# Supplementary material for: The Effects of an Extemporaneous Speech Dual-task on Older Adult Gait Control
Source: Research Square preprint supplement (doi:10.21203/rs.3.rs-7674245/v1), 2025-11-18
Supplement: Supplementary file 1 [file DT10Walk1.xlsx]

## Sheet: Sheet1
Trajectories
		10:LFHD			10:RFHD			10:LBHD			10:RBHD			10:C7			10:T10			10:CLAV			10:STRN			10:RBAK			10:LSHO			10:LUPA			10:LELB			10:LFRM			10:LWRA			10:LWRB			10:LFIN
Frame	Sub Frame	X	Y	Z	X	Y	Z	X	Y	Z	X	Y	Z	X	Y	Z	X	Y	Z	X	Y	Z	X	Y	Z	X	Y	Z	X	Y	Z	X	Y	Z	X	Y	Z	X	Y	Z	X	Y	Z	X	Y	Z	X	Y	Z
		mm	mm	mm	mm	mm	mm	mm	mm	mm	mm	mm	mm	mm	mm	mm	mm	mm	mm	mm	mm	mm	mm	mm	mm	mm	mm	mm	mm	mm	mm	mm	mm	mm	mm	mm	mm	mm	mm	mm	mm	mm	mm	mm	mm	mm	mm	mm	mm
528	0	298.182	2395.21	1551.81	193.935	2400.69	1559.49	324.307	2554.13	1590.34	205.78	2562.81	1601.15	242.307	2632.81	1442.4	233.185	2736.52	1159.99	239.817	2484.01	1327.83	222.036	2388.2	1129.27	159.564	2733.32	1260.16	394.076	2541.65	1387.56	497.469	2534.89	1146.16	504.06	2542.44	1047.81	497.593	2449.84	922.642	438.46	2419.05	830.729	505.163	2449.2	808.619	484.72	2384.78	758.03
529	0	298.926	2385.06	1550.09	194.518	2390.04	1558.05	324.941	2543.71	1590.07	206.318	2551.92	1600.93	242.785	2623.49	1442.3	233.054	2728.53	1160.34	240.382	2475.21	1327.26	222.49	2380.08	1128.58	159.612	2724.73	1260.59	394.659	2533.05	1386.91	497.162	2525.04	1145.43	503.976	2532.21	1047.18	497.103	2439.15	922.336	437.858	2406.95	831.107	504.317	2437.57	808.391	483.906	2372.73	758.316
530	0	299.891	2374.94	1548.19	195.391	2379.57	1556.27	325.477	2533.21	1589.65	206.872	2541.16	1600.65	243.161	2614.14	1442.17	232.674	2720.44	1160.59	241.012	2466.28	1326.41	222.975	2371.72	1127.59	159.497	2715.78	1260.98	395.189	2524.35	1386.08	496.771	2515.48	1144.28	503.293	2522.43	1045.93	496.531	2428.51	921.796	437.109	2395.16	831.217	502.803	2426.39	807.798	483.193	2360.78	758.365
531	0	300.743	2364.81	1546.38	196.367	2369.08	1554.48	325.911	2522.74	1589.26	207.227	2530.47	1600.22	243.28	2604.79	1441.95	232.416	2712.35	1160.97	241.478	2457.29	1325.54	223.348	2363.22	1126.47	159.131	2706.93	1261.35	395.672	2515.29	1385.37	496.52	2505.81	1143.36	502.659	2512.63	1044.8	495.949	2417.86	921.42	436.247	2383.4	831.295	501.561	2415.14	807.089	482.198	2349.1	758.5
532	0	301.539	2354.75	1544.71	197.058	2358.83	1552.7	326.346	2512.52	1588.87	207.428	2519.8	1599.86	243.64	2595.21	1441.71	232.035	2703.89	1161.25	241.932	2448.37	1324.77	223.776	2354.64	1125.46	158.966	2697.93	1261.67	395.994	2506.59	1384.84	495.797	2496.72	1142.17	502.296	2502.94	1043.89	495.256	2407.42	921.066	435.376	2371.93	831.498	500.418	2403.95	806.959	481.084	2337.5	758.708
533	0	302.402	2344.75	1542.91	198.223	2348.31	1550.93	326.785	2502.3	1588.38	207.797	2509.04	1599.27	243.771	2585.82	1441.4	231.714	2695.46	1161.19	242.398	2439.42	1323.67	224.19	2345.94	1124.4	158.64	2689.03	1261.69	396.417	2497.58	1384.01	495.698	2487.62	1141.22	501.962	2493.37	1042.82	494.511	2397.13	920.649	434.282	2360.65	831.721	498.831	2393.23	806.408	480.18	2326.03	758.855
534	0	303.135	2334.82	1541.15	198.935	2338.34	1549.01	327.055	2492.05	1587.61	208.173	2498.61	1598.53	243.864	2576.42	1440.86	231.321	2686.95	1161.03	242.691	2430.28	1322.59	224.655	2337.45	1123.05	158.47	2680.06	1261.54	396.659	2488.67	1383.02	496.182	2478.2	1140.17	501.237	2484.02	1041.49	493.621	2386.93	919.899	433.258	2349.77	831.687	497.385	2382.22	805.623	478.837	2314.69	758.826
535	0	303.548	2324.82	1539.45	199.189	2328.01	1547.39	327.281	2481.82	1586.61	208.543	2488.33	1597.69	243.982	2566.86	1440.15	230.986	2678.31	1160.67	243.085	2421.34	1321.43	224.96	2328.72	1121.67	158.162	2671.07	1261.35	396.809	2479.63	1381.82	496.149	2469.35	1139.12	500.846	2474.66	1040.26	492.725	2376.86	919.231	432.128	2338.86	831.528	495.984	2371.57	804.903	477.402	2303.57	758.774
536	0	304.012	2314.76	1537.81	199.531	2318.02	1545.72	327.595	2471.74	1585.73	209.093	2477.88	1596.7	244.128	2557.44	1439.48	230.714	2669.7	1160.29	243.396	2412.18	1320.43	225.218	2320.12	1120.35	157.996	2661.92	1260.9	397.023	2470.69	1380.74	495.813	2460.87	1137.86	500.594	2465.49	1039.1	491.923	2366.94	918.653	430.8	2328.19	831.378	494.513	2361.02	804.561	475.98	2292.65	758.753
537	0	304.153	2304.79	1536.03	199.87	2308.24	1543.93	327.871	2461.41	1584.86	209.313	2467.74	1595.79	244.221	2547.86	1438.74	230.473	2660.95	1159.94	243.803	2402.89	1319.26	225.605	2311.47	1119.02	157.826	2652.78	1260.54	397.182	2461.55	1379.65	496.025	2452.06	1136.61	500.269	2456.34	1037.72	491.185	2357.09	917.706	429.678	2317.95	831.145	493.009	2350.62	803.341	474.301	2281.83	758.429
538	0	304.151	2294.73	1534.31	199.923	2298.29	1542.18	327.97	2451.11	1583.87	209.307	2457.58	1594.96	244.152	2538.3	1437.97	230.192	2652.03	1159.57	243.865	2393.73	1318.03	226.038	2302.51	1117.46	157.389	2643.63	1260.2	397.294	2452.28	1378.55	495.624	2443.74	1135.2	499.832	2447.22	1036.37	490.305	2347.34	916.788	428.44	2307.69	830.734	491.69	2340.22	802.618	472.799	2271.24	758.134
539	0	304.03	2284.84	1532.64	199.819	2288.44	1540.42	328.069	2440.91	1583.14	209.175	2447.37	1594.07	244.062	2528.61	1437.28	229.848	2643.13	1159.2	243.945	2384.45	1316.84	226.348	2293.51	1115.96	157.139	2634.16	1259.73	397.387	2442.88	1377.7	495.279	2435.29	1134.09	499.416	2438.26	1035.17	489.453	2337.72	916.014	427.218	2297.74	830.383	490.092	2330.36	801.936	470.963	2260.76	757.784
540	0	303.891	2274.86	1530.94	199.559	2278.51	1538.86	328.102	2430.62	1582.22	209.145	2437.4	1593.14	243.909	2519.07	1436.44	229.613	2634.1	1158.59	244.021	2375.06	1315.76	226.445	2284.41	1114.66	156.76	2624.79	1259.08	397.351	2433.75	1376.68	495.295	2426.93	1132.98	499.347	2429.27	1034.06	488.717	2328.31	915.175	425.812	2288.21	829.968	489.071	2320.31	801.05	469.507	2250.86	757.431
541	0	303.716	2265.03	1529.26	199.419	2268.74	1537.14	327.836	2420.66	1581.05	209.098	2427.37	1591.89	243.926	2509.49	1435.43	229.379	2625.04	1157.69	244.135	2365.77	1314.44	226.641	2275.37	1113.33	156.438	2615.46	1258.2	397.203	2424.45	1375.33	495.587	2418.32	1131.94	499.097	2420.44	1032.62	487.91	2319.09	913.972	424.691	2278.77	829.294	487.37	2310.87	799.831	468.117	2241.08	756.766
542	0	303.317	2255.18	1527.67	199.024	2258.99	1535.23	327.402	2410.72	1579.82	208.609	2417.44	1590.73	243.309	2500.01	1434.37	228.995	2615.63	1156.79	244.143	2356.18	1313.2	226.784	2266.13	1111.76	156.01	2606.07	1257.29	396.943	2415.15	1374.17	495.069	2409.93	1130.65	498.777	2411.56	1031.41	487.077	2309.86	913.069	423.678	2269.74	828.624	486.332	2301.31	798.758	466.437	2231.41	756.123
543	0	302.823	2245.52	1525.98	198.572	2249.1	1533.57	326.918	2400.83	1578.77	208.008	2407.39	1589.42	243.004	2490.51	1433.18	228.596	2606.24	1155.67	243.979	2346.7	1311.98	226.803	2256.75	1110.46	155.746	2596.52	1256.1	396.668	2405.9	1373.08	494.883	2401.45	1129.6	498.602	2402.84	1030.4	486.341	2300.9	912.141	422.538	2260.54	828.103	485.198	2291.99	797.95	464.857	2222.14	755.375
544	0	302.517	2235.83	1524.37	198.25	2239.36	1531.84	326.218	2391.1	1577.72	207.301	2397.55	1588.12	242.583	2481.09	1431.88	228.234	2596.83	1154.33	243.836	2337.35	1310.77	226.845	2247.29	1109.31	155.351	2587.2	1254.81	396.408	2396.54	1371.86	494.764	2392.96	1128.46	498.505	2394.19	1029.3	485.766	2292.11	911.056	421.466	2251.87	827.233	484.446	2283.28	797.228	463.594	2213.19	754.502
545	0	302.055	2226.27	1522.71	197.625	2229.56	1529.83	325.344	2381.23	1576.6	206.478	2387.49	1586.99	242.032	2471.76	1430.64	227.79	2587.2	1153.05	243.519	2327.82	1309.59	226.922	2237.73	1107.88	154.905	2577.6	1253.43	395.979	2387.26	1370.73	494.416	2384.36	1127.26	498.081	2385.57	1028.09	485.164	2283.54	909.816	420.629	2243.24	826.252	483.432	2274.49	795.622	462.482	2204.52	753.498
546	0	301.374	2216.62	1521.09	196.87	2219.76	1528.24	324.387	2371.56	1575.69	205.436	2377.54	1585.97	241.245	2462.43	1429.44	227.199	2577.71	1151.66	243.103	2318.43	1308.42	226.918	2228.13	1106.76	154.224	2567.93	1252.04	395.35	2377.96	1369.82	494.143	2375.66	1126.43	497.756	2377	1027.2	484.583	2275.02	908.868	420.043	2235.04	825.411	482.707	2266.11	794.683	461.412	2196.21	752.386
547	0	300.389	2207.1	1519.64	196.075	2210.26	1526.43	323.338	2361.72	1575.08	204.36	2367.58	1584.97	240.302	2453.09	1428.31	226.581	2568.04	1150.29	242.583	2309	1307.52	226.876	2218.35	1105.99	153.464	2558.44	1250.57	394.632	2368.74	1369.09	493.771	2366.91	1125.99	497.528	2368.58	1026.58	484.08	2266.69	908.031	419.44	2226.96	824.472	481.947	2258.11	793.999	460.567	2188.17	751.402
548	0	299.428	2197.72	1518.14	194.914	2200.65	1524.7	322.175	2352.1	1574.3	203.055	2357.94	1583.82	239.205	2443.93	1426.97	226.135	2558.35	1148.66	242.034	2299.52	1306.52	226.761	2208.41	1105.16	152.812	2548.73	1248.87	393.9	2359.63	1368.27	493.329	2358.18	1125.19	497.07	2360.3	1025.73	483.754	2258.66	906.82	418.985	2218.94	823.357	481.793	2250.19	792.745	460.141	2180.44	750.133
549	0	298.232	2188.18	1516.41	193.799	2191.23	1522.89	320.864	2342.62	1573.4	201.671	2348.11	1582.67	238.073	2434.82	1425.65	225.641	2548.6	1147.09	241.331	2290.11	1305.35	226.719	2198.39	1104.21	152.013	2539.05	1247.01	392.898	2350.51	1367.52	492.864	2349.28	1124.44	496.594	2351.95	1024.92	483.55	2250.76	905.688	418.83	2211.16	822.22	481.294	2242.73	791.294	459.833	2173	748.694
550	0	296.613	2178.84	1514.95	192.3	2181.74	1521.16	319.327	2332.83	1572.56	200.106	2338.49	1581.8	236.71	2425.87	1424.31	225.026	2538.53	1145.33	240.542	2280.7	1304.39	226.433	2188.29	1103.59	151.11	2529.41	1245.02	391.738	2341.43	1366.96	492.236	2340.26	1124.19	496.164	2343.6	1024.61	483.389	2242.94	904.87	418.647	2203.59	821.01	481.526	2235.47	790.531	459.68	2165.9	747.373
551	0	295.082	2169.54	1513.81	190.609	2172.42	1519.79	317.687	2323.35	1571.91	198.433	2329	1580.84	235.091	2417.1	1422.95	224.34	2528.51	1143.24	239.536	2271.27	1303.79	226.241	2178.09	1103.33	150.207	2519.63	1242.83	390.507	2332.66	1366.43	491.608	2331.31	1123.94	495.825	2335.32	1024.27	483.342	2235.33	904.074	418.747	2196.48	819.745	481.509	2228.61	789.794	459.977	2159.08	746.071
552	0	293.542	2159.99	1512.6	188.939	2163.12	1518.48	315.839	2313.73	1571.21	196.583	2319.36	1579.99	233.509	2408.48	1421.67	223.741	2518.36	1141.3	238.462	2261.72	1303.16	226.019	2167.75	1103.05	149.081	2510.1	1240.52	389.11	2323.95	1365.95	490.906	2322.23	1123.72	495.233	2326.99	1024.04	483.323	2227.82	903.041	419.061	2189.33	818.493	481.468	2221.82	788.524	460.493	2152.59	744.547
553	0	291.627	2150.48	1511.86	187.12	2153.54	1517.56	313.827	2304.11	1570.74	194.533	2309.66	1579.61	231.637	2399.83	1420.75	222.901	2508.33	1139.67	237.181	2252.17	1302.75	225.716	2157.5	1103.01	147.98	2500.47	1238.64	387.605	2315.23	1365.72	490.051	2313.2	1123.55	494.511	2318.75	1023.82	483.332	2220.44	902.228	419.558	2182.63	817.135	482.248	2215.22	787.803	461.182	2146.26	743.077
554	0	289.568	2141.1	1511.55	185.163	2143.98	1517.14	311.787	2294.66	1571.02	192.448	2299.97	1579.46	229.754	2390.82	1420.14	222.145	2498.3	1138.4	235.671	2242.42	1302.85	225.41	2147.14	1103.5	146.898	2490.69	1237.09	386.139	2306.23	1365.93	489.217	2304.23	1124.03	493.653	2310.38	1024.04	483.466	2213.21	901.783	419.951	2175.96	816.021	482.779	2208.88	787.085	462.179	2140.35	741.973
555	0	287.708	2131.61	1511.6	183.104	2134.41	1516.95	309.807	2285.12	1571.57	190.278	2290.25	1579.72	227.908	2381.55	1419.99	221.641	2488.57	1137.7	234.285	2232.78	1303.28	224.954	2136.5	1104.09	146.044	2481.09	1236.08	384.668	2296.94	1366.49	488.289	2295.55	1124.6	493.217	2302.17	1024.82	483.698	2206.12	901.556	420.496	2169.53	815.02	483.56	2203.03	787.047	463.248	2134.71	740.957
556	0	285.752	2121.86	1511.87	181.055	2124.71	1516.95	307.562	2275.5	1572.27	187.996	2280.42	1580.18	226.206	2371.91	1420.26	221.44	2478.51	1137.62	232.64	2223.13	1303.71	224.873	2125.95	1104.83	145.2	2471.3	1235.78	383.255	2287.31	1367.41	487.327	2286.99	1125.39	492.731	2293.85	1025.94	484.005	2198.93	901.635	421.208	2163.62	814.097	484.666	2197.29	786.826	464.694	2129.43	740.07
557	0	283.577	2112.17	1512.5	178.842	2114.88	1517.25	305.109	2265.72	1573.44	185.401	2270.52	1580.92	224.497	2362.42	1420.96	221.339	2468.48	1138.08	231.045	2213.43	1304.61	224.153	2114.94	1105.94	144.725	2461.55	1235.94	381.768	2277.24	1368.88	486.303	2278.48	1126.8	491.91	2285.45	1027.48	484.042	2191.95	901.99	422.05	2158.2	813.543	485.198	2191.92	787.105	466.372	2124.63	739.638
558	0	281.371	2102.6	1513.41	176.651	2105.12	1517.88	302.706	2255.95	1574.87	182.969	2260.56	1581.98	222.899	2352.93	1421.68	221.472	2458.18	1138.86	229.442	2203.6	1305.82	223.566	2104	1107.65	144.397	2452.18	1236.34	380.242	2267.13	1370.8	485.554	2270.14	1128.73	491.283	2277.05	1029.59	483.987	2185.52	902.751	422.854	2152.8	813.474	486.788	2186.95	788.301	467.972	2120.32	739.59
559	0	279.192	2092.94	1514.45	174.5	2095.49	1518.53	300.222	2246.02	1576.43	180.356	2250.8	1582.95	221.709	2343.4	1422.74	221.889	2448.12	1139.61	227.738	2193.92	1307.12	222.83	2093.19	1109.63	144.463	2442.72	1236.85	378.67	2256.96	1372.77	484.661	2261.9	1130.79	491.243	2268.73	1032.24	484.029	2178.96	903.778	423.817	2147.17	813.739	488.603	2181.97	789.594	469.647	2116.09	739.712
560	0	276.867	2083.2	1515.71	172.317	2085.87	1519.19	297.351	2235.84	1577.97	178.03	2241.05	1584.24	220.262	2334.02	1423.93	222.316	2438.05	1140.57	226.14	2184.11	1308.63	222.063	2082.75	1111.65	144.49	2433.1	1237.54	377.08	2246.8	1374.89	483.763	2253.47	1133.35	490.206	2260.39	1034.66	484.403	2172.4	905.489	425.036	2141.57	814.207	489.664	2177.22	791.132	471.315	2112.1	740.141
561	0	274.513	2073.5	1517.29	169.941	2076.32	1520.21	295.117	2226.21	1580.08	175.434	2231.24	1585.7	218.904	2324.8	1425.36	222.683	2427.99	1141.69	224.563	2174.38	1310.68	220.84	2072.62	1113.81	144.648	2423.68	1238.37	375.508	2236.7	1377.55	483.059	2244.94	1136.49	490.135	2252.05	1038.18	484.706	2165.72	907.598	425.569	2137.51	814.402	491.307	2171.89	793.246	473.069	2108.29	740.976
562	0	272.105	2064.09	1518.88	167.555	2066.84	1521.42	292.833	2216.41	1582.18	173.169	2221.43	1587.2	217.552	2315.58	1426.7	223.351	2417.77	1142.79	223.18	2164.91	1312.75	219.741	2063	1116.34	144.812	2414.21	1239.02	373.902	2226.84	1380.13	482.423	2236.3	1139.78	489.502	2243.71	1041.44	485.138	2159.29	909.784	426.958	2133.34	815.714	492.673	2167.22	795.703	474.685	2104.81	741.977
563	0	269.973	2054.45	1520.41	165.202	2057.48	1522.68	290.586	2206.78	1584.23	170.997	2212.01	1588.76	216.299	2306.58	1428.12	223.963	2407.33	1143.8	221.891	2155.63	1314.61	218.437	2053.8	1118.61	145.204	2404.64	1239.68	372.464	2217.15	1382.84	481.559	2227.44	1143.11	489.627	2235.63	1044.9	485.704	2153.01	912.097	428.132	2128.51	817.048	494.72	2162.49	798.056	476.215	2101.3	742.853
564	0	267.782	2044.89	1522.14	162.934	2048.22	1523.98	288.379	2196.98	1586.38	168.824	2202.63	1590.65	214.888	2297.37	1429.73	224.324	2396.57	1145.17	220.6	2146.15	1316.64	217.219	2044.81	1120.71	145.188	2394.96	1240.61	370.889	2207.43	1385.54	481.093	2218.46	1146.39	489.216	2227.51	1048.18	486.148	2146.46	914.581	429.301	2124.03	818.38	496.02	2156.97	800.532	477.59	2097.38	744.145
565	0	265.465	2035.36	1524.05	160.781	2038.99	1525.36	286.33	2187.35	1588.64	166.645	2193.29	1592.46	213.36	2288.23	1431.29	224.847	2385.83	1146.64	219.266	2136.94	1318.63	216.07	2036.05	1123.04	144.869	2385.31	1241.6	369.363	2197.87	1388.43	480.653	2209.31	1149.9	488.827	2219.51	1051.58	486.608	2139.77	917.339	430.831	2119.98	820.074	498.676	2151.59	803.937	478.802	2093.62	745.508
566	0	263.312	2026.14	1525.72	158.671	2029.91	1526.75	284.417	2177.97	1590.67	164.731	2184.14	1593.93	212.094	2279.1	1432.65	225.902	2375.2	1147.91	218.137	2127.83	1320.46	214.887	2027.17	1125.29	144.792	2375.67	1242.36	368.101	2188.54	1391.02	480.443	2200.1	1153.13	489.192	2211.72	1055.04	487.252	2133.24	919.987	432.029	2114.7	821.949	501.416	2146.09	807.126	480.4	2089.89	746.906
567	0	261.283	2016.98	1527.13	156.543	2020.94	1527.91	282.567	2168.71	1592.33	162.874	2175.07	1595.25	210.779	2269.96	1433.83	226.803	2364.94	1149.01	216.921	2118.89	1321.77	214.119	2018.43	1127.01	144.49	2366.21	1242.83	366.715	2179.2	1393.02	480.303	2190.8	1155.79	489.382	2204.22	1057.88	488.196	2126.79	922.09	433.458	2109.67	823.608	502.667	2140.07	808.974	481.842	2085.59	747.97
568	0	259.324	2007.68	1528.69	154.524	2012.1	1529.12	280.753	2159.49	1593.79	160.984	2166.2	1596.32	209.545	2260.9	1434.84	227.008	2355.49	1149.9	216.127	2110.12	1322.75	213.118	2009.13	1128.46	144.252	2356.79	1243.49	365.492	2169.89	1394.9	480.097	2181.45	1158.28	489.129	2196.69	1060.23	488.94	2119.93	924.268	434.907	2104.47	824.903	504.875	2133.91	811.579	483.276	2080.63	749.11
569	0	257.201	1998.66	1530.4	152.528	2003.38	1530.31	279.042	2150.52	1595.28	159.122	2157.45	1597.33	208.366	2251.72	1435.8	226.6	2346.82	1150.89	214.97	2101.06	1323.97	212.593	1999.95	1129.99	143.736	2347.39	1244.02	364.438	2160.68	1396.74	480.022	2172.11	1160.73	490.001	2189.12	1063.33	490.02	2113.21	926.397	436.362	2098.91	826.561	506.57	2127.85	814.01	484.567	2076.3	750.189
570	0	255.304	1989.64	1531.93	150.69	1994.62	1531.44	277.416	2141.65	1596.4	157.432	2148.89	1598.08	207.339	2242.54	1436.66	226.051	2338.55	1151.29	214.096	2092.07	1324.99	212.315	1990.61	1131.13	143.348	2338.29	1244.6	363.491	2151.45	1398.11	480.215	2162.71	1162.57	490.309	2181.56	1065.43	490.958	2106.46	927.958	437.926	2093.23	827.869	509.041	2122.12	816.186	486.311	2071.44	751.112
571	0	253.452	1980.77	1533	149.005	1985.95	1532.26	275.825	2132.85	1597.21	156.147	2140.62	1598.4	206.619	2233.45	1437.26	225.652	2330.18	1152.03	213.3	2083.05	1325.59	212.2	1981.21	1131.76	143.14	2329.09	1245.03	362.669	2142.25	1399.09	480.33	2153.64	1163.83	490.283	2173.96	1066.49	492.239	2099.81	929.129	439.578	2087.57	828.543	510.121	2115.87	817.144	488.156	2066.25	751.607
572	0	251.881	1971.65	1534.33	147.324	1977.38	1533.11	274.218	2124.06	1598.11	154.614	2132.14	1598.79	205.807	2224.34	1438.06	225.283	2321.91	1152.82	212.494	2073.91	1326.15	212.283	1971.86	1132.17	142.763	2320.01	1245.77	361.953	2132.85	1400.05	480.424	2144.55	1165.06	490.821	2166.11	1068.24	493.312	2093.04	930.194	441.152	2081.39	829.175	512.168	2110.25	818.536	490.448	2061.03	752.559
573	0	250.545	1962.67	1535.75	145.899	1968.69	1534.1	272.898	2115.48	1599.05	153.139	2123.58	1599.24	205.027	2215.22	1438.82	224.987	2313.3	1154.12	211.872	2064.9	1326.77	212.56	1962.66	1132.54	142.43	2311.14	1246.55	361.414	2123.65	1401.16	480.619	2135.57	1166.32	491.541	2158.09	1069.87	494.534	2086.24	931.211	442.868	2075.31	829.892	513.901	2104.15	819.976	492.735	2055.46	753.569
574	0	249.001	1953.83	1537.03	144.438	1959.98	1534.84	271.655	2106.75	1599.96	151.847	2115.09	1599.68	204.538	2206.14	1439.54	224.497	2304.85	1154.96	211.359	2055.94	1327.22	212.781	1953.6	1132.55	142.085	2302.21	1247.27	360.895	2114.45	1401.96	480.76	2126.83	1167.27	491.967	2149.99	1070.88	495.528	2079.36	931.858	444.432	2068.93	830.335	515.188	2098.19	820.772	494.781	2049.58	754.176
575	0	247.706	1944.91	1537.89	143.189	1951.28	1535.5	270.476	2097.88	1600.5	150.864	2106.67	1599.87	203.98	2197.12	1440.18	224.251	2295.87	1155.96	211.224	2047.02	1327.48	213.021	1944.65	1132.29	141.852	2293.34	1248.13	360.384	2105.28	1402.5	480.814	2118.31	1167.9	492.359	2141.79	1071.83	496.456	2072.35	932.152	446.033	2062.65	830.437	516.804	2092.12	821.371	496.86	2043.56	754.601
576	0	246.412	1935.99	1538.81	142.106	1942.54	1536.23	269.413	2089.18	1601.13	149.633	2097.96	1600.02	203.61	2187.98	1440.79	223.896	2286.7	1156.64	210.761	2037.77	1327.87	213.493	1935.73	1132.22	141.458	2284.65	1248.69	359.841	2096.18	1403.07	480.931	2110.1	1168.74	493.471	2133.57	1073.13	497.311	2065.18	932.716	447.584	2056.36	830.776	518.177	2085.68	822.165	498.923	2037.29	755.276
577	0	245.373	1927.1	1539.74	141.126	1933.59	1536.9	268.448	2080.41	1601.49	148.546	2089.29	1600.08	202.92	2178.89	1441.3	223.912	2277.31	1157.4	210.681	2028.75	1328.39	214.023	1926.84	1132.27	141.188	2275.85	1249.49	359.465	2087.31	1403.57	481.001	2102.09	1169.53	493.872	2125.26	1074.19	498.211	2057.99	933.413	448.801	2049.66	831.212	519.514	2079	822.918	500.826	2030.67	756.213
578	0	244.548	1918.18	1540.47	140.271	1924.66	1537.39	267.498	2071.57	1601.76	147.831	2080.77	1600.01	202.447	2169.89	1441.71	223.787	2268.09	1157.91	210.623	2019.78	1328.58	214.37	1917.93	1132.16	140.775	2267.13	1249.94	359.033	2078.39	1403.93	481.022	2094.15	1170.24	494.389	2116.97	1075.08	499.183	2050.62	934.086	450.187	2042.89	831.578	520.962	2072.18	823.698	502.327	2023.78	756.638
579	0	243.824	1909.12	1541.09	139.647	1915.7	1537.81	266.716	2062.88	1601.78	147.047	2071.93	1600.01	201.893	2160.78	1442.13	223.418	2258.94	1158.73	210.278	2010.75	1328.62	214.597	1909.1	1132.05	140.306	2258.32	1250.61	358.659	2069.4	1404.22	481.118	2086.22	1170.95	494.347	2108.65	1075.57	499.849	2043.01	934.731	451.36	2035.98	831.885	522.391	2064.83	824.692	503.897	2016.55	757.473
580	0	243.195	1900.07	1541.7	138.967	1906.73	1538.35	266.043	2054.1	1601.92	146.334	2063.08	1599.95	201.501	2151.7	1442.41	222.884	2250.07	1159.01	210.056	2001.92	1328.8	214.844	1900.07	1132.22	140.056	2249.59	1250.92	358.405	2060.56	1404.65	480.729	2078.28	1171.5	494.695	2100.39	1076.51	500.372	2035.24	935.45	452.475	2028.76	832.504	523.541	2057.34	825.446	505.262	2009.36	758.237
581	0	242.783	1891.13	1542.11	138.384	1897.68	1538.57	265.527	2045.31	1601.89	145.873	2054.3	1599.81	201.066	2142.61	1442.61	222.744	2241.7	1159.42	210.03	1993.25	1328.91	215.156	1891.08	1132.57	139.725	2240.84	1251.2	358.184	2051.81	1404.98	481.065	2070.68	1172.26	495.236	2092.46	1077.26	501.058	2027.36	936.147	453.84	2021.78	833.21	524.817	2049.69	826.324	506.612	2001.94	758.974
582	0	242.319	1882.11	1542.3	138.005	1888.75	1538.65	265.11	2036.38	1601.85	145.537	2045.5	1599.76	200.747	2133.63	1442.95	222.319	2233.21	1159.91	210.049	1984.35	1328.7	215.303	1882.05	1132.73	139.541	2232.06	1251.56	357.93	2042.99	1405.35	481.232	2062.86	1172.95	495.63	2084.25	1078.18	501.593	2019.28	936.817	454.716	2014.2	833.66	526.047	2041.99	827.135	507.698	1994.4	759.626
583	0	241.993	1873.16	1542.28	137.712	1879.84	1538.6	264.732	2027.37	1601.91	145.145	2036.46	1599.74	200.355	2124.59	1443.2	222.006	2224.88	1160.22	210.002	1975.3	1328.33	215.285	1873.3	1132.9	139.217	2223.18	1251.91	357.626	2034.12	1405.55	481.595	2055.02	1173.7	495.546	2076.06	1078.52	502.214	2011.24	937.452	455.555	2006.7	833.98	526.785	2033.8	827.897	508.54	1986.59	760.151
584	0	241.577	1864.05	1542.19	137.402	1870.8	1538.52	264.442	2018.19	1601.89	144.711	2027.29	1599.62	200.096	2115.62	1443.2	221.761	2216.36	1160.55	210.015	1966.63	1328.35	215.137	1864.59	1132.91	139.012	2214.41	1251.91	357.515	2025.37	1405.9	481.88	2047.21	1174.32	496.019	2068.01	1079.28	502.943	2003.17	938.091	456.36	1998.63	834.471	527.703	2025.96	828.47	509.561	1978.77	760.684
585	0	241.538	1855	1542.06	137.2	1861.73	1538.23	264.334	2009.15	1601.77	144.617	2018.36	1599.33	199.916	2106.65	1443.07	221.872	2208.05	1160.62	210.148	1957.94	1328.26	215.405	1856.26	1132.7	139.166	2205.57	1251.81	357.564	2016.6	1405.99	482.246	2039.37	1174.68	496.161	2060.09	1079.26	503.536	1994.98	938.412	457.27	1990.12	834.926	528.602	2017.84	828.9	510.468	1970.69	760.995
586	0	241.172	1845.9	1541.53	136.962	1852.83	1537.72	264.226	1999.94	1601.55	144.588	2009.39	1599.13	199.796	2097.73	1442.91	221.744	2199.56	1160.35	210.193	1949.18	1327.86	215.455	1847.8	1132.2	139.239	2196.74	1251.78	357.451	2007.78	1405.74	482.439	2031.21	1174.79	496.487	2051.89	1079.56	504.275	1986.87	938.561	458.258	1981.99	834.844	529.138	2009.52	829.04	511.267	1962.24	761.115
587	0	240.76	1836.66	1541.08	136.675	1843.87	1537.26	264.036	1990.54	1601.35	144.508	2000.26	1598.84	199.68	2088.81	1442.79	221.955	2191.25	1160.32	210.156	1940.31	1327.49	215.531	1839.29	1131.74	139.258	2187.94	1251.64	357.397	1998.88	1405.61	482.632	2023.14	1174.93	497.423	2043.93	1080.33	504.998	1978.42	938.734	458.623	1972.74	835.037	529.693	2000.96	829.235	511.84	1953.5	761.292
588	0	240.574	1827.55	1540.64	136.393	1834.78	1536.75	264.113	1981.31	1601.13	144.476	1990.98	1598.48	199.713	2079.79	1442.44	222.15	2182.66	1160.12	210.326	1931.45	1327.21	215.544	1830.67	1131.28	139.507	2179.17	1251.19	357.556	1990.04	1405.32	482.855	2014.85	1174.79	497.037	2035.58	1079.87	505.959	1970.08	938.839	459.402	1964.03	835.219	530.297	1992.68	829.295	512.693	1945.06	761.309
589	0	240.5	1818.49	1539.98	136.33	1825.71	1535.98	264.159	1972.07	1600.69	144.688	1981.93	1597.98	199.841	2070.74	1441.95	222.605	2174.17	1159.85	210.474	1922.51	1326.68	215.804	1822.01	1130.63	139.753	2170.38	1250.77	357.565	1981.05	1404.77	483.11	2006.44	1174.47	497.868	2027.46	1079.97	506.842	1961.66	938.606	460.258	1955.03	834.904	530.787	1984.33	828.866	514.112	1936.91	761.133
590	0	240.464	1809.11	1539.32	136.551	1816.59	1535.26	264.088	1962.74	1600.29	144.618	1972.78	1597.59	199.966	2061.63	1441.62	222.637	2165.31	1159.63	210.607	1913.55	1326.04	216.048	1813.14	1129.81	139.86	2161.53	1250.68	357.656	1972	1404.34	483.278	1997.66	1174.18	497.115	2018.73	1079.12	507.478	1953.17	938.235	460.939	1945.61	834.573	531.152	1975.85	828.352	514.965	1927.68	761.028
591	0	240.667	1799.92	1538.87	136.451	1807.42	1534.63	264.167	1953.45	1599.93	144.555	1963.44	1597.08	200.09	2052.37	1441.27	222.897	2156.73	1159.43	210.58	1904.48	1325.49	216.367	1804.43	1129.11	140.103	2152.51	1250.44	357.892	1962.68	1403.92	483.434	1988.57	1173.87	497.279	2010.05	1078.9	508.105	1944.42	937.859	461.675	1936.08	834.172	531.549	1967.1	828.071	515.57	1918.4	760.763
592	0	240.808	1790.82	1538.15	136.782	1798.23	1533.92	264.344	1944.27	1599.34	144.656	1954.05	1596.37	200.387	2043.06	1440.62	223.234	2147.98	1159.06	210.936	1895.28	1324.78	216.739	1795.69	1128.36	140.493	2143.48	1250.06	358.21	1953.4	1403.4	483.689	1979.54	1173.36	497.329	2001.31	1078.24	508.796	1935.73	937.295	462.377	1926.88	833.652	531.98	1958.67	827.519	516.471	1909.26	760.237
593	0	241.153	1781.6	1537.25	137.079	1788.94	1533.03	264.615	1935.18	1598.44	144.876	1944.92	1595.49	200.724	2033.71	1439.9	223.903	2139.46	1158.61	210.906	1885.78	1323.87	217.085	1786.59	1127.27	140.936	2134.46	1249.46	358.466	1944.09	1402.63	483.932	1970.26	1172.66	497.442	1992.23	1077.49	509.262	1926.83	936.442	463.182	1918.13	832.872	532.028	1950.06	826.517	517.47	1900.08	759.674
594	0	241.569	1772.32	1536.29	137.396	1779.66	1532.1	264.678	1925.9	1597.33	145.169	1935.79	1594.5	201.029	2024.37	1439.06	224.437	2130.52	1158.09	211.124	1876.57	1322.79	217.424	1777.38	1126.05	141.303	2125.43	1248.84	358.653	1934.63	1401.72	484.285	1961.07	1171.93	497.662	1982.96	1076.74	509.707	1917.73	935.645	463.588	1908.01	832.043	532.146	1941.12	825.491	518.184	1890.59	758.99
595	0	241.872	1762.99	1535.45	137.911	1770.4	1531.21	265.115	1916.93	1596.25	145.447	1926.36	1593.39	201.351	2014.97	1438.08	225.504	2122.19	1157.33	211.349	1867.22	1321.81	217.808	1768.29	1125.05	141.821	2116.36	1247.93	358.927	1925.04	1400.72	484.374	1951.48	1170.83	497.693	1973.57	1075.76	510.318	1908.5	934.949	464.289	1898.22	831.342	532.771	1932.04	824.868	519.225	1881.2	758.48
596	0	242.335	1753.7	1534.44	138.359	1761.2	1530.28	265.566	1907.74	1594.94	146.064	1917.32	1592.12	201.871	2005.58	1436.9	226.366	2113.1	1156.27	211.768	1857.87	1320.67	218.343	1759.01	1123.94	142.581	2107.22	1246.82	359.275	1915.67	1399.53	484.776	1941.88	1169.61	498.196	1964.19	1074.75	510.814	1899.24	933.879	464.781	1888.79	830.292	533.354	1922.93	823.802	519.876	1871.79	757.45
597	0	242.798	1744.47	1533.27	138.84	1751.98	1529.08	266.081	1898.39	1593.65	146.689	1908.31	1590.86	202.522	1996.33	1435.83	227.202	2104.15	1155.2	212.171	1848.48	1319.45	218.675	1749.61	1122.53	143.315	2097.99	1245.73	359.739	1905.95	1398.33	484.951	1931.96	1168.09	498.526	1954.51	1073.43	510.969	1889.51	932.459	465.268	1879.08	828.96	532.287	1913.75	821.943	520.43	1862.18	756.156
598	0	243.23	1735.11	1532.18	139.319	1742.77	1528.02	266.916	1889.14	1592.51	147.335	1898.95	1589.65	203.131	1986.88	1434.69	227.784	2094.6	1154.1	212.797	1839.02	1318.23	219.01	1740.15	1121.21	144.013	2088.78	1244.64	360.286	1896.5	1397.17	485.425	1921.94	1166.9	499.128	1944.74	1072.34	511.432	1879.84	931.348	465.651	1869.22	827.86	533.789	1903.89	821.308	520.707	1852.4	755.018
599	0	243.895	1725.75	1531.06	139.746	1733.62	1526.94	267.644	1879.54	1591.36	148.357	1889.81	1588.51	203.846	1977.46	1433.48	228.548	2085.2	1152.91	213.234	1829.69	1317.21	219.492	1730.82	1120.17	144.803	2079.53	1243.51	360.609	1886.39	1395.81	485.793	1911.87	1165.52	499.894	1935.09	1071.15	511.702	1870.09	930.033	465.955	1859.64	826.581	533.61	1894.29	819.904	521.22	1842.63	753.952
600	0	244.554	1716.36	1529.79	140.62	1724.47	1525.71	268.67	1870.36	1590.01	149.197	1880.5	1587.37	204.817	1968.17	1432.25	229.314	2075.81	1151.64	213.929	1820.24	1315.98	219.732	1721.14	1118.83	145.707	2070.09	1242.26	361.425	1876.83	1394.48	486.41	1901.77	1164.08	500.469	1925.17	1069.5	512.062	1860.1	928.458	466.537	1850.06	825.288	534.739	1884.25	818.589	521.298	1832.66	752.299
601	0	245.367	1706.98	1528.43	141.326	1715.23	1524.47	269.644	1860.91	1588.62	150.273	1871.49	1586.23	205.67	1958.71	1430.9	230.018	2065.64	1150.13	214.568	1810.72	1314.65	220.151	1711.49	1117.43	146.522	2060.73	1240.99	362.241	1867.28	1393.09	487.017	1891.65	1162.49	501.078	1915.28	1067.83	512.445	1850.07	926.965	466.481	1839.86	823.657	534.949	1874.09	816.83	521.303	1822.53	750.712
602	0	246.193	1697.73	1527.27	142.29	1705.92	1523.42	270.803	1851.69	1587.3	151.432	1862.25	1584.97	206.901	1949.45	1429.76	230.886	2056.39	1148.72	215.371	1801.23	1313.47	220.471	1701.83	1116.34	147.359	2051.3	1239.68	363.279	1857.69	1391.75	487.611	1881.56	1160.88	501.988	1905.18	1066.35	512.94	1839.9	925.479	466.643	1829.73	822.146	535.477	1863.59	815.352	521.204	1812.19	749.111
603	0	247.374	1688.36	1526.2	143.378	1696.81	1522.53	272.156	1842.42	1585.97	152.691	1853.01	1583.58	207.934	1940.09	1428.09	231.746	2046.61	1146.95	216.285	1791.59	1312.23	220.925	1691.94	1115.27	148.42	2041.72	1238.08	364.094	1848.05	1390.12	488.484	1871.47	1159.18	502.798	1895.27	1064.54	513.275	1829.81	923.73	466.746	1819.75	820.737	535.716	1853.29	813.588	521.071	1801.94	747.393
604	0	248.579	1679.07	1524.98	144.735	1687.47	1521.45	273.517	1833.31	1584.32	154.066	1843.95	1582.19	209.158	1930.65	1426.55	232.519	2036.83	1145.06	217.204	1781.97	1310.86	221.337	1682.12	1114.03	149.378	2032.17	1236.49	365.312	1838.46	1388.47	489.308	1861.43	1157.32	503.487	1885.17	1062.51	513.745	1819.36	921.954	467.217	1809.9	818.79	536.049	1842.73	811.62	520.98	1791.45	745.489
605	0	250.008	1669.75	1523.78	146.053	1678.19	1520.44	274.731	1824.01	1582.68	155.617	1834.76	1580.96	210.507	1921.34	1425.12	233.232	2026.77	1143.37	218.378	1772.39	1309.55	221.818	1672.04	1112.89	150.373	2022.44	1234.93	366.296	1828.74	1386.66	490.061	1851.36	1155.4	504.238	1875.09	1060.59	514.058	1809.14	920.014	467.262	1799.13	817.23	535.648	1832.21	809.534	520.993	1780.92	743.691
606	0	251.475	1660.41	1522.85	147.723	1668.91	1519.63	276.527	1815.03	1581.39	157.169	1825.52	1579.73	211.922	1911.84	1423.68	234.061	2016.62	1141.65	219.514	1762.48	1308.45	222.268	1662.01	1112.08	151.342	2012.67	1233.34	367.607	1819.19	1385.19	491.047	1841.25	1153.81	505.22	1864.87	1058.99	514.657	1798.6	918.529	467.448	1788.5	815.639	536.218	1821.45	807.849	520.902	1770.15	741.918
607	0	253.314	1651.16	1521.92	149.256	1659.66	1518.81	278.13	1805.64	1579.91	159.02	1816.5	1578.5	213.352	1902.47	1422.1	234.887	2006.27	1139.7	220.632	1752.83	1307.42	222.815	1651.68	1111.32	152.441	2002.86	1231.65	369.02	1809.64	1383.49	492.029	1831.23	1151.95	505.938	1854.72	1056.91	515.166	1788.31	916.52	467.69	1777.92	814.003	536.851	1810.8	805.972	520.985	1759.37	740.066
608	0	254.967	1641.79	1520.76	151.062	1650.32	1517.93	280.114	1796.44	1578.61	160.901	1807.19	1577.44	214.761	1892.95	1420.59	235.546	1995.81	1137.65	221.848	1742.94	1306.22	223.591	1641.42	1110.46	153.522	1992.65	1230.05	370.378	1800.05	1381.79	492.971	1821.04	1150.09	506.635	1844.57	1054.77	515.672	1777.87	914.523	468.19	1766.84	812.3	537.001	1800.16	803.829	521.162	1748.51	738.202
609	0	256.723	1632.67	1519.81	152.873	1641.04	1517.22	282.245	1787.35	1577.52	162.938	1798.2	1576.54	216.362	1883.48	1419.23	236.11	1984.89	1135.74	223.049	1732.88	1305.23	224.121	1630.88	1109.78	154.481	1982.47	1228.54	371.98	1790.47	1380.32	494.104	1811.18	1147.97	507.442	1834.22	1052.96	516.218	1767.09	912.744	468.482	1755.94	810.425	536.559	1789.45	801.619	521.48	1737.48	736.465
610	0	258.571	1623.2	1519.17	154.504	1631.81	1516.73	284.376	1778.07	1576.55	164.861	1788.8	1575.74	217.801	1874.03	1417.87	236.973	1974.07	1133.9	224.332	1722.9	1304.46	224.906	1620.28	1109.49	155.45	1972.15	1226.86	373.526	1780.94	1378.89	495.235	1801.24	1146.23	508.318	1824	1051.17	516.649	1756.61	910.918	469.066	1744.75	809.149	537.5	1778.48	800.12	521.722	1726.32	734.878
611	0	260.486	1613.8	1518.41	156.46	1622.35	1516.35	286.519	1768.73	1575.36	167.142	1779.64	1574.94	219.342	1864.57	1416.53	237.909	1963.34	1132.1	225.764	1712.68	1303.79	225.702	1609.49	1109.09	156.44	1961.92	1225.2	375.134	1771.48	1377.41	496.116	1791.3	1144.18	508.733	1813.73	1048.86	517.594	1746.05	909.268	469.533	1733.57	807.386	537.837	1767.55	798.1	522.114	1715.25	732.95
612	0	262.321	1604.37	1517.92	158.467	1613	1516.19	288.559	1759.28	1574.3	169.415	1770.45	1574.41	220.998	1855.07	1415.55	238.815	1952.58	1130.55	227.101	1702.47	1303.24	226.602	1598.61	1108.87	157.408	1951.57	1223.8	376.704	1761.74	1375.97	497.168	1781.58	1142.29	509.402	1803.31	1046.88	518.163	1735.33	907.29	470.366	1722.35	805.996	537.876	1756.76	795.973	522.598	1704.36	731.296
613	0	264.154	1594.51	1517.97	160.17	1603.39	1516.52	290.668	1749.22	1573.69	171.519	1760.78	1574.15	222.389	1845.33	1414.92	239.525	1941.85	1129.51	228.592	1692.27	1303.17	227.65	1587.47	1109.1	158.166	1941.21	1222.92	378.196	1752.24	1374.96	498.09	1771.54	1140.86	510.1	1792.98	1045.47	518.576	1724.58	905.89	470.421	1711.41	804.297	538.334	1745.59	794.733	523.02	1693.22	730.188
614	0	266.056	1585.12	1518.05	162.185	1593.78	1517.1	293.072	1739.86	1573.49	174.007	1751.5	1574.14	223.943	1835.41	1414.58	239.944	1931.4	1128.61	229.951	1681.81	1303.45	228.904	1576.42	1109.64	158.882	1930.78	1222.3	379.874	1742.55	1374.19	498.769	1761.71	1139.59	510.69	1782.61	1044.2	519.324	1713.89	904.827	470.866	1700.3	803.275	538.957	1734.78	793.714	523.62	1681.46	729.377
615	0	268.087	1575.04	1518.62	164.131	1583.89	1517.9	295.211	1729.95	1573.38	176.308	1741.7	1574.67	225.379	1825.42	1414.65	240.202	1920.88	1128.23	231.472	1671.53	1303.95	230.23	1565.38	1110.32	159.558	1920.72	1222.32	381.448	1733	1373.64	499.619	1751.76	1138.63	511.011	1772.07	1043.18	519.859	1703.11	903.828	471.417	1688.86	802.451	539.27	1724.13	792.774	524.416	1670.28	728.702
616	0	269.996	1565.16	1519.33	166.176	1574.14	1518.97	297.593	1720.11	1574.03	178.645	1732.03	1575.64	226.694	1815.33	1415.23	240.377	1910.36	1128.69	232.938	1661.09	1304.78	231.541	1554.02	1111.56	159.873	1910.35	1223.1	383.087	1723.42	1373.7	500.249	1741.85	1138.2	510.917	1761.73	1042.27	520.372	1692.5	903.404	471.993	1677.56	802.095	539.378	1712.95	792.055	525.099	1659.34	728.058
617	0	272	1555.18	1520.51	168.047	1564.19	1520.53	299.635	1710.14	1574.91	180.65	1722.02	1576.96	228.224	1805.27	1416.24	240.21	1899.6	1129.21	234.511	1650.81	1306.26	232.778	1542.76	1113.42	160.112	1899.39	1223.93	384.615	1713.84	1374.36	501.073	1731.92	1138.5	511.248	1751.01	1042.48	520.851	1681.67	903.736	472.647	1666.5	802.553	539.808	1702.19	792.517	525.725	1648.19	728.796
618	0	274.047	1545.25	1521.88	170.169	1554.15	1522.27	302.032	1700.16	1576.34	182.817	1712.06	1578.77	229.475	1795.3	1417.56	240.489	1889.05	1130.46	235.986	1640.46	1307.89	234.211	1531.76	1115.43	160.378	1888.88	1225.37	386.046	1704.19	1375.35	501.588	1721.94	1139.01	511.444	1740.65	1042.96	521.231	1671.01	904.361	473.168	1655.18	803.45	540.016	1691.35	792.993	526.224	1636.85	729.689
619	0	275.939	1535.33	1523.35	172.057	1544.17	1524.14	304.004	1690.03	1577.73	184.998	1702.17	1580.71	230.678	1785.3	1419.08	240.936	1878.38	1131.75	237.518	1630.26	1309.6	235.675	1520.84	1117.71	160.806	1878.05	1226.97	387.602	1694.69	1376.75	502.223	1711.92	1139.99	511.898	1730.12	1044.06	521.654	1660.21	905.493	473.657	1643.79	804.421	540.477	1680.37	794.162	526.814	1625.87	730.796
620	0	277.833	1525.47	1524.97	174.01	1534.36	1526.13	305.921	1680.16	1579.39	186.985	1692.09	1582.85	231.965	1775.36	1420.7	241.38	1867.67	1133.08	239.071	1620.24	1311.52	236.998	1510.32	1120.04	161.308	1867.42	1228.52	389.001	1685.11	1378.31	502.566	1701.91	1141.23	512.101	1719.69	1045.37	521.995	1649.43	907.021	473.779	1632.64	805.765	540.35	1669.21	795.482	527.137	1614.68	732.281
621	0	279.6	1515.81	1526.88	175.601	1524.58	1528.42	308.067	1670.49	1581.22	189.06	1682.49	1584.98	233.36	1765.55	1422.29	242.117	1857.1	1134.4	240.448	1610.19	1313.76	238.268	1500.08	1122.72	162.002	1856.81	1229.87	390.496	1675.65	1380.12	503.224	1691.87	1142.86	512.345	1709.54	1046.88	522.474	1638.71	909.097	474.393	1621.47	807.776	540.865	1658.21	797.507	527.578	1603.44	734.242
622	0	281.264	1506.23	1528.77	177.317	1515.03	1530.61	309.796	1660.88	1582.87	190.897	1672.87	1587.03	234.549	1755.79	1423.67	243.067	1846.54	1135.67	241.789	1600.32	1315.9	239.529	1490.18	1125.23	162.844	1846.13	1231.08	391.88	1666.13	1381.88	503.809	1682.04	1144.42	512.949	1699.37	1048.66	522.963	1627.9	910.917	474.645	1609.86	809.964	541.479	1646.96	799.383	527.854	1592.21	736.072
623	0	282.709	1496.66	1530.69	178.878	1505.62	1532.73	311.521	1651.18	1584.5	192.725	1663.47	1588.94	236	1746.14	1425.19	243.862	1836.03	1136.75	243.208	1590.41	1317.66	240.682	1480.49	1127.31	163.858	1835.89	1232.59	393.319	1656.54	1383.54	504.813	1672	1146.2	513.7	1689.24	1050.38	523.446	1616.95	912.785	475.091	1598.7	811.945	540.838	1635.84	800.87	527.953	1580.79	737.655
624	0	284.044	1487.26	1532.73	180.199	1496.42	1534.93	313.23	1641.95	1586.07	194.305	1654.27	1590.82	237.539	1736.37	1426.69	244.756	1825.43	1137.81	244.427	1580.72	1319.54	241.813	1471.1	1129.41	165.052	1825.72	1233.84	394.808	1646.91	1385.29	505.618	1662	1147.94	514.666	1679.1	1052.09	524.293	1606.13	914.83	475.304	1587.06	813.81	541.448	1624.37	802.762	528.257	1569.19	739.704
625	0	285.232	1478.2	1534.76	181.391	1487.21	1537.27	314.884	1632.81	1587.56	196.053	1645.42	1592.3	239.069	1726.73	1427.82	246.045	1815.02	1138.93	245.695	1570.95	1321.35	242.786	1461.9	1131.44	166.27	1815.63	1234.75	396.2	1637.29	1386.8	506.635	1652.04	1149.36	515.717	1669.14	1053.37	525.124	1595.29	916.501	475.69	1575.59	815.875	541.584	1613.06	804.272	528.387	1557.59	741.434
626	0	286.578	1468.76	1536.81	182.629	1478.18	1539.44	316.498	1623.68	1588.74	197.716	1636.63	1593.65	240.546	1717.16	1429.09	247.527	1805.06	1139.94	246.917	1561.33	1322.86	243.784	1452.72	1133.14	167.766	1805.77	1235.91	397.664	1627.43	1388.01	507.943	1641.95	1150.66	517	1658.82	1054.54	526.033	1584.37	917.913	476.552	1563.58	817.992	542.332	1601.3	805.582	528.551	1545.8	742.989
627	0	287.825	1459.7	1538.83	183.901	1469.25	1541.47	318	1614.96	1589.79	199.104	1627.92	1594.82	241.879	1707.47	1430.2	248.878	1795.26	1141.07	248.079	1551.6	1324.01	244.64	1443.56	1134.42	169.282	1796.09	1237.09	399.076	1617.54	1389.2	509.337	1631.91	1151.91	518.412	1648.46	1055.57	527.016	1573.35	919.172	476.975	1552.25	819.443	542.186	1589.76	806.561	528.564	1533.5	744.385
628	0	288.868	1450.54	1540.86	185.041	1460.25	1543.7	319.368	1606.1	1590.6	200.587	1619.35	1595.79	243.57	1697.74	1431.2	250.221	1785.2	1142.11	249.112	1542.15	1325.08	245.352	1434.05	1135.61	170.754	1786.66	1238.1	400.382	1607.51	1390.12	510.776	1621.62	1152.92	520.05	1638.15	1056.58	528.227	1562.29	920.452	477.292	1540.65	820.903	542.599	1578	807.709	528.533	1521.05	745.928
629	0	290.156	1441.58	1542.78	186.324	1451.32	1545.67	320.8	1597.44	1591.3	202.112	1610.86	1596.46	244.94	1688.1	1432.07	251.956	1775.83	1143.28	250.19	1532.43	1326.07	245.996	1424.32	1136.57	172.253	1777.2	1239.07	401.515	1597.46	1390.85	513.05	1611.69	1154.26	521.522	1627.5	1057.26	529.205	1551.16	921.381	477.74	1529.09	822.371	543.091	1566.27	808.476	528.958	1509.32	747.265
630	0	291.546	1432.56	1544.33	187.736	1442.55	1547.36	322.266	1588.91	1591.77	203.492	1602.28	1597.12	246.29	1678.52	1433	253.257	1765.95	1144	251.193	1522.89	1326.68	246.396	1414.21	1137.08	173.744	1767.83	1240.15	402.642	1587.18	1391.37	514.31	1601.25	1154.58	523.078	1617	1057.69	530.276	1539.96	922.144	478.196	1517.64	823.36	543.62	1554.37	808.938	529.062	1497.04	748.365
631	0	292.852	1423.65	1545.98	189.033	1433.56	1548.96	323.571	1580.26	1592.12	204.819	1593.7	1597.69	247.587	1668.65	1433.79	254.839	1756.6	1145.1	252.116	1513.33	1327.18	246.743	1404.33	1137.52	175.108	1758.65	1241.19	403.712	1576.91	1391.88	515.912	1590.82	1155.29	524.468	1606.34	1058.01	531.317	1528.65	922.893	478.674	1505.97	824.364	544.269	1542.27	809.633	529.253	1484.56	749.449
632	0	294.181	1414.7	1547.56	190.231	1424.51	1550.76	325.012	1571.72	1592.64	206.086	1585.03	1598.1	248.898	1658.94	1434.57	256.144	1746.91	1146.21	252.681	1503.66	1327.7	246.743	1394.33	1137.99	176.479	1749.54	1242.25	404.451	1566.52	1392.37	517.508	1580.24	1156.18	526.21	1595.38	1058.78	532.227	1517.23	923.696	479.339	1494.42	825.486	545.508	1530.08	810.546	529.51	1472.02	750.655
633	0	295.365	1405.8	1548.87	191.565	1415.66	1552.16	326.272	1563.17	1592.72	207.485	1576.39	1598.38	250.207	1649.21	1435.22	257.504	1737.62	1146.92	253.417	1494.15	1328.01	246.559	1384.56	1138.2	177.949	1740.4	1243.36	405.354	1556.06	1392.62	518.932	1569.51	1156.71	527.67	1584.3	1058.98	533.106	1505.66	924.172	479.783	1482.86	826.291	546.296	1518.04	810.989	530	1459.84	751.63
634	0	296.709	1396.73	1549.95	192.923	1406.61	1553.38	327.515	1554.26	1592.65	208.889	1567.75	1598.56	251.405	1639.42	1435.84	258.721	1728.09	1147.78	253.983	1484.61	1328.1	246.428	1375.36	1137.9	179.374	1731.44	1244.22	406.093	1545.71	1392.78	520.216	1558.69	1157.01	529.148	1573.01	1059.21	533.923	1494.05	924.613	480.414	1471.25	826.825	547.333	1505.92	811.409	530.238	1447.34	752.316
635	0	297.782	1387.6	1551.04	194.07	1397.53	1554.6	328.808	1545.46	1592.67	210.155	1558.96	1598.74	252.753	1629.66	1436.62	260.092	1719.22	1148.89	254.499	1475.19	1328.29	246.003	1366.51	1137.43	180.758	1722.52	1245.31	406.77	1535.23	1392.96	521.379	1547.72	1157.3	530.23	1561.65	1059.36	534.656	1482.36	925.174	481.094	1459.68	827.42	548.348	1493.76	812.006	530.794	1434.95	753.127
636	0	298.874	1378.47	1551.98	195.005	1388.47	1555.74	330.226	1536.59	1592.78	211.384	1550.09	1598.82	253.928	1619.99	1437.23	261.487	1710.24	1149.59	254.881	1465.81	1328.59	245.47	1357.75	1137.14	182.278	1713.69	1246.31	407.537	1524.86	1393.25	522.088	1536.62	1157.68	531.684	1550.17	1059.78	535.307	1470.45	925.744	481.714	1448.06	828.095	548.956	1481.64	812.588	531.518	1422.79	753.901
637	0	299.875	1369.22	1552.66	196.083	1379.38	1556.6	331.446	1527.55	1592.65	212.7	1541.18	1598.92	255.222	1610.38	1437.85	262.985	1701.34	1150.61	255.352	1456.51	1328.68	244.839	1349.06	1136.63	183.828	1704.95	1247.11	408.074	1514.43	1393.31	522.93	1525.37	1157.72	532.874	1538.57	1060.02	535.854	1458.38	926.154	482.279	1436.08	828.445	549.679	1469.4	812.786	532.173	1410.56	754.383
638	0	300.775	1359.89	1553.16	196.972	1370.17	1557.21	332.514	1518.33	1592.46	213.826	1532.19	1599.05	256.413	1600.76	1438.35	264.168	1692.74	1151.24	255.639	1447.33	1328.71	244.235	1340.53	1136.07	185.424	1696.14	1248.04	408.687	1504.23	1393.33	523.689	1513.96	1157.63	533.866	1526.78	1060.02	536.373	1446.35	926.467	482.854	1424.22	828.583	550.694	1457.02	813.244	532.804	1398.43	754.617
639	0	301.525	1350.62	1553.57	197.736	1361.13	1557.75	333.672	1509.21	1592.4	214.868	1523.04	1599.08	257.69	1591.44	1438.8	265.544	1684.3	1152.1	255.782	1438.02	1328.8	243.551	1332.22	1135.8	186.877	1687.34	1248.79	409.22	1493.98	1393.4	524.132	1502.54	1157.51	534.863	1514.97	1060.31	536.846	1434.25	926.863	483.594	1412.47	828.904	551.771	1444.79	813.707	533.415	1386.24	754.974
640	0	302.369	1341.28	1553.87	198.614	1351.88	1558.16	334.757	1500.03	1592.42	215.977	1513.94	1599.09	259.034	1581.84	1439.24	266.837	1675.87	1152.7	256.139	1429.09	1328.9	242.976	1323.98	1135.49	188.346	1678.64	1249.52	409.958	1484	1393.53	524.592	1490.95	1157.41	535.654	1503.2	1060.29	537.064	1422.08	927.174	484.172	1400.42	829.268	552.83	1432.48	814.429	534.123	1374.28	755.257
641	0	303.23	1332.03	1553.88	199.534	1342.56	1558.41	335.554	1490.52	1592.2	216.837	1504.64	1599.15	260.177	1572.46	1439.55	268.095	1667.18	1153.3	256.531	1420.04	1328.84	242.576	1315.86	1135.04	189.755	1669.89	1250.19	410.672	1474.14	1393.47	524.851	1479.39	1157.15	536.332	1491.39	1060.18	537.33	1410.04	927.287	484.545	1388.26	829.28	553.006	1420.06	814.062	534.722	1362.12	755.295
642	0	304.088	1322.72	1553.79	200.494	1333.31	1558.42	336.6	1481.26	1592.21	217.761	1495.35	1599.3	261.239	1563.16	1440.03	268.742	1658.38	1153.65	256.665	1411.01	1328.68	242.293	1307.86	1134.65	190.855	1661.25	1250.82	411.337	1464.37	1393.39	525.019	1467.77	1156.92	536.807	1479.69	1060.04	537.627	1397.99	927.43	485.475	1377.05	828.998	554.028	1407.57	814.404	535.295	1349.87	755.433
643	0	305.038	1313.45	1553.78	201.193	1323.85	1558.52	337.523	1472.09	1592.25	218.581	1485.91	1599.37	262.293	1553.96	1439.99	269.747	1649.57	1154.09	256.858	1402.09	1328.67	241.945	1299.79	1134.43	191.91	1652.43	1251.2	411.775	1454.74	1393.33	525.166	1456.22	1156.71	537.14	1467.91	1059.97	537.853	1386.07	927.617	485.622	1364.45	829.251	554.712	1395.34	814.708	535.834	1337.53	755.685
644	0	305.856	1304.2	1553.43	202.127	1314.48	1558.5	338.453	1462.78	1592.04	219.552	1476.52	1599.32	263.323	1544.83	1440.11	270.55	1640.79	1154.01	257.576	1393.19	1328.74	241.819	1291.65	1134.2	193.013	1643.72	1251.48	412.295	1445.04	1392.96	525.109	1444.76	1156.21	537.246	1456.53	1059.49	538.015	1374.27	927.464	485.857	1352.26	829.218	554.699	1383.29	814.571	536.304	1325.42	755.584
645	0	306.731	1294.8	1553.09	203.161	1305.1	1558.24	339.181	1453.36	1591.65	220.438	1467.1	1599.24	264.056	1535.54	1440.05	271.135	1631.7	1154.21	257.906	1384.16	1328.46	241.695	1283.26	1133.7	193.763	1634.98	1251.76	412.826	1435.74	1392.67	525.263	1433.25	1155.76	537.307	1445.25	1058.92	538.282	1362.48	927.402	486.075	1340.21	828.947	554.676	1370.88	814.3	536.573	1312.95	755.603
646	0	307.535	1285.33	1552.73	203.869	1295.57	1558.02	340.022	1443.99	1591.45	221.165	1457.58	1599.26	264.853	1526.21	1440.1	271.941	1622.8	1154.6	258.014	1375.05	1328.11	241.619	1274.78	1133.2	194.367	1626.12	1252.18	413.385	1426.12	1392.33	524.97	1422.02	1155.27	537.364	1433.63	1058.72	538.139	1350.54	927.285	486.086	1327.96	828.791	555.158	1358.49	814.374	536.587	1300.51	755.577
647	0	308.212	1276.12	1552.13	204.589	1286.25	1557.8	340.916	1434.49	1591.07	222.077	1448.19	1599.15	265.485	1516.81	1440.04	272.45	1613.88	1154.56	258.194	1366.01	1327.88	241.589	1266.37	1132.75	195.082	1617.35	1252.43	413.781	1416.78	1391.98	525.315	1410.78	1154.97	537.266	1422.32	1058.15	538.078	1338.79	927.164	486.146	1315.85	828.832	555.282	1346.29	814.245	536.674	1288.13	755.611
648	0	308.93	1266.59	1551.56	205.262	1276.82	1557.44	341.643	1424.98	1590.45	222.874	1438.69	1598.79	266.065	1507.44	1439.86	272.633	1604.77	1154.53	258.642	1356.88	1327.39	241.629	1257.75	1132.09	195.38	1608.47	1252.48	414.26	1407.36	1391.47	525.051	1399.67	1154.31	537.975	1411.49	1057.83	538.14	1327.13	926.928	485.909	1303.46	828.663	554.546	1334.17	813.646	536.685	1275.66	755.535
649	0	309.429	1257.1	1550.8	205.845	1267.32	1556.89	342.446	1415.51	1589.7	223.652	1429.28	1598.25	266.486	1497.92	1439.51	273.135	1596.16	1154.63	259.061	1347.75	1326.69	241.86	1249.24	1131.15	195.619	1599.42	1252.43	414.55	1397.94	1390.72	525.055	1388.71	1153.47	537.203	1399.91	1056.58	537.745	1315.16	926.369	485.69	1291.06	828.173	554.782	1321.74	813.255	536.381	1263	755.286
650	0	309.936	1247.62	1550.06	206.34	1257.89	1556.27	343.142	1405.9	1588.94	224.288	1419.82	1597.66	266.893	1488.53	1439.12	273.078	1587.15	1154.55	259.203	1338.5	1325.99	241.855	1240.49	1130.23	195.779	1590.38	1252.49	414.896	1388.53	1390.07	525.035	1378.05	1152.81	537.108	1388.68	1055.96	537.376	1303.22	926.089	485.053	1278.82	827.902	553.796	1309.23	812.771	535.804	1250	755.248
651	0	310.409	1238.02	1549.33	206.823	1248.4	1555.72	343.759	1396.44	1588.03	224.962	1410.37	1596.82	267.28	1478.97	1438.61	273.023	1578.34	1154.22	259.388	1329.19	1325.23	242.028	1231.5	1129.22	195.848	1581.32	1252.35	415.17	1379.16	1389.17	525.01	1367.5	1151.9	536.994	1377.51	1055.03	536.817	1291.3	925.661	484.657	1266.51	827.597	553.89	1296.61	812.448	535.181	1237.44	755.084
652	0	310.787	1228.58	1548.25	207.291	1238.94	1554.81	344.205	1386.97	1586.74	225.533	1400.83	1595.82	267.62	1469.48	1437.94	272.962	1569.46	1153.61	259.77	1319.71	1324.16	242.263	1222.51	1127.96	195.913	1572.24	1251.89	415.587	1369.8	1388.06	525.053	1357.06	1150.68	536.9	1366.25	1053.75	536.447	1279.37	925.005	483.804	1254.04	827.184	552.893	1284.03	811.526	534.365	1224.63	754.622
653	0	311.145	1218.88	1547.25	207.701	1229.23	1553.95	344.339	1377.18	1585.33	225.907	1391.3	1594.79	267.666	1459.8	1437.07	272.507	1560.41	1153.04	259.988	1310.42	1323.09	242.448	1213.35	1126.62	195.773	1562.96	1251.44	415.589	1360.29	1386.77	525.029	1346.81	1149.47	536.441	1355	1052.23	535.571	1267.27	924.104	483.295	1242.55	826.125	552.362	1271.14	810.709	533.211	1211.69	754.125
654	0	311.621	1209.18	1546.32	208.004	1219.55	1553.05	344.72	1367.66	1584.31	226.199	1381.67	1593.75	267.889	1450.16	1436.33	272.413	1551.84	1152.45	260.083	1300.83	1322.02	242.518	1204.25	1125.28	195.582	1553.59	1250.87	415.914	1350.73	1385.7	525.14	1336.7	1148.28	536.449	1343.69	1051.24	534.859	1255.2	923.593	482.369	1230.25	825.834	551.688	1258.41	810.175	531.958	1198.58	753.883
655	0	311.947	1199.67	1545.23	208.371	1209.8	1552.09	344.906	1358.22	1583.12	226.354	1371.97	1592.52	267.866	1440.42	1435.39	271.927	1542.64	1151.67	260.253	1291.3	1320.85	242.693	1195.24	1123.8	195.39	1544.13	1250.19	415.955	1341.25	1384.41	525.084	1326.67	1146.95	536.118	1332.39	1049.92	533.988	1243.08	922.872	481.135	1217.79	825.289	550.749	1245.6	809.404	530.621	1185.6	753.488
656	0	312.275	1190.12	1543.81	208.659	1200.09	1550.82	344.887	1348.5	1581.59	226.476	1362.26	1591.21	267.789	1430.63	1434.34	271.473	1533.49	1150.83	260.463	1281.65	1319.45	242.762	1186.07	1122.06	195.067	1534.57	1249.35	415.919	1331.65	1382.92	524.969	1316.75	1145.47	535.872	1321.3	1048.43	533.065	1231.11	921.765	480.037	1205.45	824.584	549.5	1232.9	808.354	529.225	1172.55	752.949
657	0	312.421	1180.42	1542.51	208.919	1190.45	1549.48	345.105	1339.14	1580.21	226.501	1352.56	1589.91	267.731	1420.85	1433.23	271.055	1524.45	1150.08	260.472	1272.04	1318.02	242.823	1176.75	1120.27	194.787	1525.12	1248.55	415.958	1322.04	1381.58	524.617	1307.15	1143.88	535.554	1310.18	1046.91	532.159	1219.17	920.95	479.305	1193.51	823.923	548.459	1219.98	807.369	527.666	1159.39	752.523
658	0	312.59	1170.88	1541.23	209.007	1180.67	1548.26	345.034	1329.36	1578.82	226.486	1342.83	1588.5	267.508	1410.96	1432.06	270.764	1515.35	1149.07	260.471	1262.3	1316.64	242.838	1167.36	1118.62	194.419	1515.43	1247.52	415.91	1312.33	1380.22	524.424	1297.31	1142.65	534.601	1299.31	1045.29	531.29	1207.29	920.15	478.055	1181.26	823.504	547.473	1207.38	806.536	526.11	1146.39	752.137
659	0	312.544	1161.14	1539.75	209.067	1170.92	1546.81	345.041	1319.82	1577.41	226.342	1333.09	1586.96	267.302	1401.15	1430.75	270.195	1505.99	1148	260.532	1252.58	1315.13	242.915	1157.87	1116.92	193.927	1505.66	1246.45	415.744	1302.61	1378.79	524.401	1287.29	1141.4	534.227	1288.26	1043.78	530.294	1195.44	919.219	476.66	1168.41	823.276	546.01	1194.88	805.649	524.544	1133.42	751.789
660	0	312.283	1151.42	1538.28	208.862	1161.19	1545.23	344.759	1309.96	1575.76	226.192	1323.42	1585.39	266.993	1391.31	1429.45	269.65	1496.66	1146.75	260.372	1242.78	1313.42	242.907	1148.26	1115.03	193.441	1495.85	1245.16	415.496	1292.91	1377.2	523.926	1277.53	1139.85	534.021	1277.49	1042.2	529.515	1183.66	918.345	475.485	1156.11	822.62	544.842	1182.2	804.457	522.937	1120.42	751.323
661	0	312.028	1141.56	1536.86	208.505	1151.45	1543.75	344.582	1300.25	1574.3	225.946	1313.72	1583.67	266.472	1381.28	1427.97	268.954	1487.38	1145.33	260.283	1232.81	1311.83	242.97	1138.54	1113.29	192.899	1485.99	1243.72	415.115	1283.14	1375.64	523.57	1267.55	1138.39	533.773	1266.81	1040.7	528.573	1171.95	917.407	474.139	1143.92	822.057	543.608	1169.77	803.604	521.316	1107.54	750.98
662	0	311.66	1131.85	1535.52	207.995	1141.59	1542.32	344.091	1290.42	1572.69	225.594	1304.02	1581.96	265.955	1371.47	1426.4	268.46	1477.98	1143.87	260.067	1222.89	1310.32	243.03	1128.75	1111.65	192.203	1476.07	1242.23	414.724	1273.5	1374.12	523.246	1257.62	1136.96	533.273	1256.27	1039.2	527.829	1160.62	916.589	472.903	1131.84	821.787	542.115	1157.66	802.848	519.795	1094.86	750.769
663	0	311.124	1122.05	1534.07	207.433	1131.76	1540.85	343.605	1280.78	1570.98	225.107	1294.26	1580.28	265.4	1361.49	1424.91	267.834	1468.03	1142.44	259.654	1212.8	1308.67	243.12	1118.78	1109.99	191.433	1465.89	1240.77	414.4	1263.83	1372.6	522.883	1247.48	1135.54	532.775	1245.81	1037.6	527.131	1149.33	915.664	471.734	1119.67	821.411	540.564	1145.47	801.654	518.282	1082.18	750.499
664	0	310.581	1112.15	1532.81	206.947	1121.95	1539.39	342.934	1270.87	1569.55	224.392	1284.5	1578.66	264.595	1351.45	1423.34	266.859	1457.77	1140.99	259.225	1202.6	1306.96	243.136	1108.62	1108.26	190.523	1455.64	1239.21	413.76	1254.04	1371.16	522.499	1237.33	1134.24	532.349	1235.36	1036.17	526.201	1137.93	914.827	470.701	1107.77	820.885	539.495	1133.33	800.801	516.964	1069.71	750.239
665	0	309.925	1102.34	1531.69	206.154	1112.04	1538.17	342.136	1261.08	1568.09	223.618	1274.7	1577.19	263.652	1341.44	1422.01	265.983	1447.5	1139.41	258.721	1192.46	1305.56	243.145	1098.55	1106.79	189.651	1445.33	1237.58	413.276	1244.16	1369.98	522.004	1227.19	1133.12	532.018	1225.09	1034.99	525.613	1126.97	914.072	469.387	1095.67	820.856	538.441	1121.57	800.119	515.644	1057.38	750.161
666	0	309.085	1092.53	1530.5	205.349	1102.14	1537.03	341.24	1251.46	1566.76	222.606	1264.88	1575.65	262.883	1331.17	1420.46	264.981	1436.6	1137.66	258.498	1182.19	1304.29	243.13	1088.2	1105.44	188.808	1434.93	1236	412.622	1234.3	1368.74	521.548	1217	1131.99	531.336	1214.83	1033.7	524.855	1116.07	913.203	468.332	1084.13	820.633	537.156	1110.07	799.25	514.374	1045.27	749.984
667	0	308.188	1082.72	1529.52	204.512	1092.26	1535.87	340.207	1241.64	1565.58	221.449	1255.01	1574.23	261.894	1320.84	1419	264.233	1426.15	1136.39	257.636	1171.7	1302.82	243.229	1077.87	1103.97	187.774	1424.25	1234.33	411.909	1224.27	1367.59	520.969	1206.83	1130.93	530.828	1204.7	1032.59	524.226	1105.3	912.466	467.366	1072.55	820.295	535.599	1098.79	798.458	513.341	1033.5	749.817
668	0	307.174	1072.82	1528.7	203.452	1082.16	1534.76	338.768	1231.84	1564.36	220.155	1245.17	1572.96	260.731	1310.42	1417.45	263.329	1415.29	1134.88	257.256	1161.33	1301.62	243.141	1067.2	1102.63	186.735	1413.55	1232.65	410.97	1214.04	1366.55	520.397	1196.49	1130.09	530.187	1194.56	1031.63	523.463	1094.59	911.864	466.474	1061.26	820.001	534.485	1087.75	797.76	512.429	1021.84	749.886
669	0	306.052	1063.01	1527.96	202.27	1072.29	1533.8	337.44	1222.26	1563.25	218.693	1235.29	1571.56	259.517	1300	1415.95	262.545	1404.1	1133.11	256.261	1150.65	1300.45	243.017	1056.38	1101.55	185.735	1402.64	1230.89	410.033	1203.8	1365.65	519.842	1186.29	1129.45	529.667	1184.69	1030.94	522.886	1084.15	911.41	465.759	1050.41	819.89	534.04	1076.84	797.462	511.574	1010.46	750.047
670	0	304.812	1053.19	1527.12	201.027	1062.38	1532.85	335.976	1212.5	1562.16	217.279	1225.52	1570.06	258.263	1289.62	1414.39	261.666	1392.57	1131.07	255.319	1140.05	1299.37	242.865	1045.46	1100.53	184.674	1391.72	1228.79	408.952	1193.71	1364.72	519.207	1175.91	1128.77	528.874	1174.62	1030.04	522.538	1073.96	910.821	465.147	1039.45	819.787	533.155	1066.35	796.669	510.939	999.443	749.871
671	0	303.442	1043.32	1526.54	199.683	1052.38	1531.97	334.264	1202.76	1560.95	215.607	1215.77	1568.67	256.617	1279.46	1412.81	261.02	1381.36	1129.51	254.563	1129.37	1298.33	242.633	1034.26	1099.57	183.629	1380.79	1226.73	407.761	1183.41	1363.83	518.533	1165.37	1128.23	528.212	1164.79	1029.32	522.001	1063.77	910.262	464.836	1028.65	819.445	532.045	1056.1	795.935	510.633	988.781	749.628
672	0	302.004	1033.37	1526.25	198.186	1042.3	1531.33	332.549	1193.11	1560.02	213.788	1205.89	1567.49	255.18	1269.28	1411.61	259.954	1369.92	1127.79	253.761	1118.59	1297.56	242.354	1022.95	1098.9	182.447	1369.68	1225	406.322	1173.08	1363.35	517.56	1154.99	1127.89	527.359	1154.65	1028.89	521.593	1053.7	909.883	464.335	1018.14	819.143	531.765	1046.15	795.695	510.383	978.405	749.518
673	0	300.416	1023.35	1526.42	196.464	1032.21	1531.22	330.753	1183.36	1559.48	211.958	1195.93	1566.52	253.667	1258.95	1410.63	258.851	1358.29	1126.3	252.412	1107.65	1297.04	242.043	1011.55	1098.61	181.194	1358.54	1223.28	404.978	1162.76	1363.12	516.722	1144.54	1127.89	526.557	1144.75	1028.77	521.37	1043.99	909.573	464.201	1008.47	818.537	532.012	1036.63	795.426	510.649	968.624	749.405
674	0	298.819	1013.2	1526.81	195.022	1021.97	1531.39	328.847	1173.33	1559.18	210.033	1185.91	1565.95	251.99	1248.5	1410.11	257.865	1347.02	1125.29	251.271	1096.62	1296.83	241.697	999.898	1098.45	180.014	1347.42	1222.02	403.666	1152.64	1363.01	515.863	1134.16	1128.03	525.702	1134.72	1028.81	521.071	1034.48	909.164	464.143	998.672	818.2	531.272	1027.62	794.725	511.138	959.252	749.072
675	0	297.184	1003.05	1527.49	193.424	1011.78	1531.9	326.889	1163.37	1559.19	207.982	1175.83	1565.76	250.102	1237.88	1409.98	256.907	1336.05	1124.9	250.262	1085.54	1296.84	241.461	988.053	1098.51	178.906	1336.19	1221.33	402.258	1141.52	1363.34	514.774	1123.59	1128.34	524.922	1124.88	1029.15	520.903	1025.21	908.899	464.573	989.313	817.943	531.347	1019.03	794.519	511.915	950.371	748.735
676	0	295.571	992.885	1528.7	191.658	1001.35	1532.86	324.839	1153.37	1559.47	206.003	1165.67	1565.75	248.346	1226.91	1410.16	256.192	1325.5	1125.09	248.98	1074.45	1297.33	241.036	975.994	1099.16	177.996	1325.14	1221.09	400.798	1130.57	1364.03	513.697	1113.19	1129.04	524.125	1115.19	1030.09	520.78	1016.11	909.176	464.8	980.204	817.905	531.519	1010.81	794.792	512.844	942.057	748.731
677	0	293.66	982.575	1530.2	189.606	990.998	1534.13	322.753	1143.29	1560.14	203.881	1155.52	1566.06	246.874	1215.78	1410.71	255.86	1314.99	1125.66	247.627	1063.29	1298.09	240.52	963.899	1100.21	177.295	1314.02	1221.35	399.462	1119.26	1365.14	512.509	1102.91	1129.97	523.216	1105.44	1031.18	520.563	1007.38	909.545	465.236	971.783	817.994	532.288	1003.2	795.248	513.964	934.327	748.885
678	0	291.798	972.258	1531.84	187.785	980.55	1535.52	320.73	1133.25	1560.94	201.775	1145.33	1566.53	245.499	1204.73	1411.54	255.993	1304.36	1126.48	246.298	1052.14	1299.07	239.957	951.794	1101.34	176.921	1303.12	1221.95	398.131	1107.66	1366.45	511.421	1092.76	1131.02	522.277	1095.94	1032.45	520.563	998.997	910.125	465.89	963.579	818.168	532.476	995.922	795.792	515.237	927.022	749.102
679	0	289.737	961.885	1533.78	185.84	970.206	1536.98	318.644	1123.03	1562.15	199.709	1135.1	1567.26	244.306	1193.62	1412.82	256.197	1293.19	1127.73	244.902	1041.09	1300.27	239.142	939.888	1102.76	176.605	1292.13	1222.93	396.769	1096.04	1368.14	510.258	1082.71	1132.55	521.284	1086.41	1034.19	520.357	990.691	910.957	466.625	956.472	818.084	532.351	989.115	796.678	516.259	920.129	749.395
680	0	287.692	951.437	1536.01	183.705	959.929	1538.78	316.594	1112.7	1563.72	197.651	1124.93	1568.38	243.374	1182.65	1414.33	256.683	1281.9	1129.33	243.498	1030.05	1301.85	238.16	928.285	1104.63	176.654	1281.21	1224.19	395.425	1084.36	1370.36	509.176	1072.64	1134.52	520.429	1076.98	1036.48	520.313	982.699	912.258	466.805	948.914	818.974	532.622	982.201	798.112	517.328	913.957	749.926
681	0	285.695	941.053	1538.27	181.77	949.612	1540.61	314.729	1102.37	1565.61	195.701	1114.72	1569.66	242.087	1172.1	1416.01	257.066	1270.26	1130.75	242.192	1019.25	1303.67	237.135	917.019	1106.76	176.813	1270.42	1225.53	394.133	1072.82	1372.66	508.159	1062.63	1136.81	519.586	1067.62	1038.88	520.291	974.902	913.653	467.238	942.087	819.608	533.287	975.783	799.582	518.381	908.016	750.553
682	0	283.732	930.675	1540.61	179.716	939.457	1542.36	312.819	1091.98	1567.58	193.922	1104.53	1571.06	241.265	1161.41	1417.69	257.515	1258.46	1132.24	241.124	1008.6	1305.46	235.927	906.035	1108.73	176.965	1259.62	1227	392.869	1061.43	1375.05	507.242	1052.51	1139.34	518.882	1058.39	1041.56	520.233	967.123	915.239	467.618	935.455	820.311	534.155	969.236	801.178	519.348	902.349	751.194
683	0	281.821	920.284	1543.02	177.955	929.372	1544.19	311.145	1081.57	1569.8	192.175	1094.45	1572.76	240.452	1150.85	1419.52	258.003	1246.29	1133.94	240.092	998.045	1307.45	234.708	895.547	1110.95	177.226	1248.87	1228.52	391.677	1050.38	1377.61	506.369	1042.3	1142.07	518.162	1049.14	1044.33	520.233	959.58	916.929	467.783	929.028	821.157	534.832	962.86	803.003	520.057	896.813	751.951
684	0	280.096	910.079	1545.42	176.258	919.382	1546.28	309.657	1071.25	1572.12	190.717	1084.43	1574.49	239.706	1140.33	1421.07	258.397	1234.2	1135.6	239.068	987.605	1309.61	233.472	885.21	1113.41	177.269	1238.14	1229.87	390.541	1039.62	1380.04	505.52	1032.2	1144.75	517.546	1040.14	1047.05	520.229	952.061	918.773	468.3	923.269	822.073	535.118	956.65	804.951	520.669	891.614	752.623
685	0	278.531	899.975	1547.65	174.574	909.352	1548.14	308.195	1061.12	1574.09	189.411	1074.46	1576.02	238.805	1130.05	1422.61	258.572	1222.76	1137.02	238.312	977.414	1311.59	232.155	875.261	1115.62	177.195	1227.41	1231.03	389.502	1029.07	1382.24	504.763	1022.11	1147.17	517.109	1031.48	1049.59	520.176	944.441	920.543	468.504	917.127	822.971	535.887	950.207	806.844	521.13	886.427	753.101
686	0	277.138	889.887	1549.75	173.295	899.38	1549.97	307.03	1051.16	1575.94	188.176	1064.64	1577.56	237.92	1119.87	1424.36	258.105	1212	1138.37	237.49	967.137	1313.39	231.07	865.249	1117.57	177.115	1216.98	1232.35	388.579	1018.69	1384.25	504.085	1012.08	1149.42	516.588	1022.83	1051.9	519.924	936.752	922.162	468.829	911.005	823.814	536.959	943.519	808.575	521.42	881.133	753.461
687	0	275.947	880.023	1551.97	172.094	889.818	1551.94	305.987	1041.35	1577.67	187.116	1054.83	1579.07	237.251	1109.73	1425.87	258.188	1202.13	1139.95	236.746	957.014	1315.12	230.15	855.671	1119.47	176.814	1206.51	1233.66	387.732	1008.47	1386.28	503.599	1002.28	1151.69	516.371	1014.46	1054.18	520.203	929.458	923.829	469.751	905.133	824.883	537.84	936.878	810.513	521.675	875.921	753.921
688	0	274.891	870.245	1554.1	170.943	879.978	1553.76	305.032	1031.54	1579.23	186.221	1045.34	1580.28	236.716	1099.67	1427.26	257.609	1192.3	1141.3	236.078	947.063	1316.77	229.277	845.81	1121.26	176.491	1196.26	1234.95	387.164	998.382	1388.14	503.251	992.708	1153.68	515.97	1006.18	1056.11	520.53	922.27	925.31	470.414	898.944	826.056	538.555	930.556	812.254	521.993	870.664	754.253
689	0	273.964	860.574	1555.91	170.164	870.578	1555.48	304.343	1022.05	1580.26	185.544	1035.9	1581.23	235.897	1089.57	1428.54	257.003	1183.01	1142.76	235.555	937.226	1318.05	228.515	835.824	1122.76	176.029	1185.99	1236.14	386.529	988.382	1389.54	503.003	983.261	1155.24	515.932	998.101	1057.79	520.94	915.054	926.248	470.902	893.189	826.475	539.406	924.023	813.385	522.457	865.434	754.305
690	0	273.235	851.021	1557.7	169.451	861.041	1557.19	303.651	1012.44	1581.5	185.005	1026.58	1582.18	235.479	1079.51	1430.14	256.241	1173.63	1144.58	234.943	927.361	1319.13	228.01	825.819	1123.82	175.568	1176.1	1237.7	386.082	978.362	1390.97	502.736	973.908	1156.58	515.699	989.893	1059.25	521.384	907.899	927.18	471.363	886.927	827.036	540.272	917.427	814.34	522.899	860.032	754.379
691	0	272.542	841.566	1559.6	168.945	852.039	1558.87	303.301	1003.12	1582.56	184.463	1017.31	1583.18	235.097	1069.64	1431.57	255.226	1164.16	1146.15	234.581	917.693	1320.29	227.671	815.992	1124.87	175.001	1166.24	1239.4	385.671	968.427	1392.26	502.73	964.748	1157.96	515.664	981.727	1060.81	521.865	900.869	928.007	471.81	880.567	827.512	541.009	911.043	815.552	523.366	854.549	754.551
692	0	272.115	832.241	1561.3	168.373	842.619	1560.56	302.965	993.858	1583.57	184.278	1008.2	1583.9	234.648	1059.69	1432.87	254.648	1154.91	1147.83	234.217	908.042	1321.35	227.393	806.384	1125.7	174.397	1156.43	1240.73	385.463	958.712	1393.42	502.786	955.819	1158.95	515.533	973.468	1061.96	522.231	893.679	928.778	472.231	874.246	827.961	541.647	904.953	816.243	524.242	849.246	754.555
693	0	271.742	822.984	1562.83	168.014	833.577	1562.1	302.819	984.571	1584.37	184.094	999.151	1584.65	234.453	1050.02	1434.03	253.764	1145.16	1149.16	234.031	898.385	1322.13	227.338	796.785	1126.16	173.845	1147.07	1242.39	385.292	949.045	1394.29	502.779	947.041	1159.69	515.406	965.266	1062.83	522.638	886.71	929.06	472.615	867.768	828.038	541.57	898.911	816.522	524.911	843.577	754.461
694	0	271.478	813.747	1564.43	167.834	824.471	1563.52	302.641	975.513	1585.05	183.905	990.079	1585.43	234.017	1040.2	1435.28	253.275	1135.69	1150.49	233.917	888.995	1323	227.32	787.307	1126.68	173.07	1137.44	1243.9	385.043	939.549	1395.06	502.851	938.218	1160.35	515.193	956.983	1063.59	522.844	879.645	929.316	473.333	861.423	827.9	541.952	892.76	817.076	525.639	837.762	754.525
695	0	271.303	804.576	1565.97	167.496	815.328	1565.16	302.434	966.526	1585.66	183.85	981.127	1586.04	233.905	1030.72	1436.44	252.379	1125.71	1151.72	233.686	879.549	1323.95	227.38	778.006	1127.31	172.477	1128.21	1245.3	384.883	930.157	1395.84	502.683	929.834	1161.02	514.867	948.784	1064.33	522.841	872.55	929.653	473.702	855.081	827.928	542.255	886.504	817.687	526.298	831.882	754.769
696	0	271.101	795.502	1567.3	167.436	806.209	1566.64	302.423	957.464	1586.3	183.758	972.126	1586.66	233.494	1021.06	1437.51	251.768	1116.45	1153	233.653	870.239	1324.75	227.649	768.721	1127.78	171.609	1119.08	1246.84	384.721	920.991	1396.54	502.356	921.498	1161.45	514.538	940.495	1064.93	522.687	865.337	929.859	474.258	848.498	827.97	542.64	880.077	818.232	526.768	825.69	754.988
697	0	271.167	786.494	1568.49	167.408	797.273	1567.85	302.347	948.513	1586.71	183.75	963.212	1587.19	233.242	1011.72	1438.57	250.856	1107.25	1154.34	233.617	860.894	1325.35	227.93	759.671	1128.19	170.888	1109.98	1248.15	384.683	911.846	1397.06	502.001	913.574	1161.8	514.258	932.258	1065.46	522.495	858.078	929.96	474.029	842.009	827.805	543.147	873.681	818.258	527.153	819.337	754.995
698	0	271.279	777.632	1569.78	167.623	788.234	1569.19	302.394	939.728	1587.1	183.863	954.321	1587.69	232.942	1002.31	1439.5	250.115	1098.61	1155.62	233.591	851.775	1326.06	228.244	750.725	1128.72	170.099	1100.75	1249.54	384.694	902.958	1397.76	501.631	905.619	1162.3	514.047	924.204	1066.19	522.109	850.645	930.271	473.887	835.358	827.854	542.692	866.797	818.671	527.406	812.937	755.154
699	0	271.384	768.746	1571.05	167.603	779.317	1570.62	302.476	930.99	1587.4	183.832	945.479	1588.08	232.475	992.971	1440.46	249.43	1090.54	1156.91	233.672	842.68	1326.79	228.508	741.768	1129.34	169.372	1091.79	1250.76	384.623	894.05	1398.53	501.272	897.869	1162.81	513.755	916.201	1066.96	521.644	843.302	930.748	473.578	828.717	828.17	542.844	860.029	819.358	527.347	806.29	755.484
700	0	271.471	759.937	1572.09	167.755	770.447	1571.89	302.563	922.334	1587.44	183.852	936.641	1588.36	232.238	983.814	1441.23	248.635	1082.62	1158.06	233.618	833.558	1327.25	228.765	732.645	1129.94	168.542	1082.7	1251.92	384.613	885.18	1399.12	500.879	890.219	1163.22	513.51	908.335	1067.56	521.148	835.822	931.001	473.447	822.015	828.286	542.853	852.767	819.685	527.141	799.473	755.647
701	0	271.792	751.193	1573.1	168.01	761.547	1572.95	302.671	913.677	1587.36	183.939	927.911	1588.47	231.873	974.52	1442.09	247.616	1074.26	1158.77	233.62	824.416	1327.64	228.963	723.414	1130.49	167.822	1073.8	1252.95	384.623	876.357	1399.64	500.483	882.727	1163.54	513.1	900.499	1067.98	520.585	828.205	931.237	472.951	815.01	828.28	542.561	845.564	819.922	526.838	792.576	755.811
702	0	272.058	742.57	1574.07	168.091	752.826	1574.21	302.674	905.114	1587.2	184.129	919.278	1588.42	231.475	965.36	1442.74	246.832	1065.98	1159.73	233.5	815.431	1328.04	229.244	714.239	1131.27	167.174	1064.94	1253.73	384.501	867.629	1400.11	500.041	875.334	1163.88	512.667	892.775	1068.47	520.127	820.764	931.523	472.277	808.025	828.51	542.219	838.428	820.343	526.21	785.599	756.088
703	0	272.337	733.988	1574.95	168.444	744.065	1575.34	302.816	896.62	1586.91	184.387	910.651	1588.28	231.379	956.262	1443.16	245.983	1057.92	1160.26	233.486	806.417	1328.46	229.271	705.231	1132.06	166.505	1056.01	1254.52	384.57	858.923	1400.59	499.79	867.931	1164.22	512.165	885.067	1068.79	519.27	813.286	931.622	471.68	800.917	828.751	541.48	831.243	820.721	525.641	778.483	756.312
704	0	272.734	725.407	1575.67	168.805	735.47	1576.23	302.918	888.15	1586.51	184.443	902.122	1588.26	230.867	947.168	1443.68	245.218	1049.73	1160.85	233.497	797.451	1328.7	229.39	696.49	1132.3	166.076	1047.18	1255.09	384.503	850.364	1400.87	499.558	860.411	1164.5	511.791	877.441	1068.99	519.21	805.859	931.797	470.999	793.613	828.84	540.723	823.82	820.749	524.825	771.141	756.425
705	0	273.043	716.933	1576.26	169.154	726.746	1576.92	303.096	879.751	1586.15	184.573	893.599	1588.17	230.707	938.035	1444.08	244.7	1041.37	1161.62	233.463	788.506	1328.85	229.449	688.003	1132.27	165.575	1038.36	1255.71	384.489	841.667	1401.13	499.464	852.786	1164.75	511.258	869.676	1069.17	518.731	798.306	931.797	470.932	786.308	828.834	539.974	816.372	820.844	524.063	763.995	756.214
706	0	273.303	708.397	1576.85	169.423	718.171	1577.7	303.174	871.369	1585.89	184.683	885.069	1587.96	230.523	929.161	1444.33	244.414	1032.89	1162.12	233.47	779.52	1329.07	229.413	679.611	1132.23	165.131	1029.5	1256.1	384.38	832.963	1401.34	499.47	844.985	1165.15	510.892	861.99	1069.38	517.963	790.62	931.847	469.693	778.573	829.085	539.646	808.851	820.906	523.224	756.579	756.04
707	0	273.657	700.07	1577.35	169.688	709.652	1578.36	303.305	863.038	1585.61	184.757	876.569	1587.77	230.376	920.106	1444.58	244.131	1024.23	1162.22	233.373	770.521	1329.15	229.354	671.326	1132.1	164.785	1020.73	1256.45	384.251	823.972	1401.52	499.504	837.048	1165.46	510.559	854.227	1069.56	517.836	782.805	931.87	469.201	770.724	829.26	538.974	801.326	820.792	522.205	749.107	756.027
708	0	273.955	691.645	1577.71	169.983	701.01	1578.75	303.255	854.697	1585.24	184.688	867.956	1587.53	230	911.099	1444.68	243.883	1015.51	1162.54	233.404	761.552	1329.12	229.324	662.773	1131.74	164.552	1011.97	1256.71	384.198	815.165	1401.61	499.395	828.767	1165.49	510.093	846.246	1069.51	517.524	775.145	931.704	468.554	762.578	829.153	538.147	793.777	820.503	521.298	741.418	755.721
709	0	274.104	683.159	1578.08	170.131	692.476	1579.16	303.226	846.358	1584.96	184.543	859.375	1587.22	229.69	902.059	1444.69	243.558	1006.86	1162.91	233.232	752.514	1329.05	229.218	654.184	1131.41	164.207	1003.16	1256.93	384.065	806.255	1401.58	499.325	820.453	1165.64	509.684	838.284	1069.53	517.114	767.279	931.572	467.867	754.521	829.195	537	785.95	820.174	520.409	733.687	755.447
710	0	274.36	674.838	1578.39	170.35	683.873	1579.57	303.109	838.07	1584.48	184.38	850.874	1586.69	229.526	893.084	1444.54	243.382	998.174	1162.99	233.104	743.403	1329.01	229.1	645.631	1131.13	163.953	994.315	1256.96	383.929	797.364	1401.42	499.196	812.014	1165.62	509.251	830.225	1069.3	516.815	759.418	931.322	467.391	746.155	829.163	536.133	778.383	819.997	519.509	725.902	755.104
711	0	274.667	666.488	1578.33	170.525	675.264	1579.6	302.954	829.812	1583.69	184.274	842.391	1585.92	229.531	883.975	1444.15	243.287	989.498	1162.82	233.004	734.274	1328.73	229.203	636.943	1130.68	163.906	985.469	1256.72	383.821	788.459	1400.89	498.95	803.566	1165.05	508.823	822.086	1068.7	516.673	751.319	930.926	467.237	737.68	828.897	535.731	770.417	819.305	518.887	718.012	754.472
712	0	274.749	658.157	1578.31	170.79	666.641	1579.46	302.651	821.54	1582.76	184.045	833.843	1585.14	229.174	874.744	1443.81	243.148	980.763	1162.58	232.819	725.002	1328.31	229.06	628.429	1129.86	163.841	976.678	1256.57	383.683	779.323	1400.45	498.684	795.064	1164.53	508.405	813.802	1068.24	516.16	743.026	930.269	466.336	729.56	828.399	534.572	762.299	818.538	518.114	709.785	753.952
713	0	275.002	649.751	1578.24	170.912	657.985	1579.36	302.307	813.268	1581.76	183.756	825.149	1584.1	228.986	865.514	1443.38	243.164	972.077	1162.3	232.569	715.76	1327.82	229.059	619.828	1129.03	163.801	967.823	1256.22	383.471	770.168	1399.89	498.34	786.488	1163.95	508.005	805.265	1067.75	515.689	734.719	929.769	465.893	721.017	827.943	533.669	754.272	818.202	517.345	701.569	753.38
714	0	275.243	641.403	1577.93	171.005	649.349	1579.11	302.057	804.989	1580.57	183.41	816.64	1582.85	228.896	856.442	1442.69	243.284	963.518	1161.79	232.411	706.457	1327.12	228.932	611.068	1128.05	163.821	958.889	1255.71	383.271	760.812	1399.2	497.996	777.819	1163.16	507.882	796.756	1067.17	515.147	726.391	929.026	464.988	713.41	827.204	533.34	745.992	817.369	516.741	693.3	752.73
715	0	275.413	632.984	1577.35	171.335	640.577	1578.59	301.795	796.75	1579.25	183.096	808.038	1581.56	228.86	847.14	1441.9	243.595	954.952	1161.26	232.18	697.133	1326.24	228.845	602.234	1126.85	163.873	949.882	1255.14	383.141	751.431	1398.37	497.732	769.085	1162.27	507.713	788.073	1066.31	514.685	717.913	927.965	464.985	704.632	826.43	532.673	737.758	816.19	516.28	684.831	751.734
716	0	275.572	624.6	1576.81	171.438	631.82	1577.96	301.476	788.29	1577.86	182.743	799.275	1580.23	228.728	837.833	1441.2	244.028	946.239	1160.86	231.93	687.698	1325.26	228.881	593.316	1125.56	163.971	940.829	1254.52	382.997	741.954	1397.56	497.609	760.151	1161.59	507.672	779.178	1065.68	514.347	709.056	927.266	464.194	696.301	825.472	532.185	729.263	815.296	515.763	676.336	750.866
717	0	275.564	616.019	1576.3	171.338	623.209	1577.42	301.229	779.835	1576.57	182.35	790.539	1578.84	228.554	828.377	1440.42	244.41	937.459	1160.38	231.697	678.235	1324.32	228.739	584.353	1124.17	164.112	931.832	1253.92	382.783	732.363	1396.78	497.552	751.141	1161.02	507.659	770.266	1065.1	514.032	700.466	926.323	463.761	687.628	824.721	531.925	720.78	814.616	515.327	667.734	750.163
718	0	275.663	607.469	1575.64	171.42	614.408	1576.71	301.041	771.248	1575.18	182.13	781.829	1577.25	228.827	818.871	1439.33	244.816	928.659	1159.56	231.499	668.795	1323.2	228.624	575.33	1122.97	164.361	922.743	1253.03	382.764	722.756	1395.86	497.594	742.09	1160.14	507.697	761.296	1064.28	513.674	691.698	925.178	463.531	679.161	823.826	531.407	712.417	813.692	514.943	659.119	749.135
719	0	275.595	598.782	1574.77	171.348	605.704	1575.78	300.805	762.644	1573.33	182.058	773.112	1575.38	228.77	809.546	1438.08	245.265	919.74	1158.56	231.407	659.238	1321.94	228.753	566.151	1121.36	164.564	913.551	1251.9	382.678	713.146	1394.56	497.555	732.758	1158.9	507.612	752.243	1063.02	513.504	682.894	923.897	463.373	670.572	822.466	531.4	703.642	812.264	514.802	650.529	747.874
720	0	275.425	590.031	1573.88	171.282	596.993	1574.79	300.741	753.886	1571.67	181.851	764.407	1573.58	228.619	799.942	1436.8	245.657	910.833	1157.53	231.298	649.627	1320.68	228.741	556.962	1119.95	164.842	904.325	1250.74	382.589	703.519	1393.32	497.605	723.403	1157.75	507.638	743.131	1061.8	513.527	673.952	922.752	463.663	661.984	821.232	531.15	694.927	810.958	514.654	641.875	746.71
721	0	275.46	581.313	1573.06	171.254	588.185	1573.77	300.663	745.109	1569.98	181.963	755.613	1571.78	228.609	790.47	1435.57	246.073	901.76	1156.44	231.265	639.961	1319.5	228.628	547.846	1118.54	165.122	895.123	1249.59	382.597	693.836	1392.16	497.72	713.897	1156.58	507.798	734.057	1060.69	513.54	665.119	921.584	463.787	653.121	820.28	531.257	686.502	810.081	514.539	633.183	745.519
722	0	275.374	572.502	1572.01	171.15	579.45	1572.67	300.714	736.272	1568.18	181.985	746.807	1569.76	229.296	781.003	1434.27	246.48	892.581	1155.29	231.444	630.373	1318.16	228.733	538.63	1116.98	165.504	885.874	1248.4	382.647	684.152	1390.81	497.919	704.215	1155.3	507.932	724.82	1059.38	513.665	656.174	920.212	463.485	644.723	818.695	531.59	677.534	808.64	514.745	624.56	744.228
723	0	275.476	563.522	1570.88	171.265	570.586	1571.57	300.905	727.371	1566.44	182.052	737.973	1568.1	229.38	771.53	1432.94	246.854	883.21	1154.27	231.506	620.591	1316.75	228.808	529.138	1115.2	165.851	876.558	1247.21	382.776	674.396	1389.45	498.106	694.461	1154.02	508.305	715.556	1058.25	514.034	647.245	918.806	463.789	635.722	817.333	531.45	668.901	807.182	514.923	615.865	742.629
724	0	275.692	554.62	1569.84	171.493	561.604	1570.42	301.001	718.478	1564.58	182.265	728.986	1566.17	229.205	761.915	1431.49	247.143	873.817	1153.12	231.692	610.815	1315.44	228.949	519.562	1113.98	166.137	867.126	1246.1	382.857	664.668	1388.2	498.354	684.711	1152.74	508.706	706.307	1057.07	514.46	638.33	917.48	464.277	627.106	815.9	532.244	659.907	805.894	515.382	607.17	741.215
725	0	276.027	545.746	1568.69	171.792	552.616	1569.33	301.264	709.571	1562.95	182.461	720.013	1564.49	229.642	752.451	1430.3	247.43	864.283	1151.8	231.92	601.038	1314.25	229.201	509.893	1112.67	166.364	857.654	1244.82	382.997	654.974	1386.89	498.581	674.989	1151.48	509.193	697.07	1056	514.972	629.371	916.194	464.673	618.217	814.777	532.717	651.319	804.859	516.055	598.856	739.726
726	0	276.492	536.853	1567.57	172.194	543.571	1568.19	301.501	700.675	1561.16	182.675	710.932	1562.69	229.945	742.889	1428.98	247.728	854.804	1150.5	232.209	591.179	1312.92	229.277	500.249	1111.15	166.555	847.983	1243.53	383.253	645.265	1385.53	498.881	665.263	1150.24	509.607	687.77	1054.71	515.526	620.277	914.801	465.242	609.161	813.377	532.338	642.456	802.867	516.602	589.94	738.399
727	0	277.176	527.892	1566.43	172.877	534.419	1567.1	301.843	691.693	1559.44	183.042	701.835	1561.02	230.226	733.303	1427.47	248.123	845.248	1149.12	232.51	581.332	1311.76	229.477	490.332	1109.97	166.933	838.42	1242.14	383.579	635.543	1384.21	499.263	655.515	1148.93	510.055	678.473	1053.42	516.199	611.041	913.495	466.392	600.054	811.783	534.001	633.25	802.046	517.307	580.939	737.079
728	0	277.95	518.842	1565.4	173.568	525.246	1566.15	302.351	682.719	1557.84	183.508	692.647	1559.42	230.514	723.773	1426.14	248.235	835.424	1147.6	232.94	571.396	1310.75	229.625	480.515	1108.77	167.019	828.608	1240.7	383.899	625.965	1382.95	499.585	645.931	1147.63	510.521	669.236	1052.18	517.029	602.243	912.227	467.172	590.951	810.728	534.54	624.389	800.709	518.267	572.15	735.858
729	0	278.814	509.84	1564.34	174.361	516.01	1565.22	302.878	673.73	1556.17	183.939	683.364	1557.81	230.852	714.09	1424.82	248.321	825.407	1146.04	233.301	561.39	1309.8	229.845	470.462	1107.96	167.15	818.637	1239.23	384.254	616.441	1381.58	500.002	636.378	1146.36	511.191	660.137	1051.03	517.711	593.165	911.052	467.693	582.107	809.491	535.27	615.54	799.676	519.18	563.251	734.605
730	0	279.75	500.741	1563.26	175.356	506.726	1564.19	303.474	664.636	1554.58	184.703	674.128	1556.44	231.082	704.388	1423.43	248.459	815.323	1144.57	233.757	551.267	1308.81	230.214	460.093	1106.87	167.368	808.598	1237.78	384.74	607.031	1380.2	500.583	626.88	1145.13	511.707	650.934	1049.78	518.617	584.03	909.835	468.598	572.785	808.122	536.164	606.415	798.45	520.303	554.099	733.381
731	0	280.786	491.592	1562.31	176.394	497.391	1563.29	304.252	655.5	1553.3	185.374	664.85	1555.34	231.461	694.559	1422.16	248.319	804.861	1143.14	234.315	541.033	1308	230.594	449.596	1106.11	167.289	798.324	1236.49	385.328	597.553	1379.1	501.257	617.571	1144.05	512.364	641.666	1048.75	519.551	574.808	908.708	470.024	563.353	806.975	537.336	597.158	797.376	521.53	544.955	732.309
732	0	281.903	482.459	1561.51	177.386	488.111	1562.59	305.155	646.376	1552.14	186.031	655.503	1554.19	231.792	684.85	1420.87	248.25	794.373	1141.61	234.955	530.822	1307.41	231.023	439.007	1105.75	167.371	787.896	1235.08	386.027	588.109	1378.23	502.059	608.407	1143.24	513.142	632.578	1047.95	520.589	565.658	907.844	470.967	554.14	806.058	538.411	588.055	796.6	522.721	535.744	731.467
733	0	283.067	473.305	1560.61	178.519	478.738	1561.84	306.025	637.11	1550.77	186.924	646.192	1552.9	232.38	675.03	1419.47	248.2	783.522	1139.81	235.638	520.381	1306.77	231.689	428.451	1105.37	167.482	777.416	1233.57	386.78	578.493	1376.93	503.024	599.384	1142.29	514.008	623.397	1047.01	521.794	556.538	906.788	472.15	544.509	805.192	539.532	578.922	795.61	524.19	526.511	730.44
734	0	284.094	463.923	1559.7	179.666	469.372	1561.01	306.983	627.79	1549.42	187.888	636.789	1551.74	232.973	665.105	1418.22	248.403	772.838	1138.17	236.432	509.959	1306.15	232.385	417.485	1105.15	167.568	766.718	1232.03	387.649	568.817	1375.84	503.895	590.417	1141.14	514.713	614.181	1045.82	522.857	547.318	905.619	473.523	534.959	804.047	540.643	569.755	794.463	525.605	517.179	729.395
735	0	285.138	454.554	1559.06	180.771	460	1560.41	308.096	618.415	1548.29	188.97	627.38	1550.64	233.678	655.144	1417.01	248.552	762.037	1136.57	237.231	499.387	1305.76	233.014	406.71	1104.85	167.77	756	1230.51	388.478	559.114	1374.79	504.883	581.57	1140.13	515.602	605.088	1044.83	524.007	538.084	904.763	474.896	525.457	803.005	541.675	560.612	793.44	527.156	507.768	728.664
736	0	286.276	445.103	1558.68	181.957	450.549	1560.06	309.226	608.948	1547.32	190.128	617.848	1549.57	234.4	645.174	1415.83	248.701	751.24	1134.88	238.109	488.751	1305.62	233.746	395.717	1104.92	167.832	745.202	1229.06	389.522	549.431	1373.87	506.052	572.795	1139.28	516.369	595.844	1043.88	525.319	528.832	903.871	476.539	515.653	802.401	542.93	551.595	792.62	528.678	498.388	727.902
737	0	287.614	435.628	1558.39	183.163	440.903	1559.85	310.354	599.367	1546.25	191.36	608.217	1548.62	235.072	635.081	1414.9	248.83	740.236	1133.54	239.093	477.962	1305.51	234.751	384.934	1104.73	167.96	734.401	1227.88	390.604	539.586	1372.96	506.97	563.859	1138.2	517.261	586.691	1042.97	526.612	519.582	902.883	478.05	506.01	801.402	543.972	542.691	791.682	530.553	488.898	727.193
738	0	288.954	425.932	1558.3	184.49	431.209	1559.93	311.502	589.623	1545.42	192.449	598.387	1548.07	235.989	624.989	1414.35	248.98	729.196	1132.6	240.177	467.103	1305.61	235.645	373.567	1104.91	167.988	723.536	1227.09	391.629	529.602	1372.31	508.069	554.896	1137.63	517.968	577.306	1042.2	527.923	510.44	902.046	479.702	496.414	800.483	545.221	533.483	790.751	532.243	480.128	726.517
739	0	290.323	416.147	1558.66	185.801	421.318	1560.52	312.716	579.859	1545.1	193.487	588.502	1547.91	236.367	614.348	1414.25	248.69	717.966	1132.29	241.262	456.164	1306.13	236.533	362.278	1105.49	167.748	712.449	1226.8	392.557	519.534	1372.17	509.043	545.825	1137.51	518.592	567.913	1042.04	529.363	501.364	901.744	481.038	486.946	800.307	546.355	524.734	790.591	534.081	470.962	726.355
740	0	291.812	406.312	1559.31	187.205	411.439	1561.34	314.033	570.04	1545.24	194.582	578.557	1548.09	236.904	603.762	1414.58	248.388	707.069	1132.46	242.395	445.2	1306.9	237.618	350.525	1106.48	167.485	701.482	1227.01	393.476	509.462	1372.34	509.901	536.589	1137.73	519.255	558.488	1042.27	530.616	492.222	901.743	483.181	477.408	800.7	547.888	515.832	790.77	536.049	462.039	726.53
741	0	293.12	396.236	1560.02	188.578	401.318	1562.19	315.333	560.004	1545.5	195.835	568.508	1548.64	237.483	593.175	1415.07	247.759	696.058	1132.84	243.516	434.18	1307.85	238.801	338.738	1107.61	166.947	690.283	1227.67	394.277	499.34	1372.59	510.477	527.158	1137.89	519.561	548.916	1042.41	531.878	483.217	901.828	483.245	469.273	799.665	549.095	507.377	791.065	537.676	453.171	726.536
742	0	294.427	386.125	1561.13	189.971	391.12	1563.46	316.522	549.905	1546.17	197.588	558.36	1549.59	237.955	582.304	1416.2	247.047	684.846	1133.98	244.644	423.156	1309.06	240.113	327.201	1108.81	166.269	678.959	1228.79	395.051	489.313	1373.38	511.105	517.559	1138.62	519.7	539.234	1043.06	532.929	473.991	902.457	485.054	459.802	799.919	550.282	498.426	791.719	539.479	444.411	727.145
743	0	295.571	375.984	1562.51	191.066	380.883	1565.12	317.816	539.638	1547.46	198.517	548.254	1550.83	238.333	571.77	1417.56	246.588	673.621	1135.34	245.709	412.335	1310.77	241.547	315.972	1110.47	165.678	667.696	1230.18	395.783	479.308	1374.76	511.414	507.87	1139.89	520.005	529.676	1044.37	533.914	464.86	903.757	486.729	450.426	801.14	551.425	489.884	793.239	541.777	435.885	728.567
744	0	296.662	365.708	1564.14	192.095	370.552	1566.85	318.683	529.23	1548.75	199.85	537.883	1552.57	238.892	560.976	1419.01	246.266	662.148	1137.14	246.811	401.476	1312.78	243.013	304.981	1112.63	165.148	656.45	1231.81	396.375	469.406	1376.14	511.673	498.006	1141.24	520.176	520.136	1045.95	535.042	455.678	905.363	487.904	441.263	802.562	552.316	480.672	794.618	543.554	427.181	729.973
745	0	297.532	355.337	1565.62	193.055	360.229	1568.55	319.651	518.823	1550.52	200.668	527.585	1554.45	239.083	550.867	1420.83	245.767	650.269	1138.9	247.883	390.872	1314.9	244.503	293.957	1114.88	164.539	645.099	1233.5	397.198	459.731	1378.11	511.914	488.137	1142.9	520.199	510.403	1047.71	535.773	446.236	907.096	489.34	431.556	804.095	553.373	471.951	796.571	545.074	418.426	731.622
746	0	298.244	344.86	1567.36	193.725	349.88	1570.23	320.495	508.493	1552.7	201.519	517.257	1556.57	239.325	540.661	1422.64	245.21	638.661	1140.46	248.77	380.337	1317.22	245.94	283.351	1117.45	164.123	633.895	1235.17	397.851	449.964	1380.27	511.934	478.095	1144.91	520.326	500.818	1049.88	536.541	436.933	909.267	490.457	422.175	805.899	554.235	462.767	798.851	546.462	409.537	733.601
747	0	298.738	334.522	1569.04	194.185	339.561	1571.98	321.096	498.16	1554.89	202.205	506.974	1558.77	239.66	530.587	1424.43	244.741	627.671	1141.78	249.689	369.991	1319.78	247.358	273.283	1120.11	163.955	622.962	1236.8	398.959	440.631	1382.93	511.905	468.136	1147.12	520.49	491.246	1052.35	537.143	427.322	911.782	491.442	412.46	808.386	555	453.58	801.409	547.793	400.653	735.839
748	0	299.228	324.196	1570.7	194.617	329.241	1573.53	321.523	487.78	1557.26	202.56	496.636	1561.12	240.056	520.783	1426.04	244.449	617.211	1143.11	250.662	359.79	1322.28	248.781	263.304	1123.04	163.896	611.998	1238.23	399.455	431.12	1385.04	512.032	458.253	1149.38	520.746	481.742	1054.83	537.896	417.874	914.188	492.31	402.57	810.565	555.736	444.113	803.952	548.754	391.398	738.168
749	0	299.455	313.878	1572.26	194.942	318.92	1574.9	321.786	477.558	1559.51	202.54	486.308	1563.11	240.584	510.901	1427.63	244.721	607.303	1144.71	251.514	349.596	1324.51	249.99	253.493	1125.57	164.038	601.402	1239.61	400.373	421.528	1387.52	512.4	448.342	1151.76	521.112	472.133	1057.21	538.563	408.135	916.666	493.177	392.656	812.796	556.456	434.399	806.416	549.393	382.131	740.172
750	0	299.659	303.743	1573.85	195.175	308.713	1576.29	321.953	467.503	1561.59	202.816	476.221	1565.13	241.228	501.408	1429.05	244.927	597.235	1145.97	252.315	339.563	1326.78	251.153	243.731	1128.42	164.177	590.947	1240.89	400.88	411.872	1389.72	512.833	438.501	1154.08	521.668	462.541	1059.59	538.988	398.358	919.041	493.928	382.635	815.198	557.012	424.69	808.91	550.307	372.435	742.541
751	0	299.885	293.762	1575.19	195.336	298.554	1577.52	322.009	457.564	1563.55	203.047	466.007	1566.59	241.575	491.775	1430.28	245.256	587.16	1147.09	253.063	329.621	1328.85	252.171	233.951	1130.83	164.646	580.889	1241.94	401.513	402.447	1391.79	513.433	428.779	1156.22	522.397	452.956	1061.72	539.977	388.606	921.344	494.549	372.372	817.618	557.621	414.742	811.139	550.788	362.607	744.611
752	0	300.128	283.806	1576.42	195.507	288.499	1578.58	321.817	447.6	1564.9	202.703	455.87	1567.91	242.143	482.107	1431.36	245.695	576.972	1148.05	253.698	319.677	1330.55	253.078	224.005	1132.9	165.171	571.024	1242.93	402.083	392.835	1393.53	514.11	419.1	1158.13	523.248	443.319	1063.61	540.741	378.658	923.242	495.192	362.023	819.654	558.041	404.447	812.901	551.117	352.33	746.455
753	0	300.29	273.919	1577.54	195.701	278.355	1579.35	321.764	437.841	1566.21	202.984	445.884	1568.91	242.136	472.508	1432.47	246.444	566.893	1149.3	254.284	309.726	1332.08	253.883	214.06	1134.42	165.614	561.216	1244	402.419	383.11	1394.94	514.893	409.445	1159.85	524.062	433.601	1065.11	541.504	368.504	925.001	495.646	351.524	821.433	558.415	393.901	814.505	551.281	341.867	748.029
754	0	300.446	264.111	1578.55	195.82	268.231	1580.2	321.655	428.15	1567.59	202.73	435.773	1570.06	242.448	462.715	1433.56	247.083	556.84	1150.5	254.728	299.804	1333.5	254.55	204.266	1135.89	166.01	551.594	1245.09	402.805	373.435	1396.54	515.972	399.912	1161.66	525.14	423.888	1066.75	542.334	358.415	926.762	496.142	341.073	823.563	558.964	383.309	816.128	551.326	331.143	749.732
755	0	300.63	254.21	1579.35	196.079	258.094	1580.83	321.464	418.333	1568.72	202.25	425.666	1571.06	242.586	452.868	1434.64	247.74	546.892	1151.63	255.13	290.065	1334.65	255.163	194.535	1137.06	166.516	542.198	1246.21	403.063	363.687	1397.66	516.987	390.35	1163.13	526.105	414.099	1067.88	543.143	348.118	928.162	496.544	330.238	825.484	559.376	372.575	817.313	551.313	320.085	751.263
756	0	300.8	244.253	1579.85	196.249	247.913	1581.17	321.29	408.426	1569.9	202.439	415.63	1571.86	242.757	443.174	1435.73	248.143	537.288	1152.77	255.428	280.251	1335.53	255.711	184.929	1137.64	166.952	532.805	1247.31	403.256	353.855	1398.63	518.159	380.7	1164.48	527.307	404.302	1068.98	543.93	337.707	929.421	497.319	318.912	827.253	559.935	361.625	818.327	551.269	308.735	752.632
757	0	300.941	234.245	1580.26	196.342	237.675	1581.42	321.065	398.533	1571.28	201.791	405.439	1573.14	242.79	433.404	1436.86	248.608	528.32	1154.14	255.548	270.597	1336.42	255.964	175.197	1138.17	167.294	523.518	1248.7	403.361	344.107	1399.79	519.251	371.068	1165.93	528.291	394.211	1070.14	544.612	327.034	930.786	497.391	308.206	828.704	560.328	350.255	819.494	551.141	297.06	754.154
758	0	301.037	224.189	1580.62	196.376	227.432	1581.55	320.939	388.702	1572.77	201.763	395.163	1574.4	242.944	423.648	1437.85	248.995	519.474	1155.53	255.699	261.08	1337.39	256.115	165.569	1138.74	167.64	514.366	1249.99	403.36	334.349	1400.79	520.358	361.415	1167.45	529.58	384.294	1071.47	545.304	316.375	932.159	497.542	297.568	830.233	560.962	339.117	820.781	551.252	285.214	755.848
759	0	301.024	214.013	1580.54	196.345	216.982	1581.37	320.614	378.561	1574.1	201.594	385.009	1575.43	243.098	413.919	1438.84	249.54	510.762	1156.68	255.708	251.618	1338.05	256.112	155.97	1139.04	167.983	505.344	1251.19	403.467	324.627	1401.65	521.344	351.696	1168.57	530.428	374.077	1072.24	545.907	305.557	933.238	497.801	286.677	831.535	561.12	327.309	821.751	551.376	273.268	757.192
760	0	300.912	203.73	1580.33	196.324	206.581	1580.9	320.338	368.374	1575.21	201.027	374.539	1576.5	243.186	404.3	1439.7	250.188	502.159	1157.95	255.687	242.239	1338.48	256.024	146.613	1139.07	168.493	496.308	1252.22	403.445	314.836	1402.23	522.125	341.91	1169.45	531.461	363.727	1073.01	546.371	294.499	934.186	497.844	275.484	832.634	561.528	315.568	822.373	551.56	261.128	758.5
761	0	300.73	193.388	1580.06	196.147	196.211	1580.5	320.151	358.181	1576.59	200.918	364.13	1577.6	243.36	394.737	1440.41	250.811	493.539	1158.97	255.538	232.966	1338.99	255.829	137.43	1139.26	168.962	487.347	1253.21	403.377	305.144	1402.9	522.791	332.088	1170.46	532.365	353.351	1073.78	546.819	283.439	935.277	498.137	264.381	833.914	562.117	303.811	823.306	551.306	248.92	759.737
762	0	300.535	182.999	1579.65	195.865	185.858	1579.96	319.875	347.894	1577.73	200.811	353.836	1578.48	243.544	385.404	1441.25	251.486	484.891	1159.93	255.434	223.818	1339.39	255.443	128.614	1139.53	169.525	478.497	1254.08	403.396	295.428	1403.61	523.233	322.213	1171.21	533.193	342.802	1074.55	547.163	272.213	936.312	498.543	253.056	835.26	562.579	292.188	824.312	551.919	236.64	761.274
763	0	300.293	172.58	1579.11	195.542	175.417	1579.07	319.532	337.389	1578.82	200.19	343.363	1579.37	243.809	376.162	1441.84	252.099	476.276	1160.81	255.283	214.615	1339.51	255.174	119.915	1139.61	170.124	469.666	1254.73	403.336	285.802	1404.02	523.563	312.144	1171.76	533.856	332.074	1075.06	547.441	260.763	937.172	498.521	241.671	836.039	563.153	280.264	825.117	552.174	224.289	762.438
764	0	299.845	162.113	1578.46	195.192	165.07	1578.11	319.447	327.034	1579.85	200.232	332.981	1580.27	244.13	366.914	1442.22	252.687	467.643	1161.45	255.216	205.399	1339.52	254.855	111.209	1139.48	170.694	460.914	1255.38	403.293	276.259	1404.38	523.779	301.984	1172.17	534.52	321.387	1075.52	547.621	249.304	937.993	498.88	229.957	836.869	563.821	268.005	825.747	552.277	211.955	763.346
765	0	299.362	151.623	1577.85	194.77	154.771	1577.26	319.308	316.578	1580.98	200.157	322.717	1581.01	244.442	357.685	1442.64	253.381	459.108	1162.29	255.066	196.406	1339.69	254.429	102.87	1139.55	171.295	452.284	1256.04	403.33	266.702	1404.86	523.929	291.649	1172.63	535.194	310.575	1076.14	547.849	237.818	938.845	499.247	218.393	837.754	564.329	255.938	826.644	552.936	199.501	764.668
766	0	298.885	141.224	1577.13	194.263	144.541	1576.43	319.133	305.953	1581.89	199.741	312.385	1581.5	244.786	348.528	1442.98	253.853	450.538	1162.71	254.926	187.406	1339.78	254.078	94.6182	1139.6	171.924	443.645	1256.48	403.389	257.319	1405.21	523.985	281.224	1172.88	535.767	299.679	1076.53	547.988	226.201	939.502	499.222	206.815	838.465	564.921	243.814	827.347	553.326	187.232	765.562
767	0	298.442	130.841	1576.32	193.794	134.383	1575.36	319.144	295.518	1582.6	199.856	302.117	1582.04	245.092	339.4	1443.28	254.327	441.925	1163.16	254.871	178.39	1339.65	253.915	86.1568	1139.31	172.344	434.883	1256.92	403.51	247.945	1405.28	524.094	270.753	1172.88	536.183	288.683	1076.52	548.079	214.447	939.895	499.49	194.955	838.754	565.249	231.607	827.812	553.652	174.768	766.109
768	0	297.877	120.362	1575.46	193.299	124.266	1574.21	319.148	285.015	1583.39	199.872	291.983	1582.68	245.26	330.209	1443.52	254.602	433.211	1163.67	254.819	169.351	1339.51	253.638	77.7102	1139.1	172.557	426.045	1257.46	403.596	238.658	1405.31	524.072	260.096	1172.73	536.504	277.601	1076.49	547.853	202.751	940.156	499.501	182.962	838.981	565.732	219.149	828.041	553.625	162.088	766.59
769	0	297.373	110.041	1574.64	192.752	114.245	1573.3	319.04	274.482	1584.05	199.977	281.923	1583.11	245.399	320.971	1443.6	254.789	424.56	1164.07	254.722	160.264	1339.4	253.405	69.4175	1138.93	172.795	417.362	1257.88	403.565	229.329	1405.23	524.04	249.463	1172.56	536.87	266.568	1076.42	548.064	191.099	940.429	499.533	171.157	839.261	566.154	206.869	828.374	553.845	149.662	766.969
770	0	296.984	99.8454	1573.65	192.373	104.254	1572.23	319.02	264.122	1584.44	199.715	271.852	1583.36	245.509	311.701	1443.5	254.789	416.011	1164.11	254.728	151.203	1339.16	253.348	61.0186	1138.39	172.938	408.537	1258	403.627	220.098	1404.92	524.121	238.85	1172.06	537.047	255.526	1075.92	548.166	179.345	940.326	499.518	158.878	839.326	566.146	194.654	828.299	553.86	137.295	767.067
771	0	296.607	89.5711	1572.62	192.066	94.2739	1571.01	318.939	253.818	1584.64	199.825	261.737	1583.67	245.679	302.35	1443.4	254.718	407.447	1164.23	254.745	142.112	1338.64	253.359	52.3696	1137.54	172.974	399.679	1258.16	403.648	210.816	1404.44	523.987	228.099	1171.26	537.006	244.328	1075.04	548.048	167.503	939.973	499.302	146.882	838.886	566.274	182.098	827.741	553.573	124.688	766.819
772	0	296.331	79.4903	1571.67	191.721	84.3634	1570	318.831	243.647	1584.94	199.358	251.63	1583.84	245.732	292.955	1443.32	254.624	398.948	1164.44	254.718	133.052	1338.16	253.352	43.7755	1136.87	172.975	390.811	1258.47	403.716	201.523	1404.04	523.993	217.292	1170.7	536.98	233.138	1074.41	547.822	155.681	939.677	499.112	134.857	838.555	566.257	169.662	827.513	553.56	112.091	766.808
773	0	296.08	69.5856	1570.71	191.446	74.4593	1569.03	318.743	233.544	1585.16	199.473	241.683	1583.86	245.763	283.584	1443.06	254.569	390.53	1164.6	254.652	124.001	1337.63	253.359	35.1543	1136.05	172.928	381.935	1258.55	403.738	192.23	1403.62	523.953	206.587	1169.98	536.934	222.021	1073.7	547.66	143.964	939.392	498.938	122.643	838.482	565.996	157.485	827.257	553.176	99.5107	766.669
774	0	295.868	59.6902	1569.69	191.236	64.6517	1567.97	318.507	223.539	1585.09	199.115	231.793	1583.68	245.771	274.166	1442.76	254.44	381.985	1164.54	254.643	114.925	1337.03	253.313	26.451	1134.95	172.844	372.957	1258.46	403.624	182.926	1402.87	523.905	195.767	1169.08	536.853	210.782	1072.8	547.376	132.075	938.835	498.414	110.613	837.854	565.774	145.138	826.538	552.884	86.9031	766.246
775	0	295.686	49.8161	1568.67	191.039	54.8201	1566.8	318.232	213.54	1584.82	198.985	221.906	1583.48	245.713	264.732	1442.36	254.156	373.244	1164.37	254.478	105.864	1335.99	253.414	17.6547	1133.79	172.634	363.935	1258.34	403.557	173.509	1402.11	523.68	184.9	1168.1	536.43	199.414	1071.62	546.889	120.242	938.146	498.116	98.6811	837.195	565.247	132.562	825.795	552.421	74.1655	765.88
776	0	295.43	40.0382	1567.73	190.797	45.0214	1565.84	318.051	203.743	1584.64	198.728	212.132	1583.23	245.63	255.233	1441.92	253.887	364.473	1164.14	254.379	96.6899	1335.09	253.429	8.84734	1132.64	172.404	354.79	1258.12	403.46	164.102	1401.4	523.327	174.029	1167.2	536.292	188.202	1070.78	546.358	108.431	937.625	497.373	86.1137	836.895	564.977	119.972	825.238	551.717	61.4533	765.562
777	0	295.224	30.3544	1566.86	190.571	35.3767	1564.88	317.826	194.037	1584.26	198.529	202.348	1582.76	245.468	245.793	1441.35	253.559	355.585	1163.67	254.469	87.5577	1334.17	253.438	-0.039539	1131.54	172.131	345.604	1257.68	403.312	154.803	1400.61	523.119	163.311	1166.24	535.99	176.998	1069.73	545.731	96.4934	936.988	497.126	74.0498	836.363	564.526	107.649	824.606	550.862	48.8278	765.106
778	0	295.02	20.6475	1565.88	190.352	25.6634	1563.87	317.62	184.241	1583.61	198.53	192.645	1582.2	245.326	236.297	1440.63	253.226	346.533	1163.09	254.455	78.3977	1332.79	253.507	-9.0967	1130.07	171.901	336.396	1257.14	403.187	145.439	1399.51	522.839	152.497	1165.08	535.654	165.692	1068.44	544.985	84.5319	936.15	496.031	61.4852	835.715	563.749	94.9927	823.605	549.94	36.0232	764.422
779	0	294.752	10.9208	1564.9	190.135	16.0264	1562.88	317.449	174.505	1582.92	197.987	182.927	1581.38	245.148	226.783	1439.82	252.809	337.423	1162.45	254.292	69.1869	1331.44	253.454	-18.0737	1128.65	171.445	327.074	1256.5	403.018	136.048	1398.41	522.511	141.784	1163.9	535.26	154.482	1067.16	544.063	72.6682	935.27	495.015	49.2737	834.772	562.876	82.3821	822.65	548.705	23.2552	763.707
780	0	294.363	1.22566	1564.03	189.694	6.43931	1561.98	317.321	164.81	1582.16	197.782	173.324	1580.51	244.859	217.323	1438.84	252.393	328.284	1161.56	254.169	59.9399	1330.21	253.329	-27.1678	1127.38	171.055	317.684	1255.49	402.801	126.825	1397.24	522.124	131.273	1162.75	534.956	143.4	1065.88	543.109	60.8679	934.388	493.849	37.3765	834.13	561.99	69.9547	821.801	547.395	10.5139	763.127
781	0	294.003	-8.41836	1563.1	189.35	-3.16365	1561.02	317.113	155.21	1581.17	197.623	163.714	1579.51	244.579	207.743	1437.57	251.99	319.021	1160.29	253.973	50.6725	1328.7	253.211	-36.3064	1125.97	170.733	308.311	1254.27	402.607	117.552	1395.86	521.543	120.784	1161.23	534.531	132.349	1064.41	541.835	48.9899	933.294	492.546	25.4835	833.119	560.923	57.5575	820.591	545.927	-2.18861	762.4
782	0	293.572	-18.0415	1562	189.039	-12.6263	1560.05	316.86	145.523	1579.93	197.491	154.225	1578.51	244.388	198.218	1436.35	251.418	309.582	1159.04	253.834	41.3347	1327.12	253.06	-45.5409	1124.25	170.354	298.768	1253.05	402.392	108.119	1394.38	520.972	110.448	1159.59	533.986	121.266	1062.61	540.96	37.1419	932.115	491.298	13.2255	832.2	559.592	45.1658	819.306	544.312	-14.9822	761.469
783	0	293.166	-27.6456	1560.98	188.634	-22.0619	1559.04	316.568	135.92	1578.67	197.166	144.831	1577.3	244.01	188.668	1435.14	250.821	300.143	1157.85	253.595	31.903	1325.54	252.863	-54.9202	1122.69	169.906	289.323	1251.85	402.122	98.6286	1392.94	520.575	100.29	1158.06	533.529	110.387	1060.92	539.799	25.4032	930.953	489.903	1.30835	831.161	558.352	32.4344	817.974	542.659	-27.8387	760.656
784	0	292.679	-37.0732	1560.02	188.069	-31.45	1558.12	316.303	126.422	1577.38	196.887	135.468	1575.97	243.617	179.041	1433.81	250.404	290.608	1156.53	253.247	22.4154	1324.13	252.56	-64.317	1121.17	169.47	279.774	1250.53	401.884	89.1997	1391.58	520.138	90.2351	1156.6	533.1	99.651	1059.39	538.859	13.8727	929.891	488.546	-10.4535	830.402	557.085	20.1118	816.831	540.889	-40.3974	759.973
785	0	292.184	-46.5273	1558.86	187.542	-40.807	1556.96	315.986	117.248	1576.02	196.441	126.155	1574.62	243.347	169.447	1432.42	249.927	280.917	1155.24	252.878	12.9517	1322.44	252.258	-73.9635	1119.59	168.994	270.027	1249.12	401.45	79.589	1390.05	519.705	80.234	1154.99	532.681	88.8968	1057.78	537.719	2.27919	928.56	486.99	-22.5267	829.515	555.649	7.86195	815.53	538.964	-53.0792	759.001
786	0	291.568	-55.9288	1557.71	186.98	-50.2274	1555.87	315.455	107.909	1574.58	195.903	116.855	1573.27	243.035	159.838	1431.2	249.36	271.127	1153.87	252.384	3.45615	1320.79	251.912	-83.7789	1117.71	168.502	260.244	1247.81	400.973	69.8786	1388.39	519.16	70.2949	1153.29	532.083	78.1264	1055.97	536.475	-9.25725	927.271	485.247	-34.638	828.366	553.724	-4.27233	814.162	537.051	-65.743	758.12
787	0	290.866	-65.268	1556.85	186.291	-59.5009	1554.81	314.735	98.4026	1573.21	195.233	107.549	1571.8	242.387	150.13	1429.88	248.854	261.33	1152.46	251.89	-5.98892	1319.16	251.543	-93.666	1116.25	167.937	250.401	1246.39	400.406	60.1326	1386.94	518.623	60.4541	1151.83	531.483	67.5078	1054.39	535.231	-20.5756	925.966	483.41	-46.3732	827.662	552.279	-16.4743	812.818	534.987	-78.1224	757.378
788	0	290.104	-74.5108	1555.98	185.453	-68.7455	1553.9	314.046	89.3772	1572.06	194.472	98.4437	1570.43	242.117	140.533	1428.37	248.398	251.482	1150.9	251.481	-15.4032	1317.68	251.044	-103.58	1114.92	167.497	240.617	1244.86	399.906	50.5022	1385.56	518.143	50.7016	1150.46	530.946	57.1018	1052.84	533.74	-31.6848	924.845	481.727	-57.9373	826.809	550.489	-28.1003	811.747	532.961	-90.3725	756.595
789	0	289.194	-83.808	1555.15	184.695	-77.9638	1552.85	313.235	80.1517	1570.87	193.594	89.2502	1569.13	241.559	130.861	1426.98	247.812	241.367	1149.28	250.877	-25.2357	1316.35	250.611	-113.779	1113.53	167.05	230.597	1243.27	399.41	41.0217	1383.84	517.581	40.8049	1148.94	530.184	46.6487	1051.16	532.615	-42.8423	923.684	479.868	-69.4167	826.103	548.865	-40.0819	810.324	530.778	-102.594	755.947
790	0	288.223	-93.029	1554.45	183.719	-87.2366	1552.05	312.216	70.914	1569.71	192.629	80.0032	1567.72	240.97	121.133	1425.63	247.204	231.19	1147.61	250.335	-34.8812	1314.95	250.139	-123.936	1112.33	166.73	220.671	1241.66	398.634	30.9754	1382.57	516.911	30.9273	1147.61	529.428	36.2887	1049.69	530.987	-53.9204	922.507	478.153	-80.9465	825.331	546.734	-51.6145	809.203	528.644	-114.626	755.324
791	0	287.048	-102.232	1554	182.585	-96.4102	1551.32	311.154	61.7283	1568.76	191.587	70.9207	1566.66	240.176	111.406	1424.19	246.561	220.869	1145.96	249.554	-44.8194	1313.96	249.492	-134.131	1111.33	166.145	210.527	1240.03	397.973	21.2357	1381.42	516.147	21.1129	1146.56	528.771	26.2664	1048.63	529.93	-64.6064	921.804	476.707	-92.3034	825.11	544.838	-62.8924	808.303	526.489	-126.347	755.047
792	0	285.849	-111.425	1553.39	181.272	-105.417	1550.61	310.086	52.5667	1567.74	190.374	61.7641	1565.24	239.39	101.684	1422.77	245.977	210.728	1144.1	248.913	-54.7265	1313.06	249.003	-144.433	1110.53	165.511	200.272	1238.24	397.165	11.3385	1380.3	515.499	11.3257	1145.53	527.847	16.3593	1047.43	528.367	-75.0763	920.988	474.502	-103.373	824.701	542.902	-73.9919	807.514	524.296	-137.861	754.771
793	0	284.564	-120.629	1552.69	180.047	-114.595	1549.78	308.776	43.4715	1566.43	189.097	52.713	1563.83	238.549	91.9476	1421.29	245.436	200.407	1142.26	248.025	-64.7752	1311.88	248.274	-154.995	1109.69	164.843	189.893	1236.39	396.3	1.38835	1379.1	514.483	1.47023	1144.4	526.913	6.55591	1046.25	527.175	-85.536	920.116	472.86	-114.372	824.413	541.079	-85.2448	806.476	522.212	-149.225	754.335
794	0	283.156	-129.83	1552.18	178.642	-123.702	1549.15	307.468	34.2881	1565.23	187.828	43.7081	1562.66	237.486	82.2798	1419.91	244.925	189.93	1140.59	247.24	-74.642	1310.85	247.478	-165.539	1108.87	164.228	179.548	1234.61	395.223	-8.64169	1378.16	513.698	-8.3506	1143.68	525.997	-3.01917	1045.39	525.559	-95.8376	919.472	471.079	-125.078	824.132	538.968	-95.7776	805.864	520.107	-160.355	754.164
795	0	281.692	-138.834	1551.79	177.213	-132.734	1548.64	306.025	25.375	1564.05	186.374	34.6873	1561.12	236.27	72.6113	1418.46	244.305	179.282	1138.71	246.099	-84.7517	1310.12	246.632	-176.245	1108.6	163.538	169.124	1232.52	394.109	-18.6064	1377.44	512.82	-18.0523	1143.23	525.041	-12.5743	1044.8	524.59	-105.717	919.134	469.322	-135.636	824.164	537.154	-106.128	805.532	518.321	-171.184	754.342
796	0	280.269	-147.793	1551.24	175.712	-141.777	1548.12	304.522	16.4752	1562.57	185.21	25.7304	1559.8	234.942	63.0697	1416.93	243.589	168.386	1136.49	244.979	-94.8443	1309.31	245.711	-187.128	1108.18	162.779	158.51	1230.28	392.712	-28.4971	1376.54	511.95	-27.7931	1142.64	523.953	-21.913	1044.07	523.093	-115.595	918.538	467.786	-145.916	824.027	535.385	-116.339	804.813	516.484	-181.726	754.075
797	0	278.781	-156.686	1550.82	174.283	-150.838	1547.67	302.902	7.5912	1561.08	183.274	16.7468	1558.29	233.388	53.5553	1415.3	242.933	157.218	1134.23	243.643	-105.1	1308.62	244.695	-198.394	1107.78	161.735	147.767	1227.89	391.182	-38.2034	1375.57	510.906	-37.7392	1142.07	522.72	-31.5867	1043.27	522.055	-125.34	917.881	466.204	-156.173	823.716	533.621	-126.343	804.023	514.513	-192.087	753.7
798	0	277.237	-165.576	1550.9	172.681	-159.965	1547.69	300.996	-1.1093	1559.99	181.795	7.66299	1557.06	231.605	44.0294	1413.95	242.126	145.684	1132.19	242.079	-115.374	1308.15	243.67	-209.684	1107.91	160.607	137.041	1225.66	389.435	-48.227	1375.29	509.881	-47.5799	1142.02	521.754	-41.0877	1043.07	520.669	-135.068	917.593	465.184	-166.429	823.902	532.236	-136.276	803.612	513.106	-202.111	753.668
799	0	275.763	-174.439	1551.43	171.132	-169.058	1548.18	299.142	-9.75542	1559.19	179.868	-1.28414	1556.21	229.608	34.5088	1412.64	241.352	133.965	1130.07	240.486	-125.77	1308.01	242.668	-220.969	1108.33	159.229	126.154	1223.44	387.691	-57.7444	1375.04	508.747	-57.4145	1142.11	520.386	-50.6806	1043.01	519.807	-144.53	917.387	463.669	-175.298	823.547	530.746	-145.465	803.486	511.759	-211.791	753.543
800	0	274.252	-183.243	1552.17	169.63	-178.294	1548.97	297.129	-18.4921	1558.53	177.841	-10.2807	1555.5	227.538	24.8395	1411.59	240.513	122.043	1128.22	238.793	-136.273	1308.05	241.746	-232.57	1108.74	157.994	115.251	1221.5	385.98	-67.576	1374.85	507.537	-67.3609	1142.13	519.134	-60.4571	1042.83	518.602	-154.012	916.921	462.416	-184.767	823.289	529.502	-154.597	803.111	510.563	-221.043	753.167
801	0	272.602	-192.131	1553.25	168.058	-187.523	1549.97	294.845	-27.2208	1558.18	175.626	-19.524	1555.12	225.549	14.7478	1411	239.712	110.093	1127.08	236.939	-146.981	1308.27	240.743	-244.107	1109.22	156.618	104.198	1220.05	384.067	-77.7355	1374.98	506.104	-77.4222	1142.27	517.637	-70.3183	1042.91	517.432	-163.317	916.738	461.415	-194.056	823.129	528.311	-163.855	802.651	509.516	-230.049	752.93
802	0	270.892	-201.012	1555	166.186	-196.772	1551.45	292.52	-36.0678	1558.28	172.944	-28.7875	1554.92	223.515	4.38969	1410.96	238.96	98.2426	1126.81	235.029	-157.827	1309.06	239.767	-255.795	1110.17	155.445	93.1849	1219.32	382.318	-88.2939	1375.88	504.626	-87.4255	1143.02	516.294	-80.1052	1043.7	516.182	-172.443	917.083	460.346	-202.838	823.179	527.062	-172.153	803.103	508.65	-238.438	753.091
803	0	268.955	-209.895	1557.03	164.31	-206.02	1553.25	290.138	-44.9277	1558.67	170.733	-37.9782	1554.97	221.689	-6.22677	1411.36	238.517	86.6048	1127.12	233.057	-168.415	1309.87	238.724	-267.566	1111.36	154.51	82.2827	1219.19	380.511	-99.0712	1376.93	503.063	-97.366	1143.97	514.996	-89.7619	1044.97	515.003	-181.422	917.667	459.172	-211.214	823.547	526.118	-180.297	803.801	508.045	-246.483	753.448
804	0	266.858	-218.878	1559.06	162.242	-215.362	1555.06	287.537	-54.0128	1559.19	168.199	-47.1804	1555.1	220.026	-17.1295	1412.18	237.948	75.4987	1127.93	231.138	-179.265	1310.85	237.572	-279.313	1112.45	153.794	71.3813	1219.71	378.737	-110.131	1378.14	501.274	-107.416	1145.11	513.469	-99.5643	1046.36	513.646	-190.33	918.437	458.219	-219.535	823.956	525.163	-188.233	804.666	507.413	-254.112	753.985
805	0	264.702	-228.092	1561.55	160.076	-224.709	1556.98	285.126	-63.0866	1559.98	166.063	-56.5181	1555.44	218.538	-27.8923	1413.52	237.355	65.0414	1129.32	229.358	-190.05	1312.21	236.344	-291.076	1114.04	153.345	60.6485	1220.69	376.927	-121.404	1379.99	499.482	-117.508	1146.9	512.007	-109.345	1048.34	512.365	-198.932	919.733	457.253	-227.227	824.711	524.241	-195.902	805.939	506.924	-261.583	754.866
806	0	262.322	-237.163	1564.2	157.676	-233.828	1559.28	282.816	-72.2208	1561.16	163.432	-65.9102	1555.91	217.138	-38.5011	1415.03	236.856	54.5217	1131.07	227.687	-200.679	1313.92	234.986	-302.489	1116.16	153.169	50.0765	1221.96	375.274	-132.637	1382.27	497.939	-127.501	1149.3	510.737	-118.981	1050.98	511.3	-207.339	921.551	456.733	-234.814	826.213	523.633	-203.302	807.855	506.287	-268.372	756.168
807	0	259.885	-246.412	1566.99	155.187	-243.107	1561.45	280.369	-81.5592	1562.53	161.354	-75.1267	1556.67	215.856	-48.9722	1416.66	236.653	43.6911	1133.07	226.017	-210.998	1315.7	233.706	-313.562	1118.44	153.109	39.4805	1223.36	373.592	-143.97	1384.91	496.496	-137.553	1151.98	509.686	-128.495	1053.95	510.068	-215.583	923.561	455.522	-241.768	827.646	522.985	-210.419	810.002	505.907	-274.622	757.618
808	0	257.24	-255.87	1569.62	152.65	-252.319	1563.49	278.153	-91.0642	1564.21	159.246	-84.3393	1557.61	214.639	-59.2798	1418.49	236.617	32.4614	1134.9	224.527	-221.367	1317.48	232.352	-324.428	1120.51	152.958	28.936	1224.84	371.987	-155.034	1387.39	495.266	-147.76	1154.85	508.495	-138.193	1056.92	508.902	-223.945	925.614	454.565	-248.815	829.116	522.118	-217.445	812.28	505.131	-281.112	758.906
809	0	254.472	-265.296	1572.5	149.917	-261.469	1565.47	275.998	-100.587	1566.04	156.908	-93.5308	1558.69	213.383	-69.4061	1420.27	236.811	21.0829	1136.38	223.236	-231.521	1319.5	231.019	-334.938	1122.78	152.888	18.3435	1226.22	370.3	-165.729	1389.97	494.053	-157.981	1157.93	507.681	-147.78	1060.15	507.764	-232.185	927.863	453.776	-255.664	830.889	521.652	-224.561	814.779	504.206	-287.32	760.352
810	0	251.629	-274.693	1575.2	147.279	-270.493	1567.56	273.938	-110.161	1568.13	155.181	-102.758	1559.78	212.126	-79.3998	1421.87	236.961	9.81363	1137.75	221.921	-241.368	1321.63	229.723	-345.135	1125.34	152.746	8.12025	1227.61	368.823	-176.126	1392.5	493.282	-168.18	1161.12	506.96	-157.057	1063.39	506.847	-240.121	930.351	452.991	-262.199	832.765	521.572	-231.573	817.127	503.229	-293.249	761.706
811	0	249.016	-284.225	1577.86	144.704	-279.502	1569.34	271.968	-119.8	1570	153.11	-111.984	1560.69	210.879	-89.2965	1423.35	236.939	-1.18117	1139.03	220.78	-251.146	1323.5	228.59	-355.191	1127.61	152.474	-2.48523	1228.52	367.386	-186.327	1394.81	492.694	-178.473	1164.21	506.343	-166.242	1066.3	506.175	-248.319	932.626	452.447	-268.864	834.499	521.598	-238.709	819.353	502.423	-299.08	762.962
812	0	246.294	-293.671	1580.16	142.162	-288.407	1570.74	270.148	-129.385	1571.84	151.434	-121.063	1561.74	209.675	-99.0982	1424.78	236.695	-11.7557	1140.39	219.681	-260.927	1325.13	227.549	-365.087	1129.51	151.976	-12.6964	1229.71	366.174	-196.394	1396.99	492.106	-188.909	1167.01	505.782	-175.328	1068.95	505.613	-256.347	934.76	452.355	-275.517	836.045	521.581	-246.08	821.371	501.614	-305.022	763.82
813	0	243.613	-303.034	1582.42	139.555	-297.229	1572.15	268.501	-138.985	1573.77	150.03	-130.001	1562.63	208.585	-108.895	1426.09	236.055	-21.7988	1141.66	218.688	-270.603	1326.9	226.547	-374.875	1131.35	151.392	-23.018	1230.72	364.922	-206.3	1398.87	491.802	-199.141	1169.66	505.458	-184.148	1071.55	505.098	-264.219	936.747	452.225	-282.285	837.756	521.679	-253.06	823.5	501.033	-310.947	764.672
814	0	241.07	-312.425	1584.63	137.067	-305.959	1573.56	266.906	-148.468	1575.3	148.711	-138.942	1563.19	207.525	-118.671	1427.15	235.118	-31.5618	1142.7	217.72	-280.236	1328.45	225.707	-384.543	1133.09	150.614	-33.1335	1231.57	364.056	-215.989	1400.69	491.509	-209.325	1171.97	505.251	-192.686	1073.76	505.248	-272.012	938.54	452.527	-289.385	839.428	522.477	-260.348	825.191	500.974	-316.725	765.236
815	0	238.62	-321.754	1586.37	134.708	-314.765	1574.7	265.517	-158.046	1576.57	147.408	-147.851	1563.62	206.504	-128.368	1428.28	234.264	-41.2077	1143.91	216.923	-289.896	1329.61	225.15	-394.172	1134.33	149.878	-43.0717	1232.56	363.225	-225.62	1402.16	491.292	-219.365	1173.71	505.135	-201.316	1075.56	505.681	-279.749	939.781	453.289	-296.509	840.674	523.09	-267.404	826.6	501.215	-322.672	765.476
816	0	236.28	-331.092	1588.07	132.569	-323.564	1575.69	264.087	-167.573	1577.64	146.166	-156.741	1563.99	205.587	-138.191	1429.42	233.229	-51.0002	1145.18	216.181	-299.624	1330.58	224.584	-403.794	1135.13	148.929	-52.8572	1233.84	362.44	-235.298	1403.27	490.896	-229.34	1175.07	504.97	-209.992	1077.07	506.201	-287.58	940.785	454.003	-303.754	841.408	523.499	-274.387	827.896	501.552	-328.701	765.724
817	0	234.239	-340.237	1589.79	130.597	-332.341	1576.66	262.865	-176.969	1578.58	145.012	-165.662	1564.19	204.755	-147.991	1430.46	232.279	-60.8384	1146.42	215.534	-309.268	1331.53	224.231	-413.224	1135.86	147.961	-62.5532	1234.91	361.812	-244.766	1404.27	490.668	-238.891	1176.13	504.976	-218.519	1078.41	506.787	-295.196	941.67	454.46	-310.893	842.16	524.475	-281.406	828.875	502.522	-334.836	766.007
818	0	232.473	-349.397	1591.24	128.864	-341.219	1577.59	261.575	-186.256	1579.29	144.028	-174.731	1564.17	203.938	-157.727	1431.46	231.224	-70.3688	1147.61	214.999	-318.88	1332.35	223.901	-422.623	1136.41	146.965	-72.0434	1236.12	361.345	-254.267	1405.19	490.431	-248.192	1176.91	504.866	-226.949	1079.36	507.503	-302.575	942.207	455.335	-318.124	842.627	525.263	-287.916	829.736	503.697	-340.976	766.206
819	0	230.978	-358.675	1592.4	127.477	-350.372	1578.49	260.385	-195.614	1579.78	142.861	-183.811	1564.41	203.193	-167.555	1432.46	230.12	-79.5817	1148.8	214.509	-328.57	1332.94	223.733	-432.234	1136.5	145.925	-81.4444	1237.41	360.692	-263.887	1405.73	489.989	-257.237	1177.25	504.767	-235.566	1079.9	507.967	-310.146	942.416	456.446	-325.236	842.624	526.205	-294.866	829.967	505.137	-347.449	766.288
820	0	229.912	-367.833	1593.59	126.403	-359.688	1579.48	259.166	-204.752	1580.32	141.74	-193.247	1564.74	202.318	-177.345	1433.56	228.989	-88.2887	1150.08	214.017	-338.186	1333.55	223.61	-441.676	1136.64	144.911	-90.7849	1238.72	359.972	-273.342	1406.16	489.728	-265.833	1177.66	504.56	-244.111	1080.66	508.839	-317.627	942.837	457.49	-332.419	842.605	526.798	-301.393	830.527	506.603	-353.965	766.614
821	0	229.252	-376.967	1594.64	125.687	-369.172	1580.53	258.038	-213.897	1581.04	140.553	-202.748	1565.23	201.307	-187.11	1434.6	227.907	-96.9401	1151.48	213.429	-347.657	1334.24	223.46	-450.997	1136.92	143.763	-99.9478	1240.25	359.254	-282.7	1406.98	489.376	-273.93	1178.35	504.452	-252.566	1081.63	509.113	-324.895	943.376	458.378	-339.701	842.86	527.817	-308.027	831.399	508.346	-360.752	767.316
822	0	229.044	-386.126	1595.4	125.351	-378.854	1581.43	256.906	-222.887	1581.51	139.335	-212.31	1565.86	200.352	-196.783	1435.63	226.816	-105.531	1152.69	212.907	-357.019	1334.74	223.28	-460.266	1137.01	142.719	-109.058	1241.54	358.469	-292.093	1407.6	488.897	-281.866	1179.01	504.181	-260.992	1082.5	509.789	-332.415	943.937	459.204	-347.595	843.086	528.92	-314.547	832.159	510.024	-367.501	767.993
823	0	229.147	-395.399	1596.03	125.423	-388.832	1582.27	255.835	-231.968	1581.86	138.194	-222.154	1566.6	199.381	-206.413	1436.67	225.935	-114.129	1154.13	212.412	-366.344	1335.17	223.117	-469.444	1137.06	141.584	-118.248	1242.87	357.663	-301.354	1408.25	488.339	-289.662	1179.74	503.769	-269.584	1083.31	510.008	-340.118	944.501	460.605	-353.734	842.87	529.921	-321.98	832.865	511.603	-374.585	768.789
824	0	229.446	-404.566	1596.64	125.643	-398.865	1583.25	254.808	-240.973	1582.27	137.029	-232.034	1567.46	198.374	-215.826	1437.63	224.981	-122.732	1155.26	211.76	-375.532	1335.66	222.783	-478.529	1137.35	140.533	-127.169	1244.22	356.773	-310.468	1409.1	487.71	-297.276	1180.9	503.469	-277.949	1084.54	510.042	-347.743	945.463	461.086	-358.828	842.983	530.827	-328.931	834.108	513.28	-381.756	769.969
825	0	229.896	-413.826	1597.03	125.952	-408.974	1584.1	253.801	-249.986	1582.72	135.934	-242.076	1568.36	197.328	-225.051	1438.48	224.159	-131.324	1156.24	211.085	-384.559	1336.14	222.368	-487.505	1137.85	139.583	-136.171	1245.2	355.938	-319.365	1409.93	487.129	-304.782	1182.08	503.105	-286.095	1085.95	509.852	-355.556	946.435	462.317	-365.836	843.639	531.901	-336.163	835.655	514.716	-388.819	771.089
826	0	230.358	-423.21	1597.17	126.333	-419.17	1584.64	252.853	-259.113	1583.08	134.702	-252.17	1569.27	196.373	-234.209	1439.15	223.5	-140.027	1157.19	210.423	-393.529	1336.43	221.907	-496.379	1138.18	138.629	-145.004	1246.11	355.176	-328.278	1410.56	486.441	-312.424	1182.94	502.751	-294.177	1087.08	510.017	-363.553	947.552	462.706	-373.037	844.181	532.996	-343.892	836.736	516.049	-396.176	772.109
827	0	230.685	-432.64	1597.2	126.585	-429.463	1584.9	251.837	-268.33	1583.55	133.689	-262.286	1570.14	195.572	-243.229	1439.79	222.852	-148.774	1157.92	209.751	-402.419	1336.72	221.325	-505.133	1138.63	137.875	-153.813	1246.95	354.37	-337.089	1411.18	485.727	-320.171	1183.78	502.296	-302.111	1088.18	509.796	-371.51	948.472	463.378	-380.49	844.737	533.968	-351.549	838.038	517.333	-403.703	773.149
828	0	230.826	-442.068	1597.27	126.667	-439.453	1585.23	251.006	-277.628	1584.18	132.691	-272.299	1570.83	194.766	-252.16	1440.28	222.293	-157.565	1158.41	209.04	-411.223	1337.09	220.626	-513.566	1139.16	137.185	-162.371	1247.45	353.752	-345.68	1411.89	485.262	-327.843	1184.69	501.893	-309.768	1089.25	510.118	-379.333	949.656	464.498	-388.04	845.565	534.808	-359.095	839.394	518.46	-411.174	774.249
829	0	230.723	-451.569	1597.18	126.599	-449.374	1585.34	250.078	-286.966	1584.79	131.787	-282.151	1571.6	194.17	-261.062	1440.58	221.833	-166.21	1158.83	208.373	-419.926	1337.48	219.9	-521.745	1139.54	136.558	-171.031	1247.84	353.275	-354.387	1412.6	484.832	-335.434	1185.49	501.574	-317.327	1090.18	510.392	-387.141	950.704	464.788	-395.637	846.465	535.831	-367.104	840.584	519.631	-418.704	775.155
830	0	230.492	-461.159	1597.05	126.347	-459.271	1585.18	249.29	-296.49	1585.39	130.7	-291.886	1572.34	193.874	-269.928	1440.86	221.626	-174.905	1159.33	207.764	-428.681	1337.6	219.106	-529.793	1139.74	136.339	-179.709	1248.24	352.759	-363.092	1412.87	484.412	-343.334	1185.97	501.355	-324.869	1090.83	510.768	-394.989	951.413	465.558	-403.617	846.899	536.346	-374.825	841.185	520.517	-426.432	775.813
831	0	230.012	-470.819	1596.87	125.915	-468.94	1584.94	248.604	-305.98	1585.98	130.226	-301.484	1573.09	193.444	-278.912	1441.13	221.33	-183.454	1159.83	207.156	-437.488	1337.7	218.25	-537.889	1139.78	136.089	-188.218	1248.76	352.246	-372.03	1413.06	484.073	-351.297	1186.43	500.964	-332.531	1091.31	510.95	-402.781	951.937	466.455	-411.986	847.204	536.632	-382.711	841.858	521.421	-434.246	776.398
832	0	229.477	-480.345	1596.79	125.346	-478.458	1584.8	247.986	-315.454	1586.55	129.39	-310.977	1573.52	193.011	-287.87	1441.31	221.192	-191.927	1160.22	206.529	-446.226	1337.94	217.302	-545.961	1139.88	136.167	-196.841	1249.25	351.862	-380.96	1413.4	483.845	-359.27	1186.9	500.657	-340.205	1091.86	511.767	-410.535	952.51	466.526	-420.011	847.781	537.093	-390.11	842.583	522.228	-441.928	776.933
833	0	228.946	-489.786	1596.48	124.705	-487.997	1584.66	247.399	-324.889	1586.85	129.135	-320.335	1573.82	192.648	-296.826	1441.47	221.229	-200.418	1160.56	205.87	-455.073	1337.93	216.309	-554.38	1139.89	135.958	-205.02	1249.49	351.317	-390.004	1413.42	483.669	-367.418	1187.19	500.235	-348.273	1092.16	512.045	-418.26	952.593	467.002	-428.322	848.124	537.011	-397.338	842.796	522.972	-449.636	777.244
834	0	228.279	-499.281	1596.13	124.206	-497.365	1584.26	246.903	-334.375	1586.89	128.649	-329.677	1574	192.381	-305.692	1441.7	221.25	-208.919	1160.84	205.259	-464.012	1337.76	215.446	-563.129	1139.56	135.904	-213.45	1249.7	350.943	-399.273	1413.35	483.427	-375.836	1187.28	499.927	-356.503	1092.21	512.642	-426.217	952.529	467.399	-436.739	847.921	536.844	-405.061	842.732	523.463	-457.584	777.244
835	0	227.672	-508.688	1595.76	123.676	-506.61	1583.92	246.497	-343.754	1586.87	127.869	-338.898	1574.02	191.868	-314.567	1441.9	221.509	-217.304	1161.24	204.546	-472.907	1337.48	214.527	-571.782	1139.31	135.821	-221.786	1249.92	350.466	-408.652	1413.3	483.13	-384.371	1187.43	499.72	-364.719	1092.28	513.08	-434.16	952.587	467.626	-445.201	848.032	536.774	-412.896	842.632	523.846	-465.512	777.395
836	0	227.214	-518	1595.33	123.139	-515.729	1583.68	246.093	-353.054	1586.57	127.729	-348.14	1573.89	191.451	-323.591	1441.84	221.591	-225.864	1161.31	203.83	-481.841	1337.23	213.538	-580.443	1138.96	135.872	-230.175	1250.08	350.033	-417.984	1413.2	482.924	-392.935	1187.52	499.308	-373.452	1092.41	513.249	-442.134	952.437	467.622	-453.769	848.338	536.451	-420.44	842.625	523.962	-473.317	777.485
837	0	226.767	-527.273	1594.63	122.534	-524.911	1583.19	245.841	-362.346	1585.96	127.216	-357.258	1573.38	191.25	-332.723	1441.52	221.79	-234.482	1161.17	203.131	-490.808	1336.79	212.742	-589.202	1138.27	136.248	-238.996	1249.86	349.462	-427.53	1412.7	482.706	-401.79	1187.25	499.104	-382.089	1092.13	513.301	-450.413	952.076	467.635	-462.032	847.781	536.06	-428.377	842.102	524.045	-481.478	777.068
838	0	226.281	-536.615	1593.84	122.084	-534.049	1582.52	245.613	-371.709	1585.13	127.411	-366.362	1572.82	191.342	-342.143	1440.94	221.901	-243.101	1160.95	202.418	-499.898	1336.01	211.745	-598.036	1137.25	136.349	-247.637	1249.63	348.888	-437.179	1412.07	482.276	-410.864	1186.75	498.853	-391.093	1091.77	513.163	-459.028	951.615	467.414	-470.51	847.098	535.627	-436.569	841.516	523.871	-489.685	776.414
839	0	225.778	-545.872	1593.15	121.67	-543.022	1581.96	245.565	-380.903	1584.47	127.213	-375.424	1572.23	191.107	-351.249	1440.47	222.144	-251.798	1160.69	201.727	-508.94	1335.31	210.953	-606.823	1136.4	136.569	-256.292	1249.29	348.422	-446.767	1411.57	482.014	-420.04	1186.52	498.723	-400.161	1091.6	512.62	-467.666	951.108	467.044	-479.113	846.796	535.176	-444.868	841.034	523.549	-497.99	775.951
840	0	225.38	-554.981	1592.32	121.164	-552.045	1581.3	245.491	-390.166	1583.53	127.099	-384.466	1571.42	190.905	-360.512	1439.84	222.39	-260.797	1160.14	201.135	-518.029	1334.6	210.112	-615.524	1135.39	136.786	-265.113	1248.77	348.001	-456.383	1410.94	481.892	-429.352	1186.19	498.696	-409.366	1091.22	512.531	-476.505	950.65	466.511	-487.456	846.307	534.672	-453.429	840.474	522.992	-506.5	775.498
841	0	225.068	-564.249	1591.26	120.888	-561.062	1580.49	245.437	-399.48	1582.25	127.076	-393.311	1570.61	190.807	-369.783	1439.05	222.756	-269.553	1159.58	200.592	-527.198	1333.42	209.458	-624.466	1134.19	137.008	-273.96	1248.18	347.643	-466.094	1410	481.719	-438.94	1185.38	498.659	-418.821	1090.43	511.819	-485.577	949.445	466.02	-496.497	845.5	534.264	-462.121	839.477	522.409	-515.032	774.189
842	0	224.728	-573.564	1590.08	120.598	-570.04	1579.52	245.417	-408.733	1580.93	126.787	-402.386	1569.53	190.796	-379.141	1438	223.025	-278.629	1158.88	200.105	-536.458	1332.3	208.671	-633.42	1132.75	137.333	-282.763	1247.39	347.208	-475.897	1408.98	481.488	-448.823	1184.5	498.443	-428.54	1089.48	510.963	-494.888	948.471	465.469	-505.465	844.406	533.808	-471.255	838.396	521.401	-523.766	772.925
843	0	224.549	-582.683	1589.03	120.283	-579.069	1578.6	245.508	-417.935	1579.7	126.794	-411.499	1568.29	190.814	-388.384	1437.08	223.285	-287.911	1157.99	199.562	-545.622	1331.05	208.02	-642.383	1131.49	137.548	-291.647	1246.44	346.979	-485.541	1407.94	481.421	-458.712	1183.58	498.355	-438.084	1088.64	510.409	-504.04	947.348	464.694	-513.863	843.321	533.484	-480.203	837.515	520.532	-532.446	771.795
844	0	224.396	-591.894	1587.71	120.139	-588.096	1577.56	245.502	-427.106	1578.1	127.137	-420.591	1566.94	190.508	-397.645	1435.92	223.729	-296.964	1157.01	199.16	-554.856	1329.85	207.378	-651.427	1130.03	137.905	-300.621	1245.34	346.632	-495.305	1406.7	481.227	-468.828	1182.33	498.403	-447.756	1087.63	509.41	-513.396	945.893	463.981	-522.468	842.041	533.068	-489.302	836.167	519.475	-541.222	770.252
845	0	224.321	-601.041	1586.26	120.062	-597.365	1576.26	245.525	-436.385	1576.3	127.145	-429.739	1565.59	190.667	-406.972	1434.59	224.059	-306.189	1155.77	198.804	-564.221	1328.16	206.816	-660.628	1128.27	138.262	-309.662	1244.16	346.441	-505.169	1405.18	481.003	-479.234	1180.7	497.992	-457.63	1085.88	508.93	-522.981	944.208	463.277	-531.665	840.164	532.551	-498.633	834.46	518.566	-550.304	768.392
846	0	224.404	-610.255	1584.74	120.18	-606.573	1575.03	245.501	-445.562	1574.49	127.17	-438.999	1564.05	190.671	-416.311	1433.2	224.489	-315.446	1154.42	198.548	-573.627	1326.69	206.225	-669.95	1126.7	138.683	-318.738	1242.86	346.276	-514.976	1403.69	480.722	-489.757	1179.02	497.632	-467.542	1084.26	508.407	-532.466	942.496	462.824	-540.492	838.516	532.098	-507.844	832.609	517.732	-559.256	766.673
847	0	224.631	-619.406	1583.35	120.273	-615.786	1573.88	245.611	-454.76	1572.72	127.205	-448.276	1562.43	190.883	-425.695	1431.7	224.794	-324.847	1152.93	198.278	-583.063	1325.32	205.725	-679.287	1125.3	139.089	-327.813	1241.42	346.2	-524.829	1402.29	480.443	-500.11	1177.45	497.529	-477.177	1082.85	507.942	-541.776	940.882	462.494	-548.552	836.648	531.65	-516.968	831.013	516.933	-568.312	765.008
848	0	224.917	-628.703	1581.7	120.509	-625.142	1572.47	245.756	-463.915	1570.9	127.272	-457.673	1560.85	191.084	-435.109	1430.09	225.147	-334.267	1151.33	198.038	-592.552	1323.75	205.306	-688.863	1123.59	139.443	-337.091	1239.81	346.149	-534.673	1400.63	480.068	-510.66	1175.54	497.138	-487.154	1081.03	507.513	-551.341	939.014	462.093	-557.972	834.871	531.185	-526.354	829.297	516.431	-577.373	763.034
849	0	225.224	-638.026	1580.04	120.91	-634.606	1570.91	245.88	-473.351	1568.88	127.477	-467.089	1559.15	191.219	-444.636	1428.51	225.615	-343.806	1149.78	197.85	-602.093	1321.97	204.834	-698.592	1121.91	139.828	-346.421	1238.1	346.09	-544.712	1398.71	479.538	-521.393	1173.34	496.666	-497.132	1078.98	506.994	-560.884	936.817	461.102	-567.883	832.754	530.555	-535.666	827.033	515.896	-586.628	760.89
850	0	225.612	-647.518	1578.37	121.19	-644.078	1569.49	246.207	-482.706	1567.11	127.702	-476.593	1557.6	191.58	-454.158	1426.85	225.887	-353.535	1148.08	197.725	-611.808	1320.37	204.346	-708.361	1120.38	140.265	-355.837	1236.62	346.094	-554.603	1396.98	479.163	-531.868	1171.29	496.679	-506.904	1077.14	506.675	-570.48	934.771	460.682	-577.348	830.765	530.075	-545.071	825.092	515.371	-595.908	758.87
851	0	226.003	-656.904	1576.81	121.623	-653.482	1568.04	246.643	-492.171	1565.29	127.805	-486.041	1555.94	191.992	-463.8	1425.08	226.265	-363.39	1146.28	197.707	-621.538	1318.9	203.929	-718.166	1118.76	140.631	-365.472	1234.82	346.246	-564.545	1395.28	478.832	-542.107	1169.28	496.181	-516.975	1075.27	506.396	-580.091	932.85	460.541	-586.572	828.827	529.653	-554.571	823.265	515.008	-605.231	756.711
852	0	226.475	-666.494	1575.1	122.006	-663.056	1566.58	247.172	-501.846	1563.38	128.683	-495.556	1554.2	192.203	-473.549	1423.31	226.742	-373.343	1144.54	197.671	-631.4	1317.13	203.567	-728.168	1117.12	140.988	-375.21	1233.02	346.45	-574.54	1393.38	478.649	-552.302	1167.11	496.021	-526.964	1073.1	506.011	-589.922	930.592	459.937	-596.835	826.71	529.051	-564.402	820.996	514.402	-614.88	754.481
853	0	226.966	-676.2	1573.53	122.536	-672.62	1565.11	247.857	-511.569	1561.5	129.308	-505.182	1552.59	192.673	-483.376	1421.6	226.8	-383.155	1142.42	197.795	-641.429	1315.54	203.178	-738.26	1115.49	141.411	-385.147	1231.28	346.637	-584.704	1391.4	478.455	-562.483	1164.91	495.542	-537.236	1070.79	505.6	-600	928.336	459.331	-607.019	824.524	528.492	-574.318	818.719	513.764	-624.752	752.26
854	0	227.461	-685.905	1571.97	123.022	-682.187	1563.77	248.628	-521.259	1559.62	130.087	-514.721	1550.94	193.162	-493.295	1419.81	226.929	-393.302	1140.36	197.758	-651.369	1314.03	202.749	-748.43	1113.98	141.704	-395.175	1229.48	346.938	-594.741	1389.51	478.386	-572.326	1162.84	495.551	-547.134	1068.73	504.95	-609.878	926.119	458.837	-616.828	822.402	528.055	-584.315	816.68	513.241	-634.725	750.158
855	0	228.141	-695.615	1570.51	123.784	-691.655	1562.49	249.541	-531.045	1557.69	130.961	-524.475	1548.99	193.545	-503.373	1417.84	227.119	-403.505	1138.39	197.913	-661.588	1312.48	202.434	-758.69	1112.52	141.967	-405.365	1227.54	347.359	-604.804	1387.61	478.4	-582.086	1160.6	495.483	-557.027	1066.58	504.768	-620.083	924.042	458.027	-626.802	820.275	527.558	-594.57	814.534	512.649	-644.883	748.056
856	0	229.017	-705.447	1568.86	124.528	-701.56	1561.16	250.527	-540.934	1555.52	131.688	-534.175	1547.22	194.183	-513.504	1416.08	227.301	-413.883	1136.37	198.188	-671.84	1310.77	202.123	-769.138	1110.89	142.241	-415.672	1225.71	347.742	-615.189	1385.47	478.565	-592.001	1158.4	495.148	-567.323	1064.11	504.387	-630.416	921.708	457.475	-637.427	818.05	526.879	-605.012	811.974	511.843	-655.411	745.767
857	0	230.097	-715.366	1567.43	125.63	-711.357	1559.88	251.606	-550.878	1553.45	133	-544.044	1545.62	194.815	-523.685	1414.39	227.364	-424.418	1134.27	198.483	-682.308	1309.14	201.951	-779.718	1109.34	142.5	-426.084	1223.88	348.326	-625.491	1383.48	478.914	-601.825	1156.29	495.118	-577.331	1061.74	504.115	-640.896	919.533	456.948	-648.089	815.968	526.527	-615.775	809.78	511.108	-666.229	743.595
858	0	231.292	-725.123	1565.96	126.787	-721.178	1558.81	252.786	-560.664	1551.43	134.183	-554.019	1543.78	195.433	-533.996	1412.6	227.363	-435.155	1132.25	198.807	-692.655	1307.78	201.731	-790.469	1108.12	142.67	-436.626	1222.03	348.935	-635.761	1381.7	479.282	-611.604	1154.39	495.012	-587.46	1059.57	503.872	-651.284	917.461	456.471	-658.406	813.971	525.738	-626.342	807.569	510.401	-677.195	741.616
859	0	232.774	-734.99	1564.47	128.262	-731.164	1557.66	254.06	-570.619	1549.35	135.175	-563.956	1542.1	196.246	-544.258	1410.75	227.299	-446.134	1130.21	199.178	-703.296	1306.22	201.492	-801.309	1106.8	142.929	-447.329	1220.17	349.654	-646.203	1379.7	479.829	-621.514	1152.32	495.161	-597.571	1057.32	503.657	-661.897	915.219	456.144	-668.988	811.952	525.202	-637.204	805.228	509.687	-688.342	739.449
860	0	234.427	-745.05	1562.96	129.906	-741.336	1556.67	255.518	-580.665	1547.28	136.635	-574.149	1540.61	197.056	-554.623	1409.11	227.229	-457.253	1127.99	199.827	-714.2	1304.7	201.422	-812.467	1105.41	143.218	-458.173	1218.48	350.398	-656.781	1377.63	480.243	-631.657	1150.1	495.103	-607.993	1054.88	503.474	-672.743	912.893	455.661	-680.669	809.924	524.855	-648.329	802.94	509.087	-699.848	737.227
861	0	236.176	-755.061	1561.67	131.578	-751.491	1555.92	256.965	-590.707	1545.29	138.003	-584.438	1539.16	197.929	-565.115	1407.48	226.974	-468.575	1125.68	200.253	-724.988	1303.42	201.19	-823.665	1104.38	143.368	-469.136	1216.55	351.215	-667.242	1375.78	480.761	-641.752	1148.02	494.942	-618.547	1052.64	503.387	-683.49	910.683	454.774	-692.728	808.154	523.915	-659.306	800.61	508.321	-711.149	735.156
862	0	238.125	-765.059	1560.67	133.564	-761.617	1555.42	258.651	-600.74	1543.42	139.614	-594.643	1537.73	198.948	-575.569	1405.82	227.121	-480.062	1123.76	200.863	-735.914	1302.35	200.984	-834.863	1103.53	143.673	-480.162	1214.74	352.107	-677.763	1374.04	481.307	-651.987	1146.01	495.015	-629.043	1050.41	503.355	-694.429	908.634	454.866	-703.073	805.933	523.506	-670.282	798.282	507.591	-722.057	732.934
863	0	240.185	-775.225	1559.73	135.561	-772.008	1555.16	260.445	-611.001	1541.41	141.399	-604.989	1536.49	199.928	-586.194	1404.38	226.879	-491.322	1121.65	201.675	-747.021	1301.33	200.856	-846.297	1102.81	143.995	-491.288	1213.22	353.069	-688.462	1372.12	481.817	-662.522	1143.66	494.947	-639.838	1047.93	503.419	-705.51	906.324	454.232	-715.282	804.031	522.982	-681.477	795.836	507.415	-734.029	730.991
864	0	242.267	-785.522	1558.96	137.61	-782.399	1555.13	262.256	-621.424	1539.48	143.232	-615.512	1535.55	200.881	-597.105	1403.39	226.874	-502.773	1120.13	202.405	-758.367	1300.57	200.643	-857.855	1102.14	144.033	-502.428	1212.12	354.022	-699.28	1370.46	481.999	-673.399	1141.51	494.575	-651.025	1045.51	503.306	-716.715	904.102	454.155	-726.192	801.738	522.245	-692.891	793.358	506.884	-745.413	728.819
865	0	244.348	-795.971	1558.78	139.626	-792.85	1555.61	264.141	-631.908	1538.18	145.082	-626.084	1534.91	201.815	-608.135	1402.87	226.905	-514.422	1119.31	203.148	-769.735	1300.19	200.356	-869.605	1101.99	143.942	-513.703	1211.45	354.96	-710.166	1369.37	482.136	-684.45	1139.79	494.365	-662.071	1043.73	503.221	-728.032	902.421	453.779	-738.656	800.291	521.825	-704.241	791.513	506.66	-757.098	727.285
866	0	246.501	-806.334	1558.96	141.638	-803.379	1556.53	266.152	-642.522	1537.34	146.998	-636.697	1534.71	202.565	-619.294	1402.88	226.344	-525.547	1119.05	203.834	-781.068	1300.18	200.191	-881.518	1102.19	143.469	-524.825	1211.55	355.696	-720.953	1368.46	481.995	-695.715	1138.39	493.986	-673.276	1042.32	502.914	-739.318	901.068	453.873	-750.986	799.319	521.581	-715.65	790.196	506.738	-769.009	726.237
867	0	248.564	-816.885	1559.36	143.815	-814.001	1557.59	268.113	-653.327	1536.68	148.962	-647.467	1534.91	202.985	-630.445	1403.47	225.662	-536.733	1119.48	204.617	-792.548	1300.31	200.146	-893.682	1102.44	142.811	-536.21	1212.25	356.375	-731.942	1367.76	481.67	-707.31	1137.08	493.171	-684.941	1040.92	502.566	-750.94	899.681	453.641	-763.003	797.992	521.141	-727.317	789.019	506.518	-780.776	724.881
868	0	250.64	-827.679	1560.23	145.85	-824.799	1559.14	270.052	-664.248	1536.52	150.857	-658.364	1535.49	203.523	-641.89	1404.27	224.577	-547.801	1120.59	205.363	-804.035	1301.03	200.176	-905.803	1103.32	141.874	-547.678	1213.66	357.027	-742.869	1367.74	481.061	-719.107	1136.32	492.359	-696.587	1040.2	502.56	-762.659	899.212	453.496	-774.586	797.237	520.825	-739.079	788.368	506.569	-792.644	724.358
869	0	252.685	-838.279	1561.62	147.825	-835.452	1561.19	271.858	-675.124	1536.97	152.662	-669.214	1536.67	203.886	-653.279	1405.66	223.464	-559.001	1122.07	205.73	-815.411	1302.53	200.403	-917.599	1104.82	140.713	-559.237	1215.34	357.589	-753.45	1368.39	480.387	-730.824	1136.34	491.556	-707.953	1040.19	502.244	-774.186	899.549	453.444	-786.713	797.492	520.354	-750.7	788.575	506.889	-804.515	724.778
870	0	254.5	-849.057	1563.09	149.614	-846.369	1563.52	273.662	-685.999	1537.76	154.704	-680.042	1538.25	203.991	-664.531	1407.32	222.558	-570.633	1124.16	206.621	-826.632	1304.14	200.776	-929.121	1106.66	139.46	-570.909	1217.42	358.123	-763.977	1369.45	479.5	-742.529	1136.61	490.51	-719.458	1040.68	501.705	-785.847	900.181	453.255	-798.483	797.984	520.088	-762.473	789.381	507.107	-816.525	725.552
871	0	256.211	-859.913	1564.82	151.377	-857.116	1565.86	275.226	-697.019	1538.91	156.129	-690.996	1540.15	204.139	-675.587	1409.31	221.495	-582.76	1126.2	207.023	-837.811	1305.93	201.226	-940.436	1108.69	138.34	-582.633	1219.52	358.56	-774.515	1370.75	478.411	-754.219	1137.21	489.297	-731.11	1041.43	500.811	-797.716	901.174	453.151	-811.062	798.689	519.509	-774.461	790.372	507.237	-828.654	726.688
872	0	257.715	-870.754	1566.67	152.932	-867.85	1568.46	276.682	-707.926	1540.42	157.624	-701.781	1542.5	204.334	-686.645	1411.31	220.037	-595.305	1128.29	207.725	-848.802	1308.07	201.654	-951.367	1111.17	137.354	-594.212	1221.86	358.957	-784.86	1372.47	477.315	-765.626	1138.44	488.095	-742.578	1042.86	500.206	-809.578	902.966	452.431	-823.182	800.153	518.96	-786.388	792.096	507.352	-840.798	728.455
873	0	259.112	-881.507	1568.77	154.175	-878.557	1571.13	278.027	-718.666	1542.37	159	-712.366	1545	204.465	-697.342	1413.53	218.745	-607.299	1129.92	208.065	-859.539	1310.55	202.089	-961.903	1113.96	136.434	-605.887	1223.87	359.353	-795.121	1374.6	476.383	-776.739	1140.04	487.123	-753.723	1044.71	499.591	-821.322	905.12	452.106	-835.459	802.239	518.284	-798.31	794.193	507.362	-852.964	730.749
874	0	260.178	-892.156	1570.76	155.397	-889.102	1573.63	279.189	-729.331	1544.41	160.11	-722.928	1547.77	204.707	-707.975	1415.55	217.821	-618.327	1131.83	208.492	-870.276	1312.92	202.551	-972.227	1116.63	135.693	-617.329	1226.03	359.855	-805.412	1376.82	475.432	-787.774	1141.8	486.249	-764.873	1046.81	498.644	-833.111	907.346	452.273	-848.57	804.52	517.502	-810.524	796.481	507.157	-865.447	733.142
875	0	261.067	-902.707	1572.69	156.345	-899.641	1576.11	280.038	-739.981	1546.43	161.147	-733.44	1550.51	204.974	-718.51	1417.61	217.24	-628.878	1133.75	208.726	-880.979	1315.23	202.957	-982.606	1119.25	135.237	-628.561	1228.13	360.13	-815.731	1378.94	474.793	-798.653	1143.7	485.501	-776.061	1048.66	498.154	-845.072	909.652	451.404	-861.285	806.824	516.742	-823.091	798.691	506.803	-878.065	735.39
876	0	261.808	-913.075	1574.78	157.11	-909.868	1578.54	280.87	-750.344	1548.62	161.834	-743.707	1553.07	205.192	-728.854	1419.66	216.886	-639.355	1135.72	208.992	-891.378	1317.51	203.3	-992.782	1121.8	134.887	-639.644	1229.94	360.471	-825.959	1381.17	474.424	-809.293	1145.81	484.985	-787.021	1050.75	497.608	-856.897	912.163	450.787	-873.828	809.328	515.75	-835.431	800.949	506.362	-891.02	738.122
877	0	262.454	-923.183	1576.8	157.716	-920.02	1580.92	281.441	-760.472	1550.49	162.395	-753.925	1555.22	205.387	-739.358	1421.42	216.649	-649.982	1137.4	209.157	-901.782	1319.73	203.602	-1003.03	1124.34	134.699	-650.368	1231.81	360.789	-836.281	1383.31	474.273	-819.789	1147.94	485.061	-797.951	1052.99	497.141	-868.724	914.564	450.329	-887.555	812.384	514.963	-847.855	803.366	505.402	-903.653	740.531
878	0	262.998	-933.227	1578.49	158.254	-930.083	1583.01	281.784	-770.561	1551.87	162.819	-764.028	1556.98	205.428	-749.746	1423.11	216.612	-660.786	1139.06	209.391	-912.138	1321.44	203.89	-1013.19	1126.25	134.801	-661.025	1233.49	360.958	-846.571	1384.9	474.368	-830.298	1149.69	484.956	-808.981	1054.44	496.764	-880.715	916.394	449.175	-900.115	814.454	513.868	-860.584	804.903	504.363	-916.845	742.303
879	0	263.488	-943.147	1580.19	158.887	-940.043	1584.95	282.049	-780.517	1553.03	163.138	-774.005	1558.5	205.711	-760.15	1424.62	216.714	-671.498	1140.64	209.539	-922.436	1322.95	204.165	-1023.45	1127.81	134.939	-671.276	1235.2	361.133	-857.054	1386.48	474.639	-840.753	1151.38	485.191	-820.028	1055.84	496.431	-892.745	918.177	448.561	-912.545	816.409	512.854	-873.629	806.533	502.739	-930.45	744.684
880	0	263.897	-952.79	1581.95	159.196	-949.855	1586.94	282.233	-790.264	1554	163.299	-783.927	1559.62	205.782	-770.471	1426.02	216.907	-682.054	1142.09	209.54	-932.618	1324.34	204.182	-1033.44	1129.17	135.192	-681.395	1236.67	361.303	-867.481	1388.05	475.158	-850.997	1153.13	485.696	-830.856	1057.3	496.28	-904.7	920.096	447.258	-924.923	818.828	512.019	-886.575	808.161	501.358	-943.755	746.793
881	0	264.442	-962.379	1583.44	159.783	-959.498	1588.65	282.33	-799.962	1554.54	163.399	-793.856	1560.35	205.954	-780.806	1427.29	217.161	-692.142	1143.58	209.594	-942.747	1325.51	204.178	-1043.65	1130.23	135.293	-691.325	1238.19	361.316	-877.919	1389.17	475.856	-861.339	1154.61	486.293	-841.787	1058.42	496.113	-916.714	921.637	446.484	-938.523	821.431	511.277	-899.619	809.511	499.7	-957.258	748.694
882	0	264.834	-971.918	1584.65	160.179	-969.288	1590.15	282.344	-809.629	1554.75	163.505	-803.618	1560.99	205.883	-791.133	1428.5	217.315	-701.702	1144.86	209.571	-952.988	1326.21	204.09	-1053.75	1130.77	135.594	-701.17	1239.44	361.207	-888.536	1390.02	476.601	-871.792	1155.76	486.96	-852.879	1059.23	495.842	-928.909	922.801	445.446	-951.274	823.225	510.106	-912.987	810.3	497.9	-971.094	750.282
883	0	265.229	-981.451	1585.83	160.55	-978.89	1591.55	282.366	-819.261	1554.99	163.573	-813.531	1561.48	205.829	-801.452	1429.54	217.079	-711.301	1145.82	209.383	-963.028	1326.86	203.827	-1063.62	1131.06	135.684	-710.854	1240.84	360.96	-899.039	1390.83	477.345	-882.262	1156.98	487.707	-863.972	1060.09	495.422	-941.086	924.063	444.162	-963.214	824.721	509.377	-926.237	811.455	495.938	-984.977	752.027
884	0	265.608	-990.86	1587.02	160.934	-988.465	1592.95	282.378	-828.725	1555.23	163.484	-823.19	1561.89	205.98	-811.728	1430.47	217.165	-720.597	1146.98	209.215	-973.076	1327.46	203.428	-1073.52	1131.27	135.731	-720.386	1242.12	360.756	-909.532	1391.68	478.101	-892.688	1158.3	488.542	-875.01	1061.07	495.36	-953.298	925.414	443.11	-975.819	826.672	508.535	-939.599	812.613	494.081	-998.841	753.819
885	0	265.992	-1000.31	1587.93	161.222	-998.011	1594.25	282.49	-838.373	1555.13	163.734	-832.908	1562.1	205.841	-821.877	1431.42	217.165	-729.816	1148.07	208.905	-982.938	1327.82	203.006	-1083.21	1131.07	135.867	-729.899	1243.18	360.385	-919.87	1392.1	478.897	-903.382	1159.23	489.359	-886.402	1061.69	495.08	-965.563	926.413	441.862	-988.903	828.36	507.718	-953.058	813.455	492.373	-1012.77	755.146
886	0	266.27	-1009.88	1588.58	161.562	-1007.55	1595.18	282.514	-848.219	1554.8	163.773	-842.608	1562.31	205.531	-832.062	1432.21	217.391	-739.035	1149.14	208.664	-992.868	1327.98	202.439	-1092.74	1130.67	136.044	-739.352	1244.28	360.053	-930.39	1392.42	479.451	-914.277	1159.81	490.081	-897.907	1061.9	494.632	-978.03	927.15	440.949	-1001.04	829.364	506.898	-966.648	813.921	490.612	-1026.65	756.438
887	0	266.424	-1019.47	1589.28	161.727	-1017.11	1596.21	282.688	-857.899	1554.58	164.044	-852.299	1562.31	205.361	-842.252	1432.94	217.673	-748.102	1150.34	208.237	-1002.63	1328.26	201.804	-1101.94	1130.31	136.068	-748.697	1245.32	359.649	-940.688	1392.83	479.967	-925.096	1160.52	490.86	-909.513	1062.41	494.234	-990.704	927.966	439.948	-1014.31	831.069	506.062	-979.97	814.68	488.973	-1040.39	757.918
888	0	266.506	-1029.09	1589.84	161.82	-1026.58	1596.98	282.724	-867.751	1554.44	164.025	-862.035	1562.42	205.262	-852.252	1433.61	217.738	-757.297	1151.3	207.698	-1012.23	1328.48	200.99	-1110.94	1129.86	136.286	-757.945	1246.22	359.258	-950.989	1393.19	480.4	-936.048	1161.18	491.588	-921.185	1063.03	493.653	-1003.22	928.896	438.708	-1026.02	832.213	505.405	-993.235	815.716	487.408	-1053.98	759.293
889	0	266.399	-1038.81	1590.05	161.799	-1036.29	1597.5	282.868	-877.704	1554.09	164.146	-871.844	1562.22	205.263	-862.302	1434.23	218.027	-766.22	1152.23	207.17	-1021.86	1328.31	200.282	-1119.91	1129.13	136.455	-767.189	1247.1	358.769	-961.361	1393.33	480.501	-947.245	1161.47	492.205	-933.13	1063.32	492.758	-1015.79	929.518	437.466	-1038.25	833.062	504.54	-1006.61	816.267	485.835	-1067.58	760.326
890	0	266.451	-1048.74	1590.15	161.835	-1045.96	1597.72	283.019	-887.728	1553.68	164.207	-881.584	1562.09	205.111	-872.134	1434.74	218.244	-775.307	1153.12	206.616	-1031.37	1328.17	199.369	-1129.03	1128.56	136.599	-776.229	1247.94	358.33	-971.751	1393.4	480.482	-958.64	1161.58	492.652	-945.15	1063.51	491.729	-1028.42	930.183	436.306	-1050.8	833.831	503.614	-1020.02	816.872	484.294	-1080.95	761.331
891	0	266.287	-1058.53	1590.22	161.6	-1055.64	1598.17	282.795	-897.599	1553.34	164.161	-891.462	1561.98	205.204	-881.932	1435.17	218.359	-784.119	1153.77	206.086	-1040.78	1328.17	198.639	-1137.86	1128.18	136.697	-785.287	1248.61	357.862	-981.816	1393.59	480.279	-969.903	1161.85	493.054	-957.001	1063.92	490.667	-1040.84	930.907	435.082	-1063.06	834.983	502.774	-1033.23	817.748	482.864	-1094.14	762.51
892	0	266.138	-1068.41	1590.36	161.465	-1065.33	1598.35	282.805	-907.492	1553.23	164.221	-901.083	1561.93	205.098	-891.588	1435.51	218.302	-793.129	1154.35	205.606	-1050.11	1328.16	198.079	-1146.56	1127.78	136.834	-794.337	1249.24	357.538	-991.789	1393.82	479.94	-981.258	1162.11	493.47	-968.9	1064.4	489.725	-1053.32	931.88	433.675	-1075.73	836.111	501.88	-1046.24	818.582	481.402	-1107.23	763.6
893	0	265.885	-1078.46	1590.2	161.147	-1075.25	1598.34	282.786	-917.609	1553	164.207	-911.084	1561.97	205.016	-901.228	1435.76	218.349	-801.878	1154.99	205.117	-1059.42	1327.9	197.525	-1155.39	1127.35	136.86	-803.365	1249.86	357.202	-1001.75	1393.78	479.473	-992.828	1162.05	493.476	-980.889	1064.49	488.535	-1065.95	932.524	432.379	-1088.1	836.74	500.906	-1059.56	819.146	479.801	-1120.22	764.207
894	0	265.459	-1088.51	1590.13	160.889	-1085.09	1598.3	282.693	-927.62	1552.98	164.062	-920.734	1562.19	204.972	-910.729	1436.04	218.154	-810.753	1155.55	204.616	-1068.74	1327.76	196.987	-1164.1	1127.06	136.922	-812.294	1250.46	356.8	-1011.48	1393.8	478.949	-1004.38	1162.11	493.444	-992.736	1064.56	487.118	-1078.37	933.163	431.072	-1100.64	837.503	499.787	-1072.63	819.723	478.205	-1133.14	764.98
895	0	265.103	-1098.48	1590.08	160.419	-1094.81	1598.26	282.617	-937.539	1553.31	164.083	-930.633	1562.43	204.754	-920.297	1436.34	218.007	-819.349	1156.09	204.142	-1077.95	1327.85	196.474	-1172.61	1126.87	136.659	-821.346	1251.01	356.498	-1021.07	1393.93	478.395	-1015.78	1162.3	493.39	-1004.23	1064.8	486.002	-1090.58	933.807	429.67	-1112.84	838.361	498.743	-1085.41	820.469	476.552	-1145.93	765.659
896	0	264.716	-1108.53	1589.87	160.041	-1104.71	1598.17	282.356	-947.519	1553.46	163.804	-940.378	1562.67	204.642	-929.833	1436.53	217.496	-828.119	1156.46	203.704	-1087.17	1327.68	196.051	-1181.22	1126.56	136.48	-830.346	1251.43	356.193	-1030.65	1393.92	477.799	-1027.08	1162.21	493.2	-1015.72	1064.83	484.916	-1102.59	934.166	428.437	-1124.74	838.832	497.523	-1098.19	820.888	474.846	-1158.59	766.164
897	0	264.123	-1118.65	1589.5	159.597	-1114.58	1597.89	282.206	-957.633	1553.45	163.672	-950.248	1562.98	204.264	-939.378	1436.81	217.276	-836.788	1156.83	203.261	-1096.44	1327.37	195.624	-1189.99	1125.99	136.108	-839.533	1251.88	355.731	-1040.21	1393.66	477.103	-1038.55	1161.91	492.733	-1027.42	1064.46	483.839	-1114.69	934.287	427.048	-1137.21	839.192	496.063	-1111.06	820.852	473.186	-1171.47	766.525
898	0	263.622	-1128.72	1589.3	159.079	-1124.56	1597.61	281.937	-967.665	1553.55	163.472	-959.983	1563.01	203.989	-948.952	1436.97	216.841	-845.553	1157.36	202.823	-1105.77	1327.19	195.239	-1198.65	1125.5	135.836	-848.583	1252.36	355.332	-1049.7	1393.6	476.472	-1049.72	1161.7	492.145	-1038.75	1064.19	482.814	-1126.58	934.404	425.588	-1149.46	839.617	494.658	-1123.64	820.964	471.252	-1184.05	766.846
899	0	262.972	-1138.66	1589.13	158.472	-1134.38	1597.45	281.592	-977.613	1553.77	163.004	-969.858	1563.08	203.605	-958.575	1437.03	216.342	-854.22	1157.8	202.346	-1114.98	1327.06	194.84	-1207.11	1125.21	135.343	-857.731	1252.78	354.97	-1059.08	1393.51	475.755	-1060.67	1161.57	491.446	-1049.73	1063.86	481.723	-1138.23	934.535	424.066	-1161.53	840.097	493.275	-1135.91	821.183	469.63	-1196.55	767.363
900	0	262.357	-1148.68	1588.61	157.851	-1144.28	1597.04	281.134	-987.606	1553.68	162.688	-979.616	1562.91	203.045	-968.256	1436.99	215.659	-863.071	1158	201.945	-1124.34	1326.7	194.454	-1216.14	1124.54	134.598	-866.844	1253.02	354.46	-1068.5	1393.11	475.044	-1071.53	1161.11	490.711	-1060.91	1063.35	480.573	-1149.88	934.551	422.487	-1173.6	840.375	491.58	-1148.17	821.049	467.675	-1209.02	767.53
901	0	261.62	-1158.77	1588.09	157.126	-1154.33	1596.43	280.663	-997.554	1553.26	162.178	-989.584	1562.69	202.591	-977.99	1436.82	215.02	-871.801	1158.16	201.553	-1133.79	1326.16	194.254	-1225.09	1123.63	134.117	-876.177	1253.19	353.968	-1078.08	1392.63	474.381	-1082.46	1160.53	489.632	-1072.02	1062.4	479.208	-1161.62	934.246	420.904	-1185.74	840.235	489.691	-1160.32	820.433	465.885	-1221.5	767.605
902	0	261.103	-1168.68	1587.68	156.618	-1164.16	1595.94	280.058	-1007.48	1553.02	161.582	-999.479	1562.38	202.023	-987.606	1436.71	214.372	-880.779	1158.26	201.164	-1143.18	1325.73	194.085	-1233.67	1122.68	133.577	-885.353	1253.32	353.484	-1087.51	1392.31	473.462	-1092.89	1160.08	488.742	-1082.9	1061.87	477.868	-1173.15	934.275	419.246	-1197.64	840.567	487.829	-1172.18	820.185	463.86	-1233.82	767.882
903	0	260.493	-1178.6	1587.12	155.854	-1174.14	1595.37	279.367	-1017.36	1552.71	161.014	-1009.38	1561.88	201.41	-997.387	1436.49	213.593	-889.657	1158.28	200.668	-1152.63	1325.26	193.816	-1242.57	1121.96	132.626	-894.793	1253.32	352.887	-1096.95	1391.96	472.739	-1103.33	1159.57	487.793	-1093.72	1061.39	476.274	-1184.38	933.951	417.513	-1209.46	840.821	486.108	-1184.07	820.243	461.983	-1245.96	768.138
904	0	259.908	-1188.58	1586.43	155.278	-1184.22	1594.59	278.69	-1027.3	1552.16	160.239	-1019.35	1561.41	200.792	-1007.2	1436.15	212.853	-898.602	1158.33	200.289	-1162.15	1324.51	193.521	-1251.88	1120.93	132.084	-904.11	1253.23	352.383	-1106.53	1391.37	471.934	-1113.65	1158.88	486.788	-1104.66	1060.52	474.728	-1195.82	933.616	415.706	-1221.51	840.42	483.897	-1195.92	819.327	460.056	-1258.28	768.035
905	0	259.207	-1198.64	1585.57	154.638	-1194.36	1593.71	277.881	-1037.32	1551.53	159.494	-1029.51	1560.86	200.058	-1017.06	1435.74	211.949	-907.866	1158.21	199.813	-1171.83	1323.66	193.292	-1260.83	1119.74	131.215	-913.58	1253.11	351.669	-1116.24	1390.72	471.017	-1123.81	1158.03	485.621	-1115.55	1059.63	473.029	-1207.27	933.099	413.645	-1233.9	840.505	481.861	-1207.79	818.74	457.945	-1270.42	768.059
906	0	258.538	-1208.53	1584.79	153.888	-1204.42	1593.04	277.077	-1047.14	1551.05	158.658	-1039.49	1560.21	199.243	-1026.96	1435.34	211.18	-916.952	1158.07	199.239	-1181.32	1323	193.076	-1269.34	1118.49	130.315	-923.093	1252.93	351.101	-1125.75	1390.2	470.148	-1133.76	1157.32	484.613	-1126.15	1059.01	471.336	-1218.38	932.897	411.757	-1244.87	840.379	479.642	-1219.35	818.292	455.526	-1282.07	767.88
907	0	257.7	-1218.54	1584.11	153.176	-1214.48	1592.04	276.316	-1057.09	1550.51	157.854	-1049.66	1559.43	198.512	-1036.74	1434.81	210.258	-926.284	1157.74	198.754	-1191	1322.2	192.737	-1278.39	1117.34	129.458	-932.676	1252.58	350.469	-1135.29	1389.52	469.381	-1143.52	1156.55	483.446	-1136.7	1058.24	469.545	-1229.6	932.364	409.533	-1256.65	840.35	477.963	-1231.13	818.227	453.256	-1294.05	767.793
908	0	257.03	-1228.68	1583.05	152.399	-1224.72	1590.99	275.483	-1067.21	1549.66	156.992	-1059.75	1558.63	197.717	-1046.71	1434.18	209.345	-935.675	1157.34	198.261	-1200.69	1321.16	192.405	-1287.88	1115.98	128.621	-942.232	1252.14	349.74	-1145.05	1388.47	468.475	-1153.35	1155.41	482.28	-1147.41	1056.94	467.694	-1240.79	931.648	407.536	-1267.78	839.784	475.507	-1242.72	817.129	450.876	-1305.85	767.452
909	0	256.209	-1238.84	1582.16	151.492	-1234.92	1589.98	274.59	-1077.35	1548.73	156.196	-1069.93	1557.66	196.86	-1056.64	1433.47	208.576	-945.034	1156.82	197.738	-1210.5	1320.22	192	-1297.29	1114.7	127.562	-952.06	1251.58	349.107	-1154.66	1387.54	467.537	-1162.87	1154.3	480.977	-1157.91	1055.66	465.926	-1251.82	930.978	405.528	-1279.01	839.346	473.427	-1254.23	816.365	448.383	-1317.53	766.931
910	0	255.205	-1248.9	1581.23	150.521	-1244.87	1588.91	273.728	-1087.43	1547.89	155.336	-1079.86	1556.56	196.005	-1066.71	1432.48	207.485	-954.614	1156.12	197.09	-1220.2	1319.33	191.479	-1306.61	1113.6	126.563	-961.781	1250.83	348.346	-1164.24	1386.62	466.707	-1172.28	1153.29	479.794	-1168.17	1054.64	464.082	-1262.72	930.322	403.396	-1289.77	838.912	471.427	-1265.46	815.799	445.963	-1329.07	766.694
911	0	254.065	-1259.01	1580.14	149.514	-1255.04	1587.65	272.844	-1097.49	1546.8	154.327	-1089.96	1555.4	194.997	-1076.61	1431.43	206.414	-964.227	1155.29	196.413	-1230.11	1318.21	190.964	-1316.1	1112.24	125.672	-971.632	1249.9	347.575	-1173.92	1385.47	465.709	-1181.72	1151.99	478.573	-1178.44	1053.25	462.35	-1273.56	929.513	401.612	-1300.98	838.275	469.306	-1276.63	814.938	443.464	-1340.43	766.218
912	0	253.043	-1269.27	1578.84	148.373	-1265.3	1586.33	271.667	-1107.8	1545.59	153.263	-1100.12	1554.03	194.131	-1086.77	1430.38	205.447	-973.959	1154.29	195.733	-1240.09	1316.99	190.495	-1325.72	1110.61	124.517	-981.696	1248.94	346.72	-1183.75	1384.02	464.733	-1191.13	1150.3	477.21	-1188.71	1051.52	460.618	-1284.38	928.364	399.508	-1312.06	837.294	467.089	-1287.9	813.685	440.997	-1351.87	765.344
913	0	251.989	-1279.35	1577.71	147.287	-1275.34	1585.03	270.565	-1117.82	1544.36	152.185	-1110.26	1552.79	193.119	-1096.8	1429.23	204.331	-983.768	1153.3	194.997	-1250.07	1315.9	189.931	-1335.36	1109.34	123.355	-991.656	1247.91	346.071	-1193.38	1382.88	463.665	-1200.52	1148.89	475.963	-1198.78	1050.11	458.8	-1294.89	927.214	397.202	-1322.71	836.545	465.028	-1298.98	812.779	438.536	-1363.04	764.543
914	0	250.875	-1289.37	1576.53	146.078	-1285.54	1583.73	269.328	-1127.85	1543.31	150.877	-1120.42	1551.4	191.949	-1106.7	1428.15	202.966	-993.677	1152.23	194.146	-1260.06	1314.78	189.354	-1345.03	1108.07	122.173	-1001.82	1246.79	345.193	-1203.24	1381.87	462.73	-1209.81	1147.71	474.876	-1208.65	1049.01	457.21	-1305.28	926.222	395.121	-1333.6	836.159	463.047	-1309.75	812.051	436.178	-1374.02	763.928
915	0	249.619	-1299.44	1575.2	144.853	-1295.67	1582.22	268.101	-1137.91	1542.08	149.488	-1130.52	1550.02	190.774	-1116.96	1426.82	201.791	-1003.74	1151.22	193.332	-1270.2	1313.44	188.828	-1354.99	1106.53	120.938	-1011.93	1245.54	344.339	-1213.22	1380.64	461.67	-1219.32	1146.24	473.564	-1218.59	1047.39	455.693	-1315.63	924.959	393.154	-1344.42	835.269	460.822	-1320.45	810.85	433.971	-1384.88	763.003
916	0	248.186	-1309.52	1573.86	143.671	-1305.9	1580.73	266.527	-1148.08	1540.64	148.033	-1140.88	1548.58	189.702	-1127.14	1425.63	200.49	-1013.72	1149.86	192.479	-1280.47	1311.95	188.228	-1365.29	1104.95	119.662	-1022.19	1244.13	343.298	-1223.24	1379.11	460.535	-1228.87	1144.54	472.181	-1228.47	1045.6	454.024	-1325.81	923.459	391.201	-1355.07	834.259	458.868	-1331.45	809.533	431.733	-1395.7	761.971
917	0	246.872	-1319.62	1572.52	142.165	-1316.07	1579.14	265.028	-1158.02	1539.44	146.503	-1150.93	1547.01	188.418	-1137.23	1424.15	199.013	-1024	1148.25	191.394	-1290.64	1310.56	187.554	-1375.46	1103.7	118.23	-1032.49	1242.7	342.155	-1233.14	1377.81	459.369	-1238.28	1143.11	470.89	-1238.03	1044.18	452.417	-1335.86	922.172	389.214	-1365.25	833.37	456.872	-1341.61	808.328	429.565	-1406.06	760.927
918	0	245.41	-1329.66	1571.22	140.496	-1326.21	1577.55	263.517	-1167.93	1538.36	144.993	-1161.04	1545.42	187.107	-1147.33	1422.57	197.543	-1034.37	1146.58	190.331	-1300.86	1309.19	186.912	-1385.9	1102.42	116.676	-1042.97	1241.01	340.927	-1242.99	1376.46	458.136	-1247.92	1141.71	469.49	-1247.62	1042.75	450.848	-1345.72	920.87	387.289	-1375.22	832.215	454.985	-1351.67	807.147	427.53	-1416.41	759.977
919	0	243.796	-1339.86	1569.72	139.017	-1336.48	1575.87	261.802	-1178.09	1537.06	143.225	-1171.25	1544.04	185.532	-1157.48	1421.17	195.94	-1044.85	1144.96	189.26	-1311.17	1307.66	186.265	-1396.64	1100.91	115.13	-1053.39	1239.25	339.451	-1253.11	1374.85	456.843	-1257.77	1140.03	467.992	-1257.4	1040.91	449.318	-1355.54	919.34	385.732	-1385.39	830.851	452.968	-1361.67	805.452	425.528	-1426.53	758.71
920	0	241.937	-1349.98	1568.3	137.262	-1346.77	1574.33	259.887	-1188.15	1535.91	141.328	-1181.45	1542.86	183.814	-1167.51	1419.54	194.362	-1055.49	1143.07	188.055	-1321.45	1306.31	185.588	-1407.2	1099.71	113.49	-1063.85	1237.54	338.177	-1263	1373.68	455.432	-1267.65	1138.73	466.447	-1267.04	1039.34	447.867	-1365.28	917.995	383.848	-1395.08	829.673	451.137	-1371.46	803.942	423.68	-1436.35	757.569
921	0	240.157	-1360.03	1566.96	135.306	-1356.81	1572.79	257.959	-1198.13	1535.25	139.469	-1191.43	1541.78	182.132	-1177.48	1418.02	192.718	-1066.07	1141.33	186.76	-1331.68	1305.22	184.886	-1417.77	1098.83	111.733	-1074.49	1235.66	336.63	-1272.63	1372.68	453.98	-1277.48	1137.82	465.022	-1276.55	1038.34	446.295	-1374.77	916.817	382.185	-1404.7	828.807	449.387	-1380.9	802.908	421.891	-1445.99	756.523
922	0	238.13	-1370.16	1565.64	133.241	-1367.08	1571.2	255.916	-1208.07	1534.36	137.413	-1201.53	1540.69	180.237	-1187.47	1416.41	191.197	-1076.83	1139.48	185.359	-1341.89	1304.04	184.016	-1428.58	1097.87	110.209	-1085.03	1233.63	335.043	-1282.48	1371.73	452.433	-1287.45	1136.83	463.453	-1285.97	1037.26	444.821	-1384.13	915.636	380.726	-1414.18	827.72	447.857	-1390.19	801.796	420.354	-1455.36	755.352
923	0	235.878	-1380.25	1564.28	131.1	-1377.23	1569.58	253.747	-1218.04	1533.42	135.216	-1211.49	1539.64	178.24	-1197.31	1414.88	189.68	-1087.86	1137.42	183.849	-1352.25	1302.83	183.189	-1439.75	1096.99	108.362	-1095.77	1231.59	333.176	-1292.37	1370.57	450.765	-1297.65	1135.81	461.798	-1295.58	1036.18	443.358	-1393.38	914.477	379.293	-1423.57	826.457	446.288	-1399.35	800.446	418.95	-1464.61	754.168
924	0	233.706	-1390.3	1563.21	128.837	-1387.36	1568.3	251.446	-1227.92	1532.67	132.869	-1221.54	1538.63	176.183	-1207.27	1413.46	188.023	-1098.85	1135.55	182.162	-1362.52	1301.89	182.128	-1450.81	1096.48	106.48	-1106.35	1229.56	331.31	-1302.2	1369.86	449.061	-1307.66	1135.21	460.334	-1304.97	1035.57	441.949	-1402.48	913.442	377.979	-1432.75	825.624	444.976	-1408.28	799.538	417.67	-1473.43	753.17
925	0	231.431	-1400.13	1562.46	126.44	-1397.28	1567.27	249.059	-1237.66	1532.1	130.337	-1231.38	1537.6	173.905	-1217	1411.95	186.364	-1110.04	1133.57	180.411	-1372.82	1301.15	181.031	-1461.94	1096.32	104.53	-1117.13	1227.52	329.392	-1311.87	1369.55	447.313	-1317.6	1134.89	458.776	-1314.08	1035.23	440.775	-1411.37	912.811	376.852	-1441.41	824.912	443.921	-1416.87	798.971	416.594	-1481.97	752.229
926	0	228.923	-1409.88	1561.99	124.042	-1407.33	1566.69	246.343	-1247.47	1531.32	127.674	-1241.47	1536.71	171.555	-1226.95	1410.67	184.701	-1121.35	1131.91	178.517	-1383.32	1300.5	179.845	-1473.28	1096.18	102.509	-1127.81	1225.52	327.234	-1321.76	1369.05	445.484	-1327.54	1134.48	456.962	-1323.29	1034.76	439.601	-1420.25	912.068	375.801	-1450.06	823.904	442.815	-1425.41	798.022	415.822	-1490.41	751.353
927	0	226.41	-1419.79	1561.88	121.501	-1417.4	1566.43	243.459	-1257.48	1530.75	124.922	-1251.48	1536.17	169.175	-1237.04	1409.94	183.108	-1132.76	1130.83	176.522	-1393.89	1300.26	178.569	-1484.78	1096.24	100.662	-1138.51	1224.11	325.09	-1331.8	1368.81	443.713	-1337.79	1134.26	455.027	-1332.53	1034.35	438.412	-1429.01	911.447	374.968	-1458.45	822.879	442.197	-1434.06	797.449	415.167	-1498.58	750.381
928	0	223.842	-1429.38	1562.38	118.867	-1427.3	1566.87	240.588	-1267.2	1530.83	122.033	-1261.55	1535.82	166.704	-1247.36	1409.56	181.336	-1143.82	1130.28	174.351	-1404.46	1300.67	177.136	-1496.3	1096.82	98.9219	-1149.28	1223.17	322.853	-1341.92	1369.28	441.659	-1347.22	1134.62	453.2	-1341.48	1034.79	437.282	-1437.4	911.256	374.121	-1466.52	822.325	441.162	-1441.51	797.034	414.817	-1506.36	750.03
929	0	221.144	-1439.19	1563.41	116.149	-1437.22	1567.52	237.643	-1277	1531.36	119.045	-1271.73	1535.85	164.306	-1257.72	1409.84	179.729	-1154.3	1130.34	172.135	-1415.08	1301.34	175.552	-1507.84	1097.74	97.2388	-1159.93	1222.88	320.553	-1352.34	1370.08	439.725	-1356.79	1135.51	451.444	-1350.52	1035.8	436.325	-1445.64	911.488	373.386	-1474.39	822.215	440.518	-1448.97	797.263	414.631	-1513.76	749.742
930	0	218.396	-1449.07	1564.58	113.421	-1447.33	1568.4	234.691	-1286.96	1532.08	116.066	-1281.78	1536.32	161.924	-1268.1	1410.59	178.644	-1164.69	1130.83	169.918	-1425.81	1302.25	173.969	-1519.51	1098.86	95.9687	-1170.63	1223.14	318.326	-1363.18	1371.24	437.844	-1366.38	1136.6	449.493	-1359.82	1036.95	435.258	-1453.83	911.783	373.204	-1482.2	822.027	440.094	-1456.49	797.515	414.679	-1520.79	749.581
931	0	215.521	-1459.01	1566.16	110.492	-1457.43	1569.58	231.689	-1296.98	1533.18	113.113	-1291.96	1537.12	159.812	-1278.48	1411.81	178.095	-1175.15	1132.04	167.663	-1436.51	1303.59	172.138	-1531.03	1100.37	94.9522	-1181.13	1223.95	316.111	-1374.2	1372.82	435.973	-1375.82	1138.21	447.584	-1369.12	1038.54	434.214	-1461.82	912.509	372.482	-1489.61	822.223	439.414	-1462.87	798.204	414.872	-1527.39	749.833
932	0	212.525	-1468.85	1568.15	107.684	-1467.36	1571.1	228.829	-1306.9	1535	110.061	-1301.98	1538.22	157.783	-1288.74	1413.17	177.825	-1185.91	1133.46	165.441	-1447.08	1305.36	170.195	-1542.35	1102.57	93.9331	-1191.57	1224.92	313.811	-1385.33	1375.14	434.133	-1385.09	1140.49	445.85	-1378.14	1041.07	433.243	-1469.68	913.915	372.243	-1496.03	823.125	439.184	-1469.22	799.692	415.253	-1533.64	750.656
933	0	209.681	-1478.8	1570.32	104.628	-1477.37	1572.84	225.91	-1316.8	1537	107.227	-1312.05	1539.59	155.742	-1298.91	1414.9	177.445	-1196.88	1134.88	163.236	-1457.51	1307.35	168.247	-1553.43	1104.97	93.2175	-1202.13	1226.24	311.629	-1396.27	1377.62	432.323	-1394.42	1143.06	444.063	-1387.21	1043.8	432.276	-1477.6	915.568	371.953	-1502.72	824.036	439.158	-1475.53	801.573	415.709	-1539.54	751.588
934	0	206.845	-1488.94	1572.63	101.881	-1487.51	1574.55	223.221	-1326.96	1539.06	104.497	-1322.12	1541.32	153.846	-1308.91	1416.88	176.848	-1207.97	1136.62	161.194	-1467.91	1309.4	166.338	-1564.3	1107.36	92.3452	-1212.6	1227.71	309.358	-1407.19	1380.14	430.402	-1404.02	1145.79	442.196	-1396.46	1046.57	431.416	-1485.68	917.485	371.759	-1509.48	825.178	439	-1481.88	803.382	416.188	-1545.34	752.591
935	0	204.015	-1498.93	1575.02	99.1656	-1497.46	1576.53	220.614	-1336.92	1541.58	101.936	-1332.21	1543.17	152.117	-1318.97	1418.72	176.248	-1219.25	1138.33	159.133	-1478.06	1311.68	164.357	-1574.57	1109.99	91.7355	-1223.01	1229.2	307.147	-1417.86	1382.92	428.584	-1413.68	1148.86	440.451	-1405.52	1049.77	430.435	-1492.68	919.575	371.63	-1515.84	826.546	439.098	-1488.19	805.717	416.484	-1550.84	753.806
936	0	201.407	-1508.84	1577.68	96.501	-1507.3	1578.82	218.182	-1346.61	1544.39	99.5032	-1342.02	1545.52	150.213	-1328.82	1420.79	175.752	-1230.22	1140.17	157.176	-1487.93	1314.33	162.513	-1584.59	1113.03	90.8372	-1233.41	1230.91	305.095	-1428.2	1386.1	426.957	-1423.18	1152.32	439.062	-1414.31	1053.47	429.788	-1500.23	922.354	371.548	-1522.16	828.344	439.429	-1494.52	808.614	416.857	-1556.24	755.545
937	0	198.942	-1518.68	1580.2	94.0525	-1517.1	1581.08	215.992	-1356.49	1547.01	97.2237	-1351.84	1547.85	148.702	-1338.7	1422.68	175.327	-1241.09	1141.94	155.322	-1497.79	1316.74	160.713	-1594.49	1115.78	89.7997	-1243.79	1232.4	303.117	-1438.48	1389.06	425.32	-1432.94	1155.63	437.766	-1423.19	1056.84	429.236	-1507.87	925.025	371.711	-1529.37	830.306	439.826	-1501.12	811.337	417.151	-1561.62	757.078
938	0	196.595	-1528.6	1582.56	91.8398	-1526.84	1583.22	213.93	-1366.37	1549.51	95.2106	-1361.64	1550.27	146.914	-1348.48	1424.68	174.427	-1251.53	1143.78	153.47	-1507.59	1319.1	159.013	-1604.37	1118.46	88.7584	-1254.06	1234.14	301.131	-1448.6	1391.73	423.779	-1442.86	1158.78	436.383	-1432.03	1059.93	428.737	-1515.55	927.58	371.705	-1536.54	832.296	440.289	-1508.12	813.947	417.293	-1567.21	758.434
939	0	194.413	-1538.25	1585.02	89.5503	-1536.41	1585.46	211.998	-1376.32	1551.88	93.3118	-1371.03	1552.51	145.022	-1358.29	1426.81	173.136	-1261.54	1145.69	151.623	-1517.19	1321.49	157.3	-1614.07	1121.11	87.719	-1264.4	1235.72	299.22	-1458.49	1394.5	422.494	-1452.72	1162.03	435.337	-1440.48	1063.22	428.402	-1523.21	930.297	371.75	-1541.61	833.853	440.89	-1515.1	816.86	417.425	-1572.82	759.884
940	0	192.42	-1547.89	1587.36	87.566	-1545.82	1587.79	210.533	-1385.79	1554.37	91.6	-1380.57	1554.5	143.345	-1367.99	1428.47	171.713	-1271.19	1147.39	149.88	-1526.75	1323.79	155.676	-1623.69	1123.63	86.5062	-1274.4	1237.3	297.534	-1468.24	1397.08	421.35	-1462.5	1165.12	434.624	-1448.83	1066.55	428.218	-1530.91	932.967	371.884	-1547.87	835.813	441.739	-1522.22	819.859	417.561	-1578.6	761.394
941	0	190.512	-1557.49	1589.4	85.683	-1555.16	1589.68	208.796	-1395.73	1555.97	90.0732	-1389.98	1556.25	141.911	-1377.57	1430.28	170.376	-1280.77	1149.3	148.302	-1536.37	1325.73	154.228	-1633.46	1125.72	85.2581	-1284.49	1238.87	295.955	-1478.07	1399.2	420.289	-1472.36	1167.64	433.713	-1457.33	1069.08	428.185	-1538.78	935.191	372.257	-1554.74	837.454	442.474	-1529.69	822.168	417.789	-1584.69	762.633
942	0	188.74	-1567.04	1591.42	83.9415	-1564.58	1591.48	207.374	-1405.12	1557.63	88.6246	-1399.46	1557.85	140.273	-1387.36	1432.03	168.911	-1290.54	1150.99	146.818	-1546.06	1327.55	152.925	-1643.17	1127.63	83.931	-1294.42	1240.35	294.449	-1487.77	1401.07	419.399	-1482.11	1169.81	432.982	-1465.87	1071.28	428.239	-1546.66	937.106	372.766	-1561.73	838.871	443.207	-1537.16	824.079	418.161	-1590.98	763.699
943	0	187.105	-1576.47	1593.47	82.4198	-1573.7	1593.29	206.255	-1414.6	1559.33	87.4802	-1408.68	1559.25	138.79	-1397.02	1433.67	167.306	-1300.4	1152.97	145.45	-1555.53	1329.35	151.81	-1653.02	1129.52	82.8316	-1304.1	1241.93	293.198	-1497.29	1402.97	418.684	-1491.73	1172.05	432.45	-1474.25	1073.67	428.496	-1554.43	939.066	373.246	-1568.63	840.44	444.124	-1544.56	826.311	418.846	-1597.27	764.968
944	0	185.547	-1585.88	1595.24	80.7134	-1582.99	1595.1	204.923	-1424.26	1560.8	86.1418	-1417.99	1560.51	137.776	-1406.6	1435.18	165.816	-1310.21	1154.63	144.238	-1565.04	1330.93	150.789	-1662.68	1131.06	81.5221	-1313.77	1243.45	291.98	-1506.87	1404.69	418.013	-1501.36	1173.99	431.909	-1482.87	1075.68	428.785	-1562.41	940.726	373.95	-1575.89	841.724	445.049	-1552.08	828.25	419.716	-1603.97	766.048
945	0	184.097	-1595.32	1596.74	79.3278	-1592.15	1596.5	203.796	-1433.9	1561.98	85.0695	-1427.34	1561.8	136.324	-1416.31	1436.75	164.812	-1320.1	1156.09	143.147	-1574.59	1332.19	150.011	-1672.43	1132.19	80.1272	-1323.44	1244.95	290.789	-1516.35	1405.91	417.342	-1510.9	1175.4	431.311	-1491.68	1077.18	429.113	-1570.52	941.932	374.735	-1583.62	842.746	445.759	-1559.55	829.491	420.787	-1610.9	766.832
946	0	182.689	-1604.73	1598.21	77.9587	-1601.52	1597.91	202.684	-1443.29	1563.23	83.8849	-1436.71	1563.01	135.038	-1426	1438.22	163.548	-1329.81	1157.59	142.128	-1584.07	1333.49	149.224	-1681.82	1133.03	79.0441	-1332.81	1246.37	289.686	-1525.78	1407.13	416.611	-1520.19	1176.65	430.708	-1500.47	1078.63	429.306	-1578.53	943.006	375.671	-1591.32	843.51	446.726	-1567	830.786	421.951	-1617.96	767.636
947	0	181.391	-1614.11	1599.71	76.5874	-1610.73	1599.29	201.544	-1452.78	1564.69	82.8671	-1446.03	1564.15	134.116	-1435.52	1439.44	162.263	-1339.26	1158.92	141.264	-1593.44	1334.72	148.679	-1691.09	1134.01	77.5579	-1342.3	1247.98	288.725	-1534.98	1408.43	415.916	-1529.22	1177.97	430.176	-1509.21	1080.25	429.622	-1586.46	944.257	376.392	-1598.75	844.324	447.599	-1574.27	832.218	423.415	-1625.29	768.681
948	0	180.301	-1623.52	1600.86	75.5818	-1620.17	1600.39	200.548	-1462.04	1565.76	81.7617	-1455.39	1565.15	132.782	-1445.05	1440.69	161.093	-1348.16	1160.34	140.5	-1602.76	1335.8	148.269	-1700.12	1134.62	76.0604	-1351.54	1249.37	287.828	-1544.26	1409.42	415.12	-1538	1178.9	429.644	-1518.07	1081.47	429.88	-1594.59	945.166	377.375	-1606.75	845.008	448.393	-1581.72	833.287	425.024	-1632.8	769.622
949	0	179.174	-1632.97	1601.77	74.4906	-1629.62	1601.23	199.28	-1471.94	1566.58	80.6455	-1464.82	1566.24	131.635	-1454.59	1441.9	159.718	-1356.9	1161.8	139.827	-1612.05	1336.66	147.976	-1709.14	1135.06	74.8779	-1360.83	1250.71	286.878	-1553.36	1410.25	414.148	-1546.53	1179.65	428.902	-1527.09	1082.42	430.055	-1602.71	945.962	378.355	-1614.61	845.279	449.222	-1589.32	834.146	426.685	-1640.52	770.442
950	0	178.081	-1642.46	1602.69	73.3288	-1639.08	1602.05	198.304	-1481.32	1567.65	79.604	-1474.23	1567.13	130.632	-1463.95	1443.06	158.511	-1365.45	1163	139.07	-1621.27	1337.65	147.668	-1717.83	1135.49	73.3686	-1370.06	1252.22	286.001	-1562.36	1411.22	413.26	-1554.9	1180.6	428.229	-1535.8	1083.65	430.159	-1610.73	946.915	379.168	-1622.47	846.07	450.189	-1596.75	835.306	428.331	-1648.32	771.67
951	0	177.05	-1651.89	1603.44	72.5091	-1648.57	1602.61	197.186	-1490.71	1568.72	78.4682	-1483.78	1567.97	129.206	-1473.41	1444.04	156.94	-1374.01	1164.17	138.424	-1630.35	1338.49	147.498	-1726.39	1136.02	71.9383	-1379.07	1253.41	285.188	-1571.14	1412.1	412.328	-1563.03	1181.56	427.636	-1544.36	1085.06	430.29	-1618.81	948.084	380.189	-1630.18	846.624	451.209	-1604.32	836.712	430.072	-1656.22	773.022
952	0	176.132	-1661.47	1603.83	71.4802	-1658.2	1602.95	196.308	-1499.82	1569.56	77.5271	-1493.28	1568.67	128.44	-1482.54	1444.84	155.805	-1382.46	1165.15	137.921	-1639.43	1338.99	147.368	-1735.06	1136.21	70.6191	-1388.2	1254.51	284.449	-1579.97	1412.78	411.336	-1570.99	1182.21	426.952	-1552.8	1086.03	430.343	-1626.9	948.909	381.069	-1638.31	847.189	452.13	-1612.08	837.795	431.668	-1664.44	774.141
953	0	175.194	-1671.06	1604.07	70.699	-1667.97	1603.16	195.303	-1509.43	1570.34	76.4697	-1502.9	1569.36	127.424	-1491.72	1445.64	154.49	-1391.05	1166.22	137.378	-1648.58	1339.35	147.195	-1743.63	1136.31	69.3189	-1397.25	1255.58	283.685	-1588.73	1413.29	410.399	-1578.94	1182.87	426.22	-1561.11	1086.94	430.429	-1635.06	949.735	381.956	-1646.61	847.85	452.794	-1619.95	838.665	433.287	-1672.66	775.2
954	0	174.432	-1680.63	1604.35	69.8096	-1677.66	1603.24	194.362	-1518.78	1571.01	75.6464	-1512.4	1569.96	126.323	-1500.86	1446.31	153.098	-1399.55	1167.08	136.889	-1657.52	1339.73	147.123	-1752.18	1136.72	68.1956	-1406.06	1256.37	283.127	-1597.13	1413.96	409.697	-1586.56	1183.81	425.614	-1568.96	1088.08	430.494	-1642.89	950.865	382.714	-1654.4	848.572	453.623	-1627.74	839.949	434.845	-1680.91	776.609
955	0	173.642	-1690.12	1604.39	69.0058	-1687.16	1603.23	193.384	-1528.47	1571.62	74.5323	-1522.02	1570.43	125.424	-1509.92	1446.92	151.773	-1408.28	1167.69	136.425	-1666.42	1339.87	146.957	-1760.78	1137.06	66.885	-1414.93	1257.04	282.553	-1605.63	1414.51	409.054	-1594.02	1184.53	425.003	-1576.47	1089.04	430.721	-1650.72	951.831	383.445	-1662.48	849.396	454.381	-1635.45	841.134	436.306	-1689.03	777.786
956	0	172.787	-1699.73	1604.25	68.2494	-1696.94	1603.1	192.516	-1537.61	1572.01	73.9117	-1531.59	1570.78	124.897	-1518.85	1447.19	150.953	-1416.99	1168.22	135.989	-1675.35	1339.78	146.818	-1769.37	1137	65.9574	-1423.76	1257.59	281.887	-1614.43	1414.85	408.473	-1601.63	1184.88	424.59	-1584.25	1089.47	430.92	-1658.61	952.339	384.391	-1670.87	849.683	454.962	-1643.21	841.776	437.658	-1697.32	778.8
957	0	172.135	-1709.38	1603.98	67.6661	-1706.67	1602.73	191.607	-1547.05	1572.43	72.9573	-1541.18	1571.06	123.924	-1527.87	1447.51	150.001	-1425.46	1168.6	135.561	-1684.3	1339.54	146.639	-1778.1	1136.99	65.0896	-1432.42	1257.97	281.452	-1622.87	1414.92	408.076	-1609.02	1185.13	424.07	-1591.74	1089.8	431.338	-1666.35	952.818	384.979	-1679.12	849.971	455.271	-1650.81	842.15	438.883	-1705.4	779.484
958	0	171.429	-1718.91	1603.84	66.9395	-1716.29	1602.4	190.879	-1556.31	1572.87	72.2324	-1550.53	1571.29	123.418	-1536.83	1447.63	149.169	-1433.84	1169.01	135.086	-1693.1	1339.4	146.377	-1786.6	1136.99	64.235	-1441.02	1258.3	280.912	-1631.4	1415.17	407.927	-1616.3	1185.55	423.652	-1598.84	1090.2	431.655	-1673.8	953.235	385.536	-1687.06	850.247	455.629	-1658.1	842.749	440.017	-1713.45	780.339
959	0	170.863	-1728.4	1603.42	66.2933	-1725.92	1601.93	190.004	-1566.13	1573.11	71.3815	-1560.2	1571.48	122.632	-1545.8	1447.69	148.529	-1442.11	1169.24	134.727	-1701.93	1339.09	146.181	-1795.19	1136.81	63.7159	-1449.65	1258.44	280.52	-1640.05	1415.18	407.838	-1623.61	1185.81	423.384	-1606.44	1090.35	432.294	-1681.4	953.453	386.143	-1695.39	850.532	456	-1665.62	843.082	441.049	-1721.51	780.845
960	0	170.313	-1738.06	1602.99	65.6525	-1735.54	1601.28	189.507	-1575.26	1573.33	70.7773	-1569.65	1571.65	122.095	-1554.77	1447.69	148.164	-1450.59	1169.54	134.4	-1710.73	1338.64	145.99	-1803.88	1136.35	63.1062	-1458.23	1258.68	280.147	-1648.8	1414.98	407.764	-1631.03	1185.74	423.012	-1614.04	1090.06	432.826	-1688.99	953.268	386.741	-1703.7	850.521	455.986	-1673.07	842.766	441.901	-1729.42	780.928
961	0	169.577	-1747.64	1602.55	65.103	-1745.11	1600.77	188.84	-1584.78	1573.48	70.1245	-1579.14	1571.71	121.562	-1563.72	1447.56	147.693	-1459.08	1169.63	133.997	-1719.45	1338.19	145.671	-1812.31	1135.95	62.5605	-1466.8	1258.8	279.744	-1657.48	1414.79	407.746	-1638.46	1185.78	422.561	-1621.46	1089.82	433.325	-1696.45	953.111	387.078	-1711.69	850.323	456.109	-1680.54	842.577	442.601	-1737.22	780.995
962	0	168.954	-1757.13	1602.21	64.3988	-1754.53	1600.07	188.39	-1594.18	1573.65	69.6697	-1588.58	1571.62	121.175	-1572.69	1447.34	147.48	-1467.57	1169.7	133.6	-1728.12	1337.8	145.35	-1821.02	1135.61	62.4161	-1475.35	1258.7	279.475	-1666.18	1414.6	407.529	-1645.87	1185.79	422.282	-1628.91	1089.74	433.813	-1704.02	953.033	387.313	-1719.89	850.337	455.994	-1687.75	842.385	443.105	-1744.85	781.052
963	0	168.353	-1766.64	1601.52	63.8267	-1763.9	1599.43	188.001	-1603.59	1573.49	69.2887	-1597.78	1571.28	120.855	-1581.63	1447	147.348	-1476.05	1169.59	133.294	-1736.87	1337.13	145.02	-1829.72	1134.97	62.2496	-1483.89	1258.61	279.167	-1675.02	1414.02	407.513	-1653.64	1185.42	422.356	-1636.92	1089.55	434.153	-1711.57	952.477	388.14	-1728.2	849.935	455.858	-1695.12	841.798	443.452	-1752.52	780.447
964	0	167.668	-1776.24	1600.77	63.2762	-1773.37	1598.36	187.561	-1613.21	1573.12	68.8851	-1607.27	1570.78	120.522	-1590.65	1446.66	147.298	-1484.7	1169.25	132.935	-1745.75	1336.38	144.668	-1838.32	1134.11	61.9646	-1492.35	1258.39	278.927	-1684.05	1413.38	407.452	-1661.73	1184.86	422.142	-1644.94	1088.85	434.442	-1719.38	951.823	388.295	-1736.47	849.359	455.645	-1702.76	840.96	443.592	-1760.09	779.747
965	0	167.229	-1785.68	1600.09	62.747	-1782.73	1597.5	187.174	-1622.46	1572.83	68.6369	-1616.5	1570.26	120.333	-1599.55	1446.15	147.243	-1493.24	1168.94	132.651	-1754.43	1335.65	144.279	-1846.91	1133.39	61.9034	-1501	1258.02	278.718	-1693.03	1412.8	407.271	-1669.7	1184.43	422.067	-1652.99	1088.44	434.612	-1727.16	951.271	388.116	-1744.51	849.032	455.432	-1710.18	840.36	443.687	-1767.6	779.168
966	0	166.999	-1795.16	1599.29	62.3035	-1791.88	1596.58	187.049	-1631.85	1572.34	68.3744	-1625.69	1569.51	120.224	-1608.55	1445.51	147.208	-1501.74	1168.5	132.511	-1763.11	1334.72	143.917	-1855.35	1132.6	61.954	-1509.51	1257.58	278.517	-1701.97	1412.28	407.407	-1677.99	1183.97	422.009	-1660.92	1087.97	434.736	-1734.83	950.724	388.168	-1752.43	848.7	455.065	-1717.48	839.622	443.621	-1774.96	778.322
967	0	166.569	-1804.57	1598.22	62.0857	-1801.3	1595.63	186.863	-1641.32	1571.45	68.2999	-1634.98	1568.75	120.361	-1617.56	1444.79	147.371	-1510.39	1167.99	132.281	-1772.01	1333.66	143.457	-1863.75	1131.36	62.1136	-1518.05	1256.91	278.31	-1711.11	1411.35	407.286	-1686.52	1183.17	421.915	-1669.39	1087.19	434.703	-1742.89	949.827	388.273	-1760.41	847.659	454.752	-1725.19	838.663	443.388	-1782.54	777.351
968	0	166.413	-1813.95	1597.12	61.851	-1810.71	1594.54	186.785	-1650.72	1570.58	68.2255	-1644.33	1567.97	120.359	-1626.54	1444.09	147.616	-1518.93	1167.33	132.053	-1780.89	1332.61	143.076	-1872.38	1130.12	62.5202	-1526.75	1256.33	278.27	-1720.67	1410.4	407.301	-1695.26	1182.36	422.193	-1678.15	1086.5	434.485	-1751.02	948.808	387.849	-1768.19	846.712	454.413	-1732.87	837.586	442.985	-1789.99	776.081
969	0	166.268	-1823.31	1596.07	61.7792	-1819.86	1593.42	186.94	-1660.03	1569.79	68.1976	-1653.55	1567.21	120.36	-1635.55	1443.22	147.92	-1527.5	1166.63	131.773	-1789.72	1331.64	142.567	-1880.99	1129.06	62.8	-1535.33	1255.64	278.134	-1729.85	1409.59	407.274	-1703.98	1181.71	422.337	-1686.57	1085.96	434.281	-1759.07	947.879	387.509	-1775.74	845.873	454.044	-1740.46	836.712	442.524	-1797.45	774.919
970	0	166.242	-1832.69	1594.8	61.7043	-1829.14	1592.28	187.068	-1669.38	1568.77	68.3029	-1662.87	1566.18	120.519	-1644.6	1442.25	148.127	-1536.23	1165.66	131.609	-1798.56	1330.51	142.188	-1889.82	1127.85	63.0778	-1544.14	1254.84	278.105	-1739.18	1408.54	407.252	-1712.92	1180.83	422.502	-1695.28	1085.17	433.915	-1767.33	946.722	387.313	-1783.53	844.679	453.79	-1748.21	835.636	441.939	-1804.92	773.651
971	0	166.27	-1842.14	1593.42	61.7953	-1838.49	1591	187.064	-1678.83	1567.46	68.5303	-1672.08	1565.07	120.843	-1653.72	1441	148.451	-1545.12	1164.81	131.584	-1807.59	1329.13	141.857	-1898.82	1126.46	63.3915	-1552.84	1253.82	278.172	-1748.64	1407.19	407.511	-1722.48	1179.5	422.635	-1704.28	1083.81	433.54	-1775.7	945.151	386.603	-1791.05	843.078	453.404	-1756.16	834.1	441.151	-1812.41	771.803
972	0	166.304	-1851.59	1592.11	61.671	-1847.78	1589.73	187.365	-1688.31	1566.23	68.8801	-1681.18	1563.89	121.218	-1662.83	1439.98	148.907	-1553.99	1163.72	131.523	-1816.68	1327.92	141.468	-1907.69	1125.14	63.9905	-1561.78	1252.82	278.329	-1758	1405.89	407.629	-1731.92	1178.19	422.682	-1713.22	1082.5	433.118	-1784.08	943.714	386.215	-1798.5	841.462	453.004	-1764.06	832.495	440.293	-1819.8	770.018
973	0	166.229	-1861.03	1590.89	61.5495	-1856.81	1588.47	187.73	-1697.66	1565.11	69.1957	-1690.45	1562.7	121.579	-1672.17	1438.81	149.337	-1562.95	1162.64	131.494	-1825.75	1326.73	141.155	-1916.74	1123.96	64.464	-1570.6	1251.85	278.52	-1767.44	1404.69	407.753	-1741.34	1176.96	422.733	-1721.92	1081.4	432.629	-1792.19	942.125	385.574	-1805.84	839.982	452.674	-1771.71	831.131	439.468	-1827.32	768.384
974	0	166.207	-1870.46	1589.5	61.5717	-1866.06	1587.05	188.293	-1707.21	1563.83	69.6127	-1699.67	1561.33	122.244	-1681.34	1437.61	149.836	-1571.95	1161.54	131.601	-1834.88	1325.32	140.914	-1925.77	1122.43	65.172	-1579.6	1250.76	278.765	-1776.98	1403.22	407.821	-1751.07	1175.43	423.156	-1731.15	1080.11	432.157	-1800.67	940.311	384.729	-1813.3	838.201	452.25	-1779.63	829.461	438.629	-1835.06	766.485
975	0	166.302	-1880.03	1587.96	61.7448	-1875.36	1585.46	188.855	-1716.87	1562.4	70.1708	-1708.87	1560.02	122.699	-1690.64	1436.37	150.336	-1581.12	1160.35	131.836	-1844.21	1323.79	140.666	-1935.08	1120.82	65.7783	-1588.61	1249.63	279.095	-1786.76	1401.55	408.017	-1761.06	1173.63	423.185	-1740.39	1078.31	431.338	-1809.05	938.079	384.028	-1820.77	836.067	451.726	-1787.55	827.416	437.772	-1842.45	764.004
976	0	166.49	-1889.67	1586.57	61.9026	-1884.48	1584.03	189.343	-1726.38	1561.08	70.6966	-1718.14	1558.67	123.329	-1700.09	1434.97	150.834	-1590.26	1159.25	131.991	-1853.54	1322.37	140.495	-1944.27	1119.45	66.4191	-1597.72	1248.54	279.548	-1796.36	1400.04	408.115	-1770.88	1171.94	423.384	-1749.5	1076.81	430.883	-1817.38	936.117	383.387	-1828.11	834.103	451.496	-1795.44	825.648	436.643	-1849.5	761.626
977	0	166.766	-1899.12	1585.08	62.1706	-1893.71	1582.57	189.939	-1735.93	1559.76	71.4348	-1727.49	1557.24	123.883	-1709.45	1433.59	151.368	-1599.68	1157.85	132.244	-1862.91	1321	140.364	-1953.56	1118.02	67.0462	-1606.84	1247.23	279.919	-1805.95	1398.54	408.206	-1780.64	1170.22	423.328	-1758.32	1075.23	430.404	-1825.58	934.166	382.809	-1835.67	832.352	451.114	-1803.16	823.798	435.974	-1856.69	759.372
978	0	167.272	-1908.72	1583.49	62.6696	-1903.19	1581.16	190.748	-1745.65	1558.21	72.1378	-1736.79	1555.95	124.677	-1718.85	1432.22	151.934	-1609.24	1156.29	132.613	-1872.47	1319.35	140.31	-1963.23	1116.43	67.572	-1616.15	1245.92	280.38	-1815.79	1396.76	408.252	-1790.58	1168.22	423.35	-1767.46	1073.23	430.048	-1833.99	931.977	382.181	-1843.23	830.1	450.474	-1810.96	821.547	435.067	-1864.19	757.018
979	0	167.942	-1918.37	1581.89	63.4118	-1912.7	1579.71	191.526	-1755.29	1556.63	72.9577	-1746.3	1554.59	125.345	-1728.41	1430.88	152.541	-1618.86	1155.06	132.942	-1882.14	1317.85	140.226	-1972.87	1114.88	68.1825	-1625.69	1244.71	280.9	-1825.64	1395.04	408.149	-1800.41	1166.06	423.345	-1776.54	1071.21	429.737	-1842.4	929.758	381.871	-1850.97	827.806	450.315	-1818.96	819.634	434.276	-1871.84	754.706
980	0	168.76	-1927.99	1580.39	64.0678	-1922.25	1578.27	192.343	-1764.79	1555.21	73.9182	-1755.82	1553.36	125.963	-1738.05	1429.48	152.992	-1628.39	1153.56	133.202	-1891.79	1316.41	140.115	-1982.52	1113.55	68.6163	-1635.18	1243.41	281.338	-1835.38	1393.36	408.267	-1810.26	1164.3	423.323	-1785.36	1069.57	429.396	-1850.69	927.706	381.053	-1858.77	825.949	449.628	-1826.89	817.578	433.437	-1878.97	752.316
981	0	169.69	-1937.65	1579	65.0342	-1931.81	1577.12	193.269	-1774.36	1553.86	74.8216	-1765.48	1552.1	126.642	-1747.72	1427.94	153.459	-1638.02	1151.95	133.624	-1901.55	1315.14	140.12	-1992.42	1112.32	69.1304	-1644.72	1242.03	281.91	-1845.23	1391.87	408.443	-1820.01	1162.55	423.432	-1794.35	1067.9	429.163	-1859.05	925.776	380.414	-1866.37	823.903	449.663	-1834.93	815.877	432.923	-1886.89	750.385
982	0	170.687	-1947.42	1577.32	66.1634	-1941.55	1575.85	194.308	-1784.18	1552.27	75.763	-1775.18	1551.01	127.478	-1757.36	1426.59	154.041	-1647.92	1150.56	134.102	-1911.37	1313.65	140.205	-2002.45	1110.83	69.8566	-1654.4	1240.71	282.479	-1855.24	1390.1	408.592	-1829.65	1160.52	423.396	-1803.57	1065.78	428.863	-1867.62	923.543	379.87	-1874.55	821.692	448.717	-1842.84	813.559	432.017	-1894.28	747.778
983	0	171.871	-1957.21	1575.9	67.2785	-1951.36	1574.61	195.487	-1793.94	1550.86	76.9332	-1784.99	1549.94	128.316	-1767.19	1425.35	154.427	-1657.9	1149.08	134.563	-1921.29	1312.43	140.175	-2012.43	1109.63	70.5108	-1664.26	1239.39	283.212	-1865.1	1388.54	408.865	-1839.16	1158.73	423.375	-1812.8	1063.91	428.551	-1876.11	921.557	379.433	-1882.85	819.95	448.367	-1851.45	811.838	431.5	-1902.04	745.407
984	0	173.068	-1966.96	1574.55	68.4744	-1960.99	1573.4	196.573	-1803.66	1549.65	78.1512	-1794.71	1548.88	129.024	-1777.01	1423.92	154.821	-1667.95	1147.54	135.021	-1931.19	1311.37	140.249	-2022.52	1108.65	71.0991	-1674.19	1238	284.018	-1875.02	1387.18	409.335	-1848.55	1157.27	423.659	-1821.84	1062.53	428.3	-1884.58	919.659	378.675	-1890.8	818.119	447.832	-1859.53	810.017	430.591	-1910.01	743.801
985	0	174.326	-1976.89	1573.29	69.7127	-1970.88	1572.2	197.899	-1813.55	1548.4	79.4438	-1804.54	1547.72	130.157	-1786.9	1422.57	155.455	-1678.2	1145.84	135.613	-1941.28	1310.19	140.334	-2032.81	1107.6	71.781	-1684.31	1236.58	284.879	-1885.07	1385.67	409.625	-1857.66	1155.65	423.879	-1831.01	1060.92	428.091	-1893.44	917.852	378.336	-1899.14	816.18	447.207	-1867.95	808.201	429.802	-1918.05	741.718
986	0	175.57	-1986.93	1571.78	71.0506	-1980.73	1571.09	199.276	-1823.59	1547.04	80.9004	-1814.39	1546.67	131.269	-1796.86	1421.16	155.983	-1688.71	1144.19	136.33	-1951.52	1308.98	140.539	-2043.27	1106.41	72.5019	-1694.47	1235.2	285.796	-1895.32	1383.93	410.323	-1867.18	1153.9	424.086	-1840.39	1058.99	427.881	-1902.46	915.845	377.629	-1908.08	814.558	446.622	-1876.6	806.147	428.832	-1926.36	739.421
987	0	176.895	-1996.9	1570.57	72.4397	-1990.57	1570.06	200.864	-1833.58	1545.83	82.4401	-1824.26	1545.56	132.403	-1806.89	1419.72	156.437	-1699.24	1142.53	137.141	-1961.84	1307.93	140.664	-2053.73	1105.59	73.3696	-1704.71	1233.72	286.898	-1905.46	1382.46	411.045	-1876.32	1152.32	424.495	-1849.66	1057.37	427.773	-1911.36	913.93	376.984	-1916.67	812.786	446.107	-1885.36	804.265	427.887	-1934.76	737.443
988	0	178.422	-2006.84	1569.43	73.8862	-2000.36	1569.15	202.467	-1843.6	1544.58	84.0278	-1834.15	1544.45	133.678	-1816.87	1418.26	157.017	-1709.78	1140.48	137.989	-1972.13	1307.01	140.909	-2064.32	1104.91	74.3658	-1715.05	1232.07	288.093	-1915.53	1381.05	411.336	-1884.91	1150.84	424.965	-1858.87	1055.82	427.689	-1920.38	912.26	376.41	-1925.13	811.161	445.609	-1893.98	802.391	427.02	-1943.28	735.713
989	0	179.967	-2016.93	1568.21	75.6096	-2010.27	1567.87	204.148	-1853.72	1543.12	85.8229	-1844.11	1543.21	135.143	-1826.98	1416.75	157.755	-1720.57	1138.57	139.014	-1982.61	1306.01	141.215	-2075.14	1104.06	75.3541	-1725.52	1230.38	289.37	-1925.8	1379.45	412.334	-1894.29	1149.11	425.489	-1868.42	1053.96	427.707	-1929.72	910.273	376.312	-1934.3	809.414	445.166	-1903.34	800.52	426.146	-1952.17	733.549
990	0	181.485	-2026.93	1566.9	77.258	-2020.3	1566.9	206.018	-1864.02	1541.65	87.6606	-1854.11	1542.05	136.582	-1837.15	1415.31	158.533	-1731.66	1136.66	140.141	-1993.31	1304.93	141.55	-2086.24	1103.28	76.3338	-1736.24	1228.89	290.752	-1936.28	1377.74	413.359	-1903.86	1147.23	426.025	-1878.16	1051.85	427.816	-1939.27	908.163	376.232	-1944.11	807.824	444.796	-1912.65	798.34	425.337	-1961.22	731.373
991	0	183.514	-2037.25	1566.17	79.0864	-2030.25	1566.17	208.03	-1874.12	1540.42	89.68	-1864.12	1541.04	138.135	-1847.35	1414.06	159.39	-1742.84	1134.95	141.253	-2003.95	1304.24	141.867	-2097.39	1102.92	77.2421	-1746.99	1227.41	292.122	-1946.56	1376.37	414.597	-1913.4	1145.93	426.692	-1887.81	1050.35	428.043	-1948.69	906.382	376.672	-1954.08	806.588	444.418	-1921.82	796.568	424.737	-1970.2	729.461
992	0	185.465	-2047.33	1565.36	81.0293	-2040.28	1565.73	209.964	-1884.25	1539.3	91.7206	-1874.26	1540.21	139.771	-1857.67	1412.96	160.236	-1754.06	1133.39	142.41	-2014.71	1303.6	142.213	-2108.8	1102.63	78.3885	-1757.74	1226.05	293.637	-1957.12	1375.05	415.838	-1923.1	1144.54	427.351	-1897.63	1048.85	428.374	-1958.32	904.61	377.27	-1964.38	805.489	444.256	-1931.13	794.857	424.2	-1979.4	727.581
993	0	187.631	-2057.58	1564.64	83.0883	-2050.59	1565.56	212.145	-1894.65	1538.1	93.8515	-1884.48	1539.47	141.352	-1868.19	1412.03	161.177	-1765.56	1131.91	143.748	-2025.79	1303	142.585	-2120.43	1102.33	79.5021	-1768.69	1224.9	295.136	-1967.85	1373.63	416.934	-1933.32	1142.81	427.836	-1907.97	1046.96	428.755	-1968.23	902.521	377.285	-1974.12	803.516	444.344	-1940.67	792.825	423.95	-1988.91	725.51
994	0	189.668	-2067.76	1564.3	85.4014	-2060.89	1565.73	214.297	-1905.06	1537.12	95.9802	-1894.84	1539.06	142.806	-1878.89	1411.45	161.808	-1776.97	1131	145.068	-2036.83	1302.72	142.94	-2132.03	1102.24	80.2783	-1779.75	1224.24	296.566	-1978.63	1372.49	417.819	-1943.77	1141.18	428.235	-1918.48	1045.26	429.222	-1978.3	900.846	377.455	-1984.19	801.744	444.396	-1950.36	790.925	423.954	-1998.43	723.725
995	0	192.155	-2078.13	1564.61	87.6731	-2071.22	1566.37	216.534	-1915.47	1536.51	98.1318	-1905.24	1539.08	144.346	-1889.73	1411.21	162.514	-1788.24	1130.39	146.284	-2047.88	1302.89	143.34	-2143.7	1102.6	81.0378	-1790.84	1223.84	298.032	-1989.39	1371.83	418.725	-1954.24	1140.19	428.615	-1928.96	1044.19	429.803	-1988.28	899.652	377.834	-1994.37	800.592	444.577	-1959.98	789.777	424.223	-2007.99	722.471
996	0	194.63	-2088.59	1565.12	90.1641	-2081.56	1567.18	218.66	-1925.82	1536.18	100.459	-1915.79	1538.97	145.898	-1900.69	1411.32	162.944	-1799.48	1130.35	147.6	-2059.01	1303.3	143.805	-2155.52	1103.21	81.522	-1802	1224.05	299.493	-2000.14	1371.42	419.425	-1965.15	1139.39	428.927	-1939.75	1043.32	430.372	-1998.6	898.649	378.341	-2004.7	799.512	444.931	-1969.81	788.779	424.682	-2017.71	721.314
997	0	197.043	-2099	1565.59	92.6046	-2092.2	1568.09	221.008	-1936.55	1536.11	102.681	-1926.5	1539.52	147.091	-1911.8	1411.97	163.004	-1810.6	1130.9	148.96	-2070.36	1303.85	144.385	-2167.44	1103.83	81.4944	-1813.28	1224.84	300.643	-2011	1371.18	419.856	-1976.49	1138.54	429.063	-1950.94	1042.52	430.877	-2009.21	897.784	378.924	-2015.12	798.429	445.564	-1980.15	787.947	425.359	-2027.76	720.33
998	0	199.523	-2109.67	1566.59	95.2095	-2102.87	1569.56	223.065	-1947.16	1536.39	104.823	-1937.17	1540.37	148.237	-1922.93	1412.94	162.646	-1821.74	1131.85	150.262	-2081.65	1304.82	145.097	-2179.33	1105.04	81.4604	-1824.59	1226.07	302.043	-2021.97	1371.54	420.097	-1987.88	1138.26	429.067	-1962.1	1042.29	431.394	-2020.02	897.526	379.671	-2025.75	797.944	446.267	-1990.51	787.814	426.277	-2037.93	719.923
999	0	201.959	-2120.03	1567.72	97.5783	-2113.51	1571.35	225.173	-1957.77	1537.15	106.938	-1947.89	1541.5	149.077	-1934.17	1414.41	162.398	-1833.06	1133.3	151.491	-2092.79	1306.24	145.931	-2190.97	1106.77	81.1697	-1836.21	1227.86	303.183	-2032.46	1372.45	420.473	-1999.53	1138.75	429.099	-1973.3	1042.91	431.808	-2030.88	897.958	380.521	-2036.48	798.193	447.038	-2001.1	788.415	427.374	-2048.17	720.196
1000	0	204.271	-2130.81	1569.23	99.9381	-2124.25	1573.3	227.195	-1968.54	1538.15	108.955	-1958.72	1543.1	150.136	-1945.09	1415.87	162.07	-1844.8	1135.09	152.72	-2103.98	1307.86	146.938	-2202.23	1108.56	80.8806	-1847.67	1229.51	304.324	-2042.87	1373.49	420.448	-2011.19	1139.19	429.05	-1984.65	1043.51	432.176	-2042.04	898.639	381.418	-2047.61	798.608	447.806	-2012.09	789.258	428.573	-2058.81	720.729
1001	0	206.472	-2141.56	1570.58	102.226	-2135.16	1575.21	229.157	-1979.34	1539.39	111.068	-1969.58	1545.07	151.071	-1956	1417.65	161.673	-1857.13	1136.79	153.959	-2115.2	1309.66	147.99	-2213.43	1110.47	80.4726	-1859.29	1231.49	305.464	-2053.29	1374.81	420.152	-2022.71	1139.62	428.845	-1996.13	1044.19	432.549	-2053.39	899.599	382.363	-2058.87	799.127	448.748	-2023.42	790.247	429.907	-2069.78	721.541
1002	0	208.439	-2152.29	1572.32	104.191	-2145.97	1577.5	230.754	-1990.01	1541	112.749	-1980.38	1547.23	151.711	-1966.89	1419.44	161	-1869.49	1138.42	154.955	-2126.06	1311.79	148.995	-2224.17	1112.88	80.0306	-1870.8	1233.34	306.346	-2063.31	1376.36	419.888	-2034	1140.72	428.743	-2007.32	1045.63	432.849	-2064.76	901.136	383.282	-2070.09	800.361	449.704	-2034.77	791.949	431.181	-2080.89	722.891
1003	0	210.188	-2163.01	1574.01	106.002	-2156.63	1579.56	232.412	-2000.7	1542.87	114.394	-1991.11	1549.46	152.626	-1977.38	1421.14	160.306	-1881.36	1139.62	155.943	-2136.77	1313.95	150.059	-2234.72	1115.42	79.9891	-1882.23	1235.06	307.467	-2073.36	1378.22	419.835	-2045.06	1142.2	428.804	-2018.36	1047.35	433.181	-2076.23	902.971	384.246	-2081.84	802.079	450.48	-2046.38	793.928	432.441	-2092.38	724.683
1004	0	211.763	-2173.69	1575.54	107.641	-2167.44	1581.64	233.885	-2011.45	1544.67	115.776	-2001.87	1551.76	153.371	-1987.77	1422.88	160.018	-1892.17	1141.04	157.068	-2147.43	1316.13	151.201	-2245.11	1117.7	79.7461	-1893.55	1236.77	308.559	-2083.41	1379.97	419.723	-2056.21	1143.46	429.085	-2029.82	1048.99	433.759	-2088.08	904.879	385.32	-2094.04	803.766	451.376	-2058.3	795.791	433.721	-2104.33	726.457
1005	0	213.085	-2184.31	1577.17	109.024	-2178.17	1583.6	235.291	-2022.33	1546.59	117.235	-2012.46	1554.15	154.28	-1998.08	1424.6	159.983	-1902.51	1142.65	157.992	-2157.95	1318.23	152.244	-2255.38	1120.15	79.9493	-1904.66	1238.37	309.647	-2093.65	1381.79	419.799	-2067.22	1144.78	429.159	-2040.84	1050.41	434.246	-2099.77	906.743	386.147	-2106.58	805.444	451.812	-2070.61	797.454	434.814	-2116.53	728.26
1006	0	214.328	-2194.89	1578.98	110.271	-2188.65	1585.58	236.326	-2032.73	1548.59	118.373	-2022.91	1556.37	155.048	-2008.35	1426.17	160.152	-1912.72	1144.12	158.883	-2168.24	1320.26	153.174	-2265.52	1122.56	80.1759	-1915.52	1239.96	310.531	-2103.39	1383.6	420.174	-2077.86	1146.58	429.65	-2051.69	1052.33	434.809	-2111.36	908.817	387.045	-2118.72	807.564	452.718	-2082.69	799.636	435.799	-2128.94	730.358
1007	0	215.337	-2205.2	1580.49	111.376	-2199.07	1587.32	237.242	-2043.13	1550.39	119.279	-2033.32	1558.19	155.912	-2018.58	1427.63	160.332	-1923.18	1145.45	159.766	-2178.5	1322.15	154.134	-2275.72	1124.77	80.5213	-1926.05	1241.35	311.675	-2113.36	1385.1	420.832	-2088.47	1148.4	430.225	-2062.5	1054.03	435.698	-2123.18	910.759	387.87	-2131.55	809.644	453.204	-2095.28	801.533	436.697	-2141.73	732.323
1008	0	216.274	-2215.6	1581.76	112.281	-2209.54	1588.82	238.111	-2053.53	1551.85	120.079	-2043.82	1560.05	156.72	-2028.8	1429.11	161.057	-1934.05	1147.01	160.923	-2188.24	1323.46	154.928	-2285.98	1126.48	81.075	-1936.46	1242.96	312.403	-2123.54	1386.55	421.509	-2099.1	1149.71	430.88	-2073.4	1055.14	436.446	-2135.1	912.307	388.671	-2144.36	811.291	454.145	-2108.1	803.004	437.476	-2155.16	734.125
1009	0	217.076	-2225.78	1582.9	113.251	-2219.86	1590.25	238.668	-2063.76	1553.19	120.664	-2054.19	1561.56	157.349	-2039.08	1430.44	161.687	-1944.79	1148.37	161.451	-2198.78	1324.91	155.591	-2296.21	1128.09	81.7201	-1946.68	1244.36	313.25	-2133.64	1387.55	422.256	-2109.42	1150.91	431.676	-2084.31	1056.21	437.307	-2147.01	913.776	389.295	-2157.55	813.064	454.505	-2120.81	804.269	437.913	-2168.46	735.923
1010	0	217.94	-2235.99	1584.45	113.99	-2230.04	1591.64	239.317	-2073.86	1554.59	121.142	-2064.35	1562.77	157.905	-2049.35	1431.73	162.59	-1955.35	1149.95	162.226	-2208.49	1326.09	156.08	-2306.29	1129.53	82.3966	-1956.71	1245.71	313.923	-2143.75	1388.78	423.374	-2119.6	1152.36	432.725	-2095.06	1057.43	438.35	-2158.87	915.41	388.527	-2169.2	814.594	455.088	-2133.45	805.714	438.498	-2181.8	737.632
1011	0	218.668	-2245.82	1585.42	114.771	-2240.24	1592.77	239.603	-2083.82	1555.44	121.582	-2074.59	1563.89	158.406	-2059.56	1432.81	163.286	-1965.67	1151.07	162.755	-2218.54	1327.18	156.478	-2316.44	1130.58	82.9053	-1966.53	1246.95	314.314	-2153.81	1389.78	424.566	-2129.87	1153.55	433.793	-2105.89	1058.21	439.17	-2170.8	916.655	388.314	-2180.77	815.541	455.42	-2146.36	806.587	438.92	-2195.53	739.39
1012	0	219.362	-2255.74	1586.05	115.503	-2250.5	1593.8	239.844	-2093.92	1556.14	121.87	-2084.81	1564.98	158.798	-2069.77	1433.97	163.884	-1975.46	1152.18	163.188	-2228.6	1327.9	156.709	-2326.63	1131.2	83.6398	-1976.22	1248.22	314.653	-2164.15	1390.44	425.552	-2140.14	1154.34	434.888	-2117.06	1058.75	440.303	-2183.05	917.839	388.17	-2193.62	817.149	455.848	-2159.64	807.388	439.228	-2209.75	740.891
1013	0	219.946	-2265.62	1586.89	116.093	-2260.57	1594.73	240.023	-2103.71	1556.92	122.061	-2094.94	1565.89	159.208	-2079.81	1434.9	164.368	-1984.89	1153.21	163.38	-2238.5	1328.67	156.736	-2336.69	1131.79	84.3768	-1985.82	1249.4	314.859	-2174.4	1391.19	426.722	-2150.35	1155.46	436.077	-2128.03	1059.55	441.207	-2195.2	919.044	388.7	-2206.76	818.75	456.229	-2172.66	808.184	439.408	-2223.9	742.554
1014	0	220.455	-2275.49	1587.67	116.513	-2270.58	1595.48	240.079	-2113.44	1557.63	122.125	-2105.01	1566.59	159.376	-2089.94	1435.69	164.936	-1994.2	1154.06	163.46	-2248.33	1329.34	156.602	-2346.54	1132.04	84.9801	-1995.24	1250.52	315.045	-2184.6	1391.83	427.941	-2160.44	1156.72	437.217	-2138.96	1060.31	442.111	-2207.38	920.256	389.192	-2219.87	820.365	456.493	-2185.92	809.125	439.561	-2238.21	744.356
1015	0	220.851	-2285.42	1588.14	116.929	-2280.72	1596.02	240.124	-2123.31	1558.16	122.22	-2115.15	1567.24	159.675	-2099.94	1436.56	165.643	-2003.58	1155.07	163.553	-2258.11	1329.68	156.427	-2356.27	1132.07	85.5901	-2004.64	1251.47	315.03	-2194.87	1392.23	428.973	-2170.91	1157.54	438.417	-2150.37	1060.85	442.958	-2219.91	921.188	389.685	-2233.29	821.646	456.972	-2199.46	809.868	439.706	-2252.81	745.931
1016	0	221.006	-2295.35	1588.53	117.228	-2290.82	1596.55	240.145	-2133.28	1558.65	122.212	-2125.18	1567.81	159.991	-2109.99	1437.34	166.45	-2012.86	1156.15	163.552	-2267.8	1330.09	155.964	-2365.79	1131.89	85.9166	-2013.89	1252.43	314.944	-2205.29	1392.64	429.871	-2181.48	1158.11	439.586	-2161.98	1061.26	443.701	-2232.56	922.125	390.026	-2246.68	822.865	457.392	-2213.15	810.496	439.823	-2267.37	747.402
1017	0	221.138	-2305.17	1589.06	117.274	-2300.69	1597.05	240.065	-2143.08	1559.16	122.185	-2135.29	1568.36	160.103	-2119.86	1437.97	167.118	-2022.03	1157.09	163.398	-2277.38	1330.74	155.398	-2374.94	1131.72	86.7972	-2023.13	1253.33	314.915	-2215.46	1393.23	430.75	-2192.04	1159.02	440.755	-2173.47	1061.91	444.331	-2245.09	923.226	390.194	-2259.74	824.225	457.718	-2226.83	811.363	439.985	-2281.84	749.101
1018	0	221.084	-2315.07	1589.47	117.239	-2310.55	1597.37	239.99	-2152.99	1559.66	122.141	-2145.24	1568.76	160.384	-2129.77	1438.62	168.042	-2031.11	1158.04	163.186	-2286.84	1331.23	154.729	-2383.95	1131.53	87.4958	-2032.35	1254.16	314.868	-2225.68	1393.67	431.552	-2202.71	1159.96	441.829	-2185.12	1062.67	444.902	-2257.86	924.442	390.497	-2273.1	825.689	458.401	-2240.44	812.528	440.169	-2296.37	750.862
1019	0	220.918	-2325.31	1589.76	117.091	-2320.51	1597.44	240.028	-2163.22	1559.96	122.026	-2155.14	1568.95	160.675	-2139.71	1439.28	168.931	-2040.2	1158.99	162.893	-2296.27	1331.43	153.969	-2392.98	1131.14	88.1703	-2041.36	1254.71	314.654	-2236.23	1394.07	431.969	-2213.7	1160.37	442.781	-2197.04	1063.07	445.025	-2270.82	925.268	390.776	-2286.66	826.895	458.9	-2254.31	813.245	440.279	-2310.9	752.294
1020	0	220.633	-2335.37	1589.79	116.723	-2330.57	1597.41	239.809	-2173.19	1560.11	121.901	-2165.1	1569.13	160.749	-2149.43	1439.72	169.735	-2049.33	1159.74	162.483	-2305.73	1331.53	153.104	-2402.01	1130.71	89.0727	-2050.37	1255.41	314.374	-2246.5	1394.24	432.467	-2224.89	1160.9	443.661	-2208.94	1063.45	445.226	-2283.93	926.225	390.963	-2300.36	828.115	458.756	-2268.77	814.085	440.412	-2325.5	753.821
1021	0	220.245	-2345.37	1589.84	116.422	-2340.36	1597.31	239.438	-2183.07	1560.4	121.544	-2175	1569.27	160.981	-2158.97	1440.11	170.508	-2058.36	1160.22	162.046	-2315.02	1331.65	152.326	-2410.84	1130.61	89.8375	-2059.38	1255.91	314.113	-2256.61	1394.6	432.575	-2235.84	1161.38	444.563	-2220.75	1064.19	445.282	-2297.01	927.501	390.984	-2313.63	829.43	459.306	-2282.66	815.352	440.407	-2339.98	755.533
1022	0	219.816	-2355.35	1589.68	116.025	-2350.24	1597.09	239.268	-2192.97	1560.55	121.308	-2184.8	1569.35	161.12	-2168.46	1440.27	171.129	-2067.3	1160.54	161.501	-2324.19	1331.54	151.561	-2419.53	1130.33	90.4274	-2068.2	1256.28	313.942	-2266.77	1394.87	432.826	-2247.3	1161.91	445.351	-2232.75	1064.68	445.24	-2310.23	928.649	390.9	-2327.05	830.516	459.552	-2296.93	816.259	440.292	-2354.86	757
1023	0	219.433	-2365.56	1589.44	115.515	-2360.19	1596.72	238.962	-2203.03	1560.67	121.099	-2194.75	1569.58	161.408	-2177.9	1440.46	171.848	-2076.22	1160.89	161.152	-2333.47	1331.27	150.931	-2428.28	1129.89	91.0303	-2077.03	1256.65	313.52	-2276.81	1394.83	432.682	-2258.82	1161.77	445.853	-2244.88	1064.74	445.128	-2323.56	929.488	390.915	-2340.8	831.492	459.709	-2311.56	817.09	440.247	-2369.28	758.317
1024	0	218.731	-2375.43	1589.18	114.914	-2370.03	1596.28	238.703	-2213.08	1561.06	120.618	-2204.49	1569.83	161.6	-2187.24	1440.68	172.286	-2085.06	1161.27	160.612	-2342.59	1331.02	150.282	-2436.86	1129.53	91.4044	-2085.86	1256.83	313.159	-2286.56	1394.92	432.621	-2270.45	1162.05	446.285	-2256.82	1064.93	444.966	-2336.77	930.447	390.828	-2354.47	832.552	460.01	-2325.84	818.014	439.99	-2383.67	759.52
1025	0	218.127	-2385.48	1588.97	114.276	-2379.7	1595.73	238.109	-2222.77	1561.33	120.202	-2214.23	1569.88	161.427	-2196.51	1440.66	172.654	-2093.87	1161.43	160.071	-2351.67	1330.86	149.642	-2445.46	1129.2	91.759	-2094.65	1257.02	312.846	-2296.35	1395.03	433.198	-2282.51	1162.5	446.737	-2268.78	1065.34	444.754	-2349.91	931.335	390.636	-2368.13	833.625	460.29	-2340.12	819.167	439.641	-2398.05	760.74
1026	0	217.453	-2395.29	1588.31	113.623	-2389.61	1595.32	237.756	-2232.57	1561.42	119.862	-2223.93	1569.79	161.311	-2205.85	1440.57	172.847	-2102.63	1161.35	159.602	-2360.86	1330.34	149.131	-2454.17	1128.65	92.0148	-2103.63	1256.93	312.363	-2306	1394.79	432.982	-2294.33	1162.46	446.987	-2280.88	1065.32	444.52	-2363.16	931.849	390.221	-2381.63	834.082	460.346	-2354.41	819.863	439.368	-2412.54	761.74
1027	0	216.699	-2405.2	1587.84	112.998	-2399.25	1594.63	237.296	-2242.51	1561.45	119.316	-2233.6	1569.94	161.068	-2215.23	1440.47	173.046	-2111.39	1161.43	159.08	-2369.93	1329.83	148.561	-2462.92	1128.02	92.1821	-2112.44	1256.97	311.982	-2315.55	1394.38	432.772	-2306.26	1162.08	447.079	-2293.13	1064.93	444.231	-2376.27	932.114	390.255	-2395.47	834.401	459.961	-2368.59	820.016	438.926	-2427.09	762.406
1028	0	215.915	-2414.91	1587.46	112.227	-2408.87	1594.17	236.672	-2252.25	1561.41	118.83	-2243.17	1569.79	160.74	-2224.63	1440.24	173.036	-2120.19	1161.45	158.53	-2379.04	1329.36	148.015	-2471.6	1127.43	92.2098	-2121.51	1256.88	311.608	-2325.08	1394.25	432.342	-2317.9	1161.88	446.88	-2305.08	1064.6	443.887	-2389.16	932.556	389.665	-2409.02	835.145	459.736	-2382.57	820.417	438.444	-2441.39	763.258
1029	0	215.038	-2424.47	1586.88	111.39	-2418.47	1593.56	235.997	-2261.83	1561.28	118.259	-2252.7	1569.45	160.33	-2234.06	1439.88	172.984	-2128.85	1161.15	157.972	-2388.15	1328.91	147.55	-2480.32	1126.88	92.1857	-2130.33	1256.54	311.04	-2334.55	1393.93	431.867	-2329.51	1161.49	446.627	-2317	1064.29	443.501	-2402.07	932.901	389.301	-2422.74	835.8	459.314	-2396.37	820.804	437.917	-2455.68	764.165
1030	0	214.214	-2434.3	1586.31	110.559	-2428	1592.59	235.321	-2271.56	1560.9	117.499	-2262.31	1569.04	160.029	-2243.51	1439.42	172.833	-2137.75	1160.88	157.401	-2397.39	1328.04	147.055	-2489.25	1125.98	92.1443	-2139.49	1256.32	310.483	-2344.13	1393.33	431.311	-2341.25	1160.82	446.241	-2329.08	1063.57	442.969	-2415.01	932.903	388.562	-2436.28	835.879	458.688	-2410.27	820.683	437.253	-2470.15	764.595
1031	0	213.349	-2443.95	1585.54	109.714	-2437.66	1591.88	234.552	-2281.19	1560.34	116.731	-2271.93	1568.31	159.934	-2253.06	1438.88	172.619	-2146.68	1160.54	156.889	-2406.73	1327.24	146.684	-2498.23	1124.91	91.8135	-2148.54	1255.97	309.948	-2353.77	1392.75	430.659	-2352.88	1160.11	445.596	-2341.08	1062.67	442.3	-2427.92	932.837	387.747	-2449.81	835.875	457.749	-2423.98	820.37	436.529	-2484.41	765.25
1032	0	212.536	-2453.51	1584.92	108.736	-2447.35	1591.18	233.592	-2290.53	1559.94	115.767	-2281.45	1567.55	159.152	-2262.55	1438.4	172.295	-2155.52	1160.26	156.258	-2415.99	1326.44	146.188	-2507.26	1123.99	91.4855	-2157.55	1255.66	309.241	-2363.37	1392.15	429.963	-2364.29	1159.65	445.134	-2352.93	1062.31	441.459	-2440.66	932.888	386.809	-2463.11	836.096	457.147	-2437.66	820.729	435.548	-2498.46	765.741
1033	0	211.681	-2462.91	1584.18	107.975	-2456.82	1590.19	232.469	-2299.97	1559.25	114.824	-2291.05	1566.72	158.312	-2272.22	1437.78	171.843	-2164.43	1159.96	155.689	-2425.37	1325.5	145.762	-2516.4	1122.95	91.1426	-2166.77	1255.22	308.555	-2372.93	1391.55	429.326	-2375.72	1159.01	444.452	-2364.85	1061.73	440.413	-2453.52	932.897	385.919	-2476.49	836.203	456.082	-2451.14	820.662	434.483	-2512.48	766.312
1034	0	210.851	-2472.6	1583.25	107.213	-2466.51	1589.06	231.572	-2309.53	1558.26	113.725	-2300.75	1565.76	157.683	-2281.89	1437.14	171.567	-2173.48	1159.54	155.107	-2434.88	1324.38	145.372	-2525.62	1121.55	90.6194	-2176.02	1254.68	307.861	-2382.75	1390.66	428.547	-2387.2	1158.16	443.727	-2377.15	1060.78	439.289	-2466.46	932.622	384.752	-2490.74	836.666	454.92	-2464.98	820.281	433.259	-2526.53	766.429
1035	0	209.959	-2482.15	1582.49	106.4	-2475.9	1587.74	230.345	-2319.09	1557.38	112.497	-2310.38	1564.75	156.877	-2291.49	1436.33	171.049	-2182.49	1159.04	154.498	-2444.27	1323.32	144.985	-2534.81	1120.34	90.2144	-2185.31	1254.19	307.135	-2392.47	1389.95	427.744	-2398.39	1157.5	442.959	-2389.12	1060.03	437.977	-2479.22	932.484	383.392	-2503.35	836.487	453.735	-2478.56	820.189	431.832	-2540.39	766.659
1036	0	209.007	-2491.65	1581.64	105.325	-2485.82	1586.86	229.128	-2328.48	1556.68	111.319	-2320.14	1563.69	156.137	-2301.07	1435.57	170.321	-2191.72	1158.35	153.724	-2453.67	1322.25	144.488	-2543.92	1119.18	89.5996	-2194.71	1253.51	306.48	-2401.99	1389.32	426.86	-2409.31	1156.87	442.135	-2400.91	1059.59	436.541	-2491.88	932.399	381.916	-2515.98	836.315	452.752	-2492.12	820.503	430.262	-2554.07	767.155
1037	0	207.898	-2501.27	1580.48	104.276	-2495.73	1585.51	228.055	-2338.1	1555.91	110.099	-2330.01	1562.51	155.266	-2310.78	1434.67	169.765	-2200.95	1157.58	153.053	-2463.33	1321.02	144.122	-2553.28	1117.84	88.818	-2204.22	1252.58	305.62	-2411.9	1388.39	425.988	-2420.27	1155.93	441.035	-2412.73	1058.67	435.064	-2504.67	932.085	380.473	-2529.01	836.177	451.248	-2505.45	820.164	428.469	-2567.68	767.123
1038	0	206.841	-2511.06	1579.27	103.027	-2505.99	1584.41	226.79	-2347.74	1554.84	108.736	-2339.71	1561.34	154.349	-2320.49	1433.53	169.033	-2210.42	1156.7	152.336	-2472.97	1319.76	143.625	-2562.63	1116.24	88.0527	-2213.83	1251.5	304.586	-2421.59	1387.17	425.097	-2431.08	1154.87	439.968	-2424.76	1057.38	433.513	-2517.35	931.557	378.756	-2542.06	835.807	449.616	-2519.01	819.501	426.59	-2581.26	766.958
1039	0	205.721	-2520.79	1578.08	101.65	-2515.86	1583.09	225.404	-2357.47	1553.79	107.542	-2349.41	1560.02	153.45	-2330.1	1432.31	168.123	-2220.06	1155.31	151.515	-2482.58	1318.53	143.076	-2572.03	1114.87	87.2874	-2223.49	1250.21	303.704	-2430.99	1386.06	424.096	-2441.59	1153.79	438.736	-2436.34	1056.16	431.774	-2529.78	931.136	376.974	-2554.84	835.604	447.785	-2532.12	818.886	424.556	-2594.6	767.073
1040	0	204.431	-2530.45	1576.97	100.409	-2525.53	1581.7	223.908	-2366.99	1552.75	106.324	-2359.15	1558.66	152.38	-2339.7	1430.94	167.66	-2229.9	1154.04	150.746	-2492.11	1317.36	142.594	-2581.39	1113.62	86.4396	-2233.27	1248.85	302.699	-2440.39	1385	423.169	-2451.89	1152.86	437.463	-2447.68	1055.12	430.236	-2542.09	930.889	375.093	-2567.35	835.257	446.143	-2545.24	818.607	422.417	-2607.61	767.274
1041	0	202.977	-2540.23	1575.64	98.9818	-2535.25	1580.07	222.718	-2376.66	1551.64	104.943	-2368.87	1557.18	151.516	-2349.5	1429.75	166.55	-2239.69	1152.54	149.878	-2501.85	1315.89	142.097	-2590.84	1112.1	85.3026	-2243.02	1247.51	301.609	-2449.85	1383.7	422.118	-2462.34	1151.67	436.479	-2459.37	1053.93	428.528	-2554.4	930.225	373.216	-2580.13	834.864	444.304	-2558.36	817.938	420.239	-2621.1	766.948
1042	0	201.442	-2550.16	1574.26	97.4388	-2545.04	1578.34	221.325	-2386.67	1550.27	103.538	-2378.6	1555.63	150.215	-2359.05	1428.28	165.423	-2249.36	1151.24	148.923	-2511.72	1314.28	141.517	-2600.42	1110.45	84.0845	-2252.77	1245.72	300.63	-2459.64	1382.47	420.959	-2472.72	1150.36	435.032	-2470.66	1052.48	426.749	-2566.48	929.344	371.017	-2592.93	834.307	442.408	-2571.45	817.243	417.813	-2633.99	766.877
1043	0	199.931	-2559.73	1572.88	95.9171	-2554.73	1576.73	220.006	-2396.35	1549.04	102.113	-2388.29	1553.98	149.017	-2368.68	1426.87	164.26	-2259.21	1149.63	147.924	-2521.5	1312.85	140.956	-2609.99	1109.04	82.8338	-2262.69	1244.24	299.574	-2469.25	1381.25	419.739	-2482.95	1149.21	433.838	-2481.6	1051.48	425.051	-2578.49	928.761	368.917	-2605.05	834.294	440.459	-2584.14	816.878	415.534	-2646.81	766.776
1044	0	198.43	-2569.44	1571.64	94.4131	-2564.3	1575.16	218.356	-2405.79	1547.51	100.512	-2397.97	1552.27	147.989	-2378.37	1424.99	162.962	-2269.09	1147.82	146.89	-2531.36	1311.43	140.312	-2619.69	1107.69	81.3619	-2272.64	1242.64	298.439	-2478.81	1380.08	418.563	-2492.99	1147.96	432.648	-2492.55	1050.25	423.293	-2590.23	928.088	366.887	-2617.28	833.928	438.448	-2596.54	816.375	412.92	-2659.52	766.668
1045	0	196.848	-2579.04	1570.09	92.535	-2574.2	1573.6	216.775	-2415.65	1545.87	98.947	-2407.59	1550.46	146.361	-2388.05	1423.39	161.755	-2279.13	1146.17	145.802	-2541.38	1309.81	139.738	-2629.75	1106.13	79.8434	-2282.59	1240.59	297.151	-2488.42	1378.52	417.301	-2503.26	1146.39	431.174	-2503.47	1048.47	421.595	-2601.97	927.123	364.883	-2629.77	833.33	435.9	-2609	815.21	410.598	-2672.33	766.143
1046	0	195.19	-2588.57	1568.7	91.1309	-2583.64	1571.93	215.083	-2425.16	1544.45	97.1739	-2417.27	1548.76	144.936	-2397.83	1421.69	160.141	-2289.07	1144.33	144.606	-2551.35	1308.26	139.048	-2639.85	1104.65	78.6407	-2292.85	1238.6	295.88	-2497.96	1376.91	416.101	-2513.5	1144.95	429.678	-2514.09	1046.8	419.783	-2613.33	926.098	362.831	-2641.76	832.623	433.742	-2621.19	814.214	408.158	-2684.87	765.696
1047	0	193.545	-2597.95	1567.42	89.4046	-2593.23	1570.49	213.272	-2434.53	1542.94	95.2572	-2426.72	1546.82	143.64	-2407.59	1419.89	158.687	-2299.24	1142.32	143.303	-2561.3	1306.89	138.314	-2650.13	1103.36	77.0274	-2303.09	1236.46	294.517	-2507.61	1375.71	414.522	-2523.39	1143.59	428.197	-2524.39	1045.55	417.999	-2624.5	925.282	360.45	-2653.5	832.38	431.518	-2632.9	813.575	405.635	-2697.07	765.547
[truncated: 69 more columns]

## Sheet: Sheet2
Devices
		025370 - Force			025370 - Moment			025370 - CoP			027571 - Force			027571 - Moment			027571 - CoP			037720 - Force			037720 - Moment			037720 - CoP
Frame	Sub Frame	Fx	Fy	Fz	Mx	My	Mz	Cx	Cy	Cz	Fx	Fy	Fz	Mx	My	Mz	Cx	Cy	Cz	Fx	Fy	Fz	Mx	My	Mz	Cx	Cy	Cz
		N	N	N	N.mm	N.mm	N.mm	mm	mm	mm	N	N	N	N.mm	N.mm	N.mm	mm	mm	mm	N	N	N	N.mm	N.mm	N.mm	mm	mm	mm
528	0	0	0	0	0	0	0	200	300	0	0	0	0	0	0	0	200	903	0	0	0	0	0	0	0	603	903	0
528	1	0	0	0	0	0	0	200	300	0	0	0	0	0	0	0	200	903	0	0	0	0	0	0	0	603	903	0
528	2	0	0	0	0	0	0	200	300	0	0	0	0	0	0	0	200	903	0	0	0	0	0	0	0	603	903	0
528	3	0	0	0	0	0	0	200	300	0	0	0	0	0	0	0	200	903	0	0	0	0	0	0	0	603	903	0
528	4	0	0	0	0	0	0	200	300	0	0	0	0	0	0	0	200	903	0	0	0	0	0	0	0	603	903	0
528	5	0	0	0	0	0	0	200	300	0	0	0	0	0	0	0	200	903	0	0	0	0	0	0	0	603	903	0
528	6	0	0	0	0	0	0	200	300	0	0	0	0	0	0	0	200	903	0	0	0	0	0	0	0	603	903	0
528	7	0	0	0	0	0	0	200	300	0	0	0	0	0	0	0	200	903	0	0	0	0	0	0	0	603	903	0
528	8	0	0	0	0	0	0	200	300	0	0	0	0	0	0	0	200	903	0	0	0	0	0	0	0	603	903	0
528	9	0	0	0	0	0	0	200	300	0	0	0	0	0	0	0	200	903	0	0	0	0	0	0	0	603	903	0
529	0	0	0	0	0	0	0	200	300	0	0	0	0	0	0	0	200	903	0	0	0	0	0	0	0	603	903	0
529	1	0	0	0	0	0	0	200	300	0	0	0	0	0	0	0	200	903	0	0	0	0	0	0	0	603	903	0
529	2	0	0	0	0	0	0	200	300	0	0	0	0	0	0	0	200	903	0	0	0	0	0	0	0	603	903	0
529	3	0	0	0	0	0	0	200	300	0	0	0	0	0	0	0	200	903	0	0	0	0	0	0	0	603	903	0
529	4	0	0	0	0	0	0	200	300	0	0	0	0	0	0	0	200	903	0	0	0	0	0	0	0	603	903	0
529	5	0	0	0	0	0	0	200	300	0	0	0	0	0	0	0	200	903	0	0	0	0	0	0	0	603	903	0
529	6	0	0	0	0	0	0	200	300	0	0	0	0	0	0	0	200	903	0	0	0	0	0	0	0	603	903	0
529	7	0	0	0	0	0	0	200	300	0	0	0	0	0	0	0	200	903	0	0	0	0	0	0	0	603	903	0
529	8	0	0	0	0	0	0	200	300	0	0	0	0	0	0	0	200	903	0	0	0	0	0	0	0	603	903	0
529	9	0	0	0	0	0	0	200	300	0	0	0	0	0	0	0	200	903	0	0	0	0	0	0	0	603	903	0
530	0	0	0	0	0	0	0	200	300	0	0	0	0	0	0	0	200	903	0	0	0	0	0	0	0	603	903	0
530	1	0	0	0	0	0	0	200	300	0	0	0	0	0	0	0	200	903	0	0	0	0	0	0	0	603	903	0
530	2	0	0	0	0	0	0	200	300	0	0	0	0	0	0	0	200	903	0	0	0	0	0	0	0	603	903	0
530	3	0	0	0	0	0	0	200	300	0	0	0	0	0	0	0	200	903	0	0	0	0	0	0	0	603	903	0
530	4	0	0	0	0	0	0	200	300	0	0	0	0	0	0	0	200	903	0	0	0	0	0	0	0	603	903	0
530	5	0	0	0	0	0	0	200	300	0	0	0	0	0	0	0	200	903	0	0	0	0	0	0	0	603	903	0
530	6	0	0	0	0	0	0	200	300	0	0	0	0	0	0	0	200	903	0	0	0	0	0	0	0	603	903	0
530	7	0	0	0	0	0	0	200	300	0	0	0	0	0	0	0	200	903	0	0	0	0	0	0	0	603	903	0
530	8	0	0	0	0	0	0	200	300	0	0	0	0	0	0	0	200	903	0	0	0	0	0	0	0	603	903	0
530	9	0	0	0	0	0	0	200	300	0	0	0	0	0	0	0	200	903	0	0	0	0	0	0	0	603	903	0
531	0	0	0	0	0	0	0	200	300	0	0	0	0	0	0	0	200	903	0	0	0	0	0	0	0	603	903	0
531	1	0	0	0	0	0	0	200	300	0	0	0	0	0	0	0	200	903	0	0	0	0	0	0	0	603	903	0
531	2	0	0	0	0	0	0	200	300	0	0	0	0	0	0	0	200	903	0	0	0	0	0	0	0	603	903	0
531	3	0	0	0	0	0	0	200	300	0	0	0	0	0	0	0	200	903	0	0	0	0	0	0	0	603	903	0
531	4	0	0	0	0	0	0	200	300	0	0	0	0	0	0	0	200	903	0	0	0	0	0	0	0	603	903	0
531	5	0	0	0	0	0	0	200	300	0	0	0	0	0	0	0	200	903	0	0	0	0	0	0	0	603	903	0
531	6	0	0	0	0	0	0	200	300	0	0	0	0	0	0	0	200	903	0	0	0	0	0	0	0	603	903	0
531	7	0	0	0	0	0	0	200	300	0	0	0	0	0	0	0	200	903	0	0	0	0	0	0	0	603	903	0
531	8	0	0	0	0	0	0	200	300	0	0	0	0	0	0	0	200	903	0	0	0	0	0	0	0	603	903	0
531	9	0	0	0	0	0	0	200	300	0	0	0	0	0	0	0	200	903	0	0	0	0	0	0	0	603	903	0
532	0	0	0	0	0	0	0	200	300	0	0	0	0	0	0	0	200	903	0	0	0	0	0	0	0	603	903	0
532	1	0	0	0	0	0	0	200	300	0	0	0	0	0	0	0	200	903	0	0	0	0	0	0	0	603	903	0
532	2	0	0	0	0	0	0	200	300	0	0	0	0	0	0	0	200	903	0	0	0	0	0	0	0	603	903	0
532	3	0	0	0	0	0	0	200	300	0	0	0	0	0	0	0	200	903	0	0	0	0	0	0	0	603	903	0
532	4	0	0	0	0	0	0	200	300	0	0	0	0	0	0	0	200	903	0	0	0	0	0	0	0	603	903	0
532	5	0	0	0	0	0	0	200	300	0	0	0	0	0	0	0	200	903	0	0	0	0	0	0	0	603	903	0
532	6	0	0	0	0	0	0	200	300	0	0	0	0	0	0	0	200	903	0	0	0	0	0	0	0	603	903	0
532	7	0	0	0	0	0	0	200	300	0	0	0	0	0	0	0	200	903	0	0	0	0	0	0	0	603	903	0
532	8	0	0	0	0	0	0	200	300	0	0	0	0	0	0	0	200	903	0	0	0	0	0	0	0	603	903	0
532	9	0	0	0	0	0	0	200	300	0	0	0	0	0	0	0	200	903	0	0	0	0	0	0	0	603	903	0
533	0	0	0	0	0	0	0	200	300	0	0	0	0	0	0	0	200	903	0	0	0	0	0	0	0	603	903	0
533	1	0	0	0	0	0	0	200	300	0	0	0	0	0	0	0	200	903	0	0	0	0	0	0	0	603	903	0
533	2	0	0	0	0	0	0	200	300	0	0	0	0	0	0	0	200	903	0	0	0	0	0	0	0	603	903	0
533	3	0	0	0	0	0	0	200	300	0	0	0	0	0	0	0	200	903	0	0	0	0	0	0	0	603	903	0
533	4	0	0	0	0	0	0	200	300	0	0	0	0	0	0	0	200	903	0	0	0	0	0	0	0	603	903	0
533	5	0	0	0	0	0	0	200	300	0	0	0	0	0	0	0	200	903	0	0	0	0	0	0	0	603	903	0
533	6	0	0	0	0	0	0	200	300	0	0	0	0	0	0	0	200	903	0	0	0	0	0	0	0	603	903	0
533	7	0	0	0	0	0	0	200	300	0	0	0	0	0	0	0	200	903	0	0	0	0	0	0	0	603	903	0
533	8	0	0	0	0	0	0	200	300	0	0	0	0	0	0	0	200	903	0	0	0	0	0	0	0	603	903	0
533	9	0	0	0	0	0	0	200	300	0	0	0	0	0	0	0	200	903	0	0	0	0	0	0	0	603	903	0
534	0	0	0	0	0	0	0	200	300	0	0	0	0	0	0	0	200	903	0	0	0	0	0	0	0	603	903	0
534	1	0	0	0	0	0	0	200	300	0	0	0	0	0	0	0	200	903	0	0	0	0	0	0	0	603	903	0
534	2	0	0	0	0	0	0	200	300	0	0	0	0	0	0	0	200	903	0	0	0	0	0	0	0	603	903	0
534	3	0	0	0	0	0	0	200	300	0	0	0	0	0	0	0	200	903	0	0	0	0	0	0	0	603	903	0
534	4	0	0	0	0	0	0	200	300	0	0	0	0	0	0	0	200	903	0	0	0	0	0	0	0	603	903	0
534	5	0	0	0	0	0	0	200	300	0	0	0	0	0	0	0	200	903	0	0	0	0	0	0	0	603	903	0
534	6	0	0	0	0	0	0	200	300	0	0	0	0	0	0	0	200	903	0	0	0	0	0	0	0	603	903	0
534	7	0	0	0	0	0	0	200	300	0	0	0	0	0	0	0	200	903	0	0	0	0	0	0	0	603	903	0
534	8	0	0	0	0	0	0	200	300	0	0	0	0	0	0	0	200	903	0	0	0	0	0	0	0	603	903	0
534	9	0	0	0	0	0	0	200	300	0	0	0	0	0	0	0	200	903	0	0	0	0	0	0	0	603	903	0
535	0	0	0	0	0	0	0	200	300	0	0	0	0	0	0	0	200	903	0	0	0	0	0	0	0	603	903	0
535	1	0	0	0	0	0	0	200	300	0	0	0	0	0	0	0	200	903	0	0	0	0	0	0	0	603	903	0
535	2	0	0	0	0	0	0	200	300	0	0	0	0	0	0	0	200	903	0	0	0	0	0	0	0	603	903	0
535	3	0	0	0	0	0	0	200	300	0	0	0	0	0	0	0	200	903	0	0	0	0	0	0	0	603	903	0
535	4	0	0	0	0	0	0	200	300	0	0	0	0	0	0	0	200	903	0	0	0	0	0	0	0	603	903	0
535	5	0	0	0	0	0	0	200	300	0	0	0	0	0	0	0	200	903	0	0	0	0	0	0	0	603	903	0
535	6	0	0	0	0	0	0	200	300	0	0	0	0	0	0	0	200	903	0	0	0	0	0	0	0	603	903	0
535	7	0	0	0	0	0	0	200	300	0	0	0	0	0	0	0	200	903	0	0	0	0	0	0	0	603	903	0
535	8	0	0	0	0	0	0	200	300	0	0	0	0	0	0	0	200	903	0	0	0	0	0	0	0	603	903	0
535	9	0	0	0	0	0	0	200	300	0	0	0	0	0	0	0	200	903	0	0	0	0	0	0	0	603	903	0
536	0	0	0	0	0	0	0	200	300	0	0	0	0	0	0	0	200	903	0	0	0	0	0	0	0	603	903	0
536	1	0	0	0	0	0	0	200	300	0	0	0	0	0	0	0	200	903	0	0	0	0	0	0	0	603	903	0
536	2	0	0	0	0	0	0	200	300	0	0	0	0	0	0	0	200	903	0	0	0	0	0	0	0	603	903	0
536	3	0	0	0	0	0	0	200	300	0	0	0	0	0	0	0	200	903	0	0	0	0	0	0	0	603	903	0
536	4	0	0	0	0	0	0	200	300	0	0	0	0	0	0	0	200	903	0	0	0	0	0	0	0	603	903	0
536	5	0	0	0	0	0	0	200	300	0	0	0	0	0	0	0	200	903	0	0	0	0	0	0	0	603	903	0
536	6	0	0	0	0	0	0	200	300	0	0	0	0	0	0	0	200	903	0	0	0	0	0	0	0	603	903	0
536	7	0	0	0	0	0	0	200	300	0	0	0	0	0	0	0	200	903	0	0	0	0	0	0	0	603	903	0
536	8	0	0	0	0	0	0	200	300	0	0	0	0	0	0	0	200	903	0	0	0	0	0	0	0	603	903	0
536	9	0	0	0	0	0	0	200	300	0	0	0	0	0	0	0	200	903	0	0	0	0	0	0	0	603	903	0
537	0	0	0	0	0	0	0	200	300	0	0	0	0	0	0	0	200	903	0	0	0	0	0	0	0	603	903	0
537	1	0	0	0	0	0	0	200	300	0	0	0	0	0	0	0	200	903	0	0	0	0	0	0	0	603	903	0
537	2	0	0	0	0	0	0	200	300	0	0	0	0	0	0	0	200	903	0	0	0	0	0	0	0	603	903	0
537	3	0	0	0	0	0	0	200	300	0	0	0	0	0	0	0	200	903	0	0	0	0	0	0	0	603	903	0
537	4	0	0	0	0	0	0	200	300	0	0	0	0	0	0	0	200	903	0	0	0	0	0	0	0	603	903	0
537	5	0	0	0	0	0	0	200	300	0	0	0	0	0	0	0	200	903	0	0	0	0	0	0	0	603	903	0
537	6	0	0	0	0	0	0	200	300	0	0	0	0	0	0	0	200	903	0	0	0	0	0	0	0	603	903	0
537	7	0	0	0	0	0	0	200	300	0	0	0	0	0	0	0	200	903	0	0	0	0	0	0	0	603	903	0
537	8	0	0	0	0	0	0	200	300	0	0	0	0	0	0	0	200	903	0	0	0	0	0	0	0	603	903	0
537	9	0	0	0	0	0	0	200	300	0	0	0	0	0	0	0	200	903	0	0	0	0	0	0	0	603	903	0
538	0	0	0	0	0	0	0	200	300	0	0	0	0	0	0	0	200	903	0	0	0	0	0	0	0	603	903	0
538	1	0	0	0	0	0	0	200	300	0	0	0	0	0	0	0	200	903	0	0	0	0	0	0	0	603	903	0
538	2	0	0	0	0	0	0	200	300	0	0	0	0	0	0	0	200	903	0	0	0	0	0	0	0	603	903	0
538	3	0	0	0	0	0	0	200	300	0	0	0	0	0	0	0	200	903	0	0	0	0	0	0	0	603	903	0
538	4	0	0	0	0	0	0	200	300	0	0	0	0	0	0	0	200	903	0	0	0	0	0	0	0	603	903	0
538	5	0	0	0	0	0	0	200	300	0	0	0	0	0	0	0	200	903	0	0	0	0	0	0	0	603	903	0
538	6	0	0	0	0	0	0	200	300	0	0	0	0	0	0	0	200	903	0	0	0	0	0	0	0	603	903	0
538	7	0	0	0	0	0	0	200	300	0	0	0	0	0	0	0	200	903	0	0	0	0	0	0	0	603	903	0
538	8	0	0	0	0	0	0	200	300	0	0	0	0	0	0	0	200	903	0	0	0	0	0	0	0	603	903	0
538	9	0	0	0	0	0	0	200	300	0	0	0	0	0	0	0	200	903	0	0	0	0	0	0	0	603	903	0
539	0	0	0	0	0	0	0	200	300	0	0	0	0	0	0	0	200	903	0	0	0	0	0	0	0	603	903	0
539	1	0	0	0	0	0	0	200	300	0	0	0	0	0	0	0	200	903	0	0	0	0	0	0	0	603	903	0
539	2	0	0	0	0	0	0	200	300	0	0	0	0	0	0	0	200	903	0	0	0	0	0	0	0	603	903	0
539	3	0	0	0	0	0	0	200	300	0	0	0	0	0	0	0	200	903	0	0	0	0	0	0	0	603	903	0
539	4	0	0	0	0	0	0	200	300	0	0	0	0	0	0	0	200	903	0	0	0	0	0	0	0	603	903	0
539	5	0	0	0	0	0	0	200	300	0	0	0	0	0	0	0	200	903	0	0	0	0	0	0	0	603	903	0
539	6	0	0	0	0	0	0	200	300	0	0	0	0	0	0	0	200	903	0	0	0	0	0	0	0	603	903	0
539	7	0	0	0	0	0	0	200	300	0	0	0	0	0	0	0	200	903	0	0	0	0	0	0	0	603	903	0
539	8	0	0	0	0	0	0	200	300	0	0	0	0	0	0	0	200	903	0	0	0	0	0	0	0	603	903	0
539	9	0	0	0	0	0	0	200	300	0	0	0	0	0	0	0	200	903	0	0	0	0	0	0	0	603	903	0
540	0	0	0	0	0	0	0	200	300	0	0	0	0	0	0	0	200	903	0	0	0	0	0	0	0	603	903	0
540	1	0	0	0	0	0	0	200	300	0	0	0	0	0	0	0	200	903	0	0	0	0	0	0	0	603	903	0
540	2	0	0	0	0	0	0	200	300	0	0	0	0	0	0	0	200	903	0	0	0	0	0	0	0	603	903	0
540	3	0	0	0	0	0	0	200	300	0	0	0	0	0	0	0	200	903	0	0	0	0	0	0	0	603	903	0
540	4	0	0	0	0	0	0	200	300	0	0	0	0	0	0	0	200	903	0	0	0	0	0	0	0	603	903	0
540	5	0	0	0	0	0	0	200	300	0	0	0	0	0	0	0	200	903	0	0	0	0	0	0	0	603	903	0
540	6	0	0	0	0	0	0	200	300	0	0	0	0	0	0	0	200	903	0	0	0	0	0	0	0	603	903	0
540	7	0	0	0	0	0	0	200	300	0	0	0	0	0	0	0	200	903	0	0	0	0	0	0	0	603	903	0
540	8	0	0	0	0	0	0	200	300	0	0	0	0	0	0	0	200	903	0	0	0	0	0	0	0	603	903	0
540	9	0	0	0	0	0	0	200	300	0	0	0	0	0	0	0	200	903	0	0	0	0	0	0	0	603	903	0
541	0	0	0	0	0	0	0	200	300	0	0	0	0	0	0	0	200	903	0	0	0	0	0	0	0	603	903	0
541	1	0	0	0	0	0	0	200	300	0	0	0	0	0	0	0	200	903	0	0	0	0	0	0	0	603	903	0
541	2	0	0	0	0	0	0	200	300	0	0	0	0	0	0	0	200	903	0	0	0	0	0	0	0	603	903	0
541	3	0	0	0	0	0	0	200	300	0	0	0	0	0	0	0	200	903	0	0	0	0	0	0	0	603	903	0
541	4	0	0	0	0	0	0	200	300	0	0	0	0	0	0	0	200	903	0	0	0	0	0	0	0	603	903	0
541	5	0	0	0	0	0	0	200	300	0	0	0	0	0	0	0	200	903	0	0	0	0	0	0	0	603	903	0
541	6	0	0	0	0	0	0	200	300	0	0	0	0	0	0	0	200	903	0	0	0	0	0	0	0	603	903	0
541	7	0	0	0	0	0	0	200	300	0	0	0	0	0	0	0	200	903	0	0	0	0	0	0	0	603	903	0
541	8	0	0	0	0	0	0	200	300	0	0	0	0	0	0	0	200	903	0	0	0	0	0	0	0	603	903	0
541	9	0	0	0	0	0	0	200	300	0	0	0	0	0	0	0	200	903	0	0	0	0	0	0	0	603	903	0
542	0	0	0	0	0	0	0	200	300	0	0	0	0	0	0	0	200	903	0	0	0	0	0	0	0	603	903	0
542	1	0	0	0	0	0	0	200	300	0	0	0	0	0	0	0	200	903	0	0	0	0	0	0	0	603	903	0
542	2	0	0	0	0	0	0	200	300	0	0	0	0	0	0	0	200	903	0	0	0	0	0	0	0	603	903	0
542	3	0	0	0	0	0	0	200	300	0	0	0	0	0	0	0	200	903	0	0	0	0	0	0	0	603	903	0
542	4	0	0	0	0	0	0	200	300	0	0	0	0	0	0	0	200	903	0	0	0	0	0	0	0	603	903	0
542	5	0	0	0	0	0	0	200	300	0	0	0	0	0	0	0	200	903	0	0	0	0	0	0	0	603	903	0
542	6	0	0	0	0	0	0	200	300	0	0	0	0	0	0	0	200	903	0	0	0	0	0	0	0	603	903	0
542	7	0	0	0	0	0	0	200	300	0	0	0	0	0	0	0	200	903	0	0	0	0	0	0	0	603	903	0
542	8	0	0	0	0	0	0	200	300	0	0	0	0	0	0	0	200	903	0	0	0	0	0	0	0	603	903	0
542	9	0	0	0	0	0	0	200	300	0	0	0	0	0	0	0	200	903	0	0	0	0	0	0	0	603	903	0
543	0	0	0	0	0	0	0	200	300	0	0	0	0	0	0	0	200	903	0	0	0	0	0	0	0	603	903	0
543	1	0	0	0	0	0	0	200	300	0	0	0	0	0	0	0	200	903	0	0	0	0	0	0	0	603	903	0
543	2	0	0	0	0	0	0	200	300	0	0	0	0	0	0	0	200	903	0	0	0	0	0	0	0	603	903	0
543	3	0	0	0	0	0	0	200	300	0	0	0	0	0	0	0	200	903	0	0	0	0	0	0	0	603	903	0
543	4	0	0	0	0	0	0	200	300	0	0	0	0	0	0	0	200	903	0	0	0	0	0	0	0	603	903	0
543	5	0	0	0	0	0	0	200	300	0	0	0	0	0	0	0	200	903	0	0	0	0	0	0	0	603	903	0
543	6	0	0	0	0	0	0	200	300	0	0	0	0	0	0	0	200	903	0	0	0	0	0	0	0	603	903	0
543	7	0	0	0	0	0	0	200	300	0	0	0	0	0	0	0	200	903	0	0	0	0	0	0	0	603	903	0
543	8	0	0	0	0	0	0	200	300	0	0	0	0	0	0	0	200	903	0	0	0	0	0	0	0	603	903	0
543	9	0	0	0	0	0	0	200	300	0	0	0	0	0	0	0	200	903	0	0	0	0	0	0	0	603	903	0
544	0	0	0	0	0	0	0	200	300	0	0	0	0	0	0	0	200	903	0	0	0	0	0	0	0	603	903	0
544	1	0	0	0	0	0	0	200	300	0	0	0	0	0	0	0	200	903	0	0	0	0	0	0	0	603	903	0
544	2	0	0	0	0	0	0	200	300	0	0	0	0	0	0	0	200	903	0	0	0	0	0	0	0	603	903	0
544	3	0	0	0	0	0	0	200	300	0	0	0	0	0	0	0	200	903	0	0	0	0	0	0	0	603	903	0
544	4	0	0	0	0	0	0	200	300	0	0	0	0	0	0	0	200	903	0	0	0	0	0	0	0	603	903	0
544	5	0	0	0	0	0	0	200	300	0	0	0	0	0	0	0	200	903	0	0	0	0	0	0	0	603	903	0
544	6	0	0	0	0	0	0	200	300	0	0	0	0	0	0	0	200	903	0	0	0	0	0	0	0	603	903	0
544	7	0	0	0	0	0	0	200	300	0	0	0	0	0	0	0	200	903	0	0	0	0	0	0	0	603	903	0
544	8	0	0	0	0	0	0	200	300	0	0	0	0	0	0	0	200	903	0	0	0	0	0	0	0	603	903	0
544	9	0	0	0	0	0	0	200	300	0	0	0	0	0	0	0	200	903	0	0	0	0	0	0	0	603	903	0
545	0	0	0	0	0	0	0	200	300	0	0	0	0	0	0	0	200	903	0	0	0	0	0	0	0	603	903	0
545	1	0	0	0	0	0	0	200	300	0	0	0	0	0	0	0	200	903	0	0	0	0	0	0	0	603	903	0
545	2	0	0	0	0	0	0	200	300	0	0	0	0	0	0	0	200	903	0	0	0	0	0	0	0	603	903	0
545	3	0	0	0	0	0	0	200	300	0	0	0	0	0	0	0	200	903	0	0	0	0	0	0	0	603	903	0
545	4	0	0	0	0	0	0	200	300	0	0	0	0	0	0	0	200	903	0	0	0	0	0	0	0	603	903	0
545	5	0	0	0	0	0	0	200	300	0	0	0	0	0	0	0	200	903	0	0	0	0	0	0	0	603	903	0
545	6	0	0	0	0	0	0	200	300	0	0	0	0	0	0	0	200	903	0	0	0	0	0	0	0	603	903	0
545	7	0	0	0	0	0	0	200	300	0	0	0	0	0	0	0	200	903	0	0	0	0	0	0	0	603	903	0
545	8	0	0	0	0	0	0	200	300	0	0	0	0	0	0	0	200	903	0	0	0	0	0	0	0	603	903	0
545	9	0	0	0	0	0	0	200	300	0	0	0	0	0	0	0	200	903	0	0	0	0	0	0	0	603	903	0
546	0	0	0	0	0	0	0	200	300	0	0	0	0	0	0	0	200	903	0	0	0	0	0	0	0	603	903	0
546	1	0	0	0	0	0	0	200	300	0	0	0	0	0	0	0	200	903	0	0	0	0	0	0	0	603	903	0
546	2	0	0	0	0	0	0	200	300	0	0	0	0	0	0	0	200	903	0	0	0	0	0	0	0	603	903	0
546	3	0	0	0	0	0	0	200	300	0	0	0	0	0	0	0	200	903	0	0	0	0	0	0	0	603	903	0
546	4	0	0	0	0	0	0	200	300	0	0	0	0	0	0	0	200	903	0	0	0	0	0	0	0	603	903	0
546	5	0	0	0	0	0	0	200	300	0	0	0	0	0	0	0	200	903	0	0	0	0	0	0	0	603	903	0
546	6	0	0	0	0	0	0	200	300	0	0	0	0	0	0	0	200	903	0	0	0	0	0	0	0	603	903	0
546	7	0	0	0	0	0	0	200	300	0	0	0	0	0	0	0	200	903	0	0	0	0	0	0	0	603	903	0
546	8	0	0	0	0	0	0	200	300	0	0	0	0	0	0	0	200	903	0	0	0	0	0	0	0	603	903	0
546	9	0	0	0	0	0	0	200	300	0	0	0	0	0	0	0	200	903	0	0	0	0	0	0	0	603	903	0
547	0	0	0	0	0	0	0	200	300	0	0	0	0	0	0	0	200	903	0	0	0	0	0	0	0	603	903	0
547	1	0	0	0	0	0	0	200	300	0	0	0	0	0	0	0	200	903	0	0	0	0	0	0	0	603	903	0
547	2	0	0	0	0	0	0	200	300	0	0	0	0	0	0	0	200	903	0	0	0	0	0	0	0	603	903	0
547	3	0	0	0	0	0	0	200	300	0	0	0	0	0	0	0	200	903	0	0	0	0	0	0	0	603	903	0
547	4	0	0	0	0	0	0	200	300	0	0	0	0	0	0	0	200	903	0	0	0	0	0	0	0	603	903	0
547	5	0	0	0	0	0	0	200	300	0	0	0	0	0	0	0	200	903	0	0	0	0	0	0	0	603	903	0
547	6	0	0	0	0	0	0	200	300	0	0	0	0	0	0	0	200	903	0	0	0	0	0	0	0	603	903	0
547	7	0	0	0	0	0	0	200	300	0	0	0	0	0	0	0	200	903	0	0	0	0	0	0	0	603	903	0
547	8	0	0	0	0	0	0	200	300	0	0	0	0	0	0	0	200	903	0	0	0	0	0	0	0	603	903	0
547	9	0	0	0	0	0	0	200	300	0	0	0	0	0	0	0	200	903	0	0	0	0	0	0	0	603	903	0
548	0	0	0	0	0	0	0	200	300	0	0	0	0	0	0	0	200	903	0	0	0	0	0	0	0	603	903	0
548	1	0	0	0	0	0	0	200	300	0	0	0	0	0	0	0	200	903	0	0	0	0	0	0	0	603	903	0
548	2	0	0	0	0	0	0	200	300	0	0	0	0	0	0	0	200	903	0	0	0	0	0	0	0	603	903	0
548	3	0	0	0	0	0	0	200	300	0	0	0	0	0	0	0	200	903	0	0	0	0	0	0	0	603	903	0
548	4	0	0	0	0	0	0	200	300	0	0	0	0	0	0	0	200	903	0	0	0	0	0	0	0	603	903	0
548	5	0	0	0	0	0	0	200	300	0	0	0	0	0	0	0	200	903	0	0	0	0	0	0	0	603	903	0
548	6	0	0	0	0	0	0	200	300	0	0	0	0	0	0	0	200	903	0	0	0	0	0	0	0	603	903	0
548	7	0	0	0	0	0	0	200	300	0	0	0	0	0	0	0	200	903	0	0	0	0	0	0	0	603	903	0
548	8	0	0	0	0	0	0	200	300	0	0	0	0	0	0	0	200	903	0	0	0	0	0	0	0	603	903	0
548	9	0	0	0	0	0	0	200	300	0	0	0	0	0	0	0	200	903	0	0	0	0	0	0	0	603	903	0
549	0	0	0	0	0	0	0	200	300	0	0	0	0	0	0	0	200	903	0	0	0	0	0	0	0	603	903	0
549	1	0	0	0	0	0	0	200	300	0	0	0	0	0	0	0	200	903	0	0	0	0	0	0	0	603	903	0
549	2	0	0	0	0	0	0	200	300	0	0	0	0	0	0	0	200	903	0	0	0	0	0	0	0	603	903	0
549	3	0	0	0	0	0	0	200	300	0	0	0	0	0	0	0	200	903	0	0	0	0	0	0	0	603	903	0
549	4	0	0	0	0	0	0	200	300	0	0	0	0	0	0	0	200	903	0	0	0	0	0	0	0	603	903	0
549	5	0	0	0	0	0	0	200	300	0	0	0	0	0	0	0	200	903	0	0	0	0	0	0	0	603	903	0
549	6	0	0	0	0	0	0	200	300	0	0	0	0	0	0	0	200	903	0	0	0	0	0	0	0	603	903	0
549	7	0	0	0	0	0	0	200	300	0	0	0	0	0	0	0	200	903	0	0	0	0	0	0	0	603	903	0
549	8	0	0	0	0	0	0	200	300	0	0	0	0	0	0	0	200	903	0	0	0	0	0	0	0	603	903	0
549	9	0	0	0	0	0	0	200	300	0	0	0	0	0	0	0	200	903	0	0	0	0	0	0	0	603	903	0
550	0	0	0	0	0	0	0	200	300	0	0	0	0	0	0	0	200	903	0	0	0	0	0	0	0	603	903	0
550	1	0	0	0	0	0	0	200	300	0	0	0	0	0	0	0	200	903	0	0	0	0	0	0	0	603	903	0
550	2	0	0	0	0	0	0	200	300	0	0	0	0	0	0	0	200	903	0	0	0	0	0	0	0	603	903	0
550	3	0	0	0	0	0	0	200	300	0	0	0	0	0	0	0	200	903	0	0	0	0	0	0	0	603	903	0
550	4	0	0	0	0	0	0	200	300	0	0	0	0	0	0	0	200	903	0	0	0	0	0	0	0	603	903	0
550	5	0	0	0	0	0	0	200	300	0	0	0	0	0	0	0	200	903	0	0	0	0	0	0	0	603	903	0
550	6	0	0	0	0	0	0	200	300	0	0	0	0	0	0	0	200	903	0	0	0	0	0	0	0	603	903	0
550	7	0	0	0	0	0	0	200	300	0	0	0	0	0	0	0	200	903	0	0	0	0	0	0	0	603	903	0
550	8	0	0	0	0	0	0	200	300	0	0	0	0	0	0	0	200	903	0	0	0	0	0	0	0	603	903	0
550	9	0	0	0	0	0	0	200	300	0	0	0	0	0	0	0	200	903	0	0	0	0	0	0	0	603	903	0
551	0	0	0	0	0	0	0	200	300	0	0	0	0	0	0	0	200	903	0	0	0	0	0	0	0	603	903	0
551	1	0	0	0	0	0	0	200	300	0	0	0	0	0	0	0	200	903	0	0	0	0	0	0	0	603	903	0
551	2	0	0	0	0	0	0	200	300	0	0	0	0	0	0	0	200	903	0	0	0	0	0	0	0	603	903	0
551	3	0	0	0	0	0	0	200	300	0	0	0	0	0	0	0	200	903	0	0	0	0	0	0	0	603	903	0
551	4	0	0	0	0	0	0	200	300	0	0	0	0	0	0	0	200	903	0	0	0	0	0	0	0	603	903	0
551	5	0	0	0	0	0	0	200	300	0	0	0	0	0	0	0	200	903	0	0	0	0	0	0	0	603	903	0
551	6	0	0	0	0	0	0	200	300	0	0	0	0	0	0	0	200	903	0	0	0	0	0	0	0	603	903	0
551	7	0	0	0	0	0	0	200	300	0	0	0	0	0	0	0	200	903	0	0	0	0	0	0	0	603	903	0
551	8	0	0	0	0	0	0	200	300	0	0	0	0	0	0	0	200	903	0	0	0	0	0	0	0	603	903	0
551	9	0	0	0	0	0	0	200	300	0	0	0	0	0	0	0	200	903	0	0	0	0	0	0	0	603	903	0
552	0	0	0	0	0	0	0	200	300	0	0	0	0	0	0	0	200	903	0	0	0	0	0	0	0	603	903	0
552	1	0	0	0	0	0	0	200	300	0	0	0	0	0	0	0	200	903	0	0	0	0	0	0	0	603	903	0
552	2	0	0	0	0	0	0	200	300	0	0	0	0	0	0	0	200	903	0	0	0	0	0	0	0	603	903	0
552	3	0	0	0	0	0	0	200	300	0	0	0	0	0	0	0	200	903	0	0	0	0	0	0	0	603	903	0
552	4	0	0	0	0	0	0	200	300	0	0	0	0	0	0	0	200	903	0	0	0	0	0	0	0	603	903	0
552	5	0	0	0	0	0	0	200	300	0	0	0	0	0	0	0	200	903	0	0	0	0	0	0	0	603	903	0
552	6	0	0	0	0	0	0	200	300	0	0	0	0	0	0	0	200	903	0	0	0	0	0	0	0	603	903	0
552	7	0	0	0	0	0	0	200	300	0	0	0	0	0	0	0	200	903	0	0	0	0	0	0	0	603	903	0
552	8	0	0	0	0	0	0	200	300	0	0	0	0	0	0	0	200	903	0	0	0	0	0	0	0	603	903	0
552	9	0	0	0	0	0	0	200	300	0	0	0	0	0	0	0	200	903	0	0	0	0	0	0	0	603	903	0
553	0	0	0	0	0	0	0	200	300	0	0	0	0	0	0	0	200	903	0	0	0	0	0	0	0	603	903	0
553	1	0	0	0	0	0	0	200	300	0	0	0	0	0	0	0	200	903	0	0	0	0	0	0	0	603	903	0
553	2	0	0	0	0	0	0	200	300	0	0	0	0	0	0	0	200	903	0	0	0	0	0	0	0	603	903	0
553	3	0	0	0	0	0	0	200	300	0	0	0	0	0	0	0	200	903	0	0	0	0	0	0	0	603	903	0
553	4	0	0	0	0	0	0	200	300	0	0	0	0	0	0	0	200	903	0	0	0	0	0	0	0	603	903	0
553	5	0	0	0	0	0	0	200	300	0	0	0	0	0	0	0	200	903	0	0	0	0	0	0	0	603	903	0
553	6	0	0	0	0	0	0	200	300	0	0	0	0	0	0	0	200	903	0	0	0	0	0	0	0	603	903	0
553	7	0	0	0	0	0	0	200	300	0	0	0	0	0	0	0	200	903	0	0	0	0	0	0	0	603	903	0
553	8	0	0	0	0	0	0	200	300	0	0	0	0	0	0	0	200	903	0	0	0	0	0	0	0	603	903	0
553	9	0	0	0	0	0	0	200	300	0	0	0	0	0	0	0	200	903	0	0	0	0	0	0	0	603	903	0
554	0	0	0	0	0	0	0	200	300	0	0	0	0	0	0	0	200	903	0	0	0	0	0	0	0	603	903	0
554	1	0	0	0	0	0	0	200	300	0	0	0	0	0	0	0	200	903	0	0	0	0	0	0	0	603	903	0
554	2	0	0	0	0	0	0	200	300	0	0	0	0	0	0	0	200	903	0	0	0	0	0	0	0	603	903	0
554	3	0	0	0	0	0	0	200	300	0	0	0	0	0	0	0	200	903	0	0	0	0	0	0	0	603	903	0
554	4	0	0	0	0	0	0	200	300	0	0	0	0	0	0	0	200	903	0	0	0	0	0	0	0	603	903	0
554	5	0	0	0	0	0	0	200	300	0	0	0	0	0	0	0	200	903	0	0	0	0	0	0	0	603	903	0
554	6	0	0	0	0	0	0	200	300	0	0	0	0	0	0	0	200	903	0	0	0	0	0	0	0	603	903	0
554	7	0	0	0	0	0	0	200	300	0	0	0	0	0	0	0	200	903	0	0	0	0	0	0	0	603	903	0
554	8	0	0	0	0	0	0	200	300	0	0	0	0	0	0	0	200	903	0	0	0	0	0	0	0	603	903	0
554	9	0	0	0	0	0	0	200	300	0	0	0	0	0	0	0	200	903	0	0	0	0	0	0	0	603	903	0
555	0	0	0	0	0	0	0	200	300	0	0	0	0	0	0	0	200	903	0	0	0	0	0	0	0	603	903	0
555	1	0	0	0	0	0	0	200	300	0	0	0	0	0	0	0	200	903	0	0	0	0	0	0	0	603	903	0
555	2	0	0	0	0	0	0	200	300	0	0	0	0	0	0	0	200	903	0	0	0	0	0	0	0	603	903	0
555	3	0	0	0	0	0	0	200	300	0	0	0	0	0	0	0	200	903	0	0	0	0	0	0	0	603	903	0
555	4	0	0	0	0	0	0	200	300	0	0	0	0	0	0	0	200	903	0	0	0	0	0	0	0	603	903	0
555	5	0	0	0	0	0	0	200	300	0	0	0	0	0	0	0	200	903	0	0	0	0	0	0	0	603	903	0
555	6	0	0	0	0	0	0	200	300	0	0	0	0	0	0	0	200	903	0	0	0	0	0	0	0	603	903	0
555	7	0	0	0	0	0	0	200	300	0	0	0	0	0	0	0	200	903	0	0	0	0	0	0	0	603	903	0
555	8	0	0	0	0	0	0	200	300	0	0	0	0	0	0	0	200	903	0	0	0	0	0	0	0	603	903	0
555	9	0	0	0	0	0	0	200	300	0	0	0	0	0	0	0	200	903	0	0	0	0	0	0	0	603	903	0
556	0	0	0	0	0	0	0	200	300	0	0	0	0	0	0	0	200	903	0	0	0	0	0	0	0	603	903	0
556	1	0	0	0	0	0	0	200	300	0	0	0	0	0	0	0	200	903	0	0	0	0	0	0	0	603	903	0
556	2	0	0	0	0	0	0	200	300	0	0	0	0	0	0	0	200	903	0	0	0	0	0	0	0	603	903	0
556	3	0	0	0	0	0	0	200	300	0	0	0	0	0	0	0	200	903	0	0	0	0	0	0	0	603	903	0
556	4	0	0	0	0	0	0	200	300	0	0	0	0	0	0	0	200	903	0	0	0	0	0	0	0	603	903	0
556	5	0	0	0	0	0	0	200	300	0	0	0	0	0	0	0	200	903	0	0	0	0	0	0	0	603	903	0
556	6	0	0	0	0	0	0	200	300	0	0	0	0	0	0	0	200	903	0	0	0	0	0	0	0	603	903	0
556	7	0	0	0	0	0	0	200	300	0	0	0	0	0	0	0	200	903	0	0	0	0	0	0	0	603	903	0
556	8	0	0	0	0	0	0	200	300	0	0	0	0	0	0	0	200	903	0	0	0	0	0	0	0	603	903	0
556	9	0	0	0	0	0	0	200	300	0	0	0	0	0	0	0	200	903	0	0	0	0	0	0	0	603	903	0
557	0	0	0	0	0	0	0	200	300	0	0	0	0	0	0	0	200	903	0	0	0	0	0	0	0	603	903	0
557	1	0	0	0	0	0	0	200	300	0	0	0	0	0	0	0	200	903	0	0	0	0	0	0	0	603	903	0
557	2	0	0	0	0	0	0	200	300	0	0	0	0	0	0	0	200	903	0	0	0	0	0	0	0	603	903	0
557	3	0	0	0	0	0	0	200	300	0	0	0	0	0	0	0	200	903	0	0	0	0	0	0	0	603	903	0
557	4	0	0	0	0	0	0	200	300	0	0	0	0	0	0	0	200	903	0	0	0	0	0	0	0	603	903	0
557	5	0	0	0	0	0	0	200	300	0	0	0	0	0	0	0	200	903	0	0	0	0	0	0	0	603	903	0
557	6	0	0	0	0	0	0	200	300	0	0	0	0	0	0	0	200	903	0	0	0	0	0	0	0	603	903	0
557	7	0	0	0	0	0	0	200	300	0	0	0	0	0	0	0	200	903	0	0	0	0	0	0	0	603	903	0
557	8	0	0	0	0	0	0	200	300	0	0	0	0	0	0	0	200	903	0	0	0	0	0	0	0	603	903	0
557	9	0	0	0	0	0	0	200	300	0	0	0	0	0	0	0	200	903	0	0	0	0	0	0	0	603	903	0
558	0	0	0	0	0	0	0	200	300	0	0	0	0	0	0	0	200	903	0	0	0	0	0	0	0	603	903	0
558	1	0	0	0	0	0	0	200	300	0	0	0	0	0	0	0	200	903	0	0	0	0	0	0	0	603	903	0
558	2	0	0	0	0	0	0	200	300	0	0	0	0	0	0	0	200	903	0	0	0	0	0	0	0	603	903	0
558	3	0	0	0	0	0	0	200	300	0	0	0	0	0	0	0	200	903	0	0	0	0	0	0	0	603	903	0
558	4	0	0	0	0	0	0	200	300	0	0	0	0	0	0	0	200	903	0	0	0	0	0	0	0	603	903	0
558	5	0	0	0	0	0	0	200	300	0	0	0	0	0	0	0	200	903	0	0	0	0	0	0	0	603	903	0
558	6	0	0	0	0	0	0	200	300	0	0	0	0	0	0	0	200	903	0	0	0	0	0	0	0	603	903	0
558	7	0	0	0	0	0	0	200	300	0	0	0	0	0	0	0	200	903	0	0	0	0	0	0	0	603	903	0
558	8	0	0	0	0	0	0	200	300	0	0	0	0	0	0	0	200	903	0	0	0	0	0	0	0	603	903	0
558	9	0	0	0	0	0	0	200	300	0	0	0	0	0	0	0	200	903	0	0	0	0	0	0	0	603	903	0
559	0	0	0	0	0	0	0	200	300	0	0	0	0	0	0	0	200	903	0	0	0	0	0	0	0	603	903	0
559	1	0	0	0	0	0	0	200	300	0	0	0	0	0	0	0	200	903	0	0	0	0	0	0	0	603	903	0
559	2	0	0	0	0	0	0	200	300	0	0	0	0	0	0	0	200	903	0	0	0	0	0	0	0	603	903	0
559	3	0	0	0	0	0	0	200	300	0	0	0	0	0	0	0	200	903	0	0	0	0	0	0	0	603	903	0
559	4	0	0	0	0	0	0	200	300	0	0	0	0	0	0	0	200	903	0	0	0	0	0	0	0	603	903	0
559	5	0	0	0	0	0	0	200	300	0	0	0	0	0	0	0	200	903	0	0	0	0	0	0	0	603	903	0
559	6	0	0	0	0	0	0	200	300	0	0	0	0	0	0	0	200	903	0	0	0	0	0	0	0	603	903	0
559	7	0	0	0	0	0	0	200	300	0	0	0	0	0	0	0	200	903	0	0	0	0	0	0	0	603	903	0
559	8	0	0	0	0	0	0	200	300	0	0	0	0	0	0	0	200	903	0	0	0	0	0	0	0	603	903	0
559	9	0	0	0	0	0	0	200	300	0	0	0	0	0	0	0	200	903	0	0	0	0	0	0	0	603	903	0
560	0	0	0	0	0	0	0	200	300	0	0	0	0	0	0	0	200	903	0	0	0	0	0	0	0	603	903	0
560	1	0	0	0	0	0	0	200	300	0	0	0	0	0	0	0	200	903	0	0	0	0	0	0	0	603	903	0
560	2	0	0	0	0	0	0	200	300	0	0	0	0	0	0	0	200	903	0	0	0	0	0	0	0	603	903	0
560	3	0	0	0	0	0	0	200	300	0	0	0	0	0	0	0	200	903	0	0	0	0	0	0	0	603	903	0
560	4	0	0	0	0	0	0	200	300	0	0	0	0	0	0	0	200	903	0	0	0	0	0	0	0	603	903	0
560	5	0	0	0	0	0	0	200	300	0	0	0	0	0	0	0	200	903	0	0	0	0	0	0	0	603	903	0
560	6	0	0	0	0	0	0	200	300	0	0	0	0	0	0	0	200	903	0	0	0	0	0	0	0	603	903	0
560	7	0	0	0	0	0	0	200	300	0	0	0	0	0	0	0	200	903	0	0	0	0	0	0	0	603	903	0
560	8	0	0	0	0	0	0	200	300	0	0	0	0	0	0	0	200	903	0	0	0	0	0	0	0	603	903	0
560	9	0	0	0	0	0	0	200	300	0	0	0	0	0	0	0	200	903	0	0	0	0	0	0	0	603	903	0
561	0	0	0	0	0	0	0	200	300	0	0	0	0	0	0	0	200	903	0	0	0	0	0	0	0	603	903	0
561	1	0	0	0	0	0	0	200	300	0	0	0	0	0	0	0	200	903	0	0	0	0	0	0	0	603	903	0
561	2	0	0	0	0	0	0	200	300	0	0	0	0	0	0	0	200	903	0	0	0	0	0	0	0	603	903	0
561	3	0	0	0	0	0	0	200	300	0	0	0	0	0	0	0	200	903	0	0	0	0	0	0	0	603	903	0
561	4	0	0	0	0	0	0	200	300	0	0	0	0	0	0	0	200	903	0	0	0	0	0	0	0	603	903	0
561	5	0	0	0	0	0	0	200	300	0	0	0	0	0	0	0	200	903	0	0	0	0	0	0	0	603	903	0
561	6	0	0	0	0	0	0	200	300	0	0	0	0	0	0	0	200	903	0	0	0	0	0	0	0	603	903	0
561	7	0	0	0	0	0	0	200	300	0	0	0	0	0	0	0	200	903	0	0	0	0	0	0	0	603	903	0
561	8	0	0	0	0	0	0	200	300	0	0	0	0	0	0	0	200	903	0	0	0	0	0	0	0	603	903	0
561	9	0	0	0	0	0	0	200	300	0	0	0	0	0	0	0	200	903	0	0	0	0	0	0	0	603	903	0
562	0	0	0	0	0	0	0	200	300	0	0	0	0	0	0	0	200	903	0	0	0	0	0	0	0	603	903	0
562	1	0	0	0	0	0	0	200	300	0	0	0	0	0	0	0	200	903	0	0	0	0	0	0	0	603	903	0
562	2	0	0	0	0	0	0	200	300	0	0	0	0	0	0	0	200	903	0	0	0	0	0	0	0	603	903	0
562	3	0	0	0	0	0	0	200	300	0	0	0	0	0	0	0	200	903	0	0	0	0	0	0	0	603	903	0
562	4	0	0	0	0	0	0	200	300	0	0	0	0	0	0	0	200	903	0	0	0	0	0	0	0	603	903	0
562	5	0	0	0	0	0	0	200	300	0	0	0	0	0	0	0	200	903	0	0	0	0	0	0	0	603	903	0
562	6	0	0	0	0	0	0	200	300	0	0	0	0	0	0	0	200	903	0	0	0	0	0	0	0	603	903	0
562	7	0	0	0	0	0	0	200	300	0	0	0	0	0	0	0	200	903	0	0	0	0	0	0	0	603	903	0
562	8	0	0	0	0	0	0	200	300	0	0	0	0	0	0	0	200	903	0	0	0	0	0	0	0	603	903	0
562	9	0	0	0	0	0	0	200	300	0	0	0	0	0	0	0	200	903	0	0	0	0	0	0	0	603	903	0
563	0	0	0	0	0	0	0	200	300	0	0	0	0	0	0	0	200	903	0	0	0	0	0	0	0	603	903	0
563	1	0	0	0	0	0	0	200	300	0	0	0	0	0	0	0	200	903	0	0	0	0	0	0	0	603	903	0
563	2	0	0	0	0	0	0	200	300	0	0	0	0	0	0	0	200	903	0	0	0	0	0	0	0	603	903	0
563	3	0	0	0	0	0	0	200	300	0	0	0	0	0	0	0	200	903	0	0	0	0	0	0	0	603	903	0
563	4	0	0	0	0	0	0	200	300	0	0	0	0	0	0	0	200	903	0	0	0	0	0	0	0	603	903	0
563	5	0	0	0	0	0	0	200	300	0	0	0	0	0	0	0	200	903	0	0	0	0	0	0	0	603	903	0
563	6	0	0	0	0	0	0	200	300	0	0	0	0	0	0	0	200	903	0	0	0	0	0	0	0	603	903	0
563	7	0	0	0	0	0	0	200	300	0	0	0	0	0	0	0	200	903	0	0	0	0	0	0	0	603	903	0
563	8	0	0	0	0	0	0	200	300	0	0	0	0	0	0	0	200	903	0	0	0	0	0	0	0	603	903	0
563	9	0	0	0	0	0	0	200	300	0	0	0	0	0	0	0	200	903	0	0	0	0	0	0	0	603	903	0
564	0	0	0	0	0	0	0	200	300	0	0	0	0	0	0	0	200	903	0	0	0	0	0	0	0	603	903	0
564	1	0	0	0	0	0	0	200	300	0	0	0	0	0	0	0	200	903	0	0	0	0	0	0	0	603	903	0
564	2	0	0	0	0	0	0	200	300	0	0	0	0	0	0	0	200	903	0	0	0	0	0	0	0	603	903	0
564	3	0	0	0	0	0	0	200	300	0	0	0	0	0	0	0	200	903	0	0	0	0	0	0	0	603	903	0
564	4	0	0	0	0	0	0	200	300	0	0	0	0	0	0	0	200	903	0	0	0	0	0	0	0	603	903	0
564	5	0	0	0	0	0	0	200	300	0	0	0	0	0	0	0	200	903	0	0	0	0	0	0	0	603	903	0
564	6	0	0	0	0	0	0	200	300	0	0	0	0	0	0	0	200	903	0	0	0	0	0	0	0	603	903	0
564	7	0	0	0	0	0	0	200	300	0	0	0	0	0	0	0	200	903	0	0	0	0	0	0	0	603	903	0
564	8	0	0	0	0	0	0	200	300	0	0	0	0	0	0	0	200	903	0	0	0	0	0	0	0	603	903	0
564	9	0	0	0	0	0	0	200	300	0	0	0	0	0	0	0	200	903	0	0	0	0	0	0	0	603	903	0
565	0	0	0	0	0	0	0	200	300	0	0	0	0	0	0	0	200	903	0	0	0	0	0	0	0	603	903	0
565	1	0	0	0	0	0	0	200	300	0	0	0	0	0	0	0	200	903	0	0	0	0	0	0	0	603	903	0
565	2	0	0	0	0	0	0	200	300	0	0	0	0	0	0	0	200	903	0	0	0	0	0	0	0	603	903	0
565	3	0	0	0	0	0	0	200	300	0	0	0	0	0	0	0	200	903	0	0	0	0	0	0	0	603	903	0
565	4	0	0	0	0	0	0	200	300	0	0	0	0	0	0	0	200	903	0	0	0	0	0	0	0	603	903	0
565	5	0	0	0	0	0	0	200	300	0	0	0	0	0	0	0	200	903	0	0	0	0	0	0	0	603	903	0
565	6	0	0	0	0	0	0	200	300	0	0	0	0	0	0	0	200	903	0	0	0	0	0	0	0	603	903	0
565	7	0	0	0	0	0	0	200	300	0	0	0	0	0	0	0	200	903	0	0	0	0	0	0	0	603	903	0
565	8	0	0	0	0	0	0	200	300	0	0	0	0	0	0	0	200	903	0	0	0	0	0	0	0	603	903	0
565	9	0	0	0	0	0	0	200	300	0	0	0	0	0	0	0	200	903	0	0	0	0	0	0	0	603	903	0
566	0	0	0	0	0	0	0	200	300	0	0	0	0	0	0	0	200	903	0	0	0	0	0	0	0	603	903	0
566	1	0	0	0	0	0	0	200	300	0	0	0	0	0	0	0	200	903	0	0	0	0	0	0	0	603	903	0
566	2	0	0	0	0	0	0	200	300	0	0	0	0	0	0	0	200	903	0	0	0	0	0	0	0	603	903	0
566	3	0	0	0	0	0	0	200	300	0	0	0	0	0	0	0	200	903	0	0	0	0	0	0	0	603	903	0
566	4	0	0	0	0	0	0	200	300	0	0	0	0	0	0	0	200	903	0	0	0	0	0	0	0	603	903	0
566	5	0	0	0	0	0	0	200	300	0	0	0	0	0	0	0	200	903	0	0	0	0	0	0	0	603	903	0
566	6	0	0	0	0	0	0	200	300	0	0	0	0	0	0	0	200	903	0	0	0	0	0	0	0	603	903	0
566	7	0	0	0	0	0	0	200	300	0	0	0	0	0	0	0	200	903	0	0	0	0	0	0	0	603	903	0
566	8	0	0	0	0	0	0	200	300	0	0	0	0	0	0	0	200	903	0	0	0	0	0	0	0	603	903	0
566	9	0	0	0	0	0	0	200	300	0	0	0	0	0	0	0	200	903	0	0	0	0	0	0	0	603	903	0
567	0	0	0	0	0	0	0	200	300	0	0	0	0	0	0	0	200	903	0	0	0	0	0	0	0	603	903	0
567	1	0	0	0	0	0	0	200	300	0	0	0	0	0	0	0	200	903	0	0	0	0	0	0	0	603	903	0
567	2	0	0	0	0	0	0	200	300	0	0	0	0	0	0	0	200	903	0	0	0	0	0	0	0	603	903	0
567	3	0	0	0	0	0	0	200	300	0	0	0	0	0	0	0	200	903	0	0	0	0	0	0	0	603	903	0
567	4	0	0	0	0	0	0	200	300	0	0	0	0	0	0	0	200	903	0	0	0	0	0	0	0	603	903	0
567	5	0	0	0	0	0	0	200	300	0	0	0	0	0	0	0	200	903	0	0	0	0	0	0	0	603	903	0
567	6	0	0	0	0	0	0	200	300	0	0	0	0	0	0	0	200	903	0	0	0	0	0	0	0	603	903	0
567	7	0	0	0	0	0	0	200	300	0	0	0	0	0	0	0	200	903	0	0	0	0	0	0	0	603	903	0
567	8	0	0	0	0	0	0	200	300	0	0	0	0	0	0	0	200	903	0	0	0	0	0	0	0	603	903	0
567	9	0	0	0	0	0	0	200	300	0	0	0	0	0	0	0	200	903	0	0	0	0	0	0	0	603	903	0
568	0	0	0	0	0	0	0	200	300	0	0	0	0	0	0	0	200	903	0	0	0	0	0	0	0	603	903	0
568	1	0	0	0	0	0	0	200	300	0	0	0	0	0	0	0	200	903	0	0	0	0	0	0	0	603	903	0
568	2	0	0	0	0	0	0	200	300	0	0	0	0	0	0	0	200	903	0	0	0	0	0	0	0	603	903	0
568	3	0	0	0	0	0	0	200	300	0	0	0	0	0	0	0	200	903	0	0	0	0	0	0	0	603	903	0
568	4	0	0	0	0	0	0	200	300	0	0	0	0	0	0	0	200	903	0	0	0	0	0	0	0	603	903	0
568	5	0	0	0	0	0	0	200	300	0	0	0	0	0	0	0	200	903	0	0	0	0	0	0	0	603	903	0
568	6	0	0	0	0	0	0	200	300	0	0	0	0	0	0	0	200	903	0	0	0	0	0	0	0	603	903	0
568	7	0	0	0	0	0	0	200	300	0	0	0	0	0	0	0	200	903	0	0	0	0	0	0	0	603	903	0
568	8	0	0	0	0	0	0	200	300	0	0	0	0	0	0	0	200	903	0	0	0	0	0	0	0	603	903	0
568	9	0	0	0	0	0	0	200	300	0	0	0	0	0	0	0	200	903	0	0	0	0	0	0	0	603	903	0
569	0	0	0	0	0	0	0	200	300	0	0	0	0	0	0	0	200	903	0	0	0	0	0	0	0	603	903	0
569	1	0	0	0	0	0	0	200	300	0	0	0	0	0	0	0	200	903	0	0	0	0	0	0	0	603	903	0
569	2	0	0	0	0	0	0	200	300	0	0	0	0	0	0	0	200	903	0	0	0	0	0	0	0	603	903	0
569	3	0	0	0	0	0	0	200	300	0	0	0	0	0	0	0	200	903	0	0	0	0	0	0	0	603	903	0
569	4	0	0	0	0	0	0	200	300	0	0	0	0	0	0	0	200	903	0	0	0	0	0	0	0	603	903	0
569	5	0	0	0	0	0	0	200	300	0	0	0	0	0	0	0	200	903	0	0	0	0	0	0	0	603	903	0
569	6	0	0	0	0	0	0	200	300	0	0	0	0	0	0	0	200	903	0	0	0	0	0	0	0	603	903	0
569	7	0	0	0	0	0	0	200	300	0	0	0	0	0	0	0	200	903	0	0	0	0	0	0	0	603	903	0
569	8	0	0	0	0	0	0	200	300	0	0	0	0	0	0	0	200	903	0	0	0	0	0	0	0	603	903	0
569	9	0	0	0	0	0	0	200	300	0	0	0	0	0	0	0	200	903	0	0	0	0	0	0	0	603	903	0
570	0	0	0	0	0	0	0	200	300	0	0	0	0	0	0	0	200	903	0	0	0	0	0	0	0	603	903	0
570	1	0	0	0	0	0	0	200	300	0	0	0	0	0	0	0	200	903	0	0	0	0	0	0	0	603	903	0
570	2	0	0	0	0	0	0	200	300	0	0	0	0	0	0	0	200	903	0	0	0	0	0	0	0	603	903	0
570	3	0	0	0	0	0	0	200	300	0	0	0	0	0	0	0	200	903	0	0	0	0	0	0	0	603	903	0
570	4	0	0	0	0	0	0	200	300	0	0	0	0	0	0	0	200	903	0	0	0	0	0	0	0	603	903	0
570	5	0	0	0	0	0	0	200	300	0	0	0	0	0	0	0	200	903	0	0	0	0	0	0	0	603	903	0
570	6	0	0	0	0	0	0	200	300	0	0	0	0	0	0	0	200	903	0	0	0	0	0	0	0	603	903	0
570	7	0	0	0	0	0	0	200	300	0	0	0	0	0	0	0	200	903	0	0	0	0	0	0	0	603	903	0
570	8	0	0	0	0	0	0	200	300	0	0	0	0	0	0	0	200	903	0	0	0	0	0	0	0	603	903	0
570	9	0	0	0	0	0	0	200	300	0	0	0	0	0	0	0	200	903	0	0	0	0	0	0	0	603	903	0
571	0	0	0	0	0	0	0	200	300	0	0	0	0	0	0	0	200	903	0	0	0	0	0	0	0	603	903	0
571	1	0	0	0	0	0	0	200	300	0	0	0	0	0	0	0	200	903	0	0	0	0	0	0	0	603	903	0
571	2	0	0	0	0	0	0	200	300	0	0	0	0	0	0	0	200	903	0	0	0	0	0	0	0	603	903	0
571	3	0	0	0	0	0	0	200	300	0	0	0	0	0	0	0	200	903	0	0	0	0	0	0	0	603	903	0
571	4	0	0	0	0	0	0	200	300	0	0	0	0	0	0	0	200	903	0	0	0	0	0	0	0	603	903	0
571	5	0	0	0	0	0	0	200	300	0	0	0	0	0	0	0	200	903	0	0	0	0	0	0	0	603	903	0
571	6	0	0	0	0	0	0	200	300	0	0	0	0	0	0	0	200	903	0	0	0	0	0	0	0	603	903	0
571	7	0	0	0	0	0	0	200	300	0	0	0	0	0	0	0	200	903	0	0	0	0	0	0	0	603	903	0
571	8	0	0	0	0	0	0	200	300	0	0	0	0	0	0	0	200	903	0	0	0	0	0	0	0	603	903	0
571	9	0	0	0	0	0	0	200	300	0	0	0	0	0	0	0	200	903	0	0	0	0	0	0	0	603	903	0
572	0	0	0	0	0	0	0	200	300	0	0	0	0	0	0	0	200	903	0	0	0	0	0	0	0	603	903	0
572	1	0	0	0	0	0	0	200	300	0	0	0	0	0	0	0	200	903	0	0	0	0	0	0	0	603	903	0
572	2	0	0	0	0	0	0	200	300	0	0	0	0	0	0	0	200	903	0	0	0	0	0	0	0	603	903	0
572	3	0	0	0	0	0	0	200	300	0	0	0	0	0	0	0	200	903	0	0	0	0	0	0	0	603	903	0
572	4	0	0	0	0	0	0	200	300	0	0	0	0	0	0	0	200	903	0	0	0	0	0	0	0	603	903	0
572	5	0	0	0	0	0	0	200	300	0	0	0	0	0	0	0	200	903	0	0	0	0	0	0	0	603	903	0
572	6	0	0	0	0	0	0	200	300	0	0	0	0	0	0	0	200	903	0	0	0	0	0	0	0	603	903	0
572	7	0	0	0	0	0	0	200	300	0	0	0	0	0	0	0	200	903	0	0	0	0	0	0	0	603	903	0
572	8	0	0	0	0	0	0	200	300	0	0	0	0	0	0	0	200	903	0	0	0	0	0	0	0	603	903	0
572	9	0	0	0	0	0	0	200	300	0	0	0	0	0	0	0	200	903	0	0	0	0	0	0	0	603	903	0
573	0	0	0	0	0	0	0	200	300	0	0	0	0	0	0	0	200	903	0	0	0	0	0	0	0	603	903	0
573	1	0	0	0	0	0	0	200	300	0	0	0	0	0	0	0	200	903	0	0	0	0	0	0	0	603	903	0
573	2	0	0	0	0	0	0	200	300	0	0	0	0	0	0	0	200	903	0	0	0	0	0	0	0	603	903	0
573	3	0	0	0	0	0	0	200	300	0	0	0	0	0	0	0	200	903	0	0	0	0	0	0	0	603	903	0
573	4	0	0	0	0	0	0	200	300	0	0	0	0	0	0	0	200	903	0	0	0	0	0	0	0	603	903	0
573	5	0	0	0	0	0	0	200	300	0	0	0	0	0	0	0	200	903	0	0	0	0	0	0	0	603	903	0
573	6	0	0	0	0	0	0	200	300	0	0	0	0	0	0	0	200	903	0	0	0	0	0	0	0	603	903	0
573	7	0	0	0	0	0	0	200	300	0	0	0	0	0	0	0	200	903	0	0	0	0	0	0	0	603	903	0
573	8	0	0	0	0	0	0	200	300	0	0	0	0	0	0	0	200	903	0	0	0	0	0	0	0	603	903	0
573	9	0	0	0	0	0	0	200	300	0	0	0	0	0	0	0	200	903	0	0	0	0	0	0	0	603	903	0
574	0	0	0	0	0	0	0	200	300	0	0	0	0	0	0	0	200	903	0	0	0	0	0	0	0	603	903	0
574	1	0	0	0	0	0	0	200	300	0	0	0	0	0	0	0	200	903	0	0	0	0	0	0	0	603	903	0
574	2	0	0	0	0	0	0	200	300	0	0	0	0	0	0	0	200	903	0	0	0	0	0	0	0	603	903	0
574	3	0	0	0	0	0	0	200	300	0	0	0	0	0	0	0	200	903	0	0	0	0	0	0	0	603	903	0
574	4	0	0	0	0	0	0	200	300	0	0	0	0	0	0	0	200	903	0	0	0	0	0	0	0	603	903	0
574	5	0	0	0	0	0	0	200	300	0	0	0	0	0	0	0	200	903	0	0	0	0	0	0	0	603	903	0
574	6	0	0	0	0	0	0	200	300	0	0	0	0	0	0	0	200	903	0	0	0	0	0	0	0	603	903	0
574	7	0	0	0	0	0	0	200	300	0	0	0	0	0	0	0	200	903	0	0	0	0	0	0	0	603	903	0
574	8	0	0	0	0	0	0	200	300	0	0	0	0	0	0	0	200	903	0	0	0	0	0	0	0	603	903	0
574	9	0	0	0	0	0	0	200	300	0	0	0	0	0	0	0	200	903	0	0	0	0	0	0	0	603	903	0
575	0	0	0	0	0	0	0	200	300	0	0	0	0	0	0	0	200	903	0	0	0	0	0	0	0	603	903	0
575	1	0	0	0	0	0	0	200	300	0	0	0	0	0	0	0	200	903	0	0	0	0	0	0	0	603	903	0
575	2	0	0	0	0	0	0	200	300	0	0	0	0	0	0	0	200	903	0	0	0	0	0	0	0	603	903	0
575	3	0	0	0	0	0	0	200	300	0	0	0	0	0	0	0	200	903	0	0	0	0	0	0	0	603	903	0
575	4	0	0	0	0	0	0	200	300	0	0	0	0	0	0	0	200	903	0	0	0	0	0	0	0	603	903	0
575	5	0	0	0	0	0	0	200	300	0	0	0	0	0	0	0	200	903	0	0	0	0	0	0	0	603	903	0
575	6	0	0	0	0	0	0	200	300	0	0	0	0	0	0	0	200	903	0	0	0	0	0	0	0	603	903	0
575	7	0	0	0	0	0	0	200	300	0	0	0	0	0	0	0	200	903	0	0	0	0	0	0	0	603	903	0
575	8	0	0	0	0	0	0	200	300	0	0	0	0	0	0	0	200	903	0	0	0	0	0	0	0	603	903	0
575	9	0	0	0	0	0	0	200	300	0	0	0	0	0	0	0	200	903	0	0	0	0	0	0	0	603	903	0
576	0	0	0	0	0	0	0	200	300	0	0	0	0	0	0	0	200	903	0	0	0	0	0	0	0	603	903	0
576	1	0	0	0	0	0	0	200	300	0	0	0	0	0	0	0	200	903	0	0	0	0	0	0	0	603	903	0
576	2	0	0	0	0	0	0	200	300	0	0	0	0	0	0	0	200	903	0	0	0	0	0	0	0	603	903	0
576	3	0	0	0	0	0	0	200	300	0	0	0	0	0	0	0	200	903	0	0	0	0	0	0	0	603	903	0
576	4	0	0	0	0	0	0	200	300	0	0	0	0	0	0	0	200	903	0	0	0	0	0	0	0	603	903	0
576	5	0	0	0	0	0	0	200	300	0	0	0	0	0	0	0	200	903	0	0	0	0	0	0	0	603	903	0
576	6	0	0	0	0	0	0	200	300	0	0	0	0	0	0	0	200	903	0	0	0	0	0	0	0	603	903	0
576	7	0	0	0	0	0	0	200	300	0	0	0	0	0	0	0	200	903	0	0	0	0	0	0	0	603	903	0
576	8	0	0	0	0	0	0	200	300	0	0	0	0	0	0	0	200	903	0	0	0	0	0	0	0	603	903	0
576	9	0	0	0	0	0	0	200	300	0	0	0	0	0	0	0	200	903	0	0	0	0	0	0	0	603	903	0
577	0	0	0	0	0	0	0	200	300	0	0	0	0	0	0	0	200	903	0	0	0	0	0	0	0	603	903	0
577	1	0	0	0	0	0	0	200	300	0	0	0	0	0	0	0	200	903	0	0	0	0	0	0	0	603	903	0
577	2	0	0	0	0	0	0	200	300	0	0	0	0	0	0	0	200	903	0	0	0	0	0	0	0	603	903	0
577	3	0	0	0	0	0	0	200	300	0	0	0	0	0	0	0	200	903	0	0	0	0	0	0	0	603	903	0
577	4	0	0	0	0	0	0	200	300	0	0	0	0	0	0	0	200	903	0	0	0	0	0	0	0	603	903	0
577	5	0	0	0	0	0	0	200	300	0	0	0	0	0	0	0	200	903	0	0	0	0	0	0	0	603	903	0
577	6	0	0	0	0	0	0	200	300	0	0	0	0	0	0	0	200	903	0	0	0	0	0	0	0	603	903	0
577	7	0	0	0	0	0	0	200	300	0	0	0	0	0	0	0	200	903	0	0	0	0	0	0	0	603	903	0
577	8	0	0	0	0	0	0	200	300	0	0	0	0	0	0	0	200	903	0	0	0	0	0	0	0	603	903	0
577	9	0	0	0	0	0	0	200	300	0	0	0	0	0	0	0	200	903	0	0	0	0	0	0	0	603	903	0
578	0	0	0	0	0	0	0	200	300	0	0	0	0	0	0	0	200	903	0	0	0	0	0	0	0	603	903	0
578	1	0	0	0	0	0	0	200	300	0	0	0	0	0	0	0	200	903	0	0	0	0	0	0	0	603	903	0
578	2	0	0	0	0	0	0	200	300	0	0	0	0	0	0	0	200	903	0	0	0	0	0	0	0	603	903	0
578	3	0	0	0	0	0	0	200	300	0	0	0	0	0	0	0	200	903	0	0	0	0	0	0	0	603	903	0
578	4	0	0	0	0	0	0	200	300	0	0	0	0	0	0	0	200	903	0	0	0	0	0	0	0	603	903	0
578	5	0	0	0	0	0	0	200	300	0	0	0	0	0	0	0	200	903	0	0	0	0	0	0	0	603	903	0
578	6	0	0	0	0	0	0	200	300	0	0	0	0	0	0	0	200	903	0	0	0	0	0	0	0	603	903	0
578	7	0	0	0	0	0	0	200	300	0	0	0	0	0	0	0	200	903	0	0	0	0	0	0	0	603	903	0
578	8	0	0	0	0	0	0	200	300	0	0	0	0	0	0	0	200	903	0	0	0	0	0	0	0	603	903	0
578	9	0	0	0	0	0	0	200	300	0	0	0	0	0	0	0	200	903	0	0	0	0	0	0	0	603	903	0
579	0	0	0	0	0	0	0	200	300	0	0	0	0	0	0	0	200	903	0	0	0	0	0	0	0	603	903	0
579	1	0	0	0	0	0	0	200	300	0	0	0	0	0	0	0	200	903	0	0	0	0	0	0	0	603	903	0
579	2	0	0	0	0	0	0	200	300	0	0	0	0	0	0	0	200	903	0	0	0	0	0	0	0	603	903	0
579	3	0	0	0	0	0	0	200	300	0	0	0	0	0	0	0	200	903	0	0	0	0	0	0	0	603	903	0
579	4	0	0	0	0	0	0	200	300	0	0	0	0	0	0	0	200	903	0	0	0	0	0	0	0	603	903	0
579	5	0	0	0	0	0	0	200	300	0	0	0	0	0	0	0	200	903	0	0	0	0	0	0	0	603	903	0
579	6	0	0	0	0	0	0	200	300	0	0	0	0	0	0	0	200	903	0	0	0	0	0	0	0	603	903	0
579	7	0	0	0	0	0	0	200	300	0	0	0	0	0	0	0	200	903	0	0	0	0	0	0	0	603	903	0
579	8	0	0	0	0	0	0	200	300	0	0	0	0	0	0	0	200	903	0	0	0	0	0	0	0	603	903	0
579	9	0	0	0	0	0	0	200	300	0	0	0	0	0	0	0	200	903	0	0	0	0	0	0	0	603	903	0
580	0	0	0	0	0	0	0	200	300	0	0	0	0	0	0	0	200	903	0	0	0	0	0	0	0	603	903	0
580	1	0	0	0	0	0	0	200	300	0	0	0	0	0	0	0	200	903	0	0	0	0	0	0	0	603	903	0
580	2	0	0	0	0	0	0	200	300	0	0	0	0	0	0	0	200	903	0	0	0	0	0	0	0	603	903	0
580	3	0	0	0	0	0	0	200	300	0	0	0	0	0	0	0	200	903	0	0	0	0	0	0	0	603	903	0
580	4	0	0	0	0	0	0	200	300	0	0	0	0	0	0	0	200	903	0	0	0	0	0	0	0	603	903	0
580	5	0	0	0	0	0	0	200	300	0	0	0	0	0	0	0	200	903	0	0	0	0	0	0	0	603	903	0
580	6	0	0	0	0	0	0	200	300	0	0	0	0	0	0	0	200	903	0	0	0	0	0	0	0	603	903	0
580	7	0	0	0	0	0	0	200	300	0	0	0	0	0	0	0	200	903	0	0	0	0	0	0	0	603	903	0
580	8	0	0	0	0	0	0	200	300	0	0	0	0	0	0	0	200	903	0	0	0	0	0	0	0	603	903	0
580	9	0	0	0	0	0	0	200	300	0	0	0	0	0	0	0	200	903	0	0	0	0	0	0	0	603	903	0
581	0	0	0	0	0	0	0	200	300	0	0	0	0	0	0	0	200	903	0	0	0	0	0	0	0	603	903	0
581	1	0	0	0	0	0	0	200	300	0	0	0	0	0	0	0	200	903	0	0	0	0	0	0	0	603	903	0
581	2	0	0	0	0	0	0	200	300	0	0	0	0	0	0	0	200	903	0	0	0	0	0	0	0	603	903	0
581	3	0	0	0	0	0	0	200	300	0	0	0	0	0	0	0	200	903	0	0	0	0	0	0	0	603	903	0
581	4	0	0	0	0	0	0	200	300	0	0	0	0	0	0	0	200	903	0	0	0	0	0	0	0	603	903	0
581	5	0	0	0	0	0	0	200	300	0	0	0	0	0	0	0	200	903	0	0	0	0	0	0	0	603	903	0
581	6	0	0	0	0	0	0	200	300	0	0	0	0	0	0	0	200	903	0	0	0	0	0	0	0	603	903	0
581	7	0	0	0	0	0	0	200	300	0	0	0	0	0	0	0	200	903	0	0	0	0	0	0	0	603	903	0
581	8	0	0	0	0	0	0	200	300	0	0	0	0	0	0	0	200	903	0	0	0	0	0	0	0	603	903	0
581	9	0	0	0	0	0	0	200	300	0	0	0	0	0	0	0	200	903	0	0	0	0	0	0	0	603	903	0
582	0	0	0	0	0	0	0	200	300	0	0	0	0	0	0	0	200	903	0	0	0	0	0	0	0	603	903	0
582	1	0	0	0	0	0	0	200	300	0	0	0	0	0	0	0	200	903	0	0	0	0	0	0	0	603	903	0
582	2	0	0	0	0	0	0	200	300	0	0	0	0	0	0	0	200	903	0	0	0	0	0	0	0	603	903	0
582	3	0	0	0	0	0	0	200	300	0	0	0	0	0	0	0	200	903	0	0	0	0	0	0	0	603	903	0
582	4	0	0	0	0	0	0	200	300	0	0	0	0	0	0	0	200	903	0	0	0	0	0	0	0	603	903	0
582	5	0	0	0	0	0	0	200	300	0	0	0	0	0	0	0	200	903	0	0	0	0	0	0	0	603	903	0
582	6	0	0	0	0	0	0	200	300	0	0	0	0	0	0	0	200	903	0	0	0	0	0	0	0	603	903	0
582	7	0	0	0	0	0	0	200	300	0	0	0	0	0	0	0	200	903	0	0	0	0	0	0	0	603	903	0
582	8	0	0	0	0	0	0	200	300	0	0	0	0	0	0	0	200	903	0	0	0	0	0	0	0	603	903	0
582	9	0	0	0	0	0	0	200	300	0	0	0	0	0	0	0	200	903	0	0	0	0	0	0	0	603	903	0
583	0	0	0	0	0	0	0	200	300	0	0	0	0	0	0	0	200	903	0	0	0	0	0	0	0	603	903	0
583	1	0	0	0	0	0	0	200	300	0	0	0	0	0	0	0	200	903	0	0	0	0	0	0	0	603	903	0
583	2	0	0	0	0	0	0	200	300	0	0	0	0	0	0	0	200	903	0	0	0	0	0	0	0	603	903	0
583	3	0	0	0	0	0	0	200	300	0	0	0	0	0	0	0	200	903	0	0	0	0	0	0	0	603	903	0
583	4	0	0	0	0	0	0	200	300	0	0	0	0	0	0	0	200	903	0	0	0	0	0	0	0	603	903	0
583	5	0	0	0	0	0	0	200	300	0	0	0	0	0	0	0	200	903	0	0	0	0	0	0	0	603	903	0
583	6	0	0	0	0	0	0	200	300	0	0	0	0	0	0	0	200	903	0	0	0	0	0	0	0	603	903	0
583	7	0	0	0	0	0	0	200	300	0	0	0	0	0	0	0	200	903	0	0	0	0	0	0	0	603	903	0
583	8	0	0	0	0	0	0	200	300	0	0	0	0	0	0	0	200	903	0	0	0	0	0	0	0	603	903	0
583	9	0	0	0	0	0	0	200	300	0	0	0	0	0	0	0	200	903	0	0	0	0	0	0	0	603	903	0
584	0	0	0	0	0	0	0	200	300	0	0	0	0	0	0	0	200	903	0	0	0	0	0	0	0	603	903	0
584	1	0	0	0	0	0	0	200	300	0	0	0	0	0	0	0	200	903	0	0	0	0	0	0	0	603	903	0
584	2	0	0	0	0	0	0	200	300	0	0	0	0	0	0	0	200	903	0	0	0	0	0	0	0	603	903	0
584	3	0	0	0	0	0	0	200	300	0	0	0	0	0	0	0	200	903	0	0	0	0	0	0	0	603	903	0
584	4	0	0	0	0	0	0	200	300	0	0	0	0	0	0	0	200	903	0	0	0	0	0	0	0	603	903	0
584	5	0	0	0	0	0	0	200	300	0	0	0	0	0	0	0	200	903	0	0	0	0	0	0	0	603	903	0
584	6	0	0	0	0	0	0	200	300	0	0	0	0	0	0	0	200	903	0	0	0	0	0	0	0	603	903	0
584	7	0	0	0	0	0	0	200	300	0	0	0	0	0	0	0	200	903	0	0	0	0	0	0	0	603	903	0
584	8	0	0	0	0	0	0	200	300	0	0	0	0	0	0	0	200	903	0	0	0	0	0	0	0	603	903	0
584	9	0	0	0	0	0	0	200	300	0	0	0	0	0	0	0	200	903	0	0	0	0	0	0	0	603	903	0
585	0	0	0	0	0	0	0	200	300	0	0	0	0	0	0	0	200	903	0	0	0	0	0	0	0	603	903	0
585	1	0	0	0	0	0	0	200	300	0	0	0	0	0	0	0	200	903	0	0	0	0	0	0	0	603	903	0
585	2	0	0	0	0	0	0	200	300	0	0	0	0	0	0	0	200	903	0	0	0	0	0	0	0	603	903	0
585	3	0	0	0	0	0	0	200	300	0	0	0	0	0	0	0	200	903	0	0	0	0	0	0	0	603	903	0
585	4	0	0	0	0	0	0	200	300	0	0	0	0	0	0	0	200	903	0	0	0	0	0	0	0	603	903	0
585	5	0	0	0	0	0	0	200	300	0	0	0	0	0	0	0	200	903	0	0	0	0	0	0	0	603	903	0
585	6	0	0	0	0	0	0	200	300	0	0	0	0	0	0	0	200	903	0	0	0	0	0	0	0	603	903	0
585	7	0	0	0	0	0	0	200	300	0	0	0	0	0	0	0	200	903	0	0	0	0	0	0	0	603	903	0
585	8	0	0	0	0	0	0	200	300	0	0	0	0	0	0	0	200	903	0	0	0	0	0	0	0	603	903	0
585	9	0	0	0	0	0	0	200	300	0	0	0	0	0	0	0	200	903	0	0	0	0	0	0	0	603	903	0
586	0	0	0	0	0	0	0	200	300	0	0	0	0	0	0	0	200	903	0	0	0	0	0	0	0	603	903	0
586	1	0	0	0	0	0	0	200	300	0	0	0	0	0	0	0	200	903	0	0	0	0	0	0	0	603	903	0
586	2	0	0	0	0	0	0	200	300	0	0	0	0	0	0	0	200	903	0	0	0	0	0	0	0	603	903	0
586	3	0	0	0	0	0	0	200	300	0	0	0	0	0	0	0	200	903	0	0	0	0	0	0	0	603	903	0
586	4	0	0	0	0	0	0	200	300	0	0	0	0	0	0	0	200	903	0	0	0	0	0	0	0	603	903	0
586	5	0	0	0	0	0	0	200	300	0	0	0	0	0	0	0	200	903	0	0	0	0	0	0	0	603	903	0
586	6	0	0	0	0	0	0	200	300	0	0	0	0	0	0	0	200	903	0	0	0	0	0	0	0	603	903	0
586	7	0	0	0	0	0	0	200	300	0	0	0	0	0	0	0	200	903	0	0	0	0	0	0	0	603	903	0
586	8	0	0	0	0	0	0	200	300	0	0	0	0	0	0	0	200	903	0	0	0	0	0	0	0	603	903	0
586	9	0	0	0	0	0	0	200	300	0	0	0	0	0	0	0	200	903	0	0	0	0	0	0	0	603	903	0
587	0	0	0	0	0	0	0	200	300	0	0	0	0	0	0	0	200	903	0	0	0	0	0	0	0	603	903	0
587	1	0	0	0	0	0	0	200	300	0	0	0	0	0	0	0	200	903	0	0	0	0	0	0	0	603	903	0
587	2	0	0	0	0	0	0	200	300	0	0	0	0	0	0	0	200	903	0	0	0	0	0	0	0	603	903	0
587	3	0	0	0	0	0	0	200	300	0	0	0	0	0	0	0	200	903	0	0	0	0	0	0	0	603	903	0
587	4	0	0	0	0	0	0	200	300	0	0	0	0	0	0	0	200	903	0	0	0	0	0	0	0	603	903	0
587	5	0	0	0	0	0	0	200	300	0	0	0	0	0	0	0	200	903	0	0	0	0	0	0	0	603	903	0
587	6	0	0	0	0	0	0	200	300	0	0	0	0	0	0	0	200	903	0	0	0	0	0	0	0	603	903	0
587	7	0	0	0	0	0	0	200	300	0	0	0	0	0	0	0	200	903	0	0	0	0	0	0	0	603	903	0
587	8	0	0	0	0	0	0	200	300	0	0	0	0	0	0	0	200	903	0	0	0	0	0	0	0	603	903	0
587	9	0	0	0	0	0	0	200	300	0	0	0	0	0	0	0	200	903	0	0	0	0	0	0	0	603	903	0
588	0	0	0	0	0	0	0	200	300	0	0	0	0	0	0	0	200	903	0	0	0	0	0	0	0	603	903	0
588	1	0	0	0	0	0	0	200	300	0	0	0	0	0	0	0	200	903	0	0	0	0	0	0	0	603	903	0
588	2	0	0	0	0	0	0	200	300	0	0	0	0	0	0	0	200	903	0	0	0	0	0	0	0	603	903	0
588	3	0	0	0	0	0	0	200	300	0	0	0	0	0	0	0	200	903	0	0	0	0	0	0	0	603	903	0
588	4	0	0	0	0	0	0	200	300	0	0	0	0	0	0	0	200	903	0	0	0	0	0	0	0	603	903	0
588	5	0	0	0	0	0	0	200	300	0	0	0	0	0	0	0	200	903	0	0	0	0	0	0	0	603	903	0
588	6	0	0	0	0	0	0	200	300	0	0	0	0	0	0	0	200	903	0	0	0	0	0	0	0	603	903	0
588	7	0	0	0	0	0	0	200	300	0	0	0	0	0	0	0	200	903	0	0	0	0	0	0	0	603	903	0
588	8	0	0	0	0	0	0	200	300	0	0	0	0	0	0	0	200	903	0	0	0	0	0	0	0	603	903	0
588	9	0	0	0	0	0	0	200	300	0	0	0	0	0	0	0	200	903	0	0	0	0	0	0	0	603	903	0
589	0	0	0	0	0	0	0	200	300	0	0	0	0	0	0	0	200	903	0	0	0	0	0	0	0	603	903	0
589	1	0	0	0	0	0	0	200	300	0	0	0	0	0	0	0	200	903	0	0	0	0	0	0	0	603	903	0
589	2	0	0	0	0	0	0	200	300	0	0	0	0	0	0	0	200	903	0	0	0	0	0	0	0	603	903	0
589	3	0	0	0	0	0	0	200	300	0	0	0	0	0	0	0	200	903	0	0	0	0	0	0	0	603	903	0
589	4	0	0	0	0	0	0	200	300	0	0	0	0	0	0	0	200	903	0	0	0	0	0	0	0	603	903	0
589	5	0	0	0	0	0	0	200	300	0	0	0	0	0	0	0	200	903	0	0	0	0	0	0	0	603	903	0
589	6	0	0	0	0	0	0	200	300	0	0	0	0	0	0	0	200	903	0	0	0	0	0	0	0	603	903	0
589	7	0	0	0	0	0	0	200	300	0	0	0	0	0	0	0	200	903	0	0	0	0	0	0	0	603	903	0
589	8	0	0	0	0	0	0	200	300	0	0	0	0	0	0	0	200	903	0	0	0	0	0	0	0	603	903	0
589	9	0	0	0	0	0	0	200	300	0	0	0	0	0	0	0	200	903	0	0	0	0	0	0	0	603	903	0
590	0	0	0	0	0	0	0	200	300	0	0	0	0	0	0	0	200	903	0	0	0	0	0	0	0	603	903	0
590	1	0	0	0	0	0	0	200	300	0	0	0	0	0	0	0	200	903	0	0	0	0	0	0	0	603	903	0
590	2	0	0	0	0	0	0	200	300	0	0	0	0	0	0	0	200	903	0	0	0	0	0	0	0	603	903	0
590	3	0	0	0	0	0	0	200	300	0	0	0	0	0	0	0	200	903	0	0	0	0	0	0	0	603	903	0
590	4	0	0	0	0	0	0	200	300	0	0	0	0	0	0	0	200	903	0	0	0	0	0	0	0	603	903	0
590	5	0	0	0	0	0	0	200	300	0	0	0	0	0	0	0	200	903	0	0	0	0	0	0	0	603	903	0
590	6	0	0	0	0	0	0	200	300	0	0	0	0	0	0	0	200	903	0	0	0	0	0	0	0	603	903	0
590	7	0	0	0	0	0	0	200	300	0	0	0	0	0	0	0	200	903	0	0	0	0	0	0	0	603	903	0
590	8	0	0	0	0	0	0	200	300	0	0	0	0	0	0	0	200	903	0	0	0	0	0	0	0	603	903	0
590	9	0	0	0	0	0	0	200	300	0	0	0	0	0	0	0	200	903	0	0	0	0	0	0	0	603	903	0
591	0	0	0	0	0	0	0	200	300	0	0	0	0	0	0	0	200	903	0	0	0	0	0	0	0	603	903	0
591	1	0	0	0	0	0	0	200	300	0	0	0	0	0	0	0	200	903	0	0	0	0	0	0	0	603	903	0
591	2	0	0	0	0	0	0	200	300	0	0	0	0	0	0	0	200	903	0	0	0	0	0	0	0	603	903	0
591	3	0	0	0	0	0	0	200	300	0	0	0	0	0	0	0	200	903	0	0	0	0	0	0	0	603	903	0
591	4	0	0	0	0	0	0	200	300	0	0	0	0	0	0	0	200	903	0	0	0	0	0	0	0	603	903	0
591	5	0	0	0	0	0	0	200	300	0	0	0	0	0	0	0	200	903	0	0	0	0	0	0	0	603	903	0
591	6	0	0	0	0	0	0	200	300	0	0	0	0	0	0	0	200	903	0	0	0	0	0	0	0	603	903	0
591	7	0	0	0	0	0	0	200	300	0	0	0	0	0	0	0	200	903	0	0	0	0	0	0	0	603	903	0
591	8	0	0	0	0	0	0	200	300	0	0	0	0	0	0	0	200	903	0	0	0	0	0	0	0	603	903	0
591	9	0	0	0	0	0	0	200	300	0	0	0	0	0	0	0	200	903	0	0	0	0	0	0	0	603	903	0
592	0	0	0	0	0	0	0	200	300	0	0	0	0	0	0	0	200	903	0	0	0	0	0	0	0	603	903	0
592	1	0	0	0	0	0	0	200	300	0	0	0	0	0	0	0	200	903	0	0	0	0	0	0	0	603	903	0
592	2	0	0	0	0	0	0	200	300	0	0	0	0	0	0	0	200	903	0	0	0	0	0	0	0	603	903	0
592	3	0	0	0	0	0	0	200	300	0	0	0	0	0	0	0	200	903	0	0	0	0	0	0	0	603	903	0
592	4	0	0	0	0	0	0	200	300	0	0	0	0	0	0	0	200	903	0	0	0	0	0	0	0	603	903	0
592	5	0	0	0	0	0	0	200	300	0	0	0	0	0	0	0	200	903	0	0	0	0	0	0	0	603	903	0
592	6	0	0	0	0	0	0	200	300	0	0	0	0	0	0	0	200	903	0	0	0	0	0	0	0	603	903	0
592	7	0	0	0	0	0	0	200	300	0	0	0	0	0	0	0	200	903	0	0	0	0	0	0	0	603	903	0
592	8	0	0	0	0	0	0	200	300	0	0	0	0	0	0	0	200	903	0	0	0	0	0	0	0	603	903	0
592	9	0	0	0	0	0	0	200	300	0	0	0	0	0	0	0	200	903	0	0	0	0	0	0	0	603	903	0
593	0	0	0	0	0	0	0	200	300	0	0	0	0	0	0	0	200	903	0	0	0	0	0	0	0	603	903	0
593	1	0	0	0	0	0	0	200	300	0	0	0	0	0	0	0	200	903	0	0	0	0	0	0	0	603	903	0
593	2	0	0	0	0	0	0	200	300	0	0	0	0	0	0	0	200	903	0	0	0	0	0	0	0	603	903	0
593	3	0	0	0	0	0	0	200	300	0	0	0	0	0	0	0	200	903	0	0	0	0	0	0	0	603	903	0
593	4	0	0	0	0	0	0	200	300	0	0	0	0	0	0	0	200	903	0	0	0	0	0	0	0	603	903	0
593	5	0	0	0	0	0	0	200	300	0	0	0	0	0	0	0	200	903	0	0	0	0	0	0	0	603	903	0
593	6	0	0	0	0	0	0	200	300	0	0	0	0	0	0	0	200	903	0	0	0	0	0	0	0	603	903	0
593	7	0	0	0	0	0	0	200	300	0	0	0	0	0	0	0	200	903	0	0	0	0	0	0	0	603	903	0
593	8	0	0	0	0	0	0	200	300	0	0	0	0	0	0	0	200	903	0	0	0	0	0	0	0	603	903	0
593	9	0	0	0	0	0	0	200	300	0	0	0	0	0	0	0	200	903	0	0	0	0	0	0	0	603	903	0
594	0	0	0	0	0	0	0	200	300	0	0	0	0	0	0	0	200	903	0	0	0	0	0	0	0	603	903	0
594	1	0	0	0	0	0	0	200	300	0	0	0	0	0	0	0	200	903	0	0	0	0	0	0	0	603	903	0
594	2	0	0	0	0	0	0	200	300	0	0	0	0	0	0	0	200	903	0	0	0	0	0	0	0	603	903	0
594	3	0	0	0	0	0	0	200	300	0	0	0	0	0	0	0	200	903	0	0	0	0	0	0	0	603	903	0
594	4	0	0	0	0	0	0	200	300	0	0	0	0	0	0	0	200	903	0	0	0	0	0	0	0	603	903	0
594	5	0	0	0	0	0	0	200	300	0	0	0	0	0	0	0	200	903	0	0	0	0	0	0	0	603	903	0
594	6	0	0	0	0	0	0	200	300	0	0	0	0	0	0	0	200	903	0	0	0	0	0	0	0	603	903	0
594	7	0	0	0	0	0	0	200	300	0	0	0	0	0	0	0	200	903	0	0	0	0	0	0	0	603	903	0
594	8	0	0	0	0	0	0	200	300	0	0	0	0	0	0	0	200	903	0	0	0	0	0	0	0	603	903	0
594	9	0	0	0	0	0	0	200	300	0	0	0	0	0	0	0	200	903	0	0	0	0	0	0	0	603	903	0
595	0	0	0	0	0	0	0	200	300	0	0	0	0	0	0	0	200	903	0	0	0	0	0	0	0	603	903	0
595	1	0	0	0	0	0	0	200	300	0	0	0	0	0	0	0	200	903	0	0	0	0	0	0	0	603	903	0
595	2	0	0	0	0	0	0	200	300	0	0	0	0	0	0	0	200	903	0	0	0	0	0	0	0	603	903	0
595	3	0	0	0	0	0	0	200	300	0	0	0	0	0	0	0	200	903	0	0	0	0	0	0	0	603	903	0
595	4	0	0	0	0	0	0	200	300	0	0	0	0	0	0	0	200	903	0	0	0	0	0	0	0	603	903	0
595	5	0	0	0	0	0	0	200	300	0	0	0	0	0	0	0	200	903	0	0	0	0	0	0	0	603	903	0
595	6	0	0	0	0	0	0	200	300	0	0	0	0	0	0	0	200	903	0	0	0	0	0	0	0	603	903	0
595	7	0	0	0	0	0	0	200	300	0	0	0	0	0	0	0	200	903	0	0	0	0	0	0	0	603	903	0
595	8	0	0	0	0	0	0	200	300	0	0	0	0	0	0	0	200	903	0	0	0	0	0	0	0	603	903	0
595	9	0	0	0	0	0	0	200	300	0	0	0	0	0	0	0	200	903	0	0	0	0	0	0	0	603	903	0
596	0	0	0	0	0	0	0	200	300	0	0	0	0	0	0	0	200	903	0	0	0	0	0	0	0	603	903	0
596	1	0	0	0	0	0	0	200	300	0	0	0	0	0	0	0	200	903	0	0	0	0	0	0	0	603	903	0
596	2	0	0	0	0	0	0	200	300	0	0	0	0	0	0	0	200	903	0	0	0	0	0	0	0	603	903	0
596	3	0	0	0	0	0	0	200	300	0	0	0	0	0	0	0	200	903	0	0	0	0	0	0	0	603	903	0
596	4	0	0	0	0	0	0	200	300	0	0	0	0	0	0	0	200	903	0	0	0	0	0	0	0	603	903	0
596	5	0	0	0	0	0	0	200	300	0	0	0	0	0	0	0	200	903	0	0	0	0	0	0	0	603	903	0
596	6	0	0	0	0	0	0	200	300	0	0	0	0	0	0	0	200	903	0	0	0	0	0	0	0	603	903	0
596	7	0	0	0	0	0	0	200	300	0	0	0	0	0	0	0	200	903	0	0	0	0	0	0	0	603	903	0
596	8	0	0	0	0	0	0	200	300	0	0	0	0	0	0	0	200	903	0	0	0	0	0	0	0	603	903	0
596	9	0	0	0	0	0	0	200	300	0	0	0	0	0	0	0	200	903	0	0	0	0	0	0	0	603	903	0
597	0	0	0	0	0	0	0	200	300	0	0	0	0	0	0	0	200	903	0	0	0	0	0	0	0	603	903	0
597	1	0	0	0	0	0	0	200	300	0	0	0	0	0	0	0	200	903	0	0	0	0	0	0	0	603	903	0
597	2	0	0	0	0	0	0	200	300	0	0	0	0	0	0	0	200	903	0	0	0	0	0	0	0	603	903	0
597	3	0	0	0	0	0	0	200	300	0	0	0	0	0	0	0	200	903	0	0	0	0	0	0	0	603	903	0
597	4	0	0	0	0	0	0	200	300	0	0	0	0	0	0	0	200	903	0	0	0	0	0	0	0	603	903	0
597	5	0	0	0	0	0	0	200	300	0	0	0	0	0	0	0	200	903	0	0	0	0	0	0	0	603	903	0
597	6	0	0	0	0	0	0	200	300	0	0	0	0	0	0	0	200	903	0	0	0	0	0	0	0	603	903	0
597	7	0	0	0	0	0	0	200	300	0	0	0	0	0	0	0	200	903	0	0	0	0	0	0	0	603	903	0
597	8	0	0	0	0	0	0	200	300	0	0	0	0	0	0	0	200	903	0	0	0	0	0	0	0	603	903	0
597	9	0	0	0	0	0	0	200	300	0	0	0	0	0	0	0	200	903	0	0	0	0	0	0	0	603	903	0
598	0	0	0	0	0	0	0	200	300	0	0	0	0	0	0	0	200	903	0	0	0	0	0	0	0	603	903	0
598	1	0	0	0	0	0	0	200	300	0	0	0	0	0	0	0	200	903	0	0	0	0	0	0	0	603	903	0
598	2	0	0	0	0	0	0	200	300	0	0	0	0	0	0	0	200	903	0	0	0	0	0	0	0	603	903	0
598	3	0	0	0	0	0	0	200	300	0	0	0	0	0	0	0	200	903	0	0	0	0	0	0	0	603	903	0
598	4	0	0	0	0	0	0	200	300	0	0	0	0	0	0	0	200	903	0	0	0	0	0	0	0	603	903	0
598	5	0	0	0	0	0	0	200	300	0	0	0	0	0	0	0	200	903	0	0	0	0	0	0	0	603	903	0
598	6	0	0	0	0	0	0	200	300	0	0	0	0	0	0	0	200	903	0	0	0	0	0	0	0	603	903	0
598	7	0	0	0	0	0	0	200	300	0	0	0	0	0	0	0	200	903	0	0	0	0	0	0	0	603	903	0
598	8	0	0	0	0	0	0	200	300	0	0	0	0	0	0	0	200	903	0	0	0	0	0	0	0	603	903	0
598	9	0	0	0	0	0	0	200	300	0	0	0	0	0	0	0	200	903	0	0	0	0	0	0	0	603	903	0
599	0	0	0	0	0	0	0	200	300	0	0	0	0	0	0	0	200	903	0	0	0	0	0	0	0	603	903	0
599	1	0	0	0	0	0	0	200	300	0	0	0	0	0	0	0	200	903	0	0	0	0	0	0	0	603	903	0
599	2	0	0	0	0	0	0	200	300	0	0	0	0	0	0	0	200	903	0	0	0	0	0	0	0	603	903	0
599	3	0	0	0	0	0	0	200	300	0	0	0	0	0	0	0	200	903	0	0	0	0	0	0	0	603	903	0
599	4	0	0	0	0	0	0	200	300	0	0	0	0	0	0	0	200	903	0	0	0	0	0	0	0	603	903	0
599	5	0	0	0	0	0	0	200	300	0	0	0	0	0	0	0	200	903	0	0	0	0	0	0	0	603	903	0
599	6	0	0	0	0	0	0	200	300	0	0	0	0	0	0	0	200	903	0	0	0	0	0	0	0	603	903	0
599	7	0	0	0	0	0	0	200	300	0	0	0	0	0	0	0	200	903	0	0	0	0	0	0	0	603	903	0
599	8	0	0	0	0	0	0	200	300	0	0	0	0	0	0	0	200	903	0	0	0	0	0	0	0	603	903	0
599	9	0	0	0	0	0	0	200	300	0	0	0	0	0	0	0	200	903	0	0	0	0	0	0	0	603	903	0
600	0	0	0	0	0	0	0	200	300	0	0	0	0	0	0	0	200	903	0	0	0	0	0	0	0	603	903	0
600	1	0	0	0	0	0	0	200	300	0	0	0	0	0	0	0	200	903	0	0	0	0	0	0	0	603	903	0
600	2	0	0	0	0	0	0	200	300	0	0	0	0	0	0	0	200	903	0	0	0	0	0	0	0	603	903	0
600	3	0	0	0	0	0	0	200	300	0	0	0	0	0	0	0	200	903	0	0	0	0	0	0	0	603	903	0
600	4	0	0	0	0	0	0	200	300	0	0	0	0	0	0	0	200	903	0	0	0	0	0	0	0	603	903	0
600	5	0	0	0	0	0	0	200	300	0	0	0	0	0	0	0	200	903	0	0	0	0	0	0	0	603	903	0
600	6	0	0	0	0	0	0	200	300	0	0	0	0	0	0	0	200	903	0	0	0	0	0	0	0	603	903	0
600	7	0	0	0	0	0	0	200	300	0	0	0	0	0	0	0	200	903	0	0	0	0	0	0	0	603	903	0
600	8	0	0	0	0	0	0	200	300	0	0	0	0	0	0	0	200	903	0	0	0	0	0	0	0	603	903	0
600	9	0	0	0	0	0	0	200	300	0	0	0	0	0	0	0	200	903	0	0	0	0	0	0	0	603	903	0
601	0	0	0	0	0	0	0	200	300	0	0	0	0	0	0	0	200	903	0	0	0	0	0	0	0	603	903	0
601	1	0	0	0	0	0	0	200	300	0	0	0	0	0	0	0	200	903	0	0	0	0	0	0	0	603	903	0
601	2	0	0	0	0	0	0	200	300	0	0	0	0	0	0	0	200	903	0	0	0	0	0	0	0	603	903	0
601	3	0	0	0	0	0	0	200	300	0	0	0	0	0	0	0	200	903	0	0	0	0	0	0	0	603	903	0
601	4	0	0	0	0	0	0	200	300	0	0	0	0	0	0	0	200	903	0	0	0	0	0	0	0	603	903	0
601	5	0	0	0	0	0	0	200	300	0	0	0	0	0	0	0	200	903	0	0	0	0	0	0	0	603	903	0
601	6	0	0	0	0	0	0	200	300	0	0	0	0	0	0	0	200	903	0	0	0	0	0	0	0	603	903	0
601	7	0	0	0	0	0	0	200	300	0	0	0	0	0	0	0	200	903	0	0	0	0	0	0	0	603	903	0
601	8	0	0	0	0	0	0	200	300	0	0	0	0	0	0	0	200	903	0	0	0	0	0	0	0	603	903	0
601	9	0	0	0	0	0	0	200	300	0	0	0	0	0	0	0	200	903	0	0	0	0	0	0	0	603	903	0
602	0	0	0	0	0	0	0	200	300	0	0	0	0	0	0	0	200	903	0	0	0	0	0	0	0	603	903	0
602	1	0	0	0	0	0	0	200	300	0	0	0	0	0	0	0	200	903	0	0	0	0	0	0	0	603	903	0
602	2	0	0	0	0	0	0	200	300	0	0	0	0	0	0	0	200	903	0	0	0	0	0	0	0	603	903	0
602	3	0	0	0	0	0	0	200	300	0	0	0	0	0	0	0	200	903	0	0	0	0	0	0	0	603	903	0
602	4	0	0	0	0	0	0	200	300	0	0	0	0	0	0	0	200	903	0	0	0	0	0	0	0	603	903	0
602	5	0	0	0	0	0	0	200	300	0	0	0	0	0	0	0	200	903	0	0	0	0	0	0	0	603	903	0
602	6	0	0	0	0	0	0	200	300	0	0	0	0	0	0	0	200	903	0	0	0	0	0	0	0	603	903	0
602	7	0	0	0	0	0	0	200	300	0	0	0	0	0	0	0	200	903	0	0	0	0	0	0	0	603	903	0
602	8	0	0	0	0	0	0	200	300	0	0	0	0	0	0	0	200	903	0	0	0	0	0	0	0	603	903	0
602	9	0	0	0	0	0	0	200	300	0	0	0	0	0	0	0	200	903	0	0	0	0	0	0	0	603	903	0
603	0	0	0	0	0	0	0	200	300	0	0	0	0	0	0	0	200	903	0	0	0	0	0	0	0	603	903	0
603	1	0	0	0	0	0	0	200	300	0	0	0	0	0	0	0	200	903	0	0	0	0	0	0	0	603	903	0
603	2	0	0	0	0	0	0	200	300	0	0	0	0	0	0	0	200	903	0	0	0	0	0	0	0	603	903	0
603	3	0	0	0	0	0	0	200	300	0	0	0	0	0	0	0	200	903	0	0	0	0	0	0	0	603	903	0
603	4	0	0	0	0	0	0	200	300	0	0	0	0	0	0	0	200	903	0	0	0	0	0	0	0	603	903	0
603	5	0	0	0	0	0	0	200	300	0	0	0	0	0	0	0	200	903	0	0	0	0	0	0	0	603	903	0
603	6	0	0	0	0	0	0	200	300	0	0	0	0	0	0	0	200	903	0	0	0	0	0	0	0	603	903	0
603	7	0	0	0	0	0	0	200	300	0	0	0	0	0	0	0	200	903	0	0	0	0	0	0	0	603	903	0
603	8	0	0	0	0	0	0	200	300	0	0	0	0	0	0	0	200	903	0	0	0	0	0	0	0	603	903	0
603	9	0	0	0	0	0	0	200	300	0	0	0	0	0	0	0	200	903	0	0	0	0	0	0	0	603	903	0
604	0	0	0	0	0	0	0	200	300	0	0	0	0	0	0	0	200	903	0	0	0	0	0	0	0	603	903	0
604	1	0	0	0	0	0	0	200	300	0	0	0	0	0	0	0	200	903	0	0	0	0	0	0	0	603	903	0
604	2	0	0	0	0	0	0	200	300	0	0	0	0	0	0	0	200	903	0	0	0	0	0	0	0	603	903	0
604	3	0	0	0	0	0	0	200	300	0	0	0	0	0	0	0	200	903	0	0	0	0	0	0	0	603	903	0
604	4	0	0	0	0	0	0	200	300	0	0	0	0	0	0	0	200	903	0	0	0	0	0	0	0	603	903	0
604	5	0	0	0	0	0	0	200	300	0	0	0	0	0	0	0	200	903	0	0	0	0	0	0	0	603	903	0
604	6	0	0	0	0	0	0	200	300	0	0	0	0	0	0	0	200	903	0	0	0	0	0	0	0	603	903	0
604	7	0	0	0	0	0	0	200	300	0	0	0	0	0	0	0	200	903	0	0	0	0	0	0	0	603	903	0
604	8	0	0	0	0	0	0	200	300	0	0	0	0	0	0	0	200	903	0	0	0	0	0	0	0	603	903	0
604	9	0	0	0	0	0	0	200	300	0	0	0	0	0	0	0	200	903	0	0	0	0	0	0	0	603	903	0
605	0	0	0	0	0	0	0	200	300	0	0	0	0	0	0	0	200	903	0	0	0	0	0	0	0	603	903	0
605	1	0	0	0	0	0	0	200	300	0	0	0	0	0	0	0	200	903	0	0	0	0	0	0	0	603	903	0
605	2	0	0	0	0	0	0	200	300	0	0	0	0	0	0	0	200	903	0	0	0	0	0	0	0	603	903	0
605	3	0	0	0	0	0	0	200	300	0	0	0	0	0	0	0	200	903	0	0	0	0	0	0	0	603	903	0
605	4	0	0	0	0	0	0	200	300	0	0	0	0	0	0	0	200	903	0	0	0	0	0	0	0	603	903	0
605	5	0	0	0	0	0	0	200	300	0	0	0	0	0	0	0	200	903	0	0	0	0	0	0	0	603	903	0
605	6	0	0	0	0	0	0	200	300	0	0	0	0	0	0	0	200	903	0	0	0	0	0	0	0	603	903	0
605	7	0	0	0	0	0	0	200	300	0	0	0	0	0	0	0	200	903	0	0	0	0	0	0	0	603	903	0
605	8	0	0	0	0	0	0	200	300	0	0	0	0	0	0	0	200	903	0	0	0	0	0	0	0	603	903	0
605	9	0	0	0	0	0	0	200	300	0	0	0	0	0	0	0	200	903	0	0	0	0	0	0	0	603	903	0
606	0	0	0	0	0	0	0	200	300	0	0	0	0	0	0	0	200	903	0	0	0	0	0	0	0	603	903	0
606	1	0	0	0	0	0	0	200	300	0	0	0	0	0	0	0	200	903	0	0	0	0	0	0	0	603	903	0
606	2	0	0	0	0	0	0	200	300	0	0	0	0	0	0	0	200	903	0	0	0	0	0	0	0	603	903	0
606	3	0	0	0	0	0	0	200	300	0	0	0	0	0	0	0	200	903	0	0	0	0	0	0	0	603	903	0
606	4	0	0	0	0	0	0	200	300	0	0	0	0	0	0	0	200	903	0	0	0	0	0	0	0	603	903	0
606	5	0	0	0	0	0	0	200	300	0	0	0	0	0	0	0	200	903	0	0	0	0	0	0	0	603	903	0
606	6	0	0	0	0	0	0	200	300	0	0	0	0	0	0	0	200	903	0	0	0	0	0	0	0	603	903	0
606	7	0	0	0	0	0	0	200	300	0	0	0	0	0	0	0	200	903	0	0	0	0	0	0	0	603	903	0
606	8	0	0	0	0	0	0	200	300	0	0	0	0	0	0	0	200	903	0	0	0	0	0	0	0	603	903	0
606	9	0	0	0	0	0	0	200	300	0	0	0	0	0	0	0	200	903	0	0	0	0	0	0	0	603	903	0
607	0	0	0	0	0	0	0	200	300	0	0	0	0	0	0	0	200	903	0	0	0	0	0	0	0	603	903	0
607	1	0	0	0	0	0	0	200	300	0	0	0	0	0	0	0	200	903	0	0	0	0	0	0	0	603	903	0
607	2	0	0	0	0	0	0	200	300	0	0	0	0	0	0	0	200	903	0	0	0	0	0	0	0	603	903	0
607	3	0	0	0	0	0	0	200	300	0	0	0	0	0	0	0	200	903	0	0	0	0	0	0	0	603	903	0
607	4	0	0	0	0	0	0	200	300	0	0	0	0	0	0	0	200	903	0	0	0	0	0	0	0	603	903	0
607	5	0	0	0	0	0	0	200	300	0	0	0	0	0	0	0	200	903	0	0	0	0	0	0	0	603	903	0
607	6	0	0	0	0	0	0	200	300	0	0	0	0	0	0	0	200	903	0	0	0	0	0	0	0	603	903	0
607	7	0	0	0	0	0	0	200	300	0	0	0	0	0	0	0	200	903	0	0	0	0	0	0	0	603	903	0
607	8	0	0	0	0	0	0	200	300	0	0	0	0	0	0	0	200	903	0	0	0	0	0	0	0	603	903	0
607	9	0	0	0	0	0	0	200	300	0	0	0	0	0	0	0	200	903	0	0	0	0	0	0	0	603	903	0
608	0	0	0	0	0	0	0	200	300	0	0	0	0	0	0	0	200	903	0	0	0	0	0	0	0	603	903	0
608	1	0	0	0	0	0	0	200	300	0	0	0	0	0	0	0	200	903	0	0	0	0	0	0	0	603	903	0
608	2	0	0	0	0	0	0	200	300	0	0	0	0	0	0	0	200	903	0	0	0	0	0	0	0	603	903	0
608	3	0	0	0	0	0	0	200	300	0	0	0	0	0	0	0	200	903	0	0	0	0	0	0	0	603	903	0
608	4	0	0	0	0	0	0	200	300	0	0	0	0	0	0	0	200	903	0	0	0	0	0	0	0	603	903	0
608	5	0	0	0	0	0	0	200	300	0	0	0	0	0	0	0	200	903	0	0	0	0	0	0	0	603	903	0
608	6	0	0	0	0	0	0	200	300	0	0	0	0	0	0	0	200	903	0	0	0	0	0	0	0	603	903	0
608	7	0	0	0	0	0	0	200	300	0	0	0	0	0	0	0	200	903	0	0	0	0	0	0	0	603	903	0
608	8	0	0	0	0	0	0	200	300	0	0	0	0	0	0	0	200	903	0	0	0	0	0	0	0	603	903	0
608	9	0	0	0	0	0	0	200	300	0	0	0	0	0	0	0	200	903	0	0	0	0	0	0	0	603	903	0
609	0	0	0	0	0	0	0	200	300	0	0	0	0	0	0	0	200	903	0	0	0	0	0	0	0	603	903	0
609	1	0	0	0	0	0	0	200	300	0	0	0	0	0	0	0	200	903	0	0	0	0	0	0	0	603	903	0
609	2	0	0	0	0	0	0	200	300	0	0	0	0	0	0	0	200	903	0	0	0	0	0	0	0	603	903	0
609	3	0	0	0	0	0	0	200	300	0	0	0	0	0	0	0	200	903	0	0	0	0	0	0	0	603	903	0
609	4	0	0	0	0	0	0	200	300	0	0	0	0	0	0	0	200	903	0	0	0	0	0	0	0	603	903	0
609	5	0	0	0	0	0	0	200	300	0	0	0	0	0	0	0	200	903	0	0	0	0	0	0	0	603	903	0
609	6	0	0	0	0	0	0	200	300	0	0	0	0	0	0	0	200	903	0	0	0	0	0	0	0	603	903	0
609	7	0	0	0	0	0	0	200	300	0	0	0	0	0	0	0	200	903	0	0	0	0	0	0	0	603	903	0
609	8	0	0	0	0	0	0	200	300	0	0	0	0	0	0	0	200	903	0	0	0	0	0	0	0	603	903	0
609	9	0	0	0	0	0	0	200	300	0	0	0	0	0	0	0	200	903	0	0	0	0	0	0	0	603	903	0
610	0	0	0	0	0	0	0	200	300	0	0	0	0	0	0	0	200	903	0	0	0	0	0	0	0	603	903	0
610	1	0	0	0	0	0	0	200	300	0	0	0	0	0	0	0	200	903	0	0	0	0	0	0	0	603	903	0
610	2	0	0	0	0	0	0	200	300	0	0	0	0	0	0	0	200	903	0	0	0	0	0	0	0	603	903	0
610	3	0	0	0	0	0	0	200	300	0	0	0	0	0	0	0	200	903	0	0	0	0	0	0	0	603	903	0
610	4	0	0	0	0	0	0	200	300	0	0	0	0	0	0	0	200	903	0	0	0	0	0	0	0	603	903	0
610	5	0	0	0	0	0	0	200	300	0	0	0	0	0	0	0	200	903	0	0	0	0	0	0	0	603	903	0
610	6	0	0	0	0	0	0	200	300	0	0	0	0	0	0	0	200	903	0	0	0	0	0	0	0	603	903	0
610	7	0	0	0	0	0	0	200	300	0	0	0	0	0	0	0	200	903	0	0	0	0	0	0	0	603	903	0
610	8	0	0	0	0	0	0	200	300	0	0	0	0	0	0	0	200	903	0	0	0	0	0	0	0	603	903	0
610	9	0	0	0	0	0	0	200	300	0	0	0	0	0	0	0	200	903	0	0	0	0	0	0	0	603	903	0
611	0	0	0	0	0	0	0	200	300	0	0	0	0	0	0	0	200	903	0	0	0	0	0	0	0	603	903	0
611	1	0	0	0	0	0	0	200	300	0	0	0	0	0	0	0	200	903	0	0	0	0	0	0	0	603	903	0
611	2	0	0	0	0	0	0	200	300	0	0	0	0	0	0	0	200	903	0	0	0	0	0	0	0	603	903	0
611	3	0	0	0	0	0	0	200	300	0	0	0	0	0	0	0	200	903	0	0	0	0	0	0	0	603	903	0
611	4	0	0	0	0	0	0	200	300	0	0	0	0	0	0	0	200	903	0	0	0	0	0	0	0	603	903	0
611	5	0	0	0	0	0	0	200	300	0	0	0	0	0	0	0	200	903	0	0	0	0	0	0	0	603	903	0
611	6	0	0	0	0	0	0	200	300	0	0	0	0	0	0	0	200	903	0	0	0	0	0	0	0	603	903	0
611	7	0	0	0	0	0	0	200	300	0	0	0	0	0	0	0	200	903	0	0	0	0	0	0	0	603	903	0
611	8	0	0	0	0	0	0	200	300	0	0	0	0	0	0	0	200	903	0	0	0	0	0	0	0	603	903	0
611	9	0	0	0	0	0	0	200	300	0	0	0	0	0	0	0	200	903	0	0	0	0	0	0	0	603	903	0
612	0	0	0	0	0	0	0	200	300	0	0	0	0	0	0	0	200	903	0	0	0	0	0	0	0	603	903	0
612	1	0	0	0	0	0	0	200	300	0	0	0	0	0	0	0	200	903	0	0	0	0	0	0	0	603	903	0
612	2	0	0	0	0	0	0	200	300	0	0	0	0	0	0	0	200	903	0	0	0	0	0	0	0	603	903	0
612	3	0	0	0	0	0	0	200	300	0	0	0	0	0	0	0	200	903	0	0	0	0	0	0	0	603	903	0
612	4	0	0	0	0	0	0	200	300	0	0	0	0	0	0	0	200	903	0	0	0	0	0	0	0	603	903	0
612	5	0	0	0	0	0	0	200	300	0	0	0	0	0	0	0	200	903	0	0	0	0	0	0	0	603	903	0
612	6	0	0	0	0	0	0	200	300	0	0	0	0	0	0	0	200	903	0	0	0	0	0	0	0	603	903	0
612	7	0	0	0	0	0	0	200	300	0	0	0	0	0	0	0	200	903	0	0	0	0	0	0	0	603	903	0
612	8	0	0	0	0	0	0	200	300	0	0	0	0	0	0	0	200	903	0	0	0	0	0	0	0	603	903	0
612	9	0	0	0	0	0	0	200	300	0	0	0	0	0	0	0	200	903	0	0	0	0	0	0	0	603	903	0
613	0	0	0	0	0	0	0	200	300	0	0	0	0	0	0	0	200	903	0	0	0	0	0	0	0	603	903	0
613	1	0	0	0	0	0	0	200	300	0	0	0	0	0	0	0	200	903	0	0	0	0	0	0	0	603	903	0
613	2	0	0	0	0	0	0	200	300	0	0	0	0	0	0	0	200	903	0	0	0	0	0	0	0	603	903	0
613	3	0	0	0	0	0	0	200	300	0	0	0	0	0	0	0	200	903	0	0	0	0	0	0	0	603	903	0
613	4	0	0	0	0	0	0	200	300	0	0	0	0	0	0	0	200	903	0	0	0	0	0	0	0	603	903	0
613	5	0	0	0	0	0	0	200	300	0	0	0	0	0	0	0	200	903	0	0	0	0	0	0	0	603	903	0
613	6	0	0	0	0	0	0	200	300	0	0	0	0	0	0	0	200	903	0	0	0	0	0	0	0	603	903	0
613	7	0	0	0	0	0	0	200	300	0	0	0	0	0	0	0	200	903	0	0	0	0	0	0	0	603	903	0
613	8	0	0	0	0	0	0	200	300	0	0	0	0	0	0	0	200	903	0	0	0	0	0	0	0	603	903	0
613	9	0	0	0	0	0	0	200	300	0	0	0	0	0	0	0	200	903	0	0	0	0	0	0	0	603	903	0
614	0	0	0	0	0	0	0	200	300	0	0	0	0	0	0	0	200	903	0	0	0	0	0	0	0	603	903	0
614	1	0	0	0	0	0	0	200	300	0	0	0	0	0	0	0	200	903	0	0	0	0	0	0	0	603	903	0
614	2	0	0	0	0	0	0	200	300	0	0	0	0	0	0	0	200	903	0	0	0	0	0	0	0	603	903	0
614	3	0	0	0	0	0	0	200	300	0	0	0	0	0	0	0	200	903	0	0	0	0	0	0	0	603	903	0
614	4	0	0	0	0	0	0	200	300	0	0	0	0	0	0	0	200	903	0	0	0	0	0	0	0	603	903	0
614	5	0	0	0	0	0	0	200	300	0	0	0	0	0	0	0	200	903	0	0	0	0	0	0	0	603	903	0
614	6	0	0	0	0	0	0	200	300	0	0	0	0	0	0	0	200	903	0	0	0	0	0	0	0	603	903	0
614	7	0	0	0	0	0	0	200	300	0	0	0	0	0	0	0	200	903	0	0	0	0	0	0	0	603	903	0
614	8	0	0	0	0	0	0	200	300	0	0	0	0	0	0	0	200	903	0	0	0	0	0	0	0	603	903	0
614	9	0	0	0	0	0	0	200	300	0	0	0	0	0	0	0	200	903	0	0	0	0	0	0	0	603	903	0
615	0	0	0	0	0	0	0	200	300	0	0	0	0	0	0	0	200	903	0	0	0	0	0	0	0	603	903	0
615	1	0	0	0	0	0	0	200	300	0	0	0	0	0	0	0	200	903	0	0	0	0	0	0	0	603	903	0
615	2	0	0	0	0	0	0	200	300	0	0	0	0	0	0	0	200	903	0	0	0	0	0	0	0	603	903	0
615	3	0	0	0	0	0	0	200	300	0	0	0	0	0	0	0	200	903	0	0	0	0	0	0	0	603	903	0
615	4	0	0	0	0	0	0	200	300	0	0	0	0	0	0	0	200	903	0	0	0	0	0	0	0	603	903	0
615	5	0	0	0	0	0	0	200	300	0	0	0	0	0	0	0	200	903	0	0	0	0	0	0	0	603	903	0
615	6	0	0	0	0	0	0	200	300	0	0	0	0	0	0	0	200	903	0	0	0	0	0	0	0	603	903	0
615	7	0	0	0	0	0	0	200	300	0	0	0	0	0	0	0	200	903	0	0	0	0	0	0	0	603	903	0
615	8	0	0	0	0	0	0	200	300	0	0	0	0	0	0	0	200	903	0	0	0	0	0	0	0	603	903	0
615	9	0	0	0	0	0	0	200	300	0	0	0	0	0	0	0	200	903	0	0	0	0	0	0	0	603	903	0
616	0	0	0	0	0	0	0	200	300	0	0	0	0	0	0	0	200	903	0	0	0	0	0	0	0	603	903	0
616	1	0	0	0	0	0	0	200	300	0	0	0	0	0	0	0	200	903	0	0	0	0	0	0	0	603	903	0
616	2	0	0	0	0	0	0	200	300	0	0	0	0	0	0	0	200	903	0	0	0	0	0	0	0	603	903	0
616	3	0	0	0	0	0	0	200	300	0	0	0	0	0	0	0	200	903	0	0	0	0	0	0	0	603	903	0
616	4	0	0	0	0	0	0	200	300	0	0	0	0	0	0	0	200	903	0	0	0	0	0	0	0	603	903	0
616	5	0	0	0	0	0	0	200	300	0	0	0	0	0	0	0	200	903	0	0	0	0	0	0	0	603	903	0
616	6	0	0	0	0	0	0	200	300	0	0	0	0	0	0	0	200	903	0	0	0	0	0	0	0	603	903	0
616	7	0	0	0	0	0	0	200	300	0	0	0	0	0	0	0	200	903	0	0	0	0	0	0	0	603	903	0
616	8	0	0	0	0	0	0	200	300	0	0	0	0	0	0	0	200	903	0	0	0	0	0	0	0	603	903	0
616	9	0	0	0	0	0	0	200	300	0	0	0	0	0	0	0	200	903	0	0	0	0	0	0	0	603	903	0
617	0	0	0	0	0	0	0	200	300	0	0	0	0	0	0	0	200	903	0	0	0	0	0	0	0	603	903	0
617	1	0	0	0	0	0	0	200	300	0	0	0	0	0	0	0	200	903	0	0	0	0	0	0	0	603	903	0
617	2	0	0	0	0	0	0	200	300	0	0	0	0	0	0	0	200	903	0	0	0	0	0	0	0	603	903	0
617	3	0	0	0	0	0	0	200	300	0	0	0	0	0	0	0	200	903	0	0	0	0	0	0	0	603	903	0
617	4	0	0	0	0	0	0	200	300	0	0	0	0	0	0	0	200	903	0	0	0	0	0	0	0	603	903	0
617	5	0	0	0	0	0	0	200	300	0	0	0	0	0	0	0	200	903	0	0	0	0	0	0	0	603	903	0
617	6	0	0	0	0	0	0	200	300	0	0	0	0	0	0	0	200	903	0	0	0	0	0	0	0	603	903	0
617	7	0	0	0	0	0	0	200	300	0	0	0	0	0	0	0	200	903	0	0	0	0	0	0	0	603	903	0
617	8	0	0	0	0	0	0	200	300	0	0	0	0	0	0	0	200	903	0	0	0	0	0	0	0	603	903	0
617	9	0	0	0	0	0	0	200	300	0	0	0	0	0	0	0	200	903	0	0	0	0	0	0	0	603	903	0
618	0	0	0	0	0	0	0	200	300	0	0	0	0	0	0	0	200	903	0	0	0	0	0	0	0	603	903	0
618	1	0	0	0	0	0	0	200	300	0	0	0	0	0	0	0	200	903	0	0	0	0	0	0	0	603	903	0
618	2	0	0	0	0	0	0	200	300	0	0	0	0	0	0	0	200	903	0	0	0	0	0	0	0	603	903	0
618	3	0	0	0	0	0	0	200	300	0	0	0	0	0	0	0	200	903	0	0	0	0	0	0	0	603	903	0
618	4	0	0	0	0	0	0	200	300	0	0	0	0	0	0	0	200	903	0	0	0	0	0	0	0	603	903	0
618	5	0	0	0	0	0	0	200	300	0	0	0	0	0	0	0	200	903	0	0	0	0	0	0	0	603	903	0
618	6	0	0	0	0	0	0	200	300	0	0	0	0	0	0	0	200	903	0	0	0	0	0	0	0	603	903	0
618	7	0	0	0	0	0	0	200	300	0	0	0	0	0	0	0	200	903	0	0	0	0	0	0	0	603	903	0
618	8	0	0	0	0	0	0	200	300	0	0	0	0	0	0	0	200	903	0	0	0	0	0	0	0	603	903	0
618	9	0	0	0	0	0	0	200	300	0	0	0	0	0	0	0	200	903	0	0	0	0	0	0	0	603	903	0
619	0	0	0	0	0	0	0	200	300	0	0	0	0	0	0	0	200	903	0	0	0	0	0	0	0	603	903	0
619	1	0	0	0	0	0	0	200	300	0	0	0	0	0	0	0	200	903	0	0	0	0	0	0	0	603	903	0
619	2	0	0	0	0	0	0	200	300	0	0	0	0	0	0	0	200	903	0	0	0	0	0	0	0	603	903	0
619	3	0	0	0	0	0	0	200	300	0	0	0	0	0	0	0	200	903	0	0	0	0	0	0	0	603	903	0
619	4	0	0	0	0	0	0	200	300	0	0	0	0	0	0	0	200	903	0	0	0	0	0	0	0	603	903	0
619	5	0	0	0	0	0	0	200	300	0	0	0	0	0	0	0	200	903	0	0	0	0	0	0	0	603	903	0
619	6	0	0	0	0	0	0	200	300	0	0	0	0	0	0	0	200	903	0	0	0	0	0	0	0	603	903	0
619	7	0	0	0	0	0	0	200	300	0	0	0	0	0	0	0	200	903	0	0	0	0	0	0	0	603	903	0
619	8	0	0	0	0	0	0	200	300	0	0	0	0	0	0	0	200	903	0	0	0	0	0	0	0	603	903	0
619	9	0	0	0	0	0	0	200	300	0	0	0	0	0	0	0	200	903	0	0	0	0	0	0	0	603	903	0
620	0	0	0	0	0	0	0	200	300	0	0	0	0	0	0	0	200	903	0	0	0	0	0	0	0	603	903	0
620	1	0	0	0	0	0	0	200	300	0	0	0	0	0	0	0	200	903	0	0	0	0	0	0	0	603	903	0
620	2	0	0	0	0	0	0	200	300	0	0	0	0	0	0	0	200	903	0	0	0	0	0	0	0	603	903	0
620	3	0	0	0	0	0	0	200	300	0	0	0	0	0	0	0	200	903	0	0	0	0	0	0	0	603	903	0
620	4	0	0	0	0	0	0	200	300	0	0	0	0	0	0	0	200	903	0	0	0	0	0	0	0	603	903	0
620	5	0	0	0	0	0	0	200	300	0	0	0	0	0	0	0	200	903	0	0	0	0	0	0	0	603	903	0
620	6	0	0	0	0	0	0	200	300	0	0	0	0	0	0	0	200	903	0	0	0	0	0	0	0	603	903	0
620	7	0	0	0	0	0	0	200	300	0	0	0	0	0	0	0	200	903	0	0	0	0	0	0	0	603	903	0
620	8	0	0	0	0	0	0	200	300	0	0	0	0	0	0	0	200	903	0	0	0	0	0	0	0	603	903	0
620	9	0	0	0	0	0	0	200	300	0	0	0	0	0	0	0	200	903	0	0	0	0	0	0	0	603	903	0
621	0	0	0	0	0	0	0	200	300	0	0	0	0	0	0	0	200	903	0	0	0	0	0	0	0	603	903	0
621	1	0	0	0	0	0	0	200	300	0	0	0	0	0	0	0	200	903	0	0	0	0	0	0	0	603	903	0
621	2	0	0	0	0	0	0	200	300	0	0	0	0	0	0	0	200	903	0	0	0	0	0	0	0	603	903	0
621	3	0	0	0	0	0	0	200	300	0	0	0	0	0	0	0	200	903	0	0	0	0	0	0	0	603	903	0
621	4	0	0	0	0	0	0	200	300	0	0	0	0	0	0	0	200	903	0	0	0	0	0	0	0	603	903	0
621	5	0	0	0	0	0	0	200	300	0	0	0	0	0	0	0	200	903	0	0	0	0	0	0	0	603	903	0
621	6	0	0	0	0	0	0	200	300	0	0	0	0	0	0	0	200	903	0	0	0	0	0	0	0	603	903	0
621	7	0	0	0	0	0	0	200	300	0	0	0	0	0	0	0	200	903	0	0	0	0	0	0	0	603	903	0
621	8	0	0	0	0	0	0	200	300	0	0	0	0	0	0	0	200	903	0	0	0	0	0	0	0	603	903	0
621	9	0	0	0	0	0	0	200	300	0	0	0	0	0	0	0	200	903	0	0	0	0	0	0	0	603	903	0
622	0	0	0	0	0	0	0	200	300	0	0	0	0	0	0	0	200	903	0	0	0	0	0	0	0	603	903	0
622	1	0	0	0	0	0	0	200	300	0	0	0	0	0	0	0	200	903	0	0	0	0	0	0	0	603	903	0
622	2	0	0	0	0	0	0	200	300	0	0	0	0	0	0	0	200	903	0	0	0	0	0	0	0	603	903	0
622	3	0	0	0	0	0	0	200	300	0	0	0	0	0	0	0	200	903	0	0	0	0	0	0	0	603	903	0
622	4	0	0	0	0	0	0	200	300	0	0	0	0	0	0	0	200	903	0	0	0	0	0	0	0	603	903	0
622	5	0	0	0	0	0	0	200	300	0	0	0	0	0	0	0	200	903	0	0	0	0	0	0	0	603	903	0
622	6	0	0	0	0	0	0	200	300	0	0	0	0	0	0	0	200	903	0	0	0	0	0	0	0	603	903	0
622	7	0	0	0	0	0	0	200	300	0	0	0	0	0	0	0	200	903	0	0	0	0	0	0	0	603	903	0
622	8	0	0	0	0	0	0	200	300	0	0	0	0	0	0	0	200	903	0	0	0	0	0	0	0	603	903	0
622	9	0	0	0	0	0	0	200	300	0	0	0	0	0	0	0	200	903	0	0	0	0	0	0	0	603	903	0
623	0	0	0	0	0	0	0	200	300	0	0	0	0	0	0	0	200	903	0	0	0	0	0	0	0	603	903	0
623	1	0	0	0	0	0	0	200	300	0	0	0	0	0	0	0	200	903	0	0	0	0	0	0	0	603	903	0
623	2	0	0	0	0	0	0	200	300	0	0	0	0	0	0	0	200	903	0	0	0	0	0	0	0	603	903	0
623	3	0	0	0	0	0	0	200	300	0	0	0	0	0	0	0	200	903	0	0	0	0	0	0	0	603	903	0
623	4	0	0	0	0	0	0	200	300	0	0	0	0	0	0	0	200	903	0	0	0	0	0	0	0	603	903	0
623	5	0	0	0	0	0	0	200	300	0	0	0	0	0	0	0	200	903	0	0	0	0	0	0	0	603	903	0
623	6	0	0	0	0	0	0	200	300	0	0	0	0	0	0	0	200	903	0	0	0	0	0	0	0	603	903	0
623	7	0	0	0	0	0	0	200	300	0	0	0	0	0	0	0	200	903	0	0	0	0	0	0	0	603	903	0
623	8	0	0	0	0	0	0	200	300	0	0	0	0	0	0	0	200	903	0	0	0	0	0	0	0	603	903	0
623	9	0	0	0	0	0	0	200	300	0	0	0	0	0	0	0	200	903	0	0	0	0	0	0	0	603	903	0
624	0	0	0	0	0	0	0	200	300	0	0	0	0	0	0	0	200	903	0	0	0	0	0	0	0	603	903	0
624	1	0	0	0	0	0	0	200	300	0	0	0	0	0	0	0	200	903	0	0	0	0	0	0	0	603	903	0
624	2	0	0	0	0	0	0	200	300	0	0	0	0	0	0	0	200	903	0	0	0	0	0	0	0	603	903	0
624	3	0	0	0	0	0	0	200	300	0	0	0	0	0	0	0	200	903	0	0	0	0	0	0	0	603	903	0
624	4	0	0	0	0	0	0	200	300	0	0	0	0	0	0	0	200	903	0	0	0	0	0	0	0	603	903	0
624	5	0	0	0	0	0	0	200	300	0	0	0	0	0	0	0	200	903	0	0	0	0	0	0	0	603	903	0
624	6	0	0	0	0	0	0	200	300	0	0	0	0	0	0	0	200	903	0	0	0	0	0	0	0	603	903	0
624	7	0	0	0	0	0	0	200	300	0	0	0	0	0	0	0	200	903	0	0	0	0	0	0	0	603	903	0
624	8	0	0	0	0	0	0	200	300	0	0	0	0	0	0	0	200	903	0	0	0	0	0	0	0	603	903	0
624	9	0	0	0	0	0	0	200	300	0	0	0	0	0	0	0	200	903	0	0	0	0	0	0	0	603	903	0
625	0	0	0	0	0	0	0	200	300	0	0	0	0	0	0	0	200	903	0	0	0	0	0	0	0	603	903	0
625	1	0	0	0	0	0	0	200	300	0	0	0	0	0	0	0	200	903	0	0	0	0	0	0	0	603	903	0
625	2	0	0	0	0	0	0	200	300	0	0	0	0	0	0	0	200	903	0	0	0	0	0	0	0	603	903	0
625	3	0	0	0	0	0	0	200	300	0	0	0	0	0	0	0	200	903	0	0	0	0	0	0	0	603	903	0
625	4	0	0	0	0	0	0	200	300	0	0	0	0	0	0	0	200	903	0	0	0	0	0	0	0	603	903	0
625	5	0	0	0	0	0	0	200	300	0	0	0	0	0	0	0	200	903	0	0	0	0	0	0	0	603	903	0
625	6	0	0	0	0	0	0	200	300	0	0	0	0	0	0	0	200	903	0	0	0	0	0	0	0	603	903	0
625	7	0	0	0	0	0	0	200	300	0	0	0	0	0	0	0	200	903	0	0	0	0	0	0	0	603	903	0
625	8	0	0	0	0	0	0	200	300	0	0	0	0	0	0	0	200	903	0	0	0	0	0	0	0	603	903	0
625	9	0	0	0	0	0	0	200	300	0	0	0	0	0	0	0	200	903	0	0	0	0	0	0	0	603	903	0
626	0	0	0	0	0	0	0	200	300	0	0	0	0	0	0	0	200	903	0	0	0	0	0	0	0	603	903	0
626	1	0	0	0	0	0	0	200	300	0	0	0	0	0	0	0	200	903	0	0	0	0	0	0	0	603	903	0
626	2	0	0	0	0	0	0	200	300	0	0	0	0	0	0	0	200	903	0	0	0	0	0	0	0	603	903	0
626	3	0	0	0	0	0	0	200	300	0	0	0	0	0	0	0	200	903	0	0	0	0	0	0	0	603	903	0
626	4	0	0	0	0	0	0	200	300	0	0	0	0	0	0	0	200	903	0	0	0	0	0	0	0	603	903	0
626	5	0	0	0	0	0	0	200	300	0	0	0	0	0	0	0	200	903	0	0	0	0	0	0	0	603	903	0
626	6	0	0	0	0	0	0	200	300	0	0	0	0	0	0	0	200	903	0	0	0	0	0	0	0	603	903	0
626	7	0	0	0	0	0	0	200	300	0	0	0	0	0	0	0	200	903	0	0	0	0	0	0	0	603	903	0
626	8	0	0	0	0	0	0	200	300	0	0	0	0	0	0	0	200	903	0	0	0	0	0	0	0	603	903	0
626	9	0	0	0	0	0	0	200	300	0	0	0	0	0	0	0	200	903	0	0	0	0	0	0	0	603	903	0
627	0	0	0	0	0	0	0	200	300	0	0	0	0	0	0	0	200	903	0	0	0	0	0	0	0	603	903	0
627	1	0	0	0	0	0	0	200	300	0	0	0	0	0	0	0	200	903	0	0	0	0	0	0	0	603	903	0
627	2	0	0	0	0	0	0	200	300	0	0	0	0	0	0	0	200	903	0	0	0	0	0	0	0	603	903	0
627	3	0	0	0	0	0	0	200	300	0	0	0	0	0	0	0	200	903	0	0	0	0	0	0	0	603	903	0
627	4	0	0	0	0	0	0	200	300	0	0	0	0	0	0	0	200	903	0	0	0	0	0	0	0	603	903	0
627	5	0	0	0	0	0	0	200	300	0	0	0	0	0	0	0	200	903	0	0	0	0	0	0	0	603	903	0
627	6	0	0	0	0	0	0	200	300	0	0	0	0	0	0	0	200	903	0	0	0	0	0	0	0	603	903	0
627	7	0	0	0	0	0	0	200	300	0	0	0	0	0	0	0	200	903	0	0	0	0	0	0	0	603	903	0
627	8	0	0	0	0	0	0	200	300	0	0	0	0	0	0	0	200	903	0	0	0	0	0	0	0	603	903	0
627	9	0	0	0	0	0	0	200	300	0	0	0	0	0	0	0	200	903	0	0	0	0	0	0	0	603	903	0
628	0	0	0	0	0	0	0	200	300	0	0	0	0	0	0	0	200	903	0	0	0	0	0	0	0	603	903	0
628	1	0	0	0	0	0	0	200	300	0	0	0	0	0	0	0	200	903	0	0	0	0	0	0	0	603	903	0
628	2	0	0	0	0	0	0	200	300	0	0	0	0	0	0	0	200	903	0	0	0	0	0	0	0	603	903	0
628	3	0	0	0	0	0	0	200	300	0	0	0	0	0	0	0	200	903	0	0	0	0	0	0	0	603	903	0
628	4	0	0	0	0	0	0	200	300	0	0	0	0	0	0	0	200	903	0	0	0	0	0	0	0	603	903	0
628	5	0	0	0	0	0	0	200	300	0	0	0	0	0	0	0	200	903	0	0	0	0	0	0	0	603	903	0
628	6	0	0	0	0	0	0	200	300	0	0	0	0	0	0	0	200	903	0	0	0	0	0	0	0	603	903	0
628	7	0	0	0	0	0	0	200	300	0	0	0	0	0	0	0	200	903	0	0	0	0	0	0	0	603	903	0
628	8	0	0	0	0	0	0	200	300	0	0	0	0	0	0	0	200	903	0	0	0	0	0	0	0	603	903	0
628	9	0	0	0	0	0	0	200	300	0	0	0	0	0	0	0	200	903	0	0	0	0	0	0	0	603	903	0
629	0	0	0	0	0	0	0	200	300	0	0	0	0	0	0	0	200	903	0	0	0	0	0	0	0	603	903	0
629	1	0	0	0	0	0	0	200	300	0	0	0	0	0	0	0	200	903	0	0	0	0	0	0	0	603	903	0
629	2	0	0	0	0	0	0	200	300	0	0	0	0	0	0	0	200	903	0	0	0	0	0	0	0	603	903	0
629	3	0	0	0	0	0	0	200	300	0	0	0	0	0	0	0	200	903	0	0	0	0	0	0	0	603	903	0
629	4	0	0	0	0	0	0	200	300	0	0	0	0	0	0	0	200	903	0	0	0	0	0	0	0	603	903	0
629	5	0	0	0	0	0	0	200	300	0	0	0	0	0	0	0	200	903	0	0	0	0	0	0	0	603	903	0
629	6	0	0	0	0	0	0	200	300	0	0	0	0	0	0	0	200	903	0	0	0	0	0	0	0	603	903	0
629	7	0	0	0	0	0	0	200	300	0	0	0	0	0	0	0	200	903	0	0	0	0	0	0	0	603	903	0
629	8	0	0	0	0	0	0	200	300	0	0	0	0	0	0	0	200	903	0	0	0	0	0	0	0	603	903	0
629	9	0	0	0	0	0	0	200	300	0	0	0	0	0	0	0	200	903	0	0	0	0	0	0	0	603	903	0
630	0	0	0	0	0	0	0	200	300	0	0	0	0	0	0	0	200	903	0	0	0	0	0	0	0	603	903	0
630	1	0	0	0	0	0	0	200	300	0	0	0	0	0	0	0	200	903	0	0	0	0	0	0	0	603	903	0
630	2	0	0	0	0	0	0	200	300	0	0	0	0	0	0	0	200	903	0	0	0	0	0	0	0	603	903	0
630	3	0	0	0	0	0	0	200	300	0	0	0	0	0	0	0	200	903	0	0	0	0	0	0	0	603	903	0
630	4	0	0	0	0	0	0	200	300	0	0	0	0	0	0	0	200	903	0	0	0	0	0	0	0	603	903	0
630	5	0	0	0	0	0	0	200	300	0	0	0	0	0	0	0	200	903	0	0	0	0	0	0	0	603	903	0
630	6	0	0	0	0	0	0	200	300	0	0	0	0	0	0	0	200	903	0	0	0	0	0	0	0	603	903	0
630	7	0	0	0	0	0	0	200	300	0	0	0	0	0	0	0	200	903	0	0	0	0	0	0	0	603	903	0
630	8	0	0	0	0	0	0	200	300	0	0	0	0	0	0	0	200	903	0	0	0	0	0	0	0	603	903	0
630	9	0	0	0	0	0	0	200	300	0	0	0	0	0	0	0	200	903	0	0	0	0	0	0	0	603	903	0
631	0	0	0	0	0	0	0	200	300	0	0	0	0	0	0	0	200	903	0	0	0	0	0	0	0	603	903	0
631	1	0	0	0	0	0	0	200	300	0	0	0	0	0	0	0	200	903	0	0	0	0	0	0	0	603	903	0
631	2	0	0	0	0	0	0	200	300	0	0	0	0	0	0	0	200	903	0	0	0	0	0	0	0	603	903	0
631	3	0	0	0	0	0	0	200	300	0	0	0	0	0	0	0	200	903	0	0	0	0	0	0	0	603	903	0
631	4	0	0	0	0	0	0	200	300	0	0	0	0	0	0	0	200	903	0	0	0	0	0	0	0	603	903	0
631	5	0	0	0	0	0	0	200	300	0	0	0	0	0	0	0	200	903	0	0	0	0	0	0	0	603	903	0
631	6	0	0	0	0	0	0	200	300	0	0	0	0	0	0	0	200	903	0	0	0	0	0	0	0	603	903	0
631	7	0	0	0	0	0	0	200	300	0	0	0	0	0	0	0	200	903	0	0	0	0	0	0	0	603	903	0
631	8	0	0	0	0	0	0	200	300	0	0	0	0	0	0	0	200	903	0	0	0	0	0	0	0	603	903	0
631	9	0	0	0	0	0	0	200	300	0	0	0	0	0	0	0	200	903	0	0	0	0	0	0	0	603	903	0
632	0	0	0	0	0	0	0	200	300	0	0	0	0	0	0	0	200	903	0	0	0	0	0	0	0	603	903	0
632	1	0	0	0	0	0	0	200	300	0	0	0	0	0	0	0	200	903	0	0	0	0	0	0	0	603	903	0
632	2	0	0	0	0	0	0	200	300	0	0	0	0	0	0	0	200	903	0	0	0	0	0	0	0	603	903	0
632	3	0	0	0	0	0	0	200	300	0	0	0	0	0	0	0	200	903	0	0	0	0	0	0	0	603	903	0
632	4	0	0	0	0	0	0	200	300	0	0	0	0	0	0	0	200	903	0	0	0	0	0	0	0	603	903	0
632	5	0	0	0	0	0	0	200	300	0	0	0	0	0	0	0	200	903	0	0	0	0	0	0	0	603	903	0
632	6	0	0	0	0	0	0	200	300	0	0	0	0	0	0	0	200	903	0	0	0	0	0	0	0	603	903	0
632	7	0	0	0	0	0	0	200	300	0	0	0	0	0	0	0	200	903	0	0	0	0	0	0	0	603	903	0
632	8	0	0	0	0	0	0	200	300	0	0	0	0	0	0	0	200	903	0	0	0	0	0	0	0	603	903	0
632	9	0	0	0	0	0	0	200	300	0	0	0	0	0	0	0	200	903	0	0	0	0	0	0	0	603	903	0
633	0	0	0	0	0	0	0	200	300	0	0	0	0	0	0	0	200	903	0	0	0	0	0	0	0	603	903	0
633	1	0	0	0	0	0	0	200	300	0	0	0	0	0	0	0	200	903	0	0	0	0	0	0	0	603	903	0
633	2	0	0	0	0	0	0	200	300	0	0	0	0	0	0	0	200	903	0	0	0	0	0	0	0	603	903	0
633	3	0	0	0	0	0	0	200	300	0	0	0	0	0	0	0	200	903	0	0	0	0	0	0	0	603	903	0
633	4	0	0	0	0	0	0	200	300	0	0	0	0	0	0	0	200	903	0	0	0	0	0	0	0	603	903	0
633	5	0	0	0	0	0	0	200	300	0	0	0	0	0	0	0	200	903	0	0	0	0	0	0	0	603	903	0
633	6	0	0	0	0	0	0	200	300	0	0	0	0	0	0	0	200	903	0	0	0	0	0	0	0	603	903	0
633	7	0	0	0	0	0	0	200	300	0	0	0	0	0	0	0	200	903	0	0	0	0	0	0	0	603	903	0
633	8	0	0	0	0	0	0	200	300	0	0	0	0	0	0	0	200	903	0	0	0	0	0	0	0	603	903	0
633	9	0	0	0	0	0	0	200	300	0	0	0	0	0	0	0	200	903	0	0	0	0	0	0	0	603	903	0
634	0	0	0	0	0	0	0	200	300	0	0	0	0	0	0	0	200	903	0	0	0	0	0	0	0	603	903	0
634	1	0	0	0	0	0	0	200	300	0	0	0	0	0	0	0	200	903	0	0	0	0	0	0	0	603	903	0
634	2	0	0	0	0	0	0	200	300	0	0	0	0	0	0	0	200	903	0	0	0	0	0	0	0	603	903	0
634	3	0	0	0	0	0	0	200	300	0	0	0	0	0	0	0	200	903	0	0	0	0	0	0	0	603	903	0
634	4	0	0	0	0	0	0	200	300	0	0	0	0	0	0	0	200	903	0	0	0	0	0	0	0	603	903	0
634	5	0	0	0	0	0	0	200	300	0	0	0	0	0	0	0	200	903	0	0	0	0	0	0	0	603	903	0
634	6	0	0	0	0	0	0	200	300	0	0	0	0	0	0	0	200	903	0	0	0	0	0	0	0	603	903	0
634	7	0	0	0	0	0	0	200	300	0	0	0	0	0	0	0	200	903	0	0	0	0	0	0	0	603	903	0
634	8	0	0	0	0	0	0	200	300	0	0	0	0	0	0	0	200	903	0	0	0	0	0	0	0	603	903	0
634	9	0	0	0	0	0	0	200	300	0	0	0	0	0	0	0	200	903	0	0	0	0	0	0	0	603	903	0
635	0	0	0	0	0	0	0	200	300	0	0	0	0	0	0	0	200	903	0	0	0	0	0	0	0	603	903	0
635	1	0	0	0	0	0	0	200	300	0	0	0	0	0	0	0	200	903	0	0	0	0	0	0	0	603	903	0
635	2	0	0	0	0	0	0	200	300	0	0	0	0	0	0	0	200	903	0	0	0	0	0	0	0	603	903	0
635	3	0	0	0	0	0	0	200	300	0	0	0	0	0	0	0	200	903	0	0	0	0	0	0	0	603	903	0
635	4	0	0	0	0	0	0	200	300	0	0	0	0	0	0	0	200	903	0	0	0	0	0	0	0	603	903	0
635	5	0	0	0	0	0	0	200	300	0	0	0	0	0	0	0	200	903	0	0	0	0	0	0	0	603	903	0
635	6	0	0	0	0	0	0	200	300	0	0	0	0	0	0	0	200	903	0	0	0	0	0	0	0	603	903	0
635	7	0	0	0	0	0	0	200	300	0	0	0	0	0	0	0	200	903	0	0	0	0	0	0	0	603	903	0
635	8	0	0	0	0	0	0	200	300	0	0	0	0	0	0	0	200	903	0	0	0	0	0	0	0	603	903	0
635	9	0	0	0	0	0	0	200	300	0	0	0	0	0	0	0	200	903	0	0	0	0	0	0	0	603	903	0
636	0	0	0	0	0	0	0	200	300	0	0	0	0	0	0	0	200	903	0	0	0	0	0	0	0	603	903	0
636	1	0	0	0	0	0	0	200	300	0	0	0	0	0	0	0	200	903	0	0	0	0	0	0	0	603	903	0
636	2	0	0	0	0	0	0	200	300	0	0	0	0	0	0	0	200	903	0	0	0	0	0	0	0	603	903	0
636	3	0	0	0	0	0	0	200	300	0	0	0	0	0	0	0	200	903	0	0	0	0	0	0	0	603	903	0
636	4	0	0	0	0	0	0	200	300	0	0	0	0	0	0	0	200	903	0	0	0	0	0	0	0	603	903	0
636	5	0	0	0	0	0	0	200	300	0	0	0	0	0	0	0	200	903	0	0	0	0	0	0	0	603	903	0
636	6	0	0	0	0	0	0	200	300	0	0	0	0	0	0	0	200	903	0	0	0	0	0	0	0	603	903	0
636	7	0	0	0	0	0	0	200	300	0	0	0	0	0	0	0	200	903	0	0	0	0	0	0	0	603	903	0
636	8	0	0	0	0	0	0	200	300	0	0	0	0	0	0	0	200	903	0	0	0	0	0	0	0	603	903	0
636	9	0	0	0	0	0	0	200	300	0	0	0	0	0	0	0	200	903	0	0	0	0	0	0	0	603	903	0
637	0	0	0	0	0	0	0	200	300	0	0	0	0	0	0	0	200	903	0	0	0	0	0	0	0	603	903	0
637	1	0	0	0	0	0	0	200	300	0	0	0	0	0	0	0	200	903	0	0	0	0	0	0	0	603	903	0
637	2	0	0	0	0	0	0	200	300	0	0	0	0	0	0	0	200	903	0	0	0	0	0	0	0	603	903	0
637	3	0	0	0	0	0	0	200	300	0	0	0	0	0	0	0	200	903	0	0	0	0	0	0	0	603	903	0
637	4	0	0	0	0	0	0	200	300	0	0	0	0	0	0	0	200	903	0	0	0	0	0	0	0	603	903	0
637	5	0	0	0	0	0	0	200	300	0	0	0	0	0	0	0	200	903	0	0	0	0	0	0	0	603	903	0
637	6	0	0	0	0	0	0	200	300	0	0	0	0	0	0	0	200	903	0	0	0	0	0	0	0	603	903	0
637	7	0	0	0	0	0	0	200	300	0	0	0	0	0	0	0	200	903	0	0	0	0	0	0	0	603	903	0
637	8	0	0	0	0	0	0	200	300	0	0	0	0	0	0	0	200	903	0	0	0	0	0	0	0	603	903	0
637	9	0	0	0	0	0	0	200	300	0	0	0	0	0	0	0	200	903	0	0	0	0	0	0	0	603	903	0
638	0	0	0	0	0	0	0	200	300	0	0	0	0	0	0	0	200	903	0	0	0	0	0	0	0	603	903	0
638	1	0	0	0	0	0	0	200	300	0	0	0	0	0	0	0	200	903	0	0	0	0	0	0	0	603	903	0
638	2	0	0	0	0	0	0	200	300	0	0	0	0	0	0	0	200	903	0	0	0	0	0	0	0	603	903	0
638	3	0	0	0	0	0	0	200	300	0	0	0	0	0	0	0	200	903	0	0	0	0	0	0	0	603	903	0
638	4	0	0	0	0	0	0	200	300	0	0	0	0	0	0	0	200	903	0	0	0	0	0	0	0	603	903	0
638	5	0	0	0	0	0	0	200	300	0	0	0	0	0	0	0	200	903	0	0	0	0	0	0	0	603	903	0
638	6	0	0	0	0	0	0	200	300	0	0	0	0	0	0	0	200	903	0	0	0	0	0	0	0	603	903	0
638	7	0	0	0	0	0	0	200	300	0	0	0	0	0	0	0	200	903	0	0	0	0	0	0	0	603	903	0
638	8	0	0	0	0	0	0	200	300	0	0	0	0	0	0	0	200	903	0	0	0	0	0	0	0	603	903	0
638	9	0	0	0	0	0	0	200	300	0	0	0	0	0	0	0	200	903	0	0	0	0	0	0	0	603	903	0
639	0	0	0	0	0	0	0	200	300	0	0	0	0	0	0	0	200	903	0	0	0	0	0	0	0	603	903	0
639	1	0	0	0	0	0	0	200	300	0	0	0	0	0	0	0	200	903	0	0	0	0	0	0	0	603	903	0
639	2	0	0	0	0	0	0	200	300	0	0	0	0	0	0	0	200	903	0	0	0	0	0	0	0	603	903	0
639	3	0	0	0	0	0	0	200	300	0	0	0	0	0	0	0	200	903	0	0	0	0	0	0	0	603	903	0
639	4	0	0	0	0	0	0	200	300	0	0	0	0	0	0	0	200	903	0	0	0	0	0	0	0	603	903	0
639	5	0	0	0	0	0	0	200	300	0	0	0	0	0	0	0	200	903	0	0	0	0	0	0	0	603	903	0
639	6	0	0	0	0	0	0	200	300	0	0	0	0	0	0	0	200	903	0	0	0	0	0	0	0	603	903	0
639	7	0	0	0	0	0	0	200	300	0	0	0	0	0	0	0	200	903	0	0	0	0	0	0	0	603	903	0
639	8	0	0	0	0	0	0	200	300	0	0	0	0	0	0	0	200	903	0	0	0	0	0	0	0	603	903	0
639	9	0	0	0	0	0	0	200	300	0	0	0	0	0	0	0	200	903	0	0	0	0	0	0	0	603	903	0
640	0	0	0	0	0	0	0	200	300	0	0	0	0	0	0	0	200	903	0	0	0	0	0	0	0	603	903	0
640	1	0	0	0	0	0	0	200	300	0	0	0	0	0	0	0	200	903	0	0	0	0	0	0	0	603	903	0
640	2	0	0	0	0	0	0	200	300	0	0	0	0	0	0	0	200	903	0	0	0	0	0	0	0	603	903	0
640	3	0	0	0	0	0	0	200	300	0	0	0	0	0	0	0	200	903	0	0	0	0	0	0	0	603	903	0
640	4	0	0	0	0	0	0	200	300	0	0	0	0	0	0	0	200	903	0	0	0	0	0	0	0	603	903	0
640	5	0	0	0	0	0	0	200	300	0	0	0	0	0	0	0	200	903	0	0	0	0	0	0	0	603	903	0
640	6	0	0	0	0	0	0	200	300	0	0	0	0	0	0	0	200	903	0	0	0	0	0	0	0	603	903	0
640	7	0	0	0	0	0	0	200	300	0	0	0	0	0	0	0	200	903	0	0	0	0	0	0	0	603	903	0
640	8	0	0	0	0	0	0	200	300	0	0	0	0	0	0	0	200	903	0	0	0	0	0	0	0	603	903	0
640	9	0	0	0	0	0	0	200	300	0	0	0	0	0	0	0	200	903	0	0	0	0	0	0	0	603	903	0
641	0	0	0	0	0	0	0	200	300	0	0	0	0	0	0	0	200	903	0	0	0	0	0	0	0	603	903	0
641	1	0	0	0	0	0	0	200	300	0	0	0	0	0	0	0	200	903	0	0	0	0	0	0	0	603	903	0
641	2	0	0	0	0	0	0	200	300	0	0	0	0	0	0	0	200	903	0	0	0	0	0	0	0	603	903	0
641	3	0	0	0	0	0	0	200	300	0	0	0	0	0	0	0	200	903	0	0	0	0	0	0	0	603	903	0
641	4	0	0	0	0	0	0	200	300	0	0	0	0	0	0	0	200	903	0	0	0	0	0	0	0	603	903	0
641	5	0	0	0	0	0	0	200	300	0	0	0	0	0	0	0	200	903	0	0	0	0	0	0	0	603	903	0
641	6	0	0	0	0	0	0	200	300	0	0	0	0	0	0	0	200	903	0	0	0	0	0	0	0	603	903	0
641	7	0	0	0	0	0	0	200	300	0	0	0	0	0	0	0	200	903	0	0	0	0	0	0	0	603	903	0
641	8	0	0	0	0	0	0	200	300	0	0	0	0	0	0	0	200	903	0	0	0	0	0	0	0	603	903	0
641	9	0	0	0	0	0	0	200	300	0	0	0	0	0	0	0	200	903	0	0	0	0	0	0	0	603	903	0
642	0	0	0	0	0	0	0	200	300	0	0	0	0	0	0	0	200	903	0	0	0	0	0	0	0	603	903	0
642	1	0	0	0	0	0	0	200	300	0	0	0	0	0	0	0	200	903	0	0	0	0	0	0	0	603	903	0
642	2	0	0	0	0	0	0	200	300	0	0	0	0	0	0	0	200	903	0	0	0	0	0	0	0	603	903	0
642	3	0	0	0	0	0	0	200	300	0	0	0	0	0	0	0	200	903	0	0	0	0	0	0	0	603	903	0
642	4	0	0	0	0	0	0	200	300	0	0	0	0	0	0	0	200	903	0	0	0	0	0	0	0	603	903	0
642	5	0	0	0	0	0	0	200	300	0	0	0	0	0	0	0	200	903	0	0	0	0	0	0	0	603	903	0
642	6	0	0	0	0	0	0	200	300	0	0	0	0	0	0	0	200	903	0	0	0	0	0	0	0	603	903	0
642	7	0	0	0	0	0	0	200	300	0	0	0	0	0	0	0	200	903	0	0	0	0	0	0	0	603	903	0
642	8	0	0	0	0	0	0	200	300	0	0	0	0	0	0	0	200	903	0	0	0	0	0	0	0	603	903	0
642	9	0	0	0	0	0	0	200	300	0	0	0	0	0	0	0	200	903	0	0	0	0	0	0	0	603	903	0
643	0	0	0	0	0	0	0	200	300	0	0	0	0	0	0	0	200	903	0	0	0	0	0	0	0	603	903	0
643	1	0	0	0	0	0	0	200	300	0	0	0	0	0	0	0	200	903	0	0	0	0	0	0	0	603	903	0
643	2	0	0	0	0	0	0	200	300	0	0	0	0	0	0	0	200	903	0	0	0	0	0	0	0	603	903	0
643	3	0	0	0	0	0	0	200	300	0	0	0	0	0	0	0	200	903	0	0	0	0	0	0	0	603	903	0
643	4	0	0	0	0	0	0	200	300	0	0	0	0	0	0	0	200	903	0	0	0	0	0	0	0	603	903	0
643	5	0	0	0	0	0	0	200	300	0	0	0	0	0	0	0	200	903	0	0	0	0	0	0	0	603	903	0
643	6	0	0	0	0	0	0	200	300	0	0	0	0	0	0	0	200	903	0	0	0	0	0	0	0	603	903	0
643	7	0	0	0	0	0	0	200	300	0	0	0	0	0	0	0	200	903	0	0	0	0	0	0	0	603	903	0
643	8	0	0	0	0	0	0	200	300	0	0	0	0	0	0	0	200	903	0	0	0	0	0	0	0	603	903	0
643	9	0	0	0	0	0	0	200	300	0	0	0	0	0	0	0	200	903	0	0	0	0	0	0	0	603	903	0
644	0	0	0	0	0	0	0	200	300	0	0	0	0	0	0	0	200	903	0	0	0	0	0	0	0	603	903	0
644	1	0	0	0	0	0	0	200	300	0	0	0	0	0	0	0	200	903	0	0	0	0	0	0	0	603	903	0
644	2	0	0	0	0	0	0	200	300	0	0	0	0	0	0	0	200	903	0	0	0	0	0	0	0	603	903	0
644	3	0	0	0	0	0	0	200	300	0	0	0	0	0	0	0	200	903	0	0	0	0	0	0	0	603	903	0
644	4	0	0	0	0	0	0	200	300	0	0	0	0	0	0	0	200	903	0	0	0	0	0	0	0	603	903	0
644	5	0	0	0	0	0	0	200	300	0	0	0	0	0	0	0	200	903	0	0	0	0	0	0	0	603	903	0
644	6	0	0	0	0	0	0	200	300	0	0	0	0	0	0	0	200	903	0	0	0	0	0	0	0	603	903	0
644	7	0	0	0	0	0	0	200	300	0	0	0	0	0	0	0	200	903	0	0	0	0	0	0	0	603	903	0
644	8	0	0	0	0	0	0	200	300	0	0	0	0	0	0	0	200	903	0	0	0	0	0	0	0	603	903	0
644	9	0	0	0	0	0	0	200	300	0	0	0	0	0	0	0	200	903	0	0	0	0	0	0	0	603	903	0
645	0	0	0	0	0	0	0	200	300	0	0	0	0	0	0	0	200	903	0	0	0	0	0	0	0	603	903	0
645	1	0	0	0	0	0	0	200	300	0	0	0	0	0	0	0	200	903	0	0	0	0	0	0	0	603	903	0
645	2	0	0	0	0	0	0	200	300	0	0	0	0	0	0	0	200	903	0	0	0	0	0	0	0	603	903	0
645	3	0	0	0	0	0	0	200	300	0	0	0	0	0	0	0	200	903	0	0	0	0	0	0	0	603	903	0
645	4	0	0	0	0	0	0	200	300	0	0	0	0	0	0	0	200	903	0	0	0	0	0	0	0	603	903	0
645	5	0	0	0	0	0	0	200	300	0	0	0	0	0	0	0	200	903	0	0	0	0	0	0	0	603	903	0
645	6	0	0	0	0	0	0	200	300	0	0	0	0	0	0	0	200	903	0	0	0	0	0	0	0	603	903	0
645	7	0	0	0	0	0	0	200	300	0	0	0	0	0	0	0	200	903	0	0	0	0	0	0	0	603	903	0
645	8	0	0	0	0	0	0	200	300	0	0	0	0	0	0	0	200	903	0	0	0	0	0	0	0	603	903	0
645	9	0	0	0	0	0	0	200	300	0	0	0	0	0	0	0	200	903	0	0	0	0	0	0	0	603	903	0
646	0	0	0	0	0	0	0	200	300	0	0	0	0	0	0	0	200	903	0	0	0	0	0	0	0	603	903	0
646	1	0	0	0	0	0	0	200	300	0	0	0	0	0	0	0	200	903	0	0	0	0	0	0	0	603	903	0
646	2	0	0	0	0	0	0	200	300	0	0	0	0	0	0	0	200	903	0	0	0	0	0	0	0	603	903	0
646	3	0	0	0	0	0	0	200	300	0	0	0	0	0	0	0	200	903	0	0	0	0	0	0	0	603	903	0
646	4	0	0	0	0	0	0	200	300	0	0	0	0	0	0	0	200	903	0	0	0	0	0	0	0	603	903	0
646	5	0	0	0	0	0	0	200	300	0	0	0	0	0	0	0	200	903	0	0	0	0	0	0	0	603	903	0
646	6	0	0	0	0	0	0	200	300	0	0	0	0	0	0	0	200	903	0	0	0	0	0	0	0	603	903	0
646	7	0	0	0	0	0	0	200	300	0	0	0	0	0	0	0	200	903	0	0	0	0	0	0	0	603	903	0
646	8	0	0	0	0	0	0	200	300	0	0	0	0	0	0	0	200	903	0	0	0	0	0	0	0	603	903	0
646	9	0	0	0	0	0	0	200	300	0	0	0	0	0	0	0	200	903	0	0	0	0	0	0	0	603	903	0
647	0	0	0	0	0	0	0	200	300	0	0	0	0	0	0	0	200	903	0	0	0	0	0	0	0	603	903	0
647	1	0	0	0	0	0	0	200	300	0	0	0	0	0	0	0	200	903	0	0	0	0	0	0	0	603	903	0
647	2	0	0	0	0	0	0	200	300	0	0	0	0	0	0	0	200	903	0	0	0	0	0	0	0	603	903	0
647	3	0	0	0	0	0	0	200	300	0	0	0	0	0	0	0	200	903	0	0	0	0	0	0	0	603	903	0
647	4	0	0	0	0	0	0	200	300	0	0	0	0	0	0	0	200	903	0	0	0	0	0	0	0	603	903	0
647	5	0	0	0	0	0	0	200	300	0	0	0	0	0	0	0	200	903	0	0	0	0	0	0	0	603	903	0
647	6	0	0	0	0	0	0	200	300	0	0	0	0	0	0	0	200	903	0	0	0	0	0	0	0	603	903	0
647	7	0	0	0	0	0	0	200	300	0	0	0	0	0	0	0	200	903	0	0	0	0	0	0	0	603	903	0
647	8	0	0	0	0	0	0	200	300	0	0	0	0	0	0	0	200	903	0	0	0	0	0	0	0	603	903	0
647	9	0	0	0	0	0	0	200	300	0	0	0	0	0	0	0	200	903	0	0	0	0	0	0	0	603	903	0
648	0	0	0	0	0	0	0	200	300	0	0	0	0	0	0	0	200	903	0	0	0	0	0	0	0	603	903	0
648	1	0	0	0	0	0	0	200	300	0	0	0	0	0	0	0	200	903	0	0	0	0	0	0	0	603	903	0
648	2	0	0	0	0	0	0	200	300	0	0	0	0	0	0	0	200	903	0	0	0	0	0	0	0	603	903	0
648	3	0	0	0	0	0	0	200	300	0	0	0	0	0	0	0	200	903	0	0	0	0	0	0	0	603	903	0
648	4	0	0	0	0	0	0	200	300	0	0	0	0	0	0	0	200	903	0	0	0	0	0	0	0	603	903	0
648	5	0	0	0	0	0	0	200	300	0	0	0	0	0	0	0	200	903	0	0	0	0	0	0	0	603	903	0
648	6	0	0	0	0	0	0	200	300	0	0	0	0	0	0	0	200	903	0	0	0	0	0	0	0	603	903	0
648	7	0	0	0	0	0	0	200	300	0	0	0	0	0	0	0	200	903	0	0	0	0	0	0	0	603	903	0
648	8	0	0	0	0	0	0	200	300	0	0	0	0	0	0	0	200	903	0	0	0	0	0	0	0	603	903	0
648	9	0	0	0	0	0	0	200	300	0	0	0	0	0	0	0	200	903	0	0	0	0	0	0	0	603	903	0
649	0	0	0	0	0	0	0	200	300	0	0	0	0	0	0	0	200	903	0	0	0	0	0	0	0	603	903	0
649	1	0	0	0	0	0	0	200	300	0	0	0	0	0	0	0	200	903	0	0	0	0	0	0	0	603	903	0
649	2	0	0	0	0	0	0	200	300	0	0	0	0	0	0	0	200	903	0	0	0	0	0	0	0	603	903	0
649	3	0	0	0	0	0	0	200	300	0	0	0	0	0	0	0	200	903	0	0	0	0	0	0	0	603	903	0
649	4	0	0	0	0	0	0	200	300	0	0	0	0	0	0	0	200	903	0	0	0	0	0	0	0	603	903	0
649	5	0	0	0	0	0	0	200	300	0	0	0	0	0	0	0	200	903	0	0	0	0	0	0	0	603	903	0
649	6	0	0	0	0	0	0	200	300	0	0	0	0	0	0	0	200	903	0	0	0	0	0	0	0	603	903	0
649	7	0	0	0	0	0	0	200	300	0	0	0	0	0	0	0	200	903	0	0	0	0	0	0	0	603	903	0
649	8	0	0	0	0	0	0	200	300	0	0	0	0	0	0	0	200	903	0	0	0	0	0	0	0	603	903	0
649	9	0	0	0	0	0	0	200	300	0	0	0	0	0	0	0	200	903	0	0	0	0	0	0	0	603	903	0
650	0	0	0	0	0	0	0	200	300	0	0	0	0	0	0	0	200	903	0	0	0	0	0	0	0	603	903	0
650	1	0	0	0	0	0	0	200	300	0	0	0	0	0	0	0	200	903	0	0	0	0	0	0	0	603	903	0
650	2	0	0	0	0	0	0	200	300	0	0	0	0	0	0	0	200	903	0	0	0	0	0	0	0	603	903	0
650	3	0	0	0	0	0	0	200	300	0	0	0	0	0	0	0	200	903	0	0	0	0	0	0	0	603	903	0
650	4	0	0	0	0	0	0	200	300	0	0	0	0	0	0	0	200	903	0	0	0	0	0	0	0	603	903	0
650	5	0	0	0	0	0	0	200	300	0	0	0	0	0	0	0	200	903	0	0	0	0	0	0	0	603	903	0
650	6	0	0	0	0	0	0	200	300	0	0	0	0	0	0	0	200	903	0	0	0	0	0	0	0	603	903	0
650	7	0	0	0	0	0	0	200	300	0	0	0	0	0	0	0	200	903	0	0	0	0	0	0	0	603	903	0
650	8	0	0	0	0	0	0	200	300	0	0	0	0	0	0	0	200	903	0	0	0	0	0	0	0	603	903	0
650	9	0	0	0	0	0	0	200	300	0	0	0	0	0	0	0	200	903	0	0	0	0	0	0	0	603	903	0
651	0	0	0	0	0	0	0	200	300	0	0	0	0	0	0	0	200	903	0	0	0	0	0	0	0	603	903	0
651	1	0	0	0	0	0	0	200	300	0	0	0	0	0	0	0	200	903	0	0	0	0	0	0	0	603	903	0
651	2	0	0	0	0	0	0	200	300	0	0	0	0	0	0	0	200	903	0	0	0	0	0	0	0	603	903	0
651	3	0	0	0	0	0	0	200	300	0	0	0	0	0	0	0	200	903	0	0	0	0	0	0	0	603	903	0
651	4	0	0	0	0	0	0	200	300	0	0	0	0	0	0	0	200	903	0	0	0	0	0	0	0	603	903	0
651	5	0	0	0	0	0	0	200	300	0	0	0	0	0	0	0	200	903	0	0	0	0	0	0	0	603	903	0
651	6	0	0	0	0	0	0	200	300	0	0	0	0	0	0	0	200	903	0	0	0	0	0	0	0	603	903	0
651	7	0	0	0	0	0	0	200	300	0	0	0	0	0	0	0	200	903	0	0	0	0	0	0	0	603	903	0
651	8	0	0	0	0	0	0	200	300	0	0	0	0	0	0	0	200	903	0	0	0	0	0	0	0	603	903	0
651	9	0	0	0	0	0	0	200	300	0	0	0	0	0	0	0	200	903	0	0	0	0	0	0	0	603	903	0
652	0	0	0	0	0	0	0	200	300	0	0	0	0	0	0	0	200	903	0	0	0	0	0	0	0	603	903	0
652	1	0	0	0	0	0	0	200	300	0	0	0	0	0	0	0	200	903	0	0	0	0	0	0	0	603	903	0
652	2	0	0	0	0	0	0	200	300	0	0	0	0	0	0	0	200	903	0	0	0	0	0	0	0	603	903	0
652	3	0	0	0	0	0	0	200	300	0	0	0	0	0	0	0	200	903	0	0	0	0	0	0	0	603	903	0
652	4	0	0	0	0	0	0	200	300	0	0	0	0	0	0	0	200	903	0	0	0	0	0	0	0	603	903	0
652	5	0	0	0	0	0	0	200	300	0	0	0	0	0	0	0	200	903	0	0	0	0	0	0	0	603	903	0
652	6	0	0	0	0	0	0	200	300	0	0	0	0	0	0	0	200	903	0	0	0	0	0	0	0	603	903	0
652	7	0	0	0	0	0	0	200	300	0	0	0	0	0	0	0	200	903	0	0	0	0	0	0	0	603	903	0
652	8	0	0	0	0	0	0	200	300	0	0	0	0	0	0	0	200	903	0	0	0	0	0	0	0	603	903	0
652	9	0	0	0	0	0	0	200	300	0	0	0	0	0	0	0	200	903	0	0	0	0	0	0	0	603	903	0
653	0	0	0	0	0	0	0	200	300	0	0	0	0	0	0	0	200	903	0	0	0	0	0	0	0	603	903	0
653	1	0	0	0	0	0	0	200	300	0	0	0	0	0	0	0	200	903	0	0	0	0	0	0	0	603	903	0
653	2	0	0	0	0	0	0	200	300	0	0	0	0	0	0	0	200	903	0	0	0	0	0	0	0	603	903	0
653	3	0	0	0	0	0	0	200	300	0	0	0	0	0	0	0	200	903	0	0	0	0	0	0	0	603	903	0
653	4	0	0	0	0	0	0	200	300	0	0	0	0	0	0	0	200	903	0	0	0	0	0	0	0	603	903	0
653	5	0	0	0	0	0	0	200	300	0	0	0	0	0	0	0	200	903	0	0	0	0	0	0	0	603	903	0
653	6	0	0	0	0	0	0	200	300	0	0	0	0	0	0	0	200	903	0	0	0	0	0	0	0	603	903	0
653	7	0	0	0	0	0	0	200	300	0	0	0	0	0	0	0	200	903	0	0	0	0	0	0	0	603	903	0
653	8	0	0	0	0	0	0	200	300	0	0	0	0	0	0	0	200	903	0	0	0	0	0	0	0	603	903	0
653	9	0	0	0	0	0	0	200	300	0	0	0	0	0	0	0	200	903	0	0	0	0	0	0	0	603	903	0
654	0	0	0	0	0	0	0	200	300	0	0	0	0	0	0	0	200	903	0	0	0	0	0	0	0	603	903	0
654	1	0	0	0	0	0	0	200	300	0	0	0	0	0	0	0	200	903	0	0	0	0	0	0	0	603	903	0
654	2	0	0	0	0	0	0	200	300	0	0	0	0	0	0	0	200	903	0	0	0	0	0	0	0	603	903	0
654	3	0	0	0	0	0	0	200	300	0	0	0	0	0	0	0	200	903	0	0	0	0	0	0	0	603	903	0
654	4	0	0	0	0	0	0	200	300	0	0	0	0	0	0	0	200	903	0	0	0	0	0	0	0	603	903	0
654	5	0	0	0	0	0	0	200	300	0	0	0	0	0	0	0	200	903	0	0	0	0	0	0	0	603	903	0
654	6	0	0	0	0	0	0	200	300	0	0	0	0	0	0	0	200	903	0	0	0	0	0	0	0	603	903	0
654	7	0	0	0	0	0	0	200	300	0	0	0	0	0	0	0	200	903	0	0	0	0	0	0	0	603	903	0
654	8	0	0	0	0	0	0	200	300	0	0	0	0	0	0	0	200	903	0	0	0	0	0	0	0	603	903	0
654	9	0	0	0	0	0	0	200	300	0	0	0	0	0	0	0	200	903	0	0	0	0	0	0	0	603	903	0
655	0	0	0	0	0	0	0	200	300	0	0	0	0	0	0	0	200	903	0	0	0	0	0	0	0	603	903	0
655	1	0	0	0	0	0	0	200	300	0	0	0	0	0	0	0	200	903	0	0	0	0	0	0	0	603	903	0
655	2	0	0	0	0	0	0	200	300	0	0	0	0	0	0	0	200	903	0	0	0	0	0	0	0	603	903	0
655	3	0	0	0	0	0	0	200	300	0	0	0	0	0	0	0	200	903	0	0	0	0	0	0	0	603	903	0
655	4	0	0	0	0	0	0	200	300	0	0	0	0	0	0	0	200	903	0	0	0	0	0	0	0	603	903	0
655	5	0	0	0	0	0	0	200	300	0	0	0	0	0	0	0	200	903	0	0	0	0	0	0	0	603	903	0
655	6	0	0	0	0	0	0	200	300	0	0	0	0	0	0	0	200	903	0	0	0	0	0	0	0	603	903	0
655	7	0	0	0	0	0	0	200	300	0	0	0	0	0	0	0	200	903	0	0	0	0	0	0	0	603	903	0
655	8	0	0	0	0	0	0	200	300	0	0	0	0	0	0	0	200	903	0	0	0	0	0	0	0	603	903	0
655	9	0	0	0	0	0	0	200	300	0	0	0	0	0	0	0	200	903	0	0	0	0	0	0	0	603	903	0
656	0	0	0	0	0	0	0	200	300	0	0	0	0	0	0	0	200	903	0	0	0	0	0	0	0	603	903	0
656	1	0	0	0	0	0	0	200	300	0	0	0	0	0	0	0	200	903	0	0	0	0	0	0	0	603	903	0
656	2	0	0	0	0	0	0	200	300	0	0	0	0	0	0	0	200	903	0	0	0	0	0	0	0	603	903	0
656	3	0	0	0	0	0	0	200	300	0	0	0	0	0	0	0	200	903	0	0	0	0	0	0	0	603	903	0
656	4	0	0	0	0	0	0	200	300	0	0	0	0	0	0	0	200	903	0	0	0	0	0	0	0	603	903	0
656	5	0	0	0	0	0	0	200	300	0	0	0	0	0	0	0	200	903	0	0	0	0	0	0	0	603	903	0
656	6	0	0	0	0	0	0	200	300	0	0	0	0	0	0	0	200	903	0	0	0	0	0	0	0	603	903	0
656	7	0	0	0	0	0	0	200	300	0	0	0	0	0	0	0	200	903	0	0	0	0	0	0	0	603	903	0
656	8	0	0	0	0	0	0	200	300	0	0	0	0	0	0	0	200	903	0	0	0	0	0	0	0	603	903	0
656	9	0	0	0	0	0	0	200	300	0	0	0	0	0	0	0	200	903	0	0	0	0	0	0	0	603	903	0
657	0	0	0	0	0	0	0	200	300	0	0	0	0	0	0	0	200	903	0	0	0	0	0	0	0	603	903	0
657	1	0	0	0	0	0	0	200	300	0	0	0	0	0	0	0	200	903	0	0	0	0	0	0	0	603	903	0
657	2	0	0	0	0	0	0	200	300	0	0	0	0	0	0	0	200	903	0	0	0	0	0	0	0	603	903	0
657	3	0	0	0	0	0	0	200	300	0	0	0	0	0	0	0	200	903	0	0	0	0	0	0	0	603	903	0
657	4	0	0	0	0	0	0	200	300	0	0	0	0	0	0	0	200	903	0	0	0	0	0	0	0	603	903	0
657	5	0	0	0	0	0	0	200	300	0	0	0	0	0	0	0	200	903	0	0	0	0	0	0	0	603	903	0
657	6	0	0	0	0	0	0	200	300	0	0	0	0	0	0	0	200	903	0	0	0	0	0	0	0	603	903	0
657	7	0	0	0	0	0	0	200	300	0	0	0	0	0	0	0	200	903	0	0	0	0	0	0	0	603	903	0
657	8	0	0	0	0	0	0	200	300	0	0	0	0	0	0	0	200	903	0	0	0	0	0	0	0	603	903	0
657	9	0	0	0	0	0	0	200	300	0	0	0	0	0	0	0	200	903	0	0	0	0	0	0	0	603	903	0
658	0	0	0	0	0	0	0	200	300	0	0	0	0	0	0	0	200	903	0	0	0	0	0	0	0	603	903	0
658	1	0	0	0	0	0	0	200	300	0	0	0	0	0	0	0	200	903	0	0	0	0	0	0	0	603	903	0
658	2	0	0	0	0	0	0	200	300	0	0	0	0	0	0	0	200	903	0	0	0	0	0	0	0	603	903	0
658	3	0	0	0	0	0	0	200	300	0	0	0	0	0	0	0	200	903	0	0	0	0	0	0	0	603	903	0
658	4	0	0	0	0	0	0	200	300	0	0	0	0	0	0	0	200	903	0	0	0	0	0	0	0	603	903	0
658	5	0	0	0	0	0	0	200	300	0	0	0	0	0	0	0	200	903	0	0	0	0	0	0	0	603	903	0
658	6	0	0	0	0	0	0	200	300	0	0	0	0	0	0	0	200	903	0	0	0	0	0	0	0	603	903	0
658	7	0	0	0	0	0	0	200	300	0	0	0	0	0	0	0	200	903	0	0	0	0	0	0	0	603	903	0
658	8	0	0	0	0	0	0	200	300	0	0	0	0	0	0	0	200	903	0	0	0	0	0	0	0	603	903	0
658	9	0	0	0	0	0	0	200	300	0	0	0	0	0	0	0	200	903	0	0	0	0	0	0	0	603	903	0
659	0	0	0	0	0	0	0	200	300	0	0	0	0	0	0	0	200	903	0	0	0	0	0	0	0	603	903	0
659	1	0	0	0	0	0	0	200	300	0	0	0	0	0	0	0	200	903	0	0	0	0	0	0	0	603	903	0
659	2	0	0	0	0	0	0	200	300	0	0	0	0	0	0	0	200	903	0	0	0	0	0	0	0	603	903	0
659	3	0	0	0	0	0	0	200	300	0	0	0	0	0	0	0	200	903	0	0	0	0	0	0	0	603	903	0
659	4	0	0	0	0	0	0	200	300	0	0	0	0	0	0	0	200	903	0	0	0	0	0	0	0	603	903	0
659	5	0	0	0	0	0	0	200	300	0	0	0	0	0	0	0	200	903	0	0	0	0	0	0	0	603	903	0
659	6	0	0	0	0	0	0	200	300	0	0	0	0	0	0	0	200	903	0	0	0	0	0	0	0	603	903	0
659	7	0	0	0	0	0	0	200	300	0	0	0	0	0	0	0	200	903	0	0	0	0	0	0	0	603	903	0
659	8	0	0	0	0	0	0	200	300	0	0	0	0	0	0	0	200	903	0	0	0	0	0	0	0	603	903	0
659	9	0	0	0	0	0	0	200	300	0	0	0	0	0	0	0	200	903	0	0	0	0	0	0	0	603	903	0
660	0	0	0	0	0	0	0	200	300	0	0	0	0	0	0	0	200	903	0	0	0	0	0	0	0	603	903	0
660	1	0	0	0	0	0	0	200	300	0	0	0	0	0	0	0	200	903	0	0	0	0	0	0	0	603	903	0
660	2	0	0	0	0	0	0	200	300	0	0	0	0	0	0	0	200	903	0	0	0	0	0	0	0	603	903	0
660	3	0	0	0	0	0	0	200	300	0	0	0	0	0	0	0	200	903	0	0	0	0	0	0	0	603	903	0
660	4	0	0	0	0	0	0	200	300	0	0	0	0	0	0	0	200	903	0	0	0	0	0	0	0	603	903	0
660	5	0	0	0	0	0	0	200	300	0	0	0	0	0	0	0	200	903	0	0	0	0	0	0	0	603	903	0
660	6	0	0	0	0	0	0	200	300	0	0	0	0	0	0	0	200	903	0	0	0	0	0	0	0	603	903	0
660	7	0	0	0	0	0	0	200	300	0	0	0	0	0	0	0	200	903	0	0	0	0	0	0	0	603	903	0
660	8	0	0	0	0	0	0	200	300	0	0	0	0	0	0	0	200	903	0	0	0	0	0	0	0	603	903	0
660	9	0	0	0	0	0	0	200	300	0	0	0	0	0	0	0	200	903	0	0	0	0	0	0	0	603	903	0
661	0	0	0	0	0	0	0	200	300	0	0	0	0	0	0	0	200	903	0	0	0	0	0	0	0	603	903	0
661	1	0	0	0	0	0	0	200	300	0	0	0	0	0	0	0	200	903	0	0	0	0	0	0	0	603	903	0
661	2	0	0	0	0	0	0	200	300	0	0	0	0	0	0	0	200	903	0	0	0	0	0	0	0	603	903	0
661	3	0	0	0	0	0	0	200	300	0	0	0	0	0	0	0	200	903	0	0	0	0	0	0	0	603	903	0
661	4	0	0	0	0	0	0	200	300	0	0	0	0	0	0	0	200	903	0	0	0	0	0	0	0	603	903	0
661	5	0	0	0	0	0	0	200	300	0	0	0	0	0	0	0	200	903	0	0	0	0	0	0	0	603	903	0
661	6	0	0	0	0	0	0	200	300	0	0	0	0	0	0	0	200	903	0	0	0	0	0	0	0	603	903	0
661	7	0	0	0	0	0	0	200	300	0	0	0	0	0	0	0	200	903	0	0	0	0	0	0	0	603	903	0
661	8	0	0	0	0	0	0	200	300	0	0	0	0	0	0	0	200	903	0	0	0	0	0	0	0	603	903	0
661	9	0	0	0	0	0	0	200	300	0	0	0	0	0	0	0	200	903	0	0	0	0	0	0	0	603	903	0
662	0	0	0	0	0	0	0	200	300	0	0	0	0	0	0	0	200	903	0	0	0	0	0	0	0	603	903	0
662	1	0	0	0	0	0	0	200	300	0	0	0	0	0	0	0	200	903	0	0	0	0	0	0	0	603	903	0
662	2	0	0	0	0	0	0	200	300	0	0	0	0	0	0	0	200	903	0	0	0	0	0	0	0	603	903	0
662	3	0	0	0	0	0	0	200	300	0	0	0	0	0	0	0	200	903	0	0	0	0	0	0	0	603	903	0
662	4	0	0	0	0	0	0	200	300	0	0	0	0	0	0	0	200	903	0	0	0	0	0	0	0	603	903	0
662	5	0	0	0	0	0	0	200	300	0	0	0	0	0	0	0	200	903	0	0	0	0	0	0	0	603	903	0
662	6	0	0	0	0	0	0	200	300	0	0	0	0	0	0	0	200	903	0	0	0	0	0	0	0	603	903	0
662	7	0	0	0	0	0	0	200	300	0	0	0	0	0	0	0	200	903	0	0	0	0	0	0	0	603	903	0
662	8	0	0	0	0	0	0	200	300	0	0	0	0	0	0	0	200	903	0	0	0	0	0	0	0	603	903	0
662	9	0	0	0	0	0	0	200	300	0	0	0	0	0	0	0	200	903	0	0	0	0	0	0	0	603	903	0
663	0	0	0	0	0	0	0	200	300	0	0	0	0	0	0	0	200	903	0	0	0	0	0	0	0	603	903	0
663	1	0	0	0	0	0	0	200	300	0	0	0	0	0	0	0	200	903	0	0	0	0	0	0	0	603	903	0
663	2	0	0	0	0	0	0	200	300	0	0	0	0	0	0	0	200	903	0	0	0	0	0	0	0	603	903	0
663	3	0	0	0	0	0	0	200	300	0	0	0	0	0	0	0	200	903	0	0	0	0	0	0	0	603	903	0
663	4	0	0	0	0	0	0	200	300	0	0	0	0	0	0	0	200	903	0	0	0	0	0	0	0	603	903	0
663	5	0	0	0	0	0	0	200	300	0	0	0	0	0	0	0	200	903	0	0	0	0	0	0	0	603	903	0
663	6	0	0	0	0	0	0	200	300	0	0	0	0	0	0	0	200	903	0	0	0	0	0	0	0	603	903	0
663	7	0	0	0	0	0	0	200	300	0	0	0	0	0	0	0	200	903	0	0	0	0	0	0	0	603	903	0
663	8	0	0	0	0	0	0	200	300	0	0	0	0	0	0	0	200	903	0	0	0	0	0	0	0	603	903	0
663	9	0	0	0	0	0	0	200	300	0	0	0	0	0	0	0	200	903	0	0	0	0	0	0	0	603	903	0
664	0	0	0	0	0	0	0	200	300	0	0	0	0	0	0	0	200	903	0	0	0	0	0	0	0	603	903	0
664	1	0	0	0	0	0	0	200	300	0	0	0	0	0	0	0	200	903	0	0	0	0	0	0	0	603	903	0
664	2	0	0	0	0	0	0	200	300	0	0	0	0	0	0	0	200	903	0	0	0	0	0	0	0	603	903	0
664	3	0	0	0	0	0	0	200	300	0	0	0	0	0	0	0	200	903	0	0	0	0	0	0	0	603	903	0
664	4	0	0	0	0	0	0	200	300	0	0	0	0	0	0	0	200	903	0	0	0	0	0	0	0	603	903	0
664	5	0	0	0	0	0	0	200	300	0	0	0	0	0	0	0	200	903	0	0	0	0	0	0	0	603	903	0
664	6	0	0	0	0	0	0	200	300	0	0	0	0	0	0	0	200	903	0	0	0	0	0	0	0	603	903	0
664	7	0	0	0	0	0	0	200	300	0	0	0	0	0	0	0	200	903	0	0	0	0	0	0	0	603	903	0
664	8	0	0	0	0	0	0	200	300	0	0	0	0	0	0	0	200	903	0	0	0	0	0	0	0	603	903	0
664	9	0	0	0	0	0	0	200	300	0	0	0	0	0	0	0	200	903	0	0	0	0	0	0	0	603	903	0
665	0	0	0	0	0	0	0	200	300	0	0	0	0	0	0	0	200	903	0	0	0	0	0	0	0	603	903	0
665	1	0	0	0	0	0	0	200	300	0	0	0	0	0	0	0	200	903	0	0	0	0	0	0	0	603	903	0
665	2	0	0	0	0	0	0	200	300	0	0	0	0	0	0	0	200	903	0	0	0	0	0	0	0	603	903	0
665	3	0	0	0	0	0	0	200	300	0	0	0	0	0	0	0	200	903	0	0	0	0	0	0	0	603	903	0
665	4	0	0	0	0	0	0	200	300	0	0	0	0	0	0	0	200	903	0	0	0	0	0	0	0	603	903	0
665	5	0	0	0	0	0	0	200	300	0	0	0	0	0	0	0	200	903	0	0	0	0	0	0	0	603	903	0
665	6	0	0	0	0	0	0	200	300	0	0	0	0	0	0	0	200	903	0	0	0	0	0	0	0	603	903	0
665	7	0	0	0	0	0	0	200	300	0	0	0	0	0	0	0	200	903	0	0	0	0	0	0	0	603	903	0
665	8	0	0	0	0	0	0	200	300	0	0	0	0	0	0	0	200	903	0	0	0	0	0	0	0	603	903	0
665	9	0	0	0	0	0	0	200	300	0	0	0	0	0	0	0	200	903	0	0	0	0	0	0	0	603	903	0
666	0	0	0	0	0	0	0	200	300	0	0	0	0	0	0	0	200	903	0	0	0	0	0	0	0	603	903	0
666	1	0	0	0	0	0	0	200	300	0	0	0	0	0	0	0	200	903	0	0	0	0	0	0	0	603	903	0
666	2	0	0	0	0	0	0	200	300	0	0	0	0	0	0	0	200	903	0	0	0	0	0	0	0	603	903	0
666	3	0	0	0	0	0	0	200	300	0	0	0	0	0	0	0	200	903	0	0	0	0	0	0	0	603	903	0
666	4	0	0	0	0	0	0	200	300	0	0	0	0	0	0	0	200	903	0	0	0	0	0	0	0	603	903	0
666	5	0	0	0	0	0	0	200	300	0	0	0	0	0	0	0	200	903	0	0	0	0	0	0	0	603	903	0
666	6	0	0	0	0	0	0	200	300	0	0	0	0	0	0	0	200	903	0	0	0	0	0	0	0	603	903	0
666	7	0	0	0	0	0	0	200	300	0	0	0	0	0	0	0	200	903	0	0	0	0	0	0	0	603	903	0
666	8	0	0	0	0	0	0	200	300	0	0	0	0	0	0	0	200	903	0	0	0	0	0	0	0	603	903	0
666	9	0	0	0	0	0	0	200	300	0	0	0	0	0	0	0	200	903	0	0	0	0	0	0	0	603	903	0
667	0	0	0	0	0	0	0	200	300	0	0	0	0	0	0	0	200	903	0	0	0	0	0	0	0	603	903	0
667	1	0	0	0	0	0	0	200	300	0	0	0	0	0	0	0	200	903	0	0	0	0	0	0	0	603	903	0
667	2	0	0	0	0	0	0	200	300	0	0	0	0	0	0	0	200	903	0	0	0	0	0	0	0	603	903	0
667	3	0	0	0	0	0	0	200	300	0	0	0	0	0	0	0	200	903	0	0	0	0	0	0	0	603	903	0
667	4	0	0	0	0	0	0	200	300	0	0	0	0	0	0	0	200	903	0	0	0	0	0	0	0	603	903	0
667	5	0	0	0	0	0	0	200	300	0	0	0	0	0	0	0	200	903	0	0	0	0	0	0	0	603	903	0
667	6	0	0	0	0	0	0	200	300	0	0	0	0	0	0	0	200	903	0	0	0	0	0	0	0	603	903	0
667	7	0	0	0	0	0	0	200	300	0	0	0	0	0	0	0	200	903	0	0	0	0	0	0	0	603	903	0
667	8	0	0	0	0	0	0	200	300	0	0	0	0	0	0	0	200	903	0	0	0	0	0	0	0	603	903	0
667	9	0	0	0	0	0	0	200	300	0	0	0	0	0	0	0	200	903	0	0	0	0	0	0	0	603	903	0
668	0	0	0	0	0	0	0	200	300	0	0	0	0	0	0	0	200	903	0	0	0	0	0	0	0	603	903	0
668	1	0	0	0	0	0	0	200	300	0	0	0	0	0	0	0	200	903	0	0	0	0	0	0	0	603	903	0
668	2	0	0	0	0	0	0	200	300	0	0	0	0	0	0	0	200	903	0	0	0	0	0	0	0	603	903	0
668	3	0	0	0	0	0	0	200	300	0	0	0	0	0	0	0	200	903	0	0	0	0	0	0	0	603	903	0
668	4	0	0	0	0	0	0	200	300	0	0	0	0	0	0	0	200	903	0	0	0	0	0	0	0	603	903	0
668	5	0	0	0	0	0	0	200	300	0	0	0	0	0	0	0	200	903	0	0	0	0	0	0	0	603	903	0
668	6	0	0	0	0	0	0	200	300	0	0	0	0	0	0	0	200	903	0	0	0	0	0	0	0	603	903	0
668	7	0	0	0	0	0	0	200	300	0	0	0	0	0	0	0	200	903	0	0	0	0	0	0	0	603	903	0
668	8	0	0	0	0	0	0	200	300	0	0	0	0	0	0	0	200	903	0	0	0	0	0	0	0	603	903	0
668	9	0	0	0	0	0	0	200	300	0	0	0	0	0	0	0	200	903	0	0	0	0	0	0	0	603	903	0
669	0	0	0	0	0	0	0	200	300	0	0	0	0	0	0	0	200	903	0	0	0	0	0	0	0	603	903	0
669	1	0	0	0	0	0	0	200	300	0	0	0	0	0	0	0	200	903	0	0	0	0	0	0	0	603	903	0
669	2	0	0	0	0	0	0	200	300	0	0	0	0	0	0	0	200	903	0	0	0	0	0	0	0	603	903	0
669	3	0	0	0	0	0	0	200	300	0	0	0	0	0	0	0	200	903	0	0	0	0	0	0	0	603	903	0
669	4	0	0	0	0	0	0	200	300	0	0	0	0	0	0	0	200	903	0	0	0	0	0	0	0	603	903	0
669	5	0	0	0	0	0	0	200	300	0	0	0	0	0	0	0	200	903	0	0	0	0	0	0	0	603	903	0
669	6	0	0	0	0	0	0	200	300	0	0	0	0	0	0	0	200	903	0	0	0	0	0	0	0	603	903	0
669	7	0	0	0	0	0	0	200	300	0	0	0	0	0	0	0	200	903	0	0	0	0	0	0	0	603	903	0
669	8	0	0	0	0	0	0	200	300	0	0	0	0	0	0	0	200	903	0	0	0	0	0	0	0	603	903	0
669	9	0	0	0	0	0	0	200	300	0	0	0	0	0	0	0	200	903	0	0	0	0	0	0	0	603	903	0
670	0	0	0	0	0	0	0	200	300	0	0	0	0	0	0	0	200	903	0	0	0	0	0	0	0	603	903	0
670	1	0	0	0	0	0	0	200	300	0	6.02753	3.61069	-23.2431	-1391.05	370.166	32.5004	215.926	962.848	0	0	0	0	0	0	0	603	903	0
670	2	0	0	0	0	0	0	200	300	0	2.82318	6.35727	-25.0741	-1940.37	248.095	-59.0523	209.895	980.385	0	0	0	0	0	0	0	603	903	0
670	3	0	0	0	0	0	0	200	300	0	5.26459	5.28915	-27.2103	-2306.58	614.307	124.053	222.576	987.769	0	0	0	0	0	0	0	603	903	0
670	4	0	0	0	0	0	0	200	300	0	3.43353	7.57797	-32.3983	-1848.82	614.307	398.711	218.961	960.065	0	0	0	0	0	0	0	603	903	0
670	5	0	0	0	0	0	0	200	300	0	3.43353	10.7823	-39.1122	-2306.58	1041.55	169.83	226.63	961.973	0	0	0	0	0	0	0	603	903	0
670	6	0	0	0	0	0	0	200	300	0	2.67059	10.9349	-46.4364	-2306.58	370.166	32.5004	207.971	952.672	0	0	0	0	0	0	0	603	903	0
670	7	0	0	0	0	0	0	200	300	0	2.67059	10.4771	-47.3519	-2764.34	1285.69	444.488	227.152	961.379	0	0	0	0	0	0	0	603	903	0
670	8	0	0	0	0	0	0	200	300	0	3.12836	12.4608	-55.2865	-2672.79	1529.83	-196.381	227.671	951.344	0	0	0	0	0	0	0	603	903	0
670	9	0	0	0	0	0	0	200	300	0	4.50165	12.3082	-60.4745	-3039	1285.69	169.83	221.26	953.253	0	0	0	0	0	0	0	603	903	0
671	0	0	0	0	0	0	0	200	300	0	5.112	12.3082	-66.8832	-3130.56	1835.01	169.83	227.436	949.806	0	0	0	0	0	0	0	603	903	0
671	1	0	0	0	0	0	0	200	300	0	5.72235	14.2918	-74.2074	-3862.98	2201.22	-59.0523	229.663	955.057	0	0	0	0	0	0	0	603	903	0
671	2	0	0	0	0	0	0	200	300	0	7.70599	16.8858	-81.2265	-4229.19	2201.22	215.606	227.1	955.067	0	0	0	0	0	0	0	603	903	0
671	3	0	0	0	0	0	0	200	300	0	10.6052	14.4444	-85.1937	-4137.63	2445.36	261.382	228.704	951.567	0	0	0	0	0	0	0	603	903	0
671	4	0	0	0	0	0	0	200	300	0	9.68964	15.8177	-94.9594	-3954.53	2750.54	398.711	228.965	944.644	0	0	0	0	0	0	0	603	903	0
671	5	0	0	0	0	0	0	200	300	0	12.2836	18.1065	-103.199	-4412.29	3055.71	215.606	229.61	945.755	0	0	0	0	0	0	0	603	903	0
671	6	0	0	0	0	0	0	200	300	0	14.8776	17.8014	-111.439	-4412.29	3177.78	398.711	228.516	942.594	0	0	0	0	0	0	0	603	903	0
671	7	0	0	0	0	0	0	200	300	0	17.1664	14.597	-121.815	-4870.06	3849.17	307.159	231.599	942.979	0	0	0	0	0	0	0	603	903	0
671	8	0	0	0	0	0	0	200	300	0	18.082	15.0548	-127.613	-5144.72	3666.07	398.711	228.728	943.315	0	0	0	0	0	0	0	603	903	0
671	9	0	0	0	0	0	0	200	300	0	20.0656	14.7496	-135.548	-5236.27	4337.45	536.04	231.999	941.63	0	0	0	0	0	0	0	603	903	0
672	0	0	0	0	0	0	0	200	300	0	20.676	11.2401	-143.482	-4686.95	4825.73	261.382	233.633	935.666	0	0	0	0	0	0	0	603	903	0
672	1	0	0	0	0	0	0	200	300	0	25.5588	8.95126	-153.858	-5327.82	5069.88	352.935	232.952	937.628	0	0	0	0	0	0	0	603	903	0
672	2	0	0	0	0	0	0	200	300	0	22.507	8.4935	-160.267	-5510.93	5008.84	307.159	231.253	937.386	0	0	0	0	0	0	0	603	903	0
672	3	0	0	0	0	0	0	200	300	0	26.1691	5.59433	-166.981	-5510.93	5558.16	78.2768	233.286	936.003	0	0	0	0	0	0	0	603	903	0
672	4	0	0	0	0	0	0	200	300	0	25.864	2.54257	-172.779	-4778.5	5985.4	215.606	234.642	930.657	0	0	0	0	0	0	0	603	903	0
672	5	0	0	0	0	0	0	200	300	0	27.695	0.406342	-178.272	-5510.93	6046.44	398.711	233.917	933.913	0	0	0	0	0	0	0	603	903	0
672	6	0	0	0	0	0	0	200	300	0	26.9321	-1.5773	-187.428	-5419.37	6534.72	78.2768	234.865	931.914	0	0	0	0	0	0	0	603	903	0
672	7	0	0	0	0	0	0	200	300	0	29.0683	-6.15494	-193.226	-6060.24	6595.75	307.159	234.135	934.364	0	0	0	0	0	0	0	603	903	0
672	8	0	0	0	0	0	0	200	300	0	29.8312	-8.59634	-199.635	-5694.03	6778.86	32.5004	233.956	931.522	0	0	0	0	0	0	0	603	903	0
672	9	0	0	0	0	0	0	200	300	0	31.3571	-10.1222	-207.264	-5785.59	6900.93	215.606	233.295	930.914	0	0	0	0	0	0	0	603	903	0
673	0	0	0	0	0	0	0	200	300	0	32.2726	-13.7843	-214.893	-4870.06	7145.07	215.606	233.249	925.663	0	0	0	0	0	0	0	603	903	0
673	1	0	0	0	0	0	0	200	300	0	33.7985	-17.1413	-220.997	-5510.93	7328.18	352.935	233.16	927.937	0	0	0	0	0	0	0	603	903	0
673	2	0	0	0	0	0	0	200	300	0	34.8666	-20.193	-228.932	-4961.61	7694.39	-150.605	233.61	924.673	0	0	0	0	0	0	0	603	903	0
673	3	0	0	0	0	0	0	200	300	0	36.3925	-21.5663	-232.899	-5327.82	8182.67	-59.0523	235.134	925.876	0	0	0	0	0	0	0	603	903	0
673	4	0	0	0	0	0	0	200	300	0	37.1555	-25.2284	-239.308	-4870.06	8731.99	-104.829	236.489	923.351	0	0	0	0	0	0	0	603	903	0
673	5	0	0	0	0	0	0	200	300	0	40.665	-27.2121	-246.632	-5236.27	8304.74	-59.0523	233.673	924.231	0	0	0	0	0	0	0	603	903	0
673	6	0	0	0	0	0	0	200	300	0	38.8339	-28.8905	-252.735	-4686.95	8731.99	-333.711	234.55	921.545	0	0	0	0	0	0	0	603	903	0
673	7	0	0	0	0	0	0	200	300	0	42.0383	-32.0949	-259.144	-4870.06	8854.06	-287.934	234.167	921.793	0	0	0	0	0	0	0	603	903	0
673	8	0	0	0	0	0	0	200	300	0	41.1227	-35.1466	-264.027	-4412.29	8793.02	-516.816	233.304	919.712	0	0	0	0	0	0	0	603	903	0
673	9	0	0	0	0	0	0	200	300	0	41.7331	-37.2829	-273.792	-4503.85	9708.55	-242.158	235.46	919.45	0	0	0	0	0	0	0	603	903	0
674	0	0	0	0	0	0	0	200	300	0	42.6486	-39.5717	-276.234	-3771.42	9952.69	-562.593	236.03	916.653	0	0	0	0	0	0	0	603	903	0
674	1	0	0	0	0	0	0	200	300	0	43.5641	-42.9286	-286.915	-4229.19	9586.48	-562.593	233.412	917.74	0	0	0	0	0	0	0	603	903	0
674	2	0	0	0	0	0	0	200	300	0	42.1909	-45.5226	-291.493	-4503.85	10196.8	-745.698	234.981	918.451	0	0	0	0	0	0	0	603	903	0
674	3	0	0	0	0	0	0	200	300	0	42.8012	-46.7433	-297.901	-4412.29	10441	-791.474	235.048	917.811	0	0	0	0	0	0	0	603	903	0
674	4	0	0	0	0	0	0	200	300	0	41.1227	-48.8795	-307.057	-3771.42	10441	-745.698	234.003	915.283	0	0	0	0	0	0	0	603	903	0
674	5	0	0	0	0	0	0	200	300	0	42.496	-51.9313	-312.55	-3405.21	10318.9	-562.593	233.015	913.895	0	0	0	0	0	0	0	603	903	0
674	6	0	0	0	0	0	0	200	300	0	40.9702	-52.9994	-319.874	-3679.87	10502	-745.698	232.832	914.504	0	0	0	0	0	0	0	603	903	0
674	7	0	0	0	0	0	0	200	300	0	40.665	-54.3727	-326.588	-3496.77	10868.2	-883.027	233.278	913.707	0	0	0	0	0	0	0	603	903	0
674	8	0	0	0	0	0	0	200	300	0	40.5124	-56.6615	-336.353	-3313.66	10990.3	-1066.13	232.675	912.852	0	0	0	0	0	0	0	603	903	0
674	9	0	0	0	0	0	0	200	300	0	41.1227	-58.6452	-343.983	-3130.56	11417.5	-883.027	233.192	912.101	0	0	0	0	0	0	0	603	903	0
675	0	0	0	0	0	0	0	200	300	0	40.0546	-59.2555	-350.392	-2764.34	11661.7	-1249.24	233.282	910.889	0	0	0	0	0	0	0	603	903	0
675	1	0	0	0	0	0	0	200	300	0	40.665	-61.0866	-356.8	-3130.56	10868.2	-1340.79	230.46	911.774	0	0	0	0	0	0	0	603	903	0
675	2	0	0	0	0	0	0	200	300	0	40.9702	-62.765	-366.871	-2306.58	12150	-1066.13	233.118	909.287	0	0	0	0	0	0	0	603	903	0
675	3	0	0	0	0	0	0	200	300	0	38.5287	-64.5961	-374.5	-2123.47	12211	-1249.24	232.606	908.67	0	0	0	0	0	0	0	603	903	0
675	4	0	0	0	0	0	0	200	300	0	38.9865	-64.5961	-382.13	-1207.95	12150	-1432.34	231.795	906.161	0	0	0	0	0	0	0	603	903	0
675	5	0	0	0	0	0	0	200	300	0	38.2236	-65.8168	-387.623	-1848.82	12150	-1386.57	231.345	907.77	0	0	0	0	0	0	0	603	903	0
675	6	0	0	0	0	0	0	200	300	0	36.5451	-67.0375	-393.421	-1574.16	12272	-1752.78	231.193	907.001	0	0	0	0	0	0	0	603	903	0
675	7	0	0	0	0	0	0	200	300	0	36.0873	-67.6479	-402.271	-1116.39	12638.2	-1432.34	231.417	905.775	0	0	0	0	0	0	0	603	903	0
675	8	0	0	0	0	0	0	200	300	0	35.6296	-69.7841	-409.29	-1024.84	12760.3	-1661.23	231.177	905.504	0	0	0	0	0	0	0	603	903	0
675	9	0	0	0	0	0	0	200	300	0	35.477	-70.8522	-414.173	-383.972	13004.4	-1661.23	231.399	903.927	0	0	0	0	0	0	0	603	903	0
676	0	0	0	0	0	0	0	200	300	0	33.9511	-71.31	-419.666	-841.736	13248.6	-1661.23	231.569	905.006	0	0	0	0	0	0	0	603	903	0
676	1	0	0	0	0	0	0	200	300	0	35.0192	-70.547	-423.329	-475.525	12333.1	-1752.78	229.134	904.123	0	0	0	0	0	0	0	603	903	0
676	2	0	0	0	0	0	0	200	300	0	33.1882	-72.9884	-428.822	165.344	13309.6	-1890.11	231.038	902.615	0	0	0	0	0	0	0	603	903	0
676	3	0	0	0	0	0	0	200	300	0	32.2726	-75.2773	-436.146	256.897	13370.7	-1569.67	230.656	902.411	0	0	0	0	0	0	0	603	903	0
676	4	0	0	0	0	0	0	200	300	0	31.8149	-75.2773	-439.503	165.344	12882.4	-1615.45	229.311	902.624	0	0	0	0	0	0	0	603	903	0
676	5	0	0	0	0	0	0	200	300	0	29.8312	-75.2773	-442.86	623.108	13065.5	-1890.11	229.503	901.593	0	0	0	0	0	0	0	603	903	0
676	6	0	0	0	0	0	0	200	300	0	29.5261	-77.8712	-446.827	806.214	13614.8	-1798.55	230.47	901.196	0	0	0	0	0	0	0	603	903	0
676	7	0	0	0	0	0	0	200	300	0	29.6786	-78.7868	-451.405	1813.29	13126.5	-1478.12	229.079	898.983	0	0	0	0	0	0	0	603	903	0
676	8	0	0	0	0	0	0	200	300	0	28.0002	-80.3127	-454.151	1263.98	13431.7	-1844.33	229.575	900.217	0	0	0	0	0	0	0	603	903	0
676	9	0	0	0	0	0	0	200	300	0	27.3898	-81.2282	-457.203	1904.85	13675.8	-1707	229.912	898.834	0	0	0	0	0	0	0	603	903	0
677	0	0	0	0	0	0	0	200	300	0	26.6269	-82.1437	-459.95	1721.74	13492.7	-1661.23	229.335	899.257	0	0	0	0	0	0	0	603	903	0
677	1	0	0	0	0	0	0	200	300	0	27.5424	-83.6696	-462.696	2454.16	13187.6	-1569.67	228.502	897.696	0	0	0	0	0	0	0	603	903	0
677	2	0	0	0	0	0	0	200	300	0	27.3898	-84.2799	-460.56	2637.27	13736.9	-1569.67	229.826	897.274	0	0	0	0	0	0	0	603	903	0
677	3	0	0	0	0	0	0	200	300	0	25.101	-86.2636	-465.138	3644.35	13553.8	-1661.23	229.139	895.165	0	0	0	0	0	0	0	603	903	0
677	4	0	0	0	0	0	0	200	300	0	24.7958	-86.8739	-468.8	2637.27	13248.6	-1432.34	228.261	897.375	0	0	0	0	0	0	0	603	903	0
677	5	0	0	0	0	0	0	200	300	0	22.9648	-87.3317	-472.767	3735.9	13675.8	-1707	228.927	895.098	0	0	0	0	0	0	0	603	903	0
677	6	0	0	0	0	0	0	200	300	0	24.6432	-90.3835	-474.293	3919.01	13675.8	-1523.9	228.834	894.737	0	0	0	0	0	0	0	603	903	0
677	7	0	0	0	0	0	0	200	300	0	23.8803	-91.6042	-474.903	4193.66	13126.5	-1111.91	227.64	894.169	0	0	0	0	0	0	0	603	903	0
677	8	0	0	0	0	0	0	200	300	0	22.0493	-91.6042	-477.039	4010.56	13492.7	-1478.12	228.284	894.593	0	0	0	0	0	0	0	603	903	0
677	9	0	0	0	0	0	0	200	300	0	21.8967	-92.2145	-479.481	4651.43	13126.5	-1569.67	227.377	893.299	0	0	0	0	0	0	0	603	903	0
678	0	0	0	0	0	0	0	200	300	0	22.6596	-94.0456	-480.702	4742.98	13309.6	-1432.34	227.688	893.133	0	0	0	0	0	0	0	603	903	0
678	1	0	0	0	0	0	0	200	300	0	20.676	-95.1137	-482.227	5383.85	13431.7	-1340.79	227.853	891.836	0	0	0	0	0	0	0	603	903	0
678	2	0	0	0	0	0	0	200	300	0	19.7604	-95.4189	-479.481	5017.64	13553.8	-1295.01	228.268	892.535	0	0	0	0	0	0	0	603	903	0
678	3	0	0	0	0	0	0	200	300	0	19.913	-95.8766	-484.669	5750.06	13492.7	-1432.34	227.839	891.136	0	0	0	0	0	0	0	603	903	0
678	4	0	0	0	0	0	0	200	300	0	19.6078	-97.2499	-487.11	5841.62	12943.4	-1295.01	226.572	891.008	0	0	0	0	0	0	0	603	903	0
678	5	0	0	0	0	0	0	200	300	0	18.2346	-98.7758	-488.636	6482.48	13370.7	-1523.9	227.363	889.734	0	0	0	0	0	0	0	603	903	0
678	6	0	0	0	0	0	0	200	300	0	19.913	-99.8439	-488.331	5933.17	13614.8	-1020.36	227.88	890.85	0	0	0	0	0	0	0	603	903	0
678	7	0	0	0	0	0	0	200	300	0	15.9457	-100.454	-489.246	7031.8	13431.7	-1295.01	227.454	888.627	0	0	0	0	0	0	0	603	903	0
678	8	0	0	0	0	0	0	200	300	0	18.8449	-101.217	-491.078	6390.93	13736.9	-1203.46	227.973	889.986	0	0	0	0	0	0	0	603	903	0
678	9	0	0	0	0	0	0	200	300	0	14.1147	-102.133	-493.214	7306.46	13370.7	-1432.34	227.109	888.186	0	0	0	0	0	0	0	603	903	0
679	0	0	0	0	0	0	0	200	300	0	15.488	-101.675	-494.129	7214.91	13126.5	-1432.34	226.565	888.399	0	0	0	0	0	0	0	603	903	0
679	1	0	0	0	0	0	0	200	300	0	13.0466	-103.811	-494.434	7947.33	13248.6	-1478.12	226.795	886.926	0	0	0	0	0	0	0	603	903	0
679	2	0	0	0	0	0	0	200	300	0	13.5043	-104.269	-495.35	7947.33	12943.4	-1340.79	226.13	886.956	0	0	0	0	0	0	0	603	903	0
679	3	0	0	0	0	0	0	200	300	0	11.2155	-104.116	-497.791	8221.98	12821.3	-1615.45	225.756	886.483	0	0	0	0	0	0	0	603	903	0
679	4	0	0	0	0	0	0	200	300	0	9.38446	-105.947	-500.233	8313.54	12821.3	-1707	225.631	886.381	0	0	0	0	0	0	0	603	903	0
679	5	0	0	0	0	0	0	200	300	0	8.01117	-104.727	-501.759	8862.85	13126.5	-1798.55	226.161	885.336	0	0	0	0	0	0	0	603	903	0
679	6	0	0	0	0	0	0	200	300	0	8.16376	-107.321	-501.148	8862.85	13004.4	-1340.79	225.949	885.315	0	0	0	0	0	0	0	603	903	0
679	7	0	0	0	0	0	0	200	300	0	7.24823	-106.71	-500.843	9412.17	12150	-1752.78	224.259	884.207	0	0	0	0	0	0	0	603	903	0
679	8	0	0	0	0	0	0	200	300	0	5.41718	-107.016	-503.895	8954.41	12882.4	-1615.45	225.566	885.23	0	0	0	0	0	0	0	603	903	0
679	9	0	0	0	0	0	0	200	300	0	4.19647	-107.778	-505.421	10053	12821.3	-1844.33	225.368	883.11	0	0	0	0	0	0	0	603	903	0
680	0	0	0	0	0	0	0	200	300	0	4.34906	-108.389	-507.557	9869.93	12699.3	-1661.23	225.02	883.554	0	0	0	0	0	0	0	603	903	0
680	1	0	0	0	0	0	0	200	300	0	2.21283	-109.762	-507.862	10968.6	13004.4	-1752.78	225.606	881.402	0	0	0	0	0	0	0	603	903	0
680	2	0	0	0	0	0	0	200	300	0	0.229187	-108.999	-510.609	10236.1	12699.3	-1661.23	224.871	882.953	0	0	0	0	0	0	0	603	903	0
680	3	0	0	0	0	0	0	200	300	0	-0.838928	-109.152	-514.576	11243.2	12333.1	-1890.11	223.967	881.151	0	0	0	0	0	0	0	603	903	0
680	4	0	0	0	0	0	0	200	300	0	-0.381165	-110.525	-517.628	11701	12516.2	-1569.67	224.18	880.395	0	0	0	0	0	0	0	603	903	0
680	5	0	0	0	0	0	0	200	300	0	-2.97516	-112.051	-520.069	11701	12760.3	-1981.66	224.536	880.501	0	0	0	0	0	0	0	603	903	0
680	6	0	0	0	0	0	0	200	300	0	-6.02692	-112.509	-520.985	11701	12150	-1752.78	223.321	880.541	0	0	0	0	0	0	0	603	903	0
680	7	0	0	0	0	0	0	200	300	0	-6.78986	-114.035	-523.731	12525	12394.1	-1981.66	223.665	879.085	0	0	0	0	0	0	0	603	903	0
680	8	0	0	0	0	0	0	200	300	0	-6.33209	-114.645	-527.393	12525	12088.9	-2118.99	222.922	879.251	0	0	0	0	0	0	0	603	903	0
680	9	0	0	0	0	0	0	200	300	0	-7.40021	-116.781	-528.614	12891.2	12150	-2118.99	222.985	878.613	0	0	0	0	0	0	0	603	903	0
681	0	0	0	0	0	0	0	200	300	0	-9.23126	-118.46	-530.75	13257.4	12394.1	-2118.99	223.352	878.021	0	0	0	0	0	0	0	603	903	0
681	1	0	0	0	0	0	0	200	300	0	-10.6046	-118.765	-532.276	13898.3	12699.3	-1935.88	223.858	876.889	0	0	0	0	0	0	0	603	903	0
681	2	0	0	0	0	0	0	200	300	0	-8.7735	-118.612	-534.412	13806.7	12516.2	-1935.88	223.42	877.165	0	0	0	0	0	0	0	603	903	0
681	3	0	0	0	0	0	0	200	300	0	-10.1468	-119.528	-538.075	13898.3	12027.9	-2164.77	222.354	877.17	0	0	0	0	0	0	0	603	903	0
681	4	0	0	0	0	0	0	200	300	0	-11.8253	-121.817	-540.516	13898.3	12760.3	-1981.66	223.608	877.287	0	0	0	0	0	0	0	603	903	0
681	5	0	0	0	0	0	0	200	300	0	-11.3675	-121.511	-541.432	14630.7	12638.2	-1661.23	223.342	875.978	0	0	0	0	0	0	0	603	903	0
681	6	0	0	0	0	0	0	200	300	0	-11.3675	-121.054	-543.873	14813.8	12333.1	-1798.55	222.676	875.763	0	0	0	0	0	0	0	603	903	0
681	7	0	0	0	0	0	0	200	300	0	-11.5201	-121.054	-545.704	15180	12638.2	-1981.66	223.16	875.183	0	0	0	0	0	0	0	603	903	0
681	8	0	0	0	0	0	0	200	300	0	-12.1304	-121.969	-546.314	14905.3	12699.3	-1844.33	223.245	875.717	0	0	0	0	0	0	0	603	903	0
681	9	0	0	0	0	0	0	200	300	0	-12.8934	-118.46	-550.282	16004	12333.1	-1798.55	222.412	873.917	0	0	0	0	0	0	0	603	903	0
682	0	0	0	0	0	0	0	200	300	0	-11.9778	-120.748	-552.418	16187.1	12455.1	-1798.55	222.547	873.698	0	0	0	0	0	0	0	603	903	0
682	1	0	0	0	0	0	0	200	300	0	-12.5882	-120.138	-554.554	15637.8	13187.6	-1752.78	223.78	874.801	0	0	0	0	0	0	0	603	903	0
682	2	0	0	0	0	0	0	200	300	0	-12.8934	-119.833	-558.827	16278.6	12455.1	-1569.67	222.288	873.87	0	0	0	0	0	0	0	603	903	0
682	3	0	0	0	0	0	0	200	300	0	-11.2149	-119.833	-560.352	16553.3	12882.4	-1798.55	222.99	873.459	0	0	0	0	0	0	0	603	903	0
682	4	0	0	0	0	0	0	200	300	0	-12.5882	-119.986	-561.878	17011	12516.2	-1707	222.276	872.725	0	0	0	0	0	0	0	603	903	0
682	5	0	0	0	0	0	0	200	300	0	-14.2667	-119.528	-561.878	17011	12760.3	-1569.67	222.71	872.725	0	0	0	0	0	0	0	603	903	0
682	6	0	0	0	0	0	0	200	300	0	-14.4193	-119.68	-567.066	17468.8	12638.2	-1569.67	222.287	872.194	0	0	0	0	0	0	0	603	903	0
682	7	0	0	0	0	0	0	200	300	0	-13.046	-119.528	-568.897	18201.2	13065.5	-1569.67	222.966	871.006	0	0	0	0	0	0	0	603	903	0
682	8	0	0	0	0	0	0	200	300	0	-12.7408	-120.901	-571.949	17835	12882.4	-1432.34	222.524	871.817	0	0	0	0	0	0	0	603	903	0
682	9	0	0	0	0	0	0	200	300	0	-14.1141	-120.748	-574.391	18018.1	12577.2	-1707	221.897	871.631	0	0	0	0	0	0	0	603	903	0
683	0	0	0	0	0	0	0	200	300	0	-14.877	-119.223	-572.254	18475.9	13309.6	-1752.78	223.258	870.714	0	0	0	0	0	0	0	603	903	0
683	1	0	0	0	0	0	0	200	300	0	-12.4356	-120.138	-578.358	18750.5	13492.7	-1798.55	223.329	870.58	0	0	0	0	0	0	0	603	903	0
683	2	0	0	0	0	0	0	200	300	0	-14.5718	-119.833	-582.63	18567.4	12821.3	-1661.23	222.006	871.132	0	0	0	0	0	0	0	603	903	0
683	3	0	0	0	0	0	0	200	300	0	-14.2667	-120.901	-584.156	18842.1	13492.7	-1981.66	223.098	870.745	0	0	0	0	0	0	0	603	903	0
683	4	0	0	0	0	0	0	200	300	0	-16.2503	-120.596	-586.903	19299.9	13370.7	-1615.45	222.782	870.116	0	0	0	0	0	0	0	603	903	0
683	5	0	0	0	0	0	0	200	300	0	-15.4874	-120.596	-588.429	19757.6	13248.6	-1523.9	222.515	869.423	0	0	0	0	0	0	0	603	903	0
683	6	0	0	0	0	0	0	200	300	0	-15.3348	-119.528	-592.091	19574.5	13126.5	-1890.11	222.17	869.94	0	0	0	0	0	0	0	603	903	0
683	7	0	0	0	0	0	0	200	300	0	-17.6236	-119.375	-595.142	19483	13797.9	-1798.55	223.184	870.263	0	0	0	0	0	0	0	603	903	0
683	8	0	0	0	0	0	0	200	300	0	-16.8607	-119.986	-598.499	20490.1	13187.6	-1707	222.034	868.764	0	0	0	0	0	0	0	603	903	0
683	9	0	0	0	0	0	0	200	300	0	-16.5555	-120.291	-600.025	20398.5	13431.7	-1981.66	222.385	869.004	0	0	0	0	0	0	0	603	903	0
684	0	0	0	0	0	0	0	200	300	0	-16.0977	-118.765	-602.467	20581.6	14042	-1935.88	223.308	868.838	0	0	0	0	0	0	0	603	903	0
684	1	0	0	0	0	0	0	200	300	0	-16.0977	-118.765	-605.824	20581.6	13858.9	-2073.21	222.876	869.027	0	0	0	0	0	0	0	603	903	0
684	2	0	0	0	0	0	0	200	300	0	-16.5555	-118.002	-608.875	21405.6	13736.9	-1798.55	222.561	867.844	0	0	0	0	0	0	0	603	903	0
684	3	0	0	0	0	0	0	200	300	0	-15.7925	-118.917	-611.317	21314	13858.9	-1798.55	222.671	868.134	0	0	0	0	0	0	0	603	903	0
684	4	0	0	0	0	0	0	200	300	0	-16.5555	-118.002	-613.148	21588.7	13736.9	-1981.66	222.404	867.79	0	0	0	0	0	0	0	603	903	0
684	5	0	0	0	0	0	0	200	300	0	-17.1658	-116.934	-612.843	21588.7	13858.9	-1798.55	222.614	867.773	0	0	0	0	0	0	0	603	903	0
684	6	0	0	0	0	0	0	200	300	0	-15.4874	-116.476	-616.81	21680.2	14225.2	-1890.11	223.062	867.851	0	0	0	0	0	0	0	603	903	0
684	7	0	0	0	0	0	0	200	300	0	-15.0296	-115.56	-620.777	21588.7	14713.4	-1798.55	223.702	868.223	0	0	0	0	0	0	0	603	903	0
684	8	0	0	0	0	0	0	200	300	0	-16.7081	-115.866	-623.524	22321.1	13736.9	-1844.33	222.031	867.202	0	0	0	0	0	0	0	603	903	0
684	9	0	0	0	0	0	0	200	300	0	-15.4874	-115.713	-624.745	22412.7	15079.6	-1890.11	224.137	867.125	0	0	0	0	0	0	0	603	903	0
685	0	0	0	0	0	0	0	200	300	0	-14.2667	-114.187	-629.322	22778.9	14530.3	-1844.33	223.089	866.804	0	0	0	0	0	0	0	603	903	0
685	1	0	0	0	0	0	0	200	300	0	-13.5037	-112.356	-631.764	22412.7	14042	-1890.11	222.227	867.524	0	0	0	0	0	0	0	603	903	0
685	2	0	0	0	0	0	0	200	300	0	-14.7244	-112.509	-635.426	22687.3	14774.5	-1890.11	223.251	867.296	0	0	0	0	0	0	0	603	903	0
685	3	0	0	0	0	0	0	200	300	0	-13.6563	-113.424	-637.562	22778.9	14774.5	-1661.23	223.173	867.272	0	0	0	0	0	0	0	603	903	0
685	4	0	0	0	0	0	0	200	300	0	-10.452	-112.204	-639.088	23511.3	14713.4	-1707	223.023	866.211	0	0	0	0	0	0	0	603	903	0
685	5	0	0	0	0	0	0	200	300	0	-14.2667	-110.83	-641.529	23419.7	15445.9	-1844.33	224.077	866.494	0	0	0	0	0	0	0	603	903	0
685	6	0	0	0	0	0	0	200	300	0	-13.9615	-110.525	-644.886	23053.5	15140.7	-1935.88	223.478	867.252	0	0	0	0	0	0	0	603	903	0
685	7	0	0	0	0	0	0	200	300	0	-11.9778	-110.372	-644.886	23785.9	15140.7	-1981.66	223.478	866.116	0	0	0	0	0	0	0	603	903	0
685	8	0	0	0	0	0	0	200	300	0	-12.283	-108.084	-651.905	24335.3	15262.7	-2027.44	223.413	865.671	0	0	0	0	0	0	0	603	903	0
685	9	0	0	0	0	0	0	200	300	0	-12.4356	-109.762	-654.041	23694.4	15201.7	-1707	223.243	866.772	0	0	0	0	0	0	0	603	903	0
686	0	0	0	0	0	0	0	200	300	0	-12.4356	-107.321	-655.872	24518.4	15201.7	-2027.44	223.178	865.617	0	0	0	0	0	0	0	603	903	0
686	1	0	0	0	0	0	0	200	300	0	-11.0623	-107.168	-660.145	24335.3	15384.8	-1752.78	223.305	866.136	0	0	0	0	0	0	0	603	903	0
686	2	0	0	0	0	0	0	200	300	0	-11.5201	-107.626	-663.502	24060.6	15934.1	-1844.33	224.015	866.737	0	0	0	0	0	0	0	603	903	0
686	3	0	0	0	0	0	0	200	300	0	-12.4356	-107.321	-665.943	24243.7	15873.1	-1707	223.836	866.595	0	0	0	0	0	0	0	603	903	0
686	4	0	0	0	0	0	0	200	300	0	-12.283	-105.642	-665.638	25250.8	15995.2	-1707	224.03	865.065	0	0	0	0	0	0	0	603	903	0
686	5	0	0	0	0	0	0	200	300	0	-11.0623	-104.422	-670.826	24976.1	15934.1	-1569.67	223.753	865.768	0	0	0	0	0	0	0	603	903	0
686	6	0	0	0	0	0	0	200	300	0	-11.3675	-104.269	-673.573	25067.7	15934.1	-2073.21	223.656	865.784	0	0	0	0	0	0	0	603	903	0
686	7	0	0	0	0	0	0	200	300	0	-11.8253	-104.269	-677.235	25159.2	15934.1	-1890.11	223.528	865.85	0	0	0	0	0	0	0	603	903	0
686	8	0	0	0	0	0	0	200	300	0	-12.1304	-103.506	-678.455	26166.3	16178.3	-1844.33	223.846	864.432	0	0	0	0	0	0	0	603	903	0
686	9	0	0	0	0	0	0	200	300	0	-10.1468	-102.133	-682.423	26166.3	16239.3	-1844.33	223.797	864.657	0	0	0	0	0	0	0	603	903	0
687	0	0	0	0	0	0	0	200	300	0	-10.1468	-101.828	-685.474	25983.2	15812.1	-2073.21	223.067	865.095	0	0	0	0	0	0	0	603	903	0
687	1	0	0	0	0	0	0	200	300	0	-11.3675	-101.675	-689.747	25891.7	15995.2	-1981.66	223.19	865.462	0	0	0	0	0	0	0	603	903	0
687	2	0	0	0	0	0	0	200	300	0	-11.9778	-100.454	-690.968	26624.1	16605.5	-2027.44	224.032	864.468	0	0	0	0	0	0	0	603	903	0
687	3	0	0	0	0	0	0	200	300	0	-10.1468	-100.912	-694.63	26441	16605.5	-1890.11	223.906	864.935	0	0	0	0	0	0	0	603	903	0
687	4	0	0	0	0	0	0	200	300	0	-10.2994	-99.3861	-695.24	26715.6	16727.6	-2027.44	224.06	864.574	0	0	0	0	0	0	0	603	903	0
687	5	0	0	0	0	0	0	200	300	0	-10.2994	-98.9284	-698.597	26441	16849.7	-1752.78	224.119	865.151	0	0	0	0	0	0	0	603	903	0
687	6	0	0	0	0	0	0	200	300	0	-11.6727	-98.7758	-701.344	27356.5	17032.8	-2027.44	224.286	863.994	0	0	0	0	0	0	0	603	903	0
687	7	0	0	0	0	0	0	200	300	0	-9.9942	-98.4706	-702.87	27631.2	16849.7	-2118.99	223.973	863.688	0	0	0	0	0	0	0	603	903	0
687	8	0	0	0	0	0	0	200	300	0	-9.84161	-95.8766	-701.954	27814.3	17093.8	-2256.32	224.352	863.376	0	0	0	0	0	0	0	603	903	0
687	9	0	0	0	0	0	0	200	300	0	-9.9942	-96.9447	-707.142	27539.6	16605.5	-1935.88	223.483	864.055	0	0	0	0	0	0	0	603	903	0
688	0	0	0	0	0	0	0	200	300	0	-10.7571	-96.487	-709.583	28455.1	16483.4	-2118.99	223.23	862.899	0	0	0	0	0	0	0	603	903	0
688	1	0	0	0	0	0	0	200	300	0	-9.23126	-96.6396	-712.025	27905.8	16971.7	-2118.99	223.836	863.808	0	0	0	0	0	0	0	603	903	0
688	2	0	0	0	0	0	0	200	300	0	-9.68903	-96.6396	-713.245	28272	17460	-2073.21	224.48	863.361	0	0	0	0	0	0	0	603	903	0
688	3	0	0	0	0	0	0	200	300	0	-10.2994	-95.5714	-715.992	28729.8	17276.9	-1981.66	224.13	862.874	0	0	0	0	0	0	0	603	903	0
688	4	0	0	0	0	0	0	200	300	0	-10.2994	-94.8085	-716.908	29096	17032.8	-1890.11	223.759	862.415	0	0	0	0	0	0	0	603	903	0
688	5	0	0	0	0	0	0	200	300	0	-9.23126	-95.2663	-720.265	29004.5	17215.9	-2118.99	223.902	862.731	0	0	0	0	0	0	0	603	903	0
688	6	0	0	0	0	0	0	200	300	0	-8.92609	-94.0456	-722.706	29279.1	17521	-2164.77	224.244	862.487	0	0	0	0	0	0	0	603	903	0
688	7	0	0	0	0	0	0	200	300	0	-8.92609	-94.8085	-722.096	29462.2	17276.9	-2164.77	223.926	862.199	0	0	0	0	0	0	0	603	903	0
688	8	0	0	0	0	0	0	200	300	0	-9.84161	-93.7404	-724.537	30194.6	17765.2	-2256.32	224.519	861.326	0	0	0	0	0	0	0	603	903	0
688	9	0	0	0	0	0	0	200	300	0	-9.07867	-93.13	-725.453	30560.9	17582.1	-2210.54	224.236	860.873	0	0	0	0	0	0	0	603	903	0
689	0	0	0	0	0	0	0	200	300	0	-8.92609	-94.3507	-726.978	30377.8	17093.8	-2118.99	223.514	861.214	0	0	0	0	0	0	0	603	903	0
689	1	0	0	0	0	0	0	200	300	0	-9.68903	-93.893	-727.589	30469.3	17460	-2027.44	223.997	861.123	0	0	0	0	0	0	0	603	903	0
689	2	0	0	0	0	0	0	200	300	0	-9.9942	-92.8249	-728.504	30744	17826.2	-2027.44	224.47	860.799	0	0	0	0	0	0	0	603	903	0
689	3	0	0	0	0	0	0	200	300	0	-9.53644	-92.6723	-731.556	30927.1	17643.1	-2073.21	224.117	860.724	0	0	0	0	0	0	0	603	903	0
689	4	0	0	0	0	0	0	200	300	0	-8.92609	-92.9774	-731.556	30652.4	17582.1	-2210.54	224.034	861.1	0	0	0	0	0	0	0	603	903	0
689	5	0	0	0	0	0	0	200	300	0	-9.84161	-91.6042	-731.556	31567.9	17154.8	-2118.99	223.45	859.848	0	0	0	0	0	0	0	603	903	0
689	6	0	0	0	0	0	0	200	300	0	-10.2994	-91.4516	-731.251	31659.5	17704.1	-1935.88	224.211	859.705	0	0	0	0	0	0	0	603	903	0
689	7	0	0	0	0	0	0	200	300	0	-8.46832	-90.9938	-735.523	31751	17765.2	-1981.66	224.153	859.832	0	0	0	0	0	0	0	603	903	0
689	8	0	0	0	0	0	0	200	300	0	-9.9942	-91.1464	-734.608	31476.4	18314.5	-2256.32	224.931	860.152	0	0	0	0	0	0	0	603	903	0
689	9	0	0	0	0	0	0	200	300	0	-9.68903	-90.6886	-734.303	32117.2	17948.3	-2530.98	224.443	859.262	0	0	0	0	0	0	0	603	903	0
690	0	0	0	0	0	0	0	200	300	0	-11.0623	-90.2309	-735.828	32483.5	17704.1	-2302.1	224.06	858.855	0	0	0	0	0	0	0	603	903	0
690	1	0	0	0	0	0	0	200	300	0	-9.68903	-89.6205	-736.439	32758.1	18009.3	-1935.88	224.455	858.518	0	0	0	0	0	0	0	603	903	0
690	2	0	0	0	0	0	0	200	300	0	-11.2149	-90.0783	-737.049	32849.7	18192.4	-2118.99	224.683	858.431	0	0	0	0	0	0	0	603	903	0
690	3	0	0	0	0	0	0	200	300	0	-11.6727	-89.1628	-737.354	33032.8	17154.8	-2302.1	223.265	858.201	0	0	0	0	0	0	0	603	903	0
690	4	0	0	0	0	0	0	200	300	0	-12.1304	-90.6886	-737.049	33032.8	18253.5	-2073.21	224.766	858.182	0	0	0	0	0	0	0	603	903	0
690	5	0	0	0	0	0	0	200	300	0	-10.9097	-88.705	-737.354	34314.5	17948.3	-2210.54	224.341	856.463	0	0	0	0	0	0	0	603	903	0
690	6	0	0	0	0	0	0	200	300	0	-12.7408	-88.3998	-739.185	33307.4	18009.3	-2118.99	224.364	857.94	0	0	0	0	0	0	0	603	903	0
690	7	0	0	0	0	0	0	200	300	0	-12.283	-88.705	-739.185	33948.3	18009.3	-2027.44	224.364	857.073	0	0	0	0	0	0	0	603	903	0
690	8	0	0	0	0	0	0	200	300	0	-12.283	-88.5524	-737.66	34039.9	18009.3	-2210.54	224.414	856.854	0	0	0	0	0	0	0	603	903	0
690	9	0	0	0	0	0	0	200	300	0	-13.1985	-87.3317	-738.575	34223	17643.1	-2118.99	223.888	856.664	0	0	0	0	0	0	0	603	903	0
691	0	0	0	0	0	0	0	200	300	0	-14.1141	-87.1791	-738.575	34497.6	17826.2	-2118.99	224.136	856.292	0	0	0	0	0	0	0	603	903	0
691	1	0	0	0	0	0	0	200	300	0	-14.5718	-86.5688	-737.965	35321.6	17521	-2393.65	223.742	855.137	0	0	0	0	0	0	0	603	903	0
691	2	0	0	0	0	0	0	200	300	0	-14.4193	-87.6369	-739.185	35047	17704.1	-2164.77	223.951	855.587	0	0	0	0	0	0	0	603	903	0
691	3	0	0	0	0	0	0	200	300	0	-14.877	-86.8739	-738.27	35047	17643.1	-2302.1	223.898	855.528	0	0	0	0	0	0	0	603	903	0
691	4	0	0	0	0	0	0	200	300	0	-14.877	-86.5688	-737.66	35047	17704.1	-2485.2	224	855.489	0	0	0	0	0	0	0	603	903	0
691	5	0	0	0	0	0	0	200	300	0	-15.3348	-85.8058	-738.575	36420.2	17887.3	-2485.2	224.219	853.689	0	0	0	0	0	0	0	603	903	0
691	6	0	0	0	0	0	0	200	300	0	-15.1822	-87.0265	-737.965	35870.9	17093.8	-2347.87	223.163	854.392	0	0	0	0	0	0	0	603	903	0
691	7	0	0	0	0	0	0	200	300	0	-16.5555	-86.2636	-735.828	36145.6	17765.2	-2302.1	224.143	853.878	0	0	0	0	0	0	0	603	903	0
691	8	0	0	0	0	0	0	200	300	0	-16.7081	-85.3481	-736.134	36054	17704.1	-2668.31	224.05	854.023	0	0	0	0	0	0	0	603	903	0
691	9	0	0	0	0	0	0	200	300	0	-16.2503	-83.8222	-734.913	36603.3	17337.9	-2714.08	223.592	853.194	0	0	0	0	0	0	0	603	903	0
692	0	0	0	0	0	0	0	200	300	0	-17.471	-85.5006	-733.387	36694.9	17460	-2256.32	223.807	852.965	0	0	0	0	0	0	0	603	903	0
692	1	0	0	0	0	0	0	200	300	0	-17.7762	-84.2799	-736.744	36694.9	17460	-2576.75	223.699	853.193	0	0	0	0	0	0	0	603	903	0
692	2	0	0	0	0	0	0	200	300	0	-18.3865	-85.6532	-733.692	36878	17460	-2393.65	223.797	852.736	0	0	0	0	0	0	0	603	903	0
692	3	0	0	0	0	0	0	200	300	0	-17.6236	-83.8222	-733.082	37244.2	17704.1	-2576.75	224.15	852.195	0	0	0	0	0	0	0	603	903	0
692	4	0	0	0	0	0	0	200	300	0	-18.8443	-83.6696	-734.303	36878	17826.2	-2485.2	224.276	852.778	0	0	0	0	0	0	0	603	903	0
692	5	0	0	0	0	0	0	200	300	0	-19.7598	-83.2118	-733.387	37518.9	17337.9	-2393.65	223.641	851.842	0	0	0	0	0	0	0	603	903	0
692	6	0	0	0	0	0	0	200	300	0	-19.1495	-83.517	-731.556	37427.3	17154.8	-2256.32	223.45	851.839	0	0	0	0	0	0	0	603	903	0
692	7	0	0	0	0	0	0	200	300	0	-18.9969	-81.8385	-730.641	37885.1	17521	-2622.53	223.98	851.148	0	0	0	0	0	0	0	603	903	0
692	8	0	0	0	0	0	0	200	300	0	-18.9969	-81.9911	-731.861	37335.8	17154.8	-2576.75	223.44	851.985	0	0	0	0	0	0	0	603	903	0
692	9	0	0	0	0	0	0	200	300	0	-18.5391	-82.2963	-731.251	37702	17337.9	-2805.64	223.71	851.442	0	0	0	0	0	0	0	603	903	0
693	0	0	0	0	0	0	0	200	300	0	-17.471	-81.3808	-730.335	38068.2	17582.1	-2576.75	224.074	850.876	0	0	0	0	0	0	0	603	903	0
693	1	0	0	0	0	0	0	200	300	0	-19.9124	-80.6178	-728.504	38342.9	17460	-2714.08	223.967	850.368	0	0	0	0	0	0	0	603	903	0
693	2	0	0	0	0	0	0	200	300	0	-20.6754	-80.1601	-729.42	37976.6	17093.8	-2530.98	223.435	850.936	0	0	0	0	0	0	0	603	903	0
693	3	0	0	0	0	0	0	200	300	0	-19.7598	-80.3127	-728.809	38526	17399	-2759.86	223.873	850.139	0	0	0	0	0	0	0	603	903	0
693	4	0	0	0	0	0	0	200	300	0	-20.5228	-79.8549	-727.589	38709.1	17399	-2714.08	223.913	849.798	0	0	0	0	0	0	0	603	903	0
693	5	0	0	0	0	0	0	200	300	0	-21.7435	-79.8549	-726.673	38800.6	17154.8	-2714.08	223.607	849.605	0	0	0	0	0	0	0	603	903	0
693	6	0	0	0	0	0	0	200	300	0	-21.8961	-77.5661	-727.284	39258.4	16849.7	-2759.86	223.168	849.021	0	0	0	0	0	0	0	603	903	0
693	7	0	0	0	0	0	0	200	300	0	-22.0486	-78.329	-723.621	38709.1	16666.6	-2851.41	223.032	849.506	0	0	0	0	0	0	0	603	903	0
693	8	0	0	0	0	0	0	200	300	0	-21.1331	-78.329	-724.537	39716.1	16971.7	-2805.64	223.424	848.184	0	0	0	0	0	0	0	603	903	0
693	9	0	0	0	0	0	0	200	300	0	-21.8961	-79.7023	-724.232	39990.8	17215.9	-2714.08	223.771	847.782	0	0	0	0	0	0	0	603	903	0
694	0	0	0	0	0	0	0	200	300	0	-22.8116	-77.8712	-723.011	39624.6	17460	-2759.86	224.149	848.195	0	0	0	0	0	0	0	603	903	0
694	1	0	0	0	0	0	0	200	300	0	-22.9642	-76.8031	-722.096	39258.4	17215.9	-2759.86	223.842	848.633	0	0	0	0	0	0	0	603	903	0
694	2	0	0	0	0	0	0	200	300	0	-21.2857	-77.5661	-720.57	40265.4	16605.5	-2622.53	223.045	847.12	0	0	0	0	0	0	0	603	903	0
694	3	0	0	0	0	0	0	200	300	0	-22.0486	-77.2609	-719.654	39990.8	17399	-2942.96	224.177	847.431	0	0	0	0	0	0	0	603	903	0
694	4	0	0	0	0	0	0	200	300	0	-23.1168	-75.735	-719.349	39807.7	17093.8	-2988.74	223.763	847.662	0	0	0	0	0	0	0	603	903	0
694	5	0	0	0	0	0	0	200	300	0	-22.5064	-76.0402	-719.959	40265.4	16544.5	-2805.64	222.98	847.073	0	0	0	0	0	0	0	603	903	0
694	6	0	0	0	0	0	0	200	300	0	-21.5909	-75.8876	-718.433	40723.2	17032.8	-2988.74	223.708	846.317	0	0	0	0	0	0	0	603	903	0
694	7	0	0	0	0	0	0	200	300	0	-21.5909	-76.3454	-715.992	40540.1	17154.8	-3126.07	223.96	846.379	0	0	0	0	0	0	0	603	903	0
694	8	0	0	0	0	0	0	200	300	0	-22.3538	-75.2773	-713.551	40631.7	16910.7	-2805.64	223.699	846.057	0	0	0	0	0	0	0	603	903	0
694	9	0	0	0	0	0	0	200	300	0	-22.8116	-75.4298	-716.297	41181	17460	-2851.41	224.375	845.509	0	0	0	0	0	0	0	603	903	0
695	0	0	0	0	0	0	0	200	300	0	-21.7435	-74.6669	-715.992	41364.1	17032.8	-3080.29	223.789	845.228	0	0	0	0	0	0	0	603	903	0
695	1	0	0	0	0	0	0	200	300	0	-21.2857	-74.8195	-715.992	40631.7	17093.8	-3034.52	223.874	846.251	0	0	0	0	0	0	0	603	903	0
695	2	0	0	0	0	0	0	200	300	0	-22.3538	-74.5143	-714.771	41547.2	16971.7	-2851.41	223.744	844.873	0	0	0	0	0	0	0	603	903	0
695	3	0	0	0	0	0	0	200	300	0	-22.2012	-74.0565	-714.466	41455.6	17460	-3034.52	224.438	844.977	0	0	0	0	0	0	0	603	903	0
695	4	0	0	0	0	0	0	200	300	0	-20.8279	-73.141	-716.602	41913.4	16910.7	-3217.62	223.598	844.511	0	0	0	0	0	0	0	603	903	0
695	5	0	0	0	0	0	0	200	300	0	-21.5909	-73.141	-715.382	41547.2	17399	-2988.74	224.321	844.923	0	0	0	0	0	0	0	603	903	0
695	6	0	0	0	0	0	0	200	300	0	-20.2176	-72.2255	-712.94	41730.3	17032.8	-3263.4	223.891	844.467	0	0	0	0	0	0	0	603	903	0
695	7	0	0	0	0	0	0	200	300	0	-20.6754	-72.2255	-711.109	42188.1	17399	-3034.52	224.467	843.673	0	0	0	0	0	0	0	603	903	0
695	8	0	0	0	0	0	0	200	300	0	-18.9969	-71.31	-713.551	42737.4	17093.8	-2942.96	223.956	843.106	0	0	0	0	0	0	0	603	903	0
695	9	0	0	0	0	0	0	200	300	0	-21.2857	-70.8522	-714.161	42096.5	17337.9	-3126.07	224.277	844.055	0	0	0	0	0	0	0	603	903	0
696	0	0	0	0	0	0	0	200	300	0	-20.3702	-71.7677	-714.161	42188.1	17582.1	-3217.62	224.619	843.926	0	0	0	0	0	0	0	603	903	0
696	1	0	0	0	0	0	0	200	300	0	-20.2176	-70.8522	-713.551	42462.7	16971.7	-3217.62	223.785	843.491	0	0	0	0	0	0	0	603	903	0
696	2	0	0	0	0	0	0	200	300	0	-19.9124	-69.7841	-712.33	43836	17399	-2988.74	224.425	841.461	0	0	0	0	0	0	0	603	903	0
696	3	0	0	0	0	0	0	200	300	0	-20.2176	-69.6315	-714.161	42279.6	18009.3	-3126.07	225.217	843.798	0	0	0	0	0	0	0	603	903	0
696	4	0	0	0	0	0	0	200	300	0	-20.6754	-68.716	-713.245	43469.8	17276.9	-3126.07	224.223	842.054	0	0	0	0	0	0	0	603	903	0
696	5	0	0	0	0	0	0	200	300	0	-19.3021	-68.716	-711.72	43103.6	17215.9	-3080.29	224.189	842.437	0	0	0	0	0	0	0	603	903	0
696	6	0	0	0	0	0	0	200	300	0	-19.1495	-66.8849	-708.973	43012	17765.2	-3217.62	225.058	842.332	0	0	0	0	0	0	0	603	903	0
696	7	0	0	0	0	0	0	200	300	0	-20.065	-68.2582	-712.94	42920.5	17643.1	-2851.41	224.747	842.798	0	0	0	0	0	0	0	603	903	0
696	8	0	0	0	0	0	0	200	300	0	-19.1495	-66.7323	-712.33	44202.2	16666.6	-2942.96	223.397	840.947	0	0	0	0	0	0	0	603	903	0
696	9	0	0	0	0	0	0	200	300	0	-16.0977	-66.7323	-713.856	43744.4	17643.1	-3171.85	224.715	841.721	0	0	0	0	0	0	0	603	903	0
697	0	0	0	0	0	0	0	200	300	0	-19.1495	-66.2746	-712.025	43744.4	17399	-3171.85	224.436	841.563	0	0	0	0	0	0	0	603	903	0
697	1	0	0	0	0	0	0	200	300	0	-19.4547	-65.2065	-712.025	43836	17460	-2988.74	224.522	841.435	0	0	0	0	0	0	0	603	903	0
697	2	0	0	0	0	0	0	200	300	0	-18.2339	-64.7487	-711.109	44293.8	17582.1	-3263.4	224.725	840.712	0	0	0	0	0	0	0	603	903	0
697	3	0	0	0	0	0	0	200	300	0	-17.1658	-65.6642	-712.33	44019.1	17704.1	-2942.96	224.854	841.204	0	0	0	0	0	0	0	603	903	0
697	4	0	0	0	0	0	0	200	300	0	-17.9288	-63.8332	-710.804	44019.1	17276.9	-3080.29	224.306	841.071	0	0	0	0	0	0	0	603	903	0
697	5	0	0	0	0	0	0	200	300	0	-17.6236	-64.1383	-707.447	44019.1	17582.1	-3080.29	224.853	840.778	0	0	0	0	0	0	0	603	903	0
697	6	0	0	0	0	0	0	200	300	0	-16.7081	-63.528	-711.109	45300.9	17887.3	-3263.4	225.154	839.296	0	0	0	0	0	0	0	603	903	0
697	7	0	0	0	0	0	0	200	300	0	-16.7081	-63.2228	-712.635	45209.3	17337.9	-2942.96	224.329	839.56	0	0	0	0	0	0	0	603	903	0
697	8	0	0	0	0	0	0	200	300	0	-17.9288	-63.3754	-711.72	44843.1	17582.1	-3126.07	224.704	839.993	0	0	0	0	0	0	0	603	903	0
697	9	0	0	0	0	0	0	200	300	0	-17.0132	-63.528	-710.804	44751.5	17887.3	-2759.86	225.165	840.041	0	0	0	0	0	0	0	603	903	0
698	0	0	0	0	0	0	0	200	300	0	-15.64	-62.3073	-710.499	45484	17826.2	-3171.85	225.09	838.983	0	0	0	0	0	0	0	603	903	0
698	1	0	0	0	0	0	0	200	300	0	-15.3348	-61.3918	-711.109	45484	17582.1	-3171.85	224.725	839.038	0	0	0	0	0	0	0	603	903	0
698	2	0	0	0	0	0	0	200	300	0	-16.5555	-60.6288	-706.532	45758.6	18070.4	-3217.62	225.576	838.235	0	0	0	0	0	0	0	603	903	0
698	3	0	0	0	0	0	0	200	300	0	-14.877	-61.5443	-712.635	45941.7	17765.2	-2988.74	224.929	838.533	0	0	0	0	0	0	0	603	903	0
698	4	0	0	0	0	0	0	200	300	0	-14.4193	-61.0866	-708.363	45575.5	17521	-3309.18	224.735	838.661	0	0	0	0	0	0	0	603	903	0
698	5	0	0	0	0	0	0	200	300	0	-14.2667	-60.6288	-710.499	45300.9	17887.3	-3217.62	225.176	839.241	0	0	0	0	0	0	0	603	903	0
698	6	0	0	0	0	0	0	200	300	0	-15.1822	-59.8659	-711.72	45667.1	18131.4	-3354.95	225.475	838.836	0	0	0	0	0	0	0	603	903	0
698	7	0	0	0	0	0	0	200	300	0	-14.877	-59.7133	-711.414	45941.7	17826.2	-3126.07	225.057	838.422	0	0	0	0	0	0	0	603	903	0
698	8	0	0	0	0	0	0	200	300	0	-13.6563	-59.4081	-709.278	46491	18009.3	-3309.18	225.391	837.453	0	0	0	0	0	0	0	603	903	0
698	9	0	0	0	0	0	0	200	300	0	-12.8934	-58.4926	-711.109	45575.5	18070.4	-3171.85	225.412	838.909	0	0	0	0	0	0	0	603	903	0
699	0	0	0	0	0	0	0	200	300	0	-14.5718	-58.1874	-711.109	46399.5	18009.3	-3171.85	225.326	837.751	0	0	0	0	0	0	0	603	903	0
699	1	0	0	0	0	0	0	200	300	0	-14.1141	-58.1874	-712.635	46582.6	17948.3	-3263.4	225.186	837.633	0	0	0	0	0	0	0	603	903	0
699	2	0	0	0	0	0	0	200	300	0	-12.7408	-58.0348	-710.194	46399.5	18192.4	-3080.29	225.616	837.667	0	0	0	0	0	0	0	603	903	0
699	3	0	0	0	0	0	0	200	300	0	-13.046	-57.8822	-710.499	46216.4	17826.2	-2759.86	225.09	837.952	0	0	0	0	0	0	0	603	903	0
699	4	0	0	0	0	0	0	200	300	0	-11.6727	-57.7296	-708.973	46582.6	17704.1	-3446.5	224.972	837.296	0	0	0	0	0	0	0	603	903	0
699	5	0	0	0	0	0	0	200	300	0	-13.3511	-57.1193	-711.109	47040.3	18070.4	-3217.62	225.412	836.849	0	0	0	0	0	0	0	603	903	0
699	6	0	0	0	0	0	0	200	300	0	-10.9097	-56.6615	-709.278	47131.9	18131.4	-3400.73	225.563	836.549	0	0	0	0	0	0	0	603	903	0
699	7	0	0	0	0	0	0	200	300	0	-12.4356	-56.2038	-709.583	46765.7	17826.2	-3354.95	225.122	837.094	0	0	0	0	0	0	0	603	903	0
699	8	0	0	0	0	0	0	200	300	0	-11.6727	-55.1357	-708.057	46765.7	18314.5	-3446.5	225.866	836.952	0	0	0	0	0	0	0	603	903	0
699	9	0	0	0	0	0	0	200	300	0	-13.046	-55.1357	-708.363	47589.7	17948.3	-3263.4	225.338	835.817	0	0	0	0	0	0	0	603	903	0
700	0	0	0	0	0	0	0	200	300	0	-9.9942	-55.4408	-706.532	47681.2	18009.3	-3309.18	225.49	835.514	0	0	0	0	0	0	0	603	903	0
700	1	0	0	0	0	0	0	200	300	0	-11.9778	-53.7624	-708.363	47406.6	18009.3	-3309.18	225.424	836.076	0	0	0	0	0	0	0	603	903	0
700	2	0	0	0	0	0	0	200	300	0	-11.8253	-54.0675	-707.142	47131.9	18375.5	-3354.95	225.986	836.349	0	0	0	0	0	0	0	603	903	0
700	3	0	0	0	0	0	0	200	300	0	-12.8934	-52.5417	-707.447	47864.3	17765.2	-3492.28	225.112	835.342	0	0	0	0	0	0	0	603	903	0
700	4	0	0	0	0	0	0	200	300	0	-11.3675	-53.3046	-708.057	47955.9	17826.2	-3309.18	225.176	835.271	0	0	0	0	0	0	0	603	903	0
700	5	0	0	0	0	0	0	200	300	0	-12.5882	-52.9994	-708.057	47681.2	17704.1	-3263.4	225.004	835.659	0	0	0	0	0	0	0	603	903	0
700	6	0	0	0	0	0	0	200	300	0	-11.6727	-52.5417	-706.226	47681.2	17948.3	-3217.62	225.414	835.485	0	0	0	0	0	0	0	603	903	0
700	7	0	0	0	0	0	0	200	300	0	-11.9778	-50.8632	-703.785	48688.3	18131.4	-3171.85	225.763	833.819	0	0	0	0	0	0	0	603	903	0
700	8	0	0	0	0	0	0	200	300	0	-11.3675	-51.6261	-706.226	47681.2	18070.4	-3446.5	225.587	835.485	0	0	0	0	0	0	0	603	903	0
700	9	0	0	0	0	0	0	200	300	0	-11.2149	-51.0158	-707.142	48230.5	18314.5	-3446.5	225.899	834.795	0	0	0	0	0	0	0	603	903	0
701	0	0	0	0	0	0	0	200	300	0	-11.6727	-52.0839	-705.311	48505.2	18314.5	-3400.73	225.967	834.229	0	0	0	0	0	0	0	603	903	0
701	1	0	0	0	0	0	0	200	300	0	-12.7408	-51.9313	-705.616	48779.9	18070.4	-3400.73	225.609	833.869	0	0	0	0	0	0	0	603	903	0
701	2	0	0	0	0	0	0	200	300	0	-11.3675	-50.558	-704.395	48688.3	17887.3	-3492.28	225.394	833.879	0	0	0	0	0	0	0	603	903	0
701	3	0	0	0	0	0	0	200	300	0	-12.283	-49.7951	-702.87	48413.7	17948.3	-3675.39	225.536	834.12	0	0	0	0	0	0	0	603	903	0
701	4	0	0	0	0	0	0	200	300	0	-11.0623	-50.2528	-703.48	48963	18192.4	-2897.19	225.861	833.399	0	0	0	0	0	0	0	603	903	0
701	5	0	0	0	0	0	0	200	300	0	-13.1985	-50.1003	-703.175	49237.6	18070.4	-3583.83	225.698	832.978	0	0	0	0	0	0	0	603	903	0
701	6	0	0	0	0	0	0	200	300	0	-9.84161	-49.6425	-702.259	49054.5	17337.9	-3446.5	224.689	833.148	0	0	0	0	0	0	0	603	903	0
701	7	0	0	0	0	0	0	200	300	0	-13.046	-49.1847	-701.954	48779.9	18192.4	-3629.61	225.917	833.509	0	0	0	0	0	0	0	603	903	0
701	8	0	0	0	0	0	0	200	300	0	-10.7571	-49.0321	-701.344	48688.3	18314.5	-3492.28	226.113	833.579	0	0	0	0	0	0	0	603	903	0
701	9	0	0	0	0	0	0	200	300	0	-12.5882	-48.1166	-701.954	49603.8	17826.2	-3583.83	225.395	832.335	0	0	0	0	0	0	0	603	903	0
702	0	0	0	0	0	0	0	200	300	0	-12.283	-49.1847	-702.564	49512.3	18314.5	-3080.29	226.068	832.526	0	0	0	0	0	0	0	603	903	0
702	1	0	0	0	0	0	0	200	300	0	-12.1304	-48.2692	-699.818	49420.7	18009.3	-3446.5	225.734	832.381	0	0	0	0	0	0	0	603	903	0
702	2	0	0	0	0	0	0	200	300	0	-13.046	-47.2011	-697.071	49054.5	17826.2	-3629.61	225.573	832.628	0	0	0	0	0	0	0	603	903	0
702	3	0	0	0	0	0	0	200	300	0	-13.6563	-47.5063	-699.513	49695.4	18192.4	-3721.16	226.007	831.957	0	0	0	0	0	0	0	603	903	0
702	4	0	0	0	0	0	0	200	300	0	-11.9778	-47.0485	-700.733	49786.9	17948.3	-3217.62	225.614	831.95	0	0	0	0	0	0	0	603	903	0
702	5	0	0	0	0	0	0	200	300	0	-12.1304	-46.4381	-698.902	49695.4	17704.1	-3492.28	225.331	831.895	0	0	0	0	0	0	0	603	903	0
702	6	0	0	0	0	0	0	200	300	0	-12.5882	-45.9804	-697.071	49420.7	17643.1	-3538.06	225.31	832.102	0	0	0	0	0	0	0	603	903	0
702	7	0	0	0	0	0	0	200	300	0	-12.8934	-46.2856	-696.156	50336.2	18009.3	-3721.16	225.87	830.694	0	0	0	0	0	0	0	603	903	0
702	8	0	0	0	0	0	0	200	300	0	-11.9778	-45.2174	-697.682	50061.6	17948.3	-3080.29	225.726	831.246	0	0	0	0	0	0	0	603	903	0
702	9	0	0	0	0	0	0	200	300	0	-13.5037	-43.9967	-696.766	49786.9	18009.3	-3538.06	225.847	831.546	0	0	0	0	0	0	0	603	903	0
703	0	0	0	0	0	0	0	200	300	0	-13.3511	-44.3019	-696.461	49146.1	17276.9	-3309.18	224.807	832.435	0	0	0	0	0	0	0	603	903	0
703	1	0	0	0	0	0	0	200	300	0	-13.1985	-43.6916	-694.935	50427.8	17399	-3812.72	225.037	830.435	0	0	0	0	0	0	0	603	903	0
703	2	0	0	0	0	0	0	200	300	0	-12.4356	-43.3864	-692.494	50427.8	17826.2	-3583.83	225.742	830.179	0	0	0	0	0	0	0	603	903	0
703	3	0	0	0	0	0	0	200	300	0	-12.4356	-43.2338	-692.799	50610.9	18192.4	-3538.06	226.259	829.947	0	0	0	0	0	0	0	603	903	0
703	4	0	0	0	0	0	0	200	300	0	-13.6563	-42.1657	-694.63	50336.2	17948.3	-3629.61	225.839	830.535	0	0	0	0	0	0	0	603	903	0
703	5	0	0	0	0	0	0	200	300	0	-14.4193	-42.1657	-691.578	50244.7	17582.1	-3721.16	225.423	830.348	0	0	0	0	0	0	0	603	903	0
703	6	0	0	0	0	0	0	200	300	0	-12.5882	-41.7079	-691.273	50885.6	17826.2	-3446.5	225.788	829.389	0	0	0	0	0	0	0	603	903	0
703	7	0	0	0	0	0	0	200	300	0	-13.3511	-40.4872	-691.578	51160.2	17887.3	-3675.39	225.864	829.024	0	0	0	0	0	0	0	603	903	0
703	8	0	0	0	0	0	0	200	300	0	-14.2667	-40.0294	-690.052	49970	17337.9	-3812.72	225.126	830.585	0	0	0	0	0	0	0	603	903	0
703	9	0	0	0	0	0	0	200	300	0	-14.5718	-39.4191	-689.747	50519.4	18131.4	-3858.49	226.287	829.757	0	0	0	0	0	0	0	603	903	0
704	0	0	0	0	0	0	0	200	300	0	-13.046	-39.4191	-690.357	50061.6	17704.1	-3858.49	225.645	830.484	0	0	0	0	0	0	0	603	903	0
704	1	0	0	0	0	0	0	200	300	0	-13.1985	-38.6562	-686.39	51068.7	17582.1	-3904.27	225.615	828.598	0	0	0	0	0	0	0	603	903	0
704	2	0	0	0	0	0	0	200	300	0	-14.5718	-38.1984	-687.916	50244.7	17337.9	-3629.61	225.204	829.961	0	0	0	0	0	0	0	603	903	0
704	3	0	0	0	0	0	0	200	300	0	-14.4193	-38.0458	-688.221	50794	17704.1	-3629.61	225.725	829.195	0	0	0	0	0	0	0	603	903	0
704	4	0	0	0	0	0	0	200	300	0	-13.8089	-37.2829	-684.559	50427.8	17337.9	-3629.61	225.327	829.335	0	0	0	0	0	0	0	603	903	0
704	5	0	0	0	0	0	0	200	300	0	-13.8089	-36.5199	-684.864	50336.2	17521	-3538.06	225.583	829.502	0	0	0	0	0	0	0	603	903	0
704	6	0	0	0	0	0	0	200	300	0	-13.9615	-37.2829	-684.864	49970	17460	-3583.83	225.494	830.037	0	0	0	0	0	0	0	603	903	0
704	7	0	0	0	0	0	0	200	300	0	-15.4874	-35.9096	-683.949	50885.6	17154.8	-3583.83	225.082	828.6	0	0	0	0	0	0	0	603	903	0
704	8	0	0	0	0	0	0	200	300	0	-13.3511	-35.6044	-684.559	50794	17399	-3721.16	225.416	828.8	0	0	0	0	0	0	0	603	903	0
704	9	0	0	0	0	0	0	200	300	0	-13.5037	-34.5363	-684.559	51434.9	17826.2	-3904.27	226.04	827.864	0	0	0	0	0	0	0	603	903	0
705	0	0	0	0	0	0	0	200	300	0	-15.0296	-33.6208	-682.423	50885.6	17460	-3766.94	225.585	828.434	0	0	0	0	0	0	0	603	903	0
705	1	0	0	0	0	0	0	200	300	0	-15.4874	-33.6208	-680.897	50610.9	16727.6	-3629.61	224.567	828.67	0	0	0	0	0	0	0	603	903	0
705	2	0	0	0	0	0	0	200	300	0	-13.9615	-32.7052	-683.643	51709.6	17582.1	-3950.04	225.718	827.362	0	0	0	0	0	0	0	603	903	0
705	3	0	0	0	0	0	0	200	300	0	-14.4193	-32.5526	-681.812	51343.3	17337.9	-3766.94	225.429	827.696	0	0	0	0	0	0	0	603	903	0
705	4	0	0	0	0	0	0	200	300	0	-15.0296	-31.9423	-680.897	50244.7	17582.1	-3995.82	225.822	829.208	0	0	0	0	0	0	0	603	903	0
705	5	0	0	0	0	0	0	200	300	0	-14.877	-31.0268	-679.066	51068.7	17521	-3858.49	225.802	827.796	0	0	0	0	0	0	0	603	903	0
705	6	0	0	0	0	0	0	200	300	0	-13.8089	-31.6371	-679.066	51434.9	17399	-3766.94	225.622	827.256	0	0	0	0	0	0	0	603	903	0
705	7	0	0	0	0	0	0	200	300	0	-14.1141	-30.2638	-679.066	50977.1	17276.9	-3675.39	225.442	827.93	0	0	0	0	0	0	0	603	903	0
705	8	0	0	0	0	0	0	200	300	0	-15.0296	-30.1112	-680.592	51068.7	16727.6	-3446.5	224.578	827.964	0	0	0	0	0	0	0	603	903	0
705	9	0	0	0	0	0	0	200	300	0	-14.877	-29.5009	-678.15	51343.3	17582.1	-3492.28	225.927	827.289	0	0	0	0	0	0	0	603	903	0
706	0	0	0	0	0	0	0	200	300	0	-13.9615	-28.4328	-678.15	51709.6	16788.6	-3858.49	224.757	826.749	0	0	0	0	0	0	0	603	903	0
706	1	0	0	0	0	0	0	200	300	0	-13.6563	-28.7379	-678.15	51160.2	16971.7	-3492.28	225.027	827.559	0	0	0	0	0	0	0	603	903	0
706	2	0	0	0	0	0	0	200	300	0	-15.0296	-28.1276	-676.93	51343.3	17337.9	-3675.39	225.613	827.153	0	0	0	0	0	0	0	603	903	0
706	3	0	0	0	0	0	0	200	300	0	-14.4193	-27.6698	-676.319	51434.9	17154.8	-3858.49	225.365	826.949	0	0	0	0	0	0	0	603	903	0
706	4	0	0	0	0	0	0	200	300	0	-13.1985	-26.9069	-676.014	51801.1	17093.8	-3904.27	225.286	826.373	0	0	0	0	0	0	0	603	903	0
706	5	0	0	0	0	0	0	200	300	0	-13.9615	-26.144	-676.319	50885.6	16971.7	-3812.72	225.094	827.761	0	0	0	0	0	0	0	603	903	0
706	6	0	0	0	0	0	0	200	300	0	-14.7244	-25.9914	-676.624	51434.9	17093.8	-3995.82	225.263	826.983	0	0	0	0	0	0	0	603	903	0
706	7	0	0	0	0	0	0	200	300	0	-14.4193	-25.9914	-676.319	51526.4	17093.8	-3675.39	225.275	826.813	0	0	0	0	0	0	0	603	903	0
706	8	0	0	0	0	0	0	200	300	0	-13.1985	-24.7707	-675.709	52075.8	17215.9	-3812.72	225.478	825.932	0	0	0	0	0	0	0	603	903	0
706	9	0	0	0	0	0	0	200	300	0	-13.5037	-24.3129	-675.404	52075.8	16971.7	-3446.5	225.128	825.897	0	0	0	0	0	0	0	603	903	0
707	0	0	0	0	0	0	0	200	300	0	-15.1822	-24.1603	-673.573	51984.2	17337.9	-3766.94	225.74	825.823	0	0	0	0	0	0	0	603	903	0
707	1	0	0	0	0	0	0	200	300	0	-14.1141	-24.6181	-675.404	51526.4	17337.9	-3583.83	225.671	826.71	0	0	0	0	0	0	0	603	903	0
707	2	0	0	0	0	0	0	200	300	0	-12.8934	-23.2448	-674.793	52533.5	17154.8	-3721.16	225.422	825.149	0	0	0	0	0	0	0	603	903	0
707	3	0	0	0	0	0	0	200	300	0	-11.0623	-23.55	-673.573	52442	17215.9	-3354.95	225.559	825.144	0	0	0	0	0	0	0	603	903	0
707	4	0	0	0	0	0	0	200	300	0	-12.7408	-22.6344	-673.878	52075.8	17460	-3721.16	225.91	825.722	0	0	0	0	0	0	0	603	903	0
707	5	0	0	0	0	0	0	200	300	0	-11.5201	-21.8715	-675.404	52075.8	17337.9	-3675.39	225.671	825.897	0	0	0	0	0	0	0	603	903	0
707	6	0	0	0	0	0	0	200	300	0	-11.2149	-21.7189	-674.488	52991.3	16788.6	-3629.61	224.891	824.435	0	0	0	0	0	0	0	603	903	0
707	7	0	0	0	0	0	0	200	300	0	-10.7571	-21.8715	-673.878	52533.5	17337.9	-3217.62	225.729	825.043	0	0	0	0	0	0	0	603	903	0
707	8	0	0	0	0	0	0	200	300	0	-12.5882	-20.3456	-673.267	52442	17337.9	-3766.94	225.752	825.108	0	0	0	0	0	0	0	603	903	0
707	9	0	0	0	0	0	0	200	300	0	-12.4356	-20.8034	-675.404	52808.2	17215.9	-3812.72	225.49	824.812	0	0	0	0	0	0	0	603	903	0
708	0	0	0	0	0	0	0	200	300	0	-12.5882	-20.956	-675.404	52991.3	17399	-3812.72	225.761	824.541	0	0	0	0	0	0	0	603	903	0
708	1	0	0	0	0	0	0	200	300	0	-11.0623	-20.4982	-675.099	53082.8	17460	-3538.06	225.863	824.37	0	0	0	0	0	0	0	603	903	0
708	2	0	0	0	0	0	0	200	300	0	-11.3675	-19.8878	-673.573	52991.3	17093.8	-3766.94	225.378	824.328	0	0	0	0	0	0	0	603	903	0
708	3	0	0	0	0	0	0	200	300	0	-9.84161	-19.5827	-674.793	52808.2	17093.8	-3721.16	225.332	824.742	0	0	0	0	0	0	0	603	903	0
708	4	0	0	0	0	0	0	200	300	0	-11.3675	-18.8197	-675.099	53449.1	17337.9	-3858.49	225.682	823.828	0	0	0	0	0	0	0	603	903	0
708	5	0	0	0	0	0	0	200	300	0	-9.68903	-18.362	-675.099	53540.6	16971.7	-3675.39	225.14	823.692	0	0	0	0	0	0	0	603	903	0
708	6	0	0	0	0	0	0	200	300	0	-12.7408	-17.9042	-672.962	53265.9	17582.1	-3629.61	226.126	823.849	0	0	0	0	0	0	0	603	903	0
708	7	0	0	0	0	0	0	200	300	0	-11.9778	-18.2094	-674.793	53632.2	17093.8	-3538.06	225.332	823.521	0	0	0	0	0	0	0	603	903	0
708	8	0	0	0	0	0	0	200	300	0	-10.7571	-16.2257	-672.962	53998.4	17337.9	-3812.72	225.764	822.76	0	0	0	0	0	0	0	603	903	0
708	9	0	0	0	0	0	0	200	300	0	-10.7571	-18.0568	-676.93	53723.7	17215.9	-3675.39	225.432	823.636	0	0	0	0	0	0	0	603	903	0
709	0	0	0	0	0	0	0	200	300	0	-12.5882	-16.8361	-675.709	53540.6	17582.1	-3583.83	226.02	823.764	0	0	0	0	0	0	0	603	903	0
709	1	0	0	0	0	0	0	200	300	0	-9.9942	-16.0732	-675.099	53815.3	17215.9	-3675.39	225.501	823.285	0	0	0	0	0	0	0	603	903	0
709	2	0	0	0	0	0	0	200	300	0	-10.6046	-16.2257	-676.93	54273	17093.8	-3675.39	225.252	822.825	0	0	0	0	0	0	0	603	903	0
709	3	0	0	0	0	0	0	200	300	0	-9.9942	-15.9206	-678.15	54089.9	17521	-3583.83	225.837	823.239	0	0	0	0	0	0	0	603	903	0
709	4	0	0	0	0	0	0	200	300	0	-11.8253	-15.3102	-676.93	54273	17887.3	-3766.94	226.424	822.825	0	0	0	0	0	0	0	603	903	0
709	5	0	0	0	0	0	0	200	300	0	-11.5201	-15.4628	-674.793	54547.7	16788.6	-3629.61	224.88	822.164	0	0	0	0	0	0	0	603	903	0
709	6	0	0	0	0	0	0	200	300	0	-9.38385	-15.005	-677.235	54730.8	17704.1	-3675.39	226.142	822.185	0	0	0	0	0	0	0	603	903	0
709	7	0	0	0	0	0	0	200	300	0	-7.40021	-14.0895	-678.455	55097	17276.9	-3400.73	225.465	821.791	0	0	0	0	0	0	0	603	903	0
709	8	0	0	0	0	0	0	200	300	0	-10.7571	-14.3947	-678.15	54730.8	17093.8	-3629.61	225.207	822.294	0	0	0	0	0	0	0	603	903	0
709	9	0	0	0	0	0	0	200	300	0	-8.62091	-13.7843	-678.455	54913.9	17521	-3354.95	225.825	822.06	0	0	0	0	0	0	0	603	903	0
710	0	0	0	0	0	0	0	200	300	0	-9.84161	-14.8524	-678.15	55829.4	17521	-3492.28	225.837	820.674	0	0	0	0	0	0	0	603	903	0
710	1	0	0	0	0	0	0	200	300	0	-9.53644	-12.411	-678.15	55921	17154.8	-3400.73	225.297	820.539	0	0	0	0	0	0	0	603	903	0
710	2	0	0	0	0	0	0	200	300	0	-10.6046	-11.6481	-678.455	55371.7	17399	-3538.06	225.645	821.386	0	0	0	0	0	0	0	603	903	0
710	3	0	0	0	0	0	0	200	300	0	-9.9942	-11.9533	-679.981	56195.6	16788.6	-3400.73	224.69	820.357	0	0	0	0	0	0	0	603	903	0
710	4	0	0	0	0	0	0	200	300	0	-9.53644	-11.4955	-678.455	56104.1	17276.9	-3538.06	225.465	820.306	0	0	0	0	0	0	0	603	903	0
710	5	0	0	0	0	0	0	200	300	0	-9.23126	-12.2585	-679.981	55737.9	17399	-3309.18	225.587	821.03	0	0	0	0	0	0	0	603	903	0
710	6	0	0	0	0	0	0	200	300	0	-9.53644	-10.58	-678.761	55737.9	17521	-3583.83	225.813	820.883	0	0	0	0	0	0	0	603	903	0
710	7	0	0	0	0	0	0	200	300	0	-9.9942	-9.05411	-679.676	56378.7	17521	-3583.83	225.779	820.051	0	0	0	0	0	0	0	603	903	0
710	8	0	0	0	0	0	0	200	300	0	-9.68903	-9.66446	-680.286	56561.8	17276.9	-3446.5	225.397	819.856	0	0	0	0	0	0	0	603	903	0
710	9	0	0	0	0	0	0	200	300	0	-9.84161	-9.35928	-680.592	56378.7	17337.9	-3492.28	225.475	820.162	0	0	0	0	0	0	0	603	903	0
711	0	0	0	0	0	0	0	200	300	0	-8.7735	-8.44376	-677.54	56470.3	17582.1	-3217.62	225.95	819.654	0	0	0	0	0	0	0	603	903	0
711	1	0	0	0	0	0	0	200	300	0	-10.452	-8.29117	-679.371	56744.9	17032.8	-3309.18	225.071	819.474	0	0	0	0	0	0	0	603	903	0
711	2	0	0	0	0	0	0	200	300	0	-9.07867	-7.98599	-680.897	56470.3	17521	-3583.83	225.732	820.065	0	0	0	0	0	0	0	603	903	0
711	3	0	0	0	0	0	0	200	300	0	-9.9942	-7.68082	-681.202	56928.1	17154.8	-3354.95	225.183	819.43	0	0	0	0	0	0	0	603	903	0
711	4	0	0	0	0	0	0	200	300	0	-9.84161	-7.68082	-680.592	57019.6	16727.6	-3309.18	224.578	819.221	0	0	0	0	0	0	0	603	903	0
711	5	0	0	0	0	0	0	200	300	0	-8.7735	-6.15494	-679.676	58026.7	17276.9	-3309.18	225.419	817.626	0	0	0	0	0	0	0	603	903	0
711	6	0	0	0	0	0	0	200	300	0	-8.7735	-6.30753	-679.371	57568.9	17093.8	-3309.18	225.161	818.261	0	0	0	0	0	0	0	603	903	0
711	7	0	0	0	0	0	0	200	300	0	-10.2994	-5.54459	-681.507	57294.3	16361.4	-3034.52	224.008	818.93	0	0	0	0	0	0	0	603	903	0
711	8	0	0	0	0	0	0	200	300	0	-9.68903	-5.23941	-681.507	57385.8	17154.8	-3171.85	225.172	818.796	0	0	0	0	0	0	0	603	903	0
711	9	0	0	0	0	0	0	200	300	0	-8.7735	-5.23941	-679.676	57294.3	17215.9	-3217.62	225.33	818.704	0	0	0	0	0	0	0	603	903	0
712	0	0	0	0	0	0	0	200	300	0	-8.31573	-4.78165	-681.202	57935.1	17154.8	-3126.07	225.183	817.952	0	0	0	0	0	0	0	603	903	0
712	1	0	0	0	0	0	0	200	300	0	-9.38385	-3.56094	-679.981	57935.1	17093.8	-3217.62	225.139	817.799	0	0	0	0	0	0	0	603	903	0
712	2	0	0	0	0	0	0	200	300	0	-9.23126	-3.25577	-680.592	57019.6	17093.8	-3309.18	225.116	819.221	0	0	0	0	0	0	0	603	903	0
712	3	0	0	0	0	0	0	200	300	0	-8.31573	-3.25577	-680.897	58118.2	16971.7	-3171.85	224.926	817.645	0	0	0	0	0	0	0	603	903	0
712	4	0	0	0	0	0	0	200	300	0	-7.85797	-4.01871	-681.202	58209.8	16910.7	-2942.96	224.825	817.548	0	0	0	0	0	0	0	603	903	0
712	5	0	0	0	0	0	0	200	300	0	-9.38385	-2.03506	-679.981	57843.6	16300.3	-3263.4	223.972	817.934	0	0	0	0	0	0	0	603	903	0
712	6	0	0	0	0	0	0	200	300	0	-8.92609	-1.72989	-679.066	58392.9	16910.7	-3217.62	224.903	817.01	0	0	0	0	0	0	0	603	903	0
712	7	0	0	0	0	0	0	200	300	0	-8.7735	-1.72989	-680.897	58392.9	16849.7	-3217.62	224.746	817.241	0	0	0	0	0	0	0	603	903	0
712	8	0	0	0	0	0	0	200	300	0	-8.16315	-0.814361	-681.507	58392.9	16483.4	-2988.74	224.187	817.318	0	0	0	0	0	0	0	603	903	0
712	9	0	0	0	0	0	0	200	300	0	-9.84161	-2.18765	-680.897	58667.6	16544.5	-3034.52	224.298	816.838	0	0	0	0	0	0	0	603	903	0
713	0	0	0	0	0	0	0	200	300	0	-9.07867	-1.42471	-679.676	58484.5	16483.4	-2805.64	224.252	816.952	0	0	0	0	0	0	0	603	903	0
713	1	0	0	0	0	0	0	200	300	0	-8.46832	0.864106	-679.981	59400	16910.7	-3126.07	224.869	815.645	0	0	0	0	0	0	0	603	903	0
713	2	0	0	0	0	0	0	200	300	0	-8.31573	0.864106	-681.507	58667.6	16788.6	-3126.07	224.635	816.915	0	0	0	0	0	0	0	603	903	0
713	3	0	0	0	0	0	0	200	300	0	-10.1468	1.16928	-681.812	58118.2	16727.6	-3080.29	224.534	817.759	0	0	0	0	0	0	0	603	903	0
713	4	0	0	0	0	0	0	200	300	0	-9.23126	1.62705	-679.981	59400	16605.5	-3080.29	224.421	815.645	0	0	0	0	0	0	0	603	903	0
713	5	0	0	0	0	0	0	200	300	0	-8.7735	2.69516	-678.761	59125.3	16544.5	-3263.4	224.375	815.892	0	0	0	0	0	0	0	603	903	0
713	6	0	0	0	0	0	0	200	300	0	-7.5528	2.38998	-679.676	59400	16056.2	-3034.52	223.623	815.606	0	0	0	0	0	0	0	603	903	0
713	7	0	0	0	0	0	0	200	300	0	-9.53644	4.22104	-680.592	59125.3	16605.5	-2942.96	224.399	816.127	0	0	0	0	0	0	0	603	903	0
713	8	0	0	0	0	0	0	200	300	0	-9.68903	3.76328	-680.286	59491.5	16178.3	-2942.96	223.782	815.549	0	0	0	0	0	0	0	603	903	0
713	9	0	0	0	0	0	0	200	300	0	-8.92609	4.6788	-679.066	59216.9	16117.2	-3080.29	223.734	815.797	0	0	0	0	0	0	0	603	903	0
714	0	0	0	0	0	0	0	200	300	0	-8.46832	5.59433	-680.592	59949.3	16300.3	-2988.74	223.95	814.916	0	0	0	0	0	0	0	603	903	0
714	1	0	0	0	0	0	0	200	300	0	-10.2994	6.05209	-681.202	60407.1	16727.6	-3126.07	224.556	814.323	0	0	0	0	0	0	0	603	903	0
714	2	0	0	0	0	0	0	200	300	0	-10.1468	6.35727	-678.455	60132.4	15812.1	-3034.52	223.306	814.369	0	0	0	0	0	0	0	603	903	0
714	3	0	0	0	0	0	0	200	300	0	-9.07867	5.59433	-682.423	59949.3	16422.4	-2988.74	224.065	815.152	0	0	0	0	0	0	0	603	903	0
714	4	0	0	0	0	0	0	200	300	0	-9.38385	7.57797	-680.897	60590.2	15445.9	-2988.74	222.685	814.014	0	0	0	0	0	0	0	603	903	0
714	5	0	0	0	0	0	0	200	300	0	-11.2149	7.57797	-681.507	60498.6	15934.1	-2897.19	223.381	814.228	0	0	0	0	0	0	0	603	903	0
714	6	0	0	0	0	0	0	200	300	0	-11.2149	8.4935	-683.949	60773.3	15873.1	-2988.74	223.208	814.144	0	0	0	0	0	0	0	603	903	0
714	7	0	0	0	0	0	0	200	300	0	-9.9942	7.88315	-683.643	61963.5	16117.2	-3034.52	223.576	812.363	0	0	0	0	0	0	0	603	903	0
714	8	0	0	0	0	0	0	200	300	0	-10.6046	7.88315	-683.338	61597.2	15506.9	-2988.74	222.693	812.858	0	0	0	0	0	0	0	603	903	0
714	9	0	0	0	0	0	0	200	300	0	-11.8253	9.10385	-681.812	60498.6	16178.3	-3126.07	223.728	814.268	0	0	0	0	0	0	0	603	903	0
715	0	0	0	0	0	0	0	200	300	0	-11.3675	10.3246	-683.033	62512.8	15812.1	-3171.85	223.15	811.478	0	0	0	0	0	0	0	603	903	0
715	1	0	0	0	0	0	0	200	300	0	-10.6046	10.0194	-684.559	62512.8	15445.9	-2988.74	222.563	811.682	0	0	0	0	0	0	0	603	903	0
715	2	0	0	0	0	0	0	200	300	0	-10.7571	10.172	-686.695	62055	16056.2	-2851.41	223.382	812.632	0	0	0	0	0	0	0	603	903	0
715	3	0	0	0	0	0	0	200	300	0	-11.8253	9.40903	-687.306	61963.5	16239.3	-3171.85	223.627	812.846	0	0	0	0	0	0	0	603	903	0
715	4	0	0	0	0	0	0	200	300	0	-12.5882	10.6297	-685.169	62970.5	15018.6	-3309.18	221.92	811.095	0	0	0	0	0	0	0	603	903	0
715	5	0	0	0	0	0	0	200	300	0	-11.5201	10.7823	-685.78	63336.7	16056.2	-3034.52	223.413	810.643	0	0	0	0	0	0	0	603	903	0
715	6	0	0	0	0	0	0	200	300	0	-10.9097	11.3927	-687.916	63153.6	16239.3	-3126.07	223.607	811.196	0	0	0	0	0	0	0	603	903	0
715	7	0	0	0	0	0	0	200	300	0	-12.4356	11.0875	-687.916	63153.6	15812.1	-2851.41	222.985	811.196	0	0	0	0	0	0	0	603	903	0
715	8	0	0	0	0	0	0	200	300	0	-12.283	12.003	-687.916	64526.9	16056.2	-3034.52	223.34	809.199	0	0	0	0	0	0	0	603	903	0
715	9	0	0	0	0	0	0	200	300	0	-11.0623	12.3082	-686.695	64069.2	15873.1	-2897.19	223.115	809.699	0	0	0	0	0	0	0	603	903	0
716	0	0	0	0	0	0	0	200	300	0	-11.8253	12.003	-687.306	64343.8	15690	-2988.74	222.828	809.383	0	0	0	0	0	0	0	603	903	0
716	1	0	0	0	0	0	0	200	300	0	-12.8934	12.4608	-689.747	64343.8	16239.3	-2942.96	223.544	809.714	0	0	0	0	0	0	0	603	903	0
716	2	0	0	0	0	0	0	200	300	0	-12.283	13.2237	-689.747	65442.5	15812.1	-3034.52	222.924	808.121	0	0	0	0	0	0	0	603	903	0
716	3	0	0	0	0	0	0	200	300	0	-11.0623	13.0711	-688.831	64618.5	15629	-2897.19	222.689	809.191	0	0	0	0	0	0	0	603	903	0
716	4	0	0	0	0	0	0	200	300	0	-11.2149	13.2237	-689.747	64984.7	15690	-3217.62	222.747	808.785	0	0	0	0	0	0	0	603	903	0
716	5	0	0	0	0	0	0	200	300	0	-12.5882	13.5289	-689.442	64435.4	15384.8	-2897.19	222.315	809.54	0	0	0	0	0	0	0	603	903	0
716	6	0	0	0	0	0	0	200	300	0	-13.3511	13.9867	-690.662	65900.2	15690	-3126.07	222.717	807.584	0	0	0	0	0	0	0	603	903	0
716	7	0	0	0	0	0	0	200	300	0	-11.2149	13.6815	-691.883	65717.1	15751	-3080.29	222.765	808.017	0	0	0	0	0	0	0	603	903	0
716	8	0	0	0	0	0	0	200	300	0	-11.9778	14.7496	-690.662	67090.4	15995.2	-2668.31	223.159	805.861	0	0	0	0	0	0	0	603	903	0
716	9	0	0	0	0	0	0	200	300	0	-13.046	15.5125	-691.273	66358	15506.9	-2897.19	222.432	807.006	0	0	0	0	0	0	0	603	903	0
717	0	0	0	0	0	0	0	200	300	0	-13.1985	13.8341	-693.409	67639.7	15751	-3080.29	222.715	805.453	0	0	0	0	0	0	0	603	903	0
717	1	0	0	0	0	0	0	200	300	0	-11.0623	15.2074	-693.714	67639.7	15995.2	-2897.19	223.057	805.496	0	0	0	0	0	0	0	603	903	0
717	2	0	0	0	0	0	0	200	300	0	-12.1304	16.1229	-693.714	67548.2	15751	-3171.85	222.705	805.628	0	0	0	0	0	0	0	603	903	0
717	3	0	0	0	0	0	0	200	300	0	-12.8934	16.4281	-693.104	67639.7	15873.1	-3263.4	222.901	805.41	0	0	0	0	0	0	0	603	903	0
717	4	0	0	0	0	0	0	200	300	0	-13.1985	17.3436	-694.019	68372.2	16056.2	-2988.74	223.135	804.484	0	0	0	0	0	0	0	603	903	0
717	5	0	0	0	0	0	0	200	300	0	-12.283	16.5807	-693.714	68738.4	15934.1	-2759.86	222.969	803.913	0	0	0	0	0	0	0	603	903	0
717	6	0	0	0	0	0	0	200	300	0	-12.1304	17.0384	-695.24	68555.2	15018.6	-2942.96	221.602	804.393	0	0	0	0	0	0	0	603	903	0
717	7	0	0	0	0	0	0	200	300	0	-12.5882	17.6488	-695.85	68372.2	15812.1	-2714.08	222.723	804.743	0	0	0	0	0	0	0	603	903	0
717	8	0	0	0	0	0	0	200	300	0	-13.5037	17.8014	-694.935	69196.1	15812.1	-3080.29	222.753	803.428	0	0	0	0	0	0	0	603	903	0
717	9	0	0	0	0	0	0	200	300	0	-11.6727	18.8695	-697.376	69470.8	15629	-2851.41	222.411	803.383	0	0	0	0	0	0	0	603	903	0
718	0	0	0	0	0	0	0	200	300	0	-12.1304	19.3272	-697.682	69562.3	16056.2	-3126.07	223.014	803.295	0	0	0	0	0	0	0	603	903	0
718	1	0	0	0	0	0	0	200	300	0	-12.7408	18.8695	-695.85	69653.9	15567.9	-3034.52	222.373	802.901	0	0	0	0	0	0	0	603	903	0
718	2	0	0	0	0	0	0	200	300	0	-13.3511	18.2591	-697.071	70752.5	15506.9	-3263.4	222.246	801.5	0	0	0	0	0	0	0	603	903	0
718	3	0	0	0	0	0	0	200	300	0	-12.1304	18.8695	-698.902	70844.1	15506.9	-2942.96	222.188	801.635	0	0	0	0	0	0	0	603	903	0
718	4	0	0	0	0	0	0	200	300	0	-12.7408	19.785	-699.207	70844.1	16056.2	-3034.52	222.963	801.68	0	0	0	0	0	0	0	603	903	0
718	5	0	0	0	0	0	0	200	300	0	-13.1985	20.7005	-701.954	71118.7	15629	-3126.07	222.265	801.685	0	0	0	0	0	0	0	603	903	0
718	6	0	0	0	0	0	0	200	300	0	-13.8089	20.3954	-701.038	71851.1	15751	-2897.19	222.468	800.508	0	0	0	0	0	0	0	603	903	0
718	7	0	0	0	0	0	0	200	300	0	-10.9097	20.8531	-701.344	72308.9	15567.9	-2714.08	222.197	799.9	0	0	0	0	0	0	0	603	903	0
718	8	0	0	0	0	0	0	200	300	0	-13.9615	21.7686	-701.649	72125.8	15873.1	-2988.74	222.623	800.205	0	0	0	0	0	0	0	603	903	0
718	9	0	0	0	0	0	0	200	300	0	-11.5201	22.379	-703.785	72675.1	15506.9	-2805.64	222.034	799.737	0	0	0	0	0	0	0	603	903	0
719	0	0	0	0	0	0	0	200	300	0	-12.283	21.0057	-702.564	72766.7	15873.1	-2897.19	222.593	799.427	0	0	0	0	0	0	0	603	903	0
719	1	0	0	0	0	0	0	200	300	0	-12.7408	22.379	-705.006	72949.8	15629	-3126.07	222.169	799.526	0	0	0	0	0	0	0	603	903	0
719	2	0	0	0	0	0	0	200	300	0	-13.5037	22.5316	-705.006	73407.5	15506.9	-2897.19	221.995	798.877	0	0	0	0	0	0	0	603	903	0
719	3	0	0	0	0	0	0	200	300	0	-12.283	23.5997	-706.226	73590.7	15384.8	-2851.41	221.785	798.797	0	0	0	0	0	0	0	603	903	0
719	4	0	0	0	0	0	0	200	300	0	-13.9615	24.0575	-707.752	74414.6	15629	-2851.41	222.083	797.858	0	0	0	0	0	0	0	603	903	0
719	5	0	0	0	0	0	0	200	300	0	-13.1985	24.2101	-708.057	74689.3	15629	-2668.31	222.073	797.515	0	0	0	0	0	0	0	603	903	0
719	6	0	0	0	0	0	0	200	300	0	-13.1985	23.7523	-708.973	74048.4	16056.2	-2439.42	222.647	798.555	0	0	0	0	0	0	0	603	903	0
719	7	0	0	0	0	0	0	200	300	0	-12.5882	24.5152	-707.752	75147	15751	-2988.74	222.255	796.823	0	0	0	0	0	0	0	603	903	0
719	8	0	0	0	0	0	0	200	300	0	-12.4356	24.973	-709.889	75513.2	15812.1	-2897.19	222.274	796.627	0	0	0	0	0	0	0	603	903	0
719	9	0	0	0	0	0	0	200	300	0	-11.6727	26.3463	-711.72	75879.5	15812.1	-2897.19	222.217	796.386	0	0	0	0	0	0	0	603	903	0
720	0	0	0	0	0	0	0	200	300	0	-11.3675	25.5833	-712.33	75879.5	15629	-2759.86	221.941	796.477	0	0	0	0	0	0	0	603	903	0
720	1	0	0	0	0	0	0	200	300	0	-11.5201	26.1937	-711.72	76428.8	15384.8	-3034.52	221.616	795.614	0	0	0	0	0	0	0	603	903	0
720	2	0	0	0	0	0	0	200	300	0	-12.283	26.1937	-712.33	76611.9	15934.1	-2851.41	222.369	795.449	0	0	0	0	0	0	0	603	903	0
720	3	0	0	0	0	0	0	200	300	0	-12.4356	26.6515	-713.245	77802.1	15995.2	-2851.41	222.426	793.918	0	0	0	0	0	0	0	603	903	0
720	4	0	0	0	0	0	0	200	300	0	-13.5037	28.4825	-716.297	77344.3	15873.1	-2485.2	222.16	795.022	0	0	0	0	0	0	0	603	903	0
720	5	0	0	0	0	0	0	200	300	0	-13.1985	28.3299	-715.382	77802.1	15995.2	-2988.74	222.359	794.244	0	0	0	0	0	0	0	603	903	0
720	6	0	0	0	0	0	0	200	300	0	-12.7408	28.6351	-716.602	78626.1	15995.2	-2942.96	222.321	793.279	0	0	0	0	0	0	0	603	903	0
720	7	0	0	0	0	0	0	200	300	0	-12.283	28.9403	-717.823	79266.9	15873.1	-2897.19	222.113	792.573	0	0	0	0	0	0	0	603	903	0
720	8	0	0	0	0	0	0	200	300	0	-13.046	28.7877	-715.992	78900.7	15873.1	-2851.41	222.169	792.802	0	0	0	0	0	0	0	603	903	0
720	9	0	0	0	0	0	0	200	300	0	-13.9615	30.161	-719.959	79175.4	15934.1	-2805.64	222.132	793.028	0	0	0	0	0	0	0	603	903	0
721	0	0	0	0	0	0	0	200	300	0	-11.6727	29.7032	-721.18	79450	15629	-2805.64	221.671	792.833	0	0	0	0	0	0	0	603	903	0
721	1	0	0	0	0	0	0	200	300	0	-12.283	29.8558	-720.57	79358.5	15873.1	-2942.96	222.029	792.867	0	0	0	0	0	0	0	603	903	0
721	2	0	0	0	0	0	0	200	300	0	-13.3511	30.6187	-721.79	79266.9	15751	-2668.31	221.822	793.18	0	0	0	0	0	0	0	603	903	0
721	3	0	0	0	0	0	0	200	300	0	-13.6563	31.2291	-722.401	80914.9	15873.1	-2622.53	221.973	790.992	0	0	0	0	0	0	0	603	903	0
721	4	0	0	0	0	0	0	200	300	0	-12.4356	31.5343	-722.706	80823.3	15690	-2530.98	221.71	791.166	0	0	0	0	0	0	0	603	903	0
721	5	0	0	0	0	0	0	200	300	0	-12.283	31.6869	-723.316	81006.4	15567.9	-2897.19	221.523	791.007	0	0	0	0	0	0	0	603	903	0
721	6	0	0	0	0	0	0	200	300	0	-13.5037	31.6869	-723.927	81281.1	15751	-2714.08	221.758	790.722	0	0	0	0	0	0	0	603	903	0
721	7	0	0	0	0	0	0	200	300	0	-14.2667	33.2127	-724.232	81555.8	16117.2	-2759.86	222.254	790.39	0	0	0	0	0	0	0	603	903	0
721	8	0	0	0	0	0	0	200	300	0	-12.1304	33.0602	-725.758	81830.4	15995.2	-2393.65	222.039	790.248	0	0	0	0	0	0	0	603	903	0
721	9	0	0	0	0	0	0	200	300	0	-12.4356	33.2127	-726.673	82837.5	16117.2	-2805.64	222.179	789.005	0	0	0	0	0	0	0	603	903	0
722	0	0	0	0	0	0	0	200	300	0	-13.3511	32.2972	-726.368	83020.6	15751	-2805.64	221.685	788.705	0	0	0	0	0	0	0	603	903	0
722	1	0	0	0	0	0	0	200	300	0	-13.9615	33.6705	-727.284	83203.7	15934.1	-2851.41	221.909	788.597	0	0	0	0	0	0	0	603	903	0
722	2	0	0	0	0	0	0	200	300	0	-12.283	34.586	-728.199	83936.1	15506.9	-2714.08	221.295	787.735	0	0	0	0	0	0	0	603	903	0
722	3	0	0	0	0	0	0	200	300	0	-12.283	35.349	-728.199	84485.4	15751	-2805.64	221.63	786.98	0	0	0	0	0	0	0	603	903	0
722	4	0	0	0	0	0	0	200	300	0	-13.046	35.1964	-728.809	84027.6	15995.2	-2942.96	221.947	787.706	0	0	0	0	0	0	0	603	903	0
722	5	0	0	0	0	0	0	200	300	0	-13.3511	35.5016	-727.894	84485.4	16056.2	-2714.08	222.058	786.932	0	0	0	0	0	0	0	603	903	0
722	6	0	0	0	0	0	0	200	300	0	-12.5882	35.6541	-729.42	85767.1	15629	-2805.64	221.427	785.417	0	0	0	0	0	0	0	603	903	0
722	7	0	0	0	0	0	0	200	300	0	-13.1985	35.349	-729.115	86041.8	16300.3	-2485.2	222.356	784.991	0	0	0	0	0	0	0	603	903	0
722	8	0	0	0	0	0	0	200	300	0	-13.1985	36.8748	-731.556	85492.5	15995.2	-2485.2	221.865	786.136	0	0	0	0	0	0	0	603	903	0
722	9	0	0	0	0	0	0	200	300	0	-13.6563	36.5697	-731.556	86224.9	15201.7	-2988.74	220.78	785.135	0	0	0	0	0	0	0	603	903	0
723	0	0	0	0	0	0	0	200	300	0	-12.5882	37.7904	-732.777	86316.5	16056.2	-2759.86	221.911	785.206	0	0	0	0	0	0	0	603	903	0
723	1	0	0	0	0	0	0	200	300	0	-12.8934	38.2481	-732.166	86957.3	16300.3	-2668.31	222.263	784.233	0	0	0	0	0	0	0	603	903	0
723	2	0	0	0	0	0	0	200	300	0	-13.6563	39.4688	-734.303	86957.3	15873.1	-2530.98	221.617	784.578	0	0	0	0	0	0	0	603	903	0
723	3	0	0	0	0	0	0	200	300	0	-13.6563	39.0111	-730.946	87232	15384.8	-2622.53	221.048	783.659	0	0	0	0	0	0	0	603	903	0
723	4	0	0	0	0	0	0	200	300	0	-12.283	37.4852	-734.608	87598.2	15873.1	-2622.53	221.608	783.755	0	0	0	0	0	0	0	603	903	0
723	5	0	0	0	0	0	0	200	300	0	-12.5882	39.774	-735.523	88696.8	16056.2	-2668.31	221.83	782.41	0	0	0	0	0	0	0	603	903	0
723	6	0	0	0	0	0	0	200	300	0	-13.1985	40.6895	-735.828	87781.3	15629	-2393.65	221.24	783.704	0	0	0	0	0	0	0	603	903	0
723	7	0	0	0	0	0	0	200	300	0	-13.046	42.0628	-737.66	88422.2	16300.3	-2439.42	222.097	783.131	0	0	0	0	0	0	0	603	903	0
723	8	0	0	0	0	0	0	200	300	0	-11.6727	41.7577	-738.575	89520.8	15873.1	-2393.65	221.492	781.793	0	0	0	0	0	0	0	603	903	0
723	9	0	0	0	0	0	0	200	300	0	-11.3675	42.368	-737.049	89246.2	16117.2	-2622.53	221.867	781.914	0	0	0	0	0	0	0	603	903	0
724	0	0	0	0	0	0	0	200	300	0	-12.8934	43.4361	-739.491	89063	15934.1	-2485.2	221.547	782.562	0	0	0	0	0	0	0	603	903	0
724	1	0	0	0	0	0	0	200	300	0	-13.3511	43.7413	-739.491	90070.1	16056.2	-2485.2	221.713	781.2	0	0	0	0	0	0	0	603	903	0
724	2	0	0	0	0	0	0	200	300	0	-13.3511	44.0465	-737.354	90344.8	16056.2	-2439.42	221.775	780.474	0	0	0	0	0	0	0	603	903	0
724	3	0	0	0	0	0	0	200	300	0	-12.4356	43.8939	-741.322	90527.9	16178.3	-2439.42	221.824	780.883	0	0	0	0	0	0	0	603	903	0
724	4	0	0	0	0	0	0	200	300	0	-12.5882	44.5042	-740.101	90894.1	15567.9	-2347.87	221.035	780.187	0	0	0	0	0	0	0	603	903	0
724	5	0	0	0	0	0	0	200	300	0	-13.3511	44.962	-741.932	90894.1	16117.2	-2485.2	221.723	780.49	0	0	0	0	0	0	0	603	903	0
724	6	0	0	0	0	0	0	200	300	0	-12.7408	46.0301	-744.679	91718.1	16300.3	-2530.98	221.889	779.835	0	0	0	0	0	0	0	603	903	0
724	7	0	0	0	0	0	0	200	300	0	-13.1985	46.0301	-743.458	91809.7	16300.3	-2576.75	221.925	779.51	0	0	0	0	0	0	0	603	903	0
724	8	0	0	0	0	0	0	200	300	0	-12.5882	46.3353	-743.153	91718.1	15934.1	-2485.2	221.441	779.582	0	0	0	0	0	0	0	603	903	0
724	9	0	0	0	0	0	0	200	300	0	-13.1985	46.0301	-742.542	92450.5	16239.3	-2393.65	221.87	778.495	0	0	0	0	0	0	0	603	903	0
725	0	0	0	0	0	0	0	200	300	0	-12.4356	47.8612	-744.984	93091.4	16117.2	-2347.87	221.634	778.042	0	0	0	0	0	0	0	603	903	0
725	1	0	0	0	0	0	0	200	300	0	-13.046	48.4715	-746.204	93366	15567.9	-2027.44	220.863	777.879	0	0	0	0	0	0	0	603	903	0
725	2	0	0	0	0	0	0	200	300	0	-12.5882	48.1664	-745.899	92999.8	16239.3	-2164.77	221.771	778.319	0	0	0	0	0	0	0	603	903	0
725	3	0	0	0	0	0	0	200	300	0	-13.3511	48.6241	-744.984	93457.6	16422.4	-2210.54	222.044	777.551	0	0	0	0	0	0	0	603	903	0
725	4	0	0	0	0	0	0	200	300	0	-13.1985	49.3871	-744.679	94373.1	15567.9	-2164.77	220.906	776.27	0	0	0	0	0	0	0	603	903	0
725	5	0	0	0	0	0	0	200	300	0	-12.1304	49.5396	-746.815	94281.6	16422.4	-2118.99	221.99	776.755	0	0	0	0	0	0	0	603	903	0
725	6	0	0	0	0	0	0	200	300	0	-12.1304	50.4552	-748.341	94464.7	16178.3	-2164.77	221.619	776.768	0	0	0	0	0	0	0	603	903	0
725	7	0	0	0	0	0	0	200	300	0	-12.8934	50.4552	-749.256	94647.8	15934.1	-2164.77	221.267	776.678	0	0	0	0	0	0	0	603	903	0
725	8	0	0	0	0	0	0	200	300	0	-13.6563	51.3707	-748.951	95380.2	15934.1	-2347.87	221.275	775.648	0	0	0	0	0	0	0	603	903	0
725	9	0	0	0	0	0	0	200	300	0	-12.1304	52.4388	-749.561	94922.4	16117.2	-2027.44	221.502	776.363	0	0	0	0	0	0	0	603	903	0
726	0	0	0	0	0	0	0	200	300	0	-12.283	51.5233	-746.815	95746.4	15934.1	-1478.12	221.336	774.794	0	0	0	0	0	0	0	603	903	0
726	1	0	0	0	0	0	0	200	300	0	-12.7408	53.5069	-747.73	95838	16300.3	-1935.88	221.8	774.828	0	0	0	0	0	0	0	603	903	0
726	2	0	0	0	0	0	0	200	300	0	-12.8934	53.6595	-752.308	96936.6	16239.3	-2164.77	221.586	774.148	0	0	0	0	0	0	0	603	903	0
726	3	0	0	0	0	0	0	200	300	0	-11.6727	53.6595	-751.087	96845.1	16422.4	-1890.11	221.865	774.06	0	0	0	0	0	0	0	603	903	0
726	4	0	0	0	0	0	0	200	300	0	-11.9778	55.6432	-752.308	97028.2	15995.2	-1707	221.261	774.026	0	0	0	0	0	0	0	603	903	0
726	5	0	0	0	0	0	0	200	300	0	-12.1304	55.0328	-753.224	97119.7	16361.4	-1386.57	221.722	774.061	0	0	0	0	0	0	0	603	903	0
726	6	0	0	0	0	0	0	200	300	0	-12.283	55.0328	-754.139	97943.7	16361.4	-1661.23	221.695	773.125	0	0	0	0	0	0	0	603	903	0
726	7	0	0	0	0	0	0	200	300	0	-10.9097	55.9483	-753.834	97943.7	15934.1	-1798.55	221.137	773.073	0	0	0	0	0	0	0	603	903	0
726	8	0	0	0	0	0	0	200	300	0	-11.6727	56.5587	-753.529	97852.1	16483.4	-1844.33	221.875	773.141	0	0	0	0	0	0	0	603	903	0
726	9	0	0	0	0	0	0	200	300	0	-12.283	57.169	-756.58	98218.3	16300.3	-1615.45	221.545	773.181	0	0	0	0	0	0	0	603	903	0
727	0	0	0	0	0	0	0	200	300	0	-11.8253	57.3216	-752.003	99133.9	15873.1	-1798.55	221.108	771.174	0	0	0	0	0	0	0	603	903	0
727	1	0	0	0	0	0	0	200	300	0	-11.0623	56.1009	-756.58	98950.7	15934.1	-1798.55	221.061	772.213	0	0	0	0	0	0	0	603	903	0
727	2	0	0	0	0	0	0	200	300	0	-11.5201	58.6949	-755.665	98859.2	16056.2	-2027.44	221.248	772.176	0	0	0	0	0	0	0	603	903	0
727	3	0	0	0	0	0	0	200	300	0	-11.6727	59.3053	-757.191	99408.5	16056.2	-1661.23	221.205	771.714	0	0	0	0	0	0	0	603	903	0
727	4	0	0	0	0	0	0	200	300	0	-12.8934	60.8311	-758.411	100141	16361.4	-1707	221.573	770.96	0	0	0	0	0	0	0	603	903	0
727	5	0	0	0	0	0	0	200	300	0	-10.1468	59.9156	-759.632	100416	15995.2	-1340.79	221.056	770.81	0	0	0	0	0	0	0	603	903	0
[truncated: 3,204 more rows]
