# Supplementary material for: The Effects of an Extemporaneous Speech Dual-task on Older Adult Gait Control
Source: Research Square preprint supplement (doi:10.21203/rs.3.rs-7674245/v1), 2025-11-18
Supplement: Supplementary file 3 [file DT10Walk2.xlsx]

## Sheet: Sheet1
Trajectories
		10:LFHD			10:RFHD			10:LBHD			10:RBHD			10:C7			10:T10			10:CLAV			10:STRN			10:RBAK			10:LSHO			10:LUPA			10:LELB			10:LFRM			10:LWRA			10:LWRB			10:LFIN
Frame	Sub Frame	X	Y	Z	X	Y	Z	X	Y	Z	X	Y	Z	X	Y	Z	X	Y	Z	X	Y	Z	X	Y	Z	X	Y	Z	X	Y	Z	X	Y	Z	X	Y	Z	X	Y	Z	X	Y	Z	X	Y	Z	X	Y	Z
		mm	mm	mm	mm	mm	mm	mm	mm	mm	mm	mm	mm	mm	mm	mm	mm	mm	mm	mm	mm	mm	mm	mm	mm	mm	mm	mm	mm	mm	mm	mm	mm	mm	mm	mm	mm	mm	mm	mm	mm	mm	mm	mm	mm	mm	mm	mm	mm
2017	0	144.92	-2251.64	1584.17	249.001	-2251.65	1587.68	131.717	-2415.97	1573.69	249.64	-2419.24	1578.4	208.57	-2444.99	1442.13	207.098	-2541.23	1161.77	199.439	-2280.66	1345.9	204.918	-2183.8	1145.29	286.578	-2535.04	1257.96	50.5224	-2351.96	1404.77	-68.1721	-2374.12	1171.01	-76.6138	-2396.74	1075.67	-101.582	-2332.22	937.287	-60.7548	-2311.28	833.968	-119.869	-2357.91	825.946	-117.145	-2304.57	760.486
2018	0	143.954	-2242.22	1584.39	247.853	-2242.06	1587.96	130.82	-2406.6	1573.87	248.89	-2409.73	1578.75	207.444	-2435.42	1442.89	205.596	-2532.82	1162.85	198.861	-2271.6	1345.5	204.703	-2175.1	1144.41	285.121	-2526.54	1259.09	49.8063	-2341.91	1404.71	-69.5974	-2364.2	1171.19	-78.5994	-2386.14	1075.82	-103.147	-2320.72	937.648	-62.2951	-2299.47	834.094	-121.407	-2345.64	826.059	-119.078	-2291.34	761.62
2019	0	143.057	-2232.74	1584.58	247.205	-2232.74	1588.17	130.065	-2397.24	1574.02	248.07	-2400.27	1578.78	206.251	-2426.08	1443.41	204.241	-2524.55	1163.73	198.603	-2262.67	1345.15	204.569	-2166.47	1143.51	283.684	-2518.13	1259.91	49.0226	-2332.23	1404.69	-70.7187	-2354.32	1171.32	-80.3633	-2375.46	1075.94	-104.422	-2309.23	938.082	-63.2995	-2287.9	834.952	-123.099	-2333.36	826.455	-120.674	-2278.23	762.675
2020	0	142.372	-2223.35	1584.53	246.373	-2223.27	1588.05	129.329	-2387.74	1574.03	247.305	-2390.81	1578.7	205.121	-2416.88	1443.81	202.867	-2516.32	1164.49	198.122	-2253.7	1344.69	204.451	-2158.08	1142.71	282.29	-2509.77	1260.63	48.3463	-2322.54	1404.54	-71.8317	-2344.34	1171.32	-82.0822	-2364.81	1076.11	-105.474	-2297.52	938.384	-64.6774	-2276.01	835.338	-124.864	-2321.06	827.009	-122.384	-2265.02	763.83
2021	0	141.747	-2213.93	1584.55	245.831	-2213.62	1588.05	128.54	-2378.28	1574.13	246.643	-2381.3	1578.73	203.951	-2407.71	1444.22	201.627	-2508.04	1165.29	197.548	-2244.72	1344.25	204.316	-2149.63	1142.1	281.006	-2501.35	1261.44	47.6421	-2313.08	1404.57	-72.6968	-2334.22	1171.27	-83.5958	-2354.03	1076.24	-106.468	-2285.79	938.867	-65.7214	-2264.12	835.728	-126.5	-2308.55	827.624	-123.839	-2251.98	764.792
2022	0	141.1	-2204.4	1584.31	245.288	-2204.18	1587.68	128.013	-2368.84	1574.09	246.095	-2371.85	1578.59	202.981	-2398.69	1444.51	200.546	-2499.82	1165.84	197.081	-2235.84	1343.77	203.986	-2141.52	1141.59	279.862	-2493.01	1261.96	46.9075	-2303.62	1404.52	-73.3235	-2323.95	1171.17	-85.127	-2343.2	1076.21	-107.348	-2273.82	939.16	-66.6355	-2252.28	836.047	-127.855	-2295.95	827.799	-125.051	-2238.84	765.642
2023	0	140.618	-2194.97	1584.2	244.703	-2194.91	1587.18	127.611	-2359.53	1574.19	245.619	-2362.48	1578.31	202.133	-2389.86	1444.58	199.625	-2491.7	1166.05	196.421	-2227.15	1343.36	203.787	-2133.48	1141.39	278.883	-2484.8	1262.18	46.2524	-2294.62	1404.49	-73.9204	-2313.71	1171.08	-86.3582	-2332.31	1076.2	-107.967	-2262.03	939.722	-67.583	-2239.96	836.473	-128.917	-2283.36	828.219	-126.113	-2225.78	766.603
2024	0	140.098	-2185.58	1583.9	244.159	-2185.54	1586.77	127.053	-2350.23	1574.12	245.165	-2352.99	1578.02	201.274	-2381.02	1444.58	198.826	-2483.45	1166.3	195.941	-2218.53	1342.96	203.493	-2125.59	1141.08	278.008	-2476.47	1262.47	45.3918	-2285.71	1404.33	-74.4445	-2303.55	1171.03	-87.4621	-2321.4	1076.16	-108.628	-2250.03	940.005	-67.9345	-2228.01	836.674	-129.863	-2270.68	828.423	-126.926	-2212.74	767.218
2025	0	139.543	-2176.4	1583.49	243.652	-2176.07	1586.43	126.647	-2340.9	1573.97	244.778	-2343.55	1577.76	200.46	-2372.32	1444.55	198.15	-2475.22	1166.49	195.46	-2210.07	1342.47	203.043	-2117.72	1140.59	277.279	-2468.2	1262.65	44.8165	-2276.76	1403.91	-75.0086	-2293.11	1170.64	-88.3706	-2310.45	1075.86	-109.138	-2238.03	940.05	-68.3417	-2216.13	836.479	-130.719	-2257.96	828.68	-127.534	-2199.69	767.533
2026	0	139.217	-2167.23	1583.02	243.191	-2166.76	1585.91	126.264	-2331.88	1573.66	244.44	-2334.37	1577.34	199.897	-2363.67	1444.32	197.631	-2467.16	1166.38	195.163	-2201.46	1342.22	202.789	-2109.82	1140.19	276.685	-2459.94	1262.54	44.2916	-2268.1	1403.58	-75.3696	-2282.77	1170.15	-89.0417	-2299.52	1075.31	-109.516	-2226.28	940.021	-68.5473	-2203.94	836.771	-131.562	-2245.6	828.492	-127.858	-2186.81	767.79
2027	0	138.719	-2158.25	1582.76	242.787	-2157.74	1585.55	125.991	-2322.92	1573.38	244.07	-2325.26	1576.87	199.333	-2355.07	1443.91	197.244	-2459.09	1166.2	194.772	-2193.09	1341.56	202.482	-2101.94	1139.7	276.19	-2451.78	1262.32	43.7604	-2259.68	1403.28	-75.8496	-2272.44	1169.61	-89.6563	-2288.68	1074.6	-109.813	-2214.55	939.929	-68.9311	-2191.36	836.872	-132.025	-2232.97	828.237	-128.056	-2173.91	767.876
2028	0	138.282	-2149.27	1582.51	242.345	-2148.69	1585.29	125.602	-2313.97	1572.87	243.783	-2316.12	1576.27	198.95	-2346.39	1443.74	196.87	-2450.92	1166.16	194.26	-2184.73	1340.94	202.039	-2093.8	1139.1	275.78	-2443.38	1262.32	43.3559	-2251.1	1402.79	-76.1441	-2262.03	1168.95	-90.322	-2277.91	1073.84	-110.104	-2202.69	939.706	-68.8813	-2178.78	836.936	-132.365	-2220.33	828	-127.916	-2160.88	767.8
2029	0	137.851	-2140.43	1582.36	242.024	-2139.78	1585.13	125.319	-2305.11	1572.27	243.531	-2307.19	1575.71	198.622	-2337.64	1443.49	196.663	-2442.66	1166.07	193.726	-2176.2	1340.31	201.716	-2085.6	1138.38	275.58	-2434.92	1262.25	42.9029	-2242.48	1402.18	-76.5356	-2251.64	1168.27	-90.6463	-2267.05	1073.1	-110.178	-2190.96	939.538	-68.9398	-2166.43	836.826	-132.164	-2207.45	827.633	-127.649	-2147.76	767.795
2030	0	137.632	-2131.78	1582.35	241.726	-2131.19	1584.78	125.093	-2296.4	1571.5	243.28	-2298.44	1574.82	198.385	-2328.83	1442.94	196.551	-2434.5	1165.71	193.356	-2167.67	1339.78	201.256	-2077.58	1137.5	275.376	-2426.52	1261.9	42.3951	-2234.1	1401.44	-76.795	-2241.44	1167.5	-90.7475	-2256.29	1072.12	-110.199	-2179.16	939.112	-68.7018	-2154.01	836.641	-132.097	-2194.76	827.034	-127.213	-2134.73	767.626
2031	0	137.273	-2123.08	1582.01	241.482	-2122.59	1584.6	124.867	-2287.85	1570.6	242.973	-2289.89	1574.03	198.153	-2320.1	1442.37	196.464	-2426.28	1165.4	193.136	-2159	1339.26	200.972	-2069.27	1136.59	275.238	-2418.06	1261.47	42.4649	-2225.51	1400.46	-76.9524	-2231.3	1166.73	-90.8014	-2245.63	1071	-110.026	-2167.43	938.668	-68.0613	-2141.61	836.547	-131.729	-2182.11	826.352	-126.325	-2121.79	767.414
2032	0	137.113	-2114.55	1581.6	241.226	-2113.9	1584.4	124.62	-2279.17	1569.86	242.756	-2281.23	1573.22	197.967	-2311.2	1441.96	196.462	-2417.9	1165.18	192.927	-2150.31	1338.55	200.598	-2060.97	1135.38	275.206	-2409.42	1261.22	42.0266	-2216.98	1399.78	-76.9808	-2221.21	1165.56	-90.8119	-2235.02	1069.85	-109.557	-2155.83	938.125	-67.51	-2129.1	836.113	-131.165	-2169.37	825.64	-125.5	-2108.65	767.048
2033	0	136.852	-2105.95	1581.16	241.27	-2105.5	1584.03	124.507	-2270.61	1568.82	242.805	-2272.84	1572.22	197.918	-2302.44	1441.29	196.561	-2409.56	1164.67	192.782	-2141.61	1337.43	200.215	-2052.56	1134.16	275.274	-2400.82	1260.76	41.9596	-2208.35	1398.73	-76.9146	-2211.19	1164.33	-90.65	-2224.49	1068.52	-108.887	-2144.13	937.299	-66.5033	-2116.69	835.861	-130.301	-2156.88	824.731	-124.394	-2095.51	766.697
2034	0	136.853	-2097.43	1580.65	241.088	-2097.04	1583.36	124.548	-2262.18	1567.7	242.678	-2264.16	1570.94	197.896	-2293.53	1440.47	196.684	-2401.14	1163.97	192.423	-2132.89	1336.29	199.824	-2043.99	1133.07	275.393	-2392.25	1260.06	41.9654	-2199.74	1397.57	-76.773	-2201.36	1163.35	-90.2785	-2213.95	1067.28	-108.095	-2132.4	936.802	-65.3731	-2104.51	835.523	-129.241	-2144.2	824.088	-123.096	-2082.56	766.585
2035	0	136.739	-2088.92	1580.23	241.053	-2088.44	1582.83	124.648	-2253.58	1566.52	242.747	-2255.48	1569.9	198.023	-2284.51	1439.88	196.858	-2392.72	1163.46	192.314	-2124.04	1335.33	199.505	-2035.5	1131.9	275.589	-2383.44	1259.51	41.8755	-2190.97	1396.75	-76.6264	-2191.65	1162.39	-90.1836	-2203.33	1066.34	-107.287	-2120.63	936.349	-64.1847	-2092.25	835.15	-128.016	-2131.5	823.492	-121.651	-2069.39	766.441
2036	0	136.725	-2080.32	1579.6	240.901	-2079.45	1582.28	124.834	-2244.96	1565.43	243.019	-2246.66	1568.72	198.158	-2275.53	1439.11	196.957	-2384.08	1162.96	192.378	-2115.16	1334.25	199.297	-2026.73	1130.6	275.789	-2374.54	1258.84	41.7846	-2182.31	1395.93	-76.3259	-2182.14	1161.28	-89.5106	-2192.64	1065	-105.993	-2108.96	935.789	-62.8859	-2079.81	834.928	-126.821	-2118.96	822.872	-120.025	-2056.33	766.299
2037	0	136.644	-2071.83	1578.79	240.971	-2070.74	1581.53	125.101	-2236.53	1564.12	243.204	-2237.86	1567.33	198.385	-2266.59	1438.16	197.269	-2375.51	1162.22	192.219	-2106.43	1333.1	198.988	-2018.06	1129.47	276.017	-2365.8	1257.94	41.9083	-2173.66	1395.06	-75.8805	-2172.81	1160.15	-88.9856	-2182.15	1063.65	-104.77	-2097.52	935.056	-61.1161	-2067.6	834.986	-125.327	-2106.52	821.863	-118.093	-2043.4	766.012
2038	0	136.793	-2063.22	1577.86	241.19	-2061.96	1580.48	125.439	-2227.96	1562.9	243.564	-2229.14	1566.02	198.664	-2257.62	1437.02	197.512	-2366.89	1161.21	192.245	-2097.63	1331.85	198.781	-2009.47	1128.31	276.379	-2356.91	1256.86	42.0623	-2164.91	1393.98	-75.4487	-2163.56	1159.07	-88.3966	-2171.68	1062.57	-103.444	-2085.85	934.494	-59.4271	-2055.56	834.584	-123.767	-2094.04	821.235	-116.119	-2030.46	765.903
2039	0	137.028	-2054.45	1576.74	241.361	-2053.04	1579.28	125.926	-2219.22	1561.73	244.026	-2220.19	1564.81	198.986	-2248.55	1436	197.874	-2358.11	1160.34	192.33	-2088.55	1330.61	198.586	-2000.71	1126.8	276.799	-2347.84	1255.85	42.2203	-2156.24	1392.88	-74.9572	-2154.36	1157.81	-87.7738	-2161.22	1061.22	-102.008	-2074.17	933.786	-57.5943	-2043.53	834.025	-121.975	-2081.43	820.343	-113.91	-2017.55	765.537
2040	0	137.295	-2045.67	1575.54	241.585	-2044.16	1577.94	126.422	-2210.44	1560.74	244.758	-2211.32	1563.65	199.404	-2239.55	1434.95	198.374	-2349.27	1159.39	192.209	-2079.69	1329.07	198.482	-1991.95	1125.33	277.353	-2338.7	1254.8	42.5225	-2147.4	1391.52	-74.4592	-2145.31	1156.56	-87.2947	-2150.99	1059.91	-100.604	-2062.82	933.05	-55.6755	-2031.44	833.721	-120.187	-2068.86	819.56	-111.488	-2004.48	765.185
2041	0	137.788	-2036.84	1574.38	242.029	-2035.13	1576.32	127.11	-2201.72	1559.63	245.425	-2202.34	1562.23	199.915	-2230.64	1433.61	198.854	-2340.38	1158.07	192.591	-2070.68	1327.55	198.528	-1983.11	1124.04	277.904	-2329.63	1253.38	42.7595	-2138.83	1390.4	-73.8492	-2136.26	1155.37	-86.546	-2140.86	1058.54	-98.9932	-2051.4	932.257	-53.5032	-2019.61	833.33	-118.419	-2056.37	818.601	-108.914	-1991.69	764.821
2042	0	138.412	-2027.94	1573.07	242.8	-2026.13	1574.89	127.923	-2192.88	1558.59	246.143	-2193.32	1560.75	200.445	-2221.63	1432.21	199.394	-2331.5	1156.71	192.805	-2061.59	1326.35	198.223	-1974.05	1122.49	278.553	-2320.43	1252	43.1667	-2130.17	1389.12	-73.3159	-2127.27	1153.86	-85.7908	-2130.83	1056.97	-97.4397	-2040.17	931.367	-51.3616	-2007.69	832.964	-116.378	-2044.07	817.762	-106.118	-1978.87	764.448
2043	0	139.232	-2018.96	1571.9	243.566	-2017	1573.43	128.721	-2183.89	1557.64	246.942	-2184.34	1559.52	200.997	-2212.61	1430.98	200.014	-2322.29	1155.47	192.917	-2052.51	1325.15	198.183	-1965.1	1121.11	279.16	-2311.18	1250.68	43.6947	-2121.46	1387.63	-72.6969	-2118.39	1152.42	-85.1474	-2120.96	1055.36	-95.9799	-2029.07	930.437	-49.1183	-1995.84	832.769	-114.264	-2031.61	816.72	-103.306	-1966.18	764.136
2044	0	140.065	-2009.98	1570.58	244.314	-2008	1571.77	129.669	-2175	1556.55	248.074	-2175.29	1558.14	201.691	-2203.57	1429.7	200.645	-2313.08	1154.09	193.135	-2043.4	1323.71	198.074	-1955.9	1119.83	279.905	-2301.81	1249.17	44.1255	-2112.68	1386.47	-72.1402	-2109.42	1151.1	-84.4043	-2111.21	1053.98	-94.2947	-2018.02	929.562	-46.7156	-1984.29	832.384	-112.078	-2019.53	815.85	-100.437	-1953.49	763.83
2045	0	141.145	-2001.11	1569.41	245.426	-1999.08	1570.23	130.791	-2166.05	1555.35	249.056	-2166.23	1556.45	202.481	-2194.6	1428.12	201.399	-2303.87	1152.48	193.636	-2034.12	1322.46	197.99	-1946.53	1118.71	280.696	-2292.56	1247.54	44.5709	-2103.86	1385.21	-71.4998	-2100.52	1149.86	-83.606	-2101.61	1052.5	-92.6684	-2007.23	928.808	-44.2524	-1972.83	832.258	-109.563	-2007.61	814.956	-97.4512	-1941.13	763.867
2046	0	142.136	-1992.19	1568.38	246.26	-1990.03	1568.82	131.945	-2157.21	1554.14	250.235	-2157.23	1554.97	203.35	-2185.45	1426.79	202.082	-2294.45	1150.97	194.059	-2024.88	1321.47	197.892	-1937.01	1117.65	281.488	-2283.1	1245.97	45.0477	-2095	1384.3	-70.7715	-2091.43	1148.72	-82.7844	-2091.97	1051.2	-91.107	-1996.68	928.213	-41.8176	-1961.24	832.427	-107.213	-1995.62	814.219	-94.4889	-1928.88	763.948
2047	0	143.34	-1983.3	1567.43	247.45	-1980.93	1567.66	133.189	-2148.25	1553.03	251.63	-2148.27	1553.59	204.127	-2176.29	1425.47	202.781	-2284.99	1149.58	194.483	-2015.55	1320.4	197.823	-1927.51	1116.57	282.272	-2273.51	1244.47	45.8934	-2086.05	1383.25	-70.1926	-2082.31	1147.72	-81.9568	-2082.68	1049.97	-89.4504	-1986.22	927.431	-39.4634	-1950.26	832.483	-104.818	-1984.14	813.642	-91.5929	-1916.85	764.093
2048	0	144.616	-1974.41	1566.48	248.768	-1971.91	1566.37	134.532	-2139.5	1551.83	253.016	-2139.35	1552.04	205.151	-2167.03	1424.04	203.527	-2275.46	1148.05	195.089	-2006.22	1318.96	197.712	-1918.04	1115.43	283.093	-2264.04	1242.89	46.6404	-2077	1382.2	-69.4406	-2073.29	1146.69	-81.0036	-2073.65	1048.65	-87.8397	-1976.14	926.81	-36.9706	-1939.3	832.496	-102.374	-1973.02	812.906	-88.5936	-1905.14	764.162
2049	0	146.069	-1965.58	1565.67	250.018	-1963.09	1565.21	135.986	-2130.6	1550.57	254.336	-2130.38	1550.3	206.074	-2157.91	1422.55	204.291	-2265.84	1146.31	195.739	-1996.78	1317.82	197.781	-1908.49	1114.38	283.88	-2254.48	1241.08	47.3727	-2067.73	1381.34	-68.7761	-2064.18	1145.87	-80.1714	-2064.5	1047.55	-86.0939	-1966.09	926.261	-34.6755	-1928.55	832.759	-99.7798	-1962.16	812.306	-85.7916	-1893.73	764.323
2050	0	147.576	-1956.71	1564.94	251.744	-1954.23	1564.25	137.474	-2121.72	1549.36	255.811	-2121.45	1548.86	207.192	-2148.56	1421.27	204.891	-2256.03	1144.79	196.509	-1987.33	1316.86	197.845	-1898.71	1113.46	284.64	-2244.78	1239.47	48.3101	-2058.56	1380.53	-68.0473	-2054.84	1145.09	-79.2189	-2055.58	1046.68	-84.5827	-1956.23	925.82	-32.4584	-1917.93	833.063	-97.2203	-1951.59	811.683	-83.0438	-1882.55	764.546
2051	0	149.321	-1947.7	1564.25	253.391	-1945.31	1563.35	138.997	-2112.66	1548.38	257.387	-2112.48	1547.55	208.388	-2139.16	1420.03	205.601	-2246.05	1143.44	197.313	-1977.76	1315.95	198.122	-1888.96	1112.67	285.479	-2234.86	1237.96	49.4288	-2049.18	1379.77	-67.2931	-2045.58	1144.45	-78.3613	-2046.51	1046.08	-82.965	-1946.51	925.442	-30.2255	-1907.63	833.363	-94.8778	-1941.18	811.328	-80.3006	-1871.73	764.81
2052	0	151.094	-1938.87	1563.68	255.381	-1936.6	1562.32	140.629	-2103.76	1547.27	258.968	-2103.62	1546.08	209.691	-2129.91	1418.73	206.267	-2235.89	1141.74	198.315	-1968.16	1314.99	198.313	-1878.99	1111.88	286.229	-2224.98	1236.11	50.6338	-2039.77	1379.04	-66.481	-2036.3	1144.18	-77.408	-2037.5	1045.37	-81.4828	-1937.11	925.183	-28.2092	-1897.72	833.378	-92.6237	-1931.02	810.89	-77.8979	-1861.21	765.112
2053	0	153.026	-1929.84	1563.14	257.258	-1927.71	1561.45	142.318	-2094.82	1546.33	260.642	-2094.78	1544.71	211.026	-2120.55	1417.33	206.831	-2225.58	1139.95	199.189	-1958.59	1314.32	198.757	-1868.94	1111.31	287.074	-2215.07	1234.17	51.781	-2030.44	1378.56	-65.8159	-2026.86	1143.83	-76.589	-2028.56	1044.8	-79.9218	-1927.52	924.823	-26.1909	-1887.88	833.58	-90.4043	-1921.11	810.438	-75.3614	-1850.86	765.302
2054	0	155.014	-1920.86	1562.6	259.229	-1918.71	1560.79	144.075	-2085.67	1545.54	262.4	-2085.86	1543.66	212.43	-2111.26	1416.16	207.406	-2215.05	1138.22	200.469	-1948.65	1313.77	199.197	-1858.59	1111	287.894	-2205.03	1232.25	53.1757	-2020.99	1378.08	-65.0712	-2017.65	1143.58	-75.7388	-2019.38	1044.27	-78.5845	-1918.29	924.5	-24.3344	-1878.34	833.971	-88.4821	-1911.6	810.051	-73.0868	-1841.04	765.286
2055	0	157.077	-1911.81	1562.26	261.328	-1909.62	1560.2	145.933	-2076.65	1544.87	264.35	-2076.92	1542.64	214.05	-2101.91	1414.97	208.02	-2204.38	1136.5	201.596	-1938.88	1313.34	199.792	-1848.17	1110.78	288.789	-2194.89	1230.39	54.4427	-2011.51	1377.73	-64.0892	-2008.3	1143.42	-74.8329	-2010.29	1044.08	-77.2744	-1909	924.223	-22.739	-1869.11	833.952	-86.7206	-1902.11	809.614	-71.1083	-1831.51	765.193
2056	0	159.216	-1902.77	1562.19	263.538	-1900.76	1559.73	148.058	-2067.51	1544.23	266.372	-2067.78	1541.6	215.717	-2092.52	1413.71	208.583	-2193.67	1134.8	202.986	-1928.95	1313.01	200.467	-1837.59	1110.88	289.759	-2184.74	1228.43	55.9803	-2002.08	1377.47	-63.2259	-1998.87	1143.42	-73.9831	-2001.08	1043.92	-75.9298	-1899.84	923.994	-21	-1860.02	834.098	-85.0094	-1893.1	809.328	-69.0536	-1822.39	765.042
2057	0	161.373	-1893.53	1562.37	265.543	-1891.58	1559.35	150.227	-2058.39	1543.95	268.473	-2058.5	1540.92	217.414	-2082.93	1412.9	208.998	-2182.82	1133.55	204.228	-1918.74	1313.12	201.139	-1826.84	1111.06	290.637	-2174.42	1226.93	57.475	-1992.4	1377.62	-62.2379	-1989.41	1143.65	-72.9823	-1991.84	1044.13	-74.7275	-1890.77	923.971	-19.7047	-1851.35	834.027	-83.4416	-1884.07	809.2	-67.5292	-1813.48	764.999
2058	0	163.443	-1884.27	1562.73	267.759	-1882	1559.71	152.432	-2048.92	1544.15	270.773	-2048.89	1540.72	219.119	-2073.02	1412.63	209.317	-2171.96	1132.95	205.817	-1908.48	1313.33	201.655	-1815.84	1111.5	291.423	-2164.1	1225.89	59.0496	-1982.27	1378.04	-61.1839	-1979.92	1144.07	-71.9556	-1982.61	1044.61	-73.4645	-1881.84	924.152	-18.3541	-1842.77	834.175	-82.5299	-1875.52	809.545	-66.0108	-1805.01	765.058
2059	0	165.603	-1874.83	1563.43	269.7	-1872.44	1560.08	154.813	-2039.64	1544.33	273.13	-2039.29	1540.6	220.694	-2063.1	1412.45	209.591	-2161.33	1132.6	207.234	-1898.3	1313.86	202.456	-1804.69	1112.28	292.104	-2153.78	1225.18	60.5747	-1972.02	1378.77	-59.9361	-1970.38	1144.96	-71.074	-1973.45	1045.37	-72.3004	-1873.08	924.564	-17.2297	-1834.52	834.418	-81.6016	-1867.4	809.825	-64.8895	-1797.16	765.005
2060	0	167.705	-1865.48	1564.35	271.813	-1862.74	1560.6	157.201	-2030.22	1544.74	275.514	-2029.68	1540.63	222.19	-2053.18	1412.62	209.701	-2151.01	1132.53	208.908	-1887.83	1314.57	203.155	-1793.77	1113.15	292.542	-2143.52	1224.86	62.1985	-1961.49	1379.82	-58.8041	-1960.86	1146.05	-69.9537	-1964.54	1046.64	-71.3313	-1864.73	925.14	-16.2796	-1826.62	834.787	-80.6243	-1859.73	810.411	-64.0871	-1789.7	765.242
2061	0	169.737	-1856.07	1565.53	273.869	-1853.07	1561.52	159.616	-2020.85	1545.31	277.915	-2019.82	1540.92	223.531	-2043.11	1413.28	209.598	-2140.57	1133.12	210.556	-1877.18	1315.69	204.207	-1782.63	1114.23	292.728	-2133.22	1224.93	63.7534	-1950.64	1381.24	-57.5853	-1951.33	1147.47	-68.88	-1955.38	1048.25	-70.3751	-1856.6	925.972	-15.925	-1819.31	835.274	-80.0476	-1852.47	811.208	-63.6033	-1782.69	765.46
2062	0	171.898	-1846.53	1566.93	276.021	-1843.16	1562.65	162.088	-2011.16	1546.33	280.402	-2009.86	1541.46	224.783	-2033.09	1414.45	209.254	-2130.02	1134.16	212.166	-1866.73	1316.73	205.175	-1771.65	1115.44	292.828	-2122.94	1225.6	65.4402	-1939.6	1383.06	-56.4494	-1941.56	1149.47	-67.7761	-1946.44	1050.22	-69.6559	-1848.57	927.109	-15.3651	-1812.13	835.966	-79.5129	-1845.54	812.331	-63.3787	-1776.1	765.968
2063	0	174.048	-1836.89	1568.63	278.171	-1833.48	1563.8	164.448	-2001.51	1547.63	282.727	-1999.96	1542.27	225.994	-2023.05	1415.67	208.833	-2119.33	1135.22	213.702	-1856.06	1318.19	206.402	-1760.63	1117.23	292.614	-2112.74	1226.27	67.1045	-1928.49	1385.03	-55.2878	-1931.71	1151.67	-66.8328	-1937.34	1052.48	-69.2137	-1840.77	928.557	-15.0425	-1805.18	836.725	-79.2329	-1839.09	813.779	-63.4214	-1770.14	766.612
2064	0	176.334	-1827.13	1570.64	280.405	-1823.67	1565.2	166.749	-1991.9	1549.2	284.946	-1990.23	1543.31	227.039	-2013.05	1416.98	208.301	-2108.42	1136.4	215.184	-1845.87	1319.76	207.712	-1749.71	1119.08	292.377	-2102.64	1227.24	68.676	-1917.39	1387.2	-54.13	-1921.78	1154.15	-65.9965	-1928.39	1055.12	-68.7593	-1833.42	930.034	-14.9504	-1798.73	837.586	-79.0285	-1832.94	815.154	-63.7706	-1764.5	767.499
2065	0	178.508	-1817.38	1572.66	282.573	-1813.88	1566.84	168.689	-1982.04	1551.24	287.029	-1980.41	1544.74	228.089	-2002.84	1418.54	207.639	-2097.34	1137.88	216.841	-1836.01	1321.12	209.038	-1739.03	1121.06	291.996	-2092.5	1228.39	70.1257	-1906.29	1389.56	-53.2172	-1911.84	1156.87	-65.1946	-1919.23	1058.04	-68.4482	-1826.07	931.65	-15.2071	-1792.54	838.418	-78.911	-1827.24	816.729	-64.1099	-1759.26	768.122
2066	0	180.719	-1807.56	1574.82	284.717	-1804.09	1568.72	170.578	-1972.06	1553.38	288.839	-1970.66	1546.33	229.129	-1992.77	1420.23	207.038	-2086.35	1139.42	218.143	-1825.92	1322.97	210.631	-1728.41	1123.47	291.746	-2082.15	1229.72	71.6556	-1895.35	1392.06	-52.2107	-1901.97	1159.8	-64.3972	-1910.09	1061	-68.1736	-1818.77	933.382	-15.1399	-1786.43	839.439	-79.4275	-1821.5	818.706	-64.691	-1754.33	768.865
2067	0	182.947	-1797.75	1577.04	286.865	-1794.59	1570.42	172.231	-1962.33	1555.64	290.488	-1961.08	1547.98	230.139	-1982.79	1421.84	206.629	-2075.63	1140.81	219.629	-1815.82	1324.96	211.844	-1717.97	1125.9	291.569	-2071.99	1230.98	73.1263	-1884.76	1394.55	-51.2412	-1891.9	1162.81	-63.7009	-1900.99	1064	-68.0656	-1811.57	935.249	-15.5761	-1779.95	840.887	-79.8484	-1815.87	820.508	-65.3146	-1749.72	769.525
2068	0	185.051	-1787.85	1579.48	288.995	-1785.11	1572.32	173.819	-1952.46	1557.88	292.034	-1951.58	1549.83	231.201	-1972.93	1423.45	206.405	-2065.04	1142.26	220.999	-1805.85	1327.23	213.32	-1707.58	1128.46	291.476	-2061.78	1232.15	74.5011	-1874.23	1397.06	-50.3766	-1881.69	1165.83	-63.2429	-1891.92	1067.13	-68.1205	-1804.38	937.228	-16.1741	-1775.03	842.071	-80.7149	-1810.23	822.77	-65.9921	-1745.19	770.415
2069	0	186.989	-1777.95	1581.7	290.987	-1775.6	1574.21	175.147	-1942.49	1560.16	293.381	-1942	1551.78	232.169	-1963.05	1425.19	206.324	-2054.47	1143.9	222.333	-1795.9	1329.27	214.606	-1697.41	1130.71	291.509	-2051.47	1233.47	75.7984	-1863.79	1399.68	-49.7225	-1871.42	1168.92	-62.7253	-1882.99	1070.4	-68.3356	-1797.06	939.32	-16.6807	-1769.39	843.095	-81.6121	-1804.33	825.003	-66.6475	-1740.63	771.005
2070	0	188.716	-1768.26	1583.82	292.697	-1766.1	1576.23	176.328	-1932.65	1562.21	294.586	-1932.51	1553.43	233.122	-1953.1	1426.84	206.346	-2044.04	1145.43	223.564	-1786.03	1331.27	215.839	-1687.25	1132.99	291.681	-2041.29	1234.92	76.9901	-1853.46	1401.93	-49.0405	-1861.22	1171.75	-62.4495	-1874.1	1073.18	-68.6235	-1789.92	941.308	-17.2715	-1763.46	844.445	-82.758	-1798.53	827.259	-67.5325	-1736.28	771.662
2071	0	190.359	-1758.56	1585.98	294.337	-1756.81	1577.95	177.468	-1922.96	1563.99	295.558	-1923.16	1554.94	234.001	-1943.3	1428.24	206.472	-2033.77	1146.78	224.625	-1776.23	1333.09	216.723	-1677.29	1135.1	291.931	-2031.29	1236.07	78.0622	-1843.39	1404	-48.4083	-1851.08	1174.14	-62.0624	-1865.57	1075.86	-69.0151	-1782.8	943.206	-18.4551	-1757.95	845.482	-83.8889	-1792.64	829.186	-68.5146	-1731.86	772.147
2072	0	191.756	-1748.91	1588.02	295.723	-1747.34	1579.85	178.331	-1913.29	1565.64	296.553	-1913.72	1556.33	234.831	-1933.4	1429.79	206.775	-2023.68	1148.36	225.548	-1766.48	1334.66	217.64	-1667.36	1136.96	292.338	-2021.13	1237.43	78.9672	-1833.31	1405.85	-48.0671	-1841.07	1176.38	-61.9586	-1856.89	1078.3	-69.5376	-1775.55	944.978	-19.3452	-1751.85	846.551	-85.4986	-1786.59	831.249	-69.5369	-1727.31	772.623
2073	0	192.94	-1739.28	1589.77	296.979	-1737.84	1581.57	179.164	-1903.39	1567.03	297.41	-1904.35	1557.75	235.604	-1923.44	1431.38	207.479	-2013.93	1150.06	226.363	-1756.69	1335.99	218.232	-1657.6	1138.35	292.759	-2011.09	1238.9	79.7523	-1823.25	1407.47	-47.7494	-1831.12	1178.26	-61.7838	-1848.31	1080.42	-70.1951	-1768.26	946.459	-20.6166	-1746.07	847.22	-86.9787	-1780.33	833.148	-70.9031	-1722.73	772.959
2074	0	193.997	-1729.69	1591.52	297.984	-1728.4	1583.09	180.03	-1893.75	1568.25	298.181	-1894.69	1558.7	236.303	-1913.47	1432.84	208.361	-2004.52	1151.66	227.15	-1746.95	1337.04	218.801	-1647.99	1139.33	293.449	-2001.25	1240.35	80.4753	-1813.32	1408.83	-47.3887	-1821.32	1180	-61.7685	-1839.73	1082.49	-70.7206	-1760.92	947.823	-21.7599	-1740.27	847.807	-88.6915	-1774.23	834.786	-72.3398	-1717.77	773.267
2075	0	194.672	-1720.22	1593.03	298.648	-1718.98	1584.61	180.595	-1884.33	1569.24	298.862	-1885.2	1559.68	237.005	-1903.58	1434.09	209.182	-1995.03	1153.2	227.688	-1737.28	1337.99	219.105	-1638.49	1140.01	294.137	-1991.45	1241.78	81.0783	-1803.46	1410.01	-47.1769	-1811.71	1181.41	-61.9	-1831.2	1084.37	-71.51	-1753.65	949.008	-22.9071	-1734.14	848.378	-90.1491	-1767.9	836.243	-73.8566	-1712.83	773.508
2076	0	195.217	-1710.73	1594.47	299.237	-1709.42	1586.09	180.977	-1874.67	1570.17	299.333	-1875.53	1560.75	237.518	-1893.61	1435.51	209.913	-1985.79	1154.84	228.281	-1727.6	1338.87	219.149	-1629.13	1140.6	294.721	-1981.72	1243.21	81.5478	-1793.67	1411.21	-47.0385	-1802.27	1182.48	-61.9109	-1822.69	1085.67	-72.2289	-1746.32	949.86	-24.5084	-1728.09	848.579	-92.0908	-1761.9	837.397	-75.699	-1707.51	773.789
2077	0	195.638	-1701.21	1595.72	299.682	-1699.78	1587.54	181.504	-1865.12	1571.1	299.783	-1865.88	1561.64	238.002	-1883.72	1436.83	210.661	-1976.57	1156.43	228.59	-1717.98	1339.46	219.09	-1620.04	1140.85	295.396	-1972.08	1244.76	81.8498	-1784.03	1411.99	-46.909	-1793.42	1183.35	-61.8878	-1814.08	1086.69	-73.0096	-1739.13	950.388	-25.9157	-1721.92	848.771	-93.3089	-1755.58	838.274	-77.5408	-1702.14	774.024
2078	0	195.796	-1691.86	1596.64	299.886	-1690.34	1588.6	181.875	-1855.74	1571.77	300.123	-1856.38	1562.34	238.506	-1873.86	1437.84	211.44	-1967.8	1157.74	228.732	-1708.49	1340.07	219.019	-1611	1140.91	296.142	-1962.54	1246.11	82.1432	-1774.6	1412.74	-46.6866	-1784.77	1183.88	-61.8006	-1805.74	1087.71	-73.6731	-1731.99	950.942	-27.3783	-1715.69	848.786	-95.0283	-1749.56	839.126	-79.6685	-1696.89	774.404
2079	0	196.09	-1682.38	1597.67	300.089	-1680.81	1589.56	182.175	-1846.3	1572.63	300.395	-1846.9	1563.2	238.979	-1864.14	1439	212.286	-1958.92	1159.06	228.761	-1699.04	1340.71	218.815	-1602.12	1141.04	296.955	-1953.26	1247.59	82.3822	-1765.22	1413.36	-46.4284	-1776.47	1184.58	-61.8322	-1797.27	1088.68	-74.4115	-1724.89	951.389	-28.9123	-1709.48	848.864	-96.4376	-1743.46	839.836	-81.9007	-1691.12	774.822
2080	0	196.204	-1672.86	1598.56	300.082	-1671.19	1590.48	182.346	-1836.67	1573.38	300.761	-1837.24	1564.06	239.422	-1854.38	1440.23	213.079	-1950.05	1160.65	228.672	-1689.62	1341.23	218.468	-1593.4	1140.96	297.774	-1943.9	1249.14	82.5382	-1755.96	1414.08	-46.2057	-1768.37	1184.99	-61.6796	-1788.99	1089.61	-75.096	-1717.88	951.925	-30.363	-1703.23	848.951	-98.0511	-1737.37	840.767	-84.1448	-1685.12	775.261
2081	0	196.171	-1663.38	1599.39	300.116	-1661.61	1591.3	182.559	-1827.26	1574.12	300.961	-1827.73	1564.92	239.801	-1844.6	1441.32	213.973	-1941.52	1162.03	228.463	-1680.36	1341.73	217.961	-1584.8	1140.76	298.567	-1934.7	1250.6	82.5404	-1746.85	1414.63	-45.7979	-1760.43	1185.58	-61.7263	-1781.04	1090.44	-75.7561	-1710.92	952.385	-31.8183	-1697.09	848.759	-99.1689	-1731.3	841.498	-86.4469	-1679.2	775.876
2082	0	196.061	-1653.94	1599.95	300.116	-1652.13	1591.89	182.581	-1817.82	1574.71	300.902	-1818.22	1565.5	240.141	-1835.19	1442.34	214.832	-1933.01	1163.23	228.228	-1671.11	1342.19	217.439	-1576.31	1140.54	299.356	-1925.51	1251.93	82.6157	-1737.95	1415.15	-45.4731	-1752.86	1186.03	-61.4736	-1773.11	1091.2	-76.3889	-1704.08	952.783	-33.1384	-1690.66	849.071	-100.807	-1725.25	842.304	-88.5225	-1673.1	776.597
2083	0	196.016	-1644.27	1600.42	300.058	-1642.53	1592.47	182.538	-1808.28	1575.28	300.911	-1808.62	1566.14	240.415	-1825.77	1443.28	215.633	-1924.49	1164.47	227.902	-1662.01	1342.53	216.831	-1567.77	1140.55	300.139	-1916.52	1253.34	82.588	-1729.16	1415.7	-45.142	-1745.4	1186.63	-61.3031	-1765.58	1092.15	-76.9917	-1697.29	953.373	-34.4687	-1684.29	849.237	-101.904	-1719.18	843.245	-90.6969	-1667.09	777.409
2084	0	195.864	-1634.77	1600.75	299.886	-1632.83	1593.06	182.494	-1798.67	1575.88	300.859	-1799.03	1567.01	240.648	-1816.38	1444.3	216.442	-1916.05	1165.84	227.441	-1653.05	1342.7	216.267	-1559.26	1140.69	300.755	-1907.47	1254.62	82.4896	-1720.31	1416.3	-45.1433	-1738.14	1187.17	-61.2437	-1758.33	1092.87	-77.6219	-1690.56	954.032	-35.8078	-1677.9	849.378	-103.1	-1713.03	844.28	-92.5944	-1660.76	778.223
2085	0	195.667	-1625.22	1601.05	299.684	-1623.21	1593.41	182.431	-1789.12	1576.34	300.744	-1789.41	1567.43	240.921	-1807.23	1445.05	217.177	-1907.68	1166.85	227.027	-1644.16	1342.97	215.736	-1550.84	1140.81	301.393	-1898.46	1255.69	82.4366	-1711.76	1416.9	-45.2203	-1730.92	1187.94	-61.3599	-1751.34	1093.91	-78.3787	-1683.98	954.773	-37.0489	-1671.41	849.821	-104.098	-1707	845.021	-94.5414	-1654.48	779.292
2086	0	195.552	-1615.59	1601.32	299.597	-1613.65	1593.65	182.382	-1779.57	1576.75	300.638	-1780	1567.97	241.165	-1798.11	1445.65	217.777	-1899.31	1167.65	226.686	-1635.2	1343.27	215.361	-1542.41	1141.09	302.036	-1889.66	1256.63	82.3227	-1703.29	1417.38	-45.3541	-1723.79	1188.76	-61.2929	-1744.41	1094.68	-79.128	-1677.4	955.565	-38.2471	-1664.77	850.266	-104.592	-1700.91	845.714	-96.1613	-1648.08	780.253
2087	0	195.391	-1605.94	1601.53	299.459	-1604.09	1593.91	182.141	-1769.99	1577.19	300.473	-1770.42	1568.6	241.264	-1788.96	1446.22	218.201	-1890.8	1168.55	226.349	-1626.31	1343.6	214.941	-1533.96	1141.35	302.416	-1880.74	1257.43	82.0503	-1694.72	1417.93	-45.7573	-1716.81	1189.45	-61.3663	-1737.57	1095.44	-79.8917	-1670.79	956.202	-39.1716	-1658.03	850.844	-105.572	-1694.84	846.483	-97.8482	-1641.74	781.22
2088	0	195.069	-1596.44	1601.49	299.225	-1594.37	1594.09	181.892	-1760.46	1577.54	300.256	-1760.93	1569.09	241.283	-1779.93	1446.78	218.494	-1882.52	1169.36	225.875	-1617.5	1343.75	214.473	-1525.67	1141.59	302.679	-1871.97	1258.31	81.745	-1686.12	1418.36	-46.0745	-1709.85	1190.06	-61.5079	-1730.82	1095.9	-80.6563	-1664.4	956.578	-39.9428	-1651.33	851.437	-106.13	-1688.78	846.868	-99.0821	-1635.27	781.805
2089	0	194.77	-1586.88	1601.41	298.946	-1584.83	1594.02	181.808	-1750.94	1577.78	300.114	-1751.47	1569.21	241.295	-1770.99	1447	218.611	-1874.22	1169.81	225.497	-1608.7	1343.75	214.109	-1517.37	1141.61	302.863	-1863.31	1258.63	81.4862	-1677.65	1418.45	-46.3208	-1703.05	1190.31	-61.6277	-1724.24	1096.13	-81.436	-1658.08	956.812	-40.8058	-1644.56	851.66	-106.306	-1682.6	847.203	-100.187	-1628.9	782.159
2090	0	194.485	-1577.38	1601.36	298.568	-1575.31	1593.9	181.613	-1741.48	1577.89	299.815	-1741.87	1569.4	241.189	-1761.96	1447.13	218.69	-1865.86	1170.12	225.131	-1600.02	1343.71	213.693	-1509.1	1141.55	302.914	-1854.67	1259.03	81.1648	-1669.1	1418.55	-46.71	-1696.27	1190.59	-61.859	-1717.51	1096.58	-82.2773	-1651.57	957.11	-41.7406	-1637.95	851.972	-106.859	-1676.2	847.497	-101.023	-1622.48	782.442
2091	0	194.148	-1567.87	1601.2	298.254	-1565.8	1593.77	181.312	-1732.06	1578.06	299.562	-1732.32	1569.68	241.044	-1752.93	1447.47	218.657	-1857.58	1170.76	224.787	-1591.21	1343.57	213.37	-1500.92	1141.25	302.918	-1846.01	1259.63	80.755	-1660.3	1418.59	-47.1029	-1689.36	1190.89	-62.1159	-1710.54	1096.81	-82.9593	-1644.87	957.195	-42.1945	-1630.82	852.002	-107.323	-1669.75	847.599	-101.664	-1615.98	782.528
2092	0	193.731	-1558.35	1600.79	297.91	-1556.19	1593.47	180.945	-1722.6	1578.16	299.387	-1722.88	1569.88	240.862	-1743.69	1447.69	218.553	-1849.28	1171.22	224.484	-1582.49	1343.14	213.015	-1492.87	1140.7	302.874	-1837.5	1260.04	80.3744	-1651.44	1418.37	-47.5483	-1682.53	1191.05	-62.5518	-1703.63	1096.86	-83.633	-1638.25	957.069	-42.4936	-1623.83	851.79	-107.55	-1663.23	847.533	-101.993	-1609.45	782.284
2093	0	193.288	-1548.94	1600.42	297.419	-1546.71	1593.01	180.538	-1713.26	1578.03	299.013	-1713.49	1569.73	240.58	-1734.62	1447.55	218.344	-1840.99	1171.34	224.211	-1573.69	1342.82	212.806	-1484.71	1140.02	302.745	-1829	1260.35	80.0828	-1642.68	1418.07	-48.0287	-1675.62	1190.97	-62.9654	-1696.73	1096.72	-84.2662	-1631.61	956.724	-43.0664	-1617.04	851.576	-107.559	-1656.85	847.08	-102.118	-1602.92	781.993
2094	0	192.924	-1539.43	1599.85	296.94	-1537.23	1592.47	180.275	-1703.96	1577.79	298.574	-1704.09	1569.51	240.152	-1725.51	1447.42	218.022	-1832.74	1171.55	223.888	-1564.88	1342.33	212.621	-1476.54	1139.4	302.469	-1820.49	1260.55	79.6294	-1633.69	1417.53	-48.4318	-1668.46	1190.72	-63.2554	-1689.6	1096.47	-84.7802	-1624.81	956.301	-43.4263	-1609.99	851.465	-107.362	-1650.49	846.533	-102.361	-1596.51	781.517
2095	0	192.289	-1529.95	1599.28	296.435	-1527.65	1591.93	179.717	-1694.42	1577.64	298.178	-1694.69	1569.48	239.747	-1716.32	1447.39	217.688	-1824.52	1171.89	223.45	-1555.99	1341.7	212.457	-1468.29	1138.54	302.071	-1811.84	1260.83	79.1851	-1624.66	1417.08	-48.9436	-1661.11	1190.51	-63.6484	-1682.2	1096.24	-85.3542	-1617.91	955.781	-43.6431	-1602.87	851.312	-107.43	-1643.83	846.035	-102.516	-1589.96	780.925
2096	0	191.665	-1520.49	1598.4	295.712	-1518.03	1591.15	179.19	-1684.91	1577.25	297.577	-1685.1	1569.05	239.326	-1707.12	1447.13	217.273	-1816.17	1171.91	223.2	-1547.21	1340.92	212.291	-1460.1	1137.45	301.707	-1803.23	1260.98	78.704	-1615.56	1416.48	-49.4495	-1653.42	1190.16	-64.0352	-1674.68	1095.88	-85.752	-1610.94	955.25	-43.9915	-1595.75	850.99	-107.221	-1637.26	845.265	-102.458	-1583.36	780.032
2097	0	191.089	-1510.93	1597.47	295.172	-1508.68	1590.02	178.702	-1675.59	1576.67	297.053	-1675.7	1568.49	238.842	-1698	1446.62	216.856	-1807.81	1171.7	222.905	-1538.44	1339.97	212.07	-1451.76	1136.3	301.242	-1794.84	1260.91	78.3604	-1606.64	1415.72	-49.936	-1645.65	1189.75	-64.3144	-1667.08	1095.41	-85.9095	-1603.76	954.497	-44.3046	-1588.99	849.954	-107.191	-1630.65	844.347	-102.261	-1576.88	779.095
2098	0	190.558	-1501.47	1596.39	294.61	-1499.22	1589.12	178.025	-1666.07	1576.08	296.403	-1666.32	1568.13	238.206	-1688.97	1446.18	216.286	-1799.42	1171.6	222.568	-1529.58	1338.98	211.797	-1443.48	1135.01	300.646	-1786.19	1260.8	77.8051	-1597.51	1414.93	-50.4745	-1637.49	1189.15	-64.7966	-1659.15	1094.8	-86.2002	-1596.57	953.595	-44.3485	-1581.82	849.26	-107.017	-1623.91	843.421	-102.113	-1570.38	778.143
2099	0	189.803	-1491.9	1595.19	293.847	-1489.56	1588.12	177.215	-1656.42	1575.4	295.623	-1656.72	1567.52	237.454	-1679.79	1445.69	215.535	-1790.76	1171.34	222.025	-1520.7	1337.85	211.457	-1434.98	1133.61	299.88	-1777.58	1260.57	77.295	-1588.19	1414.08	-51.0955	-1628.94	1188.4	-65.2235	-1651.25	1093.97	-86.276	-1589.19	952.502	-44.2575	-1575.01	848.543	-107.1	-1617.05	842.575	-101.982	-1563.85	776.852
2100	0	188.998	-1482.44	1593.78	293.06	-1480	1586.84	176.327	-1646.9	1574.39	294.7	-1647.17	1566.5	236.712	-1670.85	1444.87	214.852	-1782.28	1170.79	221.506	-1511.9	1336.68	211.297	-1426.38	1132.35	299.098	-1769.08	1260.1	76.7712	-1579.03	1413.01	-51.548	-1620.4	1187.4	-65.6202	-1643.32	1093.03	-86.4468	-1581.9	951.271	-44.4692	-1568.27	847.004	-106.988	-1610.31	841.31	-101.816	-1557.29	775.501
2101	0	188.13	-1472.77	1592.27	292.348	-1470.7	1585.5	175.415	-1637.49	1573.23	293.801	-1637.92	1565.72	235.83	-1661.78	1443.92	214.081	-1773.8	1170.05	221.127	-1502.95	1335.42	210.983	-1417.73	1130.9	298.167	-1760.55	1259.35	75.9662	-1569.72	1411.89	-51.9935	-1611.44	1186.13	-66.0297	-1635.15	1092.01	-86.5701	-1574.36	949.909	-44.1238	-1561.19	845.758	-106.847	-1603.42	839.974	-101.678	-1550.68	773.89
2102	0	187.375	-1463.07	1590.84	291.431	-1461.14	1584.16	174.344	-1627.89	1572.24	292.782	-1628.49	1564.93	234.83	-1652.73	1443.03	213.008	-1765.02	1169.37	220.572	-1494.06	1334.07	210.748	-1408.99	1129.58	297.164	-1751.96	1258.67	75.2318	-1560.41	1410.6	-52.4084	-1602.18	1184.78	-66.5569	-1626.76	1090.92	-86.544	-1566.62	948.457	-44.0812	-1554.25	844.255	-106.821	-1596.38	838.629	-101.475	-1544.01	772.282
2103	0	186.369	-1453.53	1589.2	290.58	-1451.64	1582.75	173.162	-1618.19	1571.18	291.673	-1618.97	1563.98	233.894	-1643.55	1442.09	212.075	-1756.39	1168.56	219.976	-1485.12	1332.77	210.346	-1400.05	1128.12	296.122	-1743.26	1257.89	74.5004	-1550.98	1409.3	-52.9184	-1592.96	1183.25	-66.8788	-1618.46	1089.62	-86.6682	-1558.91	946.849	-43.8694	-1547.15	842.518	-106.563	-1589.32	837.215	-101.146	-1537.27	770.432
2104	0	185.395	-1443.91	1587.69	289.691	-1442.32	1581.21	171.961	-1608.59	1570	290.427	-1609.7	1562.92	232.71	-1634.43	1440.83	211.01	-1747.39	1167.45	219.212	-1476.15	1331.4	210.02	-1390.95	1126.82	294.954	-1734.52	1256.85	73.5261	-1541.59	1407.94	-53.4304	-1583.64	1181.79	-67.3863	-1609.74	1088.16	-86.6661	-1551.1	945.2	-43.7893	-1540.04	840.968	-106.739	-1582.06	835.573	-100.831	-1530.52	768.674
2105	0	184.514	-1434.28	1586.03	288.662	-1432.97	1579.7	170.794	-1599.06	1568.84	289.104	-1600.51	1561.98	231.452	-1625.36	1439.55	209.807	-1738.66	1166.24	218.555	-1467.02	1330.17	209.524	-1381.71	1125.73	293.688	-1725.89	1255.64	72.4474	-1532.2	1406.65	-54.0348	-1574.15	1180.1	-67.7608	-1601.19	1086.6	-86.7331	-1543.3	943.256	-43.6686	-1532.85	839.233	-106.805	-1574.68	833.73	-100.511	-1523.68	766.597
2106	0	183.434	-1424.68	1584.24	287.685	-1423.65	1578.21	169.317	-1589.46	1567.81	287.696	-1591.04	1560.89	230.153	-1616.1	1438.32	208.517	-1729.54	1165.11	217.655	-1457.88	1328.8	209.015	-1372.56	1124.25	292.327	-1716.87	1254.61	71.3691	-1522.77	1405.14	-54.6004	-1564.63	1178.16	-68.3686	-1592.34	1084.86	-86.8852	-1535.21	941.33	-43.8062	-1525.63	837.121	-107.014	-1567.06	832.165	-100.209	-1516.63	764.499
2107	0	182.375	-1415.09	1582.69	286.715	-1414.21	1576.58	167.756	-1579.81	1566.59	286.209	-1581.8	1559.79	228.763	-1606.91	1436.93	207.344	-1720.55	1163.79	216.681	-1448.77	1327.33	208.431	-1363.24	1122.9	291.015	-1707.99	1253.29	70.125	-1513.23	1403.43	-55.262	-1555.11	1176.27	-68.8655	-1583.62	1083.22	-86.9952	-1526.99	939.237	-43.7338	-1517.97	835.331	-107.145	-1559.38	830.301	-99.8573	-1509.47	762.07
2108	0	181.103	-1405.44	1581.04	285.522	-1404.98	1574.81	166.149	-1570.24	1565.24	284.591	-1572.57	1558.59	227.339	-1597.75	1435.41	206.121	-1711.37	1162.21	215.592	-1439.52	1325.9	207.838	-1353.86	1121.69	289.634	-1698.94	1251.83	68.8686	-1503.9	1401.85	-56.0288	-1545.53	1174.6	-69.5357	-1574.69	1081.37	-87.3053	-1518.8	937.242	-43.6349	-1510.3	833.089	-107.227	-1551.63	828.225	-99.6433	-1502.26	759.826
2109	0	179.922	-1395.82	1579.35	284.248	-1395.7	1573.26	164.417	-1560.63	1564.05	282.997	-1563.27	1557.46	225.841	-1588.4	1433.97	204.841	-1702.03	1160.75	214.481	-1430.26	1324.56	207.063	-1344.5	1120.24	288.276	-1689.85	1250.56	67.5271	-1494.32	1400.18	-56.8672	-1535.81	1172.5	-70.248	-1565.7	1079.5	-87.6494	-1510.39	935.172	-43.8632	-1502.59	831.031	-107.451	-1543.62	826.176	-99.4309	-1494.72	757.563
2110	0	178.235	-1386.26	1577.65	282.675	-1386.22	1571.83	162.652	-1551.03	1562.72	281.2	-1553.85	1556.33	224.23	-1579.11	1432.58	203.508	-1692.68	1159.31	213.271	-1420.75	1323.16	206.406	-1334.91	1118.89	286.808	-1680.59	1249.28	66.2385	-1484.75	1398.32	-57.8247	-1526.19	1170.54	-70.8791	-1556.55	1077.5	-88.0795	-1501.69	933.018	-43.6586	-1494.49	828.495	-107.711	-1535.18	824.181	-99.3072	-1487.09	755.052
2111	0	176.801	-1376.73	1575.85	281.081	-1376.81	1570.29	160.844	-1541.54	1561.23	279.391	-1544.49	1555.04	222.563	-1569.74	1431	202.155	-1683.15	1157.65	212.072	-1411.39	1321.61	205.722	-1325.32	1117.47	285.353	-1671.35	1247.72	64.657	-1475.22	1396.59	-58.8338	-1516.75	1168.42	-71.615	-1547.33	1075.34	-88.423	-1493.07	930.7	-43.6933	-1486.25	826.589	-107.922	-1526.75	822.078	-98.999	-1479.28	752.509
2112	0	174.74	-1367.14	1574.35	279.314	-1367.33	1568.78	158.977	-1531.99	1559.88	277.435	-1534.98	1553.87	220.8	-1560.38	1429.37	200.764	-1673.52	1155.8	210.652	-1401.88	1320.29	204.924	-1315.68	1116.36	283.888	-1662	1246.1	63.0722	-1465.76	1394.94	-60.101	-1507.3	1166.38	-72.5085	-1538.15	1073.19	-88.9398	-1484.03	928.53	-43.7891	-1477.75	824.179	-108.202	-1518.18	819.722	-98.7445	-1471.2	750.073
2113	0	172.784	-1357.53	1572.65	277.314	-1357.74	1567.48	156.909	-1522.34	1558.64	275.468	-1525.36	1552.89	219.005	-1550.92	1427.95	199.404	-1663.88	1154.23	209.281	-1392.36	1319.04	204.147	-1305.83	1115.08	282.298	-1652.39	1244.8	61.4063	-1456.12	1393.14	-61.476	-1497.84	1164.51	-73.4919	-1528.81	1071.26	-89.5275	-1474.92	926.376	-44.5291	-1468.69	822.233	-108.662	-1509.08	817.661	-98.6668	-1462.64	747.675
2114	0	170.7	-1347.81	1570.97	275.255	-1348.01	1566.09	154.737	-1512.62	1557.35	273.386	-1515.71	1551.99	217.184	-1541.36	1426.54	198.113	-1654.05	1152.65	207.704	-1382.76	1317.61	203.485	-1296.13	1113.8	280.868	-1642.82	1243.44	59.7046	-1446.43	1391.44	-62.7217	-1488.28	1162.56	-74.3938	-1519.31	1069.16	-90.0932	-1465.66	924.367	-44.7625	-1459.43	820.422	-109.101	-1499.69	815.656	-98.4792	-1453.82	745.326
2115	0	168.308	-1338.21	1569.29	272.932	-1338.36	1564.54	152.559	-1502.97	1556	271.168	-1506.17	1550.96	215.286	-1531.83	1424.84	196.686	-1644.09	1150.73	206.405	-1373.03	1316.36	202.578	-1286.25	1112.6	279.224	-1633.15	1241.77	57.914	-1436.78	1389.54	-64.0885	-1478.92	1160.59	-75.3103	-1509.74	1067.01	-90.5868	-1456.07	922.164	-44.6027	-1450.53	818.082	-109.505	-1490.24	813.503	-98.4492	-1444.66	743.166
2116	0	166.129	-1328.37	1567.44	270.615	-1328.72	1562.98	150.261	-1493.28	1554.78	268.734	-1496.47	1550.05	213.2	-1522.23	1423.27	195.227	-1634.02	1148.82	204.756	-1363.3	1315.18	201.827	-1276.36	1111.46	277.637	-1623.38	1240.17	56.131	-1427.17	1387.84	-65.3684	-1469.58	1158.66	-76.3525	-1500.33	1065.03	-91.2753	-1446.64	920.105	-45.0108	-1440.97	816.287	-109.83	-1480.62	811.182	-98.5557	-1435.25	740.886
2117	0	163.639	-1318.42	1565.52	268.092	-1318.77	1561.47	147.666	-1483.43	1553.7	266.287	-1486.7	1549.32	211.113	-1512.65	1421.86	193.731	-1623.71	1147.11	203.001	-1353.42	1314.01	200.663	-1266.19	1110.5	276.019	-1613.38	1238.81	54.1314	-1417.41	1385.99	-66.8477	-1460.21	1156.51	-77.5585	-1490.83	1062.86	-92.1093	-1436.88	917.968	-45.4621	-1431.04	814.357	-110.375	-1470.5	809.117	-98.6569	-1425.32	738.585
2118	0	161.161	-1308.52	1563.83	265.639	-1308.92	1560.06	145.02	-1473.52	1552.54	263.602	-1476.85	1548.48	208.961	-1503.08	1420.38	192.332	-1613.3	1145.27	201.173	-1343.53	1312.81	199.629	-1255.95	1109.29	274.434	-1603.37	1237.2	52.0729	-1407.73	1384.21	-68.4467	-1450.72	1154.52	-78.7307	-1481.07	1060.65	-92.9085	-1426.88	915.792	-46.0037	-1421.06	811.917	-110.98	-1460.42	806.979	-98.9892	-1415.27	736.402
2119	0	158.624	-1298.41	1562.03	263.119	-1299.21	1558.48	142.287	-1463.57	1551.48	260.887	-1467.08	1547.71	206.844	-1493.51	1418.78	190.968	-1602.83	1143.22	199.273	-1333.68	1311.65	198.539	-1245.52	1108.44	272.778	-1593.28	1235.44	49.8313	-1397.98	1382.5	-69.9872	-1441.3	1152.48	-79.884	-1471.2	1058.59	-93.9881	-1416.77	913.664	-46.9169	-1410.84	810.3	-111.693	-1450.24	804.637	-99.4345	-1404.89	734.3
2120	0	156.04	-1288.31	1560.56	260.439	-1289.27	1557.06	139.462	-1453.5	1550.64	258.095	-1457.2	1547.21	204.537	-1483.88	1417.45	189.556	-1592.1	1141.33	197.429	-1323.5	1310.8	197.269	-1235.1	1107.75	271.206	-1583.02	1233.89	47.6264	-1388.36	1380.89	-71.514	-1431.72	1150.63	-81.1779	-1461.1	1056.44	-95.0647	-1406.43	911.777	-47.3404	-1400.16	808.379	-112.319	-1439.76	802.481	-100.041	-1394.1	732.255
2121	0	153.201	-1278.13	1559.05	257.725	-1279.22	1556.19	136.487	-1443.24	1549.91	255.167	-1447.16	1546.88	202.101	-1474.24	1416.27	188.078	-1581.2	1139.64	195.418	-1313.25	1310.27	196.01	-1224.47	1107.34	269.52	-1572.68	1232.61	45.2141	-1378.55	1379.46	-73.1693	-1421.91	1148.73	-82.6049	-1451.05	1054.45	-96.2557	-1395.87	909.781	-48.5404	-1389.23	806.309	-113.142	-1429.14	800.54	-100.859	-1383.25	730.449
2122	0	150.337	-1267.9	1557.86	254.877	-1269.03	1555.36	133.522	-1433.03	1549.23	252.151	-1437.09	1546.62	199.634	-1464.53	1415.12	186.621	-1570.36	1137.92	193.284	-1303.08	1309.72	194.506	-1213.7	1107.01	267.854	-1562.39	1231.18	42.883	-1368.86	1378.1	-74.7004	-1412.05	1146.63	-83.7495	-1440.72	1052.25	-97.5122	-1385.45	907.74	-49.3506	-1378.14	804.726	-113.804	-1418.32	798.441	-101.729	-1372.13	728.617
2123	0	147.42	-1257.64	1556.81	252.032	-1258.88	1554.64	130.508	-1422.88	1548.68	249.095	-1426.98	1546.53	197.186	-1454.83	1414.15	185.253	-1559.58	1136.43	191.068	-1292.68	1309.61	193.104	-1202.87	1107.1	266.16	-1552.01	1229.98	40.4997	-1359.17	1376.85	-76.3953	-1402.04	1144.98	-84.9033	-1430.3	1050.38	-98.7793	-1374.74	906.174	-50.5514	-1366.99	803.323	-114.756	-1407.54	796.592	-102.851	-1360.82	727.099
2124	0	144.303	-1247.2	1556.12	249.032	-1248.44	1554.44	127.48	-1412.48	1548.55	246.099	-1416.59	1546.95	194.774	-1444.87	1413.71	183.876	-1548.79	1135.57	188.663	-1282.3	1309.63	191.657	-1191.76	1107.46	264.637	-1541.49	1229.4	38.0338	-1349.25	1376.06	-77.9801	-1391.77	1143.5	-86.2696	-1419.79	1048.9	-100.117	-1363.92	904.78	-51.6903	-1355.61	801.71	-115.71	-1396.4	795.061	-104.235	-1349.2	725.967
2125	0	141.218	-1236.54	1555.75	245.946	-1237.73	1554.52	124.482	-1401.95	1548.9	243.109	-1405.92	1547.7	192.491	-1434.62	1413.77	182.759	-1537.78	1135.37	186.589	-1271.85	1309.93	189.843	-1180.57	1107.93	263.294	-1530.8	1229.58	35.7687	-1339.26	1375.45	-79.4699	-1381.18	1142.43	-87.2332	-1408.91	1047.7	-101.237	-1352.96	903.593	-53.1531	-1344	801.034	-116.655	-1385.16	793.857	-105.492	-1337.48	725.023
2126	0	138.075	-1225.77	1555.76	242.865	-1227.05	1554.76	121.432	-1391.21	1549.6	240.05	-1395.26	1548.85	190.217	-1424.34	1414.07	181.81	-1527.01	1135.47	184.267	-1261.28	1310.67	188.16	-1169.42	1108.84	262.056	-1520.19	1229.82	33.3796	-1329.32	1375.29	-80.7715	-1370.48	1141.54	-88.0388	-1397.89	1046.79	-102.669	-1341.67	902.927	-54.3176	-1332.22	800.082	-117.844	-1373.78	793.143	-107.103	-1325.6	724.564
2127	0	134.962	-1214.92	1555.99	239.718	-1216.22	1555.27	118.325	-1380.38	1550.64	237.021	-1384.49	1550.45	187.967	-1414.02	1414.78	181.081	-1516.45	1135.99	181.928	-1250.72	1311.76	186.294	-1158.41	1109.97	260.937	-1509.54	1230.75	31.1003	-1319.39	1375.47	-82.1497	-1359.74	1141.14	-89.0234	-1387.01	1046.36	-103.997	-1330.39	902.651	-55.8184	-1320.29	799.991	-118.885	-1362.41	792.599	-108.774	-1313.63	724.39
2128	0	131.857	-1204.02	1556.47	236.645	-1205.21	1556.28	115.28	-1369.53	1552.37	233.974	-1373.49	1552.51	185.702	-1403.57	1416.04	180.178	-1505.81	1137.25	179.573	-1240.27	1313.09	184.332	-1147.38	1111.43	259.751	-1498.73	1232.2	28.7847	-1309.37	1376.11	-83.3647	-1348.78	1140.99	-89.9989	-1375.81	1046.28	-105.27	-1318.89	902.745	-57.2366	-1308.29	799.861	-120.187	-1350.64	792.729	-110.464	-1301.62	724.76
2129	0	128.938	-1192.89	1557.25	233.648	-1194.18	1557.49	112.231	-1358.41	1554.26	230.945	-1362.44	1554.9	183.524	-1393.13	1417.63	179.31	-1495.03	1138.86	177.241	-1229.88	1314.7	182.471	-1136.48	1113.33	258.719	-1487.96	1234.17	26.4679	-1299.44	1377.19	-84.5875	-1337.88	1141.35	-90.6989	-1364.35	1046.66	-106.473	-1307.35	903.312	-59.0151	-1296	800.641	-121.556	-1338.72	793.504	-112.348	-1289.39	725.474
2130	0	126.095	-1181.75	1558.28	230.683	-1183.16	1558.69	109.255	-1347.3	1556.49	227.892	-1351.39	1557.54	181.43	-1382.82	1419.41	178.574	-1484.22	1140.6	174.784	-1219.62	1316.66	180.387	-1125.88	1115.41	257.684	-1477.36	1236.15	24.1671	-1289.53	1378.6	-85.5212	-1326.99	1142.19	-91.5649	-1353.27	1047.59	-107.81	-1295.56	904.556	-60.3771	-1283.6	801.534	-122.627	-1326.86	794.424	-114.222	-1277.12	726.843
2131	0	123.268	-1170.56	1559.41	228.026	-1172.08	1560.06	106.396	-1335.99	1559.12	224.903	-1340.26	1560.59	179.276	-1372.62	1421.46	177.813	-1473.49	1142.52	172.531	-1209.43	1318.86	178.343	-1115.54	1117.97	256.572	-1466.67	1238.35	21.9456	-1279.81	1380.49	-86.4489	-1315.99	1143.32	-92.5399	-1342.02	1048.85	-108.961	-1283.71	906.143	-61.8696	-1271.02	803.053	-123.991	-1314.69	795.945	-116.106	-1264.57	728.558
2132	0	120.715	-1159.26	1560.47	225.576	-1160.89	1561.54	103.352	-1324.54	1562	222.07	-1329.14	1563.8	177.31	-1362.69	1423.74	176.842	-1462.98	1144.69	170.202	-1199.38	1321.27	176.299	-1105.25	1120.7	255.33	-1456.04	1240.74	19.6938	-1269.95	1382.52	-87.6379	-1305.05	1144.81	-93.4157	-1330.64	1050.44	-110.304	-1271.73	908.137	-63.4676	-1258.26	804.966	-125.249	-1302.09	797.851	-117.922	-1251.9	730.526
2133	0	118.439	-1147.83	1561.52	223.164	-1149.88	1562.88	100.687	-1313.22	1564.82	219.183	-1318.07	1566.95	175.096	-1352.81	1425.84	175.863	-1452.77	1146.66	167.994	-1189.59	1323.51	174.432	-1095.28	1123.33	254	-1445.68	1242.92	17.5658	-1260.39	1384.44	-88.8837	-1294.24	1146.45	-94.7007	-1319.63	1052.09	-111.503	-1259.7	910.025	-64.9636	-1245.35	807.053	-126.457	-1289.59	799.812	-119.551	-1239.03	732.549
2134	0	116.092	-1136.68	1562.52	220.936	-1138.9	1564.02	97.9155	-1301.82	1567.64	216.507	-1307.12	1570.02	172.825	-1343.31	1427.82	174.718	-1442.83	1148.36	165.847	-1179.92	1325.91	172.679	-1085.41	1126.14	252.485	-1435.58	1244.91	15.2962	-1250.87	1386.55	-89.8707	-1283.48	1147.94	-95.9539	-1308.55	1053.79	-112.793	-1247.68	912.107	-66.1684	-1232.56	809.155	-127.343	-1276.94	801.572	-121.042	-1225.93	734.77
2135	0	113.991	-1125.41	1563.42	218.888	-1127.91	1565.1	95.2785	-1290.52	1570.6	213.873	-1296.08	1573.17	170.533	-1333.75	1429.86	173.291	-1432.7	1150.16	163.799	-1170.29	1328.24	170.965	-1075.73	1128.85	250.779	-1425.55	1246.87	13.1675	-1241.44	1388.59	-91.4149	-1272.67	1149.66	-97.4205	-1297.32	1055.5	-114.34	-1235.65	914.45	-67.5242	-1219.37	811.209	-128.835	-1263.86	803.622	-122.461	-1212.6	737.128
2136	0	112.079	-1114.07	1564.22	217.026	-1116.93	1566.05	92.8911	-1279.01	1573.51	211.468	-1284.96	1576.35	168.331	-1324.33	1431.82	171.87	-1422.53	1152	161.802	-1160.87	1330.35	169.337	-1066.19	1131.42	249.176	-1415.64	1248.78	11.0848	-1231.89	1390.53	-93.1648	-1261.91	1151.65	-99.0864	-1286.3	1057.34	-115.714	-1223.27	916.331	-69.2243	-1205.75	813.921	-130.013	-1250.79	805.613	-123.569	-1199.03	739.151
2137	0	110.103	-1103.04	1564.78	215.06	-1106.16	1566.57	90.6416	-1267.76	1576.19	209.158	-1273.99	1579.24	166.143	-1315.13	1433.4	170.237	-1412.74	1153.41	159.895	-1151.51	1332.32	167.848	-1056.76	1133.85	247.369	-1406.11	1250.42	9.16903	-1222.47	1392.13	-94.9014	-1251.34	1153.31	-100.942	-1275.31	1058.66	-117.339	-1211.1	918.227	-70.2912	-1192.7	815.841	-131.116	-1237.44	807.149	-124.682	-1185.24	741.233
2138	0	108.263	-1091.98	1565.1	213.208	-1095.37	1567.03	88.5471	-1256.62	1578.66	206.93	-1263.03	1581.95	164.038	-1305.87	1434.83	168.529	-1403.22	1154.63	158.17	-1142.18	1334.21	166.481	-1047.47	1136.06	245.375	-1396.74	1251.74	7.19976	-1213.17	1393.6	-96.8929	-1240.75	1154.78	-103.101	-1264.24	1060	-118.879	-1198.71	919.934	-71.3936	-1179.65	817.999	-132.222	-1224.02	808.481	-125.488	-1171.2	743.174
2139	0	106.366	-1081.01	1565.27	211.242	-1084.39	1567.43	86.4925	-1245.41	1581.09	204.976	-1251.92	1584.56	162.004	-1296.59	1436.25	166.793	-1393.63	1155.95	156.467	-1132.93	1335.88	165.32	-1038.05	1137.97	243.574	-1387.52	1253.35	5.30584	-1203.84	1395.08	-98.9937	-1230.24	1156.26	-105.346	-1253.15	1060.99	-120.618	-1186.42	921.594	-72.4809	-1166.12	820.152	-133.739	-1210.31	809.932	-126.26	-1156.95	745.068
2140	0	104.396	-1070.21	1565.18	209.469	-1073.54	1567.66	84.483	-1234.35	1583.05	203.12	-1240.72	1587.02	160.098	-1287.31	1437.5	165.075	-1383.86	1157.07	154.87	-1123.83	1337.29	164.301	-1028.83	1139.47	241.596	-1378.4	1254.62	3.50031	-1194.44	1396.26	-101.34	-1219.75	1157.45	-107.645	-1242.18	1061.88	-122.318	-1173.9	923.108	-73.6943	-1152.7	822.277	-134.948	-1196.5	811.204	-126.862	-1142.46	746.795
2141	0	102.837	-1059.27	1564.93	207.861	-1062.98	1567.61	82.964	-1223.41	1584.76	201.473	-1229.65	1588.96	158.383	-1278.12	1438.48	163.505	-1374.6	1157.84	153.36	-1114.62	1338.36	163.496	-1019.68	1140.64	239.859	-1369.53	1255.74	2.05412	-1185.05	1396.98	-103.536	-1209.34	1158.42	-110.029	-1231.28	1062.43	-123.886	-1161.5	924.213	-74.7872	-1139.29	824.001	-136.11	-1182.63	811.965	-127.396	-1127.77	748.451
2142	0	101.083	-1048.64	1564.59	206.068	-1051.99	1567.16	81.4527	-1212.5	1586.44	199.938	-1218.53	1590.71	156.727	-1268.82	1439.46	161.936	-1365.72	1158.89	152.192	-1105.5	1339.38	162.815	-1010.6	1141.5	238.125	-1360.66	1256.84	0.593301	-1175.64	1397.78	-105.847	-1198.95	1159.41	-111.905	-1219.89	1062.97	-125.43	-1148.94	925.534	-75.7182	-1126.16	825.624	-137.347	-1168.7	812.762	-128.051	-1112.93	750.31
2143	0	99.6897	-1037.75	1564.02	204.704	-1041.33	1566.83	79.9198	-1201.38	1587.88	198.541	-1207.34	1592.42	155.254	-1259.44	1440.48	160.237	-1356.59	1159.99	151.037	-1096.35	1340.08	162.288	-1001.6	1142	236.473	-1351.86	1258.15	-0.702355	-1166.1	1398.32	-108.148	-1188.52	1160.17	-114.202	-1208.74	1063.63	-127.032	-1136.26	926.599	-76.6969	-1112.68	827.135	-138.581	-1154.65	813.741	-128.666	-1097.97	751.995
2144	0	98.3053	-1027.02	1563.4	203.377	-1030.7	1566.25	78.4745	-1190.36	1589.17	197.115	-1196.37	1593.69	153.811	-1250.09	1441.29	158.656	-1347.89	1160.99	150.201	-1087.17	1340.48	161.9	-992.727	1142.17	234.887	-1343.14	1259.23	-1.94997	-1156.53	1398.63	-110.072	-1178.24	1160.7	-116.327	-1197.5	1063.99	-128.343	-1123.61	927.446	-77.5698	-1099.32	828.484	-139.676	-1140.85	814.399	-129.32	-1083.1	753.568
2145	0	97.2307	-1016.25	1562.78	202.381	-1020.07	1565.47	77.2398	-1179.29	1590.14	195.784	-1185.57	1594.7	152.362	-1240.74	1441.94	157.027	-1339.15	1161.78	149.323	-1078.02	1340.76	161.54	-984.018	1142.16	233.251	-1334.51	1259.98	-2.96629	-1146.95	1398.93	-111.963	-1167.93	1161.23	-118.499	-1186.07	1064.11	-129.74	-1110.96	928.332	-78.7213	-1086.04	829.866	-140.937	-1127.2	815.01	-130.214	-1068.4	755.186
2146	0	96.179	-1005.66	1562.06	201.36	-1009.64	1564.7	76.0373	-1168.27	1591.09	194.54	-1174.68	1595.66	150.992	-1231.37	1442.63	155.419	-1330.61	1162.69	148.573	-1068.92	1340.95	161.439	-975.236	1142.04	231.619	-1325.88	1261.04	-3.97887	-1137.1	1399.22	-113.602	-1157.65	1161.55	-120.439	-1174.65	1064.46	-131.065	-1098.46	929.217	-79.7974	-1072.93	831.199	-142.284	-1113.63	815.539	-131.223	-1053.78	756.785
2147	0	95.9435	-995.091	1561.19	200.523	-999.049	1563.91	74.7799	-1157.29	1592.16	193.453	-1163.83	1596.6	149.652	-1221.9	1443.38	153.759	-1321.8	1163.84	147.996	-1059.82	1340.95	161.316	-966.575	1141.74	229.989	-1317.2	1262.05	-4.91034	-1127.29	1399.32	-115.226	-1147.36	1161.99	-122.264	-1163.26	1064.89	-132.267	-1085.71	930.026	-81.1595	-1059.84	832.427	-143.386	-1100.16	816.263	-132.328	-1039.3	758.339
2148	0	95.151	-984.667	1560.26	199.719	-988.706	1563.07	73.911	-1146.4	1592.65	192.505	-1153.06	1597.29	148.401	-1212.44	1443.95	152.148	-1313.33	1164.72	147.482	-1050.67	1340.86	161.241	-957.952	1141.41	228.418	-1308.92	1262.87	-5.74558	-1117.28	1399.45	-116.567	-1136.93	1162.42	-124.038	-1151.64	1065.07	-133.295	-1073.24	930.751	-82.2058	-1046.8	833.369	-144.716	-1086.67	816.842	-133.639	-1025.11	759.808
2149	0	94.0621	-974.303	1559.44	198.946	-978.31	1562.17	72.9794	-1135.68	1593.1	191.585	-1142.32	1597.84	147.249	-1203.06	1444.46	150.519	-1305.25	1165.54	146.93	-1041.7	1340.77	161.298	-949.395	1141.03	226.885	-1300.49	1263.71	-6.61502	-1107.35	1399.79	-117.658	-1126.52	1162.73	-125.589	-1140.14	1065.22	-134.365	-1060.77	931.6	-83.3141	-1033.82	834.585	-145.766	-1073.62	817.459	-134.87	-1011.27	761.26
2150	0	93.5866	-963.909	1558.38	198.247	-967.888	1561.35	72.0432	-1124.94	1593.58	190.695	-1131.65	1598.34	145.934	-1193.57	1444.88	148.935	-1296.74	1166.51	146.573	-1032.61	1340.62	161.18	-941.058	1140.53	225.308	-1292.05	1264.61	-7.33881	-1097.4	1399.91	-118.807	-1116	1162.81	-127.129	-1128.72	1065.42	-135.473	-1048.33	932.327	-84.2636	-1020.96	835.544	-147.023	-1060.43	818.132	-136.241	-997.62	762.558
2151	0	92.9801	-953.569	1557.25	197.582	-957.521	1560.32	71.274	-1114.15	1593.96	189.951	-1120.94	1598.83	144.867	-1184.29	1445.39	147.573	-1288.65	1167.46	146.112	-1023.63	1340.33	161.06	-932.733	1139.85	223.95	-1283.65	1265.47	-7.61797	-1087.53	1399.51	-119.623	-1105.25	1162.69	-128.363	-1117.1	1065.41	-136.235	-1035.96	932.78	-85.3418	-1008.19	836.028	-148.168	-1047.37	818.613	-137.429	-984.059	763.514
2152	0	92.5221	-943.46	1555.79	196.969	-947.119	1559.07	70.6479	-1103.53	1594.07	189.265	-1110.25	1599.03	143.868	-1174.86	1445.71	146.411	-1280.51	1167.99	145.689	-1014.86	1339.8	161.019	-924.425	1139.19	222.746	-1275.29	1266.14	-8.39024	-1077.85	1399.48	-120.26	-1094.54	1162.57	-129.526	-1105.57	1065.3	-136.933	-1023.56	933.089	-86.0936	-995.657	836.437	-149.227	-1034.48	818.992	-138.43	-970.772	764.225
2153	0	91.8918	-933.166	1554.56	196.375	-937.036	1557.69	70.0664	-1092.93	1594.19	188.75	-1099.68	1599.21	143.052	-1165.91	1445.7	145.339	-1272.27	1168.51	145.387	-1006.17	1339.4	160.733	-916.309	1138.62	221.676	-1266.85	1266.65	-8.75702	-1068.35	1399.29	-120.814	-1083.44	1162.33	-130.551	-1094.01	1065.2	-137.65	-1011.31	933.539	-86.851	-983.205	836.669	-150.274	-1021.69	819.395	-139.28	-957.503	765.056
2154	0	91.1873	-922.795	1553.26	195.921	-926.714	1556.25	69.5153	-1082.32	1594.33	188.232	-1089.09	1599.39	142.195	-1156.59	1445.97	144.493	-1263.99	1169.17	144.922	-997.321	1338.87	160.52	-908.126	1137.81	220.698	-1258.35	1267.31	-9.25493	-1058.99	1398.97	-121.34	-1072.31	1162.08	-131.359	-1082.42	1064.94	-138.163	-999.033	933.635	-87.4171	-970.726	836.769	-151.428	-1008.64	819.719	-139.913	-944.298	765.526
2155	0	91.1624	-912.829	1551.81	195.651	-916.659	1554.98	68.9943	-1071.88	1594.22	187.744	-1078.64	1599.14	141.284	-1147.47	1445.86	143.752	-1255.84	1169.56	144.443	-988.702	1338.34	160.357	-899.945	1136.99	219.94	-1249.95	1267.8	-9.69861	-1049.72	1398.38	-121.716	-1061.25	1161.56	-132.165	-1071.07	1064.71	-138.649	-986.876	933.614	-87.7914	-958.346	836.767	-151.818	-995.718	819.683	-140.473	-931.33	765.736
2156	0	90.9378	-902.83	1550.61	195.339	-906.813	1553.68	68.5531	-1061.59	1593.84	187.256	-1068.44	1598.72	140.791	-1138.36	1445.77	143.289	-1247.74	1169.63	144.203	-979.911	1337.79	160.002	-891.778	1136.41	219.295	-1241.45	1268	-10.078	-1040.75	1398.01	-122.024	-1050.08	1160.99	-132.675	-1059.78	1064.12	-139.076	-974.846	933.68	-88.1745	-946.076	836.749	-152.781	-982.921	819.744	-140.899	-918.743	765.893
2157	0	90.7192	-892.839	1549.47	195.096	-897.019	1552.47	68.0598	-1051.41	1593.48	186.878	-1058.53	1598.27	140.23	-1129.21	1445.55	142.74	-1239.38	1169.72	143.75	-971.091	1337.11	159.616	-883.534	1135.62	218.749	-1232.94	1268.1	-10.6533	-1031.77	1397.5	-122.453	-1039.02	1160.48	-132.995	-1048.44	1063.3	-139.554	-962.95	933.603	-88.7091	-933.887	836.886	-153.516	-970.415	819.744	-141.385	-906.212	766.007
2158	0	90.5459	-883.072	1548.53	194.927	-887.362	1551.45	67.746	-1041.36	1593.07	186.538	-1048.59	1597.92	139.613	-1120.11	1445.42	142.381	-1230.91	1169.88	143.278	-962.369	1336.38	159.414	-875.184	1134.76	218.304	-1224.31	1268.23	-11.1427	-1022.71	1396.98	-122.716	-1027.86	1159.91	-133.443	-1037.33	1062.69	-139.875	-951.094	933.495	-89.2284	-921.637	836.763	-154.127	-957.941	819.462	-141.713	-893.654	766.001
2159	0	90.3791	-873.491	1547.41	194.923	-877.733	1550.45	67.5239	-1031.65	1592.48	186.348	-1038.91	1597.26	139.341	-1110.96	1445.05	142.22	-1222.63	1169.75	143.197	-953.478	1335.47	159.105	-866.764	1133.8	217.995	-1215.59	1268.12	-11.2025	-1013.65	1396.27	-122.799	-1016.78	1159.13	-133.526	-1026.37	1061.79	-140.042	-939.442	933.176	-89.5587	-909.557	836.483	-154.48	-945.537	819.206	-141.917	-881.278	765.72
2160	0	90.3041	-863.964	1546.51	194.727	-868.411	1549.3	67.3881	-1021.98	1591.68	186.133	-1029.39	1596.58	139.073	-1101.75	1444.48	141.998	-1214.23	1169.45	142.703	-944.637	1334.53	158.824	-858.169	1132.69	217.767	-1206.91	1267.84	-11.6362	-1004.59	1395.51	-122.715	-1005.72	1158.39	-133.604	-1015.44	1060.97	-140.19	-927.92	932.714	-89.6154	-897.622	836.108	-154.619	-933.401	818.826	-142.055	-868.984	765.492
2161	0	90.1279	-854.662	1545.51	194.654	-859.032	1548.39	67.1797	-1012.63	1591	186.016	-1019.96	1595.98	138.843	-1092.48	1443.97	141.773	-1205.66	1169.19	142.622	-935.656	1333.51	158.52	-849.498	1131.46	217.552	-1198.17	1267.55	-11.8166	-995.469	1394.6	-122.773	-994.845	1157.5	-133.692	-1004.62	1060.05	-140.274	-916.48	932.216	-89.7706	-885.701	835.784	-154.698	-921.375	818.297	-142.179	-856.959	765.142
2162	0	90.1195	-845.179	1544.66	194.619	-849.637	1547.65	67.0164	-1003.11	1590.3	185.902	-1010.57	1595.21	138.637	-1083.18	1443.39	141.609	-1196.96	1168.84	142.435	-926.715	1332.22	158.154	-840.802	1130.29	217.394	-1189.28	1267.21	-11.9573	-986.351	1393.63	-122.704	-984.202	1156.44	-133.504	-993.946	1058.87	-140.205	-905.209	931.607	-89.6655	-873.847	835.283	-154.413	-909.681	817.555	-142.17	-844.904	764.711
2163	0	90.1653	-836.177	1543.58	194.628	-840.53	1546.66	67.0903	-994.046	1589.33	185.923	-1001.45	1594.09	138.613	-1073.96	1442.51	141.569	-1188.39	1168.23	142.265	-917.631	1331.15	157.912	-832.043	1128.8	217.403	-1180.34	1266.54	-12.0212	-977.171	1392.62	-122.555	-973.633	1155.41	-133.336	-983.475	1057.8	-140.007	-894.102	930.797	-89.6008	-861.9	834.762	-154.106	-898.009	816.723	-141.995	-832.987	764.266
2164	0	90.3338	-826.857	1542.75	194.816	-831.283	1545.62	67.2479	-984.828	1588.26	185.977	-992.278	1592.98	138.683	-1064.76	1441.57	141.587	-1179.9	1167.48	142.226	-908.57	1329.93	157.591	-823.327	1127.65	217.495	-1171.53	1265.75	-12.0816	-968.216	1391.64	-122.305	-963.148	1154.36	-132.996	-972.826	1056.63	-139.764	-883.031	930.333	-89.2657	-850.35	834.308	-153.751	-886.416	816.229	-141.765	-821.143	763.938
2165	0	90.3719	-817.681	1541.83	194.981	-822.095	1544.74	67.4055	-975.551	1587.37	186.137	-983.112	1592.1	138.795	-1055.31	1440.66	141.664	-1170.78	1166.84	142.159	-899.544	1328.8	157.342	-814.48	1126.2	217.543	-1162.36	1265.11	-11.9826	-959.002	1390.57	-122.16	-953.071	1153.33	-132.689	-962.112	1055.66	-139.334	-872.014	929.689	-88.7963	-839.028	833.76	-153.316	-874.842	815.417	-141.298	-809.368	763.644
2166	0	90.5884	-808.446	1540.95	195.349	-812.874	1543.65	67.6836	-966.276	1586.37	186.418	-973.848	1590.96	139.006	-1046.2	1439.92	141.877	-1161.9	1166.24	142.153	-890.341	1327.78	157.156	-805.678	1124.83	217.842	-1153.27	1264.34	-11.9339	-950	1389.59	-122.013	-943.151	1152.4	-132.383	-951.639	1054.55	-138.712	-860.902	928.895	-88.0792	-827.787	833.138	-152.761	-863.434	814.712	-140.668	-797.662	763.119
2167	0	91.0693	-799.159	1539.87	195.687	-803.695	1542.48	67.904	-956.965	1585.18	186.691	-964.648	1589.63	139.324	-1037.03	1438.73	142.191	-1153.27	1165.17	142.191	-881.305	1326.54	157.076	-796.713	1123.47	218.19	-1144.26	1263.28	-11.642	-941.134	1388.37	-121.573	-933.504	1151.11	-132.015	-941.333	1053.31	-138.048	-850.07	928.173	-87.3066	-816.647	832.536	-152.268	-852.06	813.997	-139.834	-786.01	762.702
2168	0	91.3329	-789.827	1538.79	196.07	-794.571	1541.32	68.2698	-947.739	1583.98	187.03	-955.495	1588.45	139.623	-1027.83	1437.58	142.444	-1144.26	1164.15	141.982	-872.17	1325.5	156.906	-787.846	1122.04	218.504	-1135.11	1262.15	-11.5397	-932.089	1387.06	-121.453	-924.079	1149.91	-131.64	-930.973	1052.19	-137.233	-839.247	927.426	-86.4775	-805.6	831.829	-151.571	-840.676	813.151	-138.902	-774.56	762.139
2169	0	91.8103	-780.524	1537.68	196.648	-785.155	1540.17	68.6639	-938.434	1582.82	187.508	-946.284	1587.2	139.993	-1018.48	1436.53	142.775	-1135	1163.21	142.491	-862.883	1324.2	156.942	-778.808	1120.62	218.905	-1125.77	1261.22	-11.283	-923.01	1385.78	-121.066	-914.862	1148.6	-131.148	-920.757	1050.79	-136.325	-828.353	926.48	-85.5146	-794.661	831.078	-150.722	-829.352	812.328	-137.775	-763.064	761.512
2170	0	92.5815	-771.295	1536.45	197.075	-775.938	1538.87	69.2003	-929.133	1581.54	188.082	-937.072	1585.62	140.55	-1009.13	1435.32	143.307	-1125.95	1162.09	142.589	-853.63	1322.79	156.849	-769.696	1119.15	219.466	-1116.47	1259.93	-10.9454	-913.977	1384.54	-120.718	-905.86	1147.25	-130.777	-910.74	1049.56	-135.339	-817.757	925.646	-84.314	-783.824	830.337	-149.678	-818.277	811.32	-136.361	-751.854	760.853
2171	0	93.0854	-762.066	1535.48	197.52	-766.887	1537.68	69.9128	-920.16	1580.09	188.682	-928.033	1584.13	141.154	-999.793	1434.03	143.843	-1116.76	1160.78	142.919	-844.197	1321.57	157.06	-760.466	1117.93	220.058	-1107.07	1258.57	-10.376	-904.788	1383.34	-120.342	-896.916	1146.13	-130.204	-900.929	1048.29	-134.359	-807.179	924.832	-83.1799	-773.255	829.654	-148.675	-807.199	810.508	-135.028	-740.638	760.29
2172	0	93.6514	-752.933	1534.62	198.333	-757.581	1536.89	70.591	-911.188	1578.58	189.311	-918.905	1582.66	141.753	-990.332	1432.78	144.292	-1107.22	1159.58	143.457	-834.845	1320.46	157.169	-751.115	1116.68	220.624	-1097.43	1257.24	-9.9923	-895.613	1382.19	-119.979	-888.132	1144.9	-129.702	-891.07	1047.06	-133.374	-796.861	924.052	-81.9637	-762.737	829.082	-147.541	-796.277	809.64	-133.497	-729.667	759.836
2173	0	94.2601	-743.743	1533.9	198.914	-748.348	1536.11	71.2769	-902.205	1577.17	190.089	-909.992	1581.04	142.473	-980.728	1431.56	144.834	-1097.67	1158.34	143.864	-825.301	1318.91	157.356	-741.649	1115.39	221.269	-1087.79	1255.87	-9.54559	-886.335	1381.06	-119.639	-879.425	1143.71	-129.253	-881.688	1045.77	-132.477	-786.687	923.031	-80.5412	-752.318	828.551	-146.419	-785.585	808.64	-131.917	-718.754	759.137
2174	0	95.0479	-734.834	1533.25	199.631	-739.369	1535.27	72.1355	-893.451	1575.63	190.996	-901.247	1579.34	143.298	-971.22	1430.11	145.424	-1087.96	1156.86	144.412	-815.664	1317.71	157.622	-731.933	1114.1	221.964	-1078.04	1254.29	-8.78289	-876.826	1379.62	-119.061	-870.863	1142.55	-128.719	-872.308	1044.44	-131.488	-776.784	922.062	-79.1382	-742.095	827.866	-144.753	-775.191	807.536	-130.221	-708.095	758.594
2175	0	95.662	-725.884	1532.93	200.487	-730.418	1534.62	73.1609	-884.961	1573.96	191.955	-892.627	1577.54	144.294	-961.649	1428.63	146.189	-1078.24	1155.26	145.188	-805.937	1316.37	157.917	-722.03	1112.87	222.798	-1068.29	1252.65	-8.07046	-867.469	1378.59	-118.508	-862.184	1141.37	-128.095	-862.933	1043.34	-130.612	-767.085	921.214	-77.7754	-732.054	827.184	-143.645	-764.814	806.708	-128.409	-697.565	757.989
2176	0	96.9225	-716.983	1532.62	201.507	-721.535	1534.35	74.196	-876.329	1572.36	193.063	-884.142	1575.84	145.299	-951.974	1427.32	146.925	-1068.22	1153.83	145.92	-796.143	1314.99	158.118	-712.078	1111.7	223.699	-1058.26	1251.1	-7.25481	-857.958	1377.52	-117.923	-853.329	1140.28	-127.435	-853.835	1042.19	-129.561	-757.31	920.205	-76.3616	-722.09	826.677	-141.986	-754.766	805.703	-126.715	-687.212	757.34
2177	0	97.9526	-708.207	1532.53	202.659	-712.767	1534.18	75.3496	-867.94	1570.83	194.321	-875.719	1574.02	146.391	-942.23	1425.97	147.82	-1058.51	1152.22	146.614	-786.283	1313.73	158.338	-701.993	1110.35	224.666	-1048.2	1249.45	-6.26734	-848.205	1376.29	-117.382	-844.397	1139.34	-126.79	-844.766	1041.02	-128.65	-747.665	919.185	-74.9331	-712.274	825.983	-140.677	-744.872	804.748	-125.012	-677.075	756.63
2178	0	99.1383	-699.576	1532.74	203.977	-704.186	1534.01	76.7857	-859.742	1569.02	195.598	-867.563	1571.96	147.588	-932.546	1424.35	148.759	-1048.43	1150.39	147.543	-776.387	1312.43	158.698	-691.731	1109.26	225.665	-1038.16	1247.57	-5.27303	-838.547	1375.17	-116.648	-835.474	1138.25	-125.978	-835.635	1039.9	-127.534	-738.518	918.097	-73.5488	-702.644	825.215	-139.182	-735.185	803.583	-123.325	-667.288	755.793
2179	0	100.734	-690.871	1533.13	205.475	-695.606	1534.2	78.2333	-851.598	1567.21	197.014	-859.534	1569.96	148.869	-922.861	1422.95	149.615	-1038.21	1148.68	148.37	-766.388	1311.28	158.933	-681.314	1108.2	226.633	-1027.85	1245.69	-4.23715	-828.975	1374.2	-116.002	-826.406	1137.29	-125.288	-826.619	1038.74	-126.747	-729.352	917.182	-72.3342	-693.067	824.569	-137.701	-725.761	802.521	-121.808	-657.719	755.052
2180	0	102.229	-682.392	1533.58	207.157	-687.092	1534.63	79.7442	-843.572	1565.57	198.596	-851.536	1568.01	150.045	-912.974	1421.48	150.464	-1027.77	1147.07	149.047	-756.311	1310.25	159.343	-670.835	1107.1	227.68	-1017.6	1244.02	-3.37167	-819.108	1373.32	-115.271	-817.321	1136.39	-124.593	-817.572	1037.77	-125.808	-720.181	916.119	-71.133	-683.626	823.958	-136.333	-716.484	801.525	-120.237	-648.328	754.16
2181	0	104.275	-674.02	1534.18	208.92	-678.754	1534.94	81.5707	-835.56	1563.9	200.441	-843.637	1565.88	151.39	-903.04	1419.95	151.333	-1017.17	1145.26	150.155	-746.061	1309.19	159.675	-660.267	1106.09	228.727	-1007.08	1242.08	-2.26083	-809.09	1372.35	-114.394	-807.957	1135.51	-123.678	-808.59	1036.89	-124.669	-711.031	915.047	-69.7717	-674.172	823.31	-134.866	-707.387	800.477	-118.696	-639.198	753.202
2182	0	106.028	-665.664	1534.85	210.793	-670.463	1535.12	83.6252	-827.679	1562.04	202.401	-835.768	1563.72	152.885	-893.14	1418.45	152.179	-1006.26	1143.55	151.331	-735.836	1308.1	160.133	-649.634	1105.19	229.82	-996.698	1240.03	-0.954638	-798.979	1371.56	-113.533	-798.531	1134.81	-122.781	-799.609	1036.05	-123.729	-702.182	914.212	-68.4868	-665.783	822.367	-133.229	-698.499	799.501	-117.232	-630.264	752.319
2183	0	108.038	-657.452	1535.45	212.73	-662.181	1535.4	85.6395	-819.86	1560.45	204.486	-827.838	1561.59	154.321	-883.151	1416.97	152.929	-995.48	1141.7	152.702	-725.428	1307.03	160.694	-638.858	1104.31	230.737	-985.986	1237.96	0.358641	-788.772	1370.84	-112.583	-789.131	1134.32	-121.99	-790.618	1035.39	-122.72	-693.261	913.246	-67.3013	-656.905	821.642	-132.099	-689.752	798.595	-115.845	-621.487	751.443
2184	0	109.972	-649.178	1536.15	214.682	-653.795	1535.89	87.8147	-812.042	1559.01	206.705	-819.893	1559.68	155.93	-873.254	1415.72	153.661	-984.385	1139.84	154.033	-715.024	1306.2	161.411	-627.954	1103.53	231.769	-975.18	1235.86	1.82833	-778.387	1370.1	-111.563	-779.54	1133.7	-120.924	-781.52	1034.67	-121.795	-684.54	912.209	-66.2466	-648.271	820.809	-130.684	-681.373	797.381	-114.528	-613.041	750.253
2185	0	111.524	-641.001	1536.95	216.637	-645.516	1536.32	90.0453	-804.109	1557.31	208.946	-811.883	1557.61	157.771	-863.397	1414.17	154.556	-973.181	1137.62	155.381	-704.543	1305.46	162.254	-616.895	1102.78	232.886	-964.47	1233.6	3.48204	-768.167	1369.46	-110.517	-769.719	1133.12	-119.871	-772.549	1033.94	-120.806	-675.947	911.3	-65.2982	-639.798	819.747	-129.694	-673.106	796.42	-113.463	-604.914	749.139
2186	0	113.59	-632.547	1538.12	218.694	-637.032	1536.91	92.4206	-796.281	1555.87	211.221	-803.792	1555.68	159.607	-853.6	1412.62	155.518	-961.647	1135.4	156.976	-693.933	1304.8	163.051	-605.696	1102.3	234.153	-953.732	1231.21	5.16737	-757.846	1369.02	-109.234	-759.787	1132.75	-118.852	-763.447	1033.61	-119.852	-667.41	910.451	-64.1859	-631.5	818.919	-128.48	-665.043	795.559	-112.359	-596.956	747.987
2187	0	115.588	-624.157	1539.14	220.719	-628.342	1537.86	94.8451	-788.255	1554.76	213.594	-795.453	1554.21	161.418	-843.454	1411.32	156.297	-949.824	1133.61	158.565	-683.212	1304.28	163.939	-594.362	1101.96	235.397	-942.839	1229.18	6.86919	-747.324	1368.71	-108.059	-749.732	1132.63	-117.717	-754.177	1033.51	-118.994	-658.867	909.702	-63.4241	-623.469	818.015	-127.855	-657.049	794.767	-111.531	-589.294	746.903
2188	0	117.439	-615.666	1540.61	222.676	-619.605	1538.93	97.2433	-779.939	1553.93	216.141	-786.829	1553.04	163.533	-833.37	1410.64	157.008	-937.824	1132.32	160.334	-672.396	1304.1	164.951	-582.885	1101.92	236.599	-931.75	1227.51	8.87992	-736.854	1368.63	-106.758	-739.487	1132.7	-116.403	-744.853	1033.46	-118.024	-650.318	909.012	-62.581	-615.492	816.884	-126.928	-649.371	794.264	-110.828	-581.74	745.851
2189	0	119.625	-607.136	1541.9	224.693	-610.745	1540.13	99.6327	-771.561	1553.23	218.62	-778.152	1552.09	165.396	-822.912	1409.82	157.838	-926.074	1131.23	162.209	-661.527	1304.29	166.128	-571.107	1102.22	237.774	-920.805	1226.08	10.6186	-726.014	1368.92	-105.314	-729.247	1133.07	-115.166	-735.572	1033.89	-117.152	-642.075	908.669	-62.1179	-607.917	816.265	-126.36	-642.026	793.875	-110.286	-574.756	744.88
2190	0	121.561	-598.409	1543.6	226.701	-601.758	1541.56	102.092	-763.064	1552.8	221.005	-769.311	1551.43	167.22	-812.393	1409.52	158.539	-914.884	1130.67	164.005	-650.55	1304.82	167.396	-559.253	1102.79	238.655	-909.851	1225.13	12.5686	-715.014	1369.41	-103.998	-718.953	1133.68	-113.916	-726.106	1034.5	-116.274	-633.829	908.589	-61.5187	-600.371	815.946	-125.897	-634.906	793.774	-110.134	-568.356	744.217
2191	0	123.577	-589.612	1545.32	228.799	-592.559	1543.31	104.51	-754.312	1552.72	223.396	-760.267	1551.22	168.853	-801.685	1409.78	158.999	-903.963	1130.73	166.174	-639.626	1305.36	168.567	-547.359	1103.48	239.331	-898.889	1224.88	14.2892	-703.745	1370.26	-102.428	-708.532	1134.65	-112.669	-716.7	1035.61	-115.541	-625.715	908.815	-61.0186	-593.1	815.484	-125.249	-628.067	793.804	-109.859	-561.983	743.681
2192	0	125.73	-580.518	1547.27	230.82	-583.399	1545.08	106.907	-745.401	1553.03	225.832	-751.069	1551.18	170.451	-790.676	1410.33	159.049	-893.033	1131.29	167.836	-628.59	1306.08	170.043	-535.427	1104.53	239.869	-888.071	1225.07	16.3136	-692.243	1371.33	-100.947	-698.012	1135.89	-111.247	-707.194	1037.01	-114.604	-617.675	909.172	-60.8458	-586.175	815.322	-125.043	-621.47	794.417	-109.969	-555.799	743.34
2193	0	127.857	-571.234	1549.3	232.919	-574.111	1546.84	109.263	-736.418	1553.44	228.209	-741.879	1551.48	172.039	-780.074	1411.21	158.992	-881.859	1132	169.893	-617.645	1307.19	171.738	-523.662	1105.91	240.105	-877.174	1225.3	18.1103	-680.517	1373.07	-99.3087	-687.401	1137.49	-109.801	-697.715	1038.72	-113.888	-609.905	910.07	-60.5082	-579.477	815.656	-124.595	-615.059	795.356	-110.134	-550.104	743.421
2194	0	130.047	-561.902	1551.65	235.019	-564.842	1548.76	111.438	-727.243	1554.37	230.413	-732.597	1552.12	173.467	-769.052	1412.14	158.868	-870.419	1132.98	171.908	-606.669	1308.7	173.479	-511.982	1107.69	240.276	-866.418	1226.02	20.1575	-668.876	1374.83	-97.7131	-676.728	1139.48	-108.549	-688.206	1041.09	-113.064	-602.115	911.254	-60.1612	-572.846	816.002	-124.63	-608.959	796.775	-110.427	-544.561	743.9
2195	0	132.177	-552.637	1553.86	237.265	-555.381	1550.89	113.508	-717.77	1555.75	232.496	-723.214	1553.05	174.716	-758.642	1413.59	158.774	-858.692	1134.2	173.898	-595.852	1310.23	175.27	-500.529	1109.54	240.2	-855.509	1226.99	21.7806	-657.318	1377	-96.1543	-666.018	1141.69	-107.469	-678.613	1043.61	-112.35	-594.402	912.574	-59.712	-566.414	816.594	-124.313	-602.804	798.211	-110.698	-539.296	744.426
2196	0	134.372	-543.214	1556.05	239.322	-546.029	1552.76	115.495	-708.291	1557.11	234.45	-713.814	1554.02	175.917	-748.336	1414.96	158.705	-846.971	1135.26	175.677	-585.21	1311.95	177.137	-489.31	1111.72	240.289	-844.747	1227.71	23.6732	-646.014	1379.08	-94.6574	-655.388	1144.13	-106.237	-668.92	1046.41	-111.573	-586.687	914.145	-59.4445	-560.235	817.354	-124.482	-596.786	800.011	-110.788	-534.215	745.029
2197	0	136.343	-533.67	1558.52	241.363	-536.679	1554.95	117.347	-698.779	1558.67	236.217	-704.492	1555.28	177.131	-738.188	1416.21	158.379	-835.288	1136.19	176.928	-574.725	1314.23	178.977	-478.308	1114.1	240.28	-833.934	1228.57	25.3414	-634.919	1381.49	-93.2362	-644.772	1146.84	-105.149	-659.382	1049.29	-110.88	-579.002	915.979	-59.2282	-554.223	818.563	-124.561	-590.606	802.139	-110.898	-529.192	746.019
2198	0	138.201	-524.13	1561.02	243.23	-527.25	1557.19	119.016	-689.179	1560.45	237.904	-695.076	1556.87	178.426	-727.998	1417.74	158.172	-823.968	1137.29	178.518	-564.372	1316.35	180.727	-467.563	1116.91	240.464	-823.165	1229.45	27.0156	-624.138	1383.98	-92.0516	-634.198	1149.77	-104.249	-649.862	1052.32	-110.424	-571.318	918.199	-59.0102	-548.093	820.15	-124.699	-584.436	804.506	-110.908	-524.179	747.093
2199	0	139.956	-514.553	1563.44	245.039	-517.771	1559.56	120.656	-679.633	1562.41	239.521	-685.565	1558.49	179.737	-717.873	1419.32	158.272	-812.96	1138.57	179.955	-553.976	1318.51	182.323	-456.941	1119.44	240.842	-812.319	1230.58	28.5495	-613.438	1386.27	-90.8963	-623.726	1152.67	-103.431	-640.393	1055.22	-109.814	-563.397	920.384	-58.9086	-541.987	821.5	-124.918	-577.696	806.925	-110.862	-519.027	748.156
2200	0	141.658	-505.081	1565.74	246.71	-508.398	1561.74	122.186	-670.141	1563.8	240.971	-676.142	1559.9	181.011	-707.806	1420.7	158.525	-802.251	1139.69	181.441	-543.742	1320.46	183.839	-446.476	1121.89	241.304	-801.614	1231.48	29.9558	-602.963	1388.59	-90.1504	-613.378	1155.51	-102.858	-631.209	1058.09	-109.355	-555.591	922.552	-58.7232	-536.156	822.913	-125.301	-570.944	809.344	-110.712	-513.752	749.23
2201	0	143.223	-495.668	1568.08	248.196	-499.091	1563.92	123.54	-660.568	1565.29	242.316	-666.711	1561.18	182.249	-697.61	1422.18	158.987	-791.561	1141.02	182.815	-533.415	1322.48	185.153	-436.03	1124.07	241.924	-790.971	1232.61	31.2673	-592.628	1390.73	-89.473	-603.077	1158.14	-102.072	-622.142	1060.74	-109.087	-547.624	924.757	-58.801	-529.709	824.382	-125.457	-563.989	811.504	-110.644	-508.268	750.292
2202	0	144.587	-486.224	1570.35	249.642	-489.601	1566.24	124.687	-650.98	1566.55	243.544	-657.256	1562.43	183.383	-687.333	1423.76	159.606	-780.9	1142.66	183.956	-523.212	1324.19	186.246	-425.578	1126.09	242.65	-780.312	1233.98	32.4333	-582.169	1392.75	-88.8189	-592.965	1160.46	-101.68	-613.296	1063.24	-108.839	-539.52	926.707	-58.7883	-523.025	826.034	-126.038	-556.711	813.871	-110.566	-502.517	751.369
2203	0	145.957	-476.679	1572.38	250.938	-480.195	1568.26	125.829	-641.418	1567.59	244.613	-647.854	1563.31	184.473	-677.01	1425.33	160.567	-770.457	1144.36	185.107	-512.943	1325.66	187.07	-415.2	1127.65	243.438	-769.761	1235.34	33.5201	-571.79	1394.41	-88.3482	-582.909	1162.45	-101.126	-604.315	1065.41	-108.815	-531.392	928.48	-58.7864	-516.103	827.334	-126.54	-549.2	815.981	-110.456	-496.485	752.158
2204	0	147.154	-467.174	1574.46	252.118	-470.948	1570.12	126.922	-632.109	1568.22	245.608	-638.53	1563.85	185.611	-666.641	1426.66	161.678	-760.5	1145.97	186.06	-502.663	1327	187.797	-405.004	1128.92	244.223	-759.223	1236.57	34.4596	-561.617	1395.88	-87.9988	-573.004	1164.26	-100.953	-595.431	1067.5	-108.652	-523.162	929.836	-58.904	-508.789	828.692	-126.964	-541.655	817.695	-110.303	-490.145	753.074
2205	0	148.259	-457.825	1576.5	253.228	-461.611	1571.83	127.867	-622.656	1569.09	246.571	-629.098	1564.53	186.46	-656.277	1428.18	162.6	-750.577	1147.76	186.844	-492.456	1328.02	188.273	-394.794	1129.95	245.075	-748.827	1238.11	35.2128	-551.313	1397.32	-87.806	-563.208	1166.03	-100.669	-586.277	1069.15	-108.709	-514.875	931.333	-59.0799	-501.276	829.954	-127.623	-533.84	819.263	-110.403	-483.53	753.885
2206	0	149.148	-448.321	1578.31	254.137	-452.178	1573.79	128.643	-613.071	1569.97	247.36	-619.62	1565.22	187.274	-645.924	1429.84	163.566	-740.842	1149.62	187.422	-482.311	1329.12	188.47	-384.838	1130.78	246.228	-739.035	1239.97	35.8071	-541.128	1398.62	-87.5773	-553.554	1167.45	-100.459	-577.076	1070.76	-108.839	-506.661	932.664	-59.2574	-494.095	830.674	-128.015	-526.007	820.791	-110.746	-476.62	754.731
2207	0	149.823	-439.011	1580.15	254.944	-442.827	1575.5	129.25	-603.591	1570.56	248.04	-610.238	1565.74	188.009	-635.677	1431.19	164.524	-731.373	1151.17	187.765	-472.211	1330.1	188.364	-375.034	1131.4	247.189	-729.001	1241.5	36.4115	-531.083	1399.81	-87.354	-544.308	1168.6	-100.456	-568.143	1072.14	-108.676	-498.227	933.577	-59.5806	-486.64	831.58	-128.314	-518.294	821.956	-110.861	-469.508	755.578
2208	0	150.429	-429.777	1581.81	255.501	-433.518	1577.05	129.863	-594.27	1571.09	248.56	-600.836	1566.13	188.816	-625.23	1432.24	165.458	-721.959	1152.65	188.027	-462.268	1330.94	188.114	-365.43	1131.78	248.139	-719.303	1243.04	36.9264	-521.283	1400.75	-87.1658	-535.391	1169.54	-100.21	-559.029	1073.18	-108.735	-490.012	934.489	-59.5184	-478.602	832.428	-128.475	-510.654	822.852	-111.302	-462.076	756.352
2209	0	150.862	-420.36	1583.44	255.925	-424.13	1578.65	130.325	-584.879	1571.74	249.013	-591.366	1566.63	189.454	-615.089	1433.61	166.441	-712.706	1154.27	188.097	-452.373	1331.82	187.716	-355.972	1132.07	249.102	-709.562	1244.71	37.2255	-511.614	1401.78	-86.751	-526.701	1170.35	-99.8724	-549.761	1074.31	-108.607	-481.59	935.235	-59.8956	-470.845	833.113	-128.848	-502.874	823.878	-111.359	-454.329	757.262
2210	0	151.201	-410.943	1585.03	256.231	-414.668	1580.11	130.675	-575.402	1572.29	249.397	-581.87	1567.18	190.133	-604.933	1434.98	167.412	-703.561	1156	188.167	-442.501	1332.51	187.084	-346.746	1132.21	250.133	-699.788	1246.55	37.5123	-502.076	1402.71	-86.3452	-518.127	1171.21	-99.6876	-540.649	1075.34	-108.682	-473.196	936.065	-60.224	-463.067	833.545	-129.168	-494.895	824.886	-112.334	-446.298	758.104
2211	0	151.33	-401.772	1586.25	256.399	-405.243	1581.35	130.989	-565.978	1572.68	249.694	-572.35	1567.52	190.798	-594.963	1436.21	168.612	-694.473	1157.39	188.085	-432.802	1333.11	186.37	-337.659	1132.26	251.357	-690.166	1248.07	37.7722	-492.666	1403.51	-85.7621	-509.726	1171.89	-99.2192	-531.667	1076.35	-108.507	-464.828	936.755	-60.4139	-454.768	834.139	-129.321	-486.991	825.68	-112.919	-438.052	759.04
2212	0	151.347	-392.385	1587.5	256.35	-395.875	1582.57	131.177	-556.626	1573.02	249.82	-562.888	1567.93	191.345	-585.013	1437.23	169.699	-685.513	1158.68	187.739	-423.186	1333.79	185.644	-328.6	1132.48	252.36	-680.576	1249.48	37.8865	-483.494	1404.4	-85.0892	-501.538	1172.63	-98.8132	-522.921	1077.15	-108.468	-456.491	937.5	-60.991	-446.639	834.805	-129.598	-479.002	826.422	-113.732	-429.742	760.034
2213	0	151.247	-382.946	1588.66	256.294	-386.342	1583.75	131.193	-547.241	1573.48	249.883	-553.324	1568.4	191.828	-575.274	1438.41	170.818	-676.487	1160.19	187.368	-413.683	1334.31	184.806	-319.618	1132.69	253.363	-670.922	1251.04	37.8594	-474.32	1405.3	-84.6112	-493.243	1173.42	-98.3387	-514.316	1078.11	-108.536	-447.985	938.454	-61.3733	-438.132	835.476	-130.024	-470.756	827.378	-114.559	-421.174	761.019
2214	0	151.071	-373.629	1589.48	256.22	-376.803	1584.87	131.192	-537.77	1573.84	249.937	-543.779	1568.82	192.298	-565.464	1439.41	171.848	-667.48	1161.43	187.097	-404.133	1334.78	184.039	-310.537	1132.92	254.284	-661.362	1252.38	37.8959	-465.318	1406.01	-84.3233	-485.012	1174.11	-97.884	-505.951	1078.75	-108.473	-439.489	939.189	-61.8614	-429.575	835.97	-130.361	-462.495	828.291	-115.338	-412.437	761.995
2215	0	150.982	-364.348	1590.12	256.098	-367.348	1585.67	131.237	-528.292	1573.92	249.905	-534.252	1569.06	192.755	-555.889	1440.19	172.903	-658.445	1162.43	186.656	-394.785	1335.23	183.179	-301.43	1133.28	255.257	-651.89	1253.34	37.7973	-456.507	1406.71	-84.0376	-476.804	1174.76	-97.4047	-497.717	1079.54	-108.509	-431.016	939.907	-62.3747	-420.755	836.655	-130.448	-454.309	828.962	-116.005	-403.297	763.154
2216	0	150.787	-354.861	1590.87	255.866	-357.89	1586.43	131.175	-518.914	1574.12	249.893	-524.734	1569.51	193.206	-546.428	1441.01	173.95	-649.812	1163.42	186.263	-385.494	1335.68	182.443	-292.319	1133.76	256.121	-642.413	1254.35	37.683	-447.613	1407.41	-84.005	-468.633	1175.48	-97.0656	-489.576	1080.25	-108.889	-422.733	940.866	-63.0682	-411.805	837.518	-130.852	-445.919	829.761	-117.232	-394.758	764.131
2217	0	150.841	-345.366	1591.62	255.747	-348.363	1587.12	131.018	-509.442	1574.5	249.745	-515.209	1569.89	193.504	-536.87	1441.77	174.686	-640.921	1164.4	185.746	-376.158	1336.11	181.72	-283.277	1134.21	256.845	-632.909	1255.31	37.5722	-438.941	1408.01	-83.9337	-460.499	1176.02	-97.0402	-481.681	1080.87	-109.154	-414.314	941.527	-63.4618	-402.652	838.17	-131.041	-437.37	830.621	-118.237	-385.95	764.951
2218	0	150.427	-336.02	1591.92	255.517	-338.894	1587.54	130.869	-499.985	1574.7	249.628	-505.647	1570.18	193.644	-527.397	1442.14	175.387	-632.009	1165.02	185.286	-366.926	1336.41	181.03	-274.127	1134.54	257.384	-623.499	1255.94	37.2286	-429.972	1408.38	-84.0983	-452.488	1176.42	-96.527	-473.479	1081.13	-109.634	-405.995	942.072	-64.1234	-393.558	838.716	-131.296	-428.927	831.154	-119.099	-376.907	765.702
2219	0	149.979	-326.63	1592.18	255.143	-329.529	1587.75	130.665	-490.537	1574.81	249.341	-496.323	1570.28	193.687	-518.001	1442.37	175.901	-623.098	1165.32	184.829	-357.575	1336.67	180.402	-265.101	1134.82	257.866	-614.213	1256.3	36.951	-421.255	1408.58	-84.1348	-444.498	1176.54	-96.6545	-465.753	1081.28	-110.214	-397.689	942.37	-64.4657	-384.128	839.315	-131.306	-420.4	831.315	-119.897	-367.873	766.268
2220	0	149.746	-317.23	1592.51	254.824	-320.027	1588.06	130.408	-481.214	1574.96	249.069	-486.85	1570.52	193.559	-508.397	1442.65	176.16	-614.108	1165.85	184.354	-348.414	1336.8	179.797	-256.149	1135.07	258.199	-604.78	1256.77	36.648	-412.541	1408.83	-84.3813	-436.651	1176.64	-96.6677	-457.666	1081.33	-110.71	-389.264	942.559	-65.1111	-374.839	839.649	-131.446	-411.701	831.548	-120.577	-358.724	766.809
2221	0	149.097	-307.889	1592.44	254.374	-310.51	1588.26	130.118	-471.856	1575.04	248.912	-477.317	1570.65	193.617	-499.054	1442.89	176.39	-605.005	1166.27	183.899	-339.124	1336.82	179.287	-247.202	1134.94	258.479	-595.48	1257.29	36.4007	-403.431	1408.83	-84.565	-428.723	1176.57	-96.5957	-449.443	1081.37	-111.304	-380.775	942.613	-65.5305	-365.4	839.72	-131.529	-402.71	831.629	-121.16	-349.422	767.189
2222	0	148.567	-298.578	1592.29	253.773	-301.084	1588.17	129.882	-462.556	1574.8	248.579	-467.862	1570.48	193.672	-489.803	1442.92	176.627	-596.061	1166.37	183.56	-329.826	1336.64	178.884	-238.345	1134.68	258.721	-586.145	1257.43	35.977	-394.479	1408.65	-84.7909	-420.905	1176.4	-96.7604	-441.214	1081.11	-111.833	-372.122	942.577	-65.8492	-355.958	839.629	-131.597	-393.902	831.344	-121.56	-340.084	767.125
2223	0	147.948	-289.335	1592.1	253.187	-291.644	1588.03	129.494	-453.278	1574.43	248.191	-458.398	1570.24	193.513	-480.336	1442.79	176.712	-587.149	1166.39	183.147	-320.591	1336.38	178.514	-229.586	1134.3	258.715	-576.947	1257.5	35.726	-385.462	1408.32	-85.3158	-412.927	1176.44	-96.897	-432.844	1080.67	-112.504	-363.497	942.343	-66.3235	-346.508	839.761	-131.653	-384.889	831.003	-121.802	-330.632	767.017
2224	0	147.093	-280.069	1591.87	252.468	-282.165	1588	129.025	-444.026	1573.96	247.74	-448.932	1569.96	193.17	-470.774	1442.61	176.629	-578.059	1166.46	182.722	-311.345	1336.08	178.217	-220.717	1133.68	258.596	-567.589	1257.62	35.2819	-376.153	1407.88	-85.6641	-404.882	1176.11	-97.197	-424.241	1080.25	-112.963	-354.556	941.961	-66.592	-336.989	839.724	-131.724	-375.731	830.554	-122.119	-321.22	766.917
2225	0	146.346	-270.744	1591.43	251.703	-272.684	1587.78	128.465	-434.795	1573.25	247.261	-439.403	1569.46	192.792	-461.188	1442.34	176.485	-569.055	1166.36	182.482	-301.921	1335.53	177.879	-211.685	1132.94	258.456	-558.235	1257.62	34.8241	-366.795	1407.24	-86.1371	-396.672	1175.68	-97.5944	-415.444	1079.72	-113.484	-345.62	941.489	-66.9615	-327.367	839.236	-131.902	-366.568	830.013	-122.381	-311.724	766.53
2226	0	145.481	-261.43	1590.83	250.816	-263.202	1587.15	127.953	-425.437	1572.31	246.641	-429.969	1568.65	192.378	-451.701	1441.69	176.304	-559.952	1165.89	182.086	-292.589	1334.84	177.593	-202.84	1132.02	258.111	-549.014	1257.2	34.4094	-357.355	1406.58	-86.6258	-388.183	1175.1	-97.9211	-406.572	1078.93	-114.016	-336.536	940.836	-67.4365	-317.85	838.891	-132.01	-357.452	829.148	-122.541	-302.164	765.94
2227	0	144.668	-252.116	1590.06	249.96	-253.767	1586.48	127.238	-416.039	1571.27	245.955	-420.554	1567.79	191.869	-442.105	1441.02	175.938	-550.91	1165.36	181.557	-283.291	1333.96	177.327	-193.863	1130.94	257.66	-539.808	1256.79	34.0126	-347.861	1405.57	-87.2442	-379.491	1174.38	-98.3781	-397.523	1078.06	-114.362	-327.24	940.083	-67.97	-308.292	838.343	-132.001	-348.208	828.124	-122.738	-292.629	765.245
2228	0	143.849	-242.682	1589.11	249.106	-244.379	1585.84	126.475	-406.646	1570.32	245.189	-410.989	1566.96	191.172	-432.464	1440.41	175.382	-541.559	1165.02	181.145	-273.834	1332.89	177.141	-184.836	1129.72	257.144	-530.467	1256.44	33.4388	-338.152	1404.64	-87.8043	-370.438	1173.44	-99.0223	-388.333	1077.26	-114.828	-318.044	939.148	-68.3172	-298.599	837.444	-132.296	-338.931	827.224	-123.093	-283.035	764.402
2229	0	142.892	-233.158	1588.21	248.222	-234.85	1585.05	125.571	-397.074	1568.97	244.334	-401.483	1565.69	190.443	-422.863	1439.53	174.683	-532.251	1164.3	180.689	-264.309	1331.71	176.995	-175.565	1128.3	256.391	-521.121	1255.79	32.7721	-328.431	1403.49	-88.46	-361.026	1172.45	-99.6009	-379.072	1076.16	-115.253	-308.749	938.048	-68.6987	-289.117	836.599	-132.627	-329.664	826.052	-123.478	-273.602	763.364
2230	0	141.887	-223.67	1587.12	247.324	-225.358	1583.96	124.553	-387.555	1567.38	243.425	-391.994	1564.26	189.467	-413.293	1438.35	173.971	-523.024	1163.26	180.14	-254.746	1330.44	176.642	-166.202	1127	255.512	-511.886	1254.79	32.1275	-318.639	1401.95	-89.0885	-351.483	1171.12	-100.233	-369.919	1074.86	-115.615	-299.373	936.647	-69.2607	-279.616	835.414	-132.861	-320.593	824.654	-123.917	-264.18	762.19
2231	0	140.988	-214.112	1585.85	246.276	-215.919	1582.87	123.529	-377.992	1565.88	242.208	-382.518	1562.94	188.44	-403.655	1437.25	172.959	-513.692	1162.26	179.56	-245.165	1329.11	176.445	-156.712	1125.57	254.432	-502.571	1253.87	31.2737	-308.624	1400.66	-89.8115	-341.618	1169.69	-101.008	-360.595	1073.47	-116.257	-290.218	935.369	-69.8818	-270.15	834.167	-132.963	-311.512	823.043	-124.426	-254.863	760.884
2232	0	139.87	-204.557	1584.45	245.256	-206.357	1581.82	122.421	-368.331	1564.23	241.11	-372.882	1561.45	187.421	-393.941	1436.13	171.925	-504.168	1161.26	178.965	-235.517	1327.57	176.198	-147.548	1123.78	253.397	-493.163	1252.91	30.5227	-298.662	1399.15	-90.5671	-331.512	1168.11	-101.871	-351.113	1072.22	-116.877	-280.962	933.699	-70.2977	-260.659	832.863	-133.029	-302.438	821.52	-124.949	-245.594	759.502
2233	0	138.774	-194.98	1582.97	244.122	-196.734	1580.5	121.275	-358.621	1562.45	240.006	-363.311	1559.92	186.45	-384.159	1434.72	170.983	-494.742	1160.04	178.36	-225.831	1326.12	175.834	-137.752	1122.12	252.313	-483.805	1251.72	29.7066	-288.647	1397.61	-91.2955	-321.331	1166.44	-102.473	-341.626	1070.58	-117.397	-271.574	932.081	-70.9976	-251.32	831.155	-133.271	-293.358	819.775	-125.539	-236.349	757.867
2234	0	137.37	-185.309	1581.53	242.842	-187.141	1579.18	120.061	-349.113	1560.55	238.819	-353.688	1558.46	185.289	-374.439	1433.14	169.764	-485.122	1158.51	177.589	-216.106	1324.53	175.744	-127.653	1120.97	251.14	-474.415	1250.27	28.7209	-278.539	1395.92	-92.0272	-310.974	1164.61	-103.251	-332.141	1068.74	-118.124	-262.404	930.405	-71.6128	-242.158	829.563	-133.668	-284.402	817.793	-126.114	-227.295	756.079
2235	0	136.084	-175.707	1579.8	241.498	-177.437	1577.88	118.723	-339.319	1558.79	237.421	-343.998	1556.92	184.002	-364.699	1431.7	168.419	-475.412	1157.06	176.871	-206.339	1323	175.372	-118.031	1119.2	249.734	-464.931	1248.91	27.7635	-268.486	1394.25	-92.7759	-300.55	1162.68	-104.098	-322.514	1066.99	-118.931	-253.16	928.416	-72.1286	-232.898	827.8	-134.555	-275.165	816.048	-126.757	-218.219	754.161
2236	0	134.678	-165.933	1578.16	240.057	-167.749	1576.35	117.21	-329.619	1557.12	235.957	-334.28	1555.49	182.574	-354.866	1430.21	167.086	-465.649	1155.51	176.067	-196.542	1321.25	175.227	-107.971	1117.68	248.367	-455.359	1247.53	26.6831	-258.261	1392.41	-93.4821	-289.989	1160.7	-104.954	-312.771	1065.26	-119.669	-243.8	926.223	-72.8369	-223.571	825.563	-135.229	-265.983	814.091	-127.354	-209.201	752.042
2237	0	133.223	-156.15	1576.31	238.608	-158.054	1574.86	115.642	-319.877	1555.29	234.371	-324.583	1553.92	181.137	-345.118	1428.39	165.586	-455.746	1153.7	175.161	-186.672	1319.64	174.922	-97.9146	1116.14	246.811	-445.747	1245.84	25.5457	-248.207	1390.47	-94.1259	-279.496	1158.45	-105.681	-303.175	1063.06	-120.468	-234.374	924.159	-73.6651	-214.391	823.502	-135.968	-256.824	811.947	-127.928	-200.22	749.807
2238	0	131.788	-146.262	1574.87	237.109	-148.377	1573.23	114.022	-309.953	1553.71	232.729	-314.937	1552.42	179.594	-335.271	1426.66	164.107	-445.774	1151.81	174.16	-176.727	1318.12	174.594	-87.671	1114.85	245.19	-436.126	1244.09	24.2746	-237.948	1388.76	-94.9739	-268.854	1156.42	-106.488	-293.414	1061.09	-121.519	-225.044	922.159	-74.6189	-205.167	821.308	-136.498	-247.81	809.843	-128.734	-191.205	747.578
2239	0	130.72	-136.338	1572.96	235.689	-138.596	1571.76	112.248	-300.016	1552.13	231.008	-305.161	1551.08	178.044	-325.648	1425.03	162.595	-435.505	1150.11	173.091	-166.769	1316.59	174.241	-77.4276	1113.46	243.628	-426.269	1242.55	22.9826	-227.684	1386.85	-95.9484	-258.276	1154.39	-107.393	-283.372	1059.31	-122.497	-215.425	920.126	-75.3783	-195.624	819.23	-137.55	-238.347	807.9	-129.558	-182.206	745.35
2240	0	128.853	-126.249	1571.39	234.168	-128.868	1570.08	110.389	-289.823	1550.61	229.056	-295.335	1549.55	176.363	-315.736	1423.31	161.037	-425.219	1148.14	171.956	-156.722	1315.14	173.846	-67.1088	1112.12	241.976	-416.308	1240.84	21.5484	-217.438	1385	-97.0135	-247.691	1152.46	-108.363	-273.385	1057.24	-123.373	-205.697	917.935	-76.3132	-186.196	817.044	-138.41	-228.959	805.793	-130.374	-173.124	742.848
2241	0	127.292	-116.212	1569.55	232.482	-119.067	1568.4	108.363	-279.86	1548.87	227.008	-285.586	1548.03	174.58	-305.879	1421.44	159.416	-414.846	1145.99	170.657	-146.642	1313.65	173.4	-56.7982	1110.88	240.264	-406.349	1238.92	19.9814	-207.172	1383.11	-98.1536	-237.242	1150.37	-109.448	-263.301	1055.06	-124.449	-196.025	915.711	-77.2831	-176.67	814.873	-139.44	-219.555	803.577	-131.327	-164.1	740.415
2242	0	125.723	-106.068	1567.79	230.719	-109.193	1566.79	106.172	-269.669	1547.28	224.824	-275.71	1546.67	172.647	-295.954	1419.56	157.749	-404.381	1143.94	169.339	-136.49	1312.34	172.732	-46.2979	1109.68	238.573	-396.284	1236.98	18.3979	-196.892	1381.1	-99.4471	-226.81	1148.2	-110.601	-253.289	1052.97	-125.631	-186.268	913.551	-78.4003	-166.928	812.882	-140.391	-209.955	801.404	-132.372	-154.973	738.098
2243	0	123.751	-95.9967	1566.04	228.761	-99.2135	1565.24	103.931	-259.46	1545.73	222.628	-265.925	1545.1	170.64	-285.649	1417.89	156.131	-393.747	1141.96	167.876	-126.228	1310.83	172.048	-35.7525	1108.49	236.851	-386.054	1235.24	16.682	-186.507	1379.16	-100.78	-216.471	1146.01	-111.742	-243.04	1050.93	-126.825	-176.38	911.47	-79.4259	-157.079	810.506	-141.384	-200.308	799.273	-133.308	-145.578	735.585
2244	0	121.302	-85.759	1564.19	226.524	-89.1989	1563.68	101.505	-249.27	1544.12	220.285	-255.953	1543.58	168.663	-275.738	1416.08	154.63	-383.023	1139.78	166.635	-115.895	1309.37	171.213	-25.4322	1107.07	235.139	-375.747	1233.38	14.8838	-176.161	1377.24	-102.232	-206.189	1143.86	-112.841	-232.798	1048.8	-127.887	-166.248	909.095	-80.5398	-147.134	808.111	-142.209	-190.575	797.033	-134.311	-136.009	733.148
2245	0	118.962	-75.6541	1562.65	224.078	-79.1846	1562.21	99.3092	-239.408	1542.03	217.853	-245.94	1542.22	166.485	-265.715	1414.3	153.098	-372.166	1137.54	164.978	-105.486	1308.01	170.281	-15.0514	1105.81	233.336	-365.39	1231.42	13.1065	-165.805	1375.02	-103.677	-195.947	1141.67	-114.033	-222.569	1046.43	-129.091	-156.026	906.89	-81.7861	-137.189	805.781	-143.539	-180.643	794.719	-135.429	-126.419	730.716
2246	0	116.18	-65.4329	1561.33	221.482	-69.0363	1561.27	96.5443	-229.191	1540.52	215.089	-235.876	1541.12	164.23	-255.766	1412.76	151.491	-361.105	1135.67	163.198	-94.8994	1306.94	169.302	-4.26181	1104.78	231.537	-354.954	1229.79	10.8942	-155.276	1373.42	-105.425	-185.841	1139.54	-115.353	-212.09	1044.22	-130.409	-145.977	904.643	-83.0872	-127.184	803.436	-144.519	-170.634	792.534	-136.598	-116.556	728.317
2247	0	113.514	-55.1541	1560.37	218.817	-58.7836	1560.77	93.7071	-218.753	1539.19	212.275	-225.608	1540.2	161.892	-245.373	1411.51	149.927	-350.038	1134.2	161.44	-84.197	1305.97	168.123	6.74467	1103.93	229.768	-344.453	1228.58	8.78502	-144.849	1371.63	-107.143	-175.67	1137.4	-116.618	-201.594	1042.09	-131.75	-135.702	902.378	-84.2902	-116.97	801.139	-145.861	-160.41	790.431	-137.794	-106.489	726.029
2248	0	110.864	-44.8709	1559.62	215.956	-48.5371	1560.56	90.9014	-208.407	1537.88	209.447	-215.375	1539.41	159.571	-234.755	1410.51	148.49	-339.02	1132.97	159.486	-73.4023	1305.35	166.955	17.7444	1103.24	228.127	-333.89	1227.66	6.53574	-134.134	1369.92	-108.803	-165.494	1135.33	-117.865	-190.952	1039.9	-133.194	-125.335	900.33	-85.6782	-106.821	798.864	-147.018	-150.185	788.259	-138.793	-96.4786	723.655
2249	0	107.927	-34.3484	1559.45	212.984	-38.1892	1560.62	87.9382	-197.871	1536.97	206.39	-205.031	1538.97	157.327	-223.856	1410.04	147.254	-328.044	1132.43	157.453	-62.3877	1305.09	165.647	29.0108	1102.81	226.705	-323.24	1227.34	4.31486	-123.487	1368.72	-110.376	-155.154	1133.63	-118.893	-180.232	1038.12	-134.533	-114.891	898.411	-87.0433	-96.1165	797.294	-148.183	-139.906	786.427	-140.148	-86.2417	721.928
2250	0	104.925	-23.7354	1559.6	209.994	-27.6538	1561.2	84.86	-187.058	1536.53	203.442	-194.484	1538.98	155.234	-212.689	1410.31	146.287	-317.263	1132.79	155.325	-51.3435	1305.07	164.188	40.431	1102.68	225.51	-312.333	1227.86	2.14273	-112.769	1368	-111.975	-144.736	1132.61	-119.9	-169.209	1036.76	-135.864	-104.21	896.999	-88.4097	-85.4755	795.922	-149.299	-129.626	785.114	-141.556	-75.9933	720.63
2251	0	101.964	-13.1192	1559.84	207.031	-17.0159	1561.99	81.7865	-176.285	1536.43	200.291	-183.717	1539.36	153.193	-201.328	1411.04	145.47	-306.616	1133.59	153.152	-40.228	1305.36	162.591	51.9034	1102.85	224.506	-301.328	1228.99	-0.015686	-101.985	1367.75	-113.32	-134.145	1131.7	-120.749	-158.2	1035.89	-137	-93.5237	896.077	-89.8291	-74.5794	794.888	-150.758	-119.069	784.331	-143.084	-65.6791	719.6
2252	0	98.9596	-2.2321	1560.52	203.965	-6.34885	1563.07	78.6672	-165.359	1536.49	197.201	-173.105	1539.97	151.139	-190.212	1411.93	144.956	-296.185	1134.6	150.971	-29.1273	1306.02	160.82	63.3488	1103.45	223.615	-290.333	1230.34	-2.15582	-91.3372	1367.97	-114.48	-123.417	1131.38	-121.434	-147.159	1035.39	-138.16	-82.8357	895.557	-91.3057	-63.7899	794.359	-151.663	-108.728	783.85	-144.617	-55.278	719.194
2253	0	95.9003	8.77978	1561.61	200.911	4.5398	1564.61	75.5581	-154.389	1537.17	193.936	-162.337	1541.16	149.149	-179.254	1413.3	144.376	-285.539	1136.12	148.789	-18.1334	1307.1	158.869	74.5385	1104.53	222.796	-279.288	1232.1	-4.20316	-80.8923	1368.47	-115.503	-112.531	1131.52	-122.128	-136.207	1035.65	-139.259	-72.1443	895.98	-92.7444	-52.8398	794.466	-153.045	-98.004	784.226	-146.141	-44.7018	719.359
2254	0	92.9216	19.8252	1562.94	197.915	15.5155	1566.46	72.4837	-143.218	1538.49	190.975	-151.411	1542.97	147.392	-168.397	1415.1	143.642	-274.378	1138.22	146.561	-7.20087	1308.62	156.856	85.4501	1106.09	222.038	-268.277	1234.49	-6.30322	-70.3802	1369.69	-116.392	-101.62	1132.13	-122.779	-125.272	1036.57	-140.25	-61.3011	896.915	-94.1664	-41.7011	795.457	-154.349	-87.0717	785.287	-147.695	-33.9931	720.393
2255	0	90.0678	30.8218	1564.35	194.976	26.6011	1568.39	69.804	-132.225	1540.14	188.178	-140.327	1545.22	145.3	-157.708	1417.26	143.218	-263.028	1140.22	144.353	3.54901	1310.54	154.893	95.7724	1107.99	221.188	-257.192	1236.86	-8.42553	-60.0788	1371.49	-117.201	-90.6452	1133.4	-123.424	-114.502	1038.09	-141.196	-50.5974	898.369	-94.7784	-31.258	796.465	-154.983	-76.6518	786.706	-149.241	-23.2885	721.861
2256	0	87.3751	41.794	1566.11	192.23	37.6629	1570.53	67.1506	-121.309	1542.32	185.542	-129.441	1547.87	143.604	-147.086	1419.38	142.65	-251.928	1142.35	142.167	14.0885	1312.99	152.721	106.072	1110.55	220.306	-246.2	1239.26	-10.5402	-49.9412	1373.57	-117.963	-79.8475	1134.98	-124.122	-103.972	1039.81	-142.187	-39.8793	900.349	-95.7529	-19.6647	798.623	-155.664	-65.8733	788.504	-150.768	-12.3832	724.004
2257	0	84.8366	52.8042	1568.26	189.637	48.6405	1572.95	64.7399	-110.317	1544.93	183.201	-118.45	1550.9	141.585	-136.628	1421.78	141.798	-241.17	1144.69	140.002	24.5281	1315.63	150.57	116.149	1113.33	219.232	-235.227	1241.8	-12.7097	-39.8111	1376.1	-118.815	-69.1403	1137.05	-124.529	-93.8351	1041.81	-143.282	-29.1991	902.755	-97.024	-8.69137	800.704	-156.486	-54.8882	790.915	-152.157	-1.31099	726.5
2258	0	82.3071	63.6995	1570.15	187.23	59.6126	1575.3	62.3057	-99.4845	1547.82	180.821	-107.609	1554.08	139.492	-126.378	1424.26	140.93	-230.731	1147.06	137.814	34.7447	1318.33	148.558	126.247	1116.31	218.277	-224.493	1244.53	-14.87	-30.0793	1378.61	-119.748	-58.7985	1139.14	-125.43	-83.4736	1044.17	-144.332	-18.4432	905.255	-98.4028	3.22773	803.656	-157.338	-43.7627	793.478	-153.397	9.98443	729.075
2259	0	80.0204	74.4092	1572.2	185.034	70.4628	1577.59	60.0949	-88.9576	1550.66	178.627	-96.8657	1557.1	137.537	-116.297	1426.5	139.955	-220.464	1149.05	135.762	44.8886	1320.92	146.364	136.068	1119.24	216.884	-213.87	1246.66	-16.8777	-20.1329	1381.01	-120.829	-48.5686	1141.39	-126.375	-73.2129	1046.42	-145.39	-7.70062	907.819	-99.1094	15.006	806.518	-157.998	-32.5763	795.825	-154.269	21.5303	731.585
2260	0	78.0638	85.0568	1574.24	182.811	81.0345	1579.6	58.1941	-78.3845	1553.29	176.608	-86.31	1560.03	135.608	-106.378	1428.67	138.814	-210.264	1151.03	133.703	54.9267	1323.56	144.513	145.893	1122.14	215.393	-203.308	1248.66	-18.8133	-10.4519	1383.36	-122.162	-38.4513	1143.82	-127.536	-63.1575	1048.7	-146.462	3.18671	910.272	-99.8797	26.6003	809.196	-158.577	-21.0684	798.112	-155.116	33.4611	734.412
2261	0	76.0336	95.4818	1576.15	180.91	91.5414	1581.75	56.1964	-68.068	1555.98	174.665	-75.8211	1562.78	133.863	-96.4581	1430.99	137.512	-200.008	1153.2	131.824	64.8372	1325.98	142.624	155.712	1124.97	213.933	-192.943	1250.98	-20.7577	-0.544159	1385.62	-123.592	-28.2997	1146.07	-129.061	-52.9983	1051.04	-147.676	14.3764	912.683	-100.718	38.0678	811.542	-159.27	-9.50727	800.596	-155.441	45.2081	736.599
2262	0	74.0806	105.654	1578.14	178.928	101.784	1583.9	54.2852	-57.8192	1558.37	172.738	-65.5278	1565.32	132.14	-86.7449	1433.17	136.042	-189.79	1155.25	129.82	74.6446	1328.26	140.761	165.439	1127.6	212.493	-182.82	1253.13	-22.5804	9.02413	1387.75	-125.278	-18.3021	1148.38	-130.66	-42.7906	1053.21	-148.87	25.2985	915.081	-101.392	49.7148	814.247	-159.867	2.16785	802.803	-155.875	57.2709	738.99
2263	0	72.1795	115.777	1579.98	177.084	111.919	1585.74	52.6723	-47.7015	1560.31	171.037	-55.4338	1567.44	130.43	-77.1886	1435.06	134.41	-179.622	1156.95	128.063	84.3431	1330.44	139.232	175.074	1130	210.936	-172.856	1254.87	-24.3444	18.7058	1389.6	-127.328	-8.47836	1150.59	-132.48	-32.7923	1054.88	-150.037	36.0799	917.215	-102.279	61.5541	817.174	-160.55	14.007	804.671	-156.078	69.6129	741.388
2264	0	70.4202	125.738	1581.58	175.22	121.951	1587.58	50.9143	-37.9099	1562.15	169.246	-45.4003	1569.46	128.753	-67.5224	1436.79	132.883	-169.449	1158.49	126.335	93.9811	1332.37	137.712	184.829	1132.22	209.344	-163.189	1256.53	-26.3838	28.5997	1391.6	-129.345	1.34491	1152.59	-134.47	-22.7856	1056.47	-151.329	47.1499	919.228	-103.087	73.4591	819.801	-161.526	26.2401	806.439	-156.253	82.1999	743.675
2265	0	68.5062	135.569	1582.96	173.389	131.911	1589.3	49.2392	-28.0441	1563.76	167.598	-35.4206	1571.35	127.258	-57.6065	1438.3	131.331	-159.395	1160.18	124.652	103.62	1334.01	136.279	194.427	1133.93	207.755	-153.528	1258.35	-27.9371	38.1624	1392.96	-131.736	11.1014	1154.41	-136.621	-12.6333	1058.02	-152.767	58.3155	921.104	-103.897	85.3874	822.23	-162.354	38.6266	808.119	-156.478	94.9705	745.853
2266	0	66.6731	145.312	1584.11	171.612	141.798	1590.67	47.7877	-18.289	1565.01	166.191	-25.608	1572.93	125.856	-47.9587	1439.78	129.895	-149.863	1161.73	122.922	113.075	1335.34	135.016	203.92	1135.21	206.246	-144.094	1259.85	-28.9314	47.5323	1394.15	-133.793	20.8703	1155.91	-138.845	-2.59628	1059.36	-154.135	69.5698	922.761	-104.568	97.353	824.517	-163.222	50.8781	809.584	-156.709	108.139	747.981
2267	0	65.2226	154.975	1585.16	170.001	151.521	1591.79	46.3752	-8.81887	1566.08	164.656	-15.8244	1574.26	124.505	-38.2901	1440.96	128.496	-140.781	1162.92	121.871	122.541	1336.3	134.032	213.435	1136.21	204.791	-134.966	1261.17	-30.112	57.2795	1395.21	-136.101	30.5568	1157.43	-140.934	7.43843	1060.32	-155.528	80.7876	924.348	-105.183	109.304	826.685	-164.038	63.3597	810.749	-156.67	121.326	750.093
2268	0	63.6857	164.624	1586.07	168.486	161.212	1592.9	44.915	0.86766	1567.12	163.194	-6.18947	1575.54	123.293	-28.6312	1442.19	126.985	-131.691	1164.28	120.812	132.038	1337.07	133.193	222.805	1136.84	203.375	-125.805	1262.53	-31.2442	66.9973	1395.99	-138.22	40.3249	1158.76	-143.238	17.5556	1061.41	-156.922	92.1949	925.833	-105.932	121.335	828.767	-164.689	75.9144	811.904	-157.016	134.472	752.106
2269	0	62.3134	174.271	1586.75	167.087	170.838	1593.78	43.5525	10.6167	1568.07	161.843	3.48457	1576.59	122.057	-18.9635	1443.3	125.523	-122.689	1165.71	119.934	141.435	1337.56	132.529	231.871	1137.09	201.88	-116.769	1263.89	-32.4292	76.8245	1396.74	-140.373	50.0592	1159.91	-145.574	27.7753	1062.33	-158.202	103.581	926.977	-106.468	133.255	830.467	-165.868	88.4054	813.212	-157.219	147.877	753.863
2270	0	61.0445	183.869	1587.27	165.92	180.362	1594.47	42.1823	20.0836	1568.67	160.454	12.9546	1577.25	120.906	-9.46043	1444.11	124.01	-113.872	1166.72	119.102	150.752	1337.87	132.001	240.855	1137.06	200.374	-107.811	1264.96	-33.4157	86.5838	1397.22	-142.21	59.6725	1160.84	-147.628	38.0529	1062.96	-159.551	115.04	928.029	-107.248	145.153	832.108	-167.071	101.23	814.189	-157.577	161.189	755.547
2271	0	59.9247	193.394	1587.78	164.849	189.8	1595.01	40.9188	29.5977	1569.08	159.314	22.3038	1577.99	119.729	0.027168	1444.78	122.464	-105.115	1167.6	118.287	159.902	1338.14	131.495	249.692	1136.97	199.039	-99.2639	1265.62	-34.3319	96.3703	1397.75	-143.934	69.3192	1161.53	-149.482	48.2879	1063.27	-160.887	126.595	929.112	-108.196	157.045	833.725	-168.04	113.616	814.886	-158.248	174.317	757.303
2272	0	59.0199	202.924	1588.12	163.876	199.203	1595.49	39.781	39.2795	1569.41	158.074	31.7683	1578.44	118.491	9.62866	1445.48	120.912	-96.3535	1168.67	117.737	168.993	1338.3	131.281	258.412	1136.54	197.518	-90.4358	1266.84	-35.0393	106.175	1397.97	-145.527	78.9838	1162.14	-151.475	58.7147	1063.88	-161.982	138.158	930.038	-109.03	169.001	835.101	-169.28	126.076	815.912	-158.932	187.682	759.02
2273	0	58.3316	212.523	1588.25	163.079	208.551	1595.77	38.7216	48.9126	1569.68	156.916	41.2264	1578.7	117.52	18.8116	1446.17	119.249	-87.6712	1169.77	117.321	177.942	1338.19	131.306	267.079	1136.15	196.1	-81.9644	1267.57	-35.6116	116.017	1398.05	-146.899	88.6997	1162.64	-153.229	69.2436	1064.41	-163.042	149.774	930.906	-109.877	180.823	836.222	-170.219	138.589	816.609	-159.901	200.583	760.556
2274	0	57.703	222.064	1588.37	162.355	217.771	1595.85	37.6881	58.3666	1569.79	155.857	50.5771	1578.86	116.477	27.9363	1446.69	117.666	-79.1283	1170.45	116.909	186.888	1338.18	131.322	275.625	1135.72	194.687	-73.4463	1268.42	-36.2435	125.812	1398.3	-147.968	98.6205	1163.01	-154.796	79.7569	1064.67	-164.119	161.351	931.749	-110.97	192.667	837.294	-171.339	150.756	817.334	-160.818	213.602	761.931
2275	0	57.0741	231.541	1588.32	161.73	227.094	1595.81	36.7603	67.815	1569.85	154.891	59.8236	1579.03	115.247	37.0651	1447.02	115.961	-70.6217	1171.06	116.485	195.711	1338.04	131.3	284.005	1135.16	193.093	-65.0901	1268.94	-36.7935	135.486	1398.42	-148.838	108.663	1163.05	-156.184	90.3982	1064.76	-165.217	172.795	932.588	-112.277	204.658	838.405	-172.604	162.805	817.982	-162.088	226.07	763.065
2276	0	56.5688	241.023	1588.01	161.252	236.397	1595.7	35.8575	77.3526	1569.96	153.976	69.1015	1579.16	114.265	45.9746	1447.43	114.27	-62.148	1171.78	116.147	204.396	1337.79	131.281	292.366	1134.56	191.561	-56.7432	1269.52	-37.3188	145.075	1398.34	-149.65	118.85	1163	-157.545	101.205	1064.95	-166.113	184.232	932.93	-113.141	216.429	838.948	-174.079	175.24	818.515	-163.279	238.654	763.913
2277	0	56.2076	250.522	1587.57	160.876	245.678	1595.4	35.167	86.9134	1569.93	153.189	78.3953	1579.19	113.378	55.0041	1447.54	112.688	-53.7706	1172.16	115.982	213.048	1337.4	131.436	300.625	1134.1	189.961	-48.4095	1269.67	-37.7482	154.569	1398.16	-150.316	129.131	1162.87	-158.645	111.978	1064.99	-166.871	195.813	933.155	-114.06	227.99	839.184	-175.176	187.253	818.957	-164.559	250.962	764.683
2278	0	55.8687	259.974	1587.13	160.475	254.912	1594.88	34.6586	96.3261	1569.83	152.549	87.6033	1579.23	112.623	63.7992	1447.5	111.467	-45.475	1172.35	115.776	221.608	1337.06	131.557	308.931	1133.67	188.79	-40.3276	1269.9	-37.9898	163.807	1397.91	-150.858	139.521	1162.62	-159.444	122.719	1064.65	-167.639	207.432	933.484	-115.111	239.797	839.392	-176.023	198.849	819.174	-165.81	263.093	765.308
2279	0	55.5565	269.35	1586.71	160.146	264.139	1594.49	34.0112	105.744	1569.95	151.883	96.7766	1579.43	111.863	72.3894	1447.62	110.164	-37.1527	1172.54	115.553	230.072	1336.91	131.635	317.228	1133.42	187.483	-32.0468	1270.05	-38.4163	172.902	1397.8	-151.406	150.111	1162.36	-160.263	133.673	1064.55	-168.52	218.715	933.878	-116.035	251.534	839.675	-177.18	210.788	819.28	-167.12	275.231	765.781
2280	0	55.3001	278.763	1586.29	159.987	273.312	1594.09	33.3596	115.108	1570.12	151.258	105.911	1579.54	111.042	81.1076	1447.58	109.059	-28.8825	1172.72	115.331	238.524	1336.66	131.527	325.312	1133.14	186.355	-23.8259	1270.2	-39.1172	181.774	1397.96	-151.85	160.782	1162.08	-160.868	144.787	1064.26	-169.298	230.102	933.789	-116.977	263.043	839.514	-178.488	222.763	819.608	-168.476	286.952	766.068
2281	0	55.089	288.066	1585.59	159.827	282.476	1593.48	32.8527	124.352	1570.09	150.749	115.032	1579.49	110.304	89.7157	1447.25	108.109	-20.6019	1172.57	115.285	246.861	1336.26	131.504	333.405	1132.88	185.387	-15.6466	1270.1	-39.3727	190.636	1397.64	-152.084	171.556	1161.46	-161.302	155.746	1063.69	-169.743	241.428	933.59	-117.79	274.649	839.279	-179.484	234.219	819.386	-169.643	298.66	765.897
2282	0	55.0045	297.278	1584.92	159.684	291.496	1592.84	32.4601	133.555	1569.94	150.247	124.065	1579.4	109.864	98.1341	1446.99	107.287	-12.4217	1172.33	115.077	255.441	1335.91	131.413	341.533	1132.52	184.541	-7.48259	1269.88	-39.7438	199.497	1397.35	-152.266	182.345	1160.83	-161.6	166.729	1063.09	-170.423	252.607	933.242	-118.664	286.115	838.889	-179.991	245.552	819.011	-170.676	310.329	765.841
2283	0	54.9825	306.434	1584.38	159.664	300.521	1592.32	32.106	142.708	1569.86	149.907	132.966	1579.31	109.32	106.851	1446.87	106.53	-4.23165	1172.3	114.989	263.992	1335.55	131.439	349.84	1132.11	183.803	0.721945	1269.79	-39.9633	208.299	1397.06	-152.549	193.155	1160.36	-161.792	177.949	1062.35	-170.958	263.815	932.97	-119.423	297.51	838.42	-181.014	257.328	818.622	-171.745	321.808	765.535
2284	0	55.0894	315.455	1583.85	159.735	309.459	1591.66	31.9037	151.868	1569.76	149.718	141.937	1579.11	109.084	115.406	1446.68	106.027	4.07153	1172.28	114.863	272.547	1335.03	131.458	357.978	1131.55	183.248	9.04786	1269.67	-40.2412	217.049	1396.59	-152.454	204.087	1159.54	-161.747	189.171	1061.87	-171.252	275.206	932.579	-120.076	308.968	837.711	-181.526	268.542	818.377	-172.61	333.177	765.153
2285	0	55.1501	324.46	1583.18	159.841	318.3	1590.88	31.9295	160.88	1569.33	149.582	150.841	1578.65	108.882	124.016	1446.16	105.542	12.292	1171.99	114.777	281.11	1334.39	131.399	366.258	1130.96	182.84	17.3835	1269.36	-40.3729	225.76	1395.96	-152.33	214.96	1158.86	-161.715	200.284	1061.05	-171.49	286.491	932.022	-120.401	320.22	836.919	-182.09	279.831	817.693	-173.242	344.589	764.536
2286	0	55.2124	333.37	1582.52	159.784	327.103	1590.1	31.9234	169.733	1568.74	149.564	159.597	1578.11	108.56	132.818	1445.66	105.089	20.3856	1171.71	114.653	289.721	1333.67	131.157	374.477	1130.07	182.392	25.7095	1269.05	-40.5819	234.562	1395.52	-152.216	225.634	1157.99	-161.351	211.592	1060.19	-171.543	297.797	931.536	-120.959	331.4	836.052	-182.66	291.233	817.228	-173.979	355.728	763.852
2287	0	55.3551	342.127	1581.77	159.867	335.908	1589.45	31.8791	178.515	1568.25	149.625	168.385	1577.51	108.444	141.54	1445.24	104.682	28.6931	1171.52	114.567	298.32	1332.99	131.121	382.832	1129.29	182.066	34.0894	1268.77	-40.5988	243.31	1394.89	-151.926	236.476	1157.1	-161.39	222.75	1059.6	-171.531	308.997	930.862	-121.081	342.669	835.269	-182.963	302.345	816.666	-174.456	366.88	763.163
2288	0	55.4673	350.823	1581.1	160.043	344.724	1588.71	32.0486	187.233	1567.6	149.774	177.174	1576.63	108.373	150.339	1444.73	104.378	36.9075	1171.19	114.689	307.02	1332.16	131.025	391.315	1128.43	181.866	42.5552	1268.37	-40.6097	252.101	1394.15	-151.649	247.112	1156.33	-160.964	234.143	1058.81	-171.196	320.326	930.296	-121.285	353.735	834.338	-183.751	313.757	816.38	-174.61	378.097	762.354
2289	0	55.4635	359.476	1580.54	160.076	353.462	1587.93	32.4016	195.762	1566.76	150.121	185.906	1575.78	108.4	159.192	1444.02	104.266	45.2042	1170.59	114.423	315.508	1331.38	130.927	399.757	1127.57	181.757	51.1199	1267.8	-40.5123	260.888	1393.45	-151.444	257.606	1155.53	-160.612	245.171	1057.96	-171.013	331.559	929.92	-121.258	364.867	833.841	-183.812	324.723	815.553	-174.823	389.107	761.815
2290	0	55.547	368.113	1579.79	160.294	362.238	1587.12	32.7336	204.423	1565.88	150.481	194.647	1574.86	108.616	167.951	1443.36	104.21	53.6161	1170.12	114.492	324.139	1330.53	130.81	408.307	1126.83	181.701	59.7433	1267.19	-40.3597	269.688	1392.93	-151.001	268.197	1154.97	-160.133	256.434	1057.14	-170.527	342.927	929.574	-121.019	375.892	833.105	-183.565	336.24	815.102	-174.667	400.357	761.171
2291	0	55.839	376.792	1578.96	160.634	371.074	1586.25	33.013	213.127	1565.21	150.879	203.507	1573.89	108.795	176.9	1442.65	104.131	62.0801	1169.81	114.668	332.864	1329.49	130.726	416.92	1125.63	181.837	68.4519	1266.71	-40.2655	278.528	1392.32	-150.681	278.53	1154.21	-159.654	267.634	1056.65	-170.031	354.221	929.189	-120.643	386.957	832.412	-184.002	347.942	814.743	-174.405	411.524	760.521
2292	0	56.2286	385.661	1578.12	161.054	379.876	1585.31	33.4487	221.776	1564.35	151.354	212.334	1572.92	109.133	185.775	1441.82	104.215	70.4932	1169.09	114.845	341.6	1328.44	130.64	425.51	1124.52	182	77.1031	1265.88	-39.9944	287.288	1391.37	-150.331	288.637	1153.36	-159.349	278.558	1055.58	-169.324	365.565	928.518	-120.116	398.038	831.556	-183.378	359.212	814.067	-173.799	422.843	759.751
2293	0	56.6996	394.44	1577.33	161.5	388.688	1584.22	33.9469	230.548	1563.37	151.737	221.065	1571.83	109.445	194.527	1440.83	104.378	79.1003	1168.07	114.952	350.379	1327.37	130.498	434.184	1123.25	182.28	85.9044	1264.84	-39.6416	295.983	1390.43	-149.815	298.771	1152.35	-158.994	289.233	1054.72	-168.63	376.768	928.019	-119.528	409.1	831.039	-183.213	370.772	813.368	-173.214	434.221	759.097
2294	0	57.3468	403.234	1576.43	162.102	397.438	1583.14	34.4314	239.459	1562.5	152.309	229.857	1570.8	109.944	203.41	1439.96	104.552	87.7226	1167.35	115.217	359.217	1326.24	130.345	442.939	1122.16	182.556	94.836	1263.91	-39.2456	304.708	1389.46	-149.357	308.692	1151.33	-158.709	299.991	1053.81	-167.933	387.957	927.471	-118.718	420.129	830.276	-182.974	382.639	813.227	-172.419	445.63	758.527
2295	0	58.0323	412.121	1575.28	162.874	406.291	1581.99	35.0346	248.417	1561.58	153.014	238.752	1569.62	110.481	212.431	1438.96	104.905	96.3847	1166.55	115.549	368.097	1324.94	130.244	451.562	1120.49	183.107	103.8	1262.96	-38.7766	313.509	1388.41	-149.077	318.369	1150.59	-157.981	310.721	1052.97	-166.909	399.278	926.828	-117.638	431.17	829.626	-182.275	394.199	812.585	-171.182	457.302	758.026
2296	0	58.8714	420.934	1574.27	163.679	415.08	1580.67	35.8406	257.32	1560.44	153.655	247.551	1568.2	111.058	221.475	1437.73	105.37	105.244	1165.38	115.837	377.024	1323.64	130.231	460.289	1119.22	183.588	112.682	1261.66	-38.355	322.262	1387.42	-148.729	328.007	1149.58	-158.121	320.901	1052.06	-166.111	410.254	926.335	-116.569	442.088	828.897	-181.576	405.859	812.145	-169.951	469.042	757.502
2297	0	59.7209	429.818	1573.42	164.638	423.764	1579.52	36.6102	266.274	1559.18	154.435	256.359	1566.8	111.618	230.387	1436.47	105.759	113.982	1164.11	116.066	386.016	1322.56	129.969	469.052	1117.79	184.143	121.721	1260.3	-38.0658	330.963	1386.43	-148.367	337.52	1148.78	-157.714	331.24	1051.05	-165.256	421.224	925.81	-115.5	452.998	828.692	-180.552	417.647	811.441	-168.502	480.786	757.321
2298	0	60.7644	438.757	1572.42	165.631	432.647	1578.45	37.4571	275.238	1557.86	155.272	265.275	1565.29	112.357	239.373	1435.44	106.273	122.922	1163.04	116.497	395.086	1321.29	130.033	477.941	1116.71	184.691	130.892	1259.02	-37.7179	339.824	1385.36	-148.048	346.836	1147.88	-157.173	341.453	1049.97	-164.256	432.099	925.38	-113.981	463.881	828.362	-179.621	429.282	810.966	-166.937	492.502	757.166
2299	0	61.7706	447.689	1571.41	166.663	441.595	1577.27	38.4198	284.07	1556.71	156.276	274.139	1563.66	113.082	248.624	1434.06	106.787	131.859	1161.76	116.88	404.222	1319.98	130.032	486.94	1115.22	185.305	140.042	1257.8	-37.263	348.865	1384.45	-147.685	356.013	1146.84	-157.531	351.181	1048.99	-163.373	442.764	924.628	-112.68	474.694	828.011	-178.633	440.695	810.214	-165.288	504.253	756.857
2300	0	62.7706	456.539	1570.39	167.771	450.393	1575.84	39.5119	292.879	1555.2	157.329	283.049	1562.02	113.842	257.825	1432.7	107.43	140.988	1160.35	117.474	413.465	1318.6	130.117	496.068	1113.94	185.998	149.174	1256.23	-36.3962	358.109	1383.13	-147.355	365.238	1145.96	-156.938	361.127	1047.7	-162.361	453.433	924.007	-111.238	485.481	827.615	-177.417	452.055	809.513	-163.415	515.986	756.725
2301	0	63.7037	465.334	1569.4	168.768	459.318	1574.49	40.6467	301.64	1553.87	158.619	292.001	1560.51	114.648	267.127	1431.32	108.051	150.202	1158.97	118.093	422.792	1317.31	130.224	505.371	1112.39	186.792	158.471	1254.77	-35.7785	367.259	1382.13	-146.938	374.105	1144.69	-156.629	370.902	1046.74	-161.399	463.926	923.405	-109.61	496.237	827.393	-176.315	463.509	809.16	-161.547	527.594	756.661
2302	0	65.0096	474.072	1568	169.907	468.305	1573.18	41.9095	310.56	1552.81	159.895	300.961	1558.99	115.649	276.497	1430.12	108.796	159.493	1157.83	118.762	432.131	1315.86	130.394	514.832	1111	187.576	167.968	1253.38	-34.885	376.531	1380.92	-146.604	383.168	1143.71	-156.623	380.417	1045.74	-160.463	474.308	922.639	-108.022	506.886	827.009	-174.824	474.773	808.227	-159.653	539.17	756.578
2303	0	66.3975	483.071	1566.92	171.225	477.322	1571.89	43.1901	319.539	1551.4	161.191	310.056	1557.3	116.646	285.863	1428.63	109.475	168.84	1156.43	119.438	441.503	1314.47	130.489	524.329	1109.45	188.333	177.326	1251.91	-34.1004	385.686	1379.67	-146.28	392.184	1142.6	-156.134	390.008	1044.64	-159.424	484.568	921.961	-106.489	517.555	826.634	-173.035	485.465	807.63	-157.701	550.533	756.278
2304	0	67.7913	491.986	1566.02	172.6	486.35	1570.53	44.6648	328.477	1549.99	162.669	318.992	1555.66	117.785	295.293	1427.14	110.347	178.274	1154.79	120.185	450.931	1313.18	130.685	533.767	1108.05	189.322	186.935	1250.16	-33.1036	394.942	1378.64	-145.839	401.184	1141.73	-155.815	399.282	1043.58	-158.385	494.647	921.277	-104.907	528.09	826.532	-171.466	496.196	806.737	-155.769	561.679	756.252
2305	0	69.1196	500.872	1565.11	174.044	495.212	1569.44	46.0606	337.379	1548.87	164.058	328.019	1554.17	118.966	304.732	1425.88	111.268	188.049	1153.38	121.122	460.519	1312.06	131.016	543.498	1107.01	190.323	196.572	1248.67	-32.0464	404.349	1377.67	-145.389	410.366	1141.03	-155.403	408.666	1042.69	-157.347	504.565	920.8	-103.358	538.644	826.657	-170.051	507.056	806.173	-153.769	572.776	756.329
2306	0	70.8048	509.941	1564.28	175.731	504.26	1568.36	47.6119	346.518	1547.69	165.691	337.072	1552.6	120.315	314.197	1424.58	112.144	197.733	1152.02	121.874	470.076	1310.88	131.336	553.385	1105.68	191.416	206.383	1247.15	-30.9693	413.67	1376.68	-144.842	419.593	1140.36	-155.225	417.903	1041.95	-156.308	514.551	920.322	-101.886	549.033	826.789	-168.28	517.551	805.7	-151.77	583.766	756.472
2307	0	72.5036	519.013	1563.54	177.531	513.304	1567.31	49.4022	355.707	1546.28	167.417	346.163	1550.95	121.68	323.692	1423.14	113.289	207.607	1150.36	122.775	479.713	1309.82	131.559	563.094	1104.81	192.536	216.355	1245.36	-29.8877	422.99	1376	-144.209	428.788	1139.98	-154.517	427.168	1041.05	-155.345	524.253	919.953	-100.288	559.198	826.896	-166.397	527.717	805.089	-149.676	594.504	756.602
2308	0	74.4193	528.053	1562.89	179.406	522.201	1566.11	51.1846	364.709	1545.05	169.196	355.212	1549.29	123.128	333.057	1421.72	114.352	217.611	1148.59	123.914	489.45	1308.84	131.948	573.058	1103.88	193.728	226.416	1243.42	-28.7371	432.544	1375.52	-143.462	437.906	1139.62	-153.667	436.308	1040.54	-154.15	533.857	919.716	-98.6461	569.258	827.123	-164.923	538.098	804.863	-147.87	605	756.905
2309	0	76.5001	537.188	1562.06	181.434	531.377	1565.08	52.9962	373.851	1543.82	171.057	364.298	1547.65	124.606	342.503	1420.35	115.229	227.974	1146.99	124.872	499.14	1307.8	132.48	583.223	1102.93	194.852	236.351	1241.68	-27.4011	442.008	1374.61	-142.766	447.044	1139.11	-153.182	445.242	1039.91	-153.062	543.364	919.452	-97.4136	579.318	827.597	-162.937	547.888	804.501	-146.084	615.268	757.04
2310	0	78.4686	546.155	1561.18	183.49	540.386	1563.95	55.0399	383.011	1542.48	173.139	373.411	1545.98	126.137	351.926	1418.89	116.093	238.345	1145.18	126.122	509.063	1306.78	132.924	593.444	1102.09	196.075	246.483	1239.73	-25.8325	451.54	1373.66	-141.803	456.299	1138.73	-153	453.839	1039.47	-151.946	552.738	919.188	-95.9124	589.038	827.781	-161.34	557.834	804.161	-144.086	625.468	757.127
2311	0	80.6605	555.211	1560.45	185.594	549.414	1562.9	57.2101	391.894	1541.29	175.333	382.423	1544.32	127.859	361.29	1417.49	117.291	249.042	1143.03	127.398	518.885	1305.89	133.586	603.95	1101.29	197.411	256.689	1237.45	-24.1872	461.171	1373.19	-140.661	465.562	1138.43	-151.806	462.543	1039.12	-150.99	561.796	918.926	-94.3787	598.541	827.913	-159.798	567.299	803.947	-142.449	635.249	757.484
2312	0	82.5509	563.961	1560.05	187.697	558.464	1562.1	59.673	400.909	1540.21	177.628	391.521	1542.96	129.843	370.705	1416.17	118.371	259.766	1141.01	128.85	528.897	1305.14	134.13	614.51	1100.92	198.867	267.002	1235.23	-22.3634	470.642	1372.64	-139.625	474.748	1138.34	-151.183	470.939	1039.21	-150.161	570.757	918.907	-93.2947	607.898	828.172	-158.688	576.853	803.882	-140.885	644.945	757.759
2313	0	84.8517	572.909	1560.01	189.818	567.507	1561.88	61.8989	409.689	1539.46	180.149	400.662	1541.84	131.897	380.281	1414.97	119.441	270.756	1139.4	130.317	538.937	1304.64	134.931	625.218	1100.63	200.482	277.389	1233.43	-20.5441	480.311	1372.67	-138.622	483.988	1138.5	-149.949	479.677	1039.18	-149.282	579.577	918.924	-92.4662	617.035	828.582	-157.664	585.763	804.108	-139.753	654.117	757.98
2314	0	86.9388	581.725	1560.51	191.954	576.637	1562.11	64.5118	418.65	1538.72	182.649	409.947	1540.8	134.128	389.868	1414.06	120.638	281.967	1137.99	132.086	549.183	1304.56	135.684	636.335	1100.54	202.068	288.014	1231.53	-18.7144	489.784	1372.59	-137.369	493.276	1138.72	-149.112	488.065	1039.26	-148.36	588.242	918.861	-91.6149	625.981	828.898	-156.612	594.21	804.195	-138.755	662.986	758.3
2315	0	88.9356	590.393	1561.44	194.064	585.578	1562.69	67.3139	427.337	1538.33	185.362	419.078	1540.06	136.333	399.645	1413.41	121.886	293.052	1136.9	133.719	559.411	1304.9	136.257	647.152	1100.99	203.572	298.484	1230.09	-16.8331	499.716	1373.12	-136.031	502.514	1139.28	-147.777	496.744	1039.64	-147.718	596.517	919.222	-91.0948	634.612	829.374	-155.315	602.076	804.202	-138.238	671.297	758.639
2316	0	91.303	599.293	1562.54	196.454	594.827	1563.68	69.8653	436.309	1538.17	187.969	428.34	1539.67	138.404	409.824	1413.26	123.009	303.719	1136.67	135.486	569.853	1305.55	137.001	658.65	1101.7	204.798	309.078	1229.38	-14.9597	509.869	1373.76	-134.9	511.516	1140.22	-146.085	505.657	1040.37	-147.125	604.797	919.553	-90.862	643.002	829.896	-154.54	609.69	804.311	-138.145	679.119	758.893
2317	0	93.6586	608.103	1564.11	198.862	603.807	1564.86	72.456	445.457	1538.45	190.678	437.718	1539.42	140.546	420.077	1413.68	123.977	313.791	1136.99	137.386	580.334	1306.35	137.853	670.049	1102.64	206.091	319.735	1229.3	-13.0778	520.137	1374.95	-133.547	520.776	1141.36	-145.195	514.278	1041.65	-146.611	612.86	920.041	-90.6964	651.158	830.365	-153.609	616.944	804.581	-138.288	686.484	759.159
2318	0	96.4479	617.212	1565.74	201.58	612.937	1566.17	75.225	454.663	1538.87	193.401	447.004	1539.4	142.572	430.374	1414.43	124.628	324.077	1137.69	139.198	590.76	1307.34	138.822	681.207	1103.78	207.125	330.222	1229.56	-11.1329	530.889	1376.44	-132.055	530.127	1142.88	-143.413	523.261	1042.98	-145.936	620.561	920.695	-90.6643	658.96	830.888	-153.466	623.678	805.445	-138.714	693.268	759.589
2319	0	99.0332	626.205	1567.74	204.259	622.004	1567.55	77.7742	463.97	1539.64	196.088	456.335	1539.72	144.193	440.626	1415.38	125.045	334.497	1138.63	141.066	601.242	1308.6	139.832	692.306	1105.19	207.927	340.697	1230.12	-9.18415	541.758	1377.84	-130.659	539.472	1144.72	-141.84	532.299	1045	-145.387	628.318	921.784	-90.6924	666.508	831.524	-152.571	629.981	806.268	-139.302	699.589	760.126
2320	0	102.045	635.664	1569.8	207.151	631.22	1569.11	80.3258	473.553	1541.09	198.674	465.679	1540.49	145.828	450.718	1416.73	125.175	345.339	1139.96	142.819	611.724	1310.07	141.112	703.443	1106.72	208.229	351.019	1231.11	-7.3922	552.642	1380.15	-129.045	549.167	1146.62	-140.817	541.279	1047.27	-144.76	635.878	923.002	-90.7199	673.783	832.237	-152.179	636.06	807.56	-140.183	705.389	760.738
2321	0	104.874	645.037	1571.78	209.967	640.497	1570.62	82.6396	483.081	1542.79	201.037	475.097	1541.45	147.267	460.768	1418.14	125.505	356.486	1141.36	144.533	621.897	1311.74	142.54	714.246	1108.62	208.511	361.138	1232.18	-5.53172	563.444	1382.22	-127.445	558.748	1148.9	-139.541	550.221	1050.05	-144.026	643.279	924.339	-90.8837	680.508	832.94	-152.255	642.124	809.112	-141.008	710.82	761.384
2322	0	107.718	654.518	1573.93	212.829	649.834	1572.06	85.1041	492.787	1544.77	203.358	484.465	1542.61	148.858	470.498	1419.54	125.715	367.612	1142.46	146.316	632.095	1313.55	143.859	724.717	1110.72	208.698	371.465	1232.99	-3.74984	574.166	1384.69	-125.715	568.401	1151.22	-138.264	559.226	1052.69	-143.461	650.794	925.922	-90.8546	687.352	833.84	-152.29	647.841	810.71	-141.729	715.94	762.065
2323	0	110.502	664.197	1576.27	215.421	659.175	1573.76	87.3258	502.285	1547	205.517	493.847	1544.32	150.137	480.243	1421.22	125.536	378.919	1143.57	147.814	642.014	1315.79	145.482	735.149	1113.23	208.775	381.514	1233.97	-1.62197	584.562	1387.21	-124.151	578.244	1154.08	-137.031	568.336	1055.66	-142.928	658.129	928.106	-90.7905	693.308	834.788	-152.028	653.575	812.905	-142.282	720.953	763.043
2324	0	112.849	673.632	1578.56	217.903	668.616	1575.54	89.4044	512.012	1549.6	207.746	503.251	1546.39	151.823	489.711	1422.8	125.211	390.001	1144.8	149.406	651.897	1318.03	146.734	745.296	1115.86	209.092	391.719	1235.02	0.027943	594.565	1389.96	-122.898	588.253	1157.33	-136.059	577.461	1059.04	-142.393	665.492	930.304	-90.74	699.352	836.16	-152.272	659.632	815.207	-142.667	725.848	764.253
2325	0	115.267	683.226	1580.81	220.261	678.069	1577.44	91.5185	521.473	1552.25	209.639	512.692	1548.37	153.277	499.233	1424.44	125.23	400.762	1145.97	150.946	661.509	1320.31	148.314	755.331	1118.79	209.558	401.885	1236.01	1.68797	604.547	1392.64	-121.629	598.313	1160.41	-135.161	586.45	1062.21	-141.861	672.904	932.578	-90.6241	705.078	837.52	-153.132	665.558	817.872	-142.896	730.762	765.38
2326	0	117.281	692.675	1582.94	222.232	687.426	1578.95	93.3368	530.909	1554.75	211.658	522.08	1550.43	154.887	508.351	1425.85	125.669	411.095	1146.99	152.436	671.208	1322.51	149.698	765.286	1121.43	210.123	411.946	1236.82	3.17427	614.065	1395.28	-120.659	608.26	1163.35	-134.338	595.242	1065.04	-141.458	680.223	934.837	-90.5613	710.906	838.89	-153.404	671.816	820.208	-142.867	735.722	766.375
2327	0	119.31	702.098	1584.9	224.273	696.807	1580.72	95.283	540.34	1556.9	213.348	531.325	1552.31	156.163	517.768	1427.22	126.096	421.393	1148.09	153.746	680.57	1324.66	151.021	775.205	1123.98	210.882	421.986	1237.81	4.88598	623.63	1397.46	-119.65	618.312	1166.22	-133.757	603.838	1068.17	-141.107	687.64	937.169	-90.4103	716.516	840.134	-154.096	678.453	822.516	-142.807	740.795	767.41
2328	0	121.136	711.364	1586.86	226.081	706.036	1582.25	96.7394	549.585	1559.17	215.105	540.608	1554.19	157.48	527.142	1428.76	126.776	431.639	1149.5	155.186	689.888	1326.43	152.233	785.051	1126.32	211.829	431.91	1238.91	6.19726	632.986	1399.6	-118.923	628.127	1168.8	-133.258	612.368	1070.86	-140.879	695.169	939.233	-90.3004	722.221	841.285	-154.944	685.195	825.143	-142.787	746.011	768.29
2329	0	123.011	720.641	1588.52	227.788	715.178	1583.72	98.4332	558.878	1560.92	216.522	549.871	1555.49	158.837	536.43	1430.05	127.999	441.447	1150.8	156.379	699.357	1328.15	153.326	794.955	1128.43	212.912	441.851	1239.9	7.48219	642.248	1401.49	-118.127	637.928	1171.14	-132.486	620.75	1073.11	-140.639	702.561	941.07	-90.2046	727.94	842.313	-155.878	692.019	827.393	-142.589	751.522	769.091
2330	0	124.52	729.735	1590.43	229.422	724.341	1584.99	99.9515	568.074	1562.49	218.082	558.876	1556.72	160.124	545.834	1431.26	129.43	450.972	1152.05	157.385	708.674	1329.69	154.114	804.703	1130.24	214.026	451.678	1240.87	8.69293	651.521	1403.14	-117.562	647.586	1173.29	-132.235	628.922	1075.32	-140.493	710.098	942.807	-89.9665	733.921	843.338	-156.732	699.115	829.115	-142.184	756.883	769.69
2331	0	126.225	738.924	1592.06	230.963	733.249	1586.38	101.17	577.154	1563.9	219.339	568.043	1557.73	161.314	555.185	1432.59	130.732	460.302	1153.47	158.466	718.057	1331.15	154.975	814.594	1132.05	215.063	461.276	1242	9.73903	660.589	1404.89	-117.167	656.917	1175.22	-132.027	637.125	1077.4	-140.508	717.498	944.404	-90.3981	740.064	844.54	-158.043	706.17	831.034	-141.76	762.367	770.188
2332	0	127.614	747.916	1593.64	232.504	742.157	1587.7	102.419	586.306	1565.21	220.509	577.047	1558.5	162.31	564.495	1433.76	131.951	469.608	1154.77	159.332	727.399	1332.35	155.299	824.022	1133.31	216.25	470.872	1243.17	10.4096	669.636	1406.26	-116.864	666.092	1176.59	-131.81	645.394	1079.02	-140.593	724.907	945.533	-90.2808	746.002	845.092	-158.834	713.141	832.494	-142.176	768.137	770.778
2333	0	128.946	756.892	1595.04	233.82	751.065	1588.71	103.537	595.473	1566.07	221.576	585.978	1559.07	163.357	573.894	1434.81	133.262	478.669	1155.92	159.959	736.558	1333.32	155.579	833.326	1134.3	217.426	480.404	1244.23	11.0931	678.67	1407.22	-116.414	675.02	1177.75	-131.436	653.612	1080.26	-140.541	732.282	946.432	-90.7844	752.161	845.639	-159.313	719.659	833.484	-142.497	774.187	771.208
2334	0	130.291	765.852	1596.37	234.997	759.823	1589.67	104.609	604.454	1566.78	222.582	594.842	1559.62	164.386	583.151	1435.84	134.504	487.555	1157	160.55	745.81	1334.19	155.744	842.596	1135.07	218.658	489.67	1245.31	11.8295	687.7	1408.06	-115.963	683.491	1178.73	-130.825	661.889	1081.32	-140.655	739.572	947.295	-91.3515	758.554	846.172	-159.834	726.251	834.33	-143.259	780.176	771.815
2335	0	131.31	774.744	1597.45	236.124	768.569	1590.62	105.378	613.509	1567.63	223.48	603.86	1560.15	165.265	592.379	1436.85	135.623	496.199	1158.29	161.087	754.99	1334.89	155.7	851.57	1135.57	219.872	498.845	1246.5	12.3862	696.581	1408.94	-115.462	691.562	1179.45	-130.787	670.007	1082.6	-140.708	746.771	947.923	-91.9371	765.075	846.495	-160.629	732.506	835.281	-144.307	786.316	772.209
2336	0	132.208	783.574	1598.36	237.142	777.551	1591.41	106.285	622.461	1568.24	224.366	612.859	1560.5	166.154	601.602	1437.81	136.747	504.854	1159.35	161.466	764.081	1335.36	155.565	860.323	1135.74	221.029	508.147	1247.56	12.8645	705.2	1409.66	-114.898	699.244	1179.96	-130.422	678.151	1083.58	-140.604	753.93	948.29	-92.2573	771.737	846.422	-161.49	738.82	836.078	-144.976	792.248	772.283
2337	0	133.012	792.564	1599.2	237.855	786.494	1592.01	107.064	631.496	1568.65	225.037	621.799	1560.74	167.072	610.676	1438.59	137.879	513.391	1160.18	161.672	772.954	1335.83	155.106	868.926	1135.81	222.42	516.802	1248.71	13.3552	713.76	1410.27	-114.174	706.515	1180.23	-129.94	686.111	1084.16	-140.552	761.005	948.639	-92.8699	778.284	846.381	-161.482	744.891	836.285	-146.229	798.535	772.712
2338	0	133.709	801.467	1599.94	238.419	795.4	1592.56	107.782	640.308	1569.12	225.595	630.77	1561.08	167.802	619.748	1439.41	139.087	521.74	1161.1	161.717	781.752	1336.33	154.613	877.398	1135.76	223.483	525.915	1249.56	13.7904	722.269	1410.79	-113.472	713.518	1180.47	-129.406	693.893	1084.77	-140.615	767.859	948.994	-93.5706	784.848	846.368	-162.013	750.918	836.751	-147.683	804.717	773.22
2339	0	134.155	810.356	1600.53	238.887	804.359	1593.11	108.273	649.17	1569.68	226.173	639.697	1561.48	168.504	628.742	1440.2	140.299	529.979	1162.22	161.757	790.471	1336.7	154.097	885.766	1135.68	224.673	534.505	1250.81	14.0832	730.688	1411.36	-112.823	720.464	1180.73	-128.57	701.58	1085.28	-140.555	774.764	949.188	-94.2734	791.28	846.408	-162.745	757.317	837.428	-149.273	811.339	773.868
2340	0	134.532	819.264	1600.94	239.355	813.369	1593.43	108.814	658.153	1570.11	226.742	648.846	1561.86	169.369	637.668	1440.79	141.554	538.239	1162.97	161.832	799.073	1336.91	153.634	894.185	1135.77	225.823	543.312	1251.69	14.4359	738.899	1411.84	-112.117	727.249	1181.14	-128.224	708.961	1086	-140.427	781.691	949.393	-94.6682	797.954	846.298	-162.814	763.393	837.731	-150.366	817.854	774.318
2341	0	135.004	828.338	1601.31	239.698	822.453	1593.63	109.52	667.107	1570.54	227.388	657.766	1562.31	170.176	646.455	1441.41	142.809	546.409	1163.67	161.764	807.633	1337.26	153.119	902.561	1135.74	227.081	551.924	1252.46	14.81	746.937	1412.24	-111.673	734.004	1181.67	-127.457	716.309	1086.35	-140.38	788.485	949.687	-95.1902	804.563	846.488	-163.121	769.566	837.997	-151.521	824.36	774.943
2342	0	135.319	837.441	1601.69	240.03	831.556	1593.96	109.856	676.191	1571.13	227.754	666.89	1562.88	170.755	655.124	1442.15	143.923	554.533	1164.58	161.605	816.151	1337.58	152.606	910.989	1135.95	228.003	560.714	1253.27	14.9926	754.966	1412.8	-111.383	740.854	1182.15	-126.839	723.475	1086.83	-140.504	795.304	950.121	-95.7662	810.098	846.433	-163.735	776.15	838.558	-152.451	831.027	775.633
2343	0	135.577	846.416	1601.86	240.308	840.619	1594.12	110.242	685.223	1571.76	228.063	676.01	1563.41	171.278	663.691	1442.68	144.873	562.612	1165.4	161.499	824.551	1337.73	152.14	919.466	1136.06	228.951	569.076	1254.04	15.0521	762.884	1413.26	-111.266	747.702	1182.53	-126.363	730.497	1087.28	-140.521	802.073	950.435	-96.5418	817.738	846.933	-163.881	782.514	838.988	-153.381	837.574	776.068
2344	0	135.806	855.56	1601.98	240.593	849.758	1594.02	110.478	694.181	1572.27	228.448	685.004	1563.7	171.705	672.189	1442.96	145.766	570.63	1165.81	161.334	832.91	1337.87	151.774	927.911	1136.33	229.694	577.518	1254.45	15.1253	770.726	1413.57	-111.178	754.465	1182.79	-125.84	737.299	1087.51	-140.722	808.832	950.617	-96.7522	824.722	846.948	-164	789.051	839.224	-153.958	844.192	776.4
2345	0	136.177	864.675	1601.97	240.744	858.897	1593.85	110.76	703.111	1572.76	228.686	694.047	1564.08	172.11	680.684	1443.32	146.731	578.494	1166.41	161.113	841.176	1338.06	151.376	936.35	1136.75	230.369	585.817	1254.89	15.1685	778.589	1413.87	-111.158	761.314	1183.03	-125.31	744.046	1087.6	-140.857	815.638	950.934	-96.9529	831.526	846.996	-164.126	795.468	839.578	-154.675	850.777	776.72
2346	0	136.312	873.764	1601.9	240.926	868	1593.8	111.071	712.003	1573.36	228.947	702.96	1564.53	172.425	688.984	1443.64	147.047	586.8	1166.77	160.903	849.449	1338.16	151.044	944.766	1137.23	230.845	594.161	1255.36	15.1527	786.485	1414.18	-111.098	768.317	1183.39	-124.893	750.921	1087.87	-141.183	822.406	951.196	-97.6518	838.876	847.427	-164.295	802.173	840.048	-154.863	857.312	776.677
2347	0	136.292	882.68	1601.69	240.997	877.036	1593.66	111.174	720.977	1573.88	229.149	711.926	1564.97	172.666	697.37	1443.86	147.431	594.969	1167.05	160.595	857.68	1338.21	150.803	953.03	1137.59	231.424	602.441	1255.6	15.2222	794.199	1414.42	-111.223	775.094	1183.72	-124.592	757.634	1088.13	-141.57	829.261	951.466	-97.7038	845.945	847.479	-164.288	808.945	840.331	-155.423	864.047	777.016
2348	0	136.223	891.575	1601.41	240.89	885.995	1593.23	111.463	729.694	1574.07	229.303	720.876	1565.2	172.755	705.701	1443.86	147.774	602.993	1167.03	160.434	865.866	1338.14	150.563	961.168	1137.84	231.725	610.594	1255.65	15.0008	802.153	1414.51	-111.097	782.138	1183.81	-124.26	764.454	1088.02	-141.897	835.999	951.423	-98.0834	853.643	847.777	-164.152	815.629	840.188	-155.481	870.885	776.886
2349	0	136.072	900.463	1601.17	240.755	894.975	1592.98	111.445	738.397	1574.3	229.432	729.643	1565.51	172.736	713.749	1443.92	148.039	611.038	1167.04	160.303	874.046	1338.18	150.288	969.139	1137.91	231.98	618.763	1255.69	14.7742	810.093	1414.55	-111.141	789.125	1183.84	-124.07	771.34	1088.02	-142.442	842.976	951.629	-98.2705	861.005	847.822	-164.327	822.623	840.064	-155.705	877.57	776.826
2350	0	135.933	909.277	1600.79	240.479	903.858	1592.7	111.455	747.08	1574.57	229.247	738.495	1565.79	172.665	722.119	1443.96	148.122	619.211	1167.17	160.165	882.253	1338.09	150.062	977.053	1137.77	232.151	626.902	1255.83	14.5732	818.069	1414.56	-111.276	796.135	1183.8	-124.1	778.505	1088.1	-142.721	849.906	951.505	-98.6498	868.514	848.021	-164.255	829.548	840.084	-155.778	884.512	776.574
2351	0	135.608	917.99	1600.39	240.102	912.68	1592.26	111.389	755.646	1574.66	229.27	747.196	1565.94	172.729	730.446	1443.8	148.304	627.257	1167.12	160.045	890.461	1337.92	149.98	984.853	1137.66	232.324	635.145	1255.84	14.4152	826.096	1414.29	-111.355	803.354	1183.57	-124.145	785.694	1087.85	-142.832	856.681	951.033	-98.9028	875.963	847.825	-163.853	836.498	839.715	-155.563	891.629	776.081
2352	0	135.185	926.583	1599.95	239.882	921.406	1591.92	111.166	764.264	1574.46	229.113	755.799	1565.94	172.681	738.765	1443.54	148.455	635.381	1166.84	159.957	898.59	1337.66	149.897	992.756	1137.35	232.374	643.244	1255.65	14.3555	834.133	1413.94	-111.439	810.649	1183.3	-124.205	792.998	1087.37	-143.065	863.821	950.702	-98.9304	883.766	847.677	-163.583	843.644	839.053	-155.497	898.832	775.642
2353	0	134.73	935.199	1599.4	239.469	929.923	1591.49	110.893	772.777	1574.22	228.842	764.384	1565.87	172.578	747.139	1443.27	148.527	643.419	1166.67	159.871	906.785	1337.21	149.83	1000.74	1136.71	232.403	651.433	1255.54	14.1128	842.332	1413.49	-111.692	818.075	1183.1	-124.401	800.616	1087.16	-143.234	871.212	950.263	-99.0014	891.368	847.385	-163.746	851.143	838.745	-155.272	906.209	775.13
2354	0	134.329	943.765	1598.72	239.075	938.459	1591.1	110.306	781.402	1573.92	228.339	772.834	1565.6	172.254	755.571	1442.9	148.375	651.612	1166.43	159.809	915.094	1336.67	149.862	1008.68	1136.05	232.411	659.709	1255.31	13.8483	850.55	1412.83	-112.088	825.639	1182.57	-124.833	808.323	1086.69	-143.331	878.872	949.585	-98.9424	899.233	846.882	-163.625	858.721	838.108	-154.906	913.771	774.4
2355	0	133.849	952.302	1598.09	238.55	946.926	1590.37	109.927	789.872	1573.23	227.804	781.453	1565.06	171.915	763.966	1442.22	148.383	659.712	1165.87	159.726	923.338	1336.06	149.927	1016.84	1135.4	232.109	667.935	1254.92	13.505	858.876	1412.01	-112.453	833.315	1181.9	-125.126	815.951	1085.82	-143.366	886.543	948.708	-98.4098	905.797	845.947	-163.475	866.269	837.1	-154.626	921.321	773.549
2356	0	133.335	960.82	1597.31	238.063	955.315	1589.75	109.265	798.464	1572.34	227.159	789.759	1564.37	171.441	772.343	1441.52	148.167	667.991	1165.17	159.506	931.65	1335.33	149.843	1025.07	1134.59	231.779	676.021	1254.35	13.2592	867.406	1411.22	-112.873	841.284	1181.14	-125.457	823.786	1085.08	-143.369	894.334	947.866	-98.3767	913.621	845.292	-163.409	873.919	836.103	-154.388	928.982	772.705
2357	0	132.741	969.347	1596.51	237.563	963.746	1589.15	108.584	807.06	1571.46	226.481	798.266	1563.72	170.91	780.833	1440.88	147.87	676.148	1164.63	159.302	940.06	1334.56	149.992	1033.38	1133.84	231.339	684.257	1253.87	12.7701	876.062	1410.32	-113.412	849.452	1180.37	-125.913	831.734	1084.23	-143.386	902.32	946.971	-98.3059	921.165	844.399	-163.408	881.739	835.184	-154.229	936.855	771.887
2358	0	132.219	977.901	1595.43	236.865	972.2	1588.28	107.951	815.542	1570.48	225.923	806.726	1562.83	170.255	789.319	1440.06	147.39	684.583	1163.98	159.119	948.539	1333.49	150.057	1041.76	1132.61	230.804	692.509	1253.3	12.2895	884.74	1409.37	-113.906	857.792	1179.49	-126.327	839.895	1083.51	-143.377	910.339	945.927	-98.1425	928.413	843.132	-163.531	889.57	834.147	-153.968	944.759	770.704
2359	0	131.473	986.399	1594.37	236.107	980.618	1587.27	107.034	824.164	1568.89	225.01	815.219	1561.45	169.483	797.938	1439.1	146.864	692.886	1163.03	158.825	957.035	1332.36	150.207	1050.25	1131.59	230.144	700.764	1252.47	11.7639	893.655	1408.12	-114.321	866.264	1178.27	-126.697	848.056	1082.18	-143.433	918.357	944.654	-98.1945	936.234	841.948	-163.221	897.137	832.718	-154.017	952.519	769.434
2360	0	130.578	994.857	1593.25	235.253	989.045	1586.42	106.329	832.621	1567.43	224.108	823.691	1560.15	168.628	806.439	1438.13	146.173	701.305	1162.09	158.559	965.584	1331.3	150.134	1058.75	1130.35	229.164	709.034	1251.65	11.1788	902.597	1406.88	-114.762	874.938	1177	-127.086	856.336	1080.98	-143.545	926.427	943.161	-98.36	943.725	840.396	-163.362	904.795	831.22	-153.693	960.241	768.127
2361	0	129.544	1003.35	1592.09	234.237	997.564	1585.5	105.241	841.16	1565.83	223.201	832.2	1558.95	167.676	815.02	1437.08	145.183	709.883	1161.22	158.17	974.251	1329.93	150.242	1067.39	1129.16	228.199	717.337	1250.82	10.4526	911.66	1405.55	-115.152	883.93	1175.54	-127.538	864.88	1079.89	-143.817	934.491	941.664	-98.7481	951.296	838.811	-163.7	912.591	829.841	-154.203	968.012	766.644
2362	0	128.508	1011.86	1590.66	233.201	1006.12	1584.48	104.216	849.684	1564.01	222.158	840.879	1557.41	166.791	823.739	1435.81	144.269	718.398	1159.99	157.838	982.884	1328.36	150.416	1076.14	1127.48	227.164	725.717	1249.65	9.89394	920.969	1403.95	-115.484	892.924	1173.9	-127.952	873.431	1078.27	-144.028	942.568	939.926	-99.0912	959.282	837.082	-164.146	920.43	828.253	-154.318	975.768	764.719
2363	0	127.297	1020.31	1589.34	231.986	1014.58	1583.33	103.324	858.138	1562.26	221.21	849.355	1555.88	165.86	832.357	1434.44	143.272	727.208	1158.51	157.391	991.601	1327	150.585	1084.83	1126.01	226.032	734.185	1248.4	9.31103	930.305	1402.42	-115.908	902.058	1172.3	-128.189	882.165	1076.63	-144.397	950.703	938.066	-98.9762	967.018	834.997	-164.38	928.058	826.389	-154.36	983.306	762.793
2364	0	126.031	1028.78	1588.09	230.792	1023.06	1582.42	102.053	866.8	1560.44	220.019	857.873	1554.54	164.775	841.249	1433.13	142.086	736.06	1157.16	156.798	1000.36	1325.59	150.638	1093.44	1124.61	224.888	742.664	1247.27	8.52574	939.534	1400.88	-116.344	911.39	1170.61	-128.668	891.045	1075	-144.879	958.976	936.245	-99.3273	974.894	833.05	-164.508	935.828	824.484	-155.176	991.013	760.973
2365	0	124.768	1037.26	1586.79	229.555	1031.53	1581.44	100.761	875.365	1558.77	218.701	866.477	1553.21	163.507	850.091	1431.74	140.948	744.896	1155.94	156.291	1009.31	1324.31	150.747	1102.2	1123.03	223.574	751.335	1245.98	7.65409	948.924	1399.26	-116.864	920.908	1168.81	-129.249	900.01	1073.42	-145.546	967.342	934.294	-99.8704	983.044	831.206	-165.05	943.89	822.63	-155.696	998.623	758.821
2366	0	123.507	1045.86	1585.31	228.326	1039.95	1580.34	99.3235	883.966	1556.97	217.297	874.967	1551.62	162.358	859.08	1430.18	139.735	753.791	1154.3	155.777	1018.31	1322.71	150.991	1111.1	1121.44	222.216	759.991	1244.6	6.80452	958.356	1397.44	-117.422	930.417	1166.79	-129.696	909.023	1071.29	-146.112	975.758	932.164	-99.9171	989.898	828.765	-165.96	952.01	820.639	-156.163	1006.26	756.459
2367	0	122.259	1054.56	1583.92	227.108	1048.45	1579.15	97.7864	892.794	1555.11	215.822	883.404	1550.08	160.987	868.025	1428.58	138.433	762.938	1152.6	155.121	1027.38	1321.24	151.079	1120.06	1119.93	220.894	768.76	1243.14	5.82864	967.814	1395.65	-117.957	940.238	1164.59	-130.188	918.194	1069.2	-146.778	984.384	930.017	-100.55	998.823	826.483	-166.244	960.115	818.32	-156.854	1014.02	754.116
2368	0	120.919	1063.31	1582.51	225.781	1056.9	1578.02	96.0812	901.664	1553.23	214.089	892.101	1548.56	159.546	877.085	1427.13	137.086	772.067	1151.24	154.325	1036.42	1319.79	151.076	1129.11	1118.24	219.514	777.608	1241.83	4.76025	977.276	1393.67	-118.562	950.067	1162.47	-130.719	927.555	1067.2	-147.28	993.215	927.705	-100.994	1007.06	824.091	-166.966	968.477	816.319	-157.526	1021.77	751.526
2369	0	119.628	1072.21	1581.1	224.476	1065.49	1576.82	94.353	910.607	1551.66	212.329	900.646	1547.1	158.132	886.197	1425.7	135.746	781.103	1149.66	153.436	1045.57	1318.14	151.244	1138.34	1116.7	218.049	786.613	1240.44	3.68107	986.965	1391.79	-119.178	960.017	1160.24	-131.398	936.873	1065.21	-147.981	1002.17	925.49	-102.229	1016.37	822.199	-167.631	977.101	814.409	-158.174	1029.81	748.969
2370	0	118.198	1081.07	1579.69	223.066	1074.07	1575.56	92.5838	919.651	1549.85	210.447	909.353	1545.46	156.575	895.356	1424.12	134.534	790.541	1147.83	152.7	1054.86	1316.74	151.195	1147.61	1115.18	216.609	795.662	1238.99	2.52921	996.606	1389.89	-119.857	970	1158.05	-132.031	946.318	1063.09	-148.638	1011.17	923.226	-102.307	1024.36	819.35	-168.346	985.874	812.205	-158.843	1038.01	746.535
2371	0	116.56	1090.11	1578.3	221.486	1082.76	1574.3	90.6013	928.784	1548.17	208.501	918.173	1544.15	154.909	904.6	1422.61	133.167	800.005	1146.23	151.804	1064.13	1315.34	151.181	1157.05	1113.71	215.167	804.778	1237.56	1.30094	1006.24	1388.04	-120.658	980.001	1155.91	-132.694	955.793	1060.97	-149.42	1020.23	921.078	-102.83	1033.06	816.995	-169.2	994.875	810.193	-159.471	1046.44	744.212
2372	0	114.8	1099.19	1576.91	219.747	1091.68	1573.23	88.522	938.018	1546.75	206.43	927.01	1542.96	153.185	913.93	1421.17	131.619	809.584	1144.71	150.716	1073.43	1313.81	151.104	1166.63	1112.5	213.554	814.03	1236.17	-0.006958	1015.98	1386.16	-121.597	989.977	1153.89	-133.663	965.28	1059.19	-150.099	1029.54	919.101	-103.379	1042.51	814.979	-169.537	1003.84	808.345	-159.584	1055.14	741.79
2373	0	112.952	1108.38	1575.41	217.792	1100.75	1572.21	86.5043	947.219	1545.27	204.272	936.217	1541.73	151.412	923.212	1419.71	130.07	819.223	1143.04	149.626	1082.79	1312.55	150.794	1176.26	1111.19	212.067	823.436	1234.77	-1.33745	1025.74	1384.45	-122.65	999.798	1151.92	-134.556	974.778	1057.18	-150.869	1039.01	917.058	-104.156	1051.38	813.145	-170.281	1013.17	806.484	-160.534	1064.19	739.746
2374	0	110.848	1117.66	1574.06	215.756	1109.84	1571.15	84.4869	956.468	1543.51	202.272	945.292	1540.65	149.728	932.564	1418.23	128.761	829.117	1141.32	148.532	1092.32	1311.39	150.553	1186.04	1110.12	210.566	832.842	1233.34	-2.86403	1035.43	1382.84	-123.697	1009.71	1150.11	-135.3	984.439	1055.07	-151.664	1048.5	915.18	-104.457	1060.35	810.915	-171.116	1022.91	804.498	-161.071	1073.43	737.785
2375	0	108.598	1127.02	1572.77	213.492	1119.11	1570.18	82.2827	965.782	1542.11	200.172	954.491	1539.64	147.929	941.949	1416.84	127.488	839.319	1139.47	147.301	1101.97	1310.31	150.075	1195.88	1109.23	209.051	842.499	1231.88	-4.31469	1045.18	1381.17	-124.953	1019.47	1148.36	-136.271	994.1	1053.19	-152.435	1058.3	913.428	-104.928	1070.25	809.282	-171.398	1032.57	802.55	-161.244	1083.25	735.894
2376	0	106.181	1136.41	1571.33	211.123	1128.54	1569.35	80.0122	975.18	1540.7	197.783	964.033	1538.55	146.079	951.436	1415.47	126.16	849.647	1137.84	145.948	1111.72	1309.3	149.655	1205.86	1108.13	207.49	852.314	1230.43	-5.85917	1054.98	1379.55	-126.314	1029.2	1146.57	-137.436	1003.92	1051.41	-153.34	1068.54	911.842	-105.725	1080.17	807.629	-172.455	1042.85	800.901	-161.979	1093.29	734.022
2377	0	103.875	1145.89	1569.98	208.737	1138.04	1568.38	77.5846	984.711	1539.04	195.638	973.389	1537.6	144.264	960.98	1414.02	124.936	859.998	1136.01	144.782	1121.44	1308.2	149.112	1215.94	1107.43	206.095	862.24	1228.83	-7.539	1064.61	1377.86	-127.632	1039	1144.71	-138.433	1013.85	1049.35	-153.736	1078.25	909.713	-105.933	1090.25	805.777	-173.009	1053.11	798.926	-162.416	1103.9	732.23
2378	0	101.287	1155.4	1568.83	206.342	1147.5	1567.58	75.1828	994.209	1537.6	193.1	982.869	1536.54	142.311	970.529	1412.61	123.654	870.561	1134.01	143.568	1131.51	1307.51	148.331	1226.33	1106.67	204.528	872.214	1227.32	-9.29281	1074.35	1376.26	-129.07	1048.71	1142.85	-139.687	1023.67	1047.33	-154.318	1088.44	907.828	-107.169	1101.27	804.187	-173.064	1063.26	796.707	-162.398	1114.44	730.417
2379	0	98.7287	1164.96	1568	203.81	1157.01	1567.17	72.6336	1003.91	1536.31	190.467	992.392	1535.76	140.324	980.274	1411.43	122.418	881.256	1132.38	141.762	1141.47	1306.71	147.581	1236.93	1106.38	203.072	882.444	1225.87	-11.1026	1084.2	1374.75	-130.593	1058.48	1141.19	-140.935	1033.81	1045.43	-155.01	1098.9	905.962	-107.032	1111.11	802.287	-173.931	1074.12	794.969	-162.939	1125.36	729.007
2380	0	96.3279	1174.66	1567.31	201.339	1166.6	1566.87	70.0358	1013.74	1535.34	188.002	1002.08	1535.21	138.401	990.126	1410.49	121.332	891.92	1131.13	140.214	1151.89	1306.3	146.686	1247.55	1106.08	201.743	892.781	1224.75	-12.9561	1094.06	1373.48	-132.062	1068.32	1139.58	-142.245	1043.94	1043.78	-155.892	1109.35	904.334	-107.483	1121.94	801.051	-174.397	1085.01	793.343	-163.269	1136.24	727.188
2381	0	93.8891	1184.5	1566.81	198.802	1176.21	1566.8	67.4973	1023.63	1534.36	185.388	1011.8	1534.66	136.518	1000.17	1409.67	120.473	902.581	1129.85	138.615	1162.02	1306	145.742	1258.4	1105.9	200.547	903.231	1223.72	-14.9554	1103.93	1372.25	-133.5	1078.27	1138.05	-143.385	1054.23	1041.88	-156.558	1119.98	902.796	-107.788	1132.67	799.607	-174.216	1095.67	791.395	-162.012	1146.89	725.673
2382	0	91.3778	1194.3	1566.8	196.324	1185.83	1567.15	64.9162	1033.61	1533.51	182.758	1021.53	1534.35	134.66	1010.27	1409.23	119.359	913.073	1129.04	136.966	1172.45	1306.09	144.736	1269.28	1106.34	199.319	913.663	1223.16	-16.7695	1113.96	1371.53	-134.92	1088.21	1136.83	-144.284	1064.74	1040.51	-157.244	1130.75	901.485	-108.159	1143.43	798.501	-174.508	1106.56	789.93	-162.712	1158.41	724.842
2383	0	88.7402	1204.25	1567.08	193.77	1195.56	1567.94	62.1626	1043.77	1533.36	180.029	1031.4	1534.54	132.823	1020.53	1409.35	118.324	923.969	1128.9	135.23	1182.96	1306.54	143.436	1280.28	1106.87	198.317	924.192	1223.15	-18.7619	1123.99	1371.12	-136.229	1098.36	1135.98	-145.251	1075.34	1039.77	-158.066	1141.39	900.678	-108.55	1154.71	798.054	-175.423	1117.87	789.126	-162.982	1169.82	724.196
2384	0	86.1276	1214.22	1567.55	191.193	1205.54	1568.79	59.4259	1053.82	1533.44	177.294	1041.4	1534.89	131.062	1030.87	1409.72	117.392	934.321	1129.3	133.352	1193.59	1307.06	142.09	1291.41	1107.47	197.6	934.888	1223.63	-20.6211	1134.04	1370.93	-137.521	1108.6	1135.46	-146.06	1085.96	1039.18	-158.79	1152.26	900.195	-109.554	1166.85	798.205	-175.711	1129.1	788.543	-163.336	1181.39	723.76
2385	0	83.5832	1224.34	1568.32	188.606	1215.57	1569.91	56.9269	1064.02	1533.66	174.761	1051.39	1535.65	129.461	1041.24	1410.35	117.403	945.009	1129.62	131.539	1204.19	1307.86	140.676	1302.53	1108.49	197.028	945.558	1224.38	-22.3457	1144.18	1371.14	-138.501	1119.02	1135.28	-146.508	1096.59	1038.95	-159.353	1163.24	899.85	-109.6	1177.58	797.672	-175.506	1139.85	788.005	-163.16	1192.89	723.682
2386	0	80.9998	1234.4	1569.36	185.856	1225.62	1571.2	54.3691	1074.22	1534.31	172.192	1061.5	1536.84	127.924	1051.63	1411.45	117.323	955.476	1130.51	129.635	1214.69	1309.16	139.093	1313.45	1109.81	196.512	956.29	1225.68	-24.0822	1154.16	1371.76	-139.324	1129.53	1135.44	-146.985	1107.38	1039.05	-159.894	1174.25	900.264	-110.094	1189.2	798.092	-175.685	1150.97	788.196	-164.122	1204.63	724.263
2387	0	78.3764	1244.57	1570.61	183.137	1235.66	1572.89	51.8256	1084.37	1535.48	169.654	1071.66	1538.61	126.484	1061.86	1412.9	117.035	966.244	1131.98	127.975	1225.24	1310.67	137.506	1324.1	1111.37	196.369	967.232	1227.29	-25.7172	1164.07	1372.81	-140.015	1140.08	1136.08	-147.417	1118.22	1039.94	-160.522	1185.08	901.024	-110.608	1200.97	799.102	-176.461	1162.6	789.024	-164.213	1216.25	724.997
2388	0	75.8856	1254.71	1571.94	180.723	1245.83	1574.87	49.4585	1094.54	1536.9	167.226	1081.85	1540.49	125.193	1072.14	1414.4	116.752	977.179	1133.48	126.061	1235.56	1312.39	135.828	1334.37	1113.19	196.107	978.153	1228.94	-27.1942	1173.87	1374.08	-140.582	1150.67	1136.97	-147.57	1128.78	1040.97	-161.066	1196.14	902.174	-111.196	1212.8	800.368	-176.618	1173.9	790.122	-165.311	1228.06	726.302
2389	0	73.4009	1264.95	1573.57	178.237	1255.99	1576.9	47.1805	1104.67	1538.38	164.777	1091.86	1542.62	123.851	1082.21	1416.04	117.028	988.528	1134.77	124.418	1245.83	1314.39	134.258	1344.63	1115.49	195.905	988.946	1230.6	-28.724	1183.36	1375.49	-140.944	1161.14	1138.05	-147.48	1139.02	1041.68	-161.411	1207.22	903.608	-111.714	1224.78	801.692	-176.405	1185.01	791.265	-165.585	1239.69	727.789
2390	0	71.1045	1274.99	1575.16	175.888	1266.07	1578.97	44.952	1114.8	1540.18	162.606	1101.95	1545.01	122.666	1092.28	1417.77	117.294	999.817	1136.15	122.705	1255.92	1316.67	132.48	1354.65	1117.86	195.695	999.782	1232.31	-30.2684	1192.81	1377.4	-141.289	1171.42	1139.32	-147.463	1149.63	1043.13	-161.815	1218.38	905.361	-112.412	1236.67	803.58	-176.741	1196.52	792.951	-166.709	1251.47	729.674
2391	0	68.9963	1285.17	1576.78	173.765	1276.12	1581.23	42.769	1124.87	1542.09	160.516	1111.95	1547.47	121.466	1101.97	1419.55	117.221	1010.53	1137.69	121.117	1265.91	1318.82	130.842	1364.73	1120.23	195.523	1010.55	1233.98	-31.7039	1202.11	1379.22	-141.55	1181.6	1140.83	-147.642	1160.07	1044.82	-162.165	1229.56	907.219	-113.597	1249.57	805.917	-177.365	1208.4	794.893	-167.376	1263.4	731.635
2392	0	67.103	1295.18	1578.36	171.901	1286.12	1583.13	40.9285	1134.83	1543.97	158.616	1121.83	1549.92	120.273	1111.65	1421.18	116.953	1020.75	1139.25	119.55	1275.76	1320.9	129.228	1374.53	1122.65	195.213	1021.14	1235.48	-33.0982	1211.43	1381.06	-141.863	1191.66	1142.24	-147.748	1170.36	1046.25	-162.574	1240.63	908.982	-114.154	1261.47	807.806	-177.423	1220.05	796.609	-167.927	1275.41	733.679
2393	0	65.2504	1305.06	1579.99	170.017	1295.93	1584.86	39.2045	1144.7	1545.83	156.828	1131.63	1552.04	119.283	1121.4	1422.72	116.702	1030.96	1140.45	117.923	1285.39	1322.95	127.667	1384.34	1125.13	194.846	1031.52	1236.89	-34.4265	1220.59	1382.75	-142.199	1201.55	1143.73	-147.989	1180.69	1047.65	-162.939	1251.78	910.803	-114.562	1272.66	809.535	-177.474	1231.74	798.234	-168.319	1287.56	735.784
2394	0	63.753	1314.97	1581.51	168.419	1305.72	1586.85	37.5182	1154.52	1547.65	155.123	1141.34	1554.17	118.046	1130.95	1424.24	116.187	1040.92	1141.85	116.586	1295.02	1324.9	126.131	1394.12	1127.28	194.18	1041.72	1238.37	-35.9271	1229.72	1384.45	-142.762	1211.36	1145.13	-148.6	1191	1049.12	-163.418	1262.94	912.523	-114.709	1286.01	812.109	-177.222	1243.55	799.879	-168.747	1299.82	737.761
2395	0	62.2669	1324.66	1582.98	166.965	1315.53	1588.53	35.9906	1164.26	1549.37	153.664	1151.08	1556.09	116.671	1140.4	1425.62	115.41	1050.54	1143.19	115.312	1304.76	1326.61	124.735	1403.95	1129.23	193.467	1051.74	1239.68	-37.3479	1238.93	1385.99	-143.532	1221.21	1146.39	-149.277	1201.33	1050.38	-163.915	1274.1	914.09	-115.029	1297.92	813.946	-177.4	1255.65	801.479	-168.969	1312.53	739.569
2396	0	60.8038	1334.22	1584.38	165.384	1325.23	1589.96	34.8016	1173.77	1550.88	152.417	1160.75	1557.69	115.633	1150.05	1426.9	114.724	1060.39	1144.29	113.828	1314.28	1328.12	123.417	1413.59	1131.07	192.634	1061.51	1240.97	-38.5686	1248.21	1387.33	-144.414	1231.01	1147.58	-149.978	1211.69	1051.34	-164.397	1285.36	915.542	-115.199	1310.21	815.747	-177.282	1267.66	802.688	-168.842	1325.01	741.23
2397	0	59.3186	1343.75	1585.69	163.932	1334.88	1591.43	33.8696	1183.21	1552.17	151.402	1170.26	1559.23	114.506	1159.44	1428.21	113.815	1070.01	1145.55	112.61	1323.86	1329.73	122.141	1423.36	1132.89	191.71	1071.05	1242.36	-39.7556	1257.52	1388.47	-145.441	1240.73	1148.66	-150.96	1221.96	1052.14	-164.859	1296.7	916.956	-115.084	1322.58	817.554	-177.337	1279.79	804.025	-168.859	1337.74	743.129
2398	0	57.8524	1353.09	1586.78	162.62	1344.51	1592.79	32.8205	1192.47	1553.38	150.569	1179.91	1560.71	113.481	1169.15	1429.5	112.747	1079.9	1146.98	111.697	1333.31	1330.87	121.195	1432.98	1134.03	190.708	1080.44	1243.75	-40.9239	1267.02	1389.57	-146.7	1250.48	1149.77	-152.165	1232.35	1053.09	-165.473	1308.16	918.298	-115.065	1334.71	819.246	-177.74	1292.47	805.363	-168.354	1350.6	744.795
2399	0	56.5558	1362.35	1587.62	161.168	1354.15	1593.96	32.0152	1201.78	1554.27	149.706	1189.66	1561.76	112.503	1178.74	1430.5	111.519	1089.15	1148.3	110.741	1342.68	1331.71	120.53	1442.51	1134.92	189.646	1089.69	1244.9	-41.8676	1276.52	1390.43	-147.97	1260.2	1150.67	-153.454	1242.61	1053.77	-165.907	1319.48	919.52	-114.961	1345.89	820.774	-177.766	1304.82	806.407	-167.847	1363.72	746.355
2400	0	55.1451	1371.57	1588.54	159.807	1363.75	1595.1	31.3725	1210.82	1554.86	149.023	1199.11	1562.75	111.562	1188.19	1431.5	110.634	1098.5	1149.34	109.971	1352.12	1332.57	119.864	1451.94	1135.73	188.686	1098.73	1246.17	-42.7039	1285.99	1391.13	-149.381	1269.77	1151.46	-154.776	1252.82	1054.24	-166.353	1330.91	920.662	-114.944	1358.58	822.635	-177.659	1317.4	807.06	-167.251	1376.75	747.962
2401	0	53.6565	1380.65	1589.34	158.408	1373.25	1596.14	30.6238	1219.9	1555.47	148.408	1208.61	1563.71	110.755	1197.71	1432.56	109.477	1107.29	1150.54	109.184	1361.39	1333.19	119.38	1461.18	1136.2	187.594	1107.62	1247.42	-43.5423	1295.55	1391.53	-150.858	1279.48	1152.21	-156.14	1263.24	1054.74	-166.862	1342.34	921.529	-114.664	1370.69	824.208	-177.58	1329.82	807.896	-166.744	1389.92	749.573
2402	0	52.4324	1389.78	1589.9	157.123	1382.76	1597.08	30.1092	1228.91	1555.99	147.728	1218.25	1564.47	109.964	1207.18	1433.41	108.422	1116.26	1151.6	108.652	1370.69	1333.53	119.2	1470.16	1136.29	186.472	1116.44	1248.56	-44.088	1305.22	1392.1	-152.24	1289.12	1152.99	-157.609	1273.73	1055.26	-167.396	1353.76	922.498	-114.125	1382.61	825.585	-177.233	1342.36	808.745	-165.932	1403.08	751.103
2403	0	51.4366	1398.99	1590.29	156.001	1392.35	1597.66	29.6797	1238.12	1556.28	147.4	1227.64	1564.97	109.326	1216.64	1434.04	107.462	1124.83	1152.51	108.418	1379.91	1333.76	119.34	1478.84	1136.13	185.558	1125.15	1249.45	-44.5102	1314.95	1392.41	-153.556	1298.87	1153.7	-158.95	1284.15	1055.62	-167.689	1365.27	923.267	-113.573	1393.5	826.684	-176.995	1354.84	809.371	-165.074	1416.27	752.567
2404	0	50.4961	1408.02	1590.61	155.078	1401.6	1598.23	29.2164	1247.09	1556.44	147.023	1237.07	1565.51	108.745	1226	1434.77	106.331	1133.44	1153.43	108.133	1388.85	1334.01	119.728	1487.3	1135.89	184.592	1133.74	1250.41	-44.7545	1324.73	1392.74	-154.745	1308.7	1154.34	-160.365	1294.66	1055.87	-167.887	1376.96	924.165	-113.632	1405.33	828.131	-176.905	1367.23	809.926	-164.296	1429.43	754.047
2405	0	49.7149	1417.2	1591.02	154.402	1411	1598.91	28.747	1256.38	1556.71	146.494	1246.39	1566.05	108.034	1235.32	1435.64	104.918	1141.94	1154.62	108.261	1397.9	1334.21	120.278	1495.54	1135.43	183.443	1142.16	1251.53	-44.9093	1334.57	1392.99	-155.876	1318.52	1154.92	-161.937	1305.33	1056.39	-168.065	1388.59	925.028	-112.947	1417.17	829.166	-176.857	1379.8	810.734	-163.565	1442.33	755.667
2406	0	49.2405	1426.43	1591.31	153.821	1420.28	1599.38	28.3869	1265.55	1556.96	146.095	1255.77	1566.36	107.51	1244.69	1436.32	103.616	1150.48	1155.75	108.33	1406.74	1334.16	121.205	1503.81	1134.99	182.341	1150.54	1252.5	-45.0523	1344.43	1393.2	-156.839	1328.5	1155.45	-163.162	1316.12	1056.93	-168.023	1400.28	925.867	-112.317	1429.55	830.567	-176.759	1392.14	811.568	-162.669	1455.2	756.994
2407	0	48.9282	1435.76	1591.41	153.488	1429.67	1599.64	28.2351	1274.84	1556.93	145.876	1265.02	1566.53	106.978	1253.86	1436.83	102.275	1158.94	1156.69	108.58	1415.6	1334.02	122.197	1511.77	1134.28	181.173	1158.83	1253.2	-45.042	1354.35	1393.35	-157.56	1338.67	1155.91	-164.186	1326.76	1057.22	-167.939	1411.77	926.625	-111.843	1440.47	831.613	-176.578	1404.28	812.227	-161.84	1467.78	758.265
2408	0	48.7242	1445.07	1591.5	153.225	1438.86	1599.84	28.1116	1284.11	1556.94	145.773	1274.26	1566.76	106.369	1263.01	1437.39	100.957	1167.23	1157.56	108.843	1424.32	1333.88	123.373	1519.85	1133.68	179.97	1166.98	1254.01	-44.9317	1364.42	1393.64	-158.078	1348.97	1156.44	-165.181	1337.43	1057.6	-167.946	1423.14	927.459	-111.428	1451.65	832.774	-176.386	1416.59	812.878	-161.214	1480.38	759.75
2409	0	48.6148	1454.43	1591.57	153.349	1448.25	1600.1	28.0774	1293.48	1557.27	145.802	1283.53	1567.22	105.907	1272.1	1438.01	99.6442	1175.67	1158.57	109.382	1433.03	1333.79	124.643	1527.88	1133.24	178.766	1175.07	1254.94	-44.7218	1374.27	1393.7	-158.441	1359.43	1156.96	-166.04	1348.17	1058.32	-167.889	1434.57	928.377	-111.435	1463.33	834.189	-176.307	1428.6	813.999	-160.464	1492.62	761.095
2410	0	48.7527	1463.74	1591.52	153.346	1457.51	1600.12	28.2066	1302.68	1557.42	145.876	1292.95	1567.51	105.489	1281.08	1438.54	98.4312	1183.74	1159.41	110.098	1441.62	1333.74	126.06	1535.98	1132.81	177.536	1183.06	1255.7	-44.4644	1384.28	1394.02	-158.609	1369.99	1157.34	-166.8	1358.82	1058.86	-167.63	1445.93	929.17	-110.575	1474.12	834.722	-176.466	1440.65	814.906	-159.723	1504.62	762.169
2411	0	49.0268	1473.11	1591.22	153.659	1466.99	1600.04	28.5112	1312.08	1557.54	146.107	1302.21	1567.7	105.067	1289.94	1438.82	97.2381	1191.91	1159.95	110.783	1450.05	1333.59	127.417	1543.97	1132.55	176.517	1191.03	1256.27	-44.0738	1394.08	1394.08	-158.578	1380.67	1157.51	-167.189	1369.46	1059.04	-167.181	1457.12	929.987	-110.151	1485.69	835.691	-176.151	1452.33	815.553	-159.008	1516.37	763.125
2412	0	49.3357	1482.49	1590.89	153.858	1476.35	1599.86	28.8638	1321.16	1557.78	146.454	1311.49	1568.13	104.752	1298.87	1439.17	96.066	1199.91	1160.51	111.679	1458.56	1333.42	128.583	1551.58	1132.01	175.291	1198.87	1256.88	-43.6824	1403.8	1394.08	-158.449	1391.48	1157.71	-167.418	1380.23	1059.36	-166.797	1468.3	930.696	-109.704	1497.19	836.652	-175.35	1463.9	815.978	-158.092	1528.05	764.039
2413	0	49.7643	1491.82	1590.59	154.287	1485.76	1599.64	29.2895	1330.49	1558.09	146.979	1320.74	1568.63	104.55	1307.61	1439.53	95.0283	1207.88	1161.2	112.41	1466.88	1333.18	129.654	1559.44	1131.54	174.32	1206.77	1257.45	-43.1533	1413.44	1393.91	-158.184	1402.37	1157.88	-167.821	1391.03	1059.87	-165.999	1479.49	931.153	-109.241	1508.65	837.297	-175.459	1475.53	816.792	-157.515	1539.48	764.456
2414	0	50.353	1501.27	1590.15	154.81	1495.22	1599.16	29.9475	1339.59	1558.34	147.616	1330.1	1568.96	104.564	1316.39	1439.69	94.2997	1215.86	1161.68	113.454	1475.38	1332.79	131.158	1567.47	1131.23	173.512	1214.6	1257.82	-42.43	1423.04	1393.97	-157.696	1413.26	1157.96	-167.732	1401.66	1059.89	-165.907	1490.59	931.399	-108.759	1519.86	837.673	-174.803	1486.87	817.056	-157.067	1550.84	764.776
2415	0	50.9752	1510.55	1589.67	155.438	1504.53	1598.8	30.7407	1348.8	1558.46	148.359	1339.31	1569.25	104.6	1325.05	1439.79	93.6472	1223.76	1161.93	114.346	1483.75	1332.62	132.448	1575.32	1130.95	172.833	1222.38	1258.17	-41.7851	1432.43	1393.99	-157.117	1424.18	1157.89	-167.492	1412.42	1059.81	-165.49	1501.54	931.785	-108.301	1531.12	838.036	-173.589	1497.76	817.101	-156.808	1562.03	765.181
2416	0	51.7494	1519.81	1589.07	156.223	1513.82	1598.47	31.556	1357.95	1558.64	149.205	1348.49	1569.59	104.83	1333.74	1439.94	92.9215	1231.68	1162.34	115.503	1491.95	1332.38	133.771	1583.19	1130.54	172.269	1230.17	1258.51	-41.0813	1441.76	1393.91	-156.445	1435.01	1157.93	-167.229	1423.25	1059.91	-165.052	1512.45	931.993	-107.645	1542.49	838.424	-173.249	1508.97	817.22	-156.152	1573.15	765.271
2417	0	52.6294	1529.09	1588.39	157.07	1523.22	1597.94	32.3979	1366.97	1558.8	150.118	1357.75	1569.81	105.124	1342.44	1439.92	92.3991	1239.55	1162.71	116.655	1500.23	1331.78	135.04	1590.92	1129.8	171.806	1238.03	1258.65	-40.173	1451.04	1393.72	-155.738	1445.82	1157.85	-166.798	1434.14	1059.94	-164.335	1523.39	931.75	-106.843	1553.83	838.379	-171.994	1519.73	817.271	-155.408	1584.14	765.095
2418	0	53.5011	1538.23	1587.71	157.929	1532.55	1597.15	33.7059	1376.06	1558.69	151.194	1367.06	1569.85	105.528	1351.17	1439.75	92.0295	1247.5	1162.82	117.676	1508.51	1331.28	136.334	1598.63	1129.11	171.437	1245.91	1258.74	-39.1782	1460.33	1393.4	-154.848	1456.68	1157.52	-165.791	1445.03	1059.42	-163.247	1534.37	931.789	-106.053	1564.91	838.427	-171.452	1530.87	817.205	-154.627	1595.06	765.097
2419	0	54.5197	1547.42	1586.88	158.868	1541.91	1596.49	34.9432	1384.95	1558.53	152.473	1376.18	1569.81	106.044	1359.84	1439.58	91.6751	1255.3	1162.85	118.969	1516.85	1330.74	137.514	1606.38	1128.5	171.178	1253.67	1258.84	-38.1915	1469.62	1393.11	-153.87	1467.55	1157.25	-164.909	1456	1059.22	-162.551	1545.24	931.563	-105.229	1576.09	838.52	-170.206	1541.38	816.781	-153.791	1605.9	764.867
2420	0	55.5283	1556.45	1586.07	160.059	1551.22	1595.74	36.2649	1393.85	1558.48	153.942	1385.31	1569.73	106.733	1368.53	1439.48	91.5076	1263.42	1163.02	120.098	1525.13	1330.21	138.766	1614.17	1127.38	171.026	1261.5	1258.9	-37.1722	1478.86	1392.92	-152.817	1478.4	1157.1	-164.013	1466.98	1059	-161.597	1556	931.346	-104.236	1587.17	838.361	-169.091	1552.25	816.63	-152.786	1616.69	764.619
2421	0	56.8311	1565.64	1585.25	161.159	1560.59	1594.68	37.8605	1402.76	1558.31	155.642	1394.54	1569.42	107.46	1377.28	1439.14	91.2962	1271.31	1163.07	121.401	1533.65	1329.27	140.061	1621.88	1126.29	170.947	1269.51	1258.74	-35.8961	1488.21	1392.65	-151.576	1489.21	1156.74	-163.002	1478.01	1058.72	-160.385	1566.83	931.121	-103.357	1598.17	838.124	-168.003	1563.36	816.441	-151.589	1627.49	764.188
2422	0	58.0873	1574.53	1584.24	162.436	1569.86	1593.58	39.5448	1411.5	1557.86	157.386	1403.69	1568.89	108.278	1385.99	1438.61	91.1966	1279.23	1162.9	122.6	1541.92	1328.34	141.121	1629.81	1125.02	171.031	1277.55	1258.43	-34.6172	1497.48	1392.21	-150.308	1499.96	1156.26	-161.923	1488.97	1058.35	-158.826	1577.84	930.659	-101.473	1608.87	837.56	-165.998	1574	815.76	-150.08	1638.35	763.683
2423	0	59.3039	1583.45	1583.35	163.653	1579.09	1592.55	41.2877	1420.22	1557.48	159.045	1412.86	1568.42	109.159	1394.74	1438.28	91.3281	1287.29	1162.65	124.053	1550.43	1327.56	142.423	1637.73	1123.95	171.043	1285.41	1258.23	-33.2659	1506.77	1391.65	-148.963	1510.71	1155.83	-161.052	1499.83	1057.98	-157.273	1588.83	930.283	-100.305	1619.48	837.193	-164.635	1584.76	815.346	-148.652	1649.08	763.293
2424	0	60.7136	1592.24	1582.43	165.016	1588.33	1591.39	43.1984	1428.88	1557.06	161.041	1422.04	1567.77	110.238	1403.43	1437.74	91.3503	1295.25	1162.45	125.296	1558.75	1326.44	143.649	1645.7	1122.61	171.415	1293.52	1257.9	-31.8533	1516.02	1391.06	-147.512	1521.38	1155.24	-159.765	1510.92	1057.5	-155.241	1599.54	929.973	-98.3833	1630.19	836.565	-163.014	1595.6	814.797	-146.511	1659.84	762.757
2425	0	62.1361	1601.12	1581.29	166.569	1597.59	1590.22	45.3536	1437.6	1556.44	163.365	1431.19	1566.94	111.478	1412.21	1437.05	91.7834	1303.36	1161.99	126.715	1567.32	1325.49	144.771	1653.56	1121.15	171.851	1301.72	1257.22	-30.4286	1525.14	1390.53	-146.157	1531.98	1154.66	-158.395	1521.92	1056.97	-153.459	1610.69	929.276	-96.3345	1641.02	835.958	-161.352	1606.76	814.22	-144.626	1670.7	762.165
2426	0	63.4814	1609.5	1580.27	168.094	1606.86	1588.9	47.5371	1446.22	1555.8	165.413	1440.46	1566.02	112.76	1420.95	1436.25	92.237	1311.63	1161.36	128.059	1575.79	1324.42	145.955	1662.01	1119.9	172.426	1310.02	1256.46	-28.9267	1534.15	1389.89	-144.672	1542.35	1154.22	-156.99	1532.79	1056.29	-151.235	1621.64	928.848	-94.3951	1650.97	835.269	-160.405	1618.02	814.14	-142.435	1681.68	761.6
2427	0	65.0564	1618.2	1579.42	169.876	1616.07	1587.75	49.8407	1454.82	1555.19	167.916	1449.52	1565.14	113.994	1429.61	1435.48	92.8063	1319.87	1160.8	129.39	1584.26	1323.47	147.271	1670.28	1118.86	173.127	1318.36	1255.81	-27.4694	1543.14	1389.21	-143.298	1552.57	1153.62	-155.3	1543.92	1055.7	-149.333	1632.62	928.617	-92.0079	1661.35	834.737	-158.793	1629.2	813.77	-140.13	1692.63	761.257
2428	0	66.8282	1626.93	1578.27	171.669	1625.29	1586.38	52.1671	1463.43	1554.56	170.226	1458.58	1564.07	115.449	1438.37	1434.51	93.5456	1328.22	1160.08	130.983	1592.86	1322.51	148.389	1678.57	1117.48	174.052	1326.76	1254.86	-25.9622	1552.06	1388.47	-141.794	1562.72	1153.01	-153.816	1554.76	1054.93	-147.035	1643.55	928.022	-89.7459	1671.52	833.936	-156.218	1640.26	812.789	-137.471	1703.39	760.715
2429	0	68.7226	1635.7	1577.29	173.568	1634.4	1584.85	54.6409	1472.06	1553.71	172.792	1467.75	1562.79	117.02	1447	1433.44	94.5024	1336.68	1159.03	132.283	1601.39	1321.21	149.727	1686.95	1116.15	175.247	1335.35	1253.69	-24.3452	1560.85	1387.55	-140.215	1572.79	1152.11	-152.281	1565.32	1053.91	-144.535	1654.44	927.312	-87.1246	1681.91	833.157	-154.238	1651.45	812.154	-134.406	1714.28	759.883
2430	0	70.6482	1644.36	1576.05	175.499	1643.45	1583.2	57.1818	1480.55	1552.78	175.385	1476.83	1561.43	118.661	1455.62	1432.23	95.6759	1345.23	1157.86	133.95	1610.15	1320.11	150.724	1695.22	1114.52	176.507	1343.86	1252.48	-22.6756	1569.68	1386.43	-138.486	1582.67	1151.08	-150.605	1575.88	1053.01	-142	1665.4	926.597	-84.7125	1692.13	832.298	-152.158	1662.84	811.404	-131.454	1725.24	759.143
2431	0	72.7438	1653.05	1574.78	177.492	1652.45	1581.68	59.6533	1489.06	1551.93	178.005	1485.87	1560.1	120.436	1464.33	1431.07	96.9283	1353.76	1156.84	135.447	1618.83	1318.75	152.009	1703.72	1113.15	177.894	1352.46	1251.2	-20.8733	1578.43	1385.41	-136.65	1592.56	1150.44	-148.984	1586.39	1052.15	-139.732	1676.07	925.759	-82.1863	1702.76	831.775	-150.701	1674.33	811.099	-128.425	1736.13	758.351
2432	0	74.8145	1661.59	1573.73	179.586	1661.43	1580.09	62.2188	1497.64	1550.91	180.743	1494.7	1558.69	122.208	1472.92	1429.79	98.2601	1362.34	1155.69	137.067	1627.49	1317.39	153.104	1712.22	1111.69	179.409	1361.16	1249.84	-19.0933	1587.19	1384.4	-134.954	1602.18	1149.12	-147.125	1596.51	1051.13	-136.721	1686.8	925.067	-79.3188	1712.47	830.646	-147.915	1685.36	810.329	-125.263	1747.09	757.656
2433	0	76.9284	1670.14	1572.45	181.712	1670.35	1578.51	64.9418	1506.15	1549.66	183.324	1503.58	1557.06	124.205	1481.57	1428.45	99.7958	1370.92	1154.35	138.689	1636.22	1316	154.386	1720.84	1110.35	181.147	1369.81	1248.24	-17.332	1595.91	1383.38	-133.104	1611.68	1148.3	-145.275	1606.49	1049.95	-134.37	1697.15	924.37	-76.6428	1722.62	830.141	-146.211	1696.6	809.84	-122.167	1758	757.235
2434	0	79.0757	1678.64	1571.31	183.973	1679.19	1577.05	67.6103	1514.49	1548.43	185.601	1512.5	1555.41	126.057	1490.27	1427.07	101.326	1379.54	1153.03	140.578	1645.05	1314.85	155.675	1729.65	1109.12	182.905	1378.49	1246.73	-15.5399	1604.5	1382.46	-131.273	1621.23	1147.19	-143.378	1616.06	1048.94	-132.025	1707.38	923.742	-74.044	1732.84	829.703	-143.301	1707.51	809.019	-119.229	1768.87	756.952
2435	0	81.1827	1687.08	1570.16	186.142	1688.05	1575.61	70.0962	1522.87	1547.27	188.276	1521.3	1553.94	128.351	1499.15	1425.61	103.071	1388.08	1151.74	142.278	1653.74	1313.36	156.897	1738.58	1107.81	184.676	1387.17	1245.32	-13.6933	1613.08	1381.33	-129.4	1630.51	1146.39	-141.481	1625.57	1047.82	-129.421	1717.5	923.178	-71.243	1743.05	829.13	-141.417	1718.33	808.702	-116.171	1779.74	756.613
2436	0	83.3577	1695.53	1568.81	188.383	1696.72	1574.15	72.6872	1531.25	1546.01	191.224	1530.05	1552.56	130.063	1507.62	1424.14	104.925	1396.96	1150.33	144.212	1662.53	1312.08	158.311	1747.67	1106.62	186.713	1396.04	1243.69	-11.748	1621.7	1380.31	-127.267	1639.66	1145.24	-139.378	1634.83	1046.62	-126.978	1727.42	922.465	-68.4982	1753.1	828.626	-138.619	1729.05	808.046	-113.311	1790.52	756.328
2437	0	85.6412	1703.93	1567.61	190.596	1705.45	1572.58	75.4664	1539.68	1544.7	194.027	1538.76	1551.09	132.316	1516.26	1422.67	106.914	1405.99	1148.61	146.175	1671.35	1310.9	159.654	1756.88	1105.3	188.839	1405	1241.95	-9.54956	1630.32	1379.26	-125.101	1648.68	1144.19	-137.27	1643.94	1045.57	-124.689	1736.98	921.758	-65.8997	1763.13	828.404	-135.977	1739.1	807.336	-110.546	1801.15	756.17
2438	0	87.7814	1712.3	1566.3	192.959	1714.22	1571.29	78.0813	1547.97	1543.63	196.39	1547.62	1549.68	134.426	1524.84	1421.38	109.001	1415.22	1146.93	148.172	1680.16	1309.64	161.208	1766.21	1104.3	190.912	1413.99	1240.23	-7.35459	1638.92	1378.08	-123.031	1657.44	1143.35	-135.189	1652.86	1044.54	-122.281	1746.35	921.173	-63.2577	1773.02	827.953	-133.315	1749.08	806.723	-107.673	1811.61	756.078
2439	0	90.1682	1720.78	1565.07	195.257	1723.01	1569.77	80.7912	1556.4	1542.65	199.392	1556.27	1548.51	136.813	1533.47	1419.92	111.222	1424.63	1145.33	150.288	1688.93	1308.36	162.827	1775.58	1103.07	193.173	1423.1	1238.39	-5.13975	1647.51	1377.15	-120.875	1666.16	1142.16	-133.093	1661.61	1043.49	-119.811	1755.62	920.372	-60.454	1782.97	827.513	-129.9	1758.81	805.767	-104.969	1821.88	755.948
2440	0	92.7566	1729.35	1563.76	197.814	1731.73	1568.41	83.5705	1564.76	1541.58	202.221	1564.94	1547.21	139.183	1542.06	1418.32	113.305	1433.98	1143.5	152.326	1697.78	1307.07	164.534	1785.08	1102.12	195.463	1432.24	1236.41	-2.9214	1656.08	1376.08	-118.667	1674.66	1141.24	-130.929	1670.09	1042.44	-117.521	1764.76	919.443	-57.8715	1792.81	827.134	-127.544	1768.51	805.265	-102.315	1831.98	755.84
2441	0	95.1503	1737.85	1562.54	200.185	1740.67	1566.9	86.4352	1573.24	1540.57	204.894	1573.62	1545.97	141.564	1550.42	1416.71	115.53	1443.41	1141.39	154.595	1706.73	1306.22	166.407	1794.68	1101.34	197.787	1441.32	1234.4	-0.548017	1664.54	1375.14	-116.455	1683.12	1140.28	-128.672	1678.46	1041.48	-115.303	1773.75	918.98	-55.39	1802.38	826.957	-124.59	1777.91	804.438	-99.7012	1841.9	755.777
2442	0	97.7889	1746.39	1561.47	202.85	1749.26	1565.55	89.3972	1581.72	1539.74	207.809	1582.23	1544.96	144.414	1558.74	1415.11	117.943	1452.98	1139.36	156.885	1715.63	1305.23	168.365	1804.35	1100.74	200.217	1450.49	1232.33	1.94255	1672.89	1374.28	-114.215	1691.49	1139.31	-126.429	1686.72	1040.58	-112.931	1782.67	918.35	-52.7801	1811.91	826.856	-121.857	1787.06	803.899	-97.1183	1851.61	755.733
2443	0	100.5	1754.77	1560.28	205.576	1757.99	1564.26	92.4662	1590	1539.03	210.979	1590.93	1543.98	147.093	1566.81	1413.66	120.375	1462.65	1137.28	159.27	1724.49	1304.23	170.543	1814.09	1100.31	202.849	1459.71	1230.11	4.51381	1681.15	1373.39	-112.074	1699.45	1138.69	-124.124	1694.92	1039.65	-111.03	1791.23	917.631	-50.1002	1821.33	826.648	-119.075	1796	803.314	-94.4353	1861.13	755.558
2444	0	103.327	1763.13	1559.67	208.334	1766.83	1563.23	95.5135	1598.34	1538.34	214.225	1599.66	1543.04	150.043	1575.33	1412.24	123	1472.3	1135.4	161.779	1733.4	1303.73	172.867	1823.92	1100.25	205.529	1468.93	1228.04	6.99062	1689.36	1372.74	-109.744	1707.34	1138.15	-121.674	1702.77	1038.83	-108.875	1799.51	917.166	-47.7626	1830.35	826.451	-115.711	1804.47	802.585	-91.8376	1870.33	755.542
2445	0	105.995	1771.54	1559.49	211.167	1775.53	1562.93	98.6716	1606.56	1537.93	217.419	1608.32	1542.43	152.791	1583.67	1411.3	125.538	1481.79	1134.02	164.332	1742.37	1303.63	175.074	1833.77	1100.65	208.07	1478.18	1226.51	9.53915	1697.73	1372.56	-107.467	1715.16	1137.81	-119.157	1710.51	1038.35	-106.63	1807.77	916.974	-45.5516	1838.99	826.76	-113.176	1812.97	802.219	-89.4366	1879.17	755.814
2446	0	108.624	1779.91	1559.78	213.966	1784.17	1562.99	101.973	1615.06	1537.94	220.755	1617.12	1542.2	155.623	1592.33	1411.02	128.068	1491.27	1133.39	166.955	1751.45	1303.85	177.408	1843.95	1101.08	210.689	1487.47	1225.57	12.1075	1706.26	1372.57	-105.131	1722.74	1137.76	-116.649	1718.29	1038.18	-104.661	1815.93	917.033	-43.2743	1847.54	827.044	-110.621	1821.01	802.106	-87.1707	1887.79	756.14
2447	0	111.844	1788.29	1560.15	216.761	1792.91	1563.27	105.481	1623.43	1538.1	224.112	1625.92	1542.09	158.407	1601.11	1410.93	130.379	1500.52	1133.14	169.742	1760.67	1304.15	179.752	1854.2	1101.71	213.365	1496.93	1224.95	14.8166	1715.09	1372.98	-102.679	1730.16	1138.09	-113.85	1725.74	1038.35	-102.541	1823.33	917.039	-41.2028	1855.81	827.363	-108.745	1828.81	802.45	-85.0524	1895.85	756.48
2448	0	114.753	1796.74	1561.01	219.791	1801.62	1564.04	109	1631.9	1538.52	227.559	1634.73	1542.33	161.421	1610.23	1411.25	132.732	1509.92	1133.36	172.58	1769.95	1304.96	182.264	1864.5	1102.79	215.981	1506.27	1225.02	17.8172	1724.23	1373.73	-100.168	1737.52	1138.85	-111.063	1733.32	1039.02	-100.462	1830.99	917.581	-39.0751	1863.68	828.124	-105.659	1835.76	802.568	-83.2832	1903.24	757.169
2449	0	117.582	1805.09	1562.52	222.722	1810.37	1565.24	112.391	1640.3	1539.49	231.079	1643.45	1543.12	164.491	1619.29	1412.22	135.033	1519.48	1134.24	175.52	1779.24	1306.26	184.823	1874.64	1104.33	218.338	1515.6	1225.63	20.7646	1733.55	1374.98	-97.5397	1744.83	1139.87	-108.355	1740.71	1040.36	-98.5441	1838.01	918.449	-37.0559	1871.05	829.084	-103.474	1842.51	803.565	-82.0558	1910.35	758.234
2450	0	120.6	1813.67	1564.14	225.768	1819.15	1566.67	115.795	1648.8	1540.87	234.488	1652.37	1544.15	167.385	1628.47	1413.49	137.214	1528.96	1135.51	178.289	1788.51	1307.5	187.362	1884.66	1105.96	220.785	1525.05	1226.65	23.6755	1742.79	1376.81	-95.0377	1752.27	1141.67	-105.739	1748.04	1041.92	-96.5495	1844.8	919.619	-35.3458	1878.25	830.189	-101.92	1848.99	804.963	-80.5336	1916.91	759.411
2451	0	123.758	1822.23	1566.19	228.955	1827.95	1568.36	119.047	1657.3	1542.46	237.915	1661.21	1545.48	170.241	1637.46	1414.94	139.164	1538.45	1136.95	181.3	1797.72	1309.45	190.057	1894.5	1108.07	223.012	1534.39	1227.88	26.6994	1752.07	1378.79	-92.3882	1759.77	1143.64	-103.126	1755.45	1044.17	-94.3454	1851.67	921.212	-33.8936	1885.27	831.854	-99.8827	1854.98	806.477	-79.2341	1923.22	760.789
2452	0	126.969	1830.76	1568.3	232.178	1836.77	1570.33	122.353	1665.94	1544.38	241.056	1669.94	1547.08	173.427	1646.81	1416.65	141.415	1548.21	1138.43	183.986	1806.72	1311.4	192.457	1903.99	1110.37	225.324	1543.74	1229.3	29.6365	1761.24	1381.02	-89.6073	1767.41	1146.11	-100.011	1762.82	1046.52	-92.3387	1858.59	923.068	-32.0579	1891.53	833.254	-97.3286	1860.52	807.93	-78.1317	1929	762.169
2453	0	130.123	1839.36	1570.71	235.279	1845.48	1572.39	125.597	1674.67	1546.81	244.368	1678.69	1549.19	176.116	1655.51	1418.59	143.592	1558.2	1140.11	186.819	1815.76	1313.81	195.016	1913.23	1113.05	227.619	1553.13	1231.05	32.561	1770.29	1383.82	-86.8543	1775.27	1148.95	-97.741	1770.15	1049.36	-90.4136	1865.03	925.266	-30.5928	1897.8	835.005	-96.2295	1866.33	810.258	-76.9855	1934.29	763.873
2454	0	133.287	1848.13	1573.3	238.455	1854.22	1574.56	128.754	1683.37	1549.48	247.538	1687.42	1551.43	179.078	1664.35	1420.65	145.712	1567.94	1142.14	189.56	1824.61	1316.21	197.498	1922.24	1115.75	230.04	1562.54	1232.68	35.5676	1779.08	1386.72	-84.013	1783.07	1152.04	-95.1556	1777.56	1052.52	-88.449	1871.51	927.633	-28.8577	1903.79	836.785	-93.9176	1871.73	812.329	-75.7132	1939.37	765.309
2455	0	136.478	1856.86	1575.82	241.691	1862.87	1576.77	131.984	1692.06	1552.16	250.715	1696.01	1553.84	182.113	1673.04	1422.65	147.975	1577.69	1143.91	192.21	1833.27	1318.69	199.922	1931.06	1118.62	232.707	1572.01	1234.38	38.4808	1787.53	1389.58	-81.4734	1791.09	1155.15	-92.7129	1784.86	1055.69	-86.5835	1877.86	930.05	-27.3374	1909.4	838.598	-92.4531	1877.25	814.77	-74.4389	1944.37	766.939
2456	0	139.384	1865.48	1578.39	244.69	1871.44	1578.9	134.985	1700.65	1554.99	253.571	1704.65	1556.23	185.07	1681.57	1424.71	150.339	1587	1145.74	194.667	1841.87	1321.22	202.161	1939.81	1121.51	235.267	1581.31	1236.04	41.3428	1795.84	1392.43	-78.8969	1799.38	1158.36	-90.3759	1792.25	1058.78	-84.9312	1884.28	932.753	-25.7967	1915.02	840.749	-92.044	1882.91	817.784	-73.2227	1949.12	768.703
2457	0	142.515	1874.1	1580.62	247.754	1880.03	1580.97	137.782	1709.16	1557.87	256.647	1713.27	1558.77	188.048	1690.06	1426.85	152.937	1595.92	1147.61	197.263	1850.46	1323.72	204.319	1948.43	1124.3	237.989	1590.57	1237.76	43.9935	1803.94	1395.08	-76.4638	1807.66	1161.41	-88.0454	1799.58	1062.01	-83.2331	1890.68	935.324	-24.4589	1920.7	842.594	-90.8337	1888.36	820.19	-72.0165	1953.95	770.026
2458	0	145.624	1882.75	1582.8	250.94	1888.74	1582.97	140.695	1717.7	1560.54	259.527	1721.77	1561.01	190.913	1698.52	1428.64	155.682	1604.65	1149.34	199.685	1858.96	1325.97	206.375	1956.96	1126.99	240.736	1599.82	1239.21	46.5558	1812.05	1397.78	-74.1657	1815.93	1164.35	-86.0065	1806.63	1064.95	-81.6729	1897.21	937.772	-23.3941	1926.24	844.33	-89.9736	1894.28	822.513	-70.7098	1958.76	771.381
2459	0	148.467	1891.28	1584.96	253.882	1897.31	1584.54	143.645	1726.24	1563	262.356	1730.42	1563.02	193.849	1707.03	1430.42	158.713	1613.17	1150.96	201.881	1867.24	1327.99	208.045	1965.53	1129.25	243.628	1608.96	1240.67	49.0526	1819.94	1399.99	-71.8385	1824.35	1167.02	-83.699	1813.3	1067.51	-80.3613	1903.86	940.13	-22.5747	1931.71	846.025	-89.983	1900.46	825.181	-68.9412	1963.69	772.559
2460	0	151.294	1899.83	1586.78	256.685	1905.81	1586.23	146.574	1735.09	1565.18	265.093	1738.74	1564.91	196.641	1715.36	1432.04	161.654	1621.47	1152.54	204.242	1875.72	1330.07	209.69	1974.17	1131.56	246.438	1617.93	1242.01	51.4739	1827.79	1402.06	-69.6438	1832.92	1169.39	-82.1744	1820.43	1070.09	-78.6684	1909.93	942.46	-22.0899	1937.39	847.866	-89.213	1906.5	827.278	-68.0288	1968.69	773.592
2461	0	154.003	1908.28	1588.48	259.308	1914.17	1587.43	149.093	1743.58	1567.22	267.8	1747.25	1566.56	199.32	1723.7	1433.66	164.779	1629.98	1154.32	206.418	1884.41	1331.73	211.119	1982.88	1133.52	249.287	1626.85	1243.39	53.7119	1835.52	1404.07	-67.7858	1841.29	1171.74	-80.4232	1827.37	1072.44	-77.9441	1916.41	944.279	-21.2202	1942.82	849.123	-88.9201	1912.65	829.227	-67.2379	1973.71	774.464
2462	0	156.766	1916.78	1590.04	262.129	1922.69	1588.66	151.643	1751.93	1568.85	270.522	1756.04	1567.77	201.874	1732	1434.86	167.631	1638.42	1155.71	208.365	1892.76	1333.24	212.416	1991.57	1135.27	252.117	1635.69	1244.42	55.7281	1843.27	1405.82	-66.1023	1849.4	1173.56	-78.9866	1834.13	1074.26	-77.2465	1922.51	945.986	-20.9534	1948.75	850.383	-88.8589	1918.54	830.855	-66.6509	1978.81	775.146
2463	0	159.234	1925.11	1591.4	264.77	1931.07	1589.74	154.136	1760.37	1570.11	272.88	1764.36	1568.74	204.38	1740.49	1436.01	170.158	1647.11	1156.86	210.097	1901.14	1334.48	213.321	2000.1	1136.64	254.773	1644.32	1245.52	57.5268	1850.96	1407.06	-64.3046	1857.58	1175.15	-77.3083	1841.09	1075.67	-76.251	1928.81	947.392	-20.7159	1954.34	851.026	-88.8499	1924.39	832.038	-66.7679	1983.96	775.912
2464	0	161.556	1933.51	1592.73	267.029	1939.32	1590.76	156.462	1768.71	1571.31	275.22	1772.56	1569.75	206.606	1748.83	1437.23	172.538	1655.58	1157.97	211.516	1909.44	1335.52	214.028	2008.62	1137.78	257.373	1652.95	1246.83	59.2925	1858.64	1408.38	-62.869	1865.3	1176.12	-75.9779	1848.02	1077.12	-76.1216	1935.13	948.322	-20.9442	1960.29	852.006	-89.0857	1929.93	833.2	-67.2138	1989.23	776.501
2465	0	163.828	1941.74	1593.87	269.335	1947.79	1591.64	158.754	1777.05	1572.36	277.445	1781.12	1570.46	208.954	1757.27	1438.24	174.903	1663.37	1159.35	212.926	1917.87	1336.23	214.471	2016.54	1138.13	259.839	1661.31	1247.79	60.9865	1866.38	1409.34	-61.2698	1872.81	1176.97	-74.6192	1855.2	1078.36	-75.4544	1941.34	949.078	-21.132	1966.07	852.011	-89.9642	1935.52	834.349	-67.986	1994.35	776.861
2466	0	166.073	1950.11	1594.74	271.56	1956.18	1592.38	160.953	1785.25	1573.21	279.707	1789.44	1571.01	211.278	1765.74	1439.15	177.57	1671.1	1160.38	214.297	1926.22	1336.91	214.947	2024.5	1138.25	262.464	1669.74	1248.9	62.7478	1874.09	1410.14	-59.9089	1879.73	1177.61	-73.2099	1862.03	1079.26	-75.3002	1947.56	949.506	-21.5743	1972.1	852.028	-89.5376	1940.62	834.685	-69.1209	1999.54	777.153
2467	0	168.162	1958.38	1595.7	273.53	1964.37	1593.05	163.098	1793.55	1574.04	281.778	1797.79	1571.53	213.366	1774.1	1440.12	180.087	1678.75	1161.48	215.54	1934.51	1337.63	215.243	2032.92	1138.74	264.95	1678.09	1249.93	64.2435	1881.66	1410.8	-58.5742	1886.26	1178.29	-71.8203	1869.02	1080.01	-74.8009	1953.47	949.754	-22.1441	1978.35	852.143	-89.8662	1945.72	835.082	-70.4459	2004.82	777.461
2468	0	170.116	1966.63	1596.73	275.381	1972.8	1593.74	165.008	1801.95	1574.92	283.894	1806.2	1572.32	215.442	1782.42	1441.12	182.3	1686.4	1162.68	216.642	1942.8	1338.29	215.479	2040.78	1138.78	267.422	1686.22	1251.18	65.8262	1889.39	1411.59	-57.2529	1892.38	1179	-70.7719	1875.89	1081.06	-74.8977	1959.34	950.254	-23.0095	1984.16	852.199	-90.9931	1950.95	835.96	-72.1289	2010.06	777.964
2469	0	171.776	1975.01	1597.42	277.269	1981.2	1594.35	166.798	1810.16	1575.81	285.595	1814.58	1572.86	217.568	1790.98	1442.02	184.482	1694.15	1163.9	217.751	1950.93	1338.82	215.513	2048.73	1138.67	269.837	1694.41	1252.33	67.1106	1896.92	1412.41	-56.0865	1898.23	1179.66	-69.4533	1882.62	1082.04	-74.6936	1965.12	950.825	-23.4838	1988.97	852.06	-91.6863	1956.09	836.766	-73.7838	2015.33	778.569
2470	0	173.501	1983.28	1598.07	279.083	1989.49	1594.84	168.84	1818.41	1576.48	287.364	1822.82	1573.26	219.6	1799.34	1442.78	186.798	1701.75	1164.93	218.676	1959.06	1339.28	215.584	2056.91	1138.8	272.214	1702.61	1253.26	68.6439	1904.45	1413.11	-54.9896	1903.87	1180.46	-68.436	1889.1	1082.75	-74.8575	1971.05	951.402	-24.372	1994.29	852.135	-91.7904	1960.79	837.231	-75.5012	2020.51	779.348
2471	0	175.17	1991.49	1598.71	280.333	1997.87	1595.27	170.536	1826.74	1577.18	289.161	1831.14	1573.86	221.625	1807.6	1443.59	188.857	1709.37	1165.78	219.561	1967.09	1339.84	215.65	2064.75	1139.09	274.458	1710.77	1254.3	69.9841	1911.82	1413.74	-53.961	1909.38	1181.36	-67.3161	1895.54	1083.69	-74.9163	1976.83	952.202	-25.0018	1999.88	852.48	-92.4721	1966.08	838.08	-77.468	2025.75	780.337
2472	0	176.931	1999.89	1599.22	282.164	2006.35	1595.7	172.152	1835.03	1578.05	290.837	1839.56	1574.51	223.437	1815.74	1444.4	190.874	1716.81	1166.92	220.357	1974.98	1340.21	215.984	2072.62	1139.31	276.579	1718.87	1255.26	71.2366	1919.25	1414.56	-53.3398	1914.8	1182.45	-66.6383	1901.76	1084.96	-75.2214	1982.37	953.208	-25.931	2005.15	852.947	-93.4734	1971.17	839.326	-79.4196	2030.98	781.306
2473	0	178.506	2008.44	1599.51	283.771	2014.63	1595.62	173.684	1843.45	1578.72	292.397	1847.9	1574.94	225.054	1823.78	1445	192.747	1724.4	1167.73	221.302	1982.99	1340.41	216.091	2079.96	1139.36	278.405	1726.96	1255.9	72.3868	1926.63	1415.28	-52.5714	1920.39	1183.48	-65.8553	1907.86	1086.01	-75.364	1988.2	954.089	-26.6754	2010.54	853.278	-95.1676	1976.67	840.73	-80.9551	2036.15	782.168
2474	0	180.071	2016.87	1599.84	285.375	2023.23	1595.61	175.162	1851.84	1579.29	293.907	1856.2	1575.32	226.575	1831.77	1445.46	194.589	1731.96	1168.21	221.932	1990.8	1340.65	216.316	2088.05	1139.87	280.134	1734.85	1256.5	73.5521	1934.1	1415.85	-51.8685	1926.12	1184.44	-65.3219	1913.64	1086.96	-75.5552	1993.94	954.913	-27.5434	2015.85	853.788	-95.3833	1981.93	841.385	-82.2333	2041.36	783.087
2475	0	181.482	2025.26	1599.8	286.686	2031.68	1595.44	176.547	1860.18	1579.86	295.285	1864.83	1575.55	227.988	1839.78	1445.94	196.017	1739.5	1168.68	222.604	1998.7	1340.78	216.62	2095.77	1140.03	281.723	1742.88	1256.98	74.1767	1941.29	1416.23	-51.467	1931.82	1185.26	-64.9377	1919.47	1087.81	-76.1551	1999.44	955.728	-28.5376	2021.48	854.231	-97.0578	1987.57	842.745	-83.5919	2046.8	783.881
2476	0	182.862	2033.87	1599.84	287.945	2040.15	1595.09	177.983	1868.65	1580.57	296.717	1873.36	1575.91	229.25	1847.67	1446.26	197.342	1747.09	1169.3	223.299	2006.55	1340.67	216.736	2103.18	1140.02	283.075	1750.76	1257.34	75.2109	1948.72	1416.66	-51.1262	1937.64	1185.96	-64.4538	1925.35	1088.84	-76.6393	2005.21	956.435	-29.2663	2026.52	854.439	-98.0617	1993.12	843.888	-84.8306	2052.01	784.552
2477	0	184.04	2042.21	1599.77	289.28	2048.82	1594.82	179.278	1876.88	1581.12	298.031	1881.84	1576.07	230.482	1855.58	1446.48	198.691	1754.61	1169.63	223.837	2014.26	1340.66	216.934	2110.83	1140.18	284.335	1758.56	1257.58	76.0491	1956.19	1417.02	-50.9106	1943.55	1186.76	-64.4105	1930.95	1089.53	-77.4198	2010.72	957.074	-29.8744	2032.37	854.931	-98.3705	1998.49	844.498	-86.3398	2057.28	785.181
2478	0	185.147	2050.63	1599.65	290.259	2057.15	1594.3	180.426	1885.18	1581.52	299.126	1889.99	1576.23	231.557	1863.36	1446.55	199.708	1762.21	1169.76	224.422	2022.05	1340.8	217.264	2118.18	1140.26	285.426	1766.31	1257.64	76.827	1963.54	1417.1	-50.6059	1949.67	1187.32	-64.2185	1936.63	1089.9	-78.1314	2016.28	957.592	-30.9199	2037.85	855.305	-99.1611	2003.84	845.006	-87.1693	2062.64	785.526
2479	0	186.022	2059.09	1599.62	291.218	2065.72	1593.94	181.517	1893.58	1581.9	300.198	1898.45	1576.42	232.455	1871.24	1446.65	200.525	1769.7	1169.89	225.067	2029.8	1340.73	217.606	2125.44	1140.25	286.381	1774.11	1257.77	77.3599	1970.97	1417.22	-50.3808	1955.9	1187.75	-64.1077	1942.46	1090.4	-78.6932	2022.13	957.821	-31.6728	2043.56	855.417	-100.592	2009.61	845.711	-88.3043	2067.99	785.811
2480	0	186.901	2067.39	1599.1	292.085	2074.07	1593.26	182.38	1901.71	1582.23	301.138	1907.01	1576.32	233.362	1879.27	1446.61	201.39	1777.36	1170.02	225.505	2037.59	1340.4	217.93	2132.75	1139.66	287.413	1782	1257.74	78.0689	1978.7	1417.21	-50.193	1962.29	1188.04	-64.2683	1948.65	1090.77	-79.5918	2027.69	958.052	-32.6675	2049.57	855.666	-100.913	2014.91	845.816	-89.4855	2073.42	785.783
2481	0	187.605	2075.7	1598.61	292.962	2082.43	1592.62	183.333	1909.94	1582.22	302.023	1915.15	1576.01	234.006	1887.1	1446.24	202.237	1784.87	1169.83	225.977	2045.34	1339.85	218.324	2140.22	1139.11	288.22	1789.73	1257.53	78.6115	1986.26	1416.93	-50.0212	1968.88	1187.91	-64.2888	1954.82	1090.79	-80.1582	2033.49	957.947	-33.6677	2055.16	855.326	-101.576	2020.48	845.583	-90.0997	2078.7	785.42
2482	0	188.134	2083.85	1598.28	293.068	2090.7	1591.94	183.988	1918.17	1582.13	302.748	1923.33	1575.78	234.756	1895.27	1445.98	202.949	1792.49	1169.62	226.413	2053.35	1339.65	218.51	2147.61	1138.81	288.796	1797.41	1257.42	79.1415	1993.92	1416.43	-49.8637	1975.58	1187.65	-64.3238	1961.07	1090.65	-80.6716	2039.49	957.455	-34.2502	2061.26	854.933	-102.649	2025.95	845.582	-91.5485	2084.23	785.299
2483	0	188.822	2092.13	1597.76	293.933	2098.9	1591.22	184.695	1926.28	1582	303.493	1931.77	1575.4	235.214	1903.24	1445.66	203.629	1800.07	1169.49	226.897	2061.13	1339.15	218.858	2155.1	1137.87	289.551	1805.27	1257.25	79.5139	2001.83	1415.96	-49.7926	1982.38	1187.43	-64.4272	1967.52	1090.73	-81.2912	2045.28	957.195	-34.8556	2067.1	854.608	-103.063	2031.57	845.248	-92.3812	2089.78	784.86
2484	0	189.256	2100.31	1597.01	294.53	2107.21	1590.41	185.22	1934.43	1581.56	304.195	1940.15	1574.74	235.821	1911.37	1445.02	204.197	1807.68	1169.04	227.295	2069.04	1338.23	219.417	2162.7	1137.17	290.122	1813.18	1256.7	79.731	2009.54	1415.35	-49.7175	1989.29	1187.17	-64.4912	1974.1	1090.4	-81.8113	2051.16	956.712	-35.1848	2072.85	853.922	-103.117	2036.92	844.533	-92.8903	2095.21	784.01
2485	0	189.563	2108.42	1596.45	294.786	2115.3	1589.51	185.621	1942.62	1580.84	304.68	1948.14	1573.92	236.043	1919.43	1444.26	204.712	1815.45	1168.38	227.681	2076.98	1337.72	219.615	2170.3	1136.18	290.64	1821.08	1256.23	80.1402	2017.56	1414.55	-49.7593	1996.36	1186.48	-64.573	1980.77	1089.72	-82.0908	2057.31	955.939	-36.2038	2078.96	853.304	-103.412	2042.64	843.766	-93.6989	2100.77	783.293
2486	0	189.805	2116.44	1595.71	295.084	2123.4	1588.78	185.871	1950.67	1580.02	304.784	1956.33	1573.02	236.19	1927.44	1443.6	205.132	1823.15	1167.73	227.801	2084.84	1336.8	219.821	2177.9	1135.33	290.991	1828.93	1255.66	80.2905	2025.5	1413.72	-49.7315	2003.67	1185.83	-64.5527	1987.67	1089.08	-82.2822	2063.66	954.945	-36.6726	2084.82	852.149	-103.565	2048.5	842.915	-94.4712	2106.41	782.499
2487	0	189.916	2124.6	1594.74	295.16	2131.62	1587.7	186.023	1958.75	1579.09	304.905	1964.45	1571.95	236.3	1935.66	1442.81	205.498	1831.02	1167.09	227.969	2093.02	1335.74	219.917	2185.62	1133.9	291.191	1836.9	1255	80.3871	2033.61	1412.74	-49.6172	2011.18	1184.7	-64.6618	1994.72	1088.32	-82.4037	2070.04	953.906	-37.5061	2090.7	851.073	-104.058	2054.13	841.776	-94.9062	2112.12	781.045
2488	0	189.904	2132.66	1593.57	295.199	2139.67	1586.65	186.081	1966.92	1577.82	305.036	1972.57	1570.73	236.344	1943.79	1441.73	205.762	1838.81	1166.23	228.01	2100.86	1334.35	220.267	2193.45	1132.43	291.414	1844.86	1254.15	80.4881	2041.74	1411.51	-49.597	2018.66	1183.62	-64.7314	2001.89	1087.26	-82.4266	2076.61	952.415	-37.634	2096.65	849.366	-104.868	2060.05	840.795	-95.188	2117.8	779.576
2489	0	189.719	2140.92	1592.36	295.039	2147.92	1585.33	186.022	1974.96	1576.41	304.937	1980.92	1569.3	236.277	1951.97	1440.54	205.954	1846.67	1165.23	228.215	2109.17	1333.01	220.492	2201.3	1130.93	291.505	1852.79	1253.14	80.5131	2050.04	1410.03	-49.578	2026.31	1182.17	-64.6756	2008.99	1086.03	-82.2633	2083.28	950.824	-37.3208	2102.64	847.511	-104.935	2066.2	839.228	-95.3562	2123.57	777.848
2490	0	189.41	2148.99	1591.24	294.837	2155.96	1584.35	185.756	1983.19	1575.04	304.648	1988.97	1568.02	236.109	1960.28	1439.6	206.077	1854.62	1164.27	228.144	2117.18	1331.71	220.411	2209.31	1129.52	291.459	1860.77	1252.31	80.5485	2058.42	1408.73	-49.4249	2034.27	1180.72	-64.7709	2016.28	1084.84	-81.7057	2089.92	949.211	-37.2624	2108.73	845.692	-104.126	2072.21	837.5	-95.4447	2129.41	776.143
2491	0	189.1	2157.15	1589.94	294.424	2164.24	1583.15	185.23	1991.46	1573.62	304.289	1997.35	1566.86	235.783	1968.49	1438.41	206.08	1862.64	1163.23	227.975	2125.39	1330.36	220.434	2217.47	1128.04	291.337	1868.82	1251.23	80.2902	2066.61	1407.33	-49.4909	2041.92	1179.1	-64.8872	2023.7	1083.4	-81.99	2096.74	947.589	-37.4189	2114.75	843.952	-104.491	2078.57	835.914	-95.4318	2135.26	774.16
2492	0	188.681	2165.39	1588.32	294.09	2172.43	1581.85	184.766	1999.75	1572	303.702	2005.43	1565.38	235.558	1976.88	1437.04	206.081	1870.64	1161.84	227.899	2133.67	1328.9	220.418	2225.6	1126.53	291.237	1876.98	1249.96	79.8823	2074.96	1405.62	-49.4019	2050	1177.43	-64.5584	2031.29	1081.62	-81.9467	2103.48	945.521	-37.077	2121.04	841.8	-104.519	2084.76	833.974	-95.4762	2141.33	771.893
2493	0	188.146	2173.77	1587.02	293.552	2180.73	1580.51	184.048	2008.08	1570.48	303.046	2013.54	1563.98	235.096	1985.19	1435.62	205.95	1878.85	1160.4	227.505	2141.88	1327.48	220.297	2234.01	1125.11	290.912	1885.1	1248.69	79.5327	2083.46	1404.06	-49.3773	2057.98	1175.68	-64.3979	2038.91	1079.76	-81.9274	2110.29	943.47	-37.1034	2127.37	839.631	-104.295	2091.1	831.928	-95.1334	2147.17	769.486
2494	0	187.603	2182.21	1585.65	293.112	2189	1579.24	183.265	2016.61	1569.2	302.247	2021.97	1562.84	234.504	1993.46	1434.38	205.796	1887.1	1159.24	226.869	2150.47	1325.97	220.006	2242.37	1123.57	290.717	1893.31	1247.66	79.0768	2091.71	1402.57	-49.4284	2066.33	1173.8	-64.3465	2046.46	1078.06	-81.7988	2117.27	941.375	-36.7139	2133.66	837.401	-104.676	2097.61	830.154	-95.2017	2153.25	767.369
2495	0	187.015	2190.66	1584.05	292.575	2197.25	1577.98	182.349	2025.09	1567.9	301.49	2029.97	1561.64	233.865	2001.95	1433.04	205.712	1895.45	1157.97	226.622	2158.8	1324.63	219.927	2250.96	1122.1	290.279	1901.68	1246.38	78.5408	2100.2	1400.99	-49.4942	2074.48	1171.81	-63.9957	2054.39	1076.22	-81.5016	2124.38	939.095	-36.5735	2140.46	835.354	-103.824	2104.05	827.911	-94.3077	2159.04	764.778
2496	0	186.364	2199.26	1582.58	291.883	2205.67	1576.44	181.206	2033.64	1566.33	300.317	2038.22	1560.24	232.996	2010.3	1431.51	205.343	1903.87	1156.28	226.232	2167.41	1323.34	219.621	2259.5	1120.79	289.759	1910.06	1244.97	77.8668	2108.93	1399.24	-49.3897	2082.99	1169.75	-63.8111	2062.09	1074.09	-81.1686	2131.67	936.769	-35.9984	2146.91	832.651	-103.713	2110.66	825.746	-93.7804	2165.18	762.176
2497	0	185.551	2207.97	1581.16	290.941	2213.92	1575.16	180.01	2042.29	1564.86	299.057	2046.74	1558.86	232.264	2018.82	1430.23	204.974	1912.46	1154.75	225.291	2175.79	1321.72	219.253	2268.22	1119.43	289.153	1918.49	1243.71	77.0651	2117.22	1397.6	-49.5731	2091.4	1167.78	-63.4814	2070.14	1072.09	-80.9769	2139.01	934.433	-35.7823	2153.93	830.245	-103.33	2117.42	823.428	-93.2482	2171.49	759.532
2498	0	184.489	2216.56	1579.59	289.948	2222.48	1573.89	178.732	2050.87	1563.43	297.856	2055.15	1557.59	231.386	2027.36	1428.76	204.486	1921.1	1153.4	224.612	2184.43	1320.19	218.937	2276.84	1117.84	288.72	1927.21	1242.3	76.132	2125.75	1395.83	-49.7118	2100.02	1165.67	-63.4025	2077.99	1070.15	-80.9104	2146.23	932.12	-35.3744	2161.34	828.213	-102.878	2124.41	821.227	-92.6223	2177.99	756.847
2499	0	183.292	2225.12	1578.24	288.16	2230.9	1572.54	177.528	2059.62	1561.89	296.548	2063.64	1556.26	230.413	2036.04	1427.3	204.06	1929.92	1151.99	223.821	2193.38	1318.97	218.641	2285.62	1116.64	288.207	1935.76	1240.97	75.2864	2134.46	1394.25	-50.0363	2108.58	1163.73	-63.2492	2086.18	1068.11	-80.7206	2153.71	929.96	-35.1602	2168.51	825.904	-102.415	2131.38	819.018	-92.1354	2184.69	754.433
2500	0	182.105	2233.66	1577.03	287.164	2239.47	1571.68	176.008	2068.24	1560.26	295.098	2072	1555.07	229.429	2044.75	1425.99	203.643	1938.61	1150.2	223.101	2202.04	1317.97	218.14	2294.35	1115.72	287.597	1944.45	1239.69	74.1965	2143.13	1392.65	-50.3485	2117.1	1161.88	-63.216	2094.12	1066.05	-80.4502	2161.36	927.804	-34.5317	2175.53	823.676	-101.919	2138.49	816.825	-91.418	2191.49	752.109
2501	0	180.358	2242.35	1575.77	285.602	2248.05	1570.73	174.438	2076.95	1558.72	293.584	2080.59	1553.93	228.459	2053.42	1424.76	203.212	1947.59	1148.72	221.823	2210.87	1316.53	217.665	2303.24	1114.52	287.05	1953.42	1238.39	73.1603	2151.78	1391.16	-50.6175	2125.76	1159.98	-63.0686	2102.33	1064.09	-80.4643	2168.92	925.78	-34.7359	2183.36	822.046	-101.167	2145.89	814.594	-90.763	2198.14	749.576
2502	0	178.546	2250.81	1574.37	283.867	2256.7	1569.7	172.759	2085.34	1557.21	292.047	2089.34	1552.69	227.286	2062.31	1423.23	202.826	1956.62	1147.34	221.032	2219.84	1315.31	217.319	2312.53	1113.29	286.362	1962.48	1237.02	71.8865	2160.42	1389.62	-51.2635	2134.17	1158.18	-63.191	2110.52	1062.25	-80.2573	2176.89	923.669	-33.9422	2191.18	819.945	-100.947	2153.69	812.646	-90.0829	2205.61	747.247
2503	0	176.654	2259.46	1572.98	281.95	2265.55	1568.76	171.137	2094.13	1555.52	290.158	2098.17	1551.47	226.106	2071.07	1421.84	202.236	1965.78	1145.66	219.981	2228.89	1314.16	216.781	2321.75	1112.32	286.135	1971.92	1235.79	70.9076	2169.38	1387.88	-51.6848	2142.77	1156.16	-63.4544	2118.84	1060.24	-80.1717	2184.93	921.599	-33.6632	2199.07	817.896	-100.465	2161.41	810.504	-89.3225	2213.27	744.953
2504	0	174.612	2268.06	1571.73	279.629	2274.18	1567.84	169.161	2102.69	1553.93	288.299	2106.87	1550.43	224.844	2080.02	1420.6	201.778	1975.09	1143.86	218.752	2237.43	1312.79	216.045	2331	1111.2	285.469	1981.05	1234.46	69.5716	2177.66	1385.97	-52.3573	2151.13	1154.17	-63.571	2127.04	1058.17	-80.1302	2193.15	919.396	-33.1779	2207.27	815.742	-99.9141	2169.69	808.23	-88.6905	2221.31	742.705
2505	0	172.241	2276.8	1570.38	277.56	2282.99	1567.01	167.325	2111.4	1552.5	286.346	2116.01	1549.36	223.617	2088.8	1419.33	201.383	1984.64	1142.31	217.582	2246.76	1311.83	215.415	2340.47	1110.33	284.634	1990.24	1233.03	68.2251	2186.67	1384.52	-53.1471	2159.61	1152.33	-63.9746	2135.49	1056.21	-79.9119	2201.59	917.411	-32.8006	2215.68	813.982	-99.5673	2177.68	806.164	-87.8148	2229.39	740.219
2506	0	169.994	2285.45	1568.98	275.188	2291.8	1566.1	165.203	2120.21	1551.12	284.269	2124.71	1548.4	222.265	2097.74	1417.78	200.898	1994.29	1140.7	216.466	2255.88	1310.76	214.831	2350.27	1109.47	283.95	1999.7	1231.62	66.6837	2195.22	1382.89	-53.8196	2167.69	1150.37	-64.4599	2143.87	1054.32	-80.0684	2210.24	915.422	-32.4193	2224.66	812.244	-99.5045	2186.5	804.04	-87.0942	2237.73	738.054
2507	0	167.652	2294.11	1567.77	272.907	2300.64	1565.34	163.01	2128.83	1549.53	282.113	2133.41	1547.5	220.654	2106.64	1416.34	200.281	2004.12	1138.63	215.075	2265.14	1309.84	214.047	2359.99	1108.72	283.341	2009.28	1230.03	65.3505	2204.1	1381.31	-54.7979	2176.13	1148.46	-64.7371	2152.55	1052.07	-80.3555	2218.72	913.378	-32.1029	2233.04	810.199	-99.0839	2195.32	801.874	-86.5583	2246.5	736.013
2508	0	165.243	2302.86	1566.67	270.553	2309.29	1564.77	160.701	2137.8	1548.02	279.694	2142.19	1546.62	219.007	2115.51	1415.02	199.926	2014.62	1136.56	213.63	2274.47	1309.17	213.181	2369.91	1108.5	282.462	2018.81	1228.5	63.4676	2212.67	1379.54	-55.9598	2184.27	1146.65	-65.5173	2160.99	1049.91	-80.5075	2227.66	911.26	-32.0947	2241.92	808.349	-99.0078	2204.19	799.601	-86.0222	2255.5	733.926
2509	0	162.698	2311.71	1565.56	268.153	2318.19	1564.2	158.089	2146.59	1546.74	277.272	2150.99	1545.83	217.366	2124.26	1413.74	199.229	2024.73	1134.9	212.145	2283.75	1308.49	212.234	2379.94	1107.99	281.52	2028.52	1226.97	61.7322	2221.51	1378.03	-57.0679	2192.83	1144.67	-66.2187	2169.84	1048.03	-80.784	2236.7	909.23	-32.2104	2251.21	806.667	-98.5591	2213.24	797.521	-85.7083	2264.77	731.819
2510	0	160.322	2320.44	1564.55	265.435	2326.89	1563.71	155.715	2155.58	1545.5	274.819	2159.8	1545.09	215.71	2133.27	1412.42	198.74	2035.03	1133	210.546	2293.31	1307.79	211.405	2390.15	1107.77	280.615	2038.28	1225.43	60.073	2230.41	1376.59	-58.2945	2201.28	1142.79	-66.9586	2178.69	1046.03	-81.3318	2245.78	907.296	-32.2463	2260.81	804.917	-98.8053	2222.62	795.456	-85.403	2274.17	729.859
2511	0	158.064	2329.55	1564.01	263.307	2335.74	1563.46	152.971	2164.55	1544.27	272.256	2168.63	1544.31	213.831	2142.23	1411.21	198.224	2045.18	1131.19	209.051	2302.88	1307.46	210.423	2400.3	1107.56	279.589	2048.11	1223.87	58.1263	2239.08	1374.97	-59.4958	2210.08	1141	-67.6068	2187.66	1044.07	-81.941	2254.9	905.38	-32.9352	2270.48	803.353	-98.772	2231.93	793.385	-85.3742	2283.69	728.048
2512	0	155.49	2338.54	1563.53	260.788	2344.56	1563.47	150.514	2173.74	1543.36	269.575	2177.47	1543.93	212.046	2151.33	1410.55	197.639	2055.16	1129.97	207.242	2312.48	1307.31	209.452	2410.51	1107.82	278.658	2057.89	1222.91	56.2352	2248.07	1373.83	-60.7114	2218.97	1139.41	-68.2517	2196.84	1042.42	-82.5237	2264.27	903.751	-33.1476	2279.82	801.688	-98.944	2241.22	791.67	-85.6648	2293.32	726.583
2513	0	152.968	2347.48	1563.46	257.995	2353.38	1563.87	147.743	2182.78	1542.77	266.868	2186.48	1543.87	210.31	2160.69	1410.11	197.092	2065.01	1129.2	205.535	2322.16	1307.33	208.396	2420.56	1108	277.781	2067.84	1222.3	54.409	2257.22	1373.11	-61.8868	2227.95	1138.09	-68.8438	2206.16	1041.07	-83.3035	2273.78	902.412	-34.0797	2289.78	800.884	-99.504	2250.62	790.293	-86.3302	2303.21	725.461
2514	0	150.108	2356.65	1563.74	255.28	2362.53	1564.52	145.131	2191.96	1542.27	264.239	2195.53	1543.95	208.614	2170.15	1409.93	196.344	2074.9	1128.62	203.873	2332.1	1307.76	207.32	2431.05	1108.6	276.876	2077.72	1221.99	52.6128	2266.43	1372.53	-63.0074	2237.23	1137.04	-69.4458	2215.62	1039.87	-84.168	2283.06	901.457	-34.61	2299.42	799.883	-100.055	2260.13	789.198	-87.0742	2312.99	724.668
2515	0	147.291	2365.48	1563.89	252.741	2371.58	1565.49	142.418	2201.08	1542.1	261.508	2204.67	1544.41	206.991	2179.8	1410.21	195.531	2084.96	1128.54	202.035	2341.9	1308.42	206.136	2441.51	1109.66	276.254	2087.73	1222.19	50.821	2275.67	1372.27	-63.9809	2246.59	1136.23	-69.9015	2225.12	1038.96	-85.1125	2292.47	900.83	-35.5234	2309.48	799.176	-100.638	2269.73	788.216	-88.1414	2322.79	723.908
2516	0	144.282	2374.82	1564.7	249.781	2380.96	1566.75	139.773	2210.39	1542.33	258.819	2214.07	1545.35	205.528	2189.51	1410.88	195.34	2094.88	1129.02	200.237	2351.84	1309.26	204.959	2452.13	1110.79	275.818	2097.83	1223.01	49.1763	2284.99	1372.32	-64.9101	2255.93	1136.02	-70.4485	2234.74	1038.61	-86.1	2302.12	900.452	-36.9064	2319.64	799.035	-101.219	2279.52	787.906	-89.4696	2333	724.109
2517	0	141.579	2383.99	1565.55	246.82	2390.38	1568.19	137.242	2219.57	1543.1	256.378	2223.56	1546.68	204.015	2199.32	1411.96	195.533	2104.75	1129.86	198.536	2361.65	1310.41	203.627	2462.94	1112.26	275.578	2107.95	1224.23	47.5055	2294.16	1372.74	-65.5484	2265.45	1135.95	-70.8146	2244.46	1038.78	-87.0526	2311.86	900.735	-37.8885	2330.21	799.364	-101.876	2289.27	788.177	-91.1364	2343.07	724.444
2518	0	138.457	2393.07	1566.54	243.512	2399.72	1569.85	134.624	2228.86	1543.89	253.822	2233	1548.29	202.773	2208.85	1413.16	195.328	2114.84	1131.02	196.82	2371.57	1311.84	202.131	2473.48	1114.08	275.211	2118.14	1225.68	46.0653	2303.31	1373.72	-66.2881	2274.97	1136.23	-71.1288	2254.29	1039.15	-87.8021	2321.69	901.155	-38.6834	2340.02	799.308	-102.613	2299.04	788.673	-92.597	2353.15	724.949
2519	0	135.773	2402.49	1567.62	240.866	2409.41	1571.6	132.405	2238.3	1544.99	251.355	2242.53	1550.24	201.523	2218.48	1414.65	194.99	2125.32	1132.43	195.252	2381.25	1313.56	200.632	2483.64	1116.1	275.023	2128.4	1227.29	44.6372	2312.25	1374.83	-66.8912	2284.61	1136.99	-71.4598	2264.21	1039.85	-88.7729	2331.65	902.058	-40.2924	2350.89	800.474	-103.601	2309.08	789.646	-94.031	2363.29	725.974
2520	0	133.075	2411.93	1568.85	238.131	2418.97	1573.55	129.887	2247.62	1546.62	248.966	2252.23	1552.56	200.295	2227.87	1416.28	194.749	2136.16	1133.94	193.712	2390.96	1315.49	199.137	2493.86	1118.34	274.684	2138.56	1228.92	43.1296	2321.22	1376.25	-67.4182	2294.19	1138.03	-71.9154	2274.13	1041.11	-89.7071	2341.76	903.464	-41.7794	2361.5	801.931	-104.465	2319.26	791.154	-95.6371	2373.58	727.47
2521	0	130.504	2421.34	1570.16	235.219	2428.52	1575.44	127.732	2257.05	1548.38	246.656	2261.85	1554.99	199.087	2237.15	1417.91	194.831	2147.08	1135.13	192.19	2400.3	1317.56	197.698	2503.45	1120.84	274.343	2148.89	1230.57	41.6654	2329.92	1377.92	-67.8393	2303.87	1139.45	-72.3959	2284	1042.62	-90.5429	2352.04	905.124	-42.6268	2372.56	803.693	-105.519	2329.63	793.032	-97.2101	2384.04	729.217
2522	0	128.291	2430.79	1571.47	233.245	2438.08	1577.43	125.845	2266.5	1550.27	244.675	2271.29	1557.56	197.725	2246.23	1419.42	194.666	2157.62	1136.17	190.531	2409.54	1319.77	196.019	2512.96	1123.5	273.97	2158.93	1231.87	40.3156	2338.66	1379.8	-68.5365	2313.54	1141.09	-72.8946	2293.97	1044.2	-91.5011	2362.47	907.056	-44.0793	2383.26	805.258	-106.468	2340.05	794.766	-98.8309	2394.65	731.162
2523	0	126.274	2440.13	1572.9	230.809	2447.65	1579.27	123.863	2275.82	1552.36	242.63	2280.67	1560.13	196.629	2255.22	1420.98	194.137	2167.66	1137.49	189.093	2418.63	1322.05	194.483	2522.02	1126.23	273.247	2169	1233.27	38.9194	2347.1	1381.7	-69.1833	2323.17	1142.71	-73.6009	2303.73	1045.89	-92.5699	2372.77	909.258	-45.4308	2394.05	807.188	-107.263	2350.79	796.798	-100.313	2405.46	733.308
2524	0	124.46	2449.52	1574.46	229.324	2457.05	1580.97	121.907	2285.13	1554.63	240.921	2290.02	1562.62	195.374	2263.92	1422.45	193.403	2177.23	1138.73	187.795	2427.71	1324.14	193.192	2530.97	1128.82	272.561	2178.9	1234.56	37.3704	2355.76	1383.57	-69.9989	2332.76	1144.47	-74.6421	2313.44	1047.8	-93.7023	2383.35	911.305	-46.5504	2405.43	809.656	-108.657	2362.02	799.152	-101.421	2416.67	735.468
2525	0	122.82	2458.77	1575.85	227.656	2466.44	1582.43	120.623	2294.46	1556.68	239.414	2299.4	1564.8	193.895	2272.84	1423.7	192.636	2186.73	1139.6	186.241	2436.65	1325.9	191.703	2540.01	1131.17	271.604	2188.57	1235.56	35.857	2364.27	1385.05	-71.0927	2342.41	1146.13	-75.915	2323.22	1049.36	-94.9849	2393.88	913.345	-47.9441	2416.76	811.531	-109.999	2373.14	800.828	-102.947	2427.94	737.362
2526	0	121.241	2467.89	1577.15	225.732	2475.58	1583.8	119.04	2303.54	1558.52	237.891	2308.64	1566.8	192.468	2281.6	1424.81	191.747	2196.19	1140.28	184.871	2445.52	1327.66	190.4	2549.01	1133.44	270.211	2197.96	1236.43	34.4117	2372.92	1386.42	-72.2796	2351.97	1147.48	-77.0038	2333.04	1050.55	-96.5358	2404.35	915.129	-49.2468	2428.11	813.428	-111.182	2384.63	802.305	-104.054	2439.71	739.183
2527	0	119.761	2476.94	1578.35	224.407	2484.94	1585.15	117.86	2312.49	1560.25	236.678	2317.81	1568.67	190.997	2290.44	1425.99	190.587	2205.49	1141.19	183.405	2454.38	1329.28	189.157	2558.09	1135.49	268.881	2207.16	1237.49	32.8509	2381.64	1387.69	-73.5354	2361.48	1148.72	-78.6917	2342.75	1051.92	-97.8354	2415.13	916.642	-50.536	2439.81	815.347	-112.296	2396.27	804.09	-105.307	2451.55	740.991
2528	0	118.299	2485.79	1579.42	222.93	2494.01	1586.33	116.951	2321.29	1561.73	235.609	2326.97	1570.21	189.553	2299.26	1427.02	189.067	2214.95	1142.19	182.139	2463.33	1330.55	188.021	2567.25	1137.12	267.488	2216.18	1238.49	31.453	2390.51	1388.76	-75.1014	2370.87	1149.9	-80.3963	2352.48	1052.96	-99.3116	2425.96	918.143	-51.7811	2451.51	817.231	-113.666	2407.89	805.379	-106.29	2463.84	742.72
2529	0	116.633	2494.42	1580.42	221.32	2503.08	1587.38	116.011	2329.95	1562.71	234.678	2336.09	1571.27	188.35	2308.34	1427.72	187.624	2224.36	1142.86	181.094	2472.22	1331.5	187.127	2576.23	1138.22	266.108	2225.19	1239.17	30.3032	2399.57	1389.55	-76.8231	2380.11	1150.88	-82.3212	2362.21	1053.75	-100.744	2436.83	919.426	-53.0664	2463.02	818.761	-114.887	2419.79	806.423	-107.2	2476.31	744.419
2530	0	114.999	2502.95	1581.26	219.791	2512.05	1588.4	115.08	2338.47	1563.39	233.701	2345.14	1572.2	186.856	2317.29	1428.48	185.781	2233.75	1143.4	179.889	2481.02	1332.37	186.264	2585.36	1139.28	264.662	2233.98	1240.02	28.9978	2408.72	1390.16	-78.734	2389.24	1151.72	-84.166	2372	1054.21	-102.442	2447.58	920.563	-54.1597	2474.87	820.383	-115.983	2431.8	807.24	-108.167	2488.93	746.076
2531	0	113.522	2511.45	1581.86	218.169	2520.89	1589.31	114.256	2347.09	1563.9	232.851	2354.11	1573.01	185.437	2326.28	1429.18	184.138	2242.92	1144.29	178.808	2489.91	1332.93	185.476	2594.43	1139.7	263.124	2242.59	1240.96	27.7423	2418	1390.6	-80.7328	2398.48	1152.44	-86.1992	2381.93	1054.75	-103.91	2458.62	921.417	-55.2935	2486.79	821.897	-117.339	2443.84	808.206	-108.824	2501.86	747.671
2532	0	111.999	2519.89	1582.32	216.606	2529.84	1590.02	113.432	2355.53	1564.15	231.988	2363.1	1573.47	184.24	2335.39	1429.69	182.825	2251.74	1144.98	178.042	2498.94	1333.24	185.019	2603.49	1139.79	261.722	2251.1	1241.61	26.6708	2427.3	1390.69	-82.4572	2407.81	1152.88	-88.2204	2391.93	1055.07	-105.427	2469.76	922.381	-56.473	2498.6	823.336	-118.725	2455.9	808.984	-109.94	2514.82	749.013
2533	0	110.703	2528.28	1582.59	215.068	2538.6	1590.52	112.749	2364.02	1564	231.169	2371.95	1573.63	183.159	2344.31	1430.02	181.391	2260.08	1145.19	177.273	2507.86	1333.25	184.723	2612.28	1139.62	260.327	2259.41	1242.05	25.9599	2436.77	1390.77	-84.5605	2416.92	1153.5	-90.2037	2401.92	1055.18	-106.99	2480.67	923.004	-57.6634	2510.21	824.26	-119.509	2468.36	809.222	-110.713	2527.92	750.479
2534	0	109.141	2536.69	1582.93	213.765	2547.28	1590.97	111.901	2372.48	1563.9	230.251	2380.77	1573.79	182.039	2353.36	1430.32	179.972	2268.45	1145.66	176.596	2516.54	1332.96	184.495	2620.94	1139.1	258.898	2267.72	1242.5	25.1939	2446.43	1390.88	-86.4151	2426.11	1153.87	-92.1605	2412.02	1055.3	-108.215	2492.12	923.555	-60.6576	2516.68	823.694	-120.523	2480.65	809.724	-111.555	2540.99	751.947
2535	0	107.845	2545.18	1582.96	212.358	2556.07	1591.22	111.156	2380.99	1563.75	229.485	2389.58	1573.97	180.935	2362.4	1430.62	178.67	2276.51	1146.32	176.093	2525.36	1332.82	184.601	2629.39	1138.53	257.442	2275.87	1243.08	24.5539	2456.05	1390.78	-88.123	2435.56	1154.19	-94.118	2422.3	1055.45	-109.715	2503.27	924.238	-59.2759	2534.03	826.662	-122.085	2492.82	810.299	-112.194	2553.98	753.003
2536	0	106.604	2553.55	1582.82	210.829	2564.82	1591.37	110.381	2389.5	1563.36	228.737	2398.47	1573.86	179.908	2371.25	1430.83	177.109	2284.77	1146.81	175.699	2534.09	1332.27	184.837	2637.76	1137.57	255.977	2284.03	1243.53	23.9814	2465.64	1390.68	-89.8508	2445.22	1154.49	-96.0775	2432.71	1055.47	-110.779	2514.83	924.493	-60.548	2545.39	827.318	-123.372	2505.14	810.675	-113.329	2567.11	754.352
2537	0	105.708	2562.1	1582.62	209.86	2573.43	1591.48	109.656	2398	1562.9	228.032	2407.23	1573.61	178.859	2380.27	1430.97	175.459	2292.89	1147.19	175.385	2542.92	1331.93	185.199	2645.89	1136.51	254.497	2291.92	1243.83	23.5439	2475.3	1390.33	-91.0189	2455.11	1154.37	-97.8462	2443.27	1055.28	-112.123	2526.14	925.009	-61.1809	2557.62	828.238	-124.134	2517.48	810.765	-114.003	2579.93	755.259
2538	0	104.588	2570.6	1582.37	208.589	2582.16	1591.44	109.137	2406.71	1562.41	227.355	2416.07	1573.34	177.782	2389.34	1431.29	173.863	2300.97	1147.91	175.297	2551.64	1331.44	185.667	2654.06	1135.57	253.054	2299.88	1244.42	23.0307	2485.1	1390.16	-92.4113	2465.16	1154.51	-99.459	2453.99	1055.4	-112.979	2537.9	925.266	-62.2138	2569.27	828.694	-125.421	2529.67	811.144	-114.998	2592.76	756.122
2539	0	103.899	2579.2	1582.15	207.779	2591.05	1591.33	108.729	2415.25	1562.08	226.834	2425.01	1573.12	176.751	2398.23	1431.63	172.316	2308.98	1148.68	175.124	2560.08	1330.9	186.221	2662.19	1134.39	251.534	2307.69	1245.04	22.7245	2494.91	1390.15	-93.4116	2475.64	1154.33	-100.9	2464.94	1055.45	-114.074	2549.34	925.796	-63.0255	2581.16	829.248	-126.775	2541.72	811.758	-115.742	2605.35	757.177
2540	0	103.466	2587.74	1581.9	207.116	2599.79	1591.36	108.361	2423.89	1561.61	226.516	2433.84	1572.79	175.95	2407.07	1431.82	170.844	2316.88	1149.25	175.241	2568.58	1330.48	186.914	2670.26	1133.49	250.066	2315.65	1245.53	22.263	2504.46	1389.8	-94.1948	2486.08	1154.23	-102.309	2475.86	1055.56	-114.891	2560.94	926.057	-63.8717	2592.88	829.773	-127.784	2553.84	811.988	-116.847	2617.94	757.806
2541	0	102.889	2596.37	1581.78	206.457	2608.41	1591.33	108.003	2432.65	1561.15	226.127	2442.66	1572.6	174.971	2415.86	1432.09	169.439	2324.96	1149.76	175.133	2577.11	1330.3	187.362	2678.21	1132.93	248.499	2323.33	1246.1	22.1383	2514.1	1389.76	-94.8413	2496.87	1154.23	-103.239	2487	1055.37	-115.382	2572.62	926.713	-64.754	2604.54	830.299	-128.379	2566.09	812.322	-117.68	2630.1	758.745
2542	0	102.012	2605.03	1581.61	205.871	2617.43	1591.16	107.698	2441.38	1560.94	225.757	2451.47	1572.44	174.128	2424.52	1432.39	167.729	2332.67	1150.44	175.133	2585.47	1330.14	187.991	2686.11	1132.4	247.109	2331.09	1246.75	21.7654	2523.56	1389.82	-95.2654	2507.87	1154.38	-104.441	2498.11	1055.62	-116.355	2584.1	927.115	-65.5818	2616.27	830.985	-129.658	2577.87	812.811	-118.842	2642.19	759.463
2543	0	101.559	2613.67	1581.51	205.455	2626.2	1591.04	107.322	2450.11	1560.7	225.484	2460.29	1572.29	173.223	2433.27	1432.56	166.429	2340.42	1151.07	175.144	2593.71	1329.72	188.433	2693.74	1131.88	245.88	2338.86	1247.23	21.3935	2532.8	1389.56	-95.369	2519.03	1154.22	-105.073	2509.32	1055.75	-116.893	2595.61	927.646	-66.5072	2627.94	831.309	-130.645	2589.66	813.458	-119.712	2654.08	759.931
2544	0	101.14	2622.4	1581.16	204.994	2634.96	1590.71	107.174	2458.75	1560.37	225.286	2469.21	1572.07	172.417	2441.78	1432.66	165.287	2348.24	1151.28	175.026	2602.07	1329.36	188.779	2701.38	1131.26	244.702	2346.46	1247.6	21.2577	2541.94	1389.53	-95.4957	2530.4	1154.22	-105.833	2520.43	1055.8	-117.214	2607.36	927.889	-67.1341	2639.96	831.607	-131.404	2601.71	813.668	-120.658	2665.9	760.246
2545	0	100.904	2631.18	1580.68	204.613	2643.66	1590.4	107.077	2467.48	1560.26	225.032	2478	1571.95	171.714	2450.15	1432.82	164.194	2355.84	1151.58	175.129	2610.23	1329.16	189.135	2708.89	1130.92	243.39	2354.15	1248.08	21.1259	2551.08	1389.47	-95.4373	2541.75	1153.93	-106.282	2531.81	1055.77	-117.623	2618.93	928.247	-67.7575	2651.46	831.626	-132.127	2613.51	814.041	-121.098	2677.79	760.647
2546	0	100.619	2639.86	1580.42	204.466	2652.58	1590.1	106.91	2476.24	1560.26	224.956	2486.8	1571.89	171.139	2458.53	1432.97	163.161	2363.43	1151.99	175.299	2618.57	1328.91	189.531	2716.4	1130.25	242.368	2361.94	1248.45	21.0301	2560.03	1389.3	-95.2805	2552.98	1153.88	-106.512	2542.99	1056	-117.941	2630.42	928.512	-68.2569	2663.09	831.68	-132.938	2625.19	814.542	-122.031	2689.39	760.715
2547	0	100.536	2648.56	1579.98	204.285	2661.46	1589.79	106.879	2484.84	1560.13	224.893	2495.67	1571.8	170.688	2466.9	1432.91	162.236	2371.1	1152.27	175.461	2626.71	1328.45	190.067	2723.9	1129.69	241.442	2369.74	1248.57	20.945	2568.81	1389.27	-94.9833	2564.33	1153.66	-106.565	2554.3	1056.02	-118.042	2642.09	928.703	-68.593	2674.87	831.774	-133.239	2636.96	814.881	-122.569	2700.93	760.877
2548	0	100.368	2657.12	1579.62	204.113	2670.1	1589.41	106.858	2493.5	1559.93	224.875	2504.35	1571.72	170.253	2475.45	1432.68	161.443	2378.88	1152.3	175.59	2634.89	1328.34	190.432	2731.46	1129.38	240.544	2377.44	1248.64	20.8441	2577.55	1389.28	-94.8528	2575.61	1153.56	-106.347	2565.53	1055.7	-118.205	2653.31	928.964	-68.794	2686.02	831.695	-133.699	2648.61	814.813	-122.994	2712.55	760.99
2549	0	100.223	2665.86	1579.36	204.033	2678.77	1589.11	106.928	2502.08	1559.86	224.8	2513.04	1571.75	169.828	2483.79	1432.67	160.488	2386.16	1152.51	175.599	2642.6	1327.87	190.483	2738.8	1128.91	239.607	2385.11	1248.85	20.8508	2586.32	1389.09	-94.7708	2586.59	1153.33	-106.52	2576.77	1055.69	-118.251	2664.63	929.05	-69.0142	2697.69	831.744	-134.08	2659.97	815.005	-123.445	2724.08	761.309
2550	0	100.079	2674.4	1578.81	203.953	2687.59	1588.59	107.116	2510.86	1559.86	224.921	2521.83	1571.66	169.587	2492.2	1432.57	159.736	2393.94	1152.66	175.653	2650.63	1327.32	190.838	2746.47	1128.33	238.956	2392.91	1248.97	20.8405	2595.06	1388.91	-94.4452	2597.69	1153.22	-106.557	2588	1055.56	-118.046	2676.16	929.292	-69.3684	2709.22	832.109	-134.268	2671.56	815.214	-123.721	2735.62	761.35
2551	0	100.593	2683.08	1578.29	204.12	2696.5	1587.92	107.3	2519.46	1559.6	225.196	2530.67	1571.28	169.427	2500.67	1432.2	159.013	2401.41	1152.68	175.945	2658.71	1326.74	191.199	2754.34	1127.48	238.474	2400.76	1248.73	20.9902	2603.74	1388.65	-94.2024	2608.45	1152.84	-106.293	2599.15	1055.21	-117.891	2687.31	929.233	-69.3745	2720.32	831.853	-134.127	2683.28	815.073	-123.568	2747.28	761.323
2552	0	100.659	2691.7	1577.68	204.351	2705.07	1587.33	107.546	2528.05	1559.27	225.393	2539.31	1570.92	169.314	2509.05	1431.99	158.536	2409.09	1152.5	175.989	2667.09	1326.32	191.363	2762.25	1126.9	237.902	2408.53	1248.65	20.9884	2612.37	1388.1	-93.6882	2619.26	1152.52	-106.029	2610.17	1054.87	-117.442	2698.69	929.243	-68.7116	2732.57	831.64	-134.027	2694.81	814.829	-123.401	2759.11	761.423
2553	0	100.934	2700.39	1577.06	204.519	2713.79	1586.65	107.835	2536.6	1559.02	225.663	2548.06	1570.45	169.155	2517.28	1432.04	158.042	2417.04	1152.57	176.223	2675.15	1325.67	191.576	2770.26	1126.03	237.414	2416.36	1248.59	21.1499	2621	1387.83	-93.3329	2629.69	1152.01	-105.642	2621.24	1054.53	-116.822	2710.15	929.057	-68.1491	2743.38	831.389	-133.948	2706.39	814.993	-122.931	2770.69	761.408
2554	0	100.893	2709.01	1576.58	204.755	2722.49	1585.95	108.29	2545.29	1558.66	226.124	2556.87	1569.88	169.165	2525.86	1431.56	157.68	2424.92	1152.55	176.387	2683.42	1324.76	191.766	2778.14	1125.16	237.185	2424.35	1248.35	21.2735	2629.68	1387.29	-92.9023	2640.19	1151.58	-105.405	2632.06	1054.27	-115.909	2721.56	928.972	-67.4779	2754.6	831.131	-133.587	2718.07	815.126	-122.182	2782.69	761.317
2555	0	101.428	2717.67	1575.76	205.134	2731.24	1585.07	108.788	2553.98	1557.96	226.592	2565.59	1569.12	169.236	2534.26	1431.13	157.339	2432.62	1152.27	176.597	2691.87	1324.1	191.823	2786.29	1124.1	236.929	2432.43	1248.03	21.546	2638.33	1386.7	-92.9003	2650.28	1151.16	-104.854	2642.9	1053.73	-115.324	2732.64	928.912	-66.5208	2765.98	830.794	-132.855	2729.97	814.89	-121.466	2794.56	761.52
2556	0	101.775	2726.26	1575.27	205.656	2740.05	1584.37	109.238	2562.65	1557.4	227.108	2574.26	1568.39	169.382	2542.58	1430.87	157.252	2440.62	1151.93	176.648	2700.01	1323.2	191.925	2794.25	1123.23	236.84	2440.49	1247.7	21.8076	2646.99	1386.28	-92.5431	2660.26	1150.78	-104.455	2653.6	1053.19	-114.484	2744.03	928.89	-65.9086	2776.98	830.981	-131.928	2742.05	814.812	-120.132	2806.63	761.69
2557	0	102.068	2734.98	1574.71	206.021	2748.77	1583.56	109.741	2571.31	1556.8	227.703	2583.07	1567.66	169.638	2551.19	1430.35	157.197	2448.77	1151.74	176.946	2708.52	1322.55	191.931	2802.17	1122.25	236.867	2448.74	1247.41	21.9187	2655.5	1385.72	-92.1506	2670.07	1150.36	-104.2	2664.23	1052.82	-113.18	2755.35	929.085	-64.7568	2788.26	831.119	-131.125	2753.87	814.934	-118.822	2818.73	762.04
2558	0	102.788	2743.55	1573.98	206.587	2757.44	1582.79	110.335	2579.95	1556.17	228.364	2591.8	1566.85	169.937	2559.92	1429.75	157.279	2456.85	1151.33	177.191	2717.03	1321.49	192.082	2810.35	1121.17	237.151	2457.12	1246.87	22.2957	2664.04	1385.15	-91.9538	2679.59	1150.05	-104.035	2674.51	1052.31	-112.387	2766.27	929.042	-63.0988	2799.54	831.112	-130.422	2765.56	814.867	-117.433	2830.79	762.465
2559	0	103.235	2752.23	1573.07	207.177	2766.2	1581.61	111.111	2588.7	1555.39	228.914	2600.67	1565.86	170.286	2568.65	1428.95	157.473	2464.97	1150.82	177.46	2725.5	1320.73	192.192	2818.41	1120.06	237.366	2465.48	1246.28	22.6297	2672.66	1384.33	-91.5758	2688.85	1149.55	-103.287	2684.82	1051.7	-110.995	2777.41	929.058	-61.8599	2810.45	831.219	-129.054	2777.27	814.628	-115.714	2842.83	762.64
2560	0	103.919	2761.31	1572.27	207.94	2774.97	1580.66	111.726	2597.6	1554.65	229.507	2609.53	1564.83	170.618	2577.4	1428.21	157.786	2473.34	1150.25	177.657	2734.13	1319.55	192.011	2826.54	1118.72	237.633	2473.91	1245.61	23.2085	2681.2	1383.47	-91.2804	2698.05	1148.8	-103.275	2694.9	1051.03	-111.433	2786.53	928.991	-60.4055	2821.82	831.426	-127.833	2789.14	814.52	-114.001	2854.95	762.832
2561	0	104.758	2770.14	1571.24	208.845	2783.87	1579.16	112.777	2606.39	1553.93	230.254	2618.41	1563.88	171.124	2586.17	1427.48	158.049	2481.62	1149.74	178.054	2742.71	1318.42	192.064	2834.88	1117.27	238.156	2482.47	1245.05	23.62	2689.78	1382.48	-90.8311	2707	1147.94	-103.198	2704.85	1050.36	-109.12	2799.39	928.533	-58.8976	2832.97	831.169	-126.847	2800.87	814.518	-112.104	2866.99	763.096
2562	0	105.891	2779.02	1570.2	209.748	2792.81	1577.85	113.469	2615.36	1553.08	231.085	2627.11	1562.59	171.831	2594.85	1426.54	158.488	2489.84	1148.97	178.39	2751.42	1317.14	192.085	2843	1115.76	238.846	2491.19	1244.08	23.9223	2698.45	1381.69	-90.698	2716.08	1147.21	-102.457	2714.65	1049.55	-108.226	2809.75	928.227	-57.0773	2844.38	831.273	-125.816	2812.77	814.292	-110.019	2879.09	763.118
2563	0	106.578	2788.27	1569.21	210.824	2801.76	1576.65	113.99	2624.34	1552.21	231.743	2635.91	1561.34	172.415	2603.51	1425.55	159.373	2498.35	1148.05	178.547	2760.1	1316	192.027	2851.36	1114.53	239.47	2499.85	1243.01	24.4274	2706.95	1380.62	-90.4027	2724.83	1146.27	-102.303	2724.33	1048.42	-106.935	2820.31	927.863	-55.6221	2855.23	831.555	-124.405	2824.42	814.041	-107.877	2891.12	763.538
2564	0	107.648	2797.23	1568.31	211.987	2810.47	1575.33	114.691	2633.25	1551.29	232.547	2644.59	1560.19	173.183	2612.2	1424.53	159.988	2506.89	1147.08	179.049	2768.87	1315	191.849	2859.89	1113.32	240.164	2508.64	1242.04	24.9464	2715.29	1379.75	-90.0911	2733.44	1145.63	-102.008	2734.01	1047.53	-105.9	2830.87	927.677	-54.0662	2866.09	831.515	-123.232	2835.96	813.801	-105.837	2902.97	763.894
2565	0	108.639	2806.08	1567.16	212.915	2819.32	1574.07	115.511	2642.15	1550.38	233.53	2653.37	1558.98	173.919	2620.93	1423.33	160.85	2515.31	1146.18	179.454	2777.74	1313.77	191.915	2868.51	1112	241.185	2517.59	1240.85	25.4154	2723.77	1378.87	-89.9451	2742.11	1144.8	-101.466	2743.33	1046.67	-104.891	2842.65	927.385	-52.2786	2877.43	831.781	-122.528	2847.39	813.732	-103.691	2914.78	764.243
2566	0	109.603	2814.92	1566.2	214.077	2827.67	1572.6	116.526	2650.91	1549.2	234.431	2662.19	1557.63	174.88	2629.82	1422.11	162.093	2524.06	1144.86	179.8	2786.64	1312.62	191.839	2877.27	1110.89	242.05	2526.66	1239.51	25.9949	2732.12	1377.86	-89.6691	2750.56	1143.97	-100.573	2752.44	1045.41	-103.519	2853.08	927.208	-50.6622	2888.19	832.151	-119.006	2858.33	812.815	-101.739	2926.36	764.767
2567	0	110.486	2824.15	1565.13	216.841	2839.73	1573.09	117.533	2659.73	1548.05	235.385	2670.85	1556.34	175.81	2638.58	1420.88	162.99	2532.92	1143.73	180.264	2795.6	1311.71	191.428	2885.89	1109.92	243.087	2535.71	1238.16	26.7405	2740.6	1377.03	-89.0574	2759.21	1143.34	-100.237	2761.69	1044.46	-102.83	2862.87	926.928	-49.0293	2898.83	832.701	-118.041	2869.52	812.75	-99.7956	2937.89	765.229
2568	0	111.625	2832.82	1564.14	216.053	2845.49	1570.26	118.598	2668.44	1547.05	236.53	2679.73	1555.11	176.955	2647.45	1419.72	164.122	2541.9	1142.43	180.728	2804.49	1310.53	191.29	2894.95	1108.72	244.431	2544.77	1236.82	27.4339	2748.96	1375.88	-88.7816	2767.84	1142.4	-99.7278	2770.5	1043.64	-101.775	2872.88	926.629	-47.5864	2909.38	832.914	-117.154	2880.99	812.57	-97.8673	2949.13	765.89
2569	0	112.689	2841.61	1562.88	217.19	2854.54	1568.98	119.849	2677.11	1546.12	237.763	2688.63	1553.93	178.172	2656.34	1418.48	165.336	2550.91	1141.27	181.359	2813.55	1309.33	191.129	2903.94	1107.5	245.82	2553.95	1235.41	28.2678	2757.45	1375.08	-88.1914	2776.45	1141.74	-99.2371	2779.55	1042.78	-100.586	2882.72	926.38	-45.9925	2920.08	832.855	-115.546	2891.44	812.256	-95.9087	2960.28	766.164
2570	0	113.905	2850.31	1561.7	220.212	2865.98	1568.82	121.033	2685.88	1545.11	239.092	2697.37	1552.56	179.515	2665.12	1417.12	166.664	2559.94	1139.79	181.945	2822.46	1308.33	190.945	2913.08	1106.43	247.132	2563.34	1233.73	29.2143	2765.95	1374.01	-87.5455	2785.06	1140.8	-98.1527	2788.23	1041.89	-99.4516	2892.44	925.856	-44.5024	2930.04	833.109	-113.853	2901.91	811.909	-94.0436	2971.16	766.441
2571	0	115.265	2859.1	1560.58	219.955	2871.46	1566.03	122.274	2694.65	1544.19	240.245	2706.23	1551.38	180.721	2673.83	1415.82	167.768	2569.11	1138.3	182.495	2831.63	1307.25	190.677	2922.55	1105.42	248.457	2572.71	1232.22	30.1848	2774.35	1373.14	-86.942	2793.47	1140.11	-97.9458	2796.87	1041.02	-98.4816	2901.76	925.556	-42.8086	2940.43	833.304	-112.213	2912.07	811.652	-92.2321	2981.76	766.807
2572	0	116.636	2868.05	1559.67	223.288	2883.94	1566.35	123.589	2703.48	1543.44	241.605	2714.74	1550.37	182.133	2682.67	1414.65	169.054	2578.4	1137.02	183.243	2840.76	1306.44	190.699	2931.99	1104.55	249.849	2582.13	1230.77	31.1059	2782.63	1372.23	-86.3141	2802.22	1139.41	-97.1196	2805.51	1040.45	-97.2364	2910.99	925.331	-41.3679	2950.49	833.782	-111.1	2922.04	811.393	-90.4663	2992	767.203
2573	0	118.405	2876.8	1558.78	223.137	2888.83	1563.63	124.906	2712.37	1542.76	242.981	2723.51	1549.32	183.828	2691.54	1413.32	170.416	2587.88	1135.4	183.866	2849.77	1305.57	190.391	2941.08	1103.92	251.478	2591.75	1229	32.1731	2791.09	1371.72	-85.1566	2810.5	1138.97	-96.3733	2814.12	1039.8	-96.2672	2920.03	925.217	-39.7977	2959.86	834.056	-108.865	2931.68	811.154	-88.7183	3002.23	767.543
2574	0	120.201	2885.73	1557.98	225.049	2897.48	1562.58	126.219	2721.34	1541.86	244.369	2731.99	1548.27	185.423	2700.22	1411.86	171.838	2597.53	1133.49	184.758	2858.86	1305.04	190.389	2950.88	1103.4	253.031	2601.49	1227.02	33.3739	2799.24	1371.05	-84.4857	2818.92	1138.58	-95.4466	2822.44	1039.1	-95.3686	2928.82	925.274	-38.5184	2969.14	834.577	-108.013	2941.53	811.281	-87.17	3011.99	768.131
2575	0	122.119	2894.6	1557.12	227.093	2906.18	1561.6	127.692	2730.23	1541.3	245.744	2740.52	1547.39	187.301	2708.88	1410.63	173.265	2607.41	1131.79	185.559	2867.87	1304.37	190.397	2960.32	1103.15	254.724	2611.18	1225.05	34.6388	2807.57	1370.71	-83.5443	2827.47	1138.44	-95.1601	2831.12	1038.72	-94.4095	2937.6	925.371	-37.7757	2978.14	834.396	-107.666	2945.85	812.129	-85.7133	3021.48	768.71
2576	0	124.158	2903.64	1556.65	229.16	2914.76	1560.76	129.146	2739.2	1540.97	247.183	2749.49	1546.73	189.437	2717.54	1409.24	174.875	2617.15	1130.14	186.559	2877.04	1303.92	190.54	2970.31	1102.98	256.579	2620.98	1223.22	35.9037	2815.8	1370.39	-82.8398	2836.35	1138.43	-94.3325	2839.23	1038.58	-93.4192	2946.26	925.307	-36.1747	2987.33	834.912	-104.907	2959.91	811.389	-84.2055	3030.7	769.034
2577	0	125.901	2912.76	1556.23	230.987	2923.4	1560.26	130.741	2748.26	1540.5	248.807	2757.94	1546.16	191.286	2726.27	1408.22	176.323	2627.3	1128.45	187.657	2886.38	1303.54	190.586	2979.97	1102.88	258.456	2630.95	1221.26	37.3939	2824.31	1370.19	-82.0346	2844.55	1138.35	-94.0089	2848.04	1038.29	-92.3929	2954.93	925.39	-34.944	2996.2	835.154	-105.173	2968.52	811.07	-82.8745	3039.7	769.464
2578	0	128.538	2921.7	1555.81	233.28	2932.41	1559.73	132.634	2757.21	1540.34	250.475	2766.66	1545.83	193.333	2735.25	1407.43	177.704	2637.95	1127.08	188.757	2895.71	1303.4	190.741	2990.27	1103.11	260.262	2640.88	1219.78	38.9938	2832.51	1369.76	-80.9265	2852.68	1138.13	-93.0697	2856.14	1038.24	-91.5592	2963.22	925.434	-34.3283	3004.88	835.797	-104.355	2971.76	812.617	-81.9118	3048.38	770.04
2579	0	130.344	2930.88	1555.93	235.077	2941.17	1559.67	134.189	2766.36	1540.48	252.249	2775.73	1545.81	195.587	2744.48	1406.98	179.171	2648.37	1126.55	189.998	2905.19	1303.45	190.962	3000.4	1103.34	262.043	2650.97	1218.7	40.5834	2841.48	1370.01	-79.7813	2860.88	1138.47	-92.0838	2864.13	1039.04	-90.7823	2971.21	925.734	-33.4209	3012.91	836.133	-103.469	2979.8	812.878	-81.2294	3056.91	770.31
2580	0	132.4	2940.03	1556.37	237.101	2950.07	1559.89	136.222	2775.32	1540.81	254.225	2784.56	1545.97	197.843	2753.79	1407	180.482	2659.26	1126.27	191.474	2914.79	1303.71	191.305	3010.96	1103.79	263.767	2661.15	1218.12	42.2025	2850.51	1370.59	-78.5923	2868.82	1139.12	-90.9443	2872	1039.72	-89.9134	2979.13	926.199	-32.7704	3021.07	836.354	-101.208	2993.04	812.414	-80.6368	3064.32	770.751
2581	0	134.392	2949.01	1557.16	239.205	2959.12	1560.6	138.067	2784.45	1541.26	256.526	2792.99	1546.26	200.015	2763.11	1407.33	181.941	2669.11	1126.33	192.865	2924.55	1304.37	191.618	3021.48	1104.81	265.229	2671.2	1217.87	43.9893	2859.89	1371.71	-77.5414	2876.51	1140.21	-90.0047	2879.88	1040.5	-88.8395	2986.53	926.86	-32.2108	3028.54	837.183	-101.522	2993.82	814.436	-80.3253	3071.93	771.477
2582	0	136.493	2957.98	1558.48	241.614	2968.66	1562.03	140.513	2793.36	1541.96	258.363	2802.3	1546.98	201.828	2772.81	1408.02	183.346	2678.34	1126.86	194.444	2934.2	1305.52	192.039	3031.86	1106.15	266.606	2681.24	1218.2	45.6925	2869.35	1373.08	-76.4483	2884.42	1141.8	-88.9439	2887.5	1042.07	-88.5317	2993.82	927.923	-31.8403	3035.52	838.353	-101.571	3000.57	815.685	-80.3981	3078.77	772.59
2583	0	138.452	2966.99	1560.12	243.641	2977.47	1563.5	142.387	2802.65	1543.14	260.547	2810.81	1547.98	203.853	2782.41	1409.02	184.451	2687.8	1127.97	195.957	2943.86	1306.9	192.461	3042.14	1107.89	267.828	2691.17	1218.95	47.4021	2878.99	1374.86	-75.5076	2892.22	1143.62	-87.9914	2895.06	1044.06	-87.9904	3000.54	929.304	-31.6277	3042.46	839.56	-100.918	3013	815.046	-80.7608	3084.63	773.88
2584	0	140.669	2976.04	1562.22	245.805	2986.57	1565.1	144.683	2811.67	1544.55	262.8	2819.86	1549.13	206.015	2792.04	1410.34	185.24	2697.73	1129.33	197.525	2953.18	1308.57	192.964	3051.79	1109.69	268.87	2701.21	1219.9	49.0807	2888.69	1377.2	-74.3884	2899.97	1146.05	-86.7372	2902.59	1046.3	-87.6409	3007.2	930.772	-31.6705	3048.96	840.971	-100.676	3018.82	816.569	-81.4335	3090.07	774.93
2585	0	142.905	2985.16	1564.27	247.903	2995.23	1566.71	146.687	2821.12	1546.19	264.992	2829.32	1550.28	207.722	2801.62	1411.81	185.945	2707.95	1130.8	198.938	2963.09	1310.3	193.734	3061.79	1111.68	269.934	2711.01	1221.09	50.8772	2898.31	1379.29	-73.2244	2907.95	1148.43	-85.7812	2909.98	1048.6	-87.0737	3013.74	932.541	-32.0758	3054.48	842.301	-99.4945	3024.13	818.172	-81.8035	3095.59	776.114
2586	0	145.253	2994.32	1566.47	250.446	3004.83	1568.49	149.128	2830.31	1548.26	267.293	2838.43	1551.62	209.175	2811.01	1413.53	186.789	2718.03	1132.49	200.423	2972.39	1312.26	195.009	3071.5	1113.92	270.768	2720.92	1222.47	52.6057	2908.03	1381.87	-72.0117	2916.07	1151.06	-84.5974	2917.31	1051.5	-86.8051	3019.98	934.202	-31.8015	3060.01	843.324	-98.7626	3029.35	819.809	-80.616	3103.32	777.69
2587	0	147.618	3003.65	1568.67	252.979	3014.42	1570.36	151.177	2839.56	1550.56	269.406	2847.54	1553.33	210.992	2820.41	1415.32	187.213	2728.38	1134.14	201.907	2981.62	1314.12	195.699	3081.36	1116.28	271.671	2730.81	1223.91	54.4373	2917.59	1384.59	-70.6654	2924.22	1153.9	-83.5695	2924.45	1054.4	-86.4596	3026.16	936.06	-31.8713	3065.46	844.527	-99.0858	3034.63	821.673	-82.4709	3105.46	778.31
2588	0	149.923	3012.93	1570.79	255.734	3023.99	1571.81	153.471	2848.61	1552.86	271.375	2856.71	1555.07	212.582	2829.79	1416.92	188.004	2738.57	1135.61	203.183	2991.1	1316.3	196.38	3091.35	1118.76	272.529	2740.77	1225.2	56.1145	2926.79	1387.06	-69.5567	2932.4	1156.75	-82.9766	2931.63	1057.4	-86.2863	3032.15	938.007	-31.8963	3070.3	846.034	-99.763	3039.55	823.704	-82.1665	3111.9	778.891
[truncated: 69 more columns]

## Sheet: Sheet2
Devices
		025370 - Force			025370 - Moment			025370 - CoP			027571 - Force			027571 - Moment			027571 - CoP			037720 - Force			037720 - Moment			037720 - CoP
Frame	Sub Frame	Fx	Fy	Fz	Mx	My	Mz	Cx	Cy	Cz	Fx	Fy	Fz	Mx	My	Mz	Cx	Cy	Cz	Fx	Fy	Fz	Mx	My	Mz	Cx	Cy	Cz
		N	N	N	N.mm	N.mm	N.mm	mm	mm	mm	N	N	N	N.mm	N.mm	N.mm	mm	mm	mm	N	N	N	N.mm	N.mm	N.mm	mm	mm	mm
2017	0	0	0	0	0	0	0	200	300	0	0	0	0	0	0	0	200	903	0	0	0	0	0	0	0	603	903	0
2017	1	0	0	0	0	0	0	200	300	0	0	0	0	0	0	0	200	903	0	0	0	0	0	0	0	603	903	0
2017	2	0	0	0	0	0	0	200	300	0	0	0	0	0	0	0	200	903	0	0	0	0	0	0	0	603	903	0
2017	3	0	0	0	0	0	0	200	300	0	0	0	0	0	0	0	200	903	0	0	0	0	0	0	0	603	903	0
2017	4	0	0	0	0	0	0	200	300	0	0	0	0	0	0	0	200	903	0	0	0	0	0	0	0	603	903	0
2017	5	0	0	0	0	0	0	200	300	0	0	0	0	0	0	0	200	903	0	0	0	0	0	0	0	603	903	0
2017	6	0	0	0	0	0	0	200	300	0	0	0	0	0	0	0	200	903	0	0	0	0	0	0	0	603	903	0
2017	7	0	0	0	0	0	0	200	300	0	0	0	0	0	0	0	200	903	0	0	0	0	0	0	0	603	903	0
2017	8	0	0	0	0	0	0	200	300	0	0	0	0	0	0	0	200	903	0	0	0	0	0	0	0	603	903	0
2017	9	0	0	0	0	0	0	200	300	0	0	0	0	0	0	0	200	903	0	0	0	0	0	0	0	603	903	0
2018	0	0	0	0	0	0	0	200	300	0	0	0	0	0	0	0	200	903	0	0	0	0	0	0	0	603	903	0
2018	1	0	0	0	0	0	0	200	300	0	0	0	0	0	0	0	200	903	0	0	0	0	0	0	0	603	903	0
2018	2	0	0	0	0	0	0	200	300	0	0	0	0	0	0	0	200	903	0	0	0	0	0	0	0	603	903	0
2018	3	0	0	0	0	0	0	200	300	0	0	0	0	0	0	0	200	903	0	0	0	0	0	0	0	603	903	0
2018	4	0	0	0	0	0	0	200	300	0	0	0	0	0	0	0	200	903	0	0	0	0	0	0	0	603	903	0
2018	5	0	0	0	0	0	0	200	300	0	0	0	0	0	0	0	200	903	0	0	0	0	0	0	0	603	903	0
2018	6	0	0	0	0	0	0	200	300	0	0	0	0	0	0	0	200	903	0	0	0	0	0	0	0	603	903	0
2018	7	0	0	0	0	0	0	200	300	0	0	0	0	0	0	0	200	903	0	0	0	0	0	0	0	603	903	0
2018	8	0	0	0	0	0	0	200	300	0	0	0	0	0	0	0	200	903	0	0	0	0	0	0	0	603	903	0
2018	9	0	0	0	0	0	0	200	300	0	0	0	0	0	0	0	200	903	0	0	0	0	0	0	0	603	903	0
2019	0	0	0	0	0	0	0	200	300	0	0	0	0	0	0	0	200	903	0	0	0	0	0	0	0	603	903	0
2019	1	0	0	0	0	0	0	200	300	0	0	0	0	0	0	0	200	903	0	0	0	0	0	0	0	603	903	0
2019	2	0	0	0	0	0	0	200	300	0	0	0	0	0	0	0	200	903	0	0	0	0	0	0	0	603	903	0
2019	3	0	0	0	0	0	0	200	300	0	0	0	0	0	0	0	200	903	0	0	0	0	0	0	0	603	903	0
2019	4	0	0	0	0	0	0	200	300	0	0	0	0	0	0	0	200	903	0	0	0	0	0	0	0	603	903	0
2019	5	0	0	0	0	0	0	200	300	0	0	0	0	0	0	0	200	903	0	0	0	0	0	0	0	603	903	0
2019	6	0	0	0	0	0	0	200	300	0	0	0	0	0	0	0	200	903	0	0	0	0	0	0	0	603	903	0
2019	7	0	0	0	0	0	0	200	300	0	0	0	0	0	0	0	200	903	0	0	0	0	0	0	0	603	903	0
2019	8	0	0	0	0	0	0	200	300	0	0	0	0	0	0	0	200	903	0	0	0	0	0	0	0	603	903	0
2019	9	0	0	0	0	0	0	200	300	0	0	0	0	0	0	0	200	903	0	0	0	0	0	0	0	603	903	0
2020	0	0	0	0	0	0	0	200	300	0	0	0	0	0	0	0	200	903	0	0	0	0	0	0	0	603	903	0
2020	1	0	0	0	0	0	0	200	300	0	0	0	0	0	0	0	200	903	0	0	0	0	0	0	0	603	903	0
2020	2	0	0	0	0	0	0	200	300	0	0	0	0	0	0	0	200	903	0	0	0	0	0	0	0	603	903	0
2020	3	0	0	0	0	0	0	200	300	0	0	0	0	0	0	0	200	903	0	0	0	0	0	0	0	603	903	0
2020	4	0	0	0	0	0	0	200	300	0	0	0	0	0	0	0	200	903	0	0	0	0	0	0	0	603	903	0
2020	5	0	0	0	0	0	0	200	300	0	0	0	0	0	0	0	200	903	0	0	0	0	0	0	0	603	903	0
2020	6	0	0	0	0	0	0	200	300	0	0	0	0	0	0	0	200	903	0	0	0	0	0	0	0	603	903	0
2020	7	0	0	0	0	0	0	200	300	0	0	0	0	0	0	0	200	903	0	0	0	0	0	0	0	603	903	0
2020	8	0	0	0	0	0	0	200	300	0	0	0	0	0	0	0	200	903	0	0	0	0	0	0	0	603	903	0
2020	9	0	0	0	0	0	0	200	300	0	0	0	0	0	0	0	200	903	0	0	0	0	0	0	0	603	903	0
2021	0	0	0	0	0	0	0	200	300	0	0	0	0	0	0	0	200	903	0	0	0	0	0	0	0	603	903	0
2021	1	0	0	0	0	0	0	200	300	0	0	0	0	0	0	0	200	903	0	0	0	0	0	0	0	603	903	0
2021	2	0	0	0	0	0	0	200	300	0	0	0	0	0	0	0	200	903	0	0	0	0	0	0	0	603	903	0
2021	3	0	0	0	0	0	0	200	300	0	0	0	0	0	0	0	200	903	0	0	0	0	0	0	0	603	903	0
2021	4	0	0	0	0	0	0	200	300	0	0	0	0	0	0	0	200	903	0	0	0	0	0	0	0	603	903	0
2021	5	0	0	0	0	0	0	200	300	0	0	0	0	0	0	0	200	903	0	0	0	0	0	0	0	603	903	0
2021	6	0	0	0	0	0	0	200	300	0	0	0	0	0	0	0	200	903	0	0	0	0	0	0	0	603	903	0
2021	7	0	0	0	0	0	0	200	300	0	0	0	0	0	0	0	200	903	0	0	0	0	0	0	0	603	903	0
2021	8	0	0	0	0	0	0	200	300	0	0	0	0	0	0	0	200	903	0	0	0	0	0	0	0	603	903	0
2021	9	0	0	0	0	0	0	200	300	0	0	0	0	0	0	0	200	903	0	0	0	0	0	0	0	603	903	0
2022	0	0	0	0	0	0	0	200	300	0	0	0	0	0	0	0	200	903	0	0	0	0	0	0	0	603	903	0
2022	1	0	0	0	0	0	0	200	300	0	0	0	0	0	0	0	200	903	0	0	0	0	0	0	0	603	903	0
2022	2	0	0	0	0	0	0	200	300	0	0	0	0	0	0	0	200	903	0	0	0	0	0	0	0	603	903	0
2022	3	0	0	0	0	0	0	200	300	0	0	0	0	0	0	0	200	903	0	0	0	0	0	0	0	603	903	0
2022	4	0	0	0	0	0	0	200	300	0	0	0	0	0	0	0	200	903	0	0	0	0	0	0	0	603	903	0
2022	5	0	0	0	0	0	0	200	300	0	0	0	0	0	0	0	200	903	0	0	0	0	0	0	0	603	903	0
2022	6	0	0	0	0	0	0	200	300	0	0	0	0	0	0	0	200	903	0	0	0	0	0	0	0	603	903	0
2022	7	0	0	0	0	0	0	200	300	0	0	0	0	0	0	0	200	903	0	0	0	0	0	0	0	603	903	0
2022	8	0	0	0	0	0	0	200	300	0	0	0	0	0	0	0	200	903	0	0	0	0	0	0	0	603	903	0
2022	9	0	0	0	0	0	0	200	300	0	0	0	0	0	0	0	200	903	0	0	0	0	0	0	0	603	903	0
2023	0	0	0	0	0	0	0	200	300	0	0	0	0	0	0	0	200	903	0	0	0	0	0	0	0	603	903	0
2023	1	0	0	0	0	0	0	200	300	0	0	0	0	0	0	0	200	903	0	0	0	0	0	0	0	603	903	0
2023	2	0	0	0	0	0	0	200	300	0	0	0	0	0	0	0	200	903	0	0	0	0	0	0	0	603	903	0
2023	3	0	0	0	0	0	0	200	300	0	0	0	0	0	0	0	200	903	0	0	0	0	0	0	0	603	903	0
2023	4	0	0	0	0	0	0	200	300	0	0	0	0	0	0	0	200	903	0	0	0	0	0	0	0	603	903	0
2023	5	0	0	0	0	0	0	200	300	0	0	0	0	0	0	0	200	903	0	0	0	0	0	0	0	603	903	0
2023	6	0	0	0	0	0	0	200	300	0	0	0	0	0	0	0	200	903	0	0	0	0	0	0	0	603	903	0
2023	7	0	0	0	0	0	0	200	300	0	0	0	0	0	0	0	200	903	0	0	0	0	0	0	0	603	903	0
2023	8	0	0	0	0	0	0	200	300	0	0	0	0	0	0	0	200	903	0	0	0	0	0	0	0	603	903	0
2023	9	0	0	0	0	0	0	200	300	0	0	0	0	0	0	0	200	903	0	0	0	0	0	0	0	603	903	0
2024	0	0	0	0	0	0	0	200	300	0	0	0	0	0	0	0	200	903	0	0	0	0	0	0	0	603	903	0
2024	1	0	0	0	0	0	0	200	300	0	0	0	0	0	0	0	200	903	0	0	0	0	0	0	0	603	903	0
2024	2	0	0	0	0	0	0	200	300	0	0	0	0	0	0	0	200	903	0	0	0	0	0	0	0	603	903	0
2024	3	0	0	0	0	0	0	200	300	0	0	0	0	0	0	0	200	903	0	0	0	0	0	0	0	603	903	0
2024	4	0	0	0	0	0	0	200	300	0	0	0	0	0	0	0	200	903	0	0	0	0	0	0	0	603	903	0
2024	5	0	0	0	0	0	0	200	300	0	0	0	0	0	0	0	200	903	0	0	0	0	0	0	0	603	903	0
2024	6	0	0	0	0	0	0	200	300	0	0	0	0	0	0	0	200	903	0	0	0	0	0	0	0	603	903	0
2024	7	0	0	0	0	0	0	200	300	0	0	0	0	0	0	0	200	903	0	0	0	0	0	0	0	603	903	0
2024	8	0	0	0	0	0	0	200	300	0	0	0	0	0	0	0	200	903	0	0	0	0	0	0	0	603	903	0
2024	9	0	0	0	0	0	0	200	300	0	0	0	0	0	0	0	200	903	0	0	0	0	0	0	0	603	903	0
2025	0	0	0	0	0	0	0	200	300	0	0	0	0	0	0	0	200	903	0	0	0	0	0	0	0	603	903	0
2025	1	0	0	0	0	0	0	200	300	0	0	0	0	0	0	0	200	903	0	0	0	0	0	0	0	603	903	0
2025	2	0	0	0	0	0	0	200	300	0	0	0	0	0	0	0	200	903	0	0	0	0	0	0	0	603	903	0
2025	3	0	0	0	0	0	0	200	300	0	0	0	0	0	0	0	200	903	0	0	0	0	0	0	0	603	903	0
2025	4	0	0	0	0	0	0	200	300	0	0	0	0	0	0	0	200	903	0	0	0	0	0	0	0	603	903	0
2025	5	0	0	0	0	0	0	200	300	0	0	0	0	0	0	0	200	903	0	0	0	0	0	0	0	603	903	0
2025	6	0	0	0	0	0	0	200	300	0	0	0	0	0	0	0	200	903	0	0	0	0	0	0	0	603	903	0
2025	7	0	0	0	0	0	0	200	300	0	0	0	0	0	0	0	200	903	0	0	0	0	0	0	0	603	903	0
2025	8	0	0	0	0	0	0	200	300	0	0	0	0	0	0	0	200	903	0	0	0	0	0	0	0	603	903	0
2025	9	0	0	0	0	0	0	200	300	0	0	0	0	0	0	0	200	903	0	0	0	0	0	0	0	603	903	0
2026	0	0	0	0	0	0	0	200	300	0	0	0	0	0	0	0	200	903	0	0	0	0	0	0	0	603	903	0
2026	1	0	0	0	0	0	0	200	300	0	0	0	0	0	0	0	200	903	0	0	0	0	0	0	0	603	903	0
2026	2	0	0	0	0	0	0	200	300	0	0	0	0	0	0	0	200	903	0	0	0	0	0	0	0	603	903	0
2026	3	0	0	0	0	0	0	200	300	0	0	0	0	0	0	0	200	903	0	0	0	0	0	0	0	603	903	0
2026	4	0	0	0	0	0	0	200	300	0	0	0	0	0	0	0	200	903	0	0	0	0	0	0	0	603	903	0
2026	5	0	0	0	0	0	0	200	300	0	0	0	0	0	0	0	200	903	0	0	0	0	0	0	0	603	903	0
2026	6	0	0	0	0	0	0	200	300	0	0	0	0	0	0	0	200	903	0	0	0	0	0	0	0	603	903	0
2026	7	0	0	0	0	0	0	200	300	0	0	0	0	0	0	0	200	903	0	0	0	0	0	0	0	603	903	0
2026	8	0	0	0	0	0	0	200	300	0	0	0	0	0	0	0	200	903	0	0	0	0	0	0	0	603	903	0
2026	9	0	0	0	0	0	0	200	300	0	0	0	0	0	0	0	200	903	0	0	0	0	0	0	0	603	903	0
2027	0	0	0	0	0	0	0	200	300	0	0	0	0	0	0	0	200	903	0	0	0	0	0	0	0	603	903	0
2027	1	0	0	0	0	0	0	200	300	0	0	0	0	0	0	0	200	903	0	0	0	0	0	0	0	603	903	0
2027	2	0	0	0	0	0	0	200	300	0	0	0	0	0	0	0	200	903	0	0	0	0	0	0	0	603	903	0
2027	3	0	0	0	0	0	0	200	300	0	0	0	0	0	0	0	200	903	0	0	0	0	0	0	0	603	903	0
2027	4	0	0	0	0	0	0	200	300	0	0	0	0	0	0	0	200	903	0	0	0	0	0	0	0	603	903	0
2027	5	0	0	0	0	0	0	200	300	0	0	0	0	0	0	0	200	903	0	0	0	0	0	0	0	603	903	0
2027	6	0	0	0	0	0	0	200	300	0	0	0	0	0	0	0	200	903	0	0	0	0	0	0	0	603	903	0
2027	7	0	0	0	0	0	0	200	300	0	0	0	0	0	0	0	200	903	0	0	0	0	0	0	0	603	903	0
2027	8	0	0	0	0	0	0	200	300	0	0	0	0	0	0	0	200	903	0	0	0	0	0	0	0	603	903	0
2027	9	0	0	0	0	0	0	200	300	0	0	0	0	0	0	0	200	903	0	0	0	0	0	0	0	603	903	0
2028	0	0	0	0	0	0	0	200	300	0	0	0	0	0	0	0	200	903	0	0	0	0	0	0	0	603	903	0
2028	1	0	0	0	0	0	0	200	300	0	0	0	0	0	0	0	200	903	0	0	0	0	0	0	0	603	903	0
2028	2	0	0	0	0	0	0	200	300	0	0	0	0	0	0	0	200	903	0	0	0	0	0	0	0	603	903	0
2028	3	0	0	0	0	0	0	200	300	0	0	0	0	0	0	0	200	903	0	0	0	0	0	0	0	603	903	0
2028	4	0	0	0	0	0	0	200	300	0	0	0	0	0	0	0	200	903	0	0	0	0	0	0	0	603	903	0
2028	5	0	0	0	0	0	0	200	300	0	0	0	0	0	0	0	200	903	0	0	0	0	0	0	0	603	903	0
2028	6	0	0	0	0	0	0	200	300	0	0	0	0	0	0	0	200	903	0	0	0	0	0	0	0	603	903	0
2028	7	0	0	0	0	0	0	200	300	0	0	0	0	0	0	0	200	903	0	0	0	0	0	0	0	603	903	0
2028	8	0	0	0	0	0	0	200	300	0	0	0	0	0	0	0	200	903	0	0	0	0	0	0	0	603	903	0
2028	9	0	0	0	0	0	0	200	300	0	0	0	0	0	0	0	200	903	0	0	0	0	0	0	0	603	903	0
2029	0	0	0	0	0	0	0	200	300	0	0	0	0	0	0	0	200	903	0	0	0	0	0	0	0	603	903	0
2029	1	0	0	0	0	0	0	200	300	0	0	0	0	0	0	0	200	903	0	0	0	0	0	0	0	603	903	0
2029	2	0	0	0	0	0	0	200	300	0	0	0	0	0	0	0	200	903	0	0	0	0	0	0	0	603	903	0
2029	3	0	0	0	0	0	0	200	300	0	0	0	0	0	0	0	200	903	0	0	0	0	0	0	0	603	903	0
2029	4	0	0	0	0	0	0	200	300	0	0	0	0	0	0	0	200	903	0	0	0	0	0	0	0	603	903	0
2029	5	0	0	0	0	0	0	200	300	0	0	0	0	0	0	0	200	903	0	0	0	0	0	0	0	603	903	0
2029	6	0	0	0	0	0	0	200	300	0	0	0	0	0	0	0	200	903	0	0	0	0	0	0	0	603	903	0
2029	7	0	0	0	0	0	0	200	300	0	0	0	0	0	0	0	200	903	0	0	0	0	0	0	0	603	903	0
2029	8	0	0	0	0	0	0	200	300	0	0	0	0	0	0	0	200	903	0	0	0	0	0	0	0	603	903	0
2029	9	0	0	0	0	0	0	200	300	0	0	0	0	0	0	0	200	903	0	0	0	0	0	0	0	603	903	0
2030	0	0	0	0	0	0	0	200	300	0	0	0	0	0	0	0	200	903	0	0	0	0	0	0	0	603	903	0
2030	1	0	0	0	0	0	0	200	300	0	0	0	0	0	0	0	200	903	0	0	0	0	0	0	0	603	903	0
2030	2	0	0	0	0	0	0	200	300	0	0	0	0	0	0	0	200	903	0	0	0	0	0	0	0	603	903	0
2030	3	0	0	0	0	0	0	200	300	0	0	0	0	0	0	0	200	903	0	0	0	0	0	0	0	603	903	0
2030	4	0	0	0	0	0	0	200	300	0	0	0	0	0	0	0	200	903	0	0	0	0	0	0	0	603	903	0
2030	5	0	0	0	0	0	0	200	300	0	0	0	0	0	0	0	200	903	0	0	0	0	0	0	0	603	903	0
2030	6	0	0	0	0	0	0	200	300	0	0	0	0	0	0	0	200	903	0	0	0	0	0	0	0	603	903	0
2030	7	0	0	0	0	0	0	200	300	0	0	0	0	0	0	0	200	903	0	0	0	0	0	0	0	603	903	0
2030	8	0	0	0	0	0	0	200	300	0	0	0	0	0	0	0	200	903	0	0	0	0	0	0	0	603	903	0
2030	9	0	0	0	0	0	0	200	300	0	0	0	0	0	0	0	200	903	0	0	0	0	0	0	0	603	903	0
2031	0	0	0	0	0	0	0	200	300	0	0	0	0	0	0	0	200	903	0	0	0	0	0	0	0	603	903	0
2031	1	0	0	0	0	0	0	200	300	0	0	0	0	0	0	0	200	903	0	0	0	0	0	0	0	603	903	0
2031	2	0	0	0	0	0	0	200	300	0	0	0	0	0	0	0	200	903	0	0	0	0	0	0	0	603	903	0
2031	3	0	0	0	0	0	0	200	300	0	0	0	0	0	0	0	200	903	0	0	0	0	0	0	0	603	903	0
2031	4	0	0	0	0	0	0	200	300	0	0	0	0	0	0	0	200	903	0	0	0	0	0	0	0	603	903	0
2031	5	0	0	0	0	0	0	200	300	0	0	0	0	0	0	0	200	903	0	0	0	0	0	0	0	603	903	0
2031	6	0	0	0	0	0	0	200	300	0	0	0	0	0	0	0	200	903	0	0	0	0	0	0	0	603	903	0
2031	7	0	0	0	0	0	0	200	300	0	0	0	0	0	0	0	200	903	0	0	0	0	0	0	0	603	903	0
2031	8	0	0	0	0	0	0	200	300	0	0	0	0	0	0	0	200	903	0	0	0	0	0	0	0	603	903	0
2031	9	0	0	0	0	0	0	200	300	0	0	0	0	0	0	0	200	903	0	0	0	0	0	0	0	603	903	0
2032	0	0	0	0	0	0	0	200	300	0	0	0	0	0	0	0	200	903	0	0	0	0	0	0	0	603	903	0
2032	1	0	0	0	0	0	0	200	300	0	0	0	0	0	0	0	200	903	0	0	0	0	0	0	0	603	903	0
2032	2	0	0	0	0	0	0	200	300	0	0	0	0	0	0	0	200	903	0	0	0	0	0	0	0	603	903	0
2032	3	0	0	0	0	0	0	200	300	0	0	0	0	0	0	0	200	903	0	0	0	0	0	0	0	603	903	0
2032	4	0	0	0	0	0	0	200	300	0	0	0	0	0	0	0	200	903	0	0	0	0	0	0	0	603	903	0
2032	5	0	0	0	0	0	0	200	300	0	0	0	0	0	0	0	200	903	0	0	0	0	0	0	0	603	903	0
2032	6	0	0	0	0	0	0	200	300	0	0	0	0	0	0	0	200	903	0	0	0	0	0	0	0	603	903	0
2032	7	0	0	0	0	0	0	200	300	0	0	0	0	0	0	0	200	903	0	0	0	0	0	0	0	603	903	0
2032	8	0	0	0	0	0	0	200	300	0	0	0	0	0	0	0	200	903	0	0	0	0	0	0	0	603	903	0
2032	9	0	0	0	0	0	0	200	300	0	0	0	0	0	0	0	200	903	0	0	0	0	0	0	0	603	903	0
2033	0	0	0	0	0	0	0	200	300	0	0	0	0	0	0	0	200	903	0	0	0	0	0	0	0	603	903	0
2033	1	0	0	0	0	0	0	200	300	0	0	0	0	0	0	0	200	903	0	0	0	0	0	0	0	603	903	0
2033	2	0	0	0	0	0	0	200	300	0	0	0	0	0	0	0	200	903	0	0	0	0	0	0	0	603	903	0
2033	3	0	0	0	0	0	0	200	300	0	0	0	0	0	0	0	200	903	0	0	0	0	0	0	0	603	903	0
2033	4	0	0	0	0	0	0	200	300	0	0	0	0	0	0	0	200	903	0	0	0	0	0	0	0	603	903	0
2033	5	0	0	0	0	0	0	200	300	0	0	0	0	0	0	0	200	903	0	0	0	0	0	0	0	603	903	0
2033	6	0	0	0	0	0	0	200	300	0	0	0	0	0	0	0	200	903	0	0	0	0	0	0	0	603	903	0
2033	7	0	0	0	0	0	0	200	300	0	0	0	0	0	0	0	200	903	0	0	0	0	0	0	0	603	903	0
2033	8	0	0	0	0	0	0	200	300	0	0	0	0	0	0	0	200	903	0	0	0	0	0	0	0	603	903	0
2033	9	0	0	0	0	0	0	200	300	0	0	0	0	0	0	0	200	903	0	0	0	0	0	0	0	603	903	0
2034	0	0	0	0	0	0	0	200	300	0	0	0	0	0	0	0	200	903	0	0	0	0	0	0	0	603	903	0
2034	1	0	0	0	0	0	0	200	300	0	0	0	0	0	0	0	200	903	0	0	0	0	0	0	0	603	903	0
2034	2	0	0	0	0	0	0	200	300	0	0	0	0	0	0	0	200	903	0	0	0	0	0	0	0	603	903	0
2034	3	0	0	0	0	0	0	200	300	0	0	0	0	0	0	0	200	903	0	0	0	0	0	0	0	603	903	0
2034	4	0	0	0	0	0	0	200	300	0	0	0	0	0	0	0	200	903	0	0	0	0	0	0	0	603	903	0
2034	5	0	0	0	0	0	0	200	300	0	0	0	0	0	0	0	200	903	0	0	0	0	0	0	0	603	903	0
2034	6	0	0	0	0	0	0	200	300	0	0	0	0	0	0	0	200	903	0	0	0	0	0	0	0	603	903	0
2034	7	0	0	0	0	0	0	200	300	0	0	0	0	0	0	0	200	903	0	0	0	0	0	0	0	603	903	0
2034	8	0	0	0	0	0	0	200	300	0	0	0	0	0	0	0	200	903	0	0	0	0	0	0	0	603	903	0
2034	9	0	0	0	0	0	0	200	300	0	0	0	0	0	0	0	200	903	0	0	0	0	0	0	0	603	903	0
2035	0	0	0	0	0	0	0	200	300	0	0	0	0	0	0	0	200	903	0	0	0	0	0	0	0	603	903	0
2035	1	0	0	0	0	0	0	200	300	0	0	0	0	0	0	0	200	903	0	0	0	0	0	0	0	603	903	0
2035	2	0	0	0	0	0	0	200	300	0	0	0	0	0	0	0	200	903	0	0	0	0	0	0	0	603	903	0
2035	3	0	0	0	0	0	0	200	300	0	0	0	0	0	0	0	200	903	0	0	0	0	0	0	0	603	903	0
2035	4	0	0	0	0	0	0	200	300	0	0	0	0	0	0	0	200	903	0	0	0	0	0	0	0	603	903	0
2035	5	0	0	0	0	0	0	200	300	0	0	0	0	0	0	0	200	903	0	0	0	0	0	0	0	603	903	0
2035	6	0	0	0	0	0	0	200	300	0	0	0	0	0	0	0	200	903	0	0	0	0	0	0	0	603	903	0
2035	7	0	0	0	0	0	0	200	300	0	0	0	0	0	0	0	200	903	0	0	0	0	0	0	0	603	903	0
2035	8	0	0	0	0	0	0	200	300	0	0	0	0	0	0	0	200	903	0	0	0	0	0	0	0	603	903	0
2035	9	0	0	0	0	0	0	200	300	0	0	0	0	0	0	0	200	903	0	0	0	0	0	0	0	603	903	0
2036	0	0	0	0	0	0	0	200	300	0	0	0	0	0	0	0	200	903	0	0	0	0	0	0	0	603	903	0
2036	1	0	0	0	0	0	0	200	300	0	0	0	0	0	0	0	200	903	0	0	0	0	0	0	0	603	903	0
2036	2	0	0	0	0	0	0	200	300	0	0	0	0	0	0	0	200	903	0	0	0	0	0	0	0	603	903	0
2036	3	0	0	0	0	0	0	200	300	0	0	0	0	0	0	0	200	903	0	0	0	0	0	0	0	603	903	0
2036	4	0	0	0	0	0	0	200	300	0	0	0	0	0	0	0	200	903	0	0	0	0	0	0	0	603	903	0
2036	5	0	0	0	0	0	0	200	300	0	0	0	0	0	0	0	200	903	0	0	0	0	0	0	0	603	903	0
2036	6	0	0	0	0	0	0	200	300	0	0	0	0	0	0	0	200	903	0	0	0	0	0	0	0	603	903	0
2036	7	0	0	0	0	0	0	200	300	0	0	0	0	0	0	0	200	903	0	0	0	0	0	0	0	603	903	0
2036	8	0	0	0	0	0	0	200	300	0	0	0	0	0	0	0	200	903	0	0	0	0	0	0	0	603	903	0
2036	9	0	0	0	0	0	0	200	300	0	0	0	0	0	0	0	200	903	0	0	0	0	0	0	0	603	903	0
2037	0	0	0	0	0	0	0	200	300	0	0	0	0	0	0	0	200	903	0	0	0	0	0	0	0	603	903	0
2037	1	0	0	0	0	0	0	200	300	0	0	0	0	0	0	0	200	903	0	0	0	0	0	0	0	603	903	0
2037	2	0	0	0	0	0	0	200	300	0	0	0	0	0	0	0	200	903	0	0	0	0	0	0	0	603	903	0
2037	3	0	0	0	0	0	0	200	300	0	0	0	0	0	0	0	200	903	0	0	0	0	0	0	0	603	903	0
2037	4	0	0	0	0	0	0	200	300	0	0	0	0	0	0	0	200	903	0	0	0	0	0	0	0	603	903	0
2037	5	0	0	0	0	0	0	200	300	0	0	0	0	0	0	0	200	903	0	0	0	0	0	0	0	603	903	0
2037	6	0	0	0	0	0	0	200	300	0	0	0	0	0	0	0	200	903	0	0	0	0	0	0	0	603	903	0
2037	7	0	0	0	0	0	0	200	300	0	0	0	0	0	0	0	200	903	0	0	0	0	0	0	0	603	903	0
2037	8	0	0	0	0	0	0	200	300	0	0	0	0	0	0	0	200	903	0	0	0	0	0	0	0	603	903	0
2037	9	0	0	0	0	0	0	200	300	0	0	0	0	0	0	0	200	903	0	0	0	0	0	0	0	603	903	0
2038	0	0	0	0	0	0	0	200	300	0	0	0	0	0	0	0	200	903	0	0	0	0	0	0	0	603	903	0
2038	1	0	0	0	0	0	0	200	300	0	0	0	0	0	0	0	200	903	0	0	0	0	0	0	0	603	903	0
2038	2	0	0	0	0	0	0	200	300	0	0	0	0	0	0	0	200	903	0	0	0	0	0	0	0	603	903	0
2038	3	0	0	0	0	0	0	200	300	0	0	0	0	0	0	0	200	903	0	0	0	0	0	0	0	603	903	0
2038	4	0	0	0	0	0	0	200	300	0	0	0	0	0	0	0	200	903	0	0	0	0	0	0	0	603	903	0
2038	5	0	0	0	0	0	0	200	300	0	0	0	0	0	0	0	200	903	0	0	0	0	0	0	0	603	903	0
2038	6	0	0	0	0	0	0	200	300	0	0	0	0	0	0	0	200	903	0	0	0	0	0	0	0	603	903	0
2038	7	0	0	0	0	0	0	200	300	0	0	0	0	0	0	0	200	903	0	0	0	0	0	0	0	603	903	0
2038	8	0	0	0	0	0	0	200	300	0	0	0	0	0	0	0	200	903	0	0	0	0	0	0	0	603	903	0
2038	9	0	0	0	0	0	0	200	300	0	0	0	0	0	0	0	200	903	0	0	0	0	0	0	0	603	903	0
2039	0	0	0	0	0	0	0	200	300	0	0	0	0	0	0	0	200	903	0	0	0	0	0	0	0	603	903	0
2039	1	0	0	0	0	0	0	200	300	0	0	0	0	0	0	0	200	903	0	0	0	0	0	0	0	603	903	0
2039	2	0	0	0	0	0	0	200	300	0	0	0	0	0	0	0	200	903	0	0	0	0	0	0	0	603	903	0
2039	3	0	0	0	0	0	0	200	300	0	0	0	0	0	0	0	200	903	0	0	0	0	0	0	0	603	903	0
2039	4	0	0	0	0	0	0	200	300	0	0	0	0	0	0	0	200	903	0	0	0	0	0	0	0	603	903	0
2039	5	0	0	0	0	0	0	200	300	0	0	0	0	0	0	0	200	903	0	0	0	0	0	0	0	603	903	0
2039	6	0	0	0	0	0	0	200	300	0	0	0	0	0	0	0	200	903	0	0	0	0	0	0	0	603	903	0
2039	7	0	0	0	0	0	0	200	300	0	0	0	0	0	0	0	200	903	0	0	0	0	0	0	0	603	903	0
2039	8	0	0	0	0	0	0	200	300	0	0	0	0	0	0	0	200	903	0	0	0	0	0	0	0	603	903	0
2039	9	0	0	0	0	0	0	200	300	0	0	0	0	0	0	0	200	903	0	0	0	0	0	0	0	603	903	0
2040	0	0	0	0	0	0	0	200	300	0	0	0	0	0	0	0	200	903	0	0	0	0	0	0	0	603	903	0
2040	1	0	0	0	0	0	0	200	300	0	0	0	0	0	0	0	200	903	0	0	0	0	0	0	0	603	903	0
2040	2	0	0	0	0	0	0	200	300	0	0	0	0	0	0	0	200	903	0	0	0	0	0	0	0	603	903	0
2040	3	0	0	0	0	0	0	200	300	0	0	0	0	0	0	0	200	903	0	0	0	0	0	0	0	603	903	0
2040	4	0	0	0	0	0	0	200	300	0	0	0	0	0	0	0	200	903	0	0	0	0	0	0	0	603	903	0
2040	5	0	0	0	0	0	0	200	300	0	0	0	0	0	0	0	200	903	0	0	0	0	0	0	0	603	903	0
2040	6	0	0	0	0	0	0	200	300	0	0	0	0	0	0	0	200	903	0	0	0	0	0	0	0	603	903	0
2040	7	0	0	0	0	0	0	200	300	0	0	0	0	0	0	0	200	903	0	0	0	0	0	0	0	603	903	0
2040	8	0	0	0	0	0	0	200	300	0	0	0	0	0	0	0	200	903	0	0	0	0	0	0	0	603	903	0
2040	9	0	0	0	0	0	0	200	300	0	0	0	0	0	0	0	200	903	0	0	0	0	0	0	0	603	903	0
2041	0	0	0	0	0	0	0	200	300	0	0	0	0	0	0	0	200	903	0	0	0	0	0	0	0	603	903	0
2041	1	0	0	0	0	0	0	200	300	0	0	0	0	0	0	0	200	903	0	0	0	0	0	0	0	603	903	0
2041	2	0	0	0	0	0	0	200	300	0	0	0	0	0	0	0	200	903	0	0	0	0	0	0	0	603	903	0
2041	3	0	0	0	0	0	0	200	300	0	0	0	0	0	0	0	200	903	0	0	0	0	0	0	0	603	903	0
2041	4	0	0	0	0	0	0	200	300	0	0	0	0	0	0	0	200	903	0	0	0	0	0	0	0	603	903	0
2041	5	0	0	0	0	0	0	200	300	0	0	0	0	0	0	0	200	903	0	0	0	0	0	0	0	603	903	0
2041	6	0	0	0	0	0	0	200	300	0	0	0	0	0	0	0	200	903	0	0	0	0	0	0	0	603	903	0
2041	7	0	0	0	0	0	0	200	300	0	0	0	0	0	0	0	200	903	0	0	0	0	0	0	0	603	903	0
2041	8	0	0	0	0	0	0	200	300	0	0	0	0	0	0	0	200	903	0	0	0	0	0	0	0	603	903	0
2041	9	0	0	0	0	0	0	200	300	0	0	0	0	0	0	0	200	903	0	0	0	0	0	0	0	603	903	0
2042	0	0	0	0	0	0	0	200	300	0	0	0	0	0	0	0	200	903	0	0	0	0	0	0	0	603	903	0
2042	1	0	0	0	0	0	0	200	300	0	0	0	0	0	0	0	200	903	0	0	0	0	0	0	0	603	903	0
2042	2	0	0	0	0	0	0	200	300	0	0	0	0	0	0	0	200	903	0	0	0	0	0	0	0	603	903	0
2042	3	0	0	0	0	0	0	200	300	0	0	0	0	0	0	0	200	903	0	0	0	0	0	0	0	603	903	0
2042	4	0	0	0	0	0	0	200	300	0	0	0	0	0	0	0	200	903	0	0	0	0	0	0	0	603	903	0
2042	5	0	0	0	0	0	0	200	300	0	0	0	0	0	0	0	200	903	0	0	0	0	0	0	0	603	903	0
2042	6	0	0	0	0	0	0	200	300	0	0	0	0	0	0	0	200	903	0	0	0	0	0	0	0	603	903	0
2042	7	0	0	0	0	0	0	200	300	0	0	0	0	0	0	0	200	903	0	0	0	0	0	0	0	603	903	0
2042	8	0	0	0	0	0	0	200	300	0	0	0	0	0	0	0	200	903	0	0	0	0	0	0	0	603	903	0
2042	9	0	0	0	0	0	0	200	300	0	0	0	0	0	0	0	200	903	0	0	0	0	0	0	0	603	903	0
2043	0	0	0	0	0	0	0	200	300	0	0	0	0	0	0	0	200	903	0	0	0	0	0	0	0	603	903	0
2043	1	0	0	0	0	0	0	200	300	0	0	0	0	0	0	0	200	903	0	0	0	0	0	0	0	603	903	0
2043	2	0	0	0	0	0	0	200	300	0	0	0	0	0	0	0	200	903	0	0	0	0	0	0	0	603	903	0
2043	3	0	0	0	0	0	0	200	300	0	0	0	0	0	0	0	200	903	0	0	0	0	0	0	0	603	903	0
2043	4	0	0	0	0	0	0	200	300	0	0	0	0	0	0	0	200	903	0	0	0	0	0	0	0	603	903	0
2043	5	0	0	0	0	0	0	200	300	0	0	0	0	0	0	0	200	903	0	0	0	0	0	0	0	603	903	0
2043	6	0	0	0	0	0	0	200	300	0	0	0	0	0	0	0	200	903	0	0	0	0	0	0	0	603	903	0
2043	7	0	0	0	0	0	0	200	300	0	0	0	0	0	0	0	200	903	0	0	0	0	0	0	0	603	903	0
2043	8	0	0	0	0	0	0	200	300	0	0	0	0	0	0	0	200	903	0	0	0	0	0	0	0	603	903	0
2043	9	0	0	0	0	0	0	200	300	0	0	0	0	0	0	0	200	903	0	0	0	0	0	0	0	603	903	0
2044	0	0	0	0	0	0	0	200	300	0	0	0	0	0	0	0	200	903	0	0	0	0	0	0	0	603	903	0
2044	1	0	0	0	0	0	0	200	300	0	0	0	0	0	0	0	200	903	0	0	0	0	0	0	0	603	903	0
2044	2	0	0	0	0	0	0	200	300	0	0	0	0	0	0	0	200	903	0	0	0	0	0	0	0	603	903	0
2044	3	0	0	0	0	0	0	200	300	0	0	0	0	0	0	0	200	903	0	0	0	0	0	0	0	603	903	0
2044	4	0	0	0	0	0	0	200	300	0	0	0	0	0	0	0	200	903	0	0	0	0	0	0	0	603	903	0
2044	5	0	0	0	0	0	0	200	300	0	0	0	0	0	0	0	200	903	0	0	0	0	0	0	0	603	903	0
2044	6	0	0	0	0	0	0	200	300	0	0	0	0	0	0	0	200	903	0	0	0	0	0	0	0	603	903	0
2044	7	0	0	0	0	0	0	200	300	0	0	0	0	0	0	0	200	903	0	0	0	0	0	0	0	603	903	0
2044	8	0	0	0	0	0	0	200	300	0	0	0	0	0	0	0	200	903	0	0	0	0	0	0	0	603	903	0
2044	9	0	0	0	0	0	0	200	300	0	0	0	0	0	0	0	200	903	0	0	0	0	0	0	0	603	903	0
2045	0	0	0	0	0	0	0	200	300	0	0	0	0	0	0	0	200	903	0	0	0	0	0	0	0	603	903	0
2045	1	0	0	0	0	0	0	200	300	0	0	0	0	0	0	0	200	903	0	0	0	0	0	0	0	603	903	0
2045	2	0	0	0	0	0	0	200	300	0	0	0	0	0	0	0	200	903	0	0	0	0	0	0	0	603	903	0
2045	3	0	0	0	0	0	0	200	300	0	0	0	0	0	0	0	200	903	0	0	0	0	0	0	0	603	903	0
2045	4	0	0	0	0	0	0	200	300	0	0	0	0	0	0	0	200	903	0	0	0	0	0	0	0	603	903	0
2045	5	0	0	0	0	0	0	200	300	0	0	0	0	0	0	0	200	903	0	0	0	0	0	0	0	603	903	0
2045	6	0	0	0	0	0	0	200	300	0	0	0	0	0	0	0	200	903	0	0	0	0	0	0	0	603	903	0
2045	7	0	0	0	0	0	0	200	300	0	0	0	0	0	0	0	200	903	0	0	0	0	0	0	0	603	903	0
2045	8	0	0	0	0	0	0	200	300	0	0	0	0	0	0	0	200	903	0	0	0	0	0	0	0	603	903	0
2045	9	0	0	0	0	0	0	200	300	0	0	0	0	0	0	0	200	903	0	0	0	0	0	0	0	603	903	0
2046	0	0	0	0	0	0	0	200	300	0	0	0	0	0	0	0	200	903	0	0	0	0	0	0	0	603	903	0
2046	1	0	0	0	0	0	0	200	300	0	0	0	0	0	0	0	200	903	0	0	0	0	0	0	0	603	903	0
2046	2	0	0	0	0	0	0	200	300	0	0	0	0	0	0	0	200	903	0	0	0	0	0	0	0	603	903	0
2046	3	0	0	0	0	0	0	200	300	0	0	0	0	0	0	0	200	903	0	0	0	0	0	0	0	603	903	0
2046	4	0	0	0	0	0	0	200	300	0	0	0	0	0	0	0	200	903	0	0	0	0	0	0	0	603	903	0
2046	5	0	0	0	0	0	0	200	300	0	0	0	0	0	0	0	200	903	0	0	0	0	0	0	0	603	903	0
2046	6	0	0	0	0	0	0	200	300	0	0	0	0	0	0	0	200	903	0	0	0	0	0	0	0	603	903	0
2046	7	0	0	0	0	0	0	200	300	0	0	0	0	0	0	0	200	903	0	0	0	0	0	0	0	603	903	0
2046	8	0	0	0	0	0	0	200	300	0	0	0	0	0	0	0	200	903	0	0	0	0	0	0	0	603	903	0
2046	9	0	0	0	0	0	0	200	300	0	0	0	0	0	0	0	200	903	0	0	0	0	0	0	0	603	903	0
2047	0	0	0	0	0	0	0	200	300	0	0	0	0	0	0	0	200	903	0	0	0	0	0	0	0	603	903	0
2047	1	0	0	0	0	0	0	200	300	0	0	0	0	0	0	0	200	903	0	0	0	0	0	0	0	603	903	0
2047	2	0	0	0	0	0	0	200	300	0	0	0	0	0	0	0	200	903	0	0	0	0	0	0	0	603	903	0
2047	3	0	0	0	0	0	0	200	300	0	0	0	0	0	0	0	200	903	0	0	0	0	0	0	0	603	903	0
2047	4	0	0	0	0	0	0	200	300	0	0	0	0	0	0	0	200	903	0	0	0	0	0	0	0	603	903	0
2047	5	0	0	0	0	0	0	200	300	0	0	0	0	0	0	0	200	903	0	0	0	0	0	0	0	603	903	0
2047	6	0	0	0	0	0	0	200	300	0	0	0	0	0	0	0	200	903	0	0	0	0	0	0	0	603	903	0
2047	7	0	0	0	0	0	0	200	300	0	0	0	0	0	0	0	200	903	0	0	0	0	0	0	0	603	903	0
2047	8	0	0	0	0	0	0	200	300	0	0	0	0	0	0	0	200	903	0	0	0	0	0	0	0	603	903	0
2047	9	0	0	0	0	0	0	200	300	0	0	0	0	0	0	0	200	903	0	0	0	0	0	0	0	603	903	0
2048	0	0	0	0	0	0	0	200	300	0	0	0	0	0	0	0	200	903	0	0	0	0	0	0	0	603	903	0
2048	1	0	0	0	0	0	0	200	300	0	0	0	0	0	0	0	200	903	0	0	0	0	0	0	0	603	903	0
2048	2	0	0	0	0	0	0	200	300	0	0	0	0	0	0	0	200	903	0	0	0	0	0	0	0	603	903	0
2048	3	0	0	0	0	0	0	200	300	0	0	0	0	0	0	0	200	903	0	0	0	0	0	0	0	603	903	0
2048	4	0	0	0	0	0	0	200	300	0	0	0	0	0	0	0	200	903	0	0	0	0	0	0	0	603	903	0
2048	5	0	0	0	0	0	0	200	300	0	0	0	0	0	0	0	200	903	0	0	0	0	0	0	0	603	903	0
2048	6	0	0	0	0	0	0	200	300	0	0	0	0	0	0	0	200	903	0	0	0	0	0	0	0	603	903	0
2048	7	0	0	0	0	0	0	200	300	0	0	0	0	0	0	0	200	903	0	0	0	0	0	0	0	603	903	0
2048	8	0	0	0	0	0	0	200	300	0	0	0	0	0	0	0	200	903	0	0	0	0	0	0	0	603	903	0
2048	9	0	0	0	0	0	0	200	300	0	0	0	0	0	0	0	200	903	0	0	0	0	0	0	0	603	903	0
2049	0	0	0	0	0	0	0	200	300	0	0	0	0	0	0	0	200	903	0	0	0	0	0	0	0	603	903	0
2049	1	0	0	0	0	0	0	200	300	0	0	0	0	0	0	0	200	903	0	0	0	0	0	0	0	603	903	0
2049	2	0	0	0	0	0	0	200	300	0	0	0	0	0	0	0	200	903	0	0	0	0	0	0	0	603	903	0
2049	3	0	0	0	0	0	0	200	300	0	0	0	0	0	0	0	200	903	0	0	0	0	0	0	0	603	903	0
2049	4	0	0	0	0	0	0	200	300	0	0	0	0	0	0	0	200	903	0	0	0	0	0	0	0	603	903	0
2049	5	0	0	0	0	0	0	200	300	0	0	0	0	0	0	0	200	903	0	0	0	0	0	0	0	603	903	0
2049	6	0	0	0	0	0	0	200	300	0	0	0	0	0	0	0	200	903	0	0	0	0	0	0	0	603	903	0
2049	7	0	0	0	0	0	0	200	300	0	0	0	0	0	0	0	200	903	0	0	0	0	0	0	0	603	903	0
2049	8	0	0	0	0	0	0	200	300	0	0	0	0	0	0	0	200	903	0	0	0	0	0	0	0	603	903	0
2049	9	0	0	0	0	0	0	200	300	0	0	0	0	0	0	0	200	903	0	0	0	0	0	0	0	603	903	0
2050	0	0	0	0	0	0	0	200	300	0	0	0	0	0	0	0	200	903	0	0	0	0	0	0	0	603	903	0
2050	1	0	0	0	0	0	0	200	300	0	0	0	0	0	0	0	200	903	0	0	0	0	0	0	0	603	903	0
2050	2	0	0	0	0	0	0	200	300	0	0	0	0	0	0	0	200	903	0	0	0	0	0	0	0	603	903	0
2050	3	0	0	0	0	0	0	200	300	0	0	0	0	0	0	0	200	903	0	0	0	0	0	0	0	603	903	0
2050	4	0	0	0	0	0	0	200	300	0	0	0	0	0	0	0	200	903	0	0	0	0	0	0	0	603	903	0
2050	5	0	0	0	0	0	0	200	300	0	0	0	0	0	0	0	200	903	0	0	0	0	0	0	0	603	903	0
2050	6	0	0	0	0	0	0	200	300	0	0	0	0	0	0	0	200	903	0	0	0	0	0	0	0	603	903	0
2050	7	0	0	0	0	0	0	200	300	0	0	0	0	0	0	0	200	903	0	0	0	0	0	0	0	603	903	0
2050	8	0	0	0	0	0	0	200	300	0	0	0	0	0	0	0	200	903	0	0	0	0	0	0	0	603	903	0
2050	9	0	0	0	0	0	0	200	300	0	0	0	0	0	0	0	200	903	0	0	0	0	0	0	0	603	903	0
2051	0	0	0	0	0	0	0	200	300	0	0	0	0	0	0	0	200	903	0	0	0	0	0	0	0	603	903	0
2051	1	0	0	0	0	0	0	200	300	0	0	0	0	0	0	0	200	903	0	0	0	0	0	0	0	603	903	0
2051	2	0	0	0	0	0	0	200	300	0	0	0	0	0	0	0	200	903	0	0	0	0	0	0	0	603	903	0
2051	3	0	0	0	0	0	0	200	300	0	0	0	0	0	0	0	200	903	0	0	0	0	0	0	0	603	903	0
2051	4	0	0	0	0	0	0	200	300	0	0	0	0	0	0	0	200	903	0	0	0	0	0	0	0	603	903	0
2051	5	0	0	0	0	0	0	200	300	0	0	0	0	0	0	0	200	903	0	0	0	0	0	0	0	603	903	0
2051	6	0	0	0	0	0	0	200	300	0	0	0	0	0	0	0	200	903	0	0	0	0	0	0	0	603	903	0
2051	7	0	0	0	0	0	0	200	300	0	0	0	0	0	0	0	200	903	0	0	0	0	0	0	0	603	903	0
2051	8	0	0	0	0	0	0	200	300	0	0	0	0	0	0	0	200	903	0	0	0	0	0	0	0	603	903	0
2051	9	0	0	0	0	0	0	200	300	0	0	0	0	0	0	0	200	903	0	0	0	0	0	0	0	603	903	0
2052	0	0	0	0	0	0	0	200	300	0	0	0	0	0	0	0	200	903	0	0	0	0	0	0	0	603	903	0
2052	1	0	0	0	0	0	0	200	300	0	0	0	0	0	0	0	200	903	0	0	0	0	0	0	0	603	903	0
2052	2	0	0	0	0	0	0	200	300	0	0	0	0	0	0	0	200	903	0	0	0	0	0	0	0	603	903	0
2052	3	0	0	0	0	0	0	200	300	0	0	0	0	0	0	0	200	903	0	0	0	0	0	0	0	603	903	0
2052	4	0	0	0	0	0	0	200	300	0	0	0	0	0	0	0	200	903	0	0	0	0	0	0	0	603	903	0
2052	5	0	0	0	0	0	0	200	300	0	0	0	0	0	0	0	200	903	0	0	0	0	0	0	0	603	903	0
2052	6	0	0	0	0	0	0	200	300	0	0	0	0	0	0	0	200	903	0	0	0	0	0	0	0	603	903	0
2052	7	0	0	0	0	0	0	200	300	0	0	0	0	0	0	0	200	903	0	0	0	0	0	0	0	603	903	0
2052	8	0	0	0	0	0	0	200	300	0	0	0	0	0	0	0	200	903	0	0	0	0	0	0	0	603	903	0
2052	9	0	0	0	0	0	0	200	300	0	0	0	0	0	0	0	200	903	0	0	0	0	0	0	0	603	903	0
2053	0	0	0	0	0	0	0	200	300	0	0	0	0	0	0	0	200	903	0	0	0	0	0	0	0	603	903	0
2053	1	0	0	0	0	0	0	200	300	0	0	0	0	0	0	0	200	903	0	0	0	0	0	0	0	603	903	0
2053	2	0	0	0	0	0	0	200	300	0	0	0	0	0	0	0	200	903	0	0	0	0	0	0	0	603	903	0
2053	3	0	0	0	0	0	0	200	300	0	0	0	0	0	0	0	200	903	0	0	0	0	0	0	0	603	903	0
2053	4	0	0	0	0	0	0	200	300	0	0	0	0	0	0	0	200	903	0	0	0	0	0	0	0	603	903	0
2053	5	0	0	0	0	0	0	200	300	0	0	0	0	0	0	0	200	903	0	0	0	0	0	0	0	603	903	0
2053	6	0	0	0	0	0	0	200	300	0	0	0	0	0	0	0	200	903	0	0	0	0	0	0	0	603	903	0
2053	7	0	0	0	0	0	0	200	300	0	0	0	0	0	0	0	200	903	0	0	0	0	0	0	0	603	903	0
2053	8	0	0	0	0	0	0	200	300	0	0	0	0	0	0	0	200	903	0	0	0	0	0	0	0	603	903	0
2053	9	0	0	0	0	0	0	200	300	0	0	0	0	0	0	0	200	903	0	0	0	0	0	0	0	603	903	0
2054	0	0	0	0	0	0	0	200	300	0	0	0	0	0	0	0	200	903	0	0	0	0	0	0	0	603	903	0
2054	1	0	0	0	0	0	0	200	300	0	0	0	0	0	0	0	200	903	0	0	0	0	0	0	0	603	903	0
2054	2	0	0	0	0	0	0	200	300	0	0	0	0	0	0	0	200	903	0	0	0	0	0	0	0	603	903	0
2054	3	0	0	0	0	0	0	200	300	0	0	0	0	0	0	0	200	903	0	0	0	0	0	0	0	603	903	0
2054	4	0	0	0	0	0	0	200	300	0	0	0	0	0	0	0	200	903	0	0	0	0	0	0	0	603	903	0
2054	5	0	0	0	0	0	0	200	300	0	0	0	0	0	0	0	200	903	0	0	0	0	0	0	0	603	903	0
2054	6	0	0	0	0	0	0	200	300	0	0	0	0	0	0	0	200	903	0	0	0	0	0	0	0	603	903	0
2054	7	0	0	0	0	0	0	200	300	0	0	0	0	0	0	0	200	903	0	0	0	0	0	0	0	603	903	0
2054	8	0	0	0	0	0	0	200	300	0	0	0	0	0	0	0	200	903	0	0	0	0	0	0	0	603	903	0
2054	9	0	0	0	0	0	0	200	300	0	0	0	0	0	0	0	200	903	0	0	0	0	0	0	0	603	903	0
2055	0	0	0	0	0	0	0	200	300	0	0	0	0	0	0	0	200	903	0	0	0	0	0	0	0	603	903	0
2055	1	0	0	0	0	0	0	200	300	0	0	0	0	0	0	0	200	903	0	0	0	0	0	0	0	603	903	0
2055	2	0	0	0	0	0	0	200	300	0	0	0	0	0	0	0	200	903	0	0	0	0	0	0	0	603	903	0
2055	3	0	0	0	0	0	0	200	300	0	0	0	0	0	0	0	200	903	0	0	0	0	0	0	0	603	903	0
2055	4	0	0	0	0	0	0	200	300	0	0	0	0	0	0	0	200	903	0	0	0	0	0	0	0	603	903	0
2055	5	0	0	0	0	0	0	200	300	0	0	0	0	0	0	0	200	903	0	0	0	0	0	0	0	603	903	0
2055	6	0	0	0	0	0	0	200	300	0	0	0	0	0	0	0	200	903	0	0	0	0	0	0	0	603	903	0
2055	7	0	0	0	0	0	0	200	300	0	0	0	0	0	0	0	200	903	0	0	0	0	0	0	0	603	903	0
2055	8	0	0	0	0	0	0	200	300	0	0	0	0	0	0	0	200	903	0	0	0	0	0	0	0	603	903	0
2055	9	0	0	0	0	0	0	200	300	0	0	0	0	0	0	0	200	903	0	0	0	0	0	0	0	603	903	0
2056	0	0	0	0	0	0	0	200	300	0	0	0	0	0	0	0	200	903	0	0	0	0	0	0	0	603	903	0
2056	1	0	0	0	0	0	0	200	300	0	0	0	0	0	0	0	200	903	0	0	0	0	0	0	0	603	903	0
2056	2	0	0	0	0	0	0	200	300	0	0	0	0	0	0	0	200	903	0	0	0	0	0	0	0	603	903	0
2056	3	0	0	0	0	0	0	200	300	0	0	0	0	0	0	0	200	903	0	0	0	0	0	0	0	603	903	0
2056	4	0	0	0	0	0	0	200	300	0	0	0	0	0	0	0	200	903	0	0	0	0	0	0	0	603	903	0
2056	5	0	0	0	0	0	0	200	300	0	0	0	0	0	0	0	200	903	0	0	0	0	0	0	0	603	903	0
2056	6	0	0	0	0	0	0	200	300	0	0	0	0	0	0	0	200	903	0	0	0	0	0	0	0	603	903	0
2056	7	0	0	0	0	0	0	200	300	0	0	0	0	0	0	0	200	903	0	0	0	0	0	0	0	603	903	0
2056	8	0	0	0	0	0	0	200	300	0	0	0	0	0	0	0	200	903	0	0	0	0	0	0	0	603	903	0
2056	9	0	0	0	0	0	0	200	300	0	0	0	0	0	0	0	200	903	0	0	0	0	0	0	0	603	903	0
2057	0	0	0	0	0	0	0	200	300	0	0	0	0	0	0	0	200	903	0	0	0	0	0	0	0	603	903	0
2057	1	0	0	0	0	0	0	200	300	0	0	0	0	0	0	0	200	903	0	0	0	0	0	0	0	603	903	0
2057	2	0	0	0	0	0	0	200	300	0	0	0	0	0	0	0	200	903	0	0	0	0	0	0	0	603	903	0
2057	3	0	0	0	0	0	0	200	300	0	0	0	0	0	0	0	200	903	0	0	0	0	0	0	0	603	903	0
2057	4	0	0	0	0	0	0	200	300	0	0	0	0	0	0	0	200	903	0	0	0	0	0	0	0	603	903	0
2057	5	0	0	0	0	0	0	200	300	0	0	0	0	0	0	0	200	903	0	0	0	0	0	0	0	603	903	0
2057	6	0	0	0	0	0	0	200	300	0	0	0	0	0	0	0	200	903	0	0	0	0	0	0	0	603	903	0
2057	7	0	0	0	0	0	0	200	300	0	0	0	0	0	0	0	200	903	0	0	0	0	0	0	0	603	903	0
2057	8	0	0	0	0	0	0	200	300	0	0	0	0	0	0	0	200	903	0	0	0	0	0	0	0	603	903	0
2057	9	0	0	0	0	0	0	200	300	0	0	0	0	0	0	0	200	903	0	0	0	0	0	0	0	603	903	0
2058	0	0	0	0	0	0	0	200	300	0	0	0	0	0	0	0	200	903	0	0	0	0	0	0	0	603	903	0
2058	1	0	0	0	0	0	0	200	300	0	0	0	0	0	0	0	200	903	0	0	0	0	0	0	0	603	903	0
2058	2	0	0	0	0	0	0	200	300	0	0	0	0	0	0	0	200	903	0	0	0	0	0	0	0	603	903	0
2058	3	0	0	0	0	0	0	200	300	0	0	0	0	0	0	0	200	903	0	0	0	0	0	0	0	603	903	0
2058	4	0	0	0	0	0	0	200	300	0	0	0	0	0	0	0	200	903	0	0	0	0	0	0	0	603	903	0
2058	5	0	0	0	0	0	0	200	300	0	0	0	0	0	0	0	200	903	0	0	0	0	0	0	0	603	903	0
2058	6	0	0	0	0	0	0	200	300	0	0	0	0	0	0	0	200	903	0	0	0	0	0	0	0	603	903	0
2058	7	0	0	0	0	0	0	200	300	0	0	0	0	0	0	0	200	903	0	0	0	0	0	0	0	603	903	0
2058	8	0	0	0	0	0	0	200	300	0	0	0	0	0	0	0	200	903	0	0	0	0	0	0	0	603	903	0
2058	9	0	0	0	0	0	0	200	300	0	0	0	0	0	0	0	200	903	0	0	0	0	0	0	0	603	903	0
2059	0	0	0	0	0	0	0	200	300	0	0	0	0	0	0	0	200	903	0	0	0	0	0	0	0	603	903	0
2059	1	0	0	0	0	0	0	200	300	0	0	0	0	0	0	0	200	903	0	0	0	0	0	0	0	603	903	0
2059	2	0	0	0	0	0	0	200	300	0	0	0	0	0	0	0	200	903	0	0	0	0	0	0	0	603	903	0
2059	3	0	0	0	0	0	0	200	300	0	0	0	0	0	0	0	200	903	0	0	0	0	0	0	0	603	903	0
2059	4	0	0	0	0	0	0	200	300	0	0	0	0	0	0	0	200	903	0	0	0	0	0	0	0	603	903	0
2059	5	0	0	0	0	0	0	200	300	0	0	0	0	0	0	0	200	903	0	0	0	0	0	0	0	603	903	0
2059	6	0	0	0	0	0	0	200	300	0	0	0	0	0	0	0	200	903	0	0	0	0	0	0	0	603	903	0
2059	7	0	0	0	0	0	0	200	300	0	0	0	0	0	0	0	200	903	0	0	0	0	0	0	0	603	903	0
2059	8	0	0	0	0	0	0	200	300	0	0	0	0	0	0	0	200	903	0	0	0	0	0	0	0	603	903	0
2059	9	0	0	0	0	0	0	200	300	0	0	0	0	0	0	0	200	903	0	0	0	0	0	0	0	603	903	0
2060	0	0	0	0	0	0	0	200	300	0	0	0	0	0	0	0	200	903	0	0	0	0	0	0	0	603	903	0
2060	1	0	0	0	0	0	0	200	300	0	0	0	0	0	0	0	200	903	0	0	0	0	0	0	0	603	903	0
2060	2	0	0	0	0	0	0	200	300	0	0	0	0	0	0	0	200	903	0	0	0	0	0	0	0	603	903	0
2060	3	0	0	0	0	0	0	200	300	0	0	0	0	0	0	0	200	903	0	0	0	0	0	0	0	603	903	0
2060	4	0	0	0	0	0	0	200	300	0	0	0	0	0	0	0	200	903	0	0	0	0	0	0	0	603	903	0
2060	5	0	0	0	0	0	0	200	300	0	0	0	0	0	0	0	200	903	0	0	0	0	0	0	0	603	903	0
2060	6	0	0	0	0	0	0	200	300	0	0	0	0	0	0	0	200	903	0	0	0	0	0	0	0	603	903	0
2060	7	0	0	0	0	0	0	200	300	0	0	0	0	0	0	0	200	903	0	0	0	0	0	0	0	603	903	0
2060	8	0	0	0	0	0	0	200	300	0	0	0	0	0	0	0	200	903	0	0	0	0	0	0	0	603	903	0
2060	9	0	0	0	0	0	0	200	300	0	0	0	0	0	0	0	200	903	0	0	0	0	0	0	0	603	903	0
2061	0	0	0	0	0	0	0	200	300	0	0	0	0	0	0	0	200	903	0	0	0	0	0	0	0	603	903	0
2061	1	0	0	0	0	0	0	200	300	0	0	0	0	0	0	0	200	903	0	0	0	0	0	0	0	603	903	0
2061	2	0	0	0	0	0	0	200	300	0	0	0	0	0	0	0	200	903	0	0	0	0	0	0	0	603	903	0
2061	3	0	0	0	0	0	0	200	300	0	0	0	0	0	0	0	200	903	0	0	0	0	0	0	0	603	903	0
2061	4	0	0	0	0	0	0	200	300	0	0	0	0	0	0	0	200	903	0	0	0	0	0	0	0	603	903	0
2061	5	0	0	0	0	0	0	200	300	0	0	0	0	0	0	0	200	903	0	0	0	0	0	0	0	603	903	0
2061	6	0	0	0	0	0	0	200	300	0	0	0	0	0	0	0	200	903	0	0	0	0	0	0	0	603	903	0
2061	7	0	0	0	0	0	0	200	300	0	0	0	0	0	0	0	200	903	0	0	0	0	0	0	0	603	903	0
2061	8	0	0	0	0	0	0	200	300	0	0	0	0	0	0	0	200	903	0	0	0	0	0	0	0	603	903	0
2061	9	0	0	0	0	0	0	200	300	0	0	0	0	0	0	0	200	903	0	0	0	0	0	0	0	603	903	0
2062	0	0	0	0	0	0	0	200	300	0	0	0	0	0	0	0	200	903	0	0	0	0	0	0	0	603	903	0
2062	1	0	0	0	0	0	0	200	300	0	0	0	0	0	0	0	200	903	0	0	0	0	0	0	0	603	903	0
2062	2	0	0	0	0	0	0	200	300	0	0	0	0	0	0	0	200	903	0	0	0	0	0	0	0	603	903	0
2062	3	0	0	0	0	0	0	200	300	0	0	0	0	0	0	0	200	903	0	0	0	0	0	0	0	603	903	0
2062	4	0	0	0	0	0	0	200	300	0	0	0	0	0	0	0	200	903	0	0	0	0	0	0	0	603	903	0
2062	5	0	0	0	0	0	0	200	300	0	0	0	0	0	0	0	200	903	0	0	0	0	0	0	0	603	903	0
2062	6	0	0	0	0	0	0	200	300	0	0	0	0	0	0	0	200	903	0	0	0	0	0	0	0	603	903	0
2062	7	0	0	0	0	0	0	200	300	0	0	0	0	0	0	0	200	903	0	0	0	0	0	0	0	603	903	0
2062	8	0	0	0	0	0	0	200	300	0	0	0	0	0	0	0	200	903	0	0	0	0	0	0	0	603	903	0
2062	9	0	0	0	0	0	0	200	300	0	0	0	0	0	0	0	200	903	0	0	0	0	0	0	0	603	903	0
2063	0	0	0	0	0	0	0	200	300	0	0	0	0	0	0	0	200	903	0	0	0	0	0	0	0	603	903	0
2063	1	0	0	0	0	0	0	200	300	0	0	0	0	0	0	0	200	903	0	0	0	0	0	0	0	603	903	0
2063	2	0	0	0	0	0	0	200	300	0	0	0	0	0	0	0	200	903	0	0	0	0	0	0	0	603	903	0
2063	3	0	0	0	0	0	0	200	300	0	0	0	0	0	0	0	200	903	0	0	0	0	0	0	0	603	903	0
2063	4	0	0	0	0	0	0	200	300	0	0	0	0	0	0	0	200	903	0	0	0	0	0	0	0	603	903	0
2063	5	0	0	0	0	0	0	200	300	0	0	0	0	0	0	0	200	903	0	0	0	0	0	0	0	603	903	0
2063	6	0	0	0	0	0	0	200	300	0	0	0	0	0	0	0	200	903	0	0	0	0	0	0	0	603	903	0
2063	7	0	0	0	0	0	0	200	300	0	0	0	0	0	0	0	200	903	0	0	0	0	0	0	0	603	903	0
2063	8	0	0	0	0	0	0	200	300	0	0	0	0	0	0	0	200	903	0	0	0	0	0	0	0	603	903	0
2063	9	0	0	0	0	0	0	200	300	0	0	0	0	0	0	0	200	903	0	0	0	0	0	0	0	603	903	0
2064	0	0	0	0	0	0	0	200	300	0	0	0	0	0	0	0	200	903	0	0	0	0	0	0	0	603	903	0
2064	1	0	0	0	0	0	0	200	300	0	0	0	0	0	0	0	200	903	0	0	0	0	0	0	0	603	903	0
2064	2	0	0	0	0	0	0	200	300	0	0	0	0	0	0	0	200	903	0	0	0	0	0	0	0	603	903	0
2064	3	0	0	0	0	0	0	200	300	0	0	0	0	0	0	0	200	903	0	0	0	0	0	0	0	603	903	0
2064	4	0	0	0	0	0	0	200	300	0	0	0	0	0	0	0	200	903	0	0	0	0	0	0	0	603	903	0
2064	5	0	0	0	0	0	0	200	300	0	0	0	0	0	0	0	200	903	0	0	0	0	0	0	0	603	903	0
2064	6	0	0	0	0	0	0	200	300	0	0	0	0	0	0	0	200	903	0	0	0	0	0	0	0	603	903	0
2064	7	0	0	0	0	0	0	200	300	0	0	0	0	0	0	0	200	903	0	0	0	0	0	0	0	603	903	0
2064	8	0	0	0	0	0	0	200	300	0	0	0	0	0	0	0	200	903	0	0	0	0	0	0	0	603	903	0
2064	9	0	0	0	0	0	0	200	300	0	0	0	0	0	0	0	200	903	0	0	0	0	0	0	0	603	903	0
2065	0	0	0	0	0	0	0	200	300	0	0	0	0	0	0	0	200	903	0	0	0	0	0	0	0	603	903	0
2065	1	0	0	0	0	0	0	200	300	0	0	0	0	0	0	0	200	903	0	0	0	0	0	0	0	603	903	0
2065	2	0	0	0	0	0	0	200	300	0	0	0	0	0	0	0	200	903	0	0	0	0	0	0	0	603	903	0
2065	3	0	0	0	0	0	0	200	300	0	0	0	0	0	0	0	200	903	0	0	0	0	0	0	0	603	903	0
2065	4	0	0	0	0	0	0	200	300	0	0	0	0	0	0	0	200	903	0	0	0	0	0	0	0	603	903	0
2065	5	0	0	0	0	0	0	200	300	0	0	0	0	0	0	0	200	903	0	0	0	0	0	0	0	603	903	0
2065	6	0	0	0	0	0	0	200	300	0	0	0	0	0	0	0	200	903	0	0	0	0	0	0	0	603	903	0
2065	7	0	0	0	0	0	0	200	300	0	0	0	0	0	0	0	200	903	0	0	0	0	0	0	0	603	903	0
2065	8	0	0	0	0	0	0	200	300	0	0	0	0	0	0	0	200	903	0	0	0	0	0	0	0	603	903	0
2065	9	0	0	0	0	0	0	200	300	0	0	0	0	0	0	0	200	903	0	0	0	0	0	0	0	603	903	0
2066	0	0	0	0	0	0	0	200	300	0	0	0	0	0	0	0	200	903	0	0	0	0	0	0	0	603	903	0
2066	1	0	0	0	0	0	0	200	300	0	0	0	0	0	0	0	200	903	0	0	0	0	0	0	0	603	903	0
2066	2	0	0	0	0	0	0	200	300	0	0	0	0	0	0	0	200	903	0	0	0	0	0	0	0	603	903	0
2066	3	0	0	0	0	0	0	200	300	0	0	0	0	0	0	0	200	903	0	0	0	0	0	0	0	603	903	0
2066	4	0	0	0	0	0	0	200	300	0	0	0	0	0	0	0	200	903	0	0	0	0	0	0	0	603	903	0
2066	5	0	0	0	0	0	0	200	300	0	0	0	0	0	0	0	200	903	0	0	0	0	0	0	0	603	903	0
2066	6	0	0	0	0	0	0	200	300	0	0	0	0	0	0	0	200	903	0	0	0	0	0	0	0	603	903	0
2066	7	0	0	0	0	0	0	200	300	0	0	0	0	0	0	0	200	903	0	0	0	0	0	0	0	603	903	0
2066	8	0	0	0	0	0	0	200	300	0	0	0	0	0	0	0	200	903	0	0	0	0	0	0	0	603	903	0
2066	9	0	0	0	0	0	0	200	300	0	0	0	0	0	0	0	200	903	0	0	0	0	0	0	0	603	903	0
2067	0	0	0	0	0	0	0	200	300	0	0	0	0	0	0	0	200	903	0	0	0	0	0	0	0	603	903	0
2067	1	0	0	0	0	0	0	200	300	0	0	0	0	0	0	0	200	903	0	0	0	0	0	0	0	603	903	0
2067	2	0	0	0	0	0	0	200	300	0	0	0	0	0	0	0	200	903	0	0	0	0	0	0	0	603	903	0
2067	3	0	0	0	0	0	0	200	300	0	0	0	0	0	0	0	200	903	0	0	0	0	0	0	0	603	903	0
2067	4	0	0	0	0	0	0	200	300	0	0	0	0	0	0	0	200	903	0	0	0	0	0	0	0	603	903	0
2067	5	0	0	0	0	0	0	200	300	0	0	0	0	0	0	0	200	903	0	0	0	0	0	0	0	603	903	0
2067	6	0	0	0	0	0	0	200	300	0	0	0	0	0	0	0	200	903	0	0	0	0	0	0	0	603	903	0
2067	7	0	0	0	0	0	0	200	300	0	0	0	0	0	0	0	200	903	0	0	0	0	0	0	0	603	903	0
2067	8	0	0	0	0	0	0	200	300	0	0	0	0	0	0	0	200	903	0	0	0	0	0	0	0	603	903	0
2067	9	0	0	0	0	0	0	200	300	0	0	0	0	0	0	0	200	903	0	0	0	0	0	0	0	603	903	0
2068	0	0	0	0	0	0	0	200	300	0	0	0	0	0	0	0	200	903	0	0	0	0	0	0	0	603	903	0
2068	1	0	0	0	0	0	0	200	300	0	0	0	0	0	0	0	200	903	0	0	0	0	0	0	0	603	903	0
2068	2	0	0	0	0	0	0	200	300	0	0	0	0	0	0	0	200	903	0	0	0	0	0	0	0	603	903	0
2068	3	0	0	0	0	0	0	200	300	0	0	0	0	0	0	0	200	903	0	0	0	0	0	0	0	603	903	0
2068	4	0	0	0	0	0	0	200	300	0	0	0	0	0	0	0	200	903	0	0	0	0	0	0	0	603	903	0
2068	5	0	0	0	0	0	0	200	300	0	0	0	0	0	0	0	200	903	0	0	0	0	0	0	0	603	903	0
2068	6	0	0	0	0	0	0	200	300	0	0	0	0	0	0	0	200	903	0	0	0	0	0	0	0	603	903	0
2068	7	0	0	0	0	0	0	200	300	0	0	0	0	0	0	0	200	903	0	0	0	0	0	0	0	603	903	0
2068	8	0	0	0	0	0	0	200	300	0	0	0	0	0	0	0	200	903	0	0	0	0	0	0	0	603	903	0
2068	9	0	0	0	0	0	0	200	300	0	0	0	0	0	0	0	200	903	0	0	0	0	0	0	0	603	903	0
2069	0	0	0	0	0	0	0	200	300	0	0	0	0	0	0	0	200	903	0	0	0	0	0	0	0	603	903	0
2069	1	0	0	0	0	0	0	200	300	0	0	0	0	0	0	0	200	903	0	0	0	0	0	0	0	603	903	0
2069	2	0	0	0	0	0	0	200	300	0	0	0	0	0	0	0	200	903	0	0	0	0	0	0	0	603	903	0
2069	3	0	0	0	0	0	0	200	300	0	0	0	0	0	0	0	200	903	0	0	0	0	0	0	0	603	903	0
2069	4	0	0	0	0	0	0	200	300	0	0	0	0	0	0	0	200	903	0	0	0	0	0	0	0	603	903	0
2069	5	0	0	0	0	0	0	200	300	0	0	0	0	0	0	0	200	903	0	0	0	0	0	0	0	603	903	0
2069	6	0	0	0	0	0	0	200	300	0	0	0	0	0	0	0	200	903	0	0	0	0	0	0	0	603	903	0
2069	7	0	0	0	0	0	0	200	300	0	0	0	0	0	0	0	200	903	0	0	0	0	0	0	0	603	903	0
2069	8	0	0	0	0	0	0	200	300	0	0	0	0	0	0	0	200	903	0	0	0	0	0	0	0	603	903	0
2069	9	0	0	0	0	0	0	200	300	0	0	0	0	0	0	0	200	903	0	0	0	0	0	0	0	603	903	0
2070	0	0	0	0	0	0	0	200	300	0	0	0	0	0	0	0	200	903	0	0	0	0	0	0	0	603	903	0
2070	1	0	0	0	0	0	0	200	300	0	0	0	0	0	0	0	200	903	0	0	0	0	0	0	0	603	903	0
2070	2	0	0	0	0	0	0	200	300	0	0	0	0	0	0	0	200	903	0	0	0	0	0	0	0	603	903	0
2070	3	0	0	0	0	0	0	200	300	0	0	0	0	0	0	0	200	903	0	0	0	0	0	0	0	603	903	0
2070	4	0	0	0	0	0	0	200	300	0	0	0	0	0	0	0	200	903	0	0	0	0	0	0	0	603	903	0
2070	5	0	0	0	0	0	0	200	300	0	0	0	0	0	0	0	200	903	0	0	0	0	0	0	0	603	903	0
2070	6	0	0	0	0	0	0	200	300	0	0	0	0	0	0	0	200	903	0	0	0	0	0	0	0	603	903	0
2070	7	0	0	0	0	0	0	200	300	0	0	0	0	0	0	0	200	903	0	0	0	0	0	0	0	603	903	0
2070	8	0	0	0	0	0	0	200	300	0	0	0	0	0	0	0	200	903	0	0	0	0	0	0	0	603	903	0
2070	9	0	0	0	0	0	0	200	300	0	0	0	0	0	0	0	200	903	0	0	0	0	0	0	0	603	903	0
2071	0	0	0	0	0	0	0	200	300	0	0	0	0	0	0	0	200	903	0	0	0	0	0	0	0	603	903	0
2071	1	0	0	0	0	0	0	200	300	0	0	0	0	0	0	0	200	903	0	0	0	0	0	0	0	603	903	0
2071	2	0	0	0	0	0	0	200	300	0	0	0	0	0	0	0	200	903	0	0	0	0	0	0	0	603	903	0
2071	3	0	0	0	0	0	0	200	300	0	0	0	0	0	0	0	200	903	0	0	0	0	0	0	0	603	903	0
2071	4	0	0	0	0	0	0	200	300	0	0	0	0	0	0	0	200	903	0	0	0	0	0	0	0	603	903	0
2071	5	0	0	0	0	0	0	200	300	0	0	0	0	0	0	0	200	903	0	0	0	0	0	0	0	603	903	0
2071	6	0	0	0	0	0	0	200	300	0	0	0	0	0	0	0	200	903	0	0	0	0	0	0	0	603	903	0
2071	7	0	0	0	0	0	0	200	300	0	0	0	0	0	0	0	200	903	0	0	0	0	0	0	0	603	903	0
2071	8	0	0	0	0	0	0	200	300	0	0	0	0	0	0	0	200	903	0	0	0	0	0	0	0	603	903	0
2071	9	0	0	0	0	0	0	200	300	0	0	0	0	0	0	0	200	903	0	0	0	0	0	0	0	603	903	0
2072	0	0	0	0	0	0	0	200	300	0	0	0	0	0	0	0	200	903	0	0	0	0	0	0	0	603	903	0
2072	1	0	0	0	0	0	0	200	300	0	0	0	0	0	0	0	200	903	0	0	0	0	0	0	0	603	903	0
2072	2	0	0	0	0	0	0	200	300	0	0	0	0	0	0	0	200	903	0	0	0	0	0	0	0	603	903	0
2072	3	0	0	0	0	0	0	200	300	0	0	0	0	0	0	0	200	903	0	0	0	0	0	0	0	603	903	0
2072	4	0	0	0	0	0	0	200	300	0	0	0	0	0	0	0	200	903	0	0	0	0	0	0	0	603	903	0
2072	5	0	0	0	0	0	0	200	300	0	0	0	0	0	0	0	200	903	0	0	0	0	0	0	0	603	903	0
2072	6	0	0	0	0	0	0	200	300	0	0	0	0	0	0	0	200	903	0	0	0	0	0	0	0	603	903	0
2072	7	0	0	0	0	0	0	200	300	0	0	0	0	0	0	0	200	903	0	0	0	0	0	0	0	603	903	0
2072	8	0	0	0	0	0	0	200	300	0	0	0	0	0	0	0	200	903	0	0	0	0	0	0	0	603	903	0
2072	9	0	0	0	0	0	0	200	300	0	0	0	0	0	0	0	200	903	0	0	0	0	0	0	0	603	903	0
2073	0	0	0	0	0	0	0	200	300	0	0	0	0	0	0	0	200	903	0	0	0	0	0	0	0	603	903	0
2073	1	0	0	0	0	0	0	200	300	0	0	0	0	0	0	0	200	903	0	0	0	0	0	0	0	603	903	0
2073	2	0	0	0	0	0	0	200	300	0	0	0	0	0	0	0	200	903	0	0	0	0	0	0	0	603	903	0
2073	3	0	0	0	0	0	0	200	300	0	0	0	0	0	0	0	200	903	0	0	0	0	0	0	0	603	903	0
2073	4	0	0	0	0	0	0	200	300	0	0	0	0	0	0	0	200	903	0	0	0	0	0	0	0	603	903	0
2073	5	0	0	0	0	0	0	200	300	0	0	0	0	0	0	0	200	903	0	0	0	0	0	0	0	603	903	0
2073	6	0	0	0	0	0	0	200	300	0	0	0	0	0	0	0	200	903	0	0	0	0	0	0	0	603	903	0
2073	7	0	0	0	0	0	0	200	300	0	0	0	0	0	0	0	200	903	0	0	0	0	0	0	0	603	903	0
2073	8	0	0	0	0	0	0	200	300	0	0	0	0	0	0	0	200	903	0	0	0	0	0	0	0	603	903	0
2073	9	0	0	0	0	0	0	200	300	0	0	0	0	0	0	0	200	903	0	0	0	0	0	0	0	603	903	0
2074	0	0	0	0	0	0	0	200	300	0	0	0	0	0	0	0	200	903	0	0	0	0	0	0	0	603	903	0
2074	1	0	0	0	0	0	0	200	300	0	0	0	0	0	0	0	200	903	0	0	0	0	0	0	0	603	903	0
2074	2	0	0	0	0	0	0	200	300	0	0	0	0	0	0	0	200	903	0	0	0	0	0	0	0	603	903	0
2074	3	0	0	0	0	0	0	200	300	0	0	0	0	0	0	0	200	903	0	0	0	0	0	0	0	603	903	0
2074	4	0	0	0	0	0	0	200	300	0	0	0	0	0	0	0	200	903	0	0	0	0	0	0	0	603	903	0
2074	5	0	0	0	0	0	0	200	300	0	0	0	0	0	0	0	200	903	0	0	0	0	0	0	0	603	903	0
2074	6	0	0	0	0	0	0	200	300	0	0	0	0	0	0	0	200	903	0	0	0	0	0	0	0	603	903	0
2074	7	0	0	0	0	0	0	200	300	0	0	0	0	0	0	0	200	903	0	0	0	0	0	0	0	603	903	0
2074	8	0	0	0	0	0	0	200	300	0	0	0	0	0	0	0	200	903	0	0	0	0	0	0	0	603	903	0
2074	9	0	0	0	0	0	0	200	300	0	0	0	0	0	0	0	200	903	0	0	0	0	0	0	0	603	903	0
2075	0	0	0	0	0	0	0	200	300	0	0	0	0	0	0	0	200	903	0	0	0	0	0	0	0	603	903	0
2075	1	0	0	0	0	0	0	200	300	0	0	0	0	0	0	0	200	903	0	0	0	0	0	0	0	603	903	0
2075	2	0	0	0	0	0	0	200	300	0	0	0	0	0	0	0	200	903	0	0	0	0	0	0	0	603	903	0
2075	3	0	0	0	0	0	0	200	300	0	0	0	0	0	0	0	200	903	0	0	0	0	0	0	0	603	903	0
2075	4	0	0	0	0	0	0	200	300	0	0	0	0	0	0	0	200	903	0	0	0	0	0	0	0	603	903	0
2075	5	0	0	0	0	0	0	200	300	0	0	0	0	0	0	0	200	903	0	0	0	0	0	0	0	603	903	0
2075	6	0	0	0	0	0	0	200	300	0	0	0	0	0	0	0	200	903	0	0	0	0	0	0	0	603	903	0
2075	7	0	0	0	0	0	0	200	300	0	0	0	0	0	0	0	200	903	0	0	0	0	0	0	0	603	903	0
2075	8	0	0	0	0	0	0	200	300	0	0	0	0	0	0	0	200	903	0	0	0	0	0	0	0	603	903	0
2075	9	0	0	0	0	0	0	200	300	0	0	0	0	0	0	0	200	903	0	0	0	0	0	0	0	603	903	0
2076	0	0	0	0	0	0	0	200	300	0	0	0	0	0	0	0	200	903	0	0	0	0	0	0	0	603	903	0
2076	1	0	0	0	0	0	0	200	300	0	0	0	0	0	0	0	200	903	0	0	0	0	0	0	0	603	903	0
2076	2	0	0	0	0	0	0	200	300	0	0	0	0	0	0	0	200	903	0	0	0	0	0	0	0	603	903	0
2076	3	0	0	0	0	0	0	200	300	0	0	0	0	0	0	0	200	903	0	0	0	0	0	0	0	603	903	0
2076	4	0	0	0	0	0	0	200	300	0	0	0	0	0	0	0	200	903	0	0	0	0	0	0	0	603	903	0
2076	5	0	0	0	0	0	0	200	300	0	0	0	0	0	0	0	200	903	0	0	0	0	0	0	0	603	903	0
2076	6	0	0	0	0	0	0	200	300	0	0	0	0	0	0	0	200	903	0	0	0	0	0	0	0	603	903	0
2076	7	0	0	0	0	0	0	200	300	0	0	0	0	0	0	0	200	903	0	0	0	0	0	0	0	603	903	0
2076	8	0	0	0	0	0	0	200	300	0	0	0	0	0	0	0	200	903	0	0	0	0	0	0	0	603	903	0
2076	9	0	0	0	0	0	0	200	300	0	0	0	0	0	0	0	200	903	0	0	0	0	0	0	0	603	903	0
2077	0	0	0	0	0	0	0	200	300	0	0	0	0	0	0	0	200	903	0	0	0	0	0	0	0	603	903	0
2077	1	0	0	0	0	0	0	200	300	0	0	0	0	0	0	0	200	903	0	0	0	0	0	0	0	603	903	0
2077	2	0	0	0	0	0	0	200	300	0	0	0	0	0	0	0	200	903	0	0	0	0	0	0	0	603	903	0
2077	3	0	0	0	0	0	0	200	300	0	0	0	0	0	0	0	200	903	0	0	0	0	0	0	0	603	903	0
2077	4	0	0	0	0	0	0	200	300	0	0	0	0	0	0	0	200	903	0	0	0	0	0	0	0	603	903	0
2077	5	0	0	0	0	0	0	200	300	0	0	0	0	0	0	0	200	903	0	0	0	0	0	0	0	603	903	0
2077	6	0	0	0	0	0	0	200	300	0	0	0	0	0	0	0	200	903	0	0	0	0	0	0	0	603	903	0
2077	7	0	0	0	0	0	0	200	300	0	0	0	0	0	0	0	200	903	0	0	0	0	0	0	0	603	903	0
2077	8	0	0	0	0	0	0	200	300	0	0	0	0	0	0	0	200	903	0	0	0	0	0	0	0	603	903	0
2077	9	0	0	0	0	0	0	200	300	0	0	0	0	0	0	0	200	903	0	0	0	0	0	0	0	603	903	0
2078	0	0	0	0	0	0	0	200	300	0	0	0	0	0	0	0	200	903	0	0	0	0	0	0	0	603	903	0
2078	1	0	0	0	0	0	0	200	300	0	0	0	0	0	0	0	200	903	0	0	0	0	0	0	0	603	903	0
2078	2	0	0	0	0	0	0	200	300	0	0	0	0	0	0	0	200	903	0	0	0	0	0	0	0	603	903	0
2078	3	0	0	0	0	0	0	200	300	0	0	0	0	0	0	0	200	903	0	0	0	0	0	0	0	603	903	0
2078	4	0	0	0	0	0	0	200	300	0	0	0	0	0	0	0	200	903	0	0	0	0	0	0	0	603	903	0
2078	5	0	0	0	0	0	0	200	300	0	0	0	0	0	0	0	200	903	0	0	0	0	0	0	0	603	903	0
2078	6	0	0	0	0	0	0	200	300	0	0	0	0	0	0	0	200	903	0	0	0	0	0	0	0	603	903	0
2078	7	0	0	0	0	0	0	200	300	0	0	0	0	0	0	0	200	903	0	0	0	0	0	0	0	603	903	0
2078	8	0	0	0	0	0	0	200	300	0	0	0	0	0	0	0	200	903	0	0	0	0	0	0	0	603	903	0
2078	9	0	0	0	0	0	0	200	300	0	0	0	0	0	0	0	200	903	0	0	0	0	0	0	0	603	903	0
2079	0	0	0	0	0	0	0	200	300	0	0	0	0	0	0	0	200	903	0	0	0	0	0	0	0	603	903	0
2079	1	0	0	0	0	0	0	200	300	0	0	0	0	0	0	0	200	903	0	0	0	0	0	0	0	603	903	0
2079	2	0	0	0	0	0	0	200	300	0	0	0	0	0	0	0	200	903	0	0	0	0	0	0	0	603	903	0
2079	3	0	0	0	0	0	0	200	300	0	0	0	0	0	0	0	200	903	0	0	0	0	0	0	0	603	903	0
2079	4	0	0	0	0	0	0	200	300	0	0	0	0	0	0	0	200	903	0	0	0	0	0	0	0	603	903	0
2079	5	0	0	0	0	0	0	200	300	0	0	0	0	0	0	0	200	903	0	0	0	0	0	0	0	603	903	0
2079	6	0	0	0	0	0	0	200	300	0	0	0	0	0	0	0	200	903	0	0	0	0	0	0	0	603	903	0
2079	7	0	0	0	0	0	0	200	300	0	0	0	0	0	0	0	200	903	0	0	0	0	0	0	0	603	903	0
2079	8	0	0	0	0	0	0	200	300	0	0	0	0	0	0	0	200	903	0	0	0	0	0	0	0	603	903	0
2079	9	0	0	0	0	0	0	200	300	0	0	0	0	0	0	0	200	903	0	0	0	0	0	0	0	603	903	0
2080	0	0	0	0	0	0	0	200	300	0	0	0	0	0	0	0	200	903	0	0	0	0	0	0	0	603	903	0
2080	1	0	0	0	0	0	0	200	300	0	0	0	0	0	0	0	200	903	0	0	0	0	0	0	0	603	903	0
2080	2	0	0	0	0	0	0	200	300	0	0	0	0	0	0	0	200	903	0	0	0	0	0	0	0	603	903	0
2080	3	0	0	0	0	0	0	200	300	0	0	0	0	0	0	0	200	903	0	0	0	0	0	0	0	603	903	0
2080	4	0	0	0	0	0	0	200	300	0	0	0	0	0	0	0	200	903	0	0	0	0	0	0	0	603	903	0
2080	5	0	0	0	0	0	0	200	300	0	0	0	0	0	0	0	200	903	0	0	0	0	0	0	0	603	903	0
2080	6	0	0	0	0	0	0	200	300	0	0	0	0	0	0	0	200	903	0	0	0	0	0	0	0	603	903	0
2080	7	0	0	0	0	0	0	200	300	0	0	0	0	0	0	0	200	903	0	0	0	0	0	0	0	603	903	0
2080	8	0	0	0	0	0	0	200	300	0	0	0	0	0	0	0	200	903	0	0	0	0	0	0	0	603	903	0
2080	9	0	0	0	0	0	0	200	300	0	0	0	0	0	0	0	200	903	0	0	0	0	0	0	0	603	903	0
2081	0	0	0	0	0	0	0	200	300	0	0	0	0	0	0	0	200	903	0	0	0	0	0	0	0	603	903	0
2081	1	0	0	0	0	0	0	200	300	0	0	0	0	0	0	0	200	903	0	0	0	0	0	0	0	603	903	0
2081	2	0	0	0	0	0	0	200	300	0	0	0	0	0	0	0	200	903	0	0	0	0	0	0	0	603	903	0
2081	3	0	0	0	0	0	0	200	300	0	0	0	0	0	0	0	200	903	0	0	0	0	0	0	0	603	903	0
2081	4	0	0	0	0	0	0	200	300	0	0	0	0	0	0	0	200	903	0	0	0	0	0	0	0	603	903	0
2081	5	0	0	0	0	0	0	200	300	0	0	0	0	0	0	0	200	903	0	0	0	0	0	0	0	603	903	0
2081	6	0	0	0	0	0	0	200	300	0	0	0	0	0	0	0	200	903	0	0	0	0	0	0	0	603	903	0
2081	7	0	0	0	0	0	0	200	300	0	0	0	0	0	0	0	200	903	0	0	0	0	0	0	0	603	903	0
2081	8	0	0	0	0	0	0	200	300	0	0	0	0	0	0	0	200	903	0	0	0	0	0	0	0	603	903	0
2081	9	0	0	0	0	0	0	200	300	0	0	0	0	0	0	0	200	903	0	0	0	0	0	0	0	603	903	0
2082	0	0	0	0	0	0	0	200	300	0	0	0	0	0	0	0	200	903	0	0	0	0	0	0	0	603	903	0
2082	1	0	0	0	0	0	0	200	300	0	0	0	0	0	0	0	200	903	0	0	0	0	0	0	0	603	903	0
2082	2	0	0	0	0	0	0	200	300	0	0	0	0	0	0	0	200	903	0	0	0	0	0	0	0	603	903	0
2082	3	0	0	0	0	0	0	200	300	0	0	0	0	0	0	0	200	903	0	0	0	0	0	0	0	603	903	0
2082	4	0	0	0	0	0	0	200	300	0	0	0	0	0	0	0	200	903	0	0	0	0	0	0	0	603	903	0
2082	5	0	0	0	0	0	0	200	300	0	0	0	0	0	0	0	200	903	0	0	0	0	0	0	0	603	903	0
2082	6	0	0	0	0	0	0	200	300	0	0	0	0	0	0	0	200	903	0	0	0	0	0	0	0	603	903	0
2082	7	0	0	0	0	0	0	200	300	0	0	0	0	0	0	0	200	903	0	0	0	0	0	0	0	603	903	0
2082	8	0	0	0	0	0	0	200	300	0	0	0	0	0	0	0	200	903	0	0	0	0	0	0	0	603	903	0
2082	9	0	0	0	0	0	0	200	300	0	0	0	0	0	0	0	200	903	0	0	0	0	0	0	0	603	903	0
2083	0	0	0	0	0	0	0	200	300	0	0	0	0	0	0	0	200	903	0	0	0	0	0	0	0	603	903	0
2083	1	0	0	0	0	0	0	200	300	0	0	0	0	0	0	0	200	903	0	0	0	0	0	0	0	603	903	0
2083	2	0	0	0	0	0	0	200	300	0	0	0	0	0	0	0	200	903	0	0	0	0	0	0	0	603	903	0
2083	3	0	0	0	0	0	0	200	300	0	0	0	0	0	0	0	200	903	0	0	0	0	0	0	0	603	903	0
2083	4	0	0	0	0	0	0	200	300	0	0	0	0	0	0	0	200	903	0	0	0	0	0	0	0	603	903	0
2083	5	0	0	0	0	0	0	200	300	0	0	0	0	0	0	0	200	903	0	0	0	0	0	0	0	603	903	0
2083	6	0	0	0	0	0	0	200	300	0	0	0	0	0	0	0	200	903	0	0	0	0	0	0	0	603	903	0
2083	7	0	0	0	0	0	0	200	300	0	0	0	0	0	0	0	200	903	0	0	0	0	0	0	0	603	903	0
2083	8	0	0	0	0	0	0	200	300	0	0	0	0	0	0	0	200	903	0	0	0	0	0	0	0	603	903	0
2083	9	0	0	0	0	0	0	200	300	0	0	0	0	0	0	0	200	903	0	0	0	0	0	0	0	603	903	0
2084	0	0	0	0	0	0	0	200	300	0	0	0	0	0	0	0	200	903	0	0	0	0	0	0	0	603	903	0
2084	1	0	0	0	0	0	0	200	300	0	0	0	0	0	0	0	200	903	0	0	0	0	0	0	0	603	903	0
2084	2	0	0	0	0	0	0	200	300	0	0	0	0	0	0	0	200	903	0	0	0	0	0	0	0	603	903	0
2084	3	0	0	0	0	0	0	200	300	0	0	0	0	0	0	0	200	903	0	0	0	0	0	0	0	603	903	0
2084	4	0	0	0	0	0	0	200	300	0	0	0	0	0	0	0	200	903	0	0	0	0	0	0	0	603	903	0
2084	5	0	0	0	0	0	0	200	300	0	0	0	0	0	0	0	200	903	0	0	0	0	0	0	0	603	903	0
2084	6	0	0	0	0	0	0	200	300	0	0	0	0	0	0	0	200	903	0	0	0	0	0	0	0	603	903	0
2084	7	0	0	0	0	0	0	200	300	0	0	0	0	0	0	0	200	903	0	0	0	0	0	0	0	603	903	0
2084	8	0	0	0	0	0	0	200	300	0	0	0	0	0	0	0	200	903	0	0	0	0	0	0	0	603	903	0
2084	9	0	0	0	0	0	0	200	300	0	0	0	0	0	0	0	200	903	0	0	0	0	0	0	0	603	903	0
2085	0	0	0	0	0	0	0	200	300	0	0	0	0	0	0	0	200	903	0	0	0	0	0	0	0	603	903	0
2085	1	0	0	0	0	0	0	200	300	0	0	0	0	0	0	0	200	903	0	0	0	0	0	0	0	603	903	0
2085	2	0	0	0	0	0	0	200	300	0	0	0	0	0	0	0	200	903	0	0	0	0	0	0	0	603	903	0
2085	3	0	0	0	0	0	0	200	300	0	0	0	0	0	0	0	200	903	0	0	0	0	0	0	0	603	903	0
2085	4	0	0	0	0	0	0	200	300	0	0	0	0	0	0	0	200	903	0	0	0	0	0	0	0	603	903	0
2085	5	0	0	0	0	0	0	200	300	0	0	0	0	0	0	0	200	903	0	0	0	0	0	0	0	603	903	0
2085	6	0	0	0	0	0	0	200	300	0	0	0	0	0	0	0	200	903	0	0	0	0	0	0	0	603	903	0
2085	7	0	0	0	0	0	0	200	300	0	0	0	0	0	0	0	200	903	0	0	0	0	0	0	0	603	903	0
2085	8	0	0	0	0	0	0	200	300	0	0	0	0	0	0	0	200	903	0	0	0	0	0	0	0	603	903	0
2085	9	0	0	0	0	0	0	200	300	0	0	0	0	0	0	0	200	903	0	0	0	0	0	0	0	603	903	0
2086	0	0	0	0	0	0	0	200	300	0	0	0	0	0	0	0	200	903	0	0	0	0	0	0	0	603	903	0
2086	1	0	0	0	0	0	0	200	300	0	0	0	0	0	0	0	200	903	0	0	0	0	0	0	0	603	903	0
2086	2	0	0	0	0	0	0	200	300	0	0	0	0	0	0	0	200	903	0	0	0	0	0	0	0	603	903	0
2086	3	0	0	0	0	0	0	200	300	0	0	0	0	0	0	0	200	903	0	0	0	0	0	0	0	603	903	0
2086	4	0	0	0	0	0	0	200	300	0	0	0	0	0	0	0	200	903	0	0	0	0	0	0	0	603	903	0
2086	5	0	0	0	0	0	0	200	300	0	0	0	0	0	0	0	200	903	0	0	0	0	0	0	0	603	903	0
2086	6	0	0	0	0	0	0	200	300	0	0	0	0	0	0	0	200	903	0	0	0	0	0	0	0	603	903	0
2086	7	0	0	0	0	0	0	200	300	0	0	0	0	0	0	0	200	903	0	0	0	0	0	0	0	603	903	0
2086	8	0	0	0	0	0	0	200	300	0	0	0	0	0	0	0	200	903	0	0	0	0	0	0	0	603	903	0
2086	9	0	0	0	0	0	0	200	300	0	0	0	0	0	0	0	200	903	0	0	0	0	0	0	0	603	903	0
2087	0	0	0	0	0	0	0	200	300	0	0	0	0	0	0	0	200	903	0	0	0	0	0	0	0	603	903	0
2087	1	0	0	0	0	0	0	200	300	0	0	0	0	0	0	0	200	903	0	0	0	0	0	0	0	603	903	0
2087	2	0	0	0	0	0	0	200	300	0	0	0	0	0	0	0	200	903	0	0	0	0	0	0	0	603	903	0
2087	3	0	0	0	0	0	0	200	300	0	0	0	0	0	0	0	200	903	0	0	0	0	0	0	0	603	903	0
2087	4	0	0	0	0	0	0	200	300	0	0	0	0	0	0	0	200	903	0	0	0	0	0	0	0	603	903	0
2087	5	0	0	0	0	0	0	200	300	0	0	0	0	0	0	0	200	903	0	0	0	0	0	0	0	603	903	0
2087	6	0	0	0	0	0	0	200	300	0	0	0	0	0	0	0	200	903	0	0	0	0	0	0	0	603	903	0
2087	7	0	0	0	0	0	0	200	300	0	0	0	0	0	0	0	200	903	0	0	0	0	0	0	0	603	903	0
2087	8	0	0	0	0	0	0	200	300	0	0	0	0	0	0	0	200	903	0	0	0	0	0	0	0	603	903	0
2087	9	0	0	0	0	0	0	200	300	0	0	0	0	0	0	0	200	903	0	0	0	0	0	0	0	603	903	0
2088	0	0	0	0	0	0	0	200	300	0	0	0	0	0	0	0	200	903	0	0	0	0	0	0	0	603	903	0
2088	1	0	0	0	0	0	0	200	300	0	0	0	0	0	0	0	200	903	0	0	0	0	0	0	0	603	903	0
2088	2	0	0	0	0	0	0	200	300	0	0	0	0	0	0	0	200	903	0	0	0	0	0	0	0	603	903	0
2088	3	0	0	0	0	0	0	200	300	0	0	0	0	0	0	0	200	903	0	0	0	0	0	0	0	603	903	0
2088	4	0	0	0	0	0	0	200	300	0	0	0	0	0	0	0	200	903	0	0	0	0	0	0	0	603	903	0
2088	5	0	0	0	0	0	0	200	300	0	0	0	0	0	0	0	200	903	0	0	0	0	0	0	0	603	903	0
2088	6	0	0	0	0	0	0	200	300	0	0	0	0	0	0	0	200	903	0	0	0	0	0	0	0	603	903	0
2088	7	0	0	0	0	0	0	200	300	0	0	0	0	0	0	0	200	903	0	0	0	0	0	0	0	603	903	0
2088	8	0	0	0	0	0	0	200	300	0	0	0	0	0	0	0	200	903	0	0	0	0	0	0	0	603	903	0
2088	9	0	0	0	0	0	0	200	300	0	0	0	0	0	0	0	200	903	0	0	0	0	0	0	0	603	903	0
2089	0	0	0	0	0	0	0	200	300	0	0	0	0	0	0	0	200	903	0	0	0	0	0	0	0	603	903	0
2089	1	0	0	0	0	0	0	200	300	0	0	0	0	0	0	0	200	903	0	0	0	0	0	0	0	603	903	0
2089	2	0	0	0	0	0	0	200	300	0	0	0	0	0	0	0	200	903	0	0	0	0	0	0	0	603	903	0
2089	3	0	0	0	0	0	0	200	300	0	0	0	0	0	0	0	200	903	0	0	0	0	0	0	0	603	903	0
2089	4	0	0	0	0	0	0	200	300	0	0	0	0	0	0	0	200	903	0	0	0	0	0	0	0	603	903	0
2089	5	0	0	0	0	0	0	200	300	0	0	0	0	0	0	0	200	903	0	0	0	0	0	0	0	603	903	0
2089	6	0	0	0	0	0	0	200	300	0	0	0	0	0	0	0	200	903	0	0	0	0	0	0	0	603	903	0
2089	7	0	0	0	0	0	0	200	300	0	0	0	0	0	0	0	200	903	0	0	0	0	0	0	0	603	903	0
2089	8	0	0	0	0	0	0	200	300	0	0	0	0	0	0	0	200	903	0	0	0	0	0	0	0	603	903	0
2089	9	0	0	0	0	0	0	200	300	0	0	0	0	0	0	0	200	903	0	0	0	0	0	0	0	603	903	0
2090	0	0	0	0	0	0	0	200	300	0	0	0	0	0	0	0	200	903	0	0	0	0	0	0	0	603	903	0
2090	1	0	0	0	0	0	0	200	300	0	0	0	0	0	0	0	200	903	0	0	0	0	0	0	0	603	903	0
2090	2	0	0	0	0	0	0	200	300	0	0	0	0	0	0	0	200	903	0	0	0	0	0	0	0	603	903	0
2090	3	0	0	0	0	0	0	200	300	0	0	0	0	0	0	0	200	903	0	0	0	0	0	0	0	603	903	0
2090	4	0	0	0	0	0	0	200	300	0	0	0	0	0	0	0	200	903	0	0	0	0	0	0	0	603	903	0
2090	5	0	0	0	0	0	0	200	300	0	0	0	0	0	0	0	200	903	0	0	0	0	0	0	0	603	903	0
2090	6	0	0	0	0	0	0	200	300	0	0	0	0	0	0	0	200	903	0	0	0	0	0	0	0	603	903	0
2090	7	0	0	0	0	0	0	200	300	0	0	0	0	0	0	0	200	903	0	0	0	0	0	0	0	603	903	0
2090	8	0	0	0	0	0	0	200	300	0	0	0	0	0	0	0	200	903	0	0	0	0	0	0	0	603	903	0
2090	9	0	0	0	0	0	0	200	300	0	0	0	0	0	0	0	200	903	0	0	0	0	0	0	0	603	903	0
2091	0	0	0	0	0	0	0	200	300	0	0	0	0	0	0	0	200	903	0	0	0	0	0	0	0	603	903	0
2091	1	0	0	0	0	0	0	200	300	0	0	0	0	0	0	0	200	903	0	0	0	0	0	0	0	603	903	0
2091	2	0	0	0	0	0	0	200	300	0	0	0	0	0	0	0	200	903	0	0	0	0	0	0	0	603	903	0
2091	3	0	0	0	0	0	0	200	300	0	0	0	0	0	0	0	200	903	0	0	0	0	0	0	0	603	903	0
2091	4	0	0	0	0	0	0	200	300	0	0	0	0	0	0	0	200	903	0	0	0	0	0	0	0	603	903	0
2091	5	0	0	0	0	0	0	200	300	0	0	0	0	0	0	0	200	903	0	0	0	0	0	0	0	603	903	0
2091	6	0	0	0	0	0	0	200	300	0	0	0	0	0	0	0	200	903	0	0	0	0	0	0	0	603	903	0
2091	7	0	0	0	0	0	0	200	300	0	0	0	0	0	0	0	200	903	0	0	0	0	0	0	0	603	903	0
2091	8	0	0	0	0	0	0	200	300	0	0	0	0	0	0	0	200	903	0	0	0	0	0	0	0	603	903	0
2091	9	0	0	0	0	0	0	200	300	0	0	0	0	0	0	0	200	903	0	0	0	0	0	0	0	603	903	0
2092	0	0	0	0	0	0	0	200	300	0	0	0	0	0	0	0	200	903	0	0	0	0	0	0	0	603	903	0
2092	1	0	0	0	0	0	0	200	300	0	0	0	0	0	0	0	200	903	0	0	0	0	0	0	0	603	903	0
2092	2	0	0	0	0	0	0	200	300	0	0	0	0	0	0	0	200	903	0	0	0	0	0	0	0	603	903	0
2092	3	0	0	0	0	0	0	200	300	0	0	0	0	0	0	0	200	903	0	0	0	0	0	0	0	603	903	0
2092	4	0	0	0	0	0	0	200	300	0	0	0	0	0	0	0	200	903	0	0	0	0	0	0	0	603	903	0
2092	5	0	0	0	0	0	0	200	300	0	0	0	0	0	0	0	200	903	0	0	0	0	0	0	0	603	903	0
2092	6	0	0	0	0	0	0	200	300	0	0	0	0	0	0	0	200	903	0	0	0	0	0	0	0	603	903	0
2092	7	0	0	0	0	0	0	200	300	0	0	0	0	0	0	0	200	903	0	0	0	0	0	0	0	603	903	0
2092	8	0	0	0	0	0	0	200	300	0	0	0	0	0	0	0	200	903	0	0	0	0	0	0	0	603	903	0
2092	9	0	0	0	0	0	0	200	300	0	0	0	0	0	0	0	200	903	0	0	0	0	0	0	0	603	903	0
2093	0	0	0	0	0	0	0	200	300	0	0	0	0	0	0	0	200	903	0	0	0	0	0	0	0	603	903	0
2093	1	0	0	0	0	0	0	200	300	0	0	0	0	0	0	0	200	903	0	0	0	0	0	0	0	603	903	0
2093	2	0	0	0	0	0	0	200	300	0	0	0	0	0	0	0	200	903	0	0	0	0	0	0	0	603	903	0
2093	3	0	0	0	0	0	0	200	300	0	0	0	0	0	0	0	200	903	0	0	0	0	0	0	0	603	903	0
2093	4	0	0	0	0	0	0	200	300	0	0	0	0	0	0	0	200	903	0	0	0	0	0	0	0	603	903	0
2093	5	0	0	0	0	0	0	200	300	0	0	0	0	0	0	0	200	903	0	0	0	0	0	0	0	603	903	0
2093	6	0	0	0	0	0	0	200	300	0	0	0	0	0	0	0	200	903	0	0	0	0	0	0	0	603	903	0
2093	7	0	0	0	0	0	0	200	300	0	0	0	0	0	0	0	200	903	0	0	0	0	0	0	0	603	903	0
2093	8	0	0	0	0	0	0	200	300	0	0	0	0	0	0	0	200	903	0	0	0	0	0	0	0	603	903	0
2093	9	0	0	0	0	0	0	200	300	0	0	0	0	0	0	0	200	903	0	0	0	0	0	0	0	603	903	0
2094	0	0	0	0	0	0	0	200	300	0	0	0	0	0	0	0	200	903	0	0	0	0	0	0	0	603	903	0
2094	1	0	0	0	0	0	0	200	300	0	0	0	0	0	0	0	200	903	0	0	0	0	0	0	0	603	903	0
2094	2	0	0	0	0	0	0	200	300	0	0	0	0	0	0	0	200	903	0	0	0	0	0	0	0	603	903	0
2094	3	0	0	0	0	0	0	200	300	0	0	0	0	0	0	0	200	903	0	0	0	0	0	0	0	603	903	0
2094	4	0	0	0	0	0	0	200	300	0	0	0	0	0	0	0	200	903	0	0	0	0	0	0	0	603	903	0
2094	5	0	0	0	0	0	0	200	300	0	0	0	0	0	0	0	200	903	0	0	0	0	0	0	0	603	903	0
2094	6	0	0	0	0	0	0	200	300	0	0	0	0	0	0	0	200	903	0	0	0	0	0	0	0	603	903	0
2094	7	0	0	0	0	0	0	200	300	0	0	0	0	0	0	0	200	903	0	0	0	0	0	0	0	603	903	0
2094	8	0	0	0	0	0	0	200	300	0	0	0	0	0	0	0	200	903	0	0	0	0	0	0	0	603	903	0
2094	9	0	0	0	0	0	0	200	300	0	0	0	0	0	0	0	200	903	0	0	0	0	0	0	0	603	903	0
2095	0	0	0	0	0	0	0	200	300	0	0	0	0	0	0	0	200	903	0	0	0	0	0	0	0	603	903	0
2095	1	0	0	0	0	0	0	200	300	0	0	0	0	0	0	0	200	903	0	0	0	0	0	0	0	603	903	0
2095	2	0	0	0	0	0	0	200	300	0	0	0	0	0	0	0	200	903	0	0	0	0	0	0	0	603	903	0
2095	3	0	0	0	0	0	0	200	300	0	0	0	0	0	0	0	200	903	0	0	0	0	0	0	0	603	903	0
2095	4	0	0	0	0	0	0	200	300	0	0	0	0	0	0	0	200	903	0	0	0	0	0	0	0	603	903	0
2095	5	0	0	0	0	0	0	200	300	0	0	0	0	0	0	0	200	903	0	0	0	0	0	0	0	603	903	0
2095	6	0	0	0	0	0	0	200	300	0	0	0	0	0	0	0	200	903	0	0	0	0	0	0	0	603	903	0
2095	7	0	0	0	0	0	0	200	300	0	0	0	0	0	0	0	200	903	0	0	0	0	0	0	0	603	903	0
2095	8	0	0	0	0	0	0	200	300	0	0	0	0	0	0	0	200	903	0	0	0	0	0	0	0	603	903	0
2095	9	0	0	0	0	0	0	200	300	0	0	0	0	0	0	0	200	903	0	0	0	0	0	0	0	603	903	0
2096	0	0	0	0	0	0	0	200	300	0	0	0	0	0	0	0	200	903	0	0	0	0	0	0	0	603	903	0
2096	1	0	0	0	0	0	0	200	300	0	0	0	0	0	0	0	200	903	0	0	0	0	0	0	0	603	903	0
2096	2	0	0	0	0	0	0	200	300	0	0	0	0	0	0	0	200	903	0	0	0	0	0	0	0	603	903	0
2096	3	0	0	0	0	0	0	200	300	0	0	0	0	0	0	0	200	903	0	0	0	0	0	0	0	603	903	0
2096	4	0	0	0	0	0	0	200	300	0	0	0	0	0	0	0	200	903	0	0	0	0	0	0	0	603	903	0
2096	5	0	0	0	0	0	0	200	300	0	0	0	0	0	0	0	200	903	0	0	0	0	0	0	0	603	903	0
2096	6	0	0	0	0	0	0	200	300	0	0	0	0	0	0	0	200	903	0	0	0	0	0	0	0	603	903	0
2096	7	0	0	0	0	0	0	200	300	0	0	0	0	0	0	0	200	903	0	0	0	0	0	0	0	603	903	0
2096	8	0	0	0	0	0	0	200	300	0	0	0	0	0	0	0	200	903	0	0	0	0	0	0	0	603	903	0
2096	9	0	0	0	0	0	0	200	300	0	0	0	0	0	0	0	200	903	0	0	0	0	0	0	0	603	903	0
2097	0	0	0	0	0	0	0	200	300	0	0	0	0	0	0	0	200	903	0	0	0	0	0	0	0	603	903	0
2097	1	0	0	0	0	0	0	200	300	0	0	0	0	0	0	0	200	903	0	0	0	0	0	0	0	603	903	0
2097	2	0	0	0	0	0	0	200	300	0	0	0	0	0	0	0	200	903	0	0	0	0	0	0	0	603	903	0
2097	3	0	0	0	0	0	0	200	300	0	0	0	0	0	0	0	200	903	0	0	0	0	0	0	0	603	903	0
2097	4	0	0	0	0	0	0	200	300	0	0	0	0	0	0	0	200	903	0	0	0	0	0	0	0	603	903	0
2097	5	0	0	0	0	0	0	200	300	0	0	0	0	0	0	0	200	903	0	0	0	0	0	0	0	603	903	0
2097	6	0	0	0	0	0	0	200	300	0	0	0	0	0	0	0	200	903	0	0	0	0	0	0	0	603	903	0
2097	7	0	0	0	0	0	0	200	300	0	0	0	0	0	0	0	200	903	0	0	0	0	0	0	0	603	903	0
2097	8	0	0	0	0	0	0	200	300	0	0	0	0	0	0	0	200	903	0	0	0	0	0	0	0	603	903	0
2097	9	0	0	0	0	0	0	200	300	0	0	0	0	0	0	0	200	903	0	0	0	0	0	0	0	603	903	0
2098	0	0	0	0	0	0	0	200	300	0	0	0	0	0	0	0	200	903	0	0	0	0	0	0	0	603	903	0
2098	1	0	0	0	0	0	0	200	300	0	0	0	0	0	0	0	200	903	0	0	0	0	0	0	0	603	903	0
2098	2	0	0	0	0	0	0	200	300	0	0	0	0	0	0	0	200	903	0	0	0	0	0	0	0	603	903	0
2098	3	0	0	0	0	0	0	200	300	0	0	0	0	0	0	0	200	903	0	0	0	0	0	0	0	603	903	0
2098	4	0	0	0	0	0	0	200	300	0	0	0	0	0	0	0	200	903	0	0	0	0	0	0	0	603	903	0
2098	5	0	0	0	0	0	0	200	300	0	0	0	0	0	0	0	200	903	0	0	0	0	0	0	0	603	903	0
2098	6	0	0	0	0	0	0	200	300	0	0	0	0	0	0	0	200	903	0	0	0	0	0	0	0	603	903	0
2098	7	0	0	0	0	0	0	200	300	0	0	0	0	0	0	0	200	903	0	0	0	0	0	0	0	603	903	0
2098	8	0	0	0	0	0	0	200	300	0	0	0	0	0	0	0	200	903	0	0	0	0	0	0	0	603	903	0
2098	9	0	0	0	0	0	0	200	300	0	0	0	0	0	0	0	200	903	0	0	0	0	0	0	0	603	903	0
2099	0	0	0	0	0	0	0	200	300	0	0	0	0	0	0	0	200	903	0	0	0	0	0	0	0	603	903	0
2099	1	0	0	0	0	0	0	200	300	0	0	0	0	0	0	0	200	903	0	0	0	0	0	0	0	603	903	0
2099	2	0	0	0	0	0	0	200	300	0	0	0	0	0	0	0	200	903	0	0	0	0	0	0	0	603	903	0
2099	3	0	0	0	0	0	0	200	300	0	0	0	0	0	0	0	200	903	0	0	0	0	0	0	0	603	903	0
2099	4	0	0	0	0	0	0	200	300	0	0	0	0	0	0	0	200	903	0	0	0	0	0	0	0	603	903	0
2099	5	0	0	0	0	0	0	200	300	0	0	0	0	0	0	0	200	903	0	0	0	0	0	0	0	603	903	0
2099	6	0	0	0	0	0	0	200	300	0	0	0	0	0	0	0	200	903	0	0	0	0	0	0	0	603	903	0
2099	7	0	0	0	0	0	0	200	300	0	0	0	0	0	0	0	200	903	0	0	0	0	0	0	0	603	903	0
2099	8	0	0	0	0	0	0	200	300	0	0	0	0	0	0	0	200	903	0	0	0	0	0	0	0	603	903	0
2099	9	0	0	0	0	0	0	200	300	0	0	0	0	0	0	0	200	903	0	0	0	0	0	0	0	603	903	0
2100	0	0	0	0	0	0	0	200	300	0	0	0	0	0	0	0	200	903	0	0	0	0	0	0	0	603	903	0
2100	1	0	0	0	0	0	0	200	300	0	0	0	0	0	0	0	200	903	0	0	0	0	0	0	0	603	903	0
2100	2	0	0	0	0	0	0	200	300	0	0	0	0	0	0	0	200	903	0	0	0	0	0	0	0	603	903	0
2100	3	0	0	0	0	0	0	200	300	0	0	0	0	0	0	0	200	903	0	0	0	0	0	0	0	603	903	0
2100	4	0	0	0	0	0	0	200	300	0	0	0	0	0	0	0	200	903	0	0	0	0	0	0	0	603	903	0
2100	5	0	0	0	0	0	0	200	300	0	0	0	0	0	0	0	200	903	0	0	0	0	0	0	0	603	903	0
2100	6	0	0	0	0	0	0	200	300	0	0	0	0	0	0	0	200	903	0	0	0	0	0	0	0	603	903	0
2100	7	0	0	0	0	0	0	200	300	0	0	0	0	0	0	0	200	903	0	0	0	0	0	0	0	603	903	0
2100	8	0	0	0	0	0	0	200	300	0	0	0	0	0	0	0	200	903	0	0	0	0	0	0	0	603	903	0
2100	9	0	0	0	0	0	0	200	300	0	0	0	0	0	0	0	200	903	0	0	0	0	0	0	0	603	903	0
2101	0	0	0	0	0	0	0	200	300	0	0	0	0	0	0	0	200	903	0	0	0	0	0	0	0	603	903	0
2101	1	0	0	0	0	0	0	200	300	0	0	0	0	0	0	0	200	903	0	0	0	0	0	0	0	603	903	0
2101	2	0	0	0	0	0	0	200	300	0	0	0	0	0	0	0	200	903	0	0	0	0	0	0	0	603	903	0
2101	3	0	0	0	0	0	0	200	300	0	0	0	0	0	0	0	200	903	0	0	0	0	0	0	0	603	903	0
2101	4	0	0	0	0	0	0	200	300	0	0	0	0	0	0	0	200	903	0	0	0	0	0	0	0	603	903	0
2101	5	0	0	0	0	0	0	200	300	0	0	0	0	0	0	0	200	903	0	0	0	0	0	0	0	603	903	0
2101	6	0	0	0	0	0	0	200	300	0	0	0	0	0	0	0	200	903	0	0	0	0	0	0	0	603	903	0
2101	7	0	0	0	0	0	0	200	300	0	0	0	0	0	0	0	200	903	0	0	0	0	0	0	0	603	903	0
2101	8	0	0	0	0	0	0	200	300	0	0	0	0	0	0	0	200	903	0	0	0	0	0	0	0	603	903	0
2101	9	0	0	0	0	0	0	200	300	0	0	0	0	0	0	0	200	903	0	0	0	0	0	0	0	603	903	0
2102	0	0	0	0	0	0	0	200	300	0	0	0	0	0	0	0	200	903	0	0	0	0	0	0	0	603	903	0
2102	1	0	0	0	0	0	0	200	300	0	0	0	0	0	0	0	200	903	0	0	0	0	0	0	0	603	903	0
2102	2	0	0	0	0	0	0	200	300	0	0	0	0	0	0	0	200	903	0	0	0	0	0	0	0	603	903	0
2102	3	0	0	0	0	0	0	200	300	0	0	0	0	0	0	0	200	903	0	0	0	0	0	0	0	603	903	0
2102	4	0	0	0	0	0	0	200	300	0	0	0	0	0	0	0	200	903	0	0	0	0	0	0	0	603	903	0
2102	5	0	0	0	0	0	0	200	300	0	0	0	0	0	0	0	200	903	0	0	0	0	0	0	0	603	903	0
2102	6	0	0	0	0	0	0	200	300	0	0	0	0	0	0	0	200	903	0	0	0	0	0	0	0	603	903	0
2102	7	0	0	0	0	0	0	200	300	0	0	0	0	0	0	0	200	903	0	0	0	0	0	0	0	603	903	0
2102	8	0	0	0	0	0	0	200	300	0	0	0	0	0	0	0	200	903	0	0	0	0	0	0	0	603	903	0
2102	9	0	0	0	0	0	0	200	300	0	0	0	0	0	0	0	200	903	0	0	0	0	0	0	0	603	903	0
2103	0	0	0	0	0	0	0	200	300	0	0	0	0	0	0	0	200	903	0	0	0	0	0	0	0	603	903	0
2103	1	0	0	0	0	0	0	200	300	0	0	0	0	0	0	0	200	903	0	0	0	0	0	0	0	603	903	0
2103	2	0	0	0	0	0	0	200	300	0	0	0	0	0	0	0	200	903	0	0	0	0	0	0	0	603	903	0
2103	3	0	0	0	0	0	0	200	300	0	0	0	0	0	0	0	200	903	0	0	0	0	0	0	0	603	903	0
2103	4	0	0	0	0	0	0	200	300	0	0	0	0	0	0	0	200	903	0	0	0	0	0	0	0	603	903	0
2103	5	0	0	0	0	0	0	200	300	0	0	0	0	0	0	0	200	903	0	0	0	0	0	0	0	603	903	0
2103	6	0	0	0	0	0	0	200	300	0	0	0	0	0	0	0	200	903	0	0	0	0	0	0	0	603	903	0
2103	7	0	0	0	0	0	0	200	300	0	0	0	0	0	0	0	200	903	0	0	0	0	0	0	0	603	903	0
2103	8	0	0	0	0	0	0	200	300	0	0	0	0	0	0	0	200	903	0	0	0	0	0	0	0	603	903	0
2103	9	0	0	0	0	0	0	200	300	0	0	0	0	0	0	0	200	903	0	0	0	0	0	0	0	603	903	0
2104	0	0	0	0	0	0	0	200	300	0	0	0	0	0	0	0	200	903	0	0	0	0	0	0	0	603	903	0
2104	1	0	0	0	0	0	0	200	300	0	0	0	0	0	0	0	200	903	0	0	0	0	0	0	0	603	903	0
2104	2	0	0	0	0	0	0	200	300	0	0	0	0	0	0	0	200	903	0	0	0	0	0	0	0	603	903	0
2104	3	0	0	0	0	0	0	200	300	0	0	0	0	0	0	0	200	903	0	0	0	0	0	0	0	603	903	0
2104	4	0	0	0	0	0	0	200	300	0	0	0	0	0	0	0	200	903	0	0	0	0	0	0	0	603	903	0
2104	5	0	0	0	0	0	0	200	300	0	0	0	0	0	0	0	200	903	0	0	0	0	0	0	0	603	903	0
2104	6	0	0	0	0	0	0	200	300	0	0	0	0	0	0	0	200	903	0	0	0	0	0	0	0	603	903	0
2104	7	0	0	0	0	0	0	200	300	0	0	0	0	0	0	0	200	903	0	0	0	0	0	0	0	603	903	0
2104	8	0	0	0	0	0	0	200	300	0	0	0	0	0	0	0	200	903	0	0	0	0	0	0	0	603	903	0
2104	9	0	0	0	0	0	0	200	300	0	0	0	0	0	0	0	200	903	0	0	0	0	0	0	0	603	903	0
2105	0	0	0	0	0	0	0	200	300	0	0	0	0	0	0	0	200	903	0	0	0	0	0	0	0	603	903	0
2105	1	0	0	0	0	0	0	200	300	0	0	0	0	0	0	0	200	903	0	0	0	0	0	0	0	603	903	0
2105	2	0	0	0	0	0	0	200	300	0	0	0	0	0	0	0	200	903	0	0	0	0	0	0	0	603	903	0
2105	3	0	0	0	0	0	0	200	300	0	0	0	0	0	0	0	200	903	0	0	0	0	0	0	0	603	903	0
2105	4	0	0	0	0	0	0	200	300	0	0	0	0	0	0	0	200	903	0	0	0	0	0	0	0	603	903	0
2105	5	0	0	0	0	0	0	200	300	0	0	0	0	0	0	0	200	903	0	0	0	0	0	0	0	603	903	0
2105	6	0	0	0	0	0	0	200	300	0	0	0	0	0	0	0	200	903	0	0	0	0	0	0	0	603	903	0
2105	7	0	0	0	0	0	0	200	300	0	0	0	0	0	0	0	200	903	0	0	0	0	0	0	0	603	903	0
2105	8	0	0	0	0	0	0	200	300	0	0	0	0	0	0	0	200	903	0	0	0	0	0	0	0	603	903	0
2105	9	0	0	0	0	0	0	200	300	0	0	0	0	0	0	0	200	903	0	0	0	0	0	0	0	603	903	0
2106	0	0	0	0	0	0	0	200	300	0	0	0	0	0	0	0	200	903	0	0	0	0	0	0	0	603	903	0
2106	1	0	0	0	0	0	0	200	300	0	0	0	0	0	0	0	200	903	0	0	0	0	0	0	0	603	903	0
2106	2	0	0	0	0	0	0	200	300	0	0	0	0	0	0	0	200	903	0	0	0	0	0	0	0	603	903	0
2106	3	0	0	0	0	0	0	200	300	0	0	0	0	0	0	0	200	903	0	0	0	0	0	0	0	603	903	0
2106	4	0	0	0	0	0	0	200	300	0	0	0	0	0	0	0	200	903	0	0	0	0	0	0	0	603	903	0
2106	5	0	0	0	0	0	0	200	300	0	0	0	0	0	0	0	200	903	0	0	0	0	0	0	0	603	903	0
2106	6	0	0	0	0	0	0	200	300	0	0	0	0	0	0	0	200	903	0	0	0	0	0	0	0	603	903	0
2106	7	0	0	0	0	0	0	200	300	0	0	0	0	0	0	0	200	903	0	0	0	0	0	0	0	603	903	0
2106	8	0	0	0	0	0	0	200	300	0	0	0	0	0	0	0	200	903	0	0	0	0	0	0	0	603	903	0
2106	9	0	0	0	0	0	0	200	300	0	0	0	0	0	0	0	200	903	0	0	0	0	0	0	0	603	903	0
2107	0	0	0	0	0	0	0	200	300	0	0	0	0	0	0	0	200	903	0	0	0	0	0	0	0	603	903	0
2107	1	0	0	0	0	0	0	200	300	0	0	0	0	0	0	0	200	903	0	0	0	0	0	0	0	603	903	0
2107	2	0	0	0	0	0	0	200	300	0	0	0	0	0	0	0	200	903	0	0	0	0	0	0	0	603	903	0
2107	3	0	0	0	0	0	0	200	300	0	0	0	0	0	0	0	200	903	0	0	0	0	0	0	0	603	903	0
2107	4	0	0	0	0	0	0	200	300	0	0	0	0	0	0	0	200	903	0	0	0	0	0	0	0	603	903	0
2107	5	0	0	0	0	0	0	200	300	0	0	0	0	0	0	0	200	903	0	0	0	0	0	0	0	603	903	0
2107	6	0	0	0	0	0	0	200	300	0	0	0	0	0	0	0	200	903	0	0	0	0	0	0	0	603	903	0
2107	7	0	0	0	0	0	0	200	300	0	0	0	0	0	0	0	200	903	0	0	0	0	0	0	0	603	903	0
2107	8	0	0	0	0	0	0	200	300	0	0	0	0	0	0	0	200	903	0	0	0	0	0	0	0	603	903	0
2107	9	0	0	0	0	0	0	200	300	0	0	0	0	0	0	0	200	903	0	0	0	0	0	0	0	603	903	0
2108	0	0	0	0	0	0	0	200	300	0	0	0	0	0	0	0	200	903	0	0	0	0	0	0	0	603	903	0
2108	1	0	0	0	0	0	0	200	300	0	0	0	0	0	0	0	200	903	0	0	0	0	0	0	0	603	903	0
2108	2	0	0	0	0	0	0	200	300	0	0	0	0	0	0	0	200	903	0	0	0	0	0	0	0	603	903	0
2108	3	0	0	0	0	0	0	200	300	0	0	0	0	0	0	0	200	903	0	0	0	0	0	0	0	603	903	0
2108	4	0	0	0	0	0	0	200	300	0	0	0	0	0	0	0	200	903	0	0	0	0	0	0	0	603	903	0
2108	5	0	0	0	0	0	0	200	300	0	0	0	0	0	0	0	200	903	0	0	0	0	0	0	0	603	903	0
2108	6	0	0	0	0	0	0	200	300	0	0	0	0	0	0	0	200	903	0	0	0	0	0	0	0	603	903	0
2108	7	0	0	0	0	0	0	200	300	0	0	0	0	0	0	0	200	903	0	0	0	0	0	0	0	603	903	0
2108	8	0	0	0	0	0	0	200	300	0	0	0	0	0	0	0	200	903	0	0	0	0	0	0	0	603	903	0
2108	9	0	0	0	0	0	0	200	300	0	0	0	0	0	0	0	200	903	0	0	0	0	0	0	0	603	903	0
2109	0	0	0	0	0	0	0	200	300	0	0	0	0	0	0	0	200	903	0	0	0	0	0	0	0	603	903	0
2109	1	0	0	0	0	0	0	200	300	0	0	0	0	0	0	0	200	903	0	0	0	0	0	0	0	603	903	0
2109	2	0	0	0	0	0	0	200	300	0	0	0	0	0	0	0	200	903	0	0	0	0	0	0	0	603	903	0
2109	3	0	0	0	0	0	0	200	300	0	0	0	0	0	0	0	200	903	0	0	0	0	0	0	0	603	903	0
2109	4	0	0	0	0	0	0	200	300	0	0	0	0	0	0	0	200	903	0	0	0	0	0	0	0	603	903	0
2109	5	0	0	0	0	0	0	200	300	0	0	0	0	0	0	0	200	903	0	0	0	0	0	0	0	603	903	0
2109	6	0	0	0	0	0	0	200	300	0	0	0	0	0	0	0	200	903	0	0	0	0	0	0	0	603	903	0
2109	7	0	0	0	0	0	0	200	300	0	0	0	0	0	0	0	200	903	0	0	0	0	0	0	0	603	903	0
2109	8	0	0	0	0	0	0	200	300	0	0	0	0	0	0	0	200	903	0	0	0	0	0	0	0	603	903	0
2109	9	0	0	0	0	0	0	200	300	0	0	0	0	0	0	0	200	903	0	0	0	0	0	0	0	603	903	0
2110	0	0	0	0	0	0	0	200	300	0	0	0	0	0	0	0	200	903	0	0	0	0	0	0	0	603	903	0
2110	1	0	0	0	0	0	0	200	300	0	0	0	0	0	0	0	200	903	0	0	0	0	0	0	0	603	903	0
2110	2	0	0	0	0	0	0	200	300	0	0	0	0	0	0	0	200	903	0	0	0	0	0	0	0	603	903	0
2110	3	0	0	0	0	0	0	200	300	0	0	0	0	0	0	0	200	903	0	0	0	0	0	0	0	603	903	0
2110	4	0	0	0	0	0	0	200	300	0	0	0	0	0	0	0	200	903	0	0	0	0	0	0	0	603	903	0
2110	5	0	0	0	0	0	0	200	300	0	0	0	0	0	0	0	200	903	0	0	0	0	0	0	0	603	903	0
2110	6	0	0	0	0	0	0	200	300	0	0	0	0	0	0	0	200	903	0	0	0	0	0	0	0	603	903	0
2110	7	0	0	0	0	0	0	200	300	0	0	0	0	0	0	0	200	903	0	0	0	0	0	0	0	603	903	0
2110	8	0	0	0	0	0	0	200	300	0	0	0	0	0	0	0	200	903	0	0	0	0	0	0	0	603	903	0
2110	9	0	0	0	0	0	0	200	300	0	0	0	0	0	0	0	200	903	0	0	0	0	0	0	0	603	903	0
2111	0	0	0	0	0	0	0	200	300	0	0	0	0	0	0	0	200	903	0	0	0	0	0	0	0	603	903	0
2111	1	0	0	0	0	0	0	200	300	0	0	0	0	0	0	0	200	903	0	0	0	0	0	0	0	603	903	0
2111	2	0	0	0	0	0	0	200	300	0	0	0	0	0	0	0	200	903	0	0	0	0	0	0	0	603	903	0
2111	3	0	0	0	0	0	0	200	300	0	0	0	0	0	0	0	200	903	0	0	0	0	0	0	0	603	903	0
2111	4	0	0	0	0	0	0	200	300	0	0	0	0	0	0	0	200	903	0	0	0	0	0	0	0	603	903	0
2111	5	0	0	0	0	0	0	200	300	0	0	0	0	0	0	0	200	903	0	0	0	0	0	0	0	603	903	0
2111	6	0	0	0	0	0	0	200	300	0	0	0	0	0	0	0	200	903	0	0	0	0	0	0	0	603	903	0
2111	7	0	0	0	0	0	0	200	300	0	0	0	0	0	0	0	200	903	0	0	0	0	0	0	0	603	903	0
2111	8	0	0	0	0	0	0	200	300	0	0	0	0	0	0	0	200	903	0	0	0	0	0	0	0	603	903	0
2111	9	0	0	0	0	0	0	200	300	0	0	0	0	0	0	0	200	903	0	0	0	0	0	0	0	603	903	0
2112	0	0	0	0	0	0	0	200	300	0	0	0	0	0	0	0	200	903	0	0	0	0	0	0	0	603	903	0
2112	1	0	0	0	0	0	0	200	300	0	0	0	0	0	0	0	200	903	0	0	0	0	0	0	0	603	903	0
2112	2	0	0	0	0	0	0	200	300	0	0	0	0	0	0	0	200	903	0	0	0	0	0	0	0	603	903	0
2112	3	0	0	0	0	0	0	200	300	0	0	0	0	0	0	0	200	903	0	0	0	0	0	0	0	603	903	0
2112	4	0	0	0	0	0	0	200	300	0	0	0	0	0	0	0	200	903	0	0	0	0	0	0	0	603	903	0
2112	5	0	0	0	0	0	0	200	300	0	0	0	0	0	0	0	200	903	0	0	0	0	0	0	0	603	903	0
2112	6	0	0	0	0	0	0	200	300	0	0	0	0	0	0	0	200	903	0	0	0	0	0	0	0	603	903	0
2112	7	0	0	0	0	0	0	200	300	0	0	0	0	0	0	0	200	903	0	0	0	0	0	0	0	603	903	0
2112	8	0	0	0	0	0	0	200	300	0	0	0	0	0	0	0	200	903	0	0	0	0	0	0	0	603	903	0
2112	9	0	0	0	0	0	0	200	300	0	0	0	0	0	0	0	200	903	0	0	0	0	0	0	0	603	903	0
2113	0	0	0	0	0	0	0	200	300	0	0	0	0	0	0	0	200	903	0	0	0	0	0	0	0	603	903	0
2113	1	0	0	0	0	0	0	200	300	0	0	0	0	0	0	0	200	903	0	0	0	0	0	0	0	603	903	0
2113	2	0	0	0	0	0	0	200	300	0	0	0	0	0	0	0	200	903	0	0	0	0	0	0	0	603	903	0
2113	3	0	0	0	0	0	0	200	300	0	0	0	0	0	0	0	200	903	0	0	0	0	0	0	0	603	903	0
2113	4	0	0	0	0	0	0	200	300	0	0	0	0	0	0	0	200	903	0	0	0	0	0	0	0	603	903	0
2113	5	0	0	0	0	0	0	200	300	0	0	0	0	0	0	0	200	903	0	0	0	0	0	0	0	603	903	0
2113	6	0	0	0	0	0	0	200	300	0	0	0	0	0	0	0	200	903	0	0	0	0	0	0	0	603	903	0
2113	7	0	0	0	0	0	0	200	300	0	0	0	0	0	0	0	200	903	0	0	0	0	0	0	0	603	903	0
2113	8	0	0	0	0	0	0	200	300	0	0	0	0	0	0	0	200	903	0	0	0	0	0	0	0	603	903	0
2113	9	0	0	0	0	0	0	200	300	0	0	0	0	0	0	0	200	903	0	0	0	0	0	0	0	603	903	0
2114	0	0	0	0	0	0	0	200	300	0	0	0	0	0	0	0	200	903	0	0	0	0	0	0	0	603	903	0
2114	1	0	0	0	0	0	0	200	300	0	0	0	0	0	0	0	200	903	0	0	0	0	0	0	0	603	903	0
2114	2	0	0	0	0	0	0	200	300	0	0	0	0	0	0	0	200	903	0	0	0	0	0	0	0	603	903	0
2114	3	0	0	0	0	0	0	200	300	0	0	0	0	0	0	0	200	903	0	0	0	0	0	0	0	603	903	0
2114	4	0	0	0	0	0	0	200	300	0	0	0	0	0	0	0	200	903	0	0	0	0	0	0	0	603	903	0
2114	5	0	0	0	0	0	0	200	300	0	0	0	0	0	0	0	200	903	0	0	0	0	0	0	0	603	903	0
2114	6	0	0	0	0	0	0	200	300	0	0	0	0	0	0	0	200	903	0	0	0	0	0	0	0	603	903	0
2114	7	0	0	0	0	0	0	200	300	0	0	0	0	0	0	0	200	903	0	0	0	0	0	0	0	603	903	0
2114	8	0	0	0	0	0	0	200	300	0	0	0	0	0	0	0	200	903	0	0	0	0	0	0	0	603	903	0
2114	9	0	0	0	0	0	0	200	300	0	0	0	0	0	0	0	200	903	0	0	0	0	0	0	0	603	903	0
2115	0	0	0	0	0	0	0	200	300	0	0	0	0	0	0	0	200	903	0	0	0	0	0	0	0	603	903	0
2115	1	0	0	0	0	0	0	200	300	0	0	0	0	0	0	0	200	903	0	0	0	0	0	0	0	603	903	0
2115	2	0	0	0	0	0	0	200	300	0	0	0	0	0	0	0	200	903	0	0	0	0	0	0	0	603	903	0
2115	3	0	0	0	0	0	0	200	300	0	0	0	0	0	0	0	200	903	0	0	0	0	0	0	0	603	903	0
2115	4	0	0	0	0	0	0	200	300	0	0	0	0	0	0	0	200	903	0	0	0	0	0	0	0	603	903	0
2115	5	0	0	0	0	0	0	200	300	0	0	0	0	0	0	0	200	903	0	0	0	0	0	0	0	603	903	0
2115	6	0	0	0	0	0	0	200	300	0	0	0	0	0	0	0	200	903	0	0	0	0	0	0	0	603	903	0
2115	7	0	0	0	0	0	0	200	300	0	0	0	0	0	0	0	200	903	0	0	0	0	0	0	0	603	903	0
2115	8	0	0	0	0	0	0	200	300	0	0	0	0	0	0	0	200	903	0	0	0	0	0	0	0	603	903	0
2115	9	0	0	0	0	0	0	200	300	0	0	0	0	0	0	0	200	903	0	0	0	0	0	0	0	603	903	0
2116	0	0	0	0	0	0	0	200	300	0	0	0	0	0	0	0	200	903	0	0	0	0	0	0	0	603	903	0
2116	1	0	0	0	0	0	0	200	300	0	0	0	0	0	0	0	200	903	0	0	0	0	0	0	0	603	903	0
2116	2	0	0	0	0	0	0	200	300	0	0	0	0	0	0	0	200	903	0	0	0	0	0	0	0	603	903	0
2116	3	0	0	0	0	0	0	200	300	0	0	0	0	0	0	0	200	903	0	0	0	0	0	0	0	603	903	0
2116	4	0	0	0	0	0	0	200	300	0	0	0	0	0	0	0	200	903	0	0	0	0	0	0	0	603	903	0
2116	5	0	0	0	0	0	0	200	300	0	0	0	0	0	0	0	200	903	0	0	0	0	0	0	0	603	903	0
2116	6	0	0	0	0	0	0	200	300	0	0	0	0	0	0	0	200	903	0	0	0	0	0	0	0	603	903	0
2116	7	0	0	0	0	0	0	200	300	0	0	0	0	0	0	0	200	903	0	0	0	0	0	0	0	603	903	0
2116	8	0	0	0	0	0	0	200	300	0	0	0	0	0	0	0	200	903	0	0	0	0	0	0	0	603	903	0
2116	9	0	0	0	0	0	0	200	300	0	0	0	0	0	0	0	200	903	0	0	0	0	0	0	0	603	903	0
2117	0	0	0	0	0	0	0	200	300	0	0	0	0	0	0	0	200	903	0	0	0	0	0	0	0	603	903	0
2117	1	0	0	0	0	0	0	200	300	0	0	0	0	0	0	0	200	903	0	0	0	0	0	0	0	603	903	0
2117	2	0	0	0	0	0	0	200	300	0	0	0	0	0	0	0	200	903	0	0	0	0	0	0	0	603	903	0
2117	3	0	0	0	0	0	0	200	300	0	0	0	0	0	0	0	200	903	0	0	0	0	0	0	0	603	903	0
2117	4	0	0	0	0	0	0	200	300	0	0	0	0	0	0	0	200	903	0	0	0	0	0	0	0	603	903	0
2117	5	0	0	0	0	0	0	200	300	0	0	0	0	0	0	0	200	903	0	0	0	0	0	0	0	603	903	0
2117	6	0	0	0	0	0	0	200	300	0	0	0	0	0	0	0	200	903	0	0	0	0	0	0	0	603	903	0
2117	7	0	0	0	0	0	0	200	300	0	0	0	0	0	0	0	200	903	0	0	0	0	0	0	0	603	903	0
2117	8	0	0	0	0	0	0	200	300	0	0	0	0	0	0	0	200	903	0	0	0	0	0	0	0	603	903	0
2117	9	0	0	0	0	0	0	200	300	0	0	0	0	0	0	0	200	903	0	0	0	0	0	0	0	603	903	0
2118	0	0	0	0	0	0	0	200	300	0	0	0	0	0	0	0	200	903	0	0	0	0	0	0	0	603	903	0
2118	1	0	0	0	0	0	0	200	300	0	0	0	0	0	0	0	200	903	0	0	0	0	0	0	0	603	903	0
2118	2	0	0	0	0	0	0	200	300	0	0	0	0	0	0	0	200	903	0	0	0	0	0	0	0	603	903	0
2118	3	0	0	0	0	0	0	200	300	0	0	0	0	0	0	0	200	903	0	0	0	0	0	0	0	603	903	0
2118	4	0	0	0	0	0	0	200	300	0	0	0	0	0	0	0	200	903	0	0	0	0	0	0	0	603	903	0
2118	5	0	0	0	0	0	0	200	300	0	0	0	0	0	0	0	200	903	0	0	0	0	0	0	0	603	903	0
2118	6	0	0	0	0	0	0	200	300	0	0	0	0	0	0	0	200	903	0	0	0	0	0	0	0	603	903	0
2118	7	0	0	0	0	0	0	200	300	0	0	0	0	0	0	0	200	903	0	0	0	0	0	0	0	603	903	0
2118	8	0	0	0	0	0	0	200	300	0	0	0	0	0	0	0	200	903	0	0	0	0	0	0	0	603	903	0
2118	9	0	0	0	0	0	0	200	300	0	0	0	0	0	0	0	200	903	0	0	0	0	0	0	0	603	903	0
2119	0	0	0	0	0	0	0	200	300	0	0	0	0	0	0	0	200	903	0	0	0	0	0	0	0	603	903	0
2119	1	0	0	0	0	0	0	200	300	0	0	0	0	0	0	0	200	903	0	0	0	0	0	0	0	603	903	0
2119	2	0	0	0	0	0	0	200	300	0	0	0	0	0	0	0	200	903	0	0	0	0	0	0	0	603	903	0
2119	3	0	0	0	0	0	0	200	300	0	0	0	0	0	0	0	200	903	0	0	0	0	0	0	0	603	903	0
2119	4	0	0	0	0	0	0	200	300	0	0	0	0	0	0	0	200	903	0	0	0	0	0	0	0	603	903	0
2119	5	0	0	0	0	0	0	200	300	0	0	0	0	0	0	0	200	903	0	0	0	0	0	0	0	603	903	0
2119	6	0	0	0	0	0	0	200	300	0	0	0	0	0	0	0	200	903	0	0	0	0	0	0	0	603	903	0
2119	7	0	0	0	0	0	0	200	300	0	0	0	0	0	0	0	200	903	0	0	0	0	0	0	0	603	903	0
2119	8	0	0	0	0	0	0	200	300	0	0	0	0	0	0	0	200	903	0	0	0	0	0	0	0	603	903	0
2119	9	0	0	0	0	0	0	200	300	0	0	0	0	0	0	0	200	903	0	0	0	0	0	0	0	603	903	0
2120	0	0	0	0	0	0	0	200	300	0	0	0	0	0	0	0	200	903	0	0	0	0	0	0	0	603	903	0
2120	1	0	0	0	0	0	0	200	300	0	0	0	0	0	0	0	200	903	0	0	0	0	0	0	0	603	903	0
2120	2	0	0	0	0	0	0	200	300	0	0	0	0	0	0	0	200	903	0	0	0	0	0	0	0	603	903	0
2120	3	0	0	0	0	0	0	200	300	0	0	0	0	0	0	0	200	903	0	0	0	0	0	0	0	603	903	0
2120	4	0	0	0	0	0	0	200	300	0	0	0	0	0	0	0	200	903	0	0	0	0	0	0	0	603	903	0
2120	5	0	0	0	0	0	0	200	300	0	0	0	0	0	0	0	200	903	0	0	0	0	0	0	0	603	903	0
2120	6	0	0	0	0	0	0	200	300	0	0	0	0	0	0	0	200	903	0	0	0	0	0	0	0	603	903	0
2120	7	0	0	0	0	0	0	200	300	0	0	0	0	0	0	0	200	903	0	0	0	0	0	0	0	603	903	0
2120	8	0	0	0	0	0	0	200	300	0	0	0	0	0	0	0	200	903	0	0	0	0	0	0	0	603	903	0
2120	9	0	0	0	0	0	0	200	300	0	0	0	0	0	0	0	200	903	0	0	0	0	0	0	0	603	903	0
2121	0	0	0	0	0	0	0	200	300	0	0	0	0	0	0	0	200	903	0	0	0	0	0	0	0	603	903	0
2121	1	0	0	0	0	0	0	200	300	0	0	0	0	0	0	0	200	903	0	0	0	0	0	0	0	603	903	0
2121	2	0	0	0	0	0	0	200	300	0	0	0	0	0	0	0	200	903	0	0	0	0	0	0	0	603	903	0
2121	3	0	0	0	0	0	0	200	300	0	0	0	0	0	0	0	200	903	0	0	0	0	0	0	0	603	903	0
2121	4	0	0	0	0	0	0	200	300	0	0	0	0	0	0	0	200	903	0	0	0	0	0	0	0	603	903	0
2121	5	0	0	0	0	0	0	200	300	0	0	0	0	0	0	0	200	903	0	0	0	0	0	0	0	603	903	0
2121	6	0	0	0	0	0	0	200	300	0	0	0	0	0	0	0	200	903	0	0	0	0	0	0	0	603	903	0
2121	7	0	0	0	0	0	0	200	300	0	0	0	0	0	0	0	200	903	0	0	0	0	0	0	0	603	903	0
2121	8	0	0	0	0	0	0	200	300	0	0	0	0	0	0	0	200	903	0	0	0	0	0	0	0	603	903	0
2121	9	0	0	0	0	0	0	200	300	0	0	0	0	0	0	0	200	903	0	0	0	0	0	0	0	603	903	0
2122	0	0	0	0	0	0	0	200	300	0	0	0	0	0	0	0	200	903	0	0	0	0	0	0	0	603	903	0
2122	1	0	0	0	0	0	0	200	300	0	0	0	0	0	0	0	200	903	0	0	0	0	0	0	0	603	903	0
2122	2	0	0	0	0	0	0	200	300	0	0	0	0	0	0	0	200	903	0	0	0	0	0	0	0	603	903	0
2122	3	0	0	0	0	0	0	200	300	0	0	0	0	0	0	0	200	903	0	0	0	0	0	0	0	603	903	0
2122	4	0	0	0	0	0	0	200	300	0	0	0	0	0	0	0	200	903	0	0	0	0	0	0	0	603	903	0
2122	5	0	0	0	0	0	0	200	300	0	0	0	0	0	0	0	200	903	0	0	0	0	0	0	0	603	903	0
2122	6	0	0	0	0	0	0	200	300	0	0	0	0	0	0	0	200	903	0	0	0	0	0	0	0	603	903	0
2122	7	0	0	0	0	0	0	200	300	0	0	0	0	0	0	0	200	903	0	0	0	0	0	0	0	603	903	0
2122	8	0	0	0	0	0	0	200	300	0	0	0	0	0	0	0	200	903	0	0	0	0	0	0	0	603	903	0
2122	9	0	0	0	0	0	0	200	300	0	0	0	0	0	0	0	200	903	0	0	0	0	0	0	0	603	903	0
2123	0	0	0	0	0	0	0	200	300	0	0	0	0	0	0	0	200	903	0	0	0	0	0	0	0	603	903	0
2123	1	0	0	0	0	0	0	200	300	0	0	0	0	0	0	0	200	903	0	0	0	0	0	0	0	603	903	0
2123	2	0	0	0	0	0	0	200	300	0	0	0	0	0	0	0	200	903	0	0	0	0	0	0	0	603	903	0
2123	3	0	0	0	0	0	0	200	300	0	0	0	0	0	0	0	200	903	0	0	0	0	0	0	0	603	903	0
2123	4	0	0	0	0	0	0	200	300	0	0	0	0	0	0	0	200	903	0	0	0	0	0	0	0	603	903	0
2123	5	0	0	0	0	0	0	200	300	0	0	0	0	0	0	0	200	903	0	0	0	0	0	0	0	603	903	0
2123	6	0	0	0	0	0	0	200	300	0	0	0	0	0	0	0	200	903	0	0	0	0	0	0	0	603	903	0
2123	7	0	0	0	0	0	0	200	300	0	0	0	0	0	0	0	200	903	0	0	0	0	0	0	0	603	903	0
2123	8	0	0	0	0	0	0	200	300	0	0	0	0	0	0	0	200	903	0	0	0	0	0	0	0	603	903	0
2123	9	0	0	0	0	0	0	200	300	0	0	0	0	0	0	0	200	903	0	0	0	0	0	0	0	603	903	0
2124	0	0	0	0	0	0	0	200	300	0	0	0	0	0	0	0	200	903	0	0	0	0	0	0	0	603	903	0
2124	1	0	0	0	0	0	0	200	300	0	0	0	0	0	0	0	200	903	0	0	0	0	0	0	0	603	903	0
2124	2	0	0	0	0	0	0	200	300	0	0	0	0	0	0	0	200	903	0	0	0	0	0	0	0	603	903	0
2124	3	0	0	0	0	0	0	200	300	0	0	0	0	0	0	0	200	903	0	0	0	0	0	0	0	603	903	0
2124	4	0	0	0	0	0	0	200	300	0	0	0	0	0	0	0	200	903	0	0	0	0	0	0	0	603	903	0
2124	5	0	0	0	0	0	0	200	300	0	0	0	0	0	0	0	200	903	0	0	0	0	0	0	0	603	903	0
2124	6	0	0	0	0	0	0	200	300	0	0	0	0	0	0	0	200	903	0	0	0	0	0	0	0	603	903	0
2124	7	0	0	0	0	0	0	200	300	0	0	0	0	0	0	0	200	903	0	0	0	0	0	0	0	603	903	0
2124	8	0	0	0	0	0	0	200	300	0	0	0	0	0	0	0	200	903	0	0	0	0	0	0	0	603	903	0
2124	9	0	0	0	0	0	0	200	300	0	0	0	0	0	0	0	200	903	0	0	0	0	0	0	0	603	903	0
2125	0	0	0	0	0	0	0	200	300	0	0	0	0	0	0	0	200	903	0	0	0	0	0	0	0	603	903	0
2125	1	0	0	0	0	0	0	200	300	0	0	0	0	0	0	0	200	903	0	0	0	0	0	0	0	603	903	0
2125	2	0	0	0	0	0	0	200	300	0	0	0	0	0	0	0	200	903	0	0	0	0	0	0	0	603	903	0
2125	3	0	0	0	0	0	0	200	300	0	0	0	0	0	0	0	200	903	0	0	0	0	0	0	0	603	903	0
2125	4	0	0	0	0	0	0	200	300	0	0	0	0	0	0	0	200	903	0	0	0	0	0	0	0	603	903	0
2125	5	0	0	0	0	0	0	200	300	0	0	0	0	0	0	0	200	903	0	0	0	0	0	0	0	603	903	0
2125	6	0	0	0	0	0	0	200	300	0	0	0	0	0	0	0	200	903	0	0	0	0	0	0	0	603	903	0
2125	7	0	0	0	0	0	0	200	300	0	0	0	0	0	0	0	200	903	0	0	0	0	0	0	0	603	903	0
2125	8	0	0	0	0	0	0	200	300	0	0	0	0	0	0	0	200	903	0	0	0	0	0	0	0	603	903	0
2125	9	0	0	0	0	0	0	200	300	0	0	0	0	0	0	0	200	903	0	0	0	0	0	0	0	603	903	0
2126	0	0	0	0	0	0	0	200	300	0	0	0	0	0	0	0	200	903	0	0	0	0	0	0	0	603	903	0
2126	1	0	0	0	0	0	0	200	300	0	0	0	0	0	0	0	200	903	0	0	0	0	0	0	0	603	903	0
2126	2	0	0	0	0	0	0	200	300	0	0	0	0	0	0	0	200	903	0	0	0	0	0	0	0	603	903	0
2126	3	0	0	0	0	0	0	200	300	0	0	0	0	0	0	0	200	903	0	0	0	0	0	0	0	603	903	0
2126	4	0	0	0	0	0	0	200	300	0	0	0	0	0	0	0	200	903	0	0	0	0	0	0	0	603	903	0
2126	5	0	0	0	0	0	0	200	300	0	0	0	0	0	0	0	200	903	0	0	0	0	0	0	0	603	903	0
2126	6	0	0	0	0	0	0	200	300	0	0	0	0	0	0	0	200	903	0	0	0	0	0	0	0	603	903	0
2126	7	0	0	0	0	0	0	200	300	0	0	0	0	0	0	0	200	903	0	0	0	0	0	0	0	603	903	0
2126	8	0	0	0	0	0	0	200	300	0	0	0	0	0	0	0	200	903	0	0	0	0	0	0	0	603	903	0
2126	9	0	0	0	0	0	0	200	300	0	0	0	0	0	0	0	200	903	0	0	0	0	0	0	0	603	903	0
2127	0	0	0	0	0	0	0	200	300	0	0	0	0	0	0	0	200	903	0	0	0	0	0	0	0	603	903	0
2127	1	0	0	0	0	0	0	200	300	0	0	0	0	0	0	0	200	903	0	0	0	0	0	0	0	603	903	0
2127	2	0	0	0	0	0	0	200	300	0	0	0	0	0	0	0	200	903	0	0	0	0	0	0	0	603	903	0
2127	3	0	0	0	0	0	0	200	300	0	0	0	0	0	0	0	200	903	0	0	0	0	0	0	0	603	903	0
2127	4	0	0	0	0	0	0	200	300	0	0	0	0	0	0	0	200	903	0	0	0	0	0	0	0	603	903	0
2127	5	0	0	0	0	0	0	200	300	0	0	0	0	0	0	0	200	903	0	0	0	0	0	0	0	603	903	0
2127	6	0	0	0	0	0	0	200	300	0	0	0	0	0	0	0	200	903	0	0	0	0	0	0	0	603	903	0
2127	7	0	0	0	0	0	0	200	300	0	0	0	0	0	0	0	200	903	0	0	0	0	0	0	0	603	903	0
2127	8	0	0	0	0	0	0	200	300	0	0	0	0	0	0	0	200	903	0	0	0	0	0	0	0	603	903	0
2127	9	0	0	0	0	0	0	200	300	0	0	0	0	0	0	0	200	903	0	0	0	0	0	0	0	603	903	0
2128	0	0	0	0	0	0	0	200	300	0	0	0	0	0	0	0	200	903	0	0	0	0	0	0	0	603	903	0
2128	1	0	0	0	0	0	0	200	300	0	0	0	0	0	0	0	200	903	0	0	0	0	0	0	0	603	903	0
2128	2	0	0	0	0	0	0	200	300	0	0	0	0	0	0	0	200	903	0	0	0	0	0	0	0	603	903	0
2128	3	0	0	0	0	0	0	200	300	0	0	0	0	0	0	0	200	903	0	0	0	0	0	0	0	603	903	0
2128	4	0	0	0	0	0	0	200	300	0	0	0	0	0	0	0	200	903	0	0	0	0	0	0	0	603	903	0
2128	5	0	0	0	0	0	0	200	300	0	0	0	0	0	0	0	200	903	0	0	0	0	0	0	0	603	903	0
2128	6	0	0	0	0	0	0	200	300	0	0	0	0	0	0	0	200	903	0	0	0	0	0	0	0	603	903	0
2128	7	0	0	0	0	0	0	200	300	0	0	0	0	0	0	0	200	903	0	0	0	0	0	0	0	603	903	0
2128	8	0	0	0	0	0	0	200	300	0	0	0	0	0	0	0	200	903	0	0	0	0	0	0	0	603	903	0
2128	9	0	0	0	0	0	0	200	300	0	0	0	0	0	0	0	200	903	0	0	0	0	0	0	0	603	903	0
2129	0	0	0	0	0	0	0	200	300	0	0	0	0	0	0	0	200	903	0	0	0	0	0	0	0	603	903	0
2129	1	0	0	0	0	0	0	200	300	0	0	0	0	0	0	0	200	903	0	0	0	0	0	0	0	603	903	0
2129	2	0	0	0	0	0	0	200	300	0	0	0	0	0	0	0	200	903	0	0	0	0	0	0	0	603	903	0
2129	3	0	0	0	0	0	0	200	300	0	0	0	0	0	0	0	200	903	0	0	0	0	0	0	0	603	903	0
2129	4	0	0	0	0	0	0	200	300	0	0	0	0	0	0	0	200	903	0	0	0	0	0	0	0	603	903	0
2129	5	0	0	0	0	0	0	200	300	0	0	0	0	0	0	0	200	903	0	0	0	0	0	0	0	603	903	0
2129	6	0	0	0	0	0	0	200	300	0	0	0	0	0	0	0	200	903	0	0	0	0	0	0	0	603	903	0
2129	7	0	0	0	0	0	0	200	300	0	0	0	0	0	0	0	200	903	0	0	0	0	0	0	0	603	903	0
2129	8	0	0	0	0	0	0	200	300	0	0	0	0	0	0	0	200	903	0	0	0	0	0	0	0	603	903	0
2129	9	0	0	0	0	0	0	200	300	0	0	0	0	0	0	0	200	903	0	0	0	0	0	0	0	603	903	0
2130	0	0	0	0	0	0	0	200	300	0	0	0	0	0	0	0	200	903	0	0	0	0	0	0	0	603	903	0
2130	1	0	0	0	0	0	0	200	300	0	0	0	0	0	0	0	200	903	0	0	0	0	0	0	0	603	903	0
2130	2	0	0	0	0	0	0	200	300	0	0	0	0	0	0	0	200	903	0	0	0	0	0	0	0	603	903	0
2130	3	0	0	0	0	0	0	200	300	0	0	0	0	0	0	0	200	903	0	0	0	0	0	0	0	603	903	0
2130	4	0	0	0	0	0	0	200	300	0	0	0	0	0	0	0	200	903	0	0	0	0	0	0	0	603	903	0
2130	5	0	0	0	0	0	0	200	300	0	0	0	0	0	0	0	200	903	0	0	0	0	0	0	0	603	903	0
2130	6	0	0	0	0	0	0	200	300	0	0	0	0	0	0	0	200	903	0	0	0	0	0	0	0	603	903	0
2130	7	0	0	0	0	0	0	200	300	0	0	0	0	0	0	0	200	903	0	0	0	0	0	0	0	603	903	0
2130	8	0	0	0	0	0	0	200	300	0	0	0	0	0	0	0	200	903	0	0	0	0	0	0	0	603	903	0
2130	9	0	0	0	0	0	0	200	300	0	0	0	0	0	0	0	200	903	0	0	0	0	0	0	0	603	903	0
2131	0	0	0	0	0	0	0	200	300	0	0	0	0	0	0	0	200	903	0	0	0	0	0	0	0	603	903	0
2131	1	0	0	0	0	0	0	200	300	0	0	0	0	0	0	0	200	903	0	0	0	0	0	0	0	603	903	0
2131	2	0	0	0	0	0	0	200	300	0	0	0	0	0	0	0	200	903	0	0	0	0	0	0	0	603	903	0
2131	3	0	0	0	0	0	0	200	300	0	0	0	0	0	0	0	200	903	0	0	0	0	0	0	0	603	903	0
2131	4	0	0	0	0	0	0	200	300	0	0	0	0	0	0	0	200	903	0	0	0	0	0	0	0	603	903	0
2131	5	0	0	0	0	0	0	200	300	0	0	0	0	0	0	0	200	903	0	0	0	0	0	0	0	603	903	0
2131	6	0	0	0	0	0	0	200	300	0	0	0	0	0	0	0	200	903	0	0	0	0	0	0	0	603	903	0
2131	7	0	0	0	0	0	0	200	300	0	0	0	0	0	0	0	200	903	0	0	0	0	0	0	0	603	903	0
2131	8	0	0	0	0	0	0	200	300	0	0	0	0	0	0	0	200	903	0	0	0	0	0	0	0	603	903	0
2131	9	0	0	0	0	0	0	200	300	0	0	0	0	0	0	0	200	903	0	0	0	0	0	0	0	603	903	0
2132	0	0	0	0	0	0	0	200	300	0	0	0	0	0	0	0	200	903	0	0	0	0	0	0	0	603	903	0
2132	1	0	0	0	0	0	0	200	300	0	0	0	0	0	0	0	200	903	0	0	0	0	0	0	0	603	903	0
2132	2	0	0	0	0	0	0	200	300	0	0	0	0	0	0	0	200	903	0	0	0	0	0	0	0	603	903	0
2132	3	0	0	0	0	0	0	200	300	0	0	0	0	0	0	0	200	903	0	0	0	0	0	0	0	603	903	0
2132	4	0	0	0	0	0	0	200	300	0	0	0	0	0	0	0	200	903	0	0	0	0	0	0	0	603	903	0
2132	5	0	0	0	0	0	0	200	300	0	0	0	0	0	0	0	200	903	0	0	0	0	0	0	0	603	903	0
2132	6	0	0	0	0	0	0	200	300	0	0	0	0	0	0	0	200	903	0	0	0	0	0	0	0	603	903	0
2132	7	0	0	0	0	0	0	200	300	0	0	0	0	0	0	0	200	903	0	0	0	0	0	0	0	603	903	0
2132	8	0	0	0	0	0	0	200	300	0	0	0	0	0	0	0	200	903	0	0	0	0	0	0	0	603	903	0
2132	9	0	0	0	0	0	0	200	300	0	0	0	0	0	0	0	200	903	0	0	0	0	0	0	0	603	903	0
2133	0	0	0	0	0	0	0	200	300	0	0	0	0	0	0	0	200	903	0	0	0	0	0	0	0	603	903	0
2133	1	0	0	0	0	0	0	200	300	0	0	0	0	0	0	0	200	903	0	0	0	0	0	0	0	603	903	0
2133	2	0	0	0	0	0	0	200	300	0	0	0	0	0	0	0	200	903	0	0	0	0	0	0	0	603	903	0
2133	3	0	0	0	0	0	0	200	300	0	0	0	0	0	0	0	200	903	0	0	0	0	0	0	0	603	903	0
2133	4	0	0	0	0	0	0	200	300	0	0	0	0	0	0	0	200	903	0	0	0	0	0	0	0	603	903	0
2133	5	0	0	0	0	0	0	200	300	0	0	0	0	0	0	0	200	903	0	0	0	0	0	0	0	603	903	0
2133	6	0	0	0	0	0	0	200	300	0	0	0	0	0	0	0	200	903	0	0	0	0	0	0	0	603	903	0
2133	7	0	0	0	0	0	0	200	300	0	0	0	0	0	0	0	200	903	0	0	0	0	0	0	0	603	903	0
2133	8	0	0	0	0	0	0	200	300	0	0	0	0	0	0	0	200	903	0	0	0	0	0	0	0	603	903	0
2133	9	0	0	0	0	0	0	200	300	0	0	0	0	0	0	0	200	903	0	0	0	0	0	0	0	603	903	0
2134	0	0	0	0	0	0	0	200	300	0	0	0	0	0	0	0	200	903	0	0	0	0	0	0	0	603	903	0
2134	1	0	0	0	0	0	0	200	300	0	0	0	0	0	0	0	200	903	0	0	0	0	0	0	0	603	903	0
2134	2	0	0	0	0	0	0	200	300	0	0	0	0	0	0	0	200	903	0	0	0	0	0	0	0	603	903	0
2134	3	0	0	0	0	0	0	200	300	0	0	0	0	0	0	0	200	903	0	0	0	0	0	0	0	603	903	0
2134	4	0	0	0	0	0	0	200	300	0	0	0	0	0	0	0	200	903	0	0	0	0	0	0	0	603	903	0
2134	5	0	0	0	0	0	0	200	300	0	0	0	0	0	0	0	200	903	0	0	0	0	0	0	0	603	903	0
2134	6	0	0	0	0	0	0	200	300	0	0	0	0	0	0	0	200	903	0	0	0	0	0	0	0	603	903	0
2134	7	0	0	0	0	0	0	200	300	0	0	0	0	0	0	0	200	903	0	0	0	0	0	0	0	603	903	0
2134	8	0	0	0	0	0	0	200	300	0	0	0	0	0	0	0	200	903	0	0	0	0	0	0	0	603	903	0
2134	9	0	0	0	0	0	0	200	300	0	0	0	0	0	0	0	200	903	0	0	0	0	0	0	0	603	903	0
2135	0	0	0	0	0	0	0	200	300	0	0	0	0	0	0	0	200	903	0	0	0	0	0	0	0	603	903	0
2135	1	0	0	0	0	0	0	200	300	0	0	0	0	0	0	0	200	903	0	0	0	0	0	0	0	603	903	0
2135	2	0	0	0	0	0	0	200	300	0	0	0	0	0	0	0	200	903	0	0	0	0	0	0	0	603	903	0
2135	3	0	0	0	0	0	0	200	300	0	0	0	0	0	0	0	200	903	0	0	0	0	0	0	0	603	903	0
2135	4	0	0	0	0	0	0	200	300	0	0	0	0	0	0	0	200	903	0	0	0	0	0	0	0	603	903	0
2135	5	0	0	0	0	0	0	200	300	0	0	0	0	0	0	0	200	903	0	0	0	0	0	0	0	603	903	0
2135	6	0	0	0	0	0	0	200	300	0	0	0	0	0	0	0	200	903	0	0	0	0	0	0	0	603	903	0
2135	7	0	0	0	0	0	0	200	300	0	0	0	0	0	0	0	200	903	0	0	0	0	0	0	0	603	903	0
2135	8	0	0	0	0	0	0	200	300	0	0	0	0	0	0	0	200	903	0	0	0	0	0	0	0	603	903	0
2135	9	0	0	0	0	0	0	200	300	0	0	0	0	0	0	0	200	903	0	0	0	0	0	0	0	603	903	0
2136	0	0	0	0	0	0	0	200	300	0	0	0	0	0	0	0	200	903	0	0	0	0	0	0	0	603	903	0
2136	1	0	0	0	0	0	0	200	300	0	0	0	0	0	0	0	200	903	0	0	0	0	0	0	0	603	903	0
2136	2	0	0	0	0	0	0	200	300	0	0	0	0	0	0	0	200	903	0	0	0	0	0	0	0	603	903	0
2136	3	0	0	0	0	0	0	200	300	0	0	0	0	0	0	0	200	903	0	0	0	0	0	0	0	603	903	0
2136	4	0	0	0	0	0	0	200	300	0	0	0	0	0	0	0	200	903	0	0	0	0	0	0	0	603	903	0
2136	5	0	0	0	0	0	0	200	300	0	0	0	0	0	0	0	200	903	0	0	0	0	0	0	0	603	903	0
2136	6	0	0	0	0	0	0	200	300	0	0	0	0	0	0	0	200	903	0	0	0	0	0	0	0	603	903	0
2136	7	0	0	0	0	0	0	200	300	0	0	0	0	0	0	0	200	903	0	0	0	0	0	0	0	603	903	0
2136	8	0	0	0	0	0	0	200	300	0	0	0	0	0	0	0	200	903	0	0	0	0	0	0	0	603	903	0
2136	9	0	0	0	0	0	0	200	300	0	0	0	0	0	0	0	200	903	0	0	0	0	0	0	0	603	903	0
2137	0	0	0	0	0	0	0	200	300	0	0	0	0	0	0	0	200	903	0	0	0	0	0	0	0	603	903	0
2137	1	0	0	0	0	0	0	200	300	0	0	0	0	0	0	0	200	903	0	0	0	0	0	0	0	603	903	0
2137	2	0	0	0	0	0	0	200	300	0	0	0	0	0	0	0	200	903	0	0	0	0	0	0	0	603	903	0
2137	3	0	0	0	0	0	0	200	300	0	0	0	0	0	0	0	200	903	0	0	0	0	0	0	0	603	903	0
2137	4	0	0	0	0	0	0	200	300	0	0	0	0	0	0	0	200	903	0	0	0	0	0	0	0	603	903	0
2137	5	0	0	0	0	0	0	200	300	0	0	0	0	0	0	0	200	903	0	0	0	0	0	0	0	603	903	0
2137	6	0	0	0	0	0	0	200	300	0	0	0	0	0	0	0	200	903	0	0	0	0	0	0	0	603	903	0
2137	7	0	0	0	0	0	0	200	300	0	0	0	0	0	0	0	200	903	0	0	0	0	0	0	0	603	903	0
2137	8	0	0	0	0	0	0	200	300	0	0	0	0	0	0	0	200	903	0	0	0	0	0	0	0	603	903	0
2137	9	0	0	0	0	0	0	200	300	0	0	0	0	0	0	0	200	903	0	0	0	0	0	0	0	603	903	0
2138	0	0	0	0	0	0	0	200	300	0	0	0	0	0	0	0	200	903	0	0	0	0	0	0	0	603	903	0
2138	1	0	0	0	0	0	0	200	300	0	0	0	0	0	0	0	200	903	0	0	0	0	0	0	0	603	903	0
2138	2	0	0	0	0	0	0	200	300	0	0	0	0	0	0	0	200	903	0	0	0	0	0	0	0	603	903	0
2138	3	0	0	0	0	0	0	200	300	0	0	0	0	0	0	0	200	903	0	0	0	0	0	0	0	603	903	0
2138	4	0	0	0	0	0	0	200	300	0	0	0	0	0	0	0	200	903	0	0	0	0	0	0	0	603	903	0
2138	5	0	0	0	0	0	0	200	300	0	0	0	0	0	0	0	200	903	0	0	0	0	0	0	0	603	903	0
2138	6	0	0	0	0	0	0	200	300	0	0	0	0	0	0	0	200	903	0	0	0	0	0	0	0	603	903	0
2138	7	0	0	0	0	0	0	200	300	0	0	0	0	0	0	0	200	903	0	0	0	0	0	0	0	603	903	0
2138	8	0	0	0	0	0	0	200	300	0	0	0	0	0	0	0	200	903	0	0	0	0	0	0	0	603	903	0
2138	9	0	0	0	0	0	0	200	300	0	0	0	0	0	0	0	200	903	0	0	0	0	0	0	0	603	903	0
2139	0	0	0	0	0	0	0	200	300	0	0	0	0	0	0	0	200	903	0	0	0	0	0	0	0	603	903	0
2139	1	0	0	0	0	0	0	200	300	0	0	0	0	0	0	0	200	903	0	0	0	0	0	0	0	603	903	0
2139	2	0	0	0	0	0	0	200	300	0	0	0	0	0	0	0	200	903	0	0	0	0	0	0	0	603	903	0
2139	3	0	0	0	0	0	0	200	300	0	0	0	0	0	0	0	200	903	0	0	0	0	0	0	0	603	903	0
2139	4	0	0	0	0	0	0	200	300	0	0	0	0	0	0	0	200	903	0	0	0	0	0	0	0	603	903	0
2139	5	0	0	0	0	0	0	200	300	0	0	0	0	0	0	0	200	903	0	0	0	0	0	0	0	603	903	0
2139	6	0	0	0	0	0	0	200	300	0	0	0	0	0	0	0	200	903	0	0	0	0	0	0	0	603	903	0
2139	7	0	0	0	0	0	0	200	300	0	0	0	0	0	0	0	200	903	0	0	0	0	0	0	0	603	903	0
2139	8	0	0	0	0	0	0	200	300	0	0	0	0	0	0	0	200	903	0	0	0	0	0	0	0	603	903	0
2139	9	0	0	0	0	0	0	200	300	0	0	0	0	0	0	0	200	903	0	0	0	0	0	0	0	603	903	0
2140	0	0	0	0	0	0	0	200	300	0	0	0	0	0	0	0	200	903	0	0	0	0	0	0	0	603	903	0
2140	1	0	0	0	0	0	0	200	300	0	0	0	0	0	0	0	200	903	0	0	0	0	0	0	0	603	903	0
2140	2	0	0	0	0	0	0	200	300	0	0	0	0	0	0	0	200	903	0	0	0	0	0	0	0	603	903	0
2140	3	0	0	0	0	0	0	200	300	0	0	0	0	0	0	0	200	903	0	0	0	0	0	0	0	603	903	0
2140	4	0	0	0	0	0	0	200	300	0	0	0	0	0	0	0	200	903	0	0	0	0	0	0	0	603	903	0
2140	5	0	0	0	0	0	0	200	300	0	0	0	0	0	0	0	200	903	0	0	0	0	0	0	0	603	903	0
2140	6	0	0	0	0	0	0	200	300	0	0	0	0	0	0	0	200	903	0	0	0	0	0	0	0	603	903	0
2140	7	0	0	0	0	0	0	200	300	0	0	0	0	0	0	0	200	903	0	0	0	0	0	0	0	603	903	0
2140	8	0	0	0	0	0	0	200	300	0	0	0	0	0	0	0	200	903	0	0	0	0	0	0	0	603	903	0
2140	9	0	0	0	0	0	0	200	300	0	0	0	0	0	0	0	200	903	0	0	0	0	0	0	0	603	903	0
2141	0	0	0	0	0	0	0	200	300	0	0	0	0	0	0	0	200	903	0	0	0	0	0	0	0	603	903	0
2141	1	0	0	0	0	0	0	200	300	0	0	0	0	0	0	0	200	903	0	0	0	0	0	0	0	603	903	0
2141	2	0	0	0	0	0	0	200	300	0	0	0	0	0	0	0	200	903	0	0	0	0	0	0	0	603	903	0
2141	3	0	0	0	0	0	0	200	300	0	0	0	0	0	0	0	200	903	0	0	0	0	0	0	0	603	903	0
2141	4	0	0	0	0	0	0	200	300	0	0	0	0	0	0	0	200	903	0	0	0	0	0	0	0	603	903	0
2141	5	0	0	0	0	0	0	200	300	0	0	0	0	0	0	0	200	903	0	0	0	0	0	0	0	603	903	0
2141	6	0	0	0	0	0	0	200	300	0	0	0	0	0	0	0	200	903	0	0	0	0	0	0	0	603	903	0
2141	7	0	0	0	0	0	0	200	300	0	0	0	0	0	0	0	200	903	0	0	0	0	0	0	0	603	903	0
2141	8	0	0	0	0	0	0	200	300	0	0	0	0	0	0	0	200	903	0	0	0	0	0	0	0	603	903	0
2141	9	0	0	0	0	0	0	200	300	0	0	0	0	0	0	0	200	903	0	0	0	0	0	0	0	603	903	0
2142	0	0	0	0	0	0	0	200	300	0	0	0	0	0	0	0	200	903	0	0	0	0	0	0	0	603	903	0
2142	1	0	0	0	0	0	0	200	300	0	0	0	0	0	0	0	200	903	0	0	0	0	0	0	0	603	903	0
2142	2	0	0	0	0	0	0	200	300	0	0	0	0	0	0	0	200	903	0	0	0	0	0	0	0	603	903	0
2142	3	0	0	0	0	0	0	200	300	0	0	0	0	0	0	0	200	903	0	0	0	0	0	0	0	603	903	0
2142	4	0	0	0	0	0	0	200	300	0	0	0	0	0	0	0	200	903	0	0	0	0	0	0	0	603	903	0
2142	5	0	0	0	0	0	0	200	300	0	0	0	0	0	0	0	200	903	0	0	0	0	0	0	0	603	903	0
2142	6	0	0	0	0	0	0	200	300	0	0	0	0	0	0	0	200	903	0	0	0	0	0	0	0	603	903	0
2142	7	0	0	0	0	0	0	200	300	0	0	0	0	0	0	0	200	903	0	0	0	0	0	0	0	603	903	0
2142	8	0	0	0	0	0	0	200	300	0	0	0	0	0	0	0	200	903	0	0	0	0	0	0	0	603	903	0
2142	9	0	0	0	0	0	0	200	300	0	0	0	0	0	0	0	200	903	0	0	0	0	0	0	0	603	903	0
2143	0	0	0	0	0	0	0	200	300	0	0	0	0	0	0	0	200	903	0	0	0	0	0	0	0	603	903	0
2143	1	0	0	0	0	0	0	200	300	0	0	0	0	0	0	0	200	903	0	0	0	0	0	0	0	603	903	0
2143	2	0	0	0	0	0	0	200	300	0	0	0	0	0	0	0	200	903	0	0	0	0	0	0	0	603	903	0
2143	3	0	0	0	0	0	0	200	300	0	0	0	0	0	0	0	200	903	0	0	0	0	0	0	0	603	903	0
2143	4	0	0	0	0	0	0	200	300	0	0	0	0	0	0	0	200	903	0	0	0	0	0	0	0	603	903	0
2143	5	0	0	0	0	0	0	200	300	0	0	0	0	0	0	0	200	903	0	0	0	0	0	0	0	603	903	0
2143	6	0	0	0	0	0	0	200	300	0	0	0	0	0	0	0	200	903	0	0	0	0	0	0	0	603	903	0
2143	7	0	0	0	0	0	0	200	300	0	0	0	0	0	0	0	200	903	0	0	0	0	0	0	0	603	903	0
2143	8	0	0	0	0	0	0	200	300	0	0	0	0	0	0	0	200	903	0	0	0	0	0	0	0	603	903	0
2143	9	0	0	0	0	0	0	200	300	0	0	0	0	0	0	0	200	903	0	0	0	0	0	0	0	603	903	0
2144	0	0	0	0	0	0	0	200	300	0	0	0	0	0	0	0	200	903	0	0	0	0	0	0	0	603	903	0
2144	1	0	0	0	0	0	0	200	300	0	0	0	0	0	0	0	200	903	0	0	0	0	0	0	0	603	903	0
2144	2	0	0	0	0	0	0	200	300	0	0	0	0	0	0	0	200	903	0	0	0	0	0	0	0	603	903	0
2144	3	0	0	0	0	0	0	200	300	0	0	0	0	0	0	0	200	903	0	0	0	0	0	0	0	603	903	0
2144	4	0	0	0	0	0	0	200	300	0	0	0	0	0	0	0	200	903	0	0	0	0	0	0	0	603	903	0
2144	5	0	0	0	0	0	0	200	300	0	0	0	0	0	0	0	200	903	0	0	0	0	0	0	0	603	903	0
2144	6	0	0	0	0	0	0	200	300	0	0	0	0	0	0	0	200	903	0	0	0	0	0	0	0	603	903	0
2144	7	0	0	0	0	0	0	200	300	0	0	0	0	0	0	0	200	903	0	0	0	0	0	0	0	603	903	0
2144	8	0	0	0	0	0	0	200	300	0	0	0	0	0	0	0	200	903	0	0	0	0	0	0	0	603	903	0
2144	9	0	0	0	0	0	0	200	300	0	0	0	0	0	0	0	200	903	0	0	0	0	0	0	0	603	903	0
2145	0	0	0	0	0	0	0	200	300	0	0	0	0	0	0	0	200	903	0	0	0	0	0	0	0	603	903	0
2145	1	0	0	0	0	0	0	200	300	0	0	0	0	0	0	0	200	903	0	0	0	0	0	0	0	603	903	0
2145	2	0	0	0	0	0	0	200	300	0	0	0	0	0	0	0	200	903	0	0	0	0	0	0	0	603	903	0
2145	3	0	0	0	0	0	0	200	300	0	0	0	0	0	0	0	200	903	0	0	0	0	0	0	0	603	903	0
2145	4	0	0	0	0	0	0	200	300	0	0	0	0	0	0	0	200	903	0	0	0	0	0	0	0	603	903	0
2145	5	0	0	0	0	0	0	200	300	0	0	0	0	0	0	0	200	903	0	0	0	0	0	0	0	603	903	0
2145	6	0	0	0	0	0	0	200	300	0	0	0	0	0	0	0	200	903	0	0	0	0	0	0	0	603	903	0
2145	7	0	0	0	0	0	0	200	300	0	0	0	0	0	0	0	200	903	0	0	0	0	0	0	0	603	903	0
2145	8	0	0	0	0	0	0	200	300	0	0	0	0	0	0	0	200	903	0	0	0	0	0	0	0	603	903	0
2145	9	0	0	0	0	0	0	200	300	0	0	0	0	0	0	0	200	903	0	0	0	0	0	0	0	603	903	0
2146	0	0	0	0	0	0	0	200	300	0	0	0	0	0	0	0	200	903	0	0	0	0	0	0	0	603	903	0
2146	1	0	0	0	0	0	0	200	300	0	0	0	0	0	0	0	200	903	0	0	0	0	0	0	0	603	903	0
2146	2	0	0	0	0	0	0	200	300	0	0	0	0	0	0	0	200	903	0	0	0	0	0	0	0	603	903	0
2146	3	0	0	0	0	0	0	200	300	0	0	0	0	0	0	0	200	903	0	0	0	0	0	0	0	603	903	0
2146	4	0	0	0	0	0	0	200	300	0	0	0	0	0	0	0	200	903	0	0	0	0	0	0	0	603	903	0
2146	5	0	0	0	0	0	0	200	300	0	0	0	0	0	0	0	200	903	0	0	0	0	0	0	0	603	903	0
2146	6	0	0	0	0	0	0	200	300	0	0	0	0	0	0	0	200	903	0	0	0	0	0	0	0	603	903	0
2146	7	0	0	0	0	0	0	200	300	0	0	0	0	0	0	0	200	903	0	0	0	0	0	0	0	603	903	0
2146	8	0	0	0	0	0	0	200	300	0	0	0	0	0	0	0	200	903	0	0	0	0	0	0	0	603	903	0
2146	9	0	0	0	0	0	0	200	300	0	0	0	0	0	0	0	200	903	0	0	0	0	0	0	0	603	903	0
2147	0	0	0	0	0	0	0	200	300	0	0	0	0	0	0	0	200	903	0	0	0	0	0	0	0	603	903	0
2147	1	0	0	0	0	0	0	200	300	0	0	0	0	0	0	0	200	903	0	0	0	0	0	0	0	603	903	0
2147	2	0	0	0	0	0	0	200	300	0	0	0	0	0	0	0	200	903	0	0	0	0	0	0	0	603	903	0
2147	3	0	0	0	0	0	0	200	300	0	0	0	0	0	0	0	200	903	0	0	0	0	0	0	0	603	903	0
2147	4	0	0	0	0	0	0	200	300	0	0	0	0	0	0	0	200	903	0	0	0	0	0	0	0	603	903	0
2147	5	0	0	0	0	0	0	200	300	0	0	0	0	0	0	0	200	903	0	0	0	0	0	0	0	603	903	0
2147	6	0	0	0	0	0	0	200	300	0	0	0	0	0	0	0	200	903	0	0	0	0	0	0	0	603	903	0
2147	7	0	0	0	0	0	0	200	300	0	0	0	0	0	0	0	200	903	0	0	0	0	0	0	0	603	903	0
2147	8	0	0	0	0	0	0	200	300	0	0	0	0	0	0	0	200	903	0	0	0	0	0	0	0	603	903	0
2147	9	0	0	0	0	0	0	200	300	0	0	0	0	0	0	0	200	903	0	0	0	0	0	0	0	603	903	0
2148	0	0	0	0	0	0	0	200	300	0	0	0	0	0	0	0	200	903	0	0	0	0	0	0	0	603	903	0
2148	1	0	0	0	0	0	0	200	300	0	0	0	0	0	0	0	200	903	0	0	0	0	0	0	0	603	903	0
2148	2	0	0	0	0	0	0	200	300	0	0	0	0	0	0	0	200	903	0	0	0	0	0	0	0	603	903	0
2148	3	0	0	0	0	0	0	200	300	0	0	0	0	0	0	0	200	903	0	0	0	0	0	0	0	603	903	0
2148	4	0	0	0	0	0	0	200	300	0	0	0	0	0	0	0	200	903	0	0	0	0	0	0	0	603	903	0
2148	5	0	0	0	0	0	0	200	300	0	0	0	0	0	0	0	200	903	0	0	0	0	0	0	0	603	903	0
2148	6	0	0	0	0	0	0	200	300	0	0	0	0	0	0	0	200	903	0	0	0	0	0	0	0	603	903	0
2148	7	0	0	0	0	0	0	200	300	0	0	0	0	0	0	0	200	903	0	0	0	0	0	0	0	603	903	0
2148	8	0	0	0	0	0	0	200	300	0	0	0	0	0	0	0	200	903	0	0	0	0	0	0	0	603	903	0
2148	9	0	0	0	0	0	0	200	300	0	0	0	0	0	0	0	200	903	0	0	0	0	0	0	0	603	903	0
2149	0	0	0	0	0	0	0	200	300	0	0	0	0	0	0	0	200	903	0	0	0	0	0	0	0	603	903	0
2149	1	0	0	0	0	0	0	200	300	0	0	0	0	0	0	0	200	903	0	0	0	0	0	0	0	603	903	0
2149	2	0	0	0	0	0	0	200	300	0	0	0	0	0	0	0	200	903	0	0	0	0	0	0	0	603	903	0
2149	3	0	0	0	0	0	0	200	300	0	0	0	0	0	0	0	200	903	0	0	0	0	0	0	0	603	903	0
2149	4	0	0	0	0	0	0	200	300	0	0	0	0	0	0	0	200	903	0	0	0	0	0	0	0	603	903	0
2149	5	0	0	0	0	0	0	200	300	0	0	0	0	0	0	0	200	903	0	0	0	0	0	0	0	603	903	0
2149	6	0	0	0	0	0	0	200	300	0	0	0	0	0	0	0	200	903	0	0	0	0	0	0	0	603	903	0
2149	7	0	0	0	0	0	0	200	300	0	0	0	0	0	0	0	200	903	0	0	0	0	0	0	0	603	903	0
2149	8	0	0	0	0	0	0	200	300	0	0	0	0	0	0	0	200	903	0	0	0	0	0	0	0	603	903	0
2149	9	0	0	0	0	0	0	200	300	0	0	0	0	0	0	0	200	903	0	0	0	0	0	0	0	603	903	0
2150	0	0	0	0	0	0	0	200	300	0	0	0	0	0	0	0	200	903	0	0	0	0	0	0	0	603	903	0
2150	1	0	0	0	0	0	0	200	300	0	0	0	0	0	0	0	200	903	0	0	0	0	0	0	0	603	903	0
2150	2	0	0	0	0	0	0	200	300	0	0	0	0	0	0	0	200	903	0	0	0	0	0	0	0	603	903	0
2150	3	0	0	0	0	0	0	200	300	0	0	0	0	0	0	0	200	903	0	0	0	0	0	0	0	603	903	0
2150	4	0	0	0	0	0	0	200	300	0	0	0	0	0	0	0	200	903	0	0	0	0	0	0	0	603	903	0
2150	5	0	0	0	0	0	0	200	300	0	0	0	0	0	0	0	200	903	0	0	0	0	0	0	0	603	903	0
2150	6	0	0	0	0	0	0	200	300	0	0	0	0	0	0	0	200	903	0	0	0	0	0	0	0	603	903	0
2150	7	0	0	0	0	0	0	200	300	0	0	0	0	0	0	0	200	903	0	0	0	0	0	0	0	603	903	0
2150	8	0	0	0	0	0	0	200	300	0	0	0	0	0	0	0	200	903	0	0	0	0	0	0	0	603	903	0
2150	9	0	0	0	0	0	0	200	300	0	0	0	0	0	0	0	200	903	0	0	0	0	0	0	0	603	903	0
2151	0	0	0	0	0	0	0	200	300	0	0	0	0	0	0	0	200	903	0	0	0	0	0	0	0	603	903	0
2151	1	0	0	0	0	0	0	200	300	0	0	0	0	0	0	0	200	903	0	0	0	0	0	0	0	603	903	0
2151	2	0	0	0	0	0	0	200	300	0	0	0	0	0	0	0	200	903	0	0	0	0	0	0	0	603	903	0
2151	3	0	0	0	0	0	0	200	300	0	0	0	0	0	0	0	200	903	0	0	0	0	0	0	0	603	903	0
2151	4	0	0	0	0	0	0	200	300	0	0	0	0	0	0	0	200	903	0	0	0	0	0	0	0	603	903	0
2151	5	0	0	0	0	0	0	200	300	0	0	0	0	0	0	0	200	903	0	0	0	0	0	0	0	603	903	0
2151	6	0	0	0	0	0	0	200	300	0	0	0	0	0	0	0	200	903	0	0	0	0	0	0	0	603	903	0
2151	7	0	0	0	0	0	0	200	300	0	0	0	0	0	0	0	200	903	0	0	0	0	0	0	0	603	903	0
2151	8	0	0	0	0	0	0	200	300	0	0	0	0	0	0	0	200	903	0	0	0	0	0	0	0	603	903	0
2151	9	0	0	0	0	0	0	200	300	0	0	0	0	0	0	0	200	903	0	0	0	0	0	0	0	603	903	0
2152	0	0	0	0	0	0	0	200	300	0	0	0	0	0	0	0	200	903	0	0	0	0	0	0	0	603	903	0
2152	1	0	0	0	0	0	0	200	300	0	0	0	0	0	0	0	200	903	0	0	0	0	0	0	0	603	903	0
2152	2	0	0	0	0	0	0	200	300	0	0	0	0	0	0	0	200	903	0	0	0	0	0	0	0	603	903	0
2152	3	0	0	0	0	0	0	200	300	0	0	0	0	0	0	0	200	903	0	0	0	0	0	0	0	603	903	0
2152	4	0	0	0	0	0	0	200	300	0	0	0	0	0	0	0	200	903	0	0	0	0	0	0	0	603	903	0
2152	5	0	0	0	0	0	0	200	300	0	0	0	0	0	0	0	200	903	0	0	0	0	0	0	0	603	903	0
2152	6	0	0	0	0	0	0	200	300	0	0	0	0	0	0	0	200	903	0	0	0	0	0	0	0	603	903	0
2152	7	0	0	0	0	0	0	200	300	0	0	0	0	0	0	0	200	903	0	0	0	0	0	0	0	603	903	0
2152	8	0	0	0	0	0	0	200	300	0	0	0	0	0	0	0	200	903	0	0	0	0	0	0	0	603	903	0
2152	9	0	0	0	0	0	0	200	300	0	0	0	0	0	0	0	200	903	0	0	0	0	0	0	0	603	903	0
2153	0	0	0	0	0	0	0	200	300	0	0	0	0	0	0	0	200	903	0	0	0	0	0	0	0	603	903	0
2153	1	0	0	0	0	0	0	200	300	0	0	0	0	0	0	0	200	903	0	0	0	0	0	0	0	603	903	0
2153	2	0	0	0	0	0	0	200	300	0	0	0	0	0	0	0	200	903	0	0	0	0	0	0	0	603	903	0
2153	3	0	0	0	0	0	0	200	300	0	0	0	0	0	0	0	200	903	0	0	0	0	0	0	0	603	903	0
2153	4	0	0	0	0	0	0	200	300	0	0	0	0	0	0	0	200	903	0	0	0	0	0	0	0	603	903	0
2153	5	0	0	0	0	0	0	200	300	0	0	0	0	0	0	0	200	903	0	0	0	0	0	0	0	603	903	0
2153	6	0	0	0	0	0	0	200	300	0	0	0	0	0	0	0	200	903	0	0	0	0	0	0	0	603	903	0
2153	7	0	0	0	0	0	0	200	300	0	0	0	0	0	0	0	200	903	0	0	0	0	0	0	0	603	903	0
2153	8	0	0	0	0	0	0	200	300	0	0	0	0	0	0	0	200	903	0	0	0	0	0	0	0	603	903	0
2153	9	0	0	0	0	0	0	200	300	0	0	0	0	0	0	0	200	903	0	0	0	0	0	0	0	603	903	0
2154	0	0	0	0	0	0	0	200	300	0	0	0	0	0	0	0	200	903	0	0	0	0	0	0	0	603	903	0
2154	1	0	0	0	0	0	0	200	300	0	0	0	0	0	0	0	200	903	0	0	0	0	0	0	0	603	903	0
2154	2	0	0	0	0	0	0	200	300	0	0	0	0	0	0	0	200	903	0	0	0	0	0	0	0	603	903	0
2154	3	0	0	0	0	0	0	200	300	0	0	0	0	0	0	0	200	903	0	0	0	0	0	0	0	603	903	0
2154	4	0	0	0	0	0	0	200	300	0	0	0	0	0	0	0	200	903	0	0	0	0	0	0	0	603	903	0
2154	5	0	0	0	0	0	0	200	300	0	0	0	0	0	0	0	200	903	0	0	0	0	0	0	0	603	903	0
2154	6	0	0	0	0	0	0	200	300	0	0	0	0	0	0	0	200	903	0	0	0	0	0	0	0	603	903	0
2154	7	0	0	0	0	0	0	200	300	0	0	0	0	0	0	0	200	903	0	0	0	0	0	0	0	603	903	0
2154	8	0	0	0	0	0	0	200	300	0	0	0	0	0	0	0	200	903	0	0	0	0	0	0	0	603	903	0
2154	9	0	0	0	0	0	0	200	300	0	0	0	0	0	0	0	200	903	0	0	0	0	0	0	0	603	903	0
2155	0	0	0	0	0	0	0	200	300	0	0	0	0	0	0	0	200	903	0	0	0	0	0	0	0	603	903	0
2155	1	0	0	0	0	0	0	200	300	0	0	0	0	0	0	0	200	903	0	0	0	0	0	0	0	603	903	0
2155	2	0	0	0	0	0	0	200	300	0	0	0	0	0	0	0	200	903	0	0	0	0	0	0	0	603	903	0
2155	3	0	0	0	0	0	0	200	300	0	0	0	0	0	0	0	200	903	0	0	0	0	0	0	0	603	903	0
2155	4	0	0	0	0	0	0	200	300	0	0	0	0	0	0	0	200	903	0	0	0	0	0	0	0	603	903	0
2155	5	0	0	0	0	0	0	200	300	0	0	0	0	0	0	0	200	903	0	0	0	0	0	0	0	603	903	0
2155	6	0	0	0	0	0	0	200	300	0	0	0	0	0	0	0	200	903	0	0	0	0	0	0	0	603	903	0
2155	7	0	0	0	0	0	0	200	300	0	0	0	0	0	0	0	200	903	0	0	0	0	0	0	0	603	903	0
2155	8	0	0	0	0	0	0	200	300	0	0	0	0	0	0	0	200	903	0	0	0	0	0	0	0	603	903	0
2155	9	0	0	0	0	0	0	200	300	0	0	0	0	0	0	0	200	903	0	0	0	0	0	0	0	603	903	0
2156	0	0	0	0	0	0	0	200	300	0	0	0	0	0	0	0	200	903	0	0	0	0	0	0	0	603	903	0
2156	1	0	0	0	0	0	0	200	300	0	0	0	0	0	0	0	200	903	0	0	0	0	0	0	0	603	903	0
2156	2	0	0	0	0	0	0	200	300	0	0	0	0	0	0	0	200	903	0	0	0	0	0	0	0	603	903	0
2156	3	0	0	0	0	0	0	200	300	0	0	0	0	0	0	0	200	903	0	0	0	0	0	0	0	603	903	0
2156	4	0	0	0	0	0	0	200	300	0	0	0	0	0	0	0	200	903	0	0	0	0	0	0	0	603	903	0
2156	5	0	0	0	0	0	0	200	300	0	0	0	0	0	0	0	200	903	0	0	0	0	0	0	0	603	903	0
2156	6	0	0	0	0	0	0	200	300	0	0	0	0	0	0	0	200	903	0	0	0	0	0	0	0	603	903	0
2156	7	0	0	0	0	0	0	200	300	0	0	0	0	0	0	0	200	903	0	0	0	0	0	0	0	603	903	0
2156	8	0	0	0	0	0	0	200	300	0	0	0	0	0	0	0	200	903	0	0	0	0	0	0	0	603	903	0
2156	9	0	0	0	0	0	0	200	300	0	0	0	0	0	0	0	200	903	0	0	0	0	0	0	0	603	903	0
2157	0	0	0	0	0	0	0	200	300	0	0	0	0	0	0	0	200	903	0	0	0	0	0	0	0	603	903	0
2157	1	0	0	0	0	0	0	200	300	0	0	0	0	0	0	0	200	903	0	0	0	0	0	0	0	603	903	0
2157	2	0	0	0	0	0	0	200	300	0	0	0	0	0	0	0	200	903	0	0	0	0	0	0	0	603	903	0
2157	3	0	0	0	0	0	0	200	300	0	0	0	0	0	0	0	200	903	0	0	0	0	0	0	0	603	903	0
2157	4	0	0	0	0	0	0	200	300	0	0	0	0	0	0	0	200	903	0	0	0	0	0	0	0	603	903	0
2157	5	0	0	0	0	0	0	200	300	0	0	0	0	0	0	0	200	903	0	0	0	0	0	0	0	603	903	0
2157	6	0	0	0	0	0	0	200	300	0	0	0	0	0	0	0	200	903	0	0	0	0	0	0	0	603	903	0
2157	7	0	0	0	0	0	0	200	300	0	0	0	0	0	0	0	200	903	0	0	0	0	0	0	0	603	903	0
2157	8	0	0	0	0	0	0	200	300	0	0	0	0	0	0	0	200	903	0	0	0	0	0	0	0	603	903	0
2157	9	0	0	0	0	0	0	200	300	0	0	0	0	0	0	0	200	903	0	0	0	0	0	0	0	603	903	0
2158	0	0	0	0	0	0	0	200	300	0	0	0	0	0	0	0	200	903	0	0	0	0	0	0	0	603	903	0
2158	1	0	0	0	0	0	0	200	300	0	0	0	0	0	0	0	200	903	0	0	0	0	0	0	0	603	903	0
2158	2	0	0	0	0	0	0	200	300	0	0	0	0	0	0	0	200	903	0	0	0	0	0	0	0	603	903	0
2158	3	0	0	0	0	0	0	200	300	0	0	0	0	0	0	0	200	903	0	0	0	0	0	0	0	603	903	0
2158	4	0	0	0	0	0	0	200	300	0	0	0	0	0	0	0	200	903	0	0	0	0	0	0	0	603	903	0
2158	5	0	0	0	0	0	0	200	300	0	0	0	0	0	0	0	200	903	0	0	0	0	0	0	0	603	903	0
2158	6	0	0	0	0	0	0	200	300	0	0	0	0	0	0	0	200	903	0	0	0	0	0	0	0	603	903	0
2158	7	0	0	0	0	0	0	200	300	0	0	0	0	0	0	0	200	903	0	0	0	0	0	0	0	603	903	0
2158	8	0	0	0	0	0	0	200	300	0	0	0	0	0	0	0	200	903	0	0	0	0	0	0	0	603	903	0
2158	9	0	0	0	0	0	0	200	300	0	0	0	0	0	0	0	200	903	0	0	0	0	0	0	0	603	903	0
2159	0	0	0	0	0	0	0	200	300	0	0	0	0	0	0	0	200	903	0	0	0	0	0	0	0	603	903	0
2159	1	0	0	0	0	0	0	200	300	0	0	0	0	0	0	0	200	903	0	0	0	0	0	0	0	603	903	0
2159	2	0	0	0	0	0	0	200	300	0	0	0	0	0	0	0	200	903	0	0	0	0	0	0	0	603	903	0
2159	3	0	0	0	0	0	0	200	300	0	0	0	0	0	0	0	200	903	0	0	0	0	0	0	0	603	903	0
2159	4	0	0	0	0	0	0	200	300	0	0	0	0	0	0	0	200	903	0	0	0	0	0	0	0	603	903	0
2159	5	0	0	0	0	0	0	200	300	0	0	0	0	0	0	0	200	903	0	0	0	0	0	0	0	603	903	0
2159	6	0	0	0	0	0	0	200	300	0	0	0	0	0	0	0	200	903	0	0	0	0	0	0	0	603	903	0
2159	7	0	0	0	0	0	0	200	300	0	0	0	0	0	0	0	200	903	0	0	0	0	0	0	0	603	903	0
2159	8	0	0	0	0	0	0	200	300	0	0	0	0	0	0	0	200	903	0	0	0	0	0	0	0	603	903	0
2159	9	0	0	0	0	0	0	200	300	0	0	0	0	0	0	0	200	903	0	0	0	0	0	0	0	603	903	0
2160	0	0	0	0	0	0	0	200	300	0	0	0	0	0	0	0	200	903	0	0	0	0	0	0	0	603	903	0
2160	1	0	0	0	0	0	0	200	300	0	0	0	0	0	0	0	200	903	0	0	0	0	0	0	0	603	903	0
2160	2	0	0	0	0	0	0	200	300	0	0	0	0	0	0	0	200	903	0	0	0	0	0	0	0	603	903	0
2160	3	0	0	0	0	0	0	200	300	0	0	0	0	0	0	0	200	903	0	0	0	0	0	0	0	603	903	0
2160	4	0	0	0	0	0	0	200	300	0	0	0	0	0	0	0	200	903	0	0	0	0	0	0	0	603	903	0
2160	5	0	0	0	0	0	0	200	300	0	0	0	0	0	0	0	200	903	0	0	0	0	0	0	0	603	903	0
2160	6	0	0	0	0	0	0	200	300	0	0	0	0	0	0	0	200	903	0	0	0	0	0	0	0	603	903	0
2160	7	0	0	0	0	0	0	200	300	0	0	0	0	0	0	0	200	903	0	0	0	0	0	0	0	603	903	0
2160	8	0	0	0	0	0	0	200	300	0	0	0	0	0	0	0	200	903	0	0	0	0	0	0	0	603	903	0
2160	9	0	0	0	0	0	0	200	300	0	0	0	0	0	0	0	200	903	0	0	0	0	0	0	0	603	903	0
2161	0	0	0	0	0	0	0	200	300	0	0	0	0	0	0	0	200	903	0	0	0	0	0	0	0	603	903	0
2161	1	0	0	0	0	0	0	200	300	0	0	0	0	0	0	0	200	903	0	0	0	0	0	0	0	603	903	0
2161	2	0	0	0	0	0	0	200	300	0	0	0	0	0	0	0	200	903	0	0	0	0	0	0	0	603	903	0
2161	3	0	0	0	0	0	0	200	300	0	0	0	0	0	0	0	200	903	0	0	0	0	0	0	0	603	903	0
2161	4	0	0	0	0	0	0	200	300	0	0	0	0	0	0	0	200	903	0	0	0	0	0	0	0	603	903	0
2161	5	0	0	0	0	0	0	200	300	0	0	0	0	0	0	0	200	903	0	0	0	0	0	0	0	603	903	0
2161	6	0	0	0	0	0	0	200	300	0	0	0	0	0	0	0	200	903	0	0	0	0	0	0	0	603	903	0
2161	7	0	0	0	0	0	0	200	300	0	0	0	0	0	0	0	200	903	0	0	0	0	0	0	0	603	903	0
2161	8	0	0	0	0	0	0	200	300	0	0	0	0	0	0	0	200	903	0	0	0	0	0	0	0	603	903	0
2161	9	0	0	0	0	0	0	200	300	0	0	0	0	0	0	0	200	903	0	0	0	0	0	0	0	603	903	0
2162	0	0	0	0	0	0	0	200	300	0	0	0	0	0	0	0	200	903	0	0	0	0	0	0	0	603	903	0
2162	1	0	0	0	0	0	0	200	300	0	0	0	0	0	0	0	200	903	0	0	0	0	0	0	0	603	903	0
2162	2	0	0	0	0	0	0	200	300	0	0	0	0	0	0	0	200	903	0	0	0	0	0	0	0	603	903	0
2162	3	0	0	0	0	0	0	200	300	0	0	0	0	0	0	0	200	903	0	0	0	0	0	0	0	603	903	0
2162	4	0	0	0	0	0	0	200	300	0	0	0	0	0	0	0	200	903	0	0	0	0	0	0	0	603	903	0
2162	5	0	0	0	0	0	0	200	300	0	0	0	0	0	0	0	200	903	0	0	0	0	0	0	0	603	903	0
2162	6	0	0	0	0	0	0	200	300	0	0	0	0	0	0	0	200	903	0	0	0	0	0	0	0	603	903	0
2162	7	0	0	0	0	0	0	200	300	0	0	0	0	0	0	0	200	903	0	0	0	0	0	0	0	603	903	0
2162	8	0	0	0	0	0	0	200	300	0	0	0	0	0	0	0	200	903	0	0	0	0	0	0	0	603	903	0
2162	9	0	0	0	0	0	0	200	300	0	0	0	0	0	0	0	200	903	0	0	0	0	0	0	0	603	903	0
2163	0	0	0	0	0	0	0	200	300	0	0	0	0	0	0	0	200	903	0	0	0	0	0	0	0	603	903	0
2163	1	0	0	0	0	0	0	200	300	0	0	0	0	0	0	0	200	903	0	0	0	0	0	0	0	603	903	0
2163	2	0	0	0	0	0	0	200	300	0	0	0	0	0	0	0	200	903	0	0	0	0	0	0	0	603	903	0
2163	3	0	0	0	0	0	0	200	300	0	0	0	0	0	0	0	200	903	0	0	0	0	0	0	0	603	903	0
2163	4	0	0	0	0	0	0	200	300	0	0	0	0	0	0	0	200	903	0	0	0	0	0	0	0	603	903	0
2163	5	0	0	0	0	0	0	200	300	0	0	0	0	0	0	0	200	903	0	0	0	0	0	0	0	603	903	0
2163	6	0	0	0	0	0	0	200	300	0	0	0	0	0	0	0	200	903	0	0	0	0	0	0	0	603	903	0
2163	7	0	0	0	0	0	0	200	300	0	0	0	0	0	0	0	200	903	0	0	0	0	0	0	0	603	903	0
2163	8	0	0	0	0	0	0	200	300	0	0	0	0	0	0	0	200	903	0	0	0	0	0	0	0	603	903	0
2163	9	0	0	0	0	0	0	200	300	0	0	0	0	0	0	0	200	903	0	0	0	0	0	0	0	603	903	0
2164	0	0	0	0	0	0	0	200	300	0	0	0	0	0	0	0	200	903	0	0	0	0	0	0	0	603	903	0
2164	1	0	0	0	0	0	0	200	300	0	0	0	0	0	0	0	200	903	0	0	0	0	0	0	0	603	903	0
2164	2	0	0	0	0	0	0	200	300	0	0	0	0	0	0	0	200	903	0	0	0	0	0	0	0	603	903	0
2164	3	0	0	0	0	0	0	200	300	0	0	0	0	0	0	0	200	903	0	0	0	0	0	0	0	603	903	0
2164	4	0	0	0	0	0	0	200	300	0	0	0	0	0	0	0	200	903	0	0	0	0	0	0	0	603	903	0
2164	5	0	0	0	0	0	0	200	300	0	0	0	0	0	0	0	200	903	0	0	0	0	0	0	0	603	903	0
2164	6	0	0	0	0	0	0	200	300	0	0	0	0	0	0	0	200	903	0	0	0	0	0	0	0	603	903	0
2164	7	0	0	0	0	0	0	200	300	0	0	0	0	0	0	0	200	903	0	0	0	0	0	0	0	603	903	0
2164	8	0	0	0	0	0	0	200	300	0	0	0	0	0	0	0	200	903	0	0	0	0	0	0	0	603	903	0
2164	9	0	0	0	0	0	0	200	300	0	0	0	0	0	0	0	200	903	0	0	0	0	0	0	0	603	903	0
2165	0	0	0	0	0	0	0	200	300	0	0	0	0	0	0	0	200	903	0	0	0	0	0	0	0	603	903	0
2165	1	0	0	0	0	0	0	200	300	0	0	0	0	0	0	0	200	903	0	0	0	0	0	0	0	603	903	0
2165	2	0	0	0	0	0	0	200	300	0	0	0	0	0	0	0	200	903	0	0	0	0	0	0	0	603	903	0
2165	3	0	0	0	0	0	0	200	300	0	0	0	0	0	0	0	200	903	0	0	0	0	0	0	0	603	903	0
2165	4	0	0	0	0	0	0	200	300	0	0	0	0	0	0	0	200	903	0	0	0	0	0	0	0	603	903	0
2165	5	0	0	0	0	0	0	200	300	0	0	0	0	0	0	0	200	903	0	0	0	0	0	0	0	603	903	0
2165	6	0	0	0	0	0	0	200	300	0	0	0	0	0	0	0	200	903	0	0	0	0	0	0	0	603	903	0
2165	7	0	0	0	0	0	0	200	300	0	0	0	0	0	0	0	200	903	0	0	0	0	0	0	0	603	903	0
2165	8	0	0	0	0	0	0	200	300	0	0	0	0	0	0	0	200	903	0	0	0	0	0	0	0	603	903	0
2165	9	0	0	0	0	0	0	200	300	0	0	0	0	0	0	0	200	903	0	0	0	0	0	0	0	603	903	0
2166	0	0	0	0	0	0	0	200	300	0	0	0	0	0	0	0	200	903	0	0	0	0	0	0	0	603	903	0
2166	1	0	0	0	0	0	0	200	300	0	0	0	0	0	0	0	200	903	0	0	0	0	0	0	0	603	903	0
2166	2	0	0	0	0	0	0	200	300	0	0	0	0	0	0	0	200	903	0	0	0	0	0	0	0	603	903	0
2166	3	0	0	0	0	0	0	200	300	0	0	0	0	0	0	0	200	903	0	0	0	0	0	0	0	603	903	0
2166	4	0	0	0	0	0	0	200	300	0	0	0	0	0	0	0	200	903	0	0	0	0	0	0	0	603	903	0
2166	5	0	0	0	0	0	0	200	300	0	0	0	0	0	0	0	200	903	0	0	0	0	0	0	0	603	903	0
2166	6	0	0	0	0	0	0	200	300	0	0	0	0	0	0	0	200	903	0	0	0	0	0	0	0	603	903	0
2166	7	0	0	0	0	0	0	200	300	0	0	0	0	0	0	0	200	903	0	0	0	0	0	0	0	603	903	0
2166	8	0	0	0	0	0	0	200	300	0	0	0	0	0	0	0	200	903	0	0	0	0	0	0	0	603	903	0
2166	9	0	0	0	0	0	0	200	300	0	0	0	0	0	0	0	200	903	0	0	0	0	0	0	0	603	903	0
2167	0	0	0	0	0	0	0	200	300	0	0	0	0	0	0	0	200	903	0	0	0	0	0	0	0	603	903	0
2167	1	0	0	0	0	0	0	200	300	0	0	0	0	0	0	0	200	903	0	0	0	0	0	0	0	603	903	0
2167	2	0	0	0	0	0	0	200	300	0	0	0	0	0	0	0	200	903	0	0	0	0	0	0	0	603	903	0
2167	3	0	0	0	0	0	0	200	300	0	0	0	0	0	0	0	200	903	0	0	0	0	0	0	0	603	903	0
2167	4	0	0	0	0	0	0	200	300	0	0	0	0	0	0	0	200	903	0	0	0	0	0	0	0	603	903	0
2167	5	0	0	0	0	0	0	200	300	0	0	0	0	0	0	0	200	903	0	0	0	0	0	0	0	603	903	0
2167	6	0	0	0	0	0	0	200	300	0	0	0	0	0	0	0	200	903	0	0	0	0	0	0	0	603	903	0
2167	7	0	0	0	0	0	0	200	300	0	0	0	0	0	0	0	200	903	0	0	0	0	0	0	0	603	903	0
2167	8	0	0	0	0	0	0	200	300	0	0	0	0	0	0	0	200	903	0	0	0	0	0	0	0	603	903	0
2167	9	0	0	0	0	0	0	200	300	0	0	0	0	0	0	0	200	903	0	0	0	0	0	0	0	603	903	0
2168	0	0	0	0	0	0	0	200	300	0	0	0	0	0	0	0	200	903	0	0	0	0	0	0	0	603	903	0
2168	1	0	0	0	0	0	0	200	300	0	0	0	0	0	0	0	200	903	0	0	0	0	0	0	0	603	903	0
2168	2	0	0	0	0	0	0	200	300	0	0	0	0	0	0	0	200	903	0	0	0	0	0	0	0	603	903	0
2168	3	0	0	0	0	0	0	200	300	0	0	0	0	0	0	0	200	903	0	0	0	0	0	0	0	603	903	0
2168	4	0	0	0	0	0	0	200	300	0	0	0	0	0	0	0	200	903	0	0	0	0	0	0	0	603	903	0
2168	5	0	0	0	0	0	0	200	300	0	0	0	0	0	0	0	200	903	0	0	0	0	0	0	0	603	903	0
2168	6	0	0	0	0	0	0	200	300	0	0	0	0	0	0	0	200	903	0	0	0	0	0	0	0	603	903	0
2168	7	0	0	0	0	0	0	200	300	0	0	0	0	0	0	0	200	903	0	0	0	0	0	0	0	603	903	0
2168	8	0	0	0	0	0	0	200	300	0	0	0	0	0	0	0	200	903	0	0	0	0	0	0	0	603	903	0
2168	9	0	0	0	0	0	0	200	300	0	0	0	0	0	0	0	200	903	0	0	0	0	0	0	0	603	903	0
2169	0	0	0	0	0	0	0	200	300	0	0	0	0	0	0	0	200	903	0	0	0	0	0	0	0	603	903	0
2169	1	0	0	0	0	0	0	200	300	0	0	0	0	0	0	0	200	903	0	0	0	0	0	0	0	603	903	0
2169	2	0	0	0	0	0	0	200	300	0	0	0	0	0	0	0	200	903	0	0	0	0	0	0	0	603	903	0
2169	3	0	0	0	0	0	0	200	300	0	0	0	0	0	0	0	200	903	0	0	0	0	0	0	0	603	903	0
2169	4	0	0	0	0	0	0	200	300	0	0	0	0	0	0	0	200	903	0	0	0	0	0	0	0	603	903	0
2169	5	0	0	0	0	0	0	200	300	0	0	0	0	0	0	0	200	903	0	0	0	0	0	0	0	603	903	0
2169	6	0	0	0	0	0	0	200	300	0	0	0	0	0	0	0	200	903	0	0	0	0	0	0	0	603	903	0
2169	7	0	0	0	0	0	0	200	300	0	0	0	0	0	0	0	200	903	0	0	0	0	0	0	0	603	903	0
2169	8	0	0	0	0	0	0	200	300	0	0	0	0	0	0	0	200	903	0	0	0	0	0	0	0	603	903	0
2169	9	0	0	0	0	0	0	200	300	0	0	0	0	0	0	0	200	903	0	0	0	0	0	0	0	603	903	0
2170	0	0	0	0	0	0	0	200	300	0	0	0	0	0	0	0	200	903	0	0	0	0	0	0	0	603	903	0
2170	1	0	0	0	0	0	0	200	300	0	0	0	0	0	0	0	200	903	0	0	0	0	0	0	0	603	903	0
2170	2	0	0	0	0	0	0	200	300	0	0	0	0	0	0	0	200	903	0	0	0	0	0	0	0	603	903	0
2170	3	0	0	0	0	0	0	200	300	0	0	0	0	0	0	0	200	903	0	0	0	0	0	0	0	603	903	0
2170	4	0	0	0	0	0	0	200	300	0	0	0	0	0	0	0	200	903	0	0	0	0	0	0	0	603	903	0
2170	5	0	0	0	0	0	0	200	300	0	0	0	0	0	0	0	200	903	0	0	0	0	0	0	0	603	903	0
2170	6	0	0	0	0	0	0	200	300	0	0	0	0	0	0	0	200	903	0	0	0	0	0	0	0	603	903	0
2170	7	0	0	0	0	0	0	200	300	0	0	0	0	0	0	0	200	903	0	0	0	0	0	0	0	603	903	0
2170	8	0	0	0	0	0	0	200	300	0	0	0	0	0	0	0	200	903	0	0	0	0	0	0	0	603	903	0
2170	9	0	0	0	0	0	0	200	300	0	0	0	0	0	0	0	200	903	0	0	0	0	0	0	0	603	903	0
2171	0	0	0	0	0	0	0	200	300	0	0	0	0	0	0	0	200	903	0	0	0	0	0	0	0	603	903	0
2171	1	0	0	0	0	0	0	200	300	0	0	0	0	0	0	0	200	903	0	0	0	0	0	0	0	603	903	0
2171	2	0	0	0	0	0	0	200	300	0	0	0	0	0	0	0	200	903	0	0	0	0	0	0	0	603	903	0
2171	3	0	0	0	0	0	0	200	300	0	0	0	0	0	0	0	200	903	0	0	0	0	0	0	0	603	903	0
2171	4	0	0	0	0	0	0	200	300	0	0	0	0	0	0	0	200	903	0	0	0	0	0	0	0	603	903	0
2171	5	0	0	0	0	0	0	200	300	0	0	0	0	0	0	0	200	903	0	0	0	0	0	0	0	603	903	0
2171	6	0	0	0	0	0	0	200	300	0	0	0	0	0	0	0	200	903	0	0	0	0	0	0	0	603	903	0
2171	7	0	0	0	0	0	0	200	300	0	0	0	0	0	0	0	200	903	0	0	0	0	0	0	0	603	903	0
2171	8	0	0	0	0	0	0	200	300	0	0	0	0	0	0	0	200	903	0	0	0	0	0	0	0	603	903	0
2171	9	0	0	0	0	0	0	200	300	0	0	0	0	0	0	0	200	903	0	0	0	0	0	0	0	603	903	0
2172	0	0	0	0	0	0	0	200	300	0	0	0	0	0	0	0	200	903	0	0	0	0	0	0	0	603	903	0
2172	1	0	0	0	0	0	0	200	300	0	0	0	0	0	0	0	200	903	0	0	0	0	0	0	0	603	903	0
2172	2	0	0	0	0	0	0	200	300	0	0	0	0	0	0	0	200	903	0	0	0	0	0	0	0	603	903	0
2172	3	0	0	0	0	0	0	200	300	0	0	0	0	0	0	0	200	903	0	0	0	0	0	0	0	603	903	0
2172	4	0	0	0	0	0	0	200	300	0	0	0	0	0	0	0	200	903	0	0	0	0	0	0	0	603	903	0
2172	5	0	0	0	0	0	0	200	300	0	0	0	0	0	0	0	200	903	0	0	0	0	0	0	0	603	903	0
2172	6	0	0	0	0	0	0	200	300	0	0	0	0	0	0	0	200	903	0	0	0	0	0	0	0	603	903	0
2172	7	0	0	0	0	0	0	200	300	0	0	0	0	0	0	0	200	903	0	0	0	0	0	0	0	603	903	0
2172	8	0	0	0	0	0	0	200	300	0	0	0	0	0	0	0	200	903	0	0	0	0	0	0	0	603	903	0
2172	9	0	0	0	0	0	0	200	300	0	0	0	0	0	0	0	200	903	0	0	0	0	0	0	0	603	903	0
2173	0	0	0	0	0	0	0	200	300	0	0	0	0	0	0	0	200	903	0	0	0	0	0	0	0	603	903	0
2173	1	0	0	0	0	0	0	200	300	0	0	0	0	0	0	0	200	903	0	0	0	0	0	0	0	603	903	0
2173	2	0	0	0	0	0	0	200	300	0	0	0	0	0	0	0	200	903	0	0	0	0	0	0	0	603	903	0
2173	3	0	0	0	0	0	0	200	300	0	0	0	0	0	0	0	200	903	0	0	0	0	0	0	0	603	903	0
2173	4	0	0	0	0	0	0	200	300	0	0	0	0	0	0	0	200	903	0	0	0	0	0	0	0	603	903	0
2173	5	0	0	0	0	0	0	200	300	0	0	0	0	0	0	0	200	903	0	0	0	0	0	0	0	603	903	0
2173	6	0	0	0	0	0	0	200	300	0	0	0	0	0	0	0	200	903	0	0	0	0	0	0	0	603	903	0
2173	7	0	0	0	0	0	0	200	300	0	0	0	0	0	0	0	200	903	0	0	0	0	0	0	0	603	903	0
2173	8	0	0	0	0	0	0	200	300	0	0	0	0	0	0	0	200	903	0	0	0	0	0	0	0	603	903	0
2173	9	0	0	0	0	0	0	200	300	0	0	0	0	0	0	0	200	903	0	0	0	0	0	0	0	603	903	0
2174	0	0	0	0	0	0	0	200	300	0	0	0	0	0	0	0	200	903	0	0	0	0	0	0	0	603	903	0
2174	1	0	0	0	0	0	0	200	300	0	0	0	0	0	0	0	200	903	0	0	0	0	0	0	0	603	903	0
2174	2	0	0	0	0	0	0	200	300	0	0	0	0	0	0	0	200	903	0	0	0	0	0	0	0	603	903	0
2174	3	0	0	0	0	0	0	200	300	0	0	0	0	0	0	0	200	903	0	0	0	0	0	0	0	603	903	0
2174	4	0	0	0	0	0	0	200	300	0	0	0	0	0	0	0	200	903	0	0	0	0	0	0	0	603	903	0
2174	5	0	0	0	0	0	0	200	300	0	0	0	0	0	0	0	200	903	0	0	0	0	0	0	0	603	903	0
2174	6	0	0	0	0	0	0	200	300	0	0	0	0	0	0	0	200	903	0	0	0	0	0	0	0	603	903	0
2174	7	0	0	0	0	0	0	200	300	0	0	0	0	0	0	0	200	903	0	0	0	0	0	0	0	603	903	0
2174	8	0	0	0	0	0	0	200	300	0	0	0	0	0	0	0	200	903	0	0	0	0	0	0	0	603	903	0
2174	9	0	0	0	0	0	0	200	300	0	0	0	0	0	0	0	200	903	0	0	0	0	0	0	0	603	903	0
2175	0	0	0	0	0	0	0	200	300	0	0	0	0	0	0	0	200	903	0	0	0	0	0	0	0	603	903	0
2175	1	0	0	0	0	0	0	200	300	0	0	0	0	0	0	0	200	903	0	0	0	0	0	0	0	603	903	0
2175	2	0	0	0	0	0	0	200	300	0	0	0	0	0	0	0	200	903	0	0	0	0	0	0	0	603	903	0
2175	3	0	0	0	0	0	0	200	300	0	0	0	0	0	0	0	200	903	0	0	0	0	0	0	0	603	903	0
2175	4	0	0	0	0	0	0	200	300	0	0	0	0	0	0	0	200	903	0	0	0	0	0	0	0	603	903	0
2175	5	0	0	0	0	0	0	200	300	0	0	0	0	0	0	0	200	903	0	0	0	0	0	0	0	603	903	0
2175	6	0	0	0	0	0	0	200	300	0	0	0	0	0	0	0	200	903	0	0	0	0	0	0	0	603	903	0
2175	7	0	0	0	0	0	0	200	300	0	0	0	0	0	0	0	200	903	0	0	0	0	0	0	0	603	903	0
2175	8	0	0	0	0	0	0	200	300	0	0	0	0	0	0	0	200	903	0	0	0	0	0	0	0	603	903	0
2175	9	0	0	0	0	0	0	200	300	0	0	0	0	0	0	0	200	903	0	0	0	0	0	0	0	603	903	0
2176	0	0	0	0	0	0	0	200	300	0	0	0	0	0	0	0	200	903	0	0	0	0	0	0	0	603	903	0
2176	1	0	0	0	0	0	0	200	300	0	0	0	0	0	0	0	200	903	0	0	0	0	0	0	0	603	903	0
2176	2	0	0	0	0	0	0	200	300	0	0	0	0	0	0	0	200	903	0	0	0	0	0	0	0	603	903	0
2176	3	0	0	0	0	0	0	200	300	0	0	0	0	0	0	0	200	903	0	0	0	0	0	0	0	603	903	0
2176	4	0	0	0	0	0	0	200	300	0	0	0	0	0	0	0	200	903	0	0	0	0	0	0	0	603	903	0
2176	5	0	0	0	0	0	0	200	300	0	0	0	0	0	0	0	200	903	0	0	0	0	0	0	0	603	903	0
2176	6	0	0	0	0	0	0	200	300	0	0	0	0	0	0	0	200	903	0	0	0	0	0	0	0	603	903	0
2176	7	0	0	0	0	0	0	200	300	0	0	0	0	0	0	0	200	903	0	0	0	0	0	0	0	603	903	0
2176	8	0	0	0	0	0	0	200	300	0	0	0	0	0	0	0	200	903	0	0	0	0	0	0	0	603	903	0
2176	9	0	0	0	0	0	0	200	300	0	0	0	0	0	0	0	200	903	0	0	0	0	0	0	0	603	903	0
2177	0	0	0	0	0	0	0	200	300	0	0	0	0	0	0	0	200	903	0	0	0	0	0	0	0	603	903	0
2177	1	0	0	0	0	0	0	200	300	0	0	0	0	0	0	0	200	903	0	0	0	0	0	0	0	603	903	0
2177	2	0	0	0	0	0	0	200	300	0	0	0	0	0	0	0	200	903	0	0	0	0	0	0	0	603	903	0
2177	3	0	0	0	0	0	0	200	300	0	0	0	0	0	0	0	200	903	0	0	0	0	0	0	0	603	903	0
2177	4	0	0	0	0	0	0	200	300	0	0	0	0	0	0	0	200	903	0	0	0	0	0	0	0	603	903	0
2177	5	0	0	0	0	0	0	200	300	0	0	0	0	0	0	0	200	903	0	0	0	0	0	0	0	603	903	0
2177	6	0	0	0	0	0	0	200	300	0	0	0	0	0	0	0	200	903	0	0	0	0	0	0	0	603	903	0
2177	7	0	0	0	0	0	0	200	300	0	0	0	0	0	0	0	200	903	0	0	0	0	0	0	0	603	903	0
2177	8	0	0	0	0	0	0	200	300	0	0	0	0	0	0	0	200	903	0	0	0	0	0	0	0	603	903	0
2177	9	0	0	0	0	0	0	200	300	0	0	0	0	0	0	0	200	903	0	0	0	0	0	0	0	603	903	0
2178	0	0	0	0	0	0	0	200	300	0	0	0	0	0	0	0	200	903	0	0	0	0	0	0	0	603	903	0
2178	1	0	0	0	0	0	0	200	300	0	0	0	0	0	0	0	200	903	0	0	0	0	0	0	0	603	903	0
2178	2	0	0	0	0	0	0	200	300	0	0	0	0	0	0	0	200	903	0	0	0	0	0	0	0	603	903	0
2178	3	0	0	0	0	0	0	200	300	0	0	0	0	0	0	0	200	903	0	0	0	0	0	0	0	603	903	0
2178	4	0	0	0	0	0	0	200	300	0	0	0	0	0	0	0	200	903	0	0	0	0	0	0	0	603	903	0
2178	5	0	0	0	0	0	0	200	300	0	0	0	0	0	0	0	200	903	0	0	0	0	0	0	0	603	903	0
2178	6	0	0	0	0	0	0	200	300	0	0	0	0	0	0	0	200	903	0	0	0	0	0	0	0	603	903	0
2178	7	0	0	0	0	0	0	200	300	0	0	0	0	0	0	0	200	903	0	0	0	0	0	0	0	603	903	0
2178	8	0	0	0	0	0	0	200	300	0	0	0	0	0	0	0	200	903	0	0	0	0	0	0	0	603	903	0
2178	9	0	0	0	0	0	0	200	300	0	0	0	0	0	0	0	200	903	0	0	0	0	0	0	0	603	903	0
2179	0	0	0	0	0	0	0	200	300	0	0	0	0	0	0	0	200	903	0	0	0	0	0	0	0	603	903	0
2179	1	0	0	0	0	0	0	200	300	0	0	0	0	0	0	0	200	903	0	0	0	0	0	0	0	603	903	0
2179	2	0	0	0	0	0	0	200	300	0	0	0	0	0	0	0	200	903	0	0	0	0	0	0	0	603	903	0
2179	3	0	0	0	0	0	0	200	300	0	0	0	0	0	0	0	200	903	0	0	0	0	0	0	0	603	903	0
2179	4	0	0	0	0	0	0	200	300	0	0	0	0	0	0	0	200	903	0	0	0	0	0	0	0	603	903	0
2179	5	0	0	0	0	0	0	200	300	0	0	0	0	0	0	0	200	903	0	0	0	0	0	0	0	603	903	0
2179	6	0	0	0	0	0	0	200	300	0	0	0	0	0	0	0	200	903	0	0	0	0	0	0	0	603	903	0
2179	7	0	0	0	0	0	0	200	300	0	0	0	0	0	0	0	200	903	0	0	0	0	0	0	0	603	903	0
2179	8	0	0	0	0	0	0	200	300	0	0	0	0	0	0	0	200	903	0	0	0	0	0	0	0	603	903	0
2179	9	0	0	0	0	0	0	200	300	0	0	0	0	0	0	0	200	903	0	0	0	0	0	0	0	603	903	0
2180	0	0	0	0	0	0	0	200	300	0	0	0	0	0	0	0	200	903	0	0	0	0	0	0	0	603	903	0
2180	1	0	0	0	0	0	0	200	300	0	0	0	0	0	0	0	200	903	0	0	0	0	0	0	0	603	903	0
2180	2	0	0	0	0	0	0	200	300	0	0	0	0	0	0	0	200	903	0	0	0	0	0	0	0	603	903	0
2180	3	0	0	0	0	0	0	200	300	0	0	0	0	0	0	0	200	903	0	0	0	0	0	0	0	603	903	0
2180	4	0	0	0	0	0	0	200	300	0	0	0	0	0	0	0	200	903	0	0	0	0	0	0	0	603	903	0
2180	5	0	0	0	0	0	0	200	300	0	0	0	0	0	0	0	200	903	0	0	0	0	0	0	0	603	903	0
2180	6	0	0	0	0	0	0	200	300	0	0	0	0	0	0	0	200	903	0	0	0	0	0	0	0	603	903	0
2180	7	0	0	0	0	0	0	200	300	0	0	0	0	0	0	0	200	903	0	0	0	0	0	0	0	603	903	0
2180	8	0	0	0	0	0	0	200	300	0	0	0	0	0	0	0	200	903	0	0	0	0	0	0	0	603	903	0
2180	9	0	0	0	0	0	0	200	300	0	0	0	0	0	0	0	200	903	0	0	0	0	0	0	0	603	903	0
2181	0	0	0	0	0	0	0	200	300	0	0	0	0	0	0	0	200	903	0	0	0	0	0	0	0	603	903	0
2181	1	0	0	0	0	0	0	200	300	0	0	0	0	0	0	0	200	903	0	0	0	0	0	0	0	603	903	0
2181	2	0	0	0	0	0	0	200	300	0	0	0	0	0	0	0	200	903	0	0	0	0	0	0	0	603	903	0
2181	3	0	0	0	0	0	0	200	300	0	0	0	0	0	0	0	200	903	0	0	0	0	0	0	0	603	903	0
2181	4	0	0	0	0	0	0	200	300	0	0	0	0	0	0	0	200	903	0	0	0	0	0	0	0	603	903	0
2181	5	0	0	0	0	0	0	200	300	0	0	0	0	0	0	0	200	903	0	0	0	0	0	0	0	603	903	0
2181	6	0	0	0	0	0	0	200	300	0	0	0	0	0	0	0	200	903	0	0	0	0	0	0	0	603	903	0
2181	7	0	0	0	0	0	0	200	300	0	0	0	0	0	0	0	200	903	0	0	0	0	0	0	0	603	903	0
2181	8	0	0	0	0	0	0	200	300	0	0	0	0	0	0	0	200	903	0	0	0	0	0	0	0	603	903	0
2181	9	0	0	0	0	0	0	200	300	0	0	0	0	0	0	0	200	903	0	0	0	0	0	0	0	603	903	0
2182	0	0	0	0	0	0	0	200	300	0	0	0	0	0	0	0	200	903	0	0	0	0	0	0	0	603	903	0
2182	1	0	0	0	0	0	0	200	300	0	0	0	0	0	0	0	200	903	0	0	0	0	0	0	0	603	903	0
2182	2	0	0	0	0	0	0	200	300	0	0	0	0	0	0	0	200	903	0	0	0	0	0	0	0	603	903	0
2182	3	0	0	0	0	0	0	200	300	0	0	0	0	0	0	0	200	903	0	0	0	0	0	0	0	603	903	0
2182	4	0	0	0	0	0	0	200	300	0	0	0	0	0	0	0	200	903	0	0	0	0	0	0	0	603	903	0
2182	5	0	0	0	0	0	0	200	300	0	0	0	0	0	0	0	200	903	0	0	0	0	0	0	0	603	903	0
2182	6	0	0	0	0	0	0	200	300	0	0	0	0	0	0	0	200	903	0	0	0	0	0	0	0	603	903	0
2182	7	0	0	0	0	0	0	200	300	0	0	0	0	0	0	0	200	903	0	0	0	0	0	0	0	603	903	0
2182	8	0	0	0	0	0	0	200	300	0	0	0	0	0	0	0	200	903	0	0	0	0	0	0	0	603	903	0
2182	9	0	0	0	0	0	0	200	300	0	0	0	0	0	0	0	200	903	0	0	0	0	0	0	0	603	903	0
2183	0	0	0	0	0	0	0	200	300	0	0	0	0	0	0	0	200	903	0	0	0	0	0	0	0	603	903	0
2183	1	0	0	0	0	0	0	200	300	0	0	0	0	0	0	0	200	903	0	0	0	0	0	0	0	603	903	0
2183	2	0	0	0	0	0	0	200	300	0	0	0	0	0	0	0	200	903	0	0	0	0	0	0	0	603	903	0
2183	3	0	0	0	0	0	0	200	300	0	0	0	0	0	0	0	200	903	0	0	0	0	0	0	0	603	903	0
2183	4	0	0	0	0	0	0	200	300	0	0	0	0	0	0	0	200	903	0	0	0	0	0	0	0	603	903	0
2183	5	0	0	0	0	0	0	200	300	0	0	0	0	0	0	0	200	903	0	0	0	0	0	0	0	603	903	0
2183	6	0	0	0	0	0	0	200	300	0	0	0	0	0	0	0	200	903	0	0	0	0	0	0	0	603	903	0
2183	7	0	0	0	0	0	0	200	300	0	0	0	0	0	0	0	200	903	0	0	0	0	0	0	0	603	903	0
2183	8	0	0	0	0	0	0	200	300	0	0	0	0	0	0	0	200	903	0	0	0	0	0	0	0	603	903	0
2183	9	0	0	0	0	0	0	200	300	0	0	0	0	0	0	0	200	903	0	0	0	0	0	0	0	603	903	0
2184	0	0	0	0	0	0	0	200	300	0	0	0	0	0	0	0	200	903	0	0	0	0	0	0	0	603	903	0
2184	1	0	0	0	0	0	0	200	300	0	0	0	0	0	0	0	200	903	0	0	0	0	0	0	0	603	903	0
2184	2	0	0	0	0	0	0	200	300	0	0	0	0	0	0	0	200	903	0	0	0	0	0	0	0	603	903	0
2184	3	0	0	0	0	0	0	200	300	0	0	0	0	0	0	0	200	903	0	0	0	0	0	0	0	603	903	0
2184	4	0	0	0	0	0	0	200	300	0	0	0	0	0	0	0	200	903	0	0	0	0	0	0	0	603	903	0
2184	5	0	0	0	0	0	0	200	300	0	0	0	0	0	0	0	200	903	0	0	0	0	0	0	0	603	903	0
2184	6	0	0	0	0	0	0	200	300	0	0	0	0	0	0	0	200	903	0	0	0	0	0	0	0	603	903	0
2184	7	0	0	0	0	0	0	200	300	0	0	0	0	0	0	0	200	903	0	0	0	0	0	0	0	603	903	0
2184	8	0	0	0	0	0	0	200	300	0	0	0	0	0	0	0	200	903	0	0	0	0	0	0	0	603	903	0
2184	9	0	0	0	0	0	0	200	300	0	0	0	0	0	0	0	200	903	0	0	0	0	0	0	0	603	903	0
2185	0	0	0	0	0	0	0	200	300	0	0	0	0	0	0	0	200	903	0	0	0	0	0	0	0	603	903	0
2185	1	0	0	0	0	0	0	200	300	0	0	0	0	0	0	0	200	903	0	0	0	0	0	0	0	603	903	0
2185	2	0	0	0	0	0	0	200	300	0	0	0	0	0	0	0	200	903	0	0	0	0	0	0	0	603	903	0
2185	3	0	0	0	0	0	0	200	300	0	0	0	0	0	0	0	200	903	0	0	0	0	0	0	0	603	903	0
2185	4	0	0	0	0	0	0	200	300	0	0	0	0	0	0	0	200	903	0	0	0	0	0	0	0	603	903	0
2185	5	0	0	0	0	0	0	200	300	0	0	0	0	0	0	0	200	903	0	0	0	0	0	0	0	603	903	0
2185	6	0	0	0	0	0	0	200	300	0	0	0	0	0	0	0	200	903	0	0	0	0	0	0	0	603	903	0
2185	7	0	0	0	0	0	0	200	300	0	0	0	0	0	0	0	200	903	0	0	0	0	0	0	0	603	903	0
2185	8	0	0	0	0	0	0	200	300	0	0	0	0	0	0	0	200	903	0	0	0	0	0	0	0	603	903	0
2185	9	0	0	0	0	0	0	200	300	0	0	0	0	0	0	0	200	903	0	0	0	0	0	0	0	603	903	0
2186	0	0	0	0	0	0	0	200	300	0	0	0	0	0	0	0	200	903	0	0	0	0	0	0	0	603	903	0
2186	1	0	0	0	0	0	0	200	300	0	0	0	0	0	0	0	200	903	0	0	0	0	0	0	0	603	903	0
2186	2	0	0	0	0	0	0	200	300	0	0	0	0	0	0	0	200	903	0	0	0	0	0	0	0	603	903	0
2186	3	0	0	0	0	0	0	200	300	0	0	0	0	0	0	0	200	903	0	0	0	0	0	0	0	603	903	0
2186	4	0	0	0	0	0	0	200	300	0	0	0	0	0	0	0	200	903	0	0	0	0	0	0	0	603	903	0
2186	5	0	0	0	0	0	0	200	300	0	0	0	0	0	0	0	200	903	0	0	0	0	0	0	0	603	903	0
2186	6	0	0	0	0	0	0	200	300	0	0	0	0	0	0	0	200	903	0	0	0	0	0	0	0	603	903	0
2186	7	0	0	0	0	0	0	200	300	0	0	0	0	0	0	0	200	903	0	0	0	0	0	0	0	603	903	0
2186	8	0	0	0	0	0	0	200	300	0	0	0	0	0	0	0	200	903	0	0	0	0	0	0	0	603	903	0
2186	9	0	0	0	0	0	0	200	300	0	0	0	0	0	0	0	200	903	0	0	0	0	0	0	0	603	903	0
2187	0	0	0	0	0	0	0	200	300	0	0	0	0	0	0	0	200	903	0	0	0	0	0	0	0	603	903	0
2187	1	0	0	0	0	0	0	200	300	0	0	0	0	0	0	0	200	903	0	0	0	0	0	0	0	603	903	0
2187	2	0	0	0	0	0	0	200	300	0	0	0	0	0	0	0	200	903	0	0	0	0	0	0	0	603	903	0
2187	3	0	0	0	0	0	0	200	300	0	0	0	0	0	0	0	200	903	0	0	0	0	0	0	0	603	903	0
2187	4	0	0	0	0	0	0	200	300	0	0	0	0	0	0	0	200	903	0	0	0	0	0	0	0	603	903	0
2187	5	0	0	0	0	0	0	200	300	0	0	0	0	0	0	0	200	903	0	0	0	0	0	0	0	603	903	0
2187	6	0	0	0	0	0	0	200	300	0	0	0	0	0	0	0	200	903	0	0	0	0	0	0	0	603	903	0
2187	7	0	0	0	0	0	0	200	300	0	0	0	0	0	0	0	200	903	0	0	0	0	0	0	0	603	903	0
2187	8	0	0	0	0	0	0	200	300	0	0	0	0	0	0	0	200	903	0	0	0	0	0	0	0	603	903	0
2187	9	0	0	0	0	0	0	200	300	0	0	0	0	0	0	0	200	903	0	0	0	0	0	0	0	603	903	0
2188	0	0	0	0	0	0	0	200	300	0	0	0	0	0	0	0	200	903	0	0	0	0	0	0	0	603	903	0
2188	1	0	0	0	0	0	0	200	300	0	0	0	0	0	0	0	200	903	0	0	0	0	0	0	0	603	903	0
2188	2	0	0	0	0	0	0	200	300	0	0	0	0	0	0	0	200	903	0	0	0	0	0	0	0	603	903	0
2188	3	0	0	0	0	0	0	200	300	0	0	0	0	0	0	0	200	903	0	0	0	0	0	0	0	603	903	0
2188	4	0	0	0	0	0	0	200	300	0	0	0	0	0	0	0	200	903	0	0	0	0	0	0	0	603	903	0
2188	5	0	0	0	0	0	0	200	300	0	0	0	0	0	0	0	200	903	0	0	0	0	0	0	0	603	903	0
2188	6	0	0	0	0	0	0	200	300	0	0	0	0	0	0	0	200	903	0	0	0	0	0	0	0	603	903	0
2188	7	0	0	0	0	0	0	200	300	0	0	0	0	0	0	0	200	903	0	0	0	0	0	0	0	603	903	0
2188	8	0	0	0	0	0	0	200	300	0	0	0	0	0	0	0	200	903	0	0	0	0	0	0	0	603	903	0
2188	9	0	0	0	0	0	0	200	300	0	0	0	0	0	0	0	200	903	0	0	0	0	0	0	0	603	903	0
2189	0	0	0	0	0	0	0	200	300	0	0	0	0	0	0	0	200	903	0	0	0	0	0	0	0	603	903	0
2189	1	0	0	0	0	0	0	200	300	0	0	0	0	0	0	0	200	903	0	0	0	0	0	0	0	603	903	0
2189	2	0	0	0	0	0	0	200	300	0	0	0	0	0	0	0	200	903	0	0	0	0	0	0	0	603	903	0
2189	3	0	0	0	0	0	0	200	300	0	0	0	0	0	0	0	200	903	0	0	0	0	0	0	0	603	903	0
2189	4	0	0	0	0	0	0	200	300	0	0	0	0	0	0	0	200	903	0	0	0	0	0	0	0	603	903	0
2189	5	0	0	0	0	0	0	200	300	0	0	0	0	0	0	0	200	903	0	0	0	0	0	0	0	603	903	0
2189	6	0	0	0	0	0	0	200	300	0	0	0	0	0	0	0	200	903	0	0	0	0	0	0	0	603	903	0
2189	7	0	0	0	0	0	0	200	300	0	0	0	0	0	0	0	200	903	0	0	0	0	0	0	0	603	903	0
2189	8	0	0	0	0	0	0	200	300	0	0	0	0	0	0	0	200	903	0	0	0	0	0	0	0	603	903	0
2189	9	0	0	0	0	0	0	200	300	0	0	0	0	0	0	0	200	903	0	0	0	0	0	0	0	603	903	0
2190	0	0	0	0	0	0	0	200	300	0	0	0	0	0	0	0	200	903	0	0	0	0	0	0	0	603	903	0
2190	1	0	0	0	0	0	0	200	300	0	0	0	0	0	0	0	200	903	0	0	0	0	0	0	0	603	903	0
2190	2	0	0	0	0	0	0	200	300	0	0	0	0	0	0	0	200	903	0	0	0	0	0	0	0	603	903	0
2190	3	0	0	0	0	0	0	200	300	0	0	0	0	0	0	0	200	903	0	0	0	0	0	0	0	603	903	0
2190	4	0	0	0	0	0	0	200	300	0	0	0	0	0	0	0	200	903	0	0	0	0	0	0	0	603	903	0
2190	5	0	0	0	0	0	0	200	300	0	0	0	0	0	0	0	200	903	0	0	0	0	0	0	0	603	903	0
2190	6	0	0	0	0	0	0	200	300	0	0	0	0	0	0	0	200	903	0	0	0	0	0	0	0	603	903	0
2190	7	0	0	0	0	0	0	200	300	0	0	0	0	0	0	0	200	903	0	0	0	0	0	0	0	603	903	0
2190	8	0	0	0	0	0	0	200	300	0	0	0	0	0	0	0	200	903	0	0	0	0	0	0	0	603	903	0
2190	9	0	0	0	0	0	0	200	300	0	0	0	0	0	0	0	200	903	0	0	0	0	0	0	0	603	903	0
2191	0	0	0	0	0	0	0	200	300	0	0	0	0	0	0	0	200	903	0	0	0	0	0	0	0	603	903	0
2191	1	0	0	0	0	0	0	200	300	0	0	0	0	0	0	0	200	903	0	0	0	0	0	0	0	603	903	0
2191	2	0	0	0	0	0	0	200	300	0	0	0	0	0	0	0	200	903	0	0	0	0	0	0	0	603	903	0
2191	3	0	0	0	0	0	0	200	300	0	0	0	0	0	0	0	200	903	0	0	0	0	0	0	0	603	903	0
2191	4	0	0	0	0	0	0	200	300	0	0	0	0	0	0	0	200	903	0	0	0	0	0	0	0	603	903	0
2191	5	0	0	0	0	0	0	200	300	0	0	0	0	0	0	0	200	903	0	0	0	0	0	0	0	603	903	0
2191	6	0	0	0	0	0	0	200	300	0	0	0	0	0	0	0	200	903	0	0	0	0	0	0	0	603	903	0
2191	7	0	0	0	0	0	0	200	300	0	0	0	0	0	0	0	200	903	0	0	0	0	0	0	0	603	903	0
2191	8	0	0	0	0	0	0	200	300	0	0	0	0	0	0	0	200	903	0	0	0	0	0	0	0	603	903	0
2191	9	0	0	0	0	0	0	200	300	0	0	0	0	0	0	0	200	903	0	0	0	0	0	0	0	603	903	0
2192	0	0	0	0	0	0	0	200	300	0	0	0	0	0	0	0	200	903	0	0	0	0	0	0	0	603	903	0
2192	1	0	0	0	0	0	0	200	300	0	0	0	0	0	0	0	200	903	0	0	0	0	0	0	0	603	903	0
2192	2	0	0	0	0	0	0	200	300	0	0	0	0	0	0	0	200	903	0	0	0	0	0	0	0	603	903	0
2192	3	0	0	0	0	0	0	200	300	0	0	0	0	0	0	0	200	903	0	0	0	0	0	0	0	603	903	0
2192	4	0	0	0	0	0	0	200	300	0	0	0	0	0	0	0	200	903	0	0	0	0	0	0	0	603	903	0
2192	5	0	0	0	0	0	0	200	300	0	0	0	0	0	0	0	200	903	0	0	0	0	0	0	0	603	903	0
2192	6	0	0	0	0	0	0	200	300	0	0	0	0	0	0	0	200	903	0	0	0	0	0	0	0	603	903	0
2192	7	0	0	0	0	0	0	200	300	0	0	0	0	0	0	0	200	903	0	0	0	0	0	0	0	603	903	0
2192	8	0	0	0	0	0	0	200	300	0	0	0	0	0	0	0	200	903	0	0	0	0	0	0	0	603	903	0
2192	9	0	0	0	0	0	0	200	300	0	0	0	0	0	0	0	200	903	0	0	0	0	0	0	0	603	903	0
2193	0	0	0	0	0	0	0	200	300	0	0	0	0	0	0	0	200	903	0	0	0	0	0	0	0	603	903	0
2193	1	0	0	0	0	0	0	200	300	0	0	0	0	0	0	0	200	903	0	0	0	0	0	0	0	603	903	0
2193	2	0	0	0	0	0	0	200	300	0	0	0	0	0	0	0	200	903	0	0	0	0	0	0	0	603	903	0
2193	3	0	0	0	0	0	0	200	300	0	0	0	0	0	0	0	200	903	0	0	0	0	0	0	0	603	903	0
2193	4	0	0	0	0	0	0	200	300	0	0	0	0	0	0	0	200	903	0	0	0	0	0	0	0	603	903	0
2193	5	0	0	0	0	0	0	200	300	0	0	0	0	0	0	0	200	903	0	0	0	0	0	0	0	603	903	0
2193	6	0	0	0	0	0	0	200	300	0	0	0	0	0	0	0	200	903	0	0	0	0	0	0	0	603	903	0
2193	7	0	0	0	0	0	0	200	300	0	0	0	0	0	0	0	200	903	0	0	0	0	0	0	0	603	903	0
2193	8	0	0	0	0	0	0	200	300	0	0	0	0	0	0	0	200	903	0	0	0	0	0	0	0	603	903	0
2193	9	0	0	0	0	0	0	200	300	0	0	0	0	0	0	0	200	903	0	0	0	0	0	0	0	603	903	0
2194	0	0	0	0	0	0	0	200	300	0	0	0	0	0	0	0	200	903	0	0	0	0	0	0	0	603	903	0
2194	1	0	0	0	0	0	0	200	300	0	0	0	0	0	0	0	200	903	0	0	0	0	0	0	0	603	903	0
2194	2	0	0	0	0	0	0	200	300	0	0	0	0	0	0	0	200	903	0	0	0	0	0	0	0	603	903	0
2194	3	0	0	0	0	0	0	200	300	0	0	0	0	0	0	0	200	903	0	0	0	0	0	0	0	603	903	0
2194	4	0	0	0	0	0	0	200	300	0	0	0	0	0	0	0	200	903	0	0	0	0	0	0	0	603	903	0
2194	5	0	0	0	0	0	0	200	300	0	0	0	0	0	0	0	200	903	0	0	0	0	0	0	0	603	903	0
2194	6	0	0	0	0	0	0	200	300	0	0	0	0	0	0	0	200	903	0	0	0	0	0	0	0	603	903	0
2194	7	0	0	0	0	0	0	200	300	0	0	0	0	0	0	0	200	903	0	0	0	0	0	0	0	603	903	0
2194	8	0	0	0	0	0	0	200	300	0	0	0	0	0	0	0	200	903	0	0	0	0	0	0	0	603	903	0
2194	9	0	0	0	0	0	0	200	300	0	0	0	0	0	0	0	200	903	0	0	0	0	0	0	0	603	903	0
2195	0	0	0	0	0	0	0	200	300	0	0	0	0	0	0	0	200	903	0	0	0	0	0	0	0	603	903	0
2195	1	0	0	0	0	0	0	200	300	0	0	0	0	0	0	0	200	903	0	0	0	0	0	0	0	603	903	0
2195	2	0	0	0	0	0	0	200	300	0	0	0	0	0	0	0	200	903	0	0	0	0	0	0	0	603	903	0
2195	3	0	0	0	0	0	0	200	300	0	0	0	0	0	0	0	200	903	0	0	0	0	0	0	0	603	903	0
2195	4	0	0	0	0	0	0	200	300	0	0	0	0	0	0	0	200	903	0	0	0	0	0	0	0	603	903	0
2195	5	0	0	0	0	0	0	200	300	0	0	0	0	0	0	0	200	903	0	0	0	0	0	0	0	603	903	0
2195	6	0	0	0	0	0	0	200	300	0	0	0	0	0	0	0	200	903	0	0	0	0	0	0	0	603	903	0
2195	7	0	0	0	0	0	0	200	300	0	0	0	0	0	0	0	200	903	0	0	0	0	0	0	0	603	903	0
2195	8	0	0	0	0	0	0	200	300	0	0	0	0	0	0	0	200	903	0	0	0	0	0	0	0	603	903	0
2195	9	0	0	0	0	0	0	200	300	0	0	0	0	0	0	0	200	903	0	0	0	0	0	0	0	603	903	0
2196	0	0	0	0	0	0	0	200	300	0	0	0	0	0	0	0	200	903	0	0	0	0	0	0	0	603	903	0
2196	1	0	0	0	0	0	0	200	300	0	0	0	0	0	0	0	200	903	0	0	0	0	0	0	0	603	903	0
2196	2	0	0	0	0	0	0	200	300	0	0	0	0	0	0	0	200	903	0	0	0	0	0	0	0	603	903	0
2196	3	0	0	0	0	0	0	200	300	0	0	0	0	0	0	0	200	903	0	0	0	0	0	0	0	603	903	0
2196	4	0	0	0	0	0	0	200	300	0	0	0	0	0	0	0	200	903	0	0	0	0	0	0	0	603	903	0
2196	5	0	0	0	0	0	0	200	300	0	0	0	0	0	0	0	200	903	0	0	0	0	0	0	0	603	903	0
2196	6	0	0	0	0	0	0	200	300	0	0	0	0	0	0	0	200	903	0	0	0	0	0	0	0	603	903	0
2196	7	0	0	0	0	0	0	200	300	0	0	0	0	0	0	0	200	903	0	0	0	0	0	0	0	603	903	0
2196	8	0	0	0	0	0	0	200	300	0	0	0	0	0	0	0	200	903	0	0	0	0	0	0	0	603	903	0
2196	9	0	0	0	0	0	0	200	300	0	0	0	0	0	0	0	200	903	0	0	0	0	0	0	0	603	903	0
2197	0	0	0	0	0	0	0	200	300	0	0	0	0	0	0	0	200	903	0	0	0	0	0	0	0	603	903	0
2197	1	0	0	0	0	0	0	200	300	0	0	0	0	0	0	0	200	903	0	0	0	0	0	0	0	603	903	0
2197	2	0	0	0	0	0	0	200	300	0	0	0	0	0	0	0	200	903	0	0	0	0	0	0	0	603	903	0
2197	3	0	0	0	0	0	0	200	300	0	0	0	0	0	0	0	200	903	0	0	0	0	0	0	0	603	903	0
2197	4	0	0	0	0	0	0	200	300	0	0	0	0	0	0	0	200	903	0	0	0	0	0	0	0	603	903	0
2197	5	0	0	0	0	0	0	200	300	0	0	0	0	0	0	0	200	903	0	0	0	0	0	0	0	603	903	0
2197	6	0	0	0	0	0	0	200	300	0	0	0	0	0	0	0	200	903	0	0	0	0	0	0	0	603	903	0
2197	7	0	0	0	0	0	0	200	300	0	0	0	0	0	0	0	200	903	0	0	0	0	0	0	0	603	903	0
2197	8	0	0	0	0	0	0	200	300	0	0	0	0	0	0	0	200	903	0	0	0	0	0	0	0	603	903	0
2197	9	0	0	0	0	0	0	200	300	0	0	0	0	0	0	0	200	903	0	0	0	0	0	0	0	603	903	0
2198	0	0	0	0	0	0	0	200	300	0	0	0	0	0	0	0	200	903	0	0	0	0	0	0	0	603	903	0
2198	1	0	0	0	0	0	0	200	300	0	0	0	0	0	0	0	200	903	0	0	0	0	0	0	0	603	903	0
2198	2	0	0	0	0	0	0	200	300	0	0	0	0	0	0	0	200	903	0	0	0	0	0	0	0	603	903	0
2198	3	0	0	0	0	0	0	200	300	0	0	0	0	0	0	0	200	903	0	0	0	0	0	0	0	603	903	0
2198	4	0	0	0	0	0	0	200	300	0	0	0	0	0	0	0	200	903	0	0	0	0	0	0	0	603	903	0
2198	5	0	0	0	0	0	0	200	300	0	0	0	0	0	0	0	200	903	0	0	0	0	0	0	0	603	903	0
2198	6	0	0	0	0	0	0	200	300	0	0	0	0	0	0	0	200	903	0	0	0	0	0	0	0	603	903	0
2198	7	0	0	0	0	0	0	200	300	0	0	0	0	0	0	0	200	903	0	0	0	0	0	0	0	603	903	0
2198	8	0	0	0	0	0	0	200	300	0	0	0	0	0	0	0	200	903	0	0	0	0	0	0	0	603	903	0
2198	9	0	0	0	0	0	0	200	300	0	0	0	0	0	0	0	200	903	0	0	0	0	0	0	0	603	903	0
2199	0	0	0	0	0	0	0	200	300	0	0	0	0	0	0	0	200	903	0	0	0	0	0	0	0	603	903	0
2199	1	0	0	0	0	0	0	200	300	0	0	0	0	0	0	0	200	903	0	0	0	0	0	0	0	603	903	0
2199	2	0	0	0	0	0	0	200	300	0	0	0	0	0	0	0	200	903	0	0	0	0	0	0	0	603	903	0
2199	3	0	0	0	0	0	0	200	300	0	0	0	0	0	0	0	200	903	0	0	0	0	0	0	0	603	903	0
2199	4	0	0	0	0	0	0	200	300	0	0	0	0	0	0	0	200	903	0	0	0	0	0	0	0	603	903	0
2199	5	0	0	0	0	0	0	200	300	0	0	0	0	0	0	0	200	903	0	0	0	0	0	0	0	603	903	0
2199	6	0	0	0	0	0	0	200	300	0	0	0	0	0	0	0	200	903	0	0	0	0	0	0	0	603	903	0
2199	7	0	0	0	0	0	0	200	300	0	0	0	0	0	0	0	200	903	0	0	0	0	0	0	0	603	903	0
2199	8	0	0	0	0	0	0	200	300	0	0	0	0	0	0	0	200	903	0	0	0	0	0	0	0	603	903	0
2199	9	0	0	0	0	0	0	200	300	0	0	0	0	0	0	0	200	903	0	0	0	0	0	0	0	603	903	0
2200	0	0	0	0	0	0	0	200	300	0	0	0	0	0	0	0	200	903	0	0	0	0	0	0	0	603	903	0
2200	1	0	0	0	0	0	0	200	300	0	0	0	0	0	0	0	200	903	0	0	0	0	0	0	0	603	903	0
2200	2	0	0	0	0	0	0	200	300	0	0	0	0	0	0	0	200	903	0	0	0	0	0	0	0	603	903	0
2200	3	0	0	0	0	0	0	200	300	0	0	0	0	0	0	0	200	903	0	0	0	0	0	0	0	603	903	0
2200	4	0	0	0	0	0	0	200	300	0	0	0	0	0	0	0	200	903	0	0	0	0	0	0	0	603	903	0
2200	5	0	0	0	0	0	0	200	300	0	0	0	0	0	0	0	200	903	0	0	0	0	0	0	0	603	903	0
2200	6	0	0	0	0	0	0	200	300	0	0	0	0	0	0	0	200	903	0	0	0	0	0	0	0	603	903	0
2200	7	0	0	0	0	0	0	200	300	0	0	0	0	0	0	0	200	903	0	0	0	0	0	0	0	603	903	0
2200	8	0	0	0	0	0	0	200	300	0	0	0	0	0	0	0	200	903	0	0	0	0	0	0	0	603	903	0
2200	9	0	0	0	0	0	0	200	300	0	0	0	0	0	0	0	200	903	0	0	0	0	0	0	0	603	903	0
2201	0	0	0	0	0	0	0	200	300	0	0	0	0	0	0	0	200	903	0	0	0	0	0	0	0	603	903	0
2201	1	0	0	0	0	0	0	200	300	0	0	0	0	0	0	0	200	903	0	0	0	0	0	0	0	603	903	0
2201	2	0	0	0	0	0	0	200	300	0	0	0	0	0	0	0	200	903	0	0	0	0	0	0	0	603	903	0
2201	3	0	0	0	0	0	0	200	300	0	0	0	0	0	0	0	200	903	0	0	0	0	0	0	0	603	903	0
2201	4	0	0	0	0	0	0	200	300	0	0	0	0	0	0	0	200	903	0	0	0	0	0	0	0	603	903	0
2201	5	0	0	0	0	0	0	200	300	0	0	0	0	0	0	0	200	903	0	0	0	0	0	0	0	603	903	0
2201	6	0	0	0	0	0	0	200	300	0	0	0	0	0	0	0	200	903	0	0	0	0	0	0	0	603	903	0
2201	7	0	0	0	0	0	0	200	300	0	0	0	0	0	0	0	200	903	0	0	0	0	0	0	0	603	903	0
2201	8	0	0	0	0	0	0	200	300	0	0	0	0	0	0	0	200	903	0	0	0	0	0	0	0	603	903	0
2201	9	0	0	0	0	0	0	200	300	0	0	0	0	0	0	0	200	903	0	0	0	0	0	0	0	603	903	0
2202	0	0	0	0	0	0	0	200	300	0	0	0	0	0	0	0	200	903	0	0	0	0	0	0	0	603	903	0
2202	1	0	0	0	0	0	0	200	300	0	0	0	0	0	0	0	200	903	0	0	0	0	0	0	0	603	903	0
2202	2	0	0	0	0	0	0	200	300	0	0	0	0	0	0	0	200	903	0	0	0	0	0	0	0	603	903	0
2202	3	0	0	0	0	0	0	200	300	0	0	0	0	0	0	0	200	903	0	0	0	0	0	0	0	603	903	0
2202	4	0	0	0	0	0	0	200	300	0	0	0	0	0	0	0	200	903	0	0	0	0	0	0	0	603	903	0
2202	5	0	0	0	0	0	0	200	300	0	0	0	0	0	0	0	200	903	0	0	0	0	0	0	0	603	903	0
2202	6	0	0	0	0	0	0	200	300	0	0	0	0	0	0	0	200	903	0	0	0	0	0	0	0	603	903	0
2202	7	0	0	0	0	0	0	200	300	0	0	0	0	0	0	0	200	903	0	0	0	0	0	0	0	603	903	0
2202	8	0	0	0	0	0	0	200	300	0	0	0	0	0	0	0	200	903	0	0	0	0	0	0	0	603	903	0
2202	9	0	0	0	0	0	0	200	300	0	0	0	0	0	0	0	200	903	0	0	0	0	0	0	0	603	903	0
2203	0	0	0	0	0	0	0	200	300	0	0	0	0	0	0	0	200	903	0	0	0	0	0	0	0	603	903	0
2203	1	0	0	0	0	0	0	200	300	0	0	0	0	0	0	0	200	903	0	0	0	0	0	0	0	603	903	0
2203	2	0	0	0	0	0	0	200	300	0	0	0	0	0	0	0	200	903	0	0	0	0	0	0	0	603	903	0
2203	3	0	0	0	0	0	0	200	300	0	0	0	0	0	0	0	200	903	0	0	0	0	0	0	0	603	903	0
2203	4	0	0	0	0	0	0	200	300	0	0	0	0	0	0	0	200	903	0	0	0	0	0	0	0	603	903	0
2203	5	0	0	0	0	0	0	200	300	0	0	0	0	0	0	0	200	903	0	0	0	0	0	0	0	603	903	0
2203	6	0	0	0	0	0	0	200	300	0	0	0	0	0	0	0	200	903	0	0	0	0	0	0	0	603	903	0
2203	7	0	0	0	0	0	0	200	300	0	0	0	0	0	0	0	200	903	0	0	0	0	0	0	0	603	903	0
2203	8	0	0	0	0	0	0	200	300	0	0	0	0	0	0	0	200	903	0	0	0	0	0	0	0	603	903	0
2203	9	0	0	0	0	0	0	200	300	0	0	0	0	0	0	0	200	903	0	0	0	0	0	0	0	603	903	0
2204	0	0	0	0	0	0	0	200	300	0	0	0	0	0	0	0	200	903	0	0	0	0	0	0	0	603	903	0
2204	1	0	0	0	0	0	0	200	300	0	0	0	0	0	0	0	200	903	0	0	0	0	0	0	0	603	903	0
2204	2	0	0	0	0	0	0	200	300	0	0	0	0	0	0	0	200	903	0	0	0	0	0	0	0	603	903	0
2204	3	0	0	0	0	0	0	200	300	0	0	0	0	0	0	0	200	903	0	0	0	0	0	0	0	603	903	0
2204	4	0	0	0	0	0	0	200	300	0	0	0	0	0	0	0	200	903	0	0	0	0	0	0	0	603	903	0
2204	5	0	0	0	0	0	0	200	300	0	0	0	0	0	0	0	200	903	0	0	0	0	0	0	0	603	903	0
2204	6	0	0	0	0	0	0	200	300	0	0	0	0	0	0	0	200	903	0	0	0	0	0	0	0	603	903	0
2204	7	0	0	0	0	0	0	200	300	0	0	0	0	0	0	0	200	903	0	0	0	0	0	0	0	603	903	0
2204	8	0	0	0	0	0	0	200	300	0	0	0	0	0	0	0	200	903	0	0	0	0	0	0	0	603	903	0
2204	9	0	0	0	0	0	0	200	300	0	0	0	0	0	0	0	200	903	0	0	0	0	0	0	0	603	903	0
2205	0	0	0	0	0	0	0	200	300	0	0	0	0	0	0	0	200	903	0	0	0	0	0	0	0	603	903	0
2205	1	0	0	0	0	0	0	200	300	0	0	0	0	0	0	0	200	903	0	0	0	0	0	0	0	603	903	0
2205	2	0	0	0	0	0	0	200	300	0	0	0	0	0	0	0	200	903	0	0	0	0	0	0	0	603	903	0
2205	3	0	0	0	0	0	0	200	300	0	0	0	0	0	0	0	200	903	0	0	0	0	0	0	0	603	903	0
2205	4	0	0	0	0	0	0	200	300	0	0	0	0	0	0	0	200	903	0	0	0	0	0	0	0	603	903	0
2205	5	0	0	0	0	0	0	200	300	0	0	0	0	0	0	0	200	903	0	0	0	0	0	0	0	603	903	0
2205	6	0	0	0	0	0	0	200	300	0	0	0	0	0	0	0	200	903	0	0	0	0	0	0	0	603	903	0
2205	7	0	0	0	0	0	0	200	300	0	0	0	0	0	0	0	200	903	0	0	0	0	0	0	0	603	903	0
2205	8	0	0	0	0	0	0	200	300	0	0	0	0	0	0	0	200	903	0	0	0	0	0	0	0	603	903	0
2205	9	0	0	0	0	0	0	200	300	0	0	0	0	0	0	0	200	903	0	0	0	0	0	0	0	603	903	0
2206	0	0	0	0	0	0	0	200	300	0	0	0	0	0	0	0	200	903	0	0	0	0	0	0	0	603	903	0
2206	1	0	0	0	0	0	0	200	300	0	0	0	0	0	0	0	200	903	0	0	0	0	0	0	0	603	903	0
2206	2	0	0	0	0	0	0	200	300	0	0	0	0	0	0	0	200	903	0	0	0	0	0	0	0	603	903	0
2206	3	0	0	0	0	0	0	200	300	0	0	0	0	0	0	0	200	903	0	0	0	0	0	0	0	603	903	0
2206	4	0	0	0	0	0	0	200	300	0	0	0	0	0	0	0	200	903	0	0	0	0	0	0	0	603	903	0
2206	5	0	0	0	0	0	0	200	300	0	0	0	0	0	0	0	200	903	0	0	0	0	0	0	0	603	903	0
2206	6	0	0	0	0	0	0	200	300	0	0	0	0	0	0	0	200	903	0	0	0	0	0	0	0	603	903	0
2206	7	0	0	0	0	0	0	200	300	0	0	0	0	0	0	0	200	903	0	0	0	0	0	0	0	603	903	0
2206	8	0	0	0	0	0	0	200	300	0	0	0	0	0	0	0	200	903	0	0	0	0	0	0	0	603	903	0
2206	9	0	0	0	0	0	0	200	300	0	0	0	0	0	0	0	200	903	0	0	0	0	0	0	0	603	903	0
2207	0	0	0	0	0	0	0	200	300	0	0	0	0	0	0	0	200	903	0	0	0	0	0	0	0	603	903	0
2207	1	0	0	0	0	0	0	200	300	0	0	0	0	0	0	0	200	903	0	0	0	0	0	0	0	603	903	0
2207	2	0	0	0	0	0	0	200	300	0	0	0	0	0	0	0	200	903	0	0	0	0	0	0	0	603	903	0
2207	3	0	0	0	0	0	0	200	300	0	0	0	0	0	0	0	200	903	0	0	0	0	0	0	0	603	903	0
2207	4	0	0	0	0	0	0	200	300	0	0	0	0	0	0	0	200	903	0	0	0	0	0	0	0	603	903	0
2207	5	0	0	0	0	0	0	200	300	0	0	0	0	0	0	0	200	903	0	0	0	0	0	0	0	603	903	0
2207	6	0	0	0	0	0	0	200	300	0	0	0	0	0	0	0	200	903	0	0	0	0	0	0	0	603	903	0
2207	7	0	0	0	0	0	0	200	300	0	0	0	0	0	0	0	200	903	0	0	0	0	0	0	0	603	903	0
2207	8	0	0	0	0	0	0	200	300	0	0	0	0	0	0	0	200	903	0	0	0	0	0	0	0	603	903	0
2207	9	0	0	0	0	0	0	200	300	0	0	0	0	0	0	0	200	903	0	0	0	0	0	0	0	603	903	0
2208	0	0	0	0	0	0	0	200	300	0	0	0	0	0	0	0	200	903	0	0	0	0	0	0	0	603	903	0
2208	1	0	0	0	0	0	0	200	300	0	0	0	0	0	0	0	200	903	0	0	0	0	0	0	0	603	903	0
2208	2	0	0	0	0	0	0	200	300	0	0	0	0	0	0	0	200	903	0	0	0	0	0	0	0	603	903	0
2208	3	0	0	0	0	0	0	200	300	0	0	0	0	0	0	0	200	903	0	0	0	0	0	0	0	603	903	0
2208	4	0	0	0	0	0	0	200	300	0	0	0	0	0	0	0	200	903	0	0	0	0	0	0	0	603	903	0
2208	5	0	0	0	0	0	0	200	300	0	0	0	0	0	0	0	200	903	0	0	0	0	0	0	0	603	903	0
2208	6	0	0	0	0	0	0	200	300	0	0	0	0	0	0	0	200	903	0	0	0	0	0	0	0	603	903	0
2208	7	0	0	0	0	0	0	200	300	0	0	0	0	0	0	0	200	903	0	0	0	0	0	0	0	603	903	0
2208	8	0	0	0	0	0	0	200	300	0	0	0	0	0	0	0	200	903	0	0	0	0	0	0	0	603	903	0
2208	9	0	0	0	0	0	0	200	300	0	0	0	0	0	0	0	200	903	0	0	0	0	0	0	0	603	903	0
2209	0	0	0	0	0	0	0	200	300	0	0	0	0	0	0	0	200	903	0	0	0	0	0	0	0	603	903	0
2209	1	0	0	0	0	0	0	200	300	0	0	0	0	0	0	0	200	903	0	0	0	0	0	0	0	603	903	0
2209	2	0	0	0	0	0	0	200	300	0	0	0	0	0	0	0	200	903	0	0	0	0	0	0	0	603	903	0
2209	3	0	0	0	0	0	0	200	300	0	0	0	0	0	0	0	200	903	0	0	0	0	0	0	0	603	903	0
2209	4	0	0	0	0	0	0	200	300	0	0	0	0	0	0	0	200	903	0	0	0	0	0	0	0	603	903	0
2209	5	0	0	0	0	0	0	200	300	0	0	0	0	0	0	0	200	903	0	0	0	0	0	0	0	603	903	0
2209	6	0	0	0	0	0	0	200	300	0	0	0	0	0	0	0	200	903	0	0	0	0	0	0	0	603	903	0
2209	7	0	0	0	0	0	0	200	300	0	0	0	0	0	0	0	200	903	0	0	0	0	0	0	0	603	903	0
2209	8	0	0	0	0	0	0	200	300	0	0	0	0	0	0	0	200	903	0	0	0	0	0	0	0	603	903	0
2209	9	0	0	0	0	0	0	200	300	0	0	0	0	0	0	0	200	903	0	0	0	0	0	0	0	603	903	0
2210	0	0	0	0	0	0	0	200	300	0	0	0	0	0	0	0	200	903	0	0	0	0	0	0	0	603	903	0
2210	1	0	0	0	0	0	0	200	300	0	0	0	0	0	0	0	200	903	0	0	0	0	0	0	0	603	903	0
2210	2	0	0	0	0	0	0	200	300	0	0	0	0	0	0	0	200	903	0	0	0	0	0	0	0	603	903	0
2210	3	0	0	0	0	0	0	200	300	0	0	0	0	0	0	0	200	903	0	0	0	0	0	0	0	603	903	0
2210	4	0	0	0	0	0	0	200	300	0	0	0	0	0	0	0	200	903	0	0	0	0	0	0	0	603	903	0
2210	5	0	0	0	0	0	0	200	300	0	0	0	0	0	0	0	200	903	0	0	0	0	0	0	0	603	903	0
2210	6	0	0	0	0	0	0	200	300	0	0	0	0	0	0	0	200	903	0	0	0	0	0	0	0	603	903	0
2210	7	0	0	0	0	0	0	200	300	0	0	0	0	0	0	0	200	903	0	0	0	0	0	0	0	603	903	0
2210	8	0	0	0	0	0	0	200	300	0	0	0	0	0	0	0	200	903	0	0	0	0	0	0	0	603	903	0
2210	9	0	0	0	0	0	0	200	300	0	0	0	0	0	0	0	200	903	0	0	0	0	0	0	0	603	903	0
2211	0	0	0	0	0	0	0	200	300	0	0	0	0	0	0	0	200	903	0	0	0	0	0	0	0	603	903	0
2211	1	0	0	0	0	0	0	200	300	0	0	0	0	0	0	0	200	903	0	0	0	0	0	0	0	603	903	0
2211	2	0	0	0	0	0	0	200	300	0	0	0	0	0	0	0	200	903	0	0	0	0	0	0	0	603	903	0
2211	3	0	0	0	0	0	0	200	300	0	0	0	0	0	0	0	200	903	0	0	0	0	0	0	0	603	903	0
2211	4	0	0	0	0	0	0	200	300	0	0	0	0	0	0	0	200	903	0	0	0	0	0	0	0	603	903	0
2211	5	0	0	0	0	0	0	200	300	0	0	0	0	0	0	0	200	903	0	0	0	0	0	0	0	603	903	0
2211	6	0	0	0	0	0	0	200	300	0	0	0	0	0	0	0	200	903	0	0	0	0	0	0	0	603	903	0
2211	7	0	0	0	0	0	0	200	300	0	0	0	0	0	0	0	200	903	0	0	0	0	0	0	0	603	903	0
2211	8	0	0	0	0	0	0	200	300	0	0	0	0	0	0	0	200	903	0	0	0	0	0	0	0	603	903	0
2211	9	0	0	0	0	0	0	200	300	0	0	0	0	0	0	0	200	903	0	0	0	0	0	0	0	603	903	0
2212	0	0	0	0	0	0	0	200	300	0	0	0	0	0	0	0	200	903	0	0	0	0	0	0	0	603	903	0
2212	1	0	0	0	0	0	0	200	300	0	0	0	0	0	0	0	200	903	0	0	0	0	0	0	0	603	903	0
2212	2	0	0	0	0	0	0	200	300	0	0	0	0	0	0	0	200	903	0	0	0	0	0	0	0	603	903	0
2212	3	0	0	0	0	0	0	200	300	0	0	0	0	0	0	0	200	903	0	0	0	0	0	0	0	603	903	0
2212	4	0	0	0	0	0	0	200	300	0	0	0	0	0	0	0	200	903	0	0	0	0	0	0	0	603	903	0
2212	5	0	0	0	0	0	0	200	300	0	0	0	0	0	0	0	200	903	0	0	0	0	0	0	0	603	903	0
2212	6	0	0	0	0	0	0	200	300	0	0	0	0	0	0	0	200	903	0	0	0	0	0	0	0	603	903	0
2212	7	0	0	0	0	0	0	200	300	0	0	0	0	0	0	0	200	903	0	0	0	0	0	0	0	603	903	0
2212	8	0	0	0	0	0	0	200	300	0	0	0	0	0	0	0	200	903	0	0	0	0	0	0	0	603	903	0
2212	9	0	0	0	0	0	0	200	300	0	0	0	0	0	0	0	200	903	0	0	0	0	0	0	0	603	903	0
2213	0	0	0	0	0	0	0	200	300	0	0	0	0	0	0	0	200	903	0	0	0	0	0	0	0	603	903	0
2213	1	0	0	0	0	0	0	200	300	0	0	0	0	0	0	0	200	903	0	0	0	0	0	0	0	603	903	0
2213	2	0	0	0	0	0	0	200	300	0	0	0	0	0	0	0	200	903	0	0	0	0	0	0	0	603	903	0
2213	3	0	0	0	0	0	0	200	300	0	0	0	0	0	0	0	200	903	0	0	0	0	0	0	0	603	903	0
2213	4	0	0	0	0	0	0	200	300	0	0	0	0	0	0	0	200	903	0	0	0	0	0	0	0	603	903	0
2213	5	0	0	0	0	0	0	200	300	0	0	0	0	0	0	0	200	903	0	0	0	0	0	0	0	603	903	0
2213	6	0	0	0	0	0	0	200	300	0	0	0	0	0	0	0	200	903	0	0	0	0	0	0	0	603	903	0
2213	7	0	0	0	0	0	0	200	300	0	0	0	0	0	0	0	200	903	0	0	0	0	0	0	0	603	903	0
2213	8	0	0	0	0	0	0	200	300	0	0	0	0	0	0	0	200	903	0	0	0	0	0	0	0	603	903	0
2213	9	0	0	0	0	0	0	200	300	0	0	0	0	0	0	0	200	903	0	0	0	0	0	0	0	603	903	0
2214	0	0	0	0	0	0	0	200	300	0	0	0	0	0	0	0	200	903	0	0	0	0	0	0	0	603	903	0
2214	1	0	0	0	0	0	0	200	300	0	0	0	0	0	0	0	200	903	0	0	0	0	0	0	0	603	903	0
2214	2	0	0	0	0	0	0	200	300	0	0	0	0	0	0	0	200	903	0	0	0	0	0	0	0	603	903	0
2214	3	0	0	0	0	0	0	200	300	0	0	0	0	0	0	0	200	903	0	0	0	0	0	0	0	603	903	0
2214	4	0	0	0	0	0	0	200	300	0	0	0	0	0	0	0	200	903	0	0	0	0	0	0	0	603	903	0
2214	5	0	0	0	0	0	0	200	300	0	0	0	0	0	0	0	200	903	0	0	0	0	0	0	0	603	903	0
2214	6	0	0	0	0	0	0	200	300	0	0	0	0	0	0	0	200	903	0	0	0	0	0	0	0	603	903	0
2214	7	0	0	0	0	0	0	200	300	0	0	0	0	0	0	0	200	903	0	0	0	0	0	0	0	603	903	0
2214	8	0	0	0	0	0	0	200	300	0	0	0	0	0	0	0	200	903	0	0	0	0	0	0	0	603	903	0
2214	9	0	0	0	0	0	0	200	300	0	0	0	0	0	0	0	200	903	0	0	0	0	0	0	0	603	903	0
2215	0	0	0	0	0	0	0	200	300	0	0	0	0	0	0	0	200	903	0	0	0	0	0	0	0	603	903	0
2215	1	0	0	0	0	0	0	200	300	0	0	0	0	0	0	0	200	903	0	0	0	0	0	0	0	603	903	0
2215	2	0	0	0	0	0	0	200	300	0	0	0	0	0	0	0	200	903	0	0	0	0	0	0	0	603	903	0
2215	3	0	0	0	0	0	0	200	300	0	0	0	0	0	0	0	200	903	0	0	0	0	0	0	0	603	903	0
2215	4	0	0	0	0	0	0	200	300	0	0	0	0	0	0	0	200	903	0	0	0	0	0	0	0	603	903	0
2215	5	0	0	0	0	0	0	200	300	0	0	0	0	0	0	0	200	903	0	0	0	0	0	0	0	603	903	0
2215	6	0	0	0	0	0	0	200	300	0	0	0	0	0	0	0	200	903	0	0	0	0	0	0	0	603	903	0
2215	7	0	0	0	0	0	0	200	300	0	0	0	0	0	0	0	200	903	0	0	0	0	0	0	0	603	903	0
2215	8	0	0	0	0	0	0	200	300	0	0	0	0	0	0	0	200	903	0	0	0	0	0	0	0	603	903	0
2215	9	0	0	0	0	0	0	200	300	0	0	0	0	0	0	0	200	903	0	0	0	0	0	0	0	603	903	0
2216	0	0	0	0	0	0	0	200	300	0	0	0	0	0	0	0	200	903	0	0	0	0	0	0	0	603	903	0
2216	1	0	0	0	0	0	0	200	300	0	0	0	0	0	0	0	200	903	0	0	0	0	0	0	0	603	903	0
2216	2	0	0	0	0	0	0	200	300	0	0	0	0	0	0	0	200	903	0	0	0	0	0	0	0	603	903	0
2216	3	0	0	0	0	0	0	200	300	0	0	0	0	0	0	0	200	903	0	0	0	0	0	0	0	603	903	0
2216	4	0	0	0	0	0	0	200	300	0	0	0	0	0	0	0	200	903	0	0	0	0	0	0	0	603	903	0
2216	5	0	0	0	0	0	0	200	300	0	0	0	0	0	0	0	200	903	0	0	0	0	0	0	0	603	903	0
[truncated: 3,724 more rows]
