# Supplementary material for: The Effects of an Extemporaneous Speech Dual-task on Older Adult Gait Control
Source: Research Square preprint supplement (doi:10.21203/rs.3.rs-7674245/v1), 2025-11-18
Supplement: Supplementary file 5 [file DT10Walk4.xlsx]

## Sheet: Sheet1
Trajectories
		10:LFHD			10:RFHD			10:LBHD			10:RBHD			10:C7			10:T10			10:CLAV			10:STRN			10:RBAK			10:LSHO			10:LUPA			10:LELB			10:LFRM			10:LWRA			10:LWRB			10:LFIN
Frame	Sub Frame	X	Y	Z	X	Y	Z	X	Y	Z	X	Y	Z	X	Y	Z	X	Y	Z	X	Y	Z	X	Y	Z	X	Y	Z	X	Y	Z	X	Y	Z	X	Y	Z	X	Y	Z	X	Y	Z	X	Y	Z	X	Y	Z
		mm	mm	mm	mm	mm	mm	mm	mm	mm	mm	mm	mm	mm	mm	mm	mm	mm	mm	mm	mm	mm	mm	mm	mm	mm	mm	mm	mm	mm	mm	mm	mm	mm	mm	mm	mm	mm	mm	mm	mm	mm	mm	mm	mm	mm	mm	mm	mm
4728	0	123.944	-1887.93	1563.28	228.46	-1890.19	1563.03	106.968	-2051.97	1542.56	225.246	-2056.83	1542.81	176.476	-2077.46	1411.46	168.186	-2179.87	1133.41	172.026	-1919.04	1304.25	177.029	-1822.83	1102.41	248.326	-2174.43	1227.73	20.685	-1981.5	1369.43	-92.954	-2026.6	1135.55	-98.9165	-2053.11	1039.7	-104.454	-1997.66	894.469	-51.8656	-1993.28	794.138	-116.885	-2030.02	784.517	-100.035	-1983.46	715.917
4729	0	121.137	-1876.85	1564.07	225.636	-1879.2	1564.45	103.878	-2040.84	1543.45	222.264	-2046.33	1544.38	174.276	-2066.41	1412.56	167.852	-2168.49	1134.35	170.267	-1907.76	1305.34	175.979	-1810.95	1103.63	247.369	-2163.34	1229.16	18.6766	-1970.65	1369.38	-93.9153	-2015.43	1135.02	-99.3862	-2041.65	1039.41	-105.16	-1986.47	893.963	-52.1858	-1982.45	793.102	-117.616	-2019.01	783.99	-100.493	-1972.6	715.111
4730	0	118.202	-1865.72	1565.08	222.776	-1868.32	1566.02	100.717	-2029.73	1544.44	218.973	-2035.09	1545.76	172.287	-2055.34	1413.94	167.705	-2157.37	1135.69	168.298	-1896.61	1306.68	174.868	-1799.14	1105.23	246.553	-2152.27	1230.92	16.6902	-1959.74	1370.02	-94.7032	-2003.81	1134.85	-99.4789	-2030.03	1039.2	-105.808	-1975.12	893.815	-53.3509	-1970.52	793.224	-118.187	-2007.86	784.001	-101.297	-1961.5	714.778
4731	0	115.286	-1854.55	1566.35	219.843	-1857.38	1567.83	97.5776	-2018.62	1545.88	215.909	-2024.34	1547.85	170.352	-2044.37	1415.59	167.039	-2146.09	1137.45	166.407	-1885.78	1308.33	173.795	-1787.61	1107.17	245.85	-2141.1	1233.03	14.9982	-1948.96	1370.99	-95.3002	-1992.05	1135.34	-99.7179	-2018.14	1039.85	-106.678	-1963.45	894.364	-54.3396	-1958.74	793.427	-118.921	-1996.4	784.371	-102.461	-1950.21	715.165
4732	0	112.21	-1843.4	1567.85	216.81	-1846.28	1570.09	94.4334	-2007.45	1547.48	212.755	-2013.34	1550.39	168.558	-2033.49	1417.65	166.465	-2134.06	1139.39	164.643	-1874.7	1310.49	172.738	-1776.57	1109.55	245.195	-2129.85	1235.52	13.0463	-1938.35	1372.67	-95.6629	-1979.97	1136.06	-99.6918	-2006.21	1040.65	-107.385	-1951.66	895.422	-54.9976	-1946.46	793.908	-119.981	-1984.69	785.603	-104.046	-1938.54	716.136
4733	0	109.331	-1832.27	1569.4	213.905	-1835.32	1572.33	91.3564	-1996.15	1549.47	209.606	-2002.44	1553.43	166.802	-2022.69	1419.94	166.518	-2122.02	1141.46	162.921	-1864.41	1312.55	171.816	-1766.02	1112.33	244.571	-2118.65	1238.15	11.5956	-1927.82	1374.17	-95.8804	-1967.92	1137.12	-99.8339	-1994.03	1041.97	-108.303	-1939.31	896.999	-56.7051	-1933.96	795.291	-121.032	-1972.49	787.172	-105.709	-1926.69	717.407
4734	0	106.618	-1821	1570.89	211.235	-1824.44	1574.76	88.3307	-1984.99	1551.56	206.569	-1991.68	1556.32	165.027	-2012.19	1422.04	166.339	-2111.15	1143.53	161.341	-1853.77	1314.96	170.973	-1755.67	1114.97	243.846	-2107.55	1240.55	9.96498	-1917.54	1376.2	-96.0782	-1955.89	1138.4	-99.9365	-1982.06	1043.41	-109.08	-1927.06	898.832	-58.2219	-1920.97	797.107	-122.106	-1960.13	788.866	-107.407	-1914.37	718.955
4735	0	104.08	-1809.85	1572.61	208.685	-1813.68	1577.06	85.3318	-1973.8	1553.71	203.379	-1980.87	1559.19	163.168	-2001.83	1424.1	165.6	-2100.77	1145.4	159.808	-1843.43	1317.54	170.124	-1745.62	1117.81	242.917	-2096.77	1242.78	8.28542	-1907.18	1378.27	-96.2695	-1944.03	1139.86	-100.299	-1970.08	1044.99	-110.006	-1914.54	900.721	-59.6434	-1907.78	798.925	-123.324	-1947.31	790.737	-109.248	-1901.72	720.8
4736	0	101.855	-1798.76	1574.17	206.379	-1802.95	1579.27	82.4411	-1962.69	1555.9	200.478	-1970.44	1562.39	161.232	-1991.59	1426.23	164.816	-2090.31	1147.37	158.335	-1833.26	1320.01	169.354	-1735.76	1120.53	241.835	-2086	1245.11	6.60626	-1896.95	1380.13	-96.5801	-1932.12	1141.19	-100.685	-1958.11	1046.52	-110.898	-1901.72	902.677	-60.2938	-1895	800.104	-124.65	-1934.13	792.678	-110.962	-1888.68	722.499
4737	0	99.8491	-1787.73	1575.61	204.272	-1792.38	1581.27	79.5444	-1951.58	1558.07	197.695	-1959.79	1565.02	159.367	-1981.48	1428.24	163.937	-2079.75	1149.26	157.026	-1823.46	1321.72	168.67	-1725.84	1122.91	240.617	-2075.62	1247.15	5.08142	-1886.8	1381.77	-97.1097	-1920.41	1142.37	-101.38	-1946.17	1048.13	-111.95	-1888.88	904.416	-61.9113	-1880.88	801.981	-125.95	-1920.6	794.514	-112.67	-1875.12	724.217
4738	0	98.0138	-1776.93	1576.93	202.439	-1782.02	1582.91	77.1726	-1940.75	1560.11	195.149	-1949.38	1567.47	157.461	-1971.53	1429.96	162.804	-2069.33	1150.94	155.609	-1813.46	1323.77	168.156	-1716.04	1125.31	239.325	-2065.44	1248.98	3.3062	-1876.62	1383.46	-97.7907	-1908.62	1143.62	-102.209	-1934.21	1049.45	-112.98	-1875.88	906.059	-62.7623	-1867.82	802.913	-127.105	-1906.99	796.083	-114.224	-1861.1	725.975
4739	0	96.2567	-1766.25	1578.18	200.597	-1771.75	1584.5	74.8308	-1930.05	1561.94	192.801	-1939.09	1569.73	155.586	-1961.63	1431.63	161.548	-2059.09	1152.61	154.52	-1803.77	1325.55	167.601	-1706.36	1127.36	237.808	-2055.56	1250.9	1.67345	-1866.43	1384.93	-98.6971	-1896.82	1144.81	-103.373	-1922.21	1050.64	-114.229	-1862.83	907.692	-64.0938	-1853.49	804.541	-128.507	-1892.89	797.598	-115.715	-1846.67	727.689
4740	0	94.6041	-1755.77	1579.44	198.852	-1761.38	1586.23	72.6892	-1919.38	1563.58	190.717	-1928.77	1571.86	153.697	-1951.62	1433.33	160.233	-2049.18	1154.31	153.276	-1794.28	1326.92	167.157	-1696.58	1129.21	236.202	-2045.84	1252.84	0.41932	-1856.22	1385.95	-99.8371	-1885.16	1145.87	-104.654	-1910.03	1051.58	-115.55	-1849.7	909.015	-65.9158	-1839.18	806.348	-129.834	-1878.64	798.935	-117.001	-1831.83	729.308
4741	0	93.0134	-1745.23	1580.94	197.072	-1751.13	1587.89	70.8737	-1909.05	1565.02	188.737	-1918.62	1573.73	151.994	-1941.81	1434.84	158.85	-2039.63	1155.84	152.241	-1784.71	1328.41	166.686	-1686.65	1130.95	234.6	-2036.3	1254.56	-1.0072	-1846.09	1387.18	-101.242	-1873.54	1146.7	-106.055	-1898.11	1052.23	-116.798	-1836.38	910.263	-67.0231	-1824.69	807.946	-130.973	-1864.31	800.046	-118.186	-1816.95	730.371
4742	0	91.2033	-1735.16	1581.87	195.438	-1740.98	1589.32	69.1631	-1899.01	1566.11	187.102	-1908.58	1575.23	150.365	-1931.96	1436.13	157.482	-2030.24	1157.34	151.409	-1774.91	1329.96	166.335	-1676.85	1132.4	232.96	-2026.92	1256.17	-2.33146	-1835.9	1388.05	-102.859	-1862.12	1147.65	-107.501	-1885.97	1052.77	-118.145	-1823.14	911.41	-68.1313	-1810.67	809.162	-132.086	-1849.9	800.876	-119.396	-1801.81	732.028
4743	0	89.5567	-1725	1582.94	193.65	-1730.89	1590.52	67.6893	-1889.03	1567.11	185.455	-1898.32	1576.57	148.954	-1922.08	1437.52	156.018	-2020.73	1158.82	150.538	-1765.38	1331.06	166.261	-1666.88	1133.55	231.415	-2017.67	1257.74	-3.43156	-1825.58	1388.96	-104.335	-1850.62	1148.33	-109.25	-1873.79	1053.3	-119.322	-1809.56	912.52	-69.0709	-1796.29	810.692	-133.298	-1835.34	801.677	-120.292	-1785.97	733.872
4744	0	87.9538	-1715.03	1583.82	191.945	-1720.76	1591.87	66.187	-1879.06	1568.11	184.018	-1888.17	1578.04	147.64	-1912.16	1438.9	154.613	-2011.41	1160.42	149.692	-1755.79	1331.93	166.276	-1657.15	1134.42	229.949	-2008.44	1259.4	-4.34382	-1815.3	1389.65	-105.908	-1839.16	1149.3	-110.916	-1861.61	1053.89	-120.653	-1796.08	913.651	-70.0802	-1781.99	812.253	-134.349	-1820.58	802.469	-121.231	-1770.02	735.593
4745	0	86.3817	-1705.14	1584.61	190.444	-1710.82	1592.95	64.8829	-1869.22	1568.97	182.654	-1878.2	1579.22	146.479	-1902.32	1440	153.278	-2002.36	1161.87	149.115	-1746.33	1332.8	166.331	-1647.53	1135.07	228.644	-1999.28	1260.91	-5.13955	-1805.09	1390.38	-107.394	-1827.88	1149.98	-112.262	-1849.31	1054.35	-121.675	-1782.49	914.728	-71.0849	-1767.58	813.672	-135.41	-1805.97	803.246	-122.079	-1754.12	737.327
4746	0	84.9321	-1695.36	1585.23	189.039	-1700.92	1593.85	63.5422	-1859.36	1569.69	181.258	-1868.29	1580.27	145.349	-1892.45	1440.98	151.901	-1993.19	1163.06	148.637	-1736.8	1333.49	166.699	-1637.91	1135.49	227.246	-1990.39	1262.16	-5.82371	-1794.9	1390.9	-108.704	-1816.57	1150.9	-113.908	-1837.13	1055.04	-122.876	-1768.97	915.858	-72.1005	-1753.26	815.035	-136.614	-1791.35	803.868	-122.978	-1738.12	739.174
4747	0	83.7504	-1685.45	1585.73	187.727	-1690.99	1594.72	62.2103	-1849.51	1570.47	179.933	-1858.43	1581.23	144.195	-1882.78	1442.02	150.494	-1984.35	1164.43	148.289	-1727.48	1333.95	167.071	-1628.64	1135.69	225.876	-1981.33	1263.51	-6.45322	-1784.65	1391.44	-109.962	-1805.5	1151.52	-115.36	-1825.09	1055.42	-123.866	-1755.39	916.897	-73.0207	-1738.84	816.263	-137.742	-1776.54	804.568	-123.955	-1721.88	740.919
4748	0	82.4879	-1675.61	1585.89	186.629	-1681.2	1595.33	60.9776	-1839.52	1571.02	178.702	-1848.58	1582.11	143.191	-1873.11	1442.99	149.205	-1975.4	1165.67	147.871	-1718.24	1334.28	167.439	-1619.67	1135.85	224.602	-1972.51	1264.73	-6.98548	-1774.57	1391.8	-111.046	-1794.32	1152.17	-116.597	-1812.86	1055.93	-124.976	-1742.01	917.886	-74.1231	-1724.49	817.67	-138.807	-1761.95	805.435	-125.087	-1706	742.773
4749	0	81.7243	-1665.54	1586.49	185.66	-1671.34	1595.72	59.9635	-1829.53	1571.47	177.512	-1838.77	1582.78	142.268	-1863.55	1443.82	148.021	-1966.54	1166.7	147.447	-1709.05	1334.65	168.018	-1610.87	1135.79	223.325	-1963.65	1265.75	-7.38309	-1764.43	1392.36	-111.964	-1783.15	1152.82	-117.861	-1800.77	1056.46	-125.959	-1728.57	919.169	-75.4603	-1710.03	819.305	-140.155	-1747.71	806.366	-126.319	-1690.16	744.84
4750	0	81.236	-1655.61	1586.73	185.112	-1661.61	1596	58.9594	-1819.53	1571.93	176.492	-1828.95	1583.43	141.402	-1854.03	1444.61	146.841	-1957.72	1167.74	147.161	-1699.81	1335	168.585	-1602.36	1135.78	222.083	-1954.91	1266.74	-7.78371	-1754.4	1392.96	-112.784	-1772.11	1153.64	-118.995	-1788.7	1057.17	-126.971	-1715.14	920.423	-76.5142	-1695.44	820.863	-141.31	-1733.2	807.311	-127.701	-1674.51	746.941
4751	0	80.6917	-1645.66	1586.77	184.73	-1651.9	1596.36	58.1178	-1809.39	1572.22	175.598	-1819.19	1583.86	140.555	-1844.44	1445.35	145.704	-1948.88	1168.78	147.064	-1690.67	1335.25	169.073	-1594.01	1135.72	220.947	-1946.13	1267.82	-8.18133	-1744.46	1393.29	-113.562	-1760.98	1154.13	-120.001	-1776.57	1057.47	-127.903	-1701.88	921.742	-77.804	-1680.88	822.486	-142.208	-1718.5	808.232	-129.047	-1659.05	748.829
4752	0	80.4637	-1635.6	1586.91	184.365	-1642.2	1596.53	57.3038	-1799.4	1572.38	174.812	-1809.54	1584.14	139.722	-1835.07	1445.77	144.646	-1940.4	1169.51	146.922	-1681.55	1335.32	169.454	-1585.81	1135.52	219.831	-1937.48	1268.58	-8.55407	-1734.77	1393.58	-114.089	-1749.86	1154.53	-120.846	-1764.81	1057.78	-128.762	-1688.64	922.675	-79.016	-1666.44	823.772	-143.241	-1704.24	809.173	-130.506	-1643.69	750.503
4753	0	80.1149	-1625.72	1586.47	184.182	-1632.52	1596.31	56.6759	-1789.56	1572.45	174.164	-1799.89	1584.21	138.906	-1826.05	1446.15	143.81	-1931.89	1170.02	146.702	-1672.51	1335.17	169.781	-1577.69	1135.21	218.906	-1928.81	1269.28	-8.92697	-1725.05	1393.7	-114.459	-1738.89	1154.5	-121.661	-1752.94	1057.83	-129.653	-1675.38	923.598	-79.8734	-1651.83	825.044	-143.819	-1689.94	809.839	-131.858	-1628.64	752.117
4754	0	80.0886	-1615.8	1586.19	184.091	-1622.89	1596.03	56.1698	-1779.62	1572.53	173.616	-1790.19	1584.21	138.387	-1816.61	1446.4	143.058	-1923.31	1170.62	146.499	-1663.57	1334.94	169.948	-1569.47	1134.81	218.049	-1920.28	1269.73	-9.20398	-1715.45	1393.58	-114.794	-1728.04	1154.53	-122.282	-1741.31	1057.87	-130.392	-1662.2	924.403	-80.7533	-1637.42	825.909	-144.743	-1675.64	810.533	-133.185	-1613.61	753.506
4755	0	79.9037	-1606.09	1585.66	184.108	-1613.25	1595.67	55.8001	-1769.75	1572.5	173.327	-1780.53	1584.32	137.801	-1807.28	1446.61	142.446	-1914.84	1171.14	146.37	-1654.61	1334.61	170.111	-1561.17	1134.34	217.389	-1911.66	1270.38	-9.41335	-1706.09	1393.31	-114.992	-1717	1154.33	-123.115	-1729.53	1057.75	-131.079	-1649.13	924.942	-81.3772	-1623.44	826.562	-145.555	-1661.29	811.114	-134.211	-1598.62	754.756
4756	0	79.9536	-1596.34	1584.98	183.941	-1603.57	1595.13	55.6758	-1760.02	1572.26	173.084	-1770.92	1584.19	137.376	-1798.14	1446.63	142.077	-1906.3	1171.39	146.216	-1645.72	1334.09	170.066	-1552.91	1133.77	216.88	-1903.13	1270.73	-9.73873	-1696.77	1393.08	-115.289	-1706.24	1153.95	-123.486	-1717.91	1057.25	-131.645	-1636.14	925.329	-82.1653	-1609.41	827.05	-146.263	-1647.17	811.736	-135.087	-1583.74	755.889
4757	0	79.9444	-1586.62	1584.37	183.909	-1593.95	1594.46	55.4785	-1750.35	1572.09	172.887	-1761.23	1583.98	137.044	-1788.95	1446.5	141.844	-1898.15	1171.63	146.262	-1636.74	1333.65	169.972	-1544.61	1133.26	216.467	-1894.56	1270.87	-9.88657	-1687.54	1392.75	-115.401	-1695.5	1153.32	-123.948	-1706.48	1056.76	-132.061	-1623	925.551	-82.5248	-1595.39	827.516	-146.637	-1632.93	811.947	-135.769	-1569.04	756.863
4758	0	79.8433	-1576.87	1583.63	183.86	-1584.24	1593.85	55.2606	-1740.69	1571.87	172.669	-1751.6	1583.8	136.715	-1779.76	1446.35	141.693	-1889.75	1171.74	146.206	-1627.78	1333.01	169.868	-1536.26	1132.45	216.268	-1886	1271.2	-10.0102	-1678.53	1392.15	-115.536	-1684.87	1152.61	-124.187	-1694.81	1056.06	-132.596	-1610.3	925.685	-82.982	-1581.62	827.674	-147.17	-1618.92	812.049	-136.45	-1554.53	757.601
4759	0	79.7187	-1567.15	1582.89	183.858	-1574.46	1593.11	55.1625	-1730.96	1571.55	172.558	-1741.88	1583.58	136.537	-1770.72	1446.18	141.709	-1881.25	1171.89	146.183	-1618.9	1332.51	169.828	-1527.79	1131.57	216.22	-1877.38	1271.32	-9.94354	-1669.5	1391.43	-115.765	-1674.4	1152.01	-124.391	-1683.38	1055.29	-132.84	-1597.68	925.754	-83.0783	-1567.99	828.106	-147.443	-1605.05	811.986	-136.857	-1540.17	758.283
4760	0	79.7426	-1557.44	1581.95	183.801	-1564.87	1592.13	55.2409	-1721.29	1571.02	172.525	-1732.26	1583.18	136.546	-1761.48	1445.72	141.812	-1873.16	1171.77	146.292	-1609.97	1331.97	169.913	-1519.22	1130.71	216.284	-1868.68	1271.22	-9.97905	-1660.45	1390.9	-115.621	-1663.74	1151.44	-124.238	-1671.79	1054.41	-132.977	-1584.97	925.779	-83.1879	-1554.56	828.424	-147.43	-1591.26	811.892	-137.119	-1525.95	758.991
4761	0	79.7318	-1547.83	1580.81	183.854	-1555.21	1591.19	55.2073	-1711.7	1570.52	172.562	-1722.62	1582.74	136.633	-1752.42	1445.3	142.081	-1864.76	1171.64	146.368	-1601.05	1331.25	169.846	-1510.72	1129.85	216.466	-1860.26	1271.19	-9.89495	-1651.6	1390.22	-115.647	-1653.17	1150.77	-124.285	-1660.23	1053.59	-132.941	-1572.42	925.859	-83.3212	-1541.26	828.498	-147.931	-1577.62	812.156	-137.096	-1511.89	759.606
4762	0	79.8162	-1538.12	1579.6	183.971	-1545.49	1590.27	55.1724	-1702.05	1569.84	172.577	-1712.94	1582.34	136.781	-1743.25	1444.92	142.361	-1856.22	1171.48	146.479	-1592.26	1330.49	169.915	-1502.15	1128.68	216.784	-1851.51	1271.11	-9.75341	-1642.47	1389.32	-115.494	-1642.58	1149.89	-124.076	-1648.91	1052.72	-132.706	-1559.99	925.667	-83.1756	-1528.06	828.678	-147.829	-1564.24	811.982	-137.049	-1498.02	760.086
4763	0	79.8802	-1528.45	1578.45	184.129	-1535.87	1589.23	55.3084	-1692.3	1568.92	172.582	-1703.29	1581.56	136.972	-1734.04	1444.23	142.688	-1847.88	1171.19	146.626	-1583.35	1329.55	169.951	-1493.46	1127.38	217.085	-1842.67	1270.85	-9.38031	-1633.65	1388.29	-115.31	-1632.12	1149.02	-123.889	-1637.66	1051.77	-132.302	-1547.73	925.449	-82.6899	-1515.08	828.654	-147.584	-1551.14	811.736	-136.675	-1484.41	760.293
4764	0	80.0834	-1518.9	1577.07	184.295	-1526.3	1587.89	55.3448	-1682.76	1567.78	172.723	-1693.74	1580.61	137.275	-1725.02	1443.41	143.145	-1839.3	1170.52	146.921	-1574.46	1328.55	170.305	-1484.79	1126.06	217.519	-1833.88	1270.2	-9.08368	-1624.71	1387.23	-114.856	-1621.53	1147.95	-123.549	-1626.56	1050.84	-131.875	-1535.48	925.189	-82.2253	-1502.2	828.739	-147.128	-1537.96	811.252	-136.126	-1471.03	760.494
4765	0	80.3483	-1509.32	1575.54	184.537	-1516.68	1586.6	55.6725	-1673.23	1566.6	172.962	-1684.21	1579.65	137.642	-1715.77	1442.47	143.509	-1830.5	1169.92	147.087	-1565.46	1327.31	170.421	-1476.24	1124.47	217.988	-1824.94	1269.47	-8.64652	-1615.8	1385.99	-114.434	-1611.02	1146.88	-123.108	-1615.37	1049.85	-131.186	-1523.49	924.843	-81.5779	-1489.68	828.56	-146.47	-1525.16	810.938	-135.489	-1457.72	760.563
4766	0	80.5481	-1499.79	1574.06	184.804	-1507.02	1585.39	56.1335	-1663.58	1565.47	173.402	-1674.52	1578.64	138.219	-1706.55	1441.64	144.126	-1821.76	1169.35	147.441	-1556.52	1325.99	170.717	-1467.7	1123.07	218.587	-1815.92	1268.81	-8.16767	-1606.73	1384.78	-113.834	-1600.52	1145.89	-122.878	-1604.33	1048.86	-130.413	-1511.53	924.548	-80.9323	-1477.16	828.303	-145.843	-1512.24	810.523	-134.593	-1444.7	760.663
4767	0	81.0572	-1490.14	1572.78	185.24	-1497.42	1583.97	56.5643	-1654.04	1564.16	173.915	-1664.91	1577.4	138.832	-1697.16	1440.59	144.643	-1812.81	1168.4	147.955	-1547.32	1324.58	171.155	-1458.92	1121.65	219.243	-1806.87	1267.86	-7.66789	-1597.76	1383.55	-113.212	-1590.23	1144.88	-122.36	-1593.48	1047.73	-129.492	-1499.73	924.179	-79.9284	-1464.97	828.013	-144.784	-1499.75	810.118	-133.499	-1431.81	760.762
4768	0	81.4667	-1480.62	1571.29	185.776	-1487.86	1582.48	57.273	-1644.69	1562.75	174.551	-1655.37	1576.11	139.539	-1688.01	1439.44	145.369	-1804.07	1167.48	148.391	-1538.24	1323.37	171.479	-1450.18	1120.17	220.033	-1797.86	1266.85	-7.09671	-1588.74	1382.41	-112.448	-1580.17	1143.68	-121.782	-1582.72	1046.68	-128.553	-1488.01	923.896	-78.7391	-1452.67	828.157	-143.859	-1487.32	809.746	-132.286	-1419.1	760.886
4769	0	82.0657	-1471.17	1569.86	186.329	-1478.13	1581.24	57.9167	-1635.22	1561.54	175.335	-1645.66	1574.95	140.306	-1678.62	1438.41	145.925	-1795	1166.61	149.06	-1528.95	1322	172.001	-1441.14	1118.76	220.732	-1788.66	1265.89	-6.4908	-1579.58	1381.12	-111.924	-1570.25	1142.7	-121.187	-1572.17	1045.48	-127.548	-1476.64	923.348	-77.5329	-1441.05	828.069	-143.067	-1475.17	809.284	-130.977	-1406.76	760.885
4770	0	82.6078	-1461.72	1568.51	186.868	-1468.39	1579.88	58.9338	-1625.73	1560.34	176.264	-1636.06	1573.66	141.205	-1669.14	1437.27	146.735	-1786	1165.76	149.706	-1519.68	1320.61	172.478	-1432.14	1117.28	221.614	-1779.34	1264.93	-5.80117	-1570.55	1379.81	-111.135	-1560.54	1141.65	-120.381	-1561.64	1044.2	-126.387	-1465.49	922.759	-76.4641	-1429.56	827.529	-141.738	-1463.24	808.577	-129.46	-1394.46	760.667
4771	0	83.4089	-1452.33	1566.94	187.7	-1458.74	1578.21	59.9319	-1616.42	1559.09	177.307	-1626.44	1572.25	142.256	-1659.7	1436.02	147.532	-1776.87	1164.61	150.473	-1510.24	1319.1	172.978	-1422.89	1115.59	222.604	-1770.06	1263.63	-4.828	-1561.39	1378.43	-110.423	-1551	1140.27	-119.683	-1551.45	1043.11	-125.18	-1454.32	922.165	-74.859	-1417.8	827.218	-140.183	-1451.42	807.727	-127.717	-1382.41	760.311
4772	0	84.2233	-1442.82	1565.35	188.572	-1449.19	1576.5	61.1785	-1607.05	1557.78	178.511	-1616.88	1570.93	143.475	-1650.16	1434.65	148.564	-1767.74	1163.45	151.204	-1500.94	1317.44	173.436	-1413.65	1114	223.725	-1760.55	1262.42	-3.89644	-1552.11	1377.21	-109.528	-1541.72	1139.04	-118.752	-1541.17	1041.87	-123.9	-1443.38	921.358	-73.2687	-1406.66	826.718	-138.945	-1439.76	807.376	-125.877	-1370.58	760.09
4773	0	85.4145	-1433.27	1563.92	189.806	-1439.54	1574.93	62.4184	-1597.63	1556.76	179.96	-1607.21	1569.76	144.65	-1640.61	1433.5	149.55	-1758.36	1162.37	152.103	-1491.39	1315.92	173.856	-1404.25	1112.28	224.883	-1750.98	1261.19	-2.77547	-1542.85	1375.92	-108.633	-1532.51	1137.91	-117.899	-1531.01	1040.8	-122.405	-1432.63	920.584	-71.6243	-1395.59	826.253	-137.223	-1428.34	806.556	-123.923	-1358.88	759.911
4774	0	86.6209	-1423.92	1562.6	191.17	-1429.96	1573.3	63.986	-1588.18	1555.59	181.462	-1597.6	1568.2	145.949	-1631.06	1432.16	150.655	-1748.94	1161.09	153.078	-1481.99	1314.27	174.516	-1394.65	1110.83	226.131	-1741.32	1259.77	-1.64715	-1533.65	1374.58	-107.625	-1523.49	1136.63	-116.97	-1521.3	1039.59	-121.016	-1422.27	919.857	-69.6231	-1384.76	825.783	-135.623	-1417.15	805.773	-121.77	-1347.61	759.367
4775	0	87.9955	-1414.53	1561.12	192.505	-1420.37	1571.65	65.5667	-1578.84	1554.37	183.096	-1588.14	1566.75	147.419	-1621.67	1430.62	151.828	-1739.53	1159.5	154.203	-1472.4	1312.84	175.029	-1385.2	1109.24	227.375	-1731.64	1258.06	-0.379714	-1524.38	1373.29	-106.827	-1514.42	1135.61	-115.735	-1511.77	1038.27	-119.591	-1412.06	919.086	-67.9688	-1374.16	825.429	-133.702	-1406.31	804.895	-119.798	-1336.56	759.023
4776	0	89.6607	-1405.12	1559.96	194.265	-1410.92	1570.15	67.3728	-1569.55	1553.18	184.967	-1578.64	1565.33	148.877	-1612.2	1429.17	153.025	-1730.02	1158.06	155.32	-1462.86	1311.52	175.506	-1375.62	1107.86	228.766	-1721.93	1256.42	0.752441	-1515.1	1372.39	-105.557	-1505.48	1134.51	-114.842	-1502.33	1037.16	-118.088	-1401.99	918.272	-66.3614	-1363.85	825.128	-131.976	-1395.88	804.143	-117.613	-1325.81	758.606
4777	0	91.5348	-1395.81	1558.77	196.156	-1401.37	1568.85	69.3815	-1560.14	1552.05	187	-1569.13	1563.88	150.555	-1602.68	1427.81	154.26	-1720.12	1156.53	156.613	-1453.16	1310.1	175.929	-1365.9	1106.56	230.169	-1711.98	1254.73	2.19016	-1505.74	1371.32	-104.638	-1496.52	1133.75	-113.55	-1493.09	1036.07	-116.705	-1392.18	917.76	-64.4085	-1353.8	824.768	-130.163	-1385.55	803.561	-115.442	-1315.36	758.326
4778	0	93.4695	-1386.47	1557.69	198.225	-1391.93	1567.42	71.4415	-1550.81	1550.93	189.212	-1559.71	1562.44	152.303	-1593.15	1426.3	155.619	-1710.45	1154.85	157.896	-1443.44	1308.97	176.545	-1356.33	1105.18	231.776	-1702.19	1252.89	3.68919	-1496.34	1370.38	-103.354	-1487.39	1132.89	-112.531	-1484	1035.1	-115.175	-1382.7	916.946	-62.5101	-1343.86	824.397	-128.001	-1375.63	802.614	-113.388	-1305.18	758.019
4779	0	95.6617	-1377.13	1556.7	200.329	-1382.66	1565.93	73.7771	-1541.7	1549.82	191.53	-1550.38	1560.99	154.113	-1583.8	1424.76	156.941	-1700.41	1153.02	159.276	-1433.71	1307.69	177.039	-1346.57	1104.02	233.31	-1692.36	1250.91	5.17725	-1486.84	1369.46	-102.129	-1478.43	1132.11	-111.195	-1475.06	1034.18	-113.633	-1373.33	916.286	-60.5871	-1334.19	824.164	-126.192	-1365.97	802.193	-111.16	-1295.42	757.666
4780	0	98.0583	-1367.95	1555.7	202.666	-1373.34	1564.64	76.1507	-1532.32	1548.82	193.956	-1541.14	1559.6	156.023	-1574.21	1423.22	158.209	-1690.45	1151.28	160.807	-1423.91	1306.44	177.489	-1336.62	1102.77	234.744	-1682.35	1248.95	6.98236	-1477.29	1368.63	-100.755	-1469.15	1131.39	-110.07	-1466.36	1033.36	-112.184	-1364.35	915.509	-58.5665	-1324.83	823.778	-124.021	-1356.63	801.193	-109.027	-1285.94	757.052
4781	0	100.301	-1358.81	1554.53	205.168	-1364	1563.36	78.6246	-1523.23	1547.93	196.565	-1531.87	1558.28	157.992	-1564.79	1421.76	159.452	-1680.34	1149.53	162.293	-1414.02	1305.22	178.126	-1326.32	1101.52	236.283	-1672.41	1246.96	8.55553	-1467.76	1367.83	-99.5946	-1460.14	1130.68	-108.848	-1457.52	1032.55	-110.708	-1355.45	914.576	-56.6434	-1315.81	823.213	-121.995	-1347.6	800.251	-106.769	-1276.73	756.298
4782	0	102.982	-1349.63	1553.74	207.839	-1354.81	1561.96	81.3652	-1514.21	1546.93	199.305	-1522.67	1556.84	160.13	-1555.28	1420.11	160.768	-1670.08	1147.51	163.888	-1404.17	1304.09	178.55	-1316.19	1100.58	237.747	-1662.32	1244.72	10.4322	-1458.13	1367.04	-98.1347	-1450.76	1130.02	-107.579	-1448.89	1031.78	-109.21	-1346.75	913.731	-54.8181	-1306.98	822.789	-119.923	-1338.89	799.495	-104.617	-1267.8	755.649
4783	0	105.797	-1340.5	1553	210.495	-1345.63	1560.59	84.2148	-1505.06	1546.01	202.156	-1513.55	1555.46	162.331	-1545.74	1418.56	162.12	-1659.73	1145.45	165.462	-1394.23	1303.07	179.272	-1305.62	1099.8	239.364	-1652.27	1242.4	12.435	-1448.34	1366.41	-96.7093	-1441.74	1129.7	-106.277	-1440.28	1031.17	-107.669	-1338.22	913.106	-53.0613	-1298.49	822.143	-117.892	-1330.24	798.744	-102.516	-1259.26	755.029
4784	0	108.587	-1331.44	1552.01	213.322	-1336.44	1559.31	87.1911	-1495.77	1545.28	205.14	-1504.3	1554.19	164.559	-1536.34	1417.02	163.401	-1649.26	1143.48	167.288	-1384.17	1302.28	180.069	-1295.04	1098.87	240.943	-1642.09	1240.19	14.3211	-1438.75	1365.91	-95.4553	-1432.3	1129.4	-105.08	-1431.66	1030.76	-106.121	-1329.79	912.347	-51.1212	-1290.12	821.425	-116.299	-1321.93	797.983	-100.323	-1250.94	754.298
4785	0	111.624	-1322.3	1551.22	216.332	-1327.24	1558.08	90.247	-1486.77	1544.64	208.228	-1495.03	1552.93	167.003	-1526.92	1415.42	164.757	-1638.62	1141.32	169.219	-1374.21	1301.4	181.034	-1284.4	1098.34	242.567	-1631.85	1237.75	16.4351	-1429.14	1365.43	-94.0432	-1423.12	1129.19	-103.91	-1423.06	1030.44	-104.656	-1321.55	911.665	-49.5225	-1282.13	820.933	-114.367	-1313.79	797.166	-98.2847	-1242.99	753.431
4786	0	114.584	-1313.17	1550.44	219.43	-1318	1556.77	93.3458	-1477.79	1543.97	211.41	-1485.92	1551.74	169.5	-1517.74	1413.76	166.106	-1627.72	1138.89	171.146	-1364.23	1300.76	182.061	-1273.64	1097.92	244.25	-1621.65	1235.05	18.7228	-1419.62	1365.16	-92.5674	-1413.9	1129.07	-102.497	-1414.56	1030.02	-103.241	-1313.44	910.995	-47.8176	-1274.3	820.404	-112.779	-1306.04	796.479	-96.3161	-1235.44	752.44
4787	0	117.513	-1304.06	1549.85	222.531	-1308.72	1555.78	96.3582	-1468.69	1543.49	214.629	-1476.66	1550.72	172.1	-1508.62	1412.24	167.423	-1616.51	1136.52	173.138	-1354.09	1300.27	183.207	-1262.65	1097.72	245.93	-1611.35	1232.48	20.9658	-1410.26	1364.8	-91.0801	-1404.71	1129.1	-101.138	-1406.25	1029.97	-101.78	-1305.44	910.392	-46.5181	-1266.67	819.725	-111.204	-1298.45	795.561	-94.6585	-1228.18	751.38
4788	0	120.55	-1294.77	1549.49	225.487	-1299.19	1555.14	99.5955	-1459.4	1543.32	217.953	-1467.3	1550.11	174.756	-1499.42	1411.03	168.832	-1605.18	1134.51	175.303	-1344	1299.87	184.598	-1251.69	1097.75	247.746	-1601.09	1230.19	23.3956	-1400.81	1364.73	-89.4251	-1395.59	1129.12	-99.5764	-1397.72	1029.84	-100.494	-1297.53	909.972	-45.3165	-1259.38	819.059	-110.084	-1291.08	795.096	-93.0669	-1220.93	750.464
4789	0	123.626	-1285.47	1549.51	228.57	-1289.63	1554.66	103.061	-1450.24	1543.53	221.406	-1457.7	1549.79	177.588	-1489.98	1410.09	170.393	-1593.92	1132.93	177.685	-1333.82	1299.77	186.12	-1240.63	1097.92	249.607	-1590.73	1228.19	25.8636	-1391.47	1364.74	-87.709	-1386.24	1129.4	-98.1045	-1389.39	1030.11	-99.1392	-1289.75	909.628	-44.07	-1252.17	818.281	-109.093	-1283.96	794.933	-91.6899	-1214.39	749.311
4790	0	126.683	-1276.09	1549.76	231.576	-1279.95	1554.31	106.617	-1440.93	1543.98	224.881	-1447.98	1549.82	180.368	-1480.46	1409.5	171.784	-1582.92	1131.77	180.132	-1323.57	1300.14	187.481	-1229.42	1098.43	251.334	-1580.25	1226.55	28.2973	-1381.66	1365.17	-85.8321	-1377.22	1130.06	-96.3347	-1380.93	1030.61	-97.931	-1282.04	909.609	-43.1007	-1245.37	817.846	-108.147	-1277.1	794.784	-90.6392	-1207.93	748.62
4791	0	129.784	-1266.45	1550.2	234.672	-1270.05	1554.45	110.075	-1431.31	1544.91	228.395	-1438.15	1550.31	182.947	-1470.63	1409.44	172.821	-1572.4	1131.25	182.562	-1313.23	1300.78	188.937	-1218.08	1099.38	252.875	-1569.79	1225.6	30.7032	-1371.64	1365.89	-83.9654	-1368.24	1130.83	-94.6951	-1372.67	1031.7	-96.7987	-1274.75	909.876	-42.2834	-1238.65	817.645	-107.449	-1270.59	794.815	-90.0216	-1202.01	747.99
4792	0	132.887	-1256.75	1550.95	237.794	-1259.99	1554.88	113.465	-1421.62	1546.23	231.945	-1428.11	1551.1	185.386	-1460.71	1409.85	173.516	-1561.82	1131.4	185.033	-1302.86	1301.66	190.528	-1206.64	1100.61	254.142	-1559.36	1225.18	33.1963	-1361.35	1367.14	-82.085	-1359.32	1131.91	-92.9659	-1364.35	1032.99	-95.5909	-1267.62	910.148	-41.4143	-1232.24	817.714	-106.665	-1264.6	795.329	-89.5298	-1196.42	747.701
4793	0	136.1	-1246.94	1552.04	241.022	-1249.85	1555.45	117.21	-1411.94	1547.72	235.536	-1418.1	1552.1	187.732	-1450.81	1410.49	173.905	-1551.33	1131.83	187.414	-1292.59	1302.81	192.226	-1195.09	1102.34	255.157	-1549.07	1225.14	35.5937	-1350.85	1368.8	-80.2528	-1350.56	1133.5	-91.1496	-1356.12	1034.74	-94.3149	-1260.72	910.891	-40.7215	-1226.24	817.852	-105.782	-1259.13	795.97	-89.2359	-1191.29	747.727
4794	0	139.345	-1236.94	1553.38	244.259	-1239.7	1556.22	120.589	-1402.04	1549.71	239.083	-1407.95	1553.43	189.96	-1440.96	1411.5	174.232	-1540.57	1132.5	189.806	-1282.37	1304.37	194.033	-1183.92	1104.31	256.008	-1538.76	1225.52	37.8022	-1340.31	1371.09	-78.3284	-1341.84	1135.7	-89.5008	-1347.87	1037.07	-93.2258	-1254.01	912.092	-40.2781	-1220.16	818.521	-105.342	-1253.72	797.339	-89.2174	-1186.51	748.117
4795	0	142.703	-1226.77	1555.09	247.468	-1229.38	1557.16	124.073	-1391.94	1552.17	242.551	-1397.64	1555.18	191.839	-1431.13	1412.79	174.326	-1529.52	1133.69	192.067	-1272.24	1306.22	195.823	-1173.06	1106.62	256.582	-1528.56	1226.24	40.1128	-1329.58	1373.47	-76.5882	-1332.96	1138.18	-87.6749	-1339.44	1039.65	-92.3001	-1247.28	913.667	-39.5909	-1214.96	819.271	-104.664	-1248.64	798.866	-89.4305	-1182.01	748.928
4796	0	146.061	-1216.54	1556.75	250.828	-1219.1	1558.22	127.401	-1381.58	1555	245.951	-1387.33	1557.18	193.658	-1421.46	1414.34	174.478	-1518.59	1134.97	194.247	-1262.42	1308.24	197.639	-1162.44	1109.26	257.088	-1518.29	1227.17	42.2909	-1319.06	1376.27	-74.7882	-1323.92	1141.13	-86.2322	-1331.19	1042.67	-91.3452	-1240.78	915.6	-39.0821	-1209.58	820.192	-104.11	-1243.87	800.887	-89.4174	-1177.73	749.886
4797	0	149.376	-1206.21	1558.54	254.123	-1208.88	1559.05	130.598	-1371.43	1558.01	249.113	-1377.09	1559.24	195.533	-1411.97	1415.82	174.822	-1507.53	1135.93	196.469	-1252.62	1310.46	199.56	-1152	1112.18	257.524	-1508.19	1227.95	44.4856	-1308.75	1379.22	-73.1215	-1315.01	1144.41	-84.5475	-1322.86	1045.78	-90.2983	-1234.28	917.515	-38.5975	-1204.35	821.477	-103.684	-1239.04	802.94	-89.5667	-1173.69	750.956
4798	0	152.654	-1195.79	1560.25	257.34	-1198.62	1560.01	133.473	-1360.95	1561.34	252.131	-1366.86	1561.59	197.282	-1402.49	1417.47	175.03	-1496.33	1137.21	198.481	-1242.86	1312.81	201.501	-1141.89	1114.83	257.945	-1498.08	1228.88	46.6211	-1298.51	1382.04	-71.5131	-1305.87	1147.43	-83.033	-1314.4	1049.14	-89.443	-1227.66	919.759	-38.2122	-1199.24	822.895	-103.593	-1234.07	805.469	-89.5211	-1169.75	752.087
4799	0	155.689	-1185.42	1561.91	260.432	-1188.33	1561.06	136.379	-1350.5	1564.72	254.975	-1356.53	1564.12	199.035	-1393.19	1418.94	174.996	-1485.32	1138.64	200.206	-1233.46	1314.88	203.391	-1132.03	1117.57	258.455	-1487.96	1230.03	48.6568	-1288.66	1384.85	-70.0257	-1296.54	1150.7	-81.9265	-1306.06	1052.51	-88.5727	-1221.08	922.053	-37.6933	-1194.21	824.289	-103.304	-1228.93	807.882	-89.3697	-1165.75	753.192
4800	0	158.672	-1175.05	1563.56	263.393	-1178.11	1561.99	139.079	-1340.05	1568	257.672	-1346.32	1566.69	200.907	-1383.94	1420.59	175.248	-1474.51	1139.94	202.063	-1223.97	1317.24	205.085	-1122.46	1120.3	259.186	-1477.95	1230.95	50.6691	-1279.01	1387.67	-68.6641	-1287.23	1153.96	-80.5772	-1297.73	1055.89	-87.7399	-1214.38	924.526	-37.3615	-1189.01	825.772	-103.419	-1223.42	810.683	-89.0511	-1161.68	754.336
4801	0	161.42	-1164.63	1565.13	266.22	-1167.93	1562.8	141.666	-1329.58	1571.06	260.209	-1336.05	1569.1	202.716	-1374.7	1422.14	175.82	-1464.55	1141.1	203.718	-1214.63	1319.39	206.786	-1113.03	1122.84	260.083	-1468.05	1231.97	52.564	-1269.44	1390.26	-67.3923	-1277.68	1157.01	-79.2793	-1289.5	1059.05	-87.1115	-1207.44	926.99	-36.9691	-1183.69	827.519	-103.634	-1217.86	813.428	-88.6107	-1157.59	755.499
4802	0	164.04	-1154.16	1566.49	268.873	-1157.76	1563.73	144.154	-1319.1	1574.04	262.623	-1325.77	1571.56	204.39	-1365.51	1423.81	176.662	-1454.97	1142.48	205.22	-1205.37	1321.52	208.389	-1103.57	1125.42	261.02	-1458.16	1233	54.2099	-1260.14	1392.84	-66.503	-1268.35	1160.07	-78.456	-1281.54	1062.12	-86.555	-1200.47	929.208	-36.7748	-1178.1	829.402	-103.835	-1211.66	815.992	-88.232	-1153.34	756.511
4803	0	166.403	-1143.74	1567.54	271.338	-1147.48	1564.57	146.264	-1308.47	1576.88	264.733	-1315.41	1573.82	205.961	-1356.31	1425.33	177.718	-1445.85	1143.94	206.836	-1195.99	1323.45	209.756	-1094.19	1127.62	262.073	-1448.3	1234.11	55.8087	-1250.79	1395.1	-65.6425	-1258.87	1162.84	-77.6937	-1273.7	1064.66	-86.1517	-1193.55	931.6	-36.4694	-1172.69	831.058	-104.386	-1205.59	818.47	-87.9465	-1148.75	757.484
4804	0	168.68	-1133.32	1568.39	273.669	-1137.32	1565.04	148.307	-1297.92	1579.19	266.744	-1305.09	1575.82	207.556	-1347.1	1426.69	179.076	-1436.41	1145.4	208.162	-1186.78	1325.23	211.009	-1084.64	1129.74	263.21	-1438.65	1235.2	57.3072	-1241.57	1397.16	-64.9621	-1249.58	1165.22	-76.933	-1265.82	1067.13	-85.918	-1186.53	933.535	-36.5779	-1166.85	832.703	-104.6	-1199.14	820.576	-87.6941	-1143.89	758.399
4805	0	170.73	-1122.86	1568.97	275.826	-1127.19	1565.27	150.274	-1287.48	1581.27	268.583	-1294.87	1577.55	209.07	-1337.84	1427.97	180.629	-1427.07	1146.85	209.465	-1177.5	1326.65	211.902	-1075.1	1131.46	264.369	-1429.18	1236.25	58.58	-1232.38	1398.99	-64.2482	-1240.02	1167.27	-76.1815	-1257.75	1069.2	-85.6192	-1179.4	935.197	-36.5037	-1160.67	834.092	-104.983	-1192.63	822.511	-87.5543	-1138.72	759.241
4806	0	172.736	-1112.38	1569.47	277.87	-1116.93	1565.44	151.875	-1276.91	1583.33	270.346	-1284.52	1579.22	210.474	-1328.37	1429.34	182.073	-1417.63	1148.29	210.662	-1168.27	1327.78	212.622	-1065.57	1132.74	265.611	-1419.75	1237.51	59.7208	-1223.12	1400.65	-63.7709	-1230.78	1169.17	-75.731	-1249.62	1071.23	-85.4407	-1172.06	936.738	-36.4919	-1154.31	835.262	-105.389	-1185.9	824.424	-87.5857	-1133.42	760.007
4807	0	174.575	-1102.01	1569.78	279.82	-1106.74	1565.59	153.498	-1266.17	1585.07	272.01	-1274.19	1580.75	211.827	-1318.93	1430.64	183.548	-1407.44	1149.64	211.719	-1159.09	1328.66	213.145	-1056.27	1133.65	266.978	-1410.32	1238.97	60.8737	-1214	1401.81	-63.1727	-1221.45	1170.65	-75.3729	-1241.43	1073.03	-85.3703	-1164.71	937.981	-36.5244	-1147.81	836.128	-105.684	-1179.22	825.98	-87.7998	-1127.91	760.628
4808	0	176.265	-1091.61	1570.01	281.595	-1096.67	1565.43	154.883	-1255.78	1586.61	273.434	-1263.92	1581.97	213.084	-1309.5	1431.75	184.853	-1398.56	1151.06	212.565	-1149.82	1329.33	213.481	-1047.24	1134.22	268.313	-1401.11	1240.17	61.9017	-1204.81	1402.97	-62.4731	-1212.71	1171.84	-74.9755	-1233.16	1074.35	-85.2143	-1157.39	938.99	-36.7462	-1141.1	836.833	-105.918	-1172.63	827.174	-88.0147	-1122.12	761.084
4809	0	177.748	-1081.17	1570.09	283.076	-1086.53	1565.34	156.224	-1245.39	1587.99	274.666	-1253.68	1583.09	214.215	-1300.11	1432.83	186.261	-1390.07	1152.32	213.269	-1140.62	1329.85	213.618	-1038.22	1134.71	269.596	-1392.06	1241.37	62.7311	-1195.89	1404.06	-61.9026	-1204.34	1172.86	-74.4151	-1224.76	1075.47	-85.0683	-1149.99	939.769	-36.9285	-1134.45	837.546	-106.093	-1166.15	828.152	-88.5214	-1115.98	761.701
4810	0	179.102	-1070.83	1570	284.407	-1076.37	1565.29	157.431	-1234.76	1589.16	275.857	-1243.41	1584.22	215.31	-1290.78	1433.99	187.573	-1381.91	1153.65	214.002	-1131.34	1330.41	213.635	-1029.26	1134.92	270.999	-1382.93	1242.85	63.6595	-1186.89	1404.9	-61.1469	-1196.26	1173.73	-73.9999	-1216.35	1076.79	-84.9467	-1142.63	940.437	-37.1979	-1127.63	838.049	-106.222	-1159.55	829.016	-89.0227	-1109.67	762.282
4811	0	180.203	-1060.68	1569.99	285.571	-1066.22	1565.17	158.435	-1224.39	1590.43	277.064	-1233.06	1585.27	216.671	-1281.57	1435.03	188.857	-1373.27	1154.92	214.456	-1122.32	1330.92	213.316	-1020.54	1135.04	272.482	-1374.01	1244.16	64.4456	-1178.04	1405.74	-60.3418	-1188.48	1174.45	-73.6292	-1207.93	1077.84	-84.7336	-1135.28	941.125	-37.418	-1120.87	838.42	-106.454	-1152.89	829.729	-89.6665	-1103.12	762.946
4812	0	181.107	-1050.4	1569.94	286.698	-1056.12	1564.86	159.687	-1214.01	1591.48	278.143	-1222.77	1586.28	217.634	-1272.24	1435.92	190.181	-1365	1155.98	215.077	-1113.37	1331.36	213.059	-1011.96	1135.15	273.857	-1365.13	1245.29	65.222	-1169.27	1406.57	-59.4871	-1180.92	1175.23	-72.9659	-1199.65	1078.9	-84.5875	-1127.86	941.88	-37.741	-1114.07	838.849	-106.695	-1146.28	830.522	-90.2633	-1096.17	763.842
4813	0	182.213	-1040.09	1569.74	287.758	-1045.9	1564.51	160.486	-1203.56	1592.7	279.093	-1212.39	1587.37	218.936	-1263.1	1436.9	191.525	-1356.83	1157.21	215.43	-1104.37	1331.82	212.83	-1003.47	1135.13	275.443	-1356.22	1246.61	65.9932	-1160.59	1407.26	-58.4829	-1173.34	1175.86	-72.2883	-1191.5	1079.84	-84.296	-1120.43	942.601	-38.0369	-1107	839.387	-106.858	-1139.55	831.222	-91.0323	-1089.2	764.851
4814	0	183.108	-1029.75	1569.24	288.556	-1035.51	1564.07	161.348	-1193	1593.74	279.987	-1201.84	1588.42	219.908	-1253.91	1437.84	192.866	-1348.56	1158.33	215.686	-1095.59	1332.17	212.365	-995.159	1135.07	276.825	-1347.33	1247.91	66.6136	-1152.04	1408.05	-57.4583	-1165.86	1176.42	-71.6459	-1183.8	1080.66	-83.9477	-1112.99	943.172	-38.2493	-1099.99	839.745	-107.114	-1132.7	832.042	-91.8499	-1082.2	765.628
4815	0	183.751	-1019.49	1568.56	289.151	-1025.41	1563.27	162.279	-1182.52	1594.83	280.831	-1191.32	1589.39	220.867	-1244.91	1438.61	194.197	-1340.46	1159.23	216.067	-1086.75	1332.52	211.897	-986.886	1134.96	278.165	-1338.55	1248.78	67.2246	-1143.56	1408.52	-56.6588	-1158.57	1176.95	-70.9625	-1176.21	1081.38	-83.6838	-1105.75	943.738	-38.5141	-1092.96	840.156	-107.244	-1125.84	832.598	-92.6172	-1074.9	766.45
4816	0	184.351	-1009.28	1567.65	289.819	-1015.2	1562.32	163.001	-1172.06	1595.59	281.626	-1180.8	1590.26	221.807	-1235.88	1439.16	195.511	-1332.47	1160.01	216.266	-1078.21	1332.75	211.599	-978.441	1134.87	279.515	-1329.76	1249.76	67.7347	-1135.26	1409.12	-55.9838	-1151.18	1177.63	-70.0838	-1168.75	1082.02	-83.4522	-1098.48	944.394	-38.7603	-1085.63	840.665	-107.397	-1118.86	833.288	-93.3733	-1067.57	767.33
4817	0	184.785	-998.947	1566.79	290.417	-1005.11	1561.23	163.69	-1161.31	1596.59	282.309	-1170.29	1591.32	222.686	-1226.95	1439.85	196.85	-1324.1	1160.93	216.435	-1069.67	1333.04	211.263	-969.932	1134.94	280.835	-1321.04	1250.57	68.2592	-1126.98	1409.7	-55.4669	-1143.84	1178.19	-69.3013	-1161.47	1082.69	-83.3576	-1091.24	945.098	-39.0999	-1078.35	841.186	-107.597	-1111.71	834.16	-94.1714	-1060.07	768.351
4818	0	185.851	-988.611	1565.6	290.902	-994.601	1560.08	164.21	-1150.58	1597.3	282.963	-1159.63	1592.16	223.446	-1218.04	1440.43	198.013	-1315.84	1161.73	216.548	-1061.07	1333.07	210.894	-961.397	1135.13	282.061	-1312.35	1251.39	68.7794	-1118.71	1410.02	-55.0632	-1136.58	1178.68	-68.761	-1154.37	1083.29	-83.2802	-1084.1	945.7	-39.4008	-1070.82	841.585	-107.39	-1104.57	834.93	-94.8379	-1052.51	769.264
4819	0	186.062	-978.369	1564.39	291.281	-984.632	1558.89	164.926	-1140.11	1597.97	283.478	-1148.93	1592.74	224.105	-1209.25	1440.68	199.058	-1307.83	1162.23	216.525	-1052.53	1333.12	210.832	-952.796	1135.43	282.933	-1303.79	1251.75	69.0037	-1110.66	1410.37	-54.7219	-1129.29	1179.09	-68.2328	-1147.42	1083.56	-83.3143	-1076.97	946.129	-39.6102	-1063.25	842.056	-107.451	-1097.45	835.404	-95.3475	-1045.11	769.936
4820	0	186.273	-968.077	1563.15	291.577	-974.48	1557.53	165.347	-1129.57	1598.47	283.917	-1138.42	1593.2	224.695	-1200.43	1440.97	199.892	-1299.67	1162.64	216.8	-1043.77	1333.22	210.778	-944.284	1135.7	283.822	-1295.2	1252.14	69.1502	-1102.5	1410.62	-54.4759	-1122.07	1179.31	-67.6318	-1140.44	1083.85	-83.4289	-1069.9	946.43	-39.5934	-1055.41	842.279	-107.28	-1090.51	835.623	-95.8511	-1037.61	770.512
4821	0	186.529	-958.074	1561.98	291.832	-964.202	1556.49	165.605	-1118.98	1598.82	284.235	-1127.86	1593.66	225.192	-1191.51	1441.27	200.446	-1291.63	1163.23	216.759	-1035.21	1333.16	210.618	-935.845	1135.86	284.498	-1286.53	1252.69	69.3485	-1094.07	1410.77	-54.2723	-1114.9	1179.36	-67.2645	-1133.36	1083.93	-83.6767	-1062.79	946.656	-39.891	-1047.56	842.605	-107.126	-1083.38	836.011	-96.242	-1030.01	770.949
4822	0	186.67	-947.959	1560.77	291.834	-954.108	1555.41	165.899	-1108.54	1599.06	284.527	-1117.41	1593.96	225.631	-1182.53	1441.42	201.114	-1283.39	1163.61	216.912	-1026.51	1333	210.753	-927.444	1135.82	285.157	-1277.93	1253.05	69.3707	-1085.63	1410.71	-54.179	-1107.71	1179.41	-66.8872	-1126.26	1083.76	-83.8762	-1055.59	946.723	-40.0428	-1039.66	842.71	-106.788	-1076.16	836.036	-96.539	-1022.26	771.262
4823	0	186.6	-937.954	1559.66	291.839	-944.11	1554.23	166.186	-1098.52	1599.1	284.753	-1107.09	1594.04	226.039	-1173.46	1441.46	201.775	-1275.18	1163.84	217.053	-1017.71	1332.87	210.842	-919.163	1135.57	285.819	-1269.41	1253.29	69.4885	-1077.14	1410.59	-53.9558	-1100.57	1179.47	-66.5831	-1119.1	1083.61	-84.0724	-1048.5	946.68	-39.9787	-1031.87	842.685	-106.242	-1068.79	835.605	-96.7431	-1014.5	771.377
4824	0	186.335	-928.006	1558.46	291.767	-934.086	1552.91	166.303	-1088.23	1599.16	284.938	-1096.75	1594.21	226.408	-1164.34	1441.56	202.24	-1266.77	1164.23	216.944	-1008.99	1332.44	210.895	-910.931	1135.11	286.333	-1260.76	1253.62	69.7759	-1068.39	1410.27	-53.758	-1093.26	1179.27	-66.2105	-1111.8	1083.45	-84.1906	-1041.11	946.342	-40.1332	-1023.93	842.614	-105.892	-1061.3	835.328	-96.7936	-1006.68	771.386
4825	0	186.36	-918.395	1557.07	291.533	-924.058	1551.88	166.191	-1077.99	1599.08	284.992	-1086.43	1594.26	226.598	-1155.1	1441.57	202.634	-1258.26	1164.59	217.134	-1000.19	1331.97	211.088	-902.637	1134.39	286.763	-1252.06	1254.03	69.6883	-1059.58	1409.98	-53.5968	-1085.86	1178.87	-66.2924	-1104.45	1083.22	-84.2709	-1033.69	945.781	-39.8115	-1015.66	842.276	-105.43	-1053.77	834.815	-96.6025	-998.84	770.914
4826	0	185.92	-908.495	1555.68	291.392	-914.105	1550.68	166.214	-1067.93	1598.82	284.934	-1076.14	1594.18	226.717	-1145.86	1441.42	202.941	-1249.89	1164.66	217.199	-991.429	1331.3	211.195	-894.395	1133.39	287.062	-1243.44	1254.34	69.6274	-1050.66	1409.27	-53.3949	-1078.4	1178.31	-65.9084	-1096.74	1082.55	-84.3034	-1026.12	945.203	-39.798	-1007.68	841.899	-105.071	-1046.22	834.263	-96.3104	-990.865	770.462
4827	0	185.685	-898.653	1554.3	291.107	-904.189	1549.23	166.057	-1057.8	1598.31	284.708	-1065.97	1593.84	226.746	-1136.71	1441.06	203.199	-1241.52	1164.54	217.329	-982.472	1330.7	211.481	-885.982	1132.53	287.248	-1234.8	1254.23	69.7191	-1041.77	1408.46	-53.2547	-1070.89	1177.67	-65.95	-1089.16	1081.94	-84.3762	-1018.44	944.475	-39.7369	-999.597	841.415	-104.312	-1038.69	833.332	-96.0896	-983.113	769.944
4828	0	185.448	-888.922	1552.74	290.729	-894.344	1547.85	165.755	-1047.54	1597.9	284.56	-1055.71	1593.64	226.746	-1127.48	1440.74	203.413	-1233.1	1164.52	217.283	-973.605	1330.07	211.741	-877.61	1131.56	287.401	-1226.03	1254.25	69.7778	-1032.73	1407.74	-53.4143	-1063.01	1177.1	-65.8022	-1081.09	1081.34	-84.374	-1010.59	943.826	-39.5203	-991.319	840.885	-104.011	-1030.87	832.434	-95.6101	-975.19	769.09
4829	0	185.008	-878.827	1551.15	290.537	-884.218	1546.5	165.645	-1037.37	1597.45	284.337	-1045.36	1593.35	226.58	-1118.23	1440.38	203.643	-1224.47	1164.38	217.538	-964.747	1329.24	212.004	-869.215	1130.3	287.584	-1217.34	1254.31	69.6967	-1023.44	1406.99	-53.4808	-1054.91	1176.47	-65.981	-1073.05	1080.81	-84.2534	-1002.58	943.048	-39.3868	-983.21	840.298	-103.605	-1023.16	831.673	-95.1949	-967.165	768.319
4830	0	184.876	-868.904	1549.26	290.146	-874.299	1544.68	165.305	-1027.08	1596.67	283.941	-1035.05	1592.75	226.362	-1109.02	1439.75	203.787	-1215.89	1163.95	217.467	-955.792	1328.27	212.34	-860.851	1129.13	287.529	-1208.68	1254.03	69.4312	-1014.3	1406.02	-53.4765	-1046.54	1175.78	-65.9529	-1064.91	1079.81	-84.1202	-994.571	942.126	-39.3141	-975.118	839.5	-102.915	-1015.44	830.416	-94.9198	-959.375	767.39
4831	0	184.346	-858.999	1547.31	289.635	-864.429	1542.89	164.749	-1016.75	1595.8	283.498	-1024.77	1592.14	226.006	-1099.86	1438.99	203.697	-1207.32	1163.4	217.382	-946.756	1327.31	212.646	-852.423	1127.77	287.324	-1199.97	1253.6	69.3603	-1004.96	1404.83	-53.7514	-1038.08	1174.78	-65.8055	-1056.66	1078.78	-84.0396	-986.543	941.003	-39.1404	-966.849	838.626	-102.569	-1007.73	829.075	-94.5764	-951.513	766.171
4832	0	183.861	-849.173	1545.25	289.151	-854.345	1541.18	164.248	-1006.47	1594.92	282.949	-1014.43	1591.52	225.575	-1090.54	1438.25	203.521	-1198.73	1162.83	217.421	-937.669	1326.31	212.948	-843.85	1126.29	287.075	-1191.23	1253.25	68.995	-995.621	1403.76	-53.7811	-1029.36	1173.58	-65.9151	-1048.33	1077.87	-83.9047	-978.417	939.771	-39.2422	-958.74	837.528	-102.126	-1000.08	827.825	-94.4059	-943.649	764.86
4833	0	183.299	-839.354	1543.1	288.506	-844.41	1539.38	163.655	-996.285	1593.81	282.395	-1004.07	1590.62	225.11	-1081.24	1437.39	203.403	-1190.19	1162.26	217.299	-928.577	1325.02	213.218	-835.113	1124.95	286.654	-1182.47	1252.77	68.7301	-985.995	1402.57	-53.9546	-1020.19	1172.46	-65.8991	-1039.79	1076.53	-83.8048	-970.311	938.291	-39.3171	-950.711	836.239	-101.789	-992.445	826.323	-94.3521	-935.948	763.312
4834	0	183.014	-829.63	1540.91	287.791	-834.367	1537.33	163.035	-986.005	1592.42	281.788	-993.822	1589.61	224.649	-1071.96	1436.34	203.21	-1181.41	1161.36	217.19	-919.436	1323.56	213.465	-826.222	1123.38	286.295	-1173.61	1251.94	68.5104	-976.616	1400.98	-54.0362	-1010.87	1171.01	-65.6794	-1030.95	1075.21	-83.8231	-962.216	936.782	-39.166	-942.531	834.574	-101.621	-984.876	824.774	-94.3333	-928.341	761.665
4835	0	182.268	-819.724	1538.86	287.014	-824.424	1535.39	162.265	-975.892	1591.19	281.102	-983.522	1588.6	224.019	-1062.57	1435.29	202.841	-1172.53	1160.48	217.058	-910.16	1322.25	213.74	-817.187	1121.96	285.767	-1164.72	1251.22	68.1211	-966.891	1399.64	-54.1392	-1001.37	1169.47	-65.77	-1022.28	1073.8	-83.6548	-953.964	934.964	-39.2776	-934.592	832.81	-101.399	-977.268	822.898	-94.4442	-920.722	759.92
4836	0	181.119	-809.894	1536.88	286.265	-814.453	1533.66	161.547	-965.764	1589.97	280.365	-973.315	1587.62	223.406	-1053.09	1434.26	202.309	-1163.46	1159.68	216.704	-900.856	1320.78	213.849	-808.18	1120.44	285.213	-1155.76	1250.41	67.8062	-957.438	1398.07	-54.1449	-991.641	1167.61	-65.68	-1013.22	1072.16	-83.7286	-945.817	933.156	-39.5511	-926.663	830.837	-101.319	-969.591	821.182	-94.5943	-913.223	757.896
4837	0	180.299	-799.888	1534.87	285.499	-804.494	1531.94	160.659	-955.624	1588.45	279.476	-963.166	1586.47	222.652	-1043.66	1433.07	201.766	-1154.38	1158.62	216.56	-891.465	1319.44	214.09	-798.836	1118.99	284.464	-1146.72	1249.49	67.3554	-947.773	1396.5	-54.2469	-981.845	1165.73	-65.4604	-1003.95	1070.38	-83.7439	-937.553	931.039	-39.4111	-918.593	828.809	-101.156	-961.974	819.274	-94.8316	-905.95	755.84
4838	0	179.456	-790.135	1532.75	284.659	-794.645	1530.07	159.751	-945.539	1587.04	278.529	-953.079	1585.23	221.96	-1034.3	1431.84	201.161	-1145.13	1157.31	216.023	-882.077	1318.06	214.119	-789.618	1117.66	283.759	-1137.55	1248.4	66.75	-938.241	1394.84	-54.1052	-971.959	1163.77	-65.5332	-995.034	1068.73	-83.9034	-929.239	929.071	-39.6686	-910.818	826.67	-101.197	-954.44	817.284	-95.0484	-898.678	753.624
4839	0	178.836	-780.352	1530.86	283.808	-784.76	1528.35	158.764	-935.505	1585.69	277.56	-943.012	1584.08	221.079	-1024.74	1430.62	200.515	-1135.79	1156.15	215.722	-872.582	1316.78	214.121	-780.123	1116.29	283.023	-1128.42	1247.3	66.1943	-928.461	1393.21	-54.1594	-962.082	1161.84	-65.6699	-985.865	1066.95	-84.0948	-920.865	927.076	-39.8914	-902.938	824.596	-101.193	-946.778	815.427	-95.2459	-891.348	751.417
4840	0	178.069	-770.398	1528.82	283.022	-774.941	1526.67	157.765	-925.257	1584.35	276.542	-932.869	1583.02	220.234	-1015.26	1429.42	199.864	-1126.31	1155	215.03	-863.057	1315.64	214.192	-770.478	1115.09	282.371	-1119	1246.3	65.4649	-918.899	1391.68	-54.3368	-952.102	1159.94	-65.6478	-976.388	1065.29	-84.1644	-912.343	925.034	-39.9624	-894.771	822.392	-101.434	-938.712	813.486	-95.4022	-883.826	749.171
4841	0	176.622	-760.443	1526.96	281.865	-765.051	1524.74	156.616	-915.089	1582.99	275.481	-922.749	1581.92	219.357	-1005.75	1428.16	199.381	-1116.89	1153.64	214.531	-853.53	1314.28	214.089	-760.972	1113.76	281.733	-1109.7	1245.21	64.8544	-909.263	1390.09	-54.3786	-941.982	1157.95	-65.8253	-967.2	1063.46	-84.3152	-903.777	923.058	-40.2593	-886.813	820.206	-101.851	-930.605	811.713	-95.73	-876.484	746.903
4842	0	176.048	-750.492	1524.89	280.819	-755.187	1522.97	155.484	-904.9	1581.55	274.288	-912.64	1580.78	218.46	-996.365	1426.83	198.744	-1107.26	1152.23	213.726	-843.873	1313.14	213.977	-751.258	1112.66	281.008	-1100.24	1243.96	63.8761	-899.756	1388.56	-54.541	-932.242	1156.06	-65.8917	-957.659	1061.71	-84.4388	-895.116	921.029	-40.5534	-878.775	817.986	-102.219	-922.589	809.976	-95.9841	-868.98	744.553
4843	0	174.632	-740.598	1523.07	279.666	-745.232	1521.38	154.132	-894.774	1580.37	272.987	-902.444	1579.67	217.333	-986.728	1425.57	198.162	-1097.62	1150.88	213.204	-834.185	1311.89	213.801	-741.484	1111.49	280.276	-1090.6	1242.81	63.1336	-890.044	1386.86	-54.9841	-922.237	1154.01	-66.2087	-948.358	1059.88	-84.582	-886.277	918.951	-40.6669	-870.422	815.835	-102.614	-914.193	808.083	-96.0929	-861.373	742.137
4844	0	173.613	-730.656	1521.23	278.447	-735.151	1520.02	152.709	-884.591	1578.98	271.566	-892.277	1578.7	216.319	-977.249	1424.36	197.645	-1087.98	1149.47	212.316	-824.494	1310.64	213.483	-731.656	1110.29	279.484	-1080.94	1241.6	62.1329	-880.535	1385.21	-55.3806	-912.491	1152.15	-66.6046	-938.865	1058.05	-84.7608	-877.298	916.95	-40.5363	-862.301	813.402	-102.907	-905.637	806.336	-96.2095	-853.614	739.851
4845	0	172.049	-720.754	1519.64	276.897	-725.299	1518.43	151.341	-874.633	1577.54	270.16	-882.21	1577.56	215.218	-967.549	1422.95	197.245	-1078.29	1147.97	211.602	-814.619	1309.62	213.094	-721.681	1109.41	278.798	-1071.16	1240.12	61.1269	-870.757	1383.72	-56.0839	-902.758	1150.57	-66.9828	-929.434	1056.3	-84.9744	-868.185	915.108	-40.7301	-853.807	811.368	-103.362	-897.009	804.503	-96.257	-845.685	737.62
4846	0	170.495	-710.817	1518.14	275.329	-715.253	1517.22	149.867	-864.802	1576.35	268.665	-872.142	1576.55	214.161	-957.794	1421.55	196.647	-1068.08	1146.41	210.576	-804.776	1308.55	212.707	-711.689	1108.47	277.916	-1061.21	1238.81	59.8991	-861.081	1382.36	-56.6743	-893.258	1148.88	-67.5197	-919.878	1054.62	-85.2021	-859.111	913.445	-40.8693	-845.211	809.59	-103.759	-887.926	802.849	-96.2768	-837.362	735.656
4847	0	168.635	-701.104	1516.67	273.526	-705.177	1516.19	148.124	-854.829	1574.94	266.992	-862.005	1575.53	212.927	-947.895	1420.35	196.006	-1058.34	1145.05	209.647	-794.601	1307.53	212.166	-701.538	1107.49	277.183	-1051.07	1237.6	58.8159	-851.154	1380.81	-57.718	-883.761	1147.35	-68.1818	-910.528	1053.07	-85.5772	-849.733	911.649	-41.0751	-836.434	807.752	-104.217	-878.79	801.418	-96.2196	-828.802	733.596
4848	0	166.781	-691.169	1515.51	271.654	-695.109	1515.3	146.239	-845.059	1573.59	265.213	-851.977	1574.42	211.676	-937.926	1419.04	195.34	-1048.2	1143.51	208.543	-784.586	1306.35	211.54	-691.19	1106.53	276.378	-1040.9	1236.24	57.4432	-841.345	1379.42	-58.6139	-874.536	1145.73	-68.8182	-901.091	1051.23	-85.9464	-840.32	909.89	-41.1128	-827.345	806.147	-104.641	-869.332	799.708	-95.9587	-819.95	731.578
4849	0	164.626	-681.218	1514.63	269.668	-685.127	1514.58	144.457	-835.476	1572.04	263.273	-842.238	1573.25	210.637	-927.972	1417.5	194.695	-1037.7	1141.78	207.446	-774.212	1305.34	210.856	-680.698	1105.68	275.529	-1030.48	1234.76	56.2271	-831.364	1377.85	-59.7498	-865.143	1144.32	-69.6383	-891.801	1049.56	-86.5169	-830.922	908.257	-41.5928	-817.89	804.781	-105.077	-859.794	798.018	-96.0078	-810.927	729.814
4850	0	162.405	-671.411	1513.62	267.669	-675.156	1514.08	142.337	-825.718	1570.52	261.153	-832.441	1572.23	209.284	-917.645	1416.14	193.968	-1027.01	1140.19	206.174	-763.689	1304.41	209.956	-669.974	1104.95	274.719	-1019.84	1233.31	54.8423	-821.397	1376.39	-60.9064	-856.157	1142.63	-70.4166	-882.421	1047.84	-87.1787	-821.389	906.719	-42.2616	-808.218	803.407	-105.459	-850.118	796.248	-95.8018	-801.515	727.946
4851	0	160.59	-661.437	1512.83	265.594	-665.108	1513.74	140.084	-816.084	1569.15	259.079	-822.751	1571.1	208.031	-907.346	1414.88	193.324	-1016.14	1138.57	204.725	-753.043	1303.27	209.002	-659.137	1103.91	273.946	-1008.99	1231.9	53.5562	-811.314	1374.64	-62.1045	-846.887	1141.1	-71.4659	-872.996	1046.36	-87.4762	-811.723	904.638	-41.5409	-799.252	801.108	-105.984	-840.266	794.57	-95.7	-791.819	726.074
4852	0	158.439	-651.661	1512.36	263.358	-655.205	1513.44	137.978	-806.7	1567.35	256.769	-813.206	1569.73	206.705	-896.963	1413.5	192.724	-1005.25	1136.93	203.555	-742.187	1302.27	208.127	-648.002	1103.14	273.271	-998.095	1230.47	52.0688	-801.267	1373.18	-63.215	-837.675	1139.45	-72.2209	-863.562	1044.65	-88.3134	-802.026	903.057	-41.8666	-790.234	799.537	-106.3	-830.544	792.766	-95.7332	-781.919	724.366
4853	0	156.332	-641.696	1512.24	261.117	-645.318	1513.7	135.489	-797.272	1565.64	254.363	-803.894	1568.42	205.413	-886.578	1412.25	192.042	-994.22	1135.31	201.826	-731.358	1301.41	206.93	-636.755	1102.45	272.631	-987.047	1229.04	50.5325	-791.085	1371.87	-64.5786	-828.44	1138.1	-73.2018	-854.012	1042.94	-89.1392	-792.318	901.422	-42.4192	-780.042	798.068	-106.757	-820.69	791.023	-96.0308	-771.949	722.811
4854	0	153.983	-631.84	1512.54	258.89	-635.324	1514.6	133.005	-788.055	1563.98	251.846	-794.673	1567.29	203.893	-875.961	1411.27	191.207	-983.03	1134.01	200.201	-720.418	1300.6	205.576	-625.226	1101.97	271.896	-975.94	1227.97	48.8451	-780.745	1370.53	-65.9359	-819.148	1136.66	-74.1204	-844.442	1041.52	-90.2488	-782.641	899.97	-43.4698	-769.509	796.955	-107.177	-811.139	789.446	-96.4304	-761.87	721.253
4855	0	151.504	-621.934	1513.25	256.535	-625.385	1515.86	130.486	-778.891	1562.45	249.305	-785.382	1566.26	202.375	-865.308	1410.58	190.465	-971.717	1132.98	198.629	-709.259	1300.08	204.078	-613.56	1101.71	271.215	-964.599	1227.04	47.2503	-770.528	1369.2	-67.326	-809.615	1135.38	-74.9433	-834.69	1040.1	-91.3268	-773.017	898.51	-44.5468	-759.444	795.736	-107.698	-801.412	787.978	-97.2435	-751.816	719.798
4856	0	149.078	-612.138	1514.51	254.033	-615.541	1517.35	127.858	-769.742	1561.24	246.731	-776.274	1565.39	200.755	-854.545	1410.03	189.773	-960.375	1132.18	196.743	-698.149	1299.82	202.427	-601.752	1101.54	270.627	-953.519	1226.45	45.4115	-760.025	1368.41	-68.6022	-800.033	1134.31	-75.6913	-824.832	1038.92	-92.5885	-763.278	897.285	-45.6112	-749.356	794.585	-108.299	-791.963	786.532	-98.3471	-741.556	718.663
4857	0	146.627	-602.296	1516.02	251.537	-605.791	1519.33	125.36	-760.717	1560.33	244.149	-767.151	1565	199.189	-843.705	1409.96	189.223	-948.919	1131.83	194.969	-686.881	1299.87	200.652	-589.777	1101.78	269.888	-942.073	1226.24	43.424	-749.588	1367.94	-69.7038	-790.142	1133.55	-76.3626	-814.884	1037.95	-93.893	-753.574	896.416	-47.324	-738.704	793.905	-108.578	-782.54	785.32	-99.5972	-731.823	717.986
4858	0	143.901	-592.436	1518.12	249.052	-595.936	1521.77	122.612	-751.418	1559.91	241.447	-758.048	1565.03	197.507	-832.687	1410.33	188.83	-937.471	1132.01	193.003	-675.602	1300.34	198.827	-577.839	1102.33	269.313	-930.809	1226.68	41.6494	-738.948	1367.66	-71.0082	-780.002	1133.02	-76.9068	-804.452	1037.46	-95.2858	-743.825	895.851	-48.8317	-727.914	793.368	-109.55	-772.932	784.703	-101.31	-721.424	717.698
4859	0	141.625	-582.772	1520.41	246.549	-586.27	1524.61	119.92	-742.291	1559.78	238.672	-748.974	1565.31	195.808	-821.561	1411.02	188.678	-925.958	1132.46	191.003	-664.379	1301.15	196.957	-566.027	1103.2	268.618	-919.119	1227.53	39.5277	-728.32	1367.72	-71.7366	-769.787	1132.67	-77.4397	-794.252	1037.13	-96.6183	-734.015	895.557	-50.5284	-717.299	793.164	-110.241	-763.49	784.429	-103.264	-711.546	717.633
4860	0	139.178	-573.019	1523.03	243.97	-576.738	1527.46	117.192	-733.163	1559.94	235.874	-739.933	1565.75	194.092	-810.527	1411.78	188.699	-914.56	1133.16	189.038	-653.052	1302.38	194.928	-554.304	1104.37	268.077	-907.884	1228.66	37.6704	-717.686	1368.27	-72.6159	-759.465	1132.75	-77.7942	-783.828	1037.2	-98.0004	-724.063	895.677	-52.122	-706.328	793.217	-110.893	-753.846	784.331	-105.354	-701.618	717.81
4861	0	136.717	-563.309	1525.94	241.449	-567.197	1530.76	114.38	-723.887	1560.45	233.115	-730.927	1566.64	192.387	-799.33	1413.01	188.396	-902.974	1134.5	186.895	-641.867	1303.9	193.101	-542.887	1105.88	267.546	-896.443	1230.34	35.7793	-707.18	1369.12	-73.279	-748.9	1133.13	-78.1247	-773.131	1037.81	-99.3579	-713.933	896.283	-53.9319	-695.502	793.768	-111.919	-744.046	784.972	-107.446	-691.623	718.411
4862	0	133.897	-553.596	1528.96	239.046	-557.491	1534.29	111.809	-714.702	1561.25	230.469	-721.742	1567.89	190.779	-788.316	1414.71	187.998	-891.476	1136.2	184.962	-630.62	1305.67	191.157	-531.814	1107.72	267.063	-884.892	1232.25	34.0428	-696.634	1370.3	-73.8863	-738.042	1133.85	-78.4789	-762.452	1038.73	-100.596	-703.63	897.357	-55.7535	-684.348	794.621	-113.04	-733.945	786.078	-109.648	-681.555	719.531
4863	0	131.472	-544.116	1531.94	236.533	-547.911	1537.62	109.361	-705.529	1562.24	227.95	-712.617	1569.24	189.214	-777.39	1416.39	187.75	-879.914	1137.92	182.998	-619.718	1307.59	189.369	-521.083	1109.79	266.547	-873.526	1234.15	32.2254	-686.234	1371.99	-74.485	-727.335	1135.06	-78.772	-751.777	1040.05	-101.805	-693.084	898.774	-57.481	-673.42	795.716	-114.137	-723.515	787.593	-111.763	-671.349	720.968
4864	0	128.98	-534.598	1535.08	234.104	-538.415	1540.86	107.012	-696.33	1563.29	225.601	-703.417	1570.66	187.667	-766.696	1418.17	187.246	-868.392	1139.74	181.242	-608.762	1309.75	187.695	-510.639	1111.97	266.014	-862.206	1236.15	30.4782	-676.027	1373.78	-75.1845	-716.45	1136.4	-79.1606	-741.02	1041.5	-103.1	-682.314	900.517	-59.0035	-662.42	796.941	-115.367	-712.901	789.196	-113.809	-660.766	722.739
4865	0	126.951	-525.196	1537.79	231.723	-528.891	1544.23	104.812	-687.256	1564.53	223.412	-694.122	1572.32	186.098	-756.09	1420.07	186.537	-857.102	1141.69	179.391	-598.041	1311.96	186.03	-500.473	1114.24	265.325	-850.994	1238.24	28.8607	-665.784	1375.51	-75.9426	-705.425	1137.86	-79.9298	-730.098	1043.16	-104.312	-671.328	902.206	-60.5778	-651.017	798.607	-116.856	-701.874	791.165	-115.852	-650.172	724.094
4866	0	124.68	-515.935	1540.52	229.37	-519.388	1547.22	102.675	-678.1	1565.97	221.289	-684.903	1573.94	184.521	-745.688	1421.86	185.721	-846.172	1143.59	177.692	-587.389	1314.05	184.501	-490.37	1116.62	264.488	-840.071	1240.15	27.1725	-655.735	1377.15	-76.8935	-694.588	1139.33	-80.7863	-719.076	1044.89	-105.466	-660.214	904.004	-62.4073	-639.638	800.483	-118.428	-690.588	793.186	-117.598	-639.22	725.752
4867	0	122.478	-506.632	1543.11	227.226	-509.954	1550.01	100.877	-669.183	1567.14	219.357	-675.679	1575.33	182.915	-735.308	1423.44	185.015	-835.692	1145.26	175.914	-577.032	1316.19	183.116	-480.173	1119.04	263.537	-829.37	1241.9	25.5497	-645.598	1378.93	-77.9114	-683.611	1140.81	-81.7449	-708.275	1046.41	-106.777	-648.923	905.82	-63.6853	-628.089	802.035	-119.828	-679.129	795.05	-119.379	-627.764	727.548
4868	0	120.076	-497.401	1545.65	225.043	-500.565	1552.57	99.0556	-660.208	1568.22	217.62	-666.572	1576.72	181.243	-725.213	1425.08	184.183	-825.505	1146.85	174.49	-566.72	1318.16	181.872	-469.935	1121.32	262.525	-818.951	1243.67	23.9425	-635.624	1380.54	-79.0479	-672.575	1142.35	-83.0324	-697.39	1047.88	-108.236	-637.53	907.613	-65.137	-616.505	803.504	-121.516	-667.311	796.697	-120.821	-616.272	729.134
4869	0	118.28	-488.385	1547.79	222.957	-491.21	1555.17	97.4707	-651.35	1569.39	216.054	-657.288	1578.12	179.833	-715.205	1426.75	183.346	-815.51	1148.29	172.868	-556.584	1319.91	180.714	-459.767	1123.2	261.429	-808.622	1245.41	22.3797	-625.444	1382.12	-80.4133	-661.637	1143.79	-84.4826	-686.267	1049.42	-109.78	-625.962	909.346	-66.9208	-604.665	805.189	-123.243	-655.123	798.477	-122.274	-604.283	730.764
4870	0	116.006	-479.263	1550.06	220.977	-481.913	1557.43	95.9596	-642.484	1570.4	214.509	-648.158	1579.27	178.305	-705.183	1428.22	182.299	-805.294	1149.87	171.678	-546.43	1321.43	179.836	-449.809	1124.95	260.318	-798.604	1247.14	20.9664	-615.39	1383.36	-81.7958	-650.8	1145.14	-86.0958	-675.327	1050.6	-111.248	-614.29	910.739	-68.3573	-592.795	806.767	-124.833	-642.935	799.979	-123.613	-592.009	732.239
4871	0	114.115	-470.315	1551.93	219.006	-472.663	1559.56	94.4298	-633.749	1571.05	212.941	-639.139	1580.13	176.762	-695.267	1429.37	181.163	-795.353	1151.14	170.236	-536.426	1322.97	178.937	-440.029	1126.48	259.056	-788.87	1248.52	19.5654	-605.336	1384.52	-83.2887	-640.148	1146.27	-87.757	-664.395	1051.59	-112.779	-602.605	911.97	-70.0186	-580.33	808.442	-126.452	-630.586	800.957	-125.031	-579.498	733.691
4872	0	112.571	-461.422	1553.76	217.167	-463.449	1561.6	93.0375	-625.085	1571.72	211.538	-630.039	1581.05	175.433	-685.28	1430.67	179.87	-785.182	1152.74	169.301	-526.385	1324.3	178.385	-430.427	1127.74	257.854	-779.239	1250.17	18.3968	-595.219	1385.51	-84.8898	-629.429	1147.26	-89.6229	-653.418	1052.47	-114.455	-590.839	913.197	-71.1812	-568.044	809.982	-128.059	-618.004	802.161	-126.096	-566.762	734.952
4873	0	110.475	-452.456	1555.45	215.337	-454.224	1563.49	91.6599	-616.272	1572.4	210.241	-621.021	1581.89	174.162	-675.452	1432.03	178.932	-775.455	1154.03	168.374	-516.436	1325.51	177.904	-420.783	1128.76	256.685	-769.737	1251.7	17.3336	-585.086	1386.33	-86.5579	-618.821	1148.24	-91.4078	-642.411	1053.35	-115.957	-578.909	914.289	-72.3196	-555.656	811.422	-129.721	-605.183	803.227	-127.224	-553.631	736.261
4874	0	109.015	-443.654	1556.84	213.62	-445.092	1565.13	90.5964	-607.549	1573.01	208.948	-611.895	1582.64	172.98	-665.404	1433.2	178.048	-765.991	1155.3	167.542	-506.572	1326.57	177.661	-411.013	1129.59	255.558	-760.39	1253.25	16.3035	-575.016	1387.26	-88.2296	-608.257	1149.24	-93.2138	-631.436	1054.01	-117.426	-566.92	915.394	-73.532	-543.017	812.928	-131.051	-592.531	804.105	-128.281	-540.255	737.601
4875	0	107.213	-434.689	1558.2	212.032	-436.032	1566.59	89.2537	-598.833	1573.37	207.691	-602.948	1583.33	171.967	-655.557	1434.35	177.182	-756.94	1156.52	167.003	-496.754	1327.44	177.57	-401.394	1130.37	254.428	-751.127	1254.62	15.5235	-564.813	1388.04	-89.8195	-597.669	1150.2	-94.9211	-620.472	1054.62	-118.883	-554.799	916.599	-75.0767	-530.382	814.38	-132.507	-579.636	804.764	-129.366	-526.673	739.038
4876	0	105.815	-425.844	1559.37	210.419	-426.975	1568.06	87.9518	-589.908	1573.84	206.461	-593.964	1584.14	171.031	-645.66	1435.7	176.084	-747.99	1157.93	166.398	-487.161	1328.36	177.636	-391.847	1130.91	253.364	-741.957	1256.23	14.7467	-554.736	1388.81	-91.3823	-587.03	1151.18	-96.5997	-609.384	1055.39	-120.407	-542.817	917.732	-76.1031	-517.795	815.759	-133.987	-566.565	805.764	-130.588	-512.977	740.606
4877	0	104.274	-416.823	1560.52	209.099	-417.824	1569.47	86.7485	-580.998	1574.3	205.136	-584.92	1584.83	170.031	-635.985	1436.71	175.025	-739.048	1159.33	165.997	-477.505	1329.14	177.842	-382.514	1131.42	252.113	-732.783	1257.68	14.2149	-544.658	1389.38	-92.7153	-576.564	1152.06	-98.2823	-598.254	1056.26	-121.796	-530.805	918.773	-77.3756	-505.107	817.222	-135.289	-553.663	806.643	-131.79	-499.2	742.137
4878	0	103.257	-407.86	1561.48	207.855	-408.741	1570.64	85.6926	-572.226	1574.57	204.036	-575.947	1585.43	169.019	-626.317	1437.64	173.808	-730.093	1160.66	165.649	-468.036	1329.75	178.186	-373.326	1131.73	251.003	-723.832	1259.08	13.6947	-534.596	1390.02	-93.9974	-566.138	1152.92	-99.7719	-587.088	1056.8	-123.043	-518.691	919.825	-78.5075	-492.406	818.418	-136.502	-540.745	807.556	-133.022	-485.328	743.647
4879	0	101.962	-398.793	1562.33	206.717	-399.712	1571.68	84.7116	-563.148	1574.95	203.026	-566.929	1586.03	168.197	-616.986	1438.86	172.591	-721.36	1161.94	165.253	-458.683	1330.51	178.561	-364.298	1132.16	249.826	-714.906	1260.27	13.0728	-524.615	1390.81	-95.0412	-555.466	1153.8	-101.132	-575.819	1057.6	-124.145	-506.437	921.039	-79.6268	-479.558	819.9	-137.733	-527.655	808.479	-134.36	-471.387	745.47
4880	0	101.005	-389.737	1563.05	205.715	-390.652	1572.66	83.7251	-554.163	1575.4	202.113	-557.886	1586.66	167.038	-607.267	1439.86	171.309	-712.464	1163.4	165.134	-449.355	1331.24	178.886	-355.336	1132.61	248.679	-705.984	1261.7	12.5849	-514.51	1391.55	-96.0829	-544.756	1154.73	-102.488	-564.524	1058.53	-125.181	-494.172	922.257	-80.7727	-466.723	821.397	-139.041	-514.458	809.593	-135.672	-457.403	747.38
4881	0	100.154	-380.721	1563.67	204.852	-381.592	1573.42	82.9747	-545.143	1575.75	201.271	-548.773	1587.18	166.121	-598.086	1440.79	170.187	-703.739	1164.61	164.802	-440.238	1331.83	179.285	-346.602	1132.98	247.52	-697.225	1262.86	12.2734	-504.578	1392.06	-97.0068	-534.105	1155.46	-103.66	-553.209	1059.27	-126.246	-481.878	923.528	-81.7688	-453.938	822.753	-140.135	-501.454	810.69	-136.972	-443.493	749.173
4882	0	99.6764	-371.688	1564.17	204.081	-372.588	1573.95	82.1988	-536.14	1575.94	200.463	-539.875	1587.57	165.141	-588.84	1441.47	169.06	-695.297	1165.47	164.553	-431.2	1332.41	179.594	-338.023	1133.46	246.232	-688.621	1263.76	11.642	-494.775	1392.8	-97.6238	-523.371	1156.01	-104.838	-541.925	1059.87	-127.127	-469.522	924.668	-82.7863	-441.098	824.064	-141.383	-488.275	811.596	-138.219	-429.658	750.793
4883	0	98.9246	-362.673	1564.56	203.469	-363.526	1574.45	81.4526	-527.002	1576.25	199.769	-530.856	1587.93	164.248	-579.845	1442.34	168.11	-686.655	1166.34	164.403	-422.166	1332.95	179.824	-329.521	1133.87	245.148	-680.036	1264.71	11.228	-485.18	1393.19	-98.303	-512.596	1156.62	-105.887	-530.595	1060.35	-127.824	-457.171	925.647	-83.5795	-428.168	825.308	-142.103	-475.109	812.576	-139.383	-415.835	752.305
4884	0	98.1602	-353.612	1564.7	202.828	-354.478	1574.75	80.8975	-518.027	1576.41	199.216	-521.825	1588.27	163.314	-570.74	1442.8	167.143	-678.276	1167.14	164.026	-413.306	1333.31	179.917	-321.053	1134.23	244.052	-671.398	1265.56	10.7944	-475.729	1393.6	-98.9197	-501.769	1156.96	-106.777	-519.179	1060.71	-128.493	-444.672	926.561	-84.4226	-415.264	826.379	-143.247	-461.789	813.491	-140.439	-402.015	753.73
4885	0	97.5767	-344.565	1564.78	202.332	-345.441	1574.9	80.3284	-509.035	1576.52	198.699	-512.829	1588.5	162.55	-561.884	1443.33	166.381	-669.833	1167.64	163.873	-404.413	1333.69	180.001	-312.727	1134.58	243.144	-662.874	1266.12	10.3257	-466.336	1393.95	-99.3373	-490.95	1157.17	-107.682	-507.793	1060.99	-129.053	-432.116	927.309	-84.9557	-402.171	827.179	-143.689	-448.475	814.285	-141.265	-388.16	754.856
4886	0	97.1485	-335.562	1564.76	201.736	-336.483	1574.74	80.0782	-499.994	1576.47	198.227	-503.84	1588.52	161.848	-553.012	1443.41	165.72	-661.452	1167.99	163.556	-395.602	1333.84	179.953	-304.314	1134.8	242.397	-654.464	1266.54	9.95893	-457.14	1394.15	-99.6753	-480.023	1157.23	-108.306	-496.329	1060.97	-129.529	-419.547	928.02	-85.3726	-389.121	827.93	-144.739	-434.988	814.657	-141.966	-374.324	755.933
4887	0	96.7196	-326.589	1564.64	201.393	-327.48	1574.67	79.459	-490.933	1576.48	197.767	-494.9	1588.63	161.254	-544.199	1443.69	165.099	-653.005	1168.4	163.304	-386.707	1334.04	179.941	-295.927	1135.06	241.699	-645.966	1266.98	9.44371	-448.086	1394.26	-100.163	-469.055	1157.2	-109.062	-484.777	1060.87	-129.883	-406.962	928.37	-85.6858	-376.147	828.295	-145.307	-421.602	815.182	-142.504	-360.528	756.789
4888	0	96.6007	-317.597	1564.49	201.044	-318.571	1574.66	78.9606	-481.954	1576.41	197.302	-485.986	1588.57	160.614	-535.421	1443.78	164.58	-644.659	1168.63	163.09	-377.851	1334.07	179.833	-287.527	1135.06	241.07	-637.431	1267.28	9.08011	-439.048	1394.18	-100.564	-458.167	1156.84	-109.748	-473.088	1060.6	-130.338	-394.43	928.654	-86.1557	-363.102	828.729	-145.953	-408.065	815.464	-142.848	-346.742	757.379
4889	0	96.2099	-308.687	1564.2	200.704	-309.711	1574.39	78.6609	-473.085	1576.05	196.845	-477.179	1588.28	160.163	-526.646	1443.8	164.189	-636.307	1168.74	162.817	-368.996	1334.02	179.745	-279.071	1134.94	240.619	-628.935	1267.36	8.74937	-430.101	1393.94	-100.833	-447.152	1156.46	-110.246	-461.388	1060.17	-130.519	-381.856	928.707	-86.0405	-350.051	829.043	-146.294	-394.77	815.478	-143.085	-333.028	757.823
4890	0	95.9737	-299.838	1563.74	200.551	-300.9	1574.03	78.2675	-464.207	1575.56	196.445	-468.423	1587.9	159.776	-517.742	1443.49	163.905	-627.953	1168.75	162.728	-359.985	1333.92	179.705	-270.532	1134.68	240.322	-620.391	1267.34	8.39066	-421.176	1393.61	-101.223	-436.196	1155.95	-110.678	-449.761	1059.52	-130.545	-369.219	928.799	-86.1274	-337	829.302	-146.492	-381.311	815.329	-143.029	-319.321	758.166
4891	0	95.7433	-290.982	1563.28	200.321	-292.108	1573.68	77.9742	-455.237	1575.04	196.085	-459.633	1587.43	159.666	-508.621	1443.18	163.67	-619.529	1168.82	162.498	-351.046	1333.71	179.467	-261.958	1134.27	240.079	-611.745	1267.36	8.15051	-412.164	1393.17	-101.545	-425.18	1155.45	-110.93	-437.979	1058.87	-130.538	-356.523	928.699	-85.9311	-324.014	829.227	-146.467	-367.82	815.226	-142.816	-305.546	758.471
4892	0	95.4858	-282.073	1562.61	200.157	-283.274	1573.15	77.6651	-446.393	1574.4	195.905	-450.872	1586.76	159.431	-499.606	1442.85	163.615	-611.043	1168.84	162.258	-342.112	1333.16	179.437	-253.213	1133.6	239.938	-603.05	1267.28	7.93135	-403.181	1392.57	-101.769	-414.09	1154.77	-111.218	-426.163	1058.27	-130.384	-343.876	928.47	-85.5893	-311.081	829.177	-146.69	-354.364	815.09	-142.278	-291.795	758.447
4893	0	95.2111	-273.305	1561.98	199.998	-274.516	1572.43	77.5162	-437.57	1573.52	195.734	-442.118	1585.87	159.112	-490.669	1442.39	163.668	-602.573	1168.51	162.143	-333.084	1332.6	179.324	-244.543	1132.73	239.866	-594.372	1266.98	7.82075	-394.233	1391.92	-101.965	-403.108	1154.03	-111.421	-414.338	1057.42	-129.967	-331.087	928.228	-85.0099	-298.221	829.075	-146.234	-340.932	814.615	-141.728	-278.096	758.507
4894	0	95.2978	-264.419	1561.44	199.771	-265.737	1571.77	77.4017	-428.806	1572.53	195.596	-433.409	1585	159.071	-481.386	1441.66	163.649	-594.036	1168.22	162.125	-324.071	1331.85	179.186	-236.369	1131.59	239.891	-585.575	1266.62	7.77627	-385.184	1391.06	-102.046	-392.152	1153.19	-111.661	-402.515	1056.57	-129.615	-318.466	927.989	-84.3598	-285.325	828.871	-146.173	-327.433	814.327	-140.936	-264.403	758.505
4895	0	95.0406	-255.743	1560.36	199.629	-256.874	1571.08	77.2623	-420.108	1571.42	195.477	-424.54	1584.01	159.116	-472.507	1441.11	163.691	-585.403	1167.83	162.083	-315.071	1331.16	179.19	-227.185	1130.7	239.962	-576.684	1266.2	7.7973	-376.154	1390.15	-102.206	-380.986	1152.59	-111.676	-390.738	1055.59	-128.873	-305.688	927.473	-83.5394	-272.431	828.65	-145.823	-313.949	813.955	-139.843	-250.692	758.261
4896	0	94.9889	-247.007	1559.35	199.536	-247.969	1570.14	77.407	-411.289	1570.26	195.602	-415.767	1582.84	159.039	-463.454	1440.25	163.907	-576.735	1167.16	162.145	-305.989	1330.17	179.166	-218.792	1129.4	240.158	-567.72	1265.55	7.89843	-367.135	1389.19	-102.188	-370.205	1151.71	-111.282	-378.697	1054.56	-128.188	-293.051	927.174	-82.5477	-259.647	828.467	-145.286	-300.466	813.438	-138.669	-237.047	758.129
4897	0	94.9062	-238.207	1558.46	199.358	-239.145	1568.94	77.5301	-402.604	1569.04	195.763	-406.865	1581.61	159.314	-454.442	1439.2	164.285	-567.9	1166.31	162.177	-296.893	1329.18	179.022	-209.837	1128.36	240.456	-558.697	1264.64	8.01337	-358.127	1388.28	-102.052	-359.357	1150.86	-111.388	-367.121	1053.68	-127.111	-280.279	926.787	-81.4216	-246.79	828.206	-144.507	-287.195	813.003	-137.268	-223.365	758.023
4898	0	94.8503	-229.446	1557.36	199.387	-230.241	1567.87	77.7299	-393.885	1567.87	195.982	-397.928	1580.47	159.509	-445.332	1438.25	164.576	-559.054	1165.42	162.308	-287.779	1328.18	178.909	-200.944	1127.13	240.79	-549.565	1263.67	8.10772	-349.209	1387.22	-101.833	-348.671	1149.82	-111.034	-355.224	1052.59	-126.323	-267.658	926.299	-80.2978	-234.045	827.85	-143.788	-273.697	812.532	-135.856	-209.662	757.734
4899	0	94.8484	-220.529	1556.14	199.589	-221.224	1566.74	77.964	-384.961	1566.58	196.205	-388.951	1579.08	159.764	-436.288	1437.11	164.903	-550.025	1164.4	162.421	-278.611	1326.94	178.844	-192.021	1125.76	241.158	-540.343	1262.61	8.23271	-340.353	1385.94	-101.617	-338.114	1148.78	-111.017	-343.813	1051.36	-125.211	-254.986	925.752	-78.7714	-221.608	827.553	-142.835	-260	811.835	-134.226	-196.064	757.397
4900	0	95.2413	-211.625	1554.9	199.905	-212.291	1565.4	78.2095	-375.995	1565.19	196.474	-380.069	1577.58	159.987	-427.13	1435.7	165.378	-541.066	1163.08	162.544	-269.404	1325.66	178.849	-183.152	1124.56	241.625	-531.148	1261.23	8.45493	-331.412	1384.59	-101.352	-327.528	1147.53	-110.687	-332.252	1050.02	-124.108	-242.493	925.125	-77.3765	-208.732	827.071	-141.774	-246.63	811.134	-132.494	-182.434	757.049
4901	0	95.5433	-202.62	1553.62	200.212	-203.357	1563.93	78.5725	-367.028	1563.79	196.804	-371.132	1575.96	160.569	-417.879	1434.1	165.884	-531.956	1161.61	162.795	-260.162	1324.32	178.819	-174.55	1122.91	242.089	-521.917	1259.71	8.72082	-322.517	1383.07	-100.903	-317.184	1146.2	-110.257	-320.871	1048.6	-122.976	-230.011	924.347	-75.9162	-195.983	826.513	-140.697	-233.135	810.424	-130.672	-168.775	756.613
4902	0	96.2096	-193.421	1552.46	200.84	-194.317	1562.57	78.9669	-357.927	1562.34	197.259	-362.139	1574.39	160.82	-408.725	1432.68	166.316	-522.678	1160.21	162.929	-250.811	1322.75	178.701	-165.331	1121.45	242.605	-512.55	1258.34	8.90574	-313.411	1381.66	-100.406	-307.063	1144.61	-109.979	-309.562	1047.24	-121.725	-217.456	923.662	-74.6029	-183.163	826.015	-139.358	-219.687	809.566	-128.719	-155.005	756.216
4903	0	96.6997	-184.288	1551.05	201.412	-185.333	1560.9	79.5252	-348.756	1560.72	197.852	-353.091	1572.63	161.253	-399.455	1431.16	166.808	-513.393	1158.65	163.231	-241.411	1321.17	178.673	-156.157	1119.64	243.158	-503.194	1256.78	9.21224	-304.27	1380.07	-100.042	-296.75	1143.05	-109.446	-298.247	1045.61	-120.557	-205.207	922.542	-72.7859	-170.482	825.229	-137.877	-206.306	808.557	-126.627	-141.377	755.702
4904	0	97.6582	-175.103	1549.64	202.296	-176.291	1559.42	80.1919	-339.512	1559.04	198.468	-344.054	1570.67	161.823	-389.957	1429.43	167.483	-503.988	1156.95	163.49	-231.956	1319.45	178.666	-146.764	1117.99	243.741	-493.784	1255.01	9.48088	-294.978	1378.6	-99.5459	-286.72	1141.4	-108.715	-286.967	1043.9	-119.217	-192.871	921.685	-70.9185	-157.78	824.664	-136.19	-193.114	807.6	-124.574	-127.846	755.176
4905	0	98.4796	-165.811	1548.52	203.089	-167.179	1557.98	80.8764	-330.327	1557.32	199.098	-335.052	1568.72	162.318	-380.593	1427.77	167.815	-494.544	1155.3	163.922	-222.396	1317.9	178.688	-137.12	1116.39	244.24	-484.308	1253.19	9.90126	-285.512	1377.05	-98.8929	-276.847	1139.73	-108.246	-275.814	1042.24	-118.006	-180.772	920.769	-69.0809	-145.099	824.382	-134.617	-179.951	806.586	-122.423	-114.384	754.841
4906	0	99.2764	-156.64	1547.22	203.97	-158.018	1556.57	81.5987	-321.078	1555.55	199.914	-325.885	1566.84	162.734	-371.001	1426.11	168.291	-484.843	1153.61	164.304	-212.807	1316.15	178.799	-127.39	1114.65	244.674	-474.705	1251.47	10.3712	-275.886	1375.54	-98.3791	-266.896	1138.21	-107.857	-264.818	1040.7	-116.677	-168.775	919.768	-67.2411	-132.767	823.792	-132.492	-167.147	805.366	-120.21	-100.922	754.507
4907	0	100.284	-147.409	1545.97	204.966	-148.779	1555.22	82.5647	-311.886	1553.87	200.891	-316.754	1564.87	163.553	-361.351	1424.54	168.794	-475.064	1151.86	164.853	-203.055	1314.54	178.927	-117.5	1112.89	245.184	-464.985	1249.78	10.9751	-266.121	1374.13	-97.8563	-256.947	1136.84	-107.254	-253.841	1039.2	-115.191	-156.777	918.758	-65.2875	-120.343	823.226	-130.735	-154.378	804.421	-117.893	-87.6673	754.154
4908	0	101.16	-138.209	1544.85	205.892	-139.651	1553.8	83.6772	-302.784	1552.15	201.968	-307.614	1563.03	164.152	-351.562	1422.73	169.234	-465.152	1149.97	165.367	-193.285	1312.82	179.108	-107.311	1111.24	245.686	-455.14	1247.76	11.7579	-256.239	1372.65	-97.2268	-246.886	1135.37	-106.394	-242.764	1037.8	-113.894	-145.095	917.87	-63.3013	-107.98	823.001	-129.006	-141.774	803.62	-115.587	-74.6519	753.885
4909	0	102.296	-129.045	1543.77	206.979	-130.391	1552.5	84.8246	-293.548	1550.56	203.111	-298.392	1561.28	164.968	-341.912	1421.15	169.623	-455.071	1148.26	166.036	-183.407	1311.25	179.4	-97.2112	1109.63	246.141	-445.192	1245.89	12.4921	-246.267	1371.46	-96.5858	-236.693	1134.13	-105.73	-231.978	1036.54	-112.339	-133.358	917.117	-61.3176	-95.8606	822.664	-127.004	-129.214	802.728	-113.156	-61.8145	753.674
4910	0	103.354	-119.819	1542.73	208.276	-121.11	1551.46	86.0382	-284.384	1549.14	204.412	-289.181	1559.63	165.823	-332.029	1419.61	169.87	-444.796	1146.53	166.85	-173.412	1309.65	179.815	-86.9666	1107.98	246.566	-435.152	1244.14	13.4049	-236.162	1370.13	-95.8488	-226.433	1132.84	-105.091	-221.395	1035.37	-110.973	-121.979	916.358	-59.5199	-83.9489	822.312	-124.769	-117.041	801.819	-110.759	-49.1892	753.522
4911	0	104.716	-110.588	1541.82	209.664	-111.882	1550.28	87.4215	-275.201	1547.65	205.797	-280.011	1557.77	166.644	-322.197	1417.95	170.111	-434.411	1144.58	167.799	-163.406	1308.17	180.269	-76.7312	1106.55	246.942	-425.134	1242.05	14.3413	-225.952	1368.94	-95.113	-215.967	1131.91	-104.254	-211.042	1034.16	-109.42	-110.603	915.54	-57.6677	-72.0909	822.05	-122.91	-105.236	801.042	-108.42	-36.8277	753.23
4912	0	106.281	-101.307	1541.01	211.192	-102.796	1549.14	88.9799	-265.944	1546.21	207.372	-270.911	1556.1	167.634	-312.346	1416.19	170.351	-423.855	1142.46	168.611	-153.309	1306.83	180.809	-66.4452	1105.15	247.303	-414.894	1239.87	15.3912	-215.59	1367.9	-94.289	-205.498	1131.07	-103.113	-200.52	1033	-108.278	-99.7406	915.044	-55.9103	-60.5424	822.096	-121.091	-93.5094	800.352	-106.283	-24.8416	753.031
4913	0	107.963	-92.0869	1540.33	213.069	-93.5735	1548.2	90.611	-256.699	1544.92	208.998	-261.809	1554.41	168.544	-302.36	1414.62	170.426	-413.174	1140.65	169.613	-143.152	1305.6	181.402	-55.9093	1104.14	247.671	-404.53	1237.88	16.5447	-205.13	1366.98	-93.6066	-194.967	1130.42	-102.272	-190.207	1032.14	-107.058	-88.8599	914.46	-54.374	-49.161	822.135	-119.333	-82.1046	799.732	-104.387	-13.1249	752.955
4914	0	110.107	-82.8507	1539.58	215.049	-84.4914	1547.05	92.3217	-247.38	1543.66	210.843	-252.676	1552.66	169.818	-292.53	1413	170.602	-402.288	1138.68	170.84	-132.922	1304.44	182.221	-45.3875	1102.93	248.054	-394.185	1235.73	17.7102	-194.596	1366.2	-92.7924	-184.407	1129.84	-101.4	-179.921	1031.37	-105.854	-78.1415	913.821	-52.8524	-37.893	822.182	-117.347	-71.1319	799.034	-102.489	-1.57819	752.941
4915	0	112.193	-73.4505	1539	217.238	-75.3627	1546.03	94.2023	-238.043	1542.34	212.798	-243.573	1550.85	170.867	-282.576	1411.31	170.779	-391.254	1136.33	172.07	-122.644	1303.29	183.103	-34.7859	1101.93	248.519	-383.801	1233.27	19.1072	-184.106	1365.32	-91.8587	-173.735	1129.28	-100.427	-169.735	1030.62	-104.791	-67.7651	913.313	-51.7032	-27.0599	821.761	-115.969	-60.3994	798.409	-100.868	9.45084	752.646
4916	0	114.309	-64.1276	1538.64	219.486	-66.2124	1545.24	96.2609	-228.785	1541.18	214.761	-234.475	1549.32	172.401	-272.982	1409.77	170.898	-380.01	1134.17	173.41	-112.298	1302.43	184.062	-23.9811	1101.29	248.945	-373.291	1231.02	20.5016	-173.648	1364.78	-90.8674	-162.869	1128.75	-99.4747	-159.486	1029.95	-103.813	-57.5011	912.619	-50.6006	-15.8641	821.876	-114.38	-49.8786	797.58	-99.4843	20.215	752.198
4917	0	116.676	-54.8107	1538.56	221.756	-56.9454	1544.86	98.4108	-219.387	1540.33	216.909	-225.236	1548.04	173.757	-263.147	1408.42	171.033	-368.619	1132.3	174.908	-101.842	1301.73	185.001	-12.8072	1100.77	249.493	-362.781	1228.88	22.0916	-163.216	1364.23	-89.9359	-151.949	1128.33	-98.4603	-149.304	1029.43	-102.962	-47.3298	911.916	-49.6396	-5.37373	821.696	-112.924	-39.9942	796.741	-98.4342	30.5047	751.742
4918	0	118.873	-45.487	1538.89	224.086	-47.5884	1544.84	100.723	-210.034	1539.75	219.206	-215.991	1546.98	175.547	-253.339	1407.22	171.293	-357.228	1130.49	176.642	-91.185	1301.33	186.016	-1.61115	1100.43	250.193	-352.236	1226.82	23.8408	-152.764	1363.9	-88.7032	-141.049	1128.05	-97.2099	-138.969	1028.93	-102.073	-37.3749	911.318	-48.8262	4.84347	821.177	-111.751	-30.4881	796.103	-97.6288	40.2341	751.176
4919	0	121.15	-35.9732	1539.71	226.317	-38.1184	1545.11	103.05	-200.644	1539.45	221.732	-206.507	1546.26	177.262	-243.117	1406.43	171.455	-345.91	1129.15	178.363	-80.4784	1301.3	187.063	9.82329	1100.42	250.846	-341.643	1225.12	25.5802	-142.044	1364.13	-87.3807	-129.988	1128.04	-95.9368	-128.802	1029.03	-101.227	-27.6881	910.85	-48.2936	14.727	820.836	-110.86	-21.2986	795.659	-97.1611	49.3935	750.554
4920	0	123.43	-26.5481	1540.79	228.531	-28.6348	1545.88	105.543	-191.333	1539.54	224.199	-196.938	1545.99	179.112	-232.85	1406.23	171.536	-334.909	1128.67	180.169	-69.6673	1301.74	188.056	21.4971	1100.83	251.32	-330.963	1224.16	27.2212	-130.929	1364.71	-85.9043	-119.029	1128.47	-94.6918	-118.566	1029.61	-100.369	-18.2208	910.728	-47.6681	24.1925	820.746	-109.531	-12.5909	795.445	-96.8136	58.1789	750.353
4921	0	125.641	-17.0855	1542.35	230.89	-18.9281	1547.29	108.099	-181.82	1540.01	226.733	-187.329	1546.07	180.706	-221.739	1406.27	171.399	-324.047	1128.95	182.078	-58.7683	1302.42	189.23	33.2861	1101.57	251.665	-320.218	1223.93	28.9905	-119.54	1365.79	-84.3257	-108.078	1129.31	-93.4307	-108.482	1030.53	-99.4857	-9.1373	910.875	-47.1005	33.3033	820.919	-108.432	-4.34059	795.454	-96.6997	66.4433	750.416
4922	0	127.963	-7.62837	1544.27	233.268	-9.35839	1548.83	110.64	-172.255	1540.57	229.332	-177.692	1546.29	182.17	-211.1	1407.14	170.917	-313.344	1129.66	183.971	-47.822	1303.28	190.434	44.7422	1102.44	251.697	-309.636	1224.19	30.8069	-107.875	1367.26	-82.8102	-97.3991	1130.64	-92.2213	-98.6132	1031.97	-98.6215	-0.278117	911.472	-46.7004	41.8974	821.269	-107.679	3.25423	796.035	-96.9698	73.9382	750.738
4923	0	130.467	1.97428	1546.46	235.671	0.261362	1550.67	113.202	-162.776	1541.6	231.837	-168.145	1546.89	183.281	-200.293	1408.37	170.112	-302.574	1130.93	186.058	-36.8367	1304.51	191.774	56.2895	1103.81	251.504	-299.009	1225.02	32.6713	-95.9586	1369.23	-81.3035	-86.8189	1132.44	-90.7671	-88.6395	1033.93	-97.693	8.20789	912.466	-46.1669	49.9048	821.804	-106.684	10.4478	796.839	-96.9558	80.9866	751.111
4924	0	132.817	11.6104	1548.88	238.136	9.86019	1552.66	115.582	-153.126	1542.97	234.246	-158.494	1547.8	184.593	-189.479	1410.04	169.178	-291.559	1132.69	187.698	-26.0722	1306	192.971	67.5918	1105.47	251.21	-288.457	1226.31	34.5714	-84.0119	1371.73	-79.8	-76.1564	1134.7	-89.4857	-78.6831	1036.48	-96.7496	16.5977	914.013	-45.5666	57.5373	822.625	-106.028	17.5682	798.242	-97.0747	87.5987	751.968
4925	0	135.449	21.2607	1551.55	240.722	19.47	1554.9	118.003	-143.271	1544.86	236.721	-148.881	1549.06	185.751	-178.761	1412.11	168.565	-280.346	1134.78	189.261	-15.4702	1307.86	194.322	78.6789	1107.41	250.777	-277.847	1227.96	36.4791	-72.1724	1374.42	-78.3166	-65.5337	1137.54	-88.1667	-68.7166	1039.48	-95.7909	24.9383	915.878	-45.0359	64.5392	823.615	-105.325	24.0085	800.213	-97.1246	93.7215	753.114
4926	0	138.203	31.0175	1554.43	243.372	28.9607	1557.19	120.398	-133.443	1547.01	239.016	-139.343	1550.48	186.95	-168.267	1414.2	168.05	-269.035	1136.77	191.066	-4.93831	1309.94	195.59	89.2532	1109.72	250.369	-267.338	1229.56	38.2238	-60.5195	1377.52	-76.9882	-54.9691	1140.9	-87.0518	-58.8518	1042.85	-94.6886	33.1163	917.887	-44.3926	70.8828	824.451	-105.226	30.6085	802.427	-96.9678	99.5201	754.425
4927	0	140.823	40.8199	1557.51	246.019	38.3001	1559.55	122.405	-123.68	1549.44	241.07	-129.827	1552.28	188.026	-158.027	1416.36	167.439	-257.703	1138.74	192.677	5.35883	1312.37	196.801	99.5579	1112.34	249.972	-256.875	1231.3	39.9036	-49.1934	1380.59	-75.8392	-44.405	1144.46	-86.1693	-49.0541	1046.44	-93.7737	41.2443	920.511	-43.5572	77.1267	825.963	-104.771	37.2311	804.804	-96.5879	105.216	755.865
4928	0	143.397	50.5476	1560.67	248.642	47.6471	1562.05	124.209	-113.893	1552.19	242.998	-120.448	1554.21	189.003	-147.939	1418.55	166.814	-246.426	1140.7	193.952	15.5154	1314.93	197.975	109.77	1115.08	249.566	-246.321	1233.02	41.3082	-38.213	1384.05	-74.7882	-33.6681	1148.09	-85.6631	-39.5045	1050.12	-93.0649	49.2257	923.038	-43.0007	83.3428	827.719	-104.662	43.7228	807.616	-96.1235	110.747	757.084
4929	0	145.916	60.2516	1563.62	251.142	56.9508	1564.53	126.07	-104.025	1554.98	244.724	-111.143	1556.3	190.052	-137.964	1420.71	166.385	-235.192	1142.55	195.156	25.5477	1317.57	199.096	120.013	1118.03	249.46	-235.948	1234.62	42.8459	-27.7066	1387.22	-73.9645	-22.877	1151.82	-84.8061	-29.8556	1053.64	-92.2798	57.2585	925.836	-42.2782	89.4972	829.514	-104.924	50.3859	810.563	-95.387	116.224	758.518
4930	0	148.309	69.8098	1566.56	253.511	66.076	1566.78	127.766	-94.3736	1557.63	246.371	-101.89	1558.34	191.135	-128.225	1422.69	166.175	-224.342	1144.2	196.263	35.4801	1320.15	199.99	130.025	1120.88	249.5	-225.517	1236.13	43.9322	-17.1714	1390.41	-73.188	-12.1849	1155.56	-84.3927	-20.4849	1057.34	-91.516	65.3906	928.545	-41.8509	95.4856	831.32	-105.283	57.3662	813.528	-94.582	121.584	759.913
4931	0	150.369	79.2367	1569.43	255.505	75.1761	1569.09	129.35	-84.7895	1560.23	247.853	-92.7707	1560.37	192.105	-118.472	1424.63	166.24	-213.89	1145.99	197.234	45.3069	1322.63	200.851	140.055	1123.69	249.764	-215.16	1237.66	45.2243	-7.15697	1393.24	-72.583	-1.52084	1159.1	-84.3271	-11.425	1060.85	-91.1306	73.3228	931.421	-41.4132	101.47	833.43	-106.015	64.7703	816.724	-93.7413	127.147	761.285
4932	0	152.266	88.6439	1572.13	257.457	84.227	1571.5	130.695	-75.2809	1562.53	249.275	-83.5855	1562.24	193.059	-108.674	1426.61	166.348	-203.606	1147.89	198.2	55.1148	1324.89	201.516	149.844	1126.14	250.079	-204.923	1239.31	46.1888	2.95255	1396.04	-72.1728	9.04248	1162.24	-83.8881	-2.33032	1063.98	-90.6923	81.4529	933.95	-41.0042	107.504	835.159	-106.52	72.1795	819.417	-92.7906	132.903	762.298
4933	0	153.933	97.8802	1574.6	259.142	93.2164	1573.59	131.95	-65.9133	1564.47	250.447	-74.5473	1563.73	193.991	-98.9954	1428.41	166.751	-193.642	1149.6	199.028	64.8562	1326.85	202.064	159.768	1128.3	250.492	-194.757	1240.79	47.0685	12.8724	1398.35	-71.8574	19.4052	1165.04	-84.1689	6.23017	1066.96	-90.5213	89.4363	936.239	-40.7783	113.567	836.683	-107.977	79.449	822.261	-92.0185	138.6	763.234
4934	0	155.554	107.011	1577.09	260.55	102.168	1575.61	133.101	-56.7779	1566.17	251.579	-65.4973	1565.06	194.848	-89.2078	1430.02	167.278	-183.926	1151.36	199.724	74.5868	1328.72	202.465	169.497	1130.11	251.061	-184.731	1242.26	47.8757	22.5408	1400.44	-71.6241	29.5678	1167.52	-83.9935	14.9233	1069.45	-90.6654	97.294	938.252	-40.7126	119.928	838.298	-108.546	87.113	824.417	-91.5673	144.315	763.987
4935	0	156.818	115.965	1579.26	261.887	111.009	1577.7	134.14	-47.7016	1567.58	252.513	-56.6174	1566.19	195.749	-79.4511	1431.69	167.918	-174.401	1153.13	200.293	84.2973	1330.35	202.669	179.29	1131.77	251.617	-174.77	1243.76	48.5737	32.2244	1402.31	-71.4621	39.4645	1169.66	-84.2189	23.4901	1071.63	-90.7632	105.254	940.11	-41.0369	126.361	839.854	-109.176	94.726	826.208	-90.8384	150.184	764.748
4936	0	157.801	124.886	1581.24	262.984	119.88	1579.48	135.112	-38.753	1568.86	253.698	-47.7241	1567.15	196.473	-69.7385	1433.1	168.657	-165.003	1154.92	200.742	93.9124	1331.62	202.753	188.921	1133.03	252.296	-164.991	1245.33	49.1382	41.8199	1403.9	-71.3337	49.0118	1171.25	-84.4268	31.9192	1073.48	-91.1741	113	941.55	-41.3347	132.949	840.912	-110.065	101.956	827.927	-91.0049	156.115	765.279
4937	0	158.793	133.638	1582.98	264.023	128.658	1580.96	136.001	-29.8722	1569.85	254.539	-38.8282	1567.84	197.359	-60.0665	1434.44	169.422	-155.779	1156.45	201.148	103.456	1332.68	202.697	198.569	1134.03	253.04	-155.405	1246.62	49.6401	51.236	1405.28	-71.2474	58.2297	1172.74	-84.5687	40.3824	1075.07	-91.4407	120.908	942.748	-42.0842	140.052	841.994	-110.812	109.001	829.175	-91.4529	162.044	765.76
4938	0	159.589	142.315	1584.74	264.775	137.415	1582.35	136.809	-21.1221	1570.68	255.272	-30.011	1568.37	198.107	-50.4364	1435.6	170.179	-146.755	1157.82	201.428	112.914	1333.64	202.472	207.817	1134.68	253.899	-145.97	1248	50.0976	60.3827	1406.28	-71.2203	66.8824	1173.83	-84.4121	49.1544	1076.41	-91.9768	128.388	943.743	-42.7299	146.807	842.683	-111.268	115.806	830.091	-92.0893	168.145	766.24
4939	0	160.373	151.101	1586.35	265.461	146.1	1583.69	137.484	-12.325	1571.53	255.964	-21.2351	1568.95	198.743	-40.9416	1436.83	170.974	-137.815	1159.36	201.629	122.235	1334.51	202.242	217.029	1135.19	254.688	-136.71	1249.38	50.3567	69.6168	1407.4	-71.4118	74.8919	1174.92	-84.7926	57.1769	1077.58	-92.4188	135.857	944.409	-43.7936	153.807	843.221	-112.338	122.482	831.198	-93.4828	174.369	766.863
4940	0	160.863	159.787	1587.63	266.035	154.907	1584.93	138.092	-3.60568	1572.17	256.556	-12.4395	1569.43	199.429	-31.5431	1437.94	171.716	-129.161	1160.58	201.687	131.44	1335.22	201.648	225.881	1135.4	255.603	-127.587	1250.75	50.646	78.5265	1408.24	-71.1898	82.5506	1175.44	-84.6051	65.4414	1078.5	-92.7636	143.042	944.934	-44.5951	160.467	843.352	-112.95	128.811	831.808	-94.7875	180.79	767.432
4941	0	161.365	168.436	1588.79	266.492	163.634	1585.87	138.775	5.10586	1572.59	257.096	-3.68172	1569.72	200.08	-22.3288	1438.85	172.627	-120.598	1161.76	201.819	140.427	1335.78	201.053	234.688	1135.46	256.617	-118.707	1251.93	51.0515	87.3241	1408.93	-71.1819	89.6864	1176.02	-84.5522	73.5252	1079.38	-93.25	150.1	945.341	-45.6486	167.466	843.64	-113.719	135.122	832.419	-96.6855	187.323	767.951
4942	0	161.77	176.994	1589.59	266.756	172.315	1586.69	139.291	13.7751	1573.02	257.694	5.12425	1570.09	200.825	-13.2035	1439.8	173.516	-112.155	1162.87	201.775	149.573	1336.35	200.454	243.332	1135.53	257.598	-109.664	1253.11	51.2726	95.9877	1409.72	-70.7799	96.7206	1176.47	-84.6272	81.24	1080.3	-93.684	157.196	945.695	-46.5134	174.25	843.96	-114.759	141.618	833.098	-97.9957	194.051	768.497
4943	0	161.933	185.741	1590.54	266.904	181.141	1587.56	139.587	22.4188	1573.51	258.046	14.0174	1570.48	201.338	-4.14019	1440.79	174.51	-103.709	1164.06	201.674	158.372	1336.81	199.908	251.93	1135.54	258.537	-100.97	1254.34	51.7322	104.116	1410.26	-70.7968	103.376	1177.15	-84.731	88.7967	1081.06	-94.1049	164.142	946.172	-47.5816	180.996	844.092	-115.537	148.106	833.794	-99.8313	201.033	769.38
4944	0	161.85	194.258	1591.07	267.037	189.947	1588.29	139.962	30.9205	1573.83	258.412	22.8229	1570.79	201.934	4.70592	1441.46	175.5	-95.4867	1164.89	201.488	167.09	1337.17	199.101	259.947	1135.57	259.557	-92.2186	1255.34	51.9569	112.285	1410.71	-70.6784	110.094	1177.77	-84.8556	96.0618	1081.81	-94.5339	171.065	946.741	-48.616	187.65	844.318	-116.184	154.521	834.322	-101.357	207.941	770.437
4945	0	161.811	202.86	1591.9	267.023	198.706	1588.86	140.233	39.5126	1574.09	258.68	31.6067	1571.06	202.491	13.2992	1442.09	176.502	-87.2457	1165.62	201.295	175.701	1337.58	198.553	268.441	1135.78	260.475	-83.6483	1256.05	51.9186	120.366	1411.22	-70.6789	116.726	1178.29	-84.5523	103.347	1082.35	-94.846	177.919	947.179	-49.0237	193.877	844.23	-117.075	160.959	834.868	-102.894	214.945	771.35
4946	0	161.854	211.434	1592.46	267.101	207.508	1589.51	140.496	48.1567	1574.45	258.924	40.4061	1571.5	202.948	21.8885	1442.75	177.313	-79.0492	1166.33	201.059	184.22	1337.96	198.118	277.005	1136.12	261.289	-75.0542	1256.83	51.8658	128.357	1411.71	-70.9633	123.246	1179	-84.6145	110.289	1083.02	-95.5727	184.575	947.762	-49.8999	200.562	844.592	-118.055	167.471	835.545	-104.242	221.976	772.378
4947	0	161.736	219.989	1592.75	267.089	216.233	1590.04	140.632	56.7513	1574.88	259.123	49.1063	1571.95	203.223	30.4083	1443.35	178.142	-70.9029	1167.06	200.861	192.643	1338.24	197.581	285.256	1136.45	262.016	-66.4373	1257.61	51.9081	136.189	1412.23	-71.1596	130.021	1179.59	-84.8655	116.936	1083.64	-96.0405	191.313	948.252	-51.0199	207.458	845.222	-119.217	174.146	836.348	-105.974	228.872	773.352
4948	0	161.546	228.642	1593.12	266.806	224.92	1590.33	140.681	65.226	1575.16	259.245	57.8418	1572.32	203.6	38.8457	1443.71	178.881	-62.7452	1167.71	200.533	200.989	1338.52	197.11	293.576	1136.87	262.609	-58.0041	1258	51.6873	144.028	1412.68	-71.5385	136.759	1180.01	-84.8855	123.612	1083.98	-96.6441	198.218	948.781	-51.6581	214.161	845.352	-119.878	180.903	836.746	-107.45	236.01	774.203
4949	0	161.329	237.179	1593.67	266.659	233.591	1590.67	140.669	73.7125	1575.4	259.167	66.4436	1572.61	203.857	47.1558	1444.12	179.324	-54.6334	1168.07	200.187	209.308	1338.91	196.693	301.743	1137.37	263.125	-49.6992	1258.35	51.4975	151.901	1413.07	-72.0275	143.314	1180.41	-85.0743	130.224	1084.41	-97.4684	204.807	949.384	-52.7879	221.183	845.888	-120.533	187.6	837.236	-108.704	243.002	774.87
4950	0	161.056	245.557	1593.98	266.436	242.175	1591.03	140.65	82.2675	1575.66	259.093	75.0467	1572.89	203.922	55.4887	1444.53	179.601	-46.5516	1168.48	199.891	217.618	1339.13	196.428	310.006	1137.85	263.425	-41.3019	1258.84	51.1928	159.685	1413.41	-72.3891	150.188	1180.65	-85.1933	136.973	1084.66	-98.3011	211.6	949.637	-53.6696	228.257	846.06	-121.423	194.261	837.774	-109.862	250.02	775.381
4951	0	160.648	253.943	1594	266.121	250.721	1591.26	140.429	90.6569	1575.87	258.918	83.6033	1572.99	203.859	63.8626	1444.77	179.753	-38.4275	1168.84	199.57	225.867	1339.19	196.05	318.041	1138	263.624	-32.938	1259.16	50.8103	167.545	1413.46	-72.6339	157	1180.73	-85.5056	143.705	1084.89	-98.9752	218.433	949.554	-54.2304	235.173	845.828	-122.112	200.979	838.055	-111.107	257.012	775.635
4952	0	160.468	262.435	1594.3	265.657	259.209	1591.41	140.006	98.7916	1575.99	258.685	91.9858	1572.98	203.806	72.2319	1444.92	179.899	-30.3361	1169.04	199.182	234.13	1339.32	195.757	326.033	1138.18	263.812	-24.6993	1259.25	50.4642	175.666	1413.6	-73.1691	163.841	1180.85	-85.7965	150.537	1084.9	-99.76	225.38	949.57	-55.2036	242.63	846.102	-122.518	207.807	838.014	-111.98	263.906	775.9
4953	0	159.764	270.627	1594.33	265.221	267.516	1591.61	139.899	107.257	1575.82	258.436	100.473	1572.99	203.71	80.6521	1444.98	180.15	-22.2741	1169.16	198.876	242.433	1339.41	195.515	333.975	1138.34	263.97	-16.4143	1259.44	50.1454	183.53	1413.43	-73.3073	170.918	1180.68	-85.9737	157.683	1084.85	-100.698	232.21	949.73	-55.8864	249.908	846.042	-123.056	214.638	837.924	-112.872	271.018	775.92
4954	0	159.154	278.879	1594.46	264.767	275.994	1591.88	139.615	115.567	1575.59	258.091	108.887	1572.9	203.617	89.0319	1445.15	180.239	-14.0965	1169.31	198.621	250.743	1339.4	195.014	341.95	1138.3	264.111	-8.01952	1259.74	49.8213	191.456	1413.38	-73.7482	177.941	1180.76	-86.5048	164.715	1084.93	-101.45	239.408	949.685	-56.8187	257.285	846.088	-123.652	221.657	837.831	-113.708	277.811	775.696
4955	0	158.786	287.165	1594.58	264.063	284.333	1591.97	139.092	123.628	1575.33	257.721	117.312	1572.7	203.474	97.2874	1445.15	180.356	-5.934	1169.31	198.196	258.965	1339.18	194.8	350.012	1138.01	264.159	0.291464	1259.83	49.3405	199.766	1413.22	-74.0136	185.104	1180.71	-86.5378	172.223	1084.65	-102.207	246.41	949.458	-57.5796	264.78	846.105	-124.154	228.66	837.704	-114.269	284.915	775.49
4956	0	157.765	295.202	1594.42	263.373	292.617	1591.99	138.679	131.853	1574.82	257.2	125.658	1572.3	203.061	105.906	1444.84	180.582	2.1257	1169.09	197.887	267.324	1339.13	194.523	358.148	1137.69	264.233	8.55381	1259.76	48.9698	207.805	1412.74	-74.4846	192.417	1180.46	-87.1655	179.343	1084.39	-102.839	253.515	949.099	-58.0816	272.206	845.954	-124.642	235.572	837.234	-114.793	291.912	774.998
4957	0	156.983	303.445	1594.4	262.508	300.87	1592.01	138.119	140.006	1574.32	256.694	133.926	1571.96	202.755	114.383	1444.61	180.577	10.2402	1168.98	197.504	275.667	1338.79	194.102	366.178	1137.46	264.19	16.9161	1259.8	48.5067	215.886	1412.29	-74.8067	199.935	1179.94	-87.51	187.006	1083.9	-103.412	260.748	948.709	-58.8621	279.581	845.47	-124.972	242.922	836.59	-115.411	299.055	774.34
4958	0	156.387	311.695	1593.98	261.761	309.296	1591.92	137.35	148.177	1573.72	256.096	142.311	1571.53	202.455	122.772	1444.23	180.643	18.4626	1168.79	196.999	284.026	1338.32	193.653	374.193	1136.72	264.123	25.3431	1259.73	48.0851	224.23	1411.82	-75.3038	207.491	1179.43	-88.022	194.465	1083.43	-104.082	268.154	947.971	-59.418	287.112	844.954	-125.661	249.974	836.129	-115.796	306.169	773.606
4959	0	155.573	319.839	1593.51	260.852	317.565	1591.44	136.978	156.518	1572.74	255.488	150.697	1570.78	202.04	131.267	1443.83	180.826	26.6598	1168.39	196.594	292.301	1337.6	193.444	382.476	1135.86	263.989	33.6977	1259.36	47.6025	232.574	1410.98	-75.6054	215.446	1178.73	-88.1957	202.176	1082.72	-104.482	275.637	947.157	-59.9805	294.532	844.101	-125.955	257.386	835.056	-116.275	313.359	772.586
4960	0	154.647	328.075	1592.88	259.994	325.89	1590.87	136.251	164.701	1571.86	254.773	159.01	1570	201.502	139.654	1443.23	180.871	34.7334	1167.81	196.218	300.729	1336.84	193.174	390.776	1135.09	263.956	42.0361	1258.95	47.0622	240.906	1410.05	-76.0593	223.324	1177.73	-88.6422	209.895	1081.8	-104.941	283.14	946.14	-60.5642	302.132	843.129	-126.399	264.462	834.133	-116.609	320.63	771.534
4961	0	153.703	336.484	1592.1	259.133	334.253	1590.36	135.324	172.885	1570.97	254.029	167.464	1569.23	200.836	148.116	1442.67	180.745	42.999	1167.31	195.741	309.191	1336.06	192.687	399.014	1134.01	263.627	50.3713	1258.51	46.5409	249.32	1409.07	-76.513	231.444	1176.78	-88.9497	217.645	1080.94	-105.514	290.696	945.139	-61.0648	309.592	841.918	-126.725	271.943	832.945	-117.165	327.811	770.339
4962	0	152.794	344.746	1591.21	258.171	342.736	1589.73	134.708	181.403	1569.89	253.254	175.91	1568.43	200.1	156.786	1441.73	180.415	51.361	1166.57	195.317	317.635	1335.13	192.451	407.394	1133.06	263.108	58.8252	1257.91	45.9386	257.914	1407.88	-76.9065	239.82	1175.47	-89.176	225.689	1079.76	-105.795	298.328	943.73	-61.6221	317.207	840.744	-127.222	279.013	831.9	-117.787	335.075	768.892
4963	0	151.813	353.077	1590.45	257.208	351.187	1588.94	133.809	189.663	1568.75	252.453	184.363	1567.52	199.316	165.216	1440.85	180.014	59.6773	1165.69	194.752	326.103	1334.19	192.097	415.833	1132.02	262.558	67.2405	1257.06	45.2129	266.554	1406.92	-77.2906	248.163	1174.32	-89.5439	233.574	1078.54	-106.277	305.929	942.501	-62.2001	324.662	839.305	-127.448	286.417	830.41	-118.411	342.083	767.526
4964	0	150.897	361.601	1589.38	256.259	359.679	1588.11	132.905	198.016	1567.57	251.6	192.86	1566.49	198.537	173.838	1439.9	179.597	68.1243	1164.74	194.079	334.566	1333.27	191.879	424.55	1131.06	261.998	75.6283	1256.13	44.4868	275.238	1405.79	-77.6758	256.603	1172.9	-89.7025	241.535	1077.15	-106.591	313.55	941.029	-62.7149	332.204	838.084	-127.834	293.543	829.021	-118.899	349.413	766.118
4965	0	149.859	370.169	1588.33	255.249	368.176	1587.24	132.096	206.684	1566.35	250.661	201.482	1565.46	197.857	182.384	1439.05	178.969	76.6819	1163.93	193.565	343.125	1332.15	191.602	433.272	1129.96	261.317	84.1545	1255.34	43.7365	283.96	1404.57	-78.0949	265.18	1171.69	-89.8712	249.835	1075.97	-107.079	321.331	939.454	-63.0255	339.74	836.374	-128.117	300.975	827.711	-119.468	356.638	764.57
4966	0	148.807	378.642	1587.18	254.258	376.746	1586.27	131.094	215.262	1565.05	249.674	210.099	1564.29	196.875	190.954	1437.96	178.223	85.2795	1162.87	192.948	351.756	1330.93	191.35	441.926	1128.8	260.581	92.6859	1254.33	43.0283	292.732	1403.19	-78.3777	273.948	1170.02	-90.0375	258.094	1074.42	-107.456	328.912	937.91	-63.5958	347.318	834.657	-128.562	308.339	826.044	-120.086	363.957	762.961
4967	0	147.746	387.178	1585.93	253.225	385.332	1585.12	130.008	223.839	1563.5	248.61	218.566	1562.97	195.945	199.633	1436.66	177.474	93.9238	1161.51	192.25	360.416	1329.76	191.074	450.689	1127.57	259.671	101.225	1253.09	42.3221	301.545	1401.85	-78.5595	282.645	1168.33	-90.2194	266.243	1072.79	-107.76	336.917	936.168	-64.0013	354.876	832.82	-128.934	315.69	824.353	-120.546	371.246	761.013
4968	0	146.843	395.878	1584.7	252.203	393.908	1583.96	128.958	232.507	1562.02	247.489	227.153	1561.56	195.129	208.168	1435.44	176.54	102.544	1160.15	191.524	369.048	1328.41	190.634	459.482	1126.31	258.855	109.953	1251.91	41.5975	310.323	1400.1	-78.6612	291.432	1166.55	-90.4658	274.535	1071.23	-108.156	344.733	934.274	-64.4259	362.635	830.929	-129.148	323.274	822.64	-121.17	378.598	759.007
4969	0	145.919	404.65	1583.27	251.133	402.48	1582.84	127.786	241.351	1560.53	246.311	235.809	1560.22	193.989	217.019	1434.1	175.744	111.333	1158.88	190.723	377.768	1326.96	190.187	468.351	1124.82	257.869	118.618	1250.65	40.6462	319.117	1398.57	-78.9744	300.293	1164.53	-90.7534	282.891	1069.55	-108.578	352.678	932.285	-64.897	370.311	828.803	-129.292	330.696	820.823	-121.569	386.082	756.937
4970	0	144.755	413.41	1582.09	250.1	411.09	1581.54	126.573	250.053	1558.94	245.12	244.514	1558.68	193.006	225.842	1432.59	175.049	120.109	1157.5	189.954	386.604	1325.52	189.837	477.225	1123.52	257.147	127.415	1249.34	39.6846	328.014	1397.03	-79.2337	309.223	1162.65	-90.8866	291.27	1067.7	-108.906	360.61	930.439	-65.4929	377.861	826.47	-129.763	338.4	818.759	-122.037	393.222	754.667
4971	0	143.557	422.118	1580.79	248.944	419.71	1580.33	125.389	258.802	1557.28	243.839	253.185	1557.22	192.096	234.703	1431.06	174.234	128.881	1155.9	189.07	395.452	1324.19	189.169	486.256	1122.22	256.273	136.185	1247.94	38.7923	336.797	1395.46	-79.7152	318.134	1161.02	-91.0997	299.694	1065.84	-109.284	368.779	928.525	-66.0141	385.946	824.783	-129.985	346.142	816.872	-122.453	400.709	752.738
4972	0	142.289	430.88	1579.64	247.767	428.451	1579.32	124.16	267.745	1555.73	242.592	261.939	1555.92	190.979	243.499	1429.89	173.386	137.795	1154.5	188.132	404.459	1322.97	188.71	495.409	1121.28	255.38	145.033	1246.64	37.658	345.84	1394.01	-80.3139	326.856	1159.15	-91.6412	308.152	1064.08	-109.926	376.768	926.693	-66.4167	394.352	823.147	-130.529	353.711	815.276	-122.894	408.175	750.818
4973	0	141.014	439.647	1578.23	246.354	437.245	1578.22	122.73	276.581	1554.26	241.194	270.786	1554.45	189.846	252.381	1428.39	172.482	146.898	1153.13	187.322	413.506	1321.68	188.138	504.558	1119.83	254.429	154.025	1245.35	36.6672	354.778	1392.38	-81.1404	335.609	1157.39	-92.2073	316.556	1062.38	-110.38	384.748	924.772	-66.8548	402.349	821.368	-130.863	361.696	813.408	-123.349	415.73	748.721
4974	0	139.469	448.523	1576.96	244.728	446.08	1577.14	121.304	285.221	1552.54	239.725	279.703	1553.06	188.571	261.434	1427	171.561	156.106	1151.6	186.396	422.62	1320.42	187.506	513.887	1118.79	253.442	163.05	1243.93	35.5675	363.753	1390.54	-82.0267	344.33	1155.72	-92.7494	325.031	1060.52	-110.973	392.959	922.891	-67.2799	410.674	819.403	-130.728	369.571	811.115	-123.563	423.477	746.587
4975	0	137.742	457.271	1575.69	243.066	454.998	1576.19	119.812	294.043	1551.08	238.279	288.554	1551.96	187.411	270.645	1425.59	170.646	165.46	1150.02	185.235	431.71	1319.09	186.784	523.232	1117.48	252.467	172.231	1242.56	34.336	372.972	1389.15	-82.9763	353.131	1153.92	-93.3652	333.611	1058.68	-111.506	401.272	920.94	-67.4872	418.535	817.442	-130.94	377.628	809.328	-123.763	431.522	744.632
4976	0	135.885	466.063	1574.44	241.265	464.003	1575.22	118.341	302.936	1549.56	236.709	297.528	1550.83	186.001	279.696	1424.27	169.621	175.045	1148.57	184.126	440.896	1317.97	186.151	532.658	1116.49	251.299	181.519	1241.21	33.0665	382.054	1387.57	-83.8853	361.896	1152.15	-94.1439	342.266	1056.94	-111.927	409.685	918.976	-67.7397	426.885	815.584	-131.475	385.863	807.707	-123.948	439.49	742.652
4977	0	134.05	475.048	1573.1	239.294	472.941	1574.18	116.606	311.738	1548.23	234.956	306.6	1549.69	184.658	289.03	1422.91	168.564	184.72	1147.06	183.004	450.216	1316.64	185.43	542.182	1115.12	250.195	190.994	1239.84	31.7035	391.308	1385.93	-84.9721	370.518	1150.49	-94.9664	350.781	1055.27	-112.526	418.185	917.16	-67.8073	435.29	813.617	-131.771	394.335	805.827	-123.936	447.789	740.674
4978	0	132.165	483.978	1571.96	237.305	481.883	1573.22	114.743	320.634	1546.71	233.158	315.552	1548.56	183.28	298.306	1421.5	167.507	194.526	1145.38	181.747	459.586	1315.55	184.71	551.844	1114.23	248.928	200.532	1238.35	30.303	400.595	1384.52	-86.2022	379.036	1149.03	-96.0049	359.362	1053.59	-113.092	426.72	915.396	-68.0577	443.719	812.016	-131.964	402.814	803.744	-123.863	456.222	738.711
4979	0	130.03	492.871	1570.84	235.33	490.875	1572.43	112.92	329.758	1545.28	231.231	324.578	1547.4	181.611	307.746	1420.09	166.403	204.595	1143.71	180.425	469.131	1314.58	183.845	561.578	1113.34	247.668	210.148	1236.89	28.7829	409.939	1383.08	-87.5795	387.587	1147.46	-97.0395	368.093	1051.88	-113.827	435.364	913.636	-68.2135	452.384	810.388	-132.245	411.527	802.003	-123.855	464.819	736.952
4980	0	127.928	501.917	1569.87	233.259	499.917	1571.77	110.735	338.95	1543.8	229.069	333.63	1546.38	179.98	317.132	1418.82	165.222	214.68	1142.16	179.007	478.714	1313.67	182.879	571.477	1112.65	246.301	220.034	1235.57	27.1931	419.299	1381.52	-88.8859	396.309	1145.98	-98.0892	376.88	1050.33	-114.614	444.125	912.075	-68.6841	461.032	809.137	-132.671	420.456	800.46	-123.806	473.604	735.286
4981	0	125.978	511.128	1568.94	231.241	508.926	1571.02	108.531	348.002	1542.44	227.006	342.728	1545.16	178.315	326.555	1417.48	164.178	224.823	1140.46	177.452	488.486	1312.84	181.814	581.459	1111.93	244.988	229.986	1234.07	25.5882	428.686	1380.05	-90.3779	404.963	1144.52	-99.0564	385.657	1048.61	-115.263	453.046	910.364	-69.3984	469.667	807.485	-132.694	429.238	798.611	-123.779	482.462	733.579
4982	0	123.846	520.33	1568	229.102	517.962	1570.25	106.438	357.408	1540.95	224.777	351.87	1543.85	176.734	336.202	1415.97	163.116	234.993	1138.65	175.859	498.362	1311.99	180.827	591.662	1111.46	243.753	240.057	1232.54	23.7668	438.198	1378.77	-91.8884	413.617	1143.1	-100.16	394.419	1047.01	-116.093	461.942	908.697	-70.0131	478.925	806.067	-133.284	438.218	796.767	-123.879	491.55	731.908
4983	0	121.563	529.622	1567.34	226.939	527.153	1569.78	104.118	366.906	1539.59	222.386	361.139	1542.83	174.878	345.911	1414.86	162.025	245.271	1137.23	174.126	508.341	1311.27	179.625	602.148	1110.88	242.492	250.253	1231.2	21.8792	447.736	1377.46	-93.4465	422.507	1141.67	-101.321	403.383	1045.42	-116.953	470.945	907.103	-70.6845	488.241	804.844	-133.772	447.356	794.982	-124.129	500.685	730.17
4984	0	119.267	539.009	1566.64	224.714	536.446	1569.49	101.512	376.327	1538.51	220.018	370.457	1541.94	173.051	355.624	1413.81	160.933	255.686	1135.98	172.432	518.422	1310.6	178.654	612.828	1110.61	241.178	260.585	1230.01	19.9341	457.091	1376.01	-94.8632	431.601	1140.12	-102.504	412.416	1043.95	-117.89	480.05	905.464	-71.5172	497.654	803.53	-134.008	456.274	793.28	-124.536	509.873	728.524
4985	0	116.929	548.498	1566.18	222.281	545.723	1569.19	99.0383	385.886	1537.25	217.45	379.897	1540.94	171.447	365.607	1412.71	159.791	266.157	1134.6	170.585	528.623	1310.13	177.369	623.417	1110.17	240.047	271.065	1228.85	17.9564	466.921	1374.82	-96.2277	440.79	1138.6	-103.483	421.622	1042.42	-118.83	489.191	903.713	-71.7996	506.387	801.642	-134.791	465.132	791.756	-125.007	519.038	726.906
4986	0	114.506	558.13	1565.87	219.799	555.151	1569.07	96.678	395.679	1536.26	214.908	389.547	1540.28	169.603	375.578	1412.1	158.715	276.782	1133.62	168.653	538.997	1309.77	175.937	634.175	1109.98	238.967	281.613	1228.08	16.0644	476.697	1373.9	-97.6519	450.166	1137.17	-104.412	431.03	1040.99	-120.079	498.362	902.328	-72.7426	515.733	800.216	-135.42	473.98	790.168	-125.885	528.029	725.592
4987	0	112.076	567.773	1565.65	217.281	564.866	1569.35	94.1736	405.545	1535.54	212.477	399.252	1539.96	167.881	385.84	1411.85	157.891	287.361	1133.2	166.77	549.399	1309.6	174.527	645.398	1110.12	238.192	292.181	1227.81	14.2132	486.556	1373.03	-99.0113	459.645	1136.12	-105.32	440.531	1040.07	-121.221	507.612	901.094	-73.8243	525.216	799.222	-136.11	482.872	788.959	-126.836	537.074	724.344
4988	0	109.372	577.437	1565.77	214.659	574.72	1569.89	91.792	415.287	1535	210.076	409.065	1539.92	166.122	396.214	1411.92	157.575	298.095	1132.96	164.79	559.885	1309.72	172.953	656.532	1110.37	237.563	302.781	1227.94	12.3235	496.472	1372.66	-100.109	469.309	1135.26	-105.974	450.142	1039.22	-122.33	516.475	900.214	-75.0227	534.722	798.399	-137.156	491.77	788.131	-128.13	545.996	723.433
4989	0	106.517	587.199	1566.29	211.933	584.545	1570.68	89.2304	425.135	1534.92	207.558	419.084	1540.09	164.477	406.521	1412.23	157.528	308.681	1133.09	162.791	570.405	1310.2	171.03	667.628	1111	236.953	313.492	1228.39	10.3632	506.3	1372.51	-101.26	478.961	1134.81	-106.592	459.853	1038.58	-123.499	525.583	899.664	-76.2274	544.096	797.67	-137.918	500.474	787.34	-129.472	554.959	722.904
4990	0	103.715	597.095	1567.1	209.196	594.407	1571.75	86.6913	435.026	1535.1	205.021	429.09	1540.64	162.805	416.74	1412.88	157.263	319.721	1133.49	160.698	580.914	1311.04	169.236	678.803	1112.03	236.505	324.241	1229.22	8.42675	516.15	1372.63	-102.192	488.704	1134.33	-107.12	469.699	1038.22	-124.732	534.773	899.282	-77.5945	553.713	797.464	-139.059	509.255	787.169	-131.018	563.778	722.485
4991	0	101.179	606.989	1568.03	206.474	604.448	1573.07	84.2127	445.092	1535.69	202.551	439.103	1541.52	161.122	427.129	1413.78	156.85	330.688	1134.41	158.677	591.415	1312.06	167.283	689.823	1113.19	236.021	335.098	1230.39	6.4756	525.964	1373.13	-103.085	498.526	1134.34	-107.671	479.628	1038.43	-125.833	544.131	899.254	-79.2315	563.389	797.411	-139.872	518.259	787.145	-132.772	572.518	722.467
4992	0	98.6035	617.086	1569.21	203.775	614.386	1574.47	81.708	455.214	1536.56	199.946	449.207	1542.62	159.584	437.5	1414.98	156.792	341.898	1135.5	156.594	601.835	1313.36	165.225	700.692	1114.6	235.645	345.9	1231.7	4.61643	535.584	1373.77	-103.826	508.388	1134.5	-108.058	489.538	1038.67	-126.869	553.636	899.534	-80.6571	573.01	797.483	-141.17	527.473	787.698	-134.809	581.405	722.692
4993	0	96.0412	627.182	1570.76	201.281	624.451	1576.25	79.2517	465.242	1537.77	197.471	459.197	1544.25	157.95	447.562	1416.27	156.767	352.956	1136.57	154.522	612.187	1315.02	163.14	711.332	1116.48	235.243	356.7	1233.17	2.70279	545.131	1374.8	-104.546	518.248	1135.01	-108.449	499.504	1039.32	-127.897	563.239	900.248	-81.8496	582.486	797.579	-142.041	536.585	788.39	-137.003	590.624	723.498
4994	0	93.6298	637.193	1572.37	198.735	634.478	1578.15	76.8178	475.248	1539.26	195.08	469.159	1546.24	156.24	457.655	1417.94	156.527	363.954	1138.01	152.427	622.424	1317.03	161.008	721.806	1118.79	234.662	367.507	1234.88	0.684633	554.528	1376.1	-105.342	528.159	1135.75	-109.135	509.409	1040.37	-128.932	572.94	901.181	-83.1888	592.214	798.233	-143.428	545.853	789.655	-138.876	599.78	724.593
4995	0	91.3301	647.22	1574.02	196.47	644.477	1580.21	74.3126	485.342	1540.97	192.596	479.238	1548.19	154.516	467.551	1419.62	156.137	374.591	1139.42	150.383	632.541	1319	159.038	732.182	1121.24	234.009	378.307	1236.57	-1.30009	563.919	1377.75	-106.091	538.086	1136.89	-109.904	519.257	1041.77	-129.981	582.7	902.486	-84.5616	602.058	799.43	-144.495	555.354	791.075	-140.206	608.592	725.505
4996	0	89.0066	657.244	1575.83	194.194	654.394	1582.27	72.0849	495.354	1542.87	190.32	489.116	1550.38	152.803	477.398	1421.2	155.767	385.051	1140.87	148.329	642.507	1321.16	157.115	742.443	1123.66	233.253	388.987	1238.18	-3.24398	573.331	1379.46	-106.971	548.107	1138.23	-110.556	529.2	1043.21	-131.041	592.466	903.919	-85.7506	611.837	800.671	-145.561	564.992	792.696	-141.738	617.916	726.834
4997	0	86.81	667.195	1577.67	191.912	664.266	1584.2	69.8882	505.288	1544.81	188.023	498.937	1552.59	151.07	487.025	1422.96	155.062	395.46	1142.23	146.376	652.283	1323.49	155.184	752.546	1126.56	232.25	399.389	1239.83	-5.13071	582.691	1381.16	-107.999	558.063	1139.71	-111.487	539.059	1044.68	-132.165	602.443	905.567	-86.9427	621.865	802.1	-146.822	575.006	794.298	-143.017	627.592	728.375
4998	0	84.7472	677.077	1579.39	189.868	674.125	1586.4	67.7342	515.199	1546.73	185.877	508.71	1554.9	149.336	496.553	1424.75	154.072	405.474	1143.82	144.499	661.971	1325.67	153.558	762.636	1129.37	231.23	409.79	1241.5	-6.98965	591.993	1382.9	-109.214	567.993	1141.47	-112.581	549.003	1046.4	-133.346	612.488	907.344	-88.0766	632.05	803.944	-147.888	585.143	796.228	-144.197	637.383	729.932
4999	0	82.761	686.863	1581.07	187.882	683.771	1588.18	65.7243	524.984	1548.75	183.864	518.448	1557.04	147.598	506.014	1426.3	153.043	415.969	1145.17	142.696	671.512	1327.72	151.973	772.54	1131.92	230.086	420.037	1242.99	-8.83748	601.232	1384.68	-110.556	577.784	1143.05	-113.8	558.9	1047.96	-134.468	622.591	909.153	-89.191	642.232	805.713	-148.933	595.493	797.887	-145.178	647.541	731.566
5000	0	80.8898	696.59	1582.6	185.977	693.429	1589.79	63.8109	534.691	1550.5	181.938	528.063	1558.95	145.895	515.419	1427.7	151.651	426.204	1146.33	141.014	681.064	1329.64	150.614	782.426	1134.4	228.59	429.944	1244.3	-10.5933	610.467	1386.25	-111.994	587.538	1144.67	-115.152	568.704	1049.44	-135.778	632.862	910.808	-90.1726	652.698	807.278	-150.221	606.064	799.553	-146.054	658.16	733.029
5001	0	79.0243	706.184	1583.98	184.11	703.015	1591.43	61.9507	544.228	1552.01	180.009	537.571	1560.85	144.218	524.813	1429.07	150.1	436.216	1147.62	139.361	690.542	1331.43	149.272	792.26	1136.53	227.024	439.588	1245.59	-12.3294	619.787	1387.72	-113.58	597.209	1146.04	-116.701	578.555	1050.75	-137.06	643.201	912.32	-91.1317	663.439	808.849	-151.42	616.872	800.852	-146.845	668.852	734.468
5002	0	77.2642	715.706	1585.23	182.297	712.576	1592.93	60.1018	553.685	1553.45	178.235	547.153	1562.45	142.408	534.205	1430.34	148.444	446.159	1148.91	137.825	700.008	1332.98	148.029	801.878	1138.28	225.487	449.115	1246.82	-13.9518	629.21	1388.95	-115.327	606.796	1147.26	-118.469	588.376	1051.99	-138.379	653.592	913.534	-92.2399	674.3	810.601	-152.243	627.937	802.179	-147.28	679.886	735.633
5003	0	75.4962	725.165	1586.39	180.588	722.081	1594.28	58.47	563.179	1554.69	176.527	556.614	1563.77	140.805	543.607	1431.47	147.014	455.932	1149.88	136.399	709.35	1334.3	147.007	811.433	1139.78	223.937	458.459	1248.01	-15.4417	638.692	1389.93	-117.13	616.34	1148.45	-120.334	598.19	1053.05	-139.703	664.117	914.667	-93.2548	685.143	812.036	-153.254	639.03	803.075	-147.816	691.274	736.786
5004	0	73.8852	734.62	1587.35	178.877	731.432	1595.34	56.9564	572.618	1555.69	174.945	565.944	1564.98	139.324	552.942	1432.48	145.637	465.452	1150.89	135.075	718.694	1335.4	146.052	820.897	1141.08	222.407	467.407	1249.24	-16.908	648.126	1390.82	-119.065	625.87	1149.57	-122.173	608.019	1053.87	-141.022	674.813	915.848	-94.2392	696.185	813.269	-154.206	650.487	803.985	-148.238	703.088	737.985
5005	0	72.1952	743.996	1588.27	177.266	740.782	1596.34	55.4026	582.013	1556.62	173.389	575.323	1566.17	137.843	562.346	1433.58	144.353	474.987	1151.91	133.799	727.974	1336.4	145.142	830.261	1142.01	220.901	476.457	1250.42	-18.1739	657.622	1391.64	-120.993	635.435	1150.51	-124.125	617.956	1054.53	-142.473	685.623	916.833	-95.4079	707.177	814.627	-155.396	662.069	804.972	-148.757	714.928	739.214
5006	0	70.6641	753.38	1589.01	175.817	750.191	1597.31	53.8725	591.391	1557.49	171.9	584.705	1567.2	136.405	571.736	1434.49	143.139	484.253	1152.91	132.682	737.208	1337.13	144.382	839.449	1142.56	219.488	485.428	1251.55	-19.5241	667.141	1392.38	-122.763	644.991	1151.36	-126.041	627.87	1055.12	-143.852	696.452	917.758	-96.0176	719.005	816.37	-156.253	673.736	805.569	-149.174	727.122	740.335
5007	0	69.2475	762.687	1589.65	174.343	759.437	1598.02	52.42	600.666	1558.14	170.457	593.981	1567.94	135.03	581.018	1435.2	141.586	493.003	1153.79	131.711	746.395	1337.64	143.737	848.529	1142.97	218.086	494.237	1252.49	-20.6648	676.653	1392.86	-124.545	654.572	1152.11	-127.874	637.893	1055.62	-145.113	707.359	918.541	-97.1369	729.967	817.417	-157.892	685.592	806.314	-149.741	739.57	741.474
5008	0	67.905	771.968	1590.15	172.94	768.665	1598.57	51.0344	609.898	1558.65	169.038	603.227	1568.59	133.748	590.218	1435.87	140.286	501.846	1154.44	130.73	755.503	1338.1	143.299	857.539	1143.27	216.629	502.96	1253.4	-21.7569	686.158	1393.22	-126.295	664.256	1152.71	-129.756	647.979	1056.13	-146.295	718.361	919.073	-97.7115	741.715	818.615	-158.51	697.455	806.709	-150.257	752.17	742.578
5009	0	66.6474	781.288	1590.45	171.713	777.943	1599.07	49.7032	619.168	1559.12	167.563	612.372	1569.14	132.457	599.323	1436.43	138.937	510.497	1155.27	129.988	764.526	1338.38	142.991	866.366	1143.26	215.349	511.616	1254.19	-22.6522	695.706	1393.49	-127.872	673.96	1153.14	-131.549	658.309	1056.42	-147.513	729.434	919.777	-98.6484	753.064	819.608	-159.837	709.324	807.16	-150.74	764.85	743.669
5010	0	65.4819	790.584	1590.73	170.551	787.111	1599.48	48.4525	628.468	1559.45	166.249	621.544	1569.58	131.229	608.366	1436.97	137.543	519.001	1156.07	129.292	773.523	1338.55	142.762	875.165	1143.06	213.911	520.067	1254.81	-23.499	705.195	1393.78	-129.381	683.697	1153.67	-133.279	668.73	1056.83	-148.62	740.621	920.481	-99.4616	764.543	820.557	-160.726	721.149	807.725	-151.611	777.501	744.809
5011	0	64.4227	799.897	1590.91	169.37	796.176	1599.71	47.2365	637.732	1559.65	165.107	630.734	1570.03	130.116	617.399	1437.47	136.192	527.422	1156.56	128.691	782.355	1338.63	142.645	883.757	1142.77	212.547	528.462	1255.49	-24.2095	714.73	1393.87	-130.642	693.648	1154.01	-134.787	679.205	1057.13	-149.676	752.117	921.085	-100.521	776.442	821.487	-161.792	733.097	808.15	-152.398	790.124	745.878
5012	0	63.5109	809.118	1591	168.39	805.254	1599.94	45.9933	647.028	1559.77	163.758	639.802	1570.39	128.82	626.345	1437.91	134.81	535.935	1157.05	128.322	791.029	1338.65	142.714	892.278	1142.64	211.126	536.84	1256.04	-24.8971	724.2	1393.8	-131.723	703.691	1154.26	-136.262	689.706	1057.24	-150.606	763.289	921.645	-101.176	787.638	822.117	-162.994	744.952	808.354	-153.392	802.749	747.008
5013	0	62.7178	818.439	1591	167.447	814.281	1600.23	44.727	656.327	1559.98	162.5	648.773	1570.75	127.621	635.201	1438.32	133.202	544.361	1157.7	127.877	799.7	1338.59	142.907	900.709	1142.36	209.623	545.112	1256.62	-25.6564	733.675	1394.05	-132.685	713.923	1154.34	-137.725	700.209	1057.52	-151.496	774.434	922.05	-101.969	799.11	822.712	-163.559	756.819	808.951	-154.544	815.268	748.03
5014	0	61.9046	827.66	1590.93	166.64	823.352	1600.35	43.5428	665.6	1560.11	161.359	657.83	1571	126.51	644.019	1438.61	131.832	552.634	1158.25	127.444	808.418	1338.42	142.933	909.075	1141.89	208.319	553.38	1257.02	-26.342	743.006	1394.01	-133.479	724.194	1154.34	-138.925	710.874	1057.66	-152.274	785.796	922.5	-102.837	810.621	823.141	-164.891	768.922	809.375	-155.394	827.783	748.813
5015	0	61.0988	836.905	1590.89	165.93	832.328	1600.37	42.4949	674.906	1560.24	160.374	666.698	1571.4	125.556	652.864	1438.89	130.543	560.843	1158.56	127.115	816.992	1338.31	142.893	917.389	1141.56	207.047	561.611	1257.35	-26.9862	752.299	1394.15	-134.168	734.56	1154.32	-139.972	721.592	1057.54	-153.024	797.173	922.854	-103.672	822.342	823.532	-165.643	780.703	809.503	-156.477	840.198	749.591
5016	0	60.4375	846.096	1590.8	165.285	841.334	1600.49	41.4803	684.102	1560.45	159.252	675.551	1571.84	124.542	661.591	1439.19	129.366	569.098	1159.07	126.77	825.396	1338.27	142.878	925.571	1141.54	205.742	569.732	1257.88	-27.5351	761.477	1394.05	-134.768	745.149	1154.25	-141.04	732.328	1057.62	-153.764	808.596	923.158	-104.443	834	823.947	-166.836	792.627	809.767	-157.581	852.516	750.349
5017	0	59.8794	855.373	1590.58	164.782	850.343	1600.47	40.4843	693.35	1560.63	158.13	684.695	1572.08	123.488	670.395	1439.35	128.25	577.237	1159.48	126.636	833.71	1338.09	142.879	933.641	1141.25	204.648	577.809	1258.27	-28.2428	770.562	1394	-135.369	755.525	1154.15	-141.906	743.261	1057.5	-154.382	820.035	923.437	-105.102	845.389	824.073	-167.469	804.503	809.82	-158.402	864.616	750.821
5018	0	59.3786	864.721	1590.26	164.27	859.347	1600.28	39.5206	702.594	1560.65	157.15	693.595	1572.19	122.658	679.093	1439.33	127.211	585.182	1159.63	126.181	842.053	1337.86	142.804	941.662	1140.78	203.631	585.953	1258.4	-28.7636	779.604	1393.74	-135.833	766.174	1153.84	-142.839	754.076	1057.07	-154.857	831.547	923.463	-105.601	857.033	824.129	-168.766	816.567	810.043	-159.284	876.819	751.197
5019	0	58.8897	873.893	1589.87	163.755	868.304	1599.95	38.6032	711.79	1560.5	155.987	702.442	1572.13	121.836	687.703	1439.31	126.44	593.117	1159.7	125.811	850.46	1337.61	142.674	949.677	1140.41	202.621	594.056	1258.58	-29.3526	788.444	1393.45	-136.256	776.649	1153.3	-143.434	765.126	1056.63	-155.251	843.136	923.416	-106.128	868.776	824.127	-169.715	828.656	809.888	-159.948	888.992	751.388
5020	0	58.3754	883.029	1589.42	163.158	877.205	1599.55	37.702	721.028	1560.3	155.36	711.371	1572.2	121.002	696.391	1439.28	125.568	601.112	1159.91	125.478	858.916	1337.32	142.61	957.565	1139.91	201.82	602.009	1258.9	-29.6409	797.414	1392.89	-136.535	787.341	1152.69	-144.074	776.143	1056.17	-155.668	854.739	923.294	-106.435	880.421	823.823	-170.56	840.77	809.909	-160.464	901.137	751.254
5021	0	57.8611	892.237	1588.74	162.662	886.218	1599.11	36.9498	730.259	1559.86	154.451	720.383	1571.95	120.353	705.137	1439.25	124.983	608.984	1160.06	125.08	867.113	1336.6	142.499	965.489	1139.04	200.94	610.11	1259.13	-30.1766	806.182	1392.35	-136.939	797.891	1151.92	-144.61	787.258	1055.73	-155.851	866.348	922.978	-106.798	891.997	823.395	-170.853	852.878	809.57	-160.811	913.297	751.131
5022	0	57.4802	901.451	1587.95	162.155	895.201	1598.46	36.4317	739.267	1559.34	153.895	729.367	1571.71	119.734	713.755	1439.03	124.336	617.008	1160.12	124.902	875.715	1336.04	142.374	973.478	1138.29	200.335	618.272	1259.23	-30.5664	814.884	1391.79	-137.084	808.548	1151.18	-144.934	798.374	1054.84	-156.047	877.985	922.693	-106.729	903.649	822.91	-171.306	865.013	809.284	-160.821	925.526	750.763
5023	0	56.9149	910.455	1587.17	161.623	904.319	1597.86	35.8368	748.295	1558.9	153.336	738.267	1571.36	119.232	722.599	1438.81	124.027	624.822	1160.09	124.511	884.024	1335.4	142.284	981.524	1137.41	199.724	626.305	1259.28	-31.0304	823.661	1391.33	-137.412	819.112	1150.41	-145.388	809.346	1054.25	-156.105	889.632	922.457	-106.736	915.181	822.369	-171.794	877.16	809.025	-161.041	937.564	750.6
5024	0	56.3039	919.555	1586.31	161.024	913.512	1597.23	35.1978	757.33	1558.37	152.771	747.355	1571.07	118.67	731.322	1438.59	123.382	632.837	1160.2	124.2	892.546	1334.71	142.169	989.778	1136.48	199.235	634.585	1259.4	-31.3482	832.39	1390.63	-137.705	829.603	1149.73	-145.737	820.444	1053.54	-156.058	901.267	922.147	-106.716	927.013	822.238	-172.153	889.585	808.734	-160.825	949.657	750.343
5025	0	55.6591	928.465	1585.34	160.415	922.573	1596.54	34.8764	766.261	1557.68	152.251	756.497	1570.68	118.306	740.09	1438.19	123.085	640.812	1160.09	124.031	900.956	1333.93	142.042	998.006	1135.64	198.799	642.756	1259.34	-31.5594	841.358	1389.95	-137.916	840.216	1148.98	-145.934	831.499	1052.79	-155.952	912.836	921.869	-106.571	938.617	821.824	-172.365	901.684	808.44	-160.836	961.657	750.071
5026	0	55.1405	937.527	1584.39	159.759	931.656	1595.69	34.6006	775.133	1557.06	152.005	765.421	1570.39	118.039	748.91	1437.72	122.837	648.987	1159.8	123.94	909.48	1333.19	141.889	1006.27	1134.6	198.452	651.078	1259.07	-31.7144	850.097	1389.19	-138.119	850.527	1148.32	-145.895	842.456	1051.89	-155.637	924.36	921.508	-106.21	950.231	821.598	-172.031	913.703	807.691	-160.525	973.778	749.888
5027	0	54.6946	946.618	1583.3	159.284	940.781	1594.77	34.2257	784.103	1556.51	151.728	774.371	1570.03	117.813	757.682	1437.22	122.717	657.081	1159.57	123.72	917.999	1332.27	141.875	1014.48	1133.66	198.157	659.407	1258.85	-31.8384	858.922	1388.56	-138.182	861.018	1147.63	-146.138	853.287	1051.09	-155.266	935.966	921.184	-105.741	961.636	821.229	-171.777	925.839	807.432	-159.965	986.147	749.716
5028	0	54.2933	955.613	1582.17	158.881	949.913	1593.85	34.0465	793.01	1555.81	151.377	783.488	1569.58	117.681	766.622	1436.68	122.44	665.347	1159.4	123.825	926.353	1331.16	141.834	1022.64	1132.32	198.001	667.869	1258.55	-31.9117	867.649	1387.77	-138.268	871.231	1146.94	-146.084	864.206	1050.4	-154.677	947.515	920.688	-105	973.404	820.858	-171.588	938.021	807.031	-159.188	998.269	749.495
5029	0	53.9921	964.655	1581.04	158.664	959.147	1592.93	33.79	802.013	1555.13	151.239	792.526	1569.05	117.529	775.422	1436.1	122.46	673.329	1158.96	123.697	934.867	1330.15	141.77	1030.94	1131.26	197.911	676.395	1258.11	-32.0462	876.315	1386.87	-138.119	881.502	1146.14	-145.855	875.041	1049.38	-154.11	958.942	920.398	-104.185	985.03	820.408	-171.43	950.275	806.857	-158.283	1010.56	749.176
5030	0	53.8071	973.679	1579.97	158.395	968.186	1591.84	33.685	811.01	1554.41	150.964	801.707	1568.33	117.477	784.237	1435.36	122.273	681.743	1158.3	123.538	943.524	1329.23	141.621	1039.3	1130.04	197.815	684.851	1257.5	-32.1712	884.958	1386.02	-138.18	891.624	1145.33	-146.204	885.584	1048.57	-153.491	970.389	919.933	-103.423	996.559	820.17	-170.889	962.513	806.082	-156.998	1022.87	748.998
5031	0	53.7568	982.846	1578.88	158.29	977.225	1590.86	33.6139	820.069	1553.58	150.925	810.725	1567.56	117.407	793.186	1434.56	122.239	690.155	1157.77	123.432	952.121	1328.1	141.533	1047.52	1128.84	197.816	693.506	1256.91	-32.0744	893.627	1384.86	-138.028	901.689	1144.44	-146.119	896.31	1047.5	-152.896	981.892	919.549	-102.41	1008.11	819.73	-170.39	974.761	805.693	-156.105	1035.19	748.76
5032	0	53.8147	991.889	1577.76	158.409	986.58	1589.69	33.703	829.204	1552.7	151.068	819.801	1566.73	117.555	801.992	1433.79	122.24	698.562	1157.24	123.415	960.751	1326.93	141.437	1055.8	1127.57	197.969	702.04	1256.25	-31.994	902.387	1383.74	-137.853	911.552	1143.57	-145.951	906.872	1046.6	-152.183	993.39	919.049	-101.532	1019.64	819.408	-169.36	987.039	805.123	-154.569	1047.67	748.521
5033	0	53.9067	1001.06	1576.68	158.526	995.609	1588.57	34.0446	838.214	1551.68	151.337	829.042	1565.63	117.653	810.896	1432.84	122.428	707.095	1156.44	123.534	969.61	1325.87	141.277	1064.2	1126.13	198.02	710.802	1255.48	-31.9932	911.163	1382.86	-137.708	921.278	1142.68	-145.805	917.373	1045.48	-151.4	1004.79	918.66	-100.262	1031.28	819.15	-168.999	999.254	804.861	-153.291	1060.13	748.396
5034	0	54.146	1010.24	1575.54	158.654	1004.8	1587.28	34.226	847.384	1550.48	151.748	838.14	1564.43	117.868	819.906	1431.84	122.612	715.703	1155.58	123.575	978.637	1324.65	141.181	1072.66	1124.98	198.202	719.548	1254.62	-31.9747	919.899	1381.68	-137.452	930.944	1141.77	-145.681	927.958	1044.49	-150.48	1016.25	918.191	-99.3251	1042	818.788	-167.893	1011.48	804.153	-151.545	1072.64	748.273
5035	0	54.2699	1019.24	1574.39	158.993	1014.07	1586.07	34.718	856.444	1549.42	152.065	847.462	1563.22	118.02	829.04	1430.88	122.83	724.275	1154.81	123.634	987.523	1323.49	141.039	1081.33	1123.43	198.448	728.558	1253.76	-31.8281	928.844	1380.64	-137.224	940.437	1140.74	-145.703	938.551	1043.55	-149.615	1027.61	917.768	-97.8647	1053.73	818.413	-167.209	1023.8	803.758	-150.202	1085.2	748.272
5036	0	54.7062	1028.47	1573.13	159.181	1023.36	1584.69	35.1578	865.506	1548.31	152.758	856.66	1561.89	118.289	838.2	1429.76	123.021	732.955	1153.94	123.681	996.552	1321.98	140.982	1090.07	1121.92	198.822	737.604	1252.78	-31.5649	937.948	1379.4	-137.112	949.843	1139.6	-145.662	948.827	1042.38	-148.693	1038.98	917.094	-96.5405	1065.38	817.96	-166.115	1035.97	803.029	-148.188	1097.59	747.985
5037	0	54.9253	1037.47	1571.8	159.546	1032.75	1583.21	35.9138	874.529	1546.89	153.344	865.988	1560.47	118.654	847.47	1428.62	123.382	741.736	1152.89	124.003	1005.84	1320.72	140.853	1098.89	1120.48	198.993	746.594	1251.62	-31.4228	947.021	1378.4	-136.869	959.187	1138.43	-145.407	959.151	1041.3	-147.718	1050.13	916.496	-95.3595	1077.22	817.926	-164.721	1048.14	802.441	-146.599	1110.12	747.896
5038	0	55.3616	1046.67	1570.64	159.878	1041.98	1581.88	36.6191	883.646	1545.72	154.308	875.22	1559.18	119.042	856.756	1427.55	123.666	750.672	1151.95	124.042	1015.01	1319.39	140.732	1107.86	1118.96	199.395	755.767	1250.62	-30.9398	956.315	1377.13	-136.65	968.545	1137.43	-145.197	969.589	1040.17	-146.778	1061.29	916.029	-93.9726	1088.53	817.726	-163.863	1060.29	801.933	-144.941	1122.39	747.989
5039	0	55.8432	1055.72	1569.38	160.47	1051.44	1580.58	37.3608	892.764	1544.55	155.11	884.621	1557.82	119.55	866.09	1426.5	124.027	759.633	1151.05	124.36	1024.23	1318.16	140.742	1117.09	1117.58	199.779	765.034	1249.51	-30.5868	965.505	1376.2	-136.434	977.818	1136.52	-145.116	979.675	1039.26	-145.88	1072.37	915.573	-92.9042	1100.1	817.967	-162.592	1072.16	801.489	-143.084	1134.7	747.996
5040	0	56.4872	1064.93	1568.27	161.171	1060.64	1579.25	38.325	901.888	1543.41	156.061	893.877	1556.48	120.209	875.498	1425.25	124.312	768.606	1150.02	124.693	1033.65	1316.83	140.628	1126.3	1116.19	200.228	774.462	1248.32	-30.0907	974.74	1375.19	-136.304	987.055	1135.59	-144.707	989.823	1038.25	-144.871	1083.26	915.051	-91.2453	1111.05	817.481	-160.996	1083.96	800.683	-141.278	1146.81	748.018
5041	0	57.2561	1074.05	1567.23	161.99	1070.05	1577.81	39.2094	911.137	1542.23	156.932	903.197	1554.91	120.871	884.841	1424.02	124.683	777.831	1148.73	124.976	1042.96	1315.69	140.571	1135.62	1114.74	200.742	783.788	1246.95	-29.5175	983.975	1374.12	-135.948	996.466	1134.62	-144.444	999.925	1037.18	-143.993	1094.18	914.545	-89.9646	1122.28	817.435	-159.839	1095.62	800.291	-139.319	1158.79	747.989
5042	0	58.2716	1083.33	1566.13	162.967	1079.18	1576.58	40.2587	920.228	1541.03	157.882	912.54	1553.51	121.584	894.168	1422.78	125.185	787.156	1147.48	125.461	1052.43	1314.33	140.53	1145.05	1113.45	201.284	793.368	1245.52	-28.8288	993.358	1373.2	-135.69	1005.83	1133.76	-144.073	1009.75	1036.28	-143.015	1104.94	914.017	-88.6022	1133.44	817.274	-158.696	1107.17	799.721	-137.902	1170.69	748.19
5043	0	59.3778	1092.53	1565.15	164.16	1088.59	1575.25	41.3398	929.556	1539.97	158.969	921.843	1552.03	122.463	903.538	1421.53	125.605	796.631	1146.14	125.827	1061.82	1313.12	140.283	1154.4	1112.03	201.9	802.963	1244	-28.2219	1002.49	1372.17	-135.196	1015.36	1132.93	-143.397	1019.83	1035.33	-141.709	1115.52	913.596	-87.2967	1144.69	817.298	-157.352	1118.43	799.372	-136.203	1182.35	748.169
5044	0	60.8532	1101.75	1563.9	165.483	1097.74	1573.92	42.5319	938.794	1538.93	160.38	931.161	1550.65	123.505	912.892	1420.2	126.383	806.305	1144.65	126.412	1071.34	1311.85	140.282	1163.94	1110.82	202.675	812.666	1242.36	-27.4845	1011.65	1371.31	-134.827	1024.88	1132.29	-143.083	1029.39	1034.61	-141.038	1126.08	913.12	-85.9314	1155.74	817.285	-156.022	1129.76	798.918	-134.443	1193.85	748.309
5045	0	62.1087	1111.02	1563.1	166.844	1106.92	1572.49	44.0337	948.042	1537.85	161.988	940.332	1549.31	124.529	922.211	1418.79	126.959	816.097	1143.17	126.883	1080.83	1310.74	140.094	1173.45	1109.7	203.493	822.438	1240.59	-26.6581	1020.89	1370.66	-134.201	1034.48	1131.72	-142.518	1039.05	1033.85	-140.165	1136.29	912.95	-84.6807	1166.69	817.517	-154.562	1140.64	798.62	-132.817	1205.28	748.518
5046	0	63.6046	1120.23	1562.13	168.465	1116.29	1571.19	45.5445	957.303	1537.02	163.34	949.594	1547.86	125.647	931.54	1417.44	127.627	825.922	1141.7	127.449	1090.41	1309.68	139.9	1183.12	1108.71	204.22	832.224	1238.95	-25.8321	1030.07	1369.86	-133.703	1044.07	1131.23	-142.059	1048.48	1033.27	-139.503	1146.49	912.79	-83.5671	1177.44	817.789	-153.182	1151.44	798.51	-131.643	1216.43	748.88
5047	0	65.2552	1129.41	1561.2	170.128	1125.6	1570.05	47.1389	966.523	1536.04	165.038	958.962	1546.46	126.694	940.877	1416	128.174	835.963	1139.95	128.215	1100.04	1308.64	139.819	1192.87	1107.85	205.023	842.153	1236.9	-24.9301	1039.33	1369.3	-133.046	1053.68	1130.73	-141.372	1057.91	1032.72	-138.709	1156.36	912.522	-82.4832	1188.03	818.02	-152.085	1162.05	798.223	-130.284	1227.41	749.218
5048	0	66.9588	1138.44	1560.24	171.751	1134.76	1568.61	49.1345	975.522	1534.97	166.959	968.149	1545.07	128.125	950.192	1414.48	128.736	846.165	1137.97	128.757	1109.62	1307.64	139.704	1202.98	1106.97	205.915	852.176	1234.85	-23.8538	1048.67	1368.59	-132.442	1063.31	1130.42	-141.055	1066.89	1032.12	-137.963	1166.34	912.439	-81.5638	1198.53	818.413	-151.043	1172.39	798.112	-129.165	1238.12	749.493
5049	0	68.6112	1147.44	1559.41	173.499	1144.11	1567.32	51.1181	984.522	1534.01	169.11	977.358	1543.72	129.488	959.456	1412.95	129.366	856.708	1136.03	129.838	1119.48	1306.79	139.569	1213.11	1106.43	206.799	862.273	1232.63	-22.8019	1057.94	1368.13	-131.787	1072.93	1130.19	-140.31	1076.3	1031.8	-137.444	1175.79	912.366	-80.6859	1208.92	818.815	-149.799	1182.34	798.017	-128.22	1248.63	749.982
5050	0	70.4273	1156.48	1558.57	175.43	1153.35	1566.15	53.3075	993.47	1533.17	171.428	986.657	1542.4	131.041	968.762	1411.39	129.843	867.353	1134.03	130.638	1129.33	1305.92	139.536	1223.49	1105.72	207.773	872.425	1230.35	-21.4614	1067.43	1367.74	-131.117	1082.51	1130	-139.989	1085.18	1031.43	-136.697	1185.4	912.241	-80.1613	1219.31	819.311	-148.972	1192.29	797.895	-127.313	1258.85	750.308
5051	0	72.3265	1165.35	1557.93	177.284	1162.56	1565.01	55.6518	1002.38	1532.28	173.907	995.904	1540.96	132.785	978.062	1409.86	130.428	878.616	1131.82	131.678	1139.05	1304.93	139.725	1234	1105.11	208.801	882.698	1227.99	-20.1407	1076.65	1367.33	-130.584	1092.07	1129.92	-139.351	1094.41	1031.1	-136.325	1194.7	912.067	-79.5675	1229.36	819.562	-148.118	1201.79	797.745	-126.624	1268.85	750.483
5052	0	74.2032	1174.21	1557.56	179.259	1171.75	1564.14	57.951	1011.27	1531.43	175.945	1005.42	1539.52	134.557	987.385	1408.38	130.944	889.887	1129.71	132.981	1149.26	1304.45	139.818	1244.37	1104.84	209.926	892.945	1225.59	-18.6703	1086.01	1367	-129.955	1101.7	1129.84	-138.789	1103.56	1030.94	-135.914	1203.91	911.862	-78.9455	1238.9	819.412	-147.353	1211.12	797.47	-126.12	1278.58	750.626
5053	0	76.2162	1183.07	1557.65	181.324	1180.93	1563.9	60.3255	1020.18	1530.79	178.633	1014.57	1538.6	136.377	996.833	1407.27	131.674	901.286	1128.06	134.138	1159.26	1304.12	139.852	1255.33	1104.64	210.983	903.288	1223.6	-17.1749	1095.46	1366.82	-129.34	1111.28	1129.92	-137.971	1112.76	1031.02	-135.696	1213	911.758	-78.526	1247.95	819.212	-146.645	1220.18	796.927	-125.997	1287.91	750.798
5054	0	78.2173	1191.94	1557.93	183.441	1190.2	1563.81	62.8267	1029.15	1530.41	181.046	1023.91	1537.61	138.253	1006.53	1406.43	132.171	912.156	1126.87	135.408	1169.41	1303.97	140.082	1266.09	1104.62	212.018	913.77	1221.92	-15.6726	1105.07	1366.95	-128.647	1120.82	1130.22	-137.478	1121.99	1031.21	-135.148	1221.94	911.541	-78.2692	1257.27	819.378	-145.704	1228.74	796.654	-125.846	1296.87	750.967
5055	0	80.4691	1200.89	1558.44	185.582	1199.28	1563.9	65.3786	1038.05	1530.22	183.922	1033.11	1536.99	140.15	1016.42	1405.92	132.709	922.69	1126.1	136.784	1179.63	1304.14	140.174	1277.11	1105.14	213.006	924.188	1220.64	-14.0724	1114.89	1367.35	-127.879	1130.18	1130.86	-136.91	1131.07	1031.67	-134.891	1230.55	911.674	-78.0853	1265.99	819.552	-145.293	1236.89	796.801	-125.924	1305.31	751.06
5056	0	82.7693	1209.85	1559.41	188.055	1208.54	1564.47	68.1013	1047.17	1530.27	186.549	1042.45	1536.53	141.983	1026.41	1405.9	133.301	932.885	1125.72	138.219	1189.88	1304.62	140.655	1288.23	1105.68	213.654	934.662	1219.91	-12.5163	1125.05	1368.12	-126.976	1139.5	1131.71	-136.116	1140.28	1032.56	-134.373	1239.15	912.149	-78.0655	1274.16	819.883	-145.151	1244.64	797.239	-126.232	1313.28	751.461
5057	0	85.2589	1218.9	1560.86	190.489	1217.68	1565.41	70.5917	1056.37	1530.73	188.7	1051.92	1536.34	143.611	1036.51	1406.26	133.3	942.503	1126.04	139.731	1200.2	1305.39	141.087	1299.38	1106.56	214.115	944.958	1219.67	-10.966	1135.52	1369.41	-126.114	1148.73	1132.96	-135.572	1149.49	1033.94	-134.14	1247.45	912.708	-78.4527	1282.19	820.505	-145.096	1252.07	797.859	-126.662	1320.78	751.977
5058	0	87.8123	1228.03	1562.3	193.167	1226.79	1566.42	73.1307	1065.64	1531.44	191.344	1061.18	1536.49	145.047	1046.57	1406.89	132.887	952.48	1126.7	141.352	1210.55	1306.37	141.572	1310.44	1107.65	214.279	955.213	1219.85	-9.3065	1146.26	1370.98	-125.101	1157.88	1134.53	-134.623	1158.53	1035.61	-133.754	1255.38	913.675	-78.0863	1289.47	820.837	-145.385	1258.95	798.858	-127.19	1327.76	752.679
5059	0	90.5349	1237.4	1564.08	195.817	1235.95	1567.41	75.6045	1075.03	1532.47	194.092	1070.6	1536.8	146.441	1056.57	1407.81	132.476	963.092	1127.59	142.828	1220.72	1307.48	142.324	1321.38	1108.85	214.123	965.35	1220.18	-7.70917	1157.1	1372.95	-124.146	1167.08	1136.6	-134.003	1167.55	1037.84	-133.427	1263.19	914.949	-78.3313	1296.69	821.801	-145.415	1265.65	800.197	-127.768	1334.19	753.479
5060	0	93.2938	1246.73	1566.04	198.745	1245.3	1568.84	77.9975	1084.56	1534.06	196.463	1079.87	1537.55	147.608	1066.4	1409.02	131.559	973.592	1128.74	144.307	1230.84	1308.97	143.092	1332.03	1110.7	213.76	975.443	1220.97	-6.07908	1168.02	1375.23	-123.218	1176.39	1138.94	-133.513	1176.28	1040.49	-133.211	1270.69	916.555	-78.2369	1303.16	822.68	-145.536	1271.86	801.759	-128.277	1340.37	754.611
5061	0	96.1499	1256.22	1568.21	201.488	1254.62	1570.12	80.3585	1094.12	1536.02	198.711	1089.18	1538.67	148.696	1076.06	1410.52	130.617	984.501	1130.06	145.757	1240.78	1310.83	144.079	1342.62	1112.92	213.295	985.483	1221.83	-4.43924	1178.81	1377.92	-122.327	1185.82	1141.87	-132.945	1185.06	1043.61	-132.727	1278.08	918.519	-78.3632	1308.72	823.774	-145.695	1277.9	803.817	-128.916	1345.75	755.893
5062	0	98.9354	1265.69	1570.41	204.255	1263.82	1571.6	82.5788	1103.65	1538.23	201.081	1098.65	1540	149.749	1085.56	1412.07	129.998	995.606	1131.27	146.964	1250.46	1312.58	144.994	1352.91	1115.2	212.832	995.529	1222.71	-2.90056	1189.23	1380.72	-121.53	1195.43	1145.17	-132.489	1193.84	1046.95	-132.567	1285.33	920.67	-78.6058	1315.33	825.472	-145.605	1283.72	805.902	-129.369	1350.92	757.152
5063	0	101.551	1275.25	1572.62	206.734	1272.98	1572.85	84.6389	1113.2	1540.68	202.939	1107.89	1541.55	150.891	1094.96	1413.47	129.416	1006.65	1132.27	148.48	1260.21	1314.81	145.994	1362.88	1117.85	212.358	1005.52	1223.41	-1.27897	1199.5	1383.54	-120.876	1205.06	1148.56	-132.009	1202.51	1050.24	-132.316	1292.51	922.845	-78.4432	1320.73	826.768	-146.18	1289.39	808.422	-129.713	1355.96	758.513
5064	0	104.087	1284.56	1574.69	209.157	1282.23	1574.53	86.6557	1122.58	1543.09	205.056	1117.12	1543.3	152.088	1104.28	1414.96	128.658	1018.06	1133.23	149.593	1269.62	1316.88	146.919	1372.67	1120.42	212.021	1015.46	1224.3	0.25418	1209.49	1386.43	-120.297	1214.87	1152.1	-131.863	1211.11	1053.72	-132.123	1299.58	925.395	-78.4997	1325.77	828.378	-147.018	1295.32	811.147	-129.898	1360.74	759.912
5065	0	106.124	1293.92	1577.03	211.334	1291.58	1576.17	88.5945	1131.84	1545.58	206.916	1126.38	1545.09	153.23	1113.49	1416.41	127.917	1028.89	1134.59	150.809	1278.97	1319.19	147.812	1382.38	1123.17	211.987	1025.38	1225.12	1.61019	1219.12	1389.27	-119.819	1224.68	1155.57	-131.698	1219.56	1057.1	-131.814	1306.69	927.917	-78.6351	1331.06	830.098	-147.302	1301.44	813.663	-129.949	1365.29	761.161
5066	0	107.984	1303.14	1579.14	213.252	1300.8	1577.86	90.4936	1141.07	1547.91	208.973	1135.54	1546.81	154.42	1122.69	1417.8	128.008	1039.16	1135.73	151.913	1288.36	1321.25	148.608	1391.91	1125.72	212.171	1035.28	1225.93	3.08011	1228.74	1391.93	-119.357	1234.55	1158.95	-131.731	1227.93	1060.34	-132.151	1313.61	930.478	-78.8761	1336.39	831.965	-148.154	1307.57	816.338	-129.875	1369.93	762.344
5067	0	109.793	1312.25	1581.17	214.959	1309.91	1579.34	92.2868	1150.13	1549.76	210.633	1144.83	1548.41	155.661	1131.88	1419.18	128.432	1048.8	1136.79	152.598	1297.57	1323.34	149.235	1401.57	1128	212.511	1045.14	1226.77	4.21481	1237.9	1394.24	-118.988	1244.25	1162.17	-131.662	1236.03	1063.34	-132.256	1320.73	932.825	-79.2579	1342.28	834.124	-148.649	1313.92	818.707	-129.304	1374.61	763.196
5068	0	111.381	1321.18	1583.2	216.646	1319.1	1580.88	94.0557	1159.02	1551.71	212.425	1154.02	1549.73	156.8	1141.15	1420.57	128.729	1058.23	1138.4	153.613	1306.94	1325	149.814	1411.14	1130.05	212.987	1054.84	1227.85	5.29261	1247.22	1396.47	-118.685	1253.93	1164.98	-131.843	1243.89	1066.27	-132.413	1327.87	935.028	-79.599	1347.8	835.548	-149.846	1320.51	821.302	-129.091	1379.17	763.841
5069	0	113.005	1330.09	1584.87	218.055	1328.03	1582.32	95.5945	1167.98	1553.12	214.168	1163.07	1550.78	157.846	1150.46	1421.87	129.282	1067.62	1139.77	154.697	1316.11	1326.64	150.258	1420.59	1131.85	213.579	1064.56	1228.86	6.14828	1256.32	1398.43	-118.507	1263.44	1167.29	-132.091	1251.72	1068.71	-132.623	1335.07	936.963	-79.6735	1353.55	836.82	-150.829	1326.99	823.508	-128.916	1384.04	764.33
5070	0	114.333	1338.81	1586.72	219.427	1336.98	1583.6	97.0833	1176.74	1554.46	215.388	1172.07	1551.57	158.817	1159.79	1423.14	130.17	1076.91	1141.16	155.504	1325.42	1328.11	150.432	1429.99	1133.24	214.201	1074.09	1229.94	7.08186	1265.55	1399.98	-118.316	1272.78	1169.25	-132.225	1259.33	1070.84	-132.894	1342.14	938.541	-80.3689	1359.59	838.255	-151.658	1333.46	825.242	-128.993	1388.84	764.851
5071	0	115.667	1347.52	1588.38	220.751	1345.71	1585.02	98.3605	1185.63	1555.53	216.682	1180.93	1552.22	159.733	1169.13	1424.41	131.068	1085.72	1142.63	155.997	1334.56	1329.31	150.519	1439.43	1134.48	214.957	1083.55	1231.08	7.71264	1274.52	1401.48	-118.211	1281.83	1171.01	-132.373	1267.04	1072.62	-133.402	1348.77	940.05	-80.858	1365.44	839.383	-152.573	1339.9	826.793	-129.445	1393.7	765.355
5072	0	116.931	1356.17	1589.93	221.937	1354.44	1586.16	99.5237	1194.39	1556.46	218.093	1189.79	1552.79	160.65	1178.42	1425.63	131.953	1094.47	1144.17	156.523	1343.83	1330.27	150.488	1448.63	1135.36	215.782	1092.95	1232.31	8.46182	1283.73	1402.72	-118.17	1290.61	1172.46	-132.261	1274.93	1074.18	-133.706	1355.62	941.193	-81.6737	1371.51	840.337	-153.575	1346.06	828.186	-130.054	1398.76	765.577
5073	0	118.035	1364.91	1591.27	223.073	1363.18	1587.1	100.592	1203.1	1557.29	219.085	1198.63	1553.18	161.38	1187.64	1426.69	132.727	1103.23	1145.5	156.882	1352.88	1331.07	150.4	1457.71	1135.91	216.646	1102.14	1233.41	8.70939	1292.42	1403.77	-118.108	1299.05	1173.55	-132.607	1282.52	1075.38	-134.238	1362.36	941.99	-82.3929	1377.92	841.027	-154.526	1352.1	829.128	-130.977	1403.95	765.653
5074	0	118.889	1373.58	1592.47	224.001	1371.88	1588.02	101.517	1211.9	1558.1	219.876	1207.41	1553.64	162.146	1196.85	1427.74	133.491	1111.67	1146.71	157.128	1362	1331.88	150.038	1466.58	1136.45	217.375	1111.14	1234.61	9.23555	1301.33	1404.63	-117.986	1306.93	1174.33	-132.602	1290.17	1076.51	-134.616	1369.15	942.56	-83.3758	1384.08	841.526	-155.318	1357.85	829.827	-132.221	1409.24	765.948
5075	0	119.766	1382.33	1593.64	224.823	1380.54	1589.02	102.342	1220.72	1558.85	220.703	1216.14	1554.15	162.773	1205.9	1428.83	134.218	1119.89	1147.99	157.037	1370.92	1332.62	149.62	1475.34	1136.77	218.369	1119.81	1235.97	9.55092	1309.92	1405.46	-117.832	1314.44	1175.03	-132.618	1297.74	1077.49	-135.069	1375.71	943.063	-84.1635	1390.52	841.735	-155.975	1363.42	830.262	-133.769	1414.62	766.384
5076	0	120.438	1390.97	1594.61	225.603	1389.38	1589.82	102.916	1229.42	1559.63	221.404	1224.93	1554.63	163.371	1214.79	1429.8	135.063	1128.11	1149.23	157.406	1379.81	1333.22	148.976	1483.89	1136.71	219.255	1128.62	1237.23	9.74769	1318.41	1406.24	-117.592	1321.45	1175.47	-132.294	1305.34	1078.16	-135.649	1381.98	943.44	-85.5329	1395.64	841.627	-156.899	1368.85	830.823	-135.354	1420.13	766.604
5077	0	120.897	1399.66	1595.4	226.058	1398.12	1590.37	103.486	1238.2	1560.16	221.889	1233.86	1555.08	164.033	1223.69	1430.75	135.884	1135.93	1150.4	157.281	1388.54	1333.66	148.44	1492.34	1136.68	220.207	1137.2	1238.31	10.0632	1326.83	1406.77	-117.175	1328.19	1175.79	-132.177	1312.54	1078.91	-136.279	1388.37	943.696	-86.3507	1401.61	841.413	-157.905	1374.44	831.273	-137.023	1425.8	766.882
5078	0	121.397	1408.5	1596.02	226.452	1407.01	1590.87	104.086	1247	1560.84	222.577	1242.6	1555.66	164.634	1232.44	1431.73	136.984	1143.78	1151.5	157.071	1397.08	1334.17	147.672	1500.39	1136.82	221.249	1145.71	1239.62	10.3168	1334.93	1407.29	-116.753	1334.57	1176.16	-131.85	1319.62	1079.66	-136.663	1394.71	943.912	-87.4495	1407.61	841.376	-158.869	1379.77	831.681	-138.86	1431.61	767.458
5079	0	121.697	1417.28	1596.64	226.763	1415.8	1591.47	104.563	1255.67	1561.52	222.975	1251.46	1556.38	165.17	1241.01	1432.7	137.9	1151.66	1152.58	156.764	1405.58	1334.65	147.073	1508.36	1136.9	222.182	1154.06	1240.88	10.4504	1342.92	1407.92	-116.293	1340.78	1176.58	-131.279	1326.59	1080.38	-137.17	1400.76	944.254	-89.1398	1413.87	841.737	-159.72	1385.25	832.219	-140.755	1437.4	768.115
5080	0	121.709	1425.86	1597.26	226.91	1424.65	1591.97	104.796	1264.38	1562.27	223.276	1260.28	1556.96	165.59	1249.51	1433.5	138.715	1159.32	1153.67	156.608	1414	1335.06	146.425	1516.34	1137	223.209	1162.42	1241.91	10.4757	1350.75	1408.53	-115.974	1346.75	1177.14	-131.059	1333.2	1081.02	-137.067	1406.97	944.528	-90.0015	1419.86	841.968	-160.699	1390.73	832.881	-142.557	1443.33	768.87
5081	0	122.067	1434.74	1597.65	227.143	1433.52	1592.41	104.99	1273.02	1562.93	223.545	1269.02	1557.54	166.131	1257.97	1434.2	139.71	1167.3	1154.49	156.454	1422.14	1335.53	145.802	1524.21	1137.27	224.085	1170.72	1242.79	10.4195	1358.38	1409.11	-115.817	1352.69	1177.73	-130.633	1339.63	1081.61	-137.592	1412.8	945.1	-90.5542	1424.77	841.628	-161.639	1396.21	833.451	-144.28	1449.27	769.723
5082	0	122.162	1443.45	1598.17	227.02	1442.16	1592.83	105.22	1281.75	1563.55	223.478	1277.75	1558.14	166.502	1266.28	1434.93	140.643	1174.98	1155.32	155.924	1430.16	1335.96	145.255	1532.19	1137.81	224.788	1178.96	1243.66	10.3993	1365.98	1409.66	-115.785	1358.64	1178.26	-130.338	1345.9	1082.24	-137.987	1418.82	945.596	-91.3625	1430.97	841.94	-162.124	1401.67	834.032	-146.061	1455.16	770.71
5083	0	121.956	1452	1598.51	227.164	1451.04	1593.19	105.224	1290.38	1564.24	223.525	1286.43	1558.81	166.875	1274.55	1435.66	141.255	1182.67	1156.23	155.712	1438.21	1336.45	144.746	1540.16	1138.36	225.512	1187.19	1244.57	10.3224	1373.54	1410.23	-115.933	1364.6	1178.82	-130.131	1352	1082.91	-138.82	1424.71	946.199	-92.3983	1436.64	842.122	-163.107	1407.33	834.884	-147.634	1461.2	771.593
5084	0	122.181	1460.92	1598.73	227.149	1459.65	1593.46	105.311	1298.92	1564.84	223.777	1295.03	1559.38	167.159	1282.74	1436.15	141.842	1190.45	1157.03	155.409	1446.19	1336.72	144.37	1548.13	1138.83	226.128	1195.28	1245.26	10.1831	1381.13	1410.75	-116.106	1370.63	1179.31	-129.913	1358.09	1083.41	-139.294	1430.68	946.619	-93.1359	1442.8	842.362	-163.808	1412.84	835.532	-149.065	1467.05	772.279
5085	0	121.925	1469.31	1599.07	227.059	1468.24	1593.59	105.33	1307.46	1565.32	223.693	1303.6	1559.81	167.427	1290.99	1436.63	142.254	1198	1157.51	155.037	1454.1	1336.97	143.958	1556.11	1139.3	226.562	1203.31	1245.82	10.022	1388.76	1411.11	-116.347	1376.58	1179.76	-129.746	1364.14	1083.78	-139.863	1436.62	946.931	-93.7404	1448.59	842.416	-164.213	1418.49	835.88	-150.53	1472.83	772.803
5086	0	121.833	1477.83	1599.27	227.084	1476.89	1593.81	105.154	1316.01	1565.77	223.472	1312.12	1560.26	167.449	1299.07	1437.06	142.477	1205.67	1158.12	154.744	1462	1337.04	143.61	1563.87	1139.68	226.735	1211.2	1246.36	9.75721	1396.42	1411.47	-116.596	1382.83	1180.23	-129.949	1370.02	1084.19	-140.269	1442.47	947.207	-94.3185	1454.92	842.738	-164.708	1424.02	836.323	-151.621	1478.74	773.265
5087	0	121.934	1486.53	1599.29	226.874	1485.34	1593.98	104.959	1324.47	1566.2	223.171	1320.53	1560.61	167.561	1307.28	1437.48	142.603	1213.42	1158.68	154.409	1469.94	1337.07	143.36	1571.59	1139.7	227.013	1219.14	1246.93	9.46516	1404.11	1411.73	-116.872	1388.92	1180.47	-129.979	1376.18	1084.54	-141.064	1448.58	947.408	-94.8899	1460.95	842.747	-165.202	1429.77	836.661	-152.425	1484.75	773.661
5088	0	121.831	1495.04	1599.43	226.685	1493.75	1594.07	104.772	1332.86	1566.54	223.083	1328.95	1560.93	167.565	1315.48	1437.79	142.705	1221.01	1159.14	154.094	1477.91	1337.09	143.103	1579.27	1139.65	227.148	1227.03	1247.38	9.32012	1411.94	1411.82	-117.114	1395.29	1180.67	-130.077	1382.4	1084.67	-141.834	1454.33	947.582	-95.5494	1467.14	842.826	-165.506	1435.53	836.774	-153.002	1490.57	773.863
5089	0	121.356	1503.22	1599.59	226.548	1502.14	1594.1	104.54	1341.38	1566.66	222.946	1337.19	1561.12	167.53	1323.72	1437.99	142.791	1228.64	1159.51	153.805	1485.87	1337.09	142.826	1586.79	1139.62	227.285	1234.9	1247.79	9.03767	1419.77	1411.8	-117.382	1401.7	1180.84	-130.307	1388.71	1084.78	-142.32	1460.55	947.461	-95.943	1473.25	842.888	-165.619	1441.49	836.629	-153.594	1496.38	773.907
5090	0	121.27	1511.8	1599.58	226.307	1510.5	1594.12	104.193	1349.75	1566.74	222.367	1345.6	1561.22	167.18	1331.98	1438.15	142.824	1236.34	1159.97	153.644	1493.87	1337.02	142.685	1594.37	1139.27	227.298	1242.81	1248.22	8.7098	1427.79	1411.73	-117.684	1408.36	1180.97	-130.681	1395.2	1084.96	-143.024	1466.56	947.395	-96.7721	1479.4	842.984	-165.63	1447.22	836.41	-154.112	1502.37	773.76
5091	0	121.065	1520.16	1599.28	225.961	1518.83	1594.03	103.649	1358.14	1566.66	222.067	1354.01	1561.24	166.89	1340.29	1438.23	142.81	1243.95	1160.34	153.532	1501.73	1336.75	142.644	1601.88	1138.69	227.279	1250.61	1248.62	8.45869	1435.85	1411.58	-118.036	1415.06	1180.96	-131.147	1401.87	1085.04	-143.529	1472.74	947.29	-96.9076	1485.83	842.922	-165.688	1453.26	836.164	-154.058	1508.26	773.457
5092	0	120.735	1528.55	1598.97	225.625	1527.15	1593.86	103.216	1366.61	1566.43	221.556	1362.23	1561.06	166.743	1348.57	1438.22	142.745	1251.53	1160.54	153.227	1509.73	1336.36	142.484	1609.36	1138.07	227.108	1258.44	1248.9	8.28743	1443.99	1411.26	-118.391	1421.97	1180.81	-131.555	1408.63	1084.76	-143.839	1479.2	946.8	-97.0025	1491.8	842.536	-165.971	1459.25	835.744	-154.175	1514.25	773.003
5093	0	120.215	1537.04	1598.72	225.192	1535.46	1593.63	102.722	1375.03	1566.07	220.82	1370.55	1560.89	166.421	1356.69	1438.15	142.805	1259.05	1160.41	153.111	1517.78	1335.89	142.417	1617.07	1137.36	226.868	1266.25	1249.09	7.92498	1452.26	1410.75	-118.744	1429.05	1180.57	-132.057	1415.52	1084.59	-144.128	1485.62	946.297	-97.8431	1498.69	842.566	-165.994	1465.08	835.199	-154.062	1520.15	772.371
5094	0	119.805	1545.74	1598.39	224.816	1543.84	1593.41	102.001	1383.56	1565.76	220.42	1378.99	1560.67	165.788	1365.11	1437.96	142.631	1266.87	1160.53	152.889	1525.82	1335.23	142.351	1624.72	1136.5	226.591	1274.06	1249.13	7.57889	1460.58	1410.28	-119.171	1436.46	1180.15	-132.563	1422.5	1084.32	-144.479	1491.9	945.781	-97.364	1504.76	841.911	-165.893	1471.11	834.512	-153.897	1526.13	771.659
5095	0	119.174	1554.03	1597.8	224.198	1552.19	1592.88	101.427	1392.04	1565.35	219.703	1387.46	1560.32	165.685	1373.35	1437.74	142.407	1274.53	1160.55	152.643	1533.7	1334.32	142.394	1632.27	1135.41	226.399	1281.99	1249.2	7.32093	1469.01	1409.68	-119.705	1444.03	1179.78	-133.101	1429.62	1083.91	-144.369	1498.54	944.899	-97.4135	1511.04	841.308	-165.7	1477.16	833.696	-153.795	1532.2	770.758
5096	0	118.744	1562.67	1596.98	223.691	1560.7	1592.18	100.812	1400.6	1564.75	219.167	1395.92	1559.99	165.093	1381.6	1437.39	142.095	1282.25	1160.32	152.433	1541.72	1333.6	142.484	1640.08	1134.37	226.014	1289.85	1249.08	6.94057	1477.47	1408.83	-120.028	1451.85	1179.07	-133.463	1436.88	1083.33	-144.526	1505.32	944.088	-97.7837	1517.57	840.484	-165.547	1483.22	832.754	-153.632	1538.19	769.782
5097	0	118.23	1571.25	1596.09	223.222	1569.26	1591.52	100.095	1409.26	1564.2	218.281	1404.4	1559.58	164.371	1389.91	1436.95	141.599	1290.15	1159.98	152.222	1549.84	1332.6	142.409	1647.92	1133.25	225.389	1297.66	1248.9	6.54778	1486.02	1408	-120.497	1459.8	1178.39	-133.854	1444.14	1082.55	-144.522	1512.06	942.914	-97.0653	1523.63	839.345	-165.465	1489.37	831.692	-153.336	1544.18	768.485
5098	0	117.639	1579.95	1595.06	222.638	1577.71	1590.7	99.3721	1417.9	1563.45	217.623	1412.81	1559.11	163.804	1398.22	1436.39	141.079	1298	1159.77	152.08	1558.06	1331.7	142.572	1655.88	1132.24	224.767	1305.48	1248.66	5.965	1494.6	1407.12	-120.92	1467.96	1177.43	-134.271	1451.57	1081.83	-144.183	1518.82	941.775	-96.8856	1529.94	838.357	-165.309	1495.66	830.638	-152.502	1549.78	766.978
5099	0	117.033	1588.61	1594.14	222.081	1586.33	1589.84	98.5195	1426.61	1562.67	216.707	1421.24	1558.42	162.902	1406.63	1435.82	140.448	1305.83	1159.28	151.787	1566.19	1330.63	142.635	1663.88	1131.1	224.057	1313.47	1248.3	5.48077	1503.15	1406.22	-121.284	1476.28	1176.52	-134.576	1459.05	1080.76	-144.155	1525.67	940.597	-97.1758	1536.52	837.494	-165.134	1501.86	829.392	-152.501	1555.69	765.691
5100	0	116.362	1597.34	1592.99	221.573	1594.98	1588.85	97.8015	1435.33	1561.84	216.344	1429.61	1557.71	162.095	1414.95	1435.12	139.781	1313.87	1158.57	151.46	1574.32	1329.7	142.719	1671.91	1130.09	223.19	1321.4	1247.76	4.91994	1511.86	1405.16	-121.648	1484.72	1175.45	-134.822	1466.68	1079.7	-144.359	1532.47	939.155	-96.5244	1542.33	835.961	-164.954	1508.21	828.011	-151.749	1561.69	764.083
5101	0	115.71	1606.13	1591.96	220.732	1603.59	1587.79	96.9058	1444.1	1561.07	215.113	1438.36	1556.98	161.4	1423.42	1434.34	138.978	1321.94	1158.1	150.991	1582.48	1328.51	142.674	1680.03	1128.91	222.357	1329.33	1247.21	4.28198	1520.68	1404.24	-121.961	1493.22	1174.23	-135.121	1474.46	1078.62	-144.406	1539.38	937.835	-96.229	1548.61	834.559	-164.73	1514.63	826.748	-151.317	1567.72	762.509
5102	0	115.038	1615	1590.64	220.146	1612.24	1586.77	95.9099	1452.88	1560.22	214.359	1446.89	1556.31	160.366	1431.87	1433.57	138.06	1330.09	1157.49	150.715	1590.84	1327.42	142.735	1688.26	1127.65	221.336	1337.37	1246.68	3.60706	1529.47	1402.98	-122.196	1501.8	1172.99	-135.4	1482.21	1077.51	-144.257	1546.5	936.328	-95.8709	1555.11	833.076	-164.19	1521.1	825.23	-150.802	1573.77	760.765
5103	0	114.399	1624.01	1589.53	219.426	1621	1585.55	94.8655	1461.83	1559.14	213.325	1455.45	1555.36	159.37	1440.46	1432.61	137.038	1338.24	1156.55	150.148	1599.2	1326.06	142.669	1696.37	1126.34	220.293	1345.42	1245.93	2.83825	1538.46	1401.7	-122.472	1510.46	1171.4	-135.629	1490.18	1076.1	-143.819	1553.66	934.376	-95.3638	1561.52	831.186	-163.988	1527.71	823.601	-150.261	1579.92	758.671
5104	0	113.691	1632.88	1588.09	218.547	1629.55	1584.39	93.8179	1470.7	1558.16	212.061	1464.1	1554.38	158.19	1449.07	1431.63	136.1	1346.57	1155.68	149.556	1607.63	1324.86	142.544	1704.7	1124.93	219.214	1353.68	1245.1	2.10956	1547.41	1400.28	-122.821	1519.17	1169.7	-135.818	1498.18	1074.48	-143.932	1560.98	932.411	-94.9835	1568.05	829.252	-163.955	1534.59	821.838	-149.527	1586.06	756.456
5105	0	112.868	1641.94	1586.83	217.666	1638.33	1583.16	92.5303	1479.65	1557.13	210.753	1472.85	1553.49	157.126	1457.71	1430.62	135.002	1355.04	1154.71	149.119	1616.23	1323.63	142.581	1713.08	1123.55	218.098	1361.88	1244.23	1.21862	1556.39	1398.79	-123.118	1527.92	1167.98	-136.119	1506.42	1072.89	-143.759	1568.29	930.521	-94.577	1574.78	827.323	-163.471	1541.53	819.987	-148.77	1592.45	754.266
5106	0	111.847	1650.84	1585.57	216.757	1647.03	1581.99	91.1745	1488.67	1555.92	209.557	1481.52	1552.43	155.97	1466.5	1429.49	134.06	1363.46	1153.7	148.296	1624.78	1322.17	142.31	1721.32	1122.11	216.95	1370.14	1243.35	0.308735	1565.34	1397.32	-123.665	1536.69	1166.44	-136.498	1514.65	1071.39	-143.425	1575.86	928.698	-94.22	1581.76	825.519	-163.402	1548.67	818.345	-148.035	1598.88	752.049
5107	0	110.866	1659.82	1584.2	215.647	1655.72	1580.9	89.801	1497.78	1554.67	208.189	1490.21	1551.45	154.688	1475.3	1428.35	132.974	1372.04	1152.59	147.578	1633.4	1321.06	142.109	1729.8	1120.75	215.786	1378.53	1242.44	-0.651889	1574.33	1395.94	-124.213	1545.56	1164.84	-136.789	1522.94	1069.65	-143.296	1583.47	926.786	-93.6402	1588.58	823.534	-163.139	1555.95	816.448	-147.366	1605.37	749.855
5108	0	109.555	1668.91	1583.08	214.538	1664.6	1579.8	88.3489	1506.77	1553.43	206.694	1499.1	1550.46	153.468	1484.1	1427.26	131.926	1380.64	1151.47	146.881	1642.2	1319.9	142.079	1738.53	1119.66	214.66	1386.95	1241.55	-1.64161	1583.5	1394.49	-124.89	1554.35	1163.24	-137.088	1531.38	1067.81	-143.395	1591.41	924.924	-93.1699	1595.72	821.876	-162.8	1563.4	814.571	-146.513	1612.12	747.697
5109	0	108.375	1677.99	1581.66	213.425	1673.47	1578.87	86.7723	1515.98	1552.13	205.031	1507.93	1549.36	152.328	1492.95	1426.07	130.792	1389.38	1150.48	146.1	1650.93	1318.55	142.046	1747.33	1118.35	213.381	1395.55	1240.48	-2.6862	1592.57	1393.01	-125.577	1563.31	1161.55	-137.485	1539.9	1066.12	-143.413	1599.29	923.091	-92.8096	1603.18	820.244	-162.472	1571.29	812.785	-145.79	1619.03	745.596
5110	0	106.892	1687.04	1580.32	211.968	1682.31	1577.73	85.1082	1525.06	1550.75	203.315	1516.98	1548.16	151.047	1501.95	1424.9	129.654	1398.16	1149.3	145.473	1659.86	1317.32	141.865	1756.12	1116.97	212.328	1404.22	1239.64	-3.84572	1601.68	1391.44	-126.429	1572.13	1159.81	-138.006	1548.3	1064.42	-143.358	1607.27	921.146	-92.7111	1611.32	818.796	-162.304	1579.03	810.879	-144.854	1626.37	743.378
5111	0	105.433	1696.13	1579.1	210.484	1691.43	1576.82	83.4751	1534.15	1549.23	201.685	1525.86	1547.17	149.654	1510.9	1423.78	128.576	1407.06	1148.15	144.524	1668.81	1316.04	141.626	1764.84	1115.77	211.127	1412.94	1238.65	-4.84394	1610.97	1389.91	-127.073	1581.2	1158.01	-138.403	1556.89	1062.51	-143.003	1615.61	919.031	-91.9618	1618.59	816.587	-161.939	1587.06	808.941	-143.877	1633.79	741.12
5112	0	103.663	1705.36	1577.65	208.628	1700.45	1575.6	81.8275	1543.47	1547.86	199.932	1534.96	1546.21	148.089	1520.08	1422.67	127.425	1416.05	1147.02	143.611	1677.7	1314.68	141.349	1773.89	1114.36	209.849	1421.7	1237.7	-5.98865	1620.27	1388.16	-127.912	1590.03	1156.29	-138.92	1565.47	1060.71	-143.036	1623.94	917.046	-91.5255	1626.56	814.738	-161.267	1595.34	806.88	-142.796	1641.65	738.872
5113	0	102.008	1714.59	1576.16	206.946	1709.62	1574.65	79.9812	1552.6	1546.61	198.184	1544.13	1545.16	146.669	1529.2	1421.58	126.366	1425.21	1146.03	142.828	1686.88	1313.41	141.053	1783.05	1112.82	208.71	1430.61	1236.77	-7.19658	1629.58	1386.47	-128.643	1598.91	1154.51	-139.45	1574.31	1058.97	-143.164	1632.58	915.138	-91.4247	1635.3	813.168	-161.227	1603.74	805.1	-141.812	1649.62	736.921
5114	0	100.17	1723.76	1575.08	205.01	1718.85	1573.5	78.2086	1561.78	1545.2	196.233	1553.4	1544.12	145.318	1538.32	1420.38	125.142	1434.38	1144.72	141.778	1695.99	1312.07	140.773	1792.28	1111.72	207.53	1439.75	1235.77	-8.48351	1638.98	1384.94	-129.476	1607.72	1152.78	-139.94	1583.21	1057.27	-143.208	1641.27	913.273	-90.7123	1643.37	811.104	-160.85	1612.3	803.11	-140.952	1658.01	734.993
5115	0	98.1599	1732.96	1573.8	203.106	1727.95	1572.8	76.3174	1571.08	1543.99	194.452	1562.29	1543.37	143.385	1547.56	1419.38	124.101	1443.8	1143.53	140.689	1705.3	1311.16	140.289	1801.62	1110.74	206.163	1448.78	1234.86	-9.78002	1648.42	1383.46	-130.399	1616.6	1151.14	-140.563	1592.14	1055.43	-143.195	1650.07	911.431	-90.3602	1651.96	809.482	-160.498	1620.95	801.213	-140.357	1666.6	733.143
5116	0	96.0471	1742.23	1572.91	201.13	1737.45	1572.09	74.2346	1580.29	1542.9	192.314	1571.57	1542.53	142.046	1556.48	1418.4	123.056	1453.36	1142.38	139.501	1714.5	1310.32	139.727	1810.98	1109.88	204.804	1458.1	1233.96	-11.3797	1657.89	1382.29	-131.326	1625.46	1149.53	-141.216	1601.23	1053.77	-143.296	1658.97	909.74	-90.1588	1660.73	808.072	-159.976	1629.9	799.424	-139.803	1675.39	731.39
5117	0	94.1768	1751.4	1571.85	199.099	1746.55	1571.4	72.1704	1589.63	1541.74	190.127	1580.89	1541.58	140.286	1565.78	1417.33	122.028	1463.07	1141.2	138.229	1723.97	1309.34	139.279	1820.49	1109.1	203.495	1467.47	1232.94	-13.024	1667.17	1380.77	-132.351	1634.4	1147.95	-141.85	1610.43	1052.19	-143.422	1668.23	908.107	-90.2542	1670.22	807.029	-160.137	1638.92	797.764	-139.344	1684.4	729.707
5118	0	92.0717	1760.69	1570.79	197.094	1755.66	1570.56	69.991	1598.9	1540.67	188.034	1590.01	1540.7	138.506	1575.16	1416.12	120.929	1472.76	1139.73	136.891	1733.51	1308.61	138.595	1830.03	1108.25	202.081	1477.04	1231.76	-14.7682	1676.63	1379.45	-133.408	1643.52	1146.39	-142.596	1619.63	1050.42	-143.811	1677.35	906.501	-90.0805	1679.24	805.486	-159.902	1648.17	795.971	-139.055	1693.56	728.012
5119	0	89.8352	1770.11	1569.97	195.05	1764.83	1569.95	67.5958	1608.26	1539.63	185.717	1598.98	1540.14	136.468	1584.48	1415.1	119.687	1482.6	1138.37	135.362	1743.08	1307.86	137.849	1839.77	1107.9	200.479	1486.58	1230.84	-16.5006	1686.14	1378.21	-134.546	1652.68	1144.81	-143.445	1628.99	1048.8	-144.109	1686.7	904.822	-90.1831	1688.8	803.934	-159.68	1657.6	794.165	-138.687	1703.06	726.251
5120	0	87.7979	1779.3	1569.15	192.791	1773.95	1569.44	65.1885	1617.73	1538.65	183.201	1608.3	1539.47	134.501	1593.86	1414.22	118.469	1492.52	1136.97	133.849	1752.6	1307.28	137.061	1849.74	1107.44	198.811	1496.19	1229.79	-18.3242	1695.81	1377.08	-135.774	1661.94	1143.27	-144.285	1638.28	1047.25	-144.482	1696.39	903.076	-90.2555	1698.69	802.675	-159.842	1667.1	792.531	-138.567	1712.77	724.735
5121	0	85.6385	1788.79	1568.56	190.781	1783.19	1569.13	62.6789	1627.19	1537.75	180.801	1617.44	1538.75	132.352	1603.24	1413.19	117.182	1502.44	1135.72	132.273	1762.41	1306.59	136.428	1859.84	1107.03	197.245	1505.95	1228.76	-20.3094	1705.31	1375.77	-136.945	1671.39	1141.75	-145.071	1647.75	1045.66	-145.069	1705.99	901.488	-90.2523	1708.23	801.096	-159.967	1676.81	790.884	-138.596	1722.65	723.293
5122	0	83.3929	1798.2	1567.92	188.291	1792.37	1568.76	60.1512	1636.74	1536.84	178.174	1626.76	1538.17	130.233	1612.87	1412.3	115.745	1512.5	1134.6	130.654	1772.22	1306.23	135.533	1870.2	1106.72	195.594	1515.73	1227.8	-22.1726	1715.18	1374.57	-138.309	1681.03	1140.26	-145.77	1657.55	1044.03	-145.593	1715.75	900.036	-90.7179	1718.22	799.611	-160.218	1686.57	789.265	-138.835	1732.7	721.796
5123	0	80.9575	1807.67	1567.72	185.899	1801.61	1568.86	57.5949	1646.33	1536.19	175.702	1635.96	1538.03	128.218	1622.52	1411.87	114.292	1522.77	1133.86	128.837	1782.08	1305.95	134.771	1880.32	1106.77	194.337	1525.84	1227.48	-24.1579	1724.88	1373.61	-139.51	1690.83	1138.92	-146.67	1667.34	1042.72	-146.422	1725.63	898.731	-91.4226	1728.38	798.442	-160.659	1696.37	787.807	-139.402	1742.83	720.523
5124	0	78.3851	1817.21	1567.75	183.442	1811.04	1569.31	54.9654	1655.86	1535.85	172.92	1645.38	1538.06	126.258	1632.33	1411.83	112.84	1533.04	1133.45	127.261	1792.08	1306.09	133.835	1890.71	1106.9	192.801	1535.66	1227.33	-26.1421	1734.75	1373.03	-140.833	1700.88	1137.84	-147.331	1677.37	1041.64	-147.596	1735.71	897.63	-92.6847	1739.23	797.648	-161.458	1706.22	786.653	-140.214	1753.18	719.423
5125	0	75.6471	1826.63	1567.9	180.763	1820.42	1569.88	52.3502	1665.54	1535.57	170.436	1654.88	1538.2	124.214	1642.09	1411.78	111.612	1543.3	1133.32	125.374	1802.09	1306.24	133.026	1901.06	1107.28	191.519	1545.6	1227.28	-27.997	1744.47	1372.36	-141.974	1710.89	1136.93	-147.87	1687.72	1040.62	-148.586	1745.79	896.717	-93.5076	1749.56	796.684	-162.198	1716.32	785.698	-141.314	1763.56	718.495
5126	0	72.9769	1836.3	1568.35	178.063	1829.96	1570.57	49.6866	1675.08	1535.57	167.701	1664.45	1538.55	122.294	1652.06	1412.08	110.625	1553.34	1133.33	123.591	1812.12	1306.73	132.229	1911.6	1107.88	190.342	1555.64	1227.63	-29.8036	1754.61	1372.33	-143.061	1721.16	1136.33	-148.467	1697.99	1039.68	-149.809	1755.99	895.986	-95.2756	1760.55	796.151	-163.351	1726.6	784.844	-142.771	1773.9	717.745
5127	0	70.287	1845.83	1569.05	175.298	1839.58	1571.67	47.0776	1684.87	1535.95	165.15	1674.18	1539.39	120.36	1661.94	1412.81	109.973	1563.24	1133.92	121.895	1822.31	1307.53	131.403	1922.03	1108.74	189.301	1565.72	1228.55	-31.6612	1764.27	1372.37	-143.994	1731.5	1135.8	-149.069	1708.38	1039.37	-151.395	1766.37	895.817	-96.3873	1771.26	795.567	-164.357	1736.93	784.46	-144.555	1784.36	717.468
5128	0	67.5328	1855.6	1569.95	172.606	1849.38	1572.95	44.4527	1694.42	1536.64	162.415	1683.85	1540.43	118.601	1671.97	1413.74	109.6	1572.97	1134.87	120.204	1832.39	1308.59	130.271	1932.69	1109.93	188.548	1575.87	1229.72	-33.4773	1774.07	1372.56	-144.631	1741.88	1135.46	-149.426	1718.91	1039.2	-152.527	1777.03	895.835	-98.0581	1782.36	795.413	-165.809	1747.4	784.64	-146.568	1795.02	717.318
5129	0	64.6989	1865.31	1570.96	169.84	1859.02	1574.43	42.0326	1704.26	1537.53	159.945	1693.5	1541.9	116.906	1681.89	1415.02	108.952	1583.13	1136.12	118.365	1842.46	1309.85	129.153	1943.05	1111.39	187.931	1586.02	1231.26	-35.2568	1783.75	1373.21	-145.206	1752.4	1135.36	-149.828	1729.6	1039.27	-153.958	1787.74	896.065	-99.72	1793.71	795.385	-167.258	1758.22	784.868	-148.817	1805.83	717.446
5130	0	62.1197	1875.07	1572.21	167.067	1868.98	1575.9	39.3155	1713.91	1538.75	157.563	1703.3	1543.6	115.248	1691.8	1416.41	108.449	1593.46	1137.63	116.597	1852.37	1311.32	127.732	1953.26	1113.11	187.386	1596.23	1232.98	-36.7819	1793.23	1373.97	-145.634	1763.03	1135.74	-150.214	1740.12	1039.75	-155.387	1798.69	896.789	-101.989	1805.39	795.811	-168.963	1769.13	785.535	-151.095	1816.91	718.097
5131	0	59.633	1885	1573.43	164.397	1878.64	1577.65	37.0359	1723.9	1540.23	154.799	1713.45	1545.4	113.641	1701.61	1417.97	108.29	1604.21	1139.18	114.899	1862.28	1313.02	126.493	1962.76	1114.78	187.026	1606.55	1234.7	-38.5599	1802.46	1375.26	-146.082	1773.44	1136.25	-150.698	1750.71	1040.53	-156.492	1809.73	897.823	-103.456	1816.76	796.54	-170.597	1780.26	786.695	-153.593	1828.11	719.019
5132	0	56.9711	1894.7	1574.81	161.946	1888.57	1579.65	34.3718	1733.48	1541.91	152.459	1722.92	1547.79	112.067	1711.4	1419.52	108.381	1615.24	1140.46	113.461	1872.32	1315.03	125.017	1972.83	1116.98	186.523	1616.91	1236.49	-40.3205	1811.75	1376.63	-146.541	1783.79	1136.94	-151.188	1761.37	1041.56	-158.216	1820.78	899.196	-105.841	1828.91	797.717	-172.407	1791.68	788.131	-156.198	1839.51	720.351
5133	0	54.6224	1904.62	1576.27	159.535	1898.32	1581.6	32.1625	1743.41	1543.67	150.088	1732.57	1550.09	110.508	1720.78	1421.19	108.562	1626.15	1141.49	111.68	1882.02	1317.18	123.647	1982.57	1119.37	186.032	1627	1238.2	-42.07	1820.6	1378.05	-147.123	1794.35	1137.91	-151.873	1771.84	1042.68	-159.596	1831.96	900.638	-107.465	1840.48	798.742	-174.261	1803.26	789.468	-158.809	1851.29	721.791
5134	0	52.3969	1914.43	1577.73	157.296	1908.17	1583.29	29.8921	1753.06	1545.66	147.844	1742.5	1552.46	109.105	1730.1	1422.94	108.445	1636.33	1143.04	110.091	1891.48	1319.12	121.824	1991.43	1121.45	185.582	1637.22	1239.88	-43.6579	1829.54	1379.58	-147.768	1804.54	1139.24	-152.733	1782.21	1044.06	-161.039	1843.21	902.279	-109.776	1852.91	800.379	-175.94	1815.01	791.275	-161.417	1863.19	723.626
5135	0	50.432	1924.23	1578.95	155.224	1917.89	1584.95	27.7802	1762.91	1547.61	145.927	1752.12	1554.92	107.614	1739.22	1424.5	107.885	1646.04	1144.46	108.47	1900.85	1320.82	120.344	2000.99	1123.67	185.011	1647.16	1241.49	-45.3627	1838.28	1381.05	-148.708	1814.63	1140.5	-153.563	1792.64	1045.47	-162.519	1854.55	904.059	-111.217	1864.84	801.871	-177.659	1826.81	793.164	-163.813	1875.59	725.56
5136	0	48.4172	1934.08	1580.24	153.246	1927.53	1586.5	25.6982	1772.55	1549.36	143.652	1761.76	1556.89	106.257	1748.49	1425.9	107.372	1655.56	1145.62	106.959	1910.3	1322.63	118.783	2010	1125.78	184.291	1657.14	1242.74	-46.9429	1847.22	1382.72	-149.717	1824.69	1141.82	-154.608	1803.19	1046.8	-164.13	1865.95	905.792	-113.09	1877.29	803.494	-179.662	1839	794.877	-166.138	1888.17	727.548
5137	0	46.5931	1943.69	1581.48	151.406	1937.22	1588.03	23.8208	1782.15	1551.06	141.765	1771.21	1559.04	104.708	1757.53	1427.2	106.849	1665.04	1146.75	105.435	1919.4	1324.48	117.335	2019.4	1128.11	183.558	1666.87	1244.17	-48.5354	1855.78	1384.12	-150.941	1834.54	1143.21	-155.934	1813.38	1047.95	-165.884	1877.24	907.669	-114.868	1889.5	805.235	-181.229	1851.4	796.496	-168.342	1900.91	729.509
5138	0	44.6	1953.19	1582.59	149.535	1946.7	1589.52	22.0449	1791.69	1552.75	140.145	1780.74	1561.12	103.375	1766.66	1428.53	106.036	1674.52	1147.99	103.903	1928.51	1326.14	115.692	2028.49	1130.17	182.555	1676.18	1245.5	-50.1064	1864.53	1385.37	-152.427	1844.33	1144.52	-157.564	1823.66	1049.16	-167.674	1888.74	909.487	-116.842	1902.02	807.058	-183.072	1863.71	798.118	-170.272	1914.08	731.599
5139	0	42.8034	1962.64	1583.4	147.624	1956.43	1590.67	20.5094	1800.82	1554.16	138.564	1790.1	1562.84	101.974	1775.75	1429.67	104.986	1683.85	1149.16	102.417	1937.56	1327.42	114.445	2037.72	1131.71	181.631	1685.53	1246.72	-51.7005	1873.26	1386.36	-154.047	1853.79	1145.58	-159.383	1833.87	1050.16	-169.56	1900.12	911.078	-118.734	1914.6	808.839	-184.612	1876.51	799.537	-172.08	1927.43	733.552
5140	0	41.0388	1971.99	1583.98	145.837	1965.96	1591.62	19.1911	1810.07	1555.3	137.248	1799.67	1564.4	100.728	1784.93	1430.58	104.013	1693.05	1150.17	101.112	1946.68	1328.45	113.107	2046.87	1133	180.64	1694.69	1247.73	-53.0794	1882.08	1387.34	-155.679	1863.44	1146.66	-161.254	1843.78	1050.92	-171.38	1911.61	912.563	-120.34	1927.36	810.636	-186.001	1889.1	800.613	-173.611	1940.91	735.372
5141	0	39.083	1981.2	1584.65	143.866	1975.4	1592.56	17.9101	1819.02	1556.32	135.934	1809.08	1565.77	99.4997	1793.98	1431.61	103.137	1702.09	1151.21	99.8925	1955.54	1329.39	111.871	2056.09	1134.03	179.519	1703.5	1248.94	-54.2181	1891.1	1388.05	-157.425	1872.75	1147.66	-163.173	1853.96	1051.59	-173.076	1923.37	913.722	-121.652	1940.22	812.325	-187.48	1902.06	801.638	-175.05	1954.7	737.083
5142	0	37.407	1990.26	1585.07	142.193	1984.95	1593.57	17.1215	1827.88	1556.95	134.755	1818.41	1567.17	98.4998	1803.3	1432.64	101.957	1710.74	1152.33	98.6501	1964.51	1330.14	110.715	2065.08	1134.8	178.492	1712.35	1250.2	-55.3069	1899.95	1388.67	-159.43	1882.06	1148.62	-165.208	1864.07	1052.28	-174.631	1935.04	914.91	-123.314	1952.83	813.847	-189.192	1914.98	802.863	-176.27	1968.86	738.992
5143	0	35.6624	1999.25	1585.45	140.478	1994.27	1594.33	15.924	1836.67	1557.56	133.784	1827.69	1568.17	97.505	1812.46	1433.37	100.987	1719.42	1153.24	97.6011	1973.43	1330.56	109.835	2073.76	1135.04	177.377	1720.93	1251.2	-56.4304	1908.96	1389.11	-161.233	1891.37	1149.3	-167.522	1874.04	1052.81	-176.631	1946.51	916.278	-124.278	1965.8	815.492	-190.719	1927.9	803.789	-177.431	1982.93	740.844
5144	0	34.154	2008.36	1585.83	138.839	2003.64	1594.92	15.0055	1845.66	1557.82	132.993	1836.81	1568.9	96.9041	1821.63	1434.05	99.9649	1727.9	1154.01	96.6334	1982.34	1330.85	109.094	2082.41	1135.18	176.337	1729.42	1252.04	-57.1974	1918.12	1389.28	-163.225	1900.38	1149.91	-169.576	1884.03	1053.12	-178.451	1958.04	917.384	-125.788	1978.51	817.131	-191.607	1941.18	804.374	-178.671	1997.31	742.733
5145	0	32.6719	2017.14	1586.12	137.496	2012.75	1595.49	13.985	1854.41	1558.07	131.958	1846.05	1569.41	95.7004	1830.41	1434.57	98.8652	1736.24	1154.73	95.7195	1991.08	1331.08	108.632	2090.87	1135.04	175.17	1737.69	1252.84	-58.0244	1926.95	1389.22	-165.02	1909.7	1150.54	-171.672	1894.2	1053.43	-179.951	1969.94	918.167	-126.868	1991.33	818.827	-192.881	1954.31	805.098	-179.587	2011.37	744.518
5146	0	31.4718	2026.16	1586.23	136.222	2021.67	1595.88	13.1896	1863.36	1558.09	131.217	1854.97	1569.83	94.8372	1839.4	1435.01	97.6293	1744.41	1155.55	95.2294	1999.85	1331.16	108.275	2099.06	1134.64	174.215	1746.02	1253.7	-58.7595	1936.21	1389.63	-166.899	1918.83	1151.24	-173.717	1904.56	1053.72	-181.574	1981.53	919.287	-128.123	2003.79	820.154	-194.288	1967.25	806.017	-180.541	2025.58	746.216
5147	0	30.4168	2034.83	1586.17	135.197	2030.73	1596.11	12.3431	1872.06	1557.95	129.978	1864.03	1569.86	94.0662	1848.21	1435.4	96.6482	1752.5	1156.16	94.6513	2008.41	1331.01	108.251	2107.17	1134.21	173.205	1754.13	1254.34	-59.2601	1945.4	1389.66	-168.553	1928.23	1151.59	-175.697	1914.79	1053.93	-183.168	1993.11	920.235	-129.358	2016.69	821.778	-195.424	1980.34	806.555	-181.484	2039.71	748.011
5148	0	29.59	2043.71	1586.19	134.302	2039.48	1596.26	11.6875	1881.04	1557.67	129.211	1872.92	1569.87	93.2008	1857	1435.76	95.4027	1760.56	1156.8	94.1847	2016.89	1330.8	108.315	2114.9	1133.55	172.016	1762.06	1254.92	-59.8202	1954.42	1389.46	-170.107	1937.57	1152.03	-177.621	1925.16	1053.97	-184.363	2005.11	921.053	-129.901	2029.08	822.83	-196.319	1993.45	807.089	-182.343	2053.61	749.818
5149	0	29.0937	2052.48	1586.05	133.589	2048.32	1596.28	10.8616	1889.77	1557.35	128.451	1881.68	1569.71	92.3852	1865.79	1436.09	94.0278	1768.46	1157.39	94.0411	2025.37	1330.49	108.794	2122.56	1132.71	170.905	1769.96	1255.42	-60.446	1963.54	1389.41	-171.654	1947.05	1152.35	-179.62	1935.57	1054.22	-185.746	2016.69	921.948	-131.235	2041.8	824.293	-197.358	2006.54	807.826	-183.132	2067.51	751.427
5150	0	28.3995	2061.16	1585.7	133.001	2056.97	1596.41	10.1776	1898.64	1556.95	128.199	1890.39	1569.7	91.6565	1874.61	1436.38	92.6201	1776.27	1158.19	93.944	2033.8	1330.02	109.449	2130.28	1131.74	169.738	1777.82	1256.02	-60.4897	1973.05	1389.26	-172.839	1956.73	1152.46	-181.365	1946.07	1054.46	-186.456	2028.77	922.572	-132.026	2054.57	825.465	-198.378	2019.4	808.652	-183.927	2081.18	752.855
5151	0	27.7397	2070	1585.52	132.505	2065.72	1596.49	9.73045	1907.46	1556.66	127.645	1899.11	1569.6	90.8782	1883.3	1436.76	91.2013	1784.22	1158.85	93.842	2042.14	1329.72	110.044	2137.88	1130.95	168.424	1785.47	1256.67	-60.7226	1982.39	1388.92	-173.745	1966.72	1152.83	-182.848	1956.83	1054.62	-187.745	2040.4	923.458	-133.054	2067.18	826.463	-199.533	2032.13	809.384	-184.826	2094.69	754.352
5152	0	27.402	2078.91	1585.4	132.067	2074.49	1596.4	9.15459	1916.13	1556.38	126.659	1907.82	1569.49	90.1643	1891.97	1437.05	89.8454	1791.97	1159.53	94.0938	2050.45	1329.46	110.858	2145.97	1130.38	167.145	1793.12	1257.27	-60.804	1991.69	1388.9	-174.469	1976.61	1152.9	-184.082	1967.69	1054.89	-188.425	2052.39	924.443	-133.485	2079.86	827.803	-199.934	2044.77	810.136	-185.59	2107.88	755.896
5153	0	27.1519	2087.51	1585.18	131.738	2083.14	1596.27	8.88089	1925.12	1556.29	126.623	1916.47	1569.66	89.4402	1900.29	1437.52	88.5536	1799.62	1160.27	94.3181	2058.55	1329.15	111.65	2153.81	1129.77	166.008	1800.81	1257.88	-60.7727	2000.9	1388.97	-175.277	1986.84	1153.17	-185.393	1978.43	1055.11	-189.24	2064.09	925.271	-134.535	2092.97	829.13	-200.848	2057.6	811.026	-186.307	2121.01	757.292
5154	0	27.0241	2096.46	1584.7	131.784	2091.95	1596.09	8.39076	1933.85	1556.32	125.924	1925.33	1569.69	88.602	1908.56	1437.73	87.2937	1807.4	1160.92	94.6091	2066.71	1328.77	112.652	2161.85	1129.4	164.836	1808.31	1258.4	-61.0432	2009.82	1388.86	-175.817	1997.01	1153.54	-186.376	1989.25	1055.34	-189.703	2076.1	926.068	-134.957	2105.14	830.055	-201.485	2070.26	811.765	-186.887	2134.06	758.357
5155	0	26.993	2105.38	1584.36	131.825	2100.62	1595.91	8.05505	1942.63	1556.43	125.476	1933.89	1569.99	88.135	1917.09	1437.86	86.116	1814.91	1161.37	94.893	2074.61	1328.68	113.539	2169.79	1129.25	163.608	1815.76	1258.89	-60.6991	2018.97	1388.73	-176.123	2007.42	1153.61	-187.241	2000.08	1055.57	-190.251	2087.79	927.074	-135.713	2117.5	831.049	-202.023	2082.67	812.581	-187.188	2146.83	759.438
5156	0	27.1183	2114.41	1583.97	131.88	2109.24	1595.56	7.91156	1951.61	1556.77	125.457	1942.46	1570.58	87.5333	1925.12	1438.29	85.1556	1822.41	1161.77	95.3001	2082.51	1328.71	114.308	2177.5	1129.31	162.571	1823.1	1259.43	-60.5935	2027.69	1388.51	-176.185	2018.09	1153.67	-187.757	2011.06	1055.6	-190.496	2099.66	927.769	-136.272	2129.95	832.322	-202.035	2095.04	813.133	-187.935	2159.38	760.603
5157	0	27.3353	2123.31	1583.23	132.089	2118.05	1594.99	7.58093	1960.42	1557.29	125	1951.26	1571.18	87.1692	1933.31	1438.38	84.2938	1829.88	1162.28	95.7764	2090.19	1328.5	115.175	2185.3	1129.22	161.671	1830.53	1259.96	-60.4554	2036.43	1388.67	-176.083	2028.79	1153.86	-187.785	2022	1055.83	-190.862	2111.37	928.371	-136.475	2142.37	833.051	-202.226	2107.56	813.722	-188.407	2171.94	761.435
5158	0	27.8433	2132.46	1582.56	132.589	2126.97	1594.42	7.46169	1969.26	1557.82	125.207	1959.9	1571.97	86.8766	1941.29	1438.42	83.5654	1837.32	1162.53	96.3409	2097.99	1328.24	115.901	2192.72	1128.98	161.011	1837.97	1260.16	-60.2083	2044.95	1388.66	-176.003	2039.32	1153.78	-187.974	2032.88	1056.08	-190.99	2122.92	929.18	-136.6	2154.96	833.827	-202.424	2119.72	814.439	-188.396	2184.48	762.077
5159	0	28.0324	2141.45	1581.9	132.895	2135.7	1593.91	7.5277	1978.34	1558.25	124.531	1968.51	1572.61	86.6558	1949.26	1438.49	82.8283	1844.79	1162.71	96.8447	2105.64	1328.17	116.662	2199.92	1128.92	160.299	1845.4	1260.38	-59.9263	2053.46	1388.58	-175.531	2050.19	1153.77	-187.627	2044.01	1055.96	-190.885	2134.81	929.829	-136.472	2167.02	834.656	-202.723	2131.87	815.044	-188.543	2196.93	763.107
5160	0	28.8124	2150.32	1580.97	133.337	2144.4	1593.24	7.46963	1987.2	1558.71	124.665	1977.07	1573.36	86.5343	1957.1	1438.61	82.1252	1852.06	1162.87	97.37	2113.42	1328.12	117.498	2206.97	1128.58	159.555	1852.65	1260.5	-59.2963	2062.09	1388.61	-175.068	2060.91	1153.9	-187.538	2054.73	1056.02	-190.762	2146.07	930.2	-136.92	2178.97	835.269	-202.644	2143.86	815.577	-188.672	2209.1	763.676
5161	0	29.5831	2159.2	1580.18	134.025	2153.24	1592.72	7.52026	1995.96	1559.19	124.622	1985.8	1573.92	86.5813	1964.99	1438.51	81.6181	1859.53	1162.92	97.9373	2121.12	1327.88	118.155	2214.18	1128.19	159.154	1860.15	1260.58	-59.1162	2070.18	1388.64	-174.39	2071.39	1153.71	-186.979	2066.01	1056.14	-190.308	2157.75	930.6	-136.675	2191.28	835.687	-202.202	2156.14	815.996	-188.541	2221.25	764.323
5162	0	30.2206	2168.19	1579.15	134.703	2161.94	1591.86	7.85292	2004.79	1559.41	124.964	1994.36	1574.33	86.7177	1972.89	1438.25	81.2154	1866.96	1162.9	98.5164	2128.72	1327.53	118.856	2221.09	1127.67	158.756	1867.5	1260.46	-58.5939	2078.58	1388.6	-173.48	2082.24	1153.54	-186.498	2076.76	1055.93	-189.676	2169.31	931.196	-136.11	2203.24	836.266	-201.443	2167.97	816.199	-188.347	2233.36	765.025
5163	0	31.0561	2176.96	1578.39	135.392	2170.53	1590.93	8.30547	2013.66	1559.55	125.106	2002.92	1574.51	86.9315	1980.76	1438.06	80.9276	1874.48	1162.85	99.2106	2136.47	1327.11	119.387	2228.14	1127.13	158.482	1874.95	1260.27	-58.0388	2086.9	1388.4	-172.749	2092.63	1153.58	-185.548	2087.87	1055.83	-188.959	2180.53	931.553	-135.062	2214.97	836.657	-201.041	2179.78	816.675	-187.801	2245.57	765.481
5164	0	31.8246	2185.64	1577.39	136.238	2179.03	1590.26	8.67797	2022.25	1559.66	125.592	2011.49	1574.8	87.1408	1988.67	1437.88	80.6454	1881.99	1162.87	99.9051	2144.12	1326.87	120.085	2235.69	1126.61	158.057	1882.47	1260.15	-57.4496	2095.14	1388.24	-171.805	2103.25	1153.3	-184.819	2098.7	1055.75	-187.507	2192.17	931.803	-134.576	2226.89	837.079	-199.902	2191.54	816.919	-187.054	2257.55	766.038
5165	0	32.7501	2194.37	1576.63	137.144	2187.61	1589.35	9.17813	2030.82	1559.65	126.189	2019.96	1574.76	87.5069	1996.73	1437.58	80.3537	1889.5	1162.72	100.497	2151.92	1326.3	120.774	2243.17	1126.11	158.025	1890.01	1259.88	-56.8626	2103.35	1388	-170.928	2113.6	1153.12	-183.635	2109.84	1055.46	-186.56	2203.61	932.144	-133.469	2238.36	837.219	-199	2203.6	817.16	-185.966	2269.51	766.734
5166	0	33.6372	2202.86	1575.66	138.154	2196.08	1588.39	9.9475	2039.47	1559.33	127.026	2028.39	1574.51	88.0121	2004.71	1436.95	80.1873	1897.1	1162.27	101.055	2159.75	1325.65	121.312	2250.62	1125.3	157.926	1897.6	1259.28	-56.3519	2111.51	1387.79	-170.066	2123.73	1152.98	-182.816	2120.53	1055.32	-185.332	2214.88	932.488	-132.059	2250.02	837.553	-197.979	2215.35	817.276	-185.025	2281.51	766.951
5167	0	34.687	2211.45	1574.71	139.042	2204.48	1587.32	10.6341	2047.94	1559.11	127.477	2036.75	1574.19	88.4022	2012.78	1436.43	80.1764	1904.67	1161.8	101.777	2167.65	1325.07	121.728	2258.38	1124.57	157.982	1905.13	1258.76	-55.6636	2119.71	1387.26	-169.016	2133.97	1152.47	-181.53	2131.64	1054.8	-183.68	2226.35	932.594	-130.878	2261.23	837.376	-197.597	2227.31	817.628	-183.538	2293.42	767.23
5168	0	35.8532	2220.06	1573.78	140.26	2212.86	1586.3	11.3443	2056.39	1558.8	128.159	2045.07	1573.7	89.1622	2020.76	1435.94	80.3399	1912.41	1161.43	102.342	2175.55	1324.23	122.285	2266.29	1123.71	158.211	1913.01	1258.29	-54.7497	2128.1	1386.77	-167.97	2144.04	1152.08	-180.524	2142.29	1054.49	-182.272	2237.91	932.578	-129.446	2272.94	837.66	-196.825	2239.27	817.94	-181.891	2305.41	767.567
5169	0	37.0237	2228.28	1572.69	141.484	2221.11	1585.1	12.2757	2064.94	1558.25	129.096	2053.32	1572.96	89.785	2028.94	1435.19	80.6232	1920.11	1160.74	103.135	2183.5	1323.35	122.675	2274.14	1122.63	158.752	1921.14	1257.48	-54.1279	2136.04	1386.25	-166.996	2153.86	1151.46	-179.204	2153.24	1053.81	-180.443	2249.36	932.553	-127.609	2284.26	837.549	-195.4	2251.27	818.075	-179.847	2317.43	767.55
5170	0	38.3539	2236.76	1571.78	142.854	2229.43	1583.83	13.4182	2073.31	1557.51	130.223	2061.58	1572.04	90.5603	2037	1434.23	80.9854	1927.96	1159.88	103.796	2191.53	1322.43	123.253	2282.16	1121.63	159.179	1929.03	1256.6	-53.3031	2144.21	1385.49	-165.873	2163.69	1150.77	-178.051	2163.7	1053.23	-178.773	2260.66	932.71	-125.681	2295.86	837.695	-193.384	2263.35	817.866	-177.907	2329.42	767.756
5171	0	39.7039	2244.95	1570.72	144.194	2237.48	1582.61	14.4468	2081.61	1556.85	131.282	2069.67	1571.03	91.4342	2045.1	1433.33	81.431	1935.77	1159.03	104.484	2199.57	1321.56	123.562	2289.85	1120.44	159.871	1937.06	1255.67	-52.4117	2152.32	1384.72	-164.738	2173.38	1150.13	-176.711	2174.32	1052.4	-176.973	2271.9	932.462	-123.881	2306.91	837.621	-191.807	2275.52	817.966	-175.612	2341.39	767.849
5172	0	41.2514	2253.33	1569.89	145.662	2245.65	1581.44	15.4192	2089.75	1555.86	132.514	2077.83	1569.82	92.4622	2053.33	1432.27	81.9902	1943.64	1158.24	105.157	2207.7	1320.42	123.938	2297.91	1119.17	160.482	1945.18	1254.5	-51.6217	2160.29	1383.89	-163.602	2182.83	1149.2	-175.652	2184.58	1051.83	-174.722	2283.26	932.308	-121.755	2318.17	837.394	-190.712	2287.67	818.22	-172.811	2353.47	767.881
5173	0	42.6685	2261.34	1568.82	147.13	2253.61	1580.18	17.0643	2097.96	1554.81	133.997	2085.95	1568.32	93.5241	2061.49	1431.05	82.8274	1951.83	1156.98	105.96	2215.93	1319.44	124.223	2305.78	1117.83	161.604	1953.45	1253.38	-50.5705	2168.46	1382.86	-162.417	2192.23	1148.35	-174.105	2194.9	1050.73	-172.655	2294.42	932.264	-119.496	2329.49	837.491	-188.294	2299.63	817.698	-170.206	2365.47	768.11
5174	0	44.0346	2269.3	1567.97	148.609	2261.56	1578.81	18.5444	2106.03	1553.32	135.524	2093.89	1566.71	94.6627	2069.77	1429.77	83.8773	1960.3	1155.77	106.657	2224.13	1318.32	124.571	2313.89	1116.36	162.55	1961.67	1251.93	-49.5615	2176.56	1381.95	-161.265	2201.32	1147.38	-172.794	2205.04	1050	-171.137	2305.13	931.941	-117.174	2340.47	837.495	-186.273	2311.61	817.729	-167.573	2377.45	768.239
5175	0	45.7084	2277.19	1567.15	150.214	2269.51	1577.81	20.1054	2113.68	1552.15	137.183	2101.9	1564.89	95.8755	2078.09	1428.53	84.8415	1968.62	1154.44	107.528	2232.45	1317.17	124.85	2321.99	1114.98	163.724	1970.07	1250.56	-48.5236	2184.72	1380.85	-160.131	2210.4	1146.35	-171.793	2214.86	1048.84	-169.059	2316.03	931.658	-114.806	2351.64	837.561	-184.212	2323.5	817.55	-164.698	2389.27	768.466
5176	0	47.1914	2284.9	1566.19	151.855	2277.45	1576.6	21.8511	2121.75	1550.43	138.991	2109.92	1562.88	97.2181	2086.41	1427.15	86.0465	1977.01	1153.15	108.356	2240.74	1315.85	125.268	2330.18	1113.52	164.936	1978.57	1248.93	-47.3728	2192.81	1379.78	-159.027	2219.28	1145.42	-170.85	2224.41	1047.97	-167.002	2326.63	931.382	-112.236	2362.42	837.437	-181.771	2335.24	817.177	-161.845	2401.2	768.817
5177	0	48.8237	2292.61	1565.45	153.524	2285.27	1575.37	23.7246	2129.51	1548.87	141.118	2117.87	1560.84	98.6068	2094.78	1425.54	87.0185	1985.05	1151.71	109.462	2249.23	1314.68	125.665	2338.5	1111.92	166.344	1987.12	1247.28	-46.3082	2201.02	1378.58	-157.901	2228.01	1144.3	-169.524	2233.98	1046.77	-164.921	2337.02	930.888	-109.716	2373.04	837.436	-179.651	2346.68	816.989	-158.84	2412.88	769.127
5178	0	50.4376	2300.36	1564.72	155.137	2293.26	1574.15	25.5645	2137.12	1547.16	142.872	2125.71	1558.7	100.152	2103.28	1424.07	88.4472	1993.79	1150.1	110.363	2257.74	1313.31	125.964	2347.02	1110.44	167.66	1995.65	1245.67	-44.8578	2209.37	1377.46	-156.828	2236.64	1143.38	-168.245	2243.32	1045.4	-162.962	2347.31	930.419	-107.272	2383.62	837.426	-177.604	2358.03	816.885	-155.831	2424.5	769.568
5179	0	51.9621	2308.14	1563.94	156.924	2301.02	1573.19	27.5705	2145.1	1545.52	144.802	2133.63	1556.64	101.574	2111.74	1422.72	89.8914	2002.37	1148.64	111.431	2266.32	1311.97	126.224	2355.64	1108.98	169.132	2004.31	1244.15	-43.7215	2217.57	1376.27	-155.788	2245.35	1142.12	-166.838	2252.62	1044.36	-161.007	2357.29	930.015	-104.847	2394.36	837.481	-175.176	2368.94	816.42	-152.943	2435.95	770.019
5180	0	53.9823	2315.86	1563.1	158.75	2308.88	1571.91	29.509	2152.88	1543.91	147.064	2141.62	1554.53	103.25	2120.28	1421.15	91.0843	2010.47	1147.22	112.659	2275.02	1310.48	126.754	2364.48	1107.29	170.854	2013.06	1242.4	-42.2437	2225.92	1374.85	-154.612	2253.82	1140.99	-165.749	2261.4	1043	-159.168	2367.03	929.161	-102.441	2404.52	837.445	-171.797	2379.86	815.532	-149.915	2447.23	770.289
5181	0	55.9296	2323.7	1562.44	160.777	2316.75	1570.79	31.5215	2160.69	1542.07	149.234	2149.55	1552.42	104.974	2128.8	1419.65	92.8995	2019.67	1145.42	113.816	2283.68	1308.95	127.393	2373.55	1105.72	172.512	2021.95	1240.6	-40.7393	2234.4	1373.69	-153.351	2262.47	1139.72	-164.355	2270.12	1041.68	-157.307	2376.73	928.549	-99.9891	2414.74	837.34	-170.036	2390.21	815.198	-147.022	2458.33	770.62
5182	0	57.8914	2331.56	1561.65	162.782	2324.42	1569.83	33.6286	2168.8	1540.58	151.279	2157.48	1550.43	106.7	2137.34	1418.19	94.465	2028.63	1143.8	115.224	2292.57	1307.78	128.035	2382.63	1104.31	174.161	2030.87	1238.92	-39.2244	2242.7	1372.35	-151.952	2271.07	1138.64	-162.932	2278.74	1040.45	-155.564	2386.12	927.93	-97.6372	2425.09	837.526	-167.334	2400.5	814.571	-144.237	2469.14	771.14
5183	0	60.0349	2339.34	1560.98	164.948	2332.5	1568.84	35.7948	2176.76	1539.16	153.297	2165.57	1548.67	108.591	2146.02	1416.78	95.9974	2037.54	1142.29	116.555	2301.35	1306.42	128.775	2391.78	1103.16	175.81	2039.79	1237.18	-37.7079	2251.1	1371.34	-150.676	2279.54	1137.66	-161.273	2287.34	1039.2	-153.663	2395.26	927.235	-95.4753	2434.78	837.656	-164.909	2410.02	814.065	-141.779	2479.47	771.647
5184	0	62.2224	2347.45	1560.46	167.221	2340.5	1567.99	37.7579	2184.88	1537.84	155.497	2173.61	1546.9	110.525	2154.65	1415.3	97.5108	2046.56	1140.57	118.06	2310.28	1305.41	129.479	2401.04	1102.17	177.62	2048.94	1235.44	-36.1304	2259.44	1370.28	-149.467	2287.8	1136.85	-160.116	2295.72	1038.29	-151.926	2404.27	926.843	-93.311	2444.5	837.725	-162.406	2419.54	813.395	-139.488	2489.54	772.13
5185	0	64.504	2355.51	1559.69	169.41	2348.46	1566.88	39.8711	2192.98	1536.44	157.746	2181.7	1545.2	112.396	2163.32	1413.81	99.3423	2056.26	1138.7	119.428	2319.08	1304.18	130.407	2410.31	1101.2	179.333	2058.12	1233.43	-34.4492	2268.04	1369.55	-148.067	2296.18	1135.95	-158.48	2304.13	1036.96	-150.157	2413.04	926.19	-91.2385	2454.05	837.849	-159.911	2428.99	812.723	-137.142	2499.51	772.522
5186	0	66.8622	2363.59	1558.86	171.838	2356.63	1565.8	42.3776	2201.27	1535.49	160.124	2190.01	1543.72	114.705	2171.97	1412.33	100.991	2065.89	1136.96	121.278	2328.11	1303.33	131.588	2419.65	1100.35	181.229	2067.36	1231.56	-32.7383	2276.48	1368.79	-146.682	2304.39	1135.37	-157.114	2312.25	1036.29	-148.415	2421.8	925.711	-89.1401	2463.36	837.987	-156.852	2438.02	812.057	-134.812	2509.15	772.847
5187	0	69.2742	2371.75	1558.21	174.433	2364.94	1564.79	44.8227	2209.66	1534.47	162.563	2198.29	1542.43	116.87	2180.54	1410.88	102.668	2075.62	1135.22	122.94	2337.1	1302.17	132.86	2428.89	1099.63	183.075	2076.77	1229.6	-30.7471	2285.06	1367.75	-145.109	2312.78	1134.55	-155.713	2320.52	1035.55	-146.776	2430.2	925.319	-87.1377	2472.3	837.916	-154.666	2446.96	811.518	-132.64	2518.39	773.128
5188	0	71.9418	2380.09	1557.56	176.971	2373.27	1563.63	47.439	2217.97	1533.51	165.319	2206.49	1541.18	119.178	2189.14	1409.51	104.323	2085.57	1133.21	124.942	2346.26	1301.42	134.235	2438.31	1099.17	185.049	2086.3	1227.56	-28.7335	2293.57	1367.21	-143.348	2321.05	1133.91	-153.878	2328.79	1034.84	-145.327	2438.62	924.793	-85.315	2480.95	837.821	-152.573	2455.7	810.897	-130.574	2527.39	773.17
5189	0	74.4868	2388.44	1557.08	179.577	2381.74	1562.83	50.0233	2226.28	1532.8	167.902	2215.04	1539.94	121.291	2197.81	1408.18	106.154	2095.81	1131.45	126.82	2355.53	1300.67	135.756	2447.92	1098.77	187	2095.79	1225.58	-26.7575	2302.28	1366.55	-141.68	2329.24	1133.22	-152.292	2336.93	1034.15	-143.591	2447.07	924.256	-83.38	2489.35	837.447	-151.253	2464.11	810.739	-128.549	2536.07	773.037
5190	0	77.2173	2396.89	1556.79	182.335	2390.24	1562.25	52.9588	2234.75	1532.3	170.881	2223.55	1538.97	123.88	2206.69	1407.22	107.786	2105.95	1130.2	128.902	2364.83	1299.93	137.223	2457.86	1098.51	188.973	2105.23	1224	-24.6847	2310.94	1365.98	-139.992	2337.32	1132.68	-151.076	2344.87	1033.77	-141.501	2455.33	923.814	-81.5977	2497.61	837.258	-149.405	2472.28	810.471	-126.593	2544.45	772.787
5191	0	79.8501	2405.25	1556.83	184.959	2398.93	1561.95	55.8998	2243.19	1531.99	173.797	2232.37	1538.2	126.407	2215.77	1406.56	109.621	2115.99	1129.38	131.036	2374.34	1299.74	138.709	2467.82	1098.38	190.955	2114.75	1222.78	-22.4895	2319.98	1365.61	-138.237	2345.27	1132.47	-149.373	2352.73	1033.49	-140.082	2463.23	923.341	-79.6882	2505.94	837.011	-147.58	2480.35	810.085	-124.925	2552.4	772.659
5192	0	82.6013	2413.74	1557.2	187.74	2407.62	1561.96	58.8733	2251.81	1531.84	176.825	2241.1	1537.76	128.718	2224.96	1406.18	111.428	2125.65	1128.74	133.192	2383.77	1299.93	140.285	2478.01	1098.78	192.944	2124.46	1222.08	-20.3046	2329.24	1365.81	-136.27	2353.47	1132.55	-147.603	2360.76	1033.62	-138.64	2470.98	923.375	-78.2924	2513.44	836.972	-145.947	2487.95	809.898	-123.365	2560.09	772.687
5193	0	85.4619	2422.33	1557.86	190.628	2416.36	1562.12	61.8695	2260.44	1532.02	179.927	2249.94	1537.47	131.106	2234.13	1406.04	112.939	2134.7	1128.4	135.544	2393.19	1300.23	141.854	2488.26	1099.27	194.86	2134.08	1221.57	-17.974	2338.68	1366.39	-134.536	2361.26	1132.95	-145.747	2368.65	1034	-136.821	2478.68	923.214	-76.5332	2520.56	836.621	-143.676	2495.14	809.599	-121.986	2567.11	772.694
5194	0	88.4571	2431.07	1558.61	193.673	2425.13	1562.5	64.8744	2269.25	1532.49	182.973	2258.78	1537.32	133.63	2243.39	1406.24	114.34	2143.75	1128.57	137.95	2402.85	1300.7	143.747	2498.51	1099.83	196.441	2143.65	1221.38	-15.6467	2348.29	1367.11	-132.74	2369.09	1133.55	-144.012	2376.31	1034.59	-135.544	2485.78	923.348	-75.253	2527.82	836.708	-142.37	2501.76	809.759	-120.58	2573.91	772.483
5195	0	91.5372	2439.88	1559.57	196.805	2434.02	1563.14	67.8677	2278.04	1533.06	185.87	2267.77	1537.34	135.747	2252.79	1406.73	115.643	2153.09	1128.99	140.318	2412.47	1301.33	145.808	2509.03	1100.74	198.131	2153.23	1221.46	-13.112	2358.21	1368.24	-130.865	2377.11	1134.45	-142.192	2384.01	1035.37	-133.718	2492.95	923.55	-73.8479	2534.24	836.394	-140.905	2508.21	809.802	-119.524	2580.25	772.307
5196	0	94.6613	2448.64	1561.06	199.837	2442.75	1564	70.8919	2286.95	1533.89	189.081	2276.49	1537.72	138.054	2262.15	1407.45	116.92	2162.9	1129.48	142.707	2421.95	1302.33	147.739	2519	1102.07	199.294	2162.61	1221.89	-10.6876	2368.04	1369.57	-128.794	2385.29	1135.71	-140.193	2391.53	1036.74	-132.381	2499.77	923.945	-72.6944	2540.77	836.629	-139.542	2514.16	810.015	-118.672	2586.04	772.252
5197	0	97.6982	2457.49	1562.67	203.082	2451.45	1565.22	73.7955	2295.89	1535.34	191.972	2285.36	1538.6	140.28	2271.44	1408.44	118.198	2173.15	1130.4	145.177	2431.44	1303.9	149.975	2529.08	1103.86	200.843	2172.17	1222.67	-8.22307	2377.88	1371.23	-126.714	2393.65	1137.28	-138.35	2399.08	1038.2	-131.316	2506.19	924.551	-71.7706	2546.82	837.093	-138.401	2519.56	810.575	-117.9	2591.39	772.291
5198	0	100.984	2466.31	1564.64	206.44	2460.23	1566.57	76.7643	2304.79	1537	194.81	2294.24	1539.62	142.589	2280.52	1409.69	119.241	2183.65	1131.42	147.545	2440.65	1305.27	152.413	2539.23	1105.61	202.022	2181.8	1223.34	-5.75014	2387.65	1373.11	-124.688	2401.95	1139.31	-136.095	2406.62	1039.99	-129.479	2512.49	925.157	-70.38	2552.34	836.928	-137.91	2524.92	811.411	-117.344	2596.34	772.31
5199	0	104.063	2475.22	1566.85	209.57	2468.87	1568.15	79.6314	2313.68	1539.11	197.748	2303.02	1540.97	144.857	2289.88	1411.04	120.062	2194.01	1132.5	150.047	2450.02	1307.34	154.965	2548.89	1107.86	203.527	2191.54	1224.26	-3.16987	2397.26	1375.55	-122.444	2410.55	1141.35	-134.222	2414.13	1042.21	-128.097	2518.65	926.004	-69.4762	2557.75	837.132	-136.98	2529.62	812.125	-116.806	2600.75	772.291
5200	0	107.327	2483.99	1569.22	212.709	2477.55	1570.05	82.3146	2322.51	1541.58	200.524	2311.64	1542.84	147.079	2298.27	1413.06	121.261	2204.53	1133.91	152.364	2459.47	1309.64	157.358	2558.37	1110.4	204.797	2201.13	1225.44	-0.676768	2406.77	1377.86	-120.182	2419.27	1143.89	-132.677	2421.89	1045.14	-126.78	2524.63	927.259	-68.4894	2562.98	837.77	-135.414	2533.97	812.961	-116.176	2604.98	772.356
5201	0	110.309	2492.67	1571.75	215.655	2486.23	1572.27	85.0785	2331.28	1544.18	203.095	2320.3	1544.95	149.291	2307.43	1414.88	122.466	2214.66	1135.45	154.561	2468.39	1311.93	159.543	2567.74	1113.09	206.33	2210.76	1226.93	1.747	2416.13	1380.45	-117.906	2428.14	1146.44	-129.361	2429.1	1047.27	-125.607	2530.2	928.484	-67.6161	2567.71	838.184	-134.466	2538.3	813.992	-115.67	2608.73	772.432
5202	0	113.296	2501.28	1574.4	218.605	2494.78	1574.46	87.7857	2340	1546.7	205.931	2328.94	1547.01	151.397	2316	1417.04	124.072	2224.34	1137.05	157.017	2477.34	1314.43	161.879	2577.05	1115.84	207.851	2220.45	1228.2	3.95954	2424.99	1383.05	-115.621	2437.09	1149.18	-127.363	2436.39	1050.1	-123.957	2535.99	929.879	-66.4764	2572.38	838.634	-133.572	2542.4	815.318	-115.159	2612.19	772.471
5203	0	116.156	2509.75	1577.11	221.45	2503.45	1576.71	90.6209	2348.5	1549.2	208.708	2337.47	1549.04	153.909	2324.97	1418.9	125.832	2233.71	1138.72	159.223	2486.3	1316.94	164.165	2586.18	1118.83	209.964	2230.19	1229.76	6.6364	2434.12	1386	-113.448	2446.06	1152.11	-124.934	2444.02	1052.93	-122.782	2541.57	931.692	-65.4813	2576.65	839.342	-132.921	2546.33	816.96	-114.661	2615.41	772.732
5204	0	118.755	2518.12	1579.92	224.159	2511.89	1579.12	93.104	2357.09	1551.76	211.251	2345.95	1551.14	156.222	2333.96	1420.82	127.839	2243.24	1140.42	161.304	2495.23	1319.51	166.094	2595.34	1121.99	211.983	2239.68	1231.47	8.89138	2443.03	1388.97	-111.262	2454.94	1155.04	-122.884	2451.23	1055.77	-121.387	2547.11	933.422	-64.6727	2581.15	840.357	-132.115	2550.56	818.656	-114.241	2618.41	773.025
5205	0	121.325	2526.4	1582.71	226.786	2520.15	1581.63	95.6699	2365.4	1554.2	213.604	2354.39	1553.21	158.255	2342.41	1423.02	129.957	2252.59	1142.36	163.492	2504.11	1322.12	167.844	2604.55	1124.96	213.779	2248.99	1233.13	11.0481	2451.73	1391.7	-109.051	2463.78	1157.98	-120.757	2458.66	1058.79	-119.996	2552.71	935.355	-63.8863	2585.19	841.157	-131.847	2554.45	820.533	-113.451	2621.43	773.256
5206	0	123.939	2534.7	1585.21	229.286	2528.39	1583.87	98.1916	2373.67	1556.22	216.239	2362.73	1555.09	160.58	2351.1	1424.95	132.037	2262.01	1144.02	165.53	2513.03	1324.44	169.468	2613.86	1127.6	215.895	2258.43	1234.74	13.1793	2460.4	1394.21	-106.907	2472.58	1160.74	-118.958	2465.8	1061.56	-118.555	2558.35	936.906	-62.9804	2590.09	841.991	-130.914	2558.78	822.105	-112.835	2624.43	773.296
5207	0	126.281	2542.9	1587.57	231.616	2536.64	1585.89	100.621	2381.94	1558.2	218.707	2371.16	1556.66	163.023	2360.24	1426.5	134.292	2271.33	1145.85	167.368	2521.74	1326.38	171.234	2622.89	1129.99	218.174	2267.85	1236.24	15.2373	2469.02	1396.55	-104.869	2481.22	1163.2	-116.888	2473.07	1064.14	-117.079	2564.03	938.587	-62.3902	2594.66	842.78	-130.208	2563.25	823.742	-112.04	2627.52	773.15
5208	0	128.571	2551.08	1589.74	233.999	2544.95	1588	102.941	2390.25	1559.94	220.995	2379.46	1558.1	165.006	2368.86	1428.28	136.389	2280.64	1147.45	169.307	2530.45	1328.39	172.592	2631.73	1132	220.228	2277.07	1237.86	17.2596	2477.56	1398.76	-102.784	2489.82	1165.43	-115.136	2480.05	1066.46	-115.802	2569.77	939.879	-61.5721	2598.57	843.447	-129.991	2567.53	825.387	-111.379	2630.52	773.082
5209	0	130.878	2559.13	1591.85	236.196	2553.28	1589.88	105.301	2398.42	1561.38	223.355	2387.76	1559.41	167.168	2377.72	1429.88	138.494	2289.53	1149.38	170.967	2539.1	1329.96	173.951	2640.47	1133.85	222.205	2286.14	1239.42	19.1729	2486.12	1400.53	-100.992	2498.15	1167.51	-113.317	2487.16	1068.65	-114.476	2575.51	941.164	-60.595	2602.83	843.61	-129.98	2572.25	827.051	-110.629	2633.7	772.84
5210	0	132.763	2567.16	1593.54	238.162	2561.36	1591.47	107.543	2406.7	1562.43	225.638	2396.09	1560.29	169.397	2386.57	1431.26	140.716	2298.24	1150.99	172.611	2547.68	1331.38	175.02	2649.08	1135.15	224.346	2295.16	1240.8	21.1013	2494.62	1402.32	-99.2172	2506.36	1169.09	-111.686	2494.04	1070.47	-113.198	2581.27	942.229	-59.8668	2607.38	844.208	-128.959	2576.89	828.001	-109.757	2637.05	772.524
5211	0	134.744	2575.17	1595.29	240.027	2569.66	1593	109.63	2414.79	1563.28	227.697	2404.46	1560.97	171.439	2395.28	1432.56	142.759	2306.52	1152.19	174.255	2556.31	1332.66	176.007	2657.69	1136.2	226.258	2303.94	1242.04	22.8118	2502.98	1403.63	-97.6504	2514.09	1170.68	-110.079	2501.02	1071.85	-112.005	2587.06	943.064	-58.8363	2611.83	844.247	-128.575	2581.62	829.032	-108.847	2640.5	772.117
5212	0	136.501	2583.14	1596.63	241.874	2577.84	1594.42	111.785	2422.76	1563.97	229.766	2412.93	1561.53	173.384	2403.95	1433.82	144.704	2314.74	1153.75	175.843	2564.91	1333.57	176.958	2666.16	1136.92	228.337	2312.66	1243.3	24.4146	2511.27	1404.85	-96.1719	2521.46	1171.89	-108.741	2507.88	1073.18	-110.758	2592.76	943.721	-58.0472	2616.51	844.531	-128.614	2586.75	830.12	-107.924	2644.11	771.773
5213	0	138.092	2591.18	1597.98	243.676	2586.27	1595.65	113.87	2431.03	1564.53	232.051	2421.28	1561.95	175.355	2412.61	1434.85	146.472	2322.83	1154.96	177.111	2573.48	1334.33	177.605	2674.33	1137.37	230.431	2321.36	1244.37	26.0517	2519.56	1405.94	-94.7654	2528.63	1172.79	-107.431	2514.58	1074.33	-109.637	2598.57	944.125	-57.1111	2621.13	844.747	-127.627	2591.39	830.717	-106.993	2647.86	771.212
5214	0	139.666	2599.08	1599.13	245.22	2594.41	1596.69	115.963	2439.12	1564.96	234.064	2429.69	1562.32	177.215	2421.29	1435.79	148.632	2330.86	1156.13	178.363	2581.91	1335.06	178.258	2682.5	1137.68	232.437	2329.86	1245.55	27.6994	2527.67	1406.8	-93.0423	2535.32	1173.35	-105.928	2521.28	1075.12	-108.396	2604.26	944.544	-56.0308	2625.42	844.424	-127.4	2596.46	831.336	-106.183	2651.7	770.924
5215	0	141.285	2606.96	1600.04	246.852	2602.89	1597.7	117.785	2447.03	1565.37	235.914	2438.15	1562.67	179.284	2429.72	1436.76	150.277	2338.36	1157.27	179.524	2590.19	1335.65	178.726	2690.46	1137.76	234.318	2338.13	1246.71	29.1297	2535.75	1407.51	-91.7365	2541.63	1174.03	-104.6	2527.86	1075.98	-107.426	2609.82	944.901	-54.9144	2630.85	844.579	-126.282	2601.32	831.549	-105.321	2655.7	770.635
5216	0	142.72	2614.98	1600.94	248.353	2611.21	1598.42	119.591	2455.16	1565.77	237.788	2446.65	1562.9	180.98	2438.39	1437.67	152.526	2346.8	1158.31	180.671	2598.53	1336.04	179.084	2698.35	1137.54	236.405	2346.4	1247.88	30.4938	2543.8	1408.25	-90.4679	2547.77	1174.64	-103.539	2534.13	1076.84	-106.48	2615.21	945.197	-54.5232	2634.56	844.533	-125.771	2605.99	832.063	-104.505	2659.89	770.522
5217	0	143.995	2623.04	1601.63	249.682	2619.43	1598.91	121.414	2463.53	1566	239.638	2455.13	1562.89	182.812	2446.88	1438.34	154.25	2353.86	1159.48	181.716	2606.75	1336.37	179.392	2706.16	1137.21	238.516	2354.54	1248.79	31.7771	2551.7	1408.81	-89.3269	2553.7	1175.15	-102.465	2540.28	1077.47	-105.641	2620.62	945.366	-55.4278	2635.14	843.929	-125.445	2610.9	832.501	-103.801	2664.11	770.262
5218	0	145.429	2631.27	1602.1	251.002	2627.82	1599.31	123.163	2471.54	1566.07	241.368	2463.67	1562.97	184.328	2455.14	1439.06	156.079	2361.3	1160.25	182.684	2614.89	1336.53	179.742	2713.99	1136.95	240.199	2362.55	1249.68	33.1808	2559.58	1409.15	-88.2806	2559.55	1175.77	-101.3	2546.25	1078.11	-104.693	2625.99	945.584	-53.1961	2643.58	844.57	-124.691	2615.45	832.776	-103.202	2668.54	770.308
5219	0	146.755	2639.39	1602.44	252.26	2636.57	1599.81	124.856	2479.91	1566.18	242.962	2472.13	1563.11	185.908	2463.45	1439.71	157.88	2368.6	1161.17	183.537	2623.02	1336.81	179.905	2721.71	1136.6	241.986	2370.38	1250.75	34.3745	2567.31	1409.65	-87.3661	2565.29	1176.4	-100.398	2552.05	1078.69	-104.006	2631.22	945.731	-52.7732	2649.13	844.889	-123.342	2620.03	832.876	-102.8	2673.02	770.568
5220	0	148.087	2647.57	1602.65	253.54	2645.04	1599.91	126.373	2488.19	1566.36	244.663	2480.72	1563.25	187.761	2471.61	1440.18	159.524	2375.91	1162.09	184.356	2630.94	1336.75	180.155	2729.38	1136.36	243.856	2378.25	1251.47	35.5466	2574.96	1410.03	-86.6235	2570.99	1177.1	-99.4222	2557.79	1079.42	-103.341	2636.1	945.978	-52.319	2653	844.688	-123.516	2624.37	833.356	-102.123	2677.93	770.843
5221	0	149.237	2655.99	1602.76	254.752	2653.58	1599.94	127.881	2496.32	1566.5	246.19	2489.3	1563.15	189.121	2479.73	1440.53	161.153	2383.26	1162.71	185.191	2638.88	1336.62	180.653	2737.02	1136.08	245.532	2386.12	1251.95	36.7043	2582.58	1410.39	-86.0267	2576.68	1177.7	-98.522	2563.29	1079.89	-102.946	2641.12	946.183	-51.1312	2659.05	844.915	-122.755	2629.02	833.509	-102.098	2682.3	771.1
5222	0	150.281	2664.33	1602.84	256.023	2662.18	1599.88	129.902	2504.69	1566.45	247.963	2497.73	1563.3	190.581	2487.87	1440.82	162.578	2390.54	1163.27	185.93	2646.65	1336.61	180.881	2744.67	1136.02	246.866	2393.76	1252.49	37.737	2590.08	1410.69	-85.5015	2582.27	1178.39	-97.7683	2568.7	1080.46	-102.63	2646.19	946.481	-50.8986	2663.51	845.31	-122.067	2633.42	833.879	-101.961	2686.72	771.492
5223	0	151.517	2672.81	1602.73	257.111	2670.88	1599.86	130.873	2512.81	1566.95	249.311	2506.26	1563.7	191.871	2495.87	1441.18	163.824	2397.84	1164	186.806	2654.43	1336.64	181.27	2752.43	1136.06	248.148	2401.31	1253.17	38.6656	2597.58	1411.1	-85.0815	2587.82	1179	-97.2457	2574	1081.18	-102.437	2650.89	946.763	-50.616	2668.44	845.665	-121.571	2637.99	834.112	-101.805	2691.43	771.888
5224	0	152.611	2681.04	1602.49	258.386	2679.88	1599.72	132.432	2521.15	1567.39	250.626	2514.75	1563.99	193.147	2503.73	1441.41	164.809	2405.14	1164.41	187.434	2662.09	1336.65	181.647	2760.06	1136.13	249.424	2408.89	1253.54	39.5842	2605.09	1411.44	-84.804	2593.28	1179.51	-96.8914	2579.27	1081.66	-102.119	2656.01	946.946	-50.0302	2674.54	846	-120.659	2642.26	834.27	-101.63	2696.38	772.26
5225	0	153.522	2689.52	1602.14	259.266	2688.27	1598.98	133.539	2529.32	1567.82	252.089	2523.23	1564.19	194.335	2511.6	1441.49	165.744	2412.26	1164.78	188.243	2669.84	1336.27	182.305	2767.84	1136.22	250.489	2416.42	1253.69	40.4141	2612.53	1411.51	-84.4101	2598.9	1179.91	-96.2999	2584.7	1082.01	-101.952	2660.95	947.046	-50.2842	2677.93	846.284	-120.194	2647.03	834.307	-101.492	2701.08	772.449
5226	0	154.473	2698.05	1601.75	260.091	2696.81	1598.35	134.969	2537.82	1568.19	253.355	2531.68	1564.43	195.299	2519.42	1441.57	166.706	2419.38	1165.11	188.82	2677.45	1335.96	182.948	2775.4	1135.98	251.405	2423.97	1253.87	41.2279	2620.05	1411.48	-83.922	2604.56	1180.23	-95.9237	2590.07	1082.26	-101.847	2665.9	947.157	-49.6741	2684.05	846.412	-119.57	2651.51	834.335	-101.106	2706.17	772.647
5227	0	155.5	2706.38	1601.33	261.234	2705.54	1597.93	136.13	2545.54	1568.65	254.68	2540.06	1564.79	196.188	2527.23	1441.73	167.515	2426.87	1165.48	189.708	2684.96	1335.68	183.57	2782.88	1135.78	252.246	2431.45	1254.21	42.0742	2627.64	1411.46	-83.5974	2610.32	1180.46	-95.4028	2595.71	1082.62	-101.592	2671.22	947.124	-49.5432	2688.77	846.149	-119.023	2656.48	834.432	-100.936	2711.03	772.676
5228	0	156.162	2714.73	1600.83	261.945	2714.21	1597.32	137.015	2553.89	1569.02	255.615	2548.41	1565.02	197.132	2534.87	1441.72	168.049	2434.11	1165.63	190.401	2692.51	1335.45	184.308	2789.84	1135.35	253.087	2438.76	1254.43	42.6411	2635.08	1411.21	-83.1462	2616.18	1180.57	-95.2093	2601.25	1082.77	-101.698	2676.34	946.914	-49.6188	2693.67	846.067	-118.855	2661.22	834.406	-100.676	2715.99	772.583
5229	0	156.924	2723.01	1600.23	262.805	2722.76	1596.76	138.008	2562.07	1569.12	256.7	2556.78	1565.03	197.774	2542.65	1441.6	168.612	2441.18	1165.65	191.029	2699.98	1334.9	185.062	2796.9	1134.89	253.741	2446.09	1254.37	43.4247	2642.68	1411.02	-82.7808	2622.28	1180.63	-94.9409	2607.03	1082.79	-101.502	2681.7	946.722	-48.8944	2699.69	846.139	-118.199	2666.18	833.906	-100.434	2721.01	772.422
5230	0	157.47	2731.26	1599.72	263.286	2731.01	1596.01	138.824	2570.07	1569.16	257.594	2565.1	1565.08	198.437	2550.48	1441.28	169.199	2448.34	1165.86	191.741	2707.63	1334.49	185.802	2804.05	1134.16	254.342	2453.54	1254.42	44.0527	2650.19	1410.83	-82.5586	2628.62	1180.57	-94.9669	2612.91	1082.77	-101.191	2687.25	946.599	-48.8601	2704.83	845.884	-117.889	2671.5	833.809	-100.311	2726.15	772.189
5231	0	157.92	2739.44	1599.01	263.877	2739.66	1595.46	139.729	2578.18	1569.17	258.379	2573.4	1565.14	199.072	2558.25	1441.26	169.937	2455.82	1165.99	192.543	2715.14	1334.03	186.579	2811.05	1133.69	254.884	2460.96	1254.59	44.6533	2658.01	1410.47	-82.2842	2635.12	1180.62	-94.7466	2619.21	1082.92	-101.099	2693.07	946.217	-48.9833	2709.45	845.122	-117.604	2676.69	833.578	-99.9777	2731.28	771.782
5232	0	158.36	2747.53	1598.29	264.262	2748.05	1594.73	140.653	2586.11	1568.88	259.332	2581.51	1565.01	199.576	2565.94	1441.17	170.424	2463.02	1165.88	193.038	2722.75	1333.38	187.327	2818.31	1132.88	255.446	2468.37	1254.48	45.4195	2665.74	1409.97	-81.9928	2642.01	1180.47	-94.5932	2625.54	1082.68	-100.295	2699.05	945.685	-48.2077	2715.44	844.972	-117.336	2682.12	833.119	-99.5329	2736.57	771.111
5233	0	158.77	2755.71	1597.36	264.524	2756.18	1593.86	141.096	2594.16	1568.63	259.458	2589.92	1564.6	200.213	2573.77	1440.67	170.999	2470.22	1165.74	193.783	2730.38	1332.73	188.101	2825.6	1132.17	256.004	2475.7	1254.36	45.9394	2673.45	1409.35	-81.6802	2649.03	1179.91	-94.0119	2632.18	1082.35	-100.217	2704.96	945.252	-48.0182	2721.84	845.089	-116.84	2687.75	832.45	-99.1948	2741.92	770.446
5234	0	159.018	2763.77	1596.57	264.854	2764.47	1593.09	141.665	2602.23	1568.11	260.291	2598.02	1564.25	200.661	2581.45	1440.17	171.5	2477.62	1165.42	194.461	2737.8	1331.96	188.821	2832.99	1131.36	256.422	2483.11	1254.08	46.4194	2681.26	1408.59	-81.4638	2656.09	1179.61	-94.0628	2638.77	1081.94	-99.957	2711.24	944.506	-47.4105	2727.55	844.186	-116.776	2693.58	831.864	-98.7923	2747.3	769.563
5235	0	159.211	2771.82	1595.54	265.207	2772.85	1592.27	142.059	2610.14	1567.47	260.74	2606.25	1563.7	201.117	2589.23	1439.7	171.874	2484.97	1165.07	195.033	2745.56	1331.15	189.569	2840.29	1130.3	256.81	2490.58	1253.68	46.9036	2689.06	1407.94	-81.1404	2663.6	1178.84	-93.9806	2645.62	1081.48	-99.7304	2717.49	943.786	-47.4232	2732.02	842.937	-116.742	2699.42	831.157	-98.3807	2752.8	768.598
5236	0	159.406	2779.85	1594.62	265.33	2781.11	1591.5	142.45	2618.17	1566.69	261.025	2614.29	1563.05	201.285	2597.02	1439.06	172.374	2492.3	1164.64	195.527	2753.17	1330.31	190.141	2847.72	1129.44	257.023	2498.02	1253.32	47.3135	2697	1407.01	-80.8823	2671.02	1178.17	-93.7467	2652.52	1080.9	-99.4749	2723.9	942.848	-47.7254	2737.51	841.859	-116.384	2705.32	830.373	-98.35	2758.53	767.611
5237	0	159.315	2788	1593.54	265.358	2789.17	1590.5	142.969	2626.14	1565.65	261.232	2622.41	1562.38	201.538	2604.85	1438.43	172.611	2499.7	1163.93	195.939	2760.96	1329.49	190.718	2855.3	1128.52	257.199	2505.59	1252.83	47.6299	2704.95	1406.24	-80.3693	2678.92	1177.33	-93.4076	2659.62	1080.1	-98.7304	2730.28	942.058	-47.288	2743.65	840.635	-116.408	2711.1	829.341	-98.1027	2763.94	766.493
5238	0	159.469	2796.07	1592.51	265.486	2797.18	1589.64	142.841	2634.15	1564.89	261.487	2630.49	1561.66	201.714	2612.77	1437.59	172.861	2507.2	1163.57	196.447	2768.71	1328.39	191.514	2863.06	1127.4	257.424	2513.11	1252.3	48.0123	2713.03	1405.23	-80.0691	2686.49	1176.6	-93.1226	2666.85	1079.61	-98.5662	2736.65	940.913	-46.9029	2750.17	839.639	-116.241	2717.05	828.603	-97.9626	2769.49	765.254
5239	0	159.371	2804.25	1591.35	265.587	2805.35	1588.59	142.927	2642.21	1563.82	261.725	2638.46	1560.81	201.817	2620.77	1436.76	172.954	2514.74	1162.88	196.972	2776.55	1327.32	192.057	2870.48	1126.28	257.571	2520.8	1251.59	48.269	2721.11	1404.31	-79.6555	2694.53	1175.47	-92.9469	2674.04	1078.86	-98.0756	2743.23	939.841	-46.5874	2756.46	838.808	-116.196	2723.02	827.683	-97.9593	2775.35	764
5240	0	159.888	2811.93	1589.88	265.789	2813.7	1587.88	142.911	2650.21	1562.79	261.942	2646.33	1559.95	201.92	2628.66	1435.87	173.072	2522.37	1162.16	197.234	2784.43	1326.3	192.454	2878.11	1125.09	257.499	2528.39	1250.89	48.3482	2729.33	1403.21	-79.2137	2702.53	1174.64	-92.5638	2681.6	1077.98	-98.1533	2749.94	938.696	-49.564	2756.4	836.221	-116.089	2729.11	826.522	-98.4653	2781.96	763.024
5241	0	159.622	2820.31	1588.9	265.58	2821.64	1586.76	142.79	2658.39	1561.68	261.648	2654.41	1559.19	201.815	2636.74	1435	172.932	2530.28	1161.32	197.642	2792.42	1325.35	193.095	2886.04	1123.97	257.295	2536.04	1250.13	48.6319	2737.82	1402.18	-78.8765	2710.6	1173.47	-92.3627	2689.13	1077.02	-97.8133	2756.76	937.297	-49.0807	2763.3	834.805	-116.142	2735.17	825.487	-98.5274	2787.72	761.555
5242	0	159.369	2828.42	1587.61	265.559	2829.72	1585.74	142.564	2666.62	1560.6	261.446	2662.44	1558.33	201.639	2644.85	1434.06	172.803	2538.2	1160.56	197.731	2800.37	1324.08	193.489	2893.76	1122.65	257.059	2543.78	1249.39	48.7848	2746.19	1401.1	-78.4898	2718.76	1172.21	-91.9672	2696.94	1076.04	-97.8585	2763.78	936.001	-48.5675	2770.52	833.542	-116.014	2741.57	824.213	-98.1761	2792.97	759.704
5243	0	157.785	2833.98	1586.63	265.585	2837.83	1584.68	142.374	2674.77	1559.55	261.272	2670.56	1557.35	201.553	2653.01	1433.03	172.557	2546.18	1159.51	198.029	2808.4	1322.99	193.996	2901.61	1121.29	256.821	2551.6	1248.47	48.8771	2754.69	1399.87	-78.1878	2727.09	1171.11	-91.8119	2704.7	1074.93	-97.5707	2770.88	934.576	-48.2929	2777.39	831.936	-115.955	2748.11	822.81	-98.1833	2799.09	758.06
5244	0	159.192	2845.48	1585.27	265.517	2846.18	1583.46	142.014	2683.12	1558.28	260.889	2678.56	1556.3	201.132	2661.14	1431.9	172.38	2554.32	1158.5	198.113	2816.41	1321.84	194.411	2909.52	1120.19	256.568	2559.51	1247.44	48.8374	2763.23	1398.6	-78.0189	2735.29	1169.82	-91.3575	2712.74	1073.54	-97.6291	2778.03	933.033	-48.7962	2782.5	829.781	-116.03	2754.67	821.488	-98.2009	2805.41	756.366
5245	0	158.947	2853.69	1584.12	265.271	2854.15	1582.53	141.536	2691.43	1557.23	260.321	2686.73	1555.39	200.822	2669.39	1430.91	172.104	2562.38	1157.49	198.114	2824.59	1320.72	194.737	2917.43	1118.98	256.053	2567.32	1246.71	48.7119	2771.8	1397.46	-77.8337	2743.76	1168.35	-91.252	2720.87	1072.19	-96.9831	2785.57	931.33	-48.6891	2789.35	828.217	-115.875	2761.76	820.068	-98.3494	2811.73	754.596
5246	0	157.003	2858.45	1583.07	265.024	2862.31	1581.36	140.916	2699.8	1556.11	259.933	2694.72	1554.35	200.278	2677.61	1429.83	171.798	2570.72	1156.37	198.138	2832.81	1319.6	195.169	2925.53	1117.63	255.723	2575.45	1245.7	48.4375	2780.17	1396.15	-77.7685	2752.36	1166.82	-90.8006	2729.17	1070.92	-96.9796	2793	929.679	-48.5729	2796.74	826.601	-115.893	2768.93	818.559	-98.4249	2818.24	752.733
5247	0	158.252	2870.58	1581.68	264.914	2871.03	1580.23	140.417	2708.25	1554.85	259.431	2702.81	1553.27	199.909	2686.08	1428.58	171.499	2578.86	1155.27	198.024	2841.13	1318.4	195.613	2933.66	1116.48	255.3	2583.52	1244.66	48.2	2788.96	1394.76	-77.7106	2761.06	1165.32	-90.7139	2737.53	1069.32	-96.586	2800.93	927.876	-48.332	2803.84	824.625	-116.064	2775.96	816.883	-98.4198	2825.03	750.794
5248	0	157.749	2878.85	1580.29	264.27	2878.95	1579.21	139.786	2716.65	1553.55	258.739	2711.2	1552.17	199.309	2694.37	1427.36	171.292	2587.39	1154.04	197.839	2849.51	1317.07	195.833	2941.94	1115.21	254.918	2591.72	1243.6	47.8039	2797.33	1393.21	-77.6471	2769.6	1163.71	-90.5939	2745.99	1067.6	-96.5951	2808.76	926.126	-48.3046	2811.44	822.792	-116.157	2783.5	815.164	-98.5606	2832.16	748.816
5249	0	157.055	2887.41	1578.9	263.678	2887.55	1577.94	138.978	2725.07	1552.39	257.795	2719.71	1551.02	198.818	2702.68	1426.29	171.015	2595.7	1152.8	197.584	2857.95	1315.86	196.188	2950.19	1113.81	254.521	2600.06	1242.56	47.5779	2806.24	1391.79	-77.5736	2778.24	1161.98	-90.3937	2754.5	1066.11	-96.6156	2816.89	924.321	-48.3494	2819.07	820.846	-116.241	2791.26	813.557	-98.0453	2839.01	746.516
5250	0	156.184	2896.01	1577.64	262.883	2896.05	1576.83	138.168	2733.69	1551.04	257.07	2727.97	1549.9	198.235	2711.38	1425.07	170.823	2604.24	1151.69	197.464	2866.46	1314.73	196.646	2958.72	1112.64	254.19	2608.49	1241.51	47.1318	2814.99	1390.39	-77.6967	2787.23	1160.3	-89.9957	2763.21	1064.43	-96.208	2825.06	922.549	-49.1044	2825.47	818.741	-115.868	2799.18	812.027	-98.2313	2846.33	744.677
5251	0	155.472	2904.19	1576.22	261.694	2904.07	1575.75	137.236	2742.05	1549.52	256.138	2736.49	1548.79	197.689	2719.77	1423.81	170.653	2612.85	1150.34	197.158	2875.03	1313.29	196.948	2967.36	1111.49	253.892	2617.06	1240.27	46.7905	2823.55	1388.84	-77.8617	2796.23	1158.57	-90.0143	2771.65	1062.69	-96.0135	2833.24	920.776	-49.1541	2833.9	816.787	-115.84	2807.19	810.232	-98.4821	2854.71	742.926
5252	0	154.037	2912.81	1575.01	260.454	2913.16	1574.65	136.153	2750.61	1548.11	255.032	2744.98	1547.76	197.138	2728.36	1422.6	170.45	2621.5	1148.96	196.827	2883.51	1312.19	197.103	2976.03	1110.37	253.557	2625.7	1239.13	46.2766	2832.4	1387.3	-77.8751	2804.98	1156.82	-89.9233	2780.25	1060.87	-96.1604	2842.02	919.271	-48.8267	2841.97	815.061	-115.912	2815.52	808.593	-98.3105	2862.72	741.103
5253	0	152.754	2921.42	1573.67	259.456	2921.78	1573.91	134.952	2759.31	1546.94	253.978	2753.51	1546.93	196.659	2737.23	1421.4	170.435	2630.28	1147.8	196.49	2892.4	1311.09	197.412	2984.99	1109.29	253.461	2634.37	1238.23	45.6789	2841.22	1385.91	-78.1129	2814.1	1155.17	-89.9763	2788.9	1059.36	-96.1342	2850.34	917.561	-48.5575	2850.87	813.638	-115.871	2823.9	807.092	-98.2735	2870.83	739.335
5254	0	151.408	2930.14	1572.37	257.893	2929.8	1572.9	133.915	2767.88	1545.67	252.651	2762.31	1546.03	195.984	2746.06	1420.22	170.585	2639.22	1146.58	195.992	2901.29	1309.91	197.297	2993.59	1108.1	253.356	2643.32	1237.08	45.1043	2849.86	1384.31	-78.596	2823.57	1153.67	-89.8321	2797.35	1057.64	-96.9546	2859.52	916.103	-48.7501	2858.95	811.785	-115.673	2832.58	805.432	-98.1148	2879.4	737.641
5255	0	150.105	2938.83	1571.2	256.62	2938.95	1571.86	132.542	2776.5	1544.23	251.305	2770.7	1545.2	195.573	2754.59	1419.12	170.73	2648.18	1145.12	195.456	2909.98	1308.89	197.205	3002.66	1107.13	253.37	2652.28	1235.81	44.5624	2858.56	1382.88	-78.9133	2832.34	1151.97	-89.9673	2805.75	1055.73	-96.5154	2868.27	914.446	-48.2802	2868.39	810.309	-115.315	2841.25	803.581	-97.8228	2888.44	735.968
5256	0	148.744	2947.57	1569.99	255.345	2947.6	1571.29	131.099	2785.34	1543.03	249.849	2779.16	1544.46	194.641	2763.6	1417.93	170.893	2657.3	1143.71	194.977	2919.02	1308.1	197.069	3011.48	1106.23	253.208	2661.45	1234.73	43.7225	2867.43	1381.53	-79.2481	2840.95	1150.3	-89.85	2814.48	1054.12	-96.4325	2877.09	912.746	-48.0848	2877.19	808.689	-114.987	2850.28	801.896	-97.5689	2897.4	734.374
5257	0	147.312	2956.51	1568.82	254.009	2956.02	1570.67	129.508	2794.29	1541.92	248.11	2787.77	1543.71	193.968	2772.54	1416.6	171.142	2666.63	1142.27	194.381	2928.04	1307.01	196.746	3020.27	1105.36	253.157	2670.67	1233.46	42.7508	2875.96	1380.06	-79.6428	2849.44	1148.54	-90.2904	2823.09	1052.41	-96.4974	2885.66	910.979	-48.1122	2885.7	806.843	-114.7	2859.22	800.167	-97.2892	2906.7	732.783
5258	0	145.99	2965.42	1567.72	252.585	2965.12	1569.77	127.797	2803.26	1540.69	246.472	2796.53	1542.95	193.119	2781.41	1415.34	171.488	2676.03	1140.66	193.725	2937.02	1306.23	196.517	3030.25	1104.67	253.038	2679.97	1232.13	41.8921	2884.7	1378.77	-80.0339	2857.88	1146.71	-90.0871	2831.88	1050.53	-97.4957	2894.99	909.231	-48.022	2895.75	805.375	-114.312	2868.28	798.295	-96.9736	2916.3	731.256
5259	0	144.558	2974.46	1566.75	251.378	2974.16	1569.31	125.764	2812.52	1539.62	244.758	2804.92	1542.22	192.141	2790.35	1414.1	171.628	2685.55	1139.11	193.01	2946.49	1305.61	196.126	3039.44	1104.16	252.769	2689.4	1230.8	40.8152	2893.38	1377.05	-81.7194	2862.71	1144.62	-90.2633	2840.35	1048.69	-97.1984	2904.07	907.586	-47.6973	2904.86	803.671	-113.513	2877.85	796.464	-96.4693	2925.92	729.986
5260	0	142.985	2983.39	1565.83	249.746	2982.53	1568.85	124.239	2821.47	1538.69	243.087	2813.53	1541.68	191.058	2799.5	1412.98	171.708	2695.22	1137.56	192.114	2955.78	1304.96	197.687	3052.94	1104.69	252.623	2698.87	1229.72	39.8717	2902.26	1375.71	-81.0802	2874.76	1143.36	-90.2129	2849.09	1046.8	-97.2937	2913.29	906.04	-48.4512	2913.45	801.709	-113.18	2887.1	794.795	-96.0724	2935.81	728.526
5261	0	141.314	2992.3	1565.1	248.196	2991.27	1568.56	122.507	2830.65	1537.74	241.48	2822.4	1541.26	190.159	2808.41	1411.99	171.653	2705.04	1136.08	191.337	2964.96	1304.52	197.11	3063	1104.84	252.388	2708.6	1228.51	38.6408	2911.14	1374.44	-81.7467	2883.03	1141.74	-90.5192	2857.73	1045.21	-96.6206	2922.56	904.504	-46.1711	2926.3	801.683	-112.677	2896.79	793.079	-95.6655	2945.97	727.164
5262	0	139.483	3001.37	1564.63	246.988	3001.25	1568.51	120.414	2840.19	1536.91	239.658	2831.37	1540.68	188.49	2818.49	1411	171.59	2714.9	1134.73	190.356	2974.4	1303.99	197.135	3073.07	1104.45	252.168	2718.34	1227.42	37.4725	2920.01	1373.3	-82.2705	2891.57	1140.26	-90.2519	2866.94	1043.55	-97.1146	2931.99	902.949	-46.5734	2934.85	799.876	-111.986	2906.37	791.324	-95.2751	2956.31	725.799
5263	0	137.642	3010.4	1564.2	244.848	3010.14	1568.38	118.364	2849.61	1536.22	237.832	2840.5	1540.44	187.626	2827.53	1410.49	171.641	2724.71	1133.87	189.295	2984.28	1303.93	195.485	3081.18	1104.15	251.933	2727.93	1226.83	36.3792	2929	1372.4	-84.0304	2896.25	1138.61	-90.1972	2876.11	1042.18	-97.2268	2941.51	901.834	-45.0352	2948.28	799.994	-111.567	2915.72	789.92	-94.9429	2966.67	724.8
5264	0	135.577	3019.45	1564.13	243.212	3020.11	1568.92	116.682	2858.7	1535.95	236.167	2849.78	1540.46	186.635	2837.06	1410.14	171.518	2734.68	1133.28	188.305	2993.55	1303.88	194.134	3089.12	1103.79	252.019	2737.86	1226.49	35.2748	2938.05	1371.7	-83.2895	2908.92	1138.2	-90.1139	2885.15	1041.03	-97.4073	2951.05	900.985	-46.7811	2955.37	798.155	-111.352	2925.57	788.87	-94.7759	2976.94	724.013
[truncated: 69 more columns]

## Sheet: Sheet2
Devices
		025370 - Force			025370 - Moment			025370 - CoP			027571 - Force			027571 - Moment			027571 - CoP			037720 - Force			037720 - Moment			037720 - CoP
Frame	Sub Frame	Fx	Fy	Fz	Mx	My	Mz	Cx	Cy	Cz	Fx	Fy	Fz	Mx	My	Mz	Cx	Cy	Cz	Fx	Fy	Fz	Mx	My	Mz	Cx	Cy	Cz
		N	N	N	N.mm	N.mm	N.mm	mm	mm	mm	N	N	N	N.mm	N.mm	N.mm	mm	mm	mm	N	N	N	N.mm	N.mm	N.mm	mm	mm	mm
4728	0	0	0	0	0	0	0	200	300	0	0	0	0	0	0	0	200	903	0	0	0	0	0	0	0	603	903	0
4728	1	0	0	0	0	0	0	200	300	0	0	0	0	0	0	0	200	903	0	0	0	0	0	0	0	603	903	0
4728	2	0	0	0	0	0	0	200	300	0	0	0	0	0	0	0	200	903	0	0	0	0	0	0	0	603	903	0
4728	3	0	0	0	0	0	0	200	300	0	0	0	0	0	0	0	200	903	0	0	0	0	0	0	0	603	903	0
4728	4	0	0	0	0	0	0	200	300	0	0	0	0	0	0	0	200	903	0	0	0	0	0	0	0	603	903	0
4728	5	0	0	0	0	0	0	200	300	0	0	0	0	0	0	0	200	903	0	0	0	0	0	0	0	603	903	0
4728	6	0	0	0	0	0	0	200	300	0	0	0	0	0	0	0	200	903	0	0	0	0	0	0	0	603	903	0
4728	7	0	0	0	0	0	0	200	300	0	0	0	0	0	0	0	200	903	0	0	0	0	0	0	0	603	903	0
4728	8	0	0	0	0	0	0	200	300	0	0	0	0	0	0	0	200	903	0	0	0	0	0	0	0	603	903	0
4728	9	0	0	0	0	0	0	200	300	0	0	0	0	0	0	0	200	903	0	0	0	0	0	0	0	603	903	0
4729	0	0	0	0	0	0	0	200	300	0	0	0	0	0	0	0	200	903	0	0	0	0	0	0	0	603	903	0
4729	1	0	0	0	0	0	0	200	300	0	0	0	0	0	0	0	200	903	0	0	0	0	0	0	0	603	903	0
4729	2	0	0	0	0	0	0	200	300	0	0	0	0	0	0	0	200	903	0	0	0	0	0	0	0	603	903	0
4729	3	0	0	0	0	0	0	200	300	0	0	0	0	0	0	0	200	903	0	0	0	0	0	0	0	603	903	0
4729	4	0	0	0	0	0	0	200	300	0	0	0	0	0	0	0	200	903	0	0	0	0	0	0	0	603	903	0
4729	5	0	0	0	0	0	0	200	300	0	0	0	0	0	0	0	200	903	0	0	0	0	0	0	0	603	903	0
4729	6	0	0	0	0	0	0	200	300	0	0	0	0	0	0	0	200	903	0	0	0	0	0	0	0	603	903	0
4729	7	0	0	0	0	0	0	200	300	0	0	0	0	0	0	0	200	903	0	0	0	0	0	0	0	603	903	0
4729	8	0	0	0	0	0	0	200	300	0	0	0	0	0	0	0	200	903	0	0	0	0	0	0	0	603	903	0
4729	9	0	0	0	0	0	0	200	300	0	0	0	0	0	0	0	200	903	0	0	0	0	0	0	0	603	903	0
4730	0	0	0	0	0	0	0	200	300	0	0	0	0	0	0	0	200	903	0	0	0	0	0	0	0	603	903	0
4730	1	0	0	0	0	0	0	200	300	0	0	0	0	0	0	0	200	903	0	0	0	0	0	0	0	603	903	0
4730	2	0	0	0	0	0	0	200	300	0	0	0	0	0	0	0	200	903	0	0	0	0	0	0	0	603	903	0
4730	3	0	0	0	0	0	0	200	300	0	0	0	0	0	0	0	200	903	0	0	0	0	0	0	0	603	903	0
4730	4	0	0	0	0	0	0	200	300	0	0	0	0	0	0	0	200	903	0	0	0	0	0	0	0	603	903	0
4730	5	0	0	0	0	0	0	200	300	0	0	0	0	0	0	0	200	903	0	0	0	0	0	0	0	603	903	0
4730	6	0	0	0	0	0	0	200	300	0	0	0	0	0	0	0	200	903	0	0	0	0	0	0	0	603	903	0
4730	7	0	0	0	0	0	0	200	300	0	0	0	0	0	0	0	200	903	0	0	0	0	0	0	0	603	903	0
4730	8	0	0	0	0	0	0	200	300	0	0	0	0	0	0	0	200	903	0	0	0	0	0	0	0	603	903	0
4730	9	0	0	0	0	0	0	200	300	0	0	0	0	0	0	0	200	903	0	0	0	0	0	0	0	603	903	0
4731	0	0	0	0	0	0	0	200	300	0	0	0	0	0	0	0	200	903	0	0	0	0	0	0	0	603	903	0
4731	1	0	0	0	0	0	0	200	300	0	0	0	0	0	0	0	200	903	0	0	0	0	0	0	0	603	903	0
4731	2	0	0	0	0	0	0	200	300	0	0	0	0	0	0	0	200	903	0	0	0	0	0	0	0	603	903	0
4731	3	0	0	0	0	0	0	200	300	0	0	0	0	0	0	0	200	903	0	0	0	0	0	0	0	603	903	0
4731	4	0	0	0	0	0	0	200	300	0	0	0	0	0	0	0	200	903	0	0	0	0	0	0	0	603	903	0
4731	5	0	0	0	0	0	0	200	300	0	0	0	0	0	0	0	200	903	0	0	0	0	0	0	0	603	903	0
4731	6	0	0	0	0	0	0	200	300	0	0	0	0	0	0	0	200	903	0	0	0	0	0	0	0	603	903	0
4731	7	0	0	0	0	0	0	200	300	0	0	0	0	0	0	0	200	903	0	0	0	0	0	0	0	603	903	0
4731	8	0	0	0	0	0	0	200	300	0	0	0	0	0	0	0	200	903	0	0	0	0	0	0	0	603	903	0
4731	9	0	0	0	0	0	0	200	300	0	0	0	0	0	0	0	200	903	0	0	0	0	0	0	0	603	903	0
4732	0	0	0	0	0	0	0	200	300	0	0	0	0	0	0	0	200	903	0	0	0	0	0	0	0	603	903	0
4732	1	0	0	0	0	0	0	200	300	0	0	0	0	0	0	0	200	903	0	0	0	0	0	0	0	603	903	0
4732	2	0	0	0	0	0	0	200	300	0	0	0	0	0	0	0	200	903	0	0	0	0	0	0	0	603	903	0
4732	3	0	0	0	0	0	0	200	300	0	0	0	0	0	0	0	200	903	0	0	0	0	0	0	0	603	903	0
4732	4	0	0	0	0	0	0	200	300	0	0	0	0	0	0	0	200	903	0	0	0	0	0	0	0	603	903	0
4732	5	0	0	0	0	0	0	200	300	0	0	0	0	0	0	0	200	903	0	0	0	0	0	0	0	603	903	0
4732	6	0	0	0	0	0	0	200	300	0	0	0	0	0	0	0	200	903	0	0	0	0	0	0	0	603	903	0
4732	7	0	0	0	0	0	0	200	300	0	0	0	0	0	0	0	200	903	0	0	0	0	0	0	0	603	903	0
4732	8	0	0	0	0	0	0	200	300	0	0	0	0	0	0	0	200	903	0	0	0	0	0	0	0	603	903	0
4732	9	0	0	0	0	0	0	200	300	0	0	0	0	0	0	0	200	903	0	0	0	0	0	0	0	603	903	0
4733	0	0	0	0	0	0	0	200	300	0	0	0	0	0	0	0	200	903	0	0	0	0	0	0	0	603	903	0
4733	1	0	0	0	0	0	0	200	300	0	0	0	0	0	0	0	200	903	0	0	0	0	0	0	0	603	903	0
4733	2	0	0	0	0	0	0	200	300	0	0	0	0	0	0	0	200	903	0	0	0	0	0	0	0	603	903	0
4733	3	0	0	0	0	0	0	200	300	0	0	0	0	0	0	0	200	903	0	0	0	0	0	0	0	603	903	0
4733	4	0	0	0	0	0	0	200	300	0	0	0	0	0	0	0	200	903	0	0	0	0	0	0	0	603	903	0
4733	5	0	0	0	0	0	0	200	300	0	0	0	0	0	0	0	200	903	0	0	0	0	0	0	0	603	903	0
4733	6	0	0	0	0	0	0	200	300	0	0	0	0	0	0	0	200	903	0	0	0	0	0	0	0	603	903	0
4733	7	0	0	0	0	0	0	200	300	0	0	0	0	0	0	0	200	903	0	0	0	0	0	0	0	603	903	0
4733	8	0	0	0	0	0	0	200	300	0	0	0	0	0	0	0	200	903	0	0	0	0	0	0	0	603	903	0
4733	9	0	0	0	0	0	0	200	300	0	0	0	0	0	0	0	200	903	0	0	0	0	0	0	0	603	903	0
4734	0	0	0	0	0	0	0	200	300	0	0	0	0	0	0	0	200	903	0	0	0	0	0	0	0	603	903	0
4734	1	0	0	0	0	0	0	200	300	0	0	0	0	0	0	0	200	903	0	0	0	0	0	0	0	603	903	0
4734	2	0	0	0	0	0	0	200	300	0	0	0	0	0	0	0	200	903	0	0	0	0	0	0	0	603	903	0
4734	3	0	0	0	0	0	0	200	300	0	0	0	0	0	0	0	200	903	0	0	0	0	0	0	0	603	903	0
4734	4	0	0	0	0	0	0	200	300	0	0	0	0	0	0	0	200	903	0	0	0	0	0	0	0	603	903	0
4734	5	0	0	0	0	0	0	200	300	0	0	0	0	0	0	0	200	903	0	0	0	0	0	0	0	603	903	0
4734	6	0	0	0	0	0	0	200	300	0	0	0	0	0	0	0	200	903	0	0	0	0	0	0	0	603	903	0
4734	7	0	0	0	0	0	0	200	300	0	0	0	0	0	0	0	200	903	0	0	0	0	0	0	0	603	903	0
4734	8	0	0	0	0	0	0	200	300	0	0	0	0	0	0	0	200	903	0	0	0	0	0	0	0	603	903	0
4734	9	0	0	0	0	0	0	200	300	0	0	0	0	0	0	0	200	903	0	0	0	0	0	0	0	603	903	0
4735	0	0	0	0	0	0	0	200	300	0	0	0	0	0	0	0	200	903	0	0	0	0	0	0	0	603	903	0
4735	1	0	0	0	0	0	0	200	300	0	0	0	0	0	0	0	200	903	0	0	0	0	0	0	0	603	903	0
4735	2	0	0	0	0	0	0	200	300	0	0	0	0	0	0	0	200	903	0	0	0	0	0	0	0	603	903	0
4735	3	0	0	0	0	0	0	200	300	0	0	0	0	0	0	0	200	903	0	0	0	0	0	0	0	603	903	0
4735	4	0	0	0	0	0	0	200	300	0	0	0	0	0	0	0	200	903	0	0	0	0	0	0	0	603	903	0
4735	5	0	0	0	0	0	0	200	300	0	0	0	0	0	0	0	200	903	0	0	0	0	0	0	0	603	903	0
4735	6	0	0	0	0	0	0	200	300	0	0	0	0	0	0	0	200	903	0	0	0	0	0	0	0	603	903	0
4735	7	0	0	0	0	0	0	200	300	0	0	0	0	0	0	0	200	903	0	0	0	0	0	0	0	603	903	0
4735	8	0	0	0	0	0	0	200	300	0	0	0	0	0	0	0	200	903	0	0	0	0	0	0	0	603	903	0
4735	9	0	0	0	0	0	0	200	300	0	0	0	0	0	0	0	200	903	0	0	0	0	0	0	0	603	903	0
4736	0	0	0	0	0	0	0	200	300	0	0	0	0	0	0	0	200	903	0	0	0	0	0	0	0	603	903	0
4736	1	0	0	0	0	0	0	200	300	0	0	0	0	0	0	0	200	903	0	0	0	0	0	0	0	603	903	0
4736	2	0	0	0	0	0	0	200	300	0	0	0	0	0	0	0	200	903	0	0	0	0	0	0	0	603	903	0
4736	3	0	0	0	0	0	0	200	300	0	0	0	0	0	0	0	200	903	0	0	0	0	0	0	0	603	903	0
4736	4	0	0	0	0	0	0	200	300	0	0	0	0	0	0	0	200	903	0	0	0	0	0	0	0	603	903	0
4736	5	0	0	0	0	0	0	200	300	0	0	0	0	0	0	0	200	903	0	0	0	0	0	0	0	603	903	0
4736	6	0	0	0	0	0	0	200	300	0	0	0	0	0	0	0	200	903	0	0	0	0	0	0	0	603	903	0
4736	7	0	0	0	0	0	0	200	300	0	0	0	0	0	0	0	200	903	0	0	0	0	0	0	0	603	903	0
4736	8	0	0	0	0	0	0	200	300	0	0	0	0	0	0	0	200	903	0	0	0	0	0	0	0	603	903	0
4736	9	0	0	0	0	0	0	200	300	0	0	0	0	0	0	0	200	903	0	0	0	0	0	0	0	603	903	0
4737	0	0	0	0	0	0	0	200	300	0	0	0	0	0	0	0	200	903	0	0	0	0	0	0	0	603	903	0
4737	1	0	0	0	0	0	0	200	300	0	0	0	0	0	0	0	200	903	0	0	0	0	0	0	0	603	903	0
4737	2	0	0	0	0	0	0	200	300	0	0	0	0	0	0	0	200	903	0	0	0	0	0	0	0	603	903	0
4737	3	0	0	0	0	0	0	200	300	0	0	0	0	0	0	0	200	903	0	0	0	0	0	0	0	603	903	0
4737	4	0	0	0	0	0	0	200	300	0	0	0	0	0	0	0	200	903	0	0	0	0	0	0	0	603	903	0
4737	5	0	0	0	0	0	0	200	300	0	0	0	0	0	0	0	200	903	0	0	0	0	0	0	0	603	903	0
4737	6	0	0	0	0	0	0	200	300	0	0	0	0	0	0	0	200	903	0	0	0	0	0	0	0	603	903	0
4737	7	0	0	0	0	0	0	200	300	0	0	0	0	0	0	0	200	903	0	0	0	0	0	0	0	603	903	0
4737	8	0	0	0	0	0	0	200	300	0	0	0	0	0	0	0	200	903	0	0	0	0	0	0	0	603	903	0
4737	9	0	0	0	0	0	0	200	300	0	0	0	0	0	0	0	200	903	0	0	0	0	0	0	0	603	903	0
4738	0	0	0	0	0	0	0	200	300	0	0	0	0	0	0	0	200	903	0	0	0	0	0	0	0	603	903	0
4738	1	0	0	0	0	0	0	200	300	0	0	0	0	0	0	0	200	903	0	0	0	0	0	0	0	603	903	0
4738	2	0	0	0	0	0	0	200	300	0	0	0	0	0	0	0	200	903	0	0	0	0	0	0	0	603	903	0
4738	3	0	0	0	0	0	0	200	300	0	0	0	0	0	0	0	200	903	0	0	0	0	0	0	0	603	903	0
4738	4	0	0	0	0	0	0	200	300	0	0	0	0	0	0	0	200	903	0	0	0	0	0	0	0	603	903	0
4738	5	0	0	0	0	0	0	200	300	0	0	0	0	0	0	0	200	903	0	0	0	0	0	0	0	603	903	0
4738	6	0	0	0	0	0	0	200	300	0	0	0	0	0	0	0	200	903	0	0	0	0	0	0	0	603	903	0
4738	7	0	0	0	0	0	0	200	300	0	0	0	0	0	0	0	200	903	0	0	0	0	0	0	0	603	903	0
4738	8	0	0	0	0	0	0	200	300	0	0	0	0	0	0	0	200	903	0	0	0	0	0	0	0	603	903	0
4738	9	0	0	0	0	0	0	200	300	0	0	0	0	0	0	0	200	903	0	0	0	0	0	0	0	603	903	0
4739	0	0	0	0	0	0	0	200	300	0	0	0	0	0	0	0	200	903	0	0	0	0	0	0	0	603	903	0
4739	1	0	0	0	0	0	0	200	300	0	0	0	0	0	0	0	200	903	0	0	0	0	0	0	0	603	903	0
4739	2	0	0	0	0	0	0	200	300	0	0	0	0	0	0	0	200	903	0	0	0	0	0	0	0	603	903	0
4739	3	0	0	0	0	0	0	200	300	0	0	0	0	0	0	0	200	903	0	0	0	0	0	0	0	603	903	0
4739	4	0	0	0	0	0	0	200	300	0	0	0	0	0	0	0	200	903	0	0	0	0	0	0	0	603	903	0
4739	5	0	0	0	0	0	0	200	300	0	0	0	0	0	0	0	200	903	0	0	0	0	0	0	0	603	903	0
4739	6	0	0	0	0	0	0	200	300	0	0	0	0	0	0	0	200	903	0	0	0	0	0	0	0	603	903	0
4739	7	0	0	0	0	0	0	200	300	0	0	0	0	0	0	0	200	903	0	0	0	0	0	0	0	603	903	0
4739	8	0	0	0	0	0	0	200	300	0	0	0	0	0	0	0	200	903	0	0	0	0	0	0	0	603	903	0
4739	9	0	0	0	0	0	0	200	300	0	0	0	0	0	0	0	200	903	0	0	0	0	0	0	0	603	903	0
4740	0	0	0	0	0	0	0	200	300	0	0	0	0	0	0	0	200	903	0	0	0	0	0	0	0	603	903	0
4740	1	0	0	0	0	0	0	200	300	0	0	0	0	0	0	0	200	903	0	0	0	0	0	0	0	603	903	0
4740	2	0	0	0	0	0	0	200	300	0	0	0	0	0	0	0	200	903	0	0	0	0	0	0	0	603	903	0
4740	3	0	0	0	0	0	0	200	300	0	0	0	0	0	0	0	200	903	0	0	0	0	0	0	0	603	903	0
4740	4	0	0	0	0	0	0	200	300	0	0	0	0	0	0	0	200	903	0	0	0	0	0	0	0	603	903	0
4740	5	0	0	0	0	0	0	200	300	0	0	0	0	0	0	0	200	903	0	0	0	0	0	0	0	603	903	0
4740	6	0	0	0	0	0	0	200	300	0	0	0	0	0	0	0	200	903	0	0	0	0	0	0	0	603	903	0
4740	7	0	0	0	0	0	0	200	300	0	0	0	0	0	0	0	200	903	0	0	0	0	0	0	0	603	903	0
4740	8	0	0	0	0	0	0	200	300	0	0	0	0	0	0	0	200	903	0	0	0	0	0	0	0	603	903	0
4740	9	0	0	0	0	0	0	200	300	0	0	0	0	0	0	0	200	903	0	0	0	0	0	0	0	603	903	0
4741	0	0	0	0	0	0	0	200	300	0	0	0	0	0	0	0	200	903	0	0	0	0	0	0	0	603	903	0
4741	1	0	0	0	0	0	0	200	300	0	0	0	0	0	0	0	200	903	0	0	0	0	0	0	0	603	903	0
4741	2	0	0	0	0	0	0	200	300	0	0	0	0	0	0	0	200	903	0	0	0	0	0	0	0	603	903	0
4741	3	0	0	0	0	0	0	200	300	0	0	0	0	0	0	0	200	903	0	0	0	0	0	0	0	603	903	0
4741	4	0	0	0	0	0	0	200	300	0	0	0	0	0	0	0	200	903	0	0	0	0	0	0	0	603	903	0
4741	5	0	0	0	0	0	0	200	300	0	0	0	0	0	0	0	200	903	0	0	0	0	0	0	0	603	903	0
4741	6	0	0	0	0	0	0	200	300	0	0	0	0	0	0	0	200	903	0	0	0	0	0	0	0	603	903	0
4741	7	0	0	0	0	0	0	200	300	0	0	0	0	0	0	0	200	903	0	0	0	0	0	0	0	603	903	0
4741	8	0	0	0	0	0	0	200	300	0	0	0	0	0	0	0	200	903	0	0	0	0	0	0	0	603	903	0
4741	9	0	0	0	0	0	0	200	300	0	0	0	0	0	0	0	200	903	0	0	0	0	0	0	0	603	903	0
4742	0	0	0	0	0	0	0	200	300	0	0	0	0	0	0	0	200	903	0	0	0	0	0	0	0	603	903	0
4742	1	0	0	0	0	0	0	200	300	0	0	0	0	0	0	0	200	903	0	0	0	0	0	0	0	603	903	0
4742	2	0	0	0	0	0	0	200	300	0	0	0	0	0	0	0	200	903	0	0	0	0	0	0	0	603	903	0
4742	3	0	0	0	0	0	0	200	300	0	0	0	0	0	0	0	200	903	0	0	0	0	0	0	0	603	903	0
4742	4	0	0	0	0	0	0	200	300	0	0	0	0	0	0	0	200	903	0	0	0	0	0	0	0	603	903	0
4742	5	0	0	0	0	0	0	200	300	0	0	0	0	0	0	0	200	903	0	0	0	0	0	0	0	603	903	0
4742	6	0	0	0	0	0	0	200	300	0	0	0	0	0	0	0	200	903	0	0	0	0	0	0	0	603	903	0
4742	7	0	0	0	0	0	0	200	300	0	0	0	0	0	0	0	200	903	0	0	0	0	0	0	0	603	903	0
4742	8	0	0	0	0	0	0	200	300	0	0	0	0	0	0	0	200	903	0	0	0	0	0	0	0	603	903	0
4742	9	0	0	0	0	0	0	200	300	0	0	0	0	0	0	0	200	903	0	0	0	0	0	0	0	603	903	0
4743	0	0	0	0	0	0	0	200	300	0	0	0	0	0	0	0	200	903	0	0	0	0	0	0	0	603	903	0
4743	1	0	0	0	0	0	0	200	300	0	0	0	0	0	0	0	200	903	0	0	0	0	0	0	0	603	903	0
4743	2	0	0	0	0	0	0	200	300	0	0	0	0	0	0	0	200	903	0	0	0	0	0	0	0	603	903	0
4743	3	0	0	0	0	0	0	200	300	0	0	0	0	0	0	0	200	903	0	0	0	0	0	0	0	603	903	0
4743	4	0	0	0	0	0	0	200	300	0	0	0	0	0	0	0	200	903	0	0	0	0	0	0	0	603	903	0
4743	5	0	0	0	0	0	0	200	300	0	0	0	0	0	0	0	200	903	0	0	0	0	0	0	0	603	903	0
4743	6	0	0	0	0	0	0	200	300	0	0	0	0	0	0	0	200	903	0	0	0	0	0	0	0	603	903	0
4743	7	0	0	0	0	0	0	200	300	0	0	0	0	0	0	0	200	903	0	0	0	0	0	0	0	603	903	0
4743	8	0	0	0	0	0	0	200	300	0	0	0	0	0	0	0	200	903	0	0	0	0	0	0	0	603	903	0
4743	9	0	0	0	0	0	0	200	300	0	0	0	0	0	0	0	200	903	0	0	0	0	0	0	0	603	903	0
4744	0	0	0	0	0	0	0	200	300	0	0	0	0	0	0	0	200	903	0	0	0	0	0	0	0	603	903	0
4744	1	0	0	0	0	0	0	200	300	0	0	0	0	0	0	0	200	903	0	0	0	0	0	0	0	603	903	0
4744	2	0	0	0	0	0	0	200	300	0	0	0	0	0	0	0	200	903	0	0	0	0	0	0	0	603	903	0
4744	3	0	0	0	0	0	0	200	300	0	0	0	0	0	0	0	200	903	0	0	0	0	0	0	0	603	903	0
4744	4	0	0	0	0	0	0	200	300	0	0	0	0	0	0	0	200	903	0	0	0	0	0	0	0	603	903	0
4744	5	0	0	0	0	0	0	200	300	0	0	0	0	0	0	0	200	903	0	0	0	0	0	0	0	603	903	0
4744	6	0	0	0	0	0	0	200	300	0	0	0	0	0	0	0	200	903	0	0	0	0	0	0	0	603	903	0
4744	7	0	0	0	0	0	0	200	300	0	0	0	0	0	0	0	200	903	0	0	0	0	0	0	0	603	903	0
4744	8	0	0	0	0	0	0	200	300	0	0	0	0	0	0	0	200	903	0	0	0	0	0	0	0	603	903	0
4744	9	0	0	0	0	0	0	200	300	0	0	0	0	0	0	0	200	903	0	0	0	0	0	0	0	603	903	0
4745	0	0	0	0	0	0	0	200	300	0	0	0	0	0	0	0	200	903	0	0	0	0	0	0	0	603	903	0
4745	1	0	0	0	0	0	0	200	300	0	0	0	0	0	0	0	200	903	0	0	0	0	0	0	0	603	903	0
4745	2	0	0	0	0	0	0	200	300	0	0	0	0	0	0	0	200	903	0	0	0	0	0	0	0	603	903	0
4745	3	0	0	0	0	0	0	200	300	0	0	0	0	0	0	0	200	903	0	0	0	0	0	0	0	603	903	0
4745	4	0	0	0	0	0	0	200	300	0	0	0	0	0	0	0	200	903	0	0	0	0	0	0	0	603	903	0
4745	5	0	0	0	0	0	0	200	300	0	0	0	0	0	0	0	200	903	0	0	0	0	0	0	0	603	903	0
4745	6	0	0	0	0	0	0	200	300	0	0	0	0	0	0	0	200	903	0	0	0	0	0	0	0	603	903	0
4745	7	0	0	0	0	0	0	200	300	0	0	0	0	0	0	0	200	903	0	0	0	0	0	0	0	603	903	0
4745	8	0	0	0	0	0	0	200	300	0	0	0	0	0	0	0	200	903	0	0	0	0	0	0	0	603	903	0
4745	9	0	0	0	0	0	0	200	300	0	0	0	0	0	0	0	200	903	0	0	0	0	0	0	0	603	903	0
4746	0	0	0	0	0	0	0	200	300	0	0	0	0	0	0	0	200	903	0	0	0	0	0	0	0	603	903	0
4746	1	0	0	0	0	0	0	200	300	0	0	0	0	0	0	0	200	903	0	0	0	0	0	0	0	603	903	0
4746	2	0	0	0	0	0	0	200	300	0	0	0	0	0	0	0	200	903	0	0	0	0	0	0	0	603	903	0
4746	3	0	0	0	0	0	0	200	300	0	0	0	0	0	0	0	200	903	0	0	0	0	0	0	0	603	903	0
4746	4	0	0	0	0	0	0	200	300	0	0	0	0	0	0	0	200	903	0	0	0	0	0	0	0	603	903	0
4746	5	0	0	0	0	0	0	200	300	0	0	0	0	0	0	0	200	903	0	0	0	0	0	0	0	603	903	0
4746	6	0	0	0	0	0	0	200	300	0	0	0	0	0	0	0	200	903	0	0	0	0	0	0	0	603	903	0
4746	7	0	0	0	0	0	0	200	300	0	0	0	0	0	0	0	200	903	0	0	0	0	0	0	0	603	903	0
4746	8	0	0	0	0	0	0	200	300	0	0	0	0	0	0	0	200	903	0	0	0	0	0	0	0	603	903	0
4746	9	0	0	0	0	0	0	200	300	0	0	0	0	0	0	0	200	903	0	0	0	0	0	0	0	603	903	0
4747	0	0	0	0	0	0	0	200	300	0	0	0	0	0	0	0	200	903	0	0	0	0	0	0	0	603	903	0
4747	1	0	0	0	0	0	0	200	300	0	0	0	0	0	0	0	200	903	0	0	0	0	0	0	0	603	903	0
4747	2	0	0	0	0	0	0	200	300	0	0	0	0	0	0	0	200	903	0	0	0	0	0	0	0	603	903	0
4747	3	0	0	0	0	0	0	200	300	0	0	0	0	0	0	0	200	903	0	0	0	0	0	0	0	603	903	0
4747	4	0	0	0	0	0	0	200	300	0	0	0	0	0	0	0	200	903	0	0	0	0	0	0	0	603	903	0
4747	5	0	0	0	0	0	0	200	300	0	0	0	0	0	0	0	200	903	0	0	0	0	0	0	0	603	903	0
4747	6	0	0	0	0	0	0	200	300	0	0	0	0	0	0	0	200	903	0	0	0	0	0	0	0	603	903	0
4747	7	0	0	0	0	0	0	200	300	0	0	0	0	0	0	0	200	903	0	0	0	0	0	0	0	603	903	0
4747	8	0	0	0	0	0	0	200	300	0	0	0	0	0	0	0	200	903	0	0	0	0	0	0	0	603	903	0
4747	9	0	0	0	0	0	0	200	300	0	0	0	0	0	0	0	200	903	0	0	0	0	0	0	0	603	903	0
4748	0	0	0	0	0	0	0	200	300	0	0	0	0	0	0	0	200	903	0	0	0	0	0	0	0	603	903	0
4748	1	0	0	0	0	0	0	200	300	0	0	0	0	0	0	0	200	903	0	0	0	0	0	0	0	603	903	0
4748	2	0	0	0	0	0	0	200	300	0	0	0	0	0	0	0	200	903	0	0	0	0	0	0	0	603	903	0
4748	3	0	0	0	0	0	0	200	300	0	0	0	0	0	0	0	200	903	0	0	0	0	0	0	0	603	903	0
4748	4	0	0	0	0	0	0	200	300	0	0	0	0	0	0	0	200	903	0	0	0	0	0	0	0	603	903	0
4748	5	0	0	0	0	0	0	200	300	0	0	0	0	0	0	0	200	903	0	0	0	0	0	0	0	603	903	0
4748	6	0	0	0	0	0	0	200	300	0	0	0	0	0	0	0	200	903	0	0	0	0	0	0	0	603	903	0
4748	7	0	0	0	0	0	0	200	300	0	0	0	0	0	0	0	200	903	0	0	0	0	0	0	0	603	903	0
4748	8	0	0	0	0	0	0	200	300	0	0	0	0	0	0	0	200	903	0	0	0	0	0	0	0	603	903	0
4748	9	0	0	0	0	0	0	200	300	0	0	0	0	0	0	0	200	903	0	0	0	0	0	0	0	603	903	0
4749	0	0	0	0	0	0	0	200	300	0	0	0	0	0	0	0	200	903	0	0	0	0	0	0	0	603	903	0
4749	1	0	0	0	0	0	0	200	300	0	0	0	0	0	0	0	200	903	0	0	0	0	0	0	0	603	903	0
4749	2	0	0	0	0	0	0	200	300	0	0	0	0	0	0	0	200	903	0	0	0	0	0	0	0	603	903	0
4749	3	0	0	0	0	0	0	200	300	0	0	0	0	0	0	0	200	903	0	0	0	0	0	0	0	603	903	0
4749	4	0	0	0	0	0	0	200	300	0	0	0	0	0	0	0	200	903	0	0	0	0	0	0	0	603	903	0
4749	5	0	0	0	0	0	0	200	300	0	0	0	0	0	0	0	200	903	0	0	0	0	0	0	0	603	903	0
4749	6	0	0	0	0	0	0	200	300	0	0	0	0	0	0	0	200	903	0	0	0	0	0	0	0	603	903	0
4749	7	0	0	0	0	0	0	200	300	0	0	0	0	0	0	0	200	903	0	0	0	0	0	0	0	603	903	0
4749	8	0	0	0	0	0	0	200	300	0	0	0	0	0	0	0	200	903	0	0	0	0	0	0	0	603	903	0
4749	9	0	0	0	0	0	0	200	300	0	0	0	0	0	0	0	200	903	0	0	0	0	0	0	0	603	903	0
4750	0	0	0	0	0	0	0	200	300	0	0	0	0	0	0	0	200	903	0	0	0	0	0	0	0	603	903	0
4750	1	0	0	0	0	0	0	200	300	0	0	0	0	0	0	0	200	903	0	0	0	0	0	0	0	603	903	0
4750	2	0	0	0	0	0	0	200	300	0	0	0	0	0	0	0	200	903	0	0	0	0	0	0	0	603	903	0
4750	3	0	0	0	0	0	0	200	300	0	0	0	0	0	0	0	200	903	0	0	0	0	0	0	0	603	903	0
4750	4	0	0	0	0	0	0	200	300	0	0	0	0	0	0	0	200	903	0	0	0	0	0	0	0	603	903	0
4750	5	0	0	0	0	0	0	200	300	0	0	0	0	0	0	0	200	903	0	0	0	0	0	0	0	603	903	0
4750	6	0	0	0	0	0	0	200	300	0	0	0	0	0	0	0	200	903	0	0	0	0	0	0	0	603	903	0
4750	7	0	0	0	0	0	0	200	300	0	0	0	0	0	0	0	200	903	0	0	0	0	0	0	0	603	903	0
4750	8	0	0	0	0	0	0	200	300	0	0	0	0	0	0	0	200	903	0	0	0	0	0	0	0	603	903	0
4750	9	0	0	0	0	0	0	200	300	0	0	0	0	0	0	0	200	903	0	0	0	0	0	0	0	603	903	0
4751	0	0	0	0	0	0	0	200	300	0	0	0	0	0	0	0	200	903	0	0	0	0	0	0	0	603	903	0
4751	1	0	0	0	0	0	0	200	300	0	0	0	0	0	0	0	200	903	0	0	0	0	0	0	0	603	903	0
4751	2	0	0	0	0	0	0	200	300	0	0	0	0	0	0	0	200	903	0	0	0	0	0	0	0	603	903	0
4751	3	0	0	0	0	0	0	200	300	0	0	0	0	0	0	0	200	903	0	0	0	0	0	0	0	603	903	0
4751	4	0	0	0	0	0	0	200	300	0	0	0	0	0	0	0	200	903	0	0	0	0	0	0	0	603	903	0
4751	5	0	0	0	0	0	0	200	300	0	0	0	0	0	0	0	200	903	0	0	0	0	0	0	0	603	903	0
4751	6	0	0	0	0	0	0	200	300	0	0	0	0	0	0	0	200	903	0	0	0	0	0	0	0	603	903	0
4751	7	0	0	0	0	0	0	200	300	0	0	0	0	0	0	0	200	903	0	0	0	0	0	0	0	603	903	0
4751	8	0	0	0	0	0	0	200	300	0	0	0	0	0	0	0	200	903	0	0	0	0	0	0	0	603	903	0
4751	9	0	0	0	0	0	0	200	300	0	0	0	0	0	0	0	200	903	0	0	0	0	0	0	0	603	903	0
4752	0	0	0	0	0	0	0	200	300	0	0	0	0	0	0	0	200	903	0	0	0	0	0	0	0	603	903	0
4752	1	0	0	0	0	0	0	200	300	0	0	0	0	0	0	0	200	903	0	0	0	0	0	0	0	603	903	0
4752	2	0	0	0	0	0	0	200	300	0	0	0	0	0	0	0	200	903	0	0	0	0	0	0	0	603	903	0
4752	3	0	0	0	0	0	0	200	300	0	0	0	0	0	0	0	200	903	0	0	0	0	0	0	0	603	903	0
4752	4	0	0	0	0	0	0	200	300	0	0	0	0	0	0	0	200	903	0	0	0	0	0	0	0	603	903	0
4752	5	0	0	0	0	0	0	200	300	0	0	0	0	0	0	0	200	903	0	0	0	0	0	0	0	603	903	0
4752	6	0	0	0	0	0	0	200	300	0	0	0	0	0	0	0	200	903	0	0	0	0	0	0	0	603	903	0
4752	7	0	0	0	0	0	0	200	300	0	0	0	0	0	0	0	200	903	0	0	0	0	0	0	0	603	903	0
4752	8	0	0	0	0	0	0	200	300	0	0	0	0	0	0	0	200	903	0	0	0	0	0	0	0	603	903	0
4752	9	0	0	0	0	0	0	200	300	0	0	0	0	0	0	0	200	903	0	0	0	0	0	0	0	603	903	0
4753	0	0	0	0	0	0	0	200	300	0	0	0	0	0	0	0	200	903	0	0	0	0	0	0	0	603	903	0
4753	1	0	0	0	0	0	0	200	300	0	0	0	0	0	0	0	200	903	0	0	0	0	0	0	0	603	903	0
4753	2	0	0	0	0	0	0	200	300	0	0	0	0	0	0	0	200	903	0	0	0	0	0	0	0	603	903	0
4753	3	0	0	0	0	0	0	200	300	0	0	0	0	0	0	0	200	903	0	0	0	0	0	0	0	603	903	0
4753	4	0	0	0	0	0	0	200	300	0	0	0	0	0	0	0	200	903	0	0	0	0	0	0	0	603	903	0
4753	5	0	0	0	0	0	0	200	300	0	0	0	0	0	0	0	200	903	0	0	0	0	0	0	0	603	903	0
4753	6	0	0	0	0	0	0	200	300	0	0	0	0	0	0	0	200	903	0	0	0	0	0	0	0	603	903	0
4753	7	0	0	0	0	0	0	200	300	0	0	0	0	0	0	0	200	903	0	0	0	0	0	0	0	603	903	0
4753	8	0	0	0	0	0	0	200	300	0	0	0	0	0	0	0	200	903	0	0	0	0	0	0	0	603	903	0
4753	9	0	0	0	0	0	0	200	300	0	0	0	0	0	0	0	200	903	0	0	0	0	0	0	0	603	903	0
4754	0	0	0	0	0	0	0	200	300	0	0	0	0	0	0	0	200	903	0	0	0	0	0	0	0	603	903	0
4754	1	0	0	0	0	0	0	200	300	0	0	0	0	0	0	0	200	903	0	0	0	0	0	0	0	603	903	0
4754	2	0	0	0	0	0	0	200	300	0	0	0	0	0	0	0	200	903	0	0	0	0	0	0	0	603	903	0
4754	3	0	0	0	0	0	0	200	300	0	0	0	0	0	0	0	200	903	0	0	0	0	0	0	0	603	903	0
4754	4	0	0	0	0	0	0	200	300	0	0	0	0	0	0	0	200	903	0	0	0	0	0	0	0	603	903	0
4754	5	0	0	0	0	0	0	200	300	0	0	0	0	0	0	0	200	903	0	0	0	0	0	0	0	603	903	0
4754	6	0	0	0	0	0	0	200	300	0	0	0	0	0	0	0	200	903	0	0	0	0	0	0	0	603	903	0
4754	7	0	0	0	0	0	0	200	300	0	0	0	0	0	0	0	200	903	0	0	0	0	0	0	0	603	903	0
4754	8	0	0	0	0	0	0	200	300	0	0	0	0	0	0	0	200	903	0	0	0	0	0	0	0	603	903	0
4754	9	0	0	0	0	0	0	200	300	0	0	0	0	0	0	0	200	903	0	0	0	0	0	0	0	603	903	0
4755	0	0	0	0	0	0	0	200	300	0	0	0	0	0	0	0	200	903	0	0	0	0	0	0	0	603	903	0
4755	1	0	0	0	0	0	0	200	300	0	0	0	0	0	0	0	200	903	0	0	0	0	0	0	0	603	903	0
4755	2	0	0	0	0	0	0	200	300	0	0	0	0	0	0	0	200	903	0	0	0	0	0	0	0	603	903	0
4755	3	0	0	0	0	0	0	200	300	0	0	0	0	0	0	0	200	903	0	0	0	0	0	0	0	603	903	0
4755	4	0	0	0	0	0	0	200	300	0	0	0	0	0	0	0	200	903	0	0	0	0	0	0	0	603	903	0
4755	5	0	0	0	0	0	0	200	300	0	0	0	0	0	0	0	200	903	0	0	0	0	0	0	0	603	903	0
4755	6	0	0	0	0	0	0	200	300	0	0	0	0	0	0	0	200	903	0	0	0	0	0	0	0	603	903	0
4755	7	0	0	0	0	0	0	200	300	0	0	0	0	0	0	0	200	903	0	0	0	0	0	0	0	603	903	0
4755	8	0	0	0	0	0	0	200	300	0	0	0	0	0	0	0	200	903	0	0	0	0	0	0	0	603	903	0
4755	9	0	0	0	0	0	0	200	300	0	0	0	0	0	0	0	200	903	0	0	0	0	0	0	0	603	903	0
4756	0	0	0	0	0	0	0	200	300	0	0	0	0	0	0	0	200	903	0	0	0	0	0	0	0	603	903	0
4756	1	0	0	0	0	0	0	200	300	0	0	0	0	0	0	0	200	903	0	0	0	0	0	0	0	603	903	0
4756	2	0	0	0	0	0	0	200	300	0	0	0	0	0	0	0	200	903	0	0	0	0	0	0	0	603	903	0
4756	3	0	0	0	0	0	0	200	300	0	0	0	0	0	0	0	200	903	0	0	0	0	0	0	0	603	903	0
4756	4	0	0	0	0	0	0	200	300	0	0	0	0	0	0	0	200	903	0	0	0	0	0	0	0	603	903	0
4756	5	0	0	0	0	0	0	200	300	0	0	0	0	0	0	0	200	903	0	0	0	0	0	0	0	603	903	0
4756	6	0	0	0	0	0	0	200	300	0	0	0	0	0	0	0	200	903	0	0	0	0	0	0	0	603	903	0
4756	7	0	0	0	0	0	0	200	300	0	0	0	0	0	0	0	200	903	0	0	0	0	0	0	0	603	903	0
4756	8	0	0	0	0	0	0	200	300	0	0	0	0	0	0	0	200	903	0	0	0	0	0	0	0	603	903	0
4756	9	0	0	0	0	0	0	200	300	0	0	0	0	0	0	0	200	903	0	0	0	0	0	0	0	603	903	0
4757	0	0	0	0	0	0	0	200	300	0	0	0	0	0	0	0	200	903	0	0	0	0	0	0	0	603	903	0
4757	1	0	0	0	0	0	0	200	300	0	0	0	0	0	0	0	200	903	0	0	0	0	0	0	0	603	903	0
4757	2	0	0	0	0	0	0	200	300	0	0	0	0	0	0	0	200	903	0	0	0	0	0	0	0	603	903	0
4757	3	0	0	0	0	0	0	200	300	0	0	0	0	0	0	0	200	903	0	0	0	0	0	0	0	603	903	0
4757	4	0	0	0	0	0	0	200	300	0	0	0	0	0	0	0	200	903	0	0	0	0	0	0	0	603	903	0
4757	5	0	0	0	0	0	0	200	300	0	0	0	0	0	0	0	200	903	0	0	0	0	0	0	0	603	903	0
4757	6	0	0	0	0	0	0	200	300	0	0	0	0	0	0	0	200	903	0	0	0	0	0	0	0	603	903	0
4757	7	0	0	0	0	0	0	200	300	0	0	0	0	0	0	0	200	903	0	0	0	0	0	0	0	603	903	0
4757	8	0	0	0	0	0	0	200	300	0	0	0	0	0	0	0	200	903	0	0	0	0	0	0	0	603	903	0
4757	9	0	0	0	0	0	0	200	300	0	0	0	0	0	0	0	200	903	0	0	0	0	0	0	0	603	903	0
4758	0	0	0	0	0	0	0	200	300	0	0	0	0	0	0	0	200	903	0	0	0	0	0	0	0	603	903	0
4758	1	0	0	0	0	0	0	200	300	0	0	0	0	0	0	0	200	903	0	0	0	0	0	0	0	603	903	0
4758	2	0	0	0	0	0	0	200	300	0	0	0	0	0	0	0	200	903	0	0	0	0	0	0	0	603	903	0
4758	3	0	0	0	0	0	0	200	300	0	0	0	0	0	0	0	200	903	0	0	0	0	0	0	0	603	903	0
4758	4	0	0	0	0	0	0	200	300	0	0	0	0	0	0	0	200	903	0	0	0	0	0	0	0	603	903	0
4758	5	0	0	0	0	0	0	200	300	0	0	0	0	0	0	0	200	903	0	0	0	0	0	0	0	603	903	0
4758	6	0	0	0	0	0	0	200	300	0	0	0	0	0	0	0	200	903	0	0	0	0	0	0	0	603	903	0
4758	7	0	0	0	0	0	0	200	300	0	0	0	0	0	0	0	200	903	0	0	0	0	0	0	0	603	903	0
4758	8	0	0	0	0	0	0	200	300	0	0	0	0	0	0	0	200	903	0	0	0	0	0	0	0	603	903	0
4758	9	0	0	0	0	0	0	200	300	0	0	0	0	0	0	0	200	903	0	0	0	0	0	0	0	603	903	0
4759	0	0	0	0	0	0	0	200	300	0	0	0	0	0	0	0	200	903	0	0	0	0	0	0	0	603	903	0
4759	1	0	0	0	0	0	0	200	300	0	0	0	0	0	0	0	200	903	0	0	0	0	0	0	0	603	903	0
4759	2	0	0	0	0	0	0	200	300	0	0	0	0	0	0	0	200	903	0	0	0	0	0	0	0	603	903	0
4759	3	0	0	0	0	0	0	200	300	0	0	0	0	0	0	0	200	903	0	0	0	0	0	0	0	603	903	0
4759	4	0	0	0	0	0	0	200	300	0	0	0	0	0	0	0	200	903	0	0	0	0	0	0	0	603	903	0
4759	5	0	0	0	0	0	0	200	300	0	0	0	0	0	0	0	200	903	0	0	0	0	0	0	0	603	903	0
4759	6	0	0	0	0	0	0	200	300	0	0	0	0	0	0	0	200	903	0	0	0	0	0	0	0	603	903	0
4759	7	0	0	0	0	0	0	200	300	0	0	0	0	0	0	0	200	903	0	0	0	0	0	0	0	603	903	0
4759	8	0	0	0	0	0	0	200	300	0	0	0	0	0	0	0	200	903	0	0	0	0	0	0	0	603	903	0
4759	9	0	0	0	0	0	0	200	300	0	0	0	0	0	0	0	200	903	0	0	0	0	0	0	0	603	903	0
4760	0	0	0	0	0	0	0	200	300	0	0	0	0	0	0	0	200	903	0	0	0	0	0	0	0	603	903	0
4760	1	0	0	0	0	0	0	200	300	0	0	0	0	0	0	0	200	903	0	0	0	0	0	0	0	603	903	0
4760	2	0	0	0	0	0	0	200	300	0	0	0	0	0	0	0	200	903	0	0	0	0	0	0	0	603	903	0
4760	3	0	0	0	0	0	0	200	300	0	0	0	0	0	0	0	200	903	0	0	0	0	0	0	0	603	903	0
4760	4	0	0	0	0	0	0	200	300	0	0	0	0	0	0	0	200	903	0	0	0	0	0	0	0	603	903	0
4760	5	0	0	0	0	0	0	200	300	0	0	0	0	0	0	0	200	903	0	0	0	0	0	0	0	603	903	0
4760	6	0	0	0	0	0	0	200	300	0	0	0	0	0	0	0	200	903	0	0	0	0	0	0	0	603	903	0
4760	7	0	0	0	0	0	0	200	300	0	0	0	0	0	0	0	200	903	0	0	0	0	0	0	0	603	903	0
4760	8	0	0	0	0	0	0	200	300	0	0	0	0	0	0	0	200	903	0	0	0	0	0	0	0	603	903	0
4760	9	0	0	0	0	0	0	200	300	0	0	0	0	0	0	0	200	903	0	0	0	0	0	0	0	603	903	0
4761	0	0	0	0	0	0	0	200	300	0	0	0	0	0	0	0	200	903	0	0	0	0	0	0	0	603	903	0
4761	1	0	0	0	0	0	0	200	300	0	0	0	0	0	0	0	200	903	0	0	0	0	0	0	0	603	903	0
4761	2	0	0	0	0	0	0	200	300	0	0	0	0	0	0	0	200	903	0	0	0	0	0	0	0	603	903	0
4761	3	0	0	0	0	0	0	200	300	0	0	0	0	0	0	0	200	903	0	0	0	0	0	0	0	603	903	0
4761	4	0	0	0	0	0	0	200	300	0	0	0	0	0	0	0	200	903	0	0	0	0	0	0	0	603	903	0
4761	5	0	0	0	0	0	0	200	300	0	0	0	0	0	0	0	200	903	0	0	0	0	0	0	0	603	903	0
4761	6	0	0	0	0	0	0	200	300	0	0	0	0	0	0	0	200	903	0	0	0	0	0	0	0	603	903	0
4761	7	0	0	0	0	0	0	200	300	0	0	0	0	0	0	0	200	903	0	0	0	0	0	0	0	603	903	0
4761	8	0	0	0	0	0	0	200	300	0	0	0	0	0	0	0	200	903	0	0	0	0	0	0	0	603	903	0
4761	9	0	0	0	0	0	0	200	300	0	0	0	0	0	0	0	200	903	0	0	0	0	0	0	0	603	903	0
4762	0	0	0	0	0	0	0	200	300	0	0	0	0	0	0	0	200	903	0	0	0	0	0	0	0	603	903	0
4762	1	0	0	0	0	0	0	200	300	0	0	0	0	0	0	0	200	903	0	0	0	0	0	0	0	603	903	0
4762	2	0	0	0	0	0	0	200	300	0	0	0	0	0	0	0	200	903	0	0	0	0	0	0	0	603	903	0
4762	3	0	0	0	0	0	0	200	300	0	0	0	0	0	0	0	200	903	0	0	0	0	0	0	0	603	903	0
4762	4	0	0	0	0	0	0	200	300	0	0	0	0	0	0	0	200	903	0	0	0	0	0	0	0	603	903	0
4762	5	0	0	0	0	0	0	200	300	0	0	0	0	0	0	0	200	903	0	0	0	0	0	0	0	603	903	0
4762	6	0	0	0	0	0	0	200	300	0	0	0	0	0	0	0	200	903	0	0	0	0	0	0	0	603	903	0
4762	7	0	0	0	0	0	0	200	300	0	0	0	0	0	0	0	200	903	0	0	0	0	0	0	0	603	903	0
4762	8	0	0	0	0	0	0	200	300	0	0	0	0	0	0	0	200	903	0	0	0	0	0	0	0	603	903	0
4762	9	0	0	0	0	0	0	200	300	0	0	0	0	0	0	0	200	903	0	0	0	0	0	0	0	603	903	0
4763	0	0	0	0	0	0	0	200	300	0	0	0	0	0	0	0	200	903	0	0	0	0	0	0	0	603	903	0
4763	1	0	0	0	0	0	0	200	300	0	0	0	0	0	0	0	200	903	0	0	0	0	0	0	0	603	903	0
4763	2	0	0	0	0	0	0	200	300	0	0	0	0	0	0	0	200	903	0	0	0	0	0	0	0	603	903	0
4763	3	0	0	0	0	0	0	200	300	0	0	0	0	0	0	0	200	903	0	0	0	0	0	0	0	603	903	0
4763	4	0	0	0	0	0	0	200	300	0	0	0	0	0	0	0	200	903	0	0	0	0	0	0	0	603	903	0
4763	5	0	0	0	0	0	0	200	300	0	0	0	0	0	0	0	200	903	0	0	0	0	0	0	0	603	903	0
4763	6	0	0	0	0	0	0	200	300	0	0	0	0	0	0	0	200	903	0	0	0	0	0	0	0	603	903	0
4763	7	0	0	0	0	0	0	200	300	0	0	0	0	0	0	0	200	903	0	0	0	0	0	0	0	603	903	0
4763	8	0	0	0	0	0	0	200	300	0	0	0	0	0	0	0	200	903	0	0	0	0	0	0	0	603	903	0
4763	9	0	0	0	0	0	0	200	300	0	0	0	0	0	0	0	200	903	0	0	0	0	0	0	0	603	903	0
4764	0	0	0	0	0	0	0	200	300	0	0	0	0	0	0	0	200	903	0	0	0	0	0	0	0	603	903	0
4764	1	0	0	0	0	0	0	200	300	0	0	0	0	0	0	0	200	903	0	0	0	0	0	0	0	603	903	0
4764	2	0	0	0	0	0	0	200	300	0	0	0	0	0	0	0	200	903	0	0	0	0	0	0	0	603	903	0
4764	3	0	0	0	0	0	0	200	300	0	0	0	0	0	0	0	200	903	0	0	0	0	0	0	0	603	903	0
4764	4	0	0	0	0	0	0	200	300	0	0	0	0	0	0	0	200	903	0	0	0	0	0	0	0	603	903	0
4764	5	0	0	0	0	0	0	200	300	0	0	0	0	0	0	0	200	903	0	0	0	0	0	0	0	603	903	0
4764	6	0	0	0	0	0	0	200	300	0	0	0	0	0	0	0	200	903	0	0	0	0	0	0	0	603	903	0
4764	7	0	0	0	0	0	0	200	300	0	0	0	0	0	0	0	200	903	0	0	0	0	0	0	0	603	903	0
4764	8	0	0	0	0	0	0	200	300	0	0	0	0	0	0	0	200	903	0	0	0	0	0	0	0	603	903	0
4764	9	0	0	0	0	0	0	200	300	0	0	0	0	0	0	0	200	903	0	0	0	0	0	0	0	603	903	0
4765	0	0	0	0	0	0	0	200	300	0	0	0	0	0	0	0	200	903	0	0	0	0	0	0	0	603	903	0
4765	1	0	0	0	0	0	0	200	300	0	0	0	0	0	0	0	200	903	0	0	0	0	0	0	0	603	903	0
4765	2	0	0	0	0	0	0	200	300	0	0	0	0	0	0	0	200	903	0	0	0	0	0	0	0	603	903	0
4765	3	0	0	0	0	0	0	200	300	0	0	0	0	0	0	0	200	903	0	0	0	0	0	0	0	603	903	0
4765	4	0	0	0	0	0	0	200	300	0	0	0	0	0	0	0	200	903	0	0	0	0	0	0	0	603	903	0
4765	5	0	0	0	0	0	0	200	300	0	0	0	0	0	0	0	200	903	0	0	0	0	0	0	0	603	903	0
4765	6	0	0	0	0	0	0	200	300	0	0	0	0	0	0	0	200	903	0	0	0	0	0	0	0	603	903	0
4765	7	0	0	0	0	0	0	200	300	0	0	0	0	0	0	0	200	903	0	0	0	0	0	0	0	603	903	0
4765	8	0	0	0	0	0	0	200	300	0	0	0	0	0	0	0	200	903	0	0	0	0	0	0	0	603	903	0
4765	9	0	0	0	0	0	0	200	300	0	0	0	0	0	0	0	200	903	0	0	0	0	0	0	0	603	903	0
4766	0	0	0	0	0	0	0	200	300	0	0	0	0	0	0	0	200	903	0	0	0	0	0	0	0	603	903	0
4766	1	0	0	0	0	0	0	200	300	0	0	0	0	0	0	0	200	903	0	0	0	0	0	0	0	603	903	0
4766	2	0	0	0	0	0	0	200	300	0	0	0	0	0	0	0	200	903	0	0	0	0	0	0	0	603	903	0
4766	3	0	0	0	0	0	0	200	300	0	0	0	0	0	0	0	200	903	0	0	0	0	0	0	0	603	903	0
4766	4	0	0	0	0	0	0	200	300	0	0	0	0	0	0	0	200	903	0	0	0	0	0	0	0	603	903	0
4766	5	0	0	0	0	0	0	200	300	0	0	0	0	0	0	0	200	903	0	0	0	0	0	0	0	603	903	0
4766	6	0	0	0	0	0	0	200	300	0	0	0	0	0	0	0	200	903	0	0	0	0	0	0	0	603	903	0
4766	7	0	0	0	0	0	0	200	300	0	0	0	0	0	0	0	200	903	0	0	0	0	0	0	0	603	903	0
4766	8	0	0	0	0	0	0	200	300	0	0	0	0	0	0	0	200	903	0	0	0	0	0	0	0	603	903	0
4766	9	0	0	0	0	0	0	200	300	0	0	0	0	0	0	0	200	903	0	0	0	0	0	0	0	603	903	0
4767	0	0	0	0	0	0	0	200	300	0	0	0	0	0	0	0	200	903	0	0	0	0	0	0	0	603	903	0
4767	1	0	0	0	0	0	0	200	300	0	0	0	0	0	0	0	200	903	0	0	0	0	0	0	0	603	903	0
4767	2	0	0	0	0	0	0	200	300	0	0	0	0	0	0	0	200	903	0	0	0	0	0	0	0	603	903	0
4767	3	0	0	0	0	0	0	200	300	0	0	0	0	0	0	0	200	903	0	0	0	0	0	0	0	603	903	0
4767	4	0	0	0	0	0	0	200	300	0	0	0	0	0	0	0	200	903	0	0	0	0	0	0	0	603	903	0
4767	5	0	0	0	0	0	0	200	300	0	0	0	0	0	0	0	200	903	0	0	0	0	0	0	0	603	903	0
4767	6	0	0	0	0	0	0	200	300	0	0	0	0	0	0	0	200	903	0	0	0	0	0	0	0	603	903	0
4767	7	0	0	0	0	0	0	200	300	0	0	0	0	0	0	0	200	903	0	0	0	0	0	0	0	603	903	0
4767	8	0	0	0	0	0	0	200	300	0	0	0	0	0	0	0	200	903	0	0	0	0	0	0	0	603	903	0
4767	9	0	0	0	0	0	0	200	300	0	0	0	0	0	0	0	200	903	0	0	0	0	0	0	0	603	903	0
4768	0	0	0	0	0	0	0	200	300	0	0	0	0	0	0	0	200	903	0	0	0	0	0	0	0	603	903	0
4768	1	0	0	0	0	0	0	200	300	0	0	0	0	0	0	0	200	903	0	0	0	0	0	0	0	603	903	0
4768	2	0	0	0	0	0	0	200	300	0	0	0	0	0	0	0	200	903	0	0	0	0	0	0	0	603	903	0
4768	3	0	0	0	0	0	0	200	300	0	0	0	0	0	0	0	200	903	0	0	0	0	0	0	0	603	903	0
4768	4	0	0	0	0	0	0	200	300	0	0	0	0	0	0	0	200	903	0	0	0	0	0	0	0	603	903	0
4768	5	0	0	0	0	0	0	200	300	0	0	0	0	0	0	0	200	903	0	0	0	0	0	0	0	603	903	0
4768	6	0	0	0	0	0	0	200	300	0	0	0	0	0	0	0	200	903	0	0	0	0	0	0	0	603	903	0
4768	7	0	0	0	0	0	0	200	300	0	0	0	0	0	0	0	200	903	0	0	0	0	0	0	0	603	903	0
4768	8	0	0	0	0	0	0	200	300	0	0	0	0	0	0	0	200	903	0	0	0	0	0	0	0	603	903	0
4768	9	0	0	0	0	0	0	200	300	0	0	0	0	0	0	0	200	903	0	0	0	0	0	0	0	603	903	0
4769	0	0	0	0	0	0	0	200	300	0	0	0	0	0	0	0	200	903	0	0	0	0	0	0	0	603	903	0
4769	1	0	0	0	0	0	0	200	300	0	0	0	0	0	0	0	200	903	0	0	0	0	0	0	0	603	903	0
4769	2	0	0	0	0	0	0	200	300	0	0	0	0	0	0	0	200	903	0	0	0	0	0	0	0	603	903	0
4769	3	0	0	0	0	0	0	200	300	0	0	0	0	0	0	0	200	903	0	0	0	0	0	0	0	603	903	0
4769	4	0	0	0	0	0	0	200	300	0	0	0	0	0	0	0	200	903	0	0	0	0	0	0	0	603	903	0
4769	5	0	0	0	0	0	0	200	300	0	0	0	0	0	0	0	200	903	0	0	0	0	0	0	0	603	903	0
4769	6	0	0	0	0	0	0	200	300	0	0	0	0	0	0	0	200	903	0	0	0	0	0	0	0	603	903	0
4769	7	0	0	0	0	0	0	200	300	0	0	0	0	0	0	0	200	903	0	0	0	0	0	0	0	603	903	0
4769	8	0	0	0	0	0	0	200	300	0	0	0	0	0	0	0	200	903	0	0	0	0	0	0	0	603	903	0
4769	9	0	0	0	0	0	0	200	300	0	0	0	0	0	0	0	200	903	0	0	0	0	0	0	0	603	903	0
4770	0	0	0	0	0	0	0	200	300	0	0	0	0	0	0	0	200	903	0	0	0	0	0	0	0	603	903	0
4770	1	0	0	0	0	0	0	200	300	0	0	0	0	0	0	0	200	903	0	0	0	0	0	0	0	603	903	0
4770	2	0	0	0	0	0	0	200	300	0	0	0	0	0	0	0	200	903	0	0	0	0	0	0	0	603	903	0
4770	3	0	0	0	0	0	0	200	300	0	0	0	0	0	0	0	200	903	0	0	0	0	0	0	0	603	903	0
4770	4	0	0	0	0	0	0	200	300	0	0	0	0	0	0	0	200	903	0	0	0	0	0	0	0	603	903	0
4770	5	0	0	0	0	0	0	200	300	0	0	0	0	0	0	0	200	903	0	0	0	0	0	0	0	603	903	0
4770	6	0	0	0	0	0	0	200	300	0	0	0	0	0	0	0	200	903	0	0	0	0	0	0	0	603	903	0
4770	7	0	0	0	0	0	0	200	300	0	0	0	0	0	0	0	200	903	0	0	0	0	0	0	0	603	903	0
4770	8	0	0	0	0	0	0	200	300	0	0	0	0	0	0	0	200	903	0	0	0	0	0	0	0	603	903	0
4770	9	0	0	0	0	0	0	200	300	0	0	0	0	0	0	0	200	903	0	0	0	0	0	0	0	603	903	0
4771	0	0	0	0	0	0	0	200	300	0	0	0	0	0	0	0	200	903	0	0	0	0	0	0	0	603	903	0
4771	1	0	0	0	0	0	0	200	300	0	0	0	0	0	0	0	200	903	0	0	0	0	0	0	0	603	903	0
4771	2	0	0	0	0	0	0	200	300	0	0	0	0	0	0	0	200	903	0	0	0	0	0	0	0	603	903	0
4771	3	0	0	0	0	0	0	200	300	0	0	0	0	0	0	0	200	903	0	0	0	0	0	0	0	603	903	0
4771	4	0	0	0	0	0	0	200	300	0	0	0	0	0	0	0	200	903	0	0	0	0	0	0	0	603	903	0
4771	5	0	0	0	0	0	0	200	300	0	0	0	0	0	0	0	200	903	0	0	0	0	0	0	0	603	903	0
4771	6	0	0	0	0	0	0	200	300	0	0	0	0	0	0	0	200	903	0	0	0	0	0	0	0	603	903	0
4771	7	0	0	0	0	0	0	200	300	0	0	0	0	0	0	0	200	903	0	0	0	0	0	0	0	603	903	0
4771	8	0	0	0	0	0	0	200	300	0	0	0	0	0	0	0	200	903	0	0	0	0	0	0	0	603	903	0
4771	9	0	0	0	0	0	0	200	300	0	0	0	0	0	0	0	200	903	0	0	0	0	0	0	0	603	903	0
4772	0	0	0	0	0	0	0	200	300	0	0	0	0	0	0	0	200	903	0	0	0	0	0	0	0	603	903	0
4772	1	0	0	0	0	0	0	200	300	0	0	0	0	0	0	0	200	903	0	0	0	0	0	0	0	603	903	0
4772	2	0	0	0	0	0	0	200	300	0	0	0	0	0	0	0	200	903	0	0	0	0	0	0	0	603	903	0
4772	3	0	0	0	0	0	0	200	300	0	0	0	0	0	0	0	200	903	0	0	0	0	0	0	0	603	903	0
4772	4	0	0	0	0	0	0	200	300	0	0	0	0	0	0	0	200	903	0	0	0	0	0	0	0	603	903	0
4772	5	0	0	0	0	0	0	200	300	0	0	0	0	0	0	0	200	903	0	0	0	0	0	0	0	603	903	0
4772	6	0	0	0	0	0	0	200	300	0	0	0	0	0	0	0	200	903	0	0	0	0	0	0	0	603	903	0
4772	7	0	0	0	0	0	0	200	300	0	0	0	0	0	0	0	200	903	0	0	0	0	0	0	0	603	903	0
4772	8	0	0	0	0	0	0	200	300	0	0	0	0	0	0	0	200	903	0	0	0	0	0	0	0	603	903	0
4772	9	0	0	0	0	0	0	200	300	0	0	0	0	0	0	0	200	903	0	0	0	0	0	0	0	603	903	0
4773	0	0	0	0	0	0	0	200	300	0	0	0	0	0	0	0	200	903	0	0	0	0	0	0	0	603	903	0
4773	1	0	0	0	0	0	0	200	300	0	0	0	0	0	0	0	200	903	0	0	0	0	0	0	0	603	903	0
4773	2	0	0	0	0	0	0	200	300	0	0	0	0	0	0	0	200	903	0	0	0	0	0	0	0	603	903	0
4773	3	0	0	0	0	0	0	200	300	0	0	0	0	0	0	0	200	903	0	0	0	0	0	0	0	603	903	0
4773	4	0	0	0	0	0	0	200	300	0	0	0	0	0	0	0	200	903	0	0	0	0	0	0	0	603	903	0
4773	5	0	0	0	0	0	0	200	300	0	0	0	0	0	0	0	200	903	0	0	0	0	0	0	0	603	903	0
4773	6	0	0	0	0	0	0	200	300	0	0	0	0	0	0	0	200	903	0	0	0	0	0	0	0	603	903	0
4773	7	0	0	0	0	0	0	200	300	0	0	0	0	0	0	0	200	903	0	0	0	0	0	0	0	603	903	0
4773	8	0	0	0	0	0	0	200	300	0	0	0	0	0	0	0	200	903	0	0	0	0	0	0	0	603	903	0
4773	9	0	0	0	0	0	0	200	300	0	0	0	0	0	0	0	200	903	0	0	0	0	0	0	0	603	903	0
4774	0	0	0	0	0	0	0	200	300	0	0	0	0	0	0	0	200	903	0	0	0	0	0	0	0	603	903	0
4774	1	0	0	0	0	0	0	200	300	0	0	0	0	0	0	0	200	903	0	0	0	0	0	0	0	603	903	0
4774	2	0	0	0	0	0	0	200	300	0	0	0	0	0	0	0	200	903	0	0	0	0	0	0	0	603	903	0
4774	3	0	0	0	0	0	0	200	300	0	0	0	0	0	0	0	200	903	0	0	0	0	0	0	0	603	903	0
4774	4	0	0	0	0	0	0	200	300	0	0	0	0	0	0	0	200	903	0	0	0	0	0	0	0	603	903	0
4774	5	0	0	0	0	0	0	200	300	0	0	0	0	0	0	0	200	903	0	0	0	0	0	0	0	603	903	0
4774	6	0	0	0	0	0	0	200	300	0	0	0	0	0	0	0	200	903	0	0	0	0	0	0	0	603	903	0
4774	7	0	0	0	0	0	0	200	300	0	0	0	0	0	0	0	200	903	0	0	0	0	0	0	0	603	903	0
4774	8	0	0	0	0	0	0	200	300	0	0	0	0	0	0	0	200	903	0	0	0	0	0	0	0	603	903	0
4774	9	0	0	0	0	0	0	200	300	0	0	0	0	0	0	0	200	903	0	0	0	0	0	0	0	603	903	0
4775	0	0	0	0	0	0	0	200	300	0	0	0	0	0	0	0	200	903	0	0	0	0	0	0	0	603	903	0
4775	1	0	0	0	0	0	0	200	300	0	0	0	0	0	0	0	200	903	0	0	0	0	0	0	0	603	903	0
4775	2	0	0	0	0	0	0	200	300	0	0	0	0	0	0	0	200	903	0	0	0	0	0	0	0	603	903	0
4775	3	0	0	0	0	0	0	200	300	0	0	0	0	0	0	0	200	903	0	0	0	0	0	0	0	603	903	0
4775	4	0	0	0	0	0	0	200	300	0	0	0	0	0	0	0	200	903	0	0	0	0	0	0	0	603	903	0
4775	5	0	0	0	0	0	0	200	300	0	0	0	0	0	0	0	200	903	0	0	0	0	0	0	0	603	903	0
4775	6	0	0	0	0	0	0	200	300	0	0	0	0	0	0	0	200	903	0	0	0	0	0	0	0	603	903	0
4775	7	0	0	0	0	0	0	200	300	0	0	0	0	0	0	0	200	903	0	0	0	0	0	0	0	603	903	0
4775	8	0	0	0	0	0	0	200	300	0	0	0	0	0	0	0	200	903	0	0	0	0	0	0	0	603	903	0
4775	9	0	0	0	0	0	0	200	300	0	0	0	0	0	0	0	200	903	0	0	0	0	0	0	0	603	903	0
4776	0	0	0	0	0	0	0	200	300	0	0	0	0	0	0	0	200	903	0	0	0	0	0	0	0	603	903	0
4776	1	0	0	0	0	0	0	200	300	0	0	0	0	0	0	0	200	903	0	0	0	0	0	0	0	603	903	0
4776	2	0	0	0	0	0	0	200	300	0	0	0	0	0	0	0	200	903	0	0	0	0	0	0	0	603	903	0
4776	3	0	0	0	0	0	0	200	300	0	0	0	0	0	0	0	200	903	0	0	0	0	0	0	0	603	903	0
4776	4	0	0	0	0	0	0	200	300	0	0	0	0	0	0	0	200	903	0	0	0	0	0	0	0	603	903	0
4776	5	0	0	0	0	0	0	200	300	0	0	0	0	0	0	0	200	903	0	0	0	0	0	0	0	603	903	0
4776	6	0	0	0	0	0	0	200	300	0	0	0	0	0	0	0	200	903	0	0	0	0	0	0	0	603	903	0
4776	7	0	0	0	0	0	0	200	300	0	0	0	0	0	0	0	200	903	0	0	0	0	0	0	0	603	903	0
4776	8	0	0	0	0	0	0	200	300	0	0	0	0	0	0	0	200	903	0	0	0	0	0	0	0	603	903	0
4776	9	0	0	0	0	0	0	200	300	0	0	0	0	0	0	0	200	903	0	0	0	0	0	0	0	603	903	0
4777	0	0	0	0	0	0	0	200	300	0	0	0	0	0	0	0	200	903	0	0	0	0	0	0	0	603	903	0
4777	1	0	0	0	0	0	0	200	300	0	0	0	0	0	0	0	200	903	0	0	0	0	0	0	0	603	903	0
4777	2	0	0	0	0	0	0	200	300	0	0	0	0	0	0	0	200	903	0	0	0	0	0	0	0	603	903	0
4777	3	0	0	0	0	0	0	200	300	0	0	0	0	0	0	0	200	903	0	0	0	0	0	0	0	603	903	0
4777	4	0	0	0	0	0	0	200	300	0	0	0	0	0	0	0	200	903	0	0	0	0	0	0	0	603	903	0
4777	5	0	0	0	0	0	0	200	300	0	0	0	0	0	0	0	200	903	0	0	0	0	0	0	0	603	903	0
4777	6	0	0	0	0	0	0	200	300	0	0	0	0	0	0	0	200	903	0	0	0	0	0	0	0	603	903	0
4777	7	0	0	0	0	0	0	200	300	0	0	0	0	0	0	0	200	903	0	0	0	0	0	0	0	603	903	0
4777	8	0	0	0	0	0	0	200	300	0	0	0	0	0	0	0	200	903	0	0	0	0	0	0	0	603	903	0
4777	9	0	0	0	0	0	0	200	300	0	0	0	0	0	0	0	200	903	0	0	0	0	0	0	0	603	903	0
4778	0	0	0	0	0	0	0	200	300	0	0	0	0	0	0	0	200	903	0	0	0	0	0	0	0	603	903	0
4778	1	0	0	0	0	0	0	200	300	0	0	0	0	0	0	0	200	903	0	0	0	0	0	0	0	603	903	0
4778	2	0	0	0	0	0	0	200	300	0	0	0	0	0	0	0	200	903	0	0	0	0	0	0	0	603	903	0
4778	3	0	0	0	0	0	0	200	300	0	0	0	0	0	0	0	200	903	0	0	0	0	0	0	0	603	903	0
4778	4	0	0	0	0	0	0	200	300	0	0	0	0	0	0	0	200	903	0	0	0	0	0	0	0	603	903	0
4778	5	0	0	0	0	0	0	200	300	0	0	0	0	0	0	0	200	903	0	0	0	0	0	0	0	603	903	0
4778	6	0	0	0	0	0	0	200	300	0	0	0	0	0	0	0	200	903	0	0	0	0	0	0	0	603	903	0
4778	7	0	0	0	0	0	0	200	300	0	0	0	0	0	0	0	200	903	0	0	0	0	0	0	0	603	903	0
4778	8	0	0	0	0	0	0	200	300	0	0	0	0	0	0	0	200	903	0	0	0	0	0	0	0	603	903	0
4778	9	0	0	0	0	0	0	200	300	0	0	0	0	0	0	0	200	903	0	0	0	0	0	0	0	603	903	0
4779	0	0	0	0	0	0	0	200	300	0	0	0	0	0	0	0	200	903	0	0	0	0	0	0	0	603	903	0
4779	1	0	0	0	0	0	0	200	300	0	0	0	0	0	0	0	200	903	0	0	0	0	0	0	0	603	903	0
4779	2	0	0	0	0	0	0	200	300	0	0	0	0	0	0	0	200	903	0	0	0	0	0	0	0	603	903	0
4779	3	0	0	0	0	0	0	200	300	0	0	0	0	0	0	0	200	903	0	0	0	0	0	0	0	603	903	0
4779	4	0	0	0	0	0	0	200	300	0	0	0	0	0	0	0	200	903	0	0	0	0	0	0	0	603	903	0
4779	5	0	0	0	0	0	0	200	300	0	0	0	0	0	0	0	200	903	0	0	0	0	0	0	0	603	903	0
4779	6	0	0	0	0	0	0	200	300	0	0	0	0	0	0	0	200	903	0	0	0	0	0	0	0	603	903	0
4779	7	0	0	0	0	0	0	200	300	0	0	0	0	0	0	0	200	903	0	0	0	0	0	0	0	603	903	0
4779	8	0	0	0	0	0	0	200	300	0	0	0	0	0	0	0	200	903	0	0	0	0	0	0	0	603	903	0
4779	9	0	0	0	0	0	0	200	300	0	0	0	0	0	0	0	200	903	0	0	0	0	0	0	0	603	903	0
4780	0	0	0	0	0	0	0	200	300	0	0	0	0	0	0	0	200	903	0	0	0	0	0	0	0	603	903	0
4780	1	0	0	0	0	0	0	200	300	0	0	0	0	0	0	0	200	903	0	0	0	0	0	0	0	603	903	0
4780	2	0	0	0	0	0	0	200	300	0	0	0	0	0	0	0	200	903	0	0	0	0	0	0	0	603	903	0
4780	3	0	0	0	0	0	0	200	300	0	0	0	0	0	0	0	200	903	0	0	0	0	0	0	0	603	903	0
4780	4	0	0	0	0	0	0	200	300	0	0	0	0	0	0	0	200	903	0	0	0	0	0	0	0	603	903	0
4780	5	0	0	0	0	0	0	200	300	0	0	0	0	0	0	0	200	903	0	0	0	0	0	0	0	603	903	0
4780	6	0	0	0	0	0	0	200	300	0	0	0	0	0	0	0	200	903	0	0	0	0	0	0	0	603	903	0
4780	7	0	0	0	0	0	0	200	300	0	0	0	0	0	0	0	200	903	0	0	0	0	0	0	0	603	903	0
4780	8	0	0	0	0	0	0	200	300	0	0	0	0	0	0	0	200	903	0	0	0	0	0	0	0	603	903	0
4780	9	0	0	0	0	0	0	200	300	0	0	0	0	0	0	0	200	903	0	0	0	0	0	0	0	603	903	0
4781	0	0	0	0	0	0	0	200	300	0	0	0	0	0	0	0	200	903	0	0	0	0	0	0	0	603	903	0
4781	1	0	0	0	0	0	0	200	300	0	0	0	0	0	0	0	200	903	0	0	0	0	0	0	0	603	903	0
4781	2	0	0	0	0	0	0	200	300	0	0	0	0	0	0	0	200	903	0	0	0	0	0	0	0	603	903	0
4781	3	0	0	0	0	0	0	200	300	0	0	0	0	0	0	0	200	903	0	0	0	0	0	0	0	603	903	0
4781	4	0	0	0	0	0	0	200	300	0	0	0	0	0	0	0	200	903	0	0	0	0	0	0	0	603	903	0
4781	5	0	0	0	0	0	0	200	300	0	0	0	0	0	0	0	200	903	0	0	0	0	0	0	0	603	903	0
4781	6	0	0	0	0	0	0	200	300	0	0	0	0	0	0	0	200	903	0	0	0	0	0	0	0	603	903	0
4781	7	0	0	0	0	0	0	200	300	0	0	0	0	0	0	0	200	903	0	0	0	0	0	0	0	603	903	0
4781	8	0	0	0	0	0	0	200	300	0	0	0	0	0	0	0	200	903	0	0	0	0	0	0	0	603	903	0
4781	9	0	0	0	0	0	0	200	300	0	0	0	0	0	0	0	200	903	0	0	0	0	0	0	0	603	903	0
4782	0	0	0	0	0	0	0	200	300	0	0	0	0	0	0	0	200	903	0	0	0	0	0	0	0	603	903	0
4782	1	0	0	0	0	0	0	200	300	0	0	0	0	0	0	0	200	903	0	0	0	0	0	0	0	603	903	0
4782	2	0	0	0	0	0	0	200	300	0	0	0	0	0	0	0	200	903	0	0	0	0	0	0	0	603	903	0
4782	3	0	0	0	0	0	0	200	300	0	0	0	0	0	0	0	200	903	0	0	0	0	0	0	0	603	903	0
4782	4	0	0	0	0	0	0	200	300	0	0	0	0	0	0	0	200	903	0	0	0	0	0	0	0	603	903	0
4782	5	0	0	0	0	0	0	200	300	0	0	0	0	0	0	0	200	903	0	0	0	0	0	0	0	603	903	0
4782	6	0	0	0	0	0	0	200	300	0	0	0	0	0	0	0	200	903	0	0	0	0	0	0	0	603	903	0
4782	7	0	0	0	0	0	0	200	300	0	0	0	0	0	0	0	200	903	0	0	0	0	0	0	0	603	903	0
4782	8	0	0	0	0	0	0	200	300	0	0	0	0	0	0	0	200	903	0	0	0	0	0	0	0	603	903	0
4782	9	0	0	0	0	0	0	200	300	0	0	0	0	0	0	0	200	903	0	0	0	0	0	0	0	603	903	0
4783	0	0	0	0	0	0	0	200	300	0	0	0	0	0	0	0	200	903	0	0	0	0	0	0	0	603	903	0
4783	1	0	0	0	0	0	0	200	300	0	0	0	0	0	0	0	200	903	0	0	0	0	0	0	0	603	903	0
4783	2	0	0	0	0	0	0	200	300	0	0	0	0	0	0	0	200	903	0	0	0	0	0	0	0	603	903	0
4783	3	0	0	0	0	0	0	200	300	0	0	0	0	0	0	0	200	903	0	0	0	0	0	0	0	603	903	0
4783	4	0	0	0	0	0	0	200	300	0	0	0	0	0	0	0	200	903	0	0	0	0	0	0	0	603	903	0
4783	5	0	0	0	0	0	0	200	300	0	0	0	0	0	0	0	200	903	0	0	0	0	0	0	0	603	903	0
4783	6	0	0	0	0	0	0	200	300	0	0	0	0	0	0	0	200	903	0	0	0	0	0	0	0	603	903	0
4783	7	0	0	0	0	0	0	200	300	0	0	0	0	0	0	0	200	903	0	0	0	0	0	0	0	603	903	0
4783	8	0	0	0	0	0	0	200	300	0	0	0	0	0	0	0	200	903	0	0	0	0	0	0	0	603	903	0
4783	9	0	0	0	0	0	0	200	300	0	0	0	0	0	0	0	200	903	0	0	0	0	0	0	0	603	903	0
4784	0	0	0	0	0	0	0	200	300	0	0	0	0	0	0	0	200	903	0	0	0	0	0	0	0	603	903	0
4784	1	0	0	0	0	0	0	200	300	0	0	0	0	0	0	0	200	903	0	0	0	0	0	0	0	603	903	0
4784	2	0	0	0	0	0	0	200	300	0	0	0	0	0	0	0	200	903	0	0	0	0	0	0	0	603	903	0
4784	3	0	0	0	0	0	0	200	300	0	0	0	0	0	0	0	200	903	0	0	0	0	0	0	0	603	903	0
4784	4	0	0	0	0	0	0	200	300	0	0	0	0	0	0	0	200	903	0	0	0	0	0	0	0	603	903	0
4784	5	0	0	0	0	0	0	200	300	0	0	0	0	0	0	0	200	903	0	0	0	0	0	0	0	603	903	0
4784	6	0	0	0	0	0	0	200	300	0	0	0	0	0	0	0	200	903	0	0	0	0	0	0	0	603	903	0
4784	7	0	0	0	0	0	0	200	300	0	0	0	0	0	0	0	200	903	0	0	0	0	0	0	0	603	903	0
4784	8	0	0	0	0	0	0	200	300	0	0	0	0	0	0	0	200	903	0	0	0	0	0	0	0	603	903	0
4784	9	0	0	0	0	0	0	200	300	0	0	0	0	0	0	0	200	903	0	0	0	0	0	0	0	603	903	0
4785	0	0	0	0	0	0	0	200	300	0	0	0	0	0	0	0	200	903	0	0	0	0	0	0	0	603	903	0
4785	1	0	0	0	0	0	0	200	300	0	0	0	0	0	0	0	200	903	0	0	0	0	0	0	0	603	903	0
4785	2	0	0	0	0	0	0	200	300	0	0	0	0	0	0	0	200	903	0	0	0	0	0	0	0	603	903	0
4785	3	0	0	0	0	0	0	200	300	0	0	0	0	0	0	0	200	903	0	0	0	0	0	0	0	603	903	0
4785	4	0	0	0	0	0	0	200	300	0	0	0	0	0	0	0	200	903	0	0	0	0	0	0	0	603	903	0
4785	5	0	0	0	0	0	0	200	300	0	0	0	0	0	0	0	200	903	0	0	0	0	0	0	0	603	903	0
4785	6	0	0	0	0	0	0	200	300	0	0	0	0	0	0	0	200	903	0	0	0	0	0	0	0	603	903	0
4785	7	0	0	0	0	0	0	200	300	0	0	0	0	0	0	0	200	903	0	0	0	0	0	0	0	603	903	0
4785	8	0	0	0	0	0	0	200	300	0	0	0	0	0	0	0	200	903	0	0	0	0	0	0	0	603	903	0
4785	9	0	0	0	0	0	0	200	300	0	0	0	0	0	0	0	200	903	0	0	0	0	0	0	0	603	903	0
4786	0	0	0	0	0	0	0	200	300	0	0	0	0	0	0	0	200	903	0	0	0	0	0	0	0	603	903	0
4786	1	0	0	0	0	0	0	200	300	0	0	0	0	0	0	0	200	903	0	0	0	0	0	0	0	603	903	0
4786	2	0	0	0	0	0	0	200	300	0	0	0	0	0	0	0	200	903	0	0	0	0	0	0	0	603	903	0
4786	3	0	0	0	0	0	0	200	300	0	0	0	0	0	0	0	200	903	0	0	0	0	0	0	0	603	903	0
4786	4	0	0	0	0	0	0	200	300	0	0	0	0	0	0	0	200	903	0	0	0	0	0	0	0	603	903	0
4786	5	0	0	0	0	0	0	200	300	0	0	0	0	0	0	0	200	903	0	0	0	0	0	0	0	603	903	0
4786	6	0	0	0	0	0	0	200	300	0	0	0	0	0	0	0	200	903	0	0	0	0	0	0	0	603	903	0
4786	7	0	0	0	0	0	0	200	300	0	0	0	0	0	0	0	200	903	0	0	0	0	0	0	0	603	903	0
4786	8	0	0	0	0	0	0	200	300	0	0	0	0	0	0	0	200	903	0	0	0	0	0	0	0	603	903	0
4786	9	0	0	0	0	0	0	200	300	0	0	0	0	0	0	0	200	903	0	0	0	0	0	0	0	603	903	0
4787	0	0	0	0	0	0	0	200	300	0	0	0	0	0	0	0	200	903	0	0	0	0	0	0	0	603	903	0
4787	1	0	0	0	0	0	0	200	300	0	0	0	0	0	0	0	200	903	0	0	0	0	0	0	0	603	903	0
4787	2	0	0	0	0	0	0	200	300	0	0	0	0	0	0	0	200	903	0	0	0	0	0	0	0	603	903	0
4787	3	0	0	0	0	0	0	200	300	0	0	0	0	0	0	0	200	903	0	0	0	0	0	0	0	603	903	0
4787	4	0	0	0	0	0	0	200	300	0	0	0	0	0	0	0	200	903	0	0	0	0	0	0	0	603	903	0
4787	5	0	0	0	0	0	0	200	300	0	0	0	0	0	0	0	200	903	0	0	0	0	0	0	0	603	903	0
4787	6	0	0	0	0	0	0	200	300	0	0	0	0	0	0	0	200	903	0	0	0	0	0	0	0	603	903	0
4787	7	0	0	0	0	0	0	200	300	0	0	0	0	0	0	0	200	903	0	0	0	0	0	0	0	603	903	0
4787	8	0	0	0	0	0	0	200	300	0	0	0	0	0	0	0	200	903	0	0	0	0	0	0	0	603	903	0
4787	9	0	0	0	0	0	0	200	300	0	0	0	0	0	0	0	200	903	0	0	0	0	0	0	0	603	903	0
4788	0	0	0	0	0	0	0	200	300	0	0	0	0	0	0	0	200	903	0	0	0	0	0	0	0	603	903	0
4788	1	0	0	0	0	0	0	200	300	0	0	0	0	0	0	0	200	903	0	0	0	0	0	0	0	603	903	0
4788	2	0	0	0	0	0	0	200	300	0	0	0	0	0	0	0	200	903	0	0	0	0	0	0	0	603	903	0
4788	3	0	0	0	0	0	0	200	300	0	0	0	0	0	0	0	200	903	0	0	0	0	0	0	0	603	903	0
4788	4	0	0	0	0	0	0	200	300	0	0	0	0	0	0	0	200	903	0	0	0	0	0	0	0	603	903	0
4788	5	0	0	0	0	0	0	200	300	0	0	0	0	0	0	0	200	903	0	0	0	0	0	0	0	603	903	0
4788	6	0	0	0	0	0	0	200	300	0	0	0	0	0	0	0	200	903	0	0	0	0	0	0	0	603	903	0
4788	7	0	0	0	0	0	0	200	300	0	0	0	0	0	0	0	200	903	0	0	0	0	0	0	0	603	903	0
4788	8	0	0	0	0	0	0	200	300	0	0	0	0	0	0	0	200	903	0	0	0	0	0	0	0	603	903	0
4788	9	0	0	0	0	0	0	200	300	0	0	0	0	0	0	0	200	903	0	0	0	0	0	0	0	603	903	0
4789	0	0	0	0	0	0	0	200	300	0	0	0	0	0	0	0	200	903	0	0	0	0	0	0	0	603	903	0
4789	1	0	0	0	0	0	0	200	300	0	0	0	0	0	0	0	200	903	0	0	0	0	0	0	0	603	903	0
4789	2	0	0	0	0	0	0	200	300	0	0	0	0	0	0	0	200	903	0	0	0	0	0	0	0	603	903	0
4789	3	0	0	0	0	0	0	200	300	0	0	0	0	0	0	0	200	903	0	0	0	0	0	0	0	603	903	0
4789	4	0	0	0	0	0	0	200	300	0	0	0	0	0	0	0	200	903	0	0	0	0	0	0	0	603	903	0
4789	5	0	0	0	0	0	0	200	300	0	0	0	0	0	0	0	200	903	0	0	0	0	0	0	0	603	903	0
4789	6	0	0	0	0	0	0	200	300	0	0	0	0	0	0	0	200	903	0	0	0	0	0	0	0	603	903	0
4789	7	0	0	0	0	0	0	200	300	0	0	0	0	0	0	0	200	903	0	0	0	0	0	0	0	603	903	0
4789	8	0	0	0	0	0	0	200	300	0	0	0	0	0	0	0	200	903	0	0	0	0	0	0	0	603	903	0
4789	9	0	0	0	0	0	0	200	300	0	0	0	0	0	0	0	200	903	0	0	0	0	0	0	0	603	903	0
4790	0	0	0	0	0	0	0	200	300	0	0	0	0	0	0	0	200	903	0	0	0	0	0	0	0	603	903	0
4790	1	0	0	0	0	0	0	200	300	0	0	0	0	0	0	0	200	903	0	0	0	0	0	0	0	603	903	0
4790	2	0	0	0	0	0	0	200	300	0	0	0	0	0	0	0	200	903	0	0	0	0	0	0	0	603	903	0
4790	3	0	0	0	0	0	0	200	300	0	0	0	0	0	0	0	200	903	0	0	0	0	0	0	0	603	903	0
4790	4	0	0	0	0	0	0	200	300	0	0	0	0	0	0	0	200	903	0	0	0	0	0	0	0	603	903	0
4790	5	0	0	0	0	0	0	200	300	0	0	0	0	0	0	0	200	903	0	0	0	0	0	0	0	603	903	0
4790	6	0	0	0	0	0	0	200	300	0	0	0	0	0	0	0	200	903	0	0	0	0	0	0	0	603	903	0
4790	7	0	0	0	0	0	0	200	300	0	0	0	0	0	0	0	200	903	0	0	0	0	0	0	0	603	903	0
4790	8	0	0	0	0	0	0	200	300	0	0	0	0	0	0	0	200	903	0	0	0	0	0	0	0	603	903	0
4790	9	0	0	0	0	0	0	200	300	0	0	0	0	0	0	0	200	903	0	0	0	0	0	0	0	603	903	0
4791	0	0	0	0	0	0	0	200	300	0	0	0	0	0	0	0	200	903	0	0	0	0	0	0	0	603	903	0
4791	1	0	0	0	0	0	0	200	300	0	0	0	0	0	0	0	200	903	0	0	0	0	0	0	0	603	903	0
4791	2	0	0	0	0	0	0	200	300	0	0	0	0	0	0	0	200	903	0	0	0	0	0	0	0	603	903	0
4791	3	0	0	0	0	0	0	200	300	0	0	0	0	0	0	0	200	903	0	0	0	0	0	0	0	603	903	0
4791	4	0	0	0	0	0	0	200	300	0	0	0	0	0	0	0	200	903	0	0	0	0	0	0	0	603	903	0
4791	5	0	0	0	0	0	0	200	300	0	0	0	0	0	0	0	200	903	0	0	0	0	0	0	0	603	903	0
4791	6	0	0	0	0	0	0	200	300	0	0	0	0	0	0	0	200	903	0	0	0	0	0	0	0	603	903	0
4791	7	0	0	0	0	0	0	200	300	0	0	0	0	0	0	0	200	903	0	0	0	0	0	0	0	603	903	0
4791	8	0	0	0	0	0	0	200	300	0	0	0	0	0	0	0	200	903	0	0	0	0	0	0	0	603	903	0
4791	9	0	0	0	0	0	0	200	300	0	0	0	0	0	0	0	200	903	0	0	0	0	0	0	0	603	903	0
4792	0	0	0	0	0	0	0	200	300	0	0	0	0	0	0	0	200	903	0	0	0	0	0	0	0	603	903	0
4792	1	0	0	0	0	0	0	200	300	0	0	0	0	0	0	0	200	903	0	0	0	0	0	0	0	603	903	0
4792	2	0	0	0	0	0	0	200	300	0	0	0	0	0	0	0	200	903	0	0	0	0	0	0	0	603	903	0
4792	3	0	0	0	0	0	0	200	300	0	0	0	0	0	0	0	200	903	0	0	0	0	0	0	0	603	903	0
4792	4	0	0	0	0	0	0	200	300	0	0	0	0	0	0	0	200	903	0	0	0	0	0	0	0	603	903	0
4792	5	0	0	0	0	0	0	200	300	0	0	0	0	0	0	0	200	903	0	0	0	0	0	0	0	603	903	0
4792	6	0	0	0	0	0	0	200	300	0	0	0	0	0	0	0	200	903	0	0	0	0	0	0	0	603	903	0
4792	7	0	0	0	0	0	0	200	300	0	0	0	0	0	0	0	200	903	0	0	0	0	0	0	0	603	903	0
4792	8	0	0	0	0	0	0	200	300	0	0	0	0	0	0	0	200	903	0	0	0	0	0	0	0	603	903	0
4792	9	0	0	0	0	0	0	200	300	0	0	0	0	0	0	0	200	903	0	0	0	0	0	0	0	603	903	0
4793	0	0	0	0	0	0	0	200	300	0	0	0	0	0	0	0	200	903	0	0	0	0	0	0	0	603	903	0
4793	1	0	0	0	0	0	0	200	300	0	0	0	0	0	0	0	200	903	0	0	0	0	0	0	0	603	903	0
4793	2	0	0	0	0	0	0	200	300	0	0	0	0	0	0	0	200	903	0	0	0	0	0	0	0	603	903	0
4793	3	0	0	0	0	0	0	200	300	0	0	0	0	0	0	0	200	903	0	0	0	0	0	0	0	603	903	0
4793	4	0	0	0	0	0	0	200	300	0	0	0	0	0	0	0	200	903	0	0	0	0	0	0	0	603	903	0
4793	5	0	0	0	0	0	0	200	300	0	0	0	0	0	0	0	200	903	0	0	0	0	0	0	0	603	903	0
4793	6	0	0	0	0	0	0	200	300	0	0	0	0	0	0	0	200	903	0	0	0	0	0	0	0	603	903	0
4793	7	0	0	0	0	0	0	200	300	0	0	0	0	0	0	0	200	903	0	0	0	0	0	0	0	603	903	0
4793	8	0	0	0	0	0	0	200	300	0	0	0	0	0	0	0	200	903	0	0	0	0	0	0	0	603	903	0
4793	9	0	0	0	0	0	0	200	300	0	0	0	0	0	0	0	200	903	0	0	0	0	0	0	0	603	903	0
4794	0	0	0	0	0	0	0	200	300	0	0	0	0	0	0	0	200	903	0	0	0	0	0	0	0	603	903	0
4794	1	0	0	0	0	0	0	200	300	0	0	0	0	0	0	0	200	903	0	0	0	0	0	0	0	603	903	0
4794	2	0	0	0	0	0	0	200	300	0	0	0	0	0	0	0	200	903	0	0	0	0	0	0	0	603	903	0
4794	3	0	0	0	0	0	0	200	300	0	0	0	0	0	0	0	200	903	0	0	0	0	0	0	0	603	903	0
4794	4	0	0	0	0	0	0	200	300	0	0	0	0	0	0	0	200	903	0	0	0	0	0	0	0	603	903	0
4794	5	0	0	0	0	0	0	200	300	0	0	0	0	0	0	0	200	903	0	0	0	0	0	0	0	603	903	0
4794	6	0	0	0	0	0	0	200	300	0	0	0	0	0	0	0	200	903	0	0	0	0	0	0	0	603	903	0
4794	7	0	0	0	0	0	0	200	300	0	0	0	0	0	0	0	200	903	0	0	0	0	0	0	0	603	903	0
4794	8	0	0	0	0	0	0	200	300	0	0	0	0	0	0	0	200	903	0	0	0	0	0	0	0	603	903	0
4794	9	0	0	0	0	0	0	200	300	0	0	0	0	0	0	0	200	903	0	0	0	0	0	0	0	603	903	0
4795	0	0	0	0	0	0	0	200	300	0	0	0	0	0	0	0	200	903	0	0	0	0	0	0	0	603	903	0
4795	1	0	0	0	0	0	0	200	300	0	0	0	0	0	0	0	200	903	0	0	0	0	0	0	0	603	903	0
4795	2	0	0	0	0	0	0	200	300	0	0	0	0	0	0	0	200	903	0	0	0	0	0	0	0	603	903	0
4795	3	0	0	0	0	0	0	200	300	0	0	0	0	0	0	0	200	903	0	0	0	0	0	0	0	603	903	0
4795	4	0	0	0	0	0	0	200	300	0	0	0	0	0	0	0	200	903	0	0	0	0	0	0	0	603	903	0
4795	5	0	0	0	0	0	0	200	300	0	0	0	0	0	0	0	200	903	0	0	0	0	0	0	0	603	903	0
4795	6	0	0	0	0	0	0	200	300	0	0	0	0	0	0	0	200	903	0	0	0	0	0	0	0	603	903	0
4795	7	0	0	0	0	0	0	200	300	0	0	0	0	0	0	0	200	903	0	0	0	0	0	0	0	603	903	0
4795	8	0	0	0	0	0	0	200	300	0	0	0	0	0	0	0	200	903	0	0	0	0	0	0	0	603	903	0
4795	9	0	0	0	0	0	0	200	300	0	0	0	0	0	0	0	200	903	0	0	0	0	0	0	0	603	903	0
4796	0	0	0	0	0	0	0	200	300	0	0	0	0	0	0	0	200	903	0	0	0	0	0	0	0	603	903	0
4796	1	0	0	0	0	0	0	200	300	0	0	0	0	0	0	0	200	903	0	0	0	0	0	0	0	603	903	0
4796	2	0	0	0	0	0	0	200	300	0	0	0	0	0	0	0	200	903	0	0	0	0	0	0	0	603	903	0
4796	3	0	0	0	0	0	0	200	300	0	0	0	0	0	0	0	200	903	0	0	0	0	0	0	0	603	903	0
4796	4	0	0	0	0	0	0	200	300	0	0	0	0	0	0	0	200	903	0	0	0	0	0	0	0	603	903	0
4796	5	0	0	0	0	0	0	200	300	0	0	0	0	0	0	0	200	903	0	0	0	0	0	0	0	603	903	0
4796	6	0	0	0	0	0	0	200	300	0	0	0	0	0	0	0	200	903	0	0	0	0	0	0	0	603	903	0
4796	7	0	0	0	0	0	0	200	300	0	0	0	0	0	0	0	200	903	0	0	0	0	0	0	0	603	903	0
4796	8	0	0	0	0	0	0	200	300	0	0	0	0	0	0	0	200	903	0	0	0	0	0	0	0	603	903	0
4796	9	0	0	0	0	0	0	200	300	0	0	0	0	0	0	0	200	903	0	0	0	0	0	0	0	603	903	0
4797	0	0	0	0	0	0	0	200	300	0	0	0	0	0	0	0	200	903	0	0	0	0	0	0	0	603	903	0
4797	1	0	0	0	0	0	0	200	300	0	0	0	0	0	0	0	200	903	0	0	0	0	0	0	0	603	903	0
4797	2	0	0	0	0	0	0	200	300	0	0	0	0	0	0	0	200	903	0	0	0	0	0	0	0	603	903	0
4797	3	0	0	0	0	0	0	200	300	0	0	0	0	0	0	0	200	903	0	0	0	0	0	0	0	603	903	0
4797	4	0	0	0	0	0	0	200	300	0	0	0	0	0	0	0	200	903	0	0	0	0	0	0	0	603	903	0
4797	5	0	0	0	0	0	0	200	300	0	0	0	0	0	0	0	200	903	0	0	0	0	0	0	0	603	903	0
4797	6	0	0	0	0	0	0	200	300	0	0	0	0	0	0	0	200	903	0	0	0	0	0	0	0	603	903	0
4797	7	0	0	0	0	0	0	200	300	0	0	0	0	0	0	0	200	903	0	0	0	0	0	0	0	603	903	0
4797	8	0	0	0	0	0	0	200	300	0	0	0	0	0	0	0	200	903	0	0	0	0	0	0	0	603	903	0
4797	9	0	0	0	0	0	0	200	300	0	0	0	0	0	0	0	200	903	0	0	0	0	0	0	0	603	903	0
4798	0	0	0	0	0	0	0	200	300	0	0	0	0	0	0	0	200	903	0	0	0	0	0	0	0	603	903	0
4798	1	0	0	0	0	0	0	200	300	0	0	0	0	0	0	0	200	903	0	0	0	0	0	0	0	603	903	0
4798	2	0	0	0	0	0	0	200	300	0	0	0	0	0	0	0	200	903	0	0	0	0	0	0	0	603	903	0
4798	3	0	0	0	0	0	0	200	300	0	0	0	0	0	0	0	200	903	0	0	0	0	0	0	0	603	903	0
4798	4	0	0	0	0	0	0	200	300	0	0	0	0	0	0	0	200	903	0	0	0	0	0	0	0	603	903	0
4798	5	0	0	0	0	0	0	200	300	0	0	0	0	0	0	0	200	903	0	0	0	0	0	0	0	603	903	0
4798	6	0	0	0	0	0	0	200	300	0	0	0	0	0	0	0	200	903	0	0	0	0	0	0	0	603	903	0
4798	7	0	0	0	0	0	0	200	300	0	0	0	0	0	0	0	200	903	0	0	0	0	0	0	0	603	903	0
4798	8	0	0	0	0	0	0	200	300	0	0	0	0	0	0	0	200	903	0	0	0	0	0	0	0	603	903	0
4798	9	0	0	0	0	0	0	200	300	0	0	0	0	0	0	0	200	903	0	0	0	0	0	0	0	603	903	0
4799	0	0	0	0	0	0	0	200	300	0	0	0	0	0	0	0	200	903	0	0	0	0	0	0	0	603	903	0
4799	1	0	0	0	0	0	0	200	300	0	0	0	0	0	0	0	200	903	0	0	0	0	0	0	0	603	903	0
4799	2	0	0	0	0	0	0	200	300	0	0	0	0	0	0	0	200	903	0	0	0	0	0	0	0	603	903	0
4799	3	0	0	0	0	0	0	200	300	0	0	0	0	0	0	0	200	903	0	0	0	0	0	0	0	603	903	0
4799	4	0	0	0	0	0	0	200	300	0	0	0	0	0	0	0	200	903	0	0	0	0	0	0	0	603	903	0
4799	5	0	0	0	0	0	0	200	300	0	0	0	0	0	0	0	200	903	0	0	0	0	0	0	0	603	903	0
4799	6	0	0	0	0	0	0	200	300	0	0	0	0	0	0	0	200	903	0	0	0	0	0	0	0	603	903	0
4799	7	0	0	0	0	0	0	200	300	0	0	0	0	0	0	0	200	903	0	0	0	0	0	0	0	603	903	0
4799	8	0	0	0	0	0	0	200	300	0	0	0	0	0	0	0	200	903	0	0	0	0	0	0	0	603	903	0
4799	9	0	0	0	0	0	0	200	300	0	0	0	0	0	0	0	200	903	0	0	0	0	0	0	0	603	903	0
4800	0	0	0	0	0	0	0	200	300	0	0	0	0	0	0	0	200	903	0	0	0	0	0	0	0	603	903	0
4800	1	0	0	0	0	0	0	200	300	0	0	0	0	0	0	0	200	903	0	0	0	0	0	0	0	603	903	0
4800	2	0	0	0	0	0	0	200	300	0	0	0	0	0	0	0	200	903	0	0	0	0	0	0	0	603	903	0
4800	3	0	0	0	0	0	0	200	300	0	0	0	0	0	0	0	200	903	0	0	0	0	0	0	0	603	903	0
4800	4	0	0	0	0	0	0	200	300	0	0	0	0	0	0	0	200	903	0	0	0	0	0	0	0	603	903	0
4800	5	0	0	0	0	0	0	200	300	0	0	0	0	0	0	0	200	903	0	0	0	0	0	0	0	603	903	0
4800	6	0	0	0	0	0	0	200	300	0	0	0	0	0	0	0	200	903	0	0	0	0	0	0	0	603	903	0
4800	7	0	0	0	0	0	0	200	300	0	0	0	0	0	0	0	200	903	0	0	0	0	0	0	0	603	903	0
4800	8	0	0	0	0	0	0	200	300	0	0	0	0	0	0	0	200	903	0	0	0	0	0	0	0	603	903	0
4800	9	0	0	0	0	0	0	200	300	0	0	0	0	0	0	0	200	903	0	0	0	0	0	0	0	603	903	0
4801	0	0	0	0	0	0	0	200	300	0	0	0	0	0	0	0	200	903	0	0	0	0	0	0	0	603	903	0
4801	1	0	0	0	0	0	0	200	300	0	0	0	0	0	0	0	200	903	0	0	0	0	0	0	0	603	903	0
4801	2	0	0	0	0	0	0	200	300	0	0	0	0	0	0	0	200	903	0	0	0	0	0	0	0	603	903	0
4801	3	0	0	0	0	0	0	200	300	0	0	0	0	0	0	0	200	903	0	0	0	0	0	0	0	603	903	0
4801	4	0	0	0	0	0	0	200	300	0	0	0	0	0	0	0	200	903	0	0	0	0	0	0	0	603	903	0
4801	5	0	0	0	0	0	0	200	300	0	0	0	0	0	0	0	200	903	0	0	0	0	0	0	0	603	903	0
4801	6	0	0	0	0	0	0	200	300	0	0	0	0	0	0	0	200	903	0	0	0	0	0	0	0	603	903	0
4801	7	0	0	0	0	0	0	200	300	0	0	0	0	0	0	0	200	903	0	0	0	0	0	0	0	603	903	0
4801	8	0	0	0	0	0	0	200	300	0	0	0	0	0	0	0	200	903	0	0	0	0	0	0	0	603	903	0
4801	9	0	0	0	0	0	0	200	300	0	0	0	0	0	0	0	200	903	0	0	0	0	0	0	0	603	903	0
4802	0	0	0	0	0	0	0	200	300	0	0	0	0	0	0	0	200	903	0	0	0	0	0	0	0	603	903	0
4802	1	0	0	0	0	0	0	200	300	0	0	0	0	0	0	0	200	903	0	0	0	0	0	0	0	603	903	0
4802	2	0	0	0	0	0	0	200	300	0	0	0	0	0	0	0	200	903	0	0	0	0	0	0	0	603	903	0
4802	3	0	0	0	0	0	0	200	300	0	0	0	0	0	0	0	200	903	0	0	0	0	0	0	0	603	903	0
4802	4	0	0	0	0	0	0	200	300	0	0	0	0	0	0	0	200	903	0	0	0	0	0	0	0	603	903	0
4802	5	0	0	0	0	0	0	200	300	0	0	0	0	0	0	0	200	903	0	0	0	0	0	0	0	603	903	0
4802	6	0	0	0	0	0	0	200	300	0	0	0	0	0	0	0	200	903	0	0	0	0	0	0	0	603	903	0
4802	7	0	0	0	0	0	0	200	300	0	0	0	0	0	0	0	200	903	0	0	0	0	0	0	0	603	903	0
4802	8	0	0	0	0	0	0	200	300	0	0	0	0	0	0	0	200	903	0	0	0	0	0	0	0	603	903	0
4802	9	0	0	0	0	0	0	200	300	0	0	0	0	0	0	0	200	903	0	0	0	0	0	0	0	603	903	0
4803	0	0	0	0	0	0	0	200	300	0	0	0	0	0	0	0	200	903	0	0	0	0	0	0	0	603	903	0
4803	1	0	0	0	0	0	0	200	300	0	0	0	0	0	0	0	200	903	0	0	0	0	0	0	0	603	903	0
4803	2	0	0	0	0	0	0	200	300	0	0	0	0	0	0	0	200	903	0	0	0	0	0	0	0	603	903	0
4803	3	0	0	0	0	0	0	200	300	0	0	0	0	0	0	0	200	903	0	0	0	0	0	0	0	603	903	0
4803	4	0	0	0	0	0	0	200	300	0	0	0	0	0	0	0	200	903	0	0	0	0	0	0	0	603	903	0
4803	5	0	0	0	0	0	0	200	300	0	0	0	0	0	0	0	200	903	0	0	0	0	0	0	0	603	903	0
4803	6	0	0	0	0	0	0	200	300	0	0	0	0	0	0	0	200	903	0	0	0	0	0	0	0	603	903	0
4803	7	0	0	0	0	0	0	200	300	0	0	0	0	0	0	0	200	903	0	0	0	0	0	0	0	603	903	0
4803	8	0	0	0	0	0	0	200	300	0	0	0	0	0	0	0	200	903	0	0	0	0	0	0	0	603	903	0
4803	9	0	0	0	0	0	0	200	300	0	0	0	0	0	0	0	200	903	0	0	0	0	0	0	0	603	903	0
4804	0	0	0	0	0	0	0	200	300	0	0	0	0	0	0	0	200	903	0	0	0	0	0	0	0	603	903	0
4804	1	0	0	0	0	0	0	200	300	0	0	0	0	0	0	0	200	903	0	0	0	0	0	0	0	603	903	0
4804	2	0	0	0	0	0	0	200	300	0	0	0	0	0	0	0	200	903	0	0	0	0	0	0	0	603	903	0
4804	3	0	0	0	0	0	0	200	300	0	0	0	0	0	0	0	200	903	0	0	0	0	0	0	0	603	903	0
4804	4	0	0	0	0	0	0	200	300	0	0	0	0	0	0	0	200	903	0	0	0	0	0	0	0	603	903	0
4804	5	0	0	0	0	0	0	200	300	0	0	0	0	0	0	0	200	903	0	0	0	0	0	0	0	603	903	0
4804	6	0	0	0	0	0	0	200	300	0	0	0	0	0	0	0	200	903	0	0	0	0	0	0	0	603	903	0
4804	7	0	0	0	0	0	0	200	300	0	0	0	0	0	0	0	200	903	0	0	0	0	0	0	0	603	903	0
4804	8	0	0	0	0	0	0	200	300	0	0	0	0	0	0	0	200	903	0	0	0	0	0	0	0	603	903	0
4804	9	0	0	0	0	0	0	200	300	0	0	0	0	0	0	0	200	903	0	0	0	0	0	0	0	603	903	0
4805	0	0	0	0	0	0	0	200	300	0	0	0	0	0	0	0	200	903	0	0	0	0	0	0	0	603	903	0
4805	1	0	0	0	0	0	0	200	300	0	0	0	0	0	0	0	200	903	0	0	0	0	0	0	0	603	903	0
4805	2	0	0	0	0	0	0	200	300	0	0	0	0	0	0	0	200	903	0	0	0	0	0	0	0	603	903	0
4805	3	0	0	0	0	0	0	200	300	0	0	0	0	0	0	0	200	903	0	0	0	0	0	0	0	603	903	0
4805	4	0	0	0	0	0	0	200	300	0	0	0	0	0	0	0	200	903	0	0	0	0	0	0	0	603	903	0
4805	5	0	0	0	0	0	0	200	300	0	0	0	0	0	0	0	200	903	0	0	0	0	0	0	0	603	903	0
4805	6	0	0	0	0	0	0	200	300	0	0	0	0	0	0	0	200	903	0	0	0	0	0	0	0	603	903	0
4805	7	0	0	0	0	0	0	200	300	0	0	0	0	0	0	0	200	903	0	0	0	0	0	0	0	603	903	0
4805	8	0	0	0	0	0	0	200	300	0	0	0	0	0	0	0	200	903	0	0	0	0	0	0	0	603	903	0
4805	9	0	0	0	0	0	0	200	300	0	0	0	0	0	0	0	200	903	0	0	0	0	0	0	0	603	903	0
4806	0	0	0	0	0	0	0	200	300	0	0	0	0	0	0	0	200	903	0	0	0	0	0	0	0	603	903	0
4806	1	0	0	0	0	0	0	200	300	0	0	0	0	0	0	0	200	903	0	0	0	0	0	0	0	603	903	0
4806	2	0	0	0	0	0	0	200	300	0	0	0	0	0	0	0	200	903	0	0	0	0	0	0	0	603	903	0
4806	3	0	0	0	0	0	0	200	300	0	0	0	0	0	0	0	200	903	0	0	0	0	0	0	0	603	903	0
4806	4	0	0	0	0	0	0	200	300	0	0	0	0	0	0	0	200	903	0	0	0	0	0	0	0	603	903	0
4806	5	0	0	0	0	0	0	200	300	0	0	0	0	0	0	0	200	903	0	0	0	0	0	0	0	603	903	0
4806	6	0	0	0	0	0	0	200	300	0	0	0	0	0	0	0	200	903	0	0	0	0	0	0	0	603	903	0
4806	7	0	0	0	0	0	0	200	300	0	0	0	0	0	0	0	200	903	0	0	0	0	0	0	0	603	903	0
4806	8	0	0	0	0	0	0	200	300	0	0	0	0	0	0	0	200	903	0	0	0	0	0	0	0	603	903	0
4806	9	0	0	0	0	0	0	200	300	0	0	0	0	0	0	0	200	903	0	0	0	0	0	0	0	603	903	0
4807	0	0	0	0	0	0	0	200	300	0	0	0	0	0	0	0	200	903	0	0	0	0	0	0	0	603	903	0
4807	1	0	0	0	0	0	0	200	300	0	0	0	0	0	0	0	200	903	0	0	0	0	0	0	0	603	903	0
4807	2	0	0	0	0	0	0	200	300	0	0	0	0	0	0	0	200	903	0	0	0	0	0	0	0	603	903	0
4807	3	0	0	0	0	0	0	200	300	0	0	0	0	0	0	0	200	903	0	0	0	0	0	0	0	603	903	0
4807	4	0	0	0	0	0	0	200	300	0	0	0	0	0	0	0	200	903	0	0	0	0	0	0	0	603	903	0
4807	5	0	0	0	0	0	0	200	300	0	0	0	0	0	0	0	200	903	0	0	0	0	0	0	0	603	903	0
4807	6	0	0	0	0	0	0	200	300	0	0	0	0	0	0	0	200	903	0	0	0	0	0	0	0	603	903	0
4807	7	0	0	0	0	0	0	200	300	0	0	0	0	0	0	0	200	903	0	0	0	0	0	0	0	603	903	0
4807	8	0	0	0	0	0	0	200	300	0	0	0	0	0	0	0	200	903	0	0	0	0	0	0	0	603	903	0
4807	9	0	0	0	0	0	0	200	300	0	0	0	0	0	0	0	200	903	0	0	0	0	0	0	0	603	903	0
4808	0	0	0	0	0	0	0	200	300	0	0	0	0	0	0	0	200	903	0	0	0	0	0	0	0	603	903	0
4808	1	0	0	0	0	0	0	200	300	0	0	0	0	0	0	0	200	903	0	0	0	0	0	0	0	603	903	0
4808	2	0	0	0	0	0	0	200	300	0	0	0	0	0	0	0	200	903	0	0	0	0	0	0	0	603	903	0
4808	3	0	0	0	0	0	0	200	300	0	0	0	0	0	0	0	200	903	0	0	0	0	0	0	0	603	903	0
4808	4	0	0	0	0	0	0	200	300	0	0	0	0	0	0	0	200	903	0	0	0	0	0	0	0	603	903	0
4808	5	0	0	0	0	0	0	200	300	0	0	0	0	0	0	0	200	903	0	0	0	0	0	0	0	603	903	0
4808	6	0	0	0	0	0	0	200	300	0	0	0	0	0	0	0	200	903	0	0	0	0	0	0	0	603	903	0
4808	7	0	0	0	0	0	0	200	300	0	0	0	0	0	0	0	200	903	0	0	0	0	0	0	0	603	903	0
4808	8	0	0	0	0	0	0	200	300	0	0	0	0	0	0	0	200	903	0	0	0	0	0	0	0	603	903	0
4808	9	0	0	0	0	0	0	200	300	0	0	0	0	0	0	0	200	903	0	0	0	0	0	0	0	603	903	0
4809	0	0	0	0	0	0	0	200	300	0	0	0	0	0	0	0	200	903	0	0	0	0	0	0	0	603	903	0
4809	1	0	0	0	0	0	0	200	300	0	0	0	0	0	0	0	200	903	0	0	0	0	0	0	0	603	903	0
4809	2	0	0	0	0	0	0	200	300	0	0	0	0	0	0	0	200	903	0	0	0	0	0	0	0	603	903	0
4809	3	0	0	0	0	0	0	200	300	0	0	0	0	0	0	0	200	903	0	0	0	0	0	0	0	603	903	0
4809	4	0	0	0	0	0	0	200	300	0	0	0	0	0	0	0	200	903	0	0	0	0	0	0	0	603	903	0
4809	5	0	0	0	0	0	0	200	300	0	0	0	0	0	0	0	200	903	0	0	0	0	0	0	0	603	903	0
4809	6	0	0	0	0	0	0	200	300	0	0	0	0	0	0	0	200	903	0	0	0	0	0	0	0	603	903	0
4809	7	0	0	0	0	0	0	200	300	0	0	0	0	0	0	0	200	903	0	0	0	0	0	0	0	603	903	0
4809	8	0	0	0	0	0	0	200	300	0	0	0	0	0	0	0	200	903	0	0	0	0	0	0	0	603	903	0
4809	9	0	0	0	0	0	0	200	300	0	0	0	0	0	0	0	200	903	0	0	0	0	0	0	0	603	903	0
4810	0	0	0	0	0	0	0	200	300	0	0	0	0	0	0	0	200	903	0	0	0	0	0	0	0	603	903	0
4810	1	0	0	0	0	0	0	200	300	0	0	0	0	0	0	0	200	903	0	0	0	0	0	0	0	603	903	0
4810	2	0	0	0	0	0	0	200	300	0	0	0	0	0	0	0	200	903	0	0	0	0	0	0	0	603	903	0
4810	3	0	0	0	0	0	0	200	300	0	0	0	0	0	0	0	200	903	0	0	0	0	0	0	0	603	903	0
4810	4	0	0	0	0	0	0	200	300	0	0	0	0	0	0	0	200	903	0	0	0	0	0	0	0	603	903	0
4810	5	0	0	0	0	0	0	200	300	0	0	0	0	0	0	0	200	903	0	0	0	0	0	0	0	603	903	0
4810	6	0	0	0	0	0	0	200	300	0	0	0	0	0	0	0	200	903	0	0	0	0	0	0	0	603	903	0
4810	7	0	0	0	0	0	0	200	300	0	0	0	0	0	0	0	200	903	0	0	0	0	0	0	0	603	903	0
4810	8	0	0	0	0	0	0	200	300	0	0	0	0	0	0	0	200	903	0	0	0	0	0	0	0	603	903	0
4810	9	0	0	0	0	0	0	200	300	0	0	0	0	0	0	0	200	903	0	0	0	0	0	0	0	603	903	0
4811	0	0	0	0	0	0	0	200	300	0	0	0	0	0	0	0	200	903	0	0	0	0	0	0	0	603	903	0
4811	1	0	0	0	0	0	0	200	300	0	0	0	0	0	0	0	200	903	0	0	0	0	0	0	0	603	903	0
4811	2	0	0	0	0	0	0	200	300	0	0	0	0	0	0	0	200	903	0	0	0	0	0	0	0	603	903	0
4811	3	0	0	0	0	0	0	200	300	0	0	0	0	0	0	0	200	903	0	0	0	0	0	0	0	603	903	0
4811	4	0	0	0	0	0	0	200	300	0	0	0	0	0	0	0	200	903	0	0	0	0	0	0	0	603	903	0
4811	5	0	0	0	0	0	0	200	300	0	0	0	0	0	0	0	200	903	0	0	0	0	0	0	0	603	903	0
4811	6	0	0	0	0	0	0	200	300	0	0	0	0	0	0	0	200	903	0	0	0	0	0	0	0	603	903	0
4811	7	0	0	0	0	0	0	200	300	0	0	0	0	0	0	0	200	903	0	0	0	0	0	0	0	603	903	0
4811	8	0	0	0	0	0	0	200	300	0	0	0	0	0	0	0	200	903	0	0	0	0	0	0	0	603	903	0
4811	9	0	0	0	0	0	0	200	300	0	0	0	0	0	0	0	200	903	0	0	0	0	0	0	0	603	903	0
4812	0	0	0	0	0	0	0	200	300	0	0	0	0	0	0	0	200	903	0	0	0	0	0	0	0	603	903	0
4812	1	0	0	0	0	0	0	200	300	0	0	0	0	0	0	0	200	903	0	0	0	0	0	0	0	603	903	0
4812	2	0	0	0	0	0	0	200	300	0	0	0	0	0	0	0	200	903	0	0	0	0	0	0	0	603	903	0
4812	3	0	0	0	0	0	0	200	300	0	0	0	0	0	0	0	200	903	0	0	0	0	0	0	0	603	903	0
4812	4	0	0	0	0	0	0	200	300	0	0	0	0	0	0	0	200	903	0	0	0	0	0	0	0	603	903	0
4812	5	0	0	0	0	0	0	200	300	0	0	0	0	0	0	0	200	903	0	0	0	0	0	0	0	603	903	0
4812	6	0	0	0	0	0	0	200	300	0	0	0	0	0	0	0	200	903	0	0	0	0	0	0	0	603	903	0
4812	7	0	0	0	0	0	0	200	300	0	0	0	0	0	0	0	200	903	0	0	0	0	0	0	0	603	903	0
4812	8	0	0	0	0	0	0	200	300	0	0	0	0	0	0	0	200	903	0	0	0	0	0	0	0	603	903	0
4812	9	0	0	0	0	0	0	200	300	0	0	0	0	0	0	0	200	903	0	0	0	0	0	0	0	603	903	0
4813	0	0	0	0	0	0	0	200	300	0	0	0	0	0	0	0	200	903	0	0	0	0	0	0	0	603	903	0
4813	1	0	0	0	0	0	0	200	300	0	0	0	0	0	0	0	200	903	0	0	0	0	0	0	0	603	903	0
4813	2	0	0	0	0	0	0	200	300	0	0	0	0	0	0	0	200	903	0	0	0	0	0	0	0	603	903	0
4813	3	0	0	0	0	0	0	200	300	0	0	0	0	0	0	0	200	903	0	0	0	0	0	0	0	603	903	0
4813	4	0	0	0	0	0	0	200	300	0	0	0	0	0	0	0	200	903	0	0	0	0	0	0	0	603	903	0
4813	5	0	0	0	0	0	0	200	300	0	0	0	0	0	0	0	200	903	0	0	0	0	0	0	0	603	903	0
4813	6	0	0	0	0	0	0	200	300	0	0	0	0	0	0	0	200	903	0	0	0	0	0	0	0	603	903	0
4813	7	0	0	0	0	0	0	200	300	0	0	0	0	0	0	0	200	903	0	0	0	0	0	0	0	603	903	0
4813	8	0	0	0	0	0	0	200	300	0	0	0	0	0	0	0	200	903	0	0	0	0	0	0	0	603	903	0
4813	9	0	0	0	0	0	0	200	300	0	0	0	0	0	0	0	200	903	0	0	0	0	0	0	0	603	903	0
4814	0	0	0	0	0	0	0	200	300	0	0	0	0	0	0	0	200	903	0	0	0	0	0	0	0	603	903	0
4814	1	0	0	0	0	0	0	200	300	0	0	0	0	0	0	0	200	903	0	0	0	0	0	0	0	603	903	0
4814	2	0	0	0	0	0	0	200	300	0	0	0	0	0	0	0	200	903	0	0	0	0	0	0	0	603	903	0
4814	3	0	0	0	0	0	0	200	300	0	0	0	0	0	0	0	200	903	0	0	0	0	0	0	0	603	903	0
4814	4	0	0	0	0	0	0	200	300	0	0	0	0	0	0	0	200	903	0	0	0	0	0	0	0	603	903	0
4814	5	0	0	0	0	0	0	200	300	0	0	0	0	0	0	0	200	903	0	0	0	0	0	0	0	603	903	0
4814	6	0	0	0	0	0	0	200	300	0	0	0	0	0	0	0	200	903	0	0	0	0	0	0	0	603	903	0
4814	7	0	0	0	0	0	0	200	300	0	0	0	0	0	0	0	200	903	0	0	0	0	0	0	0	603	903	0
4814	8	0	0	0	0	0	0	200	300	0	0	0	0	0	0	0	200	903	0	0	0	0	0	0	0	603	903	0
4814	9	0	0	0	0	0	0	200	300	0	0	0	0	0	0	0	200	903	0	0	0	0	0	0	0	603	903	0
4815	0	0	0	0	0	0	0	200	300	0	0	0	0	0	0	0	200	903	0	0	0	0	0	0	0	603	903	0
4815	1	0	0	0	0	0	0	200	300	0	0	0	0	0	0	0	200	903	0	0	0	0	0	0	0	603	903	0
4815	2	0	0	0	0	0	0	200	300	0	0	0	0	0	0	0	200	903	0	0	0	0	0	0	0	603	903	0
4815	3	0	0	0	0	0	0	200	300	0	0	0	0	0	0	0	200	903	0	0	0	0	0	0	0	603	903	0
4815	4	0	0	0	0	0	0	200	300	0	0	0	0	0	0	0	200	903	0	0	0	0	0	0	0	603	903	0
4815	5	0	0	0	0	0	0	200	300	0	0	0	0	0	0	0	200	903	0	0	0	0	0	0	0	603	903	0
4815	6	0	0	0	0	0	0	200	300	0	0	0	0	0	0	0	200	903	0	0	0	0	0	0	0	603	903	0
4815	7	0	0	0	0	0	0	200	300	0	0	0	0	0	0	0	200	903	0	0	0	0	0	0	0	603	903	0
4815	8	0	0	0	0	0	0	200	300	0	0	0	0	0	0	0	200	903	0	0	0	0	0	0	0	603	903	0
4815	9	0	0	0	0	0	0	200	300	0	0	0	0	0	0	0	200	903	0	0	0	0	0	0	0	603	903	0
4816	0	0	0	0	0	0	0	200	300	0	0	0	0	0	0	0	200	903	0	0	0	0	0	0	0	603	903	0
4816	1	0	0	0	0	0	0	200	300	0	0	0	0	0	0	0	200	903	0	0	0	0	0	0	0	603	903	0
4816	2	0	0	0	0	0	0	200	300	0	0	0	0	0	0	0	200	903	0	0	0	0	0	0	0	603	903	0
4816	3	0	0	0	0	0	0	200	300	0	0	0	0	0	0	0	200	903	0	0	0	0	0	0	0	603	903	0
4816	4	0	0	0	0	0	0	200	300	0	0	0	0	0	0	0	200	903	0	0	0	0	0	0	0	603	903	0
4816	5	0	0	0	0	0	0	200	300	0	0	0	0	0	0	0	200	903	0	0	0	0	0	0	0	603	903	0
4816	6	0	0	0	0	0	0	200	300	0	0	0	0	0	0	0	200	903	0	0	0	0	0	0	0	603	903	0
4816	7	0	0	0	0	0	0	200	300	0	0	0	0	0	0	0	200	903	0	0	0	0	0	0	0	603	903	0
4816	8	0	0	0	0	0	0	200	300	0	0	0	0	0	0	0	200	903	0	0	0	0	0	0	0	603	903	0
4816	9	0	0	0	0	0	0	200	300	0	0	0	0	0	0	0	200	903	0	0	0	0	0	0	0	603	903	0
4817	0	0	0	0	0	0	0	200	300	0	0	0	0	0	0	0	200	903	0	0	0	0	0	0	0	603	903	0
4817	1	0	0	0	0	0	0	200	300	0	0	0	0	0	0	0	200	903	0	0	0	0	0	0	0	603	903	0
4817	2	0	0	0	0	0	0	200	300	0	0	0	0	0	0	0	200	903	0	0	0	0	0	0	0	603	903	0
4817	3	0	0	0	0	0	0	200	300	0	0	0	0	0	0	0	200	903	0	0	0	0	0	0	0	603	903	0
4817	4	0	0	0	0	0	0	200	300	0	0	0	0	0	0	0	200	903	0	0	0	0	0	0	0	603	903	0
4817	5	0	0	0	0	0	0	200	300	0	0	0	0	0	0	0	200	903	0	0	0	0	0	0	0	603	903	0
4817	6	0	0	0	0	0	0	200	300	0	0	0	0	0	0	0	200	903	0	0	0	0	0	0	0	603	903	0
4817	7	0	0	0	0	0	0	200	300	0	0	0	0	0	0	0	200	903	0	0	0	0	0	0	0	603	903	0
4817	8	0	0	0	0	0	0	200	300	0	0	0	0	0	0	0	200	903	0	0	0	0	0	0	0	603	903	0
4817	9	0	0	0	0	0	0	200	300	0	0	0	0	0	0	0	200	903	0	0	0	0	0	0	0	603	903	0
4818	0	0	0	0	0	0	0	200	300	0	0	0	0	0	0	0	200	903	0	0	0	0	0	0	0	603	903	0
4818	1	0	0	0	0	0	0	200	300	0	0	0	0	0	0	0	200	903	0	0	0	0	0	0	0	603	903	0
4818	2	0	0	0	0	0	0	200	300	0	0	0	0	0	0	0	200	903	0	0	0	0	0	0	0	603	903	0
4818	3	0	0	0	0	0	0	200	300	0	0	0	0	0	0	0	200	903	0	0	0	0	0	0	0	603	903	0
4818	4	0	0	0	0	0	0	200	300	0	0	0	0	0	0	0	200	903	0	0	0	0	0	0	0	603	903	0
4818	5	0	0	0	0	0	0	200	300	0	0	0	0	0	0	0	200	903	0	0	0	0	0	0	0	603	903	0
4818	6	0	0	0	0	0	0	200	300	0	0	0	0	0	0	0	200	903	0	0	0	0	0	0	0	603	903	0
4818	7	0	0	0	0	0	0	200	300	0	0	0	0	0	0	0	200	903	0	0	0	0	0	0	0	603	903	0
4818	8	0	0	0	0	0	0	200	300	0	0	0	0	0	0	0	200	903	0	0	0	0	0	0	0	603	903	0
4818	9	0	0	0	0	0	0	200	300	0	0	0	0	0	0	0	200	903	0	0	0	0	0	0	0	603	903	0
4819	0	0	0	0	0	0	0	200	300	0	0	0	0	0	0	0	200	903	0	0	0	0	0	0	0	603	903	0
4819	1	0	0	0	0	0	0	200	300	0	0	0	0	0	0	0	200	903	0	0	0	0	0	0	0	603	903	0
4819	2	0	0	0	0	0	0	200	300	0	0	0	0	0	0	0	200	903	0	0	0	0	0	0	0	603	903	0
4819	3	0	0	0	0	0	0	200	300	0	0	0	0	0	0	0	200	903	0	0	0	0	0	0	0	603	903	0
4819	4	0	0	0	0	0	0	200	300	0	0	0	0	0	0	0	200	903	0	0	0	0	0	0	0	603	903	0
4819	5	0	0	0	0	0	0	200	300	0	0	0	0	0	0	0	200	903	0	0	0	0	0	0	0	603	903	0
4819	6	0	0	0	0	0	0	200	300	0	0	0	0	0	0	0	200	903	0	0	0	0	0	0	0	603	903	0
4819	7	0	0	0	0	0	0	200	300	0	0	0	0	0	0	0	200	903	0	0	0	0	0	0	0	603	903	0
4819	8	0	0	0	0	0	0	200	300	0	0	0	0	0	0	0	200	903	0	0	0	0	0	0	0	603	903	0
4819	9	0	0	0	0	0	0	200	300	0	0	0	0	0	0	0	200	903	0	0	0	0	0	0	0	603	903	0
4820	0	0	0	0	0	0	0	200	300	0	0	0	0	0	0	0	200	903	0	0	0	0	0	0	0	603	903	0
4820	1	0	0	0	0	0	0	200	300	0	0	0	0	0	0	0	200	903	0	0	0	0	0	0	0	603	903	0
4820	2	0	0	0	0	0	0	200	300	0	0	0	0	0	0	0	200	903	0	0	0	0	0	0	0	603	903	0
4820	3	0	0	0	0	0	0	200	300	0	0	0	0	0	0	0	200	903	0	0	0	0	0	0	0	603	903	0
4820	4	0	0	0	0	0	0	200	300	0	0	0	0	0	0	0	200	903	0	0	0	0	0	0	0	603	903	0
4820	5	0	0	0	0	0	0	200	300	0	0	0	0	0	0	0	200	903	0	0	0	0	0	0	0	603	903	0
4820	6	0	0	0	0	0	0	200	300	0	0	0	0	0	0	0	200	903	0	0	0	0	0	0	0	603	903	0
4820	7	0	0	0	0	0	0	200	300	0	0	0	0	0	0	0	200	903	0	0	0	0	0	0	0	603	903	0
4820	8	0	0	0	0	0	0	200	300	0	0	0	0	0	0	0	200	903	0	0	0	0	0	0	0	603	903	0
4820	9	0	0	0	0	0	0	200	300	0	0	0	0	0	0	0	200	903	0	0	0	0	0	0	0	603	903	0
4821	0	0	0	0	0	0	0	200	300	0	0	0	0	0	0	0	200	903	0	0	0	0	0	0	0	603	903	0
4821	1	0	0	0	0	0	0	200	300	0	0	0	0	0	0	0	200	903	0	0	0	0	0	0	0	603	903	0
4821	2	0	0	0	0	0	0	200	300	0	0	0	0	0	0	0	200	903	0	0	0	0	0	0	0	603	903	0
4821	3	0	0	0	0	0	0	200	300	0	0	0	0	0	0	0	200	903	0	0	0	0	0	0	0	603	903	0
4821	4	0	0	0	0	0	0	200	300	0	0	0	0	0	0	0	200	903	0	0	0	0	0	0	0	603	903	0
4821	5	0	0	0	0	0	0	200	300	0	0	0	0	0	0	0	200	903	0	0	0	0	0	0	0	603	903	0
4821	6	0	0	0	0	0	0	200	300	0	0	0	0	0	0	0	200	903	0	0	0	0	0	0	0	603	903	0
4821	7	0	0	0	0	0	0	200	300	0	0	0	0	0	0	0	200	903	0	0	0	0	0	0	0	603	903	0
4821	8	0	0	0	0	0	0	200	300	0	0	0	0	0	0	0	200	903	0	0	0	0	0	0	0	603	903	0
4821	9	0	0	0	0	0	0	200	300	0	0	0	0	0	0	0	200	903	0	0	0	0	0	0	0	603	903	0
4822	0	0	0	0	0	0	0	200	300	0	0	0	0	0	0	0	200	903	0	0	0	0	0	0	0	603	903	0
4822	1	0	0	0	0	0	0	200	300	0	0	0	0	0	0	0	200	903	0	0	0	0	0	0	0	603	903	0
4822	2	0	0	0	0	0	0	200	300	0	0	0	0	0	0	0	200	903	0	0	0	0	0	0	0	603	903	0
4822	3	0	0	0	0	0	0	200	300	0	0	0	0	0	0	0	200	903	0	0	0	0	0	0	0	603	903	0
4822	4	0	0	0	0	0	0	200	300	0	0	0	0	0	0	0	200	903	0	0	0	0	0	0	0	603	903	0
4822	5	0	0	0	0	0	0	200	300	0	0	0	0	0	0	0	200	903	0	0	0	0	0	0	0	603	903	0
4822	6	0	0	0	0	0	0	200	300	0	0	0	0	0	0	0	200	903	0	0	0	0	0	0	0	603	903	0
4822	7	0	0	0	0	0	0	200	300	0	0	0	0	0	0	0	200	903	0	0	0	0	0	0	0	603	903	0
4822	8	0	0	0	0	0	0	200	300	0	0	0	0	0	0	0	200	903	0	0	0	0	0	0	0	603	903	0
4822	9	0	0	0	0	0	0	200	300	0	0	0	0	0	0	0	200	903	0	0	0	0	0	0	0	603	903	0
4823	0	0	0	0	0	0	0	200	300	0	0	0	0	0	0	0	200	903	0	0	0	0	0	0	0	603	903	0
4823	1	0	0	0	0	0	0	200	300	0	0	0	0	0	0	0	200	903	0	0	0	0	0	0	0	603	903	0
4823	2	0	0	0	0	0	0	200	300	0	0	0	0	0	0	0	200	903	0	0	0	0	0	0	0	603	903	0
4823	3	0	0	0	0	0	0	200	300	0	0	0	0	0	0	0	200	903	0	0	0	0	0	0	0	603	903	0
4823	4	0	0	0	0	0	0	200	300	0	0	0	0	0	0	0	200	903	0	0	0	0	0	0	0	603	903	0
4823	5	0	0	0	0	0	0	200	300	0	0	0	0	0	0	0	200	903	0	0	0	0	0	0	0	603	903	0
4823	6	0	0	0	0	0	0	200	300	0	0	0	0	0	0	0	200	903	0	0	0	0	0	0	0	603	903	0
4823	7	0	0	0	0	0	0	200	300	0	0	0	0	0	0	0	200	903	0	0	0	0	0	0	0	603	903	0
4823	8	0	0	0	0	0	0	200	300	0	0	0	0	0	0	0	200	903	0	0	0	0	0	0	0	603	903	0
4823	9	0	0	0	0	0	0	200	300	0	0	0	0	0	0	0	200	903	0	0	0	0	0	0	0	603	903	0
4824	0	0	0	0	0	0	0	200	300	0	0	0	0	0	0	0	200	903	0	0	0	0	0	0	0	603	903	0
4824	1	0	0	0	0	0	0	200	300	0	0	0	0	0	0	0	200	903	0	0	0	0	0	0	0	603	903	0
4824	2	0	0	0	0	0	0	200	300	0	0	0	0	0	0	0	200	903	0	0	0	0	0	0	0	603	903	0
4824	3	0	0	0	0	0	0	200	300	0	0	0	0	0	0	0	200	903	0	0	0	0	0	0	0	603	903	0
4824	4	0	0	0	0	0	0	200	300	0	0	0	0	0	0	0	200	903	0	0	0	0	0	0	0	603	903	0
4824	5	0	0	0	0	0	0	200	300	0	0	0	0	0	0	0	200	903	0	0	0	0	0	0	0	603	903	0
4824	6	0	0	0	0	0	0	200	300	0	0	0	0	0	0	0	200	903	0	0	0	0	0	0	0	603	903	0
4824	7	0	0	0	0	0	0	200	300	0	0	0	0	0	0	0	200	903	0	0	0	0	0	0	0	603	903	0
4824	8	0	0	0	0	0	0	200	300	0	0	0	0	0	0	0	200	903	0	0	0	0	0	0	0	603	903	0
4824	9	0	0	0	0	0	0	200	300	0	0	0	0	0	0	0	200	903	0	0	0	0	0	0	0	603	903	0
4825	0	0	0	0	0	0	0	200	300	0	0	0	0	0	0	0	200	903	0	0	0	0	0	0	0	603	903	0
4825	1	0	0	0	0	0	0	200	300	0	0	0	0	0	0	0	200	903	0	0	0	0	0	0	0	603	903	0
4825	2	0	0	0	0	0	0	200	300	0	0	0	0	0	0	0	200	903	0	0	0	0	0	0	0	603	903	0
4825	3	0	0	0	0	0	0	200	300	0	0	0	0	0	0	0	200	903	0	0	0	0	0	0	0	603	903	0
4825	4	0	0	0	0	0	0	200	300	0	0	0	0	0	0	0	200	903	0	0	0	0	0	0	0	603	903	0
4825	5	0	0	0	0	0	0	200	300	0	0	0	0	0	0	0	200	903	0	0	0	0	0	0	0	603	903	0
4825	6	0	0	0	0	0	0	200	300	0	0	0	0	0	0	0	200	903	0	0	0	0	0	0	0	603	903	0
4825	7	0	0	0	0	0	0	200	300	0	0	0	0	0	0	0	200	903	0	0	0	0	0	0	0	603	903	0
4825	8	0	0	0	0	0	0	200	300	0	0	0	0	0	0	0	200	903	0	0	0	0	0	0	0	603	903	0
4825	9	0	0	0	0	0	0	200	300	0	0	0	0	0	0	0	200	903	0	0	0	0	0	0	0	603	903	0
4826	0	0	0	0	0	0	0	200	300	0	0	0	0	0	0	0	200	903	0	0	0	0	0	0	0	603	903	0
4826	1	0	0	0	0	0	0	200	300	0	0	0	0	0	0	0	200	903	0	0	0	0	0	0	0	603	903	0
4826	2	0	0	0	0	0	0	200	300	0	0	0	0	0	0	0	200	903	0	0	0	0	0	0	0	603	903	0
4826	3	0	0	0	0	0	0	200	300	0	0	0	0	0	0	0	200	903	0	0	0	0	0	0	0	603	903	0
4826	4	0	0	0	0	0	0	200	300	0	0	0	0	0	0	0	200	903	0	0	0	0	0	0	0	603	903	0
4826	5	0	0	0	0	0	0	200	300	0	0	0	0	0	0	0	200	903	0	0	0	0	0	0	0	603	903	0
4826	6	0	0	0	0	0	0	200	300	0	0	0	0	0	0	0	200	903	0	0	0	0	0	0	0	603	903	0
4826	7	0	0	0	0	0	0	200	300	0	0	0	0	0	0	0	200	903	0	0	0	0	0	0	0	603	903	0
4826	8	0	0	0	0	0	0	200	300	0	0	0	0	0	0	0	200	903	0	0	0	0	0	0	0	603	903	0
4826	9	0	0	0	0	0	0	200	300	0	0	0	0	0	0	0	200	903	0	0	0	0	0	0	0	603	903	0
4827	0	0	0	0	0	0	0	200	300	0	0	0	0	0	0	0	200	903	0	0	0	0	0	0	0	603	903	0
4827	1	0	0	0	0	0	0	200	300	0	0	0	0	0	0	0	200	903	0	0	0	0	0	0	0	603	903	0
4827	2	0	0	0	0	0	0	200	300	0	0	0	0	0	0	0	200	903	0	0	0	0	0	0	0	603	903	0
4827	3	0	0	0	0	0	0	200	300	0	0	0	0	0	0	0	200	903	0	0	0	0	0	0	0	603	903	0
4827	4	0	0	0	0	0	0	200	300	0	0	0	0	0	0	0	200	903	0	0	0	0	0	0	0	603	903	0
4827	5	0	0	0	0	0	0	200	300	0	0	0	0	0	0	0	200	903	0	0	0	0	0	0	0	603	903	0
4827	6	0	0	0	0	0	0	200	300	0	0	0	0	0	0	0	200	903	0	0	0	0	0	0	0	603	903	0
4827	7	0	0	0	0	0	0	200	300	0	0	0	0	0	0	0	200	903	0	0	0	0	0	0	0	603	903	0
4827	8	0	0	0	0	0	0	200	300	0	0	0	0	0	0	0	200	903	0	0	0	0	0	0	0	603	903	0
4827	9	0	0	0	0	0	0	200	300	0	0	0	0	0	0	0	200	903	0	0	0	0	0	0	0	603	903	0
4828	0	0	0	0	0	0	0	200	300	0	0	0	0	0	0	0	200	903	0	0	0	0	0	0	0	603	903	0
4828	1	0	0	0	0	0	0	200	300	0	0	0	0	0	0	0	200	903	0	0	0	0	0	0	0	603	903	0
4828	2	0	0	0	0	0	0	200	300	0	0	0	0	0	0	0	200	903	0	0	0	0	0	0	0	603	903	0
4828	3	0	0	0	0	0	0	200	300	0	0	0	0	0	0	0	200	903	0	0	0	0	0	0	0	603	903	0
4828	4	0	0	0	0	0	0	200	300	0	0	0	0	0	0	0	200	903	0	0	0	0	0	0	0	603	903	0
4828	5	0	0	0	0	0	0	200	300	0	0	0	0	0	0	0	200	903	0	0	0	0	0	0	0	603	903	0
4828	6	0	0	0	0	0	0	200	300	0	0	0	0	0	0	0	200	903	0	0	0	0	0	0	0	603	903	0
4828	7	0	0	0	0	0	0	200	300	0	0	0	0	0	0	0	200	903	0	0	0	0	0	0	0	603	903	0
4828	8	0	0	0	0	0	0	200	300	0	0	0	0	0	0	0	200	903	0	0	0	0	0	0	0	603	903	0
4828	9	0	0	0	0	0	0	200	300	0	0	0	0	0	0	0	200	903	0	0	0	0	0	0	0	603	903	0
4829	0	0	0	0	0	0	0	200	300	0	0	0	0	0	0	0	200	903	0	0	0	0	0	0	0	603	903	0
4829	1	0	0	0	0	0	0	200	300	0	0	0	0	0	0	0	200	903	0	0	0	0	0	0	0	603	903	0
4829	2	0	0	0	0	0	0	200	300	0	0	0	0	0	0	0	200	903	0	0	0	0	0	0	0	603	903	0
4829	3	0	0	0	0	0	0	200	300	0	0	0	0	0	0	0	200	903	0	0	0	0	0	0	0	603	903	0
4829	4	0	0	0	0	0	0	200	300	0	0	0	0	0	0	0	200	903	0	0	0	0	0	0	0	603	903	0
4829	5	0	0	0	0	0	0	200	300	0	0	0	0	0	0	0	200	903	0	0	0	0	0	0	0	603	903	0
4829	6	0	0	0	0	0	0	200	300	0	0	0	0	0	0	0	200	903	0	0	0	0	0	0	0	603	903	0
4829	7	0	0	0	0	0	0	200	300	0	0	0	0	0	0	0	200	903	0	0	0	0	0	0	0	603	903	0
4829	8	0	0	0	0	0	0	200	300	0	0	0	0	0	0	0	200	903	0	0	0	0	0	0	0	603	903	0
4829	9	0	0	0	0	0	0	200	300	0	0	0	0	0	0	0	200	903	0	0	0	0	0	0	0	603	903	0
4830	0	0	0	0	0	0	0	200	300	0	0	0	0	0	0	0	200	903	0	0	0	0	0	0	0	603	903	0
4830	1	0	0	0	0	0	0	200	300	0	0	0	0	0	0	0	200	903	0	0	0	0	0	0	0	603	903	0
4830	2	0	0	0	0	0	0	200	300	0	0	0	0	0	0	0	200	903	0	0	0	0	0	0	0	603	903	0
4830	3	0	0	0	0	0	0	200	300	0	0	0	0	0	0	0	200	903	0	0	0	0	0	0	0	603	903	0
4830	4	0	0	0	0	0	0	200	300	0	0	0	0	0	0	0	200	903	0	0	0	0	0	0	0	603	903	0
4830	5	0	0	0	0	0	0	200	300	0	0	0	0	0	0	0	200	903	0	0	0	0	0	0	0	603	903	0
4830	6	0	0	0	0	0	0	200	300	0	0	0	0	0	0	0	200	903	0	0	0	0	0	0	0	603	903	0
4830	7	0	0	0	0	0	0	200	300	0	0	0	0	0	0	0	200	903	0	0	0	0	0	0	0	603	903	0
4830	8	0	0	0	0	0	0	200	300	0	0	0	0	0	0	0	200	903	0	0	0	0	0	0	0	603	903	0
4830	9	0	0	0	0	0	0	200	300	0	0	0	0	0	0	0	200	903	0	0	0	0	0	0	0	603	903	0
4831	0	0	0	0	0	0	0	200	300	0	0	0	0	0	0	0	200	903	0	0	0	0	0	0	0	603	903	0
4831	1	0	0	0	0	0	0	200	300	0	0	0	0	0	0	0	200	903	0	0	0	0	0	0	0	603	903	0
4831	2	0	0	0	0	0	0	200	300	0	0	0	0	0	0	0	200	903	0	0	0	0	0	0	0	603	903	0
4831	3	0	0	0	0	0	0	200	300	0	0	0	0	0	0	0	200	903	0	0	0	0	0	0	0	603	903	0
4831	4	0	0	0	0	0	0	200	300	0	0	0	0	0	0	0	200	903	0	0	0	0	0	0	0	603	903	0
4831	5	0	0	0	0	0	0	200	300	0	0	0	0	0	0	0	200	903	0	0	0	0	0	0	0	603	903	0
4831	6	0	0	0	0	0	0	200	300	0	0	0	0	0	0	0	200	903	0	0	0	0	0	0	0	603	903	0
4831	7	0	0	0	0	0	0	200	300	0	0	0	0	0	0	0	200	903	0	0	0	0	0	0	0	603	903	0
4831	8	0	0	0	0	0	0	200	300	0	0	0	0	0	0	0	200	903	0	0	0	0	0	0	0	603	903	0
4831	9	0	0	0	0	0	0	200	300	0	0	0	0	0	0	0	200	903	0	0	0	0	0	0	0	603	903	0
4832	0	0	0	0	0	0	0	200	300	0	0	0	0	0	0	0	200	903	0	0	0	0	0	0	0	603	903	0
4832	1	0	0	0	0	0	0	200	300	0	0	0	0	0	0	0	200	903	0	0	0	0	0	0	0	603	903	0
4832	2	0	0	0	0	0	0	200	300	0	0	0	0	0	0	0	200	903	0	0	0	0	0	0	0	603	903	0
4832	3	0	0	0	0	0	0	200	300	0	0	0	0	0	0	0	200	903	0	0	0	0	0	0	0	603	903	0
4832	4	0	0	0	0	0	0	200	300	0	0	0	0	0	0	0	200	903	0	0	0	0	0	0	0	603	903	0
4832	5	0	0	0	0	0	0	200	300	0	0	0	0	0	0	0	200	903	0	0	0	0	0	0	0	603	903	0
4832	6	0	0	0	0	0	0	200	300	0	0	0	0	0	0	0	200	903	0	0	0	0	0	0	0	603	903	0
4832	7	0	0	0	0	0	0	200	300	0	0	0	0	0	0	0	200	903	0	0	0	0	0	0	0	603	903	0
4832	8	0	0	0	0	0	0	200	300	0	0	0	0	0	0	0	200	903	0	0	0	0	0	0	0	603	903	0
4832	9	0	0	0	0	0	0	200	300	0	0	0	0	0	0	0	200	903	0	0	0	0	0	0	0	603	903	0
4833	0	0	0	0	0	0	0	200	300	0	0	0	0	0	0	0	200	903	0	0	0	0	0	0	0	603	903	0
4833	1	0	0	0	0	0	0	200	300	0	0	0	0	0	0	0	200	903	0	0	0	0	0	0	0	603	903	0
4833	2	0	0	0	0	0	0	200	300	0	0	0	0	0	0	0	200	903	0	0	0	0	0	0	0	603	903	0
4833	3	0	0	0	0	0	0	200	300	0	0	0	0	0	0	0	200	903	0	0	0	0	0	0	0	603	903	0
4833	4	0	0	0	0	0	0	200	300	0	0	0	0	0	0	0	200	903	0	0	0	0	0	0	0	603	903	0
4833	5	0	0	0	0	0	0	200	300	0	0	0	0	0	0	0	200	903	0	0	0	0	0	0	0	603	903	0
4833	6	0	0	0	0	0	0	200	300	0	0	0	0	0	0	0	200	903	0	0	0	0	0	0	0	603	903	0
4833	7	0	0	0	0	0	0	200	300	0	0	0	0	0	0	0	200	903	0	0	0	0	0	0	0	603	903	0
4833	8	0	0	0	0	0	0	200	300	0	0	0	0	0	0	0	200	903	0	0	0	0	0	0	0	603	903	0
4833	9	0	0	0	0	0	0	200	300	0	0	0	0	0	0	0	200	903	0	0	0	0	0	0	0	603	903	0
4834	0	0	0	0	0	0	0	200	300	0	0	0	0	0	0	0	200	903	0	0	0	0	0	0	0	603	903	0
4834	1	0	0	0	0	0	0	200	300	0	0	0	0	0	0	0	200	903	0	0	0	0	0	0	0	603	903	0
4834	2	0	0	0	0	0	0	200	300	0	0	0	0	0	0	0	200	903	0	0	0	0	0	0	0	603	903	0
4834	3	0	0	0	0	0	0	200	300	0	0	0	0	0	0	0	200	903	0	0	0	0	0	0	0	603	903	0
4834	4	0	0	0	0	0	0	200	300	0	0	0	0	0	0	0	200	903	0	0	0	0	0	0	0	603	903	0
4834	5	0	0	0	0	0	0	200	300	0	0	0	0	0	0	0	200	903	0	0	0	0	0	0	0	603	903	0
4834	6	0	0	0	0	0	0	200	300	0	0	0	0	0	0	0	200	903	0	0	0	0	0	0	0	603	903	0
4834	7	0	0	0	0	0	0	200	300	0	0	0	0	0	0	0	200	903	0	0	0	0	0	0	0	603	903	0
4834	8	0	0	0	0	0	0	200	300	0	0	0	0	0	0	0	200	903	0	0	0	0	0	0	0	603	903	0
4834	9	0	0	0	0	0	0	200	300	0	0	0	0	0	0	0	200	903	0	0	0	0	0	0	0	603	903	0
4835	0	0	0	0	0	0	0	200	300	0	0	0	0	0	0	0	200	903	0	0	0	0	0	0	0	603	903	0
4835	1	0	0	0	0	0	0	200	300	0	0	0	0	0	0	0	200	903	0	0	0	0	0	0	0	603	903	0
4835	2	0	0	0	0	0	0	200	300	0	0	0	0	0	0	0	200	903	0	0	0	0	0	0	0	603	903	0
4835	3	0	0	0	0	0	0	200	300	0	0	0	0	0	0	0	200	903	0	0	0	0	0	0	0	603	903	0
4835	4	0	0	0	0	0	0	200	300	0	0	0	0	0	0	0	200	903	0	0	0	0	0	0	0	603	903	0
4835	5	0	0	0	0	0	0	200	300	0	0	0	0	0	0	0	200	903	0	0	0	0	0	0	0	603	903	0
4835	6	0	0	0	0	0	0	200	300	0	0	0	0	0	0	0	200	903	0	0	0	0	0	0	0	603	903	0
4835	7	0	0	0	0	0	0	200	300	0	0	0	0	0	0	0	200	903	0	0	0	0	0	0	0	603	903	0
4835	8	0	0	0	0	0	0	200	300	0	0	0	0	0	0	0	200	903	0	0	0	0	0	0	0	603	903	0
4835	9	0	0	0	0	0	0	200	300	0	0	0	0	0	0	0	200	903	0	0	0	0	0	0	0	603	903	0
4836	0	0	0	0	0	0	0	200	300	0	0	0	0	0	0	0	200	903	0	0	0	0	0	0	0	603	903	0
4836	1	0	0	0	0	0	0	200	300	0	0	0	0	0	0	0	200	903	0	0	0	0	0	0	0	603	903	0
4836	2	0	0	0	0	0	0	200	300	0	0	0	0	0	0	0	200	903	0	0	0	0	0	0	0	603	903	0
4836	3	0	0	0	0	0	0	200	300	0	0	0	0	0	0	0	200	903	0	0	0	0	0	0	0	603	903	0
4836	4	0	0	0	0	0	0	200	300	0	0	0	0	0	0	0	200	903	0	0	0	0	0	0	0	603	903	0
4836	5	0	0	0	0	0	0	200	300	0	0	0	0	0	0	0	200	903	0	0	0	0	0	0	0	603	903	0
4836	6	0	0	0	0	0	0	200	300	0	0	0	0	0	0	0	200	903	0	0	0	0	0	0	0	603	903	0
4836	7	0	0	0	0	0	0	200	300	0	0	0	0	0	0	0	200	903	0	0	0	0	0	0	0	603	903	0
4836	8	0	0	0	0	0	0	200	300	0	0	0	0	0	0	0	200	903	0	0	0	0	0	0	0	603	903	0
4836	9	0	0	0	0	0	0	200	300	0	0	0	0	0	0	0	200	903	0	0	0	0	0	0	0	603	903	0
4837	0	0	0	0	0	0	0	200	300	0	0	0	0	0	0	0	200	903	0	0	0	0	0	0	0	603	903	0
4837	1	0	0	0	0	0	0	200	300	0	0	0	0	0	0	0	200	903	0	0	0	0	0	0	0	603	903	0
4837	2	0	0	0	0	0	0	200	300	0	0	0	0	0	0	0	200	903	0	0	0	0	0	0	0	603	903	0
4837	3	0	0	0	0	0	0	200	300	0	0	0	0	0	0	0	200	903	0	0	0	0	0	0	0	603	903	0
4837	4	0	0	0	0	0	0	200	300	0	0	0	0	0	0	0	200	903	0	0	0	0	0	0	0	603	903	0
4837	5	0	0	0	0	0	0	200	300	0	0	0	0	0	0	0	200	903	0	0	0	0	0	0	0	603	903	0
4837	6	0	0	0	0	0	0	200	300	0	0	0	0	0	0	0	200	903	0	0	0	0	0	0	0	603	903	0
4837	7	0	0	0	0	0	0	200	300	0	0	0	0	0	0	0	200	903	0	0	0	0	0	0	0	603	903	0
4837	8	0	0	0	0	0	0	200	300	0	0	0	0	0	0	0	200	903	0	0	0	0	0	0	0	603	903	0
4837	9	0	0	0	0	0	0	200	300	0	0	0	0	0	0	0	200	903	0	0	0	0	0	0	0	603	903	0
4838	0	0	0	0	0	0	0	200	300	0	0	0	0	0	0	0	200	903	0	0	0	0	0	0	0	603	903	0
4838	1	0	0	0	0	0	0	200	300	0	0	0	0	0	0	0	200	903	0	0	0	0	0	0	0	603	903	0
4838	2	0	0	0	0	0	0	200	300	0	0	0	0	0	0	0	200	903	0	0	0	0	0	0	0	603	903	0
4838	3	0	0	0	0	0	0	200	300	0	0	0	0	0	0	0	200	903	0	0	0	0	0	0	0	603	903	0
4838	4	0	0	0	0	0	0	200	300	0	0	0	0	0	0	0	200	903	0	0	0	0	0	0	0	603	903	0
4838	5	0	0	0	0	0	0	200	300	0	0	0	0	0	0	0	200	903	0	0	0	0	0	0	0	603	903	0
4838	6	0	0	0	0	0	0	200	300	0	0	0	0	0	0	0	200	903	0	0	0	0	0	0	0	603	903	0
4838	7	0	0	0	0	0	0	200	300	0	0	0	0	0	0	0	200	903	0	0	0	0	0	0	0	603	903	0
4838	8	0	0	0	0	0	0	200	300	0	0	0	0	0	0	0	200	903	0	0	0	0	0	0	0	603	903	0
4838	9	0	0	0	0	0	0	200	300	0	0	0	0	0	0	0	200	903	0	0	0	0	0	0	0	603	903	0
4839	0	0	0	0	0	0	0	200	300	0	0	0	0	0	0	0	200	903	0	0	0	0	0	0	0	603	903	0
4839	1	0	0	0	0	0	0	200	300	0	0	0	0	0	0	0	200	903	0	0	0	0	0	0	0	603	903	0
4839	2	0	0	0	0	0	0	200	300	0	0	0	0	0	0	0	200	903	0	0	0	0	0	0	0	603	903	0
4839	3	0	0	0	0	0	0	200	300	0	0	0	0	0	0	0	200	903	0	0	0	0	0	0	0	603	903	0
4839	4	0	0	0	0	0	0	200	300	0	0	0	0	0	0	0	200	903	0	0	0	0	0	0	0	603	903	0
4839	5	0	0	0	0	0	0	200	300	0	0	0	0	0	0	0	200	903	0	0	0	0	0	0	0	603	903	0
4839	6	0	0	0	0	0	0	200	300	0	0	0	0	0	0	0	200	903	0	0	0	0	0	0	0	603	903	0
4839	7	0	0	0	0	0	0	200	300	0	0	0	0	0	0	0	200	903	0	0	0	0	0	0	0	603	903	0
4839	8	0	0	0	0	0	0	200	300	0	0	0	0	0	0	0	200	903	0	0	0	0	0	0	0	603	903	0
4839	9	0	0	0	0	0	0	200	300	0	0	0	0	0	0	0	200	903	0	0	0	0	0	0	0	603	903	0
4840	0	0	0	0	0	0	0	200	300	0	0	0	0	0	0	0	200	903	0	0	0	0	0	0	0	603	903	0
4840	1	0	0	0	0	0	0	200	300	0	0	0	0	0	0	0	200	903	0	0	0	0	0	0	0	603	903	0
4840	2	0	0	0	0	0	0	200	300	0	0	0	0	0	0	0	200	903	0	0	0	0	0	0	0	603	903	0
4840	3	0	0	0	0	0	0	200	300	0	0	0	0	0	0	0	200	903	0	0	0	0	0	0	0	603	903	0
4840	4	0	0	0	0	0	0	200	300	0	0	0	0	0	0	0	200	903	0	0	0	0	0	0	0	603	903	0
4840	5	0	0	0	0	0	0	200	300	0	0	0	0	0	0	0	200	903	0	0	0	0	0	0	0	603	903	0
4840	6	0	0	0	0	0	0	200	300	0	0	0	0	0	0	0	200	903	0	0	0	0	0	0	0	603	903	0
4840	7	0	0	0	0	0	0	200	300	0	0	0	0	0	0	0	200	903	0	0	0	0	0	0	0	603	903	0
4840	8	0	0	0	0	0	0	200	300	0	0	0	0	0	0	0	200	903	0	0	0	0	0	0	0	603	903	0
4840	9	0	0	0	0	0	0	200	300	0	0	0	0	0	0	0	200	903	0	0	0	0	0	0	0	603	903	0
4841	0	0	0	0	0	0	0	200	300	0	0	0	0	0	0	0	200	903	0	0	0	0	0	0	0	603	903	0
4841	1	0	0	0	0	0	0	200	300	0	0	0	0	0	0	0	200	903	0	0	0	0	0	0	0	603	903	0
4841	2	0	0	0	0	0	0	200	300	0	0	0	0	0	0	0	200	903	0	0	0	0	0	0	0	603	903	0
4841	3	0	0	0	0	0	0	200	300	0	0	0	0	0	0	0	200	903	0	0	0	0	0	0	0	603	903	0
4841	4	0	0	0	0	0	0	200	300	0	0	0	0	0	0	0	200	903	0	0	0	0	0	0	0	603	903	0
4841	5	0	0	0	0	0	0	200	300	0	0	0	0	0	0	0	200	903	0	0	0	0	0	0	0	603	903	0
4841	6	0	0	0	0	0	0	200	300	0	0	0	0	0	0	0	200	903	0	0	0	0	0	0	0	603	903	0
4841	7	0	0	0	0	0	0	200	300	0	0	0	0	0	0	0	200	903	0	0	0	0	0	0	0	603	903	0
4841	8	0	0	0	0	0	0	200	300	0	0	0	0	0	0	0	200	903	0	0	0	0	0	0	0	603	903	0
4841	9	0	0	0	0	0	0	200	300	0	0	0	0	0	0	0	200	903	0	0	0	0	0	0	0	603	903	0
4842	0	0	0	0	0	0	0	200	300	0	0	0	0	0	0	0	200	903	0	0	0	0	0	0	0	603	903	0
4842	1	0	0	0	0	0	0	200	300	0	0	0	0	0	0	0	200	903	0	0	0	0	0	0	0	603	903	0
4842	2	0	0	0	0	0	0	200	300	0	0	0	0	0	0	0	200	903	0	0	0	0	0	0	0	603	903	0
4842	3	0	0	0	0	0	0	200	300	0	0	0	0	0	0	0	200	903	0	0	0	0	0	0	0	603	903	0
4842	4	0	0	0	0	0	0	200	300	0	0	0	0	0	0	0	200	903	0	0	0	0	0	0	0	603	903	0
4842	5	0	0	0	0	0	0	200	300	0	0	0	0	0	0	0	200	903	0	0	0	0	0	0	0	603	903	0
4842	6	0	0	0	0	0	0	200	300	0	0	0	0	0	0	0	200	903	0	0	0	0	0	0	0	603	903	0
4842	7	0	0	0	0	0	0	200	300	0	0	0	0	0	0	0	200	903	0	0	0	0	0	0	0	603	903	0
4842	8	0	0	0	0	0	0	200	300	0	0	0	0	0	0	0	200	903	0	0	0	0	0	0	0	603	903	0
4842	9	0	0	0	0	0	0	200	300	0	0	0	0	0	0	0	200	903	0	0	0	0	0	0	0	603	903	0
4843	0	0	0	0	0	0	0	200	300	0	0	0	0	0	0	0	200	903	0	0	0	0	0	0	0	603	903	0
4843	1	0	0	0	0	0	0	200	300	0	0	0	0	0	0	0	200	903	0	0	0	0	0	0	0	603	903	0
4843	2	0	0	0	0	0	0	200	300	0	0	0	0	0	0	0	200	903	0	0	0	0	0	0	0	603	903	0
4843	3	0	0	0	0	0	0	200	300	0	0	0	0	0	0	0	200	903	0	0	0	0	0	0	0	603	903	0
4843	4	0	0	0	0	0	0	200	300	0	0	0	0	0	0	0	200	903	0	0	0	0	0	0	0	603	903	0
4843	5	0	0	0	0	0	0	200	300	0	0	0	0	0	0	0	200	903	0	0	0	0	0	0	0	603	903	0
4843	6	0	0	0	0	0	0	200	300	0	0	0	0	0	0	0	200	903	0	0	0	0	0	0	0	603	903	0
4843	7	0	0	0	0	0	0	200	300	0	0	0	0	0	0	0	200	903	0	0	0	0	0	0	0	603	903	0
4843	8	0	0	0	0	0	0	200	300	0	0	0	0	0	0	0	200	903	0	0	0	0	0	0	0	603	903	0
4843	9	0	0	0	0	0	0	200	300	0	0	0	0	0	0	0	200	903	0	0	0	0	0	0	0	603	903	0
4844	0	0	0	0	0	0	0	200	300	0	0	0	0	0	0	0	200	903	0	0	0	0	0	0	0	603	903	0
4844	1	0	0	0	0	0	0	200	300	0	0	0	0	0	0	0	200	903	0	0	0	0	0	0	0	603	903	0
4844	2	0	0	0	0	0	0	200	300	0	0	0	0	0	0	0	200	903	0	0	0	0	0	0	0	603	903	0
4844	3	0	0	0	0	0	0	200	300	0	0	0	0	0	0	0	200	903	0	0	0	0	0	0	0	603	903	0
4844	4	0	0	0	0	0	0	200	300	0	0	0	0	0	0	0	200	903	0	0	0	0	0	0	0	603	903	0
4844	5	0	0	0	0	0	0	200	300	0	0	0	0	0	0	0	200	903	0	0	0	0	0	0	0	603	903	0
4844	6	0	0	0	0	0	0	200	300	0	0	0	0	0	0	0	200	903	0	0	0	0	0	0	0	603	903	0
4844	7	0	0	0	0	0	0	200	300	0	0	0	0	0	0	0	200	903	0	0	0	0	0	0	0	603	903	0
4844	8	0	0	0	0	0	0	200	300	0	0	0	0	0	0	0	200	903	0	0	0	0	0	0	0	603	903	0
4844	9	0	0	0	0	0	0	200	300	0	0	0	0	0	0	0	200	903	0	0	0	0	0	0	0	603	903	0
4845	0	0	0	0	0	0	0	200	300	0	0	0	0	0	0	0	200	903	0	0	0	0	0	0	0	603	903	0
4845	1	0	0	0	0	0	0	200	300	0	0	0	0	0	0	0	200	903	0	0	0	0	0	0	0	603	903	0
4845	2	0	0	0	0	0	0	200	300	0	0	0	0	0	0	0	200	903	0	0	0	0	0	0	0	603	903	0
4845	3	0	0	0	0	0	0	200	300	0	0	0	0	0	0	0	200	903	0	0	0	0	0	0	0	603	903	0
4845	4	0	0	0	0	0	0	200	300	0	0	0	0	0	0	0	200	903	0	0	0	0	0	0	0	603	903	0
4845	5	0	0	0	0	0	0	200	300	0	0	0	0	0	0	0	200	903	0	0	0	0	0	0	0	603	903	0
4845	6	0	0	0	0	0	0	200	300	0	0	0	0	0	0	0	200	903	0	0	0	0	0	0	0	603	903	0
4845	7	0	0	0	0	0	0	200	300	0	0	0	0	0	0	0	200	903	0	0	0	0	0	0	0	603	903	0
4845	8	0	0	0	0	0	0	200	300	0	0	0	0	0	0	0	200	903	0	0	0	0	0	0	0	603	903	0
4845	9	0	0	0	0	0	0	200	300	0	0	0	0	0	0	0	200	903	0	0	0	0	0	0	0	603	903	0
4846	0	0	0	0	0	0	0	200	300	0	0	0	0	0	0	0	200	903	0	0	0	0	0	0	0	603	903	0
4846	1	0	0	0	0	0	0	200	300	0	0	0	0	0	0	0	200	903	0	0	0	0	0	0	0	603	903	0
4846	2	0	0	0	0	0	0	200	300	0	0	0	0	0	0	0	200	903	0	0	0	0	0	0	0	603	903	0
4846	3	0	0	0	0	0	0	200	300	0	0	0	0	0	0	0	200	903	0	0	0	0	0	0	0	603	903	0
4846	4	0	0	0	0	0	0	200	300	0	0	0	0	0	0	0	200	903	0	0	0	0	0	0	0	603	903	0
4846	5	0	0	0	0	0	0	200	300	0	0	0	0	0	0	0	200	903	0	0	0	0	0	0	0	603	903	0
4846	6	0	0	0	0	0	0	200	300	0	0	0	0	0	0	0	200	903	0	0	0	0	0	0	0	603	903	0
4846	7	0	0	0	0	0	0	200	300	0	0	0	0	0	0	0	200	903	0	0	0	0	0	0	0	603	903	0
4846	8	0	0	0	0	0	0	200	300	0	0	0	0	0	0	0	200	903	0	0	0	0	0	0	0	603	903	0
4846	9	0	0	0	0	0	0	200	300	0	0	0	0	0	0	0	200	903	0	0	0	0	0	0	0	603	903	0
4847	0	0	0	0	0	0	0	200	300	0	0	0	0	0	0	0	200	903	0	0	0	0	0	0	0	603	903	0
4847	1	0	0	0	0	0	0	200	300	0	0	0	0	0	0	0	200	903	0	0	0	0	0	0	0	603	903	0
4847	2	0	0	0	0	0	0	200	300	0	0	0	0	0	0	0	200	903	0	0	0	0	0	0	0	603	903	0
4847	3	0	0	0	0	0	0	200	300	0	0	0	0	0	0	0	200	903	0	0	0	0	0	0	0	603	903	0
4847	4	0	0	0	0	0	0	200	300	0	0	0	0	0	0	0	200	903	0	0	0	0	0	0	0	603	903	0
4847	5	0	0	0	0	0	0	200	300	0	0	0	0	0	0	0	200	903	0	0	0	0	0	0	0	603	903	0
4847	6	0	0	0	0	0	0	200	300	0	0	0	0	0	0	0	200	903	0	0	0	0	0	0	0	603	903	0
4847	7	0	0	0	0	0	0	200	300	0	0	0	0	0	0	0	200	903	0	0	0	0	0	0	0	603	903	0
4847	8	0	0	0	0	0	0	200	300	0	0	0	0	0	0	0	200	903	0	0	0	0	0	0	0	603	903	0
4847	9	0	0	0	0	0	0	200	300	0	0	0	0	0	0	0	200	903	0	0	0	0	0	0	0	603	903	0
4848	0	0	0	0	0	0	0	200	300	0	0	0	0	0	0	0	200	903	0	0	0	0	0	0	0	603	903	0
4848	1	0	0	0	0	0	0	200	300	0	0	0	0	0	0	0	200	903	0	0	0	0	0	0	0	603	903	0
4848	2	0	0	0	0	0	0	200	300	0	0	0	0	0	0	0	200	903	0	0	0	0	0	0	0	603	903	0
4848	3	0	0	0	0	0	0	200	300	0	0	0	0	0	0	0	200	903	0	0	0	0	0	0	0	603	903	0
4848	4	0	0	0	0	0	0	200	300	0	0	0	0	0	0	0	200	903	0	0	0	0	0	0	0	603	903	0
4848	5	0	0	0	0	0	0	200	300	0	0	0	0	0	0	0	200	903	0	0	0	0	0	0	0	603	903	0
4848	6	0	0	0	0	0	0	200	300	0	0	0	0	0	0	0	200	903	0	0	0	0	0	0	0	603	903	0
4848	7	0	0	0	0	0	0	200	300	0	0	0	0	0	0	0	200	903	0	0	0	0	0	0	0	603	903	0
4848	8	0	0	0	0	0	0	200	300	0	0	0	0	0	0	0	200	903	0	0	0	0	0	0	0	603	903	0
4848	9	0	0	0	0	0	0	200	300	0	0	0	0	0	0	0	200	903	0	0	0	0	0	0	0	603	903	0
4849	0	0	0	0	0	0	0	200	300	0	0	0	0	0	0	0	200	903	0	0	0	0	0	0	0	603	903	0
4849	1	0	0	0	0	0	0	200	300	0	0	0	0	0	0	0	200	903	0	0	0	0	0	0	0	603	903	0
4849	2	0	0	0	0	0	0	200	300	0	0	0	0	0	0	0	200	903	0	0	0	0	0	0	0	603	903	0
4849	3	0	0	0	0	0	0	200	300	0	0	0	0	0	0	0	200	903	0	0	0	0	0	0	0	603	903	0
4849	4	0	0	0	0	0	0	200	300	0	0	0	0	0	0	0	200	903	0	0	0	0	0	0	0	603	903	0
4849	5	0	0	0	0	0	0	200	300	0	0	0	0	0	0	0	200	903	0	0	0	0	0	0	0	603	903	0
4849	6	0	0	0	0	0	0	200	300	0	0	0	0	0	0	0	200	903	0	0	0	0	0	0	0	603	903	0
4849	7	0	0	0	0	0	0	200	300	0	0	0	0	0	0	0	200	903	0	0	0	0	0	0	0	603	903	0
4849	8	0	0	0	0	0	0	200	300	0	0	0	0	0	0	0	200	903	0	0	0	0	0	0	0	603	903	0
4849	9	0	0	0	0	0	0	200	300	0	0	0	0	0	0	0	200	903	0	0	0	0	0	0	0	603	903	0
4850	0	0	0	0	0	0	0	200	300	0	0	0	0	0	0	0	200	903	0	0	0	0	0	0	0	603	903	0
4850	1	0	0	0	0	0	0	200	300	0	0	0	0	0	0	0	200	903	0	0	0	0	0	0	0	603	903	0
4850	2	0	0	0	0	0	0	200	300	0	0	0	0	0	0	0	200	903	0	0	0	0	0	0	0	603	903	0
4850	3	0	0	0	0	0	0	200	300	0	0	0	0	0	0	0	200	903	0	0	0	0	0	0	0	603	903	0
4850	4	0	0	0	0	0	0	200	300	0	0	0	0	0	0	0	200	903	0	0	0	0	0	0	0	603	903	0
4850	5	0	0	0	0	0	0	200	300	0	0	0	0	0	0	0	200	903	0	0	0	0	0	0	0	603	903	0
4850	6	0	0	0	0	0	0	200	300	0	0	0	0	0	0	0	200	903	0	0	0	0	0	0	0	603	903	0
4850	7	0	0	0	0	0	0	200	300	0	0	0	0	0	0	0	200	903	0	0	0	0	0	0	0	603	903	0
4850	8	0	0	0	0	0	0	200	300	0	0	0	0	0	0	0	200	903	0	0	0	0	0	0	0	603	903	0
4850	9	0	0	0	0	0	0	200	300	0	0	0	0	0	0	0	200	903	0	0	0	0	0	0	0	603	903	0
4851	0	0	0	0	0	0	0	200	300	0	0	0	0	0	0	0	200	903	0	0	0	0	0	0	0	603	903	0
4851	1	0	0	0	0	0	0	200	300	0	0	0	0	0	0	0	200	903	0	0	0	0	0	0	0	603	903	0
4851	2	0	0	0	0	0	0	200	300	0	0	0	0	0	0	0	200	903	0	0	0	0	0	0	0	603	903	0
4851	3	0	0	0	0	0	0	200	300	0	0	0	0	0	0	0	200	903	0	0	0	0	0	0	0	603	903	0
4851	4	0	0	0	0	0	0	200	300	0	0	0	0	0	0	0	200	903	0	0	0	0	0	0	0	603	903	0
4851	5	0	0	0	0	0	0	200	300	0	0	0	0	0	0	0	200	903	0	0	0	0	0	0	0	603	903	0
4851	6	0	0	0	0	0	0	200	300	0	0	0	0	0	0	0	200	903	0	0	0	0	0	0	0	603	903	0
4851	7	0	0	0	0	0	0	200	300	0	0	0	0	0	0	0	200	903	0	0	0	0	0	0	0	603	903	0
4851	8	0	0	0	0	0	0	200	300	0	0	0	0	0	0	0	200	903	0	0	0	0	0	0	0	603	903	0
4851	9	0	0	0	0	0	0	200	300	0	0	0	0	0	0	0	200	903	0	0	0	0	0	0	0	603	903	0
4852	0	0	0	0	0	0	0	200	300	0	0	0	0	0	0	0	200	903	0	0	0	0	0	0	0	603	903	0
4852	1	0	0	0	0	0	0	200	300	0	0	0	0	0	0	0	200	903	0	0	0	0	0	0	0	603	903	0
4852	2	0	0	0	0	0	0	200	300	0	0	0	0	0	0	0	200	903	0	0	0	0	0	0	0	603	903	0
4852	3	0	0	0	0	0	0	200	300	0	0	0	0	0	0	0	200	903	0	0	0	0	0	0	0	603	903	0
4852	4	0	0	0	0	0	0	200	300	0	0	0	0	0	0	0	200	903	0	0	0	0	0	0	0	603	903	0
4852	5	0	0	0	0	0	0	200	300	0	0	0	0	0	0	0	200	903	0	0	0	0	0	0	0	603	903	0
4852	6	0	0	0	0	0	0	200	300	0	0	0	0	0	0	0	200	903	0	0	0	0	0	0	0	603	903	0
4852	7	0	0	0	0	0	0	200	300	0	0	0	0	0	0	0	200	903	0	0	0	0	0	0	0	603	903	0
4852	8	0	0	0	0	0	0	200	300	0	0	0	0	0	0	0	200	903	0	0	0	0	0	0	0	603	903	0
4852	9	0	0	0	0	0	0	200	300	0	0	0	0	0	0	0	200	903	0	0	0	0	0	0	0	603	903	0
4853	0	0	0	0	0	0	0	200	300	0	0	0	0	0	0	0	200	903	0	0	0	0	0	0	0	603	903	0
4853	1	0	0	0	0	0	0	200	300	0	0	0	0	0	0	0	200	903	0	0	0	0	0	0	0	603	903	0
4853	2	0	0	0	0	0	0	200	300	0	0	0	0	0	0	0	200	903	0	0	0	0	0	0	0	603	903	0
4853	3	0	0	0	0	0	0	200	300	0	0	0	0	0	0	0	200	903	0	0	0	0	0	0	0	603	903	0
4853	4	0	0	0	0	0	0	200	300	0	0	0	0	0	0	0	200	903	0	0	0	0	0	0	0	603	903	0
4853	5	0	0	0	0	0	0	200	300	0	0	0	0	0	0	0	200	903	0	0	0	0	0	0	0	603	903	0
4853	6	0	0	0	0	0	0	200	300	0	0	0	0	0	0	0	200	903	0	0	0	0	0	0	0	603	903	0
4853	7	0	0	0	0	0	0	200	300	0	0	0	0	0	0	0	200	903	0	0	0	0	0	0	0	603	903	0
4853	8	0	0	0	0	0	0	200	300	0	0	0	0	0	0	0	200	903	0	0	0	0	0	0	0	603	903	0
4853	9	0	0	0	0	0	0	200	300	0	0	0	0	0	0	0	200	903	0	0	0	0	0	0	0	603	903	0
4854	0	0	0	0	0	0	0	200	300	0	0	0	0	0	0	0	200	903	0	0	0	0	0	0	0	603	903	0
4854	1	0	0	0	0	0	0	200	300	0	0	0	0	0	0	0	200	903	0	0	0	0	0	0	0	603	903	0
4854	2	0	0	0	0	0	0	200	300	0	0	0	0	0	0	0	200	903	0	0	0	0	0	0	0	603	903	0
4854	3	0	0	0	0	0	0	200	300	0	0	0	0	0	0	0	200	903	0	0	0	0	0	0	0	603	903	0
4854	4	0	0	0	0	0	0	200	300	0	0	0	0	0	0	0	200	903	0	0	0	0	0	0	0	603	903	0
4854	5	0	0	0	0	0	0	200	300	0	0	0	0	0	0	0	200	903	0	0	0	0	0	0	0	603	903	0
4854	6	0	0	0	0	0	0	200	300	0	0	0	0	0	0	0	200	903	0	0	0	0	0	0	0	603	903	0
4854	7	0	0	0	0	0	0	200	300	0	0	0	0	0	0	0	200	903	0	0	0	0	0	0	0	603	903	0
4854	8	0	0	0	0	0	0	200	300	0	0	0	0	0	0	0	200	903	0	0	0	0	0	0	0	603	903	0
4854	9	0	0	0	0	0	0	200	300	0	0	0	0	0	0	0	200	903	0	0	0	0	0	0	0	603	903	0
4855	0	0	0	0	0	0	0	200	300	0	0	0	0	0	0	0	200	903	0	0	0	0	0	0	0	603	903	0
4855	1	0	0	0	0	0	0	200	300	0	0	0	0	0	0	0	200	903	0	0	0	0	0	0	0	603	903	0
4855	2	0	0	0	0	0	0	200	300	0	0	0	0	0	0	0	200	903	0	0	0	0	0	0	0	603	903	0
4855	3	0	0	0	0	0	0	200	300	0	0	0	0	0	0	0	200	903	0	0	0	0	0	0	0	603	903	0
4855	4	0	0	0	0	0	0	200	300	0	0	0	0	0	0	0	200	903	0	0	0	0	0	0	0	603	903	0
4855	5	0	0	0	0	0	0	200	300	0	0	0	0	0	0	0	200	903	0	0	0	0	0	0	0	603	903	0
4855	6	0	0	0	0	0	0	200	300	0	0	0	0	0	0	0	200	903	0	0	0	0	0	0	0	603	903	0
4855	7	0	0	0	0	0	0	200	300	0	0	0	0	0	0	0	200	903	0	0	0	0	0	0	0	603	903	0
4855	8	0	0	0	0	0	0	200	300	0	0	0	0	0	0	0	200	903	0	0	0	0	0	0	0	603	903	0
4855	9	0	0	0	0	0	0	200	300	0	0	0	0	0	0	0	200	903	0	0	0	0	0	0	0	603	903	0
4856	0	0	0	0	0	0	0	200	300	0	0	0	0	0	0	0	200	903	0	0	0	0	0	0	0	603	903	0
4856	1	0	0	0	0	0	0	200	300	0	0	0	0	0	0	0	200	903	0	0	0	0	0	0	0	603	903	0
4856	2	0	0	0	0	0	0	200	300	0	0	0	0	0	0	0	200	903	0	0	0	0	0	0	0	603	903	0
4856	3	0	0	0	0	0	0	200	300	0	0	0	0	0	0	0	200	903	0	0	0	0	0	0	0	603	903	0
4856	4	0	0	0	0	0	0	200	300	0	0	0	0	0	0	0	200	903	0	0	0	0	0	0	0	603	903	0
4856	5	0	0	0	0	0	0	200	300	0	0	0	0	0	0	0	200	903	0	0	0	0	0	0	0	603	903	0
4856	6	0	0	0	0	0	0	200	300	0	0	0	0	0	0	0	200	903	0	0	0	0	0	0	0	603	903	0
4856	7	0	0	0	0	0	0	200	300	0	0	0	0	0	0	0	200	903	0	0	0	0	0	0	0	603	903	0
4856	8	0	0	0	0	0	0	200	300	0	0	0	0	0	0	0	200	903	0	0	0	0	0	0	0	603	903	0
4856	9	0	0	0	0	0	0	200	300	0	0	0	0	0	0	0	200	903	0	0	0	0	0	0	0	603	903	0
4857	0	0	0	0	0	0	0	200	300	0	0	0	0	0	0	0	200	903	0	0	0	0	0	0	0	603	903	0
4857	1	0	0	0	0	0	0	200	300	0	0	0	0	0	0	0	200	903	0	0	0	0	0	0	0	603	903	0
4857	2	0	0	0	0	0	0	200	300	0	0	0	0	0	0	0	200	903	0	0	0	0	0	0	0	603	903	0
4857	3	0	0	0	0	0	0	200	300	0	0	0	0	0	0	0	200	903	0	0	0	0	0	0	0	603	903	0
4857	4	0	0	0	0	0	0	200	300	0	0	0	0	0	0	0	200	903	0	0	0	0	0	0	0	603	903	0
4857	5	0	0	0	0	0	0	200	300	0	0	0	0	0	0	0	200	903	0	0	0	0	0	0	0	603	903	0
4857	6	0	0	0	0	0	0	200	300	0	0	0	0	0	0	0	200	903	0	0	0	0	0	0	0	603	903	0
4857	7	0	0	0	0	0	0	200	300	0	0	0	0	0	0	0	200	903	0	0	0	0	0	0	0	603	903	0
4857	8	0	0	0	0	0	0	200	300	0	0	0	0	0	0	0	200	903	0	0	0	0	0	0	0	603	903	0
4857	9	0	0	0	0	0	0	200	300	0	0	0	0	0	0	0	200	903	0	0	0	0	0	0	0	603	903	0
4858	0	0	0	0	0	0	0	200	300	0	0	0	0	0	0	0	200	903	0	0	0	0	0	0	0	603	903	0
4858	1	0	0	0	0	0	0	200	300	0	0	0	0	0	0	0	200	903	0	0	0	0	0	0	0	603	903	0
4858	2	0	0	0	0	0	0	200	300	0	0	0	0	0	0	0	200	903	0	0	0	0	0	0	0	603	903	0
4858	3	0	0	0	0	0	0	200	300	0	0	0	0	0	0	0	200	903	0	0	0	0	0	0	0	603	903	0
4858	4	0	0	0	0	0	0	200	300	0	0	0	0	0	0	0	200	903	0	0	0	0	0	0	0	603	903	0
4858	5	0	0	0	0	0	0	200	300	0	0	0	0	0	0	0	200	903	0	0	0	0	0	0	0	603	903	0
4858	6	0	0	0	0	0	0	200	300	0	0	0	0	0	0	0	200	903	0	0	0	0	0	0	0	603	903	0
4858	7	0	0	0	0	0	0	200	300	0	0	0	0	0	0	0	200	903	0	0	0	0	0	0	0	603	903	0
4858	8	0	0	0	0	0	0	200	300	0	0	0	0	0	0	0	200	903	0	0	0	0	0	0	0	603	903	0
4858	9	0	0	0	0	0	0	200	300	0	0	0	0	0	0	0	200	903	0	0	0	0	0	0	0	603	903	0
4859	0	0	0	0	0	0	0	200	300	0	0	0	0	0	0	0	200	903	0	0	0	0	0	0	0	603	903	0
4859	1	0	0	0	0	0	0	200	300	0	0	0	0	0	0	0	200	903	0	0	0	0	0	0	0	603	903	0
4859	2	0	0	0	0	0	0	200	300	0	0	0	0	0	0	0	200	903	0	0	0	0	0	0	0	603	903	0
4859	3	0	0	0	0	0	0	200	300	0	0	0	0	0	0	0	200	903	0	0	0	0	0	0	0	603	903	0
4859	4	0	0	0	0	0	0	200	300	0	0	0	0	0	0	0	200	903	0	0	0	0	0	0	0	603	903	0
4859	5	0	0	0	0	0	0	200	300	0	0	0	0	0	0	0	200	903	0	0	0	0	0	0	0	603	903	0
4859	6	0	0	0	0	0	0	200	300	0	0	0	0	0	0	0	200	903	0	0	0	0	0	0	0	603	903	0
4859	7	0	0	0	0	0	0	200	300	0	0	0	0	0	0	0	200	903	0	0	0	0	0	0	0	603	903	0
4859	8	0	0	0	0	0	0	200	300	0	0	0	0	0	0	0	200	903	0	0	0	0	0	0	0	603	903	0
4859	9	0	0	0	0	0	0	200	300	0	0	0	0	0	0	0	200	903	0	0	0	0	0	0	0	603	903	0
4860	0	0	0	0	0	0	0	200	300	0	0	0	0	0	0	0	200	903	0	0	0	0	0	0	0	603	903	0
4860	1	0	0	0	0	0	0	200	300	0	0	0	0	0	0	0	200	903	0	0	0	0	0	0	0	603	903	0
4860	2	0	0	0	0	0	0	200	300	0	0	0	0	0	0	0	200	903	0	0	0	0	0	0	0	603	903	0
4860	3	0	0	0	0	0	0	200	300	0	0	0	0	0	0	0	200	903	0	0	0	0	0	0	0	603	903	0
4860	4	0	0	0	0	0	0	200	300	0	0	0	0	0	0	0	200	903	0	0	0	0	0	0	0	603	903	0
4860	5	0	0	0	0	0	0	200	300	0	0	0	0	0	0	0	200	903	0	0	0	0	0	0	0	603	903	0
4860	6	0	0	0	0	0	0	200	300	0	0	0	0	0	0	0	200	903	0	0	0	0	0	0	0	603	903	0
4860	7	0	0	0	0	0	0	200	300	0	0	0	0	0	0	0	200	903	0	0	0	0	0	0	0	603	903	0
4860	8	0	0	0	0	0	0	200	300	0	0	0	0	0	0	0	200	903	0	0	0	0	0	0	0	603	903	0
4860	9	0	0	0	0	0	0	200	300	0	0	0	0	0	0	0	200	903	0	0	0	0	0	0	0	603	903	0
4861	0	0	0	0	0	0	0	200	300	0	0	0	0	0	0	0	200	903	0	0	0	0	0	0	0	603	903	0
4861	1	0	0	0	0	0	0	200	300	0	0	0	0	0	0	0	200	903	0	0	0	0	0	0	0	603	903	0
4861	2	0	0	0	0	0	0	200	300	0	0	0	0	0	0	0	200	903	0	0	0	0	0	0	0	603	903	0
4861	3	0	0	0	0	0	0	200	300	0	0	0	0	0	0	0	200	903	0	0	0	0	0	0	0	603	903	0
4861	4	0	0	0	0	0	0	200	300	0	0	0	0	0	0	0	200	903	0	0	0	0	0	0	0	603	903	0
4861	5	0	0	0	0	0	0	200	300	0	0	0	0	0	0	0	200	903	0	0	0	0	0	0	0	603	903	0
4861	6	0	0	0	0	0	0	200	300	0	0	0	0	0	0	0	200	903	0	0	0	0	0	0	0	603	903	0
4861	7	0	0	0	0	0	0	200	300	0	0	0	0	0	0	0	200	903	0	0	0	0	0	0	0	603	903	0
4861	8	0	0	0	0	0	0	200	300	0	0	0	0	0	0	0	200	903	0	0	0	0	0	0	0	603	903	0
4861	9	0	0	0	0	0	0	200	300	0	0	0	0	0	0	0	200	903	0	0	0	0	0	0	0	603	903	0
4862	0	0	0	0	0	0	0	200	300	0	0	0	0	0	0	0	200	903	0	0	0	0	0	0	0	603	903	0
4862	1	0	0	0	0	0	0	200	300	0	0	0	0	0	0	0	200	903	0	0	0	0	0	0	0	603	903	0
4862	2	0	0	0	0	0	0	200	300	0	0	0	0	0	0	0	200	903	0	0	0	0	0	0	0	603	903	0
4862	3	0	0	0	0	0	0	200	300	0	0	0	0	0	0	0	200	903	0	0	0	0	0	0	0	603	903	0
4862	4	0	0	0	0	0	0	200	300	0	0	0	0	0	0	0	200	903	0	0	0	0	0	0	0	603	903	0
4862	5	0	0	0	0	0	0	200	300	0	0	0	0	0	0	0	200	903	0	0	0	0	0	0	0	603	903	0
4862	6	0	0	0	0	0	0	200	300	0	0	0	0	0	0	0	200	903	0	0	0	0	0	0	0	603	903	0
4862	7	0	0	0	0	0	0	200	300	0	0	0	0	0	0	0	200	903	0	0	0	0	0	0	0	603	903	0
4862	8	0	0	0	0	0	0	200	300	0	0	0	0	0	0	0	200	903	0	0	0	0	0	0	0	603	903	0
4862	9	0	0	0	0	0	0	200	300	0	0	0	0	0	0	0	200	903	0	0	0	0	0	0	0	603	903	0
4863	0	0	0	0	0	0	0	200	300	0	0	0	0	0	0	0	200	903	0	0	0	0	0	0	0	603	903	0
4863	1	0	0	0	0	0	0	200	300	0	0	0	0	0	0	0	200	903	0	0	0	0	0	0	0	603	903	0
4863	2	0	0	0	0	0	0	200	300	0	0	0	0	0	0	0	200	903	0	0	0	0	0	0	0	603	903	0
4863	3	0	0	0	0	0	0	200	300	0	0	0	0	0	0	0	200	903	0	0	0	0	0	0	0	603	903	0
4863	4	0	0	0	0	0	0	200	300	0	0	0	0	0	0	0	200	903	0	0	0	0	0	0	0	603	903	0
4863	5	0	0	0	0	0	0	200	300	0	0	0	0	0	0	0	200	903	0	0	0	0	0	0	0	603	903	0
4863	6	0	0	0	0	0	0	200	300	0	0	0	0	0	0	0	200	903	0	0	0	0	0	0	0	603	903	0
4863	7	0	0	0	0	0	0	200	300	0	0	0	0	0	0	0	200	903	0	0	0	0	0	0	0	603	903	0
4863	8	0	0	0	0	0	0	200	300	0	0	0	0	0	0	0	200	903	0	0	0	0	0	0	0	603	903	0
4863	9	0	0	0	0	0	0	200	300	0	0	0	0	0	0	0	200	903	0	0	0	0	0	0	0	603	903	0
4864	0	0	0	0	0	0	0	200	300	0	0	0	0	0	0	0	200	903	0	0	0	0	0	0	0	603	903	0
4864	1	0	0	0	0	0	0	200	300	0	0	0	0	0	0	0	200	903	0	0	0	0	0	0	0	603	903	0
4864	2	0	0	0	0	0	0	200	300	0	0	0	0	0	0	0	200	903	0	0	0	0	0	0	0	603	903	0
4864	3	0	0	0	0	0	0	200	300	0	0	0	0	0	0	0	200	903	0	0	0	0	0	0	0	603	903	0
4864	4	0	0	0	0	0	0	200	300	0	0	0	0	0	0	0	200	903	0	0	0	0	0	0	0	603	903	0
4864	5	0	0	0	0	0	0	200	300	0	0	0	0	0	0	0	200	903	0	0	0	0	0	0	0	603	903	0
4864	6	0	0	0	0	0	0	200	300	0	0	0	0	0	0	0	200	903	0	0	0	0	0	0	0	603	903	0
4864	7	0	0	0	0	0	0	200	300	0	0	0	0	0	0	0	200	903	0	0	0	0	0	0	0	603	903	0
4864	8	0	0	0	0	0	0	200	300	0	0	0	0	0	0	0	200	903	0	0	0	0	0	0	0	603	903	0
4864	9	0	0	0	0	0	0	200	300	0	0	0	0	0	0	0	200	903	0	0	0	0	0	0	0	603	903	0
4865	0	0	0	0	0	0	0	200	300	0	0	0	0	0	0	0	200	903	0	0	0	0	0	0	0	603	903	0
4865	1	0	0	0	0	0	0	200	300	0	0	0	0	0	0	0	200	903	0	0	0	0	0	0	0	603	903	0
4865	2	0	0	0	0	0	0	200	300	0	0	0	0	0	0	0	200	903	0	0	0	0	0	0	0	603	903	0
4865	3	0	0	0	0	0	0	200	300	0	0	0	0	0	0	0	200	903	0	0	0	0	0	0	0	603	903	0
4865	4	0	0	0	0	0	0	200	300	0	0	0	0	0	0	0	200	903	0	0	0	0	0	0	0	603	903	0
4865	5	0	0	0	0	0	0	200	300	0	0	0	0	0	0	0	200	903	0	0	0	0	0	0	0	603	903	0
4865	6	0	0	0	0	0	0	200	300	0	0	0	0	0	0	0	200	903	0	0	0	0	0	0	0	603	903	0
4865	7	0	0	0	0	0	0	200	300	0	0	0	0	0	0	0	200	903	0	0	0	0	0	0	0	603	903	0
4865	8	0	0	0	0	0	0	200	300	0	0	0	0	0	0	0	200	903	0	0	0	0	0	0	0	603	903	0
4865	9	0	0	0	0	0	0	200	300	0	0	0	0	0	0	0	200	903	0	0	0	0	0	0	0	603	903	0
4866	0	0	0	0	0	0	0	200	300	0	0	0	0	0	0	0	200	903	0	0	0	0	0	0	0	603	903	0
4866	1	0	0	0	0	0	0	200	300	0	0	0	0	0	0	0	200	903	0	0	0	0	0	0	0	603	903	0
4866	2	0	0	0	0	0	0	200	300	0	0	0	0	0	0	0	200	903	0	0	0	0	0	0	0	603	903	0
4866	3	0	0	0	0	0	0	200	300	0	0	0	0	0	0	0	200	903	0	0	0	0	0	0	0	603	903	0
4866	4	0	0	0	0	0	0	200	300	0	0	0	0	0	0	0	200	903	0	0	0	0	0	0	0	603	903	0
4866	5	0	0	0	0	0	0	200	300	0	0	0	0	0	0	0	200	903	0	0	0	0	0	0	0	603	903	0
4866	6	0	0	0	0	0	0	200	300	0	0	0	0	0	0	0	200	903	0	0	0	0	0	0	0	603	903	0
4866	7	0	0	0	0	0	0	200	300	0	0	0	0	0	0	0	200	903	0	0	0	0	0	0	0	603	903	0
4866	8	0	0	0	0	0	0	200	300	0	0	0	0	0	0	0	200	903	0	0	0	0	0	0	0	603	903	0
4866	9	0	0	0	0	0	0	200	300	0	0	0	0	0	0	0	200	903	0	0	0	0	0	0	0	603	903	0
4867	0	0	0	0	0	0	0	200	300	0	0	0	0	0	0	0	200	903	0	0	0	0	0	0	0	603	903	0
4867	1	0	0	0	0	0	0	200	300	0	0	0	0	0	0	0	200	903	0	0	0	0	0	0	0	603	903	0
4867	2	0	0	0	0	0	0	200	300	0	0	0	0	0	0	0	200	903	0	0	0	0	0	0	0	603	903	0
4867	3	0	0	0	0	0	0	200	300	0	0	0	0	0	0	0	200	903	0	0	0	0	0	0	0	603	903	0
4867	4	0	0	0	0	0	0	200	300	0	0	0	0	0	0	0	200	903	0	0	0	0	0	0	0	603	903	0
4867	5	0	0	0	0	0	0	200	300	0	0	0	0	0	0	0	200	903	0	0	0	0	0	0	0	603	903	0
4867	6	0	0	0	0	0	0	200	300	0	0	0	0	0	0	0	200	903	0	0	0	0	0	0	0	603	903	0
4867	7	0	0	0	0	0	0	200	300	0	0	0	0	0	0	0	200	903	0	0	0	0	0	0	0	603	903	0
4867	8	0	0	0	0	0	0	200	300	0	0	0	0	0	0	0	200	903	0	0	0	0	0	0	0	603	903	0
4867	9	0	0	0	0	0	0	200	300	0	0	0	0	0	0	0	200	903	0	0	0	0	0	0	0	603	903	0
4868	0	0	0	0	0	0	0	200	300	0	0	0	0	0	0	0	200	903	0	0	0	0	0	0	0	603	903	0
4868	1	0	0	0	0	0	0	200	300	0	0	0	0	0	0	0	200	903	0	0	0	0	0	0	0	603	903	0
4868	2	0	0	0	0	0	0	200	300	0	0	0	0	0	0	0	200	903	0	0	0	0	0	0	0	603	903	0
4868	3	0	0	0	0	0	0	200	300	0	0	0	0	0	0	0	200	903	0	0	0	0	0	0	0	603	903	0
4868	4	0	0	0	0	0	0	200	300	0	0	0	0	0	0	0	200	903	0	0	0	0	0	0	0	603	903	0
4868	5	0	0	0	0	0	0	200	300	0	0	0	0	0	0	0	200	903	0	0	0	0	0	0	0	603	903	0
4868	6	0	0	0	0	0	0	200	300	0	0	0	0	0	0	0	200	903	0	0	0	0	0	0	0	603	903	0
4868	7	0	0	0	0	0	0	200	300	0	0	0	0	0	0	0	200	903	0	0	0	0	0	0	0	603	903	0
4868	8	0	0	0	0	0	0	200	300	0	0	0	0	0	0	0	200	903	0	0	0	0	0	0	0	603	903	0
4868	9	0	0	0	0	0	0	200	300	0	0	0	0	0	0	0	200	903	0	0	0	0	0	0	0	603	903	0
4869	0	0	0	0	0	0	0	200	300	0	0	0	0	0	0	0	200	903	0	0	0	0	0	0	0	603	903	0
4869	1	0	0	0	0	0	0	200	300	0	0	0	0	0	0	0	200	903	0	0	0	0	0	0	0	603	903	0
4869	2	0	0	0	0	0	0	200	300	0	0	0	0	0	0	0	200	903	0	0	0	0	0	0	0	603	903	0
4869	3	0	0	0	0	0	0	200	300	0	0	0	0	0	0	0	200	903	0	0	0	0	0	0	0	603	903	0
4869	4	0	0	0	0	0	0	200	300	0	0	0	0	0	0	0	200	903	0	0	0	0	0	0	0	603	903	0
4869	5	0	0	0	0	0	0	200	300	0	0	0	0	0	0	0	200	903	0	0	0	0	0	0	0	603	903	0
4869	6	0	0	0	0	0	0	200	300	0	0	0	0	0	0	0	200	903	0	0	0	0	0	0	0	603	903	0
4869	7	0	0	0	0	0	0	200	300	0	0	0	0	0	0	0	200	903	0	0	0	0	0	0	0	603	903	0
4869	8	0	0	0	0	0	0	200	300	0	0	0	0	0	0	0	200	903	0	0	0	0	0	0	0	603	903	0
4869	9	0	0	0	0	0	0	200	300	0	0	0	0	0	0	0	200	903	0	0	0	0	0	0	0	603	903	0
4870	0	0	0	0	0	0	0	200	300	0	0	0	0	0	0	0	200	903	0	0	0	0	0	0	0	603	903	0
4870	1	0	0	0	0	0	0	200	300	0	0	0	0	0	0	0	200	903	0	0	0	0	0	0	0	603	903	0
4870	2	0	0	0	0	0	0	200	300	0	0	0	0	0	0	0	200	903	0	0	0	0	0	0	0	603	903	0
4870	3	0	0	0	0	0	0	200	300	0	0	0	0	0	0	0	200	903	0	0	0	0	0	0	0	603	903	0
4870	4	0	0	0	0	0	0	200	300	0	0	0	0	0	0	0	200	903	0	0	0	0	0	0	0	603	903	0
4870	5	0	0	0	0	0	0	200	300	0	0	0	0	0	0	0	200	903	0	0	0	0	0	0	0	603	903	0
4870	6	0	0	0	0	0	0	200	300	0	0	0	0	0	0	0	200	903	0	0	0	0	0	0	0	603	903	0
4870	7	0	0	0	0	0	0	200	300	0	0	0	0	0	0	0	200	903	0	0	0	0	0	0	0	603	903	0
4870	8	0	0	0	0	0	0	200	300	0	0	0	0	0	0	0	200	903	0	0	0	0	0	0	0	603	903	0
4870	9	0	0	0	0	0	0	200	300	0	0	0	0	0	0	0	200	903	0	0	0	0	0	0	0	603	903	0
4871	0	0	0	0	0	0	0	200	300	0	0	0	0	0	0	0	200	903	0	0	0	0	0	0	0	603	903	0
4871	1	0	0	0	0	0	0	200	300	0	0	0	0	0	0	0	200	903	0	0	0	0	0	0	0	603	903	0
4871	2	0	0	0	0	0	0	200	300	0	0	0	0	0	0	0	200	903	0	0	0	0	0	0	0	603	903	0
4871	3	0	0	0	0	0	0	200	300	0	0	0	0	0	0	0	200	903	0	0	0	0	0	0	0	603	903	0
4871	4	0	0	0	0	0	0	200	300	0	0	0	0	0	0	0	200	903	0	0	0	0	0	0	0	603	903	0
4871	5	0	0	0	0	0	0	200	300	0	0	0	0	0	0	0	200	903	0	0	0	0	0	0	0	603	903	0
4871	6	0	0	0	0	0	0	200	300	0	0	0	0	0	0	0	200	903	0	0	0	0	0	0	0	603	903	0
4871	7	0	0	0	0	0	0	200	300	0	0	0	0	0	0	0	200	903	0	0	0	0	0	0	0	603	903	0
4871	8	0	0	0	0	0	0	200	300	0	0	0	0	0	0	0	200	903	0	0	0	0	0	0	0	603	903	0
4871	9	0	0	0	0	0	0	200	300	0	0	0	0	0	0	0	200	903	0	0	0	0	0	0	0	603	903	0
4872	0	0	0	0	0	0	0	200	300	0	0	0	0	0	0	0	200	903	0	0	0	0	0	0	0	603	903	0
4872	1	0	0	0	0	0	0	200	300	0	0	0	0	0	0	0	200	903	0	0	0	0	0	0	0	603	903	0
4872	2	0	0	0	0	0	0	200	300	0	0	0	0	0	0	0	200	903	0	0	0	0	0	0	0	603	903	0
4872	3	0	0	0	0	0	0	200	300	0	0	0	0	0	0	0	200	903	0	0	0	0	0	0	0	603	903	0
4872	4	0	0	0	0	0	0	200	300	0	0	0	0	0	0	0	200	903	0	0	0	0	0	0	0	603	903	0
4872	5	0	0	0	0	0	0	200	300	0	0	0	0	0	0	0	200	903	0	0	0	0	0	0	0	603	903	0
4872	6	0	0	0	0	0	0	200	300	0	0	0	0	0	0	0	200	903	0	0	0	0	0	0	0	603	903	0
4872	7	0	0	0	0	0	0	200	300	0	0	0	0	0	0	0	200	903	0	0	0	0	0	0	0	603	903	0
4872	8	0	0	0	0	0	0	200	300	0	0	0	0	0	0	0	200	903	0	0	0	0	0	0	0	603	903	0
4872	9	0	0	0	0	0	0	200	300	0	0	0	0	0	0	0	200	903	0	0	0	0	0	0	0	603	903	0
4873	0	0	0	0	0	0	0	200	300	0	0	0	0	0	0	0	200	903	0	0	0	0	0	0	0	603	903	0
4873	1	0	0	0	0	0	0	200	300	0	0	0	0	0	0	0	200	903	0	0	0	0	0	0	0	603	903	0
4873	2	0	0	0	0	0	0	200	300	0	0	0	0	0	0	0	200	903	0	0	0	0	0	0	0	603	903	0
4873	3	0	0	0	0	0	0	200	300	0	0	0	0	0	0	0	200	903	0	0	0	0	0	0	0	603	903	0
4873	4	0	0	0	0	0	0	200	300	0	0	0	0	0	0	0	200	903	0	0	0	0	0	0	0	603	903	0
4873	5	0	0	0	0	0	0	200	300	0	0	0	0	0	0	0	200	903	0	0	0	0	0	0	0	603	903	0
4873	6	0	0	0	0	0	0	200	300	0	0	0	0	0	0	0	200	903	0	0	0	0	0	0	0	603	903	0
4873	7	0	0	0	0	0	0	200	300	0	0	0	0	0	0	0	200	903	0	0	0	0	0	0	0	603	903	0
4873	8	0	0	0	0	0	0	200	300	0	0	0	0	0	0	0	200	903	0	0	0	0	0	0	0	603	903	0
4873	9	0	0	0	0	0	0	200	300	0	0	0	0	0	0	0	200	903	0	0	0	0	0	0	0	603	903	0
4874	0	0	0	0	0	0	0	200	300	0	0	0	0	0	0	0	200	903	0	0	0	0	0	0	0	603	903	0
4874	1	0	0	0	0	0	0	200	300	0	0	0	0	0	0	0	200	903	0	0	0	0	0	0	0	603	903	0
4874	2	0	0	0	0	0	0	200	300	0	0	0	0	0	0	0	200	903	0	0	0	0	0	0	0	603	903	0
4874	3	0	0	0	0	0	0	200	300	0	0	0	0	0	0	0	200	903	0	0	0	0	0	0	0	603	903	0
4874	4	0	0	0	0	0	0	200	300	0	0	0	0	0	0	0	200	903	0	0	0	0	0	0	0	603	903	0
4874	5	0	0	0	0	0	0	200	300	0	0	0	0	0	0	0	200	903	0	0	0	0	0	0	0	603	903	0
4874	6	0	0	0	0	0	0	200	300	0	0	0	0	0	0	0	200	903	0	0	0	0	0	0	0	603	903	0
4874	7	0	0	0	0	0	0	200	300	0	0	0	0	0	0	0	200	903	0	0	0	0	0	0	0	603	903	0
4874	8	0	0	0	0	0	0	200	300	0	0	0	0	0	0	0	200	903	0	0	0	0	0	0	0	603	903	0
4874	9	0	0	0	0	0	0	200	300	0	0	0	0	0	0	0	200	903	0	0	0	0	0	0	0	603	903	0
4875	0	0	0	0	0	0	0	200	300	0	0	0	0	0	0	0	200	903	0	0	0	0	0	0	0	603	903	0
4875	1	0	0	0	0	0	0	200	300	0	0	0	0	0	0	0	200	903	0	0	0	0	0	0	0	603	903	0
4875	2	0	0	0	0	0	0	200	300	0	0	0	0	0	0	0	200	903	0	0	0	0	0	0	0	603	903	0
4875	3	0	0	0	0	0	0	200	300	0	0	0	0	0	0	0	200	903	0	0	0	0	0	0	0	603	903	0
4875	4	0	0	0	0	0	0	200	300	0	0	0	0	0	0	0	200	903	0	0	0	0	0	0	0	603	903	0
4875	5	0	0	0	0	0	0	200	300	0	0	0	0	0	0	0	200	903	0	0	0	0	0	0	0	603	903	0
4875	6	0	0	0	0	0	0	200	300	0	0	0	0	0	0	0	200	903	0	0	0	0	0	0	0	603	903	0
4875	7	0	0	0	0	0	0	200	300	0	0	0	0	0	0	0	200	903	0	0	0	0	0	0	0	603	903	0
4875	8	0	0	0	0	0	0	200	300	0	0	0	0	0	0	0	200	903	0	0	0	0	0	0	0	603	903	0
4875	9	0	0	0	0	0	0	200	300	0	0	0	0	0	0	0	200	903	0	0	0	0	0	0	0	603	903	0
4876	0	0	0	0	0	0	0	200	300	0	0	0	0	0	0	0	200	903	0	0	0	0	0	0	0	603	903	0
4876	1	0	0	0	0	0	0	200	300	0	0	0	0	0	0	0	200	903	0	0	0	0	0	0	0	603	903	0
4876	2	0	0	0	0	0	0	200	300	0	0	0	0	0	0	0	200	903	0	0	0	0	0	0	0	603	903	0
4876	3	0	0	0	0	0	0	200	300	0	0	0	0	0	0	0	200	903	0	0	0	0	0	0	0	603	903	0
4876	4	0	0	0	0	0	0	200	300	0	0	0	0	0	0	0	200	903	0	0	0	0	0	0	0	603	903	0
4876	5	0	0	0	0	0	0	200	300	0	0	0	0	0	0	0	200	903	0	0	0	0	0	0	0	603	903	0
4876	6	0	0	0	0	0	0	200	300	0	0	0	0	0	0	0	200	903	0	0	0	0	0	0	0	603	903	0
4876	7	0	0	0	0	0	0	200	300	0	0	0	0	0	0	0	200	903	0	0	0	0	0	0	0	603	903	0
4876	8	0	0	0	0	0	0	200	300	0	0	0	0	0	0	0	200	903	0	0	0	0	0	0	0	603	903	0
4876	9	0	0	0	0	0	0	200	300	0	0	0	0	0	0	0	200	903	0	0	0	0	0	0	0	603	903	0
4877	0	0	0	0	0	0	0	200	300	0	0	0	0	0	0	0	200	903	0	0	0	0	0	0	0	603	903	0
4877	1	0	0	0	0	0	0	200	300	0	0	0	0	0	0	0	200	903	0	0	0	0	0	0	0	603	903	0
4877	2	0	0	0	0	0	0	200	300	0	0	0	0	0	0	0	200	903	0	0	0	0	0	0	0	603	903	0
4877	3	0	0	0	0	0	0	200	300	0	0	0	0	0	0	0	200	903	0	0	0	0	0	0	0	603	903	0
4877	4	0	0	0	0	0	0	200	300	0	0	0	0	0	0	0	200	903	0	0	0	0	0	0	0	603	903	0
4877	5	0	0	0	0	0	0	200	300	0	0	0	0	0	0	0	200	903	0	0	0	0	0	0	0	603	903	0
4877	6	0	0	0	0	0	0	200	300	0	0	0	0	0	0	0	200	903	0	0	0	0	0	0	0	603	903	0
4877	7	0	0	0	0	0	0	200	300	0	0	0	0	0	0	0	200	903	0	0	0	0	0	0	0	603	903	0
4877	8	0	0	0	0	0	0	200	300	0	0	0	0	0	0	0	200	903	0	0	0	0	0	0	0	603	903	0
4877	9	0	0	0	0	0	0	200	300	0	0	0	0	0	0	0	200	903	0	0	0	0	0	0	0	603	903	0
4878	0	0	0	0	0	0	0	200	300	0	0	0	0	0	0	0	200	903	0	0	0	0	0	0	0	603	903	0
4878	1	0	0	0	0	0	0	200	300	0	0	0	0	0	0	0	200	903	0	0	0	0	0	0	0	603	903	0
4878	2	0	0	0	0	0	0	200	300	0	0	0	0	0	0	0	200	903	0	0	0	0	0	0	0	603	903	0
4878	3	0	0	0	0	0	0	200	300	0	0	0	0	0	0	0	200	903	0	0	0	0	0	0	0	603	903	0
4878	4	0	0	0	0	0	0	200	300	0	0	0	0	0	0	0	200	903	0	0	0	0	0	0	0	603	903	0
4878	5	0	0	0	0	0	0	200	300	0	0	0	0	0	0	0	200	903	0	0	0	0	0	0	0	603	903	0
4878	6	0	0	0	0	0	0	200	300	0	0	0	0	0	0	0	200	903	0	0	0	0	0	0	0	603	903	0
4878	7	0	0	0	0	0	0	200	300	0	0	0	0	0	0	0	200	903	0	0	0	0	0	0	0	603	903	0
4878	8	0	0	0	0	0	0	200	300	0	0	0	0	0	0	0	200	903	0	0	0	0	0	0	0	603	903	0
4878	9	0	0	0	0	0	0	200	300	0	0	0	0	0	0	0	200	903	0	0	0	0	0	0	0	603	903	0
4879	0	0	0	0	0	0	0	200	300	0	0	0	0	0	0	0	200	903	0	0	0	0	0	0	0	603	903	0
4879	1	0	0	0	0	0	0	200	300	0	0	0	0	0	0	0	200	903	0	0	0	0	0	0	0	603	903	0
4879	2	0	0	0	0	0	0	200	300	0	0	0	0	0	0	0	200	903	0	0	0	0	0	0	0	603	903	0
4879	3	0	0	0	0	0	0	200	300	0	0	0	0	0	0	0	200	903	0	0	0	0	0	0	0	603	903	0
4879	4	0	0	0	0	0	0	200	300	0	0	0	0	0	0	0	200	903	0	0	0	0	0	0	0	603	903	0
4879	5	0	0	0	0	0	0	200	300	0	0	0	0	0	0	0	200	903	0	0	0	0	0	0	0	603	903	0
4879	6	0	0	0	0	0	0	200	300	0	0	0	0	0	0	0	200	903	0	0	0	0	0	0	0	603	903	0
4879	7	0	0	0	0	0	0	200	300	0	0	0	0	0	0	0	200	903	0	0	0	0	0	0	0	603	903	0
4879	8	0	0	0	0	0	0	200	300	0	0	0	0	0	0	0	200	903	0	0	0	0	0	0	0	603	903	0
4879	9	0	0	0	0	0	0	200	300	0	0	0	0	0	0	0	200	903	0	0	0	0	0	0	0	603	903	0
4880	0	0	0	0	0	0	0	200	300	0	0	0	0	0	0	0	200	903	0	0	0	0	0	0	0	603	903	0
4880	1	0	0	0	0	0	0	200	300	0	0	0	0	0	0	0	200	903	0	0	0	0	0	0	0	603	903	0
4880	2	0	0	0	0	0	0	200	300	0	0	0	0	0	0	0	200	903	0	0	0	0	0	0	0	603	903	0
4880	3	0	0	0	0	0	0	200	300	0	0	0	0	0	0	0	200	903	0	0	0	0	0	0	0	603	903	0
4880	4	0	0	0	0	0	0	200	300	0	0	0	0	0	0	0	200	903	0	0	0	0	0	0	0	603	903	0
4880	5	0	0	0	0	0	0	200	300	0	0	0	0	0	0	0	200	903	0	0	0	0	0	0	0	603	903	0
4880	6	0	0	0	0	0	0	200	300	0	0	0	0	0	0	0	200	903	0	0	0	0	0	0	0	603	903	0
4880	7	0	0	0	0	0	0	200	300	0	0	0	0	0	0	0	200	903	0	0	0	0	0	0	0	603	903	0
4880	8	0	0	0	0	0	0	200	300	0	0	0	0	0	0	0	200	903	0	0	0	0	0	0	0	603	903	0
4880	9	0	0	0	0	0	0	200	300	0	0	0	0	0	0	0	200	903	0	0	0	0	0	0	0	603	903	0
4881	0	0	0	0	0	0	0	200	300	0	0	0	0	0	0	0	200	903	0	0	0	0	0	0	0	603	903	0
4881	1	0	0	0	0	0	0	200	300	0	0	0	0	0	0	0	200	903	0	0	0	0	0	0	0	603	903	0
4881	2	0	0	0	0	0	0	200	300	0	0	0	0	0	0	0	200	903	0	0	0	0	0	0	0	603	903	0
4881	3	0	0	0	0	0	0	200	300	0	0	0	0	0	0	0	200	903	0	0	0	0	0	0	0	603	903	0
4881	4	0	0	0	0	0	0	200	300	0	0	0	0	0	0	0	200	903	0	0	0	0	0	0	0	603	903	0
4881	5	0	0	0	0	0	0	200	300	0	0	0	0	0	0	0	200	903	0	0	0	0	0	0	0	603	903	0
4881	6	0	0	0	0	0	0	200	300	0	0	0	0	0	0	0	200	903	0	0	0	0	0	0	0	603	903	0
4881	7	0	0	0	0	0	0	200	300	0	0	0	0	0	0	0	200	903	0	0	0	0	0	0	0	603	903	0
4881	8	0	0	0	0	0	0	200	300	0	0	0	0	0	0	0	200	903	0	0	0	0	0	0	0	603	903	0
4881	9	0	0	0	0	0	0	200	300	0	0	0	0	0	0	0	200	903	0	0	0	0	0	0	0	603	903	0
4882	0	0	0	0	0	0	0	200	300	0	0	0	0	0	0	0	200	903	0	0	0	0	0	0	0	603	903	0
4882	1	0	0	0	0	0	0	200	300	0	0	0	0	0	0	0	200	903	0	0	0	0	0	0	0	603	903	0
4882	2	0	0	0	0	0	0	200	300	0	0	0	0	0	0	0	200	903	0	0	0	0	0	0	0	603	903	0
4882	3	0	0	0	0	0	0	200	300	0	0	0	0	0	0	0	200	903	0	0	0	0	0	0	0	603	903	0
4882	4	0	0	0	0	0	0	200	300	0	0	0	0	0	0	0	200	903	0	0	0	0	0	0	0	603	903	0
4882	5	0	0	0	0	0	0	200	300	0	0	0	0	0	0	0	200	903	0	0	0	0	0	0	0	603	903	0
4882	6	0	0	0	0	0	0	200	300	0	0	0	0	0	0	0	200	903	0	0	0	0	0	0	0	603	903	0
4882	7	0	0	0	0	0	0	200	300	0	0	0	0	0	0	0	200	903	0	0	0	0	0	0	0	603	903	0
4882	8	0	0	0	0	0	0	200	300	0	0	0	0	0	0	0	200	903	0	0	0	0	0	0	0	603	903	0
4882	9	0	0	0	0	0	0	200	300	0	0	0	0	0	0	0	200	903	0	0	0	0	0	0	0	603	903	0
4883	0	0	0	0	0	0	0	200	300	0	0	0	0	0	0	0	200	903	0	0	0	0	0	0	0	603	903	0
4883	1	0	0	0	0	0	0	200	300	0	0	0	0	0	0	0	200	903	0	0	0	0	0	0	0	603	903	0
4883	2	0	0	0	0	0	0	200	300	0	0	0	0	0	0	0	200	903	0	0	0	0	0	0	0	603	903	0
4883	3	0	0	0	0	0	0	200	300	0	0	0	0	0	0	0	200	903	0	0	0	0	0	0	0	603	903	0
4883	4	0	0	0	0	0	0	200	300	0	0	0	0	0	0	0	200	903	0	0	0	0	0	0	0	603	903	0
4883	5	0	0	0	0	0	0	200	300	0	0	0	0	0	0	0	200	903	0	0	0	0	0	0	0	603	903	0
4883	6	0	0	0	0	0	0	200	300	0	0	0	0	0	0	0	200	903	0	0	0	0	0	0	0	603	903	0
4883	7	0	0	0	0	0	0	200	300	0	0	0	0	0	0	0	200	903	0	0	0	0	0	0	0	603	903	0
4883	8	0	0	0	0	0	0	200	300	0	0	0	0	0	0	0	200	903	0	0	0	0	0	0	0	603	903	0
4883	9	0	0	0	0	0	0	200	300	0	0	0	0	0	0	0	200	903	0	0	0	0	0	0	0	603	903	0
4884	0	0	0	0	0	0	0	200	300	0	0	0	0	0	0	0	200	903	0	0	0	0	0	0	0	603	903	0
4884	1	0	0	0	0	0	0	200	300	0	0	0	0	0	0	0	200	903	0	0	0	0	0	0	0	603	903	0
4884	2	0	0	0	0	0	0	200	300	0	0	0	0	0	0	0	200	903	0	0	0	0	0	0	0	603	903	0
4884	3	0	0	0	0	0	0	200	300	0	0	0	0	0	0	0	200	903	0	0	0	0	0	0	0	603	903	0
4884	4	0	0	0	0	0	0	200	300	0	0	0	0	0	0	0	200	903	0	0	0	0	0	0	0	603	903	0
4884	5	0	0	0	0	0	0	200	300	0	0	0	0	0	0	0	200	903	0	0	0	0	0	0	0	603	903	0
4884	6	0	0	0	0	0	0	200	300	0	0	0	0	0	0	0	200	903	0	0	0	0	0	0	0	603	903	0
4884	7	0	0	0	0	0	0	200	300	0	0	0	0	0	0	0	200	903	0	0	0	0	0	0	0	603	903	0
4884	8	0	0	0	0	0	0	200	300	0	0	0	0	0	0	0	200	903	0	0	0	0	0	0	0	603	903	0
4884	9	0	0	0	0	0	0	200	300	0	0	0	0	0	0	0	200	903	0	0	0	0	0	0	0	603	903	0
4885	0	0	0	0	0	0	0	200	300	0	0	0	0	0	0	0	200	903	0	0	0	0	0	0	0	603	903	0
4885	1	0	0	0	0	0	0	200	300	0	0	0	0	0	0	0	200	903	0	0	0	0	0	0	0	603	903	0
4885	2	0	0	0	0	0	0	200	300	0	0	0	0	0	0	0	200	903	0	0	0	0	0	0	0	603	903	0
4885	3	0	0	0	0	0	0	200	300	0	0	0	0	0	0	0	200	903	0	0	0	0	0	0	0	603	903	0
4885	4	0	0	0	0	0	0	200	300	0	0	0	0	0	0	0	200	903	0	0	0	0	0	0	0	603	903	0
4885	5	0	0	0	0	0	0	200	300	0	0	0	0	0	0	0	200	903	0	0	0	0	0	0	0	603	903	0
4885	6	0	0	0	0	0	0	200	300	0	0	0	0	0	0	0	200	903	0	0	0	0	0	0	0	603	903	0
4885	7	0	0	0	0	0	0	200	300	0	0	0	0	0	0	0	200	903	0	0	0	0	0	0	0	603	903	0
4885	8	0	0	0	0	0	0	200	300	0	0	0	0	0	0	0	200	903	0	0	0	0	0	0	0	603	903	0
4885	9	0	0	0	0	0	0	200	300	0	0	0	0	0	0	0	200	903	0	0	0	0	0	0	0	603	903	0
4886	0	0	0	0	0	0	0	200	300	0	0	0	0	0	0	0	200	903	0	0	0	0	0	0	0	603	903	0
4886	1	0	0	0	0	0	0	200	300	0	0	0	0	0	0	0	200	903	0	0	0	0	0	0	0	603	903	0
4886	2	0	0	0	0	0	0	200	300	0	0	0	0	0	0	0	200	903	0	0	0	0	0	0	0	603	903	0
4886	3	0	0	0	0	0	0	200	300	0	0	0	0	0	0	0	200	903	0	0	0	0	0	0	0	603	903	0
4886	4	0	0	0	0	0	0	200	300	0	0	0	0	0	0	0	200	903	0	0	0	0	0	0	0	603	903	0
4886	5	0	0	0	0	0	0	200	300	0	0	0	0	0	0	0	200	903	0	0	0	0	0	0	0	603	903	0
4886	6	0	0	0	0	0	0	200	300	0	0	0	0	0	0	0	200	903	0	0	0	0	0	0	0	603	903	0
4886	7	0	0	0	0	0	0	200	300	0	0	0	0	0	0	0	200	903	0	0	0	0	0	0	0	603	903	0
4886	8	0	0	0	0	0	0	200	300	0	0	0	0	0	0	0	200	903	0	0	0	0	0	0	0	603	903	0
4886	9	0	0	0	0	0	0	200	300	0	0	0	0	0	0	0	200	903	0	0	0	0	0	0	0	603	903	0
4887	0	0	0	0	0	0	0	200	300	0	0	0	0	0	0	0	200	903	0	0	0	0	0	0	0	603	903	0
4887	1	0	0	0	0	0	0	200	300	0	0	0	0	0	0	0	200	903	0	0	0	0	0	0	0	603	903	0
4887	2	0	0	0	0	0	0	200	300	0	0	0	0	0	0	0	200	903	0	0	0	0	0	0	0	603	903	0
4887	3	0	0	0	0	0	0	200	300	0	0	0	0	0	0	0	200	903	0	0	0	0	0	0	0	603	903	0
4887	4	0	0	0	0	0	0	200	300	0	0	0	0	0	0	0	200	903	0	0	0	0	0	0	0	603	903	0
4887	5	0	0	0	0	0	0	200	300	0	0	0	0	0	0	0	200	903	0	0	0	0	0	0	0	603	903	0
4887	6	0	0	0	0	0	0	200	300	0	0	0	0	0	0	0	200	903	0	0	0	0	0	0	0	603	903	0
4887	7	0	0	0	0	0	0	200	300	0	0	0	0	0	0	0	200	903	0	0	0	0	0	0	0	603	903	0
4887	8	0	0	0	0	0	0	200	300	0	0	0	0	0	0	0	200	903	0	0	0	0	0	0	0	603	903	0
4887	9	0	0	0	0	0	0	200	300	0	0	0	0	0	0	0	200	903	0	0	0	0	0	0	0	603	903	0
4888	0	0	0	0	0	0	0	200	300	0	0	0	0	0	0	0	200	903	0	0	0	0	0	0	0	603	903	0
4888	1	0	0	0	0	0	0	200	300	0	0	0	0	0	0	0	200	903	0	0	0	0	0	0	0	603	903	0
4888	2	0	0	0	0	0	0	200	300	0	0	0	0	0	0	0	200	903	0	0	0	0	0	0	0	603	903	0
4888	3	0	0	0	0	0	0	200	300	0	0	0	0	0	0	0	200	903	0	0	0	0	0	0	0	603	903	0
4888	4	0	0	0	0	0	0	200	300	0	0	0	0	0	0	0	200	903	0	0	0	0	0	0	0	603	903	0
4888	5	0	0	0	0	0	0	200	300	0	0	0	0	0	0	0	200	903	0	0	0	0	0	0	0	603	903	0
4888	6	0	0	0	0	0	0	200	300	0	0	0	0	0	0	0	200	903	0	0	0	0	0	0	0	603	903	0
4888	7	0	0	0	0	0	0	200	300	0	0	0	0	0	0	0	200	903	0	0	0	0	0	0	0	603	903	0
4888	8	0	0	0	0	0	0	200	300	0	0	0	0	0	0	0	200	903	0	0	0	0	0	0	0	603	903	0
4888	9	0	0	0	0	0	0	200	300	0	0	0	0	0	0	0	200	903	0	0	0	0	0	0	0	603	903	0
4889	0	0	0	0	0	0	0	200	300	0	0	0	0	0	0	0	200	903	0	0	0	0	0	0	0	603	903	0
4889	1	0	0	0	0	0	0	200	300	0	0	0	0	0	0	0	200	903	0	0	0	0	0	0	0	603	903	0
4889	2	0	0	0	0	0	0	200	300	0	0	0	0	0	0	0	200	903	0	0	0	0	0	0	0	603	903	0
4889	3	0	0	0	0	0	0	200	300	0	0	0	0	0	0	0	200	903	0	0	0	0	0	0	0	603	903	0
4889	4	0	0	0	0	0	0	200	300	0	0	0	0	0	0	0	200	903	0	0	0	0	0	0	0	603	903	0
4889	5	0	0	0	0	0	0	200	300	0	0	0	0	0	0	0	200	903	0	0	0	0	0	0	0	603	903	0
4889	6	0	0	0	0	0	0	200	300	0	0	0	0	0	0	0	200	903	0	0	0	0	0	0	0	603	903	0
4889	7	0	0	0	0	0	0	200	300	0	0	0	0	0	0	0	200	903	0	0	0	0	0	0	0	603	903	0
4889	8	0	0	0	0	0	0	200	300	0	0	0	0	0	0	0	200	903	0	0	0	0	0	0	0	603	903	0
4889	9	0	0	0	0	0	0	200	300	0	0	0	0	0	0	0	200	903	0	0	0	0	0	0	0	603	903	0
4890	0	0	0	0	0	0	0	200	300	0	0	0	0	0	0	0	200	903	0	0	0	0	0	0	0	603	903	0
4890	1	0	0	0	0	0	0	200	300	0	0	0	0	0	0	0	200	903	0	0	0	0	0	0	0	603	903	0
4890	2	0	0	0	0	0	0	200	300	0	0	0	0	0	0	0	200	903	0	0	0	0	0	0	0	603	903	0
4890	3	0	0	0	0	0	0	200	300	0	0	0	0	0	0	0	200	903	0	0	0	0	0	0	0	603	903	0
4890	4	0	0	0	0	0	0	200	300	0	0	0	0	0	0	0	200	903	0	0	0	0	0	0	0	603	903	0
4890	5	0	0	0	0	0	0	200	300	0	0	0	0	0	0	0	200	903	0	0	0	0	0	0	0	603	903	0
4890	6	0	0	0	0	0	0	200	300	0	0	0	0	0	0	0	200	903	0	0	0	0	0	0	0	603	903	0
4890	7	0	0	0	0	0	0	200	300	0	0	0	0	0	0	0	200	903	0	0	0	0	0	0	0	603	903	0
4890	8	0	0	0	0	0	0	200	300	0	0	0	0	0	0	0	200	903	0	0	0	0	0	0	0	603	903	0
4890	9	0	0	0	0	0	0	200	300	0	0	0	0	0	0	0	200	903	0	0	0	0	0	0	0	603	903	0
4891	0	0	0	0	0	0	0	200	300	0	0	0	0	0	0	0	200	903	0	0	0	0	0	0	0	603	903	0
4891	1	0	0	0	0	0	0	200	300	0	0	0	0	0	0	0	200	903	0	0	0	0	0	0	0	603	903	0
4891	2	0	0	0	0	0	0	200	300	0	0	0	0	0	0	0	200	903	0	0	0	0	0	0	0	603	903	0
4891	3	0	0	0	0	0	0	200	300	0	0	0	0	0	0	0	200	903	0	0	0	0	0	0	0	603	903	0
4891	4	0	0	0	0	0	0	200	300	0	0	0	0	0	0	0	200	903	0	0	0	0	0	0	0	603	903	0
4891	5	0	0	0	0	0	0	200	300	0	0	0	0	0	0	0	200	903	0	0	0	0	0	0	0	603	903	0
4891	6	0	0	0	0	0	0	200	300	0	0	0	0	0	0	0	200	903	0	0	0	0	0	0	0	603	903	0
4891	7	0	0	0	0	0	0	200	300	0	0	0	0	0	0	0	200	903	0	0	0	0	0	0	0	603	903	0
4891	8	0	0	0	0	0	0	200	300	0	0	0	0	0	0	0	200	903	0	0	0	0	0	0	0	603	903	0
4891	9	0	0	0	0	0	0	200	300	0	0	0	0	0	0	0	200	903	0	0	0	0	0	0	0	603	903	0
4892	0	0	0	0	0	0	0	200	300	0	0	0	0	0	0	0	200	903	0	0	0	0	0	0	0	603	903	0
4892	1	0	0	0	0	0	0	200	300	0	0	0	0	0	0	0	200	903	0	0	0	0	0	0	0	603	903	0
4892	2	0	0	0	0	0	0	200	300	0	0	0	0	0	0	0	200	903	0	0	0	0	0	0	0	603	903	0
4892	3	0	0	0	0	0	0	200	300	0	0	0	0	0	0	0	200	903	0	0	0	0	0	0	0	603	903	0
4892	4	0	0	0	0	0	0	200	300	0	0	0	0	0	0	0	200	903	0	0	0	0	0	0	0	603	903	0
4892	5	0	0	0	0	0	0	200	300	0	0	0	0	0	0	0	200	903	0	0	0	0	0	0	0	603	903	0
4892	6	0	0	0	0	0	0	200	300	0	0	0	0	0	0	0	200	903	0	0	0	0	0	0	0	603	903	0
4892	7	0	0	0	0	0	0	200	300	0	0	0	0	0	0	0	200	903	0	0	0	0	0	0	0	603	903	0
4892	8	0	0	0	0	0	0	200	300	0	0	0	0	0	0	0	200	903	0	0	0	0	0	0	0	603	903	0
4892	9	0	0	0	0	0	0	200	300	0	0	0	0	0	0	0	200	903	0	0	0	0	0	0	0	603	903	0
4893	0	0	0	0	0	0	0	200	300	0	0	0	0	0	0	0	200	903	0	0	0	0	0	0	0	603	903	0
4893	1	0	0	0	0	0	0	200	300	0	0	0	0	0	0	0	200	903	0	0	0	0	0	0	0	603	903	0
4893	2	0	0	0	0	0	0	200	300	0	0	0	0	0	0	0	200	903	0	0	0	0	0	0	0	603	903	0
4893	3	0	0	0	0	0	0	200	300	0	0	0	0	0	0	0	200	903	0	0	0	0	0	0	0	603	903	0
4893	4	0	0	0	0	0	0	200	300	0	0	0	0	0	0	0	200	903	0	0	0	0	0	0	0	603	903	0
4893	5	0	0	0	0	0	0	200	300	0	0	0	0	0	0	0	200	903	0	0	0	0	0	0	0	603	903	0
4893	6	0	0	0	0	0	0	200	300	0	0	0	0	0	0	0	200	903	0	0	0	0	0	0	0	603	903	0
4893	7	0	0	0	0	0	0	200	300	0	0	0	0	0	0	0	200	903	0	0	0	0	0	0	0	603	903	0
4893	8	0	0	0	0	0	0	200	300	0	0	0	0	0	0	0	200	903	0	0	0	0	0	0	0	603	903	0
4893	9	0	0	0	0	0	0	200	300	0	0	0	0	0	0	0	200	903	0	0	0	0	0	0	0	603	903	0
4894	0	0	0	0	0	0	0	200	300	0	0	0	0	0	0	0	200	903	0	0	0	0	0	0	0	603	903	0
4894	1	0	0	0	0	0	0	200	300	0	0	0	0	0	0	0	200	903	0	0	0	0	0	0	0	603	903	0
4894	2	0	0	0	0	0	0	200	300	0	0	0	0	0	0	0	200	903	0	0	0	0	0	0	0	603	903	0
4894	3	0	0	0	0	0	0	200	300	0	0	0	0	0	0	0	200	903	0	0	0	0	0	0	0	603	903	0
4894	4	0	0	0	0	0	0	200	300	0	0	0	0	0	0	0	200	903	0	0	0	0	0	0	0	603	903	0
4894	5	0	0	0	0	0	0	200	300	0	0	0	0	0	0	0	200	903	0	0	0	0	0	0	0	603	903	0
4894	6	0	0	0	0	0	0	200	300	0	0	0	0	0	0	0	200	903	0	0	0	0	0	0	0	603	903	0
4894	7	0	0	0	0	0	0	200	300	0	0	0	0	0	0	0	200	903	0	0	0	0	0	0	0	603	903	0
4894	8	0	0	0	0	0	0	200	300	0	0	0	0	0	0	0	200	903	0	0	0	0	0	0	0	603	903	0
4894	9	0	0	0	0	0	0	200	300	0	0	0	0	0	0	0	200	903	0	0	0	0	0	0	0	603	903	0
4895	0	0	0	0	0	0	0	200	300	0	0	0	0	0	0	0	200	903	0	0	0	0	0	0	0	603	903	0
4895	1	0	0	0	0	0	0	200	300	0	0	0	0	0	0	0	200	903	0	0	0	0	0	0	0	603	903	0
4895	2	0	0	0	0	0	0	200	300	0	0	0	0	0	0	0	200	903	0	0	0	0	0	0	0	603	903	0
4895	3	0	0	0	0	0	0	200	300	0	0	0	0	0	0	0	200	903	0	0	0	0	0	0	0	603	903	0
4895	4	0	0	0	0	0	0	200	300	0	0	0	0	0	0	0	200	903	0	0	0	0	0	0	0	603	903	0
4895	5	0	0	0	0	0	0	200	300	0	0	0	0	0	0	0	200	903	0	0	0	0	0	0	0	603	903	0
4895	6	0	0	0	0	0	0	200	300	0	0	0	0	0	0	0	200	903	0	0	0	0	0	0	0	603	903	0
4895	7	0	0	0	0	0	0	200	300	0	0	0	0	0	0	0	200	903	0	0	0	0	0	0	0	603	903	0
4895	8	0	0	0	0	0	0	200	300	0	0	0	0	0	0	0	200	903	0	0	0	0	0	0	0	603	903	0
4895	9	0	0	0	0	0	0	200	300	0	0	0	0	0	0	0	200	903	0	0	0	0	0	0	0	603	903	0
4896	0	0	0	0	0	0	0	200	300	0	0	0	0	0	0	0	200	903	0	0	0	0	0	0	0	603	903	0
4896	1	0	0	0	0	0	0	200	300	0	0	0	0	0	0	0	200	903	0	0	0	0	0	0	0	603	903	0
4896	2	0	0	0	0	0	0	200	300	0	0	0	0	0	0	0	200	903	0	0	0	0	0	0	0	603	903	0
4896	3	0	0	0	0	0	0	200	300	0	0	0	0	0	0	0	200	903	0	0	0	0	0	0	0	603	903	0
4896	4	0	0	0	0	0	0	200	300	0	0	0	0	0	0	0	200	903	0	0	0	0	0	0	0	603	903	0
4896	5	0	0	0	0	0	0	200	300	0	0	0	0	0	0	0	200	903	0	0	0	0	0	0	0	603	903	0
4896	6	0	0	0	0	0	0	200	300	0	0	0	0	0	0	0	200	903	0	0	0	0	0	0	0	603	903	0
4896	7	0	0	0	0	0	0	200	300	0	0	0	0	0	0	0	200	903	0	0	0	0	0	0	0	603	903	0
4896	8	0	0	0	0	0	0	200	300	0	0	0	0	0	0	0	200	903	0	0	0	0	0	0	0	603	903	0
4896	9	0	0	0	0	0	0	200	300	0	0	0	0	0	0	0	200	903	0	0	0	0	0	0	0	603	903	0
4897	0	0	0	0	0	0	0	200	300	0	0	0	0	0	0	0	200	903	0	0	0	0	0	0	0	603	903	0
4897	1	0	0	0	0	0	0	200	300	0	0	0	0	0	0	0	200	903	0	0	0	0	0	0	0	603	903	0
4897	2	0	0	0	0	0	0	200	300	0	0	0	0	0	0	0	200	903	0	0	0	0	0	0	0	603	903	0
4897	3	0	0	0	0	0	0	200	300	0	0	0	0	0	0	0	200	903	0	0	0	0	0	0	0	603	903	0
4897	4	0	0	0	0	0	0	200	300	0	0	0	0	0	0	0	200	903	0	0	0	0	0	0	0	603	903	0
4897	5	0	0	0	0	0	0	200	300	0	0	0	0	0	0	0	200	903	0	0	0	0	0	0	0	603	903	0
4897	6	0	0	0	0	0	0	200	300	0	0	0	0	0	0	0	200	903	0	0	0	0	0	0	0	603	903	0
4897	7	0	0	0	0	0	0	200	300	0	0	0	0	0	0	0	200	903	0	0	0	0	0	0	0	603	903	0
4897	8	0	0	0	0	0	0	200	300	0	0	0	0	0	0	0	200	903	0	0	0	0	0	0	0	603	903	0
4897	9	0	0	0	0	0	0	200	300	0	0	0	0	0	0	0	200	903	0	0	0	0	0	0	0	603	903	0
4898	0	0	0	0	0	0	0	200	300	0	0	0	0	0	0	0	200	903	0	0	0	0	0	0	0	603	903	0
4898	1	0	0	0	0	0	0	200	300	0	0	0	0	0	0	0	200	903	0	0	0	0	0	0	0	603	903	0
4898	2	0	0	0	0	0	0	200	300	0	0	0	0	0	0	0	200	903	0	0	0	0	0	0	0	603	903	0
4898	3	0	0	0	0	0	0	200	300	0	0	0	0	0	0	0	200	903	0	0	0	0	0	0	0	603	903	0
4898	4	0	0	0	0	0	0	200	300	0	0	0	0	0	0	0	200	903	0	0	0	0	0	0	0	603	903	0
4898	5	0	0	0	0	0	0	200	300	0	0	0	0	0	0	0	200	903	0	0	0	0	0	0	0	603	903	0
4898	6	0	0	0	0	0	0	200	300	0	0	0	0	0	0	0	200	903	0	0	0	0	0	0	0	603	903	0
4898	7	0	0	0	0	0	0	200	300	0	0	0	0	0	0	0	200	903	0	0	0	0	0	0	0	603	903	0
4898	8	0	0	0	0	0	0	200	300	0	0	0	0	0	0	0	200	903	0	0	0	0	0	0	0	603	903	0
4898	9	0	0	0	0	0	0	200	300	0	0	0	0	0	0	0	200	903	0	0	0	0	0	0	0	603	903	0
4899	0	0	0	0	0	0	0	200	300	0	0	0	0	0	0	0	200	903	0	0	0	0	0	0	0	603	903	0
4899	1	0	0	0	0	0	0	200	300	0	0	0	0	0	0	0	200	903	0	0	0	0	0	0	0	603	903	0
4899	2	0	0	0	0	0	0	200	300	0	0	0	0	0	0	0	200	903	0	0	0	0	0	0	0	603	903	0
4899	3	0	0	0	0	0	0	200	300	0	0	0	0	0	0	0	200	903	0	0	0	0	0	0	0	603	903	0
4899	4	0	0	0	0	0	0	200	300	0	0	0	0	0	0	0	200	903	0	0	0	0	0	0	0	603	903	0
4899	5	0	0	0	0	0	0	200	300	0	0	0	0	0	0	0	200	903	0	0	0	0	0	0	0	603	903	0
4899	6	0	0	0	0	0	0	200	300	0	0	0	0	0	0	0	200	903	0	0	0	0	0	0	0	603	903	0
4899	7	0	0	0	0	0	0	200	300	0	0	0	0	0	0	0	200	903	0	0	0	0	0	0	0	603	903	0
4899	8	0	0	0	0	0	0	200	300	0	0	0	0	0	0	0	200	903	0	0	0	0	0	0	0	603	903	0
4899	9	0	0	0	0	0	0	200	300	0	0	0	0	0	0	0	200	903	0	0	0	0	0	0	0	603	903	0
4900	0	0	0	0	0	0	0	200	300	0	0	0	0	0	0	0	200	903	0	0	0	0	0	0	0	603	903	0
4900	1	0	0	0	0	0	0	200	300	0	0	0	0	0	0	0	200	903	0	0	0	0	0	0	0	603	903	0
4900	2	0	0	0	0	0	0	200	300	0	0	0	0	0	0	0	200	903	0	0	0	0	0	0	0	603	903	0
4900	3	0	0	0	0	0	0	200	300	0	0	0	0	0	0	0	200	903	0	0	0	0	0	0	0	603	903	0
4900	4	0	0	0	0	0	0	200	300	0	0	0	0	0	0	0	200	903	0	0	0	0	0	0	0	603	903	0
4900	5	0	0	0	0	0	0	200	300	0	0	0	0	0	0	0	200	903	0	0	0	0	0	0	0	603	903	0
4900	6	0	0	0	0	0	0	200	300	0	0	0	0	0	0	0	200	903	0	0	0	0	0	0	0	603	903	0
4900	7	0	0	0	0	0	0	200	300	0	0	0	0	0	0	0	200	903	0	0	0	0	0	0	0	603	903	0
4900	8	0	0	0	0	0	0	200	300	0	0	0	0	0	0	0	200	903	0	0	0	0	0	0	0	603	903	0
4900	9	0	0	0	0	0	0	200	300	0	0	0	0	0	0	0	200	903	0	0	0	0	0	0	0	603	903	0
4901	0	0	0	0	0	0	0	200	300	0	0	0	0	0	0	0	200	903	0	0	0	0	0	0	0	603	903	0
4901	1	0	0	0	0	0	0	200	300	0	0	0	0	0	0	0	200	903	0	0	0	0	0	0	0	603	903	0
4901	2	0	0	0	0	0	0	200	300	0	0	0	0	0	0	0	200	903	0	0	0	0	0	0	0	603	903	0
4901	3	0	0	0	0	0	0	200	300	0	0	0	0	0	0	0	200	903	0	0	0	0	0	0	0	603	903	0
4901	4	0	0	0	0	0	0	200	300	0	0	0	0	0	0	0	200	903	0	0	0	0	0	0	0	603	903	0
4901	5	0	0	0	0	0	0	200	300	0	0	0	0	0	0	0	200	903	0	0	0	0	0	0	0	603	903	0
4901	6	0	0	0	0	0	0	200	300	0	0	0	0	0	0	0	200	903	0	0	0	0	0	0	0	603	903	0
4901	7	0	0	0	0	0	0	200	300	0	0	0	0	0	0	0	200	903	0	0	0	0	0	0	0	603	903	0
4901	8	0	0	0	0	0	0	200	300	0	0	0	0	0	0	0	200	903	0	0	0	0	0	0	0	603	903	0
4901	9	0	0	0	0	0	0	200	300	0	0	0	0	0	0	0	200	903	0	0	0	0	0	0	0	603	903	0
4902	0	0	0	0	0	0	0	200	300	0	0	0	0	0	0	0	200	903	0	0	0	0	0	0	0	603	903	0
4902	1	0	0	0	0	0	0	200	300	0	0	0	0	0	0	0	200	903	0	0	0	0	0	0	0	603	903	0
4902	2	0	0	0	0	0	0	200	300	0	0	0	0	0	0	0	200	903	0	0	0	0	0	0	0	603	903	0
4902	3	0	0	0	0	0	0	200	300	0	0	0	0	0	0	0	200	903	0	0	0	0	0	0	0	603	903	0
4902	4	0	0	0	0	0	0	200	300	0	0	0	0	0	0	0	200	903	0	0	0	0	0	0	0	603	903	0
4902	5	0	0	0	0	0	0	200	300	0	0	0	0	0	0	0	200	903	0	0	0	0	0	0	0	603	903	0
4902	6	0	0	0	0	0	0	200	300	0	0	0	0	0	0	0	200	903	0	0	0	0	0	0	0	603	903	0
4902	7	0	0	0	0	0	0	200	300	0	0	0	0	0	0	0	200	903	0	0	0	0	0	0	0	603	903	0
4902	8	0	0	0	0	0	0	200	300	0	0	0	0	0	0	0	200	903	0	0	0	0	0	0	0	603	903	0
4902	9	0	0	0	0	0	0	200	300	0	0	0	0	0	0	0	200	903	0	0	0	0	0	0	0	603	903	0
4903	0	0	0	0	0	0	0	200	300	0	0	0	0	0	0	0	200	903	0	0	0	0	0	0	0	603	903	0
4903	1	0	0	0	0	0	0	200	300	0	0	0	0	0	0	0	200	903	0	0	0	0	0	0	0	603	903	0
4903	2	0	0	0	0	0	0	200	300	0	0	0	0	0	0	0	200	903	0	0	0	0	0	0	0	603	903	0
4903	3	0	0	0	0	0	0	200	300	0	0	0	0	0	0	0	200	903	0	0	0	0	0	0	0	603	903	0
4903	4	0	0	0	0	0	0	200	300	0	0	0	0	0	0	0	200	903	0	0	0	0	0	0	0	603	903	0
4903	5	0	0	0	0	0	0	200	300	0	0	0	0	0	0	0	200	903	0	0	0	0	0	0	0	603	903	0
4903	6	0	0	0	0	0	0	200	300	0	0	0	0	0	0	0	200	903	0	0	0	0	0	0	0	603	903	0
4903	7	0	0	0	0	0	0	200	300	0	0	0	0	0	0	0	200	903	0	0	0	0	0	0	0	603	903	0
4903	8	0	0	0	0	0	0	200	300	0	0	0	0	0	0	0	200	903	0	0	0	0	0	0	0	603	903	0
4903	9	0	0	0	0	0	0	200	300	0	0	0	0	0	0	0	200	903	0	0	0	0	0	0	0	603	903	0
4904	0	0	0	0	0	0	0	200	300	0	0	0	0	0	0	0	200	903	0	0	0	0	0	0	0	603	903	0
4904	1	0	0	0	0	0	0	200	300	0	0	0	0	0	0	0	200	903	0	0	0	0	0	0	0	603	903	0
4904	2	0	0	0	0	0	0	200	300	0	0	0	0	0	0	0	200	903	0	0	0	0	0	0	0	603	903	0
4904	3	0	0	0	0	0	0	200	300	0	0	0	0	0	0	0	200	903	0	0	0	0	0	0	0	603	903	0
4904	4	0	0	0	0	0	0	200	300	0	0	0	0	0	0	0	200	903	0	0	0	0	0	0	0	603	903	0
4904	5	0	0	0	0	0	0	200	300	0	0	0	0	0	0	0	200	903	0	0	0	0	0	0	0	603	903	0
4904	6	0	0	0	0	0	0	200	300	0	0	0	0	0	0	0	200	903	0	0	0	0	0	0	0	603	903	0
4904	7	0	0	0	0	0	0	200	300	0	0	0	0	0	0	0	200	903	0	0	0	0	0	0	0	603	903	0
4904	8	0	0	0	0	0	0	200	300	0	0	0	0	0	0	0	200	903	0	0	0	0	0	0	0	603	903	0
4904	9	0	0	0	0	0	0	200	300	0	0	0	0	0	0	0	200	903	0	0	0	0	0	0	0	603	903	0
4905	0	0	0	0	0	0	0	200	300	0	0	0	0	0	0	0	200	903	0	0	0	0	0	0	0	603	903	0
4905	1	0	0	0	0	0	0	200	300	0	0	0	0	0	0	0	200	903	0	0	0	0	0	0	0	603	903	0
4905	2	0	0	0	0	0	0	200	300	0	0	0	0	0	0	0	200	903	0	0	0	0	0	0	0	603	903	0
4905	3	0	0	0	0	0	0	200	300	0	0	0	0	0	0	0	200	903	0	0	0	0	0	0	0	603	903	0
4905	4	0	0	0	0	0	0	200	300	0	0	0	0	0	0	0	200	903	0	0	0	0	0	0	0	603	903	0
4905	5	0	0	0	0	0	0	200	300	0	0	0	0	0	0	0	200	903	0	0	0	0	0	0	0	603	903	0
4905	6	0	0	0	0	0	0	200	300	0	0	0	0	0	0	0	200	903	0	0	0	0	0	0	0	603	903	0
4905	7	0	0	0	0	0	0	200	300	0	0	0	0	0	0	0	200	903	0	0	0	0	0	0	0	603	903	0
4905	8	0	0	0	0	0	0	200	300	0	0	0	0	0	0	0	200	903	0	0	0	0	0	0	0	603	903	0
4905	9	0	0	0	0	0	0	200	300	0	0	0	0	0	0	0	200	903	0	0	0	0	0	0	0	603	903	0
4906	0	0	0	0	0	0	0	200	300	0	0	0	0	0	0	0	200	903	0	0	0	0	0	0	0	603	903	0
4906	1	0	0	0	0	0	0	200	300	0	0	0	0	0	0	0	200	903	0	0	0	0	0	0	0	603	903	0
4906	2	0	0	0	0	0	0	200	300	0	0	0	0	0	0	0	200	903	0	0	0	0	0	0	0	603	903	0
4906	3	0	0	0	0	0	0	200	300	0	0	0	0	0	0	0	200	903	0	0	0	0	0	0	0	603	903	0
4906	4	0	0	0	0	0	0	200	300	0	0	0	0	0	0	0	200	903	0	0	0	0	0	0	0	603	903	0
4906	5	0	0	0	0	0	0	200	300	0	0	0	0	0	0	0	200	903	0	0	0	0	0	0	0	603	903	0
4906	6	0	0	0	0	0	0	200	300	0	0	0	0	0	0	0	200	903	0	0	0	0	0	0	0	603	903	0
4906	7	0	0	0	0	0	0	200	300	0	0	0	0	0	0	0	200	903	0	0	0	0	0	0	0	603	903	0
4906	8	0	0	0	0	0	0	200	300	0	0	0	0	0	0	0	200	903	0	0	0	0	0	0	0	603	903	0
4906	9	0	0	0	0	0	0	200	300	0	0	0	0	0	0	0	200	903	0	0	0	0	0	0	0	603	903	0
4907	0	0	0	0	0	0	0	200	300	0	0	0	0	0	0	0	200	903	0	0	0	0	0	0	0	603	903	0
4907	1	0	0	0	0	0	0	200	300	0	0	0	0	0	0	0	200	903	0	0	0	0	0	0	0	603	903	0
4907	2	0	0	0	0	0	0	200	300	0	0	0	0	0	0	0	200	903	0	0	0	0	0	0	0	603	903	0
4907	3	0	0	0	0	0	0	200	300	0	0	0	0	0	0	0	200	903	0	0	0	0	0	0	0	603	903	0
4907	4	0	0	0	0	0	0	200	300	0	0	0	0	0	0	0	200	903	0	0	0	0	0	0	0	603	903	0
4907	5	0	0	0	0	0	0	200	300	0	0	0	0	0	0	0	200	903	0	0	0	0	0	0	0	603	903	0
4907	6	0	0	0	0	0	0	200	300	0	0	0	0	0	0	0	200	903	0	0	0	0	0	0	0	603	903	0
4907	7	0	0	0	0	0	0	200	300	0	0	0	0	0	0	0	200	903	0	0	0	0	0	0	0	603	903	0
4907	8	0	0	0	0	0	0	200	300	0	0	0	0	0	0	0	200	903	0	0	0	0	0	0	0	603	903	0
4907	9	0	0	0	0	0	0	200	300	0	0	0	0	0	0	0	200	903	0	0	0	0	0	0	0	603	903	0
4908	0	0	0	0	0	0	0	200	300	0	0	0	0	0	0	0	200	903	0	0	0	0	0	0	0	603	903	0
4908	1	0	0	0	0	0	0	200	300	0	0	0	0	0	0	0	200	903	0	0	0	0	0	0	0	603	903	0
4908	2	0	0	0	0	0	0	200	300	0	0	0	0	0	0	0	200	903	0	0	0	0	0	0	0	603	903	0
4908	3	0	0	0	0	0	0	200	300	0	0	0	0	0	0	0	200	903	0	0	0	0	0	0	0	603	903	0
4908	4	0	0	0	0	0	0	200	300	0	0	0	0	0	0	0	200	903	0	0	0	0	0	0	0	603	903	0
4908	5	0	0	0	0	0	0	200	300	0	0	0	0	0	0	0	200	903	0	0	0	0	0	0	0	603	903	0
4908	6	0	0	0	0	0	0	200	300	0	0	0	0	0	0	0	200	903	0	0	0	0	0	0	0	603	903	0
4908	7	0	0	0	0	0	0	200	300	0	0	0	0	0	0	0	200	903	0	0	0	0	0	0	0	603	903	0
4908	8	0	0	0	0	0	0	200	300	0	0	0	0	0	0	0	200	903	0	0	0	0	0	0	0	603	903	0
4908	9	0	0	0	0	0	0	200	300	0	0	0	0	0	0	0	200	903	0	0	0	0	0	0	0	603	903	0
4909	0	0	0	0	0	0	0	200	300	0	0	0	0	0	0	0	200	903	0	0	0	0	0	0	0	603	903	0
4909	1	0	0	0	0	0	0	200	300	0	0	0	0	0	0	0	200	903	0	0	0	0	0	0	0	603	903	0
4909	2	0	0	0	0	0	0	200	300	0	0	0	0	0	0	0	200	903	0	0	0	0	0	0	0	603	903	0
4909	3	0	0	0	0	0	0	200	300	0	0	0	0	0	0	0	200	903	0	0	0	0	0	0	0	603	903	0
4909	4	0	0	0	0	0	0	200	300	0	0	0	0	0	0	0	200	903	0	0	0	0	0	0	0	603	903	0
4909	5	0	0	0	0	0	0	200	300	0	0	0	0	0	0	0	200	903	0	0	0	0	0	0	0	603	903	0
4909	6	0	0	0	0	0	0	200	300	0	0	0	0	0	0	0	200	903	0	0	0	0	0	0	0	603	903	0
4909	7	0	0	0	0	0	0	200	300	0	0	0	0	0	0	0	200	903	0	0	0	0	0	0	0	603	903	0
4909	8	0	0	0	0	0	0	200	300	0	0	0	0	0	0	0	200	903	0	0	0	0	0	0	0	603	903	0
4909	9	0	0	0	0	0	0	200	300	0	0	0	0	0	0	0	200	903	0	0	0	0	0	0	0	603	903	0
4910	0	0	0	0	0	0	0	200	300	0	0	0	0	0	0	0	200	903	0	0	0	0	0	0	0	603	903	0
4910	1	0	0	0	0	0	0	200	300	0	0	0	0	0	0	0	200	903	0	0	0	0	0	0	0	603	903	0
4910	2	0	0	0	0	0	0	200	300	0	0	0	0	0	0	0	200	903	0	0	0	0	0	0	0	603	903	0
4910	3	0	0	0	0	0	0	200	300	0	0	0	0	0	0	0	200	903	0	0	0	0	0	0	0	603	903	0
4910	4	0	0	0	0	0	0	200	300	0	0	0	0	0	0	0	200	903	0	0	0	0	0	0	0	603	903	0
4910	5	0	0	0	0	0	0	200	300	0	0	0	0	0	0	0	200	903	0	0	0	0	0	0	0	603	903	0
4910	6	0	0	0	0	0	0	200	300	0	0	0	0	0	0	0	200	903	0	0	0	0	0	0	0	603	903	0
4910	7	0	0	0	0	0	0	200	300	0	0	0	0	0	0	0	200	903	0	0	0	0	0	0	0	603	903	0
4910	8	0	0	0	0	0	0	200	300	0	0	0	0	0	0	0	200	903	0	0	0	0	0	0	0	603	903	0
4910	9	0	0	0	0	0	0	200	300	0	0	0	0	0	0	0	200	903	0	0	0	0	0	0	0	603	903	0
4911	0	0	0	0	0	0	0	200	300	0	0	0	0	0	0	0	200	903	0	0	0	0	0	0	0	603	903	0
4911	1	0	0	0	0	0	0	200	300	0	0	0	0	0	0	0	200	903	0	0	0	0	0	0	0	603	903	0
4911	2	0	0	0	0	0	0	200	300	0	0	0	0	0	0	0	200	903	0	0	0	0	0	0	0	603	903	0
4911	3	0	0	0	0	0	0	200	300	0	0	0	0	0	0	0	200	903	0	0	0	0	0	0	0	603	903	0
4911	4	0	0	0	0	0	0	200	300	0	0	0	0	0	0	0	200	903	0	0	0	0	0	0	0	603	903	0
4911	5	0	0	0	0	0	0	200	300	0	0	0	0	0	0	0	200	903	0	0	0	0	0	0	0	603	903	0
4911	6	0	0	0	0	0	0	200	300	0	0	0	0	0	0	0	200	903	0	0	0	0	0	0	0	603	903	0
4911	7	0	0	0	0	0	0	200	300	0	0	0	0	0	0	0	200	903	0	0	0	0	0	0	0	603	903	0
4911	8	0	0	0	0	0	0	200	300	0	0	0	0	0	0	0	200	903	0	0	0	0	0	0	0	603	903	0
4911	9	0	0	0	0	0	0	200	300	0	0	0	0	0	0	0	200	903	0	0	0	0	0	0	0	603	903	0
4912	0	0	0	0	0	0	0	200	300	0	0	0	0	0	0	0	200	903	0	0	0	0	0	0	0	603	903	0
4912	1	0	0	0	0	0	0	200	300	0	0	0	0	0	0	0	200	903	0	0	0	0	0	0	0	603	903	0
4912	2	0	0	0	0	0	0	200	300	0	0	0	0	0	0	0	200	903	0	0	0	0	0	0	0	603	903	0
4912	3	0	0	0	0	0	0	200	300	0	0	0	0	0	0	0	200	903	0	0	0	0	0	0	0	603	903	0
4912	4	0	0	0	0	0	0	200	300	0	0	0	0	0	0	0	200	903	0	0	0	0	0	0	0	603	903	0
4912	5	0	0	0	0	0	0	200	300	0	0	0	0	0	0	0	200	903	0	0	0	0	0	0	0	603	903	0
4912	6	0	0	0	0	0	0	200	300	0	0	0	0	0	0	0	200	903	0	0	0	0	0	0	0	603	903	0
4912	7	0	0	0	0	0	0	200	300	0	0	0	0	0	0	0	200	903	0	0	0	0	0	0	0	603	903	0
4912	8	0	0	0	0	0	0	200	300	0	0	0	0	0	0	0	200	903	0	0	0	0	0	0	0	603	903	0
4912	9	0	0	0	0	0	0	200	300	0	0	0	0	0	0	0	200	903	0	0	0	0	0	0	0	603	903	0
4913	0	0	0	0	0	0	0	200	300	0	0	0	0	0	0	0	200	903	0	0	0	0	0	0	0	603	903	0
4913	1	0	0	0	0	0	0	200	300	0	0	0	0	0	0	0	200	903	0	0	0	0	0	0	0	603	903	0
4913	2	-3.75335	1.07071	-9.42077	1451.57	546.265	-1030.88	257.985	145.918	0	0	0	0	0	0	0	200	903	0	0	0	0	0	0	0	603	903	0
4913	3	-5.27923	1.07071	-9.42077	2000.89	912.476	-847.778	296.858	87.6089	0	0	0	0	0	0	0	200	903	0	0	0	0	0	0	0	603	903	0
4913	4	-5.12664	0.918126	-10.3363	1726.23	424.194	-802.001	241.039	132.993	0	0	0	0	0	0	0	200	903	0	0	0	0	0	0	0	603	903	0
4913	5	-4.3637	0.918126	-11.2518	1817.78	546.265	-573.12	248.549	138.446	0	0	0	0	0	0	0	200	903	0	0	0	0	0	0	0	603	903	0
4913	6	-5.88958	1.37589	-11.8622	2092.44	912.476	-939.331	276.923	123.604	0	0	0	0	0	0	0	200	903	0	0	0	0	0	0	0	603	903	0
4913	7	-4.66888	2.13883	-11.8622	2183.99	546.265	-847.778	246.051	115.886	0	0	0	0	0	0	0	200	903	0	0	0	0	0	0	0	603	903	0
4913	8	-5.43182	2.74918	-14.3036	2183.99	790.406	-1076.66	255.259	147.311	0	0	0	0	0	0	0	200	903	0	0	0	0	0	0	0	603	903	0
4913	9	-5.43182	3.05436	-13.9984	3282.63	790.406	-756.225	256.464	65.5	0	0	0	0	0	0	0	200	903	0	0	0	0	0	0	0	603	903	0
4914	0	-6.19476	3.96988	-14.3036	3099.52	912.476	-1213.99	263.794	83.3046	0	0	0	0	0	0	0	200	903	0	0	0	0	0	0	0	603	903	0
4914	1	-4.3637	3.51212	-16.745	3465.73	424.194	-756.225	225.333	93.0287	0	0	0	0	0	0	0	200	903	0	0	0	0	0	0	0	603	903	0
4914	2	-4.51629	4.58024	-17.0502	3374.18	729.37	-1030.88	242.778	102.103	0	0	0	0	0	0	0	200	903	0	0	0	0	0	0	0	603	903	0
4914	3	-4.97405	5.19059	-19.4916	2916.42	1095.58	-893.554	256.208	150.376	0	0	0	0	0	0	0	200	903	0	0	0	0	0	0	0	603	903	0
4914	4	-3.143	4.88541	-19.7967	3282.63	973.511	-710.449	249.175	134.184	0	0	0	0	0	0	0	200	903	0	0	0	0	0	0	0	603	903	0
4914	5	-4.05853	6.41129	-22.8485	4930.57	729.37	-481.567	231.922	84.2058	0	0	0	0	0	0	0	200	903	0	0	0	0	0	0	0	603	903	0
4914	6	-1.76971	5.49576	-24.6796	4747.47	1095.58	-435.79	244.392	107.636	0	0	0	0	0	0	0	200	903	0	0	0	0	0	0	0	603	903	0
4914	7	-4.21111	4.73282	-26.2054	5937.65	1217.65	-664.672	246.466	73.419	0	0	0	0	0	0	0	200	903	0	0	0	0	0	0	0	603	903	0
4914	8	-3.29559	3.35953	-30.4779	6395.42	912.476	-435.79	229.939	90.1621	0	0	0	0	0	0	0	200	903	0	0	0	0	0	0	0	603	903	0
4914	9	-3.29559	1.68107	-32.9193	7585.6	1339.72	-756.225	240.697	69.5697	0	0	0	0	0	0	0	200	903	0	0	0	0	0	0	0	603	903	0
4915	0	-2.83782	0.307774	-39.0228	8318.03	1644.9	-573.12	242.152	86.842	0	0	0	0	0	0	0	200	903	0	0	0	0	0	0	0	603	903	0
4915	1	-3.60076	-1.06552	-41.4642	8958.9	1889.04	-756.225	245.558	83.9367	0	0	0	0	0	0	0	200	903	0	0	0	0	0	0	0	603	903	0
4915	2	-5.12664	-3.65951	-49.3988	10149.1	1644.9	-893.554	233.298	94.548	0	0	0	0	0	0	0	200	903	0	0	0	0	0	0	0	603	903	0
4915	3	-3.44818	-3.50692	-53.0609	11522.4	1889.04	-1397.09	235.601	82.8463	0	0	0	0	0	0	0	200	903	0	0	0	0	0	0	0	603	903	0
4915	4	-5.58441	-4.88021	-60.0799	13719.6	1950.07	-1076.66	232.458	71.6437	0	0	0	0	0	0	0	200	903	0	0	0	0	0	0	0	603	903	0
4915	5	-6.04217	-6.86386	-64.9628	14452.1	2133.18	-1259.77	232.837	77.5331	0	0	0	0	0	0	0	200	903	0	0	0	0	0	0	0	603	903	0
4915	6	-7.41546	-8.8475	-70.7611	16191.6	2377.32	-1992.19	233.596	71.1799	0	0	0	0	0	0	0	200	903	0	0	0	0	0	0	0	603	903	0
4915	7	-7.11028	-8.8475	-81.4423	17381.7	2804.57	-1809.08	234.436	86.5758	0	0	0	0	0	0	0	200	903	0	0	0	0	0	0	0	603	903	0
4915	8	-9.55169	-9.00009	-87.8509	19395.9	2743.53	-1717.53	231.229	79.218	0	0	0	0	0	0	0	200	903	0	0	0	0	0	0	0	603	903	0
4915	9	-10.925	-10.526	-96.701	20311.4	2804.57	-2129.52	229.002	89.9564	0	0	0	0	0	0	0	200	903	0	0	0	0	0	0	0	603	903	0
4916	0	-12.1457	-11.8993	-104.025	21684.7	2438.35	-2678.83	223.44	91.5437	0	0	0	0	0	0	0	200	903	0	0	0	0	0	0	0	603	903	0
4916	1	-12.756	-11.2889	-111.044	24065.1	3292.85	-2816.16	229.653	83.2838	0	0	0	0	0	0	0	200	903	0	0	0	0	0	0	0	603	903	0
4916	2	-14.5871	-10.0682	-122.336	26720.1	3475.95	-2999.27	228.413	81.5837	0	0	0	0	0	0	0	200	903	0	0	0	0	0	0	0	603	903	0
4916	3	-13.8242	-11.1363	-132.712	28551.2	3170.78	-3182.37	223.892	84.8632	0	0	0	0	0	0	0	200	903	0	0	0	0	0	0	0	603	903	0
4916	4	-16.8759	-10.2208	-142.172	30565.3	3659.06	-3594.36	225.737	85.0118	0	0	0	0	0	0	0	200	903	0	0	0	0	0	0	0	603	903	0
4916	5	-19.9277	-9.76303	-152.853	32121.7	3781.13	-3777.47	224.737	89.8526	0	0	0	0	0	0	0	200	903	0	0	0	0	0	0	0	603	903	0
4916	6	-19.1647	-6.86386	-160.483	33311.9	3598.02	-3914.8	222.42	92.4268	0	0	0	0	0	0	0	200	903	0	0	0	0	0	0	0	603	903	0
4916	7	-21.9113	-4.42245	-166.281	35509.2	3964.23	-4143.68	223.841	86.4508	0	0	0	0	0	0	0	200	903	0	0	0	0	0	0	0	603	903	0
4916	8	-24.2001	-1.52328	-174.521	36516.3	4147.34	-4235.23	223.764	90.7627	0	0	0	0	0	0	0	200	903	0	0	0	0	0	0	0	603	903	0
4916	9	-23.895	1.2233	-182.761	38988.2	3964.23	-4418.33	221.691	86.6707	0	0	0	0	0	0	0	200	903	0	0	0	0	0	0	0	603	903	0
4917	0	-21.301	4.27506	-191.916	40453	4269.41	-4143.68	222.246	89.2147	0	0	0	0	0	0	0	200	903	0	0	0	0	0	0	0	603	903	0
4917	1	-25.8786	7.17423	-200.156	41643.2	4574.58	-4418.33	222.855	91.9458	0	0	0	0	0	0	0	200	903	0	0	0	0	0	0	0	603	903	0
4917	2	-28.0148	10.0734	-207.175	43016.5	4574.58	-4830.32	222.081	92.3659	0	0	0	0	0	0	0	200	903	0	0	0	0	0	0	0	603	903	0
4917	3	-28.7778	13.1252	-216.025	44939.1	4391.48	-4921.87	220.329	91.9723	0	0	0	0	0	0	0	200	903	0	0	0	0	0	0	0	603	903	0
4917	4	-31.6769	17.3976	-222.128	45305.3	4635.62	-4738.77	220.869	96.0397	0	0	0	0	0	0	0	200	903	0	0	0	0	0	0	0	603	903	0
4917	5	-32.8976	21.0597	-224.875	46495.5	5062.87	-5425.42	222.514	93.2382	0	0	0	0	0	0	0	200	903	0	0	0	0	0	0	0	603	903	0
4917	6	-32.5925	23.3485	-235.556	47868.8	4330.44	-5654.3	218.384	96.7837	0	0	0	0	0	0	0	200	903	0	0	0	0	0	0	0	603	903	0
4917	7	-34.1183	26.5529	-244.711	50066.1	4818.73	-5883.18	219.691	95.4075	0	0	0	0	0	0	0	200	903	0	0	0	0	0	0	0	603	903	0
4917	8	-35.339	30.3676	-252.341	51256.3	5245.97	-5837.4	220.789	96.8767	0	0	0	0	0	0	0	200	903	0	0	0	0	0	0	0	603	903	0
4917	9	-37.1701	32.5038	-259.36	52080.2	5062.87	-5974.73	219.521	99.1969	0	0	0	0	0	0	0	200	903	0	0	0	0	0	0	0	603	903	0
4918	0	-36.102	36.6237	-264.853	53728.2	5062.87	-6157.84	219.116	97.1395	0	0	0	0	0	0	0	200	903	0	0	0	0	0	0	0	603	903	0
4918	1	-38.3908	39.3703	-272.787	54002.8	5307.01	-5928.96	219.455	102.033	0	0	0	0	0	0	0	200	903	0	0	0	0	0	0	0	603	903	0
4918	2	-36.8649	42.2694	-277.67	55284.6	5612.18	-5562.75	220.212	100.898	0	0	0	0	0	0	0	200	903	0	0	0	0	0	0	0	603	903	0
4918	3	-35.4916	45.3212	-287.436	56017	5612.18	-5883.18	219.525	105.115	0	0	0	0	0	0	0	200	903	0	0	0	0	0	0	0	603	903	0
4918	4	-37.933	48.6781	-294.455	57756.5	5612.18	-6112.06	219.06	103.853	0	0	0	0	0	0	0	200	903	0	0	0	0	0	0	0	603	903	0
4918	5	-37.933	51.5773	-301.474	59038.3	5856.33	-5974.73	219.426	104.168	0	0	0	0	0	0	0	200	903	0	0	0	0	0	0	0	603	903	0
4918	6	-37.1701	54.0187	-308.188	59862.2	5978.4	-5700.07	219.399	105.761	0	0	0	0	0	0	0	200	903	0	0	0	0	0	0	0	603	903	0
4918	7	-37.933	55.8498	-312.766	61418.6	5978.4	-5700.07	219.115	103.627	0	0	0	0	0	0	0	200	903	0	0	0	0	0	0	0	603	903	0
4918	8	-36.4072	57.3756	-316.733	61876.4	6344.61	-5700.07	220.031	104.642	0	0	0	0	0	0	0	200	903	0	0	0	0	0	0	0	603	903	0
4918	9	-35.1865	59.2067	-327.719	63066.6	6466.68	-5059.2	219.732	107.559	0	0	0	0	0	0	0	200	903	0	0	0	0	0	0	0	603	903	0
4919	0	-34.4235	63.0214	-336.264	63890.5	6344.61	-5104.98	218.868	109.999	0	0	0	0	0	0	0	200	903	0	0	0	0	0	0	0	603	903	0
4919	1	-34.1183	64.2421	-342.673	65538.5	7138.06	-4967.65	220.831	108.743	0	0	0	0	0	0	0	200	903	0	0	0	0	0	0	0	603	903	0
4919	2	-34.1183	65.768	-350.912	67094.9	7382.2	-5104.98	221.037	108.799	0	0	0	0	0	0	0	200	903	0	0	0	0	0	0	0	603	903	0
4919	3	-32.5925	66.9887	-357.016	68468.2	7748.42	-4738.77	221.703	108.221	0	0	0	0	0	0	0	200	903	0	0	0	0	0	0	0	603	903	0
4919	4	-32.4399	68.5146	-365.866	69933	7870.49	-4830.32	221.512	108.856	0	0	0	0	0	0	0	200	903	0	0	0	0	0	0	0	603	903	0
4919	5	-31.3718	69.8879	-373.495	70207.7	8053.59	-5059.2	221.563	112.025	0	0	0	0	0	0	0	200	903	0	0	0	0	0	0	0	603	903	0
4919	6	-30.6088	72.787	-382.956	71214.8	8053.59	-4647.22	221.03	114.039	0	0	0	0	0	0	0	200	903	0	0	0	0	0	0	0	603	903	0
4919	7	-28.9304	73.8551	-392.111	72404.9	8358.76	-4326.78	221.317	115.346	0	0	0	0	0	0	0	200	903	0	0	0	0	0	0	0	603	903	0
4919	8	-29.0829	75.5336	-399.13	74510.6	8663.94	-4509.89	221.707	113.317	0	0	0	0	0	0	0	200	903	0	0	0	0	0	0	0	603	903	0
4919	9	-27.7097	77.0595	-407.065	74602.2	8908.08	-4189.45	221.884	116.731	0	0	0	0	0	0	0	200	903	0	0	0	0	0	0	0	603	903	0
4920	0	-26.6415	79.0431	-413.168	77074.1	8969.12	-3823.24	221.708	113.456	0	0	0	0	0	0	0	200	903	0	0	0	0	0	0	0	603	903	0
4920	1	-24.2001	79.9587	-417.746	77806.5	9823.61	-3823.24	223.516	113.747	0	0	0	0	0	0	0	200	903	0	0	0	0	0	0	0	603	903	0
4920	2	-22.9794	82.5527	-427.817	78630.5	9884.64	-3823.24	223.105	116.205	0	0	0	0	0	0	0	200	903	0	0	0	0	0	0	0	603	903	0
4920	3	-21.6061	84.5363	-436.362	79179.9	9701.54	-3502.81	222.233	118.545	0	0	0	0	0	0	0	200	903	0	0	0	0	0	0	0	603	903	0
4920	4	-20.538	86.2148	-441.245	80370	9701.54	-3273.93	221.987	117.856	0	0	0	0	0	0	0	200	903	0	0	0	0	0	0	0	603	903	0
4920	5	-21.301	87.1303	-448.264	81285.6	10311.9	-2953.49	223.004	118.666	0	0	0	0	0	0	0	200	903	0	0	0	0	0	0	0	603	903	0
4920	6	-18.707	88.8088	-451.01	81651.8	10372.9	-2907.72	222.999	118.958	0	0	0	0	0	0	0	200	903	0	0	0	0	0	0	0	603	903	0
4920	7	-19.4699	89.8769	-456.808	82750.4	10311.9	-2541.5	222.574	118.851	0	0	0	0	0	0	0	200	903	0	0	0	0	0	0	0	603	903	0
4920	8	-17.1811	91.7079	-461.081	83299.7	11105.4	-2587.28	224.085	119.338	0	0	0	0	0	0	0	200	903	0	0	0	0	0	0	0	603	903	0
4920	9	-15.9604	92.3183	-468.405	83665.9	11166.4	-2129.52	223.839	121.381	0	0	0	0	0	0	0	200	903	0	0	0	0	0	0	0	603	903	0
4921	0	-14.8923	94.3019	-473.593	83665.9	11166.4	-2037.96	223.578	123.338	0	0	0	0	0	0	0	200	903	0	0	0	0	0	0	0	603	903	0
4921	1	-15.0449	95.5226	-476.035	83940.6	11715.7	-2266.85	224.611	123.667	0	0	0	0	0	0	0	200	903	0	0	0	0	0	0	0	603	903	0
4921	2	-13.8242	96.8959	-478.171	85771.6	11837.8	-1580.2	224.756	120.625	0	0	0	0	0	0	0	200	903	0	0	0	0	0	0	0	603	903	0
4921	3	-13.3664	97.3537	-478.171	85954.8	11471.6	-1259.77	223.991	120.243	0	0	0	0	0	0	0	200	903	0	0	0	0	0	0	0	603	903	0
4921	4	-10.6198	98.4218	-484.885	85954.8	12081.9	-1122.44	224.917	122.731	0	0	0	0	0	0	0	200	903	0	0	0	0	0	0	0	603	903	0
4921	5	-10.3146	98.727	-488.852	85954.8	12387.1	-1030.88	225.339	124.17	0	0	0	0	0	0	0	200	903	0	0	0	0	0	0	0	603	903	0
4921	6	-9.09393	99.4899	-494.04	86137.9	12081.9	-573.12	224.455	125.646	0	0	0	0	0	0	0	200	903	0	0	0	0	0	0	0	603	903	0
4921	7	-9.85687	101.321	-495.261	86229.4	12448.1	-527.343	225.135	125.891	0	0	0	0	0	0	0	200	903	0	0	0	0	0	0	0	603	903	0
4921	8	-6.9577	100.253	-496.481	86687.2	11898.8	-390.014	223.966	125.397	0	0	0	0	0	0	0	200	903	0	0	0	0	0	0	0	603	903	0
4921	9	-7.87322	102.694	-497.092	87145	12142.9	-298.461	224.428	124.69	0	0	0	0	0	0	0	200	903	0	0	0	0	0	0	0	603	903	0
4922	0	-6.65252	102.999	-500.754	86504.1	12692.3	113.526	225.346	127.252	0	0	0	0	0	0	0	200	903	0	0	0	0	0	0	0	603	903	0
4922	1	-4.82147	104.068	-504.111	87602.7	13058.5	159.302	225.904	126.223	0	0	0	0	0	0	0	200	903	0	0	0	0	0	0	0	603	903	0
4922	2	-5.73699	104.373	-506.552	86961.8	12875.4	433.961	225.418	128.326	0	0	0	0	0	0	0	200	903	0	0	0	0	0	0	0	603	903	0
4922	3	-5.27923	105.441	-508.078	86687.2	12875.4	617.066	225.341	129.382	0	0	0	0	0	0	0	200	903	0	0	0	0	0	0	0	603	903	0
4922	4	-5.27923	107.272	-508.994	86961.8	13485.7	1120.61	226.495	129.149	0	0	0	0	0	0	0	200	903	0	0	0	0	0	0	0	603	903	0
4922	5	-3.90594	106.967	-509.909	87053.4	13485.7	1166.38	226.447	129.277	0	0	0	0	0	0	0	200	903	0	0	0	0	0	0	0	603	903	0
4922	6	-3.44818	107.882	-510.214	87328	13241.6	1074.83	225.953	128.84	0	0	0	0	0	0	0	200	903	0	0	0	0	0	0	0	603	903	0
4922	7	-1.31194	108.187	-511.13	87328	13241.6	1486.82	225.907	129.147	0	0	0	0	0	0	0	200	903	0	0	0	0	0	0	0	603	903	0
4922	8	-0.701593	108.34	-512.961	86778.8	13546.8	1486.82	226.409	130.828	0	0	0	0	0	0	0	200	903	0	0	0	0	0	0	0	603	903	0
4922	9	-0.549005	108.645	-510.825	87785.8	13485.7	1669.92	226.4	128.149	0	0	0	0	0	0	0	200	903	0	0	0	0	0	0	0	603	903	0
4923	0	-0.701593	109.256	-512.35	85771.6	13424.7	1669.92	226.202	132.592	0	0	0	0	0	0	0	200	903	0	0	0	0	0	0	0	603	903	0
4923	1	0.213934	109.713	-512.35	86046.3	13607.8	2356.57	226.56	132.056	0	0	0	0	0	0	0	200	903	0	0	0	0	0	0	0	603	903	0
4923	2	0.51911	109.103	-512.35	85863.2	14035	2127.69	227.393	132.413	0	0	0	0	0	0	0	200	903	0	0	0	0	0	0	0	603	903	0
4923	3	1.58723	110.171	-512.961	86229.4	13607.8	2219.24	226.528	131.899	0	0	0	0	0	0	0	200	903	0	0	0	0	0	0	0	603	903	0
4923	4	3.72346	109.713	-510.214	85588.6	13546.8	2448.12	226.551	132.25	0	0	0	0	0	0	0	200	903	0	0	0	0	0	0	0	603	903	0
4923	5	4.33381	110.171	-513.266	85588.6	13974	2631.23	227.226	133.247	0	0	0	0	0	0	0	200	903	0	0	0	0	0	0	0	603	903	0
4923	6	2.80793	109.713	-514.487	84581.5	14035	2860.11	227.28	135.6	0	0	0	0	0	0	0	200	903	0	0	0	0	0	0	0	603	903	0
4923	7	4.79157	110.324	-512.045	84398.3	13913	2860.11	227.171	135.174	0	0	0	0	0	0	0	200	903	0	0	0	0	0	0	0	603	903	0
4923	8	4.79157	110.781	-512.35	84123.7	14096.1	3180.54	227.513	135.808	0	0	0	0	0	0	0	200	903	0	0	0	0	0	0	0	603	903	0
4923	9	6.31745	109.256	-512.045	84123.7	14401.2	3043.21	228.125	135.71	0	0	0	0	0	0	0	200	903	0	0	0	0	0	0	0	603	903	0
4924	0	8.30109	110.781	-513.571	84673	14279.2	3363.65	227.804	135.129	0	0	0	0	0	0	0	200	903	0	0	0	0	0	0	0	603	903	0
4924	1	9.36921	110.324	-514.487	83391.3	14462.3	3546.75	228.11	137.914	0	0	0	0	0	0	0	200	903	0	0	0	0	0	0	0	603	903	0
4924	2	10.2847	109.256	-512.045	84123.7	14462.3	3546.75	228.244	135.71	0	0	0	0	0	0	0	200	903	0	0	0	0	0	0	0	603	903	0
4924	3	11.658	111.392	-516.623	83299.7	14523.3	4324.95	228.112	138.761	0	0	0	0	0	0	0	200	903	0	0	0	0	0	0	0	603	903	0
4924	4	13.0313	112.46	-515.402	83025.1	14767.5	4416.5	228.652	138.912	0	0	0	0	0	0	0	200	903	0	0	0	0	0	0	0	603	903	0
4924	5	14.0994	112.612	-512.35	83025.1	15133.7	4691.16	229.538	137.953	0	0	0	0	0	0	0	200	903	0	0	0	0	0	0	0	603	903	0
4924	6	16.846	113.833	-516.318	83391.3	14584.4	4828.49	228.247	138.488	0	0	0	0	0	0	0	200	903	0	0	0	0	0	0	0	603	903	0
4924	7	17.609	114.138	-519.675	83665.9	15438.8	5377.81	229.709	139.003	0	0	0	0	0	0	0	200	903	0	0	0	0	0	0	0	603	903	0
4924	8	19.1348	115.359	-520.59	83116.6	15744	5332.03	230.243	140.342	0	0	0	0	0	0	0	200	903	0	0	0	0	0	0	0	603	903	0
4924	9	19.44	115.969	-520.895	82567.3	15133.7	5698.24	229.053	141.49	0	0	0	0	0	0	0	200	903	0	0	0	0	0	0	0	603	903	0
4925	0	21.5762	117.038	-519.675	82292.6	15499.9	5744.02	229.826	141.646	0	0	0	0	0	0	0	200	903	0	0	0	0	0	0	0	603	903	0
4925	1	20.9659	117.495	-522.116	82018	15683	6018.68	230.037	142.912	0	0	0	0	0	0	0	200	903	0	0	0	0	0	0	0	603	903	0
4925	2	22.9495	119.326	-522.116	82018	15805.1	6293.34	230.271	142.912	0	0	0	0	0	0	0	200	903	0	0	0	0	0	0	0	603	903	0
4925	3	24.1702	120.089	-522.116	82292.6	15744	6476.44	230.154	142.386	0	0	0	0	0	0	0	200	903	0	0	0	0	0	0	0	603	903	0
4925	4	24.1702	120.089	-524.863	82109.5	15988.2	6659.55	230.462	143.56	0	0	0	0	0	0	0	200	903	0	0	0	0	0	0	0	603	903	0
4925	5	23.7125	120.852	-525.473	82750.4	16232.3	6705.32	230.891	142.522	0	0	0	0	0	0	0	200	903	0	0	0	0	0	0	0	603	903	0
4925	6	26.7642	120.242	-525.473	81560.2	15560.9	7071.54	229.613	144.787	0	0	0	0	0	0	0	200	903	0	0	0	0	0	0	0	603	903	0
4925	7	25.0858	121.768	-525.778	80919.4	16232.3	7025.76	230.873	146.096	0	0	0	0	0	0	0	200	903	0	0	0	0	0	0	0	603	903	0
4925	8	26.0013	121.615	-526.389	81194	16171.3	7163.09	230.721	145.753	0	0	0	0	0	0	0	200	903	0	0	0	0	0	0	0	603	903	0
4925	9	26.4591	121.92	-526.694	81468.7	16049.2	7254.64	230.472	145.321	0	0	0	0	0	0	0	200	903	0	0	0	0	0	0	0	603	903	0
4926	0	26.7642	120.242	-529.44	81743.3	15988.2	7620.85	230.198	145.604	0	0	0	0	0	0	0	200	903	0	0	0	0	0	0	0	603	903	0
4926	1	26.3065	121.92	-529.44	81560.2	16476.4	7254.64	231.12	145.95	0	0	0	0	0	0	0	200	903	0	0	0	0	0	0	0	603	903	0
4926	2	26.4591	120.7	-531.577	80644.7	16110.2	7666.63	230.307	148.291	0	0	0	0	0	0	0	200	903	0	0	0	0	0	0	0	603	903	0
4926	3	26.6116	121.768	-530.356	81102.4	16354.4	7712.4	230.837	147.079	0	0	0	0	0	0	0	200	903	0	0	0	0	0	0	0	603	903	0
4926	4	27.3746	121.31	-532.492	80827.8	16476.4	7987.06	230.942	148.208	0	0	0	0	0	0	0	200	903	0	0	0	0	0	0	0	603	903	0
4926	5	27.5272	118.258	-532.797	80827.8	16598.5	7895.51	231.154	148.295	0	0	0	0	0	0	0	200	903	0	0	0	0	0	0	0	603	903	0
4926	6	27.5272	120.547	-534.323	81560.2	16232.3	7712.4	230.379	147.358	0	0	0	0	0	0	0	200	903	0	0	0	0	0	0	0	603	903	0
4926	7	28.5953	120.394	-535.544	80553.2	16293.3	7987.06	230.424	149.586	0	0	0	0	0	0	0	200	903	0	0	0	0	0	0	0	603	903	0
4926	8	27.222	120.394	-536.459	81834.9	16659.5	7941.29	231.055	147.454	0	0	0	0	0	0	0	200	903	0	0	0	0	0	0	0	603	903	0
4926	9	27.3746	119.479	-536.459	80827.8	16415.4	8124.39	230.6	149.331	0	0	0	0	0	0	0	200	903	0	0	0	0	0	0	0	603	903	0
4927	0	26.6116	119.479	-534.323	81102.4	16354.4	7895.51	230.608	148.215	0	0	0	0	0	0	0	200	903	0	0	0	0	0	0	0	603	903	0
4927	1	27.9849	121.157	-539.511	81102.4	16537.5	7941.29	230.653	149.674	0	0	0	0	0	0	0	200	903	0	0	0	0	0	0	0	603	903	0
4927	2	28.2901	120.7	-542.258	81285.6	16842.7	7987.06	231.06	150.098	0	0	0	0	0	0	0	200	903	0	0	0	0	0	0	0	603	903	0
4927	3	27.6798	121.005	-543.478	81743.3	16293.3	8215.94	229.98	149.592	0	0	0	0	0	0	0	200	903	0	0	0	0	0	0	0	603	903	0
4927	4	28.5953	120.7	-543.784	81377.1	16842.7	8078.61	230.973	150.35	0	0	0	0	0	0	0	200	903	0	0	0	0	0	0	0	603	903	0
4927	5	29.2056	120.547	-542.868	81834.9	16842.7	8032.84	231.025	149.255	0	0	0	0	0	0	0	200	903	0	0	0	0	0	0	0	603	903	0
[truncated: 3,374 more rows]
