# Supplementary material for: The Effects of an Extemporaneous Speech Dual-task on Older Adult Gait Control
Source: Research Square preprint supplement (doi:10.21203/rs.3.rs-7674245/v1), 2025-11-18
Supplement: Supplementary file 7 [file DT10Walk5.xlsx]

## Sheet: Sheet1
Trajectories
		10:LFHD			10:RFHD			10:LBHD			10:RBHD			10:C7			10:T10			10:CLAV			10:STRN			10:RBAK			10:LSHO			10:LUPA			10:LELB			10:LFRM			10:LWRA			10:LWRB			10:LFIN
Frame	Sub Frame	X	Y	Z	X	Y	Z	X	Y	Z	X	Y	Z	X	Y	Z	X	Y	Z	X	Y	Z	X	Y	Z	X	Y	Z	X	Y	Z	X	Y	Z	X	Y	Z	X	Y	Z	X	Y	Z	X	Y	Z	X	Y	Z
		mm	mm	mm	mm	mm	mm	mm	mm	mm	mm	mm	mm	mm	mm	mm	mm	mm	mm	mm	mm	mm	mm	mm	mm	mm	mm	mm	mm	mm	mm	mm	mm	mm	mm	mm	mm	mm	mm	mm	mm	mm	mm	mm	mm	mm	mm	mm	mm
6006	0	305.792	1825.77	1541.56	201.247	1833.68	1538.29	332.908	1989.13	1559.56	213.777	2000.43	1557.01	274.846	2046.44	1414.79	297.331	2149.05	1139.28	264.58	1884.98	1309.57	255.812	1792.81	1108.87	215.053	2150.85	1232.1	420.264	1935.57	1376.73	538.667	1927.59	1142.79	550.982	1928.79	1044.65	544.5	1831.22	921.957	487.599	1797.44	831.094	553.816	1825.91	807.187	534.997	1756.04	763.752
6007	0	302.317	1815.8	1543.46	197.872	1823.73	1539.79	329.663	1979.38	1561.66	210.533	1990.62	1558.5	272.57	2036.56	1416.29	296.317	2137.8	1140.27	261.566	1874.39	1311.79	253.06	1782.27	1111.19	213.89	2140.47	1233.06	417.384	1924.75	1379.06	535.996	1917.34	1145.03	548.276	1919.8	1046.73	543.099	1823.59	923.386	486.552	1790.34	832.026	552.473	1819.68	808.529	534.634	1750.04	764.396
6008	0	298.981	1805.91	1545.46	194.827	1814.01	1541.24	326.358	1969.35	1563.91	207.416	1980.83	1560.14	270.395	2026.71	1417.76	295.184	2126.84	1141.59	258.973	1864.22	1313.79	250.257	1771.63	1113.8	212.631	2130.16	1234.16	414.078	1914.26	1381.12	533.36	1907.03	1147.36	545.961	1911	1049.05	541.73	1815.78	925.087	485.567	1783.7	832.917	551.214	1813.63	810.048	534.132	1744.38	765.014
6009	0	295.776	1795.94	1547.71	191.485	1804.15	1543.02	323.317	1959.39	1566.33	204.18	1970.96	1562.1	268.186	2016.93	1419.54	293.782	2116.14	1142.85	256.212	1853.98	1316.14	247.526	1761.3	1116.36	211.057	2119.81	1235.48	411.082	1903.44	1383.57	531.166	1896.68	1150.18	544.008	1902.16	1051.9	540.126	1808.12	926.687	484.398	1777.38	833.873	550.67	1807.38	811.95	533.266	1739.01	765.617
6010	0	292.923	1786.16	1550	188.636	1794.68	1544.81	320.331	1949.48	1568.53	201.226	1961.22	1563.86	265.901	2007.05	1421.09	292.411	2105.64	1144.34	253.659	1843.83	1318.55	244.83	1750.85	1119.01	209.517	2109.43	1236.58	408.747	1893.08	1386.13	528.962	1886.49	1152.92	542.036	1893.3	1054.64	538.493	1801.14	928.137	483.366	1771.15	834.962	549.275	1801.51	813.456	532.467	1733.74	766.223
6011	0	289.938	1776.26	1552.06	185.793	1784.98	1546.66	317.566	1939.81	1570.67	198.526	1951.5	1565.77	263.685	1997.22	1422.83	290.958	2095.34	1146.01	251.21	1833.83	1320.6	242.423	1740.6	1121.51	208.075	2099.21	1238.1	406.389	1882.91	1388.43	526.429	1876.37	1155.28	540.126	1884.54	1057.31	536.944	1793.73	929.81	482.192	1765.08	835.735	548.664	1795.3	815.387	531.468	1728.8	766.559
6012	0	287.138	1766.26	1554.23	183.08	1775.15	1548.37	314.841	1930.03	1572.83	195.982	1941.75	1567.45	261.482	1987.19	1424.61	289.159	2085.23	1147.67	248.882	1823.9	1322.68	240.066	1730.58	1123.89	206.322	2089.14	1239.59	403.976	1872.68	1390.72	524.472	1866.2	1157.92	538.262	1875.95	1059.78	535.637	1786.57	931.536	481.016	1759.29	836.565	548.232	1788.96	817.308	530.362	1723.77	766.926
6013	0	284.426	1756.52	1556.17	180.467	1765.42	1550.28	312.352	1920.23	1574.89	193.631	1932.08	1569.24	259.361	1977.33	1426.33	287.485	2075.18	1149.47	246.597	1814.01	1324.7	237.868	1720.54	1126.11	204.718	2079.07	1241.14	401.776	1862.6	1392.97	522.582	1856.1	1160.37	536.309	1867.27	1062.04	534.214	1779.18	933.142	479.952	1753.35	837.458	547.088	1782.85	818.696	529.16	1718.97	767.142
6014	0	281.968	1746.81	1558.09	177.851	1755.67	1551.88	309.954	1910.38	1576.92	191.112	1922.36	1571.02	257.203	1967.55	1428.24	285.837	2065.29	1151.6	244.499	1804.32	1326.49	235.854	1710.67	1127.92	203.031	2069.11	1242.91	399.672	1852.7	1395.01	520.56	1846.16	1162.56	534.745	1858.72	1064.45	532.925	1771.94	934.672	478.736	1747.24	838.24	547.182	1776.52	820.697	527.92	1714.14	767.277
6015	0	279.622	1737.02	1559.69	175.665	1746.12	1553.35	307.682	1900.48	1578.72	188.81	1912.68	1572.56	255.27	1957.69	1429.83	283.963	2055.77	1153.38	242.715	1795.01	1327.67	234.045	1700.95	1129.45	201.133	2059.31	1244.62	397.622	1842.78	1396.73	518.899	1836.25	1164.53	532.892	1849.96	1066.3	531.509	1764.67	935.876	477.663	1741.22	838.892	546.534	1770.04	822.084	526.609	1709.21	767.117
6016	0	277.403	1727.18	1561.28	173.252	1736.28	1554.61	305.515	1890.81	1580.44	186.721	1902.93	1574.1	253.406	1947.74	1431.58	282.152	2046.44	1155.18	240.752	1785.41	1328.88	232.431	1691.41	1130.76	199.345	2049.61	1246.3	395.801	1832.99	1398.39	517.413	1826.46	1166.46	531.271	1841.42	1068.11	530.047	1757.22	937.011	476.385	1735.53	839.173	545.601	1763.62	823.366	525.272	1704.28	767.036
6017	0	275.202	1717.4	1562.83	171.098	1726.63	1555.91	303.451	1880.91	1582.23	184.483	1893.22	1575.51	251.375	1938.12	1433.21	280.526	2037.11	1157.07	239.112	1775.98	1330.1	231.012	1682.15	1131.94	197.563	2040	1247.96	394.054	1823.51	1399.94	515.997	1816.7	1168.12	529.796	1832.82	1069.81	528.583	1749.84	938.039	475.135	1729.58	839.587	545.287	1756.87	824.546	524.004	1699.24	766.869
6018	0	273.034	1707.67	1564.03	169.012	1716.92	1556.98	301.39	1871.07	1583.59	182.678	1883.6	1576.82	249.627	1928.43	1434.6	278.73	2027.97	1158.5	237.573	1766.6	1331.13	229.748	1673.02	1132.68	195.873	2030.56	1249.52	392.357	1814.11	1401.19	514.53	1807.44	1169.32	528.308	1824.26	1071.24	527.182	1742.35	938.771	474.364	1724.28	839.682	544.921	1750.35	825.652	522.57	1694.08	766.429
6019	0	270.962	1697.89	1565.05	167.05	1707.19	1557.79	299.368	1861.28	1585	180.637	1873.93	1578	247.743	1918.98	1436.11	277.043	2019.03	1160.09	236.153	1757.27	1331.95	228.702	1664.1	1133.2	193.962	2021.27	1251.09	390.835	1804.93	1402.36	512.994	1798.56	1170.47	526.799	1815.79	1072.54	525.835	1734.99	939.464	473.42	1718.42	839.786	544.319	1743.76	826.437	521.509	1688.78	766.283
6020	0	269.062	1688.2	1566.09	165.101	1697.54	1558.61	297.237	1851.51	1586.2	178.698	1864.2	1579.04	246.102	1909.43	1437.41	275.391	2010.42	1161.68	234.834	1748.09	1332.85	227.887	1655.33	1133.69	192.11	2012.15	1252.58	389.29	1795.82	1403.43	511.199	1790.2	1171.29	525.151	1807.3	1073.62	524.24	1727.6	940.068	472.434	1712.48	839.9	543.369	1737.47	827.171	520.589	1683.55	766.223
6021	0	267.275	1678.55	1566.85	163.259	1687.77	1559.28	295.405	1841.87	1587.64	176.799	1854.36	1580.11	244.421	1900.13	1438.58	273.522	2001.81	1163.05	233.577	1738.87	1333.68	227.19	1646.63	1134.08	190.288	2003.17	1253.96	387.977	1786.95	1404.48	509.798	1782.4	1172.12	523.981	1799.13	1074.88	522.959	1720.45	940.655	471.712	1706.82	840.069	543.099	1730.94	828.045	519.962	1678.33	766.272
6022	0	265.478	1668.86	1567.45	161.586	1678.03	1559.65	293.323	1832.08	1588.65	174.871	1844.54	1580.9	242.843	1891.04	1439.63	271.797	1993.32	1164.42	232.606	1730.01	1334.34	226.628	1638.07	1134.25	188.513	1994.24	1255.35	386.588	1778.11	1405.41	508.188	1774.68	1172.73	522.019	1791.11	1075.49	521.625	1713.46	941.062	470.949	1700.78	840.102	542.615	1724.86	828.564	519.251	1672.53	766.264
6023	0	263.843	1659.15	1568.05	159.998	1668.31	1559.87	291.351	1822.29	1589.71	172.861	1834.79	1581.81	241.186	1881.88	1440.91	269.936	1985	1165.78	231.536	1721.07	1334.95	226.181	1629.63	1134.39	186.547	1985.41	1256.77	385.469	1769.48	1406.43	506.656	1767.34	1173.41	520.71	1783.33	1076.65	520.504	1706.52	941.698	470.434	1694.53	840.328	542.101	1718.86	829.254	519.006	1667.03	766.487
6024	0	262.143	1649.52	1568.54	158.275	1658.59	1560.13	289.544	1812.73	1590.94	170.87	1825.01	1582.82	239.581	1872.85	1442.04	268.023	1976.59	1167.3	230.558	1712.21	1335.59	225.626	1621.13	1134.63	184.698	1976.64	1258.28	384.236	1760.82	1407.49	505.373	1760.23	1174.41	519.189	1775.92	1077.66	519.554	1699.86	942.371	469.892	1688.69	840.696	541.57	1712.89	830.092	518.853	1661.27	766.987
6025	0	260.689	1639.97	1568.9	156.729	1648.82	1560.27	287.67	1803.04	1591.96	169.12	1815.2	1583.59	237.953	1863.86	1443.04	266.16	1968.42	1168.58	229.726	1703.54	1336.2	225.097	1612.6	1134.93	182.809	1968	1259.58	383.1	1752.46	1408.5	503.485	1753.67	1175.08	518.013	1768.71	1078.85	518.742	1693.39	943.006	469.632	1682.79	841.065	541.258	1707.16	831.019	518.953	1655.35	767.585
6026	0	259.159	1630.31	1569.02	155.203	1639.21	1560.27	285.907	1793.27	1592.87	167.378	1805.39	1584.27	236.485	1855.03	1443.96	264.403	1960.08	1169.77	228.993	1694.91	1336.69	224.845	1604.14	1135.32	181.025	1959.38	1260.71	382.053	1744.05	1409.26	502.391	1746.73	1175.82	516.634	1761.84	1079.75	518.103	1687.06	943.592	469.183	1676.42	841.472	540.776	1701.46	831.7	519.19	1649.41	768.255
6027	0	257.681	1620.72	1569.09	153.753	1629.66	1560.15	284.328	1783.7	1593.81	165.726	1795.66	1585.03	235.026	1846.35	1444.72	262.836	1951.97	1170.73	228.19	1686.28	1337.23	224.474	1595.61	1135.88	179.478	1950.69	1261.55	381.006	1735.84	1410.06	501.709	1740.07	1176.86	515.718	1755.19	1080.73	517.711	1680.95	944.386	469.03	1670.01	842.142	540.508	1695.66	832.635	519.493	1643.48	769.041
6028	0	256.18	1611.2	1569.12	152.38	1620.09	1559.9	282.528	1774.07	1594.75	164.041	1786.08	1585.76	233.413	1837.64	1445.38	261.269	1943.65	1171.48	227.377	1677.82	1337.83	224.069	1586.96	1136.6	177.954	1942.24	1262.35	380.015	1727.7	1410.87	500.966	1733.53	1177.93	514.637	1748.71	1081.75	517.418	1674.77	945.258	469.004	1663.92	842.958	540.212	1690.14	833.587	519.613	1637.86	769.77
6029	0	254.743	1601.85	1569	150.897	1610.6	1559.56	280.872	1764.38	1595.62	162.446	1776.49	1586.4	232.146	1829	1445.95	260.167	1935.53	1172.45	226.594	1669.32	1338.25	223.599	1578.39	1137.28	176.593	1933.69	1263.02	379.092	1719.59	1411.59	500.407	1726.97	1178.8	513.952	1742.3	1082.75	517.238	1668.61	945.94	468.905	1657.73	843.543	539.917	1684.35	834.442	519.817	1631.78	770.533
6030	0	253.483	1592.41	1568.79	149.775	1601.27	1559.1	279.305	1754.86	1596.4	160.92	1766.9	1586.97	230.78	1820.45	1446.47	258.886	1927.22	1172.93	225.839	1660.87	1338.64	223.129	1570.04	1137.82	175.293	1925.19	1263.49	378.056	1711.7	1412.16	499.825	1720.46	1179.62	513.213	1736.19	1083.49	517.322	1662.59	946.599	468.867	1651.17	844.169	539.174	1678.65	835.034	520.076	1625.78	771.29
6031	0	252.156	1583.01	1568.61	148.538	1592.03	1558.73	277.82	1745.37	1597.08	159.458	1757.35	1587.47	229.479	1811.7	1446.77	257.927	1919	1173.35	224.904	1652.34	1338.92	222.482	1561.76	1138.23	173.992	1916.72	1263.73	377.135	1703.54	1412.64	499.299	1714	1180.29	512.671	1729.78	1084.32	517.27	1656.53	947.138	468.697	1644.73	844.849	539.208	1672.82	835.728	520.205	1619.81	771.923
6032	0	250.85	1573.79	1568.42	147.197	1582.79	1558.32	276.218	1735.62	1597.64	158.15	1748.01	1587.79	228.341	1803.16	1447.11	257.126	1910.64	1173.86	224.188	1643.86	1339.2	221.985	1553.63	1138.58	172.998	1908.28	1264.09	376.345	1695.32	1413.06	498.931	1707.64	1180.89	512.001	1723.75	1084.79	517.249	1650.37	947.598	468.451	1638.3	845.452	539.017	1666.89	836.331	520.324	1613.69	772.524
6033	0	249.742	1564.59	1568.22	146.099	1573.65	1557.81	274.829	1726.2	1598.23	156.781	1738.68	1588.1	227.217	1794.4	1447.28	256.353	1902.42	1174.37	223.507	1635.29	1339.26	221.49	1545.61	1138.67	172.145	1899.74	1264.37	375.625	1687.01	1413.46	498.719	1701.28	1181.58	512.063	1717.28	1085.62	517.438	1644.18	948.031	468.556	1632.05	845.854	538.833	1660.88	836.651	520.37	1607.42	773.029
6034	0	248.565	1555.37	1567.96	145.035	1564.44	1557.25	273.605	1717.08	1598.58	155.5	1729.39	1588.18	226.19	1785.7	1447.46	255.426	1893.97	1174.58	222.87	1626.64	1339.08	220.92	1537.71	1138.54	171.213	1891.31	1264.73	374.782	1678.49	1413.58	498.457	1694.9	1182.06	511.69	1710.87	1085.98	517.358	1637.8	948.312	468.585	1625.69	846.095	538.568	1654.85	836.973	520.497	1601.24	773.379
6035	0	247.532	1546.22	1567.57	143.964	1555.24	1556.67	272.393	1707.88	1598.7	154.242	1720.09	1588.06	225.299	1776.95	1447.45	254.92	1885.75	1174.81	221.853	1618.02	1338.98	220.246	1529.6	1138.27	170.59	1882.98	1264.75	374.148	1670.03	1413.61	498.236	1688.3	1182.45	511.668	1704.18	1086.29	517.547	1631.55	948.364	468.575	1619.19	846.338	538.283	1648.69	836.98	520.386	1594.91	773.532
6036	0	246.479	1537.12	1567.01	142.87	1546.01	1555.97	271.237	1698.62	1598.78	153.066	1710.82	1587.87	224.484	1768.08	1447.34	254.439	1877.47	1174.93	221.22	1609.51	1338.73	219.543	1521.46	1137.82	169.863	1874.43	1264.76	373.279	1661.34	1413.33	497.877	1681.35	1182.51	511.579	1697.36	1086.6	517.558	1624.97	948.372	468.478	1612.62	846.356	538.042	1642.63	836.796	520.449	1588.69	773.571
6037	0	245.623	1527.83	1566.27	141.961	1537.07	1554.97	270.115	1689.37	1598.57	152.103	1701.76	1587.52	223.703	1759.29	1447.09	253.902	1869.05	1175	220.42	1600.89	1338.16	218.935	1513.35	1137.03	169.284	1866.02	1264.77	372.621	1652.55	1412.89	497.797	1674.29	1182.69	511.463	1690.38	1086.63	517.761	1618.33	948.296	468.422	1606.01	846.313	538.115	1636.29	836.783	520.469	1582.44	773.397
6038	0	244.664	1518.77	1565.44	141.11	1527.99	1553.91	269.164	1680.21	1598.24	151.236	1692.76	1587.02	223.05	1750.44	1446.8	253.443	1860.83	1174.84	219.727	1592.36	1337.52	218.186	1505.2	1136.15	168.788	1857.58	1264.68	371.929	1643.67	1412.48	497.777	1666.97	1182.8	511.353	1683.18	1086.48	517.938	1611.67	948.129	468.494	1599.51	846.07	537.991	1630.17	836.567	520.521	1576.04	773.194
6039	0	243.999	1509.75	1564.5	140.432	1518.83	1552.83	268.456	1671.13	1597.98	150.395	1683.55	1586.5	222.423	1741.57	1446.34	252.902	1852.35	1174.5	219.034	1583.79	1336.78	217.542	1497.01	1135.18	168.443	1849.18	1264.54	371.256	1634.75	1411.92	497.768	1659.38	1182.62	511.752	1675.76	1086.64	518.014	1604.75	947.707	468.706	1593.01	845.864	538.078	1623.7	836.208	520.551	1570.03	772.673
6040	0	243.574	1500.63	1563.39	139.934	1509.85	1551.72	267.483	1661.79	1597.24	149.615	1674.31	1585.79	222.048	1732.74	1445.71	252.757	1844.18	1174.06	218.3	1575.17	1335.85	216.725	1488.7	1134.03	168.156	1840.73	1264.08	370.622	1625.77	1411.06	497.761	1651.56	1182.21	511.797	1668.17	1086.26	518.031	1598.12	946.939	468.932	1586.54	845.384	538	1617.54	835.419	520.578	1563.75	771.862
6041	0	243.158	1491.64	1562.15	139.429	1500.69	1550.45	267.048	1652.9	1596.54	148.996	1665.1	1585.13	221.594	1723.83	1445.05	252.428	1835.73	1173.65	217.738	1566.59	1334.73	215.994	1480.31	1132.61	167.972	1832.24	1263.62	370.034	1616.61	1410.24	497.711	1643.37	1181.79	511.742	1660.6	1085.84	518.15	1591.19	946.183	469.097	1579.89	844.455	537.455	1611.16	834.418	520.73	1557.57	771.004
6042	0	242.636	1482.62	1560.8	139.15	1491.51	1549.05	266.391	1643.53	1595.71	148.387	1655.97	1584.38	221.496	1714.86	1444.35	252.122	1827.14	1173.13	217.044	1557.95	1333.62	215.218	1471.82	1131.34	167.794	1823.79	1263.04	369.52	1607.43	1409.29	497.56	1634.89	1181.29	511.77	1652.78	1085.36	518.041	1583.96	945.351	469.256	1573.22	843.448	537.473	1604.83	833.634	520.843	1551.15	770.052
6043	0	242.527	1473.55	1559.42	138.831	1482.41	1547.69	265.991	1634.49	1594.71	147.79	1646.65	1583.45	221.267	1705.98	1443.42	252.156	1818.68	1172.33	216.572	1549.47	1332.47	214.474	1463.24	1130	167.797	1815.26	1262.27	368.967	1598.41	1408.19	497.297	1626.23	1180.44	511.745	1644.82	1084.73	518.038	1576.78	944.3	469.399	1566.55	842.428	537.856	1598.3	832.854	521.302	1545.02	768.903
6044	0	242.367	1464.47	1557.82	138.71	1473.27	1546.18	265.698	1625.44	1593.6	147.546	1637.52	1582.33	221.191	1697.17	1442.35	252.059	1809.91	1171.3	215.932	1540.71	1331.1	213.598	1454.57	1128.53	167.852	1806.71	1261.24	368.643	1589.23	1406.85	497.208	1617.54	1179.35	511.611	1636.84	1083.7	518.176	1569.71	942.979	469.774	1559.82	841.083	537.99	1591.88	831.528	521.686	1538.79	767.335
6045	0	242.161	1455.52	1556.18	138.596	1464.07	1544.51	265.278	1616.04	1592.42	147.246	1628.33	1581.27	221.177	1688.39	1441.14	252.508	1801.67	1170.25	215.624	1531.99	1329.76	212.948	1445.83	1127.12	167.983	1798.14	1260.2	368.356	1580.11	1405.47	496.763	1608.28	1177.99	511.522	1628.56	1082.66	518.229	1562.32	941.519	470.106	1553.06	839.417	538.273	1585.38	830.197	522.237	1532.6	765.828
6046	0	241.956	1446.44	1554.61	138.406	1455.13	1542.95	265.267	1607.03	1591.31	147.011	1619.01	1580.07	221.421	1679.66	1439.85	252.569	1792.88	1168.99	215.257	1523.23	1328.43	212.276	1436.97	1125.69	168.198	1789.51	1258.92	368.156	1571.09	1404.05	496.625	1599.09	1176.63	511.522	1620.35	1081.72	518.452	1555.16	940.124	470.627	1546.49	837.861	539.36	1578.65	829.323	522.884	1526.41	764.159
6047	0	241.818	1437.17	1552.97	138.154	1445.95	1541.28	265.022	1597.63	1590.02	147.041	1609.94	1578.77	221.474	1670.74	1438.46	252.875	1784.09	1167.72	214.878	1514.35	1327.12	211.594	1428.19	1124.4	168.493	1780.85	1257.54	368.046	1561.75	1402.4	496.191	1589.79	1174.97	511.471	1612.07	1080.47	518.531	1547.89	938.366	470.898	1539.56	835.994	539.638	1572.25	827.77	523.607	1520.31	762.29
6048	0	241.556	1427.96	1551.09	138.115	1436.9	1539.35	265.082	1588.36	1588.72	146.943	1600.66	1577.45	221.755	1661.9	1437.05	253.287	1775.23	1166.25	214.766	1505.46	1325.63	211.023	1419.21	1122.99	168.851	1772.09	1256.08	368.088	1552.7	1400.8	495.709	1580.57	1172.97	511.249	1603.77	1078.72	518.609	1540.46	936.419	471.371	1532.98	833.811	539.644	1565.68	826.016	524.114	1514.08	760.141
6049	0	241.419	1418.84	1549.34	137.973	1427.91	1537.66	265.266	1578.95	1587.52	147.13	1591.62	1576.22	222.177	1653.07	1435.68	253.458	1766.08	1164.76	214.622	1496.52	1324.25	210.577	1410.23	1121.65	169.301	1763.26	1254.7	368.306	1543.53	1399.24	495.373	1571.06	1170.97	511.206	1595.27	1077.08	519.221	1533.29	934.535	471.762	1525.97	831.596	540.185	1558.8	824.242	524.845	1507.81	757.994
6050	0	241.361	1409.61	1547.67	137.979	1418.87	1535.83	265.486	1569.67	1586.32	147.22	1582.37	1574.9	222.579	1644.15	1434.21	253.773	1757.03	1163.16	214.679	1487.6	1322.89	210.164	1401.12	1120.39	169.755	1754.31	1253.32	368.501	1534.33	1397.61	495.315	1561.7	1169.17	511.073	1586.52	1075.45	519.135	1525.44	932.453	472.094	1519.21	829.463	540.831	1551.96	822.61	525.421	1501.57	755.852
6051	0	241.498	1400.38	1545.9	137.97	1409.66	1534.21	265.733	1560.29	1584.88	147.544	1573.29	1573.38	223.103	1635.16	1432.65	254.07	1747.66	1161.45	214.807	1478.59	1321.49	209.736	1391.94	1119.1	170.245	1745.25	1251.7	368.786	1525.1	1395.94	495.289	1552.4	1167.2	510.855	1577.81	1073.57	519.308	1517.7	930.295	472.377	1512.24	827.039	541.397	1544.87	820.758	525.88	1495.13	753.367
6052	0	241.845	1391.17	1544.19	138.397	1400.73	1532.44	266.03	1550.9	1583.28	147.859	1564.05	1571.97	223.489	1625.96	1431	254.594	1738.28	1159.8	214.904	1469.49	1320	209.517	1382.68	1117.73	170.661	1736.15	1250	369.076	1515.71	1394.14	495.032	1543	1165.08	510.559	1568.94	1071.54	519.402	1509.9	928.09	472.618	1505.19	824.663	541.485	1537.62	818.549	526.314	1488.66	751.015
6053	0	242.122	1381.89	1542.51	138.783	1391.55	1530.83	266.611	1541.71	1581.9	148.5	1554.86	1570.54	224.22	1617.08	1429.34	254.62	1728.58	1157.93	215.076	1460.16	1318.47	209.169	1373.27	1116.42	171.087	1726.97	1248.26	369.376	1506.45	1392.3	494.907	1533.72	1163.1	510.338	1560.02	1069.58	519.306	1501.77	925.83	473.205	1499.05	821.884	541.794	1530.23	816.592	526.602	1482	748.559
6054	0	242.856	1372.84	1541	139.369	1382.3	1529.41	267.151	1532.61	1580.23	149.011	1545.56	1568.99	224.794	1607.81	1427.61	255.064	1719.06	1155.78	215.181	1450.89	1317.11	208.774	1363.63	1115.16	171.663	1717.65	1246.56	369.77	1496.92	1390.48	495.113	1524.59	1161.18	510.322	1551.16	1067.7	519.294	1493.46	923.76	472.933	1490.73	819.884	541.945	1522.61	814.66	526.791	1475.13	746.07
6055	0	243.516	1363.67	1539.46	140.208	1373.14	1528.09	268.069	1523.52	1578.64	149.788	1536.44	1567.56	225.255	1598.9	1425.96	255.553	1709.48	1153.74	215.677	1441.46	1315.78	208.477	1353.82	1113.94	172.25	1708.22	1244.68	370.314	1487.52	1388.72	495.261	1515.39	1159.18	510.386	1541.99	1065.76	519.433	1485.07	921.657	473.316	1483.55	817.451	542.507	1514.7	812.891	526.971	1468.07	743.677
6056	0	244.628	1354.33	1538.09	141.164	1363.82	1526.92	269.085	1514.41	1577.12	150.61	1527.02	1566.21	226.024	1589.69	1424.28	255.89	1699.5	1151.92	215.911	1431.93	1314.39	208.387	1344.11	1112.67	172.701	1698.73	1242.93	370.853	1477.92	1386.91	495.893	1506.38	1157.45	510.407	1532.69	1063.74	519.318	1476.4	919.538	473.234	1475.55	815.354	542.885	1506.34	811.002	526.897	1460.62	741.23
6057	0	245.588	1345.12	1536.78	142.117	1354.54	1525.76	270.119	1505.12	1575.71	151.744	1517.8	1565.06	226.869	1580.04	1422.61	256.379	1689.44	1149.9	216.303	1422.29	1313.09	207.929	1334.05	1111.56	173.272	1688.96	1241.15	371.527	1468.3	1385.18	496.185	1497.15	1155.46	510.723	1523.4	1061.9	519.182	1467.49	917.341	473.319	1467.75	813.013	543.027	1497.8	809.009	526.807	1453.01	738.886
6058	0	246.689	1335.84	1535.58	143.166	1345.14	1524.8	271.253	1495.83	1574.28	152.784	1508.4	1563.92	227.808	1570.49	1421.07	256.854	1679.36	1147.98	216.807	1412.64	1312.01	207.798	1324.07	1110.51	174.077	1679.23	1239.57	372.267	1458.53	1383.56	496.778	1487.9	1153.72	510.755	1513.96	1059.95	519.246	1458.57	915.394	473.466	1459.46	811.217	542.719	1489.06	807.036	526.382	1445.07	736.508
6059	0	247.932	1326.43	1534.37	144.291	1335.66	1523.85	272.828	1486.52	1572.87	154.141	1499.07	1562.79	228.78	1560.82	1419.46	257.341	1668.93	1146.2	217.36	1402.76	1310.78	207.628	1313.93	1109.36	174.685	1669.22	1237.93	373.026	1448.7	1381.84	497.31	1478.62	1151.78	510.921	1504.55	1058.02	519.182	1449.37	913.213	473.273	1450.57	809.101	543.246	1479.77	805.104	525.814	1436.61	734.017
6060	0	249.222	1316.92	1533.27	145.693	1326.34	1522.98	274.311	1477.03	1571.46	155.708	1489.7	1561.62	229.54	1551.23	1418.02	257.719	1658.43	1144.36	217.982	1392.74	1309.54	207.464	1303.6	1108.34	175.175	1658.83	1236.23	373.829	1438.74	1380.09	497.997	1469.24	1150.01	511.131	1494.98	1056.13	519.258	1439.93	911.306	472.998	1442.34	806.837	543.27	1470.37	803.144	525.407	1427.83	731.948
6061	0	250.588	1307.3	1532.34	147.019	1316.84	1522.29	275.951	1467.47	1569.99	157.292	1480.27	1560.49	230.665	1541.28	1416.38	258.007	1647.82	1142.33	218.652	1382.64	1308.5	207.57	1293.3	1107.36	175.789	1648.62	1234.52	374.685	1428.79	1378.46	498.569	1459.73	1148.31	511.355	1485.47	1054.36	519.235	1430.42	909.367	473.4	1432.76	805.192	543.708	1460.96	801.544	525.117	1418.95	729.908
6062	0	252.117	1297.69	1531.32	148.479	1307.35	1521.76	277.825	1458	1568.32	159.236	1470.91	1559.24	231.685	1531.31	1414.85	258.412	1637.17	1140.23	219.542	1372.36	1307.55	207.774	1282.81	1106.58	176.43	1638.19	1232.72	375.871	1418.77	1376.88	499.13	1450.05	1146.56	511.557	1475.82	1052.46	519.544	1420.76	907.586	473.769	1422.71	803.825	543.078	1451.49	799.322	525.011	1409.73	727.928
6063	0	253.756	1287.88	1530.39	150.066	1297.75	1521.19	279.78	1448.41	1566.68	161.206	1461.36	1558.16	232.857	1521.32	1413.3	258.748	1626.26	1138.33	220.395	1361.82	1306.55	208.066	1272.07	1105.73	177.009	1627.47	1231.01	376.832	1408.69	1375.2	499.581	1440.2	1144.79	511.901	1465.92	1050.74	519.807	1410.89	905.738	474.269	1411.96	802.216	543.726	1441.76	797.637	525.081	1400.26	725.988
6064	0	255.38	1278.17	1529.59	151.726	1287.97	1520.88	281.766	1438.64	1565.26	163.148	1451.75	1557.21	233.959	1511.15	1411.86	259.042	1615.24	1136.57	221.271	1351.28	1305.68	208.511	1261.26	1105.09	177.521	1616.71	1229.43	378.013	1398.48	1373.84	500.227	1430.26	1143.15	512.247	1456.08	1049.18	520.151	1401.06	904.06	473.621	1403.8	799.614	543.943	1431.97	796.011	525.197	1390.36	724.228
6065	0	257.152	1268.28	1529.14	153.387	1278.07	1520.98	284	1428.96	1564.1	165.317	1442.04	1556.4	235.191	1500.92	1410.71	259.152	1604.05	1134.73	222.189	1340.51	1305	208.925	1250.13	1104.69	177.959	1605.83	1227.9	379.193	1388.23	1372.53	500.634	1420.09	1141.48	512.365	1445.92	1047.54	520.67	1390.95	902.412	473.998	1393.53	798.114	544.044	1422.25	794.356	525.564	1380.4	722.532
6066	0	259.034	1258.29	1528.85	155.272	1268.15	1521.13	286.138	1419.03	1563.06	167.434	1432.22	1555.93	236.289	1490.54	1409.67	259.282	1592.86	1133.32	223.372	1329.67	1304.54	209.487	1238.75	1104.44	178.385	1594.78	1226.73	380.458	1377.73	1371.45	501.221	1409.82	1139.96	512.462	1435.57	1046.05	521.096	1380.88	900.832	474.696	1382.69	796.659	544.459	1412.74	792.925	526.309	1370.26	721.183
6067	0	261.064	1248.15	1528.76	157.194	1257.91	1521.59	288.364	1409	1562.17	169.558	1422.11	1555.71	237.343	1479.88	1408.97	259.427	1581.62	1132.3	224.536	1318.72	1304.26	210.176	1227.19	1104.47	178.597	1583.6	1225.88	381.701	1367.27	1370.59	501.71	1399.43	1138.61	512.412	1425.17	1044.7	521.806	1370.71	899.621	475.23	1371.72	795.336	543.831	1402.96	791.336	527.253	1359.83	720.052
6068	0	263.116	1237.94	1528.96	159.375	1247.7	1522.4	290.719	1399.07	1561.51	171.819	1412.06	1555.67	238.301	1469.11	1408.51	259.414	1570.34	1131.66	225.598	1307.61	1304.27	210.883	1215.39	1104.66	178.686	1572.39	1225.45	382.875	1356.72	1370.01	501.982	1388.83	1137.53	512.303	1414.58	1043.76	522.48	1360.5	898.584	476.021	1360.77	794.428	544.553	1393.11	790.521	528.265	1349.27	719.271
6069	0	265.24	1227.54	1529.52	161.349	1237.27	1523.38	292.779	1388.67	1561.13	174.022	1401.73	1555.83	239.193	1458.15	1408.54	259.247	1559.09	1131.55	226.757	1296.44	1304.55	211.648	1203.37	1105.17	178.526	1561.13	1225.36	383.885	1346.21	1369.63	502.155	1378.22	1136.78	512.107	1404.09	1043.16	522.986	1350.38	897.947	476.849	1349.56	793.845	544.166	1383.49	789.712	529.466	1338.76	718.867
6070	0	267.486	1217.14	1530.12	163.504	1226.69	1524.57	295.009	1378.42	1561.03	176.2	1391.36	1556.48	239.857	1447.06	1408.96	258.596	1548.03	1131.6	227.965	1285.12	1305.09	212.711	1191.43	1105.82	178.04	1549.71	1225.8	384.893	1335.81	1369.53	502.092	1367.49	1136.15	511.996	1393.44	1042.81	523.428	1340.02	897.615	477.776	1338.27	793.502	544.72	1373.55	789.527	530.903	1328.18	718.756
6071	0	269.622	1206.45	1531.04	165.636	1215.92	1526.06	297.218	1367.88	1561.52	178.335	1380.66	1557.54	240.26	1436.06	1409.72	257.338	1537	1132.28	229.279	1273.89	1305.87	213.78	1179.44	1106.71	177.321	1538.1	1226.81	385.838	1325.27	1369.93	501.98	1356.73	1135.99	511.337	1382.99	1042.77	523.848	1329.62	897.684	478.529	1327.01	793.27	544.359	1363.45	789.439	532.292	1317.37	719.174
6072	0	271.641	1195.78	1532.15	167.773	1205.19	1527.81	299.422	1357.33	1562.12	180.474	1369.89	1558.86	240.488	1425.09	1410.92	256.19	1525.9	1133.46	230.382	1262.6	1307.02	215.258	1167.79	1108.04	176.374	1526.53	1228.01	386.856	1315.13	1370.69	501.975	1346.06	1136.24	510.851	1372.41	1043.07	524.313	1319.14	898.239	479.157	1315.45	793.724	544.546	1353.3	789.958	533.663	1306.64	719.833
6073	0	273.635	1185.16	1533.45	169.614	1194.26	1529.92	301.424	1346.36	1563.21	182.54	1359.15	1560.58	240.848	1413.79	1412.25	255.499	1514.42	1134.97	231.686	1251.35	1308.64	216.666	1156.07	1109.78	175.385	1514.78	1229.58	387.732	1305.13	1371.84	501.918	1335.59	1136.97	510.381	1362.06	1043.77	524.812	1308.88	899.221	480.111	1303.49	794.946	544.596	1343.52	790.953	535.011	1295.68	721.034
6074	0	275.611	1174.24	1535.08	171.526	1183.32	1531.97	303.388	1335.71	1564.41	184.374	1348.09	1562.57	240.86	1402.77	1414.05	254.135	1502.6	1136.46	232.95	1240.21	1310.44	218.473	1144.7	1111.68	174.086	1502.97	1231.53	388.596	1295.1	1373.33	501.487	1325.1	1137.79	509.827	1351.81	1044.82	524.944	1298.24	900.418	480.718	1291.7	796.023	544.736	1332.92	792.113	536.336	1284.57	722.583
6075	0	277.217	1163.36	1536.79	173.18	1172.36	1534.35	305.148	1324.8	1566.05	186.047	1337.19	1564.94	241.035	1391.76	1415.85	252.54	1490.52	1138.2	234.153	1229.21	1312.44	220.282	1133.67	1113.92	172.956	1491.12	1233.44	389.524	1285.33	1375.21	501.281	1315.02	1139.19	509.413	1341.52	1046.3	525.107	1287.75	902.212	481.086	1280.32	797.522	544.511	1322.35	793.672	537.306	1273.56	724.595
6076	0	278.65	1152.71	1538.52	174.656	1161.35	1536.81	306.702	1313.84	1568	187.581	1326.31	1567.35	241.196	1380.94	1417.69	251.326	1479.1	1139.7	235.237	1218.27	1314.76	222.005	1122.71	1116.36	171.83	1479.37	1235.15	390.358	1275.74	1377.22	500.777	1305.05	1140.58	509.151	1331.57	1048.04	524.948	1277.32	903.98	481.327	1269.18	799.254	543.985	1311.84	795.296	538.198	1262.46	726.678
6077	0	280.052	1141.88	1540.54	176.054	1150.51	1539.24	307.985	1303.2	1569.82	188.931	1315.39	1569.77	241.347	1370.25	1419.7	250.366	1468.12	1141.33	236.256	1207.31	1317.05	223.821	1111.95	1118.89	170.951	1467.75	1236.91	391.259	1265.93	1379.19	500.693	1295.4	1142.38	508.923	1321.71	1049.93	524.911	1267.02	905.98	481.493	1257.54	801.237	543.91	1301.28	797.472	538.661	1251.28	728.854
6078	0	281.313	1131.15	1542.59	177.353	1139.74	1541.66	309.131	1292.57	1571.73	190.058	1304.57	1572.28	241.456	1359.65	1421.58	249.613	1457.39	1143.24	237.519	1196.56	1319.3	225.765	1101.35	1121.36	170.172	1456.17	1238.81	392.072	1256.37	1381.38	500.796	1285.87	1144.41	508.763	1311.72	1051.79	525.182	1256.63	908.241	481.733	1244.93	803.948	543.398	1290.4	799.302	538.927	1239.93	731.247
6079	0	282.411	1120.67	1544.77	178.345	1129.01	1544.1	309.994	1281.94	1573.83	190.93	1293.88	1574.72	241.783	1349.01	1423.47	248.962	1446.88	1145.13	238.504	1185.84	1321.55	227.414	1090.61	1123.99	169.623	1444.85	1240.57	392.931	1246.63	1383.64	501.326	1276.59	1146.71	509.327	1301.97	1054.13	525.432	1246.11	910.567	481.51	1233.81	806.251	543.236	1279.47	801.398	538.941	1228.69	733.666
6080	0	283.397	1110.48	1546.83	179.433	1118.53	1546.57	310.918	1271.79	1575.96	191.721	1283.42	1577	241.997	1338.49	1425.44	248.45	1436.32	1146.8	239.675	1175.23	1323.74	228.92	1079.98	1126.46	169.336	1433.82	1242.32	393.727	1236.79	1385.76	501.71	1267.37	1148.83	509.255	1292.13	1055.79	525.715	1235.76	912.729	481.621	1222.48	808.74	543.061	1268.58	803.462	538.727	1216.9	735.945
6081	0	284.326	1100.24	1549	180.317	1108.06	1548.87	311.497	1261.66	1577.63	192.419	1273.13	1579.01	242.213	1327.99	1427.35	248.457	1425.69	1148.45	240.464	1164.69	1325.68	230.446	1069.42	1128.62	169.268	1423.12	1244.18	394.374	1226.99	1387.63	502.547	1258.24	1150.95	510.044	1282.57	1057.68	526.088	1225.22	914.691	481.408	1211.15	810.964	542.833	1257.4	805.199	538.175	1205.57	737.877
6082	0	285.172	1090.11	1551	181.086	1097.83	1551.04	311.96	1251.7	1579.21	192.884	1262.9	1580.85	242.515	1317.29	1428.98	248.76	1415.2	1150.35	241.376	1154.37	1327.41	231.808	1058.92	1130.52	169.46	1412.29	1246.01	395.072	1217.01	1389.4	503.367	1248.9	1153.05	510.736	1272.89	1059.43	526.58	1214.66	916.582	481.551	1199.77	813.285	542.254	1246.22	806.721	537.59	1193.95	739.799
6083	0	285.978	1080.32	1553.04	181.955	1087.66	1553.16	312.495	1241.93	1580.85	193.374	1252.81	1582.48	242.629	1306.79	1430.55	249.286	1404.88	1152.31	242.063	1143.91	1328.99	232.823	1048.57	1132.27	169.65	1401.96	1247.79	395.491	1207.01	1391.08	504.47	1239.71	1155.21	511.73	1263.14	1061.38	527.202	1204	918.634	481.402	1188.31	815.573	542.337	1234.67	808.528	536.972	1182.38	741.616
6084	0	286.76	1070.28	1554.92	182.612	1077.57	1555.14	312.884	1232.21	1581.98	193.856	1242.91	1583.86	242.958	1296.38	1432.23	249.794	1394.49	1154.01	242.889	1133.76	1330.36	233.775	1038.24	1133.68	169.871	1391.53	1249.36	396.102	1197.03	1392.59	505.746	1230.43	1157.04	512.602	1253.32	1062.75	527.828	1193.35	920.325	481.682	1176.78	817.915	542.546	1223.21	809.954	536.282	1171.05	743.165
6085	0	287.476	1060.67	1556.35	183.394	1067.61	1556.77	313.385	1222.5	1583.2	194.228	1233.01	1585.07	243.212	1286.09	1433.51	250.202	1384.2	1155.38	243.42	1123.61	1331.39	234.624	1028.13	1134.6	170.331	1381.63	1250.83	396.641	1186.87	1393.82	506.975	1221.12	1158.72	513.505	1243.58	1063.94	528.525	1182.5	921.783	481.86	1165.38	819.809	542.806	1211.54	811.054	535.92	1159.19	744.637
6086	0	287.945	1050.83	1557.76	183.869	1057.77	1558.24	313.772	1212.79	1584.13	194.598	1223.23	1586.22	243.504	1275.8	1434.73	250.738	1374.32	1156.84	244.015	1113.64	1332.33	235.162	1018.27	1135.29	170.776	1371.75	1252.3	396.888	1176.83	1395.06	507.986	1211.46	1160.3	514.671	1233.57	1065.29	529.339	1171.66	923.379	482.263	1153.71	822.045	543.299	1200.02	812.239	535.133	1147.09	746.103
6087	0	288.313	1041.09	1558.85	184.339	1047.92	1559.45	314.104	1203.11	1585.02	195.023	1213.42	1587.1	243.667	1265.82	1435.77	251.141	1364.53	1158.21	244.419	1103.64	1333.18	235.49	1008.45	1135.81	171.132	1361.92	1253.51	397.031	1166.77	1395.98	509.014	1201.79	1161.62	515.776	1223.47	1066.45	530.179	1160.77	924.805	482.424	1142.49	823.664	543.509	1188.43	813.313	534.91	1135.22	747.444
6088	0	288.795	1031.41	1559.76	184.721	1038.23	1560.31	314.451	1193.46	1585.8	195.318	1203.77	1587.86	244.103	1255.82	1436.63	251.739	1355.31	1159.08	244.812	1094.02	1333.68	235.845	999.014	1136	171.701	1352.39	1254.55	397.245	1156.72	1396.78	509.845	1191.91	1162.77	516.98	1213.31	1067.56	530.888	1149.84	925.904	482.806	1131.03	825.054	544.223	1176.83	814.303	534.746	1123.25	748.55
6089	0	289.008	1021.6	1560.47	184.905	1028.44	1561.05	314.768	1183.71	1586.21	195.69	1194.11	1588.3	244.391	1245.76	1437.26	252.365	1345.92	1160.1	244.887	1084.27	1334.01	235.968	989.813	1135.87	172.202	1342.96	1255.36	397.509	1146.89	1397.37	510.839	1181.89	1163.69	518.018	1202.91	1068.2	531.7	1138.77	926.881	483.385	1119.73	826.261	544.497	1165.26	814.876	534.953	1111.34	749.525
6090	0	289.3	1011.97	1561.09	185.244	1018.86	1561.66	315.016	1174.06	1586.45	196.014	1184.43	1588.64	244.768	1236.12	1437.93	252.833	1336.75	1160.68	245.048	1074.6	1334.23	235.941	980.718	1135.77	172.871	1333.67	1256.11	397.622	1136.83	1397.86	511.582	1171.67	1164.37	518.661	1192.39	1068.53	532.565	1127.72	927.707	483.968	1108.28	827.248	545.442	1153.49	815.534	535.351	1099.32	750.431
6091	0	289.388	1002.25	1561.58	185.338	1009.07	1562.14	315.163	1164.28	1586.75	196.143	1174.81	1588.93	245.038	1226.27	1438.53	253.786	1327.39	1161.65	245.148	1065.24	1334.36	235.868	971.758	1135.53	173.517	1324.58	1256.79	397.765	1126.82	1398.3	512.237	1161.3	1164.85	519.892	1181.94	1069.19	533.267	1116.59	928.416	484.716	1096.74	828.219	546.324	1141.76	816.236	536.124	1087.5	751.295
6092	0	289.583	992.593	1561.81	185.441	999.478	1562.35	315.413	1154.73	1586.96	196.333	1165.14	1588.93	245.457	1216.66	1439.01	254.574	1318.69	1162.33	245.148	1055.8	1334.32	235.601	962.936	1134.96	174.249	1315.47	1257.53	397.848	1117.05	1398.44	512.682	1150.66	1165.12	521.056	1171.32	1069.63	533.99	1105.29	929.026	485.692	1085.94	828.677	547.139	1129.92	816.89	536.899	1075.4	752.073
6093	0	289.723	982.898	1561.87	185.611	989.781	1562.38	315.487	1144.97	1587.13	196.343	1155.5	1589	245.79	1206.87	1439.47	255.505	1309.69	1163.36	245.051	1046.53	1334.15	235.447	954.19	1134.36	174.888	1306.52	1258.14	397.986	1107.1	1398.56	513.036	1139.89	1165.09	521.833	1160.63	1069.75	534.752	1093.83	929.388	486.202	1073.94	829.107	548.024	1118.1	817.242	537.822	1063.32	752.785
6094	0	289.711	973.161	1561.87	185.712	980.075	1562.3	315.6	1135.32	1587.24	196.49	1145.77	1589.03	246.278	1197.27	1439.93	256.237	1300.82	1163.98	244.935	1037.22	1333.97	235.115	945.38	1133.86	175.852	1297.81	1258.93	398.123	1097.14	1398.67	513.259	1129.09	1164.97	522.816	1150	1069.86	535.24	1082.56	929.738	486.861	1062.44	829.538	548.99	1106.2	817.684	538.846	1051.16	753.486
6095	0	289.951	963.569	1561.81	185.672	970.445	1562.13	315.617	1125.59	1587.27	196.44	1136.06	1589	246.66	1187.72	1440.2	257.254	1292.06	1164.79	244.868	1028.08	1333.71	234.927	936.632	1133.35	176.607	1289.02	1259.42	398.25	1087.34	1398.72	513.637	1118.16	1164.93	523.755	1139.12	1069.88	535.777	1071.14	930.056	487.374	1050.33	829.848	550.07	1094.02	818.049	539.706	1038.76	754.098
6096	0	289.934	953.855	1561.43	185.828	960.685	1561.68	315.663	1115.94	1587.06	196.482	1126.34	1588.77	247.035	1178.23	1440.29	258.048	1283.51	1165.2	244.896	1019.12	1333.38	234.757	927.984	1132.7	177.315	1280.27	1259.97	398.315	1077.39	1398.52	513.93	1107.35	1164.7	524.449	1128.32	1069.6	536.446	1059.72	930.212	488.405	1040.35	829.493	550.419	1081.92	818.113	540.702	1026.37	754.559
6097	0	289.961	944.184	1560.98	185.922	951.108	1561.09	315.692	1106.17	1586.91	196.65	1116.72	1588.53	247.535	1169.03	1440.35	258.873	1274.99	1165.67	244.791	1010.12	1332.95	234.609	919.291	1132.14	178.073	1271.69	1260.34	398.443	1068.02	1398.27	514.216	1096.39	1164.3	525.254	1117.31	1069.36	536.797	1047.98	930.301	488.783	1028.84	829.315	551.463	1069.69	818.215	541.508	1013.81	754.924
6098	0	289.849	934.515	1560.41	185.705	941.535	1560.54	315.779	1096.45	1586.71	196.651	1107.03	1588.3	247.878	1159.98	1440.36	259.59	1266.44	1165.84	244.774	1001.19	1332.57	234.416	910.62	1131.72	178.796	1263.16	1260.44	398.528	1058.56	1397.86	514.546	1085.45	1163.9	525.912	1106.29	1068.98	537.26	1036.3	930.26	488.912	1016.72	829.339	552.233	1057.35	818.344	542.208	1001.18	755.233
6099	0	289.791	924.894	1559.71	185.652	931.962	1559.81	315.901	1086.69	1586.49	196.933	1097.44	1588	248.292	1150.85	1440.21	260.059	1257.98	1165.7	244.722	992.306	1332.17	234.136	902.052	1131.26	179.448	1254.65	1260.45	398.621	1049.21	1397.38	515.048	1074.72	1163.51	526.694	1095.19	1068.57	537.479	1024.51	930.036	489.325	1004.94	829.265	552.935	1044.93	818.132	542.89	988.543	755.328
6100	0	289.664	915.256	1559.04	185.59	922.649	1559.08	315.937	1076.85	1586.29	196.996	1087.84	1587.88	248.644	1141.85	1440.06	260.485	1249.48	1165.79	244.636	983.492	1331.73	234.042	893.58	1130.72	180.074	1246.23	1260.68	398.641	1039.85	1397	515.31	1063.82	1163.04	527.156	1084.02	1068.02	537.659	1012.58	929.838	489.543	992.923	828.877	553.997	1032.22	817.991	543.281	975.74	755.427
6101	0	289.56	905.614	1558.35	185.477	913.144	1558.41	316.171	1067.2	1586.06	197.124	1078.36	1587.7	249.121	1132.94	1439.9	261.012	1240.96	1165.84	244.611	974.694	1331.29	233.758	884.969	1130.21	180.631	1237.68	1260.72	398.881	1030.66	1396.54	515.566	1052.95	1162.47	527.608	1072.75	1067.25	537.926	1000.62	929.608	489.913	981.031	828.609	554.729	1019.59	817.771	543.608	962.813	755.481
6102	0	289.39	896.089	1557.64	185.338	903.783	1557.72	316.241	1057.38	1585.78	197.444	1068.92	1587.38	249.49	1123.96	1439.54	261.486	1232.44	1165.76	244.61	965.887	1330.88	233.505	876.483	1129.79	181.001	1229.21	1260.56	399.009	1021.57	1396.05	516.265	1042.19	1161.91	528.095	1061.42	1066.53	538.016	988.554	929.367	490.057	968.766	828.35	555.17	1006.89	817.334	543.975	950.095	755.372
6103	0	289.298	886.644	1556.89	185.264	894.642	1556.91	316.503	1047.93	1585.41	197.516	1059.49	1587.02	249.764	1114.92	1439.17	261.887	1224	1165.67	244.636	957.088	1330.34	233.195	868.101	1129.22	181.448	1220.67	1260.51	399.293	1012.45	1395.54	516.29	1031.46	1161.12	528.491	1050.12	1065.66	538.25	976.475	928.96	490.326	956.944	827.859	555.632	994.102	816.9	544.08	937.082	755.276
6104	0	289.172	877.16	1556.17	185.176	885.319	1556.12	316.609	1038.31	1585.02	197.748	1050.17	1586.55	250.125	1105.82	1438.9	262.28	1215.6	1165.57	244.542	948.234	1329.67	232.907	859.488	1128.52	181.902	1212.14	1260.49	399.419	1003.28	1394.97	516.423	1020.51	1160.5	528.675	1038.51	1064.85	538.183	964.196	928.631	490.309	944.33	827.516	555.586	981.382	816.432	544.072	923.962	754.998
6105	0	289.066	867.793	1555.45	185.019	876.07	1555.4	316.703	1028.82	1584.58	197.911	1040.88	1586.1	250.515	1096.76	1438.59	262.662	1207.19	1165.38	244.648	939.465	1329.03	232.563	850.886	1127.86	182.324	1203.57	1260.39	399.486	994.035	1394.26	516.612	1009.68	1159.77	529.047	1027.01	1064.18	538.2	951.997	928.152	490.371	932.231	827.07	555.839	968.418	815.947	543.845	910.908	754.703
6106	0	289.08	858.52	1554.74	185.019	866.903	1554.77	316.914	1019.59	1584	198.046	1031.65	1585.4	250.806	1087.69	1438.11	263.071	1198.76	1165.14	244.624	930.549	1328.45	232.172	842.285	1127.06	182.754	1195.05	1260.17	399.643	984.862	1393.48	516.749	998.969	1158.98	529.243	1015.46	1063.22	538.099	939.63	927.787	490.228	919.748	826.72	556.387	955.242	815.472	543.569	897.634	754.413
6107	0	289.159	849.25	1553.99	185.171	857.745	1554.03	316.999	1010.32	1583.24	198.207	1022.39	1584.71	250.89	1078.46	1437.59	263.286	1190.34	1164.9	244.729	921.661	1327.67	231.961	833.612	1126.29	183.052	1186.35	1259.88	399.74	975.696	1392.7	517.03	988.097	1158.03	529.443	1003.67	1062.29	537.851	927.061	927.367	490.048	907.076	826.228	556.516	941.989	814.899	543.271	884.358	754.064
6108	0	289.25	840.055	1553.28	185.105	848.417	1553.23	317.057	1000.98	1582.61	198.229	1013.18	1584.05	251.052	1069.33	1437.12	263.419	1181.65	1164.7	244.699	912.688	1326.9	231.843	824.885	1125.42	183.134	1177.56	1259.63	399.885	966.524	1391.98	516.676	977.351	1157.16	529.205	991.752	1061.25	537.556	914.479	926.952	489.674	894.361	825.812	556.014	928.702	814.376	542.717	870.943	753.696
6109	0	289.217	830.812	1552.44	185.091	839.134	1552.45	317.057	991.687	1581.88	198.374	1003.9	1583.38	251.18	1060.4	1436.59	263.322	1172.78	1164.39	244.661	903.716	1326.14	231.467	816.094	1124.56	183.068	1168.7	1259.28	399.78	957.41	1391.18	516.556	966.509	1156.33	529.356	979.852	1060.57	537.024	901.726	926.602	489.248	881.627	825.437	556.131	915.303	814.132	542.171	857.439	753.552
6110	0	289.299	821.533	1551.56	185.171	829.832	1551.59	317.215	982.469	1581.25	198.345	994.595	1582.76	251.421	1051.27	1436.04	263.232	1163.8	1163.9	244.615	894.769	1325.42	231.349	807.303	1123.69	183.072	1159.86	1258.94	399.818	948.339	1390.47	516.368	955.76	1155.43	529.162	968	1059.63	536.625	889.084	926.264	488.565	868.606	825.149	555.923	901.764	813.69	541.426	843.78	753.199
6111	0	289.251	812.233	1550.6	185.13	820.652	1550.62	317.133	972.976	1580.59	198.308	985.223	1582.23	251.118	1041.97	1435.42	263.129	1155.22	1163.41	244.6	885.728	1324.53	231.246	798.47	1122.62	182.949	1150.88	1258.51	399.732	939.215	1389.62	516.087	945.018	1154.57	528.993	956.215	1058.63	535.894	876.264	925.763	487.925	855.622	824.546	555.542	888.037	813.212	540.583	829.964	752.914
6112	0	289.202	802.784	1549.65	185.218	811.304	1549.71	317.068	963.495	1579.87	198.41	975.776	1581.63	251.193	1032.92	1434.85	262.872	1146.24	1162.84	244.564	876.696	1323.81	231.184	789.573	1121.71	182.642	1141.7	1257.96	399.684	930.243	1388.74	515.859	934.357	1153.65	528.599	944.296	1057.51	535.141	863.418	925.365	487.218	842.609	824.222	555.025	874.347	812.723	539.761	816.171	752.802
6113	0	289.2	793.418	1548.65	185.088	801.905	1548.72	317.209	954.157	1579.25	198.336	966.381	1580.9	251.238	1023.93	1434.15	262.504	1137.15	1162.14	244.51	867.612	1323.11	231.245	780.872	1120.85	182.459	1132.58	1257.21	399.704	921.275	1387.94	515.606	923.809	1152.83	528.238	932.457	1056.58	534.366	850.654	925.037	486.247	829.535	824.035	554.873	860.375	812.519	538.751	802.177	752.761
6114	0	288.943	784.006	1547.49	184.78	792.53	1547.6	317.077	944.505	1578.46	198.438	956.95	1580.12	251.253	1014.56	1433.32	262.24	1128	1161.25	244.523	858.36	1322.23	231.182	771.857	1119.95	182.193	1123.45	1256.42	399.683	912.293	1386.98	515.191	913.269	1151.73	528.042	920.694	1055.57	533.461	837.754	924.662	485.456	816.611	823.595	554.086	846.479	812.001	537.546	788.121	752.623
6115	0	288.677	774.428	1546.43	184.628	783.183	1546.47	316.962	934.866	1577.65	198.256	947.455	1579.27	251.191	1005.31	1432.4	261.887	1118.95	1160.44	244.481	849.044	1321.3	231.364	762.739	1118.86	181.774	1113.97	1255.57	399.62	903.196	1385.86	514.809	902.712	1150.62	527.546	908.997	1054.42	532.441	824.839	924.127	484.543	803.734	823.145	552.965	832.55	811.554	536.237	773.88	752.559
6116	0	288.409	764.914	1545.36	184.371	773.696	1545.36	316.965	925.406	1576.75	198.095	938.036	1578.33	251.123	996.116	1431.34	261.275	1109.58	1159.47	244.436	839.807	1320.35	231.378	753.799	1117.86	181.468	1104.66	1254.6	399.494	894.114	1384.77	514.373	892.173	1149.58	527.033	897.309	1053.34	531.364	811.945	923.822	482.966	790.323	822.889	552.36	818.559	811.289	534.747	759.605	752.545
6117	0	287.991	755.405	1544.26	183.913	764.235	1544.26	316.638	915.783	1575.57	197.983	928.509	1577.05	250.825	986.641	1430.16	260.937	1100.37	1158.25	244.381	830.359	1319.33	231.468	744.464	1116.91	180.931	1095.18	1253.51	399.394	884.861	1383.64	513.972	881.725	1148.4	526.743	885.762	1052.25	530.361	799.152	923.343	481.705	777.136	822.693	551.277	804.549	810.855	533.23	745.371	752.576
6118	0	287.813	745.949	1543.14	183.698	754.799	1543.07	316.291	906.217	1574.33	197.611	919.073	1575.83	250.356	977.239	1429.18	260.21	1090.84	1157.12	244.394	820.841	1318.24	231.758	734.982	1115.73	180.441	1085.6	1252.38	399.373	875.655	1382.53	513.69	871.249	1147.21	526.24	874.216	1050.89	529.258	786.32	922.85	480.329	763.82	822.398	550.221	790.351	810.156	531.567	730.968	752.652
6119	0	287.493	736.378	1541.99	183.429	745.293	1541.89	316.103	896.83	1573.19	197.261	909.575	1574.68	250.272	967.693	1428.1	259.615	1081.3	1156	244.363	811.249	1317.09	231.754	725.259	1114.67	179.757	1075.8	1251.25	399.153	866.269	1381.43	513.323	860.849	1146.24	525.772	862.599	1049.68	528.159	773.578	922.394	478.987	750.593	822.153	549.059	776.384	809.694	529.77	716.546	752.722
6120	0	287.167	726.905	1540.86	183.06	735.628	1540.69	315.691	887.269	1572.14	196.911	900.023	1573.39	249.488	958.105	1426.92	258.996	1071.75	1154.86	244.126	801.516	1315.88	231.992	715.713	1113.5	179.248	1066.09	1249.98	398.915	856.874	1380.4	512.923	850.334	1145.18	525.519	851.224	1048.74	527.081	760.892	922.001	477.418	737.293	822.061	547.941	762.604	809.343	527.975	702.257	752.998
6121	0	286.79	717.409	1539.62	182.598	726.191	1539.46	315.117	877.753	1570.85	196.318	890.454	1572.07	248.91	948.632	1425.55	258.285	1061.95	1153.59	243.908	791.865	1314.74	232.03	705.692	1112.37	178.459	1056.1	1248.65	398.407	847.401	1379.24	512.861	839.854	1144	525.045	839.726	1047.6	525.902	748.305	921.522	475.834	724.058	822.026	546.464	748.936	808.891	526.084	688.054	753.232
6122	0	286.405	707.848	1538.38	182.323	716.509	1538.17	314.597	868.381	1569.55	195.892	880.907	1570.8	248.279	938.896	1424.05	257.508	1052.15	1152.16	243.757	782.09	1313.5	232.279	695.707	1111.19	177.725	1046.15	1247.2	397.948	838.033	1378	512.504	829.306	1142.89	524.317	828.28	1046.31	524.727	735.777	921.044	474.272	710.882	821.892	544.767	735.504	808.368	524.169	673.849	753.444
6123	0	285.88	698.325	1537.2	181.873	706.815	1536.81	313.922	858.845	1568.51	195.063	871.182	1569.65	247.746	929.248	1422.86	256.586	1042.23	1150.54	243.404	772.238	1312.25	232.605	686.003	1109.83	176.841	1036.09	1245.56	397.478	828.633	1376.82	512.188	818.846	1141.94	523.703	816.861	1045.21	523.594	723.409	920.687	472.681	697.799	821.911	543.251	721.909	807.803	522.378	659.95	753.785
6124	0	285.322	688.844	1536.09	181.089	697.253	1535.61	313.11	849.34	1567.47	194.247	861.614	1568.43	246.821	919.649	1421.43	255.598	1032.07	1149.03	243.152	762.412	1311.23	232.666	675.732	1108.77	175.759	1025.85	1243.97	396.912	819.269	1375.84	511.552	808.26	1141.05	523.226	805.672	1044.36	522.373	711.15	920.457	471.121	684.81	822.154	541.598	708.943	807.673	520.399	645.879	754.348
6125	0	284.606	679.256	1534.92	180.436	687.586	1534.35	312.14	839.771	1566.29	193.414	851.914	1567.16	245.775	909.943	1419.93	254.686	1021.89	1147.38	242.824	752.616	1310.14	232.885	665.421	1107.85	174.884	1015.66	1242.26	396.253	809.779	1374.75	510.929	797.568	1140.16	522.624	794.628	1043.42	521.218	699.076	920.212	469.577	671.925	822.518	540.164	695.802	807.193	518.586	632.349	754.773
6126	0	283.781	669.674	1533.81	179.606	677.902	1532.99	311.141	830.151	1565.2	192.397	842.369	1566.04	245.055	900.335	1418.71	253.614	1011.23	1145.57	242.293	742.557	1308.96	233.176	655.171	1106.66	173.908	1005.34	1240.42	395.574	800.349	1373.75	510.343	786.954	1139.56	521.859	783.704	1042.54	520.265	687.397	920.09	468.135	659.189	822.837	538.226	683.143	806.972	516.759	619.01	755.346
6127	0	282.667	660.136	1532.8	178.471	668.461	1531.83	310.158	820.674	1564.33	191.352	832.678	1564.7	243.862	890.569	1417.14	252.578	1000.56	1143.86	241.826	732.617	1308.01	233.128	644.716	1105.87	172.742	994.87	1238.67	394.875	790.867	1373.01	509.453	776.192	1138.96	521.054	772.989	1041.87	519.055	675.764	920.073	466.638	646.656	823.307	537.011	670.586	806.893	515.09	605.921	756.184
6128	0	281.581	650.59	1531.83	177.327	658.802	1530.75	308.816	811.019	1563.21	190.003	823.234	1563.35	242.891	880.956	1415.68	251.867	989.954	1142.05	241.237	722.492	1307.12	233.205	634.02	1105.27	171.783	984.354	1236.6	393.995	781.177	1372.28	508.716	765.793	1138.48	520.535	762.642	1041.37	517.845	664.307	920.074	465.309	634.337	823.952	535.496	658.575	806.867	513.59	593.068	756.943
6129	0	280.281	641.08	1530.9	176.093	649.271	1529.58	307.503	801.74	1561.97	188.741	813.681	1562.08	241.627	871.181	1414.23	251.084	979.106	1139.91	240.584	712.33	1306.16	233.229	623.387	1104.37	170.857	973.824	1234.49	392.993	771.482	1371.48	507.87	755.3	1137.9	519.805	752.319	1040.73	517.125	653.268	920.006	464.282	622.304	824.492	534.1	646.808	806.62	512.379	580.571	757.679
6130	0	278.977	631.544	1530.21	174.871	639.799	1528.65	306.042	792.206	1560.97	187.226	804.243	1560.77	240.307	861.585	1412.62	250.237	967.939	1137.85	239.818	702.103	1305.3	233.111	612.537	1103.87	169.719	963.132	1232.32	391.926	761.749	1370.8	507.128	744.976	1137.47	518.967	742.14	1040.13	516.414	642.465	920.014	463.251	610.209	825.237	532.82	635.471	806.445	511.208	568.401	758.364
6131	0	277.698	621.963	1529.88	173.388	630.083	1528.18	304.52	782.853	1560.18	185.686	794.739	1559.71	238.712	851.928	1411.3	249.407	956.553	1135.87	238.876	691.703	1304.72	232.96	601.569	1103.57	168.55	952.376	1230.12	390.716	752.042	1370.41	506.292	734.439	1137.29	518.081	732.113	1039.72	515.739	631.96	919.886	462.598	598.813	825.758	531.66	624.663	806.222	510.295	556.644	759.001
6132	0	276.213	612.408	1529.9	171.974	620.415	1528.08	302.774	773.362	1559.66	183.931	785.162	1559.04	237.111	842.203	1410.21	248.627	945.146	1134.07	237.9	681.352	1304.44	232.703	590.421	1103.55	167.511	941.694	1228.23	389.522	742.257	1370.16	505.388	724.135	1137.15	517.173	722.195	1039.42	515.194	621.661	919.854	461.988	587.59	826.33	530.529	614.263	806.075	510.038	545.714	759.625
6133	0	274.81	602.69	1530.3	170.505	610.365	1528.26	301.044	763.948	1559.46	182.152	775.291	1558.68	235.438	832.269	1409.49	247.972	933.765	1132.93	236.595	670.712	1304.32	232.529	579.098	1103.6	166.414	930.904	1226.64	388.171	732.209	1370.12	504.535	713.932	1137.2	516.302	712.333	1039.47	514.757	611.842	919.749	461.706	576.713	826.551	529.305	604.609	805.941	509.898	535.105	760.168
6134	0	273.395	593.028	1530.93	169.09	600.467	1528.67	299.111	754.227	1559.65	180.23	765.523	1558.6	233.777	821.976	1409.28	247.498	922.396	1132.32	235.52	660.099	1304.62	232.211	567.636	1103.91	165.46	919.988	1225.63	387.065	722.014	1370.63	503.61	704.058	1137.32	515.275	702.543	1039.56	514.514	602.222	919.816	461.543	566.309	827.033	528.617	595.201	805.607	510.124	525.224	760.637
6135	0	271.838	583.181	1532.06	167.476	590.432	1529.61	297.399	744.707	1560.16	178.377	755.522	1558.78	232.336	811.564	1409.42	247.118	911.497	1132.35	234.192	649.372	1305.3	231.788	556.054	1104.64	164.643	909.051	1225.19	385.629	711.312	1371.29	502.692	694.344	1138.01	514.333	692.808	1040.33	514.13	592.926	920.155	461.439	556.663	827.495	527.722	586.447	805.779	510.475	515.818	761.364
6136	0	270.219	573.214	1533.33	165.869	580.219	1530.63	295.302	734.814	1560.9	176.218	745.539	1559.22	231.016	801.052	1410.07	246.765	900.91	1132.88	232.891	638.624	1306.12	231.298	544.436	1105.65	164.149	898.286	1225.31	384.427	700.433	1372.51	501.774	684.864	1138.93	513.514	683.164	1041.29	513.764	583.889	920.618	461.215	547.046	828.306	526.72	578.375	806.054	511.063	507.146	762.081
6137	0	268.479	563.123	1534.81	164.172	570.18	1531.71	293.156	724.929	1561.88	174.357	735.396	1559.9	229.862	790.453	1411.04	246.765	890.649	1133.73	231.488	627.837	1307.18	230.508	532.659	1106.94	164.152	887.734	1225.87	382.888	689.201	1373.89	500.734	675.25	1140.2	512.483	673.44	1042.79	513.334	575.087	921.355	461.144	538.072	829.021	525.966	570.535	806.648	511.511	498.972	762.924
6138	0	266.682	552.899	1536.63	162.41	559.796	1532.99	291.331	714.944	1563.54	172.332	725.315	1561	228.849	779.743	1412.26	247.031	880.003	1135.13	230.193	617.143	1308.58	229.718	521.607	1108.38	164.079	876.947	1226.8	381.659	677.86	1375.87	499.675	665.643	1141.9	511.574	663.768	1044.76	512.905	566.587	922.428	461.134	530.11	829.68	525.337	563.159	807.604	512.05	491.454	763.836
6139	0	264.845	542.735	1538.36	160.578	549.626	1534.42	289.46	704.654	1565.39	170.557	715.037	1562.28	228.096	769.294	1413.66	247.774	869.056	1136.53	228.905	606.52	1310.31	228.757	510.545	1110.22	164.663	866.448	1227.97	380.221	666.468	1377.99	498.749	656.065	1144.06	510.704	654.36	1047.07	512.335	558.226	923.814	460.988	522.101	830.771	525.227	556.123	809.152	512.549	484.467	764.826
6140	0	263.096	532.42	1540.28	158.812	539.56	1535.84	287.555	694.211	1567.5	168.572	704.852	1563.86	227.388	758.999	1415.42	248.176	857.61	1137.83	227.684	596.047	1312.16	227.753	499.61	1112.48	164.883	855.817	1229.22	378.932	655.248	1380.45	497.85	646.25	1146.57	509.955	644.94	1049.72	511.727	550.044	925.478	460.981	514.995	831.821	525.069	549.271	810.724	512.905	477.958	765.901
6141	0	261.35	522.129	1542.35	157.128	529.331	1537.28	286.021	683.902	1569.92	167.141	694.625	1565.8	226.79	748.817	1417.14	248.842	846.087	1139.44	226.76	585.7	1314.33	226.693	489.088	1115	165.417	845.337	1230.57	377.869	644.283	1383.18	497.157	636.176	1149.5	509.086	635.62	1052.41	511.34	542.07	927.372	460.876	508.057	833.037	524.85	542.518	812.5	513.259	471.824	766.986
6142	0	259.591	511.928	1544.53	155.392	519.421	1538.94	284.608	673.563	1572.7	165.713	684.614	1567.89	226.322	738.994	1419.05	249.611	834.763	1141.05	225.855	575.514	1316.75	225.799	478.891	1117.59	165.781	834.782	1231.87	376.952	633.628	1385.98	496.27	625.958	1152.49	508.563	626.517	1055.45	511.128	534.354	929.458	460.81	501.543	834.37	525.197	535.931	814.739	513.336	465.989	768.064
6143	0	257.97	501.664	1546.68	153.956	509.432	1540.83	283.261	663.2	1575.44	164.397	674.506	1570.07	225.582	729.055	1420.79	250.219	823.428	1142.29	224.875	565.324	1319.12	224.778	468.605	1120.43	166.164	824.268	1233.15	375.92	623.216	1388.66	495.601	615.614	1155.49	508.055	617.588	1058.45	510.934	526.776	931.595	460.799	495.24	835.692	526.003	529.25	816.937	513.23	460.412	768.827
6144	0	256.58	491.629	1548.92	152.512	499.602	1542.71	282.057	653.021	1577.9	163.328	664.595	1572.19	225.11	719.159	1422.54	250.674	812.12	1143.68	224.112	555.229	1321.52	223.696	458.616	1123.06	166.268	813.776	1234.47	374.888	612.843	1391.08	494.851	605.327	1158.26	507.555	608.844	1061.12	510.502	519.061	933.489	460.871	489.209	836.835	526.241	522.796	819.057	513.154	455.076	769.447
6145	0	255.271	481.61	1551.17	151.292	489.892	1544.64	281.128	643.008	1580.35	162.323	654.788	1574.35	224.338	709.276	1424.37	250.729	801.449	1145.33	223.447	545.294	1323.79	222.845	448.421	1125.58	166.128	803.293	1235.88	374.267	602.805	1393.49	494.346	595.042	1161.05	507.211	600.262	1063.74	510.473	511.608	935.513	461.02	483.215	837.911	527.052	516.192	821.251	512.995	449.82	769.863
6146	0	254.183	471.69	1553.51	150.243	480.15	1546.85	280.281	633.027	1582.73	161.653	645.039	1576.45	223.667	699.328	1426.13	250.366	791.159	1147.01	222.74	535.27	1326.08	222.14	438.252	1128.16	165.957	792.962	1237.38	373.643	592.862	1395.88	493.864	585.005	1163.73	507.181	591.929	1066.44	510.475	504.245	937.405	461.183	477.322	839.165	528.219	509.449	823.419	512.816	444.781	770.299
6147	0	253.271	462.026	1555.66	149.248	470.554	1548.86	279.59	623.333	1584.67	160.829	635.431	1578.32	223.135	689.276	1427.9	249.957	781.193	1148.73	222.203	525.361	1328.17	221.389	428.13	1130.31	165.506	782.534	1238.85	373.11	582.94	1397.82	493.544	575.041	1165.95	507.049	583.706	1068.66	510.897	497.058	938.991	461.471	471.516	840.208	528.928	502.976	825.331	512.67	439.701	770.417
6148	0	252.381	452.305	1557.66	148.402	461.057	1550.81	279.133	613.59	1586.45	160.438	625.963	1579.91	222.47	679.264	1429.5	249.109	771.127	1150.47	221.703	515.477	1329.85	220.943	418.128	1132	165.076	772.433	1240.46	372.66	573.058	1399.54	493.467	565.411	1167.82	506.815	575.479	1070.35	511.189	489.758	940.289	461.864	465.739	840.897	530.058	496.255	826.62	512.757	434.739	770.297
6149	0	251.658	442.522	1559.69	147.715	451.442	1552.66	278.503	603.784	1587.88	160.053	616.468	1581.39	221.957	669.137	1431.24	248.412	761.536	1152.35	221.267	505.552	1331.43	220.606	408.419	1133.5	164.327	762.198	1242.16	372.3	563.29	1401.16	493.391	555.912	1169.53	506.832	567.323	1072.16	511.637	482.603	941.468	462.442	459.952	841.542	531.208	489.838	828.189	512.861	429.748	770.196
6150	0	251.099	432.906	1561.43	147.106	441.964	1554.39	278.31	594.269	1589.43	159.671	607.036	1582.66	221.369	659.088	1432.65	247.456	751.89	1154.16	220.891	495.716	1332.84	220.434	398.804	1134.74	163.728	752.321	1243.71	371.984	553.569	1402.57	493.265	546.715	1171.01	506.926	559.14	1073.93	511.978	475.495	942.41	463.088	454.012	842.015	532.215	483.654	829.39	513.378	424.945	769.984
6151	0	250.649	423.296	1563.02	146.656	432.48	1555.89	277.971	584.701	1590.38	159.462	597.627	1583.74	221.083	649.088	1434.22	246.514	742.603	1155.76	220.709	485.918	1333.98	220.494	388.828	1135.8	162.833	742.37	1245.45	371.717	543.84	1403.57	493.411	537.741	1172.1	506.824	550.923	1075.08	512.64	468.593	942.928	463.944	448.101	842.059	533.123	477.703	830.049	514.134	420.136	769.609
6152	0	250.386	413.711	1564.29	146.385	422.957	1557.28	277.729	575.044	1591.24	159.368	588.123	1584.59	220.515	639.153	1435.47	245.858	733.501	1157.4	220.757	476.178	1334.83	220.83	379.491	1136.4	162.291	732.801	1247	371.653	534.361	1404.53	493.474	529.181	1172.91	506.537	542.683	1075.91	513.019	461.595	943.246	465.316	442.44	841.898	533.78	472.028	830.515	515.312	415.304	769.163
6153	0	250.12	404.023	1565.49	146.16	413.344	1558.36	277.577	565.454	1592.16	159.175	578.604	1585.48	220.329	629.356	1436.77	244.831	724.422	1158.8	220.697	466.489	1335.56	221.023	369.924	1136.89	161.361	723.067	1248.58	371.581	525.016	1405.39	493.04	520.801	1173.59	506.321	534.522	1076.78	513.275	454.757	943.526	466.139	436.592	841.731	534.957	466.3	830.932	516.666	410.521	768.833
6154	0	249.936	394.493	1566.47	145.927	403.706	1559.36	277.533	556.023	1593.05	158.906	569.05	1586.34	219.81	619.582	1437.94	243.951	715.552	1160.35	220.791	457.06	1336.24	221.566	361.055	1137.36	160.528	713.675	1250.22	371.523	515.772	1406.23	493.269	512.827	1174.24	506.158	526.408	1077.72	513.789	448.039	943.868	466.765	430.648	841.514	535.92	460.776	831.347	518.076	405.604	768.583
6155	0	249.872	384.874	1567.22	145.871	394.08	1560.2	277.388	546.478	1593.69	158.912	559.48	1587.01	219.395	609.877	1439.09	243.102	706.804	1161.7	220.974	447.722	1336.68	222.075	352.163	1137.33	159.697	704.353	1251.74	371.524	506.621	1406.84	492.557	505.148	1174.4	506.006	518.488	1078.33	514.09	441.367	943.855	467.861	424.826	841.013	536.717	455.522	831.711	519.696	400.585	768.31
6156	0	249.934	375.311	1567.89	145.899	384.425	1560.89	277.298	536.869	1594.39	158.809	549.778	1587.65	219.148	600.372	1440.12	242.287	698.204	1163.01	221.236	438.413	1337.03	222.669	342.939	1137.18	158.569	695.006	1253.16	371.495	497.7	1407.31	492.224	497.723	1174.51	505.679	510.656	1078.85	514.33	434.882	943.816	468.779	419.015	840.593	537.752	449.887	831.732	521.208	395.401	768.132
6157	0	250.004	365.794	1568.47	145.95	374.776	1561.48	277.174	527.277	1594.98	158.674	540.063	1588.22	218.729	590.825	1441.02	241.266	689.665	1164.1	221.52	429.212	1337.47	223.399	334.499	1137.22	157.81	685.941	1254.46	371.539	488.9	1407.86	491.86	490.633	1174.77	505.553	503.261	1079.58	514.71	428.481	943.986	469.661	413.14	840.473	538.627	444.367	832.183	522.824	390.175	768.321
6158	0	250.228	356.319	1568.84	146.13	365.106	1561.88	277.248	517.83	1595.53	158.545	530.344	1588.77	218.324	581.435	1441.86	240.361	680.989	1165.04	221.915	420.142	1337.87	224.033	325.969	1137.22	156.91	676.78	1255.53	371.702	480.333	1408.31	491.616	483.627	1175.03	505.365	495.979	1080.11	514.854	422.11	944.133	470.691	407.356	840.456	539.651	438.95	832.586	524.366	384.925	768.391
6159	0	250.519	346.709	1569.05	146.385	355.36	1562.08	277.223	508.337	1596.05	158.53	520.722	1589.33	217.91	572.202	1442.7	239.404	672.421	1166.04	222.27	411.134	1338.09	224.869	317.552	1137.21	155.941	667.634	1256.62	371.745	471.793	1408.64	491.378	476.626	1175.3	504.933	488.9	1080.43	515.07	415.842	944.258	471.577	401.632	840.302	540.436	433.293	832.919	525.704	379.467	768.583
6160	0	250.644	337.137	1569.13	146.544	345.708	1562.17	277.14	498.822	1596.46	158.546	510.973	1589.87	217.561	563.048	1443.33	238.443	663.775	1166.77	222.621	402.167	1338.29	225.497	309.189	1137.09	155.082	658.63	1257.51	371.912	463.235	1409.02	491.353	469.801	1175.71	504.729	482.119	1080.99	515.328	409.537	944.415	472.093	396.618	839.911	541.147	427.734	833.334	526.87	373.98	768.82
6161	0	250.851	327.595	1569.06	146.686	336.012	1562.15	277.181	489.347	1596.97	158.57	501.241	1590.37	217.337	553.989	1443.7	237.676	655.193	1167.45	222.95	393.275	1338.54	226.056	300.042	1137.51	154.473	649.788	1258.15	371.974	454.914	1409.37	491.395	463.011	1176.05	504.754	475.461	1081.52	515.668	403.274	944.568	472.603	390.845	839.794	541.855	422.133	833.788	527.996	368.392	769.022
6162	0	251.056	318.111	1568.88	146.996	326.388	1562.02	277.171	479.683	1597.42	158.592	491.496	1590.77	217.175	544.902	1444.12	236.992	646.716	1168.15	223.476	384.466	1338.69	226.743	291.149	1137.61	153.806	640.752	1258.77	372.255	446.634	1409.81	491.585	456.257	1176.31	504.677	469.05	1081.81	516.188	397.403	944.694	473.258	385.097	839.746	542.416	416.424	834.128	528.977	362.793	769.29
6163	0	251.32	308.675	1568.69	147.245	316.886	1561.76	277.188	470.221	1597.85	158.51	481.901	1591.24	216.862	536	1444.58	236.363	638.266	1168.66	223.905	375.694	1338.72	227.36	282.315	1137.77	153.254	631.871	1259.18	372.526	438.559	1410.33	492.026	449.604	1176.7	504.688	462.639	1082.12	516.735	391.27	944.833	473.889	379.236	839.678	542.869	411.027	834.439	529.768	357.116	769.487
6164	0	251.554	299.293	1568.38	147.519	307.413	1561.45	277.284	460.763	1598.13	158.573	472.381	1591.51	216.732	527.116	1444.82	236.024	629.83	1169.07	224.308	367.021	1338.81	227.923	273.588	1138.07	152.828	623.112	1259.55	372.798	430.23	1410.6	492.582	442.894	1177.18	504.791	456.299	1082.35	517.317	385.349	944.962	474.396	373.352	839.72	543.335	405.028	834.549	530.514	351.526	769.584
6165	0	251.828	289.962	1568.06	147.815	297.979	1561.05	277.371	451.333	1598.28	158.638	462.931	1591.61	216.803	518.194	1444.91	235.769	621.344	1169.28	224.764	358.296	1338.86	228.503	265.025	1138.34	152.568	614.331	1259.73	373.11	421.945	1410.8	492.944	436.292	1177.37	505.101	450.067	1082.6	518.015	379.344	944.971	474.757	367.523	839.728	543.658	399.462	834.646	531.066	345.893	769.584
6166	0	252.146	280.686	1567.58	148.139	288.577	1560.56	277.485	441.956	1598.26	158.782	453.427	1591.51	216.772	509.305	1444.85	235.634	612.901	1169.36	225.195	349.522	1338.69	229.091	256.427	1138.35	152.421	605.565	1259.76	373.453	413.491	1410.73	493.387	429.55	1177.41	505.275	443.64	1082.56	518.696	373.343	944.767	475.275	361.307	839.623	543.972	393.854	834.457	531.602	340.268	769.326
6167	0	252.445	271.389	1567.14	148.479	279.235	1560	277.675	432.72	1598.24	158.901	443.936	1591.42	216.758	500.46	1444.88	235.63	604.338	1169.51	225.57	340.778	1338.45	229.762	247.944	1138.11	152.411	596.882	1259.83	373.717	404.921	1410.57	493.891	422.779	1177.44	505.569	437.083	1082.6	519.464	367.314	944.533	475.942	354.937	839.491	544.017	388.235	834.166	532.009	334.619	769.016
6168	0	252.8	262.121	1566.73	148.797	269.904	1559.54	277.911	423.33	1598.23	159.101	434.469	1591.31	216.946	491.481	1444.82	235.627	595.735	1169.58	225.976	332.074	1338.23	230.211	239.688	1137.75	152.365	588.212	1259.94	374.086	396.398	1410.49	494.414	416.086	1177.51	506.214	430.537	1082.88	520.18	361.12	944.346	476.457	348.7	839.445	544.328	382.595	834.024	532.508	329.068	768.633
6169	0	253.287	252.933	1566.16	149.187	260.542	1559.01	278.159	414.129	1598	159.368	425.059	1590.99	217.182	482.552	1444.53	235.724	587.184	1169.46	226.29	323.328	1337.94	230.665	231.186	1137.33	152.527	579.528	1259.91	374.453	387.676	1410.16	494.839	409.085	1177.41	506.561	423.784	1082.77	520.941	355.03	943.964	476.929	342.453	839.282	544.629	376.963	833.567	533.025	323.521	767.991
6170	0	253.747	243.786	1565.53	149.685	251.332	1558.34	278.47	404.966	1597.72	159.608	415.78	1590.71	217.435	473.584	1444.26	235.87	578.502	1169.3	226.621	314.516	1337.41	230.988	222.619	1136.68	152.695	570.827	1259.82	374.832	378.901	1409.77	495.309	402.096	1177.21	506.388	416.899	1082.13	521.666	348.835	943.398	477.272	336.107	838.788	544.603	371.215	832.851	533.433	317.527	767.472
6171	0	254.17	234.599	1564.88	150.066	242.158	1557.7	278.803	395.712	1597.39	159.95	406.578	1590.45	217.775	464.583	1443.97	236.109	569.808	1169.19	226.987	305.644	1336.88	231.302	213.998	1136.08	152.992	562.043	1259.74	375.138	369.922	1409.34	495.905	394.792	1177.04	506.881	409.86	1081.79	522.326	342.266	942.896	477.882	329.537	838.39	544.472	365.579	832.218	533.849	311.66	766.792
6172	0	254.543	225.403	1564.25	150.437	233.008	1557.04	279.207	386.461	1597.03	160.344	397.433	1590.05	218.198	455.532	1443.58	236.397	561.133	1169	227.364	296.835	1336.43	231.715	205.471	1135.41	153.306	553.263	1259.52	375.573	361.039	1408.84	496.373	387.388	1176.79	507.716	402.776	1081.69	523.052	336.032	942.197	478.223	323.284	837.845	544.875	359.729	831.732	534.145	306.32	765.976
6173	0	254.967	216.199	1563.51	150.854	223.882	1556.39	279.73	377.337	1596.51	160.899	388.295	1589.52	218.66	446.469	1443.04	236.853	552.468	1168.65	227.796	287.925	1335.69	231.864	196.901	1134.37	153.709	544.485	1259.15	376.026	352.008	1408.17	497.05	379.746	1176.35	508.389	395.577	1081.28	523.777	329.483	941.475	478.884	316.733	837.181	545.185	353.594	830.881	534.451	300.512	764.967
6174	0	255.52	207.08	1562.7	151.355	214.791	1555.6	280.27	368.099	1595.69	161.485	379.221	1588.83	219.208	437.382	1442.38	237.302	543.733	1168.01	228.13	278.992	1334.74	232.147	188.233	1133.37	154.279	535.703	1258.62	376.444	342.798	1407.24	497.729	371.949	1175.68	508.89	388.093	1080.54	524.356	322.614	940.471	479.587	310.016	836.388	545.446	347.463	829.801	534.846	294.538	763.807
6175	0	256.123	197.956	1561.89	151.886	205.675	1554.79	280.811	358.909	1594.78	162.15	370.109	1588	219.881	428.255	1441.6	237.849	534.914	1167.25	228.45	270.018	1333.76	232.497	179.407	1132.43	154.972	526.894	1257.91	377.094	333.648	1406.35	498.265	363.848	1174.85	509.526	380.692	1079.77	524.71	315.823	939.491	479.745	303.781	835.252	545.506	341.281	828.942	535.23	288.52	762.727
6176	0	256.714	188.875	1560.91	152.512	196.616	1553.93	281.433	349.945	1593.77	162.806	360.97	1586.94	220.575	419.178	1440.72	238.416	526.007	1166.37	228.914	260.986	1332.86	232.674	170.412	1131.36	155.732	518.027	1257.08	377.615	324.323	1405.3	498.949	355.648	1173.99	510.069	373.068	1078.91	525.307	308.841	938.392	480.085	297.162	834.218	546.334	335.055	827.916	535.505	282.438	761.468
6177	0	257.339	179.74	1559.89	153.191	187.487	1552.88	282.12	340.887	1592.63	163.271	351.959	1585.95	221.294	410.028	1439.73	239.076	516.949	1165.4	229.296	251.908	1331.68	232.897	161.223	1130.23	156.527	509.01	1256.09	378.215	314.881	1404.17	499.565	347.253	1172.96	510.847	365.337	1078.02	525.773	301.64	937.079	480.749	290.228	833.13	546.507	328.473	826.774	535.88	276.247	760.073
6178	0	258.128	170.632	1558.85	153.899	178.325	1551.86	282.841	331.83	1591.49	164.009	342.768	1584.87	222.125	400.851	1438.64	239.841	507.771	1164.36	229.765	242.732	1330.34	233.125	151.999	1128.88	157.363	500.031	1255.1	378.906	305.365	1402.91	500.126	338.607	1171.71	511.3	357.345	1076.84	526.146	294.425	935.558	481.597	283.256	831.723	546.931	321.743	825.493	536.047	269.749	758.445
6179	0	258.933	161.485	1557.7	154.711	169.046	1550.8	283.61	322.757	1590.27	164.784	333.634	1583.74	223.165	391.652	1437.45	240.77	498.449	1163.12	230.319	233.548	1329.07	233.302	142.731	1127.62	158.485	490.93	1253.95	379.6	295.808	1401.56	500.739	329.836	1170.45	511.998	349.262	1075.76	526.551	287.057	934.018	481.573	276.401	830.117	547.469	314.787	824.124	536.47	263.377	756.848
6180	0	259.845	152.399	1556.48	155.55	159.828	1549.63	284.409	313.593	1588.97	165.392	324.506	1582.39	224.188	382.313	1436.04	241.875	489.073	1161.77	230.863	224.349	1327.62	233.569	133.344	1126.31	159.622	481.818	1252.66	380.401	286.13	1400.11	501.442	320.779	1169.13	512.562	341.092	1074.46	527.343	279.591	932.485	482.743	268.866	829.095	547.86	308.028	822.684	536.766	256.887	755.117
6181	0	260.822	143.202	1555.2	156.603	150.62	1548.32	285.314	304.417	1587.52	166.319	315.354	1580.94	225.326	372.994	1434.64	243.083	479.754	1160.38	231.58	215.098	1326.15	233.794	124.023	1124.84	160.95	472.675	1251.31	381.284	276.342	1398.64	502.105	311.585	1167.65	513.351	332.762	1073.07	527.777	271.937	930.758	481.808	263.087	826.499	548.454	300.796	820.971	537.122	250.167	753.187
6182	0	261.784	133.946	1553.9	157.585	141.346	1546.95	286.4	295.24	1586.01	167.582	306.113	1579.52	226.482	363.62	1433.23	244.375	470.398	1158.86	232.283	205.714	1324.56	233.967	114.623	1123.32	162.214	463.483	1249.86	382.21	266.567	1397	502.802	302.294	1165.97	513.866	324.262	1071.43	528.362	264.165	928.87	482.205	256	824.564	548.295	293.651	819.17	537.413	243.327	751.233
6183	0	262.737	124.689	1552.45	158.574	132.061	1545.63	287.421	286.034	1584.34	168.606	296.66	1577.73	227.75	354.161	1431.51	245.716	460.966	1157.14	232.994	196.374	1322.98	234.158	105.143	1121.69	163.587	454.139	1248.18	383.203	256.759	1394.98	503.472	292.845	1164.15	514.611	315.782	1069.78	528.705	256.412	926.944	482.606	248.768	822.604	548.89	286.121	817.334	537.854	236.526	749.156
6184	0	263.752	115.327	1550.96	159.623	122.794	1544.19	288.588	276.673	1582.73	169.654	287.392	1576.01	229.05	344.681	1429.75	247.058	451.367	1155.35	233.804	186.784	1321.43	234.466	95.5934	1120.05	164.856	444.77	1246.56	384.113	247.007	1393.22	504.264	283.317	1162.21	515.343	307.113	1067.97	529.383	248.409	924.899	483.223	241.209	820.507	549.689	278.802	815.577	538.221	229.331	746.932
6185	0	264.884	105.881	1549.53	160.746	113.534	1542.75	289.888	267.198	1581	171.092	278.362	1574.56	230.473	335.215	1428.13	248.358	441.671	1153.62	234.701	177.165	1319.52	234.724	85.9212	1118.35	166.291	435.316	1244.94	385.264	237.149	1391.14	505.11	273.574	1160.18	516	298.129	1065.96	530.124	240.087	922.674	483.667	233.352	818.222	550.214	271.005	813.41	538.579	222.115	744.588
6186	0	266.089	96.3744	1548.06	161.919	104.172	1541.38	291.28	257.77	1579.24	172.616	268.937	1572.84	231.791	325.658	1426.5	249.514	431.885	1151.97	235.744	167.736	1317.79	235.081	76.1197	1116.69	167.579	425.806	1243.41	386.305	227.37	1389.2	505.98	263.786	1158.2	516.778	289.085	1064.13	530.805	231.715	920.546	484.246	225.354	816.062	550.651	262.95	811.459	538.972	214.528	742.352
6187	0	267.362	86.9108	1546.67	163.097	94.7694	1540.17	292.845	248.335	1577.57	173.881	259.61	1571.26	233.133	315.961	1424.89	250.889	422.019	1150.16	236.719	157.993	1316.17	235.45	66.1648	1115.2	168.945	416.158	1241.75	387.502	217.545	1387.29	506.882	253.861	1156.2	517.678	280.124	1062.27	531.36	223.222	918.296	484.679	217.212	813.999	551.197	254.889	809.386	539.406	206.852	740.052
6188	0	268.802	77.3725	1545.3	164.593	85.3627	1538.93	294.386	238.812	1575.88	175.447	250.221	1569.84	234.486	306.199	1423.18	251.992	412.099	1148.44	237.854	148.372	1314.48	235.878	56.074	1113.57	170.278	406.367	1240.13	388.741	207.603	1385.39	507.947	244.11	1154.15	518.353	270.803	1060.12	532.113	214.565	916.25	485.32	208.812	811.878	551.772	246.483	807.327	539.756	198.834	737.705
6189	0	270.206	67.8417	1543.95	166.131	75.7483	1537.79	296.009	229.259	1574.13	177.284	240.816	1568.35	235.916	296.414	1421.69	253.123	402.055	1146.76	238.866	138.334	1313	236.482	45.8168	1112.14	171.586	396.659	1238.6	390.06	197.423	1383.52	508.881	234.188	1152.09	519.283	261.394	1058.2	532.757	205.324	914.012	485.639	200.181	809.679	552.3	237.804	805.249	540.101	190.419	735.439
6190	0	271.863	58.211	1542.68	167.75	66.2633	1536.73	297.876	219.79	1572.54	178.868	231.282	1566.9	237.505	286.507	1420.12	254.235	391.844	1144.9	239.984	128.41	1311.57	237.155	35.4914	1110.79	172.898	386.562	1237.06	391.371	187.484	1381.75	509.904	224.412	1150.18	520.051	251.889	1056.33	533.304	196.448	911.838	486.735	191.293	807.679	552.928	229.133	803.304	540.691	181.79	733.385
6191	0	273.691	48.5752	1541.6	169.498	56.7404	1535.75	299.753	210.197	1571.02	180.823	221.731	1565.49	239.091	276.619	1418.43	255.49	381.593	1143.03	241.171	118.423	1310.33	237.88	25.2402	1109.59	174.133	376.408	1235.37	392.911	177.515	1380.02	511.023	214.704	1148.31	521.022	242.363	1054.51	534.172	187.014	910.008	486.922	182.392	805.729	553.516	220.115	801.311	540.955	173.229	731.062
6192	0	275.577	38.9759	1540.4	171.409	47.0685	1534.79	301.777	200.562	1569.39	182.747	212.294	1564.18	240.727	266.677	1416.83	256.676	371.114	1141.15	242.471	108.137	1309.06	238.711	14.8072	1108.43	175.491	366.111	1233.58	394.433	167.182	1378.3	512.19	205.115	1146.38	521.817	232.48	1052.41	534.989	177.511	907.969	487.543	173.063	803.737	554.085	210.749	799.263	541.688	163.97	729.184
6193	0	277.509	29.2643	1539.26	173.364	37.5169	1533.89	303.863	190.962	1567.9	185.052	202.611	1562.99	242.471	256.784	1415.38	257.934	360.452	1139.24	243.926	97.8992	1307.9	239.724	4.2791	1107.29	176.958	355.673	1231.87	396.126	157.059	1376.69	513.368	195.44	1144.59	522.861	222.58	1050.6	535.548	167.749	906.013	488.233	163.845	801.83	554.734	201.202	797.194	542.001	154.827	726.948
6194	0	279.404	19.5142	1538.29	175.185	27.8384	1533.09	306.03	181.21	1566.67	187.19	192.94	1561.9	244.359	246.783	1413.78	259.239	349.579	1137.24	245.392	87.6819	1306.94	240.719	-6.24308	1106.56	178.438	345.16	1230.17	397.805	147.047	1375.2	514.689	185.73	1142.96	523.97	212.513	1048.93	536.673	157.858	904.231	488.983	154.184	800.099	555.528	191.571	795.487	542.618	145.217	725.106
6195	0	281.375	9.70989	1537.43	177.179	18.1232	1532.44	308.315	171.435	1565.6	189.394	183.486	1560.99	246.287	236.859	1412.39	260.463	338.737	1135.4	247.021	77.5131	1305.87	241.913	-16.8992	1105.87	179.924	334.415	1228.49	399.71	136.951	1373.7	516.082	176.013	1141.4	525.07	202.385	1047.31	537.671	147.618	902.435	489.767	144.282	798.325	556.423	181.619	793.827	543.291	135.387	723.311
6196	0	283.451	-0.232404	1536.82	179.323	8.44878	1531.96	310.714	161.503	1564.53	191.814	173.657	1560.21	248.227	226.918	1411.15	261.685	327.806	1133.7	248.701	66.828	1305.28	243.156	-27.7327	1105.27	181.397	323.931	1227.12	401.666	126.754	1372.35	517.632	166.087	1139.72	526.21	192.066	1045.56	538.734	137.236	900.66	490.853	133.897	796.555	557.355	171.301	792.032	543.992	125.196	721.295
6197	0	285.576	-10.3402	1536.53	181.321	-1.38429	1531.76	313.239	151.486	1563.74	194.268	163.929	1559.65	250.219	216.784	1410.1	262.908	316.755	1132.25	250.599	56.2111	1304.8	244.4	-38.6521	1104.97	182.699	313.144	1225.79	403.638	116.549	1371.16	519.055	156	1138.15	527.155	181.59	1043.82	539.89	126.756	899.085	491.956	122.719	795.151	558.282	160.83	790.335	545.102	114.746	719.811
6198	0	287.798	-20.3581	1536.51	183.662	-11.2881	1531.93	315.742	141.342	1563.13	196.944	154.086	1559.2	252.225	206.496	1409.37	264.158	305.614	1131.09	252.467	45.5813	1304.69	245.784	-49.8452	1105.02	184.054	302.643	1224.93	405.71	106.444	1370.21	520.598	145.76	1136.77	528.309	171.021	1042.32	541.157	116.222	897.682	493.165	112.003	793.807	559.386	150.311	788.821	546.318	104.089	718.476
6199	0	290.095	-30.6952	1536.75	185.86	-21.4175	1532.5	318.345	131.205	1562.8	199.435	143.932	1559.06	254.157	196.078	1409.07	265.38	294.561	1130.48	254.467	34.7866	1304.75	247.24	-61.3259	1105.28	185.344	291.943	1224.55	407.71	96.08	1369.37	522.045	135.17	1135.5	529.256	160.261	1041.02	542.491	105.481	896.416	494.408	101.023	792.637	560.693	139.603	787.601	547.546	93.6536	717.014
6200	0	292.439	-41.031	1537.41	188.312	-31.6814	1533.35	321.014	120.873	1562.71	202.106	133.838	1559.23	256.111	185.487	1409.33	266.188	283.641	1130.54	256.234	24.03	1305.13	248.638	-72.8939	1105.82	186.347	281.08	1224.73	409.709	85.7589	1368.92	523.34	124.26	1134.5	530.122	149.28	1040.08	543.789	94.4964	895.518	496.044	89.6748	791.545	561.936	128.735	786.678	549.055	82.5969	716.025
6201	0	294.983	-51.5166	1538.46	190.84	-41.9497	1534.76	323.705	110.523	1562.95	204.974	123.671	1559.85	257.902	174.667	1409.85	266.827	272.944	1131.16	258.208	13.0683	1305.91	250.174	-84.6722	1106.76	187.277	270.189	1225.62	411.646	75.3895	1368.96	524.627	113.199	1134.12	530.826	138.115	1039.54	545.317	83.442	895.197	497.509	78.3407	791.07	563.268	117.763	786.3	550.845	71.4866	715.735
6202	0	297.542	-61.908	1539.71	193.458	-52.4609	1536.41	326.584	100.195	1563.48	207.685	113.331	1560.87	259.677	163.806	1411.02	267.071	262.559	1132.04	260.119	2.19369	1307.08	251.752	-96.2194	1108.15	187.895	259.152	1226.9	413.49	64.9787	1369.39	525.573	102.022	1133.98	531.598	127.037	1039.55	546.771	72.323	895.341	499.262	66.5294	791.26	564.663	106.539	786.457	552.974	59.9316	715.97
6203	0	300.29	-72.4608	1541.12	196.226	-63.0261	1538.38	329.369	89.7688	1564.32	210.475	102.775	1562.23	261.296	152.996	1412.42	267.582	251.98	1133.75	262.079	-8.73192	1308.47	253.433	-107.58	1109.78	188.693	248.311	1228.76	415.365	54.6281	1370.28	526.533	90.6337	1134.35	532.112	115.698	1039.85	548.248	60.9345	895.995	501.647	54.3098	791.664	566.091	95.0296	787.059	555.104	48.384	716.562
6204	0	303.056	-83.0403	1542.79	198.833	-73.5269	1540.62	332.24	79.1432	1565.43	213.307	92.3052	1563.98	263.005	142.252	1414.2	268.441	240.853	1135.69	263.977	-19.4219	1310.22	255.089	-118.741	1111.72	189.196	237.316	1230.82	417.115	44.3811	1371.71	527.196	79.3538	1135.2	532.695	104.316	1040.82	549.647	49.3301	897.199	503.622	42.0404	792.701	567.551	83.2741	788.164	557.271	36.5265	717.737
6205	0	305.562	-93.5356	1544.57	201.392	-84.0982	1542.93	335.008	68.5841	1566.98	216.115	81.8334	1566.12	264.558	131.663	1416.19	268.736	229.377	1137.55	265.855	-30.0031	1312.4	256.56	-129.382	1114.2	189.811	226.219	1232.95	418.842	34.2907	1373.46	527.928	68.2619	1136.48	533.557	93.0408	1042.39	551.018	37.3183	898.952	505.105	29.7597	794.186	568.966	71.2783	789.937	559.607	24.2377	719.597
6206	0	308.056	-104.15	1546.28	203.809	-94.5158	1545.33	337.721	58.0348	1568.64	218.855	71.2654	1568.48	266.182	121.248	1418.09	268.664	217.449	1139.04	267.686	-40.3582	1314.69	258.025	-139.82	1116.63	190.427	215.147	1235.08	420.506	24.3078	1375.24	528.504	57.1161	1137.82	534.234	81.7713	1044.02	552.455	25.5323	900.793	507.157	16.9452	795.943	570.49	58.9484	791.817	562.114	11.486	721.909
6207	0	310.453	-114.604	1548.08	206.289	-104.96	1547.67	340.368	47.4915	1570.28	221.384	60.7806	1570.87	267.925	111.137	1420.15	268.842	205.538	1140.54	269.473	-50.653	1316.93	259.553	-149.929	1119.27	191.269	204.23	1237.1	422.215	14.3923	1377.14	529.148	46.0818	1139.39	534.933	70.4874	1045.66	553.812	13.5852	902.835	508.887	3.97683	797.802	572.026	46.5514	793.885	564.242	-1.30325	723.965
6208	0	312.675	-125.017	1550.13	208.487	-115.254	1550.21	342.823	36.9844	1572.1	223.951	50.5275	1573.16	269.713	101.12	1422.17	269.723	194.534	1142.54	271.358	-60.7691	1319.36	260.9	-159.752	1121.92	192.102	193.458	1239.11	423.888	4.60994	1379.26	529.891	35.0887	1141.1	535.957	59.279	1047.62	555.132	1.43927	905.376	510.553	-8.73291	799.853	573.475	33.7415	796.032	565.932	-14.2173	726.083
6209	0	314.646	-135.242	1552.16	210.537	-125.297	1552.56	345.121	26.6726	1573.84	226.404	40.4783	1575.36	271.316	91.2049	1424	270.859	184.167	1144.22	272.984	-70.6324	1321.71	262.232	-169.484	1124.76	193.04	183.079	1240.99	425.651	-5.07472	1381.23	530.997	24.3006	1143.12	537.1	48.1352	1049.5	556.608	-10.8218	907.581	512.211	-22.0729	802.305	574.868	20.6635	798.299	567.897	-27.6547	728.534
6210	0	316.525	-145.418	1554.03	212.351	-135.178	1554.71	347.318	16.5507	1575.46	228.455	30.4736	1577.29	273.153	81.4092	1425.73	271.744	174.247	1145.71	274.637	-80.4411	1323.97	263.488	-179.356	1127.35	194.165	172.713	1242.75	427.337	-14.8268	1383.05	532.18	13.3987	1144.75	538.435	36.9651	1051.13	558.051	-22.9509	909.684	513.903	-35.8551	804.491	576.084	7.68525	800.083	569.849	-41.5568	730.957
6211	0	318.205	-155.323	1555.79	214.097	-145.025	1556.8	349.297	6.56438	1577	230.443	20.6693	1579.04	274.821	71.6999	1427.32	272.859	164.116	1147.06	276.255	-90.2405	1325.99	264.569	-189.135	1129.76	195.62	162.68	1244.26	428.91	-24.4821	1384.67	533.668	2.5811	1146.45	540.027	25.8204	1052.52	559.559	-35.3655	911.696	515.318	-49.3736	806.475	577.583	-6.02672	801.897	571.347	-55.6739	732.995
6212	0	319.853	-165.069	1557.73	215.721	-154.62	1558.9	351.198	-3.25947	1578.48	232.555	11.1358	1580.77	276.597	61.9923	1428.79	274.225	154.023	1148.38	277.672	-99.8609	1328.04	265.514	-198.894	1132.07	197.098	152.85	1245.77	430.473	-34.2199	1386.17	535.22	-8.06778	1148.04	541.737	14.8137	1053.91	561.183	-47.7545	913.466	516.656	-63.0294	808.572	579.061	-19.3819	803.513	572.673	-69.7726	735.038
6213	0	321.443	-174.681	1559.54	217.344	-164.089	1561.01	352.862	-12.7728	1579.65	234.179	1.66645	1582.18	278.231	52.3048	1430.18	275.632	143.801	1149.69	278.986	-109.436	1329.81	266.374	-208.573	1134.06	198.667	143.151	1247.27	431.936	-43.9286	1387.48	536.886	-18.6852	1149.44	543.648	3.69072	1055.17	562.786	-60.2104	915.054	518.151	-76.8151	810.726	580.266	-33.3549	805.004	573.925	-84.3932	737.138
6214	0	323.076	-184.077	1561.33	218.868	-173.499	1562.99	354.505	-22.0814	1580.58	235.858	-7.69723	1583.45	279.741	42.6152	1431.39	277.081	134.025	1151	280.24	-119.051	1331.09	267.03	-218.337	1135.47	200.183	133.519	1248.53	433.35	-53.804	1388.33	538.67	-29.3199	1150.38	545.604	-7.47129	1055.85	564.432	-73.0058	916.443	519.346	-90.8008	812.303	581.521	-47.3542	805.871	574.907	-99.341	738.765
6215	0	324.532	-193.346	1562.86	220.407	-182.789	1564.8	355.978	-31.2848	1581.32	237.308	-16.7944	1584.25	281.229	32.807	1432.58	278.453	124.412	1152.25	281.393	-128.72	1332.21	267.623	-228.075	1136.52	201.886	124.161	1249.95	434.577	-63.735	1389.11	540.6	-39.8454	1151.31	547.449	-18.59	1056.33	566.081	-85.6118	917.598	520.511	-104.673	814.003	582.621	-61.5499	806.658	575.723	-114.497	740.474
6216	0	325.887	-202.417	1564.51	221.724	-191.987	1566.7	357.42	-40.285	1581.9	238.828	-26.0082	1585.18	282.527	23.0228	1433.67	279.877	115.037	1153.4	282.322	-138.409	1333.19	267.971	-237.741	1137.42	203.331	114.911	1251.13	435.684	-73.735	1389.74	542.482	-50.2929	1152.22	549.621	-29.6679	1057.09	567.714	-98.403	918.85	521.776	-119.178	816.153	583.808	-75.7456	807.628	576.538	-129.758	742.239
6217	0	327.242	-211.576	1565.91	223.077	-201.127	1568.3	358.644	-49.271	1582.41	240.151	-34.9965	1585.94	283.64	13.2022	1434.55	281.254	105.787	1154.55	283.079	-148.142	1333.75	268.157	-247.244	1137.92	204.872	105.864	1252.37	436.649	-83.7512	1390.23	544.383	-60.6762	1152.94	551.635	-40.8739	1057.54	569.122	-111.222	919.846	522.525	-132.536	817.557	584.987	-89.9717	808.346	577.133	-145.235	743.963
6218	0	328.554	-220.606	1567.12	224.324	-210.211	1569.71	359.826	-58.1868	1582.82	241.133	-43.9632	1586.47	284.742	3.48133	1435.45	282.535	96.5522	1155.58	283.637	-157.776	1334	268.178	-256.71	1138.08	206.079	96.6516	1253.42	437.488	-93.931	1390.52	546.046	-71.158	1153.56	553.502	-52.2545	1057.88	570.479	-124.104	920.772	523.422	-146.311	819.004	585.926	-104.36	809.05	577.806	-160.677	745.674
6219	0	329.673	-229.676	1568.21	225.432	-219.324	1570.85	360.808	-67.0553	1583.23	242.006	-53.0113	1586.95	285.608	-6.18061	1436.2	283.848	87.4023	1156.6	284.025	-167.346	1334.16	268.017	-266.077	1138.04	207.274	87.5979	1254.56	438.09	-104.102	1390.79	547.602	-81.5435	1154.32	555.292	-63.6648	1058.25	571.786	-136.962	921.751	524.204	-160.191	820.477	586.99	-118.422	809.619	578.386	-176.261	747.471
6220	0	330.72	-238.643	1569.29	226.402	-228.365	1572.04	361.607	-75.9842	1583.5	242.873	-61.9927	1587.26	286.662	-15.8301	1436.94	285.298	78.4886	1157.53	284.33	-176.814	1334.34	267.73	-275.197	1137.95	208.546	78.7582	1255.45	438.606	-114.233	1391.1	549.035	-91.9387	1154.96	557.068	-75.2992	1058.7	572.878	-149.853	922.757	525.057	-173.904	822.027	587.798	-132.809	810.443	579.141	-191.476	749.295
6221	0	331.572	-247.672	1570.05	227.361	-237.509	1572.94	362.44	-84.925	1583.69	243.701	-70.9419	1587.58	287.526	-25.521	1437.61	286.685	69.6923	1158.47	284.591	-186.225	1334.38	267.298	-284.17	1137.51	209.853	69.8792	1256.42	439.091	-124.46	1391.39	550.325	-102.435	1155.57	558.685	-86.9767	1059.06	573.855	-163.009	923.78	525.904	-187.633	823.558	588.773	-146.875	811.114	579.931	-206.802	751.198
6222	0	332.21	-256.694	1570.64	228.077	-246.623	1573.51	363.053	-93.912	1583.76	244.406	-80.0651	1587.79	288.446	-35.1148	1438.27	288.138	60.8242	1159.39	284.732	-195.506	1334.36	266.727	-293.055	1137.06	211.234	61.1336	1257.26	439.421	-134.744	1391.55	551.408	-113.082	1156.11	560.085	-98.7726	1059.4	574.759	-175.875	924.688	526.638	-201.425	824.811	589.395	-160.966	811.799	580.581	-221.818	752.892
6223	0	332.666	-265.787	1571.09	228.462	-255.723	1574.08	363.513	-102.983	1583.92	244.907	-89.0921	1587.93	289.223	-44.6804	1438.84	289.532	52.1305	1160.37	284.698	-204.726	1334.33	265.942	-301.83	1136.71	212.529	52.4778	1258.22	439.628	-144.946	1391.77	552.25	-123.876	1156.54	561.508	-110.603	1059.91	575.561	-188.717	925.65	527.254	-215.102	826.111	590.201	-174.976	812.659	581.188	-236.701	754.665
6224	0	332.933	-274.996	1571.51	228.743	-264.796	1574.46	363.914	-112.186	1584.03	245.486	-98.108	1587.99	290.084	-54.1038	1439.46	290.913	43.4046	1161.21	284.597	-213.821	1334.29	265.108	-310.321	1136.25	213.843	43.9035	1259.04	439.815	-155.135	1392.05	552.996	-134.709	1156.98	562.59	-122.504	1060.31	575.868	-201.995	926.686	527.77	-228.783	827.384	590.846	-188.98	813.562	581.897	-251.401	756.247
6225	0	333.083	-284.223	1571.66	228.879	-273.869	1574.62	364.279	-121.429	1584	245.752	-107.258	1587.95	290.873	-63.5117	1439.91	292.269	34.8397	1161.94	284.313	-222.672	1334.2	264.413	-318.805	1135.79	215.129	35.3757	1259.73	439.961	-165.207	1392.08	553.502	-145.924	1157.08	563.588	-134.496	1060.5	576.319	-214.94	927.416	528.512	-242.243	828.336	591.407	-202.872	814.14	582.451	-265.927	757.582
6226	0	333.063	-293.482	1571.73	228.898	-282.985	1574.58	364.398	-130.727	1583.92	245.65	-116.427	1587.92	291.557	-72.7154	1440.31	293.303	26.3308	1162.54	284.198	-231.487	1333.92	263.778	-327.11	1135.36	216.258	26.8923	1260.44	440.048	-175.139	1392.14	553.882	-157.208	1157.13	564.414	-146.473	1060.49	576.66	-228.12	928.116	528.443	-255.799	829.13	591.998	-216.782	814.734	582.877	-280.346	758.863
6227	0	333.004	-302.714	1571.75	228.767	-292.089	1574.51	364.597	-140.076	1584.02	245.848	-125.586	1587.92	292.145	-81.8753	1440.59	294.344	17.9553	1163.2	284.003	-240.125	1333.78	263.159	-335.256	1135.02	217.332	18.5146	1261.05	440.106	-184.805	1392.23	554.115	-168.569	1157.2	565.102	-158.487	1060.64	576.88	-241.107	928.834	528.698	-269.122	829.882	592.425	-230.524	815.394	583.109	-294.723	760.006
6228	0	332.776	-312.059	1571.6	228.547	-301.198	1574.3	364.611	-149.379	1584.02	245.93	-134.676	1587.88	292.751	-90.9266	1440.8	295.269	9.57604	1163.68	283.828	-248.931	1333.58	262.587	-343.288	1134.57	218.244	10.0793	1261.48	440.162	-194.416	1392.15	554.255	-180.071	1157.05	565.568	-170.547	1060.55	576.841	-253.97	929.34	528.645	-282.286	830.411	592.917	-244.401	816.018	583.224	-308.693	760.857
6229	0	332.563	-321.297	1571.32	228.378	-310.39	1573.91	364.515	-158.711	1583.94	246.143	-143.857	1587.77	293.095	-99.9395	1440.92	295.905	1.29441	1163.93	283.687	-257.716	1333.31	262.159	-351.444	1134.22	219.055	1.77725	1261.85	440.195	-203.819	1391.97	554.233	-191.726	1156.76	565.885	-182.65	1060.29	576.717	-266.961	929.681	528.294	-295.463	830.734	593.042	-258.18	816.257	583.146	-322.617	761.436
6230	0	332.166	-330.585	1570.98	227.972	-319.514	1573.54	364.33	-168.052	1583.81	245.723	-153.079	1587.6	293.366	-108.898	1440.93	296.576	-6.99748	1164.22	283.343	-266.473	1333.07	261.753	-359.678	1133.76	219.634	-6.5073	1262.17	440.115	-213.121	1391.7	554.099	-203.465	1156.23	565.9	-194.796	1059.9	576.43	-279.926	929.763	528.078	-308.62	830.931	593.074	-271.836	816.54	582.811	-336.422	761.864
6231	0	331.807	-339.771	1570.6	227.574	-328.525	1573.16	364.079	-177.194	1583.59	245.671	-162.224	1587.31	293.713	-117.764	1440.86	297.013	-15.3215	1164.17	283.141	-274.993	1332.79	261.379	-367.934	1133.27	220.292	-14.8136	1262.2	439.987	-222.53	1391.43	553.748	-215.066	1155.82	565.758	-206.869	1059.46	576.081	-292.654	929.885	527.604	-321.67	831.022	593.185	-285.44	816.7	582.517	-350.037	762.365
6232	0	331.31	-348.914	1570.17	227.146	-337.57	1572.73	363.794	-186.396	1583.28	245.416	-171.281	1586.91	293.824	-126.669	1440.62	297.528	-23.6269	1164.24	282.78	-283.612	1332.31	261.023	-376.17	1132.84	220.674	-23.1249	1262.15	439.905	-231.499	1391.06	553.432	-226.739	1155.28	565.493	-218.935	1058.89	575.585	-305.323	929.885	527.04	-334.455	830.953	592.885	-298.701	816.784	582.061	-363.543	762.541
6233	0	330.757	-357.965	1569.69	226.674	-346.497	1572.17	363.385	-195.549	1582.88	244.785	-180.183	1586.36	293.863	-135.588	1440.38	297.806	-31.8823	1164.24	282.325	-292.269	1331.65	260.533	-384.488	1132.21	221.026	-31.51	1262.09	439.659	-240.698	1390.6	552.991	-238.424	1154.73	565.015	-231.145	1058.35	574.942	-318.086	929.86	526.651	-347.766	830.971	592.616	-312.253	816.628	581.29	-376.853	762.545
6234	0	330.143	-366.912	1569.29	225.955	-355.447	1571.66	362.886	-204.566	1582.41	244.623	-189.091	1585.74	293.831	-144.473	1440.01	298.159	-40.2402	1164.12	281.913	-300.948	1331.06	260	-392.799	1131.43	221.405	-39.869	1261.93	439.45	-249.775	1390.24	552.407	-250.126	1154.18	564.392	-243.177	1057.78	573.97	-330.686	929.71	525.691	-360.294	830.684	592.017	-325.277	816.429	580.478	-389.918	762.556
6235	0	329.324	-375.876	1568.7	225.147	-364.204	1570.99	362.335	-213.488	1581.91	243.777	-197.958	1585.09	293.75	-153.395	1439.61	298.404	-48.5098	1163.9	281.39	-309.633	1330.46	259.476	-401.257	1130.72	221.588	-48.2626	1261.73	439.055	-258.897	1389.71	551.749	-261.694	1153.69	563.748	-255.087	1057.31	573.031	-343.207	929.653	524.542	-372.811	830.533	591.262	-338.169	816.438	579.46	-402.924	762.439
6236	0	328.516	-384.782	1568.06	224.396	-372.993	1570.13	361.661	-222.403	1581.22	243.191	-206.764	1584.33	293.542	-162.287	1439.13	298.57	-56.9444	1163.62	280.973	-318.362	1329.51	258.983	-409.84	1129.74	221.692	-56.6611	1261.4	438.58	-268.056	1389.15	550.972	-273.295	1153.1	562.869	-267.068	1056.68	571.819	-355.653	929.416	523.386	-385.529	830.297	590.047	-350.996	816.152	578.317	-415.907	762.24
6237	0	327.629	-393.702	1567.39	223.583	-381.761	1569.21	360.848	-231.331	1580.4	242.581	-215.498	1583.37	293.14	-171.219	1438.54	298.695	-65.3731	1163.23	280.478	-327.217	1328.66	258.436	-418.407	1128.65	221.684	-65.0988	1260.91	438.161	-277.233	1388.45	550.014	-284.764	1152.3	561.822	-278.997	1055.8	570.417	-368.067	929.065	522.029	-398.011	829.865	588.999	-364.132	815.679	576.866	-428.74	761.958
6238	0	326.743	-402.451	1566.73	222.606	-390.555	1568.43	360.113	-240.169	1579.57	241.615	-224.227	1582.18	292.738	-180.223	1437.77	298.771	-73.8884	1162.59	279.905	-335.981	1327.72	257.887	-426.951	1127.66	221.641	-73.5627	1260.24	437.586	-286.307	1387.67	549.053	-296.028	1151.42	560.714	-290.745	1054.91	568.996	-380.304	928.74	520.448	-410.458	829.608	587.66	-376.672	815.388	575.26	-441.515	761.676
6239	0	325.774	-411.383	1565.85	221.609	-399.361	1567.37	359.149	-248.999	1578.6	240.941	-233.04	1580.97	292.225	-189.129	1436.89	298.636	-82.4463	1161.86	279.252	-344.849	1326.78	257.226	-435.494	1126.49	221.469	-82.1367	1259.4	436.83	-295.512	1386.73	548.008	-307.038	1150.51	559.566	-302.417	1053.99	567.334	-392.501	928.205	518.759	-422.638	829.172	586.386	-389.547	814.897	573.388	-454.134	761.247
6240	0	324.727	-420.185	1564.91	220.617	-408.144	1566.2	358.118	-257.842	1577.62	239.85	-241.872	1579.89	291.61	-198.14	1435.97	298.459	-91.0237	1161.13	278.564	-353.702	1325.65	256.584	-444.165	1125.22	221.144	-90.7792	1258.6	436.12	-304.62	1385.79	546.856	-318.033	1149.51	558.432	-314.012	1052.96	565.525	-404.655	927.828	516.86	-434.912	828.637	584.75	-402.322	814.463	571.229	-466.894	760.883
6241	0	323.719	-429.174	1564	219.603	-417.031	1565.01	357.039	-266.754	1576.59	238.616	-250.811	1578.65	290.898	-207.11	1435.12	298.207	-99.5211	1160.44	277.75	-362.556	1324.31	255.87	-452.823	1123.87	220.718	-99.5095	1257.77	435.176	-313.842	1384.79	545.622	-328.777	1148.5	557.246	-325.546	1052.13	563.534	-416.798	927.215	514.745	-446.929	828.195	582.895	-415.032	814.024	568.871	-479.462	760.483
6242	0	322.612	-438.073	1562.8	218.481	-425.967	1563.84	355.934	-275.591	1575.76	237.547	-259.699	1577.46	290.09	-216.16	1434.12	297.767	-108.236	1159.47	277.027	-371.527	1323.34	255.161	-461.629	1122.51	220.14	-108.261	1256.76	434.327	-322.895	1383.82	544.473	-339.303	1147.6	555.801	-336.877	1051.19	561.546	-428.71	926.895	512.402	-458.935	827.699	580.691	-427.407	813.615	566.469	-492.099	760.152
6243	0	321.583	-446.961	1561.77	217.334	-434.972	1562.48	354.745	-284.585	1574.79	236.407	-268.65	1576.42	289.12	-225.31	1432.99	297.239	-116.981	1158.5	276.051	-380.428	1322.09	254.458	-470.433	1121.21	219.485	-117.172	1255.65	433.346	-332.089	1382.87	543.261	-349.589	1146.69	554.393	-348.054	1050.28	559.307	-440.663	926.352	509.872	-470.968	827.525	578.704	-440.003	813.08	563.63	-504.488	759.66
6244	0	320.347	-455.934	1560.49	216.134	-443.929	1561.13	353.486	-293.592	1573.74	235.275	-277.663	1575.2	287.989	-234.207	1431.99	296.625	-125.864	1157.58	275.176	-389.484	1320.87	253.752	-479.285	1119.78	218.744	-126.106	1254.54	432.43	-341.157	1381.91	542.076	-359.708	1145.75	553.013	-359.361	1049.23	557.066	-452.577	925.882	507.766	-482.61	826.971	576.768	-452.866	812.395	560.729	-517.137	759.289
6245	0	318.987	-465.03	1559.3	214.812	-452.979	1559.67	352.18	-302.626	1572.77	233.916	-286.729	1574.05	286.877	-243.224	1430.9	295.908	-134.774	1156.57	274.027	-398.564	1319.54	252.991	-488.168	1118.47	217.879	-135.126	1253.31	431.245	-350.31	1380.89	540.829	-369.764	1144.82	551.657	-370.328	1048.31	554.358	-464.242	925.206	504.725	-494.401	826.658	574.283	-465.393	811.857	557.418	-529.624	758.971
6246	0	317.432	-473.985	1557.99	213.257	-461.93	1558.21	350.883	-311.749	1571.74	232.473	-295.67	1572.71	285.75	-252.321	1429.58	295.066	-143.804	1155.28	272.876	-407.737	1318.41	252.193	-497.095	1117.04	216.946	-144.253	1251.98	430.077	-359.4	1379.81	539.557	-379.477	1143.62	550.281	-381.008	1047.3	552.109	-475.854	924.717	501.896	-505.953	826.217	571.803	-477.717	811.429	554.115	-541.954	758.537
6247	0	315.802	-483.077	1556.63	211.685	-470.893	1556.77	349.262	-320.824	1570.34	231.034	-304.72	1571.15	284.464	-261.358	1428.19	294.107	-153.017	1153.68	271.719	-416.847	1316.96	251.342	-506.137	1115.59	215.824	-153.466	1250.32	428.745	-368.475	1378.45	538.272	-389.183	1142.33	548.765	-391.62	1045.89	549.771	-487.281	923.975	498.932	-517.419	825.692	568.95	-489.917	810.694	550.647	-554.407	758.172
6248	0	314.105	-492.185	1555.38	210.007	-479.897	1555.25	347.696	-329.987	1568.93	229.418	-313.713	1569.61	283.178	-270.501	1426.68	293.097	-162.296	1152.08	270.539	-426.126	1315.64	250.489	-515.343	1114.18	214.768	-162.719	1248.62	427.463	-377.601	1377.17	536.941	-398.754	1141.09	547.135	-402.131	1044.36	547.238	-498.594	923.136	496.305	-528.082	825.036	566.109	-502.153	809.881	547.021	-566.699	757.93
6249	0	312.308	-501.209	1554.26	208.117	-488.828	1553.89	346.03	-339.031	1567.62	227.708	-322.608	1568.01	281.673	-279.618	1425.17	292.01	-171.642	1150.55	269.198	-435.387	1314.29	249.606	-524.612	1112.83	213.509	-172.021	1246.98	426.154	-386.671	1375.95	535.606	-408.27	1139.95	545.656	-412.352	1043.11	544.83	-509.667	922.62	493.453	-539.198	824.612	563.018	-514.062	809.081	543.312	-578.725	757.646
6250	0	310.384	-510.227	1553.01	206.185	-497.773	1552.4	344.209	-348.057	1566.29	225.901	-331.539	1566.33	280.063	-288.738	1423.56	290.808	-181.062	1148.9	267.896	-444.753	1313.09	248.67	-534.083	1111.7	212.186	-181.428	1245.08	424.737	-395.719	1374.81	534.257	-417.756	1138.83	544.242	-422.472	1042.04	542.294	-520.511	921.782	489.894	-550.783	824.561	560.387	-526.045	808.371	539.551	-590.821	757.47
6251	0	308.406	-519.226	1551.76	204.227	-506.788	1550.89	342.216	-357.029	1564.96	223.991	-340.536	1564.78	278.522	-297.93	1422.02	289.53	-190.575	1147.15	266.388	-454.157	1311.6	247.698	-543.686	1110.29	210.879	-190.828	1243.35	423.205	-404.945	1373.56	532.887	-427.344	1137.65	542.516	-432.469	1040.64	539.851	-531.297	920.94	486.652	-561.922	824.205	557.421	-537.694	807.497	535.884	-602.686	757.215
6252	0	306.351	-528.23	1550.52	202.219	-515.736	1549.43	340.165	-365.992	1563.59	222.002	-349.478	1563.17	276.756	-307.052	1420.52	288.199	-200.056	1145.55	264.901	-463.641	1310.27	246.837	-553.435	1109.01	209.293	-200.403	1241.39	421.617	-414.204	1372.41	531.431	-436.822	1136.6	541.018	-442.413	1039.43	537.051	-541.89	920.077	483.42	-572.927	823.927	554.324	-549.123	806.724	532.085	-614.291	756.948
6253	0	304.313	-537.155	1549.5	200.174	-524.745	1548.16	337.979	-374.861	1562.41	219.774	-358.472	1561.65	274.786	-316.228	1418.99	286.704	-209.798	1143.74	263.305	-473.098	1309.02	245.856	-563.291	1107.96	207.742	-210.011	1239.58	419.979	-423.392	1371.51	529.991	-446.254	1135.64	539.406	-452.143	1038.4	534.709	-552.316	919.335	480.391	-583.643	823.856	550.977	-559.883	806.092	528.441	-625.658	756.819
6254	0	302.223	-546.107	1548.45	198.066	-533.768	1546.88	335.691	-383.741	1561.22	217.567	-367.445	1560.24	272.87	-325.397	1417.52	285.211	-219.587	1142.04	261.765	-482.614	1307.76	244.892	-573.181	1106.83	206.05	-219.73	1237.56	418.232	-432.711	1370.44	528.447	-455.705	1134.69	537.708	-461.713	1037.27	532.335	-562.479	918.664	477.182	-594.428	823.614	547.991	-570.937	805.269	524.874	-636.868	756.671
6255	0	300.047	-554.988	1547.31	195.892	-542.815	1545.52	333.252	-392.689	1559.88	214.973	-376.438	1558.78	270.822	-334.659	1415.84	283.689	-229.484	1140.06	260.112	-492.224	1306.56	243.837	-583.23	1105.64	204.403	-229.526	1235.48	416.355	-442.045	1369.35	526.83	-465.159	1133.6	535.982	-471.336	1036.02	529.916	-572.575	917.698	474.282	-604.873	823.451	544.722	-581.548	804.216	521.386	-647.822	756.396
6256	0	297.7	-563.889	1546.26	193.585	-551.809	1544.26	330.856	-401.564	1558.81	212.706	-385.429	1557.34	268.821	-343.892	1414.23	282.112	-239.573	1137.91	258.247	-501.808	1305.39	242.705	-593.299	1104.52	202.6	-239.482	1233.26	414.457	-451.405	1368.42	525.187	-474.474	1132.74	534.278	-480.693	1034.99	527.66	-582.325	917.168	471.314	-615.085	823.277	541.382	-591.679	803.52	517.922	-658.456	756.357
6257	0	295.242	-572.798	1545.26	191.046	-560.798	1543.05	328.293	-410.408	1557.68	210.204	-394.411	1555.96	266.551	-353.144	1412.44	280.565	-249.898	1135.87	256.442	-511.44	1304.51	241.385	-603.474	1103.78	200.982	-249.494	1230.95	412.38	-460.71	1367.6	523.542	-483.742	1132.11	532.519	-489.828	1034.2	525.263	-591.984	916.59	468.382	-625.132	823.287	538.468	-601.803	802.827	514.507	-668.897	756.215
6258	0	292.717	-581.878	1544.14	188.614	-569.707	1541.6	325.635	-419.29	1556.52	207.543	-403.348	1554.47	264.484	-362.387	1410.54	278.706	-260.648	1133.42	254.496	-521.159	1303.38	240.041	-613.787	1102.86	198.993	-259.612	1228.46	410.189	-470.068	1366.64	521.687	-493.109	1131.32	530.794	-498.966	1033.28	522.971	-601.486	915.91	465.556	-634.985	822.994	535.396	-611.719	802.024	511.204	-679.134	756.095
6259	0	290.031	-590.877	1543.15	185.834	-578.802	1540.37	322.922	-428.326	1555.45	204.865	-412.33	1553.16	262.081	-371.627	1408.75	276.945	-271.679	1131.2	252.498	-530.972	1302.35	238.611	-624.173	1102.2	197.056	-269.724	1226.07	407.904	-479.429	1365.79	519.888	-502.471	1130.67	528.92	-508.121	1032.28	520.792	-610.984	915.289	462.954	-644.686	822.852	532.48	-621.515	801.131	508.034	-689.157	755.792
6260	0	287.346	-599.932	1542.43	182.994	-587.819	1539.33	320.164	-437.356	1554.55	202.048	-421.297	1551.94	259.576	-380.546	1407.26	275.19	-282.741	1128.86	250.327	-540.815	1301.62	237.088	-634.776	1101.69	194.922	-279.888	1223.55	405.617	-488.695	1365.22	518.079	-511.839	1130.13	527.092	-517.157	1031.5	518.641	-620.277	914.716	460.298	-654.131	822.572	529.816	-631.103	800.511	505.068	-698.927	755.505
6261	0	284.303	-609.063	1541.97	180.183	-596.958	1538.63	317.285	-446.562	1553.94	199.248	-430.489	1551	256.943	-389.763	1405.86	273.403	-293.947	1127.17	248.276	-550.814	1301.16	235.512	-645.516	1101.56	192.692	-290.162	1221.52	403.234	-497.977	1364.8	516.2	-521.282	1129.88	525.262	-526.073	1031.2	516.621	-629.321	914.311	458.007	-663.407	822.639	527.413	-640.224	800.058	502.347	-708.269	755.267
6262	0	281.247	-618.384	1541.8	177.1	-606.25	1538.13	314.387	-455.855	1553.84	196.313	-439.676	1550.52	254.239	-399.128	1405.06	271.329	-305.339	1125.94	245.914	-560.839	1300.84	233.835	-656.404	1101.49	190.445	-300.47	1219.86	400.851	-507.532	1364.64	514.182	-530.743	1129.74	523.241	-535.079	1030.97	514.545	-638.316	913.833	455.605	-672.62	822.576	525.138	-649.2	799.705	499.798	-717.296	754.945
6263	0	278.139	-627.817	1541.82	173.996	-615.687	1537.81	311.313	-465.306	1553.97	193.207	-449.03	1550.21	251.503	-408.864	1404.53	269.461	-315.879	1125.25	243.312	-570.865	1300.97	232.206	-667.583	1101.74	188.297	-310.742	1218.82	398.44	-517.329	1364.8	512.101	-540.111	1129.77	521.132	-544.056	1031.1	512.514	-647.048	913.572	453.828	-681.033	822.303	522.95	-657.724	799.441	497.675	-725.845	754.733
6264	0	274.98	-637.272	1542.2	170.849	-625.064	1537.89	308.188	-474.698	1554.33	190.07	-458.517	1550.23	248.82	-418.678	1404.4	267.569	-325.988	1124.8	240.811	-581.048	1301.39	230.435	-678.858	1102.43	186.27	-321.097	1218.05	395.863	-527.336	1365.39	510.002	-549.406	1130.36	519.02	-552.8	1031.5	510.687	-655.519	913.623	451.912	-689.355	822.424	521.029	-665.606	799.361	495.97	-733.992	754.782
6265	0	271.85	-646.766	1542.94	167.718	-634.583	1538.34	305.04	-484.217	1555.01	186.998	-468.046	1550.51	246.284	-428.633	1404.66	265.867	-335.744	1124.94	238.389	-591.283	1302.07	228.58	-690.157	1103.37	184.424	-331.333	1217.84	393.255	-537.662	1366.27	507.823	-558.614	1131.14	516.866	-561.557	1032.27	508.966	-663.573	913.838	450.581	-697.427	822.539	519.056	-672.661	799.484	494.624	-741.513	754.893
6266	0	268.729	-656.412	1543.97	164.602	-644.204	1539.07	301.834	-493.827	1555.91	183.917	-477.45	1551.18	243.829	-438.604	1405.39	264.525	-345.414	1125.44	235.795	-601.462	1302.95	226.596	-701.355	1104.53	182.863	-341.649	1218.08	390.662	-548.203	1367.63	505.508	-567.923	1132.35	514.476	-570.225	1033.32	506.973	-671.293	914.112	448.98	-705.49	823.018	517.323	-679.564	799.625	493.709	-748.552	755.221
6267	0	265.549	-666.15	1545.5	161.516	-653.812	1540.22	298.62	-503.476	1557.37	180.608	-487.275	1552.36	241.324	-448.676	1406.58	263.577	-355.802	1126.54	233.122	-611.617	1304.4	224.358	-712.398	1106.31	181.429	-351.883	1218.89	387.913	-558.878	1369.51	503.188	-577.077	1134.07	512.176	-578.675	1035.02	505.609	-678.682	915.049	448.128	-711.958	823.568	515.84	-685.772	800.349	493.12	-754.884	755.798
6268	0	262.414	-675.754	1547.39	158.268	-663.465	1541.8	295.553	-513.123	1559.41	177.577	-496.806	1553.91	238.944	-458.647	1408.11	262.721	-366.662	1127.93	230.495	-621.638	1306.31	222.002	-723.316	1108.47	180.184	-362.147	1220.03	385.164	-569.443	1371.84	500.718	-586.205	1136.24	509.869	-586.887	1037.38	504.172	-685.724	916.292	447.135	-718.649	824.405	514.753	-691.422	801.564	492.88	-760.664	756.577
6269	0	259.179	-685.475	1549.54	155.135	-673.052	1543.52	292.477	-522.875	1561.9	174.51	-506.397	1555.81	236.679	-468.439	1409.96	261.789	-377.679	1129.83	227.959	-631.627	1308.49	219.654	-733.924	1110.97	178.975	-372.399	1221.44	382.507	-579.956	1374.51	498.229	-595.396	1138.78	507.561	-595.099	1040.02	502.865	-692.471	917.834	446.352	-725.039	825.471	513.733	-696.764	802.97	492.792	-765.907	757.462
6270	0	255.904	-695.159	1552	152.056	-682.617	1545.48	289.378	-532.669	1564.71	171.56	-516.026	1558.19	234.371	-478.153	1412.13	260.862	-388.774	1131.67	225.528	-641.427	1310.94	217.264	-744.252	1113.8	177.777	-382.705	1223.09	379.806	-590.136	1377.48	495.739	-604.539	1141.74	505.376	-603.389	1043.12	501.672	-699.162	919.755	445.6	-731.276	826.568	512.567	-701.599	804.762	492.972	-770.66	758.551
6271	0	252.774	-704.799	1554.76	148.984	-692.114	1547.73	286.423	-542.398	1567.84	168.726	-525.549	1560.81	232.035	-487.79	1414.54	259.965	-399.806	1134	223.234	-651.029	1313.77	215.019	-754.074	1116.94	176.455	-393.006	1225.21	377.275	-600.201	1380.81	493.345	-613.7	1145.06	503.36	-611.511	1046.72	500.324	-705.58	922.011	445.037	-736.571	828.276	512.078	-706.598	807.254	493.212	-774.957	759.813
6272	0	249.731	-714.3	1557.63	145.939	-701.515	1550.22	283.61	-551.985	1571.3	165.919	-535.001	1563.6	229.632	-497.334	1416.9	258.853	-410.511	1136.28	221.006	-660.548	1316.8	212.936	-763.661	1120.25	175.025	-403.398	1227.1	374.887	-609.939	1384.27	491.182	-622.751	1148.82	501.574	-619.487	1050.53	499.234	-711.799	924.544	444.585	-741.947	830.22	511.773	-711.477	810.03	493.498	-779.076	761.392
6273	0	246.725	-723.73	1560.54	143.051	-710.774	1552.68	280.78	-561.553	1574.41	163.146	-544.303	1566.33	227.179	-506.818	1419.36	257.292	-420.847	1138.25	218.858	-670.013	1319.72	211.039	-773.039	1123.53	173.192	-413.511	1228.91	372.53	-619.362	1387.64	489.081	-631.765	1152.45	499.792	-627.245	1054.2	498.534	-718.198	927.559	444.139	-747.181	832.238	511.703	-716.565	812.82	493.543	-782.71	762.801
6274	0	243.771	-733.103	1563.25	140.246	-719.912	1554.96	278.093	-570.992	1577.34	160.535	-553.46	1568.93	224.87	-516.253	1421.65	255.564	-430.659	1140.36	216.827	-679.4	1322.48	209.433	-782.214	1126.55	171.426	-423.678	1230.74	370.194	-628.766	1390.83	487.118	-640.654	1156.14	498.153	-634.775	1057.75	497.657	-724.491	930.362	443.826	-752.261	834.059	511.525	-721.549	815.772	493.387	-786.523	764.079
6275	0	241	-742.287	1566.01	137.409	-728.955	1557.52	275.557	-580.194	1580.16	158.108	-562.533	1571.26	222.552	-525.646	1423.76	253.504	-440.383	1142.31	214.869	-688.76	1325.09	207.831	-791.599	1129.63	169.516	-433.854	1232.62	368.027	-637.942	1393.79	485.46	-649.496	1159.64	496.963	-641.948	1061.36	497.09	-730.697	933.335	443.993	-756.623	835.808	511.912	-726.9	818.943	493.262	-790.417	765.443
6276	0	238.397	-751.419	1568.54	135.132	-737.73	1559.63	273.099	-589.313	1582.66	155.733	-571.507	1573.49	220.265	-534.998	1425.9	251.226	-450.153	1144.52	212.97	-698.001	1327.6	206.544	-800.898	1132.42	167.387	-443.88	1234.32	365.882	-647.03	1396.67	483.946	-658.046	1163.11	495.795	-649.136	1064.72	496.656	-737.134	936.082	443.955	-761.705	837.891	512.539	-732.609	821.945	493.165	-794.362	766.715
6277	0	235.992	-760.516	1570.99	132.567	-746.791	1561.75	270.866	-598.397	1584.81	153.56	-580.436	1575.38	217.884	-544.37	1427.88	248.875	-459.999	1146.44	211.181	-707.312	1329.66	205.458	-810.226	1134.77	165.215	-453.85	1236.02	363.966	-656.088	1399.21	482.785	-666.675	1166.21	494.942	-656.267	1067.69	496.393	-743.478	938.69	444.112	-766.884	839.671	513.112	-738.529	824.568	493.007	-798.427	767.805
6278	0	233.639	-769.466	1573.16	130.295	-755.642	1563.84	268.608	-607.377	1586.66	151.363	-589.275	1577	215.662	-553.716	1429.78	246.689	-469.88	1148.4	209.46	-716.58	1331.47	204.521	-819.558	1136.76	163.027	-463.558	1237.85	362.084	-664.95	1401.56	481.776	-675.067	1169.02	494.268	-663.409	1070.5	496.287	-749.899	940.896	444.109	-772.16	841.404	513.501	-744.193	827.171	492.95	-802.703	768.716
6279	0	231.36	-778.421	1575.1	128.128	-764.539	1565.58	266.489	-616.357	1588.17	149.278	-598.174	1578.25	213.467	-563.062	1431.4	244.418	-479.416	1150.25	207.84	-725.835	1333.08	203.661	-828.765	1138.45	160.692	-473.157	1239.39	360.297	-673.794	1403.43	480.944	-683.312	1171.44	493.808	-670.465	1073.1	496.246	-756.344	942.871	444.413	-777.589	843.188	514.529	-750.286	829.436	493.091	-807.033	769.529
6280	0	229.334	-787.332	1576.96	125.963	-773.526	1567.21	264.548	-625.275	1589.55	147.324	-607.024	1579.43	211.269	-572.46	1432.79	242.109	-488.279	1151.92	206.326	-735.052	1334.42	202.973	-838.029	1139.77	158.366	-482.612	1240.93	358.686	-682.538	1405.08	480.309	-691.284	1173.52	493.385	-677.578	1075.21	496.384	-762.716	944.53	444.693	-783.164	844.537	515.178	-755.982	831.48	493.397	-811.517	770.251
6281	0	227.43	-796.341	1578.55	124.138	-782.532	1568.63	262.523	-634.206	1590.6	145.372	-615.936	1580.45	209.154	-581.802	1434.2	239.927	-496.896	1153.41	204.968	-744.301	1335.47	202.434	-847.134	1140.57	156.041	-491.931	1242.37	357.162	-691.301	1406.4	479.696	-699.05	1175.03	492.986	-684.854	1076.92	496.569	-769.212	945.908	445.807	-788.59	845.215	515.971	-761.989	832.795	493.903	-816.268	770.761
6282	0	225.575	-805.362	1579.96	122.373	-791.582	1569.94	260.727	-643.095	1591.61	143.492	-624.986	1581.23	207.125	-591.097	1435.35	237.741	-505.44	1154.67	203.615	-753.517	1336.4	201.963	-856.37	1141.16	153.729	-501.115	1243.55	355.656	-699.85	1407.38	479.046	-706.373	1176.34	492.641	-691.969	1078.27	496.728	-775.455	946.849	445.959	-794.284	846.013	516.553	-767.533	834.078	494.589	-821.222	771.352
6283	0	223.932	-814.298	1581.17	120.743	-800.695	1571.06	258.859	-652.018	1592.45	141.679	-634.046	1581.9	205.158	-600.324	1436.39	235.555	-513.824	1155.89	202.48	-762.707	1337.12	201.711	-865.533	1141.56	151.476	-510.151	1244.78	354.275	-708.391	1408.3	478.532	-713.303	1177.27	492.365	-698.996	1079.53	497.057	-781.787	947.66	446.889	-799.976	846.594	517.351	-773.146	834.984	495.531	-826.3	771.8
6284	0	222.42	-823.337	1582.15	119.158	-809.852	1572.01	257.148	-661.038	1593.18	139.902	-643.204	1582.61	203.235	-609.669	1437.45	233.46	-522.136	1157.17	201.359	-771.853	1337.7	201.404	-874.778	1141.72	149.194	-519.152	1246.11	352.96	-716.921	1409	477.882	-719.948	1177.99	491.917	-706.046	1080.48	497.283	-787.85	948.274	447.666	-805.329	846.812	517.861	-778.471	835.711	496.664	-831.552	772.341
6285	0	220.91	-832.443	1583.04	117.654	-819.121	1572.75	255.411	-670.115	1593.92	138.172	-652.456	1583.25	201.48	-619.137	1438.4	231.507	-530.323	1158.48	200.366	-781.019	1338.15	201.212	-883.922	1141.83	147.03	-528.036	1247.36	351.534	-725.355	1409.76	477.175	-726.481	1178.85	491.431	-713.031	1081.6	497.538	-794.051	948.954	448.155	-811.229	847.273	518.505	-783.804	836.487	497.972	-836.995	773.053
6286	0	219.468	-841.605	1583.76	116.108	-828.43	1573.37	253.787	-679.134	1594.67	136.472	-661.639	1583.83	199.313	-628.225	1439.3	229.558	-538.45	1159.69	199.384	-790.042	1338.64	201.062	-892.741	1141.8	144.839	-536.905	1248.51	350.25	-733.766	1410.46	476.345	-732.866	1179.66	490.9	-719.773	1082.76	497.633	-799.94	949.608	449.08	-816.61	847.556	519.439	-789.172	837.348	499.341	-842.598	773.94
6287	0	218.146	-850.661	1584.2	114.828	-837.768	1573.78	252.061	-688.206	1595.15	134.873	-670.952	1584.28	197.625	-637.434	1440.16	227.601	-546.71	1160.84	198.51	-799.029	1338.88	201.007	-901.476	1141.61	142.755	-545.688	1249.63	348.96	-742.25	1410.96	475.44	-739.19	1180.43	490.401	-726.431	1083.84	497.822	-805.825	950.118	449.924	-822.533	847.865	519.986	-794.181	838.159	500.825	-848.155	774.806
6288	0	216.884	-859.783	1584.46	113.748	-847.211	1573.93	250.482	-697.402	1595.51	133.256	-680.277	1584.62	195.979	-646.57	1440.84	226.013	-554.765	1161.97	197.752	-808.006	1339	200.931	-910.009	1141.34	140.864	-554.255	1250.78	347.806	-750.703	1411.43	474.65	-745.478	1181.21	489.715	-733.062	1084.69	498.082	-811.739	950.728	450.449	-828.228	848.341	520.706	-799.544	838.668	502.387	-853.99	775.743
6289	0	215.741	-868.955	1584.71	112.426	-856.537	1573.95	248.994	-706.552	1595.87	131.698	-689.698	1584.8	194.442	-655.612	1441.42	224.32	-562.633	1162.82	196.994	-816.832	1339.07	200.822	-918.468	1141.14	139.256	-563.057	1251.62	346.929	-758.888	1412.07	473.956	-751.69	1182.03	489.046	-739.502	1085.67	498.217	-817.405	951.319	451.442	-833.344	848.516	521.282	-804.599	839.447	503.891	-859.641	776.788
6290	0	214.565	-878.232	1584.72	111.18	-865.907	1573.88	247.454	-715.67	1596.21	130.233	-699.106	1584.88	192.945	-664.569	1441.92	222.81	-570.918	1163.51	196.251	-825.546	1339.07	200.637	-926.81	1141.03	137.624	-571.619	1252.31	345.835	-767.367	1412.6	473.233	-757.965	1182.82	488.407	-745.666	1086.64	498.333	-823.169	952.007	452.488	-838.936	848.874	521.91	-809.633	840.319	505.369	-865.408	777.872
6291	0	213.472	-887.454	1584.5	110.059	-875.457	1573.51	246.03	-724.876	1596.38	128.809	-708.57	1584.88	191.623	-673.465	1442.24	221.247	-579.141	1164.03	195.648	-834.157	1338.99	200.574	-935.066	1140.86	135.971	-580.12	1252.84	344.916	-775.634	1412.93	472.527	-764.312	1183.32	487.818	-751.766	1087.38	498.533	-828.875	952.445	452.799	-844.968	849.416	522.421	-814.795	840.859	506.803	-871.023	778.773
6292	0	212.381	-896.746	1584.02	109.229	-884.915	1572.95	244.656	-734.097	1596.47	127.39	-717.979	1584.79	190.398	-682.285	1442.48	220.044	-587.085	1164.55	195.017	-842.734	1338.77	200.392	-943.185	1140.59	134.766	-588.56	1253.25	343.956	-783.908	1413.03	471.883	-770.737	1183.83	487.163	-757.895	1087.9	498.427	-834.625	952.733	453.424	-850.702	849.532	522.809	-819.96	841.339	508.261	-876.739	779.491
6293	0	211.479	-905.951	1583.63	108.14	-894.263	1572.38	243.312	-743.474	1596.64	126.056	-727.444	1584.76	189.381	-691.028	1442.56	219.125	-595.278	1164.87	194.469	-851.234	1338.55	200.128	-951.183	1140.38	133.601	-596.978	1253.45	343.256	-792.176	1413.32	471.372	-777.218	1184.21	486.706	-763.893	1088.44	498.925	-840.425	953.164	454.385	-856.368	849.557	523.278	-825.095	841.721	509.564	-882.289	780.155
6294	0	210.663	-915.289	1583.14	107.228	-903.863	1571.69	242.134	-752.723	1596.82	124.865	-736.897	1584.65	188.224	-699.862	1442.65	218.102	-603.069	1165.24	194.005	-859.608	1338.26	199.918	-959.056	1139.99	132.644	-605.331	1253.68	342.641	-800.498	1413.45	470.86	-783.746	1184.62	486.188	-769.98	1088.78	499.268	-846.234	953.427	455.181	-862.241	849.598	523.716	-830.353	842.118	510.862	-887.8	780.604
6295	0	209.815	-924.503	1582.4	106.439	-913.321	1570.69	240.981	-762.039	1596.84	123.712	-746.357	1584.54	187.346	-708.623	1442.56	217.439	-611.09	1165.5	193.599	-868.112	1337.86	199.652	-966.858	1139.36	131.748	-613.797	1253.8	342.156	-808.846	1413.48	470.372	-790.393	1184.82	485.502	-776.253	1088.93	499.881	-852.169	953.453	455.994	-868.836	849.685	524.146	-835.705	842.273	512.035	-893.435	780.665
6296	0	208.936	-933.831	1581.61	105.731	-922.698	1569.71	239.984	-771.406	1596.83	122.616	-755.893	1584.31	186.576	-717.303	1442.52	216.781	-619.148	1165.82	193.113	-876.582	1337.34	199.384	-974.725	1138.62	131.049	-622.193	1253.98	341.439	-817.264	1413.23	469.889	-797.199	1184.86	484.848	-782.501	1088.92	500.421	-858.291	953.311	456.534	-874.523	848.986	524.517	-841.12	842.151	513.169	-898.743	780.321
6297	0	208.141	-943.12	1580.87	104.86	-932.097	1568.73	239	-780.779	1596.87	121.553	-765.204	1583.97	185.838	-726.109	1442.49	216.187	-627.036	1166.08	192.647	-885.041	1336.92	199.105	-982.55	1137.96	130.314	-630.474	1254.05	340.943	-825.661	1413.01	469.506	-803.959	1184.94	484.343	-788.812	1089.09	501.049	-864.144	953.168	457.342	-881.271	849.044	524.885	-846.316	842.187	514.236	-904.083	780.099
6298	0	207.344	-952.495	1580.07	104.185	-941.329	1567.77	238.155	-790.115	1596.72	120.858	-774.543	1583.51	185.333	-734.876	1442.2	215.473	-635.039	1166.09	192.24	-893.565	1336.3	198.839	-990.495	1137.17	129.718	-638.741	1254.15	340.455	-834.104	1412.67	469.228	-811.041	1184.83	483.752	-795.33	1089.05	501.415	-869.605	952.736	458.213	-887.621	848.698	525.314	-851.507	841.905	515.411	-909.26	779.583
6299	0	206.655	-961.792	1579.07	103.454	-950.644	1566.41	237.333	-799.463	1596.23	120.084	-783.939	1582.94	184.716	-743.758	1441.83	215.017	-642.922	1165.94	191.906	-902.178	1335.55	198.699	-998.576	1136.16	129.27	-647.137	1254	340.06	-842.812	1412.1	468.867	-818.497	1184.32	483.044	-802.369	1088.56	501.933	-875.706	952.026	459.218	-894.238	847.923	525.62	-856.874	841.126	516.491	-914.362	778.73
6300	0	205.956	-971.02	1578.08	103.027	-959.912	1565.35	236.693	-808.869	1595.68	119.499	-793.21	1582.29	184.329	-752.614	1441.35	214.635	-650.953	1165.72	191.567	-910.775	1334.75	198.525	-1006.75	1135.12	128.907	-655.413	1253.87	339.747	-851.52	1411.43	468.656	-826.149	1183.78	482.583	-809.507	1087.92	502.552	-881.871	951.223	460.601	-900.804	847.11	525.83	-862.226	840.279	517.593	-919.456	777.654
6301	0	205.586	-980.255	1577.2	102.471	-969.075	1564.35	236.108	-818.111	1595.18	118.952	-802.383	1581.63	183.953	-761.478	1440.95	214.226	-659.021	1165.59	191.253	-919.362	1334.09	198.39	-1014.9	1134.18	128.569	-663.834	1253.68	339.459	-860.154	1410.84	468.482	-834.057	1183.32	482.186	-816.793	1087.43	503.113	-888.063	950.544	461.611	-907.294	846.476	526.246	-867.521	839.588	518.822	-924.421	776.554
6302	0	205.25	-989.474	1576.22	102.07	-978.219	1563.2	235.713	-827.242	1594.62	118.589	-811.616	1580.93	183.681	-770.434	1440.5	214.027	-667.067	1165.43	191.018	-927.99	1333.17	198.198	-1023.27	1133.09	128.312	-672.208	1253.58	339.176	-869.006	1410.11	468.301	-842.199	1182.69	481.881	-824.44	1086.99	503.576	-894.531	949.678	462.245	-912.237	844.918	526.586	-872.803	838.805	520.159	-929.356	775.549
6303	0	204.914	-998.664	1575.17	101.849	-987.556	1561.93	235.312	-836.536	1594.01	118.213	-820.912	1580.16	183.568	-779.416	1439.91	213.74	-675.281	1165.26	190.824	-936.67	1332.06	198.165	-1031.62	1131.79	128.062	-680.652	1253.36	338.955	-877.977	1409.27	468.059	-850.688	1181.91	481.641	-832.319	1086.48	503.968	-901.236	948.704	463.106	-918.281	843.398	527.018	-878.339	837.981	520.881	-934.461	774.055
6304	0	204.774	-1007.81	1574.12	101.792	-996.499	1560.88	235.152	-845.592	1593.37	118.096	-829.999	1579.35	183.509	-788.436	1439.41	213.768	-683.44	1164.99	190.707	-945.372	1331.14	198.06	-1040.04	1130.64	128.054	-689.132	1253.14	338.899	-886.903	1408.51	467.807	-859.198	1181.09	481.485	-840.281	1085.87	504.169	-907.982	947.628	463.924	-924.66	842.123	527.502	-884.042	837.15	522.062	-939.704	772.714
6305	0	204.809	-1016.87	1573.08	101.698	-1005.81	1559.83	235.005	-854.72	1592.71	117.96	-839.185	1578.55	183.582	-797.366	1438.73	213.554	-691.781	1164.63	190.682	-954.062	1330.18	197.994	-1048.55	1129.51	127.948	-697.688	1252.74	338.877	-895.796	1407.67	467.66	-867.735	1180.19	481.47	-848.283	1085.31	504.628	-914.874	946.713	464.669	-930.954	840.91	528.143	-890.013	836.416	523.104	-944.869	771.333
6306	0	204.968	-1025.98	1571.97	101.879	-1014.89	1558.6	235.096	-863.831	1591.94	118.108	-848.379	1577.67	183.621	-806.352	1437.91	213.56	-700.228	1164.05	190.755	-962.724	1329.14	198.038	-1057.04	1128.28	128.037	-706.297	1252.28	339.014	-904.824	1406.72	467.494	-876.466	1179.15	481.407	-856.432	1084.48	504.953	-922.037	945.529	465.346	-937.276	839.481	528.723	-896.305	835.446	523.61	-950.264	769.546
6307	0	205.002	-1035.11	1570.8	101.997	-1023.97	1557.41	235.252	-873.129	1590.97	118.084	-857.486	1576.81	183.992	-815.34	1437.14	213.512	-708.847	1163.37	190.893	-971.449	1327.96	198.083	-1065.64	1127.09	128.239	-714.827	1251.6	339.163	-913.907	1405.62	467.436	-885.422	1177.89	481.379	-864.743	1083.38	505.179	-929.432	944.276	465.851	-943.69	837.861	529.302	-902.916	834.314	524.363	-956.079	768.011
6308	0	205.253	-1044.35	1569.68	102.205	-1033.06	1556.21	235.574	-882.252	1590.05	118.526	-866.602	1575.91	184.413	-824.233	1436.14	213.604	-717.546	1162.49	191.093	-980.195	1326.85	198.159	-1074.26	1125.83	128.364	-723.525	1250.72	339.363	-922.757	1404.42	467.403	-894.155	1176.62	481.504	-872.95	1082.31	505.403	-936.83	942.895	466.269	-950.071	836.265	530.038	-909.614	833.255	524.776	-961.863	766.233
6309	0	205.486	-1053.56	1568.34	102.54	-1041.98	1554.96	236.043	-891.546	1589.14	119.086	-875.747	1574.86	184.739	-833.204	1435	213.816	-726.31	1161.49	191.471	-989.021	1325.69	198.186	-1082.87	1124.64	128.672	-732.223	1249.83	339.8	-931.774	1403.24	467.528	-903.07	1175.22	481.688	-881.31	1081.15	505.571	-944.439	941.35	466.538	-956.683	834.619	530.699	-916.576	832.008	525.289	-968.06	764.587
6310	0	205.844	-1062.73	1566.96	102.826	-1051.11	1553.59	236.696	-900.876	1588.07	119.554	-884.775	1573.91	185.395	-842.106	1433.99	213.94	-735.185	1160.46	191.853	-997.912	1324.58	198.326	-1091.65	1123.45	128.988	-741.02	1248.87	340.333	-940.821	1401.89	467.721	-911.941	1173.79	481.905	-889.764	1079.69	505.622	-952.233	939.794	466.558	-963.185	832.638	531.419	-923.927	830.717	525.611	-974.478	762.678
6311	0	206.264	-1072.06	1565.55	103.296	-1060.1	1552.31	237.424	-910.299	1586.94	120.517	-893.946	1572.93	186.055	-851.078	1432.76	214.234	-744.021	1159.25	192.331	-1006.88	1323.36	198.479	-1100.63	1122.23	129.47	-749.937	1247.78	340.91	-949.745	1400.51	468.066	-920.969	1172.24	482.191	-898.347	1078.32	505.941	-960.173	938.211	467.179	-970.39	830.908	532.055	-931.476	829.432	525.813	-981.27	760.7
6312	0	206.828	-1081.21	1564.27	103.825	-1069.06	1550.99	238.242	-919.605	1585.86	121.367	-902.928	1571.94	186.641	-860.042	1431.7	214.44	-753.036	1158.07	192.892	-1015.93	1322.29	198.598	-1109.53	1121.12	129.728	-758.812	1246.86	341.527	-958.687	1399.18	468.513	-929.882	1170.87	482.613	-906.711	1077.06	506.179	-968.163	936.674	466.923	-977.16	829.221	532.72	-939.219	828.313	525.969	-988.162	758.917
6313	0	207.402	-1090.42	1562.83	104.498	-1078.06	1549.83	239.298	-928.866	1584.72	122.387	-912.032	1570.88	187.481	-868.996	1430.55	214.792	-761.977	1156.78	193.493	-1024.96	1321.05	198.825	-1118.5	1119.92	130.189	-767.834	1245.74	342.264	-967.679	1397.71	468.948	-938.893	1169.27	482.883	-914.99	1075.45	506.187	-976.244	934.915	467.166	-984.6	827.493	533.353	-947.138	826.86	526.037	-995.371	756.977
6314	0	208.282	-1099.62	1561.42	105.313	-1087.12	1548.46	240.401	-938.072	1583.32	123.429	-921.038	1569.66	188.398	-878.098	1429.18	215.028	-771.093	1155.44	194.202	-1034.18	1319.73	199.081	-1127.66	1118.65	130.819	-776.962	1244.52	343.133	-976.88	1396.1	469.415	-947.916	1167.47	483.258	-923.56	1073.75	506.564	-984.507	933.133	467.557	-992.214	825.386	533.867	-955.452	825.187	526.037	-1002.99	754.931
6315	0	209.247	-1108.77	1560	106.207	-1096.17	1547.31	241.603	-947.346	1581.84	124.683	-930.155	1568.35	189.299	-887.251	1427.77	215.431	-780.286	1154.06	194.863	-1043.41	1318.36	199.308	-1136.8	1117.33	131.334	-786.123	1243.24	343.979	-986.045	1394.42	469.903	-956.825	1165.64	483.616	-931.985	1072.02	506.862	-992.877	931.309	467.362	-999.963	823.643	533.942	-963.328	823.255	526.056	-1010.89	753.156
6316	0	210.507	-1117.95	1558.85	107.512	-1105.32	1546.2	242.82	-956.44	1580.25	125.953	-939.156	1567.04	190.233	-896.526	1426.31	215.857	-789.536	1152.47	195.606	-1052.66	1317.14	199.496	-1146.38	1116.13	131.913	-795.276	1241.93	344.849	-995.266	1392.71	470.414	-965.68	1163.82	484.004	-940.442	1070.32	507.108	-1000.97	929.351	467.886	-1007.92	821.625	534.231	-971.482	821.511	526.19	-1019.01	751.281
6317	0	211.888	-1127.08	1557.54	108.896	-1114.38	1545.17	244.296	-965.576	1578.68	127.34	-948.475	1565.61	191.451	-905.67	1425.01	216.279	-798.914	1150.97	196.433	-1062.09	1315.74	199.791	-1155.76	1114.81	132.604	-804.598	1240.61	345.892	-1004.67	1391	471.014	-974.335	1161.96	484.386	-949.037	1068.37	507.413	-1009.28	927.405	467.823	-1015.97	819.929	534.584	-979.474	819.633	526.42	-1027.36	749.285
6318	0	213.391	-1136.32	1556.23	110.477	-1123.73	1544.16	245.838	-974.674	1577.14	128.634	-957.581	1564.43	192.483	-915.167	1423.59	216.831	-808.36	1149.49	197.285	-1071.6	1314.38	200.169	-1164.9	1113.19	133.202	-813.991	1239.39	346.924	-1014.15	1389.22	471.593	-983.162	1160.04	484.672	-957.727	1066.38	507.742	-1017.71	925.341	468.044	-1024.62	817.954	534.376	-987.73	817.344	526.628	-1035.73	747.247
6319	0	215.086	-1145.53	1555.02	111.992	-1133.06	1543.16	247.464	-983.877	1575.72	130.229	-966.944	1563.25	193.543	-924.642	1422.34	217.277	-817.965	1148.09	198.069	-1081.08	1313.08	200.358	-1174.78	1112.04	134.025	-823.497	1238.19	347.925	-1023.65	1387.54	472.227	-991.814	1158.3	485.037	-966.332	1064.76	508.248	-1026.03	923.536	468.635	-1033.39	816.107	534.268	-995.895	815.418	526.623	-1043.66	745.139
6320	0	216.803	-1154.72	1553.87	113.549	-1142.39	1542.35	249.124	-993.051	1574.41	131.963	-976.218	1562.03	194.748	-934.115	1420.93	217.925	-827.493	1146.72	199.057	-1090.68	1311.89	200.589	-1184.37	1110.72	134.562	-833.058	1237.12	348.98	-1033.15	1385.89	472.836	-1000.43	1156.68	485.41	-974.883	1063.1	508.617	-1034.46	921.661	468.902	-1042.34	814.392	534.407	-1004.04	813.746	526.877	-1052.24	743.427
6321	0	218.685	-1164.07	1552.7	115.423	-1151.82	1541.45	250.851	-1002.29	1572.81	133.486	-985.484	1560.97	195.9	-943.666	1419.67	218.283	-837.391	1145.26	200.073	-1100.32	1310.52	201.036	-1193.95	1109.3	135.35	-842.767	1235.84	350.085	-1042.73	1384.14	473.433	-1009.17	1154.76	485.639	-983.636	1061.07	509.05	-1043.05	919.669	469.211	-1051.47	812.501	534.225	-1012.4	811.619	527.148	-1061.01	741.47
6322	0	220.581	-1173.41	1551.44	117.33	-1161.39	1540.51	252.618	-1011.66	1571.26	135.446	-994.981	1559.81	196.997	-953.26	1418.31	218.889	-847.264	1143.75	201.055	-1110.06	1309.36	201.396	-1203.99	1108.16	136.039	-852.53	1234.55	351.236	-1052.29	1382.34	474.073	-1017.9	1152.94	485.949	-992.443	1059.08	509.519	-1051.74	917.664	469.505	-1060.77	810.662	533.943	-1020.88	809.411	527.349	-1069.93	739.584
6323	0	222.575	-1182.82	1550.27	119.195	-1170.8	1539.74	254.491	-1021.01	1569.8	137.271	-1004.52	1558.78	198.421	-962.855	1417.08	219.117	-857.152	1141.96	202.052	-1119.79	1308.35	201.881	-1213.97	1107.2	136.798	-862.383	1233.12	352.492	-1061.72	1380.79	474.798	-1026.54	1151.01	486.28	-1001.24	1057.22	509.72	-1060.29	915.625	469.736	-1070.1	809.029	533.629	-1029.52	807.392	527.641	-1078.83	737.836
6324	0	224.638	-1192.32	1549.21	121.169	-1180.31	1538.98	256.455	-1030.48	1568.44	138.936	-1013.97	1557.86	199.727	-972.379	1415.66	219.787	-867.264	1140.27	203.269	-1129.59	1307.31	202.498	-1224.03	1106.36	137.512	-872.416	1231.78	353.809	-1071.21	1379.15	475.62	-1035.46	1149.1	486.616	-1010.14	1055.29	510.34	-1069.2	913.799	470.074	-1080	807.567	533.454	-1038.16	805.277	527.803	-1087.96	736.059
6325	0	226.649	-1202	1548.13	123.14	-1189.98	1538.15	258.488	-1039.95	1567.14	141.084	-1023.59	1557	201.065	-981.967	1414.37	220.03	-877.608	1138.59	204.12	-1139.54	1306.5	203.167	-1234.46	1105.53	138.379	-882.443	1230.35	355.244	-1080.74	1377.62	476.335	-1044.41	1147.17	486.926	-1019.09	1053.2	510.69	-1078.2	911.783	470.249	-1089.41	805.578	533.038	-1047.13	803.068	527.927	-1097.27	734.092
6326	0	228.591	-1211.57	1547.13	125.15	-1199.68	1537.57	260.584	-1049.51	1566.09	143.004	-1033.27	1556.31	202.47	-991.491	1413.15	220.693	-887.945	1136.94	205.315	-1149.57	1305.74	203.788	-1244.97	1105.12	139.02	-892.571	1229.03	356.686	-1090.27	1376.19	477.047	-1053.33	1145.47	487.304	-1028.16	1051.4	511.139	-1087.34	909.942	470.39	-1099.37	804.068	532.734	-1056.17	801.041	527.955	-1106.63	732.321
6327	0	230.645	-1221.25	1546.46	127.152	-1209.33	1537.28	262.663	-1059.19	1565.36	145.291	-1042.98	1555.93	204.04	-1001.01	1412.14	221.233	-898.441	1135.43	206.534	-1159.62	1305.27	204.587	-1255.6	1105.02	139.932	-902.666	1227.85	358.132	-1099.7	1375.03	477.889	-1062.43	1144	487.834	-1037.39	1049.82	511.485	-1096.59	908.278	470.46	-1108.84	802.485	532.568	-1065.34	799.489	528.1	-1116.15	730.826
6328	0	232.814	-1231.04	1546.01	129.289	-1219.16	1537.18	264.749	-1068.95	1564.63	147.033	-1052.67	1555.69	205.59	-1010.7	1411.47	222.09	-908.997	1134.18	207.904	-1169.77	1305.02	205.416	-1266.49	1105.09	140.733	-912.937	1226.82	359.653	-1109.39	1374	478.762	-1071.78	1142.6	488.209	-1046.86	1048.29	511.869	-1106.02	906.735	470.642	-1119.03	801.241	532.304	-1074.79	797.853	528	-1125.8	729.325
6329	0	235.021	-1240.89	1545.68	131.399	-1229.05	1537.37	266.887	-1078.84	1564.1	149.057	-1062.55	1555.72	206.786	-1020.47	1411.02	222.801	-919.603	1133.31	209.282	-1180.02	1304.99	206.208	-1277.42	1105.39	141.421	-923.222	1226.28	361.222	-1119.15	1373.2	479.444	-1081.22	1141.34	488.657	-1056.62	1046.9	512.243	-1115.63	905.333	470.646	-1128.68	799.861	532.146	-1084.41	796.264	527.696	-1135.38	727.905
6330	0	237.322	-1250.76	1545.78	133.581	-1239.12	1537.95	269.111	-1088.66	1563.98	151.122	-1072.57	1556.02	208.165	-1030.34	1411.03	223.474	-930.213	1132.96	210.619	-1190.28	1305.27	206.88	-1288.52	1106.06	142.155	-933.587	1225.95	362.688	-1128.89	1372.75	480.286	-1090.89	1140.54	488.949	-1066.49	1045.98	512.52	-1125.35	904.39	470.618	-1138.59	799.006	531.859	-1094.07	795.219	527.769	-1145.17	727.037
6331	0	239.607	-1260.77	1546.2	135.819	-1249.2	1538.76	271.406	-1098.52	1564.1	153.737	-1082.69	1556.57	209.539	-1040.23	1411.27	224.168	-940.747	1132.87	211.951	-1200.59	1305.8	207.689	-1299.61	1106.95	142.836	-943.825	1226.09	364.115	-1138.72	1372.61	480.845	-1100.47	1140.04	489.243	-1076.44	1045.32	512.711	-1135.25	903.699	470.556	-1148.58	798.434	531.683	-1103.84	794.477	527.542	-1155.01	726.28
6332	0	242	-1270.82	1546.71	138.223	-1259.34	1539.78	273.631	-1108.54	1564.33	155.986	-1092.84	1557.5	210.616	-1050.36	1411.86	224.33	-951.173	1133.22	213.314	-1210.99	1306.6	208.673	-1310.61	1107.97	143.085	-954.483	1226.63	365.459	-1148.58	1372.59	481.244	-1110.38	1139.54	489.483	-1086.7	1044.8	512.985	-1145.47	903.184	470.509	-1158.8	797.896	531.573	-1113.95	793.963	527.325	-1165.09	725.749
6333	0	244.45	-1280.9	1547.47	140.653	-1269.61	1541.09	275.795	-1118.67	1564.99	157.842	-1103.06	1558.78	211.897	-1060.52	1412.72	224.278	-961.458	1133.78	214.655	-1221.35	1307.61	209.795	-1321.24	1109.12	143.533	-965.035	1227.57	366.734	-1158.46	1373.07	481.714	-1120.61	1139.43	489.538	-1097.1	1044.62	512.96	-1155.7	903.137	470.51	-1169.44	798.109	531.365	-1124.13	793.766	527.063	-1175.21	725.576
6334	0	246.887	-1290.97	1548.54	143.018	-1279.82	1542.63	277.982	-1128.71	1566.12	159.913	-1113.3	1560.45	212.943	-1070.93	1413.77	224.52	-971.946	1134.83	216.068	-1231.59	1309.14	210.904	-1331.95	1110.81	143.849	-975.636	1228.93	368.028	-1168.2	1373.95	482.23	-1130.81	1139.89	489.66	-1107.43	1045.13	512.971	-1166.03	903.605	470.414	-1179.58	798.499	531.344	-1134.41	794.276	526.928	-1185.38	725.959
6335	0	249.25	-1301.13	1549.66	145.193	-1290.12	1544.46	280.232	-1138.84	1567.42	162.125	-1123.55	1562.39	214.045	-1081.13	1415.16	224.956	-983.013	1136.26	217.326	-1241.85	1310.8	211.974	-1342.46	1112.71	143.959	-986.524	1230.21	369.268	-1177.91	1375.18	482.607	-1141.15	1140.72	489.701	-1117.88	1045.95	512.953	-1176.6	904.51	470.354	-1190.26	799.334	531.113	-1145.03	795.018	526.856	-1195.79	726.704
6336	0	251.469	-1311.34	1550.87	147.362	-1300.41	1546.19	282.502	-1148.76	1569.01	164.248	-1133.83	1564.55	215.124	-1091.13	1416.58	224.902	-994.63	1137.29	218.637	-1252	1312.54	213.222	-1352.5	1114.6	144.112	-997.242	1231.77	370.495	-1187.56	1376.55	482.836	-1151.65	1141.54	489.734	-1128.34	1046.84	512.897	-1187.37	905.528	470.273	-1201.15	800.345	531.093	-1155.9	796.062	526.675	-1206.45	727.483
6337	0	253.542	-1321.42	1552.32	149.434	-1310.56	1548.18	284.477	-1158.97	1570.77	166.183	-1144.04	1566.96	216.243	-1101.02	1418.18	224.722	-1006.44	1138.47	219.808	-1262.03	1314.52	214.387	-1362.28	1116.81	144.522	-1007.92	1233.26	371.75	-1197.11	1378.14	483.089	-1161.99	1142.69	489.79	-1138.67	1048	512.845	-1198.13	906.79	470.224	-1212.11	801.564	531.034	-1166.75	797.303	526.523	-1217.24	728.613
6338	0	255.464	-1331.44	1553.9	151.241	-1320.52	1550.2	286.312	-1169.3	1572.69	168.055	-1154.15	1569.29	217.33	-1110.65	1419.78	224.518	-1017.87	1139.56	221.041	-1271.91	1316.68	215.416	-1372.57	1119.38	144.919	-1018.71	1234.68	372.992	-1206.53	1379.96	483.506	-1172.3	1144.16	490.001	-1148.97	1049.48	512.893	-1209.12	908.379	470.135	-1223.16	803.12	530.912	-1177.93	798.818	526.034	-1228.16	729.883
6339	0	257.251	-1341.45	1555.49	153.062	-1330.62	1552.21	288.232	-1179.01	1574.65	169.878	-1164.18	1571.71	218.343	-1120.33	1421.37	225.06	-1028.52	1140.81	222.362	-1281.77	1318.84	216.679	-1382.37	1121.79	145.189	-1029.27	1236.03	374.269	-1215.97	1381.53	483.789	-1182.69	1145.39	490.464	-1159.33	1050.82	513.048	-1220.12	909.862	470.125	-1235.01	804.934	530.795	-1189.4	800.119	526.056	-1239.66	731.406
6340	0	258.818	-1351.35	1557.12	154.7	-1340.53	1554.07	289.941	-1189.06	1576.47	171.633	-1174.18	1573.94	219.802	-1129.86	1422.97	225.617	-1038.77	1142.14	223.572	-1291.55	1320.87	217.732	-1392.59	1124.28	145.92	-1039.67	1237.37	375.55	-1225.41	1383.07	484.304	-1193.06	1146.53	490.666	-1169.97	1051.73	513.175	-1231.2	911.232	470.038	-1246.46	806.254	530.719	-1201.23	801.281	525.798	-1251.44	732.636
6341	0	260.363	-1361.1	1558.81	156.246	-1350.27	1556.06	291.383	-1198.89	1578.31	173.017	-1183.84	1576.09	220.981	-1139.42	1424.36	225.961	-1048.84	1143.07	224.719	-1301.33	1322.93	218.817	-1402.26	1126.75	146.58	-1050	1238.69	376.823	-1234.73	1384.67	484.902	-1203.2	1147.93	491.412	-1180.28	1053.06	513.5	-1242.36	912.752	469.951	-1258.15	807.963	530.697	-1213.1	802.765	525.484	-1263.38	734.118
6342	0	261.898	-1370.58	1560.65	157.698	-1359.7	1558.07	292.853	-1208.29	1580.15	174.562	-1193.45	1578.09	222.235	-1148.96	1425.83	226.448	-1058.74	1144.16	225.912	-1310.92	1324.94	219.784	-1412.48	1129.38	147.478	-1060.06	1239.84	378.116	-1244.12	1386.33	485.839	-1213.2	1149.46	492.11	-1190.9	1054.38	513.892	-1253.71	914.351	469.819	-1270.07	809.806	530.71	-1225.07	804.052	525.061	-1275.66	735.692
6343	0	263.291	-1380.05	1562.27	159.15	-1369.34	1559.97	294.297	-1217.64	1581.65	175.853	-1203.06	1579.86	223.542	-1158.51	1427.13	227.406	-1068.77	1145.27	226.946	-1320.55	1326.7	220.649	-1422.61	1131.57	148.355	-1069.98	1241.21	379.317	-1253.7	1387.63	486.748	-1223.39	1150.62	492.963	-1201.56	1055.38	514.311	-1265.26	915.541	469.795	-1282.28	811.3	530.873	-1237.48	805.264	524.528	-1288.36	736.896
6344	0	264.849	-1389.36	1563.9	160.636	-1378.83	1561.93	295.419	-1226.9	1582.87	177.093	-1212.38	1581.49	224.758	-1167.93	1428.5	228.462	-1079.03	1146.33	227.952	-1330.15	1328.25	221.344	-1432.58	1133.63	149.547	-1079.71	1242.4	380.539	-1263.31	1388.9	487.911	-1233.52	1151.75	493.96	-1212.32	1056.23	514.846	-1276.91	916.826	469.692	-1294.97	812.992	530.883	-1250.09	806.17	523.958	-1301.31	738.116
6345	0	266.351	-1398.43	1565.6	162.015	-1388.14	1563.85	296.69	-1235.89	1584.06	178.266	-1221.62	1582.98	226.058	-1177.44	1429.73	229.712	-1089.2	1147.53	228.937	-1339.64	1329.66	221.944	-1442.4	1135.42	150.683	-1089.32	1243.68	381.654	-1272.93	1390.11	489.153	-1243.64	1152.97	495.167	-1223.11	1057.19	515.356	-1288.75	918.061	469.612	-1307.27	814.525	531.069	-1262.9	807.357	523.428	-1314.47	739.585
6346	0	267.775	-1407.5	1567.2	163.416	-1397.35	1565.84	297.867	-1244.85	1585.06	179.526	-1230.79	1584.07	227.106	-1187.04	1430.8	230.639	-1099.38	1148.57	229.76	-1349.11	1330.85	222.4	-1452.26	1136.97	151.779	-1098.71	1244.97	382.673	-1282.74	1391.21	490.527	-1253.81	1154.22	496.384	-1234.05	1058.07	515.869	-1300.85	919.298	469.513	-1319.78	816.123	531.189	-1275.91	808.322	523.025	-1328.05	740.972
6347	0	269.154	-1416.55	1568.6	164.899	-1406.58	1567.38	299.014	-1253.7	1585.56	180.607	-1239.85	1585.05	228.342	-1196.56	1431.85	231.925	-1109.16	1149.63	230.563	-1358.59	1331.78	222.62	-1461.64	1137.99	153.28	-1108.06	1246	383.499	-1292.64	1392.06	491.822	-1264.16	1155.1	497.707	-1245.34	1058.7	516.387	-1313.11	920.326	469.567	-1332.82	817.495	531.169	-1289.41	808.841	522.634	-1342.07	742.226
6348	0	270.49	-1425.52	1569.78	166.111	-1415.7	1568.91	300.224	-1262.48	1586.12	181.681	-1249.04	1585.93	229.384	-1206.13	1432.72	233.126	-1118.65	1150.68	231.153	-1367.96	1332.5	222.688	-1471.28	1138.72	154.511	-1117.13	1247.09	384.238	-1302.61	1392.71	493.055	-1274.53	1156.02	498.918	-1256.53	1059.32	516.872	-1325.6	921.351	469.493	-1345.72	818.88	531.484	-1302.71	809.723	522.135	-1356.22	743.545
6349	0	271.633	-1434.41	1570.86	167.237	-1424.81	1570.29	301.207	-1271.27	1586.44	182.703	-1257.99	1586.51	230.276	-1215.69	1433.47	234.389	-1127.86	1151.48	231.639	-1377.35	1333.05	222.53	-1480.42	1139.21	155.745	-1126.24	1247.99	384.847	-1312.61	1393.35	494.388	-1284.93	1156.99	500.32	-1267.86	1059.97	517.298	-1338.12	922.296	469.39	-1359.1	820.399	531.752	-1316.21	810.418	521.768	-1370.45	744.855
6350	0	272.664	-1443.43	1571.69	168.241	-1433.86	1571.33	302.171	-1280.2	1586.64	183.795	-1266.94	1586.89	231.314	-1225.11	1434.03	235.699	-1136.83	1152.18	232.066	-1386.69	1333.34	222.213	-1489.56	1139.4	156.971	-1135.16	1248.85	385.396	-1322.79	1393.73	495.483	-1295.74	1157.59	501.492	-1279.46	1060.26	517.665	-1350.96	923.08	469.405	-1372.49	821.593	531.892	-1330.47	810.871	521.463	-1385.07	746.06
6351	0	273.405	-1452.49	1572.34	169.033	-1442.81	1572.15	302.973	-1289.16	1586.55	184.723	-1275.75	1587.13	232.287	-1234.53	1434.61	237.126	-1145.81	1152.89	232.319	-1395.94	1333.59	221.736	-1498.47	1139.32	158.248	-1143.98	1249.57	385.844	-1332.92	1394.12	496.524	-1306.79	1157.89	502.763	-1291.24	1060.38	518.109	-1363.97	923.841	469.515	-1385.99	822.765	532.274	-1344.63	811.337	521.348	-1400.07	747.427
6352	0	274.049	-1461.42	1572.96	169.661	-1451.7	1572.9	303.772	-1298.21	1586.48	185.414	-1284.69	1587.14	233.138	-1243.89	1435.14	238.414	-1154.73	1153.41	232.459	-1405.17	1333.65	221.044	-1507.07	1138.99	159.719	-1152.72	1250.13	386.113	-1342.94	1394.24	497.435	-1317.99	1158.17	503.92	-1303.03	1060.47	518.501	-1377.01	924.577	469.61	-1399.4	823.861	532.633	-1358.81	811.749	521.169	-1414.6	748.624
6353	0	274.465	-1470.47	1573.52	170.001	-1460.59	1573.45	304.268	-1307.52	1586.21	185.94	-1293.53	1587.02	234.086	-1253.29	1435.63	239.711	-1163.54	1154.17	232.474	-1414.43	1333.74	220.181	-1515.64	1138.58	160.982	-1161.15	1250.8	386.4	-1353.19	1394.52	498.391	-1329.28	1158.45	505.068	-1314.8	1060.69	518.874	-1390.18	925.288	469.641	-1412.98	824.89	533.057	-1373.09	812.489	521.072	-1429.54	749.869
6354	0	274.722	-1479.55	1573.87	170.319	-1469.61	1573.82	304.814	-1316.27	1586.09	186.416	-1302.49	1586.78	234.887	-1262.72	1435.96	241.097	-1172.21	1155.01	232.352	-1423.68	1333.59	219.276	-1524.18	1137.76	162.415	-1169.7	1251.55	386.532	-1363.62	1394.42	498.989	-1340.97	1158.44	506.073	-1326.89	1060.68	519.087	-1403.59	925.822	469.646	-1426.89	825.664	533.386	-1387.66	812.997	521	-1444.58	750.896
6355	0	274.934	-1488.66	1574.11	170.462	-1478.67	1574.13	305.006	-1325.45	1585.74	186.863	-1311.43	1586.47	235.559	-1272.22	1436.47	242.481	-1180.79	1155.72	232.179	-1432.93	1333.44	218.274	-1532.68	1136.91	163.791	-1178.1	1252.43	386.654	-1374.02	1394.49	499.642	-1353.02	1158.38	507.013	-1338.98	1060.58	519.293	-1417.05	926.445	469.596	-1440.87	826.547	533.656	-1402.26	813.446	520.953	-1459.69	752.049
6356	0	274.977	-1497.71	1574.33	170.61	-1487.69	1574.34	305.164	-1334.39	1585.43	186.93	-1320.45	1586.04	236.312	-1281.72	1436.82	244.024	-1189.24	1156.71	231.875	-1442.03	1333.25	217.208	-1541.06	1136.07	164.84	-1186.46	1253.26	386.658	-1384.32	1394.53	500.137	-1364.95	1158.45	507.957	-1351.18	1060.85	519.388	-1430.4	927.143	469.602	-1454.64	827.472	534.098	-1416.84	814.354	521.053	-1474.87	753.414
6357	0	274.814	-1506.7	1574.43	170.692	-1496.72	1574.44	305.187	-1343.33	1585.17	186.913	-1329.59	1585.73	236.935	-1291.23	1437.22	245.404	-1197.63	1157.61	231.527	-1451.14	1333.09	216.138	-1549.35	1135.41	166.266	-1194.81	1254.07	386.566	-1394.63	1394.52	500.539	-1377.07	1158.5	508.688	-1363.35	1060.89	519.565	-1443.88	927.925	469.402	-1468.66	828.691	534.403	-1431.42	815.086	521.008	-1489.92	754.8
6358	0	274.851	-1516.01	1574.23	170.595	-1505.89	1574.2	305.077	-1352.7	1584.71	186.918	-1338.62	1585.39	237.548	-1300.63	1437.56	246.774	-1206.04	1158.21	231.072	-1460.15	1332.73	215.034	-1557.73	1134.46	167.534	-1203.13	1254.74	386.393	-1405.04	1394.29	500.694	-1389.36	1158.27	509.337	-1375.7	1060.73	519.51	-1457.49	928.48	469.637	-1483.67	829.701	534.555	-1446.27	815.481	520.899	-1505.19	755.921
6359	0	274.643	-1525.24	1573.99	170.325	-1515.09	1573.94	305.086	-1361.8	1584.35	186.774	-1347.91	1584.95	238.144	-1310.03	1437.88	248.072	-1214.23	1158.98	230.526	-1469.2	1332.41	213.929	-1566.14	1133.74	168.701	-1211.22	1255.43	386.17	-1415.26	1394.15	500.729	-1401.62	1158.19	509.781	-1388.09	1060.72	519.463	-1471.1	929.169	469.169	-1496.71	830.297	534.779	-1461.09	816.169	520.766	-1520.55	757.196
6360	0	274.335	-1534.42	1573.7	170.07	-1524.32	1573.67	304.889	-1371.14	1584.12	186.575	-1357.09	1584.61	238.655	-1319.2	1438.02	249.255	-1222.38	1159.53	229.898	-1478.13	1332.1	212.783	-1574.32	1133.28	169.938	-1219.38	1256	385.881	-1425.32	1394.07	500.716	-1413.81	1158.24	510.256	-1400.39	1060.78	519.345	-1484.63	929.92	469.003	-1510.73	831.345	534.868	-1475.79	816.99	520.545	-1535.86	758.507
6361	0	273.858	-1543.85	1573.24	169.567	-1533.54	1573.14	304.653	-1380.62	1583.87	186.462	-1366.38	1584.26	238.989	-1328.42	1438.06	250.42	-1230.53	1159.92	229.241	-1486.96	1331.82	211.619	-1582.5	1132.7	170.932	-1227.58	1256.47	385.545	-1435.31	1393.83	500.548	-1426	1158.1	510.557	-1412.88	1060.7	519.166	-1498.64	930.568	468.734	-1525.12	832.295	534.74	-1490.58	817.52	520.4	-1551.19	759.911
6362	0	273.226	-1553.34	1572.54	169.07	-1542.81	1572.39	304.413	-1390.21	1583.42	186.17	-1375.62	1583.98	239.274	-1337.6	1438.1	251.381	-1238.74	1160.17	228.616	-1495.88	1331.37	210.508	-1590.53	1132.05	171.87	-1235.73	1256.79	385.173	-1445.27	1393.54	500.315	-1438.3	1157.77	510.729	-1425.46	1060.35	518.644	-1512.07	931.089	468.375	-1539.42	832.932	534.418	-1505.45	817.792	519.998	-1566.58	761.02
6363	0	272.52	-1562.87	1571.85	168.371	-1552.03	1571.65	304.056	-1399.88	1583.17	185.861	-1384.97	1583.69	239.577	-1346.72	1438.09	252.306	-1246.87	1160.66	227.913	-1504.79	1330.96	209.362	-1598.54	1131.47	172.732	-1243.74	1257.21	384.785	-1455.12	1393.37	500.045	-1450.4	1157.67	510.803	-1438.08	1060.19	518.134	-1525.77	931.695	467.889	-1553.79	833.835	534.097	-1520.2	818.387	519.531	-1582.01	762.236
6364	0	271.659	-1572.43	1571.16	167.397	-1561.34	1570.95	303.686	-1409.42	1582.95	185.511	-1394.27	1583.27	239.691	-1355.69	1437.97	253.035	-1254.94	1161.05	227.108	-1513.58	1330.66	208.172	-1606.48	1131	173.486	-1251.79	1257.43	384.331	-1464.81	1393.2	499.731	-1462.35	1157.66	510.819	-1450.59	1060.21	517.966	-1539.27	932.349	467.308	-1568.21	834.887	533.634	-1534.8	819.073	518.879	-1597.33	763.516
6365	0	270.509	-1581.97	1570.25	166.548	-1570.67	1569.95	303.13	-1419.11	1582.48	184.983	-1403.8	1582.8	239.698	-1364.89	1437.84	253.623	-1263.01	1161.3	226.334	-1522.43	1330.06	206.999	-1614.58	1130.2	174.264	-1259.93	1257.6	383.791	-1474.6	1392.82	499.348	-1474.28	1157.38	510.818	-1463.26	1060.03	517.377	-1552.97	932.879	466.533	-1582.64	835.697	532.9	-1549.55	819.505	518.237	-1612.69	764.825
6366	0	269.532	-1591.6	1569.27	165.633	-1580.02	1568.89	302.579	-1428.79	1581.99	184.477	-1413.12	1582.34	239.712	-1373.89	1437.63	254.034	-1271.16	1161.35	225.474	-1531.39	1329.48	205.8	-1622.84	1129.43	174.844	-1268.03	1257.8	383.135	-1484.32	1392.39	498.92	-1486.22	1157.1	510.624	-1475.92	1059.71	516.614	-1566.65	933.214	465.706	-1597.08	836.444	531.983	-1564.18	819.797	517.261	-1628.02	765.921
6367	0	268.544	-1601.09	1568.19	164.63	-1589.4	1567.76	301.794	-1438.55	1581.39	183.741	-1422.68	1581.74	239.634	-1382.95	1437.35	254.563	-1279.3	1161.5	224.611	-1540.28	1328.9	204.604	-1631	1128.64	175.168	-1276.18	1257.86	382.464	-1494.11	1392.04	498.434	-1497.91	1156.82	510.443	-1488.53	1059.39	515.769	-1580.25	933.732	464.604	-1611.36	837.249	530.927	-1578.73	820.172	516.068	-1643.27	767.068
6368	0	267.632	-1610.54	1567.17	163.779	-1598.77	1566.77	301.223	-1448	1580.91	182.938	-1431.99	1581.08	239.204	-1392.14	1436.97	255.005	-1287.35	1161.49	223.806	-1549.22	1328.26	203.519	-1639.29	1127.84	175.425	-1284.41	1257.79	381.661	-1503.63	1391.64	497.901	-1509.49	1156.55	510.081	-1500.99	1059.16	514.742	-1593.67	934.143	463.407	-1625.5	838.08	529.839	-1593.25	820.593	514.852	-1658.48	768.407
6369	0	266.879	-1620.07	1565.92	162.919	-1608.11	1565.45	300.257	-1457.6	1580.05	182.119	-1441.47	1580.32	238.788	-1401.25	1436.64	255.276	-1295.46	1161.4	222.811	-1558.21	1327.51	202.443	-1647.6	1126.8	175.56	-1292.69	1257.67	380.785	-1513.39	1390.95	497.23	-1521.07	1156.14	509.411	-1513.54	1058.56	513.607	-1607.27	934.504	462.107	-1639.7	838.748	528.349	-1607.85	820.69	513.321	-1673.65	769.571
6370	0	265.795	-1629.5	1564.76	161.905	-1617.54	1564.25	299.206	-1467.08	1579.15	181.351	-1450.89	1579.63	238.299	-1410.41	1436.12	255.385	-1303.69	1161.35	221.786	-1567.13	1326.76	201.376	-1655.95	1125.75	175.638	-1301.05	1257.52	379.823	-1522.96	1390.42	496.441	-1532.6	1155.76	508.732	-1526.06	1058.06	512.294	-1620.76	934.872	460.8	-1653.81	839.566	526.835	-1622.36	820.924	511.536	-1688.7	770.648
6371	0	264.925	-1638.87	1563.51	160.79	-1626.96	1563.06	298.288	-1476.46	1578.57	180.244	-1460.4	1578.83	237.67	-1419.55	1435.61	255.319	-1312.09	1161.24	220.818	-1576.06	1325.83	200.286	-1664.29	1124.67	175.647	-1309.41	1257.34	378.84	-1532.39	1389.84	495.614	-1544.03	1155.47	508.108	-1538.39	1057.84	510.756	-1634.1	935.171	458.803	-1667.58	840.222	525.287	-1636.76	821.475	509.574	-1703.69	771.865
6372	0	263.772	-1648.24	1562.32	159.77	-1636.31	1561.66	297.27	-1485.85	1577.89	179.21	-1469.81	1577.96	237.047	-1428.67	1434.96	255.16	-1320.51	1160.97	219.754	-1585.11	1325.02	199.295	-1672.76	1123.48	175.338	-1318.1	1256.98	377.871	-1541.89	1389.22	494.765	-1555.47	1155.09	507.245	-1550.73	1057.39	509.151	-1647.44	935.528	457.073	-1681.44	840.915	523.687	-1651.19	821.847	507.273	-1718.54	772.837
6373	0	262.668	-1657.65	1561.01	158.677	-1645.66	1560.28	296.074	-1495.43	1577.06	178.118	-1479.12	1577.09	236.25	-1437.9	1434.39	254.907	-1328.99	1160.72	218.716	-1594.2	1324.14	198.367	-1681.25	1122.27	174.908	-1326.74	1256.54	376.918	-1551.5	1388.54	493.84	-1566.78	1154.61	506.304	-1563.12	1056.78	507.386	-1660.85	935.765	454.789	-1695.1	841.341	521.681	-1665.74	822.059	504.879	-1733.38	773.824
6374	0	261.371	-1667.01	1559.85	157.377	-1654.86	1559.05	294.994	-1504.74	1576.29	176.938	-1488.41	1576.19	235.486	-1446.98	1433.77	254.501	-1337.6	1160.34	217.763	-1603.35	1323.3	197.456	-1689.77	1121.11	174.52	-1335.44	1256.04	375.841	-1560.92	1387.83	492.776	-1577.91	1154.17	505.258	-1575.3	1056.26	505.458	-1674.12	936.128	452.556	-1708.72	842.199	519.703	-1680.06	822.377	502.233	-1747.97	774.757
6375	0	260.06	-1676.31	1558.71	155.958	-1664.11	1557.58	293.659	-1514.19	1575.5	175.626	-1497.79	1575.12	234.528	-1456.26	1432.91	253.746	-1346.3	1159.81	216.645	-1612.39	1322.5	196.581	-1698.29	1120	173.685	-1344.38	1255.35	374.849	-1570.02	1387.08	491.586	-1588.81	1153.68	504.161	-1587.27	1055.82	503.45	-1687.18	936.485	450.102	-1721.98	842.727	517.679	-1694.28	822.904	499.463	-1762.48	775.786
6376	0	258.444	-1685.64	1557.37	154.491	-1673.35	1556.09	292.412	-1523.56	1574.56	174.379	-1507.06	1573.85	233.576	-1465.33	1432.02	253.166	-1354.93	1159.04	215.594	-1621.61	1321.51	195.727	-1706.89	1118.76	172.942	-1353.27	1254.49	373.796	-1579.22	1386.2	490.342	-1599.79	1152.93	502.847	-1599.28	1055.06	501.104	-1700.25	936.57	447.704	-1735.35	843.238	515.394	-1708.44	823.045	496.534	-1776.81	776.519
6377	0	257.053	-1695.08	1555.9	153.063	-1682.66	1554.49	290.872	-1532.98	1573.51	173.049	-1516.39	1572.6	232.504	-1474.54	1430.88	252.378	-1363.71	1158.27	214.562	-1630.93	1320.46	194.922	-1715.68	1117.49	171.976	-1362.38	1253.51	372.652	-1588.31	1385.09	489.04	-1610.63	1152.04	501.521	-1611.21	1054.24	498.819	-1713.15	936.636	445.117	-1748.54	843.53	512.877	-1722.23	822.922	493.474	-1791.05	777.3
6378	0	255.382	-1704.32	1554.52	151.531	-1691.84	1552.83	289.492	-1542.42	1572.29	171.541	-1525.59	1571.22	231.32	-1483.75	1429.82	251.333	-1372.54	1157.34	213.431	-1640.19	1319.4	194.213	-1724.56	1116.33	170.941	-1371.5	1252.48	371.496	-1597.53	1384.05	487.599	-1621.2	1151.21	500.03	-1622.97	1053.46	496.412	-1725.97	936.673	442.453	-1761.68	843.884	510.344	-1736.02	823.026	490.317	-1805.08	777.924
6379	0	254.024	-1713.61	1553.06	150.08	-1701.07	1551.17	287.861	-1551.72	1571.14	169.963	-1534.94	1569.76	230.05	-1492.82	1428.65	250.205	-1381.39	1156.33	212.326	-1649.45	1318.37	193.54	-1733.47	1115.15	169.623	-1380.56	1251.26	370.319	-1606.63	1383.15	486.149	-1631.57	1150.35	498.362	-1634.46	1052.58	494.061	-1738.57	936.854	439.677	-1774.49	844.323	507.976	-1749.9	823.38	487.158	-1818.89	778.787
6380	0	252.412	-1722.89	1551.53	148.568	-1710.39	1549.36	286.324	-1560.92	1569.83	168.406	-1544.12	1568.4	228.708	-1502.01	1427.4	248.925	-1390.33	1155.23	211.239	-1658.78	1317.21	192.956	-1742.64	1113.95	168.245	-1389.78	1249.99	369.082	-1615.77	1382.16	484.741	-1642.12	1149.44	496.971	-1646.33	1051.77	491.548	-1751.06	936.64	436.805	-1787.19	844.484	505.122	-1763.29	823.189	483.798	-1832.56	779.249
6381	0	250.913	-1731.95	1549.99	147.167	-1719.67	1547.69	284.577	-1570.17	1568.54	166.707	-1553.46	1566.99	227.267	-1511.08	1426.15	247.531	-1399.47	1154.03	210.102	-1668.15	1316.01	192.348	-1751.93	1112.91	166.767	-1399.13	1248.72	367.715	-1624.93	1381.15	483.206	-1652.42	1148.55	495.083	-1657.58	1050.81	489.104	-1763.38	936.614	433.903	-1799.85	844.876	502.526	-1776.81	823.357	480.498	-1846.08	779.867
6382	0	249.514	-1741.09	1548.56	145.472	-1728.89	1546.13	282.844	-1579.11	1567.41	164.922	-1562.64	1565.48	225.606	-1520.16	1424.91	245.97	-1408.66	1152.79	208.789	-1677.5	1315	191.73	-1761.41	1111.79	165.102	-1408.39	1247.31	366.319	-1633.91	1380.25	481.671	-1662.52	1147.75	493.511	-1668.95	1050.25	486.474	-1775.47	936.625	430.816	-1812.01	845.175	499.553	-1789.54	823.503	477.016	-1859.2	780.645
6383	0	248.014	-1750.11	1547.13	143.975	-1738.11	1544.46	280.964	-1588.14	1566.27	162.836	-1571.91	1564.01	223.814	-1529.36	1423.38	244.285	-1417.89	1151.48	207.494	-1686.88	1314.08	191.125	-1771.02	1110.77	163.232	-1417.9	1245.83	364.825	-1642.85	1379.38	480.05	-1672.73	1146.95	491.751	-1679.89	1049.54	483.781	-1787.34	936.471	427.754	-1824.22	845.502	496.764	-1802.48	823.693	473.491	-1872.19	781.156
6384	0	246.231	-1759.1	1545.73	142.343	-1747.25	1542.88	279.046	-1597.13	1564.9	161.025	-1581.05	1562.63	221.943	-1538.42	1422.06	242.51	-1427.35	1149.92	206.382	-1696.32	1312.83	190.625	-1780.78	1109.72	161.403	-1427.33	1244.23	363.299	-1651.8	1378.41	478.374	-1682.83	1146.08	490.069	-1691.05	1048.55	481.222	-1799.12	936.435	424.704	-1836.11	845.734	493.815	-1815.19	823.511	469.947	-1884.89	781.748
6385	0	244.482	-1768.04	1544.5	140.582	-1756.39	1541.32	276.957	-1606.17	1563.74	158.871	-1590.08	1561.25	220.07	-1547.46	1420.81	240.496	-1436.9	1148.43	205.053	-1705.85	1311.88	190.039	-1790.6	1108.65	159.38	-1436.95	1242.62	361.686	-1660.54	1377.46	476.609	-1692.86	1145.27	488.01	-1701.59	1047.61	478.505	-1810.52	936.299	421.625	-1847.67	845.88	490.753	-1827.33	823.447	466.352	-1897.3	782.29
6386	0	242.676	-1777.02	1543.32	138.708	-1765.37	1540.04	274.836	-1614.98	1562.64	156.786	-1599.12	1559.76	218.093	-1556.63	1419.27	238.714	-1446.34	1146.9	203.661	-1715.31	1310.99	189.402	-1800.5	1107.9	157.319	-1446.69	1240.91	359.997	-1669.43	1376.75	474.85	-1702.78	1144.63	486.029	-1711.85	1046.98	475.778	-1821.58	936.312	418.476	-1859.32	846.231	487.823	-1839.78	823.535	462.806	-1909.51	783.022
6387	0	240.609	-1785.91	1542.09	136.646	-1774.33	1538.56	272.567	-1623.9	1561.37	154.636	-1608.14	1558.35	216.087	-1565.64	1417.87	236.648	-1456.1	1145.11	202.096	-1724.73	1310.22	188.741	-1810.57	1107.13	155.327	-1456.23	1239.1	358.261	-1678.41	1375.92	473.023	-1712.66	1143.95	484.182	-1722.15	1046.25	473.181	-1832.48	936.344	415.505	-1870.59	846.572	484.863	-1851.46	823.532	459.255	-1921.54	783.733
6388	0	238.238	-1794.81	1540.92	134.462	-1783.36	1537.08	270.312	-1632.79	1560.22	152.308	-1616.97	1556.98	213.91	-1574.61	1416.52	234.571	-1466	1143.47	200.496	-1734.31	1309.55	187.914	-1820.8	1106.41	153.106	-1466.06	1237.2	356.416	-1687.37	1375.19	471.185	-1722.45	1143.37	482.189	-1732.03	1045.44	470.55	-1843.05	936.142	412.451	-1881.43	846.836	481.71	-1862.95	823.239	455.769	-1932.99	784.234
6389	0	236.152	-1803.73	1539.79	132.119	-1792.17	1535.79	268.018	-1641.72	1559.35	149.931	-1625.93	1555.57	211.69	-1583.6	1415.19	232.61	-1476.05	1141.65	198.821	-1743.86	1309.09	186.977	-1831.04	1106.09	150.799	-1475.9	1235.43	354.488	-1696.21	1374.74	469.274	-1732.09	1142.94	480.093	-1741.58	1044.91	468.072	-1853.24	936.229	409.57	-1891.92	847.265	478.952	-1873.5	823.673	452.544	-1944.07	785.046
6390	0	233.643	-1812.58	1538.9	129.759	-1801.15	1534.49	265.432	-1650.6	1558.38	147.337	-1634.9	1554.38	209.433	-1592.41	1413.91	230.507	-1486.15	1139.76	197.077	-1753.21	1308.72	185.976	-1841.46	1105.96	148.732	-1485.82	1233.41	352.478	-1705.11	1374.4	467.286	-1741.5	1142.65	478.136	-1750.95	1044.59	465.566	-1863.04	936.18	406.877	-1902.13	847.749	476.218	-1883.7	823.822	449.568	-1954.52	785.59
6391	0	231.337	-1821.48	1538.02	127.462	-1810.18	1533.52	262.906	-1659.39	1557.61	144.922	-1643.79	1553.42	207.013	-1601.17	1412.51	228.334	-1496.53	1137.94	195.298	-1762.76	1308.59	184.902	-1851.97	1105.93	146.399	-1495.63	1231.43	350.409	-1713.99	1374.18	465.314	-1750.73	1142.42	475.905	-1760.11	1044.05	463.362	-1872.67	936.239	404.397	-1911.85	848	473.403	-1893.61	823.611	446.935	-1964.57	786.244
6392	0	229.225	-1830.52	1537.4	125.02	-1819.3	1532.78	260.254	-1668.45	1557.07	142.263	-1652.95	1552.73	204.519	-1609.96	1411.47	226.347	-1506.96	1136.21	193.255	-1772.35	1308.8	183.65	-1862.49	1106.3	144.188	-1505.73	1229.69	348.229	-1723.05	1374.1	463.36	-1759.97	1142.5	473.992	-1769.46	1044.04	461.178	-1881.83	936.138	402	-1921.32	848.427	470.719	-1902.73	823.483	444.348	-1974.14	786.648
6393	0	226.772	-1839.56	1537.18	122.831	-1828.57	1532.38	257.498	-1677.42	1557.06	139.469	-1662.25	1552.61	202.03	-1618.83	1410.85	224.471	-1517.2	1134.94	191.099	-1782.04	1309.3	182.338	-1873.04	1106.99	141.83	-1515.69	1228.24	345.881	-1732.08	1374.7	461.299	-1769.04	1142.95	471.758	-1778.06	1044.38	459.088	-1890.54	936.412	399.808	-1930.23	848.912	468.674	-1911.46	823.832	442.146	-1983.16	787.278
6394	0	224.336	-1848.63	1537.32	120.276	-1837.97	1532.25	254.623	-1686.34	1557.35	136.527	-1671.49	1552.58	199.285	-1627.94	1410.6	222.686	-1527.43	1134.23	188.941	-1791.75	1310.12	181.03	-1883.8	1108.03	139.856	-1525.74	1227.15	343.598	-1741.28	1375.48	459.289	-1777.94	1143.71	469.859	-1786.82	1045.23	457.196	-1898.93	936.534	397.948	-1938.4	849.647	466.24	-1918.96	823.913	440.267	-1991.54	787.783
6395	0	222.127	-1857.77	1537.63	118.003	-1847.52	1532.44	251.601	-1695.41	1557.79	133.575	-1680.95	1552.94	196.634	-1637.14	1410.72	220.796	-1537.53	1134.04	186.697	-1801.59	1311.13	179.645	-1894.73	1109.31	137.672	-1535.8	1226.61	341.162	-1750.89	1376.6	457.276	-1786.86	1144.67	467.555	-1795.29	1046	455.448	-1906.98	936.872	396.215	-1946.53	850.038	464.307	-1926.57	824.012	438.722	-1999.3	788.091
6396	0	219.605	-1867	1538.48	115.429	-1857.06	1533.08	248.549	-1704.62	1558.59	130.479	-1690.46	1553.56	194.102	-1646.55	1411.28	219.483	-1547.58	1134.54	184.335	-1811.32	1312.68	178.118	-1905.54	1111.01	135.827	-1545.94	1226.67	338.697	-1760.55	1378.18	455.214	-1795.65	1146.04	465.551	-1803.75	1047.3	453.844	-1914.55	937.522	394.693	-1953.97	850.55	462.448	-1933.34	824.24	437.468	-2006.43	788.642
6397	0	216.935	-1876.37	1539.86	112.679	-1866.6	1534.03	245.525	-1713.87	1559.97	127.38	-1700.02	1554.38	191.613	-1656.2	1412.33	218.315	-1557.74	1135.4	181.955	-1821.14	1314.55	176.531	-1916.2	1113.06	134.377	-1555.89	1227.42	336.218	-1770.32	1380.3	453.211	-1804.18	1147.9	463.51	-1811.63	1049.05	452.363	-1921.7	938.39	393.433	-1960.92	851.417	460.872	-1939.44	824.916	436.565	-2012.75	789.282
6398	0	214.177	-1885.8	1541.39	110.003	-1876.21	1535.09	242.409	-1723.26	1561.61	124.26	-1709.63	1555.57	189.231	-1665.88	1413.86	217.022	-1568.03	1136.77	179.565	-1830.92	1316.63	174.81	-1926.89	1115.27	132.784	-1565.93	1228.72	333.656	-1780.45	1382.82	451.091	-1812.8	1149.94	461.352	-1819.33	1051.09	450.923	-1928.54	939.49	392.374	-1967.39	852.196	459.414	-1945.09	825.737	435.925	-2018.4	789.795
6399	0	211.193	-1895.33	1543.15	107.315	-1885.8	1536.47	239.295	-1732.77	1563.55	121.195	-1719.19	1556.92	186.949	-1675.63	1415.67	216.114	-1578.15	1138.72	177.254	-1840.68	1318.97	173.064	-1937.39	1117.7	131.455	-1576.08	1230.27	331.02	-1790.73	1385.34	449.038	-1821.38	1152.38	459.35	-1827.07	1053.45	449.647	-1935.05	940.731	391.407	-1973.35	853.004	458.252	-1950.24	826.72	435.443	-2023.52	790.244
6400	0	208.461	-1904.79	1545.16	104.462	-1895.49	1538.02	236.246	-1742.23	1565.91	118.195	-1728.9	1558.8	184.75	-1685.32	1417.92	215.03	-1588.38	1140.84	174.938	-1850.38	1321.53	171.301	-1947.55	1120.43	130.284	-1585.93	1232.25	328.59	-1800.58	1388.45	447.003	-1829.79	1155.36	457.723	-1834.67	1056.54	448.535	-1941.19	942.378	390.485	-1978.84	854.143	457.201	-1954.7	828.062	435.125	-2027.91	790.908
6401	0	205.834	-1914.32	1547.2	101.935	-1905.01	1539.61	233.195	-1751.74	1568.38	115.334	-1738.46	1560.72	182.435	-1694.96	1420.08	213.673	-1598.54	1143.07	172.779	-1859.87	1324.26	169.542	-1957.51	1123.41	128.929	-1595.97	1234.19	326.162	-1810.61	1391.66	445.138	-1838.27	1158.75	455.949	-1842.05	1059.77	447.477	-1947.08	944.237	389.759	-1983.81	855.162	456.488	-1958.99	829.737	434.916	-2031.73	791.369
6402	0	203.383	-1923.71	1549.07	99.5494	-1914.6	1541.18	230.434	-1761.26	1570.79	112.452	-1748.16	1562.9	180.192	-1704.4	1422.48	212.662	-1608.66	1145.27	170.729	-1869.38	1326.98	167.923	-1967.42	1126.32	127.518	-1606.04	1236.23	323.694	-1820.37	1394.83	443.272	-1846.84	1162.13	454.225	-1849.37	1062.95	446.512	-1952.9	946.101	389.258	-1988.53	856.306	456.141	-1963.45	831.575	434.783	-2035.35	791.799
6403	0	201.07	-1933.11	1550.99	97.242	-1924.16	1542.89	227.829	-1770.69	1573.32	109.834	-1757.78	1565.01	177.955	-1713.71	1424.79	211.434	-1618.77	1147.57	168.714	-1878.85	1329.69	166.305	-1977.02	1129.28	126.199	-1615.8	1238.26	321.356	-1829.98	1398.05	441.544	-1855.41	1165.72	452.881	-1856.86	1066.4	445.766	-1958.61	948.2	388.858	-1992.91	857.405	456.001	-1967.63	833.458	434.679	-2038.52	792.105
6404	0	198.791	-1942.32	1552.9	94.995	-1933.47	1544.71	225.312	-1779.88	1575.72	107.307	-1767.2	1567.24	175.617	-1723.03	1426.87	209.952	-1628.77	1149.47	166.685	-1888.18	1332.42	164.752	-1986.54	1132.27	124.562	-1625.7	1240.06	319.072	-1839.26	1401.22	440.012	-1863.92	1169.42	451.679	-1863.9	1070.08	445.134	-1964.08	950.456	388.745	-1997.09	858.647	456.199	-1971.64	835.779	434.552	-2041.42	792.47
6405	0	196.83	-1951.55	1554.8	92.87	-1942.69	1546.31	222.894	-1789.05	1577.92	105.012	-1776.42	1569.17	173.452	-1732.11	1428.94	208.428	-1638.63	1151.26	164.788	-1897.49	1334.87	163.258	-1995.97	1135.12	122.837	-1635.4	1241.66	316.847	-1848.39	1404.13	438.47	-1872.34	1172.88	450.617	-1870.97	1073.53	444.592	-1969.67	952.502	388.677	-2001.06	859.714	456.621	-1975.7	837.966	434.477	-2044.18	792.628
6406	0	194.749	-1960.72	1556.43	90.8538	-1951.81	1547.81	220.772	-1798.26	1579.79	102.845	-1785.65	1570.97	171.311	-1741.14	1430.69	206.776	-1648.27	1152.84	163.027	-1906.78	1337.21	161.892	-2005.41	1137.67	121.11	-1645.11	1243.23	314.804	-1857.54	1406.7	437.113	-1880.96	1176.01	449.419	-1877.84	1076.3	444.252	-1975.19	954.376	388.762	-2005.14	860.637	456.951	-1979.94	839.675	434.523	-2046.94	792.398
6407	0	192.861	-1969.8	1558.13	89.0136	-1960.87	1549.42	218.881	-1807.35	1581.7	100.881	-1794.65	1572.67	169.427	-1750.22	1432.07	204.915	-1657.63	1154.26	161.328	-1916.09	1339.36	160.573	-2014.86	1140.06	119.138	-1654.65	1244.62	312.956	-1866.5	1409.17	435.833	-1889.35	1178.87	448.47	-1884.56	1078.99	444.13	-1980.73	956.257	389.213	-2009.14	861.539	457.989	-1984.47	841.712	434.61	-2049.57	792.187
6408	0	190.949	-1978.66	1559.83	87.1085	-1969.74	1551.06	217.046	-1816.28	1583.31	98.9891	-1803.66	1574.29	167.308	-1759.2	1433.79	202.966	-1666.81	1155.84	159.639	-1925.28	1341.48	159.348	-2024.08	1142.25	117.07	-1664.25	1246.01	311.179	-1875.18	1411.48	434.695	-1897.58	1181.53	447.788	-1891.2	1081.66	444.152	-1986.1	957.91	389.69	-2013.08	862.375	458.923	-1988.7	843.463	435.122	-2052.23	791.987
6409	0	189.328	-1987.59	1561.38	85.6087	-1978.74	1552.45	215.292	-1825.17	1584.73	97.3753	-1812.5	1575.62	165.51	-1768.21	1435.15	200.79	-1675.81	1157.32	158.144	-1934.54	1343.28	158.246	-2033.47	1144.11	114.963	-1673.48	1247.39	309.511	-1884.06	1413.39	433.679	-1905.78	1183.68	447.184	-1897.89	1083.92	444.366	-1991.51	959.167	390.521	-2017.21	862.982	460.136	-1993.24	845.092	435.849	-2054.91	791.584
6410	0	188.024	-1996.42	1562.55	84.1169	-1987.72	1553.63	213.642	-1833.97	1585.92	95.6368	-1821.6	1576.73	163.768	-1777.22	1436.53	198.596	-1684.55	1158.68	156.76	-1943.69	1344.78	157.193	-2042.74	1145.5	113.021	-1682.9	1248.69	307.972	-1892.86	1414.91	432.647	-1913.75	1185.24	446.251	-1904.43	1085.48	444.655	-1996.97	960.009	391.3	-2021.4	863.159	461.269	-1997.56	846.145	436.841	-2057.61	790.963
6411	0	186.697	-2005.2	1563.74	82.7676	-1996.79	1554.79	211.913	-1842.63	1586.98	94.0684	-1830.42	1577.7	161.712	-1786.24	1437.91	196.638	-1693.35	1160.02	155.357	-1952.79	1346.07	156.295	-2051.95	1146.68	110.653	-1692.02	1250.08	306.509	-1901.48	1416.23	431.722	-1921.42	1186.51	445.537	-1910.81	1087.11	445.017	-2002.18	960.629	392.42	-2025.62	863.292	462.352	-2001.23	846.929	438.281	-2060.3	790.259
6412	0	185.454	-2014.01	1564.84	81.5481	-2005.68	1555.84	210.304	-1851.26	1588	92.3455	-1839.52	1578.66	159.93	-1795.28	1439.11	194.511	-1701.71	1161.49	154.192	-1961.67	1347.28	155.505	-2060.91	1147.68	108.638	-1701.06	1251.28	305.15	-1910	1417.46	430.859	-1928.9	1187.67	444.831	-1917.21	1088.6	445.577	-2007.27	961.13	393.955	-2029.8	863.213	463.798	-2005.05	847.789	439.997	-2062.93	789.714
6413	0	184.323	-2022.73	1565.62	80.3388	-2014.84	1556.8	208.737	-1860.03	1588.86	90.8196	-1848.46	1579.66	158.193	-1804.22	1440.36	192.356	-1710.03	1162.79	153.105	-1970.56	1348.2	154.865	-2069.82	1148.37	106.493	-1710.14	1252.76	303.849	-1918.48	1418.47	429.988	-1936.08	1188.51	443.989	-1923.7	1089.63	446.162	-2012.25	961.364	395.303	-2034.11	862.893	465.069	-2008.59	848.138	442.1	-2065.7	789.074
6414	0	183.256	-2031.63	1566.37	79.2924	-2023.77	1557.49	207.404	-1868.84	1589.69	89.3649	-1857.49	1580.53	156.395	-1813.09	1441.46	190.333	-1718.2	1164.01	152.14	-1979.33	1349.16	154.37	-2078.43	1148.85	104.325	-1718.94	1254.06	302.618	-1926.76	1419.3	429.099	-1942.97	1189.26	443.209	-1930.21	1090.61	446.865	-2017.15	961.643	397.096	-2038.29	862.446	466.775	-2012.32	848.642	444.616	-2068.57	788.581
6415	0	182.147	-2040.37	1566.95	78.2063	-2032.77	1558.14	206.028	-1877.64	1590.59	87.9417	-1866.45	1581.3	154.715	-1821.99	1442.45	188.199	-1726.34	1165.34	151.158	-1988.05	1349.94	153.955	-2086.95	1149.26	102.217	-1727.7	1255.35	301.45	-1934.83	1420.13	428.152	-1949.5	1190.09	442.266	-1936.26	1091.69	447.485	-2021.8	961.917	398.52	-2042.85	862.225	468.264	-2015.33	849.09	447.283	-2071.56	788.531
6416	0	181.17	-2049.34	1567.45	77.1869	-2041.83	1558.54	204.616	-1886.53	1591.38	86.6017	-1875.59	1582.02	153.029	-1830.64	1443.47	186.17	-1734.28	1166.59	150.34	-1996.61	1350.69	153.676	-2095.23	1149.6	99.9955	-1736.39	1256.6	300.337	-1942.81	1420.89	427.137	-1955.7	1190.73	441.606	-1942.4	1092.82	448.131	-2026.26	962.102	398.166	-2049.72	863.142	469.781	-2018.57	849.75	450.169	-2074.56	788.467
6417	0	180.177	-2058.2	1567.63	76.278	-2050.98	1558.71	203.23	-1895.42	1592.1	85.1827	-1884.7	1582.75	151.303	-1839.29	1444.36	184.123	-1742.19	1167.77	149.622	-2005.15	1351.27	153.518	-2103.35	1149.79	97.9484	-1744.97	1257.61	299.242	-1950.72	1421.5	426.123	-1961.8	1191.24	440.859	-1948.39	1093.69	448.744	-2030.78	962.267	401.833	-2050.77	861.143	471.361	-2021.86	850.191	452.945	-2077.5	788.453
6418	0	179.457	-2067.1	1567.81	75.5792	-2060.15	1558.8	201.846	-1904.36	1592.76	83.8897	-1893.95	1583.33	149.817	-1847.9	1445.13	182.115	-1749.99	1168.77	148.949	-2013.63	1351.82	153.461	-2111.39	1150.07	95.8744	-1753.4	1258.65	298.352	-1958.53	1422.14	425.405	-1968	1191.85	439.757	-1953.83	1094.4	449.505	-2035.14	962.571	403.272	-2054.7	860.752	472.689	-2025.08	850.762	455.671	-2080.77	788.697
6419	0	178.639	-2075.88	1567.9	74.875	-2069.3	1558.91	200.478	-1912.97	1593.39	82.4448	-1903.21	1583.88	148.278	-1856.29	1445.89	180.31	-1757.93	1169.61	148.373	-2021.94	1352.29	153.39	-2119.24	1150.43	93.9766	-1761.83	1259.61	297.434	-1966.11	1422.84	424.637	-1973.53	1192.49	439.089	-1959.15	1095.41	450.183	-2039.53	963.129	404.801	-2058.31	860.559	473.871	-2027.75	851.234	458.404	-2083.92	789.225
6420	0	178.135	-2084.68	1567.95	74.2164	-2078.51	1558.92	199.205	-1921.71	1593.91	81.2383	-1912.45	1584.41	146.802	-1864.67	1446.59	178.453	-1765.68	1170.43	147.787	-2030.2	1352.76	153.432	-2127.06	1150.76	92.1728	-1770.25	1260.34	296.476	-1973.51	1423.46	423.874	-1978.88	1193.1	438.329	-1964.35	1096.22	450.72	-2043.72	963.585	406.262	-2062.04	860.583	475.253	-2031.12	852.025	460.968	-2087.31	790.04
6421	0	177.54	-2093.38	1567.74	73.6881	-2087.66	1558.72	197.918	-1930.54	1594.3	79.981	-1921.7	1584.94	145.445	-1873.07	1447.16	176.72	-1773.36	1171.23	147.248	-2038.44	1353.02	153.482	-2134.81	1150.98	90.4735	-1778.63	1261.06	295.701	-1981.13	1424.02	423.292	-1984.12	1193.7	437.772	-1969.47	1097.04	451.535	-2048.09	964.153	407.858	-2065.66	860.331	476.479	-2034.35	852.719	463.196	-2090.64	790.653
6422	0	176.934	-2102.17	1567.73	73.1594	-2096.58	1558.53	196.912	-1939.25	1594.81	78.7467	-1930.76	1585.37	144.038	-1881.35	1447.7	175.269	-1781.28	1171.85	146.698	-2046.59	1353.28	153.49	-2142.47	1151.24	88.9901	-1786.88	1261.72	294.953	-1988.68	1424.66	422.89	-1989.34	1194.52	437.353	-1974.32	1098.03	451.931	-2052.05	964.501	408.815	-2069.41	860.372	477.478	-2037.51	853.51	465.27	-2093.97	791.331
6423	0	176.202	-2110.76	1567.47	72.5419	-2105.43	1558.36	195.91	-1947.94	1595.32	77.8122	-1939.77	1585.85	142.569	-1889.61	1448.14	173.769	-1788.92	1172.57	146.156	-2054.7	1353.55	153.566	-2150.12	1151.6	87.2769	-1795.08	1262.24	294.216	-1996.08	1425.2	422.698	-1994.35	1195.36	437.082	-1979.13	1099.06	452.521	-2056.18	965.016	409.815	-2073.15	860.493	478.433	-2040.84	854.53	467.157	-2097.38	792.006
6424	0	175.568	-2119.52	1567.36	71.7795	-2114.26	1558.02	194.939	-1956.71	1595.78	76.7936	-1948.6	1586.16	141.465	-1897.87	1448.51	172.365	-1796.53	1173.18	145.811	-2062.8	1353.69	153.65	-2157.79	1151.72	85.828	-1803.31	1262.61	293.691	-2003.77	1425.7	422.656	-1999.51	1196.26	436.729	-1983.98	1099.77	453.065	-2060.35	965.437	411.15	-2076.99	860.599	479.54	-2044.43	855.211	468.974	-2101	792.676
6425	0	174.834	-2128.17	1567.07	71.0235	-2122.98	1557.66	193.954	-1965.53	1596	75.7505	-1957.43	1586.4	140.284	-1906.09	1448.79	171.189	-1804.29	1173.62	145.413	-2070.87	1353.74	153.667	-2165.42	1151.72	84.582	-1811.48	1263.04	293.043	-2011.34	1426.05	422.552	-2004.46	1196.79	436.446	-1988.83	1100.29	453.833	-2064.51	965.705	412.029	-2080.83	860.681	480.341	-2048.06	855.695	470.461	-2104.41	793.031
6426	0	174.117	-2136.76	1566.84	70.3315	-2131.64	1557.38	193.028	-1974.07	1596.26	74.8888	-1966.02	1586.51	139.242	-1914.28	1449.05	170.187	-1811.92	1174.12	145.016	-2078.96	1353.79	153.676	-2173.06	1151.68	83.4701	-1819.57	1263.42	292.44	-2018.79	1426.29	422.509	-2009.57	1197.54	436.527	-1993.99	1101.15	454.496	-2068.73	966.125	412.861	-2085.06	861.041	480.891	-2051.42	856.056	471.711	-2107.83	793.324
6427	0	173.468	-2145.15	1566.5	69.7398	-2140.22	1557.07	192.113	-1982.55	1596.5	74.0346	-1974.8	1586.58	138.264	-1922.53	1449.07	169.233	-1819.65	1174.39	144.686	-2087	1353.8	153.735	-2180.64	1151.65	82.2324	-1827.65	1263.73	291.809	-2026.48	1426.48	421.612	-2013.99	1197.99	436.393	-1998.79	1101.75	455.093	-2072.86	966.262	414.017	-2089.07	861.165	481.526	-2054.82	856.372	472.737	-2111.71	793.411
6428	0	173.007	-2153.57	1566.14	69.3474	-2148.97	1556.64	191.175	-1990.94	1596.49	73.0959	-1983.41	1586.49	137.4	-1930.76	1449.22	168.245	-1827.41	1174.65	144.377	-2095.12	1353.59	153.863	-2188.28	1151.3	81.3445	-1835.67	1263.93	291.314	-2034.24	1426.43	421.53	-2019.45	1198.3	436.281	-2003.88	1102.12	455.965	-2077.29	966.486	414.514	-2093.35	861.4	482.182	-2058.41	856.579	473.534	-2114.59	793.082
6429	0	172.751	-2161.97	1565.96	69.1444	-2157.51	1556.29	190.266	-1999.26	1596.43	72.2662	-1992.21	1586.33	136.685	-1938.98	1449.39	167.483	-1834.99	1175.04	144.114	-2103.17	1353.43	153.967	-2195.9	1150.74	80.5047	-1843.79	1264.09	290.878	-2042.29	1426.5	421.469	-2025.03	1198.62	436.272	-2009.16	1102.55	456.753	-2081.61	966.563	415.728	-2097.55	861.334	482.652	-2062.13	856.662	474.368	-2117.95	792.882
6430	0	172.644	-2170.18	1565.66	68.9477	-2166.17	1556.03	189.701	-2007.44	1596.34	71.5768	-2000.75	1586.29	135.928	-1947.27	1449.45	166.652	-1842.65	1175.33	143.813	-2111.26	1353.24	154.125	-2203.54	1150.34	79.6816	-1851.87	1264.36	290.355	-2049.93	1426.48	421.617	-2030.76	1199.18	436.419	-2014.43	1103.08	457.456	-2085.86	966.653	416.511	-2101.75	861.452	482.992	-2065.68	856.747	475.019	-2121.26	792.656
6431	0	172.551	-2178.41	1565.34	68.909	-2174.61	1555.71	189.137	-2015.64	1596.16	71.1068	-2009.35	1586.01	135.278	-1955.52	1449.35	165.999	-1850.42	1175.53	143.586	-2119.31	1352.88	154.211	-2211.31	1149.81	79.0557	-1859.85	1264.43	290	-2057.85	1426.35	421.63	-2036.72	1199.51	436.574	-2019.89	1103.5	458.158	-2090.4	966.646	417.202	-2106.23	861.496	483.291	-2069.46	856.755	475.658	-2124.64	792.255
6432	0	172.536	-2186.54	1564.86	68.9386	-2183.15	1555.4	188.842	-2023.94	1595.84	70.6849	-2017.72	1585.74	134.805	-1963.77	1449.31	165.329	-1858.2	1175.66	143.413	-2127.46	1352.5	154.364	-2219.06	1149.26	78.3313	-1867.81	1264.59	289.683	-2065.78	1426.09	421.742	-2043.09	1199.79	436.774	-2025.69	1103.8	458.804	-2095.1	966.511	417.915	-2110.67	861.286	483.781	-2073.3	856.593	476.282	-2128.15	791.662
6433	0	172.467	-2194.76	1564.4	68.8693	-2191.5	1554.94	188.569	-2032.13	1595.54	70.3846	-2026.28	1585.46	134.32	-1972.06	1449.03	164.773	-1865.97	1175.59	143.22	-2135.59	1352.05	154.419	-2226.77	1148.56	77.816	-1875.94	1264.49	289.548	-2073.89	1425.88	421.777	-2049.45	1199.9	436.944	-2031.43	1104.02	459.296	-2099.88	966.262	418.512	-2115.42	861.042	483.967	-2077.23	856.381	476.778	-2131.65	790.989
6434	0	172.389	-2203.24	1564.1	68.7541	-2199.87	1554.52	188.358	-2040.39	1595.2	70.2347	-2034.59	1584.92	134.061	-1980.34	1448.73	164.339	-1873.9	1175.43	143.138	-2143.64	1351.5	154.511	-2234.54	1147.91	77.4646	-1884.03	1264.29	289.267	-2081.69	1425.34	421.878	-2055.97	1199.86	437.138	-2037.24	1104.16	459.799	-2104.77	965.822	419.014	-2119.81	860.503	484.293	-2081.14	856.062	477.19	-2135.07	790
6435	0	172.313	-2211.53	1563.52	68.6888	-2208.2	1553.88	188.267	-2048.78	1594.53	70.1907	-2042.98	1584.32	133.963	-1988.62	1448.29	163.886	-1881.76	1174.99	143.069	-2151.88	1350.73	154.625	-2242.48	1147	77.0663	-1892.08	1263.89	289.385	-2089.76	1424.63	421.938	-2062.85	1199.32	437.292	-2043.32	1103.72	460.161	-2109.88	965.065	419.475	-2124.45	859.745	484.406	-2085.47	855.391	477.568	-2138.85	789.04
6436	0	172.374	-2220	1562.92	68.6659	-2216.55	1553.22	188.427	-2057.32	1593.73	70.2812	-2051.21	1583.7	133.921	-1996.92	1447.65	163.685	-1889.76	1174.53	143.145	-2160.06	1349.96	154.785	-2250.45	1146.25	76.9322	-1900.12	1263.37	289.427	-2097.93	1423.84	422.025	-2069.99	1198.57	437.285	-2049.59	1103.05	460.517	-2115.18	964.253	419.876	-2129.22	858.844	484.616	-2089.9	854.472	477.998	-2142.74	787.802
6437	0	172.373	-2227.99	1562.02	68.7997	-2224.84	1552.59	188.647	-2065.7	1593.12	70.4282	-2059.59	1583.03	134.022	-2005.28	1447.11	163.437	-1897.67	1174.02	143.278	-2168.17	1349.22	154.871	-2258.35	1145.36	76.7985	-1908.35	1263.01	289.618	-2106.11	1423.2	422.156	-2077.11	1198	437.504	-2055.94	1102.68	460.776	-2120.51	963.341	420.134	-2133.87	857.89	484.721	-2094.58	853.766	478.346	-2146.77	786.655
6438	0	172.689	-2236.52	1561.26	68.9817	-2233.21	1551.84	188.807	-2074.01	1592.39	70.6325	-2068.02	1582.34	134.213	-2013.56	1446.39	163.299	-1905.73	1173.43	143.364	-2176.34	1348.32	154.997	-2266.32	1144.49	76.8465	-1916.39	1262.41	289.789	-2114.26	1422.37	422.222	-2084.41	1197.33	437.552	-2062.46	1102.16	460.829	-2126.12	962.398	420.232	-2138.73	856.782	484.883	-2099.3	853.054	478.294	-2151.34	785.841
6439	0	173.043	-2244.7	1560.1	69.4454	-2241.65	1551.01	189.162	-2082.44	1591.37	71.014	-2076.47	1581.45	134.453	-2021.94	1445.63	163.179	-1913.78	1172.73	143.551	-2184.65	1347.27	155.161	-2274.45	1143.36	76.8359	-1924.54	1261.79	289.918	-2122.63	1421.3	422.377	-2092.1	1196.44	437.67	-2069.26	1101.4	460.944	-2132.04	961.215	420.254	-2143.78	855.44	485.037	-2104.37	852.132	478.396	-2155.96	784.399
6440	0	173.643	-2253.18	1559.16	70.0643	-2250.13	1550.2	189.615	-2090.77	1590.38	71.3593	-2085.02	1580.7	134.656	-2030.29	1444.81	163.348	-1921.85	1172.13	143.813	-2192.9	1346.24	155.356	-2282.54	1142.23	76.9803	-1932.84	1261.09	290.21	-2131.02	1420.25	422.462	-2099.95	1195.38	437.673	-2076.27	1100.49	460.865	-2138.04	959.9	420.303	-2148.77	854.192	485.178	-2109.64	851.11	478.415	-2160.59	782.893
6441	0	174.334	-2261.46	1558.14	70.661	-2258.64	1549.44	190.105	-2099.08	1589.31	71.9448	-2093.52	1579.74	134.896	-2038.72	1443.92	163.373	-1930.1	1171.27	144.111	-2201.15	1345.06	155.47	-2290.67	1141.1	77.1822	-1941.04	1260.39	290.562	-2139.39	1419.13	422.597	-2107.81	1194.21	437.835	-2083.3	1099.62	460.711	-2144.11	958.529	420.214	-2154.03	852.528	485.232	-2114.96	849.999	478.323	-2165.33	781.356
6442	0	175.101	-2269.82	1557.23	71.5643	-2267.06	1548.55	190.725	-2107.47	1588.29	72.6277	-2101.96	1578.9	135.495	-2047.09	1442.85	163.464	-1938.3	1170.33	144.389	-2209.61	1343.92	155.69	-2298.88	1139.79	77.4883	-1949.33	1259.5	290.942	-2147.77	1417.81	422.713	-2115.84	1192.94	437.878	-2090.49	1098.48	460.665	-2150.42	957.01	420.142	-2159.44	850.933	485.314	-2120.64	848.786	478.225	-2170.37	779.713
6443	0	175.903	-2278.37	1556.35	72.299	-2275.6	1547.78	191.623	-2115.98	1586.98	73.3638	-2110.49	1577.99	135.994	-2055.56	1441.78	163.822	-1946.7	1169.29	144.875	-2218.05	1342.74	155.952	-2307.18	1138.46	77.889	-1957.74	1258.57	291.502	-2156.32	1416.52	422.784	-2124.06	1191.25	437.954	-2097.97	1097.07	460.583	-2156.96	955.405	419.985	-2165.09	849.237	485.229	-2126.58	847.154	478.093	-2175.66	777.915
6444	0	176.596	-2286.88	1555.33	72.9963	-2284.09	1547	192.596	-2124.49	1585.73	74.1935	-2118.85	1576.95	136.669	-2064.19	1440.66	164.062	-1955.19	1168.16	145.629	-2226.09	1341.26	156.05	-2315.61	1137.19	78.2757	-1966.16	1257.52	292.075	-2164.82	1415.05	423.012	-2132.28	1189.78	438.111	-2105.48	1095.79	460.461	-2163.64	953.671	419.77	-2171.01	847.309	485.23	-2132.53	845.628	477.749	-2180.94	776.012
6445	0	177.279	-2295.27	1554.16	73.6254	-2292.52	1546.1	193.389	-2132.93	1584.49	75.1491	-2127.31	1575.66	137.298	-2072.78	1439.42	164.572	-1963.72	1166.86	145.928	-2234.99	1340.12	156.244	-2324.1	1135.83	78.7831	-1974.68	1256.33	292.654	-2173.45	1413.55	423.354	-2140.4	1188.34	438.402	-2113.06	1094.51	460.355	-2170.48	951.953	419.58	-2176.94	845.633	485.213	-2138.66	844.233	477.511	-2186.53	774
6446	0	178.164	-2303.95	1553.25	74.4628	-2300.89	1545.15	194.418	-2141.41	1583.11	76.2072	-2135.72	1574.49	138.149	-2081.5	1438.2	165.063	-1972.33	1165.56	146.486	-2243.56	1338.73	156.453	-2332.63	1134.4	79.3288	-1983.17	1255.27	293.448	-2182.25	1412.07	423.751	-2148.75	1186.68	438.601	-2120.91	1092.93	460.255	-2177.57	950.032	419.433	-2183.28	843.745	485.033	-2145.08	842.511	477.145	-2192.44	771.963
6447	0	179.037	-2312.69	1552.27	75.3423	-2309.42	1544.19	195.535	-2150.04	1581.86	77.1594	-2144.23	1573.37	138.985	-2090.16	1437.05	165.636	-1980.9	1164.39	147.138	-2252.34	1337.37	156.7	-2341.33	1132.91	79.9824	-1991.85	1254.15	294.42	-2191.11	1410.56	424.26	-2157.29	1184.87	438.876	-2128.99	1091.19	460.318	-2184.87	948.068	419.387	-2189.85	841.992	484.964	-2151.78	840.56	476.961	-2198.84	769.881
6448	0	179.929	-2321.26	1551.35	76.2388	-2317.95	1543.29	196.535	-2158.72	1580.43	78.2848	-2152.63	1572.18	139.975	-2098.95	1435.97	166.127	-1989.74	1163.3	147.871	-2260.99	1336.01	156.915	-2350.1	1131.59	80.5796	-2000.43	1253.16	295.183	-2200.04	1409.06	424.911	-2165.8	1183.33	439.167	-2136.99	1089.66	460.081	-2192.05	946.099	419.219	-2196.18	839.778	484.988	-2158.51	838.856	476.618	-2205.03	767.831
6449	0	180.98	-2329.87	1550.28	77.2936	-2326.59	1542.43	197.679	-2167.27	1579.11	79.3703	-2161.24	1570.96	141.078	-2107.81	1434.7	166.797	-1998.48	1162.1	148.525	-2269.82	1334.75	157.103	-2358.88	1130.19	81.5194	-2009.15	1252.04	296.017	-2208.99	1407.49	425.511	-2174.27	1181.8	439.542	-2145.27	1088.24	460.318	-2199.53	944.326	419.19	-2203.25	838.149	484.912	-2165.49	837.278	476.41	-2211.55	765.946
6450	0	182.235	-2338.52	1548.85	78.5024	-2335.31	1541.39	198.883	-2175.84	1577.55	80.5271	-2170.03	1569.67	142.11	-2116.63	1433.29	167.538	-2007.5	1160.59	149.278	-2278.9	1333.35	157.365	-2367.88	1128.82	82.3373	-2017.78	1250.97	296.95	-2218.03	1405.9	426.08	-2182.88	1180.1	439.741	-2153.53	1086.55	460.443	-2207.29	942.467	419.192	-2210.64	836.476	484.907	-2172.7	835.395	476.169	-2218.46	763.878
6451	0	183.572	-2347.31	1547.68	79.8247	-2344.09	1540.42	200.233	-2184.54	1576.05	81.9147	-2178.72	1568.61	143.055	-2125.64	1432.05	168.367	-2016.49	1159.38	150.237	-2287.59	1331.82	157.659	-2376.95	1127.49	83.1749	-2026.76	1249.77	297.854	-2227.24	1404.37	426.605	-2191.45	1178.29	440.12	-2161.95	1084.84	460.649	-2215.08	940.573	419.19	-2218.13	834.626	484.769	-2180.18	833.584	475.954	-2225.52	761.849
6452	0	184.913	-2356.19	1546.74	81.2056	-2352.84	1539.51	201.631	-2193.2	1574.64	83.3828	-2187.49	1567.36	144.202	-2134.49	1430.77	169.252	-2025.6	1157.91	151.03	-2296.51	1330.49	157.899	-2386.07	1126.22	84.0932	-2035.71	1248.45	298.834	-2236.4	1402.85	427.365	-2199.96	1176.81	440.462	-2170.2	1083.31	460.881	-2223.05	938.921	419.145	-2225.88	832.858	484.719	-2187.7	831.811	475.771	-2232.81	759.977
6453	0	186.405	-2364.98	1545.64	82.6822	-2361.6	1538.58	203.103	-2201.96	1573.19	84.9158	-2196.33	1566.26	145.363	-2143.52	1429.47	170.054	-2034.85	1156.5	151.795	-2305.8	1329.41	158.264	-2395.31	1125.1	85.0753	-2044.76	1247.16	300.053	-2245.48	1401.36	428.199	-2208.64	1175.29	441.07	-2178.73	1081.81	461.31	-2231.15	937.178	419.314	-2233.77	831.226	484.938	-2195.65	830.258	475.756	-2240.43	758.13
6454	0	187.996	-2373.96	1544.53	84.1818	-2370.46	1537.71	204.621	-2210.92	1571.76	86.4752	-2205.13	1565.1	146.719	-2152.75	1428.2	171.035	-2044.2	1155.13	152.875	-2314.82	1328.05	158.605	-2404.65	1123.98	86.2942	-2053.94	1245.83	301.228	-2254.66	1399.68	428.864	-2217.32	1173.54	441.554	-2187.39	1079.97	461.71	-2239.53	935.429	419.554	-2241.99	829.528	485.237	-2203.64	828.643	475.763	-2248.32	756.246
6455	0	189.336	-2382.83	1543.41	85.6298	-2379.3	1536.83	206.394	-2219.9	1570.47	88.153	-2213.91	1564.04	148.092	-2161.85	1426.98	171.938	-2053.66	1153.77	153.764	-2324.01	1326.89	158.97	-2414.06	1122.88	87.5148	-2063.17	1244.61	302.327	-2263.89	1398.24	429.877	-2226.22	1172.03	442.196	-2196.12	1078.37	462.091	-2248.09	933.645	419.727	-2250.56	827.962	485.309	-2212.05	826.76	475.717	-2256.52	754.309
6456	0	190.82	-2391.76	1542.46	87.1656	-2388.16	1535.92	208.094	-2228.78	1569.4	89.781	-2222.83	1562.93	149.544	-2171	1425.58	172.971	-2063.23	1152.3	154.601	-2333.59	1325.97	159.502	-2423.48	1122	88.374	-2072.45	1243.4	303.543	-2273.05	1396.75	430.688	-2234.87	1170.56	442.948	-2204.82	1076.94	462.629	-2256.83	931.911	419.925	-2259.31	826.356	485.402	-2220.61	825.001	475.81	-2264.97	752.509
6457	0	192.411	-2400.92	1541.58	88.7272	-2397.15	1535.05	209.89	-2237.84	1568.14	91.6118	-2231.84	1561.8	150.982	-2180.17	1424.28	173.968	-2073.16	1150.62	156.21	-2342.31	1324.56	160.093	-2433.06	1121	89.6159	-2081.89	1242.05	305.023	-2282.29	1395.14	431.625	-2243.84	1168.76	443.692	-2213.88	1075.13	463.117	-2265.86	930.077	420.19	-2268.14	824.266	485.643	-2229.6	823.176	475.942	-2273.82	750.538
6458	0	194.046	-2410	1540.59	90.3955	-2406.24	1534.3	211.77	-2246.94	1566.74	93.3261	-2240.73	1560.7	152.602	-2189.38	1422.9	174.996	-2083.16	1148.89	157.14	-2352.34	1323.8	160.759	-2442.8	1120	90.8018	-2091.53	1240.51	306.55	-2291.67	1393.52	432.645	-2253.09	1166.75	444.402	-2223.12	1073.04	463.822	-2275.1	928.135	420.75	-2277.25	822.393	486.168	-2238.86	821.153	476.202	-2282.92	748.467
6459	0	196.004	-2419.19	1539.83	92.1781	-2415.1	1533.61	213.47	-2255.9	1565.5	95.3909	-2249.68	1559.66	154.258	-2198.58	1421.44	176.061	-2093.35	1147.05	158.63	-2361.44	1322.7	161.532	-2452.71	1119.34	92.2588	-2101.34	1238.89	308.333	-2301.29	1392.19	433.787	-2262.31	1164.96	445.289	-2232.42	1071.19	464.562	-2284.31	926.279	421.327	-2286.6	820.881	486.638	-2248	819.177	476.601	-2292.12	746.702
6460	0	197.901	-2428.24	1539.18	93.8464	-2424.57	1533.49	215.494	-2264.91	1564.39	97.2803	-2258.67	1558.64	155.92	-2207.9	1420.17	177.187	-2103.6	1145.1	160.261	-2370.78	1321.67	162.328	-2462.67	1118.59	93.516	-2111.18	1237.05	309.928	-2310.52	1390.67	435.02	-2271.73	1163.26	446.267	-2241.83	1069.56	465.328	-2293.72	924.591	422.038	-2296.25	819.378	487.052	-2257.32	817.355	477.15	-2301.6	745.076
6461	0	199.873	-2437.47	1538.89	95.9192	-2433.6	1533.13	217.556	-2274.04	1563.49	99.262	-2267.85	1557.88	157.803	-2217.18	1418.92	178.086	-2114.1	1143.28	161.771	-2380.54	1320.73	163.311	-2472.86	1118.08	94.632	-2120.9	1235.68	311.614	-2319.96	1389.28	436.54	-2281.59	1161.69	447.301	-2251.49	1067.82	466.223	-2303.48	922.851	422.84	-2306.21	817.803	487.665	-2267.01	815.532	477.879	-2311.46	743.303
6462	0	201.933	-2446.8	1538.8	98.0275	-2442.83	1533.2	219.648	-2283.19	1562.65	101.379	-2276.98	1557.23	159.592	-2226.47	1417.85	179.398	-2124.59	1141.9	163.365	-2390.52	1320.08	164.222	-2483.26	1117.65	96.0048	-2130.86	1234.54	313.345	-2329.57	1388.03	437.763	-2291.37	1160.05	448.253	-2261.37	1066.24	467.206	-2313.3	921.335	423.554	-2316.34	816.268	488.426	-2276.77	813.948	478.698	-2321.38	741.73
6463	0	203.969	-2455.97	1538.85	100.044	-2452.33	1533.8	221.743	-2292.3	1561.95	103.553	-2286.21	1556.89	161.643	-2235.97	1417.05	180.418	-2135.11	1140.7	164.938	-2400.54	1319.67	165.092	-2493.77	1117.54	97.0931	-2140.9	1233.57	315.094	-2339.34	1387.1	438.992	-2301.13	1158.74	449.233	-2271.25	1065.08	468.214	-2323.12	919.949	424.436	-2326.53	814.854	489.247	-2286.54	812.688	479.714	-2331.4	740.524
6464	0	206.276	-2465.35	1539.21	102.372	-2461.42	1534.2	224.221	-2301.59	1561.48	105.872	-2295.56	1556.79	163.167	-2245.89	1416.48	181.308	-2145.69	1139.86	166.626	-2410.78	1319.49	166.096	-2504.51	1117.66	98.3766	-2151.1	1232.93	316.965	-2349.18	1386.31	440.107	-2311.03	1157.53	450.174	-2281.32	1063.9	469.381	-2333.11	918.818	425.557	-2336.7	813.684	490.061	-2296.49	811.527	480.905	-2341.64	739.469
6465	0	208.544	-2474.83	1539.71	104.617	-2470.89	1535.06	226.474	-2311.03	1561.09	108.114	-2304.87	1556.9	164.947	-2255.81	1416.43	182.131	-2156.27	1139.47	168.397	-2421.03	1319.51	167.066	-2515.31	1117.75	99.2874	-2161.13	1232.89	318.785	-2358.83	1385.68	441.188	-2321.16	1156.44	451.12	-2291.7	1062.88	470.508	-2343.23	917.8	426.864	-2347.27	812.867	491.037	-2306.69	810.472	482.272	-2352.12	738.676
6466	0	210.719	-2484.34	1540.39	106.813	-2480.43	1536.17	228.701	-2320.43	1561.01	110.603	-2314.28	1557.21	166.524	-2265.87	1416.81	182.792	-2166.79	1139.7	170.021	-2431.3	1319.78	167.968	-2526.14	1118.23	100.205	-2171.53	1233.27	320.147	-2368.78	1385.33	442.267	-2331.41	1155.83	451.809	-2301.94	1062.22	471.498	-2353.44	917.23	428.335	-2357.78	812.257	491.946	-2316.85	809.842	483.677	-2362.63	738.232
6467	0	213.055	-2494.02	1541.32	109.024	-2489.95	1537.36	231.291	-2330.02	1561.41	113.026	-2323.79	1557.87	168.174	-2276	1417.33	183.157	-2177.17	1140.03	171.633	-2441.47	1320.36	168.999	-2536.92	1119	101.006	-2181.9	1233.88	321.842	-2378.55	1385.39	443.248	-2341.56	1155.62	452.567	-2312.14	1061.98	472.667	-2363.81	917.079	429.863	-2368.42	811.784	492.859	-2327.15	809.569	485.184	-2373.18	738.103
6468	0	215.403	-2503.78	1542.34	111.521	-2499.6	1538.87	233.681	-2339.69	1561.9	115.397	-2333.44	1558.79	169.596	-2286.09	1418.12	183.305	-2187.54	1140.69	173.338	-2451.65	1321.19	170.196	-2547.56	1120.03	101.62	-2192.47	1234.95	323.453	-2388.28	1385.68	443.909	-2351.76	1155.29	453.057	-2322.41	1061.8	473.692	-2374.24	916.996	431.26	-2379.6	811.779	493.834	-2337.83	809.618	486.774	-2384.07	738.283
6469	0	217.733	-2513.53	1543.64	113.744	-2509.31	1540.44	235.942	-2349.25	1562.55	117.852	-2343.05	1560.04	170.837	-2296.11	1419.28	183.34	-2197.82	1141.77	174.99	-2461.75	1322.32	171.408	-2558.06	1121.41	101.672	-2202.92	1236.21	324.957	-2397.95	1386.29	444.512	-2362.2	1155.21	453.432	-2332.81	1061.7	474.6	-2384.88	917.367	432.646	-2390.88	812.028	494.967	-2349.13	810.045	488.227	-2395.11	738.684
6470	0	220.084	-2523.26	1545.15	115.708	-2519.55	1542.64	238.467	-2359.07	1563.56	120.125	-2352.78	1561.56	172.193	-2306	1420.62	183.501	-2208.31	1143.09	176.616	-2471.66	1323.78	172.728	-2568.41	1123.14	102.152	-2213.47	1237.66	326.476	-2407.12	1387.23	445.196	-2372.34	1155.67	454.036	-2343.12	1062.26	475.588	-2395.54	918.117	434.048	-2402.05	812.542	495.977	-2359.42	810.576	489.738	-2406.26	739.546
6471	0	222.371	-2533.17	1546.84	117.937	-2529.29	1544.79	240.597	-2368.67	1564.71	122.344	-2362.54	1563.37	173.69	-2315.76	1422.1	183.638	-2219.1	1144.05	178.189	-2481.5	1325.43	174.142	-2578.76	1125.31	102.533	-2223.97	1238.98	327.919	-2416.19	1388.37	445.778	-2382.43	1156.34	454.619	-2353.27	1063.11	476.516	-2406.35	919.208	434.983	-2414.15	813.911	496.673	-2370.37	811.309	491.165	-2417.63	740.641
6472	0	224.46	-2542.62	1548.36	120.1	-2538.95	1546.75	242.533	-2378.19	1565.95	124.577	-2372.23	1565.09	174.886	-2325.22	1423.39	183.895	-2229.36	1145.11	179.717	-2491.29	1327.07	175.536	-2588.99	1127.39	103.129	-2234.5	1240.19	329.386	-2425.38	1389.55	446.753	-2392.8	1157.27	455.572	-2363.41	1064.19	477.497	-2417.36	920.435	436.153	-2425.79	814.99	497.733	-2382	812.554	492.611	-2429.51	741.813
6473	0	226.312	-2552.13	1549.99	122.123	-2548.41	1548.84	244.679	-2387.66	1567.43	126.498	-2381.66	1566.87	176.189	-2334.74	1424.88	184.097	-2239.65	1146.3	181.25	-2500.98	1328.82	177.025	-2599.07	1129.76	103.25	-2244.79	1241.35	331.05	-2434.28	1390.81	447.121	-2402.44	1157.98	456.161	-2373.5	1065.04	478.479	-2428.33	921.774	437.173	-2437.71	816.036	498.51	-2393.57	813.598	493.926	-2441.26	743.115
6474	0	228.022	-2561.48	1551.84	123.823	-2557.81	1551.02	246.559	-2397.08	1568.84	128.392	-2390.97	1568.54	177.813	-2343.95	1426.08	184.373	-2249.9	1147.06	182.685	-2510.5	1330.67	178.408	-2608.99	1132.2	103.751	-2254.83	1242.54	332.736	-2443.18	1392.1	447.901	-2412.01	1158.91	456.821	-2383.37	1065.94	479.205	-2439.1	922.816	438.046	-2449.48	817.148	499.194	-2404.92	814.726	495.05	-2453.4	744.524
6475	0	229.693	-2570.82	1553.91	125.48	-2566.85	1553.16	248.468	-2406.29	1570.23	130.134	-2400.01	1570.14	178.982	-2353.13	1427.1	184.926	-2260.13	1147.79	184.155	-2519.9	1332.4	179.809	-2618.99	1134.56	104.749	-2265.04	1243.43	334.369	-2452.15	1393.46	448.919	-2421.62	1159.96	457.694	-2393.46	1066.86	480.261	-2450.08	924.118	438.901	-2461.32	818.675	500.077	-2416.8	816.122	496.174	-2465.58	746.079
6476	0	231.152	-2579.87	1555.81	127.124	-2575.78	1555.26	250.104	-2415.47	1571.44	131.991	-2408.91	1571.69	180.676	-2362.32	1428.46	185.711	-2269.97	1148.79	185.611	-2529.39	1333.99	181.222	-2628.79	1136.78	105.921	-2274.78	1244.29	335.892	-2461.12	1394.58	450.161	-2431.46	1160.91	458.643	-2403.57	1067.51	481.4	-2461.15	925.302	439.756	-2473.42	819.932	500.441	-2428.44	816.49	497.101	-2478.08	747.326
6477	0	232.645	-2588.7	1557.74	128.47	-2584.57	1557.38	251.619	-2424.1	1572.49	133.653	-2417.52	1572.93	182.014	-2371.52	1429.53	186.811	-2279.55	1149.82	186.947	-2538.76	1335.57	182.387	-2638.52	1138.72	107.227	-2284.39	1245.54	337.336	-2470.2	1395.83	451.115	-2440.76	1161.86	459.812	-2413.72	1068.39	482.439	-2472.3	926.529	440.628	-2485.47	821.058	501.061	-2440.22	817.36	497.956	-2490.87	748.724
6478	0	234.153	-2597.39	1559.81	129.852	-2593.22	1559.63	253.056	-2432.59	1573.36	135.141	-2426.12	1574.05	183.333	-2380.8	1430.48	187.876	-2289.26	1150.71	188.216	-2548.1	1337.02	183.487	-2648.04	1140.5	108.146	-2293.78	1246.6	338.586	-2479.14	1396.92	452.427	-2450.02	1163.1	461.063	-2423.73	1069.35	483.605	-2483.37	927.756	441.385	-2497.93	822.854	501.935	-2452.49	818.652	498.722	-2503.66	750.443
6479	0	235.554	-2605.84	1561.67	131.414	-2601.74	1561.67	254.676	-2440.96	1573.96	136.535	-2434.6	1574.81	184.695	-2390.07	1431.65	188.953	-2298.77	1151.76	189.404	-2557.4	1338.12	184.492	-2657.51	1141.85	109.302	-2302.9	1247.64	340.033	-2488.57	1397.85	454.191	-2459.71	1164.35	462.313	-2433.98	1070.11	484.687	-2494.68	928.72	442.25	-2510.31	824.142	502.367	-2465.03	819.333	499.207	-2516.43	751.608
6480	0	236.986	-2614.28	1563.34	132.792	-2610.21	1563.54	256.015	-2449.19	1574.22	137.937	-2442.87	1575.22	185.877	-2399.47	1432.65	190.567	-2308.16	1152.87	190.536	-2566.72	1338.92	185.367	-2666.77	1142.79	110.563	-2311.83	1248.73	341.236	-2498.19	1398.68	455.122	-2468.87	1164.82	463.568	-2444.38	1070.51	485.822	-2506.18	929.6	442.957	-2522.87	825.303	503.018	-2477.15	819.575	499.602	-2529.89	752.482
6481	0	238.358	-2622.45	1565.04	134.254	-2618.43	1565.51	257.324	-2457.62	1574.34	139.289	-2450.92	1575.38	186.859	-2408.68	1433.36	191.638	-2317.31	1153.57	191.525	-2575.97	1339.6	185.983	-2675.86	1143.42	112.068	-2320.7	1249.75	342.399	-2507.65	1399.41	456.686	-2478.44	1165.8	465.055	-2454.86	1071.1	486.928	-2517.7	930.614	443.647	-2535.22	826.695	503.881	-2489.42	820.448	499.993	-2542.91	753.838
6482	0	239.7	-2630.61	1566.73	135.481	-2626.59	1567.29	258.414	-2465.37	1574.16	140.561	-2458.95	1575.42	188.205	-2417.96	1434.24	193.001	-2326.2	1154.71	192.436	-2585.18	1340.16	186.514	-2684.74	1143.85	113.461	-2329.41	1250.52	343.312	-2517.31	1400.22	458.702	-2488.53	1167.11	466.472	-2465.23	1071.62	488.061	-2529.4	931.547	444.313	-2547.61	828.062	504.698	-2502.46	821.084	500.331	-2556.36	754.862
6483	0	240.846	-2638.77	1568.25	136.611	-2634.66	1568.88	259.787	-2473.24	1573.75	141.747	-2466.92	1575.23	189.211	-2427.18	1435.07	194.267	-2334.71	1155.78	193.18	-2594.28	1340.38	186.924	-2693.62	1143.96	114.745	-2337.88	1251.81	344.279	-2527	1400.77	459.696	-2498.07	1167.56	468.01	-2476.06	1071.93	489.11	-2541.28	932.247	444.958	-2560.26	829.054	505.466	-2515.42	821.501	500.694	-2569.78	756.049
6484	0	241.824	-2646.86	1569.54	137.563	-2642.76	1570.33	260.795	-2481.39	1573.42	142.742	-2474.95	1575.01	190.369	-2436.45	1435.85	195.487	-2343.33	1156.68	193.797	-2603.28	1340.45	187.035	-2702.26	1143.64	115.793	-2346.41	1252.78	344.868	-2536.56	1401.02	460.921	-2508.09	1167.93	469.466	-2486.81	1072.08	490.055	-2553.38	932.928	445.513	-2573	830.013	506.174	-2528.63	821.866	500.997	-2583.46	757.013
6485	0	242.686	-2654.81	1570.63	138.384	-2650.7	1571.7	261.548	-2489.35	1573.12	143.763	-2482.9	1574.71	191.733	-2445.47	1436.45	196.799	-2351.59	1157.63	194.243	-2612.22	1340.58	186.964	-2710.72	1143.37	116.934	-2354.65	1253.66	345.348	-2546.17	1401.37	462.18	-2518.17	1168.4	471.187	-2497.7	1072.49	490.926	-2565.63	933.642	445.933	-2585.66	830.969	507.143	-2541.75	822.489	500.969	-2598.36	756.452
6486	0	243.449	-2662.88	1571.74	139.086	-2658.62	1572.81	262.73	-2497.71	1572.84	144.624	-2490.78	1574.34	192.634	-2454.26	1437.01	197.893	-2359.84	1158.54	194.599	-2621.1	1340.51	186.758	-2719.08	1142.94	118.101	-2362.87	1254.37	345.914	-2555.65	1401.5	463.287	-2528.49	1168.67	472.232	-2508.99	1072.5	491.64	-2577.9	934.077	446.344	-2598.51	831.671	507.945	-2555.21	822.943	501.193	-2609.97	759.45
6487	0	244.055	-2670.94	1572.53	139.668	-2666.53	1573.69	263.482	-2505.94	1572.39	145.42	-2498.6	1574.04	193.467	-2463.08	1437.43	199.429	-2368.01	1159.27	194.844	-2629.87	1340.35	186.396	-2727.38	1142.4	119.563	-2371	1255.39	346.316	-2565.3	1401.61	464.342	-2539.22	1168.67	473.71	-2520.38	1072.34	492.363	-2590.51	934.57	446.77	-2612.58	831.994	508.739	-2568.8	823.252	501.254	-2626.41	758.196
6488	0	244.538	-2679.01	1573.39	140.227	-2674.38	1574.61	264.282	-2514.17	1572.26	145.834	-2506.97	1574.2	194.639	-2471.91	1437.8	200.827	-2376.02	1160.02	194.971	-2638.41	1340.27	185.897	-2735.52	1141.93	120.818	-2379.04	1256.13	346.73	-2574.79	1401.76	465.5	-2550.35	1168.8	475.186	-2531.69	1072.29	492.917	-2603.07	935.073	446.984	-2624.18	833.158	509.397	-2582.5	823.544	501.48	-2638.17	760.835
6489	0	244.821	-2686.99	1574.24	140.577	-2682.29	1575.37	264.661	-2522.91	1572.35	146.162	-2515.25	1574.16	195.035	-2480.7	1438.54	202.302	-2384.05	1160.87	194.948	-2646.85	1340.23	185.331	-2743.5	1141.63	121.924	-2387.02	1256.69	347.16	-2584.15	1401.81	466.411	-2561.16	1168.98	476.53	-2543.02	1072.44	493.37	-2615.74	935.634	447.126	-2637.04	833.992	510.188	-2596.13	824.235	500.964	-2654.24	760.042
6490	0	245.028	-2695.2	1574.82	140.796	-2690.33	1575.97	265.103	-2531.08	1572.09	146.758	-2523.18	1573.82	196.511	-2489.31	1438.95	203.513	-2391.93	1161.64	194.916	-2655.31	1340.09	184.744	-2751.48	1141.29	123.37	-2395.01	1257.43	347.424	-2593.65	1401.79	467.235	-2572.39	1169.21	477.805	-2554.54	1072.53	493.812	-2628.55	936.266	447.229	-2650.19	834.564	510.627	-2609.87	824.675	500.866	-2668.58	760.698
[truncated: 69 more columns]

## Sheet: Sheet2
Devices
		025370 - Force			025370 - Moment			025370 - CoP			027571 - Force			027571 - Moment			027571 - CoP			037720 - Force			037720 - Moment			037720 - CoP
Frame	Sub Frame	Fx	Fy	Fz	Mx	My	Mz	Cx	Cy	Cz	Fx	Fy	Fz	Mx	My	Mz	Cx	Cy	Cz	Fx	Fy	Fz	Mx	My	Mz	Cx	Cy	Cz
		N	N	N	N.mm	N.mm	N.mm	mm	mm	mm	N	N	N	N.mm	N.mm	N.mm	mm	mm	mm	N	N	N	N.mm	N.mm	N.mm	mm	mm	mm
6006	0	0	0	0	0	0	0	200	300	0	0	0	0	0	0	0	200	903	0	0	0	0	0	0	0	603	903	0
6006	1	0	0	0	0	0	0	200	300	0	0	0	0	0	0	0	200	903	0	0	0	0	0	0	0	603	903	0
6006	2	0	0	0	0	0	0	200	300	0	0	0	0	0	0	0	200	903	0	0	0	0	0	0	0	603	903	0
6006	3	0	0	0	0	0	0	200	300	0	0	0	0	0	0	0	200	903	0	0	0	0	0	0	0	603	903	0
6006	4	0	0	0	0	0	0	200	300	0	0	0	0	0	0	0	200	903	0	0	0	0	0	0	0	603	903	0
6006	5	0	0	0	0	0	0	200	300	0	0	0	0	0	0	0	200	903	0	0	0	0	0	0	0	603	903	0
6006	6	0	0	0	0	0	0	200	300	0	0	0	0	0	0	0	200	903	0	0	0	0	0	0	0	603	903	0
6006	7	0	0	0	0	0	0	200	300	0	0	0	0	0	0	0	200	903	0	0	0	0	0	0	0	603	903	0
6006	8	0	0	0	0	0	0	200	300	0	0	0	0	0	0	0	200	903	0	0	0	0	0	0	0	603	903	0
6006	9	0	0	0	0	0	0	200	300	0	0	0	0	0	0	0	200	903	0	0	0	0	0	0	0	603	903	0
6007	0	0	0	0	0	0	0	200	300	0	0	0	0	0	0	0	200	903	0	0	0	0	0	0	0	603	903	0
6007	1	0	0	0	0	0	0	200	300	0	0	0	0	0	0	0	200	903	0	0	0	0	0	0	0	603	903	0
6007	2	0	0	0	0	0	0	200	300	0	0	0	0	0	0	0	200	903	0	0	0	0	0	0	0	603	903	0
6007	3	0	0	0	0	0	0	200	300	0	0	0	0	0	0	0	200	903	0	0	0	0	0	0	0	603	903	0
6007	4	0	0	0	0	0	0	200	300	0	0	0	0	0	0	0	200	903	0	0	0	0	0	0	0	603	903	0
6007	5	0	0	0	0	0	0	200	300	0	0	0	0	0	0	0	200	903	0	0	0	0	0	0	0	603	903	0
6007	6	0	0	0	0	0	0	200	300	0	0	0	0	0	0	0	200	903	0	0	0	0	0	0	0	603	903	0
6007	7	0	0	0	0	0	0	200	300	0	0	0	0	0	0	0	200	903	0	0	0	0	0	0	0	603	903	0
6007	8	0	0	0	0	0	0	200	300	0	0	0	0	0	0	0	200	903	0	0	0	0	0	0	0	603	903	0
6007	9	0	0	0	0	0	0	200	300	0	0	0	0	0	0	0	200	903	0	0	0	0	0	0	0	603	903	0
6008	0	0	0	0	0	0	0	200	300	0	0	0	0	0	0	0	200	903	0	0	0	0	0	0	0	603	903	0
6008	1	0	0	0	0	0	0	200	300	0	0	0	0	0	0	0	200	903	0	0	0	0	0	0	0	603	903	0
6008	2	0	0	0	0	0	0	200	300	0	0	0	0	0	0	0	200	903	0	0	0	0	0	0	0	603	903	0
6008	3	0	0	0	0	0	0	200	300	0	0	0	0	0	0	0	200	903	0	0	0	0	0	0	0	603	903	0
6008	4	0	0	0	0	0	0	200	300	0	0	0	0	0	0	0	200	903	0	0	0	0	0	0	0	603	903	0
6008	5	0	0	0	0	0	0	200	300	0	0	0	0	0	0	0	200	903	0	0	0	0	0	0	0	603	903	0
6008	6	0	0	0	0	0	0	200	300	0	0	0	0	0	0	0	200	903	0	0	0	0	0	0	0	603	903	0
6008	7	0	0	0	0	0	0	200	300	0	0	0	0	0	0	0	200	903	0	0	0	0	0	0	0	603	903	0
6008	8	0	0	0	0	0	0	200	300	0	0	0	0	0	0	0	200	903	0	0	0	0	0	0	0	603	903	0
6008	9	0	0	0	0	0	0	200	300	0	0	0	0	0	0	0	200	903	0	0	0	0	0	0	0	603	903	0
6009	0	0	0	0	0	0	0	200	300	0	0	0	0	0	0	0	200	903	0	0	0	0	0	0	0	603	903	0
6009	1	0	0	0	0	0	0	200	300	0	0	0	0	0	0	0	200	903	0	0	0	0	0	0	0	603	903	0
6009	2	0	0	0	0	0	0	200	300	0	0	0	0	0	0	0	200	903	0	0	0	0	0	0	0	603	903	0
6009	3	0	0	0	0	0	0	200	300	0	0	0	0	0	0	0	200	903	0	0	0	0	0	0	0	603	903	0
6009	4	0	0	0	0	0	0	200	300	0	0	0	0	0	0	0	200	903	0	0	0	0	0	0	0	603	903	0
6009	5	0	0	0	0	0	0	200	300	0	0	0	0	0	0	0	200	903	0	0	0	0	0	0	0	603	903	0
6009	6	0	0	0	0	0	0	200	300	0	0	0	0	0	0	0	200	903	0	0	0	0	0	0	0	603	903	0
6009	7	0	0	0	0	0	0	200	300	0	0	0	0	0	0	0	200	903	0	0	0	0	0	0	0	603	903	0
6009	8	0	0	0	0	0	0	200	300	0	0	0	0	0	0	0	200	903	0	0	0	0	0	0	0	603	903	0
6009	9	0	0	0	0	0	0	200	300	0	0	0	0	0	0	0	200	903	0	0	0	0	0	0	0	603	903	0
6010	0	0	0	0	0	0	0	200	300	0	0	0	0	0	0	0	200	903	0	0	0	0	0	0	0	603	903	0
6010	1	0	0	0	0	0	0	200	300	0	0	0	0	0	0	0	200	903	0	0	0	0	0	0	0	603	903	0
6010	2	0	0	0	0	0	0	200	300	0	0	0	0	0	0	0	200	903	0	0	0	0	0	0	0	603	903	0
6010	3	0	0	0	0	0	0	200	300	0	0	0	0	0	0	0	200	903	0	0	0	0	0	0	0	603	903	0
6010	4	0	0	0	0	0	0	200	300	0	0	0	0	0	0	0	200	903	0	0	0	0	0	0	0	603	903	0
6010	5	0	0	0	0	0	0	200	300	0	0	0	0	0	0	0	200	903	0	0	0	0	0	0	0	603	903	0
6010	6	0	0	0	0	0	0	200	300	0	0	0	0	0	0	0	200	903	0	0	0	0	0	0	0	603	903	0
6010	7	0	0	0	0	0	0	200	300	0	0	0	0	0	0	0	200	903	0	0	0	0	0	0	0	603	903	0
6010	8	0	0	0	0	0	0	200	300	0	0	0	0	0	0	0	200	903	0	0	0	0	0	0	0	603	903	0
6010	9	0	0	0	0	0	0	200	300	0	0	0	0	0	0	0	200	903	0	0	0	0	0	0	0	603	903	0
6011	0	0	0	0	0	0	0	200	300	0	0	0	0	0	0	0	200	903	0	0	0	0	0	0	0	603	903	0
6011	1	0	0	0	0	0	0	200	300	0	0	0	0	0	0	0	200	903	0	0	0	0	0	0	0	603	903	0
6011	2	0	0	0	0	0	0	200	300	0	0	0	0	0	0	0	200	903	0	0	0	0	0	0	0	603	903	0
6011	3	0	0	0	0	0	0	200	300	0	0	0	0	0	0	0	200	903	0	0	0	0	0	0	0	603	903	0
6011	4	0	0	0	0	0	0	200	300	0	0	0	0	0	0	0	200	903	0	0	0	0	0	0	0	603	903	0
6011	5	0	0	0	0	0	0	200	300	0	0	0	0	0	0	0	200	903	0	0	0	0	0	0	0	603	903	0
6011	6	0	0	0	0	0	0	200	300	0	0	0	0	0	0	0	200	903	0	0	0	0	0	0	0	603	903	0
6011	7	0	0	0	0	0	0	200	300	0	0	0	0	0	0	0	200	903	0	0	0	0	0	0	0	603	903	0
6011	8	0	0	0	0	0	0	200	300	0	0	0	0	0	0	0	200	903	0	0	0	0	0	0	0	603	903	0
6011	9	0	0	0	0	0	0	200	300	0	0	0	0	0	0	0	200	903	0	0	0	0	0	0	0	603	903	0
6012	0	0	0	0	0	0	0	200	300	0	0	0	0	0	0	0	200	903	0	0	0	0	0	0	0	603	903	0
6012	1	0	0	0	0	0	0	200	300	0	0	0	0	0	0	0	200	903	0	0	0	0	0	0	0	603	903	0
6012	2	0	0	0	0	0	0	200	300	0	0	0	0	0	0	0	200	903	0	0	0	0	0	0	0	603	903	0
6012	3	0	0	0	0	0	0	200	300	0	0	0	0	0	0	0	200	903	0	0	0	0	0	0	0	603	903	0
6012	4	0	0	0	0	0	0	200	300	0	0	0	0	0	0	0	200	903	0	0	0	0	0	0	0	603	903	0
6012	5	0	0	0	0	0	0	200	300	0	0	0	0	0	0	0	200	903	0	0	0	0	0	0	0	603	903	0
6012	6	0	0	0	0	0	0	200	300	0	0	0	0	0	0	0	200	903	0	0	0	0	0	0	0	603	903	0
6012	7	0	0	0	0	0	0	200	300	0	0	0	0	0	0	0	200	903	0	0	0	0	0	0	0	603	903	0
6012	8	0	0	0	0	0	0	200	300	0	0	0	0	0	0	0	200	903	0	0	0	0	0	0	0	603	903	0
6012	9	0	0	0	0	0	0	200	300	0	0	0	0	0	0	0	200	903	0	0	0	0	0	0	0	603	903	0
6013	0	0	0	0	0	0	0	200	300	0	0	0	0	0	0	0	200	903	0	0	0	0	0	0	0	603	903	0
6013	1	0	0	0	0	0	0	200	300	0	0	0	0	0	0	0	200	903	0	0	0	0	0	0	0	603	903	0
6013	2	0	0	0	0	0	0	200	300	0	0	0	0	0	0	0	200	903	0	0	0	0	0	0	0	603	903	0
6013	3	0	0	0	0	0	0	200	300	0	0	0	0	0	0	0	200	903	0	0	0	0	0	0	0	603	903	0
6013	4	0	0	0	0	0	0	200	300	0	0	0	0	0	0	0	200	903	0	0	0	0	0	0	0	603	903	0
6013	5	0	0	0	0	0	0	200	300	0	0	0	0	0	0	0	200	903	0	0	0	0	0	0	0	603	903	0
6013	6	0	0	0	0	0	0	200	300	0	0	0	0	0	0	0	200	903	0	0	0	0	0	0	0	603	903	0
6013	7	0	0	0	0	0	0	200	300	0	0	0	0	0	0	0	200	903	0	0	0	0	0	0	0	603	903	0
6013	8	0	0	0	0	0	0	200	300	0	0	0	0	0	0	0	200	903	0	0	0	0	0	0	0	603	903	0
6013	9	0	0	0	0	0	0	200	300	0	0	0	0	0	0	0	200	903	0	0	0	0	0	0	0	603	903	0
6014	0	0	0	0	0	0	0	200	300	0	0	0	0	0	0	0	200	903	0	0	0	0	0	0	0	603	903	0
6014	1	0	0	0	0	0	0	200	300	0	0	0	0	0	0	0	200	903	0	0	0	0	0	0	0	603	903	0
6014	2	0	0	0	0	0	0	200	300	0	0	0	0	0	0	0	200	903	0	0	0	0	0	0	0	603	903	0
6014	3	0	0	0	0	0	0	200	300	0	0	0	0	0	0	0	200	903	0	0	0	0	0	0	0	603	903	0
6014	4	0	0	0	0	0	0	200	300	0	0	0	0	0	0	0	200	903	0	0	0	0	0	0	0	603	903	0
6014	5	0	0	0	0	0	0	200	300	0	0	0	0	0	0	0	200	903	0	0	0	0	0	0	0	603	903	0
6014	6	0	0	0	0	0	0	200	300	0	0	0	0	0	0	0	200	903	0	0	0	0	0	0	0	603	903	0
6014	7	0	0	0	0	0	0	200	300	0	0	0	0	0	0	0	200	903	0	0	0	0	0	0	0	603	903	0
6014	8	0	0	0	0	0	0	200	300	0	0	0	0	0	0	0	200	903	0	0	0	0	0	0	0	603	903	0
6014	9	0	0	0	0	0	0	200	300	0	0	0	0	0	0	0	200	903	0	0	0	0	0	0	0	603	903	0
6015	0	0	0	0	0	0	0	200	300	0	0	0	0	0	0	0	200	903	0	0	0	0	0	0	0	603	903	0
6015	1	0	0	0	0	0	0	200	300	0	0	0	0	0	0	0	200	903	0	0	0	0	0	0	0	603	903	0
6015	2	0	0	0	0	0	0	200	300	0	0	0	0	0	0	0	200	903	0	0	0	0	0	0	0	603	903	0
6015	3	0	0	0	0	0	0	200	300	0	0	0	0	0	0	0	200	903	0	0	0	0	0	0	0	603	903	0
6015	4	0	0	0	0	0	0	200	300	0	0	0	0	0	0	0	200	903	0	0	0	0	0	0	0	603	903	0
6015	5	0	0	0	0	0	0	200	300	0	0	0	0	0	0	0	200	903	0	0	0	0	0	0	0	603	903	0
6015	6	0	0	0	0	0	0	200	300	0	0	0	0	0	0	0	200	903	0	0	0	0	0	0	0	603	903	0
6015	7	0	0	0	0	0	0	200	300	0	0	0	0	0	0	0	200	903	0	0	0	0	0	0	0	603	903	0
6015	8	0	0	0	0	0	0	200	300	0	0	0	0	0	0	0	200	903	0	0	0	0	0	0	0	603	903	0
6015	9	0	0	0	0	0	0	200	300	0	0	0	0	0	0	0	200	903	0	0	0	0	0	0	0	603	903	0
6016	0	0	0	0	0	0	0	200	300	0	0	0	0	0	0	0	200	903	0	0	0	0	0	0	0	603	903	0
6016	1	0	0	0	0	0	0	200	300	0	0	0	0	0	0	0	200	903	0	0	0	0	0	0	0	603	903	0
6016	2	0	0	0	0	0	0	200	300	0	0	0	0	0	0	0	200	903	0	0	0	0	0	0	0	603	903	0
6016	3	0	0	0	0	0	0	200	300	0	0	0	0	0	0	0	200	903	0	0	0	0	0	0	0	603	903	0
6016	4	0	0	0	0	0	0	200	300	0	0	0	0	0	0	0	200	903	0	0	0	0	0	0	0	603	903	0
6016	5	0	0	0	0	0	0	200	300	0	0	0	0	0	0	0	200	903	0	0	0	0	0	0	0	603	903	0
6016	6	0	0	0	0	0	0	200	300	0	0	0	0	0	0	0	200	903	0	0	0	0	0	0	0	603	903	0
6016	7	0	0	0	0	0	0	200	300	0	0	0	0	0	0	0	200	903	0	0	0	0	0	0	0	603	903	0
6016	8	0	0	0	0	0	0	200	300	0	0	0	0	0	0	0	200	903	0	0	0	0	0	0	0	603	903	0
6016	9	0	0	0	0	0	0	200	300	0	0	0	0	0	0	0	200	903	0	0	0	0	0	0	0	603	903	0
6017	0	0	0	0	0	0	0	200	300	0	0	0	0	0	0	0	200	903	0	0	0	0	0	0	0	603	903	0
6017	1	0	0	0	0	0	0	200	300	0	0	0	0	0	0	0	200	903	0	0	0	0	0	0	0	603	903	0
6017	2	0	0	0	0	0	0	200	300	0	0	0	0	0	0	0	200	903	0	0	0	0	0	0	0	603	903	0
6017	3	0	0	0	0	0	0	200	300	0	0	0	0	0	0	0	200	903	0	0	0	0	0	0	0	603	903	0
6017	4	0	0	0	0	0	0	200	300	0	0	0	0	0	0	0	200	903	0	0	0	0	0	0	0	603	903	0
6017	5	0	0	0	0	0	0	200	300	0	0	0	0	0	0	0	200	903	0	0	0	0	0	0	0	603	903	0
6017	6	0	0	0	0	0	0	200	300	0	0	0	0	0	0	0	200	903	0	0	0	0	0	0	0	603	903	0
6017	7	0	0	0	0	0	0	200	300	0	0	0	0	0	0	0	200	903	0	0	0	0	0	0	0	603	903	0
6017	8	0	0	0	0	0	0	200	300	0	0	0	0	0	0	0	200	903	0	0	0	0	0	0	0	603	903	0
6017	9	0	0	0	0	0	0	200	300	0	0	0	0	0	0	0	200	903	0	0	0	0	0	0	0	603	903	0
6018	0	0	0	0	0	0	0	200	300	0	0	0	0	0	0	0	200	903	0	0	0	0	0	0	0	603	903	0
6018	1	0	0	0	0	0	0	200	300	0	0	0	0	0	0	0	200	903	0	0	0	0	0	0	0	603	903	0
6018	2	0	0	0	0	0	0	200	300	0	0	0	0	0	0	0	200	903	0	0	0	0	0	0	0	603	903	0
6018	3	0	0	0	0	0	0	200	300	0	0	0	0	0	0	0	200	903	0	0	0	0	0	0	0	603	903	0
6018	4	0	0	0	0	0	0	200	300	0	0	0	0	0	0	0	200	903	0	0	0	0	0	0	0	603	903	0
6018	5	0	0	0	0	0	0	200	300	0	0	0	0	0	0	0	200	903	0	0	0	0	0	0	0	603	903	0
6018	6	0	0	0	0	0	0	200	300	0	0	0	0	0	0	0	200	903	0	0	0	0	0	0	0	603	903	0
6018	7	0	0	0	0	0	0	200	300	0	0	0	0	0	0	0	200	903	0	0	0	0	0	0	0	603	903	0
6018	8	0	0	0	0	0	0	200	300	0	0	0	0	0	0	0	200	903	0	0	0	0	0	0	0	603	903	0
6018	9	0	0	0	0	0	0	200	300	0	0	0	0	0	0	0	200	903	0	0	0	0	0	0	0	603	903	0
6019	0	0	0	0	0	0	0	200	300	0	0	0	0	0	0	0	200	903	0	0	0	0	0	0	0	603	903	0
6019	1	0	0	0	0	0	0	200	300	0	0	0	0	0	0	0	200	903	0	0	0	0	0	0	0	603	903	0
6019	2	0	0	0	0	0	0	200	300	0	0	0	0	0	0	0	200	903	0	0	0	0	0	0	0	603	903	0
6019	3	0	0	0	0	0	0	200	300	0	0	0	0	0	0	0	200	903	0	0	0	0	0	0	0	603	903	0
6019	4	0	0	0	0	0	0	200	300	0	0	0	0	0	0	0	200	903	0	0	0	0	0	0	0	603	903	0
6019	5	0	0	0	0	0	0	200	300	0	0	0	0	0	0	0	200	903	0	0	0	0	0	0	0	603	903	0
6019	6	0	0	0	0	0	0	200	300	0	0	0	0	0	0	0	200	903	0	0	0	0	0	0	0	603	903	0
6019	7	0	0	0	0	0	0	200	300	0	0	0	0	0	0	0	200	903	0	0	0	0	0	0	0	603	903	0
6019	8	0	0	0	0	0	0	200	300	0	0	0	0	0	0	0	200	903	0	0	0	0	0	0	0	603	903	0
6019	9	0	0	0	0	0	0	200	300	0	0	0	0	0	0	0	200	903	0	0	0	0	0	0	0	603	903	0
6020	0	0	0	0	0	0	0	200	300	0	0	0	0	0	0	0	200	903	0	0	0	0	0	0	0	603	903	0
6020	1	0	0	0	0	0	0	200	300	0	0	0	0	0	0	0	200	903	0	0	0	0	0	0	0	603	903	0
6020	2	0	0	0	0	0	0	200	300	0	0	0	0	0	0	0	200	903	0	0	0	0	0	0	0	603	903	0
6020	3	0	0	0	0	0	0	200	300	0	0	0	0	0	0	0	200	903	0	0	0	0	0	0	0	603	903	0
6020	4	0	0	0	0	0	0	200	300	0	0	0	0	0	0	0	200	903	0	0	0	0	0	0	0	603	903	0
6020	5	0	0	0	0	0	0	200	300	0	0	0	0	0	0	0	200	903	0	0	0	0	0	0	0	603	903	0
6020	6	0	0	0	0	0	0	200	300	0	0	0	0	0	0	0	200	903	0	0	0	0	0	0	0	603	903	0
6020	7	0	0	0	0	0	0	200	300	0	0	0	0	0	0	0	200	903	0	0	0	0	0	0	0	603	903	0
6020	8	0	0	0	0	0	0	200	300	0	0	0	0	0	0	0	200	903	0	0	0	0	0	0	0	603	903	0
6020	9	0	0	0	0	0	0	200	300	0	0	0	0	0	0	0	200	903	0	0	0	0	0	0	0	603	903	0
6021	0	0	0	0	0	0	0	200	300	0	0	0	0	0	0	0	200	903	0	0	0	0	0	0	0	603	903	0
6021	1	0	0	0	0	0	0	200	300	0	0	0	0	0	0	0	200	903	0	0	0	0	0	0	0	603	903	0
6021	2	0	0	0	0	0	0	200	300	0	0	0	0	0	0	0	200	903	0	0	0	0	0	0	0	603	903	0
6021	3	0	0	0	0	0	0	200	300	0	0	0	0	0	0	0	200	903	0	0	0	0	0	0	0	603	903	0
6021	4	0	0	0	0	0	0	200	300	0	0	0	0	0	0	0	200	903	0	0	0	0	0	0	0	603	903	0
6021	5	0	0	0	0	0	0	200	300	0	0	0	0	0	0	0	200	903	0	0	0	0	0	0	0	603	903	0
6021	6	0	0	0	0	0	0	200	300	0	0	0	0	0	0	0	200	903	0	0	0	0	0	0	0	603	903	0
6021	7	0	0	0	0	0	0	200	300	0	0	0	0	0	0	0	200	903	0	0	0	0	0	0	0	603	903	0
6021	8	0	0	0	0	0	0	200	300	0	0	0	0	0	0	0	200	903	0	0	0	0	0	0	0	603	903	0
6021	9	0	0	0	0	0	0	200	300	0	0	0	0	0	0	0	200	903	0	0	0	0	0	0	0	603	903	0
6022	0	0	0	0	0	0	0	200	300	0	0	0	0	0	0	0	200	903	0	0	0	0	0	0	0	603	903	0
6022	1	0	0	0	0	0	0	200	300	0	0	0	0	0	0	0	200	903	0	0	0	0	0	0	0	603	903	0
6022	2	0	0	0	0	0	0	200	300	0	0	0	0	0	0	0	200	903	0	0	0	0	0	0	0	603	903	0
6022	3	0	0	0	0	0	0	200	300	0	0	0	0	0	0	0	200	903	0	0	0	0	0	0	0	603	903	0
6022	4	0	0	0	0	0	0	200	300	0	0	0	0	0	0	0	200	903	0	0	0	0	0	0	0	603	903	0
6022	5	0	0	0	0	0	0	200	300	0	0	0	0	0	0	0	200	903	0	0	0	0	0	0	0	603	903	0
6022	6	0	0	0	0	0	0	200	300	0	0	0	0	0	0	0	200	903	0	0	0	0	0	0	0	603	903	0
6022	7	0	0	0	0	0	0	200	300	0	0	0	0	0	0	0	200	903	0	0	0	0	0	0	0	603	903	0
6022	8	0	0	0	0	0	0	200	300	0	0	0	0	0	0	0	200	903	0	0	0	0	0	0	0	603	903	0
6022	9	0	0	0	0	0	0	200	300	0	0	0	0	0	0	0	200	903	0	0	0	0	0	0	0	603	903	0
6023	0	0	0	0	0	0	0	200	300	0	0	0	0	0	0	0	200	903	0	0	0	0	0	0	0	603	903	0
6023	1	0	0	0	0	0	0	200	300	0	0	0	0	0	0	0	200	903	0	0	0	0	0	0	0	603	903	0
6023	2	0	0	0	0	0	0	200	300	0	0	0	0	0	0	0	200	903	0	0	0	0	0	0	0	603	903	0
6023	3	0	0	0	0	0	0	200	300	0	0	0	0	0	0	0	200	903	0	0	0	0	0	0	0	603	903	0
6023	4	0	0	0	0	0	0	200	300	0	0	0	0	0	0	0	200	903	0	0	0	0	0	0	0	603	903	0
6023	5	0	0	0	0	0	0	200	300	0	0	0	0	0	0	0	200	903	0	0	0	0	0	0	0	603	903	0
6023	6	0	0	0	0	0	0	200	300	0	0	0	0	0	0	0	200	903	0	0	0	0	0	0	0	603	903	0
6023	7	0	0	0	0	0	0	200	300	0	0	0	0	0	0	0	200	903	0	0	0	0	0	0	0	603	903	0
6023	8	0	0	0	0	0	0	200	300	0	0	0	0	0	0	0	200	903	0	0	0	0	0	0	0	603	903	0
6023	9	0	0	0	0	0	0	200	300	0	0	0	0	0	0	0	200	903	0	0	0	0	0	0	0	603	903	0
6024	0	0	0	0	0	0	0	200	300	0	0	0	0	0	0	0	200	903	0	0	0	0	0	0	0	603	903	0
6024	1	0	0	0	0	0	0	200	300	0	0	0	0	0	0	0	200	903	0	0	0	0	0	0	0	603	903	0
6024	2	0	0	0	0	0	0	200	300	0	0	0	0	0	0	0	200	903	0	0	0	0	0	0	0	603	903	0
6024	3	0	0	0	0	0	0	200	300	0	0	0	0	0	0	0	200	903	0	0	0	0	0	0	0	603	903	0
6024	4	0	0	0	0	0	0	200	300	0	0	0	0	0	0	0	200	903	0	0	0	0	0	0	0	603	903	0
6024	5	0	0	0	0	0	0	200	300	0	0	0	0	0	0	0	200	903	0	0	0	0	0	0	0	603	903	0
6024	6	0	0	0	0	0	0	200	300	0	0	0	0	0	0	0	200	903	0	0	0	0	0	0	0	603	903	0
6024	7	0	0	0	0	0	0	200	300	0	0	0	0	0	0	0	200	903	0	0	0	0	0	0	0	603	903	0
6024	8	0	0	0	0	0	0	200	300	0	0	0	0	0	0	0	200	903	0	0	0	0	0	0	0	603	903	0
6024	9	0	0	0	0	0	0	200	300	0	0	0	0	0	0	0	200	903	0	0	0	0	0	0	0	603	903	0
6025	0	0	0	0	0	0	0	200	300	0	0	0	0	0	0	0	200	903	0	0	0	0	0	0	0	603	903	0
6025	1	0	0	0	0	0	0	200	300	0	0	0	0	0	0	0	200	903	0	0	0	0	0	0	0	603	903	0
6025	2	0	0	0	0	0	0	200	300	0	0	0	0	0	0	0	200	903	0	0	0	0	0	0	0	603	903	0
6025	3	0	0	0	0	0	0	200	300	0	0	0	0	0	0	0	200	903	0	0	0	0	0	0	0	603	903	0
6025	4	0	0	0	0	0	0	200	300	0	0	0	0	0	0	0	200	903	0	0	0	0	0	0	0	603	903	0
6025	5	0	0	0	0	0	0	200	300	0	0	0	0	0	0	0	200	903	0	0	0	0	0	0	0	603	903	0
6025	6	0	0	0	0	0	0	200	300	0	0	0	0	0	0	0	200	903	0	0	0	0	0	0	0	603	903	0
6025	7	0	0	0	0	0	0	200	300	0	0	0	0	0	0	0	200	903	0	0	0	0	0	0	0	603	903	0
6025	8	0	0	0	0	0	0	200	300	0	0	0	0	0	0	0	200	903	0	0	0	0	0	0	0	603	903	0
6025	9	0	0	0	0	0	0	200	300	0	0	0	0	0	0	0	200	903	0	0	0	0	0	0	0	603	903	0
6026	0	0	0	0	0	0	0	200	300	0	0	0	0	0	0	0	200	903	0	0	0	0	0	0	0	603	903	0
6026	1	0	0	0	0	0	0	200	300	0	0	0	0	0	0	0	200	903	0	0	0	0	0	0	0	603	903	0
6026	2	0	0	0	0	0	0	200	300	0	0	0	0	0	0	0	200	903	0	0	0	0	0	0	0	603	903	0
6026	3	0	0	0	0	0	0	200	300	0	0	0	0	0	0	0	200	903	0	0	0	0	0	0	0	603	903	0
6026	4	0	0	0	0	0	0	200	300	0	0	0	0	0	0	0	200	903	0	0	0	0	0	0	0	603	903	0
6026	5	0	0	0	0	0	0	200	300	0	0	0	0	0	0	0	200	903	0	0	0	0	0	0	0	603	903	0
6026	6	0	0	0	0	0	0	200	300	0	0	0	0	0	0	0	200	903	0	0	0	0	0	0	0	603	903	0
6026	7	0	0	0	0	0	0	200	300	0	0	0	0	0	0	0	200	903	0	0	0	0	0	0	0	603	903	0
6026	8	0	0	0	0	0	0	200	300	0	0	0	0	0	0	0	200	903	0	0	0	0	0	0	0	603	903	0
6026	9	0	0	0	0	0	0	200	300	0	0	0	0	0	0	0	200	903	0	0	0	0	0	0	0	603	903	0
6027	0	0	0	0	0	0	0	200	300	0	0	0	0	0	0	0	200	903	0	0	0	0	0	0	0	603	903	0
6027	1	0	0	0	0	0	0	200	300	0	0	0	0	0	0	0	200	903	0	0	0	0	0	0	0	603	903	0
6027	2	0	0	0	0	0	0	200	300	0	0	0	0	0	0	0	200	903	0	0	0	0	0	0	0	603	903	0
6027	3	0	0	0	0	0	0	200	300	0	0	0	0	0	0	0	200	903	0	0	0	0	0	0	0	603	903	0
6027	4	0	0	0	0	0	0	200	300	0	0	0	0	0	0	0	200	903	0	0	0	0	0	0	0	603	903	0
6027	5	0	0	0	0	0	0	200	300	0	0	0	0	0	0	0	200	903	0	0	0	0	0	0	0	603	903	0
6027	6	0	0	0	0	0	0	200	300	0	0	0	0	0	0	0	200	903	0	0	0	0	0	0	0	603	903	0
6027	7	0	0	0	0	0	0	200	300	0	0	0	0	0	0	0	200	903	0	0	0	0	0	0	0	603	903	0
6027	8	0	0	0	0	0	0	200	300	0	0	0	0	0	0	0	200	903	0	0	0	0	0	0	0	603	903	0
6027	9	0	0	0	0	0	0	200	300	0	0	0	0	0	0	0	200	903	0	0	0	0	0	0	0	603	903	0
6028	0	0	0	0	0	0	0	200	300	0	0	0	0	0	0	0	200	903	0	0	0	0	0	0	0	603	903	0
6028	1	0	0	0	0	0	0	200	300	0	0	0	0	0	0	0	200	903	0	0	0	0	0	0	0	603	903	0
6028	2	0	0	0	0	0	0	200	300	0	0	0	0	0	0	0	200	903	0	0	0	0	0	0	0	603	903	0
6028	3	0	0	0	0	0	0	200	300	0	0	0	0	0	0	0	200	903	0	0	0	0	0	0	0	603	903	0
6028	4	0	0	0	0	0	0	200	300	0	0	0	0	0	0	0	200	903	0	0	0	0	0	0	0	603	903	0
6028	5	0	0	0	0	0	0	200	300	0	0	0	0	0	0	0	200	903	0	0	0	0	0	0	0	603	903	0
6028	6	0	0	0	0	0	0	200	300	0	0	0	0	0	0	0	200	903	0	0	0	0	0	0	0	603	903	0
6028	7	0	0	0	0	0	0	200	300	0	0	0	0	0	0	0	200	903	0	0	0	0	0	0	0	603	903	0
6028	8	0	0	0	0	0	0	200	300	0	0	0	0	0	0	0	200	903	0	0	0	0	0	0	0	603	903	0
6028	9	0	0	0	0	0	0	200	300	0	0	0	0	0	0	0	200	903	0	0	0	0	0	0	0	603	903	0
6029	0	0	0	0	0	0	0	200	300	0	0	0	0	0	0	0	200	903	0	0	0	0	0	0	0	603	903	0
6029	1	0	0	0	0	0	0	200	300	0	0	0	0	0	0	0	200	903	0	0	0	0	0	0	0	603	903	0
6029	2	0	0	0	0	0	0	200	300	0	0	0	0	0	0	0	200	903	0	0	0	0	0	0	0	603	903	0
6029	3	0	0	0	0	0	0	200	300	0	0	0	0	0	0	0	200	903	0	0	0	0	0	0	0	603	903	0
6029	4	0	0	0	0	0	0	200	300	0	0	0	0	0	0	0	200	903	0	0	0	0	0	0	0	603	903	0
6029	5	0	0	0	0	0	0	200	300	0	0	0	0	0	0	0	200	903	0	0	0	0	0	0	0	603	903	0
6029	6	0	0	0	0	0	0	200	300	0	0	0	0	0	0	0	200	903	0	0	0	0	0	0	0	603	903	0
6029	7	0	0	0	0	0	0	200	300	0	0	0	0	0	0	0	200	903	0	0	0	0	0	0	0	603	903	0
6029	8	0	0	0	0	0	0	200	300	0	0	0	0	0	0	0	200	903	0	0	0	0	0	0	0	603	903	0
6029	9	0	0	0	0	0	0	200	300	0	0	0	0	0	0	0	200	903	0	0	0	0	0	0	0	603	903	0
6030	0	0	0	0	0	0	0	200	300	0	0	0	0	0	0	0	200	903	0	0	0	0	0	0	0	603	903	0
6030	1	0	0	0	0	0	0	200	300	0	0	0	0	0	0	0	200	903	0	0	0	0	0	0	0	603	903	0
6030	2	0	0	0	0	0	0	200	300	0	0	0	0	0	0	0	200	903	0	0	0	0	0	0	0	603	903	0
6030	3	0	0	0	0	0	0	200	300	0	0	0	0	0	0	0	200	903	0	0	0	0	0	0	0	603	903	0
6030	4	0	0	0	0	0	0	200	300	0	0	0	0	0	0	0	200	903	0	0	0	0	0	0	0	603	903	0
6030	5	0	0	0	0	0	0	200	300	0	0	0	0	0	0	0	200	903	0	0	0	0	0	0	0	603	903	0
6030	6	0	0	0	0	0	0	200	300	0	0	0	0	0	0	0	200	903	0	0	0	0	0	0	0	603	903	0
6030	7	0	0	0	0	0	0	200	300	0	0	0	0	0	0	0	200	903	0	0	0	0	0	0	0	603	903	0
6030	8	0	0	0	0	0	0	200	300	0	0	0	0	0	0	0	200	903	0	0	0	0	0	0	0	603	903	0
6030	9	0	0	0	0	0	0	200	300	0	0	0	0	0	0	0	200	903	0	0	0	0	0	0	0	603	903	0
6031	0	0	0	0	0	0	0	200	300	0	0	0	0	0	0	0	200	903	0	0	0	0	0	0	0	603	903	0
6031	1	0	0	0	0	0	0	200	300	0	0	0	0	0	0	0	200	903	0	0	0	0	0	0	0	603	903	0
6031	2	0	0	0	0	0	0	200	300	0	0	0	0	0	0	0	200	903	0	0	0	0	0	0	0	603	903	0
6031	3	0	0	0	0	0	0	200	300	0	0	0	0	0	0	0	200	903	0	0	0	0	0	0	0	603	903	0
6031	4	0	0	0	0	0	0	200	300	0	0	0	0	0	0	0	200	903	0	0	0	0	0	0	0	603	903	0
6031	5	0	0	0	0	0	0	200	300	0	0	0	0	0	0	0	200	903	0	0	0	0	0	0	0	603	903	0
6031	6	0	0	0	0	0	0	200	300	0	0	0	0	0	0	0	200	903	0	0	0	0	0	0	0	603	903	0
6031	7	0	0	0	0	0	0	200	300	0	0	0	0	0	0	0	200	903	0	0	0	0	0	0	0	603	903	0
6031	8	0	0	0	0	0	0	200	300	0	0	0	0	0	0	0	200	903	0	0	0	0	0	0	0	603	903	0
6031	9	0	0	0	0	0	0	200	300	0	0	0	0	0	0	0	200	903	0	0	0	0	0	0	0	603	903	0
6032	0	0	0	0	0	0	0	200	300	0	0	0	0	0	0	0	200	903	0	0	0	0	0	0	0	603	903	0
6032	1	0	0	0	0	0	0	200	300	0	0	0	0	0	0	0	200	903	0	0	0	0	0	0	0	603	903	0
6032	2	0	0	0	0	0	0	200	300	0	0	0	0	0	0	0	200	903	0	0	0	0	0	0	0	603	903	0
6032	3	0	0	0	0	0	0	200	300	0	0	0	0	0	0	0	200	903	0	0	0	0	0	0	0	603	903	0
6032	4	0	0	0	0	0	0	200	300	0	0	0	0	0	0	0	200	903	0	0	0	0	0	0	0	603	903	0
6032	5	0	0	0	0	0	0	200	300	0	0	0	0	0	0	0	200	903	0	0	0	0	0	0	0	603	903	0
6032	6	0	0	0	0	0	0	200	300	0	0	0	0	0	0	0	200	903	0	0	0	0	0	0	0	603	903	0
6032	7	0	0	0	0	0	0	200	300	0	0	0	0	0	0	0	200	903	0	0	0	0	0	0	0	603	903	0
6032	8	0	0	0	0	0	0	200	300	0	0	0	0	0	0	0	200	903	0	0	0	0	0	0	0	603	903	0
6032	9	0	0	0	0	0	0	200	300	0	0	0	0	0	0	0	200	903	0	0	0	0	0	0	0	603	903	0
6033	0	0	0	0	0	0	0	200	300	0	0	0	0	0	0	0	200	903	0	0	0	0	0	0	0	603	903	0
6033	1	0	0	0	0	0	0	200	300	0	0	0	0	0	0	0	200	903	0	0	0	0	0	0	0	603	903	0
6033	2	0	0	0	0	0	0	200	300	0	0	0	0	0	0	0	200	903	0	0	0	0	0	0	0	603	903	0
6033	3	0	0	0	0	0	0	200	300	0	0	0	0	0	0	0	200	903	0	0	0	0	0	0	0	603	903	0
6033	4	0	0	0	0	0	0	200	300	0	0	0	0	0	0	0	200	903	0	0	0	0	0	0	0	603	903	0
6033	5	0	0	0	0	0	0	200	300	0	0	0	0	0	0	0	200	903	0	0	0	0	0	0	0	603	903	0
6033	6	0	0	0	0	0	0	200	300	0	0	0	0	0	0	0	200	903	0	0	0	0	0	0	0	603	903	0
6033	7	0	0	0	0	0	0	200	300	0	0	0	0	0	0	0	200	903	0	0	0	0	0	0	0	603	903	0
6033	8	0	0	0	0	0	0	200	300	0	0	0	0	0	0	0	200	903	0	0	0	0	0	0	0	603	903	0
6033	9	0	0	0	0	0	0	200	300	0	0	0	0	0	0	0	200	903	0	0	0	0	0	0	0	603	903	0
6034	0	0	0	0	0	0	0	200	300	0	0	0	0	0	0	0	200	903	0	0	0	0	0	0	0	603	903	0
6034	1	0	0	0	0	0	0	200	300	0	0	0	0	0	0	0	200	903	0	0	0	0	0	0	0	603	903	0
6034	2	0	0	0	0	0	0	200	300	0	0	0	0	0	0	0	200	903	0	0	0	0	0	0	0	603	903	0
6034	3	0	0	0	0	0	0	200	300	0	0	0	0	0	0	0	200	903	0	0	0	0	0	0	0	603	903	0
6034	4	0	0	0	0	0	0	200	300	0	0	0	0	0	0	0	200	903	0	0	0	0	0	0	0	603	903	0
6034	5	0	0	0	0	0	0	200	300	0	0	0	0	0	0	0	200	903	0	0	0	0	0	0	0	603	903	0
6034	6	0	0	0	0	0	0	200	300	0	0	0	0	0	0	0	200	903	0	0	0	0	0	0	0	603	903	0
6034	7	0	0	0	0	0	0	200	300	0	0	0	0	0	0	0	200	903	0	0	0	0	0	0	0	603	903	0
6034	8	0	0	0	0	0	0	200	300	0	0	0	0	0	0	0	200	903	0	0	0	0	0	0	0	603	903	0
6034	9	0	0	0	0	0	0	200	300	0	0	0	0	0	0	0	200	903	0	0	0	0	0	0	0	603	903	0
6035	0	0	0	0	0	0	0	200	300	0	0	0	0	0	0	0	200	903	0	0	0	0	0	0	0	603	903	0
6035	1	0	0	0	0	0	0	200	300	0	0	0	0	0	0	0	200	903	0	0	0	0	0	0	0	603	903	0
6035	2	0	0	0	0	0	0	200	300	0	0	0	0	0	0	0	200	903	0	0	0	0	0	0	0	603	903	0
6035	3	0	0	0	0	0	0	200	300	0	0	0	0	0	0	0	200	903	0	0	0	0	0	0	0	603	903	0
6035	4	0	0	0	0	0	0	200	300	0	0	0	0	0	0	0	200	903	0	0	0	0	0	0	0	603	903	0
6035	5	0	0	0	0	0	0	200	300	0	0	0	0	0	0	0	200	903	0	0	0	0	0	0	0	603	903	0
6035	6	0	0	0	0	0	0	200	300	0	0	0	0	0	0	0	200	903	0	0	0	0	0	0	0	603	903	0
6035	7	0	0	0	0	0	0	200	300	0	0	0	0	0	0	0	200	903	0	0	0	0	0	0	0	603	903	0
6035	8	0	0	0	0	0	0	200	300	0	0	0	0	0	0	0	200	903	0	0	0	0	0	0	0	603	903	0
6035	9	0	0	0	0	0	0	200	300	0	0	0	0	0	0	0	200	903	0	0	0	0	0	0	0	603	903	0
6036	0	0	0	0	0	0	0	200	300	0	0	0	0	0	0	0	200	903	0	0	0	0	0	0	0	603	903	0
6036	1	0	0	0	0	0	0	200	300	0	0	0	0	0	0	0	200	903	0	0	0	0	0	0	0	603	903	0
6036	2	0	0	0	0	0	0	200	300	0	0	0	0	0	0	0	200	903	0	0	0	0	0	0	0	603	903	0
6036	3	0	0	0	0	0	0	200	300	0	0	0	0	0	0	0	200	903	0	0	0	0	0	0	0	603	903	0
6036	4	0	0	0	0	0	0	200	300	0	0	0	0	0	0	0	200	903	0	0	0	0	0	0	0	603	903	0
6036	5	0	0	0	0	0	0	200	300	0	0	0	0	0	0	0	200	903	0	0	0	0	0	0	0	603	903	0
6036	6	0	0	0	0	0	0	200	300	0	0	0	0	0	0	0	200	903	0	0	0	0	0	0	0	603	903	0
6036	7	0	0	0	0	0	0	200	300	0	0	0	0	0	0	0	200	903	0	0	0	0	0	0	0	603	903	0
6036	8	0	0	0	0	0	0	200	300	0	0	0	0	0	0	0	200	903	0	0	0	0	0	0	0	603	903	0
6036	9	0	0	0	0	0	0	200	300	0	0	0	0	0	0	0	200	903	0	0	0	0	0	0	0	603	903	0
6037	0	0	0	0	0	0	0	200	300	0	0	0	0	0	0	0	200	903	0	0	0	0	0	0	0	603	903	0
6037	1	0	0	0	0	0	0	200	300	0	0	0	0	0	0	0	200	903	0	0	0	0	0	0	0	603	903	0
6037	2	0	0	0	0	0	0	200	300	0	0	0	0	0	0	0	200	903	0	0	0	0	0	0	0	603	903	0
6037	3	0	0	0	0	0	0	200	300	0	0	0	0	0	0	0	200	903	0	0	0	0	0	0	0	603	903	0
6037	4	0	0	0	0	0	0	200	300	0	0	0	0	0	0	0	200	903	0	0	0	0	0	0	0	603	903	0
6037	5	0	0	0	0	0	0	200	300	0	0	0	0	0	0	0	200	903	0	0	0	0	0	0	0	603	903	0
6037	6	0	0	0	0	0	0	200	300	0	0	0	0	0	0	0	200	903	0	0	0	0	0	0	0	603	903	0
6037	7	0	0	0	0	0	0	200	300	0	0	0	0	0	0	0	200	903	0	0	0	0	0	0	0	603	903	0
6037	8	0	0	0	0	0	0	200	300	0	0	0	0	0	0	0	200	903	0	0	0	0	0	0	0	603	903	0
6037	9	0	0	0	0	0	0	200	300	0	0	0	0	0	0	0	200	903	0	0	0	0	0	0	0	603	903	0
6038	0	0	0	0	0	0	0	200	300	0	0	0	0	0	0	0	200	903	0	0	0	0	0	0	0	603	903	0
6038	1	0	0	0	0	0	0	200	300	0	0	0	0	0	0	0	200	903	0	0	0	0	0	0	0	603	903	0
6038	2	0	0	0	0	0	0	200	300	0	0	0	0	0	0	0	200	903	0	0	0	0	0	0	0	603	903	0
6038	3	0	0	0	0	0	0	200	300	0	0	0	0	0	0	0	200	903	0	0	0	0	0	0	0	603	903	0
6038	4	0	0	0	0	0	0	200	300	0	0	0	0	0	0	0	200	903	0	0	0	0	0	0	0	603	903	0
6038	5	0	0	0	0	0	0	200	300	0	0	0	0	0	0	0	200	903	0	0	0	0	0	0	0	603	903	0
6038	6	0	0	0	0	0	0	200	300	0	0	0	0	0	0	0	200	903	0	0	0	0	0	0	0	603	903	0
6038	7	0	0	0	0	0	0	200	300	0	0	0	0	0	0	0	200	903	0	0	0	0	0	0	0	603	903	0
6038	8	0	0	0	0	0	0	200	300	0	0	0	0	0	0	0	200	903	0	0	0	0	0	0	0	603	903	0
6038	9	0	0	0	0	0	0	200	300	0	0	0	0	0	0	0	200	903	0	0	0	0	0	0	0	603	903	0
6039	0	0	0	0	0	0	0	200	300	0	0	0	0	0	0	0	200	903	0	0	0	0	0	0	0	603	903	0
6039	1	0	0	0	0	0	0	200	300	0	0	0	0	0	0	0	200	903	0	0	0	0	0	0	0	603	903	0
6039	2	0	0	0	0	0	0	200	300	0	0	0	0	0	0	0	200	903	0	0	0	0	0	0	0	603	903	0
6039	3	0	0	0	0	0	0	200	300	0	0	0	0	0	0	0	200	903	0	0	0	0	0	0	0	603	903	0
6039	4	0	0	0	0	0	0	200	300	0	0	0	0	0	0	0	200	903	0	0	0	0	0	0	0	603	903	0
6039	5	0	0	0	0	0	0	200	300	0	0	0	0	0	0	0	200	903	0	0	0	0	0	0	0	603	903	0
6039	6	0	0	0	0	0	0	200	300	0	0	0	0	0	0	0	200	903	0	0	0	0	0	0	0	603	903	0
6039	7	0	0	0	0	0	0	200	300	0	0	0	0	0	0	0	200	903	0	0	0	0	0	0	0	603	903	0
6039	8	0	0	0	0	0	0	200	300	0	0	0	0	0	0	0	200	903	0	0	0	0	0	0	0	603	903	0
6039	9	0	0	0	0	0	0	200	300	0	0	0	0	0	0	0	200	903	0	0	0	0	0	0	0	603	903	0
6040	0	0	0	0	0	0	0	200	300	0	0	0	0	0	0	0	200	903	0	0	0	0	0	0	0	603	903	0
6040	1	0	0	0	0	0	0	200	300	0	0	0	0	0	0	0	200	903	0	0	0	0	0	0	0	603	903	0
6040	2	0	0	0	0	0	0	200	300	0	0	0	0	0	0	0	200	903	0	0	0	0	0	0	0	603	903	0
6040	3	0	0	0	0	0	0	200	300	0	0	0	0	0	0	0	200	903	0	0	0	0	0	0	0	603	903	0
6040	4	0	0	0	0	0	0	200	300	0	0	0	0	0	0	0	200	903	0	0	0	0	0	0	0	603	903	0
6040	5	0	0	0	0	0	0	200	300	0	0	0	0	0	0	0	200	903	0	0	0	0	0	0	0	603	903	0
6040	6	0	0	0	0	0	0	200	300	0	0	0	0	0	0	0	200	903	0	0	0	0	0	0	0	603	903	0
6040	7	0	0	0	0	0	0	200	300	0	0	0	0	0	0	0	200	903	0	0	0	0	0	0	0	603	903	0
6040	8	0	0	0	0	0	0	200	300	0	0	0	0	0	0	0	200	903	0	0	0	0	0	0	0	603	903	0
6040	9	0	0	0	0	0	0	200	300	0	0	0	0	0	0	0	200	903	0	0	0	0	0	0	0	603	903	0
6041	0	0	0	0	0	0	0	200	300	0	0	0	0	0	0	0	200	903	0	0	0	0	0	0	0	603	903	0
6041	1	0	0	0	0	0	0	200	300	0	0	0	0	0	0	0	200	903	0	0	0	0	0	0	0	603	903	0
6041	2	0	0	0	0	0	0	200	300	0	0	0	0	0	0	0	200	903	0	0	0	0	0	0	0	603	903	0
6041	3	0	0	0	0	0	0	200	300	0	0	0	0	0	0	0	200	903	0	0	0	0	0	0	0	603	903	0
6041	4	0	0	0	0	0	0	200	300	0	0	0	0	0	0	0	200	903	0	0	0	0	0	0	0	603	903	0
6041	5	0	0	0	0	0	0	200	300	0	0	0	0	0	0	0	200	903	0	0	0	0	0	0	0	603	903	0
6041	6	0	0	0	0	0	0	200	300	0	0	0	0	0	0	0	200	903	0	0	0	0	0	0	0	603	903	0
6041	7	0	0	0	0	0	0	200	300	0	0	0	0	0	0	0	200	903	0	0	0	0	0	0	0	603	903	0
6041	8	0	0	0	0	0	0	200	300	0	0	0	0	0	0	0	200	903	0	0	0	0	0	0	0	603	903	0
6041	9	0	0	0	0	0	0	200	300	0	0	0	0	0	0	0	200	903	0	0	0	0	0	0	0	603	903	0
6042	0	0	0	0	0	0	0	200	300	0	0	0	0	0	0	0	200	903	0	0	0	0	0	0	0	603	903	0
6042	1	0	0	0	0	0	0	200	300	0	0	0	0	0	0	0	200	903	0	0	0	0	0	0	0	603	903	0
6042	2	0	0	0	0	0	0	200	300	0	0	0	0	0	0	0	200	903	0	0	0	0	0	0	0	603	903	0
6042	3	0	0	0	0	0	0	200	300	0	0	0	0	0	0	0	200	903	0	0	0	0	0	0	0	603	903	0
6042	4	0	0	0	0	0	0	200	300	0	0	0	0	0	0	0	200	903	0	0	0	0	0	0	0	603	903	0
6042	5	0	0	0	0	0	0	200	300	0	0	0	0	0	0	0	200	903	0	0	0	0	0	0	0	603	903	0
6042	6	0	0	0	0	0	0	200	300	0	0	0	0	0	0	0	200	903	0	0	0	0	0	0	0	603	903	0
6042	7	0	0	0	0	0	0	200	300	0	0	0	0	0	0	0	200	903	0	0	0	0	0	0	0	603	903	0
6042	8	0	0	0	0	0	0	200	300	0	0	0	0	0	0	0	200	903	0	0	0	0	0	0	0	603	903	0
6042	9	0	0	0	0	0	0	200	300	0	0	0	0	0	0	0	200	903	0	0	0	0	0	0	0	603	903	0
6043	0	0	0	0	0	0	0	200	300	0	0	0	0	0	0	0	200	903	0	0	0	0	0	0	0	603	903	0
6043	1	0	0	0	0	0	0	200	300	0	0	0	0	0	0	0	200	903	0	0	0	0	0	0	0	603	903	0
6043	2	0	0	0	0	0	0	200	300	0	0	0	0	0	0	0	200	903	0	0	0	0	0	0	0	603	903	0
6043	3	0	0	0	0	0	0	200	300	0	0	0	0	0	0	0	200	903	0	0	0	0	0	0	0	603	903	0
6043	4	0	0	0	0	0	0	200	300	0	0	0	0	0	0	0	200	903	0	0	0	0	0	0	0	603	903	0
6043	5	0	0	0	0	0	0	200	300	0	0	0	0	0	0	0	200	903	0	0	0	0	0	0	0	603	903	0
6043	6	0	0	0	0	0	0	200	300	0	0	0	0	0	0	0	200	903	0	0	0	0	0	0	0	603	903	0
6043	7	0	0	0	0	0	0	200	300	0	0	0	0	0	0	0	200	903	0	0	0	0	0	0	0	603	903	0
6043	8	0	0	0	0	0	0	200	300	0	0	0	0	0	0	0	200	903	0	0	0	0	0	0	0	603	903	0
6043	9	0	0	0	0	0	0	200	300	0	0	0	0	0	0	0	200	903	0	0	0	0	0	0	0	603	903	0
6044	0	0	0	0	0	0	0	200	300	0	0	0	0	0	0	0	200	903	0	0	0	0	0	0	0	603	903	0
6044	1	0	0	0	0	0	0	200	300	0	0	0	0	0	0	0	200	903	0	0	0	0	0	0	0	603	903	0
6044	2	0	0	0	0	0	0	200	300	0	0	0	0	0	0	0	200	903	0	0	0	0	0	0	0	603	903	0
6044	3	0	0	0	0	0	0	200	300	0	0	0	0	0	0	0	200	903	0	0	0	0	0	0	0	603	903	0
6044	4	0	0	0	0	0	0	200	300	0	0	0	0	0	0	0	200	903	0	0	0	0	0	0	0	603	903	0
6044	5	0	0	0	0	0	0	200	300	0	0	0	0	0	0	0	200	903	0	0	0	0	0	0	0	603	903	0
6044	6	0	0	0	0	0	0	200	300	0	0	0	0	0	0	0	200	903	0	0	0	0	0	0	0	603	903	0
6044	7	0	0	0	0	0	0	200	300	0	0	0	0	0	0	0	200	903	0	0	0	0	0	0	0	603	903	0
6044	8	0	0	0	0	0	0	200	300	0	0	0	0	0	0	0	200	903	0	0	0	0	0	0	0	603	903	0
6044	9	0	0	0	0	0	0	200	300	0	0	0	0	0	0	0	200	903	0	0	0	0	0	0	0	603	903	0
6045	0	0	0	0	0	0	0	200	300	0	0	0	0	0	0	0	200	903	0	0	0	0	0	0	0	603	903	0
6045	1	0	0	0	0	0	0	200	300	0	0	0	0	0	0	0	200	903	0	0	0	0	0	0	0	603	903	0
6045	2	0	0	0	0	0	0	200	300	0	0	0	0	0	0	0	200	903	0	0	0	0	0	0	0	603	903	0
6045	3	0	0	0	0	0	0	200	300	0	0	0	0	0	0	0	200	903	0	0	0	0	0	0	0	603	903	0
6045	4	0	0	0	0	0	0	200	300	0	0	0	0	0	0	0	200	903	0	0	0	0	0	0	0	603	903	0
6045	5	0	0	0	0	0	0	200	300	0	0	0	0	0	0	0	200	903	0	0	0	0	0	0	0	603	903	0
6045	6	0	0	0	0	0	0	200	300	0	0	0	0	0	0	0	200	903	0	0	0	0	0	0	0	603	903	0
6045	7	0	0	0	0	0	0	200	300	0	0	0	0	0	0	0	200	903	0	0	0	0	0	0	0	603	903	0
6045	8	0	0	0	0	0	0	200	300	0	0	0	0	0	0	0	200	903	0	0	0	0	0	0	0	603	903	0
6045	9	0	0	0	0	0	0	200	300	0	0	0	0	0	0	0	200	903	0	0	0	0	0	0	0	603	903	0
6046	0	0	0	0	0	0	0	200	300	0	0	0	0	0	0	0	200	903	0	0	0	0	0	0	0	603	903	0
6046	1	0	0	0	0	0	0	200	300	0	0	0	0	0	0	0	200	903	0	0	0	0	0	0	0	603	903	0
6046	2	0	0	0	0	0	0	200	300	0	0	0	0	0	0	0	200	903	0	0	0	0	0	0	0	603	903	0
6046	3	0	0	0	0	0	0	200	300	0	0	0	0	0	0	0	200	903	0	0	0	0	0	0	0	603	903	0
6046	4	0	0	0	0	0	0	200	300	0	0	0	0	0	0	0	200	903	0	0	0	0	0	0	0	603	903	0
6046	5	0	0	0	0	0	0	200	300	0	0	0	0	0	0	0	200	903	0	0	0	0	0	0	0	603	903	0
6046	6	0	0	0	0	0	0	200	300	0	0	0	0	0	0	0	200	903	0	0	0	0	0	0	0	603	903	0
6046	7	0	0	0	0	0	0	200	300	0	0	0	0	0	0	0	200	903	0	0	0	0	0	0	0	603	903	0
6046	8	0	0	0	0	0	0	200	300	0	0	0	0	0	0	0	200	903	0	0	0	0	0	0	0	603	903	0
6046	9	0	0	0	0	0	0	200	300	0	0	0	0	0	0	0	200	903	0	0	0	0	0	0	0	603	903	0
6047	0	0	0	0	0	0	0	200	300	0	0	0	0	0	0	0	200	903	0	0	0	0	0	0	0	603	903	0
6047	1	0	0	0	0	0	0	200	300	0	0	0	0	0	0	0	200	903	0	0	0	0	0	0	0	603	903	0
6047	2	0	0	0	0	0	0	200	300	0	0	0	0	0	0	0	200	903	0	0	0	0	0	0	0	603	903	0
6047	3	0	0	0	0	0	0	200	300	0	0	0	0	0	0	0	200	903	0	0	0	0	0	0	0	603	903	0
6047	4	0	0	0	0	0	0	200	300	0	0	0	0	0	0	0	200	903	0	0	0	0	0	0	0	603	903	0
6047	5	0	0	0	0	0	0	200	300	0	0	0	0	0	0	0	200	903	0	0	0	0	0	0	0	603	903	0
6047	6	0	0	0	0	0	0	200	300	0	0	0	0	0	0	0	200	903	0	0	0	0	0	0	0	603	903	0
6047	7	0	0	0	0	0	0	200	300	0	0	0	0	0	0	0	200	903	0	0	0	0	0	0	0	603	903	0
6047	8	0	0	0	0	0	0	200	300	0	0	0	0	0	0	0	200	903	0	0	0	0	0	0	0	603	903	0
6047	9	0	0	0	0	0	0	200	300	0	0	0	0	0	0	0	200	903	0	0	0	0	0	0	0	603	903	0
6048	0	0	0	0	0	0	0	200	300	0	0	0	0	0	0	0	200	903	0	0	0	0	0	0	0	603	903	0
6048	1	0	0	0	0	0	0	200	300	0	0	0	0	0	0	0	200	903	0	0	0	0	0	0	0	603	903	0
6048	2	0	0	0	0	0	0	200	300	0	0	0	0	0	0	0	200	903	0	0	0	0	0	0	0	603	903	0
6048	3	0	0	0	0	0	0	200	300	0	0	0	0	0	0	0	200	903	0	0	0	0	0	0	0	603	903	0
6048	4	0	0	0	0	0	0	200	300	0	0	0	0	0	0	0	200	903	0	0	0	0	0	0	0	603	903	0
6048	5	0	0	0	0	0	0	200	300	0	0	0	0	0	0	0	200	903	0	0	0	0	0	0	0	603	903	0
6048	6	0	0	0	0	0	0	200	300	0	0	0	0	0	0	0	200	903	0	0	0	0	0	0	0	603	903	0
6048	7	0	0	0	0	0	0	200	300	0	0	0	0	0	0	0	200	903	0	0	0	0	0	0	0	603	903	0
6048	8	0	0	0	0	0	0	200	300	0	0	0	0	0	0	0	200	903	0	0	0	0	0	0	0	603	903	0
6048	9	0	0	0	0	0	0	200	300	0	0	0	0	0	0	0	200	903	0	0	0	0	0	0	0	603	903	0
6049	0	0	0	0	0	0	0	200	300	0	0	0	0	0	0	0	200	903	0	0	0	0	0	0	0	603	903	0
6049	1	0	0	0	0	0	0	200	300	0	0	0	0	0	0	0	200	903	0	0	0	0	0	0	0	603	903	0
6049	2	0	0	0	0	0	0	200	300	0	0	0	0	0	0	0	200	903	0	0	0	0	0	0	0	603	903	0
6049	3	0	0	0	0	0	0	200	300	0	0	0	0	0	0	0	200	903	0	0	0	0	0	0	0	603	903	0
6049	4	0	0	0	0	0	0	200	300	0	0	0	0	0	0	0	200	903	0	0	0	0	0	0	0	603	903	0
6049	5	0	0	0	0	0	0	200	300	0	0	0	0	0	0	0	200	903	0	0	0	0	0	0	0	603	903	0
6049	6	0	0	0	0	0	0	200	300	0	0	0	0	0	0	0	200	903	0	0	0	0	0	0	0	603	903	0
6049	7	0	0	0	0	0	0	200	300	0	0	0	0	0	0	0	200	903	0	0	0	0	0	0	0	603	903	0
6049	8	0	0	0	0	0	0	200	300	0	0	0	0	0	0	0	200	903	0	0	0	0	0	0	0	603	903	0
6049	9	0	0	0	0	0	0	200	300	0	0	0	0	0	0	0	200	903	0	0	0	0	0	0	0	603	903	0
6050	0	0	0	0	0	0	0	200	300	0	0	0	0	0	0	0	200	903	0	0	0	0	0	0	0	603	903	0
6050	1	0	0	0	0	0	0	200	300	0	0	0	0	0	0	0	200	903	0	0	0	0	0	0	0	603	903	0
6050	2	0	0	0	0	0	0	200	300	0	0	0	0	0	0	0	200	903	0	0	0	0	0	0	0	603	903	0
6050	3	0	0	0	0	0	0	200	300	0	0	0	0	0	0	0	200	903	0	0	0	0	0	0	0	603	903	0
6050	4	0	0	0	0	0	0	200	300	0	0	0	0	0	0	0	200	903	0	0	0	0	0	0	0	603	903	0
6050	5	0	0	0	0	0	0	200	300	0	0	0	0	0	0	0	200	903	0	0	0	0	0	0	0	603	903	0
6050	6	0	0	0	0	0	0	200	300	0	0	0	0	0	0	0	200	903	0	0	0	0	0	0	0	603	903	0
6050	7	0	0	0	0	0	0	200	300	0	0	0	0	0	0	0	200	903	0	0	0	0	0	0	0	603	903	0
6050	8	0	0	0	0	0	0	200	300	0	0	0	0	0	0	0	200	903	0	0	0	0	0	0	0	603	903	0
6050	9	0	0	0	0	0	0	200	300	0	0	0	0	0	0	0	200	903	0	0	0	0	0	0	0	603	903	0
6051	0	0	0	0	0	0	0	200	300	0	0	0	0	0	0	0	200	903	0	0	0	0	0	0	0	603	903	0
6051	1	0	0	0	0	0	0	200	300	0	0	0	0	0	0	0	200	903	0	0	0	0	0	0	0	603	903	0
6051	2	0	0	0	0	0	0	200	300	0	0	0	0	0	0	0	200	903	0	0	0	0	0	0	0	603	903	0
6051	3	0	0	0	0	0	0	200	300	0	0	0	0	0	0	0	200	903	0	0	0	0	0	0	0	603	903	0
6051	4	0	0	0	0	0	0	200	300	0	0	0	0	0	0	0	200	903	0	0	0	0	0	0	0	603	903	0
6051	5	0	0	0	0	0	0	200	300	0	0	0	0	0	0	0	200	903	0	0	0	0	0	0	0	603	903	0
6051	6	0	0	0	0	0	0	200	300	0	0	0	0	0	0	0	200	903	0	0	0	0	0	0	0	603	903	0
6051	7	0	0	0	0	0	0	200	300	0	0	0	0	0	0	0	200	903	0	0	0	0	0	0	0	603	903	0
6051	8	0	0	0	0	0	0	200	300	0	0	0	0	0	0	0	200	903	0	0	0	0	0	0	0	603	903	0
6051	9	0	0	0	0	0	0	200	300	0	0	0	0	0	0	0	200	903	0	0	0	0	0	0	0	603	903	0
6052	0	0	0	0	0	0	0	200	300	0	0	0	0	0	0	0	200	903	0	0	0	0	0	0	0	603	903	0
6052	1	0	0	0	0	0	0	200	300	0	0	0	0	0	0	0	200	903	0	0	0	0	0	0	0	603	903	0
6052	2	0	0	0	0	0	0	200	300	0	0	0	0	0	0	0	200	903	0	0	0	0	0	0	0	603	903	0
6052	3	0	0	0	0	0	0	200	300	0	0	0	0	0	0	0	200	903	0	0	0	0	0	0	0	603	903	0
6052	4	0	0	0	0	0	0	200	300	0	0	0	0	0	0	0	200	903	0	0	0	0	0	0	0	603	903	0
6052	5	0	0	0	0	0	0	200	300	0	0	0	0	0	0	0	200	903	0	0	0	0	0	0	0	603	903	0
6052	6	0	0	0	0	0	0	200	300	0	0	0	0	0	0	0	200	903	0	0	0	0	0	0	0	603	903	0
6052	7	0	0	0	0	0	0	200	300	0	0	0	0	0	0	0	200	903	0	0	0	0	0	0	0	603	903	0
6052	8	0	0	0	0	0	0	200	300	0	0	0	0	0	0	0	200	903	0	0	0	0	0	0	0	603	903	0
6052	9	0	0	0	0	0	0	200	300	0	0	0	0	0	0	0	200	903	0	0	0	0	0	0	0	603	903	0
6053	0	0	0	0	0	0	0	200	300	0	0	0	0	0	0	0	200	903	0	0	0	0	0	0	0	603	903	0
6053	1	0	0	0	0	0	0	200	300	0	0	0	0	0	0	0	200	903	0	0	0	0	0	0	0	603	903	0
6053	2	0	0	0	0	0	0	200	300	0	0	0	0	0	0	0	200	903	0	0	0	0	0	0	0	603	903	0
6053	3	0	0	0	0	0	0	200	300	0	0	0	0	0	0	0	200	903	0	0	0	0	0	0	0	603	903	0
6053	4	0	0	0	0	0	0	200	300	0	0	0	0	0	0	0	200	903	0	0	0	0	0	0	0	603	903	0
6053	5	0	0	0	0	0	0	200	300	0	0	0	0	0	0	0	200	903	0	0	0	0	0	0	0	603	903	0
6053	6	0	0	0	0	0	0	200	300	0	0	0	0	0	0	0	200	903	0	0	0	0	0	0	0	603	903	0
6053	7	0	0	0	0	0	0	200	300	0	0	0	0	0	0	0	200	903	0	0	0	0	0	0	0	603	903	0
6053	8	0	0	0	0	0	0	200	300	0	0	0	0	0	0	0	200	903	0	0	0	0	0	0	0	603	903	0
6053	9	0	0	0	0	0	0	200	300	0	0	0	0	0	0	0	200	903	0	0	0	0	0	0	0	603	903	0
6054	0	0	0	0	0	0	0	200	300	0	0	0	0	0	0	0	200	903	0	0	0	0	0	0	0	603	903	0
6054	1	0	0	0	0	0	0	200	300	0	0	0	0	0	0	0	200	903	0	0	0	0	0	0	0	603	903	0
6054	2	0	0	0	0	0	0	200	300	0	0	0	0	0	0	0	200	903	0	0	0	0	0	0	0	603	903	0
6054	3	0	0	0	0	0	0	200	300	0	0	0	0	0	0	0	200	903	0	0	0	0	0	0	0	603	903	0
6054	4	0	0	0	0	0	0	200	300	0	0	0	0	0	0	0	200	903	0	0	0	0	0	0	0	603	903	0
6054	5	0	0	0	0	0	0	200	300	0	0	0	0	0	0	0	200	903	0	0	0	0	0	0	0	603	903	0
6054	6	0	0	0	0	0	0	200	300	0	0	0	0	0	0	0	200	903	0	0	0	0	0	0	0	603	903	0
6054	7	0	0	0	0	0	0	200	300	0	0	0	0	0	0	0	200	903	0	0	0	0	0	0	0	603	903	0
6054	8	0	0	0	0	0	0	200	300	0	0	0	0	0	0	0	200	903	0	0	0	0	0	0	0	603	903	0
6054	9	0	0	0	0	0	0	200	300	0	0	0	0	0	0	0	200	903	0	0	0	0	0	0	0	603	903	0
6055	0	0	0	0	0	0	0	200	300	0	0	0	0	0	0	0	200	903	0	0	0	0	0	0	0	603	903	0
6055	1	0	0	0	0	0	0	200	300	0	0	0	0	0	0	0	200	903	0	0	0	0	0	0	0	603	903	0
6055	2	0	0	0	0	0	0	200	300	0	0	0	0	0	0	0	200	903	0	0	0	0	0	0	0	603	903	0
6055	3	0	0	0	0	0	0	200	300	0	0	0	0	0	0	0	200	903	0	0	0	0	0	0	0	603	903	0
6055	4	0	0	0	0	0	0	200	300	0	0	0	0	0	0	0	200	903	0	0	0	0	0	0	0	603	903	0
6055	5	0	0	0	0	0	0	200	300	0	0	0	0	0	0	0	200	903	0	0	0	0	0	0	0	603	903	0
6055	6	0	0	0	0	0	0	200	300	0	0	0	0	0	0	0	200	903	0	0	0	0	0	0	0	603	903	0
6055	7	0	0	0	0	0	0	200	300	0	0	0	0	0	0	0	200	903	0	0	0	0	0	0	0	603	903	0
6055	8	0	0	0	0	0	0	200	300	0	0	0	0	0	0	0	200	903	0	0	0	0	0	0	0	603	903	0
6055	9	0	0	0	0	0	0	200	300	0	0	0	0	0	0	0	200	903	0	0	0	0	0	0	0	603	903	0
6056	0	0	0	0	0	0	0	200	300	0	0	0	0	0	0	0	200	903	0	0	0	0	0	0	0	603	903	0
6056	1	0	0	0	0	0	0	200	300	0	0	0	0	0	0	0	200	903	0	0	0	0	0	0	0	603	903	0
6056	2	0	0	0	0	0	0	200	300	0	0	0	0	0	0	0	200	903	0	0	0	0	0	0	0	603	903	0
6056	3	0	0	0	0	0	0	200	300	0	0	0	0	0	0	0	200	903	0	0	0	0	0	0	0	603	903	0
6056	4	0	0	0	0	0	0	200	300	0	0	0	0	0	0	0	200	903	0	0	0	0	0	0	0	603	903	0
6056	5	0	0	0	0	0	0	200	300	0	0	0	0	0	0	0	200	903	0	0	0	0	0	0	0	603	903	0
6056	6	0	0	0	0	0	0	200	300	0	0	0	0	0	0	0	200	903	0	0	0	0	0	0	0	603	903	0
6056	7	0	0	0	0	0	0	200	300	0	0	0	0	0	0	0	200	903	0	0	0	0	0	0	0	603	903	0
6056	8	0	0	0	0	0	0	200	300	0	0	0	0	0	0	0	200	903	0	0	0	0	0	0	0	603	903	0
6056	9	0	0	0	0	0	0	200	300	0	0	0	0	0	0	0	200	903	0	0	0	0	0	0	0	603	903	0
6057	0	0	0	0	0	0	0	200	300	0	0	0	0	0	0	0	200	903	0	0	0	0	0	0	0	603	903	0
6057	1	0	0	0	0	0	0	200	300	0	0	0	0	0	0	0	200	903	0	0	0	0	0	0	0	603	903	0
6057	2	0	0	0	0	0	0	200	300	0	0	0	0	0	0	0	200	903	0	0	0	0	0	0	0	603	903	0
6057	3	0	0	0	0	0	0	200	300	0	0	0	0	0	0	0	200	903	0	0	0	0	0	0	0	603	903	0
6057	4	0	0	0	0	0	0	200	300	0	0	0	0	0	0	0	200	903	0	0	0	0	0	0	0	603	903	0
6057	5	0	0	0	0	0	0	200	300	0	0	0	0	0	0	0	200	903	0	0	0	0	0	0	0	603	903	0
6057	6	0	0	0	0	0	0	200	300	0	0	0	0	0	0	0	200	903	0	0	0	0	0	0	0	603	903	0
6057	7	0	0	0	0	0	0	200	300	0	0	0	0	0	0	0	200	903	0	0	0	0	0	0	0	603	903	0
6057	8	0	0	0	0	0	0	200	300	0	0	0	0	0	0	0	200	903	0	0	0	0	0	0	0	603	903	0
6057	9	0	0	0	0	0	0	200	300	0	0	0	0	0	0	0	200	903	0	0	0	0	0	0	0	603	903	0
6058	0	0	0	0	0	0	0	200	300	0	0	0	0	0	0	0	200	903	0	0	0	0	0	0	0	603	903	0
6058	1	0	0	0	0	0	0	200	300	0	0	0	0	0	0	0	200	903	0	0	0	0	0	0	0	603	903	0
6058	2	0	0	0	0	0	0	200	300	0	0	0	0	0	0	0	200	903	0	0	0	0	0	0	0	603	903	0
6058	3	0	0	0	0	0	0	200	300	0	0	0	0	0	0	0	200	903	0	0	0	0	0	0	0	603	903	0
6058	4	0	0	0	0	0	0	200	300	0	0	0	0	0	0	0	200	903	0	0	0	0	0	0	0	603	903	0
6058	5	0	0	0	0	0	0	200	300	0	0	0	0	0	0	0	200	903	0	0	0	0	0	0	0	603	903	0
6058	6	0	0	0	0	0	0	200	300	0	0	0	0	0	0	0	200	903	0	0	0	0	0	0	0	603	903	0
6058	7	0	0	0	0	0	0	200	300	0	0	0	0	0	0	0	200	903	0	0	0	0	0	0	0	603	903	0
6058	8	0	0	0	0	0	0	200	300	0	0	0	0	0	0	0	200	903	0	0	0	0	0	0	0	603	903	0
6058	9	0	0	0	0	0	0	200	300	0	0	0	0	0	0	0	200	903	0	0	0	0	0	0	0	603	903	0
6059	0	0	0	0	0	0	0	200	300	0	0	0	0	0	0	0	200	903	0	0	0	0	0	0	0	603	903	0
6059	1	0	0	0	0	0	0	200	300	0	0	0	0	0	0	0	200	903	0	0	0	0	0	0	0	603	903	0
6059	2	0	0	0	0	0	0	200	300	0	0	0	0	0	0	0	200	903	0	0	0	0	0	0	0	603	903	0
6059	3	0	0	0	0	0	0	200	300	0	0	0	0	0	0	0	200	903	0	0	0	0	0	0	0	603	903	0
6059	4	0	0	0	0	0	0	200	300	0	0	0	0	0	0	0	200	903	0	0	0	0	0	0	0	603	903	0
6059	5	0	0	0	0	0	0	200	300	0	0	0	0	0	0	0	200	903	0	0	0	0	0	0	0	603	903	0
6059	6	0	0	0	0	0	0	200	300	0	0	0	0	0	0	0	200	903	0	0	0	0	0	0	0	603	903	0
6059	7	0	0	0	0	0	0	200	300	0	0	0	0	0	0	0	200	903	0	0	0	0	0	0	0	603	903	0
6059	8	0	0	0	0	0	0	200	300	0	0	0	0	0	0	0	200	903	0	0	0	0	0	0	0	603	903	0
6059	9	0	0	0	0	0	0	200	300	0	0	0	0	0	0	0	200	903	0	0	0	0	0	0	0	603	903	0
6060	0	0	0	0	0	0	0	200	300	0	0	0	0	0	0	0	200	903	0	0	0	0	0	0	0	603	903	0
6060	1	0	0	0	0	0	0	200	300	0	0	0	0	0	0	0	200	903	0	0	0	0	0	0	0	603	903	0
6060	2	0	0	0	0	0	0	200	300	0	0	0	0	0	0	0	200	903	0	0	0	0	0	0	0	603	903	0
6060	3	0	0	0	0	0	0	200	300	0	0	0	0	0	0	0	200	903	0	0	0	0	0	0	0	603	903	0
6060	4	0	0	0	0	0	0	200	300	0	0	0	0	0	0	0	200	903	0	0	0	0	0	0	0	603	903	0
6060	5	0	0	0	0	0	0	200	300	0	0	0	0	0	0	0	200	903	0	0	0	0	0	0	0	603	903	0
6060	6	0	0	0	0	0	0	200	300	0	0	0	0	0	0	0	200	903	0	0	0	0	0	0	0	603	903	0
6060	7	0	0	0	0	0	0	200	300	0	0	0	0	0	0	0	200	903	0	0	0	0	0	0	0	603	903	0
6060	8	0	0	0	0	0	0	200	300	0	0	0	0	0	0	0	200	903	0	0	0	0	0	0	0	603	903	0
6060	9	0	0	0	0	0	0	200	300	0	0	0	0	0	0	0	200	903	0	0	0	0	0	0	0	603	903	0
6061	0	0	0	0	0	0	0	200	300	0	0	0	0	0	0	0	200	903	0	0	0	0	0	0	0	603	903	0
6061	1	0	0	0	0	0	0	200	300	0	0	0	0	0	0	0	200	903	0	0	0	0	0	0	0	603	903	0
6061	2	0	0	0	0	0	0	200	300	0	0	0	0	0	0	0	200	903	0	0	0	0	0	0	0	603	903	0
6061	3	0	0	0	0	0	0	200	300	0	0	0	0	0	0	0	200	903	0	0	0	0	0	0	0	603	903	0
6061	4	0	0	0	0	0	0	200	300	0	0	0	0	0	0	0	200	903	0	0	0	0	0	0	0	603	903	0
6061	5	0	0	0	0	0	0	200	300	0	0	0	0	0	0	0	200	903	0	0	0	0	0	0	0	603	903	0
6061	6	0	0	0	0	0	0	200	300	0	0	0	0	0	0	0	200	903	0	0	0	0	0	0	0	603	903	0
6061	7	0	0	0	0	0	0	200	300	0	0	0	0	0	0	0	200	903	0	0	0	0	0	0	0	603	903	0
6061	8	0	0	0	0	0	0	200	300	0	0	0	0	0	0	0	200	903	0	0	0	0	0	0	0	603	903	0
6061	9	0	0	0	0	0	0	200	300	0	0	0	0	0	0	0	200	903	0	0	0	0	0	0	0	603	903	0
6062	0	0	0	0	0	0	0	200	300	0	0	0	0	0	0	0	200	903	0	0	0	0	0	0	0	603	903	0
6062	1	0	0	0	0	0	0	200	300	0	-0.533752	10.9349	-19.581	-5694.03	2384.33	627.593	321.768	1193.79	0	0	0	0	0	0	0	603	903	0
6062	2	0	0	0	0	0	0	200	300	0	5.112	13.5289	-22.6327	-5968.69	1835.01	169.83	281.078	1166.72	0	0	0	0	0	0	0	603	903	0
6062	3	0	0	0	0	0	0	200	300	0	0.839539	7.73056	-18.3603	-5144.72	1773.97	719.146	296.62	1183.21	0	0	0	0	0	0	0	603	903	0
6062	4	0	0	0	0	0	0	200	300	0	0	0	0	0	0	0	200	903	0	0	0	0	0	0	0	603	903	0
6062	5	0	0	0	0	0	0	200	300	0	1.75507	11.5453	-20.8017	-5236.27	1712.94	536.04	282.346	1154.72	0	0	0	0	0	0	0	603	903	0
6062	6	0	0	0	0	0	0	200	300	0	2.67059	11.0875	-24.1586	-5968.69	2140.19	627.593	288.589	1150.06	0	0	0	0	0	0	0	603	903	0
6062	7	0	0	0	0	0	0	200	300	0	-0.381165	10.0194	-24.1586	-7067.32	2384.33	1131.13	298.695	1195.54	0	0	0	0	0	0	0	603	903	0
6062	8	0	0	0	0	0	0	200	300	0	0.534363	14.1393	-26.9052	-7525.09	2750.54	627.593	302.231	1182.69	0	0	0	0	0	0	0	603	903	0
6062	9	0	0	0	0	0	0	200	300	0	1.90765	15.0548	-32.7035	-8349.06	3360.89	536.04	302.768	1158.3	0	0	0	0	0	0	0	603	903	0
6063	0	0	0	0	0	0	0	200	300	0	3.43353	13.6815	-34.2294	-9173.04	3666.07	1131.13	307.103	1170.99	0	0	0	0	0	0	0	603	903	0
6063	1	0	0	0	0	0	0	200	300	0	3.28094	15.8177	-35.1449	-9173.04	3238.82	490.264	292.156	1164.01	0	0	0	0	0	0	0	603	903	0
6063	2	0	0	0	0	0	0	200	300	0	1.44989	16.5807	-39.4174	-10729.4	3971.24	352.935	300.749	1175.2	0	0	0	0	0	0	0	603	903	0
6063	3	0	0	0	0	0	0	200	300	0	4.19647	18.4117	-45.8261	-11736.5	4215.38	948.028	291.987	1159.11	0	0	0	0	0	0	0	603	903	0
6063	4	0	0	0	0	0	0	200	300	0	8.01117	22.8368	-52.2348	-14025.3	4825.73	719.146	292.386	1171.51	0	0	0	0	0	0	0	603	903	0
6063	5	0	0	0	0	0	0	200	300	0	3.43353	27.1092	-58.3383	-15398.6	5436.09	719.146	293.182	1166.95	0	0	0	0	0	0	0	603	903	0
6063	6	0	0	0	0	0	0	200	300	0	2.21283	28.4825	-67.4936	-17138.1	6046.44	1726.23	289.585	1156.92	0	0	0	0	0	0	0	603	903	0
6063	7	0	0	0	0	0	0	200	300	0	5.112	27.8722	-74.8178	-18786.1	6351.61	1497.34	284.894	1154.09	0	0	0	0	0	0	0	603	903	0
6063	8	0	0	0	0	0	0	200	300	0	2.97577	27.4144	-80.0058	-20983.3	6900.93	1451.57	286.255	1165.27	0	0	0	0	0	0	0	603	903	0
6063	9	0	0	0	0	0	0	200	300	0	0.0765991	25.5833	-83.6679	-21807.3	7267.14	1909.33	286.857	1163.64	0	0	0	0	0	0	0	603	903	0
6064	0	0	0	0	0	0	0	200	300	0	2.51801	23.1419	-92.2128	-22722.8	7206.11	1405.79	278.147	1149.42	0	0	0	0	0	0	0	603	903	0
6064	1	0	0	0	0	0	0	200	300	0	2.51801	19.6324	-97.4008	-24920.1	8121.63	1176.91	283.384	1158.85	0	0	0	0	0	0	0	603	903	0
6064	2	0	0	0	0	0	0	200	300	0	-0.0759888	21.3109	-101.673	-26110.3	8670.95	2138.21	285.283	1159.81	0	0	0	0	0	0	0	603	903	0
6064	3	0	0	0	0	0	0	200	300	0	-1.60187	20.3954	-107.777	-27208.9	8731.99	1863.56	281.019	1155.46	0	0	0	0	0	0	0	603	903	0
6064	4	0	0	0	0	0	0	200	300	0	-2.82257	18.2591	-113.88	-28490.7	9403.37	1863.56	282.572	1153.18	0	0	0	0	0	0	0	603	903	0
6064	5	0	0	0	0	0	0	200	300	0	-3.12775	18.8695	-121.204	-30413.3	9647.51	3191.07	279.597	1153.93	0	0	0	0	0	0	0	603	903	0
6064	6	0	0	0	0	0	0	200	300	0	-5.72174	19.0221	-125.477	-30871	9830.62	2595.98	278.346	1149.03	0	0	0	0	0	0	0	603	903	0
6064	7	0	0	0	0	0	0	200	300	0	-8.46832	13.0711	-132.191	-32885.2	10074.8	2458.65	276.214	1151.77	0	0	0	0	0	0	0	603	903	0
6064	8	0	0	0	0	0	0	200	300	0	-7.85797	9.56162	-138.294	-32519	10990.3	3282.62	279.47	1138.14	0	0	0	0	0	0	0	603	903	0
6064	9	0	0	0	0	0	0	200	300	0	-8.01056	9.25644	-141.956	-35448.7	11051.3	2870.64	277.85	1152.72	0	0	0	0	0	0	0	603	903	0
6065	0	0	0	0	0	0	0	200	300	0	-11.6727	3.30551	-145.924	-35540.2	11051.3	2367.1	275.734	1146.55	0	0	0	0	0	0	0	603	903	0
6065	1	0	0	0	0	0	0	200	300	0	-13.8089	-0.509185	-149.281	-36730.4	11905.8	3328.4	279.755	1149.05	0	0	0	0	0	0	0	603	903	0
6065	2	0	0	0	0	0	0	200	300	0	-13.5037	-2.03506	-157.52	-37737.5	11722.7	3465.73	274.42	1142.57	0	0	0	0	0	0	0	603	903	0
6065	3	0	0	0	0	0	0	200	300	0	-15.9451	-3.71353	-162.708	-39202.3	11905.8	2595.98	273.173	1143.94	0	0	0	0	0	0	0	603	903	0
6065	4	0	0	0	0	0	0	200	300	0	-18.0814	-8.59634	-170.033	-41033.4	11966.8	3740.39	270.38	1144.33	0	0	0	0	0	0	0	603	903	0
6065	5	0	0	0	0	0	0	200	300	0	-20.8279	-10.7326	-174.915	-41674.3	12943.4	3831.94	273.998	1141.25	0	0	0	0	0	0	0	603	903	0
6065	6	0	0	0	0	0	0	200	300	0	-21.5909	-12.1059	-181.019	-42589.8	12821.3	3465.73	270.829	1138.28	0	0	0	0	0	0	0	603	903	0
6065	7	0	0	0	0	0	0	200	300	0	-22.3538	-17.1413	-186.207	-44420.8	13187.6	4289.7	270.822	1141.56	0	0	0	0	0	0	0	603	903	0
6065	8	0	0	0	0	0	0	200	300	0	-24.9478	-20.3456	-189.869	-45244.8	13675.8	4289.7	272.028	1141.29	0	0	0	0	0	0	0	603	903	0
6065	9	0	0	0	0	0	0	200	300	0	-26.7789	-22.6344	-196.888	-46160.4	13797.9	4060.82	270.08	1137.45	0	0	0	0	0	0	0	603	903	0
6066	0	0	0	0	0	0	0	200	300	0	-27.847	-24.4655	-202.992	-46892.8	14042	4152.37	269.176	1134.01	0	0	0	0	0	0	0	603	903	0
6066	1	0	0	0	0	0	0	200	300	0	-28.6099	-28.8905	-210.011	-48815.4	14591.4	4243.93	269.479	1135.44	0	0	0	0	0	0	0	603	903	0
6066	2	0	0	0	0	0	0	200	300	0	-31.5091	-31.3319	-215.504	-49914	15323.8	4060.82	271.107	1134.62	0	0	0	0	0	0	0	603	903	0
6066	3	0	0	0	0	0	0	200	300	0	-33.7979	-31.7897	-221.912	-51104.2	14896.5	4564.36	267.128	1133.29	0	0	0	0	0	0	0	603	903	0
6066	4	0	0	0	0	0	0	200	300	0	-34.2557	-36.2148	-228.321	-52294.4	16056.2	4747.47	270.323	1132.04	0	0	0	0	0	0	0	603	903	0
6066	5	0	0	0	0	0	0	200	300	0	-35.1712	-37.8932	-233.814	-53484.6	16422.4	4152.37	270.237	1131.75	0	0	0	0	0	0	0	603	903	0
6066	6	0	0	0	0	0	0	200	300	0	-36.8497	-39.5717	-242.97	-55041	16422.4	4839.02	267.59	1129.53	0	0	0	0	0	0	0	603	903	0
6066	7	0	0	0	0	0	0	200	300	0	-38.9859	-41.5553	-245.106	-55956.5	17215.9	4610.14	270.239	1131.3	0	0	0	0	0	0	0	603	903	0
6066	8	0	0	0	0	0	0	200	300	0	-37.46	-44.3019	-254.871	-57604.4	17460	4335.48	268.505	1129.01	0	0	0	0	0	0	0	603	903	0
6066	9	0	0	0	0	0	0	200	300	0	-39.4437	-45.6752	-260.975	-58794.6	17826.2	4930.57	268.306	1128.29	0	0	0	0	0	0	0	603	903	0
6067	0	0	0	0	0	0	0	200	300	0	-41.7325	-46.5907	-267.079	-60351	18314.5	4747.47	268.573	1128.97	0	0	0	0	0	0	0	603	903	0
6067	1	0	0	0	0	0	0	200	300	0	-42.3428	-49.3373	-274.403	-61632.8	18680.7	4381.26	268.078	1127.61	0	0	0	0	0	0	0	603	903	0
6067	2	0	0	0	0	0	0	200	300	0	-42.8006	-50.2528	-282.337	-62090.5	19291.1	4976.35	268.326	1122.92	0	0	0	0	0	0	0	603	903	0
6067	3	0	0	0	0	0	0	200	300	0	-43.7161	-52.2365	-289.662	-64654	19840.4	4930.57	268.495	1126.21	0	0	0	0	0	0	0	603	903	0
6067	4	0	0	0	0	0	0	200	300	0	-44.1739	-53.7624	-295.765	-65661.1	20450.7	4198.15	269.145	1125	0	0	0	0	0	0	0	603	903	0
6067	5	0	0	0	0	0	0	200	300	0	-45.242	-56.2038	-302.479	-66576.6	20939	4839.02	269.225	1123.1	0	0	0	0	0	0	0	603	903	0
6067	6	0	0	0	0	0	0	200	300	0	-45.5472	-56.6615	-309.803	-67858.3	21671.4	4381.26	269.952	1122.04	0	0	0	0	0	0	0	603	903	0
6067	7	0	0	0	0	0	0	200	300	0	-45.3946	-57.7296	-317.738	-70055.6	22159.7	4060.82	269.742	1123.48	0	0	0	0	0	0	0	603	903	0
6067	8	0	0	0	0	0	0	200	300	0	-46.4627	-58.7978	-320.484	-71337.4	22648	4289.7	270.668	1125.59	0	0	0	0	0	0	0	603	903	0
6067	9	0	0	0	0	0	0	200	300	0	-46.6153	-61.2392	-332.386	-71337.4	22892.1	4060.82	268.872	1117.62	0	0	0	0	0	0	0	603	903	0
6068	0	0	0	0	0	0	0	200	300	0	-46.0049	-62.9176	-337.879	-72985.3	23197.3	3740.39	268.656	1119.01	0	0	0	0	0	0	0	603	903	0
6068	1	0	0	0	0	0	0	200	300	0	-45.5472	-64.4435	-342.152	-74083.9	23868.7	3557.28	269.761	1119.52	0	0	0	0	0	0	0	603	903	0
6068	2	0	0	0	0	0	0	200	300	0	-46.9205	-65.8168	-348.866	-75365.7	23807.7	3740.39	268.243	1119.03	0	0	0	0	0	0	0	603	903	0
6068	3	0	0	0	0	0	0	200	300	0	-46.9205	-66.5797	-354.359	-75640.4	24967.3	3099.52	270.458	1116.46	0	0	0	0	0	0	0	603	903	0
6068	4	0	0	0	0	0	0	200	300	0	-45.5472	-68.716	-361.073	-76830.5	25699.8	3236.85	271.176	1115.78	0	0	0	0	0	0	0	603	903	0
6068	5	0	0	0	0	0	0	200	300	0	-45.8524	-70.3944	-364.43	-78386.9	25882.9	3145.29	271.023	1118.09	0	0	0	0	0	0	0	603	903	0
6068	6	0	0	0	0	0	0	200	300	0	-46.4627	-71.0048	-369.312	-78112.2	25699.8	2779.08	269.588	1114.51	0	0	0	0	0	0	0	603	903	0
6068	7	0	0	0	0	0	0	200	300	0	-46.1575	-72.6833	-373.585	-79027.8	26371.1	2733.31	270.589	1114.54	0	0	0	0	0	0	0	603	903	0
6068	8	0	0	0	0	0	0	200	300	0	-45.6998	-72.5307	-378.773	-79668.7	26737.4	2687.53	270.589	1113.33	0	0	0	0	0	0	0	603	903	0
6068	9	0	0	0	0	0	0	200	300	0	-44.3265	-74.8195	-383.35	-81225.1	27103.6	2183.99	270.702	1114.88	0	0	0	0	0	0	0	603	903	0
6069	0	0	0	0	0	0	0	200	300	0	-45.5472	-74.9721	-387.318	-81316.6	27530.8	2138.21	271.081	1112.95	0	0	0	0	0	0	0	603	903	0
6069	1	0	0	0	0	0	0	200	300	0	-45.6998	-77.1083	-392.506	-81774.4	28202.2	2229.77	271.852	1111.34	0	0	0	0	0	0	0	603	903	0
6069	2	0	0	0	0	0	0	200	300	0	-43.8687	-78.7868	-394.337	-82506.8	28629.4	1680.45	272.602	1112.23	0	0	0	0	0	0	0	603	903	0
6069	3	0	0	0	0	0	0	200	300	0	-43.4109	-79.3971	-398.914	-83239.2	28385.3	1680.45	271.156	1111.66	0	0	0	0	0	0	0	603	903	0
6069	4	0	0	0	0	0	0	200	300	0	-44.6317	-80.7704	-402.271	-83788.5	29361.9	1588.9	272.99	1111.29	0	0	0	0	0	0	0	603	903	0
6069	5	0	0	0	0	0	0	200	300	0	-43.2584	-83.2118	-407.154	-83697	29606	993.804	272.715	1108.57	0	0	0	0	0	0	0	603	903	0
6069	6	0	0	0	0	0	0	200	300	0	-40.2066	-85.1955	-409.29	-84429.4	29483.9	1039.58	272.037	1109.28	0	0	0	0	0	0	0	603	903	0
6069	7	0	0	0	0	0	0	200	300	0	-43.4109	-83.0592	-412.342	-85161.8	29728.1	1039.58	272.096	1109.53	0	0	0	0	0	0	0	603	903	0
6069	8	0	0	0	0	0	0	200	300	0	-41.7325	-86.7213	-417.835	-85528	29606	398.711	270.856	1107.69	0	0	0	0	0	0	0	603	903	0
6069	9	0	0	0	0	0	0	200	300	0	-40.5118	-87.942	-418.141	-85528	30399.5	215.606	272.702	1107.54	0	0	0	0	0	0	0	603	903	0
6070	0	0	0	0	0	0	0	200	300	0	-40.054	-88.3998	-420.887	-85436.5	30399.5	124.053	272.227	1105.99	0	0	0	0	0	0	0	603	903	0
6070	1	0	0	0	0	0	0	200	300	0	-40.054	-89.9257	-424.549	-86352	31315	-425.263	273.761	1106.4	0	0	0	0	0	0	0	603	903	0
6070	2	0	0	0	0	0	0	200	300	0	-36.6971	-91.7567	-427.296	-86168.9	31559.1	-699.922	273.858	1104.66	0	0	0	0	0	0	0	603	903	0
6070	3	0	0	0	0	0	0	200	300	0	-37.1548	-93.4352	-429.127	-86443.5	31192.9	-791.474	272.689	1104.44	0	0	0	0	0	0	0	603	903	0
6070	4	0	0	0	0	0	0	200	300	0	-36.8497	-93.893	-431.873	-86626.7	32169.5	-1340.79	274.488	1103.58	0	0	0	0	0	0	0	603	903	0
6070	5	0	0	0	0	0	0	200	300	0	-36.6971	-95.8766	-434.315	-87267.5	32474.7	-1386.57	274.772	1103.93	0	0	0	0	0	0	0	603	903	0
6070	6	0	0	0	0	0	0	200	300	0	-35.7816	-97.5551	-436.146	-87542.2	32230.5	-1707	273.898	1103.72	0	0	0	0	0	0	0	603	903	0
6070	7	0	0	0	0	0	0	200	300	0	-31.2039	-98.1654	-439.503	-87450.7	32352.6	-2164.77	273.612	1101.98	0	0	0	0	0	0	0	603	903	0
6070	8	0	0	0	0	0	0	200	300	0	-30.8987	-99.2336	-443.47	-87725.3	33512.3	-2347.87	275.568	1100.82	0	0	0	0	0	0	0	603	903	0
6070	9	0	0	0	0	0	0	200	300	0	-32.8824	-100.912	-447.437	-88091.5	33207.1	-2485.2	274.216	1099.88	0	0	0	0	0	0	0	603	903	0
6071	0	0	0	0	0	0	0	200	300	0	-29.8306	-102.285	-448.963	-88549.3	33390.2	-2942.96	274.372	1100.23	0	0	0	0	0	0	0	603	903	0
6071	1	0	0	0	0	0	0	200	300	0	-32.5772	-102.133	-451.1	-88366.1	34000.6	-3217.62	275.373	1098.89	0	0	0	0	0	0	0	603	903	0
6071	2	0	0	0	0	0	0	200	300	0	-30.2884	-103.201	-455.982	-88640.8	34183.7	-2897.19	274.967	1097.4	0	0	0	0	0	0	0	603	903	0
6071	3	0	0	0	0	0	0	200	300	0	-29.678	-105.032	-456.288	-89007	34122.6	-3812.72	274.783	1098.07	0	0	0	0	0	0	0	603	903	0
6071	4	0	0	0	0	0	0	200	300	0	-27.5418	-106.405	-458.424	-89190.2	34610.9	-3995.82	275.5	1097.56	0	0	0	0	0	0	0	603	903	0
6071	5	0	0	0	0	0	0	200	300	0	-28.9151	-105.184	-460.865	-89281.7	35099.2	-4178.93	276.159	1096.73	0	0	0	0	0	0	0	603	903	0
6071	6	0	0	0	0	0	0	200	300	0	-25.1004	-108.694	-462.086	-89098.6	34855	-4774.02	275.43	1095.82	0	0	0	0	0	0	0	603	903	0
6071	7	0	0	0	0	0	0	200	300	0	-26.1685	-109.457	-464.832	-89831	35404.4	-5048.68	276.166	1096.25	0	0	0	0	0	0	0	603	903	0
6071	8	0	0	0	0	0	0	200	300	0	-25.1004	-109.915	-466.358	-89464.8	35892.6	-5369.11	276.964	1094.84	0	0	0	0	0	0	0	603	903	0
6071	9	0	0	0	0	0	0	200	300	0	-22.5064	-110.983	-469.41	-89281.7	35587.5	-5643.77	275.813	1093.2	0	0	0	0	0	0	0	603	903	0
6072	0	0	0	0	0	0	0	200	300	0	-20.9805	-112.356	-469.105	-89556.4	35648.5	-6055.76	275.993	1093.91	0	0	0	0	0	0	0	603	903	0
6072	1	0	0	0	0	0	0	200	300	0	-19.9124	-111.898	-470.936	-89831	36075.8	-5781.1	276.604	1093.75	0	0	0	0	0	0	0	603	903	0
6072	2	0	0	0	0	0	0	200	300	0	-19.4547	-112.661	-471.851	-90014.1	36625.1	-6925.51	277.62	1093.77	0	0	0	0	0	0	0	603	903	0
6072	3	0	0	0	0	0	0	200	300	0	-16.4029	-113.729	-471.851	-88732.4	35892.6	-7062.84	276.068	1091.05	0	0	0	0	0	0	0	603	903	0
6072	4	0	0	0	0	0	0	200	300	0	-15.0296	-114.035	-473.988	-90105.6	37052.3	-7200.17	278.171	1093.1	0	0	0	0	0	0	0	603	903	0
6072	5	0	0	0	0	0	0	200	300	0	-13.3511	-113.119	-477.039	-89556.4	37113.3	-7886.81	277.799	1090.73	0	0	0	0	0	0	0	603	903	0
6072	6	0	0	0	0	0	0	200	300	0	-11.3675	-114.34	-480.091	-89464.8	37235.4	-7795.26	277.559	1089.35	0	0	0	0	0	0	0	603	903	0
6072	7	0	0	0	0	0	0	200	300	0	-8.46832	-115.56	-479.786	-89098.6	37418.5	-8253.03	277.99	1088.7	0	0	0	0	0	0	0	603	903	0
6072	8	0	0	0	0	0	0	200	300	0	-5.72174	-115.408	-480.091	-89831	37784.7	-8665.01	278.703	1090.11	0	0	0	0	0	0	0	603	903	0
6072	9	0	0	0	0	0	0	200	300	0	-5.72174	-115.255	-482.533	-89739.4	37967.8	-9077	278.685	1088.98	0	0	0	0	0	0	0	603	903	0
6073	0	0	0	0	0	0	0	200	300	0	-3.89069	-117.392	-483.448	-89464.8	38028.9	-9077	278.662	1088.06	0	0	0	0	0	0	0	603	903	0
6073	1	0	0	0	0	0	0	200	300	0	-2.05963	-118.154	-483.448	-89281.7	38150.9	-9855.2	278.914	1087.68	0	0	0	0	0	0	0	603	903	0
6073	2	0	0	0	0	0	0	200	300	0	-0.68634	-118.002	-484.669	-89647.9	38517.2	-10267.2	279.471	1087.97	0	0	0	0	0	0	0	603	903	0
6073	3	0	0	0	0	0	0	200	300	0	1.60248	-119.07	-487.11	-89647.9	38395.1	-10038.3	278.822	1087.04	0	0	0	0	0	0	0	603	903	0
6073	4	0	0	0	0	0	0	200	300	0	2.67059	-120.748	-487.415	-88732.4	38578.2	-10953.8	279.148	1085.05	0	0	0	0	0	0	0	603	903	0
6073	5	0	0	0	0	0	0	200	300	0	3.43353	-120.901	-488.026	-89098.6	39249.6	-11091.2	280.425	1085.57	0	0	0	0	0	0	0	603	903	0
6073	6	0	0	0	0	0	0	200	300	0	3.28094	-120.291	-488.636	-88091.5	39249.6	-11274.3	280.325	1083.28	0	0	0	0	0	0	0	603	903	0
6073	7	0	0	0	0	0	0	200	300	0	4.65424	-120.748	-490.772	-88732.4	38334.1	-11091.2	278.11	1083.8	0	0	0	0	0	0	0	603	903	0
6073	8	0	0	0	0	0	0	200	300	0	6.3327	-121.664	-488.636	-89007	39676.8	-11503.1	281.199	1085.15	0	0	0	0	0	0	0	603	903	0
6073	9	0	0	0	0	0	0	200	300	0	6.48529	-122.274	-491.993	-89281.7	39493.7	-11915.1	280.273	1084.47	0	0	0	0	0	0	0	603	903	0
6074	0	0	0	0	0	0	0	200	300	0	6.79047	-123.648	-492.909	-89647.9	39493.7	-12098.2	280.124	1084.88	0	0	0	0	0	0	0	603	903	0
6074	1	0	0	0	0	0	0	200	300	0	7.70599	-123.342	-495.045	-88732.4	39493.7	-12418.7	279.778	1082.24	0	0	0	0	0	0	0	603	903	0
6074	2	0	0	0	0	0	0	200	300	0	8.77411	-123.8	-494.434	-89190.2	39798.9	-12327.1	280.494	1083.39	0	0	0	0	0	0	0	603	903	0
6074	3	0	0	0	0	0	0	200	300	0	9.99481	-123.19	-497.181	-89373.2	39005.4	-12510.2	278.453	1082.76	0	0	0	0	0	0	0	603	903	0
6074	4	0	0	0	0	0	0	200	300	0	9.84222	-123.953	-499.012	-89373.2	39737.9	-12693.3	279.633	1082.1	0	0	0	0	0	0	0	603	903	0
6074	5	0	0	0	0	0	0	200	300	0	10.1474	-124.411	-500.538	-89190.2	40653.4	-12693.3	281.219	1081.19	0	0	0	0	0	0	0	603	903	0
6074	6	0	0	0	0	0	0	200	300	0	13.0466	-124.258	-501.454	-89647.9	40287.2	-12647.6	280.341	1081.78	0	0	0	0	0	0	0	603	903	0
6074	7	0	0	0	0	0	0	200	300	0	11.8259	-124.105	-502.369	-89831	40287.2	-13059.5	280.194	1081.81	0	0	0	0	0	0	0	603	903	0
6074	8	0	0	0	0	0	0	200	300	0	14.1147	-123.953	-505.116	-89831	40409.2	-13105.3	280	1080.84	0	0	0	0	0	0	0	603	903	0
6074	9	0	0	0	0	0	0	200	300	0	14.1147	-125.784	-507.557	-89556.4	40287.2	-13334.2	279.375	1079.45	0	0	0	0	0	0	0	603	903	0
6075	0	0	0	0	0	0	0	200	300	0	16.8613	-125.631	-507.557	-89739.4	40653.4	-13792	280.096	1079.81	0	0	0	0	0	0	0	603	903	0
6075	1	0	0	0	0	0	0	200	300	0	14.2673	-125.936	-510.914	-90563.4	41141.7	-13471.5	280.526	1080.26	0	0	0	0	0	0	0	603	903	0
6075	2	0	0	0	0	0	0	200	300	0	15.1828	-124.563	-512.135	-90746.6	41752	-13792	281.525	1080.19	0	0	0	0	0	0	0	603	903	0
6075	3	0	0	0	0	0	0	200	300	0	17.4716	-123.037	-514.576	-90746.6	41446.8	-13883.5	280.546	1079.35	0	0	0	0	0	0	0	603	903	0
6075	4	0	0	0	0	0	0	200	300	0	17.7768	-125.479	-514.881	-90471.9	41507.9	-13654.6	280.616	1078.71	0	0	0	0	0	0	0	603	903	0
6075	5	0	0	0	0	0	0	200	300	0	18.8449	-124.563	-518.543	-90838.1	41813.1	-13929.3	280.636	1078.18	0	0	0	0	0	0	0	603	903	0
6075	6	0	0	0	0	0	0	200	300	0	18.8449	-123.19	-520.069	-91387.4	41935.1	-14066.6	280.634	1078.72	0	0	0	0	0	0	0	603	903	0
6075	7	0	0	0	0	0	0	200	300	0	20.2182	-122.427	-521.29	-91387.4	42057.2	-14112.4	280.679	1078.31	0	0	0	0	0	0	0	603	903	0
6075	8	0	0	0	0	0	0	200	300	0	20.9811	-122.885	-520.374	-92028.3	42301.3	-14066.6	281.29	1079.85	0	0	0	0	0	0	0	603	903	0
6075	9	0	0	0	0	0	0	200	300	0	19.913	-122.732	-525.562	-91936.7	43094.8	-14387.1	281.997	1077.93	0	0	0	0	0	0	0	603	903	0
6076	0	0	0	0	0	0	0	200	300	0	21.5915	-124.258	-529.224	-92119.8	42850.7	-14020.8	280.969	1077.07	0	0	0	0	0	0	0	603	903	0
6076	1	0	0	0	0	0	0	200	300	0	22.8122	-124.716	-528.614	-92302.9	42118.2	-14158.2	279.677	1077.61	0	0	0	0	0	0	0	603	903	0
6076	2	0	0	0	0	0	0	200	300	0	22.8122	-123.648	-531.971	-93035.3	43216.9	-14432.8	281.239	1077.89	0	0	0	0	0	0	0	603	903	0
6076	3	0	0	0	0	0	0	200	300	0	21.8967	-123.495	-534.107	-92394.5	43644.1	-14432.8	281.714	1075.99	0	0	0	0	0	0	0	603	903	0
6076	4	0	0	0	0	0	0	200	300	0	22.507	-123.495	-534.412	-92852.3	43216.9	-14478.6	280.868	1076.75	0	0	0	0	0	0	0	603	903	0
6076	5	0	0	0	0	0	0	200	300	0	23.8803	-123.648	-538.075	-92577.6	43461	-14432.8	280.771	1075.05	0	0	0	0	0	0	0	603	903	0
6076	6	0	0	0	0	0	0	200	300	0	24.0329	-122.274	-538.685	-92852.3	44071.4	-14478.6	281.813	1075.37	0	0	0	0	0	0	0	603	903	0
6076	7	0	0	0	0	0	0	200	300	0	24.1855	-121.969	-542.042	-92760.7	43705.1	-14524.4	280.631	1074.13	0	0	0	0	0	0	0	603	903	0
6076	8	0	0	0	0	0	0	200	300	0	24.0329	-123.037	-542.347	-93767.8	43644.1	-14753.3	280.473	1075.89	0	0	0	0	0	0	0	603	903	0
6076	9	0	0	0	0	0	0	200	300	0	25.101	-122.579	-545.094	-93676.2	44254.5	-14478.6	281.187	1074.85	0	0	0	0	0	0	0	603	903	0
6077	0	0	0	0	0	0	0	200	300	0	24.4907	-119.68	-544.788	-94957.9	44376.5	-14341.3	281.456	1077.3	0	0	0	0	0	0	0	603	903	0
6077	1	0	0	0	0	0	0	200	300	0	24.3381	-120.748	-546.314	-95598.8	44132.4	-14204	280.782	1077.99	0	0	0	0	0	0	0	603	903	0
6077	2	0	0	0	0	0	0	200	300	0	24.1855	-119.986	-550.282	-95598.8	44376.5	-14295.5	280.643	1076.73	0	0	0	0	0	0	0	603	903	0
6077	3	0	0	0	0	0	0	200	300	0	24.1855	-118.154	-550.587	-95324.2	45109	-14341.3	281.929	1076.13	0	0	0	0	0	0	0	603	903	0
6077	4	0	0	0	0	0	0	200	300	0	25.7114	-117.697	-554.249	-96239.7	44620.7	-14020.8	280.507	1076.64	0	0	0	0	0	0	0	603	903	0
6077	5	0	0	0	0	0	0	200	300	0	23.5751	-118.002	-554.859	-96697.4	44681.7	-14295.5	280.528	1077.27	0	0	0	0	0	0	0	603	903	0
6077	6	0	0	0	0	0	0	200	300	0	24.4907	-117.392	-556.995	-97063.7	45414.1	-13700.4	281.534	1077.26	0	0	0	0	0	0	0	603	903	0
6077	7	0	0	0	0	0	0	200	300	0	25.2536	-116.476	-558.216	-96880.6	45414.1	-13792	281.356	1076.55	0	0	0	0	0	0	0	603	903	0
6077	8	0	0	0	0	0	0	200	300	0	25.4062	-116.171	-561.268	-97613	45170	-13517.3	280.479	1076.92	0	0	0	0	0	0	0	603	903	0
6077	9	0	0	0	0	0	0	200	300	0	26.0165	-113.729	-564.015	-98253.8	45414.1	-13105.3	280.519	1077.2	0	0	0	0	0	0	0	603	903	0
6078	0	0	0	0	0	0	0	200	300	0	24.3381	-114.34	-564.625	-97429.9	44986.9	-13425.8	279.676	1075.56	0	0	0	0	0	0	0	603	903	0
6078	1	0	0	0	0	0	0	200	300	0	25.2536	-113.729	-568.287	-98162.3	45597.2	-13013.8	280.236	1075.73	0	0	0	0	0	0	0	603	903	0
6078	2	0	0	0	0	0	0	200	300	0	24.0329	-113.272	-569.203	-98803.2	45475.2	-13242.7	279.893	1076.58	0	0	0	0	0	0	0	603	903	0
6078	3	0	0	0	0	0	0	200	300	0	22.6596	-112.661	-571.644	-99535.6	46085.5	-13151.1	280.619	1077.12	0	0	0	0	0	0	0	603	903	0
6078	4	0	0	0	0	0	0	200	300	0	22.0493	-111.288	-573.78	-99169.4	46512.8	-12418.7	281.064	1075.84	0	0	0	0	0	0	0	603	903	0
6078	5	0	0	0	0	0	0	200	300	0	23.1174	-110.83	-576.832	-99901.8	46390.7	-12876.4	280.423	1076.19	0	0	0	0	0	0	0	603	903	0
6078	6	0	0	0	0	0	0	200	300	0	22.507	-110.83	-578.358	-100634	46268.6	-12830.7	280	1077	0	0	0	0	0	0	0	603	903	0
6078	7	0	0	0	0	0	0	200	300	0	20.676	-109.61	-578.968	-100085	46573.8	-12601.8	280.443	1075.87	0	0	0	0	0	0	0	603	903	0
6078	8	0	0	0	0	0	0	200	300	0	21.5915	-109.152	-582.02	-100634	46573.8	-11915.1	280.021	1075.91	0	0	0	0	0	0	0	603	903	0
6078	9	0	0	0	0	0	0	200	300	0	22.2018	-107.473	-584.156	-100909	46512.8	-12510.2	279.624	1075.74	0	0	0	0	0	0	0	603	903	0
6079	0	0	0	0	0	0	0	200	300	0	21.7441	-107.016	-585.072	-101641	47001	-12189.8	280.334	1076.72	0	0	0	0	0	0	0	603	903	0
6079	1	0	0	0	0	0	0	200	300	0	19.7604	-106.405	-587.818	-101916	47489.3	-12144	280.789	1076.38	0	0	0	0	0	0	0	603	903	0
6079	2	0	0	0	0	0	0	200	300	0	19.913	-105.795	-591.786	-102008	47184.1	-12052.5	279.732	1075.37	0	0	0	0	0	0	0	603	903	0
6079	3	0	0	0	0	0	0	200	300	0	21.8967	-106.1	-593.922	-102740	47062.1	-11823.6	279.24	1075.99	0	0	0	0	0	0	0	603	903	0
6079	4	0	0	0	0	0	0	200	300	0	19.3027	-105.337	-594.532	-102740	47550.4	-11548.9	279.979	1075.81	0	0	0	0	0	0	0	603	903	0
6079	5	0	0	0	0	0	0	200	300	0	21.8967	-104.574	-596.363	-103289	47367.3	-11228.5	279.427	1076.2	0	0	0	0	0	0	0	603	903	0
6079	6	0	0	0	0	0	0	200	300	0	20.5234	-102.743	-599.415	-103381	47489.3	-10953.8	279.226	1075.47	0	0	0	0	0	0	0	603	903	0
6079	7	0	0	0	0	0	0	200	300	0	19.6078	-102.438	-601.856	-104388	48099.7	-11136.9	279.919	1076.44	0	0	0	0	0	0	0	603	903	0
6079	8	0	0	0	0	0	0	200	300	0	18.8449	-103.201	-603.687	-104113	48343.8	-10999.6	280.081	1075.46	0	0	0	0	0	0	0	603	903	0
6079	9	0	0	0	0	0	0	200	300	0	18.082	-100.302	-607.96	-104205	48038.6	-10999.6	279.016	1074.4	0	0	0	0	0	0	0	603	903	0
6080	0	0	0	0	0	0	0	200	300	0	19.3027	-101.37	-608.875	-105029	48221.7	-10999.6	279.198	1075.5	0	0	0	0	0	0	0	603	903	0
6080	1	0	0	0	0	0	0	200	300	0	18.6923	-101.065	-609.181	-105395	48160.7	-10679.2	279.058	1076.01	0	0	0	0	0	0	0	603	903	0
6080	2	0	0	0	0	0	0	200	300	0	19.6078	-99.8439	-611.012	-106036	48465.9	-10633.4	279.321	1076.54	0	0	0	0	0	0	0	603	903	0
6080	3	0	0	0	0	0	0	200	300	0	18.2346	-98.7758	-614.979	-105487	48588	-10084.1	279.008	1074.53	0	0	0	0	0	0	0	603	903	0
6080	4	0	0	0	0	0	0	200	300	0	17.6242	-98.9284	-617.42	-106127	49076.2	-10587.6	279.486	1074.89	0	0	0	0	0	0	0	603	903	0
6080	5	0	0	0	0	0	0	200	300	0	16.5561	-98.4706	-617.725	-107226	49198.3	-10313	279.644	1076.58	0	0	0	0	0	0	0	603	903	0
6080	6	0	0	0	0	0	0	200	300	0	18.3871	-96.6396	-620.472	-107318	49015.2	-9946.75	278.997	1075.96	0	0	0	0	0	0	0	603	903	0
6080	7	0	0	0	0	0	0	200	300	0	16.7087	-95.4189	-621.388	-107134	49320.4	-10038.3	279.371	1075.41	0	0	0	0	0	0	0	603	903	0
6080	8	0	0	0	0	0	0	200	300	0	16.8613	-95.5714	-624.439	-107501	49320.4	-9809.42	278.983	1075.16	0	0	0	0	0	0	0	603	903	0
6080	9	0	0	0	0	0	0	200	300	0	14.8776	-95.2663	-623.829	-107867	49381.4	-9534.76	279.159	1075.91	0	0	0	0	0	0	0	603	903	0
6081	0	0	0	0	0	0	0	200	300	0	15.0302	-94.0456	-628.712	-108233	49381.4	-9397.44	278.544	1075.15	0	0	0	0	0	0	0	603	903	0
6081	1	0	0	0	0	0	0	200	300	0	15.9457	-94.3507	-629.932	-108325	49747.6	-9214.33	278.973	1074.96	0	0	0	0	0	0	0	603	903	0
6081	2	0	0	0	0	0	0	200	300	0	15.0302	-93.5878	-629.932	-108966	50052.8	-8848.12	279.457	1075.98	0	0	0	0	0	0	0	603	903	0
6081	3	0	0	0	0	0	0	200	300	0	13.8095	-91.7567	-633.289	-108325	49686.6	-8756.57	278.458	1074.05	0	0	0	0	0	0	0	603	903	0
6081	4	0	0	0	0	0	0	200	300	0	13.5043	-91.6042	-634.815	-108874	49747.6	-8939.67	278.366	1074.51	0	0	0	0	0	0	0	603	903	0
6081	5	0	0	0	0	0	0	200	300	0	14.725	-91.9093	-637.257	-109606	49686.6	-8802.34	277.97	1075	0	0	0	0	0	0	0	603	903	0
6081	6	0	0	0	0	0	0	200	300	0	13.8095	-90.9938	-637.562	-109790	49869.7	-8893.9	278.219	1075.2	0	0	0	0	0	0	0	603	903	0
6081	7	0	0	0	0	0	0	200	300	0	12.2836	-89.7731	-639.698	-110339	49930.7	-8481.91	278.054	1075.49	0	0	0	0	0	0	0	603	903	0
6081	8	0	0	0	0	0	0	200	300	0	11.9785	-89.1628	-641.834	-110156	50480	-8390.36	278.65	1074.63	0	0	0	0	0	0	0	603	903	0
6081	9	0	0	0	0	0	0	200	300	0	12.4362	-89.9257	-642.14	-110339	50602.1	-8573.46	278.802	1074.83	0	0	0	0	0	0	0	603	903	0
6082	0	0	0	0	0	0	0	200	300	0	12.131	-89.3153	-644.276	-111254	50296.9	-7795.26	278.067	1075.68	0	0	0	0	0	0	0	603	903	0
6082	1	0	0	0	0	0	0	200	300	0	11.0629	-87.0265	-645.496	-110522	50296.9	-8024.14	277.92	1074.22	0	0	0	0	0	0	0	603	903	0
6082	2	0	0	0	0	0	0	200	300	0	11.2155	-87.942	-645.496	-111071	50541.1	-7932.59	278.298	1075.07	0	0	0	0	0	0	0	603	903	0
6082	3	0	0	0	0	0	0	200	300	0	11.2155	-85.8058	-646.107	-110980	50480	-7932.59	278.13	1074.77	0	0	0	0	0	0	0	603	903	0
6082	4	0	0	0	0	0	0	200	300	0	11.5207	-85.1955	-645.802	-111163	50724.2	-7703.71	278.545	1075.13	0	0	0	0	0	0	0	603	903	0
6082	5	0	0	0	0	0	0	200	300	0	10.6052	-84.4325	-650.379	-111804	51273.5	-7703.71	278.836	1074.91	0	0	0	0	0	0	0	603	903	0
6082	6	0	0	0	0	0	0	200	300	0	10.4526	-84.5851	-652.821	-111437	50907.3	-7703.71	277.981	1073.7	0	0	0	0	0	0	0	603	903	0
6082	7	0	0	0	0	0	0	200	300	0	10.9103	-84.5851	-652.821	-111437	50785.2	-7154.39	277.794	1073.7	0	0	0	0	0	0	0	603	903	0
6082	8	0	0	0	0	0	0	200	300	0	10.3	-82.4489	-651.6	-111712	50846.3	-7154.39	278.033	1074.44	0	0	0	0	0	0	0	603	903	0
6082	9	0	0	0	0	0	0	200	300	0	9.68964	-82.7541	-653.736	-110797	51334.5	-7245.94	278.525	1072.48	0	0	0	0	0	0	0	603	903	0
6083	0	0	0	0	0	0	0	200	300	0	9.23187	-82.6015	-653.736	-111895	50907.3	-7200.17	277.871	1074.16	0	0	0	0	0	0	0	603	903	0
6083	1	0	0	0	0	0	0	200	300	0	10.3	-82.1437	-654.957	-111529	51090.4	-7245.94	278.006	1073.28	0	0	0	0	0	0	0	603	903	0
6083	2	0	0	0	0	0	0	200	300	0	9.99481	-80.923	-655.872	-111987	51639.7	-7062.84	278.734	1073.74	0	0	0	0	0	0	0	603	903	0
6083	3	0	0	0	0	0	0	200	300	0	9.84222	-80.1601	-658.009	-111987	51090.4	-7062.84	277.644	1073.19	0	0	0	0	0	0	0	603	903	0
6083	4	0	0	0	0	0	0	200	300	0	8.9267	-80.923	-656.483	-112353	51029.4	-6971.28	277.731	1074.14	0	0	0	0	0	0	0	603	903	0
6083	5	0	0	0	0	0	0	200	300	0	10.4526	-80.1601	-657.093	-111529	51212.5	-6971.28	277.938	1072.73	0	0	0	0	0	0	0	603	903	0
6083	6	0	0	0	0	0	0	200	300	0	11.9785	-79.5497	-656.483	-111712	51090.4	-6696.63	277.824	1073.17	0	0	0	0	0	0	0	603	903	0
6083	7	0	0	0	0	0	0	200	300	0	9.99481	-78.4816	-657.398	-111987	51273.5	-6971.28	277.995	1073.35	0	0	0	0	0	0	0	603	903	0
6083	8	0	0	0	0	0	0	200	300	0	11.9785	-78.9394	-659.535	-112170	51273.5	-6879.73	277.742	1073.07	0	0	0	0	0	0	0	603	903	0
6083	9	0	0	0	0	0	0	200	300	0	10.7578	-78.4816	-659.535	-111529	51944.9	-6788.18	278.76	1072.1	0	0	0	0	0	0	0	603	903	0
6084	0	0	0	0	0	0	0	200	300	0	10.3	-76.6505	-658.314	-111621	51456.6	-6833.95	278.164	1072.56	0	0	0	0	0	0	0	603	903	0
6084	1	0	0	0	0	0	0	200	300	0	10.6052	-76.1928	-656.788	-111987	51395.6	-6788.18	278.253	1073.51	0	0	0	0	0	0	0	603	903	0
6084	2	0	0	0	0	0	0	200	300	0	9.68964	-76.3454	-661.06	-111712	51395.6	-6696.63	277.747	1071.99	0	0	0	0	0	0	0	603	903	0
6084	3	0	0	0	0	0	0	200	300	0	10.3	-76.0402	-658.009	-111621	52128	-6605.07	279.221	1072.63	0	0	0	0	0	0	0	603	903	0
6084	4	0	0	0	0	0	0	200	300	0	11.3681	-75.1247	-659.84	-111254	51700.8	-6696.63	278.354	1071.61	0	0	0	0	0	0	0	603	903	0
6084	5	0	0	0	0	0	0	200	300	0	11.0629	-75.735	-661.976	-111804	51212.5	-6513.52	277.363	1071.89	0	0	0	0	0	0	0	603	903	0
6084	6	0	0	0	0	0	0	200	300	0	10.4526	-75.2773	-659.84	-111437	52067	-6833.95	278.909	1071.89	0	0	0	0	0	0	0	603	903	0
6084	7	0	0	0	0	0	0	200	300	0	11.9785	-73.904	-660.145	-111163	51700.8	-6788.18	278.317	1071.39	0	0	0	0	0	0	0	603	903	0
6084	8	0	0	0	0	0	0	200	300	0	11.6733	-73.7514	-661.06	-111163	51456.6	-6879.73	277.839	1071.16	0	0	0	0	0	0	0	603	903	0
6084	9	0	0	0	0	0	0	200	300	0	12.5888	-73.904	-662.891	-111621	51395.6	-6788.18	277.532	1071.38	0	0	0	0	0	0	0	603	903	0
6085	0	0	0	0	0	0	0	200	300	0	12.2836	-73.5988	-661.366	-111529	52189	-6513.52	278.911	1071.63	0	0	0	0	0	0	0	603	903	0
6085	1	0	0	0	0	0	0	200	300	0	12.2836	-72.3781	-661.366	-110705	51883.9	-6879.73	278.45	1070.39	0	0	0	0	0	0	0	603	903	0
6085	2	0	0	0	0	0	0	200	300	0	14.8776	-71.6151	-662.281	-110705	50907.3	-6971.28	276.867	1070.16	0	0	0	0	0	0	0	603	903	0
6085	3	0	0	0	0	0	0	200	300	0	12.5888	-72.3781	-661.366	-110980	52128	-7017.06	278.819	1070.8	0	0	0	0	0	0	0	603	903	0
6085	4	0	0	0	0	0	0	200	300	0	15.1828	-71.4626	-661.366	-111071	51700.8	-6788.18	278.173	1070.94	0	0	0	0	0	0	0	603	903	0
6085	5	0	0	0	0	0	0	200	300	0	14.4199	-70.3944	-660.145	-110613	51639.7	-6696.63	278.225	1070.56	0	0	0	0	0	0	0	603	903	0
6085	6	0	0	0	0	0	0	200	300	0	14.725	-69.7841	-662.281	-110430	51700.8	-6971.28	278.065	1069.74	0	0	0	0	0	0	0	603	903	0
6085	7	0	0	0	0	0	0	200	300	0	14.1147	-69.3263	-663.502	-110613	52189	-6788.18	278.657	1069.71	0	0	0	0	0	0	0	603	903	0
6085	8	0	0	0	0	0	0	200	300	0	14.725	-69.0211	-660.45	-110980	52067	-7108.61	278.836	1071.04	0	0	0	0	0	0	0	603	903	0
6085	9	0	0	0	0	0	0	200	300	0	15.488	-68.8686	-663.197	-110522	52067	-7200.17	278.509	1069.65	0	0	0	0	0	0	0	603	903	0
6086	0	0	0	0	0	0	0	200	300	0	17.6242	-69.4789	-663.197	-110156	52372.1	-7017.06	278.969	1069.1	0	0	0	0	0	0	0	603	903	0
6086	1	0	0	0	0	0	0	200	300	0	15.9457	-68.8686	-662.891	-110705	51517.6	-6742.4	277.717	1070	0	0	0	0	0	0	0	603	903	0
6086	2	0	0	0	0	0	0	200	300	0	15.7932	-67.8004	-661.976	-110522	52005.9	-7245.94	278.562	1069.96	0	0	0	0	0	0	0	603	903	0
6086	3	0	0	0	0	0	0	200	300	0	17.0139	-67.953	-664.417	-110156	52067	-7017.06	278.365	1068.79	0	0	0	0	0	0	0	603	903	0
6086	4	0	0	0	0	0	0	200	300	0	17.319	-68.716	-663.807	-109973	52616.3	-6833.95	279.264	1068.67	0	0	0	0	0	0	0	603	903	0
6086	5	0	0	0	0	0	0	200	300	0	16.8613	-66.7323	-663.197	-110522	52494.2	-7200.17	279.153	1069.65	0	0	0	0	0	0	0	603	903	0
6086	6	0	0	0	0	0	0	200	300	0	17.4716	-66.2746	-665.028	-110522	52311.1	-7154.39	278.66	1069.19	0	0	0	0	0	0	0	603	903	0
6086	7	0	0	0	0	0	0	200	300	0	18.082	-66.5797	-665.028	-109698	52250.1	-7291.72	278.568	1067.95	0	0	0	0	0	0	0	603	903	0
6086	8	0	0	0	0	0	0	200	300	0	19.4553	-66.4272	-665.333	-110247	52494.2	-7154.39	278.899	1068.7	0	0	0	0	0	0	0	603	903	0
6086	9	0	0	0	0	0	0	200	300	0	18.082	-64.4435	-664.112	-109606	52372.1	-7566.38	278.86	1068.04	0	0	0	0	0	0	0	603	903	0
6087	0	0	0	0	0	0	0	200	300	0	18.8449	-65.5116	-666.248	-110522	51700.8	-7520.6	277.6	1068.89	0	0	0	0	0	0	0	603	903	0
6087	1	0	0	0	0	0	0	200	300	0	20.0656	-65.359	-667.164	-109606	52799.4	-7429.05	279.14	1067.29	0	0	0	0	0	0	0	603	903	0
6087	2	0	0	0	0	0	0	200	300	0	20.5234	-64.4435	-667.469	-110156	52372.1	-7154.39	278.464	1068.04	0	0	0	0	0	0	0	603	903	0
6087	3	0	0	0	0	0	0	200	300	0	19.3027	-63.9857	-666.554	-109790	52555.2	-7520.6	278.846	1067.71	0	0	0	0	0	0	0	603	903	0
6087	4	0	0	0	0	0	0	200	300	0	19.3027	-63.8332	-667.469	-109149	52433.2	-7474.82	278.555	1066.53	0	0	0	0	0	0	0	603	903	0
6087	5	0	0	0	0	0	0	200	300	0	20.8286	-63.2228	-667.774	-108599	52982.5	-7383.27	279.342	1065.63	0	0	0	0	0	0	0	603	903	0
6087	6	0	0	0	0	0	0	200	300	0	21.1337	-63.3754	-665.638	-109423	52982.5	-7566.38	279.597	1067.39	0	0	0	0	0	0	0	603	903	0
6087	7	0	0	0	0	0	0	200	300	0	20.9811	-63.0702	-668.079	-109057	52616.3	-7429.05	278.758	1066.24	0	0	0	0	0	0	0	603	903	0
6087	8	0	0	0	0	0	0	200	300	0	20.5234	-63.3754	-665.333	-109790	52738.3	-7337.49	279.266	1068.01	0	0	0	0	0	0	0	603	903	0
6087	9	0	0	0	0	0	0	200	300	0	21.8967	-62.4599	-668.079	-109698	53165.6	-7474.82	279.58	1067.2	0	0	0	0	0	0	0	603	903	0
6088	0	0	0	0	0	0	0	200	300	0	22.9648	-62.4599	-668.079	-109881	52921.5	-7337.49	279.214	1067.47	0	0	0	0	0	0	0	603	903	0
6088	1	0	0	0	0	0	0	200	300	0	21.2863	-61.5443	-670.826	-109423	52250.1	-7337.49	277.889	1066.12	0	0	0	0	0	0	0	603	903	0
6088	2	0	0	0	0	0	0	200	300	0	23.4225	-62.3073	-670.826	-109698	53470.8	-7383.27	279.709	1066.53	0	0	0	0	0	0	0	603	903	0
6088	3	0	0	0	0	0	0	200	300	0	24.1855	-61.2392	-669.605	-109332	53287.7	-7520.6	279.581	1066.28	0	0	0	0	0	0	0	603	903	0
6088	4	0	0	0	0	0	0	200	300	0	24.1855	-60.6288	-669.605	-109606	52860.4	-7612.15	278.943	1066.69	0	0	0	0	0	0	0	603	903	0
6088	5	0	0	0	0	0	0	200	300	0	22.8122	-60.1711	-671.742	-109606	52982.5	-7291.72	278.873	1066.17	0	0	0	0	0	0	0	603	903	0
6088	6	0	0	0	0	0	0	200	300	0	24.1855	-60.1711	-672.047	-109790	53287.7	-7383.27	279.292	1066.37	0	0	0	0	0	0	0	603	903	0
6088	7	0	0	0	0	0	0	200	300	0	24.6432	-60.0185	-671.742	-109790	53775.9	-7520.6	280.055	1066.44	0	0	0	0	0	0	0	603	903	0
6088	8	0	0	0	0	0	0	200	300	0	25.2536	-59.1029	-672.047	-109240	52860.4	-7566.38	278.656	1065.55	0	0	0	0	0	0	0	603	903	0
6088	9	0	0	0	0	0	0	200	300	0	23.7277	-58.6452	-672.962	-109973	53592.8	-7337.49	279.637	1066.42	0	0	0	0	0	0	0	603	903	0
6089	0	0	0	0	0	0	0	200	300	0	23.8803	-58.6452	-674.183	-109881	53531.8	-7291.72	279.402	1065.98	0	0	0	0	0	0	0	603	903	0
6089	1	0	0	0	0	0	0	200	300	0	22.507	-58.1874	-673.267	-109606	53226.6	-7337.49	279.057	1065.8	0	0	0	0	0	0	0	603	903	0
6089	2	0	0	0	0	0	0	200	300	0	23.1174	-56.9667	-674.183	-109332	53409.7	-7291.72	279.221	1065.17	0	0	0	0	0	0	0	603	903	0
6089	3	0	0	0	0	0	0	200	300	0	23.27	-56.6615	-676.014	-110064	53409.7	-6971.28	279.007	1065.81	0	0	0	0	0	0	0	603	903	0
6089	4	0	0	0	0	0	0	200	300	0	21.8967	-56.9667	-675.099	-109149	53226.6	-7154.39	278.843	1064.68	0	0	0	0	0	0	0	603	903	0
6089	5	0	0	0	0	0	0	200	300	0	22.6596	-56.0512	-674.793	-109790	53165.6	-7200.17	278.788	1065.7	0	0	0	0	0	0	0	603	903	0
6089	6	0	0	0	0	0	0	200	300	0	22.8122	-54.6779	-676.319	-109606	54142.2	-7245.94	280.054	1065.06	0	0	0	0	0	0	0	603	903	0
6089	7	0	0	0	0	0	0	200	300	0	25.4062	-55.746	-678.15	-109240	53592.8	-7154.39	279.028	1064.09	0	0	0	0	0	0	0	603	903	0
6089	8	0	0	0	0	0	0	200	300	0	23.7277	-55.746	-677.235	-109881	53348.7	-7017.06	278.774	1065.25	0	0	0	0	0	0	0	603	903	0
6089	9	0	0	0	0	0	0	200	300	0	23.4225	-54.0675	-676.93	-110064	53531.8	-6879.73	279.08	1065.59	0	0	0	0	0	0	0	603	903	0
6090	0	0	0	0	0	0	0	200	300	0	22.9648	-54.2201	-680.286	-109606	53531.8	-6742.4	278.69	1064.12	0	0	0	0	0	0	0	603	903	0
6090	1	0	0	0	0	0	0	200	300	0	23.4225	-53.7624	-679.676	-109423	52982.5	-7017.06	277.953	1063.99	0	0	0	0	0	0	0	603	903	0
6090	2	0	0	0	0	0	0	200	300	0	22.6596	-53.6098	-678.15	-110064	53470.8	-6376.19	278.848	1065.3	0	0	0	0	0	0	0	603	903	0
6090	3	0	0	0	0	0	0	200	300	0	22.8122	-53.3046	-678.15	-109881	54203.2	-6788.18	279.928	1065.03	0	0	0	0	0	0	0	603	903	0
6090	4	0	0	0	0	0	0	200	300	0	22.2018	-51.7787	-680.286	-109240	54081.1	-6559.3	279.498	1063.58	0	0	0	0	0	0	0	603	903	0
6090	5	0	0	0	0	0	0	200	300	0	24.1855	-52.0839	-680.897	-109790	53470.8	-6376.19	278.53	1064.24	0	0	0	0	0	0	0	603	903	0
6090	6	0	0	0	0	0	0	200	300	0	22.2018	-51.321	-680.592	-110064	53653.9	-6467.74	278.834	1064.72	0	0	0	0	0	0	0	603	903	0
6090	7	0	0	0	0	0	0	200	300	0	22.8122	-50.8632	-681.507	-109881	54203.2	-6147.31	279.534	1064.23	0	0	0	0	0	0	0	603	903	0
6090	8	0	0	0	0	0	0	200	300	0	22.3544	-49.9477	-681.507	-109423	54142.2	-6101.53	279.445	1063.56	0	0	0	0	0	0	0	603	903	0
6090	9	0	0	0	0	0	0	200	300	0	23.5751	-49.7951	-682.118	-109973	53653.9	-6284.64	278.658	1064.22	0	0	0	0	0	0	0	603	903	0
6091	0	0	0	0	0	0	0	200	300	0	20.5234	-49.3373	-682.423	-110156	53959.1	-6284.64	279.07	1064.42	0	0	0	0	0	0	0	603	903	0
6091	1	0	0	0	0	0	0	200	300	0	21.5915	-48.8795	-683.033	-110247	54142.2	-6009.98	279.267	1064.41	0	0	0	0	0	0	0	603	903	0
6091	2	0	0	0	0	0	0	200	300	0	21.1337	-48.2692	-683.643	-110064	54203.2	-6009.98	279.286	1064	0	0	0	0	0	0	0	603	903	0
6091	3	0	0	0	0	0	0	200	300	0	22.507	-47.6588	-684.559	-110064	53165.6	-6101.53	277.664	1063.78	0	0	0	0	0	0	0	603	903	0
6091	4	0	0	0	0	0	0	200	300	0	19.4553	-48.1166	-684.864	-110522	54569.4	-5643.77	279.679	1064.38	0	0	0	0	0	0	0	603	903	0
6091	5	0	0	0	0	0	0	200	300	0	19.3027	-46.7433	-684.559	-110156	54264.2	-5597.99	279.269	1063.92	0	0	0	0	0	0	0	603	903	0
6091	6	0	0	0	0	0	0	200	300	0	19.913	-46.2856	-687.611	-110522	54142.2	-5460.66	278.74	1063.73	0	0	0	0	0	0	0	603	903	0
6091	7	0	0	0	0	0	0	200	300	0	19.3027	-45.9804	-687.306	-110247	53898	-5460.66	278.419	1063.41	0	0	0	0	0	0	0	603	903	0
6091	8	0	0	0	0	0	0	200	300	0	18.6923	-45.5226	-687	-109149	54386.3	-5369.11	279.165	1061.88	0	0	0	0	0	0	0	603	903	0
6091	9	0	0	0	0	0	0	200	300	0	18.082	-45.2174	-687.916	-110247	54813.5	-5277.56	279.681	1063.26	0	0	0	0	0	0	0	603	903	0
6092	0	0	0	0	0	0	0	200	300	0	19.3027	-44.6071	-690.052	-110339	53837	-5094.45	278.019	1062.9	0	0	0	0	0	0	0	603	903	0
6092	1	0	0	0	0	0	0	200	300	0	18.5397	-45.2174	-688.831	-110888	54325.3	-5048.68	278.866	1063.98	0	0	0	0	0	0	0	603	903	0
6092	2	0	0	0	0	0	0	200	300	0	17.319	-44.1493	-689.137	-110705	54386.3	-5094.45	278.919	1063.64	0	0	0	0	0	0	0	603	903	0
6092	3	0	0	0	0	0	0	200	300	0	17.1664	-43.3864	-689.442	-110430	54569.4	-5048.68	279.15	1063.17	0	0	0	0	0	0	0	603	903	0
6092	4	0	0	0	0	0	0	200	300	0	17.7768	-42.6234	-690.968	-110522	54325.3	-4774.02	278.622	1062.95	0	0	0	0	0	0	0	603	903	0
6092	5	0	0	0	0	0	0	200	300	0	18.082	-43.0812	-692.188	-111163	54813.5	-4728.24	279.189	1063.6	0	0	0	0	0	0	0	603	903	0
6092	6	0	0	0	0	0	0	200	300	0	16.4035	-42.0131	-691.273	-111071	54996.6	-4590.91	279.559	1063.68	0	0	0	0	0	0	0	603	903	0
6092	7	0	0	0	0	0	0	200	300	0	16.8613	-40.945	-693.104	-110888	54020.1	-4316.25	277.939	1062.99	0	0	0	0	0	0	0	603	903	0
6092	8	0	0	0	0	0	0	200	300	0	17.1664	-41.0976	-692.799	-110797	54447.3	-4499.36	278.59	1062.93	0	0	0	0	0	0	0	603	903	0
6092	9	0	0	0	0	0	0	200	300	0	17.319	-40.6398	-694.63	-111437	54874.6	-4362.03	278.998	1063.43	0	0	0	0	0	0	0	603	903	0
6093	0	0	0	0	0	0	0	200	300	0	15.6406	-40.6398	-694.63	-111254	54935.6	-3858.49	279.086	1063.16	0	0	0	0	0	0	0	603	903	0
6093	1	0	0	0	0	0	0	200	300	0	15.7932	-40.182	-695.545	-110980	54508.4	-4087.37	278.368	1062.56	0	0	0	0	0	0	0	603	903	0
6093	2	0	0	0	0	0	0	200	300	0	17.4716	-39.4191	-697.376	-110980	54874.6	-3995.82	278.687	1062.14	0	0	0	0	0	0	0	603	903	0
6093	3	0	0	0	0	0	0	200	300	0	14.8776	-38.9613	-697.682	-111254	55301.8	-4087.37	279.265	1062.46	0	0	0	0	0	0	0	603	903	0
6093	4	0	0	0	0	0	0	200	300	0	17.9294	-38.9613	-697.987	-111346	54569.4	-3812.72	278.181	1062.52	0	0	0	0	0	0	0	603	903	0
6093	5	0	0	0	0	0	0	200	300	0	15.1828	-38.9613	-697.376	-111163	54935.6	-3904.27	278.775	1062.4	0	0	0	0	0	0	0	603	903	0
6093	6	0	0	0	0	0	0	200	300	0	16.5561	-37.8932	-698.902	-111254	54508.4	-3766.94	277.991	1062.18	0	0	0	0	0	0	0	603	903	0
6093	7	0	0	0	0	0	0	200	300	0	14.4199	-37.7406	-700.123	-111895	54874.6	-3812.72	278.378	1062.82	0	0	0	0	0	0	0	603	903	0
6093	8	0	0	0	0	0	0	200	300	0	16.2509	-38.5036	-701.344	-111529	55057.7	-3858.49	278.503	1062.02	0	0	0	0	0	0	0	603	903	0
6093	9	0	0	0	0	0	0	200	300	0	14.8776	-37.1303	-700.733	-111163	55423.9	-3629.61	279.094	1061.64	0	0	0	0	0	0	0	603	903	0
6094	0	0	0	0	0	0	0	200	300	0	14.2673	-36.5199	-699.818	-111621	55423.9	-3538.06	279.198	1062.5	0	0	0	0	0	0	0	603	903	0
6094	1	0	0	0	0	0	0	200	300	0	14.1147	-36.9777	-702.87	-111071	54569.4	-3126.07	277.638	1061.03	0	0	0	0	0	0	0	603	903	0
6094	2	0	0	0	0	0	0	200	300	0	13.8095	-36.0622	-703.175	-111346	55362.9	-3400.73	278.733	1061.35	0	0	0	0	0	0	0	603	903	0
6094	3	0	0	0	0	0	0	200	300	0	14.5724	-36.8251	-705.311	-111712	55546	-3217.62	278.754	1061.39	0	0	0	0	0	0	0	603	903	0
6094	4	0	0	0	0	0	0	200	300	0	14.1147	-36.3673	-705.921	-111712	55301.8	-3263.4	278.34	1061.25	0	0	0	0	0	0	0	603	903	0
6094	5	0	0	0	0	0	0	200	300	0	13.0466	-36.3673	-705.311	-111621	55423.9	-3263.4	278.581	1061.26	0	0	0	0	0	0	0	603	903	0
6094	6	0	0	0	0	0	0	200	300	0	12.7414	-35.9096	-706.226	-111437	55607	-3217.62	278.738	1060.79	0	0	0	0	0	0	0	603	903	0
6094	7	0	0	0	0	0	0	200	300	0	13.5043	-35.1466	-708.363	-110888	55362.9	-2988.74	278.156	1059.54	0	0	0	0	0	0	0	603	903	0
6094	8	0	0	0	0	0	0	200	300	0	14.4199	-35.9096	-708.973	-111621	55423.9	-2897.19	278.175	1060.44	0	0	0	0	0	0	0	603	903	0
6094	9	0	0	0	0	0	0	200	300	0	13.1992	-35.1466	-707.142	-111163	55668	-3217.62	278.723	1060.2	0	0	0	0	0	0	0	603	903	0
6095	0	0	0	0	0	0	0	200	300	0	12.5888	-34.994	-708.057	-111163	55607	-3217.62	278.535	1060	0	0	0	0	0	0	0	603	903	0
6095	1	0	0	0	0	0	0	200	300	0	12.7414	-34.994	-709.889	-110797	55484.9	-2714.08	278.16	1059.08	0	0	0	0	0	0	0	603	903	0
6095	2	0	0	0	0	0	0	200	300	0	12.894	-34.6889	-711.109	-111437	55729.1	-3034.52	278.369	1059.71	0	0	0	0	0	0	0	603	903	0
6095	3	0	0	0	0	0	0	200	300	0	14.4199	-34.5363	-706.532	-111437	55973.2	-2942.96	279.223	1060.72	0	0	0	0	0	0	0	603	903	0
6095	4	0	0	0	0	0	0	200	300	0	13.5043	-35.4518	-709.583	-110430	55607	-2988.74	278.366	1058.63	0	0	0	0	0	0	0	603	903	0
6095	5	0	0	0	0	0	0	200	300	0	15.0302	-34.5363	-709.278	-110980	55790.1	-2439.42	278.658	1059.47	0	0	0	0	0	0	0	603	903	0
6095	6	0	0	0	0	0	0	200	300	0	12.2836	-33.3156	-711.72	-110980	56034.2	-2714.08	278.731	1058.93	0	0	0	0	0	0	0	603	903	0
6095	7	0	0	0	0	0	0	200	300	0	13.0466	-34.2311	-713.245	-111163	55973.2	-2714.08	278.477	1058.85	0	0	0	0	0	0	0	603	903	0
6095	8	0	0	0	0	0	0	200	300	0	13.3517	-33.6208	-712.635	-110430	56156.3	-2668.31	278.801	1057.96	0	0	0	0	0	0	0	603	903	0
6095	9	0	0	0	0	0	0	200	300	0	15.488	-33.4682	-712.94	-110339	55484.9	-2302.1	277.826	1057.77	0	0	0	0	0	0	0	603	903	0
6096	0	0	0	0	0	0	0	200	300	0	12.5888	-33.163	-712.94	-110980	56034.2	-2622.53	278.596	1058.66	0	0	0	0	0	0	0	603	903	0
6096	1	0	0	0	0	0	0	200	300	0	13.9621	-33.3156	-714.466	-110064	55729.1	-2668.31	278.001	1057.05	0	0	0	0	0	0	0	603	903	0
6096	2	0	0	0	0	0	0	200	300	0	13.3517	-33.3156	-713.551	-109790	55851.1	-2393.65	278.272	1056.86	0	0	0	0	0	0	0	603	903	0
6096	3	0	0	0	0	0	0	200	300	0	14.1147	-32.7052	-714.161	-109606	56217.4	-2668.31	278.718	1056.48	0	0	0	0	0	0	0	603	903	0
6096	4	0	0	0	0	0	0	200	300	0	13.3517	-31.4845	-712.025	-110064	56095.3	-2668.31	278.783	1057.58	0	0	0	0	0	0	0	603	903	0
6096	5	0	0	0	0	0	0	200	300	0	11.6733	-32.4001	-715.687	-109881	55912.2	-2485.2	278.124	1056.53	0	0	0	0	0	0	0	603	903	0
6096	6	0	0	0	0	0	0	200	300	0	12.5888	-33.6208	-716.908	-109515	56095.3	-2576.75	278.246	1055.76	0	0	0	0	0	0	0	603	903	0
6096	7	0	0	0	0	0	0	200	300	0	13.1992	-31.9423	-714.161	-109332	55790.1	-2576.75	278.12	1056.09	0	0	0	0	0	0	0	603	903	0
6096	8	0	0	0	0	0	0	200	300	0	13.5043	-31.9423	-715.077	-109606	55607	-2530.98	277.764	1056.28	0	0	0	0	0	0	0	603	903	0
6096	9	0	0	0	0	0	0	200	300	0	12.131	-32.0949	-716.602	-109698	55973.2	-2530.98	278.109	1056.08	0	0	0	0	0	0	0	603	903	0
6097	0	0	0	0	0	0	0	200	300	0	12.7414	-31.6371	-716.297	-108874	56400.5	-2714.08	278.739	1055	0	0	0	0	0	0	0	603	903	0
6097	1	0	0	0	0	0	0	200	300	0	13.8095	-31.1794	-713.856	-108142	56278.4	-2439.42	278.837	1054.49	0	0	0	0	0	0	0	603	903	0
6097	2	0	0	0	0	0	0	200	300	0	13.6569	-31.1794	-714.161	-109149	56034.2	-2485.2	278.462	1055.83	0	0	0	0	0	0	0	603	903	0
6097	3	0	0	0	0	0	0	200	300	0	12.7414	-30.569	-713.551	-109057	56034.2	-2302.1	278.529	1055.84	0	0	0	0	0	0	0	603	903	0
6097	4	0	0	0	0	0	0	200	300	0	12.5888	-30.1112	-715.992	-108325	55973.2	-2439.42	278.176	1054.29	0	0	0	0	0	0	0	603	903	0
6097	5	0	0	0	0	0	0	200	300	0	14.1147	-30.7216	-717.213	-107958	55851.1	-2347.87	277.872	1053.53	0	0	0	0	0	0	0	603	903	0
6097	6	0	0	0	0	0	0	200	300	0	13.3517	-30.569	-715.992	-108325	56156.3	-2393.65	278.432	1054.29	0	0	0	0	0	0	0	603	903	0
6097	7	0	0	0	0	0	0	200	300	0	13.0466	-29.6535	-717.213	-108325	56461.5	-2347.87	278.724	1054.04	0	0	0	0	0	0	0	603	903	0
6097	8	0	0	0	0	0	0	200	300	0	12.894	-29.6535	-717.518	-107684	56583.6	-2347.87	278.86	1053.08	0	0	0	0	0	0	0	603	903	0
6097	9	0	0	0	0	0	0	200	300	0	13.9621	-29.8061	-717.823	-107318	56217.4	-2347.87	278.316	1052.5	0	0	0	0	0	0	0	603	903	0
6098	0	0	0	0	0	0	0	200	300	0	13.9621	-29.9586	-717.823	-107134	56278.4	-2164.77	278.401	1052.25	0	0	0	0	0	0	0	603	903	0
6098	1	0	0	0	0	0	0	200	300	0	13.3517	-29.5009	-715.687	-106402	56522.5	-2439.42	278.977	1051.67	0	0	0	0	0	0	0	603	903	0
6098	2	0	0	0	0	0	0	200	300	0	13.6569	-28.8905	-718.433	-107409	56095.3	-2302.1	278.08	1052.5	0	0	0	0	0	0	0	603	903	0
6098	3	0	0	0	0	0	0	200	300	0	13.6569	-29.1957	-715.382	-106494	55790.1	-2393.65	277.987	1051.86	0	0	0	0	0	0	0	603	903	0
6098	4	0	0	0	0	0	0	200	300	0	13.9621	-29.1957	-717.823	-106951	56766.7	-2256.32	279.082	1051.99	0	0	0	0	0	0	0	603	903	0
6098	5	0	0	0	0	0	0	200	300	0	13.5043	-28.2802	-717.823	-107134	56949.8	-2393.65	279.337	1052.25	0	0	0	0	0	0	0	603	903	0
6098	6	0	0	0	0	0	0	200	300	0	13.0466	-27.8224	-717.823	-106127	56400.5	-2485.2	278.572	1050.85	0	0	0	0	0	0	0	603	903	0
6098	7	0	0	0	0	0	0	200	300	0	14.1147	-27.975	-719.349	-106219	56644.6	-2210.54	278.744	1050.66	0	0	0	0	0	0	0	603	903	0
6098	8	0	0	0	0	0	0	200	300	0	15.0302	-28.2802	-719.044	-105944	56888.7	-2118.99	279.117	1050.34	0	0	0	0	0	0	0	603	903	0
6098	9	0	0	0	0	0	0	200	300	0	13.9621	-27.6698	-719.654	-106402	57071.8	-2118.99	279.305	1050.85	0	0	0	0	0	0	0	603	903	0
6099	0	0	0	0	0	0	0	200	300	0	13.6569	-26.4491	-719.349	-105578	56827.7	-2302.1	278.999	1049.77	0	0	0	0	0	0	0	603	903	0
6099	1	0	0	0	0	0	0	200	300	0	14.8776	-26.6017	-719.654	-105487	56766.7	-2256.32	278.88	1049.58	0	0	0	0	0	0	0	603	903	0
6099	2	0	0	0	0	0	0	200	300	0	13.9621	-26.7543	-717.213	-105761	56888.7	-2439.42	279.319	1050.46	0	0	0	0	0	0	0	603	903	0
6099	3	0	0	0	0	0	0	200	300	0	13.5043	-26.144	-721.79	-105761	57010.8	-2439.42	278.985	1049.53	0	0	0	0	0	0	0	603	903	0
6099	4	0	0	0	0	0	0	200	300	0	13.1992	-27.0595	-720.57	-104754	56644.6	-1981.66	278.611	1048.38	0	0	0	0	0	0	0	603	903	0
6099	5	0	0	0	0	0	0	200	300	0	14.5724	-25.9914	-720.57	-104937	56949.8	-2164.77	279.034	1048.63	0	0	0	0	0	0	0	603	903	0
6099	6	0	0	0	0	0	0	200	300	0	14.725	-25.2284	-721.485	-104937	57621.2	-2118.99	279.865	1048.45	0	0	0	0	0	0	0	603	903	0
6099	7	0	0	0	0	0	0	200	300	0	13.3517	-24.7707	-721.18	-104937	57071.8	-2210.54	279.137	1048.51	0	0	0	0	0	0	0	603	903	0
6099	8	0	0	0	0	0	0	200	300	0	13.1992	-24.6181	-721.18	-104296	56888.7	-1890.11	278.883	1047.62	0	0	0	0	0	0	0	603	903	0
6099	9	0	0	0	0	0	0	200	300	0	13.9621	-23.7025	-721.485	-104388	57560.1	-2347.87	279.78	1047.68	0	0	0	0	0	0	0	603	903	0
6100	0	0	0	0	0	0	0	200	300	0	14.8776	-23.55	-722.096	-104296	57132.9	-2118.99	279.121	1047.44	0	0	0	0	0	0	0	603	903	0
6100	1	0	0	0	0	0	0	200	300	0	13.3517	-24.4655	-721.79	-104113	56644.6	-2210.54	278.478	1047.24	0	0	0	0	0	0	0	603	903	0
6100	2	0	0	0	0	0	0	200	300	0	13.8095	-25.2284	-725.453	-103564	57560.1	-1752.78	279.344	1045.76	0	0	0	0	0	0	0	603	903	0
6100	3	0	0	0	0	0	0	200	300	0	14.1147	-25.0758	-724.232	-103289	57926.3	-2256.32	279.983	1045.62	0	0	0	0	0	0	0	603	903	0
6100	4	0	0	0	0	0	0	200	300	0	14.2673	-23.0922	-723.927	-103839	57377	-2256.32	279.258	1046.44	0	0	0	0	0	0	0	603	903	0
6100	5	0	0	0	0	0	0	200	300	0	13.6569	-23.2448	-724.537	-103564	57193.9	-2210.54	278.939	1045.94	0	0	0	0	0	0	0	603	903	0
6100	6	0	0	0	0	0	0	200	300	0	12.2836	-22.4818	-724.842	-102648	57987.4	-2164.77	280	1044.61	0	0	0	0	0	0	0	603	903	0
6100	7	0	0	0	0	0	0	200	300	0	14.4199	-22.6344	-723.927	-102465	57743.2	-1981.66	279.764	1044.54	0	0	0	0	0	0	0	603	903	0
6100	8	0	0	0	0	0	0	200	300	0	14.2673	-21.8715	-723.316	-102832	56583.6	-2073.21	278.228	1045.17	0	0	0	0	0	0	0	603	903	0
6100	9	0	0	0	0	0	0	200	300	0	13.0466	-21.4137	-724.537	-103106	57865.3	-1935.88	279.865	1045.31	0	0	0	0	0	0	0	603	903	0
6101	0	0	0	0	0	0	0	200	300	0	13.1992	-20.956	-724.232	-102282	58170.5	-1844.33	280.32	1044.23	0	0	0	0	0	0	0	603	903	0
6101	1	0	0	0	0	0	0	200	300	0	14.2673	-21.8715	-726.063	-102191	57743.2	-1752.78	279.529	1043.75	0	0	0	0	0	0	0	603	903	0
6101	2	0	0	0	0	0	0	200	300	0	14.4199	-21.1086	-725.147	-102465	57804.3	-2073.21	279.714	1044.3	0	0	0	0	0	0	0	603	903	0
6101	3	0	0	0	0	0	0	200	300	0	12.4362	-20.3456	-725.147	-100817	58170.5	-2118.99	280.219	1042.03	0	0	0	0	0	0	0	603	903	0
6101	4	0	0	0	0	0	0	200	300	0	13.0466	-20.6508	-726.673	-101184	58292.5	-1752.78	280.218	1042.24	0	0	0	0	0	0	0	603	903	0
6101	5	0	0	0	0	0	0	200	300	0	14.5724	-20.193	-725.147	-101367	57987.4	-2164.77	279.966	1042.79	0	0	0	0	0	0	0	603	903	0
6101	6	0	0	0	0	0	0	200	300	0	14.1147	-19.5827	-725.453	-101458	57926.3	-2027.44	279.849	1042.85	0	0	0	0	0	0	0	603	903	0
6101	7	0	0	0	0	0	0	200	300	0	12.7414	-18.6671	-726.368	-101275	58170.5	-2027.44	280.084	1042.43	0	0	0	0	0	0	0	603	903	0
6101	8	0	0	0	0	0	0	200	300	0	13.6569	-18.362	-726.978	-100451	58170.5	-1935.88	280.017	1041.18	0	0	0	0	0	0	0	603	903	0
6101	9	0	0	0	0	0	0	200	300	0	13.9621	-18.9723	-726.368	-100268	58292.5	-1661.23	280.252	1041.04	0	0	0	0	0	0	0	603	903	0
6102	0	0	0	0	0	0	0	200	300	0	14.1147	-17.9042	-724.537	-100543	58353.6	-2347.87	280.539	1041.77	0	0	0	0	0	0	0	603	903	0
6102	1	0	0	0	0	0	0	200	300	0	12.894	-18.0568	-725.453	-100726	58902.9	-1981.66	281.195	1041.85	0	0	0	0	0	0	0	603	903	0
6102	2	0	0	0	0	0	0	200	300	0	13.5043	-16.5309	-726.063	-98437	58170.5	-2118.99	280.118	1038.58	0	0	0	0	0	0	0	603	903	0
6102	3	0	0	0	0	0	0	200	300	0	14.1147	-16.0732	-722.096	-98620.1	58475.7	-1890.11	280.98	1039.57	0	0	0	0	0	0	0	603	903	0
6102	4	0	0	0	0	0	0	200	300	0	13.6569	-16.0732	-726.673	-99260.9	58475.7	-2164.77	280.47	1039.6	0	0	0	0	0	0	0	603	903	0
6102	5	0	0	0	0	0	0	200	300	0	13.6569	-16.3783	-724.537	-99260.9	58536.7	-1890.11	280.792	1040	0	0	0	0	0	0	0	603	903	0
6102	6	0	0	0	0	0	0	200	300	0	13.6569	-16.5309	-724.232	-99444.1	58536.7	-1798.55	280.826	1040.31	0	0	0	0	0	0	0	603	903	0
6102	7	0	0	0	0	0	0	200	300	0	14.4199	-15.005	-724.842	-98803.2	58780.8	-1752.78	281.095	1039.31	0	0	0	0	0	0	0	603	903	0
6102	8	0	0	0	0	0	0	200	300	0	16.0983	-14.6999	-725.147	-98620.1	59147	-1981.66	281.566	1039	0	0	0	0	0	0	0	603	903	0
6102	9	0	0	0	0	0	0	200	300	0	14.2673	-14.3947	-724.537	-98528.5	58658.8	-1661.23	280.96	1038.99	0	0	0	0	0	0	0	603	903	0
6103	0	0	0	0	0	0	0	200	300	0	17.0139	-13.174	-723.927	-98803.2	58841.9	-1890.11	281.282	1039.48	0	0	0	0	0	0	0	603	903	0
6103	1	0	0	0	0	0	0	200	300	0	16.7087	-12.7162	-724.842	-97887.6	58536.7	-1981.66	280.758	1038.05	0	0	0	0	0	0	0	603	903	0
6103	2	0	0	0	0	0	0	200	300	0	16.8613	-13.6317	-724.842	-97796.1	58597.7	-1661.23	280.842	1037.92	0	0	0	0	0	0	0	603	903	0
6103	3	0	0	0	0	0	0	200	300	0	13.6569	-12.411	-723.011	-97613	59025	-1798.55	281.638	1038.01	0	0	0	0	0	0	0	603	903	0
6103	4	0	0	0	0	0	0	200	300	0	14.5724	-11.9533	-724.232	-98070.8	59452.2	-2027.44	282.09	1038.41	0	0	0	0	0	0	0	603	903	0
6103	5	0	0	0	0	0	0	200	300	0	14.5724	-11.3429	-720.875	-97063.7	59635.3	-1798.55	282.726	1037.65	0	0	0	0	0	0	0	603	903	0
6103	6	0	0	0	0	0	0	200	300	0	15.488	-10.1222	-721.18	-96972.1	59391.2	-1890.11	282.353	1037.46	0	0	0	0	0	0	0	603	903	0
6103	7	0	0	0	0	0	0	200	300	0	15.0302	-10.58	-724.232	-96148.2	59391.2	-1981.66	282.006	1035.76	0	0	0	0	0	0	0	603	903	0
6103	8	0	0	0	0	0	0	200	300	0	14.8776	-9.81705	-723.011	-96422.8	58780.8	-2073.21	281.3	1036.36	0	0	0	0	0	0	0	603	903	0
6103	9	0	0	0	0	0	0	200	300	0	15.7932	-9.96963	-723.316	-95965	59269.1	-1478.12	281.941	1035.67	0	0	0	0	0	0	0	603	903	0
6104	0	0	0	0	0	0	0	200	300	0	16.4035	-9.05411	-723.621	-95232.6	59330.1	-1798.55	281.991	1034.61	0	0	0	0	0	0	0	603	903	0
6104	1	0	0	0	0	0	0	200	300	0	15.1828	-8.90152	-724.537	-95598.8	60001.5	-1661.23	282.814	1034.94	0	0	0	0	0	0	0	603	903	0
6104	2	0	0	0	0	0	0	200	300	0	15.7932	-8.29117	-722.401	-96605.9	60001.5	-2027.44	283.059	1036.73	0	0	0	0	0	0	0	603	903	0
6104	3	0	0	0	0	0	0	200	300	0	17.0139	-7.8334	-720.265	-94957.9	59757.4	-1661.23	282.966	1034.84	0	0	0	0	0	0	0	603	903	0
6104	4	0	0	0	0	0	0	200	300	0	17.1664	-8.13858	-723.316	-94408.7	59940.5	-1798.55	282.869	1033.52	0	0	0	0	0	0	0	603	903	0
6104	5	0	0	0	0	0	0	200	300	0	16.5561	-6.6127	-724.232	-95141.1	59330.1	-1981.66	281.922	1034.37	0	0	0	0	0	0	0	603	903	0
6104	6	0	0	0	0	0	0	200	300	0	15.7932	-7.8334	-723.621	-95324.2	59635.3	-1661.23	282.412	1034.73	0	0	0	0	0	0	0	603	903	0
6104	7	0	0	0	0	0	0	200	300	0	17.6242	-7.07046	-723.316	-93310	59635.3	-1935.88	282.447	1032	0	0	0	0	0	0	0	603	903	0
6104	8	0	0	0	0	0	0	200	300	0	17.4716	-6.6127	-722.401	-94500.2	60428.8	-1752.78	283.65	1033.81	0	0	0	0	0	0	0	603	903	0
6104	9	0	0	0	0	0	0	200	300	0	16.0983	-5.84976	-723.316	-94134	60123.6	-1844.33	283.122	1033.14	0	0	0	0	0	0	0	603	903	0
6105	0	0	0	0	0	0	0	200	300	0	16.4035	-6.00235	-723.621	-93859.3	60001.5	-1844.33	282.918	1032.71	0	0	0	0	0	0	0	603	903	0
6105	1	0	0	0	0	0	0	200	300	0	17.0139	-5.54459	-722.096	-92577.6	60062.6	-1890.11	283.178	1031.21	0	0	0	0	0	0	0	603	903	0
6105	2	0	0	0	0	0	0	200	300	0	17.7768	-4.78165	-723.316	-93859.3	59879.5	-1890.11	282.785	1032.76	0	0	0	0	0	0	0	603	903	0
6105	3	0	0	0	0	0	0	200	300	0	16.2509	-5.08682	-722.401	-92852.3	59879.5	-1981.66	282.89	1031.53	0	0	0	0	0	0	0	603	903	0
6105	4	0	0	0	0	0	0	200	300	0	16.5561	-6.76529	-718.739	-93676.2	59757.4	-1478.12	283.142	1033.33	0	0	0	0	0	0	0	603	903	0
6105	5	0	0	0	0	0	0	200	300	0	17.4716	-5.69717	-723.011	-91662	60428.8	-1752.78	283.579	1029.78	0	0	0	0	0	0	0	603	903	0
6105	6	0	0	0	0	0	0	200	300	0	17.1664	-5.08682	-721.485	-92669.1	60367.7	-1798.55	283.672	1031.44	0	0	0	0	0	0	0	603	903	0
6105	7	0	0	0	0	0	0	200	300	0	15.9457	-5.08682	-722.401	-91936.7	60184.6	-1798.55	283.312	1030.27	0	0	0	0	0	0	0	603	903	0
6105	8	0	0	0	0	0	0	200	300	0	15.488	-4.78165	-723.621	-92119.8	60428.8	-1707	283.509	1030.3	0	0	0	0	0	0	0	603	903	0
6105	9	0	0	0	0	0	0	200	300	0	17.319	-4.78165	-723.621	-90563.4	59940.5	-1340.79	282.834	1028.15	0	0	0	0	0	0	0	603	903	0
6106	0	0	0	0	0	0	0	200	300	0	16.4035	-4.93423	-721.18	-90746.6	60123.6	-1752.78	283.368	1028.83	0	0	0	0	0	0	0	603	903	0
6106	1	0	0	0	0	0	0	200	300	0	15.7932	-5.08682	-722.096	-91753.6	60001.5	-1340.79	283.094	1030.07	0	0	0	0	0	0	0	603	903	0
6106	2	0	0	0	0	0	0	200	300	0	14.8776	-4.78165	-721.485	-90380.3	60734	-1569.67	284.179	1028.27	0	0	0	0	0	0	0	603	903	0
6106	3	0	0	0	0	0	0	200	300	0	16.2509	-3.86612	-723.621	-90380.3	60611.9	-1523.9	283.762	1027.9	0	0	0	0	0	0	0	603	903	0
6106	4	0	0	0	0	0	0	200	300	0	16.4035	-4.78165	-723.621	-91112.8	60550.8	-1569.67	283.678	1028.91	0	0	0	0	0	0	0	603	903	0
6106	5	0	0	0	0	0	0	200	300	0	15.0302	-4.01871	-722.401	-90471.9	60489.8	-1432.34	283.734	1028.24	0	0	0	0	0	0	0	603	903	0
6106	6	0	0	0	0	0	0	200	300	0	15.0302	-4.17129	-721.485	-90014.1	60917.1	-1340.79	284.433	1027.76	0	0	0	0	0	0	0	603	903	0
6106	7	0	0	0	0	0	0	200	300	0	16.0983	-2.798	-721.79	-89647.9	60306.7	-1523.9	283.552	1027.2	0	0	0	0	0	0	0	603	903	0
6106	8	0	0	0	0	0	0	200	300	0	15.9457	-3.25577	-722.401	-90288.8	60184.6	-1523.9	283.312	1027.98	0	0	0	0	0	0	0	603	903	0
6106	9	0	0	0	0	0	0	200	300	0	15.0302	-3.40836	-723.011	-89922.6	60734	-1249.24	284.001	1027.37	0	0	0	0	0	0	0	603	903	0
6107	0	0	0	0	0	0	0	200	300	0	14.725	-3.25577	-722.401	-89098.6	60611.9	-1340.79	283.903	1026.34	0	0	0	0	0	0	0	603	903	0
6107	1	0	0	0	0	0	0	200	300	0	15.488	-2.64542	-721.485	-88915.5	60001.5	-1386.57	283.164	1026.24	0	0	0	0	0	0	0	603	903	0
6107	2	0	0	0	0	0	0	200	300	0	15.6406	-2.95059	-722.706	-88823.9	60734	-1340.79	284.037	1025.9	0	0	0	0	0	0	0	603	903	0
6107	3	0	0	0	0	0	0	200	300	0	14.5724	-2.95059	-720.57	-88823.9	61039.1	-1111.91	284.71	1026.27	0	0	0	0	0	0	0	603	903	0
6107	4	0	0	0	0	0	0	200	300	0	13.9621	-2.49283	-723.316	-87908.4	60428.8	-1157.69	283.544	1024.54	0	0	0	0	0	0	0	603	903	0
6107	5	0	0	0	0	0	0	200	300	0	15.3354	-2.49283	-722.096	-88091.5	60611.9	-1203.46	283.939	1024.99	0	0	0	0	0	0	0	603	903	0
6107	6	0	0	0	0	0	0	200	300	0	14.8776	-1.72989	-722.401	-88274.6	60734	-1249.24	284.072	1025.2	0	0	0	0	0	0	0	603	903	0
6107	7	0	0	0	0	0	0	200	300	0	13.9621	-1.88248	-723.927	-87908.4	60795	-745.698	283.979	1024.43	0	0	0	0	0	0	0	603	903	0
6107	8	0	0	0	0	0	0	200	300	0	14.1147	-1.88248	-723.011	-87176	60795	-1066.13	284.086	1023.57	0	0	0	0	0	0	0	603	903	0
6107	9	0	0	0	0	0	0	200	300	0	15.488	-1.5773	-723.316	-86992.9	60856	-1020.36	284.135	1023.27	0	0	0	0	0	0	0	603	903	0
6108	0	0	0	0	0	0	0	200	300	0	14.5724	-1.11954	-723.011	-86992.9	61222.2	-1157.69	284.677	1023.32	0	0	0	0	0	0	0	603	903	0
6108	1	0	0	0	0	0	0	200	300	0	13.8095	-0.509185	-723.011	-85802.7	60795	-654.145	284.086	1021.67	0	0	0	0	0	0	0	603	903	0
6108	2	0	0	0	0	0	0	200	300	0	14.2673	-0.966949	-723.927	-85253.4	60917.1	-974.58	284.148	1020.77	0	0	0	0	0	0	0	603	903	0
6108	3	0	0	0	0	0	0	200	300	0	14.8776	-0.509185	-721.18	-85070.2	61344.3	-1111.91	285.061	1020.96	0	0	0	0	0	0	0	603	903	0
6108	4	0	0	0	0	0	0	200	300	0	14.725	-1.11954	-725.147	-85711.1	60978.1	-883.027	284.091	1021.2	0	0	0	0	0	0	0	603	903	0
6108	5	0	0	0	0	0	0	200	300	0	13.1992	-0.661773	-722.706	-84887.2	60978.1	-974.58	284.375	1020.46	0	0	0	0	0	0	0	603	903	0
6108	6	0	0	0	0	0	0	200	300	0	14.5724	0.101166	-723.011	-85985.8	61039.1	-791.474	284.423	1021.93	0	0	0	0	0	0	0	603	903	0
6108	7	0	0	0	0	0	0	200	300	0	14.5724	0.406342	-723.621	-84521	61344.3	-974.58	284.774	1019.8	0	0	0	0	0	0	0	603	903	0
6108	8	0	0	0	0	0	0	200	300	0	15.0302	-0.661773	-722.096	-84887.2	61161.2	-883.027	284.7	1020.56	0	0	0	0	0	0	0	603	903	0
6108	9	0	0	0	0	0	0	200	300	0	14.5724	0.406342	-724.537	-85253.4	61466.4	-974.58	284.835	1020.67	0	0	0	0	0	0	0	603	903	0
6109	0	0	0	0	0	0	0	200	300	0	13.9621	1.32187	-723.316	-84246.3	61283.3	-974.58	284.725	1019.47	0	0	0	0	0	0	0	603	903	0
6109	1	0	0	0	0	0	0	200	300	0	15.1828	1.16928	-722.096	-84337.8	61222.2	-654.145	284.784	1019.8	0	0	0	0	0	0	0	603	903	0
6109	2	0	0	0	0	0	0	200	300	0	15.6406	1.77963	-723.621	-83788.5	61100.2	-791.474	284.437	1018.79	0	0	0	0	0	0	0	603	903	0
6109	3	0	0	0	0	0	0	200	300	0	15.0302	1.62705	-724.232	-84612.5	61649.5	-608.369	285.124	1019.83	0	0	0	0	0	0	0	603	903	0
6109	4	0	0	0	0	0	0	200	300	0	14.5724	1.77963	-722.401	-83147.6	61283.3	-516.816	284.833	1018.1	0	0	0	0	0	0	0	603	903	0
6109	5	0	0	0	0	0	0	200	300	0	15.1828	2.54257	-723.621	-82781.4	61466.4	-654.145	284.943	1017.4	0	0	0	0	0	0	0	603	903	0
6109	6	0	0	0	0	0	0	200	300	0	15.1828	1.47446	-722.401	-83330.8	61771.6	-699.922	285.509	1018.35	0	0	0	0	0	0	0	603	903	0
6109	7	0	0	0	0	0	0	200	300	0	14.5724	3.76328	-723.316	-82232.1	61466.4	-608.369	284.979	1016.69	0	0	0	0	0	0	0	603	903	0
6109	8	0	0	0	0	0	0	200	300	0	14.725	2.08481	-723.621	-82415.2	60489.8	-287.934	283.593	1016.89	0	0	0	0	0	0	0	603	903	0
6109	9	0	0	0	0	0	0	200	300	0	15.6406	3.61069	-723.316	-81957.5	61527.4	-562.593	285.063	1016.31	0	0	0	0	0	0	0	603	903	0
6110	0	0	0	0	0	0	0	200	300	0	15.9457	3.76328	-722.096	-81957.5	61832.6	-425.263	285.629	1016.5	0	0	0	0	0	0	0	603	903	0
6110	1	0	0	0	0	0	0	200	300	0	14.725	3.91586	-722.706	-81774.4	61161.2	-333.711	284.628	1016.15	0	0	0	0	0	0	0	603	903	0
6110	2	0	0	0	0	0	0	200	300	0	14.725	3.76328	-723.011	-81408.1	61527.4	-745.698	285.099	1015.6	0	0	0	0	0	0	0	603	903	0
6110	3	0	0	0	0	0	0	200	300	0	15.3354	4.6788	-721.485	-80675.7	61283.3	-562.593	284.94	1014.82	0	0	0	0	0	0	0	603	903	0
6110	4	0	0	0	0	0	0	200	300	0	16.2509	5.28915	-719.044	-80492.6	60978.1	-562.593	284.804	1014.94	0	0	0	0	0	0	0	603	903	0
6110	5	0	0	0	0	0	0	200	300	0	14.5724	4.06845	-720.57	-79851.7	61710.5	-562.593	285.641	1013.82	0	0	0	0	0	0	0	603	903	0
6110	6	0	0	0	0	0	0	200	300	0	15.488	5.44174	-723.011	-80492.6	61405.3	-425.263	284.93	1014.33	0	0	0	0	0	0	0	603	903	0
6110	7	0	0	0	0	0	0	200	300	0	16.2509	5.28915	-721.79	-79851.7	61710.5	-379.487	285.496	1013.63	0	0	0	0	0	0	0	603	903	0
6110	8	0	0	0	0	0	0	200	300	0	16.7087	5.74692	-719.959	-79760.2	60978.1	-242.158	284.697	1013.78	0	0	0	0	0	0	0	603	903	0
6110	9	0	0	0	0	0	0	200	300	0	15.3354	6.35727	-717.518	-79302.5	61954.7	-333.711	286.346	1013.52	0	0	0	0	0	0	0	603	903	0
6111	0	0	0	0	0	0	0	200	300	0	14.725	4.98398	-720.265	-78936.2	61832.6	-425.263	285.847	1012.59	0	0	0	0	0	0	0	603	903	0
6111	1	0	0	0	0	0	0	200	300	0	16.7087	6.35727	-721.18	-78753.1	61222.2	-104.829	284.892	1012.2	0	0	0	0	0	0	0	603	903	0
6111	2	0	0	0	0	0	0	200	300	0	17.6242	7.12021	-720.265	-78478.5	61222.2	-562.593	285	1011.96	0	0	0	0	0	0	0	603	903	0
6111	3	0	0	0	0	0	0	200	300	0	15.9457	7.2728	-719.959	-78661.6	61405.3	-150.605	285.29	1012.26	0	0	0	0	0	0	0	603	903	0
6111	4	0	0	0	0	0	0	200	300	0	15.488	7.42538	-718.739	-78203.8	61405.3	-242.158	285.435	1011.81	0	0	0	0	0	0	0	603	903	0
6111	5	0	0	0	0	0	0	200	300	0	15.1828	8.03574	-719.654	-77746	61405.3	-196.381	285.326	1011.03	0	0	0	0	0	0	0	603	903	0
6111	6	0	0	0	0	0	0	200	300	0	16.5561	8.34091	-716.908	-77654.5	61710.5	-196.381	286.079	1011.32	0	0	0	0	0	0	0	603	903	0
6111	7	0	0	0	0	0	0	200	300	0	16.2509	8.03574	-719.654	-77196.8	61344.3	-104.829	285.241	1010.27	0	0	0	0	0	0	0	603	903	0
6111	8	0	0	0	0	0	0	200	300	0	15.9457	8.03574	-718.128	-77288.3	61649.5	32.5004	285.847	1010.62	0	0	0	0	0	0	0	603	903	0
6111	9	0	0	0	0	0	0	200	300	0	15.488	9.7142	-717.518	-76555.8	61832.6	-150.605	286.176	1009.7	0	0	0	0	0	0	0	603	903	0
6112	0	0	0	0	0	0	0	200	300	0	17.319	10.0194	-719.654	-76189.6	61649.5	124.053	285.665	1008.87	0	0	0	0	0	0	0	603	903	0
6112	1	0	0	0	0	0	0	200	300	0	17.1664	9.7142	-718.739	-76555.8	61405.3	78.2768	285.435	1009.51	0	0	0	0	0	0	0	603	903	0
6112	2	0	0	0	0	0	0	200	300	0	16.2509	10.4771	-717.823	-75640.4	61283.3	32.5004	285.374	1008.37	0	0	0	0	0	0	0	603	903	0
6112	3	0	0	0	0	0	0	200	300	0	15.9457	11.2401	-717.213	-75182.6	61771.6	78.2768	286.127	1007.83	0	0	0	0	0	0	0	603	903	0
6112	4	0	0	0	0	0	0	200	300	0	17.0139	11.3927	-719.349	-74358.6	61344.3	-150.605	285.278	1006.37	0	0	0	0	0	0	0	603	903	0
6112	5	0	0	0	0	0	0	200	300	0	17.6242	10.3246	-718.433	-75091	61222.2	169.83	285.216	1007.52	0	0	0	0	0	0	0	603	903	0
6112	6	0	0	0	0	0	0	200	300	0	16.0983	11.6978	-717.518	-73992.4	61466.4	32.5004	285.665	1006.12	0	0	0	0	0	0	0	603	903	0
6112	7	0	0	0	0	0	0	200	300	0	16.5561	12.1556	-715.382	-74633.3	61527.4	352.935	286.006	1007.33	0	0	0	0	0	0	0	603	903	0
6112	8	0	0	0	0	0	0	200	300	0	17.319	10.6297	-715.687	-74633.3	61222.2	124.053	285.543	1007.28	0	0	0	0	0	0	0	603	903	0
6112	9	0	0	0	0	0	0	200	300	0	17.6242	13.2237	-718.433	-74267.1	61283.3	352.935	285.301	1006.37	0	0	0	0	0	0	0	603	903	0
6113	0	0	0	0	0	0	0	200	300	0	16.5561	12.3082	-715.992	-74358.6	60978.1	215.606	285.166	1006.85	0	0	0	0	0	0	0	603	903	0
6113	1	0	0	0	0	0	0	200	300	0	16.7087	12.9185	-715.992	-73443.1	61039.1	215.606	285.251	1005.58	0	0	0	0	0	0	0	603	903	0
6113	2	0	0	0	0	0	0	200	300	0	17.1664	13.3763	-715.687	-73259.9	61466.4	352.935	285.884	1005.36	0	0	0	0	0	0	0	603	903	0
6113	3	0	0	0	0	0	0	200	300	0	17.319	14.4444	-717.518	-73168.4	61527.4	536.04	285.75	1004.97	0	0	0	0	0	0	0	603	903	0
6113	4	0	0	0	0	0	0	200	300	0	17.1664	14.4444	-716.602	-73351.5	61588.4	215.606	285.945	1005.36	0	0	0	0	0	0	0	603	903	0
6113	5	0	0	0	0	0	0	200	300	0	16.0983	15.0548	-715.077	-72344.5	61405.3	352.935	285.872	1004.17	0	0	0	0	0	0	0	603	903	0
6113	6	0	0	0	0	0	0	200	300	0	17.7768	14.597	-715.687	-72252.9	61588.4	627.593	286.055	1003.96	0	0	0	0	0	0	0	603	903	0
6113	7	0	0	0	0	0	0	200	300	0	17.4716	15.8177	-715.077	-72436	61466.4	398.711	285.958	1004.3	0	0	0	0	0	0	0	603	903	0
6113	8	0	0	0	0	0	0	200	300	0	17.319	15.9703	-715.992	-72344.5	61283.3	719.146	285.592	1004.04	0	0	0	0	0	0	0	603	903	0
6113	9	0	0	0	0	0	0	200	300	0	15.9457	15.9703	-715.687	-71612	61466.4	536.04	285.884	1003.06	0	0	0	0	0	0	0	603	903	0
6114	0	0	0	0	0	0	0	200	300	0	17.4716	15.8177	-715.687	-71428.9	61588.4	902.251	286.055	1002.8	0	0	0	0	0	0	0	603	903	0
6114	1	0	0	0	0	0	0	200	300	0	17.4716	16.7332	-715.077	-71337.4	61771.6	764.922	286.385	1002.76	0	0	0	0	0	0	0	603	903	0
6114	2	0	0	0	0	0	0	200	300	0	16.5561	17.6488	-715.687	-71520.4	61222.2	673.37	285.543	1002.93	0	0	0	0	0	0	0	603	903	0
6114	3	0	0	0	0	0	0	200	300	0	16.7087	17.4962	-717.213	-70971.2	61710.5	1176.91	286.042	1001.95	0	0	0	0	0	0	0	603	903	0
6114	4	0	0	0	0	0	0	200	300	0	17.1664	18.2591	-715.992	-70147.2	61771.6	902.251	286.274	1000.97	0	0	0	0	0	0	0	603	903	0
6114	5	0	0	0	0	0	0	200	300	0	18.082	18.1065	-715.687	-70971.2	61283.3	948.028	285.629	1002.17	0	0	0	0	0	0	0	603	903	0
6114	6	0	0	0	0	0	0	200	300	0	16.5561	20.0902	-715.992	-70696.5	61405.3	856.475	285.763	1001.74	0	0	0	0	0	0	0	603	903	0
6114	7	0	0	0	0	0	0	200	300	0	16.7087	18.5643	-715.077	-69689.4	61771.6	948.028	286.385	1000.46	0	0	0	0	0	0	0	603	903	0
6114	8	0	0	0	0	0	0	200	300	0	17.319	19.6324	-717.213	-69872.5	61954.7	1039.58	286.383	1000.42	0	0	0	0	0	0	0	603	903	0
6114	9	0	0	0	0	0	0	200	300	0	18.082	20.0902	-717.518	-69964	60917.1	902.251	284.9	1000.51	0	0	0	0	0	0	0	603	903	0
6115	0	0	0	0	0	0	0	200	300	0	16.2509	20.0902	-716.602	-69506.3	61954.7	1131.13	286.456	999.994	0	0	0	0	0	0	0	603	903	0
6115	1	0	0	0	0	0	0	200	300	0	16.7087	20.8531	-716.908	-68407.7	61832.6	1268.46	286.249	998.421	0	0	0	0	0	0	0	603	903	0
6115	2	0	0	0	0	0	0	200	300	0	17.319	21.4635	-716.908	-68041.5	61710.5	1405.79	286.079	997.91	0	0	0	0	0	0	0	603	903	0
6115	3	0	0	0	0	0	0	200	300	0	17.4716	21.6161	-717.518	-68865.4	61649.5	1360.02	285.92	998.977	0	0	0	0	0	0	0	603	903	0
6115	4	0	0	0	0	0	0	200	300	0	16.2509	21.9212	-717.213	-68865.4	62137.8	1268.46	286.638	999.018	0	0	0	0	0	0	0	603	903	0
6115	5	0	0	0	0	0	0	200	300	0	16.0983	22.9893	-713.856	-68590.8	62259.8	1268.46	287.216	999.085	0	0	0	0	0	0	0	603	903	0
6115	6	0	0	0	0	0	0	200	300	0	18.082	22.5316	-714.466	-68041.5	61588.4	1497.34	286.202	998.234	0	0	0	0	0	0	0	603	903	0
6115	7	0	0	0	0	0	0	200	300	0	18.9975	24.0575	-716.602	-67766.8	61771.6	1222.69	286.201	997.567	0	0	0	0	0	0	0	603	903	0
6115	8	0	0	0	0	0	0	200	300	0	17.319	23.5997	-717.823	-68133	62198.8	1451.57	286.649	997.916	0	0	0	0	0	0	0	603	903	0
6115	9	0	0	0	0	0	0	200	300	0	16.8613	23.5997	-715.992	-67766.8	61710.5	1543.12	286.189	997.647	0	0	0	0	0	0	0	603	903	0
6116	0	0	0	0	0	0	0	200	300	0	17.319	25.1256	-716.908	-67400.6	61649.5	1497.34	285.994	997.016	0	0	0	0	0	0	0	603	903	0
6116	1	0	0	0	0	0	0	200	300	0	17.0139	25.2782	-717.823	-67309.1	62137.8	1634.67	286.564	996.768	0	0	0	0	0	0	0	603	903	0
6116	2	0	0	0	0	0	0	200	300	0	15.1828	25.5833	-718.433	-65478	62320.9	1634.67	286.745	994.14	0	0	0	0	0	0	0	603	903	0
6116	3	0	0	0	0	0	0	200	300	0	16.0983	25.8885	-717.823	-66576.6	61771.6	1772	286.054	995.748	0	0	0	0	0	0	0	603	903	0
6116	4	0	0	0	0	0	0	200	300	0	17.0139	26.804	-716.297	-65478	61832.6	1680.45	286.323	994.412	0	0	0	0	0	0	0	603	903	0
6116	5	0	0	0	0	0	0	200	300	0	17.1664	27.1092	-719.044	-67309.1	62259.8	1772	286.587	996.609	0	0	0	0	0	0	0	603	903	0
6116	6	0	0	0	0	0	0	200	300	0	16.0983	26.4989	-717.518	-66485	62748.1	1863.56	287.452	995.66	0	0	0	0	0	0	0	603	903	0
6116	7	0	0	0	0	0	0	200	300	0	15.3354	26.3463	-714.466	-66027.3	62137.8	1909.33	286.971	995.415	0	0	0	0	0	0	0	603	903	0
6116	8	0	0	0	0	0	0	200	300	0	16.7087	27.567	-715.992	-65844.2	62626	1817.78	287.467	994.962	0	0	0	0	0	0	0	603	903	0
6116	9	0	0	0	0	0	0	200	300	0	16.5561	26.9566	-719.349	-65661.1	62442.9	1909.33	286.805	994.279	0	0	0	0	0	0	0	603	903	0
6117	0	0	0	0	0	0	0	200	300	0	15.7932	27.8722	-718.128	-66027.3	62381.9	2183.99	286.867	994.944	0	0	0	0	0	0	0	603	903	0
6117	1	0	0	0	0	0	0	200	300	0	15.488	28.7877	-720.875	-64928.6	62076.7	2183.99	286.113	993.069	0	0	0	0	0	0	0	603	903	0
6117	2	0	0	0	0	0	0	200	300	0	16.5561	28.3299	-719.654	-65386.4	62626	2183.99	287.022	993.858	0	0	0	0	0	0	0	603	903	0
6117	3	0	0	0	0	0	0	200	300	0	16.7087	29.8558	-719.654	-65386.4	62626	2183.99	287.022	993.858	0	0	0	0	0	0	0	603	903	0
6117	4	0	0	0	0	0	0	200	300	0	15.6406	31.0765	-721.485	-65294.9	62442.9	2183.99	286.548	993.501	0	0	0	0	0	0	0	603	903	0
6117	5	0	0	0	0	0	0	200	300	0	15.488	30.9239	-720.57	-65111.8	63114.3	2367.1	287.589	993.362	0	0	0	0	0	0	0	603	903	0
6117	6	0	0	0	0	0	0	200	300	0	16.7087	31.2291	-720.57	-64287.8	62687.1	2321.32	286.997	992.218	0	0	0	0	0	0	0	603	903	0
6117	7	0	0	0	0	0	0	200	300	0	17.0139	31.5343	-720.875	-64928.6	62687.1	2412.87	286.96	993.069	0	0	0	0	0	0	0	603	903	0
6117	8	0	0	0	0	0	0	200	300	0	17.1664	32.9076	-722.401	-64745.5	62565	2275.54	286.607	992.626	0	0	0	0	0	0	0	603	903	0
6117	9	0	0	0	0	0	0	200	300	0	16.7087	31.992	-722.096	-64379.3	62931.2	2458.65	287.151	992.156	0	0	0	0	0	0	0	603	903	0
6118	0	0	0	0	0	0	0	200	300	0	17.4716	32.4498	-723.011	-64379.3	63297.4	2412.87	287.547	992.043	0	0	0	0	0	0	0	603	903	0
6118	1	0	0	0	0	0	0	200	300	0	16.0983	34.1283	-724.232	-64562.4	62931.2	2641.75	286.894	992.146	0	0	0	0	0	0	0	603	903	0
6118	2	0	0	0	0	0	0	200	300	0	16.5561	34.7386	-723.621	-64104.7	63358.5	2687.53	287.557	991.589	0	0	0	0	0	0	0	603	903	0
6118	3	0	0	0	0	0	0	200	300	0	15.6406	34.8912	-724.232	-63555.4	63053.3	2595.98	287.062	990.756	0	0	0	0	0	0	0	603	903	0
6118	4	0	0	0	0	0	0	200	300	0	15.1828	35.1964	-723.621	-63738.5	62992.3	2687.53	287.051	991.083	0	0	0	0	0	0	0	603	903	0
6118	5	0	0	0	0	0	0	200	300	0	15.9457	35.9593	-723.927	-63921.6	63175.4	3007.97	287.268	991.299	0	0	0	0	0	0	0	603	903	0
6118	6	0	0	0	0	0	0	200	300	0	15.3354	35.1964	-724.537	-64013.1	62565	2641.75	286.352	991.35	0	0	0	0	0	0	0	603	903	0
6118	7	0	0	0	0	0	0	200	300	0	14.1147	37.4852	-725.758	-63006.1	63114.3	2595.98	286.963	989.814	0	0	0	0	0	0	0	603	903	0
6118	8	0	0	0	0	0	0	200	300	0	15.7932	36.8748	-726.368	-63097.6	63297.4	3053.74	287.142	989.867	0	0	0	0	0	0	0	603	903	0
6118	9	0	0	0	0	0	0	200	300	0	15.0302	37.4852	-725.147	-63006.1	63663.6	2962.19	287.794	989.887	0	0	0	0	0	0	0	603	903	0
6119	0	0	0	0	0	0	0	200	300	0	15.1828	38.2481	-725.758	-63280.7	63663.6	2962.19	287.72	990.193	0	0	0	0	0	0	0	603	903	0
6119	1	0	0	0	0	0	0	200	300	0	14.5724	39.3163	-726.063	-62639.8	63419.5	2779.08	287.347	989.273	0	0	0	0	0	0	0	603	903	0
6119	2	0	0	0	0	0	0	200	300	0	15.6406	39.4688	-728.199	-62548.3	63785.7	3099.52	287.594	988.895	0	0	0	0	0	0	0	603	903	0
6119	3	0	0	0	0	0	0	200	300	0	15.488	39.6214	-726.673	-63097.6	64029.9	3053.74	288.114	989.831	0	0	0	0	0	0	0	603	903	0
6119	4	0	0	0	0	0	0	200	300	0	16.8613	41.2999	-725.453	-62914.5	63724.7	2962.19	287.841	989.724	0	0	0	0	0	0	0	603	903	0
6119	5	0	0	0	0	0	0	200	300	0	15.488	38.5533	-725.758	-62182.1	63785.7	3282.62	287.888	988.679	0	0	0	0	0	0	0	603	903	0
6119	6	0	0	0	0	0	0	200	300	0	17.6242	41.6051	-729.42	-62182.1	64335	3236.85	288.2	988.249	0	0	0	0	0	0	0	603	903	0
6119	7	0	0	0	0	0	0	200	300	0	15.3354	40.9947	-729.42	-62639.8	64335	3236.85	288.2	988.876	0	0	0	0	0	0	0	603	903	0
6119	8	0	0	0	0	0	0	200	300	0	15.9457	43.131	-728.504	-62182.1	64151.9	3282.62	288.06	988.356	0	0	0	0	0	0	0	603	903	0
6119	9	0	0	0	0	0	0	200	300	0	15.1828	43.5887	-730.03	-61449.6	64335	3282.62	288.127	987.174	0	0	0	0	0	0	0	603	903	0
6120	0	0	0	0	0	0	0	200	300	0	15.7932	43.5887	-731.251	-61449.6	64274	3419.95	287.896	987.034	0	0	0	0	0	0	0	603	903	0
6120	1	0	0	0	0	0	0	200	300	0	16.4035	44.3517	-730.641	-61907.4	63968.8	3419.95	287.552	987.73	0	0	0	0	0	0	0	603	903	0
6120	2	0	0	0	0	0	0	200	300	0	15.3354	43.4361	-729.42	-61724.3	64274	3419.95	288.117	987.621	0	0	0	0	0	0	0	603	903	0
6120	3	0	0	0	0	0	0	200	300	0	15.1828	45.2672	-731.251	-61083.4	64640.2	3282.62	288.397	986.533	0	0	0	0	0	0	0	603	903	0
6120	4	0	0	0	0	0	0	200	300	0	16.7087	45.5724	-732.166	-61266.5	64823.3	3557.28	288.536	986.679	0	0	0	0	0	0	0	603	903	0
6120	5	0	0	0	0	0	0	200	300	0	16.5561	46.0301	-731.556	-61083.4	64396.1	3419.95	288.026	986.498	0	0	0	0	0	0	0	603	903	0
6120	6	0	0	0	0	0	0	200	300	0	15.1828	46.6405	-732.166	-61083.4	64457.1	3419.95	288.036	986.428	0	0	0	0	0	0	0	603	903	0
6120	7	0	0	0	0	0	0	200	300	0	15.6406	48.0138	-731.861	-60442.6	64090.9	3648.83	287.573	985.588	0	0	0	0	0	0	0	603	903	0
6120	8	0	0	0	0	0	0	200	300	0	16.7087	48.3189	-732.777	-60351	64335	3603.06	287.796	985.359	0	0	0	0	0	0	0	603	903	0
6120	9	0	0	0	0	0	0	200	300	0	15.9457	48.3189	-728.809	-60442.6	64457.1	3465.73	288.442	985.933	0	0	0	0	0	0	0	603	903	0
6121	0	0	0	0	0	0	0	200	300	0	17.6242	48.7767	-733.082	-60442.6	64945.4	4106.6	288.592	985.45	0	0	0	0	0	0	0	603	903	0
6121	1	0	0	0	0	0	0	200	300	0	16.4035	49.2345	-731.556	-60076.4	65250.6	3877.72	289.194	985.121	0	0	0	0	0	0	0	603	903	0
6121	2	0	0	0	0	0	0	200	300	0	18.8449	50.7603	-732.472	-59618.6	64762.3	3740.39	288.416	984.394	0	0	0	0	0	0	0	603	903	0
6121	3	0	0	0	0	0	0	200	300	0	17.1664	51.5233	-732.777	-60259.5	64640.2	3831.94	288.213	985.234	0	0	0	0	0	0	0	603	903	0
6121	4	0	0	0	0	0	0	200	300	0	15.488	51.5233	-733.692	-59527.1	65128.5	3786.16	288.768	984.134	0	0	0	0	0	0	0	603	903	0
6121	5	0	0	0	0	0	0	200	300	0	17.9294	51.6759	-732.777	-59343.9	64884.4	4198.15	288.546	983.985	0	0	0	0	0	0	0	603	903	0
6121	6	0	0	0	0	0	0	200	300	0	17.0139	53.3543	-732.472	-58977.7	64640.2	3831.94	288.249	983.519	0	0	0	0	0	0	0	603	903	0
6121	7	0	0	0	0	0	0	200	300	0	16.2509	53.6595	-733.997	-59893.3	64945.4	4106.6	288.482	984.599	0	0	0	0	0	0	0	603	903	0
6121	8	0	0	0	0	0	0	200	300	0	16.5561	53.2018	-733.692	-58977.7	65189.5	4289.7	288.851	983.385	0	0	0	0	0	0	0	603	903	0
6121	9	0	0	0	0	0	0	200	300	0	17.1664	53.9647	-732.472	-58977.7	64762.3	3923.49	288.416	983.519	0	0	0	0	0	0	0	603	903	0
6122	0	0	0	0	0	0	0	200	300	0	17.0139	55.0328	-733.387	-58336.9	64701.2	4060.82	288.223	982.544	0	0	0	0	0	0	0	603	903	0
6122	1	0	0	0	0	0	0	200	300	0	15.9457	55.6432	-735.218	-58062.2	64640.2	4060.82	287.92	981.973	0	0	0	0	0	0	0	603	903	0
6122	2	0	0	0	0	0	0	200	300	0	16.7087	56.5587	-733.387	-58520	64762.3	4381.26	288.306	982.794	0	0	0	0	0	0	0	603	903	0
6122	3	0	0	0	0	0	0	200	300	0	17.1664	55.6432	-734.913	-57879.1	64579.2	4472.81	287.873	981.756	0	0	0	0	0	0	0	603	903	0
6122	4	0	0	0	0	0	0	200	300	0	18.3871	56.2535	-733.997	-57787.5	65128.5	4518.58	288.731	981.73	0	0	0	0	0	0	0	603	903	0
6122	5	0	0	0	0	0	0	200	300	0	16.5561	58.5423	-733.387	-58062.2	65311.6	4427.03	289.055	982.17	0	0	0	0	0	0	0	603	903	0
6122	6	0	0	0	0	0	0	200	300	0	18.082	59.0001	-735.218	-58062.2	64396.1	4564.36	287.588	981.973	0	0	0	0	0	0	0	603	903	0
6122	7	0	0	0	0	0	0	200	300	0	15.9457	58.3897	-734.303	-57146.7	65189.5	4655.91	288.777	980.825	0	0	0	0	0	0	0	603	903	0
6122	8	0	0	0	0	0	0	200	300	0	16.7087	59.4579	-734.913	-57055.1	65006.4	4793.24	288.455	980.635	0	0	0	0	0	0	0	603	903	0
6122	9	0	0	0	0	0	0	200	300	0	17.1664	60.526	-733.692	-57512.9	64823.3	5205.23	288.352	981.388	0	0	0	0	0	0	0	603	903	0
6123	0	0	0	0	0	0	0	200	300	0	16.0983	62.0518	-736.439	-57238.2	64762.3	4701.69	287.94	980.723	0	0	0	0	0	0	0	603	903	0
6123	1	0	0	0	0	0	0	200	300	0	16.2509	61.2889	-736.439	-56780.5	64945.4	4976.35	288.188	980.101	0	0	0	0	0	0	0	603	903	0
6123	2	0	0	0	0	0	0	200	300	0	17.0139	62.5096	-735.218	-56322.7	65189.5	4884.8	288.667	979.607	0	0	0	0	0	0	0	603	903	0
6123	3	0	0	0	0	0	0	200	300	0	16.8613	63.5777	-733.082	-56963.6	64640.2	5251.01	288.176	980.704	0	0	0	0	0	0	0	603	903	0
6123	4	0	0	0	0	0	0	200	300	0	15.488	64.6458	-733.082	-56322.7	65189.5	5479.89	288.925	979.83	0	0	0	0	0	0	0	603	903	0
6123	5	0	0	0	0	0	0	200	300	0	16.5561	62.9674	-731.251	-56139.6	65067.5	5434.11	288.981	979.772	0	0	0	0	0	0	0	603	903	0
6123	6	0	0	0	0	0	0	200	300	0	16.5561	62.9674	-734.913	-56048.1	64579.2	5296.78	287.873	979.265	0	0	0	0	0	0	0	603	903	0
6123	7	0	0	0	0	0	0	200	300	0	17.0139	65.2562	-734.608	-56322.7	64884.4	5388.34	288.325	979.67	0	0	0	0	0	0	0	603	903	0
6123	8	0	0	0	0	0	0	200	300	0	15.7932	65.1036	-735.523	-56414.3	64823.3	5571.44	288.132	979.699	0	0	0	0	0	0	0	603	903	0
6123	9	0	0	0	0	0	0	200	300	0	15.488	67.6976	-737.354	-55773.4	64823.3	5205.23	287.913	978.64	0	0	0	0	0	0	0	603	903	0
6124	0	0	0	0	0	0	0	200	300	0	15.7932	67.0872	-738.27	-55315.6	64701.2	5754.55	287.639	977.926	0	0	0	0	0	0	0	603	903	0
6124	1	0	0	0	0	0	0	200	300	0	15.9457	68.308	-736.439	-55315.6	65006.4	5571.44	288.271	978.112	0	0	0	0	0	0	0	603	903	0
6124	2	0	0	0	0	0	0	200	300	0	16.0983	69.9864	-735.218	-55773.4	64945.4	5846.1	288.335	978.86	0	0	0	0	0	0	0	603	903	0
6124	3	0	0	0	0	0	0	200	300	0	15.1828	70.2916	-737.354	-54674.7	64518.1	5662.99	287.5	977.15	0	0	0	0	0	0	0	603	903	0
6124	4	0	0	0	0	0	0	200	300	0	16.0983	69.6812	-737.049	-54674.7	65067.5	5800.32	288.281	977.181	0	0	0	0	0	0	0	603	903	0
6124	5	0	0	0	0	0	0	200	300	0	15.7932	70.4442	-736.134	-54949.4	65250.6	5800.32	288.64	977.646	0	0	0	0	0	0	0	603	903	0
6124	6	0	0	0	0	0	0	200	300	0	15.0302	72.733	-736.439	-55132.5	64335	5846.1	287.36	977.864	0	0	0	0	0	0	0	603	903	0
6124	7	0	0	0	0	0	0	200	300	0	15.3354	72.4278	-737.965	-54308.5	64762.3	6029.21	287.758	976.592	0	0	0	0	0	0	0	603	903	0
6124	8	0	0	0	0	0	0	200	300	0	15.1828	72.5804	-738.27	-54217	64884.4	6074.98	287.887	976.438	0	0	0	0	0	0	0	603	903	0
6124	9	0	0	0	0	0	0	200	300	0	14.8776	73.1908	-736.439	-54125.4	65128.5	6258.09	288.437	976.496	0	0	0	0	0	0	0	603	903	0
6125	0	0	0	0	0	0	0	200	300	0	15.7932	74.5641	-734.913	-54308.5	63785.7	6532.75	286.794	976.898	0	0	0	0	0	0	0	603	903	0
6125	1	0	0	0	0	0	0	200	300	0	15.0302	73.1908	-733.387	-53850.8	64701.2	6441.19	288.223	976.428	0	0	0	0	0	0	0	603	903	0
6125	2	0	0	0	0	0	0	200	300	0	15.1828	73.4959	-732.777	-53118.4	65189.5	6486.97	288.962	975.489	0	0	0	0	0	0	0	603	903	0
6125	3	0	0	0	0	0	0	200	300	0	15.0302	73.6485	-735.828	-53759.2	64274	6715.85	287.349	976.06	0	0	0	0	0	0	0	603	903	0
6125	4	0	0	0	0	0	0	200	300	0	14.1147	75.327	-736.439	-53301.5	64457.1	6395.42	287.525	975.377	0	0	0	0	0	0	0	603	903	0
6125	5	0	0	0	0	0	0	200	300	0	13.6569	76.2425	-737.66	-53393	64945.4	6715.85	288.042	975.382	0	0	0	0	0	0	0	603	903	0
6125	6	0	0	0	0	0	0	200	300	0	13.8095	77.4632	-737.354	-52935.3	64762.3	6670.07	287.831	974.791	0	0	0	0	0	0	0	603	903	0
6125	7	0	0	0	0	0	0	200	300	0	14.2673	77.6158	-737.66	-53209.9	63846.7	6578.52	286.553	975.133	0	0	0	0	0	0	0	603	903	0
6125	8	0	0	0	0	0	0	200	300	0	12.894	77.7684	-736.439	-53118.4	64762.3	6853.18	287.94	975.129	0	0	0	0	0	0	0	603	903	0
6125	9	0	0	0	0	0	0	200	300	0	12.7414	79.5995	-736.134	-52569	64335	6807.4	287.396	974.412	0	0	0	0	0	0	0	603	903	0
6126	0	0	0	0	0	0	0	200	300	0	13.9621	79.5995	-737.354	-52294.4	64701.2	6944.73	287.748	973.922	0	0	0	0	0	0	0	603	903	0
6126	1	0	0	0	0	0	0	200	300	0	13.9621	79.752	-738.575	-52660.6	64274	6944.73	287.024	974.3	0	0	0	0	0	0	0	603	903	0
6126	2	0	0	0	0	0	0	200	300	0	13.3517	79.752	-737.049	-51745.1	64579.2	6990.51	287.619	973.206	0	0	0	0	0	0	0	603	903	0
6126	3	0	0	0	0	0	0	200	300	0	12.4362	81.5831	-737.049	-52385.9	64518.1	7127.84	287.536	974.075	0	0	0	0	0	0	0	603	903	0
6126	4	0	0	0	0	0	0	200	300	0	13.1992	82.0409	-738.27	-52294.4	63846.7	7265.17	286.482	973.834	0	0	0	0	0	0	0	603	903	0
6126	5	0	0	0	0	0	0	200	300	0	13.5043	81.4305	-737.66	-51928.2	64457.1	7082.06	287.381	973.396	0	0	0	0	0	0	0	603	903	0
6126	6	0	0	0	0	0	0	200	300	0	12.4362	82.1935	-737.049	-51836.6	64335	7356.72	287.287	973.33	0	0	0	0	0	0	0	603	903	0
6126	7	0	0	0	0	0	0	200	300	0	11.6733	83.2616	-735.828	-51836.6	64151.9	7310.94	287.183	973.447	0	0	0	0	0	0	0	603	903	0
6126	8	0	0	0	0	0	0	200	300	0	12.5888	83.4142	-737.66	-51012.6	63907.8	7402.5	286.636	972.155	0	0	0	0	0	0	0	603	903	0
6126	9	0	0	0	0	0	0	200	300	0	13.1992	83.4142	-736.744	-51470.4	63968.8	7265.17	286.826	972.862	0	0	0	0	0	0	0	603	903	0
6127	0	0	0	0	0	0	0	200	300	0	11.2155	84.0245	-736.134	-51287.3	64151.9	7402.5	287.147	972.671	0	0	0	0	0	0	0	603	903	0
6127	1	0	0	0	0	0	0	200	300	0	11.6733	85.5504	-736.439	-51470.4	64151.9	7677.15	287.111	972.891	0	0	0	0	0	0	0	603	903	0
6127	2	0	0	0	0	0	0	200	300	0	12.131	85.5504	-737.354	-50554.9	64396.1	7631.38	287.334	971.563	0	0	0	0	0	0	0	603	903	0
6127	3	0	0	0	0	0	0	200	300	0	14.5724	86.6185	-736.744	-50738	64151.9	7402.5	287.075	971.868	0	0	0	0	0	0	0	603	903	0
6127	4	0	0	0	0	0	0	200	300	0	10.6052	86.1607	-733.997	-50738	64151.9	7310.94	287.401	972.126	0	0	0	0	0	0	0	603	903	0
6127	5	0	0	0	0	0	0	200	300	0	11.5207	85.3978	-735.218	-50463.3	64274	7677.15	287.422	971.637	0	0	0	0	0	0	0	603	903	0
6127	6	0	0	0	0	0	0	200	300	0	12.131	87.6866	-734.913	-50554.9	63968.8	7722.93	287.043	971.79	0	0	0	0	0	0	0	603	903	0
6127	7	0	0	0	0	0	0	200	300	0	11.8259	87.2289	-734.303	-50280.2	63724.7	7722.93	286.783	971.473	0	0	0	0	0	0	0	603	903	0
6127	8	0	0	0	0	0	0	200	300	0	10.7578	88.1444	-736.439	-49181.6	63724.7	7997.59	286.531	969.783	0	0	0	0	0	0	0	603	903	0
6127	9	4.48639	-4.72763	-14.3036	-3675.38	424.194	-1442.87	229.657	556.955	0	10.4526	89.2125	-732.777	-49547.8	63602.6	8043.37	286.797	970.617	0	0	0	0	0	0	0	603	903	0
6128	0	6.62263	-3.65951	-16.4398	-3858.49	180.054	-1625.98	210.952	534.704	0	12.2836	90.128	-733.997	-48998.5	63419.5	8043.37	286.403	969.756	0	0	0	0	0	0	0	603	903	0
6128	1	4.33381	-1.82846	-13.6932	-3217.62	180.054	-939.331	213.149	534.979	0	10.9103	89.9754	-732.777	-49547.8	63480.5	8089.14	286.63	970.617	0	0	0	0	0	0	0	603	903	0
6128	2	2.19758	-5.64315	-9.72595	-2576.75	424.194	-939.331	243.615	564.936	0	10.4526	91.0435	-732.166	-48815.4	63907.8	8043.37	287.286	969.673	0	0	0	0	0	0	0	603	903	0
6128	3	7.23298	-3.35434	-10.0311	-2942.96	363.159	-1717.53	236.203	593.383	0	10.4526	91.6539	-732.472	-48815.4	63724.7	8134.92	287	969.645	0	0	0	0	0	0	0	603	903	0
6128	4	6.16486	-1.06552	-12.1674	-2942.96	302.124	-1305.54	224.831	541.874	0	11.2155	93.0272	-732.777	-48998.5	63358.5	8043.37	286.464	969.867	0	0	0	0	0	0	0	603	903	0
6128	5	3.87604	-2.28622	-18.8812	-3858.49	546.265	-1168.21	228.932	504.356	0	11.6733	91.9591	-732.777	-49273.1	63297.4	8455.35	286.38	970.242	0	0	0	0	0	0	0	603	903	0
6128	6	6.9278	-1.98104	-17.9657	-4865.57	302.124	-1580.2	216.817	570.826	0	10.1474	92.5694	-729.42	-48632.3	63053.3	8363.8	286.443	969.673	0	0	0	0	0	0	0	603	903	0
6128	7	1.8924	3.8173	-18.2709	-5048.68	241.089	-1030.88	213.195	576.324	0	10.3	93.485	-730.03	-48632.3	62870.2	8455.35	286.12	969.617	0	0	0	0	0	0	0	603	903	0
6128	8	3.26569	8.24234	-21.6278	-5506.44	241.089	-756.225	211.147	554.6	0	11.0629	95.0108	-730.641	-48082.9	62992.3	8318.02	286.215	968.809	0	0	0	0	0	0	0	603	903	0
6128	9	3.87604	4.27506	-24.6796	-6147.31	363.159	-1168.21	214.715	549.085	0	11.2155	94.7057	-729.42	-48449.2	63297.4	8592.68	286.778	969.422	0	0	0	0	0	0	0	603	903	0
6129	0	3.26569	7.93717	-31.6986	-7245.94	302.124	-1168.21	209.531	528.589	0	10.3	94.8582	-726.673	-48357.6	63175.4	8730.01	286.938	969.547	0	0	0	0	0	0	0	603	903	0
6129	1	2.96052	10.0734	-35.0555	-7978.36	851.441	-893.554	224.288	527.592	0	9.38446	96.5367	-727.284	-47259	62809.1	8592.68	286.361	967.98	0	0	0	0	0	0	0	603	903	0
6129	2	4.79157	12.9726	-41.4642	-9260.1	790.406	-1213.99	219.062	523.328	0	10.3	97.6048	-725.453	-47533.6	62870.2	9050.44	286.663	968.523	0	0	0	0	0	0	0	603	903	0
6129	3	3.72346	11.2941	-42.9901	-10541.8	424.194	-1213.99	209.867	545.216	0	11.2155	98.6729	-725.147	-47442.1	62870.2	8867.34	286.7	968.424	0	0	0	0	0	0	0	603	903	0
6129	4	3.1131	13.7355	-51.2299	-12098.2	729.37	-756.225	214.237	536.156	0	9.99481	95.9264	-724.537	-47442.1	62748.1	8684.23	286.604	968.479	0	0	0	0	0	0	0	603	903	0
6129	5	6.47004	16.6347	-55.8075	-12922.2	1461.79	-1259.77	226.193	531.55	0	8.9267	98.5204	-721.485	-46984.3	62320.9	8913.12	286.379	968.122	0	0	0	0	0	0	0	603	903	0
6129	6	7.99592	17.3976	-63.7421	-14478.6	973.511	-1580.2	215.273	527.144	0	9.99481	99.2833	-721.79	-46801.2	62320.9	8730.01	286.342	967.841	0	0	0	0	0	0	0	603	903	0
6129	7	5.7071	18.3131	-67.099	-15577.2	1217.65	-1488.65	218.147	532.153	0	10.6052	99.5885	-721.79	-46984.3	62687.1	8913.12	286.849	968.094	0	0	0	0	0	0	0	603	903	0
6129	8	5.85969	18.1606	-76.8646	-16675.9	1522.83	-1854.86	219.812	516.951	0	10.1474	99.7411	-720.875	-46801.2	61222.2	8775.79	284.928	967.923	0	0	0	0	0	0	0	603	903	0
6129	9	9.67438	18.7709	-82.663	-18598.5	1034.55	-1992.19	212.515	524.992	0	9.68964	100.504	-717.823	-45885.7	62259.8	8821.56	286.734	966.923	0	0	0	0	0	0	0	603	903	0
6130	0	8.75886	21.3649	-87.2406	-19514	1583.86	-2175.29	218.155	523.68	0	11.3681	100.962	-719.044	-46068.8	62015.7	8730.01	286.247	967.07	0	0	0	0	0	0	0	603	903	0
6130	1	11.5054	20.9071	-96.3959	-21711.3	1644.9	-2083.74	217.064	525.23	0	9.99481	101.42	-717.823	-46251.9	61710.5	8913.12	285.969	967.434	0	0	0	0	0	0	0	603	903	0
6130	2	13.3365	19.9916	-105.551	-23725.4	1766.97	-2861.94	216.74	524.777	0	9.38446	101.877	-716.602	-45977.2	61527.4	9325.1	285.86	967.16	0	0	0	0	0	0	0	603	903	0
6130	3	12.1158	21.8227	-112.875	-25007.2	1950.07	-2999.27	217.276	521.547	0	8.77411	102.64	-714.161	-45519.5	61405.3	9279.33	285.982	966.738	0	0	0	0	0	0	0	603	903	0
6130	4	14.4046	21.5175	-121.725	-26746.7	2377.32	-3319.7	219.53	519.73	0	9.68964	103.708	-713.245	-44787	61039.1	9233.55	285.579	965.793	0	0	0	0	0	0	0	603	903	0
6130	5	16.3883	19.0761	-127.219	-28577.7	1766.97	-3685.91	213.889	524.635	0	10.7578	104.319	-712.635	-45427.9	60978.1	9645.54	285.567	966.746	0	0	0	0	0	0	0	603	903	0
6130	6	16.846	17.5502	-137.595	-29584.8	2499.39	-3777.47	218.165	515.014	0	8.9267	104.929	-710.499	-45244.8	61222.2	9233.55	286.168	966.68	0	0	0	0	0	0	0	603	903	0
6130	7	19.1348	16.1769	-146.14	-31141.2	2011.11	-3777.47	213.762	513.092	0	9.23187	104.166	-708.363	-44970.2	60978.1	9325.1	286.083	966.485	0	0	0	0	0	0	0	603	903	0
6130	8	22.7969	11.9045	-155.6	-33063.8	2560.43	-4281.01	216.455	512.492	0	10.3	105.692	-707.447	-44329.3	60856	9325.1	286.022	965.661	0	0	0	0	0	0	0	603	903	0
6130	9	22.7969	10.6838	-161.398	-34803.3	2621.46	-4738.77	216.242	515.636	0	9.99481	106.608	-705.616	-44603.9	60489.8	9508.21	285.726	966.213	0	0	0	0	0	0	0	603	903	0
6131	0	22.3392	8.39493	-171.469	-36085	2804.57	-4647.22	216.356	510.446	0	8.62152	105.997	-702.564	-44603.9	60611.9	9370.88	286.272	966.487	0	0	0	0	0	0	0	603	903	0
6131	1	25.8487	5.95353	-176.047	-37733	3353.88	-4784.55	219.051	514.335	0	8.16376	106.302	-701.344	-43322.2	59879.5	9645.54	285.378	964.77	0	0	0	0	0	0	0	603	903	0
6131	2	25.5435	3.05436	-183.371	-38740.1	3048.71	-5288.09	216.626	511.266	0	9.99481	107.523	-699.513	-43139.1	60245.7	9737.09	286.125	964.67	0	0	0	0	0	0	0	603	903	0
6131	3	25.0858	-0.455165	-188.559	-39106.3	3536.99	-5196.53	218.758	507.396	0	9.99481	108.591	-698.292	-43230.7	60123.6	9691.31	286.101	964.909	0	0	0	0	0	0	0	603	903	0
6131	4	29.053	-4.72763	-197.409	-39838.7	3536.99	-5059.2	217.917	501.808	0	8.77411	107.828	-697.376	-43413.8	60062.6	9645.54	286.126	965.253	0	0	0	0	0	0	0	603	903	0
6131	5	29.053	-8.23715	-205.954	-41761.3	3659.06	-5562.75	217.766	502.77	0	8.16376	108.439	-694.63	-41948.9	58719.8	9691.31	284.534	963.39	0	0	0	0	0	0	0	603	903	0
6131	6	28.1375	-11.5941	-212.973	-43867	4025.27	-5928.96	218.9	505.975	0	9.68964	109.812	-692.188	-41674.3	59696.4	9737.09	286.243	963.207	0	0	0	0	0	0	0	603	903	0
6131	7	30.2737	-14.3407	-221.823	-45148.8	4147.34	-5928.96	218.697	503.535	0	9.68964	109.812	-690.052	-42864.5	59452.2	9645.54	286.156	965.118	0	0	0	0	0	0	0	603	903	0
6131	8	31.4945	-18.4605	-226.401	-46522.1	4147.34	-6112.06	218.319	505.485	0	8.62152	109.812	-689.747	-41582.7	58475.7	9782.87	284.778	963.287	0	0	0	0	0	0	0	603	903	0
6131	9	32.8677	-22.1226	-233.115	-47162.9	4635.62	-6157.84	219.886	502.317	0	7.85858	109.964	-685.474	-41765.8	58719.8	9645.54	285.663	963.93	0	0	0	0	0	0	0	603	903	0
6132	0	33.6307	-24.7166	-241.354	-48261.6	4757.69	-6707.15	219.712	499.962	0	9.68964	110.88	-684.254	-41216.5	58902.9	9782.87	286.083	963.236	0	0	0	0	0	0	0	603	903	0
6132	1	35.9195	-28.3787	-252.341	-49818	4574.58	-6844.48	218.129	497.423	0	10.1474	111.338	-682.423	-41674.3	58109.4	9737.09	285.152	964.068	0	0	0	0	0	0	0	603	903	0
6132	2	35.4617	-30.8202	-255.087	-51099.7	5001.83	-7256.47	219.608	500.322	0	8.77411	111.185	-678.15	-41491.1	58109.4	9553.98	285.688	964.183	0	0	0	0	0	0	0	603	903	0
6132	3	35.3092	-33.4142	-263.937	-52564.5	5123.9	-7256.47	219.413	499.155	0	10.6052	109.812	-679.981	-41308	58170.5	10011.7	285.547	963.749	0	0	0	0	0	0	0	603	903	0
6132	4	39.429	-35.3978	-269.431	-54212.5	4940.8	-7393.8	218.338	501.211	0	8.16376	111.033	-673.573	-40392.5	57987.4	9874.42	286.089	962.968	0	0	0	0	0	0	0	603	903	0
6132	5	38.2083	-36.6185	-277.365	-54395.6	5245.97	-7531.13	218.914	496.116	0	12.4362	110.422	-671.742	-40484.1	57254.9	9920.2	285.234	963.267	0	0	0	0	0	0	0	603	903	0
6132	6	39.1238	-39.8228	-284.384	-55677.3	5673.22	-7668.46	219.949	495.782	0	10.1474	112.864	-670.521	-40301	57499.1	9874.42	285.753	963.104	0	0	0	0	0	0	0	603	903	0
6132	7	40.4971	-43.485	-292.929	-56592.9	5307.01	-7851.56	218.117	493.196	0	10.4526	112.864	-668.385	-39843.2	56766.7	10103.3	284.931	962.611	0	0	0	0	0	0	0	603	903	0
6132	8	39.8868	-45.316	-300.558	-58057.7	5551.15	-7805.79	218.469	493.166	0	9.38446	113.627	-663.807	-39660.1	56888.7	9828.64	285.701	962.746	0	0	0	0	0	0	0	603	903	0
6132	9	39.2764	-46.3841	-307.883	-59705.7	5856.33	-7760.01	219.021	493.923	0	9.68964	115.305	-661.671	-39385.5	56400.5	9965.97	285.239	962.524	0	0	0	0	0	0	0	603	903	0
6133	0	39.5816	-49.2833	-314.597	-60529.6	5612.18	-7714.23	217.839	492.404	0	9.07928	114.237	-660.145	-39477	56766.7	10011.7	285.991	962.8	0	0	0	0	0	0	0	603	903	0
6133	1	39.8868	-51.2669	-317.648	-62086	6039.43	-7622.68	219.013	495.455	0	11.0629	114.847	-656.788	-38744.6	56339.4	9874.42	285.78	961.991	0	0	0	0	0	0	0	603	903	0
6133	2	39.1238	-52.0299	-326.804	-62269.1	5673.22	-7668.46	217.36	490.54	0	8.16376	114.542	-652.516	-38378.4	56156.3	10011.7	286.061	961.816	0	0	0	0	0	0	0	603	903	0
6133	3	38.5135	-54.6239	-334.128	-63367.8	5856.33	-7668.46	217.527	489.651	0	8.16376	115.61	-649.769	-37829	55546	9737.09	285.486	961.219	0	0	0	0	0	0	0	603	903	0
6133	4	38.5135	-58.286	-343.588	-64649.5	5917.36	-7485.35	217.222	488.16	0	8.46893	115.763	-648.548	-38286.8	55546	9782.87	285.647	962.035	0	0	0	0	0	0	0	603	903	0
6133	5	37.9031	-57.9808	-348.166	-66572.1	5917.36	-6798.71	216.996	491.208	0	9.53705	115	-644.581	-37645.9	55118.7	9782.87	285.511	961.404	0	0	0	0	0	0	0	603	903	0
6133	6	37.1402	-58.5912	-357.932	-67487.6	5673.22	-7668.46	215.85	488.549	0	8.77411	114.237	-637.867	-37279.7	54325.3	10240.6	285.167	961.444	0	0	0	0	0	0	0	603	903	0
6133	7	38.6661	-61.4903	-364.951	-68860.9	6100.47	-7302.25	216.716	488.686	0	10.4526	115.458	-636.341	-36913.5	54935.6	9828.64	286.33	961.009	0	0	0	0	0	0	0	603	903	0
6133	8	36.6824	-62.5584	-370.444	-69501.8	6100.47	-7119.14	216.468	487.618	0	7.85858	115.915	-634.815	-37096.6	54142.2	10240.6	285.288	961.437	0	0	0	0	0	0	0	603	903	0
6133	9	36.6824	-64.9998	-378.989	-70508.9	5795.29	-7164.92	215.291	486.045	0	9.53705	116.678	-631.458	-36730.4	53409.7	9965.97	284.582	961.168	0	0	0	0	0	0	0	603	903	0
6134	0	37.7506	-66.6783	-386.008	-71973.8	6039.43	-6844.48	215.646	486.457	0	7.70599	116.373	-629.322	-35814.9	53837	9965.97	285.548	959.91	0	0	0	0	0	0	0	603	903	0
6134	1	36.0721	-68.5094	-395.468	-72523	6039.43	-6890.26	215.272	483.385	0	9.07928	116.678	-624.745	-35906.4	53531.8	10149.1	285.686	960.474	0	0	0	0	0	0	0	603	903	0
6134	2	33.9359	-69.4249	-402.182	-74079.4	6039.43	-7027.59	215.017	484.194	0	5.56976	116.983	-621.693	-35631.8	52982.5	9874.42	285.223	960.314	0	0	0	0	0	0	0	603	903	0
6134	3	32.5626	-71.5611	-409.811	-75544.3	5917.36	-7027.59	214.439	484.339	0	7.85858	116.526	-618.641	-35540.2	52616.3	10057.5	285.051	960.449	0	0	0	0	0	0	0	603	903	0
6134	4	33.6307	-72.6292	-415.305	-76276.7	6039.43	-6432.5	214.542	483.665	0	6.48529	116.373	-615.284	-34624.7	52677.3	9874.42	285.615	959.274	0	0	0	0	0	0	0	603	903	0
6134	5	31.9522	-74.7655	-422.324	-76826	5795.29	-6386.72	213.722	481.913	0	7.55341	116.221	-610.706	-34807.8	52372.1	10057.5	285.757	959.996	0	0	0	0	0	0	0	603	903	0
6134	6	32.1048	-77.9698	-429.037	-77558.4	5734.25	-6203.61	213.365	480.773	0	6.02753	117.136	-607.349	-34624.7	51273.5	9828.64	284.422	960.01	0	0	0	0	0	0	0	603	903	0
6134	7	31.3419	-79.4957	-435.446	-78199.3	6039.43	-6249.39	213.87	479.584	0	4.95941	116.221	-604.298	-34441.6	51822.8	9782.87	285.757	959.995	0	0	0	0	0	0	0	603	903	0
6134	8	28.7479	-82.5474	-440.939	-78931.8	5612.18	-6112.06	212.728	479.008	0	4.95941	115.763	-601.246	-33892.3	51578.7	10057.5	285.786	959.37	0	0	0	0	0	0	0	603	903	0
6134	9	27.9849	-82.7	-446.738	-80762.8	5795.29	-5379.64	212.972	480.784	0	5.41718	116.068	-597.584	-32885.2	50785.2	9828.64	284.984	958.03	0	0	0	0	0	0	0	603	903	0
6135	0	26.6116	-84.5311	-451.01	-80762.8	5795.29	-5608.52	212.85	479.071	0	5.72235	114.695	-591.786	-33617.6	50602.1	10057.5	285.508	959.807	0	0	0	0	0	0	0	603	903	0
6135	1	26.6116	-85.9044	-455.588	-81403.7	5734.25	-5516.97	212.587	478.678	0	4.95941	116.373	-590.87	-32976.8	49930.7	9920.2	284.504	958.811	0	0	0	0	0	0	0	603	903	0
6135	2	25.2383	-87.4303	-459.555	-81495.2	5917.36	-5288.09	212.876	477.335	0	4.04388	115.61	-585.377	-32152.8	49747.6	9828.64	284.984	957.927	0	0	0	0	0	0	0	603	903	0
6135	3	24.7806	-88.8036	-463.828	-82044.5	5734.25	-5196.53	212.363	476.886	0	5.112	114.847	-580.189	-31511.9	49564.5	9737.09	285.428	957.313	0	0	0	0	0	0	0	603	903	0
6135	4	23.2547	-90.3294	-465.659	-82502.3	5551.15	-5013.43	211.921	477.173	0	4.95941	114.847	-578.663	-31511.9	49686.6	9782.87	285.864	957.456	0	0	0	0	0	0	0	603	903	0
6135	5	21.5762	-91.8553	-471.762	-82776.9	5429.08	-4876.1	211.508	475.463	0	4.04388	114.847	-575.001	-30871	49137.3	9416.66	285.456	956.689	0	0	0	0	0	0	0	603	903	0
6135	6	21.8814	-91.3975	-473.593	-83601	5490.11	-4738.77	211.592	476.525	0	3.73871	114.542	-569.508	-31328.8	47977.6	9599.76	284.244	958.01	0	0	0	0	0	0	0	603	903	0
6135	7	20.2029	-92.4657	-476.95	-83234.7	5062.87	-4052.12	210.615	474.515	0	3.8913	114.542	-564.93	-29772.4	48343.8	9691.31	285.575	955.701	0	0	0	0	0	0	0	603	903	0
6135	8	19.5926	-92.4657	-478.476	-84333.4	5368.04	-4555.66	211.219	476.254	0	4.04388	113.627	-562.489	-30687.9	47977.6	9782.87	285.295	957.557	0	0	0	0	0	0	0	603	903	0
6135	9	20.2029	-93.076	-483.664	-84608	5307.01	-4052.12	210.973	474.931	0	3.12836	114.847	-557.911	-30413.3	47428.3	9691.31	285.011	957.513	0	0	0	0	0	0	0	603	903	0
6136	0	17.7615	-93.5338	-484.885	-84058.7	5123.9	-3685.91	210.567	473.358	0	2.67059	114.084	-555.47	-29497.8	47062.1	9737.09	284.725	956.104	0	0	0	0	0	0	0	603	903	0
6136	1	15.3201	-94.1441	-488.547	-84424.9	5062.87	-3548.58	210.363	472.808	0	3.58612	113.474	-551.197	-29314.6	47184.1	9691.31	285.603	956.184	0	0	0	0	0	0	0	603	903	0
6136	2	15.015	-94.2967	-491.293	-84699.6	5245.97	-3548.58	210.678	472.401	0	3.12836	114.389	-544.788	-29223.1	46940	9462.43	286.162	956.641	0	0	0	0	0	0	0	603	903	0
6136	3	14.4046	-94.9071	-490.988	-84608	4818.73	-3136.6	209.814	472.322	0	2.36542	113.932	-542.042	-29223.1	46146.6	9462.43	285.135	956.913	0	0	0	0	0	0	0	603	903	0
6136	4	14.4046	-95.67	-492.819	-84974.2	5062.87	-2449.95	210.273	472.425	0	1.2973	113.016	-537.159	-28216	45719.3	9370.88	285.113	955.528	0	0	0	0	0	0	0	603	903	0
6136	5	13.0313	-96.7381	-494.65	-84699.6	4696.66	-3045.04	209.495	471.231	0	2.97577	112.711	-532.887	-27941.4	45658.3	9325.1	285.681	955.434	0	0	0	0	0	0	0	603	903	0
6136	6	12.5736	-97.0433	-498.007	-84791.1	4513.55	-2633.06	209.063	470.261	0	2.82318	113.016	-527.393	-27941.4	45170	9050.44	285.648	955.98	0	0	0	0	0	0	0	603	903	0
6136	7	12.421	-97.5011	-496.481	-84333.4	4635.62	-2266.85	209.337	469.862	0	1.2973	113.321	-525.562	-27392	44498.6	9096.22	284.669	955.12	0	0	0	0	0	0	0	603	903	0
6136	8	9.67438	-99.6373	-498.923	-84150.2	4757.69	-2175.29	209.536	468.664	0	1.2973	111.643	-522.205	-27025.8	44498.6	9325.1	285.213	954.753	0	0	0	0	0	0	0	603	903	0
6136	9	9.5218	-99.3321	-497.397	-85157.4	4635.62	-2175.29	209.32	471.206	0	2.36542	111.796	-514.576	-26201.9	44132.4	9325.1	285.765	953.919	0	0	0	0	0	0	0	603	903	0
6137	0	8.45368	-99.4847	-497.397	-83875.6	4269.41	-1809.08	208.584	468.629	0	2.82318	112.253	-510.609	-26751.2	43644.1	9325.1	285.475	955.391	0	0	0	0	0	0	0	603	903	0
6137	1	9.67438	-100.4	-498.312	-84333.4	4574.58	-1625.98	209.18	469.238	0	1.14471	112.558	-507.557	-26201.9	43338.9	9142	285.387	954.624	0	0	0	0	0	0	0	603	903	0
6137	2	7.38556	-101.774	-499.533	-83417.8	4208.37	-1488.65	208.425	466.992	0	1.2973	110.575	-503.285	-25286.3	42850.7	9325.1	285.142	953.243	0	0	0	0	0	0	0	603	903	0
6137	3	6.9278	-102.079	-497.702	-83234.7	3842.16	-1305.54	207.72	467.238	0	1.90765	109.964	-496.571	-25286.3	42362.4	9187.77	285.31	953.922	0	0	0	0	0	0	0	603	903	0
6137	4	6.01227	-102.842	-498.923	-82776.9	4330.44	-1168.21	208.68	465.911	0	2.21283	110.88	-491.993	-25286.3	41629.9	8638.46	284.615	954.396	0	0	0	0	0	0	0	603	903	0
6137	5	4.79157	-103.91	-497.092	-82685.4	4086.3	-573.12	208.22	466.338	0	0.686951	110.27	-488.026	-24920.1	41935.1	8867.34	285.928	954.063	0	0	0	0	0	0	0	603	903	0
6137	6	3.57087	-104.062	-495.871	-83051.6	3598.02	-756.225	207.256	467.486	0	1.2973	108.591	-484.669	-23913	41629.9	8775.79	285.894	952.339	0	0	0	0	0	0	0	603	903	0
6137	7	3.72346	-104.368	-495.871	-82868.5	3720.09	-527.343	207.502	467.117	0	2.06024	108.744	-477.955	-23638.4	41019.6	8867.34	285.823	952.457	0	0	0	0	0	0	0	603	903	0
6137	8	3.72346	-103.91	-494.65	-82044.5	4086.3	-390.014	208.261	465.864	0	1.90765	109.202	-472.767	-23821.5	40775.5	8684.23	286.249	953.387	0	0	0	0	0	0	0	603	903	0
6137	9	1.8924	-104.062	-496.176	-81129	3475.95	21.9732	207.005	463.509	0	0.839539	108.591	-468.495	-23272.2	39859.9	8913.12	285.081	952.674	0	0	0	0	0	0	0	603	903	0
6138	0	0.213934	-105.588	-494.04	-81129	3720.09	-115.356	207.53	464.216	0	0.0765991	107.676	-461.475	-22539.7	39615.8	8730.01	285.846	951.843	0	0	0	0	0	0	0	603	903	0
6138	1	-0.854181	-105.436	-494.955	-81769.9	3475.95	-161.132	207.023	465.207	0	2.06024	106.455	-455.982	-21441.1	38883.4	8775.79	285.274	950.022	0	0	0	0	0	0	0	603	903	0
6138	2	0.213934	-105.893	-492.209	-81312.1	3170.78	617.066	206.442	465.198	0	1.90765	106.913	-450.184	-21807.3	38944.4	8638.46	286.508	951.441	0	0	0	0	0	0	0	603	903	0
6138	3	-2.68524	-105.436	-490.378	-80671.3	3231.81	617.066	206.59	464.508	0	0.534363	105.539	-448.353	-21898.9	38639.2	8684.23	286.18	951.843	0	0	0	0	0	0	0	603	903	0
6138	4	-2.53265	-106.046	-490.073	-80030.4	2987.67	708.619	206.096	463.303	0	2.21283	104.471	-441.029	-21441.1	37540.6	8684.23	285.121	951.616	0	0	0	0	0	0	0	603	903	0
6138	5	-3.75335	-106.351	-488.242	-78931.8	3109.74	800.172	206.369	461.665	0	1.90765	102.945	-439.808	-20434	37784.7	8592.68	285.912	949.461	0	0	0	0	0	0	0	603	903	0
6138	6	-4.97405	-106.962	-490.683	-79023.3	3231.81	1120.61	206.586	461.048	0	3.58612	104.929	-431.873	-20525.6	37540.6	8730.01	286.925	950.527	0	0	0	0	0	0	0	603	903	0
6138	7	-4.97405	-106.656	-488.242	-79481	3292.85	1120.61	206.744	462.79	0	-0.533752	103.861	-423.939	-20159.4	36686.1	8318.02	286.536	950.553	0	0	0	0	0	0	0	603	903	0
6138	8	-8.48358	-106.504	-489.767	-79572.6	3170.78	1303.71	206.474	462.47	0	0.229187	103.708	-421.803	-19793.2	36258.9	8546.9	285.962	949.925	0	0	0	0	0	0	0	603	903	0
6138	9	-7.56805	-107.114	-488.852	-79298	2499.39	1853.03	205.113	462.213	0	0.686951	102.182	-414.173	-19060.7	35526.4	8089.14	285.777	949.021	0	0	0	0	0	0	0	603	903	0
6139	0	-9.70428	-107.877	-488.242	-77741.6	2926.64	1853.03	205.994	459.228	0	1.2973	102.793	-410.206	-19884.7	35343.3	8318.02	286.16	951.475	0	0	0	0	0	0	0	603	903	0
6139	1	-9.3991	-109.098	-487.936	-78290.9	3048.71	2127.69	206.248	460.453	0	-0.68634	101.114	-405.323	-18969.2	34977.1	8226.47	286.294	949.8	0	0	0	0	0	0	0	603	903	0
6139	2	-9.55169	-109.556	-492.209	-78565.6	2682.5	2585.45	205.45	459.618	0	-0.228577	101.572	-399.22	-18419.9	34855	8318.02	287.308	949.14	0	0	0	0	0	0	0	603	903	0
6139	3	-11.3827	-109.861	-490.988	-78016.2	2621.46	2265.02	205.339	458.896	0	0.0765991	97.91	-396.473	-17779	34366.8	8134.92	286.681	947.843	0	0	0	0	0	0	0	603	903	0
6139	4	-12.2983	-110.318	-491.904	-78107.8	3109.74	2310.79	206.322	458.787	0	0.229187	100.046	-389.454	-17229.7	33573.3	7997.59	286.206	947.241	0	0	0	0	0	0	0	603	903	0
6139	5	-14.8923	-111.234	-493.124	-77558.4	2377.32	2402.35	204.821	457.28	0	-1.29669	97.2997	-383.961	-16497.3	33817.4	8226.47	288.075	945.966	0	0	0	0	0	0	0	603	903	0
6139	6	-14.8923	-111.539	-491.904	-77833.1	2621.46	2631.23	205.329	458.228	0	-1.44928	98.0626	-378.468	-16771.9	32840.9	8409.58	286.773	947.315	0	0	0	0	0	0	0	603	903	0
6139	7	-15.6552	-113.065	-493.124	-77650	2499.39	2631.23	205.068	457.465	0	-0.381165	97.4522	-373.585	-16588.8	31986.4	7997.59	285.62	947.404	0	0	0	0	0	0	0	603	903	0
6139	8	-14.8923	-112.76	-496.786	-78474	2560.43	2768.56	205.154	457.963	0	-0.533752	97.4522	-369.007	-16222.6	31864.3	7906.04	286.351	946.963	0	0	0	0	0	0	0	603	903	0
6139	9	-17.4863	-113.37	-500.143	-78840.2	2499.39	2814.33	204.997	457.635	0	-1.60187	97.1471	-364.124	-15398.6	31498.1	7951.81	286.504	945.289	0	0	0	0	0	0	0	603	903	0
6140	0	-17.4863	-114.286	-503.195	-78657.1	2743.53	3134.77	205.452	456.315	0	-1.60187	95.1634	-357.716	-14757.8	31131.9	7722.93	287.03	944.256	0	0	0	0	0	0	0	603	903	0
6140	1	-19.4699	-114.591	-505.637	-78107.8	2560.43	3272.1	205.064	454.474	0	-0.533752	94.7057	-350.086	-14116.9	29850.1	7860.26	285.265	943.324	0	0	0	0	0	0	0	603	903	0
6140	2	-18.707	-116.727	-507.468	-78382.4	1705.93	3638.31	203.362	454.458	0	-1.44928	93.485	-344.898	-14208.4	29911.2	7814.48	286.725	944.196	0	0	0	0	0	0	0	603	903	0
6140	3	-21.4535	-118.253	-507.773	-78840.2	2499.39	3592.53	204.922	455.267	0	-2.05963	93.1798	-341.847	-13659.1	29606	7768.71	286.606	942.957	0	0	0	0	0	0	0	603	903	0
6140	4	-20.9958	-117.49	-511.435	-79298	2377.32	3867.19	204.648	455.05	0	-2.66998	91.5013	-331.471	-13933.8	28690.5	7585.6	286.555	945.036	0	0	0	0	0	0	0	603	903	0
6140	5	-20.538	-119.016	-515.402	-79389.5	2255.25	3958.74	204.376	454.034	0	-2.36481	89.3651	-330.25	-13384.5	28263.2	7356.72	285.581	943.528	0	0	0	0	0	0	0	603	903	0
6140	6	-22.6742	-119.321	-518.454	-79206.4	2194.21	3821.41	204.232	452.774	0	-2.21222	90.128	-322.926	-13109.8	28141.2	7768.71	287.144	943.597	0	0	0	0	0	0	0	603	903	0
6140	7	-23.895	-120.237	-520.59	-78565.6	2682.5	4050.29	205.153	450.916	0	-3.89069	87.3814	-314.991	-12652	27347.7	7494.05	286.821	943.166	0	0	0	0	0	0	0	603	903	0
6140	8	-23.7424	-120.694	-523.337	-78931.8	2377.32	4096.07	204.543	450.824	0	-3.43292	87.534	-310.413	-12743.6	26737.4	7860.26	286.135	944.054	0	0	0	0	0	0	0	603	903	0
6140	9	-23.5898	-121.305	-525.473	-80396.6	2316.28	4324.95	204.408	452.999	0	-3.58551	85.8556	-304.31	-11828.1	26554.2	7356.72	287.261	941.869	0	0	0	0	0	0	0	603	903	0
6141	0	-23.895	-121.305	-528.22	-80488.1	2621.46	4050.29	204.963	452.376	0	-2.82257	85.0926	-297.901	-11736.5	25943.9	7310.94	287.089	942.397	0	0	0	0	0	0	0	603	903	0
6141	1	-23.2846	-121.61	-530.661	-81129	2499.39	4141.85	204.71	452.883	0	-4.50104	84.7874	-290.882	-11553.4	25272.5	7402.5	286.882	942.719	0	0	0	0	0	0	0	603	903	0
6141	2	-23.5898	-121.457	-534.628	-80305.1	2255.25	4324.95	204.218	450.207	0	-4.80621	84.0245	-286.61	-11187.2	25089.4	6944.73	287.539	942.033	0	0	0	0	0	0	0	603	903	0
6141	3	-24.8105	-122.22	-537.375	-80488.1	2743.53	4187.62	205.105	449.78	0	-4.34845	81.2779	-281.422	-10363.2	24540.1	7173.61	287.2	939.825	0	0	0	0	0	0	0	603	903	0
6141	4	-24.6579	-122.678	-539.206	-81586.8	2743.53	4096.07	205.088	451.309	0	-3.43292	80.515	-274.098	-10088.6	23807.7	6853.18	286.858	939.807	0	0	0	0	0	0	0	603	903	0
6141	5	-24.5053	-122.983	-541.342	-81769.9	2438.35	4141.85	204.504	451.05	0	-5.11139	79.9046	-268.299	-10454.8	23197.3	7082.06	286.461	941.967	0	0	0	0	0	0	0	603	903	0
6141	6	-23.2846	-122.373	-540.121	-81953	2804.57	4599.61	205.192	451.731	0	-4.9588	78.6839	-263.722	-9539.25	23014.2	6990.51	287.267	939.172	0	0	0	0	0	0	0	603	903	0
6141	7	-23.2846	-122.068	-547.446	-81220.5	2560.43	4141.85	204.677	448.363	0	-4.80621	75.9373	-257.618	-9081.48	22709	6898.96	288.15	938.252	0	0	0	0	0	0	0	603	903	0
6141	8	-23.132	-122.678	-549.887	-81586.8	2682.5	4096.07	204.878	448.37	0	-6.02692	74.1063	-250.294	-8623.72	21976.6	6761.63	287.803	937.454	0	0	0	0	0	0	0	603	903	0
6141	9	-22.3691	-123.136	-553.244	-81769.9	2804.57	4233.4	205.069	447.801	0	-6.02692	74.2589	-244.495	-8806.82	21488.3	6395.42	287.888	939.02	0	0	0	0	0	0	0	603	903	0
6142	0	-24.2001	-122.678	-557.211	-82960.1	3231.81	4187.62	205.8	448.884	0	-5.26398	71.9701	-239.613	-8257.51	21000	6486.97	287.642	937.462	0	0	0	0	0	0	0	603	903	0
6142	1	-23.4372	-122.068	-555.685	-83143.2	3231.81	3958.74	205.816	449.623	0	-5.56915	69.8338	-235.035	-7433.53	20328.7	6349.64	286.492	934.627	0	0	0	0	0	0	0	603	903	0
6142	2	-23.5898	-122.525	-559.653	-83326.3	2926.64	3912.97	205.229	448.889	0	-7.24762	67.8502	-227.406	-7982.85	19962.4	6120.76	287.783	938.104	0	0	0	0	0	0	0	603	903	0
6142	3	-22.3691	-121.305	-562.399	-82868.5	3170.78	3958.74	205.638	447.348	0	-4.9588	66.9347	-222.828	-7525.09	19230	6029.21	286.3	936.771	0	0	0	0	0	0	0	603	903	0
6142	4	-21.6061	-121.305	-565.451	-82868.5	3292.85	4004.52	205.823	446.553	0	-5.87433	63.8829	-214.283	-6884.22	18802.8	5983.43	287.747	935.127	0	0	0	0	0	0	0	603	903	0
6142	5	-21.1484	-121.763	-569.724	-83784	2926.64	3592.53	205.137	447.061	0	-6.02692	65.1036	-209.095	-6609.56	18497.6	5662.99	288.465	934.61	0	0	0	0	0	0	0	603	903	0
6142	6	-21.7587	-121.152	-568.503	-84241.8	3292.85	3775.64	205.792	448.182	0	-6.48468	61.2889	-204.517	-6151.8	17887.3	5846.1	287.461	933.08	0	0	0	0	0	0	0	603	903	0
6142	7	-22.6742	-120.694	-576.132	-84699.6	3598.02	3775.64	206.245	447.014	0	-7.70538	60.6786	-197.804	-6243.35	17704.1	5571.44	289.504	934.563	0	0	0	0	0	0	0	603	903	0
6142	8	-19.9277	-120.542	-577.353	-84150.2	3414.92	3546.75	205.915	445.752	0	-6.1795	59.763	-193.531	-5602.48	16544.5	5251.01	285.487	931.949	0	0	0	0	0	0	0	603	903	0
6142	9	-22.3691	-121.457	-580.71	-84974.2	2865.6	3592.53	204.935	446.328	0	-6.78986	58.5423	-188.343	-6060.24	16300.3	5388.34	286.546	935.177	0	0	0	0	0	0	0	603	903	0
6143	0	-21.6061	-120.389	-581.931	-85065.8	3781.13	3500.98	206.498	446.179	0	-7.40021	55.6432	-183.155	-5419.37	16056.2	5296.78	287.664	932.589	0	0	0	0	0	0	0	603	903	0
6143	1	-21.1484	-120.847	-587.119	-85889.8	3842.16	3546.75	206.544	446.29	0	-8.01056	54.575	-175.831	-4778.5	15751	5434.11	289.581	930.177	0	0	0	0	0	0	0	603	903	0
6143	2	-20.538	-119.779	-591.086	-86072.8	3781.13	3729.86	206.397	445.618	0	-6.94244	53.8121	-170.948	-4503.85	14591.4	4884.8	285.355	929.346	0	0	0	0	0	0	0	603	903	0
6143	3	-20.6906	-119.779	-593.832	-86347.5	3414.92	3134.77	205.751	445.407	0	-5.72174	51.6759	-167.286	-4870.06	14591.4	5113.68	287.224	932.112	0	0	0	0	0	0	0	603	903	0
6143	4	-20.538	-119.321	-597.189	-85615.1	3781.13	3317.87	206.332	443.363	0	-7.85797	49.5396	-158.436	-4320.74	14103.1	4747.47	289.014	930.271	0	0	0	0	0	0	0	603	903	0
6143	5	-20.6906	-120.389	-598.715	-85889.8	3781.13	3088.99	206.315	443.457	0	-7.40021	46.3353	-155.689	-4503.85	13492.7	4701.69	286.664	931.928	0	0	0	0	0	0	0	603	903	0
6143	6	-20.538	-120.084	-599.02	-87629.3	3842.16	3363.65	206.414	446.288	0	-6.02692	46.7931	-149.586	-3862.98	13248.6	4472.81	288.568	928.824	0	0	0	0	0	0	0	603	903	0
6143	7	-20.0803	-119.169	-604.514	-87812.3	3964.23	3088.99	206.558	445.261	0	-5.56915	46.1827	-144.703	-4046.08	13065.5	4243.93	290.292	930.961	0	0	0	0	0	0	0	603	903	0
6143	8	-18.2492	-118.711	-609.396	-87446.1	4025.27	3088.99	206.605	443.496	0	-6.94244	44.5042	-141.651	-4046.08	12455.1	4289.7	287.928	931.564	0	0	0	0	0	0	0	603	903	0
6143	9	-18.707	-118.1	-612.448	-87995.5	4269.41	3043.21	206.971	443.678	0	-7.24762	41.7577	-137.074	-3222.11	12027.9	4060.82	287.748	926.506	0	0	0	0	0	0	0	603	903	0
6144	0	-20.0803	-117.948	-615.195	-88544.8	4147.34	2814.33	206.742	443.93	0	-4.50104	39.0111	-130.97	-2947.45	11600.6	4015.04	288.575	925.505	0	0	0	0	0	0	0	603	903	0
6144	1	-18.8596	-117.337	-615.805	-88819.5	4330.44	2768.56	207.032	444.233	0	-4.80621	39.1637	-126.698	-3130.56	11173.4	3557.28	288.189	927.709	0	0	0	0	0	0	0	603	903	0
6144	2	-18.8596	-117.185	-620.078	-89643.4	4086.3	2905.89	206.59	444.568	0	-6.33209	38.0956	-123.646	-2947.45	10746.1	3648.83	286.911	926.838	0	0	0	0	0	0	0	603	903	0
6144	3	-17.7914	-115.506	-622.214	-90192.8	4452.51	2768.56	207.156	444.955	0	-5.72174	35.5016	-119.373	-2672.79	10502	3557.28	287.976	925.39	0	0	0	0	0	0	0	603	903	0
6144	4	-17.944	-115.659	-625.266	-90559	4391.48	2493.9	207.023	444.833	0	-4.04327	33.8231	-114.185	-2855.9	10196.8	3282.62	289.301	928.011	0	0	0	0	0	0	0	603	903	0
6144	5	-17.1811	-114.133	-630.453	-90467.4	4269.41	2448.12	206.772	443.496	0	-4.19586	31.6869	-108.082	-2764.34	10379.9	3328.4	296.038	928.576	0	0	0	0	0	0	0	603	903	0
6144	6	-18.5544	-113.523	-628.317	-91016.7	4635.62	2402.35	207.378	444.858	0	-5.11139	29.8558	-104.115	-2215.03	9281.3	3236.85	289.145	924.275	0	0	0	0	0	0	0	603	903	0
6144	7	-17.6388	-113.37	-636.862	-91016.7	4208.37	2493.9	206.608	442.914	0	-4.04327	29.8558	-98.9267	-2306.58	9281.3	2962.19	293.82	926.316	0	0	0	0	0	0	0	603	903	0
6144	8	-18.2492	-112.76	-637.167	-92390	4391.48	2265.02	206.892	445.001	0	-2.66998	29.0929	-98.3163	-1848.82	8426.81	2824.86	285.711	921.805	0	0	0	0	0	0	0	603	903	0
6144	9	-15.9604	-112.76	-642.355	-92756.2	4391.48	2265.02	206.837	444.4	0	-2.66998	28.0247	-95.5697	-2398.13	8304.74	2687.53	286.897	928.093	0	0	0	0	0	0	0	603	903	0
6145	0	-16.113	-110.471	-643.271	-93122.4	4818.73	2265.02	207.491	444.764	0	-3.43292	26.3463	-90.3817	-1940.37	8243.71	2641.75	291.21	924.469	0	0	0	0	0	0	0	603	903	0
6145	1	-16.7233	-110.013	-648.154	-93580.2	4940.8	1761.48	207.623	444.38	0	-3.12775	25.5833	-88.5507	-1665.71	8060.6	2504.42	291.028	921.811	0	0	0	0	0	0	0	603	903	0
6145	2	-15.9604	-109.708	-649.069	-93488.6	4574.58	1990.36	207.048	444.035	0	-2.21222	23.7523	-83.6679	-1482.61	7816.46	2275.54	293.422	920.72	0	0	0	0	0	0	0	603	903	0
6145	3	-16.4181	-108.64	-655.783	-92573.1	5123.9	1898.8	207.813	441.164	0	-1.1441	21.7686	-79.3954	-1757.26	6778.86	2183.99	285.381	925.133	0	0	0	0	0	0	0	603	903	0
6145	4	-16.113	-109.098	-655.173	-94312.6	5123.9	2036.13	207.821	443.951	0	-2.21222	21.3109	-76.0385	-1299.5	7084.04	2092.44	293.164	920.09	0	0	0	0	0	0	0	603	903	0
6145	5	-17.1811	-107.877	-655.783	-95228.1	4940.8	1624.15	207.534	445.213	0	-1.44928	20.3954	-74.8178	-1116.39	6351.61	2046.66	284.894	917.922	0	0	0	0	0	0	0	603	903	0
6145	6	-15.35	-107.267	-660.971	-94678.8	5001.83	1853.03	207.567	443.242	0	-0.991516	18.8695	-71.4608	-1482.61	6351.61	2000.88	288.882	923.747	0	0	0	0	0	0	0	603	903	0
6145	7	-14.8923	-106.809	-665.244	-96326.8	5307.01	1669.92	207.978	444.799	0	-0.991516	18.1065	-66.8832	-841.736	5985.4	1680.45	289.49	915.585	0	0	0	0	0	0	0	603	903	0
6145	8	-15.35	-105.741	-667.685	-95777.5	5062.87	1624.15	207.583	443.447	0	-1.60187	16.8858	-65.0521	-750.183	5985.4	2092.44	292.009	914.532	0	0	0	0	0	0	0	603	903	0
6145	9	-16.4181	-105.436	-670.126	-97059.2	5245.97	1807.25	207.828	444.837	0	-1.29669	15.5125	-61.39	-933.289	5680.23	1497.34	292.527	918.203	0	0	0	0	0	0	0	603	903	0
6146	0	-14.5871	-104.825	-670.432	-96418.3	5001.83	1578.37	207.461	443.815	0	0.0765991	13.8341	-59.559	-658.631	5252.98	1680.45	288.198	914.059	0	0	0	0	0	0	0	603	903	0
6146	1	-15.0449	-103.757	-673.788	-97333.8	5184.94	1578.37	207.695	444.458	0	-0.68634	13.2237	-55.5917	-567.078	5069.88	1314.24	291.198	913.201	0	0	0	0	0	0	0	603	903	0
6146	2	-14.4345	-103.605	-676.23	-97791.6	5245.97	1486.82	207.758	444.613	0	-0.533752	12.766	-53.4555	-658.631	4947.8	1360.02	292.559	915.321	0	0	0	0	0	0	0	603	903	0
6146	3	-14.4345	-102.994	-678.671	-98524	5429.08	1441.04	208	445.172	0	-0.838928	11.5453	-52.2348	-1299.5	4581.59	1176.91	287.712	927.878	0	0	0	0	0	0	0	603	903	0
6146	4	-14.2819	-102.079	-683.554	-98432.5	5001.83	1441.04	207.317	444.001	0	-0.0759888	10.9349	-49.7934	73.7915	4459.52	810.699	289.561	901.518	0	0	0	0	0	0	0	603	903	0
6146	5	-14.5871	-101.316	-682.944	-97883.2	5123.9	1578.37	207.503	443.325	0	-0.0759888	8.79868	-47.0468	-109.314	4520.56	1085.36	296.086	905.324	0	0	0	0	0	0	0	603	903	0
6146	6	-15.1974	-101.468	-685.995	-97517	5429.08	1257.94	207.914	442.154	0	-0.68634	8.95126	-44.3002	440.003	4520.56	902.251	302.044	893.068	0	0	0	0	0	0	0	603	903	0
6146	7	-14.1293	-101.163	-688.132	-98707.2	5307.01	1486.82	207.712	443.442	0	-0.533752	8.18832	-44.3002	-750.183	3971.24	902.251	289.644	919.934	0	0	0	0	0	0	0	603	903	0
6146	8	-15.5026	-99.7899	-689.352	-99714.2	5307.01	1395.26	207.699	444.649	0	0.534363	7.42538	-41.8588	-383.972	4093.31	719.146	297.789	912.173	0	0	0	0	0	0	0	603	903	0
6146	9	-14.7397	-99.1795	-692.099	-99897.3	5490.11	1486.82	207.933	444.34	0	2.21283	5.89951	-39.7226	-475.525	3727.1	673.37	293.828	914.971	0	0	0	0	0	0	0	603	903	0
6147	0	-14.4345	-98.264	-693.015	-100172	6100.47	1120.61	208.803	444.545	0	0.0765991	5.28915	-37.2811	-750.183	3482.96	490.264	293.424	923.122	0	0	0	0	0	0	0	603	903	0
6147	1	-14.5871	-97.0433	-696.677	-99714.2	5795.29	1486.82	208.318	443.128	0	2.06024	4.98398	-37.8915	-475.525	3055.71	490.264	280.644	915.55	0	0	0	0	0	0	0	603	903	0
6147	2	-15.0449	-97.0433	-698.203	-100172	5673.22	1349.49	208.125	443.471	0	0.229187	3.61069	-34.2294	-292.419	3116.75	581.817	291.055	911.543	0	0	0	0	0	0	0	603	903	0
6147	3	-15.6552	-96.5855	-699.423	-99805.8	5612.18	983.277	208.024	442.697	0	1.60248	3.15292	-32.7035	-17.7613	2689.5	536.04	282.239	903.543	0	0	0	0	0	0	0	603	903	0
6147	4	-15.6552	-95.8226	-700.034	-100355	5368.04	1166.38	207.668	443.358	0	0.534363	3.4581	-30.2621	-475.525	2994.68	398.711	298.958	918.714	0	0	0	0	0	0	0	603	903	0
6147	5	-15.0449	-95.0597	-701.254	-101271	5612.18	800.172	208.003	444.414	0	0.0765991	3.15292	-30.2621	-292.419	2933.64	261.382	296.941	912.663	0	0	0	0	0	0	0	603	903	0
6147	6	-14.5871	-93.839	-702.475	-101271	5734.25	845.948	208.163	444.163	0	-0.381165	1.01669	-29.9569	-109.314	2811.57	536.04	293.854	906.649	0	0	0	0	0	0	0	603	903	0
6147	7	-14.7397	-92.9234	-705.832	-101637	5795.29	891.724	208.211	443.996	0	0.534363	0.253754	-27.5155	-200.867	2506.4	124.053	291.09	910.3	0	0	0	0	0	0	0	603	903	0
6147	8	-14.2819	-92.6182	-707.053	-101179	5001.83	845.948	207.074	443.1	0	1.44989	-0.0514216	-24.4638	-475.525	2079.15	352.935	284.989	922.438	0	0	0	0	0	0	0	603	903	0
6147	9	-15.0449	-92.7708	-708.884	-100630	5856.33	1349.49	208.261	441.955	0	-0.0759888	0.406342	-23.5482	-292.419	2323.29	78.2768	298.661	915.418	0	0	0	0	0	0	0	603	903	0
6148	0	-14.4345	-92.0079	-704.611	-100996	5734.25	983.277	208.138	443.336	0	0.229187	-0.204009	-23.2431	-200.867	1896.04	-59.0523	281.575	911.642	0	0	0	0	0	0	0	603	903	0
6148	1	-15.5026	-92.4657	-708.273	-102278	5673.22	1578.37	208.01	444.404	0	0.229187	-0.966949	-19.2758	256.897	1957.08	124.053	301.531	889.673	0	0	0	0	0	0	0	603	903	0
6148	2	-15.1974	-90.482	-710.41	-101545	5795.29	800.172	208.158	442.939	0	0.839539	-1.27212	-19.8861	-200.867	1712.94	-196.381	286.137	913.101	0	0	0	0	0	0	0	603	903	0
6148	3	-14.4345	-89.5665	-711.02	-102095	6039.43	845.948	208.494	443.589	0	0	0	0	0	0	0	200	903	0	0	0	0	0	0	0	603	903	0
6148	4	-14.5871	-89.7191	-712.851	-101545	5734.25	754.395	208.044	442.45	0	-0.68634	-2.798	-19.8861	73.7915	1835.01	-13.276	292.276	899.289	0	0	0	0	0	0	0	603	903	0
6148	5	-13.9767	-88.8036	-711.63	-102003	5490.11	800.172	207.715	443.337	0	0	0	0	0	0	0	200	903	0	0	0	0	0	0	0	603	903	0
6148	6	-15.0449	-88.9561	-714.377	-101454	5856.33	983.277	208.198	442.017	0	0	0	0	0	0	0	200	903	0	0	0	0	0	0	0	603	903	0
6148	7	-15.5026	-88.8036	-713.461	-101728	5551.15	708.619	207.781	442.584	0	0	0	0	0	0	0	200	903	0	0	0	0	0	0	0	603	903	0
6148	8	-15.6552	-87.2777	-713.461	-102278	5795.29	845.948	208.123	443.354	0	0	0	0	0	0	0	200	903	0	0	0	0	0	0	0	603	903	0
6148	9	-15.0449	-86.3621	-714.377	-102095	6100.47	800.172	208.54	442.914	0	0	0	0	0	0	0	200	903	0	0	0	0	0	0	0	603	903	0
6149	0	-13.3664	-85.4466	-716.818	-102278	6100.47	891.724	208.51	442.683	0	0	0	0	0	0	0	200	903	0	0	0	0	0	0	0	603	903	0
6149	1	-15.35	-85.294	-715.598	-101362	5551.15	1074.83	207.757	441.647	0	0	0	0	0	0	0	200	903	0	0	0	0	0	0	0	603	903	0
6149	2	-15.8078	-85.4466	-716.513	-101637	5978.4	1029.05	208.344	441.849	0	0	0	0	0	0	0	200	903	0	0	0	0	0	0	0	603	903	0
6149	3	-16.2656	-85.294	-715.903	-101728	6100.47	1120.61	208.521	442.098	0	0	0	0	0	0	0	200	903	0	0	0	0	0	0	0	603	903	0
6149	4	-16.8759	-84.3785	-717.123	-101637	5612.18	1029.05	207.826	441.729	0	0	0	0	0	0	0	200	903	0	0	0	0	0	0	0	603	903	0
6149	5	-16.2656	-83.463	-718.039	-102186	6100.47	983.277	208.496	442.313	0	0	0	0	0	0	0	200	903	0	0	0	0	0	0	0	603	903	0
6149	6	-16.5707	-83.1578	-716.513	-102095	6100.47	1074.83	208.514	442.488	0	0	0	0	0	0	0	200	903	0	0	0	0	0	0	0	603	903	0
6149	7	-16.113	-82.3949	-718.344	-102369	5856.33	1212.16	208.153	442.507	0	0	0	0	0	0	0	200	903	0	0	0	0	0	0	0	603	903	0
6149	8	-17.3337	-81.3267	-718.649	-101087	5795.29	1166.38	208.064	440.663	0	0	0	0	0	0	0	200	903	0	0	0	0	0	0	0	603	903	0
6149	9	-18.2492	-82.3949	-718.344	-101454	5551.15	1532.59	207.728	441.233	0	0	0	0	0	0	0	200	903	0	0	0	0	0	0	0	603	903	0
6150	0	-18.5544	-82.8526	-717.429	-100996	5673.22	1303.71	207.908	440.775	0	0	0	0	0	0	0	200	903	0	0	0	0	0	0	0	603	903	0
6150	1	-19.3173	-81.1742	-715.903	-101820	5673.22	1441.04	207.925	442.226	0	0	0	0	0	0	0	200	903	0	0	0	0	0	0	0	603	903	0
6150	2	-19.6225	-80.2586	-715.598	-101179	6039.43	1349.49	208.44	441.391	0	0	0	0	0	0	0	200	903	0	0	0	0	0	0	0	603	903	0
6150	3	-19.1647	-79.9535	-715.598	-101545	6100.47	1486.82	208.525	441.903	0	0	0	0	0	0	0	200	903	0	0	0	0	0	0	0	603	903	0
6150	4	-19.6225	-79.4957	-715.903	-100904	5307.01	1669.92	207.413	440.947	0	0	0	0	0	0	0	200	903	0	0	0	0	0	0	0	603	903	0
6150	5	-19.9277	-79.1905	-716.513	-100355	5917.36	1715.7	208.259	440.06	0	0	0	0	0	0	0	200	903	0	0	0	0	0	0	0	603	903	0
6150	6	-20.8432	-79.1905	-715.903	-99348	6100.47	1624.15	208.521	438.773	0	0	0	0	0	0	0	200	903	0	0	0	0	0	0	0	603	903	0
6150	7	-20.2328	-79.1905	-715.292	-100080	5612.18	1669.92	207.846	439.915	0	0	0	0	0	0	0	200	903	0	0	0	0	0	0	0	603	903	0
6150	8	-22.2165	-78.4276	-714.377	-100904	6161.5	1853.03	208.625	441.248	0	0	0	0	0	0	0	200	903	0	0	0	0	0	0	0	603	903	0
6150	9	-21.9113	-77.3595	-714.377	-100355	5978.4	1853.03	208.369	440.479	0	0	0	0	0	0	0	200	903	0	0	0	0	0	0	0	603	903	0
6151	0	-22.2165	-77.3595	-714.072	-100447	5673.22	2127.69	207.945	440.668	0	0	0	0	0	0	0	200	903	0	0	0	0	0	0	0	603	903	0
6151	1	-22.8268	-76.7491	-713.766	-100172	5490.11	1990.36	207.692	440.343	0	0	0	0	0	0	0	200	903	0	0	0	0	0	0	0	603	903	0
6151	2	-23.2846	-76.7491	-707.968	-99622.6	5307.01	2265.02	207.496	440.716	0	0	0	0	0	0	0	200	903	0	0	0	0	0	0	0	603	903	0
6151	3	-24.8105	-76.5965	-712.851	-98707.2	5612.18	2173.46	207.873	438.468	0	0	0	0	0	0	0	200	903	0	0	0	0	0	0	0	603	903	0
6151	4	-25.2682	-77.3595	-712.546	-99073.4	5368.04	2173.46	207.534	439.041	0	0	0	0	0	0	0	200	903	0	0	0	0	0	0	0	603	903	0
6151	5	-26.0312	-76.1388	-709.799	-99622.6	5673.22	2310.79	207.993	440.353	0	0	0	0	0	0	0	200	903	0	0	0	0	0	0	0	603	903	0
6151	6	-24.9631	-75.2232	-711.325	-97608.5	5612.18	2265.02	207.89	437.221	0	0	0	0	0	0	0	200	903	0	0	0	0	0	0	0	603	903	0
6151	7	-22.8268	-75.0706	-712.851	-99531.1	4940.8	2631.23	206.931	439.624	0	0	0	0	0	0	0	200	903	0	0	0	0	0	0	0	603	903	0
6151	8	-25.5734	-74.7655	-711.935	-98157.8	5551.15	2722.78	207.797	437.875	0	0	0	0	0	0	0	200	903	0	0	0	0	0	0	0	603	903	0
6151	9	-27.2519	-75.0706	-712.241	-98798.7	5612.18	2539.67	207.88	438.715	0	0	0	0	0	0	0	200	903	0	0	0	0	0	0	0	603	903	0
6152	0	-27.5571	-74.4603	-711.02	-98157.8	5429.08	3043.21	207.636	438.052	0	0	0	0	0	0	0	200	903	0	0	0	0	0	0	0	603	903	0
6152	1	-27.4045	-74.6129	-709.189	-98707.2	5368.04	2722.78	207.569	439.183	0	0	0	0	0	0	0	200	903	0	0	0	0	0	0	0	603	903	0
6152	2	-28.4726	-73.8499	-707.358	-98340.9	5612.18	2768.56	207.934	439.026	0	0	0	0	0	0	0	200	903	0	0	0	0	0	0	0	603	903	0
6152	3	-28.0148	-72.7818	-708.273	-98157.8	5062.87	2860.11	207.148	438.587	0	0	0	0	0	0	0	200	903	0	0	0	0	0	0	0	603	903	0
6152	4	-27.8622	-74.0025	-708.273	-98432.5	5184.94	2768.56	207.321	438.975	0	0	0	0	0	0	0	200	903	0	0	0	0	0	0	0	603	903	0
6152	5	-27.7097	-71.7137	-710.41	-97059.2	5307.01	2997.44	207.47	436.624	0	0	0	0	0	0	0	200	903	0	0	0	0	0	0	0	603	903	0
6152	6	-29.3881	-72.6292	-709.189	-97242.3	5490.11	2905.89	207.741	437.118	0	0	0	0	0	0	0	200	903	0	0	0	0	0	0	0	603	903	0
6152	7	-28.4726	-72.0189	-706.442	-96876.1	5184.94	2997.44	207.34	437.132	0	0	0	0	0	0	0	200	903	0	0	0	0	0	0	0	603	903	0
6152	8	-30.1511	-72.1715	-706.747	-96967.6	5551.15	2951.66	207.855	437.203	0	0	0	0	0	0	0	200	903	0	0	0	0	0	0	0	603	903	0
6152	9	-28.7778	-70.9508	-706.442	-96967.6	4635.62	2860.11	206.562	437.262	0	0	0	0	0	0	0	200	903	0	0	0	0	0	0	0	603	903	0
6153	0	-28.32	-70.493	-706.442	-96693	5245.97	3043.21	207.426	436.873	0	0	0	0	0	0	0	200	903	0	0	0	0	0	0	0	603	903	0
6153	1	-29.3881	-71.2559	-705.527	-96876.1	5551.15	2951.66	207.868	437.31	0	0	0	0	0	0	0	200	903	0	0	0	0	0	0	0	603	903	0
6153	2	-30.4562	-69.5775	-705.527	-95960.5	5490.11	2905.89	207.782	436.013	0	0	0	0	0	0	0	200	903	0	0	0	0	0	0	0	603	903	0
6153	3	-29.8459	-69.5775	-703.696	-95777.5	5307.01	2951.66	207.542	436.106	0	0	0	0	0	0	0	200	903	0	0	0	0	0	0	0	603	903	0
6153	4	-31.2192	-69.2723	-702.17	-95502.8	5368.04	3226.32	207.645	436.011	0	0	0	0	0	0	0	200	903	0	0	0	0	0	0	0	603	903	0
6153	5	-30.4562	-69.1197	-702.17	-95228.1	5429.08	3088.99	207.732	435.62	0	0	0	0	0	0	0	200	903	0	0	0	0	0	0	0	603	903	0
6153	6	-30.6088	-67.899	-700.949	-95502.8	5245.97	3088.99	207.484	436.248	0	0	0	0	0	0	0	200	903	0	0	0	0	0	0	0	603	903	0
6153	7	-30.1511	-67.899	-702.475	-95228.1	4940.8	3226.32	207.033	435.561	0	0	0	0	0	0	0	200	903	0	0	0	0	0	0	0	603	903	0
6153	8	-29.6933	-68.9671	-700.949	-95411.3	5551.15	3134.77	207.919	436.117	0	0	0	0	0	0	0	200	903	0	0	0	0	0	0	0	603	903	0
6153	9	-31.6769	-66.5257	-702.78	-94953.5	5001.83	3226.32	207.117	435.111	0	0	0	0	0	0	0	200	903	0	0	0	0	0	0	0	603	903	0
6154	0	-31.6769	-67.5938	-700.644	-94312.6	5307.01	3043.21	207.574	434.609	0	0	0	0	0	0	0	200	903	0	0	0	0	0	0	0	603	903	0
6154	1	-31.8295	-66.2205	-700.339	-94861.9	5368.04	3088.99	207.665	435.452	0	0	0	0	0	0	0	200	903	0	0	0	0	0	0	0	603	903	0
6154	2	-30.7614	-66.068	-700.034	-95319.7	5245.97	3134.77	207.494	436.164	0	0	0	0	0	0	0	200	903	0	0	0	0	0	0	0	603	903	0
6154	3	-30.914	-65.305	-701.559	-94587.3	5062.87	3134.77	207.217	434.824	0	0	0	0	0	0	0	200	903	0	0	0	0	0	0	0	603	903	0
6154	4	-30.1511	-64.6947	-701.865	-94037.9	5429.08	3134.77	207.735	433.983	0	0	0	0	0	0	0	200	903	0	0	0	0	0	0	0	603	903	0
6154	5	-32.1347	-63.9317	-701.865	-94770.4	5307.01	3043.21	207.561	435.027	0	0	0	0	0	0	0	200	903	0	0	0	0	0	0	0	603	903	0
6154	6	-31.9821	-63.9317	-696.371	-94404.1	5123.9	3226.32	207.358	435.566	0	0	0	0	0	0	0	200	903	0	0	0	0	0	0	0	603	903	0
6154	7	-31.2192	-63.7791	-699.423	-94037.9	5551.15	3088.99	207.937	434.451	0	0	0	0	0	0	0	200	903	0	0	0	0	0	0	0	603	903	0
6154	8	-30.4562	-63.3214	-700.949	-93854.9	5307.01	3226.32	207.571	433.897	0	0	0	0	0	0	0	200	903	0	0	0	0	0	0	0	603	903	0
6154	9	-30.4562	-62.5584	-698.813	-93946.4	4757.69	3134.77	206.808	434.437	0	0	0	0	0	0	0	200	903	0	0	0	0	0	0	0	603	903	0
6155	0	-30.914	-61.9481	-701.559	-94129.5	5551.15	3088.99	207.913	434.172	0	0	0	0	0	0	0	200	903	0	0	0	0	0	0	0	603	903	0
6155	1	-29.0829	-62.1007	-700.339	-94312.6	5551.15	2997.44	207.926	434.667	0	0	0	0	0	0	0	200	903	0	0	0	0	0	0	0	603	903	0
6155	2	-31.5243	-60.5748	-701.559	-94129.5	5001.83	3134.77	207.13	434.172	0	0	0	0	0	0	0	200	903	0	0	0	0	0	0	0	603	903	0
6155	3	-31.3718	-60.5748	-698.508	-94129.5	5307.01	3088.99	207.598	434.758	0	0	0	0	0	0	0	200	903	0	0	0	0	0	0	0	603	903	0
6155	4	-29.9985	-59.6593	-700.034	-93763.3	5245.97	3043.21	207.494	433.941	0	0	0	0	0	0	0	200	903	0	0	0	0	0	0	0	603	903	0
6155	5	-29.6933	-58.8963	-700.949	-93305.5	5429.08	3272.1	207.745	433.113	0	0	0	0	0	0	0	200	903	0	0	0	0	0	0	0	603	903	0
6155	6	-29.5407	-59.0489	-700.339	-93214	5123.9	3134.77	207.316	433.098	0	0	0	0	0	0	0	200	903	0	0	0	0	0	0	0	603	903	0
6155	7	-30.7614	-59.8119	-698.508	-93397.1	5307.01	2860.11	207.598	433.709	0	0	0	0	0	0	0	200	903	0	0	0	0	0	0	0	603	903	0
6155	8	-29.5407	-57.523	-701.865	-93946.4	5551.15	3043.21	207.909	433.853	0	0	0	0	0	0	0	200	903	0	0	0	0	0	0	0	603	903	0
6155	9	-30.1511	-56.6075	-701.254	-92481.6	5429.08	3363.65	207.742	431.88	0	0	0	0	0	0	0	200	903	0	0	0	0	0	0	0	603	903	0
6156	0	-29.3881	-56.6075	-698.203	-93854.9	5612.18	2905.89	208.038	434.424	0	0	0	0	0	0	0	200	903	0	0	0	0	0	0	0	603	903	0
6156	1	-28.4726	-55.692	-700.644	-93671.7	5490.11	2722.78	207.836	433.694	0	0	0	0	0	0	0	200	903	0	0	0	0	0	0	0	603	903	0
6156	2	-27.0993	-55.2342	-702.78	-93030.9	5123.9	2677	207.291	432.375	0	0	0	0	0	0	0	200	903	0	0	0	0	0	0	0	603	903	0
6156	3	-27.5571	-55.5394	-702.475	-92115.4	5245.97	2539.67	207.468	431.13	0	0	0	0	0	0	0	200	903	0	0	0	0	0	0	0	603	903	0
6156	4	-28.0148	-55.2342	-702.78	-93122.4	5245.97	2585.45	207.465	432.506	0	0	0	0	0	0	0	200	903	0	0	0	0	0	0	0	603	903	0
6156	5	-26.9467	-54.0135	-700.949	-93580.2	5307.01	2493.9	207.571	433.505	0	0	0	0	0	0	0	200	903	0	0	0	0	0	0	0	603	903	0
6156	6	-27.5571	-53.7083	-701.559	-93305.5	5429.08	2585.45	207.739	432.997	0	0	0	0	0	0	0	200	903	0	0	0	0	0	0	0	603	903	0
6156	7	-26.0312	-53.2506	-701.254	-93580.2	5551.15	2448.12	207.916	433.447	0	0	0	0	0	0	0	200	903	0	0	0	0	0	0	0	603	903	0
6156	8	-26.0312	-52.9454	-700.949	-93488.6	5245.97	2127.69	207.484	433.374	0	0	0	0	0	0	0	200	903	0	0	0	0	0	0	0	603	903	0
6156	9	-25.2682	-51.7247	-703.696	-92573.1	5368.04	2493.9	207.628	431.553	0	0	0	0	0	0	0	200	903	0	0	0	0	0	0	0	603	903	0
6157	0	-25.726	-51.4195	-703.391	-92023.8	5673.22	2448.12	208.066	430.829	0	0	0	0	0	0	0	200	903	0	0	0	0	0	0	0	603	903	0
6157	1	-25.5734	-51.1143	-702.475	-92664.6	5734.25	2356.57	208.163	431.912	0	0	0	0	0	0	0	200	903	0	0	0	0	0	0	0	603	903	0
6157	2	-25.8786	-51.7247	-700.949	-92390	5673.22	1853.03	208.094	431.807	0	0	0	0	0	0	0	200	903	0	0	0	0	0	0	0	603	903	0
6157	3	-25.1157	-50.1988	-699.423	-92847.8	5795.29	2310.79	208.286	432.749	0	0	0	0	0	0	0	200	903	0	0	0	0	0	0	0	603	903	0
6157	4	-24.2001	-49.1307	-701.865	-91199.8	6161.5	1807.25	208.779	429.939	0	0	0	0	0	0	0	200	903	0	0	0	0	0	0	0	603	903	0
6157	5	-22.2165	-48.9781	-702.78	-92756.2	5551.15	2127.69	207.899	431.985	0	0	0	0	0	0	0	200	903	0	0	0	0	0	0	0	603	903	0
6157	6	-22.6742	-47.91	-703.085	-91657.6	5856.33	1669.92	208.329	430.365	0	0	0	0	0	0	0	200	903	0	0	0	0	0	0	0	603	903	0
6157	7	-23.7424	-47.1471	-704.611	-91566	5917.36	1944.58	208.398	429.953	0	0	0	0	0	0	0	200	903	0	0	0	0	0	0	0	603	903	0
6157	8	-22.9794	-47.7574	-704.001	-91840.7	5856.33	1990.36	208.319	430.455	0	0	0	0	0	0	0	200	903	0	0	0	0	0	0	0	603	903	0
6157	9	-23.4372	-47.4522	-702.78	-91932.2	5612.18	1578.37	207.986	430.812	0	0	0	0	0	0	0	200	903	0	0	0	0	0	0	0	603	903	0
6158	0	-22.0639	-46.5367	-703.085	-92481.6	5856.33	1578.37	208.329	431.537	0	0	0	0	0	0	0	200	903	0	0	0	0	0	0	0	603	903	0
6158	1	-21.6061	-45.316	-703.391	-92115.4	6283.57	1395.26	208.933	430.959	0	0	0	0	0	0	0	200	903	0	0	0	0	0	0	0	603	903	0
6158	2	-21.301	-45.4686	-704.611	-92298.4	6039.43	1441.04	208.571	430.992	0	0	0	0	0	0	0	200	903	0	0	0	0	0	0	0	603	903	0
6158	3	-20.9958	-45.4686	-702.475	-92023.8	6405.64	1166.38	209.119	430.999	0	0	0	0	0	0	0	200	903	0	0	0	0	0	0	0	603	903	0
6158	4	-21.6061	-43.9427	-705.222	-91291.4	6222.54	1257.94	208.824	429.451	0	0	0	0	0	0	0	200	903	0	0	0	0	0	0	0	603	903	0
6158	5	-19.0121	-42.2642	-703.696	-91657.6	6344.61	1257.94	209.016	430.252	0	0	0	0	0	0	0	200	903	0	0	0	0	0	0	0	603	903	0
6158	6	-21.301	-43.6375	-704.916	-90833.6	6283.57	1120.61	208.914	428.857	0	0	0	0	0	0	0	200	903	0	0	0	0	0	0	0	603	903	0
6158	7	-19.4699	-43.1798	-704.611	-91566	6283.57	1212.16	208.918	429.953	0	0	0	0	0	0	0	200	903	0	0	0	0	0	0	0	603	903	0
6158	8	-17.6388	-42.722	-706.137	-91382.9	6344.61	1166.38	208.985	429.412	0	0	0	0	0	0	0	200	903	0	0	0	0	0	0	0	603	903	0
6158	9	-18.8596	-41.9591	-707.663	-91016.7	6344.61	1303.71	208.966	428.616	0	0	0	0	0	0	0	200	903	0	0	0	0	0	0	0	603	903	0
6159	0	-19.4699	-41.3487	-708.273	-91749.1	6405.64	937.501	209.044	429.539	0	0	0	0	0	0	0	200	903	0	0	0	0	0	0	0	603	903	0
6159	1	-19.4699	-40.5858	-709.494	-90650.5	6222.54	1120.61	208.77	427.768	0	0	0	0	0	0	0	200	903	0	0	0	0	0	0	0	603	903	0
6159	2	-18.8596	-40.5858	-707.053	-91108.2	6344.61	983.277	208.973	428.856	0	0	0	0	0	0	0	200	903	0	0	0	0	0	0	0	603	903	0
6159	3	-19.9277	-40.4332	-705.527	-90833.6	6527.71	937.501	209.252	428.746	0	0	0	0	0	0	0	200	903	0	0	0	0	0	0	0	603	903	0
6159	4	-17.944	-40.128	-707.358	-90375.8	6283.57	845.948	208.883	427.765	0	0	0	0	0	0	0	200	903	0	0	0	0	0	0	0	603	903	0
6159	5	-17.6388	-39.8228	-709.494	-91108.2	6161.5	708.619	208.684	428.413	0	0	0	0	0	0	0	200	903	0	0	0	0	0	0	0	603	903	0
6159	6	-17.1811	-39.2125	-709.189	-90101.2	6466.68	983.277	209.118	427.048	0	0	0	0	0	0	0	200	903	0	0	0	0	0	0	0	603	903	0
6159	7	-18.5544	-38.7547	-709.494	-91108.2	6222.54	891.724	208.77	428.413	0	0	0	0	0	0	0	200	903	0	0	0	0	0	0	0	603	903	0
6159	8	-16.7233	-38.297	-709.799	-90559	6161.5	754.395	208.681	427.584	0	0	0	0	0	0	0	200	903	0	0	0	0	0	0	0	603	903	0
6159	9	-18.5544	-37.2288	-709.494	-90009.6	6710.82	708.619	209.459	426.865	0	0	0	0	0	0	0	200	903	0	0	0	0	0	0	0	603	903	0
6160	0	-17.1811	-38.4496	-710.715	-89460.3	6527.71	891.724	209.185	425.874	0	0	0	0	0	0	0	200	903	0	0	0	0	0	0	0	603	903	0
6160	1	-16.8759	-38.297	-709.189	-90101.2	6466.68	845.948	209.118	427.048	0	0	0	0	0	0	0	200	903	0	0	0	0	0	0	0	603	903	0
6160	2	-17.0285	-39.6703	-711.325	-89826.5	6161.5	571.29	208.662	426.281	0	0	0	0	0	0	0	200	903	0	0	0	0	0	0	0	603	903	0
6160	3	-15.9604	-37.2288	-709.799	-90375.8	6588.75	525.513	209.283	427.326	0	0	0	0	0	0	0	200	903	0	0	0	0	0	0	0	603	903	0
6160	4	-17.6388	-36.7711	-711.02	-90009.6	6283.57	937.501	208.837	426.592	0	0	0	0	0	0	0	200	903	0	0	0	0	0	0	0	603	903	0
6160	5	-16.8759	-36.0081	-710.104	-90467.4	6222.54	800.172	208.763	427.4	0	0	0	0	0	0	0	200	903	0	0	0	0	0	0	0	603	903	0
6160	6	-17.7914	-37.2288	-709.799	-89918.1	6283.57	388.184	208.853	426.681	0	0	0	0	0	0	0	200	903	0	0	0	0	0	0	0	603	903	0
6160	7	-16.2656	-36.3133	-710.715	-89185.7	6222.54	617.066	208.755	425.487	0	0	0	0	0	0	0	200	903	0	0	0	0	0	0	0	603	903	0
6160	8	-15.0449	-36.6185	-710.104	-88727.9	6466.68	1074.83	209.107	424.951	0	0	0	0	0	0	0	200	903	0	0	0	0	0	0	0	603	903	0
6160	9	-16.4181	-37.2288	-711.63	-89002.5	6161.5	708.619	208.658	425.069	0	0	0	0	0	0	0	200	903	0	0	0	0	0	0	0	603	903	0
6161	0	-17.3337	-35.8556	-713.156	-88727.9	6344.61	342.408	208.897	424.416	0	0	0	0	0	0	0	200	903	0	0	0	0	0	0	0	603	903	0
6161	1	-17.3337	-36.0081	-713.156	-88727.9	6527.71	617.066	209.153	424.416	0	0	0	0	0	0	0	200	903	0	0	0	0	0	0	0	603	903	0
6161	2	-17.4863	-36.1607	-710.715	-89185.7	6527.71	617.066	209.185	425.487	0	0	0	0	0	0	0	200	903	0	0	0	0	0	0	0	603	903	0
6161	3	-16.4181	-36.0081	-711.63	-88819.5	6466.68	571.29	209.087	424.811	0	0	0	0	0	0	0	200	903	0	0	0	0	0	0	0	603	903	0
6161	4	-15.5026	-35.0926	-711.325	-89094.1	6588.75	708.619	209.263	425.251	0	0	0	0	0	0	0	200	903	0	0	0	0	0	0	0	603	903	0
6161	5	-15.8078	-36.1607	-713.156	-88361.7	6466.68	754.395	209.068	423.902	0	0	0	0	0	0	0	200	903	0	0	0	0	0	0	0	603	903	0
6161	6	-16.5707	-35.0926	-709.799	-87903.9	6588.75	525.513	209.283	423.843	0	0	0	0	0	0	0	200	903	0	0	0	0	0	0	0	603	903	0
6161	7	-17.6388	-35.2452	-712.851	-87171.5	6527.71	891.724	209.157	422.286	0	0	0	0	0	0	0	200	903	0	0	0	0	0	0	0	603	903	0
6161	8	-16.113	-35.8556	-711.02	-87354.6	5917.36	800.172	208.322	422.858	0	0	0	0	0	0	0	200	903	0	0	0	0	0	0	0	603	903	0
6161	9	-17.7914	-35.0926	-710.715	-87263.1	6649.78	571.29	209.356	422.782	0	0	0	0	0	0	0	200	903	0	0	0	0	0	0	0	603	903	0
6162	0	-17.3337	-34.94	-711.325	-87537.7	6161.5	296.632	208.662	423.063	0	0	0	0	0	0	0	200	903	0	0	0	0	0	0	0	603	903	0
6162	1	-15.9604	-34.1771	-710.715	-87354.6	6100.47	525.513	208.584	422.911	0	0	0	0	0	0	0	200	903	0	0	0	0	0	0	0	603	903	0
6162	2	-16.5707	-35.3978	-712.851	-87079.9	6405.64	662.843	208.986	422.157	0	0	0	0	0	0	0	200	903	0	0	0	0	0	0	0	603	903	0
6162	3	-16.5707	-34.0245	-707.968	-86622.2	6344.61	708.619	208.962	422.353	0	0	0	0	0	0	0	200	903	0	0	0	0	0	0	0	603	903	0
6162	4	-17.7914	-34.1771	-712.546	-86072.8	5429.08	845.948	207.619	420.796	0	0	0	0	0	0	0	200	903	0	0	0	0	0	0	0	603	903	0
6162	5	-16.8759	-33.8719	-710.41	-86072.8	6405.64	617.066	209.017	421.16	0	0	0	0	0	0	0	200	903	0	0	0	0	0	0	0	603	903	0
6162	6	-18.0966	-33.4142	-710.104	-85706.6	6588.75	800.172	209.279	420.696	0	0	0	0	0	0	0	200	903	0	0	0	0	0	0	0	603	903	0
6162	7	-17.6388	-34.0245	-710.41	-86072.8	5429.08	1029.05	207.642	421.16	0	0	0	0	0	0	0	200	903	0	0	0	0	0	0	0	603	903	0
6162	8	-17.3337	-32.4986	-709.799	-84699.6	6283.57	708.619	208.853	419.329	0	0	0	0	0	0	0	200	903	0	0	0	0	0	0	0	603	903	0
6162	9	-17.4863	-32.346	-711.02	-85615.1	6466.68	1166.38	209.095	420.412	0	0	0	0	0	0	0	200	903	0	0	0	0	0	0	0	603	903	0
6163	0	-17.3337	-32.346	-707.663	-85981.3	6161.5	800.172	208.707	421.5	0	0	0	0	0	0	0	200	903	0	0	0	0	0	0	0	603	903	0
6163	1	-19.1647	-31.7357	-710.104	-84699.6	6588.75	891.724	209.279	419.278	0	0	0	0	0	0	0	200	903	0	0	0	0	0	0	0	603	903	0
6163	2	-17.3337	-32.346	-709.494	-83692.5	6344.61	845.948	208.942	417.961	0	0	0	0	0	0	0	200	903	0	0	0	0	0	0	0	603	903	0
6163	3	-19.4699	-31.7357	-708.273	-84150.2	6283.57	845.948	208.872	418.81	0	0	0	0	0	0	0	200	903	0	0	0	0	0	0	0	603	903	0
6163	4	-18.4018	-32.6512	-707.968	-84058.7	5856.33	1029.05	208.272	418.732	0	0	0	0	0	0	0	200	903	0	0	0	0	0	0	0	603	903	0
6163	5	-18.707	-31.1253	-707.053	-84516.4	5917.36	800.172	208.369	419.533	0	0	0	0	0	0	0	200	903	0	0	0	0	0	0	0	603	903	0
6163	6	-18.4018	-30.515	-709.799	-83784	5795.29	937.501	208.165	418.039	0	0	0	0	0	0	0	200	903	0	0	0	0	0	0	0	603	903	0
6163	7	-18.4018	-30.0572	-706.747	-83692.5	5978.4	1212.16	208.459	418.419	0	0	0	0	0	0	0	200	903	0	0	0	0	0	0	0	603	903	0
6163	8	-19.7751	-29.752	-709.189	-83509.4	5734.25	937.501	208.086	417.753	0	0	0	0	0	0	0	200	903	0	0	0	0	0	0	0	603	903	0
6163	9	-17.3337	-29.5995	-708.273	-83417.8	5856.33	983.277	208.268	417.776	0	0	0	0	0	0	0	200	903	0	0	0	0	0	0	0	603	903	0
6164	0	-20.3854	-29.9046	-706.747	-82593.9	5734.25	1303.71	208.114	416.865	0	0	0	0	0	0	0	200	903	0	0	0	0	0	0	0	603	903	0
6164	1	-19.3173	-30.0572	-706.442	-82960.1	5795.29	1257.94	208.203	417.434	0	0	0	0	0	0	0	200	903	0	0	0	0	0	0	0	603	903	0
6164	2	-19.9277	-29.2943	-705.832	-83051.6	5551.15	1074.83	207.865	417.665	0	0	0	0	0	0	0	200	903	0	0	0	0	0	0	0	603	903	0
6164	3	-19.3173	-27.921	-708.273	-83143.2	5734.25	1303.71	208.096	417.389	0	0	0	0	0	0	0	200	903	0	0	0	0	0	0	0	603	903	0
6164	4	-19.1647	-27.6158	-705.222	-82776.9	5978.4	1074.83	208.477	417.377	0	0	0	0	0	0	0	200	903	0	0	0	0	0	0	0	603	903	0
6164	5	-20.6906	-27.3106	-706.747	-82319.2	5368.04	1166.38	207.595	416.476	0	0	0	0	0	0	0	200	903	0	0	0	0	0	0	0	603	903	0
6164	6	-19.3173	-26.8529	-704.306	-81953	5673.22	1074.83	208.055	416.36	0	0	0	0	0	0	0	200	903	0	0	0	0	0	0	0	603	903	0
6164	7	-21.1484	-27.4632	-705.222	-81312.1	5551.15	1166.38	207.871	415.3	0	0	0	0	0	0	0	200	903	0	0	0	0	0	0	0	603	903	0
6164	8	-19.6225	-26.7003	-704.611	-81037.5	5612.18	1029.05	207.965	415.01	0	0	0	0	0	0	0	200	903	0	0	0	0	0	0	0	603	903	0
6164	9	-20.2328	-26.7003	-704.611	-81495.2	5245.97	1074.83	207.445	415.66	0	0	0	0	0	0	0	200	903	0	0	0	0	0	0	0	603	903	0
6165	0	-19.9277	-26.0899	-705.222	-81678.3	5734.25	1120.61	208.131	415.819	0	0	0	0	0	0	0	200	903	0	0	0	0	0	0	0	603	903	0
6165	1	-21.6061	-25.1744	-702.78	-81220.5	5734.25	1120.61	208.159	415.57	0	0	0	0	0	0	0	200	903	0	0	0	0	0	0	0	603	903	0
6165	2	-20.9958	-26.8529	-705.527	-81312.1	5123.9	1441.04	207.263	415.25	0	0	0	0	0	0	0	200	903	0	0	0	0	0	0	0	603	903	0
6165	3	-21.4535	-24.7166	-702.78	-79847.3	5673.22	1212.16	208.073	413.616	0	0	0	0	0	0	0	200	903	0	0	0	0	0	0	0	603	903	0
6165	4	-20.8432	-24.7166	-702.17	-80213.5	5612.18	1257.94	207.993	414.237	0	0	0	0	0	0	0	200	903	0	0	0	0	0	0	0	603	903	0
6165	5	-20.0803	-24.7166	-701.254	-79847.3	5734.25	1120.61	208.177	413.863	0	0	0	0	0	0	0	200	903	0	0	0	0	0	0	0	603	903	0
6165	6	-20.0803	-24.2589	-701.559	-79938.8	5551.15	1212.16	207.913	413.945	0	0	0	0	0	0	0	200	903	0	0	0	0	0	0	0	603	903	0
6165	7	-20.538	-23.8011	-702.78	-80121.9	5673.22	1212.16	208.073	414.007	0	0	0	0	0	0	0	200	903	0	0	0	0	0	0	0	603	903	0
6165	8	-21.1484	-22.733	-698.203	-78382.4	5307.01	1029.05	207.601	412.263	0	0	0	0	0	0	0	200	903	0	0	0	0	0	0	0	603	903	0
6165	9	-20.9958	-22.4278	-702.17	-79481	5429.08	1669.92	207.732	413.193	0	0	0	0	0	0	0	200	903	0	0	0	0	0	0	0	603	903	0
6166	0	-21.4535	-21.9701	-700.034	-79023.3	5368.04	1120.61	207.668	412.885	0	0	0	0	0	0	0	200	903	0	0	0	0	0	0	0	603	903	0
6166	1	-21.4535	-22.1226	-699.423	-78657.1	5245.97	1212.16	207.5	412.46	0	0	0	0	0	0	0	200	903	0	0	0	0	0	0	0	603	903	0
6166	2	-21.4535	-22.2752	-699.728	-78474	5307.01	1349.49	207.584	412.149	0	0	0	0	0	0	0	200	903	0	0	0	0	0	0	0	603	903	0
6166	3	-20.8432	-21.8175	-698.508	-78290.9	5551.15	1349.49	207.947	412.083	0	0	0	0	0	0	0	200	903	0	0	0	0	0	0	0	603	903	0
6166	4	-20.538	-21.8175	-699.423	-78748.6	5307.01	1212.16	207.588	412.591	0	0	0	0	0	0	0	200	903	0	0	0	0	0	0	0	603	903	0
6166	5	-21.9113	-21.0545	-699.728	-78199.3	5184.94	1257.94	207.41	411.757	0	0	0	0	0	0	0	200	903	0	0	0	0	0	0	0	603	903	0
6166	6	-21.4535	-19.6812	-698.203	-77558.4	5184.94	1166.38	207.426	411.083	0	0	0	0	0	0	0	200	903	0	0	0	0	0	0	0	603	903	0
6166	7	-21.6061	-19.5287	-697.592	-78016.2	5062.87	1212.16	207.258	411.836	0	0	0	0	0	0	0	200	903	0	0	0	0	0	0	0	603	903	0
6166	8	-21.6061	-19.2235	-693.93	-77833.1	5307.01	1257.94	207.648	412.163	0	0	0	0	0	0	0	200	903	0	0	0	0	0	0	0	603	903	0
6166	9	-20.9958	-18.6131	-696.677	-76734.5	5551.15	1257.94	207.968	410.144	0	0	0	0	0	0	0	200	903	0	0	0	0	0	0	0	603	903	0
6167	0	-19.7751	-18.7657	-698.203	-76826	5429.08	1166.38	207.776	410.034	0	0	0	0	0	0	0	200	903	0	0	0	0	0	0	0	603	903	0
6167	1	-20.6906	-18.6131	-697.897	-76002.1	4696.66	1395.26	206.73	408.902	0	0	0	0	0	0	0	200	903	0	0	0	0	0	0	0	603	903	0
6167	2	-21.6061	-18.9183	-696.982	-76368.3	5001.83	1166.38	207.176	409.57	0	0	0	0	0	0	0	200	903	0	0	0	0	0	0	0	603	903	0
6167	3	-22.2165	-18.1554	-691.183	-76642.9	5307.01	1441.04	207.678	410.887	0	0	0	0	0	0	0	200	903	0	0	0	0	0	0	0	603	903	0
6167	4	-21.9113	-17.0872	-695.456	-75727.4	5001.83	1074.83	207.192	408.889	0	0	0	0	0	0	0	200	903	0	0	0	0	0	0	0	603	903	0
6167	5	-20.8432	-16.4769	-693.625	-76185.1	5001.83	1166.38	207.211	409.836	0	0	0	0	0	0	0	200	903	0	0	0	0	0	0	0	603	903	0
6167	6	-20.8432	-16.0191	-693.625	-75818.9	5368.04	1166.38	207.739	409.308	0	0	0	0	0	0	0	200	903	0	0	0	0	0	0	0	603	903	0
6167	7	-20.2328	-16.0191	-694.846	-75178.1	5184.94	1029.05	207.462	408.194	0	0	0	0	0	0	0	200	903	0	0	0	0	0	0	0	603	903	0
6167	8	-20.0803	-15.8665	-692.099	-74720.3	5062.87	1029.05	207.315	407.962	0	0	0	0	0	0	0	200	903	0	0	0	0	0	0	0	603	903	0
6167	9	-20.6906	-16.3243	-694.846	-74537.2	5307.01	1257.94	207.638	407.272	0	0	0	0	0	0	0	200	903	0	0	0	0	0	0	0	603	903	0
6168	0	-20.0803	-16.0191	-693.015	-74537.2	4940.8	1166.38	207.129	407.555	0	0	0	0	0	0	0	200	903	0	0	0	0	0	0	0	603	903	0
6168	1	-21.4535	-15.5614	-693.015	-74903.4	5062.87	1120.61	207.306	408.084	0	0	0	0	0	0	0	200	903	0	0	0	0	0	0	0	603	903	0
6168	2	-19.9277	-14.7984	-693.625	-74445.6	5123.9	1166.38	207.387	407.328	0	0	0	0	0	0	0	200	903	0	0	0	0	0	0	0	603	903	0
6168	3	-20.2328	-14.3407	-693.32	-74445.6	4818.73	1120.61	206.95	407.376	0	0	0	0	0	0	0	200	903	0	0	0	0	0	0	0	603	903	0
6168	4	-20.3854	-14.0355	-693.015	-73713.2	4940.8	1120.61	207.129	406.366	0	0	0	0	0	0	0	200	903	0	0	0	0	0	0	0	603	903	0
6168	5	-20.0803	-14.4933	-690.573	-73255.5	5001.83	1029.05	207.243	406.079	0	0	0	0	0	0	0	200	903	0	0	0	0	0	0	0	603	903	0
6168	6	-20.6906	-14.1881	-693.93	-73072.4	5184.94	891.724	207.472	405.302	0	0	0	0	0	0	0	200	903	0	0	0	0	0	0	0	603	903	0
6168	7	-19.9277	-14.1881	-692.099	-72889.2	4940.8	1212.16	207.139	405.316	0	0	0	0	0	0	0	200	903	0	0	0	0	0	0	0	603	903	0
6168	8	-20.6906	-14.0355	-692.099	-73621.7	5245.97	937.501	207.58	406.375	0	0	0	0	0	0	0	200	903	0	0	0	0	0	0	0	603	903	0
6168	9	-20.538	-12.8148	-691.489	-72706.2	5062.87	1212.16	207.322	405.144	0	0	0	0	0	0	0	200	903	0	0	0	0	0	0	0	603	903	0
6169	0	-19.6225	-13.2725	-691.794	-73255.5	5001.83	1120.61	207.23	405.892	0	0	0	0	0	0	0	200	903	0	0	0	0	0	0	0	603	903	0
6169	1	-20.2328	-12.8148	-691.794	-72156.8	5123.9	1120.61	207.407	404.304	0	0	0	0	0	0	0	200	903	0	0	0	0	0	0	0	603	903	0
6169	2	-20.0803	-13.4251	-691.489	-72156.8	4940.8	1029.05	207.145	404.35	0	0	0	0	0	0	0	200	903	0	0	0	0	0	0	0	603	903	0
6169	3	-20.8432	-12.8148	-692.709	-71607.5	4452.51	1029.05	206.428	403.373	0	0	0	0	0	0	0	200	903	0	0	0	0	0	0	0	603	903	0
6169	4	-20.9958	-14.3407	-691.183	-71424.4	5001.83	1212.16	207.237	403.336	0	0	0	0	0	0	0	200	903	0	0	0	0	0	0	0	603	903	0
6169	5	-20.6906	-12.6622	-689.047	-71882.2	5001.83	1074.83	207.259	404.321	0	0	0	0	0	0	0	200	903	0	0	0	0	0	0	0	603	903	0
6169	6	-19.7751	-11.2889	-690.878	-71149.8	4818.73	800.172	206.975	402.985	0	0	0	0	0	0	0	200	903	0	0	0	0	0	0	0	603	903	0
6169	7	-17.944	-11.1363	-693.015	-71882.2	5001.83	1166.38	207.218	403.724	0	0	0	0	0	0	0	200	903	0	0	0	0	0	0	0	603	903	0
6169	8	-19.9277	-11.4415	-691.489	-70051.1	4818.73	1212.16	206.969	401.305	0	0	0	0	0	0	0	200	903	0	0	0	0	0	0	0	603	903	0
6169	9	-21.301	-11.4415	-692.709	-70783.5	4635.62	1212.16	206.692	402.184	0	0	0	0	0	0	0	200	903	0	0	0	0	0	0	0	603	903	0
6170	0	-20.538	-11.4415	-690.573	-70142.7	4696.66	708.619	206.801	401.572	0	0	0	0	0	0	0	200	903	0	0	0	0	0	0	0	603	903	0
6170	1	-21.4535	-12.6622	-690.573	-70234.2	5001.83	891.724	207.243	401.704	0	0	0	0	0	0	0	200	903	0	0	0	0	0	0	0	603	903	0
6170	2	-19.9277	-11.2889	-689.963	-70783.5	4757.69	983.277	206.896	402.59	0	0	0	0	0	0	0	200	903	0	0	0	0	0	0	0	603	903	0
6170	3	-20.6906	-10.2208	-690.878	-69776.5	4696.66	662.843	206.798	400.997	0	0	0	0	0	0	0	200	903	0	0	0	0	0	0	0	603	903	0
6170	4	-18.8596	-9.61044	-692.404	-70142.7	4635.62	937.501	206.695	401.303	0	0	0	0	0	0	0	200	903	0	0	0	0	0	0	0	603	903	0
6170	5	-21.1484	-9.91561	-689.963	-69868	4696.66	754.395	206.807	401.263	0	0	0	0	0	0	0	200	903	0	0	0	0	0	0	0	603	903	0
6170	6	-20.3854	-9.76303	-692.709	-69227.1	4879.76	891.724	207.044	399.937	0	0	0	0	0	0	0	200	903	0	0	0	0	0	0	0	603	903	0
6170	7	-20.2328	-10.2208	-689.047	-68769.4	4696.66	754.395	206.816	399.804	0	0	0	0	0	0	0	200	903	0	0	0	0	0	0	0	603	903	0
6170	8	-21.1484	-10.8311	-690.878	-68769.4	4879.76	754.395	207.063	399.539	0	0	0	0	0	0	0	200	903	0	0	0	0	0	0	0	603	903	0
6170	9	-20.0803	-9.76303	-689.963	-68952.5	4940.8	891.724	207.161	399.937	0	0	0	0	0	0	0	200	903	0	0	0	0	0	0	0	603	903	0
6171	0	-18.4018	-9.15267	-691.794	-68586.3	4574.58	845.948	206.613	399.143	0	0	0	0	0	0	0	200	903	0	0	0	0	0	0	0	603	903	0
6171	1	-19.6225	-8.69491	-689.658	-68860.9	4879.76	1074.83	207.076	399.848	0	0	0	0	0	0	0	200	903	0	0	0	0	0	0	0	603	903	0
6171	2	-20.3854	-8.8475	-691.183	-68586.3	4696.66	983.277	206.795	399.23	0	0	0	0	0	0	0	200	903	0	0	0	0	0	0	0	603	903	0
6171	3	-20.9958	-8.08456	-691.489	-67579.2	4879.76	891.724	207.057	397.73	0	0	0	0	0	0	0	200	903	0	0	0	0	0	0	0	603	903	0
6171	4	-21.6061	-8.8475	-688.437	-67487.6	4940.8	754.395	207.177	398.03	0	0	0	0	0	0	0	200	903	0	0	0	0	0	0	0	603	903	0
6171	5	-20.9958	-9.76303	-687.521	-67487.6	4757.69	845.948	206.92	398.161	0	0	0	0	0	0	0	200	903	0	0	0	0	0	0	0	603	903	0
6171	6	-20.0803	-8.08456	-689.047	-67487.6	4879.76	937.501	207.082	397.943	0	0	0	0	0	0	0	200	903	0	0	0	0	0	0	0	603	903	0
6171	7	-20.2328	-7.6268	-689.658	-66572.1	4635.62	891.724	206.722	396.529	0	0	0	0	0	0	0	200	903	0	0	0	0	0	0	0	603	903	0
6171	8	-20.2328	-7.16903	-689.047	-67213	4513.55	662.843	206.55	397.545	0	0	0	0	0	0	0	200	903	0	0	0	0	0	0	0	603	903	0
6171	9	-20.9958	-6.40609	-689.963	-66572.1	4696.66	891.724	206.807	396.487	0	0	0	0	0	0	0	200	903	0	0	0	0	0	0	0	603	903	0
6172	0	-20.2328	-5.18539	-686.911	-66205.9	5001.83	800.172	207.282	396.382	0	0	0	0	0	0	0	200	903	0	0	0	0	0	0	0	603	903	0
6172	1	-21.7587	-6.40609	-688.437	-66114.4	4696.66	708.619	206.822	396.036	0	0	0	0	0	0	0	200	903	0	0	0	0	0	0	0	603	903	0
6172	2	-20.3854	-6.25351	-687.521	-66022.8	4818.73	708.619	207.009	396.03	0	0	0	0	0	0	0	200	903	0	0	0	0	0	0	0	603	903	0
6172	3	-20.3854	-5.49057	-686.911	-66205.9	4635.62	1029.05	206.749	396.382	0	0	0	0	0	0	0	200	903	0	0	0	0	0	0	0	603	903	0
6172	4	-19.9277	-5.0328	-688.742	-65473.5	4757.69	983.277	206.908	395.062	0	0	0	0	0	0	0	200	903	0	0	0	0	0	0	0	603	903	0
6172	5	-20.9958	-5.0328	-685.69	-65931.2	4635.62	983.277	206.761	396.153	0	0	0	0	0	0	0	200	903	0	0	0	0	0	0	0	603	903	0
6172	6	-21.4535	-4.26986	-688.742	-65015.7	4635.62	937.501	206.731	394.398	0	0	0	0	0	0	0	200	903	0	0	0	0	0	0	0	603	903	0
6172	7	-19.7751	-3.04916	-686.301	-64649.5	4025.27	1029.05	205.865	394.2	0	0	0	0	0	0	0	200	903	0	0	0	0	0	0	0	603	903	0
6172	8	-21.9113	-3.8121	-683.859	-64558	4513.55	617.066	206.6	394.402	0	0	0	0	0	0	0	200	903	0	0	0	0	0	0	0	603	903	0
6172	9	-20.6906	-3.50692	-684.164	-64466.4	4757.69	800.172	206.954	394.227	0	0	0	0	0	0	0	200	903	0	0	0	0	0	0	0	603	903	0
6173	0	-20.6906	-3.96469	-683.859	-64924.2	4391.48	800.172	206.422	394.938	0	0	0	0	0	0	0	200	903	0	0	0	0	0	0	0	603	903	0
6173	1	-21.1484	-2.28622	-685.69	-64008.6	4757.69	617.066	206.939	393.349	0	0	0	0	0	0	0	200	903	0	0	0	0	0	0	0	603	903	0
6173	2	-22.2165	-2.89657	-686.606	-64558	4635.62	617.066	206.752	394.025	0	0	0	0	0	0	0	200	903	0	0	0	0	0	0	0	603	903	0
6173	3	-22.0639	-2.13363	-685.08	-64008.6	4635.62	662.843	206.767	393.432	0	0	0	0	0	0	0	200	903	0	0	0	0	0	0	0	603	903	0
6173	4	-22.2165	-2.13363	-683.859	-63276.2	4208.37	845.948	206.154	392.528	0	0	0	0	0	0	0	200	903	0	0	0	0	0	0	0	603	903	0
6173	5	-22.8268	-1.67587	-682.028	-63093.1	4452.51	1257.94	206.528	392.508	0	0	0	0	0	0	0	200	903	0	0	0	0	0	0	0	603	903	0
6173	6	-21.7587	-0.912929	-682.944	-63001.6	4269.41	433.961	206.251	392.25	0	0	0	0	0	0	0	200	903	0	0	0	0	0	0	0	603	903	0
6173	7	-21.6061	-0.607753	-685.08	-63825.5	4391.48	891.724	206.41	393.165	0	0	0	0	0	0	0	200	903	0	0	0	0	0	0	0	603	903	0
6173	8	-21.4535	0.155186	-684.775	-62543.8	4452.51	525.513	206.502	391.335	0	0	0	0	0	0	0	200	903	0	0	0	0	0	0	0	603	903	0
6173	9	-22.5217	0.61295	-685.69	-63093.1	4330.44	754.395	206.315	392.014	0	0	0	0	0	0	0	200	903	0	0	0	0	0	0	0	603	903	0
6174	0	-21.4535	1.07071	-683.554	-62543.8	4391.48	525.513	206.424	391.498	0	0	0	0	0	0	0	200	903	0	0	0	0	0	0	0	603	903	0
6174	1	-23.4372	1.98624	-682.639	-62086	4025.27	617.066	205.897	390.95	0	0	0	0	0	0	0	200	903	0	0	0	0	0	0	0	603	903	0
6174	2	-21.4535	1.83365	-682.028	-62086	4574.58	800.172	206.707	391.031	0	0	0	0	0	0	0	200	903	0	0	0	0	0	0	0	603	903	0
6174	3	-22.5217	1.98624	-680.807	-61811.4	4452.51	754.395	206.54	390.791	0	0	0	0	0	0	0	200	903	0	0	0	0	0	0	0	603	903	0
6174	4	-22.2165	1.83365	-683.554	-62726.9	4269.41	662.843	206.246	391.766	0	0	0	0	0	0	0	200	903	0	0	0	0	0	0	0	603	903	0
6174	5	-24.0475	3.20694	-683.859	-62177.6	4391.48	571.29	206.422	390.922	0	0	0	0	0	0	0	200	903	0	0	0	0	0	0	0	603	903	0
6174	6	-23.4372	2.59659	-683.554	-62360.7	3781.13	662.843	205.532	391.23	0	0	0	0	0	0	0	200	903	0	0	0	0	0	0	0	603	903	0
6174	7	-23.7424	4.42765	-682.333	-61536.7	4330.44	525.513	206.347	390.186	0	0	0	0	0	0	0	200	903	0	0	0	0	0	0	0	603	903	0
6174	8	-23.4372	3.51212	-682.333	-61079	4025.27	571.29	205.899	389.515	0	0	0	0	0	0	0	200	903	0	0	0	0	0	0	0	603	903	0
6174	9	-22.0639	4.12247	-682.028	-60895.9	4452.51	571.29	206.528	389.286	0	0	0	0	0	0	0	200	903	0	0	0	0	0	0	0	603	903	0
6175	0	-22.6742	4.73282	-685.08	-61628.3	4208.37	571.29	206.143	389.958	0	0	0	0	0	0	0	200	903	0	0	0	0	0	0	0	603	903	0
6175	1	-23.5898	5.038	-681.113	-61170.5	3842.16	525.513	205.641	389.81	0	0	0	0	0	0	0	200	903	0	0	0	0	0	0	0	603	903	0
6175	2	-24.0475	6.2587	-683.859	-61170.5	4330.44	433.961	206.332	389.449	0	0	0	0	0	0	0	200	903	0	0	0	0	0	0	0	603	903	0
6175	3	-23.5898	4.88541	-682.944	-61170.5	4391.48	662.843	206.43	389.569	0	0	0	0	0	0	0	200	903	0	0	0	0	0	0	0	603	903	0
6175	4	-23.895	7.4794	-682.333	-59888.8	4269.41	388.184	206.257	387.771	0	0	0	0	0	0	0	200	903	0	0	0	0	0	0	0	603	903	0
6175	5	-22.9794	6.2587	-682.639	-60621.2	3964.23	800.172	205.807	388.804	0	0	0	0	0	0	0	200	903	0	0	0	0	0	0	0	603	903	0
6175	6	-21.301	7.63199	-683.859	-59888.8	4208.37	296.632	206.154	387.575	0	0	0	0	0	0	0	200	903	0	0	0	0	0	0	0	603	903	0
6175	7	-22.6742	7.4794	-685.69	-60529.6	3964.23	479.737	205.781	388.276	0	0	0	0	0	0	0	200	903	0	0	0	0	0	0	0	603	903	0
6175	8	-23.7424	8.54752	-685.385	-60071.9	4086.3	845.948	205.962	387.647	0	0	0	0	0	0	0	200	903	0	0	0	0	0	0	0	603	903	0
6175	9	-23.895	9.00528	-685.69	-60438.1	4147.34	433.961	206.048	388.142	0	0	0	0	0	0	0	200	903	0	0	0	0	0	0	0	603	903	0
6176	0	-23.4372	7.78458	-685.08	-60438.1	4147.34	525.513	206.054	388.22	0	0	0	0	0	0	0	200	903	0	0	0	0	0	0	0	603	903	0
6176	1	-24.2001	10.226	-682.028	-58973.2	3842.16	342.408	205.633	386.467	0	0	0	0	0	0	0	200	903	0	0	0	0	0	0	0	603	903	0
6176	2	-22.2165	9.46305	-685.385	-59156.3	4147.34	571.29	206.051	386.311	0	0	0	0	0	0	0	200	903	0	0	0	0	0	0	0	603	903	0
6176	3	-21.7587	10.226	-686.911	-58607	4147.34	479.737	206.038	385.32	0	0	0	0	0	0	0	200	903	0	0	0	0	0	0	0	603	903	0
6176	4	-22.5217	10.226	-687.216	-59797.2	3720.09	433.961	205.413	387.014	0	0	0	0	0	0	0	200	903	0	0	0	0	0	0	0	603	903	0
6176	5	-23.4372	10.226	-688.132	-59522.5	4025.27	388.184	205.85	386.499	0	0	0	0	0	0	0	200	903	0	0	0	0	0	0	0	603	903	0
6176	6	-22.2165	11.4467	-687.827	-59247.9	4269.41	433.961	206.207	386.138	0	0	0	0	0	0	0	200	903	0	0	0	0	0	0	0	603	903	0
6176	7	-23.895	11.9045	-687.216	-59705.7	4025.27	388.184	205.857	386.88	0	0	0	0	0	0	0	200	903	0	0	0	0	0	0	0	603	903	0
6176	8	-23.4372	12.6674	-687.216	-58332.4	3414.92	388.184	204.969	384.882	0	0	0	0	0	0	0	200	903	0	0	0	0	0	0	0	603	903	0
6176	9	-22.0639	12.057	-689.047	-58423.9	4269.41	296.632	206.196	384.789	0	0	0	0	0	0	0	200	903	0	0	0	0	0	0	0	603	903	0
6177	0	-22.9794	11.2941	-691.183	-58240.8	4025.27	250.855	205.824	384.262	0	0	0	0	0	0	0	200	903	0	0	0	0	0	0	0	603	903	0
6177	1	-22.3691	13.1252	-690.573	-58881.7	3781.13	250.855	205.475	385.265	0	0	0	0	0	0	0	200	903	0	0	0	0	0	0	0	603	903	0
6177	2	-23.5898	14.1933	-692.099	-58149.3	3842.16	113.526	205.551	384.019	0	0	0	0	0	0	0	200	903	0	0	0	0	0	0	0	603	903	0
6177	3	-23.895	14.9562	-691.489	-58515.5	4086.3	342.408	205.909	384.623	0	0	0	0	0	0	0	200	903	0	0	0	0	0	0	0	603	903	0
6177	4	-23.7424	15.2614	-686.911	-57233.7	3964.23	754.395	205.771	383.32	0	0	0	0	0	0	0	200	903	0	0	0	0	0	0	0	603	903	0
6177	5	-22.8268	15.7192	-692.099	-57416.9	3048.71	205.079	204.405	382.96	0	0	0	0	0	0	0	200	903	0	0	0	0	0	0	0	603	903	0
6177	6	-22.6742	15.8717	-693.93	-57233.7	4147.34	159.302	205.977	382.478	0	0	0	0	0	0	0	200	903	0	0	0	0	0	0	0	603	903	0
6177	7	-22.9794	14.9562	-694.54	-56684.4	3903.2	388.184	205.62	381.614	0	0	0	0	0	0	0	200	903	0	0	0	0	0	0	0	603	903	0
6177	8	-23.5898	16.4821	-696.066	-57966.2	3842.16	296.632	205.52	383.277	0	0	0	0	0	0	0	200	903	0	0	0	0	0	0	0	603	903	0
6177	9	-22.3691	17.3976	-695.151	-57142.2	3231.81	-23.8032	204.649	382.201	0	0	0	0	0	0	0	200	903	0	0	0	0	0	0	0	603	903	0
6178	0	-23.4372	17.7028	-695.456	-57874.6	3781.13	342.408	205.437	383.218	0	0	0	0	0	0	0	200	903	0	0	0	0	0	0	0	603	903	0
6178	1	-22.6742	18.1606	-694.846	-56226.6	3598.02	159.302	205.178	380.92	0	0	0	0	0	0	0	200	903	0	0	0	0	0	0	0	603	903	0
6178	2	-21.9113	18.008	-698.508	-56867.5	3659.06	113.526	205.238	381.413	0	0	0	0	0	0	0	200	903	0	0	0	0	0	0	0	603	903	0
6178	3	-22.9794	18.7709	-699.423	-56592.9	3903.2	250.855	205.581	380.914	0	0	0	0	0	0	0	200	903	0	0	0	0	0	0	0	603	903	0
6178	4	-23.7424	18.7709	-700.644	-56318.2	3903.2	67.7495	205.571	380.381	0	0	0	0	0	0	0	200	903	0	0	0	0	0	0	0	603	903	0
6178	5	-22.3691	19.839	-698.508	-57142.2	3414.92	-69.5796	204.889	381.806	0	0	0	0	0	0	0	200	903	0	0	0	0	0	0	0	603	903	0
6178	6	-24.9631	20.4494	-700.034	-55952	3659.06	159.302	205.227	379.928	0	0	0	0	0	0	0	200	903	0	0	0	0	0	0	0	603	903	0
6178	7	-22.8268	21.0597	-699.728	-57050.6	3964.23	250.855	205.665	381.533	0	0	0	0	0	0	0	200	903	0	0	0	0	0	0	0	603	903	0
6178	8	-23.5898	21.6701	-698.508	-55768.9	3353.88	479.737	204.802	379.84	0	0	0	0	0	0	0	200	903	0	0	0	0	0	0	0	603	903	0
6178	9	-23.132	21.5175	-703.696	-55860.4	3903.2	113.526	205.547	379.382	0	0	0	0	0	0	0	200	903	0	0	0	0	0	0	0	603	903	0
6179	0	-24.9631	21.5175	-704.916	-55860.4	3781.13	21.9732	205.364	379.244	0	0	0	0	0	0	0	200	903	0	0	0	0	0	0	0	603	903	0
6179	1	-25.1157	21.2123	-705.222	-55677.3	3720.09	-115.356	205.275	378.95	0	0	0	0	0	0	0	200	903	0	0	0	0	0	0	0	603	903	0
6179	2	-25.1157	23.196	-703.696	-55952	3109.74	67.7495	204.419	379.512	0	0	0	0	0	0	0	200	903	0	0	0	0	0	0	0	603	903	0
6179	3	-24.6579	23.6537	-704.611	-55128	3475.95	433.961	204.933	378.239	0	0	0	0	0	0	0	200	903	0	0	0	0	0	0	0	603	903	0
6179	4	-23.7424	24.4167	-705.527	-55860.4	3781.13	-23.8032	205.359	379.176	0	0	0	0	0	0	0	200	903	0	0	0	0	0	0	0	603	903	0
6179	5	-23.5898	25.027	-709.494	-55219.6	3353.88	67.7495	204.727	377.83	0	0	0	0	0	0	0	200	903	0	0	0	0	0	0	0	603	903	0
6179	6	-25.1157	26.0951	-705.527	-55036.5	3536.99	159.302	205.013	378.008	0	0	0	0	0	0	0	200	903	0	0	0	0	0	0	0	603	903	0
6179	7	-24.8105	25.027	-710.104	-54944.9	3842.16	159.302	205.411	377.376	0	0	0	0	0	0	0	200	903	0	0	0	0	0	0	0	603	903	0
6179	8	-25.1157	25.6374	-709.494	-54487.2	3720.09	433.961	205.243	376.797	0	0	0	0	0	0	0	200	903	0	0	0	0	0	0	0	603	903	0
6179	9	-25.5734	26.5529	-705.832	-54670.3	3475.95	250.855	204.925	377.455	0	0	0	0	0	0	0	200	903	0	0	0	0	0	0	0	603	903	0
6180	0	-23.2846	26.7055	-710.715	-54395.6	3720.09	296.632	205.234	376.536	0	0	0	0	0	0	0	200	903	0	0	0	0	0	0	0	603	903	0
6180	1	-24.9631	25.6374	-711.63	-54944.9	3353.88	21.9732	204.713	377.21	0	0	0	0	0	0	0	200	903	0	0	0	0	0	0	0	603	903	0
6180	2	-24.3527	27.7736	-710.104	-54121	3353.88	113.526	204.723	376.215	0	0	0	0	0	0	0	200	903	0	0	0	0	0	0	0	603	903	0
6180	3	-25.5734	28.0788	-713.461	-53754.7	3353.88	205.079	204.701	375.344	0	0	0	0	0	0	0	200	903	0	0	0	0	0	0	0	603	903	0
6180	4	-25.726	28.2314	-713.156	-53663.2	3231.81	67.7495	204.532	375.247	0	0	0	0	0	0	0	200	903	0	0	0	0	0	0	0	603	903	0
6180	5	-26.3364	28.6891	-713.461	-54487.2	3292.85	67.7495	204.615	376.37	0	0	0	0	0	0	0	200	903	0	0	0	0	0	0	0	603	903	0
6180	6	-25.4208	29.6046	-714.987	-53846.3	3048.71	433.961	204.264	375.311	0	0	0	0	0	0	0	200	903	0	0	0	0	0	0	0	603	903	0
6180	7	-24.3527	30.3676	-717.429	-53937.8	3598.02	525.513	205.015	375.182	0	0	0	0	0	0	0	200	903	0	0	0	0	0	0	0	603	903	0
6180	8	-25.4208	30.8254	-718.649	-53663.2	3292.85	159.302	204.582	374.672	0	0	0	0	0	0	0	200	903	0	0	0	0	0	0	0	603	903	0
6180	9	-26.3364	30.6728	-717.734	-52930.8	3109.74	159.302	204.333	373.747	0	0	0	0	0	0	0	200	903	0	0	0	0	0	0	0	603	903	0
6181	0	-23.7424	31.1305	-718.039	-52015.2	3231.81	159.302	204.501	372.441	0	0	0	0	0	0	0	200	903	0	0	0	0	0	0	0	603	903	0
6181	1	-26.3364	31.2831	-719.26	-52564.5	3353.88	159.302	204.663	373.081	0	0	0	0	0	0	0	200	903	0	0	0	0	0	0	0	603	903	0
6181	2	-25.726	30.8254	-719.26	-51740.6	3048.71	159.302	204.239	371.936	0	0	0	0	0	0	0	200	903	0	0	0	0	0	0	0	603	903	0
6181	3	-24.0475	31.1305	-721.396	-53113.9	2682.5	433.961	203.718	373.626	0	0	0	0	0	0	0	200	903	0	0	0	0	0	0	0	603	903	0
6181	4	-25.2682	33.8771	-723.227	-52839.2	3170.78	-161.132	204.384	373.06	0	0	0	0	0	0	0	200	903	0	0	0	0	0	0	0	603	903	0
6181	5	-26.1838	31.1305	-723.837	-52473	2743.53	113.526	203.79	372.493	0	0	0	0	0	0	0	200	903	0	0	0	0	0	0	0	603	903	0
6181	6	-27.0993	33.2668	-724.448	-51832.1	3048.71	113.526	204.208	371.547	0	0	0	0	0	0	0	200	903	0	0	0	0	0	0	0	603	903	0
6181	7	-27.2519	34.3349	-723.227	-51832.1	3170.78	113.526	204.384	371.668	0	0	0	0	0	0	0	200	903	0	0	0	0	0	0	0	603	903	0
6181	8	-25.8786	33.4193	-724.753	-51282.8	3170.78	296.632	204.375	370.759	0	0	0	0	0	0	0	200	903	0	0	0	0	0	0	0	603	903	0
6181	9	-25.726	33.4193	-724.448	-51282.8	2804.57	21.9732	203.871	370.789	0	0	0	0	0	0	0	200	903	0	0	0	0	0	0	0	603	903	0
6182	0	-26.0312	35.7082	-726.584	-51557.5	3170.78	113.526	204.364	370.959	0	0	0	0	0	0	0	200	903	0	0	0	0	0	0	0	603	903	0
6182	1	-27.4045	36.6237	-724.142	-51557.5	2926.64	113.526	204.042	371.198	0	0	0	0	0	0	0	200	903	0	0	0	0	0	0	0	603	903	0
6182	2	-26.3364	36.1659	-729.941	-51191.3	2865.6	159.302	203.926	370.131	0	0	0	0	0	0	0	200	903	0	0	0	0	0	0	0	603	903	0
6182	3	-27.2519	36.7763	-728.11	-50458.8	2987.67	113.526	204.103	369.301	0	0	0	0	0	0	0	200	903	0	0	0	0	0	0	0	603	903	0
6182	4	-26.4889	36.3185	-729.025	-49451.7	3048.71	479.737	204.182	367.833	0	0	0	0	0	0	0	200	903	0	0	0	0	0	0	0	603	903	0
6182	5	-25.726	36.7763	-729.636	-50092.6	2743.53	-23.8032	203.76	368.654	0	0	0	0	0	0	0	200	903	0	0	0	0	0	0	0	603	903	0
6182	6	-26.4889	37.5392	-732.382	-50367.3	2743.53	113.526	203.746	368.772	0	0	0	0	0	0	0	200	903	0	0	0	0	0	0	0	603	903	0
6182	7	-26.6415	36.7763	-727.805	-50367.3	3353.88	159.302	204.608	369.204	0	0	0	0	0	0	0	200	903	0	0	0	0	0	0	0	603	903	0
6182	8	-26.7941	38.3022	-733.908	-50367.3	2865.6	-23.8032	203.905	368.629	0	0	0	0	0	0	0	200	903	0	0	0	0	0	0	0	603	903	0
6182	9	-27.4045	38.9125	-732.993	-50001.1	2926.64	-23.8032	203.993	368.215	0	0	0	0	0	0	0	200	903	0	0	0	0	0	0	0	603	903	0
6183	0	-27.8622	39.9806	-731.772	-48719.3	2865.6	342.408	203.916	366.577	0	0	0	0	0	0	0	200	903	0	0	0	0	0	0	0	603	903	0
6183	1	-26.0312	39.2177	-734.518	-49268.6	2804.57	296.632	203.818	367.076	0	0	0	0	0	0	0	200	903	0	0	0	0	0	0	0	603	903	0
6183	2	-26.6415	41.2013	-736.655	-48627.8	2682.5	-115.356	203.641	366.012	0	0	0	0	0	0	0	200	903	0	0	0	0	0	0	0	603	903	0
6183	3	-26.4889	41.2013	-736.349	-49177.1	2682.5	250.855	203.643	366.785	0	0	0	0	0	0	0	200	903	0	0	0	0	0	0	0	603	903	0
6183	4	-27.2519	41.5065	-737.875	-48353.1	2865.6	67.7495	203.884	365.53	0	0	0	0	0	0	0	200	903	0	0	0	0	0	0	0	603	903	0
6183	5	-28.32	41.2013	-737.57	-48810.9	3048.71	525.513	204.133	366.178	0	0	0	0	0	0	0	200	903	0	0	0	0	0	0	0	603	903	0
6183	6	-27.4045	42.5746	-737.265	-48170	2438.35	159.302	203.307	365.336	0	0	0	0	0	0	0	200	903	0	0	0	0	0	0	0	603	903	0
6183	7	-26.4889	43.0324	-738.791	-46339	2560.43	113.526	203.466	362.723	0	0	0	0	0	0	0	200	903	0	0	0	0	0	0	0	603	903	0
6183	8	-26.7941	42.1169	-740.317	-47529.2	2926.64	159.302	203.953	364.201	0	0	0	0	0	0	0	200	903	0	0	0	0	0	0	0	603	903	0
6183	9	-27.4045	42.1169	-738.486	-47895.4	2621.46	159.302	203.55	364.856	0	0	0	0	0	0	0	200	903	0	0	0	0	0	0	0	603	903	0
6184	0	-27.8622	44.1005	-742.148	-47071.4	2499.39	205.079	203.368	363.426	0	0	0	0	0	0	0	200	903	0	0	0	0	0	0	0	603	903	0
6184	1	-27.0993	45.3212	-741.537	-47712.3	2621.46	388.184	203.535	364.342	0	0	0	0	0	0	0	200	903	0	0	0	0	0	0	0	603	903	0
6184	2	-28.7778	44.4057	-742.453	-46705.2	2255.25	433.961	203.038	362.907	0	0	0	0	0	0	0	200	903	0	0	0	0	0	0	0	603	903	0
6184	3	-27.4045	44.2531	-742.148	-46796.7	2743.53	250.855	203.697	363.056	0	0	0	0	0	0	0	200	903	0	0	0	0	0	0	0	603	903	0
6184	4	-25.8786	45.016	-744.284	-46247.4	2194.21	296.632	202.948	362.137	0	0	0	0	0	0	0	200	903	0	0	0	0	0	0	0	603	903	0
6184	5	-27.0993	46.3893	-745.2	-46522.1	1828	67.7495	202.453	362.429	0	0	0	0	0	0	0	200	903	0	0	0	0	0	0	0	603	903	0
6184	6	-28.1674	44.7108	-747.336	-46155.8	2499.39	205.079	203.344	361.761	0	0	0	0	0	0	0	200	903	0	0	0	0	0	0	0	603	903	0
6184	7	-26.4889	46.6945	-746.42	-46339	2438.35	388.184	203.267	362.082	0	0	0	0	0	0	0	200	903	0	0	0	0	0	0	0	603	903	0
6184	8	-28.32	47.4574	-746.725	-45881.2	2011.11	-23.8032	202.693	361.443	0	0	0	0	0	0	0	200	903	0	0	0	0	0	0	0	603	903	0
6184	9	-27.0993	47.4574	-747.946	-44782.6	2316.28	250.855	203.097	359.874	0	0	0	0	0	0	0	200	903	0	0	0	0	0	0	0	603	903	0
6185	0	-27.5571	46.5419	-747.336	-43592.4	2255.25	250.855	203.018	358.33	0	0	0	0	0	0	0	200	903	0	0	0	0	0	0	0	603	903	0
6185	1	-27.2519	47.4574	-749.472	-44782.6	2133.18	433.961	202.846	359.752	0	0	0	0	0	0	0	200	903	0	0	0	0	0	0	0	603	903	0
6185	2	-28.32	48.5255	-751.303	-44782.6	1889.04	250.855	202.514	359.607	0	0	0	0	0	0	0	200	903	0	0	0	0	0	0	0	603	903	0
6185	3	-28.4726	46.9997	-752.524	-44691	2255.25	342.408	202.997	359.388	0	0	0	0	0	0	0	200	903	0	0	0	0	0	0	0	603	903	0
6185	4	-29.0829	48.8307	-750.693	-44599.5	1950.07	617.066	202.598	359.411	0	0	0	0	0	0	0	200	903	0	0	0	0	0	0	0	603	903	0
6185	5	-28.1674	48.9833	-751.913	-44416.4	1705.93	159.302	202.269	359.071	0	0	0	0	0	0	0	200	903	0	0	0	0	0	0	0	603	903	0
6185	6	-26.3364	50.204	-750.693	-43409.3	1889.04	342.408	202.516	357.826	0	0	0	0	0	0	0	200	903	0	0	0	0	0	0	0	603	903	0
6185	7	-27.5571	48.6781	-754.965	-43134.6	1583.86	296.632	202.098	357.135	0	0	0	0	0	0	0	200	903	0	0	0	0	0	0	0	603	903	0
6185	8	-27.4045	49.7463	-754.965	-43134.6	1766.97	525.513	202.34	357.135	0	0	0	0	0	0	0	200	903	0	0	0	0	0	0	0	603	903	0
6185	9	-28.4726	51.1195	-756.186	-43500.8	1766.97	205.079	202.337	357.527	0	0	0	0	0	0	0	200	903	0	0	0	0	0	0	0	603	903	0
6186	0	-28.6252	50.6618	-754.66	-43409.3	1828	388.184	202.422	357.522	0	0	0	0	0	0	0	200	903	0	0	0	0	0	0	0	603	903	0
6186	1	-29.5407	51.1195	-753.439	-42859.9	1583.86	388.184	202.102	356.886	0	0	0	0	0	0	0	200	903	0	0	0	0	0	0	0	603	903	0
6186	2	-28.4726	52.3402	-755.27	-42676.8	1461.79	571.29	201.935	356.505	0	0	0	0	0	0	0	200	903	0	0	0	0	0	0	0	603	903	0
6186	3	-27.0993	53.4084	-758.017	-41852.9	1705.93	388.184	202.251	355.214	0	0	0	0	0	0	0	200	903	0	0	0	0	0	0	0	603	903	0
6186	4	-27.8622	52.1877	-756.491	-41028.9	1339.72	433.961	201.771	354.236	0	0	0	0	0	0	0	200	903	0	0	0	0	0	0	0	603	903	0
6186	5	-28.4726	52.0351	-758.932	-41395.1	1339.72	433.961	201.765	354.544	0	0	0	0	0	0	0	200	903	0	0	0	0	0	0	0	603	903	0
6186	6	-28.4726	54.0187	-758.322	-42127.5	1095.58	617.066	201.445	355.554	0	0	0	0	0	0	0	200	903	0	0	0	0	0	0	0	603	903	0
6186	7	-29.0829	54.4765	-758.932	-41395.1	1583.86	525.513	202.087	354.544	0	0	0	0	0	0	0	200	903	0	0	0	0	0	0	0	603	903	0
6186	8	-28.32	54.4765	-759.543	-41395.1	1522.83	433.961	202.005	354.5	0	0	0	0	0	0	0	200	903	0	0	0	0	0	0	0	603	903	0
6186	9	-26.6415	54.4765	-761.679	-40571.1	1461.79	571.29	201.919	353.265	0	0	0	0	0	0	0	200	903	0	0	0	0	0	0	0	603	903	0
6187	0	-28.0148	54.9342	-761.374	-40296.5	1400.76	433.961	201.84	352.926	0	0	0	0	0	0	0	200	903	0	0	0	0	0	0	0	603	903	0
6187	1	-29.2355	54.7817	-762.9	-40388	1278.69	708.619	201.676	352.94	0	0	0	0	0	0	0	200	903	0	0	0	0	0	0	0	603	903	0
6187	2	-29.5407	55.392	-764.731	-40754.3	1461.79	1120.61	201.912	353.292	0	0	0	0	0	0	0	200	903	0	0	0	0	0	0	0	603	903	0
6187	3	-29.2355	56.7653	-763.51	-40571.1	1522.83	479.737	201.995	353.138	0	0	0	0	0	0	0	200	903	0	0	0	0	0	0	0	603	903	0
6187	4	-29.0829	57.6808	-763.51	-40571.1	1034.55	571.29	201.355	353.138	0	0	0	0	0	0	0	200	903	0	0	0	0	0	0	0	603	903	0
6187	5	-28.7778	57.2231	-763.51	-39747.2	790.406	617.066	201.035	352.059	0	0	0	0	0	0	0	200	903	0	0	0	0	0	0	0	603	903	0
6187	6	-27.4045	57.8334	-765.646	-39106.3	1339.72	845.948	201.75	351.076	0	0	0	0	0	0	0	200	903	0	0	0	0	0	0	0	603	903	0
6187	7	-27.0993	58.1386	-765.036	-38282.3	973.511	754.395	201.273	350.04	0	0	0	0	0	0	0	200	903	0	0	0	0	0	0	0	603	903	0
6187	8	-29.6933	56.4601	-765.952	-38831.6	1034.55	891.724	201.351	350.697	0	0	0	0	0	0	0	200	903	0	0	0	0	0	0	0	603	903	0
6187	9	-30.4562	58.9015	-765.036	-39014.7	1217.65	662.843	201.592	350.997	0	0	0	0	0	0	0	200	903	0	0	0	0	0	0	0	603	903	0
6188	0	-29.9985	59.9696	-763.205	-38007.7	790.406	845.948	201.036	349.8	0	0	0	0	0	0	0	200	903	0	0	0	0	0	0	0	603	903	0
6188	1	-29.0829	61.1903	-765.341	-38282.3	668.335	983.277	200.873	350.02	0	0	0	0	0	0	0	200	903	0	0	0	0	0	0	0	603	903	0
6188	2	-28.9304	60.58	-767.783	-37641.5	302.124	1166.38	200.394	349.026	0	0	0	0	0	0	0	200	903	0	0	0	0	0	0	0	603	903	0
6188	3	-29.6933	61.3429	-768.393	-37458.4	729.37	662.843	200.949	348.749	0	0	0	0	0	0	0	200	903	0	0	0	0	0	0	0	603	903	0
6188	4	-30.914	61.1903	-769.614	-36909	790.406	891.724	201.027	347.958	0	0	0	0	0	0	0	200	903	0	0	0	0	0	0	0	603	903	0
6188	5	-29.2355	61.6481	-768.088	-37458.4	607.3	983.277	200.791	348.768	0	0	0	0	0	0	0	200	903	0	0	0	0	0	0	0	603	903	0
6188	6	-31.5243	62.2585	-768.698	-37641.5	546.265	708.619	200.711	348.968	0	0	0	0	0	0	0	200	903	0	0	0	0	0	0	0	603	903	0
6188	7	-30.1511	62.5636	-767.783	-37366.8	668.335	1120.61	200.87	348.668	0	0	0	0	0	0	0	200	903	0	0	0	0	0	0	0	603	903	0
6188	8	-30.3036	62.411	-767.783	-36817.5	851.441	1395.26	201.109	347.953	0	0	0	0	0	0	0	200	903	0	0	0	0	0	0	0	603	903	0
6188	9	-30.6088	63.4792	-770.224	-35901.9	729.37	1212.16	200.947	346.612	0	0	0	0	0	0	0	200	903	0	0	0	0	0	0	0	603	903	0
6189	0	-31.5243	62.8688	-769.614	-35535.7	790.406	662.843	201.027	346.173	0	0	0	0	0	0	0	200	903	0	0	0	0	0	0	0	603	903	0
6189	1	-32.2873	63.7843	-771.14	-35444.2	851.441	1074.83	201.104	345.963	0	0	0	0	0	0	0	200	903	0	0	0	0	0	0	0	603	903	0
6189	2	-32.1347	64.0895	-769.308	-35993.5	790.406	1029.05	201.027	346.787	0	0	0	0	0	0	0	200	903	0	0	0	0	0	0	0	603	903	0
6189	3	-32.8976	64.2421	-766.562	-35901.9	-64.0869	937.501	199.916	346.835	0	0	0	0	0	0	0	200	903	0	0	0	0	0	0	0	603	903	0
6189	4	-30.914	65.768	-768.698	-35352.6	668.335	1212.16	200.869	345.99	0	0	0	0	0	0	0	200	903	0	0	0	0	0	0	0	603	903	0
6189	5	-31.3718	66.3783	-771.75	-34711.8	546.265	1212.16	200.708	344.978	0	0	0	0	0	0	0	200	903	0	0	0	0	0	0	0	603	903	0
6189	6	-30.914	67.4464	-768.698	-34437.1	424.194	1166.38	200.552	344.799	0	0	0	0	0	0	0	200	903	0	0	0	0	0	0	0	603	903	0
6189	7	-33.3554	66.5309	-772.055	-33887.8	424.194	937.501	200.549	343.893	0	0	0	0	0	0	0	200	903	0	0	0	0	0	0	0	603	903	0
6189	8	-31.9821	65.6154	-771.445	-33887.8	424.194	1166.38	200.55	343.928	0	0	0	0	0	0	0	200	903	0	0	0	0	0	0	0	603	903	0
6189	9	-33.2028	68.6672	-769.919	-33979.3	607.3	1303.71	200.789	344.134	0	0	0	0	0	0	0	200	903	0	0	0	0	0	0	0	603	903	0
6190	0	-31.8295	68.6672	-771.445	-33063.8	180.054	1029.05	200.233	342.86	0	0	0	0	0	0	0	200	903	0	0	0	0	0	0	0	603	903	0
6190	1	-30.4562	68.5146	-772.36	-33430	485.23	708.619	200.628	343.283	0	0	0	0	0	0	0	200	903	0	0	0	0	0	0	0	603	903	0
6190	2	-32.1347	69.2775	-774.191	-32789.1	302.124	1303.71	200.39	342.353	0	0	0	0	0	0	0	200	903	0	0	0	0	0	0	0	603	903	0
6190	3	-33.0502	70.3456	-772.971	-32880.7	363.159	1166.38	200.47	342.538	0	0	0	0	0	0	0	200	903	0	0	0	0	0	0	0	603	903	0
6190	4	-32.1347	70.6508	-771.14	-32422.9	363.159	1029.05	200.471	342.046	0	0	0	0	0	0	0	200	903	0	0	0	0	0	0	0	603	903	0
6190	5	-33.508	70.3456	-771.445	-33246.9	485.23	1349.49	200.629	343.097	0	0	0	0	0	0	0	200	903	0	0	0	0	0	0	0	603	903	0
[truncated: 3,004 more rows]
