# Supplementary material for: The Effects of an Extemporaneous Speech Dual-task on Older Adult Gait Control
Source: Research Square preprint supplement (doi:10.21203/rs.3.rs-7674245/v1), 2025-11-18
Supplement: Supplementary file 9 [file DT10Walk8.xlsx]

## Sheet: Sheet1
Trajectories
		10:LFHD			10:RFHD			10:LBHD			10:RBHD			10:C7			10:T10			10:CLAV			10:STRN			10:RBAK			10:LSHO			10:LUPA			10:LELB			10:LFRM			10:LWRA			10:LWRB			10:LFIN
Frame	Sub Frame	X	Y	Z	X	Y	Z	X	Y	Z	X	Y	Z	X	Y	Z	X	Y	Z	X	Y	Z	X	Y	Z	X	Y	Z	X	Y	Z	X	Y	Z	X	Y	Z	X	Y	Z	X	Y	Z	X	Y	Z	X	Y	Z
		mm	mm	mm	mm	mm	mm	mm	mm	mm	mm	mm	mm	mm	mm	mm	mm	mm	mm	mm	mm	mm	mm	mm	mm	mm	mm	mm	mm	mm	mm	mm	mm	mm	mm	mm	mm	mm	mm	mm	mm	mm	mm	mm	mm	mm	mm	mm	mm
10480	0	131.984	-2235.7	1545.96	235.792	-2240.59	1549.91	109.535	-2397.65	1568.03	227.324	-2406.69	1574.3	188.385	-2456.17	1420.32	188.114	-2548.04	1141.63	184.56	-2290.75	1323.08	194.053	-2191.16	1125.53	267.103	-2545.47	1237.24	33.0837	-2360.67	1380.09	-72.8836	-2395.85	1141.62	-77.2788	-2421.24	1047.48	-86.0643	-2367.22	902.679	-35.5948	-2363.8	800.128	-100.839	-2401.4	793.786	-87.1279	-2356.39	723.663
10481	0	130.636	-2225.51	1547.02	234.424	-2230.51	1551.46	107.795	-2387.4	1569.97	225.635	-2396.41	1576.85	187.452	-2446.8	1422.03	188.192	-2537.96	1143.04	183.762	-2281.28	1325.27	193.712	-2181.71	1128.23	266.996	-2535.28	1238.88	31.8903	-2351.7	1382	-72.921	-2385.63	1143.14	-77.0939	-2410.7	1049.03	-86.3834	-2355.85	904.678	-36.3658	-2351.14	801.862	-101.555	-2389.04	795.705	-88.4681	-2343.71	725.527
10482	0	129.352	-2215.44	1548.06	233.163	-2220.42	1553.01	106.443	-2377.07	1571.96	224.22	-2386.25	1579.45	186.602	-2437.55	1423.7	188.004	-2527.97	1144.51	183.128	-2271.77	1327.38	193.333	-2172.21	1130.88	266.663	-2525.27	1240.41	31.0494	-2342.44	1383.84	-73.0812	-2375.41	1144.63	-77.4327	-2400.11	1050.63	-86.9787	-2344.1	906.655	-37.4553	-2338.07	803.9	-102.352	-2376.23	797.602	-89.6062	-2330.65	727.5
10483	0	128.135	-2205.51	1549.18	231.969	-2210.36	1554.47	105.158	-2367.01	1574.03	223.03	-2376.2	1581.78	185.694	-2428.3	1425.28	187.609	-2518.11	1145.83	182.314	-2262.39	1329.32	192.778	-2162.74	1133.18	266.136	-2515.32	1241.83	30.2856	-2333.23	1385.21	-73.4263	-2365.34	1146.07	-77.9109	-2389.49	1052.25	-87.7754	-2332.04	908.663	-37.8277	-2325.6	805.137	-102.384	-2363.53	799.273	-90.6104	-2317.34	729.488
10484	0	127.221	-2195.69	1550.19	230.908	-2200.62	1555.71	104.196	-2357.18	1575.62	221.886	-2366.11	1583.62	184.814	-2419.08	1426.52	187.12	-2508.45	1146.94	181.559	-2253.11	1330.98	192.493	-2153.47	1135.34	265.518	-2505.76	1243.04	29.2808	-2324.04	1386.89	-74.0342	-2355.4	1147.49	-78.6373	-2379.03	1053.33	-88.5089	-2320.1	910.354	-38.7255	-2312.69	806.694	-103.265	-2350.38	800.772	-91.2804	-2303.66	731.321
10485	0	126.223	-2185.98	1551.2	229.919	-2190.83	1556.86	103.17	-2347.4	1576.94	220.862	-2356.08	1585.19	183.909	-2409.89	1427.75	186.408	-2498.84	1148.08	180.989	-2243.78	1332.42	192.218	-2144.09	1137.21	264.643	-2496.49	1244.2	28.5572	-2314.72	1388.18	-74.8037	-2345.57	1148.88	-79.5612	-2368.43	1054.66	-89.1637	-2308.25	911.894	-39.0906	-2299.38	808.593	-103.57	-2337.09	802.065	-91.635	-2289.75	733.196
10486	0	125.321	-2176.29	1552.1	229.153	-2181.06	1558.04	102.38	-2337.77	1578.36	220.069	-2346.24	1586.78	182.97	-2400.57	1428.9	185.584	-2489.39	1149.17	180.519	-2234.5	1333.8	191.878	-2134.69	1138.71	263.77	-2487.31	1245.47	27.7921	-2305.36	1389.23	-75.7658	-2335.63	1150.21	-80.7039	-2357.83	1055.35	-90.3344	-2295.83	913.325	-39.5039	-2285.95	810.615	-104.13	-2323.63	803.274	-92.0622	-2275.32	734.96
10487	0	124.31	-2166.8	1552.76	228.134	-2171.38	1558.97	101.679	-2328.22	1579.4	219.412	-2336.53	1588.15	182.109	-2391.32	1429.91	184.809	-2479.99	1150.17	179.845	-2225.2	1334.91	191.622	-2125.39	1139.73	262.82	-2478.39	1246.57	27.1846	-2295.92	1390.13	-76.9272	-2325.74	1151.04	-81.9864	-2346.96	1056.15	-90.8792	-2283.8	914.361	-40.4568	-2271.73	812.553	-104.629	-2310	803.975	-92.2421	-2260.91	736.602
10488	0	123.4	-2157.47	1553.25	227.164	-2161.68	1559.6	101.082	-2318.85	1580.09	218.715	-2326.79	1588.93	181.226	-2382.12	1430.53	183.951	-2470.68	1150.83	179.398	-2215.98	1335.69	191.571	-2116.15	1140.4	261.797	-2469.77	1247.46	26.4221	-2286.33	1390.65	-78.0784	-2315.89	1151.92	-83.3907	-2336.3	1056.66	-91.9625	-2271.28	915.401	-40.8247	-2258.52	813.805	-104.924	-2296.4	804.529	-92.1896	-2246.12	738.023
10489	0	122.521	-2148.06	1553.52	226.41	-2152.18	1560.31	100.54	-2309.5	1580.77	218.195	-2317.22	1589.88	180.479	-2372.8	1431.3	183.177	-2461.7	1151.62	179.142	-2206.83	1336.2	191.751	-2107.03	1140.78	260.895	-2461.1	1248.46	26.1483	-2276.73	1390.9	-79.3573	-2305.85	1152.47	-84.6544	-2325.51	1057.04	-92.8464	-2258.84	916.478	-40.9126	-2244.69	815.2	-105.296	-2282.54	805.157	-91.8385	-2231.26	739.425
10490	0	121.783	-2138.64	1553.61	225.455	-2142.39	1560.61	99.929	-2300.03	1581.18	217.711	-2307.41	1590.48	179.742	-2363.48	1431.92	182.256	-2453.04	1152.45	179.018	-2197.68	1336.37	191.858	-2098.03	1140.62	259.88	-2452.63	1249.34	25.6114	-2266.98	1390.99	-80.7234	-2295.8	1153.01	-86.2099	-2314.69	1056.88	-93.7515	-2246.39	917.008	-41.2729	-2231.1	816.665	-105.5	-2268.53	805.578	-91.6504	-2216.08	740.749
10491	0	121.001	-2129.2	1553.62	224.85	-2132.88	1560.64	99.4065	-2290.65	1581.44	217.164	-2297.93	1591.02	179.053	-2354.31	1432.4	181.392	-2444.61	1153.08	178.925	-2188.58	1336.51	192.337	-2089	1140.54	258.945	-2444.34	1250.21	25.2797	-2257.14	1391.1	-82.0057	-2285.52	1153.23	-87.8809	-2303.57	1056.94	-94.5264	-2233.9	917.752	-41.2452	-2217.52	818.074	-105.675	-2254.59	805.63	-91.5215	-2200.65	742.203
10492	0	120.536	-2119.78	1553.53	224.245	-2123.45	1560.6	98.9327	-2281.2	1581.62	216.615	-2288.28	1591.23	178.386	-2345.17	1432.78	180.477	-2436.26	1153.66	178.926	-2179.54	1336.4	192.867	-2080.28	1139.98	258.045	-2436.05	1250.81	24.9362	-2247.39	1391.26	-83.2799	-2275.16	1153.5	-89.5156	-2292.59	1057.19	-95.1923	-2221.22	918.388	-41.3496	-2203.78	819.295	-105.877	-2240.6	805.878	-91.1187	-2185.26	743.466
10493	0	119.984	-2110.37	1553.19	223.968	-2114.1	1560.67	98.3296	-2271.78	1581.67	216.116	-2278.77	1591.55	177.77	-2335.95	1433.21	179.443	-2427.95	1154.43	178.889	-2170.79	1336.03	193.568	-2071.67	1139.4	256.972	-2427.9	1251.56	25.0402	-2237.53	1390.94	-84.4345	-2264.61	1153.7	-90.7669	-2281.4	1057	-96.0882	-2208.58	918.946	-41.5968	-2189.89	820.492	-106.144	-2226.57	805.986	-90.6756	-2170.03	744.795
10494	0	119.557	-2100.86	1552.77	223.451	-2104.43	1560.32	97.8746	-2262.25	1581.58	215.677	-2269.4	1591.8	177.183	-2326.8	1433.6	178.322	-2419.76	1155.05	179.086	-2161.93	1335.73	194.486	-2063.14	1138.57	255.979	-2419.74	1252.21	25.0121	-2227.74	1390.75	-85.4361	-2253.92	1153.78	-92.5184	-2269.96	1056.78	-96.3279	-2195.8	919.177	-41.7324	-2175.92	821.643	-106.823	-2212.75	806.261	-90.5531	-2154.6	746.256
10495	0	119.395	-2091.38	1552.32	223.292	-2095.09	1560.04	97.5099	-2252.69	1581.5	215.196	-2259.66	1591.57	176.65	-2317.78	1433.89	177.176	-2411.65	1155.69	179.318	-2153.42	1335.32	195.453	-2054.9	1137.94	254.961	-2411.75	1252.72	25.1733	-2218.05	1390.81	-86.1834	-2243.06	1153.98	-93.2817	-2258.56	1056.54	-97.1497	-2182.81	920.075	-42.1159	-2162	822.669	-106.637	-2198.44	806.728	-90.2424	-2139.48	747.654
10496	0	119.319	-2081.82	1551.83	223.286	-2085.7	1559.65	97.216	-2243.14	1581.44	214.889	-2250.22	1591.75	176.103	-2308.76	1434.21	176.039	-2403.51	1156.28	179.583	-2144.59	1334.83	196.479	-2046.51	1137.31	253.907	-2403.73	1253.33	25.1572	-2208.44	1390.68	-86.8895	-2232.07	1154	-94.5452	-2246.67	1056.67	-97.1233	-2169.96	920.338	-42.0562	-2148.58	823.679	-106.646	-2184.4	807	-90.2186	-2124.29	749.096
10497	0	119.323	-2072.35	1551.23	223.473	-2076.28	1559.21	96.8976	-2233.45	1581.28	214.699	-2240.77	1592.01	175.572	-2299.86	1434.56	174.896	-2395.45	1156.95	180.164	-2136.1	1334.29	197.614	-2038.41	1136.72	252.876	-2395.78	1253.91	25.1615	-2198.75	1390.46	-87.4932	-2220.98	1153.94	-95.3623	-2234.91	1056.31	-97.4878	-2156.88	920.933	-41.783	-2134.99	824.589	-106.796	-2170.34	807.164	-89.8857	-2109.47	750.39
10498	0	119.315	-2062.8	1550.4	223.306	-2066.73	1558.52	96.7035	-2223.89	1581.2	214.553	-2231.3	1591.98	174.994	-2291.08	1434.75	173.917	-2387.42	1157.48	180.71	-2128.25	1333.4	198.687	-2030.39	1136.05	251.925	-2388	1254.45	25.4293	-2189.34	1390.27	-87.5524	-2209.67	1153.73	-96.2727	-2222.85	1056.46	-97.1593	-2143.83	921.379	-41.7033	-2121.27	825.369	-106.842	-2156.27	807.457	-89.7107	-2094.57	751.566
10499	0	119.652	-2053.43	1549.63	223.451	-2057.5	1557.69	96.6728	-2214.31	1581.26	214.477	-2221.73	1591.92	174.462	-2282.53	1434.91	173.028	-2379.48	1157.89	181.019	-2119.42	1333.47	199.745	-2022.59	1135.55	250.988	-2380.19	1254.91	25.5807	-2180.06	1390.15	-87.6588	-2198.29	1153.51	-96.861	-2210.74	1056.14	-97.1385	-2130.68	921.896	-40.8594	-2107.11	826.579	-106.92	-2142.17	807.982	-89.6654	-2079.93	752.592
10500	0	119.73	-2044.07	1548.88	223.779	-2048.2	1556.9	96.718	-2204.63	1581.39	214.42	-2212.16	1592.09	173.968	-2273.88	1435.12	172.305	-2371.63	1158.28	181.545	-2111.19	1333.3	200.745	-2014.76	1135.26	250.094	-2372.43	1255.3	25.6976	-2170.93	1390.03	-87.7235	-2186.84	1153.2	-97.1234	-2198.71	1055.78	-96.6952	-2117.51	922.25	-41.1472	-2094.2	826.608	-106.985	-2128.13	808.252	-89.2893	-2065.61	753.54
10501	0	120.045	-2034.47	1548.03	224.142	-2038.83	1556.09	96.7707	-2194.88	1581.59	214.524	-2202.71	1592.53	173.586	-2265.34	1435.37	171.602	-2363.8	1158.82	182.101	-2103.05	1333.02	201.533	-2007.02	1134.97	249.359	-2364.67	1255.96	25.8672	-2161.85	1389.86	-87.4759	-2175.3	1152.99	-97.4341	-2186.26	1055.78	-96.4402	-2104.1	922.749	-40.7901	-2081.17	826.753	-106.865	-2114.07	808.438	-89.0673	-2051.26	754.164
10502	0	120.516	-2025.1	1547.19	224.624	-2029.6	1555.21	96.9247	-2185.25	1581.89	214.602	-2193.08	1592.51	173.227	-2256.87	1435.53	171.126	-2356.08	1159.12	182.233	-2094.8	1332.88	202.453	-1999.3	1134.75	248.741	-2356.89	1256.35	26.0013	-2153.02	1389.8	-87.0313	-2163.61	1152.59	-97.4934	-2174.01	1055.44	-95.6195	-2091.13	922.906	-40.1219	-2068.03	826.821	-106.964	-2100.06	808.945	-88.6577	-2037.12	754.709
10503	0	121.018	-2015.7	1546.39	224.951	-2020.43	1554.14	96.9801	-2175.61	1582.07	214.716	-2183.71	1592.77	172.937	-2248.45	1435.63	170.728	-2348.39	1159.45	182.631	-2086.6	1332.9	203.417	-1991.74	1134.53	248.157	-2349.1	1256.72	26.1886	-2144.11	1389.62	-86.5666	-2152.05	1152.32	-97.1315	-2161.75	1055.25	-94.8647	-2078.15	923.202	-39.5854	-2054.43	827.567	-106.925	-2086.16	809.26	-88.1375	-2023.23	755.222
10504	0	121.477	-2006.33	1545.56	225.546	-2011.31	1553.38	97.1159	-2165.96	1582.26	214.869	-2174.34	1592.9	172.654	-2239.94	1435.75	170.305	-2340.65	1159.8	183.098	-2078.38	1332.72	204.055	-1984.07	1134.3	247.675	-2341.28	1257.1	26.2771	-2135.38	1389.37	-86.0519	-2140.39	1151.73	-96.5149	-2149.34	1054.52	-94.324	-2064.97	923.392	-39.6403	-2042.08	827.191	-106.947	-2072.36	809.402	-87.6425	-2009.36	755.649
10505	0	121.986	-1997.04	1544.72	226.221	-2002.17	1552.48	97.3481	-2156.39	1582.34	215.082	-2164.97	1593	172.336	-2231.76	1435.97	170.068	-2332.94	1160.12	183.504	-2070.06	1332.44	204.748	-1976.49	1133.83	247.32	-2333.37	1257.5	26.38	-2126.61	1389.18	-85.1925	-2128.79	1151.16	-95.6893	-2137.33	1053.94	-93.3444	-2052.03	923.597	-38.8334	-2028.62	827.161	-106.651	-2058.71	809.597	-87.2179	-1995.75	755.814
10506	0	122.534	-1987.79	1543.91	226.833	-1993.13	1551.65	97.6353	-2147.02	1582.26	215.423	-2155.82	1592.72	172.254	-2223.28	1435.88	169.824	-2325.23	1160.14	183.933	-2061.92	1332.06	205.439	-1968.76	1133.48	246.944	-2325.66	1257.59	26.6341	-2117.9	1388.88	-84.3658	-2117.34	1150.67	-95.492	-2125.05	1053.99	-92.4625	-2039.33	923.614	-38.187	-2015.57	827.192	-106.32	-2045.23	809.87	-86.7863	-1982.38	756.01
10507	0	123.153	-1978.58	1543.2	227.446	-1984.23	1550.69	97.8864	-2137.6	1582.09	215.702	-2146.67	1592.6	172.269	-2214.82	1435.84	169.628	-2317.42	1160.25	184.432	-2053.74	1331.66	206.104	-1961.06	1132.82	246.7	-2317.75	1257.74	26.7757	-2109.19	1388.61	-83.5167	-2105.84	1150.1	-93.938	-2113.2	1053.23	-91.5594	-2026.56	923.732	-37.6069	-2002.58	827.092	-106.009	-2031.89	809.909	-86.2162	-1969.15	756.119
10508	0	123.748	-1969.47	1542.42	228.221	-1975.26	1550.01	98.2651	-2128.29	1581.92	216.068	-2137.55	1592.32	172.251	-2206.29	1435.73	169.417	-2309.53	1160.44	184.718	-2045.23	1331.15	206.624	-1953.37	1132.15	246.5	-2309.8	1257.91	27.103	-2100.34	1388.19	-82.4144	-2094.47	1149.56	-93.053	-2101.06	1052.95	-90.6611	-2014.12	923.894	-36.8747	-1989.62	826.824	-105.268	-2018.59	810.017	-85.8869	-1955.92	756.122
10509	0	124.398	-1960.42	1541.62	228.867	-1966.29	1549.25	98.6999	-2119.08	1581.69	216.473	-2128.47	1592.05	172.354	-2197.73	1435.57	169.309	-2301.67	1160.44	185.166	-2036.9	1330.52	207.348	-1945.39	1131.32	246.303	-2301.81	1257.87	27.4477	-2091.64	1387.75	-81.2936	-2083.36	1148.94	-91.5832	-2089.45	1052.02	-89.4215	-2001.63	923.785	-36.0014	-1976.7	826.896	-104.475	-2005.86	809.88	-85.2714	-1942.91	756.115
10510	0	125.075	-1951.39	1540.73	229.557	-1957.37	1548.3	99.1684	-2109.95	1581.28	216.916	-2119.38	1591.58	172.494	-2189.22	1435.17	169.194	-2293.82	1160.29	185.532	-2029.12	1329.32	207.809	-1937.62	1130.54	246.201	-2293.95	1257.66	27.8002	-2082.88	1387.28	-80.2363	-2072.27	1148.23	-90.2559	-2077.68	1051.64	-88.1214	-1989.29	923.849	-35.1805	-1963.82	826.747	-103.514	-1993.04	809.742	-84.5178	-1930.02	756.279
10511	0	125.736	-1942.34	1539.89	230.08	-1948.37	1547.3	99.6767	-2100.77	1580.86	217.421	-2110.25	1591.11	172.814	-2180.62	1434.86	169.185	-2285.8	1160.16	185.922	-2020.49	1328.95	208.245	-1929.54	1129.63	246.253	-2285.82	1257.51	28.3596	-2074.13	1386.74	-79.0963	-2061.44	1147.59	-89.0186	-2066.04	1050.8	-86.9891	-1977.11	923.743	-34.1617	-1951.18	826.558	-102.53	-1980.22	809.847	-83.771	-1916.98	756.374
10512	0	126.276	-1933.3	1539.02	230.777	-1939.32	1546.21	100.418	-2091.6	1580.46	218.109	-2101.12	1590.73	173.172	-2172.04	1434.54	169.285	-2277.62	1160	186.362	-2012.35	1327.8	208.804	-1921.47	1128.63	246.417	-2277.56	1257.38	28.7698	-2065.52	1386.22	-78.0567	-2050.78	1146.99	-87.5328	-2054.67	1050.33	-85.6517	-1965.12	923.664	-32.9808	-1938.61	826.343	-101.453	-1967.6	809.753	-82.8539	-1904.3	756.447
10513	0	127.124	-1924.39	1538.03	231.646	-1930.37	1545.17	101.129	-2082.5	1580	218.843	-2092.06	1590.14	173.677	-2163.46	1433.99	169.475	-2269.62	1159.64	186.775	-2004.07	1326.96	209.177	-1913.27	1127.5	246.651	-2269.33	1256.94	29.3363	-2056.92	1385.58	-77.0091	-2040.4	1146.3	-86.1174	-2043.5	1049.67	-84.2326	-1953.1	923.552	-31.6316	-1926.18	826.336	-100.393	-1955.04	809.714	-81.5097	-1891.49	756.551
10514	0	128.035	-1915.34	1537	232.42	-1921.45	1544.11	101.84	-2073.44	1579.52	219.713	-2083.02	1589.5	174.287	-2154.74	1433.4	169.792	-2261.43	1159.23	187.341	-1995.75	1325.95	209.608	-1904.94	1126.41	246.977	-2261	1256.39	29.9677	-2048.2	1384.88	-75.9501	-2030.23	1145.49	-84.7306	-2032.43	1048.76	-82.6823	-1941.25	923.386	-30.0269	-1913.85	826.409	-98.6005	-1942.62	809.67	-80.0077	-1878.9	756.61
10515	0	128.935	-1906.34	1536.09	233.43	-1912.39	1543.09	102.818	-2064.27	1579.01	220.589	-2073.88	1588.87	174.829	-2146.11	1432.79	170.153	-2253.13	1158.76	188.025	-1987.29	1324.76	210.041	-1896.65	1125.27	247.402	-2252.57	1255.89	30.6056	-2039.58	1384.1	-74.8458	-2020.44	1144.73	-83.3413	-2021.48	1047.99	-81.1131	-1929.63	923.206	-28.2999	-1901.66	826.34	-97.0902	-1930.01	809.398	-78.2582	-1866.22	756.843
10516	0	129.949	-1897.26	1535.02	234.493	-1903.36	1541.97	103.826	-2055.02	1578.41	221.623	-2064.78	1588.13	175.529	-2137.38	1432.16	170.64	-2244.79	1158.34	188.558	-1978.82	1323.73	210.38	-1888.46	1123.8	247.941	-2244.03	1255.35	31.3791	-2030.93	1383.2	-73.8692	-2010.79	1143.96	-82.1165	-2010.76	1047.17	-79.4621	-1918.02	923.173	-26.3478	-1889.55	826.395	-95.4503	-1917.54	809.233	-76.3677	-1853.57	757.021
10517	0	131.068	-1888.27	1533.93	235.635	-1894.48	1540.51	104.855	-2045.93	1577.68	222.746	-2055.75	1587.1	176.257	-2128.65	1431.26	171.159	-2236.47	1157.54	189.293	-1970.16	1322.59	210.766	-1880.16	1122.51	248.57	-2235.41	1254.51	32.11	-2022.39	1382.36	-72.8477	-2001.31	1143	-81.0702	-2000.37	1046.35	-77.701	-1906.48	922.932	-24.6992	-1877.65	826.391	-93.4017	-1905.41	809.151	-74.1846	-1841.08	757.232
10518	0	132.347	-1879.13	1532.95	236.898	-1885.55	1539.16	106.114	-2036.87	1576.9	223.993	-2046.75	1586.13	176.991	-2119.85	1430.35	171.793	-2227.9	1156.74	189.805	-1961.62	1321.39	211.195	-1871.84	1121.01	249.26	-2226.81	1253.63	32.8557	-2013.48	1381.35	-71.9512	-1992.05	1142.1	-79.8332	-1990.21	1045.42	-76.0363	-1895.18	922.702	-22.5302	-1865.94	826.402	-91.6009	-1892.99	808.973	-71.7545	-1828.57	757.476
10519	0	133.737	-1870.1	1531.96	238.225	-1876.56	1538.02	107.418	-2027.72	1576.12	225.317	-2037.77	1584.99	177.785	-2110.91	1429.44	172.483	-2219.4	1155.94	190.66	-1952.96	1319.92	211.535	-1863.55	1119.54	250.023	-2217.96	1252.76	33.6117	-2004.78	1380.45	-71.004	-1982.93	1141.18	-78.7635	-1980.17	1044.34	-74.3251	-1884.15	922.497	-20.0786	-1854.18	826.654	-89.4575	-1880.92	808.674	-69.1318	-1816.1	757.833
10520	0	135.078	-1861.09	1531.03	239.627	-1867.55	1536.79	108.82	-2018.81	1575.26	226.777	-2028.88	1583.82	178.674	-2102.01	1428.38	173.246	-2210.76	1155.01	191.253	-1944.2	1318.95	211.867	-1855.1	1118.25	250.85	-2209.21	1251.73	34.4395	-1995.92	1379.39	-70.2283	-1973.89	1140.12	-77.7369	-1970.3	1043.28	-72.5948	-1873.16	922.212	-17.9171	-1842.87	826.799	-87.2483	-1869.06	808.313	-66.2741	-1803.89	758.139
10521	0	136.463	-1852.21	1530.02	241.111	-1858.73	1535.47	110.304	-2009.9	1574.24	228.221	-2020	1582.3	179.546	-2093.18	1427.28	174.099	-2202.15	1153.94	192.055	-1935.38	1317.64	212.352	-1846.45	1116.87	251.701	-2200.4	1250.53	35.1461	-1987.15	1378.28	-69.4937	-1965.24	1138.97	-77.2079	-1960.56	1042.38	-70.8792	-1862.58	921.694	-15.2764	-1831.5	827.289	-84.7576	-1857.41	807.949	-63.3814	-1791.88	758.439
10522	0	137.941	-1843.3	1529.05	242.324	-1849.78	1534.24	111.816	-2001.11	1573.34	229.81	-2011.16	1580.98	180.533	-2084.31	1426.22	174.941	-2193.46	1152.92	192.771	-1926.63	1316.19	212.695	-1837.73	1115.35	252.575	-2191.57	1249.32	35.9513	-1978.22	1377.26	-68.9505	-1956.5	1137.96	-76.184	-1951.23	1040.93	-69.1753	-1852.23	921.215	-13.1949	-1820.7	827.189	-82.187	-1845.99	807.285	-60.4617	-1779.91	758.895
10523	0	139.132	-1834.48	1528.1	243.86	-1840.87	1532.79	113.422	-1992.24	1572.45	231.435	-2002.13	1579.69	181.607	-2075.25	1425.15	175.889	-2184.57	1151.88	193.584	-1917.65	1315	213.11	-1828.82	1113.98	253.62	-2182.57	1248.25	36.9436	-1969.35	1376.16	-68.1285	-1947.9	1136.84	-75.2927	-1942.14	1039.69	-67.2789	-1842.02	920.652	-10.5661	-1809.92	827.318	-79.8031	-1834.79	807.015	-57.388	-1768.19	759.349
10524	0	140.502	-1825.62	1527.09	245.236	-1831.94	1531.48	115.125	-1983.46	1571.58	233.154	-1993.28	1578.53	182.829	-2066.35	1423.96	176.912	-2175.81	1150.81	194.542	-1908.78	1313.95	213.612	-1819.74	1112.7	254.662	-2173.51	1246.94	38.0506	-1960.41	1375.15	-67.4351	-1939.19	1135.9	-74.646	-1932.86	1038.64	-65.72	-1832.06	920.193	-8.11919	-1799.32	827.706	-77.0369	-1823.89	806.293	-54.2395	-1756.83	759.71
10525	0	141.937	-1816.76	1526.06	246.667	-1823.05	1530.2	116.67	-1974.7	1570.75	234.786	-1984.31	1577.25	184.107	-2057.48	1422.78	178.03	-2166.85	1149.5	195.363	-1899.86	1312.75	214.098	-1810.45	1111.47	255.828	-2164.51	1245.56	39.176	-1951.69	1374.19	-66.674	-1930.73	1135.09	-73.6166	-1924.22	1037.47	-63.9026	-1822.46	919.659	-5.70583	-1789.14	827.978	-74.5442	-1813.4	805.858	-51.232	-1745.79	760.299
10526	0	143.379	-1807.97	1525.05	248.165	-1814.05	1528.97	118.419	-1965.76	1569.98	236.526	-1975.3	1576.19	185.444	-2048.59	1421.63	179.12	-2157.87	1148.31	196.529	-1890.95	1311.61	214.597	-1801.28	1110.39	257.025	-2155.21	1244.14	40.3765	-1942.88	1373.3	-66.045	-1922.09	1134.31	-72.9297	-1915.31	1036.65	-62.27	-1813.03	919.166	-3.14972	-1779.06	828.493	-71.7549	-1803.39	805.262	-48.1895	-1734.97	760.758
10527	0	144.817	-1799.03	1524.19	249.627	-1805.03	1527.97	120.019	-1956.83	1569.25	238.15	-1966.29	1575.24	186.947	-2039.67	1420.47	180.264	-2148.54	1147.02	197.521	-1881.94	1310.62	215.069	-1791.98	1109.39	258.3	-2145.97	1242.75	41.6377	-1934.23	1372.38	-65.1456	-1913.6	1133.52	-71.6431	-1906.86	1035.52	-60.5114	-1803.89	918.793	-0.895465	-1769.48	828.435	-69.1127	-1793.44	804.596	-45.1657	-1724.7	761.157
10528	0	146.535	-1790.22	1523.28	251.296	-1796.18	1526.81	121.682	-1948	1568.48	239.917	-1957.41	1574.25	188.483	-2030.81	1419.19	181.579	-2139.18	1145.47	198.662	-1872.93	1309.63	215.724	-1782.54	1108.62	259.673	-2136.55	1241.06	42.9119	-1925.56	1371.55	-64.2184	-1905.09	1132.93	-71.0435	-1898.3	1035.06	-58.7933	-1794.91	918.352	1.51906	-1760.03	828.866	-66.4063	-1783.96	804.241	-42.3005	-1714.66	761.694
10529	0	148.438	-1781.23	1522.38	253.101	-1787.42	1525.61	123.582	-1939.11	1567.64	241.755	-1948.57	1573.25	190.12	-2021.97	1417.96	182.856	-2129.28	1143.83	199.749	-1863.81	1308.95	216.295	-1773.12	1107.99	261.101	-2127.06	1239.38	44.2981	-1916.88	1370.92	-63.3695	-1896.48	1132.6	-70.4026	-1889.98	1034.35	-56.9983	-1786.28	918.021	3.71704	-1751.04	829.249	-63.5339	-1775.03	803.462	-39.3432	-1705.1	762.101
10530	0	150.307	-1772.32	1521.6	255.073	-1778.52	1524.68	125.374	-1930.12	1566.9	243.671	-1939.73	1572.26	191.779	-2013.09	1416.71	184.057	-2119.24	1142.16	201.016	-1854.65	1308.12	217.05	-1763.53	1107.39	262.538	-2117.54	1237.62	45.5608	-1908.26	1370.32	-62.4013	-1888.11	1132.14	-68.2792	-1882.36	1032.94	-55.5269	-1777.68	917.608	6.06629	-1742.09	829.659	-61.0753	-1766.1	803.252	-36.5898	-1695.69	762.333
10531	0	152.403	-1763.42	1520.86	257.178	-1769.72	1523.77	127.428	-1921.28	1566.15	245.592	-1930.98	1571.22	193.611	-2004.32	1415.47	185.334	-2109.27	1140.49	202.29	-1845.39	1307.47	217.797	-1753.85	1106.87	264.097	-2107.92	1235.85	47.1326	-1899.51	1369.82	-61.3155	-1879.62	1131.76	-67.5287	-1874.36	1032.49	-53.7808	-1769.37	917.372	8.0001	-1733.49	829.79	-58.6121	-1757.57	802.695	-33.9689	-1687.1	762.361
10532	0	154.55	-1754.45	1520.36	259.391	-1761.02	1523.03	129.395	-1912.38	1565.48	247.607	-1922.26	1570.28	195.544	-1995.59	1414.19	186.674	-2099.25	1138.72	203.72	-1836.15	1306.86	218.619	-1744.13	1106.55	265.805	-2098.35	1233.98	48.7005	-1890.88	1369.38	-60.0757	-1871.36	1131.49	-66.5366	-1866.64	1032.19	-52.2141	-1761.35	917.072	9.96416	-1725.24	830.145	-56.5633	-1749.3	802.483	-31.4774	-1678.62	762.415
10533	0	156.574	-1745.52	1520.22	261.439	-1752.03	1522.57	131.591	-1903.51	1565.03	249.822	-1913.44	1569.58	197.475	-1986.83	1413.23	188.115	-2088.98	1137.21	205.234	-1826.77	1306.36	219.407	-1734.15	1106.55	267.49	-2088.63	1232.3	50.4034	-1882.06	1368.97	-58.8278	-1863.23	1131.3	-65.3475	-1858.99	1031.74	-50.9314	-1753.68	916.833	11.501	-1717.46	830.185	-55.0138	-1741.23	802.41	-29.4679	-1670.67	762.447
10534	0	158.751	-1736.46	1520.41	263.572	-1742.88	1522.58	133.821	-1894.5	1564.88	252.132	-1904.48	1569.14	199.596	-1977.8	1412.66	189.599	-2078.56	1136.31	206.836	-1817.36	1306.2	220.122	-1723.98	1106.5	269.236	-2078.8	1231.11	52.1839	-1873.15	1369.02	-57.491	-1855.16	1131	-64.1657	-1851.55	1031.58	-49.6435	-1746.12	916.559	13.1256	-1709.88	830.153	-53.5461	-1733.64	802.155	-27.5529	-1662.95	762.378
10535	0	160.872	-1727.33	1520.88	265.707	-1733.61	1522.65	136.292	-1885.58	1565.06	254.565	-1895.35	1568.92	201.738	-1968.43	1412.35	190.993	-2068.19	1135.83	208.454	-1807.71	1306.32	220.865	-1713.59	1106.63	270.896	-2068.94	1230.21	53.9528	-1863.75	1369.29	-56.0546	-1847.15	1131.23	-62.8897	-1844.14	1031.86	-48.1216	-1739.03	916.062	14.4842	-1702.55	830.28	-51.8562	-1726.74	801.886	-26.3043	-1655.78	762.385
10536	0	163.142	-1718.17	1521.54	267.949	-1724.49	1523.03	138.725	-1876.64	1565.32	257.065	-1886.18	1568.98	203.934	-1958.81	1412.36	192.254	-2058.03	1135.75	210.129	-1798.13	1306.57	221.718	-1703.21	1107.01	272.465	-2059.1	1229.68	55.7082	-1854.33	1369.97	-54.6923	-1839.35	1131.7	-61.2009	-1836.87	1031.95	-47.0057	-1732.2	915.94	15.7523	-1695.67	830.259	-50.5222	-1720.3	801.622	-25.1065	-1649.32	762.13
10537	0	165.214	-1709.05	1522.46	270.295	-1715.03	1523.84	141.349	-1867.49	1566.02	259.688	-1876.91	1569.33	205.969	-1949.07	1412.72	193.401	-2048.33	1136.07	211.993	-1788.24	1307.24	222.723	-1692.47	1107.69	273.873	-2049.16	1229.71	57.6099	-1844.58	1370.77	-53.2516	-1831.64	1132.49	-59.8158	-1829.51	1032.78	-46.0192	-1725.54	915.985	16.8445	-1689.12	830.283	-49.2315	-1714.46	801.504	-24.3741	-1643.31	761.937
10538	0	167.589	-1699.7	1523.48	272.653	-1705.55	1524.69	144.042	-1858.34	1566.84	262.467	-1867.56	1569.86	208.036	-1939.36	1413.29	194.321	-2038.73	1136.53	213.72	-1778.39	1307.8	223.786	-1681.97	1108.37	275.012	-2039.25	1229.94	59.6125	-1834.51	1371.89	-51.992	-1824.07	1133.61	-58.1968	-1822.19	1033.8	-45.105	-1719.18	916.134	17.5834	-1682.99	830.242	-48.0423	-1708.82	801.564	-23.9258	-1637.94	761.615
10539	0	170.092	-1690.34	1524.74	275.023	-1696.04	1525.38	146.743	-1849.03	1568.01	265.18	-1858.17	1570.45	209.99	-1929.75	1414.09	195.099	-2029.04	1137.25	215.572	-1768.58	1308.7	224.839	-1671.66	1109.41	276.077	-2029.45	1230.35	61.5706	-1824.56	1373.37	-50.5219	-1816.36	1134.95	-56.6951	-1814.93	1035.09	-44.2176	-1712.91	916.348	18.1681	-1677.23	830.038	-47.2218	-1703.95	801.796	-23.667	-1633.04	761.238
10540	0	172.588	-1680.86	1526.19	277.514	-1686.44	1526.35	149.561	-1839.69	1569.51	267.875	-1848.63	1571.31	211.923	-1920.19	1415.18	195.665	-2018.79	1138.2	217.457	-1758.93	1310.13	226.124	-1661.45	1110.86	277.044	-2019.68	1230.88	63.5673	-1814.5	1375.28	-48.9946	-1808.58	1136.73	-55.2867	-1807.52	1036.91	-43.3704	-1706.98	916.973	18.866	-1671.87	830.149	-45.8069	-1699.78	801.993	-23.5929	-1628.7	760.984
10541	0	175.204	-1671.3	1527.89	280.011	-1676.89	1527.53	152.297	-1829.95	1571.37	270.802	-1839.05	1572.68	213.805	-1910.72	1416.5	196.221	-2008.08	1139.27	219.194	-1749.26	1311.66	227.373	-1651.46	1112.58	277.961	-2009.71	1231.73	65.5357	-1804.47	1377.36	-47.4679	-1800.47	1138.85	-53.9865	-1800.11	1039.09	-42.6936	-1701.13	917.856	19.3174	-1666.7	830.436	-45.82	-1695.19	802.82	-23.7815	-1624.88	760.85
10542	0	177.766	-1661.62	1529.63	282.557	-1667.35	1528.72	154.95	-1820.43	1573.44	273.477	-1829.54	1574.11	215.729	-1901.36	1417.94	196.742	-1997.32	1140.48	221.041	-1739.77	1313.34	228.762	-1641.58	1114.48	278.883	-1999.95	1232.69	67.6732	-1794.84	1379.67	-46.0049	-1792.11	1141.39	-52.5062	-1792.6	1041.55	-42.0751	-1695.39	918.839	19.6268	-1662.14	830.615	-45.4494	-1691.22	803.827	-23.9444	-1621.29	760.665
10543	0	180.264	-1652.08	1531.58	285.204	-1657.91	1530.15	157.651	-1810.75	1575.61	276.115	-1819.92	1575.7	217.687	-1892.15	1419.52	197.357	-1986.8	1141.7	222.744	-1730.23	1315.44	230.111	-1632	1116.78	279.847	-1990.2	1233.58	69.5323	-1785.42	1382.39	-44.476	-1783.86	1144.11	-51.1751	-1785.1	1044.21	-41.3543	-1689.69	920.206	19.6388	-1657.85	831.049	-45.2941	-1687.04	805.154	-24.172	-1618.25	760.643
10544	0	182.786	-1642.45	1533.55	287.583	-1648.4	1531.66	160.227	-1801.13	1578.01	278.629	-1810.31	1577.58	219.659	-1882.92	1421.26	198.154	-1976.76	1143.19	224.433	-1720.93	1317.53	231.329	-1622.31	1119.17	280.928	-1980.25	1234.74	71.6207	-1776.03	1384.99	-42.8994	-1775.23	1146.84	-50.0865	-1777.66	1047.18	-40.816	-1683.91	921.835	20.0372	-1653.7	831.773	-46.5052	-1682.92	807.216	-24.4504	-1615.36	760.697
10545	0	185.156	-1633.02	1535.84	289.965	-1638.84	1533.63	162.669	-1791.51	1580.53	281.184	-1800.85	1579.77	221.679	-1873.7	1423.15	199.189	-1967.01	1144.81	226.126	-1711.57	1319.84	232.514	-1612.68	1121.94	282.174	-1970.4	1236.2	73.4571	-1766.85	1387.8	-41.4661	-1766.42	1149.9	-48.884	-1770.2	1050.17	-40.2655	-1678.42	923.574	19.4373	-1649.84	832.422	-46.8016	-1678.99	808.954	-24.597	-1612.77	760.932
10546	0	187.445	-1623.65	1538.03	292.031	-1629.4	1535.55	165.186	-1782.13	1582.98	283.635	-1791.41	1581.82	223.787	-1864.5	1425.05	200.47	-1957.34	1146.42	227.74	-1702.34	1322.12	233.666	-1603.1	1124.69	283.578	-1960.62	1237.51	75.3496	-1757.81	1390.46	-40.0206	-1757.72	1153.08	-47.9222	-1762.87	1053.55	-39.946	-1672.87	925.72	19.6588	-1646.2	833.421	-47.541	-1674.93	811.176	-24.8913	-1610.27	761.252
10547	0	189.707	-1614.34	1540.43	294.358	-1620.17	1537.53	167.545	-1772.88	1585.41	285.979	-1782.09	1583.77	225.909	-1855.31	1426.83	201.861	-1947.94	1147.99	229.354	-1693.05	1324.39	234.574	-1593.47	1127.5	285.099	-1950.71	1238.77	77.4009	-1748.94	1393.14	-38.9598	-1748.94	1156.36	-47.0833	-1755.72	1056.79	-39.6431	-1667.39	928.13	18.8374	-1642.11	834.636	-48.7643	-1670.5	813.71	-25.332	-1607.65	761.771
10548	0	191.757	-1605.14	1542.73	296.444	-1611	1539.53	169.816	-1763.67	1587.76	288.214	-1772.84	1585.82	227.958	-1846.11	1428.74	203.501	-1938.15	1149.68	230.81	-1684.01	1326.54	235.325	-1584.04	1130	286.695	-1940.86	1240.21	78.9256	-1740.17	1396.14	-37.7731	-1740.02	1159.63	-46.2729	-1748.77	1059.98	-39.5388	-1661.6	930.363	18.5905	-1638.95	835.832	-50.0916	-1665.8	816.42	-25.607	-1605.1	762.305
10549	0	193.864	-1595.99	1544.9	298.568	-1601.81	1541.6	171.867	-1754.5	1589.93	290.341	-1763.7	1587.63	229.94	-1836.83	1430.49	205.198	-1928.47	1151.49	232.254	-1674.9	1328.49	236.037	-1574.57	1132.49	288.309	-1930.94	1241.65	80.533	-1731.38	1398.61	-36.7614	-1731.17	1162.61	-45.6781	-1741.98	1063.07	-39.4871	-1656.16	932.717	18.0471	-1635.06	837.169	-51.2483	-1661.21	818.752	-26.131	-1602.46	762.912
10550	0	195.769	-1587.02	1547.13	300.463	-1592.87	1543.33	174.039	-1745.64	1591.71	292.391	-1754.82	1589.17	231.957	-1827.66	1431.99	207.057	-1918.85	1153.13	233.539	-1665.84	1330.12	236.567	-1565.23	1134.47	290.114	-1921.27	1242.94	82.1631	-1722.68	1400.84	-35.875	-1722.45	1165.38	-45.1173	-1735.26	1066.04	-39.763	-1650.49	934.879	17.3995	-1631.31	838.476	-52.8413	-1656.31	821.168	-26.728	-1599.72	763.367
10551	0	197.816	-1577.97	1549.11	302.354	-1583.96	1545.12	175.895	-1736.77	1593.27	294.316	-1746.11	1590.42	233.787	-1818.43	1433.37	208.853	-1909.79	1154.63	234.824	-1656.8	1331.54	236.802	-1556.19	1136.22	291.842	-1911.71	1244.15	83.622	-1714.02	1402.73	-35.0869	-1714.16	1167.79	-44.702	-1728.51	1068.62	-39.9629	-1644.92	936.614	16.4188	-1627.2	839.486	-53.9613	-1651.69	823.342	-27.5269	-1596.65	763.749
10552	0	199.594	-1569.1	1551.14	304.066	-1574.98	1546.66	177.78	-1727.98	1594.73	296.151	-1737.36	1591.38	235.535	-1809.16	1434.73	210.619	-1900.85	1155.99	236.004	-1647.7	1332.73	237.031	-1547.19	1137.63	293.563	-1902.17	1245.28	84.8739	-1705.26	1404.38	-34.465	-1705.74	1170.02	-44.4095	-1721.78	1070.9	-40.37	-1639.31	938.346	15.3818	-1623.06	840.462	-55.6024	-1646.6	825.102	-28.5226	-1593.51	764.203
10553	0	201.377	-1560.17	1552.79	305.768	-1566.07	1548.16	179.584	-1719.28	1595.82	297.835	-1728.64	1592.1	237.158	-1799.91	1435.92	212.301	-1892.06	1157.52	236.886	-1638.74	1333.61	237.151	-1538.29	1138.56	295.259	-1892.65	1246.44	86.1357	-1696.63	1405.68	-33.9452	-1697.7	1171.84	-44.124	-1715.1	1072.7	-40.7194	-1633.69	939.625	14.4572	-1618.66	841.288	-57.1454	-1641.85	826.865	-29.8694	-1590.14	764.49
10554	0	202.984	-1551.36	1554.4	307.529	-1557.39	1549.29	181.154	-1710.56	1596.69	299.5	-1720.03	1592.52	238.722	-1790.68	1436.9	213.837	-1883.43	1158.56	237.821	-1629.62	1334.4	237.126	-1529.51	1139.14	296.922	-1883.42	1247.48	87.2538	-1688	1406.82	-33.4202	-1690.16	1173.2	-43.9723	-1708.52	1074.28	-41.2779	-1628.21	940.574	13.2498	-1614.04	841.622	-58.3956	-1637.13	827.891	-31.329	-1586.64	764.696
10555	0	204.515	-1542.46	1555.72	309.155	-1548.55	1550.28	182.79	-1701.9	1597.32	301.006	-1711.52	1592.71	240.158	-1781.48	1437.75	215.35	-1874.84	1159.67	238.486	-1620.72	1334.9	236.979	-1520.91	1139.31	298.486	-1874.28	1248.41	88.112	-1679.44	1407.65	-33.0249	-1683.08	1174.16	-43.8315	-1701.99	1075.52	-42.0863	-1622.65	941.302	11.954	-1609.18	841.878	-59.9023	-1632.44	828.95	-33.1504	-1582.82	764.972
10556	0	205.968	-1533.66	1556.93	310.41	-1539.66	1551.32	184.156	-1693.36	1597.8	302.485	-1702.92	1592.79	241.546	-1772.27	1438.6	216.818	-1866.43	1160.79	238.957	-1611.73	1335.42	236.656	-1512.42	1139.12	300.132	-1865.24	1249.42	89.0528	-1670.87	1408.43	-32.5878	-1676.28	1174.86	-43.7378	-1695.54	1076.45	-42.8028	-1617.22	941.874	10.5505	-1604.46	842.092	-61.402	-1628.03	829.865	-35.1313	-1578.55	765.041
10557	0	207.222	-1524.83	1558.03	311.815	-1530.9	1551.95	185.629	-1684.67	1597.88	303.902	-1694.27	1592.55	242.864	-1763.11	1439.31	218.294	-1858.22	1161.9	239.394	-1602.73	1335.57	236.263	-1503.94	1138.67	301.769	-1856.34	1250.48	89.8679	-1662.4	1408.83	-32.0671	-1669.91	1175.34	-43.5817	-1689.16	1077.51	-43.7423	-1611.82	942.273	9.08903	-1599.52	841.943	-62.7737	-1623.39	830.341	-37.3308	-1574.16	765.356
10558	0	208.555	-1515.88	1558.97	312.975	-1522.05	1552.46	186.927	-1676.06	1597.98	305.191	-1685.66	1592.17	244.101	-1753.99	1439.93	219.831	-1850.27	1162.76	239.742	-1593.84	1335.63	235.817	-1495.4	1138.14	303.362	-1847.62	1251.31	90.5933	-1653.97	1409.21	-31.5697	-1663.85	1175.69	-43.4415	-1682.77	1077.98	-44.6315	-1606.53	942.46	7.63141	-1594.5	841.927	-64.1431	-1619.2	830.689	-39.6932	-1569.81	765.609
10559	0	209.502	-1507.14	1559.72	314.044	-1513.18	1552.87	188.043	-1667.49	1598.12	306.3	-1677.01	1591.76	245.294	-1744.89	1440.58	221.361	-1842.41	1163.77	239.955	-1585.01	1335.63	235.352	-1486.98	1137.66	304.918	-1838.86	1252.33	91.2452	-1645.71	1409.43	-31.1144	-1657.7	1176.05	-43.1711	-1676.5	1078.55	-45.5454	-1601.25	942.51	6.00191	-1589.32	841.699	-65.4718	-1614.93	830.954	-42.0675	-1565.09	766.021
10560	0	210.534	-1498.22	1560.19	315.069	-1504.2	1553.19	189.182	-1658.62	1598.03	307.407	-1668.17	1591.31	246.356	-1735.83	1441.16	222.864	-1834.46	1164.68	240.099	-1576.2	1335.57	234.776	-1478.71	1136.92	306.544	-1830.24	1253.4	91.874	-1637.44	1409.55	-30.6719	-1651.85	1176.18	-42.8221	-1670.38	1079.04	-46.5758	-1595.97	942.574	4.34409	-1584.26	841.358	-66.7158	-1610.65	830.942	-44.4406	-1560.22	766.249
10561	0	211.377	-1489.37	1560.64	315.77	-1495.29	1553.29	190.167	-1649.87	1597.99	308.439	-1659.45	1590.93	247.395	-1726.78	1441.64	224.448	-1826.74	1165.51	240.249	-1567.62	1335.46	234.177	-1470.52	1136.14	308.041	-1821.74	1254.17	92.3151	-1629.31	1409.76	-30.3224	-1646.14	1176.68	-42.6749	-1664.42	1079.61	-47.4485	-1590.8	942.687	2.94624	-1579.16	841.048	-68.0929	-1606.18	831.406	-46.8663	-1555.24	766.709
10562	0	212.229	-1480.41	1560.97	316.759	-1486.38	1553.18	191.076	-1641.22	1598.08	309.315	-1650.59	1590.46	248.385	-1717.93	1442.04	225.978	-1818.93	1166.24	240.261	-1559.02	1335.27	233.596	-1462.13	1135.61	309.534	-1813.1	1254.96	92.8076	-1621.28	1409.9	-30.2271	-1640.26	1177.18	-42.4634	-1658.45	1080.29	-48.576	-1585.56	943.057	1.1799	-1573.79	841.246	-69.452	-1601.76	831.628	-49.4244	-1550.09	767.28
10563	0	213.044	-1471.41	1561.15	317.23	-1477.28	1553.11	191.948	-1632.13	1598.03	310.21	-1641.61	1590.15	249.235	-1708.98	1442.53	227.359	-1811.11	1167.08	240.125	-1550.53	1334.98	232.888	-1453.67	1135.26	310.91	-1804.59	1255.76	93.1236	-1613.39	1410.01	-30.1225	-1634.56	1177.63	-42.2702	-1652.62	1080.79	-49.5418	-1580.28	943.319	-0.366524	-1568.32	841.292	-70.7554	-1597.07	832.112	-51.6661	-1544.92	767.777
10564	0	213.741	-1462.49	1561.25	318.09	-1468.28	1552.87	192.684	-1623.27	1598.05	310.987	-1632.66	1589.78	250.117	-1700.19	1442.85	228.711	-1803.17	1167.79	240.019	-1542.08	1334.77	232.155	-1445.25	1135.22	312.169	-1796.06	1256.36	93.3853	-1605.6	1410.3	-30.009	-1628.74	1178.11	-41.8793	-1646.81	1081.52	-50.7239	-1575.01	943.769	-2.20502	-1562.83	841.487	-72.0381	-1592.52	832.732	-53.9973	-1539.72	768.523
10565	0	214.384	-1453.47	1561.14	318.763	-1459.26	1552.46	193.442	-1614.22	1598.01	311.817	-1623.66	1589.43	250.969	-1691.52	1443.06	229.878	-1795.44	1168.26	239.903	-1533.75	1334.7	231.455	-1436.76	1135.32	313.319	-1787.66	1256.85	93.5355	-1597.92	1410.63	-29.8662	-1622.92	1178.63	-41.6512	-1641.1	1082.11	-51.6989	-1569.85	944.294	-3.65365	-1556.97	841.996	-72.6355	-1588.1	833.091	-56.5639	-1534.49	769.323
10566	0	214.94	-1444.38	1560.93	319.317	-1450.33	1551.95	194.199	-1605.1	1598.06	312.438	-1614.56	1589.06	251.666	-1682.97	1443.2	230.827	-1787.53	1168.72	239.762	-1525.38	1334.38	230.758	-1428.45	1135.41	314.313	-1779.2	1257.13	93.6131	-1590.21	1410.78	-29.7078	-1617.27	1178.99	-41.4679	-1635.44	1082.56	-52.864	-1564.53	944.641	-5.52756	-1551.36	842.133	-74.0469	-1583.35	833.486	-58.814	-1529.33	770.004
10567	0	215.418	-1435.33	1560.51	319.807	-1441.23	1551.27	194.721	-1595.99	1598.25	313.024	-1605.52	1588.79	252.213	-1674.44	1443.36	231.547	-1779.7	1169.13	239.547	-1517.14	1334.17	230.085	-1420.37	1135.47	315.204	-1771.06	1257.5	93.6852	-1582.5	1410.87	-29.716	-1611.45	1179.43	-41.6022	-1629.78	1083.25	-53.9558	-1559.04	945.054	-7.04636	-1545.37	842.343	-75.0832	-1578.43	834.018	-61.0212	-1524.02	770.592
10568	0	215.839	-1426.36	1560.04	320.22	-1432.32	1550.45	195.239	-1586.96	1598.42	313.642	-1596.33	1588.61	252.686	-1665.92	1443.42	232.238	-1771.76	1169.48	239.441	-1508.89	1333.88	229.444	-1412.65	1135.32	315.956	-1762.6	1257.79	93.6625	-1574.77	1411.16	-29.5831	-1605.73	1179.85	-41.392	-1624.09	1083.71	-55.1816	-1553.79	945.581	-8.59709	-1539.42	842.597	-76.1133	-1573.48	834.612	-63.209	-1518.83	771.037
10569	0	216.127	-1417.37	1559.45	320.526	-1423.3	1549.5	195.867	-1577.87	1598.47	314.1	-1587.24	1588.38	253.138	-1657.39	1443.47	232.796	-1763.9	1169.64	239.162	-1500.8	1333.73	228.768	-1404.91	1134.98	316.633	-1754.29	1257.85	93.6624	-1567.01	1411.25	-29.3627	-1599.92	1180.04	-41.3117	-1618.23	1084.13	-56.182	-1548.18	945.844	-10.0718	-1533.22	842.876	-76.8517	-1568.48	834.9	-65.0659	-1513.66	771.38
10570	0	216.209	-1408.4	1558.79	320.566	-1414.3	1548.59	196.227	-1568.77	1598.64	314.425	-1578.06	1588.23	253.49	-1648.79	1443.44	233.271	-1756	1169.93	238.842	-1492.59	1333.47	228.049	-1397.29	1134.54	317.114	-1746.01	1258.04	93.6526	-1559.11	1411.21	-29.3192	-1593.83	1180.21	-41.2775	-1612.31	1084.61	-57.3063	-1542.65	946.107	-11.3124	-1526.98	843.051	-77.9109	-1563.24	835.225	-67.0416	-1508.21	771.641
10571	0	216.294	-1399.46	1558.06	320.49	-1405.34	1547.72	196.446	-1559.71	1598.74	314.722	-1568.89	1588.02	253.783	-1640.32	1443.4	233.656	-1747.98	1170.16	238.495	-1484.45	1333.09	227.484	-1389.59	1134.08	317.564	-1737.68	1258.21	93.571	-1551.2	1411.04	-29.3394	-1587.84	1180.46	-41.3516	-1606.41	1084.68	-58.3024	-1537.01	946.23	-12.825	-1520.75	843.107	-78.6179	-1557.85	835.381	-68.7089	-1502.85	771.805
10572	0	216.118	-1390.71	1557.4	320.34	-1396.36	1546.81	196.672	-1550.76	1598.63	314.893	-1559.74	1587.79	253.871	-1631.81	1443.18	233.967	-1740.19	1170.13	238.236	-1476.28	1332.83	226.789	-1381.89	1133.52	317.914	-1729.31	1258.13	93.4177	-1543.22	1410.88	-29.4621	-1581.74	1180.69	-41.5574	-1600.34	1084.74	-59.2838	-1531.18	946.198	-13.8215	-1514.68	843.089	-79.4343	-1552.47	835.494	-69.9183	-1497.59	771.661
10573	0	215.668	-1381.9	1556.64	320.112	-1387.56	1545.83	196.655	-1541.87	1598.43	314.905	-1550.69	1587.55	253.903	-1623.26	1442.96	234.288	-1732.22	1170.01	237.967	-1467.94	1332.38	226.196	-1374.08	1132.9	318.146	-1721.04	1258.03	93.2272	-1535.18	1410.6	-29.8257	-1575.24	1180.73	-41.7165	-1593.95	1084.85	-60.4287	-1525.22	946.238	-15.225	-1508.18	842.915	-79.9616	-1546.95	835.314	-71.5037	-1491.92	771.483
10574	0	215.197	-1373.17	1555.7	319.591	-1378.72	1545.01	196.41	-1532.9	1598.13	314.751	-1541.77	1587.23	253.98	-1614.78	1442.62	234.438	-1724.15	1169.9	237.592	-1459.69	1331.94	225.622	-1366.17	1132.38	318.335	-1712.64	1258	92.9476	-1527.01	1410.14	-30.273	-1568.5	1180.68	-42.0762	-1587.48	1084.74	-61.3255	-1519.15	946.095	-16.253	-1501.98	842.794	-80.7651	-1541.21	835.172	-72.8266	-1486.31	771.124
10575	0	214.847	-1364.39	1554.73	319.085	-1369.87	1544.1	196.072	-1524.14	1597.74	314.489	-1532.76	1586.8	253.761	-1606.08	1442.16	234.686	-1716.01	1169.63	237.244	-1451.22	1331.26	225.193	-1358.18	1131.47	318.497	-1704.33	1257.77	92.6907	-1518.79	1409.43	-30.7207	-1561.45	1180.35	-42.4491	-1580.88	1084.43	-62.2069	-1512.95	945.671	-17.3398	-1495.53	842.508	-81.5516	-1535.33	834.78	-73.7746	-1480.52	770.599
10576	0	214.294	-1355.63	1553.8	318.55	-1361.11	1543.08	195.614	-1515.27	1596.97	314.002	-1523.94	1586.07	253.515	-1597.57	1441.57	234.74	-1707.85	1169.17	236.727	-1442.79	1330.53	224.725	-1350.19	1130.37	318.464	-1695.87	1257.37	92.2027	-1510.44	1408.68	-31.1872	-1554.23	1179.83	-42.7989	-1573.94	1084.02	-63.0562	-1506.55	944.98	-18.272	-1489.15	841.612	-82.0276	-1529.5	833.996	-74.7945	-1474.64	769.83
10577	0	213.459	-1346.94	1552.81	318.019	-1352.44	1542.24	195.003	-1506.57	1596.14	313.34	-1515.15	1585.39	253.168	-1588.89	1440.85	234.781	-1699.74	1168.65	236.278	-1434.36	1329.67	224.256	-1342.03	1129.33	318.289	-1687.38	1256.89	91.7651	-1502.16	1407.73	-31.7973	-1546.68	1179.11	-43.5698	-1566.93	1083.48	-63.88	-1499.98	944.143	-19.1419	-1482.68	840.678	-82.7429	-1523.39	833.267	-75.7056	-1468.72	768.795
10578	0	212.618	-1338.27	1551.75	317.31	-1343.68	1541.42	194.092	-1497.76	1595.26	312.565	-1506.43	1584.55	252.556	-1580.1	1440.14	234.699	-1691.46	1168.2	235.775	-1425.89	1328.63	223.826	-1333.69	1128.35	318.036	-1678.93	1256.4	91.2713	-1493.72	1406.73	-32.4254	-1538.87	1178.31	-44.2971	-1559.63	1082.76	-64.6581	-1493.28	943.213	-19.8774	-1476.16	839.836	-83.4017	-1517.13	832.335	-76.3619	-1462.69	767.714
10579	0	211.754	-1329.64	1550.62	316.331	-1334.97	1540.41	193.166	-1489.31	1594.11	311.557	-1497.93	1583.64	251.997	-1571.38	1439.14	234.513	-1683.16	1167.4	235.374	-1417.27	1327.48	223.407	-1325.24	1127.01	317.678	-1670.39	1255.7	90.5061	-1484.95	1405.57	-33.1055	-1530.96	1177.31	-44.9373	-1552.36	1081.88	-65.3849	-1486.39	942.048	-20.9349	-1469.73	838.482	-84.0938	-1510.74	831.161	-77.1192	-1456.47	766.432
10580	0	210.846	-1320.93	1549.53	315.332	-1326.46	1539.37	192.09	-1480.69	1592.61	310.516	-1489.31	1582.43	251.257	-1562.59	1438.09	234.229	-1674.71	1166.45	234.74	-1408.56	1326.3	223.136	-1316.67	1125.66	317.186	-1661.8	1254.89	89.8276	-1476.12	1404.3	-33.6896	-1522.94	1176.14	-45.6058	-1544.76	1080.79	-65.9867	-1479.38	940.757	-21.734	-1463.09	837.254	-84.6311	-1504.31	829.8	-77.8996	-1450.21	765.06
10581	0	209.607	-1312.28	1548.44	314.311	-1317.8	1538.51	190.87	-1472.08	1591.33	309.365	-1480.66	1581.33	250.489	-1553.78	1436.98	233.763	-1666.31	1165.58	233.934	-1399.86	1324.98	222.74	-1308.23	1124.3	316.587	-1653.28	1254.02	89.0837	-1467.3	1402.89	-34.4205	-1514.52	1174.93	-46.2455	-1537.12	1079.58	-66.7066	-1472.24	939.365	-22.3999	-1456.26	835.785	-85.5387	-1497.65	828.555	-78.5374	-1443.84	763.425
10582	0	208.351	-1303.67	1547.08	312.977	-1309.03	1537.55	189.638	-1463.39	1589.93	308.111	-1471.91	1580.16	249.472	-1545.02	1435.87	233.196	-1657.71	1164.56	233.217	-1391.16	1323.69	222.359	-1299.71	1122.74	315.904	-1644.63	1253.15	88.238	-1458.5	1401.45	-35.0435	-1506.1	1173.31	-47.008	-1529.25	1078.12	-67.3515	-1465	937.731	-22.955	-1449.36	834.351	-86.1212	-1490.83	827.045	-79.3109	-1437.43	761.789
10583	0	206.886	-1294.94	1545.8	311.628	-1300.32	1536.36	188.193	-1454.91	1588.24	306.708	-1463.27	1578.81	248.443	-1536.14	1434.42	232.519	-1649.12	1163.25	232.397	-1382.45	1322.13	222.052	-1291.03	1121.07	315.174	-1636.05	1251.94	87.3992	-1449.6	1399.66	-35.6035	-1497.59	1171.53	-47.5024	-1521.16	1076.54	-67.9475	-1457.69	935.814	-23.7462	-1442.43	832.36	-86.5806	-1484.08	825.13	-79.8401	-1430.84	759.642
10584	0	205.201	-1286.35	1544.28	310.057	-1291.52	1535.18	186.683	-1446.31	1586.66	305.239	-1454.53	1577.43	247.249	-1527.34	1433.13	231.821	-1640.6	1161.92	231.522	-1373.58	1320.61	221.684	-1282.19	1119.42	314.296	-1627.41	1250.77	86.2577	-1440.5	1397.95	-36.1898	-1488.83	1169.64	-47.8303	-1513.04	1074.87	-68.4894	-1450.32	933.896	-24.3996	-1435.17	830.389	-87.1878	-1477.12	823.227	-80.4326	-1424.25	757.598
10585	0	203.569	-1277.67	1542.83	308.367	-1282.57	1533.98	185.168	-1437.65	1585.15	303.759	-1445.79	1576.3	245.99	-1518.51	1431.79	231.035	-1631.77	1160.57	230.643	-1364.72	1319.1	221.187	-1273.5	1117.82	313.415	-1618.71	1249.5	85.4321	-1431.62	1395.96	-36.819	-1479.97	1167.53	-48.4732	-1504.89	1072.84	-69.1068	-1442.65	931.713	-25.0801	-1428.08	828.071	-87.9663	-1469.89	821.489	-81.0079	-1417.45	755.251
10586	0	201.682	-1268.81	1541.38	306.662	-1273.74	1532.84	183.417	-1428.85	1583.54	302.06	-1436.83	1575.04	244.734	-1509.71	1430.37	230.333	-1622.9	1159.16	229.711	-1355.81	1317.49	220.775	-1264.62	1116.12	312.56	-1609.85	1248.31	84.2904	-1422.61	1394.18	-37.4747	-1471.04	1165.27	-49.0844	-1496.43	1070.86	-69.6084	-1434.9	929.4	-25.7302	-1420.63	825.716	-88.4871	-1462.66	819.314	-81.603	-1410.47	752.823
10587	0	199.824	-1260.06	1539.91	304.705	-1264.77	1531.45	181.867	-1420.14	1581.82	300.263	-1427.96	1573.69	243.383	-1500.97	1428.89	229.645	-1613.99	1157.49	228.489	-1346.82	1316.13	220.354	-1255.53	1114.68	311.71	-1601.03	1246.96	83.1	-1413.84	1392.17	-38.0806	-1461.96	1163.23	-49.5056	-1488.14	1068.94	-70.2066	-1427.02	927.3	-25.8175	-1413.27	823.245	-88.9487	-1455.28	817.103	-82.1605	-1403.43	750.595
10588	0	197.861	-1251.15	1538.62	302.809	-1255.92	1530.53	179.726	-1411.33	1580.34	298.413	-1418.97	1572.51	241.973	-1492	1427.45	228.899	-1605.05	1156.04	227.335	-1337.81	1314.79	219.743	-1246.59	1113.25	310.81	-1592.03	1245.75	81.691	-1405.05	1390.46	-38.7591	-1452.88	1161.01	-50.0652	-1479.6	1066.75	-70.7255	-1419.04	924.964	-26.5423	-1405.58	821.063	-89.2642	-1447.87	815.122	-82.7567	-1396.25	748.225
10589	0	195.761	-1242.24	1537.16	300.623	-1246.69	1529.53	177.675	-1402.45	1578.79	296.377	-1409.93	1571.43	240.518	-1482.96	1426.11	228.107	-1595.92	1154.6	226.068	-1328.75	1313.46	219.086	-1237.49	1112	309.912	-1582.96	1244.61	80.3097	-1396.2	1388.62	-39.4545	-1443.55	1158.78	-50.4802	-1470.98	1064.59	-71.1727	-1411.05	922.756	-27.18	-1397.73	818.693	-89.7344	-1440.09	812.955	-83.268	-1388.94	745.777
10590	0	193.364	-1233.32	1535.76	298.463	-1237.63	1528.55	175.512	-1393.52	1577.24	294.255	-1400.92	1570.28	239.054	-1473.96	1424.73	227.419	-1586.71	1153.08	224.808	-1319.57	1312.08	218.471	-1228.21	1110.74	309.073	-1573.84	1243.34	78.8024	-1387.29	1386.7	-40.0803	-1434.38	1156.5	-50.6493	-1462.24	1062.3	-71.5248	-1402.74	920.38	-27.4678	-1389.69	816.405	-90.1599	-1432.15	810.728	-83.5865	-1381.52	743.312
10591	0	191.147	-1224.41	1534.52	296.212	-1228.61	1527.54	173.289	-1384.81	1575.57	291.991	-1391.82	1569.04	237.569	-1464.84	1423.28	226.817	-1577.45	1151.52	223.625	-1310.39	1311	217.785	-1218.91	1109.52	308.161	-1564.59	1242.01	77.2581	-1378.47	1385	-40.9706	-1425.21	1154.24	-51.1378	-1453.58	1060.05	-71.9267	-1394.44	918.169	-27.5811	-1381.5	814.047	-90.3028	-1424.14	808.498	-83.8253	-1373.76	740.951
10592	0	188.531	-1215.46	1533.25	293.689	-1219.43	1526.83	170.939	-1375.96	1574.03	289.654	-1382.71	1568.01	236.014	-1455.52	1422.06	226.233	-1568.04	1150.15	222.11	-1301.05	1309.84	216.908	-1209.51	1108.4	307.304	-1555.05	1240.92	75.8272	-1369.5	1383.12	-41.7101	-1415.87	1152.15	-51.6635	-1444.92	1058.1	-72.1904	-1386.22	916.026	-28.2525	-1372.94	812.026	-90.4991	-1415.7	806.323	-84.0619	-1365.69	738.735
10593	0	185.886	-1206.56	1532.06	290.986	-1210.27	1525.96	168.401	-1367	1572.67	287.295	-1373.56	1567.12	234.481	-1446.27	1420.77	225.621	-1558.33	1148.76	220.585	-1291.65	1308.43	215.915	-1199.86	1107.35	306.495	-1545.51	1239.77	74.3027	-1360.4	1381.4	-42.3654	-1406.73	1149.92	-52.0905	-1436.03	1056.05	-72.5315	-1377.53	913.938	-28.5062	-1364.13	809.962	-90.4737	-1407.17	804.326	-84.0863	-1357.3	736.323
10594	0	183.162	-1197.6	1530.67	288.119	-1201.06	1525.14	165.874	-1358.31	1570.99	284.724	-1364.44	1566.05	232.924	-1437.06	1419.43	225.097	-1548.78	1147.14	218.998	-1282.2	1307.41	214.858	-1190.08	1106.45	305.682	-1535.82	1238.47	72.6098	-1351.38	1379.88	-43.3023	-1397.78	1147.88	-52.3999	-1427.23	1053.76	-72.7894	-1368.65	911.672	-27.9404	-1355.7	807.273	-90.6895	-1398.53	802.147	-84.1701	-1348.74	734.248
10595	0	180.19	-1188.76	1529.52	285.261	-1191.84	1524.51	163.244	-1349.52	1569.56	282.042	-1355.31	1565.16	231.135	-1427.98	1418.05	224.444	-1539.01	1145.46	217.561	-1272.77	1306.47	213.575	-1180.11	1105.62	304.794	-1525.96	1237.07	71.0731	-1342.43	1378.04	-44.2492	-1389.14	1145.99	-52.9077	-1418.3	1051.75	-73.1269	-1359.79	909.784	-27.9627	-1347.09	805.086	-90.6721	-1389.52	800.041	-83.8551	-1339.98	731.963
10596	0	177.187	-1179.87	1528.42	282.357	-1182.64	1524.06	160.533	-1340.58	1568.1	279.258	-1346.12	1564.61	229.52	-1418.74	1416.87	223.771	-1529.03	1143.9	215.738	-1263.11	1305.63	212.295	-1169.86	1104.97	303.935	-1516.11	1235.83	69.122	-1333.39	1376.57	-45.2404	-1380.43	1143.95	-53.5094	-1409.56	1049.7	-73.4724	-1350.65	907.694	-28.14	-1337.82	803.331	-90.5896	-1380.49	798.089	-83.6935	-1330.87	729.882
10597	0	174.324	-1170.74	1527.43	279.368	-1173.34	1523.69	157.51	-1331.69	1566.99	276.461	-1336.91	1564.22	227.819	-1409.42	1415.78	222.884	-1518.86	1142.27	214.073	-1253.42	1304.99	210.932	-1159.57	1104.68	302.939	-1506.07	1234.43	67.4129	-1324.43	1375.04	-46.2491	-1371.87	1142.15	-54.0664	-1400.41	1047.66	-73.5386	-1341.46	905.486	-28.0799	-1328.4	801.192	-90.461	-1370.89	795.819	-83.2515	-1321.4	727.78
10598	0	171.353	-1161.57	1526.78	276.49	-1164.16	1523.55	154.542	-1322.76	1566.02	273.475	-1327.81	1563.83	225.892	-1400.3	1414.62	221.929	-1508.6	1140.46	212.164	-1243.7	1304.67	209.502	-1149.11	1104.58	301.739	-1496.02	1232.98	65.2321	-1315.46	1373.76	-47.3954	-1363.29	1140.26	-54.4944	-1391.33	1045.49	-73.9394	-1332.04	903.511	-28.1572	-1318.88	799.5	-90.2555	-1361.49	793.712	-82.9041	-1311.73	725.709
10599	0	168.539	-1152.49	1526.49	273.769	-1155.41	1523.82	151.429	-1313.52	1565.3	270.369	-1318.65	1563.84	223.687	-1391.15	1413.86	220.866	-1498.12	1139.06	210.25	-1233.82	1304.4	208.085	-1138.58	1104.66	300.528	-1486.02	1231.87	63.1041	-1306.32	1372.61	-48.5432	-1354.89	1138.58	-55.1813	-1382.17	1043.69	-74.331	-1322.69	901.717	-27.8203	-1309.07	797.766	-90.0464	-1351.75	791.715	-82.4691	-1301.92	724.014
10600	0	165.738	-1143.12	1526.45	271.027	-1146.04	1524.51	148.254	-1304.11	1564.83	267.148	-1309.47	1564.15	221.587	-1381.68	1413.37	219.751	-1487.59	1138.1	208.212	-1223.85	1304.63	206.589	-1128.03	1104.99	299.174	-1475.75	1231.25	60.9158	-1297.03	1371.65	-49.7259	-1346.05	1137.17	-56.0538	-1372.77	1041.98	-74.6551	-1313	900.016	-27.9266	-1298.84	796.692	-89.7157	-1341.91	789.887	-82.1078	-1291.81	722.414
10601	0	162.998	-1133.45	1526.66	268.375	-1136.75	1525.39	144.897	-1294.62	1564.76	263.932	-1300.19	1564.57	219.424	-1372.09	1413.25	218.659	-1477.18	1137.48	206.222	-1213.73	1305.05	205.205	-1117.32	1105.67	297.95	-1465.58	1231	58.8185	-1287.83	1370.83	-50.8936	-1337.37	1135.83	-56.497	-1363.15	1040.43	-75.0919	-1303.13	898.625	-27.6968	-1288.6	795.437	-89.311	-1331.94	788.296	-81.5051	-1281.48	720.924
10602	0	160.326	-1123.93	1527.31	265.6	-1127.31	1526.31	141.776	-1285.03	1564.77	260.613	-1290.95	1565.18	217.29	-1362.32	1413.36	217.501	-1466.7	1137.16	204.043	-1203.79	1305.66	203.756	-1106.83	1106.29	296.722	-1455.39	1231.13	56.5688	-1278.29	1370.33	-52.1218	-1328.3	1135	-56.9538	-1353.51	1039.28	-75.4192	-1293.27	897.517	-27.407	-1278.34	794.67	-89.1243	-1321.85	786.947	-81.0708	-1271.22	719.931
10603	0	157.568	-1114.17	1528.22	262.831	-1117.99	1527.71	138.505	-1275.32	1565.21	257.305	-1281.56	1566.14	215.105	-1352.35	1413.98	216.642	-1456.46	1137.69	201.915	-1193.62	1306.55	202.344	-1096.38	1107.29	295.508	-1445	1231.9	54.1795	-1268.58	1370.52	-53.3258	-1318.96	1134.57	-57.5172	-1343.52	1038.6	-75.7776	-1283.32	896.797	-27.4366	-1267.68	794.094	-88.6456	-1311.61	786.131	-80.7876	-1260.52	719.394
10604	0	154.83	-1104.33	1529.34	260.091	-1108.31	1529.48	135.212	-1265.56	1565.95	254.12	-1271.96	1567.46	212.986	-1342.26	1415	216.35	-1446.15	1138.44	199.731	-1183.28	1307.63	201.024	-1086	1108.47	294.555	-1434.54	1233.26	52.1004	-1258.84	1370.83	-54.2179	-1309.24	1134.3	-57.8066	-1333.46	1038.31	-76.0514	-1273	896.516	-27.5667	-1256.92	794.137	-88.3577	-1301.33	785.867	-80.382	-1249.72	719.052
10605	0	151.782	-1094.49	1530.63	257.087	-1098.58	1531.24	132.079	-1255.84	1566.74	250.869	-1262.25	1568.85	210.909	-1332.12	1416.18	215.81	-1435.83	1139.6	197.515	-1173.19	1309.2	199.553	-1075.89	1109.89	293.492	-1424.04	1234.68	49.8784	-1249.16	1371.45	-55.0977	-1299.41	1134.37	-58.1598	-1323.32	1038.37	-76.4704	-1262.68	896.77	-27.852	-1246.23	794.472	-88.0922	-1290.74	785.661	-80.2325	-1239.19	719.244
10606	0	148.75	-1084.75	1532.09	254.024	-1088.76	1533.14	128.944	-1246.26	1567.75	247.757	-1252.49	1570.56	208.836	-1322.07	1417.6	214.75	-1425.12	1141.02	195.547	-1162.93	1310.67	198.023	-1065.77	1111.6	292.555	-1413.54	1236.51	47.9105	-1239.56	1372.37	-55.9904	-1289.27	1134.76	-58.3514	-1313.02	1038.73	-76.8516	-1252.28	897.295	-27.9247	-1235.15	795.082	-87.8902	-1280.13	786.054	-80.2197	-1228.21	719.651
10607	0	145.599	-1075.23	1533.64	250.782	-1078.7	1535.36	125.866	-1236.61	1569.08	244.688	-1242.7	1572.42	206.785	-1311.97	1419.24	213.725	-1414.02	1142.72	193.506	-1152.68	1312.46	196.548	-1055.7	1113.53	291.458	-1403.06	1238.54	45.813	-1229.85	1373.54	-56.6857	-1278.9	1135.44	-58.7397	-1302.61	1039.52	-77.0229	-1241.67	898.066	-28.4412	-1223.84	796.062	-87.6362	-1269.45	786.734	-80.2945	-1217.31	720.531
10608	0	142.581	-1065.45	1535.26	247.761	-1068.85	1537.63	122.941	-1226.98	1570.41	241.785	-1232.77	1574.46	204.786	-1301.89	1421.03	212.952	-1402.94	1144.56	191.559	-1142.72	1314.34	195.153	-1045.66	1115.59	290.398	-1392.55	1240.56	43.9859	-1220.19	1374.82	-57.3335	-1268.43	1136.22	-58.9822	-1292.03	1040.52	-77.4741	-1230.83	899.168	-28.5429	-1211.85	797.697	-87.5357	-1258.34	787.83	-80.441	-1206.19	721.626
10609	0	139.5	-1055.99	1537.08	244.722	-1059.1	1539.85	120.163	-1217.54	1571.78	238.912	-1223.02	1576.47	202.745	-1292.01	1422.73	211.876	-1391.99	1146.08	189.543	-1132.76	1316.37	193.576	-1035.74	1117.94	289.212	-1382.1	1242.41	41.9561	-1210.49	1376.49	-58.1458	-1258.01	1137.37	-59.3641	-1281.44	1041.56	-77.8224	-1219.98	900.494	-28.7358	-1200.3	799.143	-87.5691	-1247.31	789.004	-80.7002	-1194.91	722.932
10610	0	136.691	-1046.43	1538.9	241.948	-1049.55	1542.18	117.362	-1208.15	1573.28	236.128	-1213.48	1578.58	200.682	-1282.21	1424.49	210.889	-1382.17	1147.81	187.688	-1122.92	1318.54	192.187	-1025.94	1120.3	287.926	-1371.8	1244.35	40.2064	-1200.75	1377.89	-58.9182	-1247.59	1138.54	-59.9521	-1270.92	1042.85	-78.2267	-1208.85	901.953	-29.3084	-1188.5	800.935	-87.4346	-1235.99	790.178	-81.125	-1183.41	724.434
10611	0	134.117	-1037.07	1540.69	239.196	-1040.03	1544.53	114.546	-1198.77	1574.64	233.376	-1204.07	1580.48	198.601	-1272.56	1426.06	209.666	-1372.18	1149.31	185.836	-1113.23	1320.32	190.786	-1016.09	1122.4	286.391	-1361.7	1246.07	37.8913	-1191.12	1379.6	-59.7041	-1237.01	1139.54	-60.651	-1260.21	1043.96	-78.6869	-1197.79	903.184	-29.7361	-1176.74	802.385	-87.6267	-1224.41	791.48	-81.2427	-1171.81	725.621
10612	0	131.566	-1027.88	1542.49	236.731	-1030.81	1546.84	112.055	-1189.56	1575.87	230.778	-1194.99	1582.16	196.435	-1262.97	1427.62	208.323	-1362.71	1150.65	183.856	-1103.61	1321.87	189.467	-1006.6	1124.28	284.649	-1351.81	1247.67	35.9312	-1181.46	1380.84	-60.6404	-1226.49	1140.47	-61.6502	-1249.6	1045.1	-79.1012	-1186.41	904.174	-29.9437	-1164.79	803.526	-87.9092	-1212.63	792.597	-81.3975	-1159.8	726.747
10613	0	129.379	-1018.94	1544.4	234.336	-1021.89	1549.09	109.646	-1180.76	1576.85	228.21	-1186.22	1583.58	194.211	-1253.46	1428.89	206.93	-1353.21	1151.86	182.287	-1094	1323.45	188.035	-997.115	1126.33	282.9	-1342.15	1249	34.0237	-1171.84	1382.02	-61.8507	-1215.88	1141.41	-62.858	-1238.94	1045.86	-79.9345	-1175.08	905.428	-30.2127	-1153.02	804.852	-88.044	-1200.79	793.541	-81.6295	-1147.61	727.965
10614	0	127.009	-1009.96	1546.43	232.023	-1013.04	1551.38	107.149	-1172.05	1577.73	225.82	-1177.55	1584.95	192.049	-1243.9	1430.16	205.131	-1343.2	1153.07	180.545	-1084.39	1324.86	186.837	-987.613	1128.2	280.978	-1332.55	1250.36	32.2062	-1162.09	1382.91	-63.3621	-1205.32	1142.33	-64.2025	-1228.15	1046.69	-80.6499	-1163.47	906.303	-30.4325	-1141.14	805.864	-88.4513	-1188.66	794.413	-81.7988	-1135.38	729.177
10615	0	125.114	-1001.3	1548.31	229.982	-1004.36	1553.91	105.053	-1163.43	1578.26	223.508	-1169.19	1585.98	189.99	-1234.4	1431.26	203.25	-1333.61	1154.21	179.056	-1074.82	1326.15	185.77	-978.055	1129.66	278.954	-1323.22	1251.66	30.2775	-1152.41	1383.75	-64.9584	-1194.66	1143.02	-65.8971	-1217.41	1047.19	-81.6712	-1151.95	907.203	-30.7375	-1129.01	806.952	-89.077	-1176.33	795.184	-81.8677	-1122.65	730.207
10616	0	122.978	-992.565	1550.37	227.878	-995.799	1556.11	102.778	-1155.22	1578.83	221.308	-1160.92	1586.75	188.002	-1224.91	1432.25	201.202	-1323.73	1155.14	177.462	-1065.33	1327.21	184.867	-968.54	1130.88	277.006	-1314.05	1252.88	28.3199	-1142.52	1384.66	-66.7869	-1184.01	1143.58	-67.6805	-1206.54	1047.59	-82.5505	-1140.21	907.844	-31.2064	-1116.97	808.271	-89.6832	-1163.8	795.713	-81.7849	-1109.87	731.038
10617	0	120.998	-984.278	1552.35	225.808	-987.388	1558.36	100.817	-1147.05	1578.98	219.17	-1152.75	1587.32	186.028	-1215.38	1433.07	199.088	-1314.46	1156.19	176.034	-1055.98	1328.13	183.891	-959.175	1131.83	274.896	-1304.92	1253.79	26.5046	-1132.69	1385.35	-68.6826	-1173.34	1144.11	-69.573	-1195.68	1047.89	-83.6781	-1128.49	908.542	-31.7388	-1104.8	809.266	-90.2421	-1151.28	796.137	-81.8079	-1096.76	732.046
10618	0	118.823	-975.878	1554.13	223.832	-978.932	1560.7	98.7306	-1138.88	1579.2	217.245	-1144.66	1587.9	184.217	-1205.89	1433.92	197.123	-1304.87	1157.05	174.694	-1046.57	1328.93	183.329	-949.7	1132.54	273.04	-1296.08	1254.97	25.2861	-1122.59	1385.52	-70.9264	-1162.75	1144.62	-71.8785	-1184.78	1048.15	-84.8011	-1116.69	909.081	-32.3467	-1092.55	810.57	-90.9328	-1138.38	796.32	-81.8048	-1083.54	732.884
10619	0	117.003	-967.623	1555.65	221.858	-970.52	1562.62	96.9517	-1130.99	1579.2	215.364	-1136.5	1588.22	182.555	-1196.33	1434.65	195.244	-1295.45	1157.9	173.697	-1037.14	1329.32	182.861	-940.525	1132.75	271.119	-1287.14	1255.98	23.9023	-1112.51	1385.92	-73.0106	-1151.95	1145	-74.0612	-1173.66	1048.19	-85.7962	-1104.53	909.432	-32.6868	-1080.29	811.379	-91.902	-1125.49	796.692	-81.8503	-1070.03	733.658
10620	0	115.036	-959.328	1556.99	219.842	-962.22	1564.1	95.2192	-1122.98	1578.98	213.605	-1128.38	1588.38	180.987	-1186.91	1435.19	193.592	-1286.33	1158.45	172.556	-1027.83	1329.67	182.633	-931.396	1132.59	269.293	-1278.52	1256.65	22.6876	-1102.45	1386	-75.0147	-1141.08	1145.25	-76.1879	-1162.47	1048.14	-86.9917	-1092.52	909.748	-33.2926	-1067.77	812.325	-92.8807	-1112.49	796.8	-81.8743	-1056.59	734.41
10621	0	113.242	-951.146	1558.08	218.038	-953.84	1565.52	93.7313	-1114.85	1578.72	211.96	-1120.31	1588.46	179.518	-1177.47	1435.71	191.854	-1277.48	1159.23	171.793	-1018.68	1329.74	182.628	-922.361	1132.28	267.571	-1269.97	1257.52	21.6575	-1092.17	1386.09	-76.9314	-1130.07	1145.54	-78.4242	-1151.38	1048.35	-88.0351	-1080.27	910.119	-33.6447	-1055.86	812.931	-93.8286	-1099.54	797.058	-82.0984	-1042.94	735.263
10622	0	111.486	-942.926	1559.04	216.32	-945.432	1566.87	92.0901	-1106.89	1578.55	210.399	-1111.98	1588.58	178.085	-1168.13	1436.22	189.846	-1268.86	1160.07	171.07	-1009.36	1329.82	182.671	-913.307	1131.81	265.715	-1261.47	1258.43	20.8249	-1082.06	1386	-79.0065	-1119.16	1145.8	-80.7004	-1140.12	1048.36	-89.1383	-1067.92	910.383	-34.2576	-1043.74	813.508	-94.9444	-1086.32	797.127	-82.4258	-1029.29	736.08
10623	0	109.944	-934.55	1559.83	214.692	-937.067	1567.94	90.6658	-1098.66	1578.24	209.027	-1103.7	1588.57	176.633	-1158.84	1436.71	187.969	-1260.43	1160.81	170.584	-1000.28	1329.84	182.864	-904.462	1131.27	263.847	-1253	1259.07	19.9499	-1071.99	1386	-80.624	-1108.15	1145.93	-82.2981	-1128.15	1048.36	-90.0545	-1055.66	910.681	-34.8803	-1031.55	814.09	-95.8438	-1073.42	797.432	-82.8528	-1015.6	736.967
10624	0	108.591	-926.201	1560.5	213.293	-928.664	1568.7	89.3851	-1090.37	1577.92	207.665	-1095.44	1588.43	175.25	-1149.57	1437.07	186.087	-1251.85	1161.4	170.068	-991.235	1329.74	183.269	-895.793	1130.94	262.107	-1244.69	1259.65	19.1125	-1061.63	1385.99	-82.3521	-1097.24	1146.13	-84.4455	-1116.66	1048.48	-91.0829	-1043.23	911.112	-35.4148	-1019.42	814.701	-97.1926	-1060.26	797.542	-83.3804	-1002.1	737.795
10625	0	107.358	-917.7	1561.15	212.119	-920.128	1569.58	88.2403	-1082	1577.66	206.423	-1086.99	1588.38	173.825	-1140.33	1437.52	184.157	-1243.27	1162.18	169.713	-982.336	1329.67	183.776	-886.97	1130.54	260.256	-1236.44	1260.45	18.3135	-1051.64	1386.17	-83.8114	-1086.1	1146.29	-86.4291	-1104.73	1048.53	-92.0678	-1030.72	911.685	-36.3811	-1007.13	815.542	-98.3446	-1047.43	797.817	-84.2136	-988.724	738.782
10626	0	106.426	-909.054	1561.75	211.169	-911.555	1570.36	87.0574	-1073.3	1577.46	205.305	-1078.58	1588.34	172.398	-1131.1	1438.05	182.223	-1234.58	1162.93	169.295	-973.538	1329.64	184.192	-878.298	1130.24	258.33	-1228.19	1261.21	17.5959	-1041.53	1386.3	-85.1016	-1074.97	1146.39	-88.4776	-1092.94	1048.65	-92.9591	-1018.22	912.029	-37.1576	-994.986	816.093	-99.9179	-1034.18	798.328	-84.9244	-975.344	739.466
10627	0	105.724	-900.53	1562.15	210.412	-903.076	1570.9	86.2586	-1064.6	1577.19	204.261	-1070.17	1588.16	171.065	-1122.02	1438.35	180.42	-1226.31	1163.5	169.13	-964.739	1329.57	184.771	-869.749	1129.88	256.512	-1219.96	1261.77	16.8496	-1031.64	1386.39	-86.2158	-1063.62	1146.47	-89.754	-1080.8	1048.62	-93.8063	-1005.54	912.39	-38.0159	-982.957	816.467	-101.03	-1021.31	798.508	-85.7496	-962.02	740.163
10628	0	105.009	-891.634	1562.46	209.679	-894.534	1571.23	85.2031	-1055.9	1577	203.255	-1061.61	1587.92	169.749	-1113.07	1438.64	178.564	-1218.38	1164.13	168.888	-956.027	1329.49	185.133	-861.418	1129.65	254.679	-1211.83	1262.39	16.2498	-1021.81	1386.28	-87.3125	-1052.23	1146.36	-91.5727	-1068.8	1048.8	-94.6039	-993.02	912.704	-38.7992	-970.593	816.741	-102.51	-1008.13	798.809	-86.5662	-948.874	740.686
10629	0	104.556	-882.847	1562.54	209.194	-885.892	1571.48	84.1893	-1047.11	1576.88	202.413	-1053.02	1587.87	168.417	-1104.07	1439.1	176.849	-1210.15	1164.74	168.456	-947.507	1329.32	185.566	-853.164	1129.25	252.968	-1203.76	1263.08	15.54	-1012.11	1386.22	-87.9911	-1040.74	1146.13	-92.9162	-1056.74	1048.61	-95.5081	-980.398	912.924	-39.5707	-958.259	816.784	-103.928	-995.044	799.092	-87.5069	-935.778	741.032
10630	0	104.222	-873.872	1562.61	208.805	-877.176	1571.62	83.4155	-1038.23	1576.7	201.592	-1044.38	1587.81	167.271	-1095.3	1439.46	175.312	-1202.05	1165.32	168.35	-938.951	1329.1	185.826	-845.16	1128.88	251.354	-1195.62	1263.69	14.9866	-1002.51	1386.07	-88.8239	-1029.2	1145.85	-94.1037	-1044.7	1048.42	-96.2372	-967.765	913.091	-40.4144	-945.968	816.704	-105.142	-981.987	799.462	-88.3926	-922.808	741.26
10631	0	103.791	-865.132	1562.56	208.323	-868.599	1571.58	82.7034	-1029.26	1576.51	200.822	-1035.75	1587.67	166.113	-1086.46	1439.52	173.964	-1194.15	1165.64	168.096	-930.443	1328.88	186.094	-837.141	1128.66	249.863	-1187.59	1263.99	14.4534	-993.048	1385.98	-89.442	-1017.69	1145.55	-95.2962	-1032.58	1048.39	-96.8916	-955.27	913.294	-41.4643	-933.766	816.739	-106.774	-969.044	799.567	-89.333	-909.796	741.542
10632	0	103.529	-856.104	1562.49	208.018	-859.924	1571.47	82.1361	-1020.39	1576.34	200.2	-1027.04	1587.66	165.035	-1077.77	1439.6	172.669	-1186.08	1165.93	167.768	-922.036	1328.75	186.28	-829.151	1128.5	248.494	-1179.65	1264.35	13.7662	-983.774	1385.9	-90.0073	-1006.09	1145.33	-96.2524	-1020.53	1048.27	-97.6224	-942.648	913.521	-42.2486	-921.274	816.856	-108.153	-956.202	799.91	-90.3616	-896.942	741.655
10633	0	103.123	-847.227	1562.34	207.664	-851.185	1571.56	81.3736	-1011.34	1576.29	199.529	-1018.28	1587.7	164.146	-1069.28	1439.71	171.359	-1177.96	1166.27	167.583	-913.684	1328.59	186.374	-821.183	1128.21	247.151	-1171.59	1264.76	13.2829	-974.572	1385.75	-90.5754	-994.541	1145.13	-96.8542	-1008.52	1047.73	-98.2996	-930.106	913.681	-43.1865	-908.76	816.804	-109.222	-942.865	799.974	-91.4224	-884.193	741.733
10634	0	102.955	-838.555	1561.99	207.412	-842.487	1571.43	80.9409	-1002.47	1576.14	198.982	-1009.55	1587.68	163.071	-1060.23	1439.64	170.28	-1169.77	1166.43	167.424	-905.198	1328.31	186.598	-813.176	1127.92	245.974	-1163.46	1264.99	12.8404	-965.445	1385.57	-91.0976	-983.044	1144.76	-97.4499	-996.498	1047.33	-98.8685	-917.71	913.723	-43.8843	-896.224	816.82	-110.195	-929.849	799.795	-92.4006	-871.41	741.698
10635	0	102.876	-829.495	1561.74	207.307	-833.827	1571.05	80.5551	-993.464	1575.8	198.409	-1000.81	1587.49	162.442	-1051.97	1439.36	169.313	-1161.97	1166.37	167.183	-896.828	1328.06	186.672	-805.249	1127.51	244.892	-1155.4	1265	12.3275	-956.466	1385.28	-91.5399	-971.615	1144.38	-97.9551	-984.551	1047.03	-99.4107	-905.243	913.748	-44.7436	-883.66	816.65	-111.439	-917.057	800.104	-93.5342	-858.567	741.793
10636	0	102.667	-820.613	1561.33	207.125	-825.256	1570.61	79.9056	-984.504	1575.77	197.984	-992.135	1587.41	161.656	-1043.31	1439.23	168.279	-1153.77	1166.4	167.163	-888.32	1327.68	186.805	-797.28	1127.1	243.888	-1147.2	1264.93	12.1566	-947.372	1384.86	-91.7586	-960.138	1144	-98.3697	-972.584	1046.63	-100.017	-892.837	913.873	-45.6381	-871.071	816.519	-112.602	-904.075	800.17	-94.6125	-845.802	741.818
10637	0	103.053	-811.662	1560.81	207.233	-816.484	1570.12	79.6285	-975.569	1575.52	197.549	-983.367	1587.11	161.086	-1034.62	1438.97	167.439	-1145.55	1166.27	166.995	-880.003	1327.17	187.016	-789.117	1126.54	242.943	-1138.97	1264.81	11.59	-938.492	1384.6	-91.8954	-948.766	1143.49	-98.702	-960.67	1046.3	-100.417	-880.326	913.888	-46.2368	-858.407	816.199	-113.39	-891.306	800.032	-95.5091	-832.929	741.638
10638	0	102.708	-802.939	1560.05	207.243	-807.863	1569.35	79.2043	-966.529	1575.16	197.227	-974.669	1586.62	160.541	-1025.9	1438.63	166.632	-1137.42	1165.87	166.736	-871.543	1326.39	187.062	-780.993	1125.77	242.172	-1130.82	1264.41	11.4565	-929.545	1383.93	-91.9738	-937.565	1142.9	-98.8571	-948.855	1045.78	-100.64	-867.961	913.796	-46.8324	-845.765	815.774	-113.947	-878.506	800.008	-96.3428	-820.068	741.494
10639	0	103.247	-793.801	1559.65	207.414	-799.303	1568.5	78.9826	-957.692	1574.54	196.999	-966.062	1585.86	160.139	-1017.44	1438	165.886	-1129.34	1165.4	166.578	-862.998	1325.67	187.195	-772.691	1124.87	241.34	-1122.54	1263.95	11.2054	-920.636	1383.25	-92.1444	-926.515	1142.2	-98.8992	-937.115	1045	-100.807	-855.688	913.568	-47.4469	-833.043	815.539	-114.874	-865.521	799.905	-97.1504	-807.237	741.42
10640	0	103.47	-784.918	1558.9	207.625	-790.606	1567.75	78.872	-948.722	1573.78	196.8	-957.394	1585.01	159.595	-1008.69	1437.23	165.267	-1121.11	1164.88	166.366	-854.474	1324.89	187.164	-764.407	1124.06	240.686	-1114.2	1263.4	10.9452	-911.742	1382.54	-92.2251	-915.562	1141.61	-98.9527	-925.345	1044.37	-100.993	-843.319	913.471	-47.8833	-820.331	815.373	-115.256	-852.763	799.67	-97.8974	-794.14	741.332
10641	0	103.578	-776.09	1558.15	207.88	-781.938	1566.95	78.8988	-939.607	1572.87	196.725	-948.695	1584.02	159.273	-999.714	1436.55	164.783	-1113.26	1164.19	166.366	-845.768	1324	187.133	-756.092	1123.12	240.136	-1105.77	1262.83	10.8126	-902.803	1381.7	-92.2549	-904.589	1140.88	-99.1287	-913.74	1043.86	-101.219	-830.878	913.525	-48.3094	-807.459	815.168	-115.899	-839.815	799.629	-98.3928	-781.036	741.345
10642	0	103.866	-767.349	1557.22	208.03	-773.254	1565.85	78.8718	-930.891	1571.81	196.788	-939.982	1582.7	159.143	-990.999	1435.68	164.437	-1104.93	1163.41	166.232	-837.114	1323.01	187.217	-747.789	1121.96	239.775	-1097.34	1262	10.5934	-894.008	1380.93	-92.298	-893.932	1140.11	-99.2175	-902.221	1042.97	-101.248	-818.533	913.344	-48.4998	-794.702	814.986	-116.245	-826.711	799.299	-98.7264	-767.898	741.286
10643	0	104.022	-758.544	1556.31	208.359	-764.415	1564.9	79.0253	-922.063	1570.66	196.936	-931.135	1581.43	159.11	-982.125	1434.77	164.146	-1096.43	1162.66	166.18	-828.304	1321.91	187.102	-739.381	1120.78	239.494	-1088.82	1261.17	10.4372	-884.902	1379.99	-92.4151	-883.532	1139.41	-99.3624	-890.78	1042.24	-101.259	-806.168	913.097	-48.5348	-781.936	814.782	-116.267	-813.682	799.057	-98.9126	-754.63	741.417
10644	0	104.27	-749.381	1555.55	208.605	-755.536	1563.94	79.1845	-913.12	1569.49	197.225	-922.343	1580.19	159.062	-973.031	1433.82	163.726	-1087.04	1162.04	166.197	-819.479	1320.78	187.068	-730.848	1119.4	239.31	-1080.05	1260.39	10.5953	-876.051	1378.96	-92.4215	-873.141	1138.57	-99.4635	-879.434	1041.28	-101.135	-793.875	912.953	-48.7675	-769.263	814.732	-116.399	-800.604	798.854	-98.8933	-741.254	741.49
10645	0	104.429	-740.518	1554.42	208.883	-746.567	1562.7	79.3338	-904.121	1568.22	197.556	-913.439	1578.79	159.218	-963.89	1432.79	163.681	-1078.45	1161.16	166.23	-810.471	1319.39	186.833	-722.292	1117.84	239.276	-1071.24	1259.42	10.7718	-866.871	1377.8	-92.3912	-863.018	1137.45	-99.5556	-868.338	1040.26	-101.027	-781.698	912.633	-48.5673	-756.53	814.513	-116.695	-787.453	798.535	-98.8118	-727.784	741.54
10646	0	104.967	-731.691	1553.17	209.104	-737.592	1561.41	79.7787	-895.232	1566.84	197.866	-904.442	1577.22	159.498	-954.845	1431.6	163.644	-1070.04	1160.23	166.314	-801.569	1317.91	186.755	-713.459	1116.13	239.328	-1062.43	1258.28	10.84	-857.781	1376.54	-92.4375	-853.255	1136.49	-99.5278	-857.259	1039.24	-100.758	-769.562	912.189	-48.3086	-743.793	814.393	-116.517	-774.368	798.255	-98.421	-714.332	741.546
10647	0	104.978	-722.65	1552.06	209.546	-728.56	1560.16	80.2748	-886.304	1565.51	198.311	-895.446	1575.78	159.669	-945.494	1430.42	163.686	-1061.16	1159.08	166.584	-792.34	1316.32	186.516	-704.786	1114.42	239.38	-1053.42	1257.14	11.1362	-848.578	1375.23	-92.4232	-843.438	1135.3	-99.5538	-846.317	1038.04	-100.52	-757.534	911.731	-47.8019	-730.92	814.095	-116.248	-761.278	797.761	-98.005	-700.78	741.789
10648	0	105.379	-713.631	1550.92	210.067	-719.443	1558.78	80.6665	-877.247	1564.1	198.861	-886.347	1574.2	159.926	-936.091	1429.15	163.757	-1052.05	1158.12	166.606	-783.21	1314.73	186.36	-695.887	1112.54	239.558	-1044.33	1256.1	11.3391	-839.207	1373.99	-92.4456	-833.848	1134.26	-99.7539	-835.478	1037.07	-100.263	-745.445	911.401	-47.3748	-718.134	814.022	-115.723	-748.342	797.216	-97.4047	-687.303	741.867
10649	0	106.394	-704.294	1549.92	210.686	-710.454	1557.39	81.2378	-867.983	1562.61	199.419	-877.332	1572.49	160.255	-926.735	1427.77	163.983	-1043.07	1156.98	166.922	-773.863	1313.23	186.279	-687.064	1110.64	239.748	-1035.16	1254.82	11.5812	-829.86	1372.68	-92.5315	-824.387	1133.08	-99.9809	-824.689	1035.94	-99.9499	-733.635	910.877	-46.8469	-705.4	813.946	-115.019	-735.471	796.759	-96.5362	-673.769	742.022
10650	0	107.196	-695.409	1548.56	211.472	-701.432	1556.04	81.8121	-858.868	1561.28	200.083	-868.336	1570.8	160.425	-917.332	1426.41	164.186	-1033.93	1155.71	167.212	-764.451	1311.55	186.244	-678.21	1108.67	239.981	-1025.89	1253.46	11.9963	-820.287	1371.26	-92.519	-814.748	1131.94	-100.109	-814.142	1034.82	-99.5631	-721.793	910.372	-46.244	-693.13	813.859	-114.434	-722.758	796.185	-95.7167	-660.383	742.317
10651	0	107.759	-685.961	1547.58	212.506	-692.294	1554.73	82.4923	-849.612	1559.88	200.695	-859.263	1569.03	160.836	-907.656	1425.14	164.402	-1024.64	1154.48	167.489	-755.025	1310.13	186.241	-669.1	1106.97	240.163	-1016.47	1252.16	12.1281	-810.798	1370.03	-92.6865	-805.474	1130.9	-100.076	-803.474	1033.49	-99.3851	-710.108	910.048	-45.5432	-680.814	813.801	-113.885	-709.954	795.656	-94.8258	-647.046	742.544
10652	0	108.937	-676.545	1546.77	213.592	-683.137	1553.4	83.2676	-840.163	1558.4	201.523	-850.128	1567.31	161.096	-898.092	1423.73	164.675	-1015.17	1153.22	167.858	-745.433	1308.62	186.214	-660.001	1105.04	240.358	-1006.91	1250.85	12.6139	-801.248	1368.52	-92.7425	-795.875	1129.68	-100.273	-792.852	1032.37	-99.077	-698.362	909.486	-44.7779	-668.385	813.782	-113.102	-697.352	795.086	-93.7436	-633.854	742.774
10653	0	109.885	-667.254	1545.61	214.66	-674.055	1551.99	84.1197	-830.789	1557.05	202.372	-841.001	1565.44	161.638	-888.319	1422.24	165.021	-1005.71	1151.77	168.248	-735.691	1307.12	186.258	-650.582	1103.38	240.724	-997.363	1249.33	12.8657	-791.425	1367.29	-92.7373	-786.342	1128.7	-100.347	-782.485	1031.12	-98.6466	-686.879	908.847	-44.0559	-656.172	813.859	-112.314	-684.965	794.443	-92.6968	-620.873	742.979
10654	0	111.348	-657.897	1544.64	215.881	-664.894	1550.7	85.1313	-821.491	1555.76	203.34	-831.82	1563.71	162.132	-878.552	1420.75	165.284	-995.877	1150.4	168.631	-725.955	1305.7	186.359	-641.159	1101.7	241.058	-987.66	1247.86	13.487	-781.48	1366.06	-92.7442	-776.73	1127.67	-100.358	-772.09	1030.15	-98.2633	-675.571	908.456	-43.3299	-644.125	814.041	-111.418	-672.603	794.06	-91.4953	-607.95	743.286
10655	0	112.578	-648.378	1543.71	217.024	-655.595	1549.49	86.1342	-812.096	1554.4	204.392	-822.588	1561.99	162.709	-868.72	1419.51	165.54	-985.972	1149.13	169.05	-716.115	1304.26	186.412	-631.502	1100.18	241.367	-977.86	1246.41	14.0287	-771.433	1364.88	-92.6413	-766.763	1126.74	-100.322	-761.702	1029.01	-97.8868	-664.237	907.979	-42.5911	-632.195	813.983	-110.484	-660.388	793.506	-90.3776	-595.302	743.532
10656	0	113.489	-639.017	1542.83	218.14	-646.208	1548.17	87.3603	-802.702	1553.11	205.626	-813.253	1560.36	163.342	-858.772	1418.19	165.761	-975.809	1147.73	169.474	-706.065	1302.71	186.466	-621.76	1098.41	241.713	-967.863	1244.93	14.6464	-761.448	1363.68	-92.3176	-756.903	1125.7	-100.173	-751.496	1027.88	-97.3534	-653.061	907.386	-41.7019	-620.346	813.853	-109.397	-648.544	792.838	-89.2413	-582.788	743.712
10657	0	114.915	-629.516	1542.05	219.343	-636.782	1546.98	88.4958	-793.309	1551.7	206.843	-803.876	1558.52	164.189	-848.608	1416.71	165.951	-965.634	1146.3	170.092	-696.065	1301.26	186.779	-611.85	1096.93	242.101	-957.832	1243.26	15.4075	-751.273	1362.64	-92.0811	-746.813	1124.84	-100.038	-741.252	1027.05	-96.874	-642.251	906.951	-40.7523	-608.643	813.847	-108.314	-636.915	792.278	-88.0898	-570.6	743.891
10658	0	115.812	-620.149	1541.19	220.579	-627.3	1546.07	89.7076	-783.914	1550.46	208.072	-794.478	1557.02	164.92	-838.599	1415.55	165.952	-955.081	1144.91	170.69	-685.881	1299.94	186.904	-601.764	1095.5	242.488	-947.637	1241.81	16.0824	-740.999	1361.67	-91.728	-736.742	1124.05	-99.7665	-731.143	1026.14	-96.3604	-631.382	906.488	-39.8895	-597.185	814.054	-107.494	-625.405	791.938	-86.9135	-558.634	744.17
10659	0	117.193	-610.781	1540.61	221.857	-617.834	1545.23	91.0375	-774.5	1549.23	209.496	-785.03	1555.55	165.736	-828.404	1414.29	165.902	-944.227	1143.5	171.494	-675.606	1298.9	187.162	-591.456	1094.39	242.89	-937.27	1240.36	16.8378	-730.434	1360.92	-91.4145	-726.352	1123.58	-99.5187	-721.012	1025.41	-95.7651	-620.789	906.064	-39.1294	-585.951	814.269	-106.39	-614.348	791.531	-86.032	-546.97	744.55
10660	0	118.388	-601.319	1540.14	223.223	-608.43	1544.37	92.4871	-765.146	1548.07	210.893	-775.579	1553.99	166.704	-818.294	1412.95	166.004	-933.216	1141.88	172.28	-665.252	1297.88	187.463	-581.051	1093.26	243.35	-926.833	1238.67	17.7881	-720.073	1360.22	-90.8797	-716	1123.14	-99.1363	-710.998	1024.84	-95.3836	-610.24	905.848	-38.513	-574.88	814.324	-105.255	-603.379	791.324	-85.1498	-535.682	744.728
10661	0	119.885	-591.9	1539.71	224.697	-599.013	1543.57	93.9928	-755.707	1546.99	212.374	-766.199	1552.54	167.868	-808.23	1411.67	166.254	-922.023	1140.26	173.16	-654.886	1296.92	187.945	-570.512	1092.39	243.95	-916.359	1236.81	19.0465	-709.696	1359.66	-90.3614	-705.421	1122.93	-98.5935	-701.087	1024.28	-95.0215	-600.162	905.649	-37.9336	-564.023	814.621	-104.46	-592.853	791.006	-84.1873	-524.617	745.114
10662	0	121.66	-582.356	1539.29	226.323	-589.578	1543.01	95.5024	-746.172	1545.98	213.926	-756.817	1551.28	169.017	-798.166	1410.46	166.727	-910.621	1138.58	174.182	-644.449	1296.2	188.448	-559.709	1091.76	244.571	-905.604	1235.03	20.1125	-699.229	1359.17	-89.7625	-694.797	1122.75	-98.2179	-691.135	1024.01	-94.5473	-589.977	905.373	-37.3599	-553.29	814.858	-103.634	-582.535	790.647	-83.6927	-513.909	745.213
10663	0	123.376	-572.825	1538.98	228.051	-580.168	1542.54	97.1063	-736.592	1545.08	215.555	-747.518	1550.14	170.464	-788.047	1409.2	167.288	-899.397	1136.86	175.347	-633.962	1295.59	188.988	-548.642	1091.17	245.381	-894.747	1233.14	21.4659	-688.89	1358.69	-89.0044	-684.069	1122.51	-97.4243	-681.255	1023.64	-94.1204	-580.009	905.074	-36.9084	-542.741	814.943	-102.992	-572.517	790.415	-83.262	-503.604	745.193
10664	0	125.29	-563.477	1538.86	229.949	-570.907	1542.11	98.8569	-727.091	1544.18	217.278	-738.221	1548.88	171.967	-778.216	1407.99	168.037	-888.218	1134.95	176.429	-623.353	1295.03	189.602	-537.348	1090.72	246.324	-883.85	1231.13	22.8501	-678.613	1358.35	-88.1084	-673.231	1122.42	-96.6999	-671.273	1023.47	-93.7144	-570.174	904.815	-36.6938	-532.545	814.75	-102.684	-562.682	790.377	-83.1006	-493.436	745.278
10665	0	127.254	-553.992	1539.16	231.878	-561.604	1541.94	100.635	-717.678	1543.51	219.058	-728.903	1547.9	173.651	-768.304	1406.91	168.838	-876.844	1133.24	177.728	-612.752	1294.59	190.277	-525.853	1090.69	247.447	-872.859	1229.15	24.5308	-668.435	1358.08	-87.0092	-662.452	1122.48	-95.8483	-661.23	1023.64	-93.2577	-560.554	904.438	-36.5444	-522.738	814.365	-101.559	-553.621	789.516	-82.9571	-483.967	744.764
10666	0	129.008	-544.435	1539.7	233.967	-552.16	1542.35	102.479	-708.288	1543.15	221.001	-719.591	1547.33	175.313	-758.334	1406.15	169.615	-865.312	1131.84	178.999	-601.995	1294.53	190.879	-514.252	1090.98	248.613	-861.838	1227.44	25.9218	-658.101	1358.2	-85.9171	-651.536	1122.7	-94.8372	-651.238	1023.77	-92.9934	-551.064	904.296	-36.6191	-513.047	814.075	-101.39	-544.631	789.157	-83.0498	-474.787	744.455
10667	0	131.127	-535.098	1540.78	235.975	-542.771	1543.32	104.506	-698.917	1543.1	223.018	-710.238	1546.92	177.055	-748.09	1405.7	170.512	-853.951	1130.9	180.448	-591.13	1294.82	191.346	-502.48	1091.66	249.754	-850.747	1226.15	27.4505	-647.674	1358.54	-84.652	-640.886	1123.11	-93.664	-641.356	1024.18	-92.5251	-541.709	904.106	-36.6416	-503.451	814.148	-101.049	-536.075	788.936	-83.5451	-466.175	744.099
10668	0	133.105	-525.735	1542.42	237.874	-533.474	1544.54	106.612	-689.706	1543.3	225.125	-700.868	1546.73	178.819	-737.637	1405.67	171.431	-842.899	1130.5	181.979	-580.215	1295.58	192.021	-490.562	1092.69	250.885	-839.737	1225.35	28.9161	-637.017	1359.42	-83.1832	-630.389	1123.71	-92.5101	-631.689	1024.83	-92.1379	-532.796	904.194	-36.9998	-494.96	814.15	-100.946	-528.059	789.161	-84.2435	-458.085	744.037
10669	0	135.017	-516.383	1544.36	239.885	-523.894	1546.38	108.816	-680.439	1543.8	227.335	-691.43	1546.99	180.506	-726.859	1406.22	172.156	-832.094	1130.81	183.575	-569.29	1296.54	192.692	-478.566	1093.86	251.821	-828.638	1225.32	30.4061	-625.971	1360.61	-81.8318	-619.918	1124.83	-91.1366	-622.1	1025.91	-92.0331	-524.465	904.784	-37.1953	-486.342	814.259	-100.585	-520.494	789.366	-85.1884	-450.542	744.109
10670	0	136.965	-507.077	1546.49	241.817	-514.433	1548.33	110.985	-671.067	1544.51	229.63	-681.921	1547.52	182.368	-715.645	1407.12	172.77	-821.316	1131.81	185.183	-558.328	1297.75	193.42	-466.495	1095.18	252.537	-817.51	1225.84	32.0946	-614.649	1362.23	-80.2604	-609.736	1126.11	-89.6285	-612.69	1027.23	-91.577	-516.083	905.323	-37.7539	-478.084	814.474	-100.433	-513.37	789.929	-86.2968	-443.437	744.211
10671	0	138.994	-497.704	1548.96	243.924	-504.932	1550.58	113.406	-661.798	1545.53	231.928	-672.416	1548.16	183.934	-704.772	1408.39	173.265	-810.425	1133.08	186.789	-547.506	1299.2	194.298	-454.553	1096.72	253.134	-806.531	1226.72	33.8338	-603.232	1364.12	-78.6872	-599.596	1127.71	-88.0738	-603.348	1029.02	-91.2038	-508.159	906.229	-37.8532	-470.286	814.933	-100.489	-506.636	790.901	-87.4473	-436.85	744.517
10672	0	141.131	-488.372	1551.52	246.047	-495.443	1552.83	115.754	-652.412	1546.87	234.254	-662.947	1549.11	185.498	-694.013	1410	173.512	-799.327	1134.69	188.334	-536.802	1300.81	195.242	-442.863	1098.54	253.516	-795.592	1227.9	35.5239	-591.962	1366.46	-76.9684	-589.682	1129.62	-86.4234	-594.095	1031.21	-90.6455	-500.331	907.442	-38.0075	-462.855	815.501	-99.93	-500.388	792.008	-88.4675	-430.854	745.135
10673	0	143.19	-478.87	1554.51	248.117	-485.947	1555.37	118.003	-642.966	1548.52	236.508	-653.363	1550.36	186.869	-683.394	1411.93	173.467	-788.096	1136.63	189.744	-526.281	1302.77	196.232	-431.39	1100.69	253.759	-784.735	1229.45	37.2209	-580.782	1368.97	-75.3687	-579.916	1131.88	-84.9106	-584.885	1033.8	-90.0189	-492.706	908.918	-38.1512	-455.962	816.135	-100.008	-494.147	793.546	-89.4213	-425.309	745.896
10674	0	145.314	-469.432	1557.52	250.304	-476.369	1558	120.201	-633.474	1550.64	238.789	-643.711	1551.81	188.238	-672.877	1413.99	173.238	-776.918	1138.6	191.189	-515.89	1304.89	197.157	-420.293	1103.11	253.996	-773.927	1231.16	38.9184	-569.842	1371.75	-73.773	-570.261	1134.53	-83.4524	-575.723	1036.62	-89.3125	-485.116	910.739	-38.0889	-449.373	817.034	-99.9663	-488.268	795.518	-90.2505	-420.055	746.797
10675	0	147.431	-460.134	1560.41	252.384	-466.844	1560.34	122.427	-623.939	1552.84	240.932	-634.196	1553.36	189.663	-662.606	1416.02	173.232	-765.819	1140.38	192.326	-505.728	1307.23	197.965	-409.653	1105.63	254.302	-763.205	1232.58	40.4021	-559.169	1374.82	-72.4568	-560.686	1137.64	-82.0569	-566.779	1039.85	-88.466	-477.603	912.872	-37.7894	-443.064	818.213	-99.702	-482.355	797.878	-90.7461	-414.921	748.109
10676	0	149.387	-450.509	1563.48	254.396	-457.413	1562.71	124.502	-614.477	1555.17	242.957	-624.66	1555.04	191.102	-652.559	1418.05	173.303	-754.746	1142.08	193.575	-495.702	1309.57	198.624	-399.466	1108.36	254.719	-752.63	1234.15	41.9612	-548.921	1377.89	-70.9962	-551.233	1140.82	-80.7332	-557.881	1043.21	-87.8182	-470.347	915.419	-37.5332	-436.954	819.734	-99.9061	-476.418	800.342	-91.0404	-409.853	749.571
10677	0	151.375	-441.044	1566.19	256.44	-447.919	1565.13	126.448	-604.937	1557.61	244.952	-615.096	1556.98	192.475	-642.678	1420.1	173.443	-743.755	1144.09	194.524	-485.866	1312.16	199.147	-389.594	1111.07	255.127	-742.034	1235.73	43.222	-538.938	1380.99	-70.0277	-541.651	1144.23	-79.7789	-549.405	1046.41	-87.1057	-462.951	918.051	-37.1905	-430.925	821.456	-99.9336	-470.147	803.18	-90.9748	-404.74	751.077
10678	0	153.541	-431.51	1568.97	258.332	-438.554	1567.09	128.198	-595.534	1559.8	246.774	-605.726	1558.63	193.781	-632.941	1421.93	173.888	-733.337	1145.8	195.393	-476.26	1314.29	199.542	-379.934	1113.7	255.707	-731.688	1237.1	44.5316	-529.227	1383.98	-68.9477	-532.305	1147.53	-78.9949	-541.189	1049.57	-86.513	-455.591	920.705	-36.9293	-425.03	823.293	-100.382	-463.663	805.907	-90.5929	-399.577	752.357
10679	0	155.175	-422.234	1571.22	260.211	-429.336	1568.95	129.904	-586.166	1561.84	248.431	-596.457	1560.05	194.984	-623.496	1423.61	174.526	-723.595	1147.33	196.191	-466.679	1316.45	199.81	-370.363	1116.1	256.448	-721.553	1238.45	45.6781	-519.708	1386.63	-68.3759	-523.005	1150.73	-78.3376	-533.236	1052.66	-86.1295	-448.403	923.231	-36.5901	-419.324	825.169	-101.12	-457.006	808.9	-89.8921	-394.275	753.62
10680	0	156.963	-413.142	1573.18	261.909	-420.142	1570.53	131.444	-576.812	1563.82	249.947	-587.227	1561.43	196.221	-614.031	1425.28	175.179	-713.874	1149.01	196.734	-457.275	1318.22	199.795	-360.858	1118.33	257.175	-711.538	1239.7	46.4933	-510.318	1389.22	-67.8416	-513.734	1153.64	-77.8311	-525.252	1055.35	-85.9168	-441.087	925.571	-36.2704	-413.796	826.844	-101.91	-449.931	811.56	-89.2053	-388.833	754.679
10681	0	158.525	-403.988	1575.15	263.565	-410.996	1572.21	132.795	-567.527	1565.48	251.31	-578.092	1562.65	197.353	-604.607	1426.84	176.049	-704.175	1150.65	197.148	-447.826	1319.86	199.432	-351.871	1119.89	258.056	-701.632	1241.04	47.3907	-501.184	1391.37	-67.5719	-504.551	1156.22	-77.9026	-517.596	1058.04	-85.8671	-433.734	927.582	-36.0497	-408.263	828.268	-102.599	-442.78	813.865	-88.4821	-383.218	755.685
10682	0	159.991	-394.877	1577.03	264.97	-402.046	1573.49	134.114	-558.393	1566.88	252.597	-569.098	1563.6	198.366	-595.313	1428.26	177.154	-694.781	1152.1	197.712	-438.506	1321.31	199.454	-342.269	1121.76	258.771	-691.706	1242.14	48.0225	-492.138	1393.19	-67.6882	-495.456	1158.57	-77.9246	-509.889	1060.28	-86.0888	-426.537	929.456	-36.0554	-402.453	829.636	-103.509	-435.992	815.937	-87.897	-377.54	756.592
10683	0	161.23	-385.78	1578.92	266.284	-393.178	1574.91	135.243	-549.428	1568.23	253.673	-560.18	1564.43	199.349	-586.059	1429.51	178.206	-685.687	1153.43	198.058	-429.267	1322.56	199.128	-332.92	1123.07	260.064	-682.831	1243.31	48.5558	-483.208	1394.84	-67.841	-486.609	1160.45	-78.08	-502.15	1062.23	-86.4372	-419.429	931.031	-36.2412	-396.519	830.971	-104.154	-429.074	817.526	-87.4275	-371.798	757.325
10684	0	162.462	-377	1580.48	267.405	-384.352	1576.36	136.283	-540.465	1569.45	254.603	-551.32	1565.3	200.114	-576.887	1430.88	179.207	-676.802	1154.94	198.26	-420.037	1323.73	198.793	-323.556	1124.15	261.069	-673.687	1244.79	48.9544	-474.416	1396.48	-68.1717	-477.921	1162.15	-78.458	-494.327	1063.9	-87.0338	-412.308	932.435	-36.7212	-390.375	832.253	-104.824	-422.262	818.973	-87.3452	-366.142	757.911
10685	0	163.442	-368.111	1582.17	268.391	-375.485	1577.71	137.188	-531.55	1570.67	255.6	-542.42	1566.26	200.88	-567.649	1432.17	180.203	-667.972	1156.51	198.575	-410.794	1324.91	198.366	-314.228	1125.05	262.009	-664.569	1246.23	49.1731	-465.565	1397.84	-68.6281	-469.586	1163.5	-78.6769	-486.29	1065.44	-87.5627	-405.245	933.481	-37.3633	-384.05	833.351	-105.472	-415.853	820.14	-87.56	-360.456	758.43
10686	0	164.27	-359.441	1583.54	269.268	-366.699	1579.06	138.176	-522.844	1571.8	256.448	-533.663	1567.12	201.76	-558.494	1433.44	181.19	-659.27	1157.85	198.685	-401.735	1326.04	197.846	-304.947	1125.77	263.043	-655.617	1247.57	49.6243	-456.807	1399.1	-68.9966	-461.493	1164.75	-79.1848	-478.503	1066.77	-88.173	-398.242	934.507	-38.176	-377.753	834.304	-106.247	-409.715	821.195	-87.7591	-354.854	759.081
10687	0	164.837	-350.733	1585.02	269.962	-357.953	1580.22	138.912	-514.192	1572.75	257.264	-524.883	1568.01	202.487	-549.531	1434.65	182.148	-650.923	1159.22	198.901	-392.72	1327.08	197.472	-295.765	1126.51	263.996	-646.757	1248.92	49.9028	-448.175	1400.28	-69.2639	-453.809	1166.02	-79.3713	-470.529	1068.26	-88.7087	-391.403	935.429	-39.1417	-371.459	835.137	-107.052	-403.732	822.195	-89.0553	-349.184	759.739
10688	0	165.38	-342.106	1586.26	270.541	-349.193	1581.37	139.722	-505.489	1573.82	258.094	-516.075	1568.99	203.197	-540.51	1435.85	182.906	-642.279	1160.59	199.074	-383.709	1328.14	197.019	-286.668	1127.11	264.946	-637.923	1250.32	50.4277	-439.509	1401.2	-69.443	-446.518	1167.32	-79.7758	-462.824	1069.66	-89.3408	-384.635	936.335	-40.0691	-365.059	835.861	-107.735	-397.883	823.093	-90.3129	-343.435	760.45
10689	0	165.893	-333.561	1587.27	271.153	-340.401	1582.42	140.381	-496.918	1574.73	258.78	-507.425	1569.82	204.019	-531.591	1436.93	183.708	-633.674	1161.83	199.173	-374.964	1328.87	196.717	-277.83	1127.69	265.824	-629.095	1251.61	50.8414	-431.017	1402.1	-69.391	-439.553	1168.54	-80.0397	-455.327	1071.15	-89.9412	-377.965	937.242	-41.1491	-358.678	836.501	-108.599	-391.995	824.042	-91.7154	-337.521	761.205
10690	0	166.652	-324.892	1588.33	271.663	-331.697	1583.25	141.198	-488.333	1575.43	259.519	-498.664	1570.54	204.73	-522.979	1437.92	184.385	-625.436	1162.97	199.461	-366.226	1329.6	196.445	-269.108	1128.33	266.737	-620.52	1252.6	51.5162	-422.803	1402.89	-69.2431	-432.821	1169.66	-80.0712	-447.802	1072.43	-90.5162	-371.433	938.139	-42.3079	-352.425	837.273	-109.316	-386.248	824.962	-93.2761	-331.629	762.231
10691	0	166.944	-316.375	1588.92	272.098	-323.038	1584.03	141.734	-479.793	1576.28	260.093	-490.016	1571.29	205.38	-514.201	1438.74	185.013	-616.996	1163.9	199.582	-357.704	1330.33	196.347	-260.705	1129.01	267.437	-611.877	1253.61	51.7294	-414.311	1403.97	-69.0066	-426.194	1170.65	-80.3297	-440.457	1073.85	-91.1064	-364.956	939.158	-43.4461	-346.219	838.061	-110.091	-380.52	825.922	-94.9892	-325.56	763.335
10692	0	167.414	-307.738	1589.68	272.601	-314.342	1584.71	142.372	-471.131	1576.96	260.782	-481.321	1571.95	205.859	-505.714	1439.51	185.634	-609.268	1164.69	199.8	-349.332	1330.89	196.266	-252.313	1129.59	268.082	-603.375	1254.52	52.2514	-406.394	1404.59	-68.864	-419.63	1171.7	-80.6031	-433.548	1075.13	-91.6776	-358.474	940.098	-44.5428	-340.085	838.725	-111.11	-374.645	827.111	-96.8376	-319.457	764.453
10693	0	167.899	-299.175	1590.26	273.096	-305.633	1585.21	143.03	-462.543	1577.46	261.371	-472.677	1572.4	206.464	-497.168	1440.09	186.1	-601.016	1165.4	200.085	-341	1331.51	196.32	-244.075	1130.3	268.727	-594.882	1255.22	52.6143	-398.078	1405.4	-68.651	-412.993	1172.78	-80.7053	-426.638	1076.47	-92.1681	-352.034	941.012	-45.5566	-334.03	839.369	-112.118	-368.739	828.186	-98.4423	-313.281	765.753
10694	0	168.391	-290.51	1590.79	273.587	-297.052	1585.51	143.633	-454.139	1577.95	262.002	-464.062	1572.9	206.954	-488.804	1440.54	186.416	-592.798	1165.93	200.312	-332.821	1332	196.418	-236.008	1130.97	269.251	-586.572	1255.72	52.7234	-390.119	1406.34	-68.4202	-406.336	1173.66	-80.8348	-419.663	1077.51	-92.7542	-345.594	942.009	-46.5852	-328.022	840.054	-113.093	-362.79	829.171	-100.1	-307.019	767.017
10695	0	168.976	-281.904	1591.22	274.1	-288.421	1585.89	144.262	-445.525	1578.48	262.61	-455.438	1573.46	207.664	-480.835	1441.13	186.641	-584.62	1166.49	200.654	-324.661	1332.45	196.547	-227.95	1131.53	269.524	-578.329	1256.19	53.0541	-382.008	1406.91	-68.3655	-399.621	1174.42	-81.2509	-412.976	1078.61	-93.2343	-339.181	942.777	-47.4457	-321.994	840.6	-114.155	-356.675	830.233	-101.697	-300.732	768.113
10696	0	169.186	-273.541	1591.23	274.567	-279.779	1586.16	144.815	-437.086	1578.94	263.214	-446.858	1573.74	208.091	-472.712	1441.47	186.744	-576.45	1166.9	200.845	-316.581	1332.68	196.748	-220.077	1131.87	269.777	-570.09	1256.52	53.2651	-374.093	1407.43	-68.3075	-392.8	1175.07	-81.5523	-406.319	1079.35	-93.657	-332.739	943.256	-48.189	-316.025	840.909	-115.111	-350.645	831.059	-103.118	-294.47	768.973
10697	0	169.748	-265.082	1591.24	274.936	-271.26	1586.08	145.479	-428.733	1579.19	263.805	-438.33	1573.9	208.501	-464.402	1441.61	186.903	-568.455	1167.1	201.155	-308.402	1332.81	197.056	-212.157	1132.04	269.987	-562.024	1256.61	53.8869	-366.201	1407.6	-68.438	-386.029	1175.62	-81.766	-399.621	1079.98	-94.1785	-326.268	943.648	-48.9427	-310.024	841.06	-116.207	-344.403	831.72	-104.337	-288.228	769.696
10698	0	170.102	-256.705	1591.3	275.342	-262.78	1586.05	146.063	-420.393	1579.34	264.377	-429.933	1574.08	208.886	-456.283	1441.67	186.88	-560.416	1167.21	201.589	-300.326	1332.88	197.328	-204.274	1132.17	270.06	-553.986	1256.66	54.1471	-358.084	1407.84	-68.5639	-379.033	1176.04	-81.6606	-392.667	1080.45	-94.5994	-319.736	943.961	-49.6451	-303.929	841.045	-116.975	-338.343	832.185	-105.549	-282	770.243
10699	0	170.449	-248.447	1591.31	275.743	-254.27	1586.08	146.569	-412.129	1579.6	264.92	-421.418	1574.24	209.165	-448.031	1441.79	186.683	-552.212	1167.58	201.831	-292.179	1332.93	197.592	-196.231	1132.24	270.016	-545.928	1256.76	54.4285	-349.795	1407.96	-68.9219	-371.782	1176.63	-81.8955	-385.771	1080.79	-95.1847	-313.176	944.206	-50.511	-297.827	840.927	-117.763	-332.019	832.632	-106.497	-275.795	770.638
10700	0	170.885	-240.07	1591.2	276.037	-245.882	1585.82	147.085	-403.789	1579.64	265.518	-412.965	1574.2	209.472	-439.721	1441.77	186.487	-544.166	1167.63	202.296	-284.013	1332.79	197.949	-188.181	1132.06	269.971	-537.888	1256.8	54.8344	-341.497	1407.89	-68.9988	-364.43	1176.89	-82.3596	-378.863	1081.16	-95.654	-306.629	944.214	-51.0783	-291.469	840.795	-118.253	-325.793	832.842	-107.252	-269.694	770.606
10701	0	171.212	-231.726	1591.09	276.419	-237.603	1585.57	147.636	-395.535	1579.44	265.946	-404.706	1573.92	209.794	-431.441	1441.57	186.24	-536.172	1167.6	202.676	-275.894	1332.52	198.217	-180.058	1131.8	269.854	-529.97	1256.62	55.0199	-333.112	1407.94	-69.1913	-356.989	1177.07	-82.4396	-371.764	1081.22	-96.0036	-299.983	943.968	-51.0604	-285.212	840.303	-118.597	-319.486	832.738	-107.95	-263.644	770.397
10702	0	171.525	-223.44	1590.89	276.837	-229.255	1585.38	147.87	-387.233	1579.24	266.298	-396.415	1573.62	209.937	-423.083	1441.39	185.962	-528.204	1167.56	203.063	-267.658	1332.25	198.494	-172.064	1131.43	269.691	-521.92	1256.48	55.2603	-324.593	1407.78	-69.2828	-349.238	1177.06	-82.6088	-364.431	1081.18	-96.6174	-293.31	943.689	-51.7062	-278.605	840.257	-118.921	-313.146	832.544	-108.484	-257.522	770.044
10703	0	171.943	-215.14	1590.71	277.228	-220.897	1585.15	148.284	-378.876	1578.95	266.632	-388.032	1573.31	210.109	-414.63	1441.2	185.666	-520.111	1167.61	203.343	-259.401	1331.93	198.731	-164.167	1130.81	269.459	-513.818	1256.46	55.5725	-316.119	1407.33	-69.4702	-341.327	1177.04	-82.8317	-356.794	1081.22	-96.912	-286.376	943.319	-51.7915	-272.168	839.502	-119.475	-306.486	832.492	-108.811	-251.367	769.54
10704	0	172.459	-206.85	1590.32	277.558	-212.641	1584.64	148.564	-370.452	1578.43	266.913	-379.735	1572.71	210.255	-406.102	1440.8	185.386	-511.963	1167.42	203.648	-251.14	1331.39	199.045	-156.063	1130.08	269.289	-505.741	1256.2	55.7308	-307.376	1407.11	-69.3504	-333.338	1176.58	-82.6112	-348.921	1080.94	-97.0024	-279.261	942.956	-51.9835	-265.5	839.139	-119.581	-299.916	832.012	-108.928	-245.201	768.674
10705	0	172.857	-198.572	1589.78	278.012	-204.314	1584.08	148.815	-362.049	1577.73	267.121	-371.395	1571.86	210.297	-397.876	1440.25	185.032	-504.024	1167.02	203.928	-242.8	1330.73	199.34	-148.044	1129.19	269.034	-497.686	1255.75	56.0206	-298.754	1406.4	-69.4594	-325.14	1176.2	-82.689	-341.1	1080.56	-97.2245	-272.067	942.342	-52.1127	-258.862	838.361	-119.713	-293.248	831.43	-108.911	-239.002	767.903
10706	0	173.226	-189.915	1589.24	278.343	-195.942	1583.46	148.97	-353.477	1577.02	267.169	-362.937	1571.12	210.21	-389.172	1439.82	184.671	-495.93	1166.82	204.051	-234.534	1329.93	199.513	-139.926	1128.19	268.692	-489.544	1255.43	56.0403	-289.906	1405.96	-69.5173	-316.707	1175.66	-83.2226	-333.19	1080.32	-97.2514	-264.736	941.596	-52.0945	-252.129	837.549	-119.744	-286.435	830.793	-108.757	-232.662	766.786
10707	0	173.422	-181.464	1588.44	278.659	-187.497	1582.74	149.009	-344.904	1576.31	267.398	-354.461	1570.32	210.097	-380.582	1439.25	184.393	-487.77	1166.5	204.205	-226.118	1329.16	199.667	-131.704	1127.17	268.348	-481.352	1255.03	56.1135	-281.113	1405.16	-69.6274	-308.205	1175.11	-83.324	-325	1079.83	-97.0366	-257.139	940.836	-51.8809	-245.219	836.901	-119.555	-279.431	829.997	-108.321	-226.123	765.657
10708	0	173.966	-172.754	1587.77	278.892	-178.914	1581.75	149.233	-336.256	1575.39	267.518	-345.894	1569.41	210.002	-372.011	1438.48	183.987	-479.663	1165.9	204.341	-217.704	1328.15	199.72	-123.843	1125.77	267.947	-473.241	1254.46	56.1434	-272.183	1404.37	-69.6669	-299.61	1174.32	-83.4498	-316.718	1079.15	-96.9246	-249.574	939.791	-51.7041	-238.512	835.655	-119.627	-272.342	829.099	-107.85	-219.655	764.309
10709	0	173.978	-164.221	1586.73	279.01	-170.336	1580.7	149.182	-327.52	1574.4	267.49	-337.574	1568.04	209.67	-363.525	1437.62	183.589	-471.458	1165.15	204.315	-209.334	1327.03	199.788	-115.583	1124.53	267.387	-465.123	1253.74	56.226	-263.234	1403.28	-69.7072	-290.839	1173.4	-83.2294	-308.089	1078.23	-96.5211	-241.826	938.648	-51.2583	-231.533	834.552	-119.445	-265.258	827.988	-107.184	-212.897	762.859
10710	0	174.091	-155.486	1585.69	279.077	-161.624	1579.7	149.141	-318.782	1573.46	267.467	-328.929	1567.04	209.371	-354.825	1436.85	183.089	-463.061	1164.58	204.28	-200.795	1326	199.865	-107.281	1123.29	266.898	-456.872	1253.17	55.8555	-254.129	1402.61	-69.7318	-281.895	1172.45	-83.2971	-299.471	1077.39	-96.0862	-233.911	937.41	-50.7143	-224.695	833.321	-119.115	-257.776	826.987	-106.475	-206.075	761.473
10711	0	173.93	-146.769	1584.45	279.004	-152.878	1578.55	149.084	-309.96	1572.39	267.457	-320.205	1565.99	209.052	-346.206	1435.96	182.574	-454.586	1163.77	204.278	-192.286	1324.71	200.044	-98.8535	1122.07	266.343	-448.589	1252.43	55.8869	-245.154	1401.56	-69.817	-272.836	1171.47	-83.7075	-290.927	1076.7	-95.6752	-225.994	936.145	-49.8766	-218.005	831.688	-118.735	-250.438	825.797	-105.624	-199.124	759.911
10712	0	173.71	-137.983	1583.27	278.704	-144.047	1577.25	149.199	-301.497	1570.9	267.268	-311.435	1564.75	208.627	-337.583	1434.87	182.008	-446.146	1162.85	204.099	-183.806	1323.44	200.183	-90.4219	1120.96	265.784	-440.346	1251.49	55.7031	-236.197	1400.51	-69.8199	-263.693	1170.27	-83.6478	-282.142	1075.62	-94.9937	-217.964	934.694	-49.0296	-211.096	830.32	-118.293	-242.865	824.441	-104.793	-192.207	758.428
10713	0	173.41	-129.17	1582.09	278.39	-135.176	1576.14	148.891	-292.763	1569.64	266.998	-302.589	1563.5	208.138	-328.956	1433.79	181.418	-437.647	1161.86	203.917	-175.144	1322.2	200.201	-81.9492	1119.64	265.084	-431.94	1250.49	55.4071	-227.128	1399.26	-69.8764	-254.471	1169.08	-83.4975	-273.237	1074.39	-94.441	-209.921	933.192	-48.2675	-204.133	828.617	-117.804	-235.372	823.014	-103.736	-185.081	756.717
10714	0	172.901	-120.361	1580.74	278	-126.252	1574.93	148.573	-283.871	1568.42	266.673	-293.695	1562.34	207.633	-320.162	1432.72	180.865	-428.991	1160.89	203.681	-166.436	1320.8	200.274	-73.3669	1118.37	264.491	-423.476	1249.55	55.0618	-218.09	1398.06	-69.8878	-245.104	1167.71	-83.7291	-264.59	1073.18	-93.8087	-201.897	931.646	-47.5095	-196.891	827.147	-117.298	-227.654	821.581	-102.92	-177.969	754.964
10715	0	172.479	-111.503	1579.38	277.473	-117.338	1573.57	148.151	-275.032	1566.99	266.314	-284.855	1560.93	207.161	-311.359	1431.46	180.337	-420.436	1159.75	203.39	-157.65	1319.55	200.284	-64.7378	1116.97	263.998	-415.001	1248.44	54.664	-209.123	1396.89	-69.9222	-235.856	1166.27	-83.768	-255.944	1071.76	-93.1429	-193.803	929.989	-46.6525	-189.467	825.431	-116.617	-219.884	819.976	-101.329	-170.745	753.08
10716	0	171.872	-102.605	1577.97	276.944	-108.464	1572.22	147.63	-266.232	1565.44	265.766	-275.961	1559.48	206.598	-302.578	1430.08	179.859	-411.742	1158.5	203.062	-148.791	1318.07	200.27	-56.0584	1115.69	263.403	-406.431	1247.25	54.2586	-200.014	1395.57	-69.8578	-226.6	1164.63	-83.5369	-247.296	1070.15	-92.4424	-185.631	928.068	-45.968	-182.073	823.811	-116.023	-212.298	818.278	-100.644	-163.368	751.115
10717	0	171.228	-93.7014	1576.65	276.243	-99.5974	1570.81	146.989	-257.26	1563.98	265.078	-267.08	1558.07	206.023	-293.596	1428.89	179.425	-403.033	1157.37	202.687	-139.723	1316.81	200.21	-47.1029	1114.4	262.922	-397.69	1246.21	53.8545	-191.021	1394.02	-69.8513	-217.29	1163.02	-83.5612	-238.695	1068.62	-92.0177	-177.56	926.464	-45.1395	-174.289	822.245	-115.378	-204.316	816.545	-99.6907	-155.969	749.291
10718	0	170.471	-84.8002	1575.1	275.543	-90.6799	1569.56	146.204	-248.286	1562.43	264.398	-258.239	1556.56	205.331	-284.757	1427.58	178.975	-394.195	1156.14	202.343	-130.618	1315.43	200.219	-38.1838	1113.08	262.383	-388.915	1245.07	53.2793	-182.031	1392.53	-70.002	-208.18	1161.27	-83.3615	-230.118	1066.89	-91.1469	-169.404	924.528	-44.5208	-166.288	820.416	-114.518	-196.404	814.713	-98.5531	-148.381	747.184
10719	0	169.656	-75.8972	1573.64	274.695	-81.7767	1568.11	145.27	-239.396	1560.75	263.484	-249.38	1555	204.618	-275.817	1426.14	178.621	-385.293	1154.69	201.904	-121.439	1314.11	200.227	-29.0986	1111.76	261.957	-380.063	1243.76	52.6711	-173.002	1390.98	-70.139	-199.172	1159.4	-83.3165	-221.664	1065.07	-90.882	-161.161	922.551	-44.3134	-158.031	818.981	-113.615	-188.568	812.628	-97.1804	-140.679	745.008
10720	0	168.676	-67.0235	1572.26	273.688	-72.9509	1566.73	144.289	-230.477	1559.08	262.466	-240.592	1553.54	203.802	-266.814	1424.76	178.157	-376.366	1153.25	201.342	-112.174	1312.97	200.031	-19.9266	1110.52	261.445	-371.118	1242.47	51.9057	-163.921	1389.46	-70.3572	-190.317	1157.6	-83.2999	-213.249	1063.12	-90.4233	-152.906	920.632	-43.8954	-149.701	817.104	-112.944	-180.589	810.592	-96.155	-132.799	743.1
10721	0	167.434	-58.1383	1570.82	272.593	-64.0392	1565.7	143.096	-221.655	1557.64	261.363	-231.651	1552.26	202.922	-257.788	1423.48	177.712	-367.252	1151.94	200.789	-102.8	1311.84	199.913	-10.6636	1109.58	260.912	-362.02	1241.36	51.0865	-154.763	1387.92	-70.6214	-181.475	1155.67	-83.3799	-204.857	1061.31	-90.1815	-144.69	918.517	-41.5232	-142.648	814.511	-112.066	-172.387	808.647	-95.1896	-124.738	740.988
10722	0	166.228	-49.2128	1569.75	271.198	-55.1089	1564.61	141.926	-212.709	1556.05	260.133	-222.813	1550.89	202.032	-248.682	1422.13	177.271	-358.036	1150.48	200.238	-93.3997	1310.85	199.707	-1.28074	1108.44	260.417	-352.838	1240.13	49.9845	-145.488	1386.66	-71.1168	-172.924	1153.97	-83.7291	-196.533	1059.55	-89.8587	-136.497	916.667	-40.7266	-134.308	812.811	-111.313	-163.967	806.638	-94.2316	-116.602	739.016
10723	0	164.662	-40.4651	1568.45	269.699	-46.2179	1563.66	140.528	-203.929	1554.49	258.757	-213.833	1549.6	201.118	-239.53	1420.83	176.927	-348.688	1148.94	199.488	-83.9026	1309.84	199.475	8.27125	1107.62	259.954	-343.558	1238.83	49.086	-136.513	1385.09	-71.5302	-164.441	1152.25	-83.6972	-188.03	1057.72	-89.3609	-128.182	914.826	-40.1052	-125.881	811.208	-110.204	-156.207	804.556	-93.2269	-108.306	737.253
10724	0	163.086	-31.4843	1567.4	268.049	-37.2822	1562.82	139.046	-195.067	1552.87	257.297	-204.924	1548.36	200.044	-230.365	1419.53	176.572	-339.138	1147.46	198.676	-74.4317	1308.91	199.164	17.8577	1106.75	259.469	-334.17	1237.56	48.2018	-127.608	1383.41	-72.1136	-155.958	1150.49	-83.906	-179.644	1055.94	-89.0628	-119.794	912.863	-39.3362	-117.348	809.716	-109.043	-148.027	802.492	-92.1899	-99.8668	735.256
10725	0	161.053	-22.7539	1566.2	266.24	-28.3397	1562.05	137.291	-186.231	1551.47	255.568	-195.993	1547.27	198.88	-221.155	1418.3	176.153	-329.377	1146.03	197.809	-64.7882	1308.05	198.874	27.5394	1105.96	258.922	-324.609	1236.44	47.0185	-118.547	1381.83	-72.7712	-147.739	1148.98	-84.2871	-170.855	1054.36	-89.0001	-111.446	911.128	-38.8365	-108.641	807.956	-108.467	-139.451	800.747	-91.0214	-91.3304	733.56
10726	0	159.283	-13.8777	1565.17	264.242	-19.48	1561.27	135.55	-177.38	1549.85	253.876	-187.092	1546.1	197.815	-211.933	1416.96	175.954	-319.514	1144.36	196.793	-55.1009	1307.29	198.491	37.4137	1105.41	258.397	-314.972	1235.08	45.8856	-109.373	1380.48	-73.3895	-139.446	1147.34	-84.0579	-162.907	1052.18	-89.0044	-102.773	909.465	-39.0794	-98.9057	807.372	-107.621	-131.002	798.823	-90.3251	-82.5847	731.861
10727	0	157.097	-5.10062	1563.95	262.239	-10.536	1560.55	133.633	-168.566	1548.4	251.923	-178.054	1545.04	196.699	-202.675	1415.7	175.652	-309.5	1142.66	195.821	-45.3433	1306.6	198.042	47.3709	1104.92	257.984	-305.176	1233.71	44.7258	-100.267	1378.91	-74.1433	-131.259	1145.75	-83.9714	-154.438	1050.48	-88.3601	-94.3555	907.518	-38.1173	-90.4256	805.338	-106.764	-122.468	796.898	-89.8172	-73.4954	730.381
10728	0	155.187	3.83982	1563.01	260.154	-1.62899	1560.02	131.616	-159.591	1546.87	249.855	-169.14	1544.07	195.328	-193.506	1414.45	175.366	-299.315	1140.93	194.679	-35.5126	1306.03	197.625	57.5019	1104.57	257.469	-295.264	1232.34	43.3134	-91.2196	1377.55	-74.8514	-123.019	1144.23	-84.2493	-145.888	1048.66	-88.7265	-85.7891	906.029	-36.7368	-82.0079	803.512	-105.931	-113.844	794.957	-88.7636	-65.081	728.508
10729	0	153.149	12.7333	1562.05	257.965	7.31671	1559.52	129.317	-150.571	1545.53	247.741	-160.153	1543.14	193.952	-184.303	1413.23	175.128	-289.026	1139.28	193.44	-25.6099	1305.49	197.068	67.8381	1104.37	256.943	-285.365	1231.03	42.1053	-82.153	1376.01	-75.6969	-114.867	1142.57	-84.8872	-137.504	1047.1	-88.8637	-77.0617	904.157	-36.4065	-72.8902	802.055	-105.594	-105.134	793.341	-87.8062	-56.2998	726.422
10730	0	150.854	21.9323	1561.47	255.885	16.2498	1559.3	127.155	-141.524	1544.24	245.554	-151.186	1542.34	192.67	-174.926	1412.16	174.96	-278.759	1137.61	192.21	-15.5706	1305.22	196.431	78.1996	1104.35	256.624	-275.338	1229.73	40.5203	-72.9965	1374.97	-76.4391	-106.572	1140.98	-84.7557	-128.834	1045.23	-88.9831	-68.3584	902.343	-37.1644	-63.0509	801.045	-105.055	-96.4913	791.466	-87.6903	-47.3716	724.947
10731	0	148.477	30.8984	1560.93	253.558	25.256	1559.21	124.932	-132.377	1543.19	243.164	-142.2	1541.83	191.338	-165.495	1411.34	174.948	-268.539	1136.28	190.797	-5.49466	1305.21	195.768	88.6104	1104.57	256.232	-265.192	1228.71	39.101	-63.8789	1373.71	-77.3176	-98.2269	1139.48	-85.3242	-120.184	1043.74	-89.0676	-59.4532	900.832	-36.2741	-54.4132	799.333	-104.674	-87.8796	789.812	-87.4848	-38.3547	723.591
10732	0	146.322	39.9223	1560.49	251.281	34.3958	1559.48	122.649	-123.234	1542.37	240.867	-133.049	1541.58	190.04	-156.011	1410.83	174.959	-258.296	1135.35	189.449	4.67194	1305.4	195.064	99.2324	1104.97	255.953	-254.939	1228.11	37.5519	-54.59	1372.98	-77.9925	-89.7381	1138.24	-85.4678	-111.323	1042.48	-89.3602	-50.6737	899.273	-37.2456	-44.4996	798.662	-104.09	-79.2008	788.326	-87.5002	-29.3035	722.247
10733	0	143.679	49.1809	1560.63	248.838	43.641	1559.82	120.407	-113.931	1541.71	238.685	-123.757	1541.43	188.891	-146.315	1410.49	175.153	-248.074	1134.76	188.079	14.8835	1305.66	194.37	109.612	1105.27	256.052	-244.597	1227.76	36.0657	-45.2769	1372.4	-78.501	-80.9624	1137.13	-85.49	-102.345	1041.31	-89.6314	-42.1447	898.208	-36.5651	-35.7121	797.291	-103.952	-70.387	787.151	-87.5586	-20.2025	721.308
10734	0	141.058	58.4183	1560.81	246.214	53.0269	1560.45	118.188	-104.886	1541.37	236.619	-114.318	1541.65	187.955	-136.562	1410.6	175.534	-237.892	1134.47	186.678	25.1137	1306.19	193.583	120.315	1106.05	256.207	-234.22	1227.81	34.7374	-35.9037	1372.09	-79.0091	-72.0922	1136.51	-85.4526	-93.4163	1040.52	-89.9876	-33.3373	897.447	-37.4766	-25.7329	796.927	-103.672	-61.8764	786.23	-87.8657	-11.2429	720.345
10735	0	138.273	67.5346	1561.28	243.465	62.6205	1561.63	116.271	-95.6903	1541.29	234.613	-104.753	1542.39	187.168	-126.335	1411.05	176.167	-227.824	1134.84	185.223	35.3865	1307.23	192.581	131.191	1107.35	256.716	-223.674	1228.46	33.451	-26.6854	1372.1	-79.3504	-62.9682	1136.07	-85.2968	-84.3473	1040.09	-90.3121	-24.3528	897.254	-36.96	-16.7929	796.388	-103.451	-53.3052	785.889	-88.013	-2.73386	720.106
10736	0	135.316	76.6897	1561.93	240.627	72.3438	1563.04	114.153	-86.5541	1541.69	232.578	-95.0038	1543.42	186.484	-116.547	1412.1	177.25	-217.87	1135.66	183.889	45.6596	1308.42	191.6	141.936	1108.72	257.356	-213.007	1229.56	32.3411	-17.5209	1372.37	-79.411	-53.5893	1135.98	-84.7057	-75.2019	1039.79	-90.7815	-15.3947	897.236	-37.8883	-6.74309	796.89	-103.274	-44.6042	785.902	-88.1639	6.17446	720.012
10737	0	132.618	85.9987	1562.68	237.786	82.1335	1564.37	112.467	-77.4176	1542.2	230.908	-85.1959	1544.65	185.837	-106.573	1413.16	178.209	-207.693	1136.69	182.583	55.862	1309.76	190.404	152.673	1110.26	258.245	-202.413	1230.94	31.3754	-8.46322	1372.79	-79.4786	-44.3628	1136.06	-84.3196	-66.3126	1040.02	-90.739	-6.7123	897.034	-37.5437	2.17791	796.444	-103.038	-35.7943	786.13	-88.8654	15.1067	720.191
10738	0	129.782	95.1304	1563.67	234.975	92.0371	1565.96	110.777	-68.3527	1543.04	229.325	-75.3952	1546.2	185.46	-96.5039	1414.36	179.16	-196.912	1137.87	181.537	66.0676	1311.34	189.201	163.15	1112.12	259.133	-191.608	1232.38	30.207	0.461708	1373.93	-79.3334	-35.1562	1136.56	-84.171	-57.6072	1040.84	-90.856	2.36611	897.732	-38.5613	11.9508	797.344	-102.895	-27.0062	786.737	-89.436	23.9252	720.788
10739	0	127.133	104.404	1565	232.404	101.966	1567.91	109.405	-59.069	1544.23	227.855	-65.4834	1548.25	184.886	-86.7645	1416.06	180.391	-185.616	1139.25	180.257	76.1026	1313.33	187.947	173.424	1114.33	259.974	-180.769	1234.12	29.2495	9.30925	1375.24	-79.2461	-25.9947	1137.49	-83.8877	-48.906	1041.95	-90.7378	11.0982	898.789	-38.8722	21.4422	798.33	-102.814	-18.1192	787.826	-89.9082	33.0466	721.896
10740	0	124.766	113.64	1566.38	229.987	111.927	1569.89	108.081	-50.0301	1545.8	226.717	-55.5837	1550.37	184.366	-77.0681	1417.77	181.557	-174.578	1140.63	179.029	86.0536	1315.5	186.558	183.583	1116.77	260.798	-169.993	1235.88	28.3378	18.0768	1376.68	-79.1525	-16.892	1138.72	-83.5434	-40.1748	1043.26	-90.8937	19.9493	900.221	-38.9859	31.3368	799.783	-102.791	-9.05208	789.314	-90.4058	42.2959	723.276
10741	0	122.733	122.84	1567.78	227.858	121.838	1571.73	107.152	-40.9106	1547.26	225.742	-45.7471	1552.28	183.807	-67.6991	1419.42	182.307	-164.415	1141.97	177.873	95.9009	1317.76	185.222	193.528	1119.54	261.356	-159.378	1237.35	27.1682	26.7386	1378.48	-78.9398	-8.21224	1139.91	-83.1051	-31.5847	1044.48	-91.0655	28.7726	901.867	-39.2698	41.0621	801.392	-102.509	0.032732	790.718	-90.8387	51.4516	724.786
10742	0	120.52	132.003	1569.63	226.004	131.738	1573.64	106.541	-31.8173	1548.94	225.081	-35.8635	1554.24	183.138	-58.1514	1421.03	182.87	-154.686	1143.32	176.709	105.639	1320.19	183.73	203.116	1121.94	261.771	-148.919	1238.92	26.1955	35.4868	1380.17	-78.9056	0.533538	1141.52	-82.9469	-23.0814	1046	-91.052	37.7948	903.498	-39.4726	50.8947	803.265	-102.248	9.18202	792.385	-91.3234	60.7398	726.624
10743	0	118.72	141.097	1571.49	224.247	141.588	1575.48	105.997	-22.9382	1551.03	224.74	-26.0153	1556.27	182.594	-48.8942	1422.83	183.399	-144.931	1144.82	175.516	115.33	1322.57	182.446	212.453	1124.61	262.044	-138.583	1240.58	25.0168	44.1318	1382.2	-79.0972	8.93934	1143.22	-83.0986	-14.4431	1047.78	-91.2686	46.8856	905.248	-39.6973	60.7629	805.264	-102.122	18.4628	794.249	-91.5547	70.281	728.58
10744	0	117.303	149.881	1573.16	222.69	151.418	1577.22	105.904	-14.0736	1552.9	224.752	-16.1105	1558.1	181.905	-39.5633	1424.55	183.706	-135.102	1146.17	174.274	124.919	1324.95	181.236	222.133	1127.26	262.114	-128.486	1242.15	24.0615	52.9297	1383.98	-79.2645	17.0816	1144.5	-83.1512	-5.84245	1049.43	-91.6622	55.7951	907.056	-39.8276	70.6553	807.063	-101.971	27.7958	796.025	-91.6483	79.9898	730.493
10745	0	115.726	158.677	1575.15	221.253	161.24	1578.83	106.317	-5.54174	1554.61	225.047	-6.28405	1559.59	180.94	-30.416	1425.98	183.674	-125.303	1147.4	172.968	134.334	1327.32	180.001	231.58	1129.73	261.944	-118.691	1243.46	22.9809	61.6509	1385.66	-79.9238	25.4951	1146.4	-83.5423	2.70085	1051	-92.1878	64.845	908.944	-39.9784	80.44	808.952	-101.826	37.1441	797.525	-91.702	89.7691	732.342
10746	0	114.18	167.051	1576.84	219.761	171.079	1580.26	106.895	2.78788	1556.28	225.797	3.62784	1560.88	180.171	-21.0862	1427.38	183.377	-115.722	1148.72	171.895	143.822	1329.28	179.001	240.985	1132.12	261.587	-109.055	1244.95	22.0358	70.5766	1387.28	-80.7206	33.6838	1148.09	-84.1089	11.3604	1052.55	-92.5118	74.0275	910.57	-40.2097	90.3971	811.093	-101.782	46.6469	799.009	-91.4628	99.5811	733.946
10747	0	112.882	175.461	1578.36	218.344	180.971	1581.62	107.599	10.9698	1557.83	226.508	13.7495	1561.98	179.569	-11.9372	1428.85	182.953	-106.308	1150.18	170.952	153.22	1331.05	178.13	250.365	1133.97	261.126	-99.6025	1246.49	21.1249	79.5937	1388.84	-81.7269	42.1452	1149.76	-84.8023	20.2759	1054	-93.2641	83.2152	912.146	-40.6269	100.412	813.114	-101.71	56.3357	800.543	-91.4266	109.674	735.618
10748	0	111.406	183.577	1579.98	216.762	190.868	1582.74	108.846	19.1179	1559.17	227.678	24.0311	1562.88	178.875	-2.75086	1430.07	182.401	-97.0377	1151.54	170.002	162.567	1332.64	177.454	259.709	1135.5	260.614	-90.4188	1247.88	20.3229	88.6503	1390.14	-82.8664	50.6318	1151.24	-85.6675	29.0346	1055.44	-94.2347	92.5363	913.71	-41.0335	110.42	814.812	-101.532	65.9495	801.722	-91.2026	119.781	737.03
10749	0	110.074	191.693	1581.29	215.201	200.763	1583.61	110.371	27.1536	1560.26	229.071	34.2318	1563.53	178.203	6.32345	1431.24	181.765	-88.0185	1152.71	169.14	171.78	1334.01	176.945	268.918	1136.76	259.989	-81.5392	1249.12	19.8058	97.739	1391.15	-83.9259	59.1872	1152.6	-86.4378	38.1376	1056.64	-95.0599	102.006	914.969	-41.6022	120.203	816.362	-101.838	75.7434	802.721	-91.2311	129.964	738.388
10750	0	108.619	199.729	1582.33	213.733	210.707	1584.42	111.925	35.3483	1561.4	230.488	44.56	1564.28	177.714	15.3714	1432.4	181.085	-78.9997	1154.05	168.576	180.892	1335.19	176.586	277.872	1137.85	259.411	-72.681	1250.41	19.3494	106.892	1392.21	-85.0224	67.8883	1154.11	-87.3754	47.4012	1057.85	-95.9364	111.707	916.26	-42.438	130.153	817.944	-102.705	85.8437	803.789	-91.4471	140.24	739.642
10751	0	107.447	207.72	1583.16	212.332	220.675	1584.95	113.588	43.3948	1562.62	232.008	54.9196	1564.89	177.288	24.3453	1433.52	180.452	-70.1582	1155.31	168.114	189.944	1336.08	176.419	286.688	1138.5	259.015	-64.1646	1251.92	18.9844	116.093	1393.23	-86.0392	76.9192	1155.5	-88.4475	56.7572	1059.06	-97.0861	121.39	917.547	-43.4753	140.142	819.481	-103.382	95.7624	804.905	-91.9048	150.67	740.917
10752	0	106.454	215.822	1584.01	211.122	230.634	1585.26	115.444	51.6085	1563.68	233.557	65.2143	1565.46	176.916	33.1675	1434.33	179.946	-61.6028	1156.15	167.802	198.802	1336.93	176.396	295.43	1138.99	258.361	-55.543	1252.79	18.7907	125.071	1394.11	-87.0554	85.8772	1156.81	-89.3031	66.2384	1059.96	-98.2497	131.06	918.75	-44.778	150.35	820.84	-104.702	105.859	805.76	-92.6258	160.761	742.019
10753	0	105.578	224.019	1584.77	210.068	240.569	1585.45	117.197	59.9384	1564.76	235.119	75.4802	1566.11	176.681	41.8698	1435.08	179.308	-53.334	1157	167.646	207.549	1337.76	176.558	304.067	1139.59	257.743	-47.139	1253.75	18.5824	134.048	1395	-87.8665	95.1359	1157.82	-90.0205	75.888	1060.72	-99.5149	140.895	919.872	-46.1555	160.606	822.115	-105.752	115.725	806.603	-93.728	170.972	743.182
10754	0	104.875	232.336	1585.29	209.325	250.499	1585.42	119.01	68.4684	1566.02	236.627	85.7218	1566.68	176.347	50.5154	1435.9	178.616	-45.1809	1158.05	167.613	216.166	1338.37	176.945	312.508	1139.79	257.148	-38.83	1254.68	18.5705	143.092	1395.71	-88.5149	104.806	1158.57	-90.8561	85.6039	1061.51	-100.638	150.976	920.811	-47.7836	171.064	823.221	-107.461	125.981	807.487	-95.1526	181.104	744.066
10755	0	104.668	241.015	1585.7	208.803	260.366	1585.13	120.779	77.2244	1567.2	238.098	95.9917	1566.99	176.253	59.2113	1436.56	177.954	-37.153	1159.06	167.764	224.716	1338.87	177.447	320.891	1139.81	256.657	-30.6206	1255.61	18.6746	152.045	1396.36	-89.0122	114.597	1159.18	-91.6577	95.2621	1062.28	-101.738	161.159	921.635	-49.6131	181.468	823.886	-108.568	136.044	808.404	-97.0657	191.088	744.765
10756	0	104.72	249.833	1586.06	208.6	270.221	1584.73	122.511	86.0646	1568.26	239.585	106.045	1567.3	176.232	67.6917	1437.31	177.3	-29.1725	1159.89	168.091	233.119	1339.26	178.146	329.056	1139.79	256.229	-22.4668	1256.41	18.8613	160.958	1396.87	-89.224	124.522	1159.63	-92.4021	104.972	1062.99	-102.999	171.443	922.5	-51.3643	192.249	824.677	-109.875	146.118	809.218	-99.22	201.04	745.578
10757	0	105.079	258.798	1586.27	208.627	280.098	1584.32	124.037	95.0953	1569.38	240.944	116.068	1567.62	176.106	76.1116	1437.98	176.557	-21.3588	1160.83	168.418	241.488	1339.69	178.718	337.087	1139.97	255.672	-14.5376	1257.21	19.0461	169.803	1397.37	-89.3548	134.418	1160.02	-93.1578	114.722	1063.74	-104.271	181.4	923.429	-53.4404	203.264	825.592	-111.38	156.008	810.105	-101.641	211.127	746.725
10758	0	105.501	268.105	1586.52	208.945	289.928	1583.76	125.498	104.298	1570.54	242.303	126.135	1568.12	175.921	84.5089	1438.74	175.828	-13.5575	1161.86	168.898	249.737	1340.05	179.287	345.071	1140.14	255.16	-6.71388	1258.16	19.2863	178.604	1397.83	-89.4535	144.379	1160.47	-93.8866	124.613	1064.56	-105.64	191.257	924.521	-55.9756	214.563	826.726	-112.402	165.41	811.043	-104.596	220.779	747.899
10759	0	106.344	277.24	1586.16	209.392	299.699	1582.88	126.891	113.677	1571.72	243.611	136.031	1568.51	175.805	92.8763	1439.41	175.247	-5.83605	1162.78	169.359	257.917	1340.32	179.828	352.963	1140.42	254.655	1.0378	1258.92	19.6536	187.25	1398.19	-89.3922	154.307	1161.03	-94.455	134.439	1065.27	-107.038	200.885	925.614	-59.3941	226.635	828.216	-113.002	174.394	811.759	-107.831	230.472	749.059
10760	0	107.32	286.924	1585.84	210.341	309.521	1581.9	128.269	123.251	1572.85	244.751	145.819	1568.82	175.857	101.222	1439.92	174.692	1.83914	1163.45	169.837	266.007	1340.57	180.507	360.857	1140.61	254.19	8.77534	1259.57	19.794	195.981	1398.9	-89.2836	164.126	1161.52	-94.7264	144.031	1065.76	-108.511	210.463	926.516	-62.7729	238.161	829.455	-112.664	182.892	812.184	-111.574	239.565	750.316
10761	0	108.428	296.815	1585.45	211.424	319.34	1580.87	129.41	133.021	1574.04	245.797	155.498	1569.43	175.854	109.586	1440.52	174.195	9.47516	1164.19	170.327	274.034	1340.88	181.043	368.694	1140.91	253.751	16.395	1260.17	20.0458	204.579	1399.38	-89.1631	173.954	1162.02	-95.0277	153.65	1066.41	-110.306	219.736	927.588	-67.5829	250.88	831.486	-112.123	191.473	812.546	-115.412	248.612	751.806
10762	0	109.634	306.65	1584.86	212.573	329.011	1579.59	130.486	142.849	1575.37	246.905	165.042	1569.97	176.011	117.825	1440.89	173.74	17.2086	1164.85	170.971	282.018	1341.05	181.563	376.312	1141.19	253.341	23.9483	1260.77	20.4347	213.096	1399.83	-89.0474	183.776	1162.56	-95.0142	162.958	1066.98	-112.505	228.595	928.596	-72.7842	263.162	833.445	-111.129	200.152	812.826	-119.032	257.619	752.998
10763	0	111.154	316.788	1584.06	213.994	338.762	1578.1	131.4	152.647	1576.53	247.821	174.533	1570.45	176.271	126.092	1441.05	173.434	24.8505	1165.25	171.577	290.045	1341.18	182.078	383.91	1141.37	253.103	31.553	1261.12	20.8879	221.545	1400.24	-88.8524	193.385	1163	-94.814	171.88	1067.36	-114.861	237.198	929.598	-78.5967	275.175	835.593	-109.634	209.106	812.994	-121.988	266.339	753.914
10764	0	112.502	326.819	1583.3	215.584	348.301	1576.66	132.172	162.536	1577.63	248.636	183.905	1570.9	176.485	134.194	1441.26	173.093	32.471	1165.46	172.179	297.968	1341.18	182.591	391.609	1141.52	252.826	39.0508	1261.34	21.2762	230.035	1400.61	-88.6249	202.837	1163.28	-94.581	180.456	1067.58	-117.607	245.865	930.661	-84.5633	287.097	837.936	-107.894	218.625	813.019	-124.923	275.58	755.036
10765	0	114.031	336.83	1582.25	217.034	357.703	1575	132.895	172.512	1578.76	249.476	193.149	1571.34	176.694	142.311	1441.34	172.784	40.0719	1165.87	172.789	305.927	1341.05	183.274	399.319	1141.46	252.65	46.65	1261.61	21.815	238.492	1400.75	-88.4426	212.19	1163.58	-94.4323	188.977	1067.92	-120.118	253.946	931.704	-90.3424	298.664	840.237	-106.531	229.089	813.315	-127.961	285.65	756.466
10766	0	115.668	346.821	1581.12	218.726	367.097	1573.38	133.626	182.374	1579.63	250.247	202.279	1571.48	177.177	150.368	1441.33	172.659	47.746	1166.12	173.456	313.915	1340.76	183.828	406.757	1141	252.511	54.3075	1261.75	22.4557	246.909	1400.75	-88.2079	221.234	1163.71	-94.2551	197.35	1068.22	-122.257	262.131	932.695	-95.3546	310.068	842.418	-105.09	240.214	813.597	-129.974	296.49	757.585
10767	0	117.222	356.736	1580.07	220.403	376.176	1571.81	134.304	192.085	1580.09	251.139	211.066	1571.62	177.52	158.623	1441.21	172.565	55.3134	1166.07	174.079	321.916	1340.39	184.377	414.305	1140.66	252.532	61.8088	1261.59	23.0323	255.244	1400.68	-88.015	230.01	1163.87	-93.9912	205.728	1068.27	-123.837	270.427	933.657	-99.7416	321.315	844.727	-104.242	251.61	813.908	-131.968	308.012	758.906
10768	0	118.925	366.409	1579	222.15	385.184	1570.37	134.873	201.684	1580.43	251.789	219.998	1571.66	178.075	166.73	1441.09	172.476	62.9834	1166.04	174.816	329.933	1339.9	185.013	421.834	1140.26	252.43	69.4915	1261.42	23.6519	263.717	1400.67	-87.8647	238.581	1164.06	-93.8791	214.172	1068.34	-125.406	279.166	934.625	-103.201	332.445	846.818	-103.655	263.6	814.061	-133.293	319.811	760.195
10769	0	120.536	376.02	1577.91	224.003	394.016	1568.85	135.331	211.225	1580.65	252.379	228.677	1571.48	178.585	175.126	1440.71	172.427	70.6799	1166.08	175.601	337.952	1339.19	185.752	429.548	1139.53	252.596	77.1773	1261.25	24.2434	272.256	1400.77	-87.7204	247.027	1164.21	-93.8976	222.652	1068.48	-126.776	288.562	935.53	-106.003	343.767	848.818	-103.711	275.789	814.645	-135.161	332.324	761.843
10770	0	122.364	385.591	1576.62	225.833	402.74	1567.44	135.801	220.565	1580.6	253.134	236.812	1571.13	179.288	183.439	1440.22	172.501	78.3851	1165.84	176.36	346.032	1338.37	186.351	437.243	1138.54	252.808	84.9832	1260.85	24.9868	280.783	1400.56	-87.7389	255.152	1164.31	-93.9875	231.247	1068.42	-127.881	298.497	936.232	-108.135	355.283	850.615	-103.839	287.845	814.92	-136.932	344.897	763.553
10771	0	123.973	394.813	1575.5	227.588	411.119	1566.1	136.272	229.803	1580.33	253.623	245.219	1570.77	179.897	191.816	1439.69	172.638	86.0585	1165.52	177.233	354.154	1337.43	186.887	444.925	1137.58	253.1	92.7866	1260.36	25.7871	289.292	1400.24	-87.7836	262.989	1164.38	-94.1803	240.065	1068.13	-128.768	308.795	936.744	-109.869	367.01	852.28	-104.518	299.969	815.298	-138.651	357.428	765.072
10772	0	125.684	404.081	1574.45	229.505	419.555	1564.97	136.619	238.938	1580.03	254.18	253.229	1570.28	180.773	200.027	1439.36	172.803	93.924	1165.19	177.932	362.28	1336.45	187.379	452.746	1136.5	253.499	100.745	1259.89	26.6101	297.837	1399.67	-87.8339	270.892	1164.52	-94.4124	249.184	1067.78	-129.644	319.563	937.242	-111.231	378.59	853.656	-105.192	312.352	815.582	-140.071	370.201	766.424
10773	0	127.382	413.203	1573.28	231.308	427.773	1563.78	136.969	247.929	1579.48	254.657	261.376	1569.66	181.555	208.575	1438.58	173.179	101.809	1164.77	178.831	370.521	1335.36	187.96	460.671	1135.09	253.982	108.799	1259.32	27.5008	306.416	1399.02	-87.775	278.835	1164.51	-94.7522	258.689	1067.48	-130.293	330.538	937.724	-112.459	390.05	854.661	-106.088	324.394	815.91	-141.648	382.642	767.52
10774	0	129.062	421.963	1572.11	233.16	435.94	1562.68	137.488	256.775	1578.62	255.239	269.403	1568.82	182.364	216.969	1437.76	173.747	109.724	1164.21	179.742	378.874	1334.11	188.504	468.667	1133.67	254.614	116.786	1258.6	28.5414	314.889	1398.1	-87.7875	286.647	1164.25	-94.9734	268.233	1066.9	-130.947	341.562	937.826	-113.055	401.804	855.215	-106.78	336.586	815.714	-142.527	395.181	768.232
10775	0	130.747	430.819	1571.16	234.917	444.012	1561.66	138.025	265.471	1577.57	255.828	277.311	1567.78	183.28	225.441	1437.03	174.32	117.722	1163.49	180.708	387.186	1332.84	189.184	476.855	1132.08	255.191	124.988	1257.76	29.3964	323.445	1397.51	-87.6728	294.648	1163.74	-95.3591	278.118	1066.12	-131.505	352.569	937.685	-113.801	413.24	855.648	-107.62	348.326	815.699	-143.524	407.309	768.774
10776	0	132.403	439.436	1570.05	236.637	452.034	1560.7	138.537	274.023	1576.54	256.397	285.118	1566.66	184.308	233.969	1436.13	174.991	125.95	1162.76	181.617	395.714	1331.49	189.769	485.059	1130.45	256.047	133.138	1256.94	30.437	331.981	1396.17	-87.4083	302.883	1162.93	-95.7496	288.209	1065.46	-131.836	363.815	937.347	-114.171	424.835	855.869	-108.254	360.234	815.418	-144.174	419.704	769.017
10777	0	133.952	447.845	1568.98	238.234	459.985	1559.67	139.261	282.384	1575.08	257.257	292.933	1565.31	185.355	242.499	1435.09	175.795	134.124	1161.89	182.674	404.192	1329.94	190.558	493.394	1128.78	256.914	141.59	1255.9	31.512	340.456	1394.83	-87.0053	311.36	1162.1	-95.9131	298.263	1064.48	-132.131	374.877	936.791	-114.52	436.297	855.758	-109.067	371.89	815.14	-144.91	431.679	769.22
10778	0	135.469	456.035	1568.04	239.95	467.777	1558.86	140.128	290.619	1573.45	258.093	300.663	1563.72	186.459	251.08	1433.74	176.733	142.35	1160.76	183.636	412.743	1328.56	191.145	501.67	1127.27	257.976	149.962	1254.68	32.534	348.92	1393.7	-86.6124	320.069	1161.09	-95.9934	308.314	1063.49	-132.361	385.825	936.475	-114.479	447.782	855.658	-109.506	383.677	814.451	-145.253	443.769	769.107
10779	0	136.931	464.199	1567.23	241.516	475.594	1558.04	141.015	298.784	1571.78	259.034	308.306	1562.15	187.586	259.636	1432.56	177.689	150.628	1159.49	184.64	421.311	1327.16	191.85	510.101	1125.84	259.022	158.518	1253.41	33.5154	357.394	1392.4	-86.2151	329.1	1160.29	-96.1064	318.16	1062.35	-132.298	396.886	935.98	-114.501	459.112	855.681	-110.203	395.194	814.044	-145.668	455.775	768.936
10780	0	138.551	472.386	1566.56	243.164	483.362	1557.28	141.909	306.915	1570.12	259.983	316.001	1560.61	188.765	268.274	1431.21	178.743	159.036	1158.37	185.589	429.941	1325.77	192.57	518.359	1124.3	260.166	167.014	1252.03	34.4817	365.91	1391.39	-85.8031	338.45	1159.24	-96.1132	328.02	1061.38	-132.269	407.685	935.568	-113.997	470.667	855.318	-110.75	406.785	813.553	-146.027	467.741	768.963
10781	0	140.292	480.597	1565.62	244.988	491.085	1556.44	142.864	315.067	1568.29	260.99	323.699	1558.78	190.01	276.896	1429.89	179.82	167.562	1156.96	186.724	438.646	1324.29	193.38	526.842	1122.88	261.329	175.605	1250.7	35.5449	374.475	1390.15	-85.03	348.114	1157.99	-95.7965	337.846	1060.03	-132.073	418.759	935.012	-113.153	481.982	854.863	-111.234	417.956	813.03	-146.135	479.746	768.564
10782	0	142.064	488.833	1564.63	246.82	498.857	1555.48	143.815	323.184	1566.42	261.964	331.284	1556.89	191.272	285.581	1428.29	180.977	176.053	1155.58	187.854	447.424	1322.8	194.144	535.304	1121.08	262.524	184.289	1249.15	36.8663	382.992	1388.51	-84.2851	357.996	1156.52	-95.2542	347.603	1058.64	-131.571	429.458	934.136	-112.15	493.257	854.114	-111.842	429.259	812.363	-146.32	491.484	768.311
10783	0	143.946	497.071	1563.62	248.695	506.589	1554.58	144.774	331.442	1564.77	263.013	338.939	1555.18	192.618	294.322	1426.94	182.209	184.768	1154.11	189.035	456.202	1321.39	195.086	544.046	1119.69	263.87	193.179	1247.63	38.1171	391.669	1387.23	-83.5367	367.928	1155.22	-94.7829	357.297	1057.43	-130.673	440.372	933.323	-110.527	504.539	853.253	-112.404	440.282	811.846	-146.584	503.276	768.136
10784	0	145.736	505.289	1562.65	250.668	514.336	1553.56	145.79	339.69	1563.08	264.034	346.69	1553.52	193.975	303.096	1425.43	183.455	193.452	1152.83	190.302	465.034	1319.88	196.021	552.973	1118.05	265.211	201.939	1246.25	39.5772	400.375	1385.63	-82.4882	378.188	1153.8	-94.1755	366.978	1056.35	-129.728	451.174	932.405	-108.485	515.664	852.295	-113.076	451.529	811.34	-146.356	515.206	768.1
10785	0	147.653	513.531	1561.75	252.665	522.211	1552.67	146.957	347.924	1561.45	265.264	354.512	1551.82	195.543	311.848	1424.01	184.874	202.335	1151.35	191.555	473.834	1318.63	196.975	561.918	1116.85	266.715	210.924	1244.65	40.9442	409.034	1384.53	-81.4698	388.216	1152.75	-93.1389	376.791	1055.05	-128.554	461.865	931.806	-106.217	526.544	851.325	-113.575	462.262	810.763	-146.165	526.849	767.975
10786	0	149.533	521.85	1560.77	254.607	530.051	1551.71	148.312	356.037	1559.8	266.551	362.214	1550.22	197.028	320.544	1422.59	186.298	211.371	1149.74	192.772	482.67	1317.38	197.737	570.924	1115.55	268.103	219.815	1243.01	42.3036	417.683	1383.47	-80.1386	398.46	1151.65	-92.1296	386.558	1053.89	-127.143	472.811	931.023	-103.506	537.202	850.274	-113.823	473.027	810.079	-145.898	538.386	768.038
10787	0	151.523	530.148	1559.87	256.519	538.009	1550.85	149.504	364.484	1558.36	267.814	370.244	1548.81	198.66	329.285	1421.21	187.692	220.505	1148.26	194.107	491.595	1316.24	198.617	580.06	1114.4	269.621	229.001	1241.38	43.8611	426.416	1382.25	-78.8732	408.353	1150.62	-91.1519	396.278	1052.85	-125.673	483.533	930.406	-100.718	547.575	849.087	-114.466	483.978	809.956	-144.723	549.873	767.969
10788	0	153.358	538.392	1559	258.543	546.139	1550.04	150.983	372.842	1556.92	269.454	378.219	1547.31	200.377	338.038	1419.88	189.223	229.822	1146.66	195.632	500.633	1315.12	199.741	589.365	1113.48	271.089	238.064	1239.82	45.4677	435.296	1381.08	-77.2076	418.463	1149.88	-89.6856	406.131	1052.03	-123.977	494.099	929.864	-97.5801	557.504	847.937	-114.771	494.291	809.447	-143.26	561.277	767.626
10789	0	155.303	546.538	1558.21	260.556	554.17	1549.22	152.633	381.15	1555.4	271.186	386.247	1545.93	202.091	346.814	1418.34	190.791	239.229	1144.94	197.094	509.694	1314.17	200.838	598.656	1112.51	272.674	247.38	1238.08	47.1268	444.154	1380.5	-75.6799	428.166	1149.1	-88.378	415.675	1051.14	-121.794	504.591	929.129	-94.2354	567.179	846.728	-114.764	504.524	809.212	-141.576	572.327	767.444
10790	0	157.38	554.804	1557.49	262.541	562.24	1548.42	154.492	389.393	1554.11	272.487	394.389	1544.47	203.774	355.621	1417.05	192.222	248.747	1143.24	198.648	518.723	1313.21	201.893	607.999	1111.88	274.204	256.674	1236.29	48.7554	453.086	1379.69	-73.712	438.163	1148.11	-86.72	425.42	1050.29	-119.715	514.967	928.599	-90.602	576.559	845.325	-114.837	514.49	808.787	-139.76	583.178	767.51
10791	0	159.551	563.15	1556.67	264.727	570.382	1547.68	156.33	397.684	1552.89	274.72	402.535	1543.38	205.71	364.492	1415.65	193.75	258.589	1141.55	200.394	527.94	1312.3	203.362	617.69	1111.07	275.714	266.154	1234.52	50.736	462.159	1378.71	-71.8899	447.681	1147.43	-85.1159	434.958	1049.87	-117.455	525.105	928.089	-86.7834	585.62	843.858	-114.872	524.511	808.662	-137.709	593.777	767.263
10792	0	161.854	571.374	1555.82	266.974	578.484	1546.82	158.223	405.967	1551.61	276.631	410.587	1541.96	207.69	373.2	1414.26	195.257	268.4	1139.68	202.242	537.053	1311.38	204.627	627.214	1110.26	277.45	275.639	1232.6	52.7118	471.092	1377.83	-69.7417	457.468	1146.66	-83.2681	444.516	1049.17	-114.914	535.144	927.296	-83.0003	594.228	842.101	-114.742	534.038	808.512	-135.344	604.254	766.77
10793	0	164.262	579.77	1555.25	269.45	586.776	1546.12	160.248	414.27	1550.46	278.785	418.741	1540.83	209.816	382.161	1412.95	196.801	278.384	1137.86	204.106	546.297	1310.7	206.164	637.151	1109.73	279.125	285.184	1230.62	54.8119	480.059	1377.15	-67.7718	466.83	1145.83	-81.4406	453.946	1048.47	-112.358	545.028	926.443	-79.0753	602.595	840.379	-114.227	543.63	808.036	-132.674	614.509	766.232
10794	0	166.829	588.288	1555.07	271.917	594.836	1545.87	162.342	422.758	1549.6	280.478	426.893	1539.83	211.933	390.74	1411.8	198.344	288.369	1136.2	206.143	555.688	1310.33	207.673	646.975	1109.6	280.923	294.862	1228.82	56.9408	489.128	1376.63	-65.5655	476.346	1145.21	-79.531	463.384	1047.97	-109.781	554.627	925.837	-75.2424	610.533	838.787	-113.733	552.998	807.863	-129.987	624.383	765.873
10795	0	169.374	596.751	1555.28	274.622	603.146	1546.01	164.517	431.459	1549.02	282.689	435.316	1539.13	214.265	399.798	1410.9	199.867	298.223	1134.92	208.169	565.129	1310.23	209.334	657.159	1109.63	282.718	304.29	1227.43	59.0642	498.065	1376.32	-63.7055	485.459	1145.01	-77.3704	472.849	1047.77	-106.978	563.967	925.265	-71.2832	618.26	837.181	-113.051	562.099	807.861	-127.408	633.747	765.771
10796	0	172.204	605.513	1555.69	277.449	611.642	1546.33	166.638	440.126	1548.65	284.862	443.643	1538.54	216.464	408.871	1410.23	201.43	308.115	1134.06	210.363	574.714	1310.4	210.833	667.237	1109.9	284.38	314.042	1226.22	61.2752	507.493	1376.56	-61.4962	494.643	1144.99	-75.2973	482.116	1047.65	-104.12	573.187	924.838	-67.4926	625.508	835.672	-112.207	570.763	807.763	-124.235	642.764	765.32
10797	0	174.917	614.266	1556.32	280.16	620.044	1546.84	169.01	448.965	1548.49	287.413	452.166	1538.38	218.741	418.268	1410	202.763	317.776	1133.77	212.617	584.337	1310.75	212.521	677.739	1110.42	286.121	323.549	1225.69	63.3411	516.994	1377	-59.6388	503.452	1145.43	-72.9374	491.508	1047.81	-101.299	582.071	924.721	-63.6741	632.567	834.434	-111.03	579.087	807.772	-121.035	650.982	764.858
10798	0	177.606	623.212	1557.09	282.886	628.814	1547.66	171.197	458.028	1548.62	289.568	460.906	1538.54	220.96	427.795	1410.33	203.822	327.448	1134.11	214.872	593.962	1311.31	214.18	688.092	1110.98	287.594	333.026	1225.77	65.624	527.025	1377.62	-57.4777	512.366	1146.06	-70.775	500.761	1048.41	-98.388	590.83	924.628	-59.9379	639.437	833.43	-109.557	587.052	808.1	-117.663	658.859	764.471
10799	0	180.298	632.206	1558.13	285.615	637.563	1548.56	173.543	466.918	1549.06	291.971	469.677	1538.87	223.135	437.649	1410.98	204.989	337.299	1134.83	217.195	603.75	1311.95	215.832	698.371	1111.67	288.8	342.556	1226.22	67.8852	537.163	1378.68	-55.4228	521.358	1147.16	-68.4521	510.225	1049.41	-95.4769	599.305	924.802	-55.844	645.222	832.135	-107.786	594.63	808.72	-114.226	665.997	764.092
10800	0	183.151	641.336	1559.23	288.319	646.449	1549.61	175.999	476.203	1549.72	294.113	478.615	1539.35	225.206	447.155	1411.95	205.992	346.989	1135.8	219.504	613.419	1312.84	217.773	708.759	1112.6	290.07	352.029	1226.85	70.218	547.255	1379.92	-53.3147	530.184	1148.54	-66.1866	519.314	1050.95	-92.3373	607.531	925.188	-52.0283	651.172	831.433	-105.676	601.713	809.571	-110.612	672.531	763.868
10801	0	185.793	650.41	1560.77	291.059	655.438	1550.94	178.273	485.248	1550.83	296.437	487.594	1540.3	227.211	456.614	1413.16	206.924	356.866	1137.07	221.939	623.079	1313.95	219.708	718.794	1114.09	291.213	361.517	1227.88	72.6139	557.597	1381.75	-51.1594	539.349	1150.36	-63.8526	528.737	1052.77	-89.2578	615.506	925.955	-48.2377	657.06	831.075	-103.595	608.582	810.759	-107.008	678.745	763.903
10802	0	188.602	659.735	1562.37	293.647	664.423	1552.5	180.64	494.565	1552.19	299.019	496.635	1541.56	229.228	466.04	1414.71	207.989	366.728	1138.56	224.098	632.506	1315.48	221.763	728.659	1115.73	292.042	371.229	1229.08	75.0622	567.684	1383.8	-49.0216	548.67	1152.48	-61.8459	537.833	1055.14	-86.23	623.338	927.055	-44.6668	662.764	831.224	-101.336	615.349	812.105	-103.325	684.483	764.043
10803	0	191.104	668.856	1564.35	296.406	673.587	1554.19	182.948	503.791	1553.91	301.365	505.704	1543.02	231.217	475.353	1416.23	208.624	376.982	1139.9	226.482	642.004	1317.23	223.829	738.352	1117.73	293.067	380.759	1230.25	77.3428	577.574	1386.1	-46.8231	558.19	1154.97	-59.6969	547.004	1057.45	-83.2092	631.017	928.469	-41.1576	667.936	831.655	-98.9453	621.67	813.916	-99.6097	689.936	764.324
10804	0	193.811	678.218	1566.35	298.806	682.559	1556.07	185.382	512.985	1555.77	303.585	514.795	1544.71	233.267	484.38	1417.83	209.408	387.102	1141.18	228.659	651.35	1319.42	225.846	747.746	1120.05	294.183	390.215	1231.44	79.751	587.299	1388.41	-44.7337	567.935	1157.63	-57.6458	556.007	1060.19	-80.3754	638.539	930.24	-37.8295	673.261	832.602	-96.6406	627.96	815.668	-95.6857	695.077	764.611
10805	0	196.177	687.293	1568.69	301.474	691.701	1558.22	187.535	522.351	1558.05	305.657	523.855	1546.74	235.233	493.395	1419.62	210.365	397.093	1142.79	230.824	660.665	1321.73	227.962	757.089	1122.72	295.431	399.547	1233.02	81.9937	596.466	1390.99	-42.6586	577.9	1160.47	-55.836	564.724	1063.11	-77.6248	646.025	932.323	-34.4231	678.604	833.882	-94.6566	634.21	818.15	-91.9413	700.047	765.306
10806	0	198.842	696.671	1571.1	303.968	700.624	1560.33	189.76	531.413	1560.47	307.784	532.946	1548.81	237.3	502.492	1421.47	211.515	406.977	1144.43	232.944	669.8	1324.05	230.019	766.472	1125.24	296.622	409.237	1234.34	84.1728	605.955	1393.88	-40.8969	587.811	1163.55	-54.161	573.302	1066.12	-74.9776	653.369	934.485	-31.3492	684.063	835.433	-92.5505	640.76	820.593	-88.0885	704.932	765.933
10807	0	201.179	705.663	1573.26	306.291	709.634	1562.38	191.959	540.727	1562.64	310.24	541.883	1551	239.316	511.378	1423.28	212.872	416.718	1146.06	235.027	678.877	1326.43	231.858	775.694	1128.05	298.081	418.471	1235.86	86.1444	615.142	1396.5	-38.8262	597.857	1166.22	-52.3154	581.625	1068.91	-72.3786	660.748	936.683	-28.328	689.423	837.044	-90.4186	647.429	822.943	-84.1102	709.938	766.486
10808	0	203.556	714.868	1575.5	308.666	718.44	1564.39	194.121	549.703	1564.91	312.185	550.744	1553.08	241.296	520.43	1425.11	214.334	426.261	1147.74	236.992	688.066	1328.74	233.847	785.097	1130.68	299.597	427.946	1237.37	88.2617	624.168	1398.83	-37.0177	607.638	1168.85	-50.6669	589.725	1071.82	-70.0061	668.063	938.965	-25.308	694.958	838.75	-88.0801	654.08	825.398	-80.3344	715.226	767.293
10809	0	205.803	723.804	1577.78	310.832	727.224	1566.47	195.87	558.74	1567.24	313.993	559.586	1555.18	243.233	529.394	1427.14	215.819	435.696	1149.51	238.866	697.02	1330.89	235.373	794.164	1132.99	301.217	437.404	1239.06	90.1829	633.218	1401.33	-35.293	617.494	1171.5	-49.1507	597.755	1074.53	-67.7811	675.344	940.975	-22.4198	700.705	840.446	-86.3471	660.925	827.802	-76.7113	720.366	767.978
10810	0	208.099	732.832	1579.91	313.119	736.078	1568.49	197.853	567.775	1569.24	315.988	568.361	1557.01	245.12	538.417	1428.95	217.617	445.031	1151.41	240.607	705.916	1332.77	237.051	803.551	1135.43	303.092	446.832	1240.76	91.9704	641.933	1403.51	-33.8501	626.925	1173.95	-47.7646	605.697	1077.16	-65.6736	682.665	943.069	-19.8812	706.534	842.204	-84.868	667.882	830.257	-73.318	725.512	768.763
10811	0	210.133	741.731	1582	315.244	744.736	1570.53	199.63	576.744	1571.11	317.676	577.097	1558.74	247.044	547.469	1430.78	219.769	454.004	1153.07	242.4	715.071	1334.85	238.4	812.726	1137.52	304.828	456.335	1242.22	93.7076	650.74	1405.56	-32.3673	636.036	1176.31	-46.3278	613.51	1079.56	-63.6435	689.921	945.032	-17.4367	712.542	844.176	-83.008	674.664	832.198	-70.1829	730.656	769.689
10812	0	212.012	750.465	1584.03	317.046	753.353	1572.48	201.245	585.471	1572.73	319.383	585.648	1560.38	248.846	556.455	1432.5	221.616	463.045	1154.85	243.966	723.644	1336.49	239.536	821.613	1139.72	306.656	465.62	1243.82	95.4656	659.499	1407.51	-31.0778	644.894	1178.52	-45.1564	621.398	1081.67	-61.7553	697.044	947.022	-15.2333	718.6	845.991	-81.1536	681.356	834.203	-67.2627	736.097	770.598
10813	0	213.789	759.3	1585.7	318.892	761.968	1574.26	202.604	594.328	1574.3	320.61	594.373	1561.85	250.642	565.508	1434.17	223.66	471.668	1156.69	245.47	732.48	1338.04	240.559	830.419	1141.18	308.432	474.676	1245.51	96.8811	668.177	1409.19	-29.8102	653.204	1180.55	-44.0207	629.195	1083.92	-59.9566	704.365	948.518	-13.0428	724.868	847.603	-79.2548	687.996	835.762	-64.5007	741.604	771.422
10814	0	215.327	767.969	1587.3	320.418	770.599	1575.84	204.052	603.036	1575.36	321.991	602.94	1562.94	252.347	574.522	1435.44	225.619	480.366	1158.1	246.819	741.362	1339.24	241.561	839.125	1142.36	310.47	483.746	1246.91	98.3289	676.674	1410.72	-28.5604	660.88	1182.1	-43.0197	637.016	1085.57	-58.0791	711.523	949.892	-11.0416	731.233	849.007	-77.386	694.452	837.246	-61.5514	746.997	772.166
10815	0	216.616	776.535	1588.49	321.731	779.06	1577.15	205.423	611.734	1576.19	323.229	611.572	1564.02	254.085	583.335	1436.69	227.552	488.862	1159.54	248.114	750.151	1340.24	242.38	847.636	1143.3	312.281	492.899	1248.1	99.8375	685.189	1411.8	-27.2681	668.049	1183.46	-41.8131	644.668	1086.92	-56.3992	718.567	950.903	-9.35041	737.656	850.024	-75.1928	700.522	838.182	-59.5825	752.741	772.866
10816	0	217.797	785.178	1589.68	323.025	787.671	1578.51	206.488	620.356	1577.12	324.682	620.18	1565.21	255.639	592.42	1437.96	229.44	497.154	1160.92	249.2	758.832	1341.06	242.992	855.979	1143.9	314.158	501.52	1249.66	101.207	693.75	1412.84	-26.0225	674.939	1184.49	-40.7095	652.209	1088.31	-54.3437	725.124	951.546	-7.70016	744.204	850.94	-73.8484	706.885	839.116	-57.5419	758.731	773.406
10817	0	218.944	793.814	1590.6	324.022	796.249	1579.5	207.523	628.849	1577.88	325.536	628.857	1565.98	257.252	601.147	1439.03	231.162	505.335	1162.27	250.082	767.433	1341.65	243.377	864.209	1144.05	315.911	510.459	1250.81	102.415	702.165	1413.54	-24.6222	681.569	1185	-39.5517	659.573	1089.33	-52.6029	731.995	952.055	-5.05766	749.345	850.674	-71.8692	713.056	839.642	-56.0205	764.665	773.851
10818	0	220.054	802.455	1591.28	325.102	804.862	1580.27	208.461	637.497	1578.41	326.588	637.367	1566.66	258.715	609.932	1439.88	232.951	513.395	1163.24	251.053	775.936	1341.94	243.796	872.19	1143.92	317.875	519.013	1252.05	103.617	710.342	1414.06	-23.183	688.153	1185.42	-38.1431	666.584	1089.92	-51.0444	738.533	952.262	-3.61076	755.944	851.056	-70.2074	719.044	839.93	-54.495	770.769	774.091
10819	0	220.93	811.034	1591.92	326.149	813.479	1581.06	209.453	646.107	1578.96	327.469	645.956	1567.42	260.139	618.69	1440.72	234.848	521.278	1164.46	251.846	784.445	1342.37	244.034	880.161	1143.85	319.67	527.441	1253.14	104.698	718.349	1414.68	-21.8094	694.697	1185.76	-36.5835	673.414	1090.26	-49.6971	744.953	952.559	-2.50258	762.296	851.462	-68.7729	724.832	840.171	-53.2069	777.053	774.551
10820	0	221.804	819.697	1592.56	327.028	821.989	1581.83	210.222	654.897	1579.56	328.372	654.53	1568.15	261.585	627.304	1441.73	236.645	529.111	1165.55	252.443	792.905	1342.87	244.192	888.133	1143.88	321.432	535.887	1254.29	105.51	726.299	1415.27	-20.7237	701.024	1186.29	-35.1208	680.158	1090.6	-48.395	751.185	952.766	-1.75396	768.62	851.869	-67.5087	730.941	840.383	-52.2133	783.081	775.023
10821	0	222.829	828.402	1593.09	327.953	830.54	1582.48	211.106	663.543	1580.1	329.026	663.09	1568.76	262.922	636.034	1442.54	238.4	536.883	1166.73	253.002	801.171	1343.16	244.254	895.898	1143.76	323.281	543.992	1255.47	106.413	734.092	1415.89	-19.6809	707.421	1186.81	-33.645	686.562	1090.88	-47.2534	757.365	952.918	-0.421676	774.667	852.045	-65.8929	736.541	840.587	-51.7366	789.552	775.552
10822	0	223.747	837.156	1593.44	328.885	839.204	1582.86	211.838	672.339	1580.55	329.932	671.688	1569.23	264.29	644.492	1443.15	240.154	544.589	1167.54	253.574	809.38	1343.37	244.244	903.728	1143.55	325.075	552.509	1256.31	107.36	741.687	1416.3	-18.6202	713.872	1187.19	-32.0281	692.831	1090.99	-46.3724	763.304	953.114	0.223874	781.191	852.491	-64.4816	742.264	840.593	-51.0853	795.854	776.028
10823	0	224.515	845.759	1593.71	329.752	847.845	1583.13	212.608	680.909	1581	330.669	680.205	1569.72	265.582	652.959	1443.81	242.036	552.171	1168.54	253.958	817.551	1343.5	244.18	911.617	1143.37	326.755	560.661	1257.3	108.187	749.337	1416.66	-17.7696	720.191	1187.63	-30.5215	699.09	1091.25	-45.3241	769.259	953.225	1.11541	787.617	852.591	-63.545	748.045	840.819	-50.7569	802.052	776.494
10824	0	225.176	854.435	1593.85	330.474	856.478	1583.31	213.131	689.621	1581.47	331.172	688.898	1570.23	266.811	661.355	1444.45	243.692	559.775	1169.44	254.307	825.57	1343.56	244.206	919.456	1143.36	328.464	569.019	1258.13	108.958	756.858	1417.07	-16.8539	726.605	1187.99	-29.2103	705.328	1091.57	-44.6104	775.21	953.434	1.87031	793.736	852.697	-62.1595	753.669	841.043	-50.2692	808.457	777.083
10825	0	225.844	863.114	1593.84	331.061	865.141	1583.36	213.986	698.118	1581.76	332.068	697.499	1570.65	268.104	669.644	1445	245.446	567.28	1170.18	254.672	833.513	1343.57	244.182	927.294	1143.46	330.061	577.163	1258.76	109.746	764.216	1417.41	-15.8398	733.016	1188.33	-28.0366	711.358	1091.86	-43.7544	781.097	953.651	2.74012	800.145	852.864	-61.198	759.691	841.356	-50.1195	814.687	777.739
10826	0	226.481	871.736	1593.6	331.616	873.793	1583.29	214.682	706.749	1581.97	332.876	706.226	1570.95	269.267	677.825	1445.34	246.953	574.799	1170.77	254.956	841.465	1343.53	244.138	935.089	1143.47	331.466	585.255	1259.2	110.491	771.692	1417.64	-14.9792	739.193	1188.59	-26.4706	717.628	1092	-42.9988	786.965	953.817	3.52394	806.616	853.112	-59.7606	765.277	841.429	-49.597	821.16	778.24
10827	0	226.865	880.367	1593.37	331.854	882.429	1583.19	215.463	715.152	1582.21	333.722	714.85	1571.35	270.316	685.949	1445.7	248.246	582.34	1171.32	255.26	849.288	1343.5	244.149	942.769	1143.46	332.733	593.314	1259.73	111.074	779.081	1417.93	-14.0248	745.46	1188.82	-25.6571	723.683	1092.38	-42.381	792.914	953.988	4.17917	812.878	853.23	-58.73	771.417	841.704	-49.3794	827.363	778.775
10828	0	227.197	888.836	1593.14	332.273	891.268	1583.09	216.147	723.602	1582.48	334.418	723.567	1571.67	271.287	693.992	1445.96	249.468	589.898	1171.89	255.575	857.056	1343.36	244.078	950.314	1143.29	334.012	601.263	1260.15	111.624	786.416	1418.19	-13.1802	751.755	1189.05	-24.8435	729.862	1092.76	-41.7329	799.009	954.202	4.93818	819.534	853.376	-58.0819	777.576	842.173	-48.8485	833.948	779.162
10829	0	227.431	897.261	1592.85	332.574	899.865	1582.8	216.846	732.004	1582.59	335.095	732.203	1571.9	272.209	702.001	1446.1	250.792	597.364	1172.19	255.938	864.846	1343.26	243.958	957.642	1143.16	335.179	609.261	1260.32	112.225	793.815	1418.32	-12.4075	757.857	1189.24	-23.9614	736.198	1092.96	-41.1832	805.213	954.339	5.65283	826.066	853.523	-56.8496	783.699	842.36	-48.3204	840.412	779.493
10830	0	227.587	905.566	1592.58	332.71	908.501	1582.61	217.526	740.238	1582.68	335.613	740.74	1572.12	273.05	710	1446.2	251.876	604.799	1172.42	256.279	872.601	1343.26	243.901	964.862	1143.2	336.206	617.111	1260.46	112.766	801.234	1418.31	-11.7325	764.229	1189.41	-23.3381	742.393	1093.06	-40.5396	811.536	954.529	6.31426	832.536	853.793	-55.939	790.042	842.405	-47.9459	846.727	779.907
10831	0	227.741	913.86	1592.29	332.886	916.958	1582.5	217.936	748.576	1582.82	335.989	749.198	1572.35	273.844	717.985	1446.26	252.681	612.292	1172.73	256.518	880.432	1343.2	243.971	972.136	1142.99	337.14	624.963	1260.65	113.22	808.721	1418.38	-11.4219	770.536	1189.68	-22.9557	748.922	1093.3	-40.0768	817.942	954.675	6.94185	839.168	853.976	-55.6189	796.58	842.751	-47.2642	853.384	780.062
10832	0	227.895	922.197	1591.94	332.979	925.401	1582.14	218.42	756.773	1582.84	336.729	757.656	1572.43	274.603	726.095	1446.22	253.405	619.72	1172.87	256.886	888.134	1342.89	244.103	979.475	1142.49	337.983	632.734	1260.76	113.652	816.219	1418.25	-11.0629	776.961	1189.77	-22.6016	755.457	1093.42	-39.6445	824.577	954.672	7.49484	845.82	854.113	-54.6113	803.076	842.712	-46.598	859.896	780.092
10833	0	228.112	930.481	1591.51	333.216	933.745	1581.85	218.793	765.011	1582.65	336.829	766.028	1572.33	275.259	734.115	1446.14	254.312	627.205	1172.9	257.203	895.935	1342.5	244.085	986.756	1141.94	338.704	640.39	1260.88	114.05	823.791	1417.92	-10.6954	783.645	1189.67	-22.3095	761.939	1093.35	-39.1001	831.314	954.582	8.03893	852.279	854.094	-54.3554	809.826	842.438	-45.994	866.281	779.794
10834	0	228.189	938.725	1591.08	333.304	942.01	1581.51	218.995	773.197	1582.36	337.164	774.149	1572.15	275.671	742.048	1445.99	254.935	634.437	1173	257.358	903.81	1342.15	244.136	994.034	1141.51	339.474	648.142	1261	114.406	831.471	1417.5	-10.6319	790.241	1189.6	-22.0293	768.765	1093.14	-38.8031	838.212	954.42	8.56984	859.029	853.948	-53.8713	816.489	842.135	-45.1683	873.073	779.565
10835	0	228.382	946.949	1590.67	333.469	950.241	1581.1	219.236	781.425	1582.09	337.377	782.487	1572	276.053	750.154	1445.85	255.475	641.966	1173.12	257.601	911.604	1341.67	244.09	1001.32	1140.67	340.127	655.963	1261.09	114.597	839.2	1417.1	-10.5771	797.177	1189.51	-21.9192	775.541	1092.95	-38.2159	844.81	954.138	9.08622	866.058	853.799	-53.189	823.106	841.936	-44.5463	879.644	779.178
10836	0	228.47	955.2	1590.09	333.45	958.368	1580.44	219.243	789.665	1581.64	337.588	790.662	1571.56	276.442	758.266	1445.6	256.03	649.581	1173.11	257.841	919.483	1340.93	244.206	1008.74	1139.71	340.611	663.805	1261.04	114.744	846.929	1416.68	-10.414	804.305	1189.16	-21.9098	782.431	1092.77	-37.9544	851.647	953.775	9.14783	872.195	853.205	-52.609	829.72	841.51	-43.9917	886.422	778.676
10837	0	228.525	963.452	1589.39	333.469	966.522	1579.84	219.28	797.763	1581.05	337.542	798.874	1571	276.663	766.388	1445.17	256.574	656.803	1172.96	257.928	927.404	1340.21	244.42	1016.18	1138.88	341.045	671.556	1260.86	114.87	854.76	1415.97	-10.3837	811.498	1188.51	-21.5467	789.227	1092.31	-37.6797	858.411	953.12	9.43547	878.73	852.617	-52.6602	836.396	840.782	-43.42	893.092	778.07
10838	0	228.579	971.707	1588.79	333.314	974.679	1579.37	219.113	806.073	1580.39	337.413	806.994	1570.49	276.697	774.482	1444.82	256.878	664.444	1172.82	258.054	935.3	1339.57	244.472	1023.79	1137.91	341.285	679.266	1260.79	114.897	862.728	1415.32	-10.429	818.825	1188	-21.4323	796.32	1091.78	-37.4563	865.26	952.463	9.79799	885.647	852.094	-52.2071	843.003	840.219	-43.0714	900.216	777.702
10839	0	228.178	979.902	1588.08	333.143	982.973	1578.81	219.013	814.209	1579.57	336.976	815.298	1569.94	276.758	782.573	1444.38	257.047	672.102	1172.68	258.094	943.185	1338.75	244.647	1031.44	1137	341.415	687.061	1260.61	114.9	870.845	1414.6	-10.4952	826.292	1187.58	-21.6086	803.305	1091.25	-37.3837	872.015	951.737	10.0774	892.539	851.72	-51.9216	849.786	839.478	-42.6477	906.363	776.792
10840	0	227.853	988.106	1587.23	332.706	991.187	1578.07	218.669	822.44	1578.71	336.862	823.508	1569.18	276.66	790.738	1443.85	257.364	679.711	1172.28	258.047	951.128	1337.85	244.743	1039.18	1135.95	341.52	694.836	1260.3	114.814	878.953	1413.89	-10.4672	833.875	1186.75	-21.4041	810.599	1090.67	-37.4074	878.899	950.974	9.86616	898.932	850.773	-51.537	856.076	838.618	-42.4283	912.888	775.977
10841	0	227.398	996.369	1586.29	332.331	999.539	1577.38	218.518	830.636	1577.89	336.514	831.878	1568.5	276.378	798.823	1443.18	257.368	687.484	1171.79	258.021	959.145	1337.05	244.806	1047.07	1134.96	341.422	702.55	1259.93	114.675	887.134	1412.94	-10.4445	841.619	1185.99	-21.4095	817.976	1089.81	-37.4686	885.901	950.192	10.0149	905.764	849.808	-51.3493	862.694	837.65	-42.3711	919.554	774.947
10842	0	226.757	1004.62	1585.31	331.781	1007.84	1576.65	217.953	838.897	1576.92	336.32	840.147	1567.98	276.199	807.02	1442.58	257.316	695.264	1171.34	257.962	967.106	1336.04	244.961	1054.92	1133.89	341.264	710.357	1259.53	114.466	895.427	1412.09	-10.4613	849.528	1185.05	-21.3981	825.568	1088.94	-37.5546	892.922	949.093	9.97138	912.57	848.742	-51.3522	869.523	836.641	-42.5352	925.932	773.872
10843	0	226.218	1012.93	1584.11	331.159	1016.2	1575.75	217.542	847.163	1575.92	335.893	848.56	1567.25	275.82	815.208	1441.82	257.248	703.331	1170.64	257.908	975.121	1334.91	245.139	1062.91	1132.61	340.975	718.146	1258.94	114.239	903.721	1411.03	-10.3772	857.422	1183.89	-21.3878	833.22	1088.11	-37.5586	900.003	947.825	10.0686	919.506	847.455	-51.3575	876.034	835.627	-42.659	932.53	772.465
10844	0	225.587	1021.35	1582.93	330.54	1024.61	1574.72	216.852	855.6	1574.87	335.363	856.857	1566.46	275.381	823.436	1440.92	256.834	711.133	1169.94	257.721	983.246	1333.87	245.259	1070.97	1131.5	340.642	726.079	1258.27	113.993	911.925	1409.56	-10.4276	865.513	1182.61	-21.4076	840.981	1086.8	-37.6803	907.173	946.326	10.1704	926.406	845.9	-51.4371	882.804	834.315	-42.8674	939.151	770.982
10845	0	224.94	1029.78	1581.69	329.944	1032.96	1573.81	216.174	863.95	1573.74	334.231	865.294	1565.63	274.808	831.615	1440.01	256.517	719.021	1169.06	257.47	991.405	1332.73	245.362	1078.96	1130.35	340.17	733.841	1257.57	113.557	920.455	1408.55	-10.5126	873.686	1181.35	-21.5195	848.794	1085.7	-37.7226	914.466	944.936	10.0261	933.281	844.287	-51.5599	889.743	832.909	-43.2555	945.66	769.606
10846	0	224.239	1038.23	1580.64	329.295	1041.22	1572.87	215.285	872.532	1572.76	333.879	873.447	1564.88	274.172	839.948	1439.11	255.902	727.073	1168.31	257.262	999.61	1331.79	245.543	1086.95	1129.28	339.569	741.956	1256.85	113.061	928.895	1407.32	-10.7716	881.959	1180.05	-21.6931	856.898	1084.56	-37.9102	921.935	943.617	9.85367	940.327	842.829	-51.894	896.596	831.893	-43.4624	952.46	768.075
10847	0	223.622	1046.73	1579.39	328.724	1049.58	1571.84	214.367	881.036	1571.4	332.452	881.962	1563.72	273.444	848.255	1438.01	255.377	735.19	1167.26	256.907	1007.9	1330.55	245.718	1095.05	1127.95	338.982	749.979	1255.93	112.536	937.438	1406	-11.0962	890.41	1178.72	-21.9231	865.062	1083.13	-38.146	929.526	941.995	9.70256	947.51	841.182	-52.2035	903.792	830.274	-43.993	959.267	766.39
10848	0	222.942	1055.31	1578.15	328.065	1057.76	1570.68	213.387	889.68	1570.24	331.591	890.146	1562.7	272.642	856.68	1436.9	254.684	743.575	1166.15	256.664	1016.22	1329.39	245.886	1103.2	1126.72	338.301	758.165	1254.9	111.877	946.022	1404.68	-11.4266	898.956	1177.15	-22.1356	873.224	1081.68	-38.3782	937.165	940.454	9.51098	954.62	839.293	-52.4495	911	828.65	-44.1603	965.731	764.429
10849	0	222.291	1063.97	1576.93	327.422	1066.14	1569.65	212.191	898.33	1568.79	330.684	898.448	1561.64	271.758	865.057	1435.78	254	751.874	1165.09	256.168	1024.66	1328.18	246.019	1111.43	1125.57	337.391	766.212	1254.04	111.126	954.634	1402.91	-11.7682	907.629	1175.46	-22.3473	881.704	1080.04	-38.6806	944.977	938.551	9.229	961.885	837.326	-52.8189	918.315	827.18	-44.5325	972.91	762.592
10850	0	221.511	1072.66	1575.56	326.754	1074.54	1568.49	210.988	907.018	1567.51	329.29	906.83	1560.48	270.782	873.601	1434.61	253.359	760.534	1163.87	255.739	1033.13	1326.85	246.221	1119.75	1124.07	336.594	774.526	1253.01	110.41	963.588	1401.58	-12.1697	916.463	1173.71	-22.6828	890.264	1078.49	-38.9173	952.834	936.623	8.90153	969.425	835.393	-53.3496	925.781	825.528	-44.7124	979.618	760.43
10851	0	220.654	1081.24	1574.13	325.893	1082.96	1567.2	209.762	915.762	1566.03	328.339	915.194	1559.25	269.759	882.164	1433.26	252.605	769.048	1162.51	255.197	1041.69	1325.34	246.567	1128.28	1122.67	335.729	782.971	1251.85	109.687	972.517	1399.83	-12.6254	925.37	1171.95	-23.1218	898.792	1076.8	-39.1457	960.837	934.726	8.76095	976.782	833.244	-54.091	933.668	823.568	-44.7634	986.307	758.012
10852	0	219.761	1090.04	1572.71	324.871	1091.49	1566.08	208.487	924.384	1564.52	326.717	923.718	1557.94	268.688	890.812	1431.91	251.775	777.434	1161.15	254.616	1050.3	1324.04	246.666	1136.83	1121.11	334.74	791.34	1250.65	108.916	981.566	1397.96	-13.2431	934.284	1170.12	-23.5671	907.442	1074.97	-39.4816	969.043	932.789	8.40373	984.395	831.063	-54.4739	941.438	821.728	-45.0394	993.776	755.901
10853	0	218.498	1098.7	1571.34	323.723	1100.03	1565.05	207.094	933.071	1562.99	325.545	932.341	1556.8	267.564	899.602	1430.61	250.931	786.439	1159.85	254.139	1059.07	1322.67	246.798	1145.45	1119.85	333.782	799.945	1249.55	108.107	990.704	1396.43	-14.0355	943.253	1168.23	-24.1964	916.195	1073.1	-39.9041	977.404	930.859	8.14845	992.372	829.215	-54.9722	949.344	820.027	-45.3733	1001.24	753.747
10854	0	217.065	1107.36	1569.92	322.303	1108.63	1564	205.572	941.775	1561.39	324.139	940.899	1555.56	266.383	908.409	1429.21	250.003	795.167	1158.4	253.527	1067.96	1321.21	246.932	1154.29	1118.31	332.838	808.575	1248.31	107.112	999.898	1394.68	-14.7832	952.46	1166.56	-24.8177	925.116	1071.28	-40.3821	985.871	928.93	7.87374	1000.37	827.185	-55.0858	957.353	818.149	-45.5762	1008.98	751.608
10855	0	215.693	1116.14	1568.39	320.792	1117.38	1562.8	204.077	950.525	1559.67	322.408	949.688	1554.18	265.206	917.392	1427.72	249.038	803.948	1156.92	253.159	1076.99	1319.72	247.178	1163.35	1116.69	331.815	817.315	1246.98	106.163	1009.08	1392.78	-15.4613	961.818	1164.86	-25.3733	934.096	1069.32	-40.7062	994.461	926.852	7.49096	1008.32	824.981	-55.8219	965.888	816.131	-45.7602	1016.92	749.412
10856	0	213.89	1124.73	1566.97	319.227	1126.26	1561.7	202.641	959.257	1557.85	321.059	958.492	1552.85	264.014	926.322	1426.24	248.251	813.253	1155.33	252.421	1085.92	1318.16	247.289	1172.45	1115.25	330.831	826.143	1245.73	105.286	1018.43	1390.86	-16.0435	970.906	1162.56	-25.9207	943.071	1067.28	-41.1421	1003.17	924.706	7.30217	1016.53	822.661	-55.9254	974.17	813.968	-46.0255	1025.12	747.233
10857	0	212.172	1133.59	1565.35	317.455	1135.13	1560.48	200.847	968.036	1556.1	319.556	967.327	1551.72	262.739	935.413	1424.93	247.417	822.301	1153.92	251.665	1094.94	1316.57	247.312	1181.71	1113.54	329.933	835.098	1244.51	104.421	1027.86	1388.75	-16.9064	980.312	1160.43	-26.5628	952.317	1065.4	-41.4402	1012.09	922.462	7.08404	1025.27	820.512	-56.4038	982.95	811.952	-45.6176	1033.44	744.817
10858	0	210.35	1142.47	1563.7	315.702	1144.01	1559.36	199.085	976.975	1554.36	317.734	976.326	1550.28	261.551	944.596	1423.36	246.485	831.321	1152.4	251.008	1104.11	1315.06	247.391	1191.23	1112.01	328.982	844.187	1243.23	103.319	1037.12	1386.76	-17.6078	989.833	1158.17	-27.2031	961.523	1063.29	-41.7568	1021.08	920.104	7.39686	1032.55	817.928	-57.0872	992.207	809.729	-46.1641	1042.17	742.557
10859	0	208.802	1151.5	1561.91	313.844	1152.99	1558.01	197.331	985.976	1552.44	315.947	985.256	1548.9	260.213	953.682	1421.82	245.841	840.963	1150.7	250.219	1113.45	1313.49	247.32	1200.69	1110.62	328.142	853.373	1241.79	102.254	1046.49	1384.91	-18.2735	999.58	1155.97	-27.6962	970.801	1060.94	-42.1218	1030.3	917.881	7.23142	1041.46	815.577	-57.0745	1001.02	807.386	-46.119	1051.05	740.238
10860	0	206.789	1160.54	1560.58	312.077	1161.98	1557.11	195.455	995.084	1550.76	313.827	994.252	1547.71	258.823	962.876	1420.43	245.114	850.316	1149.15	249.284	1122.87	1312.24	247.122	1210.41	1109.3	327.178	862.646	1240.53	101.12	1055.82	1382.89	-19.1562	1009.19	1153.83	-28.386	980.254	1058.78	-42.5058	1039.6	915.733	6.51081	1051.56	813.758	-57.822	1010.34	805.292	-46.2804	1060.13	738.04
10861	0	205.025	1169.71	1559.07	310.215	1171.05	1555.96	193.373	1004.27	1549.17	311.804	1003.24	1546.5	257.504	972.155	1419.06	244.527	860.003	1147.58	248.049	1131.98	1310.94	246.765	1220.07	1108.27	326.229	872.115	1239.15	99.8835	1065.2	1381.2	-19.9227	1019.04	1151.75	-29.0879	989.741	1056.73	-42.9553	1049.04	913.77	6.5975	1060.46	811.691	-58.2459	1019.9	803.253	-46.6244	1069.41	736.059
10862	0	203.082	1178.87	1557.79	308.454	1180.1	1555.01	191.301	1013.61	1547.7	309.63	1012.26	1545.37	256.018	981.378	1417.54	243.859	870.119	1145.74	247.072	1141.57	1309.78	246.36	1230.08	1107.26	325.453	881.705	1237.73	98.4497	1074.48	1379.59	-20.7216	1028.74	1149.68	-29.7314	999.23	1054.49	-43.363	1058.56	911.577	6.37823	1069.84	809.57	-58.4915	1029.47	801.048	-46.3381	1079	733.889
10863	0	201.327	1188.22	1556.54	306.558	1189.06	1554.03	189.029	1022.9	1546.07	307.512	1021.35	1544.41	254.438	990.659	1416.15	243.092	879.951	1143.92	245.988	1151.2	1308.96	245.847	1240.06	1106.59	324.581	891.386	1236.2	97.0137	1083.7	1377.73	-21.4892	1038.48	1147.66	-30.1934	1008.95	1052.35	-43.7161	1068.19	909.613	6.08051	1079.7	807.665	-58.8003	1039.11	798.999	-47.0076	1088.84	732.027
10864	0	199.429	1197.56	1555.32	304.747	1198.13	1553.3	186.728	1032.34	1544.91	305.311	1030.42	1543.44	252.812	999.888	1414.76	242.371	890.064	1142.19	244.581	1160.8	1307.97	245.384	1250.12	1105.94	323.488	901.087	1234.76	95.5968	1093.21	1376.29	-22.1978	1048.27	1145.61	-30.9144	1018.65	1050.49	-44.0973	1078.09	907.621	6.05419	1088.53	805.696	-58.5945	1048.81	796.963	-47.0243	1098.82	730.043
10865	0	197.498	1206.95	1554.32	302.699	1207.29	1552.63	184.503	1041.86	1543.6	303.113	1039.59	1542.72	251.307	1009.17	1413.55	241.691	900.348	1140.55	243.294	1170.58	1307.29	244.729	1260.18	1105.49	322.606	910.934	1233.45	94.1258	1102.64	1374.7	-23.0659	1057.93	1143.71	-31.3942	1028.63	1048.64	-44.482	1087.94	905.667	5.87972	1099	803.887	-59.1535	1059.03	795.174	-47.2215	1108.79	728.068
10866	0	195.603	1216.59	1553.44	300.644	1216.53	1552.3	182.107	1051.32	1542.39	300.481	1048.8	1542.01	249.753	1018.68	1412.51	240.954	910.521	1139.12	242.019	1180.46	1306.74	244.236	1270.45	1105.12	321.8	920.854	1232.33	92.6242	1112.18	1373.35	-23.6282	1067.73	1141.78	-31.8397	1038.51	1046.81	-44.8369	1098.04	903.757	5.90738	1109.26	802.027	-58.8496	1068.92	793.31	-47.2363	1119.28	726.318
10867	0	193.303	1225.97	1553.02	298.468	1225.95	1552.39	179.697	1060.94	1541.49	298.151	1058.19	1541.61	248.185	1028.31	1411.84	240.61	921.114	1138.02	240.781	1190.24	1306.44	243.503	1280.59	1105.17	320.969	930.849	1231.63	91.0904	1121.75	1372.13	-24.4056	1077.38	1140.11	-31.9554	1048.75	1045.07	-45.177	1108.23	902.154	4.83856	1120.91	800.715	-59.1932	1079.43	791.652	-47.6142	1129.74	724.752
10868	0	191.036	1235.76	1552.68	296.193	1235.5	1552.72	177.337	1070.49	1540.73	295.777	1067.7	1541.52	246.801	1038.18	1411.55	240.025	931.306	1137.62	239.215	1200.41	1306.39	242.853	1291.24	1105.29	320.476	941.022	1231.47	89.656	1131.42	1371.43	-25.0756	1087.16	1138.84	-32.4662	1058.83	1043.68	-45.5396	1118.53	900.864	4.56913	1131.71	799.564	-59.1212	1089.5	790.361	-47.7457	1140.24	723.466
10869	0	188.576	1245.4	1552.67	293.721	1245.19	1553.24	174.977	1080.19	1540.25	293.659	1077.41	1541.71	245.652	1048.25	1411.64	240.095	941.696	1137.59	237.938	1210.58	1306.46	242.218	1301.9	1105.48	320.234	951.308	1231.69	88.3629	1141.12	1370.92	-25.5868	1097.04	1137.96	-32.513	1069.17	1042.54	-45.8703	1128.96	899.77	4.82655	1141.4	798.398	-59.5192	1100.33	789.036	-47.9855	1151.13	722.505
10870	0	186.013	1255.01	1552.93	291.253	1254.99	1554.1	172.594	1089.88	1540.12	291.216	1087.19	1542.22	244.537	1058.23	1412.11	240.565	951.683	1137.88	236.605	1220.65	1306.97	241.271	1312.47	1106.1	320.235	961.773	1232.37	87.0662	1150.6	1370.54	-26.0469	1106.94	1137.24	-32.2867	1079.51	1041.56	-46.1669	1139.37	899.166	3.98049	1153.21	797.921	-59.1743	1110.66	788.286	-48.3849	1161.82	721.928
10871	0	183.388	1264.75	1553.5	288.638	1264.75	1555.23	170.204	1099.7	1540.39	288.906	1097.01	1543.22	243.417	1068.4	1412.96	240.854	961.788	1138.81	235.378	1230.9	1307.84	240.295	1323.22	1106.96	320.173	972.252	1233.5	85.7274	1160.07	1370.72	-26.4409	1117.01	1136.99	-32.268	1089.86	1041.15	-46.5089	1150.01	898.979	3.87085	1163.81	797.637	-59.7657	1121.59	787.913	-48.9089	1172.61	721.766
10872	0	180.957	1274.44	1554.2	286.164	1274.63	1556.53	167.859	1109.52	1541.06	286.538	1106.88	1544.57	242.334	1078.61	1414.03	241.04	972.265	1140.06	233.76	1240.88	1308.82	239.149	1333.67	1108.11	320.557	983.014	1234.88	84.4966	1169.5	1371.24	-26.5546	1127.07	1136.87	-32.0579	1100.34	1041.02	-46.6985	1160.64	899.146	3.19762	1174.85	797.928	-59.9145	1132.4	788.155	-49.3713	1183.67	721.807
10873	0	178.655	1284.43	1554.89	283.933	1284.55	1557.87	165.596	1119.43	1541.97	284.076	1116.82	1546.06	241.465	1088.5	1415.31	241.683	982.986	1141.22	232.502	1251.02	1310.1	238.001	1344.19	1109.44	320.918	993.74	1236.28	83.3987	1178.81	1372.06	-26.5634	1137.11	1136.92	-31.6296	1110.59	1041.17	-46.8041	1171.22	899.45	2.76046	1186.37	798.305	-59.6486	1143.11	788.266	-49.5696	1194.98	722.288
10874	0	176.656	1294.39	1555.85	281.79	1294.42	1559.35	163.406	1129.34	1543.21	282.013	1126.59	1547.84	240.466	1098.29	1416.64	242.457	993.837	1142.21	231.235	1260.96	1311.67	236.675	1354.41	1111.24	321.118	1004.35	1237.73	82.0938	1187.9	1373.15	-26.4664	1147.17	1137.32	-31.3049	1120.68	1041.71	-46.9946	1181.91	900.202	2.35443	1198	798.916	-59.9679	1154.26	788.952	-50.3449	1206.15	722.916
10875	0	174.8	1304.37	1557.22	279.854	1304.11	1561.14	161.281	1139.34	1544.82	279.845	1136.31	1549.96	239.493	1108	1418.21	242.91	1004.18	1143.44	229.75	1270.77	1313.66	235.352	1364.54	1113.39	321.164	1014.85	1239.41	80.888	1196.75	1374.25	-26.3679	1156.93	1138.01	-31.0078	1130.86	1042.61	-47.1306	1192.69	901.242	1.8719	1210.36	800.09	-59.7234	1165.1	789.969	-51.0417	1217.45	724.145
10876	0	173.261	1314.28	1558.63	278.321	1313.76	1563.02	159.232	1149.36	1546.52	277.855	1145.91	1552.27	238.538	1117.56	1419.8	243.26	1014.5	1144.78	228.385	1280.5	1315.58	233.88	1374.32	1115.79	321.202	1025.31	1240.86	79.5958	1205.72	1375.93	-26.3257	1166.62	1138.92	-30.7628	1140.85	1043.62	-47.202	1203.4	902.554	1.47825	1222.03	801.485	-59.8113	1176.35	791.363	-51.5027	1228.91	725.526
10877	0	171.747	1324.12	1560.22	276.879	1323.32	1564.76	157.408	1159.16	1548.25	275.86	1155.47	1554.25	237.527	1126.96	1421.23	243.36	1024.71	1145.87	227.134	1290.21	1317.69	232.495	1384.18	1118.12	321.147	1035.71	1242.2	78.3151	1214.64	1377.54	-26.2613	1175.94	1139.99	-30.6273	1150.75	1044.71	-47.4235	1214.06	904.105	1.15519	1233.7	802.914	-59.6505	1187.53	792.653	-52.0576	1240.57	727.191
10878	0	170.598	1333.94	1561.89	275.701	1332.7	1566.73	155.63	1168.94	1550.2	274.142	1164.82	1556.43	236.488	1136.32	1422.74	243.321	1034.94	1147.05	225.693	1299.64	1319.93	231.101	1393.95	1120.79	320.749	1045.84	1243.54	77.0587	1223.51	1379.23	-26.4317	1185.33	1141.21	-30.6443	1160.72	1045.86	-47.6604	1224.75	905.595	0.927683	1245.44	804.57	-59.2519	1198.75	794.034	-52.4597	1252.36	728.955
10879	0	169.26	1343.22	1563.75	274.53	1341.84	1568.85	153.982	1178.58	1551.99	272.283	1174.11	1558.57	235.366	1145.59	1424.3	242.887	1044.85	1148.37	224.419	1309.15	1321.97	229.715	1403.47	1123.39	320.422	1056.06	1244.93	75.8498	1232.49	1380.89	-26.7961	1194.48	1142.64	-31.0229	1170.47	1047.3	-47.8841	1235.51	907.222	0.727239	1257.34	806.54	-59.2916	1210.3	795.636	-52.7214	1264.37	730.865
10880	0	168.465	1352.58	1565.57	273.511	1351	1570.83	152.507	1188.1	1553.69	270.934	1183.22	1560.46	234.331	1154.88	1425.84	242.304	1054.48	1149.69	223.351	1318.58	1324.19	228.47	1413.13	1125.97	319.54	1065.69	1246.46	74.5661	1241.39	1382.55	-27.4766	1203.56	1144.18	-31.4568	1180.5	1048.57	-48.3581	1246.27	909.035	0.593511	1269.24	808.514	-59.0973	1221.86	797.182	-52.7572	1276.52	732.867
10881	0	167.65	1362.13	1567.28	272.624	1359.99	1572.8	151.296	1197.29	1555.05	269.741	1192.25	1562.15	233.323	1164.17	1427.19	241.651	1064.13	1150.82	222.248	1327.84	1326.07	227.426	1422.7	1128.31	318.782	1075.36	1247.72	73.3884	1250.29	1384.16	-28.3072	1212.79	1145.71	-32.1592	1190.21	1049.74	-48.7835	1257.03	910.565	0.327081	1280.67	810.387	-58.7469	1233.37	798.391	-52.6655	1288.87	734.882
10882	0	166.598	1370.98	1568.93	271.544	1368.87	1574.59	150.148	1206.49	1556.49	268.39	1201.21	1563.72	232.402	1173.48	1428.7	240.637	1073.73	1152.2	221.006	1337.03	1327.68	226.369	1432.08	1130.26	317.869	1084.75	1249.11	72.2576	1259.35	1385.66	-29.3777	1221.92	1147.32	-33.09	1200.23	1050.97	-49.3414	1268.02	912.349	0.052586	1292.44	812.526	-58.9065	1245.29	799.894	-52.4048	1301.38	736.801
10883	0	165.616	1379.86	1570.46	270.538	1377.77	1576.35	149.019	1215.51	1557.67	267.262	1210.1	1565.1	231.331	1182.71	1429.99	239.661	1083.28	1153.63	220.117	1346.28	1329.06	225.611	1441.49	1131.82	316.754	1093.9	1250.63	71.2935	1268.45	1386.8	-31.0968	1231.02	1148.97	-34.331	1210.11	1052.25	-49.8835	1279	913.863	-0.124111	1304.19	814.481	-58.9559	1257.33	801.339	-52.2789	1314.16	738.81
10884	0	164.828	1388.95	1571.88	269.636	1386.54	1577.97	148.05	1224.44	1558.63	266.386	1219	1566.38	230.468	1191.89	1431.21	238.718	1092.59	1154.82	219.361	1355.44	1330.27	224.867	1450.88	1133.13	315.876	1103.05	1251.83	70.5849	1277.78	1388.02	-32.5151	1240.42	1150.38	-35.6016	1219.97	1053.29	-50.6387	1290.05	915.292	-0.137976	1316.52	816.984	-59.0456	1269.49	802.458	-51.7354	1327.18	740.633
10885	0	163.938	1397.84	1573.14	268.773	1395.39	1579.34	147.267	1233.31	1559.48	265.309	1227.78	1567.47	229.651	1200.96	1432.29	237.679	1101.64	1155.84	218.558	1364.31	1331.24	224.3	1459.85	1134.15	314.858	1111.94	1252.89	69.8239	1286.96	1388.94	-33.9036	1249.85	1151.58	-36.8501	1229.85	1054.2	-51.3446	1301.17	916.707	-0.317004	1328.33	818.9	-59.002	1281.67	803.426	-51.3925	1339.94	742.321
10886	0	163.156	1406.58	1574.1	267.861	1404.22	1580.52	146.394	1242.12	1560.32	264.704	1236.58	1568.52	228.913	1209.97	1433.26	236.57	1110.56	1156.84	218.056	1373.22	1331.94	223.993	1469	1134.86	313.842	1120.68	1253.9	69.2764	1296.3	1389.75	-35.3596	1259.48	1152.73	-38.4923	1239.78	1055.18	-52.1853	1312.38	918.063	-0.357637	1340.3	820.818	-59.3964	1294.16	804.428	-51.1186	1353.85	744.377
10887	0	162.376	1415.33	1574.97	267.152	1412.95	1581.69	145.676	1250.78	1560.98	263.774	1245.34	1569.35	228.282	1218.93	1433.99	235.542	1119.4	1157.71	217.683	1382.17	1332.4	223.8	1477.77	1135.14	312.782	1129.27	1254.72	68.7378	1305.61	1390.5	-36.9179	1269.11	1153.9	-40.1387	1249.78	1055.98	-52.9883	1323.84	919.417	-0.638332	1351.47	822.485	-59.9116	1306.68	805.453	-50.7029	1366.87	746.041
10888	0	161.767	1424.03	1575.66	266.424	1421.49	1582.61	145.127	1259.53	1561.36	263.322	1253.96	1570.02	227.55	1227.85	1434.55	234.464	1128.07	1158.35	217.325	1390.95	1332.71	223.764	1486.33	1135.37	311.814	1137.8	1255.38	68.3285	1314.93	1390.99	-37.8277	1279.18	1154.55	-41.7307	1259.76	1056.48	-53.6575	1335.08	920.443	-0.95117	1364.1	824.494	-60.2332	1319.31	806.443	-50.3773	1380.45	747.964
10889	0	161.094	1432.58	1576.32	265.875	1430.06	1583.47	144.541	1268.13	1561.54	262.533	1262.61	1570.5	226.975	1236.68	1435.15	233.322	1136.6	1158.89	217.039	1399.57	1332.93	223.908	1494.9	1135.31	310.824	1146.14	1255.95	67.9822	1324.4	1391.5	-39.1756	1288.92	1155.38	-43.3338	1269.71	1057.13	-54.5752	1346.49	921.692	-1.27172	1376.16	826.338	-60.7351	1331.97	807.493	-50.3849	1393.71	749.949
10890	0	160.617	1441.09	1576.84	265.356	1438.63	1584.22	144.11	1276.7	1561.71	262.156	1271.12	1570.84	226.351	1245.54	1435.66	232.072	1145	1159.64	217.192	1408.35	1333	224.225	1503.28	1134.98	309.674	1154.37	1256.51	67.7631	1333.9	1391.98	-40.3648	1298.92	1156.15	-44.8601	1279.75	1057.94	-55.3691	1357.95	922.986	-1.66292	1388.6	828.491	-61.3655	1344.94	808.8	-50.4862	1407.2	751.953
10891	0	160.234	1449.67	1577.25	265.07	1447.17	1584.74	143.649	1285.29	1561.74	261.861	1279.78	1570.9	225.833	1254.4	1436.1	230.741	1153.29	1160.33	217.278	1416.98	1332.87	224.762	1511.29	1134.43	308.671	1162.6	1256.94	67.5591	1343.36	1392.27	-41.458	1308.98	1156.96	-46.4073	1289.74	1058.57	-56.1564	1369.42	924.455	-2.11871	1400.87	830.593	-62.1907	1357.95	810.072	-50.5941	1420.76	754.138
10892	0	159.825	1458.02	1577.68	264.779	1455.57	1585.16	143.515	1293.77	1561.6	261.411	1288.26	1570.81	225.322	1263.25	1436.5	229.501	1161.55	1160.95	217.259	1425.38	1332.59	225.324	1519.75	1134.03	307.625	1170.66	1257.48	67.5052	1352.98	1392.68	-42.2955	1318.97	1157.55	-47.8437	1299.54	1059.1	-56.9343	1381.01	925.941	-2.64585	1413.2	832.703	-62.8808	1371.02	811.47	-50.9306	1434.19	756.308
10893	0	159.79	1466.63	1577.97	264.598	1464.03	1585.5	143.207	1302.35	1561.61	261.376	1296.7	1570.88	224.657	1272.06	1436.97	227.953	1169.55	1161.71	217.539	1434.01	1332.3	225.871	1528.03	1133.43	306.342	1178.53	1258.14	67.3973	1362.51	1392.8	-43.1077	1329.09	1158.06	-49.3666	1309.35	1059.71	-57.5155	1392.58	927.345	-2.9923	1425.68	834.589	-63.1617	1383.82	812.751	-51.309	1447.85	758.618
10894	0	159.78	1475.2	1578.14	264.598	1472.59	1585.77	143.127	1310.96	1561.59	261.249	1305.2	1570.88	224.107	1280.88	1437.35	226.571	1177.6	1162.43	217.814	1442.52	1331.94	226.481	1536.1	1132.63	305.08	1186.43	1258.67	67.3431	1372.07	1392.8	-43.8177	1339.25	1158.31	-50.8067	1319.14	1060.33	-58.1538	1404.13	928.643	-3.4327	1438.25	836.333	-63.8207	1396.76	814.332	-51.7326	1461.3	760.618
10895	0	159.991	1483.84	1578.23	264.749	1481.08	1585.68	143.099	1319.49	1561.69	261.162	1313.78	1570.79	223.609	1289.64	1437.58	225.248	1185.65	1163.05	218.078	1450.84	1331.45	227.226	1544.31	1131.88	303.956	1194.34	1259.11	67.4155	1381.59	1392.84	-44.3085	1349.25	1158.45	-52.0572	1329	1060.81	-58.7062	1415.61	929.992	-3.69808	1450.6	837.875	-64.2815	1409.56	815.644	-52.0476	1474.81	762.532
10896	0	160.051	1492.26	1578.35	264.836	1489.51	1585.63	143.088	1328.15	1561.72	261.158	1322.28	1570.77	223.107	1298.27	1437.82	224.057	1193.74	1163.57	218.491	1459.28	1331.05	227.848	1552.44	1131.28	302.819	1202.22	1259.54	67.5324	1390.95	1392.7	-44.8164	1359.26	1158.78	-53.2511	1338.76	1061.03	-59.2487	1427.02	931.243	-4.19041	1463	839.685	-64.6054	1422.33	816.943	-52.536	1488.31	764.729
10897	0	160.321	1500.81	1578.47	265.199	1498.02	1585.75	143.103	1336.82	1561.88	261.101	1330.67	1570.91	222.557	1306.76	1438.1	222.737	1201.76	1164.03	218.847	1467.57	1330.83	228.411	1560.48	1130.99	301.645	1209.92	1259.98	67.5089	1400.24	1392.91	-45.495	1369.13	1159.24	-54.5134	1348.71	1061.47	-59.8463	1438.35	932.598	-4.58724	1475.77	841.519	-64.9664	1434.86	818.099	-53.073	1501.54	766.992
10898	0	160.655	1509.43	1578.5	265.532	1506.46	1585.76	143.239	1345.42	1562.03	261.168	1339.17	1571.03	222.113	1315.24	1438.26	221.711	1209.81	1164.35	219.142	1475.61	1330.66	229.025	1568.32	1130.83	300.631	1217.74	1260.29	67.5064	1409.32	1392.98	-46.1366	1378.82	1159.66	-55.7056	1358.68	1061.8	-60.4327	1449.55	933.753	-4.98082	1487.87	843.32	-65.1292	1447.3	819.146	-53.4612	1514.8	769.214
10899	0	161.123	1518.1	1578.5	266.153	1515.01	1585.55	143.45	1354.2	1562.11	261.58	1347.66	1571	221.805	1323.66	1438.18	220.689	1217.76	1164.37	219.585	1483.67	1330.4	229.707	1576.33	1130.47	299.639	1225.51	1260.33	67.6316	1418.42	1393.04	-46.7923	1388.62	1160	-56.7801	1368.63	1061.85	-60.9732	1460.65	934.789	-5.00657	1499.83	844.873	-65.1338	1459.62	820.022	-53.6547	1527.85	771.127
10900	0	161.704	1526.8	1578.27	266.63	1523.57	1585.25	143.702	1362.86	1562.18	261.635	1356.19	1570.85	221.421	1331.93	1438	219.599	1225.64	1164.44	219.931	1491.83	1330.13	230.273	1584.06	1130.03	298.717	1233.15	1260.29	67.6542	1427.32	1392.93	-47.3057	1398.29	1160.2	-57.5704	1378.78	1061.98	-61.4789	1471.73	935.576	-5.34503	1512.04	846.487	-64.8591	1471.85	820.805	-53.9848	1540.94	773.027
10901	0	162.328	1535.52	1578.03	267.25	1532.03	1585.02	144.074	1371.59	1562.32	261.973	1364.74	1570.9	221.013	1340.23	1437.93	218.534	1233.64	1164.42	220.376	1499.99	1329.72	230.951	1591.85	1129.75	297.7	1240.78	1260.21	67.7572	1436.25	1392.85	-47.8014	1408.03	1160.39	-58.4992	1388.8	1062.17	-61.8157	1482.9	936.262	-5.44526	1524.38	848.006	-64.719	1484.1	821.719	-54.1375	1553.78	774.855
10902	0	163.129	1544.35	1577.79	267.983	1540.7	1584.43	144.447	1380.33	1562.46	262.441	1373.22	1570.84	220.834	1348.49	1437.76	217.539	1241.54	1164.26	220.622	1508.01	1329.31	231.513	1599.19	1129.22	296.805	1248.42	1260.01	67.9087	1445.18	1392.66	-48.2429	1417.73	1160.42	-59.0269	1398.84	1062	-62.1262	1493.96	936.953	-5.53693	1536.69	849.443	-64.3312	1496.16	822.372	-54.1569	1566.65	776.587
10903	0	163.986	1553.2	1577.26	268.621	1549.18	1583.64	144.802	1389.1	1562.3	262.824	1381.75	1570.43	220.639	1356.78	1437.34	216.686	1249.5	1163.94	221.082	1516.09	1328.82	232.057	1607.24	1128.42	295.869	1256.14	1259.63	68.164	1454.13	1392.27	-48.5991	1427.51	1160.28	-59.7728	1408.96	1061.88	-62.3359	1505.06	937.512	-5.61801	1548.78	850.642	-63.778	1508.12	822.792	-53.9742	1579.3	777.939
10904	0	164.63	1561.88	1576.71	269.393	1557.91	1582.91	145.322	1397.84	1562.2	263.257	1390.42	1570.06	220.562	1365.19	1436.96	215.628	1257.43	1163.68	221.536	1524.25	1328.1	232.701	1615.03	1127.77	294.989	1263.88	1259.23	68.3828	1462.96	1391.97	-48.933	1437.19	1160.2	-60.5825	1419.18	1061.69	-62.5705	1516.18	937.866	-5.47594	1560.92	851.782	-63.289	1520.12	823.28	-53.5735	1591.88	779.229
10905	0	165.481	1570.71	1576.09	270.152	1566.47	1582.28	145.813	1406.53	1562.06	263.757	1398.99	1569.73	220.434	1373.32	1436.61	214.709	1265.45	1163.39	221.971	1532.37	1327.4	233.338	1623.18	1127.15	294.206	1271.64	1258.84	68.6657	1471.91	1391.74	-49.2287	1447.03	1160.08	-61.0291	1429.57	1061.63	-62.8257	1527.59	938.337	-5.29439	1572.99	852.939	-62.6583	1532.19	823.853	-53.0454	1604.28	780.207
10906	0	166.139	1579.35	1575.52	270.858	1575.2	1581.46	146.413	1415.25	1561.72	264.425	1407.62	1569.3	220.54	1381.86	1436.12	213.949	1273.45	1163.05	222.383	1540.37	1326.79	233.781	1631.29	1126.43	293.484	1279.46	1258.31	69.0029	1480.79	1391.38	-49.3103	1456.6	1159.82	-61.6281	1439.71	1061.36	-62.7587	1538.69	938.768	-5.11096	1584.79	854.031	-62.2464	1544.27	824.099	-52.4175	1616.7	781.18
10907	0	166.876	1588.04	1574.93	271.541	1583.74	1580.62	146.979	1423.89	1561.3	265.006	1416.29	1568.63	220.621	1390.23	1435.48	213.094	1281.52	1162.45	222.824	1548.57	1326.05	234.314	1639.48	1125.8	292.898	1287.35	1257.7	69.4516	1489.64	1390.85	-49.5873	1466.38	1159.68	-61.9016	1450.18	1060.85	-62.5418	1549.79	939.173	-4.52446	1596.65	854.915	-61.3538	1556.21	824.243	-51.5161	1628.98	782.016
10908	0	167.58	1596.69	1574.29	272.527	1592.57	1579.97	147.7	1432.67	1560.9	265.798	1424.65	1568.14	220.801	1398.64	1434.95	212.585	1289.79	1162	223.436	1556.99	1325.22	234.781	1647.78	1124.97	292.394	1295.3	1257.1	69.8675	1498.5	1390.5	-49.7466	1476.08	1159.43	-62.2531	1460.75	1060.52	-62.2197	1561.15	939.365	-3.85912	1608.41	855.69	-61.4873	1568.31	824.66	-50.3318	1641.33	782.621
10909	0	168.412	1605.4	1573.65	273.143	1601.12	1579.05	148.329	1441.25	1560.39	266.435	1433.53	1567.33	221.063	1407.21	1434.24	212.011	1297.96	1161.5	223.834	1565.18	1324.35	235.281	1656.22	1124.11	292.053	1303.43	1256.4	70.2379	1507.32	1389.96	-49.8129	1485.76	1159.01	-62.3257	1471.42	1060.04	-61.6731	1572.59	939.524	-2.99281	1619.93	856.308	-61.2237	1580.37	824.925	-49.0419	1653.52	783.255
10910	0	169.212	1614.07	1572.97	274.043	1609.9	1578.08	149.154	1449.95	1559.8	267.266	1442.15	1566.54	221.385	1415.81	1433.39	211.627	1306.15	1160.76	224.397	1573.63	1323.32	235.702	1664.65	1123.14	291.782	1311.54	1255.55	70.7564	1516.19	1389.37	-49.8052	1495.42	1158.59	-62.4932	1482	1059.32	-61.0393	1583.97	939.582	-1.9079	1631.5	856.593	-59.4508	1592.44	824.624	-47.5989	1665.7	783.733
10911	0	169.968	1622.78	1572.21	274.936	1618.44	1577.24	149.929	1458.62	1559.09	268.019	1450.91	1565.54	221.622	1424.32	1432.51	211.357	1314.42	1160.01	224.965	1582.09	1322.4	236.08	1673.14	1122.05	291.547	1319.85	1254.65	71.2167	1525.08	1388.71	-49.6647	1505.14	1157.77	-62.483	1492.73	1058.49	-60.4669	1595.32	939.289	-0.787482	1642.85	856.644	-59.1983	1604.68	824.746	-45.96	1677.86	783.804
10912	0	170.991	1631.55	1571.33	275.84	1627.26	1576.03	150.75	1467.45	1558.4	268.846	1459.48	1564.71	222.099	1432.96	1431.75	211.185	1322.84	1159.32	225.352	1590.46	1321.17	236.524	1681.62	1120.76	291.541	1328.29	1253.88	71.8061	1533.89	1387.7	-49.4027	1515.01	1157	-62.3697	1503.61	1057.66	-59.4566	1606.94	938.982	0.493986	1654.19	856.448	-57.8677	1616.7	824.37	-44.2962	1689.96	783.645
10913	0	172.063	1640.31	1570.39	276.909	1635.9	1574.97	151.632	1476.14	1557.62	269.715	1468.31	1563.43	222.504	1441.59	1430.66	211.182	1331.24	1158.49	226.102	1599.19	1320.07	236.933	1690.12	1119.48	291.637	1336.74	1252.76	72.4652	1542.81	1386.79	-49.034	1524.8	1155.93	-62.1687	1514.35	1056.77	-58.4772	1618.39	938.386	2.09662	1665.63	856.147	-56.9102	1628.77	824.092	-42.4055	1701.99	783.464
10914	0	173.14	1649.11	1569.34	277.962	1644.6	1573.65	152.516	1484.89	1556.54	270.606	1476.92	1562.22	223.105	1450.45	1429.59	211.209	1339.85	1157.41	226.505	1607.76	1318.78	237.006	1698.23	1117.75	291.78	1345.3	1251.64	72.9254	1551.62	1385.71	-48.5881	1534.76	1154.92	-61.8101	1525.2	1055.56	-57.3534	1629.92	937.784	3.64284	1676.74	855.5	-55.8748	1640.81	823.546	-40.5331	1713.96	783.091
10915	0	174.189	1657.9	1568.37	279.103	1653.38	1572.44	153.441	1493.74	1555.55	271.471	1485.66	1561.01	223.591	1459.22	1428.57	211.326	1348.44	1156.38	227.205	1616.61	1317.7	237.415	1706.79	1116.53	291.946	1353.88	1250.61	73.5793	1560.72	1384.69	-48.1561	1544.75	1153.78	-61.4301	1536.18	1054.45	-56.1206	1641.48	937.192	5.11934	1687.75	854.923	-55.1155	1653.04	823.019	-38.761	1725.68	782.623
10916	0	175.238	1666.69	1567.43	280.162	1662	1571.25	154.274	1502.54	1554.58	272.392	1494.41	1559.65	224.143	1467.99	1427.45	211.528	1357.2	1155.38	227.603	1625.24	1316.39	237.819	1715.49	1115.13	292.301	1362.71	1249.41	74.2078	1569.78	1383.6	-47.6217	1554.84	1152.59	-61.017	1547.19	1053.26	-54.664	1652.67	936.522	6.77605	1699.05	854.206	-53.658	1664.64	822.092	-36.8505	1737.45	782.087
10917	0	176.417	1675.54	1566.22	281.253	1670.91	1569.8	155.327	1511.38	1553.39	273.428	1503.24	1558.24	224.768	1476.96	1426.14	211.894	1365.98	1154.12	228.449	1634.29	1315.21	238.222	1724.13	1113.62	292.666	1371.46	1248.05	74.6973	1578.58	1382.5	-47.048	1564.9	1151.42	-60.3499	1558.2	1051.99	-53.3309	1664.21	935.374	8.54337	1709.9	853.293	-52.6565	1676.5	821.38	-34.941	1749.26	781.384
10918	0	177.452	1684.33	1565.05	282.312	1679.67	1568.46	156.305	1520.11	1552.21	274.408	1511.98	1556.72	225.497	1485.9	1424.8	212.235	1374.88	1152.77	229.016	1643.15	1313.81	238.738	1732.89	1112.35	293.144	1380.47	1246.46	75.5732	1587.72	1381.28	-46.2526	1575.25	1150.01	-59.5342	1569.23	1050.48	-51.8571	1675.4	934.388	10.2162	1720.77	852.169	-51.5961	1688.04	820.337	-32.9661	1760.79	780.616
10919	0	178.306	1693	1563.9	283.281	1688.48	1567.2	157.302	1528.91	1550.89	275.374	1520.78	1555.33	226.169	1494.78	1423.52	212.596	1383.93	1151.49	229.711	1652.13	1312.63	239.047	1741.78	1110.95	293.574	1389.36	1245.1	76.3158	1596.76	1380.15	-45.5354	1585.45	1148.76	-58.6119	1580.33	1049.21	-50.4015	1686.68	933.403	12.2042	1731.57	851.024	-49.4299	1699.42	819.04	-31.2006	1772.02	779.657
10920	0	179.365	1701.87	1562.71	284.317	1697.34	1565.86	158.354	1537.66	1549.58	276.435	1529.62	1553.84	227.032	1503.78	1422.14	213.092	1392.98	1150.08	230.54	1661.23	1311.39	239.499	1750.92	1109.58	294.215	1398.5	1243.65	77.0581	1605.71	1378.89	-44.5491	1595.89	1147.45	-57.8503	1591.37	1047.91	-48.7561	1697.93	932.268	13.8585	1742.31	849.801	-48.6545	1711.04	818.098	-29.1529	1783.24	778.55
10921	0	180.513	1710.74	1561.54	285.397	1706.21	1564.34	159.45	1546.45	1548.26	277.634	1538.43	1552.35	227.896	1512.75	1420.62	213.752	1402.18	1148.54	231.166	1670.26	1309.97	240.036	1760.23	1108.27	295.054	1407.63	1241.92	77.9618	1614.88	1377.64	-43.5204	1606.46	1145.87	-56.7447	1602.44	1046.38	-47.1464	1708.92	930.921	15.9812	1752.23	847.916	-47.3773	1722.3	816.866	-27.1888	1794.24	777.195
10922	0	181.499	1719.58	1560.25	286.475	1715.03	1563.04	160.595	1555.39	1546.99	278.589	1547.42	1550.79	228.782	1521.84	1419.14	214.477	1411.49	1146.96	232.057	1679.45	1308.69	240.427	1769.56	1106.8	295.702	1416.87	1240.24	78.8031	1624.04	1376.31	-42.4271	1617	1144.4	-55.5715	1613.55	1044.84	-45.3199	1720.22	929.493	17.8394	1763.02	846.468	-45.1634	1733.28	815.288	-25.2317	1805.29	775.812
10923	0	182.715	1728.47	1559.14	287.597	1723.95	1561.61	161.626	1564.21	1545.72	279.635	1556.24	1549.33	229.662	1530.93	1417.79	215.156	1420.86	1145.35	232.739	1688.68	1307.34	240.993	1778.96	1105.62	296.5	1426.16	1238.65	79.6774	1633.11	1375.05	-41.2125	1627.69	1142.91	-54.4851	1624.51	1043.48	-43.5875	1731.01	928.153	19.6409	1773.35	844.627	-43.7022	1744.39	813.941	-23.1325	1816.08	774.351
10924	0	184.012	1737.37	1558.02	288.982	1732.72	1560.47	162.763	1573.12	1544.5	280.899	1564.93	1547.96	230.484	1539.98	1416.26	215.983	1430.32	1143.79	233.594	1697.93	1306.15	241.527	1788.49	1104.37	297.435	1435.56	1237.07	80.4934	1642.2	1373.79	-39.89	1638.42	1141.21	-53.2055	1635.51	1042.04	-41.7258	1742.03	926.64	21.7465	1783.82	842.931	-42.283	1755.3	812.417	-20.7449	1826.74	772.87
10925	0	185.384	1746.3	1557.01	290.3	1741.53	1559.21	163.923	1582.04	1543.2	282.062	1573.76	1546.47	231.439	1549.09	1414.74	216.783	1439.97	1142.1	234.318	1707.24	1304.96	242.076	1798.19	1103.24	298.359	1445.05	1235.37	81.5793	1651.44	1372.55	-38.5097	1649.01	1139.81	-51.691	1646.44	1040.45	-39.9217	1752.85	925.176	23.5031	1793.68	841.19	-41.4193	1766.37	811.282	-18.989	1837.32	771.234
10926	0	186.758	1755.2	1556.12	291.876	1750.31	1558.14	165.221	1591.1	1542.05	283.339	1582.45	1545.1	232.421	1558.25	1413.38	217.554	1449.71	1140.41	235.358	1716.8	1304.02	242.699	1807.82	1102.32	299.111	1454.64	1233.67	82.446	1660.71	1371.48	-37.0723	1659.65	1138.49	-49.8508	1657.26	1039	-37.8209	1763.42	923.961	25.4151	1803.73	839.532	-40.0801	1777.2	810.028	-16.956	1847.75	769.776
10927	0	188.348	1764.18	1555.17	293.334	1759.1	1556.96	166.433	1599.97	1540.95	284.612	1591.3	1543.74	233.449	1567.43	1411.95	218.37	1459.64	1138.76	236.265	1726.26	1302.91	243.427	1817.61	1101.3	300.049	1464.37	1231.92	83.4065	1670.01	1370.42	-35.5813	1670.11	1137.1	-48.3342	1667.82	1037.66	-36.2666	1773.95	922.607	27.1203	1814.14	838.298	-38.2653	1787.66	808.593	-14.9342	1857.95	768.177
10928	0	189.896	1773.17	1554.31	294.834	1767.93	1555.9	167.797	1608.94	1539.72	285.988	1600.24	1542.25	234.494	1576.67	1410.46	219.151	1469.73	1136.96	237.318	1735.78	1301.95	244.379	1827.55	1100.57	300.971	1474.16	1230.11	84.4169	1679.4	1369.47	-34.0554	1680.59	1136.1	-46.3775	1678.04	1036.42	-34.0893	1784.4	921.506	28.8282	1823.43	836.368	-37.7258	1798.23	807.693	-13.0589	1868.06	766.761
10929	0	191.223	1781.98	1553.63	296.469	1777.12	1555.1	169.301	1617.86	1538.54	287.44	1609.06	1541.01	235.802	1585.97	1409.26	219.918	1480.11	1135.15	238.408	1745.3	1301.27	245.207	1837.68	1099.96	301.85	1484	1228.33	85.6282	1689.03	1368.69	-32.4042	1690.96	1134.84	-44.5109	1688.16	1035.17	-32.7373	1794.54	920.396	30.3493	1832.92	835.054	-36.6801	1808.52	806.747	-11.259	1877.91	765.514
10930	0	192.636	1790.78	1552.9	297.743	1785.88	1554.34	170.647	1626.63	1537.49	288.87	1617.92	1539.96	236.846	1595.04	1407.78	220.774	1490.66	1133.38	239.558	1755.02	1300.47	246.186	1847.86	1099.45	302.813	1493.89	1226.52	86.9936	1698.54	1367.91	-30.786	1701.18	1134.01	-42.5892	1698.06	1034.29	-31.2217	1804.29	919.439	31.4358	1842.7	833.936	-35.5529	1818.29	805.672	-9.85495	1887.57	764.092
10931	0	194.128	1799.68	1552.47	299.263	1794.94	1553.81	172.309	1635.5	1536.6	290.492	1626.98	1538.81	238.256	1604.37	1406.64	221.555	1501.32	1131.73	241	1764.85	1299.86	247.467	1858.06	1099.02	303.862	1503.96	1224.62	88.3935	1708.06	1367.23	-29.1224	1711.25	1133.2	-40.6434	1707.83	1033.55	-29.6181	1813.95	918.225	33.0209	1851.93	832.041	-33.704	1827.28	804.164	-8.75418	1896.77	762.574
10932	0	195.634	1808.59	1552.26	300.636	1803.98	1553.53	174.074	1644.45	1535.82	292.238	1636.01	1538.03	239.732	1613.72	1405.6	222.553	1512.05	1130.26	242.562	1774.78	1299.54	248.598	1868.54	1098.81	304.875	1513.99	1223.03	90.0802	1717.88	1366.74	-27.4972	1721.31	1132.6	-38.5173	1717.71	1032.91	-28.1775	1823.38	917.067	34.2316	1861.34	830.532	-33.3009	1836.29	803.355	-7.95226	1905.64	761.348
10933	0	196.958	1817.39	1552.53	302.071	1813.06	1553.8	175.753	1653.32	1535.35	293.996	1645.04	1537.7	241.298	1623.22	1405.08	223.492	1522.61	1129.31	244.072	1784.65	1299.66	249.773	1878.99	1099	305.737	1524.07	1221.92	91.6294	1727.89	1366.76	-25.838	1731.23	1132.3	-36.7214	1727.47	1032.54	-26.6734	1832.35	916.271	34.837	1870.19	829.427	-32.426	1844.71	802.377	-7.61462	1914.27	760.235
10934	0	198.472	1826.33	1553.07	303.606	1822.07	1554.52	177.492	1662.25	1535.19	295.812	1654.16	1537.6	242.676	1632.86	1404.85	224.254	1533.04	1128.79	245.738	1794.72	1300	251.114	1889.73	1099.5	306.662	1534.19	1221.29	93.0956	1737.83	1366.88	-24.1718	1741	1132.26	-34.8552	1737.16	1032.61	-26.1327	1841.45	915.736	35.6077	1878.94	828.446	-31.5749	1852.78	801.63	-7.98383	1922.41	759.29
10935	0	200.197	1835.32	1553.86	305.314	1831.14	1555.37	179.339	1671.27	1535.26	297.53	1663.33	1537.51	244.109	1642.72	1404.85	224.857	1543.11	1128.79	247.425	1804.81	1300.59	252.679	1900.62	1100.15	307.509	1544.42	1220.81	94.6208	1748.23	1367.58	-22.6532	1750.67	1132.63	-33.1487	1746.86	1032.95	-24.6484	1850.42	915.152	36.0789	1887.38	827.478	-30.8614	1860.51	800.989	-7.91383	1930.15	758.333
10936	0	202.116	1844.33	1555.1	307.266	1840.19	1556.49	181.21	1680.36	1535.61	299.482	1672.5	1537.76	245.48	1652.63	1405.33	225.409	1553.32	1129.09	249.181	1814.8	1301.43	254.193	1911.53	1101.34	308.179	1554.52	1220.97	96.3609	1758.6	1368.47	-21.0761	1760.48	1133.47	-31.334	1756.55	1033.51	-24.1301	1858.79	915.066	36.6966	1895.53	826.816	-30.3078	1867.91	800.826	-8.22401	1937.51	757.483
10937	0	203.911	1853.38	1556.64	309.192	1849.3	1557.82	183.051	1689.72	1536.4	301.297	1681.62	1538.44	246.871	1662.56	1406.23	225.657	1563.51	1129.9	250.878	1824.84	1302.6	255.966	1922.39	1102.93	308.632	1564.49	1221.48	97.9615	1769.16	1369.76	-19.6575	1770.12	1134.51	-29.7059	1766.21	1034.51	-23.0988	1867.29	915.459	37.0385	1903.43	826.607	-29.9042	1875.06	800.844	-8.62514	1944.45	757.205
10938	0	205.864	1862.53	1558.44	311.184	1858.31	1559.42	184.778	1698.85	1537.6	303.043	1690.74	1539.33	248.105	1672.48	1407.46	225.995	1574.04	1130.97	252.516	1834.89	1304.03	257.446	1933.22	1104.5	309.028	1574.51	1222.36	99.508	1779.62	1371.34	-18.1225	1779.95	1135.96	-27.9677	1775.87	1036.05	-22.7789	1875.4	915.626	37.2391	1911.22	826.42	-29.5839	1881.92	801.284	-9.14064	1951.15	756.846
10939	0	207.997	1871.83	1560.27	313.257	1867.45	1560.98	186.601	1708.31	1539	304.887	1699.89	1540.43	249.356	1682.23	1408.82	226.128	1584.52	1132.12	254.253	1844.9	1305.72	259.208	1943.92	1106.34	309.446	1584.57	1223.36	101.223	1790.24	1373.16	-16.604	1789.73	1137.59	-26.4896	1785.49	1037.86	-22.0325	1883.79	916.285	37.6826	1918.48	826.311	-29.5381	1888.79	801.949	-9.30508	1957.54	756.603
10940	0	210.108	1881.2	1562.29	315.24	1876.6	1562.63	188.298	1717.7	1540.72	306.515	1709.19	1541.75	250.485	1691.72	1410.29	226.259	1595.23	1133.39	255.94	1854.72	1307.4	260.863	1954.3	1108.44	309.722	1594.49	1224.39	102.999	1800.67	1375.09	-15.036	1799.77	1139.61	-25.1544	1795.25	1040.06	-21.3607	1891.88	917.272	37.9991	1925.46	826.215	-29.48	1895.53	802.936	-9.33915	1963.73	756.512
10941	0	212.084	1890.53	1564.59	317.065	1885.71	1564.6	189.847	1727.08	1542.95	308.11	1718.32	1543.65	252.061	1701.44	1412.21	226.511	1605.92	1134.85	257.634	1864.39	1309.69	262.398	1964.55	1110.95	310.027	1604.5	1225.76	104.597	1810.75	1377.38	-13.6863	1809.9	1142.08	-23.7638	1804.84	1042.77	-20.2203	1900.41	918.723	38.1773	1932.3	826.843	-28.3297	1902.09	804.155	-9.5519	1969.6	756.846
10942	0	213.942	1899.94	1566.96	319.136	1894.96	1566.95	191.455	1736.42	1545.35	309.716	1727.48	1545.81	253.182	1710.63	1414	226.72	1616.61	1136.4	259.014	1874.06	1311.99	263.925	1974.35	1113.66	310.527	1614.47	1227.23	106.275	1820.67	1379.98	-12.3768	1820.15	1144.73	-22.7495	1814.27	1045.64	-19.9776	1907.69	920.488	38.491	1938.79	827.813	-28.6302	1908.65	805.971	-9.7374	1975.29	757.561
10943	0	215.819	1909.21	1569.43	320.85	1904.11	1569.07	193.006	1745.65	1547.7	311.317	1736.62	1547.98	254.429	1719.98	1415.75	227.169	1627.17	1137.77	260.478	1883.51	1314.57	265.443	1984.01	1116.7	311.123	1624.37	1228.5	107.666	1830.16	1382.79	-11.2629	1830.18	1147.92	-21.7051	1823.67	1048.65	-19.2601	1915.67	922.875	38.2187	1945.45	829.417	-29.6214	1915.54	808.291	-9.65115	1980.99	758.517
10944	0	217.374	1918.39	1571.78	322.561	1913.26	1571.41	194.765	1755.44	1550.16	312.837	1745.81	1550.38	255.726	1729.15	1417.67	227.824	1637.46	1139.27	261.842	1892.84	1317.27	266.695	1993.67	1119.7	311.91	1634.24	1229.95	109.173	1839.53	1385.67	-10.1985	1840.4	1151.11	-20.9355	1832.79	1051.76	-18.554	1923.6	925.422	38.6216	1951.63	830.931	-30.4356	1922.27	811.03	-9.7573	1986.53	759.791
10945	0	218.967	1927.47	1574.14	324.132	1922.23	1573.59	196.038	1764.66	1552.7	314.121	1754.85	1552.68	257.152	1738.31	1419.59	228.678	1647.53	1140.95	262.959	1901.88	1319.58	267.617	2002.4	1122.13	312.808	1644.12	1231.46	110.318	1848.51	1388.16	-9.25896	1850.49	1154.16	-20.3864	1841.65	1054.95	-18.5256	1931.31	928.034	38.6587	1957.86	832.596	-29.9543	1929.3	813.128	-9.01045	1992.01	760.877
10946	0	220.524	1936.63	1576.3	325.591	1931.25	1575.58	197.417	1773.77	1555.02	315.464	1763.84	1554.93	258.473	1747.34	1421.32	229.881	1657.23	1142.54	264.381	1911.43	1322.07	268.656	2012.13	1125.06	313.76	1653.92	1232.82	111.819	1857.67	1390.91	-8.35102	1860.57	1157.1	-19.6401	1850.43	1057.89	-17.6274	1939.05	930.227	38.6896	1964.35	834.277	-31.0175	1936.49	816.102	-8.82732	1997.77	762.016
10947	0	221.968	1945.64	1578.39	327.164	1940.13	1577.52	198.6	1782.79	1557.14	316.637	1773.05	1556.88	259.812	1756.26	1423.12	231.125	1666.68	1144.06	265.545	1920.51	1324.02	269.286	2021.68	1127.58	314.983	1663.48	1234.22	113.06	1866.51	1393.05	-7.36918	1870.37	1159.93	-19.3161	1858.86	1060.77	-17.2399	1946.92	932.682	38.5823	1971.13	835.928	-30.8747	1943.62	818.125	-8.64667	2003.6	763.205
10948	0	223.445	1954.68	1580.29	328.537	1948.94	1579.25	199.815	1791.82	1559.21	317.856	1781.81	1558.9	261.185	1765.24	1424.76	232.594	1675.92	1145.71	266.548	1929.39	1325.96	269.871	2031	1129.87	316.266	1672.95	1235.66	114.235	1875.29	1395.17	-6.46578	1880.12	1162.37	-18.8823	1867.26	1063.54	-16.8251	1954.4	934.745	38.4745	1978.31	837.77	-32.1161	1950.99	820.887	-8.37534	2009.45	764.26
10949	0	224.976	1963.66	1582.02	329.827	1957.58	1580.8	200.712	1800.68	1561.12	318.748	1790.6	1560.44	262.452	1774.12	1426.35	234.098	1685.07	1147.42	267.38	1938.33	1327.48	270.059	2039.99	1131.34	317.612	1682.45	1236.95	115.177	1883.85	1397.08	-5.70779	1889.56	1164.67	-18.8171	1875.41	1066.07	-16.6273	1962.05	936.769	38.3502	1985.02	839.247	-32.7976	1958.23	823.165	-8.297	2015.54	765.26
10950	0	226.329	1972.45	1583.77	331.31	1966.32	1582.36	201.802	1809.63	1562.73	319.808	1799.07	1561.83	263.607	1783.01	1427.77	235.499	1693.97	1148.85	268.189	1947.24	1329.04	270.255	2048.98	1132.89	318.887	1691.7	1238.25	116.171	1892.5	1398.8	-5.01868	1898.47	1166.55	-18.5526	1883.36	1068.15	-16.8402	1969.62	938.556	38.2396	1990.67	840.416	-33.3954	1965.39	825.004	-8.44903	2021.75	766.285
10951	0	227.482	1981.08	1585.33	332.559	1974.83	1583.84	202.613	1818.38	1564.07	320.653	1807.69	1563.12	264.782	1791.87	1429.01	236.897	1702.68	1150.29	268.767	1955.96	1330.63	270.111	2057.52	1134.25	320.185	1700.8	1239.47	116.884	1900.9	1400.33	-4.51077	1906.93	1168.26	-18.2202	1891.2	1070	-16.7708	1977.06	940.199	37.8211	1997.33	841.751	-33.9196	1972.4	826.645	-8.87424	2027.95	767.356
10952	0	228.652	1989.8	1586.77	333.796	1983.28	1585.21	203.424	1827.01	1565.39	321.338	1816.15	1564.26	265.762	1800.57	1430.37	238.228	1711.21	1151.62	269.307	1964.81	1331.91	270.109	2066.58	1135.57	321.461	1709.76	1240.77	117.524	1909.23	1401.75	-4.14022	1914.95	1169.81	-18.1667	1898.83	1071.61	-16.5756	1984.22	941.474	37.284	2003.8	842.954	-34.5663	1979.09	828.202	-9.6392	2034.27	768.471
10953	0	229.76	1998.31	1588.08	335.093	1991.79	1586.41	204.165	1835.67	1566.59	322.149	1824.67	1565.2	266.927	1809.37	1431.47	239.544	1719.67	1152.85	269.552	1973.36	1332.91	269.88	2075.21	1136.32	322.867	1718.57	1241.98	118.007	1917.35	1402.97	-3.79013	1922.46	1171.05	-18.1637	1906.32	1073.09	-17.2076	1991.17	942.676	36.7516	2010.47	843.987	-34.8286	1985.3	829.433	-10.3666	2040.61	769.373
10954	0	230.841	2006.77	1589.09	336.054	2000.1	1587.26	204.953	1844.29	1567.46	322.95	1833.03	1565.87	267.951	1817.94	1432.29	240.733	1727.94	1153.9	269.981	1981.95	1333.71	269.65	2083.79	1136.89	324.304	1727.25	1242.93	118.691	1925.48	1403.98	-3.38889	1929.46	1171.98	-17.764	1913.74	1074.2	-17.3627	1997.99	943.562	36.3556	2017.26	844.541	-35.2701	1991.46	830.246	-11.3775	2047.06	770.224
10955	0	231.752	2015.22	1590.01	336.971	2008.45	1588.03	205.726	1852.86	1568.32	323.54	1841.42	1566.57	268.891	1826.4	1433.23	241.963	1735.93	1154.87	270.095	1990.32	1334.47	269.24	2092.29	1137.42	325.517	1735.69	1244.01	119.242	1933.34	1404.73	-3.04035	1936.16	1172.65	-17.4172	1921.02	1075.16	-17.463	2004.7	944.254	35.6505	2023.89	845.069	-35.6732	1997.65	830.858	-12.4193	2053.52	771.059
10956	0	232.569	2023.71	1590.8	337.806	2016.79	1588.77	206.236	1861.35	1569.15	324.278	1849.79	1567.35	269.866	1834.8	1434.17	243.206	1743.92	1155.94	270.346	1998.83	1335.05	268.703	2100.55	1137.72	326.832	1744.01	1245.17	119.849	1941.36	1405.48	-2.72651	1942.47	1173.29	-17.1816	1928.17	1076.04	-17.0834	2011.14	944.644	34.9749	2030.65	845.206	-36.1186	2003.56	831.392	-13.8045	2059.98	771.91
10957	0	233.613	2032.24	1591.34	338.635	2025.15	1589.14	206.782	1869.86	1569.89	324.841	1858.15	1567.84	270.783	1843.23	1435.12	244.395	1751.66	1156.85	270.418	2006.93	1335.4	268.375	2108.55	1137.75	328.263	1752.32	1246.09	120.303	1948.93	1406.1	-2.36041	1948.57	1173.77	-16.6244	1935.03	1076.76	-17.77	2017.36	944.98	33.9487	2037.57	845.998	-36.2187	2009.13	831.758	-15.0706	2066.32	772.423
10958	0	234.203	2040.71	1591.88	339.374	2033.57	1589.5	207.461	1878.34	1570.45	325.49	1866.6	1568.29	271.762	1851.46	1435.75	245.808	1759.37	1157.63	270.486	2015.05	1335.88	267.899	2116.55	1137.81	329.548	1760.47	1246.85	120.646	1956.38	1406.64	-2.18299	1954.32	1174.35	-16.1561	1941.63	1077.31	-18.2228	2023.49	945.309	33.4173	2043.31	845.877	-37.1604	2014.97	832.143	-16.3624	2072.67	773.146
10959	0	234.828	2049.1	1592.43	339.996	2041.9	1589.97	207.897	1886.79	1571.04	325.943	1875.02	1568.89	272.694	1859.57	1436.46	246.934	1766.82	1158.42	270.643	2023.07	1336.33	267.309	2124.38	1138.08	330.816	1768.51	1247.78	121.073	1963.68	1407.26	-1.95036	1959.99	1174.99	-15.6944	1947.85	1077.93	-18.3599	2029.56	945.757	32.5866	2049.57	846.286	-37.7871	2020.32	832.564	-17.9125	2078.83	774.062
10960	0	235.481	2057.74	1592.91	340.687	2050.29	1590.4	208.397	1895.26	1571.78	326.238	1883.32	1569.48	273.511	1867.56	1437.12	248.361	1774.43	1159.33	270.611	2030.85	1336.72	266.766	2132.28	1138.4	332.164	1776.6	1248.65	121.443	1970.85	1407.89	-1.90938	1965.66	1175.68	-15.2731	1953.97	1078.68	-18.9845	2035.51	946.37	31.8135	2056.01	846.848	-38.1961	2025.91	833.097	-19.3403	2084.81	775.001
10961	0	235.927	2066.14	1593.19	341.169	2058.74	1590.6	208.882	1903.7	1572.42	326.777	1891.73	1570.11	274.487	1875.57	1437.65	249.45	1781.86	1160.13	270.467	2038.5	1337.04	266.341	2140.06	1138.9	333.286	1784.49	1249.17	121.645	1977.81	1408.44	-1.65213	1971.08	1176.3	-14.7734	1959.83	1079.3	-19.6429	2041.14	946.951	30.9275	2062.09	847.473	-38.7409	2031.2	833.628	-20.6802	2090.69	775.9
10962	0	236.412	2074.68	1593.35	341.592	2067.17	1590.68	209.266	1912.17	1573.07	327.251	1900.15	1570.66	275.268	1883.43	1438.14	250.546	1789.35	1160.61	270.496	2046.26	1337.38	265.871	2147.86	1139.37	334.34	1792.4	1249.67	121.942	1984.88	1409.02	-1.54713	1976.51	1176.95	-14.3093	1965.48	1079.79	-20.2497	2046.66	947.559	30.0041	2067.74	847.891	-39.2256	2036.46	834.206	-22.1217	2096.48	776.78
10963	0	236.693	2083.13	1593.47	341.962	2075.67	1590.87	209.657	1920.63	1573.82	327.505	1908.54	1571.37	275.931	1891.13	1438.73	251.32	1796.69	1161.3	270.433	2053.83	1337.64	265.305	2155.48	1139.83	335.311	1800.18	1250.29	122.179	1991.95	1409.57	-1.36427	1982.09	1177.59	-13.8262	1971.13	1080.3	-20.6997	2052.26	948.082	29.437	2074.09	848.507	-39.6466	2041.71	834.782	-23.3544	2102.08	777.5
10964	0	236.912	2091.58	1593.44	342.177	2084.1	1590.92	210.015	1929.01	1574.5	327.959	1917.06	1572.17	276.665	1898.93	1439.23	252.221	1804	1161.96	270.206	2061.44	1337.8	264.695	2162.96	1140.16	336.07	1807.9	1250.8	122.235	1998.85	1409.98	-1.42242	1987.55	1178.16	-13.7526	1976.51	1080.96	-21.4197	2057.5	948.595	28.7292	2079.89	848.834	-40.092	2047.09	835.477	-25.066	2107.69	778.174
10965	0	237.183	2099.96	1593.36	342.482	2092.71	1590.71	210.333	1937.17	1575.15	328.495	1925.48	1572.78	277.262	1906.52	1439.42	252.824	1811.36	1162.37	270.053	2068.88	1337.86	264.122	2170.33	1140.26	336.873	1815.63	1251.12	122.384	2005.78	1410.46	-1.20294	1993.02	1178.48	-13.5247	1981.8	1081.41	-21.892	2063.1	948.949	27.9199	2085.63	849.163	-40.3712	2052.23	835.809	-25.9861	2113.21	778.588
10966	0	237.407	2108.34	1593.3	342.608	2100.99	1590.61	210.651	1945.55	1575.71	328.715	1933.85	1573.46	277.751	1914.05	1439.75	253.286	1818.51	1162.74	269.843	2076.21	1338.04	263.511	2177.6	1140.41	337.53	1823.26	1251.45	122.373	2012.64	1410.78	-1.1202	1998.54	1178.85	-13.3004	1987.26	1081.69	-22.5625	2068.28	949.287	27.4176	2091.59	849.387	-40.1385	2057.36	835.951	-26.91	2118.47	779.014
10967	0	237.62	2116.75	1593.16	342.833	2109.49	1590.46	210.743	1953.88	1576.37	328.877	1942.14	1574.06	278.044	1921.56	1440.11	253.746	1825.74	1163.14	269.669	2083.64	1338.25	262.868	2184.61	1140.57	337.854	1830.7	1251.79	122.442	2019.66	1411.06	-1.30182	2003.98	1179.22	-13.4411	1992.61	1082.12	-23.0043	2073.85	949.492	27.2399	2097.24	849.496	-40.6844	2062.64	836.409	-27.7653	2123.76	779.32
10968	0	237.851	2125.08	1592.9	342.984	2117.72	1590.12	210.803	1962.19	1576.87	329.01	1950.36	1574.48	278.394	1929.2	1440.24	254.21	1832.93	1163.4	269.629	2090.96	1338.23	262.275	2191.4	1140.4	338.41	1838.2	1251.93	122.326	2026.52	1411.21	-1.40879	2009.54	1179.51	-13.5029	1998.31	1082.44	-23.727	2079.07	949.652	26.4293	2102.92	849.766	-40.8533	2068	836.609	-28.3615	2129.06	779.329
10969	0	238.064	2133.47	1592.73	343.206	2125.96	1589.88	210.886	1970.53	1577.15	329.087	1958.61	1574.71	278.769	1936.84	1440.25	254.651	1840.06	1163.51	269.354	2098.26	1338.29	261.488	2198.2	1140.25	338.846	1845.68	1252.06	122.22	2033.34	1411.26	-1.56513	2015.22	1179.75	-13.7155	2003.71	1082.44	-24.1484	2084.65	949.73	25.867	2108.62	849.714	-41.0422	2073.17	836.565	-28.5289	2134.3	779.27
10970	0	238.168	2141.78	1592.56	343.404	2134.05	1589.69	210.773	1978.76	1577.55	328.899	1966.73	1575.05	278.833	1944.08	1440.43	254.978	1847.12	1163.64	268.933	2105.57	1338.34	260.851	2205.14	1140.31	339.2	1853.06	1252.27	122.036	2040.16	1411.36	-1.937	2020.93	1180.02	-13.9962	2009.39	1082.48	-24.8461	2089.99	949.914	24.954	2114.56	850.464	-41.8548	2078.71	836.846	-29.1907	2139.5	779.201
10971	0	238.282	2150.06	1592.23	343.545	2142.11	1589.32	210.659	1987.26	1577.9	328.714	1974.79	1575.3	278.85	1951.44	1440.39	255.338	1854.28	1163.79	268.537	2112.9	1338.19	260.156	2212.14	1140.25	339.364	1860.37	1252.36	121.71	2046.99	1411.27	-2.46786	2026.81	1180.15	-14.5162	2015.28	1082.57	-25.4721	2095.59	949.934	24.9151	2119.99	850.313	-41.702	2084.3	836.522	-29.3782	2144.8	779.069
10972	0	238.303	2158.38	1591.61	343.659	2150.29	1588.66	210.339	1995.52	1578.15	328.473	1982.85	1575.47	278.963	1958.85	1440.2	255.677	1861.42	1163.82	268.325	2120.07	1338.09	259.425	2219.18	1139.88	339.798	1867.73	1252.27	121.517	2053.96	1411.14	-2.9999	2032.91	1180.1	-15.1288	2021.12	1082.36	-25.7108	2101.44	949.574	24.5863	2125.45	850.293	-42.5009	2089.77	836.519	-29.505	2150.09	778.604
10973	0	238.215	2166.62	1590.97	343.45	2158.23	1587.94	210.013	2003.73	1578.29	328.064	1990.89	1575.59	278.833	1966.3	1440.05	255.964	1868.57	1163.61	267.801	2127.23	1337.58	258.783	2226.28	1139.49	340.021	1875.15	1252.25	121.166	2060.99	1410.69	-3.52256	2039.12	1179.91	-15.6452	2027.08	1082.14	-26.1803	2107.02	949.306	23.9212	2131.16	850.178	-42.5998	2095.4	836.026	-28.8798	2155.42	778.023
10974	0	237.954	2174.89	1590.18	343.084	2166.35	1587.19	209.612	2011.92	1578.4	327.551	1998.88	1575.83	278.593	1973.8	1439.92	256.05	1875.68	1163.6	267.249	2134.44	1336.91	257.933	2233.44	1138.82	339.993	1882.38	1252.26	120.822	2068.31	1410.36	-4.1571	2045.42	1179.53	-16.3102	2033.15	1081.93	-26.5744	2112.89	948.684	24.334	2136.64	849.283	-42.4512	2100.93	835.373	-29.1181	2160.88	777.349
10975	0	237.545	2182.95	1589.28	342.645	2174.64	1586.46	209.083	2019.98	1578.4	327.036	2007.04	1575.84	278.289	1981.43	1439.62	256.146	1882.86	1163.53	266.863	2141.83	1336.27	257.344	2240.81	1138.1	339.923	1889.76	1252.03	120.336	2075.56	1409.78	-4.98419	2051.8	1179.11	-16.936	2039.39	1081.66	-26.6672	2119.04	948.046	24.1951	2142	848.607	-42.839	2106.52	834.901	-29.0283	2166.36	776.501
10976	0	237.087	2191.17	1588.24	341.944	2182.65	1585.46	208.702	2028.01	1578.01	326.584	2015.1	1575.6	278.035	1989.14	1439.08	256.347	1890.21	1163.19	266.245	2149.12	1335.28	256.668	2248.21	1137.15	339.838	1897.16	1251.7	119.977	2082.93	1409.23	-5.46828	2058.43	1178.72	-17.5983	2045.53	1081.27	-26.7934	2124.95	947.29	24.0807	2147.45	847.84	-42.8073	2112.02	833.942	-28.8059	2171.96	775.674
10977	0	236.113	2199.03	1587.33	341.145	2190.7	1584.82	208.123	2035.87	1577.57	325.987	2023.1	1575.42	277.679	1996.76	1438.65	256.143	1897.34	1162.81	265.832	2156.34	1334.66	256.053	2255.57	1136.6	339.6	1904.45	1251.42	119.573	2090.41	1408.68	-6.01765	2065.21	1178.35	-18.2297	2051.81	1080.75	-27.2141	2130.69	946.617	24.009	2152.82	847.201	-42.9856	2117.75	833.269	-28.7441	2177.43	774.915
10978	0	234.977	2206.93	1586.49	340.209	2198.87	1584.23	207.252	2043.74	1577.02	325.227	2031.19	1575.17	277.034	2004.39	1438.16	255.889	1904.64	1162.44	265.147	2163.68	1333.79	255.365	2262.99	1135.76	339.106	1911.74	1251.07	118.908	2097.86	1408.14	-6.64489	2072.07	1177.96	-18.9823	2058.18	1080.32	-27.5903	2136.53	946.019	23.8315	2158.19	846.561	-43.4259	2123.35	832.564	-28.9641	2182.99	774.158
10979	0	234.014	2214.87	1585.51	339.096	2206.92	1583.43	206.464	2051.6	1576.33	324.417	2039.24	1574.68	276.58	2012.05	1437.5	255.661	1911.94	1162.1	264.588	2171.02	1332.83	254.784	2270.31	1134.92	338.759	1919.19	1250.6	118.26	2105.38	1407.48	-7.39521	2078.99	1177.47	-19.4856	2064.77	1079.77	-27.8687	2142.66	945.14	23.4862	2163.92	845.808	-43.7267	2128.91	831.65	-28.7819	2188.24	773.046
10980	0	232.728	2222.8	1584.4	337.948	2214.97	1582.48	205.636	2059.61	1575.4	323.548	2047.37	1574	275.943	2019.77	1436.61	255.113	1919.05	1161.06	263.965	2178.54	1331.73	254.133	2277.78	1133.67	338.247	1926.64	1249.92	117.633	2113.04	1406.44	-7.95566	2085.96	1176.58	-19.9912	2071.29	1078.77	-28.1701	2148.86	943.986	23.2298	2169.21	844.669	-44.1766	2134.48	830.484	-29.2372	2193.52	771.842
10981	0	231.411	2230.72	1583.38	336.778	2223.25	1581.66	204.538	2067.53	1574.51	322.46	2055.4	1573.36	275.139	2027.54	1435.8	254.491	1926.38	1160.42	263.146	2185.97	1330.52	253.496	2285.16	1132.56	337.598	1933.99	1249.3	116.798	2120.59	1405.31	-8.65838	2092.97	1175.41	-20.5841	2077.99	1077.78	-28.6346	2154.86	942.793	22.8584	2174.81	843.368	-44.7442	2140.17	829.241	-29.1359	2198.71	770.247
10982	0	230.265	2238.83	1582.13	335.566	2231.26	1580.77	203.387	2075.47	1573.56	321.424	2063.47	1572.75	274.45	2035.32	1435.11	253.886	1933.77	1159.82	262.445	2193.5	1329.29	252.966	2292.58	1131.26	336.983	1941.39	1248.78	116.001	2128.49	1404.31	-8.98442	2100.21	1174.12	-21.2178	2084.76	1076.63	-29.0027	2161.01	941.195	22.702	2180.79	841.716	-44.5917	2145.93	827.645	-29.2167	2204.04	768.47
10983	0	229.084	2246.9	1580.69	334.314	2239.44	1579.53	202.351	2083.57	1572.43	320.412	2071.66	1571.74	273.534	2043.22	1434.05	253.289	1941.21	1158.96	261.561	2201.15	1327.8	252.364	2300.01	1129.56	336.29	1949	1247.89	115.161	2136.35	1402.96	-9.41688	2107.6	1172.72	-21.8209	2091.52	1075.42	-29.5036	2167.18	939.447	22.415	2186.36	839.802	-45.01	2151.73	826.073	-29.3485	2209.35	766.53
10984	0	227.794	2255.02	1579.34	332.998	2247.66	1578.27	201.193	2091.59	1571.09	319.064	2079.7	1570.75	272.43	2051.1	1432.93	252.438	1948.76	1157.98	260.654	2208.78	1326.31	251.757	2307.43	1127.93	335.398	1956.46	1246.99	114.213	2144.3	1401.43	-10.008	2114.85	1170.97	-22.2539	2098.47	1073.9	-29.9711	2173.53	937.61	21.9919	2192.19	837.747	-45.5148	2157.34	824.309	-29.7632	2214.9	764.319
10985	0	226.301	2263.26	1578.05	331.558	2255.73	1577.23	199.685	2099.79	1569.95	317.687	2087.97	1569.75	271.324	2059.13	1432.08	251.635	1956.33	1157.11	259.74	2216.52	1324.98	251.146	2314.99	1126.47	334.336	1963.98	1246.2	113.12	2152.23	1399.99	-10.8277	2122.12	1169.32	-22.6662	2105.49	1072.33	-30.3447	2179.97	935.676	21.4618	2198.27	835.792	-46.2899	2163.34	822.63	-30.2581	2220.35	762.224
10986	0	224.772	2271.36	1576.71	330.088	2263.97	1576.03	198.235	2107.98	1568.72	316.323	2096.18	1568.69	269.988	2067.21	1430.95	250.788	1963.86	1156.23	258.818	2224.35	1323.53	250.551	2322.54	1124.93	333.352	1971.67	1245.38	112.04	2160.27	1398.62	-11.4633	2129.69	1167.73	-23.2195	2112.51	1070.7	-30.8306	2186.43	933.701	20.648	2204	833.719	-46.8763	2169.14	820.826	-30.7614	2225.79	760.087
10987	0	223.262	2279.69	1575.38	328.588	2272.37	1574.83	196.898	2116.14	1567.23	314.953	2104.37	1567.44	268.943	2075.3	1429.84	249.911	1971.65	1155.13	257.72	2232.1	1321.96	249.969	2330.34	1123.42	332.81	1979.84	1244.58	110.868	2168.43	1396.99	-12.025	2137.39	1166.11	-23.5521	2119.7	1068.99	-31.0646	2192.93	931.835	20.4465	2209.63	831.457	-46.7862	2174.95	818.736	-31.3887	2231.35	757.851
10988	0	221.558	2287.77	1573.99	326.854	2280.51	1573.64	195.392	2124.3	1565.69	313.412	2112.68	1566.34	267.473	2083.34	1428.65	248.915	1979.28	1154.08	256.646	2239.96	1320.5	249.202	2338.11	1121.82	331.617	1987.66	1243.7	109.62	2176.58	1395.43	-12.7516	2145.07	1164.26	-24.0871	2126.87	1067.12	-31.8506	2199.29	929.703	19.8537	2215.71	829.358	-47.1557	2180.84	816.791	-31.852	2236.83	755.725
10989	0	219.736	2296.06	1572.48	324.861	2288.46	1572.56	193.681	2132.55	1564.34	311.725	2121.05	1565.24	266.122	2091.52	1427.6	247.977	1987.11	1153.17	255.638	2247.99	1319.06	248.646	2346.12	1120.25	330.483	1995.43	1242.9	108.25	2185.1	1393.89	-13.7773	2152.67	1162.47	-24.5734	2134.16	1065.38	-32.6023	2205.69	927.708	19.3533	2222.15	827.417	-48.0594	2187	815.001	-32.3224	2242.64	753.643
10990	0	217.827	2304.36	1571.12	323.16	2297.2	1571.43	191.92	2140.89	1563.01	310.047	2129.46	1564.06	264.641	2099.86	1426.58	246.842	1994.94	1152.21	254.687	2256.17	1317.63	248.089	2354.13	1118.74	329.205	2003.37	1241.94	106.87	2193.4	1392.22	-14.3917	2160.65	1160.76	-25.0301	2141.5	1063.71	-33.1559	2212.22	925.801	18.8953	2228.5	825.417	-48.54	2193.11	813.074	-32.8828	2248.3	751.269
10991	0	215.77	2312.7	1569.64	321.078	2305.61	1570.12	190.177	2149.13	1561.42	308.358	2138	1562.82	263.277	2108.07	1425.29	245.603	2002.96	1150.9	253.375	2264.01	1315.96	247.395	2362.17	1117.25	327.874	2011.33	1240.83	105.63	2201.92	1390.76	-15.2152	2168.6	1158.87	-25.6674	2148.79	1062.04	-33.6807	2218.88	923.578	18.4732	2234.7	823.209	-48.7218	2199.01	810.99	-33.3338	2253.97	748.831
10992	0	213.789	2321.15	1568.18	319.025	2314.16	1569.05	188.282	2157.46	1560	306.301	2146.38	1561.9	261.513	2116.37	1424.21	244.278	2011.3	1149.73	252.005	2271.93	1314.31	246.626	2370.43	1115.74	326.36	2019.48	1240.04	104.212	2210.19	1389.02	-16.142	2176.41	1156.94	-26.3845	2156.25	1060.27	-34.2693	2225.72	921.451	17.8515	2240.97	821.075	-49.5233	2205.27	809.122	-33.6605	2259.96	746.463
10993	0	211.651	2329.59	1566.85	316.947	2322.68	1568.13	186.277	2165.94	1558.79	304.398	2154.89	1560.93	259.857	2124.86	1423.23	243.29	2020.03	1148.84	250.881	2280.22	1313.06	245.876	2378.61	1114.3	325.177	2027.64	1239.24	102.776	2218.86	1387.42	-17.1495	2184.54	1155.24	-27.2005	2163.93	1058.67	-34.8867	2232.67	919.488	17.4288	2247.53	819.032	-49.9733	2211.78	807.249	-34.2657	2266.16	744.327
10994	0	209.423	2338.07	1565.47	314.877	2331.24	1567.05	184.156	2174.4	1557.49	302.332	2163.44	1559.99	258.327	2133.28	1422.04	241.89	2028.36	1147.59	249.627	2288.43	1311.79	245.156	2386.78	1112.88	323.895	2036.03	1238.12	101.275	2227.42	1386.04	-18.2134	2192.46	1153.51	-27.9609	2171.69	1057	-35.5439	2239.78	917.447	17.1257	2254.14	816.99	-50.0596	2218.31	805.289	-34.6088	2272.18	742.151
10995	0	207.423	2346.71	1564.37	312.729	2339.82	1566.11	182.182	2183.02	1556.14	300.14	2172.03	1559.09	256.434	2141.65	1420.87	240.363	2036.91	1146.24	248.195	2296.67	1310.48	244.464	2395.2	1111.81	322.348	2044.34	1237.13	99.6748	2235.78	1384.57	-19.436	2200.46	1151.89	-28.8577	2179.43	1055.17	-36.1827	2246.99	915.626	16.7701	2260.8	815.073	-50.9597	2224.99	803.338	-35.044	2278.33	739.986
10996	0	205.226	2355.23	1563.22	310.472	2348.26	1565.39	179.723	2191.65	1555.07	297.86	2180.52	1558.31	254.833	2150.19	1419.93	238.801	2045.68	1145.1	246.656	2305.13	1309.58	243.385	2403.51	1110.84	320.809	2052.87	1236.26	97.9697	2244.26	1383.15	-20.6141	2208.64	1150.38	-29.8552	2187.25	1053.58	-36.9044	2254.39	913.904	16.1208	2267.65	813.381	-51.1548	2231.8	801.447	-35.4676	2284.76	737.981
10997	0	202.795	2363.85	1562.06	308.258	2356.86	1564.59	177.335	2200.31	1554.1	295.359	2189.12	1557.62	252.779	2158.77	1418.97	237.408	2054.31	1144.15	245.122	2313.64	1308.52	242.323	2412.1	1109.65	319.315	2061.36	1235.46	96.0653	2252.95	1381.73	-22.0009	2216.88	1148.73	-30.8203	2195.3	1052.1	-37.7592	2261.77	912.051	15.3979	2274.67	811.718	-52.3871	2238.66	799.938	-35.8094	2291.38	736.041
10998	0	200.66	2372.61	1560.83	305.888	2365.66	1563.59	174.985	2209.02	1552.97	293.024	2197.76	1556.84	250.955	2167.37	1417.85	235.772	2063.36	1142.79	243.515	2322.22	1307.34	241.239	2420.78	1108.62	317.638	2070.08	1234.26	94.2071	2261.69	1380.38	-23.2446	2225.28	1147.19	-32.0403	2203.28	1050.58	-38.618	2269.25	910.218	14.7142	2281.62	809.702	-52.906	2245.83	798.144	-36.1526	2298.18	733.916
10999	0	198.29	2381.28	1559.81	303.369	2374.2	1562.8	172.538	2217.67	1551.82	290.52	2206.36	1556.06	248.907	2176.13	1416.8	234.169	2072.43	1141.37	241.734	2330.72	1306.18	240.015	2429.52	1107.71	315.826	2078.89	1233.19	92.3221	2270.44	1378.97	-24.6491	2233.88	1145.69	-33.1596	2211.29	1049.08	-39.0842	2276.98	908.578	13.9963	2288.68	807.921	-53.3413	2253	796.365	-36.6025	2305.09	732.017
11000	0	195.611	2390.02	1558.82	300.945	2382.98	1562.23	170.039	2226.35	1550.91	287.959	2215.13	1555.42	246.747	2184.82	1415.84	232.607	2081.67	1140.32	239.984	2339.48	1305.5	238.702	2438.37	1106.87	314.165	2087.73	1232.3	90.4309	2279.39	1377.95	-26.1112	2242.36	1144.28	-34.2525	2219.63	1047.78	-39.9	2284.8	906.922	13.2861	2295.89	806.61	-54.2467	2260.4	794.973	-37.0801	2312.1	730.294
11001	0	192.92	2398.58	1558.08	298.227	2391.63	1561.73	167.325	2234.92	1549.95	285.41	2223.88	1554.81	244.704	2193.63	1414.99	230.916	2091.17	1139.3	238.162	2348.39	1304.62	237.396	2447.41	1106.24	312.387	2096.67	1231.43	88.2954	2288.14	1376.7	-27.7605	2251.1	1142.89	-35.4323	2227.7	1046.63	-41.3612	2292.58	905.445	12.5311	2303.48	805.217	-55.4966	2268.09	793.567	-37.77	2319.3	728.668
11002	0	189.983	2407.22	1557.43	295.297	2400.45	1561.34	164.747	2243.57	1548.83	282.666	2232.65	1554.17	242.486	2202.36	1414.08	229.158	2100.61	1137.84	236.2	2357.27	1303.94	235.878	2456.7	1105.69	310.521	2105.74	1230.32	86.0993	2296.86	1375.69	-29.4117	2259.39	1141.54	-36.6913	2236.03	1045.12	-42.5497	2300.32	904.011	11.3019	2311.21	803.798	-56.428	2275.71	792.143	-38.6828	2326.64	727.214
11003	0	186.943	2415.88	1556.89	292.186	2409.36	1561.33	162.057	2252.37	1548.05	280.022	2241.44	1553.71	240.299	2211.26	1413.39	227.413	2110.3	1136.79	234.285	2366.24	1303.57	234.286	2466.16	1105.33	308.694	2114.82	1229.64	84.0032	2306.04	1374.73	-31.1519	2267.95	1140.32	-38.0336	2244.51	1043.87	-43.6901	2308.41	902.771	10.1286	2319.02	802.525	-57.4475	2283.4	790.81	-39.5988	2334.1	725.711
11004	0	183.629	2424.78	1556.77	289.074	2418.25	1561.44	159.348	2260.93	1547.37	277.315	2250.42	1553.46	238.119	2220.36	1413.09	226.01	2119.92	1136.22	232.093	2375.41	1303.1	232.758	2475.79	1105.32	307.039	2124.21	1229.13	81.8691	2314.97	1374.15	-32.9347	2276.45	1139.53	-39.423	2253.05	1043.01	-45.17	2316.55	901.743	8.69869	2326.9	801.504	-58.7531	2290.94	789.813	-41.0216	2341.67	724.562
11005	0	180.431	2433.3	1556.49	285.771	2427.54	1561.65	156.547	2269.69	1546.84	274.613	2259.52	1553.37	236.109	2229.49	1412.75	224.777	2129.52	1135.66	230.133	2384.45	1303.07	231.194	2485.76	1105.18	305.591	2133.56	1228.76	79.7834	2323.94	1373.47	-34.3879	2285.3	1138.78	-40.7507	2261.77	1042.25	-46.7988	2324.48	900.784	7.08175	2334.69	800.522	-60.2874	2298.55	788.863	-42.5289	2349.28	723.502
11006	0	177.064	2442.2	1556.57	282.417	2436.54	1562.18	153.701	2278.26	1546.45	271.587	2268.61	1553.6	234.027	2238.61	1412.67	223.549	2139.07	1135.36	227.848	2394.01	1303.15	229.365	2495.62	1105.57	303.762	2142.91	1228.76	77.5322	2333.08	1372.95	-35.9137	2293.97	1138.07	-41.8384	2270.52	1041.43	-48.1691	2332.97	899.948	5.6283	2343.14	799.624	-61.7903	2306.46	787.939	-44.2797	2356.9	722.514
11007	0	173.863	2450.95	1556.57	279.044	2445.75	1562.77	150.764	2287.23	1546.48	268.852	2277.76	1554.12	231.91	2247.94	1412.98	222.491	2148.21	1135.42	225.681	2403.17	1303.37	227.674	2505.6	1106.11	302.577	2152.44	1228.99	75.5366	2342.04	1372.69	-37.4885	2302.32	1137.63	-42.9629	2279.3	1041.08	-50.1267	2341.14	899.166	3.37209	2351.62	799.017	-63.4058	2314.31	787.493	-46.2665	2364.71	721.804
11008	0	170.483	2459.96	1556.92	275.738	2454.95	1563.48	148.006	2296.2	1546.75	266.203	2286.97	1554.87	230.03	2257.14	1413.36	221.37	2157.52	1135.81	223.688	2412.52	1303.93	225.84	2515.59	1106.69	301.457	2162.25	1229.52	73.526	2351.07	1372.78	-39.1804	2311.13	1137.37	-43.9775	2288.47	1040.89	-51.8111	2349.5	898.975	1.34094	2359.87	798.572	-64.906	2322.1	787.379	-48.6761	2372.42	721.337
11009	0	167.401	2469.04	1557.51	272.491	2464.36	1564.46	145.036	2305.22	1547.26	263.344	2296.28	1555.83	227.927	2266.54	1414.02	220.533	2166.82	1136.24	221.37	2421.82	1304.63	223.913	2525.41	1107.73	300.492	2171.99	1230.26	71.2081	2359.89	1373.21	-40.3766	2319.98	1137.3	-44.9536	2297.66	1040.94	-53.6206	2358.13	898.938	-1.06347	2368.86	798.448	-66.8644	2329.93	787.42	-51.2652	2380.31	721.216
11010	0	164.094	2477.92	1558.25	269.282	2473.53	1565.59	142.196	2314	1548.07	260.412	2305.41	1557.08	225.986	2275.62	1414.94	220.058	2175.87	1136.79	219.113	2430.96	1305.72	221.885	2535.27	1109.19	299.42	2181.67	1231.18	69.3704	2368.64	1373.71	-41.5506	2328.99	1137.43	-45.8472	2305.75	1041.3	-55.7388	2366.35	899.359	-3.71629	2377.36	798.342	-68.8841	2337.99	787.705	-54.0788	2388.23	721.315
11011	0	160.873	2487.09	1559.3	266.092	2482.81	1566.99	139.354	2323.2	1549.11	257.461	2314.76	1558.61	224.061	2284.82	1415.99	219.372	2185.08	1137.74	216.786	2440.29	1307.17	219.839	2544.82	1110.86	298.476	2191.52	1232.18	66.963	2377.14	1374.53	-42.8085	2337.9	1137.96	-46.9105	2315.06	1041.78	-57.5983	2375.13	899.877	-6.56737	2386.73	799.164	-71.2715	2346.43	788.512	-57.0804	2396.23	721.86
11012	0	157.855	2495.82	1560.21	263.113	2492.15	1568.39	136.58	2332.11	1550.4	254.881	2323.97	1560.27	222.286	2293.84	1417.03	218.513	2194.51	1138.87	214.72	2449.44	1308.63	217.729	2554.42	1112.53	297.816	2201.46	1233.28	64.8674	2385.46	1375.59	-44.1261	2346.67	1138.51	-47.7788	2323.48	1042.82	-59.7459	2383.6	900.972	-9.38138	2395.53	799.784	-73.0511	2354.89	789.557	-60.2228	2404.5	722.643
11013	0	154.815	2504.93	1561.31	260.039	2501.19	1569.74	134.095	2341.43	1551.65	252.267	2333.14	1561.97	220.332	2302.72	1418.07	217.625	2204.15	1139.66	212.461	2458.67	1310.28	215.608	2563.74	1114.37	296.821	2211.45	1234.11	62.6688	2393.7	1376.64	-45.2255	2355.35	1139.04	-48.8672	2332.22	1043.64	-61.6989	2392.36	902.012	-11.908	2404.66	800.454	-75.489	2363.25	790.635	-63.6556	2412.84	723.727
11014	0	152.036	2513.85	1562.4	257.182	2510.47	1571.39	131.405	2350	1553.18	249.592	2342.17	1564.05	218.347	2311.62	1419.32	216.702	2213.67	1140.4	210.148	2467.78	1312.12	213.247	2572.95	1116.49	295.789	2221.24	1235.23	60.3838	2402.05	1377.81	-46.4305	2364.06	1139.85	-50.0979	2341.01	1044.67	-63.8224	2400.92	903.087	-14.6523	2413.64	801.146	-77.9013	2372.19	791.919	-66.4587	2421.6	724.787
11015	0	149.248	2522.71	1563.54	254.416	2519.58	1572.81	128.873	2359	1554.81	247.043	2351.3	1566.01	216.407	2320.32	1420.57	215.774	2223.95	1141.05	208.026	2476.91	1313.83	210.972	2581.73	1118.41	294.656	2231	1236.29	58.2989	2410.2	1378.94	-47.8793	2372.56	1140.77	-51.5676	2349.55	1045.83	-65.8706	2410.1	904.162	-17.0563	2423.4	802.291	-80.0761	2380.9	793.205	-69.5623	2430.55	725.969
11016	0	146.635	2531.55	1564.65	251.781	2528.56	1574.12	126.676	2367.88	1556.37	244.907	2360.3	1567.82	214.62	2329.08	1421.63	214.982	2233.12	1141.93	205.959	2486.1	1315.47	208.988	2590.37	1120.14	293.683	2240.94	1237.17	56.2038	2418.42	1380.08	-49.2985	2381.13	1141.76	-52.7863	2358.55	1046.98	-67.9622	2418.88	905.305	-19.4694	2432.86	803.331	-82.2782	2389.63	794.463	-72.3597	2439.64	727.193
11017	0	144.325	2540.21	1565.71	249.094	2537.69	1575.35	124.353	2376.64	1557.96	242.654	2369.24	1569.52	212.711	2337.75	1422.69	213.908	2242.97	1142.69	203.954	2495.12	1317.08	206.827	2599.1	1122.04	292.548	2250.56	1238.11	53.9932	2426.71	1381.25	-51.0225	2389.35	1142.79	-54.6661	2366.96	1048.02	-70.034	2427.85	906.672	-21.9171	2442.14	804.088	-84.2945	2398.54	795.705	-75.2878	2448.96	728.465
11018	0	141.591	2548.89	1566.96	246.607	2546.3	1576.83	121.968	2384.89	1559.54	240.413	2378.07	1571.33	210.743	2346.44	1423.9	212.876	2252.53	1143.61	201.664	2504.04	1318.88	204.535	2608.35	1124.43	291.234	2260.03	1239.19	51.8678	2434.88	1382.43	-52.8719	2397.56	1143.85	-56.4049	2375.69	1049.05	-72.3793	2436.74	907.964	-23.9854	2451.89	805.51	-86.7022	2407.77	797.076	-78.3007	2458.74	730.203
11019	0	139.051	2557.37	1568.19	244.08	2555.27	1578.24	119.895	2393.51	1560.86	238.068	2386.87	1572.94	208.911	2355.05	1424.97	211.301	2262.11	1144.44	199.528	2512.99	1320.52	202.41	2617.51	1126.55	289.945	2269.44	1240.11	49.8108	2443.13	1383.55	-54.9373	2405.86	1145.03	-58.4736	2384.36	1050.23	-74.8216	2445.64	909.188	-26.3175	2461.44	806.918	-88.7522	2417.35	798.235	-80.8375	2468.44	731.647
11020	0	136.493	2565.79	1569.37	241.566	2563.87	1579.49	117.649	2401.79	1562.04	236.114	2395.61	1574.31	207.192	2363.57	1425.89	209.978	2271.57	1145.17	197.47	2521.71	1322	200.328	2627.17	1128.48	288.524	2278.68	1240.85	47.7048	2451.4	1384.67	-57.4423	2413.85	1146.23	-60.4762	2393.1	1051.13	-77.3113	2455.01	910.541	-28.8757	2470.99	808.118	-91.0356	2427.07	799.222	-83.1839	2478.38	733.044
11021	0	134.193	2574.25	1570.35	239.153	2572.58	1580.63	115.869	2410.37	1563.01	233.963	2404.24	1575.58	205.361	2372.15	1426.76	208.526	2280.96	1145.71	195.465	2530.54	1323.4	198.349	2636.51	1130.21	286.952	2287.82	1241.61	45.8654	2459.66	1385.52	-59.2557	2422.48	1147.28	-62.5179	2401.75	1051.92	-79.5368	2464.09	911.611	-31.1853	2481.01	809.276	-93.1207	2436.79	800.08	-85.8635	2488.89	734.559
11022	0	131.974	2582.65	1571.11	236.99	2581.23	1581.77	113.882	2418.84	1564.01	232.027	2412.78	1576.83	203.473	2380.73	1427.68	206.884	2290.66	1146.34	193.487	2539.23	1324.53	196.573	2645.75	1131.74	285.498	2296.55	1242.48	44.047	2467.98	1386.3	-61.8405	2430.55	1148.4	-65.0393	2410.48	1052.76	-82.0876	2473.45	912.619	-33.4707	2491.14	810.583	-95.3729	2446.82	801.14	-87.9183	2499.44	735.7
11023	0	129.809	2591.1	1571.84	234.817	2589.76	1582.65	111.863	2427.24	1565.02	230.148	2421.33	1577.91	201.861	2389.2	1428.42	205.381	2300.54	1146.82	191.736	2547.83	1325.51	194.834	2654.66	1132.91	284.042	2305.32	1243.33	42.2391	2476.36	1387.11	-63.8928	2438.99	1149.3	-67.2315	2419.41	1053.4	-84.4179	2483.12	913.604	-35.632	2501.35	811.735	-97.6272	2457.13	802.015	-90.0323	2509.89	736.664
11024	0	127.841	2599.55	1572.5	232.833	2598.27	1583.36	109.925	2435.46	1565.76	228.432	2429.85	1578.82	200.279	2397.59	1429.01	203.944	2309.96	1147.19	190.012	2556.37	1326.39	193.386	2663.4	1133.87	282.383	2314.06	1243.92	40.5395	2484.76	1387.65	-65.3185	2447.29	1149.7	-69.6093	2428.04	1053.96	-86.5424	2493.08	914.525	-37.7654	2511.86	812.836	-99.893	2467.72	802.648	-91.7421	2521.12	737.868
11025	0	125.925	2607.85	1572.94	230.862	2606.8	1584.03	108.238	2443.95	1566.35	226.404	2438.44	1579.6	198.447	2406.09	1429.61	202.507	2318.5	1147.96	188.31	2564.91	1327.12	191.944	2671.98	1134.63	280.842	2322.41	1244.55	38.891	2493.14	1388.02	-68.0975	2456.11	1150.52	-72.0381	2437.21	1054.44	-88.7513	2502.99	915.264	-39.8624	2522.36	813.846	-101.901	2478.44	803.239	-93.4475	2532.21	738.783
11026	0	124.101	2616.25	1573.28	228.887	2615.25	1584.57	106.335	2452.24	1566.92	224.768	2446.77	1580.42	196.711	2414.58	1430.11	200.929	2327.23	1148.56	186.647	2573.35	1327.62	190.446	2680.3	1135.1	279.181	2330.64	1245.23	37.2383	2501.59	1388.42	-70.2591	2464.6	1151.32	-74.5034	2446.06	1054.92	-91.108	2513.02	916.29	-41.9202	2532.98	814.944	-104.101	2489.34	803.931	-95.7024	2543.79	740.107
11027	0	122.278	2624.57	1573.53	227.287	2623.69	1584.89	104.861	2460.69	1567.19	223.092	2455.24	1580.83	195.282	2422.91	1430.44	199.271	2335.69	1148.89	185.186	2581.73	1327.85	189.408	2688.51	1135.4	277.661	2338.81	1245.66	35.9077	2510.3	1388.86	-72.3365	2473.37	1151.69	-76.9381	2455.26	1055.34	-93.0693	2523.16	916.84	-43.8574	2543.88	816.143	-106.185	2500.2	804.542	-97.3197	2555.07	740.963
11028	0	120.553	2632.88	1573.67	225.443	2631.96	1585.04	103.37	2468.79	1567.29	221.508	2463.72	1581.04	193.693	2431.22	1430.68	197.637	2343.74	1149.07	183.839	2589.96	1328.16	188.506	2696.36	1135.44	275.981	2346.76	1246.05	34.4943	2519.02	1389.14	-74.2784	2482.41	1152.16	-79.1579	2464.49	1055.42	-95.3102	2533.35	917.702	-45.7769	2554.55	816.95	-108.124	2511.34	804.871	-99.2373	2566.41	741.915
11029	0	118.822	2641.09	1573.74	223.831	2640.45	1585.32	101.998	2477.16	1567.39	219.966	2472.04	1581.33	191.939	2439.58	1430.97	196.033	2351.9	1149.48	182.504	2598.08	1328.31	187.661	2703.94	1135.28	274.228	2354.54	1246.58	32.9882	2527.63	1389.1	-76.2005	2491.25	1152.61	-81.563	2473.93	1055.55	-97.2058	2543.54	918.178	-47.5852	2565.39	817.821	-110.103	2522.71	805.379	-100.965	2578.39	743.052
11030	0	117.26	2649.29	1573.48	222	2648.84	1585.24	100.551	2485.26	1567.25	218.686	2480.45	1581.33	190.453	2447.91	1431.12	194.44	2359.8	1149.84	181.302	2606.03	1328	187.157	2711.43	1134.76	272.537	2362.27	1246.94	32.003	2536.54	1389.28	-78.1067	2500.53	1152.65	-83.85	2483.36	1055.76	-99.1743	2554.02	918.723	-49.2706	2576.31	818.674	-112.095	2533.83	805.835	-102.304	2590.05	743.737
11031	0	115.968	2657.52	1573.16	220.698	2657.36	1585.01	99.3753	2493.69	1567	217.553	2488.86	1581.21	189.081	2456.17	1431.16	192.786	2367.76	1150.18	180.624	2614.2	1327.68	186.835	2719.06	1133.79	270.973	2369.85	1247.11	30.7474	2544.92	1388.65	-80.0094	2509.83	1152.8	-85.9392	2492.94	1055.75	-100.82	2564.6	918.878	-52.6709	2583.21	817.797	-113.844	2545.45	806.069	-104.383	2602.15	744.475
11032	0	114.519	2665.78	1572.75	219.356	2665.74	1584.9	97.9859	2501.79	1566.72	216.281	2497.15	1581.09	187.701	2464.3	1431.21	191.043	2375.45	1150.3	179.643	2622.1	1327.37	186.607	2726.36	1133.06	269.147	2377.19	1247.39	29.7453	2553.86	1388.33	-81.5996	2519.21	1152.52	-88.1227	2502.75	1055.56	-102.449	2575.32	919.161	-52.4065	2598.56	819.238	-115.437	2556.85	806.217	-105.706	2614.09	744.968
11033	0	113.265	2674.1	1572.32	217.999	2673.97	1584.66	96.9506	2510.14	1566.36	215.108	2505.58	1581.12	186.12	2472.53	1431.26	189.239	2382.97	1150.67	179.023	2630.08	1327.08	186.586	2733.84	1132.17	267.422	2384.54	1247.72	28.8132	2562.75	1387.82	-83.3757	2528.56	1152.48	-90.0462	2512.62	1055.39	-104.135	2586.16	919.242	-54.1117	2609.57	819.643	-117.318	2568.38	806.281	-107.46	2626.06	745.462
11034	0	112.127	2682.43	1571.99	216.901	2682.49	1584.38	95.8392	2518.41	1566.13	213.961	2513.88	1581.02	185.009	2480.59	1431.32	187.324	2390.38	1151.03	178.479	2637.98	1326.69	187.023	2741.41	1131.38	265.792	2391.87	1247.98	27.9112	2571.6	1387.65	-84.8054	2538.42	1152.36	-91.9791	2522.83	1055.22	-105.688	2596.81	919.52	-56.871	2617.8	819.029	-118.922	2579.99	806.499	-108.959	2637.86	745.936
11035	0	111.511	2690.78	1571.32	216.017	2690.82	1584.11	94.838	2526.81	1565.77	212.891	2522.35	1580.89	183.585	2488.7	1431.32	185.621	2397.87	1151.22	178.149	2645.73	1326.22	187.386	2748.95	1130.59	264.023	2399.02	1248.19	27.1838	2580.4	1386.99	-85.9702	2548.32	1151.9	-93.3848	2533.11	1054.6	-106.989	2607.98	919.564	-58.161	2628.33	818.948	-120.385	2591.66	806.239	-110.489	2649.88	746.243
11036	0	110.805	2699.22	1570.87	215.105	2699.28	1583.64	93.7919	2535.38	1565.57	212.12	2530.52	1580.9	182.262	2496.77	1431.35	183.843	2405.18	1151.56	177.999	2653.65	1325.83	188.072	2756.78	1129.93	262.34	2406.14	1248.46	26.492	2589.27	1386.5	-87.0823	2558.33	1151.56	-94.6194	2543.84	1054.27	-108.462	2618.92	919.411	-60.2122	2639.55	818.755	-121.919	2603.11	806.098	-111.851	2661.73	746.459
11037	0	109.884	2707.72	1570.33	214.659	2707.71	1583.42	92.9191	2543.74	1565.59	211.263	2538.88	1580.94	180.96	2504.79	1431.47	182.128	2412.62	1152.02	177.71	2661.48	1325.49	188.718	2764.62	1129.43	260.522	2413.2	1248.82	25.8768	2597.97	1386.11	-88.2293	2568.38	1151.1	-95.9894	2554.44	1053.99	-109.619	2630.16	919.473	-61.2044	2651.21	818.937	-123.151	2614.84	805.935	-113.368	2673.61	746.629
11038	0	109.445	2716.06	1569.86	214.098	2716.04	1582.84	92.6692	2552.21	1565.44	210.448	2547.35	1580.99	179.842	2512.68	1431.55	180.427	2420	1152.4	177.835	2669.28	1325.1	189.547	2772.42	1129.04	258.907	2420.21	1249.16	25.3444	2606.85	1385.76	-89.2307	2578.56	1150.66	-97.3742	2564.93	1053.46	-110.444	2641.49	919.552	-63.4546	2661.99	818.649	-124.941	2626.76	806.164	-114.595	2685.52	746.7
11039	0	109.049	2724.64	1569.1	213.741	2724.41	1582.2	91.9238	2560.83	1565.31	209.849	2555.75	1580.94	178.735	2520.57	1431.47	178.673	2427.02	1152.56	177.783	2676.81	1324.72	190.481	2780.05	1128.78	257.223	2427.16	1249.46	24.9533	2615.64	1385.29	-89.7338	2589.1	1150.26	-98.3614	2576	1052.88	-111.319	2653.05	919.321	-65.9399	2671.76	817.922	-125.472	2638.28	805.736	-115.928	2697.36	746.656
11040	0	108.763	2733.07	1568.53	213.467	2732.89	1581.62	91.3598	2569.17	1565.38	209.408	2564.11	1580.96	177.666	2528.52	1431.47	177.012	2434.09	1152.9	177.976	2684.4	1324.16	191.391	2787.43	1128.28	255.573	2434.12	1249.8	24.5961	2624.35	1384.77	-90.1328	2599.74	1149.6	-98.9279	2586.65	1052.49	-112.158	2664.39	919.4	-64.9693	2687.25	819.077	-126.493	2650.17	805.695	-117.05	2709.3	746.698
11041	0	108.766	2741.46	1567.74	213.179	2741.4	1581.11	91.0547	2577.7	1565.49	208.994	2572.63	1581.03	176.682	2536.38	1431.56	175.46	2441.09	1153.35	178.176	2692.26	1324.03	192.366	2794.68	1127.87	254.116	2441.11	1250.04	24.3383	2633.1	1384.7	-90.318	2610.56	1149.51	-99.8169	2598.05	1052.27	-112.717	2675.97	919.321	-63.9274	2703.19	820.506	-127.206	2662.18	805.817	-117.937	2721.29	746.817
11042	0	108.371	2750.04	1567.33	212.84	2749.89	1580.46	90.9259	2586.16	1565.34	208.8	2581.04	1581.03	175.836	2544.24	1431.61	174.307	2448.22	1153.6	178.369	2699.6	1323.55	193.36	2801.87	1127.59	252.773	2448.07	1250.34	24.1002	2641.7	1384.19	-90.4477	2621.44	1149.07	-100.241	2609.17	1052.1	-113.213	2687.63	919.519	-64.8241	2714.81	820.445	-128	2673.78	805.83	-118.932	2733.16	746.784
11043	0	108.147	2758.28	1566.51	212.621	2758.5	1579.93	90.6604	2594.57	1565.12	208.513	2589.49	1581.03	174.947	2552.16	1431.51	172.81	2455.17	1153.72	178.348	2706.65	1322.89	194.146	2808.57	1127.12	251.322	2455.02	1250.54	23.968	2650.39	1383.95	-90.6549	2631.93	1148.69	-100.467	2620.22	1051.43	-113.575	2699.13	919.534	-65.5053	2726.72	820.484	-128.571	2686.02	805.702	-119.323	2745.34	747.103
11044	0	108.142	2766.74	1565.92	212.692	2766.86	1579.3	90.5171	2602.96	1565.12	208.362	2597.94	1580.99	174.238	2560.03	1431.52	171.424	2461.83	1154.02	178.737	2714.07	1322.45	195.01	2815.48	1126.48	250.097	2461.96	1250.79	23.9286	2658.94	1383.78	-90.4695	2642.85	1148.38	-100.916	2631.68	1051.21	-113.882	2710.72	919.757	-65.8613	2738.77	820.674	-128.947	2698.12	805.762	-120.064	2757.38	747.252
11045	0	108.007	2775.25	1565.04	212.961	2775.48	1578.36	90.5939	2611.51	1564.93	208.327	2606.49	1580.8	173.815	2567.86	1431.4	170.364	2468.81	1154.24	178.987	2721.27	1321.73	195.962	2822.41	1125.82	249.025	2468.99	1250.91	23.9451	2667.42	1383.42	-90.501	2653.56	1148.01	-101.051	2643.06	1051.09	-113.797	2722.68	919.874	-66.0854	2750.92	820.644	-129.314	2710.42	805.876	-120.218	2769.92	747.465
11046	0	108.281	2783.95	1564.09	213.016	2783.77	1577.4	90.5396	2620.02	1564.63	208.334	2615.02	1580.6	173.316	2575.68	1431.23	169.409	2475.83	1154.3	179.369	2728.59	1321.09	196.604	2829.43	1125.04	247.933	2475.99	1250.94	24.0475	2675.92	1383.1	-90.2331	2664.6	1147.69	-100.934	2654.57	1050.69	-113.532	2734.77	919.931	-65.8095	2763.36	820.652	-129.615	2722.88	805.735	-120.354	2782.63	747.558
11047	0	108.626	2792.36	1562.78	214.182	2793.21	1577.08	90.568	2628.57	1564.44	208.413	2623.45	1580.49	172.912	2583.57	1430.97	168.2	2482.76	1154.23	179.7	2735.96	1320.38	197.468	2836.64	1124.2	246.823	2483.05	1250.9	24.6629	2684.38	1382.66	-89.9753	2675.45	1147.17	-100.878	2665.92	1050.19	-113.002	2746.83	919.708	-65.6976	2775.22	820.346	-129.481	2735.36	805.662	-120.047	2795.41	747.583
11048	0	109.1	2801.1	1561.76	214.043	2800.85	1575.32	90.574	2637.18	1564.4	208.428	2631.88	1580.24	172.664	2591.33	1430.71	167.377	2489.9	1154.23	180.247	2743.43	1319.52	198.295	2843.9	1123.33	246.004	2490.17	1250.68	24.9803	2692.58	1382.18	-89.4807	2686.1	1146.67	-100.656	2677.34	1049.95	-112.464	2758.9	919.839	-65.0476	2787.54	820.394	-129.447	2748.53	805.876	-119.619	2808.45	747.777
11049	0	109.586	2809.84	1560.81	215.211	2810.05	1574.56	90.8057	2645.94	1564.09	208.537	2640.39	1580.02	172.468	2599.28	1430.22	166.653	2497.06	1154.13	180.623	2750.96	1318.96	199.006	2851.23	1122.58	245.352	2497.2	1250.5	25.0978	2700.93	1381.85	-89.2194	2696.71	1146.08	-100.499	2688.78	1049.48	-111.84	2771.26	919.881	-64.4367	2799.82	820.429	-129.333	2761.26	805.886	-118.93	2821.56	747.969
11050	0	110.229	2818.57	1559.73	215.692	2818.23	1573.39	91.0789	2654.8	1563.68	208.768	2648.64	1579.67	172.353	2606.96	1429.83	165.889	2504.13	1153.81	180.924	2758.3	1318.2	199.788	2858.65	1121.82	244.734	2504.29	1250.14	25.4126	2709.04	1381.32	-88.7254	2707.31	1145.72	-99.9865	2700.22	1048.77	-111.129	2783.39	920.043	-63.0641	2812.14	820.482	-129.207	2774.38	806.088	-117.697	2834.94	748.456
11051	0	110.923	2827.27	1558.73	216.994	2827.3	1572.81	91.4094	2663.36	1563.41	209.178	2657.03	1579.28	172.383	2614.81	1429.33	165.336	2511.44	1153.63	181.222	2765.74	1317.55	200.211	2865.84	1120.99	244.059	2511.59	1249.88	25.7875	2717.25	1380.78	-88.3142	2717.76	1145.05	-99.692	2711.41	1048.11	-110.133	2795.51	919.977	-62.3213	2824.79	820.678	-128.547	2787.65	805.965	-116.524	2848.14	748.837
11052	0	111.634	2835.91	1557.55	217.387	2835.15	1571.03	91.8755	2672.02	1562.92	209.647	2665.7	1578.6	172.392	2622.81	1428.72	164.9	2518.77	1153.25	181.528	2773.29	1316.43	200.852	2873.37	1119.83	243.71	2518.83	1249.41	26.029	2725.44	1380.14	-87.6713	2728.26	1144.47	-99.1211	2722.71	1047.59	-108.886	2807.78	920.072	-60.7311	2837.25	820.504	-127.8	2801.09	805.971	-115.345	2862.13	749.184
11053	0	112.608	2844.35	1556.47	218.159	2843.46	1569.69	92.4432	2680.57	1562.31	210.429	2673.98	1577.76	172.764	2630.76	1427.97	164.46	2526.1	1152.77	182.216	2781.03	1315.35	201.53	2880.52	1118.6	243.468	2526.3	1248.76	26.6503	2733.64	1379.5	-87.0752	2738.48	1143.79	-98.2766	2734.01	1047.15	-107.182	2820.08	919.97	-58.8704	2850.2	820.713	-126.314	2814.07	805.822	-113.623	2875.65	749.592
11054	0	113.678	2852.75	1555.19	219.52	2852.06	1568.76	93.3373	2688.93	1561.54	211.189	2682.3	1576.79	173.025	2638.74	1427.24	164.134	2533.57	1152.38	182.706	2789.02	1314.51	201.999	2887.87	1117.39	243.134	2533.74	1248.31	27.1102	2741.95	1378.74	-86.2385	2748.83	1143.14	-97.6124	2745.02	1046.2	-106.154	2832.42	919.902	-56.9524	2862.28	820.965	-125.532	2827.8	806.053	-111.466	2889.36	750.117
11055	0	114.402	2861.25	1554.35	220.266	2860.44	1567.46	94.3426	2697.41	1560.74	212.113	2690.69	1575.93	173.452	2646.84	1426.78	164.024	2541.15	1151.93	183.262	2797.02	1313.51	202.442	2895.23	1116.23	243.086	2541.24	1247.81	27.7742	2750.24	1378.08	-85.5677	2758.87	1142.67	-96.9052	2755.93	1045.65	-104.265	2844.99	920.37	-55.3585	2874.82	821.18	-124.141	2841.14	806.285	-109.331	2903.1	750.918
11056	0	115.452	2869.61	1553.32	221.394	2868.88	1566.2	95.505	2705.95	1559.94	213.179	2699.33	1574.95	173.956	2655.06	1425.97	163.97	2548.63	1151.61	183.972	2805.16	1312.46	202.808	2902.69	1114.74	243.327	2548.73	1247.18	28.3564	2758.55	1377.4	-84.8651	2768.79	1141.98	-96.0194	2766.84	1045.16	-102.71	2857.04	920.621	-53.1805	2887.44	821.653	-121.736	2854.55	806.258	-106.827	2916.99	751.635
11057	0	116.841	2877.95	1552.09	222.657	2877.49	1564.88	96.5645	2714.29	1558.91	214.391	2707.82	1573.72	174.673	2663.34	1425.1	164.074	2556.43	1150.88	184.553	2813.34	1311.18	203.159	2910.07	1113.16	243.608	2556.64	1246.38	29.0728	2766.92	1376.62	-84.0001	2778.84	1141.46	-95.3408	2777.34	1044.23	-101.141	2869.06	920.698	-50.9119	2900.09	821.973	-120.31	2867.87	806.447	-104.335	2930.82	752.451
11058	0	117.758	2886.46	1550.87	223.697	2885.88	1563.7	97.8043	2722.67	1558.14	215.809	2715.98	1572.57	175.356	2671.7	1424.22	164.453	2564.19	1150.26	185.266	2821.6	1310.19	203.453	2917.38	1111.68	243.914	2564.4	1245.71	29.9624	2775.21	1375.77	-83.1348	2788.57	1140.69	-94.5405	2787.95	1043.51	-99.3106	2880.92	920.658	-48.8042	2912.3	822.63	-117.734	2880.84	806.485	-101.538	2944.61	753.155
11059	0	119.002	2894.98	1549.64	224.832	2894.29	1562.06	98.9766	2731.21	1557.35	216.955	2724.54	1571.48	176.484	2679.74	1423.37	164.894	2572.03	1149.54	185.933	2829.89	1308.92	203.812	2925.08	1110.2	244.421	2572.48	1244.96	31.0732	2783.64	1374.8	-82.2317	2798.03	1140.01	-93.5746	2798.37	1042.87	-97.3652	2892.82	920.851	-46.2153	2924.78	823.442	-115.987	2893.96	806.749	-98.6639	2958.51	754.138
11060	0	120.532	2903.54	1548.58	226.777	2903.32	1560.65	100.291	2739.84	1556.55	218.361	2733.06	1570.39	177.327	2688.25	1422.34	165.519	2579.99	1148.69	186.838	2838.23	1307.76	204.147	2932.76	1108.51	245.111	2580.51	1243.97	31.8514	2791.96	1374.11	-81.4193	2807.49	1139.34	-92.8035	2808.75	1042.19	-95.2899	2904.42	921.076	-43.4845	2937.28	824.181	-113.404	2907.06	806.915	-95.6385	2972.12	755.276
11061	0	121.989	2912.04	1547.35	228.382	2911.93	1559.19	101.584	2748.51	1555.66	219.761	2741.44	1569.22	178.485	2696.58	1421.21	166.2	2588.05	1147.71	187.754	2846.56	1306.66	204.601	2940.71	1107.01	245.951	2588.95	1242.68	32.8487	2800.11	1373.21	-80.419	2816.79	1138.72	-91.7188	2818.9	1041.19	-93.2983	2915.91	921.178	-40.5558	2949.99	825.138	-110.538	2920.01	807.156	-92.1311	2985.69	756.464
11062	0	123.573	2920.53	1546.33	230.426	2920.59	1558.27	103.262	2757.05	1554.81	221.206	2749.82	1568.12	179.676	2704.8	1420.2	166.974	2596.19	1146.77	188.553	2854.9	1305.66	204.797	2948.48	1105.69	246.83	2597.13	1241.75	33.8183	2808.27	1372.5	-79.4908	2825.84	1138.11	-90.9971	2828.99	1040.68	-91.1859	2927.7	921.46	-37.7865	2962.3	825.886	-108.653	2932.95	807.359	-88.9931	2999.09	757.781
11063	0	125.241	2929.19	1545.18	232.205	2929.09	1557	104.766	2765.72	1554.02	222.719	2757.97	1567.01	181.187	2712.9	1419.11	168.063	2604.37	1145.62	189.415	2863.17	1304.5	204.888	2956.34	1104.34	248.107	2605.6	1240.51	35.0303	2816.6	1371.59	-78.633	2835.01	1137.71	-89.9114	2838.89	1039.84	-89.291	2938.87	921.58	-35.1264	2974.57	826.837	-106.073	2945.43	807.63	-85.6774	3012.1	758.924
11064	0	127.092	2937.74	1544.1	233.493	2936.9	1555.02	106.228	2774.52	1552.98	224.273	2766.46	1565.58	182.419	2721.31	1417.87	169.138	2612.42	1144.49	190.235	2871.53	1303.16	205.053	2964.56	1102.87	249.375	2613.98	1239.07	36.1898	2824.78	1370.85	-77.6652	2843.86	1136.9	-88.7207	2848.74	1038.86	-87.26	2949.87	921.887	-32.139	2986.49	827.797	-102.347	2957.78	807.839	-82.2501	3025.08	760.203
11065	0	128.896	2946.19	1542.79	235.809	2945.79	1553.78	108.25	2782.77	1552.04	226.094	2774.67	1564.28	183.911	2729.52	1416.68	170.383	2620.89	1143.02	191.366	2879.94	1302.18	205.422	2972.98	1101.56	250.674	2622.44	1237.59	37.3863	2832.99	1369.86	-76.5151	2852.7	1136.1	-87.2544	2858.16	1038.03	-84.9925	2960.81	922	-29.0316	2998.24	828.747	-100.295	2970.08	808.07	-78.5685	3038.01	761.373
11066	0	130.859	2954.48	1541.58	237.758	2954.33	1552.4	109.805	2791.25	1551.14	227.941	2783.11	1563.11	185.708	2737.61	1415.41	171.604	2629.23	1141.93	192.453	2888.32	1300.88	205.689	2981.29	1100.35	252.158	2631.07	1236.16	38.8762	2841.18	1369.1	-75.3401	2861.33	1135.47	-86.3013	2867.67	1037.31	-82.6332	2971.61	922.077	-26.441	3009.12	829.705	-96.3908	2981.93	808.312	-75.0048	3050.65	762.537
11067	0	132.738	2962.83	1540.37	237.621	2957.36	1549.42	111.655	2799.6	1550.29	229.876	2791.6	1561.95	187.325	2745.96	1414.19	173.235	2637.53	1140.45	193.692	2896.73	1299.69	206.018	2990.12	1099.2	253.797	2639.69	1234.59	40.2771	2849.47	1368.29	-74.1375	2870.11	1134.73	-85.1789	2876.96	1036.78	-80.4124	2982.02	922.207	-23.5012	3019.76	830.437	-93.8797	2993.82	808.567	-71.3364	3062.77	763.882
11068	0	134.453	2971.07	1539.34	241.485	2971.01	1549.66	113.637	2807.77	1549.37	231.85	2799.52	1560.81	189.231	2754.17	1412.81	174.73	2646.19	1138.94	195.011	2905.31	1298.63	206.589	2999.32	1098.36	255.354	2648.58	1232.86	41.8225	2857.5	1367.57	-72.7608	2878.6	1134.36	-83.7748	2886.09	1036.08	-78.1041	2992.31	922.495	-20.3138	3031.42	831.672	-90.4768	3004.79	808.758	-67.7252	3074.61	765.186
11069	0	136.193	2979.14	1538.41	241.776	2974.62	1547.08	115.408	2816.29	1548.5	234.112	2807.85	1559.74	191.106	2762.35	1411.52	176.277	2655.08	1137.42	196.342	2913.85	1297.83	206.792	3007.92	1097.68	257.059	2657.56	1230.97	43.3848	2865.51	1367.11	-71.4614	2887.02	1133.96	-82.4581	2894.89	1035.54	-75.6728	3002.2	922.949	-17.2421	3042.22	832.986	-87.7446	3016.53	809.519	-64.0695	3086.28	766.784
11070	0	138.052	2987.07	1537.61	245.32	2987.55	1547.45	117.885	2824.13	1547.84	236.288	2816.03	1558.77	192.974	2770.71	1410.15	177.731	2664.24	1135.74	197.622	2922.26	1296.99	207.256	3016.8	1097.17	258.844	2666.62	1229.01	44.9142	2873.52	1366.54	-70.3162	2895.63	1133.81	-81.1336	2903.53	1034.85	-73.4498	3011.71	923.41	-14.5465	3052.22	834.532	-84.6804	3027.41	809.982	-60.6666	3097.57	768.332
11071	0	139.857	2995.09	1536.73	245.005	2990.02	1544.74	119.746	2832.48	1547.1	238.613	2824.17	1557.7	195.111	2778.81	1408.78	179.285	2673.63	1133.82	199.314	2930.96	1296.15	207.803	3025.5	1096.63	260.669	2675.62	1226.97	46.5745	2881.41	1366.08	-68.8279	2903.88	1133.47	-79.9694	2911.89	1034.61	-71.3669	3021.26	923.839	-11.5094	3062.69	835.776	-80.6646	3037.74	810.273	-57.1856	3108.63	769.795
11072	0	142.123	3003.07	1536.14	249.573	3003.88	1545.3	123.491	2839.47	1546.18	241.241	2832.28	1556.64	197.392	2786.71	1407.44	180.905	2683.11	1131.93	200.716	2939.47	1295.3	208.681	3034.52	1096.25	262.507	2684.63	1224.86	48.5652	2889.35	1365.57	-67.2917	2912.14	1133.03	-78.3406	2920.15	1033.77	-69.1861	3030.7	924.129	-8.69668	3072.74	836.917	-77.9369	3048	810.722	-53.8825	3118.94	771.085
11073	0	144.164	3011.06	1535.66	249.225	3005.94	1542.84	124.989	2848.25	1545.83	243.914	2840.38	1555.68	199.986	2794.44	1406.31	182.514	2692.91	1130.37	202.285	2947.95	1294.89	211.434	3047.42	1096.92	264.558	2693.59	1222.99	50.3245	2897.32	1365.18	-65.814	2920.31	1132.57	-76.8829	2928.19	1033.35	-66.9707	3039.63	924.293	-6.26516	3081.98	837.99	-75.0706	3057.88	811.168	-50.7281	3129.44	772.294
11074	0	146.637	3019.02	1535.76	254.446	3020.59	1544.32	128.31	2855.84	1545.6	246.557	2848.5	1555.08	202.085	2802.77	1405.6	184.069	2702.77	1129.16	204.12	2956.97	1294.61	210.373	3053.25	1095.8	266.579	2702.66	1221.52	52.2193	2905.26	1364.87	-64.2615	2928.45	1132.42	-75.4778	2936.22	1033.12	-65.083	3048.39	924.611	-3.95499	3091.09	839.078	-72.9325	3067.57	811.583	-46.7437	3141.8	773.456
11075	0	149.126	3027.08	1536.16	257.024	3028.98	1544.29	130.55	2864.23	1545.66	249.6	2856.72	1554.6	204.802	2810.99	1405.03	185.839	2712.63	1128.58	205.877	2965.87	1294.66	210.636	3063.42	1096.51	268.549	2711.96	1220.27	54.0165	2913.2	1364.84	-62.6815	2936.38	1132.53	-73.5387	2943.82	1032.8	-63.0703	3056.43	925.049	-1.57271	3100.18	839.763	-70.4039	3076.57	812.135	-45.2793	3148.29	774.865
11076	0	151.684	3035.37	1536.8	259.504	3037.28	1544.63	134.072	2872.1	1545.93	252.359	2864.92	1554.55	206.954	2819.63	1405.03	187.586	2721.94	1128.19	207.643	2974.79	1295.11	211.611	3073.21	1097.24	270.373	2721.11	1219.82	55.9248	2921.67	1365.25	-61.1571	2944.09	1132.88	-71.8909	2951.78	1033.01	-61.4091	3064.33	925.475	0.57949	3108.9	841.037	-67.1203	3084.76	812.465	-42.6797	3158.05	775.999
11077	0	154.41	3043.65	1537.91	262.347	3045.86	1545.2	136.484	2880.69	1546.84	255.433	2873.41	1554.87	209.018	2828.67	1405.44	189.362	2730.64	1128.21	209.576	2983.35	1295.67	213.043	3082.33	1097.69	272.083	2730.25	1219.71	57.8756	2930.45	1366.19	-59.5242	2951.61	1133.57	-69.939	2959.6	1033.97	-59.5672	3072.37	926.207	2.98253	3117.49	842.201	-64.9059	3092.73	813.046	-39.3048	3168.63	777.333
11078	0	157.106	3051.95	1539.07	265.324	3054.59	1546	139.48	2889.01	1548.03	258.418	2881.84	1555.5	211.178	2837.45	1406.1	190.85	2739.18	1128.73	211.435	2991.92	1296.66	214.079	3091.35	1098.56	273.634	2739.22	1220.04	59.9617	2939.35	1367.48	-57.8795	2959.05	1134.6	-68.3453	2967.3	1034.94	-57.5829	3079.79	926.927	4.63912	3124.37	843.026	-62.6329	3100.03	813.862	-37.4105	3176.51	778.655
11079	0	159.945	3060.32	1540.4	268.254	3063.32	1546.87	143.068	2897.22	1549.35	261.567	2890.11	1556.24	213.405	2846.11	1406.89	191.986	2747.81	1129.61	213.456	3000.97	1297.76	215.162	3100.48	1099.58	275.005	2748.38	1220.52	61.995	2948.42	1368.87	-56.1594	2966.45	1136.19	-65.653	2974.77	1036.16	-55.8222	3087.14	927.915	6.54878	3132.17	844.018	-60.7484	3106.72	814.743	-35.7015	3183.69	779.778
11080	0	162.816	3068.71	1542.02	271.178	3071.81	1547.83	145.739	2905.9	1551.19	264.571	2898.88	1557.4	215.502	2854.81	1408.19	192.699	2757.16	1130.87	215.397	3009.99	1299.27	216.145	3110.09	1101.37	276.115	2757.49	1221.47	64.1592	2957.74	1371.08	-54.5917	2974	1137.93	-64.1037	2982.41	1038.14	-54.0161	3093.95	929.031	8.07574	3138.66	844.954	-59.1948	3113.12	815.634	-36.0216	3186.89	780.732
11081	0	165.66	3077.24	1543.85	274.188	3080.5	1549.47	148.649	2914.59	1553.31	267.584	2907.32	1559.04	217.152	2863.85	1409.7	193.375	2766.71	1132.24	217.503	3018.92	1301.09	218.004	3119.84	1103.39	277.27	2766.38	1222.57	66.285	2966.9	1373.46	-52.7489	2981.72	1140.32	-62.3646	2989.86	1040.43	-52.4424	3100.75	930.558	9.56941	3144.79	846.403	-57.2156	3118.81	816.802	-34.9484	3192.6	781.717
[truncated: 69 more columns]

## Sheet: Sheet2
Devices
		025370 - Force			025370 - Moment			025370 - CoP			027571 - Force			027571 - Moment			027571 - CoP			037720 - Force			037720 - Moment			037720 - CoP
Frame	Sub Frame	Fx	Fy	Fz	Mx	My	Mz	Cx	Cy	Cz	Fx	Fy	Fz	Mx	My	Mz	Cx	Cy	Cz	Fx	Fy	Fz	Mx	My	Mz	Cx	Cy	Cz
		N	N	N	N.mm	N.mm	N.mm	mm	mm	mm	N	N	N	N.mm	N.mm	N.mm	mm	mm	mm	N	N	N	N.mm	N.mm	N.mm	mm	mm	mm
10480	0	0	0	0	0	0	0	200	300	0	0	0	0	0	0	0	200	903	0	0	0	0	0	0	0	603	903	0
10480	1	0	0	0	0	0	0	200	300	0	0	0	0	0	0	0	200	903	0	0	0	0	0	0	0	603	903	0
10480	2	0	0	0	0	0	0	200	300	0	0	0	0	0	0	0	200	903	0	0	0	0	0	0	0	603	903	0
10480	3	0	0	0	0	0	0	200	300	0	0	0	0	0	0	0	200	903	0	0	0	0	0	0	0	603	903	0
10480	4	0	0	0	0	0	0	200	300	0	0	0	0	0	0	0	200	903	0	0	0	0	0	0	0	603	903	0
10480	5	0	0	0	0	0	0	200	300	0	0	0	0	0	0	0	200	903	0	0	0	0	0	0	0	603	903	0
10480	6	0	0	0	0	0	0	200	300	0	0	0	0	0	0	0	200	903	0	0	0	0	0	0	0	603	903	0
10480	7	0	0	0	0	0	0	200	300	0	0	0	0	0	0	0	200	903	0	0	0	0	0	0	0	603	903	0
10480	8	0	0	0	0	0	0	200	300	0	0	0	0	0	0	0	200	903	0	0	0	0	0	0	0	603	903	0
10480	9	0	0	0	0	0	0	200	300	0	0	0	0	0	0	0	200	903	0	0	0	0	0	0	0	603	903	0
10481	0	0	0	0	0	0	0	200	300	0	0	0	0	0	0	0	200	903	0	0	0	0	0	0	0	603	903	0
10481	1	0	0	0	0	0	0	200	300	0	0	0	0	0	0	0	200	903	0	0	0	0	0	0	0	603	903	0
10481	2	0	0	0	0	0	0	200	300	0	0	0	0	0	0	0	200	903	0	0	0	0	0	0	0	603	903	0
10481	3	0	0	0	0	0	0	200	300	0	0	0	0	0	0	0	200	903	0	0	0	0	0	0	0	603	903	0
10481	4	0	0	0	0	0	0	200	300	0	0	0	0	0	0	0	200	903	0	0	0	0	0	0	0	603	903	0
10481	5	0	0	0	0	0	0	200	300	0	0	0	0	0	0	0	200	903	0	0	0	0	0	0	0	603	903	0
10481	6	0	0	0	0	0	0	200	300	0	0	0	0	0	0	0	200	903	0	0	0	0	0	0	0	603	903	0
10481	7	0	0	0	0	0	0	200	300	0	0	0	0	0	0	0	200	903	0	0	0	0	0	0	0	603	903	0
10481	8	0	0	0	0	0	0	200	300	0	0	0	0	0	0	0	200	903	0	0	0	0	0	0	0	603	903	0
10481	9	0	0	0	0	0	0	200	300	0	0	0	0	0	0	0	200	903	0	0	0	0	0	0	0	603	903	0
10482	0	0	0	0	0	0	0	200	300	0	0	0	0	0	0	0	200	903	0	0	0	0	0	0	0	603	903	0
10482	1	0	0	0	0	0	0	200	300	0	0	0	0	0	0	0	200	903	0	0	0	0	0	0	0	603	903	0
10482	2	0	0	0	0	0	0	200	300	0	0	0	0	0	0	0	200	903	0	0	0	0	0	0	0	603	903	0
10482	3	0	0	0	0	0	0	200	300	0	0	0	0	0	0	0	200	903	0	0	0	0	0	0	0	603	903	0
10482	4	0	0	0	0	0	0	200	300	0	0	0	0	0	0	0	200	903	0	0	0	0	0	0	0	603	903	0
10482	5	0	0	0	0	0	0	200	300	0	0	0	0	0	0	0	200	903	0	0	0	0	0	0	0	603	903	0
10482	6	0	0	0	0	0	0	200	300	0	0	0	0	0	0	0	200	903	0	0	0	0	0	0	0	603	903	0
10482	7	0	0	0	0	0	0	200	300	0	0	0	0	0	0	0	200	903	0	0	0	0	0	0	0	603	903	0
10482	8	0	0	0	0	0	0	200	300	0	0	0	0	0	0	0	200	903	0	0	0	0	0	0	0	603	903	0
10482	9	0	0	0	0	0	0	200	300	0	0	0	0	0	0	0	200	903	0	0	0	0	0	0	0	603	903	0
10483	0	0	0	0	0	0	0	200	300	0	0	0	0	0	0	0	200	903	0	0	0	0	0	0	0	603	903	0
10483	1	0	0	0	0	0	0	200	300	0	0	0	0	0	0	0	200	903	0	0	0	0	0	0	0	603	903	0
10483	2	0	0	0	0	0	0	200	300	0	0	0	0	0	0	0	200	903	0	0	0	0	0	0	0	603	903	0
10483	3	0	0	0	0	0	0	200	300	0	0	0	0	0	0	0	200	903	0	0	0	0	0	0	0	603	903	0
10483	4	0	0	0	0	0	0	200	300	0	0	0	0	0	0	0	200	903	0	0	0	0	0	0	0	603	903	0
10483	5	0	0	0	0	0	0	200	300	0	0	0	0	0	0	0	200	903	0	0	0	0	0	0	0	603	903	0
10483	6	0	0	0	0	0	0	200	300	0	0	0	0	0	0	0	200	903	0	0	0	0	0	0	0	603	903	0
10483	7	0	0	0	0	0	0	200	300	0	0	0	0	0	0	0	200	903	0	0	0	0	0	0	0	603	903	0
10483	8	0	0	0	0	0	0	200	300	0	0	0	0	0	0	0	200	903	0	0	0	0	0	0	0	603	903	0
10483	9	0	0	0	0	0	0	200	300	0	0	0	0	0	0	0	200	903	0	0	0	0	0	0	0	603	903	0
10484	0	0	0	0	0	0	0	200	300	0	0	0	0	0	0	0	200	903	0	0	0	0	0	0	0	603	903	0
10484	1	0	0	0	0	0	0	200	300	0	0	0	0	0	0	0	200	903	0	0	0	0	0	0	0	603	903	0
10484	2	0	0	0	0	0	0	200	300	0	0	0	0	0	0	0	200	903	0	0	0	0	0	0	0	603	903	0
10484	3	0	0	0	0	0	0	200	300	0	0	0	0	0	0	0	200	903	0	0	0	0	0	0	0	603	903	0
10484	4	0	0	0	0	0	0	200	300	0	0	0	0	0	0	0	200	903	0	0	0	0	0	0	0	603	903	0
10484	5	0	0	0	0	0	0	200	300	0	0	0	0	0	0	0	200	903	0	0	0	0	0	0	0	603	903	0
10484	6	0	0	0	0	0	0	200	300	0	0	0	0	0	0	0	200	903	0	0	0	0	0	0	0	603	903	0
10484	7	0	0	0	0	0	0	200	300	0	0	0	0	0	0	0	200	903	0	0	0	0	0	0	0	603	903	0
10484	8	0	0	0	0	0	0	200	300	0	0	0	0	0	0	0	200	903	0	0	0	0	0	0	0	603	903	0
10484	9	0	0	0	0	0	0	200	300	0	0	0	0	0	0	0	200	903	0	0	0	0	0	0	0	603	903	0
10485	0	0	0	0	0	0	0	200	300	0	0	0	0	0	0	0	200	903	0	0	0	0	0	0	0	603	903	0
10485	1	0	0	0	0	0	0	200	300	0	0	0	0	0	0	0	200	903	0	0	0	0	0	0	0	603	903	0
10485	2	0	0	0	0	0	0	200	300	0	0	0	0	0	0	0	200	903	0	0	0	0	0	0	0	603	903	0
10485	3	0	0	0	0	0	0	200	300	0	0	0	0	0	0	0	200	903	0	0	0	0	0	0	0	603	903	0
10485	4	0	0	0	0	0	0	200	300	0	0	0	0	0	0	0	200	903	0	0	0	0	0	0	0	603	903	0
10485	5	0	0	0	0	0	0	200	300	0	0	0	0	0	0	0	200	903	0	0	0	0	0	0	0	603	903	0
10485	6	0	0	0	0	0	0	200	300	0	0	0	0	0	0	0	200	903	0	0	0	0	0	0	0	603	903	0
10485	7	0	0	0	0	0	0	200	300	0	0	0	0	0	0	0	200	903	0	0	0	0	0	0	0	603	903	0
10485	8	0	0	0	0	0	0	200	300	0	0	0	0	0	0	0	200	903	0	0	0	0	0	0	0	603	903	0
10485	9	0	0	0	0	0	0	200	300	0	0	0	0	0	0	0	200	903	0	0	0	0	0	0	0	603	903	0
10486	0	0	0	0	0	0	0	200	300	0	0	0	0	0	0	0	200	903	0	0	0	0	0	0	0	603	903	0
10486	1	0	0	0	0	0	0	200	300	0	0	0	0	0	0	0	200	903	0	0	0	0	0	0	0	603	903	0
10486	2	0	0	0	0	0	0	200	300	0	0	0	0	0	0	0	200	903	0	0	0	0	0	0	0	603	903	0
10486	3	0	0	0	0	0	0	200	300	0	0	0	0	0	0	0	200	903	0	0	0	0	0	0	0	603	903	0
10486	4	0	0	0	0	0	0	200	300	0	0	0	0	0	0	0	200	903	0	0	0	0	0	0	0	603	903	0
10486	5	0	0	0	0	0	0	200	300	0	0	0	0	0	0	0	200	903	0	0	0	0	0	0	0	603	903	0
10486	6	0	0	0	0	0	0	200	300	0	0	0	0	0	0	0	200	903	0	0	0	0	0	0	0	603	903	0
10486	7	0	0	0	0	0	0	200	300	0	0	0	0	0	0	0	200	903	0	0	0	0	0	0	0	603	903	0
10486	8	0	0	0	0	0	0	200	300	0	0	0	0	0	0	0	200	903	0	0	0	0	0	0	0	603	903	0
10486	9	0	0	0	0	0	0	200	300	0	0	0	0	0	0	0	200	903	0	0	0	0	0	0	0	603	903	0
10487	0	0	0	0	0	0	0	200	300	0	0	0	0	0	0	0	200	903	0	0	0	0	0	0	0	603	903	0
10487	1	0	0	0	0	0	0	200	300	0	0	0	0	0	0	0	200	903	0	0	0	0	0	0	0	603	903	0
10487	2	0	0	0	0	0	0	200	300	0	0	0	0	0	0	0	200	903	0	0	0	0	0	0	0	603	903	0
10487	3	0	0	0	0	0	0	200	300	0	0	0	0	0	0	0	200	903	0	0	0	0	0	0	0	603	903	0
10487	4	0	0	0	0	0	0	200	300	0	0	0	0	0	0	0	200	903	0	0	0	0	0	0	0	603	903	0
10487	5	0	0	0	0	0	0	200	300	0	0	0	0	0	0	0	200	903	0	0	0	0	0	0	0	603	903	0
10487	6	0	0	0	0	0	0	200	300	0	0	0	0	0	0	0	200	903	0	0	0	0	0	0	0	603	903	0
10487	7	0	0	0	0	0	0	200	300	0	0	0	0	0	0	0	200	903	0	0	0	0	0	0	0	603	903	0
10487	8	0	0	0	0	0	0	200	300	0	0	0	0	0	0	0	200	903	0	0	0	0	0	0	0	603	903	0
10487	9	0	0	0	0	0	0	200	300	0	0	0	0	0	0	0	200	903	0	0	0	0	0	0	0	603	903	0
10488	0	0	0	0	0	0	0	200	300	0	0	0	0	0	0	0	200	903	0	0	0	0	0	0	0	603	903	0
10488	1	0	0	0	0	0	0	200	300	0	0	0	0	0	0	0	200	903	0	0	0	0	0	0	0	603	903	0
10488	2	0	0	0	0	0	0	200	300	0	0	0	0	0	0	0	200	903	0	0	0	0	0	0	0	603	903	0
10488	3	0	0	0	0	0	0	200	300	0	0	0	0	0	0	0	200	903	0	0	0	0	0	0	0	603	903	0
10488	4	0	0	0	0	0	0	200	300	0	0	0	0	0	0	0	200	903	0	0	0	0	0	0	0	603	903	0
10488	5	0	0	0	0	0	0	200	300	0	0	0	0	0	0	0	200	903	0	0	0	0	0	0	0	603	903	0
10488	6	0	0	0	0	0	0	200	300	0	0	0	0	0	0	0	200	903	0	0	0	0	0	0	0	603	903	0
10488	7	0	0	0	0	0	0	200	300	0	0	0	0	0	0	0	200	903	0	0	0	0	0	0	0	603	903	0
10488	8	0	0	0	0	0	0	200	300	0	0	0	0	0	0	0	200	903	0	0	0	0	0	0	0	603	903	0
10488	9	0	0	0	0	0	0	200	300	0	0	0	0	0	0	0	200	903	0	0	0	0	0	0	0	603	903	0
10489	0	0	0	0	0	0	0	200	300	0	0	0	0	0	0	0	200	903	0	0	0	0	0	0	0	603	903	0
10489	1	0	0	0	0	0	0	200	300	0	0	0	0	0	0	0	200	903	0	0	0	0	0	0	0	603	903	0
10489	2	0	0	0	0	0	0	200	300	0	0	0	0	0	0	0	200	903	0	0	0	0	0	0	0	603	903	0
10489	3	0	0	0	0	0	0	200	300	0	0	0	0	0	0	0	200	903	0	0	0	0	0	0	0	603	903	0
10489	4	0	0	0	0	0	0	200	300	0	0	0	0	0	0	0	200	903	0	0	0	0	0	0	0	603	903	0
10489	5	0	0	0	0	0	0	200	300	0	0	0	0	0	0	0	200	903	0	0	0	0	0	0	0	603	903	0
10489	6	0	0	0	0	0	0	200	300	0	0	0	0	0	0	0	200	903	0	0	0	0	0	0	0	603	903	0
10489	7	0	0	0	0	0	0	200	300	0	0	0	0	0	0	0	200	903	0	0	0	0	0	0	0	603	903	0
10489	8	0	0	0	0	0	0	200	300	0	0	0	0	0	0	0	200	903	0	0	0	0	0	0	0	603	903	0
10489	9	0	0	0	0	0	0	200	300	0	0	0	0	0	0	0	200	903	0	0	0	0	0	0	0	603	903	0
10490	0	0	0	0	0	0	0	200	300	0	0	0	0	0	0	0	200	903	0	0	0	0	0	0	0	603	903	0
10490	1	0	0	0	0	0	0	200	300	0	0	0	0	0	0	0	200	903	0	0	0	0	0	0	0	603	903	0
10490	2	0	0	0	0	0	0	200	300	0	0	0	0	0	0	0	200	903	0	0	0	0	0	0	0	603	903	0
10490	3	0	0	0	0	0	0	200	300	0	0	0	0	0	0	0	200	903	0	0	0	0	0	0	0	603	903	0
10490	4	0	0	0	0	0	0	200	300	0	0	0	0	0	0	0	200	903	0	0	0	0	0	0	0	603	903	0
10490	5	0	0	0	0	0	0	200	300	0	0	0	0	0	0	0	200	903	0	0	0	0	0	0	0	603	903	0
10490	6	0	0	0	0	0	0	200	300	0	0	0	0	0	0	0	200	903	0	0	0	0	0	0	0	603	903	0
10490	7	0	0	0	0	0	0	200	300	0	0	0	0	0	0	0	200	903	0	0	0	0	0	0	0	603	903	0
10490	8	0	0	0	0	0	0	200	300	0	0	0	0	0	0	0	200	903	0	0	0	0	0	0	0	603	903	0
10490	9	0	0	0	0	0	0	200	300	0	0	0	0	0	0	0	200	903	0	0	0	0	0	0	0	603	903	0
10491	0	0	0	0	0	0	0	200	300	0	0	0	0	0	0	0	200	903	0	0	0	0	0	0	0	603	903	0
10491	1	0	0	0	0	0	0	200	300	0	0	0	0	0	0	0	200	903	0	0	0	0	0	0	0	603	903	0
10491	2	0	0	0	0	0	0	200	300	0	0	0	0	0	0	0	200	903	0	0	0	0	0	0	0	603	903	0
10491	3	0	0	0	0	0	0	200	300	0	0	0	0	0	0	0	200	903	0	0	0	0	0	0	0	603	903	0
10491	4	0	0	0	0	0	0	200	300	0	0	0	0	0	0	0	200	903	0	0	0	0	0	0	0	603	903	0
10491	5	0	0	0	0	0	0	200	300	0	0	0	0	0	0	0	200	903	0	0	0	0	0	0	0	603	903	0
10491	6	0	0	0	0	0	0	200	300	0	0	0	0	0	0	0	200	903	0	0	0	0	0	0	0	603	903	0
10491	7	0	0	0	0	0	0	200	300	0	0	0	0	0	0	0	200	903	0	0	0	0	0	0	0	603	903	0
10491	8	0	0	0	0	0	0	200	300	0	0	0	0	0	0	0	200	903	0	0	0	0	0	0	0	603	903	0
10491	9	0	0	0	0	0	0	200	300	0	0	0	0	0	0	0	200	903	0	0	0	0	0	0	0	603	903	0
10492	0	0	0	0	0	0	0	200	300	0	0	0	0	0	0	0	200	903	0	0	0	0	0	0	0	603	903	0
10492	1	0	0	0	0	0	0	200	300	0	0	0	0	0	0	0	200	903	0	0	0	0	0	0	0	603	903	0
10492	2	0	0	0	0	0	0	200	300	0	0	0	0	0	0	0	200	903	0	0	0	0	0	0	0	603	903	0
10492	3	0	0	0	0	0	0	200	300	0	0	0	0	0	0	0	200	903	0	0	0	0	0	0	0	603	903	0
10492	4	0	0	0	0	0	0	200	300	0	0	0	0	0	0	0	200	903	0	0	0	0	0	0	0	603	903	0
10492	5	0	0	0	0	0	0	200	300	0	0	0	0	0	0	0	200	903	0	0	0	0	0	0	0	603	903	0
10492	6	0	0	0	0	0	0	200	300	0	0	0	0	0	0	0	200	903	0	0	0	0	0	0	0	603	903	0
10492	7	0	0	0	0	0	0	200	300	0	0	0	0	0	0	0	200	903	0	0	0	0	0	0	0	603	903	0
10492	8	0	0	0	0	0	0	200	300	0	0	0	0	0	0	0	200	903	0	0	0	0	0	0	0	603	903	0
10492	9	0	0	0	0	0	0	200	300	0	0	0	0	0	0	0	200	903	0	0	0	0	0	0	0	603	903	0
10493	0	0	0	0	0	0	0	200	300	0	0	0	0	0	0	0	200	903	0	0	0	0	0	0	0	603	903	0
10493	1	0	0	0	0	0	0	200	300	0	0	0	0	0	0	0	200	903	0	0	0	0	0	0	0	603	903	0
10493	2	0	0	0	0	0	0	200	300	0	0	0	0	0	0	0	200	903	0	0	0	0	0	0	0	603	903	0
10493	3	0	0	0	0	0	0	200	300	0	0	0	0	0	0	0	200	903	0	0	0	0	0	0	0	603	903	0
10493	4	0	0	0	0	0	0	200	300	0	0	0	0	0	0	0	200	903	0	0	0	0	0	0	0	603	903	0
10493	5	0	0	0	0	0	0	200	300	0	0	0	0	0	0	0	200	903	0	0	0	0	0	0	0	603	903	0
10493	6	0	0	0	0	0	0	200	300	0	0	0	0	0	0	0	200	903	0	0	0	0	0	0	0	603	903	0
10493	7	0	0	0	0	0	0	200	300	0	0	0	0	0	0	0	200	903	0	0	0	0	0	0	0	603	903	0
10493	8	0	0	0	0	0	0	200	300	0	0	0	0	0	0	0	200	903	0	0	0	0	0	0	0	603	903	0
10493	9	0	0	0	0	0	0	200	300	0	0	0	0	0	0	0	200	903	0	0	0	0	0	0	0	603	903	0
10494	0	0	0	0	0	0	0	200	300	0	0	0	0	0	0	0	200	903	0	0	0	0	0	0	0	603	903	0
10494	1	0	0	0	0	0	0	200	300	0	0	0	0	0	0	0	200	903	0	0	0	0	0	0	0	603	903	0
10494	2	0	0	0	0	0	0	200	300	0	0	0	0	0	0	0	200	903	0	0	0	0	0	0	0	603	903	0
10494	3	0	0	0	0	0	0	200	300	0	0	0	0	0	0	0	200	903	0	0	0	0	0	0	0	603	903	0
10494	4	0	0	0	0	0	0	200	300	0	0	0	0	0	0	0	200	903	0	0	0	0	0	0	0	603	903	0
10494	5	0	0	0	0	0	0	200	300	0	0	0	0	0	0	0	200	903	0	0	0	0	0	0	0	603	903	0
10494	6	0	0	0	0	0	0	200	300	0	0	0	0	0	0	0	200	903	0	0	0	0	0	0	0	603	903	0
10494	7	0	0	0	0	0	0	200	300	0	0	0	0	0	0	0	200	903	0	0	0	0	0	0	0	603	903	0
10494	8	0	0	0	0	0	0	200	300	0	0	0	0	0	0	0	200	903	0	0	0	0	0	0	0	603	903	0
10494	9	0	0	0	0	0	0	200	300	0	0	0	0	0	0	0	200	903	0	0	0	0	0	0	0	603	903	0
10495	0	0	0	0	0	0	0	200	300	0	0	0	0	0	0	0	200	903	0	0	0	0	0	0	0	603	903	0
10495	1	0	0	0	0	0	0	200	300	0	0	0	0	0	0	0	200	903	0	0	0	0	0	0	0	603	903	0
10495	2	0	0	0	0	0	0	200	300	0	0	0	0	0	0	0	200	903	0	0	0	0	0	0	0	603	903	0
10495	3	0	0	0	0	0	0	200	300	0	0	0	0	0	0	0	200	903	0	0	0	0	0	0	0	603	903	0
10495	4	0	0	0	0	0	0	200	300	0	0	0	0	0	0	0	200	903	0	0	0	0	0	0	0	603	903	0
10495	5	0	0	0	0	0	0	200	300	0	0	0	0	0	0	0	200	903	0	0	0	0	0	0	0	603	903	0
10495	6	0	0	0	0	0	0	200	300	0	0	0	0	0	0	0	200	903	0	0	0	0	0	0	0	603	903	0
10495	7	0	0	0	0	0	0	200	300	0	0	0	0	0	0	0	200	903	0	0	0	0	0	0	0	603	903	0
10495	8	0	0	0	0	0	0	200	300	0	0	0	0	0	0	0	200	903	0	0	0	0	0	0	0	603	903	0
10495	9	0	0	0	0	0	0	200	300	0	0	0	0	0	0	0	200	903	0	0	0	0	0	0	0	603	903	0
10496	0	0	0	0	0	0	0	200	300	0	0	0	0	0	0	0	200	903	0	0	0	0	0	0	0	603	903	0
10496	1	0	0	0	0	0	0	200	300	0	0	0	0	0	0	0	200	903	0	0	0	0	0	0	0	603	903	0
10496	2	0	0	0	0	0	0	200	300	0	0	0	0	0	0	0	200	903	0	0	0	0	0	0	0	603	903	0
10496	3	0	0	0	0	0	0	200	300	0	0	0	0	0	0	0	200	903	0	0	0	0	0	0	0	603	903	0
10496	4	0	0	0	0	0	0	200	300	0	0	0	0	0	0	0	200	903	0	0	0	0	0	0	0	603	903	0
10496	5	0	0	0	0	0	0	200	300	0	0	0	0	0	0	0	200	903	0	0	0	0	0	0	0	603	903	0
10496	6	0	0	0	0	0	0	200	300	0	0	0	0	0	0	0	200	903	0	0	0	0	0	0	0	603	903	0
10496	7	0	0	0	0	0	0	200	300	0	0	0	0	0	0	0	200	903	0	0	0	0	0	0	0	603	903	0
10496	8	0	0	0	0	0	0	200	300	0	0	0	0	0	0	0	200	903	0	0	0	0	0	0	0	603	903	0
10496	9	0	0	0	0	0	0	200	300	0	0	0	0	0	0	0	200	903	0	0	0	0	0	0	0	603	903	0
10497	0	0	0	0	0	0	0	200	300	0	0	0	0	0	0	0	200	903	0	0	0	0	0	0	0	603	903	0
10497	1	0	0	0	0	0	0	200	300	0	0	0	0	0	0	0	200	903	0	0	0	0	0	0	0	603	903	0
10497	2	0	0	0	0	0	0	200	300	0	0	0	0	0	0	0	200	903	0	0	0	0	0	0	0	603	903	0
10497	3	0	0	0	0	0	0	200	300	0	0	0	0	0	0	0	200	903	0	0	0	0	0	0	0	603	903	0
10497	4	0	0	0	0	0	0	200	300	0	0	0	0	0	0	0	200	903	0	0	0	0	0	0	0	603	903	0
10497	5	0	0	0	0	0	0	200	300	0	0	0	0	0	0	0	200	903	0	0	0	0	0	0	0	603	903	0
10497	6	0	0	0	0	0	0	200	300	0	0	0	0	0	0	0	200	903	0	0	0	0	0	0	0	603	903	0
10497	7	0	0	0	0	0	0	200	300	0	0	0	0	0	0	0	200	903	0	0	0	0	0	0	0	603	903	0
10497	8	0	0	0	0	0	0	200	300	0	0	0	0	0	0	0	200	903	0	0	0	0	0	0	0	603	903	0
10497	9	0	0	0	0	0	0	200	300	0	0	0	0	0	0	0	200	903	0	0	0	0	0	0	0	603	903	0
10498	0	0	0	0	0	0	0	200	300	0	0	0	0	0	0	0	200	903	0	0	0	0	0	0	0	603	903	0
10498	1	0	0	0	0	0	0	200	300	0	0	0	0	0	0	0	200	903	0	0	0	0	0	0	0	603	903	0
10498	2	0	0	0	0	0	0	200	300	0	0	0	0	0	0	0	200	903	0	0	0	0	0	0	0	603	903	0
10498	3	0	0	0	0	0	0	200	300	0	0	0	0	0	0	0	200	903	0	0	0	0	0	0	0	603	903	0
10498	4	0	0	0	0	0	0	200	300	0	0	0	0	0	0	0	200	903	0	0	0	0	0	0	0	603	903	0
10498	5	0	0	0	0	0	0	200	300	0	0	0	0	0	0	0	200	903	0	0	0	0	0	0	0	603	903	0
10498	6	0	0	0	0	0	0	200	300	0	0	0	0	0	0	0	200	903	0	0	0	0	0	0	0	603	903	0
10498	7	0	0	0	0	0	0	200	300	0	0	0	0	0	0	0	200	903	0	0	0	0	0	0	0	603	903	0
10498	8	0	0	0	0	0	0	200	300	0	0	0	0	0	0	0	200	903	0	0	0	0	0	0	0	603	903	0
10498	9	0	0	0	0	0	0	200	300	0	0	0	0	0	0	0	200	903	0	0	0	0	0	0	0	603	903	0
10499	0	0	0	0	0	0	0	200	300	0	0	0	0	0	0	0	200	903	0	0	0	0	0	0	0	603	903	0
10499	1	0	0	0	0	0	0	200	300	0	0	0	0	0	0	0	200	903	0	0	0	0	0	0	0	603	903	0
10499	2	0	0	0	0	0	0	200	300	0	0	0	0	0	0	0	200	903	0	0	0	0	0	0	0	603	903	0
10499	3	0	0	0	0	0	0	200	300	0	0	0	0	0	0	0	200	903	0	0	0	0	0	0	0	603	903	0
10499	4	0	0	0	0	0	0	200	300	0	0	0	0	0	0	0	200	903	0	0	0	0	0	0	0	603	903	0
10499	5	0	0	0	0	0	0	200	300	0	0	0	0	0	0	0	200	903	0	0	0	0	0	0	0	603	903	0
10499	6	0	0	0	0	0	0	200	300	0	0	0	0	0	0	0	200	903	0	0	0	0	0	0	0	603	903	0
10499	7	0	0	0	0	0	0	200	300	0	0	0	0	0	0	0	200	903	0	0	0	0	0	0	0	603	903	0
10499	8	0	0	0	0	0	0	200	300	0	0	0	0	0	0	0	200	903	0	0	0	0	0	0	0	603	903	0
10499	9	0	0	0	0	0	0	200	300	0	0	0	0	0	0	0	200	903	0	0	0	0	0	0	0	603	903	0
10500	0	0	0	0	0	0	0	200	300	0	0	0	0	0	0	0	200	903	0	0	0	0	0	0	0	603	903	0
10500	1	0	0	0	0	0	0	200	300	0	0	0	0	0	0	0	200	903	0	0	0	0	0	0	0	603	903	0
10500	2	0	0	0	0	0	0	200	300	0	0	0	0	0	0	0	200	903	0	0	0	0	0	0	0	603	903	0
10500	3	0	0	0	0	0	0	200	300	0	0	0	0	0	0	0	200	903	0	0	0	0	0	0	0	603	903	0
10500	4	0	0	0	0	0	0	200	300	0	0	0	0	0	0	0	200	903	0	0	0	0	0	0	0	603	903	0
10500	5	0	0	0	0	0	0	200	300	0	0	0	0	0	0	0	200	903	0	0	0	0	0	0	0	603	903	0
10500	6	0	0	0	0	0	0	200	300	0	0	0	0	0	0	0	200	903	0	0	0	0	0	0	0	603	903	0
10500	7	0	0	0	0	0	0	200	300	0	0	0	0	0	0	0	200	903	0	0	0	0	0	0	0	603	903	0
10500	8	0	0	0	0	0	0	200	300	0	0	0	0	0	0	0	200	903	0	0	0	0	0	0	0	603	903	0
10500	9	0	0	0	0	0	0	200	300	0	0	0	0	0	0	0	200	903	0	0	0	0	0	0	0	603	903	0
10501	0	0	0	0	0	0	0	200	300	0	0	0	0	0	0	0	200	903	0	0	0	0	0	0	0	603	903	0
10501	1	0	0	0	0	0	0	200	300	0	0	0	0	0	0	0	200	903	0	0	0	0	0	0	0	603	903	0
10501	2	0	0	0	0	0	0	200	300	0	0	0	0	0	0	0	200	903	0	0	0	0	0	0	0	603	903	0
10501	3	0	0	0	0	0	0	200	300	0	0	0	0	0	0	0	200	903	0	0	0	0	0	0	0	603	903	0
10501	4	0	0	0	0	0	0	200	300	0	0	0	0	0	0	0	200	903	0	0	0	0	0	0	0	603	903	0
10501	5	0	0	0	0	0	0	200	300	0	0	0	0	0	0	0	200	903	0	0	0	0	0	0	0	603	903	0
10501	6	0	0	0	0	0	0	200	300	0	0	0	0	0	0	0	200	903	0	0	0	0	0	0	0	603	903	0
10501	7	0	0	0	0	0	0	200	300	0	0	0	0	0	0	0	200	903	0	0	0	0	0	0	0	603	903	0
10501	8	0	0	0	0	0	0	200	300	0	0	0	0	0	0	0	200	903	0	0	0	0	0	0	0	603	903	0
10501	9	0	0	0	0	0	0	200	300	0	0	0	0	0	0	0	200	903	0	0	0	0	0	0	0	603	903	0
10502	0	0	0	0	0	0	0	200	300	0	0	0	0	0	0	0	200	903	0	0	0	0	0	0	0	603	903	0
10502	1	0	0	0	0	0	0	200	300	0	0	0	0	0	0	0	200	903	0	0	0	0	0	0	0	603	903	0
10502	2	0	0	0	0	0	0	200	300	0	0	0	0	0	0	0	200	903	0	0	0	0	0	0	0	603	903	0
10502	3	0	0	0	0	0	0	200	300	0	0	0	0	0	0	0	200	903	0	0	0	0	0	0	0	603	903	0
10502	4	0	0	0	0	0	0	200	300	0	0	0	0	0	0	0	200	903	0	0	0	0	0	0	0	603	903	0
10502	5	0	0	0	0	0	0	200	300	0	0	0	0	0	0	0	200	903	0	0	0	0	0	0	0	603	903	0
10502	6	0	0	0	0	0	0	200	300	0	0	0	0	0	0	0	200	903	0	0	0	0	0	0	0	603	903	0
10502	7	0	0	0	0	0	0	200	300	0	0	0	0	0	0	0	200	903	0	0	0	0	0	0	0	603	903	0
10502	8	0	0	0	0	0	0	200	300	0	0	0	0	0	0	0	200	903	0	0	0	0	0	0	0	603	903	0
10502	9	0	0	0	0	0	0	200	300	0	0	0	0	0	0	0	200	903	0	0	0	0	0	0	0	603	903	0
10503	0	0	0	0	0	0	0	200	300	0	0	0	0	0	0	0	200	903	0	0	0	0	0	0	0	603	903	0
10503	1	0	0	0	0	0	0	200	300	0	0	0	0	0	0	0	200	903	0	0	0	0	0	0	0	603	903	0
10503	2	0	0	0	0	0	0	200	300	0	0	0	0	0	0	0	200	903	0	0	0	0	0	0	0	603	903	0
10503	3	0	0	0	0	0	0	200	300	0	0	0	0	0	0	0	200	903	0	0	0	0	0	0	0	603	903	0
10503	4	0	0	0	0	0	0	200	300	0	0	0	0	0	0	0	200	903	0	0	0	0	0	0	0	603	903	0
10503	5	0	0	0	0	0	0	200	300	0	0	0	0	0	0	0	200	903	0	0	0	0	0	0	0	603	903	0
10503	6	0	0	0	0	0	0	200	300	0	0	0	0	0	0	0	200	903	0	0	0	0	0	0	0	603	903	0
10503	7	0	0	0	0	0	0	200	300	0	0	0	0	0	0	0	200	903	0	0	0	0	0	0	0	603	903	0
10503	8	0	0	0	0	0	0	200	300	0	0	0	0	0	0	0	200	903	0	0	0	0	0	0	0	603	903	0
10503	9	0	0	0	0	0	0	200	300	0	0	0	0	0	0	0	200	903	0	0	0	0	0	0	0	603	903	0
10504	0	0	0	0	0	0	0	200	300	0	0	0	0	0	0	0	200	903	0	0	0	0	0	0	0	603	903	0
10504	1	0	0	0	0	0	0	200	300	0	0	0	0	0	0	0	200	903	0	0	0	0	0	0	0	603	903	0
10504	2	0	0	0	0	0	0	200	300	0	0	0	0	0	0	0	200	903	0	0	0	0	0	0	0	603	903	0
10504	3	0	0	0	0	0	0	200	300	0	0	0	0	0	0	0	200	903	0	0	0	0	0	0	0	603	903	0
10504	4	0	0	0	0	0	0	200	300	0	0	0	0	0	0	0	200	903	0	0	0	0	0	0	0	603	903	0
10504	5	0	0	0	0	0	0	200	300	0	0	0	0	0	0	0	200	903	0	0	0	0	0	0	0	603	903	0
10504	6	0	0	0	0	0	0	200	300	0	0	0	0	0	0	0	200	903	0	0	0	0	0	0	0	603	903	0
10504	7	0	0	0	0	0	0	200	300	0	0	0	0	0	0	0	200	903	0	0	0	0	0	0	0	603	903	0
10504	8	0	0	0	0	0	0	200	300	0	0	0	0	0	0	0	200	903	0	0	0	0	0	0	0	603	903	0
10504	9	0	0	0	0	0	0	200	300	0	0	0	0	0	0	0	200	903	0	0	0	0	0	0	0	603	903	0
10505	0	0	0	0	0	0	0	200	300	0	0	0	0	0	0	0	200	903	0	0	0	0	0	0	0	603	903	0
10505	1	0	0	0	0	0	0	200	300	0	0	0	0	0	0	0	200	903	0	0	0	0	0	0	0	603	903	0
10505	2	0	0	0	0	0	0	200	300	0	0	0	0	0	0	0	200	903	0	0	0	0	0	0	0	603	903	0
10505	3	0	0	0	0	0	0	200	300	0	0	0	0	0	0	0	200	903	0	0	0	0	0	0	0	603	903	0
10505	4	0	0	0	0	0	0	200	300	0	0	0	0	0	0	0	200	903	0	0	0	0	0	0	0	603	903	0
10505	5	0	0	0	0	0	0	200	300	0	0	0	0	0	0	0	200	903	0	0	0	0	0	0	0	603	903	0
10505	6	0	0	0	0	0	0	200	300	0	0	0	0	0	0	0	200	903	0	0	0	0	0	0	0	603	903	0
10505	7	0	0	0	0	0	0	200	300	0	0	0	0	0	0	0	200	903	0	0	0	0	0	0	0	603	903	0
10505	8	0	0	0	0	0	0	200	300	0	0	0	0	0	0	0	200	903	0	0	0	0	0	0	0	603	903	0
10505	9	0	0	0	0	0	0	200	300	0	0	0	0	0	0	0	200	903	0	0	0	0	0	0	0	603	903	0
10506	0	0	0	0	0	0	0	200	300	0	0	0	0	0	0	0	200	903	0	0	0	0	0	0	0	603	903	0
10506	1	0	0	0	0	0	0	200	300	0	0	0	0	0	0	0	200	903	0	0	0	0	0	0	0	603	903	0
10506	2	0	0	0	0	0	0	200	300	0	0	0	0	0	0	0	200	903	0	0	0	0	0	0	0	603	903	0
10506	3	0	0	0	0	0	0	200	300	0	0	0	0	0	0	0	200	903	0	0	0	0	0	0	0	603	903	0
10506	4	0	0	0	0	0	0	200	300	0	0	0	0	0	0	0	200	903	0	0	0	0	0	0	0	603	903	0
10506	5	0	0	0	0	0	0	200	300	0	0	0	0	0	0	0	200	903	0	0	0	0	0	0	0	603	903	0
10506	6	0	0	0	0	0	0	200	300	0	0	0	0	0	0	0	200	903	0	0	0	0	0	0	0	603	903	0
10506	7	0	0	0	0	0	0	200	300	0	0	0	0	0	0	0	200	903	0	0	0	0	0	0	0	603	903	0
10506	8	0	0	0	0	0	0	200	300	0	0	0	0	0	0	0	200	903	0	0	0	0	0	0	0	603	903	0
10506	9	0	0	0	0	0	0	200	300	0	0	0	0	0	0	0	200	903	0	0	0	0	0	0	0	603	903	0
10507	0	0	0	0	0	0	0	200	300	0	0	0	0	0	0	0	200	903	0	0	0	0	0	0	0	603	903	0
10507	1	0	0	0	0	0	0	200	300	0	0	0	0	0	0	0	200	903	0	0	0	0	0	0	0	603	903	0
10507	2	0	0	0	0	0	0	200	300	0	0	0	0	0	0	0	200	903	0	0	0	0	0	0	0	603	903	0
10507	3	0	0	0	0	0	0	200	300	0	0	0	0	0	0	0	200	903	0	0	0	0	0	0	0	603	903	0
10507	4	0	0	0	0	0	0	200	300	0	0	0	0	0	0	0	200	903	0	0	0	0	0	0	0	603	903	0
10507	5	0	0	0	0	0	0	200	300	0	0	0	0	0	0	0	200	903	0	0	0	0	0	0	0	603	903	0
10507	6	0	0	0	0	0	0	200	300	0	0	0	0	0	0	0	200	903	0	0	0	0	0	0	0	603	903	0
10507	7	0	0	0	0	0	0	200	300	0	0	0	0	0	0	0	200	903	0	0	0	0	0	0	0	603	903	0
10507	8	0	0	0	0	0	0	200	300	0	0	0	0	0	0	0	200	903	0	0	0	0	0	0	0	603	903	0
10507	9	0	0	0	0	0	0	200	300	0	0	0	0	0	0	0	200	903	0	0	0	0	0	0	0	603	903	0
10508	0	0	0	0	0	0	0	200	300	0	0	0	0	0	0	0	200	903	0	0	0	0	0	0	0	603	903	0
10508	1	0	0	0	0	0	0	200	300	0	0	0	0	0	0	0	200	903	0	0	0	0	0	0	0	603	903	0
10508	2	0	0	0	0	0	0	200	300	0	0	0	0	0	0	0	200	903	0	0	0	0	0	0	0	603	903	0
10508	3	0	0	0	0	0	0	200	300	0	0	0	0	0	0	0	200	903	0	0	0	0	0	0	0	603	903	0
10508	4	0	0	0	0	0	0	200	300	0	0	0	0	0	0	0	200	903	0	0	0	0	0	0	0	603	903	0
10508	5	0	0	0	0	0	0	200	300	0	0	0	0	0	0	0	200	903	0	0	0	0	0	0	0	603	903	0
10508	6	0	0	0	0	0	0	200	300	0	0	0	0	0	0	0	200	903	0	0	0	0	0	0	0	603	903	0
10508	7	0	0	0	0	0	0	200	300	0	0	0	0	0	0	0	200	903	0	0	0	0	0	0	0	603	903	0
10508	8	0	0	0	0	0	0	200	300	0	0	0	0	0	0	0	200	903	0	0	0	0	0	0	0	603	903	0
10508	9	0	0	0	0	0	0	200	300	0	0	0	0	0	0	0	200	903	0	0	0	0	0	0	0	603	903	0
10509	0	0	0	0	0	0	0	200	300	0	0	0	0	0	0	0	200	903	0	0	0	0	0	0	0	603	903	0
10509	1	0	0	0	0	0	0	200	300	0	0	0	0	0	0	0	200	903	0	0	0	0	0	0	0	603	903	0
10509	2	0	0	0	0	0	0	200	300	0	0	0	0	0	0	0	200	903	0	0	0	0	0	0	0	603	903	0
10509	3	0	0	0	0	0	0	200	300	0	0	0	0	0	0	0	200	903	0	0	0	0	0	0	0	603	903	0
10509	4	0	0	0	0	0	0	200	300	0	0	0	0	0	0	0	200	903	0	0	0	0	0	0	0	603	903	0
10509	5	0	0	0	0	0	0	200	300	0	0	0	0	0	0	0	200	903	0	0	0	0	0	0	0	603	903	0
10509	6	0	0	0	0	0	0	200	300	0	0	0	0	0	0	0	200	903	0	0	0	0	0	0	0	603	903	0
10509	7	0	0	0	0	0	0	200	300	0	0	0	0	0	0	0	200	903	0	0	0	0	0	0	0	603	903	0
10509	8	0	0	0	0	0	0	200	300	0	0	0	0	0	0	0	200	903	0	0	0	0	0	0	0	603	903	0
10509	9	0	0	0	0	0	0	200	300	0	0	0	0	0	0	0	200	903	0	0	0	0	0	0	0	603	903	0
10510	0	0	0	0	0	0	0	200	300	0	0	0	0	0	0	0	200	903	0	0	0	0	0	0	0	603	903	0
10510	1	0	0	0	0	0	0	200	300	0	0	0	0	0	0	0	200	903	0	0	0	0	0	0	0	603	903	0
10510	2	0	0	0	0	0	0	200	300	0	0	0	0	0	0	0	200	903	0	0	0	0	0	0	0	603	903	0
10510	3	0	0	0	0	0	0	200	300	0	0	0	0	0	0	0	200	903	0	0	0	0	0	0	0	603	903	0
10510	4	0	0	0	0	0	0	200	300	0	0	0	0	0	0	0	200	903	0	0	0	0	0	0	0	603	903	0
10510	5	0	0	0	0	0	0	200	300	0	0	0	0	0	0	0	200	903	0	0	0	0	0	0	0	603	903	0
10510	6	0	0	0	0	0	0	200	300	0	0	0	0	0	0	0	200	903	0	0	0	0	0	0	0	603	903	0
10510	7	0	0	0	0	0	0	200	300	0	0	0	0	0	0	0	200	903	0	0	0	0	0	0	0	603	903	0
10510	8	0	0	0	0	0	0	200	300	0	0	0	0	0	0	0	200	903	0	0	0	0	0	0	0	603	903	0
10510	9	0	0	0	0	0	0	200	300	0	0	0	0	0	0	0	200	903	0	0	0	0	0	0	0	603	903	0
10511	0	0	0	0	0	0	0	200	300	0	0	0	0	0	0	0	200	903	0	0	0	0	0	0	0	603	903	0
10511	1	0	0	0	0	0	0	200	300	0	0	0	0	0	0	0	200	903	0	0	0	0	0	0	0	603	903	0
10511	2	0	0	0	0	0	0	200	300	0	0	0	0	0	0	0	200	903	0	0	0	0	0	0	0	603	903	0
10511	3	0	0	0	0	0	0	200	300	0	0	0	0	0	0	0	200	903	0	0	0	0	0	0	0	603	903	0
10511	4	0	0	0	0	0	0	200	300	0	0	0	0	0	0	0	200	903	0	0	0	0	0	0	0	603	903	0
10511	5	0	0	0	0	0	0	200	300	0	0	0	0	0	0	0	200	903	0	0	0	0	0	0	0	603	903	0
10511	6	0	0	0	0	0	0	200	300	0	0	0	0	0	0	0	200	903	0	0	0	0	0	0	0	603	903	0
10511	7	0	0	0	0	0	0	200	300	0	0	0	0	0	0	0	200	903	0	0	0	0	0	0	0	603	903	0
10511	8	0	0	0	0	0	0	200	300	0	0	0	0	0	0	0	200	903	0	0	0	0	0	0	0	603	903	0
10511	9	0	0	0	0	0	0	200	300	0	0	0	0	0	0	0	200	903	0	0	0	0	0	0	0	603	903	0
10512	0	0	0	0	0	0	0	200	300	0	0	0	0	0	0	0	200	903	0	0	0	0	0	0	0	603	903	0
10512	1	0	0	0	0	0	0	200	300	0	0	0	0	0	0	0	200	903	0	0	0	0	0	0	0	603	903	0
10512	2	0	0	0	0	0	0	200	300	0	0	0	0	0	0	0	200	903	0	0	0	0	0	0	0	603	903	0
10512	3	0	0	0	0	0	0	200	300	0	0	0	0	0	0	0	200	903	0	0	0	0	0	0	0	603	903	0
10512	4	0	0	0	0	0	0	200	300	0	0	0	0	0	0	0	200	903	0	0	0	0	0	0	0	603	903	0
10512	5	0	0	0	0	0	0	200	300	0	0	0	0	0	0	0	200	903	0	0	0	0	0	0	0	603	903	0
10512	6	0	0	0	0	0	0	200	300	0	0	0	0	0	0	0	200	903	0	0	0	0	0	0	0	603	903	0
10512	7	0	0	0	0	0	0	200	300	0	0	0	0	0	0	0	200	903	0	0	0	0	0	0	0	603	903	0
10512	8	0	0	0	0	0	0	200	300	0	0	0	0	0	0	0	200	903	0	0	0	0	0	0	0	603	903	0
10512	9	0	0	0	0	0	0	200	300	0	0	0	0	0	0	0	200	903	0	0	0	0	0	0	0	603	903	0
10513	0	0	0	0	0	0	0	200	300	0	0	0	0	0	0	0	200	903	0	0	0	0	0	0	0	603	903	0
10513	1	0	0	0	0	0	0	200	300	0	0	0	0	0	0	0	200	903	0	0	0	0	0	0	0	603	903	0
10513	2	0	0	0	0	0	0	200	300	0	0	0	0	0	0	0	200	903	0	0	0	0	0	0	0	603	903	0
10513	3	0	0	0	0	0	0	200	300	0	0	0	0	0	0	0	200	903	0	0	0	0	0	0	0	603	903	0
10513	4	0	0	0	0	0	0	200	300	0	0	0	0	0	0	0	200	903	0	0	0	0	0	0	0	603	903	0
10513	5	0	0	0	0	0	0	200	300	0	0	0	0	0	0	0	200	903	0	0	0	0	0	0	0	603	903	0
10513	6	0	0	0	0	0	0	200	300	0	0	0	0	0	0	0	200	903	0	0	0	0	0	0	0	603	903	0
10513	7	0	0	0	0	0	0	200	300	0	0	0	0	0	0	0	200	903	0	0	0	0	0	0	0	603	903	0
10513	8	0	0	0	0	0	0	200	300	0	0	0	0	0	0	0	200	903	0	0	0	0	0	0	0	603	903	0
10513	9	0	0	0	0	0	0	200	300	0	0	0	0	0	0	0	200	903	0	0	0	0	0	0	0	603	903	0
10514	0	0	0	0	0	0	0	200	300	0	0	0	0	0	0	0	200	903	0	0	0	0	0	0	0	603	903	0
10514	1	0	0	0	0	0	0	200	300	0	0	0	0	0	0	0	200	903	0	0	0	0	0	0	0	603	903	0
10514	2	0	0	0	0	0	0	200	300	0	0	0	0	0	0	0	200	903	0	0	0	0	0	0	0	603	903	0
10514	3	0	0	0	0	0	0	200	300	0	0	0	0	0	0	0	200	903	0	0	0	0	0	0	0	603	903	0
10514	4	0	0	0	0	0	0	200	300	0	0	0	0	0	0	0	200	903	0	0	0	0	0	0	0	603	903	0
10514	5	0	0	0	0	0	0	200	300	0	0	0	0	0	0	0	200	903	0	0	0	0	0	0	0	603	903	0
10514	6	0	0	0	0	0	0	200	300	0	0	0	0	0	0	0	200	903	0	0	0	0	0	0	0	603	903	0
10514	7	0	0	0	0	0	0	200	300	0	0	0	0	0	0	0	200	903	0	0	0	0	0	0	0	603	903	0
10514	8	0	0	0	0	0	0	200	300	0	0	0	0	0	0	0	200	903	0	0	0	0	0	0	0	603	903	0
10514	9	0	0	0	0	0	0	200	300	0	0	0	0	0	0	0	200	903	0	0	0	0	0	0	0	603	903	0
10515	0	0	0	0	0	0	0	200	300	0	0	0	0	0	0	0	200	903	0	0	0	0	0	0	0	603	903	0
10515	1	0	0	0	0	0	0	200	300	0	0	0	0	0	0	0	200	903	0	0	0	0	0	0	0	603	903	0
10515	2	0	0	0	0	0	0	200	300	0	0	0	0	0	0	0	200	903	0	0	0	0	0	0	0	603	903	0
10515	3	0	0	0	0	0	0	200	300	0	0	0	0	0	0	0	200	903	0	0	0	0	0	0	0	603	903	0
10515	4	0	0	0	0	0	0	200	300	0	0	0	0	0	0	0	200	903	0	0	0	0	0	0	0	603	903	0
10515	5	0	0	0	0	0	0	200	300	0	0	0	0	0	0	0	200	903	0	0	0	0	0	0	0	603	903	0
10515	6	0	0	0	0	0	0	200	300	0	0	0	0	0	0	0	200	903	0	0	0	0	0	0	0	603	903	0
10515	7	0	0	0	0	0	0	200	300	0	0	0	0	0	0	0	200	903	0	0	0	0	0	0	0	603	903	0
10515	8	0	0	0	0	0	0	200	300	0	0	0	0	0	0	0	200	903	0	0	0	0	0	0	0	603	903	0
10515	9	0	0	0	0	0	0	200	300	0	0	0	0	0	0	0	200	903	0	0	0	0	0	0	0	603	903	0
10516	0	0	0	0	0	0	0	200	300	0	0	0	0	0	0	0	200	903	0	0	0	0	0	0	0	603	903	0
10516	1	0	0	0	0	0	0	200	300	0	0	0	0	0	0	0	200	903	0	0	0	0	0	0	0	603	903	0
10516	2	0	0	0	0	0	0	200	300	0	0	0	0	0	0	0	200	903	0	0	0	0	0	0	0	603	903	0
10516	3	0	0	0	0	0	0	200	300	0	0	0	0	0	0	0	200	903	0	0	0	0	0	0	0	603	903	0
10516	4	0	0	0	0	0	0	200	300	0	0	0	0	0	0	0	200	903	0	0	0	0	0	0	0	603	903	0
10516	5	0	0	0	0	0	0	200	300	0	0	0	0	0	0	0	200	903	0	0	0	0	0	0	0	603	903	0
10516	6	0	0	0	0	0	0	200	300	0	0	0	0	0	0	0	200	903	0	0	0	0	0	0	0	603	903	0
10516	7	0	0	0	0	0	0	200	300	0	0	0	0	0	0	0	200	903	0	0	0	0	0	0	0	603	903	0
10516	8	0	0	0	0	0	0	200	300	0	0	0	0	0	0	0	200	903	0	0	0	0	0	0	0	603	903	0
10516	9	0	0	0	0	0	0	200	300	0	0	0	0	0	0	0	200	903	0	0	0	0	0	0	0	603	903	0
10517	0	0	0	0	0	0	0	200	300	0	0	0	0	0	0	0	200	903	0	0	0	0	0	0	0	603	903	0
10517	1	0	0	0	0	0	0	200	300	0	0	0	0	0	0	0	200	903	0	0	0	0	0	0	0	603	903	0
10517	2	0	0	0	0	0	0	200	300	0	0	0	0	0	0	0	200	903	0	0	0	0	0	0	0	603	903	0
10517	3	0	0	0	0	0	0	200	300	0	0	0	0	0	0	0	200	903	0	0	0	0	0	0	0	603	903	0
10517	4	0	0	0	0	0	0	200	300	0	0	0	0	0	0	0	200	903	0	0	0	0	0	0	0	603	903	0
10517	5	0	0	0	0	0	0	200	300	0	0	0	0	0	0	0	200	903	0	0	0	0	0	0	0	603	903	0
10517	6	0	0	0	0	0	0	200	300	0	0	0	0	0	0	0	200	903	0	0	0	0	0	0	0	603	903	0
10517	7	0	0	0	0	0	0	200	300	0	0	0	0	0	0	0	200	903	0	0	0	0	0	0	0	603	903	0
10517	8	0	0	0	0	0	0	200	300	0	0	0	0	0	0	0	200	903	0	0	0	0	0	0	0	603	903	0
10517	9	0	0	0	0	0	0	200	300	0	0	0	0	0	0	0	200	903	0	0	0	0	0	0	0	603	903	0
10518	0	0	0	0	0	0	0	200	300	0	0	0	0	0	0	0	200	903	0	0	0	0	0	0	0	603	903	0
10518	1	0	0	0	0	0	0	200	300	0	0	0	0	0	0	0	200	903	0	0	0	0	0	0	0	603	903	0
10518	2	0	0	0	0	0	0	200	300	0	0	0	0	0	0	0	200	903	0	0	0	0	0	0	0	603	903	0
10518	3	0	0	0	0	0	0	200	300	0	0	0	0	0	0	0	200	903	0	0	0	0	0	0	0	603	903	0
10518	4	0	0	0	0	0	0	200	300	0	0	0	0	0	0	0	200	903	0	0	0	0	0	0	0	603	903	0
10518	5	0	0	0	0	0	0	200	300	0	0	0	0	0	0	0	200	903	0	0	0	0	0	0	0	603	903	0
10518	6	0	0	0	0	0	0	200	300	0	0	0	0	0	0	0	200	903	0	0	0	0	0	0	0	603	903	0
10518	7	0	0	0	0	0	0	200	300	0	0	0	0	0	0	0	200	903	0	0	0	0	0	0	0	603	903	0
10518	8	0	0	0	0	0	0	200	300	0	0	0	0	0	0	0	200	903	0	0	0	0	0	0	0	603	903	0
10518	9	0	0	0	0	0	0	200	300	0	0	0	0	0	0	0	200	903	0	0	0	0	0	0	0	603	903	0
10519	0	0	0	0	0	0	0	200	300	0	0	0	0	0	0	0	200	903	0	0	0	0	0	0	0	603	903	0
10519	1	0	0	0	0	0	0	200	300	0	0	0	0	0	0	0	200	903	0	0	0	0	0	0	0	603	903	0
10519	2	0	0	0	0	0	0	200	300	0	0	0	0	0	0	0	200	903	0	0	0	0	0	0	0	603	903	0
10519	3	0	0	0	0	0	0	200	300	0	0	0	0	0	0	0	200	903	0	0	0	0	0	0	0	603	903	0
10519	4	0	0	0	0	0	0	200	300	0	0	0	0	0	0	0	200	903	0	0	0	0	0	0	0	603	903	0
10519	5	0	0	0	0	0	0	200	300	0	0	0	0	0	0	0	200	903	0	0	0	0	0	0	0	603	903	0
10519	6	0	0	0	0	0	0	200	300	0	0	0	0	0	0	0	200	903	0	0	0	0	0	0	0	603	903	0
10519	7	0	0	0	0	0	0	200	300	0	0	0	0	0	0	0	200	903	0	0	0	0	0	0	0	603	903	0
10519	8	0	0	0	0	0	0	200	300	0	0	0	0	0	0	0	200	903	0	0	0	0	0	0	0	603	903	0
10519	9	0	0	0	0	0	0	200	300	0	0	0	0	0	0	0	200	903	0	0	0	0	0	0	0	603	903	0
10520	0	0	0	0	0	0	0	200	300	0	0	0	0	0	0	0	200	903	0	0	0	0	0	0	0	603	903	0
10520	1	0	0	0	0	0	0	200	300	0	0	0	0	0	0	0	200	903	0	0	0	0	0	0	0	603	903	0
10520	2	0	0	0	0	0	0	200	300	0	0	0	0	0	0	0	200	903	0	0	0	0	0	0	0	603	903	0
10520	3	0	0	0	0	0	0	200	300	0	0	0	0	0	0	0	200	903	0	0	0	0	0	0	0	603	903	0
10520	4	0	0	0	0	0	0	200	300	0	0	0	0	0	0	0	200	903	0	0	0	0	0	0	0	603	903	0
10520	5	0	0	0	0	0	0	200	300	0	0	0	0	0	0	0	200	903	0	0	0	0	0	0	0	603	903	0
10520	6	0	0	0	0	0	0	200	300	0	0	0	0	0	0	0	200	903	0	0	0	0	0	0	0	603	903	0
10520	7	0	0	0	0	0	0	200	300	0	0	0	0	0	0	0	200	903	0	0	0	0	0	0	0	603	903	0
10520	8	0	0	0	0	0	0	200	300	0	0	0	0	0	0	0	200	903	0	0	0	0	0	0	0	603	903	0
10520	9	0	0	0	0	0	0	200	300	0	0	0	0	0	0	0	200	903	0	0	0	0	0	0	0	603	903	0
10521	0	0	0	0	0	0	0	200	300	0	0	0	0	0	0	0	200	903	0	0	0	0	0	0	0	603	903	0
10521	1	0	0	0	0	0	0	200	300	0	0	0	0	0	0	0	200	903	0	0	0	0	0	0	0	603	903	0
10521	2	0	0	0	0	0	0	200	300	0	0	0	0	0	0	0	200	903	0	0	0	0	0	0	0	603	903	0
10521	3	0	0	0	0	0	0	200	300	0	0	0	0	0	0	0	200	903	0	0	0	0	0	0	0	603	903	0
10521	4	0	0	0	0	0	0	200	300	0	0	0	0	0	0	0	200	903	0	0	0	0	0	0	0	603	903	0
10521	5	0	0	0	0	0	0	200	300	0	0	0	0	0	0	0	200	903	0	0	0	0	0	0	0	603	903	0
10521	6	0	0	0	0	0	0	200	300	0	0	0	0	0	0	0	200	903	0	0	0	0	0	0	0	603	903	0
10521	7	0	0	0	0	0	0	200	300	0	0	0	0	0	0	0	200	903	0	0	0	0	0	0	0	603	903	0
10521	8	0	0	0	0	0	0	200	300	0	0	0	0	0	0	0	200	903	0	0	0	0	0	0	0	603	903	0
10521	9	0	0	0	0	0	0	200	300	0	0	0	0	0	0	0	200	903	0	0	0	0	0	0	0	603	903	0
10522	0	0	0	0	0	0	0	200	300	0	0	0	0	0	0	0	200	903	0	0	0	0	0	0	0	603	903	0
10522	1	0	0	0	0	0	0	200	300	0	0	0	0	0	0	0	200	903	0	0	0	0	0	0	0	603	903	0
10522	2	0	0	0	0	0	0	200	300	0	0	0	0	0	0	0	200	903	0	0	0	0	0	0	0	603	903	0
10522	3	0	0	0	0	0	0	200	300	0	0	0	0	0	0	0	200	903	0	0	0	0	0	0	0	603	903	0
10522	4	0	0	0	0	0	0	200	300	0	0	0	0	0	0	0	200	903	0	0	0	0	0	0	0	603	903	0
10522	5	0	0	0	0	0	0	200	300	0	0	0	0	0	0	0	200	903	0	0	0	0	0	0	0	603	903	0
10522	6	0	0	0	0	0	0	200	300	0	0	0	0	0	0	0	200	903	0	0	0	0	0	0	0	603	903	0
10522	7	0	0	0	0	0	0	200	300	0	0	0	0	0	0	0	200	903	0	0	0	0	0	0	0	603	903	0
10522	8	0	0	0	0	0	0	200	300	0	0	0	0	0	0	0	200	903	0	0	0	0	0	0	0	603	903	0
10522	9	0	0	0	0	0	0	200	300	0	0	0	0	0	0	0	200	903	0	0	0	0	0	0	0	603	903	0
10523	0	0	0	0	0	0	0	200	300	0	0	0	0	0	0	0	200	903	0	0	0	0	0	0	0	603	903	0
10523	1	0	0	0	0	0	0	200	300	0	0	0	0	0	0	0	200	903	0	0	0	0	0	0	0	603	903	0
10523	2	0	0	0	0	0	0	200	300	0	0	0	0	0	0	0	200	903	0	0	0	0	0	0	0	603	903	0
10523	3	0	0	0	0	0	0	200	300	0	0	0	0	0	0	0	200	903	0	0	0	0	0	0	0	603	903	0
10523	4	0	0	0	0	0	0	200	300	0	0	0	0	0	0	0	200	903	0	0	0	0	0	0	0	603	903	0
10523	5	0	0	0	0	0	0	200	300	0	0	0	0	0	0	0	200	903	0	0	0	0	0	0	0	603	903	0
10523	6	0	0	0	0	0	0	200	300	0	0	0	0	0	0	0	200	903	0	0	0	0	0	0	0	603	903	0
10523	7	0	0	0	0	0	0	200	300	0	0	0	0	0	0	0	200	903	0	0	0	0	0	0	0	603	903	0
10523	8	0	0	0	0	0	0	200	300	0	0	0	0	0	0	0	200	903	0	0	0	0	0	0	0	603	903	0
10523	9	0	0	0	0	0	0	200	300	0	0	0	0	0	0	0	200	903	0	0	0	0	0	0	0	603	903	0
10524	0	0	0	0	0	0	0	200	300	0	0	0	0	0	0	0	200	903	0	0	0	0	0	0	0	603	903	0
10524	1	0	0	0	0	0	0	200	300	0	0	0	0	0	0	0	200	903	0	0	0	0	0	0	0	603	903	0
10524	2	0	0	0	0	0	0	200	300	0	0	0	0	0	0	0	200	903	0	0	0	0	0	0	0	603	903	0
10524	3	0	0	0	0	0	0	200	300	0	0	0	0	0	0	0	200	903	0	0	0	0	0	0	0	603	903	0
10524	4	0	0	0	0	0	0	200	300	0	0	0	0	0	0	0	200	903	0	0	0	0	0	0	0	603	903	0
10524	5	0	0	0	0	0	0	200	300	0	0	0	0	0	0	0	200	903	0	0	0	0	0	0	0	603	903	0
10524	6	0	0	0	0	0	0	200	300	0	0	0	0	0	0	0	200	903	0	0	0	0	0	0	0	603	903	0
10524	7	0	0	0	0	0	0	200	300	0	0	0	0	0	0	0	200	903	0	0	0	0	0	0	0	603	903	0
10524	8	0	0	0	0	0	0	200	300	0	0	0	0	0	0	0	200	903	0	0	0	0	0	0	0	603	903	0
10524	9	0	0	0	0	0	0	200	300	0	0	0	0	0	0	0	200	903	0	0	0	0	0	0	0	603	903	0
10525	0	0	0	0	0	0	0	200	300	0	0	0	0	0	0	0	200	903	0	0	0	0	0	0	0	603	903	0
10525	1	0	0	0	0	0	0	200	300	0	0	0	0	0	0	0	200	903	0	0	0	0	0	0	0	603	903	0
10525	2	0	0	0	0	0	0	200	300	0	0	0	0	0	0	0	200	903	0	0	0	0	0	0	0	603	903	0
10525	3	0	0	0	0	0	0	200	300	0	0	0	0	0	0	0	200	903	0	0	0	0	0	0	0	603	903	0
10525	4	0	0	0	0	0	0	200	300	0	0	0	0	0	0	0	200	903	0	0	0	0	0	0	0	603	903	0
10525	5	0	0	0	0	0	0	200	300	0	0	0	0	0	0	0	200	903	0	0	0	0	0	0	0	603	903	0
10525	6	0	0	0	0	0	0	200	300	0	0	0	0	0	0	0	200	903	0	0	0	0	0	0	0	603	903	0
10525	7	0	0	0	0	0	0	200	300	0	0	0	0	0	0	0	200	903	0	0	0	0	0	0	0	603	903	0
10525	8	0	0	0	0	0	0	200	300	0	0	0	0	0	0	0	200	903	0	0	0	0	0	0	0	603	903	0
10525	9	0	0	0	0	0	0	200	300	0	0	0	0	0	0	0	200	903	0	0	0	0	0	0	0	603	903	0
10526	0	0	0	0	0	0	0	200	300	0	0	0	0	0	0	0	200	903	0	0	0	0	0	0	0	603	903	0
10526	1	0	0	0	0	0	0	200	300	0	0	0	0	0	0	0	200	903	0	0	0	0	0	0	0	603	903	0
10526	2	0	0	0	0	0	0	200	300	0	0	0	0	0	0	0	200	903	0	0	0	0	0	0	0	603	903	0
10526	3	0	0	0	0	0	0	200	300	0	0	0	0	0	0	0	200	903	0	0	0	0	0	0	0	603	903	0
10526	4	0	0	0	0	0	0	200	300	0	0	0	0	0	0	0	200	903	0	0	0	0	0	0	0	603	903	0
10526	5	0	0	0	0	0	0	200	300	0	0	0	0	0	0	0	200	903	0	0	0	0	0	0	0	603	903	0
10526	6	0	0	0	0	0	0	200	300	0	0	0	0	0	0	0	200	903	0	0	0	0	0	0	0	603	903	0
10526	7	0	0	0	0	0	0	200	300	0	0	0	0	0	0	0	200	903	0	0	0	0	0	0	0	603	903	0
10526	8	0	0	0	0	0	0	200	300	0	0	0	0	0	0	0	200	903	0	0	0	0	0	0	0	603	903	0
10526	9	0	0	0	0	0	0	200	300	0	0	0	0	0	0	0	200	903	0	0	0	0	0	0	0	603	903	0
10527	0	0	0	0	0	0	0	200	300	0	0	0	0	0	0	0	200	903	0	0	0	0	0	0	0	603	903	0
10527	1	0	0	0	0	0	0	200	300	0	0	0	0	0	0	0	200	903	0	0	0	0	0	0	0	603	903	0
10527	2	0	0	0	0	0	0	200	300	0	0	0	0	0	0	0	200	903	0	0	0	0	0	0	0	603	903	0
10527	3	0	0	0	0	0	0	200	300	0	0	0	0	0	0	0	200	903	0	0	0	0	0	0	0	603	903	0
10527	4	0	0	0	0	0	0	200	300	0	0	0	0	0	0	0	200	903	0	0	0	0	0	0	0	603	903	0
10527	5	0	0	0	0	0	0	200	300	0	0	0	0	0	0	0	200	903	0	0	0	0	0	0	0	603	903	0
10527	6	0	0	0	0	0	0	200	300	0	0	0	0	0	0	0	200	903	0	0	0	0	0	0	0	603	903	0
10527	7	0	0	0	0	0	0	200	300	0	0	0	0	0	0	0	200	903	0	0	0	0	0	0	0	603	903	0
10527	8	0	0	0	0	0	0	200	300	0	0	0	0	0	0	0	200	903	0	0	0	0	0	0	0	603	903	0
10527	9	0	0	0	0	0	0	200	300	0	0	0	0	0	0	0	200	903	0	0	0	0	0	0	0	603	903	0
10528	0	0	0	0	0	0	0	200	300	0	0	0	0	0	0	0	200	903	0	0	0	0	0	0	0	603	903	0
10528	1	0	0	0	0	0	0	200	300	0	0	0	0	0	0	0	200	903	0	0	0	0	0	0	0	603	903	0
10528	2	0	0	0	0	0	0	200	300	0	0	0	0	0	0	0	200	903	0	0	0	0	0	0	0	603	903	0
10528	3	0	0	0	0	0	0	200	300	0	0	0	0	0	0	0	200	903	0	0	0	0	0	0	0	603	903	0
10528	4	0	0	0	0	0	0	200	300	0	0	0	0	0	0	0	200	903	0	0	0	0	0	0	0	603	903	0
10528	5	0	0	0	0	0	0	200	300	0	0	0	0	0	0	0	200	903	0	0	0	0	0	0	0	603	903	0
10528	6	0	0	0	0	0	0	200	300	0	0	0	0	0	0	0	200	903	0	0	0	0	0	0	0	603	903	0
10528	7	0	0	0	0	0	0	200	300	0	0	0	0	0	0	0	200	903	0	0	0	0	0	0	0	603	903	0
10528	8	0	0	0	0	0	0	200	300	0	0	0	0	0	0	0	200	903	0	0	0	0	0	0	0	603	903	0
10528	9	0	0	0	0	0	0	200	300	0	0	0	0	0	0	0	200	903	0	0	0	0	0	0	0	603	903	0
10529	0	0	0	0	0	0	0	200	300	0	0	0	0	0	0	0	200	903	0	0	0	0	0	0	0	603	903	0
10529	1	0	0	0	0	0	0	200	300	0	0	0	0	0	0	0	200	903	0	0	0	0	0	0	0	603	903	0
10529	2	0	0	0	0	0	0	200	300	0	0	0	0	0	0	0	200	903	0	0	0	0	0	0	0	603	903	0
10529	3	0	0	0	0	0	0	200	300	0	0	0	0	0	0	0	200	903	0	0	0	0	0	0	0	603	903	0
10529	4	0	0	0	0	0	0	200	300	0	0	0	0	0	0	0	200	903	0	0	0	0	0	0	0	603	903	0
10529	5	0	0	0	0	0	0	200	300	0	0	0	0	0	0	0	200	903	0	0	0	0	0	0	0	603	903	0
10529	6	0	0	0	0	0	0	200	300	0	0	0	0	0	0	0	200	903	0	0	0	0	0	0	0	603	903	0
10529	7	0	0	0	0	0	0	200	300	0	0	0	0	0	0	0	200	903	0	0	0	0	0	0	0	603	903	0
10529	8	0	0	0	0	0	0	200	300	0	0	0	0	0	0	0	200	903	0	0	0	0	0	0	0	603	903	0
10529	9	0	0	0	0	0	0	200	300	0	0	0	0	0	0	0	200	903	0	0	0	0	0	0	0	603	903	0
10530	0	0	0	0	0	0	0	200	300	0	0	0	0	0	0	0	200	903	0	0	0	0	0	0	0	603	903	0
10530	1	0	0	0	0	0	0	200	300	0	0	0	0	0	0	0	200	903	0	0	0	0	0	0	0	603	903	0
10530	2	0	0	0	0	0	0	200	300	0	0	0	0	0	0	0	200	903	0	0	0	0	0	0	0	603	903	0
10530	3	0	0	0	0	0	0	200	300	0	0	0	0	0	0	0	200	903	0	0	0	0	0	0	0	603	903	0
10530	4	0	0	0	0	0	0	200	300	0	0	0	0	0	0	0	200	903	0	0	0	0	0	0	0	603	903	0
10530	5	0	0	0	0	0	0	200	300	0	0	0	0	0	0	0	200	903	0	0	0	0	0	0	0	603	903	0
10530	6	0	0	0	0	0	0	200	300	0	0	0	0	0	0	0	200	903	0	0	0	0	0	0	0	603	903	0
10530	7	0	0	0	0	0	0	200	300	0	0	0	0	0	0	0	200	903	0	0	0	0	0	0	0	603	903	0
10530	8	0	0	0	0	0	0	200	300	0	0	0	0	0	0	0	200	903	0	0	0	0	0	0	0	603	903	0
10530	9	0	0	0	0	0	0	200	300	0	0	0	0	0	0	0	200	903	0	0	0	0	0	0	0	603	903	0
10531	0	0	0	0	0	0	0	200	300	0	0	0	0	0	0	0	200	903	0	0	0	0	0	0	0	603	903	0
10531	1	0	0	0	0	0	0	200	300	0	0	0	0	0	0	0	200	903	0	0	0	0	0	0	0	603	903	0
10531	2	0	0	0	0	0	0	200	300	0	0	0	0	0	0	0	200	903	0	0	0	0	0	0	0	603	903	0
10531	3	0	0	0	0	0	0	200	300	0	0	0	0	0	0	0	200	903	0	0	0	0	0	0	0	603	903	0
10531	4	0	0	0	0	0	0	200	300	0	0	0	0	0	0	0	200	903	0	0	0	0	0	0	0	603	903	0
10531	5	0	0	0	0	0	0	200	300	0	0	0	0	0	0	0	200	903	0	0	0	0	0	0	0	603	903	0
10531	6	0	0	0	0	0	0	200	300	0	0	0	0	0	0	0	200	903	0	0	0	0	0	0	0	603	903	0
10531	7	0	0	0	0	0	0	200	300	0	0	0	0	0	0	0	200	903	0	0	0	0	0	0	0	603	903	0
10531	8	0	0	0	0	0	0	200	300	0	0	0	0	0	0	0	200	903	0	0	0	0	0	0	0	603	903	0
10531	9	0	0	0	0	0	0	200	300	0	0	0	0	0	0	0	200	903	0	0	0	0	0	0	0	603	903	0
10532	0	0	0	0	0	0	0	200	300	0	0	0	0	0	0	0	200	903	0	0	0	0	0	0	0	603	903	0
10532	1	0	0	0	0	0	0	200	300	0	0	0	0	0	0	0	200	903	0	0	0	0	0	0	0	603	903	0
10532	2	0	0	0	0	0	0	200	300	0	0	0	0	0	0	0	200	903	0	0	0	0	0	0	0	603	903	0
10532	3	0	0	0	0	0	0	200	300	0	0	0	0	0	0	0	200	903	0	0	0	0	0	0	0	603	903	0
10532	4	0	0	0	0	0	0	200	300	0	0	0	0	0	0	0	200	903	0	0	0	0	0	0	0	603	903	0
10532	5	0	0	0	0	0	0	200	300	0	0	0	0	0	0	0	200	903	0	0	0	0	0	0	0	603	903	0
10532	6	0	0	0	0	0	0	200	300	0	0	0	0	0	0	0	200	903	0	0	0	0	0	0	0	603	903	0
10532	7	0	0	0	0	0	0	200	300	0	0	0	0	0	0	0	200	903	0	0	0	0	0	0	0	603	903	0
10532	8	0	0	0	0	0	0	200	300	0	0	0	0	0	0	0	200	903	0	0	0	0	0	0	0	603	903	0
10532	9	0	0	0	0	0	0	200	300	0	0	0	0	0	0	0	200	903	0	0	0	0	0	0	0	603	903	0
10533	0	0	0	0	0	0	0	200	300	0	0	0	0	0	0	0	200	903	0	0	0	0	0	0	0	603	903	0
10533	1	0	0	0	0	0	0	200	300	0	0	0	0	0	0	0	200	903	0	0	0	0	0	0	0	603	903	0
10533	2	0	0	0	0	0	0	200	300	0	0	0	0	0	0	0	200	903	0	0	0	0	0	0	0	603	903	0
10533	3	0	0	0	0	0	0	200	300	0	0	0	0	0	0	0	200	903	0	0	0	0	0	0	0	603	903	0
10533	4	0	0	0	0	0	0	200	300	0	0	0	0	0	0	0	200	903	0	0	0	0	0	0	0	603	903	0
10533	5	0	0	0	0	0	0	200	300	0	0	0	0	0	0	0	200	903	0	0	0	0	0	0	0	603	903	0
10533	6	0	0	0	0	0	0	200	300	0	0	0	0	0	0	0	200	903	0	0	0	0	0	0	0	603	903	0
10533	7	0	0	0	0	0	0	200	300	0	0	0	0	0	0	0	200	903	0	0	0	0	0	0	0	603	903	0
10533	8	0	0	0	0	0	0	200	300	0	0	0	0	0	0	0	200	903	0	0	0	0	0	0	0	603	903	0
10533	9	0	0	0	0	0	0	200	300	0	0	0	0	0	0	0	200	903	0	0	0	0	0	0	0	603	903	0
10534	0	0	0	0	0	0	0	200	300	0	0	0	0	0	0	0	200	903	0	0	0	0	0	0	0	603	903	0
10534	1	0	0	0	0	0	0	200	300	0	0	0	0	0	0	0	200	903	0	0	0	0	0	0	0	603	903	0
10534	2	0	0	0	0	0	0	200	300	0	0	0	0	0	0	0	200	903	0	0	0	0	0	0	0	603	903	0
10534	3	0	0	0	0	0	0	200	300	0	0	0	0	0	0	0	200	903	0	0	0	0	0	0	0	603	903	0
10534	4	0	0	0	0	0	0	200	300	0	0	0	0	0	0	0	200	903	0	0	0	0	0	0	0	603	903	0
10534	5	0	0	0	0	0	0	200	300	0	0	0	0	0	0	0	200	903	0	0	0	0	0	0	0	603	903	0
10534	6	0	0	0	0	0	0	200	300	0	0	0	0	0	0	0	200	903	0	0	0	0	0	0	0	603	903	0
10534	7	0	0	0	0	0	0	200	300	0	0	0	0	0	0	0	200	903	0	0	0	0	0	0	0	603	903	0
10534	8	0	0	0	0	0	0	200	300	0	0	0	0	0	0	0	200	903	0	0	0	0	0	0	0	603	903	0
10534	9	0	0	0	0	0	0	200	300	0	0	0	0	0	0	0	200	903	0	0	0	0	0	0	0	603	903	0
10535	0	0	0	0	0	0	0	200	300	0	0	0	0	0	0	0	200	903	0	0	0	0	0	0	0	603	903	0
10535	1	0	0	0	0	0	0	200	300	0	0	0	0	0	0	0	200	903	0	0	0	0	0	0	0	603	903	0
10535	2	0	0	0	0	0	0	200	300	0	0	0	0	0	0	0	200	903	0	0	0	0	0	0	0	603	903	0
10535	3	0	0	0	0	0	0	200	300	0	0	0	0	0	0	0	200	903	0	0	0	0	0	0	0	603	903	0
10535	4	0	0	0	0	0	0	200	300	0	0	0	0	0	0	0	200	903	0	0	0	0	0	0	0	603	903	0
10535	5	0	0	0	0	0	0	200	300	0	0	0	0	0	0	0	200	903	0	0	0	0	0	0	0	603	903	0
10535	6	0	0	0	0	0	0	200	300	0	0	0	0	0	0	0	200	903	0	0	0	0	0	0	0	603	903	0
10535	7	0	0	0	0	0	0	200	300	0	0	0	0	0	0	0	200	903	0	0	0	0	0	0	0	603	903	0
10535	8	0	0	0	0	0	0	200	300	0	0	0	0	0	0	0	200	903	0	0	0	0	0	0	0	603	903	0
10535	9	0	0	0	0	0	0	200	300	0	0	0	0	0	0	0	200	903	0	0	0	0	0	0	0	603	903	0
10536	0	0	0	0	0	0	0	200	300	0	0	0	0	0	0	0	200	903	0	0	0	0	0	0	0	603	903	0
10536	1	0	0	0	0	0	0	200	300	0	0	0	0	0	0	0	200	903	0	0	0	0	0	0	0	603	903	0
10536	2	0	0	0	0	0	0	200	300	0	0	0	0	0	0	0	200	903	0	0	0	0	0	0	0	603	903	0
10536	3	0	0	0	0	0	0	200	300	0	0	0	0	0	0	0	200	903	0	0	0	0	0	0	0	603	903	0
10536	4	0	0	0	0	0	0	200	300	0	0	0	0	0	0	0	200	903	0	0	0	0	0	0	0	603	903	0
10536	5	0	0	0	0	0	0	200	300	0	0	0	0	0	0	0	200	903	0	0	0	0	0	0	0	603	903	0
10536	6	0	0	0	0	0	0	200	300	0	0	0	0	0	0	0	200	903	0	0	0	0	0	0	0	603	903	0
10536	7	0	0	0	0	0	0	200	300	0	0	0	0	0	0	0	200	903	0	0	0	0	0	0	0	603	903	0
10536	8	0	0	0	0	0	0	200	300	0	0	0	0	0	0	0	200	903	0	0	0	0	0	0	0	603	903	0
10536	9	0	0	0	0	0	0	200	300	0	0	0	0	0	0	0	200	903	0	0	0	0	0	0	0	603	903	0
10537	0	0	0	0	0	0	0	200	300	0	0	0	0	0	0	0	200	903	0	0	0	0	0	0	0	603	903	0
10537	1	0	0	0	0	0	0	200	300	0	0	0	0	0	0	0	200	903	0	0	0	0	0	0	0	603	903	0
10537	2	0	0	0	0	0	0	200	300	0	0	0	0	0	0	0	200	903	0	0	0	0	0	0	0	603	903	0
10537	3	0	0	0	0	0	0	200	300	0	0	0	0	0	0	0	200	903	0	0	0	0	0	0	0	603	903	0
10537	4	0	0	0	0	0	0	200	300	0	0	0	0	0	0	0	200	903	0	0	0	0	0	0	0	603	903	0
10537	5	0	0	0	0	0	0	200	300	0	0	0	0	0	0	0	200	903	0	0	0	0	0	0	0	603	903	0
10537	6	0	0	0	0	0	0	200	300	0	0	0	0	0	0	0	200	903	0	0	0	0	0	0	0	603	903	0
10537	7	0	0	0	0	0	0	200	300	0	0	0	0	0	0	0	200	903	0	0	0	0	0	0	0	603	903	0
10537	8	0	0	0	0	0	0	200	300	0	0	0	0	0	0	0	200	903	0	0	0	0	0	0	0	603	903	0
10537	9	0	0	0	0	0	0	200	300	0	0	0	0	0	0	0	200	903	0	0	0	0	0	0	0	603	903	0
10538	0	0	0	0	0	0	0	200	300	0	0	0	0	0	0	0	200	903	0	0	0	0	0	0	0	603	903	0
10538	1	0	0	0	0	0	0	200	300	0	0	0	0	0	0	0	200	903	0	0	0	0	0	0	0	603	903	0
10538	2	0	0	0	0	0	0	200	300	0	0	0	0	0	0	0	200	903	0	0	0	0	0	0	0	603	903	0
10538	3	0	0	0	0	0	0	200	300	0	0	0	0	0	0	0	200	903	0	0	0	0	0	0	0	603	903	0
10538	4	0	0	0	0	0	0	200	300	0	0	0	0	0	0	0	200	903	0	0	0	0	0	0	0	603	903	0
10538	5	0	0	0	0	0	0	200	300	0	0	0	0	0	0	0	200	903	0	0	0	0	0	0	0	603	903	0
10538	6	0	0	0	0	0	0	200	300	0	0	0	0	0	0	0	200	903	0	0	0	0	0	0	0	603	903	0
10538	7	0	0	0	0	0	0	200	300	0	0	0	0	0	0	0	200	903	0	0	0	0	0	0	0	603	903	0
10538	8	0	0	0	0	0	0	200	300	0	0	0	0	0	0	0	200	903	0	0	0	0	0	0	0	603	903	0
10538	9	0	0	0	0	0	0	200	300	0	0	0	0	0	0	0	200	903	0	0	0	0	0	0	0	603	903	0
10539	0	0	0	0	0	0	0	200	300	0	0	0	0	0	0	0	200	903	0	0	0	0	0	0	0	603	903	0
10539	1	0	0	0	0	0	0	200	300	0	0	0	0	0	0	0	200	903	0	0	0	0	0	0	0	603	903	0
10539	2	0	0	0	0	0	0	200	300	0	0	0	0	0	0	0	200	903	0	0	0	0	0	0	0	603	903	0
10539	3	0	0	0	0	0	0	200	300	0	0	0	0	0	0	0	200	903	0	0	0	0	0	0	0	603	903	0
10539	4	0	0	0	0	0	0	200	300	0	0	0	0	0	0	0	200	903	0	0	0	0	0	0	0	603	903	0
10539	5	0	0	0	0	0	0	200	300	0	0	0	0	0	0	0	200	903	0	0	0	0	0	0	0	603	903	0
10539	6	0	0	0	0	0	0	200	300	0	0	0	0	0	0	0	200	903	0	0	0	0	0	0	0	603	903	0
10539	7	0	0	0	0	0	0	200	300	0	0	0	0	0	0	0	200	903	0	0	0	0	0	0	0	603	903	0
10539	8	0	0	0	0	0	0	200	300	0	0	0	0	0	0	0	200	903	0	0	0	0	0	0	0	603	903	0
10539	9	0	0	0	0	0	0	200	300	0	0	0	0	0	0	0	200	903	0	0	0	0	0	0	0	603	903	0
10540	0	0	0	0	0	0	0	200	300	0	0	0	0	0	0	0	200	903	0	0	0	0	0	0	0	603	903	0
10540	1	0	0	0	0	0	0	200	300	0	0	0	0	0	0	0	200	903	0	0	0	0	0	0	0	603	903	0
10540	2	0	0	0	0	0	0	200	300	0	0	0	0	0	0	0	200	903	0	0	0	0	0	0	0	603	903	0
10540	3	0	0	0	0	0	0	200	300	0	0	0	0	0	0	0	200	903	0	0	0	0	0	0	0	603	903	0
10540	4	0	0	0	0	0	0	200	300	0	0	0	0	0	0	0	200	903	0	0	0	0	0	0	0	603	903	0
10540	5	0	0	0	0	0	0	200	300	0	0	0	0	0	0	0	200	903	0	0	0	0	0	0	0	603	903	0
10540	6	0	0	0	0	0	0	200	300	0	0	0	0	0	0	0	200	903	0	0	0	0	0	0	0	603	903	0
10540	7	0	0	0	0	0	0	200	300	0	0	0	0	0	0	0	200	903	0	0	0	0	0	0	0	603	903	0
10540	8	0	0	0	0	0	0	200	300	0	0	0	0	0	0	0	200	903	0	0	0	0	0	0	0	603	903	0
10540	9	0	0	0	0	0	0	200	300	0	0	0	0	0	0	0	200	903	0	0	0	0	0	0	0	603	903	0
10541	0	0	0	0	0	0	0	200	300	0	0	0	0	0	0	0	200	903	0	0	0	0	0	0	0	603	903	0
10541	1	0	0	0	0	0	0	200	300	0	0	0	0	0	0	0	200	903	0	0	0	0	0	0	0	603	903	0
10541	2	0	0	0	0	0	0	200	300	0	0	0	0	0	0	0	200	903	0	0	0	0	0	0	0	603	903	0
10541	3	0	0	0	0	0	0	200	300	0	0	0	0	0	0	0	200	903	0	0	0	0	0	0	0	603	903	0
10541	4	0	0	0	0	0	0	200	300	0	0	0	0	0	0	0	200	903	0	0	0	0	0	0	0	603	903	0
10541	5	0	0	0	0	0	0	200	300	0	0	0	0	0	0	0	200	903	0	0	0	0	0	0	0	603	903	0
10541	6	0	0	0	0	0	0	200	300	0	0	0	0	0	0	0	200	903	0	0	0	0	0	0	0	603	903	0
10541	7	0	0	0	0	0	0	200	300	0	0	0	0	0	0	0	200	903	0	0	0	0	0	0	0	603	903	0
10541	8	0	0	0	0	0	0	200	300	0	0	0	0	0	0	0	200	903	0	0	0	0	0	0	0	603	903	0
10541	9	0	0	0	0	0	0	200	300	0	0	0	0	0	0	0	200	903	0	0	0	0	0	0	0	603	903	0
10542	0	0	0	0	0	0	0	200	300	0	0	0	0	0	0	0	200	903	0	0	0	0	0	0	0	603	903	0
10542	1	0	0	0	0	0	0	200	300	0	0	0	0	0	0	0	200	903	0	0	0	0	0	0	0	603	903	0
10542	2	0	0	0	0	0	0	200	300	0	0	0	0	0	0	0	200	903	0	0	0	0	0	0	0	603	903	0
10542	3	0	0	0	0	0	0	200	300	0	0	0	0	0	0	0	200	903	0	0	0	0	0	0	0	603	903	0
10542	4	0	0	0	0	0	0	200	300	0	0	0	0	0	0	0	200	903	0	0	0	0	0	0	0	603	903	0
10542	5	0	0	0	0	0	0	200	300	0	0	0	0	0	0	0	200	903	0	0	0	0	0	0	0	603	903	0
10542	6	0	0	0	0	0	0	200	300	0	0	0	0	0	0	0	200	903	0	0	0	0	0	0	0	603	903	0
10542	7	0	0	0	0	0	0	200	300	0	0	0	0	0	0	0	200	903	0	0	0	0	0	0	0	603	903	0
10542	8	0	0	0	0	0	0	200	300	0	0	0	0	0	0	0	200	903	0	0	0	0	0	0	0	603	903	0
10542	9	0	0	0	0	0	0	200	300	0	0	0	0	0	0	0	200	903	0	0	0	0	0	0	0	603	903	0
10543	0	0	0	0	0	0	0	200	300	0	0	0	0	0	0	0	200	903	0	0	0	0	0	0	0	603	903	0
10543	1	0	0	0	0	0	0	200	300	0	0	0	0	0	0	0	200	903	0	0	0	0	0	0	0	603	903	0
10543	2	0	0	0	0	0	0	200	300	0	0	0	0	0	0	0	200	903	0	0	0	0	0	0	0	603	903	0
10543	3	0	0	0	0	0	0	200	300	0	0	0	0	0	0	0	200	903	0	0	0	0	0	0	0	603	903	0
10543	4	0	0	0	0	0	0	200	300	0	0	0	0	0	0	0	200	903	0	0	0	0	0	0	0	603	903	0
10543	5	0	0	0	0	0	0	200	300	0	0	0	0	0	0	0	200	903	0	0	0	0	0	0	0	603	903	0
10543	6	0	0	0	0	0	0	200	300	0	0	0	0	0	0	0	200	903	0	0	0	0	0	0	0	603	903	0
10543	7	0	0	0	0	0	0	200	300	0	0	0	0	0	0	0	200	903	0	0	0	0	0	0	0	603	903	0
10543	8	0	0	0	0	0	0	200	300	0	0	0	0	0	0	0	200	903	0	0	0	0	0	0	0	603	903	0
10543	9	0	0	0	0	0	0	200	300	0	0	0	0	0	0	0	200	903	0	0	0	0	0	0	0	603	903	0
10544	0	0	0	0	0	0	0	200	300	0	0	0	0	0	0	0	200	903	0	0	0	0	0	0	0	603	903	0
10544	1	0	0	0	0	0	0	200	300	0	0	0	0	0	0	0	200	903	0	0	0	0	0	0	0	603	903	0
10544	2	0	0	0	0	0	0	200	300	0	0	0	0	0	0	0	200	903	0	0	0	0	0	0	0	603	903	0
10544	3	0	0	0	0	0	0	200	300	0	0	0	0	0	0	0	200	903	0	0	0	0	0	0	0	603	903	0
10544	4	0	0	0	0	0	0	200	300	0	0	0	0	0	0	0	200	903	0	0	0	0	0	0	0	603	903	0
10544	5	0	0	0	0	0	0	200	300	0	0	0	0	0	0	0	200	903	0	0	0	0	0	0	0	603	903	0
10544	6	0	0	0	0	0	0	200	300	0	0	0	0	0	0	0	200	903	0	0	0	0	0	0	0	603	903	0
10544	7	0	0	0	0	0	0	200	300	0	0	0	0	0	0	0	200	903	0	0	0	0	0	0	0	603	903	0
10544	8	0	0	0	0	0	0	200	300	0	0	0	0	0	0	0	200	903	0	0	0	0	0	0	0	603	903	0
10544	9	0	0	0	0	0	0	200	300	0	0	0	0	0	0	0	200	903	0	0	0	0	0	0	0	603	903	0
10545	0	0	0	0	0	0	0	200	300	0	0	0	0	0	0	0	200	903	0	0	0	0	0	0	0	603	903	0
10545	1	0	0	0	0	0	0	200	300	0	0	0	0	0	0	0	200	903	0	0	0	0	0	0	0	603	903	0
10545	2	0	0	0	0	0	0	200	300	0	0	0	0	0	0	0	200	903	0	0	0	0	0	0	0	603	903	0
10545	3	0	0	0	0	0	0	200	300	0	0	0	0	0	0	0	200	903	0	0	0	0	0	0	0	603	903	0
10545	4	0	0	0	0	0	0	200	300	0	0	0	0	0	0	0	200	903	0	0	0	0	0	0	0	603	903	0
10545	5	0	0	0	0	0	0	200	300	0	0	0	0	0	0	0	200	903	0	0	0	0	0	0	0	603	903	0
10545	6	0	0	0	0	0	0	200	300	0	0	0	0	0	0	0	200	903	0	0	0	0	0	0	0	603	903	0
10545	7	0	0	0	0	0	0	200	300	0	0	0	0	0	0	0	200	903	0	0	0	0	0	0	0	603	903	0
10545	8	0	0	0	0	0	0	200	300	0	0	0	0	0	0	0	200	903	0	0	0	0	0	0	0	603	903	0
10545	9	0	0	0	0	0	0	200	300	0	0	0	0	0	0	0	200	903	0	0	0	0	0	0	0	603	903	0
10546	0	0	0	0	0	0	0	200	300	0	0	0	0	0	0	0	200	903	0	0	0	0	0	0	0	603	903	0
10546	1	0	0	0	0	0	0	200	300	0	0	0	0	0	0	0	200	903	0	0	0	0	0	0	0	603	903	0
10546	2	0	0	0	0	0	0	200	300	0	0	0	0	0	0	0	200	903	0	0	0	0	0	0	0	603	903	0
10546	3	0	0	0	0	0	0	200	300	0	0	0	0	0	0	0	200	903	0	0	0	0	0	0	0	603	903	0
10546	4	0	0	0	0	0	0	200	300	0	0	0	0	0	0	0	200	903	0	0	0	0	0	0	0	603	903	0
10546	5	0	0	0	0	0	0	200	300	0	0	0	0	0	0	0	200	903	0	0	0	0	0	0	0	603	903	0
10546	6	0	0	0	0	0	0	200	300	0	0	0	0	0	0	0	200	903	0	0	0	0	0	0	0	603	903	0
10546	7	0	0	0	0	0	0	200	300	0	0	0	0	0	0	0	200	903	0	0	0	0	0	0	0	603	903	0
10546	8	0	0	0	0	0	0	200	300	0	0	0	0	0	0	0	200	903	0	0	0	0	0	0	0	603	903	0
10546	9	0	0	0	0	0	0	200	300	0	0	0	0	0	0	0	200	903	0	0	0	0	0	0	0	603	903	0
10547	0	0	0	0	0	0	0	200	300	0	0	0	0	0	0	0	200	903	0	0	0	0	0	0	0	603	903	0
10547	1	0	0	0	0	0	0	200	300	0	0	0	0	0	0	0	200	903	0	0	0	0	0	0	0	603	903	0
10547	2	0	0	0	0	0	0	200	300	0	0	0	0	0	0	0	200	903	0	0	0	0	0	0	0	603	903	0
10547	3	0	0	0	0	0	0	200	300	0	0	0	0	0	0	0	200	903	0	0	0	0	0	0	0	603	903	0
10547	4	0	0	0	0	0	0	200	300	0	0	0	0	0	0	0	200	903	0	0	0	0	0	0	0	603	903	0
10547	5	0	0	0	0	0	0	200	300	0	0	0	0	0	0	0	200	903	0	0	0	0	0	0	0	603	903	0
10547	6	0	0	0	0	0	0	200	300	0	0	0	0	0	0	0	200	903	0	0	0	0	0	0	0	603	903	0
10547	7	0	0	0	0	0	0	200	300	0	0	0	0	0	0	0	200	903	0	0	0	0	0	0	0	603	903	0
10547	8	0	0	0	0	0	0	200	300	0	0	0	0	0	0	0	200	903	0	0	0	0	0	0	0	603	903	0
10547	9	0	0	0	0	0	0	200	300	0	0	0	0	0	0	0	200	903	0	0	0	0	0	0	0	603	903	0
10548	0	0	0	0	0	0	0	200	300	0	0	0	0	0	0	0	200	903	0	0	0	0	0	0	0	603	903	0
10548	1	0	0	0	0	0	0	200	300	0	0	0	0	0	0	0	200	903	0	0	0	0	0	0	0	603	903	0
10548	2	0	0	0	0	0	0	200	300	0	0	0	0	0	0	0	200	903	0	0	0	0	0	0	0	603	903	0
10548	3	0	0	0	0	0	0	200	300	0	0	0	0	0	0	0	200	903	0	0	0	0	0	0	0	603	903	0
10548	4	0	0	0	0	0	0	200	300	0	0	0	0	0	0	0	200	903	0	0	0	0	0	0	0	603	903	0
10548	5	0	0	0	0	0	0	200	300	0	0	0	0	0	0	0	200	903	0	0	0	0	0	0	0	603	903	0
10548	6	0	0	0	0	0	0	200	300	0	0	0	0	0	0	0	200	903	0	0	0	0	0	0	0	603	903	0
10548	7	0	0	0	0	0	0	200	300	0	0	0	0	0	0	0	200	903	0	0	0	0	0	0	0	603	903	0
10548	8	0	0	0	0	0	0	200	300	0	0	0	0	0	0	0	200	903	0	0	0	0	0	0	0	603	903	0
10548	9	0	0	0	0	0	0	200	300	0	0	0	0	0	0	0	200	903	0	0	0	0	0	0	0	603	903	0
10549	0	0	0	0	0	0	0	200	300	0	0	0	0	0	0	0	200	903	0	0	0	0	0	0	0	603	903	0
10549	1	0	0	0	0	0	0	200	300	0	0	0	0	0	0	0	200	903	0	0	0	0	0	0	0	603	903	0
10549	2	0	0	0	0	0	0	200	300	0	0	0	0	0	0	0	200	903	0	0	0	0	0	0	0	603	903	0
10549	3	0	0	0	0	0	0	200	300	0	0	0	0	0	0	0	200	903	0	0	0	0	0	0	0	603	903	0
10549	4	0	0	0	0	0	0	200	300	0	0	0	0	0	0	0	200	903	0	0	0	0	0	0	0	603	903	0
10549	5	0	0	0	0	0	0	200	300	0	0	0	0	0	0	0	200	903	0	0	0	0	0	0	0	603	903	0
10549	6	0	0	0	0	0	0	200	300	0	0	0	0	0	0	0	200	903	0	0	0	0	0	0	0	603	903	0
10549	7	0	0	0	0	0	0	200	300	0	0	0	0	0	0	0	200	903	0	0	0	0	0	0	0	603	903	0
10549	8	0	0	0	0	0	0	200	300	0	0	0	0	0	0	0	200	903	0	0	0	0	0	0	0	603	903	0
10549	9	0	0	0	0	0	0	200	300	0	0	0	0	0	0	0	200	903	0	0	0	0	0	0	0	603	903	0
10550	0	0	0	0	0	0	0	200	300	0	0	0	0	0	0	0	200	903	0	0	0	0	0	0	0	603	903	0
10550	1	0	0	0	0	0	0	200	300	0	0	0	0	0	0	0	200	903	0	0	0	0	0	0	0	603	903	0
10550	2	0	0	0	0	0	0	200	300	0	0	0	0	0	0	0	200	903	0	0	0	0	0	0	0	603	903	0
10550	3	0	0	0	0	0	0	200	300	0	0	0	0	0	0	0	200	903	0	0	0	0	0	0	0	603	903	0
10550	4	0	0	0	0	0	0	200	300	0	0	0	0	0	0	0	200	903	0	0	0	0	0	0	0	603	903	0
10550	5	0	0	0	0	0	0	200	300	0	0	0	0	0	0	0	200	903	0	0	0	0	0	0	0	603	903	0
10550	6	0	0	0	0	0	0	200	300	0	0	0	0	0	0	0	200	903	0	0	0	0	0	0	0	603	903	0
10550	7	0	0	0	0	0	0	200	300	0	0	0	0	0	0	0	200	903	0	0	0	0	0	0	0	603	903	0
10550	8	0	0	0	0	0	0	200	300	0	0	0	0	0	0	0	200	903	0	0	0	0	0	0	0	603	903	0
10550	9	0	0	0	0	0	0	200	300	0	0	0	0	0	0	0	200	903	0	0	0	0	0	0	0	603	903	0
10551	0	0	0	0	0	0	0	200	300	0	0	0	0	0	0	0	200	903	0	0	0	0	0	0	0	603	903	0
10551	1	0	0	0	0	0	0	200	300	0	0	0	0	0	0	0	200	903	0	0	0	0	0	0	0	603	903	0
10551	2	0	0	0	0	0	0	200	300	0	0	0	0	0	0	0	200	903	0	0	0	0	0	0	0	603	903	0
10551	3	0	0	0	0	0	0	200	300	0	0	0	0	0	0	0	200	903	0	0	0	0	0	0	0	603	903	0
10551	4	0	0	0	0	0	0	200	300	0	0	0	0	0	0	0	200	903	0	0	0	0	0	0	0	603	903	0
10551	5	0	0	0	0	0	0	200	300	0	0	0	0	0	0	0	200	903	0	0	0	0	0	0	0	603	903	0
10551	6	0	0	0	0	0	0	200	300	0	0	0	0	0	0	0	200	903	0	0	0	0	0	0	0	603	903	0
10551	7	0	0	0	0	0	0	200	300	0	0	0	0	0	0	0	200	903	0	0	0	0	0	0	0	603	903	0
10551	8	0	0	0	0	0	0	200	300	0	0	0	0	0	0	0	200	903	0	0	0	0	0	0	0	603	903	0
10551	9	0	0	0	0	0	0	200	300	0	0	0	0	0	0	0	200	903	0	0	0	0	0	0	0	603	903	0
10552	0	0	0	0	0	0	0	200	300	0	0	0	0	0	0	0	200	903	0	0	0	0	0	0	0	603	903	0
10552	1	0	0	0	0	0	0	200	300	0	0	0	0	0	0	0	200	903	0	0	0	0	0	0	0	603	903	0
10552	2	0	0	0	0	0	0	200	300	0	0	0	0	0	0	0	200	903	0	0	0	0	0	0	0	603	903	0
10552	3	0	0	0	0	0	0	200	300	0	0	0	0	0	0	0	200	903	0	0	0	0	0	0	0	603	903	0
10552	4	0	0	0	0	0	0	200	300	0	0	0	0	0	0	0	200	903	0	0	0	0	0	0	0	603	903	0
10552	5	0	0	0	0	0	0	200	300	0	0	0	0	0	0	0	200	903	0	0	0	0	0	0	0	603	903	0
10552	6	0	0	0	0	0	0	200	300	0	0	0	0	0	0	0	200	903	0	0	0	0	0	0	0	603	903	0
10552	7	0	0	0	0	0	0	200	300	0	0	0	0	0	0	0	200	903	0	0	0	0	0	0	0	603	903	0
10552	8	0	0	0	0	0	0	200	300	0	0	0	0	0	0	0	200	903	0	0	0	0	0	0	0	603	903	0
10552	9	0	0	0	0	0	0	200	300	0	0	0	0	0	0	0	200	903	0	0	0	0	0	0	0	603	903	0
10553	0	0	0	0	0	0	0	200	300	0	0	0	0	0	0	0	200	903	0	0	0	0	0	0	0	603	903	0
10553	1	0	0	0	0	0	0	200	300	0	0	0	0	0	0	0	200	903	0	0	0	0	0	0	0	603	903	0
10553	2	0	0	0	0	0	0	200	300	0	0	0	0	0	0	0	200	903	0	0	0	0	0	0	0	603	903	0
10553	3	0	0	0	0	0	0	200	300	0	0	0	0	0	0	0	200	903	0	0	0	0	0	0	0	603	903	0
10553	4	0	0	0	0	0	0	200	300	0	0	0	0	0	0	0	200	903	0	0	0	0	0	0	0	603	903	0
10553	5	0	0	0	0	0	0	200	300	0	0	0	0	0	0	0	200	903	0	0	0	0	0	0	0	603	903	0
10553	6	0	0	0	0	0	0	200	300	0	0	0	0	0	0	0	200	903	0	0	0	0	0	0	0	603	903	0
10553	7	0	0	0	0	0	0	200	300	0	0	0	0	0	0	0	200	903	0	0	0	0	0	0	0	603	903	0
10553	8	0	0	0	0	0	0	200	300	0	0	0	0	0	0	0	200	903	0	0	0	0	0	0	0	603	903	0
10553	9	0	0	0	0	0	0	200	300	0	0	0	0	0	0	0	200	903	0	0	0	0	0	0	0	603	903	0
10554	0	0	0	0	0	0	0	200	300	0	0	0	0	0	0	0	200	903	0	0	0	0	0	0	0	603	903	0
10554	1	0	0	0	0	0	0	200	300	0	0	0	0	0	0	0	200	903	0	0	0	0	0	0	0	603	903	0
10554	2	0	0	0	0	0	0	200	300	0	0	0	0	0	0	0	200	903	0	0	0	0	0	0	0	603	903	0
10554	3	0	0	0	0	0	0	200	300	0	0	0	0	0	0	0	200	903	0	0	0	0	0	0	0	603	903	0
10554	4	0	0	0	0	0	0	200	300	0	0	0	0	0	0	0	200	903	0	0	0	0	0	0	0	603	903	0
10554	5	0	0	0	0	0	0	200	300	0	0	0	0	0	0	0	200	903	0	0	0	0	0	0	0	603	903	0
10554	6	0	0	0	0	0	0	200	300	0	0	0	0	0	0	0	200	903	0	0	0	0	0	0	0	603	903	0
10554	7	0	0	0	0	0	0	200	300	0	0	0	0	0	0	0	200	903	0	0	0	0	0	0	0	603	903	0
10554	8	0	0	0	0	0	0	200	300	0	0	0	0	0	0	0	200	903	0	0	0	0	0	0	0	603	903	0
10554	9	0	0	0	0	0	0	200	300	0	0	0	0	0	0	0	200	903	0	0	0	0	0	0	0	603	903	0
10555	0	0	0	0	0	0	0	200	300	0	0	0	0	0	0	0	200	903	0	0	0	0	0	0	0	603	903	0
10555	1	0	0	0	0	0	0	200	300	0	0	0	0	0	0	0	200	903	0	0	0	0	0	0	0	603	903	0
10555	2	0	0	0	0	0	0	200	300	0	0	0	0	0	0	0	200	903	0	0	0	0	0	0	0	603	903	0
10555	3	0	0	0	0	0	0	200	300	0	0	0	0	0	0	0	200	903	0	0	0	0	0	0	0	603	903	0
10555	4	0	0	0	0	0	0	200	300	0	0	0	0	0	0	0	200	903	0	0	0	0	0	0	0	603	903	0
10555	5	0	0	0	0	0	0	200	300	0	0	0	0	0	0	0	200	903	0	0	0	0	0	0	0	603	903	0
10555	6	0	0	0	0	0	0	200	300	0	0	0	0	0	0	0	200	903	0	0	0	0	0	0	0	603	903	0
10555	7	0	0	0	0	0	0	200	300	0	0	0	0	0	0	0	200	903	0	0	0	0	0	0	0	603	903	0
10555	8	0	0	0	0	0	0	200	300	0	0	0	0	0	0	0	200	903	0	0	0	0	0	0	0	603	903	0
10555	9	0	0	0	0	0	0	200	300	0	0	0	0	0	0	0	200	903	0	0	0	0	0	0	0	603	903	0
10556	0	0	0	0	0	0	0	200	300	0	0	0	0	0	0	0	200	903	0	0	0	0	0	0	0	603	903	0
10556	1	0	0	0	0	0	0	200	300	0	0	0	0	0	0	0	200	903	0	0	0	0	0	0	0	603	903	0
10556	2	0	0	0	0	0	0	200	300	0	0	0	0	0	0	0	200	903	0	0	0	0	0	0	0	603	903	0
10556	3	0	0	0	0	0	0	200	300	0	0	0	0	0	0	0	200	903	0	0	0	0	0	0	0	603	903	0
10556	4	0	0	0	0	0	0	200	300	0	0	0	0	0	0	0	200	903	0	0	0	0	0	0	0	603	903	0
10556	5	0	0	0	0	0	0	200	300	0	0	0	0	0	0	0	200	903	0	0	0	0	0	0	0	603	903	0
10556	6	0	0	0	0	0	0	200	300	0	0	0	0	0	0	0	200	903	0	0	0	0	0	0	0	603	903	0
10556	7	0	0	0	0	0	0	200	300	0	0	0	0	0	0	0	200	903	0	0	0	0	0	0	0	603	903	0
10556	8	0	0	0	0	0	0	200	300	0	0	0	0	0	0	0	200	903	0	0	0	0	0	0	0	603	903	0
10556	9	0	0	0	0	0	0	200	300	0	0	0	0	0	0	0	200	903	0	0	0	0	0	0	0	603	903	0
10557	0	0	0	0	0	0	0	200	300	0	0	0	0	0	0	0	200	903	0	0	0	0	0	0	0	603	903	0
10557	1	0	0	0	0	0	0	200	300	0	0	0	0	0	0	0	200	903	0	0	0	0	0	0	0	603	903	0
10557	2	0	0	0	0	0	0	200	300	0	0	0	0	0	0	0	200	903	0	0	0	0	0	0	0	603	903	0
10557	3	0	0	0	0	0	0	200	300	0	0	0	0	0	0	0	200	903	0	0	0	0	0	0	0	603	903	0
10557	4	0	0	0	0	0	0	200	300	0	0	0	0	0	0	0	200	903	0	0	0	0	0	0	0	603	903	0
10557	5	0	0	0	0	0	0	200	300	0	0	0	0	0	0	0	200	903	0	0	0	0	0	0	0	603	903	0
10557	6	0	0	0	0	0	0	200	300	0	0	0	0	0	0	0	200	903	0	0	0	0	0	0	0	603	903	0
10557	7	0	0	0	0	0	0	200	300	0	0	0	0	0	0	0	200	903	0	0	0	0	0	0	0	603	903	0
10557	8	0	0	0	0	0	0	200	300	0	0	0	0	0	0	0	200	903	0	0	0	0	0	0	0	603	903	0
10557	9	0	0	0	0	0	0	200	300	0	0	0	0	0	0	0	200	903	0	0	0	0	0	0	0	603	903	0
10558	0	0	0	0	0	0	0	200	300	0	0	0	0	0	0	0	200	903	0	0	0	0	0	0	0	603	903	0
10558	1	0	0	0	0	0	0	200	300	0	0	0	0	0	0	0	200	903	0	0	0	0	0	0	0	603	903	0
10558	2	0	0	0	0	0	0	200	300	0	0	0	0	0	0	0	200	903	0	0	0	0	0	0	0	603	903	0
10558	3	0	0	0	0	0	0	200	300	0	0	0	0	0	0	0	200	903	0	0	0	0	0	0	0	603	903	0
10558	4	0	0	0	0	0	0	200	300	0	0	0	0	0	0	0	200	903	0	0	0	0	0	0	0	603	903	0
10558	5	0	0	0	0	0	0	200	300	0	0	0	0	0	0	0	200	903	0	0	0	0	0	0	0	603	903	0
10558	6	0	0	0	0	0	0	200	300	0	0	0	0	0	0	0	200	903	0	0	0	0	0	0	0	603	903	0
10558	7	0	0	0	0	0	0	200	300	0	0	0	0	0	0	0	200	903	0	0	0	0	0	0	0	603	903	0
10558	8	0	0	0	0	0	0	200	300	0	0	0	0	0	0	0	200	903	0	0	0	0	0	0	0	603	903	0
10558	9	0	0	0	0	0	0	200	300	0	0	0	0	0	0	0	200	903	0	0	0	0	0	0	0	603	903	0
10559	0	0	0	0	0	0	0	200	300	0	0	0	0	0	0	0	200	903	0	0	0	0	0	0	0	603	903	0
10559	1	0	0	0	0	0	0	200	300	0	0	0	0	0	0	0	200	903	0	0	0	0	0	0	0	603	903	0
10559	2	0	0	0	0	0	0	200	300	0	0	0	0	0	0	0	200	903	0	0	0	0	0	0	0	603	903	0
10559	3	0	0	0	0	0	0	200	300	0	0	0	0	0	0	0	200	903	0	0	0	0	0	0	0	603	903	0
10559	4	0	0	0	0	0	0	200	300	0	0	0	0	0	0	0	200	903	0	0	0	0	0	0	0	603	903	0
10559	5	0	0	0	0	0	0	200	300	0	0	0	0	0	0	0	200	903	0	0	0	0	0	0	0	603	903	0
10559	6	0	0	0	0	0	0	200	300	0	0	0	0	0	0	0	200	903	0	0	0	0	0	0	0	603	903	0
10559	7	0	0	0	0	0	0	200	300	0	0	0	0	0	0	0	200	903	0	0	0	0	0	0	0	603	903	0
10559	8	0	0	0	0	0	0	200	300	0	0	0	0	0	0	0	200	903	0	0	0	0	0	0	0	603	903	0
10559	9	0	0	0	0	0	0	200	300	0	0	0	0	0	0	0	200	903	0	0	0	0	0	0	0	603	903	0
10560	0	0	0	0	0	0	0	200	300	0	0	0	0	0	0	0	200	903	0	0	0	0	0	0	0	603	903	0
10560	1	0	0	0	0	0	0	200	300	0	0	0	0	0	0	0	200	903	0	0	0	0	0	0	0	603	903	0
10560	2	0	0	0	0	0	0	200	300	0	0	0	0	0	0	0	200	903	0	0	0	0	0	0	0	603	903	0
10560	3	0	0	0	0	0	0	200	300	0	0	0	0	0	0	0	200	903	0	0	0	0	0	0	0	603	903	0
10560	4	0	0	0	0	0	0	200	300	0	0	0	0	0	0	0	200	903	0	0	0	0	0	0	0	603	903	0
10560	5	0	0	0	0	0	0	200	300	0	0	0	0	0	0	0	200	903	0	0	0	0	0	0	0	603	903	0
10560	6	0	0	0	0	0	0	200	300	0	0	0	0	0	0	0	200	903	0	0	0	0	0	0	0	603	903	0
10560	7	0	0	0	0	0	0	200	300	0	0	0	0	0	0	0	200	903	0	0	0	0	0	0	0	603	903	0
10560	8	0	0	0	0	0	0	200	300	0	0	0	0	0	0	0	200	903	0	0	0	0	0	0	0	603	903	0
10560	9	0	0	0	0	0	0	200	300	0	0	0	0	0	0	0	200	903	0	0	0	0	0	0	0	603	903	0
10561	0	0	0	0	0	0	0	200	300	0	0	0	0	0	0	0	200	903	0	0	0	0	0	0	0	603	903	0
10561	1	0	0	0	0	0	0	200	300	0	0	0	0	0	0	0	200	903	0	0	0	0	0	0	0	603	903	0
10561	2	0	0	0	0	0	0	200	300	0	0	0	0	0	0	0	200	903	0	0	0	0	0	0	0	603	903	0
10561	3	0	0	0	0	0	0	200	300	0	0	0	0	0	0	0	200	903	0	0	0	0	0	0	0	603	903	0
10561	4	0	0	0	0	0	0	200	300	0	0	0	0	0	0	0	200	903	0	0	0	0	0	0	0	603	903	0
10561	5	0	0	0	0	0	0	200	300	0	0	0	0	0	0	0	200	903	0	0	0	0	0	0	0	603	903	0
10561	6	0	0	0	0	0	0	200	300	0	0	0	0	0	0	0	200	903	0	0	0	0	0	0	0	603	903	0
10561	7	0	0	0	0	0	0	200	300	0	0	0	0	0	0	0	200	903	0	0	0	0	0	0	0	603	903	0
10561	8	0	0	0	0	0	0	200	300	0	0	0	0	0	0	0	200	903	0	0	0	0	0	0	0	603	903	0
10561	9	0	0	0	0	0	0	200	300	0	0	0	0	0	0	0	200	903	0	0	0	0	0	0	0	603	903	0
10562	0	0	0	0	0	0	0	200	300	0	0	0	0	0	0	0	200	903	0	0	0	0	0	0	0	603	903	0
10562	1	0	0	0	0	0	0	200	300	0	0	0	0	0	0	0	200	903	0	0	0	0	0	0	0	603	903	0
10562	2	0	0	0	0	0	0	200	300	0	0	0	0	0	0	0	200	903	0	0	0	0	0	0	0	603	903	0
10562	3	0	0	0	0	0	0	200	300	0	0	0	0	0	0	0	200	903	0	0	0	0	0	0	0	603	903	0
10562	4	0	0	0	0	0	0	200	300	0	0	0	0	0	0	0	200	903	0	0	0	0	0	0	0	603	903	0
10562	5	0	0	0	0	0	0	200	300	0	0	0	0	0	0	0	200	903	0	0	0	0	0	0	0	603	903	0
10562	6	0	0	0	0	0	0	200	300	0	0	0	0	0	0	0	200	903	0	0	0	0	0	0	0	603	903	0
10562	7	0	0	0	0	0	0	200	300	0	0	0	0	0	0	0	200	903	0	0	0	0	0	0	0	603	903	0
10562	8	0	0	0	0	0	0	200	300	0	0	0	0	0	0	0	200	903	0	0	0	0	0	0	0	603	903	0
10562	9	0	0	0	0	0	0	200	300	0	0	0	0	0	0	0	200	903	0	0	0	0	0	0	0	603	903	0
10563	0	0	0	0	0	0	0	200	300	0	0	0	0	0	0	0	200	903	0	0	0	0	0	0	0	603	903	0
10563	1	0	0	0	0	0	0	200	300	0	0	0	0	0	0	0	200	903	0	0	0	0	0	0	0	603	903	0
10563	2	0	0	0	0	0	0	200	300	0	0	0	0	0	0	0	200	903	0	0	0	0	0	0	0	603	903	0
10563	3	0	0	0	0	0	0	200	300	0	0	0	0	0	0	0	200	903	0	0	0	0	0	0	0	603	903	0
10563	4	0	0	0	0	0	0	200	300	0	0	0	0	0	0	0	200	903	0	0	0	0	0	0	0	603	903	0
10563	5	0	0	0	0	0	0	200	300	0	0	0	0	0	0	0	200	903	0	0	0	0	0	0	0	603	903	0
10563	6	0	0	0	0	0	0	200	300	0	0	0	0	0	0	0	200	903	0	0	0	0	0	0	0	603	903	0
10563	7	0	0	0	0	0	0	200	300	0	0	0	0	0	0	0	200	903	0	0	0	0	0	0	0	603	903	0
10563	8	0	0	0	0	0	0	200	300	0	0	0	0	0	0	0	200	903	0	0	0	0	0	0	0	603	903	0
10563	9	0	0	0	0	0	0	200	300	0	0	0	0	0	0	0	200	903	0	0	0	0	0	0	0	603	903	0
10564	0	0	0	0	0	0	0	200	300	0	0	0	0	0	0	0	200	903	0	0	0	0	0	0	0	603	903	0
10564	1	0	0	0	0	0	0	200	300	0	0	0	0	0	0	0	200	903	0	0	0	0	0	0	0	603	903	0
10564	2	0	0	0	0	0	0	200	300	0	0	0	0	0	0	0	200	903	0	0	0	0	0	0	0	603	903	0
10564	3	0	0	0	0	0	0	200	300	0	0	0	0	0	0	0	200	903	0	0	0	0	0	0	0	603	903	0
10564	4	0	0	0	0	0	0	200	300	0	0	0	0	0	0	0	200	903	0	0	0	0	0	0	0	603	903	0
10564	5	0	0	0	0	0	0	200	300	0	0	0	0	0	0	0	200	903	0	0	0	0	0	0	0	603	903	0
10564	6	0	0	0	0	0	0	200	300	0	0	0	0	0	0	0	200	903	0	0	0	0	0	0	0	603	903	0
10564	7	0	0	0	0	0	0	200	300	0	0	0	0	0	0	0	200	903	0	0	0	0	0	0	0	603	903	0
10564	8	0	0	0	0	0	0	200	300	0	0	0	0	0	0	0	200	903	0	0	0	0	0	0	0	603	903	0
10564	9	0	0	0	0	0	0	200	300	0	0	0	0	0	0	0	200	903	0	0	0	0	0	0	0	603	903	0
10565	0	0	0	0	0	0	0	200	300	0	0	0	0	0	0	0	200	903	0	0	0	0	0	0	0	603	903	0
10565	1	0	0	0	0	0	0	200	300	0	0	0	0	0	0	0	200	903	0	0	0	0	0	0	0	603	903	0
10565	2	0	0	0	0	0	0	200	300	0	0	0	0	0	0	0	200	903	0	0	0	0	0	0	0	603	903	0
10565	3	0	0	0	0	0	0	200	300	0	0	0	0	0	0	0	200	903	0	0	0	0	0	0	0	603	903	0
10565	4	0	0	0	0	0	0	200	300	0	0	0	0	0	0	0	200	903	0	0	0	0	0	0	0	603	903	0
10565	5	0	0	0	0	0	0	200	300	0	0	0	0	0	0	0	200	903	0	0	0	0	0	0	0	603	903	0
10565	6	0	0	0	0	0	0	200	300	0	0	0	0	0	0	0	200	903	0	0	0	0	0	0	0	603	903	0
10565	7	0	0	0	0	0	0	200	300	0	0	0	0	0	0	0	200	903	0	0	0	0	0	0	0	603	903	0
10565	8	0	0	0	0	0	0	200	300	0	0	0	0	0	0	0	200	903	0	0	0	0	0	0	0	603	903	0
10565	9	0	0	0	0	0	0	200	300	0	0	0	0	0	0	0	200	903	0	0	0	0	0	0	0	603	903	0
10566	0	0	0	0	0	0	0	200	300	0	0	0	0	0	0	0	200	903	0	0	0	0	0	0	0	603	903	0
10566	1	0	0	0	0	0	0	200	300	0	0	0	0	0	0	0	200	903	0	0	0	0	0	0	0	603	903	0
10566	2	0	0	0	0	0	0	200	300	0	0	0	0	0	0	0	200	903	0	0	0	0	0	0	0	603	903	0
10566	3	0	0	0	0	0	0	200	300	0	0	0	0	0	0	0	200	903	0	0	0	0	0	0	0	603	903	0
10566	4	0	0	0	0	0	0	200	300	0	0	0	0	0	0	0	200	903	0	0	0	0	0	0	0	603	903	0
10566	5	0	0	0	0	0	0	200	300	0	0	0	0	0	0	0	200	903	0	0	0	0	0	0	0	603	903	0
10566	6	0	0	0	0	0	0	200	300	0	0	0	0	0	0	0	200	903	0	0	0	0	0	0	0	603	903	0
10566	7	0	0	0	0	0	0	200	300	0	0	0	0	0	0	0	200	903	0	0	0	0	0	0	0	603	903	0
10566	8	0	0	0	0	0	0	200	300	0	0	0	0	0	0	0	200	903	0	0	0	0	0	0	0	603	903	0
10566	9	0	0	0	0	0	0	200	300	0	0	0	0	0	0	0	200	903	0	0	0	0	0	0	0	603	903	0
10567	0	0	0	0	0	0	0	200	300	0	0	0	0	0	0	0	200	903	0	0	0	0	0	0	0	603	903	0
10567	1	0	0	0	0	0	0	200	300	0	0	0	0	0	0	0	200	903	0	0	0	0	0	0	0	603	903	0
10567	2	0	0	0	0	0	0	200	300	0	0	0	0	0	0	0	200	903	0	0	0	0	0	0	0	603	903	0
10567	3	0	0	0	0	0	0	200	300	0	0	0	0	0	0	0	200	903	0	0	0	0	0	0	0	603	903	0
10567	4	0	0	0	0	0	0	200	300	0	0	0	0	0	0	0	200	903	0	0	0	0	0	0	0	603	903	0
10567	5	0	0	0	0	0	0	200	300	0	0	0	0	0	0	0	200	903	0	0	0	0	0	0	0	603	903	0
10567	6	0	0	0	0	0	0	200	300	0	0	0	0	0	0	0	200	903	0	0	0	0	0	0	0	603	903	0
10567	7	0	0	0	0	0	0	200	300	0	0	0	0	0	0	0	200	903	0	0	0	0	0	0	0	603	903	0
10567	8	0	0	0	0	0	0	200	300	0	0	0	0	0	0	0	200	903	0	0	0	0	0	0	0	603	903	0
10567	9	0	0	0	0	0	0	200	300	0	0	0	0	0	0	0	200	903	0	0	0	0	0	0	0	603	903	0
10568	0	0	0	0	0	0	0	200	300	0	0	0	0	0	0	0	200	903	0	0	0	0	0	0	0	603	903	0
10568	1	0	0	0	0	0	0	200	300	0	0	0	0	0	0	0	200	903	0	0	0	0	0	0	0	603	903	0
10568	2	0	0	0	0	0	0	200	300	0	0	0	0	0	0	0	200	903	0	0	0	0	0	0	0	603	903	0
10568	3	0	0	0	0	0	0	200	300	0	0	0	0	0	0	0	200	903	0	0	0	0	0	0	0	603	903	0
10568	4	0	0	0	0	0	0	200	300	0	0	0	0	0	0	0	200	903	0	0	0	0	0	0	0	603	903	0
10568	5	0	0	0	0	0	0	200	300	0	0	0	0	0	0	0	200	903	0	0	0	0	0	0	0	603	903	0
10568	6	0	0	0	0	0	0	200	300	0	0	0	0	0	0	0	200	903	0	0	0	0	0	0	0	603	903	0
10568	7	0	0	0	0	0	0	200	300	0	0	0	0	0	0	0	200	903	0	0	0	0	0	0	0	603	903	0
10568	8	0	0	0	0	0	0	200	300	0	0	0	0	0	0	0	200	903	0	0	0	0	0	0	0	603	903	0
10568	9	0	0	0	0	0	0	200	300	0	0	0	0	0	0	0	200	903	0	0	0	0	0	0	0	603	903	0
10569	0	0	0	0	0	0	0	200	300	0	0	0	0	0	0	0	200	903	0	0	0	0	0	0	0	603	903	0
10569	1	0	0	0	0	0	0	200	300	0	0	0	0	0	0	0	200	903	0	0	0	0	0	0	0	603	903	0
10569	2	0	0	0	0	0	0	200	300	0	0	0	0	0	0	0	200	903	0	0	0	0	0	0	0	603	903	0
10569	3	0	0	0	0	0	0	200	300	0	0	0	0	0	0	0	200	903	0	0	0	0	0	0	0	603	903	0
10569	4	0	0	0	0	0	0	200	300	0	0	0	0	0	0	0	200	903	0	0	0	0	0	0	0	603	903	0
10569	5	0	0	0	0	0	0	200	300	0	0	0	0	0	0	0	200	903	0	0	0	0	0	0	0	603	903	0
10569	6	0	0	0	0	0	0	200	300	0	0	0	0	0	0	0	200	903	0	0	0	0	0	0	0	603	903	0
10569	7	0	0	0	0	0	0	200	300	0	0	0	0	0	0	0	200	903	0	0	0	0	0	0	0	603	903	0
10569	8	0	0	0	0	0	0	200	300	0	0	0	0	0	0	0	200	903	0	0	0	0	0	0	0	603	903	0
10569	9	0	0	0	0	0	0	200	300	0	0	0	0	0	0	0	200	903	0	0	0	0	0	0	0	603	903	0
10570	0	0	0	0	0	0	0	200	300	0	0	0	0	0	0	0	200	903	0	0	0	0	0	0	0	603	903	0
10570	1	0	0	0	0	0	0	200	300	0	0	0	0	0	0	0	200	903	0	0	0	0	0	0	0	603	903	0
10570	2	0	0	0	0	0	0	200	300	0	0	0	0	0	0	0	200	903	0	0	0	0	0	0	0	603	903	0
10570	3	0	0	0	0	0	0	200	300	0	0	0	0	0	0	0	200	903	0	0	0	0	0	0	0	603	903	0
10570	4	0	0	0	0	0	0	200	300	0	0	0	0	0	0	0	200	903	0	0	0	0	0	0	0	603	903	0
10570	5	0	0	0	0	0	0	200	300	0	0	0	0	0	0	0	200	903	0	0	0	0	0	0	0	603	903	0
10570	6	0	0	0	0	0	0	200	300	0	0	0	0	0	0	0	200	903	0	0	0	0	0	0	0	603	903	0
10570	7	0	0	0	0	0	0	200	300	0	0	0	0	0	0	0	200	903	0	0	0	0	0	0	0	603	903	0
10570	8	0	0	0	0	0	0	200	300	0	0	0	0	0	0	0	200	903	0	0	0	0	0	0	0	603	903	0
10570	9	0	0	0	0	0	0	200	300	0	0	0	0	0	0	0	200	903	0	0	0	0	0	0	0	603	903	0
10571	0	0	0	0	0	0	0	200	300	0	0	0	0	0	0	0	200	903	0	0	0	0	0	0	0	603	903	0
10571	1	0	0	0	0	0	0	200	300	0	0	0	0	0	0	0	200	903	0	0	0	0	0	0	0	603	903	0
10571	2	0	0	0	0	0	0	200	300	0	0	0	0	0	0	0	200	903	0	0	0	0	0	0	0	603	903	0
10571	3	0	0	0	0	0	0	200	300	0	0	0	0	0	0	0	200	903	0	0	0	0	0	0	0	603	903	0
10571	4	0	0	0	0	0	0	200	300	0	0	0	0	0	0	0	200	903	0	0	0	0	0	0	0	603	903	0
10571	5	0	0	0	0	0	0	200	300	0	0	0	0	0	0	0	200	903	0	0	0	0	0	0	0	603	903	0
10571	6	0	0	0	0	0	0	200	300	0	0	0	0	0	0	0	200	903	0	0	0	0	0	0	0	603	903	0
10571	7	0	0	0	0	0	0	200	300	0	0	0	0	0	0	0	200	903	0	0	0	0	0	0	0	603	903	0
10571	8	0	0	0	0	0	0	200	300	0	0	0	0	0	0	0	200	903	0	0	0	0	0	0	0	603	903	0
10571	9	0	0	0	0	0	0	200	300	0	0	0	0	0	0	0	200	903	0	0	0	0	0	0	0	603	903	0
10572	0	0	0	0	0	0	0	200	300	0	0	0	0	0	0	0	200	903	0	0	0	0	0	0	0	603	903	0
10572	1	0	0	0	0	0	0	200	300	0	0	0	0	0	0	0	200	903	0	0	0	0	0	0	0	603	903	0
10572	2	0	0	0	0	0	0	200	300	0	0	0	0	0	0	0	200	903	0	0	0	0	0	0	0	603	903	0
10572	3	0	0	0	0	0	0	200	300	0	0	0	0	0	0	0	200	903	0	0	0	0	0	0	0	603	903	0
10572	4	0	0	0	0	0	0	200	300	0	0	0	0	0	0	0	200	903	0	0	0	0	0	0	0	603	903	0
10572	5	0	0	0	0	0	0	200	300	0	0	0	0	0	0	0	200	903	0	0	0	0	0	0	0	603	903	0
10572	6	0	0	0	0	0	0	200	300	0	0	0	0	0	0	0	200	903	0	0	0	0	0	0	0	603	903	0
10572	7	0	0	0	0	0	0	200	300	0	0	0	0	0	0	0	200	903	0	0	0	0	0	0	0	603	903	0
10572	8	0	0	0	0	0	0	200	300	0	0	0	0	0	0	0	200	903	0	0	0	0	0	0	0	603	903	0
10572	9	0	0	0	0	0	0	200	300	0	0	0	0	0	0	0	200	903	0	0	0	0	0	0	0	603	903	0
10573	0	0	0	0	0	0	0	200	300	0	0	0	0	0	0	0	200	903	0	0	0	0	0	0	0	603	903	0
10573	1	0	0	0	0	0	0	200	300	0	0	0	0	0	0	0	200	903	0	0	0	0	0	0	0	603	903	0
10573	2	0	0	0	0	0	0	200	300	0	0	0	0	0	0	0	200	903	0	0	0	0	0	0	0	603	903	0
10573	3	0	0	0	0	0	0	200	300	0	0	0	0	0	0	0	200	903	0	0	0	0	0	0	0	603	903	0
10573	4	0	0	0	0	0	0	200	300	0	0	0	0	0	0	0	200	903	0	0	0	0	0	0	0	603	903	0
10573	5	0	0	0	0	0	0	200	300	0	0	0	0	0	0	0	200	903	0	0	0	0	0	0	0	603	903	0
10573	6	0	0	0	0	0	0	200	300	0	0	0	0	0	0	0	200	903	0	0	0	0	0	0	0	603	903	0
10573	7	0	0	0	0	0	0	200	300	0	0	0	0	0	0	0	200	903	0	0	0	0	0	0	0	603	903	0
10573	8	0	0	0	0	0	0	200	300	0	0	0	0	0	0	0	200	903	0	0	0	0	0	0	0	603	903	0
10573	9	0	0	0	0	0	0	200	300	0	0	0	0	0	0	0	200	903	0	0	0	0	0	0	0	603	903	0
10574	0	0	0	0	0	0	0	200	300	0	0	0	0	0	0	0	200	903	0	0	0	0	0	0	0	603	903	0
10574	1	0	0	0	0	0	0	200	300	0	0	0	0	0	0	0	200	903	0	0	0	0	0	0	0	603	903	0
10574	2	0	0	0	0	0	0	200	300	0	0	0	0	0	0	0	200	903	0	0	0	0	0	0	0	603	903	0
10574	3	0	0	0	0	0	0	200	300	0	0	0	0	0	0	0	200	903	0	0	0	0	0	0	0	603	903	0
10574	4	0	0	0	0	0	0	200	300	0	0	0	0	0	0	0	200	903	0	0	0	0	0	0	0	603	903	0
10574	5	0	0	0	0	0	0	200	300	0	0	0	0	0	0	0	200	903	0	0	0	0	0	0	0	603	903	0
10574	6	0	0	0	0	0	0	200	300	0	0	0	0	0	0	0	200	903	0	0	0	0	0	0	0	603	903	0
10574	7	0	0	0	0	0	0	200	300	0	0	0	0	0	0	0	200	903	0	0	0	0	0	0	0	603	903	0
10574	8	0	0	0	0	0	0	200	300	0	0	0	0	0	0	0	200	903	0	0	0	0	0	0	0	603	903	0
10574	9	0	0	0	0	0	0	200	300	0	0	0	0	0	0	0	200	903	0	0	0	0	0	0	0	603	903	0
10575	0	0	0	0	0	0	0	200	300	0	0	0	0	0	0	0	200	903	0	0	0	0	0	0	0	603	903	0
10575	1	0	0	0	0	0	0	200	300	0	0	0	0	0	0	0	200	903	0	0	0	0	0	0	0	603	903	0
10575	2	0	0	0	0	0	0	200	300	0	0	0	0	0	0	0	200	903	0	0	0	0	0	0	0	603	903	0
10575	3	0	0	0	0	0	0	200	300	0	0	0	0	0	0	0	200	903	0	0	0	0	0	0	0	603	903	0
10575	4	0	0	0	0	0	0	200	300	0	0	0	0	0	0	0	200	903	0	0	0	0	0	0	0	603	903	0
10575	5	0	0	0	0	0	0	200	300	0	0	0	0	0	0	0	200	903	0	0	0	0	0	0	0	603	903	0
10575	6	0	0	0	0	0	0	200	300	0	0	0	0	0	0	0	200	903	0	0	0	0	0	0	0	603	903	0
10575	7	0	0	0	0	0	0	200	300	0	0	0	0	0	0	0	200	903	0	0	0	0	0	0	0	603	903	0
10575	8	0	0	0	0	0	0	200	300	0	0	0	0	0	0	0	200	903	0	0	0	0	0	0	0	603	903	0
10575	9	0	0	0	0	0	0	200	300	0	0	0	0	0	0	0	200	903	0	0	0	0	0	0	0	603	903	0
10576	0	0	0	0	0	0	0	200	300	0	0	0	0	0	0	0	200	903	0	0	0	0	0	0	0	603	903	0
10576	1	0	0	0	0	0	0	200	300	0	0	0	0	0	0	0	200	903	0	0	0	0	0	0	0	603	903	0
10576	2	0	0	0	0	0	0	200	300	0	0	0	0	0	0	0	200	903	0	0	0	0	0	0	0	603	903	0
10576	3	0	0	0	0	0	0	200	300	0	0	0	0	0	0	0	200	903	0	0	0	0	0	0	0	603	903	0
10576	4	0	0	0	0	0	0	200	300	0	0	0	0	0	0	0	200	903	0	0	0	0	0	0	0	603	903	0
10576	5	0	0	0	0	0	0	200	300	0	0	0	0	0	0	0	200	903	0	0	0	0	0	0	0	603	903	0
10576	6	0	0	0	0	0	0	200	300	0	0	0	0	0	0	0	200	903	0	0	0	0	0	0	0	603	903	0
10576	7	0	0	0	0	0	0	200	300	0	0	0	0	0	0	0	200	903	0	0	0	0	0	0	0	603	903	0
10576	8	0	0	0	0	0	0	200	300	0	0	0	0	0	0	0	200	903	0	0	0	0	0	0	0	603	903	0
10576	9	0	0	0	0	0	0	200	300	0	0	0	0	0	0	0	200	903	0	0	0	0	0	0	0	603	903	0
10577	0	0	0	0	0	0	0	200	300	0	0	0	0	0	0	0	200	903	0	0	0	0	0	0	0	603	903	0
10577	1	0	0	0	0	0	0	200	300	0	0	0	0	0	0	0	200	903	0	0	0	0	0	0	0	603	903	0
10577	2	0	0	0	0	0	0	200	300	0	0	0	0	0	0	0	200	903	0	0	0	0	0	0	0	603	903	0
10577	3	0	0	0	0	0	0	200	300	0	0	0	0	0	0	0	200	903	0	0	0	0	0	0	0	603	903	0
10577	4	0	0	0	0	0	0	200	300	0	0	0	0	0	0	0	200	903	0	0	0	0	0	0	0	603	903	0
10577	5	0	0	0	0	0	0	200	300	0	0	0	0	0	0	0	200	903	0	0	0	0	0	0	0	603	903	0
10577	6	0	0	0	0	0	0	200	300	0	0	0	0	0	0	0	200	903	0	0	0	0	0	0	0	603	903	0
10577	7	0	0	0	0	0	0	200	300	0	0	0	0	0	0	0	200	903	0	0	0	0	0	0	0	603	903	0
10577	8	0	0	0	0	0	0	200	300	0	0	0	0	0	0	0	200	903	0	0	0	0	0	0	0	603	903	0
10577	9	0	0	0	0	0	0	200	300	0	0	0	0	0	0	0	200	903	0	0	0	0	0	0	0	603	903	0
10578	0	0	0	0	0	0	0	200	300	0	0	0	0	0	0	0	200	903	0	0	0	0	0	0	0	603	903	0
10578	1	0	0	0	0	0	0	200	300	0	0	0	0	0	0	0	200	903	0	0	0	0	0	0	0	603	903	0
10578	2	0	0	0	0	0	0	200	300	0	0	0	0	0	0	0	200	903	0	0	0	0	0	0	0	603	903	0
10578	3	0	0	0	0	0	0	200	300	0	0	0	0	0	0	0	200	903	0	0	0	0	0	0	0	603	903	0
10578	4	0	0	0	0	0	0	200	300	0	0	0	0	0	0	0	200	903	0	0	0	0	0	0	0	603	903	0
10578	5	0	0	0	0	0	0	200	300	0	0	0	0	0	0	0	200	903	0	0	0	0	0	0	0	603	903	0
10578	6	0	0	0	0	0	0	200	300	0	0	0	0	0	0	0	200	903	0	0	0	0	0	0	0	603	903	0
10578	7	0	0	0	0	0	0	200	300	0	0	0	0	0	0	0	200	903	0	0	0	0	0	0	0	603	903	0
10578	8	0	0	0	0	0	0	200	300	0	0	0	0	0	0	0	200	903	0	0	0	0	0	0	0	603	903	0
10578	9	0	0	0	0	0	0	200	300	0	0	0	0	0	0	0	200	903	0	0	0	0	0	0	0	603	903	0
10579	0	0	0	0	0	0	0	200	300	0	0	0	0	0	0	0	200	903	0	0	0	0	0	0	0	603	903	0
10579	1	0	0	0	0	0	0	200	300	0	0	0	0	0	0	0	200	903	0	0	0	0	0	0	0	603	903	0
10579	2	0	0	0	0	0	0	200	300	0	0	0	0	0	0	0	200	903	0	0	0	0	0	0	0	603	903	0
10579	3	0	0	0	0	0	0	200	300	0	0	0	0	0	0	0	200	903	0	0	0	0	0	0	0	603	903	0
10579	4	0	0	0	0	0	0	200	300	0	0	0	0	0	0	0	200	903	0	0	0	0	0	0	0	603	903	0
10579	5	0	0	0	0	0	0	200	300	0	0	0	0	0	0	0	200	903	0	0	0	0	0	0	0	603	903	0
10579	6	0	0	0	0	0	0	200	300	0	0	0	0	0	0	0	200	903	0	0	0	0	0	0	0	603	903	0
10579	7	0	0	0	0	0	0	200	300	0	0	0	0	0	0	0	200	903	0	0	0	0	0	0	0	603	903	0
10579	8	0	0	0	0	0	0	200	300	0	0	0	0	0	0	0	200	903	0	0	0	0	0	0	0	603	903	0
10579	9	0	0	0	0	0	0	200	300	0	0	0	0	0	0	0	200	903	0	0	0	0	0	0	0	603	903	0
10580	0	0	0	0	0	0	0	200	300	0	0	0	0	0	0	0	200	903	0	0	0	0	0	0	0	603	903	0
10580	1	0	0	0	0	0	0	200	300	0	0	0	0	0	0	0	200	903	0	0	0	0	0	0	0	603	903	0
10580	2	0	0	0	0	0	0	200	300	0	0	0	0	0	0	0	200	903	0	0	0	0	0	0	0	603	903	0
10580	3	0	0	0	0	0	0	200	300	0	0	0	0	0	0	0	200	903	0	0	0	0	0	0	0	603	903	0
10580	4	0	0	0	0	0	0	200	300	0	0	0	0	0	0	0	200	903	0	0	0	0	0	0	0	603	903	0
10580	5	0	0	0	0	0	0	200	300	0	0	0	0	0	0	0	200	903	0	0	0	0	0	0	0	603	903	0
10580	6	0	0	0	0	0	0	200	300	0	0	0	0	0	0	0	200	903	0	0	0	0	0	0	0	603	903	0
10580	7	0	0	0	0	0	0	200	300	0	0	0	0	0	0	0	200	903	0	0	0	0	0	0	0	603	903	0
10580	8	0	0	0	0	0	0	200	300	0	0	0	0	0	0	0	200	903	0	0	0	0	0	0	0	603	903	0
10580	9	0	0	0	0	0	0	200	300	0	0	0	0	0	0	0	200	903	0	0	0	0	0	0	0	603	903	0
10581	0	0	0	0	0	0	0	200	300	0	0	0	0	0	0	0	200	903	0	0	0	0	0	0	0	603	903	0
10581	1	0	0	0	0	0	0	200	300	0	0	0	0	0	0	0	200	903	0	0	0	0	0	0	0	603	903	0
10581	2	0	0	0	0	0	0	200	300	0	0	0	0	0	0	0	200	903	0	0	0	0	0	0	0	603	903	0
10581	3	0	0	0	0	0	0	200	300	0	0	0	0	0	0	0	200	903	0	0	0	0	0	0	0	603	903	0
10581	4	0	0	0	0	0	0	200	300	0	0	0	0	0	0	0	200	903	0	0	0	0	0	0	0	603	903	0
10581	5	0	0	0	0	0	0	200	300	0	0	0	0	0	0	0	200	903	0	0	0	0	0	0	0	603	903	0
10581	6	0	0	0	0	0	0	200	300	0	0	0	0	0	0	0	200	903	0	0	0	0	0	0	0	603	903	0
10581	7	0	0	0	0	0	0	200	300	0	0	0	0	0	0	0	200	903	0	0	0	0	0	0	0	603	903	0
10581	8	0	0	0	0	0	0	200	300	0	0	0	0	0	0	0	200	903	0	0	0	0	0	0	0	603	903	0
10581	9	0	0	0	0	0	0	200	300	0	0	0	0	0	0	0	200	903	0	0	0	0	0	0	0	603	903	0
10582	0	0	0	0	0	0	0	200	300	0	0	0	0	0	0	0	200	903	0	0	0	0	0	0	0	603	903	0
10582	1	0	0	0	0	0	0	200	300	0	0	0	0	0	0	0	200	903	0	0	0	0	0	0	0	603	903	0
10582	2	0	0	0	0	0	0	200	300	0	0	0	0	0	0	0	200	903	0	0	0	0	0	0	0	603	903	0
10582	3	0	0	0	0	0	0	200	300	0	0	0	0	0	0	0	200	903	0	0	0	0	0	0	0	603	903	0
10582	4	0	0	0	0	0	0	200	300	0	0	0	0	0	0	0	200	903	0	0	0	0	0	0	0	603	903	0
10582	5	0	0	0	0	0	0	200	300	0	0	0	0	0	0	0	200	903	0	0	0	0	0	0	0	603	903	0
10582	6	0	0	0	0	0	0	200	300	0	0	0	0	0	0	0	200	903	0	0	0	0	0	0	0	603	903	0
10582	7	0	0	0	0	0	0	200	300	0	0	0	0	0	0	0	200	903	0	0	0	0	0	0	0	603	903	0
10582	8	0	0	0	0	0	0	200	300	0	0	0	0	0	0	0	200	903	0	0	0	0	0	0	0	603	903	0
10582	9	0	0	0	0	0	0	200	300	0	0	0	0	0	0	0	200	903	0	0	0	0	0	0	0	603	903	0
10583	0	0	0	0	0	0	0	200	300	0	0	0	0	0	0	0	200	903	0	0	0	0	0	0	0	603	903	0
10583	1	0	0	0	0	0	0	200	300	0	0	0	0	0	0	0	200	903	0	0	0	0	0	0	0	603	903	0
10583	2	0	0	0	0	0	0	200	300	0	0	0	0	0	0	0	200	903	0	0	0	0	0	0	0	603	903	0
10583	3	0	0	0	0	0	0	200	300	0	0	0	0	0	0	0	200	903	0	0	0	0	0	0	0	603	903	0
10583	4	0	0	0	0	0	0	200	300	0	0	0	0	0	0	0	200	903	0	0	0	0	0	0	0	603	903	0
10583	5	0	0	0	0	0	0	200	300	0	0	0	0	0	0	0	200	903	0	0	0	0	0	0	0	603	903	0
10583	6	0	0	0	0	0	0	200	300	0	0	0	0	0	0	0	200	903	0	0	0	0	0	0	0	603	903	0
10583	7	0	0	0	0	0	0	200	300	0	0	0	0	0	0	0	200	903	0	0	0	0	0	0	0	603	903	0
10583	8	0	0	0	0	0	0	200	300	0	0	0	0	0	0	0	200	903	0	0	0	0	0	0	0	603	903	0
10583	9	0	0	0	0	0	0	200	300	0	0	0	0	0	0	0	200	903	0	0	0	0	0	0	0	603	903	0
10584	0	0	0	0	0	0	0	200	300	0	0	0	0	0	0	0	200	903	0	0	0	0	0	0	0	603	903	0
10584	1	0	0	0	0	0	0	200	300	0	0	0	0	0	0	0	200	903	0	0	0	0	0	0	0	603	903	0
10584	2	0	0	0	0	0	0	200	300	0	0	0	0	0	0	0	200	903	0	0	0	0	0	0	0	603	903	0
10584	3	0	0	0	0	0	0	200	300	0	0	0	0	0	0	0	200	903	0	0	0	0	0	0	0	603	903	0
10584	4	0	0	0	0	0	0	200	300	0	0	0	0	0	0	0	200	903	0	0	0	0	0	0	0	603	903	0
10584	5	0	0	0	0	0	0	200	300	0	0	0	0	0	0	0	200	903	0	0	0	0	0	0	0	603	903	0
10584	6	0	0	0	0	0	0	200	300	0	0	0	0	0	0	0	200	903	0	0	0	0	0	0	0	603	903	0
10584	7	0	0	0	0	0	0	200	300	0	0	0	0	0	0	0	200	903	0	0	0	0	0	0	0	603	903	0
10584	8	0	0	0	0	0	0	200	300	0	0	0	0	0	0	0	200	903	0	0	0	0	0	0	0	603	903	0
10584	9	0	0	0	0	0	0	200	300	0	0	0	0	0	0	0	200	903	0	0	0	0	0	0	0	603	903	0
10585	0	0	0	0	0	0	0	200	300	0	0	0	0	0	0	0	200	903	0	0	0	0	0	0	0	603	903	0
10585	1	0	0	0	0	0	0	200	300	0	0	0	0	0	0	0	200	903	0	0	0	0	0	0	0	603	903	0
10585	2	0	0	0	0	0	0	200	300	0	0	0	0	0	0	0	200	903	0	0	0	0	0	0	0	603	903	0
10585	3	0	0	0	0	0	0	200	300	0	0	0	0	0	0	0	200	903	0	0	0	0	0	0	0	603	903	0
10585	4	0	0	0	0	0	0	200	300	0	0	0	0	0	0	0	200	903	0	0	0	0	0	0	0	603	903	0
10585	5	0	0	0	0	0	0	200	300	0	0	0	0	0	0	0	200	903	0	0	0	0	0	0	0	603	903	0
10585	6	0	0	0	0	0	0	200	300	0	0	0	0	0	0	0	200	903	0	0	0	0	0	0	0	603	903	0
10585	7	0	0	0	0	0	0	200	300	0	0	0	0	0	0	0	200	903	0	0	0	0	0	0	0	603	903	0
10585	8	0	0	0	0	0	0	200	300	0	0	0	0	0	0	0	200	903	0	0	0	0	0	0	0	603	903	0
10585	9	0	0	0	0	0	0	200	300	0	0	0	0	0	0	0	200	903	0	0	0	0	0	0	0	603	903	0
10586	0	0	0	0	0	0	0	200	300	0	0	0	0	0	0	0	200	903	0	0	0	0	0	0	0	603	903	0
10586	1	0	0	0	0	0	0	200	300	0	0	0	0	0	0	0	200	903	0	0	0	0	0	0	0	603	903	0
10586	2	0	0	0	0	0	0	200	300	0	0	0	0	0	0	0	200	903	0	0	0	0	0	0	0	603	903	0
10586	3	0	0	0	0	0	0	200	300	0	0	0	0	0	0	0	200	903	0	0	0	0	0	0	0	603	903	0
10586	4	0	0	0	0	0	0	200	300	0	0	0	0	0	0	0	200	903	0	0	0	0	0	0	0	603	903	0
10586	5	0	0	0	0	0	0	200	300	0	0	0	0	0	0	0	200	903	0	0	0	0	0	0	0	603	903	0
10586	6	0	0	0	0	0	0	200	300	0	0	0	0	0	0	0	200	903	0	0	0	0	0	0	0	603	903	0
10586	7	0	0	0	0	0	0	200	300	0	0	0	0	0	0	0	200	903	0	0	0	0	0	0	0	603	903	0
10586	8	0	0	0	0	0	0	200	300	0	0	0	0	0	0	0	200	903	0	0	0	0	0	0	0	603	903	0
10586	9	0	0	0	0	0	0	200	300	0	0	0	0	0	0	0	200	903	0	0	0	0	0	0	0	603	903	0
10587	0	0	0	0	0	0	0	200	300	0	0	0	0	0	0	0	200	903	0	0	0	0	0	0	0	603	903	0
10587	1	0	0	0	0	0	0	200	300	0	0	0	0	0	0	0	200	903	0	0	0	0	0	0	0	603	903	0
10587	2	0	0	0	0	0	0	200	300	0	0	0	0	0	0	0	200	903	0	0	0	0	0	0	0	603	903	0
10587	3	0	0	0	0	0	0	200	300	0	0	0	0	0	0	0	200	903	0	0	0	0	0	0	0	603	903	0
10587	4	0	0	0	0	0	0	200	300	0	0	0	0	0	0	0	200	903	0	0	0	0	0	0	0	603	903	0
10587	5	0	0	0	0	0	0	200	300	0	0	0	0	0	0	0	200	903	0	0	0	0	0	0	0	603	903	0
10587	6	0	0	0	0	0	0	200	300	0	0	0	0	0	0	0	200	903	0	0	0	0	0	0	0	603	903	0
10587	7	0	0	0	0	0	0	200	300	0	0	0	0	0	0	0	200	903	0	0	0	0	0	0	0	603	903	0
10587	8	0	0	0	0	0	0	200	300	0	0	0	0	0	0	0	200	903	0	0	0	0	0	0	0	603	903	0
10587	9	0	0	0	0	0	0	200	300	0	0	0	0	0	0	0	200	903	0	0	0	0	0	0	0	603	903	0
10588	0	0	0	0	0	0	0	200	300	0	0	0	0	0	0	0	200	903	0	0	0	0	0	0	0	603	903	0
10588	1	0	0	0	0	0	0	200	300	0	0	0	0	0	0	0	200	903	0	0	0	0	0	0	0	603	903	0
10588	2	0	0	0	0	0	0	200	300	0	0	0	0	0	0	0	200	903	0	0	0	0	0	0	0	603	903	0
10588	3	0	0	0	0	0	0	200	300	0	0	0	0	0	0	0	200	903	0	0	0	0	0	0	0	603	903	0
10588	4	0	0	0	0	0	0	200	300	0	0	0	0	0	0	0	200	903	0	0	0	0	0	0	0	603	903	0
10588	5	0	0	0	0	0	0	200	300	0	0	0	0	0	0	0	200	903	0	0	0	0	0	0	0	603	903	0
10588	6	0	0	0	0	0	0	200	300	0	0	0	0	0	0	0	200	903	0	0	0	0	0	0	0	603	903	0
10588	7	0	0	0	0	0	0	200	300	0	0	0	0	0	0	0	200	903	0	0	0	0	0	0	0	603	903	0
10588	8	0	0	0	0	0	0	200	300	0	0	0	0	0	0	0	200	903	0	0	0	0	0	0	0	603	903	0
10588	9	0	0	0	0	0	0	200	300	0	0	0	0	0	0	0	200	903	0	0	0	0	0	0	0	603	903	0
10589	0	0	0	0	0	0	0	200	300	0	0	0	0	0	0	0	200	903	0	0	0	0	0	0	0	603	903	0
10589	1	0	0	0	0	0	0	200	300	0	0	0	0	0	0	0	200	903	0	0	0	0	0	0	0	603	903	0
10589	2	0	0	0	0	0	0	200	300	0	0	0	0	0	0	0	200	903	0	0	0	0	0	0	0	603	903	0
10589	3	0	0	0	0	0	0	200	300	0	0	0	0	0	0	0	200	903	0	0	0	0	0	0	0	603	903	0
10589	4	0	0	0	0	0	0	200	300	0	0	0	0	0	0	0	200	903	0	0	0	0	0	0	0	603	903	0
10589	5	0	0	0	0	0	0	200	300	0	0	0	0	0	0	0	200	903	0	0	0	0	0	0	0	603	903	0
10589	6	0	0	0	0	0	0	200	300	0	0	0	0	0	0	0	200	903	0	0	0	0	0	0	0	603	903	0
10589	7	0	0	0	0	0	0	200	300	0	0	0	0	0	0	0	200	903	0	0	0	0	0	0	0	603	903	0
10589	8	0	0	0	0	0	0	200	300	0	0	0	0	0	0	0	200	903	0	0	0	0	0	0	0	603	903	0
10589	9	0	0	0	0	0	0	200	300	0	0	0	0	0	0	0	200	903	0	0	0	0	0	0	0	603	903	0
10590	0	0	0	0	0	0	0	200	300	0	0	0	0	0	0	0	200	903	0	0	0	0	0	0	0	603	903	0
10590	1	0	0	0	0	0	0	200	300	0	0	0	0	0	0	0	200	903	0	0	0	0	0	0	0	603	903	0
10590	2	0	0	0	0	0	0	200	300	0	0	0	0	0	0	0	200	903	0	0	0	0	0	0	0	603	903	0
10590	3	0	0	0	0	0	0	200	300	0	0	0	0	0	0	0	200	903	0	0	0	0	0	0	0	603	903	0
10590	4	0	0	0	0	0	0	200	300	0	0	0	0	0	0	0	200	903	0	0	0	0	0	0	0	603	903	0
10590	5	0	0	0	0	0	0	200	300	0	0	0	0	0	0	0	200	903	0	0	0	0	0	0	0	603	903	0
10590	6	0	0	0	0	0	0	200	300	0	0	0	0	0	0	0	200	903	0	0	0	0	0	0	0	603	903	0
10590	7	0	0	0	0	0	0	200	300	0	0	0	0	0	0	0	200	903	0	0	0	0	0	0	0	603	903	0
10590	8	0	0	0	0	0	0	200	300	0	0	0	0	0	0	0	200	903	0	0	0	0	0	0	0	603	903	0
10590	9	0	0	0	0	0	0	200	300	0	0	0	0	0	0	0	200	903	0	0	0	0	0	0	0	603	903	0
10591	0	0	0	0	0	0	0	200	300	0	0	0	0	0	0	0	200	903	0	0	0	0	0	0	0	603	903	0
10591	1	0	0	0	0	0	0	200	300	0	0	0	0	0	0	0	200	903	0	0	0	0	0	0	0	603	903	0
10591	2	0	0	0	0	0	0	200	300	0	0	0	0	0	0	0	200	903	0	0	0	0	0	0	0	603	903	0
10591	3	0	0	0	0	0	0	200	300	0	0	0	0	0	0	0	200	903	0	0	0	0	0	0	0	603	903	0
10591	4	0	0	0	0	0	0	200	300	0	0	0	0	0	0	0	200	903	0	0	0	0	0	0	0	603	903	0
10591	5	0	0	0	0	0	0	200	300	0	0	0	0	0	0	0	200	903	0	0	0	0	0	0	0	603	903	0
10591	6	0	0	0	0	0	0	200	300	0	0	0	0	0	0	0	200	903	0	0	0	0	0	0	0	603	903	0
10591	7	0	0	0	0	0	0	200	300	0	0	0	0	0	0	0	200	903	0	0	0	0	0	0	0	603	903	0
10591	8	0	0	0	0	0	0	200	300	0	0	0	0	0	0	0	200	903	0	0	0	0	0	0	0	603	903	0
10591	9	0	0	0	0	0	0	200	300	0	0	0	0	0	0	0	200	903	0	0	0	0	0	0	0	603	903	0
10592	0	0	0	0	0	0	0	200	300	0	0	0	0	0	0	0	200	903	0	0	0	0	0	0	0	603	903	0
10592	1	0	0	0	0	0	0	200	300	0	0	0	0	0	0	0	200	903	0	0	0	0	0	0	0	603	903	0
10592	2	0	0	0	0	0	0	200	300	0	0	0	0	0	0	0	200	903	0	0	0	0	0	0	0	603	903	0
10592	3	0	0	0	0	0	0	200	300	0	0	0	0	0	0	0	200	903	0	0	0	0	0	0	0	603	903	0
10592	4	0	0	0	0	0	0	200	300	0	0	0	0	0	0	0	200	903	0	0	0	0	0	0	0	603	903	0
10592	5	0	0	0	0	0	0	200	300	0	0	0	0	0	0	0	200	903	0	0	0	0	0	0	0	603	903	0
10592	6	0	0	0	0	0	0	200	300	0	0	0	0	0	0	0	200	903	0	0	0	0	0	0	0	603	903	0
10592	7	0	0	0	0	0	0	200	300	0	0	0	0	0	0	0	200	903	0	0	0	0	0	0	0	603	903	0
10592	8	0	0	0	0	0	0	200	300	0	0	0	0	0	0	0	200	903	0	0	0	0	0	0	0	603	903	0
10592	9	0	0	0	0	0	0	200	300	0	0	0	0	0	0	0	200	903	0	0	0	0	0	0	0	603	903	0
10593	0	0	0	0	0	0	0	200	300	0	0	0	0	0	0	0	200	903	0	0	0	0	0	0	0	603	903	0
10593	1	0	0	0	0	0	0	200	300	0	0	0	0	0	0	0	200	903	0	0	0	0	0	0	0	603	903	0
10593	2	0	0	0	0	0	0	200	300	0	0	0	0	0	0	0	200	903	0	0	0	0	0	0	0	603	903	0
10593	3	0	0	0	0	0	0	200	300	0	0	0	0	0	0	0	200	903	0	0	0	0	0	0	0	603	903	0
10593	4	0	0	0	0	0	0	200	300	0	0	0	0	0	0	0	200	903	0	0	0	0	0	0	0	603	903	0
10593	5	0	0	0	0	0	0	200	300	0	0	0	0	0	0	0	200	903	0	0	0	0	0	0	0	603	903	0
10593	6	0	0	0	0	0	0	200	300	0	0	0	0	0	0	0	200	903	0	0	0	0	0	0	0	603	903	0
10593	7	0	0	0	0	0	0	200	300	0	0	0	0	0	0	0	200	903	0	0	0	0	0	0	0	603	903	0
10593	8	0	0	0	0	0	0	200	300	0	0	0	0	0	0	0	200	903	0	0	0	0	0	0	0	603	903	0
10593	9	0	0	0	0	0	0	200	300	0	0	0	0	0	0	0	200	903	0	0	0	0	0	0	0	603	903	0
10594	0	0	0	0	0	0	0	200	300	0	0	0	0	0	0	0	200	903	0	0	0	0	0	0	0	603	903	0
10594	1	0	0	0	0	0	0	200	300	0	0	0	0	0	0	0	200	903	0	0	0	0	0	0	0	603	903	0
10594	2	0	0	0	0	0	0	200	300	0	0	0	0	0	0	0	200	903	0	0	0	0	0	0	0	603	903	0
10594	3	0	0	0	0	0	0	200	300	0	0	0	0	0	0	0	200	903	0	0	0	0	0	0	0	603	903	0
10594	4	0	0	0	0	0	0	200	300	0	0	0	0	0	0	0	200	903	0	0	0	0	0	0	0	603	903	0
10594	5	0	0	0	0	0	0	200	300	0	0	0	0	0	0	0	200	903	0	0	0	0	0	0	0	603	903	0
10594	6	0	0	0	0	0	0	200	300	0	0	0	0	0	0	0	200	903	0	0	0	0	0	0	0	603	903	0
10594	7	0	0	0	0	0	0	200	300	0	0	0	0	0	0	0	200	903	0	0	0	0	0	0	0	603	903	0
10594	8	0	0	0	0	0	0	200	300	0	0	0	0	0	0	0	200	903	0	0	0	0	0	0	0	603	903	0
10594	9	0	0	0	0	0	0	200	300	0	0	0	0	0	0	0	200	903	0	0	0	0	0	0	0	603	903	0
10595	0	0	0	0	0	0	0	200	300	0	0	0	0	0	0	0	200	903	0	0	0	0	0	0	0	603	903	0
10595	1	0	0	0	0	0	0	200	300	0	0	0	0	0	0	0	200	903	0	0	0	0	0	0	0	603	903	0
10595	2	0	0	0	0	0	0	200	300	0	0	0	0	0	0	0	200	903	0	0	0	0	0	0	0	603	903	0
10595	3	0	0	0	0	0	0	200	300	0	0	0	0	0	0	0	200	903	0	0	0	0	0	0	0	603	903	0
10595	4	0	0	0	0	0	0	200	300	0	0	0	0	0	0	0	200	903	0	0	0	0	0	0	0	603	903	0
10595	5	0	0	0	0	0	0	200	300	0	0	0	0	0	0	0	200	903	0	0	0	0	0	0	0	603	903	0
10595	6	0	0	0	0	0	0	200	300	0	0	0	0	0	0	0	200	903	0	0	0	0	0	0	0	603	903	0
10595	7	0	0	0	0	0	0	200	300	0	0	0	0	0	0	0	200	903	0	0	0	0	0	0	0	603	903	0
10595	8	0	0	0	0	0	0	200	300	0	0	0	0	0	0	0	200	903	0	0	0	0	0	0	0	603	903	0
10595	9	0	0	0	0	0	0	200	300	0	0	0	0	0	0	0	200	903	0	0	0	0	0	0	0	603	903	0
10596	0	0	0	0	0	0	0	200	300	0	0	0	0	0	0	0	200	903	0	0	0	0	0	0	0	603	903	0
10596	1	0	0	0	0	0	0	200	300	0	0	0	0	0	0	0	200	903	0	0	0	0	0	0	0	603	903	0
10596	2	0	0	0	0	0	0	200	300	0	0	0	0	0	0	0	200	903	0	0	0	0	0	0	0	603	903	0
10596	3	0	0	0	0	0	0	200	300	0	0	0	0	0	0	0	200	903	0	0	0	0	0	0	0	603	903	0
10596	4	0	0	0	0	0	0	200	300	0	0	0	0	0	0	0	200	903	0	0	0	0	0	0	0	603	903	0
10596	5	0	0	0	0	0	0	200	300	0	0	0	0	0	0	0	200	903	0	0	0	0	0	0	0	603	903	0
10596	6	0	0	0	0	0	0	200	300	0	0	0	0	0	0	0	200	903	0	0	0	0	0	0	0	603	903	0
10596	7	0	0	0	0	0	0	200	300	0	0	0	0	0	0	0	200	903	0	0	0	0	0	0	0	603	903	0
10596	8	0	0	0	0	0	0	200	300	0	0	0	0	0	0	0	200	903	0	0	0	0	0	0	0	603	903	0
10596	9	0	0	0	0	0	0	200	300	0	0	0	0	0	0	0	200	903	0	0	0	0	0	0	0	603	903	0
10597	0	0	0	0	0	0	0	200	300	0	0	0	0	0	0	0	200	903	0	0	0	0	0	0	0	603	903	0
10597	1	0	0	0	0	0	0	200	300	0	0	0	0	0	0	0	200	903	0	0	0	0	0	0	0	603	903	0
10597	2	0	0	0	0	0	0	200	300	0	0	0	0	0	0	0	200	903	0	0	0	0	0	0	0	603	903	0
10597	3	0	0	0	0	0	0	200	300	0	0	0	0	0	0	0	200	903	0	0	0	0	0	0	0	603	903	0
10597	4	0	0	0	0	0	0	200	300	0	0	0	0	0	0	0	200	903	0	0	0	0	0	0	0	603	903	0
10597	5	0	0	0	0	0	0	200	300	0	0	0	0	0	0	0	200	903	0	0	0	0	0	0	0	603	903	0
10597	6	0	0	0	0	0	0	200	300	0	0	0	0	0	0	0	200	903	0	0	0	0	0	0	0	603	903	0
10597	7	0	0	0	0	0	0	200	300	0	0	0	0	0	0	0	200	903	0	0	0	0	0	0	0	603	903	0
10597	8	0	0	0	0	0	0	200	300	0	0	0	0	0	0	0	200	903	0	0	0	0	0	0	0	603	903	0
10597	9	0	0	0	0	0	0	200	300	0	0	0	0	0	0	0	200	903	0	0	0	0	0	0	0	603	903	0
10598	0	0	0	0	0	0	0	200	300	0	0	0	0	0	0	0	200	903	0	0	0	0	0	0	0	603	903	0
10598	1	0	0	0	0	0	0	200	300	0	0	0	0	0	0	0	200	903	0	0	0	0	0	0	0	603	903	0
10598	2	0	0	0	0	0	0	200	300	0	0	0	0	0	0	0	200	903	0	0	0	0	0	0	0	603	903	0
10598	3	0	0	0	0	0	0	200	300	0	0	0	0	0	0	0	200	903	0	0	0	0	0	0	0	603	903	0
10598	4	0	0	0	0	0	0	200	300	0	0	0	0	0	0	0	200	903	0	0	0	0	0	0	0	603	903	0
10598	5	0	0	0	0	0	0	200	300	0	0	0	0	0	0	0	200	903	0	0	0	0	0	0	0	603	903	0
10598	6	0	0	0	0	0	0	200	300	0	0	0	0	0	0	0	200	903	0	0	0	0	0	0	0	603	903	0
10598	7	0	0	0	0	0	0	200	300	0	0	0	0	0	0	0	200	903	0	0	0	0	0	0	0	603	903	0
10598	8	0	0	0	0	0	0	200	300	0	0	0	0	0	0	0	200	903	0	0	0	0	0	0	0	603	903	0
10598	9	0	0	0	0	0	0	200	300	0	0	0	0	0	0	0	200	903	0	0	0	0	0	0	0	603	903	0
10599	0	0	0	0	0	0	0	200	300	0	0	0	0	0	0	0	200	903	0	0	0	0	0	0	0	603	903	0
10599	1	0	0	0	0	0	0	200	300	0	0	0	0	0	0	0	200	903	0	0	0	0	0	0	0	603	903	0
10599	2	0	0	0	0	0	0	200	300	0	0	0	0	0	0	0	200	903	0	0	0	0	0	0	0	603	903	0
10599	3	0	0	0	0	0	0	200	300	0	0	0	0	0	0	0	200	903	0	0	0	0	0	0	0	603	903	0
10599	4	0	0	0	0	0	0	200	300	0	0	0	0	0	0	0	200	903	0	0	0	0	0	0	0	603	903	0
10599	5	0	0	0	0	0	0	200	300	0	0	0	0	0	0	0	200	903	0	0	0	0	0	0	0	603	903	0
10599	6	0	0	0	0	0	0	200	300	0	0	0	0	0	0	0	200	903	0	0	0	0	0	0	0	603	903	0
10599	7	0	0	0	0	0	0	200	300	0	0	0	0	0	0	0	200	903	0	0	0	0	0	0	0	603	903	0
10599	8	0	0	0	0	0	0	200	300	0	0	0	0	0	0	0	200	903	0	0	0	0	0	0	0	603	903	0
10599	9	0	0	0	0	0	0	200	300	0	0	0	0	0	0	0	200	903	0	0	0	0	0	0	0	603	903	0
10600	0	0	0	0	0	0	0	200	300	0	0	0	0	0	0	0	200	903	0	0	0	0	0	0	0	603	903	0
10600	1	0	0	0	0	0	0	200	300	0	0	0	0	0	0	0	200	903	0	0	0	0	0	0	0	603	903	0
10600	2	0	0	0	0	0	0	200	300	0	0	0	0	0	0	0	200	903	0	0	0	0	0	0	0	603	903	0
10600	3	0	0	0	0	0	0	200	300	0	0	0	0	0	0	0	200	903	0	0	0	0	0	0	0	603	903	0
10600	4	0	0	0	0	0	0	200	300	0	0	0	0	0	0	0	200	903	0	0	0	0	0	0	0	603	903	0
10600	5	0	0	0	0	0	0	200	300	0	0	0	0	0	0	0	200	903	0	0	0	0	0	0	0	603	903	0
10600	6	0	0	0	0	0	0	200	300	0	0	0	0	0	0	0	200	903	0	0	0	0	0	0	0	603	903	0
10600	7	0	0	0	0	0	0	200	300	0	0	0	0	0	0	0	200	903	0	0	0	0	0	0	0	603	903	0
10600	8	0	0	0	0	0	0	200	300	0	0	0	0	0	0	0	200	903	0	0	0	0	0	0	0	603	903	0
10600	9	0	0	0	0	0	0	200	300	0	0	0	0	0	0	0	200	903	0	0	0	0	0	0	0	603	903	0
10601	0	0	0	0	0	0	0	200	300	0	0	0	0	0	0	0	200	903	0	0	0	0	0	0	0	603	903	0
10601	1	0	0	0	0	0	0	200	300	0	0	0	0	0	0	0	200	903	0	0	0	0	0	0	0	603	903	0
10601	2	0	0	0	0	0	0	200	300	0	0	0	0	0	0	0	200	903	0	0	0	0	0	0	0	603	903	0
10601	3	0	0	0	0	0	0	200	300	0	0	0	0	0	0	0	200	903	0	0	0	0	0	0	0	603	903	0
10601	4	0	0	0	0	0	0	200	300	0	0	0	0	0	0	0	200	903	0	0	0	0	0	0	0	603	903	0
10601	5	0	0	0	0	0	0	200	300	0	0	0	0	0	0	0	200	903	0	0	0	0	0	0	0	603	903	0
10601	6	0	0	0	0	0	0	200	300	0	0	0	0	0	0	0	200	903	0	0	0	0	0	0	0	603	903	0
10601	7	0	0	0	0	0	0	200	300	0	0	0	0	0	0	0	200	903	0	0	0	0	0	0	0	603	903	0
10601	8	0	0	0	0	0	0	200	300	0	0	0	0	0	0	0	200	903	0	0	0	0	0	0	0	603	903	0
10601	9	0	0	0	0	0	0	200	300	0	0	0	0	0	0	0	200	903	0	0	0	0	0	0	0	603	903	0
10602	0	0	0	0	0	0	0	200	300	0	0	0	0	0	0	0	200	903	0	0	0	0	0	0	0	603	903	0
10602	1	0	0	0	0	0	0	200	300	0	0	0	0	0	0	0	200	903	0	0	0	0	0	0	0	603	903	0
10602	2	0	0	0	0	0	0	200	300	0	0	0	0	0	0	0	200	903	0	0	0	0	0	0	0	603	903	0
10602	3	0	0	0	0	0	0	200	300	0	0	0	0	0	0	0	200	903	0	0	0	0	0	0	0	603	903	0
10602	4	0	0	0	0	0	0	200	300	0	0	0	0	0	0	0	200	903	0	0	0	0	0	0	0	603	903	0
10602	5	0	0	0	0	0	0	200	300	0	0	0	0	0	0	0	200	903	0	0	0	0	0	0	0	603	903	0
10602	6	0	0	0	0	0	0	200	300	0	0	0	0	0	0	0	200	903	0	0	0	0	0	0	0	603	903	0
10602	7	0	0	0	0	0	0	200	300	0	0	0	0	0	0	0	200	903	0	0	0	0	0	0	0	603	903	0
10602	8	0	0	0	0	0	0	200	300	0	0	0	0	0	0	0	200	903	0	0	0	0	0	0	0	603	903	0
10602	9	0	0	0	0	0	0	200	300	0	0	0	0	0	0	0	200	903	0	0	0	0	0	0	0	603	903	0
10603	0	0	0	0	0	0	0	200	300	0	0	0	0	0	0	0	200	903	0	0	0	0	0	0	0	603	903	0
10603	1	0	0	0	0	0	0	200	300	0	0	0	0	0	0	0	200	903	0	0	0	0	0	0	0	603	903	0
10603	2	0	0	0	0	0	0	200	300	0	0	0	0	0	0	0	200	903	0	0	0	0	0	0	0	603	903	0
10603	3	0	0	0	0	0	0	200	300	0	0	0	0	0	0	0	200	903	0	0	0	0	0	0	0	603	903	0
10603	4	0	0	0	0	0	0	200	300	0	0	0	0	0	0	0	200	903	0	0	0	0	0	0	0	603	903	0
10603	5	0	0	0	0	0	0	200	300	0	0	0	0	0	0	0	200	903	0	0	0	0	0	0	0	603	903	0
10603	6	0	0	0	0	0	0	200	300	0	0	0	0	0	0	0	200	903	0	0	0	0	0	0	0	603	903	0
10603	7	0	0	0	0	0	0	200	300	0	0	0	0	0	0	0	200	903	0	0	0	0	0	0	0	603	903	0
10603	8	0	0	0	0	0	0	200	300	0	0	0	0	0	0	0	200	903	0	0	0	0	0	0	0	603	903	0
10603	9	0	0	0	0	0	0	200	300	0	0	0	0	0	0	0	200	903	0	0	0	0	0	0	0	603	903	0
10604	0	0	0	0	0	0	0	200	300	0	0	0	0	0	0	0	200	903	0	0	0	0	0	0	0	603	903	0
10604	1	0	0	0	0	0	0	200	300	0	0	0	0	0	0	0	200	903	0	0	0	0	0	0	0	603	903	0
10604	2	0	0	0	0	0	0	200	300	0	0	0	0	0	0	0	200	903	0	0	0	0	0	0	0	603	903	0
10604	3	0	0	0	0	0	0	200	300	0	0	0	0	0	0	0	200	903	0	0	0	0	0	0	0	603	903	0
10604	4	0	0	0	0	0	0	200	300	0	0	0	0	0	0	0	200	903	0	0	0	0	0	0	0	603	903	0
10604	5	0	0	0	0	0	0	200	300	0	0	0	0	0	0	0	200	903	0	0	0	0	0	0	0	603	903	0
10604	6	0	0	0	0	0	0	200	300	0	0	0	0	0	0	0	200	903	0	0	0	0	0	0	0	603	903	0
10604	7	0	0	0	0	0	0	200	300	0	0	0	0	0	0	0	200	903	0	0	0	0	0	0	0	603	903	0
10604	8	0	0	0	0	0	0	200	300	0	0	0	0	0	0	0	200	903	0	0	0	0	0	0	0	603	903	0
10604	9	0	0	0	0	0	0	200	300	0	0	0	0	0	0	0	200	903	0	0	0	0	0	0	0	603	903	0
10605	0	0	0	0	0	0	0	200	300	0	0	0	0	0	0	0	200	903	0	0	0	0	0	0	0	603	903	0
10605	1	0	0	0	0	0	0	200	300	0	0	0	0	0	0	0	200	903	0	0	0	0	0	0	0	603	903	0
10605	2	0	0	0	0	0	0	200	300	0	0	0	0	0	0	0	200	903	0	0	0	0	0	0	0	603	903	0
10605	3	0	0	0	0	0	0	200	300	0	0	0	0	0	0	0	200	903	0	0	0	0	0	0	0	603	903	0
10605	4	0	0	0	0	0	0	200	300	0	0	0	0	0	0	0	200	903	0	0	0	0	0	0	0	603	903	0
10605	5	0	0	0	0	0	0	200	300	0	0	0	0	0	0	0	200	903	0	0	0	0	0	0	0	603	903	0
10605	6	0	0	0	0	0	0	200	300	0	0	0	0	0	0	0	200	903	0	0	0	0	0	0	0	603	903	0
10605	7	0	0	0	0	0	0	200	300	0	0	0	0	0	0	0	200	903	0	0	0	0	0	0	0	603	903	0
10605	8	0	0	0	0	0	0	200	300	0	0	0	0	0	0	0	200	903	0	0	0	0	0	0	0	603	903	0
10605	9	0	0	0	0	0	0	200	300	0	0	0	0	0	0	0	200	903	0	0	0	0	0	0	0	603	903	0
10606	0	0	0	0	0	0	0	200	300	0	0	0	0	0	0	0	200	903	0	0	0	0	0	0	0	603	903	0
10606	1	0	0	0	0	0	0	200	300	0	0	0	0	0	0	0	200	903	0	0	0	0	0	0	0	603	903	0
10606	2	0	0	0	0	0	0	200	300	0	0	0	0	0	0	0	200	903	0	0	0	0	0	0	0	603	903	0
10606	3	0	0	0	0	0	0	200	300	0	0	0	0	0	0	0	200	903	0	0	0	0	0	0	0	603	903	0
10606	4	0	0	0	0	0	0	200	300	0	0	0	0	0	0	0	200	903	0	0	0	0	0	0	0	603	903	0
10606	5	0	0	0	0	0	0	200	300	0	0	0	0	0	0	0	200	903	0	0	0	0	0	0	0	603	903	0
10606	6	0	0	0	0	0	0	200	300	0	0	0	0	0	0	0	200	903	0	0	0	0	0	0	0	603	903	0
10606	7	0	0	0	0	0	0	200	300	0	0	0	0	0	0	0	200	903	0	0	0	0	0	0	0	603	903	0
10606	8	0	0	0	0	0	0	200	300	0	0	0	0	0	0	0	200	903	0	0	0	0	0	0	0	603	903	0
10606	9	0	0	0	0	0	0	200	300	0	0	0	0	0	0	0	200	903	0	0	0	0	0	0	0	603	903	0
10607	0	0	0	0	0	0	0	200	300	0	0	0	0	0	0	0	200	903	0	0	0	0	0	0	0	603	903	0
10607	1	0	0	0	0	0	0	200	300	0	0	0	0	0	0	0	200	903	0	0	0	0	0	0	0	603	903	0
10607	2	0	0	0	0	0	0	200	300	0	0	0	0	0	0	0	200	903	0	0	0	0	0	0	0	603	903	0
10607	3	0	0	0	0	0	0	200	300	0	0	0	0	0	0	0	200	903	0	0	0	0	0	0	0	603	903	0
10607	4	0	0	0	0	0	0	200	300	0	0	0	0	0	0	0	200	903	0	0	0	0	0	0	0	603	903	0
10607	5	0	0	0	0	0	0	200	300	0	0	0	0	0	0	0	200	903	0	0	0	0	0	0	0	603	903	0
10607	6	0	0	0	0	0	0	200	300	0	0	0	0	0	0	0	200	903	0	0	0	0	0	0	0	603	903	0
10607	7	0	0	0	0	0	0	200	300	0	0	0	0	0	0	0	200	903	0	0	0	0	0	0	0	603	903	0
10607	8	0	0	0	0	0	0	200	300	0	0	0	0	0	0	0	200	903	0	0	0	0	0	0	0	603	903	0
10607	9	0	0	0	0	0	0	200	300	0	0	0	0	0	0	0	200	903	0	0	0	0	0	0	0	603	903	0
10608	0	0	0	0	0	0	0	200	300	0	0	0	0	0	0	0	200	903	0	0	0	0	0	0	0	603	903	0
10608	1	0	0	0	0	0	0	200	300	0	0	0	0	0	0	0	200	903	0	0	0	0	0	0	0	603	903	0
10608	2	0	0	0	0	0	0	200	300	0	0	0	0	0	0	0	200	903	0	0	0	0	0	0	0	603	903	0
10608	3	0	0	0	0	0	0	200	300	0	0	0	0	0	0	0	200	903	0	0	0	0	0	0	0	603	903	0
10608	4	0	0	0	0	0	0	200	300	0	0	0	0	0	0	0	200	903	0	0	0	0	0	0	0	603	903	0
10608	5	0	0	0	0	0	0	200	300	0	0	0	0	0	0	0	200	903	0	0	0	0	0	0	0	603	903	0
10608	6	0	0	0	0	0	0	200	300	0	0	0	0	0	0	0	200	903	0	0	0	0	0	0	0	603	903	0
10608	7	0	0	0	0	0	0	200	300	0	0	0	0	0	0	0	200	903	0	0	0	0	0	0	0	603	903	0
10608	8	0	0	0	0	0	0	200	300	0	0	0	0	0	0	0	200	903	0	0	0	0	0	0	0	603	903	0
10608	9	0	0	0	0	0	0	200	300	0	0	0	0	0	0	0	200	903	0	0	0	0	0	0	0	603	903	0
10609	0	0	0	0	0	0	0	200	300	0	0	0	0	0	0	0	200	903	0	0	0	0	0	0	0	603	903	0
10609	1	0	0	0	0	0	0	200	300	0	0	0	0	0	0	0	200	903	0	0	0	0	0	0	0	603	903	0
10609	2	0	0	0	0	0	0	200	300	0	0	0	0	0	0	0	200	903	0	0	0	0	0	0	0	603	903	0
10609	3	0	0	0	0	0	0	200	300	0	0	0	0	0	0	0	200	903	0	0	0	0	0	0	0	603	903	0
10609	4	0	0	0	0	0	0	200	300	0	0	0	0	0	0	0	200	903	0	0	0	0	0	0	0	603	903	0
10609	5	0	0	0	0	0	0	200	300	0	0	0	0	0	0	0	200	903	0	0	0	0	0	0	0	603	903	0
10609	6	0	0	0	0	0	0	200	300	0	0	0	0	0	0	0	200	903	0	0	0	0	0	0	0	603	903	0
10609	7	0	0	0	0	0	0	200	300	0	0	0	0	0	0	0	200	903	0	0	0	0	0	0	0	603	903	0
10609	8	0	0	0	0	0	0	200	300	0	0	0	0	0	0	0	200	903	0	0	0	0	0	0	0	603	903	0
10609	9	0	0	0	0	0	0	200	300	0	0	0	0	0	0	0	200	903	0	0	0	0	0	0	0	603	903	0
10610	0	0	0	0	0	0	0	200	300	0	0	0	0	0	0	0	200	903	0	0	0	0	0	0	0	603	903	0
10610	1	0	0	0	0	0	0	200	300	0	0	0	0	0	0	0	200	903	0	0	0	0	0	0	0	603	903	0
10610	2	0	0	0	0	0	0	200	300	0	0	0	0	0	0	0	200	903	0	0	0	0	0	0	0	603	903	0
10610	3	0	0	0	0	0	0	200	300	0	0	0	0	0	0	0	200	903	0	0	0	0	0	0	0	603	903	0
10610	4	0	0	0	0	0	0	200	300	0	0	0	0	0	0	0	200	903	0	0	0	0	0	0	0	603	903	0
10610	5	0	0	0	0	0	0	200	300	0	0	0	0	0	0	0	200	903	0	0	0	0	0	0	0	603	903	0
10610	6	0	0	0	0	0	0	200	300	0	0	0	0	0	0	0	200	903	0	0	0	0	0	0	0	603	903	0
10610	7	0	0	0	0	0	0	200	300	0	0	0	0	0	0	0	200	903	0	0	0	0	0	0	0	603	903	0
10610	8	0	0	0	0	0	0	200	300	0	0	0	0	0	0	0	200	903	0	0	0	0	0	0	0	603	903	0
10610	9	0	0	0	0	0	0	200	300	0	0	0	0	0	0	0	200	903	0	0	0	0	0	0	0	603	903	0
10611	0	0	0	0	0	0	0	200	300	0	0	0	0	0	0	0	200	903	0	0	0	0	0	0	0	603	903	0
10611	1	0	0	0	0	0	0	200	300	0	0	0	0	0	0	0	200	903	0	0	0	0	0	0	0	603	903	0
10611	2	0	0	0	0	0	0	200	300	0	0	0	0	0	0	0	200	903	0	0	0	0	0	0	0	603	903	0
10611	3	0	0	0	0	0	0	200	300	0	0	0	0	0	0	0	200	903	0	0	0	0	0	0	0	603	903	0
10611	4	0	0	0	0	0	0	200	300	0	0	0	0	0	0	0	200	903	0	0	0	0	0	0	0	603	903	0
10611	5	0	0	0	0	0	0	200	300	0	0	0	0	0	0	0	200	903	0	0	0	0	0	0	0	603	903	0
10611	6	0	0	0	0	0	0	200	300	0	0	0	0	0	0	0	200	903	0	0	0	0	0	0	0	603	903	0
10611	7	0	0	0	0	0	0	200	300	0	0	0	0	0	0	0	200	903	0	0	0	0	0	0	0	603	903	0
10611	8	0	0	0	0	0	0	200	300	0	0	0	0	0	0	0	200	903	0	0	0	0	0	0	0	603	903	0
10611	9	0	0	0	0	0	0	200	300	0	0	0	0	0	0	0	200	903	0	0	0	0	0	0	0	603	903	0
10612	0	0	0	0	0	0	0	200	300	0	0	0	0	0	0	0	200	903	0	0	0	0	0	0	0	603	903	0
10612	1	0	0	0	0	0	0	200	300	0	0	0	0	0	0	0	200	903	0	0	0	0	0	0	0	603	903	0
10612	2	0	0	0	0	0	0	200	300	0	0	0	0	0	0	0	200	903	0	0	0	0	0	0	0	603	903	0
10612	3	0	0	0	0	0	0	200	300	0	0	0	0	0	0	0	200	903	0	0	0	0	0	0	0	603	903	0
10612	4	0	0	0	0	0	0	200	300	0	0	0	0	0	0	0	200	903	0	0	0	0	0	0	0	603	903	0
10612	5	0	0	0	0	0	0	200	300	0	0	0	0	0	0	0	200	903	0	0	0	0	0	0	0	603	903	0
10612	6	0	0	0	0	0	0	200	300	0	0	0	0	0	0	0	200	903	0	0	0	0	0	0	0	603	903	0
10612	7	0	0	0	0	0	0	200	300	0	0	0	0	0	0	0	200	903	0	0	0	0	0	0	0	603	903	0
10612	8	0	0	0	0	0	0	200	300	0	0	0	0	0	0	0	200	903	0	0	0	0	0	0	0	603	903	0
10612	9	0	0	0	0	0	0	200	300	0	0	0	0	0	0	0	200	903	0	0	0	0	0	0	0	603	903	0
10613	0	0	0	0	0	0	0	200	300	0	0	0	0	0	0	0	200	903	0	0	0	0	0	0	0	603	903	0
10613	1	0	0	0	0	0	0	200	300	0	0	0	0	0	0	0	200	903	0	0	0	0	0	0	0	603	903	0
10613	2	0	0	0	0	0	0	200	300	0	0	0	0	0	0	0	200	903	0	0	0	0	0	0	0	603	903	0
10613	3	0	0	0	0	0	0	200	300	0	0	0	0	0	0	0	200	903	0	0	0	0	0	0	0	603	903	0
10613	4	0	0	0	0	0	0	200	300	0	0	0	0	0	0	0	200	903	0	0	0	0	0	0	0	603	903	0
10613	5	0	0	0	0	0	0	200	300	0	0	0	0	0	0	0	200	903	0	0	0	0	0	0	0	603	903	0
10613	6	0	0	0	0	0	0	200	300	0	0	0	0	0	0	0	200	903	0	0	0	0	0	0	0	603	903	0
10613	7	0	0	0	0	0	0	200	300	0	0	0	0	0	0	0	200	903	0	0	0	0	0	0	0	603	903	0
10613	8	0	0	0	0	0	0	200	300	0	0	0	0	0	0	0	200	903	0	0	0	0	0	0	0	603	903	0
10613	9	0	0	0	0	0	0	200	300	0	0	0	0	0	0	0	200	903	0	0	0	0	0	0	0	603	903	0
10614	0	0	0	0	0	0	0	200	300	0	0	0	0	0	0	0	200	903	0	0	0	0	0	0	0	603	903	0
10614	1	0	0	0	0	0	0	200	300	0	0	0	0	0	0	0	200	903	0	0	0	0	0	0	0	603	903	0
10614	2	0	0	0	0	0	0	200	300	0	0	0	0	0	0	0	200	903	0	0	0	0	0	0	0	603	903	0
10614	3	0	0	0	0	0	0	200	300	0	0	0	0	0	0	0	200	903	0	0	0	0	0	0	0	603	903	0
10614	4	0	0	0	0	0	0	200	300	0	0	0	0	0	0	0	200	903	0	0	0	0	0	0	0	603	903	0
10614	5	0	0	0	0	0	0	200	300	0	0	0	0	0	0	0	200	903	0	0	0	0	0	0	0	603	903	0
10614	6	0	0	0	0	0	0	200	300	0	0	0	0	0	0	0	200	903	0	0	0	0	0	0	0	603	903	0
10614	7	0	0	0	0	0	0	200	300	0	0	0	0	0	0	0	200	903	0	0	0	0	0	0	0	603	903	0
10614	8	0	0	0	0	0	0	200	300	0	0	0	0	0	0	0	200	903	0	0	0	0	0	0	0	603	903	0
10614	9	0	0	0	0	0	0	200	300	0	0	0	0	0	0	0	200	903	0	0	0	0	0	0	0	603	903	0
10615	0	0	0	0	0	0	0	200	300	0	0	0	0	0	0	0	200	903	0	0	0	0	0	0	0	603	903	0
10615	1	0	0	0	0	0	0	200	300	0	0	0	0	0	0	0	200	903	0	0	0	0	0	0	0	603	903	0
10615	2	0	0	0	0	0	0	200	300	0	0	0	0	0	0	0	200	903	0	0	0	0	0	0	0	603	903	0
10615	3	0	0	0	0	0	0	200	300	0	0	0	0	0	0	0	200	903	0	0	0	0	0	0	0	603	903	0
10615	4	0	0	0	0	0	0	200	300	0	0	0	0	0	0	0	200	903	0	0	0	0	0	0	0	603	903	0
10615	5	0	0	0	0	0	0	200	300	0	0	0	0	0	0	0	200	903	0	0	0	0	0	0	0	603	903	0
10615	6	0	0	0	0	0	0	200	300	0	0	0	0	0	0	0	200	903	0	0	0	0	0	0	0	603	903	0
10615	7	0	0	0	0	0	0	200	300	0	0	0	0	0	0	0	200	903	0	0	0	0	0	0	0	603	903	0
10615	8	0	0	0	0	0	0	200	300	0	0	0	0	0	0	0	200	903	0	0	0	0	0	0	0	603	903	0
10615	9	0	0	0	0	0	0	200	300	0	0	0	0	0	0	0	200	903	0	0	0	0	0	0	0	603	903	0
10616	0	0	0	0	0	0	0	200	300	0	0	0	0	0	0	0	200	903	0	0	0	0	0	0	0	603	903	0
10616	1	0	0	0	0	0	0	200	300	0	0	0	0	0	0	0	200	903	0	0	0	0	0	0	0	603	903	0
10616	2	0	0	0	0	0	0	200	300	0	0	0	0	0	0	0	200	903	0	0	0	0	0	0	0	603	903	0
10616	3	0	0	0	0	0	0	200	300	0	0	0	0	0	0	0	200	903	0	0	0	0	0	0	0	603	903	0
10616	4	0	0	0	0	0	0	200	300	0	0	0	0	0	0	0	200	903	0	0	0	0	0	0	0	603	903	0
10616	5	0	0	0	0	0	0	200	300	0	0	0	0	0	0	0	200	903	0	0	0	0	0	0	0	603	903	0
10616	6	0	0	0	0	0	0	200	300	0	0	0	0	0	0	0	200	903	0	0	0	0	0	0	0	603	903	0
10616	7	0	0	0	0	0	0	200	300	0	0	0	0	0	0	0	200	903	0	0	0	0	0	0	0	603	903	0
10616	8	0	0	0	0	0	0	200	300	0	0	0	0	0	0	0	200	903	0	0	0	0	0	0	0	603	903	0
10616	9	0	0	0	0	0	0	200	300	0	0	0	0	0	0	0	200	903	0	0	0	0	0	0	0	603	903	0
10617	0	0	0	0	0	0	0	200	300	0	0	0	0	0	0	0	200	903	0	0	0	0	0	0	0	603	903	0
10617	1	0	0	0	0	0	0	200	300	0	0	0	0	0	0	0	200	903	0	0	0	0	0	0	0	603	903	0
10617	2	0	0	0	0	0	0	200	300	0	0	0	0	0	0	0	200	903	0	0	0	0	0	0	0	603	903	0
10617	3	0	0	0	0	0	0	200	300	0	0	0	0	0	0	0	200	903	0	0	0	0	0	0	0	603	903	0
10617	4	0	0	0	0	0	0	200	300	0	0	0	0	0	0	0	200	903	0	0	0	0	0	0	0	603	903	0
10617	5	0	0	0	0	0	0	200	300	0	0	0	0	0	0	0	200	903	0	0	0	0	0	0	0	603	903	0
10617	6	0	0	0	0	0	0	200	300	0	0	0	0	0	0	0	200	903	0	0	0	0	0	0	0	603	903	0
10617	7	0	0	0	0	0	0	200	300	0	0	0	0	0	0	0	200	903	0	0	0	0	0	0	0	603	903	0
10617	8	0	0	0	0	0	0	200	300	0	0	0	0	0	0	0	200	903	0	0	0	0	0	0	0	603	903	0
10617	9	0	0	0	0	0	0	200	300	0	0	0	0	0	0	0	200	903	0	0	0	0	0	0	0	603	903	0
10618	0	0	0	0	0	0	0	200	300	0	0	0	0	0	0	0	200	903	0	0	0	0	0	0	0	603	903	0
10618	1	0	0	0	0	0	0	200	300	0	0	0	0	0	0	0	200	903	0	0	0	0	0	0	0	603	903	0
10618	2	0	0	0	0	0	0	200	300	0	0	0	0	0	0	0	200	903	0	0	0	0	0	0	0	603	903	0
10618	3	0	0	0	0	0	0	200	300	0	0	0	0	0	0	0	200	903	0	0	0	0	0	0	0	603	903	0
10618	4	0	0	0	0	0	0	200	300	0	0	0	0	0	0	0	200	903	0	0	0	0	0	0	0	603	903	0
10618	5	0	0	0	0	0	0	200	300	0	0	0	0	0	0	0	200	903	0	0	0	0	0	0	0	603	903	0
10618	6	0	0	0	0	0	0	200	300	0	0	0	0	0	0	0	200	903	0	0	0	0	0	0	0	603	903	0
10618	7	0	0	0	0	0	0	200	300	0	0	0	0	0	0	0	200	903	0	0	0	0	0	0	0	603	903	0
10618	8	0	0	0	0	0	0	200	300	0	0	0	0	0	0	0	200	903	0	0	0	0	0	0	0	603	903	0
10618	9	0	0	0	0	0	0	200	300	0	0	0	0	0	0	0	200	903	0	0	0	0	0	0	0	603	903	0
10619	0	0	0	0	0	0	0	200	300	0	0	0	0	0	0	0	200	903	0	0	0	0	0	0	0	603	903	0
10619	1	0	0	0	0	0	0	200	300	0	0	0	0	0	0	0	200	903	0	0	0	0	0	0	0	603	903	0
10619	2	0	0	0	0	0	0	200	300	0	0	0	0	0	0	0	200	903	0	0	0	0	0	0	0	603	903	0
10619	3	0	0	0	0	0	0	200	300	0	0	0	0	0	0	0	200	903	0	0	0	0	0	0	0	603	903	0
10619	4	0	0	0	0	0	0	200	300	0	0	0	0	0	0	0	200	903	0	0	0	0	0	0	0	603	903	0
10619	5	0	0	0	0	0	0	200	300	0	0	0	0	0	0	0	200	903	0	0	0	0	0	0	0	603	903	0
10619	6	0	0	0	0	0	0	200	300	0	0	0	0	0	0	0	200	903	0	0	0	0	0	0	0	603	903	0
10619	7	0	0	0	0	0	0	200	300	0	0	0	0	0	0	0	200	903	0	0	0	0	0	0	0	603	903	0
10619	8	0	0	0	0	0	0	200	300	0	0	0	0	0	0	0	200	903	0	0	0	0	0	0	0	603	903	0
10619	9	0	0	0	0	0	0	200	300	0	0	0	0	0	0	0	200	903	0	0	0	0	0	0	0	603	903	0
10620	0	0	0	0	0	0	0	200	300	0	0	0	0	0	0	0	200	903	0	0	0	0	0	0	0	603	903	0
10620	1	0	0	0	0	0	0	200	300	0	0	0	0	0	0	0	200	903	0	0	0	0	0	0	0	603	903	0
10620	2	0	0	0	0	0	0	200	300	0	0	0	0	0	0	0	200	903	0	0	0	0	0	0	0	603	903	0
10620	3	0	0	0	0	0	0	200	300	0	0	0	0	0	0	0	200	903	0	0	0	0	0	0	0	603	903	0
10620	4	0	0	0	0	0	0	200	300	0	0	0	0	0	0	0	200	903	0	0	0	0	0	0	0	603	903	0
10620	5	0	0	0	0	0	0	200	300	0	0	0	0	0	0	0	200	903	0	0	0	0	0	0	0	603	903	0
10620	6	0	0	0	0	0	0	200	300	0	0	0	0	0	0	0	200	903	0	0	0	0	0	0	0	603	903	0
10620	7	0	0	0	0	0	0	200	300	0	0	0	0	0	0	0	200	903	0	0	0	0	0	0	0	603	903	0
10620	8	0	0	0	0	0	0	200	300	0	0	0	0	0	0	0	200	903	0	0	0	0	0	0	0	603	903	0
10620	9	0	0	0	0	0	0	200	300	0	0	0	0	0	0	0	200	903	0	0	0	0	0	0	0	603	903	0
10621	0	0	0	0	0	0	0	200	300	0	0	0	0	0	0	0	200	903	0	0	0	0	0	0	0	603	903	0
10621	1	0	0	0	0	0	0	200	300	0	0	0	0	0	0	0	200	903	0	0	0	0	0	0	0	603	903	0
10621	2	0	0	0	0	0	0	200	300	0	0	0	0	0	0	0	200	903	0	0	0	0	0	0	0	603	903	0
10621	3	0	0	0	0	0	0	200	300	0	0	0	0	0	0	0	200	903	0	0	0	0	0	0	0	603	903	0
10621	4	0	0	0	0	0	0	200	300	0	0	0	0	0	0	0	200	903	0	0	0	0	0	0	0	603	903	0
10621	5	0	0	0	0	0	0	200	300	0	0	0	0	0	0	0	200	903	0	0	0	0	0	0	0	603	903	0
10621	6	0	0	0	0	0	0	200	300	0	0	0	0	0	0	0	200	903	0	0	0	0	0	0	0	603	903	0
10621	7	0	0	0	0	0	0	200	300	0	0	0	0	0	0	0	200	903	0	0	0	0	0	0	0	603	903	0
10621	8	0	0	0	0	0	0	200	300	0	0	0	0	0	0	0	200	903	0	0	0	0	0	0	0	603	903	0
10621	9	0	0	0	0	0	0	200	300	0	0	0	0	0	0	0	200	903	0	0	0	0	0	0	0	603	903	0
10622	0	0	0	0	0	0	0	200	300	0	0	0	0	0	0	0	200	903	0	0	0	0	0	0	0	603	903	0
10622	1	0	0	0	0	0	0	200	300	0	0	0	0	0	0	0	200	903	0	0	0	0	0	0	0	603	903	0
10622	2	0	0	0	0	0	0	200	300	0	0	0	0	0	0	0	200	903	0	0	0	0	0	0	0	603	903	0
10622	3	0	0	0	0	0	0	200	300	0	0	0	0	0	0	0	200	903	0	0	0	0	0	0	0	603	903	0
10622	4	0	0	0	0	0	0	200	300	0	0	0	0	0	0	0	200	903	0	0	0	0	0	0	0	603	903	0
10622	5	0	0	0	0	0	0	200	300	0	0	0	0	0	0	0	200	903	0	0	0	0	0	0	0	603	903	0
10622	6	0	0	0	0	0	0	200	300	0	0	0	0	0	0	0	200	903	0	0	0	0	0	0	0	603	903	0
10622	7	0	0	0	0	0	0	200	300	0	0	0	0	0	0	0	200	903	0	0	0	0	0	0	0	603	903	0
10622	8	0	0	0	0	0	0	200	300	0	0	0	0	0	0	0	200	903	0	0	0	0	0	0	0	603	903	0
10622	9	0	0	0	0	0	0	200	300	0	0	0	0	0	0	0	200	903	0	0	0	0	0	0	0	603	903	0
10623	0	0	0	0	0	0	0	200	300	0	0	0	0	0	0	0	200	903	0	0	0	0	0	0	0	603	903	0
10623	1	0	0	0	0	0	0	200	300	0	0	0	0	0	0	0	200	903	0	0	0	0	0	0	0	603	903	0
10623	2	0	0	0	0	0	0	200	300	0	0	0	0	0	0	0	200	903	0	0	0	0	0	0	0	603	903	0
10623	3	0	0	0	0	0	0	200	300	0	0	0	0	0	0	0	200	903	0	0	0	0	0	0	0	603	903	0
10623	4	0	0	0	0	0	0	200	300	0	0	0	0	0	0	0	200	903	0	0	0	0	0	0	0	603	903	0
10623	5	0	0	0	0	0	0	200	300	0	0	0	0	0	0	0	200	903	0	0	0	0	0	0	0	603	903	0
10623	6	0	0	0	0	0	0	200	300	0	0	0	0	0	0	0	200	903	0	0	0	0	0	0	0	603	903	0
10623	7	0	0	0	0	0	0	200	300	0	0	0	0	0	0	0	200	903	0	0	0	0	0	0	0	603	903	0
10623	8	0	0	0	0	0	0	200	300	0	0	0	0	0	0	0	200	903	0	0	0	0	0	0	0	603	903	0
10623	9	0	0	0	0	0	0	200	300	0	0	0	0	0	0	0	200	903	0	0	0	0	0	0	0	603	903	0
10624	0	0	0	0	0	0	0	200	300	0	0	0	0	0	0	0	200	903	0	0	0	0	0	0	0	603	903	0
10624	1	0	0	0	0	0	0	200	300	0	0	0	0	0	0	0	200	903	0	0	0	0	0	0	0	603	903	0
10624	2	0	0	0	0	0	0	200	300	0	0	0	0	0	0	0	200	903	0	0	0	0	0	0	0	603	903	0
10624	3	0	0	0	0	0	0	200	300	0	0	0	0	0	0	0	200	903	0	0	0	0	0	0	0	603	903	0
10624	4	0	0	0	0	0	0	200	300	0	0	0	0	0	0	0	200	903	0	0	0	0	0	0	0	603	903	0
10624	5	0	0	0	0	0	0	200	300	0	0	0	0	0	0	0	200	903	0	0	0	0	0	0	0	603	903	0
10624	6	0	0	0	0	0	0	200	300	0	0	0	0	0	0	0	200	903	0	0	0	0	0	0	0	603	903	0
10624	7	0	0	0	0	0	0	200	300	0	0	0	0	0	0	0	200	903	0	0	0	0	0	0	0	603	903	0
10624	8	0	0	0	0	0	0	200	300	0	0	0	0	0	0	0	200	903	0	0	0	0	0	0	0	603	903	0
10624	9	0	0	0	0	0	0	200	300	0	0	0	0	0	0	0	200	903	0	0	0	0	0	0	0	603	903	0
10625	0	0	0	0	0	0	0	200	300	0	0	0	0	0	0	0	200	903	0	0	0	0	0	0	0	603	903	0
10625	1	0	0	0	0	0	0	200	300	0	0	0	0	0	0	0	200	903	0	0	0	0	0	0	0	603	903	0
10625	2	0	0	0	0	0	0	200	300	0	0	0	0	0	0	0	200	903	0	0	0	0	0	0	0	603	903	0
10625	3	0	0	0	0	0	0	200	300	0	0	0	0	0	0	0	200	903	0	0	0	0	0	0	0	603	903	0
10625	4	0	0	0	0	0	0	200	300	0	0	0	0	0	0	0	200	903	0	0	0	0	0	0	0	603	903	0
10625	5	0	0	0	0	0	0	200	300	0	0	0	0	0	0	0	200	903	0	0	0	0	0	0	0	603	903	0
10625	6	0	0	0	0	0	0	200	300	0	0	0	0	0	0	0	200	903	0	0	0	0	0	0	0	603	903	0
10625	7	0	0	0	0	0	0	200	300	0	0	0	0	0	0	0	200	903	0	0	0	0	0	0	0	603	903	0
10625	8	0	0	0	0	0	0	200	300	0	0	0	0	0	0	0	200	903	0	0	0	0	0	0	0	603	903	0
10625	9	0	0	0	0	0	0	200	300	0	0	0	0	0	0	0	200	903	0	0	0	0	0	0	0	603	903	0
10626	0	0	0	0	0	0	0	200	300	0	0	0	0	0	0	0	200	903	0	0	0	0	0	0	0	603	903	0
10626	1	0	0	0	0	0	0	200	300	0	0	0	0	0	0	0	200	903	0	0	0	0	0	0	0	603	903	0
10626	2	0	0	0	0	0	0	200	300	0	0	0	0	0	0	0	200	903	0	0	0	0	0	0	0	603	903	0
10626	3	0	0	0	0	0	0	200	300	0	0	0	0	0	0	0	200	903	0	0	0	0	0	0	0	603	903	0
10626	4	0	0	0	0	0	0	200	300	0	0	0	0	0	0	0	200	903	0	0	0	0	0	0	0	603	903	0
10626	5	0	0	0	0	0	0	200	300	0	0	0	0	0	0	0	200	903	0	0	0	0	0	0	0	603	903	0
10626	6	0	0	0	0	0	0	200	300	0	0	0	0	0	0	0	200	903	0	0	0	0	0	0	0	603	903	0
10626	7	0	0	0	0	0	0	200	300	0	0	0	0	0	0	0	200	903	0	0	0	0	0	0	0	603	903	0
10626	8	0	0	0	0	0	0	200	300	0	0	0	0	0	0	0	200	903	0	0	0	0	0	0	0	603	903	0
10626	9	0	0	0	0	0	0	200	300	0	0	0	0	0	0	0	200	903	0	0	0	0	0	0	0	603	903	0
10627	0	0	0	0	0	0	0	200	300	0	0	0	0	0	0	0	200	903	0	0	0	0	0	0	0	603	903	0
10627	1	0	0	0	0	0	0	200	300	0	0	0	0	0	0	0	200	903	0	0	0	0	0	0	0	603	903	0
10627	2	0	0	0	0	0	0	200	300	0	0	0	0	0	0	0	200	903	0	0	0	0	0	0	0	603	903	0
10627	3	0	0	0	0	0	0	200	300	0	0	0	0	0	0	0	200	903	0	0	0	0	0	0	0	603	903	0
10627	4	0	0	0	0	0	0	200	300	0	0	0	0	0	0	0	200	903	0	0	0	0	0	0	0	603	903	0
10627	5	0	0	0	0	0	0	200	300	0	0	0	0	0	0	0	200	903	0	0	0	0	0	0	0	603	903	0
10627	6	0	0	0	0	0	0	200	300	0	0	0	0	0	0	0	200	903	0	0	0	0	0	0	0	603	903	0
10627	7	0	0	0	0	0	0	200	300	0	0	0	0	0	0	0	200	903	0	0	0	0	0	0	0	603	903	0
10627	8	0	0	0	0	0	0	200	300	0	0	0	0	0	0	0	200	903	0	0	0	0	0	0	0	603	903	0
10627	9	0	0	0	0	0	0	200	300	0	0	0	0	0	0	0	200	903	0	0	0	0	0	0	0	603	903	0
10628	0	0	0	0	0	0	0	200	300	0	0	0	0	0	0	0	200	903	0	0	0	0	0	0	0	603	903	0
10628	1	0	0	0	0	0	0	200	300	0	0	0	0	0	0	0	200	903	0	0	0	0	0	0	0	603	903	0
10628	2	0	0	0	0	0	0	200	300	0	0	0	0	0	0	0	200	903	0	0	0	0	0	0	0	603	903	0
10628	3	0	0	0	0	0	0	200	300	0	0	0	0	0	0	0	200	903	0	0	0	0	0	0	0	603	903	0
10628	4	0	0	0	0	0	0	200	300	0	0	0	0	0	0	0	200	903	0	0	0	0	0	0	0	603	903	0
10628	5	0	0	0	0	0	0	200	300	0	0	0	0	0	0	0	200	903	0	0	0	0	0	0	0	603	903	0
10628	6	0	0	0	0	0	0	200	300	0	0	0	0	0	0	0	200	903	0	0	0	0	0	0	0	603	903	0
10628	7	0	0	0	0	0	0	200	300	0	0	0	0	0	0	0	200	903	0	0	0	0	0	0	0	603	903	0
10628	8	0	0	0	0	0	0	200	300	0	0	0	0	0	0	0	200	903	0	0	0	0	0	0	0	603	903	0
10628	9	0	0	0	0	0	0	200	300	0	0	0	0	0	0	0	200	903	0	0	0	0	0	0	0	603	903	0
10629	0	0	0	0	0	0	0	200	300	0	0	0	0	0	0	0	200	903	0	0	0	0	0	0	0	603	903	0
10629	1	0	0	0	0	0	0	200	300	0	0	0	0	0	0	0	200	903	0	0	0	0	0	0	0	603	903	0
10629	2	0	0	0	0	0	0	200	300	0	0	0	0	0	0	0	200	903	0	0	0	0	0	0	0	603	903	0
10629	3	0	0	0	0	0	0	200	300	0	0	0	0	0	0	0	200	903	0	0	0	0	0	0	0	603	903	0
10629	4	0	0	0	0	0	0	200	300	0	0	0	0	0	0	0	200	903	0	0	0	0	0	0	0	603	903	0
10629	5	0	0	0	0	0	0	200	300	0	0	0	0	0	0	0	200	903	0	0	0	0	0	0	0	603	903	0
10629	6	0	0	0	0	0	0	200	300	0	0	0	0	0	0	0	200	903	0	0	0	0	0	0	0	603	903	0
10629	7	0	0	0	0	0	0	200	300	0	0	0	0	0	0	0	200	903	0	0	0	0	0	0	0	603	903	0
10629	8	0	0	0	0	0	0	200	300	0	0	0	0	0	0	0	200	903	0	0	0	0	0	0	0	603	903	0
10629	9	0	0	0	0	0	0	200	300	0	0	0	0	0	0	0	200	903	0	0	0	0	0	0	0	603	903	0
10630	0	0	0	0	0	0	0	200	300	0	0	0	0	0	0	0	200	903	0	0	0	0	0	0	0	603	903	0
10630	1	0	0	0	0	0	0	200	300	0	0	0	0	0	0	0	200	903	0	0	0	0	0	0	0	603	903	0
10630	2	0	0	0	0	0	0	200	300	0	0	0	0	0	0	0	200	903	0	0	0	0	0	0	0	603	903	0
10630	3	0	0	0	0	0	0	200	300	0	0	0	0	0	0	0	200	903	0	0	0	0	0	0	0	603	903	0
10630	4	0	0	0	0	0	0	200	300	0	0	0	0	0	0	0	200	903	0	0	0	0	0	0	0	603	903	0
10630	5	0	0	0	0	0	0	200	300	0	0	0	0	0	0	0	200	903	0	0	0	0	0	0	0	603	903	0
10630	6	0	0	0	0	0	0	200	300	0	0	0	0	0	0	0	200	903	0	0	0	0	0	0	0	603	903	0
10630	7	0	0	0	0	0	0	200	300	0	0	0	0	0	0	0	200	903	0	0	0	0	0	0	0	603	903	0
10630	8	0	0	0	0	0	0	200	300	0	0	0	0	0	0	0	200	903	0	0	0	0	0	0	0	603	903	0
10630	9	0	0	0	0	0	0	200	300	0	0	0	0	0	0	0	200	903	0	0	0	0	0	0	0	603	903	0
10631	0	0	0	0	0	0	0	200	300	0	0	0	0	0	0	0	200	903	0	0	0	0	0	0	0	603	903	0
10631	1	0	0	0	0	0	0	200	300	0	0	0	0	0	0	0	200	903	0	0	0	0	0	0	0	603	903	0
10631	2	0	0	0	0	0	0	200	300	0	0	0	0	0	0	0	200	903	0	0	0	0	0	0	0	603	903	0
10631	3	0	0	0	0	0	0	200	300	0	0	0	0	0	0	0	200	903	0	0	0	0	0	0	0	603	903	0
10631	4	0	0	0	0	0	0	200	300	0	0	0	0	0	0	0	200	903	0	0	0	0	0	0	0	603	903	0
10631	5	0	0	0	0	0	0	200	300	0	0	0	0	0	0	0	200	903	0	0	0	0	0	0	0	603	903	0
10631	6	0	0	0	0	0	0	200	300	0	0	0	0	0	0	0	200	903	0	0	0	0	0	0	0	603	903	0
10631	7	0	0	0	0	0	0	200	300	0	0	0	0	0	0	0	200	903	0	0	0	0	0	0	0	603	903	0
10631	8	0	0	0	0	0	0	200	300	0	0	0	0	0	0	0	200	903	0	0	0	0	0	0	0	603	903	0
10631	9	0	0	0	0	0	0	200	300	0	0	0	0	0	0	0	200	903	0	0	0	0	0	0	0	603	903	0
10632	0	0	0	0	0	0	0	200	300	0	0	0	0	0	0	0	200	903	0	0	0	0	0	0	0	603	903	0
10632	1	0	0	0	0	0	0	200	300	0	0	0	0	0	0	0	200	903	0	0	0	0	0	0	0	603	903	0
10632	2	0	0	0	0	0	0	200	300	0	0	0	0	0	0	0	200	903	0	0	0	0	0	0	0	603	903	0
10632	3	0	0	0	0	0	0	200	300	0	0	0	0	0	0	0	200	903	0	0	0	0	0	0	0	603	903	0
10632	4	0	0	0	0	0	0	200	300	0	0	0	0	0	0	0	200	903	0	0	0	0	0	0	0	603	903	0
10632	5	0	0	0	0	0	0	200	300	0	0	0	0	0	0	0	200	903	0	0	0	0	0	0	0	603	903	0
10632	6	0	0	0	0	0	0	200	300	0	0	0	0	0	0	0	200	903	0	0	0	0	0	0	0	603	903	0
10632	7	0	0	0	0	0	0	200	300	0	0	0	0	0	0	0	200	903	0	0	0	0	0	0	0	603	903	0
10632	8	0	0	0	0	0	0	200	300	0	0	0	0	0	0	0	200	903	0	0	0	0	0	0	0	603	903	0
10632	9	0	0	0	0	0	0	200	300	0	0	0	0	0	0	0	200	903	0	0	0	0	0	0	0	603	903	0
10633	0	0	0	0	0	0	0	200	300	0	0	0	0	0	0	0	200	903	0	0	0	0	0	0	0	603	903	0
10633	1	0	0	0	0	0	0	200	300	0	0	0	0	0	0	0	200	903	0	0	0	0	0	0	0	603	903	0
10633	2	0	0	0	0	0	0	200	300	0	0	0	0	0	0	0	200	903	0	0	0	0	0	0	0	603	903	0
10633	3	0	0	0	0	0	0	200	300	0	0	0	0	0	0	0	200	903	0	0	0	0	0	0	0	603	903	0
10633	4	0	0	0	0	0	0	200	300	0	0	0	0	0	0	0	200	903	0	0	0	0	0	0	0	603	903	0
10633	5	0	0	0	0	0	0	200	300	0	0	0	0	0	0	0	200	903	0	0	0	0	0	0	0	603	903	0
10633	6	0	0	0	0	0	0	200	300	0	0	0	0	0	0	0	200	903	0	0	0	0	0	0	0	603	903	0
10633	7	0	0	0	0	0	0	200	300	0	0	0	0	0	0	0	200	903	0	0	0	0	0	0	0	603	903	0
10633	8	0	0	0	0	0	0	200	300	0	0	0	0	0	0	0	200	903	0	0	0	0	0	0	0	603	903	0
10633	9	0	0	0	0	0	0	200	300	0	0	0	0	0	0	0	200	903	0	0	0	0	0	0	0	603	903	0
10634	0	0	0	0	0	0	0	200	300	0	0	0	0	0	0	0	200	903	0	0	0	0	0	0	0	603	903	0
10634	1	0	0	0	0	0	0	200	300	0	0	0	0	0	0	0	200	903	0	0	0	0	0	0	0	603	903	0
10634	2	0	0	0	0	0	0	200	300	0	0	0	0	0	0	0	200	903	0	0	0	0	0	0	0	603	903	0
10634	3	0	0	0	0	0	0	200	300	0	0	0	0	0	0	0	200	903	0	0	0	0	0	0	0	603	903	0
10634	4	0	0	0	0	0	0	200	300	0	0	0	0	0	0	0	200	903	0	0	0	0	0	0	0	603	903	0
10634	5	0	0	0	0	0	0	200	300	0	0	0	0	0	0	0	200	903	0	0	0	0	0	0	0	603	903	0
10634	6	0	0	0	0	0	0	200	300	0	0	0	0	0	0	0	200	903	0	0	0	0	0	0	0	603	903	0
10634	7	0	0	0	0	0	0	200	300	0	0	0	0	0	0	0	200	903	0	0	0	0	0	0	0	603	903	0
10634	8	0	0	0	0	0	0	200	300	0	0	0	0	0	0	0	200	903	0	0	0	0	0	0	0	603	903	0
10634	9	0	0	0	0	0	0	200	300	0	0	0	0	0	0	0	200	903	0	0	0	0	0	0	0	603	903	0
10635	0	0	0	0	0	0	0	200	300	0	0	0	0	0	0	0	200	903	0	0	0	0	0	0	0	603	903	0
10635	1	0	0	0	0	0	0	200	300	0	0	0	0	0	0	0	200	903	0	0	0	0	0	0	0	603	903	0
10635	2	0	0	0	0	0	0	200	300	0	0	0	0	0	0	0	200	903	0	0	0	0	0	0	0	603	903	0
10635	3	0	0	0	0	0	0	200	300	0	0	0	0	0	0	0	200	903	0	0	0	0	0	0	0	603	903	0
10635	4	0	0	0	0	0	0	200	300	0	0	0	0	0	0	0	200	903	0	0	0	0	0	0	0	603	903	0
10635	5	0	0	0	0	0	0	200	300	0	0	0	0	0	0	0	200	903	0	0	0	0	0	0	0	603	903	0
10635	6	0	0	0	0	0	0	200	300	0	0	0	0	0	0	0	200	903	0	0	0	0	0	0	0	603	903	0
10635	7	0	0	0	0	0	0	200	300	0	0	0	0	0	0	0	200	903	0	0	0	0	0	0	0	603	903	0
10635	8	0	0	0	0	0	0	200	300	0	0	0	0	0	0	0	200	903	0	0	0	0	0	0	0	603	903	0
10635	9	0	0	0	0	0	0	200	300	0	0	0	0	0	0	0	200	903	0	0	0	0	0	0	0	603	903	0
10636	0	0	0	0	0	0	0	200	300	0	0	0	0	0	0	0	200	903	0	0	0	0	0	0	0	603	903	0
10636	1	0	0	0	0	0	0	200	300	0	0	0	0	0	0	0	200	903	0	0	0	0	0	0	0	603	903	0
10636	2	0	0	0	0	0	0	200	300	0	0	0	0	0	0	0	200	903	0	0	0	0	0	0	0	603	903	0
10636	3	0	0	0	0	0	0	200	300	0	0	0	0	0	0	0	200	903	0	0	0	0	0	0	0	603	903	0
10636	4	0	0	0	0	0	0	200	300	0	0	0	0	0	0	0	200	903	0	0	0	0	0	0	0	603	903	0
10636	5	0	0	0	0	0	0	200	300	0	0	0	0	0	0	0	200	903	0	0	0	0	0	0	0	603	903	0
10636	6	0	0	0	0	0	0	200	300	0	0	0	0	0	0	0	200	903	0	0	0	0	0	0	0	603	903	0
10636	7	0	0	0	0	0	0	200	300	0	0	0	0	0	0	0	200	903	0	0	0	0	0	0	0	603	903	0
10636	8	0	0	0	0	0	0	200	300	0	0	0	0	0	0	0	200	903	0	0	0	0	0	0	0	603	903	0
10636	9	0	0	0	0	0	0	200	300	0	0	0	0	0	0	0	200	903	0	0	0	0	0	0	0	603	903	0
10637	0	0	0	0	0	0	0	200	300	0	0	0	0	0	0	0	200	903	0	0	0	0	0	0	0	603	903	0
10637	1	0	0	0	0	0	0	200	300	0	0	0	0	0	0	0	200	903	0	0	0	0	0	0	0	603	903	0
10637	2	0	0	0	0	0	0	200	300	0	0	0	0	0	0	0	200	903	0	0	0	0	0	0	0	603	903	0
10637	3	0	0	0	0	0	0	200	300	0	0	0	0	0	0	0	200	903	0	0	0	0	0	0	0	603	903	0
10637	4	0	0	0	0	0	0	200	300	0	0	0	0	0	0	0	200	903	0	0	0	0	0	0	0	603	903	0
10637	5	0	0	0	0	0	0	200	300	0	0	0	0	0	0	0	200	903	0	0	0	0	0	0	0	603	903	0
10637	6	0	0	0	0	0	0	200	300	0	0	0	0	0	0	0	200	903	0	0	0	0	0	0	0	603	903	0
10637	7	0	0	0	0	0	0	200	300	0	0	0	0	0	0	0	200	903	0	0	0	0	0	0	0	603	903	0
10637	8	0	0	0	0	0	0	200	300	0	0	0	0	0	0	0	200	903	0	0	0	0	0	0	0	603	903	0
10637	9	0	0	0	0	0	0	200	300	0	0	0	0	0	0	0	200	903	0	0	0	0	0	0	0	603	903	0
10638	0	0	0	0	0	0	0	200	300	0	0	0	0	0	0	0	200	903	0	0	0	0	0	0	0	603	903	0
10638	1	0	0	0	0	0	0	200	300	0	0	0	0	0	0	0	200	903	0	0	0	0	0	0	0	603	903	0
10638	2	0	0	0	0	0	0	200	300	0	0	0	0	0	0	0	200	903	0	0	0	0	0	0	0	603	903	0
10638	3	0	0	0	0	0	0	200	300	0	0	0	0	0	0	0	200	903	0	0	0	0	0	0	0	603	903	0
10638	4	0	0	0	0	0	0	200	300	0	0	0	0	0	0	0	200	903	0	0	0	0	0	0	0	603	903	0
10638	5	0	0	0	0	0	0	200	300	0	0	0	0	0	0	0	200	903	0	0	0	0	0	0	0	603	903	0
10638	6	0	0	0	0	0	0	200	300	0	0	0	0	0	0	0	200	903	0	0	0	0	0	0	0	603	903	0
10638	7	0	0	0	0	0	0	200	300	0	0	0	0	0	0	0	200	903	0	0	0	0	0	0	0	603	903	0
10638	8	0	0	0	0	0	0	200	300	0	0	0	0	0	0	0	200	903	0	0	0	0	0	0	0	603	903	0
10638	9	0	0	0	0	0	0	200	300	0	0	0	0	0	0	0	200	903	0	0	0	0	0	0	0	603	903	0
10639	0	0	0	0	0	0	0	200	300	0	0	0	0	0	0	0	200	903	0	0	0	0	0	0	0	603	903	0
10639	1	0	0	0	0	0	0	200	300	0	0	0	0	0	0	0	200	903	0	0	0	0	0	0	0	603	903	0
10639	2	0	0	0	0	0	0	200	300	0	0	0	0	0	0	0	200	903	0	0	0	0	0	0	0	603	903	0
10639	3	0	0	0	0	0	0	200	300	0	0	0	0	0	0	0	200	903	0	0	0	0	0	0	0	603	903	0
10639	4	0	0	0	0	0	0	200	300	0	0	0	0	0	0	0	200	903	0	0	0	0	0	0	0	603	903	0
10639	5	0	0	0	0	0	0	200	300	0	0	0	0	0	0	0	200	903	0	0	0	0	0	0	0	603	903	0
10639	6	0	0	0	0	0	0	200	300	0	0	0	0	0	0	0	200	903	0	0	0	0	0	0	0	603	903	0
10639	7	0	0	0	0	0	0	200	300	0	0	0	0	0	0	0	200	903	0	0	0	0	0	0	0	603	903	0
10639	8	0	0	0	0	0	0	200	300	0	0	0	0	0	0	0	200	903	0	0	0	0	0	0	0	603	903	0
10639	9	0	0	0	0	0	0	200	300	0	0	0	0	0	0	0	200	903	0	0	0	0	0	0	0	603	903	0
10640	0	0	0	0	0	0	0	200	300	0	0	0	0	0	0	0	200	903	0	0	0	0	0	0	0	603	903	0
10640	1	0	0	0	0	0	0	200	300	0	0	0	0	0	0	0	200	903	0	0	0	0	0	0	0	603	903	0
10640	2	0	0	0	0	0	0	200	300	0	0	0	0	0	0	0	200	903	0	0	0	0	0	0	0	603	903	0
10640	3	0	0	0	0	0	0	200	300	0	0	0	0	0	0	0	200	903	0	0	0	0	0	0	0	603	903	0
10640	4	0	0	0	0	0	0	200	300	0	0	0	0	0	0	0	200	903	0	0	0	0	0	0	0	603	903	0
10640	5	0	0	0	0	0	0	200	300	0	0	0	0	0	0	0	200	903	0	0	0	0	0	0	0	603	903	0
10640	6	0	0	0	0	0	0	200	300	0	0	0	0	0	0	0	200	903	0	0	0	0	0	0	0	603	903	0
10640	7	0	0	0	0	0	0	200	300	0	0	0	0	0	0	0	200	903	0	0	0	0	0	0	0	603	903	0
10640	8	0	0	0	0	0	0	200	300	0	0	0	0	0	0	0	200	903	0	0	0	0	0	0	0	603	903	0
10640	9	0	0	0	0	0	0	200	300	0	0	0	0	0	0	0	200	903	0	0	0	0	0	0	0	603	903	0
10641	0	0	0	0	0	0	0	200	300	0	0	0	0	0	0	0	200	903	0	0	0	0	0	0	0	603	903	0
10641	1	0	0	0	0	0	0	200	300	0	0	0	0	0	0	0	200	903	0	0	0	0	0	0	0	603	903	0
10641	2	0	0	0	0	0	0	200	300	0	0	0	0	0	0	0	200	903	0	0	0	0	0	0	0	603	903	0
10641	3	0	0	0	0	0	0	200	300	0	0	0	0	0	0	0	200	903	0	0	0	0	0	0	0	603	903	0
10641	4	0	0	0	0	0	0	200	300	0	0	0	0	0	0	0	200	903	0	0	0	0	0	0	0	603	903	0
10641	5	0	0	0	0	0	0	200	300	0	0	0	0	0	0	0	200	903	0	0	0	0	0	0	0	603	903	0
10641	6	0	0	0	0	0	0	200	300	0	0	0	0	0	0	0	200	903	0	0	0	0	0	0	0	603	903	0
10641	7	0	0	0	0	0	0	200	300	0	0	0	0	0	0	0	200	903	0	0	0	0	0	0	0	603	903	0
10641	8	0	0	0	0	0	0	200	300	0	0	0	0	0	0	0	200	903	0	0	0	0	0	0	0	603	903	0
10641	9	0	0	0	0	0	0	200	300	0	0	0	0	0	0	0	200	903	0	0	0	0	0	0	0	603	903	0
10642	0	0	0	0	0	0	0	200	300	0	0	0	0	0	0	0	200	903	0	0	0	0	0	0	0	603	903	0
10642	1	0	0	0	0	0	0	200	300	0	0	0	0	0	0	0	200	903	0	0	0	0	0	0	0	603	903	0
10642	2	0	0	0	0	0	0	200	300	0	0	0	0	0	0	0	200	903	0	0	0	0	0	0	0	603	903	0
10642	3	0	0	0	0	0	0	200	300	0	0	0	0	0	0	0	200	903	0	0	0	0	0	0	0	603	903	0
10642	4	0	0	0	0	0	0	200	300	0	0	0	0	0	0	0	200	903	0	0	0	0	0	0	0	603	903	0
10642	5	0	0	0	0	0	0	200	300	0	0	0	0	0	0	0	200	903	0	0	0	0	0	0	0	603	903	0
10642	6	0	0	0	0	0	0	200	300	0	0	0	0	0	0	0	200	903	0	0	0	0	0	0	0	603	903	0
10642	7	0	0	0	0	0	0	200	300	0	0	0	0	0	0	0	200	903	0	0	0	0	0	0	0	603	903	0
10642	8	0	0	0	0	0	0	200	300	0	0	0	0	0	0	0	200	903	0	0	0	0	0	0	0	603	903	0
10642	9	0	0	0	0	0	0	200	300	0	0	0	0	0	0	0	200	903	0	0	0	0	0	0	0	603	903	0
10643	0	0	0	0	0	0	0	200	300	0	0	0	0	0	0	0	200	903	0	0	0	0	0	0	0	603	903	0
10643	1	0	0	0	0	0	0	200	300	0	0	0	0	0	0	0	200	903	0	0	0	0	0	0	0	603	903	0
10643	2	0	0	0	0	0	0	200	300	0	0	0	0	0	0	0	200	903	0	0	0	0	0	0	0	603	903	0
10643	3	0	0	0	0	0	0	200	300	0	0	0	0	0	0	0	200	903	0	0	0	0	0	0	0	603	903	0
10643	4	0	0	0	0	0	0	200	300	0	0	0	0	0	0	0	200	903	0	0	0	0	0	0	0	603	903	0
10643	5	0	0	0	0	0	0	200	300	0	0	0	0	0	0	0	200	903	0	0	0	0	0	0	0	603	903	0
10643	6	0	0	0	0	0	0	200	300	0	0	0	0	0	0	0	200	903	0	0	0	0	0	0	0	603	903	0
10643	7	0	0	0	0	0	0	200	300	0	0	0	0	0	0	0	200	903	0	0	0	0	0	0	0	603	903	0
10643	8	0	0	0	0	0	0	200	300	0	0	0	0	0	0	0	200	903	0	0	0	0	0	0	0	603	903	0
10643	9	0	0	0	0	0	0	200	300	0	0	0	0	0	0	0	200	903	0	0	0	0	0	0	0	603	903	0
10644	0	0	0	0	0	0	0	200	300	0	0	0	0	0	0	0	200	903	0	0	0	0	0	0	0	603	903	0
10644	1	0	0	0	0	0	0	200	300	0	0	0	0	0	0	0	200	903	0	0	0	0	0	0	0	603	903	0
10644	2	0	0	0	0	0	0	200	300	0	0	0	0	0	0	0	200	903	0	0	0	0	0	0	0	603	903	0
10644	3	0	0	0	0	0	0	200	300	0	0	0	0	0	0	0	200	903	0	0	0	0	0	0	0	603	903	0
10644	4	0	0	0	0	0	0	200	300	0	0	0	0	0	0	0	200	903	0	0	0	0	0	0	0	603	903	0
10644	5	0	0	0	0	0	0	200	300	0	0	0	0	0	0	0	200	903	0	0	0	0	0	0	0	603	903	0
10644	6	0	0	0	0	0	0	200	300	0	0	0	0	0	0	0	200	903	0	0	0	0	0	0	0	603	903	0
10644	7	0	0	0	0	0	0	200	300	0	0	0	0	0	0	0	200	903	0	0	0	0	0	0	0	603	903	0
10644	8	0	0	0	0	0	0	200	300	0	0	0	0	0	0	0	200	903	0	0	0	0	0	0	0	603	903	0
10644	9	0	0	0	0	0	0	200	300	0	0	0	0	0	0	0	200	903	0	0	0	0	0	0	0	603	903	0
10645	0	0	0	0	0	0	0	200	300	0	0	0	0	0	0	0	200	903	0	0	0	0	0	0	0	603	903	0
10645	1	0	0	0	0	0	0	200	300	0	0	0	0	0	0	0	200	903	0	0	0	0	0	0	0	603	903	0
10645	2	0	0	0	0	0	0	200	300	0	0	0	0	0	0	0	200	903	0	0	0	0	0	0	0	603	903	0
10645	3	0	0	0	0	0	0	200	300	0	0	0	0	0	0	0	200	903	0	0	0	0	0	0	0	603	903	0
10645	4	0	0	0	0	0	0	200	300	0	0	0	0	0	0	0	200	903	0	0	0	0	0	0	0	603	903	0
10645	5	0	0	0	0	0	0	200	300	0	0	0	0	0	0	0	200	903	0	0	0	0	0	0	0	603	903	0
10645	6	0	0	0	0	0	0	200	300	0	0	0	0	0	0	0	200	903	0	0	0	0	0	0	0	603	903	0
10645	7	0	0	0	0	0	0	200	300	0	0	0	0	0	0	0	200	903	0	0	0	0	0	0	0	603	903	0
10645	8	0	0	0	0	0	0	200	300	0	0	0	0	0	0	0	200	903	0	0	0	0	0	0	0	603	903	0
10645	9	0	0	0	0	0	0	200	300	0	0	0	0	0	0	0	200	903	0	0	0	0	0	0	0	603	903	0
10646	0	0	0	0	0	0	0	200	300	0	0	0	0	0	0	0	200	903	0	0	0	0	0	0	0	603	903	0
10646	1	0	0	0	0	0	0	200	300	0	0	0	0	0	0	0	200	903	0	0	0	0	0	0	0	603	903	0
10646	2	0	0	0	0	0	0	200	300	0	0	0	0	0	0	0	200	903	0	0	0	0	0	0	0	603	903	0
10646	3	0	0	0	0	0	0	200	300	0	0	0	0	0	0	0	200	903	0	0	0	0	0	0	0	603	903	0
10646	4	0	0	0	0	0	0	200	300	0	0	0	0	0	0	0	200	903	0	0	0	0	0	0	0	603	903	0
10646	5	0	0	0	0	0	0	200	300	0	0	0	0	0	0	0	200	903	0	0	0	0	0	0	0	603	903	0
10646	6	0	0	0	0	0	0	200	300	0	0	0	0	0	0	0	200	903	0	0	0	0	0	0	0	603	903	0
10646	7	0	0	0	0	0	0	200	300	0	0	0	0	0	0	0	200	903	0	0	0	0	0	0	0	603	903	0
10646	8	0	0	0	0	0	0	200	300	0	0	0	0	0	0	0	200	903	0	0	0	0	0	0	0	603	903	0
10646	9	0	0	0	0	0	0	200	300	0	0	0	0	0	0	0	200	903	0	0	0	0	0	0	0	603	903	0
10647	0	0	0	0	0	0	0	200	300	0	0	0	0	0	0	0	200	903	0	0	0	0	0	0	0	603	903	0
10647	1	0	0	0	0	0	0	200	300	0	0	0	0	0	0	0	200	903	0	0	0	0	0	0	0	603	903	0
10647	2	0	0	0	0	0	0	200	300	0	0	0	0	0	0	0	200	903	0	0	0	0	0	0	0	603	903	0
10647	3	0	0	0	0	0	0	200	300	0	0	0	0	0	0	0	200	903	0	0	0	0	0	0	0	603	903	0
10647	4	0	0	0	0	0	0	200	300	0	0	0	0	0	0	0	200	903	0	0	0	0	0	0	0	603	903	0
10647	5	0	0	0	0	0	0	200	300	0	0	0	0	0	0	0	200	903	0	0	0	0	0	0	0	603	903	0
10647	6	0	0	0	0	0	0	200	300	0	0	0	0	0	0	0	200	903	0	0	0	0	0	0	0	603	903	0
10647	7	0	0	0	0	0	0	200	300	0	0	0	0	0	0	0	200	903	0	0	0	0	0	0	0	603	903	0
10647	8	0	0	0	0	0	0	200	300	0	0	0	0	0	0	0	200	903	0	0	0	0	0	0	0	603	903	0
10647	9	0	0	0	0	0	0	200	300	0	0	0	0	0	0	0	200	903	0	0	0	0	0	0	0	603	903	0
10648	0	0	0	0	0	0	0	200	300	0	0	0	0	0	0	0	200	903	0	0	0	0	0	0	0	603	903	0
10648	1	0	0	0	0	0	0	200	300	0	0	0	0	0	0	0	200	903	0	0	0	0	0	0	0	603	903	0
10648	2	0	0	0	0	0	0	200	300	0	0	0	0	0	0	0	200	903	0	0	0	0	0	0	0	603	903	0
10648	3	0	0	0	0	0	0	200	300	0	0	0	0	0	0	0	200	903	0	0	0	0	0	0	0	603	903	0
10648	4	0	0	0	0	0	0	200	300	0	0	0	0	0	0	0	200	903	0	0	0	0	0	0	0	603	903	0
10648	5	0	0	0	0	0	0	200	300	0	0	0	0	0	0	0	200	903	0	0	0	0	0	0	0	603	903	0
10648	6	0	0	0	0	0	0	200	300	0	0	0	0	0	0	0	200	903	0	0	0	0	0	0	0	603	903	0
10648	7	0	0	0	0	0	0	200	300	0	0	0	0	0	0	0	200	903	0	0	0	0	0	0	0	603	903	0
10648	8	0	0	0	0	0	0	200	300	0	0	0	0	0	0	0	200	903	0	0	0	0	0	0	0	603	903	0
10648	9	0	0	0	0	0	0	200	300	0	0	0	0	0	0	0	200	903	0	0	0	0	0	0	0	603	903	0
10649	0	0	0	0	0	0	0	200	300	0	0	0	0	0	0	0	200	903	0	0	0	0	0	0	0	603	903	0
10649	1	0	0	0	0	0	0	200	300	0	0	0	0	0	0	0	200	903	0	0	0	0	0	0	0	603	903	0
10649	2	0	0	0	0	0	0	200	300	0	0	0	0	0	0	0	200	903	0	0	0	0	0	0	0	603	903	0
10649	3	0	0	0	0	0	0	200	300	0	0	0	0	0	0	0	200	903	0	0	0	0	0	0	0	603	903	0
10649	4	0	0	0	0	0	0	200	300	0	0	0	0	0	0	0	200	903	0	0	0	0	0	0	0	603	903	0
10649	5	0	0	0	0	0	0	200	300	0	0	0	0	0	0	0	200	903	0	0	0	0	0	0	0	603	903	0
10649	6	0	0	0	0	0	0	200	300	0	0	0	0	0	0	0	200	903	0	0	0	0	0	0	0	603	903	0
10649	7	0	0	0	0	0	0	200	300	0	0	0	0	0	0	0	200	903	0	0	0	0	0	0	0	603	903	0
10649	8	0	0	0	0	0	0	200	300	0	0	0	0	0	0	0	200	903	0	0	0	0	0	0	0	603	903	0
10649	9	0	0	0	0	0	0	200	300	0	0	0	0	0	0	0	200	903	0	0	0	0	0	0	0	603	903	0
10650	0	0	0	0	0	0	0	200	300	0	0	0	0	0	0	0	200	903	0	0	0	0	0	0	0	603	903	0
10650	1	0	0	0	0	0	0	200	300	0	0	0	0	0	0	0	200	903	0	0	0	0	0	0	0	603	903	0
10650	2	0	0	0	0	0	0	200	300	0	0	0	0	0	0	0	200	903	0	0	0	0	0	0	0	603	903	0
10650	3	0	0	0	0	0	0	200	300	0	0	0	0	0	0	0	200	903	0	0	0	0	0	0	0	603	903	0
10650	4	0	0	0	0	0	0	200	300	0	0	0	0	0	0	0	200	903	0	0	0	0	0	0	0	603	903	0
10650	5	0	0	0	0	0	0	200	300	0	0	0	0	0	0	0	200	903	0	0	0	0	0	0	0	603	903	0
10650	6	0	0	0	0	0	0	200	300	0	0	0	0	0	0	0	200	903	0	0	0	0	0	0	0	603	903	0
10650	7	0	0	0	0	0	0	200	300	0	0	0	0	0	0	0	200	903	0	0	0	0	0	0	0	603	903	0
10650	8	0	0	0	0	0	0	200	300	0	0	0	0	0	0	0	200	903	0	0	0	0	0	0	0	603	903	0
10650	9	0	0	0	0	0	0	200	300	0	0	0	0	0	0	0	200	903	0	0	0	0	0	0	0	603	903	0
10651	0	0	0	0	0	0	0	200	300	0	0	0	0	0	0	0	200	903	0	0	0	0	0	0	0	603	903	0
10651	1	0	0	0	0	0	0	200	300	0	0	0	0	0	0	0	200	903	0	0	0	0	0	0	0	603	903	0
10651	2	0	0	0	0	0	0	200	300	0	0	0	0	0	0	0	200	903	0	0	0	0	0	0	0	603	903	0
10651	3	0	0	0	0	0	0	200	300	0	0	0	0	0	0	0	200	903	0	0	0	0	0	0	0	603	903	0
10651	4	0	0	0	0	0	0	200	300	0	0	0	0	0	0	0	200	903	0	0	0	0	0	0	0	603	903	0
10651	5	0	0	0	0	0	0	200	300	0	0	0	0	0	0	0	200	903	0	0	0	0	0	0	0	603	903	0
10651	6	0	0	0	0	0	0	200	300	0	0	0	0	0	0	0	200	903	0	0	0	0	0	0	0	603	903	0
10651	7	0	0	0	0	0	0	200	300	0	0	0	0	0	0	0	200	903	0	0	0	0	0	0	0	603	903	0
10651	8	0	0	0	0	0	0	200	300	0	0	0	0	0	0	0	200	903	0	0	0	0	0	0	0	603	903	0
10651	9	0	0	0	0	0	0	200	300	0	0	0	0	0	0	0	200	903	0	0	0	0	0	0	0	603	903	0
10652	0	0	0	0	0	0	0	200	300	0	0	0	0	0	0	0	200	903	0	0	0	0	0	0	0	603	903	0
10652	1	0	0	0	0	0	0	200	300	0	0	0	0	0	0	0	200	903	0	0	0	0	0	0	0	603	903	0
10652	2	0	0	0	0	0	0	200	300	0	0	0	0	0	0	0	200	903	0	0	0	0	0	0	0	603	903	0
10652	3	0	0	0	0	0	0	200	300	0	0	0	0	0	0	0	200	903	0	0	0	0	0	0	0	603	903	0
10652	4	0	0	0	0	0	0	200	300	0	0	0	0	0	0	0	200	903	0	0	0	0	0	0	0	603	903	0
10652	5	0	0	0	0	0	0	200	300	0	0	0	0	0	0	0	200	903	0	0	0	0	0	0	0	603	903	0
10652	6	0	0	0	0	0	0	200	300	0	0	0	0	0	0	0	200	903	0	0	0	0	0	0	0	603	903	0
10652	7	0	0	0	0	0	0	200	300	0	0	0	0	0	0	0	200	903	0	0	0	0	0	0	0	603	903	0
10652	8	0	0	0	0	0	0	200	300	0	0	0	0	0	0	0	200	903	0	0	0	0	0	0	0	603	903	0
10652	9	0	0	0	0	0	0	200	300	0	0	0	0	0	0	0	200	903	0	0	0	0	0	0	0	603	903	0
10653	0	0	0	0	0	0	0	200	300	0	0	0	0	0	0	0	200	903	0	0	0	0	0	0	0	603	903	0
10653	1	0	0	0	0	0	0	200	300	0	0	0	0	0	0	0	200	903	0	0	0	0	0	0	0	603	903	0
10653	2	0	0	0	0	0	0	200	300	0	0	0	0	0	0	0	200	903	0	0	0	0	0	0	0	603	903	0
10653	3	0	0	0	0	0	0	200	300	0	0	0	0	0	0	0	200	903	0	0	0	0	0	0	0	603	903	0
10653	4	0	0	0	0	0	0	200	300	0	0	0	0	0	0	0	200	903	0	0	0	0	0	0	0	603	903	0
10653	5	0	0	0	0	0	0	200	300	0	0	0	0	0	0	0	200	903	0	0	0	0	0	0	0	603	903	0
10653	6	0	0	0	0	0	0	200	300	0	0	0	0	0	0	0	200	903	0	0	0	0	0	0	0	603	903	0
10653	7	0	0	0	0	0	0	200	300	0	0	0	0	0	0	0	200	903	0	0	0	0	0	0	0	603	903	0
10653	8	0	0	0	0	0	0	200	300	0	0	0	0	0	0	0	200	903	0	0	0	0	0	0	0	603	903	0
10653	9	0	0	0	0	0	0	200	300	0	0	0	0	0	0	0	200	903	0	0	0	0	0	0	0	603	903	0
10654	0	0	0	0	0	0	0	200	300	0	0	0	0	0	0	0	200	903	0	0	0	0	0	0	0	603	903	0
10654	1	0	0	0	0	0	0	200	300	0	0	0	0	0	0	0	200	903	0	0	0	0	0	0	0	603	903	0
10654	2	0	0	0	0	0	0	200	300	0	0	0	0	0	0	0	200	903	0	0	0	0	0	0	0	603	903	0
10654	3	0	0	0	0	0	0	200	300	0	0	0	0	0	0	0	200	903	0	0	0	0	0	0	0	603	903	0
10654	4	0	0	0	0	0	0	200	300	0	0	0	0	0	0	0	200	903	0	0	0	0	0	0	0	603	903	0
10654	5	0	0	0	0	0	0	200	300	0	0	0	0	0	0	0	200	903	0	0	0	0	0	0	0	603	903	0
10654	6	0	0	0	0	0	0	200	300	0	0	0	0	0	0	0	200	903	0	0	0	0	0	0	0	603	903	0
10654	7	0	0	0	0	0	0	200	300	0	0	0	0	0	0	0	200	903	0	0	0	0	0	0	0	603	903	0
10654	8	0	0	0	0	0	0	200	300	0	0	0	0	0	0	0	200	903	0	0	0	0	0	0	0	603	903	0
10654	9	0	0	0	0	0	0	200	300	0	0	0	0	0	0	0	200	903	0	0	0	0	0	0	0	603	903	0
10655	0	0	0	0	0	0	0	200	300	0	0	0	0	0	0	0	200	903	0	0	0	0	0	0	0	603	903	0
10655	1	0	0	0	0	0	0	200	300	0	0	0	0	0	0	0	200	903	0	0	0	0	0	0	0	603	903	0
10655	2	0	0	0	0	0	0	200	300	0	0	0	0	0	0	0	200	903	0	0	0	0	0	0	0	603	903	0
10655	3	0	0	0	0	0	0	200	300	0	0	0	0	0	0	0	200	903	0	0	0	0	0	0	0	603	903	0
10655	4	0	0	0	0	0	0	200	300	0	0	0	0	0	0	0	200	903	0	0	0	0	0	0	0	603	903	0
10655	5	0	0	0	0	0	0	200	300	0	0	0	0	0	0	0	200	903	0	0	0	0	0	0	0	603	903	0
10655	6	0	0	0	0	0	0	200	300	0	0	0	0	0	0	0	200	903	0	0	0	0	0	0	0	603	903	0
10655	7	0	0	0	0	0	0	200	300	0	0	0	0	0	0	0	200	903	0	0	0	0	0	0	0	603	903	0
10655	8	0	0	0	0	0	0	200	300	0	0	0	0	0	0	0	200	903	0	0	0	0	0	0	0	603	903	0
10655	9	0	0	0	0	0	0	200	300	0	0	0	0	0	0	0	200	903	0	0	0	0	0	0	0	603	903	0
10656	0	0	0	0	0	0	0	200	300	0	0	0	0	0	0	0	200	903	0	0	0	0	0	0	0	603	903	0
10656	1	0	0	0	0	0	0	200	300	0	0	0	0	0	0	0	200	903	0	0	0	0	0	0	0	603	903	0
10656	2	0	0	0	0	0	0	200	300	0	0	0	0	0	0	0	200	903	0	0	0	0	0	0	0	603	903	0
10656	3	0	0	0	0	0	0	200	300	0	0	0	0	0	0	0	200	903	0	0	0	0	0	0	0	603	903	0
10656	4	0	0	0	0	0	0	200	300	0	0	0	0	0	0	0	200	903	0	0	0	0	0	0	0	603	903	0
10656	5	0	0	0	0	0	0	200	300	0	0	0	0	0	0	0	200	903	0	0	0	0	0	0	0	603	903	0
10656	6	0	0	0	0	0	0	200	300	0	0	0	0	0	0	0	200	903	0	0	0	0	0	0	0	603	903	0
10656	7	0	0	0	0	0	0	200	300	0	0	0	0	0	0	0	200	903	0	0	0	0	0	0	0	603	903	0
10656	8	0	0	0	0	0	0	200	300	0	0	0	0	0	0	0	200	903	0	0	0	0	0	0	0	603	903	0
10656	9	0	0	0	0	0	0	200	300	0	0	0	0	0	0	0	200	903	0	0	0	0	0	0	0	603	903	0
10657	0	0	0	0	0	0	0	200	300	0	0	0	0	0	0	0	200	903	0	0	0	0	0	0	0	603	903	0
10657	1	0	0	0	0	0	0	200	300	0	0	0	0	0	0	0	200	903	0	0	0	0	0	0	0	603	903	0
10657	2	0	0	0	0	0	0	200	300	0	0	0	0	0	0	0	200	903	0	0	0	0	0	0	0	603	903	0
10657	3	0	0	0	0	0	0	200	300	0	0	0	0	0	0	0	200	903	0	0	0	0	0	0	0	603	903	0
10657	4	0	0	0	0	0	0	200	300	0	0	0	0	0	0	0	200	903	0	0	0	0	0	0	0	603	903	0
10657	5	0	0	0	0	0	0	200	300	0	0	0	0	0	0	0	200	903	0	0	0	0	0	0	0	603	903	0
10657	6	0	0	0	0	0	0	200	300	0	0	0	0	0	0	0	200	903	0	0	0	0	0	0	0	603	903	0
10657	7	0	0	0	0	0	0	200	300	0	0	0	0	0	0	0	200	903	0	0	0	0	0	0	0	603	903	0
10657	8	0	0	0	0	0	0	200	300	0	0	0	0	0	0	0	200	903	0	0	0	0	0	0	0	603	903	0
10657	9	0	0	0	0	0	0	200	300	0	0	0	0	0	0	0	200	903	0	0	0	0	0	0	0	603	903	0
10658	0	0	0	0	0	0	0	200	300	0	0	0	0	0	0	0	200	903	0	0	0	0	0	0	0	603	903	0
10658	1	0	0	0	0	0	0	200	300	0	0	0	0	0	0	0	200	903	0	0	0	0	0	0	0	603	903	0
10658	2	0	0	0	0	0	0	200	300	0	0	0	0	0	0	0	200	903	0	0	0	0	0	0	0	603	903	0
10658	3	0	0	0	0	0	0	200	300	0	0	0	0	0	0	0	200	903	0	0	0	0	0	0	0	603	903	0
10658	4	0	0	0	0	0	0	200	300	0	0	0	0	0	0	0	200	903	0	0	0	0	0	0	0	603	903	0
10658	5	0	0	0	0	0	0	200	300	0	0	0	0	0	0	0	200	903	0	0	0	0	0	0	0	603	903	0
10658	6	0	0	0	0	0	0	200	300	0	0	0	0	0	0	0	200	903	0	0	0	0	0	0	0	603	903	0
10658	7	0	0	0	0	0	0	200	300	0	0	0	0	0	0	0	200	903	0	0	0	0	0	0	0	603	903	0
10658	8	0	0	0	0	0	0	200	300	0	0	0	0	0	0	0	200	903	0	0	0	0	0	0	0	603	903	0
10658	9	0	0	0	0	0	0	200	300	0	0	0	0	0	0	0	200	903	0	0	0	0	0	0	0	603	903	0
10659	0	0	0	0	0	0	0	200	300	0	0	0	0	0	0	0	200	903	0	0	0	0	0	0	0	603	903	0
10659	1	0	0	0	0	0	0	200	300	0	0	0	0	0	0	0	200	903	0	0	0	0	0	0	0	603	903	0
10659	2	0	0	0	0	0	0	200	300	0	0	0	0	0	0	0	200	903	0	0	0	0	0	0	0	603	903	0
10659	3	0	0	0	0	0	0	200	300	0	0	0	0	0	0	0	200	903	0	0	0	0	0	0	0	603	903	0
10659	4	0	0	0	0	0	0	200	300	0	0	0	0	0	0	0	200	903	0	0	0	0	0	0	0	603	903	0
10659	5	0	0	0	0	0	0	200	300	0	0	0	0	0	0	0	200	903	0	0	0	0	0	0	0	603	903	0
10659	6	0	0	0	0	0	0	200	300	0	0	0	0	0	0	0	200	903	0	0	0	0	0	0	0	603	903	0
10659	7	0	0	0	0	0	0	200	300	0	0	0	0	0	0	0	200	903	0	0	0	0	0	0	0	603	903	0
10659	8	0	0	0	0	0	0	200	300	0	0	0	0	0	0	0	200	903	0	0	0	0	0	0	0	603	903	0
10659	9	0	0	0	0	0	0	200	300	0	0	0	0	0	0	0	200	903	0	0	0	0	0	0	0	603	903	0
10660	0	0	0	0	0	0	0	200	300	0	0	0	0	0	0	0	200	903	0	0	0	0	0	0	0	603	903	0
10660	1	0	0	0	0	0	0	200	300	0	0	0	0	0	0	0	200	903	0	0	0	0	0	0	0	603	903	0
10660	2	0	0	0	0	0	0	200	300	0	0	0	0	0	0	0	200	903	0	0	0	0	0	0	0	603	903	0
10660	3	0	0	0	0	0	0	200	300	0	0	0	0	0	0	0	200	903	0	0	0	0	0	0	0	603	903	0
10660	4	0	0	0	0	0	0	200	300	0	0	0	0	0	0	0	200	903	0	0	0	0	0	0	0	603	903	0
10660	5	0	0	0	0	0	0	200	300	0	0	0	0	0	0	0	200	903	0	0	0	0	0	0	0	603	903	0
10660	6	0	0	0	0	0	0	200	300	0	0	0	0	0	0	0	200	903	0	0	0	0	0	0	0	603	903	0
10660	7	0	0	0	0	0	0	200	300	0	0	0	0	0	0	0	200	903	0	0	0	0	0	0	0	603	903	0
10660	8	0	0	0	0	0	0	200	300	0	0	0	0	0	0	0	200	903	0	0	0	0	0	0	0	603	903	0
10660	9	0	0	0	0	0	0	200	300	0	0	0	0	0	0	0	200	903	0	0	0	0	0	0	0	603	903	0
10661	0	0	0	0	0	0	0	200	300	0	0	0	0	0	0	0	200	903	0	0	0	0	0	0	0	603	903	0
10661	1	0	0	0	0	0	0	200	300	0	0	0	0	0	0	0	200	903	0	0	0	0	0	0	0	603	903	0
10661	2	0	0	0	0	0	0	200	300	0	0	0	0	0	0	0	200	903	0	0	0	0	0	0	0	603	903	0
10661	3	0	0	0	0	0	0	200	300	0	0	0	0	0	0	0	200	903	0	0	0	0	0	0	0	603	903	0
10661	4	0	0	0	0	0	0	200	300	0	0	0	0	0	0	0	200	903	0	0	0	0	0	0	0	603	903	0
10661	5	0	0	0	0	0	0	200	300	0	0	0	0	0	0	0	200	903	0	0	0	0	0	0	0	603	903	0
10661	6	0	0	0	0	0	0	200	300	0	0	0	0	0	0	0	200	903	0	0	0	0	0	0	0	603	903	0
10661	7	0	0	0	0	0	0	200	300	0	0	0	0	0	0	0	200	903	0	0	0	0	0	0	0	603	903	0
10661	8	0	0	0	0	0	0	200	300	0	0	0	0	0	0	0	200	903	0	0	0	0	0	0	0	603	903	0
10661	9	0	0	0	0	0	0	200	300	0	0	0	0	0	0	0	200	903	0	0	0	0	0	0	0	603	903	0
10662	0	0	0	0	0	0	0	200	300	0	0	0	0	0	0	0	200	903	0	0	0	0	0	0	0	603	903	0
10662	1	0	0	0	0	0	0	200	300	0	0	0	0	0	0	0	200	903	0	0	0	0	0	0	0	603	903	0
10662	2	0	0	0	0	0	0	200	300	0	0	0	0	0	0	0	200	903	0	0	0	0	0	0	0	603	903	0
10662	3	0	0	0	0	0	0	200	300	0	0	0	0	0	0	0	200	903	0	0	0	0	0	0	0	603	903	0
10662	4	0	0	0	0	0	0	200	300	0	0	0	0	0	0	0	200	903	0	0	0	0	0	0	0	603	903	0
10662	5	0	0	0	0	0	0	200	300	0	0	0	0	0	0	0	200	903	0	0	0	0	0	0	0	603	903	0
10662	6	0	0	0	0	0	0	200	300	0	0	0	0	0	0	0	200	903	0	0	0	0	0	0	0	603	903	0
10662	7	0	0	0	0	0	0	200	300	0	0	0	0	0	0	0	200	903	0	0	0	0	0	0	0	603	903	0
10662	8	0	0	0	0	0	0	200	300	0	0	0	0	0	0	0	200	903	0	0	0	0	0	0	0	603	903	0
10662	9	0	0	0	0	0	0	200	300	0	0	0	0	0	0	0	200	903	0	0	0	0	0	0	0	603	903	0
10663	0	0	0	0	0	0	0	200	300	0	0	0	0	0	0	0	200	903	0	0	0	0	0	0	0	603	903	0
10663	1	0	0	0	0	0	0	200	300	0	0	0	0	0	0	0	200	903	0	0	0	0	0	0	0	603	903	0
10663	2	0	0	0	0	0	0	200	300	0	0	0	0	0	0	0	200	903	0	0	0	0	0	0	0	603	903	0
10663	3	0	0	0	0	0	0	200	300	0	0	0	0	0	0	0	200	903	0	0	0	0	0	0	0	603	903	0
10663	4	0	0	0	0	0	0	200	300	0	0	0	0	0	0	0	200	903	0	0	0	0	0	0	0	603	903	0
10663	5	0	0	0	0	0	0	200	300	0	0	0	0	0	0	0	200	903	0	0	0	0	0	0	0	603	903	0
10663	6	0	0	0	0	0	0	200	300	0	0	0	0	0	0	0	200	903	0	0	0	0	0	0	0	603	903	0
10663	7	0	0	0	0	0	0	200	300	0	0	0	0	0	0	0	200	903	0	0	0	0	0	0	0	603	903	0
10663	8	0	0	0	0	0	0	200	300	0	0	0	0	0	0	0	200	903	0	0	0	0	0	0	0	603	903	0
10663	9	0	0	0	0	0	0	200	300	0	0	0	0	0	0	0	200	903	0	0	0	0	0	0	0	603	903	0
10664	0	0	0	0	0	0	0	200	300	0	0	0	0	0	0	0	200	903	0	0	0	0	0	0	0	603	903	0
10664	1	0	0	0	0	0	0	200	300	0	0	0	0	0	0	0	200	903	0	0	0	0	0	0	0	603	903	0
10664	2	0	0	0	0	0	0	200	300	0	0	0	0	0	0	0	200	903	0	0	0	0	0	0	0	603	903	0
10664	3	0	0	0	0	0	0	200	300	0	0	0	0	0	0	0	200	903	0	0	0	0	0	0	0	603	903	0
10664	4	0	0	0	0	0	0	200	300	0	0	0	0	0	0	0	200	903	0	0	0	0	0	0	0	603	903	0
10664	5	0	0	0	0	0	0	200	300	0	0	0	0	0	0	0	200	903	0	0	0	0	0	0	0	603	903	0
10664	6	0	0	0	0	0	0	200	300	0	0	0	0	0	0	0	200	903	0	0	0	0	0	0	0	603	903	0
10664	7	0	0	0	0	0	0	200	300	0	0	0	0	0	0	0	200	903	0	0	0	0	0	0	0	603	903	0
10664	8	0	0	0	0	0	0	200	300	0	0	0	0	0	0	0	200	903	0	0	0	0	0	0	0	603	903	0
10664	9	0	0	0	0	0	0	200	300	0	0	0	0	0	0	0	200	903	0	0	0	0	0	0	0	603	903	0
10665	0	0	0	0	0	0	0	200	300	0	0	0	0	0	0	0	200	903	0	0	0	0	0	0	0	603	903	0
10665	1	0	0	0	0	0	0	200	300	0	0	0	0	0	0	0	200	903	0	0	0	0	0	0	0	603	903	0
10665	2	0	0	0	0	0	0	200	300	0	0	0	0	0	0	0	200	903	0	0	0	0	0	0	0	603	903	0
10665	3	0	0	0	0	0	0	200	300	0	0	0	0	0	0	0	200	903	0	0	0	0	0	0	0	603	903	0
10665	4	0	0	0	0	0	0	200	300	0	0	0	0	0	0	0	200	903	0	0	0	0	0	0	0	603	903	0
10665	5	0	0	0	0	0	0	200	300	0	0	0	0	0	0	0	200	903	0	0	0	0	0	0	0	603	903	0
10665	6	0	0	0	0	0	0	200	300	0	0	0	0	0	0	0	200	903	0	0	0	0	0	0	0	603	903	0
10665	7	0	0	0	0	0	0	200	300	0	0	0	0	0	0	0	200	903	0	0	0	0	0	0	0	603	903	0
10665	8	0	0	0	0	0	0	200	300	0	0	0	0	0	0	0	200	903	0	0	0	0	0	0	0	603	903	0
10665	9	0	0	0	0	0	0	200	300	0	0	0	0	0	0	0	200	903	0	0	0	0	0	0	0	603	903	0
10666	0	0	0	0	0	0	0	200	300	0	0	0	0	0	0	0	200	903	0	0	0	0	0	0	0	603	903	0
10666	1	0	0	0	0	0	0	200	300	0	0	0	0	0	0	0	200	903	0	0	0	0	0	0	0	603	903	0
10666	2	0	0	0	0	0	0	200	300	0	0	0	0	0	0	0	200	903	0	0	0	0	0	0	0	603	903	0
10666	3	0	0	0	0	0	0	200	300	0	0	0	0	0	0	0	200	903	0	0	0	0	0	0	0	603	903	0
10666	4	0	0	0	0	0	0	200	300	0	0	0	0	0	0	0	200	903	0	0	0	0	0	0	0	603	903	0
10666	5	0	0	0	0	0	0	200	300	0	0	0	0	0	0	0	200	903	0	0	0	0	0	0	0	603	903	0
10666	6	0	0	0	0	0	0	200	300	0	0	0	0	0	0	0	200	903	0	0	0	0	0	0	0	603	903	0
10666	7	0	0	0	0	0	0	200	300	0	0	0	0	0	0	0	200	903	0	0	0	0	0	0	0	603	903	0
10666	8	0	0	0	0	0	0	200	300	0	0	0	0	0	0	0	200	903	0	0	0	0	0	0	0	603	903	0
10666	9	0	0	0	0	0	0	200	300	0	0	0	0	0	0	0	200	903	0	0	0	0	0	0	0	603	903	0
10667	0	0	0	0	0	0	0	200	300	0	0	0	0	0	0	0	200	903	0	0	0	0	0	0	0	603	903	0
10667	1	0	0	0	0	0	0	200	300	0	0	0	0	0	0	0	200	903	0	0	0	0	0	0	0	603	903	0
10667	2	0	0	0	0	0	0	200	300	0	0	0	0	0	0	0	200	903	0	0	0	0	0	0	0	603	903	0
10667	3	0	0	0	0	0	0	200	300	0	0	0	0	0	0	0	200	903	0	0	0	0	0	0	0	603	903	0
10667	4	0	0	0	0	0	0	200	300	0	0	0	0	0	0	0	200	903	0	0	0	0	0	0	0	603	903	0
10667	5	0	0	0	0	0	0	200	300	0	0	0	0	0	0	0	200	903	0	0	0	0	0	0	0	603	903	0
10667	6	0	0	0	0	0	0	200	300	0	0	0	0	0	0	0	200	903	0	0	0	0	0	0	0	603	903	0
10667	7	0	0	0	0	0	0	200	300	0	0	0	0	0	0	0	200	903	0	0	0	0	0	0	0	603	903	0
10667	8	0	0	0	0	0	0	200	300	0	0	0	0	0	0	0	200	903	0	0	0	0	0	0	0	603	903	0
10667	9	0	0	0	0	0	0	200	300	0	0	0	0	0	0	0	200	903	0	0	0	0	0	0	0	603	903	0
10668	0	0	0	0	0	0	0	200	300	0	0	0	0	0	0	0	200	903	0	0	0	0	0	0	0	603	903	0
10668	1	0	0	0	0	0	0	200	300	0	0	0	0	0	0	0	200	903	0	0	0	0	0	0	0	603	903	0
10668	2	0	0	0	0	0	0	200	300	0	0	0	0	0	0	0	200	903	0	0	0	0	0	0	0	603	903	0
10668	3	0	0	0	0	0	0	200	300	0	0	0	0	0	0	0	200	903	0	0	0	0	0	0	0	603	903	0
10668	4	0	0	0	0	0	0	200	300	0	0	0	0	0	0	0	200	903	0	0	0	0	0	0	0	603	903	0
10668	5	0	0	0	0	0	0	200	300	0	0	0	0	0	0	0	200	903	0	0	0	0	0	0	0	603	903	0
10668	6	0	0	0	0	0	0	200	300	0	0	0	0	0	0	0	200	903	0	0	0	0	0	0	0	603	903	0
10668	7	0	0	0	0	0	0	200	300	0	0	0	0	0	0	0	200	903	0	0	0	0	0	0	0	603	903	0
10668	8	0	0	0	0	0	0	200	300	0	0	0	0	0	0	0	200	903	0	0	0	0	0	0	0	603	903	0
10668	9	0	0	0	0	0	0	200	300	0	0	0	0	0	0	0	200	903	0	0	0	0	0	0	0	603	903	0
10669	0	0	0	0	0	0	0	200	300	0	0	0	0	0	0	0	200	903	0	0	0	0	0	0	0	603	903	0
10669	1	0	0	0	0	0	0	200	300	0	0	0	0	0	0	0	200	903	0	0	0	0	0	0	0	603	903	0
10669	2	0	0	0	0	0	0	200	300	0	0	0	0	0	0	0	200	903	0	0	0	0	0	0	0	603	903	0
10669	3	0	0	0	0	0	0	200	300	0	0	0	0	0	0	0	200	903	0	0	0	0	0	0	0	603	903	0
10669	4	0	0	0	0	0	0	200	300	0	0	0	0	0	0	0	200	903	0	0	0	0	0	0	0	603	903	0
10669	5	0	0	0	0	0	0	200	300	0	0	0	0	0	0	0	200	903	0	0	0	0	0	0	0	603	903	0
10669	6	0	0	0	0	0	0	200	300	0	0	0	0	0	0	0	200	903	0	0	0	0	0	0	0	603	903	0
10669	7	0	0	0	0	0	0	200	300	0	0	0	0	0	0	0	200	903	0	0	0	0	0	0	0	603	903	0
10669	8	0	0	0	0	0	0	200	300	0	0	0	0	0	0	0	200	903	0	0	0	0	0	0	0	603	903	0
10669	9	0	0	0	0	0	0	200	300	0	0	0	0	0	0	0	200	903	0	0	0	0	0	0	0	603	903	0
10670	0	0	0	0	0	0	0	200	300	0	0	0	0	0	0	0	200	903	0	0	0	0	0	0	0	603	903	0
10670	1	0	0	0	0	0	0	200	300	0	0	0	0	0	0	0	200	903	0	0	0	0	0	0	0	603	903	0
10670	2	0	0	0	0	0	0	200	300	0	0	0	0	0	0	0	200	903	0	0	0	0	0	0	0	603	903	0
10670	3	0	0	0	0	0	0	200	300	0	0	0	0	0	0	0	200	903	0	0	0	0	0	0	0	603	903	0
10670	4	0	0	0	0	0	0	200	300	0	0	0	0	0	0	0	200	903	0	0	0	0	0	0	0	603	903	0
10670	5	0	0	0	0	0	0	200	300	0	0	0	0	0	0	0	200	903	0	0	0	0	0	0	0	603	903	0
10670	6	0	0	0	0	0	0	200	300	0	0	0	0	0	0	0	200	903	0	0	0	0	0	0	0	603	903	0
10670	7	0	0	0	0	0	0	200	300	0	0	0	0	0	0	0	200	903	0	0	0	0	0	0	0	603	903	0
10670	8	0	0	0	0	0	0	200	300	0	0	0	0	0	0	0	200	903	0	0	0	0	0	0	0	603	903	0
10670	9	0	0	0	0	0	0	200	300	0	0	0	0	0	0	0	200	903	0	0	0	0	0	0	0	603	903	0
10671	0	0	0	0	0	0	0	200	300	0	0	0	0	0	0	0	200	903	0	0	0	0	0	0	0	603	903	0
10671	1	0	0	0	0	0	0	200	300	0	0	0	0	0	0	0	200	903	0	0	0	0	0	0	0	603	903	0
10671	2	0	0	0	0	0	0	200	300	0	0	0	0	0	0	0	200	903	0	0	0	0	0	0	0	603	903	0
10671	3	0	0	0	0	0	0	200	300	0	0	0	0	0	0	0	200	903	0	0	0	0	0	0	0	603	903	0
10671	4	0	0	0	0	0	0	200	300	0	0	0	0	0	0	0	200	903	0	0	0	0	0	0	0	603	903	0
10671	5	0	0	0	0	0	0	200	300	0	0	0	0	0	0	0	200	903	0	0	0	0	0	0	0	603	903	0
10671	6	0	0	0	0	0	0	200	300	0	0	0	0	0	0	0	200	903	0	0	0	0	0	0	0	603	903	0
10671	7	0	0	0	0	0	0	200	300	0	0	0	0	0	0	0	200	903	0	0	0	0	0	0	0	603	903	0
10671	8	0	0	0	0	0	0	200	300	0	0	0	0	0	0	0	200	903	0	0	0	0	0	0	0	603	903	0
10671	9	0	0	0	0	0	0	200	300	0	0	0	0	0	0	0	200	903	0	0	0	0	0	0	0	603	903	0
10672	0	0	0	0	0	0	0	200	300	0	0	0	0	0	0	0	200	903	0	0	0	0	0	0	0	603	903	0
10672	1	0	0	0	0	0	0	200	300	0	0	0	0	0	0	0	200	903	0	0	0	0	0	0	0	603	903	0
10672	2	0	0	0	0	0	0	200	300	0	0	0	0	0	0	0	200	903	0	0	0	0	0	0	0	603	903	0
10672	3	0	0	0	0	0	0	200	300	0	0	0	0	0	0	0	200	903	0	0	0	0	0	0	0	603	903	0
10672	4	0	0	0	0	0	0	200	300	0	0	0	0	0	0	0	200	903	0	0	0	0	0	0	0	603	903	0
10672	5	0	0	0	0	0	0	200	300	0	0	0	0	0	0	0	200	903	0	0	0	0	0	0	0	603	903	0
10672	6	0	0	0	0	0	0	200	300	0	0	0	0	0	0	0	200	903	0	0	0	0	0	0	0	603	903	0
10672	7	0	0	0	0	0	0	200	300	0	0	0	0	0	0	0	200	903	0	0	0	0	0	0	0	603	903	0
10672	8	0	0	0	0	0	0	200	300	0	0	0	0	0	0	0	200	903	0	0	0	0	0	0	0	603	903	0
10672	9	0	0	0	0	0	0	200	300	0	0	0	0	0	0	0	200	903	0	0	0	0	0	0	0	603	903	0
10673	0	0	0	0	0	0	0	200	300	0	0	0	0	0	0	0	200	903	0	0	0	0	0	0	0	603	903	0
10673	1	0	0	0	0	0	0	200	300	0	0	0	0	0	0	0	200	903	0	0	0	0	0	0	0	603	903	0
10673	2	0	0	0	0	0	0	200	300	0	0	0	0	0	0	0	200	903	0	0	0	0	0	0	0	603	903	0
10673	3	0	0	0	0	0	0	200	300	0	0	0	0	0	0	0	200	903	0	0	0	0	0	0	0	603	903	0
10673	4	0	0	0	0	0	0	200	300	0	0	0	0	0	0	0	200	903	0	0	0	0	0	0	0	603	903	0
10673	5	0	0	0	0	0	0	200	300	0	0	0	0	0	0	0	200	903	0	0	0	0	0	0	0	603	903	0
10673	6	0	0	0	0	0	0	200	300	0	0	0	0	0	0	0	200	903	0	0	0	0	0	0	0	603	903	0
10673	7	0	0	0	0	0	0	200	300	0	0	0	0	0	0	0	200	903	0	0	0	0	0	0	0	603	903	0
10673	8	0	0	0	0	0	0	200	300	0	0	0	0	0	0	0	200	903	0	0	0	0	0	0	0	603	903	0
10673	9	0	0	0	0	0	0	200	300	0	0	0	0	0	0	0	200	903	0	0	0	0	0	0	0	603	903	0
10674	0	0	0	0	0	0	0	200	300	0	0	0	0	0	0	0	200	903	0	0	0	0	0	0	0	603	903	0
10674	1	0	0	0	0	0	0	200	300	0	0	0	0	0	0	0	200	903	0	0	0	0	0	0	0	603	903	0
10674	2	0	0	0	0	0	0	200	300	0	0	0	0	0	0	0	200	903	0	0	0	0	0	0	0	603	903	0
10674	3	0	0	0	0	0	0	200	300	0	0	0	0	0	0	0	200	903	0	0	0	0	0	0	0	603	903	0
10674	4	0	0	0	0	0	0	200	300	0	0	0	0	0	0	0	200	903	0	0	0	0	0	0	0	603	903	0
10674	5	0	0	0	0	0	0	200	300	0	0	0	0	0	0	0	200	903	0	0	0	0	0	0	0	603	903	0
10674	6	0	0	0	0	0	0	200	300	0	0	0	0	0	0	0	200	903	0	0	0	0	0	0	0	603	903	0
10674	7	0	0	0	0	0	0	200	300	0	0	0	0	0	0	0	200	903	0	0	0	0	0	0	0	603	903	0
10674	8	0	0	0	0	0	0	200	300	0	0	0	0	0	0	0	200	903	0	0	0	0	0	0	0	603	903	0
10674	9	0	0	0	0	0	0	200	300	0	0	0	0	0	0	0	200	903	0	0	0	0	0	0	0	603	903	0
10675	0	0	0	0	0	0	0	200	300	0	0	0	0	0	0	0	200	903	0	0	0	0	0	0	0	603	903	0
10675	1	0	0	0	0	0	0	200	300	0	0	0	0	0	0	0	200	903	0	0	0	0	0	0	0	603	903	0
10675	2	0	0	0	0	0	0	200	300	0	0	0	0	0	0	0	200	903	0	0	0	0	0	0	0	603	903	0
10675	3	0	0	0	0	0	0	200	300	0	0	0	0	0	0	0	200	903	0	0	0	0	0	0	0	603	903	0
10675	4	0	0	0	0	0	0	200	300	0	0	0	0	0	0	0	200	903	0	0	0	0	0	0	0	603	903	0
10675	5	0	0	0	0	0	0	200	300	0	0	0	0	0	0	0	200	903	0	0	0	0	0	0	0	603	903	0
10675	6	0	0	0	0	0	0	200	300	0	0	0	0	0	0	0	200	903	0	0	0	0	0	0	0	603	903	0
10675	7	0	0	0	0	0	0	200	300	0	0	0	0	0	0	0	200	903	0	0	0	0	0	0	0	603	903	0
10675	8	0	0	0	0	0	0	200	300	0	0	0	0	0	0	0	200	903	0	0	0	0	0	0	0	603	903	0
10675	9	0	0	0	0	0	0	200	300	0	0	0	0	0	0	0	200	903	0	0	0	0	0	0	0	603	903	0
10676	0	0	0	0	0	0	0	200	300	0	0	0	0	0	0	0	200	903	0	0	0	0	0	0	0	603	903	0
10676	1	0	0	0	0	0	0	200	300	0	0	0	0	0	0	0	200	903	0	0	0	0	0	0	0	603	903	0
10676	2	0	0	0	0	0	0	200	300	0	0	0	0	0	0	0	200	903	0	0	0	0	0	0	0	603	903	0
10676	3	0	0	0	0	0	0	200	300	0	0	0	0	0	0	0	200	903	0	0	0	0	0	0	0	603	903	0
10676	4	0	0	0	0	0	0	200	300	0	0	0	0	0	0	0	200	903	0	0	0	0	0	0	0	603	903	0
10676	5	0	0	0	0	0	0	200	300	0	0	0	0	0	0	0	200	903	0	0	0	0	0	0	0	603	903	0
10676	6	0	0	0	0	0	0	200	300	0	0	0	0	0	0	0	200	903	0	0	0	0	0	0	0	603	903	0
10676	7	0	0	0	0	0	0	200	300	0	0	0	0	0	0	0	200	903	0	0	0	0	0	0	0	603	903	0
10676	8	0	0	0	0	0	0	200	300	0	0	0	0	0	0	0	200	903	0	0	0	0	0	0	0	603	903	0
10676	9	0	0	0	0	0	0	200	300	0	0	0	0	0	0	0	200	903	0	0	0	0	0	0	0	603	903	0
10677	0	0	0	0	0	0	0	200	300	0	0	0	0	0	0	0	200	903	0	0	0	0	0	0	0	603	903	0
10677	1	0	0	0	0	0	0	200	300	0	0	0	0	0	0	0	200	903	0	0	0	0	0	0	0	603	903	0
10677	2	0	0	0	0	0	0	200	300	0	0	0	0	0	0	0	200	903	0	0	0	0	0	0	0	603	903	0
10677	3	0	0	0	0	0	0	200	300	0	0	0	0	0	0	0	200	903	0	0	0	0	0	0	0	603	903	0
10677	4	0	0	0	0	0	0	200	300	0	0	0	0	0	0	0	200	903	0	0	0	0	0	0	0	603	903	0
10677	5	0	0	0	0	0	0	200	300	0	0	0	0	0	0	0	200	903	0	0	0	0	0	0	0	603	903	0
10677	6	0	0	0	0	0	0	200	300	0	0	0	0	0	0	0	200	903	0	0	0	0	0	0	0	603	903	0
10677	7	0	0	0	0	0	0	200	300	0	0	0	0	0	0	0	200	903	0	0	0	0	0	0	0	603	903	0
10677	8	0	0	0	0	0	0	200	300	0	0	0	0	0	0	0	200	903	0	0	0	0	0	0	0	603	903	0
10677	9	0	0	0	0	0	0	200	300	0	0	0	0	0	0	0	200	903	0	0	0	0	0	0	0	603	903	0
10678	0	0	0	0	0	0	0	200	300	0	0	0	0	0	0	0	200	903	0	0	0	0	0	0	0	603	903	0
10678	1	0	0	0	0	0	0	200	300	0	0	0	0	0	0	0	200	903	0	0	0	0	0	0	0	603	903	0
10678	2	0	0	0	0	0	0	200	300	0	0	0	0	0	0	0	200	903	0	0	0	0	0	0	0	603	903	0
10678	3	0	0	0	0	0	0	200	300	0	0	0	0	0	0	0	200	903	0	0	0	0	0	0	0	603	903	0
10678	4	0	0	0	0	0	0	200	300	0	0	0	0	0	0	0	200	903	0	0	0	0	0	0	0	603	903	0
10678	5	0	0	0	0	0	0	200	300	0	0	0	0	0	0	0	200	903	0	0	0	0	0	0	0	603	903	0
10678	6	0	0	0	0	0	0	200	300	0	0	0	0	0	0	0	200	903	0	0	0	0	0	0	0	603	903	0
10678	7	0	0	0	0	0	0	200	300	0	0	0	0	0	0	0	200	903	0	0	0	0	0	0	0	603	903	0
10678	8	0	0	0	0	0	0	200	300	0	0	0	0	0	0	0	200	903	0	0	0	0	0	0	0	603	903	0
10678	9	0	0	0	0	0	0	200	300	0	0	0	0	0	0	0	200	903	0	0	0	0	0	0	0	603	903	0
10679	0	0	0	0	0	0	0	200	300	0	0	0	0	0	0	0	200	903	0	0	0	0	0	0	0	603	903	0
10679	1	0	0	0	0	0	0	200	300	0	0	0	0	0	0	0	200	903	0	0	0	0	0	0	0	603	903	0
10679	2	0	0	0	0	0	0	200	300	0	0	0	0	0	0	0	200	903	0	0	0	0	0	0	0	603	903	0
10679	3	0	0	0	0	0	0	200	300	0	0	0	0	0	0	0	200	903	0	0	0	0	0	0	0	603	903	0
10679	4	0	0	0	0	0	0	200	300	0	0	0	0	0	0	0	200	903	0	0	0	0	0	0	0	603	903	0
10679	5	0	0	0	0	0	0	200	300	0	0	0	0	0	0	0	200	903	0	0	0	0	0	0	0	603	903	0
[truncated: 4,024 more rows]
