# Supplementary material for: The Effects of an Extemporaneous Speech Dual-task on Older Adult Gait Control
Source: Research Square preprint supplement (doi:10.21203/rs.3.rs-7674245/v1), 2025-11-18
Supplement: Supplementary file 11 [file DT10Walk9.xlsx]

## Sheet: Sheet1
Trajectories
		10:LFHD			10:RFHD			10:LBHD			10:RBHD			10:C7			10:T10			10:CLAV			10:STRN			10:RBAK			10:LSHO			10:LUPA			10:LELB			10:LFRM			10:LWRA			10:LWRB			10:LFIN
Frame	Sub Frame	X	Y	Z	X	Y	Z	X	Y	Z	X	Y	Z	X	Y	Z	X	Y	Z	X	Y	Z	X	Y	Z	X	Y	Z	X	Y	Z	X	Y	Z	X	Y	Z	X	Y	Z	X	Y	Z	X	Y	Z	X	Y	Z
		mm	mm	mm	mm	mm	mm	mm	mm	mm	mm	mm	mm	mm	mm	mm	mm	mm	mm	mm	mm	mm	mm	mm	mm	mm	mm	mm	mm	mm	mm	mm	mm	mm	mm	mm	mm	mm	mm	mm	mm	mm	mm	mm	mm	mm	mm	mm	mm
11874	0	344.269	2687.81	1564.36	240.469	2690.86	1579.59	365.002	2853.35	1563.55	246.613	2857.97	1580.95	276.643	2899.64	1436.89	269.428	3008.99	1164.28	272.967	2743.8	1327.89	254.826	2653.18	1127.95	193.684	3002.7	1262.51	427.465	2806.41	1385.2	534.359	2822.34	1145.67	542.699	2835.58	1049.8	553.253	2760.39	914.79	504.341	2739.24	813.92	569.923	2776.59	801.991	558.777	2717.93	741.99
11875	0	344.39	2679.42	1563.18	240.868	2682.57	1579.13	365.616	2844.5	1561.98	247.475	2849.54	1580.22	276.835	2891.56	1436.39	270.181	3001.61	1163.98	272.826	2735.91	1327.06	254.501	2645.41	1126.95	194.279	2995.35	1262.01	427.479	2798.05	1384.26	534.456	2811.32	1144.74	542.94	2823.72	1048.74	553.127	2747.67	914.341	504.542	2726.95	813.114	570.502	2763.29	801.539	558.736	2704.65	741.639
11876	0	344.503	2670.81	1562.18	241.054	2674.19	1578.69	366.133	2835.63	1560.66	248.144	2841.04	1579.45	276.879	2883.34	1435.97	270.66	2993.99	1163.68	272.428	2727.9	1326.24	254.375	2637.46	1125.94	194.612	2987.53	1261.69	427.329	2789.35	1383.53	534.441	2800.42	1144.06	543.011	2811.85	1047.98	552.819	2734.97	914.155	504.238	2714.55	812.661	571.118	2749.57	801.432	558.549	2691.15	741.478
11877	0	344.504	2662.17	1561.23	241.168	2666.01	1578.12	366.571	2826.97	1559.6	248.515	2832.59	1578.65	276.84	2874.94	1435.54	271.02	2986.1	1163.37	272.087	2719.95	1325.33	253.658	2629.75	1124.81	195.065	2980	1261.33	427.251	2780.93	1382.96	534.329	2789.61	1143.33	543.209	2800.2	1047.45	552.389	2722.44	914.018	503.934	2702.32	812.341	571.453	2736.04	801.416	558.206	2677.73	741.432
11878	0	344.584	2653.56	1560.21	241.004	2657.67	1577.38	366.781	2818.18	1558.24	248.811	2824.28	1577.73	276.854	2866.7	1434.96	271.578	2978.56	1162.89	271.803	2711.99	1324.26	253.343	2621.74	1123.67	195.4	2972.12	1260.86	427.08	2772.52	1382.1	534.314	2778.72	1142.48	543.322	2788.57	1046.57	551.95	2709.78	913.777	503.554	2689.9	811.834	571.7	2722.55	801.141	557.804	2664.27	741.272
11879	0	344.079	2645.02	1558.99	240.554	2649.21	1576.41	366.723	2809.41	1556.77	248.834	2815.94	1576.63	276.817	2858.65	1434.14	271.843	2970.79	1162.33	271.386	2703.8	1323.13	253.019	2613.73	1122.38	195.652	2964.38	1260.15	426.727	2763.89	1381.07	533.855	2768.38	1141.52	543.197	2777.01	1045.67	551.233	2697.33	913.457	502.825	2677.54	811.253	571.511	2709.11	800.777	557.04	2650.88	740.968
11880	0	343.702	2636.52	1557.88	240.717	2640.86	1575.28	366.563	2800.99	1555.56	248.796	2807.61	1575.35	276.779	2850.53	1433.09	271.991	2962.96	1161.54	270.949	2695.73	1322.22	252.592	2605.65	1121.09	195.995	2956.83	1259.47	426.383	2755.26	1379.99	533.691	2758.07	1140.73	543.007	2765.2	1044.78	550.468	2685	913.14	502.204	2665.31	811.041	571.162	2695.77	800.428	556.201	2637.28	741.074
11881	0	343.346	2627.96	1556.93	239.995	2632.6	1574.25	366.24	2792.56	1554.11	248.629	2799.38	1574.03	276.604	2842.35	1431.9	272.347	2955.48	1160.49	270.665	2687.49	1321.09	252.233	2597.55	1119.9	195.978	2948.76	1258.27	426.01	2746.78	1378.92	533.391	2747.94	1139.79	542.754	2754.58	1043.59	549.696	2672.81	912.736	501.257	2652.8	810.9	570.759	2682.47	799.974	555.143	2623.9	741.09
11882	0	342.649	2619.61	1555.41	239.297	2624.15	1572.93	365.698	2783.91	1552.75	248.347	2791	1572.77	276.383	2833.75	1430.73	272.417	2947.39	1159.5	270.222	2679.23	1319.72	251.996	2589.4	1118.57	196.195	2941.02	1257.2	425.502	2738.35	1377.84	533.091	2738.02	1138.84	542.565	2743.54	1042.56	548.845	2660.65	912.402	500.218	2640.73	810.711	570.03	2669.32	799.612	554.079	2610.33	741.198
11883	0	341.721	2611.04	1554.26	238.506	2615.77	1571.47	364.688	2775.06	1551.61	247.565	2782.44	1571.52	275.985	2825.49	1429.78	272.376	2939.4	1158.69	269.618	2670.85	1318.56	251.631	2581.41	1116.98	195.92	2932.53	1256.17	424.94	2729.7	1376.9	532.508	2728.22	1137.84	542.158	2732.42	1041.61	547.694	2648.57	912.156	498.773	2628.6	810.341	569.387	2655.89	799.357	552.506	2596.82	741.403
11884	0	341.072	2602.45	1553.28	237.518	2607.28	1570.16	364.02	2766.6	1551.03	246.671	2774.03	1570.49	275.36	2817.14	1428.93	272.079	2931.12	1157.94	269.066	2662.38	1317.5	251.277	2573.47	1115.49	195.686	2923.55	1255.18	424.306	2721.06	1376.12	532.255	2718.28	1137.33	541.898	2721.48	1041.06	546.652	2636.5	912.134	497.71	2616.34	810.277	568.493	2642.67	799.373	550.827	2583.34	741.842
11885	0	339.915	2594.14	1552.02	236.571	2598.84	1568.59	363.08	2757.96	1550.53	245.381	2765.41	1569.61	274.622	2808.67	1428.12	271.888	2923.02	1157.16	268.701	2654.06	1316.18	250.973	2565.38	1114.15	195.273	2915.19	1254.3	423.642	2712.39	1375.33	531.908	2708.42	1136.67	541.636	2710.81	1040.48	545.491	2624.63	911.991	496.384	2604.19	810.297	567.494	2629.69	799.503	549.193	2569.91	742.248
11886	0	338.843	2585.67	1550.7	235.3	2590.29	1567	361.917	2749.53	1549.82	244.164	2756.83	1568.63	273.969	2800.47	1427.15	271.433	2914.5	1156.1	268.098	2645.53	1314.81	250.862	2557.26	1112.59	194.775	2906.9	1253.25	422.915	2703.94	1374.23	531.464	2698.77	1135.61	541.228	2700.28	1039.42	544.293	2612.99	911.581	494.544	2592.07	810.446	566.45	2616.45	799.161	546.903	2556.84	741.964
11887	0	337.463	2577.18	1549.46	234.322	2581.67	1565.46	360.59	2740.93	1548.91	242.855	2748.29	1567.54	273.399	2792.4	1425.96	270.905	2906.24	1154.96	267.35	2637.05	1313.68	250.591	2549.1	1111.2	194.146	2898.45	1251.98	422.231	2695.44	1373.42	531.076	2688.98	1135.06	540.667	2689.92	1038.61	543.08	2601.34	911.594	493.058	2579.96	810.598	564.85	2603.73	798.956	544.853	2543.7	742.573
11888	0	335.989	2568.62	1548.54	232.778	2573.25	1563.8	359.192	2732.19	1548.42	241.602	2739.93	1566.24	272.535	2783.88	1424.58	270.489	2897.88	1153.8	266.615	2628.48	1312.67	250.372	2540.69	1110.06	193.542	2890.02	1250.54	421.423	2687	1372.58	530.51	2679.63	1134.34	540.096	2679.79	1037.75	541.801	2590.1	911.443	491.536	2568.01	810.74	563.265	2591.35	798.797	543.109	2530.51	743.437
11889	0	334.508	2560.1	1547.29	230.922	2564.68	1562.38	357.756	2723.74	1547.51	240.087	2731.47	1564.96	271.632	2775.62	1423.2	269.972	2889.14	1152.27	266.278	2619.67	1311.4	250.248	2532.03	1108.88	192.94	2881.33	1248.81	420.568	2678.59	1371.43	529.895	2670.27	1133.21	539.473	2669.86	1036.6	540.721	2578.96	911.169	489.826	2556.07	811.017	561.576	2579.26	798.324	541.122	2517.74	743.836
11890	0	332.806	2551.63	1546.16	229.189	2556.2	1560.56	356.005	2715.2	1546.62	238.44	2723.08	1563.71	270.519	2767.06	1421.82	269.263	2880.48	1150.72	265.354	2610.92	1310.31	250.154	2523.17	1107.65	192.128	2872.77	1247.17	419.598	2670.04	1370.3	528.895	2661.04	1132.4	538.677	2660.06	1035.55	539.334	2568	910.865	488.04	2544.17	811.222	559.908	2566.94	797.909	538.932	2505.14	744.356
11891	0	331.097	2543.03	1545.16	227.351	2547.61	1558.95	354.311	2706.72	1546.21	236.528	2714.57	1562.59	269.303	2758.52	1420.65	268.551	2871.7	1149.35	264.484	2602.3	1309.17	249.926	2514.22	1106.6	191.271	2863.72	1245.66	418.498	2661.61	1369.59	527.877	2651.95	1131.78	537.847	2650.45	1034.77	537.883	2557.22	910.87	485.846	2532.61	811.749	557.775	2555.16	797.77	536.657	2492.69	745.242
11892	0	329.206	2534.57	1544.19	225.463	2539.13	1557.53	352.417	2698.28	1545.73	234.588	2706.04	1561.41	267.947	2750.04	1419.33	267.755	2862.78	1147.82	263.732	2593.61	1308.08	249.768	2505.25	1105.68	190.343	2854.9	1243.9	417.528	2653.17	1368.88	527.329	2642.58	1131.27	537.048	2641	1034.12	536.635	2546.74	910.854	483.865	2521.07	812.421	555.672	2543.89	797.679	534.542	2480.5	745.962
11893	0	327.512	2526.03	1543.33	223.485	2530.63	1555.89	350.478	2689.79	1545.15	232.424	2697.59	1560.36	266.689	2741.55	1418.14	267.083	2853.68	1146.41	262.919	2584.86	1306.94	249.618	2496.2	1104.75	189.427	2845.72	1242.21	416.498	2644.58	1368.24	526.463	2633.49	1130.83	536.2	2631.8	1033.48	535.268	2536.55	910.861	482.444	2509.6	813.173	553.432	2532.78	797.586	532.376	2468.57	746.727
11894	0	325.339	2517.61	1542.39	221.409	2522.11	1554.38	348.438	2681.19	1544.82	230.229	2689.1	1559.41	265.078	2732.71	1416.98	266.387	2844.29	1145.06	261.922	2575.87	1305.98	249.392	2486.99	1103.88	188.43	2836.71	1240.73	415.351	2635.85	1367.86	525.562	2624.44	1130.38	535.326	2622.59	1032.89	533.926	2526.33	911.032	480.08	2498.44	814.018	551.422	2521.48	797.737	529.963	2456.81	747.637
11895	0	323.211	2509.12	1541.53	219.122	2513.58	1553.04	346.204	2672.79	1544.58	227.895	2680.46	1558.42	263.723	2724.26	1415.79	265.608	2835	1143.52	260.779	2566.95	1305.18	249.038	2477.73	1103.16	187.402	2827.39	1238.95	414.066	2627.15	1367.39	524.565	2615.83	1130.43	534.402	2613.67	1032.75	532.522	2516.55	911.266	478.468	2487.34	814.933	549.108	2510.75	797.901	527.637	2445.39	748.674
11896	0	320.94	2500.78	1540.86	216.813	2505.08	1551.68	343.883	2664.43	1544.22	225.368	2672.03	1557.26	262.133	2715.79	1414.44	264.811	2825.44	1141.71	259.842	2558.14	1304.31	248.678	2468.25	1102.68	186.407	2818.07	1236.92	412.77	2618.6	1366.9	523.489	2607.32	1129.93	533.423	2605.06	1032.28	531.163	2506.88	911.418	476.417	2476.6	815.973	546.654	2500.41	797.994	525.334	2434.25	749.71
11897	0	318.773	2492.36	1540.26	214.455	2496.63	1550.35	341.329	2656.15	1543.54	222.719	2663.6	1556.12	260.474	2707.39	1412.97	264.208	2815.72	1139.72	258.613	2549.13	1303.64	248.228	2458.71	1102.13	185.383	2808.93	1234.7	411.238	2610.1	1366.3	522.506	2598.81	1129.66	532.226	2596.74	1031.66	529.855	2497.57	911.449	474.4	2466.13	816.823	544.361	2490.37	797.776	523.106	2423.48	750.515
11898	0	316.327	2483.94	1539.81	211.957	2488.17	1549.28	338.757	2647.7	1543.23	220.322	2655.24	1554.94	258.65	2698.82	1411.61	263.418	2806.1	1137.88	257.408	2539.92	1303.09	247.83	2449.06	1101.78	184.16	2799.48	1232.57	409.731	2601.54	1365.91	521.176	2590.68	1129.43	531.019	2588.56	1031.23	528.495	2488.45	911.671	472.583	2455.88	817.762	542.01	2480.52	797.855	520.875	2412.92	751.567
11899	0	314.121	2475.44	1539.9	209.461	2479.63	1548.52	336.167	2639.31	1543.02	217.588	2646.85	1553.94	256.784	2690.29	1410.33	262.56	2796.13	1135.95	256.095	2530.83	1302.75	247.34	2439.24	1101.81	182.959	2790.16	1230.52	408.119	2592.84	1365.83	520.203	2582.4	1129.57	529.858	2580.33	1031.08	527.246	2479.55	911.963	470.969	2445.89	818.928	539.897	2471.19	798.063	518.839	2402.91	752.616
11900	0	311.443	2467.1	1539.98	206.888	2470.98	1548.08	333.451	2630.98	1543.09	214.835	2638.29	1553.19	254.799	2681.68	1409.37	261.867	2786.25	1134.41	254.619	2521.61	1302.51	246.888	2429.35	1101.9	181.682	2780.64	1228.62	406.636	2584.09	1365.89	519.254	2574.32	1129.7	528.728	2572.28	1031.07	526.077	2470.95	912.23	469.378	2436.35	820.007	537.881	2462.24	798.272	517.013	2393.28	753.552
11901	0	309.134	2458.5	1540.48	204.295	2462.32	1547.81	330.62	2622.5	1543.41	211.863	2629.67	1552.81	252.626	2672.81	1408.87	261.045	2775.99	1133.43	253.059	2512.42	1302.46	246.492	2419.32	1101.93	180.436	2771	1227.29	404.838	2575.15	1366.19	518.257	2566.18	1130.09	527.491	2564.16	1031.35	524.849	2462.56	912.537	467.984	2427	820.988	535.737	2453.69	798.364	515.206	2384	754.51
11902	0	306.231	2450	1541.16	201.704	2453.53	1547.82	327.678	2613.99	1544.14	208.914	2620.99	1552.71	250.53	2663.53	1408.66	260.158	2765.71	1132.98	251.465	2502.93	1302.75	245.83	2409.16	1102.36	179.249	2761.26	1226.4	402.998	2565.85	1366.91	517.116	2558.07	1130.91	526.152	2556	1032.02	523.61	2454.35	913.121	466.858	2418.08	822.053	533.624	2445.76	798.948	513.769	2375.38	755.561
11903	0	303.922	2441.35	1542.05	199.181	2444.86	1548.09	324.758	2605.36	1544.89	205.937	2612.13	1552.75	248.529	2654.17	1408.61	259.714	2755.57	1132.76	249.78	2493.4	1303.17	245.185	2398.74	1103.05	178.248	2751.62	1225.75	401.284	2556.2	1367.7	516.114	2550.08	1131.83	524.898	2548	1032.74	522.626	2446.58	913.643	465.685	2409.66	823.261	531.874	2438.22	799.341	512.567	2367.3	756.443
11904	0	301.537	2432.59	1543.05	196.558	2435.8	1548.66	321.851	2596.76	1545.74	202.926	2603.17	1553.15	246.689	2644.79	1408.86	259.348	2745.71	1132.94	248.182	2483.76	1303.82	244.512	2388.27	1103.9	177.523	2741.98	1225.33	399.56	2546.52	1368.79	515.053	2541.93	1133.01	523.724	2540.08	1033.8	521.746	2439	914.316	464.694	2401.64	824.456	530.349	2431.14	799.549	511.775	2359.78	757.281
11905	0	298.711	2423.77	1544.35	193.919	2426.63	1549.39	318.761	2587.94	1547.06	199.986	2594.17	1553.8	244.883	2635.29	1409.59	259.074	2736.06	1133.48	246.445	2474.11	1304.66	243.502	2377.75	1104.95	176.861	2732.17	1225.64	397.638	2536.19	1370.43	513.892	2533.58	1134.73	522.351	2532.02	1035.33	520.755	2431.58	915.283	463.844	2394.03	825.485	528.793	2424.49	800.281	510.965	2352.87	758.245
11906	0	296.095	2414.75	1545.97	191.066	2417.57	1550.32	315.748	2579.06	1548.9	196.811	2585.08	1554.75	243.207	2625.82	1410.6	258.786	2726.36	1134.55	244.655	2464.41	1305.96	242.456	2367.4	1106.37	176.525	2722.63	1226.16	395.765	2526	1372.47	512.644	2525.02	1136.81	521.141	2524.02	1037.44	519.798	2424.41	916.521	463.112	2386.74	826.825	527.381	2418.28	801.643	510.374	2346.5	759.238
11907	0	293.637	2405.63	1547.75	188.379	2408.38	1551.3	312.84	2570.06	1550.9	193.612	2575.73	1555.92	241.642	2616.48	1411.78	258.663	2716.26	1135.63	242.967	2454.72	1307.41	241.235	2357.3	1108.08	176.274	2712.91	1226.76	393.904	2515.7	1374.72	511.402	2516.37	1139.07	520.046	2516.05	1039.79	519.045	2417.56	917.974	462.402	2380.03	828.184	526.296	2412.46	802.957	510.001	2340.58	760.169
11908	0	290.75	2396.56	1549.67	185.571	2399.13	1552.47	309.885	2560.99	1553.11	190.988	2566.44	1557.23	240.252	2607.34	1413.08	258.746	2705.78	1136.61	241.118	2445.27	1309.27	239.943	2347.29	1110.07	176.197	2703.45	1227.46	392.051	2505.64	1377.04	510.069	2507.5	1141.58	518.928	2507.99	1042.36	518.232	2410.69	919.522	461.746	2373.68	829.337	525.438	2406.83	804.224	509.663	2335.29	761.042
11909	0	287.874	2387.31	1551.78	182.727	2389.92	1553.7	306.96	2551.8	1555.57	187.866	2557.32	1558.8	238.746	2598.23	1414.59	259.043	2695.05	1137.77	239.423	2435.71	1311.48	238.606	2337.28	1112.52	176.07	2693.83	1228.27	390.111	2495.64	1379.71	508.781	2498.37	1144.53	517.901	2499.84	1045.2	517.41	2403.91	921.419	461.268	2367.65	830.802	524.65	2401.4	806.007	509.389	2330.31	762.034
11910	0	285.332	2377.91	1554.27	180.007	2380.65	1555.37	304.219	2542.43	1558.34	185.336	2548.09	1560.5	237.322	2589.3	1416.19	259.502	2684.58	1139.04	237.812	2426.26	1313.81	237.178	2327.63	1115.22	175.882	2684.21	1229.15	388.264	2485.95	1382.54	507.6	2489.08	1147.66	517.046	2491.59	1048.46	516.742	2397.19	923.478	460.723	2362.1	832.316	524.077	2396.16	808.229	509.051	2325.77	763.072
11911	0	282.388	2368.76	1556.57	177.444	2371.42	1556.77	301.802	2533.12	1561.25	182.744	2539.01	1562.6	235.857	2580.33	1417.8	259.747	2674.01	1140.2	236.255	2416.98	1316.34	235.841	2318.01	1118.05	175.76	2674.66	1230.17	386.641	2476.42	1385.47	506.554	2479.65	1150.96	516.429	2483.36	1051.76	516.138	2390.44	925.711	460.222	2356.86	833.712	524.149	2390.82	810.499	508.861	2321.49	764.119
11912	0	279.406	2359.54	1558.66	174.578	2362.38	1558.46	299.439	2523.73	1563.94	180.423	2530.03	1564.6	234.459	2571.42	1419.51	259.67	2663.98	1141.49	234.809	2407.8	1318.65	234.642	2308.48	1120.88	175.422	2665.05	1231.18	384.951	2467	1388.13	505.437	2470.18	1154.08	515.848	2475.11	1054.97	515.565	2383.46	927.988	459.805	2351.93	834.971	524.204	2385.53	812.805	508.306	2317.33	764.864
11913	0	277.117	2349.97	1561.2	171.942	2353.41	1560.13	297.226	2514.42	1566.76	178.204	2521.07	1566.56	232.925	2562.46	1421.31	259.13	2653.8	1142.79	233.283	2398.6	1321.04	233.334	2299.01	1123.64	174.848	2655.35	1232.31	383.343	2457.71	1390.92	504.447	2460.66	1157.32	515.328	2466.99	1058.4	515.094	2376.56	930.396	459.23	2347.02	836.227	524.507	2379.95	815.35	507.648	2313.09	765.679
11914	0	274.431	2340.88	1563.5	169.612	2344.65	1561.79	295.138	2505.11	1569.45	176.149	2512.08	1568.6	231.481	2553.55	1422.97	258.462	2643.52	1144.29	231.774	2389.53	1323.47	232.225	2289.49	1126.51	174.062	2645.74	1233.59	381.816	2448.68	1393.63	503.597	2451.2	1160.6	514.888	2459.02	1061.6	514.529	2370.08	932.712	459.032	2342.32	837.678	525.276	2374.26	817.816	507.207	2309.15	766.477
11915	0	272.095	2331.6	1565.59	167.092	2335.65	1563.55	293.23	2495.83	1571.86	174.268	2503.15	1570.57	230.095	2544.5	1424.53	257.713	2633.08	1145.7	230.577	2380.47	1325.53	231.352	2280.14	1128.95	173.275	2636.2	1234.74	380.488	2439.62	1396.01	502.989	2441.71	1163.58	514.55	2451.17	1064.52	514.22	2363.49	934.974	459.179	2337.36	839.259	526.167	2368.32	820.267	506.954	2305.06	767.091
11916	0	269.461	2322.52	1567.5	164.854	2326.83	1564.99	291.44	2486.47	1574.15	172.593	2494.29	1572.34	228.782	2535.44	1426.19	256.451	2623.36	1147.3	229.342	2371.24	1327.57	230.538	2270.55	1131.25	172.261	2626.5	1236.06	379.169	2430.5	1398.36	502.325	2432.22	1166.31	514.162	2443.43	1067.22	514.035	2356.71	937.097	459.291	2331.91	840.645	527.033	2362.29	822.722	506.618	2300.86	767.696
11917	0	267.301	2313.24	1569.49	162.612	2317.95	1566.58	289.835	2477.15	1576.44	171.084	2485.3	1573.94	227.539	2526.29	1427.81	255.136	2614.21	1148.95	228.175	2362.18	1329.4	229.89	2261.41	1133.28	171.294	2616.97	1237.34	377.944	2421.4	1400.42	501.855	2422.84	1168.85	513.938	2435.78	1069.86	514.015	2350.04	939.088	458.976	2327.97	841.444	528.288	2355.99	825.016	506.3	2296.85	768.128
11918	0	265.18	2304.14	1571.11	160.651	2309.36	1567.85	288.351	2467.9	1578.49	169.33	2476.52	1575.77	226.236	2517.15	1429.28	253.996	2605.34	1150.45	227.083	2353.14	1330.9	229.305	2252.14	1134.96	170.146	2607.6	1238.62	376.887	2412.47	1402.26	501.554	2413.66	1171.1	513.777	2428.17	1072.22	514.051	2343.43	940.765	459.32	2323.02	842.407	529.315	2350.05	827.106	505.867	2292.77	768.163
11919	0	263.388	2294.82	1572.56	158.73	2300.22	1569.06	286.897	2458.64	1580.19	167.846	2467.67	1577.08	225.01	2507.96	1430.67	252.85	2596.43	1151.91	226.201	2344.01	1332.26	228.758	2243.08	1136.01	169.078	2598.23	1239.97	375.869	2403.44	1403.79	501.023	2404.63	1172.82	513.529	2420.61	1074.11	514.023	2336.78	942.086	459.1	2318.2	843.122	530.323	2343.96	828.727	506.028	2288.48	768.417
11920	0	261.789	2285.61	1573.88	157.152	2291.3	1569.86	285.431	2449.38	1581.67	166.622	2458.59	1578.17	223.735	2498.72	1431.88	251.645	2587.54	1153.38	225.336	2335.07	1333.1	228.844	2234.38	1136.94	167.811	2588.89	1241.2	374.992	2394.47	1405.05	500.694	2395.91	1174.33	513.176	2412.99	1075.74	514.192	2330.15	943.169	459.869	2313.43	843.452	531.247	2338.16	829.886	506.478	2284.08	768.537
11921	0	260.23	2276.51	1574.95	155.666	2282.31	1570.74	284.124	2440.2	1582.9	165.324	2449.64	1579.2	222.689	2489.5	1432.88	250.475	2578.87	1154.55	224.62	2325.96	1334.15	228.576	2225.58	1137.6	166.704	2579.74	1242.25	374.145	2385.55	1406.04	500.295	2387.77	1175.59	512.859	2405.48	1077.11	514.362	2323.74	943.929	460.645	2308.32	843.881	532.338	2332.5	830.888	507.537	2279.56	768.745
11922	0	259.202	2267.21	1575.74	154.434	2273.09	1571.3	282.982	2430.97	1584	164.192	2440.53	1580.11	221.659	2480.36	1433.79	249.677	2570.58	1155.56	224.073	2316.86	1334.73	228.643	2217.07	1137.83	165.77	2570.72	1243.21	373.311	2376.77	1406.91	499.812	2380.06	1176.37	512.613	2397.91	1078.12	514.594	2317.46	944.438	461.269	2302.52	844.178	533.359	2327.34	831.612	508.673	2275.03	768.734
11923	0	257.973	2258.05	1576.22	153.303	2263.84	1571.53	281.88	2421.85	1585.11	163.07	2431.36	1580.97	220.613	2471.26	1434.76	248.726	2562.15	1156.86	223.704	2307.82	1335.26	228.791	2208.57	1137.72	164.56	2561.83	1244.29	372.556	2368.11	1407.57	499.291	2372.61	1177.03	512.153	2390.35	1079.18	514.845	2311.14	944.837	462.287	2297.28	844.025	534.298	2322.11	832.201	510.138	2270.31	768.706
11924	0	256.755	2248.79	1576.62	152.449	2254.77	1571.58	280.824	2412.72	1586.31	161.82	2422.09	1581.85	219.521	2462.13	1435.7	247.51	2554.01	1158.06	223.277	2299.12	1335.55	228.995	2200.39	1137.55	163.329	2553.07	1245.63	371.793	2359.4	1408.3	498.34	2365.66	1177.6	511.684	2382.91	1080.28	515.012	2305	945.209	463.054	2291.73	843.787	535.281	2317.05	832.843	511.863	2265.37	768.951
11925	0	255.998	2239.49	1576.8	151.528	2245.48	1571.59	279.693	2403.1	1587.05	160.957	2412.47	1582.22	218.567	2453.03	1436.46	246.447	2546	1159.35	222.971	2290.54	1335.6	229.365	2192.19	1137.29	162.019	2544.39	1246.68	371.223	2350.91	1408.89	497.353	2359.11	1177.96	511.134	2375.72	1081.03	515.504	2298.95	945.467	464.343	2286.05	843.656	536.422	2312.33	833.236	514.016	2260.51	769.065
11926	0	255.34	2230	1576.8	150.802	2236.01	1571.41	278.85	2393.92	1587.75	160.027	2402.98	1582.75	217.652	2444.01	1437.16	245.278	2538.28	1160.18	222.81	2281.91	1335.72	229.931	2184.31	1136.78	160.979	2535.9	1247.73	370.746	2342.54	1409.23	496.629	2352.45	1178.09	510.507	2368.63	1081.57	516.054	2293.1	945.518	465.728	2280.56	843.44	537.605	2307.62	833.441	516.354	2255.54	769.093
11927	0	254.527	2220.52	1576.66	150.112	2226.38	1571.05	277.901	2384.32	1588.32	158.943	2393.48	1583.19	216.851	2435.09	1437.91	244.117	2530.57	1161.49	222.745	2273.29	1335.66	230.521	2176.34	1136.05	159.631	2527.52	1248.8	370.331	2334.22	1409.58	495.811	2345.88	1178.43	509.767	2361.72	1081.99	516.522	2287.25	945.56	467.801	2274.86	842.94	538.727	2302.74	833.738	518.562	2250.38	769.297
11928	0	253.764	2210.9	1576.58	149.229	2216.46	1570.72	277.068	2374.5	1588.99	158.17	2383.76	1583.56	215.908	2426.16	1438.7	242.853	2522.98	1162.54	222.638	2264.73	1335.62	231.037	2168.53	1135.48	158.394	2519.18	1250.13	369.912	2326.04	1410.07	495.199	2339.34	1178.81	509.137	2354.88	1082.79	517.119	2281.4	945.831	468.852	2269.35	842.866	539.798	2297.96	834.294	520.962	2245.33	769.763
11929	0	253.249	2201.24	1576.12	148.665	2206.71	1570.14	276.429	2365.03	1589.73	157.401	2374.14	1583.89	215.091	2417.33	1439.32	241.613	2515.2	1163.65	222.658	2256.19	1335.53	231.587	2160.68	1134.9	157.144	2510.89	1251.08	369.596	2318.02	1410.37	494.685	2332.92	1179.09	508.53	2348.42	1083.24	517.531	2275.8	945.86	470.391	2263.7	842.505	540.938	2293.32	834.611	523.263	2240.1	770.064
11930	0	252.87	2191.6	1575.32	148.281	2196.84	1569.3	275.774	2355.42	1590	156.782	2364.31	1584.25	214.362	2408.59	1439.76	240.463	2507.65	1164.34	222.668	2247.75	1335.32	232.238	2152.69	1134.3	156.098	2502.67	1251.97	369.375	2310.17	1410.45	494.254	2326.65	1178.97	507.827	2342.05	1083.47	518.158	2270.18	945.823	471.152	2258.14	841.965	541.838	2288.61	834.805	525.631	2234.72	770.294
11931	0	252.594	2181.64	1574.65	147.908	2187	1568.36	275.007	2345.57	1590.62	156.058	2354.22	1584.66	213.56	2399.88	1440.31	239.276	2500.16	1165.31	222.882	2239.44	1335.14	232.818	2144.83	1133.92	154.9	2494.49	1252.77	369.23	2302.4	1410.68	493.925	2320.3	1179.26	507.207	2335.84	1083.74	518.8	2264.49	946.001	472.828	2252.38	841.816	542.802	2283.66	835.076	528.157	2229.34	770.942
11932	0	252.084	2171.98	1573.99	147.519	2177.16	1567.42	274.398	2335.78	1591.33	155.473	2344.3	1585.04	212.95	2391.2	1440.73	238.251	2492.61	1166.18	223.039	2231.16	1335.22	233.34	2136.81	1133.85	153.923	2486.33	1253.67	369.028	2294.63	1411.09	493.694	2314.07	1179.61	506.714	2329.74	1084.29	519.593	2258.9	946.432	473.913	2246.75	841.952	543.649	2278.72	835.659	530.147	2224.09	771.46
11933	0	251.892	2162.16	1573.07	147.348	2167.58	1566.29	273.989	2325.8	1592.01	154.813	2334.15	1585.72	212.353	2382.7	1441.2	237.503	2485.07	1166.87	223.27	2222.74	1335.23	233.947	2128.97	1133.7	153.157	2478.23	1254.26	369.044	2286.87	1411.4	493.606	2307.84	1179.91	506.407	2323.64	1084.64	520.283	2253.39	946.694	475.041	2241.12	841.981	544.508	2273.9	836.101	531.755	2219.45	771.645
11934	0	251.71	2152.47	1571.93	147.375	2157.61	1565.11	273.482	2315.91	1592.75	154.353	2324.21	1586.27	211.933	2374.14	1441.54	236.903	2477.39	1167.68	223.507	2215.07	1334.79	234.35	2120.94	1133.51	152.44	2470.06	1255.01	369.014	2279.05	1411.58	493.5	2301.61	1180.17	506.179	2317.64	1085.03	520.945	2247.78	946.887	475.992	2235.28	841.807	545.212	2268.69	836.415	533.432	2214.39	771.934
11935	0	251.644	2142.65	1570.89	147.269	2147.72	1563.88	273.139	2305.93	1593.57	153.965	2314.13	1586.86	211.367	2365.65	1442.01	236.253	2469.66	1168.3	223.427	2206.69	1334.82	234.685	2113.13	1133.56	151.822	2461.98	1255.67	368.958	2271.21	1411.92	493.367	2295.48	1180.51	506.045	2311.44	1085.6	521.591	2242.11	947.217	477.099	2229.19	841.97	545.744	2263.54	837.096	534.638	2209.1	772.257
11936	0	251.693	2132.94	1569.9	147.018	2137.64	1562.69	272.88	2296.08	1594.29	153.752	2304.14	1587.51	211.138	2357.16	1442.3	235.951	2462.12	1169.08	223.694	2199.15	1334.14	235.111	2105.42	1133.54	151.283	2453.98	1256.2	369.072	2263.27	1412.17	493.385	2289.26	1181.02	506.097	2305.39	1086.08	522.332	2236.49	947.544	478.11	2223.55	842.251	546.323	2258.35	837.584	536.06	2203.91	772.67
11937	0	251.832	2123.25	1568.6	147.125	2127.98	1561.36	272.753	2286.22	1594.79	153.46	2294.02	1587.94	210.824	2348.75	1442.54	235.637	2454.61	1169.52	224.056	2191.17	1333.77	235.676	2097.87	1133.3	150.94	2446.02	1256.71	369.22	2255.33	1412.2	493.559	2283.11	1181.31	506.209	2299.27	1086.39	523.002	2230.84	947.671	478.353	2217.61	842.261	546.882	2252.96	837.716	537.148	2198.67	772.769
11938	0	251.925	2113.49	1567.35	147.384	2118.21	1560.02	272.726	2276.27	1595.27	153.331	2284.01	1588.37	210.701	2340.26	1442.76	235.249	2446.98	1170.09	224.249	2183.33	1333.35	236.028	2090.48	1132.8	150.511	2437.98	1257.22	369.325	2247.4	1412.2	493.666	2276.65	1181.58	506.389	2292.95	1086.61	523.634	2224.92	947.789	479.42	2211.59	842.303	547.455	2247.41	837.813	537.736	2193.18	772.696
11939	0	252.111	2103.87	1566.11	147.627	2108.82	1558.81	272.702	2266.2	1595.71	153.271	2274.05	1588.88	210.518	2331.84	1442.92	235.191	2439.4	1170.67	224.55	2175.51	1332.94	236.384	2083.13	1132.31	150.209	2429.96	1257.62	369.395	2239.37	1412.17	494.007	2270.06	1182	506.8	2286.68	1086.96	524.295	2219.08	947.959	480.151	2206.07	842.474	547.892	2241.76	838.026	538.276	2187.85	772.661
11940	0	252.225	2094.3	1564.82	147.778	2099.3	1557.46	272.883	2256.48	1595.91	153.521	2264.29	1589.01	210.48	2323.4	1443	235.078	2431.86	1170.79	224.729	2167.33	1332.67	236.539	2075.65	1131.63	150.148	2422.1	1257.98	369.602	2231.37	1411.98	494.417	2263.43	1182.12	507.337	2280.34	1087.14	524.924	2213.2	947.887	480.504	2199.65	842.569	548.232	2236.25	837.971	538.751	2182.41	772.443
11941	0	252.411	2084.82	1563.23	147.753	2089.56	1555.96	273.212	2246.65	1595.87	153.775	2254.45	1589.05	210.561	2315	1442.78	234.942	2424.16	1170.84	224.927	2159.51	1331.82	236.619	2068.21	1130.66	150.026	2414.16	1258.07	369.574	2223.57	1411.53	494.843	2256.73	1181.82	507.69	2273.94	1086.88	525.44	2207.21	947.454	481.052	2193.69	842.264	548.437	2230.71	837.486	539.03	2176.74	771.956
11942	0	252.652	2075.14	1561.77	148.059	2080.35	1554.43	273.41	2236.79	1595.79	154.323	2244.79	1589.04	210.636	2306.41	1442.59	234.906	2416.48	1171.11	225.244	2151.89	1330.77	236.709	2060.74	1129.71	149.917	2406.14	1258.28	369.728	2215.43	1410.96	495.254	2249.7	1181.65	508.254	2267.54	1086.64	525.76	2201.03	946.94	481.294	2187.43	842.038	548.653	2224.81	836.859	538.982	2170.99	771.365
11943	0	252.855	2065.75	1560.26	148.269	2070.94	1553.21	273.892	2227.11	1595.44	154.634	2235.24	1588.95	210.899	2297.98	1442.33	234.94	2408.9	1171.02	225.439	2143.74	1330	236.931	2053.13	1128.89	149.996	2398.31	1258.35	370.047	2207.24	1410.21	495.828	2242.6	1181.29	508.768	2260.98	1086.28	526.172	2194.91	946.336	481.692	2181.57	841.722	548.764	2219.16	836.14	539.172	2165.45	770.737
11944	0	253.458	2056.31	1558.63	148.862	2061.74	1551.65	274.446	2217.38	1594.91	155.204	2225.75	1588.62	211.372	2289.55	1441.92	235.06	2401.08	1170.75	225.724	2135.71	1329.16	237.128	2045.56	1127.79	150.386	2390.39	1258.28	370.513	2198.89	1409.39	496.423	2235.4	1180.7	509.387	2254.33	1085.69	526.649	2188.82	945.608	481.868	2175.58	841.069	548.849	2213.43	835.405	539.388	2159.75	769.987
11945	0	253.854	2046.88	1556.95	149.056	2052.23	1550.02	274.949	2207.65	1594.42	155.791	2216.27	1588.24	211.82	2280.96	1441.55	235.184	2393.28	1170.71	226.022	2127.58	1328.13	237.207	2037.73	1126.48	150.555	2382.35	1258.28	371.022	2190.16	1408.55	496.942	2227.92	1180.11	509.916	2247.51	1085.18	526.938	2182.47	944.744	481.983	2169.35	840.16	548.82	2207.63	834.532	539.122	2153.63	768.861
11946	0	254.23	2037.59	1555.32	149.546	2043.15	1548.48	275.659	2198.09	1593.95	156.426	2206.65	1587.77	212.415	2272.28	1441.15	235.506	2385.43	1170.84	226.264	2119.54	1327.01	237.21	2029.92	1125.26	150.794	2374.39	1258.36	371.453	2181.48	1407.76	497.368	2220.27	1179.44	510.245	2240.56	1084.73	527.137	2176.14	943.893	481.988	2163.28	839.245	548.964	2201.67	833.706	539.084	2147.63	768.079
11947	0	254.918	2028.31	1553.6	150.263	2034	1547.04	276.439	2188.57	1593.18	156.982	2197.21	1587.18	213.109	2263.69	1440.44	235.888	2377.48	1170.45	226.52	2111.23	1325.73	237.13	2021.53	1124.14	151.439	2366.27	1258.03	371.919	2172.81	1406.7	497.754	2212.61	1178.49	510.681	2233.58	1084.02	527.375	2169.89	942.708	482.192	2157.07	838.361	548.849	2196.24	832.754	538.972	2141.89	766.83
11948	0	255.837	2019.18	1551.72	151.095	2024.78	1545.3	277.384	2179.3	1592.09	157.972	2188.03	1586.35	213.922	2255.1	1439.63	236.458	2369.58	1169.85	226.962	2103.07	1324.35	237.162	2013.55	1122.61	152.147	2358.4	1257.49	372.485	2164.1	1405.47	498.164	2204.85	1177.28	511.053	2226.47	1082.95	527.6	2163.59	941.238	482.403	2151.12	837.014	548.811	2190.52	831.196	538.956	2136.36	765.233
11949	0	256.673	2010.06	1549.79	151.792	2015.65	1543.58	278.229	2169.79	1590.87	158.928	2178.6	1585.43	214.872	2246.62	1438.72	237.074	2361.63	1169.1	227.482	2094.9	1322.99	237.194	2005.51	1121.07	152.921	2350.31	1256.9	373.11	2155.16	1404.11	498.402	2196.99	1176.01	511.142	2219.14	1081.65	527.756	2157.2	939.82	482.431	2144.94	835.51	548.557	2184.93	829.567	539.07	2130.74	763.778
11950	0	257.607	2000.81	1547.94	152.988	2006.67	1541.98	279.229	2160.52	1589.66	159.943	2169.26	1584.53	215.598	2238.06	1437.59	237.697	2353.39	1168.12	227.895	2086.52	1321.64	237.204	1997.54	1119.61	153.702	2342.29	1256.12	373.709	2146.4	1402.72	498.668	2189.07	1174.68	511.309	2211.8	1080.38	527.997	2150.85	938.218	482.702	2139.09	834.094	548.234	2179.38	828.049	539.376	2125.05	762.251
11951	0	258.468	1991.66	1545.99	153.934	1997.61	1540.3	280.409	2151.15	1588.41	161.003	2159.95	1583.57	216.627	2229.57	1436.42	238.539	2345.26	1167.03	228.321	2078.16	1320.17	237.223	1989.52	1118.1	154.703	2334.14	1255.12	374.351	2137.59	1401.14	498.999	2180.98	1173.14	511.567	2204.43	1079.04	528.184	2144.37	936.425	482.802	2132.8	832.528	548.374	2173.67	826.369	539.444	2119.79	760.335
11952	0	259.524	1982.49	1543.92	154.723	1988.37	1538.44	281.551	2141.89	1586.98	162.355	2150.79	1582.5	217.624	2220.93	1435.18	239.528	2337.12	1165.9	228.731	2069.94	1318.54	237.25	1981.32	1116.39	155.78	2326.12	1254.09	375.055	2128.72	1399.56	499.304	2172.72	1171.45	511.749	2196.76	1077.46	528.175	2137.63	934.416	482.776	2126.73	830.338	548.181	2167.87	824.554	539.394	2114.17	758.165
11953	0	260.368	1973.24	1541.91	155.784	1979.34	1536.65	282.771	2132.38	1585.63	163.53	2141.6	1581.55	218.542	2212.33	1434.03	240.289	2328.64	1164.96	229.357	2061.57	1317.03	237.385	1973.07	1114.74	156.667	2317.75	1253.21	375.817	2119.84	1398.04	499.611	2164.2	1169.81	511.949	2189.02	1076.04	528.047	2130.69	932.439	482.856	2120.21	828.548	547.856	2161.86	822.877	539.379	2108.61	756.071
11954	0	261.419	1964.16	1540.08	156.827	1970.52	1535.18	284.145	2123.25	1584.35	164.663	2132.36	1580.49	219.574	2203.65	1432.85	241.25	2320.36	1163.94	229.982	2052.92	1315.57	237.565	1964.65	1113.21	157.638	2309.49	1252.23	376.722	2110.93	1396.48	500.045	2155.6	1168.08	512.337	2181.2	1074.56	528.055	2123.73	930.478	482.74	2114.11	826.231	547.872	2155.59	821.182	539.322	2103.08	753.913
11955	0	262.735	1955.13	1538.2	157.901	1961.48	1533.49	285.594	2113.96	1582.8	166.23	2123.36	1579.23	220.778	2195.06	1431.48	242.264	2311.83	1162.71	230.647	2044.34	1314.1	237.845	1956.16	1111.7	158.747	2301.14	1251.13	377.706	2102.07	1394.84	500.578	2147.06	1166.19	512.371	2173.13	1072.58	528.078	2116.49	928.319	482.728	2107.72	824.286	547.947	2149.36	819.356	539.125	2097.25	751.559
11956	0	263.744	1946.07	1536.3	159.224	1952.58	1531.85	287.051	2104.82	1581.16	167.619	2114.25	1577.87	221.991	2186.32	1430.11	243.352	2303.3	1161.44	231.395	2035.81	1312.59	238.079	1947.49	1110.15	159.858	2292.65	1249.97	378.781	2093.12	1393.08	501.002	2138.33	1164.01	512.371	2165	1070.45	528.078	2109.44	926.159	482.597	2101.62	821.899	547.803	2142.55	817.244	538.799	2091.56	749.038
11957	0	264.868	1936.92	1534.65	160.415	1943.69	1530.49	288.541	2095.7	1579.56	169.115	2105.36	1576.54	223.189	2177.52	1428.73	244.417	2294.67	1160.11	232.349	2027.1	1311.14	238.236	1938.67	1108.61	160.919	2284.14	1248.81	379.741	2084.2	1391.39	501.43	2129.56	1162.03	512.854	2157.16	1068.67	528	2102.02	923.89	482.333	2094.98	819.734	547.475	2135.75	815.226	538.408	2085.73	746.549
11958	0	266.246	1927.91	1533.06	161.744	1934.74	1529.16	290.13	2086.68	1578.08	170.743	2096.27	1575.17	224.457	2168.75	1427.37	245.355	2285.89	1158.66	233.172	2018.25	1309.78	238.706	1929.76	1107.3	162.045	2275.65	1247.56	380.767	2075.26	1389.58	501.924	2120.87	1159.93	513.258	2149.27	1066.79	527.953	2094.63	921.736	482.391	2088.53	817.764	547.712	2129.01	813.26	537.898	2079.69	744.167
11959	0	267.823	1918.87	1531.31	163.128	1925.66	1527.85	291.752	2077.67	1576.48	172.431	2087.42	1573.96	225.884	2159.93	1425.97	246.52	2277.43	1157.2	233.981	2009.45	1308.35	239.278	1920.77	1106.08	163.127	2267	1246.31	382.03	2066.27	1387.84	502.603	2112.16	1157.89	513.23	2140.97	1064.4	527.835	2086.99	919.435	481.972	2081.2	815.738	547.415	2121.6	811.047	537.391	2073.32	741.585
11960	0	269.547	1909.94	1529.75	165.174	1916.77	1526.44	293.475	2068.61	1575.01	174.147	2078.28	1572.85	227.187	2150.97	1424.71	247.342	2268.29	1155.85	235.192	2000.57	1307.04	239.729	1911.67	1104.77	164.228	2258.2	1245.19	383.242	2057.25	1386.2	503.297	2103.31	1156.05	513.328	2132.31	1062.37	527.914	2079.27	917.377	482.019	2073.72	813.94	547.106	2114	808.983	536.7	2066.52	739.333
11961	0	271.314	1900.71	1528.26	166.844	1907.73	1525.23	295.323	2059.51	1573.72	175.942	2069.04	1571.89	228.834	2142.08	1423.63	248.502	2259.31	1154.59	236.271	1991.63	1305.98	240.339	1902.53	1103.58	165.346	2249.18	1244.15	384.573	2048.14	1384.68	504.119	2094.44	1154.34	514.128	2124.07	1060.85	527.799	2071.24	915.431	481.732	2066.24	812.121	546.522	2106.1	807.07	535.871	2059.49	737.124
11962	0	273.126	1891.87	1526.78	168.854	1898.56	1524.03	297.364	2050.51	1572.4	177.895	2060.03	1570.95	230.393	2133.11	1422.33	249.507	2249.98	1153.18	237.331	1982.59	1304.77	240.876	1893.29	1102.59	166.598	2240.22	1242.98	385.968	2039.04	1383.14	505.049	2085.73	1152.67	514.476	2115.18	1058.98	527.596	2062.95	913.424	480.747	2059.25	809.763	546.861	2098.21	805.457	534.4	2052.54	734.473
11963	0	275.169	1882.73	1525.29	170.75	1889.54	1522.82	299.47	2041.33	1571.17	179.947	2050.68	1570.06	232.068	2124.18	1421.04	250.555	2240.49	1151.75	238.686	1973.54	1303.63	241.543	1884	1101.55	167.784	2231.14	1241.81	387.435	2029.9	1381.65	506.009	2076.89	1150.89	515.172	2106.63	1057.24	527.779	2054.71	911.607	480.173	2051.6	807.843	546.659	2090	803.517	533.465	2045.02	732.193
11964	0	277.089	1873.57	1523.9	172.802	1880.55	1521.7	301.636	2032.19	1570.03	182.15	2041.65	1569.28	233.796	2115.16	1419.89	251.891	2231.18	1150.29	239.922	1964.41	1302.59	242.251	1874.54	1100.55	169.103	2221.93	1240.62	389.093	2020.87	1380.28	506.994	2068.13	1149.27	516.655	2098.34	1056.02	527.489	2045.99	909.541	480.058	2043.89	806.133	546.433	2081.58	801.633	532.35	2037.06	730.087
11965	0	279.398	1864.62	1522.69	174.951	1871.51	1520.78	303.918	2022.92	1568.82	184.509	2032.54	1568.43	235.598	2106.33	1418.57	252.757	2221.22	1148.46	241.497	1955.13	1301.72	242.885	1864.96	1099.83	170.496	2212.6	1239.18	390.72	2011.7	1378.7	508.169	2059.5	1147.58	517.163	2089.21	1054.01	527.727	2037.41	907.726	479.485	2035.58	804.485	546.297	2073.03	799.686	531.502	2029.02	727.995
11966	0	281.528	1855.38	1521.55	177.07	1862.44	1520.14	306.486	2013.97	1567.59	187.038	2023.51	1567.52	237.577	2097.3	1417.12	254.051	2211.32	1146.46	242.991	1945.85	1300.98	243.853	1855.28	1099.27	172.017	2203.23	1237.6	392.579	2002.77	1377.09	509.438	2050.83	1145.8	517.878	2080.36	1051.95	528.135	2028.84	905.838	479.321	2027.17	802.953	546.215	2064.18	797.614	530.705	2020.54	725.951
11967	0	283.799	1846.25	1520.68	179.444	1853.33	1519.58	309.099	2004.84	1566.34	189.75	2014.64	1566.74	239.364	2088.31	1416.03	255.35	2201.25	1144.67	244.784	1936.17	1300.23	244.734	1845.43	1098.77	173.607	2193.68	1236.13	394.668	1993.64	1375.59	510.684	2041.96	1144.03	518.701	2071.29	1049.9	528.365	2019.87	903.852	479.257	2018.42	801.296	546.153	2055.24	795.482	530.258	2011.77	724.107
11968	0	286.157	1836.94	1520.19	181.719	1844.33	1519.4	311.631	1995.6	1565.32	192.273	2005.39	1566.11	241.577	2079.22	1414.92	256.458	2191.13	1143.2	246.425	1926.61	1299.66	245.728	1835.33	1098.47	174.999	2184.01	1234.99	396.496	1984.49	1374.33	511.98	2033.03	1142.42	520.034	2062.49	1048.55	528.657	2010.63	902.127	479.263	2009.33	799.845	546.289	2046.25	793.797	529.705	2002.56	722.387
11969	0	288.421	1827.8	1519.76	184.045	1835.11	1519.27	314.505	1986.49	1564.55	195.11	1996.52	1565.66	243.564	2069.89	1414.03	257.733	2181.41	1141.87	248.171	1916.81	1299.21	246.66	1825	1098.35	176.447	2174.15	1233.93	398.509	1975.1	1373.11	513.349	2023.81	1140.89	520.632	2052.92	1046.77	529.183	2001.26	900.484	479.331	2000.29	798.27	546.227	2036.89	791.969	529.467	1993.35	720.622
11970	0	291.019	1818.41	1519.46	186.815	1825.88	1519.55	317.327	1977.44	1563.63	197.894	1987.39	1565.21	245.323	2060.35	1413.46	258.601	2171.36	1140.74	249.925	1906.66	1298.84	247.911	1814.58	1098.32	177.707	2164.29	1233.11	400.567	1965.82	1371.98	514.63	2014.58	1139.25	521.671	2043.53	1045.27	530.17	1992.41	898.934	479.676	1990.71	796.826	546.241	2027.54	790.298	529.519	1984.12	718.84
11971	0	293.857	1809.05	1519.55	189.598	1816.5	1519.93	320.116	1968.24	1562.88	200.661	1978.13	1564.98	247.368	2050.72	1413.08	259.65	2161.96	1140.13	251.8	1896.66	1298.61	249.105	1803.78	1098.38	178.969	2154.18	1232.61	402.607	1956.2	1371.06	516.049	2005.21	1138	522.46	2034.17	1043.82	530.715	1982.62	897.435	480.349	1981.06	795.502	546.702	2018.16	788.692	529.931	1974.22	717.545
11972	0	296.866	1799.66	1519.86	192.409	1806.98	1520.75	323.016	1958.92	1562.45	203.645	1968.86	1565.02	249.425	2040.9	1412.86	260.831	2152.02	1139.87	253.887	1886.57	1298.72	250.302	1793.1	1098.79	180.08	2144.12	1232.48	404.657	1946.75	1370.44	517.23	1995.8	1137	523.225	2024.39	1042.7	531.722	1973.08	896.407	481.196	1971.07	794.808	547.033	2008.53	787.403	530.593	1964.94	716.652
11973	0	299.678	1790.06	1520.23	195.48	1797.23	1521.52	326.029	1949.77	1562.24	206.511	1959.25	1565.35	251.131	2030.9	1413.12	262.109	2141.9	1139.89	255.987	1876.6	1299.13	251.713	1782.16	1099.41	181.16	2133.89	1232.77	406.727	1937.17	1370	518.378	1986.25	1136.12	523.875	2014.67	1041.75	532.931	1963.51	895.655	482.329	1960.72	794.258	547.692	1999.33	786.601	531.863	1954.65	716.013
11974	0	302.758	1780.48	1520.77	198.511	1787.38	1522.61	328.887	1940.19	1562.29	209.691	1949.64	1565.97	253.066	2020.94	1413.59	262.915	2131.94	1140.28	257.897	1866.38	1299.68	253.21	1771.5	1099.94	182.043	2123.71	1233.41	408.616	1927.61	1369.78	519.091	1976.56	1135.29	524.489	2004.85	1041.15	534.016	1953.64	895.046	483.359	1950.53	793.41	548.401	1989.47	785.868	533.251	1944.63	715.625
11975	0	305.828	1770.73	1521.52	201.478	1777.64	1523.7	331.75	1930.52	1562.94	212.411	1939.74	1567.07	254.813	2010.78	1414.43	263.293	2121.88	1141.02	259.997	1856.23	1300.6	254.845	1761.03	1100.8	182.729	2113.39	1234.6	410.206	1917.58	1369.92	519.863	1966.76	1135.06	524.972	1995	1040.98	535.175	1943.73	895.016	484.538	1940	793.044	549.313	1979.7	785.798	534.259	1934.45	715.312
11976	0	308.607	1760.95	1522.38	204.292	1767.71	1525.09	334.635	1920.74	1563.78	215.462	1929.9	1568.44	256.458	2000.71	1415.55	263.226	2112.02	1142.06	261.969	1846.2	1301.91	256.53	1750.59	1102.17	183.245	2103.03	1236.01	412.114	1908.02	1370.53	520.826	1957.24	1135.34	525.465	1984.98	1041.22	536.333	1933.58	895.439	486.041	1928.99	793.475	550.42	1969.83	786.24	536.083	1924.13	715.737
11977	0	311.523	1751.14	1523.42	207.179	1757.66	1526.59	337.594	1910.78	1565.01	218.317	1919.97	1570.19	258.277	1990.71	1416.92	263.651	2101.86	1143.24	263.937	1836	1303.55	258.331	1740.33	1103.64	183.823	2092.47	1237.58	413.894	1898.7	1371.41	521.596	1947.32	1135.64	525.919	1975.02	1041.67	537.527	1923.38	896.126	487.543	1918.05	794.023	551.281	1959.26	786.828	538.741	1913.58	716.876
11978	0	314.102	1741.27	1524.57	209.935	1747.55	1528.1	340.369	1900.84	1566.41	221.065	1909.85	1572.03	260.083	1980.91	1418.47	264.214	2091.23	1144.71	265.984	1825.92	1305.33	260.159	1730.23	1105.28	184.372	2081.93	1239.35	415.98	1889.39	1372.62	522.227	1937.46	1136.3	526.474	1965.01	1042.47	538.673	1913.1	896.979	489.239	1906.85	794.764	552.455	1948.64	787.779	540.683	1902.53	717.837
11979	0	316.475	1731.34	1525.95	212.4	1737.86	1529.86	342.886	1890.85	1568.19	223.706	1899.88	1574.27	261.757	1971.09	1420.24	264.228	2079.93	1146.34	267.874	1816.19	1307.13	261.962	1720.27	1107.4	184.962	2071.47	1241.26	417.921	1880.32	1374.24	522.97	1927.43	1137.3	527.131	1955	1043.69	540.07	1902.56	898.564	490.749	1895.64	795.816	553.824	1938.04	789.216	542.447	1891.68	718.986
11980	0	318.869	1721.47	1527.39	214.671	1727.99	1531.67	345.37	1880.62	1570.01	226.196	1889.91	1576.46	263.553	1961.49	1421.93	264.463	2069.27	1147.62	269.962	1806.35	1309.36	263.64	1710.69	1109.53	185.726	2061.08	1242.97	419.841	1871.16	1375.75	523.751	1917.74	1138.4	528.282	1945.41	1045.2	541.215	1892.12	900.009	492.253	1884.1	797.119	555.174	1927.33	790.63	544.702	1880.33	720.727
11981	0	320.981	1711.73	1528.85	216.907	1718.28	1533.37	347.88	1871.05	1571.94	228.593	1880.03	1578.58	265.551	1952.01	1423.58	265.309	2059.31	1148.93	271.902	1796.74	1311.41	265.437	1701.34	1111.7	186.727	2050.96	1244.52	421.778	1862.1	1377.26	524.771	1907.94	1139.52	528.906	1935.3	1046.18	542.749	1881.34	901.422	494.226	1872.55	798.661	556.497	1916.1	792.011	546.789	1868.91	722.312
11982	0	323.213	1702.02	1530.46	219.037	1708.64	1535.06	349.917	1861.17	1573.92	230.874	1870.29	1580.91	267.23	1942.63	1425.35	265.967	2049.52	1150.32	273.881	1787.23	1313.58	267.231	1692.2	1113.89	187.702	2040.82	1246.21	423.796	1853.09	1378.86	525.896	1898.27	1140.8	529.846	1925.48	1047.38	544.182	1870.58	903.029	495.709	1860.89	799.959	557.973	1904.89	793.61	548.706	1857.21	724.072
11983	0	325.303	1692.4	1532.29	221.165	1699.14	1536.94	351.89	1851.29	1575.94	232.876	1860.61	1583.06	269.186	1933.4	1427.13	266.797	2039.57	1151.77	275.877	1777.72	1315.7	268.985	1683.15	1116.4	188.871	2030.9	1247.74	425.711	1844.03	1380.55	527.276	1888.65	1142.23	531.051	1915.49	1048.67	545.863	1860.01	904.808	497.833	1848.92	802.011	559.105	1893.39	794.987	550.695	1845.05	725.92
11984	0	327.306	1682.99	1533.96	223.054	1689.48	1538.71	353.991	1841.9	1577.9	235.095	1851.11	1585.17	271.146	1924.16	1428.71	268.273	2030.18	1153.3	277.591	1768.42	1317.82	270.671	1673.73	1118.98	190.233	2021.11	1249.3	427.694	1835.09	1382.05	528.817	1878.9	1143.61	532.868	1905.83	1050.23	547.901	1849.25	906.514	499.318	1836.8	803.737	560.538	1881.79	796.349	552.782	1833.17	727.817
11985	0	329.274	1673.81	1535.38	225.053	1680.15	1540.38	355.815	1832.33	1579.7	236.956	1841.53	1587.22	273.089	1915.06	1430.32	269.769	2020.45	1154.65	279.46	1759.11	1319.61	272.296	1663.99	1121.39	191.938	2011.64	1250.8	429.422	1826.03	1383.43	530.458	1869.37	1144.95	534.332	1895.72	1051.14	549.657	1838.34	907.982	501.421	1824.84	805.556	562.006	1870.41	797.846	554.445	1820.86	729.473
11986	0	330.927	1664.84	1536.73	227.136	1670.87	1541.89	357.699	1823.06	1581.75	238.779	1832.05	1589.25	274.846	1905.78	1431.96	271.098	2010.6	1156.2	280.99	1749.98	1321.44	273.718	1654.16	1123.57	193.372	2002.34	1252.65	431.307	1816.86	1384.97	532.308	1859.7	1146.57	536.217	1885.7	1052.64	551.598	1827.36	909.713	502.916	1812.57	807.155	563.574	1858.17	799.257	556.108	1808.15	731.301
11987	0	332.804	1655.61	1538.26	229.01	1661.64	1543.43	359.713	1813.99	1583.61	240.5	1822.76	1591.16	276.477	1896.65	1433.55	272.419	2000.68	1157.8	282.636	1741.01	1323.1	275.052	1644.51	1125.77	194.832	1993.15	1254.43	433.044	1807.75	1386.44	534.163	1850.1	1148.12	538.117	1875.64	1054	553.522	1816.1	911.485	504.966	1800.38	809.306	565.368	1846.16	800.846	557.841	1795.24	733.351
11988	0	334.732	1646.69	1539.42	231.187	1652.44	1544.7	361.4	1804.87	1584.98	242.294	1813.57	1592.84	278.344	1887.63	1434.95	274.133	1991.25	1159.03	284.304	1732.06	1324.52	276.306	1635.13	1127.63	196.49	1984.09	1255.77	434.732	1798.63	1387.56	536.157	1840.47	1149.39	540.327	1865.66	1055.04	555.519	1804.98	912.817	506.635	1787.95	810.912	566.893	1833.85	801.939	559.333	1781.79	735.203
11989	0	336.74	1637.53	1540.43	233.216	1643.16	1545.7	363.109	1795.88	1586.03	243.99	1804.4	1594.29	279.957	1878.44	1436.15	275.901	1982.01	1160.41	285.691	1722.93	1325.9	277.375	1626.16	1129.01	198.059	1975.29	1257.23	436.379	1789.55	1388.6	538.312	1830.94	1150.58	542.671	1855.68	1056.07	557.494	1793.71	914.154	509.074	1775.49	813.117	568.853	1821.51	803.017	560.865	1768.66	736.872
11990	0	338.478	1628.62	1541.41	235.068	1634.02	1546.76	364.833	1787.03	1587.06	245.752	1795.4	1595.55	281.486	1869.46	1437.27	277.053	1972.2	1161.49	287.128	1714.1	1326.9	278.183	1617.42	1130.2	199.467	1966.46	1258.5	437.806	1780.4	1389.58	540.341	1821.33	1151.86	544.732	1845.7	1056.85	559.465	1782.32	915.613	510.412	1763.33	814.671	570.614	1808.72	804.07	562.433	1755.58	738.382
11991	0	340.104	1619.79	1542.06	236.938	1625.01	1547.65	366.345	1778.27	1587.71	247.276	1786.4	1596.53	282.845	1860.37	1438.15	278.39	1963.76	1162.3	288.211	1705.09	1327.87	278.902	1608.71	1131.16	201.06	1957.84	1259.63	438.991	1771.26	1390.15	542.364	1811.91	1152.88	546.814	1835.47	1057.49	561.46	1771.03	916.77	512.206	1750.99	816.429	572.439	1796.23	804.902	563.936	1742	740.073
11992	0	341.603	1610.96	1542.44	238.687	1616.11	1548.24	367.945	1769.71	1588.07	249.009	1777.67	1597.12	284.329	1851.44	1438.85	279.68	1955.38	1163.15	289.206	1696.27	1328.33	279.358	1600.11	1131.54	202.48	1949.33	1260.48	440.037	1762.2	1390.41	544.108	1802.31	1153.34	548.744	1825.35	1057.8	563.353	1759.47	917.595	513.954	1738.33	817.644	574.056	1783.71	805.512	565.445	1728.33	741.245
11993	0	343.054	1602.25	1542.79	240.372	1607.13	1548.8	369.377	1760.84	1588.16	250.643	1769.08	1597.58	285.654	1842.59	1439.46	280.893	1947.2	1163.81	290.26	1687.59	1328.54	279.631	1591.57	1131.7	203.801	1940.82	1261.3	441.122	1753.01	1390.72	545.788	1792.52	1153.9	550.902	1815.18	1058.17	565.389	1747.88	918.412	515.712	1726.15	818.75	575.977	1771.07	805.908	567.209	1714.85	742.663
11994	0	344.465	1593.59	1543.2	241.952	1598.37	1549.52	370.793	1752.27	1588.25	251.9	1760.39	1597.99	286.868	1833.62	1439.94	282.223	1938.98	1164.5	291.193	1679.2	1328.6	279.914	1583.28	1131.84	205.209	1932.47	1262.16	442.1	1743.88	1391.13	547.565	1783.04	1154.56	553.141	1805.02	1058.84	567.358	1736.29	919.434	517.721	1713.79	820.105	577.937	1758.44	806.682	569.164	1701.38	744.128
11995	0	345.966	1584.97	1543.58	243.549	1589.67	1549.96	372.144	1743.8	1588.42	253.247	1751.77	1598.41	288.123	1824.84	1440.65	283.654	1930.83	1165.5	292.016	1670.58	1328.79	280.098	1575.06	1131.69	206.457	1924.31	1262.94	443.077	1734.61	1391.51	549.181	1773.07	1155.19	554.808	1794.29	1059.01	569.355	1724.7	920.435	519.782	1701.2	821.394	579.928	1745.72	807.43	571.414	1688.17	745.65
11996	0	347.101	1576.34	1543.77	244.947	1581	1550.44	373.577	1735.4	1588.54	254.53	1743.27	1598.75	289.177	1815.91	1441.23	284.939	1922.56	1166.3	292.537	1662.01	1328.65	279.999	1566.94	1131.16	207.689	1916.03	1263.86	443.799	1725.17	1391.67	550.641	1763.25	1155.58	556.699	1783.55	1059.35	571.17	1712.95	921.141	521.771	1688.76	822.205	581.695	1733.22	807.999	573.632	1674.76	746.892
11997	0	348.216	1567.76	1543.92	246.164	1572.15	1550.8	374.72	1726.97	1588.54	255.573	1734.66	1598.91	290.25	1807.15	1441.86	286.371	1914.25	1167.49	292.962	1653.49	1328.53	279.853	1558.89	1130.59	208.863	1907.85	1264.75	444.419	1715.93	1391.8	551.775	1753.24	1155.72	558.476	1772.91	1059.68	572.826	1701.24	921.789	523.675	1676.2	822.859	583.742	1720.73	808.552	575.92	1661.48	748.047
11998	0	349.19	1559.21	1544.14	247.239	1563.58	1551.18	375.752	1718.58	1588.51	256.391	1726.17	1599.08	291.305	1798.47	1442.36	287.536	1906.09	1168.11	293.405	1645.13	1328.46	279.682	1550.82	1130.09	210.173	1899.91	1265.56	445.029	1706.64	1391.78	552.8	1743.09	1155.66	559.972	1762.26	1059.66	574.538	1689.7	922.292	525.798	1664.42	823.35	585.587	1708.53	808.964	578.232	1648.41	749.084
11999	0	350.251	1550.73	1544.34	248.335	1555.1	1551.53	376.649	1710.22	1588.27	257.364	1717.8	1599.08	292.268	1789.64	1442.62	288.92	1898.18	1168.93	293.82	1636.85	1328.36	279.582	1542.68	1129.57	211.406	1891.94	1266.15	445.546	1697.54	1391.64	553.883	1733.17	1155.53	561.289	1751.37	1059.32	576.078	1678.14	922.566	527.642	1651.83	823.858	587.286	1696.47	809.155	580.843	1636	749.954
12000	0	351.015	1542.31	1544.45	249.291	1546.65	1551.82	377.314	1701.84	1587.97	258.377	1709.51	1599.09	293.313	1780.98	1443	290.036	1890.29	1169.56	294.123	1628.68	1328.1	279.492	1534.68	1128.94	212.64	1884.08	1266.95	446.09	1688.45	1391.43	554.695	1722.84	1155.16	562.546	1740.37	1058.94	577.664	1666.57	922.702	529.385	1639.45	824.072	588.922	1684.26	809.091	582.968	1622.81	750.534
12001	0	351.672	1533.97	1544.61	249.872	1538.2	1552.05	378.166	1693.51	1587.96	259.155	1701.12	1599.05	294.182	1772.4	1443.35	291.161	1882.68	1170.3	294.382	1620.46	1327.86	279.299	1526.79	1128.42	213.738	1876.23	1267.65	446.559	1679.58	1391.23	555.42	1712.46	1154.84	563.519	1729.2	1058.49	578.859	1654.76	922.844	531.078	1627.29	824.293	590.608	1671.89	809.166	585.193	1610.4	751.096
12002	0	352.289	1525.54	1544.67	250.422	1529.89	1552.34	379.011	1685.21	1587.88	259.843	1692.91	1599	295.057	1763.86	1443.64	292.21	1875.06	1171.02	294.731	1612.38	1327.7	279.151	1519.14	1127.86	214.74	1868.44	1268.4	446.953	1670.76	1391.08	555.911	1701.99	1154.44	564.495	1718.09	1058.11	580.017	1643.03	922.985	532.501	1615.26	824.406	592.306	1659.65	809.411	587.196	1597.93	751.636
12003	0	352.688	1517.36	1544.62	250.762	1521.68	1552.53	379.721	1676.71	1587.72	260.666	1684.78	1598.96	295.912	1755.42	1444.03	293.007	1867.54	1171.67	294.961	1604.26	1327.43	279.246	1511.75	1127.31	215.612	1860.66	1269.07	447.205	1661.94	1390.82	556.459	1691.36	1154.01	565.46	1706.95	1057.92	581.027	1631.26	923.137	533.766	1603.26	824.263	594.2	1647.25	809.589	588.963	1585.34	752.12
12004	0	353.015	1509.04	1544.71	251.058	1513.57	1552.7	380.453	1668.26	1587.59	261.365	1676.58	1598.99	296.501	1747.04	1444.37	293.682	1860.03	1172.46	295.241	1596.39	1327.14	279.42	1504.55	1126.7	216.391	1852.95	1269.92	447.557	1653.38	1390.78	556.92	1680.63	1153.72	566.155	1695.76	1057.71	581.648	1619.17	923.273	534.863	1591.33	824.01	595.661	1634.77	809.928	590.468	1572.73	752.609
12005	0	353.256	1500.41	1544.77	251.172	1505.55	1552.95	381.078	1659.73	1587.47	261.997	1668.4	1598.95	297.109	1738.74	1444.64	294.275	1852.6	1173.18	295.362	1588.48	1326.88	279.523	1497.2	1126.24	216.979	1845.3	1270.51	447.882	1645.08	1390.71	557.196	1669.94	1153.47	566.668	1684.52	1057.4	582.37	1607.6	923.546	535.921	1579.54	823.94	597.064	1622.4	810.203	591.875	1560.33	753.075
12006	0	353.565	1492.15	1544.72	251.112	1497.46	1553.11	381.754	1651.27	1587.24	262.698	1660.32	1598.9	297.665	1730.59	1444.75	294.713	1845.27	1173.39	295.698	1580.78	1326.62	279.642	1490.03	1125.79	217.581	1837.62	1270.96	448.309	1636.9	1390.56	557.573	1659.36	1153.11	567.225	1673.34	1057.13	582.712	1595.57	923.697	536.859	1567.67	823.931	598.408	1610.15	810.479	593.063	1547.96	753.468
12007	0	353.632	1483.89	1544.48	251.033	1489.6	1553.02	382.298	1642.86	1586.82	263.347	1652.28	1598.74	297.983	1722.44	1444.77	295.121	1837.99	1173.66	295.945	1573.05	1326.23	279.866	1482.96	1125.09	218.085	1830.06	1271.19	448.675	1628.85	1390.25	557.754	1648.83	1152.57	567.455	1662.4	1056.56	583.071	1583.89	923.655	537.231	1555.76	823.657	599.558	1597.97	810.409	593.985	1535.67	753.585
12008	0	353.366	1475.52	1544.27	250.835	1481.85	1552.92	382.591	1634.29	1586.4	263.999	1644.29	1598.57	298.632	1714.69	1444.65	295.359	1830.68	1173.88	296.115	1565.45	1325.78	280.073	1475.93	1124.44	218.415	1822.54	1271.29	448.9	1620.8	1390.02	557.647	1638.22	1151.99	567.455	1651.54	1055.96	583.172	1572.36	923.651	537.558	1544.05	823.526	600.204	1585.73	810.515	594.467	1523.36	753.617
12009	0	353.086	1467.31	1543.85	250.486	1474.16	1552.76	383.251	1625.8	1586.03	264.65	1636.42	1598.31	299.023	1706.85	1444.51	295.593	1823.35	1173.7	296.243	1557.84	1325.36	280.211	1468.8	1123.95	218.892	1815.05	1271.33	449.022	1612.94	1389.69	557.54	1627.85	1151.45	567.3	1640.64	1055.34	583.19	1560.83	923.678	538.015	1532.32	823.591	600.511	1573.77	810.424	594.928	1511.26	753.628
12010	0	352.888	1459.13	1543.35	250.097	1466.48	1552.47	383.79	1617.36	1585.49	265.311	1628.52	1597.97	299.326	1698.99	1444.18	295.765	1816.12	1173.47	296.271	1550.23	1324.86	280.395	1461.53	1123.41	219.187	1807.57	1271.2	449.159	1605.19	1389.25	557.442	1617.66	1150.77	567.298	1629.97	1054.65	583.084	1549.42	923.578	538.183	1520.65	823.596	601.043	1561.84	810.456	595.224	1499.21	753.789
12011	0	352.427	1450.83	1542.66	249.809	1458.94	1551.95	384.222	1608.87	1584.84	265.856	1620.66	1597.62	299.542	1691.27	1443.84	295.921	1808.78	1173.39	296.365	1542.79	1324.29	280.669	1454.22	1122.73	219.4	1800.05	1271.11	449.393	1597.41	1388.86	557.536	1607.5	1150.36	567.184	1619.48	1054.01	582.895	1538.08	923.561	538.003	1508.83	823.407	601.194	1549.58	810.199	595.204	1487.19	753.857
12012	0	352.107	1442.58	1542.18	249.34	1451.2	1551.56	384.514	1600.35	1584.45	266.25	1612.77	1597.3	299.587	1683.46	1443.57	296.011	1801.47	1173.42	296.403	1535.2	1323.73	280.845	1446.73	1122.23	219.439	1792.59	1270.97	449.567	1589.68	1388.64	557.213	1597.47	1150.01	567.057	1608.82	1053.69	582.667	1526.87	923.836	537.69	1497.39	823.43	601.034	1537.74	810.411	594.929	1475.16	754.25
12013	0	351.595	1434.55	1541.52	248.795	1443.43	1551.07	384.683	1591.92	1584	266.494	1604.93	1596.94	299.661	1675.71	1443.15	296.135	1794.02	1173.17	296.513	1527.76	1323.17	281.037	1439.15	1121.76	219.519	1784.96	1270.62	449.615	1582.01	1388.36	557.184	1587.74	1149.67	566.75	1598.47	1053.18	582.163	1515.63	923.972	537.028	1485.81	823.498	601.124	1525.68	810.653	594.352	1463.02	754.511
12014	0	351.142	1426.52	1540.61	248.35	1435.72	1550.4	384.862	1583.91	1583.44	266.47	1597.1	1596.36	299.688	1668.01	1442.65	296.163	1786.6	1172.77	296.506	1520.14	1322.4	281.152	1431.38	1121.14	219.482	1777.39	1270.13	449.563	1574.49	1387.76	556.875	1578.01	1148.99	566.671	1588.42	1052.63	581.59	1504.61	923.805	536.401	1474.42	823.525	600.681	1513.79	810.57	593.802	1450.89	754.541
12015	0	350.855	1418.57	1539.94	248.02	1428.02	1549.68	384.622	1575.86	1582.75	266.272	1589.27	1595.7	299.536	1660.39	1442.13	295.952	1779.07	1172.28	296.451	1512.53	1321.49	281.169	1423.72	1120.4	219.289	1769.68	1269.57	449.402	1566.84	1387.14	556.694	1568.75	1148.46	566.191	1578.32	1051.88	580.76	1493.42	923.714	535.643	1463.36	823.463	599.757	1501.83	810.431	592.405	1438.76	754.63
12016	0	350.46	1410.72	1539.29	247.7	1420.26	1548.97	384.307	1567.98	1581.99	265.979	1581.56	1594.95	299.283	1652.8	1441.44	295.753	1771.43	1171.54	296.385	1504.99	1320.71	281.257	1416.04	1119.75	219.107	1762.18	1268.86	449.223	1559.31	1386.42	556.308	1559.64	1147.8	565.758	1568.44	1051.12	579.914	1482.58	923.592	534.495	1451.45	823.818	599.082	1489.77	810.215	591.004	1426.55	754.862
12017	0	350.189	1402.98	1538.57	247.292	1412.51	1548.22	383.94	1560.49	1581.14	265.569	1573.76	1593.94	298.916	1645	1440.52	295.414	1763.72	1170.58	296.19	1497.37	1319.96	281.352	1408.45	1118.95	218.832	1754.47	1267.95	449.054	1551.88	1385.59	555.921	1550.85	1146.93	565.379	1558.74	1050.19	579.047	1471.87	923.486	533.146	1440.38	823.952	597.972	1478.27	810.068	589.72	1414.53	755.056
12018	0	350.01	1395.49	1537.78	246.975	1404.75	1547.34	383.208	1552.82	1580.04	265.1	1566.04	1592.87	298.495	1637.29	1439.55	294.989	1755.84	1169.51	296.091	1489.79	1318.96	281.299	1400.66	1117.95	218.444	1746.7	1266.92	448.71	1544.37	1384.61	555.613	1542.4	1146	564.887	1549.31	1049.03	577.925	1461.2	923.163	531.701	1429.43	823.891	596.979	1466.38	809.627	587.677	1402.38	755.375
12019	0	349.567	1387.66	1537.15	246.596	1396.93	1546.51	382.696	1545.22	1579.16	264.435	1558.34	1591.87	297.998	1629.44	1438.62	294.574	1748.04	1168.44	295.792	1481.96	1317.92	281.157	1392.93	1116.89	217.893	1738.86	1265.94	448.322	1536.76	1383.63	555.242	1534.17	1145.15	564.336	1539.89	1048.08	576.685	1450.53	922.892	530.101	1418.44	824.043	595.569	1454.59	809.314	585.604	1390.25	755.623
12020	0	349.142	1379.98	1536.52	246.077	1389.09	1545.81	382.095	1537.58	1578.37	263.736	1550.62	1590.85	297.371	1621.56	1437.62	294.06	1740.18	1167.42	295.487	1474.21	1316.98	280.94	1385.18	1115.88	217.269	1730.84	1264.85	447.791	1529.09	1382.62	554.671	1526.07	1144.22	563.908	1530.68	1047.28	575.342	1440.08	922.639	528.258	1407.46	824.277	593.837	1443.13	809.106	583.418	1378.3	755.983
12021	0	348.597	1372.35	1535.7	245.516	1381.27	1545.04	381.59	1530.09	1577.52	263.062	1542.94	1589.72	296.87	1613.86	1436.57	293.36	1732.1	1166.33	294.991	1466.2	1315.91	280.687	1377.33	1114.73	216.67	1722.95	1263.65	447.457	1521.42	1381.63	554.342	1518.25	1143.32	563.458	1521.7	1046.3	574.114	1429.81	922.37	526.312	1396.51	824.42	592.358	1431.37	808.716	581.311	1366.5	756.28
12022	0	348.124	1364.62	1535.05	245.076	1373.55	1544.18	380.709	1522.4	1576.38	262.392	1535.26	1588.54	296.19	1605.93	1435.48	292.743	1724.05	1165.33	294.597	1458.25	1314.87	280.525	1369.45	1113.47	215.946	1714.93	1262.51	447.013	1513.62	1380.57	554.022	1510.58	1142.38	562.715	1512.63	1045.02	572.793	1419.55	922.051	524.459	1385.89	824.461	590.624	1420.06	808.3	578.721	1354.55	756.444
12023	0	347.543	1356.87	1534.43	244.301	1365.83	1543.35	379.945	1514.81	1575.35	261.598	1527.66	1587.49	295.314	1597.77	1434.42	292.095	1716.21	1164.33	294.09	1450.23	1313.77	280.289	1361.51	1112.35	215.172	1706.74	1261.44	446.478	1505.72	1379.59	553.446	1502.9	1141.5	562.207	1503.8	1044.06	571.245	1409.34	921.773	522.392	1375.11	824.733	588.386	1408.66	807.849	576.434	1342.74	756.804
12024	0	346.626	1349.11	1533.58	243.503	1358.13	1542.47	379.177	1507.02	1574.19	260.647	1519.82	1586.1	294.535	1589.68	1433.11	291.488	1708.5	1163.07	293.41	1442.19	1312.65	279.817	1353.32	1111.13	214.398	1698.57	1260.15	445.908	1497.86	1378.46	552.799	1495.39	1140.38	561.63	1495.08	1042.95	569.827	1399.48	921.266	520.005	1364.63	824.917	586.57	1397.59	807.429	573.664	1331.13	757.117
12025	0	345.764	1341.23	1532.69	242.475	1350.31	1541.53	378.109	1499.13	1572.87	259.703	1512.13	1584.69	293.891	1581.66	1431.87	290.498	1700.12	1161.54	292.798	1433.99	1311.52	279.406	1345.17	1109.9	213.546	1690.22	1258.59	445.045	1489.84	1377.13	552.203	1487.93	1139.05	560.855	1486.39	1041.52	568.351	1389.58	920.698	518.447	1354.36	825.061	584.411	1386.9	806.701	571.082	1319.82	757.173
12026	0	344.59	1333.34	1531.78	241.427	1342.39	1540.56	376.995	1491.3	1571.63	258.672	1504.44	1583.39	292.856	1573.4	1430.65	289.788	1691.79	1160.35	292.032	1425.51	1310.15	278.846	1336.8	1108.64	212.704	1681.9	1257.25	444.223	1481.85	1376.01	551.514	1480.37	1137.95	560.137	1477.68	1040.35	566.76	1379.82	920.068	516.018	1344.05	824.881	582.226	1375.94	805.998	568.392	1308.47	757.37
12027	0	343.537	1325.4	1531.03	240.325	1334.48	1539.6	375.979	1483.85	1570.55	257.361	1496.65	1581.89	291.761	1565.15	1429.31	288.955	1683.6	1159.15	291.225	1417.2	1309.11	278.335	1328.43	1107.45	211.773	1673.45	1255.87	443.294	1473.66	1374.95	550.71	1472.72	1136.84	559.276	1469.03	1039.21	565.212	1370.23	919.467	514.053	1333.83	825.099	580.018	1365.52	805.397	565.603	1297.53	757.454
12028	0	342.482	1317.65	1530.2	239.173	1326.57	1538.49	374.686	1476.13	1569.33	256.034	1488.81	1580.43	290.709	1557.07	1428.03	287.961	1675	1157.56	290.388	1408.72	1308.06	277.881	1319.93	1106.45	210.717	1664.89	1254.26	442.343	1465.62	1373.83	549.924	1465.01	1135.75	558.46	1460.55	1037.98	563.725	1360.93	918.898	511.513	1323.69	825.108	577.843	1355.34	804.701	562.975	1286.79	757.519
12029	0	341.273	1309.71	1529.3	237.961	1318.51	1537.47	373.327	1468.31	1568.18	254.54	1480.94	1578.99	289.484	1548.78	1426.65	287.119	1666.57	1156	289.53	1400.22	1306.99	277.378	1311.18	1105.42	209.731	1656.34	1252.61	441.346	1457.36	1372.72	549.08	1457.16	1134.65	557.618	1452.05	1036.8	562.277	1351.68	918.219	509.602	1313.73	825.151	575.15	1345.23	803.692	560.362	1276.26	757.474
12030	0	340.012	1301.64	1528.68	236.525	1310.4	1536.49	371.536	1460.55	1567.04	252.806	1472.94	1577.58	288.259	1540.53	1425.32	286.053	1657.69	1154.64	288.738	1391.62	1306.07	276.754	1302.4	1104.43	208.609	1647.57	1251.12	440.308	1449.06	1371.81	548.269	1449.1	1133.81	556.653	1443.58	1035.75	560.624	1342.33	917.561	507.096	1303.97	824.96	573.099	1335.19	803.229	557.6	1265.97	757.384
12031	0	338.478	1293.74	1528.04	235.075	1302.37	1535.51	369.811	1452.7	1566.1	250.97	1465	1576.28	287.046	1532.25	1424.01	285.129	1649	1153.13	287.622	1382.87	1305.17	275.98	1293.42	1103.58	207.363	1638.79	1249.41	439.188	1440.69	1370.95	547.117	1440.85	1132.89	555.775	1435.23	1034.85	559.048	1333.33	917.015	505.004	1294.4	824.998	570.685	1325.57	802.61	554.927	1255.91	757.341
12032	0	336.85	1285.8	1527.4	233.466	1294.27	1534.48	368.04	1444.78	1565.26	249.156	1457.07	1574.92	285.612	1523.76	1422.7	283.806	1639.88	1151.32	286.593	1374.12	1304.33	275.469	1284.52	1102.82	206.277	1629.97	1247.71	437.802	1432.27	1369.96	546.158	1432.58	1132.01	555.043	1427.06	1034.19	557.473	1324.23	916.357	503.038	1285	824.957	568.652	1315.97	802.117	552.363	1246.05	757.164
12033	0	335.235	1277.86	1526.78	231.704	1286.12	1533.63	365.927	1436.88	1564.21	247.132	1449.12	1573.67	284.223	1515.41	1421.32	282.815	1630.55	1149.73	285.119	1365.09	1303.37	274.707	1275.37	1101.96	205.018	1620.89	1246.04	436.612	1423.97	1369.16	545.074	1424.07	1131.28	553.689	1418.41	1033.1	556.003	1315.34	915.68	500.875	1275.92	824.626	566.659	1306.68	801.417	549.908	1236.49	756.849
12034	0	333.302	1269.77	1526.42	229.816	1278.23	1532.79	363.779	1429.04	1563.34	244.972	1441.19	1572.43	282.548	1506.84	1419.91	281.758	1621.64	1148.14	284.125	1356.21	1302.82	273.927	1266.08	1101.44	203.785	1611.87	1244.15	435.217	1415.45	1368.42	543.838	1415.31	1130.68	552.473	1410.03	1032.37	554.358	1306.58	915.214	499.127	1266.87	824.582	564.687	1297.15	800.852	547.474	1227.18	756.694
12035	0	331.236	1261.8	1526.02	227.61	1270.24	1531.99	361.699	1421.14	1562.65	242.708	1433.4	1571.1	280.901	1498.47	1418.59	280.266	1612.09	1146.12	282.641	1347.08	1302.14	273.004	1256.63	1101.05	202.462	1602.59	1242.26	433.709	1406.93	1367.78	542.544	1406.57	1130.22	551.366	1401.75	1031.71	552.76	1297.82	914.829	496.981	1258.13	824.451	562.855	1288.21	800.417	545.315	1218.09	756.444
12036	0	328.805	1253.8	1525.55	225.195	1262.26	1531.19	359.249	1413.21	1561.79	240.299	1425.55	1569.85	278.957	1489.96	1417.09	279.268	1602.41	1144.31	281.42	1337.99	1301.6	272.109	1247.12	1100.59	200.946	1593.19	1240.08	432.061	1398.4	1367.09	541.283	1397.63	1129.78	550.246	1393.39	1031.21	551.348	1289.24	914.339	495.288	1249.45	824.264	560.899	1279.38	799.944	543.059	1209.21	756.02
12037	0	326.366	1245.87	1525.24	222.856	1254.45	1530.44	356.526	1405.33	1560.97	237.684	1417.76	1568.66	276.993	1481.66	1415.76	277.91	1592.43	1142.29	279.801	1328.76	1301.11	271.081	1237.47	1100.2	199.383	1583.78	1238.1	430.207	1389.75	1366.56	539.937	1388.56	1129.49	548.872	1384.87	1030.88	549.882	1280.72	914.004	493.799	1240.93	823.92	559.504	1270.58	799.581	541.149	1200.66	755.65
12038	0	324.029	1238.03	1525.12	220.311	1246.36	1529.99	354.087	1397.77	1560.39	235.009	1409.97	1567.53	274.757	1473.07	1414.37	276.5	1582.12	1140.19	278.062	1319.49	1300.74	269.963	1227.64	1100.14	197.553	1574.26	1235.83	428.119	1381.08	1366.16	538.572	1379.38	1129.47	547.575	1376.54	1030.61	548.412	1272.41	913.712	492.107	1232.76	823.681	557.943	1262.41	799.341	539.462	1192.34	755.299
12039	0	321.667	1230.03	1525.33	218.006	1238.39	1529.69	351.223	1390.03	1559.88	232.095	1402.14	1566.56	272.374	1464.86	1413.05	275.036	1571.75	1138.16	276.158	1310.11	1300.58	268.9	1217.54	1100.23	195.652	1564.7	1233.65	426.072	1372.54	1365.97	537.11	1370.21	1129.43	546.114	1368.15	1030.48	547.236	1264.25	913.556	490.681	1224.46	823.378	556.876	1254.27	799.156	538.072	1184.34	754.865
12040	0	319.415	1222.15	1525.81	215.619	1230.05	1529.79	348.179	1382.34	1559.55	229.087	1394.14	1565.8	269.728	1456.4	1412.03	273.348	1561.32	1136.31	274.268	1300.56	1300.6	267.76	1207.36	1100.5	193.594	1554.93	1231.47	423.887	1363.88	1365.97	535.584	1360.96	1129.71	544.619	1359.61	1030.44	545.998	1256.14	913.318	489.672	1216.17	823.214	555.923	1246.25	798.824	536.929	1176.55	754.465
12041	0	317.063	1214.25	1526.79	213.256	1221.75	1530.3	344.959	1374.85	1559.46	225.888	1386.06	1565.27	266.891	1447.66	1411.34	271.574	1550.81	1135.1	272.018	1290.96	1300.91	266.781	1197.08	1101.01	191.423	1545.16	1229.89	421.476	1355.05	1366.25	534.014	1351.89	1130.19	543.232	1351.21	1030.96	544.651	1248.09	913.262	488.386	1208.83	822.626	554.866	1238.76	798.804	536.076	1169.15	754.263
12042	0	314.756	1206.33	1528.04	210.776	1213.19	1531.15	341.696	1367.1	1559.83	222.447	1377.85	1565.06	264.226	1438.76	1410.83	269.871	1540.55	1134.28	269.829	1281.3	1301.55	265.621	1186.59	1101.91	189.3	1535.32	1228.42	419.223	1346.05	1366.9	532.258	1342.84	1131.05	541.678	1342.62	1031.76	543.46	1240.38	913.445	487.541	1201.25	822.691	553.828	1231.81	799.061	535.479	1162.28	754.162
12043	0	312.4	1198.35	1529.49	208.35	1204.66	1532.22	338.334	1359.7	1560.27	219.012	1369.62	1565.05	261.726	1429.48	1410.67	268.073	1530.95	1133.75	267.402	1271.46	1302.4	264.474	1175.89	1102.9	187.448	1525.32	1227.63	416.763	1336.51	1367.75	530.275	1333.81	1132	540.078	1334.23	1032.81	542.31	1232.98	913.748	486.646	1194.71	822.442	553.272	1225.1	799.295	535.141	1155.75	754.041
12044	0	309.888	1190.2	1531.34	205.914	1196.06	1533.64	334.777	1351.71	1561.01	215.498	1361.2	1565.23	259.003	1419.99	1411.08	266.596	1521.3	1133.89	265.081	1261.61	1303.31	263.257	1165.18	1104.09	185.67	1515.48	1227.46	414.32	1326.85	1368.98	528.395	1324.89	1133.34	538.415	1325.76	1034.27	541.157	1225.62	914.307	486.308	1187.92	822.667	552.471	1218.98	799.959	534.946	1149.59	754.224
12045	0	307.214	1181.96	1533.56	203.169	1187.24	1535.33	331.204	1343.92	1562.03	211.804	1352.7	1565.86	256.511	1410.34	1411.98	265.471	1511.75	1134.68	262.744	1251.6	1304.63	261.869	1154.49	1105.52	184.142	1505.64	1227.89	411.937	1316.85	1370.75	526.631	1316.03	1135.3	536.68	1317.45	1036.24	539.934	1218.44	915.311	485.283	1181.7	822.825	551.74	1213.03	800.824	535.015	1144	754.806
12046	0	304.566	1173.63	1536.09	200.363	1178.56	1537.28	327.646	1335.95	1563.52	208.22	1344.12	1566.54	253.993	1400.68	1413.05	264.759	1502.19	1135.94	260.296	1241.66	1306.27	260.247	1144.13	1107.26	182.826	1495.79	1228.71	409.41	1306.71	1372.96	524.64	1307.15	1137.5	535.075	1309.16	1038.65	538.933	1211.7	916.64	485.257	1175.77	823.711	551.6	1207.65	802.291	535.174	1138.84	755.532
12047	0	301.753	1165.18	1538.61	197.552	1169.78	1539.16	324.039	1327.62	1565.29	204.61	1335.54	1567.55	251.727	1391.05	1414.54	264.025	1492.33	1137.33	257.857	1231.76	1308.04	258.531	1133.89	1109.23	181.668	1486.13	1229.67	406.869	1296.4	1375.22	522.672	1298.34	1139.83	533.369	1301.07	1041.32	537.955	1205.22	918.168	484.467	1170.28	824.412	551.058	1202.73	803.882	535.333	1133.78	756.381
12048	0	298.551	1156.68	1541.09	194.61	1160.92	1541.26	320.525	1319.38	1567.12	201.001	1326.83	1568.84	249.35	1381.5	1416.17	262.97	1482.25	1138.98	255.557	1222.12	1310.01	256.681	1123.82	1111.29	180.666	1476.51	1231.09	404.24	1286.14	1377.84	520.522	1289.57	1142.52	531.571	1293.05	1044.23	536.908	1198.82	919.873	484.307	1164.81	825.414	550.685	1197.79	805.556	535.515	1129.5	757.301
12049	0	295.615	1147.98	1543.99	191.441	1152.05	1543.47	317.069	1310.89	1569.47	197.533	1318.15	1570.35	247.174	1372.09	1418.14	262.348	1471.99	1140.94	253.096	1212.47	1312.32	254.697	1113.97	1113.88	179.53	1466.78	1232.51	401.807	1276.06	1380.8	518.497	1280.86	1145.72	529.949	1285.05	1047.55	535.93	1192.64	922.022	483.706	1160.11	826.611	550.004	1193.21	807.817	535.747	1125.82	758.534
12050	0	292.628	1139.24	1546.82	188.542	1143.23	1545.68	313.678	1302.23	1571.81	194.24	1309.37	1571.91	244.936	1362.85	1420.01	261.846	1461.53	1142.75	250.965	1203.04	1314.76	252.792	1104.41	1116.51	178.458	1457.1	1234.08	399.255	1266.16	1383.75	516.62	1272.23	1149.01	528.396	1277.33	1051.06	534.98	1186.5	924.324	483.544	1155.16	828.195	550.125	1188.7	810.366	535.845	1122.01	759.859
12051	0	289.756	1130.62	1549.39	185.707	1134.43	1547.7	310.432	1293.57	1574.08	191.003	1300.55	1573.69	242.764	1353.73	1421.95	261.463	1450.99	1144.35	248.753	1193.67	1317.14	250.933	1095.08	1119.09	177.467	1447.48	1235.46	396.936	1256.6	1386.7	515.035	1263.61	1152.5	526.85	1269.69	1054.35	534.317	1180.5	926.742	483.16	1150.61	829.705	549.605	1184.14	812.691	536.058	1118.57	761.095
12052	0	286.839	1121.85	1551.93	182.927	1125.66	1549.78	307.336	1284.88	1576.6	187.677	1291.8	1575.49	240.409	1344.66	1423.82	260.904	1440.89	1146.03	246.593	1184.44	1319.47	249.023	1085.96	1121.7	176.415	1438.12	1236.93	394.616	1247.13	1389.66	513.39	1254.94	1156.03	525.519	1262.28	1057.91	533.498	1174.6	929.297	482.81	1145.59	831.715	549.536	1179.54	815.387	535.943	1114.97	762.483
12053	0	284.035	1113.07	1554.33	179.888	1116.87	1551.58	304.415	1276.32	1578.99	184.923	1283.04	1577.39	238.264	1335.82	1425.75	259.94	1431.16	1147.89	244.562	1175.4	1321.82	247.126	1076.92	1124.42	175.196	1428.73	1238.43	392.278	1237.88	1392.62	511.987	1246.3	1159.65	524.295	1254.98	1061.48	532.924	1168.63	932.092	482.394	1141.24	833.566	549.914	1174.76	818.396	535.873	1111.65	763.906
12054	0	281.248	1104.42	1556.49	177.161	1108.28	1553.34	301.531	1267.46	1581.3	182.105	1274.4	1579.08	236.238	1327.08	1427.48	258.819	1422.46	1149.38	242.492	1166.39	1323.93	245.318	1067.96	1126.8	173.929	1419.36	1239.67	390.123	1228.82	1395.27	510.537	1237.58	1162.87	523.158	1247.89	1064.75	532.366	1162.72	934.741	482.353	1137	835.207	549.837	1169.97	821.243	535.551	1108.07	765.102
12055	0	278.632	1095.69	1558.44	174.595	1099.79	1554.77	298.939	1258.79	1583.19	179.462	1265.83	1580.5	234.129	1318.23	1429.12	257.374	1413.82	1151.16	240.629	1157.5	1325.75	243.831	1059.18	1129.04	172.764	1410.32	1241.1	388.103	1219.83	1397.69	509.308	1228.97	1165.91	522.227	1240.96	1067.87	531.986	1156.71	937.113	482.542	1132.16	837.098	550.095	1164.89	823.846	535.35	1104.4	766.151
12056	0	276.214	1087.17	1560.26	171.995	1091.21	1556.27	296.534	1250.23	1584.92	177.054	1257.33	1581.71	232.298	1309.48	1430.54	255.902	1405.29	1152.62	238.853	1148.67	1327.59	242.447	1050.4	1131.03	171.361	1401.32	1242.15	386.264	1210.99	1399.89	508.432	1220.53	1168.69	521.508	1234.22	1070.65	531.773	1150.8	939.332	482.775	1127.28	838.9	550.627	1159.65	826.16	535.108	1100.71	767.05
12057	0	273.696	1078.58	1562.03	169.63	1082.89	1557.6	294.1	1241.52	1586.22	174.95	1249.03	1582.58	230.624	1300.86	1431.77	254.204	1396.12	1153.92	237.224	1139.91	1329.23	241.232	1041.69	1132.82	170.188	1392.52	1243.32	384.665	1202.33	1401.72	507.575	1212.06	1171.05	520.681	1227.4	1072.97	531.829	1145	941.283	482.455	1122.33	840.491	550.565	1154.52	828.125	535.183	1096.85	768
12058	0	271.304	1070.01	1563.45	167.27	1074.4	1558.63	292.173	1233.07	1587.52	172.806	1240.67	1583.44	228.936	1292.08	1432.87	252.775	1387.66	1155.33	235.556	1131.11	1330.54	240.051	1032.9	1134.24	168.92	1383.85	1244.36	383.288	1193.64	1403.42	506.899	1203.74	1173.09	520.097	1220.51	1075.14	531.761	1139.05	942.831	482.744	1117.08	841.795	551.497	1149.83	829.975	534.757	1093.1	768.432
12059	0	268.997	1061.43	1564.64	165.078	1066.21	1559.46	290.138	1224.49	1588.64	170.861	1232.4	1584.22	227.909	1283.46	1434.21	251.672	1378.64	1156.62	234.132	1122.42	1331.6	238.999	1024.26	1135.19	167.544	1375.21	1245.6	381.857	1184.86	1404.86	506.246	1195.64	1174.74	519.516	1213.53	1077.07	531.762	1133.11	944.113	483.12	1111.93	842.833	551.818	1144.94	831.478	535.07	1088.77	769.179
12060	0	266.792	1052.99	1565.84	162.809	1057.88	1560.41	288.297	1216.09	1589.6	169.032	1224.15	1584.94	226.334	1274.78	1435.35	250.606	1370	1157.88	232.691	1113.69	1332.63	238.047	1015.71	1135.96	166.385	1366.81	1246.84	380.45	1176.13	1406.05	505.582	1187.67	1176.2	519.092	1206.44	1078.87	531.8	1127.22	945.277	483.356	1106.7	843.714	551.818	1140.2	832.878	535.402	1084.68	769.747
12061	0	264.759	1044.62	1566.74	160.807	1049.76	1561.18	286.53	1207.53	1590.54	167.423	1216.02	1585.57	224.864	1266.25	1436.46	249.375	1362	1159.2	231.496	1105.07	1333.61	237.163	1007.23	1136.64	165.093	1358.56	1247.88	379.003	1167.51	1407.1	504.853	1180.14	1177.41	518.393	1199.25	1080.31	531.855	1121.49	946.181	483.792	1101.7	844.483	551.922	1135.1	833.862	536.004	1080.37	770.301
12062	0	262.926	1036.25	1567.61	158.951	1041.57	1561.84	284.966	1199.2	1591.44	165.675	1207.9	1586.3	223.247	1257.75	1437.48	247.817	1354.37	1160.26	230.454	1096.56	1334.44	236.532	998.848	1137.06	163.757	1350.27	1249.13	377.8	1159.11	1408.08	503.985	1172.94	1178.5	517.656	1192.09	1081.59	531.834	1115.65	946.982	484.429	1096.52	845.017	552.345	1130.47	834.748	536.992	1076.04	770.968
12063	0	261.134	1027.86	1568.5	157.082	1033.38	1562.44	283.28	1190.92	1592.27	164.072	1199.66	1586.9	221.765	1249.28	1438.42	246.962	1346.82	1161.83	229.366	1088.2	1335.28	235.972	990.676	1137.39	162.468	1342.18	1250.29	376.562	1150.59	1409.14	503.121	1166.04	1179.75	517.014	1184.98	1083.1	531.834	1109.93	947.88	485.122	1091.44	845.551	552.921	1125.87	835.803	538.275	1071.38	771.987
12064	0	259.207	1019.47	1569.27	155.227	1025.3	1562.98	281.71	1182.65	1593.07	162.514	1191.53	1587.55	220.675	1241.03	1439.51	245.807	1339.2	1162.86	228.117	1079.86	1336.1	235.339	982.715	1137.74	161.193	1334.08	1251.48	375.211	1142.27	1410.06	501.854	1159.32	1180.84	516.207	1178.14	1084.51	531.648	1104.38	948.741	485.628	1086.25	846.279	553.224	1121.43	836.794	539.541	1066.97	772.881
12065	0	257.31	1011.26	1569.64	153.438	1017.17	1563.34	280.149	1174.28	1593.75	161.12	1183.47	1588.06	219.002	1232.61	1440.46	244.74	1331.75	1164.16	227.133	1071.66	1336.72	234.79	974.797	1138.01	159.864	1326.07	1252.47	374.026	1134.41	1410.83	500.671	1152.79	1181.73	515.299	1171.36	1085.85	531.542	1098.92	949.543	486.142	1081.19	846.737	553.369	1117.06	837.869	541.001	1062.46	773.815
12066	0	255.643	1003.01	1570.19	151.72	1009.03	1563.68	278.63	1165.67	1594.63	159.581	1175.32	1588.64	217.665	1224.46	1441.33	243.45	1324.22	1165.25	226.282	1063.55	1337.33	234.355	967.021	1138.33	158.683	1318.17	1253.66	372.825	1126.25	1411.81	499.565	1146.31	1182.98	514.566	1164.9	1087.36	531.425	1093.42	950.561	486.781	1076.11	847.386	553.809	1112.66	839.135	542.41	1057.73	775.076
12067	0	253.941	994.645	1570.8	150.207	1001.04	1563.96	277.18	1157.47	1595.43	158.085	1167.08	1589.1	216.568	1216.38	1442.23	242.436	1316.85	1166.65	225.398	1055.58	1338.02	233.931	959.405	1138.83	157.414	1310.36	1254.92	371.72	1118.35	1412.95	498.482	1140.02	1184.35	513.661	1158.66	1089.02	531.259	1087.99	951.831	487.328	1070.93	848.373	554.028	1108.07	840.668	543.574	1053.37	776.365
12068	0	252.388	986.532	1571.24	148.486	992.933	1564.24	275.644	1149.16	1595.99	156.531	1159.08	1589.51	215.031	1208.38	1443.08	241.417	1309.4	1167.62	224.598	1047.75	1338.69	233.602	951.836	1139.42	156.179	1302.51	1255.69	370.716	1110.75	1414.06	497.558	1133.9	1185.71	513.052	1152.84	1090.7	531.239	1082.8	953.211	488.305	1065.68	849.589	554.58	1103.43	842.167	544.764	1048.65	777.85
12069	0	250.87	978.465	1571.47	146.997	984.865	1564.37	274.143	1140.95	1596.38	155.215	1151.03	1589.71	214.05	1200.52	1443.85	240.451	1301.94	1168.46	223.775	1039.94	1339.2	233.147	944.295	1139.95	155.159	1294.84	1256.51	369.725	1103.17	1414.93	496.827	1127.95	1186.85	512.422	1147.08	1092.01	531.095	1077.59	954.378	488.58	1060.92	850.401	554.804	1098.83	843.467	546.436	1044.02	779.498
12070	0	249.336	970.321	1571.69	145.532	976.821	1564.36	272.751	1132.93	1596.8	153.768	1142.92	1590.02	212.769	1192.81	1444.41	239.751	1294.57	1169.51	222.898	1032.19	1339.73	232.781	936.908	1140.52	154.345	1287.35	1257.26	368.706	1095.54	1415.85	496.101	1121.97	1188.01	511.808	1141.46	1093.45	530.962	1072.2	955.488	489.177	1055.87	851.259	554.883	1094.14	844.826	547.21	1039.05	780.948
12071	0	247.854	962.268	1571.89	144.209	968.875	1564.37	271.309	1124.83	1597.43	152.34	1134.84	1590.25	211.668	1185.12	1444.88	239.022	1287.26	1170.16	222	1024.54	1340.31	232.1	929.415	1141.24	153.528	1279.92	1257.84	367.62	1088.02	1416.79	495.556	1116.14	1189.38	511.339	1135.95	1094.93	531.045	1066.94	956.692	489.709	1051.39	852.147	554.874	1089.55	846.387	547.921	1034.27	782.379
12072	0	246.634	954.284	1572.09	142.801	960.811	1564.35	269.82	1116.72	1597.89	150.971	1126.78	1590.48	210.866	1177.58	1445.53	238.601	1280.23	1170.85	221.139	1016.84	1340.79	231.598	922.085	1141.85	152.871	1272.61	1258.28	366.641	1080.31	1417.57	495.219	1110.26	1190.64	510.827	1130.36	1096.12	531.174	1061.81	957.778	489.733	1045.81	853.334	554.904	1084.87	847.566	548.453	1029.45	783.605
12073	0	245.534	946.489	1572.03	141.706	952.803	1564.22	268.581	1108.83	1598.31	149.53	1118.77	1590.82	209.725	1170.06	1446.21	238.482	1272.94	1171.71	220.587	1009.31	1341.23	231.015	914.645	1142.3	152.414	1265.25	1258.84	365.889	1072.75	1418.38	495.187	1104.32	1192.05	510.633	1124.64	1097.36	531.414	1056.85	958.808	489.771	1040.86	854.046	555.303	1079.86	848.672	548.975	1024.63	784.634
12074	0	244.501	938.635	1572.14	140.632	944.828	1564.17	267.16	1100.92	1598.86	148.193	1110.8	1591.12	208.93	1162.3	1446.49	238.196	1265.74	1172.31	219.784	1001.74	1341.66	230.425	907.329	1142.82	151.9	1258.07	1259.38	365.177	1065.2	1419.31	495.218	1098.31	1193.56	510.435	1118.82	1098.59	531.553	1051.47	959.802	490.039	1036.39	854.854	555.245	1074.79	849.783	549.229	1019.83	785.682
12075	0	243.516	930.866	1572.31	139.617	936.955	1564.05	265.898	1093.06	1599.35	146.937	1102.8	1591.5	207.987	1154.76	1446.88	238.036	1258.39	1173.01	218.825	994.14	1342.19	229.748	900.093	1143.31	151.431	1250.8	1259.78	364.308	1057.58	1420.05	495.034	1092.04	1194.96	510.266	1112.84	1099.9	531.748	1046.02	960.809	490.2	1031.64	855.67	555.29	1069.74	850.947	549.202	1015.06	786.572
12076	0	242.369	922.996	1572.2	138.543	929.066	1563.75	264.745	1085.22	1599.78	145.745	1094.91	1591.71	207.23	1147.19	1447.2	238.128	1251.38	1173.68	218.095	986.692	1342.56	228.907	892.724	1143.61	151.139	1243.57	1260.16	363.386	1049.89	1420.48	494.968	1085.56	1196.03	510.307	1106.75	1100.94	532.028	1040.57	961.632	490.083	1026.22	856.548	555.096	1064.62	851.79	549.037	1010.14	787.109
12077	0	241.352	915.166	1572.05	137.496	921.378	1563.44	263.578	1077.32	1600.09	144.739	1087.03	1591.75	206.525	1139.59	1447.46	237.986	1244.09	1173.99	217.173	979.052	1342.77	228.259	885.534	1143.71	150.938	1236.34	1260.57	362.725	1042.29	1420.92	494.849	1078.91	1196.97	510.489	1100.54	1101.9	532.171	1034.89	962.165	490.027	1020.82	856.997	555.167	1059.19	852.283	548.793	1005.11	787.379
12078	0	240.346	907.456	1572.05	136.85	913.824	1563.14	262.542	1069.45	1600.39	143.746	1079.21	1591.84	205.866	1132.15	1447.73	237.919	1236.81	1174.48	216.496	971.562	1343.06	227.494	878.431	1143.84	150.796	1229.04	1260.89	361.993	1034.57	1421.33	494.847	1072.09	1197.87	510.27	1094.02	1102.67	532.097	1028.96	962.859	489.812	1015.33	857.757	555.057	1053.52	852.952	548.082	1000.1	787.59
12079	0	239.436	899.626	1571.98	135.97	906.077	1562.87	261.616	1061.66	1600.65	142.802	1071.42	1591.79	205.275	1124.59	1447.91	237.832	1229.49	1174.87	215.726	963.973	1343.37	226.847	871.31	1144.02	150.562	1221.84	1261.11	361.386	1026.97	1421.68	494.747	1065.06	1198.73	510.41	1087.51	1103.49	532.342	1023.03	963.553	490.182	1009.68	858.63	555.075	1047.97	853.581	547.914	994.817	788.03
12080	0	238.7	891.982	1571.77	135.093	898.386	1562.45	260.783	1053.86	1600.67	141.999	1063.7	1591.63	204.764	1117.04	1447.96	237.92	1222.42	1175.13	215.103	956.417	1343.45	226.223	864.024	1144.02	150.419	1214.66	1261.25	360.793	1019.19	1421.93	494.85	1058.04	1199.32	510.637	1080.94	1104.21	532.432	1016.95	963.972	490.142	1003.87	859.137	554.826	1042.44	853.862	547.156	989.576	787.917
12081	0	237.843	884.191	1571.42	134.308	890.666	1561.99	260.082	1046.13	1600.69	141.203	1055.99	1591.47	204.198	1109.53	1448.12	237.858	1215.03	1175.27	214.414	948.868	1343.39	225.569	856.797	1143.71	150.38	1207.38	1261.48	360.165	1011.34	1422.03	494.584	1050.6	1199.75	510.506	1073.96	1104.68	532.361	1010.58	964.323	489.961	998.116	859.421	554.668	1036.27	854.236	546.955	984.013	787.974
12082	0	237.067	876.353	1571.14	133.619	883.067	1561.59	259.419	1038.25	1600.69	140.586	1048.27	1591.29	203.927	1101.84	1448.06	237.978	1208	1175.65	213.679	941.296	1343.27	224.919	849.541	1143.47	150.386	1200.18	1261.78	359.514	1003.36	1422.15	494.402	1043.07	1200.22	510.809	1066.99	1105.54	532.101	1004.01	964.699	489.263	992.082	859.802	554.759	1030.22	854.866	546.386	978.281	788.061
12083	0	236.563	868.639	1570.78	133.092	875.258	1561.14	258.909	1030.51	1600.49	140.132	1040.52	1590.92	203.499	1094.25	1448.08	238.316	1200.74	1175.82	213.192	933.744	1343.07	224.297	842.253	1143.18	150.475	1192.96	1261.78	359.154	995.384	1422.18	494.26	1035.45	1200.45	511.064	1060.01	1106.14	532.105	997.442	964.995	489.518	985.991	860.014	554.662	1024.01	855.175	545.973	972.546	788.013
12084	0	236.193	860.866	1570.21	132.781	867.49	1560.49	258.443	1022.72	1599.9	139.729	1032.73	1590.39	203.468	1086.41	1447.72	238.491	1193.45	1175.86	212.789	926.127	1342.62	223.862	834.872	1142.66	150.539	1185.61	1261.65	358.753	987.302	1421.95	494.263	1027.82	1200.51	511.042	1052.75	1106.15	531.791	990.563	964.85	489.165	979.902	859.832	554.572	1017.61	855.115	545.346	966.597	787.614
12085	0	235.877	853.032	1569.6	132.454	859.751	1559.83	258.105	1014.89	1599.32	139.353	1024.93	1589.84	203.31	1078.65	1447.44	238.6	1185.96	1175.77	212.444	918.502	1342.11	223.526	827.435	1142.13	150.601	1178.33	1261.48	358.548	979.271	1421.66	494.215	1020	1200.52	511.056	1045.35	1106.11	531.512	983.643	964.617	488.716	973.646	859.554	554.486	1010.87	854.846	544.949	960.322	787.232
12086	0	235.631	845.265	1569.01	132.199	851.876	1559.13	257.966	1007.1	1598.81	139.144	1017.06	1589.22	203.212	1070.94	1447.06	238.773	1178.3	1175.53	212.03	910.872	1341.6	223.041	819.911	1141.53	150.826	1170.83	1261.19	358.253	971.193	1421.27	494.214	1012.19	1200.38	510.991	1037.88	1106.01	531.18	976.664	964.262	488.689	967.232	859.21	554.398	1004.36	854.672	544.651	954.079	786.82
12087	0	235.488	837.403	1568.14	132.011	844.078	1558.31	257.817	999.204	1598.12	139.113	1009.23	1588.47	203.317	1063.14	1446.51	238.959	1170.86	1175.09	211.773	903.16	1340.97	222.602	812.438	1140.79	151.147	1163.47	1260.79	358.151	963.074	1420.68	494.009	1004.18	1199.76	511.133	1030.23	1105.69	530.738	969.449	963.527	487.827	960.843	858.532	554.216	997.603	854.096	544.322	947.521	786.194
12088	0	235.404	829.493	1567.14	131.841	836.227	1557.41	257.864	991.246	1597.34	139.105	1001.43	1587.68	203.413	1055.35	1445.9	239.297	1163.4	1174.57	211.568	895.285	1340.08	222.351	804.911	1139.82	151.556	1156.11	1260.29	358.098	954.867	1419.89	494.006	996.119	1199.04	511.091	1022.5	1105.02	530.272	962.203	962.554	487.39	954.131	857.513	553.861	990.641	853.269	543.918	940.865	785.245
12089	0	235.348	821.549	1566.28	131.873	828.37	1556.44	257.98	983.231	1596.6	139.26	993.496	1586.94	203.839	1047.43	1445.22	239.673	1155.77	1173.99	211.471	887.522	1339.16	222.137	797.098	1138.89	151.99	1148.6	1259.84	358.202	946.713	1419.1	494.071	987.925	1198.26	511.016	1014.56	1104.21	529.991	954.69	961.6	487.53	947.161	856.517	553.716	983.555	852.447	543.369	934.046	784.163
12090	0	235.491	813.613	1565.31	131.82	820.604	1555.5	258.273	975.186	1595.68	139.619	985.622	1585.99	204.241	1039.61	1444.39	240.176	1148.23	1173.25	211.614	879.754	1338.35	221.785	789.442	1137.93	152.47	1141.04	1259.13	358.343	938.534	1418.21	494.108	979.699	1197.19	510.905	1006.54	1103.18	529.686	947.261	960.417	486.881	939.941	855.497	553.379	976.353	851.354	542.965	927.041	783.027
12091	0	235.587	805.542	1564.14	132.089	812.776	1554.35	258.65	967.046	1594.6	139.979	977.82	1585.01	204.808	1031.72	1443.47	240.637	1140.56	1172.45	211.793	871.847	1337.4	221.657	781.637	1136.85	153.02	1133.46	1258.34	358.669	930.38	1417.07	494.193	971.19	1195.88	510.962	998.413	1102.02	529.383	939.575	959.083	486.698	932.878	854.029	552.928	969.087	850.057	542.721	920.051	781.515
12092	0	235.714	797.421	1562.97	132.155	804.879	1553.21	259.038	958.822	1593.53	140.516	969.829	1584.01	205.129	1023.82	1442.47	241.006	1132.7	1171.65	212.016	863.862	1336.24	221.6	773.674	1135.64	153.432	1125.71	1257.62	359.064	922.101	1415.91	494.214	962.646	1194.44	510.85	990.231	1100.68	529.083	931.754	957.488	486.617	925.439	852.36	553.085	961.558	848.683	542.051	912.737	779.735
12093	0	235.884	789.332	1561.8	132.349	796.984	1552.1	259.717	950.666	1592.54	141.08	961.963	1582.97	205.806	1015.83	1441.42	241.462	1124.83	1170.67	212.123	855.745	1335.1	221.42	765.72	1134.41	153.944	1117.86	1256.69	359.373	913.823	1414.61	494.115	954.085	1192.75	510.694	981.952	1099.2	528.744	923.923	955.796	486.298	917.59	850.791	552.421	954.095	847.131	541.785	905.448	778.064
12094	0	236.342	781.163	1560.55	132.723	789.055	1551.02	260.476	942.473	1591.34	141.976	954.001	1581.68	206.699	1007.61	1440.23	241.945	1116.74	1169.46	212.451	847.735	1333.97	221.385	757.647	1133.33	154.47	1110.01	1255.64	360.097	905.716	1413.15	494.06	945.575	1190.8	510.604	973.761	1097.52	528.414	915.922	953.882	485.708	909.969	849.091	552.166	946.476	845.313	541.357	897.963	776.11
12095	0	237.013	773.063	1559.31	133.297	780.991	1549.81	261.29	934.367	1589.78	142.719	946.011	1580.38	207.473	999.446	1439.01	242.345	1108.62	1168.21	212.979	839.605	1332.66	221.409	749.489	1131.9	155.086	1102.13	1254.51	360.813	897.379	1411.61	494.151	937.081	1188.79	510.332	965.353	1095.49	528.272	908.073	951.976	485.436	902.312	846.953	551.889	938.652	843.201	541.149	890.392	774.171
12096	0	237.861	764.946	1558.1	134.131	772.968	1548.75	262.242	926.381	1588.15	143.751	937.936	1579.03	208.183	991.185	1437.76	242.786	1100.58	1167.02	213.437	831.42	1331.28	221.452	741.169	1130.59	155.704	1094.03	1253.41	361.556	888.971	1410.15	494.278	928.632	1186.9	510.148	956.825	1093.56	527.959	899.883	949.953	485.625	894.166	845.113	551.569	930.741	841.292	540.916	882.741	772.193
12097	0	238.893	756.848	1556.86	135.461	764.794	1547.69	263.473	918.289	1586.86	144.773	929.881	1577.76	208.976	982.922	1436.44	243.184	1092.41	1165.69	213.914	823.163	1330.03	221.48	732.782	1129.35	156.351	1085.86	1252.29	362.238	880.491	1408.62	494.415	920.271	1185	510.116	948.327	1091.73	527.858	891.795	948.057	485.237	886.076	843.201	551.381	922.894	839.456	540.645	874.798	770.203
12098	0	240.192	748.749	1555.57	136.663	756.654	1546.62	264.623	910.162	1585.27	145.983	921.721	1576.5	209.801	974.59	1435.02	243.695	1083.99	1164.21	214.604	814.859	1328.63	221.622	724.402	1127.91	157.004	1077.63	1251.1	362.95	871.978	1406.95	494.507	911.786	1182.93	509.888	939.708	1089.66	527.539	883.469	945.802	485.124	877.865	841.243	550.865	914.963	837.474	540.336	866.948	768.009
12099	0	241.553	740.552	1554.28	137.937	748.348	1545.59	265.88	902.086	1583.6	147.382	913.476	1575.24	210.629	966.311	1433.79	244.216	1075.54	1162.84	215.212	806.45	1327.17	221.592	715.734	1126.57	157.557	1069.26	1249.89	363.821	863.432	1405.23	494.745	903.484	1180.92	510.042	931.235	1087.72	527.328	875.034	943.644	484.405	869.622	838.785	550.296	906.707	835.244	539.712	859.039	765.594
12100	0	243.049	732.262	1553.17	139.47	739.937	1544.66	267.46	894.006	1582.19	148.702	905.182	1574.12	211.726	957.727	1432.45	244.675	1067.16	1161.58	215.867	797.915	1325.77	221.84	707.229	1125.03	158.116	1060.74	1248.68	364.377	854.772	1403.41	494.938	895.047	1178.9	509.874	922.56	1085.7	526.959	866.591	941.452	484.365	861.131	836.746	550.194	898.346	833.186	539.361	850.777	763.57
12101	0	244.685	724.026	1552.08	141.048	731.641	1543.93	269.122	885.804	1580.64	150.3	896.956	1572.79	212.98	949.245	1431.05	245.164	1058.47	1159.98	216.68	789.469	1324.52	222.029	698.675	1123.73	158.773	1052.22	1247.27	365.405	846.321	1401.65	495.175	886.638	1176.66	509.89	914.026	1083.44	526.416	858.053	939.16	484.177	852.357	834.856	549.499	890.053	830.866	538.937	842.426	761.298
12102	0	246.33	715.683	1550.89	142.764	723.27	1543.16	270.67	877.351	1578.9	152.109	888.575	1571.54	214.075	940.628	1429.55	245.624	1049.7	1158.29	217.556	780.752	1323.14	222.463	690.043	1122.41	159.418	1043.48	1245.91	366.623	837.882	1399.87	495.664	878.205	1174.42	509.994	905.461	1081.04	526.389	849.602	936.886	483.859	843.906	832.658	549.145	881.605	828.481	538.609	834.044	758.886
12103	0	248.01	707.204	1549.83	144.263	714.692	1542.41	272.5	869.034	1577.41	153.868	880.154	1570.44	215.153	931.964	1428.31	245.94	1041.06	1156.92	218.566	772.11	1321.8	222.896	681.238	1120.93	159.868	1034.69	1244.83	367.689	829.334	1398.1	496.159	869.735	1172.27	510.063	896.94	1078.82	526.327	840.984	934.667	483.419	834.775	830.228	548.854	872.817	826.2	538.092	825.328	756.758
12104	0	249.702	698.7	1548.8	145.827	706.187	1541.7	274.481	860.63	1576.09	155.664	871.712	1569.3	216.268	923.115	1427	246.138	1032.08	1155.5	219.637	763.357	1320.54	223.437	672.344	1119.77	160.258	1025.75	1243.73	368.863	820.852	1396.38	496.556	861.132	1170.03	510.169	888.432	1076.64	525.928	832.371	932.447	481.677	827.806	827.362	548.351	864.196	823.963	537.41	816.54	754.523
12105	0	251.404	690.038	1547.7	147.601	697.624	1540.94	276.373	852.072	1574.54	157.566	863.299	1568.09	217.484	914.324	1425.73	246.292	1023.14	1153.95	220.756	754.517	1319.35	224.17	663.31	1118.5	160.679	1016.76	1242.5	370.044	812.353	1394.5	497.013	852.588	1167.62	510.437	879.959	1074.35	525.913	823.713	930.047	481.135	818.998	825.205	547.879	855.627	821.563	536.778	807.656	752.172
12106	0	253.2	681.395	1546.51	149.555	688.994	1540.11	278.177	843.333	1572.87	159.611	854.759	1566.91	218.638	905.59	1424.5	246.353	1013.71	1152.44	221.912	745.451	1318.11	224.911	654.007	1117.33	160.998	1007.5	1241.22	371.583	803.888	1392.73	497.745	843.944	1165.25	510.598	871.471	1071.82	525.939	815.029	927.719	480.775	809.875	822.973	547.384	847.044	818.906	536.318	798.733	749.891
12107	0	255.094	672.626	1545.44	151.438	680.251	1539.27	280.33	834.653	1571.49	161.654	846.015	1565.88	219.936	896.71	1423.23	246.268	1004.42	1150.83	223.39	736.473	1317.06	225.922	644.678	1116.38	161.304	998.189	1240.06	373.175	795.47	1391.16	498.554	835.501	1163.22	510.957	862.888	1069.66	525.866	806.291	925.574	480.509	800.678	820.952	546.619	838.25	816.716	535.595	789.59	747.71
12108	0	257.18	663.982	1544.46	153.38	671.609	1538.5	282.635	826.017	1570.3	163.723	837.294	1564.91	221.261	887.937	1422.01	246.491	995.043	1149.25	224.864	727.481	1316.27	226.761	635.041	1115.77	161.776	988.787	1238.79	374.819	786.988	1389.72	499.372	826.992	1161.33	511.267	854.265	1067.65	525.931	797.536	923.567	480.371	791.672	819.331	546.14	829.307	814.693	534.9	780.418	745.759
12109	0	259.254	655.204	1543.36	155.455	662.953	1537.75	284.781	817.243	1568.98	166.032	828.635	1563.9	222.957	879.02	1420.62	246.706	985.375	1147.55	226.368	718.36	1315.42	227.785	625.28	1115.21	162.439	979.389	1237.34	376.425	778.489	1388.09	500.197	818.628	1159.3	511.633	845.644	1065.41	526.018	788.775	921.457	480.138	782.212	817.485	545.755	820.195	812.401	534.57	771.095	743.882
12110	0	261.498	646.469	1542.25	157.614	654.057	1537.02	286.998	808.488	1567.7	168.295	819.957	1563.03	224.279	870.376	1419.32	246.838	975.504	1145.67	227.915	709.121	1314.52	228.914	615.37	1114.61	163.07	969.852	1235.82	378.081	769.926	1386.48	500.815	810.236	1157.1	512.038	836.938	1063.13	525.943	779.668	919.15	479.502	772.875	815.263	545.035	811.134	809.945	533.789	761.722	741.656
12111	0	263.725	637.679	1541.49	159.88	645.234	1536.69	289.441	799.843	1566.67	170.561	811.174	1562.46	225.808	861.778	1418.18	247.334	965.706	1143.74	229.582	699.839	1313.97	229.882	605.388	1114.48	163.663	960.183	1234.36	379.831	761.297	1385.1	501.761	801.915	1155.25	512.401	828.186	1061.1	526.056	770.883	917.362	478.904	763.506	813.547	544.473	802.073	807.807	533.244	752.241	739.862
12112	0	266.165	628.915	1541.17	162.24	636.429	1536.7	291.83	791.204	1565.86	172.861	802.361	1562.04	227.578	853.005	1417.28	247.62	955.578	1142.1	231.244	690.517	1313.79	230.784	595.331	1114.68	164.352	950.534	1233.16	381.632	752.614	1383.94	502.704	793.548	1153.7	512.943	819.426	1059.41	526.104	761.639	915.465	478.245	754.331	812.194	543.844	793.051	806.06	532.658	742.84	738.219
12113	0	268.676	620.153	1541.04	164.677	627.518	1537	294.194	782.377	1565.16	175.321	793.59	1561.77	229.221	844.19	1416.42	248.063	945.449	1140.82	232.939	681.034	1313.69	231.678	585.284	1114.86	165.188	940.956	1232.09	383.493	743.857	1382.81	503.74	785.026	1152.19	513.281	810.432	1057.66	526.428	752.428	913.856	478.444	744.843	810.855	543.512	783.869	804.174	532.298	733.365	736.546
12114	0	271.085	611.27	1541.23	167.09	618.561	1537.56	296.763	773.627	1564.71	177.776	784.769	1561.72	230.941	834.968	1415.99	248.526	935.529	1139.94	234.631	671.42	1313.72	232.529	575.083	1115.25	165.751	931.134	1231.56	385.208	734.985	1381.79	504.608	776.364	1150.72	513.502	801.348	1055.97	526.526	743.167	912.268	478.57	734.885	809.433	543.275	774.398	802.355	531.807	723.836	734.893
12115	0	273.532	602.368	1541.88	169.509	609.686	1538.49	299.276	764.853	1564.64	180.266	775.889	1561.96	232.468	825.793	1415.8	248.715	925.283	1139.48	236.327	661.817	1314.16	233.237	564.84	1115.9	166.169	921.332	1231.46	387.059	726.152	1381.31	505.34	767.517	1149.5	513.727	792.246	1054.68	526.736	734.004	910.979	478.283	725.302	808.269	542.818	765.044	800.925	531.585	714.34	733.651
12116	0	275.933	593.348	1542.83	171.961	600.663	1539.74	301.684	755.924	1564.78	182.764	766.992	1562.44	234.045	816.259	1416.11	248.766	915.346	1139.66	237.955	652.149	1314.89	234.006	554.46	1116.84	166.63	911.636	1231.92	388.711	717.098	1380.85	505.907	758.56	1148.46	513.629	782.983	1053.5	526.779	724.644	909.832	477.828	715.712	807.267	542.678	755.91	799.943	531.539	704.758	732.614
12117	0	278.504	584.331	1543.93	174.419	591.559	1541.25	304.198	746.872	1565.14	185.34	758.081	1563.29	235.521	806.59	1416.98	248.631	905.59	1140.38	239.657	642.455	1315.76	234.92	544.203	1117.73	166.843	901.686	1232.97	390.402	708.052	1380.74	506.241	749.305	1147.53	513.561	773.702	1052.66	526.87	715.289	909.03	478.684	705.416	806.691	542.278	746.518	799.017	531.734	695.36	731.981
12118	0	280.955	575.223	1545.35	176.961	582.431	1542.97	306.931	737.899	1565.96	187.916	749.064	1564.4	237.039	796.929	1418.24	247.981	895.841	1141.3	241.323	632.852	1316.83	235.964	534.582	1118.73	166.901	891.77	1234.57	392.108	698.933	1381.02	506.802	739.954	1147.22	513.368	764.268	1052.21	527.016	705.878	908.72	479.288	696.081	806.188	541.94	737.177	798.725	531.368	685.875	731.395
12119	0	283.532	566.098	1547	179.412	573.332	1545.06	309.449	728.833	1566.83	190.487	739.876	1565.98	238.522	787.35	1419.62	247.878	886.552	1142.93	242.954	623.305	1318.41	236.955	524.646	1120.35	167.112	881.972	1236.45	393.827	690.052	1381.79	506.939	730.541	1147.2	513.116	754.82	1052.23	527.152	696.455	908.924	479.225	685.751	806.559	541.808	727.716	798.706	532.005	676.551	731.559
12120	0	285.888	557.013	1548.5	181.763	564.111	1547.25	312.01	719.66	1568.18	192.971	730.731	1567.68	240.004	777.974	1421.36	247.799	876.682	1144.68	244.567	613.995	1320.22	238.139	515.309	1122.24	167.236	871.994	1238.38	395.389	681.218	1382.71	506.992	721.084	1147.29	512.608	745.177	1052.38	527.146	686.968	909.299	479.233	675.681	806.983	541.632	718.234	799.059	532.251	666.633	732.13
12121	0	288.251	547.712	1550.12	184.127	554.899	1549.32	314.301	710.439	1569.49	195.17	721.49	1569.87	241.424	768.684	1423.2	247.608	866.852	1146.33	246.057	604.738	1322.02	239.099	505.629	1124.36	167.52	862.328	1240.45	397.021	672.511	1383.95	506.9	711.661	1147.66	512.511	735.799	1053.04	526.966	677.241	909.987	479.262	665.545	807.416	541.147	708.492	799.789	532.44	656.817	732.759
12122	0	290.385	538.612	1551.7	186.352	545.727	1551.49	316.683	701.244	1571.33	197.624	712.311	1572.18	242.817	759.532	1425.02	247.529	856.955	1148.11	247.492	595.591	1324.02	239.982	496.359	1126.64	167.631	852.45	1242.57	398.484	663.736	1385.3	506.761	702.06	1148.39	512.314	726.247	1054.15	526.842	667.43	911.149	479.117	655.301	808.27	540.813	698.53	800.904	532.262	647.333	733.512
12123	0	292.607	529.549	1553.26	188.477	536.677	1553.54	319.025	692.136	1573.08	199.818	703.224	1574.48	244.557	750.565	1426.86	247.536	847.372	1149.64	248.849	586.629	1326.05	240.931	487.615	1129.19	168.183	842.94	1244.41	400.119	655.214	1386.92	506.952	692.806	1149.43	512.127	716.752	1055.13	526.574	657.724	912.314	479.049	644.951	809.611	540.546	688.534	802.167	532.522	636.75	734.999
12124	0	294.66	520.606	1554.65	190.635	527.808	1555.53	321.24	683.122	1574.49	202.219	694.246	1576.64	246.175	741.896	1428.44	247.977	838.203	1150.99	250.435	577.915	1328.1	241.863	478.73	1131.52	168.988	833.593	1246.06	401.727	646.759	1388.3	507.281	683.445	1150.29	512.584	707.43	1056.25	526.65	647.757	913.539	479.057	634.37	810.856	540.344	678.35	803.24	532.503	626.511	736.192
12125	0	296.613	511.717	1556.04	192.63	518.947	1557.33	323.402	674.173	1576.01	204.459	685.359	1578.59	247.961	733.18	1429.77	248.55	829.188	1152.33	251.778	569.213	1329.9	242.796	470.403	1133.77	169.894	824.504	1247.56	403.353	638.34	1389.63	507.749	674.173	1151.28	512.775	697.956	1057.03	526.743	637.697	914.549	478.902	623.817	812.101	539.883	667.594	804.113	532.057	616.01	737.167
12126	0	298.334	502.926	1557.52	194.319	510.326	1559.15	325.348	665.366	1577.25	206.587	676.621	1580.45	249.566	724.809	1431.28	249.176	820.395	1153.43	253.04	560.577	1331.65	243.345	461.733	1135.94	170.825	815.516	1248.94	404.937	629.747	1391	508.618	664.917	1152.43	513.271	688.447	1057.92	526.87	627.669	915.717	478.69	613.18	813.399	539.824	657.125	805.165	531.722	605.284	738.25
12127	0	300.078	494.231	1558.76	196.001	501.872	1560.74	327.366	656.615	1578.53	208.566	668.135	1581.87	251.104	716.243	1432.36	250.117	811.653	1154.47	254.112	552.196	1333.16	244.041	453.106	1138.02	172.025	806.867	1250.19	406.434	621.246	1392.01	509.731	655.819	1153.37	514.27	679.138	1058.73	527.273	617.564	916.628	478.356	602.35	814.69	539.643	646.156	806.071	531.241	594.24	739.205
12128	0	301.837	485.76	1559.78	197.797	493.433	1562.18	329.361	648.135	1579.25	210.494	659.81	1583.09	252.753	707.856	1433.42	251.121	802.902	1155.31	255.363	543.615	1334.35	244.666	444.635	1139.59	173.241	798.375	1251.32	407.808	612.652	1392.63	510.963	646.627	1153.94	515.33	669.608	1059.18	527.775	607.294	917.299	478.236	591.572	815.555	539.61	635.196	806.41	530.452	582.831	739.906
12129	0	303.456	477.206	1560.86	199.444	485.024	1563.56	331.413	639.69	1580.08	212.288	651.433	1584.27	254.375	699.431	1434.29	252.335	794.328	1156.45	256.484	535.106	1335.42	245.107	436.257	1140.73	174.511	789.981	1252.46	409.267	604.006	1393.31	512.352	637.399	1154.68	516.601	660.138	1059.63	528.235	596.648	918.015	478.327	580.698	816.575	539.764	624.127	806.865	529.817	571.446	740.57
12130	0	305.04	468.855	1561.79	201.049	476.947	1564.89	333.299	631.157	1580.65	214.249	643.231	1585.21	255.966	691.076	1435.22	253.447	785.722	1157.38	257.525	526.666	1336.4	245.6	427.762	1141.69	175.713	781.939	1253.6	410.608	595.328	1393.89	513.882	628.261	1155.25	517.626	650.367	1059.78	528.874	586.171	918.583	478.445	569.775	817.641	539.964	612.935	807.006	529.285	559.722	741.327
12131	0	306.338	460.462	1562.4	202.414	468.935	1566.02	335.482	622.787	1580.92	216.539	635.236	1586.01	257.425	682.652	1435.87	254.737	777.242	1158.26	258.509	518.332	1337.09	245.861	419.579	1142.25	177.131	773.988	1254.48	411.877	586.644	1394.08	515.388	619.099	1155.44	518.887	640.667	1059.76	529.596	575.842	918.822	478.756	559.002	818.293	540.399	602.031	807.061	529.026	548.346	741.638
12132	0	307.486	451.975	1562.84	203.697	461.048	1566.96	337.758	614.193	1581.01	218.956	627.265	1586.71	258.66	674.285	1436.32	255.643	768.722	1158.64	259.396	510.041	1337.47	245.986	411.245	1142.4	178.235	766.031	1255.28	412.824	578.151	1394.01	516.687	609.78	1155.32	520.042	630.97	1059.52	530.366	565.416	918.814	479.204	548.111	818.569	540.577	590.458	806.535	528.817	536.681	741.758
12133	0	308.328	443.342	1563.34	204.68	453.454	1567.91	340.147	605.274	1581.04	221.742	619.595	1587.23	260.045	665.996	1436.85	256.484	760.701	1159.19	260.092	501.802	1337.77	246.125	402.545	1142.37	179.379	758.11	1256.13	413.684	569.412	1393.83	517.848	600.447	1155.23	520.967	621.111	1059.17	531.264	555.043	918.849	480.005	537.339	818.992	541.169	579.564	806.231	529.031	525.207	741.91
12134	0	308.96	434.69	1563.69	205.31	445.992	1568.99	342.868	596.394	1580.95	224.605	611.964	1587.73	261.392	657.741	1437.34	257.303	752.895	1159.86	260.737	493.736	1338.06	246.097	394.374	1142.47	180.54	750.46	1256.85	414.675	560.776	1393.79	519.023	591.198	1155.2	521.541	611.191	1058.49	532.196	544.798	918.942	481.384	525.545	819.95	541.86	568.971	806.057	529.699	513.863	742.234
12135	0	309.387	425.99	1563.82	205.879	438.827	1569.91	345.62	587.086	1580.51	227.744	604.371	1588.23	262.443	649.492	1437.65	258.189	745.268	1160.18	261.525	485.725	1338.05	246.016	386.259	1142.15	181.545	742.841	1257.52	415.486	552.229	1393.53	519.949	581.721	1154.87	522.492	601.616	1058.09	533.274	534.638	918.696	482.504	515.065	820.081	542.598	558.594	805.521	530.866	502.75	742.321
12136	0	309.507	417.2	1563.92	206.264	431.671	1570.78	348.522	577.632	1579.99	231.026	596.898	1588.74	263.591	641.304	1438.08	259.129	737.852	1160.93	262.063	477.784	1337.95	245.922	378.68	1141.51	182.461	735.134	1258.28	416.275	543.732	1393.35	520.665	572.386	1154.46	523.604	591.87	1058.07	534.388	524.596	918.598	484.341	503.849	820.373	543.1	548.767	805.028	532.474	492.128	742.456
12137	0	309.365	408.222	1563.96	206.358	424.723	1571.67	351.457	568.034	1579.45	234.455	589.483	1589.1	264.618	633.233	1438.59	259.802	730.278	1161.65	262.471	469.915	1337.86	245.672	371.211	1141.09	183.371	727.7	1259.02	416.875	535.289	1393.15	521.091	562.928	1154.04	524.477	582.219	1057.92	535.39	514.672	918.547	486.589	492.155	820.958	543.462	539.649	804.742	534.537	482.09	742.603
12138	0	309.038	399.376	1563.9	206.485	417.633	1572.45	354.294	558.316	1579	237.777	582.036	1589.5	265.662	625.158	1438.96	260.63	722.964	1162.21	262.776	462.08	1337.71	245.229	363.539	1140.79	184.221	720.283	1259.71	417.345	526.859	1392.91	521.331	553.639	1153.5	524.946	572.551	1057.59	536.481	504.935	918.446	489.398	480.537	821.583	543.452	530.974	804.4	537.24	472.734	742.72
12139	0	308.768	390.535	1563.63	206.574	410.499	1573.02	356.844	548.693	1578.32	240.819	574.475	1589.82	266.547	617.041	1439.29	261.321	715.801	1163	263.107	454.333	1337.48	245.256	356.224	1140.18	185.001	712.833	1260.51	417.949	518.56	1392.65	521.45	544.277	1152.72	525.529	563.15	1057.23	537.915	495.481	918.319	492.834	467.928	822.298	542.916	522.745	803.873	540.209	463.71	742.666
12140	0	308.541	381.694	1563.31	206.747	403.316	1573.31	359.097	539.191	1577.69	243.414	566.705	1590.11	267.48	609.103	1439.73	261.868	708.596	1163.69	263.456	446.588	1337.23	245.04	348.809	1139.77	185.793	705.614	1261.26	418.472	510.34	1392.38	521.421	535.152	1152.08	525.71	553.854	1056.69	539.621	486.239	918.326	497.291	455.848	823.206	542.026	514.606	803.43	543.304	455.26	742.554
12141	0	308.483	373.157	1562.95	207.031	395.814	1573.53	360.905	529.92	1577.28	245.779	558.879	1590.33	268.551	601.252	1440.12	262.459	701.632	1164.25	263.72	439.054	1337.19	245.089	341.744	1139.4	186.483	698.248	1261.98	419.159	502.257	1392.14	521.411	526.231	1151.51	525.877	545.027	1056.15	541.621	477.333	918.402	502.285	444.056	824.388	540.676	506.413	802.844	545.812	447.249	742.415
12142	0	308.669	364.689	1562.54	207.306	388.333	1573.54	362.242	520.91	1576.94	247.461	550.78	1590.56	269.35	593.395	1440.34	262.823	694.442	1164.89	264.211	431.498	1337.13	245.284	334.747	1139.18	187.21	691.046	1262.71	419.859	494.434	1391.9	521.354	517.283	1150.89	525.824	536.424	1055.6	544.15	468.87	918.617	507.84	432.351	825.813	539.005	498.031	802.336	547.73	439.643	741.974
12143	0	308.815	356.252	1561.86	207.769	380.602	1573.19	363.271	512.094	1576.77	248.776	542.585	1590.8	270.297	585.661	1440.62	263.261	687.555	1165.39	264.525	424.068	1336.93	245.367	327.941	1138.77	187.868	683.901	1263.42	420.458	486.595	1391.6	521.263	508.438	1150.28	525.92	528.216	1055.18	546.645	461.069	918.778	513.519	420.484	827.134	537.232	489.348	801.993	549.341	431.518	741.777
12144	0	309.155	347.915	1561.25	208.036	372.46	1572.72	364.237	503.676	1577.03	249.634	534.375	1591.17	271.141	577.965	1440.86	263.465	680.525	1165.97	264.886	416.72	1336.79	245.463	320.533	1138.75	188.242	676.659	1264.1	421.075	478.894	1391.42	521.073	499.744	1149.8	525.736	520.237	1054.86	548.96	453.448	919.071	519.069	410.14	828.343	533.715	479.471	801.229	550.922	423.106	742.068
12145	0	309.392	339.614	1560.59	208.492	364.39	1572.27	364.783	495.234	1577.35	250.217	526	1591.72	271.641	570.515	1441.2	263.645	673.674	1166.44	265.281	409.413	1336.73	245.626	313.786	1138.68	188.727	669.615	1264.75	421.539	471.398	1391.23	521.098	491.438	1149.49	525.753	512.58	1054.55	551.39	446.394	919.487	524.514	400.023	829.649	531.336	469.922	800.842	551.955	414.419	742.529
12146	0	310.047	331.524	1559.82	209.024	356.088	1571.6	365.082	486.949	1577.49	250.553	517.552	1592.03	272.541	562.994	1441.22	263.901	666.777	1166.74	265.789	402.113	1336.61	245.865	306.579	1138.66	189.072	662.475	1265.17	422.156	463.897	1390.92	521.275	483.355	1149.04	525.608	505.123	1053.98	553.563	439.458	919.654	529.64	390.297	831	529.593	459.53	800.543	553.188	404.93	742.818
12147	0	310.723	323.475	1559.08	209.638	347.599	1570.95	365.217	478.974	1577.61	250.539	509.145	1592.34	272.889	555.641	1441.34	263.995	659.783	1166.89	266.231	394.789	1336.43	246.106	299.685	1138.47	189.349	655.326	1265.49	422.729	456.759	1390.68	521.496	475.487	1148.65	525.098	497.723	1053.18	555.312	432.455	919.816	534.013	380.722	832.314	527.891	449.295	800.154	554.453	395	743.204
12148	0	311.393	315.638	1558.56	210.196	339.141	1570.43	365.229	471.294	1577.77	250.412	500.709	1592.52	273.634	548.027	1441.27	264.093	652.909	1167.06	266.557	387.517	1336.39	246.174	292.941	1138.34	189.685	648.33	1265.76	423.146	449.499	1390.55	521.812	468.015	1148.6	524.977	490.776	1052.73	556.822	425.414	920.124	537.762	371.2	833.849	527.069	438.679	800.211	556.073	384.823	744.077
12149	0	312.345	307.875	1557.96	210.954	330.801	1569.82	365.091	463.865	1577.93	249.838	492.545	1592.74	273.845	540.785	1441.31	264.12	645.873	1167.19	266.93	380.285	1336.32	246.349	285.994	1138.19	189.844	641.201	1266	423.455	442.237	1390.32	522.154	460.721	1148.5	524.973	483.896	1052.46	557.805	418.2	920.244	540.927	361.813	835.313	526.815	427.829	800.352	557.898	374.671	745.208
12150	0	313.288	300.262	1557.31	211.647	322.229	1569.12	364.632	456.518	1577.94	249.286	484.221	1592.61	274.025	533.357	1441.19	264.206	639.063	1167.37	267.237	372.982	1336.06	246.534	279.178	1137.79	189.998	634.08	1266.16	423.661	434.983	1389.97	522.508	453.803	1148.33	524.826	476.844	1051.93	559.072	410.095	920.637	543.537	352.388	836.436	526.217	417.077	800.313	559.753	364.326	746.247
12151	0	314.308	292.815	1556.75	212.474	313.643	1568.5	364.046	449.502	1577.86	248.341	476.075	1592.49	274.15	525.948	1441.12	264.175	632.058	1167.44	267.531	365.659	1335.78	246.555	272.159	1137.44	189.985	626.874	1266.19	423.94	427.857	1389.72	522.961	447.132	1148.26	524.684	469.551	1051.43	559.935	402.017	920.842	545.735	343.004	837.551	526.109	406.29	800.433	561.71	354.031	747.37
12152	0	315.569	285.52	1556.39	213.469	305.051	1567.83	363.267	442.794	1577.88	247.277	467.864	1592.24	274.201	518.58	1440.98	264.126	625.01	1167.47	267.715	358.354	1335.49	246.732	265.191	1137.18	189.917	619.59	1266.23	424.168	420.565	1389.45	523.452	440.808	1148.21	524.69	462.055	1050.91	560.884	393.496	921.093	547.674	333.677	838.695	526.354	395.781	800.544	563.696	343.964	748.488
12153	0	316.788	278.322	1555.95	214.335	296.327	1567.23	362.263	436.162	1577.89	245.948	459.716	1591.92	274.085	511.038	1440.8	264.133	617.996	1167.37	267.838	351.111	1335.06	246.757	258.296	1136.82	189.906	612.331	1266.15	424.207	413.33	1389.12	523.885	434.603	1148.15	524.903	454.373	1050.45	561.897	384.971	921.425	549.367	324.378	839.688	526.769	385.326	800.701	565.819	334.127	749.609
12154	0	317.945	271.288	1555.53	215.263	287.796	1566.47	361.137	429.617	1577.8	244.483	451.519	1591.44	273.988	503.534	1440.54	263.948	610.721	1167.19	267.97	343.658	1334.49	246.798	251.107	1136.05	189.812	605.036	1265.98	424.331	406.084	1388.6	524.315	428.361	1147.81	525.754	446.744	1050.22	562.913	376.107	921.6	550.702	314.975	840.439	527.304	375.055	800.73	567.682	324.037	750.415
12155	0	318.979	264.217	1555.23	215.972	279.299	1565.76	359.862	423.283	1577.73	242.817	443.484	1590.92	273.756	496.06	1440.2	263.738	603.443	1166.92	267.91	336.237	1333.95	246.73	244.087	1135.37	189.596	597.47	1265.7	424.09	398.976	1388.01	524.645	422.164	1147.42	526.248	439.044	1049.74	563.676	367.477	921.591	552.273	305.67	841.138	528.179	365.143	800.575	569.625	314.212	751.231
12156	0	319.819	257.348	1554.96	216.679	270.959	1565.02	358.422	416.895	1577.54	241.178	435.444	1590.22	273.506	488.37	1439.7	263.641	596.154	1166.48	267.811	328.811	1333.37	246.659	236.752	1134.64	189.308	590.062	1265.36	424.067	391.6	1387.33	524.872	415.905	1147.06	526.664	431.164	1049.07	564.398	358.738	921.464	552.96	296.351	841.643	528.565	355.092	800.1	571.473	304.412	752.087
12157	0	320.714	250.37	1554.68	217.286	262.532	1564.21	356.897	410.474	1577.22	239.326	427.511	1589.34	273.067	480.852	1439.16	263.251	588.674	1166	267.778	321.282	1332.53	246.649	229.647	1133.74	189.085	582.594	1264.87	424.096	384.465	1386.82	525.273	409.523	1146.55	527.383	423.439	1048.52	565.301	350.124	921.392	553.831	287.011	842.013	530.519	345.943	800.25	573.34	294.702	752.697
12158	0	321.355	243.447	1554.4	217.774	254.205	1563.31	355.407	404.023	1576.86	237.586	419.419	1588.21	272.806	473.104	1438.54	262.865	581.199	1165.56	267.626	313.717	1331.58	246.609	222.358	1132.52	188.684	575.07	1264.36	423.865	377.178	1386	525.495	402.913	1146.02	528.203	415.879	1048.06	566.13	341.458	921.273	554.371	277.589	842.253	531.801	336.515	800.12	575.086	284.887	753.198
12159	0	321.845	236.319	1554.13	218.037	246.047	1562.49	353.892	397.438	1576.53	235.625	411.504	1587.2	272.297	465.539	1437.92	262.486	573.777	1165.09	267.398	306.067	1330.7	246.592	215.107	1131.55	188.087	567.409	1263.79	423.554	369.697	1385.24	525.759	396.129	1145.58	528.74	408.113	1047.44	566.768	332.569	921.219	554.426	268.06	842.444	533.529	327.402	800.022	576.958	275.214	753.968
12160	0	321.949	229.216	1553.66	218.004	237.895	1561.56	352.303	390.627	1576	233.822	403.63	1585.97	271.955	457.623	1437.04	262.071	566.39	1164.42	267.148	298.374	1329.72	246.415	207.756	1130.31	187.585	559.667	1263.05	423.236	362.276	1384.3	525.915	389.139	1144.92	529.345	400.407	1046.64	567.255	323.583	920.969	553.929	258.431	842.354	535.478	318.502	799.67	578.881	265.542	754.646
12161	0	322.048	222.014	1553.1	218.001	229.627	1560.37	350.886	383.819	1575.3	232.417	395.557	1584.53	271.261	449.768	1436.08	261.487	558.832	1163.64	266.898	290.592	1328.5	246.342	200.261	1128.92	187.027	551.998	1262.26	422.668	354.679	1383.07	526.171	381.87	1144.08	529.969	392.715	1045.78	567.421	314.378	920.41	552.887	248.644	841.967	537.556	309.747	799.23	580.728	255.756	755.233
12162	0	321.931	214.604	1552.47	217.924	221.523	1559.06	349.494	376.709	1574.61	230.825	387.522	1583.25	270.676	441.841	1435.22	260.832	551.261	1162.93	266.369	282.944	1327.36	246.186	192.661	1127.52	186.457	544.248	1261.5	422.24	346.996	1382.13	526.496	374.435	1143.36	530.73	385.003	1045.16	567.667	304.892	920.157	551.302	238.969	841.47	539.88	301.168	798.986	582.41	245.701	756.053
12163	0	321.759	206.891	1551.69	217.469	213.445	1557.93	348.077	369.455	1573.8	228.943	379.503	1581.85	270.027	433.92	1434.45	260.217	543.653	1162.15	266.029	275.018	1326.16	246.126	185.063	1126.24	185.811	536.464	1260.63	421.704	339.382	1381.26	526.56	366.866	1142.78	531.003	376.964	1044.32	567.507	295.638	919.785	549.042	229.464	840.818	542.513	292.639	798.695	584.129	235.645	757.002
12164	0	321.244	199.411	1550.72	217.004	205.261	1556.6	346.823	361.904	1572.87	227.793	371.414	1580.45	269.404	425.843	1433.4	259.649	536.182	1161.26	265.602	267.134	1324.94	246.149	177.235	1125.07	185.104	528.547	1259.7	421.163	331.597	1380.2	526.453	359.367	1142.2	531.599	368.867	1043.6	567.42	285.957	919.483	546.492	220.218	839.718	545.562	284.072	798.417	585.574	225.313	757.842
12165	0	320.513	191.507	1549.7	216.188	197.24	1555.22	345.804	354.091	1571.89	226.542	363.431	1579.21	268.553	417.764	1432.32	258.959	528.452	1160.36	265.169	259.07	1323.71	245.975	169.461	1123.52	184.23	520.54	1258.75	420.46	323.785	1379.28	526.878	351.347	1141.57	532.307	360.679	1043.13	567.129	276.243	919.142	543.84	211.326	838.51	548.536	275.669	798.252	586.521	214.91	758.545
12166	0	319.553	183.509	1548.7	215.297	189.233	1553.96	344.811	346.099	1570.94	225.587	355.364	1577.86	267.592	409.669	1431.43	258.075	520.673	1159.53	264.595	251.056	1322.41	245.967	161.451	1122.29	183.385	512.443	1257.79	419.795	315.81	1378.43	526.839	343.156	1141.13	532.77	352.236	1042.69	566.539	266.575	918.683	540.773	202.745	837.044	552.047	266.949	798.522	587.113	204.482	759.3
12167	0	318.38	175.336	1547.53	214.013	181.328	1552.67	344.125	337.913	1569.84	224.833	347.531	1576.6	266.674	401.474	1430.35	257.237	512.682	1158.54	263.956	243	1321.21	245.817	153.465	1120.91	182.4	504.337	1256.68	418.923	307.901	1377.51	526.697	334.84	1140.63	533.049	343.662	1042.08	565.961	257.09	918.257	537.813	194.524	835.31	555.573	258.752	798.594	587.379	194.105	759.755
12168	0	316.992	166.992	1546.35	212.773	173.418	1551.47	343.476	329.598	1568.57	224.352	339.659	1575.33	265.621	393.332	1429.14	256.414	504.712	1157.39	263.413	234.793	1320.01	245.721	145.486	1119.57	181.391	496.044	1255.38	418.099	300.036	1376.48	526.502	326.419	1139.92	533.145	334.941	1041.26	565.231	247.538	917.546	534.844	186.623	833.337	558.434	250.183	798.335	587.06	183.879	759.609
12169	0	315.494	158.541	1545.07	211.303	165.599	1550.26	342.85	320.978	1567.22	223.726	331.771	1574.03	264.523	385.057	1427.94	255.492	496.487	1156.27	262.865	226.451	1318.71	245.845	137.291	1118.25	180.481	487.739	1254.08	417.289	291.988	1375.59	525.701	317.615	1139.08	533.365	326.376	1040.71	564.407	238.112	916.91	532.129	179.215	831.559	561.659	241.679	798.309	586.39	173.668	759.299
12170	0	313.86	150.041	1544.03	209.689	157.641	1549.1	342.166	312.314	1566	223.065	323.764	1572.9	263.307	376.732	1426.83	254.474	488.216	1155.03	262.318	218.131	1317.73	245.728	129.124	1117.03	179.358	479.324	1252.81	416.281	283.985	1374.82	525.482	308.609	1138.5	533.339	317.71	1040.26	563.633	228.856	916.465	529.262	172.484	829.418	564.264	232.866	798.337	585.631	163.587	759.143
12171	0	312.104	141.469	1543.04	207.894	149.785	1548.12	341.453	303.519	1564.93	222.413	315.712	1571.81	262.106	368.412	1425.76	253.565	479.84	1153.88	261.539	209.779	1316.54	245.686	120.901	1116.02	178.234	470.767	1251.51	415.346	275.885	1374.1	524.949	299.522	1137.99	533.314	308.985	1039.92	562.665	219.698	915.979	526.767	165.811	827.437	566.766	224.051	798.522	584.507	153.78	758.732
12172	0	310.148	132.908	1541.83	206.13	141.766	1546.98	340.56	294.716	1563.82	221.917	307.675	1570.63	260.771	359.981	1424.6	252.636	471.428	1152.74	260.736	201.328	1315.39	245.67	112.349	1114.65	177.119	462.144	1250.13	414.301	267.695	1373.31	523.999	290.346	1137.17	533.005	300.283	1039.39	561.772	210.883	915.329	524.441	159.405	825.242	568.927	215.237	798.523	582.811	144.514	757.632
12173	0	308.292	124.24	1540.91	204.249	133.672	1545.93	339.449	285.981	1562.73	220.694	299.599	1569.49	259.42	351.368	1423.46	251.621	462.694	1151.68	259.906	192.712	1314.3	245.689	103.731	1113.61	175.953	453.408	1248.8	413.211	259.319	1372.6	523.147	281.024	1136.55	532.681	291.565	1039.07	560.607	202.048	914.784	522.165	153.122	823.194	570.691	206.431	798.612	580.919	135.502	756.42
12174	0	306.267	115.598	1540.13	202.231	125.519	1544.99	338.203	277.222	1561.87	219.606	291.4	1568.52	257.991	342.817	1422.53	250.505	453.948	1150.56	258.96	184.115	1313.29	245.565	95.0834	1112.59	174.742	444.496	1247.54	412.157	250.916	1372.09	522.263	271.788	1136.12	532.265	282.79	1038.84	559.511	193.299	914.328	519.857	147.053	821.211	572.168	197.853	798.802	578.844	127.035	755.128
12175	0	304.272	107.016	1539.29	200.304	117.281	1544.12	336.693	268.458	1560.91	218.105	283.133	1567.2	256.638	334.029	1421.35	249.61	445.119	1149.29	258.157	175.298	1312.42	245.426	86.3642	1111.62	173.536	435.48	1246.11	411.024	242.37	1371.53	521.309	262.494	1135.55	531.641	274.03	1038.48	558.339	184.803	913.738	517.966	141.383	819.091	573.044	189.367	798.584	576.703	118.922	753.585
12176	0	302.219	98.3928	1538.55	198.262	108.955	1543.05	335.167	259.736	1559.93	216.755	274.797	1566.03	255.029	325.22	1420.19	248.649	436.131	1148.1	257.222	166.347	1311.27	245.25	77.3769	1110.51	172.279	426.395	1244.7	409.786	233.655	1370.84	520.362	253.257	1134.91	530.918	265.24	1037.94	556.965	176.291	912.831	515.98	135.175	817.139	573.491	180.956	798.263	574.462	111.222	751.777
12177	0	300.105	89.6439	1537.76	196.158	100.562	1542	333.274	250.928	1558.9	214.998	266.404	1564.92	253.444	316.302	1419.09	247.816	427.027	1146.79	256.11	157.386	1310.29	244.876	68.3726	1109.42	171.131	417.149	1243.18	408.384	224.878	1370.2	519.371	244.122	1134.5	530.205	256.514	1037.56	555.561	168.049	912.059	514.047	129.093	815.333	573.514	172.945	797.866	572.235	103.978	749.896
12178	0	297.87	81.0632	1537.03	193.961	92.1461	1541.2	331.444	242.308	1558.16	213.094	257.853	1563.61	251.735	307.391	1417.9	246.908	417.727	1145.35	254.957	148.362	1309.46	244.557	59.1171	1108.66	169.936	407.89	1241.51	406.89	216.017	1369.68	518.42	235.165	1134.27	529.411	247.9	1037.35	554.234	159.916	911.306	512.073	122.812	813.668	573.275	165.213	797.591	570.061	97.1556	747.961
12179	0	295.908	72.353	1536.36	191.95	83.4094	1540.14	329.403	233.674	1557.26	210.993	249.309	1562.64	249.9	298.494	1416.7	245.894	408.019	1143.84	253.695	139.108	1308.49	244.079	49.7715	1107.68	168.748	398.607	1239.84	405.368	207.088	1369.21	517.408	226.165	1133.95	528.38	239.21	1037	552.835	152.045	910.417	510.48	116.528	812.203	572.5	157.667	796.976	567.971	90.561	745.856
12180	0	293.912	63.6472	1535.67	190.007	74.7505	1539.18	327.238	225.088	1556.43	208.821	240.599	1561.6	248.082	289.5	1415.58	244.892	398.106	1142.48	252.454	129.849	1307.72	243.579	40.2417	1106.78	167.287	388.936	1238.19	403.7	198.049	1368.7	516.223	217.29	1133.7	527.1	230.49	1036.56	551.453	144.1	909.595	508.701	109.818	810.61	571.515	150.363	796.334	566.001	84.3595	743.842
12181	0	292.02	55.0283	1535.32	188.076	65.8272	1538.63	324.954	216.536	1555.85	206.441	231.845	1560.61	246.074	280.555	1414.65	243.937	388.002	1141.11	251.062	120.508	1307.04	243.016	30.5593	1106.37	165.771	379.264	1236.57	402.082	189.078	1368.57	515.144	208.582	1133.76	525.976	222.059	1036.5	550.01	136.41	908.952	507.252	103.219	809.622	570.31	143.428	795.896	564.147	78.5466	742.024
12182	0	290.279	46.3149	1535.21	186.157	56.6447	1538.29	322.361	208.024	1555.4	203.726	222.843	1559.87	243.992	271.379	1413.69	242.954	377.857	1139.75	249.412	111.035	1306.63	242.372	20.8549	1105.91	164.49	369.715	1235	400.279	179.897	1368.55	513.994	200.033	1133.97	524.698	213.655	1036.63	548.639	129.052	908.431	505.6	97.1512	808.592	569.111	136.782	795.623	562.372	72.9457	740.371
12183	0	288.493	37.6069	1535.24	184.298	47.3333	1537.99	319.646	199.632	1555.09	200.74	213.567	1559.07	241.878	262.131	1412.9	241.891	367.476	1138.62	247.865	101.412	1306.31	241.685	10.8345	1105.42	163.082	359.866	1233.6	398.355	170.531	1368.43	512.606	191.544	1134.01	523.213	205.382	1036.71	547.258	121.702	907.838	504.044	90.5825	807.691	567.603	130.41	795.213	560.703	67.585	738.748
12184	0	286.87	28.755	1535.53	182.61	37.7838	1537.95	316.701	191.086	1555.03	197.87	204.338	1558.65	239.799	252.671	1412.45	241.026	357.59	1138.08	246.13	91.6343	1306.18	241.075	0.654597	1105.42	161.646	349.973	1232.58	396.397	160.949	1368.73	511.025	183.053	1134.33	521.506	197.094	1037.11	545.722	114.508	907.57	502.446	84.052	807.017	566.004	124.174	794.952	558.951	62.296	737.546
12185	0	285.116	20.0006	1536.21	180.871	28.2115	1538.14	313.773	182.691	1555.19	194.579	194.803	1558.28	237.646	242.997	1412.3	240.245	347.683	1137.64	244.335	81.8451	1306.37	240.435	-9.48741	1105.56	160.535	340.198	1231.8	394.504	151.091	1369.4	509.431	174.752	1135.1	519.838	188.96	1037.9	544.222	107.568	907.637	500.994	77.6773	806.969	563.986	118.372	795.17	557.361	57.1544	736.883
12186	0	283.434	11.1608	1536.96	179.095	18.4418	1538.53	310.687	174.127	1555.54	191.588	185.355	1558.11	235.739	233.226	1412.21	239.714	338.038	1137.49	242.541	72.0262	1306.62	239.76	-19.7604	1105.82	159.545	330.264	1231.26	392.602	141.091	1370.16	507.92	166.462	1135.98	518.159	181.05	1038.81	542.803	100.868	907.868	499.521	71.3849	807.089	562.179	112.858	795.358	555.792	51.9875	736.44
12187	0	281.736	2.11629	1537.9	177.241	8.65059	1539.06	307.601	165.563	1556.19	188.07	175.695	1558.19	234.018	223.454	1412.53	239.348	328.193	1137.9	240.811	61.9325	1307.09	238.906	-30.1221	1106.17	158.724	320.334	1231.16	390.718	130.826	1371.18	506.146	157.969	1137.14	516.184	172.795	1040.01	541.144	94.2046	908.328	497.931	65.342	807.221	560.252	107.308	795.722	554.351	47.2997	736.441
12188	0	279.645	-6.87666	1539.31	175.161	-1.09346	1539.82	304.373	156.711	1557.23	184.741	165.798	1558.6	232.117	213.555	1413.34	239.079	318.369	1138.72	238.929	51.9332	1307.84	237.913	-40.4353	1106.96	158.06	310.529	1231.62	388.757	120.292	1372.75	504.479	149.309	1138.87	514.472	164.516	1041.9	539.477	87.5536	909.251	496.223	59.3631	807.905	558.071	102.119	796.772	552.778	42.5665	737.044
12189	0	277.436	-16.1103	1540.95	172.887	-10.8951	1540.73	301.061	147.697	1558.7	181.734	156.314	1559.26	230.327	203.687	1414.41	239.151	308.51	1139.65	237.123	42.002	1308.92	236.744	-50.6901	1108.12	157.59	300.857	1232.26	386.779	109.764	1374.63	502.754	140.453	1140.86	513.082	156.517	1044.36	537.699	80.9815	910.56	494.55	53.5839	808.939	555.854	97.3356	798.27	551.174	37.8877	737.997
12190	0	275.002	-25.4002	1542.71	170.509	-20.6888	1541.74	297.92	138.684	1560.26	178.156	146.595	1559.97	228.615	193.847	1415.67	239.374	298.371	1140.88	235.27	32.1569	1310.17	235.486	-61.0072	1109.51	157.471	291.292	1233	384.926	99.2043	1376.54	501.201	131.449	1143.14	511.339	148.091	1046.67	535.952	74.3943	911.951	492.775	47.8507	810.213	553.487	92.2406	799.753	549.513	33.1859	739.074
12191	0	272.559	-34.7203	1544.68	168.043	-30.2384	1543.05	294.832	129.36	1561.93	175.248	136.932	1560.74	226.981	184.145	1417.05	239.659	288.175	1142.15	233.661	22.4345	1311.68	234.274	-71.1582	1111.18	157.095	281.574	1234.03	383.117	88.7888	1378.66	499.754	122.139	1145.55	509.929	139.763	1049.25	534.123	67.8317	913.607	491	42.2306	811.674	551.123	87.1415	801.344	547.714	28.5904	740.325
12192	0	269.96	-44.2469	1546.96	165.458	-39.8393	1544.56	291.88	119.94	1564.02	172.312	127.462	1562.04	225.434	174.552	1418.73	239.798	277.815	1143.65	232.029	12.6869	1313.59	232.997	-81.0337	1113.21	156.871	271.85	1235.11	381.444	78.5166	1381.29	498.402	112.634	1148.43	508.472	131.388	1052.23	532.277	61.1123	915.676	489.232	36.5985	813.605	548.933	81.9674	803.469	545.89	23.9793	742.069
12193	0	267.167	-53.6417	1549.36	162.755	-49.2262	1546.14	288.938	110.328	1566.37	169.575	118.012	1563.46	224.115	165.074	1420.32	240.035	267.622	1145.23	230.476	3.34806	1315.43	231.633	-90.7613	1115.52	156.743	262.317	1236.41	379.677	68.4873	1383.96	497.254	103.15	1151.63	507.406	123.1	1055.56	530.49	54.2809	918.145	487.319	31.026	815.831	547.09	76.5747	806.071	543.995	19.2458	744.036
12194	0	264.401	-63.2129	1551.54	159.898	-58.5564	1547.72	286.407	100.734	1568.81	167.036	108.736	1565.18	222.739	155.659	1422.15	240.32	257.669	1146.91	228.961	-6.10813	1317.44	230.356	-100.395	1117.85	156.593	252.661	1237.74	378.097	58.8079	1386.53	496.183	93.3565	1154.65	506.308	114.769	1058.74	528.819	47.3016	920.63	485.427	25.3426	817.937	545.377	70.7631	808.699	541.884	14.3618	745.919
12195	0	261.433	-72.708	1553.78	157.177	-67.7206	1549.2	283.943	91.1892	1571.27	164.664	99.5898	1566.81	221.359	146.381	1423.99	240.34	247.999	1148.59	227.535	-15.3317	1319.37	229.149	-109.974	1120.25	156.296	243.155	1239.2	376.519	48.8297	1389.34	495.224	83.516	1157.81	505.294	106.412	1062.12	527.097	40.0842	923.241	483.51	19.6312	820.33	543.828	64.6521	811.529	539.506	9.09801	747.935
12196	0	258.469	-82.1844	1555.95	154.292	-76.5805	1550.7	281.718	81.5469	1573.78	162.571	90.555	1568.6	220.028	137.2	1425.8	240.136	238.42	1150.16	225.964	-24.7264	1321.52	227.917	-119.315	1122.73	156.025	233.695	1240.5	374.98	39.2926	1392.02	494.51	73.8521	1161.18	504.496	98.1788	1065.57	525.524	32.7581	926.04	481.629	13.8746	823.056	542.599	58.2686	814.578	537.129	3.62764	749.959
12197	0	255.744	-91.5476	1558.02	151.663	-85.3187	1552.27	279.741	72.1142	1576.06	160.657	81.6577	1570.18	218.855	127.942	1427.37	239.735	228.757	1151.64	224.59	-33.8753	1323.46	227.012	-128.511	1125.04	155.705	224.311	1241.71	373.665	29.7445	1394.51	493.785	64.1757	1164.14	503.918	89.8288	1068.68	524.241	25.1209	928.638	479.851	7.73869	825.437	541.579	51.7363	817.326	534.896	-1.95679	751.925
12198	0	253.124	-100.788	1560.04	148.99	-93.9781	1553.75	277.987	62.596	1577.99	159.036	72.9369	1571.74	217.854	118.9	1428.84	239.256	219.041	1153.2	223.394	-42.9476	1325.17	226.189	-137.602	1127.21	155.29	214.949	1242.98	372.486	20.2475	1396.89	493.45	54.5368	1167.04	503.524	81.3323	1071.57	523.073	17.2905	931.144	478.477	1.13044	827.91	540.447	44.3352	819.841	532.604	-7.94324	753.657
12199	0	250.462	-110	1561.92	146.509	-102.44	1555.16	276.349	53.2702	1579.83	157.483	64.3951	1573.16	216.713	109.809	1430.47	238.582	209.615	1154.76	222.132	-51.9532	1326.79	225.306	-146.529	1128.94	154.768	205.67	1244.15	371.227	10.8757	1399.12	492.995	44.9217	1169.78	503.438	72.6656	1074.46	522.043	9.27489	933.516	477.234	-5.58123	830.138	539.722	37.0174	822.426	530.293	-14.1263	755.337
12200	0	248.034	-118.998	1563.57	144.166	-110.635	1556.41	274.955	44.0952	1581.44	156.217	55.9621	1574.13	215.646	100.711	1431.64	237.855	200.576	1156.05	221.016	-60.9373	1328.16	224.505	-155.376	1130.5	154.285	196.513	1245.23	370.047	1.55646	1400.87	492.628	35.5579	1172.11	503.454	64.0247	1076.99	520.945	1.28497	935.525	475.157	-11.2316	832.001	539	29.3959	824.662	527.825	-20.3819	756.618
12201	0	245.981	-127.934	1564.99	142.18	-119.038	1557.54	273.646	35.1134	1582.55	155.052	47.5942	1574.82	214.668	91.5949	1432.65	237.321	191.736	1157.21	220.056	-69.842	1329.16	223.978	-164.155	1131.55	153.757	187.536	1246.15	369.007	-7.63953	1402.28	492.234	26.4952	1174.06	503.628	55.2916	1079	520.119	-6.93542	937.051	473.684	-18.1168	833.739	538.449	21.6078	826.502	525.94	-26.9794	757.672
12202	0	244.115	-136.768	1566.27	140.427	-127.416	1558.5	272.457	26.2056	1583.36	153.857	39.2244	1575.48	213.559	82.5668	1433.8	236.727	183.131	1158.44	219.024	-78.524	1329.71	223.517	-172.834	1132.17	153.078	178.611	1247.18	368.01	-16.849	1403.43	492.14	17.651	1175.71	503.814	46.3552	1080.76	519.104	-14.9462	938.446	472.448	-25.2717	835.134	538.005	13.7127	827.991	524.027	-33.9384	758.538
12203	0	242.575	-145.384	1567.53	138.973	-135.784	1559.53	271.234	17.5518	1584.24	152.784	30.8637	1576.11	212.816	73.5857	1434.73	236.093	174.633	1159.73	218.232	-87.4186	1330.38	223.026	-181.315	1132.7	152.47	169.88	1248.31	367.225	-25.9508	1404.67	491.786	9.046	1177.19	503.944	37.526	1082.36	518.403	-23.2727	939.767	471.656	-32.535	836.532	537.573	5.72066	829.467	522.558	-40.9396	759.411
12204	0	241.405	-153.956	1568.57	137.681	-144.186	1560.38	270.257	8.99653	1584.86	151.785	22.5043	1576.54	211.972	64.7473	1435.57	235.656	166.319	1160.87	217.491	-96.0109	1330.87	222.696	-189.683	1132.96	151.849	161.346	1249.27	366.348	-34.9286	1405.49	491.568	0.672667	1178.32	503.928	28.8139	1083.56	517.981	-31.5842	940.802	471.014	-40.1607	837.826	537.534	-2.08871	830.453	521.673	-47.8462	760.031
12205	0	240.398	-162.504	1569.23	136.555	-152.748	1561.06	269.256	0.504161	1585.3	150.863	14.0829	1576.92	211.399	55.6954	1436.13	235.242	158.173	1161.83	216.849	-104.581	1331.07	222.359	-198.095	1132.65	151.272	152.789	1250.09	365.556	-43.8	1405.95	491.043	-7.73231	1178.85	503.817	20.2047	1084.29	517.527	-39.8474	941.283	470.641	-47.7615	838.447	537.498	-10.0585	831.156	521.02	-55.2014	760.352
12206	0	239.356	-170.988	1569.84	135.725	-161.309	1561.37	268.245	-7.96996	1585.88	149.978	5.54986	1577.29	210.627	47.1039	1437.07	234.681	150.206	1162.83	216.16	-113.086	1331.23	222.07	-206.336	1132.2	150.625	144.354	1251.14	364.749	-52.6566	1406.41	490.479	-16.1513	1179.27	503.426	11.7164	1084.97	517.276	-48.0586	941.855	470.5	-55.5761	838.908	537.354	-17.96	831.744	520.699	-62.6017	760.695
12207	0	238.627	-179.388	1570.47	135.013	-169.852	1561.81	267.307	-16.3631	1586.47	148.957	-2.94644	1577.66	209.984	38.4419	1437.77	234.173	142.276	1163.89	215.631	-121.518	1331.5	221.844	-214.422	1131.81	150.05	135.998	1252.06	364.028	-61.2074	1406.83	489.751	-24.4836	1179.69	502.989	3.37773	1085.59	516.995	-56.1239	942.29	470.469	-63.5033	839.29	537.378	-25.6569	832.36	520.858	-70.4525	761.283
12208	0	238.12	-187.849	1570.96	134.467	-178.45	1562.17	266.459	-24.7024	1586.92	148.226	-11.7594	1577.76	209.423	29.8325	1438.3	233.704	134.496	1164.71	215.332	-129.785	1331.58	221.745	-222.37	1131.45	149.456	127.895	1252.89	363.586	-69.6094	1407.19	489.286	-32.8686	1180.04	502.37	-4.92595	1085.81	517.056	-64.0704	942.617	470.713	-71.5507	839.568	537.458	-33.4995	832.786	521.341	-78.2404	761.681
12209	0	237.725	-196.306	1571.28	134.042	-187.036	1562.32	265.695	-33.1439	1587.2	147.281	-20.2756	1578.07	208.822	21.291	1438.83	233.175	126.711	1165.63	215.051	-137.928	1331.55	221.78	-230.256	1130.92	148.99	119.785	1253.75	363.064	-77.9513	1407.4	488.649	-41.1579	1180.1	501.801	-13.2601	1085.97	517.044	-72.0506	942.801	471.094	-79.907	839.709	537.475	-41.1671	832.925	522.276	-86.2845	761.978
12210	0	237.374	-204.673	1571.62	133.717	-195.672	1562.55	264.937	-41.4745	1587.57	146.518	-28.8804	1578.3	208.244	12.9503	1439.48	232.645	118.993	1166.57	214.82	-146.018	1331.64	221.765	-238.03	1130.58	148.359	111.99	1254.69	362.675	-86.1112	1407.81	488.2	-49.367	1180.33	501.176	-21.461	1086.27	516.743	-79.9254	943.082	471.487	-88.1021	839.84	537.372	-49.0173	833.387	523.214	-94.5758	762.525
12211	0	237.063	-212.983	1571.89	133.334	-204.257	1562.73	264.339	-49.8309	1588.03	145.888	-37.4238	1578.47	207.735	4.61269	1440.05	232.058	111.468	1167.34	214.641	-154.076	1331.75	221.699	-245.643	1130.35	147.733	104.044	1255.46	362.286	-94.037	1408.24	487.696	-57.4596	1180.63	500.91	-29.0993	1086.83	516.906	-87.766	943.534	471.736	-96.4047	840.089	537.498	-56.6682	833.903	524.331	-102.939	763.29
12212	0	236.818	-221.381	1572.07	133.224	-212.811	1562.77	263.849	-58.0568	1588.25	145.476	-45.9592	1578.6	207.409	-3.54016	1440.51	231.481	103.9	1168.09	214.572	-162.011	1331.74	221.822	-253.255	1130.26	147.209	96.2162	1256.23	361.996	-101.854	1408.43	487.142	-65.3133	1180.69	500.218	-37.2002	1087.03	516.935	-95.6638	943.762	472.445	-104.872	839.98	537.427	-64.593	834.326	525.512	-111.524	763.962
12213	0	236.724	-229.795	1572.13	133.092	-221.385	1562.73	263.399	-66.3786	1588.37	144.961	-54.4419	1578.75	206.924	-11.6572	1440.96	231.015	96.3297	1168.81	214.559	-169.818	1331.7	221.939	-261.016	1130.14	146.762	88.4857	1256.89	361.831	-109.679	1408.7	486.591	-73.1084	1180.59	499.583	-45.093	1087.07	516.822	-103.637	943.974	473.01	-113.397	839.925	537.474	-72.5665	834.568	526.635	-120.284	764.619
12214	0	236.778	-238.068	1572.18	133.037	-229.886	1562.75	263	-74.7087	1588.61	144.563	-62.973	1578.91	206.652	-19.6238	1441.32	230.568	88.8951	1169.32	214.602	-177.597	1331.91	222.149	-268.62	1130.36	146.365	80.7322	1257.48	361.781	-117.201	1409.02	486.266	-80.6128	1180.65	499.177	-52.7637	1087.18	516.832	-111.597	944.275	472.862	-121.622	840.114	537.389	-80.7315	834.975	527.869	-129.279	765.417
12215	0	236.883	-246.319	1572.3	133.113	-238.25	1562.8	262.728	-82.9406	1588.91	144.197	-71.3986	1579.03	206.203	-27.4881	1441.72	230.221	81.4249	1169.83	214.731	-185.315	1332.11	222.294	-276.082	1130.69	145.993	73.0147	1257.89	361.824	-124.693	1409.46	485.952	-87.8434	1180.78	498.89	-60.4367	1087.31	516.866	-119.458	944.63	473.322	-130.325	840.459	537.339	-89.0479	835.228	528.925	-137.895	766.28
12216	0	236.886	-254.592	1572.2	133.131	-246.63	1562.66	262.626	-91.2231	1589.14	144.153	-79.7846	1579.23	206.228	-35.3495	1441.91	230.01	73.9671	1170.33	214.87	-192.953	1332.15	222.506	-283.723	1130.86	145.833	65.4873	1258.3	361.86	-132.216	1409.58	485.843	-95.1423	1180.86	498.69	-68.1822	1087.31	516.749	-127.587	944.765	473.274	-138.969	840.474	537.217	-97.5322	835.373	529.595	-147.297	767.123
12217	0	236.914	-262.823	1572.08	133.316	-254.945	1562.48	262.525	-99.4204	1589.45	144.097	-88.0286	1579.59	205.956	-43.1344	1442.31	229.807	66.5452	1170.78	214.943	-200.577	1332.16	222.629	-291.254	1130.94	145.601	57.8379	1258.77	361.889	-139.779	1409.63	485.731	-102.408	1180.92	498.45	-75.8885	1087.24	516.64	-135.874	944.884	473.019	-147.537	840.325	537.017	-106.348	835.688	529.691	-156.817	767.875
12218	0	237.075	-270.899	1572.07	133.324	-263.152	1562.56	262.567	-107.564	1589.78	144.051	-96.3493	1579.91	205.967	-50.9469	1442.61	229.698	59.0914	1171.19	215.062	-208.291	1332.3	222.661	-298.579	1131.12	145.463	50.2824	1259.23	362.018	-147.227	1409.84	485.876	-109.535	1181.14	498.541	-83.5182	1087.37	516.524	-144.174	945.147	472.777	-156.253	840.688	536.777	-115.018	835.929	529.914	-166.26	768.612
12219	0	237.391	-278.971	1572.04	133.615	-271.235	1562.6	262.767	-115.555	1590.05	144.293	-104.4	1580.2	206.131	-58.7599	1442.8	229.689	51.6736	1171.52	215.149	-215.868	1332.35	222.751	-306.009	1131.19	145.443	42.7719	1259.69	362.274	-154.789	1409.99	486.143	-116.57	1181.28	498.67	-91.1688	1087.42	516.512	-152.692	945.24	472.554	-165.107	840.985	536.652	-123.787	836.036	530.077	-175.852	769.395
12220	0	237.808	-286.982	1571.98	133.997	-279.336	1562.59	262.988	-123.671	1590.1	144.379	-112.495	1580.49	206.217	-66.5621	1443.05	229.608	44.1896	1171.85	215.402	-223.437	1332.25	222.953	-313.402	1131.03	145.361	35.1375	1259.95	362.427	-162.347	1409.94	486.542	-123.829	1181.33	498.713	-98.9543	1087.11	516.365	-161.179	945.263	472.525	-174.632	841.087	536.299	-132.808	835.804	529.884	-185.465	769.703
12221	0	238.26	-294.956	1571.98	134.499	-287.335	1562.73	263.381	-131.582	1590.21	144.807	-120.496	1580.75	206.398	-74.3989	1443.22	229.715	36.7013	1172.21	215.598	-231.061	1332.21	222.99	-320.676	1130.97	145.439	27.4706	1260.26	362.653	-170.004	1409.96	486.854	-131.052	1181.47	499.099	-106.676	1087.05	516.381	-169.64	945.454	472.162	-182.928	841.23	535.985	-141.925	835.694	529.503	-195.175	770.127
12222	0	238.752	-302.855	1572.03	134.936	-295.249	1562.92	263.825	-139.456	1590.28	145.15	-128.47	1580.82	206.436	-82.1907	1443.33	229.719	29.148	1172.3	215.739	-238.667	1332.16	223.08	-328.026	1130.9	145.403	19.7438	1260.49	362.939	-177.599	1409.93	487.199	-138.204	1181.61	499.211	-114.464	1086.92	516.38	-178.042	945.614	472.46	-192.43	841.806	535.795	-150.795	835.614	529.117	-204.597	770.513
12223	0	239.316	-310.643	1571.88	135.467	-303.093	1562.93	264.278	-147.226	1590.08	145.749	-136.246	1580.81	206.799	-90.1172	1443.15	229.74	21.6255	1172.26	215.877	-246.277	1331.92	223.116	-335.413	1130.51	145.443	12.1743	1260.64	363.148	-185.298	1409.54	487.465	-145.534	1181.35	499.486	-122.297	1086.58	516.291	-186.495	945.348	472.289	-201.212	841.917	535.667	-159.681	835.151	528.745	-214.203	770.481
12224	0	239.942	-318.469	1571.65	136.041	-311.073	1562.8	264.846	-155.025	1589.66	146.21	-144.215	1580.64	206.955	-97.9557	1443.05	229.781	13.9607	1172.18	216.162	-254.015	1331.57	223.145	-342.793	1129.81	145.578	4.44892	1260.6	363.389	-193.128	1409.02	487.791	-153.095	1180.81	499.648	-130.212	1085.95	516.389	-194.937	944.982	471.962	-210.172	841.801	535.322	-168.584	834.461	528.332	-223.674	770.362
12225	0	240.563	-326.244	1571.45	136.73	-318.923	1562.75	265.506	-162.826	1589.21	146.955	-151.912	1580.4	207.283	-105.849	1442.82	229.863	6.42717	1172.12	216.489	-261.814	1331.23	223.254	-350.263	1129.29	145.775	-3.19444	1260.55	363.766	-200.936	1408.61	488.023	-160.687	1180.38	499.925	-138.179	1085.45	516.494	-203.371	944.631	471.917	-219.087	841.71	535.086	-177.394	833.821	527.937	-233.165	770.13
12226	0	241.371	-333.947	1571.21	137.451	-326.575	1562.71	266.2	-170.472	1588.6	147.614	-159.73	1580.04	207.695	-113.766	1442.48	229.983	-1.19351	1171.85	216.71	-269.547	1330.85	223.361	-357.729	1128.75	145.93	-10.8966	1260.45	364.142	-208.732	1408.06	488.492	-168.426	1179.85	500.271	-146.137	1084.85	516.547	-211.679	944.297	471.959	-227.898	841.745	534.897	-185.892	833.094	527.409	-242.249	769.741
12227	0	242.093	-341.71	1570.8	138.086	-334.293	1562.51	266.951	-178.296	1587.84	148.373	-167.413	1579.46	208.193	-121.654	1442.08	230.195	-8.91346	1171.5	217.003	-277.344	1330.17	223.404	-365.232	1127.92	146.256	-18.5664	1260.23	364.534	-216.7	1407.29	488.735	-176.383	1179.04	500.452	-154.205	1083.93	516.83	-220.012	943.538	471.997	-236.839	841.336	534.526	-194.64	832.056	527.468	-251.393	769.237
12228	0	242.808	-349.5	1570.32	138.777	-342.124	1562.19	267.701	-186.009	1586.94	149.172	-175.128	1578.76	208.77	-129.632	1441.59	230.311	-16.6157	1171.08	217.301	-285.177	1329.51	223.42	-372.946	1126.99	146.602	-26.397	1259.99	365.005	-224.704	1406.47	489.012	-184.479	1178.07	500.783	-162.421	1083	516.971	-228.423	942.703	472	-245.75	840.64	534.145	-203.255	830.978	527.145	-260.417	768.427
12229	0	243.558	-357.312	1569.86	139.512	-349.873	1561.81	268.543	-193.677	1586.09	149.751	-182.938	1577.89	209.353	-137.583	1441.09	230.6	-24.2889	1170.7	217.583	-293.02	1328.89	223.415	-380.679	1126.14	146.95	-34.093	1259.54	365.47	-232.865	1405.64	489.221	-192.58	1177.17	501.092	-170.51	1082.17	516.998	-236.742	941.716	471.947	-254.666	839.963	533.87	-211.515	829.993	526.746	-269.244	767.658
12230	0	244.316	-365.125	1569.21	140.294	-357.644	1561.4	269.39	-201.371	1584.95	150.808	-190.651	1576.92	210.08	-145.69	1440.35	230.934	-32.1769	1170.09	217.957	-300.987	1328.02	223.444	-388.482	1125.12	147.403	-41.9054	1259.12	366.016	-241.039	1404.64	489.509	-200.949	1176	501.407	-178.674	1081.11	517.168	-245.044	940.686	471.977	-263.516	839.131	533.427	-220.076	828.889	526.792	-277.869	766.755
12231	0	245.333	-372.907	1568.3	141.226	-365.522	1560.8	270.333	-209.203	1583.56	151.671	-198.432	1575.81	210.892	-153.778	1439.51	231.478	-40.0398	1169.21	218.47	-309.064	1326.96	223.614	-396.446	1124.02	148.16	-49.6907	1258.46	366.695	-249.334	1403.4	489.847	-209.391	1174.57	501.589	-186.962	1079.55	517.332	-253.345	939.204	471.974	-272.215	837.805	533.128	-228.444	827.318	526.764	-286.559	765.357
12232	0	246.371	-380.736	1567.57	142.314	-373.433	1560.18	271.273	-216.936	1582.13	152.46	-206.373	1574.74	211.724	-161.939	1438.55	232.062	-48.0504	1168.3	218.935	-317.163	1325.97	223.661	-404.408	1122.93	148.785	-57.7091	1257.73	367.338	-257.698	1402.12	490.135	-217.839	1173.1	501.713	-195.278	1078.06	517.567	-261.712	937.931	472.055	-280.912	836.795	532.732	-236.825	825.742	526.716	-294.978	764.007
12233	0	247.513	-388.552	1566.76	143.392	-381.303	1559.54	272.385	-224.672	1580.83	153.406	-214.214	1573.54	212.585	-170.132	1437.48	232.682	-56.0434	1167.32	219.307	-325.257	1324.87	223.691	-412.407	1121.88	149.559	-65.5563	1256.88	367.984	-266.145	1400.92	490.474	-226.352	1171.71	502.013	-203.498	1076.68	517.723	-269.95	936.479	471.995	-289.546	835.494	532.451	-245.145	824.316	526.677	-303.425	762.635
12234	0	248.573	-396.472	1565.7	144.445	-389.367	1558.77	273.444	-232.59	1579.33	154.624	-222.098	1572.34	213.609	-178.353	1436.35	233.56	-64.2487	1166.23	219.796	-333.451	1323.68	223.787	-420.545	1120.53	150.493	-73.5308	1255.88	368.623	-274.699	1399.4	490.632	-234.972	1170.09	502.264	-211.815	1075.19	517.87	-278.211	934.864	472.104	-298.185	834.104	532.277	-253.266	822.66	526.679	-311.719	760.987
12235	0	249.685	-404.53	1564.61	145.562	-397.411	1557.97	274.584	-240.545	1577.74	155.586	-230.183	1571.1	214.512	-186.777	1435.23	234.305	-72.2953	1165.04	220.285	-341.789	1322.34	223.779	-428.775	1119.07	151.425	-81.6188	1254.89	369.288	-283.395	1397.83	490.982	-243.761	1168.41	502.439	-220.327	1073.52	517.943	-286.583	933.056	472.048	-306.673	832.195	531.993	-261.641	820.931	526.616	-319.906	759.299
12236	0	250.833	-412.622	1563.61	146.657	-405.371	1557.16	275.918	-248.593	1576.23	157.125	-238.18	1569.93	215.538	-195.115	1434	235.253	-80.6064	1164.02	220.763	-350.137	1320.98	223.772	-437.045	1117.67	152.365	-89.7707	1253.81	370.024	-292.098	1396.3	491.354	-252.613	1166.65	502.683	-228.772	1071.86	518.069	-294.923	931.352	472.136	-315.077	830.496	532.011	-269.734	819.223	526.581	-328.093	757.374
12237	0	252.049	-420.784	1562.56	147.805	-413.392	1556.4	277.351	-256.734	1574.68	158.671	-246.108	1568.62	216.649	-203.613	1432.66	236.167	-88.8775	1162.81	221.382	-358.539	1319.74	223.829	-445.388	1116.34	153.471	-97.9609	1252.69	370.912	-300.805	1394.83	491.82	-261.447	1164.9	503.219	-237.217	1070.13	518.335	-303.22	929.472	472.274	-323.233	828.808	531.944	-277.919	817.281	526.666	-336.198	755.544
12238	0	253.171	-429.013	1561.31	148.972	-421.469	1555.45	278.788	-264.999	1572.89	160.202	-254.182	1567.22	217.823	-212.125	1431.43	237.321	-97.2081	1161.68	222.081	-367.072	1318.26	223.891	-453.889	1114.82	154.582	-106.326	1251.53	371.875	-309.678	1393.12	492.332	-270.406	1163.01	503.339	-245.973	1068.1	518.545	-311.68	927.471	472.313	-331.388	826.593	532.001	-286.139	815.22	526.626	-344.232	753.47
12239	0	254.307	-437.281	1560.13	150.149	-429.587	1554.5	280.373	-273.453	1571.26	161.377	-262.343	1565.76	219.083	-220.694	1430.1	238.401	-105.729	1160.48	222.776	-375.696	1316.8	223.843	-462.51	1113.38	155.849	-114.71	1250.39	372.811	-318.637	1391.4	492.83	-279.508	1161.09	503.692	-254.864	1066.23	518.675	-320.197	925.411	472.385	-339.596	824.504	532.174	-294.436	813.302	526.55	-352.232	751.211
12240	0	255.447	-445.664	1559.02	151.295	-437.648	1553.48	281.954	-281.767	1569.75	163.07	-270.476	1564.43	220.34	-229.334	1428.74	239.392	-114.57	1159.16	223.434	-384.376	1315.43	223.79	-471.182	1111.86	156.971	-123.137	1249.14	373.845	-327.633	1389.7	493.394	-288.592	1159	504.25	-263.424	1064.44	518.883	-328.708	923.277	472.495	-347.753	822.484	532.284	-302.501	811.312	526.527	-360.165	749.01
12241	0	256.738	-454.022	1557.78	152.601	-445.864	1552.5	283.598	-290.092	1568.01	164.828	-278.565	1562.91	221.797	-237.945	1427.2	240.536	-123.057	1157.4	224.249	-393.051	1314.16	223.828	-479.968	1110.55	158.31	-131.629	1247.82	374.875	-336.67	1387.81	493.964	-297.59	1156.82	504.72	-272.118	1062.28	519.073	-337.103	920.967	472.564	-355.896	820.202	532.595	-310.474	809.115	526.575	-367.966	746.644
12242	0	258.269	-462.467	1556.56	154.161	-454.201	1551.49	285.324	-298.582	1566.2	166.527	-286.807	1561.35	223.304	-246.684	1425.73	241.662	-131.959	1155.69	225.197	-401.89	1312.69	223.915	-488.926	1109.02	159.596	-140.345	1246.42	375.979	-345.754	1385.81	494.601	-306.835	1154.43	504.954	-281.089	1059.88	519.447	-345.767	918.628	472.781	-364.115	817.921	532.696	-318.812	806.766	526.609	-375.723	744.108
12243	0	260.017	-470.894	1555.5	155.846	-462.499	1550.66	287.102	-307.003	1564.53	168.148	-295.237	1559.98	224.821	-255.521	1424.35	242.754	-140.982	1154.03	226.176	-410.781	1311.33	224.113	-497.904	1107.85	160.905	-149.028	1245.05	377.292	-355.021	1384.1	495.424	-315.986	1152.44	505.676	-289.973	1057.88	519.679	-354.355	916.469	473.051	-372.443	815.937	532.99	-326.935	804.608	526.591	-383.557	741.708
12244	0	261.906	-479.28	1554.57	157.664	-470.855	1549.92	289.044	-315.318	1563.04	170.074	-303.642	1558.74	226.475	-264.325	1422.99	244.053	-150.116	1152.58	227.218	-419.786	1310.27	224.244	-506.926	1106.67	162.245	-157.879	1243.73	378.621	-364.124	1382.54	496.307	-325.046	1150.58	506.267	-298.941	1056	520.081	-362.829	914.481	473.423	-380.768	814.142	533.311	-335.23	802.663	526.644	-391.515	739.565
12245	0	263.958	-487.716	1553.41	159.768	-479.413	1549.17	291.025	-323.72	1561.45	172.354	-312.149	1557.51	228.081	-273.246	1421.61	245.279	-159.375	1151.23	228.3	-428.901	1309.09	224.519	-516.256	1105.56	163.665	-166.868	1242.5	380.029	-373.35	1380.83	497.3	-334.277	1148.74	507.057	-307.88	1054.06	520.443	-371.586	912.374	473.607	-389.208	811.984	533.753	-343.561	800.668	526.503	-399.414	737.22
12246	0	266.047	-496.208	1552.35	161.834	-488.082	1548.47	293.082	-332.233	1559.99	174.103	-320.674	1556.52	229.802	-282.209	1420.39	246.504	-168.86	1149.78	229.416	-438.039	1307.89	224.924	-525.669	1104.34	164.972	-176.021	1241.3	381.357	-382.699	1379.17	498.254	-343.544	1146.88	507.897	-317.07	1052.22	520.834	-380.302	910.31	473.07	-396.367	808.985	534.334	-351.99	798.796	526.513	-407.458	735.025
12247	0	268.391	-504.76	1551.49	164.114	-496.67	1547.89	295.255	-340.678	1558.59	176.272	-329.278	1555.55	231.434	-291.285	1419.1	247.663	-178.379	1148.19	230.696	-447.326	1306.88	225.309	-535.118	1103.47	166.302	-185.317	1239.99	382.766	-391.957	1377.57	499.463	-352.761	1145.17	508.824	-325.97	1050.49	521.2	-388.712	908.377	473.175	-404.582	806.824	534.736	-360.752	796.967	526.36	-415.656	732.81
12248	0	270.807	-513.258	1550.53	166.415	-505.335	1547.39	297.533	-349.194	1557.11	178.631	-337.947	1554.41	233.072	-300.386	1417.77	248.679	-188.221	1146.46	232.069	-456.725	1305.88	225.799	-544.654	1102.73	167.597	-194.718	1238.64	384.38	-401.158	1376	500.716	-361.983	1143.42	509.779	-335.056	1048.74	521.793	-397.493	906.429	473.481	-412.865	805.117	535.413	-369.296	795.076	526.285	-423.76	730.453
12249	0	273.24	-521.909	1549.48	168.828	-513.999	1546.8	299.828	-357.755	1555.44	181.009	-346.6	1553.19	234.948	-309.459	1416.29	249.617	-198.075	1144.73	233.466	-466.102	1304.93	226.55	-554.557	1101.95	168.879	-204.305	1237.22	386.038	-410.286	1374.28	501.729	-371.317	1141.47	510.674	-344.233	1046.66	522.442	-406.395	904.407	473.792	-421.326	803.109	536.017	-378.4	792.951	526.554	-432.154	728.23
12250	0	275.612	-530.579	1548.55	171.209	-522.736	1546.25	302.189	-366.443	1553.85	183.428	-355.249	1552.21	236.623	-318.718	1414.91	250.566	-207.987	1142.97	234.987	-475.743	1304.03	227.34	-564.511	1101.35	170.042	-214.083	1235.68	387.633	-419.446	1372.64	502.951	-380.659	1139.66	511.537	-353.481	1044.62	522.976	-415.494	902.364	473.971	-429.82	801.068	536.852	-387.265	791.057	526.283	-440.897	726.119
12251	0	277.864	-539.434	1547.96	173.495	-531.403	1545.97	304.667	-375.203	1552.61	185.928	-363.977	1551.3	238.459	-327.826	1413.76	251.433	-218.016	1141.19	236.49	-485.328	1303.35	228.22	-574.632	1100.93	171.127	-223.827	1234.24	389.474	-428.606	1371.22	504.132	-389.862	1137.95	512.555	-362.641	1042.95	523.724	-424.597	900.542	474.389	-438.531	799.382	537.65	-396.502	789.434	526.275	-449.668	724.036
12252	0	280.191	-548.341	1547.57	175.759	-540.287	1545.94	307.2	-384.102	1551.56	188.379	-372.777	1550.37	240.24	-337.063	1412.63	252.19	-227.972	1139.65	238.066	-495.059	1302.78	229.199	-584.778	1100.58	172.221	-233.645	1232.95	391.243	-437.793	1369.84	505.307	-399.192	1136.13	513.375	-371.941	1041.25	524.443	-433.74	898.712	474.931	-447.338	797.633	538.553	-405.509	787.695	526.541	-458.464	722.083
12253	0	282.567	-557.439	1547.31	178.166	-549.249	1546.08	309.745	-393.193	1550.44	191.012	-381.736	1549.68	242.122	-346.574	1411.77	252.948	-237.768	1138.45	239.844	-504.969	1302.37	230.427	-595.114	1100.24	173.332	-243.585	1232.02	393.232	-447.176	1368.48	506.598	-408.486	1134.37	514.121	-381.438	1039.4	525.247	-443.027	896.882	475.701	-456.247	795.873	539.514	-414.608	785.759	527.24	-467.429	720.208
12254	0	284.921	-566.66	1547.46	180.535	-558.399	1546.47	312.27	-402.505	1549.66	193.546	-390.875	1549.4	243.949	-356.21	1411.34	253.74	-247.686	1137.79	241.712	-514.982	1302.25	231.75	-605.481	1100.22	174.256	-253.617	1231.58	395.205	-456.625	1367.54	507.708	-417.947	1132.91	514.971	-390.862	1037.93	526.223	-452.226	895.425	476.563	-465.337	794.403	540.392	-423.747	784.28	527.779	-475.749	718.277
12255	0	287.432	-575.978	1547.84	183.02	-567.61	1547.07	314.842	-411.817	1549.36	196.151	-400.082	1549.33	245.69	-366.206	1411.28	254.409	-257.799	1137.65	243.59	-525.017	1302.49	233.155	-615.962	1100.49	175.049	-263.764	1231.64	397.226	-466.075	1367.13	508.769	-427.256	1132.06	515.691	-400.423	1037.07	527.158	-461.455	894.473	477.533	-474.451	793.255	541.353	-432.461	783.391	528.75	-484.265	716.948
12256	0	289.957	-585.387	1548.29	185.49	-576.985	1547.95	317.454	-421.256	1549.24	198.447	-409.461	1549.57	247.278	-376.086	1411.57	254.715	-267.961	1137.7	245.223	-535.165	1302.9	234.701	-626.615	1100.9	175.688	-273.975	1232.18	399.068	-475.71	1366.75	509.787	-436.655	1131.38	516.187	-410.224	1036.37	528.263	-470.652	893.688	478.763	-483.785	792.317	542.381	-441.401	782.724	530.035	-492.935	715.911
12257	0	292.62	-595.049	1548.97	188.222	-586.732	1549.01	319.966	-430.807	1549.22	201	-419.13	1550.11	248.856	-386.269	1412.12	254.803	-277.634	1138.35	247.129	-545.386	1303.44	236.345	-637.401	1101.59	176.173	-284.309	1232.85	400.849	-485.225	1366.65	510.518	-446.21	1130.69	516.564	-419.896	1035.92	528.905	-479.799	892.839	479.845	-493.004	791.548	543.217	-450.023	782.247	531.6	-501.691	715.263
12258	0	295.401	-604.69	1549.92	190.888	-596.536	1550.27	322.397	-440.392	1549.58	203.732	-428.919	1550.89	250.238	-396.429	1413.06	254.613	-287.336	1139.13	249.064	-555.664	1304.43	238.09	-648.074	1102.61	176.561	-294.685	1234.06	402.62	-494.763	1367.06	511.119	-455.472	1130.68	516.775	-429.704	1035.92	529.996	-489.05	893.012	481.394	-502.345	791.264	544.087	-458.807	782.363	533.44	-510.377	715.475
12259	0	298.169	-614.316	1550.95	193.776	-606.343	1551.95	324.92	-450.054	1550.26	205.938	-438.829	1552.01	251.751	-406.491	1414.13	254.887	-297.374	1140.32	251.017	-565.908	1305.77	239.957	-658.492	1104	176.785	-305.234	1235.34	404.367	-504.165	1367.8	511.759	-464.915	1131	517.233	-439.175	1036.39	530.943	-498.199	893.542	483.019	-511.808	791.807	545.014	-467.411	782.734	535.452	-519.135	716.013
12260	0	301.071	-624.109	1552.17	196.514	-616.469	1553.56	327.365	-459.83	1551.07	208.674	-448.833	1553.38	253.091	-416.522	1415.5	255.092	-307.904	1141.61	253.048	-575.762	1306.99	241.987	-668.623	1105.52	177.092	-315.735	1237.03	406.102	-513.501	1368.84	512.276	-474.283	1131.59	517.314	-448.763	1036.97	532.041	-507.446	894.261	484.501	-521.543	792.405	546.027	-476.379	783.593	537.189	-527.933	716.64
12261	0	303.765	-634.009	1553.49	199.239	-626.641	1555.39	329.733	-469.671	1552.27	210.73	-458.861	1555.3	254.462	-426.56	1417.14	254.961	-318.463	1143.16	255.02	-585.878	1308.53	243.916	-678.602	1107.21	177.413	-326.421	1238.66	407.816	-522.799	1370.23	512.844	-483.786	1132.52	517.618	-457.997	1038.14	533.092	-516.705	895.525	486.041	-531.07	793.338	546.998	-485.448	784.766	539.074	-536.918	717.908
12262	0	306.246	-643.734	1554.86	201.774	-636.601	1557.3	332.037	-479.514	1553.89	213.262	-468.959	1557.33	255.908	-436.319	1418.93	254.895	-329.577	1144.64	256.77	-595.727	1310.52	245.765	-688.352	1109.32	177.702	-336.757	1240.66	409.453	-531.979	1371.93	513.493	-493.042	1133.98	518.092	-467.233	1039.91	534.15	-525.877	897.259	487.35	-540.81	794.8	548.051	-494.557	786.774	541.217	-546.17	719.695
12263	0	308.654	-653.602	1556.36	204.137	-646.649	1559.22	334.343	-489.318	1555.64	215.525	-478.881	1559.52	257.2	-445.969	1420.65	255.299	-340.351	1146.17	258.642	-605.618	1312.57	247.639	-698.178	1111.63	178.028	-347.145	1242.46	411.177	-541.084	1373.74	514.096	-501.984	1135.58	518.746	-476.118	1041.73	535.298	-535.058	898.994	488.784	-550.741	796.438	549.205	-503.79	788.699	542.999	-555.471	721.468
12264	0	310.834	-663.327	1557.59	206.393	-656.496	1561	336.432	-499.25	1557.48	217.748	-488.825	1561.83	258.764	-455.429	1422.37	255.758	-350.457	1147.51	260.439	-615.304	1314.56	249.501	-707.954	1114.01	178.65	-357.433	1244.06	412.864	-550.087	1375.41	514.842	-511.062	1137.12	519.394	-485.05	1043.23	536.532	-544.379	900.748	490.346	-560.665	798.018	550.021	-513.301	790.365	544.698	-565.05	723.251
12265	0	312.86	-673.132	1559.15	208.409	-666.369	1562.75	338.522	-509.09	1559.47	219.473	-498.607	1564.16	260.1	-464.823	1424.13	256.211	-360.186	1149.02	262.344	-624.945	1316.73	251.329	-717.675	1116.52	179.357	-367.559	1245.66	414.616	-559.024	1377.43	515.86	-520.125	1138.85	520.243	-493.953	1045.02	537.918	-553.605	902.732	491.826	-570.507	799.862	551.175	-522.641	792.386	546.177	-574.634	725.241
12266	0	314.723	-682.851	1560.86	210.222	-675.949	1564.65	340.447	-518.831	1561.56	221.483	-508.294	1566.51	261.692	-473.936	1425.81	256.67	-369.811	1150.19	264.002	-634.334	1319.04	253.071	-727.281	1119.28	180.249	-377.483	1247.16	416.401	-567.841	1379.33	517.182	-528.894	1140.85	521.43	-502.774	1046.89	539.394	-562.771	904.779	493.339	-580.508	802.085	552.205	-532.372	794.274	547.741	-584.458	727.421
12267	0	316.506	-692.277	1562.32	212.034	-685.457	1566.35	342.42	-528.447	1563.51	223.386	-517.758	1568.69	263.143	-483.147	1427.31	257.698	-379.578	1151.52	265.715	-643.674	1321.11	254.75	-736.891	1121.85	181.314	-387.243	1248.6	418.21	-576.475	1381.08	518.591	-537.651	1142.64	522.78	-511.643	1048.52	541.022	-571.981	906.548	494.774	-590.577	804.069	553.281	-542.017	795.964	549.228	-594.438	729.265
12268	0	318.104	-701.735	1563.81	213.623	-694.868	1568.07	344.053	-537.954	1565.11	225.231	-527.202	1570.56	264.739	-492.253	1428.72	258.903	-389.347	1152.62	267.298	-653.015	1322.92	256.238	-746.656	1124.26	182.481	-396.895	1249.86	419.783	-585.418	1382.54	520.201	-546.536	1144.17	524.155	-520.545	1049.82	542.583	-581.35	908.034	496.216	-600.696	805.682	554.409	-551.924	797.368	550.406	-604.655	730.745
12269	0	319.632	-711.049	1565.31	215.265	-704.14	1569.74	345.745	-547.237	1566.81	227.099	-536.422	1572.44	266.169	-501.335	1430.14	260.016	-399.117	1153.9	268.74	-662.122	1324.61	257.531	-756.324	1126.48	183.699	-406.333	1251.17	421.387	-594.316	1383.9	521.786	-555.244	1145.81	525.808	-529.461	1051.31	544.219	-590.803	909.612	497.626	-610.961	807.481	555.512	-561.961	798.742	551.454	-615.034	732.46
12270	0	321.304	-720.12	1566.86	216.934	-713.165	1571.56	347.282	-556.27	1568.2	228.36	-545.592	1573.93	267.599	-510.461	1431.45	261.35	-408.739	1154.97	270.242	-671.252	1326.34	258.782	-765.776	1128.71	185.033	-415.573	1252.42	422.925	-603.222	1385.26	523.595	-563.824	1147.44	527.594	-538.336	1052.7	546.116	-600.246	911.246	499.137	-621.237	809.444	557.027	-571.984	800.229	552.587	-625.544	734.138
12271	0	322.964	-729.079	1568.21	218.544	-722.307	1573.09	348.72	-565.236	1569.35	229.968	-554.587	1575.5	268.942	-519.638	1432.58	262.867	-418.267	1156.18	271.634	-680.283	1327.67	259.917	-775.228	1130.37	186.33	-424.792	1253.71	424.342	-612.266	1386.32	525.587	-572.697	1148.68	529.407	-547.234	1053.73	547.895	-609.913	912.58	500.801	-631.565	811.157	558.206	-582.479	801.162	553.657	-636.317	735.565
12272	0	324.533	-737.998	1569.33	220.183	-731.338	1574.57	350.177	-574.106	1570.29	231.341	-563.591	1576.73	270.235	-528.809	1433.67	264.165	-427.724	1157.17	272.744	-689.281	1328.69	260.713	-784.545	1131.74	187.688	-433.708	1254.94	425.559	-621.382	1387.19	527.52	-581.579	1149.86	531.364	-556.307	1054.59	549.765	-619.761	913.871	502.359	-641.996	812.701	559.835	-593.009	802.215	554.991	-647.344	736.989
12273	0	326.067	-746.679	1570.34	221.81	-740.188	1575.73	351.41	-582.779	1571.1	232.568	-572.487	1577.82	271.478	-537.857	1434.7	265.422	-436.992	1158.31	273.779	-698.289	1329.62	261.35	-793.591	1132.86	188.909	-442.55	1256.01	426.705	-630.412	1388.09	529.368	-590.227	1151.29	533.471	-565.323	1055.77	551.584	-629.594	915.17	504.012	-652.507	814.383	561.369	-603.475	803.27	556.196	-658.372	738.397
12274	0	327.589	-755.309	1571.09	223.233	-749.086	1576.87	352.618	-591.398	1571.69	233.879	-581.368	1578.66	272.519	-546.928	1435.47	266.52	-445.896	1159.22	274.666	-707.211	1330.39	261.864	-802.5	1133.61	190.167	-451.247	1257.04	427.749	-639.576	1388.84	531.298	-598.938	1152.46	535.543	-574.398	1056.71	553.47	-639.494	916.353	505.694	-662.954	815.803	562.986	-614.385	804.348	557.552	-669.549	739.903
12275	0	329.084	-764.137	1571.61	224.66	-758.032	1577.6	353.771	-600.011	1572.01	235.039	-590.241	1579.27	273.673	-555.869	1436.1	267.846	-454.557	1159.83	275.475	-716.131	1330.81	262.225	-811.258	1133.86	191.363	-459.827	1257.64	428.597	-648.794	1389.22	532.944	-607.758	1153.23	537.475	-583.696	1057.22	555.217	-649.739	917.134	507.049	-673.708	816.913	564.592	-625.182	804.925	558.905	-681.051	741.008
12276	0	330.347	-772.767	1571.86	226.01	-766.781	1578.08	354.836	-608.674	1572.19	236.052	-599.019	1579.67	274.637	-564.764	1436.58	269.144	-462.912	1160.39	276.138	-724.932	1331.04	262.397	-819.894	1133.96	192.556	-468.299	1258.27	429.205	-658.184	1389.21	534.528	-616.848	1153.83	539.389	-593.143	1057.59	556.897	-660.012	917.844	508.497	-684.372	817.925	566.281	-636.205	805.495	560.139	-692.595	741.982
12277	0	331.535	-781.406	1572.13	227.15	-775.544	1578.52	355.863	-617.311	1572.28	237.132	-607.672	1579.92	275.712	-573.434	1436.99	270.257	-471.3	1160.93	276.673	-733.567	1331.33	262.415	-828.298	1133.95	193.76	-476.515	1258.92	430.047	-667.249	1389.65	536.177	-625.906	1154.43	541.344	-602.609	1058.09	558.581	-670.315	918.667	510.129	-695.097	819.193	567.843	-647.342	805.91	561.766	-703.978	743.204
12278	0	332.558	-790.083	1572.28	228.091	-784.256	1578.86	356.884	-625.966	1572.21	238.142	-616.398	1580.07	276.627	-582.208	1437.27	271.586	-479.703	1161.37	277.087	-742.198	1331.37	262.288	-836.611	1133.71	195.038	-484.697	1259.35	430.682	-676.528	1389.75	537.662	-635.094	1154.93	543.268	-612.206	1058.49	560.212	-680.756	919.383	511.643	-705.869	820.101	569.875	-658.294	806.667	563.423	-715.508	744.211
12279	0	333.383	-798.949	1572.2	228.974	-792.968	1578.91	357.885	-634.859	1572.13	239.11	-625.093	1580.17	277.524	-590.954	1437.64	273.05	-487.997	1161.97	277.368	-750.822	1331.22	262.04	-844.878	1133.08	196.27	-492.866	1259.83	431.096	-685.772	1389.76	538.655	-644.377	1155.19	544.95	-622.074	1058.76	561.646	-691.366	919.854	513.181	-715.921	820.327	571.669	-669.518	807.018	565.113	-727.19	745.068
12280	0	334	-807.793	1572.13	229.65	-801.627	1578.94	358.704	-643.659	1572	240.06	-633.806	1580.1	278.538	-599.643	1437.91	274.34	-496.212	1162.59	277.572	-759.357	1331.05	261.68	-853.061	1132.57	197.458	-500.853	1260.39	431.516	-695.084	1389.74	539.967	-654.091	1155.43	546.504	-631.938	1059.06	563.103	-702.015	920.37	514.748	-726.773	820.85	573.495	-680.706	807.611	566.935	-738.798	745.912
12281	0	334.529	-816.534	1571.96	230.188	-810.346	1578.97	359.555	-652.461	1571.96	240.797	-642.504	1580.12	279.371	-608.352	1438.19	275.589	-504.302	1163.05	277.656	-767.736	1330.96	261.272	-861.043	1132.15	198.72	-508.694	1260.97	431.95	-704.213	1389.77	540.937	-663.76	1155.56	548.054	-641.861	1059.22	564.576	-712.591	920.847	516.326	-738.33	821.663	575.474	-691.61	808.111	568.822	-750.217	746.685
12282	0	335.096	-825.436	1571.65	230.749	-819.037	1578.77	360.307	-661.464	1571.89	241.625	-651.223	1580.3	280.311	-616.904	1438.38	277.006	-512.306	1163.62	277.772	-776.089	1330.71	260.879	-869.223	1131.5	199.985	-516.558	1261.3	432.255	-713.382	1389.59	541.847	-673.803	1155.39	549.322	-652.131	1059.14	565.875	-723.302	921.102	517.863	-749.152	821.915	577.092	-702.904	808.199	570.751	-761.698	747.263
12283	0	335.396	-834.366	1571.34	231.079	-827.731	1578.63	360.989	-670.443	1571.88	242.395	-659.724	1580.67	281.107	-625.408	1438.68	278.286	-520.169	1164.18	277.831	-784.37	1330.56	260.541	-877.368	1131.15	201.21	-524.426	1261.74	432.579	-722.377	1389.55	542.591	-684.114	1155.25	550.387	-662.549	1059.02	567.169	-734.135	921.337	519.523	-760.524	822.168	578.908	-714.07	808.443	572.584	-773.209	747.74
12284	0	335.698	-843.255	1571.08	231.268	-836.48	1578.43	361.51	-679.412	1572.05	242.94	-668.594	1580.87	281.752	-633.822	1438.94	279.387	-528.07	1164.5	277.79	-792.496	1330.52	260.196	-885.352	1130.9	202.367	-532.207	1262.15	432.629	-731.436	1389.42	543.261	-694.386	1155.18	551.427	-672.931	1059.1	568.382	-744.873	921.637	521.004	-771.091	822.246	580.69	-725.081	808.778	574.597	-784.474	748.318
12285	0	335.699	-852.189	1570.56	231.47	-845.091	1578.12	362.099	-688.297	1572.12	243.534	-677.366	1580.97	282.5	-642.107	1439.01	280.359	-535.915	1164.82	277.693	-800.599	1330.39	259.809	-893.376	1130.64	203.359	-539.916	1262.5	432.776	-740.224	1389.17	543.734	-704.732	1154.97	552.407	-683.473	1058.98	569.373	-755.719	921.672	522.297	-781.736	822.089	582.212	-736.253	808.809	576.384	-795.674	748.568
12286	0	335.65	-861.077	1569.8	231.459	-853.93	1577.66	362.434	-697.336	1572.07	244.023	-686.091	1581.1	283.143	-650.498	1439.03	281.323	-543.685	1164.99	277.657	-808.724	1330.04	259.52	-901.351	1130.41	204.367	-547.633	1262.6	432.878	-748.988	1388.88	544.023	-715.398	1154.35	552.976	-694.25	1058.49	570.151	-766.958	921.322	523.696	-792.554	821.53	583.729	-747.326	808.805	578.147	-806.95	748.542
12287	0	335.711	-870.058	1569.35	231.588	-862.544	1577.1	362.854	-706.358	1572.04	244.357	-694.807	1581.34	283.519	-658.719	1439.13	282.193	-551.37	1165.21	277.562	-816.696	1329.78	259.293	-909.139	1130.27	205.101	-555.262	1262.82	433.151	-757.583	1388.89	544.247	-726.101	1153.89	553.481	-705.142	1058.09	570.991	-777.961	921.326	524.749	-803.641	821.339	585.121	-758.597	808.859	579.794	-818.206	748.569
12288	0	335.627	-879.001	1568.83	231.351	-871.204	1576.62	363.055	-715.375	1572.18	244.734	-703.418	1581.48	284.049	-666.692	1439.18	282.811	-558.99	1165.36	277.481	-824.619	1329.67	259.025	-916.713	1130.08	205.745	-562.893	1262.96	433.209	-765.928	1388.75	544.448	-736.72	1153.58	554.058	-715.934	1057.89	571.647	-788.916	921.428	525.757	-814.658	821.126	586.211	-769.869	808.796	581.303	-829.308	748.699
12289	0	335.242	-887.834	1568.16	231.131	-879.813	1576.11	363.389	-724.306	1572.25	244.978	-712.143	1581.59	284.245	-674.862	1438.94	283.381	-566.682	1165.35	277.465	-832.562	1329.48	258.779	-924.27	1129.79	206.311	-570.6	1263.09	433.335	-774.305	1388.56	544.555	-747.35	1153.11	554.245	-726.936	1057.45	572.143	-799.935	921.393	526.603	-825.829	820.742	587.505	-780.982	808.771	582.738	-840.488	748.678
12290	0	334.895	-896.686	1567.33	230.767	-888.502	1575.3	363.48	-733.473	1572.16	245.115	-720.764	1581.59	284.417	-682.948	1438.85	283.784	-574.376	1165.33	277.379	-840.594	1328.99	258.654	-931.85	1129.29	206.864	-578.375	1263.07	433.347	-782.677	1388.31	544.563	-758.105	1152.5	554.377	-738.07	1056.88	572.462	-811.248	921.149	527.479	-836.975	820.191	588.654	-792.243	808.615	583.81	-851.887	748.394
12291	0	334.408	-905.572	1566.65	230.27	-897.012	1574.4	363.545	-742.344	1572.09	245.165	-729.451	1581.45	284.64	-691.004	1438.58	284.212	-581.869	1165.23	277.118	-848.539	1328.52	258.388	-939.359	1128.8	207.263	-586.11	1262.9	433.29	-791.03	1388.05	544.391	-768.67	1151.98	554.379	-749.113	1056.48	572.639	-822.498	921.047	527.986	-848.119	819.66	589.284	-803.954	808.665	584.627	-863.126	748.144
12292	0	333.809	-914.309	1565.86	229.758	-905.513	1573.69	363.387	-751.232	1571.99	245.047	-738.011	1581.17	284.606	-699.206	1438.29	284.517	-589.501	1165.13	276.94	-856.54	1328.15	258.144	-946.96	1128.2	207.756	-594.162	1262.63	433.224	-799.229	1387.74	544.277	-779.158	1151.51	554.375	-760.164	1056.09	572.753	-833.853	920.891	528.297	-859.394	819.31	589.992	-815.346	808.575	585.199	-874.408	747.891
12293	0	333.248	-923.132	1565.05	229.181	-914.145	1572.74	363.318	-760.076	1571.67	244.942	-746.615	1580.79	284.713	-707.387	1438.03	284.781	-597.192	1164.98	276.924	-864.605	1327.58	258.116	-954.711	1127.53	208.061	-601.936	1262.41	433.296	-807.513	1387.32	544.085	-789.591	1150.67	554.262	-771.176	1055.25	572.63	-845.257	920.466	528.575	-870.964	818.744	590.404	-827.01	808.094	585.895	-886.048	747.56
12294	0	332.812	-931.771	1564.1	228.803	-922.633	1571.71	362.881	-768.865	1571.14	244.636	-755.126	1580.32	284.669	-715.672	1437.57	284.951	-604.815	1164.73	276.839	-872.676	1326.88	258.128	-962.571	1126.65	208.1	-609.519	1262.19	433.125	-815.907	1386.76	543.875	-799.944	1149.95	553.897	-782.315	1054.3	572.41	-856.653	920.148	528.834	-882.091	818.03	590.693	-838.855	807.56	585.832	-897.563	746.925
12295	0	332.241	-940.379	1563.21	228.217	-931.219	1570.7	362.488	-777.429	1570.69	244.187	-763.64	1579.72	284.302	-724.01	1437.09	285.065	-612.507	1164.49	276.565	-880.781	1326.2	258.028	-970.333	1125.84	208.068	-617.386	1261.86	432.883	-824.266	1386.39	543.588	-810.077	1149.29	553.661	-793.257	1053.73	572.01	-868.14	919.926	528.475	-893.635	817.912	590.819	-850.629	807.385	585.937	-909.201	746.814
12296	0	331.747	-948.815	1562.33	227.642	-939.729	1569.68	361.885	-785.944	1570.1	243.58	-772.239	1578.95	284.085	-732.322	1436.53	285.013	-620.36	1164.21	276.335	-888.898	1325.47	257.956	-978.248	1124.91	208.008	-625.228	1261.53	432.623	-832.477	1385.93	543.153	-820.138	1148.7	553.297	-804.146	1053.08	571.344	-879.615	919.6	528.35	-904.036	816.899	590.82	-862.526	807.281	585.545	-921.142	746.455
12297	0	331.212	-957.339	1561.21	227.123	-948.388	1568.67	361.273	-794.374	1569.32	242.911	-780.817	1578.05	283.624	-740.707	1435.92	284.894	-628.143	1163.81	276.098	-897.094	1324.38	257.909	-986.235	1123.74	207.805	-633.285	1260.99	432.17	-840.723	1385.17	542.706	-830.091	1147.81	552.968	-814.932	1052.3	570.694	-891.203	919.234	527.589	-916.089	816.634	590.539	-874.629	806.735	584.95	-933.193	746.128
12298	0	330.72	-965.845	1560.33	226.591	-957.028	1567.55	360.409	-802.826	1568.44	242.164	-789.404	1577.16	283.049	-749.016	1435.16	284.661	-636.026	1163.28	275.724	-905.331	1323.38	257.917	-994.296	1122.61	207.36	-641.354	1260.32	431.736	-849.017	1384.51	542.251	-839.95	1147.1	552.461	-825.686	1051.43	569.772	-902.892	918.877	526.74	-927.482	816.037	589.995	-886.92	806.338	583.903	-945.368	745.695
12299	0	330.134	-974.196	1559.43	225.995	-965.534	1566.5	359.612	-811.101	1567.64	241.313	-797.943	1576.14	282.428	-757.466	1434.41	284.315	-644.069	1162.71	275.361	-913.484	1322.36	257.942	-1002.27	1121.5	206.917	-649.469	1259.61	431.224	-857.267	1383.94	541.852	-849.566	1146.5	552.131	-836.278	1050.72	568.981	-914.153	918.649	525.536	-939.112	816.036	589.483	-899.286	806.197	582.862	-957.777	745.589
12300	0	329.451	-982.585	1558.44	225.316	-974.121	1565.41	358.76	-819.525	1566.58	240.4	-806.409	1575.01	281.888	-765.799	1433.6	284.06	-652.07	1162	275.015	-921.798	1321.31	257.974	-1010.4	1120.3	206.353	-657.757	1258.78	430.68	-865.476	1383.12	541.453	-858.966	1145.73	551.584	-846.863	1049.85	568.077	-925.672	918.203	524.278	-950.677	815.628	588.724	-911.777	805.809	581.15	-970.382	745.262
12301	0	328.754	-990.953	1557.41	224.627	-982.733	1564.32	357.823	-827.89	1565.43	239.408	-814.984	1573.82	281.053	-774.331	1432.56	283.52	-660.293	1161.2	274.601	-930.159	1320.06	257.951	-1018.55	1118.95	205.837	-666.065	1257.85	430.035	-873.726	1382.09	540.877	-868.39	1144.77	550.987	-857.331	1048.76	566.792	-937.283	917.906	522.464	-962.433	815.523	587.716	-924.35	805.25	579.67	-983.136	745.18
12302	0	327.75	-999.5	1556.41	223.61	-991.258	1563.09	356.645	-836.416	1564.44	238.369	-823.472	1572.51	280.218	-782.749	1431.59	283.089	-668.489	1160.3	274.116	-938.652	1318.88	257.859	-1026.71	1117.49	205.053	-674.482	1256.87	429.318	-881.97	1381.31	540.301	-877.659	1143.99	550.461	-867.611	1047.89	565.332	-948.861	917.487	520.992	-973.995	815.07	586.465	-936.966	804.894	577.323	-995.953	745.013
12303	0	326.74	-1007.94	1555.48	222.624	-999.698	1561.91	355.689	-844.809	1563.5	237.224	-832.02	1571.1	279.205	-791.4	1430.34	282.355	-676.867	1159.34	273.522	-947.072	1317.66	257.8	-1034.72	1116.17	204.353	-682.903	1255.79	428.625	-890.179	1380.4	539.67	-886.65	1143.2	550.01	-877.648	1047.08	564.028	-960.164	917.206	518.795	-985.739	815.172	585.154	-949.447	804.626	575.143	-1008.82	745.138
12304	0	325.643	-1016.52	1554.44	221.465	-1008.36	1560.64	354.439	-853.291	1562.19	235.972	-840.603	1569.59	278.402	-799.928	1429.28	281.75	-685.231	1158.26	273.013	-955.68	1316.38	257.745	-1043	1114.55	203.509	-691.539	1254.46	427.864	-898.485	1379.26	539.154	-895.594	1142.2	549.421	-887.63	1045.84	562.5	-971.569	916.566	516.81	-997.472	814.929	583.504	-962.064	803.967	572.749	-1021.96	745.049
12305	0	324.588	-1025.04	1553.42	220.329	-1016.92	1559.32	353.129	-861.812	1560.98	234.752	-849.107	1568.2	277.313	-808.566	1428.04	280.978	-693.766	1157.04	272.476	-964.276	1314.96	257.788	-1051.32	1113.05	202.623	-700.291	1253.18	427.169	-906.883	1378.21	538.586	-904.461	1141.26	548.78	-897.602	1044.56	561.066	-982.751	916.239	514.847	-1009.15	814.995	581.736	-974.711	803.313	570.151	-1035.01	745.161
12306	0	323.326	-1033.63	1552.51	219.037	-1025.57	1557.99	351.844	-870.367	1559.98	233.272	-857.788	1566.71	276.237	-817.338	1426.82	280.246	-702.22	1155.92	271.774	-972.933	1313.69	257.676	-1059.65	1111.56	201.856	-708.909	1251.98	426.355	-915.317	1377.24	537.944	-913.252	1140.41	548.129	-907.326	1043.57	559.499	-993.916	915.776	512.76	-1020.4	814.779	579.892	-987.198	802.93	567.439	-1048.04	745.499
12307	0	322.123	-1042.19	1551.36	217.685	-1034.31	1556.66	350.382	-878.906	1558.83	231.736	-866.43	1565.13	275.232	-826.104	1425.59	279.353	-710.888	1154.84	271.088	-981.651	1312.29	257.441	-1068.33	1110.04	200.78	-717.763	1250.66	425.469	-923.926	1376.26	537.254	-921.947	1139.47	547.591	-916.87	1042.6	557.838	-1004.82	915.443	510.486	-1032.24	815.126	577.828	-999.342	802.469	564.635	-1060.94	745.716
12308	0	320.804	-1050.89	1550.25	216.46	-1043.1	1555.07	348.714	-887.431	1557.5	230.179	-875.2	1563.52	274	-834.997	1424.36	278.638	-719.5	1153.65	270.353	-990.516	1310.72	257.407	-1077.24	1108.46	199.769	-726.715	1249.31	424.45	-932.637	1375.01	536.493	-930.632	1138.41	546.834	-926.427	1041.3	555.907	-1015.75	914.696	508.069	-1043.83	815.014	575.379	-1011.49	801.729	561.775	-1073.89	746.033
12309	0	319.456	-1059.57	1549.02	215.029	-1052.05	1553.66	347.068	-896.021	1556.27	228.415	-884.069	1561.93	272.705	-843.964	1422.94	277.621	-728.323	1152.45	269.509	-999.437	1309.17	257.319	-1085.96	1106.81	198.731	-735.672	1247.82	423.414	-941.402	1373.99	535.666	-939.372	1137.38	545.99	-935.981	1040.06	554.373	-1026.47	914.346	505.399	-1055.63	815.351	573.03	-1023.58	801.065	558.79	-1086.7	746.278
12310	0	318.145	-1068.22	1548.02	213.78	-1060.78	1552.31	345.278	-904.63	1555.01	226.695	-892.853	1560.34	271.518	-852.807	1421.61	276.592	-737.187	1151.11	268.653	-1008.36	1307.82	257.145	-1095.17	1105.44	197.525	-744.816	1246.33	422.316	-950.08	1373.04	534.852	-947.986	1136.52	545.171	-945.389	1039.08	552.507	-1037.07	913.836	502.81	-1066.91	815.59	570.57	-1035.27	800.609	555.786	-1099.18	746.924
12311	0	316.712	-1076.82	1546.9	212.163	-1069.75	1550.82	343.478	-913.236	1553.83	224.841	-901.703	1558.78	269.994	-861.852	1420.37	275.671	-746.149	1149.75	267.898	-1017.34	1306.52	257.121	-1104.08	1104.08	196.306	-753.886	1244.82	421.14	-958.716	1372.07	534.067	-956.691	1135.71	544.335	-954.703	1037.95	550.858	-1047.49	913.556	500.305	-1078.26	815.992	567.759	-1046.72	799.867	552.804	-1111.5	747.354
12312	0	315.11	-1085.6	1545.74	210.661	-1078.71	1549.36	341.606	-921.914	1552.71	222.889	-910.639	1557.28	268.287	-870.803	1419.01	274.563	-755.395	1148.55	266.919	-1026.35	1305.17	256.878	-1113.46	1102.7	195.097	-763.083	1243.21	419.841	-967.492	1371.03	533.121	-965.498	1134.84	543.423	-964.052	1036.8	548.793	-1057.81	912.979	497.704	-1089.36	816.182	564.992	-1058.18	799.183	549.756	-1123.74	747.925
12313	0	313.288	-1094.43	1544.82	208.81	-1087.58	1548.07	339.637	-930.789	1551.79	220.837	-919.497	1555.97	266.915	-879.648	1417.81	273.492	-764.745	1147.06	265.834	-1035.43	1303.94	256.69	-1122.85	1101.52	193.733	-772.387	1241.69	418.472	-976.239	1370.24	532.234	-974.371	1134.24	542.532	-973.29	1036.08	547.088	-1068.01	912.775	495.125	-1100.41	816.63	562.199	-1069.43	798.849	546.429	-1135.58	748.467
12314	0	311.41	-1103.19	1544.05	206.781	-1096.48	1546.9	337.685	-939.509	1551.24	218.767	-928.42	1554.61	265.401	-888.724	1416.5	272.386	-774.245	1145.54	264.669	-1044.48	1303	256.383	-1132.01	1100.49	192.355	-781.886	1240.03	417.142	-984.913	1369.55	531.243	-983.184	1133.75	541.646	-982.231	1035.55	545.216	-1078.04	912.514	492.301	-1111.19	817.358	559.452	-1080.32	798.661	543.246	-1147.29	749.177
12315	0	309.413	-1111.98	1543.21	204.863	-1105.38	1545.72	335.731	-948.369	1550.59	216.72	-937.228	1553.35	263.852	-897.635	1415.19	271.355	-783.961	1144.06	263.607	-1053.66	1301.9	256.005	-1141.76	1099.58	191.17	-791.375	1238.33	415.778	-993.766	1368.83	530.138	-992.154	1133.03	540.582	-991.247	1034.74	543.379	-1088.07	912.344	489.645	-1121.81	817.725	556.676	-1091.24	798.276	540.175	-1158.81	749.805
12316	0	307.314	-1120.85	1542.52	202.735	-1114.24	1544.44	333.276	-957.03	1549.61	214.433	-946.094	1552.3	262.242	-906.628	1413.91	270.174	-793.888	1142.5	262.54	-1063.05	1301.03	255.68	-1151.26	1098.71	189.863	-800.964	1236.53	414.443	-1002.85	1368.21	529.097	-1001.29	1132.54	539.496	-1000.33	1034.11	541.397	-1097.91	912.162	487.027	-1132.3	818.411	553.879	-1102.07	797.995	536.778	-1169.94	750.229
12317	0	305.06	-1129.62	1541.96	200.683	-1123.03	1543.5	330.954	-965.901	1548.92	212.182	-954.811	1551.2	260.366	-915.709	1412.77	269.209	-804.01	1140.8	261.34	-1072.43	1300.33	255.331	-1160.99	1098.17	188.597	-810.658	1234.73	413.183	-1011.92	1367.83	527.918	-1010.26	1132.31	538.401	-1009.15	1033.8	539.375	-1107.41	912.251	484.65	-1142.55	819.204	551.244	-1112.52	798	533.758	-1180.91	751.057
12318	0	302.804	-1138.3	1541.56	198.281	-1131.72	1542.57	328.65	-974.482	1548.44	209.884	-963.557	1549.97	258.816	-924.722	1411.46	268.272	-814.253	1139.15	260.05	-1081.86	1299.76	254.583	-1170.82	1097.83	187.308	-820.27	1233.12	411.775	-1021.13	1367.53	526.732	-1019.18	1132.22	536.978	-1017.42	1033.28	537.689	-1116.8	912.32	482.205	-1152.44	819.867	548.788	-1122.55	798.099	530.728	-1191.32	751.623
12319	0	300.465	-1147.11	1541.22	196.293	-1140.49	1541.72	326.391	-983.235	1547.82	207.488	-972.343	1548.75	256.934	-933.81	1410.35	267.636	-824.503	1137.61	258.685	-1091.53	1299.15	254.16	-1180.49	1097.23	186.181	-830.068	1231.23	410.182	-1030.52	1367.14	525.498	-1028.33	1132.01	535.779	-1026.07	1032.95	535.844	-1126.15	912.258	479.721	-1162.72	820.45	546.201	-1132.73	797.845	527.931	-1201.57	752.24
12320	0	298.179	-1155.98	1541.3	193.854	-1149.43	1541.41	323.928	-992.053	1547.22	205	-981.247	1547.76	255.41	-942.889	1409.46	266.724	-834.86	1136.2	257.221	-1101.31	1298.76	253.297	-1190.74	1097.03	185.134	-839.86	1229.54	408.507	-1040.03	1367.04	524.262	-1037.42	1131.9	534.438	-1034.81	1032.59	534.234	-1135.27	912.416	477.671	-1171.88	820.85	543.942	-1142.38	797.85	525.174	-1211.46	752.68
12321	0	295.914	-1164.76	1541.78	191.482	-1158.32	1541.56	321.433	-1000.82	1546.94	202.541	-990.156	1547	253.488	-952.263	1408.7	265.685	-845.034	1135.11	255.667	-1111.05	1298.75	252.326	-1200.86	1097.25	184.05	-849.674	1228.4	406.822	-1049.61	1367.14	522.98	-1046.39	1132.13	533.125	-1043.45	1032.69	532.534	-1144.2	912.574	475.669	-1181.18	821.436	541.762	-1151.5	798.096	522.761	-1220.94	753.331
12322	0	293.681	-1173.65	1542.4	189.317	-1167.28	1541.77	318.986	-1009.65	1546.89	200.115	-999.097	1546.5	251.654	-961.88	1408.32	264.858	-855.094	1134.47	254.026	-1120.93	1298.94	251.335	-1211.37	1097.57	182.946	-859.592	1227.39	405.022	-1059.55	1367.49	521.799	-1055.41	1132.58	531.813	-1052.27	1033.06	530.945	-1153.02	912.801	474.034	-1190.05	822.531	539.336	-1159.72	798.053	520.623	-1229.91	753.85
12323	0	291.41	-1182.65	1543.08	187.174	-1176.38	1542.09	316.488	-1018.6	1547.01	197.744	-1008.1	1546.36	249.887	-971.613	1408.25	264.319	-865.001	1134.24	252.25	-1130.94	1299.24	250.149	-1222.1	1097.9	182.169	-869.611	1226.75	403.238	-1069.71	1367.94	520.518	-1064.59	1133.25	530.464	-1061.26	1033.53	529.629	-1161.81	913.171	472.228	-1198.86	823.133	537.217	-1168.23	798.13	518.765	-1238.56	754.22
12324	0	289.065	-1191.73	1544	184.823	-1185.55	1542.71	314.074	-1027.65	1547.55	195.28	-1017.24	1546.61	248.149	-981.302	1408.51	263.71	-875.039	1134.32	250.356	-1140.97	1299.8	248.652	-1232.87	1098.55	181.367	-879.56	1226.52	401.326	-1080.01	1368.76	519.155	-1073.93	1134.29	529.049	-1070.24	1034.52	527.789	-1170.12	913.334	470.519	-1207.24	823.674	535.492	-1176.45	798.666	517.064	-1246.8	754.666
12325	0	286.593	-1200.95	1545.4	182.36	-1194.72	1543.59	311.655	-1036.69	1548.54	192.778	-1026.4	1546.97	246.505	-991.025	1409.08	263.18	-885.252	1134.78	248.411	-1150.99	1300.72	246.93	-1243.59	1099.62	180.76	-889.407	1226.66	399.344	-1090.49	1369.96	517.787	-1083.27	1135.72	527.607	-1079.17	1036.01	526.53	-1178.52	914.058	468.91	-1215.58	824.408	533.824	-1184	799.438	515.695	-1254.6	755.252
12326	0	284.233	-1210.22	1546.69	179.971	-1204.05	1544.63	309.297	-1045.98	1549.66	190.442	-1035.59	1547.67	244.992	-1000.8	1409.88	262.977	-895.672	1135.41	246.458	-1161.04	1301.83	245.323	-1254.19	1100.75	180.247	-899.411	1227.01	397.421	-1101.14	1371.26	516.275	-1092.86	1137.1	526.024	-1088.2	1037.42	525.096	-1186.7	914.786	467.795	-1223.44	824.967	532.315	-1191.32	800.057	514.543	-1261.88	755.591
12327	0	281.781	-1219.61	1548.21	177.579	-1213.35	1545.87	306.987	-1055.41	1550.92	188.128	-1044.83	1548.68	243.547	-1010.47	1410.97	263.064	-906.379	1136.2	244.561	-1171.09	1303.14	243.436	-1264.85	1102.28	179.963	-909.276	1227.59	395.503	-1111.82	1372.83	514.745	-1102.7	1138.71	524.444	-1097.41	1038.89	523.749	-1194.74	915.624	466.433	-1230.97	825.789	530.781	-1198.54	800.632	513.471	-1268.69	755.971
12328	0	279.313	-1228.95	1550.18	175.12	-1222.56	1547.42	304.632	-1064.87	1552.6	185.832	-1054.18	1549.95	241.931	-1020.15	1412.03	263.111	-916.969	1137.13	242.626	-1180.95	1304.98	241.419	-1275.3	1104.39	179.665	-919.202	1228.29	393.65	-1122.26	1374.85	513.093	-1112.51	1140.83	522.976	-1106.57	1041.05	522.454	-1202.58	916.939	465.479	-1237.74	826.473	529.549	-1205.25	801.876	512.554	-1274.98	756.534
12329	0	276.925	-1238.39	1552.32	172.727	-1231.79	1549.13	302.428	-1074.3	1554.66	183.563	-1063.5	1551.46	240.666	-1029.69	1413.51	263.076	-927.499	1138.4	240.657	-1190.67	1306.97	239.473	-1285.46	1106.57	179.341	-929.074	1229.29	391.778	-1132.59	1377.14	511.513	-1122.55	1143.18	521.583	-1115.63	1043.61	521.177	-1210.37	918.493	464.629	-1244.69	827.477	528.518	-1211.67	803.41	511.817	-1281.05	757.24
12330	0	274.452	-1247.89	1554.31	170.347	-1241.18	1550.79	300.318	-1083.87	1556.9	181.555	-1072.87	1553.18	239.386	-1039.21	1415.07	263.066	-938.119	1139.52	238.771	-1200.47	1308.96	237.478	-1295.47	1108.93	179.113	-939.006	1230.48	389.95	-1142.87	1379.46	509.873	-1132.94	1145.54	520.04	-1124.92	1046.1	519.953	-1218.32	919.941	463.451	-1251.44	828.409	527.679	-1218.15	804.894	511.091	-1286.76	757.768
12331	0	271.992	-1257.45	1556.52	168.035	-1250.5	1552.53	298.13	-1093.44	1559.14	179.519	-1082.24	1555.08	238.007	-1048.58	1416.71	262.775	-948.512	1140.88	236.963	-1210.18	1311.16	235.642	-1305.42	1111.44	178.686	-948.89	1231.53	388.072	-1152.96	1381.81	508.159	-1143.33	1148.07	518.636	-1134.18	1048.78	518.589	-1225.97	921.582	462.396	-1258.01	829.329	526.799	-1224.42	806.586	510.432	-1292.25	758.347
12332	0	269.783	-1266.83	1558.7	165.679	-1259.7	1554.47	296.163	-1102.9	1561.69	177.561	-1091.49	1557.13	236.468	-1057.99	1418.46	262.444	-958.936	1142.26	235.157	-1219.63	1313.54	233.614	-1315.13	1114.24	178.005	-958.742	1232.89	386.392	-1162.73	1384.43	506.807	-1153.8	1150.84	517.424	-1143.35	1051.73	517.495	-1233.59	923.563	461.756	-1263.78	830.337	526.429	-1230.76	808.684	509.493	-1297.54	759.133
12333	0	267.68	-1276.2	1560.95	163.59	-1268.92	1556.35	294.36	-1112.37	1564.22	175.684	-1100.66	1559.25	235.112	-1067.26	1420.21	261.873	-969.501	1143.74	233.505	-1228.99	1315.85	232.28	-1324.33	1116.68	177.371	-968.573	1234.23	384.77	-1172.5	1386.99	505.202	-1164.02	1153.6	516.189	-1152.56	1054.64	516.557	-1241.38	925.573	461.036	-1269.92	831.468	526.109	-1237.19	810.752	508.801	-1302.77	759.868
12334	0	265.601	-1285.52	1562.92	161.665	-1278.16	1558.1	292.452	-1121.75	1566.38	173.709	-1109.91	1561.24	233.938	-1076.5	1421.89	260.995	-979.72	1145.4	231.973	-1238.38	1318.02	230.778	-1334.17	1119.29	176.638	-978.286	1235.51	383.192	-1182.17	1389.39	503.84	-1174.49	1156.23	515.012	-1161.69	1057.15	515.547	-1249.35	927.401	460.266	-1275.91	832.496	525.913	-1243.78	812.568	508.127	-1307.9	760.399
12335	0	263.592	-1294.77	1565.04	159.731	-1287.24	1559.8	290.671	-1131.05	1568.6	172.019	-1119.12	1563.21	232.57	-1085.71	1423.62	259.808	-989.477	1146.8	230.43	-1247.66	1320.03	229.373	-1343.57	1121.75	175.817	-987.943	1236.95	381.716	-1191.56	1391.72	502.527	-1184.71	1158.8	514.027	-1170.63	1059.85	514.402	-1256.65	929.201	459.607	-1281.88	833.584	525.859	-1250.45	814.726	507.324	-1313.04	760.952
12336	0	261.751	-1303.84	1567.04	157.788	-1296.17	1561.55	288.934	-1140.15	1570.65	170.452	-1128.16	1564.84	231.338	-1094.78	1425.41	258.85	-998.881	1148.36	228.949	-1256.78	1322.07	227.987	-1353.19	1124.13	174.846	-997.544	1238.22	380.324	-1201	1394.04	501.341	-1194.68	1161.25	513.171	-1179.4	1062.67	513.691	-1264.59	931.127	459.076	-1287.99	834.798	526.117	-1257.14	817.097	506.561	-1318.24	761.558
12337	0	259.98	-1313	1568.87	156.1	-1305.22	1563.13	287.372	-1149.27	1572.57	168.837	-1137.26	1566.39	230.173	-1103.87	1426.84	257.892	-1008.23	1149.89	227.658	-1265.93	1323.7	226.934	-1362.45	1126.08	173.956	-1006.95	1239.51	379.047	-1210.27	1395.9	500.297	-1204.8	1163.37	512.141	-1188.28	1064.91	512.908	-1272.06	932.724	458.522	-1294.03	835.633	526.233	-1264.06	818.929	505.863	-1323.69	761.829
12338	0	258.436	-1322.01	1570.49	154.635	-1314.21	1564.56	285.926	-1158.25	1574.12	167.169	-1146.14	1567.79	229.004	-1113.07	1428.3	256.628	-1017.61	1151.31	226.518	-1275.02	1325.2	225.97	-1372	1127.89	173.05	-1016.33	1240.89	377.842	-1219.61	1397.65	499.339	-1214.65	1165.22	511.215	-1197.11	1066.71	512.272	-1279.83	934.062	458.242	-1300.75	836.505	526.297	-1271.13	820.363	505.299	-1329.19	762.067
12339	0	257.086	-1330.96	1572.2	153.168	-1323.1	1566.05	284.437	-1167.3	1575.53	165.961	-1154.98	1569.08	227.807	-1122.2	1429.68	255.615	-1026.71	1152.85	225.485	-1284.05	1326.65	225.168	-1380.99	1129.42	172.013	-1025.63	1242.14	376.818	-1228.62	1399.22	498.499	-1224.23	1167.07	510.453	-1205.75	1068.52	511.714	-1287.5	935.443	458.038	-1307.6	837.388	526.62	-1278.27	821.951	504.83	-1334.65	762.338
12340	0	255.855	-1339.73	1573.65	151.988	-1331.86	1567.38	283.285	-1176.02	1576.9	164.769	-1163.85	1570.21	226.84	-1131.17	1431.02	254.582	-1035.42	1154.28	224.583	-1292.89	1327.88	224.544	-1389.99	1130.69	171.085	-1034.71	1243.32	375.813	-1237.58	1400.72	497.727	-1233.37	1168.49	509.87	-1214.22	1070.24	511.174	-1295.06	936.62	457.755	-1314.55	838.277	526.89	-1285.2	823.482	504.537	-1340.37	762.652
12341	0	254.746	-1348.61	1574.75	150.853	-1340.79	1568.38	282.125	-1184.87	1577.97	163.488	-1172.83	1571.18	225.662	-1140.22	1432.12	253.506	-1044.17	1155.5	223.779	-1301.76	1328.77	224.025	-1398.87	1131.42	170.16	-1043.7	1244.44	374.829	-1246.57	1401.81	496.898	-1242.3	1169.61	509.075	-1222.87	1071.43	510.724	-1302.91	937.532	458.068	-1321.4	838.545	527.081	-1292.29	824.477	504.506	-1346.29	762.805
12342	0	253.811	-1357.44	1575.83	149.978	-1349.69	1569.29	281.101	-1193.39	1579.06	162.52	-1181.57	1572.09	224.565	-1149.11	1433.23	252.619	-1052.78	1156.68	223.03	-1310.57	1329.49	223.723	-1407.16	1131.79	169.065	-1052.72	1245.69	373.888	-1255.31	1402.69	496.063	-1250.79	1170.46	508.372	-1231.34	1072.43	509.902	-1310.42	937.91	457.626	-1326.62	838.397	527.276	-1299.2	825.227	504.539	-1352.29	762.98
12343	0	252.99	-1366.05	1576.93	149.077	-1358.44	1570.22	280.174	-1201.89	1580.07	161.516	-1190.32	1572.91	223.627	-1157.89	1434.3	251.461	-1061.25	1157.8	222.426	-1319.22	1330.2	223.473	-1415.68	1132.25	168.086	-1061.34	1246.67	373.17	-1263.89	1403.68	495.239	-1258.94	1171.34	507.649	-1239.59	1073.59	509.616	-1317.95	938.758	457.697	-1333.04	838.576	527.632	-1305.96	826.227	504.81	-1358.46	763.258
12344	0	252.299	-1374.65	1577.76	148.473	-1367	1570.95	279.292	-1210.54	1580.75	160.837	-1198.89	1573.6	222.632	-1166.63	1435.22	250.619	-1069.48	1158.77	221.956	-1327.72	1330.79	223.439	-1424.1	1132.53	166.914	-1070.05	1247.57	372.435	-1272.35	1404.6	494.522	-1266.73	1171.98	507.051	-1247.77	1074.55	509.111	-1325.29	939.27	457.92	-1339.78	838.937	527.843	-1312.55	826.864	505.28	-1364.74	763.519
12345	0	251.731	-1383.27	1578.48	147.815	-1375.87	1571.7	278.5	-1219.13	1581.31	159.951	-1207.69	1574.27	221.753	-1175.22	1436.1	249.402	-1077.64	1159.88	221.62	-1336.13	1331.21	223.549	-1432.3	1132.64	165.72	-1078.56	1248.77	371.785	-1280.69	1405.24	493.748	-1274.3	1172.59	506.256	-1255.93	1075.15	509.08	-1332.73	939.828	458.308	-1346.48	839.026	528.168	-1319.36	827.375	506.053	-1371.15	763.747
12346	0	251.162	-1391.83	1579.17	147.311	-1384.55	1572.28	277.84	-1227.67	1581.99	159.357	-1216.31	1574.84	220.682	-1183.79	1436.98	248.335	-1085.58	1160.89	221.284	-1344.4	1331.61	223.672	-1440.35	1132.68	164.584	-1086.92	1249.86	371.25	-1288.86	1405.94	492.983	-1281.66	1173.22	505.683	-1263.76	1075.95	508.66	-1339.78	940.207	458.62	-1353.38	839.426	528.566	-1325.92	827.99	506.854	-1377.73	764.166
12347	0	250.629	-1400.37	1579.75	146.806	-1393.08	1572.7	277.17	-1236.19	1582.64	158.598	-1224.93	1575.39	219.853	-1192.2	1437.78	247.035	-1093.53	1161.81	220.95	-1352.63	1331.92	223.848	-1448.22	1132.64	163.477	-1095.15	1250.78	370.699	-1296.83	1406.65	492.389	-1288.8	1173.75	505.023	-1271.21	1076.86	508.539	-1346.81	940.732	458.859	-1360.06	839.525	528.97	-1332.2	828.722	507.737	-1384.31	764.7
12348	0	250.243	-1408.92	1580.02	146.482	-1401.92	1572.85	276.597	-1244.6	1583.15	157.969	-1233.57	1575.84	219.08	-1200.52	1438.59	245.913	-1101.23	1162.68	220.768	-1360.84	1332.14	224.078	-1456.13	1132.46	162.205	-1103.33	1251.75	370.214	-1304.74	1407.02	491.818	-1295.89	1174.12	504.398	-1278.53	1077.36	508.712	-1353.88	941.165	459.651	-1367.04	839.483	529.338	-1338.79	829.243	508.744	-1391.09	765.132
12349	0	249.941	-1417.48	1580.13	146.265	-1410.64	1572.93	276.011	-1253.11	1583.57	157.379	-1242.29	1576.41	218.275	-1208.85	1439.26	244.645	-1109.03	1163.56	220.721	-1368.97	1332.4	224.487	-1463.97	1132.31	161.112	-1111.42	1252.61	369.854	-1312.55	1407.47	491.452	-1302.71	1174.51	503.777	-1285.71	1077.68	508.827	-1360.81	941.417	459.953	-1374.05	839.789	529.564	-1345.4	829.428	509.793	-1398.01	765.646
12350	0	249.788	-1425.88	1580.32	146.151	-1419.37	1572.99	275.451	-1261.48	1584.2	156.639	-1251.03	1577.04	217.583	-1217.06	1439.82	243.581	-1116.64	1164.4	220.648	-1377.01	1332.74	224.734	-1471.8	1132.46	160.072	-1119.47	1253.48	369.536	-1320.21	1407.99	491.318	-1309.34	1175.01	503.257	-1292.6	1078.12	509.094	-1367.51	941.959	460.529	-1380.78	840.028	529.905	-1351.85	829.998	510.888	-1404.87	766.37
12351	0	249.807	-1434.28	1580.43	146.124	-1428.17	1573.09	274.787	-1269.65	1584.82	156.147	-1259.66	1577.65	216.807	-1225.39	1440.3	242.522	-1124.18	1165.19	220.593	-1384.9	1333.13	225.092	-1479.56	1132.78	159.062	-1127.42	1254.25	369.234	-1327.65	1408.43	491.126	-1315.72	1175.54	502.904	-1299.27	1078.7	509.411	-1374.14	942.548	461.078	-1387.67	840.6	530.545	-1358.21	830.657	511.897	-1411.75	767.202
12352	0	249.851	-1442.69	1580.31	146.141	-1436.99	1572.99	274.142	-1278	1585.29	155.432	-1268.47	1578.24	216.363	-1233.5	1440.76	241.557	-1131.87	1165.82	220.581	-1392.79	1333.35	225.283	-1487.54	1132.88	158.13	-1135.35	1254.95	369.009	-1335.25	1408.82	491.05	-1322.2	1175.94	502.582	-1305.95	1079.05	509.492	-1380.74	942.802	461.516	-1394.61	840.74	530.791	-1364.88	831.114	512.809	-1418.68	767.833
12353	0	250.04	-1451.04	1580.22	146.378	-1445.86	1572.95	273.593	-1286.24	1585.88	154.915	-1277.28	1578.76	215.851	-1241.52	1441.2	240.741	-1139.33	1166.46	220.552	-1400.62	1333.59	225.49	-1495.42	1133.18	157.428	-1143.17	1255.53	368.838	-1342.71	1409.16	490.797	-1328.23	1176.19	502.32	-1312.52	1079.47	510.088	-1387.48	943.306	462.092	-1401.78	841.227	531.11	-1371.51	831.621	513.725	-1425.71	768.567
12354	0	250.395	-1459.29	1580.25	146.62	-1454.57	1573.01	272.912	-1294.64	1586.41	154.154	-1286.08	1579.3	215.341	-1249.44	1441.69	240.15	-1146.75	1166.98	220.532	-1408.34	1333.93	225.661	-1503.22	1133.73	156.795	-1150.98	1256.08	368.699	-1350.07	1409.67	490.905	-1334.46	1176.75	502.231	-1318.84	1080.07	510.489	-1393.99	943.918	462.526	-1408.82	841.786	531.446	-1378.07	832.378	514.614	-1432.76	769.39
12355	0	250.877	-1467.47	1580.21	147.048	-1463.43	1572.95	272.328	-1302.51	1586.84	153.523	-1294.81	1579.74	214.9	-1257.34	1442.06	239.654	-1154.3	1167.64	220.547	-1416.01	1334.19	225.824	-1510.91	1134.14	156.195	-1158.79	1256.54	368.643	-1357.36	1410	490.921	-1340.49	1177.27	502.154	-1325.22	1080.52	511.057	-1400.61	944.447	462.932	-1415.86	842.342	531.793	-1384.72	832.9	515.388	-1439.8	770.111
12356	0	251.468	-1475.55	1580.03	147.639	-1472.29	1572.82	271.671	-1310.46	1586.91	152.933	-1303.56	1580.04	214.584	-1265.13	1442.33	239.247	-1161.8	1168.02	220.602	-1423.68	1334.17	225.98	-1518.46	1134.33	155.747	-1166.45	1256.92	368.614	-1364.82	1410.11	491.076	-1346.87	1177.5	502.138	-1331.85	1080.61	511.611	-1407.32	944.695	463.631	-1423.3	842.752	532.005	-1391.63	833.039	516.061	-1446.94	770.465
12357	0	252.166	-1483.42	1579.94	148.348	-1481.08	1572.76	271.089	-1318.26	1587.06	152.197	-1312.35	1580.35	214.31	-1272.9	1442.57	238.995	-1169.16	1168.44	220.636	-1431.27	1334.36	226.081	-1525.85	1134.47	155.341	-1174.08	1257.26	368.585	-1372.12	1410.34	491.168	-1353.1	1177.82	502.216	-1338.34	1080.7	512.169	-1414.03	945.061	464.037	-1430.53	843.19	532.226	-1398.55	833.249	516.562	-1454.02	770.934
12358	0	253.042	-1491.13	1579.9	149.186	-1489.73	1572.81	270.196	-1325.78	1587.17	151.457	-1321	1580.4	214.051	-1280.65	1442.68	238.737	-1176.55	1168.61	220.582	-1438.81	1334.38	226.104	-1533.05	1134.52	154.955	-1181.74	1257.43	368.487	-1379.47	1410.33	491.202	-1359.29	1178.15	502.435	-1344.64	1081.06	512.501	-1420.65	945.345	464.356	-1437.55	843.522	532.576	-1405.32	833.655	517.065	-1461.13	771.417
12359	0	254.133	-1498.78	1579.7	150.268	-1498.67	1572.76	269.277	-1333.15	1587.08	150.544	-1329.89	1580.25	213.873	-1288.42	1442.71	238.589	-1183.99	1168.68	220.642	-1446.49	1334.27	226.131	-1540.32	1134.23	154.647	-1189.38	1257.55	368.489	-1386.88	1410.24	491.314	-1365.74	1178.26	502.619	-1351.11	1081.09	513.182	-1427.54	945.638	464.863	-1445.1	843.939	532.8	-1412.21	833.771	517.507	-1468.42	771.636
12360	0	255.346	-1506.25	1579.5	151.526	-1507.44	1572.61	268.379	-1340.43	1586.94	149.751	-1338.67	1580.14	213.693	-1296.11	1442.67	238.394	-1191.39	1168.68	220.656	-1454.14	1334.01	226.139	-1547.61	1133.87	154.56	-1197.02	1257.58	368.452	-1394.41	1409.89	491.486	-1372.38	1178.03	502.915	-1357.84	1080.84	513.732	-1434.45	945.5	465.36	-1452.67	844.074	533.137	-1419.32	833.559	517.883	-1475.71	771.659
12361	0	256.684	-1513.65	1579.42	152.875	-1516.24	1572.48	267.529	-1347.56	1586.8	148.664	-1347.57	1580.1	213.656	-1303.82	1442.6	238.262	-1198.87	1168.67	220.635	-1461.72	1333.89	226.135	-1555.03	1133.58	154.423	-1204.52	1257.68	368.463	-1401.97	1409.71	491.785	-1379.2	1177.99	503.06	-1364.41	1080.69	514.011	-1441.25	945.456	465.749	-1459.63	844.019	533.35	-1426.28	833.47	518.514	-1482.89	771.707
12362	0	258.048	-1520.86	1579.41	154.166	-1524.75	1572.31	266.611	-1354.78	1586.62	147.923	-1356.12	1579.92	213.602	-1311.58	1442.45	238.035	-1206.34	1168.65	220.685	-1469.22	1333.75	226.17	-1562.36	1133.29	154.411	-1212.1	1257.57	368.526	-1409.45	1409.52	492.036	-1385.89	1177.93	503.48	-1371.19	1080.74	514.825	-1448.05	945.644	466.477	-1467.1	844.393	533.734	-1433.13	833.407	519.198	-1489.93	771.788
12363	0	259.208	-1528.2	1578.93	155.335	-1533.3	1571.96	265.934	-1362.07	1586.25	147.338	-1364.85	1579.51	213.673	-1319.31	1442.15	238.047	-1213.8	1168.47	220.745	-1476.88	1333.32	226.21	-1569.83	1132.77	154.417	-1219.65	1257.37	368.622	-1417.12	1409.07	492.327	-1392.98	1177.6	503.643	-1378.05	1080.35	515.336	-1455.01	945.291	467.04	-1474.5	844.25	533.903	-1439.99	832.908	519.728	-1497.1	771.561
12364	0	260.04	-1535.8	1578.41	156.283	-1541.53	1571.42	265.648	-1369.52	1585.88	146.98	-1373.27	1579.09	213.726	-1327.11	1441.77	238.081	-1221.31	1168.14	220.804	-1484.55	1332.79	226.199	-1577.39	1132.01	154.423	-1227.27	1257.19	368.67	-1424.87	1408.4	492.337	-1400.09	1177.1	503.789	-1385.04	1079.8	515.755	-1462.04	944.8	467.562	-1481.97	843.819	534.171	-1446.86	832.324	520.363	-1504.44	771.078
12365	0	260.591	-1543.48	1577.85	156.905	-1549.64	1570.88	265.544	-1377.18	1585.45	146.999	-1381.4	1578.65	213.917	-1334.93	1441.33	238.145	-1228.77	1167.86	220.805	-1492.2	1332.23	226.077	-1584.84	1131.33	154.487	-1234.86	1256.89	368.802	-1432.52	1407.87	492.33	-1407.21	1176.7	504.06	-1392.06	1079.56	516.226	-1469.01	944.319	468.107	-1489.38	843.519	534.712	-1453.63	832.137	521.028	-1511.6	770.833
12366	0	261.04	-1551.32	1577.29	157.262	-1557.43	1570.26	265.832	-1384.91	1584.89	147.293	-1389.16	1578.02	214.12	-1342.78	1440.76	238.273	-1236.34	1167.53	220.976	-1499.84	1331.61	226.097	-1592.3	1130.63	154.588	-1242.48	1256.56	369.102	-1440.36	1407.26	492.523	-1414.44	1176.22	504.314	-1399.19	1079.08	516.768	-1476.03	943.742	469.222	-1496.82	842.923	534.786	-1460.39	831.282	521.796	-1518.79	770.412
12367	0	261.137	-1559.32	1576.45	157.358	-1565.13	1569.52	266.566	-1392.98	1584.13	148.054	-1396.8	1577.41	214.504	-1350.68	1440.14	238.503	-1243.88	1166.83	221.218	-1507.65	1330.77	226.184	-1599.95	1129.6	154.888	-1250.13	1256.03	369.416	-1448.22	1406.33	492.718	-1422.14	1175.16	504.454	-1406.55	1078.06	517.26	-1483.17	942.833	469.86	-1504.27	842.082	535.094	-1467.41	830.164	522.514	-1525.9	769.551
12368	0	261.03	-1567.46	1575.65	157.246	-1572.56	1568.81	267.526	-1401.24	1583.32	149.022	-1404.12	1576.79	214.974	-1358.5	1439.45	238.714	-1251.58	1166.15	221.466	-1515.38	1329.89	226.267	-1607.53	1128.67	155.309	-1257.73	1255.45	369.8	-1456.2	1405.44	492.914	-1429.86	1174.12	504.564	-1414	1077.05	517.641	-1490.29	941.794	470.447	-1511.69	841.124	535.271	-1474.38	829.04	523.202	-1532.97	768.643
12369	0	260.733	-1575.64	1574.75	156.893	-1579.83	1568.01	268.767	-1409.52	1582.52	150.123	-1411.43	1576	215.483	-1366.41	1438.66	239.02	-1259.34	1165.4	221.698	-1523.16	1328.97	226.28	-1615.2	1127.7	155.749	-1265.41	1254.77	370.209	-1464.17	1404.54	493.275	-1437.47	1173.23	504.883	-1421.31	1076.24	518.11	-1497.5	940.845	470.978	-1518.91	840.129	535.597	-1481.18	828.08	523.909	-1540	767.79
12370	0	260.509	-1583.96	1573.73	156.62	-1587.12	1567.19	270.093	-1417.83	1581.5	151.451	-1418.62	1575.08	216.08	-1374.33	1437.72	239.498	-1267.14	1164.53	221.959	-1530.96	1327.91	226.402	-1622.99	1126.63	156.296	-1273.08	1253.98	370.639	-1472.26	1403.39	493.334	-1444.99	1172.04	505.112	-1428.91	1075.16	518.564	-1504.83	939.571	471.495	-1526.32	838.866	535.866	-1488.15	826.864	524.684	-1547.13	766.514
12371	0	260.318	-1592.3	1572.64	156.387	-1594.52	1566.21	271.42	-1426.3	1580.27	152.855	-1425.86	1574.22	216.847	-1382.35	1436.74	239.945	-1275.04	1163.69	222.416	-1538.96	1326.74	226.518	-1630.88	1125.3	156.94	-1280.88	1253.14	371.118	-1480.56	1402.13	493.578	-1453.05	1170.46	505.331	-1436.77	1073.71	518.727	-1512.22	937.877	471.896	-1533.66	837.175	536.228	-1495.4	825.39	525.221	-1554.18	764.924
12372	0	260.299	-1600.5	1571.53	156.3	-1601.74	1565.37	272.779	-1434.58	1579.05	154.189	-1433.17	1573.27	217.552	-1390.31	1435.69	240.48	-1282.95	1162.61	222.736	-1546.94	1325.56	226.683	-1638.67	1124.11	157.568	-1288.67	1252.2	371.687	-1488.9	1400.83	493.907	-1461.15	1169.06	505.631	-1444.69	1072.33	519.219	-1519.83	936.456	472.276	-1540.96	835.564	536.589	-1502.65	823.934	525.661	-1561.22	763.375
12373	0	260.517	-1608.67	1570.53	156.42	-1609.11	1564.59	274.325	-1442.87	1577.81	155.676	-1440.52	1572.15	218.274	-1398.36	1434.51	241.122	-1290.83	1161.52	223.279	-1554.9	1324.43	226.93	-1646.52	1122.88	158.333	-1296.57	1251.13	372.355	-1497.14	1399.55	494.31	-1469.18	1167.66	505.921	-1452.57	1070.91	519.583	-1527.35	934.909	472.712	-1548.25	834.002	537.018	-1509.93	822.477	526.156	-1568.27	761.616
12374	0	260.837	-1616.88	1569.38	156.709	-1616.5	1563.77	275.889	-1451.1	1576.43	157.286	-1447.93	1571.09	219.155	-1406.46	1433.42	241.787	-1298.95	1160.35	223.841	-1562.94	1323.1	227.136	-1654.56	1121.48	159.154	-1304.56	1250.1	373.003	-1505.58	1398.11	494.779	-1477.56	1165.97	506.242	-1460.72	1069.24	519.827	-1535.02	933.065	473.008	-1555.63	832.127	537.382	-1517.35	820.757	526.485	-1575.39	759.75
12375	0	261.348	-1625.03	1568.31	157.234	-1624.16	1562.86	277.31	-1459.32	1575.14	158.829	-1455.48	1570.02	220.009	-1414.64	1432.24	242.526	-1307.16	1159.15	224.35	-1571.26	1321.9	227.358	-1662.76	1120.15	159.948	-1312.56	1249.03	373.622	-1514.02	1396.55	495.243	-1486.09	1164.38	506.462	-1468.86	1067.47	520.278	-1542.92	931.318	473.234	-1563.17	830.143	537.668	-1524.92	818.949	526.677	-1582.63	757.721
12376	0	262.078	-1633.12	1567.01	157.959	-1631.67	1561.88	278.936	-1467.4	1573.69	160.229	-1463.1	1568.84	220.939	-1422.75	1431.04	243.182	-1315.25	1157.9	224.823	-1579.31	1320.63	227.511	-1671.14	1118.86	160.779	-1320.61	1247.84	374.31	-1522.39	1395.21	495.656	-1494.56	1162.94	506.837	-1477.05	1066.06	520.593	-1550.78	929.586	473.247	-1570.79	828.517	538.05	-1532.41	817.383	526.869	-1589.77	755.691
12377	0	262.996	-1641.25	1566.05	158.82	-1639.38	1561.04	280.556	-1475.42	1572.3	161.896	-1470.68	1567.76	221.876	-1431	1429.76	243.91	-1323.44	1156.75	225.55	-1587.48	1319.47	227.798	-1679.45	1117.76	161.671	-1328.81	1246.68	375.145	-1530.89	1393.76	496.249	-1503.2	1161.4	507.228	-1485.3	1064.5	520.884	-1558.63	927.865	473.77	-1578.35	826.538	538.485	-1540.03	815.796	527.051	-1596.96	753.644
12378	0	264.215	-1649.28	1564.87	160.102	-1647.12	1560.15	282.26	-1483.67	1570.84	163.544	-1478.49	1566.58	222.924	-1439.29	1428.47	244.684	-1331.89	1155.47	226.416	-1596.12	1318.22	228.133	-1687.89	1116.42	162.368	-1337.16	1245.54	376.011	-1539.29	1392.21	496.715	-1512.1	1159.41	507.541	-1493.73	1062.52	521.239	-1566.68	925.893	474.141	-1586.14	824.574	538.61	-1547.77	813.752	527.174	-1604.25	751.52
12379	0	265.668	-1657.21	1563.87	161.559	-1655.08	1559.31	283.826	-1491.7	1569.18	165.222	-1486.38	1565.5	224.009	-1447.62	1427.24	245.366	-1340.29	1153.97	227.29	-1604.36	1316.99	228.463	-1696.53	1115.29	163.253	-1345.49	1244.4	377.06	-1548.01	1390.66	497.189	-1521.07	1157.49	507.813	-1502.19	1060.62	521.465	-1574.74	924.012	474.428	-1594.1	822.851	538.823	-1555.64	811.715	527.363	-1611.73	749.435
12380	0	267.342	-1665.1	1562.96	163.223	-1663.06	1558.76	285.203	-1499.47	1567.63	166.777	-1494.15	1564.29	225.149	-1455.98	1426.07	246.101	-1348.87	1152.57	228.087	-1612.7	1315.98	228.743	-1705.08	1114.31	164.182	-1354.07	1243.12	378.047	-1556.36	1389.18	497.965	-1529.98	1155.98	508.328	-1510.48	1059.12	521.981	-1582.86	922.423	474.766	-1602.13	821.324	539.102	-1563.31	810.056	527.53	-1619.32	747.523
12381	0	269.21	-1672.99	1562.04	165.079	-1671.26	1558.16	286.791	-1507.13	1566.04	168.124	-1502.4	1563.01	226.356	-1464.52	1424.92	246.9	-1357.41	1151.32	228.947	-1621.58	1315.05	229.163	-1713.86	1113.15	164.982	-1362.62	1242.07	379.021	-1564.84	1387.78	498.353	-1538.68	1154.17	508.818	-1518.94	1057.57	522.408	-1591.05	920.586	475.308	-1610.38	819.737	539.29	-1570.92	808.289	527.71	-1626.96	745.746
12382	0	271.33	-1680.78	1561.25	167.343	-1679.6	1557.52	288.241	-1514.95	1564.55	169.516	-1510.63	1561.82	227.643	-1473.14	1423.8	247.718	-1366.23	1150.04	229.969	-1630.22	1313.95	229.658	-1722.76	1112.16	165.725	-1371.34	1240.99	380.159	-1573.4	1386.24	499.109	-1547.93	1152.38	509.079	-1527.44	1055.79	522.737	-1599.11	918.635	476.037	-1619.03	818.334	539.291	-1578.48	806.316	528.178	-1634.84	744.048
12383	0	273.681	-1688.55	1560.46	169.573	-1687.9	1557.06	289.628	-1522.58	1562.94	170.891	-1519.01	1560.53	228.804	-1481.77	1422.59	248.288	-1375.16	1148.77	231.06	-1638.95	1313.02	230.231	-1731.6	1111.2	166.623	-1380.26	1239.88	381.364	-1582.08	1384.89	499.755	-1556.76	1150.76	509.531	-1535.79	1054.21	523.463	-1607.09	917.101	477.035	-1627.94	817.297	539.288	-1585.76	804.371	528.915	-1642.5	742.443
12384	0	276.177	-1696.39	1559.91	172.004	-1696.28	1556.68	291.12	-1530.24	1561.46	172.459	-1527.31	1559.36	230.092	-1490.39	1421.45	248.878	-1384.17	1147.47	232.224	-1647.73	1312.17	230.999	-1740.58	1110.52	167.274	-1389.23	1238.75	382.673	-1590.64	1383.63	500.207	-1565.19	1149.19	509.908	-1544.02	1052.75	524.301	-1615.01	915.623	478.57	-1637.11	816.574	538.976	-1592.7	802.503	530.171	-1650.23	741.286
12385	0	278.623	-1704.2	1559.15	174.466	-1704.73	1556.34	292.802	-1538.01	1559.94	174.108	-1535.65	1558.2	231.456	-1499.1	1420.33	249.633	-1393.49	1146.05	233.521	-1656.63	1311.29	231.845	-1749.74	1109.61	168.154	-1398.33	1237.63	384.065	-1599.24	1382.26	500.687	-1573.79	1147.39	510.181	-1552.21	1051.1	525.247	-1622.85	914.131	480.563	-1646.86	815.967	538.326	-1599.51	800.286	531.329	-1658.06	739.914
12386	0	280.963	-1712.31	1558.47	176.924	-1713.01	1555.97	294.783	-1546	1558.55	176.068	-1544	1557.29	232.922	-1507.8	1419.24	250.26	-1402.96	1144.47	234.835	-1665.57	1310.54	232.77	-1759.05	1109.01	168.947	-1407.39	1236.51	385.528	-1607.89	1380.9	501.557	-1582.52	1145.71	510.533	-1560.3	1049.44	526.396	-1630.54	912.594	482.958	-1656.83	815.438	537.518	-1606.4	798.073	532.649	-1665.22	738.241
12387	0	283.191	-1720.43	1558.04	179.075	-1721.28	1555.72	296.828	-1553.99	1557.48	178.294	-1552.15	1556.4	234.647	-1516.46	1418.28	250.99	-1412.5	1143.13	236.252	-1674.51	1309.76	233.659	-1768.47	1108.63	169.964	-1416.59	1235.46	387.124	-1616.57	1379.77	502.394	-1590.7	1144.24	510.864	-1567.95	1047.9	527.755	-1638.05	911.137	485.637	-1667.44	815.334	536.415	-1613	796.103	534.182	-1672.57	736.976
12388	0	285.243	-1728.87	1557.65	181.159	-1729.43	1555.65	299.22	-1562.33	1556.47	180.608	-1560.45	1555.72	236.364	-1525.21	1417.39	251.501	-1422.26	1141.94	237.768	-1683.62	1309.23	234.673	-1778.09	1108.3	170.895	-1425.75	1234.41	388.792	-1625.15	1378.27	503.302	-1598.79	1142.7	511.225	-1575.69	1046.36	529.315	-1645.48	909.543	488.633	-1677.81	815.044	535.073	-1619.87	794.006	536.004	-1680.41	735.878
12389	0	287.288	-1737.47	1557.49	183.151	-1737.62	1555.85	302.094	-1571.2	1555.54	183.357	-1568.49	1555.29	238.256	-1534.07	1416.77	252.321	-1431.89	1140.88	239.378	-1692.87	1308.93	235.741	-1787.93	1108.09	171.814	-1435.05	1233.76	390.669	-1634.12	1377.27	504.174	-1606.96	1140.88	511.692	-1583.79	1044.6	531.073	-1653.03	907.96	492.137	-1687.95	814.732	533.319	-1627.19	791.622	537.859	-1688.49	734.829
12390	0	289.132	-1746.26	1557.8	184.957	-1745.72	1556.52	305.054	-1580.02	1554.93	186.472	-1576.48	1555.24	240.068	-1543.05	1416.44	253.043	-1441.43	1140.18	241.056	-1702.33	1309.01	236.751	-1797.98	1108.37	172.865	-1444.51	1233.42	392.594	-1643.09	1376.42	505.168	-1614.94	1139.35	511.997	-1591.64	1043.01	533.015	-1660.45	906.698	496.007	-1698.19	814.776	531.248	-1634.8	789.507	539.914	-1696.57	734.128
12391	0	290.978	-1755.02	1558.37	186.639	-1753.6	1557.56	308.162	-1589.01	1554.77	189.407	-1584.49	1555.38	241.82	-1552.19	1416.34	253.562	-1450.85	1139.82	242.738	-1711.56	1309.38	237.741	-1808.02	1108.97	173.599	-1453.96	1233.44	394.486	-1651.9	1375.84	506.1	-1622.61	1138.33	512.469	-1599.37	1042	534.961	-1667.69	905.78	500.218	-1708.46	815.315	529.272	-1642.86	788.118	542.125	-1704.57	733.813
12392	0	292.863	-1764.17	1559.06	188.52	-1761.7	1558.59	311.329	-1598.09	1554.71	192.764	-1592.73	1555.73	243.599	-1561.48	1416.52	253.963	-1460.25	1139.86	244.448	-1721.06	1309.84	238.798	-1818.24	1109.61	174.449	-1463.44	1233.77	396.267	-1660.91	1375.34	507.093	-1630.43	1137.59	512.757	-1607.18	1041.19	537.035	-1675.44	905.224	504.825	-1719	816.053	527.172	-1651.45	786.99	544.473	-1712.71	733.6
12393	0	294.744	-1773.19	1559.77	190.506	-1769.92	1559.95	314.545	-1607.39	1554.77	196.012	-1600.94	1556.4	245.304	-1570.93	1417.07	254.396	-1469.59	1140.15	246.241	-1730.68	1310.46	239.799	-1828.61	1110.43	175.326	-1473.15	1234.48	398.062	-1670.13	1375.13	508.08	-1638.58	1137.08	512.911	-1615.13	1040.38	538.988	-1683.29	904.841	509.684	-1729.43	816.906	525.019	-1660.68	786.037	545.903	-1720.44	733.287
12394	0	296.931	-1782.19	1561	192.609	-1778.27	1561.78	317.787	-1616.57	1555.05	199.284	-1609.36	1557.38	246.815	-1580.3	1417.91	254.855	-1478.95	1141.03	247.903	-1740.13	1311.56	240.821	-1838.67	1111.76	175.817	-1482.8	1235.51	399.848	-1679.08	1375.39	508.961	-1646.43	1137.05	513.095	-1623	1040.19	541.005	-1690.97	905.105	514.512	-1739.49	818.284	522.958	-1670.44	785.69	547.784	-1728.28	733.54
12395	0	299.306	-1791.24	1562.36	194.968	-1786.71	1563.83	320.829	-1625.63	1555.69	202.343	-1617.91	1558.64	248.432	-1589.65	1419.07	254.981	-1488.44	1141.89	249.617	-1749.43	1312.92	241.937	-1848.55	1113.37	176.332	-1492.53	1236.96	401.582	-1687.93	1376.05	509.766	-1654.27	1137.48	513.169	-1631.01	1040.37	542.963	-1698.96	906.028	519.363	-1749.53	820.109	520.594	-1680.83	785.951	550.236	-1736.65	734.633
12396	0	302.02	-1800.07	1563.68	197.775	-1795.56	1565.98	323.553	-1634.58	1556.45	205.37	-1626.61	1560.31	249.843	-1598.99	1420.39	255.124	-1497.93	1143.09	251.362	-1758.76	1314.38	243.072	-1858.17	1114.98	176.963	-1502.32	1238.5	403.333	-1696.89	1376.86	510.515	-1662.35	1137.97	513.159	-1639.17	1040.7	544.882	-1707.1	907.01	523.924	-1759.22	821.671	519.458	-1691.35	786.654	552.497	-1744.87	735.498
12397	0	305.049	-1809.04	1565.31	200.667	-1804.54	1568.33	326.091	-1643.55	1557.4	207.796	-1635.63	1562.02	251.435	-1608.06	1422.06	255.642	-1507.65	1144.55	252.953	-1768.09	1316.06	244.153	-1867.54	1116.76	177.37	-1512.09	1240.18	404.944	-1705.71	1377.92	511.097	-1670.51	1138.68	513.344	-1647.81	1041.36	546.787	-1715.42	908.278	528.143	-1768.95	823.455	518.859	-1701.9	787.629	555.01	-1754.07	737.028
12398	0	307.704	-1817.54	1566.9	203.628	-1813.61	1570.56	328.346	-1652.1	1558.81	210.075	-1644.81	1564.14	253.112	-1617.2	1423.58	255.939	-1517.7	1145.94	254.485	-1777.19	1318.05	245.181	-1876.62	1119.02	177.904	-1521.81	1241.89	406.553	-1714.36	1379.34	511.687	-1678.56	1139.94	513.388	-1656.07	1042.47	548.436	-1723.41	909.737	531.874	-1778.39	825.456	518.64	-1712.41	788.681	557.636	-1762.85	738.978
12399	0	310.755	-1826.05	1568.59	206.736	-1822.7	1573.04	330.385	-1660.44	1560.41	212.033	-1654.02	1566.21	254.581	-1626.13	1425.23	256.167	-1527.7	1147.21	256.01	-1786.27	1320.11	246.196	-1885.66	1121.3	178.604	-1531.53	1243.45	408.107	-1722.85	1380.87	512.272	-1686.78	1141.3	513.7	-1665.04	1043.97	550.092	-1731.98	911.443	535.408	-1787.91	827.523	519.261	-1723.37	789.978	560.29	-1771.91	740.905
12400	0	313.878	-1834.77	1570.22	209.659	-1832.04	1575.12	332.342	-1668.94	1562	214	-1663.09	1568.56	256.068	-1634.87	1426.84	256.434	-1537.83	1148.48	257.538	-1795.26	1322.15	247.287	-1894.82	1123.6	179.11	-1541.11	1245.02	409.675	-1731.43	1382.23	512.848	-1695.37	1142.33	513.899	-1673.91	1044.91	551.754	-1740.88	913.005	538.615	-1797.87	829.512	520.139	-1734.21	791.348	563.059	-1781.6	742.766
12401	0	316.634	-1843.17	1571.91	212.599	-1840.99	1577.22	334.118	-1677.33	1563.6	215.819	-1672.15	1570.83	257.485	-1643.5	1428.41	256.815	-1547.69	1149.57	259.032	-1804.13	1324.26	248.359	-1904.02	1126.03	179.84	-1550.64	1246.57	411.271	-1739.87	1383.77	513.46	-1704.13	1143.42	514.649	-1683.13	1046.16	553.43	-1749.91	914.608	541.57	-1807.83	831.544	521.404	-1744.87	792.72	565.912	-1791.51	744.659
12402	0	319.144	-1851.47	1573.64	215.094	-1849.75	1579.36	335.9	-1685.55	1565.41	217.545	-1680.9	1573	259.104	-1652.12	1429.9	257.58	-1557.15	1150.79	260.479	-1812.83	1326.44	249.405	-1912.92	1128.74	180.825	-1560.06	1247.91	412.814	-1748.08	1385.35	514.405	-1712.98	1144.94	515.529	-1692.42	1047.66	555.182	-1759.15	916.406	544.291	-1817.73	833.678	522.805	-1755.61	794.075	568.656	-1801.42	746.804
12403	0	321.37	-1859.82	1575.26	217.281	-1858.41	1581.36	337.598	-1693.77	1567.02	219.317	-1689.65	1574.79	260.588	-1660.62	1431.26	258.348	-1566.48	1151.81	261.926	-1821.47	1328.38	250.486	-1921.99	1131.12	181.604	-1569.25	1249.05	414.376	-1756.38	1386.89	515.387	-1722.03	1146.25	516.477	-1701.7	1048.83	556.931	-1768.69	918.059	546.919	-1828.01	835.614	524.45	-1766.74	795.432	571.325	-1811.65	748.832
12404	0	323.276	-1868.21	1576.84	219.384	-1866.84	1583.07	339.339	-1702.13	1568.33	221.107	-1698.02	1576.41	261.987	-1668.97	1432.51	259.156	-1575.74	1152.69	263.347	-1830.16	1330.02	251.541	-1930.91	1133.29	182.756	-1578.44	1250.08	415.815	-1764.64	1387.86	516.448	-1731.42	1147.19	517.873	-1711.49	1049.96	558.766	-1778.67	919.456	549.302	-1838.61	837.196	526.348	-1777.36	796.811	573.761	-1822.03	750.421
12405	0	324.924	-1876.43	1578.3	220.95	-1875.11	1584.97	341.149	-1710.39	1569.5	222.89	-1706.3	1577.86	263.557	-1677.34	1433.64	260	-1585.04	1153.54	264.705	-1838.77	1331.61	252.578	-1939.81	1135.45	183.758	-1587.46	1251.12	417.335	-1772.96	1389.06	517.879	-1740.86	1148.28	519.336	-1721	1051.02	560.604	-1788.77	920.89	551.389	-1849.26	838.849	528.509	-1788.07	798.273	576.406	-1832.91	752.189
12406	0	326.586	-1884.83	1580.03	222.508	-1882.99	1586.61	342.994	-1718.66	1570.52	224.829	-1714.22	1579.03	264.987	-1685.81	1434.51	260.983	-1594.31	1154.27	266.067	-1847.18	1333.05	253.577	-1948.51	1137.42	184.83	-1596.32	1252.05	418.852	-1781.19	1390.14	519.331	-1750.16	1149.29	521.11	-1730.54	1051.99	562.508	-1799.05	922.362	553.343	-1860.11	840.46	530.866	-1799.34	799.681	579.028	-1843.78	754.15
12407	0	327.911	-1892.91	1581.29	223.942	-1890.89	1588.21	344.961	-1727.05	1571.26	226.904	-1722.12	1580.03	266.495	-1694.2	1435.32	262.282	-1603.57	1154.88	267.393	-1855.73	1334.16	254.543	-1957.36	1138.93	186.015	-1604.86	1252.91	420.268	-1789.59	1390.93	521.055	-1759.94	1149.99	522.819	-1740.37	1052.75	564.278	-1809.56	923.508	554.942	-1871.19	841.57	533.273	-1810.24	800.833	581.773	-1855.09	755.809
12408	0	329.141	-1901.34	1582.51	225.18	-1898.6	1589.56	346.943	-1735.5	1571.62	228.817	-1729.91	1580.72	267.815	-1702.67	1436.1	263.46	-1612.57	1155.56	268.647	-1864.12	1335.02	255.456	-1966.05	1140.03	187.297	-1613.46	1253.68	421.576	-1798.12	1391.43	522.725	-1769.61	1150.47	524.845	-1749.94	1053.22	566.059	-1820.38	924.488	556.173	-1882.75	842.774	535.175	-1821.5	801.279	584.556	-1866.57	757.193
12409	0	330.143	-1909.46	1583.35	226.269	-1906.1	1590.65	348.828	-1743.75	1571.95	230.793	-1737.57	1581.21	269.168	-1711.11	1436.75	264.52	-1621.31	1156.14	269.661	-1872.49	1335.65	256.134	-1974.71	1140.89	188.506	-1621.62	1254.41	422.758	-1806.73	1391.91	524.386	-1778.91	1151.16	526.74	-1759.58	1053.75	567.781	-1831.41	925.536	557.042	-1894.36	843.795	539.003	-1832.41	803.006	587.434	-1878.07	759.205
12410	0	331.153	-1917.66	1583.95	227.265	-1913.75	1591.62	350.847	-1752.1	1572.08	232.874	-1745.29	1581.49	270.421	-1719.57	1437.17	265.478	-1629.55	1156.69	270.691	-1880.83	1336.09	256.776	-1983.29	1141.46	189.643	-1629.85	1254.93	423.798	-1815.41	1392.26	526.24	-1788.33	1151.9	528.665	-1769.21	1054.28	569.252	-1842.49	926.403	557.452	-1905.97	844.56	542.417	-1843.19	803.977	590.273	-1889.87	760.94
12411	0	332.189	-1925.93	1584.25	228.382	-1921.45	1592.31	352.739	-1760.52	1571.91	234.933	-1753.02	1581.72	271.533	-1728.05	1437.41	266.713	-1637.65	1157.03	271.594	-1889.15	1336.22	257.286	-1991.69	1141.32	190.967	-1637.99	1255.39	424.739	-1824.26	1392.35	527.831	-1797.84	1152.11	530.521	-1778.88	1054.3	570.705	-1853.87	926.999	557.585	-1917.82	844.972	546.13	-1853.83	804.887	593.021	-1902.36	762.304
12412	0	333.352	-1934.35	1584.52	229.557	-1929.15	1592.8	354.546	-1768.96	1571.45	236.776	-1760.71	1582.01	272.627	-1736.39	1437.73	267.81	-1645.67	1157.26	272.402	-1897.42	1336.15	257.663	-2000.06	1141.09	191.98	-1645.81	1255.93	425.474	-1833.14	1392.29	529.264	-1807.09	1152.21	532.262	-1788.58	1054.27	572.225	-1865.43	927.575	557.275	-1929.57	845.312	549.799	-1864.58	805.722	595.834	-1914.87	764.058
12413	0	334.489	-1942.25	1584.43	230.709	-1936.86	1593.27	356.083	-1777.12	1571.17	238.448	-1768.5	1582.09	273.668	-1744.62	1437.87	268.92	-1653.65	1157.64	273.058	-1905.49	1336.14	257.889	-2008.15	1140.82	193.055	-1653.66	1256.24	426.116	-1841.93	1392.37	530.829	-1816.46	1152.77	534.164	-1798.64	1054.57	573.494	-1876.9	928.422	556.836	-1941.07	845.818	553.76	-1875.23	806.582	598.165	-1927.54	765.631
12414	0	335.748	-1950.25	1584.1	231.961	-1944.76	1593.51	357.61	-1785.26	1570.62	239.926	-1776.41	1582.09	274.559	-1752.9	1438.01	270.051	-1661.55	1157.99	273.517	-1913.64	1335.88	257.918	-2016	1140.23	194.189	-1661.4	1256.53	426.676	-1850.8	1392.41	532.292	-1825.69	1153.18	535.972	-1808.71	1054.86	574.674	-1888.41	929.09	556.184	-1952.31	845.819	558.091	-1885.87	808.012	600.646	-1940.14	767.251
12415	0	336.965	-1958.24	1583.68	233.378	-1952.81	1593.59	358.783	-1793.28	1570	241.185	-1784.36	1582.06	275.439	-1761.03	1438.09	271.224	-1669.51	1158.31	273.943	-1921.74	1335.48	257.798	-2023.8	1139.44	195.312	-1669.13	1256.79	427	-1859.59	1391.95	533.371	-1834.93	1153.28	537.619	-1818.67	1054.93	575.729	-1899.82	929.429	555.45	-1963.86	845.998	562.591	-1896.37	808.787	602.454	-1953.33	768.541
12416	0	338.226	-1966.21	1583.4	234.54	-1960.97	1593.77	359.561	-1801.12	1569.45	242.004	-1792.53	1581.89	276.125	-1769.21	1438.14	272.371	-1677.16	1158.56	274.195	-1929.8	1335.18	257.486	-2031.33	1138.59	196.27	-1676.67	1257.1	427.378	-1868.31	1391.84	534.468	-1844.37	1153.38	539.353	-1828.79	1055.18	576.605	-1911.33	929.944	554.152	-1974.28	845.657	566.191	-1907.22	809.793	604.02	-1966.27	769.915
12417	0	339.611	-1973.94	1583.09	235.921	-1969.17	1593.76	360.277	-1808.81	1568.89	242.634	-1800.78	1581.72	276.884	-1777.32	1438.09	273.547	-1684.79	1158.79	274.376	-1937.73	1334.79	257.112	-2038.75	1137.86	197.3	-1684.12	1257.17	427.682	-1876.92	1391.73	535.494	-1853.71	1153.58	540.856	-1838.63	1055.31	577.425	-1922.66	930.477	553.164	-1984.59	845.463	569.677	-1917.89	810.421	605.711	-1979.34	771.35
12418	0	340.852	-1981.75	1582.73	237.3	-1977.47	1593.66	360.716	-1816.63	1568.34	243.059	-1808.97	1581.57	277.613	-1785.4	1438.08	274.76	-1692.42	1158.86	274.549	-1945.62	1334.45	256.753	-2046.24	1137.02	198.389	-1691.54	1257.27	428.152	-1885.73	1391.44	536.343	-1863.32	1153.3	542.386	-1848.82	1055.06	578.128	-1933.68	930.69	551.985	-1994.62	844.955	573.017	-1929.01	811.084	606.4	-1992.02	771.954
12419	0	341.816	-1989.15	1581.93	238.288	-1985.68	1593.48	361.017	-1824.4	1567.91	243.376	-1817.19	1581.34	278.403	-1793.44	1438.06	275.984	-1700.04	1159.07	274.619	-1953.57	1334.1	256.29	-2053.78	1136.42	199.542	-1698.92	1257.52	428.41	-1894.23	1391.02	537.017	-1872.92	1152.88	543.717	-1858.87	1054.76	578.629	-1944.68	930.814	550.808	-2004.62	844.593	575.792	-1940.01	811.511	606.845	-2004.69	772.484
12420	0	342.564	-1997.16	1581.89	238.971	-1993.88	1593.25	361.202	-1832.16	1567.73	243.544	-1825.4	1581.13	279.118	-1801.48	1438.13	277.059	-1707.45	1159.41	274.575	-1961.43	1333.85	255.759	-2061.42	1135.96	200.575	-1706.22	1257.72	428.648	-1902.64	1390.85	537.766	-1882.51	1152.98	544.888	-1868.87	1054.99	579.173	-1955.49	931.169	549.577	-2014.33	844.172	578.303	-1950.67	812.198	606.764	-2016.7	773.003
12421	0	342.931	-2005.09	1581.67	239.417	-2001.83	1593.07	361.443	-1840	1567.66	243.745	-1833.46	1580.93	279.697	-1809.45	1438.15	278.008	-1714.91	1159.66	274.626	-1969.26	1333.66	255.318	-2068.97	1135.67	201.475	-1713.59	1257.88	428.886	-1910.96	1390.61	538.624	-1892.24	1153.28	546.03	-1878.61	1055.27	579.383	-1966.11	931.494	548.475	-2023.95	844.047	580.31	-1961.42	812.965	606.555	-2028.39	773.508
12422	0	342.947	-2013.07	1581.41	239.476	-2009.75	1592.77	361.743	-1848.06	1567.5	244.117	-1841.31	1580.66	280.3	-1817.4	1438.22	278.919	-1722.39	1159.86	274.644	-1977.09	1333.48	254.978	-2076.61	1135.35	202.296	-1720.98	1258.21	429.084	-1919.3	1390.33	539.056	-1901.9	1153.14	546.964	-1888.23	1055.23	579.42	-1976.58	931.624	547.371	-2033.47	843.605	581.709	-1971.94	813.194	605.966	-2039.95	773.754
12423	0	342.612	-2021.32	1581.46	239.146	-2017.44	1592.58	362.281	-1856.33	1567.42	244.49	-1849.05	1580.45	280.889	-1825.29	1438.31	279.728	-1729.73	1160.23	274.58	-1984.91	1333.31	254.647	-2084.04	1135.07	203.128	-1728.35	1258.58	429.383	-1927.52	1390.21	539.303	-1911.39	1153.11	547.655	-1897.91	1055.07	579.354	-1986.66	931.822	546.273	-2042.75	843.503	582.902	-1982.45	813.801	605.253	-2051.04	773.895
12424	0	342.036	-2029.43	1581.56	238.567	-2024.82	1592.51	362.781	-1864.63	1567.43	245.036	-1856.62	1580.25	281.276	-1833.15	1438.36	280.196	-1736.77	1160.63	274.511	-1992.59	1333.28	254.414	-2091.25	1135.06	203.802	-1735.73	1258.79	429.625	-1935.64	1390.26	539.648	-1920.67	1153.33	548.384	-1907.32	1055.37	579.125	-1996.52	932.25	545.156	-2051.92	843.459	583.938	-1992.78	814.492	604.346	-2061.63	774.209
12425	0	341.24	-2037.65	1581.57	237.756	-2032.19	1592.41	363.366	-1873.07	1567.41	245.639	-1864.08	1580.13	281.678	-1840.92	1438.39	281.004	-1744.2	1160.67	274.474	-2000.27	1333.28	254.262	-2098.48	1134.82	204.454	-1743.03	1258.94	429.704	-1943.75	1390.27	540.055	-1930.03	1153.57	548.823	-1916.5	1055.46	578.831	-2006.12	932.433	544.123	-2061.08	843.523	584.226	-2002.66	814.817	603.298	-2072.12	774.416
12426	0	340.263	-2045.96	1581.52	236.826	-2039.55	1592.26	364.076	-1881.71	1567.24	246.315	-1871.43	1579.84	282.027	-1848.78	1438.42	281.592	-1751.55	1160.88	274.381	-2008.09	1333.11	254.142	-2105.7	1134.39	205.102	-1750.42	1259.1	429.779	-1951.89	1390.03	540.101	-1939.08	1153.4	548.951	-1925.55	1055.33	578.334	-2015.52	932.404	543.039	-2070.14	843.389	584.019	-2012.44	814.933	602.12	-2082.29	774.336
12427	0	339.276	-2054.17	1581.52	235.948	-2046.84	1592.19	364.541	-1890.12	1567.12	246.771	-1878.79	1579.56	282.249	-1856.59	1438.47	282.028	-1758.86	1161.05	274.121	-2015.8	1333.01	254.029	-2112.7	1134.11	205.473	-1757.72	1259.29	429.78	-1960.05	1390.1	539.998	-1947.71	1153.39	549.022	-1934.34	1055.34	577.815	-2024.62	932.471	541.763	-2078.98	843.413	583.627	-2021.83	815.157	600.801	-2092.03	774.306
12428	0	338.652	-2062.52	1581.82	235.112	-2054.16	1592.11	364.733	-1898.33	1566.98	247.086	-1886.26	1579.26	282.375	-1864.46	1438.35	282.438	-1766.19	1161.07	273.973	-2023.45	1332.9	253.994	-2119.87	1133.78	205.923	-1765.08	1259.44	429.799	-1968.11	1390.14	540.055	-1956.25	1153.54	548.981	-1942.88	1055.39	577.071	-2033.48	932.511	540.564	-2087.78	843.603	582.84	-2030.89	815.307	599.352	-2101.44	774.277
12429	0	338.098	-2070.44	1581.71	234.588	-2061.68	1592.05	364.934	-1906.41	1566.54	247.294	-1893.75	1578.95	282.492	-1872.27	1438.28	282.969	-1773.47	1161.09	273.893	-2031.2	1332.72	253.989	-2127.07	1133.25	206.404	-1772.46	1259.35	429.703	-1976.19	1390.06	539.985	-1964.76	1153.34	548.818	-1951.51	1055.18	576.335	-2042.24	932.371	539.349	-2096.61	843.504	581.643	-2039.93	815.022	597.878	-2110.69	774.102
12430	0	337.643	-2078.08	1581.46	234.189	-2069.39	1591.96	364.621	-1914.37	1566.01	247.18	-1901.43	1578.62	282.384	-1880.17	1438.11	283.213	-1780.74	1161.04	273.727	-2039.02	1332.35	254.032	-2134.5	1132.82	206.715	-1779.85	1259.31	429.649	-1984.32	1389.95	539.737	-1973.16	1153.02	548.449	-1960.15	1054.79	575.526	-2050.89	932.143	538.013	-2105.36	843.548	580.357	-2048.99	814.769	596.252	-2119.65	773.649
12431	0	337.382	-2085.75	1581.46	233.814	-2077.07	1591.82	364.046	-1921.83	1565.63	246.615	-1909.25	1577.96	282.273	-1888.04	1437.98	283.574	-1788	1161.11	273.47	-2046.69	1332.01	253.976	-2142.01	1132.33	206.943	-1787.37	1259.2	429.397	-1992.37	1390	539.608	-1981.32	1153.24	548.23	-1968.62	1054.87	574.543	-2059.43	932.107	536.599	-2114.05	843.556	579.02	-2057.6	814.752	594.55	-2128.43	773.514
12432	0	337.22	-2093.25	1581.22	233.616	-2084.92	1591.51	363.347	-1929.31	1565.18	245.883	-1917.14	1577.36	281.964	-1895.97	1437.72	283.755	-1795.16	1161.05	273.285	-2054.53	1331.57	253.978	-2149.58	1131.85	207.159	-1794.88	1258.95	429.054	-2000.38	1389.84	539.479	-1989.43	1153.34	547.951	-1976.94	1054.89	573.517	-2068.03	931.942	535.113	-2122.57	843.536	577.555	-2066.19	814.778	592.638	-2137.15	773.167
12433	0	337.088	-2100.84	1580.8	233.54	-2092.88	1590.9	362.621	-1936.8	1564.59	245.026	-1925.11	1576.62	281.795	-1903.88	1437.45	283.883	-1802.6	1160.88	273.07	-2062.44	1330.82	253.955	-2157.38	1130.99	207.193	-1802.49	1258.73	428.841	-2008.59	1389.53	539.189	-1997.63	1153	547.623	-1985.48	1054.48	572.459	-2076.72	931.476	533.616	-2131.34	843.22	575.996	-2075.03	814.337	590.663	-2145.94	772.415
12434	0	336.94	-2108.53	1580.52	233.328	-2100.84	1590.44	361.852	-1944.44	1563.98	244.213	-1932.99	1575.92	281.412	-1911.95	1437	284.029	-1810.03	1160.64	272.906	-2070.27	1330.19	253.983	-2165.08	1130.23	207.196	-1810.21	1258.31	428.506	-2016.51	1388.95	538.843	-2005.83	1152.45	547.18	-1993.97	1053.83	571.381	-2085.38	930.998	532.106	-2139.85	842.889	574.355	-2083.83	813.705	588.508	-2154.66	771.593
12435	0	336.669	-2116.13	1580.34	232.977	-2108.73	1589.98	360.933	-1951.94	1563.34	243.428	-1940.89	1574.9	281.033	-1919.97	1436.4	284.128	-1817.57	1160.15	272.709	-2078.02	1329.65	253.993	-2172.85	1129.54	207.055	-1817.94	1257.8	428.23	-2024.54	1388.72	538.502	-2013.81	1152.01	546.739	-2002.23	1053.29	570.295	-2093.96	930.525	530.553	-2148.43	842.636	572.785	-2092.38	813.149	586.399	-2163.28	770.796
12436	0	336.219	-2123.76	1579.86	232.475	-2116.59	1589.47	360.202	-1959.66	1562.6	242.67	-1948.84	1573.83	280.536	-1928.05	1435.78	284.113	-1825.23	1159.66	272.568	-2085.85	1328.96	254.05	-2180.71	1128.7	206.843	-1825.84	1257.1	427.86	-2032.23	1388.16	538.222	-2021.91	1151.4	546.386	-2010.54	1052.6	569.274	-2102.59	929.955	529.046	-2157.02	842.351	571.395	-2101.2	812.557	584.228	-2172.05	769.912
12437	0	335.546	-2131.5	1579.27	231.802	-2124.64	1588.74	359.388	-1967.59	1561.62	241.946	-1956.84	1572.84	280.122	-1936.13	1435.03	283.798	-1833	1159.07	272.358	-2093.92	1328.07	254.201	-2188.66	1127.67	206.426	-1833.76	1256.4	427.522	-2040.17	1387.41	537.782	-2030.14	1150.49	545.797	-2018.82	1051.58	568.272	-2111.37	929.238	527.487	-2165.67	841.733	570.042	-2110.09	811.708	582.054	-2181.02	768.787
12438	0	334.765	-2139.6	1578.84	230.96	-2132.53	1588.01	358.719	-1975.68	1560.76	241.052	-1964.88	1571.61	279.446	-1944.28	1434.36	283.469	-1840.87	1158.49	272.15	-2101.88	1327.09	254.26	-2196.55	1126.63	205.919	-1841.73	1255.74	427.125	-2048.09	1386.68	537.373	-2038.17	1149.76	545.357	-2027.16	1050.84	567.121	-2119.97	928.47	526.013	-2174.25	841.299	568.841	-2119.08	811.134	579.815	-2190.13	767.656
12439	0	333.874	-2147.58	1578.19	230.109	-2140.4	1587.1	358.116	-1983.78	1559.92	240.335	-1972.82	1570.21	278.828	-1952.43	1433.46	282.928	-1848.66	1157.73	271.722	-2110.03	1326.11	254.37	-2204.41	1125.48	205.493	-1849.84	1254.86	426.606	-2055.78	1385.86	536.901	-2045.96	1149.08	544.888	-2035.21	1050.12	566.059	-2128.55	927.774	524.418	-2182.73	840.668	567.735	-2127.88	810.634	577.727	-2199.06	766.957
12440	0	332.93	-2155.8	1577.43	229.039	-2148.45	1586.14	357.254	-1992	1558.73	239.591	-1980.95	1568.92	278.209	-1960.66	1432.51	282.22	-1856.52	1156.95	271.424	-2118.33	1325.02	254.55	-2212.27	1124.11	204.822	-1858.19	1254.01	426.316	-2063.8	1385.01	536.541	-2054.12	1148.04	544.381	-2043.48	1049	565.034	-2137.19	926.87	522.935	-2191.41	840.012	566.572	-2136.89	809.71	575.544	-2208.09	765.827
12441	0	331.954	-2164.01	1576.44	228.15	-2156.61	1585	356.393	-2000.4	1557.43	238.791	-1989.11	1567.62	277.36	-1969.08	1431.57	281.654	-1864.53	1156.22	271.096	-2126.6	1323.82	254.741	-2220.22	1122.76	204.128	-1866.45	1253.08	425.911	-2071.84	1384.05	535.876	-2062.13	1146.66	543.833	-2051.89	1047.67	563.984	-2145.88	925.892	521.392	-2199.8	839.249	565.239	-2145.98	808.549	573.643	-2217.15	764.726
12442	0	330.961	-2172.29	1575.55	227.176	-2164.79	1583.91	355.509	-2008.69	1556.3	237.9	-1997.42	1566.19	276.575	-1977.48	1430.51	280.975	-1872.55	1155.33	270.573	-2134.9	1322.68	254.813	-2228.13	1121.32	203.203	-1874.62	1251.95	425.374	-2079.87	1383.03	535.445	-2070.02	1145.71	543.262	-2060.15	1046.69	563.004	-2154.44	924.964	519.905	-2208.41	838.457	563.995	-2154.74	807.718	571.672	-2226.01	763.75
12443	0	329.945	-2180.63	1574.48	226.169	-2173.13	1582.63	354.576	-2017.19	1555.13	236.799	-2005.77	1564.62	275.704	-1986.02	1429.41	280.203	-1880.62	1154.34	270.048	-2143.45	1321.51	254.913	-2236.17	1119.91	202.301	-1883.01	1250.78	424.646	-2087.95	1381.96	534.991	-2077.83	1144.83	542.714	-2068.24	1045.72	561.963	-2163.04	923.985	518.281	-2216.71	837.725	562.803	-2163.44	806.839	569.919	-2234.95	762.802
12444	0	328.977	-2189.04	1573.26	225.213	-2181.76	1581.37	353.404	-2025.61	1553.58	235.766	-2014.47	1563.03	274.652	-1994.66	1428.2	279.531	-1888.66	1153.31	269.6	-2152.04	1320	254.984	-2244.37	1118.28	201.555	-1891.58	1249.71	424.006	-2096.44	1380.89	534.377	-2085.68	1143.58	542.266	-2076.76	1044.49	560.888	-2171.72	922.841	516.945	-2225.39	836.768	561.527	-2172.26	805.652	568.174	-2243.88	761.65
12445	0	328.063	-2197.61	1572.14	224.176	-2190.42	1580.08	351.948	-2033.92	1552.15	234.509	-2023.11	1561.49	273.639	-2003.24	1427.06	278.527	-1896.88	1152.27	268.992	-2160.73	1318.46	254.959	-2252.76	1116.63	200.375	-1900.19	1248.6	423.26	-2104.75	1379.68	533.606	-2093.54	1142.24	541.613	-2085.25	1043.17	559.753	-2180.35	921.627	515.429	-2233.96	835.723	560.252	-2181	804.375	566.532	-2252.66	760.509
12446	0	326.975	-2205.89	1570.97	223.073	-2199.04	1578.65	350.597	-2042.34	1550.85	232.869	-2031.82	1559.96	272.515	-2011.91	1425.9	277.549	-1905	1151.2	268.323	-2169.42	1317.26	254.899	-2261.05	1115.08	199.391	-1908.78	1247.36	422.321	-2113.05	1378.56	533.103	-2101.47	1141.42	541.079	-2093.55	1042.22	558.733	-2188.89	920.679	514.05	-2242.36	834.844	559.111	-2189.6	803.477	564.892	-2261.32	759.653
12447	0	325.892	-2214.35	1569.8	221.912	-2207.77	1577.22	349.063	-2050.83	1549.57	231.393	-2040.52	1558.28	271.269	-2020.75	1424.66	276.725	-1913.53	1150.17	267.568	-2178.2	1315.91	254.861	-2269.68	1113.64	198.283	-1917.74	1246.03	421.441	-2121.42	1377.56	532.545	-2109.52	1140.59	540.667	-2102.2	1041.41	557.746	-2197.58	919.77	512.753	-2250.79	834.058	558.056	-2198.35	802.619	563.507	-2270.1	758.738
12448	0	324.447	-2222.94	1568.7	220.58	-2216.46	1575.67	347.451	-2059.37	1548.38	229.724	-2049.18	1556.7	270.179	-2029.69	1423.64	275.664	-1922.28	1148.99	266.866	-2187.08	1314.44	254.79	-2278.39	1112.1	197.19	-1926.65	1244.85	420.47	-2129.92	1376.48	532.072	-2117.87	1139.78	539.996	-2110.65	1040.29	556.805	-2206.27	918.792	511.463	-2259.23	832.88	557.045	-2207.15	801.643	562.113	-2278.88	757.782
12449	0	322.755	-2231.48	1567.6	218.838	-2225.2	1574.18	345.602	-2067.9	1547.4	227.851	-2058.04	1555.11	268.857	-2038.34	1422.38	274.585	-1931.09	1147.86	266.011	-2196.05	1313.18	254.561	-2287.13	1110.6	195.806	-1935.69	1243.59	419.301	-2138.37	1375.37	531.261	-2126.03	1138.89	539.467	-2119.16	1039.51	555.79	-2214.85	917.95	510.274	-2267.71	832.058	556.239	-2215.87	800.887	560.825	-2287.66	757.066
12450	0	321.015	-2239.91	1566.51	216.99	-2233.96	1572.75	343.618	-2076.48	1546.45	225.981	-2066.77	1553.51	267.364	-2047.29	1421.11	273.438	-1940.04	1146.49	265.202	-2204.88	1312.02	254.428	-2296.02	1109.28	194.549	-1944.69	1242.14	418.338	-2146.96	1374.63	530.56	-2134.27	1138.27	538.748	-2127.23	1038.78	554.921	-2223.31	917.199	509.238	-2276.04	831.344	555.531	-2224.34	800.369	559.628	-2296.26	756.257
12451	0	319.187	-2248.59	1565.42	215.134	-2242.68	1571.14	341.639	-2085.16	1545.41	223.814	-2075.53	1552.04	265.829	-2056.13	1419.78	272.428	-1948.95	1145.18	264.311	-2213.85	1310.83	254.309	-2305.03	1108.02	193.207	-1953.89	1240.48	417.029	-2155.37	1373.55	529.742	-2142.77	1137.44	538.118	-2135.62	1037.93	554.18	-2231.74	916.348	508.21	-2284.33	830.431	554.771	-2232.86	799.451	558.628	-2304.83	755.405
12452	0	317.247	-2257.42	1564.56	213.205	-2251.52	1569.71	339.505	-2093.81	1544.32	221.572	-2084.39	1550.58	264.495	-2064.93	1418.39	271.144	-1958.17	1143.73	263.713	-2222.49	1309.44	254.165	-2314.08	1106.75	191.699	-1963.21	1238.97	415.781	-2164.07	1372.65	528.684	-2151.48	1136.38	537.168	-2143.96	1036.84	553.313	-2240.1	915.477	507.296	-2292.64	829.729	554.15	-2241.6	798.559	557.64	-2313.38	754.677
12453	0	315.317	-2266.22	1563.96	211.047	-2260.33	1568.51	337.324	-2102.43	1543.41	219.439	-2093.16	1549.18	262.799	-2073.84	1417.11	269.915	-1967.54	1142.18	262.492	-2231.8	1308.7	254.019	-2323.12	1105.66	190.328	-1972.5	1237.13	414.602	-2172.57	1372	527.714	-2159.95	1135.87	536.475	-2152.14	1036.37	552.615	-2248.27	914.984	506.507	-2300.77	829.073	553.542	-2249.78	798.036	556.939	-2321.72	754.262
12454	0	313.111	-2274.66	1563.07	208.902	-2269.11	1567.28	334.905	-2111.06	1542.42	216.849	-2102.01	1547.68	260.843	-2082.74	1415.72	268.682	-1976.99	1140.59	261.405	-2240.86	1307.78	253.808	-2332.35	1104.85	188.961	-1981.85	1235.46	413.301	-2181.33	1371.41	526.928	-2168.56	1135.7	535.654	-2160.22	1036.04	551.953	-2256.45	914.532	505.785	-2308.86	828.664	553.09	-2257.94	797.776	556.254	-2329.91	753.776
12455	0	310.92	-2283.44	1562.28	206.713	-2277.98	1566.02	332.402	-2119.65	1541.48	214.443	-2110.9	1546.11	259.185	-2091.63	1414.35	267.661	-1986.79	1138.99	260.174	-2250.14	1306.79	253.595	-2341.74	1103.87	187.662	-1991.42	1233.62	411.673	-2190.13	1370.79	525.801	-2177.33	1135.22	534.866	-2168.65	1035.67	551.272	-2264.8	914.042	505.108	-2316.97	827.944	552.687	-2266.22	797.376	555.788	-2338.12	753.226
12456	0	308.631	-2292.21	1561.53	204.402	-2286.79	1564.82	329.882	-2128.45	1540.36	211.849	-2119.87	1544.59	257.192	-2100.67	1413.18	266.746	-1996.74	1137.5	258.918	-2259.56	1305.89	253.266	-2351.31	1102.94	186.329	-2001.07	1231.69	410.034	-2199.12	1370.27	524.733	-2186.22	1134.79	533.911	-2177.08	1035.23	550.591	-2273.09	913.54	504.542	-2325.1	827.423	552.098	-2274.31	796.79	555.405	-2346.22	752.717
12457	0	306.209	-2300.73	1560.86	201.912	-2295.53	1563.82	327.383	-2137.17	1539.33	209.312	-2128.72	1543.12	255.171	-2109.6	1411.87	265.855	-2006.96	1135.7	257.544	-2268.84	1305.27	252.934	-2360.84	1102.4	184.785	-2010.7	1229.92	408.359	-2207.88	1369.84	523.842	-2195.01	1134.83	533.335	-2185.5	1035.33	550.009	-2281.26	913.328	503.994	-2333.03	826.816	551.794	-2282.23	796.702	555.054	-2354.06	752.405
12458	0	303.78	-2309.58	1560.63	199.42	-2304.32	1563.12	324.793	-2145.98	1538.48	206.886	-2137.63	1541.9	253.258	-2118.6	1410.67	264.989	-2017.25	1134.38	256.126	-2278.27	1304.65	252.492	-2370.54	1101.88	183.288	-2020.32	1228.03	406.816	-2216.96	1369.7	522.916	-2203.92	1134.95	532.693	-2194.18	1035.5	549.506	-2289.57	913.291	503.618	-2340.93	826.469	551.608	-2290.17	796.649	554.834	-2361.87	752.106
12459	0	301.14	-2318.31	1560.24	196.894	-2313.14	1562.58	322.625	-2155.26	1537.8	204.362	-2146.61	1540.58	251.212	-2127.71	1409.84	263.935	-2027.48	1133.18	254.605	-2287.89	1304.3	252.023	-2380.46	1101.54	181.933	-2030.04	1226.49	404.933	-2226.02	1369.46	521.923	-2212.94	1134.99	531.954	-2203.03	1035.52	548.953	-2297.91	912.966	503.24	-2349	825.823	551.301	-2298.12	796.281	554.663	-2369.61	751.678
12460	0	298.399	-2327.32	1560.65	194.116	-2322.08	1562.36	319.898	-2164.11	1537.23	201.756	-2155.56	1539.54	249.252	-2137	1409.15	262.749	-2037.52	1132.27	252.928	-2297.52	1304.06	251.392	-2390.45	1101.28	180.564	-2039.81	1225.42	403.094	-2235.39	1369.55	520.768	-2221.76	1135.19	531.251	-2211.91	1035.98	548.376	-2306.18	913	502.832	-2357.42	825.742	551.061	-2305.78	796.292	554.555	-2377.12	751.459
12461	0	295.762	-2336.5	1561.28	191.299	-2331.06	1562.44	317.093	-2173.18	1537.04	199.04	-2164.71	1538.75	247.014	-2146.54	1408.6	261.86	-2047.26	1131.54	251.27	-2307.21	1304.22	250.696	-2400.58	1101.45	179.291	-2049.62	1224.44	401.211	-2244.96	1369.98	519.757	-2230.53	1136.14	530.388	-2220.57	1036.82	547.838	-2314.36	913.293	502.408	-2364.4	825.332	550.965	-2313.18	796.828	554.434	-2384.45	751.489
12462	0	292.853	-2345.5	1561.93	188.517	-2340.05	1562.58	314.482	-2182.46	1537.01	196.297	-2173.97	1538.08	245.152	-2155.98	1408.46	260.965	-2056.99	1131.11	249.512	-2316.98	1304.37	249.846	-2410.94	1101.75	178.144	-2059.55	1223.7	399.35	-2254.75	1370.53	518.556	-2239.39	1136.95	529.497	-2229.38	1037.84	547.271	-2322.48	913.765	502.099	-2371.84	825.41	550.877	-2320.52	797.31	554.453	-2391.58	751.677
12463	0	290.108	-2354.79	1563.05	185.691	-2349.17	1563.1	311.783	-2191.84	1537.08	193.486	-2183.14	1537.75	243.215	-2165.51	1408.55	260.239	-2066.59	1131.19	247.714	-2326.68	1304.84	248.816	-2421.48	1102.24	177.545	-2069.33	1223.35	397.544	-2264.95	1371.52	517.439	-2248.67	1138.23	528.664	-2238.49	1039.07	546.692	-2330.48	914.519	501.764	-2379.1	825.673	550.683	-2327.86	797.914	554.448	-2398.53	752.124
12464	0	287.272	-2363.91	1564.44	182.8	-2358.2	1563.83	308.783	-2201.01	1537.68	190.619	-2192.45	1537.78	241.35	-2175	1409.19	259.865	-2076.3	1131.63	245.883	-2336.4	1305.69	247.708	-2431.98	1103.45	176.528	-2079.22	1223.24	395.54	-2274.89	1372.95	516.049	-2257.73	1140.05	527.838	-2247.31	1041.12	546.084	-2338.34	915.91	501.346	-2386.04	826.433	550.706	-2334.8	799.419	554.501	-2405.09	753.096
12465	0	284.313	-2373.02	1566.13	179.89	-2367.36	1564.88	305.843	-2210.15	1538.73	187.734	-2201.77	1537.91	239.86	-2184.53	1410.07	259.371	-2086.5	1132.47	244.059	-2346.01	1306.69	246.4	-2442.32	1104.88	175.952	-2088.92	1223.59	393.444	-2284.92	1374.67	514.965	-2266.95	1142.48	527.103	-2256.07	1043.87	545.486	-2346.16	917.769	500.986	-2392.66	827.438	550.79	-2341.36	801.472	554.566	-2411.41	754.426
12466	0	281.294	-2382.06	1567.66	176.936	-2376.59	1566.03	303.07	-2219.48	1539.99	184.759	-2211.13	1538.49	237.799	-2193.89	1411.23	258.926	-2096.71	1133.5	242.208	-2355.63	1307.86	245.061	-2452.56	1106.49	175.613	-2098.65	1224.28	391.354	-2294.98	1376.47	513.751	-2276.49	1145.05	526.383	-2265.01	1046.71	544.812	-2353.89	919.687	500.653	-2399.21	828.626	550.89	-2347.88	803.689	554.643	-2417.45	755.929
12467	0	278.267	-2391.26	1569.94	174.018	-2385.77	1567.44	300.098	-2228.58	1541.47	181.963	-2220.36	1539.27	236.271	-2203.17	1412.7	259.076	-2107.21	1134.71	240.416	-2365.19	1309.34	243.584	-2462.6	1108.39	174.995	-2108.3	1225.15	389.292	-2304.97	1378.77	512.423	-2286.2	1147.76	525.47	-2273.81	1049.67	544.144	-2361.36	921.854	500.321	-2405.45	829.968	550.909	-2354.1	805.839	554.656	-2423.35	757.565
12468	0	275.237	-2400.21	1572.18	171.095	-2394.66	1569.18	297.426	-2237.78	1543.6	179.25	-2229.53	1540.45	234.487	-2212.39	1414.16	259.087	-2117.48	1136.11	238.619	-2374.47	1311.14	242.056	-2472.45	1110.75	174.402	-2117.93	1226.18	387.381	-2314.9	1381.47	511.225	-2295.85	1150.95	524.573	-2282.4	1053.08	543.487	-2368.64	924.331	500.044	-2411.28	831.732	551.116	-2360.04	808.632	554.764	-2428.64	759.433
12469	0	272.407	-2409.23	1574.82	168.217	-2403.57	1571.17	294.798	-2246.8	1545.69	176.63	-2238.63	1541.91	232.991	-2221.57	1415.83	258.807	-2127.66	1137.54	236.941	-2383.76	1313.31	240.488	-2482.18	1113.32	174.094	-2127.5	1227.35	385.496	-2324.58	1384.1	510.101	-2305.58	1154.18	523.797	-2291.02	1056.64	542.963	-2375.74	927.026	499.871	-2416.96	833.64	551.397	-2365.77	811.396	554.813	-2433.74	761.309
12470	0	269.532	-2418.19	1577.26	165.453	-2412.13	1572.99	292.459	-2256.02	1547.8	174.216	-2247.4	1543.36	231.192	-2230.75	1417.63	258.422	-2137.67	1138.98	235.214	-2393.02	1315.51	239.007	-2491.89	1116.06	173.525	-2137.11	1228.79	383.643	-2334.1	1386.88	508.916	-2315.46	1157.32	522.733	-2299.5	1059.95	542.378	-2382.7	929.652	499.78	-2422.84	835.521	551.486	-2371.52	813.967	554.938	-2438.79	763.2
12471	0	266.654	-2427.06	1579.9	162.514	-2420.79	1574.96	289.987	-2264.86	1549.9	171.993	-2256.16	1544.92	229.557	-2239.85	1419.36	258.112	-2148.02	1140.74	233.374	-2402.23	1317.76	237.562	-2501.39	1119	172.715	-2146.5	1230.13	381.735	-2343.37	1389.7	507.448	-2324.87	1160.5	521.745	-2307.74	1063.49	541.854	-2389.56	932.476	499.652	-2428.36	837.58	551.627	-2376.99	816.857	555.047	-2443.62	765.162
12472	0	263.931	-2435.89	1582.48	159.835	-2429.23	1577.03	287.836	-2273.66	1552.27	169.797	-2264.77	1546.5	227.94	-2248.56	1421.25	257.406	-2158.09	1142.41	231.638	-2411.33	1320.16	236.094	-2510.65	1121.93	172.165	-2156.08	1231.56	379.926	-2352.52	1392.66	506.41	-2334.2	1164.18	520.998	-2315.85	1067.33	541.458	-2396.38	935.485	499.531	-2433.9	839.769	552.102	-2382.45	820.327	555.166	-2448.31	767.162
12473	0	261.242	-2444.51	1584.46	157.408	-2437.3	1578.6	285.714	-2282.4	1554.21	167.888	-2273.19	1547.99	226.192	-2257.26	1423.07	256.454	-2167.55	1144.08	230.044	-2420.44	1322.51	234.843	-2519.85	1124.71	171.261	-2165.16	1233.13	378.229	-2361.6	1395.36	505.43	-2343.45	1167.54	520.348	-2323.99	1070.93	541.06	-2403.23	938.251	499.512	-2439.46	841.733	552.441	-2388.12	823.335	555.353	-2453.18	769.231
12474	0	258.852	-2453.06	1586.43	154.904	-2445.65	1580.27	283.884	-2291.29	1556.15	166.159	-2281.47	1549.43	224.904	-2265.96	1424.8	255.365	-2176.59	1145.86	228.435	-2429.42	1324.71	233.64	-2528.86	1127.32	170.234	-2174.31	1234.44	376.73	-2370.63	1397.94	504.313	-2352.59	1170.46	519.596	-2332.14	1074.02	540.769	-2410.03	940.947	499.439	-2444.94	843.528	552.891	-2393.99	826.066	555.491	-2458.11	771.017
12475	0	256.474	-2461.58	1588.34	152.69	-2453.72	1581.88	282.288	-2299.85	1557.81	164.519	-2289.76	1550.98	223.329	-2274.43	1426.24	254.249	-2185.45	1147.3	226.922	-2438.15	1326.68	232.467	-2537.67	1129.7	169.214	-2183.4	1235.36	375.151	-2379.42	1400.34	503.502	-2361.56	1173.46	519.163	-2340.2	1077.26	540.509	-2416.84	943.597	499.422	-2450.45	845.397	553.525	-2399.86	829.052	555.544	-2463.06	772.937
12476	0	254.327	-2469.95	1589.94	150.45	-2461.81	1583.16	280.557	-2308.16	1559.39	162.715	-2297.81	1552.08	221.896	-2282.86	1427.6	253.446	-2194.29	1148.67	225.443	-2446.9	1328.58	231.464	-2546.45	1131.88	168.293	-2192.13	1236.73	373.392	-2388.03	1402.38	502.8	-2370.15	1176.34	518.881	-2348.12	1080.37	540.223	-2423.66	945.893	499.311	-2455.87	847.029	553.982	-2405.67	831.598	555.633	-2468.18	774.463
12477	0	252.351	-2478.26	1591.22	148.547	-2469.91	1584.38	278.992	-2316.58	1560.6	161.255	-2306.08	1553.05	220.376	-2291.39	1429	252.378	-2202.99	1150.24	224.01	-2455.65	1330	230.482	-2555.23	1133.63	167.637	-2200.94	1237.85	372.149	-2396.56	1404.07	502.049	-2378.66	1178.59	518.565	-2356.11	1082.76	540.177	-2430.63	947.812	499.238	-2461.58	848.34	554.645	-2411.8	833.96	555.691	-2473.45	775.808
12478	0	250.509	-2486.56	1592.46	146.78	-2478.06	1585.53	277.584	-2325.1	1561.61	159.877	-2314.12	1553.99	219.52	-2299.9	1430.13	251.488	-2211.7	1151.34	222.829	-2464.33	1331.43	229.534	-2563.88	1135.02	166.762	-2209.72	1238.88	370.99	-2405.41	1405.64	501.332	-2386.85	1180.23	518.201	-2363.97	1084.65	539.789	-2437.54	949.308	499.11	-2467.26	849.447	555	-2417.93	835.599	555.603	-2478.89	776.906
12479	0	248.865	-2494.71	1593.72	145.268	-2485.8	1586.45	276.038	-2333.04	1562.55	158.286	-2322.22	1554.79	218.134	-2308.27	1431.24	250.484	-2219.86	1152.43	221.41	-2473	1332.68	228.683	-2572.27	1136.28	165.835	-2218.21	1239.68	369.639	-2414	1407.11	500.911	-2394.8	1182.07	518.085	-2371.7	1086.69	539.619	-2444.45	950.809	498.849	-2472.83	850.544	555.639	-2424.22	837.611	555.465	-2484.4	777.97
12480	0	247.377	-2502.7	1594.69	143.724	-2493.98	1587.58	274.483	-2341.18	1563.39	157.017	-2330.14	1555.44	216.899	-2316.59	1432.15	249.77	-2227.93	1153.51	220.546	-2481.16	1333.61	227.842	-2580.72	1137.32	164.701	-2226.63	1240.76	368.529	-2422.25	1408.16	500.36	-2402.44	1183.56	517.853	-2379.43	1088.29	539.412	-2451.43	952.151	498.655	-2478.54	851.482	556.167	-2430.55	839.158	555.429	-2490.08	779.002
12481	0	245.874	-2510.65	1595.6	142.28	-2502.09	1588.45	273.233	-2349.28	1564.23	155.679	-2338.31	1556.23	215.825	-2324.99	1433.11	249.174	-2235.85	1154.75	219.61	-2489.67	1334.71	227.136	-2589.12	1138.02	164.035	-2234.89	1241.87	367.387	-2430.7	1409.26	499.872	-2410.06	1184.52	517.577	-2387.25	1089.54	539.177	-2458.5	953.188	498.424	-2484.25	852.145	556.691	-2437.01	840.377	555.361	-2496	779.812
12482	0	244.535	-2518.69	1596.66	140.678	-2510.39	1589.33	271.943	-2357.34	1565.12	154.232	-2346.26	1556.75	214.638	-2333.25	1434.22	248.299	-2243.64	1155.94	218.533	-2498.18	1335.67	226.429	-2597.46	1138.69	163.083	-2242.82	1242.97	366.588	-2439.14	1410.36	499.431	-2417.6	1185.77	517.321	-2394.95	1090.93	538.787	-2465.5	954.236	498.128	-2490	852.79	557.269	-2443.69	841.892	555.191	-2502.02	780.744
12483	0	243.12	-2526.65	1597.61	139.375	-2517.95	1589.63	270.23	-2365.07	1565.97	152.948	-2354.23	1557.17	213.784	-2341.41	1435.21	247.587	-2251.32	1157.08	217.683	-2506.28	1336.37	225.759	-2605.63	1139.25	162.049	-2250.82	1244.22	365.47	-2447.36	1411.4	498.95	-2425.01	1187.46	516.937	-2402.34	1092.5	538.357	-2472.58	955.414	497.776	-2495.83	853.531	557.452	-2450.13	843.294	555.044	-2508.06	781.84
12484	0	241.775	-2534.49	1598.26	138.052	-2526.36	1590.55	269.056	-2372.98	1566.66	151.583	-2362.26	1557.64	212.706	-2349.49	1436.17	246.849	-2258.62	1158.49	216.9	-2514.42	1337.1	225.163	-2613.67	1139.62	161.324	-2258.85	1245.35	364.536	-2455.48	1412.28	498.468	-2432.3	1188.66	516.521	-2409.86	1093.86	537.895	-2479.56	956.235	497.477	-2501.64	854.158	557.702	-2456.65	844.58	555.046	-2514.28	782.495
12485	0	240.552	-2542.5	1598.99	136.675	-2534.32	1590.99	267.931	-2380.92	1567.39	150.491	-2370.22	1558.16	211.809	-2357.55	1437.27	245.954	-2266.15	1159.78	216.014	-2522.78	1337.92	224.661	-2621.64	1140.07	160.351	-2266.59	1246.43	363.625	-2463.6	1413.21	497.72	-2439.7	1189.7	515.865	-2417.36	1094.93	537.37	-2486.54	957.27	497.118	-2507.6	854.726	558.114	-2463.25	845.885	554.622	-2520.33	783.188
12486	0	239.275	-2550.37	1599.83	135.562	-2542.16	1591.5	266.774	-2388.91	1568.23	149.289	-2378.01	1558.63	210.864	-2365.61	1438.21	245.193	-2273.57	1160.9	215.345	-2530.57	1338.7	224.218	-2629.39	1140.79	159.347	-2274.25	1247.92	362.898	-2471.51	1414.4	497.331	-2447.05	1191.29	515.361	-2424.67	1096.39	536.724	-2493.25	958.415	496.737	-2513.38	855.607	558.087	-2469.65	847.105	554.494	-2526.39	784.355
12487	0	238.055	-2558.27	1600.56	134.306	-2550.16	1592.06	265.505	-2396.76	1568.96	148.223	-2385.91	1559.08	210.121	-2373.49	1439.19	244.356	-2280.77	1161.97	214.776	-2538.25	1339.5	223.817	-2637.02	1141.56	158.643	-2281.87	1249.07	361.936	-2479.16	1415.6	496.613	-2454.04	1192.59	514.745	-2431.74	1097.94	536.305	-2499.98	959.694	496.409	-2519.32	856.658	558.057	-2475.97	848.581	554.429	-2532.54	785.638
12488	0	237.069	-2566.25	1600.97	133.277	-2558.1	1592.27	264.861	-2404.96	1569.61	147.181	-2393.87	1559.56	209.098	-2381.15	1439.92	243.943	-2288.11	1163.29	214.295	-2546.07	1340.25	223.406	-2644.52	1142.11	158.101	-2289.45	1250.02	361.124	-2486.84	1416.44	495.903	-2461.21	1193.71	514.225	-2438.84	1099.24	535.775	-2506.72	960.839	496.013	-2525.52	857.466	557.87	-2482.48	850.017	554.287	-2538.9	786.694
12489	0	235.995	-2574.19	1601.26	132.423	-2566.02	1592.52	263.695	-2412.76	1570.1	146.204	-2401.78	1560.14	208.208	-2388.85	1440.87	243.318	-2295.26	1164.43	213.52	-2554.09	1341.27	223.004	-2651.9	1142.73	157.487	-2296.87	1250.87	360.463	-2494.63	1417.51	495.258	-2468.4	1194.82	513.553	-2445.88	1100.33	535.189	-2513.43	961.78	495.586	-2531.83	858.313	557.672	-2488.86	851.094	554.097	-2545.22	787.795
12490	0	235.069	-2582.18	1601.63	131.304	-2574.07	1592.85	262.6	-2420.47	1570.7	145.252	-2409.61	1560.64	207.523	-2396.41	1441.7	242.884	-2302.36	1165.33	212.922	-2561.58	1342.01	222.558	-2659.04	1143.47	156.686	-2304.25	1251.81	359.777	-2502.25	1418.67	494.739	-2475.41	1196.04	513.095	-2452.68	1101.63	534.656	-2520	962.845	495.077	-2538.05	859.261	557.147	-2495.13	852.111	553.702	-2551.11	789.082
12491	0	234.263	-2590.15	1602	130.562	-2581.97	1593.02	261.78	-2428.54	1571.31	144.416	-2417.43	1561.22	207.052	-2403.87	1442.5	242.676	-2309.49	1166.11	212.336	-2569.12	1342.69	222.134	-2666.19	1144.16	156.576	-2311.47	1252.71	359.012	-2509.68	1419.64	494.246	-2482.45	1197.21	512.653	-2459.71	1102.77	534.323	-2526.72	963.912	494.587	-2544.38	860.213	557.07	-2501.63	853.437	553.29	-2557.51	790.139
12492	0	233.455	-2598	1602.01	129.832	-2589.84	1593.02	260.804	-2436.41	1571.92	143.506	-2425.39	1561.91	206.329	-2411.25	1443.16	242.677	-2316.61	1166.98	211.798	-2576.6	1343.22	221.729	-2673.36	1144.73	156.597	-2318.75	1253.34	358.407	-2517.21	1420.47	493.779	-2489.53	1198.03	512.381	-2466.82	1103.73	533.949	-2533.58	964.83	494.054	-2550.99	860.93	556.701	-2508.6	854.443	552.895	-2564.43	790.662
12493	0	232.554	-2605.89	1602.21	128.862	-2597.87	1593.21	259.893	-2444.24	1572.65	142.596	-2433.19	1562.43	205.719	-2418.61	1443.64	242.588	-2323.71	1167.8	211.221	-2584	1343.84	221.257	-2680.5	1145.39	156.337	-2325.95	1254.13	357.994	-2524.73	1421.32	493.492	-2496.6	1199.15	511.88	-2473.66	1104.59	533.555	-2540.38	965.769	493.471	-2557.66	861.773	556.076	-2515.47	855.22	552.165	-2571.04	791.433
12494	0	231.735	-2613.85	1602.51	128.065	-2605.75	1593.19	259.035	-2451.8	1573.29	141.827	-2441.03	1562.8	205.31	-2426.13	1444.06	242.517	-2330.69	1168.67	210.618	-2591.35	1344.42	220.757	-2687.66	1146.13	155.834	-2332.9	1254.45	357.451	-2532.13	1422.14	493.326	-2503.57	1200.35	511.621	-2480.51	1105.74	533.172	-2547.19	966.623	492.844	-2564.4	862.667	555.561	-2522.34	856.358	551.25	-2577.52	792.336
12495	0	230.988	-2621.71	1602.44	127.319	-2613.58	1592.99	258.368	-2459.71	1573.87	140.925	-2448.81	1562.91	204.578	-2433.49	1444.33	242.74	-2337.68	1169.28	210.039	-2598.82	1344.85	220.25	-2694.94	1146.55	156.222	-2340.22	1254.92	356.842	-2539.73	1422.74	493.179	-2510.64	1201.34	511.488	-2487.5	1106.64	532.981	-2554.34	967.414	492.078	-2571.49	863.301	554.883	-2529.4	856.964	550.129	-2583.72	793.442
12496	0	230.068	-2629.44	1602.33	126.506	-2621.47	1592.7	257.383	-2467.21	1573.96	140.309	-2456.56	1563.17	204.18	-2440.98	1444.8	243.04	-2344.71	1169.78	209.493	-2606.35	1345.08	219.692	-2702.13	1146.69	155.938	-2347.21	1255.28	356.358	-2547.58	1423.09	493.028	-2518	1201.84	511.356	-2494.78	1106.98	532.383	-2561.44	967.67	491.372	-2578.52	863.766	554.357	-2536.92	857.403	548.997	-2591	793.532
12497	0	229.366	-2637.26	1602.31	125.761	-2629.26	1592.47	256.77	-2475.18	1574.24	139.669	-2464.29	1563.28	204.138	-2448.59	1444.93	243.273	-2351.66	1170.24	208.941	-2613.75	1345.35	219.099	-2709.21	1146.9	155.85	-2354.31	1255.6	355.998	-2555.22	1423.57	493.015	-2525.29	1202.4	511.245	-2502.01	1107.47	532.028	-2568.74	968.236	490.819	-2586.22	864.433	553.634	-2544.28	857.726	548.104	-2598.56	793.877
12498	0	228.843	-2645.11	1602.31	125.168	-2636.92	1592.14	256.309	-2483.78	1574.72	138.917	-2472	1563.12	203.831	-2456.14	1445.11	243.507	-2358.76	1170.65	208.389	-2621.19	1345.54	218.586	-2716.27	1147.07	155.85	-2361.37	1256.16	355.429	-2562.88	1423.83	492.94	-2532.54	1202.98	511.249	-2509.19	1107.96	531.759	-2576.09	968.655	489.834	-2592.78	864.904	553.24	-2551.84	858.313	546.894	-2605.74	794.324
12499	0	228.112	-2652.81	1601.92	124.695	-2644.6	1591.52	254.384	-2489.04	1574.14	138.395	-2480.04	1563.1	203.369	-2463.55	1445.13	243.668	-2365.88	1171.09	207.918	-2628.59	1345.51	218.015	-2723.41	1146.77	156.261	-2368.38	1256.49	355.207	-2570.8	1423.96	493.225	-2540.2	1203.49	511.212	-2516.52	1108.16	531.217	-2583.56	968.728	489.126	-2600.29	865.301	552.605	-2559.36	858.488	545.844	-2613.39	794.516
12500	0	227.697	-2660.63	1601.46	124.283	-2652.51	1591.03	255.047	-2499.29	1574.37	138.015	-2487.58	1562.69	203.279	-2471.07	1445.14	244.102	-2372.95	1171.33	207.433	-2636.13	1345.24	217.45	-2730.64	1146.47	156.48	-2375.54	1256.63	354.667	-2578.85	1423.88	492.864	-2547.65	1203.47	511.079	-2524.18	1108.17	530.834	-2591.32	968.879	488.401	-2607.87	865.549	551.723	-2566.98	858.016	544.534	-2621.02	794.33
12501	0	227.412	-2668.38	1601.04	123.869	-2660.35	1590.52	254.795	-2506.59	1574.16	137.611	-2495.57	1562.57	203.368	-2478.69	1445.09	244.564	-2380.01	1171.49	206.959	-2643.53	1345	216.785	-2737.86	1146.05	156.668	-2382.54	1256.73	354.316	-2586.69	1423.72	492.819	-2555.18	1203.7	511.161	-2531.74	1108.44	530.403	-2598.92	968.875	487.7	-2615.39	865.744	551.066	-2574.54	858.017	543.649	-2628.68	794.459
12502	0	227.318	-2676.12	1600.33	123.679	-2668.15	1589.97	254.702	-2514.46	1573.99	137.369	-2503.55	1562.39	203.555	-2486.26	1444.86	245.051	-2387.17	1171.52	206.608	-2651	1344.74	216.245	-2745	1145.65	157.192	-2389.67	1256.96	354.086	-2594.69	1423.54	493.165	-2563.04	1203.99	511.273	-2539.58	1108.56	529.923	-2606.68	968.756	487.078	-2623.01	865.776	550.618	-2582.37	858.12	542.89	-2636.61	794.614
12503	0	227.324	-2684.11	1599.75	123.754	-2675.94	1589.2	254.947	-2522.5	1573.68	137.339	-2511.34	1562.16	203.937	-2493.9	1444.74	245.307	-2394.56	1171.39	206.341	-2658.49	1344.14	215.717	-2752.43	1144.83	157.504	-2396.67	1256.84	354.001	-2602.87	1423.34	492.918	-2571.08	1203.7	511.382	-2547.65	1108.41	529.6	-2614.77	968.657	486.573	-2630.75	865.611	550.118	-2590.34	857.688	542.036	-2644.65	794.11
[truncated: 69 more columns]

## Sheet: Sheet2
Devices
		025370 - Force			025370 - Moment			025370 - CoP			027571 - Force			027571 - Moment			027571 - CoP			037720 - Force			037720 - Moment			037720 - CoP
Frame	Sub Frame	Fx	Fy	Fz	Mx	My	Mz	Cx	Cy	Cz	Fx	Fy	Fz	Mx	My	Mz	Cx	Cy	Cz	Fx	Fy	Fz	Mx	My	Mz	Cx	Cy	Cz
		N	N	N	N.mm	N.mm	N.mm	mm	mm	mm	N	N	N	N.mm	N.mm	N.mm	mm	mm	mm	N	N	N	N.mm	N.mm	N.mm	mm	mm	mm
11874	0	0	0	0	0	0	0	200	300	0	0	0	0	0	0	0	200	903	0	0	0	0	0	0	0	603	903	0
11874	1	0	0	0	0	0	0	200	300	0	0	0	0	0	0	0	200	903	0	0	0	0	0	0	0	603	903	0
11874	2	0	0	0	0	0	0	200	300	0	0	0	0	0	0	0	200	903	0	0	0	0	0	0	0	603	903	0
11874	3	0	0	0	0	0	0	200	300	0	0	0	0	0	0	0	200	903	0	0	0	0	0	0	0	603	903	0
11874	4	0	0	0	0	0	0	200	300	0	0	0	0	0	0	0	200	903	0	0	0	0	0	0	0	603	903	0
11874	5	0	0	0	0	0	0	200	300	0	0	0	0	0	0	0	200	903	0	0	0	0	0	0	0	603	903	0
11874	6	0	0	0	0	0	0	200	300	0	0	0	0	0	0	0	200	903	0	0	0	0	0	0	0	603	903	0
11874	7	0	0	0	0	0	0	200	300	0	0	0	0	0	0	0	200	903	0	0	0	0	0	0	0	603	903	0
11874	8	0	0	0	0	0	0	200	300	0	0	0	0	0	0	0	200	903	0	0	0	0	0	0	0	603	903	0
11874	9	0	0	0	0	0	0	200	300	0	0	0	0	0	0	0	200	903	0	0	0	0	0	0	0	603	903	0
11875	0	0	0	0	0	0	0	200	300	0	0	0	0	0	0	0	200	903	0	0	0	0	0	0	0	603	903	0
11875	1	0	0	0	0	0	0	200	300	0	0	0	0	0	0	0	200	903	0	0	0	0	0	0	0	603	903	0
11875	2	0	0	0	0	0	0	200	300	0	0	0	0	0	0	0	200	903	0	0	0	0	0	0	0	603	903	0
11875	3	0	0	0	0	0	0	200	300	0	0	0	0	0	0	0	200	903	0	0	0	0	0	0	0	603	903	0
11875	4	0	0	0	0	0	0	200	300	0	0	0	0	0	0	0	200	903	0	0	0	0	0	0	0	603	903	0
11875	5	0	0	0	0	0	0	200	300	0	0	0	0	0	0	0	200	903	0	0	0	0	0	0	0	603	903	0
11875	6	0	0	0	0	0	0	200	300	0	0	0	0	0	0	0	200	903	0	0	0	0	0	0	0	603	903	0
11875	7	0	0	0	0	0	0	200	300	0	0	0	0	0	0	0	200	903	0	0	0	0	0	0	0	603	903	0
11875	8	0	0	0	0	0	0	200	300	0	0	0	0	0	0	0	200	903	0	0	0	0	0	0	0	603	903	0
11875	9	0	0	0	0	0	0	200	300	0	0	0	0	0	0	0	200	903	0	0	0	0	0	0	0	603	903	0
11876	0	0	0	0	0	0	0	200	300	0	0	0	0	0	0	0	200	903	0	0	0	0	0	0	0	603	903	0
11876	1	0	0	0	0	0	0	200	300	0	0	0	0	0	0	0	200	903	0	0	0	0	0	0	0	603	903	0
11876	2	0	0	0	0	0	0	200	300	0	0	0	0	0	0	0	200	903	0	0	0	0	0	0	0	603	903	0
11876	3	0	0	0	0	0	0	200	300	0	0	0	0	0	0	0	200	903	0	0	0	0	0	0	0	603	903	0
11876	4	0	0	0	0	0	0	200	300	0	0	0	0	0	0	0	200	903	0	0	0	0	0	0	0	603	903	0
11876	5	0	0	0	0	0	0	200	300	0	0	0	0	0	0	0	200	903	0	0	0	0	0	0	0	603	903	0
11876	6	0	0	0	0	0	0	200	300	0	0	0	0	0	0	0	200	903	0	0	0	0	0	0	0	603	903	0
11876	7	0	0	0	0	0	0	200	300	0	0	0	0	0	0	0	200	903	0	0	0	0	0	0	0	603	903	0
11876	8	0	0	0	0	0	0	200	300	0	0	0	0	0	0	0	200	903	0	0	0	0	0	0	0	603	903	0
11876	9	0	0	0	0	0	0	200	300	0	0	0	0	0	0	0	200	903	0	0	0	0	0	0	0	603	903	0
11877	0	0	0	0	0	0	0	200	300	0	0	0	0	0	0	0	200	903	0	0	0	0	0	0	0	603	903	0
11877	1	0	0	0	0	0	0	200	300	0	0	0	0	0	0	0	200	903	0	0	0	0	0	0	0	603	903	0
11877	2	0	0	0	0	0	0	200	300	0	0	0	0	0	0	0	200	903	0	0	0	0	0	0	0	603	903	0
11877	3	0	0	0	0	0	0	200	300	0	0	0	0	0	0	0	200	903	0	0	0	0	0	0	0	603	903	0
11877	4	0	0	0	0	0	0	200	300	0	0	0	0	0	0	0	200	903	0	0	0	0	0	0	0	603	903	0
11877	5	0	0	0	0	0	0	200	300	0	0	0	0	0	0	0	200	903	0	0	0	0	0	0	0	603	903	0
11877	6	0	0	0	0	0	0	200	300	0	0	0	0	0	0	0	200	903	0	0	0	0	0	0	0	603	903	0
11877	7	0	0	0	0	0	0	200	300	0	0	0	0	0	0	0	200	903	0	0	0	0	0	0	0	603	903	0
11877	8	0	0	0	0	0	0	200	300	0	0	0	0	0	0	0	200	903	0	0	0	0	0	0	0	603	903	0
11877	9	0	0	0	0	0	0	200	300	0	0	0	0	0	0	0	200	903	0	0	0	0	0	0	0	603	903	0
11878	0	0	0	0	0	0	0	200	300	0	0	0	0	0	0	0	200	903	0	0	0	0	0	0	0	603	903	0
11878	1	0	0	0	0	0	0	200	300	0	0	0	0	0	0	0	200	903	0	0	0	0	0	0	0	603	903	0
11878	2	0	0	0	0	0	0	200	300	0	0	0	0	0	0	0	200	903	0	0	0	0	0	0	0	603	903	0
11878	3	0	0	0	0	0	0	200	300	0	0	0	0	0	0	0	200	903	0	0	0	0	0	0	0	603	903	0
11878	4	0	0	0	0	0	0	200	300	0	0	0	0	0	0	0	200	903	0	0	0	0	0	0	0	603	903	0
11878	5	0	0	0	0	0	0	200	300	0	0	0	0	0	0	0	200	903	0	0	0	0	0	0	0	603	903	0
11878	6	0	0	0	0	0	0	200	300	0	0	0	0	0	0	0	200	903	0	0	0	0	0	0	0	603	903	0
11878	7	0	0	0	0	0	0	200	300	0	0	0	0	0	0	0	200	903	0	0	0	0	0	0	0	603	903	0
11878	8	0	0	0	0	0	0	200	300	0	0	0	0	0	0	0	200	903	0	0	0	0	0	0	0	603	903	0
11878	9	0	0	0	0	0	0	200	300	0	0	0	0	0	0	0	200	903	0	0	0	0	0	0	0	603	903	0
11879	0	0	0	0	0	0	0	200	300	0	0	0	0	0	0	0	200	903	0	0	0	0	0	0	0	603	903	0
11879	1	0	0	0	0	0	0	200	300	0	0	0	0	0	0	0	200	903	0	0	0	0	0	0	0	603	903	0
11879	2	0	0	0	0	0	0	200	300	0	0	0	0	0	0	0	200	903	0	0	0	0	0	0	0	603	903	0
11879	3	0	0	0	0	0	0	200	300	0	0	0	0	0	0	0	200	903	0	0	0	0	0	0	0	603	903	0
11879	4	0	0	0	0	0	0	200	300	0	0	0	0	0	0	0	200	903	0	0	0	0	0	0	0	603	903	0
11879	5	0	0	0	0	0	0	200	300	0	0	0	0	0	0	0	200	903	0	0	0	0	0	0	0	603	903	0
11879	6	0	0	0	0	0	0	200	300	0	0	0	0	0	0	0	200	903	0	0	0	0	0	0	0	603	903	0
11879	7	0	0	0	0	0	0	200	300	0	0	0	0	0	0	0	200	903	0	0	0	0	0	0	0	603	903	0
11879	8	0	0	0	0	0	0	200	300	0	0	0	0	0	0	0	200	903	0	0	0	0	0	0	0	603	903	0
11879	9	0	0	0	0	0	0	200	300	0	0	0	0	0	0	0	200	903	0	0	0	0	0	0	0	603	903	0
11880	0	0	0	0	0	0	0	200	300	0	0	0	0	0	0	0	200	903	0	0	0	0	0	0	0	603	903	0
11880	1	0	0	0	0	0	0	200	300	0	0	0	0	0	0	0	200	903	0	0	0	0	0	0	0	603	903	0
11880	2	0	0	0	0	0	0	200	300	0	0	0	0	0	0	0	200	903	0	0	0	0	0	0	0	603	903	0
11880	3	0	0	0	0	0	0	200	300	0	0	0	0	0	0	0	200	903	0	0	0	0	0	0	0	603	903	0
11880	4	0	0	0	0	0	0	200	300	0	0	0	0	0	0	0	200	903	0	0	0	0	0	0	0	603	903	0
11880	5	0	0	0	0	0	0	200	300	0	0	0	0	0	0	0	200	903	0	0	0	0	0	0	0	603	903	0
11880	6	0	0	0	0	0	0	200	300	0	0	0	0	0	0	0	200	903	0	0	0	0	0	0	0	603	903	0
11880	7	0	0	0	0	0	0	200	300	0	0	0	0	0	0	0	200	903	0	0	0	0	0	0	0	603	903	0
11880	8	0	0	0	0	0	0	200	300	0	0	0	0	0	0	0	200	903	0	0	0	0	0	0	0	603	903	0
11880	9	0	0	0	0	0	0	200	300	0	0	0	0	0	0	0	200	903	0	0	0	0	0	0	0	603	903	0
11881	0	0	0	0	0	0	0	200	300	0	0	0	0	0	0	0	200	903	0	0	0	0	0	0	0	603	903	0
11881	1	0	0	0	0	0	0	200	300	0	0	0	0	0	0	0	200	903	0	0	0	0	0	0	0	603	903	0
11881	2	0	0	0	0	0	0	200	300	0	0	0	0	0	0	0	200	903	0	0	0	0	0	0	0	603	903	0
11881	3	0	0	0	0	0	0	200	300	0	0	0	0	0	0	0	200	903	0	0	0	0	0	0	0	603	903	0
11881	4	0	0	0	0	0	0	200	300	0	0	0	0	0	0	0	200	903	0	0	0	0	0	0	0	603	903	0
11881	5	0	0	0	0	0	0	200	300	0	0	0	0	0	0	0	200	903	0	0	0	0	0	0	0	603	903	0
11881	6	0	0	0	0	0	0	200	300	0	0	0	0	0	0	0	200	903	0	0	0	0	0	0	0	603	903	0
11881	7	0	0	0	0	0	0	200	300	0	0	0	0	0	0	0	200	903	0	0	0	0	0	0	0	603	903	0
11881	8	0	0	0	0	0	0	200	300	0	0	0	0	0	0	0	200	903	0	0	0	0	0	0	0	603	903	0
11881	9	0	0	0	0	0	0	200	300	0	0	0	0	0	0	0	200	903	0	0	0	0	0	0	0	603	903	0
11882	0	0	0	0	0	0	0	200	300	0	0	0	0	0	0	0	200	903	0	0	0	0	0	0	0	603	903	0
11882	1	0	0	0	0	0	0	200	300	0	0	0	0	0	0	0	200	903	0	0	0	0	0	0	0	603	903	0
11882	2	0	0	0	0	0	0	200	300	0	0	0	0	0	0	0	200	903	0	0	0	0	0	0	0	603	903	0
11882	3	0	0	0	0	0	0	200	300	0	0	0	0	0	0	0	200	903	0	0	0	0	0	0	0	603	903	0
11882	4	0	0	0	0	0	0	200	300	0	0	0	0	0	0	0	200	903	0	0	0	0	0	0	0	603	903	0
11882	5	0	0	0	0	0	0	200	300	0	0	0	0	0	0	0	200	903	0	0	0	0	0	0	0	603	903	0
11882	6	0	0	0	0	0	0	200	300	0	0	0	0	0	0	0	200	903	0	0	0	0	0	0	0	603	903	0
11882	7	0	0	0	0	0	0	200	300	0	0	0	0	0	0	0	200	903	0	0	0	0	0	0	0	603	903	0
11882	8	0	0	0	0	0	0	200	300	0	0	0	0	0	0	0	200	903	0	0	0	0	0	0	0	603	903	0
11882	9	0	0	0	0	0	0	200	300	0	0	0	0	0	0	0	200	903	0	0	0	0	0	0	0	603	903	0
11883	0	0	0	0	0	0	0	200	300	0	0	0	0	0	0	0	200	903	0	0	0	0	0	0	0	603	903	0
11883	1	0	0	0	0	0	0	200	300	0	0	0	0	0	0	0	200	903	0	0	0	0	0	0	0	603	903	0
11883	2	0	0	0	0	0	0	200	300	0	0	0	0	0	0	0	200	903	0	0	0	0	0	0	0	603	903	0
11883	3	0	0	0	0	0	0	200	300	0	0	0	0	0	0	0	200	903	0	0	0	0	0	0	0	603	903	0
11883	4	0	0	0	0	0	0	200	300	0	0	0	0	0	0	0	200	903	0	0	0	0	0	0	0	603	903	0
11883	5	0	0	0	0	0	0	200	300	0	0	0	0	0	0	0	200	903	0	0	0	0	0	0	0	603	903	0
11883	6	0	0	0	0	0	0	200	300	0	0	0	0	0	0	0	200	903	0	0	0	0	0	0	0	603	903	0
11883	7	0	0	0	0	0	0	200	300	0	0	0	0	0	0	0	200	903	0	0	0	0	0	0	0	603	903	0
11883	8	0	0	0	0	0	0	200	300	0	0	0	0	0	0	0	200	903	0	0	0	0	0	0	0	603	903	0
11883	9	0	0	0	0	0	0	200	300	0	0	0	0	0	0	0	200	903	0	0	0	0	0	0	0	603	903	0
11884	0	0	0	0	0	0	0	200	300	0	0	0	0	0	0	0	200	903	0	0	0	0	0	0	0	603	903	0
11884	1	0	0	0	0	0	0	200	300	0	0	0	0	0	0	0	200	903	0	0	0	0	0	0	0	603	903	0
11884	2	0	0	0	0	0	0	200	300	0	0	0	0	0	0	0	200	903	0	0	0	0	0	0	0	603	903	0
11884	3	0	0	0	0	0	0	200	300	0	0	0	0	0	0	0	200	903	0	0	0	0	0	0	0	603	903	0
11884	4	0	0	0	0	0	0	200	300	0	0	0	0	0	0	0	200	903	0	0	0	0	0	0	0	603	903	0
11884	5	0	0	0	0	0	0	200	300	0	0	0	0	0	0	0	200	903	0	0	0	0	0	0	0	603	903	0
11884	6	0	0	0	0	0	0	200	300	0	0	0	0	0	0	0	200	903	0	0	0	0	0	0	0	603	903	0
11884	7	0	0	0	0	0	0	200	300	0	0	0	0	0	0	0	200	903	0	0	0	0	0	0	0	603	903	0
11884	8	0	0	0	0	0	0	200	300	0	0	0	0	0	0	0	200	903	0	0	0	0	0	0	0	603	903	0
11884	9	0	0	0	0	0	0	200	300	0	0	0	0	0	0	0	200	903	0	0	0	0	0	0	0	603	903	0
11885	0	0	0	0	0	0	0	200	300	0	0	0	0	0	0	0	200	903	0	0	0	0	0	0	0	603	903	0
11885	1	0	0	0	0	0	0	200	300	0	0	0	0	0	0	0	200	903	0	0	0	0	0	0	0	603	903	0
11885	2	0	0	0	0	0	0	200	300	0	0	0	0	0	0	0	200	903	0	0	0	0	0	0	0	603	903	0
11885	3	0	0	0	0	0	0	200	300	0	0	0	0	0	0	0	200	903	0	0	0	0	0	0	0	603	903	0
11885	4	0	0	0	0	0	0	200	300	0	0	0	0	0	0	0	200	903	0	0	0	0	0	0	0	603	903	0
11885	5	0	0	0	0	0	0	200	300	0	0	0	0	0	0	0	200	903	0	0	0	0	0	0	0	603	903	0
11885	6	0	0	0	0	0	0	200	300	0	0	0	0	0	0	0	200	903	0	0	0	0	0	0	0	603	903	0
11885	7	0	0	0	0	0	0	200	300	0	0	0	0	0	0	0	200	903	0	0	0	0	0	0	0	603	903	0
11885	8	0	0	0	0	0	0	200	300	0	0	0	0	0	0	0	200	903	0	0	0	0	0	0	0	603	903	0
11885	9	0	0	0	0	0	0	200	300	0	0	0	0	0	0	0	200	903	0	0	0	0	0	0	0	603	903	0
11886	0	0	0	0	0	0	0	200	300	0	0	0	0	0	0	0	200	903	0	0	0	0	0	0	0	603	903	0
11886	1	0	0	0	0	0	0	200	300	0	0	0	0	0	0	0	200	903	0	0	0	0	0	0	0	603	903	0
11886	2	0	0	0	0	0	0	200	300	0	0	0	0	0	0	0	200	903	0	0	0	0	0	0	0	603	903	0
11886	3	0	0	0	0	0	0	200	300	0	0	0	0	0	0	0	200	903	0	0	0	0	0	0	0	603	903	0
11886	4	0	0	0	0	0	0	200	300	0	0	0	0	0	0	0	200	903	0	0	0	0	0	0	0	603	903	0
11886	5	0	0	0	0	0	0	200	300	0	0	0	0	0	0	0	200	903	0	0	0	0	0	0	0	603	903	0
11886	6	0	0	0	0	0	0	200	300	0	0	0	0	0	0	0	200	903	0	0	0	0	0	0	0	603	903	0
11886	7	0	0	0	0	0	0	200	300	0	0	0	0	0	0	0	200	903	0	0	0	0	0	0	0	603	903	0
11886	8	0	0	0	0	0	0	200	300	0	0	0	0	0	0	0	200	903	0	0	0	0	0	0	0	603	903	0
11886	9	0	0	0	0	0	0	200	300	0	0	0	0	0	0	0	200	903	0	0	0	0	0	0	0	603	903	0
11887	0	0	0	0	0	0	0	200	300	0	0	0	0	0	0	0	200	903	0	0	0	0	0	0	0	603	903	0
11887	1	0	0	0	0	0	0	200	300	0	0	0	0	0	0	0	200	903	0	0	0	0	0	0	0	603	903	0
11887	2	0	0	0	0	0	0	200	300	0	0	0	0	0	0	0	200	903	0	0	0	0	0	0	0	603	903	0
11887	3	0	0	0	0	0	0	200	300	0	0	0	0	0	0	0	200	903	0	0	0	0	0	0	0	603	903	0
11887	4	0	0	0	0	0	0	200	300	0	0	0	0	0	0	0	200	903	0	0	0	0	0	0	0	603	903	0
11887	5	0	0	0	0	0	0	200	300	0	0	0	0	0	0	0	200	903	0	0	0	0	0	0	0	603	903	0
11887	6	0	0	0	0	0	0	200	300	0	0	0	0	0	0	0	200	903	0	0	0	0	0	0	0	603	903	0
11887	7	0	0	0	0	0	0	200	300	0	0	0	0	0	0	0	200	903	0	0	0	0	0	0	0	603	903	0
11887	8	0	0	0	0	0	0	200	300	0	0	0	0	0	0	0	200	903	0	0	0	0	0	0	0	603	903	0
11887	9	0	0	0	0	0	0	200	300	0	0	0	0	0	0	0	200	903	0	0	0	0	0	0	0	603	903	0
11888	0	0	0	0	0	0	0	200	300	0	0	0	0	0	0	0	200	903	0	0	0	0	0	0	0	603	903	0
11888	1	0	0	0	0	0	0	200	300	0	0	0	0	0	0	0	200	903	0	0	0	0	0	0	0	603	903	0
11888	2	0	0	0	0	0	0	200	300	0	0	0	0	0	0	0	200	903	0	0	0	0	0	0	0	603	903	0
11888	3	0	0	0	0	0	0	200	300	0	0	0	0	0	0	0	200	903	0	0	0	0	0	0	0	603	903	0
11888	4	0	0	0	0	0	0	200	300	0	0	0	0	0	0	0	200	903	0	0	0	0	0	0	0	603	903	0
11888	5	0	0	0	0	0	0	200	300	0	0	0	0	0	0	0	200	903	0	0	0	0	0	0	0	603	903	0
11888	6	0	0	0	0	0	0	200	300	0	0	0	0	0	0	0	200	903	0	0	0	0	0	0	0	603	903	0
11888	7	0	0	0	0	0	0	200	300	0	0	0	0	0	0	0	200	903	0	0	0	0	0	0	0	603	903	0
11888	8	0	0	0	0	0	0	200	300	0	0	0	0	0	0	0	200	903	0	0	0	0	0	0	0	603	903	0
11888	9	0	0	0	0	0	0	200	300	0	0	0	0	0	0	0	200	903	0	0	0	0	0	0	0	603	903	0
11889	0	0	0	0	0	0	0	200	300	0	0	0	0	0	0	0	200	903	0	0	0	0	0	0	0	603	903	0
11889	1	0	0	0	0	0	0	200	300	0	0	0	0	0	0	0	200	903	0	0	0	0	0	0	0	603	903	0
11889	2	0	0	0	0	0	0	200	300	0	0	0	0	0	0	0	200	903	0	0	0	0	0	0	0	603	903	0
11889	3	0	0	0	0	0	0	200	300	0	0	0	0	0	0	0	200	903	0	0	0	0	0	0	0	603	903	0
11889	4	0	0	0	0	0	0	200	300	0	0	0	0	0	0	0	200	903	0	0	0	0	0	0	0	603	903	0
11889	5	0	0	0	0	0	0	200	300	0	0	0	0	0	0	0	200	903	0	0	0	0	0	0	0	603	903	0
11889	6	0	0	0	0	0	0	200	300	0	0	0	0	0	0	0	200	903	0	0	0	0	0	0	0	603	903	0
11889	7	0	0	0	0	0	0	200	300	0	0	0	0	0	0	0	200	903	0	0	0	0	0	0	0	603	903	0
11889	8	0	0	0	0	0	0	200	300	0	0	0	0	0	0	0	200	903	0	0	0	0	0	0	0	603	903	0
11889	9	0	0	0	0	0	0	200	300	0	0	0	0	0	0	0	200	903	0	0	0	0	0	0	0	603	903	0
11890	0	0	0	0	0	0	0	200	300	0	0	0	0	0	0	0	200	903	0	0	0	0	0	0	0	603	903	0
11890	1	0	0	0	0	0	0	200	300	0	0	0	0	0	0	0	200	903	0	0	0	0	0	0	0	603	903	0
11890	2	0	0	0	0	0	0	200	300	0	0	0	0	0	0	0	200	903	0	0	0	0	0	0	0	603	903	0
11890	3	0	0	0	0	0	0	200	300	0	0	0	0	0	0	0	200	903	0	0	0	0	0	0	0	603	903	0
11890	4	0	0	0	0	0	0	200	300	0	0	0	0	0	0	0	200	903	0	0	0	0	0	0	0	603	903	0
11890	5	0	0	0	0	0	0	200	300	0	0	0	0	0	0	0	200	903	0	0	0	0	0	0	0	603	903	0
11890	6	0	0	0	0	0	0	200	300	0	0	0	0	0	0	0	200	903	0	0	0	0	0	0	0	603	903	0
11890	7	0	0	0	0	0	0	200	300	0	0	0	0	0	0	0	200	903	0	0	0	0	0	0	0	603	903	0
11890	8	0	0	0	0	0	0	200	300	0	0	0	0	0	0	0	200	903	0	0	0	0	0	0	0	603	903	0
11890	9	0	0	0	0	0	0	200	300	0	0	0	0	0	0	0	200	903	0	0	0	0	0	0	0	603	903	0
11891	0	0	0	0	0	0	0	200	300	0	0	0	0	0	0	0	200	903	0	0	0	0	0	0	0	603	903	0
11891	1	0	0	0	0	0	0	200	300	0	0	0	0	0	0	0	200	903	0	0	0	0	0	0	0	603	903	0
11891	2	0	0	0	0	0	0	200	300	0	0	0	0	0	0	0	200	903	0	0	0	0	0	0	0	603	903	0
11891	3	0	0	0	0	0	0	200	300	0	0	0	0	0	0	0	200	903	0	0	0	0	0	0	0	603	903	0
11891	4	0	0	0	0	0	0	200	300	0	0	0	0	0	0	0	200	903	0	0	0	0	0	0	0	603	903	0
11891	5	0	0	0	0	0	0	200	300	0	0	0	0	0	0	0	200	903	0	0	0	0	0	0	0	603	903	0
11891	6	0	0	0	0	0	0	200	300	0	0	0	0	0	0	0	200	903	0	0	0	0	0	0	0	603	903	0
11891	7	0	0	0	0	0	0	200	300	0	0	0	0	0	0	0	200	903	0	0	0	0	0	0	0	603	903	0
11891	8	0	0	0	0	0	0	200	300	0	0	0	0	0	0	0	200	903	0	0	0	0	0	0	0	603	903	0
11891	9	0	0	0	0	0	0	200	300	0	0	0	0	0	0	0	200	903	0	0	0	0	0	0	0	603	903	0
11892	0	0	0	0	0	0	0	200	300	0	0	0	0	0	0	0	200	903	0	0	0	0	0	0	0	603	903	0
11892	1	0	0	0	0	0	0	200	300	0	0	0	0	0	0	0	200	903	0	0	0	0	0	0	0	603	903	0
11892	2	0	0	0	0	0	0	200	300	0	0	0	0	0	0	0	200	903	0	0	0	0	0	0	0	603	903	0
11892	3	0	0	0	0	0	0	200	300	0	0	0	0	0	0	0	200	903	0	0	0	0	0	0	0	603	903	0
11892	4	0	0	0	0	0	0	200	300	0	0	0	0	0	0	0	200	903	0	0	0	0	0	0	0	603	903	0
11892	5	0	0	0	0	0	0	200	300	0	0	0	0	0	0	0	200	903	0	0	0	0	0	0	0	603	903	0
11892	6	0	0	0	0	0	0	200	300	0	0	0	0	0	0	0	200	903	0	0	0	0	0	0	0	603	903	0
11892	7	0	0	0	0	0	0	200	300	0	0	0	0	0	0	0	200	903	0	0	0	0	0	0	0	603	903	0
11892	8	0	0	0	0	0	0	200	300	0	0	0	0	0	0	0	200	903	0	0	0	0	0	0	0	603	903	0
11892	9	0	0	0	0	0	0	200	300	0	0	0	0	0	0	0	200	903	0	0	0	0	0	0	0	603	903	0
11893	0	0	0	0	0	0	0	200	300	0	0	0	0	0	0	0	200	903	0	0	0	0	0	0	0	603	903	0
11893	1	0	0	0	0	0	0	200	300	0	0	0	0	0	0	0	200	903	0	0	0	0	0	0	0	603	903	0
11893	2	0	0	0	0	0	0	200	300	0	0	0	0	0	0	0	200	903	0	0	0	0	0	0	0	603	903	0
11893	3	0	0	0	0	0	0	200	300	0	0	0	0	0	0	0	200	903	0	0	0	0	0	0	0	603	903	0
11893	4	0	0	0	0	0	0	200	300	0	0	0	0	0	0	0	200	903	0	0	0	0	0	0	0	603	903	0
11893	5	0	0	0	0	0	0	200	300	0	0	0	0	0	0	0	200	903	0	0	0	0	0	0	0	603	903	0
11893	6	0	0	0	0	0	0	200	300	0	0	0	0	0	0	0	200	903	0	0	0	0	0	0	0	603	903	0
11893	7	0	0	0	0	0	0	200	300	0	0	0	0	0	0	0	200	903	0	0	0	0	0	0	0	603	903	0
11893	8	0	0	0	0	0	0	200	300	0	0	0	0	0	0	0	200	903	0	0	0	0	0	0	0	603	903	0
11893	9	0	0	0	0	0	0	200	300	0	0	0	0	0	0	0	200	903	0	0	0	0	0	0	0	603	903	0
11894	0	0	0	0	0	0	0	200	300	0	0	0	0	0	0	0	200	903	0	0	0	0	0	0	0	603	903	0
11894	1	0	0	0	0	0	0	200	300	0	0	0	0	0	0	0	200	903	0	0	0	0	0	0	0	603	903	0
11894	2	0	0	0	0	0	0	200	300	0	0	0	0	0	0	0	200	903	0	0	0	0	0	0	0	603	903	0
11894	3	0	0	0	0	0	0	200	300	0	0	0	0	0	0	0	200	903	0	0	0	0	0	0	0	603	903	0
11894	4	0	0	0	0	0	0	200	300	0	0	0	0	0	0	0	200	903	0	0	0	0	0	0	0	603	903	0
11894	5	0	0	0	0	0	0	200	300	0	0	0	0	0	0	0	200	903	0	0	0	0	0	0	0	603	903	0
11894	6	0	0	0	0	0	0	200	300	0	0	0	0	0	0	0	200	903	0	0	0	0	0	0	0	603	903	0
11894	7	0	0	0	0	0	0	200	300	0	0	0	0	0	0	0	200	903	0	0	0	0	0	0	0	603	903	0
11894	8	0	0	0	0	0	0	200	300	0	0	0	0	0	0	0	200	903	0	0	0	0	0	0	0	603	903	0
11894	9	0	0	0	0	0	0	200	300	0	0	0	0	0	0	0	200	903	0	0	0	0	0	0	0	603	903	0
11895	0	0	0	0	0	0	0	200	300	0	0	0	0	0	0	0	200	903	0	0	0	0	0	0	0	603	903	0
11895	1	0	0	0	0	0	0	200	300	0	0	0	0	0	0	0	200	903	0	0	0	0	0	0	0	603	903	0
11895	2	0	0	0	0	0	0	200	300	0	0	0	0	0	0	0	200	903	0	0	0	0	0	0	0	603	903	0
11895	3	0	0	0	0	0	0	200	300	0	0	0	0	0	0	0	200	903	0	0	0	0	0	0	0	603	903	0
11895	4	0	0	0	0	0	0	200	300	0	0	0	0	0	0	0	200	903	0	0	0	0	0	0	0	603	903	0
11895	5	0	0	0	0	0	0	200	300	0	0	0	0	0	0	0	200	903	0	0	0	0	0	0	0	603	903	0
11895	6	0	0	0	0	0	0	200	300	0	0	0	0	0	0	0	200	903	0	0	0	0	0	0	0	603	903	0
11895	7	0	0	0	0	0	0	200	300	0	0	0	0	0	0	0	200	903	0	0	0	0	0	0	0	603	903	0
11895	8	0	0	0	0	0	0	200	300	0	0	0	0	0	0	0	200	903	0	0	0	0	0	0	0	603	903	0
11895	9	0	0	0	0	0	0	200	300	0	0	0	0	0	0	0	200	903	0	0	0	0	0	0	0	603	903	0
11896	0	0	0	0	0	0	0	200	300	0	0	0	0	0	0	0	200	903	0	0	0	0	0	0	0	603	903	0
11896	1	0	0	0	0	0	0	200	300	0	0	0	0	0	0	0	200	903	0	0	0	0	0	0	0	603	903	0
11896	2	0	0	0	0	0	0	200	300	0	0	0	0	0	0	0	200	903	0	0	0	0	0	0	0	603	903	0
11896	3	0	0	0	0	0	0	200	300	0	0	0	0	0	0	0	200	903	0	0	0	0	0	0	0	603	903	0
11896	4	0	0	0	0	0	0	200	300	0	0	0	0	0	0	0	200	903	0	0	0	0	0	0	0	603	903	0
11896	5	0	0	0	0	0	0	200	300	0	0	0	0	0	0	0	200	903	0	0	0	0	0	0	0	603	903	0
11896	6	0	0	0	0	0	0	200	300	0	0	0	0	0	0	0	200	903	0	0	0	0	0	0	0	603	903	0
11896	7	0	0	0	0	0	0	200	300	0	0	0	0	0	0	0	200	903	0	0	0	0	0	0	0	603	903	0
11896	8	0	0	0	0	0	0	200	300	0	0	0	0	0	0	0	200	903	0	0	0	0	0	0	0	603	903	0
11896	9	0	0	0	0	0	0	200	300	0	0	0	0	0	0	0	200	903	0	0	0	0	0	0	0	603	903	0
11897	0	0	0	0	0	0	0	200	300	0	0	0	0	0	0	0	200	903	0	0	0	0	0	0	0	603	903	0
11897	1	0	0	0	0	0	0	200	300	0	0	0	0	0	0	0	200	903	0	0	0	0	0	0	0	603	903	0
11897	2	0	0	0	0	0	0	200	300	0	0	0	0	0	0	0	200	903	0	0	0	0	0	0	0	603	903	0
11897	3	0	0	0	0	0	0	200	300	0	0	0	0	0	0	0	200	903	0	0	0	0	0	0	0	603	903	0
11897	4	0	0	0	0	0	0	200	300	0	0	0	0	0	0	0	200	903	0	0	0	0	0	0	0	603	903	0
11897	5	0	0	0	0	0	0	200	300	0	0	0	0	0	0	0	200	903	0	0	0	0	0	0	0	603	903	0
11897	6	0	0	0	0	0	0	200	300	0	0	0	0	0	0	0	200	903	0	0	0	0	0	0	0	603	903	0
11897	7	0	0	0	0	0	0	200	300	0	0	0	0	0	0	0	200	903	0	0	0	0	0	0	0	603	903	0
11897	8	0	0	0	0	0	0	200	300	0	0	0	0	0	0	0	200	903	0	0	0	0	0	0	0	603	903	0
11897	9	0	0	0	0	0	0	200	300	0	0	0	0	0	0	0	200	903	0	0	0	0	0	0	0	603	903	0
11898	0	0	0	0	0	0	0	200	300	0	0	0	0	0	0	0	200	903	0	0	0	0	0	0	0	603	903	0
11898	1	0	0	0	0	0	0	200	300	0	0	0	0	0	0	0	200	903	0	0	0	0	0	0	0	603	903	0
11898	2	0	0	0	0	0	0	200	300	0	0	0	0	0	0	0	200	903	0	0	0	0	0	0	0	603	903	0
11898	3	0	0	0	0	0	0	200	300	0	0	0	0	0	0	0	200	903	0	0	0	0	0	0	0	603	903	0
11898	4	0	0	0	0	0	0	200	300	0	0	0	0	0	0	0	200	903	0	0	0	0	0	0	0	603	903	0
11898	5	0	0	0	0	0	0	200	300	0	0	0	0	0	0	0	200	903	0	0	0	0	0	0	0	603	903	0
11898	6	0	0	0	0	0	0	200	300	0	0	0	0	0	0	0	200	903	0	0	0	0	0	0	0	603	903	0
11898	7	0	0	0	0	0	0	200	300	0	0	0	0	0	0	0	200	903	0	0	0	0	0	0	0	603	903	0
11898	8	0	0	0	0	0	0	200	300	0	0	0	0	0	0	0	200	903	0	0	0	0	0	0	0	603	903	0
11898	9	0	0	0	0	0	0	200	300	0	0	0	0	0	0	0	200	903	0	0	0	0	0	0	0	603	903	0
11899	0	0	0	0	0	0	0	200	300	0	0	0	0	0	0	0	200	903	0	0	0	0	0	0	0	603	903	0
11899	1	0	0	0	0	0	0	200	300	0	0	0	0	0	0	0	200	903	0	0	0	0	0	0	0	603	903	0
11899	2	0	0	0	0	0	0	200	300	0	0	0	0	0	0	0	200	903	0	0	0	0	0	0	0	603	903	0
11899	3	0	0	0	0	0	0	200	300	0	0	0	0	0	0	0	200	903	0	0	0	0	0	0	0	603	903	0
11899	4	0	0	0	0	0	0	200	300	0	0	0	0	0	0	0	200	903	0	0	0	0	0	0	0	603	903	0
11899	5	0	0	0	0	0	0	200	300	0	0	0	0	0	0	0	200	903	0	0	0	0	0	0	0	603	903	0
11899	6	0	0	0	0	0	0	200	300	0	0	0	0	0	0	0	200	903	0	0	0	0	0	0	0	603	903	0
11899	7	0	0	0	0	0	0	200	300	0	0	0	0	0	0	0	200	903	0	0	0	0	0	0	0	603	903	0
11899	8	0	0	0	0	0	0	200	300	0	0	0	0	0	0	0	200	903	0	0	0	0	0	0	0	603	903	0
11899	9	0	0	0	0	0	0	200	300	0	0	0	0	0	0	0	200	903	0	0	0	0	0	0	0	603	903	0
11900	0	0	0	0	0	0	0	200	300	0	0	0	0	0	0	0	200	903	0	0	0	0	0	0	0	603	903	0
11900	1	0	0	0	0	0	0	200	300	0	0	0	0	0	0	0	200	903	0	0	0	0	0	0	0	603	903	0
11900	2	0	0	0	0	0	0	200	300	0	0	0	0	0	0	0	200	903	0	0	0	0	0	0	0	603	903	0
11900	3	0	0	0	0	0	0	200	300	0	0	0	0	0	0	0	200	903	0	0	0	0	0	0	0	603	903	0
11900	4	0	0	0	0	0	0	200	300	0	0	0	0	0	0	0	200	903	0	0	0	0	0	0	0	603	903	0
11900	5	0	0	0	0	0	0	200	300	0	0	0	0	0	0	0	200	903	0	0	0	0	0	0	0	603	903	0
11900	6	0	0	0	0	0	0	200	300	0	0	0	0	0	0	0	200	903	0	0	0	0	0	0	0	603	903	0
11900	7	0	0	0	0	0	0	200	300	0	0	0	0	0	0	0	200	903	0	0	0	0	0	0	0	603	903	0
11900	8	0	0	0	0	0	0	200	300	0	0	0	0	0	0	0	200	903	0	0	0	0	0	0	0	603	903	0
11900	9	0	0	0	0	0	0	200	300	0	0	0	0	0	0	0	200	903	0	0	0	0	0	0	0	603	903	0
11901	0	0	0	0	0	0	0	200	300	0	0	0	0	0	0	0	200	903	0	0	0	0	0	0	0	603	903	0
11901	1	0	0	0	0	0	0	200	300	0	0	0	0	0	0	0	200	903	0	0	0	0	0	0	0	603	903	0
11901	2	0	0	0	0	0	0	200	300	0	0	0	0	0	0	0	200	903	0	0	0	0	0	0	0	603	903	0
11901	3	0	0	0	0	0	0	200	300	0	0	0	0	0	0	0	200	903	0	0	0	0	0	0	0	603	903	0
11901	4	0	0	0	0	0	0	200	300	0	0	0	0	0	0	0	200	903	0	0	0	0	0	0	0	603	903	0
11901	5	0	0	0	0	0	0	200	300	0	0	0	0	0	0	0	200	903	0	0	0	0	0	0	0	603	903	0
11901	6	0	0	0	0	0	0	200	300	0	0	0	0	0	0	0	200	903	0	0	0	0	0	0	0	603	903	0
11901	7	0	0	0	0	0	0	200	300	0	0	0	0	0	0	0	200	903	0	0	0	0	0	0	0	603	903	0
11901	8	0	0	0	0	0	0	200	300	0	0	0	0	0	0	0	200	903	0	0	0	0	0	0	0	603	903	0
11901	9	0	0	0	0	0	0	200	300	0	0	0	0	0	0	0	200	903	0	0	0	0	0	0	0	603	903	0
11902	0	0	0	0	0	0	0	200	300	0	0	0	0	0	0	0	200	903	0	0	0	0	0	0	0	603	903	0
11902	1	0	0	0	0	0	0	200	300	0	0	0	0	0	0	0	200	903	0	0	0	0	0	0	0	603	903	0
11902	2	0	0	0	0	0	0	200	300	0	0	0	0	0	0	0	200	903	0	0	0	0	0	0	0	603	903	0
11902	3	0	0	0	0	0	0	200	300	0	0	0	0	0	0	0	200	903	0	0	0	0	0	0	0	603	903	0
11902	4	0	0	0	0	0	0	200	300	0	0	0	0	0	0	0	200	903	0	0	0	0	0	0	0	603	903	0
11902	5	0	0	0	0	0	0	200	300	0	0	0	0	0	0	0	200	903	0	0	0	0	0	0	0	603	903	0
11902	6	0	0	0	0	0	0	200	300	0	0	0	0	0	0	0	200	903	0	0	0	0	0	0	0	603	903	0
11902	7	0	0	0	0	0	0	200	300	0	0	0	0	0	0	0	200	903	0	0	0	0	0	0	0	603	903	0
11902	8	0	0	0	0	0	0	200	300	0	0	0	0	0	0	0	200	903	0	0	0	0	0	0	0	603	903	0
11902	9	0	0	0	0	0	0	200	300	0	0	0	0	0	0	0	200	903	0	0	0	0	0	0	0	603	903	0
11903	0	0	0	0	0	0	0	200	300	0	0	0	0	0	0	0	200	903	0	0	0	0	0	0	0	603	903	0
11903	1	0	0	0	0	0	0	200	300	0	0	0	0	0	0	0	200	903	0	0	0	0	0	0	0	603	903	0
11903	2	0	0	0	0	0	0	200	300	0	0	0	0	0	0	0	200	903	0	0	0	0	0	0	0	603	903	0
11903	3	0	0	0	0	0	0	200	300	0	0	0	0	0	0	0	200	903	0	0	0	0	0	0	0	603	903	0
11903	4	0	0	0	0	0	0	200	300	0	0	0	0	0	0	0	200	903	0	0	0	0	0	0	0	603	903	0
11903	5	0	0	0	0	0	0	200	300	0	0	0	0	0	0	0	200	903	0	0	0	0	0	0	0	603	903	0
11903	6	0	0	0	0	0	0	200	300	0	0	0	0	0	0	0	200	903	0	0	0	0	0	0	0	603	903	0
11903	7	0	0	0	0	0	0	200	300	0	0	0	0	0	0	0	200	903	0	0	0	0	0	0	0	603	903	0
11903	8	0	0	0	0	0	0	200	300	0	0	0	0	0	0	0	200	903	0	0	0	0	0	0	0	603	903	0
11903	9	0	0	0	0	0	0	200	300	0	0	0	0	0	0	0	200	903	0	0	0	0	0	0	0	603	903	0
11904	0	0	0	0	0	0	0	200	300	0	0	0	0	0	0	0	200	903	0	0	0	0	0	0	0	603	903	0
11904	1	0	0	0	0	0	0	200	300	0	0	0	0	0	0	0	200	903	0	0	0	0	0	0	0	603	903	0
11904	2	0	0	0	0	0	0	200	300	0	0	0	0	0	0	0	200	903	0	0	0	0	0	0	0	603	903	0
11904	3	0	0	0	0	0	0	200	300	0	0	0	0	0	0	0	200	903	0	0	0	0	0	0	0	603	903	0
11904	4	0	0	0	0	0	0	200	300	0	0	0	0	0	0	0	200	903	0	0	0	0	0	0	0	603	903	0
11904	5	0	0	0	0	0	0	200	300	0	0	0	0	0	0	0	200	903	0	0	0	0	0	0	0	603	903	0
11904	6	0	0	0	0	0	0	200	300	0	0	0	0	0	0	0	200	903	0	0	0	0	0	0	0	603	903	0
11904	7	0	0	0	0	0	0	200	300	0	0	0	0	0	0	0	200	903	0	0	0	0	0	0	0	603	903	0
11904	8	0	0	0	0	0	0	200	300	0	0	0	0	0	0	0	200	903	0	0	0	0	0	0	0	603	903	0
11904	9	0	0	0	0	0	0	200	300	0	0	0	0	0	0	0	200	903	0	0	0	0	0	0	0	603	903	0
11905	0	0	0	0	0	0	0	200	300	0	0	0	0	0	0	0	200	903	0	0	0	0	0	0	0	603	903	0
11905	1	0	0	0	0	0	0	200	300	0	0	0	0	0	0	0	200	903	0	0	0	0	0	0	0	603	903	0
11905	2	0	0	0	0	0	0	200	300	0	0	0	0	0	0	0	200	903	0	0	0	0	0	0	0	603	903	0
11905	3	0	0	0	0	0	0	200	300	0	0	0	0	0	0	0	200	903	0	0	0	0	0	0	0	603	903	0
11905	4	0	0	0	0	0	0	200	300	0	0	0	0	0	0	0	200	903	0	0	0	0	0	0	0	603	903	0
11905	5	0	0	0	0	0	0	200	300	0	0	0	0	0	0	0	200	903	0	0	0	0	0	0	0	603	903	0
11905	6	0	0	0	0	0	0	200	300	0	0	0	0	0	0	0	200	903	0	0	0	0	0	0	0	603	903	0
11905	7	0	0	0	0	0	0	200	300	0	0	0	0	0	0	0	200	903	0	0	0	0	0	0	0	603	903	0
11905	8	0	0	0	0	0	0	200	300	0	0	0	0	0	0	0	200	903	0	0	0	0	0	0	0	603	903	0
11905	9	0	0	0	0	0	0	200	300	0	0	0	0	0	0	0	200	903	0	0	0	0	0	0	0	603	903	0
11906	0	0	0	0	0	0	0	200	300	0	0	0	0	0	0	0	200	903	0	0	0	0	0	0	0	603	903	0
11906	1	0	0	0	0	0	0	200	300	0	0	0	0	0	0	0	200	903	0	0	0	0	0	0	0	603	903	0
11906	2	0	0	0	0	0	0	200	300	0	0	0	0	0	0	0	200	903	0	0	0	0	0	0	0	603	903	0
11906	3	0	0	0	0	0	0	200	300	0	0	0	0	0	0	0	200	903	0	0	0	0	0	0	0	603	903	0
11906	4	0	0	0	0	0	0	200	300	0	0	0	0	0	0	0	200	903	0	0	0	0	0	0	0	603	903	0
11906	5	0	0	0	0	0	0	200	300	0	0	0	0	0	0	0	200	903	0	0	0	0	0	0	0	603	903	0
11906	6	0	0	0	0	0	0	200	300	0	0	0	0	0	0	0	200	903	0	0	0	0	0	0	0	603	903	0
11906	7	0	0	0	0	0	0	200	300	0	0	0	0	0	0	0	200	903	0	0	0	0	0	0	0	603	903	0
11906	8	0	0	0	0	0	0	200	300	0	0	0	0	0	0	0	200	903	0	0	0	0	0	0	0	603	903	0
11906	9	0	0	0	0	0	0	200	300	0	0	0	0	0	0	0	200	903	0	0	0	0	0	0	0	603	903	0
11907	0	0	0	0	0	0	0	200	300	0	0	0	0	0	0	0	200	903	0	0	0	0	0	0	0	603	903	0
11907	1	0	0	0	0	0	0	200	300	0	0	0	0	0	0	0	200	903	0	0	0	0	0	0	0	603	903	0
11907	2	0	0	0	0	0	0	200	300	0	0	0	0	0	0	0	200	903	0	0	0	0	0	0	0	603	903	0
11907	3	0	0	0	0	0	0	200	300	0	0	0	0	0	0	0	200	903	0	0	0	0	0	0	0	603	903	0
11907	4	0	0	0	0	0	0	200	300	0	0	0	0	0	0	0	200	903	0	0	0	0	0	0	0	603	903	0
11907	5	0	0	0	0	0	0	200	300	0	0	0	0	0	0	0	200	903	0	0	0	0	0	0	0	603	903	0
11907	6	0	0	0	0	0	0	200	300	0	0	0	0	0	0	0	200	903	0	0	0	0	0	0	0	603	903	0
11907	7	0	0	0	0	0	0	200	300	0	0	0	0	0	0	0	200	903	0	0	0	0	0	0	0	603	903	0
11907	8	0	0	0	0	0	0	200	300	0	0	0	0	0	0	0	200	903	0	0	0	0	0	0	0	603	903	0
11907	9	0	0	0	0	0	0	200	300	0	0	0	0	0	0	0	200	903	0	0	0	0	0	0	0	603	903	0
11908	0	0	0	0	0	0	0	200	300	0	0	0	0	0	0	0	200	903	0	0	0	0	0	0	0	603	903	0
11908	1	0	0	0	0	0	0	200	300	0	0	0	0	0	0	0	200	903	0	0	0	0	0	0	0	603	903	0
11908	2	0	0	0	0	0	0	200	300	0	0	0	0	0	0	0	200	903	0	0	0	0	0	0	0	603	903	0
11908	3	0	0	0	0	0	0	200	300	0	0	0	0	0	0	0	200	903	0	0	0	0	0	0	0	603	903	0
11908	4	0	0	0	0	0	0	200	300	0	0	0	0	0	0	0	200	903	0	0	0	0	0	0	0	603	903	0
11908	5	0	0	0	0	0	0	200	300	0	0	0	0	0	0	0	200	903	0	0	0	0	0	0	0	603	903	0
11908	6	0	0	0	0	0	0	200	300	0	0	0	0	0	0	0	200	903	0	0	0	0	0	0	0	603	903	0
11908	7	0	0	0	0	0	0	200	300	0	0	0	0	0	0	0	200	903	0	0	0	0	0	0	0	603	903	0
11908	8	0	0	0	0	0	0	200	300	0	0	0	0	0	0	0	200	903	0	0	0	0	0	0	0	603	903	0
11908	9	0	0	0	0	0	0	200	300	0	0	0	0	0	0	0	200	903	0	0	0	0	0	0	0	603	903	0
11909	0	0	0	0	0	0	0	200	300	0	0	0	0	0	0	0	200	903	0	0	0	0	0	0	0	603	903	0
11909	1	0	0	0	0	0	0	200	300	0	0	0	0	0	0	0	200	903	0	0	0	0	0	0	0	603	903	0
11909	2	0	0	0	0	0	0	200	300	0	0	0	0	0	0	0	200	903	0	0	0	0	0	0	0	603	903	0
11909	3	0	0	0	0	0	0	200	300	0	0	0	0	0	0	0	200	903	0	0	0	0	0	0	0	603	903	0
11909	4	0	0	0	0	0	0	200	300	0	0	0	0	0	0	0	200	903	0	0	0	0	0	0	0	603	903	0
11909	5	0	0	0	0	0	0	200	300	0	0	0	0	0	0	0	200	903	0	0	0	0	0	0	0	603	903	0
11909	6	0	0	0	0	0	0	200	300	0	0	0	0	0	0	0	200	903	0	0	0	0	0	0	0	603	903	0
11909	7	0	0	0	0	0	0	200	300	0	0	0	0	0	0	0	200	903	0	0	0	0	0	0	0	603	903	0
11909	8	0	0	0	0	0	0	200	300	0	0	0	0	0	0	0	200	903	0	0	0	0	0	0	0	603	903	0
11909	9	0	0	0	0	0	0	200	300	0	0	0	0	0	0	0	200	903	0	0	0	0	0	0	0	603	903	0
11910	0	0	0	0	0	0	0	200	300	0	0	0	0	0	0	0	200	903	0	0	0	0	0	0	0	603	903	0
11910	1	0	0	0	0	0	0	200	300	0	0	0	0	0	0	0	200	903	0	0	0	0	0	0	0	603	903	0
11910	2	0	0	0	0	0	0	200	300	0	0	0	0	0	0	0	200	903	0	0	0	0	0	0	0	603	903	0
11910	3	0	0	0	0	0	0	200	300	0	0	0	0	0	0	0	200	903	0	0	0	0	0	0	0	603	903	0
11910	4	0	0	0	0	0	0	200	300	0	0	0	0	0	0	0	200	903	0	0	0	0	0	0	0	603	903	0
11910	5	0	0	0	0	0	0	200	300	0	0	0	0	0	0	0	200	903	0	0	0	0	0	0	0	603	903	0
11910	6	0	0	0	0	0	0	200	300	0	0	0	0	0	0	0	200	903	0	0	0	0	0	0	0	603	903	0
11910	7	0	0	0	0	0	0	200	300	0	0	0	0	0	0	0	200	903	0	0	0	0	0	0	0	603	903	0
11910	8	0	0	0	0	0	0	200	300	0	0	0	0	0	0	0	200	903	0	0	0	0	0	0	0	603	903	0
11910	9	0	0	0	0	0	0	200	300	0	0	0	0	0	0	0	200	903	0	0	0	0	0	0	0	603	903	0
11911	0	0	0	0	0	0	0	200	300	0	0	0	0	0	0	0	200	903	0	0	0	0	0	0	0	603	903	0
11911	1	0	0	0	0	0	0	200	300	0	0	0	0	0	0	0	200	903	0	0	0	0	0	0	0	603	903	0
11911	2	0	0	0	0	0	0	200	300	0	0	0	0	0	0	0	200	903	0	0	0	0	0	0	0	603	903	0
11911	3	0	0	0	0	0	0	200	300	0	0	0	0	0	0	0	200	903	0	0	0	0	0	0	0	603	903	0
11911	4	0	0	0	0	0	0	200	300	0	0	0	0	0	0	0	200	903	0	0	0	0	0	0	0	603	903	0
11911	5	0	0	0	0	0	0	200	300	0	0	0	0	0	0	0	200	903	0	0	0	0	0	0	0	603	903	0
11911	6	0	0	0	0	0	0	200	300	0	0	0	0	0	0	0	200	903	0	0	0	0	0	0	0	603	903	0
11911	7	0	0	0	0	0	0	200	300	0	0	0	0	0	0	0	200	903	0	0	0	0	0	0	0	603	903	0
11911	8	0	0	0	0	0	0	200	300	0	0	0	0	0	0	0	200	903	0	0	0	0	0	0	0	603	903	0
11911	9	0	0	0	0	0	0	200	300	0	0	0	0	0	0	0	200	903	0	0	0	0	0	0	0	603	903	0
11912	0	0	0	0	0	0	0	200	300	0	0	0	0	0	0	0	200	903	0	0	0	0	0	0	0	603	903	0
11912	1	0	0	0	0	0	0	200	300	0	0	0	0	0	0	0	200	903	0	0	0	0	0	0	0	603	903	0
11912	2	0	0	0	0	0	0	200	300	0	0	0	0	0	0	0	200	903	0	0	0	0	0	0	0	603	903	0
11912	3	0	0	0	0	0	0	200	300	0	0	0	0	0	0	0	200	903	0	0	0	0	0	0	0	603	903	0
11912	4	0	0	0	0	0	0	200	300	0	0	0	0	0	0	0	200	903	0	0	0	0	0	0	0	603	903	0
11912	5	0	0	0	0	0	0	200	300	0	0	0	0	0	0	0	200	903	0	0	0	0	0	0	0	603	903	0
11912	6	0	0	0	0	0	0	200	300	0	0	0	0	0	0	0	200	903	0	0	0	0	0	0	0	603	903	0
11912	7	0	0	0	0	0	0	200	300	0	0	0	0	0	0	0	200	903	0	0	0	0	0	0	0	603	903	0
11912	8	0	0	0	0	0	0	200	300	0	0	0	0	0	0	0	200	903	0	0	0	0	0	0	0	603	903	0
11912	9	0	0	0	0	0	0	200	300	0	0	0	0	0	0	0	200	903	0	0	0	0	0	0	0	603	903	0
11913	0	0	0	0	0	0	0	200	300	0	0	0	0	0	0	0	200	903	0	0	0	0	0	0	0	603	903	0
11913	1	0	0	0	0	0	0	200	300	0	0	0	0	0	0	0	200	903	0	0	0	0	0	0	0	603	903	0
11913	2	0	0	0	0	0	0	200	300	0	0	0	0	0	0	0	200	903	0	0	0	0	0	0	0	603	903	0
11913	3	0	0	0	0	0	0	200	300	0	0	0	0	0	0	0	200	903	0	0	0	0	0	0	0	603	903	0
11913	4	0	0	0	0	0	0	200	300	0	0	0	0	0	0	0	200	903	0	0	0	0	0	0	0	603	903	0
11913	5	0	0	0	0	0	0	200	300	0	0	0	0	0	0	0	200	903	0	0	0	0	0	0	0	603	903	0
11913	6	0	0	0	0	0	0	200	300	0	0	0	0	0	0	0	200	903	0	0	0	0	0	0	0	603	903	0
11913	7	0	0	0	0	0	0	200	300	0	0	0	0	0	0	0	200	903	0	0	0	0	0	0	0	603	903	0
11913	8	0	0	0	0	0	0	200	300	0	0	0	0	0	0	0	200	903	0	0	0	0	0	0	0	603	903	0
11913	9	0	0	0	0	0	0	200	300	0	0	0	0	0	0	0	200	903	0	0	0	0	0	0	0	603	903	0
11914	0	0	0	0	0	0	0	200	300	0	0	0	0	0	0	0	200	903	0	0	0	0	0	0	0	603	903	0
11914	1	0	0	0	0	0	0	200	300	0	0	0	0	0	0	0	200	903	0	0	0	0	0	0	0	603	903	0
11914	2	0	0	0	0	0	0	200	300	0	0	0	0	0	0	0	200	903	0	0	0	0	0	0	0	603	903	0
11914	3	0	0	0	0	0	0	200	300	0	0	0	0	0	0	0	200	903	0	0	0	0	0	0	0	603	903	0
11914	4	0	0	0	0	0	0	200	300	0	0	0	0	0	0	0	200	903	0	0	0	0	0	0	0	603	903	0
11914	5	0	0	0	0	0	0	200	300	0	0	0	0	0	0	0	200	903	0	0	0	0	0	0	0	603	903	0
11914	6	0	0	0	0	0	0	200	300	0	0	0	0	0	0	0	200	903	0	0	0	0	0	0	0	603	903	0
11914	7	0	0	0	0	0	0	200	300	0	0	0	0	0	0	0	200	903	0	0	0	0	0	0	0	603	903	0
11914	8	0	0	0	0	0	0	200	300	0	0	0	0	0	0	0	200	903	0	0	0	0	0	0	0	603	903	0
11914	9	0	0	0	0	0	0	200	300	0	0	0	0	0	0	0	200	903	0	0	0	0	0	0	0	603	903	0
11915	0	0	0	0	0	0	0	200	300	0	0	0	0	0	0	0	200	903	0	0	0	0	0	0	0	603	903	0
11915	1	0	0	0	0	0	0	200	300	0	0	0	0	0	0	0	200	903	0	0	0	0	0	0	0	603	903	0
11915	2	0	0	0	0	0	0	200	300	0	0	0	0	0	0	0	200	903	0	0	0	0	0	0	0	603	903	0
11915	3	0	0	0	0	0	0	200	300	0	0	0	0	0	0	0	200	903	0	0	0	0	0	0	0	603	903	0
11915	4	0	0	0	0	0	0	200	300	0	0	0	0	0	0	0	200	903	0	0	0	0	0	0	0	603	903	0
11915	5	0	0	0	0	0	0	200	300	0	0	0	0	0	0	0	200	903	0	0	0	0	0	0	0	603	903	0
11915	6	0	0	0	0	0	0	200	300	0	0	0	0	0	0	0	200	903	0	0	0	0	0	0	0	603	903	0
11915	7	0	0	0	0	0	0	200	300	0	0	0	0	0	0	0	200	903	0	0	0	0	0	0	0	603	903	0
11915	8	0	0	0	0	0	0	200	300	0	0	0	0	0	0	0	200	903	0	0	0	0	0	0	0	603	903	0
11915	9	0	0	0	0	0	0	200	300	0	0	0	0	0	0	0	200	903	0	0	0	0	0	0	0	603	903	0
11916	0	0	0	0	0	0	0	200	300	0	0	0	0	0	0	0	200	903	0	0	0	0	0	0	0	603	903	0
11916	1	0	0	0	0	0	0	200	300	0	0	0	0	0	0	0	200	903	0	0	0	0	0	0	0	603	903	0
11916	2	0	0	0	0	0	0	200	300	0	0	0	0	0	0	0	200	903	0	0	0	0	0	0	0	603	903	0
11916	3	0	0	0	0	0	0	200	300	0	0	0	0	0	0	0	200	903	0	0	0	0	0	0	0	603	903	0
11916	4	0	0	0	0	0	0	200	300	0	0	0	0	0	0	0	200	903	0	0	0	0	0	0	0	603	903	0
11916	5	0	0	0	0	0	0	200	300	0	0	0	0	0	0	0	200	903	0	0	0	0	0	0	0	603	903	0
11916	6	0	0	0	0	0	0	200	300	0	0	0	0	0	0	0	200	903	0	0	0	0	0	0	0	603	903	0
11916	7	0	0	0	0	0	0	200	300	0	0	0	0	0	0	0	200	903	0	0	0	0	0	0	0	603	903	0
11916	8	0	0	0	0	0	0	200	300	0	0	0	0	0	0	0	200	903	0	0	0	0	0	0	0	603	903	0
11916	9	0	0	0	0	0	0	200	300	0	0	0	0	0	0	0	200	903	0	0	0	0	0	0	0	603	903	0
11917	0	0	0	0	0	0	0	200	300	0	0	0	0	0	0	0	200	903	0	0	0	0	0	0	0	603	903	0
11917	1	0	0	0	0	0	0	200	300	0	0	0	0	0	0	0	200	903	0	0	0	0	0	0	0	603	903	0
11917	2	0	0	0	0	0	0	200	300	0	0	0	0	0	0	0	200	903	0	0	0	0	0	0	0	603	903	0
11917	3	0	0	0	0	0	0	200	300	0	0	0	0	0	0	0	200	903	0	0	0	0	0	0	0	603	903	0
11917	4	0	0	0	0	0	0	200	300	0	0	0	0	0	0	0	200	903	0	0	0	0	0	0	0	603	903	0
11917	5	0	0	0	0	0	0	200	300	0	0	0	0	0	0	0	200	903	0	0	0	0	0	0	0	603	903	0
11917	6	0	0	0	0	0	0	200	300	0	0	0	0	0	0	0	200	903	0	0	0	0	0	0	0	603	903	0
11917	7	0	0	0	0	0	0	200	300	0	0	0	0	0	0	0	200	903	0	0	0	0	0	0	0	603	903	0
11917	8	0	0	0	0	0	0	200	300	0	0	0	0	0	0	0	200	903	0	0	0	0	0	0	0	603	903	0
11917	9	0	0	0	0	0	0	200	300	0	0	0	0	0	0	0	200	903	0	0	0	0	0	0	0	603	903	0
11918	0	0	0	0	0	0	0	200	300	0	0	0	0	0	0	0	200	903	0	0	0	0	0	0	0	603	903	0
11918	1	0	0	0	0	0	0	200	300	0	0	0	0	0	0	0	200	903	0	0	0	0	0	0	0	603	903	0
11918	2	0	0	0	0	0	0	200	300	0	0	0	0	0	0	0	200	903	0	0	0	0	0	0	0	603	903	0
11918	3	0	0	0	0	0	0	200	300	0	0	0	0	0	0	0	200	903	0	0	0	0	0	0	0	603	903	0
11918	4	0	0	0	0	0	0	200	300	0	0	0	0	0	0	0	200	903	0	0	0	0	0	0	0	603	903	0
11918	5	0	0	0	0	0	0	200	300	0	0	0	0	0	0	0	200	903	0	0	0	0	0	0	0	603	903	0
11918	6	0	0	0	0	0	0	200	300	0	0	0	0	0	0	0	200	903	0	0	0	0	0	0	0	603	903	0
11918	7	0	0	0	0	0	0	200	300	0	0	0	0	0	0	0	200	903	0	0	0	0	0	0	0	603	903	0
11918	8	0	0	0	0	0	0	200	300	0	0	0	0	0	0	0	200	903	0	0	0	0	0	0	0	603	903	0
11918	9	0	0	0	0	0	0	200	300	0	0	0	0	0	0	0	200	903	0	0	0	0	0	0	0	603	903	0
11919	0	0	0	0	0	0	0	200	300	0	0	0	0	0	0	0	200	903	0	0	0	0	0	0	0	603	903	0
11919	1	0	0	0	0	0	0	200	300	0	0	0	0	0	0	0	200	903	0	0	0	0	0	0	0	603	903	0
11919	2	0	0	0	0	0	0	200	300	0	0	0	0	0	0	0	200	903	0	0	0	0	0	0	0	603	903	0
11919	3	0	0	0	0	0	0	200	300	0	0	0	0	0	0	0	200	903	0	0	0	0	0	0	0	603	903	0
11919	4	0	0	0	0	0	0	200	300	0	0	0	0	0	0	0	200	903	0	0	0	0	0	0	0	603	903	0
11919	5	0	0	0	0	0	0	200	300	0	0	0	0	0	0	0	200	903	0	0	0	0	0	0	0	603	903	0
11919	6	0	0	0	0	0	0	200	300	0	0	0	0	0	0	0	200	903	0	0	0	0	0	0	0	603	903	0
11919	7	0	0	0	0	0	0	200	300	0	0	0	0	0	0	0	200	903	0	0	0	0	0	0	0	603	903	0
11919	8	0	0	0	0	0	0	200	300	0	0	0	0	0	0	0	200	903	0	0	0	0	0	0	0	603	903	0
11919	9	0	0	0	0	0	0	200	300	0	0	0	0	0	0	0	200	903	0	0	0	0	0	0	0	603	903	0
11920	0	0	0	0	0	0	0	200	300	0	0	0	0	0	0	0	200	903	0	0	0	0	0	0	0	603	903	0
11920	1	0	0	0	0	0	0	200	300	0	0	0	0	0	0	0	200	903	0	0	0	0	0	0	0	603	903	0
11920	2	0	0	0	0	0	0	200	300	0	0	0	0	0	0	0	200	903	0	0	0	0	0	0	0	603	903	0
11920	3	0	0	0	0	0	0	200	300	0	0	0	0	0	0	0	200	903	0	0	0	0	0	0	0	603	903	0
11920	4	0	0	0	0	0	0	200	300	0	0	0	0	0	0	0	200	903	0	0	0	0	0	0	0	603	903	0
11920	5	0	0	0	0	0	0	200	300	0	0	0	0	0	0	0	200	903	0	0	0	0	0	0	0	603	903	0
11920	6	0	0	0	0	0	0	200	300	0	0	0	0	0	0	0	200	903	0	0	0	0	0	0	0	603	903	0
11920	7	0	0	0	0	0	0	200	300	0	0	0	0	0	0	0	200	903	0	0	0	0	0	0	0	603	903	0
11920	8	0	0	0	0	0	0	200	300	0	0	0	0	0	0	0	200	903	0	0	0	0	0	0	0	603	903	0
11920	9	0	0	0	0	0	0	200	300	0	0	0	0	0	0	0	200	903	0	0	0	0	0	0	0	603	903	0
11921	0	0	0	0	0	0	0	200	300	0	0	0	0	0	0	0	200	903	0	0	0	0	0	0	0	603	903	0
11921	1	0	0	0	0	0	0	200	300	0	0	0	0	0	0	0	200	903	0	0	0	0	0	0	0	603	903	0
11921	2	0	0	0	0	0	0	200	300	0	0	0	0	0	0	0	200	903	0	0	0	0	0	0	0	603	903	0
11921	3	0	0	0	0	0	0	200	300	0	0	0	0	0	0	0	200	903	0	0	0	0	0	0	0	603	903	0
11921	4	0	0	0	0	0	0	200	300	0	0	0	0	0	0	0	200	903	0	0	0	0	0	0	0	603	903	0
11921	5	0	0	0	0	0	0	200	300	0	0	0	0	0	0	0	200	903	0	0	0	0	0	0	0	603	903	0
11921	6	0	0	0	0	0	0	200	300	0	0	0	0	0	0	0	200	903	0	0	0	0	0	0	0	603	903	0
11921	7	0	0	0	0	0	0	200	300	0	0	0	0	0	0	0	200	903	0	0	0	0	0	0	0	603	903	0
11921	8	0	0	0	0	0	0	200	300	0	0	0	0	0	0	0	200	903	0	0	0	0	0	0	0	603	903	0
11921	9	0	0	0	0	0	0	200	300	0	0	0	0	0	0	0	200	903	0	0	0	0	0	0	0	603	903	0
11922	0	0	0	0	0	0	0	200	300	0	0	0	0	0	0	0	200	903	0	0	0	0	0	0	0	603	903	0
11922	1	0	0	0	0	0	0	200	300	0	0	0	0	0	0	0	200	903	0	0	0	0	0	0	0	603	903	0
11922	2	0	0	0	0	0	0	200	300	0	0	0	0	0	0	0	200	903	0	0	0	0	0	0	0	603	903	0
11922	3	0	0	0	0	0	0	200	300	0	0	0	0	0	0	0	200	903	0	0	0	0	0	0	0	603	903	0
11922	4	0	0	0	0	0	0	200	300	0	0	0	0	0	0	0	200	903	0	0	0	0	0	0	0	603	903	0
11922	5	0	0	0	0	0	0	200	300	0	0	0	0	0	0	0	200	903	0	0	0	0	0	0	0	603	903	0
11922	6	0	0	0	0	0	0	200	300	0	0	0	0	0	0	0	200	903	0	0	0	0	0	0	0	603	903	0
11922	7	0	0	0	0	0	0	200	300	0	0	0	0	0	0	0	200	903	0	0	0	0	0	0	0	603	903	0
11922	8	0	0	0	0	0	0	200	300	0	0	0	0	0	0	0	200	903	0	0	0	0	0	0	0	603	903	0
11922	9	0	0	0	0	0	0	200	300	0	0	0	0	0	0	0	200	903	0	0	0	0	0	0	0	603	903	0
11923	0	0	0	0	0	0	0	200	300	0	0	0	0	0	0	0	200	903	0	0	0	0	0	0	0	603	903	0
11923	1	0	0	0	0	0	0	200	300	0	0	0	0	0	0	0	200	903	0	0	0	0	0	0	0	603	903	0
11923	2	0	0	0	0	0	0	200	300	0	0	0	0	0	0	0	200	903	0	0	0	0	0	0	0	603	903	0
11923	3	0	0	0	0	0	0	200	300	0	0	0	0	0	0	0	200	903	0	0	0	0	0	0	0	603	903	0
11923	4	0	0	0	0	0	0	200	300	0	0	0	0	0	0	0	200	903	0	0	0	0	0	0	0	603	903	0
11923	5	0	0	0	0	0	0	200	300	0	0	0	0	0	0	0	200	903	0	0	0	0	0	0	0	603	903	0
11923	6	0	0	0	0	0	0	200	300	0	0	0	0	0	0	0	200	903	0	0	0	0	0	0	0	603	903	0
11923	7	0	0	0	0	0	0	200	300	0	0	0	0	0	0	0	200	903	0	0	0	0	0	0	0	603	903	0
11923	8	0	0	0	0	0	0	200	300	0	0	0	0	0	0	0	200	903	0	0	0	0	0	0	0	603	903	0
11923	9	0	0	0	0	0	0	200	300	0	0	0	0	0	0	0	200	903	0	0	0	0	0	0	0	603	903	0
11924	0	0	0	0	0	0	0	200	300	0	0	0	0	0	0	0	200	903	0	0	0	0	0	0	0	603	903	0
11924	1	0	0	0	0	0	0	200	300	0	0	0	0	0	0	0	200	903	0	0	0	0	0	0	0	603	903	0
11924	2	0	0	0	0	0	0	200	300	0	0	0	0	0	0	0	200	903	0	0	0	0	0	0	0	603	903	0
11924	3	0	0	0	0	0	0	200	300	0	0	0	0	0	0	0	200	903	0	0	0	0	0	0	0	603	903	0
11924	4	0	0	0	0	0	0	200	300	0	0	0	0	0	0	0	200	903	0	0	0	0	0	0	0	603	903	0
11924	5	0	0	0	0	0	0	200	300	0	0	0	0	0	0	0	200	903	0	0	0	0	0	0	0	603	903	0
11924	6	0	0	0	0	0	0	200	300	0	0	0	0	0	0	0	200	903	0	0	0	0	0	0	0	603	903	0
11924	7	0	0	0	0	0	0	200	300	0	0	0	0	0	0	0	200	903	0	0	0	0	0	0	0	603	903	0
11924	8	0	0	0	0	0	0	200	300	0	0	0	0	0	0	0	200	903	0	0	0	0	0	0	0	603	903	0
11924	9	0	0	0	0	0	0	200	300	0	0	0	0	0	0	0	200	903	0	0	0	0	0	0	0	603	903	0
11925	0	0	0	0	0	0	0	200	300	0	0	0	0	0	0	0	200	903	0	0	0	0	0	0	0	603	903	0
11925	1	0	0	0	0	0	0	200	300	0	0	0	0	0	0	0	200	903	0	0	0	0	0	0	0	603	903	0
11925	2	0	0	0	0	0	0	200	300	0	0	0	0	0	0	0	200	903	0	0	0	0	0	0	0	603	903	0
11925	3	0	0	0	0	0	0	200	300	0	0	0	0	0	0	0	200	903	0	0	0	0	0	0	0	603	903	0
11925	4	0	0	0	0	0	0	200	300	0	0	0	0	0	0	0	200	903	0	0	0	0	0	0	0	603	903	0
11925	5	0	0	0	0	0	0	200	300	0	0	0	0	0	0	0	200	903	0	0	0	0	0	0	0	603	903	0
11925	6	0	0	0	0	0	0	200	300	0	0	0	0	0	0	0	200	903	0	0	0	0	0	0	0	603	903	0
11925	7	0	0	0	0	0	0	200	300	0	0	0	0	0	0	0	200	903	0	0	0	0	0	0	0	603	903	0
11925	8	0	0	0	0	0	0	200	300	0	0	0	0	0	0	0	200	903	0	0	0	0	0	0	0	603	903	0
11925	9	0	0	0	0	0	0	200	300	0	0	0	0	0	0	0	200	903	0	0	0	0	0	0	0	603	903	0
11926	0	0	0	0	0	0	0	200	300	0	0	0	0	0	0	0	200	903	0	0	0	0	0	0	0	603	903	0
11926	1	0	0	0	0	0	0	200	300	0	0	0	0	0	0	0	200	903	0	0	0	0	0	0	0	603	903	0
11926	2	0	0	0	0	0	0	200	300	0	0	0	0	0	0	0	200	903	0	0	0	0	0	0	0	603	903	0
11926	3	0	0	0	0	0	0	200	300	0	0	0	0	0	0	0	200	903	0	0	0	0	0	0	0	603	903	0
11926	4	0	0	0	0	0	0	200	300	0	0	0	0	0	0	0	200	903	0	0	0	0	0	0	0	603	903	0
11926	5	0	0	0	0	0	0	200	300	0	0	0	0	0	0	0	200	903	0	0	0	0	0	0	0	603	903	0
11926	6	0	0	0	0	0	0	200	300	0	0	0	0	0	0	0	200	903	0	0	0	0	0	0	0	603	903	0
11926	7	0	0	0	0	0	0	200	300	0	0	0	0	0	0	0	200	903	0	0	0	0	0	0	0	603	903	0
11926	8	0	0	0	0	0	0	200	300	0	0	0	0	0	0	0	200	903	0	0	0	0	0	0	0	603	903	0
11926	9	0	0	0	0	0	0	200	300	0	0	0	0	0	0	0	200	903	0	0	0	0	0	0	0	603	903	0
11927	0	0	0	0	0	0	0	200	300	0	0	0	0	0	0	0	200	903	0	0	0	0	0	0	0	603	903	0
11927	1	0	0	0	0	0	0	200	300	0	0	0	0	0	0	0	200	903	0	0	0	0	0	0	0	603	903	0
11927	2	0	0	0	0	0	0	200	300	0	0	0	0	0	0	0	200	903	0	0	0	0	0	0	0	603	903	0
11927	3	0	0	0	0	0	0	200	300	0	0	0	0	0	0	0	200	903	0	0	0	0	0	0	0	603	903	0
11927	4	0	0	0	0	0	0	200	300	0	0	0	0	0	0	0	200	903	0	0	0	0	0	0	0	603	903	0
11927	5	0	0	0	0	0	0	200	300	0	0	0	0	0	0	0	200	903	0	0	0	0	0	0	0	603	903	0
11927	6	0	0	0	0	0	0	200	300	0	0	0	0	0	0	0	200	903	0	0	0	0	0	0	0	603	903	0
11927	7	0	0	0	0	0	0	200	300	0	0	0	0	0	0	0	200	903	0	0	0	0	0	0	0	603	903	0
11927	8	0	0	0	0	0	0	200	300	0	0	0	0	0	0	0	200	903	0	0	0	0	0	0	0	603	903	0
11927	9	0	0	0	0	0	0	200	300	0	0	0	0	0	0	0	200	903	0	0	0	0	0	0	0	603	903	0
11928	0	0	0	0	0	0	0	200	300	0	0	0	0	0	0	0	200	903	0	0	0	0	0	0	0	603	903	0
11928	1	0	0	0	0	0	0	200	300	0	0	0	0	0	0	0	200	903	0	0	0	0	0	0	0	603	903	0
11928	2	0	0	0	0	0	0	200	300	0	0	0	0	0	0	0	200	903	0	0	0	0	0	0	0	603	903	0
11928	3	0	0	0	0	0	0	200	300	0	0	0	0	0	0	0	200	903	0	0	0	0	0	0	0	603	903	0
11928	4	0	0	0	0	0	0	200	300	0	0	0	0	0	0	0	200	903	0	0	0	0	0	0	0	603	903	0
11928	5	0	0	0	0	0	0	200	300	0	0	0	0	0	0	0	200	903	0	0	0	0	0	0	0	603	903	0
11928	6	0	0	0	0	0	0	200	300	0	0	0	0	0	0	0	200	903	0	0	0	0	0	0	0	603	903	0
11928	7	0	0	0	0	0	0	200	300	0	0	0	0	0	0	0	200	903	0	0	0	0	0	0	0	603	903	0
11928	8	0	0	0	0	0	0	200	300	0	0	0	0	0	0	0	200	903	0	0	0	0	0	0	0	603	903	0
11928	9	0	0	0	0	0	0	200	300	0	0	0	0	0	0	0	200	903	0	0	0	0	0	0	0	603	903	0
11929	0	0	0	0	0	0	0	200	300	0	0	0	0	0	0	0	200	903	0	0	0	0	0	0	0	603	903	0
11929	1	0	0	0	0	0	0	200	300	0	0	0	0	0	0	0	200	903	0	0	0	0	0	0	0	603	903	0
11929	2	0	0	0	0	0	0	200	300	0	0	0	0	0	0	0	200	903	0	0	0	0	0	0	0	603	903	0
11929	3	0	0	0	0	0	0	200	300	0	0	0	0	0	0	0	200	903	0	0	0	0	0	0	0	603	903	0
11929	4	0	0	0	0	0	0	200	300	0	0	0	0	0	0	0	200	903	0	0	0	0	0	0	0	603	903	0
11929	5	0	0	0	0	0	0	200	300	0	0	0	0	0	0	0	200	903	0	0	0	0	0	0	0	603	903	0
11929	6	0	0	0	0	0	0	200	300	0	0	0	0	0	0	0	200	903	0	0	0	0	0	0	0	603	903	0
11929	7	0	0	0	0	0	0	200	300	0	0	0	0	0	0	0	200	903	0	0	0	0	0	0	0	603	903	0
11929	8	0	0	0	0	0	0	200	300	0	0	0	0	0	0	0	200	903	0	0	0	0	0	0	0	603	903	0
11929	9	0	0	0	0	0	0	200	300	0	0	0	0	0	0	0	200	903	0	0	0	0	0	0	0	603	903	0
11930	0	0	0	0	0	0	0	200	300	0	0	0	0	0	0	0	200	903	0	0	0	0	0	0	0	603	903	0
11930	1	0	0	0	0	0	0	200	300	0	0	0	0	0	0	0	200	903	0	0	0	0	0	0	0	603	903	0
11930	2	0	0	0	0	0	0	200	300	0	0	0	0	0	0	0	200	903	0	0	0	0	0	0	0	603	903	0
11930	3	0	0	0	0	0	0	200	300	0	0	0	0	0	0	0	200	903	0	0	0	0	0	0	0	603	903	0
11930	4	0	0	0	0	0	0	200	300	0	0	0	0	0	0	0	200	903	0	0	0	0	0	0	0	603	903	0
11930	5	0	0	0	0	0	0	200	300	0	0	0	0	0	0	0	200	903	0	0	0	0	0	0	0	603	903	0
11930	6	0	0	0	0	0	0	200	300	0	0	0	0	0	0	0	200	903	0	0	0	0	0	0	0	603	903	0
11930	7	0	0	0	0	0	0	200	300	0	0	0	0	0	0	0	200	903	0	0	0	0	0	0	0	603	903	0
11930	8	0	0	0	0	0	0	200	300	0	0	0	0	0	0	0	200	903	0	0	0	0	0	0	0	603	903	0
11930	9	0	0	0	0	0	0	200	300	0	0	0	0	0	0	0	200	903	0	0	0	0	0	0	0	603	903	0
11931	0	0	0	0	0	0	0	200	300	0	0	0	0	0	0	0	200	903	0	0	0	0	0	0	0	603	903	0
11931	1	0	0	0	0	0	0	200	300	0	0	0	0	0	0	0	200	903	0	0	0	0	0	0	0	603	903	0
11931	2	0	0	0	0	0	0	200	300	0	0	0	0	0	0	0	200	903	0	0	0	0	0	0	0	603	903	0
11931	3	0	0	0	0	0	0	200	300	0	0	0	0	0	0	0	200	903	0	0	0	0	0	0	0	603	903	0
11931	4	0	0	0	0	0	0	200	300	0	0	0	0	0	0	0	200	903	0	0	0	0	0	0	0	603	903	0
11931	5	0	0	0	0	0	0	200	300	0	0	0	0	0	0	0	200	903	0	0	0	0	0	0	0	603	903	0
11931	6	0	0	0	0	0	0	200	300	0	0	0	0	0	0	0	200	903	0	0	0	0	0	0	0	603	903	0
11931	7	0	0	0	0	0	0	200	300	0	0	0	0	0	0	0	200	903	0	0	0	0	0	0	0	603	903	0
11931	8	0	0	0	0	0	0	200	300	0	0	0	0	0	0	0	200	903	0	0	0	0	0	0	0	603	903	0
11931	9	0	0	0	0	0	0	200	300	0	0	0	0	0	0	0	200	903	0	0	0	0	0	0	0	603	903	0
11932	0	0	0	0	0	0	0	200	300	0	0	0	0	0	0	0	200	903	0	0	0	0	0	0	0	603	903	0
11932	1	0	0	0	0	0	0	200	300	0	0	0	0	0	0	0	200	903	0	0	0	0	0	0	0	603	903	0
11932	2	0	0	0	0	0	0	200	300	0	0	0	0	0	0	0	200	903	0	0	0	0	0	0	0	603	903	0
11932	3	0	0	0	0	0	0	200	300	0	0	0	0	0	0	0	200	903	0	0	0	0	0	0	0	603	903	0
11932	4	0	0	0	0	0	0	200	300	0	0	0	0	0	0	0	200	903	0	0	0	0	0	0	0	603	903	0
11932	5	0	0	0	0	0	0	200	300	0	0	0	0	0	0	0	200	903	0	0	0	0	0	0	0	603	903	0
11932	6	0	0	0	0	0	0	200	300	0	0	0	0	0	0	0	200	903	0	0	0	0	0	0	0	603	903	0
11932	7	0	0	0	0	0	0	200	300	0	0	0	0	0	0	0	200	903	0	0	0	0	0	0	0	603	903	0
11932	8	0	0	0	0	0	0	200	300	0	0	0	0	0	0	0	200	903	0	0	0	0	0	0	0	603	903	0
11932	9	0	0	0	0	0	0	200	300	0	0	0	0	0	0	0	200	903	0	0	0	0	0	0	0	603	903	0
11933	0	0	0	0	0	0	0	200	300	0	0	0	0	0	0	0	200	903	0	0	0	0	0	0	0	603	903	0
11933	1	0	0	0	0	0	0	200	300	0	0	0	0	0	0	0	200	903	0	0	0	0	0	0	0	603	903	0
11933	2	0	0	0	0	0	0	200	300	0	0	0	0	0	0	0	200	903	0	0	0	0	0	0	0	603	903	0
11933	3	0	0	0	0	0	0	200	300	0	0	0	0	0	0	0	200	903	0	0	0	0	0	0	0	603	903	0
11933	4	0	0	0	0	0	0	200	300	0	0	0	0	0	0	0	200	903	0	0	0	0	0	0	0	603	903	0
11933	5	0	0	0	0	0	0	200	300	0	0	0	0	0	0	0	200	903	0	0	0	0	0	0	0	603	903	0
11933	6	0	0	0	0	0	0	200	300	0	0	0	0	0	0	0	200	903	0	0	0	0	0	0	0	603	903	0
11933	7	0	0	0	0	0	0	200	300	0	0	0	0	0	0	0	200	903	0	0	0	0	0	0	0	603	903	0
11933	8	0	0	0	0	0	0	200	300	0	0	0	0	0	0	0	200	903	0	0	0	0	0	0	0	603	903	0
11933	9	0	0	0	0	0	0	200	300	0	0	0	0	0	0	0	200	903	0	0	0	0	0	0	0	603	903	0
11934	0	0	0	0	0	0	0	200	300	0	0	0	0	0	0	0	200	903	0	0	0	0	0	0	0	603	903	0
11934	1	0	0	0	0	0	0	200	300	0	0	0	0	0	0	0	200	903	0	0	0	0	0	0	0	603	903	0
11934	2	0	0	0	0	0	0	200	300	0	0	0	0	0	0	0	200	903	0	0	0	0	0	0	0	603	903	0
11934	3	0	0	0	0	0	0	200	300	0	0	0	0	0	0	0	200	903	0	0	0	0	0	0	0	603	903	0
11934	4	0	0	0	0	0	0	200	300	0	0	0	0	0	0	0	200	903	0	0	0	0	0	0	0	603	903	0
11934	5	0	0	0	0	0	0	200	300	0	0	0	0	0	0	0	200	903	0	0	0	0	0	0	0	603	903	0
11934	6	0	0	0	0	0	0	200	300	0	0	0	0	0	0	0	200	903	0	0	0	0	0	0	0	603	903	0
11934	7	0	0	0	0	0	0	200	300	0	0	0	0	0	0	0	200	903	0	0	0	0	0	0	0	603	903	0
11934	8	0	0	0	0	0	0	200	300	0	0	0	0	0	0	0	200	903	0	0	0	0	0	0	0	603	903	0
11934	9	0	0	0	0	0	0	200	300	0	0	0	0	0	0	0	200	903	0	0	0	0	0	0	0	603	903	0
11935	0	0	0	0	0	0	0	200	300	0	0	0	0	0	0	0	200	903	0	0	0	0	0	0	0	603	903	0
11935	1	0	0	0	0	0	0	200	300	0	0	0	0	0	0	0	200	903	0	0	0	0	0	0	0	603	903	0
11935	2	0	0	0	0	0	0	200	300	0	0	0	0	0	0	0	200	903	0	0	0	0	0	0	0	603	903	0
11935	3	0	0	0	0	0	0	200	300	0	0	0	0	0	0	0	200	903	0	0	0	0	0	0	0	603	903	0
11935	4	0	0	0	0	0	0	200	300	0	0	0	0	0	0	0	200	903	0	0	0	0	0	0	0	603	903	0
11935	5	0	0	0	0	0	0	200	300	0	0	0	0	0	0	0	200	903	0	0	0	0	0	0	0	603	903	0
11935	6	0	0	0	0	0	0	200	300	0	0	0	0	0	0	0	200	903	0	0	0	0	0	0	0	603	903	0
11935	7	0	0	0	0	0	0	200	300	0	0	0	0	0	0	0	200	903	0	0	0	0	0	0	0	603	903	0
11935	8	0	0	0	0	0	0	200	300	0	0	0	0	0	0	0	200	903	0	0	0	0	0	0	0	603	903	0
11935	9	0	0	0	0	0	0	200	300	0	0	0	0	0	0	0	200	903	0	0	0	0	0	0	0	603	903	0
11936	0	0	0	0	0	0	0	200	300	0	0	0	0	0	0	0	200	903	0	0	0	0	0	0	0	603	903	0
11936	1	0	0	0	0	0	0	200	300	0	0	0	0	0	0	0	200	903	0	0	0	0	0	0	0	603	903	0
11936	2	0	0	0	0	0	0	200	300	0	0	0	0	0	0	0	200	903	0	0	0	0	0	0	0	603	903	0
11936	3	0	0	0	0	0	0	200	300	0	0	0	0	0	0	0	200	903	0	0	0	0	0	0	0	603	903	0
11936	4	0	0	0	0	0	0	200	300	0	0	0	0	0	0	0	200	903	0	0	0	0	0	0	0	603	903	0
11936	5	0	0	0	0	0	0	200	300	0	0	0	0	0	0	0	200	903	0	0	0	0	0	0	0	603	903	0
11936	6	0	0	0	0	0	0	200	300	0	0	0	0	0	0	0	200	903	0	0	0	0	0	0	0	603	903	0
11936	7	0	0	0	0	0	0	200	300	0	0	0	0	0	0	0	200	903	0	0	0	0	0	0	0	603	903	0
11936	8	0	0	0	0	0	0	200	300	0	0	0	0	0	0	0	200	903	0	0	0	0	0	0	0	603	903	0
11936	9	0	0	0	0	0	0	200	300	0	0	0	0	0	0	0	200	903	0	0	0	0	0	0	0	603	903	0
11937	0	0	0	0	0	0	0	200	300	0	0	0	0	0	0	0	200	903	0	0	0	0	0	0	0	603	903	0
11937	1	0	0	0	0	0	0	200	300	0	0	0	0	0	0	0	200	903	0	0	0	0	0	0	0	603	903	0
11937	2	0	0	0	0	0	0	200	300	0	0	0	0	0	0	0	200	903	0	0	0	0	0	0	0	603	903	0
11937	3	0	0	0	0	0	0	200	300	0	0	0	0	0	0	0	200	903	0	0	0	0	0	0	0	603	903	0
11937	4	0	0	0	0	0	0	200	300	0	0	0	0	0	0	0	200	903	0	0	0	0	0	0	0	603	903	0
11937	5	0	0	0	0	0	0	200	300	0	0	0	0	0	0	0	200	903	0	0	0	0	0	0	0	603	903	0
11937	6	0	0	0	0	0	0	200	300	0	0	0	0	0	0	0	200	903	0	0	0	0	0	0	0	603	903	0
11937	7	0	0	0	0	0	0	200	300	0	0	0	0	0	0	0	200	903	0	0	0	0	0	0	0	603	903	0
11937	8	0	0	0	0	0	0	200	300	0	0	0	0	0	0	0	200	903	0	0	0	0	0	0	0	603	903	0
11937	9	0	0	0	0	0	0	200	300	0	0	0	0	0	0	0	200	903	0	0	0	0	0	0	0	603	903	0
11938	0	0	0	0	0	0	0	200	300	0	0	0	0	0	0	0	200	903	0	0	0	0	0	0	0	603	903	0
11938	1	0	0	0	0	0	0	200	300	0	0	0	0	0	0	0	200	903	0	0	0	0	0	0	0	603	903	0
11938	2	0	0	0	0	0	0	200	300	0	0	0	0	0	0	0	200	903	0	0	0	0	0	0	0	603	903	0
11938	3	0	0	0	0	0	0	200	300	0	0	0	0	0	0	0	200	903	0	0	0	0	0	0	0	603	903	0
11938	4	0	0	0	0	0	0	200	300	0	0	0	0	0	0	0	200	903	0	0	0	0	0	0	0	603	903	0
11938	5	0	0	0	0	0	0	200	300	0	0	0	0	0	0	0	200	903	0	0	0	0	0	0	0	603	903	0
11938	6	0	0	0	0	0	0	200	300	0	0	0	0	0	0	0	200	903	0	0	0	0	0	0	0	603	903	0
11938	7	0	0	0	0	0	0	200	300	0	0	0	0	0	0	0	200	903	0	0	0	0	0	0	0	603	903	0
11938	8	0	0	0	0	0	0	200	300	0	0	0	0	0	0	0	200	903	0	0	0	0	0	0	0	603	903	0
11938	9	0	0	0	0	0	0	200	300	0	0	0	0	0	0	0	200	903	0	0	0	0	0	0	0	603	903	0
11939	0	0	0	0	0	0	0	200	300	0	0	0	0	0	0	0	200	903	0	0	0	0	0	0	0	603	903	0
11939	1	0	0	0	0	0	0	200	300	0	0	0	0	0	0	0	200	903	0	0	0	0	0	0	0	603	903	0
11939	2	0	0	0	0	0	0	200	300	0	0	0	0	0	0	0	200	903	0	0	0	0	0	0	0	603	903	0
11939	3	0	0	0	0	0	0	200	300	0	0	0	0	0	0	0	200	903	0	0	0	0	0	0	0	603	903	0
11939	4	0	0	0	0	0	0	200	300	0	0	0	0	0	0	0	200	903	0	0	0	0	0	0	0	603	903	0
11939	5	0	0	0	0	0	0	200	300	0	0	0	0	0	0	0	200	903	0	0	0	0	0	0	0	603	903	0
11939	6	0	0	0	0	0	0	200	300	0	0	0	0	0	0	0	200	903	0	0	0	0	0	0	0	603	903	0
11939	7	0	0	0	0	0	0	200	300	0	0	0	0	0	0	0	200	903	0	0	0	0	0	0	0	603	903	0
11939	8	0	0	0	0	0	0	200	300	0	0	0	0	0	0	0	200	903	0	0	0	0	0	0	0	603	903	0
11939	9	0	0	0	0	0	0	200	300	0	0	0	0	0	0	0	200	903	0	0	0	0	0	0	0	603	903	0
11940	0	0	0	0	0	0	0	200	300	0	0	0	0	0	0	0	200	903	0	0	0	0	0	0	0	603	903	0
11940	1	0	0	0	0	0	0	200	300	0	0	0	0	0	0	0	200	903	0	0	0	0	0	0	0	603	903	0
11940	2	0	0	0	0	0	0	200	300	0	0	0	0	0	0	0	200	903	0	0	0	0	0	0	0	603	903	0
11940	3	0	0	0	0	0	0	200	300	0	0	0	0	0	0	0	200	903	0	0	0	0	0	0	0	603	903	0
11940	4	0	0	0	0	0	0	200	300	0	0	0	0	0	0	0	200	903	0	0	0	0	0	0	0	603	903	0
11940	5	0	0	0	0	0	0	200	300	0	0	0	0	0	0	0	200	903	0	0	0	0	0	0	0	603	903	0
11940	6	0	0	0	0	0	0	200	300	0	0	0	0	0	0	0	200	903	0	0	0	0	0	0	0	603	903	0
11940	7	0	0	0	0	0	0	200	300	0	0	0	0	0	0	0	200	903	0	0	0	0	0	0	0	603	903	0
11940	8	0	0	0	0	0	0	200	300	0	0	0	0	0	0	0	200	903	0	0	0	0	0	0	0	603	903	0
11940	9	0	0	0	0	0	0	200	300	0	0	0	0	0	0	0	200	903	0	0	0	0	0	0	0	603	903	0
11941	0	0	0	0	0	0	0	200	300	0	0	0	0	0	0	0	200	903	0	0	0	0	0	0	0	603	903	0
11941	1	0	0	0	0	0	0	200	300	0	0	0	0	0	0	0	200	903	0	0	0	0	0	0	0	603	903	0
11941	2	0	0	0	0	0	0	200	300	0	0	0	0	0	0	0	200	903	0	0	0	0	0	0	0	603	903	0
11941	3	0	0	0	0	0	0	200	300	0	0	0	0	0	0	0	200	903	0	0	0	0	0	0	0	603	903	0
11941	4	0	0	0	0	0	0	200	300	0	0	0	0	0	0	0	200	903	0	0	0	0	0	0	0	603	903	0
11941	5	0	0	0	0	0	0	200	300	0	0	0	0	0	0	0	200	903	0	0	0	0	0	0	0	603	903	0
11941	6	0	0	0	0	0	0	200	300	0	0	0	0	0	0	0	200	903	0	0	0	0	0	0	0	603	903	0
11941	7	0	0	0	0	0	0	200	300	0	0	0	0	0	0	0	200	903	0	0	0	0	0	0	0	603	903	0
11941	8	0	0	0	0	0	0	200	300	0	0	0	0	0	0	0	200	903	0	0	0	0	0	0	0	603	903	0
11941	9	0	0	0	0	0	0	200	300	0	0	0	0	0	0	0	200	903	0	0	0	0	0	0	0	603	903	0
11942	0	0	0	0	0	0	0	200	300	0	0	0	0	0	0	0	200	903	0	0	0	0	0	0	0	603	903	0
11942	1	0	0	0	0	0	0	200	300	0	0	0	0	0	0	0	200	903	0	0	0	0	0	0	0	603	903	0
11942	2	0	0	0	0	0	0	200	300	0	0	0	0	0	0	0	200	903	0	0	0	0	0	0	0	603	903	0
11942	3	0	0	0	0	0	0	200	300	0	0	0	0	0	0	0	200	903	0	0	0	0	0	0	0	603	903	0
11942	4	0	0	0	0	0	0	200	300	0	0	0	0	0	0	0	200	903	0	0	0	0	0	0	0	603	903	0
11942	5	0	0	0	0	0	0	200	300	0	0	0	0	0	0	0	200	903	0	0	0	0	0	0	0	603	903	0
11942	6	0	0	0	0	0	0	200	300	0	0	0	0	0	0	0	200	903	0	0	0	0	0	0	0	603	903	0
11942	7	0	0	0	0	0	0	200	300	0	0	0	0	0	0	0	200	903	0	0	0	0	0	0	0	603	903	0
11942	8	0	0	0	0	0	0	200	300	0	0	0	0	0	0	0	200	903	0	0	0	0	0	0	0	603	903	0
11942	9	0	0	0	0	0	0	200	300	0	0	0	0	0	0	0	200	903	0	0	0	0	0	0	0	603	903	0
11943	0	0	0	0	0	0	0	200	300	0	0	0	0	0	0	0	200	903	0	0	0	0	0	0	0	603	903	0
11943	1	0	0	0	0	0	0	200	300	0	0	0	0	0	0	0	200	903	0	0	0	0	0	0	0	603	903	0
11943	2	0	0	0	0	0	0	200	300	0	0	0	0	0	0	0	200	903	0	0	0	0	0	0	0	603	903	0
11943	3	0	0	0	0	0	0	200	300	0	0	0	0	0	0	0	200	903	0	0	0	0	0	0	0	603	903	0
11943	4	0	0	0	0	0	0	200	300	0	0	0	0	0	0	0	200	903	0	0	0	0	0	0	0	603	903	0
11943	5	0	0	0	0	0	0	200	300	0	0	0	0	0	0	0	200	903	0	0	0	0	0	0	0	603	903	0
11943	6	0	0	0	0	0	0	200	300	0	0	0	0	0	0	0	200	903	0	0	0	0	0	0	0	603	903	0
11943	7	0	0	0	0	0	0	200	300	0	0	0	0	0	0	0	200	903	0	0	0	0	0	0	0	603	903	0
11943	8	0	0	0	0	0	0	200	300	0	0	0	0	0	0	0	200	903	0	0	0	0	0	0	0	603	903	0
11943	9	0	0	0	0	0	0	200	300	0	0	0	0	0	0	0	200	903	0	0	0	0	0	0	0	603	903	0
11944	0	0	0	0	0	0	0	200	300	0	0	0	0	0	0	0	200	903	0	0	0	0	0	0	0	603	903	0
11944	1	0	0	0	0	0	0	200	300	0	0	0	0	0	0	0	200	903	0	0	0	0	0	0	0	603	903	0
11944	2	0	0	0	0	0	0	200	300	0	0	0	0	0	0	0	200	903	0	0	0	0	0	0	0	603	903	0
11944	3	0	0	0	0	0	0	200	300	0	0	0	0	0	0	0	200	903	0	0	0	0	0	0	0	603	903	0
11944	4	0	0	0	0	0	0	200	300	0	0	0	0	0	0	0	200	903	0	0	0	0	0	0	0	603	903	0
11944	5	0	0	0	0	0	0	200	300	0	0	0	0	0	0	0	200	903	0	0	0	0	0	0	0	603	903	0
11944	6	0	0	0	0	0	0	200	300	0	0	0	0	0	0	0	200	903	0	0	0	0	0	0	0	603	903	0
11944	7	0	0	0	0	0	0	200	300	0	0	0	0	0	0	0	200	903	0	0	0	0	0	0	0	603	903	0
11944	8	0	0	0	0	0	0	200	300	0	0	0	0	0	0	0	200	903	0	0	0	0	0	0	0	603	903	0
11944	9	0	0	0	0	0	0	200	300	0	0	0	0	0	0	0	200	903	0	0	0	0	0	0	0	603	903	0
11945	0	0	0	0	0	0	0	200	300	0	0	0	0	0	0	0	200	903	0	0	0	0	0	0	0	603	903	0
11945	1	0	0	0	0	0	0	200	300	0	0	0	0	0	0	0	200	903	0	0	0	0	0	0	0	603	903	0
11945	2	0	0	0	0	0	0	200	300	0	0	0	0	0	0	0	200	903	0	0	0	0	0	0	0	603	903	0
11945	3	0	0	0	0	0	0	200	300	0	0	0	0	0	0	0	200	903	0	0	0	0	0	0	0	603	903	0
11945	4	0	0	0	0	0	0	200	300	0	0	0	0	0	0	0	200	903	0	0	0	0	0	0	0	603	903	0
11945	5	0	0	0	0	0	0	200	300	0	0	0	0	0	0	0	200	903	0	0	0	0	0	0	0	603	903	0
11945	6	0	0	0	0	0	0	200	300	0	0	0	0	0	0	0	200	903	0	0	0	0	0	0	0	603	903	0
11945	7	0	0	0	0	0	0	200	300	0	0	0	0	0	0	0	200	903	0	0	0	0	0	0	0	603	903	0
11945	8	0	0	0	0	0	0	200	300	0	0	0	0	0	0	0	200	903	0	0	0	0	0	0	0	603	903	0
11945	9	0	0	0	0	0	0	200	300	0	0	0	0	0	0	0	200	903	0	0	0	0	0	0	0	603	903	0
11946	0	0	0	0	0	0	0	200	300	0	0	0	0	0	0	0	200	903	0	0	0	0	0	0	0	603	903	0
11946	1	0	0	0	0	0	0	200	300	0	0	0	0	0	0	0	200	903	0	0	0	0	0	0	0	603	903	0
11946	2	0	0	0	0	0	0	200	300	0	0	0	0	0	0	0	200	903	0	0	0	0	0	0	0	603	903	0
11946	3	0	0	0	0	0	0	200	300	0	0	0	0	0	0	0	200	903	0	0	0	0	0	0	0	603	903	0
11946	4	0	0	0	0	0	0	200	300	0	0	0	0	0	0	0	200	903	0	0	0	0	0	0	0	603	903	0
11946	5	0	0	0	0	0	0	200	300	0	0	0	0	0	0	0	200	903	0	0	0	0	0	0	0	603	903	0
11946	6	0	0	0	0	0	0	200	300	0	0	0	0	0	0	0	200	903	0	0	0	0	0	0	0	603	903	0
11946	7	0	0	0	0	0	0	200	300	0	0	0	0	0	0	0	200	903	0	0	0	0	0	0	0	603	903	0
11946	8	0	0	0	0	0	0	200	300	0	0	0	0	0	0	0	200	903	0	0	0	0	0	0	0	603	903	0
11946	9	0	0	0	0	0	0	200	300	0	0	0	0	0	0	0	200	903	0	0	0	0	0	0	0	603	903	0
11947	0	0	0	0	0	0	0	200	300	0	0	0	0	0	0	0	200	903	0	0	0	0	0	0	0	603	903	0
11947	1	0	0	0	0	0	0	200	300	0	0	0	0	0	0	0	200	903	0	0	0	0	0	0	0	603	903	0
11947	2	0	0	0	0	0	0	200	300	0	0	0	0	0	0	0	200	903	0	0	0	0	0	0	0	603	903	0
11947	3	0	0	0	0	0	0	200	300	0	0	0	0	0	0	0	200	903	0	0	0	0	0	0	0	603	903	0
11947	4	0	0	0	0	0	0	200	300	0	0	0	0	0	0	0	200	903	0	0	0	0	0	0	0	603	903	0
11947	5	0	0	0	0	0	0	200	300	0	0	0	0	0	0	0	200	903	0	0	0	0	0	0	0	603	903	0
11947	6	0	0	0	0	0	0	200	300	0	0	0	0	0	0	0	200	903	0	0	0	0	0	0	0	603	903	0
11947	7	0	0	0	0	0	0	200	300	0	0	0	0	0	0	0	200	903	0	0	0	0	0	0	0	603	903	0
11947	8	0	0	0	0	0	0	200	300	0	0	0	0	0	0	0	200	903	0	0	0	0	0	0	0	603	903	0
11947	9	0	0	0	0	0	0	200	300	0	0	0	0	0	0	0	200	903	0	0	0	0	0	0	0	603	903	0
11948	0	0	0	0	0	0	0	200	300	0	0	0	0	0	0	0	200	903	0	0	0	0	0	0	0	603	903	0
11948	1	0	0	0	0	0	0	200	300	0	0	0	0	0	0	0	200	903	0	0	0	0	0	0	0	603	903	0
11948	2	0	0	0	0	0	0	200	300	0	0	0	0	0	0	0	200	903	0	0	0	0	0	0	0	603	903	0
11948	3	0	0	0	0	0	0	200	300	0	0	0	0	0	0	0	200	903	0	0	0	0	0	0	0	603	903	0
11948	4	0	0	0	0	0	0	200	300	0	0	0	0	0	0	0	200	903	0	0	0	0	0	0	0	603	903	0
11948	5	0	0	0	0	0	0	200	300	0	0	0	0	0	0	0	200	903	0	0	0	0	0	0	0	603	903	0
11948	6	0	0	0	0	0	0	200	300	0	0	0	0	0	0	0	200	903	0	0	0	0	0	0	0	603	903	0
11948	7	0	0	0	0	0	0	200	300	0	0	0	0	0	0	0	200	903	0	0	0	0	0	0	0	603	903	0
11948	8	0	0	0	0	0	0	200	300	0	0	0	0	0	0	0	200	903	0	0	0	0	0	0	0	603	903	0
11948	9	0	0	0	0	0	0	200	300	0	0	0	0	0	0	0	200	903	0	0	0	0	0	0	0	603	903	0
11949	0	0	0	0	0	0	0	200	300	0	0	0	0	0	0	0	200	903	0	0	0	0	0	0	0	603	903	0
11949	1	0	0	0	0	0	0	200	300	0	0	0	0	0	0	0	200	903	0	0	0	0	0	0	0	603	903	0
11949	2	0	0	0	0	0	0	200	300	0	0	0	0	0	0	0	200	903	0	0	0	0	0	0	0	603	903	0
11949	3	0	0	0	0	0	0	200	300	0	0	0	0	0	0	0	200	903	0	0	0	0	0	0	0	603	903	0
11949	4	0	0	0	0	0	0	200	300	0	0	0	0	0	0	0	200	903	0	0	0	0	0	0	0	603	903	0
11949	5	0	0	0	0	0	0	200	300	0	0	0	0	0	0	0	200	903	0	0	0	0	0	0	0	603	903	0
11949	6	0	0	0	0	0	0	200	300	0	0	0	0	0	0	0	200	903	0	0	0	0	0	0	0	603	903	0
11949	7	0	0	0	0	0	0	200	300	0	0	0	0	0	0	0	200	903	0	0	0	0	0	0	0	603	903	0
11949	8	0	0	0	0	0	0	200	300	0	0	0	0	0	0	0	200	903	0	0	0	0	0	0	0	603	903	0
11949	9	0	0	0	0	0	0	200	300	0	0	0	0	0	0	0	200	903	0	0	0	0	0	0	0	603	903	0
11950	0	0	0	0	0	0	0	200	300	0	0	0	0	0	0	0	200	903	0	0	0	0	0	0	0	603	903	0
11950	1	0	0	0	0	0	0	200	300	0	0	0	0	0	0	0	200	903	0	0	0	0	0	0	0	603	903	0
11950	2	0	0	0	0	0	0	200	300	0	0	0	0	0	0	0	200	903	0	0	0	0	0	0	0	603	903	0
11950	3	0	0	0	0	0	0	200	300	0	0	0	0	0	0	0	200	903	0	0	0	0	0	0	0	603	903	0
11950	4	0	0	0	0	0	0	200	300	0	0	0	0	0	0	0	200	903	0	0	0	0	0	0	0	603	903	0
11950	5	0	0	0	0	0	0	200	300	0	0	0	0	0	0	0	200	903	0	0	0	0	0	0	0	603	903	0
11950	6	0	0	0	0	0	0	200	300	0	0	0	0	0	0	0	200	903	0	0	0	0	0	0	0	603	903	0
11950	7	0	0	0	0	0	0	200	300	0	0	0	0	0	0	0	200	903	0	0	0	0	0	0	0	603	903	0
11950	8	0	0	0	0	0	0	200	300	0	0	0	0	0	0	0	200	903	0	0	0	0	0	0	0	603	903	0
11950	9	0	0	0	0	0	0	200	300	0	0	0	0	0	0	0	200	903	0	0	0	0	0	0	0	603	903	0
11951	0	0	0	0	0	0	0	200	300	0	0	0	0	0	0	0	200	903	0	0	0	0	0	0	0	603	903	0
11951	1	0	0	0	0	0	0	200	300	0	0	0	0	0	0	0	200	903	0	0	0	0	0	0	0	603	903	0
11951	2	0	0	0	0	0	0	200	300	0	0	0	0	0	0	0	200	903	0	0	0	0	0	0	0	603	903	0
11951	3	0	0	0	0	0	0	200	300	0	0	0	0	0	0	0	200	903	0	0	0	0	0	0	0	603	903	0
11951	4	0	0	0	0	0	0	200	300	0	0	0	0	0	0	0	200	903	0	0	0	0	0	0	0	603	903	0
11951	5	0	0	0	0	0	0	200	300	0	0	0	0	0	0	0	200	903	0	0	0	0	0	0	0	603	903	0
11951	6	0	0	0	0	0	0	200	300	0	0	0	0	0	0	0	200	903	0	0	0	0	0	0	0	603	903	0
11951	7	0	0	0	0	0	0	200	300	0	0	0	0	0	0	0	200	903	0	0	0	0	0	0	0	603	903	0
11951	8	0	0	0	0	0	0	200	300	0	0	0	0	0	0	0	200	903	0	0	0	0	0	0	0	603	903	0
11951	9	0	0	0	0	0	0	200	300	0	0	0	0	0	0	0	200	903	0	0	0	0	0	0	0	603	903	0
11952	0	0	0	0	0	0	0	200	300	0	0	0	0	0	0	0	200	903	0	0	0	0	0	0	0	603	903	0
11952	1	0	0	0	0	0	0	200	300	0	0	0	0	0	0	0	200	903	0	0	0	0	0	0	0	603	903	0
11952	2	0	0	0	0	0	0	200	300	0	0	0	0	0	0	0	200	903	0	0	0	0	0	0	0	603	903	0
11952	3	0	0	0	0	0	0	200	300	0	0	0	0	0	0	0	200	903	0	0	0	0	0	0	0	603	903	0
11952	4	0	0	0	0	0	0	200	300	0	0	0	0	0	0	0	200	903	0	0	0	0	0	0	0	603	903	0
11952	5	0	0	0	0	0	0	200	300	0	0	0	0	0	0	0	200	903	0	0	0	0	0	0	0	603	903	0
11952	6	0	0	0	0	0	0	200	300	0	0	0	0	0	0	0	200	903	0	0	0	0	0	0	0	603	903	0
11952	7	0	0	0	0	0	0	200	300	0	0	0	0	0	0	0	200	903	0	0	0	0	0	0	0	603	903	0
11952	8	0	0	0	0	0	0	200	300	0	0	0	0	0	0	0	200	903	0	0	0	0	0	0	0	603	903	0
11952	9	0	0	0	0	0	0	200	300	0	0	0	0	0	0	0	200	903	0	0	0	0	0	0	0	603	903	0
11953	0	0	0	0	0	0	0	200	300	0	0	0	0	0	0	0	200	903	0	0	0	0	0	0	0	603	903	0
11953	1	0	0	0	0	0	0	200	300	0	0	0	0	0	0	0	200	903	0	0	0	0	0	0	0	603	903	0
11953	2	0	0	0	0	0	0	200	300	0	0	0	0	0	0	0	200	903	0	0	0	0	0	0	0	603	903	0
11953	3	0	0	0	0	0	0	200	300	0	0	0	0	0	0	0	200	903	0	0	0	0	0	0	0	603	903	0
11953	4	0	0	0	0	0	0	200	300	0	0	0	0	0	0	0	200	903	0	0	0	0	0	0	0	603	903	0
11953	5	0	0	0	0	0	0	200	300	0	0	0	0	0	0	0	200	903	0	0	0	0	0	0	0	603	903	0
11953	6	0	0	0	0	0	0	200	300	0	0	0	0	0	0	0	200	903	0	0	0	0	0	0	0	603	903	0
11953	7	0	0	0	0	0	0	200	300	0	0	0	0	0	0	0	200	903	0	0	0	0	0	0	0	603	903	0
11953	8	0	0	0	0	0	0	200	300	0	0	0	0	0	0	0	200	903	0	0	0	0	0	0	0	603	903	0
11953	9	0	0	0	0	0	0	200	300	0	0	0	0	0	0	0	200	903	0	0	0	0	0	0	0	603	903	0
11954	0	0	0	0	0	0	0	200	300	0	0	0	0	0	0	0	200	903	0	0	0	0	0	0	0	603	903	0
11954	1	0	0	0	0	0	0	200	300	0	0	0	0	0	0	0	200	903	0	0	0	0	0	0	0	603	903	0
11954	2	0	0	0	0	0	0	200	300	0	0	0	0	0	0	0	200	903	0	0	0	0	0	0	0	603	903	0
11954	3	0	0	0	0	0	0	200	300	0	0	0	0	0	0	0	200	903	0	0	0	0	0	0	0	603	903	0
11954	4	0	0	0	0	0	0	200	300	0	0	0	0	0	0	0	200	903	0	0	0	0	0	0	0	603	903	0
11954	5	0	0	0	0	0	0	200	300	0	0	0	0	0	0	0	200	903	0	0	0	0	0	0	0	603	903	0
11954	6	0	0	0	0	0	0	200	300	0	0	0	0	0	0	0	200	903	0	0	0	0	0	0	0	603	903	0
11954	7	0	0	0	0	0	0	200	300	0	0	0	0	0	0	0	200	903	0	0	0	0	0	0	0	603	903	0
11954	8	0	0	0	0	0	0	200	300	0	0	0	0	0	0	0	200	903	0	0	0	0	0	0	0	603	903	0
11954	9	0	0	0	0	0	0	200	300	0	0	0	0	0	0	0	200	903	0	0	0	0	0	0	0	603	903	0
11955	0	0	0	0	0	0	0	200	300	0	0	0	0	0	0	0	200	903	0	0	0	0	0	0	0	603	903	0
11955	1	0	0	0	0	0	0	200	300	0	0	0	0	0	0	0	200	903	0	0	0	0	0	0	0	603	903	0
11955	2	0	0	0	0	0	0	200	300	0	0	0	0	0	0	0	200	903	0	0	0	0	0	0	0	603	903	0
11955	3	0	0	0	0	0	0	200	300	0	0	0	0	0	0	0	200	903	0	0	0	0	0	0	0	603	903	0
11955	4	0	0	0	0	0	0	200	300	0	0	0	0	0	0	0	200	903	0	0	0	0	0	0	0	603	903	0
11955	5	0	0	0	0	0	0	200	300	0	0	0	0	0	0	0	200	903	0	0	0	0	0	0	0	603	903	0
11955	6	0	0	0	0	0	0	200	300	0	0	0	0	0	0	0	200	903	0	0	0	0	0	0	0	603	903	0
11955	7	0	0	0	0	0	0	200	300	0	0	0	0	0	0	0	200	903	0	0	0	0	0	0	0	603	903	0
11955	8	0	0	0	0	0	0	200	300	0	0	0	0	0	0	0	200	903	0	0	0	0	0	0	0	603	903	0
11955	9	0	0	0	0	0	0	200	300	0	0	0	0	0	0	0	200	903	0	0	0	0	0	0	0	603	903	0
11956	0	0	0	0	0	0	0	200	300	0	0	0	0	0	0	0	200	903	0	0	0	0	0	0	0	603	903	0
11956	1	0	0	0	0	0	0	200	300	0	0	0	0	0	0	0	200	903	0	0	0	0	0	0	0	603	903	0
11956	2	0	0	0	0	0	0	200	300	0	0	0	0	0	0	0	200	903	0	0	0	0	0	0	0	603	903	0
11956	3	0	0	0	0	0	0	200	300	0	0	0	0	0	0	0	200	903	0	0	0	0	0	0	0	603	903	0
11956	4	0	0	0	0	0	0	200	300	0	0	0	0	0	0	0	200	903	0	0	0	0	0	0	0	603	903	0
11956	5	0	0	0	0	0	0	200	300	0	0	0	0	0	0	0	200	903	0	0	0	0	0	0	0	603	903	0
11956	6	0	0	0	0	0	0	200	300	0	0	0	0	0	0	0	200	903	0	0	0	0	0	0	0	603	903	0
11956	7	0	0	0	0	0	0	200	300	0	0	0	0	0	0	0	200	903	0	0	0	0	0	0	0	603	903	0
11956	8	0	0	0	0	0	0	200	300	0	0	0	0	0	0	0	200	903	0	0	0	0	0	0	0	603	903	0
11956	9	0	0	0	0	0	0	200	300	0	0	0	0	0	0	0	200	903	0	0	0	0	0	0	0	603	903	0
11957	0	0	0	0	0	0	0	200	300	0	0	0	0	0	0	0	200	903	0	0	0	0	0	0	0	603	903	0
11957	1	0	0	0	0	0	0	200	300	0	0	0	0	0	0	0	200	903	0	0	0	0	0	0	0	603	903	0
11957	2	0	0	0	0	0	0	200	300	0	0	0	0	0	0	0	200	903	0	0	0	0	0	0	0	603	903	0
11957	3	0	0	0	0	0	0	200	300	0	0	0	0	0	0	0	200	903	0	0	0	0	0	0	0	603	903	0
11957	4	0	0	0	0	0	0	200	300	0	0	0	0	0	0	0	200	903	0	0	0	0	0	0	0	603	903	0
11957	5	0	0	0	0	0	0	200	300	0	0	0	0	0	0	0	200	903	0	0	0	0	0	0	0	603	903	0
11957	6	0	0	0	0	0	0	200	300	0	0	0	0	0	0	0	200	903	0	0	0	0	0	0	0	603	903	0
11957	7	0	0	0	0	0	0	200	300	0	0	0	0	0	0	0	200	903	0	0	0	0	0	0	0	603	903	0
11957	8	0	0	0	0	0	0	200	300	0	0	0	0	0	0	0	200	903	0	0	0	0	0	0	0	603	903	0
11957	9	0	0	0	0	0	0	200	300	0	0	0	0	0	0	0	200	903	0	0	0	0	0	0	0	603	903	0
11958	0	0	0	0	0	0	0	200	300	0	0	0	0	0	0	0	200	903	0	0	0	0	0	0	0	603	903	0
11958	1	0	0	0	0	0	0	200	300	0	0	0	0	0	0	0	200	903	0	0	0	0	0	0	0	603	903	0
11958	2	0	0	0	0	0	0	200	300	0	0	0	0	0	0	0	200	903	0	0	0	0	0	0	0	603	903	0
11958	3	0	0	0	0	0	0	200	300	0	0	0	0	0	0	0	200	903	0	0	0	0	0	0	0	603	903	0
11958	4	0	0	0	0	0	0	200	300	0	0	0	0	0	0	0	200	903	0	0	0	0	0	0	0	603	903	0
11958	5	0	0	0	0	0	0	200	300	0	0	0	0	0	0	0	200	903	0	0	0	0	0	0	0	603	903	0
11958	6	0	0	0	0	0	0	200	300	0	0	0	0	0	0	0	200	903	0	0	0	0	0	0	0	603	903	0
11958	7	0	0	0	0	0	0	200	300	0	0	0	0	0	0	0	200	903	0	0	0	0	0	0	0	603	903	0
11958	8	0	0	0	0	0	0	200	300	0	0	0	0	0	0	0	200	903	0	0	0	0	0	0	0	603	903	0
11958	9	0	0	0	0	0	0	200	300	0	0	0	0	0	0	0	200	903	0	0	0	0	0	0	0	603	903	0
11959	0	0	0	0	0	0	0	200	300	0	0	0	0	0	0	0	200	903	0	0	0	0	0	0	0	603	903	0
11959	1	0	0	0	0	0	0	200	300	0	0	0	0	0	0	0	200	903	0	0	0	0	0	0	0	603	903	0
11959	2	0	0	0	0	0	0	200	300	0	0	0	0	0	0	0	200	903	0	0	0	0	0	0	0	603	903	0
11959	3	0	0	0	0	0	0	200	300	0	0	0	0	0	0	0	200	903	0	0	0	0	0	0	0	603	903	0
11959	4	0	0	0	0	0	0	200	300	0	0	0	0	0	0	0	200	903	0	0	0	0	0	0	0	603	903	0
11959	5	0	0	0	0	0	0	200	300	0	0	0	0	0	0	0	200	903	0	0	0	0	0	0	0	603	903	0
11959	6	0	0	0	0	0	0	200	300	0	0	0	0	0	0	0	200	903	0	0	0	0	0	0	0	603	903	0
11959	7	0	0	0	0	0	0	200	300	0	0	0	0	0	0	0	200	903	0	0	0	0	0	0	0	603	903	0
11959	8	0	0	0	0	0	0	200	300	0	0	0	0	0	0	0	200	903	0	0	0	0	0	0	0	603	903	0
11959	9	0	0	0	0	0	0	200	300	0	0	0	0	0	0	0	200	903	0	0	0	0	0	0	0	603	903	0
11960	0	0	0	0	0	0	0	200	300	0	0	0	0	0	0	0	200	903	0	0	0	0	0	0	0	603	903	0
11960	1	0	0	0	0	0	0	200	300	0	0	0	0	0	0	0	200	903	0	0	0	0	0	0	0	603	903	0
11960	2	0	0	0	0	0	0	200	300	0	0	0	0	0	0	0	200	903	0	0	0	0	0	0	0	603	903	0
11960	3	0	0	0	0	0	0	200	300	0	0	0	0	0	0	0	200	903	0	0	0	0	0	0	0	603	903	0
11960	4	0	0	0	0	0	0	200	300	0	0	0	0	0	0	0	200	903	0	0	0	0	0	0	0	603	903	0
11960	5	0	0	0	0	0	0	200	300	0	0	0	0	0	0	0	200	903	0	0	0	0	0	0	0	603	903	0
11960	6	0	0	0	0	0	0	200	300	0	0	0	0	0	0	0	200	903	0	0	0	0	0	0	0	603	903	0
11960	7	0	0	0	0	0	0	200	300	0	0	0	0	0	0	0	200	903	0	0	0	0	0	0	0	603	903	0
11960	8	0	0	0	0	0	0	200	300	0	0	0	0	0	0	0	200	903	0	0	0	0	0	0	0	603	903	0
11960	9	0	0	0	0	0	0	200	300	0	0	0	0	0	0	0	200	903	0	0	0	0	0	0	0	603	903	0
11961	0	0	0	0	0	0	0	200	300	0	0	0	0	0	0	0	200	903	0	0	0	0	0	0	0	603	903	0
11961	1	0	0	0	0	0	0	200	300	0	0	0	0	0	0	0	200	903	0	0	0	0	0	0	0	603	903	0
11961	2	0	0	0	0	0	0	200	300	0	0	0	0	0	0	0	200	903	0	0	0	0	0	0	0	603	903	0
11961	3	0	0	0	0	0	0	200	300	0	0	0	0	0	0	0	200	903	0	0	0	0	0	0	0	603	903	0
11961	4	0	0	0	0	0	0	200	300	0	0	0	0	0	0	0	200	903	0	0	0	0	0	0	0	603	903	0
11961	5	0	0	0	0	0	0	200	300	0	0	0	0	0	0	0	200	903	0	0	0	0	0	0	0	603	903	0
11961	6	0	0	0	0	0	0	200	300	0	0	0	0	0	0	0	200	903	0	0	0	0	0	0	0	603	903	0
11961	7	0	0	0	0	0	0	200	300	0	0	0	0	0	0	0	200	903	0	0	0	0	0	0	0	603	903	0
11961	8	0	0	0	0	0	0	200	300	0	0	0	0	0	0	0	200	903	0	0	0	0	0	0	0	603	903	0
11961	9	0	0	0	0	0	0	200	300	0	0	0	0	0	0	0	200	903	0	0	0	0	0	0	0	603	903	0
11962	0	0	0	0	0	0	0	200	300	0	0	0	0	0	0	0	200	903	0	0	0	0	0	0	0	603	903	0
11962	1	0	0	0	0	0	0	200	300	0	0	0	0	0	0	0	200	903	0	0	0	0	0	0	0	603	903	0
11962	2	0	0	0	0	0	0	200	300	0	0	0	0	0	0	0	200	903	0	0	0	0	0	0	0	603	903	0
11962	3	0	0	0	0	0	0	200	300	0	0	0	0	0	0	0	200	903	0	0	0	0	0	0	0	603	903	0
11962	4	0	0	0	0	0	0	200	300	0	0	0	0	0	0	0	200	903	0	0	0	0	0	0	0	603	903	0
11962	5	0	0	0	0	0	0	200	300	0	0	0	0	0	0	0	200	903	0	0	0	0	0	0	0	603	903	0
11962	6	0	0	0	0	0	0	200	300	0	0	0	0	0	0	0	200	903	0	0	0	0	0	0	0	603	903	0
11962	7	0	0	0	0	0	0	200	300	0	0	0	0	0	0	0	200	903	0	0	0	0	0	0	0	603	903	0
11962	8	0	0	0	0	0	0	200	300	0	0	0	0	0	0	0	200	903	0	0	0	0	0	0	0	603	903	0
11962	9	0	0	0	0	0	0	200	300	0	0	0	0	0	0	0	200	903	0	0	0	0	0	0	0	603	903	0
11963	0	0	0	0	0	0	0	200	300	0	0	0	0	0	0	0	200	903	0	0	0	0	0	0	0	603	903	0
11963	1	0	0	0	0	0	0	200	300	0	0	0	0	0	0	0	200	903	0	0	0	0	0	0	0	603	903	0
11963	2	0	0	0	0	0	0	200	300	0	0	0	0	0	0	0	200	903	0	0	0	0	0	0	0	603	903	0
11963	3	0	0	0	0	0	0	200	300	0	0	0	0	0	0	0	200	903	0	0	0	0	0	0	0	603	903	0
11963	4	0	0	0	0	0	0	200	300	0	0	0	0	0	0	0	200	903	0	0	0	0	0	0	0	603	903	0
11963	5	0	0	0	0	0	0	200	300	0	0	0	0	0	0	0	200	903	0	0	0	0	0	0	0	603	903	0
11963	6	0	0	0	0	0	0	200	300	0	0	0	0	0	0	0	200	903	0	0	0	0	0	0	0	603	903	0
11963	7	0	0	0	0	0	0	200	300	0	0	0	0	0	0	0	200	903	0	0	0	0	0	0	0	603	903	0
11963	8	0	0	0	0	0	0	200	300	0	0	0	0	0	0	0	200	903	0	0	0	0	0	0	0	603	903	0
11963	9	0	0	0	0	0	0	200	300	0	0	0	0	0	0	0	200	903	0	0	0	0	0	0	0	603	903	0
11964	0	0	0	0	0	0	0	200	300	0	0	0	0	0	0	0	200	903	0	0	0	0	0	0	0	603	903	0
11964	1	0	0	0	0	0	0	200	300	0	0	0	0	0	0	0	200	903	0	0	0	0	0	0	0	603	903	0
11964	2	0	0	0	0	0	0	200	300	0	0	0	0	0	0	0	200	903	0	0	0	0	0	0	0	603	903	0
11964	3	0	0	0	0	0	0	200	300	0	0	0	0	0	0	0	200	903	0	0	0	0	0	0	0	603	903	0
11964	4	0	0	0	0	0	0	200	300	0	0	0	0	0	0	0	200	903	0	0	0	0	0	0	0	603	903	0
11964	5	0	0	0	0	0	0	200	300	0	0	0	0	0	0	0	200	903	0	0	0	0	0	0	0	603	903	0
11964	6	0	0	0	0	0	0	200	300	0	0	0	0	0	0	0	200	903	0	0	0	0	0	0	0	603	903	0
11964	7	0	0	0	0	0	0	200	300	0	0	0	0	0	0	0	200	903	0	0	0	0	0	0	0	603	903	0
11964	8	0	0	0	0	0	0	200	300	0	0	0	0	0	0	0	200	903	0	0	0	0	0	0	0	603	903	0
11964	9	0	0	0	0	0	0	200	300	0	0	0	0	0	0	0	200	903	0	0	0	0	0	0	0	603	903	0
11965	0	0	0	0	0	0	0	200	300	0	0	0	0	0	0	0	200	903	0	0	0	0	0	0	0	603	903	0
11965	1	0	0	0	0	0	0	200	300	0	0	0	0	0	0	0	200	903	0	0	0	0	0	0	0	603	903	0
11965	2	0	0	0	0	0	0	200	300	0	0	0	0	0	0	0	200	903	0	0	0	0	0	0	0	603	903	0
11965	3	0	0	0	0	0	0	200	300	0	0	0	0	0	0	0	200	903	0	0	0	0	0	0	0	603	903	0
11965	4	0	0	0	0	0	0	200	300	0	0	0	0	0	0	0	200	903	0	0	0	0	0	0	0	603	903	0
11965	5	0	0	0	0	0	0	200	300	0	0	0	0	0	0	0	200	903	0	0	0	0	0	0	0	603	903	0
11965	6	0	0	0	0	0	0	200	300	0	0	0	0	0	0	0	200	903	0	0	0	0	0	0	0	603	903	0
11965	7	0	0	0	0	0	0	200	300	0	0	0	0	0	0	0	200	903	0	0	0	0	0	0	0	603	903	0
11965	8	0	0	0	0	0	0	200	300	0	0	0	0	0	0	0	200	903	0	0	0	0	0	0	0	603	903	0
11965	9	0	0	0	0	0	0	200	300	0	0	0	0	0	0	0	200	903	0	0	0	0	0	0	0	603	903	0
11966	0	0	0	0	0	0	0	200	300	0	0	0	0	0	0	0	200	903	0	0	0	0	0	0	0	603	903	0
11966	1	0	0	0	0	0	0	200	300	0	0	0	0	0	0	0	200	903	0	0	0	0	0	0	0	603	903	0
11966	2	0	0	0	0	0	0	200	300	0	0	0	0	0	0	0	200	903	0	0	0	0	0	0	0	603	903	0
11966	3	0	0	0	0	0	0	200	300	0	0	0	0	0	0	0	200	903	0	0	0	0	0	0	0	603	903	0
11966	4	0	0	0	0	0	0	200	300	0	0	0	0	0	0	0	200	903	0	0	0	0	0	0	0	603	903	0
11966	5	0	0	0	0	0	0	200	300	0	0	0	0	0	0	0	200	903	0	0	0	0	0	0	0	603	903	0
11966	6	0	0	0	0	0	0	200	300	0	0	0	0	0	0	0	200	903	0	0	0	0	0	0	0	603	903	0
11966	7	0	0	0	0	0	0	200	300	0	0	0	0	0	0	0	200	903	0	0	0	0	0	0	0	603	903	0
11966	8	0	0	0	0	0	0	200	300	0	0	0	0	0	0	0	200	903	0	0	0	0	0	0	0	603	903	0
11966	9	0	0	0	0	0	0	200	300	0	0	0	0	0	0	0	200	903	0	0	0	0	0	0	0	603	903	0
11967	0	0	0	0	0	0	0	200	300	0	0	0	0	0	0	0	200	903	0	0	0	0	0	0	0	603	903	0
11967	1	0	0	0	0	0	0	200	300	0	0	0	0	0	0	0	200	903	0	0	0	0	0	0	0	603	903	0
11967	2	0	0	0	0	0	0	200	300	0	0	0	0	0	0	0	200	903	0	0	0	0	0	0	0	603	903	0
11967	3	0	0	0	0	0	0	200	300	0	0	0	0	0	0	0	200	903	0	0	0	0	0	0	0	603	903	0
11967	4	0	0	0	0	0	0	200	300	0	0	0	0	0	0	0	200	903	0	0	0	0	0	0	0	603	903	0
11967	5	0	0	0	0	0	0	200	300	0	0	0	0	0	0	0	200	903	0	0	0	0	0	0	0	603	903	0
11967	6	0	0	0	0	0	0	200	300	0	0	0	0	0	0	0	200	903	0	0	0	0	0	0	0	603	903	0
11967	7	0	0	0	0	0	0	200	300	0	0	0	0	0	0	0	200	903	0	0	0	0	0	0	0	603	903	0
11967	8	0	0	0	0	0	0	200	300	0	0	0	0	0	0	0	200	903	0	0	0	0	0	0	0	603	903	0
11967	9	0	0	0	0	0	0	200	300	0	0	0	0	0	0	0	200	903	0	0	0	0	0	0	0	603	903	0
11968	0	0	0	0	0	0	0	200	300	0	0	0	0	0	0	0	200	903	0	0	0	0	0	0	0	603	903	0
11968	1	0	0	0	0	0	0	200	300	0	0	0	0	0	0	0	200	903	0	0	0	0	0	0	0	603	903	0
11968	2	0	0	0	0	0	0	200	300	0	0	0	0	0	0	0	200	903	0	0	0	0	0	0	0	603	903	0
11968	3	0	0	0	0	0	0	200	300	0	0	0	0	0	0	0	200	903	0	0	0	0	0	0	0	603	903	0
11968	4	0	0	0	0	0	0	200	300	0	0	0	0	0	0	0	200	903	0	0	0	0	0	0	0	603	903	0
11968	5	0	0	0	0	0	0	200	300	0	0	0	0	0	0	0	200	903	0	0	0	0	0	0	0	603	903	0
11968	6	0	0	0	0	0	0	200	300	0	0	0	0	0	0	0	200	903	0	0	0	0	0	0	0	603	903	0
11968	7	0	0	0	0	0	0	200	300	0	0	0	0	0	0	0	200	903	0	0	0	0	0	0	0	603	903	0
11968	8	0	0	0	0	0	0	200	300	0	0	0	0	0	0	0	200	903	0	0	0	0	0	0	0	603	903	0
11968	9	0	0	0	0	0	0	200	300	0	0	0	0	0	0	0	200	903	0	0	0	0	0	0	0	603	903	0
11969	0	0	0	0	0	0	0	200	300	0	0	0	0	0	0	0	200	903	0	0	0	0	0	0	0	603	903	0
11969	1	0	0	0	0	0	0	200	300	0	0	0	0	0	0	0	200	903	0	0	0	0	0	0	0	603	903	0
11969	2	0	0	0	0	0	0	200	300	0	0	0	0	0	0	0	200	903	0	0	0	0	0	0	0	603	903	0
11969	3	0	0	0	0	0	0	200	300	0	0	0	0	0	0	0	200	903	0	0	0	0	0	0	0	603	903	0
11969	4	0	0	0	0	0	0	200	300	0	0	0	0	0	0	0	200	903	0	0	0	0	0	0	0	603	903	0
11969	5	0	0	0	0	0	0	200	300	0	0	0	0	0	0	0	200	903	0	0	0	0	0	0	0	603	903	0
11969	6	0	0	0	0	0	0	200	300	0	0	0	0	0	0	0	200	903	0	0	0	0	0	0	0	603	903	0
11969	7	0	0	0	0	0	0	200	300	0	0	0	0	0	0	0	200	903	0	0	0	0	0	0	0	603	903	0
11969	8	0	0	0	0	0	0	200	300	0	0	0	0	0	0	0	200	903	0	0	0	0	0	0	0	603	903	0
11969	9	0	0	0	0	0	0	200	300	0	0	0	0	0	0	0	200	903	0	0	0	0	0	0	0	603	903	0
11970	0	0	0	0	0	0	0	200	300	0	0	0	0	0	0	0	200	903	0	0	0	0	0	0	0	603	903	0
11970	1	0	0	0	0	0	0	200	300	0	0	0	0	0	0	0	200	903	0	0	0	0	0	0	0	603	903	0
11970	2	0	0	0	0	0	0	200	300	0	0	0	0	0	0	0	200	903	0	0	0	0	0	0	0	603	903	0
11970	3	0	0	0	0	0	0	200	300	0	0	0	0	0	0	0	200	903	0	0	0	0	0	0	0	603	903	0
11970	4	0	0	0	0	0	0	200	300	0	0	0	0	0	0	0	200	903	0	0	0	0	0	0	0	603	903	0
11970	5	0	0	0	0	0	0	200	300	0	0	0	0	0	0	0	200	903	0	0	0	0	0	0	0	603	903	0
11970	6	0	0	0	0	0	0	200	300	0	0	0	0	0	0	0	200	903	0	0	0	0	0	0	0	603	903	0
11970	7	0	0	0	0	0	0	200	300	0	0	0	0	0	0	0	200	903	0	0	0	0	0	0	0	603	903	0
11970	8	0	0	0	0	0	0	200	300	0	0	0	0	0	0	0	200	903	0	0	0	0	0	0	0	603	903	0
11970	9	0	0	0	0	0	0	200	300	0	0	0	0	0	0	0	200	903	0	0	0	0	0	0	0	603	903	0
11971	0	0	0	0	0	0	0	200	300	0	0	0	0	0	0	0	200	903	0	0	0	0	0	0	0	603	903	0
11971	1	0	0	0	0	0	0	200	300	0	0	0	0	0	0	0	200	903	0	0	0	0	0	0	0	603	903	0
11971	2	0	0	0	0	0	0	200	300	0	0	0	0	0	0	0	200	903	0	0	0	0	0	0	0	603	903	0
11971	3	0	0	0	0	0	0	200	300	0	0	0	0	0	0	0	200	903	0	0	0	0	0	0	0	603	903	0
11971	4	0	0	0	0	0	0	200	300	0	0	0	0	0	0	0	200	903	0	0	0	0	0	0	0	603	903	0
11971	5	0	0	0	0	0	0	200	300	0	0	0	0	0	0	0	200	903	0	0	0	0	0	0	0	603	903	0
11971	6	0	0	0	0	0	0	200	300	0	0	0	0	0	0	0	200	903	0	0	0	0	0	0	0	603	903	0
11971	7	0	0	0	0	0	0	200	300	0	0	0	0	0	0	0	200	903	0	0	0	0	0	0	0	603	903	0
11971	8	0	0	0	0	0	0	200	300	0	0	0	0	0	0	0	200	903	0	0	0	0	0	0	0	603	903	0
11971	9	0	0	0	0	0	0	200	300	0	0	0	0	0	0	0	200	903	0	0	0	0	0	0	0	603	903	0
11972	0	0	0	0	0	0	0	200	300	0	0	0	0	0	0	0	200	903	0	0	0	0	0	0	0	603	903	0
11972	1	0	0	0	0	0	0	200	300	0	0	0	0	0	0	0	200	903	0	0	0	0	0	0	0	603	903	0
11972	2	0	0	0	0	0	0	200	300	0	0	0	0	0	0	0	200	903	0	0	0	0	0	0	0	603	903	0
11972	3	0	0	0	0	0	0	200	300	0	0	0	0	0	0	0	200	903	0	0	0	0	0	0	0	603	903	0
11972	4	0	0	0	0	0	0	200	300	0	0	0	0	0	0	0	200	903	0	0	0	0	0	0	0	603	903	0
11972	5	0	0	0	0	0	0	200	300	0	0	0	0	0	0	0	200	903	0	0	0	0	0	0	0	603	903	0
11972	6	0	0	0	0	0	0	200	300	0	0	0	0	0	0	0	200	903	0	0	0	0	0	0	0	603	903	0
11972	7	0	0	0	0	0	0	200	300	0	0	0	0	0	0	0	200	903	0	0	0	0	0	0	0	603	903	0
11972	8	0	0	0	0	0	0	200	300	0	0	0	0	0	0	0	200	903	0	0	0	0	0	0	0	603	903	0
11972	9	0	0	0	0	0	0	200	300	0	0	0	0	0	0	0	200	903	0	0	0	0	0	0	0	603	903	0
11973	0	0	0	0	0	0	0	200	300	0	0	0	0	0	0	0	200	903	0	0	0	0	0	0	0	603	903	0
11973	1	0	0	0	0	0	0	200	300	0	0	0	0	0	0	0	200	903	0	0	0	0	0	0	0	603	903	0
11973	2	0	0	0	0	0	0	200	300	0	0	0	0	0	0	0	200	903	0	0	0	0	0	0	0	603	903	0
11973	3	0	0	0	0	0	0	200	300	0	0	0	0	0	0	0	200	903	0	0	0	0	0	0	0	603	903	0
11973	4	0	0	0	0	0	0	200	300	0	0	0	0	0	0	0	200	903	0	0	0	0	0	0	0	603	903	0
11973	5	0	0	0	0	0	0	200	300	0	0	0	0	0	0	0	200	903	0	0	0	0	0	0	0	603	903	0
11973	6	0	0	0	0	0	0	200	300	0	0	0	0	0	0	0	200	903	0	0	0	0	0	0	0	603	903	0
11973	7	0	0	0	0	0	0	200	300	0	0	0	0	0	0	0	200	903	0	0	0	0	0	0	0	603	903	0
11973	8	0	0	0	0	0	0	200	300	0	0	0	0	0	0	0	200	903	0	0	0	0	0	0	0	603	903	0
11973	9	0	0	0	0	0	0	200	300	0	0	0	0	0	0	0	200	903	0	0	0	0	0	0	0	603	903	0
11974	0	0	0	0	0	0	0	200	300	0	0	0	0	0	0	0	200	903	0	0	0	0	0	0	0	603	903	0
11974	1	0	0	0	0	0	0	200	300	0	0	0	0	0	0	0	200	903	0	0	0	0	0	0	0	603	903	0
11974	2	0	0	0	0	0	0	200	300	0	0	0	0	0	0	0	200	903	0	0	0	0	0	0	0	603	903	0
11974	3	0	0	0	0	0	0	200	300	0	0	0	0	0	0	0	200	903	0	0	0	0	0	0	0	603	903	0
11974	4	0	0	0	0	0	0	200	300	0	0	0	0	0	0	0	200	903	0	0	0	0	0	0	0	603	903	0
11974	5	0	0	0	0	0	0	200	300	0	0	0	0	0	0	0	200	903	0	0	0	0	0	0	0	603	903	0
11974	6	0	0	0	0	0	0	200	300	0	0	0	0	0	0	0	200	903	0	0	0	0	0	0	0	603	903	0
11974	7	0	0	0	0	0	0	200	300	0	0	0	0	0	0	0	200	903	0	0	0	0	0	0	0	603	903	0
11974	8	0	0	0	0	0	0	200	300	0	0	0	0	0	0	0	200	903	0	0	0	0	0	0	0	603	903	0
11974	9	0	0	0	0	0	0	200	300	0	0	0	0	0	0	0	200	903	0	0	0	0	0	0	0	603	903	0
11975	0	0	0	0	0	0	0	200	300	0	0	0	0	0	0	0	200	903	0	0	0	0	0	0	0	603	903	0
11975	1	0	0	0	0	0	0	200	300	0	0	0	0	0	0	0	200	903	0	0	0	0	0	0	0	603	903	0
11975	2	0	0	0	0	0	0	200	300	0	0	0	0	0	0	0	200	903	0	0	0	0	0	0	0	603	903	0
11975	3	0	0	0	0	0	0	200	300	0	0	0	0	0	0	0	200	903	0	0	0	0	0	0	0	603	903	0
11975	4	0	0	0	0	0	0	200	300	0	0	0	0	0	0	0	200	903	0	0	0	0	0	0	0	603	903	0
11975	5	0	0	0	0	0	0	200	300	0	0	0	0	0	0	0	200	903	0	0	0	0	0	0	0	603	903	0
11975	6	0	0	0	0	0	0	200	300	0	0	0	0	0	0	0	200	903	0	0	0	0	0	0	0	603	903	0
11975	7	0	0	0	0	0	0	200	300	0	0	0	0	0	0	0	200	903	0	0	0	0	0	0	0	603	903	0
11975	8	0	0	0	0	0	0	200	300	0	0	0	0	0	0	0	200	903	0	0	0	0	0	0	0	603	903	0
11975	9	0	0	0	0	0	0	200	300	0	0	0	0	0	0	0	200	903	0	0	0	0	0	0	0	603	903	0
11976	0	0	0	0	0	0	0	200	300	0	0	0	0	0	0	0	200	903	0	0	0	0	0	0	0	603	903	0
11976	1	0	0	0	0	0	0	200	300	0	0	0	0	0	0	0	200	903	0	0	0	0	0	0	0	603	903	0
11976	2	0	0	0	0	0	0	200	300	0	0	0	0	0	0	0	200	903	0	0	0	0	0	0	0	603	903	0
11976	3	0	0	0	0	0	0	200	300	0	0	0	0	0	0	0	200	903	0	0	0	0	0	0	0	603	903	0
11976	4	0	0	0	0	0	0	200	300	0	0	0	0	0	0	0	200	903	0	0	0	0	0	0	0	603	903	0
11976	5	0	0	0	0	0	0	200	300	0	0	0	0	0	0	0	200	903	0	0	0	0	0	0	0	603	903	0
11976	6	0	0	0	0	0	0	200	300	0	0	0	0	0	0	0	200	903	0	0	0	0	0	0	0	603	903	0
11976	7	0	0	0	0	0	0	200	300	0	0	0	0	0	0	0	200	903	0	0	0	0	0	0	0	603	903	0
11976	8	0	0	0	0	0	0	200	300	0	0	0	0	0	0	0	200	903	0	0	0	0	0	0	0	603	903	0
11976	9	0	0	0	0	0	0	200	300	0	0	0	0	0	0	0	200	903	0	0	0	0	0	0	0	603	903	0
11977	0	0	0	0	0	0	0	200	300	0	0	0	0	0	0	0	200	903	0	0	0	0	0	0	0	603	903	0
11977	1	0	0	0	0	0	0	200	300	0	0	0	0	0	0	0	200	903	0	0	0	0	0	0	0	603	903	0
11977	2	0	0	0	0	0	0	200	300	0	0	0	0	0	0	0	200	903	0	0	0	0	0	0	0	603	903	0
11977	3	0	0	0	0	0	0	200	300	0	0	0	0	0	0	0	200	903	0	0	0	0	0	0	0	603	903	0
11977	4	0	0	0	0	0	0	200	300	0	0	0	0	0	0	0	200	903	0	0	0	0	0	0	0	603	903	0
11977	5	0	0	0	0	0	0	200	300	0	0	0	0	0	0	0	200	903	0	0	0	0	0	0	0	603	903	0
11977	6	0	0	0	0	0	0	200	300	0	0	0	0	0	0	0	200	903	0	0	0	0	0	0	0	603	903	0
11977	7	0	0	0	0	0	0	200	300	0	0	0	0	0	0	0	200	903	0	0	0	0	0	0	0	603	903	0
11977	8	0	0	0	0	0	0	200	300	0	0	0	0	0	0	0	200	903	0	0	0	0	0	0	0	603	903	0
11977	9	0	0	0	0	0	0	200	300	0	0	0	0	0	0	0	200	903	0	0	0	0	0	0	0	603	903	0
11978	0	0	0	0	0	0	0	200	300	0	0	0	0	0	0	0	200	903	0	0	0	0	0	0	0	603	903	0
11978	1	0	0	0	0	0	0	200	300	0	0	0	0	0	0	0	200	903	0	0	0	0	0	0	0	603	903	0
11978	2	0	0	0	0	0	0	200	300	0	0	0	0	0	0	0	200	903	0	0	0	0	0	0	0	603	903	0
11978	3	0	0	0	0	0	0	200	300	0	0	0	0	0	0	0	200	903	0	0	0	0	0	0	0	603	903	0
11978	4	0	0	0	0	0	0	200	300	0	0	0	0	0	0	0	200	903	0	0	0	0	0	0	0	603	903	0
11978	5	0	0	0	0	0	0	200	300	0	0	0	0	0	0	0	200	903	0	0	0	0	0	0	0	603	903	0
11978	6	0	0	0	0	0	0	200	300	0	0	0	0	0	0	0	200	903	0	0	0	0	0	0	0	603	903	0
11978	7	0	0	0	0	0	0	200	300	0	0	0	0	0	0	0	200	903	0	0	0	0	0	0	0	603	903	0
11978	8	0	0	0	0	0	0	200	300	0	0	0	0	0	0	0	200	903	0	0	0	0	0	0	0	603	903	0
11978	9	0	0	0	0	0	0	200	300	0	0	0	0	0	0	0	200	903	0	0	0	0	0	0	0	603	903	0
11979	0	0	0	0	0	0	0	200	300	0	0	0	0	0	0	0	200	903	0	0	0	0	0	0	0	603	903	0
11979	1	0	0	0	0	0	0	200	300	0	0	0	0	0	0	0	200	903	0	0	0	0	0	0	0	603	903	0
11979	2	0	0	0	0	0	0	200	300	0	0	0	0	0	0	0	200	903	0	0	0	0	0	0	0	603	903	0
11979	3	0	0	0	0	0	0	200	300	0	0	0	0	0	0	0	200	903	0	0	0	0	0	0	0	603	903	0
11979	4	0	0	0	0	0	0	200	300	0	0	0	0	0	0	0	200	903	0	0	0	0	0	0	0	603	903	0
11979	5	0	0	0	0	0	0	200	300	0	0	0	0	0	0	0	200	903	0	0	0	0	0	0	0	603	903	0
11979	6	0	0	0	0	0	0	200	300	0	0	0	0	0	0	0	200	903	0	0	0	0	0	0	0	603	903	0
11979	7	0	0	0	0	0	0	200	300	0	0	0	0	0	0	0	200	903	0	0	0	0	0	0	0	603	903	0
11979	8	0	0	0	0	0	0	200	300	0	0	0	0	0	0	0	200	903	0	0	0	0	0	0	0	603	903	0
11979	9	0	0	0	0	0	0	200	300	0	0	0	0	0	0	0	200	903	0	0	0	0	0	0	0	603	903	0
11980	0	0	0	0	0	0	0	200	300	0	0	0	0	0	0	0	200	903	0	0	0	0	0	0	0	603	903	0
11980	1	0	0	0	0	0	0	200	300	0	0	0	0	0	0	0	200	903	0	0	0	0	0	0	0	603	903	0
11980	2	0	0	0	0	0	0	200	300	0	0	0	0	0	0	0	200	903	0	0	0	0	0	0	0	603	903	0
11980	3	0	0	0	0	0	0	200	300	0	0	0	0	0	0	0	200	903	0	0	0	0	0	0	0	603	903	0
11980	4	0	0	0	0	0	0	200	300	0	0	0	0	0	0	0	200	903	0	0	0	0	0	0	0	603	903	0
11980	5	0	0	0	0	0	0	200	300	0	0	0	0	0	0	0	200	903	0	0	0	0	0	0	0	603	903	0
11980	6	0	0	0	0	0	0	200	300	0	0	0	0	0	0	0	200	903	0	0	0	0	0	0	0	603	903	0
11980	7	0	0	0	0	0	0	200	300	0	0	0	0	0	0	0	200	903	0	0	0	0	0	0	0	603	903	0
11980	8	0	0	0	0	0	0	200	300	0	0	0	0	0	0	0	200	903	0	0	0	0	0	0	0	603	903	0
11980	9	0	0	0	0	0	0	200	300	0	0	0	0	0	0	0	200	903	0	0	0	0	0	0	0	603	903	0
11981	0	0	0	0	0	0	0	200	300	0	0	0	0	0	0	0	200	903	0	0	0	0	0	0	0	603	903	0
11981	1	0	0	0	0	0	0	200	300	0	0	0	0	0	0	0	200	903	0	0	0	0	0	0	0	603	903	0
11981	2	0	0	0	0	0	0	200	300	0	0	0	0	0	0	0	200	903	0	0	0	0	0	0	0	603	903	0
11981	3	0	0	0	0	0	0	200	300	0	0	0	0	0	0	0	200	903	0	0	0	0	0	0	0	603	903	0
11981	4	0	0	0	0	0	0	200	300	0	0	0	0	0	0	0	200	903	0	0	0	0	0	0	0	603	903	0
11981	5	0	0	0	0	0	0	200	300	0	0	0	0	0	0	0	200	903	0	0	0	0	0	0	0	603	903	0
11981	6	0	0	0	0	0	0	200	300	0	0	0	0	0	0	0	200	903	0	0	0	0	0	0	0	603	903	0
11981	7	0	0	0	0	0	0	200	300	0	0	0	0	0	0	0	200	903	0	0	0	0	0	0	0	603	903	0
11981	8	0	0	0	0	0	0	200	300	0	0	0	0	0	0	0	200	903	0	0	0	0	0	0	0	603	903	0
11981	9	0	0	0	0	0	0	200	300	0	0	0	0	0	0	0	200	903	0	0	0	0	0	0	0	603	903	0
11982	0	0	0	0	0	0	0	200	300	0	0	0	0	0	0	0	200	903	0	0	0	0	0	0	0	603	903	0
11982	1	0	0	0	0	0	0	200	300	0	0	0	0	0	0	0	200	903	0	0	0	0	0	0	0	603	903	0
11982	2	0	0	0	0	0	0	200	300	0	0	0	0	0	0	0	200	903	0	0	0	0	0	0	0	603	903	0
11982	3	0	0	0	0	0	0	200	300	0	0	0	0	0	0	0	200	903	0	0	0	0	0	0	0	603	903	0
11982	4	0	0	0	0	0	0	200	300	0	0	0	0	0	0	0	200	903	0	0	0	0	0	0	0	603	903	0
11982	5	0	0	0	0	0	0	200	300	0	0	0	0	0	0	0	200	903	0	0	0	0	0	0	0	603	903	0
11982	6	0	0	0	0	0	0	200	300	0	0	0	0	0	0	0	200	903	0	0	0	0	0	0	0	603	903	0
11982	7	0	0	0	0	0	0	200	300	0	0	0	0	0	0	0	200	903	0	0	0	0	0	0	0	603	903	0
11982	8	0	0	0	0	0	0	200	300	0	0	0	0	0	0	0	200	903	0	0	0	0	0	0	0	603	903	0
11982	9	0	0	0	0	0	0	200	300	0	0	0	0	0	0	0	200	903	0	0	0	0	0	0	0	603	903	0
11983	0	0	0	0	0	0	0	200	300	0	0	0	0	0	0	0	200	903	0	0	0	0	0	0	0	603	903	0
11983	1	0	0	0	0	0	0	200	300	0	0	0	0	0	0	0	200	903	0	0	0	0	0	0	0	603	903	0
11983	2	0	0	0	0	0	0	200	300	0	0	0	0	0	0	0	200	903	0	0	0	0	0	0	0	603	903	0
11983	3	0	0	0	0	0	0	200	300	0	0	0	0	0	0	0	200	903	0	0	0	0	0	0	0	603	903	0
11983	4	0	0	0	0	0	0	200	300	0	0	0	0	0	0	0	200	903	0	0	0	0	0	0	0	603	903	0
11983	5	0	0	0	0	0	0	200	300	0	0	0	0	0	0	0	200	903	0	0	0	0	0	0	0	603	903	0
11983	6	0	0	0	0	0	0	200	300	0	0	0	0	0	0	0	200	903	0	0	0	0	0	0	0	603	903	0
11983	7	0	0	0	0	0	0	200	300	0	0	0	0	0	0	0	200	903	0	0	0	0	0	0	0	603	903	0
11983	8	0	0	0	0	0	0	200	300	0	0	0	0	0	0	0	200	903	0	0	0	0	0	0	0	603	903	0
11983	9	0	0	0	0	0	0	200	300	0	0	0	0	0	0	0	200	903	0	0	0	0	0	0	0	603	903	0
11984	0	0	0	0	0	0	0	200	300	0	0	0	0	0	0	0	200	903	0	0	0	0	0	0	0	603	903	0
11984	1	0	0	0	0	0	0	200	300	0	0	0	0	0	0	0	200	903	0	0	0	0	0	0	0	603	903	0
11984	2	0	0	0	0	0	0	200	300	0	0	0	0	0	0	0	200	903	0	0	0	0	0	0	0	603	903	0
11984	3	0	0	0	0	0	0	200	300	0	0	0	0	0	0	0	200	903	0	0	0	0	0	0	0	603	903	0
11984	4	0	0	0	0	0	0	200	300	0	0	0	0	0	0	0	200	903	0	0	0	0	0	0	0	603	903	0
11984	5	0	0	0	0	0	0	200	300	0	0	0	0	0	0	0	200	903	0	0	0	0	0	0	0	603	903	0
11984	6	0	0	0	0	0	0	200	300	0	0	0	0	0	0	0	200	903	0	0	0	0	0	0	0	603	903	0
11984	7	0	0	0	0	0	0	200	300	0	0	0	0	0	0	0	200	903	0	0	0	0	0	0	0	603	903	0
11984	8	0	0	0	0	0	0	200	300	0	0	0	0	0	0	0	200	903	0	0	0	0	0	0	0	603	903	0
11984	9	0	0	0	0	0	0	200	300	0	0	0	0	0	0	0	200	903	0	0	0	0	0	0	0	603	903	0
11985	0	0	0	0	0	0	0	200	300	0	0	0	0	0	0	0	200	903	0	0	0	0	0	0	0	603	903	0
11985	1	0	0	0	0	0	0	200	300	0	0	0	0	0	0	0	200	903	0	0	0	0	0	0	0	603	903	0
11985	2	0	0	0	0	0	0	200	300	0	0	0	0	0	0	0	200	903	0	0	0	0	0	0	0	603	903	0
11985	3	0	0	0	0	0	0	200	300	0	0	0	0	0	0	0	200	903	0	0	0	0	0	0	0	603	903	0
11985	4	0	0	0	0	0	0	200	300	0	0	0	0	0	0	0	200	903	0	0	0	0	0	0	0	603	903	0
11985	5	0	0	0	0	0	0	200	300	0	0	0	0	0	0	0	200	903	0	0	0	0	0	0	0	603	903	0
11985	6	0	0	0	0	0	0	200	300	0	0	0	0	0	0	0	200	903	0	0	0	0	0	0	0	603	903	0
11985	7	0	0	0	0	0	0	200	300	0	0	0	0	0	0	0	200	903	0	0	0	0	0	0	0	603	903	0
11985	8	0	0	0	0	0	0	200	300	0	0	0	0	0	0	0	200	903	0	0	0	0	0	0	0	603	903	0
11985	9	0	0	0	0	0	0	200	300	0	0	0	0	0	0	0	200	903	0	0	0	0	0	0	0	603	903	0
11986	0	0	0	0	0	0	0	200	300	0	0	0	0	0	0	0	200	903	0	0	0	0	0	0	0	603	903	0
11986	1	0	0	0	0	0	0	200	300	0	0	0	0	0	0	0	200	903	0	0	0	0	0	0	0	603	903	0
11986	2	0	0	0	0	0	0	200	300	0	0	0	0	0	0	0	200	903	0	0	0	0	0	0	0	603	903	0
11986	3	0	0	0	0	0	0	200	300	0	0	0	0	0	0	0	200	903	0	0	0	0	0	0	0	603	903	0
11986	4	0	0	0	0	0	0	200	300	0	0	0	0	0	0	0	200	903	0	0	0	0	0	0	0	603	903	0
11986	5	0	0	0	0	0	0	200	300	0	0	0	0	0	0	0	200	903	0	0	0	0	0	0	0	603	903	0
11986	6	0	0	0	0	0	0	200	300	0	0	0	0	0	0	0	200	903	0	0	0	0	0	0	0	603	903	0
11986	7	0	0	0	0	0	0	200	300	0	0	0	0	0	0	0	200	903	0	0	0	0	0	0	0	603	903	0
11986	8	0	0	0	0	0	0	200	300	0	0	0	0	0	0	0	200	903	0	0	0	0	0	0	0	603	903	0
11986	9	0	0	0	0	0	0	200	300	0	0	0	0	0	0	0	200	903	0	0	0	0	0	0	0	603	903	0
11987	0	0	0	0	0	0	0	200	300	0	0	0	0	0	0	0	200	903	0	0	0	0	0	0	0	603	903	0
11987	1	0	0	0	0	0	0	200	300	0	0	0	0	0	0	0	200	903	0	0	0	0	0	0	0	603	903	0
11987	2	0	0	0	0	0	0	200	300	0	0	0	0	0	0	0	200	903	0	0	0	0	0	0	0	603	903	0
11987	3	0	0	0	0	0	0	200	300	0	0	0	0	0	0	0	200	903	0	0	0	0	0	0	0	603	903	0
11987	4	0	0	0	0	0	0	200	300	0	0	0	0	0	0	0	200	903	0	0	0	0	0	0	0	603	903	0
11987	5	0	0	0	0	0	0	200	300	0	0	0	0	0	0	0	200	903	0	0	0	0	0	0	0	603	903	0
11987	6	0	0	0	0	0	0	200	300	0	0	0	0	0	0	0	200	903	0	0	0	0	0	0	0	603	903	0
11987	7	0	0	0	0	0	0	200	300	0	0	0	0	0	0	0	200	903	0	0	0	0	0	0	0	603	903	0
11987	8	0	0	0	0	0	0	200	300	0	0	0	0	0	0	0	200	903	0	0	0	0	0	0	0	603	903	0
11987	9	0	0	0	0	0	0	200	300	0	0	0	0	0	0	0	200	903	0	0	0	0	0	0	0	603	903	0
11988	0	0	0	0	0	0	0	200	300	0	0	0	0	0	0	0	200	903	0	0	0	0	0	0	0	603	903	0
11988	1	0	0	0	0	0	0	200	300	0	0	0	0	0	0	0	200	903	0	0	0	0	0	0	0	603	903	0
11988	2	0	0	0	0	0	0	200	300	0	0	0	0	0	0	0	200	903	0	0	0	0	0	0	0	603	903	0
11988	3	0	0	0	0	0	0	200	300	0	0	0	0	0	0	0	200	903	0	0	0	0	0	0	0	603	903	0
11988	4	0	0	0	0	0	0	200	300	0	0	0	0	0	0	0	200	903	0	0	0	0	0	0	0	603	903	0
11988	5	0	0	0	0	0	0	200	300	0	0	0	0	0	0	0	200	903	0	0	0	0	0	0	0	603	903	0
11988	6	0	0	0	0	0	0	200	300	0	0	0	0	0	0	0	200	903	0	0	0	0	0	0	0	603	903	0
11988	7	0	0	0	0	0	0	200	300	0	0	0	0	0	0	0	200	903	0	0	0	0	0	0	0	603	903	0
11988	8	0	0	0	0	0	0	200	300	0	0	0	0	0	0	0	200	903	0	0	0	0	0	0	0	603	903	0
11988	9	0	0	0	0	0	0	200	300	0	0	0	0	0	0	0	200	903	0	0	0	0	0	0	0	603	903	0
11989	0	0	0	0	0	0	0	200	300	0	0	0	0	0	0	0	200	903	0	0	0	0	0	0	0	603	903	0
11989	1	0	0	0	0	0	0	200	300	0	0	0	0	0	0	0	200	903	0	0	0	0	0	0	0	603	903	0
11989	2	0	0	0	0	0	0	200	300	0	0	0	0	0	0	0	200	903	0	0	0	0	0	0	0	603	903	0
11989	3	0	0	0	0	0	0	200	300	0	0	0	0	0	0	0	200	903	0	0	0	0	0	0	0	603	903	0
11989	4	0	0	0	0	0	0	200	300	0	0	0	0	0	0	0	200	903	0	0	0	0	0	0	0	603	903	0
11989	5	0	0	0	0	0	0	200	300	0	0	0	0	0	0	0	200	903	0	0	0	0	0	0	0	603	903	0
11989	6	0	0	0	0	0	0	200	300	0	0	0	0	0	0	0	200	903	0	0	0	0	0	0	0	603	903	0
11989	7	0	0	0	0	0	0	200	300	0	0	0	0	0	0	0	200	903	0	0	0	0	0	0	0	603	903	0
11989	8	0	0	0	0	0	0	200	300	0	0	0	0	0	0	0	200	903	0	0	0	0	0	0	0	603	903	0
11989	9	0	0	0	0	0	0	200	300	0	0	0	0	0	0	0	200	903	0	0	0	0	0	0	0	603	903	0
11990	0	0	0	0	0	0	0	200	300	0	0	0	0	0	0	0	200	903	0	0	0	0	0	0	0	603	903	0
11990	1	0	0	0	0	0	0	200	300	0	0	0	0	0	0	0	200	903	0	0	0	0	0	0	0	603	903	0
11990	2	0	0	0	0	0	0	200	300	0	0	0	0	0	0	0	200	903	0	0	0	0	0	0	0	603	903	0
11990	3	0	0	0	0	0	0	200	300	0	0	0	0	0	0	0	200	903	0	0	0	0	0	0	0	603	903	0
11990	4	0	0	0	0	0	0	200	300	0	0	0	0	0	0	0	200	903	0	0	0	0	0	0	0	603	903	0
11990	5	0	0	0	0	0	0	200	300	0	0	0	0	0	0	0	200	903	0	0	0	0	0	0	0	603	903	0
11990	6	0	0	0	0	0	0	200	300	0	0	0	0	0	0	0	200	903	0	0	0	0	0	0	0	603	903	0
11990	7	0	0	0	0	0	0	200	300	0	0	0	0	0	0	0	200	903	0	0	0	0	0	0	0	603	903	0
11990	8	0	0	0	0	0	0	200	300	0	0	0	0	0	0	0	200	903	0	0	0	0	0	0	0	603	903	0
11990	9	0	0	0	0	0	0	200	300	0	0	0	0	0	0	0	200	903	0	0	0	0	0	0	0	603	903	0
11991	0	0	0	0	0	0	0	200	300	0	0	0	0	0	0	0	200	903	0	0	0	0	0	0	0	603	903	0
11991	1	0	0	0	0	0	0	200	300	0	0	0	0	0	0	0	200	903	0	0	0	0	0	0	0	603	903	0
11991	2	0	0	0	0	0	0	200	300	0	0	0	0	0	0	0	200	903	0	0	0	0	0	0	0	603	903	0
11991	3	0	0	0	0	0	0	200	300	0	0	0	0	0	0	0	200	903	0	0	0	0	0	0	0	603	903	0
11991	4	0	0	0	0	0	0	200	300	0	0	0	0	0	0	0	200	903	0	0	0	0	0	0	0	603	903	0
11991	5	0	0	0	0	0	0	200	300	0	0	0	0	0	0	0	200	903	0	0	0	0	0	0	0	603	903	0
11991	6	0	0	0	0	0	0	200	300	0	0	0	0	0	0	0	200	903	0	0	0	0	0	0	0	603	903	0
11991	7	0	0	0	0	0	0	200	300	0	0	0	0	0	0	0	200	903	0	0	0	0	0	0	0	603	903	0
11991	8	0	0	0	0	0	0	200	300	0	0	0	0	0	0	0	200	903	0	0	0	0	0	0	0	603	903	0
11991	9	0	0	0	0	0	0	200	300	0	0	0	0	0	0	0	200	903	0	0	0	0	0	0	0	603	903	0
11992	0	0	0	0	0	0	0	200	300	0	0	0	0	0	0	0	200	903	0	0	0	0	0	0	0	603	903	0
11992	1	0	0	0	0	0	0	200	300	0	0	0	0	0	0	0	200	903	0	0	0	0	0	0	0	603	903	0
11992	2	0	0	0	0	0	0	200	300	0	0	0	0	0	0	0	200	903	0	0	0	0	0	0	0	603	903	0
11992	3	0	0	0	0	0	0	200	300	0	0	0	0	0	0	0	200	903	0	0	0	0	0	0	0	603	903	0
11992	4	0	0	0	0	0	0	200	300	0	0	0	0	0	0	0	200	903	0	0	0	0	0	0	0	603	903	0
11992	5	0	0	0	0	0	0	200	300	0	0	0	0	0	0	0	200	903	0	0	0	0	0	0	0	603	903	0
11992	6	0	0	0	0	0	0	200	300	0	0	0	0	0	0	0	200	903	0	0	0	0	0	0	0	603	903	0
11992	7	0	0	0	0	0	0	200	300	0	0	0	0	0	0	0	200	903	0	0	0	0	0	0	0	603	903	0
11992	8	0	0	0	0	0	0	200	300	0	0	0	0	0	0	0	200	903	0	0	0	0	0	0	0	603	903	0
11992	9	0	0	0	0	0	0	200	300	0	0	0	0	0	0	0	200	903	0	0	0	0	0	0	0	603	903	0
11993	0	0	0	0	0	0	0	200	300	0	0	0	0	0	0	0	200	903	0	0	0	0	0	0	0	603	903	0
11993	1	0	0	0	0	0	0	200	300	0	0	0	0	0	0	0	200	903	0	0	0	0	0	0	0	603	903	0
11993	2	0	0	0	0	0	0	200	300	0	0	0	0	0	0	0	200	903	0	0	0	0	0	0	0	603	903	0
11993	3	0	0	0	0	0	0	200	300	0	0	0	0	0	0	0	200	903	0	0	0	0	0	0	0	603	903	0
11993	4	0	0	0	0	0	0	200	300	0	0	0	0	0	0	0	200	903	0	0	0	0	0	0	0	603	903	0
11993	5	0	0	0	0	0	0	200	300	0	0	0	0	0	0	0	200	903	0	0	0	0	0	0	0	603	903	0
11993	6	0	0	0	0	0	0	200	300	0	0	0	0	0	0	0	200	903	0	0	0	0	0	0	0	603	903	0
11993	7	0	0	0	0	0	0	200	300	0	0	0	0	0	0	0	200	903	0	0	0	0	0	0	0	603	903	0
11993	8	0	0	0	0	0	0	200	300	0	0	0	0	0	0	0	200	903	0	0	0	0	0	0	0	603	903	0
11993	9	0	0	0	0	0	0	200	300	0	0	0	0	0	0	0	200	903	0	0	0	0	0	0	0	603	903	0
11994	0	0	0	0	0	0	0	200	300	0	0	0	0	0	0	0	200	903	0	0	0	0	0	0	0	603	903	0
11994	1	0	0	0	0	0	0	200	300	0	0	0	0	0	0	0	200	903	0	0	0	0	0	0	0	603	903	0
11994	2	0	0	0	0	0	0	200	300	0	0	0	0	0	0	0	200	903	0	0	0	0	0	0	0	603	903	0
11994	3	0	0	0	0	0	0	200	300	0	0	0	0	0	0	0	200	903	0	0	0	0	0	0	0	603	903	0
11994	4	0	0	0	0	0	0	200	300	0	0	0	0	0	0	0	200	903	0	0	0	0	0	0	0	603	903	0
11994	5	0	0	0	0	0	0	200	300	0	0	0	0	0	0	0	200	903	0	0	0	0	0	0	0	603	903	0
11994	6	0	0	0	0	0	0	200	300	0	0	0	0	0	0	0	200	903	0	0	0	0	0	0	0	603	903	0
11994	7	0	0	0	0	0	0	200	300	0	0	0	0	0	0	0	200	903	0	0	0	0	0	0	0	603	903	0
11994	8	0	0	0	0	0	0	200	300	0	0	0	0	0	0	0	200	903	0	0	0	0	0	0	0	603	903	0
11994	9	0	0	0	0	0	0	200	300	0	0	0	0	0	0	0	200	903	0	0	0	0	0	0	0	603	903	0
11995	0	0	0	0	0	0	0	200	300	0	0	0	0	0	0	0	200	903	0	0	0	0	0	0	0	603	903	0
11995	1	0	0	0	0	0	0	200	300	0	0	0	0	0	0	0	200	903	0	0	0	0	0	0	0	603	903	0
11995	2	0	0	0	0	0	0	200	300	0	0	0	0	0	0	0	200	903	0	0	0	0	0	0	0	603	903	0
11995	3	0	0	0	0	0	0	200	300	0	0	0	0	0	0	0	200	903	0	0	0	0	0	0	0	603	903	0
11995	4	0	0	0	0	0	0	200	300	0	0	0	0	0	0	0	200	903	0	0	0	0	0	0	0	603	903	0
11995	5	0	0	0	0	0	0	200	300	0	0	0	0	0	0	0	200	903	0	0	0	0	0	0	0	603	903	0
11995	6	0	0	0	0	0	0	200	300	0	0	0	0	0	0	0	200	903	0	0	0	0	0	0	0	603	903	0
11995	7	0	0	0	0	0	0	200	300	0	0	0	0	0	0	0	200	903	0	0	0	0	0	0	0	603	903	0
11995	8	0	0	0	0	0	0	200	300	0	0	0	0	0	0	0	200	903	0	0	0	0	0	0	0	603	903	0
11995	9	0	0	0	0	0	0	200	300	0	0	0	0	0	0	0	200	903	0	0	0	0	0	0	0	603	903	0
11996	0	0	0	0	0	0	0	200	300	0	0	0	0	0	0	0	200	903	0	0	0	0	0	0	0	603	903	0
11996	1	0	0	0	0	0	0	200	300	0	0	0	0	0	0	0	200	903	0	0	0	0	0	0	0	603	903	0
11996	2	0	0	0	0	0	0	200	300	0	0	0	0	0	0	0	200	903	0	0	0	0	0	0	0	603	903	0
11996	3	0	0	0	0	0	0	200	300	0	0	0	0	0	0	0	200	903	0	0	0	0	0	0	0	603	903	0
11996	4	0	0	0	0	0	0	200	300	0	0	0	0	0	0	0	200	903	0	0	0	0	0	0	0	603	903	0
11996	5	0	0	0	0	0	0	200	300	0	0	0	0	0	0	0	200	903	0	0	0	0	0	0	0	603	903	0
11996	6	0	0	0	0	0	0	200	300	0	0	0	0	0	0	0	200	903	0	0	0	0	0	0	0	603	903	0
11996	7	0	0	0	0	0	0	200	300	0	0	0	0	0	0	0	200	903	0	0	0	0	0	0	0	603	903	0
11996	8	0	0	0	0	0	0	200	300	0	0	0	0	0	0	0	200	903	0	0	0	0	0	0	0	603	903	0
11996	9	0	0	0	0	0	0	200	300	0	0	0	0	0	0	0	200	903	0	0	0	0	0	0	0	603	903	0
11997	0	0	0	0	0	0	0	200	300	0	0	0	0	0	0	0	200	903	0	0	0	0	0	0	0	603	903	0
11997	1	0	0	0	0	0	0	200	300	0	0	0	0	0	0	0	200	903	0	0	0	0	0	0	0	603	903	0
11997	2	0	0	0	0	0	0	200	300	0	0	0	0	0	0	0	200	903	0	0	0	0	0	0	0	603	903	0
11997	3	0	0	0	0	0	0	200	300	0	0	0	0	0	0	0	200	903	0	0	0	0	0	0	0	603	903	0
11997	4	0	0	0	0	0	0	200	300	0	0	0	0	0	0	0	200	903	0	0	0	0	0	0	0	603	903	0
11997	5	0	0	0	0	0	0	200	300	0	0	0	0	0	0	0	200	903	0	0	0	0	0	0	0	603	903	0
11997	6	0	0	0	0	0	0	200	300	0	0	0	0	0	0	0	200	903	0	0	0	0	0	0	0	603	903	0
11997	7	0	0	0	0	0	0	200	300	0	0	0	0	0	0	0	200	903	0	0	0	0	0	0	0	603	903	0
11997	8	0	0	0	0	0	0	200	300	0	0	0	0	0	0	0	200	903	0	0	0	0	0	0	0	603	903	0
11997	9	0	0	0	0	0	0	200	300	0	0	0	0	0	0	0	200	903	0	0	0	0	0	0	0	603	903	0
11998	0	0	0	0	0	0	0	200	300	0	0	0	0	0	0	0	200	903	0	0	0	0	0	0	0	603	903	0
11998	1	0	0	0	0	0	0	200	300	0	0	0	0	0	0	0	200	903	0	0	0	0	0	0	0	603	903	0
11998	2	0	0	0	0	0	0	200	300	0	0	0	0	0	0	0	200	903	0	0	0	0	0	0	0	603	903	0
11998	3	0	0	0	0	0	0	200	300	0	0	0	0	0	0	0	200	903	0	0	0	0	0	0	0	603	903	0
11998	4	0	0	0	0	0	0	200	300	0	0	0	0	0	0	0	200	903	0	0	0	0	0	0	0	603	903	0
11998	5	0	0	0	0	0	0	200	300	0	0	0	0	0	0	0	200	903	0	0	0	0	0	0	0	603	903	0
11998	6	0	0	0	0	0	0	200	300	0	0	0	0	0	0	0	200	903	0	0	0	0	0	0	0	603	903	0
11998	7	0	0	0	0	0	0	200	300	0	0	0	0	0	0	0	200	903	0	0	0	0	0	0	0	603	903	0
11998	8	0	0	0	0	0	0	200	300	0	0	0	0	0	0	0	200	903	0	0	0	0	0	0	0	603	903	0
11998	9	0	0	0	0	0	0	200	300	0	0	0	0	0	0	0	200	903	0	0	0	0	0	0	0	603	903	0
11999	0	0	0	0	0	0	0	200	300	0	0	0	0	0	0	0	200	903	0	0	0	0	0	0	0	603	903	0
11999	1	0	0	0	0	0	0	200	300	0	0	0	0	0	0	0	200	903	0	0	0	0	0	0	0	603	903	0
11999	2	0	0	0	0	0	0	200	300	0	0	0	0	0	0	0	200	903	0	0	0	0	0	0	0	603	903	0
11999	3	0	0	0	0	0	0	200	300	0	0	0	0	0	0	0	200	903	0	0	0	0	0	0	0	603	903	0
11999	4	0	0	0	0	0	0	200	300	0	0	0	0	0	0	0	200	903	0	0	0	0	0	0	0	603	903	0
11999	5	0	0	0	0	0	0	200	300	0	0	0	0	0	0	0	200	903	0	0	0	0	0	0	0	603	903	0
11999	6	0	0	0	0	0	0	200	300	0	0	0	0	0	0	0	200	903	0	0	0	0	0	0	0	603	903	0
11999	7	0	0	0	0	0	0	200	300	0	0	0	0	0	0	0	200	903	0	0	0	0	0	0	0	603	903	0
11999	8	0	0	0	0	0	0	200	300	0	0	0	0	0	0	0	200	903	0	0	0	0	0	0	0	603	903	0
11999	9	0	0	0	0	0	0	200	300	0	0	0	0	0	0	0	200	903	0	0	0	0	0	0	0	603	903	0
12000	0	0	0	0	0	0	0	200	300	0	0	0	0	0	0	0	200	903	0	0	0	0	0	0	0	603	903	0
12000	1	0	0	0	0	0	0	200	300	0	0	0	0	0	0	0	200	903	0	0	0	0	0	0	0	603	903	0
12000	2	0	0	0	0	0	0	200	300	0	0	0	0	0	0	0	200	903	0	0	0	0	0	0	0	603	903	0
12000	3	0	0	0	0	0	0	200	300	0	0	0	0	0	0	0	200	903	0	0	0	0	0	0	0	603	903	0
12000	4	0	0	0	0	0	0	200	300	0	0	0	0	0	0	0	200	903	0	0	0	0	0	0	0	603	903	0
12000	5	0	0	0	0	0	0	200	300	0	0	0	0	0	0	0	200	903	0	0	0	0	0	0	0	603	903	0
12000	6	0	0	0	0	0	0	200	300	0	0	0	0	0	0	0	200	903	0	0	0	0	0	0	0	603	903	0
12000	7	0	0	0	0	0	0	200	300	0	0	0	0	0	0	0	200	903	0	0	0	0	0	0	0	603	903	0
12000	8	0	0	0	0	0	0	200	300	0	0	0	0	0	0	0	200	903	0	0	0	0	0	0	0	603	903	0
12000	9	0	0	0	0	0	0	200	300	0	0	0	0	0	0	0	200	903	0	0	0	0	0	0	0	603	903	0
12001	0	0	0	0	0	0	0	200	300	0	0	0	0	0	0	0	200	903	0	0	0	0	0	0	0	603	903	0
12001	1	0	0	0	0	0	0	200	300	0	0	0	0	0	0	0	200	903	0	0	0	0	0	0	0	603	903	0
12001	2	0	0	0	0	0	0	200	300	0	0	0	0	0	0	0	200	903	0	0	0	0	0	0	0	603	903	0
12001	3	0	0	0	0	0	0	200	300	0	0	0	0	0	0	0	200	903	0	0	0	0	0	0	0	603	903	0
12001	4	0	0	0	0	0	0	200	300	0	0	0	0	0	0	0	200	903	0	0	0	0	0	0	0	603	903	0
12001	5	0	0	0	0	0	0	200	300	0	0	0	0	0	0	0	200	903	0	0	0	0	0	0	0	603	903	0
12001	6	0	0	0	0	0	0	200	300	0	0	0	0	0	0	0	200	903	0	0	0	0	0	0	0	603	903	0
12001	7	0	0	0	0	0	0	200	300	0	0	0	0	0	0	0	200	903	0	0	0	0	0	0	0	603	903	0
12001	8	0	0	0	0	0	0	200	300	0	0	0	0	0	0	0	200	903	0	0	0	0	0	0	0	603	903	0
12001	9	0	0	0	0	0	0	200	300	0	0	0	0	0	0	0	200	903	0	0	0	0	0	0	0	603	903	0
12002	0	0	0	0	0	0	0	200	300	0	0	0	0	0	0	0	200	903	0	0	0	0	0	0	0	603	903	0
12002	1	0	0	0	0	0	0	200	300	0	0	0	0	0	0	0	200	903	0	0	0	0	0	0	0	603	903	0
12002	2	0	0	0	0	0	0	200	300	0	0	0	0	0	0	0	200	903	0	0	0	0	0	0	0	603	903	0
12002	3	0	0	0	0	0	0	200	300	0	0	0	0	0	0	0	200	903	0	0	0	0	0	0	0	603	903	0
12002	4	0	0	0	0	0	0	200	300	0	0	0	0	0	0	0	200	903	0	0	0	0	0	0	0	603	903	0
12002	5	0	0	0	0	0	0	200	300	0	0	0	0	0	0	0	200	903	0	0	0	0	0	0	0	603	903	0
12002	6	0	0	0	0	0	0	200	300	0	0	0	0	0	0	0	200	903	0	0	0	0	0	0	0	603	903	0
12002	7	0	0	0	0	0	0	200	300	0	0	0	0	0	0	0	200	903	0	0	0	0	0	0	0	603	903	0
12002	8	0	0	0	0	0	0	200	300	0	0	0	0	0	0	0	200	903	0	0	0	0	0	0	0	603	903	0
12002	9	0	0	0	0	0	0	200	300	0	0	0	0	0	0	0	200	903	0	0	0	0	0	0	0	603	903	0
12003	0	0	0	0	0	0	0	200	300	0	0	0	0	0	0	0	200	903	0	0	0	0	0	0	0	603	903	0
12003	1	0	0	0	0	0	0	200	300	0	0	0	0	0	0	0	200	903	0	0	0	0	0	0	0	603	903	0
12003	2	0	0	0	0	0	0	200	300	0	0	0	0	0	0	0	200	903	0	0	0	0	0	0	0	603	903	0
12003	3	0	0	0	0	0	0	200	300	0	0	0	0	0	0	0	200	903	0	0	0	0	0	0	0	603	903	0
12003	4	0	0	0	0	0	0	200	300	0	0	0	0	0	0	0	200	903	0	0	0	0	0	0	0	603	903	0
12003	5	0	0	0	0	0	0	200	300	0	0	0	0	0	0	0	200	903	0	0	0	0	0	0	0	603	903	0
12003	6	0	0	0	0	0	0	200	300	0	0	0	0	0	0	0	200	903	0	0	0	0	0	0	0	603	903	0
12003	7	0	0	0	0	0	0	200	300	0	0	0	0	0	0	0	200	903	0	0	0	0	0	0	0	603	903	0
12003	8	0	0	0	0	0	0	200	300	0	0	0	0	0	0	0	200	903	0	0	0	0	0	0	0	603	903	0
12003	9	0	0	0	0	0	0	200	300	0	0	0	0	0	0	0	200	903	0	0	0	0	0	0	0	603	903	0
12004	0	0	0	0	0	0	0	200	300	0	0	0	0	0	0	0	200	903	0	0	0	0	0	0	0	603	903	0
12004	1	0	0	0	0	0	0	200	300	0	0	0	0	0	0	0	200	903	0	0	0	0	0	0	0	603	903	0
12004	2	0	0	0	0	0	0	200	300	0	0	0	0	0	0	0	200	903	0	0	0	0	0	0	0	603	903	0
12004	3	0	0	0	0	0	0	200	300	0	0	0	0	0	0	0	200	903	0	0	0	0	0	0	0	603	903	0
12004	4	0	0	0	0	0	0	200	300	0	0	0	0	0	0	0	200	903	0	0	0	0	0	0	0	603	903	0
12004	5	0	0	0	0	0	0	200	300	0	0	0	0	0	0	0	200	903	0	0	0	0	0	0	0	603	903	0
12004	6	0	0	0	0	0	0	200	300	0	0	0	0	0	0	0	200	903	0	0	0	0	0	0	0	603	903	0
12004	7	0	0	0	0	0	0	200	300	0	0	0	0	0	0	0	200	903	0	0	0	0	0	0	0	603	903	0
12004	8	0	0	0	0	0	0	200	300	0	0	0	0	0	0	0	200	903	0	0	0	0	0	0	0	603	903	0
12004	9	0	0	0	0	0	0	200	300	0	0	0	0	0	0	0	200	903	0	0	0	0	0	0	0	603	903	0
12005	0	0	0	0	0	0	0	200	300	0	0	0	0	0	0	0	200	903	0	0	0	0	0	0	0	603	903	0
12005	1	0	0	0	0	0	0	200	300	0	0	0	0	0	0	0	200	903	0	0	0	0	0	0	0	603	903	0
12005	2	0	0	0	0	0	0	200	300	0	0	0	0	0	0	0	200	903	0	0	0	0	0	0	0	603	903	0
12005	3	0	0	0	0	0	0	200	300	0	0	0	0	0	0	0	200	903	0	0	0	0	0	0	0	603	903	0
12005	4	0	0	0	0	0	0	200	300	0	0	0	0	0	0	0	200	903	0	0	0	0	0	0	0	603	903	0
12005	5	0	0	0	0	0	0	200	300	0	0	0	0	0	0	0	200	903	0	0	0	0	0	0	0	603	903	0
12005	6	0	0	0	0	0	0	200	300	0	0	0	0	0	0	0	200	903	0	0	0	0	0	0	0	603	903	0
12005	7	0	0	0	0	0	0	200	300	0	0	0	0	0	0	0	200	903	0	0	0	0	0	0	0	603	903	0
12005	8	0	0	0	0	0	0	200	300	0	0	0	0	0	0	0	200	903	0	0	0	0	0	0	0	603	903	0
12005	9	0	0	0	0	0	0	200	300	0	0	0	0	0	0	0	200	903	0	0	0	0	0	0	0	603	903	0
12006	0	0	0	0	0	0	0	200	300	0	0	0	0	0	0	0	200	903	0	0	0	0	0	0	0	603	903	0
12006	1	0	0	0	0	0	0	200	300	0	0	0	0	0	0	0	200	903	0	0	0	0	0	0	0	603	903	0
12006	2	0	0	0	0	0	0	200	300	0	0	0	0	0	0	0	200	903	0	0	0	0	0	0	0	603	903	0
12006	3	0	0	0	0	0	0	200	300	0	0	0	0	0	0	0	200	903	0	0	0	0	0	0	0	603	903	0
12006	4	0	0	0	0	0	0	200	300	0	0	0	0	0	0	0	200	903	0	0	0	0	0	0	0	603	903	0
12006	5	0	0	0	0	0	0	200	300	0	0	0	0	0	0	0	200	903	0	0	0	0	0	0	0	603	903	0
12006	6	0	0	0	0	0	0	200	300	0	0	0	0	0	0	0	200	903	0	0	0	0	0	0	0	603	903	0
12006	7	0	0	0	0	0	0	200	300	0	0	0	0	0	0	0	200	903	0	0	0	0	0	0	0	603	903	0
12006	8	0	0	0	0	0	0	200	300	0	0	0	0	0	0	0	200	903	0	0	0	0	0	0	0	603	903	0
12006	9	0	0	0	0	0	0	200	300	0	0	0	0	0	0	0	200	903	0	0	0	0	0	0	0	603	903	0
12007	0	0	0	0	0	0	0	200	300	0	0	0	0	0	0	0	200	903	0	0	0	0	0	0	0	603	903	0
12007	1	0	0	0	0	0	0	200	300	0	0	0	0	0	0	0	200	903	0	0	0	0	0	0	0	603	903	0
12007	2	0	0	0	0	0	0	200	300	0	0	0	0	0	0	0	200	903	0	0	0	0	0	0	0	603	903	0
12007	3	0	0	0	0	0	0	200	300	0	0	0	0	0	0	0	200	903	0	0	0	0	0	0	0	603	903	0
12007	4	0	0	0	0	0	0	200	300	0	0	0	0	0	0	0	200	903	0	0	0	0	0	0	0	603	903	0
12007	5	0	0	0	0	0	0	200	300	0	0	0	0	0	0	0	200	903	0	0	0	0	0	0	0	603	903	0
12007	6	0	0	0	0	0	0	200	300	0	0	0	0	0	0	0	200	903	0	0	0	0	0	0	0	603	903	0
12007	7	0	0	0	0	0	0	200	300	0	0	0	0	0	0	0	200	903	0	0	0	0	0	0	0	603	903	0
12007	8	0	0	0	0	0	0	200	300	0	0	0	0	0	0	0	200	903	0	0	0	0	0	0	0	603	903	0
12007	9	0	0	0	0	0	0	200	300	0	0	0	0	0	0	0	200	903	0	0	0	0	0	0	0	603	903	0
12008	0	0	0	0	0	0	0	200	300	0	0	0	0	0	0	0	200	903	0	0	0	0	0	0	0	603	903	0
12008	1	0	0	0	0	0	0	200	300	0	0	0	0	0	0	0	200	903	0	0	0	0	0	0	0	603	903	0
12008	2	0	0	0	0	0	0	200	300	0	0	0	0	0	0	0	200	903	0	0	0	0	0	0	0	603	903	0
12008	3	0	0	0	0	0	0	200	300	0	0	0	0	0	0	0	200	903	0	0	0	0	0	0	0	603	903	0
12008	4	0	0	0	0	0	0	200	300	0	0	0	0	0	0	0	200	903	0	0	0	0	0	0	0	603	903	0
12008	5	0	0	0	0	0	0	200	300	0	0	0	0	0	0	0	200	903	0	0	0	0	0	0	0	603	903	0
12008	6	0	0	0	0	0	0	200	300	0	0	0	0	0	0	0	200	903	0	0	0	0	0	0	0	603	903	0
12008	7	0	0	0	0	0	0	200	300	0	0	0	0	0	0	0	200	903	0	0	0	0	0	0	0	603	903	0
12008	8	0	0	0	0	0	0	200	300	0	0	0	0	0	0	0	200	903	0	0	0	0	0	0	0	603	903	0
12008	9	0	0	0	0	0	0	200	300	0	0	0	0	0	0	0	200	903	0	0	0	0	0	0	0	603	903	0
12009	0	0	0	0	0	0	0	200	300	0	0	0	0	0	0	0	200	903	0	0	0	0	0	0	0	603	903	0
12009	1	0	0	0	0	0	0	200	300	0	0	0	0	0	0	0	200	903	0	0	0	0	0	0	0	603	903	0
12009	2	0	0	0	0	0	0	200	300	0	0	0	0	0	0	0	200	903	0	0	0	0	0	0	0	603	903	0
12009	3	0	0	0	0	0	0	200	300	0	0	0	0	0	0	0	200	903	0	0	0	0	0	0	0	603	903	0
12009	4	0	0	0	0	0	0	200	300	0	0	0	0	0	0	0	200	903	0	0	0	0	0	0	0	603	903	0
12009	5	0	0	0	0	0	0	200	300	0	0	0	0	0	0	0	200	903	0	0	0	0	0	0	0	603	903	0
12009	6	0	0	0	0	0	0	200	300	0	0	0	0	0	0	0	200	903	0	0	0	0	0	0	0	603	903	0
12009	7	0	0	0	0	0	0	200	300	0	0	0	0	0	0	0	200	903	0	0	0	0	0	0	0	603	903	0
12009	8	0	0	0	0	0	0	200	300	0	0	0	0	0	0	0	200	903	0	0	0	0	0	0	0	603	903	0
12009	9	0	0	0	0	0	0	200	300	0	0	0	0	0	0	0	200	903	0	0	0	0	0	0	0	603	903	0
12010	0	0	0	0	0	0	0	200	300	0	0	0	0	0	0	0	200	903	0	0	0	0	0	0	0	603	903	0
12010	1	0	0	0	0	0	0	200	300	0	0	0	0	0	0	0	200	903	0	0	0	0	0	0	0	603	903	0
12010	2	0	0	0	0	0	0	200	300	0	0	0	0	0	0	0	200	903	0	0	0	0	0	0	0	603	903	0
12010	3	0	0	0	0	0	0	200	300	0	0	0	0	0	0	0	200	903	0	0	0	0	0	0	0	603	903	0
12010	4	0	0	0	0	0	0	200	300	0	0	0	0	0	0	0	200	903	0	0	0	0	0	0	0	603	903	0
12010	5	0	0	0	0	0	0	200	300	0	0	0	0	0	0	0	200	903	0	0	0	0	0	0	0	603	903	0
12010	6	0	0	0	0	0	0	200	300	0	0	0	0	0	0	0	200	903	0	0	0	0	0	0	0	603	903	0
12010	7	0	0	0	0	0	0	200	300	0	0	0	0	0	0	0	200	903	0	0	0	0	0	0	0	603	903	0
12010	8	0	0	0	0	0	0	200	300	0	0	0	0	0	0	0	200	903	0	0	0	0	0	0	0	603	903	0
12010	9	0	0	0	0	0	0	200	300	0	0	0	0	0	0	0	200	903	0	0	0	0	0	0	0	603	903	0
12011	0	0	0	0	0	0	0	200	300	0	0	0	0	0	0	0	200	903	0	0	0	0	0	0	0	603	903	0
12011	1	0	0	0	0	0	0	200	300	0	0	0	0	0	0	0	200	903	0	0	0	0	0	0	0	603	903	0
12011	2	0	0	0	0	0	0	200	300	0	0	0	0	0	0	0	200	903	0	0	0	0	0	0	0	603	903	0
12011	3	0	0	0	0	0	0	200	300	0	0	0	0	0	0	0	200	903	0	0	0	0	0	0	0	603	903	0
12011	4	0	0	0	0	0	0	200	300	0	0	0	0	0	0	0	200	903	0	0	0	0	0	0	0	603	903	0
12011	5	0	0	0	0	0	0	200	300	0	0	0	0	0	0	0	200	903	0	0	0	0	0	0	0	603	903	0
12011	6	0	0	0	0	0	0	200	300	0	0	0	0	0	0	0	200	903	0	0	0	0	0	0	0	603	903	0
12011	7	0	0	0	0	0	0	200	300	0	0	0	0	0	0	0	200	903	0	0	0	0	0	0	0	603	903	0
12011	8	0	0	0	0	0	0	200	300	0	0	0	0	0	0	0	200	903	0	0	0	0	0	0	0	603	903	0
12011	9	0	0	0	0	0	0	200	300	0	0	0	0	0	0	0	200	903	0	0	0	0	0	0	0	603	903	0
12012	0	0	0	0	0	0	0	200	300	0	0	0	0	0	0	0	200	903	0	0	0	0	0	0	0	603	903	0
12012	1	0	0	0	0	0	0	200	300	0	0	0	0	0	0	0	200	903	0	0	0	0	0	0	0	603	903	0
12012	2	0	0	0	0	0	0	200	300	0	0	0	0	0	0	0	200	903	0	0	0	0	0	0	0	603	903	0
12012	3	0	0	0	0	0	0	200	300	0	0	0	0	0	0	0	200	903	0	0	0	0	0	0	0	603	903	0
12012	4	0	0	0	0	0	0	200	300	0	0	0	0	0	0	0	200	903	0	0	0	0	0	0	0	603	903	0
12012	5	0	0	0	0	0	0	200	300	0	0	0	0	0	0	0	200	903	0	0	0	0	0	0	0	603	903	0
12012	6	0	0	0	0	0	0	200	300	0	0	0	0	0	0	0	200	903	0	0	0	0	0	0	0	603	903	0
12012	7	0	0	0	0	0	0	200	300	0	0	0	0	0	0	0	200	903	0	0	0	0	0	0	0	603	903	0
12012	8	0	0	0	0	0	0	200	300	0	0	0	0	0	0	0	200	903	0	0	0	0	0	0	0	603	903	0
12012	9	0	0	0	0	0	0	200	300	0	0	0	0	0	0	0	200	903	0	0	0	0	0	0	0	603	903	0
12013	0	0	0	0	0	0	0	200	300	0	0	0	0	0	0	0	200	903	0	0	0	0	0	0	0	603	903	0
12013	1	0	0	0	0	0	0	200	300	0	0	0	0	0	0	0	200	903	0	0	0	0	0	0	0	603	903	0
12013	2	0	0	0	0	0	0	200	300	0	0	0	0	0	0	0	200	903	0	0	0	0	0	0	0	603	903	0
12013	3	0	0	0	0	0	0	200	300	0	0	0	0	0	0	0	200	903	0	0	0	0	0	0	0	603	903	0
12013	4	0	0	0	0	0	0	200	300	0	0	0	0	0	0	0	200	903	0	0	0	0	0	0	0	603	903	0
12013	5	0	0	0	0	0	0	200	300	0	0	0	0	0	0	0	200	903	0	0	0	0	0	0	0	603	903	0
12013	6	0	0	0	0	0	0	200	300	0	0	0	0	0	0	0	200	903	0	0	0	0	0	0	0	603	903	0
12013	7	0	0	0	0	0	0	200	300	0	0	0	0	0	0	0	200	903	0	0	0	0	0	0	0	603	903	0
12013	8	0	0	0	0	0	0	200	300	0	0	0	0	0	0	0	200	903	0	0	0	0	0	0	0	603	903	0
12013	9	0	0	0	0	0	0	200	300	0	0	0	0	0	0	0	200	903	0	0	0	0	0	0	0	603	903	0
12014	0	0	0	0	0	0	0	200	300	0	0	0	0	0	0	0	200	903	0	0	0	0	0	0	0	603	903	0
12014	1	0	0	0	0	0	0	200	300	0	0	0	0	0	0	0	200	903	0	0	0	0	0	0	0	603	903	0
12014	2	0	0	0	0	0	0	200	300	0	0	0	0	0	0	0	200	903	0	0	0	0	0	0	0	603	903	0
12014	3	0	0	0	0	0	0	200	300	0	0	0	0	0	0	0	200	903	0	0	0	0	0	0	0	603	903	0
12014	4	0	0	0	0	0	0	200	300	0	0	0	0	0	0	0	200	903	0	0	0	0	0	0	0	603	903	0
12014	5	0	0	0	0	0	0	200	300	0	0	0	0	0	0	0	200	903	0	0	0	0	0	0	0	603	903	0
12014	6	0	0	0	0	0	0	200	300	0	0	0	0	0	0	0	200	903	0	0	0	0	0	0	0	603	903	0
12014	7	0	0	0	0	0	0	200	300	0	0	0	0	0	0	0	200	903	0	0	0	0	0	0	0	603	903	0
12014	8	0	0	0	0	0	0	200	300	0	0	0	0	0	0	0	200	903	0	0	0	0	0	0	0	603	903	0
12014	9	0	0	0	0	0	0	200	300	0	0	0	0	0	0	0	200	903	0	0	0	0	0	0	0	603	903	0
12015	0	0	0	0	0	0	0	200	300	0	0	0	0	0	0	0	200	903	0	0	0	0	0	0	0	603	903	0
12015	1	0	0	0	0	0	0	200	300	0	0	0	0	0	0	0	200	903	0	0	0	0	0	0	0	603	903	0
12015	2	0	0	0	0	0	0	200	300	0	0	0	0	0	0	0	200	903	0	0	0	0	0	0	0	603	903	0
12015	3	0	0	0	0	0	0	200	300	0	0	0	0	0	0	0	200	903	0	0	0	0	0	0	0	603	903	0
12015	4	0	0	0	0	0	0	200	300	0	0	0	0	0	0	0	200	903	0	0	0	0	0	0	0	603	903	0
12015	5	0	0	0	0	0	0	200	300	0	0	0	0	0	0	0	200	903	0	0	0	0	0	0	0	603	903	0
12015	6	0	0	0	0	0	0	200	300	0	0	0	0	0	0	0	200	903	0	0	0	0	0	0	0	603	903	0
12015	7	0	0	0	0	0	0	200	300	0	0	0	0	0	0	0	200	903	0	0	0	0	0	0	0	603	903	0
12015	8	0	0	0	0	0	0	200	300	0	0	0	0	0	0	0	200	903	0	0	0	0	0	0	0	603	903	0
12015	9	0	0	0	0	0	0	200	300	0	0	0	0	0	0	0	200	903	0	0	0	0	0	0	0	603	903	0
12016	0	0	0	0	0	0	0	200	300	0	0	0	0	0	0	0	200	903	0	0	0	0	0	0	0	603	903	0
12016	1	0	0	0	0	0	0	200	300	0	0	0	0	0	0	0	200	903	0	0	0	0	0	0	0	603	903	0
12016	2	0	0	0	0	0	0	200	300	0	0	0	0	0	0	0	200	903	0	0	0	0	0	0	0	603	903	0
12016	3	0	0	0	0	0	0	200	300	0	0	0	0	0	0	0	200	903	0	0	0	0	0	0	0	603	903	0
12016	4	0	0	0	0	0	0	200	300	0	0	0	0	0	0	0	200	903	0	0	0	0	0	0	0	603	903	0
12016	5	0	0	0	0	0	0	200	300	0	0	0	0	0	0	0	200	903	0	0	0	0	0	0	0	603	903	0
12016	6	0	0	0	0	0	0	200	300	0	0	0	0	0	0	0	200	903	0	0	0	0	0	0	0	603	903	0
12016	7	0	0	0	0	0	0	200	300	0	0	0	0	0	0	0	200	903	0	0	0	0	0	0	0	603	903	0
12016	8	0	0	0	0	0	0	200	300	0	0	0	0	0	0	0	200	903	0	0	0	0	0	0	0	603	903	0
12016	9	0	0	0	0	0	0	200	300	0	0	0	0	0	0	0	200	903	0	0	0	0	0	0	0	603	903	0
12017	0	0	0	0	0	0	0	200	300	0	0	0	0	0	0	0	200	903	0	0	0	0	0	0	0	603	903	0
12017	1	0	0	0	0	0	0	200	300	0	0	0	0	0	0	0	200	903	0	0	0	0	0	0	0	603	903	0
12017	2	0	0	0	0	0	0	200	300	0	0	0	0	0	0	0	200	903	0	0	0	0	0	0	0	603	903	0
12017	3	0	0	0	0	0	0	200	300	0	0	0	0	0	0	0	200	903	0	0	0	0	0	0	0	603	903	0
12017	4	0	0	0	0	0	0	200	300	0	0	0	0	0	0	0	200	903	0	0	0	0	0	0	0	603	903	0
12017	5	0	0	0	0	0	0	200	300	0	0	0	0	0	0	0	200	903	0	0	0	0	0	0	0	603	903	0
12017	6	0	0	0	0	0	0	200	300	0	0	0	0	0	0	0	200	903	0	0	0	0	0	0	0	603	903	0
12017	7	0	0	0	0	0	0	200	300	0	0	0	0	0	0	0	200	903	0	0	0	0	0	0	0	603	903	0
12017	8	0	0	0	0	0	0	200	300	0	0	0	0	0	0	0	200	903	0	0	0	0	0	0	0	603	903	0
12017	9	0	0	0	0	0	0	200	300	0	0	0	0	0	0	0	200	903	0	0	0	0	0	0	0	603	903	0
12018	0	0	0	0	0	0	0	200	300	0	0	0	0	0	0	0	200	903	0	0	0	0	0	0	0	603	903	0
12018	1	0	0	0	0	0	0	200	300	0	0	0	0	0	0	0	200	903	0	0	0	0	0	0	0	603	903	0
12018	2	0	0	0	0	0	0	200	300	0	0	0	0	0	0	0	200	903	0	0	0	0	0	0	0	603	903	0
12018	3	0	0	0	0	0	0	200	300	0	0	0	0	0	0	0	200	903	0	0	0	0	0	0	0	603	903	0
12018	4	0	0	0	0	0	0	200	300	0	0	0	0	0	0	0	200	903	0	0	0	0	0	0	0	603	903	0
12018	5	0	0	0	0	0	0	200	300	0	0	0	0	0	0	0	200	903	0	0	0	0	0	0	0	603	903	0
12018	6	0	0	0	0	0	0	200	300	0	0	0	0	0	0	0	200	903	0	0	0	0	0	0	0	603	903	0
12018	7	0	0	0	0	0	0	200	300	0	0	0	0	0	0	0	200	903	0	0	0	0	0	0	0	603	903	0
12018	8	0	0	0	0	0	0	200	300	0	0	0	0	0	0	0	200	903	0	0	0	0	0	0	0	603	903	0
12018	9	0	0	0	0	0	0	200	300	0	0	0	0	0	0	0	200	903	0	0	0	0	0	0	0	603	903	0
12019	0	0	0	0	0	0	0	200	300	0	0	0	0	0	0	0	200	903	0	0	0	0	0	0	0	603	903	0
12019	1	0	0	0	0	0	0	200	300	0	0	0	0	0	0	0	200	903	0	0	0	0	0	0	0	603	903	0
12019	2	0	0	0	0	0	0	200	300	0	0	0	0	0	0	0	200	903	0	0	0	0	0	0	0	603	903	0
12019	3	0	0	0	0	0	0	200	300	0	0	0	0	0	0	0	200	903	0	0	0	0	0	0	0	603	903	0
12019	4	0	0	0	0	0	0	200	300	0	0	0	0	0	0	0	200	903	0	0	0	0	0	0	0	603	903	0
12019	5	0	0	0	0	0	0	200	300	0	0	0	0	0	0	0	200	903	0	0	0	0	0	0	0	603	903	0
12019	6	0	0	0	0	0	0	200	300	0	0	0	0	0	0	0	200	903	0	0	0	0	0	0	0	603	903	0
12019	7	0	0	0	0	0	0	200	300	0	0	0	0	0	0	0	200	903	0	0	0	0	0	0	0	603	903	0
12019	8	0	0	0	0	0	0	200	300	0	0	0	0	0	0	0	200	903	0	0	0	0	0	0	0	603	903	0
12019	9	0	0	0	0	0	0	200	300	0	0	0	0	0	0	0	200	903	0	0	0	0	0	0	0	603	903	0
12020	0	0	0	0	0	0	0	200	300	0	0	0	0	0	0	0	200	903	0	0	0	0	0	0	0	603	903	0
12020	1	0	0	0	0	0	0	200	300	0	0	0	0	0	0	0	200	903	0	0	0	0	0	0	0	603	903	0
12020	2	0	0	0	0	0	0	200	300	0	0	0	0	0	0	0	200	903	0	0	0	0	0	0	0	603	903	0
12020	3	0	0	0	0	0	0	200	300	0	0	0	0	0	0	0	200	903	0	0	0	0	0	0	0	603	903	0
12020	4	0	0	0	0	0	0	200	300	0	0	0	0	0	0	0	200	903	0	0	0	0	0	0	0	603	903	0
12020	5	0	0	0	0	0	0	200	300	0	0	0	0	0	0	0	200	903	0	0	0	0	0	0	0	603	903	0
12020	6	0	0	0	0	0	0	200	300	0	0	0	0	0	0	0	200	903	0	0	0	0	0	0	0	603	903	0
12020	7	0	0	0	0	0	0	200	300	0	0	0	0	0	0	0	200	903	0	0	0	0	0	0	0	603	903	0
12020	8	0	0	0	0	0	0	200	300	0	0	0	0	0	0	0	200	903	0	0	0	0	0	0	0	603	903	0
12020	9	0	0	0	0	0	0	200	300	0	0	0	0	0	0	0	200	903	0	0	0	0	0	0	0	603	903	0
12021	0	0	0	0	0	0	0	200	300	0	0	0	0	0	0	0	200	903	0	0	0	0	0	0	0	603	903	0
12021	1	0	0	0	0	0	0	200	300	0	0	0	0	0	0	0	200	903	0	0	0	0	0	0	0	603	903	0
12021	2	0	0	0	0	0	0	200	300	0	0	0	0	0	0	0	200	903	0	0	0	0	0	0	0	603	903	0
12021	3	0	0	0	0	0	0	200	300	0	0	0	0	0	0	0	200	903	0	0	0	0	0	0	0	603	903	0
12021	4	0	0	0	0	0	0	200	300	0	0	0	0	0	0	0	200	903	0	0	0	0	0	0	0	603	903	0
12021	5	0	0	0	0	0	0	200	300	0	0	0	0	0	0	0	200	903	0	0	0	0	0	0	0	603	903	0
12021	6	0	0	0	0	0	0	200	300	0	0	0	0	0	0	0	200	903	0	0	0	0	0	0	0	603	903	0
12021	7	0	0	0	0	0	0	200	300	0	0	0	0	0	0	0	200	903	0	0	0	0	0	0	0	603	903	0
12021	8	0	0	0	0	0	0	200	300	0	0	0	0	0	0	0	200	903	0	0	0	0	0	0	0	603	903	0
12021	9	0	0	0	0	0	0	200	300	0	0	0	0	0	0	0	200	903	0	0	0	0	0	0	0	603	903	0
12022	0	0	0	0	0	0	0	200	300	0	0	0	0	0	0	0	200	903	0	0	0	0	0	0	0	603	903	0
12022	1	0	0	0	0	0	0	200	300	0	0	0	0	0	0	0	200	903	0	0	0	0	0	0	0	603	903	0
12022	2	0	0	0	0	0	0	200	300	0	0	0	0	0	0	0	200	903	0	0	0	0	0	0	0	603	903	0
12022	3	0	0	0	0	0	0	200	300	0	0	0	0	0	0	0	200	903	0	0	0	0	0	0	0	603	903	0
12022	4	0	0	0	0	0	0	200	300	0	0	0	0	0	0	0	200	903	0	0	0	0	0	0	0	603	903	0
12022	5	0	0	0	0	0	0	200	300	0	0	0	0	0	0	0	200	903	0	0	0	0	0	0	0	603	903	0
12022	6	0	0	0	0	0	0	200	300	0	0	0	0	0	0	0	200	903	0	0	0	0	0	0	0	603	903	0
12022	7	0	0	0	0	0	0	200	300	0	0	0	0	0	0	0	200	903	0	0	0	0	0	0	0	603	903	0
12022	8	0	0	0	0	0	0	200	300	0	0	0	0	0	0	0	200	903	0	0	0	0	0	0	0	603	903	0
12022	9	0	0	0	0	0	0	200	300	0	0	0	0	0	0	0	200	903	0	0	0	0	0	0	0	603	903	0
12023	0	0	0	0	0	0	0	200	300	0	0	0	0	0	0	0	200	903	0	0	0	0	0	0	0	603	903	0
12023	1	0	0	0	0	0	0	200	300	0	0	0	0	0	0	0	200	903	0	0	0	0	0	0	0	603	903	0
12023	2	0	0	0	0	0	0	200	300	0	0	0	0	0	0	0	200	903	0	0	0	0	0	0	0	603	903	0
12023	3	0	0	0	0	0	0	200	300	0	0	0	0	0	0	0	200	903	0	0	0	0	0	0	0	603	903	0
12023	4	0	0	0	0	0	0	200	300	0	0	0	0	0	0	0	200	903	0	0	0	0	0	0	0	603	903	0
12023	5	0	0	0	0	0	0	200	300	0	0	0	0	0	0	0	200	903	0	0	0	0	0	0	0	603	903	0
12023	6	0	0	0	0	0	0	200	300	0	0	0	0	0	0	0	200	903	0	0	0	0	0	0	0	603	903	0
12023	7	0	0	0	0	0	0	200	300	0	0	0	0	0	0	0	200	903	0	0	0	0	0	0	0	603	903	0
12023	8	0	0	0	0	0	0	200	300	0	0	0	0	0	0	0	200	903	0	0	0	0	0	0	0	603	903	0
12023	9	0	0	0	0	0	0	200	300	0	0	0	0	0	0	0	200	903	0	0	0	0	0	0	0	603	903	0
12024	0	0	0	0	0	0	0	200	300	0	0	0	0	0	0	0	200	903	0	0	0	0	0	0	0	603	903	0
12024	1	0	0	0	0	0	0	200	300	0	0	0	0	0	0	0	200	903	0	0	0	0	0	0	0	603	903	0
12024	2	0	0	0	0	0	0	200	300	0	0	0	0	0	0	0	200	903	0	0	0	0	0	0	0	603	903	0
12024	3	0	0	0	0	0	0	200	300	0	0	0	0	0	0	0	200	903	0	0	0	0	0	0	0	603	903	0
12024	4	0	0	0	0	0	0	200	300	0	0	0	0	0	0	0	200	903	0	0	0	0	0	0	0	603	903	0
12024	5	0	0	0	0	0	0	200	300	0	0	0	0	0	0	0	200	903	0	0	0	0	0	0	0	603	903	0
12024	6	0	0	0	0	0	0	200	300	0	0	0	0	0	0	0	200	903	0	0	0	0	0	0	0	603	903	0
12024	7	0	0	0	0	0	0	200	300	0	0	0	0	0	0	0	200	903	0	0	0	0	0	0	0	603	903	0
12024	8	0	0	0	0	0	0	200	300	0	0	0	0	0	0	0	200	903	0	0	0	0	0	0	0	603	903	0
12024	9	0	0	0	0	0	0	200	300	0	0	0	0	0	0	0	200	903	0	0	0	0	0	0	0	603	903	0
12025	0	0	0	0	0	0	0	200	300	0	0	0	0	0	0	0	200	903	0	0	0	0	0	0	0	603	903	0
12025	1	0	0	0	0	0	0	200	300	0	0	0	0	0	0	0	200	903	0	0	0	0	0	0	0	603	903	0
12025	2	0	0	0	0	0	0	200	300	0	0	0	0	0	0	0	200	903	0	0	0	0	0	0	0	603	903	0
12025	3	0	0	0	0	0	0	200	300	0	0	0	0	0	0	0	200	903	0	0	0	0	0	0	0	603	903	0
12025	4	0	0	0	0	0	0	200	300	0	0	0	0	0	0	0	200	903	0	0	0	0	0	0	0	603	903	0
12025	5	0	0	0	0	0	0	200	300	0	0	0	0	0	0	0	200	903	0	0	0	0	0	0	0	603	903	0
12025	6	0	0	0	0	0	0	200	300	0	0	0	0	0	0	0	200	903	0	0	0	0	0	0	0	603	903	0
12025	7	0	0	0	0	0	0	200	300	0	0	0	0	0	0	0	200	903	0	0	0	0	0	0	0	603	903	0
12025	8	0	0	0	0	0	0	200	300	0	0	0	0	0	0	0	200	903	0	0	0	0	0	0	0	603	903	0
12025	9	0	0	0	0	0	0	200	300	0	0	0	0	0	0	0	200	903	0	0	0	0	0	0	0	603	903	0
12026	0	0	0	0	0	0	0	200	300	0	0	0	0	0	0	0	200	903	0	0	0	0	0	0	0	603	903	0
12026	1	0	0	0	0	0	0	200	300	0	0	0	0	0	0	0	200	903	0	0	0	0	0	0	0	603	903	0
12026	2	0	0	0	0	0	0	200	300	0	0	0	0	0	0	0	200	903	0	0	0	0	0	0	0	603	903	0
12026	3	0	0	0	0	0	0	200	300	0	0	0	0	0	0	0	200	903	0	0	0	0	0	0	0	603	903	0
12026	4	0	0	0	0	0	0	200	300	0	0	0	0	0	0	0	200	903	0	0	0	0	0	0	0	603	903	0
12026	5	0	0	0	0	0	0	200	300	0	0	0	0	0	0	0	200	903	0	0	0	0	0	0	0	603	903	0
12026	6	0	0	0	0	0	0	200	300	0	0	0	0	0	0	0	200	903	0	0	0	0	0	0	0	603	903	0
12026	7	0	0	0	0	0	0	200	300	0	0	0	0	0	0	0	200	903	0	0	0	0	0	0	0	603	903	0
12026	8	0	0	0	0	0	0	200	300	0	0	0	0	0	0	0	200	903	0	0	0	0	0	0	0	603	903	0
12026	9	0	0	0	0	0	0	200	300	0	0	0	0	0	0	0	200	903	0	0	0	0	0	0	0	603	903	0
12027	0	0	0	0	0	0	0	200	300	0	0	0	0	0	0	0	200	903	0	0	0	0	0	0	0	603	903	0
12027	1	0	0	0	0	0	0	200	300	0	0	0	0	0	0	0	200	903	0	0	0	0	0	0	0	603	903	0
12027	2	0	0	0	0	0	0	200	300	0	0	0	0	0	0	0	200	903	0	0	0	0	0	0	0	603	903	0
12027	3	0	0	0	0	0	0	200	300	0	0	0	0	0	0	0	200	903	0	0	0	0	0	0	0	603	903	0
12027	4	0	0	0	0	0	0	200	300	0	0	0	0	0	0	0	200	903	0	0	0	0	0	0	0	603	903	0
12027	5	0	0	0	0	0	0	200	300	0	0	0	0	0	0	0	200	903	0	0	0	0	0	0	0	603	903	0
12027	6	0	0	0	0	0	0	200	300	0	0	0	0	0	0	0	200	903	0	0	0	0	0	0	0	603	903	0
12027	7	0	0	0	0	0	0	200	300	0	0	0	0	0	0	0	200	903	0	0	0	0	0	0	0	603	903	0
12027	8	0	0	0	0	0	0	200	300	0	0	0	0	0	0	0	200	903	0	0	0	0	0	0	0	603	903	0
12027	9	0	0	0	0	0	0	200	300	0	0	0	0	0	0	0	200	903	0	0	0	0	0	0	0	603	903	0
12028	0	0	0	0	0	0	0	200	300	0	0	0	0	0	0	0	200	903	0	0	0	0	0	0	0	603	903	0
12028	1	0	0	0	0	0	0	200	300	0	0	0	0	0	0	0	200	903	0	0	0	0	0	0	0	603	903	0
12028	2	0	0	0	0	0	0	200	300	0	0	0	0	0	0	0	200	903	0	0	0	0	0	0	0	603	903	0
12028	3	0	0	0	0	0	0	200	300	0	0	0	0	0	0	0	200	903	0	0	0	0	0	0	0	603	903	0
12028	4	0	0	0	0	0	0	200	300	0	0	0	0	0	0	0	200	903	0	0	0	0	0	0	0	603	903	0
12028	5	0	0	0	0	0	0	200	300	0	0	0	0	0	0	0	200	903	0	0	0	0	0	0	0	603	903	0
12028	6	0	0	0	0	0	0	200	300	0	0	0	0	0	0	0	200	903	0	0	0	0	0	0	0	603	903	0
12028	7	0	0	0	0	0	0	200	300	0	0	0	0	0	0	0	200	903	0	0	0	0	0	0	0	603	903	0
12028	8	0	0	0	0	0	0	200	300	0	0	0	0	0	0	0	200	903	0	0	0	0	0	0	0	603	903	0
12028	9	0	0	0	0	0	0	200	300	0	0	0	0	0	0	0	200	903	0	0	0	0	0	0	0	603	903	0
12029	0	0	0	0	0	0	0	200	300	0	0	0	0	0	0	0	200	903	0	0	0	0	0	0	0	603	903	0
12029	1	0	0	0	0	0	0	200	300	0	0	0	0	0	0	0	200	903	0	0	0	0	0	0	0	603	903	0
12029	2	0	0	0	0	0	0	200	300	0	0	0	0	0	0	0	200	903	0	0	0	0	0	0	0	603	903	0
12029	3	0	0	0	0	0	0	200	300	0	0	0	0	0	0	0	200	903	0	0	0	0	0	0	0	603	903	0
12029	4	0	0	0	0	0	0	200	300	0	0	0	0	0	0	0	200	903	0	0	0	0	0	0	0	603	903	0
12029	5	0	0	0	0	0	0	200	300	0	0	0	0	0	0	0	200	903	0	0	0	0	0	0	0	603	903	0
12029	6	0	0	0	0	0	0	200	300	0	0	0	0	0	0	0	200	903	0	0	0	0	0	0	0	603	903	0
12029	7	0	0	0	0	0	0	200	300	0	0	0	0	0	0	0	200	903	0	0	0	0	0	0	0	603	903	0
12029	8	0	0	0	0	0	0	200	300	0	0	0	0	0	0	0	200	903	0	0	0	0	0	0	0	603	903	0
12029	9	0	0	0	0	0	0	200	300	0	0	0	0	0	0	0	200	903	0	0	0	0	0	0	0	603	903	0
12030	0	0	0	0	0	0	0	200	300	0	0	0	0	0	0	0	200	903	0	0	0	0	0	0	0	603	903	0
12030	1	0	0	0	0	0	0	200	300	0	0	0	0	0	0	0	200	903	0	0	0	0	0	0	0	603	903	0
12030	2	0	0	0	0	0	0	200	300	0	0	0	0	0	0	0	200	903	0	0	0	0	0	0	0	603	903	0
12030	3	0	0	0	0	0	0	200	300	0	0	0	0	0	0	0	200	903	0	0	0	0	0	0	0	603	903	0
12030	4	0	0	0	0	0	0	200	300	0	0	0	0	0	0	0	200	903	0	0	0	0	0	0	0	603	903	0
12030	5	0	0	0	0	0	0	200	300	0	0	0	0	0	0	0	200	903	0	0	0	0	0	0	0	603	903	0
12030	6	0	0	0	0	0	0	200	300	0	0	0	0	0	0	0	200	903	0	0	0	0	0	0	0	603	903	0
12030	7	0	0	0	0	0	0	200	300	0	0	0	0	0	0	0	200	903	0	0	0	0	0	0	0	603	903	0
12030	8	0	0	0	0	0	0	200	300	0	0	0	0	0	0	0	200	903	0	0	0	0	0	0	0	603	903	0
12030	9	0	0	0	0	0	0	200	300	0	0	0	0	0	0	0	200	903	0	0	0	0	0	0	0	603	903	0
12031	0	0	0	0	0	0	0	200	300	0	0	0	0	0	0	0	200	903	0	0	0	0	0	0	0	603	903	0
12031	1	0	0	0	0	0	0	200	300	0	0	0	0	0	0	0	200	903	0	0	0	0	0	0	0	603	903	0
12031	2	0	0	0	0	0	0	200	300	0	0	0	0	0	0	0	200	903	0	0	0	0	0	0	0	603	903	0
12031	3	0	0	0	0	0	0	200	300	0	0	0	0	0	0	0	200	903	0	0	0	0	0	0	0	603	903	0
12031	4	0	0	0	0	0	0	200	300	0	0	0	0	0	0	0	200	903	0	0	0	0	0	0	0	603	903	0
12031	5	0	0	0	0	0	0	200	300	0	0	0	0	0	0	0	200	903	0	0	0	0	0	0	0	603	903	0
12031	6	0	0	0	0	0	0	200	300	0	0	0	0	0	0	0	200	903	0	0	0	0	0	0	0	603	903	0
12031	7	0	0	0	0	0	0	200	300	0	0	0	0	0	0	0	200	903	0	0	0	0	0	0	0	603	903	0
12031	8	0	0	0	0	0	0	200	300	0	0	0	0	0	0	0	200	903	0	0	0	0	0	0	0	603	903	0
12031	9	0	0	0	0	0	0	200	300	0	0	0	0	0	0	0	200	903	0	0	0	0	0	0	0	603	903	0
12032	0	0	0	0	0	0	0	200	300	0	0	0	0	0	0	0	200	903	0	0	0	0	0	0	0	603	903	0
12032	1	0	0	0	0	0	0	200	300	0	0	0	0	0	0	0	200	903	0	0	0	0	0	0	0	603	903	0
12032	2	0	0	0	0	0	0	200	300	0	0	0	0	0	0	0	200	903	0	0	0	0	0	0	0	603	903	0
12032	3	0	0	0	0	0	0	200	300	0	0	0	0	0	0	0	200	903	0	0	0	0	0	0	0	603	903	0
12032	4	0	0	0	0	0	0	200	300	0	0	0	0	0	0	0	200	903	0	0	0	0	0	0	0	603	903	0
12032	5	0	0	0	0	0	0	200	300	0	0	0	0	0	0	0	200	903	0	0	0	0	0	0	0	603	903	0
12032	6	0	0	0	0	0	0	200	300	0	0	0	0	0	0	0	200	903	0	0	0	0	0	0	0	603	903	0
12032	7	0	0	0	0	0	0	200	300	0	0	0	0	0	0	0	200	903	0	0	0	0	0	0	0	603	903	0
12032	8	0	0	0	0	0	0	200	300	0	0	0	0	0	0	0	200	903	0	0	0	0	0	0	0	603	903	0
12032	9	0	0	0	0	0	0	200	300	0	0	0	0	0	0	0	200	903	0	0	0	0	0	0	0	603	903	0
12033	0	0	0	0	0	0	0	200	300	0	0	0	0	0	0	0	200	903	0	0	0	0	0	0	0	603	903	0
12033	1	0	0	0	0	0	0	200	300	0	0	0	0	0	0	0	200	903	0	0	0	0	0	0	0	603	903	0
12033	2	0	0	0	0	0	0	200	300	0	0	0	0	0	0	0	200	903	0	0	0	0	0	0	0	603	903	0
12033	3	0	0	0	0	0	0	200	300	0	0	0	0	0	0	0	200	903	0	0	0	0	0	0	0	603	903	0
12033	4	0	0	0	0	0	0	200	300	0	0	0	0	0	0	0	200	903	0	0	0	0	0	0	0	603	903	0
12033	5	0	0	0	0	0	0	200	300	0	0	0	0	0	0	0	200	903	0	0	0	0	0	0	0	603	903	0
12033	6	0	0	0	0	0	0	200	300	0	0	0	0	0	0	0	200	903	0	0	0	0	0	0	0	603	903	0
12033	7	0	0	0	0	0	0	200	300	0	0	0	0	0	0	0	200	903	0	0	0	0	0	0	0	603	903	0
12033	8	0	0	0	0	0	0	200	300	0	0	0	0	0	0	0	200	903	0	0	0	0	0	0	0	603	903	0
12033	9	0	0	0	0	0	0	200	300	0	0	0	0	0	0	0	200	903	0	0	0	0	0	0	0	603	903	0
12034	0	0	0	0	0	0	0	200	300	0	0	0	0	0	0	0	200	903	0	0	0	0	0	0	0	603	903	0
12034	1	0	0	0	0	0	0	200	300	0	0	0	0	0	0	0	200	903	0	0	0	0	0	0	0	603	903	0
12034	2	0	0	0	0	0	0	200	300	0	0	0	0	0	0	0	200	903	0	0	0	0	0	0	0	603	903	0
12034	3	0	0	0	0	0	0	200	300	0	0	0	0	0	0	0	200	903	0	0	0	0	0	0	0	603	903	0
12034	4	0	0	0	0	0	0	200	300	0	0	0	0	0	0	0	200	903	0	0	0	0	0	0	0	603	903	0
12034	5	0	0	0	0	0	0	200	300	0	0	0	0	0	0	0	200	903	0	0	0	0	0	0	0	603	903	0
12034	6	0	0	0	0	0	0	200	300	0	0	0	0	0	0	0	200	903	0	0	0	0	0	0	0	603	903	0
12034	7	0	0	0	0	0	0	200	300	0	0	0	0	0	0	0	200	903	0	0	0	0	0	0	0	603	903	0
12034	8	0	0	0	0	0	0	200	300	0	0	0	0	0	0	0	200	903	0	0	0	0	0	0	0	603	903	0
12034	9	0	0	0	0	0	0	200	300	0	0	0	0	0	0	0	200	903	0	0	0	0	0	0	0	603	903	0
12035	0	0	0	0	0	0	0	200	300	0	0	0	0	0	0	0	200	903	0	0	0	0	0	0	0	603	903	0
12035	1	0	0	0	0	0	0	200	300	0	0	0	0	0	0	0	200	903	0	0	0	0	0	0	0	603	903	0
12035	2	0	0	0	0	0	0	200	300	0	0	0	0	0	0	0	200	903	0	0	0	0	0	0	0	603	903	0
12035	3	0	0	0	0	0	0	200	300	0	0	0	0	0	0	0	200	903	0	0	0	0	0	0	0	603	903	0
12035	4	0	0	0	0	0	0	200	300	0	0	0	0	0	0	0	200	903	0	0	0	0	0	0	0	603	903	0
12035	5	0	0	0	0	0	0	200	300	0	0	0	0	0	0	0	200	903	0	0	0	0	0	0	0	603	903	0
12035	6	0	0	0	0	0	0	200	300	0	0	0	0	0	0	0	200	903	0	0	0	0	0	0	0	603	903	0
12035	7	0	0	0	0	0	0	200	300	0	0	0	0	0	0	0	200	903	0	0	0	0	0	0	0	603	903	0
12035	8	0	0	0	0	0	0	200	300	0	0	0	0	0	0	0	200	903	0	0	0	0	0	0	0	603	903	0
12035	9	0	0	0	0	0	0	200	300	0	0	0	0	0	0	0	200	903	0	0	0	0	0	0	0	603	903	0
12036	0	0	0	0	0	0	0	200	300	0	0	0	0	0	0	0	200	903	0	0	0	0	0	0	0	603	903	0
12036	1	0	0	0	0	0	0	200	300	0	0	0	0	0	0	0	200	903	0	0	0	0	0	0	0	603	903	0
12036	2	0	0	0	0	0	0	200	300	0	0	0	0	0	0	0	200	903	0	0	0	0	0	0	0	603	903	0
12036	3	0	0	0	0	0	0	200	300	0	0	0	0	0	0	0	200	903	0	0	0	0	0	0	0	603	903	0
12036	4	0	0	0	0	0	0	200	300	0	0	0	0	0	0	0	200	903	0	0	0	0	0	0	0	603	903	0
12036	5	0	0	0	0	0	0	200	300	0	0	0	0	0	0	0	200	903	0	0	0	0	0	0	0	603	903	0
12036	6	0	0	0	0	0	0	200	300	0	0	0	0	0	0	0	200	903	0	0	0	0	0	0	0	603	903	0
12036	7	0	0	0	0	0	0	200	300	0	0	0	0	0	0	0	200	903	0	0	0	0	0	0	0	603	903	0
12036	8	0	0	0	0	0	0	200	300	0	0	0	0	0	0	0	200	903	0	0	0	0	0	0	0	603	903	0
12036	9	0	0	0	0	0	0	200	300	0	0	0	0	0	0	0	200	903	0	0	0	0	0	0	0	603	903	0
12037	0	0	0	0	0	0	0	200	300	0	0	0	0	0	0	0	200	903	0	0	0	0	0	0	0	603	903	0
12037	1	0	0	0	0	0	0	200	300	0	0	0	0	0	0	0	200	903	0	0	0	0	0	0	0	603	903	0
12037	2	0	0	0	0	0	0	200	300	0	2.06024	7.2728	-22.6327	-5877.14	492.236	-333.711	221.749	1162.67	0	0	0	0	0	0	0	603	903	0
12037	3	0	0	0	0	0	0	200	300	0	4.50165	10.7823	-23.8534	-6609.56	248.095	-379.487	210.401	1180.09	0	0	0	0	0	0	0	603	903	0
12037	4	0	0	0	0	0	0	200	300	0	1.44989	10.6297	-28.1259	-7067.32	553.271	-699.922	219.671	1154.27	0	0	0	0	0	0	0	603	903	0
12037	5	0	0	0	0	0	0	200	300	0	0.839539	11.2401	-30.5673	-7250.43	431.201	32.5004	214.107	1140.2	0	0	0	0	0	0	0	603	903	0
12037	6	0	0	0	0	0	0	200	300	0	1.75507	11.6978	-34.2294	-8898.38	1102.59	-104.829	232.212	1162.96	0	0	0	0	0	0	0	603	903	0
12037	7	0	0	0	0	0	0	200	300	0	1.75507	14.4444	-39.7226	-10088.6	126.025	-242.158	203.173	1156.98	0	0	0	0	0	0	0	603	903	0
12037	8	0	0	0	0	0	0	200	300	0	0.229187	16.1229	-42.7743	-10363.2	1102.59	169.83	225.777	1145.28	0	0	0	0	0	0	0	603	903	0
12037	9	0	0	0	0	0	0	200	300	0	1.44989	15.36	-48.8778	-12377.4	1285.69	307.159	226.304	1156.23	0	0	0	0	0	0	0	603	903	0
12038	0	0	0	0	0	0	0	200	300	0	2.97577	15.9703	-53.7606	-13018.2	1346.73	-425.263	225.05	1145.15	0	0	0	0	0	0	0	603	903	0
12038	1	0	0	0	0	0	0	200	300	0	2.82318	16.1229	-58.3383	-13933.8	1468.8	-242.158	225.177	1141.84	0	0	0	0	0	0	0	603	903	0
12038	2	0	0	0	0	0	0	200	300	0	2.82318	15.2074	-61.39	-14849.3	1651.9	-608.369	226.908	1144.88	0	0	0	0	0	0	0	603	903	0
12038	3	0	0	0	0	0	0	200	300	0	6.02753	15.0548	-69.6298	-16131	1285.69	-974.58	218.465	1134.67	0	0	0	0	0	0	0	603	903	0
12038	4	0	0	0	0	0	0	200	300	0	6.48529	14.4444	-75.4281	-17229.7	2079.15	-1066.13	227.565	1131.43	0	0	0	0	0	0	0	603	903	0
12038	5	0	0	0	0	0	0	200	300	0	7.55341	14.7496	-80.3109	-19152.3	2811.57	-1661.23	235.009	1141.48	0	0	0	0	0	0	0	603	903	0
12038	6	0	0	0	0	0	0	200	300	0	11.2155	14.7496	-86.1093	-20617.1	3116.75	-2073.21	236.195	1142.43	0	0	0	0	0	0	0	603	903	0
12038	7	0	0	0	0	0	0	200	300	0	9.84222	14.1393	-95.8749	-21624.2	2628.47	-1752.78	227.416	1128.55	0	0	0	0	0	0	0	603	903	0
12038	8	0	0	0	0	0	0	200	300	0	11.9785	12.766	-101.063	-22997.5	3605.03	-2759.86	235.671	1130.56	0	0	0	0	0	0	0	603	903	0
12038	9	0	0	0	0	0	0	200	300	0	14.4199	10.9349	-105.946	-25194.8	3482.96	-2851.41	232.875	1140.81	0	0	0	0	0	0	0	603	903	0
12039	0	0	0	0	0	0	0	200	300	0	13.8095	9.56162	-109.303	-26476.5	3910.21	-2942.96	235.774	1145.23	0	0	0	0	0	0	0	603	903	0
12039	1	0	0	0	0	0	0	200	300	0	14.725	6.50986	-122.12	-27849.8	4032.28	-3034.52	233.019	1131.05	0	0	0	0	0	0	0	603	903	0
12039	2	0	0	0	0	0	0	200	300	0	17.319	5.59433	-127.918	-28032.9	4093.31	-3583.83	231.999	1122.15	0	0	0	0	0	0	0	603	903	0
12039	3	0	0	0	0	0	0	200	300	0	17.7768	3.61069	-136.768	-30687.9	4642.63	-3263.4	233.945	1127.38	0	0	0	0	0	0	0	603	903	0
12039	4	0	0	0	0	0	0	200	300	0	17.9294	0.711518	-143.177	-32427.4	4764.7	-3904.27	233.278	1129.48	0	0	0	0	0	0	0	603	903	0
12039	5	0	0	0	0	0	0	200	300	0	19.1501	-1.11954	-151.722	-34441.6	5375.05	-4087.37	235.427	1130	0	0	0	0	0	0	0	603	903	0
12039	6	0	0	0	0	0	0	200	300	0	20.676	-3.71353	-161.488	-35174	5680.23	-4178.93	235.174	1120.81	0	0	0	0	0	0	0	603	903	0
12039	7	0	0	0	0	0	0	200	300	0	23.4225	-7.22305	-168.812	-37096.6	5619.19	-4545.14	233.287	1122.75	0	0	0	0	0	0	0	603	903	0
12039	8	0	0	0	0	0	0	200	300	0	22.8122	-9.35928	-175.526	-38836.1	6107.47	-4819.79	234.795	1124.26	0	0	0	0	0	0	0	603	903	0
12039	9	0	0	0	0	0	0	200	300	0	22.0493	-12.2585	-181.324	-40392.5	6595.75	-4636.69	236.375	1125.76	0	0	0	0	0	0	0	603	903	0
12040	0	0	0	0	0	0	0	200	300	0	22.0493	-15.1576	-192.31	-41308	6534.72	-5002.9	233.98	1117.8	0	0	0	0	0	0	0	603	903	0
12040	1	0	0	0	0	0	0	200	300	0	25.101	-16.9887	-199.024	-42681.4	6900.93	-5094.45	234.674	1117.45	0	0	0	0	0	0	0	603	903	0
12040	2	0	0	0	0	0	0	200	300	0	24.4907	-19.2775	-206.043	-44329.3	7267.14	-5231.78	235.27	1118.15	0	0	0	0	0	0	0	603	903	0
12040	3	0	0	0	0	0	0	200	300	0	24.4907	-21.8715	-212.147	-46068.8	7267.14	-5323.33	234.255	1120.16	0	0	0	0	0	0	0	603	903	0
12040	4	0	0	0	0	0	0	200	300	0	26.1691	-23.8551	-219.471	-46984.3	7633.35	-5735.32	234.781	1117.08	0	0	0	0	0	0	0	603	903	0
12040	5	0	0	0	0	0	0	200	300	0	27.5424	-25.5336	-228.932	-47716.7	8121.63	-5643.77	235.476	1111.43	0	0	0	0	0	0	0	603	903	0
12040	6	0	0	0	0	0	0	200	300	0	27.5424	-28.5854	-236.256	-49639.4	8304.74	-6147.31	235.152	1113.11	0	0	0	0	0	0	0	603	903	0
12040	7	0	0	0	0	0	0	200	300	0	28.0002	-31.4845	-242.97	-50646.4	8548.88	-6467.74	235.185	1111.45	0	0	0	0	0	0	0	603	903	0
12040	8	0	0	0	0	0	0	200	300	0	29.9838	-32.7052	-251.515	-53209.9	9037.16	-6330.41	235.931	1114.56	0	0	0	0	0	0	0	603	903	0
12040	9	0	0	0	0	0	0	200	300	0	31.2045	-34.994	-259.754	-53209.9	9220.27	-6925.51	235.496	1107.85	0	0	0	0	0	0	0	603	903	0
12041	0	0	0	0	0	0	0	200	300	0	31.9675	-36.8251	-264.332	-55315.6	8670.95	-7245.94	232.803	1112.27	0	0	0	0	0	0	0	603	903	0
12041	1	0	0	0	0	0	0	200	300	0	31.0519	-39.8769	-273.487	-56505.8	9769.58	-7154.39	235.722	1109.61	0	0	0	0	0	0	0	603	903	0
12041	2	0	0	0	0	0	0	200	300	0	31.8149	-42.3183	-280.811	-58245.3	9891.65	-7245.94	235.225	1110.42	0	0	0	0	0	0	0	603	903	0
12041	3	0	0	0	0	0	0	200	300	0	32.4252	-43.6916	-287.22	-58794.6	9952.69	-7429.05	234.652	1107.7	0	0	0	0	0	0	0	603	903	0
12041	4	0	0	0	0	0	0	200	300	0	32.2726	-45.9804	-296.986	-60534.1	10074.8	-6742.4	233.923	1106.83	0	0	0	0	0	0	0	603	903	0
12041	5	0	0	0	0	0	0	200	300	0	31.5097	-48.4218	-302.479	-62456.7	10257.9	-7429.05	233.913	1109.48	0	0	0	0	0	0	0	603	903	0
12041	6	0	0	0	0	0	0	200	300	0	32.7304	-50.7106	-308.582	-63646.9	10379.9	-7520.6	233.637	1109.26	0	0	0	0	0	0	0	603	903	0
12041	7	0	0	0	0	0	0	200	300	0	33.9511	-52.5417	-316.517	-63921.6	10868.2	-7245.94	234.337	1104.95	0	0	0	0	0	0	0	603	903	0
12041	8	0	0	0	0	0	0	200	300	0	33.7985	-54.9831	-325.672	-65752.6	11417.5	-7291.72	235.058	1104.9	0	0	0	0	0	0	0	603	903	0
12041	9	0	0	0	0	0	0	200	300	0	31.8149	-57.1193	-332.996	-67125.9	11356.5	-7474.82	234.104	1104.58	0	0	0	0	0	0	0	603	903	0
12042	0	0	0	0	0	0	0	200	300	0	32.2726	-58.9503	-338.49	-68224.5	11051.3	-7200.17	232.649	1104.56	0	0	0	0	0	0	0	603	903	0
12042	1	0	0	0	0	0	0	200	300	0	30.1364	-61.3918	-343.983	-69140.1	11661.7	-7749.48	233.902	1104	0	0	0	0	0	0	0	603	903	0
12042	2	0	0	0	0	0	0	200	300	0	31.3571	-63.2228	-352.833	-70513.4	11844.8	-7657.93	233.571	1102.85	0	0	0	0	0	0	0	603	903	0
12042	3	0	0	0	0	0	0	200	300	0	29.8312	-65.5116	-358.631	-71520.4	11905.8	-7429.05	233.198	1102.43	0	0	0	0	0	0	0	603	903	0
12042	4	0	0	0	0	0	0	200	300	0	27.5424	-67.6479	-364.735	-72893.7	12333.1	-7566.38	233.814	1102.85	0	0	0	0	0	0	0	603	903	0
12042	5	0	0	0	0	0	0	200	300	0	27.5424	-68.716	-369.923	-73168.4	12455.1	-7566.38	233.67	1100.79	0	0	0	0	0	0	0	603	903	0
12042	6	0	0	0	0	0	0	200	300	0	28.7631	-71.31	-377.857	-74633.3	12211	-7200.17	232.316	1100.52	0	0	0	0	0	0	0	603	903	0
12042	7	0	0	0	0	0	0	200	300	0	27.3898	-72.5307	-385.182	-76464.3	12577.2	-7429.05	232.653	1101.52	0	0	0	0	0	0	0	603	903	0
12042	8	0	0	0	0	0	0	200	300	0	27.0847	-74.2091	-390.37	-76098.1	12760.3	-7429.05	232.688	1097.94	0	0	0	0	0	0	0	603	903	0
12042	9	0	0	0	0	0	0	200	300	0	25.7114	-75.1247	-396.473	-78112.2	12699.3	-7062.84	232.031	1100.02	0	0	0	0	0	0	0	603	903	0
12043	0	0	0	0	0	0	0	200	300	0	26.9321	-76.9557	-404.102	-78478.5	12760.3	-6971.28	231.577	1097.2	0	0	0	0	0	0	0	603	903	0
12043	1	0	0	0	0	0	0	200	300	0	25.864	-78.329	-407.154	-79302.5	13004.4	-7291.72	231.94	1097.77	0	0	0	0	0	0	0	603	903	0
12043	2	0	0	0	0	0	0	200	300	0	24.0329	-79.3971	-413.868	-80675.7	12882.4	-6833.95	231.127	1097.93	0	0	0	0	0	0	0	603	903	0
12043	3	0	0	0	0	0	0	200	300	0	25.7114	-80.4652	-418.751	-81225.1	13065.5	-7108.61	231.201	1096.97	0	0	0	0	0	0	0	603	903	0
12043	4	0	0	0	0	0	0	200	300	0	23.5751	-80.923	-422.718	-81682.8	13614.8	-6879.73	232.208	1096.23	0	0	0	0	0	0	0	603	903	0
12043	5	0	0	0	0	0	0	200	300	0	22.8122	-83.0592	-427.296	-81865.9	13553.8	-6833.95	231.72	1094.59	0	0	0	0	0	0	0	603	903	0
12043	6	0	0	0	0	0	0	200	300	0	23.1174	-83.517	-434.62	-83880.1	13492.7	-6513.52	231.045	1096	0	0	0	0	0	0	0	603	903	0
12043	7	0	0	0	0	0	0	200	300	0	20.8286	-87.0265	-438.282	-83056.1	13675.8	-6879.73	231.203	1092.5	0	0	0	0	0	0	0	603	903	0
12043	8	0	0	0	0	0	0	200	300	0	20.2182	-86.5688	-444.08	-84612.5	13736.9	-6696.63	230.933	1093.53	0	0	0	0	0	0	0	603	903	0
12043	9	0	0	0	0	0	0	200	300	0	20.3708	-87.3317	-448.353	-84612.5	13614.8	-6376.19	230.366	1091.72	0	0	0	0	0	0	0	603	903	0
12044	0	0	0	0	0	0	0	200	300	0	22.6596	-90.536	-452.32	-85161.8	13614.8	-6238.86	230.1	1091.28	0	0	0	0	0	0	0	603	903	0
12044	1	0	0	0	0	0	0	200	300	0	20.3708	-91.4516	-454.151	-85802.7	13736.9	-6238.86	230.247	1091.93	0	0	0	0	0	0	0	603	903	0
12044	2	0	0	0	0	0	0	200	300	0	18.9975	-92.2145	-457.203	-86352	13614.8	-6193.09	229.778	1091.87	0	0	0	0	0	0	0	603	903	0
12044	3	0	0	0	0	0	0	200	300	0	17.7768	-92.5197	-461.781	-86443.5	13920	-5872.65	230.144	1090.2	0	0	0	0	0	0	0	603	903	0
12044	4	0	0	0	0	0	0	200	300	0	18.5397	-95.4189	-465.138	-86626.7	14103.1	-5781.1	230.32	1089.24	0	0	0	0	0	0	0	603	903	0
12044	5	0	0	0	0	0	0	200	300	0	18.082	-96.3344	-467.274	-86901.3	13981	-5781.1	229.92	1088.98	0	0	0	0	0	0	0	603	903	0
12044	6	0	0	0	0	0	0	200	300	0	16.7087	-97.2499	-468.8	-86992.9	14042	-5872.65	229.953	1088.57	0	0	0	0	0	0	0	603	903	0
12044	7	0	0	0	0	0	0	200	300	0	16.7087	-98.0128	-472.157	-87725.3	14042	-5872.65	229.74	1088.8	0	0	0	0	0	0	0	603	903	0
12044	8	0	0	0	0	0	0	200	300	0	16.7087	-100.454	-475.208	-87725.3	14042	-5643.77	229.549	1087.6	0	0	0	0	0	0	0	603	903	0
12044	9	0	0	0	0	0	0	200	300	0	15.6406	-101.675	-476.429	-87542.2	13614.8	-5689.55	228.577	1086.75	0	0	0	0	0	0	0	603	903	0
12045	0	0	0	0	0	0	0	200	300	0	14.5724	-102.133	-477.039	-88366.1	13920	-5094.45	229.18	1088.24	0	0	0	0	0	0	0	603	903	0
12045	1	0	0	0	0	0	0	200	300	0	14.8776	-103.353	-481.617	-88366.1	13736.9	-5506.44	228.522	1086.48	0	0	0	0	0	0	0	603	903	0
12045	2	0	0	0	0	0	0	200	300	0	13.8095	-105.184	-483.143	-88549.3	13675.8	-5277.56	228.306	1086.28	0	0	0	0	0	0	0	603	903	0
12045	3	0	0	0	0	0	0	200	300	0	14.1147	-106.1	-483.753	-88549.3	13553.8	-5323.33	228.018	1086.05	0	0	0	0	0	0	0	603	903	0
12045	4	0	0	0	0	0	0	200	300	0	13.0466	-107.321	-485.279	-88457.7	13309.6	-4728.24	227.427	1085.28	0	0	0	0	0	0	0	603	903	0
12045	5	0	0	0	0	0	0	200	300	0	11.5207	-108.541	-489.552	-89007	13614.8	-4636.69	227.811	1084.81	0	0	0	0	0	0	0	603	903	0
12045	6	0	0	0	0	0	0	200	300	0	10.7578	-109.915	-490.162	-89556.4	13675.8	-4499.36	227.901	1085.71	0	0	0	0	0	0	0	603	903	0
12045	7	0	0	0	0	0	0	200	300	0	9.84222	-110.678	-490.467	-88915.5	13797.9	-4224.7	228.132	1084.29	0	0	0	0	0	0	0	603	903	0
12045	8	0	0	0	0	0	0	200	300	0	9.84222	-110.83	-492.298	-89373.2	13797.9	-4453.58	228.028	1084.54	0	0	0	0	0	0	0	603	903	0
12045	9	0	0	0	0	0	0	200	300	0	10.1474	-112.204	-495.35	-89556.4	13126.5	-4224.7	226.499	1083.79	0	0	0	0	0	0	0	603	903	0
12046	0	0	0	0	0	0	0	200	300	0	7.24823	-112.661	-495.96	-88183.1	13675.8	-4087.37	227.574	1080.8	0	0	0	0	0	0	0	603	903	0
12046	1	0	0	0	0	0	0	200	300	0	6.63788	-113.882	-496.571	-89647.9	13492.7	-3675.39	227.172	1083.53	0	0	0	0	0	0	0	603	903	0
12046	2	0	0	0	0	0	0	200	300	0	6.3327	-113.577	-498.097	-89556.4	13309.6	-3675.39	226.721	1082.8	0	0	0	0	0	0	0	603	903	0
12046	3	0	0	0	0	0	0	200	300	0	7.70599	-113.577	-500.843	-89373.2	12943.4	-3675.39	225.843	1081.45	0	0	0	0	0	0	0	603	903	0
12046	4	0	0	0	0	0	0	200	300	0	4.04388	-115.866	-502.369	-89647.9	13431.7	-3400.73	226.737	1081.45	0	0	0	0	0	0	0	603	903	0
12046	5	0	0	0	0	0	0	200	300	0	3.73871	-116.171	-502.979	-89922.6	12394.1	-3034.52	224.641	1081.78	0	0	0	0	0	0	0	603	903	0
12046	6	0	0	0	0	0	0	200	300	0	1.2973	-116.171	-501.454	-89739.4	13248.6	-2805.64	226.42	1081.96	0	0	0	0	0	0	0	603	903	0
12046	7	0	0	0	0	0	0	200	300	0	1.75507	-116.018	-506.947	-89922.6	13004.4	-2439.42	225.652	1080.38	0	0	0	0	0	0	0	603	903	0
12046	8	0	0	0	0	0	0	200	300	0	0.0765991	-117.697	-506.947	-90655	12516.2	-2164.77	224.689	1081.83	0	0	0	0	0	0	0	603	903	0
12046	9	0	0	0	0	0	0	200	300	0	0.381775	-117.544	-508.167	-90655	12638.2	-1981.66	224.87	1081.4	0	0	0	0	0	0	0	603	903	0
12047	0	0	0	0	0	0	0	200	300	0	-3.28033	-117.239	-509.083	-89922.6	12699.3	-2027.44	224.945	1079.64	0	0	0	0	0	0	0	603	903	0
12047	1	0	0	0	0	0	0	200	300	0	-3.28033	-117.392	-512.745	-90014.1	11844.8	-1798.55	223.101	1078.55	0	0	0	0	0	0	0	603	903	0
12047	2	0	0	0	0	0	0	200	300	0	-5.11139	-118.765	-512.745	-90471.9	12821.3	-1523.9	225.005	1079.45	0	0	0	0	0	0	0	603	903	0
12047	3	0	0	0	0	0	0	200	300	0	-6.48468	-118.917	-512.745	-90746.6	12211	-1295.01	223.815	1079.98	0	0	0	0	0	0	0	603	903	0
12047	4	0	0	0	0	0	0	200	300	0	-8.31573	-118.46	-512.745	-90380.3	11905.8	-1203.46	223.22	1079.27	0	0	0	0	0	0	0	603	903	0
12047	5	0	0	0	0	0	0	200	300	0	-7.85797	-119.07	-515.797	-90471.9	12211	-837.251	223.674	1078.4	0	0	0	0	0	0	0	603	903	0
12047	6	0	0	0	0	0	0	200	300	0	-9.53644	-120.138	-517.017	-91204.3	12150	-608.369	223.5	1079.4	0	0	0	0	0	0	0	603	903	0
12047	7	0	0	0	0	0	0	200	300	0	-11.2149	-119.986	-518.543	-90380.3	11783.7	-471.04	222.725	1077.3	0	0	0	0	0	0	0	603	903	0
12047	8	0	0	0	0	0	0	200	300	0	-13.046	-119.375	-515.797	-90471.9	11783.7	-287.934	222.846	1078.4	0	0	0	0	0	0	0	603	903	0
12047	9	0	0	0	0	0	0	200	300	0	-12.283	-119.833	-520.68	-90471.9	11783.7	-104.829	222.631	1076.76	0	0	0	0	0	0	0	603	903	0
12048	0	0	0	0	0	0	0	200	300	0	-13.9615	-119.986	-519.459	-90471.9	11661.7	-104.829	222.45	1077.17	0	0	0	0	0	0	0	603	903	0
12048	1	0	0	0	0	0	0	200	300	0	-15.7925	-119.986	-519.764	-91112.8	11478.6	215.606	222.084	1078.3	0	0	0	0	0	0	0	603	903	0
12048	2	0	0	0	0	0	0	200	300	0	-15.7925	-120.443	-521.29	-91021.2	11722.7	398.711	222.488	1077.61	0	0	0	0	0	0	0	603	903	0
12048	3	0	0	0	0	0	0	200	300	0	-16.5555	-120.748	-525.257	-90838.1	11417.5	673.37	221.737	1075.94	0	0	0	0	0	0	0	603	903	0
12048	4	0	0	0	0	0	0	200	300	0	-16.8607	-121.664	-524.647	-90655	11112.4	810.699	221.181	1075.79	0	0	0	0	0	0	0	603	903	0
12048	5	0	0	0	0	0	0	200	300	0	-17.9288	-122.427	-528.004	-91479	11417.5	1131.13	221.624	1076.25	0	0	0	0	0	0	0	603	903	0
12048	6	0	0	0	0	0	0	200	300	0	-18.9969	-121.969	-525.257	-91479	11295.5	810.699	221.505	1077.16	0	0	0	0	0	0	0	603	903	0
12048	7	0	0	0	0	0	0	200	300	0	-20.3702	-121.206	-532.887	-91021.2	10868.2	1360.02	220.395	1073.81	0	0	0	0	0	0	0	603	903	0
12048	8	0	0	0	0	0	0	200	300	0	-20.5228	-122.579	-530.445	-90838.1	11051.3	1451.57	220.834	1074.25	0	0	0	0	0	0	0	603	903	0
12048	9	0	0	0	0	0	0	200	300	0	-20.9805	-122.427	-535.328	-91479	11295.5	1726.23	221.1	1073.88	0	0	0	0	0	0	0	603	903	0
12049	0	0	0	0	0	0	0	200	300	0	-23.2693	-124.105	-536.549	-91845.2	10624.1	1863.56	219.801	1074.18	0	0	0	0	0	0	0	603	903	0
12049	1	0	0	0	0	0	0	200	300	0	-21.8961	-122.274	-539.295	-92211.4	10990.3	2000.88	220.379	1073.98	0	0	0	0	0	0	0	603	903	0
12049	2	0	0	0	0	0	0	200	300	0	-26.1685	-122.427	-541.432	-91387.4	10746.1	2183.99	219.848	1071.79	0	0	0	0	0	0	0	603	903	0
12049	3	0	0	0	0	0	0	200	300	0	-25.1004	-123.8	-542.652	-92028.3	10685.1	2595.98	219.691	1072.59	0	0	0	0	0	0	0	603	903	0
12049	4	0	0	0	0	0	0	200	300	0	-25.8633	-125.326	-543.873	-92211.4	10441	2550.2	219.197	1072.55	0	0	0	0	0	0	0	603	903	0
12049	5	0	0	0	0	0	0	200	300	0	-28.1522	-125.173	-545.704	-92669.1	10563	2641.75	219.357	1072.82	0	0	0	0	0	0	0	603	903	0
12049	6	0	0	0	0	0	0	200	300	0	-28.7625	-125.479	-548.451	-92577.6	10318.9	2641.75	218.815	1071.8	0	0	0	0	0	0	0	603	903	0
12049	7	0	0	0	0	0	0	200	300	0	-27.6944	-127.157	-549.366	-92211.4	10196.8	3099.52	218.561	1070.85	0	0	0	0	0	0	0	603	903	0
12049	8	0	0	0	0	0	0	200	300	0	-28.1522	-126.394	-551.197	-92211.4	10318.9	2870.64	218.721	1070.29	0	0	0	0	0	0	0	603	903	0
12049	9	0	0	0	0	0	0	200	300	0	-28.4573	-125.936	-551.197	-92943.8	10563	2916.41	219.164	1071.62	0	0	0	0	0	0	0	603	903	0
12050	0	0	0	0	0	0	0	200	300	0	-29.3729	-126.089	-554.249	-92943.8	10013.7	2916.41	218.067	1070.69	0	0	0	0	0	0	0	603	903	0
12050	1	0	0	0	0	0	0	200	300	0	-30.2884	-126.852	-555.775	-92669.1	10257.9	3145.29	218.457	1069.74	0	0	0	0	0	0	0	603	903	0
12050	2	0	0	0	0	0	0	200	300	0	-29.678	-126.547	-555.775	-91753.6	10074.8	3328.4	218.127	1068.09	0	0	0	0	0	0	0	603	903	0
12050	3	0	0	0	0	0	0	200	300	0	-30.1358	-126.242	-556.385	-92943.8	10074.8	3191.07	218.108	1070.05	0	0	0	0	0	0	0	603	903	0
12050	4	0	0	0	0	0	0	200	300	0	-30.8987	-125.479	-560.352	-92394.5	10074.8	3236.85	217.979	1067.89	0	0	0	0	0	0	0	603	903	0
12050	5	0	0	0	0	0	0	200	300	0	-30.5936	-125.631	-560.658	-92577.6	10074.8	3419.95	217.97	1068.12	0	0	0	0	0	0	0	603	903	0
12050	6	0	0	0	0	0	0	200	300	0	-31.0513	-124.563	-560.658	-93035.3	9769.58	3374.18	217.425	1068.94	0	0	0	0	0	0	0	603	903	0
12050	7	0	0	0	0	0	0	200	300	0	-30.5936	-124.716	-561.573	-93401.5	10074.8	3419.95	217.94	1069.32	0	0	0	0	0	0	0	603	903	0
12050	8	0	0	0	0	0	0	200	300	0	-31.6617	-123.648	-564.625	-93676.2	9830.62	3831.94	217.411	1068.91	0	0	0	0	0	0	0	603	903	0
12050	9	0	0	0	0	0	0	200	300	0	-30.441	-123.8	-565.54	-93493.1	9403.37	3786.16	216.627	1068.32	0	0	0	0	0	0	0	603	903	0
12051	0	0	0	0	0	0	0	200	300	0	-30.5936	-123.19	-565.235	-93035.3	9830.62	3557.28	217.392	1067.6	0	0	0	0	0	0	0	603	903	0
12051	1	0	0	0	0	0	0	200	300	0	-29.3729	-122.122	-565.846	-93859.3	9891.65	3694.61	217.481	1068.87	0	0	0	0	0	0	0	603	903	0
12051	2	0	0	0	0	0	0	200	300	0	-30.8987	-121.206	-569.508	-94317.1	9708.55	4152.37	217.047	1068.61	0	0	0	0	0	0	0	603	903	0
12051	3	0	0	0	0	0	0	200	300	0	-32.5772	-122.122	-570.423	-94500.2	9525.44	3831.94	216.699	1068.67	0	0	0	0	0	0	0	603	903	0
12051	4	0	0	0	0	0	0	200	300	0	-31.9669	-121.511	-569.813	-93950.9	9647.51	3831.94	216.931	1067.88	0	0	0	0	0	0	0	603	903	0
12051	5	0	0	0	0	0	0	200	300	0	-30.7462	-119.986	-572.254	-93493.1	9708.55	4106.6	216.965	1066.38	0	0	0	0	0	0	0	603	903	0
12051	6	0	0	0	0	0	0	200	300	0	-30.8987	-119.223	-575.001	-94225.5	9037.16	3923.49	215.717	1066.87	0	0	0	0	0	0	0	603	903	0
12051	7	0	0	0	0	0	0	200	300	0	-32.272	-120.748	-574.085	-94774.9	9769.58	4015.04	217.018	1068.09	0	0	0	0	0	0	0	603	903	0
12051	8	0	0	0	0	0	0	200	300	0	-31.8143	-119.528	-576.222	-95232.6	9647.51	4152.37	216.743	1068.27	0	0	0	0	0	0	0	603	903	0
12051	9	0	0	0	0	0	0	200	300	0	-32.1194	-117.849	-577.442	-94957.9	9525.44	4015.04	216.496	1067.45	0	0	0	0	0	0	0	603	903	0
12052	0	0	0	0	0	0	0	200	300	0	-30.7462	-117.544	-580.189	-95232.6	9830.62	4152.37	216.944	1067.14	0	0	0	0	0	0	0	603	903	0
12052	1	0	0	0	0	0	0	200	300	0	-31.6617	-118.765	-581.104	-95782	9647.51	4060.82	216.602	1067.83	0	0	0	0	0	0	0	603	903	0
12052	2	0	0	0	0	0	0	200	300	0	-31.8143	-118.307	-582.935	-95782	9220.27	4106.6	215.817	1067.31	0	0	0	0	0	0	0	603	903	0
12052	3	0	0	0	0	0	0	200	300	0	-32.7298	-117.392	-583.241	-95690.4	9281.3	4015.04	215.913	1067.07	0	0	0	0	0	0	0	603	903	0
12052	4	0	0	0	0	0	0	200	300	0	-30.8987	-116.934	-585.377	-95873.5	9891.65	4152.37	216.898	1066.78	0	0	0	0	0	0	0	603	903	0
12052	5	0	0	0	0	0	0	200	300	0	-31.5091	-116.629	-588.429	-96514.4	9708.55	4152.37	216.499	1067.02	0	0	0	0	0	0	0	603	903	0
12052	6	0	0	0	0	0	0	200	300	0	-31.9669	-117.086	-590.26	-95873.5	9159.23	4381.26	215.517	1065.43	0	0	0	0	0	0	0	603	903	0
12052	7	0	0	0	0	0	0	200	300	0	-32.1194	-116.781	-590.565	-96514.4	9830.62	4243.93	216.646	1066.43	0	0	0	0	0	0	0	603	903	0
12052	8	0	0	0	0	0	0	200	300	0	-30.8987	-116.018	-593.006	-97246.8	9403.37	4335.48	215.857	1066.99	0	0	0	0	0	0	0	603	903	0
12052	9	0	0	0	0	0	0	200	300	0	-31.5091	-115.866	-595.753	-97338.4	9647.51	4243.93	216.194	1066.39	0	0	0	0	0	0	0	603	903	0
12053	0	0	0	0	0	0	0	200	300	0	-32.7298	-115.866	-598.499	-97979.2	9220.27	4335.48	215.406	1066.71	0	0	0	0	0	0	0	603	903	0
12053	1	0	0	0	0	0	0	200	300	0	-32.4246	-115.56	-598.194	-97704.6	9525.44	4243.93	215.924	1066.33	0	0	0	0	0	0	0	603	903	0
12053	2	0	0	0	0	0	0	200	300	0	-30.5936	-114.492	-600.636	-98345.4	9647.51	4381.26	216.062	1066.74	0	0	0	0	0	0	0	603	903	0
12053	3	0	0	0	0	0	0	200	300	0	-30.8987	-112.814	-600.941	-98345.4	9891.65	4060.82	216.46	1066.65	0	0	0	0	0	0	0	603	903	0
12053	4	0	0	0	0	0	0	200	300	0	-31.3565	-114.34	-604.908	-99077.9	9769.58	4060.82	216.151	1066.79	0	0	0	0	0	0	0	603	903	0
12053	5	0	0	0	0	0	0	200	300	0	-32.4246	-113.882	-607.96	-99077.9	9769.58	4060.82	216.069	1065.97	0	0	0	0	0	0	0	603	903	0
12053	6	0	0	0	0	0	0	200	300	0	-29.8306	-113.119	-608.875	-99535.6	9830.62	4198.15	216.146	1066.47	0	0	0	0	0	0	0	603	903	0
12053	7	0	0	0	0	0	0	200	300	0	-28.6099	-111.593	-611.012	-99444.1	9464.41	4015.04	215.49	1065.75	0	0	0	0	0	0	0	603	903	0
12053	8	0	0	0	0	0	0	200	300	0	-30.2884	-111.746	-614.674	-100268	9647.51	4106.6	215.695	1066.12	0	0	0	0	0	0	0	603	903	0
12053	9	0	0	0	0	0	0	200	300	0	-28.7625	-111.746	-616.2	-100817	9952.69	4243.93	216.152	1066.61	0	0	0	0	0	0	0	603	903	0
12054	0	0	0	0	0	0	0	200	300	0	-28.9151	-111.135	-618.641	-100451	10013.7	4335.48	216.187	1065.37	0	0	0	0	0	0	0	603	903	0
12054	1	0	0	0	0	0	0	200	300	0	-27.5418	-110.22	-618.336	-100726	9830.62	4243.93	215.899	1065.9	0	0	0	0	0	0	0	603	903	0
12054	2	0	0	0	0	0	0	200	300	0	-29.9832	-109.61	-622.608	-102008	10013.7	4381.26	216.084	1066.84	0	0	0	0	0	0	0	603	903	0
12054	3	0	0	0	0	0	0	200	300	0	-30.2884	-108.389	-624.745	-102008	10013.7	4015.04	216.029	1066.28	0	0	0	0	0	0	0	603	903	0
12054	4	0	0	0	0	0	0	200	300	0	-29.0677	-108.389	-626.881	-102008	9708.55	4015.04	215.487	1065.72	0	0	0	0	0	0	0	603	903	0
12054	5	0	0	0	0	0	0	200	300	0	-28.7625	-107.778	-628.101	-101733	10318.9	3694.61	216.429	1064.97	0	0	0	0	0	0	0	603	903	0
12054	6	0	0	0	0	0	0	200	300	0	-27.3892	-107.321	-629.627	-103198	10379.9	4015.04	216.486	1066.9	0	0	0	0	0	0	0	603	903	0
12054	7	0	0	0	0	0	0	200	300	0	-28.7625	-106.1	-633.9	-101916	9891.65	3969.27	215.604	1063.78	0	0	0	0	0	0	0	603	903	0
12054	8	0	0	0	0	0	0	200	300	0	-28.4573	-106.405	-633.289	-103930	10013.7	4060.82	215.812	1067.11	0	0	0	0	0	0	0	603	903	0
12054	9	0	0	0	0	0	0	200	300	0	-27.2366	-105.184	-638.172	-103655	10379.9	3557.28	216.265	1065.43	0	0	0	0	0	0	0	603	903	0
12055	0	0	0	0	0	0	0	200	300	0	-25.7108	-105.642	-639.698	-104205	9952.69	4015.04	215.558	1065.9	0	0	0	0	0	0	0	603	903	0
12055	1	0	0	0	0	0	0	200	300	0	-27.6944	-104.727	-640.919	-104571	10257.9	3877.72	216.005	1066.16	0	0	0	0	0	0	0	603	903	0
12055	2	0	0	0	0	0	0	200	300	0	-26.7789	-104.269	-643.971	-105120	10685.1	3877.72	216.593	1066.24	0	0	0	0	0	0	0	603	903	0
12055	3	0	0	0	0	0	0	200	300	0	-26.0159	-104.116	-646.412	-105120	10196.8	3740.39	215.775	1065.62	0	0	0	0	0	0	0	603	903	0
12055	4	0	0	0	0	0	0	200	300	0	-26.7789	-103.659	-647.328	-105761	10563	3831.94	216.318	1066.38	0	0	0	0	0	0	0	603	903	0
12055	5	0	0	0	0	0	0	200	300	0	-26.3211	-103.353	-650.074	-105944	9830.62	3877.72	215.122	1065.97	0	0	0	0	0	0	0	603	903	0
12055	6	0	0	0	0	0	0	200	300	0	-27.084	-102.743	-651.905	-106494	10502	3648.83	216.11	1066.36	0	0	0	0	0	0	0	603	903	0
12055	7	0	0	0	0	0	0	200	300	0	-26.9315	-102.59	-655.262	-106219	10441	3648.83	215.934	1065.1	0	0	0	0	0	0	0	603	903	0
12055	8	0	0	0	0	0	0	200	300	0	-25.5582	-102.59	-654.957	-106585	10685.1	3831.94	216.314	1065.74	0	0	0	0	0	0	0	603	903	0
12055	9	0	0	0	0	0	0	200	300	0	-24.9478	-100.607	-655.567	-107501	10502	3557.28	216.02	1066.98	0	0	0	0	0	0	0	603	903	0
12056	0	0	0	0	0	0	0	200	300	0	-26.4737	-100.149	-660.145	-108325	10563	3557.28	216.001	1067.09	0	0	0	0	0	0	0	603	903	0
12056	1	0	0	0	0	0	0	200	300	0	-26.0159	-99.9965	-659.84	-108142	10624.1	3740.39	216.101	1066.89	0	0	0	0	0	0	0	603	903	0
12056	2	0	0	0	0	0	0	200	300	0	-25.253	-100.759	-663.807	-108050	10990.3	3511.51	216.556	1065.77	0	0	0	0	0	0	0	603	903	0
12056	3	0	0	0	0	0	0	200	300	0	-24.6426	-99.8439	-664.417	-108416	10746.1	3969.27	216.174	1066.17	0	0	0	0	0	0	0	603	903	0
12056	4	0	0	0	0	0	0	200	300	0	-25.5582	-98.1654	-665.638	-109332	10929.3	3465.73	216.419	1067.25	0	0	0	0	0	0	0	603	903	0
12056	5	0	0	0	0	0	0	200	300	0	-23.5745	-98.0128	-668.69	-109149	10807.2	3694.61	216.162	1066.23	0	0	0	0	0	0	0	603	903	0
12056	6	0	0	0	0	0	0	200	300	0	-25.253	-98.1654	-670.216	-108966	11112.4	3236.85	216.58	1065.58	0	0	0	0	0	0	0	603	903	0
12056	7	0	0	0	0	0	0	200	300	0	-23.7271	-97.8603	-672.047	-109332	10868.2	3511.51	216.172	1065.68	0	0	0	0	0	0	0	603	903	0
12056	8	0	0	0	0	0	0	200	300	0	-23.8797	-96.3344	-672.657	-110156	11295.5	3007.97	216.792	1066.76	0	0	0	0	0	0	0	603	903	0
12056	9	0	0	0	0	0	0	200	300	0	-23.7271	-96.0292	-675.709	-109881	10807.2	3328.4	215.994	1065.62	0	0	0	0	0	0	0	603	903	0
12057	0	0	0	0	0	0	0	200	300	0	-24.4901	-96.0292	-676.319	-110613	10746.1	3191.07	215.889	1066.55	0	0	0	0	0	0	0	603	903	0
12057	1	0	0	0	0	0	0	200	300	0	-22.5064	-95.724	-677.235	-110430	11234.4	3603.06	216.589	1066.06	0	0	0	0	0	0	0	603	903	0
12057	2	0	0	0	0	0	0	200	300	0	-22.5064	-94.3507	-678.455	-110705	11478.6	3374.18	216.919	1066.17	0	0	0	0	0	0	0	603	903	0
12057	3	0	0	0	0	0	0	200	300	0	-21.7435	-94.0456	-681.812	-111712	11173.4	3465.73	216.388	1066.85	0	0	0	0	0	0	0	603	903	0
12057	4	0	0	0	0	0	0	200	300	0	-22.659	-93.7404	-680.897	-111437	11539.6	3374.18	216.948	1066.66	0	0	0	0	0	0	0	603	903	0
12057	5	0	0	0	0	0	0	200	300	0	-21.5909	-93.7404	-681.507	-111254	11356.5	3099.52	216.664	1066.25	0	0	0	0	0	0	0	603	903	0
12057	6	0	0	0	0	0	0	200	300	0	-21.7435	-92.6723	-683.643	-111987	11722.7	2962.19	217.147	1066.81	0	0	0	0	0	0	0	603	903	0
12057	7	0	0	0	0	0	0	200	300	0	-19.9124	-91.9093	-686.085	-111895	11661.7	3099.52	216.997	1066.09	0	0	0	0	0	0	0	603	903	0
12057	8	0	0	0	0	0	0	200	300	0	-21.4383	-91.9093	-684.864	-112536	11966.8	2962.19	217.473	1067.32	0	0	0	0	0	0	0	603	903	0
12057	9	0	0	0	0	0	0	200	300	0	-20.9805	-90.8412	-689.442	-112628	11234.4	3145.29	216.295	1066.36	0	0	0	0	0	0	0	603	903	0
12058	0	0	0	0	0	0	0	200	300	0	-21.4383	-91.1464	-687	-112445	11417.5	3053.74	216.619	1066.67	0	0	0	0	0	0	0	603	903	0
12058	1	0	0	0	0	0	0	200	300	0	-19.9124	-90.8412	-690.052	-112628	11417.5	3007.97	216.546	1066.22	0	0	0	0	0	0	0	603	903	0
12058	2	0	0	0	0	0	0	200	300	0	-20.5228	-89.4679	-690.968	-113085	11478.6	2733.31	216.612	1066.66	0	0	0	0	0	0	0	603	903	0
12058	3	0	0	0	0	0	0	200	300	0	-21.4383	-89.6205	-694.019	-113635	11478.6	3282.62	216.539	1066.73	0	0	0	0	0	0	0	603	903	0
12058	4	0	0	0	0	0	0	200	300	0	-20.9805	-88.8576	-692.188	-112902	12088.9	3007.97	217.465	1066.11	0	0	0	0	0	0	0	603	903	0
12058	5	0	0	0	0	0	0	200	300	0	-18.9969	-88.5524	-694.019	-112445	11783.7	2687.53	216.979	1065.02	0	0	0	0	0	0	0	603	903	0
12058	6	0	0	0	0	0	0	200	300	0	-19.6072	-87.6369	-695.24	-113177	11356.5	2824.86	216.335	1065.79	0	0	0	0	0	0	0	603	903	0
12058	7	0	0	0	0	0	0	200	300	0	-20.065	-88.3998	-695.85	-113635	11783.7	2962.19	216.934	1066.3	0	0	0	0	0	0	0	603	903	0
[truncated: 4,452 more rows]
