# Supplementary material for: The Effects of an Extemporaneous Speech Dual-task on Older Adult Gait Control
Source: Research Square preprint supplement (doi:10.21203/rs.3.rs-7674245/v1), 2025-11-18
Supplement: Supplementary file 13 [file DT1Walk01.xlsx]

## Sheet: Sheet1
Trajectories
		01:LFHD			01:RFHD			01:LBHD			01:RBHD			01:C7			01:T10			01:CLAV			01:STRN			01:RBAK			01:LSHO			01:LUPA			01:LELB			01:LFRM			01:LWRA			01:LWRB			01:LFIN
Frame	Sub Frame	X	Y	Z	X	Y	Z	X	Y	Z	X	Y	Z	X	Y	Z	X	Y	Z	X	Y	Z	X	Y	Z	X	Y	Z	X	Y	Z	X	Y	Z	X	Y	Z	X	Y	Z	X	Y	Z	X	Y	Z	X	Y	Z
		mm	mm	mm	mm	mm	mm	mm	mm	mm	mm	mm	mm	mm	mm	mm	mm	mm	mm	mm	mm	mm	mm	mm	mm	mm	mm	mm	mm	mm	mm	mm	mm	mm	mm	mm	mm	mm	mm	mm	mm	mm	mm	mm	mm	mm	mm	mm	mm
1	0	155.402	-775.716	1548.66	253.337	-768.597	1548.13	150.082	-939.249	1581.19	277.413	-909.41	1581.18	204.498	-1010.48	1438.87	204.55	-1113.45	1187.44	215.53	-872.966	1336.37	202.82	-827.137	1156.1	252.375	-1116	1263.92	38.8933	-931.57	1379.05	-45.8925	-1016.82	1169.61	-50.1971	-1034.38	1090.04	-77.7857	-1011.49	964.754	-25.7531	-953.344	861.041	-83.1666	-995.19	856.807	-64.1368	-950.567	777.518
2	0	151.289	-763.717	1547.01	249.237	-756.276	1546.92	146.486	-927.409	1578.94	273.707	-897.178	1579.57	202.066	-997.51	1436.93	204.404	-1100.46	1185.4	212.813	-859.773	1334.4	200.994	-814.298	1153.78	251.893	-1102.58	1262.22	36.3025	-919.784	1375.95	-46.5069	-1005.65	1165.9	-50.4099	-1023.47	1086.68	-78.5705	-1002.1	961.64	-27.5678	-944.363	857.1	-84.691	-986.652	853.703	-66.2842	-943.287	773.512
3	0	147.209	-751.627	1545.62	245.162	-743.877	1545.98	142.887	-915.462	1576.98	269.997	-884.859	1578.25	199.623	-984.493	1435.29	204.216	-1087.42	1183.7	210.093	-846.531	1332.74	199.142	-801.334	1151.83	251.37	-1089.12	1260.84	33.7235	-907.92	1373.17	-47.1433	-994.443	1162.55	-50.6559	-1012.46	1083.65	-79.3355	-992.501	958.822	-29.32	-935.068	853.546	-86.1137	-977.83	850.891	-68.3065	-935.606	769.891
4	0	143.161	-739.445	1544.49	241.113	-731.4	1545.29	139.284	-903.407	1575.32	266.284	-872.453	1577.22	197.167	-971.429	1433.95	203.986	-1074.32	1182.32	207.371	-833.24	1331.4	197.264	-788.247	1150.24	250.808	-1075.63	1259.8	31.1566	-895.978	1370.69	-47.8019	-983.205	1159.57	-50.9353	-1001.34	1080.94	-80.0807	-982.694	956.299	-31.0097	-925.459	850.379	-87.4348	-968.725	848.371	-70.2036	-927.524	766.654
5	0	139.148	-727.173	1543.61	237.091	-718.846	1544.85	135.678	-891.246	1573.94	262.57	-859.96	1576.48	194.7	-958.319	1432.9	203.713	-1061.17	1181.28	204.648	-819.901	1330.37	195.363	-775.038	1149.01	250.205	-1062.09	1259.08	28.6025	-883.958	1368.53	-48.483	-971.931	1156.95	-51.2483	-990.127	1078.55	-80.8064	-972.68	954.073	-32.6367	-915.537	847.599	-88.6548	-959.336	846.144	-71.9751	-919.042	763.802
6	0	135.17	-714.811	1542.99	233.097	-706.217	1544.68	132.071	-878.979	1572.87	258.855	-847.382	1576.03	192.223	-945.163	1432.14	203.399	-1047.96	1180.57	201.924	-806.516	1329.66	193.439	-761.712	1148.13	249.563	-1048.51	1258.69	26.0626	-871.86	1366.69	-49.187	-960.62	1154.71	-51.5955	-978.81	1076.49	-81.513	-962.456	952.141	-34.2003	-905.302	845.205	-89.7743	-949.662	844.208	-73.6202	-910.16	761.333
7	0	131.229	-702.363	1542.62	229.134	-693.515	1544.75	128.467	-866.611	1572.08	255.142	-834.722	1575.86	189.738	-931.965	1431.68	203.042	-1034.72	1180.19	199.205	-793.088	1329.26	191.495	-748.276	1147.61	248.881	-1034.91	1258.61	23.5393	-859.687	1365.16	-49.9147	-949.263	1152.82	-51.9779	-967.39	1074.76	-82.2013	-952.02	950.502	-35.6998	-894.755	843.194	-90.7945	-939.701	842.562	-75.1382	-900.877	759.244
8	0	127.331	-689.832	1542.49	225.207	-680.744	1545.07	124.869	-854.144	1571.57	251.437	-821.983	1575.98	187.247	-918.728	1431.5	202.643	-1021.43	1180.12	196.495	-779.623	1329.17	189.537	-734.743	1147.43	248.16	-1021.28	1258.86	21.0363	-847.437	1363.93	-50.6674	-937.854	1151.3	-52.3966	-955.864	1073.34	-82.8724	-941.371	949.155	-37.1339	-883.894	841.564	-91.7176	-929.45	841.205	-76.5281	-891.193	757.531
9	0	123.48	-677.224	1542.61	221.32	-667.909	1545.63	121.285	-841.585	1571.35	247.747	-809.171	1576.37	184.756	-905.458	1431.6	202.203	-1008.11	1180.38	193.799	-766.129	1329.37	187.57	-721.128	1147.58	247.399	-1007.63	1259.42	18.5585	-835.115	1363.01	-51.4464	-926.38	1150.14	-52.8535	-944.23	1072.24	-83.5276	-930.503	948.096	-38.5008	-872.723	840.31	-92.5464	-918.907	840.133	-77.7893	-881.108	756.189
10	0	119.684	-664.547	1542.96	217.482	-655.018	1546.42	117.724	-828.942	1571.4	244.079	-796.293	1577.03	182.269	-892.164	1431.97	201.72	-994.765	1180.95	191.129	-752.615	1329.87	185.605	-707.451	1148.06	246.6	-993.982	1260.29	16.1123	-822.723	1362.4	-52.2536	-914.827	1149.32	-53.3505	-932.484	1071.46	-84.1686	-919.414	947.32	-39.7985	-861.241	839.425	-93.2851	-908.066	839.343	-78.9211	-870.62	755.208
11	0	115.952	-651.809	1543.54	213.702	-642.078	1547.43	114.196	-816.224	1571.72	240.445	-783.358	1577.94	179.794	-878.852	1432.6	201.195	-981.415	1181.81	188.494	-739.093	1330.64	183.651	-693.735	1148.84	245.762	-980.339	1261.44	13.7055	-810.264	1362.08	-53.0912	-903.182	1148.83	-53.8898	-920.623	1070.97	-84.7975	-908.097	946.82	-41.0245	-849.452	838.9	-93.9387	-896.922	838.827	-79.9239	-859.729	754.579
12	0	112.295	-639.023	1544.32	209.992	-629.102	1548.64	110.715	-803.445	1572.28	236.859	-770.377	1579.09	177.339	-865.536	1433.49	200.626	-968.072	1182.95	185.908	-725.577	1331.68	181.722	-680.006	1149.9	244.887	-966.721	1262.87	11.3468	-797.742	1362.04	-53.9612	-891.43	1148.66	-54.474	-908.644	1070.78	-85.4166	-896.548	946.589	-42.1762	-837.358	838.721	-94.5135	-885.469	838.579	-80.7989	-848.433	754.287
13	0	108.725	-626.2	1545.29	206.366	-616.1	1550.04	107.295	-790.617	1573.08	233.336	-757.362	1580.47	174.913	-852.227	1434.61	200.014	-954.751	1184.36	183.384	-712.081	1332.96	179.833	-666.293	1151.22	243.974	-953.144	1264.55	9.04611	-785.164	1362.28	-54.8656	-879.555	1148.8	-55.1052	-896.544	1070.87	-86.0287	-884.761	946.614	-43.2508	-824.962	838.876	-95.0167	-873.702	838.587	-81.5488	-836.73	754.317
14	0	105.257	-613.354	1546.45	202.837	-603.086	1551.6	103.954	-777.755	1574.1	229.892	-744.327	1582.05	172.525	-838.939	1435.94	199.356	-941.469	1186	180.94	-698.623	1334.46	178.001	-652.626	1152.77	243.025	-939.629	1266.46	6.81387	-772.535	1362.78	-55.8061	-867.544	1149.22	-55.7857	-884.32	1071.21	-86.6365	-872.731	946.884	-44.2459	-812.27	839.346	-95.4565	-861.615	838.841	-82.1779	-824.619	754.651
15	0	101.905	-600.499	1547.76	199.423	-590.074	1553.32	100.709	-764.875	1575.32	226.546	-731.287	1583.81	170.187	-825.686	1437.48	198.651	-928.244	1187.87	178.59	-685.219	1336.15	176.245	-639.033	1154.51	242.038	-926.194	1268.58	4.66095	-759.862	1363.52	-56.7833	-855.387	1149.89	-56.517	-871.969	1071.8	-87.243	-860.453	947.383	-45.1592	-799.289	840.111	-95.8419	-849.202	839.327	-82.6924	-812.097	755.267
16	0	98.6862	-587.651	1549.21	196.14	-577.078	1555.16	97.5776	-751.993	1576.72	223.318	-718.255	1585.74	167.91	-812.482	1439.19	197.897	-915.093	1189.92	176.351	-671.886	1338.03	174.581	-625.542	1156.42	241.015	-912.858	1270.88	2.59817	-747.153	1364.49	-57.7972	-843.076	1150.8	-57.3004	-859.491	1072.61	-87.8514	-847.923	948.095	-45.9893	-786.024	841.149	-96.1824	-836.46	840.029	-83.1005	-799.165	756.143
17	0	95.6156	-574.823	1550.77	193.005	-564.112	1557.1	94.5797	-739.126	1578.28	220.227	-705.249	1587.79	165.704	-799.342	1441.05	197.092	-902.032	1192.14	174.239	-658.641	1340.05	173.029	-612.181	1158.47	239.957	-899.64	1273.33	0.635975	-734.414	1365.66	-58.8465	-830.606	1151.9	-58.1362	-846.883	1073.62	-88.4644	-835.141	949.002	-46.7356	-772.485	842.436	-96.4876	-823.386	840.931	-83.4121	-785.821	757.257
18	0	92.7096	-562.03	1552.44	190.036	-551.191	1559.13	91.7333	-726.288	1579.98	217.292	-692.282	1589.96	163.581	-786.277	1443.04	196.234	-889.077	1194.49	172.268	-645.498	1342.19	171.606	-598.971	1160.62	238.865	-886.555	1275.9	-1.21599	-721.654	1367.01	-59.9284	-817.976	1153.18	-59.0238	-834.147	1074.8	-89.0849	-822.104	950.085	-47.3988	-758.681	843.95	-96.7673	-809.981	842.016	-83.6391	-772.068	758.585
19	0	89.9833	-549.285	1554.19	187.249	-538.327	1561.21	89.0555	-713.494	1581.79	214.531	-679.368	1592.21	161.55	-773.301	1445.13	195.324	-876.242	1196.95	170.451	-632.472	1344.43	170.326	-585.932	1162.84	237.74	-873.618	1278.56	-2.94919	-708.881	1368.53	-61.0391	-805.189	1154.61	-59.9619	-821.283	1076.14	-89.7154	-808.815	951.325	-47.9807	-744.623	845.664	-97.0306	-796.246	843.266	-83.7945	-757.91	760.105
20	0	87.4508	-536.598	1555.99	184.66	-525.532	1563.33	86.5622	-700.758	1583.7	211.961	-666.52	1594.51	159.621	-760.422	1447.31	194.36	-863.539	1199.48	168.798	-619.573	1346.73	169.202	-573.078	1165.11	236.585	-860.841	1281.28	-4.55648	-696.103	1370.19	-62.1732	-792.249	1156.15	-60.9483	-808.294	1077.6	-90.358	-795.278	952.703	-48.4846	-730.322	847.555	-97.2864	-782.186	844.664	-83.892	-743.355	761.796
21	0	85.1246	-523.981	1557.84	182.281	-512.817	1565.46	84.2667	-688.089	1585.68	209.598	-653.749	1596.85	157.801	-747.651	1449.55	193.345	-850.976	1202.07	167.317	-606.812	1349.08	168.243	-560.42	1167.4	235.402	-848.232	1284.04	-6.0324	-683.329	1371.97	-63.3248	-779.166	1157.79	-61.9799	-795.183	1079.16	-91.0145	-781.498	954.201	-48.9151	-715.789	849.601	-97.5426	-767.808	846.192	-83.9457	-728.414	763.638
22	0	83.0151	-511.44	1559.72	180.124	-500.191	1567.59	82.18	-675.496	1587.7	207.451	-641.065	1599.2	156.098	-734.993	1451.82	192.279	-838.56	1204.68	166.012	-594.195	1351.44	167.452	-547.962	1169.68	234.193	-835.796	1286.79	-7.37327	-670.566	1373.85	-64.4871	-765.951	1159.51	-63.0532	-781.954	1080.8	-91.6864	-767.484	955.799	-49.2783	-701.038	851.78	-97.8063	-753.122	847.834	-83.9693	-713.1	765.614
23	0	81.1301	-498.981	1561.6	178.198	-487.66	1569.7	80.31	-662.987	1589.77	205.532	-628.475	1601.53	154.516	-722.453	1454.11	191.166	-826.294	1207.28	164.886	-581.727	1353.81	166.832	-535.706	1171.95	232.964	-823.537	1289.53	-8.57734	-657.821	1375.81	-65.6531	-752.617	1161.27	-64.164	-768.614	1082.51	-92.375	-753.245	957.48	-49.5811	-686.08	854.071	-98.0832	-738.139	849.574	-83.9753	-697.43	767.709
24	0	79.4747	-486.61	1563.47	176.509	-475.229	1571.76	78.6614	-650.565	1591.84	203.844	-615.985	1603.83	153.059	-710.034	1456.39	190.011	-814.178	1209.87	163.935	-569.411	1356.14	166.378	-523.646	1174.18	231.718	-811.452	1292.23	-9.64472	-645.103	1377.82	-66.8164	-739.178	1163.06	-65.3084	-755.169	1084.26	-93.0813	-738.792	959.227	-49.8317	-670.929	856.459	-98.3784	-722.874	851.398	-83.9751	-681.424	769.909
25	0	78.0513	-474.327	1565.33	175.059	-462.903	1573.76	77.2355	-638.233	1593.91	202.389	-603.6	1606.08	151.729	-697.737	1458.65	188.819	-802.21	1212.4	163.157	-557.245	1358.44	166.084	-511.774	1176.35	230.461	-799.538	1294.86	-10.5773	-632.417	1379.88	-67.9708	-725.65	1164.87	-66.4822	-741.627	1086.03	-93.806	-724.139	961.024	-50.0385	-655.597	858.924	-98.6955	-707.343	853.291	-83.9779	-665.107	772.201
26	0	76.8589	-462.134	1567.14	173.848	-450.683	1575.7	76.0303	-625.991	1595.96	201.167	-591.322	1608.25	150.525	-685.56	1460.86	187.598	-790.386	1214.87	162.545	-545.227	1360.67	165.937	-500.079	1178.47	229.198	-787.789	1297.4	-11.3787	-619.772	1381.96	-69.1116	-712.05	1166.69	-67.6818	-727.996	1087.81	-94.55	-709.301	962.854	-50.2104	-640.096	861.453	-99.0374	-691.562	855.239	-83.991	-648.501	774.576
27	0	75.8937	-450.029	1568.9	172.871	-438.569	1577.54	75.0408	-613.839	1597.97	200.172	-579.151	1610.33	149.447	-673.502	1463.01	186.356	-778.697	1217.25	162.09	-533.352	1362.83	165.925	-488.545	1180.51	227.934	-776.194	1299.83	-12.0537	-607.173	1384.05	-70.2352	-698.393	1168.5	-68.904	-714.285	1089.58	-95.3139	-694.291	964.704	-50.3559	-624.44	864.031	-99.4059	-675.55	857.229	-84.0192	-631.634	777.021
28	0	75.1489	-438.01	1570.6	172.123	-426.559	1579.28	74.259	-601.775	1599.92	199.395	-567.086	1612.31	148.493	-661.559	1465.07	185.101	-767.135	1219.53	161.779	-521.614	1364.89	166.03	-477.155	1182.47	226.677	-764.744	1302.14	-12.6087	-594.626	1386.12	-71.3396	-684.695	1170.29	-70.1464	-700.503	1091.33	-96.0985	-679.125	966.557	-50.4834	-608.64	866.644	-99.8019	-659.326	859.247	-84.0653	-614.531	779.526
29	0	74.6149	-426.075	1572.23	171.592	-414.651	1580.91	73.6742	-589.794	1601.8	198.826	-555.124	1614.17	147.658	-649.726	1467.04	183.844	-755.69	1221.69	161.603	-510.004	1366.85	166.234	-465.891	1184.33	225.434	-753.425	1304.31	-13.0508	-582.138	1388.16	-72.4243	-670.972	1172.04	-71.4072	-686.659	1093.04	-96.9044	-663.82	968.396	-50.6005	-592.707	869.277	-100.226	-642.908	861.279	-84.13	-597.22	782.08
30	0	74.28	-414.218	1573.76	171.267	-402.839	1582.42	73.2739	-577.893	1603.6	198.451	-543.262	1615.91	146.938	-637.997	1468.89	182.596	-744.351	1223.71	161.546	-498.512	1368.68	166.519	-454.733	1186.09	224.212	-742.224	1306.33	-13.3876	-569.712	1390.14	-73.4901	-657.238	1173.75	-72.6849	-672.763	1094.7	-97.7323	-648.388	970.208	-50.7139	-576.654	871.917	-100.678	-626.315	863.309	-84.2126	-579.726	784.668
31	0	74.1302	-402.434	1575.18	171.133	-391.12	1583.79	73.044	-566.066	1605.29	198.255	-531.494	1617.5	146.327	-626.365	1470.61	181.368	-733.105	1225.57	161.595	-487.129	1370.38	166.865	-443.663	1187.74	223.02	-731.125	1308.18	-13.6274	-557.356	1392.06	-74.5389	-643.506	1175.4	-73.9789	-658.821	1096.28	-98.5828	-632.846	971.975	-50.8298	-560.492	874.546	-101.157	-609.567	865.324	-84.3109	-562.073	787.276
32	0	74.1504	-390.719	1576.49	171.174	-379.486	1585.03	72.969	-554.308	1606.85	198.222	-519.815	1618.94	145.82	-614.823	1472.19	180.172	-721.942	1227.27	161.737	-475.841	1371.92	167.253	-432.661	1189.26	221.866	-720.115	1309.85	-13.7787	-545.072	1393.87	-75.5733	-629.787	1176.98	-75.2882	-644.841	1097.78	-99.456	-617.208	973.681	-50.9531	-544.231	877.15	-101.663	-592.68	867.305	-84.4225	-544.285	789.888
33	0	74.3242	-379.065	1577.67	171.373	-367.93	1586.11	73.033	-542.613	1608.29	198.335	-508.217	1620.21	145.411	-603.362	1473.62	179.02	-710.848	1228.8	161.956	-464.638	1373.31	167.665	-421.712	1190.63	220.76	-709.178	1311.33	-13.8496	-532.866	1395.58	-76.5961	-616.092	1178.47	-76.6121	-630.83	1099.17	-100.352	-601.485	975.31	-51.0882	-527.882	879.709	-102.196	-575.673	869.238	-84.5444	-526.383	792.485
34	0	74.6349	-367.467	1578.71	171.713	-356.445	1587.03	73.2197	-530.974	1609.57	198.576	-496.693	1621.32	145.094	-591.975	1474.88	177.925	-699.812	1230.14	162.241	-453.506	1374.51	168.088	-410.799	1191.85	219.71	-698.3	1312.62	-13.8482	-520.741	1397.14	-77.6096	-602.426	1179.85	-77.9492	-616.793	1100.43	-101.27	-585.691	976.844	-51.2386	-511.455	882.207	-102.754	-558.562	871.106	-84.6743	-508.386	795.048
35	0	75.0658	-355.917	1579.6	172.175	-345.021	1587.78	73.5132	-519.384	1610.69	198.928	-485.234	1622.24	144.863	-580.652	1475.96	176.898	-688.825	1231.28	162.578	-442.435	1375.53	168.505	-399.909	1192.9	218.726	-687.467	1313.71	-13.7824	-508.702	1398.55	-78.6153	-588.796	1181.1	-79.2973	-602.733	1101.56	-102.21	-569.837	978.268	-51.4072	-494.962	884.624	-103.337	-541.363	872.893	-84.8108	-490.315	797.557
36	0	75.6006	-344.407	1580.33	172.743	-333.65	1588.37	73.8984	-507.837	1611.64	199.375	-473.831	1622.98	144.711	-569.385	1476.86	175.952	-677.875	1232.23	162.956	-431.411	1376.35	168.907	-389.03	1193.75	217.819	-676.665	1314.59	-13.6591	-496.75	1399.78	-79.6135	-575.204	1182.21	-80.6532	-588.655	1102.52	-103.168	-553.933	979.566	-51.5963	-478.412	886.94	-103.946	-524.092	874.582	-84.9532	-472.184	799.991
37	0	76.224	-332.932	1580.88	173.402	-322.322	1588.77	74.361	-496.325	1612.41	199.902	-462.475	1623.53	144.634	-558.166	1477.56	175.097	-666.954	1232.97	163.366	-420.424	1376.95	169.286	-378.153	1194.41	216.996	-665.882	1315.25	-13.4848	-484.89	1400.81	-80.6027	-561.653	1183.15	-82.0123	-574.561	1103.31	-104.144	-537.991	980.725	-51.808	-461.815	889.138	-104.58	-506.764	876.159	-85.1027	-454.011	802.331
38	0	76.922	-321.484	1581.26	174.135	-311.029	1588.99	74.8882	-484.841	1612.98	200.495	-451.157	1623.89	144.628	-546.986	1478.07	174.344	-656.054	1233.5	163.797	-409.463	1377.34	169.635	-367.269	1194.85	216.268	-655.107	1315.71	-13.2651	-473.121	1401.63	-81.5796	-548.143	1183.91	-83.3685	-560.452	1103.91	-105.133	-522.019	981.731	-52.0438	-445.182	891.198	-105.239	-489.393	877.61	-85.2617	-435.809	804.556
39	0	77.6818	-310.055	1581.45	174.931	-299.762	1589.02	75.4689	-473.378	1613.35	201.141	-439.869	1624.05	144.688	-535.836	1478.38	173.702	-645.167	1233.82	164.244	-398.518	1377.5	169.953	-356.372	1195.07	215.642	-644.33	1315.96	-13.0046	-461.445	1402.21	-82.5389	-534.674	1184.47	-84.7145	-546.331	1104.3	-106.131	-506.028	982.574	-52.3048	-428.523	893.105	-105.923	-471.993	878.923	-85.434	-417.594	806.649
40	0	78.4927	-298.639	1581.45	175.778	-288.511	1588.86	76.0938	-461.93	1613.51	201.832	-428.6	1624	144.812	-524.71	1478.49	173.178	-634.286	1233.94	164.702	-387.58	1377.43	170.239	-345.457	1195.05	215.128	-633.541	1315.99	-12.7068	-449.861	1402.56	-83.4734	-521.243	1184.82	-86.0409	-532.199	1104.48	-107.134	-490.027	983.244	-52.592	-411.848	894.843	-106.633	-454.579	880.088	-85.6249	-399.38	808.596
41	0	79.3457	-287.231	1581.25	176.665	-277.268	1588.51	76.7557	-450.49	1613.47	202.558	-417.343	1623.76	144.998	-513.601	1478.39	172.781	-623.405	1233.84	165.168	-376.64	1377.13	170.497	-334.522	1194.8	214.732	-622.733	1315.83	-12.3742	-438.366	1402.66	-84.3743	-507.85	1184.94	-87.3375	-518.059	1104.44	-108.135	-474.026	983.735	-52.9061	-395.167	896.399	-107.368	-437.165	881.097	-85.8407	-381.18	810.383
42	0	80.2339	-275.823	1580.85	177.588	-266.026	1587.97	77.4495	-439.052	1613.22	203.315	-406.09	1623.31	145.244	-502.5	1478.09	172.517	-612.519	1233.55	165.64	-365.692	1376.6	170.731	-323.562	1194.31	214.46	-611.899	1315.46	-12.0078	-426.958	1402.5	-85.2313	-494.494	1184.84	-88.5925	-503.912	1104.18	-109.129	-458.035	984.044	-53.2474	-378.492	897.764	-108.127	-419.765	881.945	-86.0885	-363.008	812.001
43	0	81.1522	-264.413	1580.25	178.539	-254.777	1587.23	78.1722	-427.612	1612.75	204.098	-394.834	1622.67	145.551	-491.404	1477.59	172.388	-601.622	1233.05	166.12	-354.73	1375.84	170.95	-312.576	1193.59	214.317	-601.033	1314.89	-11.6073	-415.631	1402.09	-86.0331	-481.175	1184.5	-89.7932	-489.763	1103.7	-110.107	-442.066	984.169	-53.6159	-361.834	898.93	-108.91	-402.396	882.628	-86.3754	-344.878	813.443
44	0	82.0979	-252.994	1579.46	179.516	-243.517	1586.31	78.923	-416.165	1612.08	204.907	-383.568	1621.83	145.92	-480.304	1476.9	172.399	-590.71	1232.36	166.61	-343.747	1374.86	171.161	-301.562	1192.63	214.308	-590.13	1314.13	-11.1712	-404.379	1401.43	-86.7675	-467.892	1183.92	-90.926	-475.615	1103	-111.063	-426.13	984.11	-54.0111	-345.204	899.894	-109.713	-385.072	883.147	-86.7085	-326.805	814.706
45	0	83.07	-241.564	1578.47	180.518	-232.239	1585.2	79.7029	-404.707	1611.22	205.742	-372.287	1620.8	146.352	-469.198	1476.01	172.55	-579.777	1231.48	167.115	-332.739	1373.66	171.377	-290.519	1191.45	214.434	-579.187	1313.19	-10.6964	-393.194	1400.53	-87.4218	-454.649	1183.12	-91.9774	-461.473	1102.08	-111.987	-410.239	983.873	-54.4322	-328.614	900.655	-110.535	-367.811	883.502	-87.0943	-308.803	815.79
46	0	84.0696	-230.121	1577.29	181.546	-220.939	1583.91	80.5153	-393.235	1610.15	206.607	-360.986	1619.59	146.852	-458.081	1474.95	172.842	-568.817	1230.42	167.641	-321.703	1372.27	171.607	-279.446	1190.07	214.698	-568.199	1312.08	-10.1788	-382.065	1399.39	-87.9834	-441.447	1182.09	-92.9333	-447.346	1100.96	-112.872	-394.407	983.463	-54.8774	-312.077	901.216	-111.371	-350.63	883.697	-87.5378	-290.889	816.699
47	0	85.0996	-218.661	1575.94	182.603	-209.614	1582.45	81.3649	-381.749	1608.9	207.505	-349.662	1618.2	147.422	-446.948	1473.71	173.272	-557.827	1229.19	168.196	-310.634	1370.68	171.866	-268.34	1188.49	215.098	-557.164	1310.79	-9.613	-370.982	1398.03	-88.4397	-428.291	1180.85	-93.7801	-433.239	1099.64	-113.707	-378.647	982.889	-55.3446	-295.605	901.58	-112.215	-333.547	883.739	-88.0427	-273.08	817.437
48	0	86.1646	-207.184	1574.42	183.693	-198.262	1580.83	82.2582	-370.246	1607.48	208.444	-338.312	1616.66	148.066	-435.797	1472.31	173.838	-546.799	1227.8	168.79	-299.53	1368.92	172.164	-257.199	1186.73	215.634	-546.079	1309.35	-8.99251	-359.933	1396.47	-88.7785	-415.187	1179.42	-94.5049	-419.163	1098.16	-114.484	-362.974	982.162	-55.8305	-279.213	901.758	-113.062	-316.581	883.634	-88.6105	-255.392	818.013
49	0	87.2706	-195.689	1572.74	184.823	-186.882	1579.06	83.2028	-358.725	1605.9	209.431	-326.934	1614.96	148.791	-424.625	1470.75	174.535	-535.73	1226.25	169.432	-288.388	1367.01	172.516	-246.02	1184.81	216.303	-534.943	1307.76	-8.31007	-348.906	1394.72	-88.9882	-402.14	1177.82	-95.0955	-405.125	1096.51	-115.192	-347.403	981.294	-56.331	-262.915	901.758	-113.903	-299.752	883.393	-89.2405	-237.846	818.436
50	0	88.4251	-184.175	1570.92	186.001	-175.471	1577.16	84.2075	-347.187	1604.17	210.475	-315.528	1613.13	149.602	-413.43	1469.06	175.356	-524.611	1224.56	170.133	-277.206	1364.97	172.934	-234.797	1182.76	217.1	-523.753	1306.03	-7.55773	-337.888	1392.82	-89.0582	-389.157	1176.05	-95.5405	-391.138	1094.73	-115.823	-331.952	980.299	-56.841	-246.726	901.594	-114.728	-283.08	883.025	-89.9294	-220.46	818.717
51	0	89.6365	-172.642	1568.99	187.234	-164.031	1575.14	85.2817	-335.632	1602.32	211.586	-304.093	1611.18	150.503	-402.211	1467.24	176.295	-513.438	1222.73	170.905	-265.982	1362.81	173.431	-223.526	1180.6	218.022	-512.508	1304.17	-6.72713	-326.865	1390.78	-88.9785	-376.246	1174.15	-95.8301	-377.211	1092.83	-116.365	-316.634	979.194	-57.3542	-230.663	901.279	-115.528	-266.585	882.541	-90.6716	-203.255	818.868
52	0	90.9141	-161.092	1566.95	188.533	-152.562	1573.03	86.4355	-324.06	1600.37	212.773	-292.629	1609.13	151.502	-390.966	1465.31	177.344	-502.203	1220.78	171.759	-254.714	1360.56	174.016	-212.201	1178.35	219.061	-501.207	1302.19	-5.80983	-315.825	1388.64	-88.7403	-363.413	1172.14	-95.9557	-363.355	1090.84	-116.81	-301.469	977.994	-57.8634	-214.741	900.829	-116.291	-250.289	881.954	-91.4587	-186.253	818.901
53	0	92.2676	-149.523	1564.84	189.907	-141.064	1570.84	87.6792	-312.471	1598.33	214.048	-281.139	1607	152.603	-379.696	1463.3	178.493	-490.901	1218.73	172.705	-243.399	1358.25	174.702	-200.813	1176.04	220.211	-489.849	1300.1	-4.79755	-304.754	1386.42	-88.3357	-350.665	1170.05	-95.9099	-349.583	1088.79	-117.147	-286.47	976.718	-58.36	-198.979	900.26	-117.004	-234.212	881.277	-92.2803	-169.477	818.827
54	0	93.7069	-137.937	1562.67	191.367	-129.539	1568.6	89.0228	-300.868	1596.24	215.421	-269.621	1604.82	153.813	-368.399	1461.21	179.732	-479.526	1216.59	173.756	-232.038	1355.9	175.497	-189.356	1173.69	221.464	-478.433	1297.92	-3.68247	-293.642	1384.15	-87.7581	-338.008	1167.9	-95.6871	-335.903	1086.69	-117.367	-271.656	975.384	-58.8345	-183.393	899.589	-117.653	-218.377	880.523	-93.1234	-152.949	818.661
55	0	95.242	-126.333	1560.47	192.922	-117.987	1566.32	90.4763	-289.249	1594.11	216.902	-258.079	1602.59	155.135	-357.075	1459.08	181.052	-468.07	1214.36	174.921	-220.628	1353.53	176.409	-177.82	1171.34	222.812	-466.958	1295.67	-2.45747	-282.476	1381.86	-87.0024	-325.445	1165.71	-95.2831	-322.327	1084.59	-117.462	-257.041	974.012	-59.2763	-168.002	898.834	-118.225	-202.802	879.706	-93.9732	-136.691	818.412
56	0	96.8822	-114.713	1558.28	194.583	-106.41	1564.05	92.0487	-277.617	1591.98	218.501	-246.512	1600.36	156.575	-345.725	1456.91	182.44	-456.529	1212.08	176.21	-209.169	1351.18	177.445	-166.198	1169.02	224.244	-455.426	1293.35	-1.11638	-271.247	1379.58	-86.0647	-312.979	1163.52	-94.6948	-308.865	1082.49	-117.422	-242.64	972.62	-59.6737	-152.823	898.013	-118.706	-187.51	878.841	-94.8129	-120.728	818.093
57	0	98.6361	-103.075	1556.11	196.359	-94.8096	1561.8	93.7482	-265.97	1589.87	220.226	-234.923	1598.15	158.136	-334.349	1454.75	183.885	-444.899	1209.77	177.629	-197.66	1348.87	178.609	-154.481	1166.74	225.751	-443.835	1290.99	0.345811	-259.946	1377.36	-84.943	-300.612	1161.35	-93.921	-295.525	1080.44	-117.24	-228.467	971.23	-60.0142	-137.876	897.142	-119.08	-172.518	877.942	-95.6245	-105.083	817.715
58	0	100.511	-91.4209	1553.99	198.256	-83.1863	1559.59	95.5817	-254.308	1587.81	222.084	-223.312	1595.98	159.819	-322.947	1452.59	185.377	-433.175	1207.43	179.185	-186.101	1346.62	179.905	-142.662	1164.55	227.324	-432.188	1288.61	1.93277	-248.565	1375.2	-83.6373	-288.343	1159.24	-92.9615	-282.314	1078.46	-116.909	-214.535	969.861	-60.2847	-123.179	896.239	-119.335	-157.844	877.023	-96.3885	-89.7795	817.287
59	0	102.514	-79.7488	1551.96	200.283	-71.5413	1557.46	97.5547	-242.632	1585.83	224.082	-211.68	1593.87	161.625	-311.52	1450.48	186.905	-421.355	1205.09	180.883	-174.492	1344.47	181.335	-130.735	1162.47	228.952	-420.484	1286.22	3.64662	-237.098	1373.16	-82.1498	-276.167	1157.21	-91.8174	-269.239	1076.57	-116.422	-200.854	968.533	-60.4712	-108.748	895.32	-119.457	-143.506	876.101	-97.0843	-74.8389	816.818
60	0	104.65	-68.0582	1550.03	202.443	-59.8752	1555.42	99.6708	-230.94	1583.95	226.223	-200.027	1591.86	163.553	-300.07	1448.44	188.456	-409.438	1202.79	182.725	-162.834	1342.45	182.899	-118.696	1160.53	230.624	-408.727	1283.85	5.48776	-225.541	1371.25	-80.4846	-264.078	1155.29	-90.4912	-256.305	1074.81	-115.774	-187.434	967.267	-60.5596	-94.6011	894.4	-119.432	-129.518	875.189	-97.6911	-60.283	816.318
61	0	106.92	-56.348	1548.24	204.74	-48.1882	1553.51	101.931	-219.23	1582.2	228.51	-188.353	1589.96	165.602	-288.596	1446.49	190.022	-397.425	1200.53	184.711	-151.131	1340.57	184.595	-106.542	1158.76	232.332	-396.919	1281.52	7.45479	-213.89	1369.51	-78.6482	-252.07	1153.5	-88.9866	-243.516	1073.19	-114.96	-174.282	966.082	-60.5353	-80.7544	893.496	-119.25	-115.893	874.304	-98.1874	-46.1321	815.795
62	0	109.325	-44.6168	1546.6	207.173	-36.4803	1551.75	104.336	-207.502	1580.61	230.941	-176.656	1588.2	167.767	-277.101	1444.65	191.591	-385.319	1198.35	186.837	-139.384	1338.87	186.421	-94.2748	1157.18	234.064	-385.063	1279.26	9.54433	-202.147	1367.96	-76.649	-240.133	1151.89	-87.3081	-230.876	1071.74	-113.978	-161.404	964.997	-60.3843	-67.2227	892.622	-118.898	-102.64	873.459	-98.5521	-32.4044	815.255
63	0	111.863	-32.8632	1545.14	209.742	-24.7515	1550.15	106.882	-195.752	1579.19	233.515	-164.936	1586.61	170.043	-265.587	1442.95	193.155	-373.124	1196.27	189.1	-127.598	1337.36	188.37	-81.8975	1155.82	235.812	-373.163	1277.08	11.751	-190.311	1366.63	-74.4973	-228.256	1150.46	-85.4617	-218.386	1070.49	-112.825	-148.803	964.031	-60.0927	-54.0192	891.791	-118.369	-89.7681	872.671	-98.7645	-19.1163	814.709
64	0	114.531	-21.0855	1543.88	212.442	-13.0011	1548.73	109.563	-183.978	1577.97	236.225	-153.192	1585.2	172.421	-254.055	1441.41	194.706	-360.847	1194.32	191.492	-115.776	1336.07	190.436	-69.4181	1154.7	237.565	-361.225	1275.02	14.0674	-178.385	1365.54	-72.2053	-216.428	1149.26	-83.4545	-206.047	1069.45	-111.502	-136.481	963.2	-59.6474	-41.1553	891.016	-117.654	-77.2815	871.953	-98.805	-6.28119	814.164
65	0	117.321	-9.28239	1542.82	215.265	-1.22881	1547.51	112.372	-172.178	1576.98	239.063	-141.42	1583.99	174.892	-242.508	1440.05	196.235	-348.498	1192.52	194.003	-103.927	1335.01	192.61	-56.848	1153.85	239.317	-349.254	1273.09	16.4841	-166.376	1364.71	-69.7867	-204.639	1148.3	-81.2946	-193.861	1068.65	-110.008	-124.437	962.521	-59.0366	-28.6402	890.311	-116.747	-65.1822	871.321	-98.6549	6.09022	813.629
66	0	120.224	2.54744	1541.98	218.203	10.5659	1546.5	115.297	-160.349	1576.21	242.02	-129.621	1582.99	177.445	-230.949	1438.89	197.736	-336.086	1190.89	196.619	-92.0549	1334.21	194.879	-44.2026	1153.26	241.058	-337.258	1271.32	18.9898	-154.29	1364.16	-67.2566	-192.876	1147.61	-78.9916	-181.827	1068.09	-108.347	-112.669	962.008	-58.2497	-16.4807	889.687	-115.646	-53.4688	870.787	-98.2974	17.991	813.112
67	0	123.228	14.4047	1541.37	221.243	22.3832	1545.7	118.327	-148.49	1575.69	245.081	-117.792	1582.22	180.068	-219.38	1437.94	199.204	-323.626	1189.46	199.325	-80.1687	1333.67	197.229	-31.5008	1152.97	242.781	-325.243	1269.74	21.5713	-142.136	1363.9	-64.6318	-181.133	1147.19	-76.5561	-169.946	1067.8	-106.523	-101.174	961.674	-57.2782	-4.68053	889.156	-114.348	-42.1365	870.366	-97.7176	29.4179	812.623
68	0	126.321	26.2897	1540.99	224.373	34.2227	1545.13	121.446	-136.6	1575.42	248.233	-105.932	1581.69	182.746	-207.805	1437.22	200.632	-311.131	1188.24	202.103	-68.2763	1333.39	199.645	-18.7647	1152.97	244.479	-313.218	1268.35	24.2137	-129.925	1363.93	-61.93	-169.4	1147.07	-74.0005	-158.219	1067.77	-104.542	-89.9442	961.529	-56.1157	6.75931	888.727	-112.855	-31.1774	870.068	-96.903	40.3725	812.172
69	0	129.486	38.2019	1540.85	227.575	46.0835	1544.78	124.637	-124.677	1575.41	251.457	-94.0422	1581.39	185.464	-196.227	1436.74	202.017	-298.618	1187.26	204.935	-56.3865	1333.39	202.108	-6.01932	1153.26	246.145	-301.192	1267.19	26.9009	-117.669	1364.27	-59.1706	-157.673	1147.25	-71.3386	-146.645	1068.02	-102.413	-78.9735	961.58	-54.7582	17.8413	888.411	-111.169	-20.5802	869.905	-95.8437	50.8609	811.768
70	0	132.707	50.1399	1540.93	230.832	57.964	1544.65	127.881	-112.722	1575.65	254.736	-82.1229	1581.34	188.206	-184.649	1436.49	203.358	-286.104	1186.53	207.798	-44.5082	1333.66	204.597	6.70886	1153.83	247.776	-289.174	1266.26	29.6153	-105.382	1364.92	-56.3736	-145.95	1147.74	-68.5856	-135.226	1068.54	-100.145	-68.2524	961.832	-53.2048	28.5711	888.216	-109.298	-10.33	869.885	-94.5333	60.8945	811.421
71	0	135.964	62.1014	1541.24	234.126	69.8618	1544.73	131.158	-100.737	1576.14	258.048	-70.1765	1581.52	190.956	-173.075	1436.5	204.651	-273.606	1186.05	210.671	-32.6501	1334.19	207.09	19.3924	1154.68	249.366	-277.173	1265.58	32.3385	-93.0791	1365.85	-53.5603	-134.232	1148.53	-65.7588	-123.962	1069.33	-97.7512	-57.7705	962.285	-51.4576	38.9583	888.149	-107.247	-0.409198	870.013	-92.9685	70.4899	811.141
72	0	139.239	74.0834	1541.75	237.437	81.7734	1545.02	134.447	-88.7251	1576.88	261.374	-58.2066	1581.92	193.696	-161.51	1436.75	205.898	-261.142	1185.84	213.529	-20.821	1334.98	209.563	32.004	1155.79	250.913	-265.199	1265.15	35.0516	-80.777	1367.07	-50.7523	-122.523	1149.62	-62.8769	-112.852	1070.38	-95.2449	-47.516	962.939	-49.5218	49.0155	888.215	-105.03	9.20303	870.294	-91.1503	79.6691	810.933
73	0	142.512	86.0817	1542.47	240.745	93.6949	1545.5	137.727	-76.6891	1577.84	264.692	-46.2181	1582.55	196.41	-149.955	1437.24	207.099	-248.73	1185.89	216.348	-9.02888	1336	211.991	44.5178	1157.13	252.415	-253.26	1264.98	37.7352	-68.4927	1368.56	-47.9715	-110.83	1150.98	-59.9599	-101.898	1071.68	-92.6422	-37.476	963.787	-47.406	58.7591	888.416	-102.659	18.53	870.73	-89.0837	88.4596	810.807
74	0	145.762	98.0914	1543.37	244.028	105.621	1546.16	140.976	-64.6345	1579.01	267.98	-34.2168	1583.37	199.08	-138.416	1437.96	208.258	-236.388	1186.2	219.105	2.71909	1337.24	214.35	56.9104	1158.67	253.87	-241.366	1265.06	40.3699	-56.244	1370.3	-45.2396	-99.1642	1152.61	-57.0292	-91.0989	1073.21	-89.9605	-27.6368	964.82	-45.1224	68.2085	888.756	-100.149	27.597	871.318	-86.778	96.8933	810.767
75	0	148.97	110.107	1544.44	247.268	117.547	1546.99	144.173	-52.5671	1580.39	271.218	-22.2098	1584.38	201.691	-126.896	1438.9	209.377	-224.131	1186.76	221.776	14.4165	1338.69	216.615	69.1616	1160.39	255.281	-229.524	1265.4	42.9368	-44.0482	1372.27	-42.5778	-87.5388	1154.48	-54.1068	-80.4533	1074.96	-87.2187	-17.9841	966.025	-42.6862	77.3858	889.232	-97.5191	36.431	872.054	-84.2472	105.007	810.817
76	0	152.116	122.122	1545.66	250.444	129.465	1547.96	147.298	-40.4937	1581.93	274.386	-10.205	1585.55	204.228	-115.397	1440.05	210.462	-211.976	1187.58	224.341	26.0579	1340.3	218.762	81.2556	1162.25	256.647	-217.743	1265.99	45.4176	-31.9227	1374.42	-40.0057	-75.9703	1156.56	-51.2149	-69.9603	1076.89	-84.4367	-8.50313	967.389	-40.1161	86.3158	889.841	-94.7884	45.0601	872.931	-81.5099	112.84	810.96
77	0	155.183	134.131	1547.01	253.539	141.371	1549.06	150.332	-28.4218	1583.63	277.463	1.78928	1586.87	206.677	-103.924	1441.38	211.517	-199.935	1188.62	226.777	37.6388	1342.06	220.769	93.1813	1164.22	257.971	-206.029	1266.81	47.7949	-19.8837	1376.74	-37.5415	-64.4773	1158.81	-48.3754	-59.6183	1078.98	-81.6352	0.820948	968.894	-37.4335	95.0249	890.578	-91.9784	53.5124	873.939	-78.5889	120.435	811.198
78	0	158.152	146.125	1548.48	256.534	153.257	1550.27	153.256	-16.3589	1585.45	280.434	13.7642	1588.3	209.025	-92.479	1442.89	212.548	-188.021	1189.88	229.069	49.1554	1343.94	222.618	104.932	1166.26	259.257	-194.388	1267.85	50.053	-7.94623	1379.2	-35.2008	-53.0799	1161.21	-45.6092	-49.4254	1081.2	-78.8353	10.0028	970.519	-34.6625	103.541	891.437	-89.112	61.8161	875.068	-75.5114	127.835	811.53
79	0	161.01	158.098	1550.03	259.415	165.115	1551.56	156.054	-4.31307	1587.37	283.28	25.711	1589.83	211.26	-81.0655	1444.55	213.561	-176.244	1191.34	231.2	60.6049	1345.91	224.292	116.507	1168.34	260.507	-182.826	1269.1	52.178	3.87602	1381.75	-32.9966	-41.799	1163.71	-42.9359	-39.3794	1083.53	-76.0582	19.0566	972.245	-31.8295	111.893	892.409	-86.2128	69.9983	876.302	-72.3084	135.086	811.957
80	0	163.74	170.044	1551.66	262.167	176.941	1552.93	158.714	7.70772	1589.37	285.989	37.6211	1591.43	213.374	-69.6868	1446.33	214.562	-164.609	1192.98	233.158	71.9847	1347.94	225.779	127.91	1170.44	261.724	-171.346	1270.54	54.1581	15.5713	1384.37	-30.9386	-30.6554	1166.29	-40.3731	-29.4777	1085.94	-73.3243	27.996	974.05	-28.9623	120.109	893.485	-83.305	78.0846	877.629	-69.0143	142.231	812.475
81	0	166.333	181.954	1553.34	264.778	188.726	1554.34	161.221	19.6956	1591.42	288.546	49.4865	1593.08	215.358	-58.3463	1448.22	215.555	-153.122	1194.77	234.935	83.2929	1350.01	227.071	139.146	1172.53	262.911	-159.952	1272.14	55.9839	27.1298	1387.02	-29.0333	-19.6694	1168.9	-37.9359	-19.7175	1088.39	-70.6535	36.8338	975.912	-26.0904	128.217	894.654	-80.4132	86.099	879.031	-65.666	149.311	813.083
82	0	168.776	193.822	1555.05	267.238	200.466	1555.79	163.566	31.6429	1593.5	290.943	61.2996	1594.75	217.206	-47.0477	1450.19	216.545	-141.784	1196.68	236.525	94.528	1352.09	228.165	150.228	1174.59	264.073	-148.645	1273.89	57.6488	38.544	1389.68	-27.2836	-8.85985	1171.52	-35.6368	-10.0958	1090.86	-68.0645	45.5816	977.808	-23.2434	136.245	895.903	-77.5613	94.063	880.492	-62.3025	156.367	813.776
83	0	171.062	205.642	1556.77	269.538	212.154	1557.24	165.742	43.5425	1595.58	293.171	73.054	1596.43	218.914	-35.7946	1452.22	217.535	-130.594	1198.7	237.926	105.689	1354.17	229.062	161.166	1176.61	265.211	-137.426	1275.75	59.1488	49.8088	1392.3	-25.6886	1.75674	1174.12	-33.4855	-0.608941	1093.31	-65.5745	54.2504	979.718	-20.4512	144.219	897.221	-74.7731	101.996	881.995	-58.9637	163.433	814.549
84	0	173.184	217.408	1558.48	271.671	223.785	1558.7	167.743	55.3874	1597.65	295.223	84.7439	1598.1	220.48	-24.5905	1454.29	218.529	-119.548	1200.79	239.14	116.774	1356.22	229.768	171.976	1178.56	266.328	-126.294	1277.71	60.4825	60.9217	1394.87	-24.2445	12.1666	1176.66	-31.4883	8.74695	1095.74	-63.1988	62.8498	981.62	-17.7428	152.163	898.593	-72.0708	109.914	883.521	-55.6896	170.542	815.395
85	0	175.137	229.115	1560.17	273.634	235.356	1560.13	169.566	67.1714	1599.67	297.096	96.3648	1599.73	221.903	-13.4387	1456.36	219.528	-108.641	1202.92	240.17	127.784	1358.22	230.293	182.671	1180.44	267.424	-115.249	1279.72	61.6513	71.8826	1397.36	-22.9445	22.3593	1179.13	-29.6491	17.9766	1098.1	-60.9511	71.3886	983.495	-15.1459	160.098	900.006	-69.4757	117.831	885.055	-52.5194	177.722	816.307
86	0	176.919	240.756	1561.82	275.421	246.862	1561.53	171.21	78.8887	1601.63	298.789	107.913	1601.31	223.186	-2.34223	1458.42	220.53	-97.8644	1205.07	241.025	138.718	1360.16	230.653	193.267	1182.24	268.502	-104.287	1281.77	62.659	82.6943	1399.74	-21.7794	32.3287	1181.49	-27.9686	27.0855	1100.39	-58.8426	79.8746	985.323	-12.6866	168.045	901.445	-67.0071	125.759	886.577	-49.4904	184.994	817.275
87	0	178.528	252.329	1563.4	277.033	258.302	1562.87	172.676	90.5346	1603.51	300.302	119.387	1602.83	224.33	8.69682	1460.44	221.536	-87.2082	1207.21	241.714	149.577	1362.03	230.863	203.777	1183.96	269.559	-93.4049	1283.83	63.5119	93.3622	1401.99	-20.7383	42.0733	1183.74	-26.4451	36.0803	1102.58	-56.8829	88.315	987.086	-10.3883	176.02	902.892	-64.6823	133.707	888.071	-46.6373	192.376	818.287
88	0	179.964	263.83	1564.91	278.471	269.674	1564.16	173.969	102.105	1605.3	301.638	130.785	1604.26	225.34	19.677	1462.41	222.54	-76.6613	1209.3	242.25	160.364	1363.8	230.946	214.214	1185.58	270.595	-82.598	1285.86	64.2177	103.894	1404.11	-19.8095	51.5965	1185.85	-25.0748	44.9689	1104.65	-55.0789	96.7166	988.767	-8.27166	184.037	904.331	-62.5162	141.682	889.518	-43.9912	199.882	819.329
89	0	181.231	275.257	1566.33	279.735	280.977	1565.36	175.092	113.597	1606.97	302.801	142.107	1605.61	226.221	30.5979	1464.29	223.538	-66.2116	1211.33	242.645	171.081	1365.48	230.921	224.587	1187.1	271.606	-71.8612	1287.85	64.7862	114.301	1406.06	-18.9808	60.9068	1187.81	-23.852	53.7606	1106.59	-53.4358	105.086	990.351	-6.3541	192.107	905.743	-60.5215	149.688	890.902	-41.5787	207.518	820.387
90	0	182.332	286.607	1567.64	280.83	292.211	1566.47	176.053	125.008	1608.51	303.798	153.354	1606.85	226.979	41.4602	1466.07	224.524	-55.8462	1213.26	242.913	181.732	1367.03	230.813	234.907	1188.52	272.59	-61.1888	1289.75	65.2282	124.594	1407.84	-18.2401	70.0179	1189.61	-22.7697	62.4662	1108.38	-51.9566	113.428	991.821	-4.64951	200.24	907.11	-58.7082	157.728	892.205	-39.4219	215.289	821.441
91	0	183.271	297.881	1568.84	281.761	303.379	1567.49	176.86	136.337	1609.9	304.636	164.528	1607.97	227.622	52.2657	1467.72	225.489	-45.5518	1215.08	243.071	192.321	1368.46	230.643	245.182	1189.82	273.54	-50.5747	1291.55	65.555	134.789	1409.43	-17.5764	78.9484	1191.23	-21.82	71.0979	1110.02	-50.6425	121.751	993.164	-3.16805	208.441	908.411	-57.0837	165.804	893.409	-37.5371	223.195	822.473
92	0	184.054	309.08	1569.9	282.534	314.481	1568.39	177.522	147.585	1611.15	305.324	175.632	1608.96	228.154	63.0172	1469.24	226.424	-35.3152	1216.76	243.133	202.854	1369.75	230.433	255.416	1190.99	274.451	-40.0124	1293.23	65.7787	144.901	1410.82	-16.9795	87.7213	1192.67	-20.9945	79.6693	1111.49	-49.4927	130.059	994.366	-1.91616	216.713	909.624	-55.6528	173.917	894.499	-35.9355	231.229	823.461
93	0	184.688	320.203	1570.83	283.157	325.52	1569.17	178.048	158.753	1612.22	305.872	186.67	1609.81	228.585	73.7187	1470.6	227.32	-25.1231	1218.28	243.113	213.337	1370.89	230.203	265.617	1192.02	275.317	-29.4953	1294.76	65.911	154.948	1412	-16.441	96.3633	1193.91	-20.2845	88.1954	1112.77	-48.5053	138.36	995.413	-0.896581	225.058	910.729	-54.418	182.064	895.456	-34.6226	239.385	824.381
94	0	185.181	331.255	1571.6	283.637	336.501	1569.81	178.448	169.843	1613.13	306.288	197.647	1610.52	228.919	84.3751	1471.79	228.167	-14.9628	1219.62	243.025	223.778	1371.87	229.971	275.788	1192.9	276.13	-19.0169	1296.12	65.9634	164.946	1412.96	-15.9542	104.904	1194.96	-19.6816	96.6921	1113.87	-47.6767	146.66	996.296	-0.108584	233.475	911.703	-53.3795	190.246	896.266	-33.5986	247.653	825.211
95	0	185.54	342.238	1572.22	283.982	347.427	1570.31	178.733	180.857	1613.84	306.583	208.566	1611.07	229.164	94.9921	1472.79	228.953	-4.82219	1220.77	242.884	234.184	1372.67	229.749	285.935	1193.62	276.884	-8.57052	1297.29	65.9463	174.915	1413.71	-15.514	113.376	1195.8	-19.1778	105.176	1114.77	-47.0025	154.965	997.002	0.451753	241.961	912.525	-52.5352	198.46	896.912	-32.8589	256.018	825.925
96	0	185.773	353.156	1572.66	284.201	358.303	1570.67	178.91	191.801	1614.37	306.766	219.434	1611.46	229.325	105.576	1473.59	229.67	5.31044	1221.71	242.698	244.565	1373.29	229.552	296.062	1194.16	277.569	1.85047	1298.27	65.8693	184.872	1414.23	-15.1177	121.812	1196.44	-18.7656	113.666	1115.47	-46.4772	163.283	997.521	0.791159	250.513	913.175	-51.8817	206.703	897.381	-32.3944	264.468	826.5
97	0	185.886	364.013	1572.93	284.302	369.132	1570.86	178.99	202.677	1614.7	306.847	230.256	1611.68	229.408	116.134	1474.18	230.307	15.446	1222.44	242.48	254.928	1373.71	229.385	306.176	1194.51	278.178	12.2525	1299.03	65.7406	194.837	1414.52	-14.764	130.246	1196.86	-18.4384	122.179	1115.96	-46.0951	171.62	997.846	0.918719	259.125	913.633	-51.4139	214.974	897.659	-32.1926	272.987	826.913
98	0	185.889	374.814	1573.02	284.293	379.921	1570.89	178.979	213.492	1614.83	306.832	241.037	1611.72	229.415	126.673	1474.56	230.856	25.5947	1222.94	242.236	265.282	1373.94	229.255	316.284	1194.67	278.705	22.6421	1299.58	65.5668	204.825	1414.57	-14.4537	138.712	1197.07	-18.1902	130.732	1116.24	-45.8497	179.985	997.968	0.845375	267.792	913.879	-51.1255	223.27	897.735	-32.2381	281.558	827.141
99	0	185.786	385.565	1572.93	284.18	390.673	1570.76	178.884	224.251	1614.75	306.729	251.782	1611.58	229.35	137.201	1474.71	231.309	35.7661	1223.21	241.973	275.636	1373.95	229.164	326.394	1194.62	279.141	33.0257	1299.89	65.3529	214.854	1414.4	-14.1891	147.243	1197.07	-18.0161	139.344	1116.3	-45.7345	188.386	997.882	0.583396	276.509	913.898	-51.0094	231.59	897.598	-32.5135	290.166	827.164
100	0	185.583	396.271	1572.65	283.971	401.393	1570.45	178.711	234.958	1614.47	306.544	262.496	1611.26	229.215	147.724	1474.64	231.661	45.9692	1223.24	241.696	286	1373.75	229.111	336.515	1194.36	279.479	43.41	1299.97	65.1023	224.94	1413.99	-13.9738	155.869	1196.85	-17.9117	148.033	1116.15	-45.7432	196.829	997.582	0.145848	285.268	913.674	-51.0583	239.932	897.24	-33.0004	298.796	826.963
101	0	185.286	406.937	1572.19	283.669	412.086	1569.97	178.462	245.619	1613.97	306.279	273.184	1610.76	229.011	158.252	1474.33	231.907	56.2123	1223.04	241.406	296.381	1373.33	229.094	346.657	1193.89	279.715	53.8016	1299.81	64.8168	235.095	1413.36	-13.8124	164.618	1196.42	-17.8737	156.814	1115.79	-45.8695	205.324	997.065	-0.453919	294.066	913.196	-51.2644	248.295	896.654	-33.68	307.434	826.524
102	0	184.898	417.569	1571.53	283.28	422.757	1569.32	178.14	256.239	1613.28	305.939	283.848	1610.07	228.736	168.79	1473.79	232.044	66.5036	1222.59	241.103	306.789	1372.7	229.107	356.833	1193.2	279.842	64.2077	1299.42	64.4966	245.333	1412.5	-13.7102	173.516	1195.78	-17.8994	165.703	1115.2	-46.1075	213.877	996.328	-1.20275	302.898	912.451	-51.62	256.68	895.836	-34.5339	316.066	825.833
103	0	184.42	428.172	1570.7	282.803	433.409	1568.5	177.744	266.824	1612.37	305.523	294.494	1609.2	228.391	179.347	1473.01	232.071	76.8508	1221.9	240.787	317.232	1371.85	229.145	367.053	1192.3	279.857	74.6356	1298.78	64.1402	255.663	1411.42	-13.6728	182.584	1194.92	-17.9868	174.715	1114.4	-46.4516	222.497	995.37	-2.08812	311.759	911.434	-52.1179	265.087	894.781	-35.5448	324.684	824.879
104	0	183.855	438.752	1569.69	282.242	444.047	1567.52	177.275	277.379	1611.27	305.031	305.124	1608.14	227.973	189.929	1472.01	231.987	87.2612	1220.98	240.454	327.719	1370.78	229.2	377.329	1191.19	279.758	85.0933	1297.91	63.7448	266.094	1410.12	-13.7059	191.84	1193.86	-18.1343	183.863	1113.38	-46.8968	231.191	994.194	-3.09848	320.647	910.139	-52.751	273.518	893.49	-36.6972	333.278	823.654
105	0	183.2	449.316	1568.51	281.594	454.675	1566.39	176.728	287.908	1609.97	304.461	315.741	1606.92	227.478	200.545	1470.79	231.795	97.7423	1219.82	240.099	338.258	1369.51	229.262	387.671	1189.87	279.544	95.5891	1296.81	63.3064	276.633	1408.61	-13.8147	201.297	1192.59	-18.3411	193.159	1112.15	-47.4385	239.966	992.799	-4.22352	329.561	908.562	-53.5131	281.975	891.964	-37.9776	341.843	822.154
106	0	182.455	459.868	1567.17	280.857	465.297	1565.11	176.1	298.417	1608.47	303.808	326.348	1605.52	226.904	211.201	1469.34	231.499	108.301	1218.43	239.716	348.857	1368.03	229.323	398.092	1188.37	279.215	106.132	1295.49	62.8198	287.285	1406.89	-14.004	210.968	1191.12	-18.6064	202.612	1110.71	-48.0724	248.829	991.191	-5.45437	338.501	906.706	-54.3982	290.461	890.205	-39.3749	350.376	820.377
107	0	181.615	470.414	1565.69	280.028	475.919	1563.69	175.385	308.91	1606.8	303.068	336.949	1603.97	226.246	221.905	1467.7	231.103	118.946	1216.83	239.296	359.524	1366.36	229.372	408.6	1186.68	278.773	116.731	1293.95	62.2788	298.052	1404.97	-14.2777	220.857	1189.45	-18.93	212.23	1109.06	-48.7948	257.785	989.374	-6.78361	347.467	904.572	-55.401	298.98	888.22	-40.8804	358.876	818.323
108	0	180.678	480.96	1564.08	279.102	486.545	1562.16	174.577	319.392	1604.96	302.235	347.546	1602.27	225.501	232.665	1465.86	230.612	129.683	1215.03	238.83	370.269	1364.52	229.399	419.204	1184.82	278.221	127.397	1292.22	61.6767	308.935	1402.87	-14.6386	230.967	1187.58	-19.3117	222.021	1107.21	-49.6019	266.841	987.355	-8.20524	356.463	902.168	-56.5165	307.535	886.016	-42.4878	367.345	815.999
109	0	179.636	491.512	1562.35	278.074	497.18	1560.53	173.668	329.869	1602.96	301.302	358.144	1600.44	224.663	243.488	1463.85	230.035	140.521	1213.03	238.31	381.098	1362.5	229.393	429.913	1182.79	277.564	138.14	1290.3	61.0061	319.935	1400.59	-15.0883	241.297	1185.51	-19.7513	231.989	1105.17	-50.4902	276	985.145	-9.71456	365.491	899.502	-57.7399	316.133	883.604	-44.1928	375.789	813.412
110	0	178.484	502.077	1560.53	276.936	507.831	1558.81	172.651	340.347	1600.82	300.26	368.748	1598.48	223.728	254.382	1461.67	229.379	151.465	1210.85	237.724	392.021	1360.33	229.343	440.733	1180.62	276.809	148.97	1288.21	60.2596	331.049	1398.14	-15.6268	251.843	1183.26	-20.2483	242.135	1102.94	-51.4561	285.266	982.754	-11.3079	374.555	896.589	-59.0665	324.776	880.997	-45.9928	384.213	810.576
111	0	177.214	512.662	1558.64	275.681	518.504	1557.04	171.518	350.831	1598.55	299.103	379.362	1596.43	222.693	265.355	1459.36	228.653	162.525	1208.53	237.062	403.046	1358.03	229.238	451.672	1178.32	275.962	159.9	1285.98	59.4295	342.276	1395.53	-16.253	262.597	1180.83	-20.8023	252.46	1100.54	-52.4956	294.643	980.196	-12.9823	383.662	893.443	-60.4913	333.471	878.209	-47.8864	392.626	807.505
112	0	175.819	523.273	1556.69	274.302	529.208	1555.22	170.261	361.329	1596.18	297.822	389.994	1594.3	221.554	276.416	1456.93	227.866	173.708	1206.07	236.315	414.181	1355.63	229.068	462.734	1175.91	275.032	170.94	1283.63	58.5087	353.61	1392.79	-16.9642	273.548	1178.23	-21.4119	262.964	1097.97	-53.6047	304.131	977.487	-14.7354	392.816	890.085	-62.009	342.222	875.26	-49.8727	401.038	804.222
113	0	174.291	533.919	1554.72	272.791	539.949	1553.4	168.872	371.849	1593.73	296.409	400.651	1592.12	220.307	287.573	1454.41	227.027	185.02	1203.5	235.471	425.433	1353.13	228.823	473.925	1173.4	274.026	182.102	1281.19	57.4906	365.05	1389.93	-17.7564	284.684	1175.47	-22.0758	273.643	1095.26	-54.7788	313.733	974.647	-16.5645	402.023	886.538	-63.6135	351.035	872.17	-51.951	409.461	800.749
114	0	172.624	544.608	1552.75	271.141	550.737	1551.59	167.344	382.399	1591.22	294.856	411.341	1589.91	218.951	298.835	1451.83	226.147	196.469	1200.86	234.522	436.812	1350.57	228.494	485.253	1170.83	272.954	193.397	1278.68	56.3691	376.59	1386.96	-18.6246	295.988	1172.57	-22.7918	284.494	1092.42	-56.0126	323.45	971.695	-18.4667	411.29	882.829	-65.298	359.915	868.964	-54.1196	417.906	797.114
115	0	170.809	555.348	1550.8	269.343	561.581	1549.82	165.671	392.989	1588.68	293.158	422.075	1587.69	217.484	310.209	1449.22	225.233	208.061	1198.17	233.46	448.323	1347.98	228.073	496.721	1168.21	271.824	204.834	1276.14	55.1395	388.227	1383.92	-19.5627	307.445	1169.55	-23.5571	295.511	1089.47	-57.3004	333.281	968.657	-20.4387	420.623	878.987	-67.0547	368.866	865.666	-56.3758	426.386	793.349
116	0	168.842	566.148	1548.9	267.393	572.491	1548.12	163.848	403.63	1586.15	291.308	432.863	1585.5	215.906	321.704	1446.61	224.295	219.803	1195.47	232.278	459.975	1345.39	227.554	508.338	1165.58	270.646	216.424	1273.6	53.7982	399.956	1380.83	-20.5641	319.036	1166.43	-24.3683	306.689	1086.45	-58.6358	343.227	965.559	-22.4756	430.028	875.046	-68.8748	377.894	862.307	-58.7148	434.912	789.488
117	0	166.718	577.017	1547.09	265.285	583.477	1546.51	161.872	414.331	1583.64	289.302	443.716	1583.38	214.217	333.326	1444.03	223.34	231.698	1192.79	230.971	471.771	1342.82	226.931	520.11	1162.96	269.426	228.174	1271.1	52.343	411.773	1377.72	-21.6215	330.744	1163.24	-25.2215	318.021	1083.37	-60.0115	353.287	962.429	-24.5718	439.511	871.042	-70.7483	387.003	858.916	-61.1297	443.496	785.568
118	0	164.435	587.965	1545.37	263.017	594.549	1545.02	159.74	425.105	1581.2	287.138	454.646	1581.34	212.42	345.081	1441.52	222.374	243.751	1190.17	229.536	483.717	1340.32	226.2	532.044	1160.4	268.174	240.092	1268.67	50.7737	423.675	1374.61	-22.7273	342.552	1160.01	-26.1121	329.499	1080.27	-61.4197	363.462	959.298	-26.7202	449.078	867.013	-72.6641	396.199	855.528	-63.6106	452.15	781.63
119	0	161.991	599	1543.79	260.586	605.715	1543.69	157.452	435.962	1578.86	284.815	465.665	1579.42	210.517	356.975	1439.11	221.403	255.964	1187.65	227.972	495.816	1337.91	225.36	544.147	1157.92	266.895	252.182	1266.35	49.0915	435.659	1371.53	-23.874	354.442	1156.78	-27.0352	341.115	1077.18	-62.8524	373.75	956.201	-28.9122	458.736	863.002	-74.6102	405.487	852.176	-66.1452	460.883	777.714
120	0	159.388	610.131	1542.36	257.993	616.986	1542.52	155.009	446.915	1576.65	282.334	476.783	1577.66	208.515	369.011	1436.83	220.431	268.336	1185.26	226.281	508.068	1335.63	224.409	556.425	1155.57	265.596	264.447	1264.17	47.3	447.722	1368.53	-25.0542	366.4	1153.57	-27.9854	352.862	1074.14	-64.3006	384.151	953.169	-31.138	468.491	859.049	-76.5739	414.873	848.895	-68.7182	469.705	773.864
121	0	156.629	621.365	1541.12	255.241	628.367	1541.55	152.416	457.972	1574.6	279.697	488.011	1576.09	206.418	381.191	1434.73	219.462	280.866	1183.04	224.466	520.474	1333.51	223.348	568.883	1153.38	264.283	276.887	1262.18	45.4047	459.861	1365.64	-26.2605	378.415	1150.44	-28.9571	364.734	1071.18	-65.7556	394.666	950.238	-33.3862	478.35	855.199	-78.5417	424.362	845.723	-71.3118	478.625	770.121
122	0	153.722	632.709	1540.06	252.335	639.866	1540.8	149.679	469.143	1572.75	276.912	499.358	1574.73	204.236	393.513	1432.81	218.498	293.549	1181.03	222.533	533.03	1331.59	222.181	581.523	1151.39	262.96	289.499	1260.4	43.4134	472.074	1362.89	-27.4862	390.477	1147.43	-29.9445	376.721	1068.35	-67.2084	405.295	947.442	-35.6448	488.318	851.494	-80.5001	433.962	842.694	-73.9064	487.651	766.528
123	0	150.675	644.166	1539.23	249.283	651.487	1540.28	146.806	480.435	1571.12	273.984	510.831	1573.62	201.978	405.976	1431.13	217.541	306.377	1179.26	220.491	545.73	1329.9	220.911	594.344	1149.63	261.632	302.277	1258.86	41.3357	484.357	1360.31	-28.725	402.58	1144.57	-30.9422	388.817	1065.67	-68.6503	416.039	944.816	-37.9007	498.404	847.977	-82.4357	443.68	839.843	-76.4811	496.793	763.126
124	0	147.499	655.74	1538.62	246.095	663.232	1540.01	143.807	491.855	1569.74	270.926	522.437	1572.78	199.655	418.576	1429.7	216.592	319.338	1177.76	218.351	558.566	1328.46	219.544	607.341	1148.15	260.303	315.211	1257.61	39.1836	496.706	1357.94	-29.9711	414.719	1141.91	-31.9447	401.016	1063.19	-70.0729	426.9	942.392	-40.1401	508.616	844.689	-84.3354	453.524	837.205	-79.0142	506.058	759.954
125	0	144.207	667.433	1538.26	242.784	675.103	1540	140.697	503.404	1568.63	267.75	534.177	1572.23	197.28	431.304	1428.56	215.651	332.42	1176.56	216.125	571.528	1327.3	218.087	620.505	1146.95	258.979	328.289	1256.65	36.9708	509.117	1355.82	-31.2193	426.896	1139.48	-32.9469	413.311	1060.94	-71.4687	437.88	940.201	-42.3493	518.962	841.668	-86.187	463.505	834.811	-81.4841	515.457	757.048
126	0	140.817	679.24	1538.15	239.364	687.095	1540.25	137.491	515.084	1567.81	264.472	546.054	1571.99	194.868	444.15	1427.7	214.72	345.605	1175.68	213.829	584.601	1326.43	216.548	633.82	1146.08	257.662	341.495	1256.02	34.7125	521.584	1353.96	-32.4648	439.11	1137.33	-33.9444	425.695	1058.96	-72.8307	448.983	938.271	-44.5145	529.451	838.951	-87.9795	473.633	832.69	-83.8703	525.002	754.441
127	0	137.345	691.16	1538.29	235.854	699.207	1540.78	134.209	526.891	1567.3	261.11	558.064	1572.06	192.433	457.104	1427.16	213.798	358.872	1175.14	211.478	597.77	1325.88	214.935	647.265	1145.53	256.358	354.81	1255.72	32.4253	534.1	1352.41	-33.7034	451.367	1135.49	-34.9333	438.162	1057.27	-74.1532	460.21	936.627	-46.6225	540.094	836.569	-89.7037	483.92	830.866	-86.154	534.705	752.163
128	0	133.813	703.184	1538.69	232.271	711.43	1541.58	130.87	538.82	1567.1	257.684	570.204	1572.46	189.993	470.149	1426.94	212.887	372.201	1174.95	209.093	611.016	1325.65	213.259	660.816	1145.33	255.071	368.211	1255.78	30.1267	546.657	1351.17	-34.931	463.669	1133.97	-35.9104	450.705	1055.89	-75.4318	471.567	935.289	-48.661	550.9	834.549	-91.3517	494.378	829.362	-88.3186	544.581	750.238
129	0	130.241	715.302	1539.34	228.638	723.754	1542.65	127.498	550.861	1567.21	254.217	582.466	1573.18	187.566	483.27	1427.05	211.985	385.567	1175.13	206.69	624.317	1325.74	211.53	674.441	1145.47	253.807	381.674	1256.19	27.8346	559.246	1350.26	-36.1444	476.021	1132.81	-36.8734	463.316	1054.85	-76.6631	483.057	934.273	-50.6186	561.88	832.914	-92.918	505.021	828.195	-90.3507	554.649	748.685
130	0	126.653	727.504	1540.24	224.977	736.169	1543.96	124.119	563.003	1567.64	250.734	594.838	1574.22	185.167	496.446	1427.49	211.092	398.944	1175.66	204.291	637.651	1326.15	209.759	688.107	1145.94	252.567	395.173	1256.94	25.5671	571.857	1349.7	-37.3404	488.425	1132.02	-37.821	475.988	1054.16	-77.8456	494.685	933.591	-52.4855	573.045	831.681	-94.399	515.863	827.376	-92.2402	564.927	747.52
131	0	123.073	739.774	1541.36	221.312	748.661	1545.52	120.758	575.232	1568.37	247.26	607.309	1575.57	182.815	509.657	1428.24	210.208	412.307	1176.55	201.915	650.993	1326.88	207.96	701.776	1146.75	251.357	408.68	1258.04	23.3416	584.477	1349.5	-38.5162	500.883	1131.6	-38.7529	488.71	1053.81	-78.979	506.454	933.249	-54.2534	584.406	830.859	-95.7933	526.919	826.912	-93.9809	575.439	746.751
132	0	119.526	752.096	1542.71	217.67	761.213	1547.3	117.443	587.53	1569.4	243.824	619.864	1577.21	180.525	522.882	1429.3	209.329	425.627	1177.78	199.581	664.32	1327.9	206.144	715.41	1147.85	250.178	422.167	1259.47	21.1747	597.096	1349.65	-39.6699	513.393	1131.55	-39.6697	501.474	1053.83	-80.0646	518.367	933.246	-55.916	595.973	830.455	-97.1015	538.202	826.804	-95.57	586.208	746.38
133	0	116.038	764.454	1544.25	214.076	773.81	1549.29	114.201	599.88	1570.7	240.453	632.483	1579.11	178.314	536.098	1430.65	208.454	438.881	1179.34	197.31	677.604	1329.21	204.326	728.971	1149.24	249.031	435.605	1261.2	19.0819	609.701	1350.14	-40.7997	525.951	1131.88	-40.5735	514.268	1054.18	-81.1051	530.429	933.577	-57.4688	607.754	830.468	-98.3261	549.725	827.048	-97.009	597.258	746.406
134	0	112.635	776.829	1545.98	210.559	786.431	1551.44	111.061	612.262	1572.26	237.176	645.15	1581.26	176.194	549.282	1432.27	207.578	452.042	1181.19	195.119	690.823	1330.77	202.52	742.423	1150.87	247.917	448.968	1263.22	17.0769	622.28	1350.96	-41.905	538.549	1132.56	-41.4672	527.081	1054.88	-82.1046	542.64	934.233	-58.9094	619.759	830.889	-99.4713	561.501	827.635	-98.3024	608.615	746.822
135	0	109.341	789.203	1547.87	207.145	799.06	1553.75	108.049	624.656	1574.05	234.02	657.843	1583.62	174.179	562.412	1434.13	206.698	465.088	1183.31	193.025	703.953	1332.57	200.741	755.731	1152.73	246.834	462.229	1265.48	15.1715	634.822	1352.11	-42.9858	551.179	1133.57	-42.3549	539.902	1055.88	-83.0684	555.002	935.198	-60.2375	631.994	831.709	-100.543	573.54	828.551	-99.4579	620.302	747.614
136	0	106.182	801.558	1549.89	203.86	811.676	1556.19	105.189	637.043	1576.05	231.011	670.541	1586.15	172.276	575.469	1436.21	205.809	477.999	1185.66	191.042	716.973	1334.57	199.005	768.866	1154.77	245.78	475.365	1267.95	13.3751	647.316	1353.54	-44.0431	563.828	1134.9	-43.2418	552.718	1057.19	-84.0026	567.514	936.452	-61.4547	644.464	832.909	-101.547	585.852	829.777	-100.485	632.341	748.768
137	0	103.181	813.877	1552.04	200.731	824.261	1558.72	102.504	649.403	1578.22	228.173	683.223	1588.83	170.495	588.433	1438.48	204.906	490.756	1188.22	189.183	729.862	1336.73	197.325	781.802	1156.96	244.752	488.354	1270.61	11.695	659.752	1355.25	-45.0792	576.484	1136.51	-44.134	565.519	1058.75	-84.9145	580.176	937.974	-62.5645	657.173	834.469	-102.493	598.442	831.292	-101.397	644.752	750.262
138	0	100.357	826.146	1554.27	197.781	836.797	1561.32	100.014	661.719	1580.54	225.528	695.869	1591.62	168.839	601.287	1440.91	203.984	503.344	1190.94	187.456	742.606	1339.03	195.716	794.518	1159.26	243.744	501.179	1273.4	10.136	672.123	1357.19	-46.097	589.131	1138.37	-45.0382	578.293	1060.56	-85.8116	592.985	939.735	-63.5719	670.124	836.366	-103.387	611.315	833.071	-102.204	657.548	752.074
139	0	97.7315	838.35	1556.59	195.03	849.268	1563.96	97.7344	673.975	1582.98	223.094	708.459	1594.47	167.312	614.018	1443.46	203.038	515.752	1193.78	185.87	755.19	1341.44	194.19	807.002	1161.65	242.753	513.825	1276.3	8.70037	684.42	1359.33	-47.1008	601.757	1140.45	-45.962	591.031	1062.57	-86.702	605.938	941.709	-64.4836	683.315	838.573	-104.239	624.473	835.087	-102.921	670.742	754.181
140	0	95.3185	850.477	1558.95	192.498	861.659	1566.62	95.677	686.158	1585.5	220.885	720.973	1597.36	165.913	626.614	1446.09	202.065	527.973	1196.71	184.426	767.606	1343.91	192.758	819.243	1164.07	241.773	526.281	1279.26	7.38807	696.639	1361.65	-48.0957	614.347	1142.72	-46.9133	603.724	1064.75	-87.5936	619.03	943.866	-65.3072	696.743	841.062	-105.057	637.913	837.311	-103.56	684.339	756.556
141	0	93.131	862.52	1561.34	190.2	873.955	1569.26	93.8493	698.256	1588.08	218.911	733.397	1600.25	164.641	639.065	1448.79	201.062	540.001	1199.69	183.127	779.845	1346.43	191.427	831.24	1166.51	240.799	538.541	1282.25	6.19693	708.775	1364.11	-49.0873	626.889	1145.13	-47.9002	616.365	1067.07	-88.4945	632.258	946.176	-66.0511	710.406	843.805	-105.85	651.632	839.715	-104.133	698.339	759.173
142	0	91.1783	874.47	1563.73	188.146	886.147	1571.87	92.2542	710.261	1590.68	217.178	745.715	1603.1	163.491	651.367	1451.51	200.027	551.835	1202.69	181.971	791.905	1348.95	190.203	842.995	1168.94	239.826	550.602	1285.24	5.12287	720.825	1366.67	-50.0821	639.371	1147.66	-48.9305	628.947	1069.49	-89.4122	645.615	948.609	-66.7244	724.295	846.771	-106.625	665.625	842.271	-104.65	712.739	762.007
143	0	89.4658	886.324	1566.12	186.344	898.225	1574.42	90.8901	722.168	1593.29	215.686	757.915	1605.89	162.457	663.516	1454.22	198.959	563.478	1205.66	180.953	803.785	1351.44	189.089	854.514	1171.33	238.851	562.462	1288.18	4.16019	732.787	1369.3	-51.0869	651.784	1150.27	-50.0119	641.468	1071.98	-90.3538	659.094	951.134	-67.3365	738.402	849.931	-107.392	679.883	844.949	-105.122	727.528	765.031
144	0	87.995	898.08	1568.47	184.796	910.183	1576.89	89.7511	733.974	1595.86	214.433	769.989	1608.58	161.533	675.51	1456.9	197.86	574.935	1208.59	180.066	815.487	1353.89	188.084	865.809	1173.65	237.87	574.125	1291.07	3.30193	744.66	1371.96	-52.1085	664.121	1152.94	-51.1515	653.926	1074.52	-91.3255	672.69	953.723	-67.8966	752.717	853.255	-108.156	694.396	847.722	-105.557	742.694	768.22
145	0	86.764	909.737	1570.77	183.503	922.016	1579.26	88.8273	745.678	1598.38	213.41	781.929	1611.16	160.711	687.35	1459.52	196.73	586.212	1211.45	179.303	827.017	1356.27	187.186	876.894	1175.89	236.882	585.597	1293.86	2.54022	756.444	1374.62	-53.1538	676.378	1155.62	-52.3552	666.321	1077.05	-92.333	686.395	956.348	-68.4137	767.227	856.713	-108.924	709.15	850.565	-105.961	758.217	771.551
146	0	85.7669	921.298	1573	182.459	933.724	1581.51	88.1053	757.281	1600.83	212.605	793.733	1613.6	159.981	699.041	1462.05	195.575	597.319	1214.2	178.654	838.381	1358.54	186.388	887.788	1178.04	235.886	596.887	1296.53	1.86671	768.139	1377.26	-54.229	688.552	1158.29	-53.6281	678.655	1079.57	-93.3805	700.203	958.982	-68.8966	781.918	860.276	-109.702	724.134	853.452	-106.341	774.076	774.999
147	0	84.9948	932.766	1575.13	181.655	945.305	1583.62	87.5691	768.787	1603.18	212.005	805.398	1615.89	159.336	710.585	1464.48	194.4	608.268	1216.83	178.108	849.586	1360.71	185.685	898.508	1180.06	234.883	608.004	1299.07	1.27284	779.745	1379.84	-55.3398	700.644	1160.93	-54.9737	690.933	1082.04	-94.4715	714.107	961.603	-69.3534	796.774	863.916	-110.495	739.33	856.359	-106.704	790.245	778.54
148	0	84.4356	944.146	1577.16	181.079	956.763	1585.58	87.2002	780.201	1605.4	211.591	816.926	1618	158.766	721.989	1466.78	193.211	619.07	1219.31	177.654	860.644	1362.74	185.066	909.076	1181.95	233.875	618.959	1301.45	0.750171	791.264	1382.33	-56.4908	712.659	1163.5	-56.3938	703.161	1084.44	-95.6081	728.102	964.186	-69.7916	811.779	867.604	-111.308	754.723	859.266	-107.054	806.697	782.154
149	0	84.0746	955.443	1579.06	180.715	968.101	1587.39	86.9788	791.528	1607.5	211.344	828.322	1619.93	158.263	733.259	1468.94	192.018	629.737	1221.63	177.281	871.565	1364.61	184.521	919.51	1183.7	232.868	629.767	1303.67	0.290647	802.694	1384.72	-57.6851	724.601	1165.99	-57.8886	715.348	1086.74	-96.791	742.179	966.712	-70.2178	826.916	871.313	-112.142	770.295	862.153	-107.395	823.402	785.816
150	0	83.895	966.664	1580.83	180.547	979.326	1589.02	86.8844	802.775	1609.44	211.243	839.589	1621.67	157.819	744.403	1470.94	190.831	640.282	1223.78	176.977	882.359	1366.33	184.039	929.832	1185.3	231.867	640.439	1305.72	-0.113263	814.037	1386.97	-58.9244	736.479	1168.36	-59.4561	727.503	1088.92	-98.0197	756.334	969.162	-70.6381	842.166	875.018	-113.001	786.028	865.001	-107.734	840.328	789.506
151	0	83.8785	977.814	1582.44	180.554	990.443	1590.46	86.8968	813.949	1611.22	211.269	850.736	1623.22	157.429	755.43	1472.77	189.66	650.718	1225.75	176.732	893.04	1367.88	183.609	940.059	1186.73	230.878	650.991	1307.57	-0.468413	825.291	1389.08	-60.2084	748.303	1170.61	-61.0924	739.636	1090.97	-99.2923	770.56	971.519	-71.0576	857.512	878.692	-113.886	801.903	867.794	-108.073	857.445	793.203
152	0	84.0057	988.9	1583.88	180.715	1001.46	1591.73	86.996	825.057	1612.82	211.399	861.77	1624.56	157.085	766.347	1474.42	188.516	661.055	1227.53	176.534	903.618	1369.24	183.22	950.208	1187.99	229.911	661.435	1309.24	-0.780885	836.457	1391.02	-61.5346	760.082	1172.7	-62.7917	751.759	1092.87	-100.605	784.851	973.771	-71.4804	872.934	882.312	-114.797	817.9	870.518	-108.419	874.718	796.885
153	0	84.257	999.927	1585.15	181.01	1012.39	1592.8	87.1637	836.105	1614.25	211.616	872.702	1625.71	156.785	777.164	1475.89	187.413	671.306	1229.12	176.374	914.104	1370.42	182.859	960.295	1189.07	228.974	671.786	1310.72	-1.05594	847.531	1392.78	-62.8984	771.83	1174.63	-64.5458	763.884	1094.6	-101.954	799.201	975.904	-71.9099	888.416	885.856	-115.733	834	873.16	-108.775	892.115	800.534
154	0	84.6129	1010.9	1586.24	181.416	1023.23	1593.67	87.383	847.101	1615.48	211.899	883.541	1626.66	156.523	787.89	1477.18	186.362	681.48	1230.52	176.242	924.511	1371.4	182.518	970.331	1189.97	228.078	682.056	1312	-1.29798	858.513	1394.35	-64.2931	783.556	1176.38	-66.3451	776.023	1096.16	-103.333	813.603	977.91	-72.3481	903.94	889.304	-116.694	850.182	875.71	-109.144	909.604	804.132
155	0	85.0544	1021.83	1587.13	181.914	1034	1594.35	87.6393	858.049	1616.53	212.233	894.298	1627.41	156.299	798.532	1478.27	185.374	691.588	1231.72	176.132	934.848	1372.2	182.186	980.328	1190.69	227.232	692.259	1313.1	-1.51056	869.402	1395.72	-65.7097	795.272	1177.93	-68.1778	788.184	1097.54	-104.734	828.051	979.781	-72.796	919.488	892.638	-117.675	866.428	878.159	-109.529	927.151	807.662
156	0	85.5639	1032.71	1587.84	182.483	1044.71	1594.84	87.9198	868.954	1617.39	212.604	904.981	1627.97	156.109	809.1	1479.19	184.462	701.638	1232.74	176.035	945.124	1372.8	181.856	990.293	1191.21	226.447	702.406	1314.01	-1.69636	880.195	1396.89	-67.1372	806.988	1179.29	-70.0308	800.379	1098.73	-106.148	842.537	981.514	-73.2533	935.044	895.842	-118.674	882.716	880.5	-109.932	944.727	811.109
157	0	86.1251	1043.56	1588.35	183.107	1055.35	1595.15	88.2146	879.821	1618.05	212.999	915.602	1628.34	155.955	819.601	1479.91	183.635	711.638	1233.57	175.947	955.35	1373.21	181.521	1000.23	1191.56	225.733	712.508	1314.75	-1.85724	890.891	1397.86	-68.563	818.711	1180.44	-71.8898	812.614	1099.73	-107.568	857.052	983.104	-73.7185	950.592	898.905	-119.685	899.027	882.728	-110.354	962.301	814.46
158	0	86.7238	1054.36	1588.68	183.768	1065.95	1595.26	88.5158	890.653	1618.53	213.408	926.167	1628.54	155.836	830.041	1480.46	182.903	721.597	1234.23	175.863	965.532	1373.44	181.176	1010.16	1191.72	225.099	722.575	1315.31	-1.99423	901.488	1398.62	-69.9733	830.446	1181.38	-73.7396	824.894	1100.54	-108.981	871.589	984.55	-74.1886	966.116	901.815	-120.702	915.342	884.839	-110.793	979.845	817.706
159	0	87.3479	1065.13	1588.82	184.454	1076.5	1595.2	88.8179	901.452	1618.83	213.826	936.686	1628.57	155.753	840.427	1480.83	182.272	731.519	1234.71	175.78	975.677	1373.49	180.817	1020.06	1191.71	224.552	732.616	1315.7	-2.10761	911.988	1399.19	-71.3531	842.197	1182.12	-75.5643	837.222	1101.17	-110.377	886.135	985.854	-74.6595	981.602	904.565	-121.72	931.64	886.832	-111.247	997.332	820.837
160	0	87.9873	1075.87	1588.77	185.154	1087.01	1594.96	89.1177	912.219	1618.95	214.246	947.164	1628.44	155.707	850.764	1481.03	181.75	741.413	1235.03	175.697	985.791	1373.37	180.441	1029.96	1191.54	224.1	742.639	1315.94	-2.19693	922.391	1399.56	-72.6874	853.963	1182.66	-77.3479	849.597	1101.62	-111.745	900.681	987.018	-75.1262	997.036	907.153	-122.73	947.903	888.705	-111.713	1014.74	823.849
161	0	88.6346	1086.57	1588.55	185.858	1097.48	1594.57	89.4141	922.954	1618.91	214.665	957.607	1628.15	155.702	861.057	1481.07	181.339	751.283	1235.19	175.613	995.88	1373.09	180.049	1039.85	1191.2	223.749	752.649	1316.02	-2.26107	932.698	1399.75	-73.9612	865.74	1183	-79.0747	862.015	1101.9	-113.073	915.213	988.044	-75.5823	1012.4	909.574	-123.723	964.111	890.459	-112.185	1032.04	826.738
162	0	89.2847	1097.24	1588.17	186.563	1107.92	1594.01	89.7077	933.658	1618.7	215.085	968.017	1627.72	155.739	871.31	1480.96	181.041	761.135	1235.2	175.53	1005.95	1372.66	179.642	1049.73	1190.72	223.501	762.653	1315.95	-2.29835	942.913	1399.77	-75.1599	877.522	1183.16	-80.7294	874.47	1102.01	-114.35	929.718	988.936	-76.021	1027.69	911.831	-124.69	980.244	892.096	-112.657	1049.22	829.505
163	0	89.9349	1107.87	1587.62	187.263	1118.33	1593.31	90.0011	944.328	1618.34	215.505	978.397	1627.16	155.82	881.524	1480.69	180.858	770.974	1235.07	175.451	1016	1372.09	179.222	1059.6	1190.1	223.358	772.655	1315.75	-2.30651	953.04	1399.62	-76.2703	889.299	1183.14	-82.2977	886.952	1101.97	-115.563	944.181	989.698	-76.4349	1042.89	913.925	-125.621	996.286	893.616	-113.121	1066.25	832.151
164	0	90.5846	1118.46	1586.93	187.959	1128.7	1592.48	90.2982	954.962	1617.85	215.928	988.747	1626.47	155.949	891.702	1480.29	180.785	780.806	1234.79	175.38	1026.03	1371.38	178.796	1069.48	1189.36	223.32	782.658	1315.4	-2.28283	963.086	1399.31	-77.2803	901.06	1182.96	-83.7662	899.45	1101.78	-116.701	958.587	990.337	-76.816	1057.98	915.863	-126.505	1012.22	895.023	-113.569	1083.13	834.679
165	0	91.2357	1129.01	1586.1	188.653	1139.05	1591.52	90.6045	965.557	1617.22	216.359	999.066	1625.66	156.128	901.845	1479.75	180.82	790.637	1234.38	175.321	1036.05	1370.56	178.368	1079.37	1188.5	223.386	792.664	1314.92	-2.22417	973.056	1398.87	-78.1795	912.79	1182.62	-85.1233	911.948	1101.46	-117.755	972.918	990.855	-77.1564	1072.96	917.649	-127.33	1028.02	896.317	-113.99	1099.83	837.093
166	0	91.8919	1139.52	1585.15	189.347	1149.36	1590.44	90.9264	976.11	1616.47	216.804	1009.35	1624.75	156.359	911.953	1479.08	180.956	800.471	1233.83	175.282	1046.06	1369.64	177.947	1089.26	1187.55	223.551	802.676	1314.31	-2.12698	982.961	1398.3	-78.9597	924.475	1182.15	-86.3585	924.43	1101.01	-118.713	987.159	991.258	-77.4481	1087.81	919.292	-128.086	1043.68	897.501	-114.376	1116.34	839.4
167	0	92.5588	1149.99	1584.09	190.049	1159.63	1589.27	91.2715	986.618	1615.61	217.268	1019.6	1623.74	156.645	922.027	1478.29	181.186	810.315	1233.15	175.269	1056.06	1368.62	177.541	1099.16	1186.5	223.81	812.695	1313.57	-1.98746	992.808	1397.61	-79.6143	936.098	1181.55	-87.4633	936.878	1100.44	-119.566	1001.29	991.551	-77.6833	1102.52	920.797	-128.76	1059.17	898.577	-114.715	1132.65	841.603
168	0	93.2437	1160.4	1582.93	190.765	1169.86	1588	91.648	997.076	1614.65	217.761	1029.82	1622.64	156.989	932.066	1477.38	181.5	820.174	1232.34	175.291	1066.05	1367.51	177.162	1109.08	1185.39	224.156	822.721	1312.7	-1.80158	1002.61	1396.82	-80.1391	947.644	1180.83	-88.4309	949.275	1099.77	-120.307	1015.3	991.737	-77.8541	1117.08	922.173	-129.341	1074.49	899.544	-114.998	1148.75	843.708
169	0	93.9549	1170.76	1581.69	191.504	1180.06	1586.66	92.0651	1007.48	1613.59	218.29	1039.99	1621.46	157.392	942.071	1476.37	181.889	830.055	1231.4	175.356	1076.04	1366.33	176.819	1119.03	1184.21	224.58	832.755	1311.7	-1.56517	1012.38	1395.94	-80.5315	959.099	1180.01	-89.256	961.603	1099	-120.927	1029.17	991.819	-77.9532	1131.48	923.426	-129.818	1089.61	900.403	-115.214	1164.63	845.719
170	0	94.7021	1181.07	1580.37	192.277	1190.2	1585.25	92.5321	1017.83	1612.46	218.865	1050.11	1620.21	157.857	952.042	1475.26	182.342	839.964	1230.34	175.473	1086.01	1365.09	176.525	1129	1182.97	225.075	842.796	1310.58	-1.27397	1022.12	1394.98	-80.7908	970.448	1179.09	-89.935	973.845	1098.14	-121.42	1042.88	991.801	-77.9736	1145.71	924.562	-130.178	1104.52	901.154	-115.353	1180.27	847.638
171	0	95.4955	1191.33	1579	193.093	1200.3	1583.79	93.0587	1028.12	1611.25	219.495	1060.18	1618.9	158.385	961.978	1474.06	182.847	849.907	1229.15	175.651	1095.99	1363.8	176.291	1139.01	1181.69	225.629	852.846	1309.34	-0.923694	1031.85	1393.95	-80.9178	981.681	1178.09	-90.4656	985.984	1097.21	-121.781	1056.42	991.687	-77.9087	1159.76	925.586	-130.412	1119.2	901.794	-115.406	1195.67	849.464
172	0	96.3456	1201.53	1577.59	193.964	1210.35	1582.29	93.6549	1038.35	1609.99	220.191	1070.2	1617.53	158.979	971.88	1472.77	183.394	859.891	1227.84	175.9	1105.96	1362.46	176.129	1149.06	1180.39	226.233	862.904	1307.98	-0.510084	1041.58	1392.86	-80.9146	992.79	1177.02	-90.8469	998.007	1096.21	-122.005	1069.77	991.478	-77.7519	1173.62	926.5	-130.509	1133.65	902.321	-115.363	1210.81	851.197
173	0	97.2629	1211.67	1576.15	194.901	1220.35	1580.77	94.3304	1048.52	1608.68	220.962	1080.17	1616.12	159.64	981.751	1471.41	183.971	869.922	1226.42	176.229	1115.93	1361.1	176.05	1159.15	1179.06	226.878	872.972	1306.5	-0.028977	1051.32	1391.72	-80.784	1003.77	1175.89	-91.0788	1009.9	1095.14	-122.087	1082.93	991.178	-77.4975	1187.28	927.307	-130.461	1147.85	902.734	-115.216	1225.7	852.832
174	0	98.2579	1221.76	1574.7	195.914	1230.3	1579.23	95.0946	1058.63	1607.34	221.819	1090.08	1614.68	160.369	991.59	1469.98	184.568	880.008	1224.88	176.646	1125.91	1359.72	176.065	1169.29	1177.72	227.553	883.05	1304.91	0.523643	1061.09	1390.55	-80.5294	1014.62	1174.71	-91.1621	1021.66	1094.03	-122.024	1095.87	990.79	-77.1397	1200.73	928.006	-130.26	1161.77	903.028	-114.959	1240.3	854.362
175	0	99.3402	1231.8	1573.25	197.013	1240.2	1577.69	95.9566	1068.69	1605.98	222.77	1099.94	1613.21	161.167	1001.4	1468.5	185.174	890.154	1223.25	177.158	1135.89	1358.33	176.185	1179.5	1176.39	228.248	893.141	1303.22	1.15158	1070.89	1389.37	-80.155	1025.35	1173.49	-91.0981	1033.28	1092.87	-121.814	1108.6	990.318	-76.6733	1213.96	928.597	-129.899	1175.42	903.202	-114.585	1254.63	855.781
176	0	100.519	1241.79	1571.82	198.209	1250.06	1576.16	96.9245	1078.68	1604.61	223.823	1109.74	1611.74	162.037	1011.19	1466.97	185.782	900.368	1221.52	177.774	1145.88	1356.94	176.419	1189.76	1175.07	228.957	903.248	1301.44	1.85838	1080.75	1388.17	-79.6645	1035.96	1172.24	-90.8885	1044.75	1091.68	-121.455	1121.1	989.767	-76.0933	1226.96	929.075	-129.373	1188.78	903.253	-114.089	1268.65	857.078
177	0	101.801	1251.74	1570.42	199.508	1259.87	1574.66	98.0057	1088.62	1603.25	224.987	1119.5	1610.27	162.978	1020.95	1465.41	186.384	910.655	1219.71	178.5	1155.89	1355.57	176.773	1200.1	1173.78	229.671	913.373	1299.57	2.64726	1090.65	1386.98	-79.0619	1046.47	1170.97	-90.5352	1056.07	1090.48	-120.945	1133.37	989.142	-75.3954	1239.71	929.439	-128.677	1201.84	903.179	-113.468	1282.37	858.242
178	0	103.194	1261.64	1569.07	200.919	1269.63	1573.2	99.2063	1098.52	1601.91	226.268	1129.21	1608.81	163.992	1030.7	1463.83	186.974	921.023	1217.82	179.34	1165.91	1354.24	177.255	1210.51	1172.53	230.384	923.52	1297.62	3.52107	1100.62	1385.81	-78.3508	1056.88	1169.71	-90.0403	1067.25	1089.27	-120.285	1145.4	988.45	-74.5752	1252.23	929.683	-127.81	1214.58	902.981	-112.719	1295.76	859.262
179	0	104.702	1271.5	1567.77	202.445	1279.37	1571.79	100.531	1108.37	1600.62	227.671	1138.88	1607.38	165.08	1040.44	1462.24	187.547	931.476	1215.88	180.299	1175.95	1352.95	177.867	1221	1171.35	231.092	933.693	1295.62	4.48219	1110.67	1384.67	-77.5349	1067.22	1168.47	-89.4055	1078.29	1088.07	-119.472	1157.2	987.7	-73.629	1264.48	929.805	-126.769	1227.01	902.659	-111.84	1308.82	860.126
180	0	106.328	1281.34	1566.55	204.091	1289.07	1570.44	101.984	1118.19	1599.37	229.2	1148.52	1605.99	166.242	1050.16	1460.66	188.101	942.02	1213.9	181.379	1186.01	1351.72	178.613	1231.59	1170.24	231.792	943.898	1293.56	5.53249	1120.79	1383.59	-76.6171	1077.49	1167.25	-88.6331	1089.19	1086.9	-118.51	1168.75	986.902	-72.5535	1276.47	929.801	-125.555	1239.1	902.216	-110.831	1321.53	860.822
181	0	108.075	1291.15	1565.42	205.858	1298.75	1569.16	103.567	1127.97	1598.2	230.856	1158.14	1604.66	167.478	1059.88	1459.09	188.634	952.658	1211.89	182.581	1196.1	1350.57	179.493	1242.26	1169.22	232.481	954.139	1291.47	6.67318	1131	1382.59	-75.6005	1087.74	1166.09	-87.7249	1099.97	1085.77	-117.398	1180.06	986.065	-71.3458	1288.18	929.666	-124.17	1250.86	901.657	-109.693	1333.88	861.341
182	0	109.943	1300.94	1564.4	207.748	1308.41	1567.98	105.281	1137.73	1597.11	232.64	1167.73	1603.39	168.789	1069.61	1457.57	189.146	963.395	1209.87	183.904	1206.23	1349.5	180.503	1253.04	1168.31	233.159	964.422	1289.36	7.90466	1141.3	1381.66	-74.4879	1097.96	1165	-86.6832	1110.62	1084.7	-116.138	1191.14	985.203	-70.0035	1299.61	929.4	-122.616	1262.28	900.989	-108.425	1345.85	861.674
183	0	111.929	1310.72	1563.48	209.757	1318.07	1566.9	107.123	1147.48	1596.12	234.55	1177.32	1602.21	170.174	1079.33	1456.1	189.639	974.231	1207.86	185.346	1216.38	1348.55	181.64	1263.91	1167.53	233.827	974.75	1287.25	9.22644	1151.68	1380.85	-73.2821	1108.19	1164	-85.5101	1121.17	1083.71	-114.734	1201.98	984.328	-68.5249	1310.75	929.002	-120.9	1273.35	900.219	-107.031	1357.44	861.814
184	0	114.031	1320.49	1562.7	211.883	1327.72	1565.93	109.092	1157.21	1595.25	236.584	1186.9	1601.12	171.633	1089.07	1454.69	190.115	985.167	1205.88	186.903	1226.57	1347.71	182.897	1274.89	1166.9	234.487	985.127	1285.16	10.6369	1162.15	1380.15	-71.986	1118.44	1163.11	-84.2086	1131.62	1082.82	-113.189	1212.59	983.457	-66.9087	1321.59	928.474	-119.027	1284.07	899.36	-105.512	1368.63	861.757
185	0	116.242	1330.26	1562.05	214.119	1337.37	1565.09	111.183	1166.95	1594.49	238.736	1196.48	1600.14	173.163	1098.83	1453.37	190.577	996.2	1203.94	188.568	1236.8	1347	184.263	1285.97	1166.42	235.141	995.558	1283.1	12.1335	1172.71	1379.6	-70.6029	1128.74	1162.34	-82.7819	1141.99	1082.04	-111.508	1222.98	982.603	-65.1546	1332.13	927.817	-117.005	1294.44	898.424	-103.871	1379.42	861.5
186	0	118.557	1340.04	1561.55	216.461	1347.03	1564.38	113.39	1176.68	1593.88	241.001	1206.08	1599.28	174.762	1108.6	1452.14	191.03	1007.33	1202.08	190.333	1247.07	1346.44	185.728	1297.15	1166.12	235.792	1006.04	1281.09	13.7121	1183.34	1379.2	-69.1365	1139.08	1161.72	-81.234	1152.27	1081.39	-109.698	1233.15	981.784	-63.2632	1342.37	927.039	-114.843	1304.47	897.428	-102.11	1389.79	861.046
187	0	120.967	1349.83	1561.22	218.898	1356.71	1563.82	115.704	1186.43	1593.41	243.37	1215.69	1598.55	176.427	1118.4	1451.02	191.478	1018.54	1200.3	192.188	1257.38	1346.03	187.279	1308.42	1166	236.444	1016.59	1279.17	15.3675	1194.05	1378.96	-67.5913	1149.49	1161.26	-79.5701	1162.5	1080.88	-107.764	1243.11	981.015	-61.2359	1352.29	926.148	-112.551	1314.16	896.386	-100.231	1399.74	860.396
188	0	123.463	1359.64	1561.04	221.421	1366.42	1563.42	118.118	1196.19	1593.1	245.834	1225.33	1597.96	178.155	1128.23	1450.03	191.926	1029.83	1198.63	194.123	1267.72	1345.78	188.899	1319.79	1166.07	237.102	1027.18	1277.33	17.0932	1204.83	1378.91	-65.9726	1159.97	1160.98	-77.7963	1172.66	1080.54	-105.716	1252.87	980.313	-59.0754	1361.91	925.152	-110.141	1323.51	895.318	-98.2361	1409.27	859.558
189	0	126.033	1369.47	1561.04	224.019	1376.15	1563.17	120.621	1205.97	1592.94	248.383	1235	1597.51	179.939	1138.09	1449.17	192.379	1041.2	1197.09	196.123	1278.09	1345.7	190.572	1331.24	1166.34	237.768	1037.84	1275.61	18.8814	1215.66	1379.04	-64.2868	1170.53	1160.89	-75.9203	1182.78	1080.37	-103.563	1262.44	979.693	-56.7859	1371.21	924.066	-107.628	1332.53	894.244	-96.1252	1418.37	858.538
190	0	128.666	1379.32	1561.22	226.679	1385.92	1563.09	123.201	1215.78	1592.95	251.004	1244.7	1597.2	181.773	1147.98	1448.45	192.841	1052.61	1195.7	198.174	1288.5	1345.79	192.281	1342.75	1166.81	238.446	1048.54	1274.02	20.7229	1226.54	1379.37	-62.5417	1181.16	1160.99	-73.9514	1192.85	1080.39	-101.316	1271.84	979.17	-54.3726	1380.2	922.905	-105.025	1341.24	893.183	-93.899	1427.04	857.349
191	0	131.349	1389.21	1561.57	229.389	1395.72	1563.17	125.845	1225.62	1593.13	253.685	1254.44	1597.05	183.651	1157.91	1447.9	193.316	1064.08	1194.47	200.26	1298.94	1346.04	194.006	1354.31	1167.47	239.14	1059.29	1272.58	22.6076	1237.45	1379.9	-60.7464	1191.87	1161.3	-71.9002	1202.89	1080.6	-98.9867	1281.06	978.758	-51.8425	1388.89	921.684	-102.348	1349.65	892.156	-91.557	1435.29	856.002
192	0	134.068	1399.13	1562.1	232.135	1405.56	1563.42	128.539	1235.48	1593.47	256.412	1264.23	1597.05	185.565	1167.87	1447.5	193.81	1075.56	1193.42	202.364	1309.4	1346.46	195.729	1365.91	1168.31	239.854	1070.08	1271.31	24.524	1248.39	1380.63	-58.9112	1202.64	1161.81	-69.7792	1212.9	1081	-96.5898	1290.13	978.468	-49.2044	1397.29	920.422	-99.6149	1357.78	891.182	-89.0985	1443.13	854.514
193	0	136.809	1409.09	1562.8	234.902	1415.44	1563.83	131.269	1245.39	1593.97	259.17	1274.05	1597.19	187.505	1177.87	1447.27	194.326	1087.06	1192.56	204.469	1319.87	1347.05	197.43	1377.52	1169.33	240.591	1080.9	1270.21	26.4597	1259.34	1381.55	-57.048	1213.47	1162.54	-67.6023	1222.88	1081.61	-94.1395	1299.06	978.311	-46.4686	1405.39	919.14	-96.8442	1365.65	890.282	-86.5231	1450.56	852.901
194	0	139.556	1419.08	1563.67	237.674	1425.37	1564.39	134.019	1255.33	1594.64	261.944	1283.93	1597.48	189.463	1187.91	1447.21	194.869	1098.56	1191.9	206.557	1330.36	1347.78	199.09	1389.12	1170.51	241.353	1091.74	1269.3	28.4018	1270.27	1382.67	-55.1697	1224.34	1163.47	-65.3848	1232.83	1082.41	-91.6515	1307.85	978.293	-43.6473	1413.22	917.856	-94.0551	1373.28	889.473	-83.8308	1457.6	851.182
195	0	142.295	1429.11	1564.69	240.437	1435.34	1565.1	136.772	1265.3	1595.45	264.718	1293.84	1597.91	191.429	1197.98	1447.31	195.443	1110.03	1191.43	208.61	1340.86	1348.66	200.69	1400.69	1171.84	242.143	1102.61	1268.58	30.3362	1281.19	1383.96	-53.2901	1235.23	1164.59	-63.1431	1242.74	1083.39	-89.1424	1316.52	978.418	-40.7547	1420.79	916.591	-91.2675	1380.69	888.771	-81.0238	1464.29	849.381
196	0	145.01	1439.17	1565.85	243.174	1445.35	1565.95	139.513	1275.32	1596.4	267.476	1303.8	1598.47	193.393	1208.08	1447.58	196.051	1121.46	1191.18	210.609	1351.36	1349.67	202.214	1412.22	1173.28	242.964	1113.48	1268.05	32.2489	1292.06	1385.42	-51.4237	1246.13	1165.89	-60.8943	1252.61	1084.56	-86.6294	1325.08	978.689	-37.8068	1428.11	915.364	-88.5017	1387.91	888.19	-78.1062	1470.63	847.519
197	0	147.685	1449.26	1567.15	245.87	1455.39	1566.92	142.224	1285.36	1597.49	270.202	1313.8	1599.15	195.343	1218.21	1448.01	196.696	1132.85	1191.13	212.538	1361.85	1350.8	203.645	1423.67	1174.83	243.819	1124.35	1267.73	34.1254	1302.88	1387.03	-49.5852	1257.01	1167.37	-58.6562	1262.44	1085.88	-84.1301	1333.53	979.103	-34.8217	1435.2	914.195	-85.7782	1394.97	887.741	-75.0863	1476.66	845.622
198	0	150.305	1459.39	1568.56	248.509	1465.48	1568	144.889	1295.44	1598.7	272.878	1323.84	1599.93	197.271	1228.36	1448.59	197.383	1144.16	1191.27	214.38	1372.33	1352.03	204.967	1435.03	1176.45	244.708	1135.21	1267.6	35.9517	1313.62	1388.77	-47.789	1267.85	1168.98	-56.4463	1272.21	1087.36	-81.6619	1341.89	979.656	-31.8191	1442.08	913.1	-83.1167	1401.88	887.431	-71.9763	1482.42	843.718
199	0	152.855	1469.54	1570.08	251.075	1475.59	1569.18	147.491	1305.55	1600	275.49	1333.92	1600.81	199.165	1238.53	1449.31	198.114	1155.39	1191.61	216.12	1382.79	1353.34	206.167	1446.29	1178.13	245.635	1146.05	1267.66	37.7141	1324.28	1390.61	-46.0486	1278.61	1170.72	-54.2818	1281.91	1088.96	-79.2423	1350.15	980.34	-28.821	1448.77	912.096	-80.5367	1408.68	887.266	-68.7939	1487.95	841.836
200	0	155.321	1479.72	1571.67	253.556	1485.73	1570.43	150.015	1315.69	1601.4	278.021	1344.02	1601.78	201.016	1248.72	1450.16	198.892	1166.53	1192.12	217.744	1393.23	1354.73	207.233	1457.43	1179.84	246.6	1156.87	1267.9	39.3996	1334.84	1392.54	-44.3764	1289.27	1172.57	-52.179	1291.52	1090.67	-76.8883	1358.32	981.145	-25.8508	1455.3	911.196	-78.056	1415.39	887.245	-65.5624	1493.28	840.003
201	0	157.69	1489.92	1573.34	255.936	1495.9	1571.75	152.445	1325.84	1602.87	280.457	1354.16	1602.82	202.814	1258.91	1451.13	199.719	1177.56	1192.8	219.243	1403.64	1356.16	208.157	1468.43	1181.57	247.604	1167.64	1268.32	40.9969	1345.29	1394.53	-42.7832	1299.8	1174.48	-50.153	1301.03	1092.45	-74.6163	1366.4	982.06	-22.9337	1461.7	910.412	-75.6913	1422.02	887.367	-62.3105	1498.46	838.25
202	0	159.949	1500.13	1575.04	258.204	1506.08	1573.12	154.767	1336.02	1604.39	282.784	1364.31	1603.91	204.551	1269.1	1452.21	200.597	1188.48	1193.63	220.606	1414.01	1357.63	208.931	1479.3	1183.29	248.648	1178.37	1268.9	42.4957	1355.61	1396.55	-41.2776	1310.17	1176.44	-48.2172	1310.43	1094.3	-72.4413	1374.39	983.069	-20.0963	1467.97	909.753	-73.4575	1428.6	887.627	-59.0729	1503.53	836.604
203	0	162.087	1510.35	1576.78	260.349	1516.28	1574.52	156.968	1346.2	1605.95	284.988	1374.48	1605.05	206.219	1279.3	1453.37	201.527	1199.27	1194.59	221.828	1424.35	1359.12	209.551	1490.03	1184.98	249.731	1189.05	1269.63	43.8879	1365.8	1398.59	-39.8659	1320.36	1178.43	-46.3832	1319.69	1096.18	-70.3777	1382.3	984.157	-17.3659	1474.16	909.226	-71.3675	1435.13	888.015	-55.8883	1508.53	835.091
204	0	164.096	1520.58	1578.52	262.361	1526.48	1575.94	159.037	1356.4	1607.53	287.058	1384.65	1606.22	207.81	1289.49	1454.6	202.51	1209.95	1195.68	222.905	1434.64	1360.61	210.018	1500.62	1186.64	250.852	1199.67	1270.49	45.1674	1375.86	1400.61	-38.5517	1330.32	1180.41	-44.6603	1328.8	1098.07	-68.4381	1390.11	985.309	-14.7707	1480.29	908.835	-69.4324	1441.63	888.521	-52.7993	1513.5	833.733
205	0	165.968	1530.81	1580.26	264.232	1536.68	1577.37	160.963	1366.59	1609.11	288.984	1394.83	1607.4	209.32	1299.66	1455.89	203.545	1220.49	1196.86	223.836	1444.89	1362.1	210.332	1511.07	1188.24	252.01	1210.23	1271.48	46.3301	1385.77	1402.59	-37.3361	1340.05	1182.37	-43.0557	1337.74	1099.95	-66.6336	1397.82	986.507	-12.3389	1486.37	908.581	-67.6611	1448.11	889.13	-49.8503	1518.49	832.549
206	0	167.696	1541.02	1581.98	265.958	1546.88	1578.79	162.738	1376.78	1610.67	290.759	1405	1608.6	210.744	1309.82	1457.22	204.63	1230.9	1198.12	224.625	1455.09	1363.57	210.5	1521.38	1189.78	253.202	1220.72	1272.56	47.3743	1395.55	1404.52	-36.218	1349.52	1184.28	-41.5743	1346.51	1101.8	-64.9737	1405.43	987.734	-10.0977	1492.44	908.464	-66.0606	1454.57	889.827	-47.0861	1523.52	831.552
207	0	169.277	1551.23	1583.65	267.532	1557.07	1580.18	164.357	1386.97	1612.21	292.377	1415.17	1609.78	212.079	1319.95	1458.58	205.762	1241.19	1199.44	225.275	1465.24	1365	210.531	1531.56	1191.25	254.423	1231.13	1273.72	48.3004	1405.19	1406.37	-35.1939	1358.71	1186.13	-40.2188	1355.08	1103.61	-63.4658	1412.93	988.973	-8.07301	1498.52	908.478	-64.636	1461.02	890.593	-44.5498	1528.62	830.752
208	0	170.709	1561.42	1585.27	268.954	1567.24	1581.55	165.815	1397.14	1613.69	293.833	1425.32	1610.95	213.322	1330.05	1459.94	206.937	1251.35	1200.8	225.794	1475.33	1366.39	210.437	1541.63	1192.65	255.668	1241.47	1274.94	49.1111	1414.7	1408.13	-34.2587	1367.62	1187.9	-38.9895	1363.47	1105.35	-62.1156	1420.32	990.209	-6.28821	1504.62	908.619	-63.3904	1467.44	891.412	-42.2814	1533.82	830.15
209	0	171.992	1571.58	1586.82	270.223	1577.39	1582.88	167.11	1407.28	1615.1	295.127	1435.44	1612.1	214.474	1340.12	1461.29	208.149	1261.39	1202.18	226.19	1485.37	1367.72	210.233	1551.57	1193.97	256.932	1251.74	1276.21	49.8108	1424.09	1409.78	-33.4063	1376.24	1189.58	-37.885	1371.65	1107.02	-60.9265	1427.6	991.427	-4.7635	1510.77	908.875	-62.3252	1473.84	892.262	-40.3158	1539.13	829.743
210	0	173.125	1581.72	1588.29	271.341	1587.52	1584.16	168.244	1417.4	1616.44	296.258	1445.54	1613.21	215.535	1350.16	1462.61	209.391	1271.32	1203.55	226.476	1495.35	1368.99	209.936	1561.41	1195.2	258.205	1261.92	1277.49	50.4058	1433.35	1411.31	-32.6297	1384.59	1191.15	-36.9023	1379.65	1108.59	-59.9002	1434.76	992.611	-3.51502	1516.98	909.234	-61.4399	1480.22	893.125	-38.6814	1544.57	829.522
211	0	174.114	1591.82	1589.68	272.311	1597.61	1585.39	169.218	1427.49	1617.69	297.23	1455.6	1614.27	216.506	1360.16	1463.89	210.655	1281.14	1204.91	226.663	1505.27	1370.2	209.565	1571.15	1196.34	259.482	1272.04	1278.78	50.9038	1442.52	1412.71	-31.9216	1392.66	1192.62	-36.0367	1387.46	1110.08	-59.0361	1441.81	993.749	-2.55416	1523.26	909.681	-60.7326	1486.56	893.981	-37.3993	1550.15	829.472
212	0	174.962	1601.89	1590.96	273.137	1607.67	1586.55	170.038	1437.55	1618.84	298.046	1465.63	1615.27	217.39	1370.11	1465.12	211.931	1290.85	1206.22	226.766	1515.14	1371.32	209.14	1580.8	1197.38	260.751	1282.07	1280.05	51.3137	1451.59	1413.98	-31.2753	1400.48	1193.97	-35.2826	1395.09	1111.46	-58.3319	1448.75	994.827	-1.88709	1529.62	910.198	-60.1998	1492.88	894.812	-36.4821	1555.87	829.57
213	0	175.674	1611.93	1592.14	273.827	1617.69	1587.63	170.709	1447.56	1619.87	298.714	1475.61	1616.21	218.19	1380.03	1466.27	213.208	1300.48	1207.47	226.797	1524.95	1372.35	208.681	1590.37	1198.33	262.003	1292.04	1281.27	51.6451	1460.59	1415.1	-30.6843	1408.07	1195.2	-34.6337	1402.57	1112.73	-57.7836	1455.59	995.836	-1.51435	1536.07	910.764	-59.8367	1499.16	895.598	-35.9334	1561.72	829.793
214	0	176.257	1621.92	1593.2	274.386	1627.67	1588.65	171.24	1457.53	1620.78	299.242	1485.55	1617.07	218.911	1389.9	1467.34	214.475	1310.02	1208.65	226.771	1534.7	1373.29	208.209	1599.86	1199.17	263.227	1301.93	1282.44	51.9084	1469.53	1416.07	-30.1432	1415.46	1196.31	-34.0829	1409.91	1113.89	-57.3855	1462.34	996.764	-1.43081	1542.61	911.358	-59.6374	1505.4	896.324	-35.7485	1567.7	830.11
215	0	176.719	1631.86	1594.14	274.822	1637.61	1589.58	171.64	1467.46	1621.55	299.638	1495.45	1617.85	219.555	1399.73	1468.32	215.721	1319.49	1209.74	226.703	1544.41	1374.13	207.743	1609.28	1199.9	264.415	1311.75	1283.54	52.1139	1478.42	1416.89	-29.6474	1422.7	1197.29	-33.6232	1417.14	1114.93	-57.1306	1469	997.602	-1.62573	1549.23	911.956	-59.5946	1511.62	896.974	-35.9141	1573.8	830.491
216	0	177.066	1641.77	1594.96	275.143	1647.51	1590.41	171.919	1477.34	1622.19	299.913	1505.3	1618.54	220.128	1409.52	1469.18	216.931	1328.89	1210.72	226.605	1554.07	1374.85	207.299	1618.64	1200.5	265.554	1321.51	1284.54	52.272	1487.29	1417.55	-29.1935	1429.81	1198.14	-33.2471	1424.28	1115.85	-57.0109	1475.6	998.343	-2.08324	1555.95	912.533	-59.7008	1517.8	897.534	-36.4096	1580.01	830.901
217	0	177.307	1651.63	1595.65	275.358	1657.37	1591.16	172.089	1487.18	1622.68	300.078	1515.11	1619.13	220.634	1419.28	1469.93	218.094	1338.24	1211.59	226.491	1563.69	1375.45	206.895	1627.94	1200.98	266.636	1331.21	1285.44	52.3924	1496.15	1418.06	-28.7792	1436.84	1198.87	-32.9476	1431.37	1116.66	-57.0175	1482.16	998.981	-2.78283	1562.75	913.063	-59.9472	1523.97	897.994	-37.2081	1586.31	831.307
218	0	177.449	1661.45	1596.2	275.475	1667.2	1591.8	172.161	1496.97	1623.03	300.145	1524.89	1619.6	221.079	1429	1470.56	219.198	1347.53	1212.34	226.372	1573.27	1375.93	206.543	1637.2	1201.32	267.651	1340.84	1286.23	52.4844	1505.03	1418.42	-28.4028	1443.83	1199.48	-32.7177	1438.44	1117.34	-57.1408	1488.69	999.508	-3.70025	1569.62	913.522	-60.3251	1530.12	898.343	-38.2773	1592.7	831.675
219	0	177.499	1671.24	1596.62	275.502	1677	1592.34	172.146	1506.71	1623.22	300.124	1534.63	1619.97	221.465	1438.7	1471.05	220.229	1356.79	1212.95	226.258	1582.82	1376.27	206.255	1646.41	1201.52	268.59	1350.43	1286.89	52.5563	1513.92	1418.62	-28.0638	1450.84	1199.95	-32.5507	1445.51	1117.9	-57.371	1495.21	999.922	-4.80835	1576.57	913.886	-60.8252	1536.27	898.574	-39.5816	1599.15	831.972
220	0	177.466	1680.99	1596.89	275.445	1686.77	1592.76	172.055	1516.42	1623.26	300.025	1544.34	1620.22	221.798	1448.37	1471.41	221.178	1366.01	1213.43	226.159	1592.35	1376.47	206.039	1655.59	1201.57	269.447	1359.96	1287.42	52.6153	1522.86	1418.67	-27.762	1457.9	1200.31	-32.4405	1452.63	1118.35	-57.6982	1501.75	1000.22	-6.07811	1583.58	914.131	-61.4382	1542.44	898.68	-41.0831	1605.65	832.17
221	0	177.354	1690.71	1597.03	275.313	1696.52	1593.06	171.9	1526.1	1623.15	299.861	1554.03	1620.34	222.081	1458.02	1471.63	222.034	1375.22	1213.76	226.082	1601.86	1376.53	205.903	1664.74	1201.47	270.214	1369.46	1287.81	52.6675	1531.86	1418.57	-27.4976	1465.06	1200.54	-32.3814	1459.82	1118.67	-58.1124	1508.33	1000.4	-7.47964	1590.65	914.237	-62.1549	1548.62	898.66	-42.7431	1612.18	832.241
222	0	177.171	1700.41	1597.02	275.11	1706.26	1593.25	171.689	1535.74	1622.88	299.639	1563.72	1620.34	222.316	1467.66	1471.7	222.786	1384.41	1213.96	226.032	1611.36	1376.45	205.85	1673.87	1201.22	270.887	1378.91	1288.05	52.7176	1540.93	1418.33	-27.2713	1472.35	1200.64	-32.3682	1467.11	1118.87	-58.6038	1514.97	1000.45	-8.98317	1597.76	914.185	-62.9663	1554.85	898.509	-44.5232	1618.74	832.162
223	0	176.922	1710.08	1596.86	274.844	1715.99	1593.3	171.43	1545.37	1622.46	299.367	1573.4	1620.2	222.507	1477.3	1471.63	223.429	1393.59	1214	226.014	1620.86	1376.22	205.883	1683	1200.81	271.46	1388.33	1288.15	52.7688	1550.09	1417.95	-27.0838	1479.82	1200.63	-32.3962	1474.53	1118.96	-59.1631	1521.7	1000.39	-10.56	1604.92	913.961	-63.8634	1561.13	898.228	-46.3872	1625.32	831.915
224	0	176.611	1719.75	1596.56	274.519	1725.73	1593.22	171.132	1554.99	1621.89	299.053	1583.09	1619.94	222.655	1486.94	1471.41	223.955	1402.78	1213.91	226.029	1630.37	1375.84	206.003	1692.13	1200.25	271.932	1397.72	1288.11	52.8231	1559.34	1417.43	-26.9359	1487.49	1200.49	-32.4613	1482.1	1118.93	-59.7815	1528.53	1000.2	-12.183	1612.11	913.553	-64.8379	1567.48	897.818	-48.3012	1631.89	831.484
225	0	176.242	1729.42	1596.11	274.139	1735.47	1593.02	170.8	1564.6	1621.17	298.701	1592.79	1619.54	222.76	1496.59	1471.05	224.361	1411.98	1213.67	226.078	1639.89	1375.31	206.206	1701.27	1199.55	272.3	1407.1	1287.92	52.8809	1568.69	1416.78	-26.8282	1495.39	1200.24	-32.56	1489.84	1118.78	-60.4507	1535.48	999.889	-13.8278	1619.34	912.951	-65.8813	1573.91	897.279	-50.2351	1638.47	830.857
226	0	175.819	1739.09	1595.52	273.707	1745.24	1592.68	170.438	1574.22	1620.31	298.316	1602.52	1619.02	222.823	1506.26	1470.54	224.645	1421.21	1213.29	226.16	1649.43	1374.64	206.491	1710.43	1198.7	272.564	1416.47	1287.59	52.9413	1578.16	1416	-26.7616	1503.54	1199.86	-32.689	1497.76	1118.51	-61.1628	1542.57	999.46	-15.4729	1626.6	912.149	-66.9856	1580.43	896.615	-52.1629	1645.04	830.028
227	0	175.343	1748.78	1594.78	273.225	1755.03	1592.2	170.048	1583.84	1619.3	297.899	1612.28	1618.36	222.844	1515.96	1469.9	224.807	1430.47	1212.77	226.27	1659.01	1373.83	206.852	1719.62	1197.72	272.726	1425.84	1287.12	53.0021	1587.76	1415.1	-26.7365	1511.95	1199.36	-32.8458	1505.88	1118.13	-61.9107	1549.8	998.91	-17.0999	1633.89	911.145	-68.1428	1587.06	895.827	-54.0633	1651.61	828.993
228	0	174.816	1758.49	1593.91	272.696	1764.85	1591.6	169.631	1593.5	1618.15	297.451	1622.09	1617.57	222.82	1525.7	1469.11	224.851	1439.77	1212.12	226.405	1668.62	1372.88	207.282	1728.84	1196.6	272.786	1435.23	1286.52	53.0597	1597.47	1414.08	-26.7533	1520.62	1198.74	-33.0281	1514.2	1117.63	-62.6879	1557.19	998.24	-18.6941	1641.21	909.939	-69.3452	1593.81	894.917	-55.9195	1658.17	827.752
229	0	174.239	1768.22	1592.91	272.119	1774.71	1590.86	169.187	1603.18	1616.88	296.971	1631.94	1616.66	222.75	1535.49	1468.2	224.782	1449.12	1211.34	226.557	1678.29	1371.79	207.772	1738.12	1195.37	272.75	1444.63	1285.78	53.1096	1607.32	1412.94	-26.8124	1529.57	1198	-33.2341	1522.73	1117.01	-63.4884	1564.75	997.452	-20.2443	1648.56	908.533	-70.5851	1600.67	893.89	-57.7196	1664.73	826.308
230	0	173.611	1778	1591.78	271.494	1784.62	1590.01	168.712	1612.9	1615.47	296.455	1641.84	1615.63	222.631	1545.33	1467.16	224.607	1458.54	1210.44	226.718	1688.01	1370.58	208.312	1747.46	1194.01	272.621	1454.08	1284.92	53.146	1617.3	1411.69	-26.9135	1538.78	1197.14	-33.4623	1531.47	1116.28	-64.3068	1572.47	996.546	-21.7428	1655.96	906.934	-71.855	1607.67	892.747	-59.4561	1671.29	824.667
231	0	172.931	1787.82	1590.53	270.819	1794.58	1589.04	168.204	1622.67	1613.95	295.901	1651.8	1614.48	222.46	1555.24	1466	224.335	1468.02	1209.42	226.879	1697.81	1369.24	208.891	1756.85	1192.54	272.405	1463.57	1283.95	53.1624	1627.42	1410.33	-27.0564	1548.24	1196.15	-33.7113	1540.42	1115.43	-65.1379	1580.36	995.523	-23.1851	1663.41	905.15	-73.1471	1614.8	891.491	-61.1256	1677.87	822.839
232	0	172.196	1797.7	1589.18	270.093	1804.61	1587.96	167.656	1632.5	1612.32	295.302	1661.83	1613.23	222.233	1565.22	1464.73	223.977	1477.58	1208.3	227.028	1707.68	1367.79	209.494	1766.33	1190.96	272.109	1473.12	1282.88	53.1513	1637.67	1408.86	-27.2405	1557.94	1195.05	-33.9799	1549.57	1114.46	-65.9772	1588.43	994.384	-24.5694	1670.91	903.191	-74.454	1622.07	890.125	-62.7279	1684.47	820.833
233	0	171.404	1807.64	1587.73	269.311	1814.69	1586.79	167.063	1642.39	1610.58	294.653	1671.93	1611.87	221.945	1575.3	1463.36	223.544	1487.23	1207.08	227.155	1717.65	1366.24	210.109	1775.88	1189.28	271.742	1482.75	1281.71	53.1049	1648.05	1407.28	-27.4646	1567.86	1193.82	-34.2672	1558.91	1113.37	-66.8203	1596.66	993.133	-25.8965	1678.48	901.07	-75.7681	1629.48	888.652	-64.2657	1691.12	818.664
234	0	170.55	1817.65	1586.19	268.469	1824.85	1585.52	166.418	1652.35	1608.74	293.947	1682.1	1610.42	221.594	1585.47	1461.91	223.05	1496.97	1205.77	227.247	1727.72	1364.58	210.718	1785.52	1187.51	271.311	1492.46	1280.46	53.0149	1658.56	1405.61	-27.7275	1577.99	1192.47	-34.5718	1568.43	1112.16	-67.6631	1605.05	991.77	-27.169	1686.13	898.8	-77.0819	1637.03	887.076	-65.7435	1697.81	816.346
235	0	169.63	1827.74	1584.58	267.562	1835.09	1584.19	165.711	1662.39	1606.83	293.176	1692.36	1608.89	221.174	1595.75	1460.37	222.508	1506.82	1204.38	227.292	1737.91	1362.84	211.307	1795.25	1185.64	270.825	1502.28	1279.14	52.8727	1669.2	1403.84	-28.0272	1588.29	1191.01	-34.8926	1578.13	1110.85	-68.5016	1613.61	990.301	-28.3909	1693.87	896.398	-78.3881	1644.72	885.402	-67.1671	1704.58	813.897
236	0	168.638	1837.91	1582.91	266.584	1845.41	1582.79	164.935	1672.52	1604.85	292.332	1702.69	1607.3	220.681	1606.15	1458.77	221.931	1516.78	1202.94	227.276	1748.21	1361.02	211.861	1805.1	1183.7	270.295	1512.22	1277.77	52.6699	1679.95	1401.98	-28.3615	1598.76	1189.43	-35.228	1587.99	1109.42	-69.332	1622.31	988.729	-29.5669	1701.7	893.88	-79.6793	1652.55	883.635	-68.5427	1711.43	811.334
237	0	167.568	1848.17	1581.19	265.528	1855.81	1581.35	164.081	1682.73	1602.82	291.406	1713.11	1605.65	220.111	1616.68	1457.11	221.332	1526.86	1201.44	227.187	1758.65	1359.14	212.363	1815.05	1181.68	269.729	1522.28	1276.37	52.3985	1690.83	1400.04	-28.7277	1609.36	1187.75	-35.5762	1597.99	1107.88	-70.1503	1631.16	987.061	-30.7024	1709.65	891.265	-80.9481	1660.52	881.782	-69.8764	1718.38	808.676
238	0	166.414	1858.53	1579.45	264.387	1866.31	1579.88	163.138	1693.04	1600.75	290.39	1723.62	1603.96	219.46	1627.33	1455.43	220.725	1537.06	1199.92	227.015	1769.22	1357.21	212.801	1825.12	1179.6	269.138	1532.48	1274.95	52.0509	1701.82	1398.03	-29.123	1620.08	1185.96	-35.935	1608.13	1106.25	-70.9525	1640.15	985.304	-31.8024	1717.71	888.571	-82.1872	1668.62	879.849	-71.1737	1725.46	805.945
239	0	165.168	1868.99	1577.7	263.153	1876.91	1578.39	162.099	1703.46	1598.67	289.276	1734.23	1602.25	218.724	1638.13	1453.73	220.121	1547.39	1198.37	226.748	1779.95	1355.24	213.161	1835.33	1177.47	268.529	1542.83	1273.53	51.6202	1712.91	1395.95	-29.5441	1630.89	1184.08	-36.3018	1618.38	1104.52	-71.7346	1649.28	983.467	-32.8716	1725.91	885.818	-83.3894	1676.87	877.846	-72.4389	1732.68	803.161
240	0	163.824	1879.55	1575.96	261.819	1887.61	1576.92	160.956	1713.98	1596.58	288.057	1744.93	1600.54	217.901	1649.06	1452.03	219.531	1557.86	1196.84	226.377	1790.82	1353.27	213.433	1845.68	1175.32	267.913	1553.35	1272.13	51.1005	1724.1	1393.81	-29.9872	1641.78	1182.12	-36.6733	1628.75	1102.71	-72.4923	1658.53	981.56	-33.9139	1734.26	883.027	-84.5476	1685.25	875.783	-73.675	1740.05	800.345
241	0	162.376	1890.23	1574.24	260.377	1898.41	1575.46	159.699	1724.61	1594.53	286.725	1755.74	1598.86	216.989	1660.15	1450.35	218.964	1568.48	1195.32	225.896	1801.86	1351.29	213.609	1856.18	1173.16	267.295	1564.03	1270.77	50.4873	1735.39	1391.64	-30.4486	1652.72	1180.09	-37.0462	1639.21	1100.84	-73.2211	1667.9	979.595	-34.9321	1742.76	880.217	-85.6547	1693.76	873.671	-74.8835	1747.6	797.517
242	0	160.816	1901.02	1572.57	258.821	1909.32	1574.06	158.324	1735.35	1592.51	285.275	1766.65	1597.22	215.984	1671.39	1448.71	218.431	1579.24	1193.84	225.298	1813.05	1349.35	213.683	1866.84	1171.01	266.683	1574.88	1269.46	49.7771	1746.77	1389.44	-30.9241	1663.71	1178	-37.4163	1649.77	1098.9	-73.9165	1677.4	977.584	-35.9278	1751.42	877.409	-86.7037	1702.42	871.524	-76.0641	1755.33	794.699
243	0	159.141	1911.92	1570.96	257.144	1920.35	1572.71	156.825	1746.21	1590.56	283.702	1777.67	1595.64	214.888	1682.77	1447.12	217.936	1590.16	1192.43	224.58	1824.41	1347.45	213.652	1877.68	1168.91	266.08	1585.91	1268.24	48.9684	1758.23	1387.24	-31.4095	1674.74	1175.88	-37.7794	1660.41	1096.93	-74.5737	1687.01	975.542	-36.9014	1760.26	874.623	-87.688	1711.21	869.354	-77.2147	1763.26	791.911
244	0	157.346	1922.93	1569.43	255.342	1931.49	1571.45	155.199	1757.18	1588.7	282.002	1788.81	1594.16	213.699	1694.3	1445.62	217.486	1601.22	1191.09	223.743	1835.93	1345.63	213.518	1888.7	1166.88	265.492	1597.12	1267.11	48.0612	1769.77	1385.04	-31.9001	1685.79	1173.73	-38.1307	1671.13	1094.92	-75.188	1696.74	973.483	-37.8517	1769.28	871.878	-88.6011	1720.15	867.177	-78.3316	1771.41	789.17
245	0	155.428	1934.07	1568	253.412	1942.74	1570.28	153.444	1768.28	1586.95	280.175	1800.06	1592.78	212.42	1705.97	1444.22	217.084	1612.45	1189.86	222.787	1847.6	1343.9	213.283	1899.9	1164.94	264.92	1608.5	1266.1	47.0575	1781.38	1382.87	-32.3914	1696.86	1171.58	-38.4651	1681.92	1092.91	-75.7546	1706.58	971.425	-38.7763	1778.48	869.192	-89.437	1729.23	865.007	-79.4097	1779.77	786.495
246	0	153.388	1945.32	1566.68	251.352	1954.12	1569.24	151.561	1779.49	1585.33	278.221	1811.43	1591.54	211.054	1717.78	1442.93	216.732	1623.82	1188.74	221.717	1859.43	1342.3	212.953	1911.3	1163.13	264.366	1620.05	1265.23	45.9612	1793.06	1380.74	-32.8784	1707.96	1169.44	-38.7776	1692.8	1090.91	-76.2688	1716.54	969.384	-39.6715	1787.88	866.585	-90.1904	1738.45	862.861	-80.4425	1788.37	783.903
247	0	151.226	1956.68	1565.5	249.164	1965.61	1568.33	149.554	1790.81	1583.86	276.142	1822.91	1590.45	209.604	1729.72	1441.78	216.431	1635.34	1187.76	220.541	1871.39	1340.83	212.536	1922.89	1161.48	263.829	1631.77	1264.51	44.7784	1804.8	1378.69	-33.356	1719.08	1167.35	-39.063	1703.75	1088.94	-76.7259	1726.62	967.378	-40.5324	1797.47	864.073	-90.8563	1747.83	860.756	-81.4226	1797.2	781.41
248	0	148.946	1968.14	1564.45	246.851	1977.21	1567.57	147.428	1802.25	1582.55	273.943	1834.51	1589.53	208.077	1741.77	1440.79	216.18	1647	1186.94	219.268	1883.48	1339.54	212.042	1934.68	1160.01	263.311	1643.63	1263.95	43.5172	1816.6	1376.71	-33.8189	1730.22	1165.3	-39.316	1714.79	1087.02	-77.1219	1736.83	965.425	-41.353	1807.27	861.672	-91.4307	1757.37	858.709	-82.3417	1806.27	779.03
249	0	146.554	1979.71	1563.56	244.419	1988.92	1566.97	145.19	1813.8	1581.43	271.632	1846.23	1588.81	206.48	1753.93	1439.96	215.978	1658.79	1186.28	217.909	1895.69	1338.42	211.483	1946.64	1158.74	262.81	1655.64	1263.58	42.188	1828.44	1374.85	-34.2616	1741.41	1163.34	-39.5317	1725.92	1085.16	-77.453	1747.17	963.543	-42.1263	1817.27	859.4	-91.9103	1767.08	856.737	-83.191	1815.59	776.778
250	0	144.06	1991.38	1562.83	241.877	2000.74	1566.55	142.853	1825.45	1580.49	269.218	1858.05	1588.28	204.823	1766.18	1439.31	215.822	1670.7	1185.82	216.48	1908	1337.51	210.872	1958.77	1157.7	262.325	1667.78	1263.41	40.8027	1840.33	1373.11	-34.6786	1752.64	1161.47	-39.7054	1737.15	1083.39	-77.7159	1757.65	961.75	-42.845	1827.48	857.27	-92.293	1776.96	854.857	-83.9615	1825.14	774.666
251	0	141.474	2003.14	1562.27	239.236	2012.65	1566.31	140.428	1837.19	1579.76	266.715	1869.97	1587.97	203.117	1778.52	1438.86	215.708	1682.71	1185.55	214.996	1920.39	1336.81	210.222	1971.06	1156.89	261.857	1680.01	1263.44	39.3751	1852.25	1371.52	-35.0645	1763.94	1159.72	-39.8333	1748.48	1081.74	-77.9081	1768.27	960.063	-43.5009	1837.91	855.298	-92.5776	1787.02	853.087	-84.6444	1834.95	772.706
252	0	138.81	2014.97	1561.89	236.51	2024.66	1566.26	137.932	1849.02	1579.24	264.135	1881.99	1587.88	201.376	1790.91	1438.6	215.634	1694.81	1185.49	213.474	1932.84	1336.33	209.546	1983.46	1156.34	261.404	1692.34	1263.69	37.9205	1864.21	1370.09	-35.4141	1775.31	1158.11	-39.912	1759.92	1080.2	-78.0279	1779.04	958.501	-44.0859	1848.56	853.497	-92.7639	1797.28	851.444	-85.2309	1845	770.911
253	0	136.085	2026.88	1561.68	233.717	2036.74	1566.39	135.382	1860.93	1578.92	261.498	1894.1	1588.01	199.612	1803.35	1438.56	215.595	1706.98	1185.65	211.934	1945.33	1336.08	208.858	1995.96	1156.04	260.966	1704.72	1264.15	36.4548	1876.18	1368.85	-35.7229	1786.77	1156.65	-39.9396	1771.48	1078.82	-78.0746	1789.98	957.079	-44.5917	1859.42	851.88	-92.853	1807.75	849.942	-85.7131	1855.31	769.291
254	0	133.318	2038.84	1561.65	230.875	2048.88	1566.71	132.797	1872.9	1578.82	258.822	1906.28	1588.37	197.841	1815.82	1438.72	215.585	1719.19	1186.03	210.393	1957.84	1336.07	208.171	2008.52	1156	260.543	1717.15	1264.84	34.9947	1888.17	1367.79	-35.9869	1798.32	1155.35	-39.915	1783.16	1077.59	-78.0485	1801.09	955.81	-45.0104	1870.51	850.459	-92.8469	1818.44	848.597	-86.0836	1865.89	767.858
255	0	130.529	2050.85	1561.79	228.007	2061.09	1567.21	130.2	1884.93	1578.92	256.127	1918.53	1588.94	196.078	1828.29	1439.09	215.601	1731.42	1186.63	208.872	1970.35	1336.28	207.497	2021.11	1156.2	260.135	1729.58	1265.74	33.5572	1900.16	1366.94	-36.2033	1809.97	1154.23	-39.8387	1794.97	1076.53	-77.951	1812.37	954.708	-45.3343	1881.83	849.245	-92.7487	1829.36	847.421	-86.3364	1876.73	766.62
256	0	127.741	2062.89	1562.09	225.134	2073.33	1567.88	127.612	1896.99	1579.22	253.437	1930.82	1589.72	194.341	1840.76	1439.67	215.634	1743.65	1187.46	207.389	1982.83	1336.71	206.849	2033.7	1156.64	259.742	1742.01	1266.85	32.1587	1912.15	1366.31	-36.3706	1821.74	1153.31	-39.7128	1806.89	1075.65	-77.7846	1823.84	953.782	-45.5567	1893.38	848.248	-92.5622	1840.53	846.425	-86.4663	1887.85	765.587
257	0	124.977	2074.94	1562.54	222.283	2085.6	1568.71	125.057	1909.08	1579.7	250.776	1943.15	1590.7	192.644	1853.2	1440.44	215.681	1755.85	1188.49	205.964	1995.25	1337.35	206.238	2046.24	1157.3	259.363	1754.4	1268.17	30.8151	1924.12	1365.89	-36.4886	1833.62	1152.58	-39.5407	1818.94	1074.96	-77.5529	1835.5	953.04	-45.6717	1905.16	847.477	-92.2922	1851.96	845.62	-86.4697	1899.26	764.768
258	0	122.262	2087.01	1563.13	219.478	2097.87	1569.69	122.559	1921.18	1580.37	248.167	1955.49	1591.87	191.005	1865.6	1441.41	215.733	1768.01	1189.73	204.613	2007.61	1338.19	205.676	2058.7	1158.15	259	1766.73	1269.68	29.5411	1936.07	1365.69	-36.5588	1845.6	1152.05	-39.3277	1831.09	1074.47	-77.2608	1847.36	952.489	-45.6747	1917.18	846.939	-91.9439	1863.66	845.01	-86.3445	1910.99	764.17
259	0	119.621	2099.06	1563.85	216.746	2110.15	1570.81	120.14	1933.28	1581.19	245.636	1967.85	1593.2	189.437	1877.93	1442.54	215.784	1780.09	1191.16	203.353	2019.89	1339.21	205.172	2071.05	1159.19	258.65	1778.97	1271.36	28.35	1947.99	1365.71	-36.5841	1857.69	1151.72	-39.0801	1843.34	1074.17	-76.9139	1859.41	952.13	-45.5624	1929.44	846.641	-91.5231	1875.64	844.603	-86.0899	1923.04	763.801
260	0	117.078	2111.09	1564.68	214.111	2122.4	1572.04	117.824	1945.36	1582.17	243.206	1980.19	1594.67	187.955	1890.19	1443.84	215.827	1792.08	1192.76	202.197	2032.05	1340.4	204.735	2083.27	1160.39	258.315	1791.12	1273.2	27.2533	1959.86	1365.95	-36.5689	1869.87	1151.6	-38.8058	1855.68	1074.06	-76.5186	1871.66	951.963	-45.333	1941.95	846.586	-91.0358	1887.91	844.398	-85.7067	1935.44	763.666
261	0	114.658	2123.09	1565.62	211.6	2134.62	1573.36	115.632	1957.41	1583.27	240.901	1992.5	1596.27	186.571	1902.36	1445.29	215.857	1803.96	1194.52	201.156	2044.1	1341.73	204.374	2095.32	1161.71	257.994	1803.14	1275.17	26.2607	1971.69	1366.38	-36.519	1882.12	1151.67	-38.5137	1868.09	1074.13	-76.0823	1884.1	951.987	-44.9865	1954.7	846.779	-90.4883	1900.49	844.398	-85.1974	1948.2	763.772
262	0	112.382	2135.04	1566.64	209.236	2146.79	1574.76	113.584	1969.42	1584.48	238.742	2004.77	1597.97	185.296	1914.43	1446.86	215.868	1815.71	1196.41	200.241	2056.02	1343.18	204.094	2107.19	1163.14	257.686	1815.02	1277.26	25.3794	1983.45	1367.02	-36.4411	1894.44	1151.93	-38.2136	1880.55	1074.39	-75.6126	1896.74	952.198	-44.5245	1967.7	847.221	-89.8865	1913.38	844.601	-84.5657	1961.34	764.125
263	0	110.272	2146.95	1567.73	207.04	2158.91	1576.22	111.698	1981.39	1585.79	236.749	2016.99	1599.75	184.139	1926.39	1448.53	215.856	1827.32	1198.42	199.458	2067.79	1344.73	203.901	2118.85	1164.65	257.392	1826.76	1279.44	24.6147	1995.15	1367.83	-36.3428	1906.8	1152.37	-37.9157	1893.06	1074.82	-75.1174	1909.56	952.588	-43.9503	1980.95	847.916	-89.2367	1926.58	845.005	-83.8168	1974.89	764.729
264	0	108.347	2158.79	1568.88	205.034	2170.95	1577.71	109.99	1993.29	1587.18	234.938	2029.14	1601.58	183.108	1938.24	1450.3	215.816	1838.78	1200.52	198.81	2079.42	1346.36	203.799	2130.31	1166.21	257.111	1838.34	1281.69	23.9694	2006.77	1368.81	-36.2323	1919.17	1152.99	-37.6305	1905.58	1075.41	-74.6048	1922.57	953.151	-43.2687	1994.45	848.862	-88.5445	1940.09	845.604	-82.9571	1988.85	765.591
265	0	106.622	2170.56	1570.07	203.232	2182.91	1579.23	108.471	2005.13	1588.63	233.324	2041.22	1603.43	182.206	1949.96	1452.13	215.749	1850.09	1202.69	198.299	2090.91	1348.05	203.788	2141.55	1167.81	256.842	1849.76	1283.98	23.4443	2018.32	1369.94	-36.1178	1931.55	1153.77	-37.3683	1918.1	1076.14	-74.0827	1935.76	953.878	-42.486	2008.2	850.061	-87.8156	1953.92	846.395	-81.9938	2003.22	766.714
266	0	105.111	2182.26	1571.28	201.651	2194.79	1580.74	107.152	2016.9	1590.13	231.918	2053.21	1605.3	181.438	1961.56	1454.01	215.652	1861.24	1204.9	197.923	2102.24	1349.77	203.867	2152.57	1169.43	256.586	1861.01	1286.3	23.0378	2029.78	1371.19	-36.0075	1943.9	1154.7	-37.1393	1930.6	1077	-73.559	1949.11	954.757	-41.61	2022.2	851.509	-87.0551	1968.06	847.37	-80.9351	2018.03	768.103
267	0	103.823	2193.89	1572.51	200.299	2206.58	1582.23	106.038	2028.59	1591.66	230.728	2065.11	1607.15	180.804	1973.04	1455.92	215.527	1872.23	1207.14	197.678	2113.42	1351.51	204.035	2163.39	1171.05	256.343	1872.11	1288.62	22.7468	2041.15	1372.57	-35.9092	1956.21	1155.77	-36.9526	1943.07	1077.98	-73.041	1962.61	955.778	-40.6495	2036.43	853.206	-86.2678	1982.51	848.524	-79.7898	2033.26	769.761
268	0	102.765	2205.44	1573.74	199.184	2218.27	1583.68	105.133	2040.21	1593.2	229.758	2076.92	1608.97	180.302	1984.39	1457.84	215.376	1883.07	1209.38	197.558	2124.46	1353.24	204.284	2174	1172.64	256.113	1883.05	1290.91	22.5664	2052.43	1374.03	-35.8304	1968.45	1156.95	-36.8167	1955.49	1079.06	-72.5355	1976.26	956.93	-39.6144	2050.9	855.147	-85.4582	1997.25	849.85	-78.567	2048.92	771.689
269	0	101.94	2216.91	1574.95	198.31	2229.86	1585.08	104.438	2051.75	1594.74	229.009	2088.62	1610.73	179.931	1995.62	1459.75	215.201	1893.76	1211.6	197.555	2135.36	1354.96	204.609	2184.42	1174.21	255.896	1893.83	1293.17	22.4903	2063.62	1375.57	-35.7774	1980.6	1158.25	-36.739	1967.85	1080.21	-72.0488	1990.04	958.199	-38.5154	2065.59	857.326	-84.6304	2012.27	851.339	-77.2762	2064.98	773.887
270	0	101.348	2228.31	1576.14	197.676	2241.35	1586.41	103.951	2063.21	1596.27	228.479	2100.22	1612.42	179.685	2006.73	1461.62	215.007	1904.32	1213.77	197.66	2146.13	1356.64	205	2194.67	1175.74	255.695	1904.48	1295.36	22.5114	2074.72	1377.16	-35.756	1992.66	1159.63	-36.7254	1980.14	1081.44	-71.5865	2003.94	959.572	-37.3637	2080.5	859.736	-83.7884	2027.56	852.983	-75.927	2081.44	776.354
271	0	100.986	2239.63	1577.29	197.278	2252.75	1587.67	103.666	2074.6	1597.77	228.164	2111.72	1614.02	179.56	2017.73	1463.45	214.8	1914.75	1215.89	197.864	2156.78	1358.26	205.447	2204.77	1177.2	255.51	1915	1297.47	22.622	2085.72	1378.78	-35.7706	2004.61	1161.08	-36.7808	1992.34	1082.71	-71.1534	2017.96	961.038	-36.1711	2095.6	862.37	-82.9359	2043.11	854.773	-74.5292	2098.27	779.085
272	0	100.846	2250.87	1578.4	197.111	2264.04	1588.83	103.577	2085.91	1599.23	228.056	2123.11	1615.52	179.55	2028.62	1465.21	214.585	1925.07	1217.92	198.154	2167.32	1359.81	205.939	2214.73	1178.6	255.344	1925.4	1299.48	22.8137	2096.64	1380.41	-35.8247	2016.44	1162.58	-36.9085	2004.47	1084.01	-70.7536	2032.06	962.581	-34.9493	2110.89	865.215	-82.0762	2058.88	856.701	-73.0922	2115.43	782.072
273	0	100.921	2262.05	1579.44	197.164	2275.25	1589.89	103.673	2097.14	1600.63	228.145	2134.4	1616.91	179.647	2039.41	1466.9	214.371	1935.29	1219.85	198.52	2177.75	1361.28	206.462	2224.58	1179.93	255.2	1935.69	1301.39	23.0786	2107.46	1382.04	-35.9203	2028.15	1164.11	-37.1103	2016.51	1085.32	-70.3901	2046.26	964.19	-33.71	2126.35	868.259	-81.2127	2074.88	858.757	-71.6255	2132.91	785.306
274	0	101.199	2273.15	1580.42	197.426	2286.36	1590.85	103.946	2108.31	1601.97	228.421	2145.59	1618.17	179.844	2050.1	1468.48	214.166	1945.41	1221.67	198.952	2188.1	1362.66	207.005	2234.35	1181.17	255.08	1945.89	1303.16	23.4086	2118.2	1383.63	-36.0581	2039.74	1165.65	-37.3865	2028.46	1086.62	-70.0653	2060.52	965.85	-32.4644	2141.96	871.489	-80.3485	2091.06	860.932	-70.138	2150.65	788.774
275	0	101.666	2284.19	1581.32	197.884	2297.39	1591.68	104.382	2119.41	1603.23	228.87	2156.69	1619.3	180.135	2060.71	1469.96	213.977	1955.47	1223.36	199.438	2198.36	1363.93	207.555	2244.04	1182.31	254.99	1956.01	1304.8	23.7965	2128.85	1385.18	-36.2375	2051.2	1167.19	-37.736	2040.34	1087.9	-69.7805	2074.85	967.549	-31.2229	2157.69	874.887	-79.4866	2107.42	863.214	-68.6378	2168.63	792.461
276	0	102.31	2295.16	1582.13	198.522	2308.33	1592.39	104.969	2130.44	1604.4	229.479	2167.69	1620.29	180.513	2071.24	1471.32	213.815	1965.45	1224.92	199.969	2208.55	1365.08	208.1	2253.68	1183.34	254.933	1966.07	1306.29	24.2356	2139.42	1386.67	-36.4563	2062.55	1168.69	-38.1563	2052.14	1089.14	-69.5361	2089.23	969.273	-29.9947	2173.54	878.437	-78.6298	2123.92	865.595	-67.1325	2186.8	796.35
277	0	103.115	2306.08	1582.85	199.325	2319.2	1592.98	105.693	2141.41	1605.46	230.233	2178.61	1621.13	180.971	2081.7	1472.55	213.689	1975.39	1226.32	200.537	2218.69	1366.1	208.632	2263.29	1184.26	254.917	1976.06	1307.63	24.7203	2149.92	1388.07	-36.711	2073.8	1170.14	-38.6434	2063.88	1090.32	-69.3316	2103.65	971.011	-28.7878	2189.48	882.12	-77.7805	2140.55	868.063	-65.6283	2205.11	800.421
278	0	104.065	2316.93	1583.46	200.277	2329.99	1593.43	106.54	2152.31	1606.42	231.118	2189.44	1621.82	181.503	2092.1	1473.64	213.608	1985.28	1227.57	201.133	2228.77	1366.98	209.14	2272.89	1185.05	254.945	1986.02	1308.81	25.2458	2160.35	1389.38	-36.9966	2084.94	1171.53	-39.1923	2075.58	1091.42	-69.1655	2118.1	972.75	-27.6085	2205.48	885.916	-76.9407	2157.29	870.607	-64.1306	2223.53	804.654
279	0	105.146	2327.73	1583.97	201.363	2340.72	1593.75	107.497	2163.16	1607.25	232.119	2200.2	1622.35	182.105	2102.43	1474.58	213.581	1995.14	1228.66	201.753	2238.82	1367.71	209.618	2282.49	1185.71	255.025	1995.94	1309.82	25.8086	2170.71	1390.58	-37.3072	2096.01	1172.82	-39.7965	2087.23	1092.45	-69.0353	2132.59	974.479	-26.4614	2221.53	889.804	-76.1121	2174.1	873.218	-62.6431	2242.01	809.026
280	0	106.344	2338.47	1584.35	202.567	2351.37	1593.93	108.551	2173.95	1607.94	233.222	2210.87	1622.72	182.771	2112.72	1475.36	213.616	2004.97	1229.57	202.393	2248.83	1368.3	210.061	2292.1	1186.23	255.163	2005.84	1310.66	26.4064	2181.01	1391.66	-37.6354	2107	1174.02	-40.4487	2098.85	1093.37	-68.9375	2147.09	976.189	-25.349	2237.6	893.764	-75.2955	2190.97	875.884	-61.1685	2260.52	813.516
281	0	107.645	2349.17	1584.61	203.876	2361.97	1593.97	109.688	2184.69	1608.51	234.415	2221.48	1622.94	183.499	2122.96	1475.99	213.721	2014.79	1230.32	203.048	2258.82	1368.73	210.468	2301.74	1186.6	255.365	2015.72	1311.33	27.0378	2191.25	1392.6	-37.9734	2117.94	1175.1	-41.1407	2110.46	1094.19	-68.8679	2161.61	977.87	-24.2722	2253.68	897.775	-74.4913	2207.88	878.594	-59.708	2279.01	818.101
282	0	109.037	2359.81	1584.74	205.278	2372.5	1593.87	110.899	2195.37	1608.92	235.685	2232.01	1623	184.285	2133.15	1476.45	213.904	2024.6	1230.88	203.719	2268.79	1368.99	210.837	2311.4	1186.82	255.637	2025.6	1311.82	27.7029	2201.44	1393.41	-38.3122	2128.84	1176.05	-41.8631	2122.06	1094.9	-68.8211	2176.13	979.512	-23.23	2269.74	901.817	-73.6987	2224.81	881.337	-58.2613	2297.46	822.759
283	0	110.51	2370.4	1584.74	206.761	2382.98	1593.64	112.173	2206	1609.19	237.023	2242.48	1622.9	185.129	2143.31	1476.75	214.169	2034.4	1231.28	204.405	2278.74	1369.1	211.173	2321.1	1186.89	255.984	2035.47	1312.14	28.4027	2211.58	1394.06	-38.6426	2139.71	1176.86	-42.6062	2133.67	1095.48	-68.791	2190.66	981.108	-22.2197	2285.77	905.868	-72.9165	2241.73	884.103	-56.8274	2315.83	827.469
284	0	112.054	2380.94	1584.6	208.317	2393.4	1593.26	113.501	2216.58	1609.3	238.418	2252.88	1622.65	186.03	2153.43	1476.87	214.521	2044.2	1231.49	205.111	2288.69	1369.04	211.48	2330.84	1186.8	256.411	2045.34	1312.28	29.1393	2221.68	1394.56	-38.955	2150.56	1177.53	-43.3592	2145.3	1095.93	-68.7706	2205.18	982.65	-21.2373	2301.76	909.911	-72.142	2258.64	886.879	-55.4038	2334.1	832.211
285	0	113.662	2391.43	1584.32	209.937	2403.76	1592.75	114.878	2227.11	1609.25	239.864	2263.22	1622.24	186.987	2163.51	1476.83	214.962	2054	1231.52	205.839	2298.62	1368.82	211.766	2340.62	1186.57	256.922	2055.21	1312.24	29.9159	2231.73	1394.91	-39.2394	2161.42	1178.05	-44.1111	2156.96	1096.25	-68.7521	2219.7	984.132	-20.2773	2317.67	913.924	-71.3718	2275.5	889.655	-53.9875	2352.24	836.964
286	0	115.329	2401.87	1583.9	211.617	2414.06	1592.11	116.299	2237.58	1609.05	241.356	2273.49	1621.69	188.002	2173.56	1476.61	215.496	2063.8	1231.37	206.595	2308.55	1368.45	212.041	2350.44	1186.18	257.521	2065.09	1312.01	30.7364	2241.75	1395.09	-39.4862	2172.28	1178.41	-44.8501	2168.65	1096.44	-68.7269	2234.19	985.548	-19.3335	2333.5	917.892	-70.6015	2292.31	892.418	-52.5748	2370.24	841.711
287	0	117.052	2412.26	1583.34	213.352	2424.31	1591.33	117.762	2248	1608.69	242.891	2283.7	1621	189.076	2183.57	1476.23	216.121	2073.62	1231.03	207.386	2318.47	1367.92	212.317	2360.31	1185.66	258.208	2074.97	1311.61	31.6055	2251.73	1395.12	-39.6856	2183.15	1178.62	-45.5641	2180.37	1096.49	-68.6861	2248.66	986.892	-18.3988	2349.24	921.796	-69.8257	2309.05	895.157	-51.1615	2388.08	846.432
288	0	118.827	2422.59	1582.64	215.141	2434.49	1590.44	119.265	2258.36	1608.17	244.467	2293.85	1620.16	190.211	2193.54	1475.67	216.837	2083.44	1230.51	208.219	2328.39	1367.25	212.607	2370.22	1184.99	258.985	2084.85	1311.03	32.5287	2261.69	1395	-39.8284	2194.05	1178.67	-46.2405	2192.13	1096.41	-68.6198	2263.1	988.159	-17.4657	2364.88	925.622	-69.0379	2325.7	897.859	-49.7433	2405.73	851.11
289	0	120.655	2432.86	1581.8	216.983	2444.62	1589.42	120.81	2268.66	1607.51	246.086	2303.92	1619.2	191.411	2203.48	1474.96	217.642	2093.28	1229.81	209.103	2338.3	1366.44	212.927	2380.18	1184.2	259.851	2094.74	1310.26	33.5117	2271.62	1394.72	-39.9052	2204.97	1178.57	-46.8666	2203.93	1096.2	-68.5182	2277.5	989.344	-16.5263	2380.39	929.352	-68.231	2342.24	900.511	-48.3155	2423.2	855.727
290	0	122.537	2443.07	1580.84	218.879	2454.67	1588.29	122.399	2278.89	1606.69	247.751	2313.93	1618.11	192.677	2213.37	1474.09	218.53	2103.14	1228.93	210.048	2348.2	1365.5	213.293	2390.17	1183.3	260.804	2104.63	1309.32	34.5607	2281.53	1394.3	-39.9073	2215.91	1178.31	-47.4292	2215.76	1095.87	-68.3707	2291.85	990.443	-15.5723	2395.77	932.973	-67.3971	2358.66	903.1	-46.8735	2440.46	860.264
291	0	124.474	2453.21	1579.76	220.831	2464.66	1587.06	124.039	2289.06	1605.74	249.464	2323.87	1616.91	194.014	2223.21	1473.06	219.498	2113.01	1227.86	211.065	2358.09	1364.44	213.72	2400.21	1182.28	261.841	2114.52	1308.2	35.6821	2291.42	1393.73	-39.8262	2226.88	1177.92	-47.9149	2227.63	1095.41	-68.1668	2306.14	991.451	-14.5956	2411.02	936.47	-66.5277	2374.94	905.613	-45.4127	2457.51	864.704
292	0	126.47	2463.28	1578.58	222.843	2474.58	1585.74	125.735	2299.15	1604.67	251.234	2333.74	1615.6	195.425	2233.01	1471.89	220.538	2122.91	1226.62	212.163	2367.97	1363.28	214.225	2410.28	1181.17	262.957	2124.41	1306.9	36.8823	2301.3	1393.04	-39.6534	2237.88	1177.38	-48.3104	2239.52	1094.83	-67.8958	2320.35	992.367	-13.5879	2426.12	939.83	-65.6141	2391.06	908.036	-43.9285	2474.33	869.027
293	0	128.529	2473.28	1577.3	224.919	2484.43	1584.33	127.495	2309.17	1603.47	253.066	2343.54	1614.2	196.913	2242.75	1470.59	221.644	2132.84	1225.21	213.352	2377.83	1362.02	214.824	2420.39	1179.97	264.148	2134.29	1305.43	38.1676	2311.17	1392.23	-39.3808	2248.9	1176.72	-48.6023	2251.44	1094.15	-67.547	2334.48	993.188	-12.5409	2441.06	943.04	-64.6474	2407	910.356	-42.416	2490.92	873.214
294	0	130.655	2483.2	1575.93	227.063	2494.2	1582.87	129.326	2319.11	1602.18	254.969	2353.26	1612.73	198.482	2252.43	1469.17	222.808	2142.79	1223.63	214.644	2387.67	1360.68	215.534	2430.54	1178.71	265.406	2144.16	1303.8	39.5439	2321.04	1391.32	-39.0004	2259.94	1175.94	-48.7773	2263.37	1093.37	-67.1099	2348.51	993.912	-11.4461	2455.83	946.087	-63.6187	2422.76	912.56	-40.8707	2507.26	877.245
295	0	132.854	2493.05	1574.51	229.282	2503.89	1581.35	131.239	2328.96	1600.81	256.951	2362.91	1611.18	200.133	2262.05	1467.64	224.021	2152.77	1221.9	216.048	2397.49	1359.27	216.369	2440.72	1177.4	266.724	2154.02	1302.02	41.0169	2330.91	1390.31	-38.5043	2270.99	1175.05	-48.8224	2275.3	1092.51	-66.574	2362.43	994.54	-10.2953	2470.43	948.959	-62.5193	2438.3	914.636	-39.2874	2523.34	881.097
296	0	135.131	2502.82	1573.04	231.579	2513.51	1579.8	133.242	2338.73	1599.37	259.023	2372.48	1609.59	201.87	2271.61	1466.02	225.274	2162.78	1220.03	217.572	2407.28	1357.83	217.343	2450.94	1176.05	268.094	2163.87	1300.1	42.5915	2340.78	1389.23	-37.885	2282.05	1174.07	-48.725	2287.23	1091.57	-65.9295	2376.23	995.071	-9.08003	2484.85	951.644	-61.341	2453.61	916.573	-37.6612	2539.16	884.751
297	0	137.49	2512.5	1571.55	233.961	2523.05	1578.23	135.346	2348.41	1597.9	261.193	2381.99	1607.97	203.694	2281.11	1464.32	226.558	2172.83	1218.04	219.226	2417.05	1356.35	218.468	2461.19	1174.69	269.507	2173.7	1298.05	44.272	2350.66	1388.1	-37.1349	2293.12	1173.01	-48.4731	2299.15	1090.58	-65.1668	2389.88	995.509	-7.792	2499.07	954.132	-60.076	2468.68	918.36	-35.9866	2554.69	888.184
298	0	139.937	2522.11	1570.06	236.432	2532.51	1576.67	137.559	2358.01	1596.4	263.471	2391.43	1606.35	205.607	2290.55	1462.58	227.863	2182.91	1215.94	221.015	2426.78	1354.87	219.753	2471.47	1173.34	270.954	2183.51	1295.89	46.062	2360.56	1386.94	-36.247	2304.19	1171.9	-48.0556	2311.05	1089.55	-64.2773	2403.38	995.858	-6.42286	2513.08	956.412	-58.7172	2483.48	919.99	-34.2578	2569.92	891.375
299	0	142.476	2531.64	1568.59	238.997	2541.91	1575.13	139.891	2367.52	1594.92	265.864	2400.8	1604.73	207.608	2299.92	1460.81	229.18	2193.04	1213.76	222.944	2436.49	1353.4	221.208	2481.79	1172.02	272.427	2193.3	1293.64	47.9637	2370.48	1385.78	-35.2146	2315.26	1170.76	-47.4623	2322.92	1088.5	-63.2529	2416.72	996.125	-4.96444	2526.87	958.475	-57.2585	2498	921.456	-32.469	2584.84	894.304
300	0	145.111	2541.09	1567.17	241.659	2551.24	1573.63	142.349	2376.95	1593.48	268.381	2410.11	1603.15	209.697	2309.23	1459.03	230.5	2203.2	1211.53	225.017	2446.17	1351.98	222.837	2492.15	1170.75	273.916	2203.08	1291.33	49.9784	2380.42	1384.63	-34.0319	2326.32	1169.61	-46.6845	2334.75	1087.46	-62.087	2429.87	996.316	-3.40879	2540.44	960.314	-55.6947	2512.22	922.754	-30.6138	2599.42	896.952
301	0	147.843	2550.48	1565.82	244.42	2560.51	1572.19	144.941	2386.31	1592.1	271.027	2419.38	1601.63	211.873	2318.48	1457.27	231.815	2213.4	1209.27	227.235	2455.81	1350.62	224.643	2502.53	1169.56	275.413	2212.84	1288.99	52.1061	2390.38	1383.53	-32.694	2337.38	1168.47	-45.7148	2346.53	1086.44	-60.7739	2442.84	996.443	-1.7484	2553.76	961.922	-54.0219	2526.13	923.882	-28.6862	2613.66	899.301
302	0	150.675	2559.8	1564.56	247.281	2569.73	1570.84	147.67	2395.59	1590.82	273.807	2428.6	1600.19	214.132	2327.68	1455.56	233.115	2223.64	1207	229.596	2465.42	1349.35	226.626	2512.94	1168.48	276.91	2222.58	1286.63	54.3452	2400.38	1382.51	-31.1972	2348.42	1167.38	-44.548	2358.25	1085.48	-59.3095	2455.59	996.516	0.023624	2566.82	963.296	-52.2373	2539.7	924.84	-26.6799	2627.53	901.336
303	0	153.605	2569.06	1563.43	250.243	2578.9	1569.59	150.542	2404.81	1589.65	276.723	2437.78	1598.85	216.471	2336.82	1453.93	234.395	2233.91	1204.78	232.096	2474.99	1348.19	228.78	2523.38	1167.54	278.398	2232.3	1284.29	56.6924	2410.4	1381.59	-29.5396	2359.44	1166.37	-43.181	2369.91	1084.6	-57.6915	2468.13	996.548	1.91327	2579.6	964.432	-50.3399	2552.93	925.63	-24.5891	2641.01	903.044
304	0	156.633	2578.26	1562.44	253.303	2588.03	1568.46	153.557	2413.97	1588.64	279.778	2446.92	1597.64	218.885	2345.92	1452.39	235.647	2244.22	1202.61	234.73	2484.53	1347.18	231.1	2533.85	1166.75	279.87	2242.01	1282	59.1427	2420.44	1380.81	-27.7212	2370.46	1165.47	-41.613	2381.49	1083.82	-55.9196	2480.44	996.553	3.92533	2592.1	965.332	-48.3298	2565.8	926.259	-22.4084	2654.09	904.417
305	0	159.755	2587.41	1561.62	256.457	2597.13	1567.48	156.714	2423.07	1587.8	282.968	2456.05	1596.57	221.368	2354.97	1450.97	236.865	2254.56	1200.55	237.487	2494.03	1346.32	233.572	2544.32	1166.15	281.321	2251.7	1279.8	61.6895	2430.52	1380.19	-25.7443	2381.46	1164.7	-39.8461	2393	1083.18	-53.9955	2492.52	996.547	6.0631	2604.3	965.998	-46.2094	2578.29	926.734	-20.1334	2666.74	905.448
306	0	162.966	2596.52	1560.99	259.702	2606.21	1566.65	160.012	2432.13	1587.15	286.291	2465.15	1595.66	223.911	2363.99	1449.71	238.047	2264.93	1198.62	240.356	2503.5	1345.66	236.181	2554.8	1165.77	282.744	2261.38	1277.7	64.3239	2440.62	1379.75	-23.6141	2392.44	1164.1	-37.8855	2404.42	1082.7	-51.9236	2504.35	996.545	8.32801	2616.18	966.435	-43.9826	2590.39	927.064	-17.7607	2678.95	906.137
307	0	166.26	2605.59	1560.56	263.029	2615.26	1566	163.443	2441.14	1586.72	289.74	2474.25	1594.93	226.506	2372.98	1448.61	239.186	2275.31	1196.84	243.323	2512.94	1345.19	238.91	2565.28	1165.61	284.134	2271.04	1275.74	67.0356	2450.75	1379.53	-21.3389	2403.41	1163.69	-35.7394	2415.74	1082.39	-49.7105	2515.92	996.563	10.7194	2627.73	966.651	-41.6555	2602.11	927.261	-15.2883	2690.71	906.487
308	0	169.63	2614.62	1560.35	266.43	2624.3	1565.53	167.001	2450.12	1586.52	293.306	2483.33	1594.39	229.143	2381.95	1447.69	240.282	2285.7	1195.26	246.371	2522.34	1344.94	241.735	2575.74	1165.7	285.488	2280.7	1273.95	69.8122	2460.9	1379.54	-18.93	2414.37	1163.5	-33.4195	2426.97	1082.29	-47.3656	2527.24	996.615	13.234	2638.95	966.654	-39.2363	2613.42	927.338	-12.7164	2701.98	906.504
309	0	173.066	2623.62	1560.38	269.897	2633.33	1565.25	170.674	2459.06	1586.56	296.979	2492.4	1594.04	231.81	2390.9	1446.98	241.333	2296.1	1193.88	249.479	2531.7	1344.92	244.63	2586.17	1166.03	286.802	2290.34	1272.35	72.64	2471.06	1379.8	-16.4024	2425.31	1163.55	-30.941	2438.09	1082.41	-44.9013	2538.29	996.716	15.8659	2649.8	966.459	-36.7355	2624.33	927.31	-10.0469	2712.78	906.201
310	0	176.557	2632.58	1560.64	273.417	2642.36	1565.18	174.45	2467.98	1586.84	300.746	2501.47	1593.9	234.496	2399.83	1446.48	242.338	2306.49	1192.73	252.628	2541.04	1345.14	247.57	2596.56	1166.63	288.073	2299.97	1270.95	75.5035	2481.23	1380.31	-13.7742	2436.24	1163.85	-28.3224	2449.1	1082.75	-42.3323	2549.08	996.878	18.6061	2660.3	966.079	-34.1659	2634.83	927.192	-7.28458	2723.08	905.594
311	0	180.092	2641.53	1561.16	276.978	2651.37	1565.32	178.312	2476.86	1587.37	304.59	2510.53	1593.95	237.189	2408.76	1446.19	243.298	2316.86	1191.83	255.795	2550.35	1345.59	250.522	2606.9	1167.47	289.301	2309.59	1269.79	78.3861	2491.4	1381.09	-11.0669	2447.16	1164.42	-25.5856	2460	1083.33	-39.6764	2559.61	997.112	21.4426	2670.44	965.53	-31.5425	2644.93	926.999	-4.43692	2732.89	904.703
312	0	183.657	2650.44	1561.91	280.567	2660.37	1565.67	182.243	2485.71	1588.15	308.494	2519.58	1594.19	239.874	2417.69	1446.13	244.214	2327.2	1191.18	258.956	2559.63	1346.27	253.459	2617.17	1168.56	290.485	2319.19	1268.86	81.2704	2501.56	1382.13	-8.30466	2458.06	1165.26	-22.7554	2470.77	1084.15	-36.9534	2569.86	997.426	24.3598	2680.2	964.83	-28.8825	2654.63	926.747	-1.51467	2742.2	903.552
313	0	187.237	2659.32	1562.92	284.168	2669.37	1566.22	186.223	2494.54	1589.15	312.439	2528.61	1594.62	242.54	2426.62	1446.29	245.09	2337.51	1190.79	262.087	2568.88	1347.17	256.348	2627.37	1169.87	291.627	2328.78	1268.17	84.1382	2511.72	1383.42	-5.51392	2468.95	1166.35	-19.8589	2481.43	1085.21	-34.1855	2579.85	997.825	27.339	2689.59	963.999	-26.2051	2663.93	926.45	1.46795	2751.03	902.168
314	0	190.817	2668.18	1564.15	287.767	2678.35	1566.97	190.23	2503.33	1590.37	316.404	2537.62	1595.22	245.172	2435.56	1446.65	245.93	2347.77	1190.66	265.165	2578.12	1348.28	259.16	2637.47	1171.39	292.728	2338.34	1267.73	86.9711	2521.85	1384.94	-2.72267	2479.82	1167.71	-16.9253	2491.95	1086.49	-31.397	2589.57	998.311	30.3581	2698.62	963.056	-23.5314	2672.86	926.124	4.49294	2759.37	900.583
315	0	194.381	2677	1565.61	291.346	2687.31	1567.91	194.241	2512.09	1591.78	320.366	2546.6	1595.98	247.758	2444.51	1447.23	246.737	2357.97	1190.78	268.167	2587.33	1349.57	261.866	2647.48	1173.07	293.791	2347.89	1267.53	89.7508	2531.95	1386.69	0.040355	2490.66	1169.29	-13.9847	2502.33	1087.99	-28.6133	2599.04	998.886	33.392	2707.29	962.021	-20.8841	2681.42	925.781	7.53842	2767.26	898.827
316	0	197.912	2685.8	1567.28	294.888	2696.25	1569.04	198.233	2520.81	1593.37	324.302	2555.55	1596.88	250.286	2453.48	1447.99	247.516	2368.1	1191.15	271.071	2596.53	1351.02	264.441	2657.39	1174.89	294.818	2357.42	1267.57	92.4597	2542.02	1388.63	2.74653	2501.46	1171.1	-11.0677	2512.58	1089.67	-25.8607	2608.25	999.544	36.4128	2715.61	960.915	-18.287	2689.63	925.431	10.5786	2774.71	896.935
317	0	201.393	2694.55	1569.14	298.377	2705.16	1570.33	202.182	2529.49	1595.1	328.188	2564.46	1597.9	252.743	2462.47	1448.92	248.273	2378.15	1191.74	273.858	2605.72	1352.6	266.861	2667.2	1176.82	295.813	2366.91	1267.84	95.081	2552.04	1390.74	5.36831	2512.21	1173.08	-8.20417	2522.68	1091.53	-23.166	2617.21	1000.28	39.3899	2723.6	959.757	-15.7646	2697.5	925.086	13.5838	2781.75	894.938
318	0	204.806	2703.28	1571.17	301.795	2714.05	1571.76	206.062	2538.13	1596.96	332.003	2573.32	1599.01	255.119	2471.48	1450.01	249.013	2388.12	1192.54	276.508	2614.9	1354.29	269.108	2676.9	1178.81	296.78	2376.38	1268.32	97.5991	2562.02	1392.97	7.8801	2522.91	1175.22	-5.42281	2532.62	1093.52	-20.5559	2625.92	1001.09	42.2911	2731.27	958.567	-13.3419	2705.05	924.751	16.5209	2788.4	892.869
319	0	208.135	2711.97	1573.34	305.126	2722.9	1573.33	209.851	2546.73	1598.9	335.722	2582.13	1600.21	257.405	2480.51	1451.24	249.74	2397.98	1193.53	279.008	2624.08	1356.05	271.166	2686.5	1180.83	297.722	2385.8	1269	100	2571.94	1395.31	10.2591	2533.52	1177.48	-2.75009	2542.41	1095.62	-18.056	2634.4	1001.96	45.0829	2738.64	957.362	-11.0436	2712.31	924.432	19.3541	2794.7	890.761
320	0	211.364	2720.62	1575.62	308.352	2731.71	1575.01	213.526	2555.29	1600.91	339.325	2590.89	1601.45	259.591	2489.56	1452.57	250.459	2407.75	1194.68	281.344	2633.24	1357.85	273.024	2696	1182.85	298.643	2395.19	1269.85	102.272	2581.79	1397.7	12.4862	2544.02	1179.82	-0.209651	2552.03	1097.81	-15.6908	2642.65	1002.88	47.7311	2745.74	956.157	-8.89379	2719.29	924.133	22.0454	2800.68	888.641
321	0	214.476	2729.23	1577.99	311.459	2740.48	1576.77	217.065	2563.81	1602.95	342.79	2599.6	1602.74	261.67	2498.64	1454	251.174	2417.4	1195.97	283.507	2642.41	1359.66	274.676	2705.4	1184.82	299.547	2404.54	1270.86	104.405	2591.57	1400.13	14.5462	2554.41	1182.21	2.17833	2561.48	1100.04	-13.4829	2650.68	1003.83	50.2021	2752.58	954.969	-6.91544	2726	923.856	24.5556	2806.38	886.536
322	0	217.457	2737.81	1580.41	314.432	2749.21	1578.59	220.449	2572.28	1604.98	346.1	2608.24	1604.03	263.637	2507.73	1455.49	251.889	2426.94	1197.38	285.49	2651.56	1361.45	276.119	2714.72	1186.73	300.437	2413.84	1272	106.391	2601.28	1402.54	16.4286	2564.65	1184.61	4.39752	2570.76	1102.3	-11.4524	2658.49	1004.8	52.4633	2759.2	953.807	-5.12983	2732.48	923.6	26.8458	2811.84	884.469
323	0	220.294	2746.36	1582.86	317.259	2757.89	1580.46	223.662	2580.73	1607	349.24	2616.84	1605.32	265.487	2516.84	1457.03	252.607	2436.36	1198.88	287.291	2660.71	1363.21	277.356	2723.94	1188.54	301.315	2423.08	1273.26	108.225	2610.92	1404.92	18.1275	2574.72	1186.98	6.43569	2579.85	1104.54	-9.61678	2666.09	1005.79	54.4844	2765.62	952.683	-3.55616	2738.74	923.363	28.8783	2817.08	882.458
324	0	222.975	2754.88	1585.31	319.928	2766.54	1582.34	226.688	2589.14	1608.96	352.195	2625.39	1606.59	267.217	2525.96	1458.58	253.331	2445.66	1200.44	288.907	2669.86	1364.89	278.391	2733.09	1190.25	302.184	2432.27	1274.6	109.903	2620.46	1407.22	19.6416	2584.6	1189.29	8.28472	2588.76	1106.74	-7.99033	2673.49	1006.77	56.2383	2771.87	951.603	-2.21114	2744.8	923.143	30.618	2822.15	880.519
325	0	225.491	2763.37	1587.73	322.429	2775.15	1584.21	229.515	2597.52	1610.86	354.954	2633.9	1607.82	268.826	2535.08	1460.14	254.062	2454.84	1202.03	290.34	2678.99	1366.5	279.233	2742.17	1191.82	303.045	2441.41	1276	111.423	2629.92	1409.43	20.9734	2594.26	1191.52	9.94049	2597.49	1108.88	-6.58419	2680.7	1007.73	57.7017	2777.96	950.571	-1.10865	2750.67	922.936	32.0339	2827.06	878.661
326	0	227.832	2771.83	1590.09	324.754	2783.73	1586.06	232.136	2605.88	1612.66	357.511	2642.36	1608.99	270.313	2544.21	1461.68	254.8	2463.91	1203.63	291.596	2688.1	1368	279.893	2751.17	1193.26	303.897	2450.49	1277.44	112.788	2639.29	1411.52	22.1294	2603.69	1193.65	11.4025	2606.02	1110.94	-5.40611	2687.73	1008.65	58.8559	2783.93	949.589	-0.259493	2756.37	922.737	33.1	2831.86	876.893
327	0	229.994	2780.28	1592.36	326.898	2792.28	1587.86	234.542	2614.23	1614.35	359.86	2650.8	1610.1	271.679	2553.34	1463.19	255.546	2472.86	1205.23	292.679	2697.2	1369.39	280.386	2760.11	1194.55	304.742	2459.5	1278.9	113.998	2648.57	1413.48	23.1188	2612.88	1195.64	12.6736	2614.37	1112.9	-4.46046	2694.58	1009.54	59.6874	2789.79	948.655	0.328847	2761.92	922.542	33.7963	2836.56	875.215
328	0	231.971	2788.71	1594.54	328.857	2800.8	1589.58	236.73	2622.57	1615.93	361.999	2659.22	1611.14	272.923	2562.46	1464.64	256.296	2481.71	1206.79	293.597	2706.28	1370.66	280.725	2768.98	1195.7	305.576	2468.46	1280.35	115.058	2657.75	1415.28	23.9525	2621.81	1197.49	13.7591	2622.53	1114.74	-3.74833	2701.26	1010.38	60.1884	2795.56	947.767	0.652276	2767.33	922.345	34.1096	2841.18	873.628
329	0	233.762	2797.13	1596.59	330.629	2809.3	1591.22	238.7	2630.9	1617.37	363.926	2667.62	1612.09	274.05	2571.57	1466.02	257.048	2490.44	1208.3	294.36	2715.32	1371.8	280.928	2777.79	1196.69	306.397	2477.35	1281.78	115.973	2666.84	1416.92	24.6429	2630.47	1199.19	14.6666	2630.52	1116.46	-3.26771	2707.79	1011.16	60.3565	2801.27	946.917	0.710126	2772.61	922.141	34.034	2845.75	872.126
330	0	235.365	2805.55	1598.49	332.213	2817.79	1592.77	240.451	2639.24	1618.67	365.645	2676.01	1612.95	275.06	2580.66	1467.32	257.799	2499.08	1209.74	294.976	2724.34	1372.81	281.012	2786.54	1197.55	307.201	2486.19	1283.17	116.748	2675.83	1418.4	25.2026	2638.88	1200.73	15.4052	2638.32	1118.04	-3.01372	2714.17	1011.87	60.1951	2806.91	946.099	0.505095	2777.78	921.925	33.5711	2850.27	870.703
331	0	236.782	2813.96	1600.25	333.611	2826.26	1594.19	241.988	2647.59	1619.83	367.159	2684.41	1613.72	275.957	2589.72	1468.53	258.542	2507.62	1211.1	295.457	2733.33	1373.69	280.991	2795.22	1198.25	307.983	2494.97	1284.5	117.391	2684.73	1419.7	25.6439	2647.03	1202.11	15.985	2645.96	1119.48	-2.97891	2720.41	1012.51	59.7131	2812.51	945.303	0.043089	2782.85	921.692	32.7297	2854.76	869.349
332	0	238.014	2822.38	1601.84	334.825	2834.73	1595.5	243.315	2655.95	1620.84	368.472	2692.81	1614.38	276.742	2598.76	1469.64	259.271	2516.08	1212.37	295.81	2742.28	1374.44	280.882	2803.84	1198.82	308.736	2503.69	1285.76	117.906	2693.55	1420.82	25.9781	2654.95	1203.32	16.4165	2653.45	1120.79	-3.15362	2726.53	1013.08	58.924	2818.07	944.517	-0.666989	2787.83	921.436	31.5253	2859.22	868.053
333	0	239.064	2830.81	1603.27	335.859	2843.21	1596.67	244.437	2664.33	1621.7	369.591	2701.23	1614.94	277.418	2607.77	1470.65	259.98	2524.46	1213.53	296.048	2751.19	1375.05	280.7	2812.39	1199.26	309.454	2512.37	1286.93	118.302	2702.28	1421.78	26.215	2662.63	1204.37	16.7103	2660.78	1121.95	-3.52637	2732.54	1013.56	57.8459	2823.6	943.732	-1.61352	2792.73	921.153	29.9796	2863.66	866.801
334	0	239.938	2839.24	1604.52	336.718	2851.68	1597.7	245.361	2672.73	1622.4	370.523	2709.67	1615.39	277.988	2616.76	1471.54	260.659	2532.76	1214.59	296.177	2760.06	1375.54	280.457	2820.88	1199.57	310.129	2520.99	1288	118.585	2710.93	1422.56	26.3631	2670.12	1205.26	16.8767	2667.98	1122.98	-4.0842	2738.44	1013.96	56.5003	2829.1	942.934	-2.78249	2797.56	920.838	28.1194	2868.08	865.579
335	0	240.64	2847.69	1605.59	337.407	2860.17	1598.59	246.094	2681.16	1622.96	371.275	2718.14	1615.74	278.453	2625.71	1472.32	261.301	2541.01	1215.52	296.208	2768.89	1375.9	280.165	2829.3	1199.75	310.754	2529.57	1288.98	118.761	2719.52	1423.18	26.4284	2677.42	1206	16.9255	2675.06	1123.86	-4.81309	2744.26	1014.28	54.9115	2834.57	942.112	-4.15787	2802.34	920.486	25.9754	2872.48	864.374
336	0	241.175	2856.16	1606.48	337.931	2868.67	1599.34	246.645	2689.62	1623.37	371.853	2726.63	1615.98	278.814	2634.63	1472.98	261.896	2549.2	1216.33	296.146	2777.69	1376.14	279.832	2837.66	1199.81	311.319	2538.12	1289.84	118.834	2728.03	1423.63	26.4156	2684.58	1206.6	16.8657	2682.03	1124.62	-5.69827	2749.99	1014.51	53.1058	2840.02	941.254	-5.72201	2807.08	920.091	23.5813	2876.87	863.171
337	0	241.549	2864.65	1607.2	338.297	2877.19	1599.94	247.019	2698.11	1623.63	372.263	2735.14	1616.11	279.071	2643.52	1473.52	262.436	2557.35	1217.03	295.999	2786.44	1376.26	279.466	2845.96	1199.75	311.818	2546.63	1290.59	118.81	2736.49	1423.93	26.3272	2691.62	1207.07	16.7054	2688.9	1125.24	-6.7246	2755.66	1014.65	51.1103	2845.44	940.349	-7.4561	2811.77	919.65	20.9725	2881.23	861.955
338	0	241.768	2873.16	1607.75	338.511	2885.72	1600.4	247.224	2706.62	1623.76	372.513	2743.69	1616.13	279.225	2652.39	1473.94	262.912	2565.47	1217.6	295.772	2795.16	1376.27	279.071	2854.2	1199.59	312.242	2555.11	1291.23	118.693	2744.9	1424.07	26.1644	2698.56	1207.4	16.4519	2695.69	1125.74	-7.87684	2761.28	1014.7	48.9527	2850.84	939.388	-9.34053	2816.44	919.156	18.1848	2885.58	860.716
339	0	241.837	2881.7	1608.14	338.579	2894.27	1600.73	247.265	2715.17	1623.75	372.606	2752.27	1616.06	279.275	2661.23	1474.24	263.316	2573.56	1218.05	295.467	2803.85	1376.17	278.652	2862.4	1199.31	312.584	2563.57	1291.74	118.485	2753.27	1424.08	25.9272	2705.44	1207.61	16.1118	2702.42	1126.11	-9.13999	2766.85	1014.66	46.6599	2856.22	938.361	-11.3554	2821.09	918.606	15.2536	2889.91	859.439
340	0	241.763	2890.26	1608.36	338.507	2902.85	1600.91	247.149	2723.75	1623.61	372.547	2760.87	1615.88	279.22	2670.04	1474.43	263.64	2581.63	1218.37	295.088	2812.5	1375.96	278.21	2870.55	1198.93	312.837	2572.01	1292.14	118.187	2761.61	1423.94	25.6148	2712.29	1207.7	15.6908	2709.08	1126.36	-10.4995	2772.38	1014.52	44.2578	2861.58	937.262	-13.481	2825.72	917.993	12.2129	2894.23	858.116
341	0	241.55	2898.85	1608.43	338.299	2911.44	1600.96	246.879	2732.36	1623.34	372.34	2769.5	1615.6	279.057	2678.83	1474.5	263.877	2589.7	1218.58	294.636	2821.13	1375.65	277.745	2878.67	1198.45	312.995	2580.43	1292.42	117.801	2769.92	1423.67	25.226	2719.12	1207.68	15.1939	2715.71	1126.5	-11.9415	2777.89	1014.29	41.7706	2866.92	936.084	-15.698	2830.36	917.314	9.09408	2898.53	856.736
342	0	241.203	2907.46	1608.35	337.961	2920.06	1600.89	246.458	2740.99	1622.96	371.987	2778.15	1615.23	278.785	2687.61	1474.45	264.022	2597.76	1218.67	294.111	2829.74	1375.24	277.254	2886.76	1197.88	313.055	2588.85	1292.58	117.326	2778.22	1423.28	24.7597	2725.96	1207.54	14.6255	2722.31	1126.51	-13.453	2783.39	1013.96	39.2204	2872.25	934.823	-17.9879	2834.99	916.563	5.92598	2902.82	855.293
343	0	240.726	2916.11	1608.12	337.498	2928.69	1600.69	245.89	2749.66	1622.46	371.49	2786.82	1614.78	278.401	2696.37	1474.3	264.07	2605.84	1218.64	293.511	2838.33	1374.74	276.734	2894.84	1197.22	313.01	2597.27	1292.63	116.762	2786.5	1422.76	24.2147	2732.82	1207.3	13.9895	2728.89	1126.42	-15.0221	2788.87	1013.54	36.6267	2877.57	933.476	-20.3334	2839.65	915.736	2.73389	2907.12	853.781
344	0	240.125	2924.78	1607.77	336.914	2937.34	1600.37	245.175	2758.35	1621.85	370.85	2795.5	1614.23	277.902	2705.11	1474.03	264.016	2613.93	1218.5	292.835	2846.9	1374.16	276.182	2902.92	1196.48	312.859	2605.69	1292.56	116.107	2794.78	1422.12	23.5903	2739.73	1206.96	13.2894	2735.46	1126.2	-16.6378	2794.36	1013.01	34.0066	2882.88	932.04	-22.7182	2844.31	914.829	-0.460467	2911.41	852.196
345	0	239.402	2933.48	1607.28	336.211	2946	1599.93	244.313	2767.07	1621.14	370.067	2804.19	1613.6	277.286	2713.84	1473.65	263.86	2622.05	1218.24	292.078	2855.46	1373.48	275.593	2911.01	1195.66	312.6	2614.12	1292.37	115.358	2803.06	1421.36	22.8862	2746.68	1206.5	12.5279	2742.04	1125.87	-18.2904	2799.86	1012.37	31.3747	2888.2	930.515	-25.128	2849.01	913.838	-3.6391	2915.73	850.534
346	0	238.561	2942.21	1606.68	335.394	2954.67	1599.39	243.303	2775.81	1620.34	369.14	2812.89	1612.9	276.55	2722.57	1473.16	263.599	2630.2	1217.86	291.238	2864.02	1372.73	274.959	2919.11	1194.78	312.231	2622.57	1292.08	114.512	2811.34	1420.5	22.1024	2753.68	1205.94	11.7079	2748.63	1125.42	-19.9716	2805.37	1011.63	28.7426	2893.52	928.901	-27.5496	2853.74	912.757	-6.78765	2920.07	848.795
347	0	237.605	2950.97	1605.95	334.464	2963.34	1598.74	242.145	2784.57	1619.44	368.07	2821.58	1612.11	275.691	2731.29	1472.57	263.233	2638.39	1217.38	290.31	2872.57	1371.9	274.275	2927.25	1193.83	311.752	2631.03	1291.66	113.567	2819.63	1419.52	21.2391	2760.74	1205.26	10.8315	2755.24	1124.85	-21.6738	2810.91	1010.78	26.1197	2898.87	927.198	-29.9718	2858.52	911.585	-9.89526	2924.45	846.978
348	0	236.535	2959.75	1605.12	333.425	2972.01	1597.99	240.837	2793.36	1618.46	366.854	2830.28	1611.26	274.707	2740.01	1471.88	262.763	2646.63	1216.78	289.289	2881.13	1371	273.533	2935.42	1192.81	311.163	2639.51	1291.14	112.519	2827.94	1418.43	20.297	2767.85	1204.47	9.90063	2761.88	1124.15	-23.3909	2816.48	1009.82	23.5131	2904.24	925.408	-32.3849	2863.34	910.317	-12.9542	2928.88	845.083
349	0	235.354	2968.55	1604.18	332.279	2980.68	1597.14	239.376	2802.17	1617.38	365.491	2838.96	1610.33	273.595	2748.72	1471.08	262.19	2654.92	1216.07	288.171	2889.69	1370.02	272.727	2943.64	1191.74	310.465	2648.03	1290.51	111.364	2836.25	1417.23	19.2765	2775.03	1203.56	8.91707	2768.56	1123.32	-25.1178	2822.09	1008.74	20.928	2909.65	923.532	-34.7807	2868.22	908.951	-15.9593	2933.37	843.111
350	0	234.064	2977.38	1603.14	331.026	2989.34	1596.2	237.76	2811.01	1616.23	363.98	2847.63	1609.33	272.354	2757.43	1470.18	261.516	2663.26	1215.24	286.951	2898.26	1368.97	271.848	2951.92	1190.61	309.66	2656.57	1289.76	110.1	2844.58	1415.93	18.1786	2782.26	1202.53	7.88219	2775.27	1122.37	-26.8504	2827.74	1007.54	18.368	2915.11	921.572	-37.1527	2873.15	907.482	-18.908	2937.94	841.063
351	0	232.665	2986.24	1602.01	329.669	2997.98	1595.16	235.987	2819.86	1615	362.319	2856.29	1608.26	270.982	2766.13	1469.17	260.744	2671.65	1214.31	285.625	2906.85	1367.86	270.892	2960.26	1189.43	308.75	2665.14	1288.91	108.723	2852.92	1414.51	17.0039	2789.55	1201.37	6.79714	2782.04	1121.28	-28.5853	2833.45	1006.22	15.8355	2920.62	919.529	-39.4959	2878.16	905.91	-21.7992	2942.6	838.94
352	0	231.159	2995.12	1600.78	328.208	3006.61	1594.04	234.054	2828.73	1613.69	360.507	2864.93	1607.12	269.479	2774.84	1468.07	259.877	2680.11	1213.26	284.189	2915.45	1366.68	269.851	2968.66	1188.2	307.736	2673.75	1287.95	107.231	2861.27	1412.98	15.7532	2796.9	1200.09	5.66292	2788.85	1120.04	-30.3203	2839.21	1004.78	13.3319	2926.19	917.404	-41.8061	2883.23	904.231	-24.6333	2947.36	836.744
353	0	229.547	3004.02	1599.46	326.645	3015.22	1592.82	231.959	2837.63	1612.3	358.543	2873.55	1605.92	267.842	2783.54	1466.86	258.917	2688.63	1212.09	282.639	2924.08	1365.43	268.72	2977.13	1186.91	306.62	2682.39	1286.88	105.621	2869.63	1411.35	14.4273	2804.3	1198.67	4.48037	2795.72	1118.67	-32.0535	2845.04	1003.21	10.8577	2931.83	915.198	-44.0808	2888.39	902.444	-27.4113	2952.23	834.477
354	0	227.828	3012.95	1598.06	324.98	3023.81	1591.52	229.7	2846.54	1610.83	356.426	2882.14	1604.64	266.072	2792.24	1465.56	257.865	2697.22	1210.81	280.974	2932.72	1364.12	267.494	2985.68	1185.57	305.404	2691.07	1285.71	103.892	2878	1409.6	13.0267	2811.75	1197.12	3.25024	2802.65	1117.16	-33.7837	2850.93	1001.52	8.41329	2937.55	912.912	-46.3179	2893.62	900.548	-30.135	2957.21	832.138
355	0	226.004	3021.9	1596.57	323.213	3032.38	1590.13	227.275	2855.47	1609.29	354.154	2890.72	1603.31	264.167	2800.94	1464.16	256.725	2705.87	1209.42	279.19	2941.38	1362.75	266.171	2994.3	1184.17	304.09	2699.79	1284.43	102.043	2886.38	1407.74	11.5521	2819.26	1195.43	1.97316	2809.63	1115.5	-35.5103	2856.89	999.702	5.99848	2943.35	910.547	-48.5162	2898.94	898.541	-32.8059	2962.32	829.73
356	0	224.075	3030.87	1594.99	321.345	3040.92	1588.66	224.684	2864.43	1607.68	351.728	2899.27	1601.9	262.128	2809.64	1462.66	255.498	2714.58	1207.92	277.287	2950.07	1361.31	264.747	3003	1182.72	302.678	2708.55	1283.04	100.071	2894.77	1405.77	10.004	2826.82	1193.6	0.649672	2816.68	1113.69	-37.2325	2862.92	997.754	3.61305	2949.24	908.104	-50.6749	2904.34	896.423	-35.4256	2967.56	827.253
357	0	222.041	3039.86	1593.33	319.375	3049.43	1587.1	221.926	2873.4	1605.99	349.147	2907.8	1600.44	259.954	2818.34	1461.06	254.185	2723.36	1206.3	275.263	2958.78	1359.8	263.22	3011.78	1181.22	301.17	2717.34	1281.55	97.9771	2903.17	1403.68	8.38283	2834.43	1191.63	-0.719794	2823.78	1111.73	-38.9503	2869.02	995.677	1.25674	2955.21	905.581	-52.7938	2909.82	894.193	-37.9954	2972.93	824.708
358	0	219.901	3048.88	1591.59	317.304	3057.92	1585.47	219	2882.4	1604.22	346.411	2916.3	1598.9	257.645	2827.03	1459.37	252.787	2732.22	1204.58	273.117	2967.51	1358.23	261.591	3020.63	1179.66	299.566	2726.17	1279.95	95.7603	2911.57	1401.48	6.68885	2842.09	1189.52	-2.13495	2830.95	1109.63	-40.6633	2875.2	993.471	-1.07067	2961.26	902.981	-54.8725	2915.4	891.852	-40.5161	2978.43	822.095
359	0	217.657	3057.93	1589.76	315.132	3066.37	1583.74	215.906	2891.42	1602.38	343.519	2924.78	1597.3	255.202	2835.72	1457.58	251.303	2741.13	1202.73	270.851	2976.26	1356.6	259.858	3029.57	1178.04	297.867	2735.05	1278.25	93.4205	2919.98	1399.17	4.92219	2849.8	1187.27	-3.59566	2838.17	1107.38	-42.3715	2881.45	991.135	-3.3693	2967.4	900.303	-56.9111	2921.06	889.398	-42.9881	2984.06	819.414
360	0	215.307	3066.99	1587.85	312.858	3074.8	1581.94	212.644	2900.45	1600.47	340.471	2933.24	1595.64	252.623	2844.41	1455.69	249.735	2750.12	1200.78	268.462	2985.05	1354.9	258.022	3038.58	1176.38	296.071	2743.96	1276.45	90.9576	2928.4	1396.74	3.08288	2857.55	1184.88	-5.10185	2845.45	1104.98	-44.0749	2887.77	988.67	-5.6392	2973.64	897.547	-58.9095	2926.81	886.832	-45.4116	2989.83	816.665
[truncated: 69 more columns]

## Sheet: Sheet2
Devices
		025370 - Force			025370 - Moment			025370 - CoP			027571 - Force			027571 - Moment			027571 - CoP			037720 - Force			037720 - Moment			037720 - CoP
Frame	Sub Frame	Fx	Fy	Fz	Mx	My	Mz	Cx	Cy	Cz	Fx	Fy	Fz	Mx	My	Mz	Cx	Cy	Cz	Fx	Fy	Fz	Mx	My	Mz	Cx	Cy	Cz
		N	N	N	N.mm	N.mm	N.mm	mm	mm	mm	N	N	N	N.mm	N.mm	N.mm	mm	mm	mm	N	N	N	N.mm	N.mm	N.mm	mm	mm	mm
1	0	0	0	0	0	0	0	200	300	0	0	0	0	0	0	0	200	903	0	0	0	0	0	0	0	603	903	0
1	1	0	0	0	0	0	0	200	300	0	0	0	0	0	0	0	200	903	0	0	0	0	0	0	0	603	903	0
1	2	0	0	0	0	0	0	200	300	0	0	0	0	0	0	0	200	903	0	0	0	0	0	0	0	603	903	0
1	3	0	0	0	0	0	0	200	300	0	0	0	0	0	0	0	200	903	0	0	0	0	0	0	0	603	903	0
1	4	0	0	0	0	0	0	200	300	0	0	0	0	0	0	0	200	903	0	0	0	0	0	0	0	603	903	0
1	5	0	0	0	0	0	0	200	300	0	0	0	0	0	0	0	200	903	0	0	0	0	0	0	0	603	903	0
1	6	0	0	0	0	0	0	200	300	0	0	0	0	0	0	0	200	903	0	0	0	0	0	0	0	603	903	0
1	7	0	0	0	0	0	0	200	300	0	0	0	0	0	0	0	200	903	0	0	0	0	0	0	0	603	903	0
1	8	0	0	0	0	0	0	200	300	0	0	0	0	0	0	0	200	903	0	0	0	0	0	0	0	603	903	0
1	9	0	0	0	0	0	0	200	300	0	0	0	0	0	0	0	200	903	0	0	0	0	0	0	0	603	903	0
2	0	0	0	0	0	0	0	200	300	0	0	0	0	0	0	0	200	903	0	0	0	0	0	0	0	603	903	0
2	1	0	0	0	0	0	0	200	300	0	0	0	0	0	0	0	200	903	0	0	0	0	0	0	0	603	903	0
2	2	0	0	0	0	0	0	200	300	0	0	0	0	0	0	0	200	903	0	0	0	0	0	0	0	603	903	0
2	3	0	0	0	0	0	0	200	300	0	0	0	0	0	0	0	200	903	0	0	0	0	0	0	0	603	903	0
2	4	0	0	0	0	0	0	200	300	0	0	0	0	0	0	0	200	903	0	0	0	0	0	0	0	603	903	0
2	5	0	0	0	0	0	0	200	300	0	0	0	0	0	0	0	200	903	0	0	0	0	0	0	0	603	903	0
2	6	0	0	0	0	0	0	200	300	0	0	0	0	0	0	0	200	903	0	0	0	0	0	0	0	603	903	0
2	7	0	0	0	0	0	0	200	300	0	0	0	0	0	0	0	200	903	0	0	0	0	0	0	0	603	903	0
2	8	0	0	0	0	0	0	200	300	0	0	0	0	0	0	0	200	903	0	0	0	0	0	0	0	603	903	0
2	9	0	0	0	0	0	0	200	300	0	0	0	0	0	0	0	200	903	0	0	0	0	0	0	0	603	903	0
3	0	0	0	0	0	0	0	200	300	0	0	0	0	0	0	0	200	903	0	0	0	0	0	0	0	603	903	0
3	1	0	0	0	0	0	0	200	300	0	0	0	0	0	0	0	200	903	0	0	0	0	0	0	0	603	903	0
3	2	0	0	0	0	0	0	200	300	0	0	0	0	0	0	0	200	903	0	0	0	0	0	0	0	603	903	0
3	3	0	0	0	0	0	0	200	300	0	0	0	0	0	0	0	200	903	0	0	0	0	0	0	0	603	903	0
3	4	0	0	0	0	0	0	200	300	0	0	0	0	0	0	0	200	903	0	0	0	0	0	0	0	603	903	0
3	5	0	0	0	0	0	0	200	300	0	0	0	0	0	0	0	200	903	0	0	0	0	0	0	0	603	903	0
3	6	0	0	0	0	0	0	200	300	0	0	0	0	0	0	0	200	903	0	0	0	0	0	0	0	603	903	0
3	7	0	0	0	0	0	0	200	300	0	0	0	0	0	0	0	200	903	0	0	0	0	0	0	0	603	903	0
3	8	0	0	0	0	0	0	200	300	0	0	0	0	0	0	0	200	903	0	0	0	0	0	0	0	603	903	0
3	9	0	0	0	0	0	0	200	300	0	0	0	0	0	0	0	200	903	0	0	0	0	0	0	0	603	903	0
4	0	0	0	0	0	0	0	200	300	0	0	0	0	0	0	0	200	903	0	0	0	0	0	0	0	603	903	0
4	1	0	0	0	0	0	0	200	300	0	0	0	0	0	0	0	200	903	0	0	0	0	0	0	0	603	903	0
4	2	0	0	0	0	0	0	200	300	0	0	0	0	0	0	0	200	903	0	0	0	0	0	0	0	603	903	0
4	3	0	0	0	0	0	0	200	300	0	0	0	0	0	0	0	200	903	0	0	0	0	0	0	0	603	903	0
4	4	0	0	0	0	0	0	200	300	0	0	0	0	0	0	0	200	903	0	0	0	0	0	0	0	603	903	0
4	5	0	0	0	0	0	0	200	300	0	0	0	0	0	0	0	200	903	0	0	0	0	0	0	0	603	903	0
4	6	0	0	0	0	0	0	200	300	0	0	0	0	0	0	0	200	903	0	0	0	0	0	0	0	603	903	0
4	7	0	0	0	0	0	0	200	300	0	0	0	0	0	0	0	200	903	0	0	0	0	0	0	0	603	903	0
4	8	0	0	0	0	0	0	200	300	0	0	0	0	0	0	0	200	903	0	0	0	0	0	0	0	603	903	0
4	9	0	0	0	0	0	0	200	300	0	0	0	0	0	0	0	200	903	0	0	0	0	0	0	0	603	903	0
5	0	0	0	0	0	0	0	200	300	0	0	0	0	0	0	0	200	903	0	0	0	0	0	0	0	603	903	0
5	1	0	0	0	0	0	0	200	300	0	0	0	0	0	0	0	200	903	0	0	0	0	0	0	0	603	903	0
5	2	0	0	0	0	0	0	200	300	0	0	0	0	0	0	0	200	903	0	0	0	0	0	0	0	603	903	0
5	3	0	0	0	0	0	0	200	300	0	0	0	0	0	0	0	200	903	0	0	0	0	0	0	0	603	903	0
5	4	0	0	0	0	0	0	200	300	0	0	0	0	0	0	0	200	903	0	0	0	0	0	0	0	603	903	0
5	5	0	0	0	0	0	0	200	300	0	0	0	0	0	0	0	200	903	0	0	0	0	0	0	0	603	903	0
5	6	0	0	0	0	0	0	200	300	0	0	0	0	0	0	0	200	903	0	0	0	0	0	0	0	603	903	0
5	7	0	0	0	0	0	0	200	300	0	0	0	0	0	0	0	200	903	0	0	0	0	0	0	0	603	903	0
5	8	0	0	0	0	0	0	200	300	0	0	0	0	0	0	0	200	903	0	0	0	0	0	0	0	603	903	0
5	9	0	0	0	0	0	0	200	300	0	0	0	0	0	0	0	200	903	0	0	0	0	0	0	0	603	903	0
6	0	0	0	0	0	0	0	200	300	0	0	0	0	0	0	0	200	903	0	0	0	0	0	0	0	603	903	0
6	1	0	0	0	0	0	0	200	300	0	0	0	0	0	0	0	200	903	0	0	0	0	0	0	0	603	903	0
6	2	0	0	0	0	0	0	200	300	0	0	0	0	0	0	0	200	903	0	0	0	0	0	0	0	603	903	0
6	3	0	0	0	0	0	0	200	300	0	0	0	0	0	0	0	200	903	0	0	0	0	0	0	0	603	903	0
6	4	0	0	0	0	0	0	200	300	0	0	0	0	0	0	0	200	903	0	0	0	0	0	0	0	603	903	0
6	5	0	0	0	0	0	0	200	300	0	0	0	0	0	0	0	200	903	0	0	0	0	0	0	0	603	903	0
6	6	0	0	0	0	0	0	200	300	0	0	0	0	0	0	0	200	903	0	0	0	0	0	0	0	603	903	0
6	7	0	0	0	0	0	0	200	300	0	0	0	0	0	0	0	200	903	0	0	0	0	0	0	0	603	903	0
6	8	0	0	0	0	0	0	200	300	0	0	0	0	0	0	0	200	903	0	0	0	0	0	0	0	603	903	0
6	9	0	0	0	0	0	0	200	300	0	0	0	0	0	0	0	200	903	0	0	0	0	0	0	0	603	903	0
7	0	0	0	0	0	0	0	200	300	0	0	0	0	0	0	0	200	903	0	0	0	0	0	0	0	603	903	0
7	1	0	0	0	0	0	0	200	300	0	0	0	0	0	0	0	200	903	0	0	0	0	0	0	0	603	903	0
7	2	0	0	0	0	0	0	200	300	0	0	0	0	0	0	0	200	903	0	0	0	0	0	0	0	603	903	0
7	3	0	0	0	0	0	0	200	300	0	0	0	0	0	0	0	200	903	0	0	0	0	0	0	0	603	903	0
7	4	0	0	0	0	0	0	200	300	0	0	0	0	0	0	0	200	903	0	0	0	0	0	0	0	603	903	0
7	5	0	0	0	0	0	0	200	300	0	0	0	0	0	0	0	200	903	0	0	0	0	0	0	0	603	903	0
7	6	0	0	0	0	0	0	200	300	0	0	0	0	0	0	0	200	903	0	0	0	0	0	0	0	603	903	0
7	7	0	0	0	0	0	0	200	300	0	0	0	0	0	0	0	200	903	0	0	0	0	0	0	0	603	903	0
7	8	0	0	0	0	0	0	200	300	0	0	0	0	0	0	0	200	903	0	0	0	0	0	0	0	603	903	0
7	9	0	0	0	0	0	0	200	300	0	0	0	0	0	0	0	200	903	0	0	0	0	0	0	0	603	903	0
8	0	0	0	0	0	0	0	200	300	0	0	0	0	0	0	0	200	903	0	0	0	0	0	0	0	603	903	0
8	1	0	0	0	0	0	0	200	300	0	0	0	0	0	0	0	200	903	0	0	0	0	0	0	0	603	903	0
8	2	0	0	0	0	0	0	200	300	0	0	0	0	0	0	0	200	903	0	0	0	0	0	0	0	603	903	0
8	3	0	0	0	0	0	0	200	300	0	0	0	0	0	0	0	200	903	0	0	0	0	0	0	0	603	903	0
8	4	0	0	0	0	0	0	200	300	0	0	0	0	0	0	0	200	903	0	0	0	0	0	0	0	603	903	0
8	5	0	0	0	0	0	0	200	300	0	0	0	0	0	0	0	200	903	0	0	0	0	0	0	0	603	903	0
8	6	0	0	0	0	0	0	200	300	0	0	0	0	0	0	0	200	903	0	0	0	0	0	0	0	603	903	0
8	7	0	0	0	0	0	0	200	300	0	0	0	0	0	0	0	200	903	0	0	0	0	0	0	0	603	903	0
8	8	0	0	0	0	0	0	200	300	0	0	0	0	0	0	0	200	903	0	0	0	0	0	0	0	603	903	0
8	9	0	0	0	0	0	0	200	300	0	0	0	0	0	0	0	200	903	0	0	0	0	0	0	0	603	903	0
9	0	0	0	0	0	0	0	200	300	0	0	0	0	0	0	0	200	903	0	0	0	0	0	0	0	603	903	0
9	1	0	0	0	0	0	0	200	300	0	0	0	0	0	0	0	200	903	0	0	0	0	0	0	0	603	903	0
9	2	0	0	0	0	0	0	200	300	0	0	0	0	0	0	0	200	903	0	0	0	0	0	0	0	603	903	0
9	3	0	0	0	0	0	0	200	300	0	0	0	0	0	0	0	200	903	0	0	0	0	0	0	0	603	903	0
9	4	0	0	0	0	0	0	200	300	0	0	0	0	0	0	0	200	903	0	0	0	0	0	0	0	603	903	0
9	5	0	0	0	0	0	0	200	300	0	0	0	0	0	0	0	200	903	0	0	0	0	0	0	0	603	903	0
9	6	0	0	0	0	0	0	200	300	0	0	0	0	0	0	0	200	903	0	0	0	0	0	0	0	603	903	0
9	7	0	0	0	0	0	0	200	300	0	0	0	0	0	0	0	200	903	0	0	0	0	0	0	0	603	903	0
9	8	0	0	0	0	0	0	200	300	0	0	0	0	0	0	0	200	903	0	0	0	0	0	0	0	603	903	0
9	9	0	0	0	0	0	0	200	300	0	0	0	0	0	0	0	200	903	0	0	0	0	0	0	0	603	903	0
10	0	0	0	0	0	0	0	200	300	0	0	0	0	0	0	0	200	903	0	0	0	0	0	0	0	603	903	0
10	1	0	0	0	0	0	0	200	300	0	0	0	0	0	0	0	200	903	0	0	0	0	0	0	0	603	903	0
10	2	0	0	0	0	0	0	200	300	0	0	0	0	0	0	0	200	903	0	0	0	0	0	0	0	603	903	0
10	3	0	0	0	0	0	0	200	300	0	0	0	0	0	0	0	200	903	0	0	0	0	0	0	0	603	903	0
10	4	0	0	0	0	0	0	200	300	0	0	0	0	0	0	0	200	903	0	0	0	0	0	0	0	603	903	0
10	5	0	0	0	0	0	0	200	300	0	0	0	0	0	0	0	200	903	0	0	0	0	0	0	0	603	903	0
10	6	0	0	0	0	0	0	200	300	0	0	0	0	0	0	0	200	903	0	0	0	0	0	0	0	603	903	0
10	7	0	0	0	0	0	0	200	300	0	0	0	0	0	0	0	200	903	0	0	0	0	0	0	0	603	903	0
10	8	0	0	0	0	0	0	200	300	0	0	0	0	0	0	0	200	903	0	0	0	0	0	0	0	603	903	0
10	9	0	0	0	0	0	0	200	300	0	0	0	0	0	0	0	200	903	0	0	0	0	0	0	0	603	903	0
11	0	0	0	0	0	0	0	200	300	0	0	0	0	0	0	0	200	903	0	0	0	0	0	0	0	603	903	0
11	1	0	0	0	0	0	0	200	300	0	0	0	0	0	0	0	200	903	0	0	0	0	0	0	0	603	903	0
11	2	0	0	0	0	0	0	200	300	0	0	0	0	0	0	0	200	903	0	0	0	0	0	0	0	603	903	0
11	3	0	0	0	0	0	0	200	300	0	0	0	0	0	0	0	200	903	0	0	0	0	0	0	0	603	903	0
11	4	0	0	0	0	0	0	200	300	0	0	0	0	0	0	0	200	903	0	0	0	0	0	0	0	603	903	0
11	5	0	0	0	0	0	0	200	300	0	0	0	0	0	0	0	200	903	0	0	0	0	0	0	0	603	903	0
11	6	0	0	0	0	0	0	200	300	0	0	0	0	0	0	0	200	903	0	0	0	0	0	0	0	603	903	0
11	7	0	0	0	0	0	0	200	300	0	0	0	0	0	0	0	200	903	0	0	0	0	0	0	0	603	903	0
11	8	0	0	0	0	0	0	200	300	0	0	0	0	0	0	0	200	903	0	0	0	0	0	0	0	603	903	0
11	9	0	0	0	0	0	0	200	300	0	0	0	0	0	0	0	200	903	0	0	0	0	0	0	0	603	903	0
12	0	0	0	0	0	0	0	200	300	0	0	0	0	0	0	0	200	903	0	0	0	0	0	0	0	603	903	0
12	1	0	0	0	0	0	0	200	300	0	0	0	0	0	0	0	200	903	0	0	0	0	0	0	0	603	903	0
12	2	0	0	0	0	0	0	200	300	0	0	0	0	0	0	0	200	903	0	0	0	0	0	0	0	603	903	0
12	3	0	0	0	0	0	0	200	300	0	0	0	0	0	0	0	200	903	0	0	0	0	0	0	0	603	903	0
12	4	0	0	0	0	0	0	200	300	0	0	0	0	0	0	0	200	903	0	0	0	0	0	0	0	603	903	0
12	5	0	0	0	0	0	0	200	300	0	0	0	0	0	0	0	200	903	0	0	0	0	0	0	0	603	903	0
12	6	0	0	0	0	0	0	200	300	0	0	0	0	0	0	0	200	903	0	0	0	0	0	0	0	603	903	0
12	7	0	0	0	0	0	0	200	300	0	0	0	0	0	0	0	200	903	0	0	0	0	0	0	0	603	903	0
12	8	0	0	0	0	0	0	200	300	0	0	0	0	0	0	0	200	903	0	0	0	0	0	0	0	603	903	0
12	9	0	0	0	0	0	0	200	300	0	0	0	0	0	0	0	200	903	0	0	0	0	0	0	0	603	903	0
13	0	0	0	0	0	0	0	200	300	0	0	0	0	0	0	0	200	903	0	0	0	0	0	0	0	603	903	0
13	1	0	0	0	0	0	0	200	300	0	0	0	0	0	0	0	200	903	0	0	0	0	0	0	0	603	903	0
13	2	0	0	0	0	0	0	200	300	0	0	0	0	0	0	0	200	903	0	0	0	0	0	0	0	603	903	0
13	3	0	0	0	0	0	0	200	300	0	0	0	0	0	0	0	200	903	0	0	0	0	0	0	0	603	903	0
13	4	0	0	0	0	0	0	200	300	0	0	0	0	0	0	0	200	903	0	0	0	0	0	0	0	603	903	0
13	5	0	0	0	0	0	0	200	300	0	0	0	0	0	0	0	200	903	0	0	0	0	0	0	0	603	903	0
13	6	0	0	0	0	0	0	200	300	0	0	0	0	0	0	0	200	903	0	0	0	0	0	0	0	603	903	0
13	7	0	0	0	0	0	0	200	300	0	0	0	0	0	0	0	200	903	0	0	0	0	0	0	0	603	903	0
13	8	0	0	0	0	0	0	200	300	0	0	0	0	0	0	0	200	903	0	0	0	0	0	0	0	603	903	0
13	9	0	0	0	0	0	0	200	300	0	0	0	0	0	0	0	200	903	0	0	0	0	0	0	0	603	903	0
14	0	0	0	0	0	0	0	200	300	0	0	0	0	0	0	0	200	903	0	0	0	0	0	0	0	603	903	0
14	1	0	0	0	0	0	0	200	300	0	0	0	0	0	0	0	200	903	0	0	0	0	0	0	0	603	903	0
14	2	0	0	0	0	0	0	200	300	0	0	0	0	0	0	0	200	903	0	0	0	0	0	0	0	603	903	0
14	3	0	0	0	0	0	0	200	300	0	0	0	0	0	0	0	200	903	0	0	0	0	0	0	0	603	903	0
14	4	0	0	0	0	0	0	200	300	0	0	0	0	0	0	0	200	903	0	0	0	0	0	0	0	603	903	0
14	5	0	0	0	0	0	0	200	300	0	0	0	0	0	0	0	200	903	0	0	0	0	0	0	0	603	903	0
14	6	0	0	0	0	0	0	200	300	0	0	0	0	0	0	0	200	903	0	0	0	0	0	0	0	603	903	0
14	7	0	0	0	0	0	0	200	300	0	0	0	0	0	0	0	200	903	0	0	0	0	0	0	0	603	903	0
14	8	0	0	0	0	0	0	200	300	0	0	0	0	0	0	0	200	903	0	0	0	0	0	0	0	603	903	0
14	9	0	0	0	0	0	0	200	300	0	0	0	0	0	0	0	200	903	0	0	0	0	0	0	0	603	903	0
15	0	0	0	0	0	0	0	200	300	0	0	0	0	0	0	0	200	903	0	0	0	0	0	0	0	603	903	0
15	1	0	0	0	0	0	0	200	300	0	0	0	0	0	0	0	200	903	0	0	0	0	0	0	0	603	903	0
15	2	0	0	0	0	0	0	200	300	0	0	0	0	0	0	0	200	903	0	0	0	0	0	0	0	603	903	0
15	3	0	0	0	0	0	0	200	300	0	0	0	0	0	0	0	200	903	0	0	0	0	0	0	0	603	903	0
15	4	0	0	0	0	0	0	200	300	0	0	0	0	0	0	0	200	903	0	0	0	0	0	0	0	603	903	0
15	5	0	0	0	0	0	0	200	300	0	0	0	0	0	0	0	200	903	0	0	0	0	0	0	0	603	903	0
15	6	0	0	0	0	0	0	200	300	0	0	0	0	0	0	0	200	903	0	0	0	0	0	0	0	603	903	0
15	7	0	0	0	0	0	0	200	300	0	0	0	0	0	0	0	200	903	0	0	0	0	0	0	0	603	903	0
15	8	0	0	0	0	0	0	200	300	0	0	0	0	0	0	0	200	903	0	0	0	0	0	0	0	603	903	0
15	9	0	0	0	0	0	0	200	300	0	0	0	0	0	0	0	200	903	0	0	0	0	0	0	0	603	903	0
16	0	0	0	0	0	0	0	200	300	0	0	0	0	0	0	0	200	903	0	0	0	0	0	0	0	603	903	0
16	1	0	0	0	0	0	0	200	300	0	0	0	0	0	0	0	200	903	0	0	0	0	0	0	0	603	903	0
16	2	0	0	0	0	0	0	200	300	0	0	0	0	0	0	0	200	903	0	0	0	0	0	0	0	603	903	0
16	3	0	0	0	0	0	0	200	300	0	0	0	0	0	0	0	200	903	0	0	0	0	0	0	0	603	903	0
16	4	0	0	0	0	0	0	200	300	0	0	0	0	0	0	0	200	903	0	0	0	0	0	0	0	603	903	0
16	5	0	0	0	0	0	0	200	300	0	0	0	0	0	0	0	200	903	0	0	0	0	0	0	0	603	903	0
16	6	0	0	0	0	0	0	200	300	0	0	0	0	0	0	0	200	903	0	0	0	0	0	0	0	603	903	0
16	7	0	0	0	0	0	0	200	300	0	0	0	0	0	0	0	200	903	0	0	0	0	0	0	0	603	903	0
16	8	0	0	0	0	0	0	200	300	0	0	0	0	0	0	0	200	903	0	0	0	0	0	0	0	603	903	0
16	9	0	0	0	0	0	0	200	300	0	0	0	0	0	0	0	200	903	0	0	0	0	0	0	0	603	903	0
17	0	0	0	0	0	0	0	200	300	0	0	0	0	0	0	0	200	903	0	0	0	0	0	0	0	603	903	0
17	1	0	0	0	0	0	0	200	300	0	0	0	0	0	0	0	200	903	0	0	0	0	0	0	0	603	903	0
17	2	0	0	0	0	0	0	200	300	0	0	0	0	0	0	0	200	903	0	0	0	0	0	0	0	603	903	0
17	3	0	0	0	0	0	0	200	300	0	0	0	0	0	0	0	200	903	0	0	0	0	0	0	0	603	903	0
17	4	0	0	0	0	0	0	200	300	0	0	0	0	0	0	0	200	903	0	0	0	0	0	0	0	603	903	0
17	5	0	0	0	0	0	0	200	300	0	0	0	0	0	0	0	200	903	0	0	0	0	0	0	0	603	903	0
17	6	0	0	0	0	0	0	200	300	0	0	0	0	0	0	0	200	903	0	0	0	0	0	0	0	603	903	0
17	7	0	0	0	0	0	0	200	300	0	0	0	0	0	0	0	200	903	0	0	0	0	0	0	0	603	903	0
17	8	0	0	0	0	0	0	200	300	0	0	0	0	0	0	0	200	903	0	0	0	0	0	0	0	603	903	0
17	9	0	0	0	0	0	0	200	300	0	0	0	0	0	0	0	200	903	0	0	0	0	0	0	0	603	903	0
18	0	0	0	0	0	0	0	200	300	0	0	0	0	0	0	0	200	903	0	0	0	0	0	0	0	603	903	0
18	1	0	0	0	0	0	0	200	300	0	0	0	0	0	0	0	200	903	0	0	0	0	0	0	0	603	903	0
18	2	0	0	0	0	0	0	200	300	0	0	0	0	0	0	0	200	903	0	0	0	0	0	0	0	603	903	0
18	3	0	0	0	0	0	0	200	300	0	0	0	0	0	0	0	200	903	0	0	0	0	0	0	0	603	903	0
18	4	0	0	0	0	0	0	200	300	0	0	0	0	0	0	0	200	903	0	0	0	0	0	0	0	603	903	0
18	5	0	0	0	0	0	0	200	300	0	0	0	0	0	0	0	200	903	0	0	0	0	0	0	0	603	903	0
18	6	0	0	0	0	0	0	200	300	0	0	0	0	0	0	0	200	903	0	0	0	0	0	0	0	603	903	0
18	7	0	0	0	0	0	0	200	300	0	0	0	0	0	0	0	200	903	0	0	0	0	0	0	0	603	903	0
18	8	0	0	0	0	0	0	200	300	0	0	0	0	0	0	0	200	903	0	0	0	0	0	0	0	603	903	0
18	9	0	0	0	0	0	0	200	300	0	0	0	0	0	0	0	200	903	0	0	0	0	0	0	0	603	903	0
19	0	0	0	0	0	0	0	200	300	0	0	0	0	0	0	0	200	903	0	0	0	0	0	0	0	603	903	0
19	1	0	0	0	0	0	0	200	300	0	0	0	0	0	0	0	200	903	0	0	0	0	0	0	0	603	903	0
19	2	0	0	0	0	0	0	200	300	0	0	0	0	0	0	0	200	903	0	0	0	0	0	0	0	603	903	0
19	3	0	0	0	0	0	0	200	300	0	0	0	0	0	0	0	200	903	0	0	0	0	0	0	0	603	903	0
19	4	0	0	0	0	0	0	200	300	0	0	0	0	0	0	0	200	903	0	0	0	0	0	0	0	603	903	0
19	5	0	0	0	0	0	0	200	300	0	0	0	0	0	0	0	200	903	0	0	0	0	0	0	0	603	903	0
19	6	0	0	0	0	0	0	200	300	0	0	0	0	0	0	0	200	903	0	0	0	0	0	0	0	603	903	0
19	7	0	0	0	0	0	0	200	300	0	0	0	0	0	0	0	200	903	0	0	0	0	0	0	0	603	903	0
19	8	0	0	0	0	0	0	200	300	0	0	0	0	0	0	0	200	903	0	0	0	0	0	0	0	603	903	0
19	9	0	0	0	0	0	0	200	300	0	0	0	0	0	0	0	200	903	0	0	0	0	0	0	0	603	903	0
20	0	0	0	0	0	0	0	200	300	0	0	0	0	0	0	0	200	903	0	0	0	0	0	0	0	603	903	0
20	1	0	0	0	0	0	0	200	300	0	0	0	0	0	0	0	200	903	0	0	0	0	0	0	0	603	903	0
20	2	0	0	0	0	0	0	200	300	0	0	0	0	0	0	0	200	903	0	0	0	0	0	0	0	603	903	0
20	3	0	0	0	0	0	0	200	300	0	0	0	0	0	0	0	200	903	0	0	0	0	0	0	0	603	903	0
20	4	0	0	0	0	0	0	200	300	0	0	0	0	0	0	0	200	903	0	0	0	0	0	0	0	603	903	0
20	5	0	0	0	0	0	0	200	300	0	0	0	0	0	0	0	200	903	0	0	0	0	0	0	0	603	903	0
20	6	0	0	0	0	0	0	200	300	0	0	0	0	0	0	0	200	903	0	0	0	0	0	0	0	603	903	0
20	7	0	0	0	0	0	0	200	300	0	0	0	0	0	0	0	200	903	0	0	0	0	0	0	0	603	903	0
20	8	0	0	0	0	0	0	200	300	0	0	0	0	0	0	0	200	903	0	0	0	0	0	0	0	603	903	0
20	9	0	0	0	0	0	0	200	300	0	0	0	0	0	0	0	200	903	0	0	0	0	0	0	0	603	903	0
21	0	0	0	0	0	0	0	200	300	0	0	0	0	0	0	0	200	903	0	0	0	0	0	0	0	603	903	0
21	1	0	0	0	0	0	0	200	300	0	0	0	0	0	0	0	200	903	0	0	0	0	0	0	0	603	903	0
21	2	0	0	0	0	0	0	200	300	0	0	0	0	0	0	0	200	903	0	0	0	0	0	0	0	603	903	0
21	3	0	0	0	0	0	0	200	300	0	0	0	0	0	0	0	200	903	0	0	0	0	0	0	0	603	903	0
21	4	0	0	0	0	0	0	200	300	0	0	0	0	0	0	0	200	903	0	0	0	0	0	0	0	603	903	0
21	5	0	0	0	0	0	0	200	300	0	0	0	0	0	0	0	200	903	0	0	0	0	0	0	0	603	903	0
21	6	0	0	0	0	0	0	200	300	0	0	0	0	0	0	0	200	903	0	0	0	0	0	0	0	603	903	0
21	7	0	0	0	0	0	0	200	300	0	0	0	0	0	0	0	200	903	0	0	0	0	0	0	0	603	903	0
21	8	0	0	0	0	0	0	200	300	0	0	0	0	0	0	0	200	903	0	0	0	0	0	0	0	603	903	0
21	9	0	0	0	0	0	0	200	300	0	0	0	0	0	0	0	200	903	0	0	0	0	0	0	0	603	903	0
22	0	0	0	0	0	0	0	200	300	0	0	0	0	0	0	0	200	903	0	0	0	0	0	0	0	603	903	0
22	1	0	0	0	0	0	0	200	300	0	0	0	0	0	0	0	200	903	0	0	0	0	0	0	0	603	903	0
22	2	0	0	0	0	0	0	200	300	0	0	0	0	0	0	0	200	903	0	0	0	0	0	0	0	603	903	0
22	3	0	0	0	0	0	0	200	300	0	0	0	0	0	0	0	200	903	0	0	0	0	0	0	0	603	903	0
22	4	0	0	0	0	0	0	200	300	0	0	0	0	0	0	0	200	903	0	0	0	0	0	0	0	603	903	0
22	5	0	0	0	0	0	0	200	300	0	0	0	0	0	0	0	200	903	0	0	0	0	0	0	0	603	903	0
22	6	0	0	0	0	0	0	200	300	0	0	0	0	0	0	0	200	903	0	0	0	0	0	0	0	603	903	0
22	7	0	0	0	0	0	0	200	300	0	0	0	0	0	0	0	200	903	0	0	0	0	0	0	0	603	903	0
22	8	0	0	0	0	0	0	200	300	0	0	0	0	0	0	0	200	903	0	0	0	0	0	0	0	603	903	0
22	9	0	0	0	0	0	0	200	300	0	0	0	0	0	0	0	200	903	0	0	0	0	0	0	0	603	903	0
23	0	0	0	0	0	0	0	200	300	0	0	0	0	0	0	0	200	903	0	0	0	0	0	0	0	603	903	0
23	1	0	0	0	0	0	0	200	300	0	0	0	0	0	0	0	200	903	0	0	0	0	0	0	0	603	903	0
23	2	0	0	0	0	0	0	200	300	0	0	0	0	0	0	0	200	903	0	0	0	0	0	0	0	603	903	0
23	3	0	0	0	0	0	0	200	300	0	0	0	0	0	0	0	200	903	0	0	0	0	0	0	0	603	903	0
23	4	0	0	0	0	0	0	200	300	0	0	0	0	0	0	0	200	903	0	0	0	0	0	0	0	603	903	0
23	5	0	0	0	0	0	0	200	300	0	0	0	0	0	0	0	200	903	0	0	0	0	0	0	0	603	903	0
23	6	0	0	0	0	0	0	200	300	0	0	0	0	0	0	0	200	903	0	0	0	0	0	0	0	603	903	0
23	7	0	0	0	0	0	0	200	300	0	0	0	0	0	0	0	200	903	0	0	0	0	0	0	0	603	903	0
23	8	0	0	0	0	0	0	200	300	0	0	0	0	0	0	0	200	903	0	0	0	0	0	0	0	603	903	0
23	9	0	0	0	0	0	0	200	300	0	0	0	0	0	0	0	200	903	0	0	0	0	0	0	0	603	903	0
24	0	0	0	0	0	0	0	200	300	0	0	0	0	0	0	0	200	903	0	0	0	0	0	0	0	603	903	0
24	1	0	0	0	0	0	0	200	300	0	0	0	0	0	0	0	200	903	0	0	0	0	0	0	0	603	903	0
24	2	0	0	0	0	0	0	200	300	0	0	0	0	0	0	0	200	903	0	0	0	0	0	0	0	603	903	0
24	3	0	0	0	0	0	0	200	300	0	0	0	0	0	0	0	200	903	0	0	0	0	0	0	0	603	903	0
24	4	0	0	0	0	0	0	200	300	0	0	0	0	0	0	0	200	903	0	0	0	0	0	0	0	603	903	0
24	5	0	0	0	0	0	0	200	300	0	0	0	0	0	0	0	200	903	0	0	0	0	0	0	0	603	903	0
24	6	0	0	0	0	0	0	200	300	0	0	0	0	0	0	0	200	903	0	0	0	0	0	0	0	603	903	0
24	7	0	0	0	0	0	0	200	300	0	0	0	0	0	0	0	200	903	0	0	0	0	0	0	0	603	903	0
24	8	0	0	0	0	0	0	200	300	0	0	0	0	0	0	0	200	903	0	0	0	0	0	0	0	603	903	0
24	9	0	0	0	0	0	0	200	300	0	0	0	0	0	0	0	200	903	0	0	0	0	0	0	0	603	903	0
25	0	0	0	0	0	0	0	200	300	0	0	0	0	0	0	0	200	903	0	0	0	0	0	0	0	603	903	0
25	1	0	0	0	0	0	0	200	300	0	0	0	0	0	0	0	200	903	0	0	0	0	0	0	0	603	903	0
25	2	0	0	0	0	0	0	200	300	0	0	0	0	0	0	0	200	903	0	0	0	0	0	0	0	603	903	0
25	3	0	0	0	0	0	0	200	300	0	0	0	0	0	0	0	200	903	0	0	0	0	0	0	0	603	903	0
25	4	0	0	0	0	0	0	200	300	0	0	0	0	0	0	0	200	903	0	0	0	0	0	0	0	603	903	0
25	5	0	0	0	0	0	0	200	300	0	0	0	0	0	0	0	200	903	0	0	0	0	0	0	0	603	903	0
25	6	0	0	0	0	0	0	200	300	0	0	0	0	0	0	0	200	903	0	0	0	0	0	0	0	603	903	0
25	7	0	0	0	0	0	0	200	300	0	0	0	0	0	0	0	200	903	0	0	0	0	0	0	0	603	903	0
25	8	0	0	0	0	0	0	200	300	0	0	0	0	0	0	0	200	903	0	0	0	0	0	0	0	603	903	0
25	9	0	0	0	0	0	0	200	300	0	0	0	0	0	0	0	200	903	0	0	0	0	0	0	0	603	903	0
26	0	0	0	0	0	0	0	200	300	0	0	0	0	0	0	0	200	903	0	0	0	0	0	0	0	603	903	0
26	1	0	0	0	0	0	0	200	300	0	0	0	0	0	0	0	200	903	0	0	0	0	0	0	0	603	903	0
26	2	0	0	0	0	0	0	200	300	0	0	0	0	0	0	0	200	903	0	0	0	0	0	0	0	603	903	0
26	3	0	0	0	0	0	0	200	300	0	0	0	0	0	0	0	200	903	0	0	0	0	0	0	0	603	903	0
26	4	0	0	0	0	0	0	200	300	0	0	0	0	0	0	0	200	903	0	0	0	0	0	0	0	603	903	0
26	5	0	0	0	0	0	0	200	300	0	0	0	0	0	0	0	200	903	0	0	0	0	0	0	0	603	903	0
26	6	0	0	0	0	0	0	200	300	0	0	0	0	0	0	0	200	903	0	0	0	0	0	0	0	603	903	0
26	7	0	0	0	0	0	0	200	300	0	0	0	0	0	0	0	200	903	0	0	0	0	0	0	0	603	903	0
26	8	0	0	0	0	0	0	200	300	0	0	0	0	0	0	0	200	903	0	0	0	0	0	0	0	603	903	0
26	9	0	0	0	0	0	0	200	300	0	0	0	0	0	0	0	200	903	0	0	0	0	0	0	0	603	903	0
27	0	0	0	0	0	0	0	200	300	0	0	0	0	0	0	0	200	903	0	0	0	0	0	0	0	603	903	0
27	1	0	0	0	0	0	0	200	300	0	0	0	0	0	0	0	200	903	0	0	0	0	0	0	0	603	903	0
27	2	0	0	0	0	0	0	200	300	0	0	0	0	0	0	0	200	903	0	0	0	0	0	0	0	603	903	0
27	3	0	0	0	0	0	0	200	300	0	0	0	0	0	0	0	200	903	0	0	0	0	0	0	0	603	903	0
27	4	0	0	0	0	0	0	200	300	0	0	0	0	0	0	0	200	903	0	0	0	0	0	0	0	603	903	0
27	5	0	0	0	0	0	0	200	300	0	0	0	0	0	0	0	200	903	0	0	0	0	0	0	0	603	903	0
27	6	0	0	0	0	0	0	200	300	0	0	0	0	0	0	0	200	903	0	0	0	0	0	0	0	603	903	0
27	7	0	0	0	0	0	0	200	300	0	0	0	0	0	0	0	200	903	0	0	0	0	0	0	0	603	903	0
27	8	0	0	0	0	0	0	200	300	0	0	0	0	0	0	0	200	903	0	0	0	0	0	0	0	603	903	0
27	9	0	0	0	0	0	0	200	300	0	0	0	0	0	0	0	200	903	0	0	0	0	0	0	0	603	903	0
28	0	0	0	0	0	0	0	200	300	0	0	0	0	0	0	0	200	903	0	0	0	0	0	0	0	603	903	0
28	1	0	0	0	0	0	0	200	300	0	0	0	0	0	0	0	200	903	0	0	0	0	0	0	0	603	903	0
28	2	0	0	0	0	0	0	200	300	0	0	0	0	0	0	0	200	903	0	0	0	0	0	0	0	603	903	0
28	3	0	0	0	0	0	0	200	300	0	0	0	0	0	0	0	200	903	0	0	0	0	0	0	0	603	903	0
28	4	0	0	0	0	0	0	200	300	0	0	0	0	0	0	0	200	903	0	0	0	0	0	0	0	603	903	0
28	5	0	0	0	0	0	0	200	300	0	0	0	0	0	0	0	200	903	0	0	0	0	0	0	0	603	903	0
28	6	0	0	0	0	0	0	200	300	0	0	0	0	0	0	0	200	903	0	0	0	0	0	0	0	603	903	0
28	7	0	0	0	0	0	0	200	300	0	0	0	0	0	0	0	200	903	0	0	0	0	0	0	0	603	903	0
28	8	0	0	0	0	0	0	200	300	0	0	0	0	0	0	0	200	903	0	0	0	0	0	0	0	603	903	0
28	9	0	0	0	0	0	0	200	300	0	0	0	0	0	0	0	200	903	0	0	0	0	0	0	0	603	903	0
29	0	0	0	0	0	0	0	200	300	0	0	0	0	0	0	0	200	903	0	0	0	0	0	0	0	603	903	0
29	1	0	0	0	0	0	0	200	300	0	0	0	0	0	0	0	200	903	0	0	0	0	0	0	0	603	903	0
29	2	0	0	0	0	0	0	200	300	0	0	0	0	0	0	0	200	903	0	0	0	0	0	0	0	603	903	0
29	3	0	0	0	0	0	0	200	300	0	0	0	0	0	0	0	200	903	0	0	0	0	0	0	0	603	903	0
29	4	0	0	0	0	0	0	200	300	0	0	0	0	0	0	0	200	903	0	0	0	0	0	0	0	603	903	0
29	5	0	0	0	0	0	0	200	300	0	0	0	0	0	0	0	200	903	0	0	0	0	0	0	0	603	903	0
29	6	0	0	0	0	0	0	200	300	0	0	0	0	0	0	0	200	903	0	0	0	0	0	0	0	603	903	0
29	7	0	0	0	0	0	0	200	300	0	0	0	0	0	0	0	200	903	0	0	0	0	0	0	0	603	903	0
29	8	0	0	0	0	0	0	200	300	0	0	0	0	0	0	0	200	903	0	0	0	0	0	0	0	603	903	0
29	9	0	0	0	0	0	0	200	300	0	0	0	0	0	0	0	200	903	0	0	0	0	0	0	0	603	903	0
30	0	0	0	0	0	0	0	200	300	0	0	0	0	0	0	0	200	903	0	0	0	0	0	0	0	603	903	0
30	1	0	0	0	0	0	0	200	300	0	0	0	0	0	0	0	200	903	0	0	0	0	0	0	0	603	903	0
30	2	0	0	0	0	0	0	200	300	0	0	0	0	0	0	0	200	903	0	0	0	0	0	0	0	603	903	0
30	3	0	0	0	0	0	0	200	300	0	0	0	0	0	0	0	200	903	0	0	0	0	0	0	0	603	903	0
30	4	0	0	0	0	0	0	200	300	0	0	0	0	0	0	0	200	903	0	0	0	0	0	0	0	603	903	0
30	5	0	0	0	0	0	0	200	300	0	0	0	0	0	0	0	200	903	0	0	0	0	0	0	0	603	903	0
30	6	0	0	0	0	0	0	200	300	0	0	0	0	0	0	0	200	903	0	0	0	0	0	0	0	603	903	0
30	7	0	0	0	0	0	0	200	300	0	0	0	0	0	0	0	200	903	0	0	0	0	0	0	0	603	903	0
30	8	0	0	0	0	0	0	200	300	0	0	0	0	0	0	0	200	903	0	0	0	0	0	0	0	603	903	0
30	9	0	0	0	0	0	0	200	300	0	0	0	0	0	0	0	200	903	0	0	0	0	0	0	0	603	903	0
31	0	0	0	0	0	0	0	200	300	0	0	0	0	0	0	0	200	903	0	0	0	0	0	0	0	603	903	0
31	1	0	0	0	0	0	0	200	300	0	0	0	0	0	0	0	200	903	0	0	0	0	0	0	0	603	903	0
31	2	0	0	0	0	0	0	200	300	0	0	0	0	0	0	0	200	903	0	0	0	0	0	0	0	603	903	0
31	3	0	0	0	0	0	0	200	300	0	0	0	0	0	0	0	200	903	0	0	0	0	0	0	0	603	903	0
31	4	0	0	0	0	0	0	200	300	0	0	0	0	0	0	0	200	903	0	0	0	0	0	0	0	603	903	0
31	5	0	0	0	0	0	0	200	300	0	0	0	0	0	0	0	200	903	0	0	0	0	0	0	0	603	903	0
31	6	0	0	0	0	0	0	200	300	0	0	0	0	0	0	0	200	903	0	0	0	0	0	0	0	603	903	0
31	7	0	0	0	0	0	0	200	300	0	0	0	0	0	0	0	200	903	0	0	0	0	0	0	0	603	903	0
31	8	0	0	0	0	0	0	200	300	0	0	0	0	0	0	0	200	903	0	0	0	0	0	0	0	603	903	0
31	9	0	0	0	0	0	0	200	300	0	0	0	0	0	0	0	200	903	0	0	0	0	0	0	0	603	903	0
32	0	0	0	0	0	0	0	200	300	0	0	0	0	0	0	0	200	903	0	0	0	0	0	0	0	603	903	0
32	1	0	0	0	0	0	0	200	300	0	0	0	0	0	0	0	200	903	0	0	0	0	0	0	0	603	903	0
32	2	0	0	0	0	0	0	200	300	0	0	0	0	0	0	0	200	903	0	0	0	0	0	0	0	603	903	0
32	3	0	0	0	0	0	0	200	300	0	0	0	0	0	0	0	200	903	0	0	0	0	0	0	0	603	903	0
32	4	0	0	0	0	0	0	200	300	0	0	0	0	0	0	0	200	903	0	0	0	0	0	0	0	603	903	0
32	5	0	0	0	0	0	0	200	300	0	0	0	0	0	0	0	200	903	0	0	0	0	0	0	0	603	903	0
32	6	0	0	0	0	0	0	200	300	0	0	0	0	0	0	0	200	903	0	0	0	0	0	0	0	603	903	0
32	7	0	0	0	0	0	0	200	300	0	0	0	0	0	0	0	200	903	0	0	0	0	0	0	0	603	903	0
32	8	0	0	0	0	0	0	200	300	0	0	0	0	0	0	0	200	903	0	0	0	0	0	0	0	603	903	0
32	9	0	0	0	0	0	0	200	300	0	0	0	0	0	0	0	200	903	0	0	0	0	0	0	0	603	903	0
33	0	0	0	0	0	0	0	200	300	0	0	0	0	0	0	0	200	903	0	0	0	0	0	0	0	603	903	0
33	1	0	0	0	0	0	0	200	300	0	0	0	0	0	0	0	200	903	0	0	0	0	0	0	0	603	903	0
33	2	0	0	0	0	0	0	200	300	0	0	0	0	0	0	0	200	903	0	0	0	0	0	0	0	603	903	0
33	3	0	0	0	0	0	0	200	300	0	0	0	0	0	0	0	200	903	0	0	0	0	0	0	0	603	903	0
33	4	0	0	0	0	0	0	200	300	0	0	0	0	0	0	0	200	903	0	0	0	0	0	0	0	603	903	0
33	5	0	0	0	0	0	0	200	300	0	0	0	0	0	0	0	200	903	0	0	0	0	0	0	0	603	903	0
33	6	0	0	0	0	0	0	200	300	0	0	0	0	0	0	0	200	903	0	0	0	0	0	0	0	603	903	0
33	7	0	0	0	0	0	0	200	300	0	0	0	0	0	0	0	200	903	0	0	0	0	0	0	0	603	903	0
33	8	0	0	0	0	0	0	200	300	0	0	0	0	0	0	0	200	903	0	0	0	0	0	0	0	603	903	0
33	9	0	0	0	0	0	0	200	300	0	0	0	0	0	0	0	200	903	0	0	0	0	0	0	0	603	903	0
34	0	0	0	0	0	0	0	200	300	0	0	0	0	0	0	0	200	903	0	0	0	0	0	0	0	603	903	0
34	1	0	0	0	0	0	0	200	300	0	0	0	0	0	0	0	200	903	0	0	0	0	0	0	0	603	903	0
34	2	0	0	0	0	0	0	200	300	0	0	0	0	0	0	0	200	903	0	0	0	0	0	0	0	603	903	0
34	3	0	0	0	0	0	0	200	300	0	0	0	0	0	0	0	200	903	0	0	0	0	0	0	0	603	903	0
34	4	0	0	0	0	0	0	200	300	0	0	0	0	0	0	0	200	903	0	0	0	0	0	0	0	603	903	0
34	5	0	0	0	0	0	0	200	300	0	0	0	0	0	0	0	200	903	0	0	0	0	0	0	0	603	903	0
34	6	0	0	0	0	0	0	200	300	0	0	0	0	0	0	0	200	903	0	0	0	0	0	0	0	603	903	0
34	7	0	0	0	0	0	0	200	300	0	0	0	0	0	0	0	200	903	0	0	0	0	0	0	0	603	903	0
34	8	0	0	0	0	0	0	200	300	0	0	0	0	0	0	0	200	903	0	0	0	0	0	0	0	603	903	0
34	9	0	0	0	0	0	0	200	300	0	0	0	0	0	0	0	200	903	0	0	0	0	0	0	0	603	903	0
35	0	0	0	0	0	0	0	200	300	0	0	0	0	0	0	0	200	903	0	0	0	0	0	0	0	603	903	0
35	1	0	0	0	0	0	0	200	300	0	0	0	0	0	0	0	200	903	0	0	0	0	0	0	0	603	903	0
35	2	0	0	0	0	0	0	200	300	0	0	0	0	0	0	0	200	903	0	0	0	0	0	0	0	603	903	0
35	3	0	0	0	0	0	0	200	300	0	0	0	0	0	0	0	200	903	0	0	0	0	0	0	0	603	903	0
35	4	0	0	0	0	0	0	200	300	0	0	0	0	0	0	0	200	903	0	0	0	0	0	0	0	603	903	0
35	5	0	0	0	0	0	0	200	300	0	0	0	0	0	0	0	200	903	0	0	0	0	0	0	0	603	903	0
35	6	0	0	0	0	0	0	200	300	0	0	0	0	0	0	0	200	903	0	0	0	0	0	0	0	603	903	0
35	7	0	0	0	0	0	0	200	300	0	0	0	0	0	0	0	200	903	0	0	0	0	0	0	0	603	903	0
35	8	0	0	0	0	0	0	200	300	0	0	0	0	0	0	0	200	903	0	0	0	0	0	0	0	603	903	0
35	9	0	0	0	0	0	0	200	300	0	0	0	0	0	0	0	200	903	0	0	0	0	0	0	0	603	903	0
36	0	0	0	0	0	0	0	200	300	0	0	0	0	0	0	0	200	903	0	0	0	0	0	0	0	603	903	0
36	1	0	0	0	0	0	0	200	300	0	0	0	0	0	0	0	200	903	0	0	0	0	0	0	0	603	903	0
36	2	0	0	0	0	0	0	200	300	0	0	0	0	0	0	0	200	903	0	0	0	0	0	0	0	603	903	0
36	3	0	0	0	0	0	0	200	300	0	0	0	0	0	0	0	200	903	0	0	0	0	0	0	0	603	903	0
36	4	0	0	0	0	0	0	200	300	0	0	0	0	0	0	0	200	903	0	0	0	0	0	0	0	603	903	0
36	5	0	0	0	0	0	0	200	300	0	0	0	0	0	0	0	200	903	0	0	0	0	0	0	0	603	903	0
36	6	0	0	0	0	0	0	200	300	0	0	0	0	0	0	0	200	903	0	0	0	0	0	0	0	603	903	0
36	7	0	0	0	0	0	0	200	300	0	0	0	0	0	0	0	200	903	0	0	0	0	0	0	0	603	903	0
36	8	0	0	0	0	0	0	200	300	0	0	0	0	0	0	0	200	903	0	0	0	0	0	0	0	603	903	0
36	9	0	0	0	0	0	0	200	300	0	0	0	0	0	0	0	200	903	0	0	0	0	0	0	0	603	903	0
37	0	0	0	0	0	0	0	200	300	0	0	0	0	0	0	0	200	903	0	0	0	0	0	0	0	603	903	0
37	1	0	0	0	0	0	0	200	300	0	0	0	0	0	0	0	200	903	0	0	0	0	0	0	0	603	903	0
37	2	0	0	0	0	0	0	200	300	0	0	0	0	0	0	0	200	903	0	0	0	0	0	0	0	603	903	0
37	3	0	0	0	0	0	0	200	300	0	0	0	0	0	0	0	200	903	0	0	0	0	0	0	0	603	903	0
37	4	0	0	0	0	0	0	200	300	0	0	0	0	0	0	0	200	903	0	0	0	0	0	0	0	603	903	0
37	5	0	0	0	0	0	0	200	300	0	0	0	0	0	0	0	200	903	0	0	0	0	0	0	0	603	903	0
37	6	0	0	0	0	0	0	200	300	0	0	0	0	0	0	0	200	903	0	0	0	0	0	0	0	603	903	0
37	7	0	0	0	0	0	0	200	300	0	0	0	0	0	0	0	200	903	0	0	0	0	0	0	0	603	903	0
37	8	0	0	0	0	0	0	200	300	0	0	0	0	0	0	0	200	903	0	0	0	0	0	0	0	603	903	0
37	9	0	0	0	0	0	0	200	300	0	0	0	0	0	0	0	200	903	0	0	0	0	0	0	0	603	903	0
38	0	0	0	0	0	0	0	200	300	0	0	0	0	0	0	0	200	903	0	0	0	0	0	0	0	603	903	0
38	1	0	0	0	0	0	0	200	300	0	0	0	0	0	0	0	200	903	0	0	0	0	0	0	0	603	903	0
38	2	0	0	0	0	0	0	200	300	0	0	0	0	0	0	0	200	903	0	0	0	0	0	0	0	603	903	0
38	3	0	0	0	0	0	0	200	300	0	0	0	0	0	0	0	200	903	0	0	0	0	0	0	0	603	903	0
38	4	0	0	0	0	0	0	200	300	0	0	0	0	0	0	0	200	903	0	0	0	0	0	0	0	603	903	0
38	5	0	0	0	0	0	0	200	300	0	0	0	0	0	0	0	200	903	0	0	0	0	0	0	0	603	903	0
38	6	0	0	0	0	0	0	200	300	0	0	0	0	0	0	0	200	903	0	0	0	0	0	0	0	603	903	0
38	7	0	0	0	0	0	0	200	300	0	0	0	0	0	0	0	200	903	0	0	0	0	0	0	0	603	903	0
38	8	0	0	0	0	0	0	200	300	0	0	0	0	0	0	0	200	903	0	0	0	0	0	0	0	603	903	0
38	9	0	0	0	0	0	0	200	300	0	0	0	0	0	0	0	200	903	0	0	0	0	0	0	0	603	903	0
39	0	0	0	0	0	0	0	200	300	0	0	0	0	0	0	0	200	903	0	0	0	0	0	0	0	603	903	0
39	1	0	0	0	0	0	0	200	300	0	0	0	0	0	0	0	200	903	0	0	0	0	0	0	0	603	903	0
39	2	0	0	0	0	0	0	200	300	0	0	0	0	0	0	0	200	903	0	0	0	0	0	0	0	603	903	0
39	3	0	0	0	0	0	0	200	300	0	0	0	0	0	0	0	200	903	0	0	0	0	0	0	0	603	903	0
39	4	0	0	0	0	0	0	200	300	0	0	0	0	0	0	0	200	903	0	0	0	0	0	0	0	603	903	0
39	5	0	0	0	0	0	0	200	300	0	0	0	0	0	0	0	200	903	0	0	0	0	0	0	0	603	903	0
39	6	0	0	0	0	0	0	200	300	0	0	0	0	0	0	0	200	903	0	0	0	0	0	0	0	603	903	0
39	7	0	0	0	0	0	0	200	300	0	0	0	0	0	0	0	200	903	0	0	0	0	0	0	0	603	903	0
39	8	0	0	0	0	0	0	200	300	0	0	0	0	0	0	0	200	903	0	0	0	0	0	0	0	603	903	0
39	9	0	0	0	0	0	0	200	300	0	0	0	0	0	0	0	200	903	0	0	0	0	0	0	0	603	903	0
40	0	0	0	0	0	0	0	200	300	0	0	0	0	0	0	0	200	903	0	0	0	0	0	0	0	603	903	0
40	1	0	0	0	0	0	0	200	300	0	0	0	0	0	0	0	200	903	0	0	0	0	0	0	0	603	903	0
40	2	0	0	0	0	0	0	200	300	0	0	0	0	0	0	0	200	903	0	0	0	0	0	0	0	603	903	0
40	3	0	0	0	0	0	0	200	300	0	0	0	0	0	0	0	200	903	0	0	0	0	0	0	0	603	903	0
40	4	0	0	0	0	0	0	200	300	0	0	0	0	0	0	0	200	903	0	0	0	0	0	0	0	603	903	0
40	5	0	0	0	0	0	0	200	300	0	0	0	0	0	0	0	200	903	0	0	0	0	0	0	0	603	903	0
40	6	0	0	0	0	0	0	200	300	0	0	0	0	0	0	0	200	903	0	0	0	0	0	0	0	603	903	0
40	7	0	0	0	0	0	0	200	300	0	0	0	0	0	0	0	200	903	0	0	0	0	0	0	0	603	903	0
40	8	0	0	0	0	0	0	200	300	0	0	0	0	0	0	0	200	903	0	0	0	0	0	0	0	603	903	0
40	9	0	0	0	0	0	0	200	300	0	0	0	0	0	0	0	200	903	0	0	0	0	0	0	0	603	903	0
41	0	0	0	0	0	0	0	200	300	0	0	0	0	0	0	0	200	903	0	0	0	0	0	0	0	603	903	0
41	1	0	0	0	0	0	0	200	300	0	0	0	0	0	0	0	200	903	0	0	0	0	0	0	0	603	903	0
41	2	0	0	0	0	0	0	200	300	0	0	0	0	0	0	0	200	903	0	0	0	0	0	0	0	603	903	0
41	3	0	0	0	0	0	0	200	300	0	0	0	0	0	0	0	200	903	0	0	0	0	0	0	0	603	903	0
41	4	0	0	0	0	0	0	200	300	0	0	0	0	0	0	0	200	903	0	0	0	0	0	0	0	603	903	0
41	5	0	0	0	0	0	0	200	300	0	0	0	0	0	0	0	200	903	0	0	0	0	0	0	0	603	903	0
41	6	0	0	0	0	0	0	200	300	0	0	0	0	0	0	0	200	903	0	0	0	0	0	0	0	603	903	0
41	7	0	0	0	0	0	0	200	300	0	0	0	0	0	0	0	200	903	0	0	0	0	0	0	0	603	903	0
41	8	0	0	0	0	0	0	200	300	0	0	0	0	0	0	0	200	903	0	0	0	0	0	0	0	603	903	0
41	9	0	0	0	0	0	0	200	300	0	0	0	0	0	0	0	200	903	0	0	0	0	0	0	0	603	903	0
42	0	0	0	0	0	0	0	200	300	0	0	0	0	0	0	0	200	903	0	0	0	0	0	0	0	603	903	0
42	1	0	0	0	0	0	0	200	300	0	0	0	0	0	0	0	200	903	0	0	0	0	0	0	0	603	903	0
42	2	0	0	0	0	0	0	200	300	0	0	0	0	0	0	0	200	903	0	0	0	0	0	0	0	603	903	0
42	3	0	0	0	0	0	0	200	300	0	0	0	0	0	0	0	200	903	0	0	0	0	0	0	0	603	903	0
42	4	0	0	0	0	0	0	200	300	0	0	0	0	0	0	0	200	903	0	0	0	0	0	0	0	603	903	0
42	5	0	0	0	0	0	0	200	300	0	0	0	0	0	0	0	200	903	0	0	0	0	0	0	0	603	903	0
42	6	0	0	0	0	0	0	200	300	0	0	0	0	0	0	0	200	903	0	0	0	0	0	0	0	603	903	0
42	7	0	0	0	0	0	0	200	300	0	0	0	0	0	0	0	200	903	0	0	0	0	0	0	0	603	903	0
42	8	0	0	0	0	0	0	200	300	0	0	0	0	0	0	0	200	903	0	0	0	0	0	0	0	603	903	0
42	9	0	0	0	0	0	0	200	300	0	0	0	0	0	0	0	200	903	0	0	0	0	0	0	0	603	903	0
43	0	0	0	0	0	0	0	200	300	0	0	0	0	0	0	0	200	903	0	0	0	0	0	0	0	603	903	0
43	1	0	0	0	0	0	0	200	300	0	0	0	0	0	0	0	200	903	0	0	0	0	0	0	0	603	903	0
43	2	0	0	0	0	0	0	200	300	0	0	0	0	0	0	0	200	903	0	0	0	0	0	0	0	603	903	0
43	3	0	0	0	0	0	0	200	300	0	0	0	0	0	0	0	200	903	0	0	0	0	0	0	0	603	903	0
43	4	0	0	0	0	0	0	200	300	0	0	0	0	0	0	0	200	903	0	0	0	0	0	0	0	603	903	0
43	5	0	0	0	0	0	0	200	300	0	0	0	0	0	0	0	200	903	0	0	0	0	0	0	0	603	903	0
43	6	0	0	0	0	0	0	200	300	0	0	0	0	0	0	0	200	903	0	0	0	0	0	0	0	603	903	0
43	7	0	0	0	0	0	0	200	300	0	0	0	0	0	0	0	200	903	0	0	0	0	0	0	0	603	903	0
43	8	0	0	0	0	0	0	200	300	0	0	0	0	0	0	0	200	903	0	0	0	0	0	0	0	603	903	0
43	9	0	0	0	0	0	0	200	300	0	0	0	0	0	0	0	200	903	0	0	0	0	0	0	0	603	903	0
44	0	0	0	0	0	0	0	200	300	0	0	0	0	0	0	0	200	903	0	0	0	0	0	0	0	603	903	0
44	1	0	0	0	0	0	0	200	300	0	0	0	0	0	0	0	200	903	0	0	0	0	0	0	0	603	903	0
44	2	0	0	0	0	0	0	200	300	0	0	0	0	0	0	0	200	903	0	0	0	0	0	0	0	603	903	0
44	3	0	0	0	0	0	0	200	300	0	0	0	0	0	0	0	200	903	0	0	0	0	0	0	0	603	903	0
44	4	0	0	0	0	0	0	200	300	0	0	0	0	0	0	0	200	903	0	0	0	0	0	0	0	603	903	0
44	5	0	0	0	0	0	0	200	300	0	0	0	0	0	0	0	200	903	0	0	0	0	0	0	0	603	903	0
44	6	0	0	0	0	0	0	200	300	0	0	0	0	0	0	0	200	903	0	0	0	0	0	0	0	603	903	0
44	7	0	0	0	0	0	0	200	300	0	0	0	0	0	0	0	200	903	0	0	0	0	0	0	0	603	903	0
44	8	0	0	0	0	0	0	200	300	0	0	0	0	0	0	0	200	903	0	0	0	0	0	0	0	603	903	0
44	9	0	0	0	0	0	0	200	300	0	0	0	0	0	0	0	200	903	0	0	0	0	0	0	0	603	903	0
45	0	0	0	0	0	0	0	200	300	0	0	0	0	0	0	0	200	903	0	0	0	0	0	0	0	603	903	0
45	1	0	0	0	0	0	0	200	300	0	0	0	0	0	0	0	200	903	0	0	0	0	0	0	0	603	903	0
45	2	0	0	0	0	0	0	200	300	0	0	0	0	0	0	0	200	903	0	0	0	0	0	0	0	603	903	0
45	3	0	0	0	0	0	0	200	300	0	0	0	0	0	0	0	200	903	0	0	0	0	0	0	0	603	903	0
45	4	0	0	0	0	0	0	200	300	0	0	0	0	0	0	0	200	903	0	0	0	0	0	0	0	603	903	0
45	5	0	0	0	0	0	0	200	300	0	0	0	0	0	0	0	200	903	0	0	0	0	0	0	0	603	903	0
45	6	0	0	0	0	0	0	200	300	0	0	0	0	0	0	0	200	903	0	0	0	0	0	0	0	603	903	0
45	7	0	0	0	0	0	0	200	300	0	0	0	0	0	0	0	200	903	0	0	0	0	0	0	0	603	903	0
45	8	0	0	0	0	0	0	200	300	0	0	0	0	0	0	0	200	903	0	0	0	0	0	0	0	603	903	0
45	9	0	0	0	0	0	0	200	300	0	0	0	0	0	0	0	200	903	0	0	0	0	0	0	0	603	903	0
46	0	0	0	0	0	0	0	200	300	0	0	0	0	0	0	0	200	903	0	0	0	0	0	0	0	603	903	0
46	1	0	0	0	0	0	0	200	300	0	0	0	0	0	0	0	200	903	0	0	0	0	0	0	0	603	903	0
46	2	0	0	0	0	0	0	200	300	0	0	0	0	0	0	0	200	903	0	0	0	0	0	0	0	603	903	0
46	3	0	0	0	0	0	0	200	300	0	0	0	0	0	0	0	200	903	0	0	0	0	0	0	0	603	903	0
46	4	0	0	0	0	0	0	200	300	0	0	0	0	0	0	0	200	903	0	0	0	0	0	0	0	603	903	0
46	5	0	0	0	0	0	0	200	300	0	0	0	0	0	0	0	200	903	0	0	0	0	0	0	0	603	903	0
46	6	0	0	0	0	0	0	200	300	0	0	0	0	0	0	0	200	903	0	0	0	0	0	0	0	603	903	0
46	7	0	0	0	0	0	0	200	300	0	0	0	0	0	0	0	200	903	0	0	0	0	0	0	0	603	903	0
46	8	0	0	0	0	0	0	200	300	0	0	0	0	0	0	0	200	903	0	0	0	0	0	0	0	603	903	0
46	9	0	0	0	0	0	0	200	300	0	0	0	0	0	0	0	200	903	0	0	0	0	0	0	0	603	903	0
47	0	0	0	0	0	0	0	200	300	0	0	0	0	0	0	0	200	903	0	0	0	0	0	0	0	603	903	0
47	1	0	0	0	0	0	0	200	300	0	0	0	0	0	0	0	200	903	0	0	0	0	0	0	0	603	903	0
47	2	0	0	0	0	0	0	200	300	0	0	0	0	0	0	0	200	903	0	0	0	0	0	0	0	603	903	0
47	3	0	0	0	0	0	0	200	300	0	0	0	0	0	0	0	200	903	0	0	0	0	0	0	0	603	903	0
47	4	0	0	0	0	0	0	200	300	0	0	0	0	0	0	0	200	903	0	0	0	0	0	0	0	603	903	0
47	5	0	0	0	0	0	0	200	300	0	0	0	0	0	0	0	200	903	0	0	0	0	0	0	0	603	903	0
47	6	0	0	0	0	0	0	200	300	0	0	0	0	0	0	0	200	903	0	0	0	0	0	0	0	603	903	0
47	7	0	0	0	0	0	0	200	300	0	0	0	0	0	0	0	200	903	0	0	0	0	0	0	0	603	903	0
47	8	0	0	0	0	0	0	200	300	0	0	0	0	0	0	0	200	903	0	0	0	0	0	0	0	603	903	0
47	9	0	0	0	0	0	0	200	300	0	0	0	0	0	0	0	200	903	0	0	0	0	0	0	0	603	903	0
48	0	0	0	0	0	0	0	200	300	0	0	0	0	0	0	0	200	903	0	0	0	0	0	0	0	603	903	0
48	1	0	0	0	0	0	0	200	300	0	0	0	0	0	0	0	200	903	0	0	0	0	0	0	0	603	903	0
48	2	0	0	0	0	0	0	200	300	0	0	0	0	0	0	0	200	903	0	0	0	0	0	0	0	603	903	0
48	3	0	0	0	0	0	0	200	300	0	0	0	0	0	0	0	200	903	0	0	0	0	0	0	0	603	903	0
48	4	0	0	0	0	0	0	200	300	0	0	0	0	0	0	0	200	903	0	0	0	0	0	0	0	603	903	0
48	5	0	0	0	0	0	0	200	300	0	0	0	0	0	0	0	200	903	0	0	0	0	0	0	0	603	903	0
48	6	0	0	0	0	0	0	200	300	0	0	0	0	0	0	0	200	903	0	0	0	0	0	0	0	603	903	0
48	7	0	0	0	0	0	0	200	300	0	0	0	0	0	0	0	200	903	0	0	0	0	0	0	0	603	903	0
48	8	0	0	0	0	0	0	200	300	0	0	0	0	0	0	0	200	903	0	0	0	0	0	0	0	603	903	0
48	9	0	0	0	0	0	0	200	300	0	0	0	0	0	0	0	200	903	0	0	0	0	0	0	0	603	903	0
49	0	0	0	0	0	0	0	200	300	0	0	0	0	0	0	0	200	903	0	0	0	0	0	0	0	603	903	0
49	1	0	0	0	0	0	0	200	300	0	0	0	0	0	0	0	200	903	0	0	0	0	0	0	0	603	903	0
49	2	0	0	0	0	0	0	200	300	0	0	0	0	0	0	0	200	903	0	0	0	0	0	0	0	603	903	0
49	3	0	0	0	0	0	0	200	300	0	0	0	0	0	0	0	200	903	0	0	0	0	0	0	0	603	903	0
49	4	0	0	0	0	0	0	200	300	0	0	0	0	0	0	0	200	903	0	0	0	0	0	0	0	603	903	0
49	5	0	0	0	0	0	0	200	300	0	0	0	0	0	0	0	200	903	0	0	0	0	0	0	0	603	903	0
49	6	0	0	0	0	0	0	200	300	0	0	0	0	0	0	0	200	903	0	0	0	0	0	0	0	603	903	0
49	7	0	0	0	0	0	0	200	300	0	0	0	0	0	0	0	200	903	0	0	0	0	0	0	0	603	903	0
49	8	0	0	0	0	0	0	200	300	0	0	0	0	0	0	0	200	903	0	0	0	0	0	0	0	603	903	0
49	9	0	0	0	0	0	0	200	300	0	0	0	0	0	0	0	200	903	0	0	0	0	0	0	0	603	903	0
50	0	0	0	0	0	0	0	200	300	0	0	0	0	0	0	0	200	903	0	0	0	0	0	0	0	603	903	0
50	1	0	0	0	0	0	0	200	300	0	0	0	0	0	0	0	200	903	0	0	0	0	0	0	0	603	903	0
50	2	0	0	0	0	0	0	200	300	0	0	0	0	0	0	0	200	903	0	0	0	0	0	0	0	603	903	0
50	3	0	0	0	0	0	0	200	300	0	0	0	0	0	0	0	200	903	0	0	0	0	0	0	0	603	903	0
50	4	0	0	0	0	0	0	200	300	0	0	0	0	0	0	0	200	903	0	0	0	0	0	0	0	603	903	0
50	5	0	0	0	0	0	0	200	300	0	0	0	0	0	0	0	200	903	0	0	0	0	0	0	0	603	903	0
50	6	0	0	0	0	0	0	200	300	0	0	0	0	0	0	0	200	903	0	0	0	0	0	0	0	603	903	0
50	7	0	0	0	0	0	0	200	300	0	0	0	0	0	0	0	200	903	0	0	0	0	0	0	0	603	903	0
50	8	0	0	0	0	0	0	200	300	0	0	0	0	0	0	0	200	903	0	0	0	0	0	0	0	603	903	0
50	9	0	0	0	0	0	0	200	300	0	0	0	0	0	0	0	200	903	0	0	0	0	0	0	0	603	903	0
51	0	0	0	0	0	0	0	200	300	0	0	0	0	0	0	0	200	903	0	0	0	0	0	0	0	603	903	0
51	1	0	0	0	0	0	0	200	300	0	0	0	0	0	0	0	200	903	0	0	0	0	0	0	0	603	903	0
51	2	0	0	0	0	0	0	200	300	0	0	0	0	0	0	0	200	903	0	0	0	0	0	0	0	603	903	0
51	3	0	0	0	0	0	0	200	300	0	0	0	0	0	0	0	200	903	0	0	0	0	0	0	0	603	903	0
51	4	0	0	0	0	0	0	200	300	0	0	0	0	0	0	0	200	903	0	0	0	0	0	0	0	603	903	0
51	5	0	0	0	0	0	0	200	300	0	0	0	0	0	0	0	200	903	0	0	0	0	0	0	0	603	903	0
51	6	0	0	0	0	0	0	200	300	0	0	0	0	0	0	0	200	903	0	0	0	0	0	0	0	603	903	0
51	7	0	0	0	0	0	0	200	300	0	0	0	0	0	0	0	200	903	0	0	0	0	0	0	0	603	903	0
51	8	0	0	0	0	0	0	200	300	0	0	0	0	0	0	0	200	903	0	0	0	0	0	0	0	603	903	0
51	9	0	0	0	0	0	0	200	300	0	0	0	0	0	0	0	200	903	0	0	0	0	0	0	0	603	903	0
52	0	0	0	0	0	0	0	200	300	0	0	0	0	0	0	0	200	903	0	0	0	0	0	0	0	603	903	0
52	1	0	0	0	0	0	0	200	300	0	0	0	0	0	0	0	200	903	0	0	0	0	0	0	0	603	903	0
52	2	0	0	0	0	0	0	200	300	0	0	0	0	0	0	0	200	903	0	0	0	0	0	0	0	603	903	0
52	3	0	0	0	0	0	0	200	300	0	0	0	0	0	0	0	200	903	0	0	0	0	0	0	0	603	903	0
52	4	0	0	0	0	0	0	200	300	0	0	0	0	0	0	0	200	903	0	0	0	0	0	0	0	603	903	0
52	5	0	0	0	0	0	0	200	300	0	0	0	0	0	0	0	200	903	0	0	0	0	0	0	0	603	903	0
52	6	0	0	0	0	0	0	200	300	0	0	0	0	0	0	0	200	903	0	0	0	0	0	0	0	603	903	0
52	7	0	0	0	0	0	0	200	300	0	0	0	0	0	0	0	200	903	0	0	0	0	0	0	0	603	903	0
52	8	0	0	0	0	0	0	200	300	0	0	0	0	0	0	0	200	903	0	0	0	0	0	0	0	603	903	0
52	9	0	0	0	0	0	0	200	300	0	0	0	0	0	0	0	200	903	0	0	0	0	0	0	0	603	903	0
53	0	0	0	0	0	0	0	200	300	0	0	0	0	0	0	0	200	903	0	0	0	0	0	0	0	603	903	0
53	1	0	0	0	0	0	0	200	300	0	0	0	0	0	0	0	200	903	0	0	0	0	0	0	0	603	903	0
53	2	0	0	0	0	0	0	200	300	0	0	0	0	0	0	0	200	903	0	0	0	0	0	0	0	603	903	0
53	3	0	0	0	0	0	0	200	300	0	0	0	0	0	0	0	200	903	0	0	0	0	0	0	0	603	903	0
53	4	0	0	0	0	0	0	200	300	0	0	0	0	0	0	0	200	903	0	0	0	0	0	0	0	603	903	0
53	5	0	0	0	0	0	0	200	300	0	0	0	0	0	0	0	200	903	0	0	0	0	0	0	0	603	903	0
53	6	0	0	0	0	0	0	200	300	0	0	0	0	0	0	0	200	903	0	0	0	0	0	0	0	603	903	0
53	7	0	0	0	0	0	0	200	300	0	0	0	0	0	0	0	200	903	0	0	0	0	0	0	0	603	903	0
53	8	0	0	0	0	0	0	200	300	0	0	0	0	0	0	0	200	903	0	0	0	0	0	0	0	603	903	0
53	9	0	0	0	0	0	0	200	300	0	0	0	0	0	0	0	200	903	0	0	0	0	0	0	0	603	903	0
54	0	0	0	0	0	0	0	200	300	0	0	0	0	0	0	0	200	903	0	0	0	0	0	0	0	603	903	0
54	1	0	0	0	0	0	0	200	300	0	0	0	0	0	0	0	200	903	0	0	0	0	0	0	0	603	903	0
54	2	0	0	0	0	0	0	200	300	0	0	0	0	0	0	0	200	903	0	0	0	0	0	0	0	603	903	0
54	3	0	0	0	0	0	0	200	300	0	0	0	0	0	0	0	200	903	0	0	0	0	0	0	0	603	903	0
54	4	0	0	0	0	0	0	200	300	0	0	0	0	0	0	0	200	903	0	0	0	0	0	0	0	603	903	0
54	5	0	0	0	0	0	0	200	300	0	0	0	0	0	0	0	200	903	0	0	0	0	0	0	0	603	903	0
54	6	0	0	0	0	0	0	200	300	0	0	0	0	0	0	0	200	903	0	0	0	0	0	0	0	603	903	0
54	7	0	0	0	0	0	0	200	300	0	0	0	0	0	0	0	200	903	0	0	0	0	0	0	0	603	903	0
54	8	0	0	0	0	0	0	200	300	0	0	0	0	0	0	0	200	903	0	0	0	0	0	0	0	603	903	0
54	9	0	0	0	0	0	0	200	300	0	0	0	0	0	0	0	200	903	0	0	0	0	0	0	0	603	903	0
55	0	0	0	0	0	0	0	200	300	0	0	0	0	0	0	0	200	903	0	0	0	0	0	0	0	603	903	0
55	1	0	0	0	0	0	0	200	300	0	0	0	0	0	0	0	200	903	0	0	0	0	0	0	0	603	903	0
55	2	0	0	0	0	0	0	200	300	0	0	0	0	0	0	0	200	903	0	0	0	0	0	0	0	603	903	0
55	3	0	0	0	0	0	0	200	300	0	0	0	0	0	0	0	200	903	0	0	0	0	0	0	0	603	903	0
55	4	0	0	0	0	0	0	200	300	0	0	0	0	0	0	0	200	903	0	0	0	0	0	0	0	603	903	0
55	5	0	0	0	0	0	0	200	300	0	0	0	0	0	0	0	200	903	0	0	0	0	0	0	0	603	903	0
55	6	0	0	0	0	0	0	200	300	0	0	0	0	0	0	0	200	903	0	0	0	0	0	0	0	603	903	0
55	7	0	0	0	0	0	0	200	300	0	0	0	0	0	0	0	200	903	0	0	0	0	0	0	0	603	903	0
55	8	0	0	0	0	0	0	200	300	0	0	0	0	0	0	0	200	903	0	0	0	0	0	0	0	603	903	0
55	9	0	0	0	0	0	0	200	300	0	0	0	0	0	0	0	200	903	0	0	0	0	0	0	0	603	903	0
56	0	0	0	0	0	0	0	200	300	0	0	0	0	0	0	0	200	903	0	0	0	0	0	0	0	603	903	0
56	1	0	0	0	0	0	0	200	300	0	0	0	0	0	0	0	200	903	0	0	0	0	0	0	0	603	903	0
56	2	0	0	0	0	0	0	200	300	0	0	0	0	0	0	0	200	903	0	0	0	0	0	0	0	603	903	0
56	3	0	0	0	0	0	0	200	300	0	0	0	0	0	0	0	200	903	0	0	0	0	0	0	0	603	903	0
56	4	0	0	0	0	0	0	200	300	0	0	0	0	0	0	0	200	903	0	0	0	0	0	0	0	603	903	0
56	5	0	0	0	0	0	0	200	300	0	0	0	0	0	0	0	200	903	0	0	0	0	0	0	0	603	903	0
56	6	0	0	0	0	0	0	200	300	0	0	0	0	0	0	0	200	903	0	0	0	0	0	0	0	603	903	0
56	7	0	0	0	0	0	0	200	300	0	0	0	0	0	0	0	200	903	0	0	0	0	0	0	0	603	903	0
56	8	0	0	0	0	0	0	200	300	0	0	0	0	0	0	0	200	903	0	0	0	0	0	0	0	603	903	0
56	9	0	0	0	0	0	0	200	300	0	0	0	0	0	0	0	200	903	0	0	0	0	0	0	0	603	903	0
57	0	0	0	0	0	0	0	200	300	0	0	0	0	0	0	0	200	903	0	0	0	0	0	0	0	603	903	0
57	1	0	0	0	0	0	0	200	300	0	0	0	0	0	0	0	200	903	0	0	0	0	0	0	0	603	903	0
57	2	0	0	0	0	0	0	200	300	0	0	0	0	0	0	0	200	903	0	0	0	0	0	0	0	603	903	0
57	3	0	0	0	0	0	0	200	300	0	0	0	0	0	0	0	200	903	0	0	0	0	0	0	0	603	903	0
57	4	0	0	0	0	0	0	200	300	0	0	0	0	0	0	0	200	903	0	0	0	0	0	0	0	603	903	0
57	5	0	0	0	0	0	0	200	300	0	0	0	0	0	0	0	200	903	0	0	0	0	0	0	0	603	903	0
57	6	0	0	0	0	0	0	200	300	0	0	0	0	0	0	0	200	903	0	0	0	0	0	0	0	603	903	0
57	7	0	0	0	0	0	0	200	300	0	0	0	0	0	0	0	200	903	0	0	0	0	0	0	0	603	903	0
57	8	0	0	0	0	0	0	200	300	0	0	0	0	0	0	0	200	903	0	0	0	0	0	0	0	603	903	0
57	9	0	0	0	0	0	0	200	300	0	0	0	0	0	0	0	200	903	0	0	0	0	0	0	0	603	903	0
58	0	0	0	0	0	0	0	200	300	0	0	0	0	0	0	0	200	903	0	0	0	0	0	0	0	603	903	0
58	1	0	0	0	0	0	0	200	300	0	0	0	0	0	0	0	200	903	0	0	0	0	0	0	0	603	903	0
58	2	0	0	0	0	0	0	200	300	0	0	0	0	0	0	0	200	903	0	0	0	0	0	0	0	603	903	0
58	3	0	0	0	0	0	0	200	300	0	0	0	0	0	0	0	200	903	0	0	0	0	0	0	0	603	903	0
58	4	0	0	0	0	0	0	200	300	0	0	0	0	0	0	0	200	903	0	0	0	0	0	0	0	603	903	0
58	5	0	0	0	0	0	0	200	300	0	0	0	0	0	0	0	200	903	0	0	0	0	0	0	0	603	903	0
58	6	0	0	0	0	0	0	200	300	0	0	0	0	0	0	0	200	903	0	0	0	0	0	0	0	603	903	0
58	7	0	0	0	0	0	0	200	300	0	0	0	0	0	0	0	200	903	0	0	0	0	0	0	0	603	903	0
58	8	0	0	0	0	0	0	200	300	0	0	0	0	0	0	0	200	903	0	0	0	0	0	0	0	603	903	0
58	9	0	0	0	0	0	0	200	300	0	0	0	0	0	0	0	200	903	0	0	0	0	0	0	0	603	903	0
59	0	0	0	0	0	0	0	200	300	0	0	0	0	0	0	0	200	903	0	0	0	0	0	0	0	603	903	0
59	1	0	0	0	0	0	0	200	300	0	0	0	0	0	0	0	200	903	0	0	0	0	0	0	0	603	903	0
59	2	0	0	0	0	0	0	200	300	0	0	0	0	0	0	0	200	903	0	0	0	0	0	0	0	603	903	0
59	3	0	0	0	0	0	0	200	300	0	0	0	0	0	0	0	200	903	0	0	0	0	0	0	0	603	903	0
59	4	0	0	0	0	0	0	200	300	0	0	0	0	0	0	0	200	903	0	0	0	0	0	0	0	603	903	0
59	5	0	0	0	0	0	0	200	300	0	0	0	0	0	0	0	200	903	0	0	0	0	0	0	0	603	903	0
59	6	0	0	0	0	0	0	200	300	0	0	0	0	0	0	0	200	903	0	0	0	0	0	0	0	603	903	0
59	7	0	0	0	0	0	0	200	300	0	0	0	0	0	0	0	200	903	0	0	0	0	0	0	0	603	903	0
59	8	0	0	0	0	0	0	200	300	0	0	0	0	0	0	0	200	903	0	0	0	0	0	0	0	603	903	0
59	9	0	0	0	0	0	0	200	300	0	0	0	0	0	0	0	200	903	0	0	0	0	0	0	0	603	903	0
60	0	0	0	0	0	0	0	200	300	0	0	0	0	0	0	0	200	903	0	0	0	0	0	0	0	603	903	0
60	1	0	0	0	0	0	0	200	300	0	0	0	0	0	0	0	200	903	0	0	0	0	0	0	0	603	903	0
60	2	0	0	0	0	0	0	200	300	0	0	0	0	0	0	0	200	903	0	0	0	0	0	0	0	603	903	0
60	3	0	0	0	0	0	0	200	300	0	0	0	0	0	0	0	200	903	0	0	0	0	0	0	0	603	903	0
60	4	0	0	0	0	0	0	200	300	0	0	0	0	0	0	0	200	903	0	0	0	0	0	0	0	603	903	0
60	5	0	0	0	0	0	0	200	300	0	0	0	0	0	0	0	200	903	0	0	0	0	0	0	0	603	903	0
60	6	0	0	0	0	0	0	200	300	0	0	0	0	0	0	0	200	903	0	0	0	0	0	0	0	603	903	0
60	7	0	0	0	0	0	0	200	300	0	0	0	0	0	0	0	200	903	0	0	0	0	0	0	0	603	903	0
60	8	0	0	0	0	0	0	200	300	0	0	0	0	0	0	0	200	903	0	0	0	0	0	0	0	603	903	0
60	9	0	0	0	0	0	0	200	300	0	0	0	0	0	0	0	200	903	0	0	0	0	0	0	0	603	903	0
61	0	0	0	0	0	0	0	200	300	0	0	0	0	0	0	0	200	903	0	0	0	0	0	0	0	603	903	0
61	1	0	0	0	0	0	0	200	300	0	0	0	0	0	0	0	200	903	0	0	0	0	0	0	0	603	903	0
61	2	0	0	0	0	0	0	200	300	0	0	0	0	0	0	0	200	903	0	0	0	0	0	0	0	603	903	0
61	3	0	0	0	0	0	0	200	300	0	0	0	0	0	0	0	200	903	0	0	0	0	0	0	0	603	903	0
61	4	0	0	0	0	0	0	200	300	0	0	0	0	0	0	0	200	903	0	0	0	0	0	0	0	603	903	0
61	5	0	0	0	0	0	0	200	300	0	0	0	0	0	0	0	200	903	0	0	0	0	0	0	0	603	903	0
61	6	0	0	0	0	0	0	200	300	0	0	0	0	0	0	0	200	903	0	0	0	0	0	0	0	603	903	0
61	7	0	0	0	0	0	0	200	300	0	0	0	0	0	0	0	200	903	0	0	0	0	0	0	0	603	903	0
61	8	0	0	0	0	0	0	200	300	0	0	0	0	0	0	0	200	903	0	0	0	0	0	0	0	603	903	0
61	9	0	0	0	0	0	0	200	300	0	0	0	0	0	0	0	200	903	0	0	0	0	0	0	0	603	903	0
62	0	0	0	0	0	0	0	200	300	0	0	0	0	0	0	0	200	903	0	0	0	0	0	0	0	603	903	0
62	1	0	0	0	0	0	0	200	300	0	0	0	0	0	0	0	200	903	0	0	0	0	0	0	0	603	903	0
62	2	0	0	0	0	0	0	200	300	0	0	0	0	0	0	0	200	903	0	0	0	0	0	0	0	603	903	0
62	3	0	0	0	0	0	0	200	300	0	0	0	0	0	0	0	200	903	0	0	0	0	0	0	0	603	903	0
62	4	0	0	0	0	0	0	200	300	0	0	0	0	0	0	0	200	903	0	0	0	0	0	0	0	603	903	0
62	5	0	0	0	0	0	0	200	300	0	0	0	0	0	0	0	200	903	0	0	0	0	0	0	0	603	903	0
62	6	0	0	0	0	0	0	200	300	0	0	0	0	0	0	0	200	903	0	0	0	0	0	0	0	603	903	0
62	7	0	0	0	0	0	0	200	300	0	0	0	0	0	0	0	200	903	0	0	0	0	0	0	0	603	903	0
62	8	0	0	0	0	0	0	200	300	0	0	0	0	0	0	0	200	903	0	0	0	0	0	0	0	603	903	0
62	9	0	0	0	0	0	0	200	300	0	0	0	0	0	0	0	200	903	0	0	0	0	0	0	0	603	903	0
63	0	0	0	0	0	0	0	200	300	0	0	0	0	0	0	0	200	903	0	0	0	0	0	0	0	603	903	0
63	1	0	0	0	0	0	0	200	300	0	0	0	0	0	0	0	200	903	0	0	0	0	0	0	0	603	903	0
63	2	0	0	0	0	0	0	200	300	0	0	0	0	0	0	0	200	903	0	0	0	0	0	0	0	603	903	0
63	3	0	0	0	0	0	0	200	300	0	0	0	0	0	0	0	200	903	0	0	0	0	0	0	0	603	903	0
63	4	0	0	0	0	0	0	200	300	0	0	0	0	0	0	0	200	903	0	0	0	0	0	0	0	603	903	0
63	5	0	0	0	0	0	0	200	300	0	0	0	0	0	0	0	200	903	0	0	0	0	0	0	0	603	903	0
63	6	0	0	0	0	0	0	200	300	0	0	0	0	0	0	0	200	903	0	0	0	0	0	0	0	603	903	0
63	7	0	0	0	0	0	0	200	300	0	0	0	0	0	0	0	200	903	0	0	0	0	0	0	0	603	903	0
63	8	0	0	0	0	0	0	200	300	0	0	0	0	0	0	0	200	903	0	0	0	0	0	0	0	603	903	0
63	9	-6.97926	4.65561	-11.6025	2531.34	1746.82	-160.445	350.556	81.8271	0	0	0	0	0	0	0	200	903	0	0	0	0	0	0	0	603	903	0
64	0	-10.3362	9.23325	-20.4526	4179.29	2601.31	-114.669	327.188	95.6592	0	0	0	0	0	0	0	200	903	0	0	0	0	0	0	0	603	903	0
64	1	-4.38527	6.33408	-20.4526	2989.11	2601.31	-251.998	327.188	153.852	0	0	0	0	0	0	0	200	903	0	0	0	0	0	0	0	603	903	0
64	2	-1.02833	3.12973	-14.6542	2439.79	2052	114.213	340.028	133.509	0	0	0	0	0	0	0	200	903	0	0	0	0	0	0	0	603	903	0
64	3	-9.57325	5.57114	-12.8232	2714.45	2235.1	68.4364	374.302	88.3168	0	0	0	0	0	0	0	200	903	0	0	0	0	0	0	0	603	903	0
64	4	-6.67408	5.72372	-12.8232	2806	1685.79	68.4364	331.464	81.1772	0	0	0	0	0	0	0	200	903	0	0	0	0	0	0	0	603	903	0
64	5	-3.16456	5.11337	-18.3163	2622.9	1868.89	709.306	302.034	156.8	0	0	0	0	0	0	0	200	903	0	0	0	0	0	0	0	603	903	0
64	6	-6.36891	6.33408	-18.3163	2714.45	2723.38	388.871	348.686	151.802	0	0	0	0	0	0	0	200	903	0	0	0	0	0	0	0	603	903	0
64	7	-4.08009	7.85995	-15.8749	3813.08	2479.24	388.871	356.174	59.8047	0	0	0	0	0	0	0	200	903	0	0	0	0	0	0	0	603	903	0
64	8	-2.7068	8.16513	-18.6215	2531.34	2052	663.529	310.195	164.063	0	0	0	0	0	0	0	200	903	0	0	0	0	0	0	0	603	903	0
64	9	-6.5215	9.53842	-18.6215	2897.56	2357.17	1029.74	326.583	144.397	0	0	0	0	0	0	0	200	903	0	0	0	0	0	0	0	603	903	0
65	0	-4.23268	9.38583	-21.6733	3904.64	2418.21	1075.52	311.576	119.841	0	0	0	0	0	0	0	200	903	0	0	0	0	0	0	0	603	903	0
65	1	2.93895	10.3014	-24.4199	3904.64	2784.42	1716.39	314.023	140.104	0	0	0	0	0	0	0	200	903	0	0	0	0	0	0	0	603	903	0
65	2	2.17601	13.8109	-28.082	5277.93	2906.49	2357.25	303.5	112.053	0	0	0	0	0	0	0	200	903	0	0	0	0	0	0	0	603	903	0
65	3	1.71825	13.8109	-32.6596	6468.11	3699.95	2540.36	313.288	101.954	0	0	0	0	0	0	0	200	903	0	0	0	0	0	0	0	603	903	0
65	4	5.53295	12.1324	-38.1528	7383.64	3883.05	2723.47	301.776	106.472	0	0	0	0	0	0	0	200	903	0	0	0	0	0	0	0	603	903	0
65	5	4.15966	12.5902	-43.0356	8573.83	4676.51	3364.33	308.666	100.773	0	0	0	0	0	0	0	200	903	0	0	0	0	0	0	0	603	903	0
65	6	3.09154	11.5221	-50.0546	9855.57	5408.93	2815.02	308.061	103.104	0	0	0	0	0	0	0	200	903	0	0	0	0	0	0	0	603	903	0
65	7	5.07518	8.62289	-55.2426	11228.9	5897.21	2082.6	306.751	96.7356	0	0	0	0	0	0	0	200	903	0	0	0	0	0	0	0	603	903	0
65	8	1.56566	7.55478	-61.6513	13151.5	6385.49	2265.7	303.574	86.6799	0	0	0	0	0	0	0	200	903	0	0	0	0	0	0	0	603	903	0
65	9	-1.33351	8.31772	-69.2807	14341.7	7178.95	1945.27	303.621	92.9921	0	0	0	0	0	0	0	200	903	0	0	0	0	0	0	0	603	903	0
66	0	0.802722	5.11337	-74.7739	15074.1	7301.02	1029.74	297.641	98.4045	0	0	0	0	0	0	0	200	903	0	0	0	0	0	0	0	603	903	0
66	1	-0.723157	4.35043	-81.7929	16996.7	7972.41	1350.18	297.471	92.1986	0	0	0	0	0	0	0	200	903	0	0	0	0	0	0	0	603	903	0
66	2	-3.77491	6.79184	-89.1171	19285.5	8887.94	800.859	299.733	83.5938	0	0	0	0	0	0	0	200	903	0	0	0	0	0	0	0	603	903	0
66	3	-2.24904	5.72372	-97.9672	20292.6	9315.18	526.2	295.085	92.8636	0	0	0	0	0	0	0	200	903	0	0	0	0	0	0	0	603	903	0
66	4	-1.4861	8.77548	-102.85	21299.7	9803.46	800.859	295.318	92.9057	0	0	0	0	0	0	0	200	903	0	0	0	0	0	0	0	603	903	0
66	5	-7.28444	6.94443	-113.531	23405.4	9803.46	526.2	286.35	93.8419	0	0	0	0	0	0	0	200	903	0	0	0	0	0	0	0	603	903	0
66	6	-7.7422	6.48666	-122.076	26335.1	10780	-114.669	288.306	84.2734	0	0	0	0	0	0	0	200	903	0	0	0	0	0	0	0	603	903	0
66	7	-6.5215	7.09702	-130.621	28166.1	11268.3	-1075.97	286.267	84.3677	0	0	0	0	0	0	0	200	903	0	0	0	0	0	0	0	603	903	0
66	8	-12.4724	7.40219	-138.556	29722.5	12489	-892.867	290.137	85.4831	0	0	0	0	0	0	0	200	903	0	0	0	0	0	0	0	603	903	0
66	9	-13.5405	5.26596	-147.711	30821.1	13038.3	-1487.96	288.269	91.3414	0	0	0	0	0	0	0	200	903	0	0	0	0	0	0	0	603	903	0
67	0	-14.4561	4.8082	-155.951	33110	13099.4	-2311.94	283.997	87.6895	0	0	0	0	0	0	0	200	903	0	0	0	0	0	0	0	603	903	0
67	1	-16.4397	6.94443	-166.021	35765	14198	-1854.17	285.519	84.576	0	0	0	0	0	0	0	200	903	0	0	0	0	0	0	0	603	903	0
67	2	-17.0501	7.85995	-171.209	36772.1	14808.3	-2266.16	286.493	85.2217	0	0	0	0	0	0	0	200	903	0	0	0	0	0	0	0	603	903	0
67	3	-16.8975	7.85995	-180.67	37687.6	14991.5	-2357.71	282.977	91.4007	0	0	0	0	0	0	0	200	903	0	0	0	0	0	0	0	603	903	0
67	4	-18.8811	9.53842	-187.689	40159.5	15296.6	-2083.05	281.5	86.0314	0	0	0	0	0	0	0	200	903	0	0	0	0	0	0	0	603	903	0
67	5	-20.7122	12.1324	-192.267	41075.1	16029	-2311.94	283.369	86.364	0	0	0	0	0	0	0	200	903	0	0	0	0	0	0	0	603	903	0
67	6	-21.1699	13.8109	-203.558	42906.1	16883.5	-2495.04	282.942	89.2193	0	0	0	0	0	0	0	200	903	0	0	0	0	0	0	0	603	903	0
67	7	-23.9165	14.5738	-212.103	43913.2	17554.9	-1899.95	282.766	92.9629	0	0	0	0	0	0	0	200	903	0	0	0	0	0	0	0	603	903	0
67	8	-23.9165	17.473	-219.427	46293.6	17799.1	-2311.94	281.116	89.0254	0	0	0	0	0	0	0	200	903	0	0	0	0	0	0	0	603	903	0
67	9	-25.7476	19.304	-224.92	47666.9	18043.2	-2815.48	280.22	88.0723	0	0	0	0	0	0	0	200	903	0	0	0	0	0	0	0	603	903	0
68	0	-28.189	24.9498	-233.16	48857	18653.6	-2037.28	280.003	90.4571	0	0	0	0	0	0	0	200	903	0	0	0	0	0	0	0	603	903	0
68	1	-29.1045	28.4593	-240.484	50230.3	19080.8	-1716.84	279.343	91.1285	0	0	0	0	0	0	0	200	903	0	0	0	0	0	0	0	603	903	0
68	2	-27.5786	29.68	-248.114	51237.4	19813.2	-2083.05	279.855	93.4923	0	0	0	0	0	0	0	200	903	0	0	0	0	0	0	0	603	903	0
68	3	-29.7149	31.9688	-256.659	52793.8	20057.4	-1899.95	278.148	94.3034	0	0	0	0	0	0	0	200	903	0	0	0	0	0	0	0	603	903	0
68	4	-33.0718	36.3939	-265.204	53984	21033.9	-1671.07	279.312	96.4432	0	0	0	0	0	0	0	200	903	0	0	0	0	0	0	0	603	903	0
68	5	-33.377	40.6664	-271.002	55448.8	21400.1	-1671.07	278.967	95.3932	0	0	0	0	0	0	0	200	903	0	0	0	0	0	0	0	603	903	0
68	6	-35.208	44.6336	-277.105	56730.6	21705.3	-1442.18	278.329	95.2744	0	0	0	0	0	0	0	200	903	0	0	0	0	0	0	0	603	903	0
68	7	-37.9546	46.3121	-287.787	57737.7	21949.5	-1030.2	276.27	99.3733	0	0	0	0	0	0	0	200	903	0	0	0	0	0	0	0	603	903	0
68	8	-38.2598	49.0587	-296.026	58744.7	22376.7	-1259.08	275.59	101.556	0	0	0	0	0	0	0	200	903	0	0	0	0	0	0	0	603	903	0
68	9	-37.802	53.6363	-300.909	60667.3	23048.1	-1213.3	276.595	98.3865	0	0	0	0	0	0	0	200	903	0	0	0	0	0	0	0	603	903	0
69	0	-40.8538	55.7726	-307.318	61582.9	23841.6	-480.88	277.579	99.6118	0	0	0	0	0	0	0	200	903	0	0	0	0	0	0	0	603	903	0
69	1	-41.0064	59.5872	-314.947	62498.4	23475.3	-435.104	274.537	101.559	0	0	0	0	0	0	0	200	903	0	0	0	0	0	0	0	603	903	0
69	2	-40.0908	61.7235	-321.966	63230.8	24574	-389.327	276.325	103.61	0	0	0	0	0	0	0	200	903	0	0	0	0	0	0	0	603	903	0
69	3	-40.5486	65.233	-326.239	64329.4	25001.2	-297.775	276.635	102.815	0	0	0	0	0	0	0	200	903	0	0	0	0	0	0	0	603	903	0
69	4	-40.396	67.2166	-331.427	65428.1	25489.5	251.542	276.908	102.587	0	0	0	0	0	0	0	200	903	0	0	0	0	0	0	0	603	903	0
69	5	-40.396	68.5899	-340.277	65611.2	26099.9	800.859	276.702	107.183	0	0	0	0	0	0	0	200	903	0	0	0	0	0	0	0	603	903	0
69	6	-41.9219	71.3365	-346.685	67442.2	26588.1	663.529	276.692	105.466	0	0	0	0	0	0	0	200	903	0	0	0	0	0	0	0	603	903	0
69	7	-40.7012	73.015	-347.296	68449.3	27137.5	938.188	278.139	102.908	0	0	0	0	0	0	0	200	903	0	0	0	0	0	0	0	603	903	0
69	8	-41.9219	74.3883	-355.536	68724	27747.8	1029.74	278.045	106.703	0	0	0	0	0	0	0	200	903	0	0	0	0	0	0	0	603	903	0
69	9	-42.0745	75.4564	-361.029	69090.2	27198.5	1212.85	275.336	108.63	0	0	0	0	0	0	0	200	903	0	0	0	0	0	0	0	603	903	0
70	0	-40.0908	76.8297	-363.775	70280.4	28236.1	1899.49	277.62	106.803	0	0	0	0	0	0	0	200	903	0	0	0	0	0	0	0	603	903	0
70	1	-40.5486	76.9823	-368.353	70921.2	28175.1	1579.06	276.489	107.464	0	0	0	0	0	0	0	200	903	0	0	0	0	0	0	0	603	903	0
70	2	-40.8538	78.203	-369.574	71287.4	28602.3	1853.72	277.393	107.109	0	0	0	0	0	0	0	200	903	0	0	0	0	0	0	0	603	903	0
70	3	-39.3279	78.5081	-375.372	71562.1	29273.7	2540.36	277.986	109.357	0	0	0	0	0	0	0	200	903	0	0	0	0	0	0	0	603	903	0
70	4	-37.4968	78.9659	-379.95	72019.9	29517.8	2311.48	277.689	110.449	0	0	0	0	0	0	0	200	903	0	0	0	0	0	0	0	603	903	0
70	5	-37.802	79.8814	-385.443	72843.9	30067.1	2357.25	278.007	111.013	0	0	0	0	0	0	0	200	903	0	0	0	0	0	0	0	603	903	0
70	6	-37.1917	79.5763	-389.105	73301.6	30250.2	2448.81	277.743	111.615	0	0	0	0	0	0	0	200	903	0	0	0	0	0	0	0	603	903	0
70	7	-36.1235	80.034	-387.274	74308.7	30372.3	2631.91	278.426	108.124	0	0	0	0	0	0	0	200	903	0	0	0	0	0	0	0	603	903	0
70	8	-35.6658	79.8814	-395.208	74583.3	31104.7	2998.12	278.705	111.281	0	0	0	0	0	0	0	200	903	0	0	0	0	0	0	0	603	903	0
70	9	-34.7503	79.4237	-397.345	74217.1	31043.7	2998.12	278.128	113.217	0	0	0	0	0	0	0	200	903	0	0	0	0	0	0	0	603	903	0
71	0	-33.6821	79.4237	-397.345	74858	31287.8	3455.89	278.742	111.604	0	0	0	0	0	0	0	200	903	0	0	0	0	0	0	0	603	903	0
71	1	-32.4614	80.034	-401.922	75956.6	32386.5	3455.89	280.579	111.017	0	0	0	0	0	0	0	200	903	0	0	0	0	0	0	0	603	903	0
71	2	-28.4942	79.8814	-405.89	76048.2	32203.4	3867.87	279.34	112.638	0	0	0	0	0	0	0	200	903	0	0	0	0	0	0	0	603	903	0
71	3	-24.6795	78.8133	-409.857	76322.8	33241	4600.3	281.104	113.782	0	0	0	0	0	0	0	200	903	0	0	0	0	0	0	0	603	903	0
71	4	-23.7639	78.6607	-413.824	76597.5	33668.2	4600.3	281.359	114.903	0	0	0	0	0	0	0	200	903	0	0	0	0	0	0	0	603	903	0
71	5	-22.2381	81.7125	-419.622	77513.1	34034.4	5103.84	281.107	115.279	0	0	0	0	0	0	0	200	903	0	0	0	0	0	0	0	603	903	0
71	6	-19.7966	80.797	-423.59	77787.7	34217.5	5149.61	280.78	116.361	0	0	0	0	0	0	0	200	903	0	0	0	0	0	0	0	603	903	0
71	7	-18.5759	81.5599	-428.167	77604.6	34950	5927.81	281.627	118.752	0	0	0	0	0	0	0	200	903	0	0	0	0	0	0	0	603	903	0
71	8	-16.1345	82.0177	-432.44	78062.3	35499.3	5744.71	282.091	119.484	0	0	0	0	0	0	0	200	903	0	0	0	0	0	0	0	603	903	0
71	9	-13.8457	83.391	-434.576	79161	36048.6	6294.02	282.951	117.843	0	0	0	0	0	0	0	200	903	0	0	0	0	0	0	0	603	903	0
72	0	-11.8621	85.3746	-436.407	79252.5	35926.5	6706.01	282.323	118.398	0	0	0	0	0	0	0	200	903	0	0	0	0	0	0	0	603	903	0
72	1	-8.50514	87.5108	-440.069	79252.5	37025.1	7209.55	284.135	119.909	0	0	0	0	0	0	0	200	903	0	0	0	0	0	0	0	603	903	0
72	2	-6.82667	89.3419	-440.985	79710.3	37269.3	7484.21	284.514	119.245	0	0	0	0	0	0	0	200	903	0	0	0	0	0	0	0	603	903	0
72	3	-4.38527	90.5626	-445.868	79527.2	37391.4	7758.87	283.862	121.635	0	0	0	0	0	0	0	200	903	0	0	0	0	0	0	0	603	903	0
72	4	-3.16456	91.9359	-447.699	79618.7	37757.6	7758.87	284.337	122.16	0	0	0	0	0	0	0	200	903	0	0	0	0	0	0	0	603	903	0
72	5	0.19237	93.1566	-453.497	79893.4	38062.7	8399.74	283.932	123.828	0	0	0	0	0	0	0	200	903	0	0	0	0	0	0	0	603	903	0
72	6	0.19237	95.4454	-455.938	80259.6	38245.9	8949.05	283.884	123.968	0	0	0	0	0	0	0	200	903	0	0	0	0	0	0	0	603	903	0
72	7	0.802722	96.5135	-457.769	80442.7	38673.1	8765.95	284.482	124.272	0	0	0	0	0	0	0	200	903	0	0	0	0	0	0	0	603	903	0
72	8	2.02342	97.2765	-460.821	80168.1	39161.4	8994.83	284.982	126.032	0	0	0	0	0	0	0	200	903	0	0	0	0	0	0	0	603	903	0
72	9	2.78636	99.5653	-462.042	80442.7	39588.6	9773.03	285.682	125.897	0	0	0	0	0	0	0	200	903	0	0	0	0	0	0	0	603	903	0
73	0	5.07518	100.633	-463.568	81175.2	39710.7	9818.8	285.663	124.89	0	0	0	0	0	0	0	200	903	0	0	0	0	0	0	0	603	903	0
73	1	5.22777	100.176	-466.62	80992	40015.9	10139.2	285.757	126.428	0	0	0	0	0	0	0	200	903	0	0	0	0	0	0	0	603	903	0
73	2	6.29589	102.007	-469.671	80900.5	40565.2	10276.6	286.369	127.751	0	0	0	0	0	0	0	200	903	0	0	0	0	0	0	0	603	903	0
73	3	7.51659	101.396	-472.113	80992	40687.3	10780.1	286.181	128.448	0	0	0	0	0	0	0	200	903	0	0	0	0	0	0	0	603	903	0
73	4	9.34764	104.906	-475.47	81816	41053.5	10963.2	286.343	127.926	0	0	0	0	0	0	0	200	903	0	0	0	0	0	0	0	603	903	0
73	5	9.19506	102.77	-479.742	81907.6	41724.9	11146.3	286.974	129.267	0	0	0	0	0	0	0	200	903	0	0	0	0	0	0	0	603	903	0
73	6	9.80541	105.211	-481.573	82182.2	41541.8	11512.5	286.263	129.346	0	0	0	0	0	0	0	200	903	0	0	0	0	0	0	0	603	903	0
73	7	10.1106	106.432	-483.709	82090.7	42335.2	11695.6	287.522	130.289	0	0	0	0	0	0	0	200	903	0	0	0	0	0	0	0	603	903	0
73	8	10.4158	106.737	-487.066	82548.4	42518.3	11878.7	287.295	130.519	0	0	0	0	0	0	0	200	903	0	0	0	0	0	0	0	603	903	0
73	9	12.0942	106.432	-488.592	82182.2	42579.3	12199.2	287.147	131.798	0	0	0	0	0	0	0	200	903	0	0	0	0	0	0	0	603	903	0
74	0	9.65282	107.652	-489.508	82273.8	42274.2	12107.6	286.361	131.925	0	0	0	0	0	0	0	200	903	0	0	0	0	0	0	0	603	903	0
74	1	9.65282	107.958	-491.034	83189.3	43006.6	12153.4	287.584	130.583	0	0	0	0	0	0	0	200	903	0	0	0	0	0	0	0	603	903	0
74	2	11.7891	108.415	-493.78	83189.3	43433.8	12428.1	287.962	131.526	0	0	0	0	0	0	0	200	903	0	0	0	0	0	0	0	603	903	0
74	3	11.9416	108.263	-497.137	82548.4	43739	12107.6	287.982	133.952	0	0	0	0	0	0	0	200	903	0	0	0	0	0	0	0	603	903	0
74	4	12.2468	107.958	-499.579	83006.2	43739	12611.2	287.552	133.848	0	0	0	0	0	0	0	200	903	0	0	0	0	0	0	0	603	903	0
74	5	11.0261	109.331	-503.241	83921.7	44044.2	12840	287.521	133.237	0	0	0	0	0	0	0	200	903	0	0	0	0	0	0	0	603	903	0
74	6	11.4839	110.552	-507.208	84196.4	44227.3	12565.4	287.198	134	0	0	0	0	0	0	0	200	903	0	0	0	0	0	0	0	603	903	0
74	7	10.4158	111.467	-511.48	83830.2	45264.9	12794.3	288.498	136.103	0	0	0	0	0	0	0	200	903	0	0	0	0	0	0	0	603	903	0
74	8	9.958	112.535	-523.077	85203.5	46546.6	13389.4	288.986	137.111	0	0	0	0	0	0	0	200	903	0	0	0	0	0	0	0	603	903	0
74	9	16.2141	115.129	-526.739	85661.2	47095.9	14076	289.41	137.374	0	0	0	0	0	0	0	200	903	0	0	0	0	0	0	0	603	903	0
75	0	20.334	117.876	-532.843	85661.2	47889.4	14304.9	289.875	139.237	0	0	0	0	0	0	0	200	903	0	0	0	0	0	0	0	603	903	0
75	1	19.4184	119.249	-535.284	86393.7	48316.6	14854.2	290.264	138.602	0	0	0	0	0	0	0	200	903	0	0	0	0	0	0	0	603	903	0
75	2	20.4866	118.944	-540.167	86943	48804.9	15174.6	290.352	139.044	0	0	0	0	0	0	0	200	903	0	0	0	0	0	0	0	603	903	0
75	3	24.3013	120.012	-548.102	86027.5	49293.2	15632.4	289.934	143.045	0	0	0	0	0	0	0	200	903	0	0	0	0	0	0	0	603	903	0
75	4	25.9797	121.538	-552.984	87034.5	49598.4	15586.6	289.692	142.609	0	0	0	0	0	0	0	200	903	0	0	0	0	0	0	0	603	903	0
75	5	26.7427	123.827	-557.867	88499.4	50452.9	15861.3	290.439	141.361	0	0	0	0	0	0	0	200	903	0	0	0	0	0	0	0	603	903	0
75	6	28.4211	123.979	-563.36	87767	51063.2	16044.4	290.64	144.208	0	0	0	0	0	0	0	200	903	0	0	0	0	0	0	0	603	903	0
75	7	27.0478	127.947	-571.6	88407.8	51429.4	15769.7	289.975	145.333	0	0	0	0	0	0	0	200	903	0	0	0	0	0	0	0	603	903	0
75	8	23.8435	129.473	-577.093	89414.9	51612.5	16090.2	289.435	145.06	0	0	0	0	0	0	0	200	903	0	0	0	0	0	0	0	603	903	0
75	9	25.3694	129.473	-577.704	89872.6	52100.8	15998.6	290.186	144.431	0	0	0	0	0	0	0	200	903	0	0	0	0	0	0	0	603	903	0
76	0	24.6064	130.541	-581.06	89506.4	52833.2	15220.4	290.926	145.96	0	0	0	0	0	0	0	200	903	0	0	0	0	0	0	0	603	903	0
76	1	25.6745	131.151	-588.08	90330.4	53260.5	15678.2	290.567	146.398	0	0	0	0	0	0	0	200	903	0	0	0	0	0	0	0	603	903	0
76	2	25.8271	129.778	-591.436	90879.7	53138.4	16181.7	289.846	146.341	0	0	0	0	0	0	0	200	903	0	0	0	0	0	0	0	603	903	0
76	3	24.6064	131.151	-594.793	91245.9	53687.7	15632.4	290.263	146.592	0	0	0	0	0	0	0	200	903	0	0	0	0	0	0	0	603	903	0
76	4	23.9961	132.066	-599.066	91612.1	54115	15907.1	290.332	147.075	0	0	0	0	0	0	0	200	903	0	0	0	0	0	0	0	603	903	0
76	5	25.8271	130.998	-602.728	91520.6	54359.1	15632.4	290.189	148.156	0	0	0	0	0	0	0	200	903	0	0	0	0	0	0	0	603	903	0
76	6	24.4538	130.998	-608.221	91337.5	54847.4	15769.7	290.177	149.828	0	0	0	0	0	0	0	200	903	0	0	0	0	0	0	0	603	903	0
76	7	22.3176	130.235	-610.968	91612.1	54786.4	15632.4	289.671	150.054	0	0	0	0	0	0	0	200	903	0	0	0	0	0	0	0	603	903	0
76	8	24.6064	129.015	-612.188	92619.3	55457.8	15449.3	290.589	148.708	0	0	0	0	0	0	0	200	903	0	0	0	0	0	0	0	603	903	0
76	9	23.6909	129.167	-616.156	91795.3	56068.1	15586.6	290.997	151.019	0	0	0	0	0	0	0	200	903	0	0	0	0	0	0	0	603	903	0
77	0	23.6909	127.031	-619.207	92161.5	56007.1	15449.3	290.45	151.162	0	0	0	0	0	0	0	200	903	0	0	0	0	0	0	0	603	903	0
77	1	23.8435	127.336	-621.649	93260.1	56190.2	15540.9	290.389	149.979	0	0	0	0	0	0	0	200	903	0	0	0	0	0	0	0	603	903	0
77	2	24.3013	127.641	-625.006	92802.3	56434.3	15266.2	290.294	151.518	0	0	0	0	0	0	0	200	903	0	0	0	0	0	0	0	603	903	0
77	3	23.6909	127.947	-629.278	92710.8	56922.6	15266.2	290.457	152.671	0	0	0	0	0	0	0	200	903	0	0	0	0	0	0	0	603	903	0
77	4	24.1487	126.726	-630.194	92893.9	57166.8	15312	290.713	152.595	0	0	0	0	0	0	0	200	903	0	0	0	0	0	0	0	603	903	0
77	5	24.9116	125.505	-635.077	93626.3	57410.9	15724	290.4	152.575	0	0	0	0	0	0	0	200	903	0	0	0	0	0	0	0	603	903	0
77	6	26.2849	127.336	-635.382	93168.5	57533	15403.5	290.549	153.366	0	0	0	0	0	0	0	200	903	0	0	0	0	0	0	0	603	903	0
77	7	26.1323	127.794	-639.044	93992.5	58692.6	15220.4	291.844	152.917	0	0	0	0	0	0	0	200	903	0	0	0	0	0	0	0	603	903	0
77	8	26.2849	127.184	-642.096	94450.3	58204.3	15540.9	290.647	152.903	0	0	0	0	0	0	0	200	903	0	0	0	0	0	0	0	603	903	0
77	9	28.7263	127.184	-645.758	93717.9	58448.5	15586.6	290.511	154.871	0	0	0	0	0	0	0	200	903	0	0	0	0	0	0	0	603	903	0
78	0	29.947	126.421	-649.725	93992.5	58997.8	15632.4	290.804	155.335	0	0	0	0	0	0	0	200	903	0	0	0	0	0	0	0	603	903	0
78	1	29.947	127.641	-652.777	94175.6	59547.1	15724	291.221	155.731	0	0	0	0	0	0	0	200	903	0	0	0	0	0	0	0	603	903	0
78	2	31.4729	128.252	-653.082	94450.3	60157.5	15907.1	292.113	155.378	0	0	0	0	0	0	0	200	903	0	0	0	0	0	0	0	603	903	0
78	3	32.0832	128.862	-658.575	94358.8	59913.3	15769.7	290.974	156.723	0	0	0	0	0	0	0	200	903	0	0	0	0	0	0	0	603	903	0
78	4	32.9988	128.71	-658.88	95457.4	60340.6	16410.6	291.581	155.122	0	0	0	0	0	0	0	200	903	0	0	0	0	0	0	0	603	903	0
78	5	31.4729	127.336	-663.153	95457.4	60767.8	16273.3	291.635	156.055	0	0	0	0	0	0	0	200	903	0	0	0	0	0	0	0	603	903	0
78	6	32.3884	128.862	-662.237	95182.7	61256.1	16181.7	292.499	156.271	0	0	0	0	0	0	0	200	903	0	0	0	0	0	0	0	603	903	0
78	7	34.0669	128.862	-668.341	94816.5	61500.2	16227.5	292.019	158.131	0	0	0	0	0	0	0	200	903	0	0	0	0	0	0	0	603	903	0
78	8	34.5246	127.947	-669.867	95915.2	61439.2	16364.8	291.719	156.815	0	0	0	0	0	0	0	200	903	0	0	0	0	0	0	0	603	903	0
78	9	35.5928	126.879	-675.055	95457.4	61744.4	16364.8	291.466	158.593	0	0	0	0	0	0	0	200	903	0	0	0	0	0	0	0	603	903	0
79	0	35.2876	127.947	-673.834	95640.5	61927.5	16044.4	291.903	158.065	0	0	0	0	0	0	0	200	903	0	0	0	0	0	0	0	603	903	0
79	1	34.3721	127.184	-679.937	96556	62293.7	16181.7	291.617	157.993	0	0	0	0	0	0	0	200	903	0	0	0	0	0	0	0	603	903	0
79	2	35.5928	123.674	-680.548	96647.6	62659.9	16227.5	292.073	157.986	0	0	0	0	0	0	0	200	903	0	0	0	0	0	0	0	603	903	0
79	3	35.2876	125.047	-683.6	96556	62476.8	15998.6	291.394	158.754	0	0	0	0	0	0	0	200	903	0	0	0	0	0	0	0	603	903	0
79	4	35.7453	124.895	-683.6	96922.2	63148.2	16227.5	292.376	158.218	0	0	0	0	0	0	0	200	903	0	0	0	0	0	0	0	603	903	0
79	5	36.3557	123.674	-686.651	97196.9	63087.2	16181.7	291.877	158.448	0	0	0	0	0	0	0	200	903	0	0	0	0	0	0	0	603	903	0
79	6	36.0505	122.759	-687.567	96464.4	63331.3	15769.7	292.109	159.702	0	0	0	0	0	0	0	200	903	0	0	0	0	0	0	0	603	903	0
79	7	36.6609	120.012	-691.839	96830.7	63697.5	15998.6	292.07	160.039	0	0	0	0	0	0	0	200	903	0	0	0	0	0	0	0	603	903	0
79	8	35.7453	120.622	-691.229	96739.1	63453.4	15769.7	291.798	160.048	0	0	0	0	0	0	0	200	903	0	0	0	0	0	0	0	603	903	0
79	9	35.135	120.165	-696.417	97288.4	64185.8	15678.2	292.166	160.301	0	0	0	0	0	0	0	200	903	0	0	0	0	0	0	0	603	903	0
80	0	35.4402	119.707	-697.943	97471.5	64063.7	15724	291.789	160.345	0	0	0	0	0	0	0	200	903	0	0	0	0	0	0	0	603	903	0
80	1	34.8298	118.944	-699.164	97746.2	63697.5	15449.3	291.105	160.195	0	0	0	0	0	0	0	200	903	0	0	0	0	0	0	0	603	903	0
80	2	35.8979	118.028	-701.91	97471.5	64429.9	15403.5	291.792	161.134	0	0	0	0	0	0	0	200	903	0	0	0	0	0	0	0	603	903	0
80	3	36.0505	117.571	-703.741	97471.5	64246.8	15357.7	291.293	161.495	0	0	0	0	0	0	0	200	903	0	0	0	0	0	0	0	603	903	0
80	4	36.0505	117.418	-705.267	97380	64796.1	15312	291.875	161.925	0	0	0	0	0	0	0	200	903	0	0	0	0	0	0	0	603	903	0
80	5	36.2031	116.197	-708.624	97837.7	65162.4	15586.6	291.956	161.933	0	0	0	0	0	0	0	200	903	0	0	0	0	0	0	0	603	903	0
80	6	36.3557	116.197	-711.371	97654.7	65040.3	15815.5	291.43	162.723	0	0	0	0	0	0	0	200	903	0	0	0	0	0	0	0	603	903	0
80	7	38.6445	115.74	-711.981	97837.7	65467.5	15312	291.951	162.584	0	0	0	0	0	0	0	200	903	0	0	0	0	0	0	0	603	903	0
80	8	35.8979	115.434	-713.507	98936.4	65589.6	14900	291.926	161.338	0	0	0	0	0	0	0	200	903	0	0	0	0	0	0	0	603	903	0
80	9	36.6609	114.366	-714.117	99027.9	65833.8	15220.4	292.189	161.328	0	0	0	0	0	0	0	200	903	0	0	0	0	0	0	0	603	903	0
81	0	36.3557	112.993	-715.948	98570.2	66077.9	15037.3	292.294	162.322	0	0	0	0	0	0	0	200	903	0	0	0	0	0	0	0	603	903	0
81	1	36.0505	112.993	-715.033	98295.5	65955.8	15174.6	292.242	162.53	0	0	0	0	0	0	0	200	903	0	0	0	0	0	0	0	603	903	0
81	2	36.2031	112.535	-719.305	99394.1	65711.7	15037.3	291.354	161.819	0	0	0	0	0	0	0	200	903	0	0	0	0	0	0	0	603	903	0
81	3	36.3557	111.467	-719.305	99302.6	66383	15037.3	292.288	161.947	0	0	0	0	0	0	0	200	903	0	0	0	0	0	0	0	603	903	0
81	4	35.2876	110.399	-723.272	98203.9	65772.7	14808.4	290.938	164.223	0	0	0	0	0	0	0	200	903	0	0	0	0	0	0	0	603	903	0
81	5	36.0505	110.094	-724.188	98295.5	66444.1	14625.3	291.75	164.268	0	0	0	0	0	0	0	200	903	0	0	0	0	0	0	0	603	903	0
81	6	34.3721	109.636	-724.798	99119.5	66261	14533.8	291.42	163.245	0	0	0	0	0	0	0	200	903	0	0	0	0	0	0	0	603	903	0
81	7	34.3721	107.652	-726.324	99119.5	66261	14945.8	291.228	163.533	0	0	0	0	0	0	0	200	903	0	0	0	0	0	0	0	603	903	0
81	8	36.9661	107.5	-724.798	98387.1	66810.3	14442.2	292.178	164.256	0	0	0	0	0	0	0	200	903	0	0	0	0	0	0	0	603	903	0
81	9	34.6772	106.737	-726.629	98203.9	66749.3	14579.5	291.862	164.85	0	0	0	0	0	0	0	200	903	0	0	0	0	0	0	0	603	903	0
82	0	35.4402	105.364	-725.714	98753.3	66749.3	14213.3	291.977	163.923	0	0	0	0	0	0	0	200	903	0	0	0	0	0	0	0	603	903	0
82	1	34.2195	104.143	-727.24	99302.6	66932.4	14259.1	292.036	163.453	0	0	0	0	0	0	0	200	903	0	0	0	0	0	0	0	603	903	0
82	2	35.7453	103.533	-730.291	98112.4	66810.3	14213.3	291.484	165.653	0	0	0	0	0	0	0	200	903	0	0	0	0	0	0	0	603	903	0
82	3	34.0669	103.227	-730.902	98203.9	67054.5	14167.6	291.742	165.64	0	0	0	0	0	0	0	200	903	0	0	0	0	0	0	0	603	903	0
82	4	33.9143	102.617	-727.85	98478.6	66688.2	13938.7	291.624	164.699	0	0	0	0	0	0	0	200	903	0	0	0	0	0	0	0	603	903	0
82	5	32.9988	101.396	-731.207	98570.2	66810.3	13938.7	291.37	165.195	0	0	0	0	0	0	0	200	903	0	0	0	0	0	0	0	603	903	0
82	6	32.0832	101.091	-729.986	97746.2	66932.4	13526.7	291.69	166.099	0	0	0	0	0	0	0	200	903	0	0	0	0	0	0	0	603	903	0
82	7	32.541	100.328	-729.681	97380	66871.3	13709.8	291.645	166.544	0	0	0	0	0	0	0	200	903	0	0	0	0	0	0	0	603	903	0
82	8	31.3203	100.176	-728.766	98020.9	66810.3	13892.9	291.676	165.497	0	0	0	0	0	0	0	200	903	0	0	0	0	0	0	0	603	903	0
82	9	31.7781	98.9549	-728.766	98020.9	66688.2	13206.3	291.509	165.497	0	0	0	0	0	0	0	200	903	0	0	0	0	0	0	0	603	903	0
83	0	31.4729	98.6497	-728.46	97105.3	66505.1	13389.4	291.295	166.698	0	0	0	0	0	0	0	200	903	0	0	0	0	0	0	0	603	903	0
83	1	31.4729	98.192	-726.629	97288.4	66383	12977.4	291.358	166.11	0	0	0	0	0	0	0	200	903	0	0	0	0	0	0	0	603	903	0
83	2	31.1677	97.2765	-730.291	97013.8	66383	12931.6	290.899	167.157	0	0	0	0	0	0	0	200	903	0	0	0	0	0	0	0	603	903	0
83	3	31.0151	95.1402	-729.681	97105.3	66505.1	13068.9	291.143	166.921	0	0	0	0	0	0	0	200	903	0	0	0	0	0	0	0	603	903	0
83	4	29.947	95.1402	-727.85	96647.6	66627.2	12748.5	291.54	167.215	0	0	0	0	0	0	0	200	903	0	0	0	0	0	0	0	603	903	0
83	5	30.0996	94.0721	-728.46	96372.9	66077.9	12656.9	290.709	167.703	0	0	0	0	0	0	0	200	903	0	0	0	0	0	0	0	603	903	0
83	6	31.1677	94.2247	-726.629	96647.6	66566.2	12702.7	291.61	166.992	0	0	0	0	0	0	0	200	903	0	0	0	0	0	0	0	603	903	0
83	7	29.6418	93.1566	-726.629	96647.6	66077.9	12565.4	290.938	166.992	0	0	0	0	0	0	0	200	903	0	0	0	0	0	0	0	603	903	0
83	8	27.353	93.1566	-723.883	95091.2	66200	12519.6	291.451	168.637	0	0	0	0	0	0	0	200	903	0	0	0	0	0	0	0	603	903	0
83	9	29.1841	92.6988	-722.967	96006.7	66261	12473.8	291.651	167.205	0	0	0	0	0	0	0	200	903	0	0	0	0	0	0	0	603	903	0
84	0	28.7263	91.1729	-722.662	95182.7	65894.8	12382.3	291.183	168.289	0	0	0	0	0	0	0	200	903	0	0	0	0	0	0	0	603	903	0
84	1	28.8789	90.5626	-722.662	94358.8	66261	12336.5	291.69	169.429	0	0	0	0	0	0	0	200	903	0	0	0	0	0	0	0	603	903	0
84	2	28.4211	89.9522	-722.357	94175.6	65528.6	12061.8	290.715	169.627	0	0	0	0	0	0	0	200	903	0	0	0	0	0	0	0	603	903	0
84	3	27.9634	89.4945	-721.441	94633.4	65711.7	11649.9	291.084	168.827	0	0	0	0	0	0	0	200	903	0	0	0	0	0	0	0	603	903	0
84	4	27.2004	88.5789	-719	94175.6	65650.6	11924.5	291.308	169.019	0	0	0	0	0	0	0	200	903	0	0	0	0	0	0	0	603	903	0
84	5	28.2685	88.4264	-715.948	92985.5	65284.4	11924.5	291.186	170.123	0	0	0	0	0	0	0	200	903	0	0	0	0	0	0	0	603	903	0
84	6	27.2004	87.816	-713.812	92802.3	65162.4	11741.4	291.288	169.99	0	0	0	0	0	0	0	200	903	0	0	0	0	0	0	0	603	903	0
84	7	27.9634	86.9005	-712.286	93168.5	64857.2	11695.6	291.055	169.198	0	0	0	0	0	0	0	200	903	0	0	0	0	0	0	0	603	903	0
84	8	27.9634	85.0694	-710.76	92619.3	64918.2	11421	291.336	169.69	0	0	0	0	0	0	0	200	903	0	0	0	0	0	0	0	603	903	0
84	9	28.116	86.4427	-707.403	91978.4	64979.3	11421	291.856	169.977	0	0	0	0	0	0	0	200	903	0	0	0	0	0	0	0	603	903	0
85	0	27.8108	85.3746	-711.065	91154.4	64857.2	11741.4	291.211	171.806	0	0	0	0	0	0	0	200	903	0	0	0	0	0	0	0	603	903	0
85	1	28.2685	84.1539	-708.014	90422	64124.8	11512.5	290.57	172.288	0	0	0	0	0	0	0	200	903	0	0	0	0	0	0	0	603	903	0
85	2	27.353	83.6961	-706.183	90788.2	64674.1	11512.5	291.583	171.438	0	0	0	0	0	0	0	200	903	0	0	0	0	0	0	0	603	903	0
85	3	26.7427	83.6961	-703.436	90055.8	64307.9	11421	291.42	171.977	0	0	0	0	0	0	0	200	903	0	0	0	0	0	0	0	603	903	0
85	4	27.9634	82.7806	-698.858	89964.2	64185.8	11237.9	291.844	171.27	0	0	0	0	0	0	0	200	903	0	0	0	0	0	0	0	603	903	0
85	5	27.353	81.5599	-699.469	89964.2	64063.7	11421	291.589	171.382	0	0	0	0	0	0	0	200	903	0	0	0	0	0	0	0	603	903	0
85	6	26.8953	81.2547	-697.332	88774	63758.5	11283.6	291.432	172.695	0	0	0	0	0	0	0	200	903	0	0	0	0	0	0	0	603	903	0
85	7	27.2004	81.4073	-694.891	88407.8	63758.5	11192.1	291.753	172.775	0	0	0	0	0	0	0	200	903	0	0	0	0	0	0	0	603	903	0
85	8	27.5056	80.797	-692.755	87950	63575.4	11146.3	291.772	173.043	0	0	0	0	0	0	0	200	903	0	0	0	0	0	0	0	603	903	0
85	9	28.7263	78.8133	-692.144	87950	63209.2	11192.1	291.324	172.931	0	0	0	0	0	0	0	200	903	0	0	0	0	0	0	0	603	903	0
86	0	27.353	79.8814	-690.008	87675.4	62904.1	11009	291.164	172.936	0	0	0	0	0	0	0	200	903	0	0	0	0	0	0	0	603	903	0
86	1	27.2004	79.4237	-687.567	86851.4	63026.1	11146.3	291.665	173.683	0	0	0	0	0	0	0	200	903	0	0	0	0	0	0	0	603	903	0
86	2	27.8108	77.8978	-686.041	86759.9	62904.1	11100.5	291.691	173.535	0	0	0	0	0	0	0	200	903	0	0	0	0	0	0	0	603	903	0
86	3	29.6418	77.1349	-683.6	85752.8	62965.1	10917.4	292.108	174.557	0	0	0	0	0	0	0	200	903	0	0	0	0	0	0	0	603	903	0
86	4	28.5737	76.9823	-681.158	85661.2	61988.5	11009	291.005	174.242	0	0	0	0	0	0	0	200	903	0	0	0	0	0	0	0	603	903	0
86	5	29.3367	76.3719	-678.717	85935.9	62598.9	11375.2	292.231	173.385	0	0	0	0	0	0	0	200	903	0	0	0	0	0	0	0	603	903	0
86	6	28.116	75.609	-676.581	85111.9	62415.8	10917.4	292.252	174.203	0	0	0	0	0	0	0	200	903	0	0	0	0	0	0	0	603	903	0
86	7	29.0315	74.846	-676.581	84287.9	62232.7	10917.4	291.981	175.421	0	0	0	0	0	0	0	200	903	0	0	0	0	0	0	0	603	903	0
86	8	28.5737	73.015	-675.055	83738.6	61805.4	10871.7	291.556	175.953	0	0	0	0	0	0	0	200	903	0	0	0	0	0	0	0	603	903	0
86	9	27.353	74.6935	-670.782	83921.7	61927.5	10825.9	292.321	174.89	0	0	0	0	0	0	0	200	903	0	0	0	0	0	0	0	603	903	0
87	0	28.5737	71.0313	-669.867	83372.4	61744.4	10917.4	292.174	175.539	0	0	0	0	0	0	0	200	903	0	0	0	0	0	0	0	603	903	0
87	1	28.4211	72.7098	-667.73	82273.8	61805.4	10642.8	292.56	176.786	0	0	0	0	0	0	0	200	903	0	0	0	0	0	0	0	603	903	0
87	2	28.2685	71.4891	-664.068	82273.8	60828.9	10597	291.6	176.106	0	0	0	0	0	0	0	200	903	0	0	0	0	0	0	0	603	903	0
87	3	27.9634	71.0313	-662.848	81816	61195.1	10642.8	292.321	176.569	0	0	0	0	0	0	0	200	903	0	0	0	0	0	0	0	603	903	0
87	4	29.3367	69.9632	-659.185	81175.2	60950.9	10551.2	292.464	176.855	0	0	0	0	0	0	0	200	903	0	0	0	0	0	0	0	603	903	0
87	5	29.1841	70.8788	-657.66	80717.4	60950.9	10459.7	292.679	177.266	0	0	0	0	0	0	0	200	903	0	0	0	0	0	0	0	603	903	0
87	6	31.4729	70.1158	-659.491	80809	60889.9	10597	292.329	177.468	0	0	0	0	0	0	0	200	903	0	0	0	0	0	0	0	603	903	0
87	7	29.1841	68.2848	-656.134	80809	60523.7	10459.7	292.243	176.841	0	0	0	0	0	0	0	200	903	0	0	0	0	0	0	0	603	903	0
87	8	29.4892	67.3692	-655.829	79801.9	60462.6	10230.8	292.193	178.319	0	0	0	0	0	0	0	200	903	0	0	0	0	0	0	0	603	903	0
87	9	29.3367	67.3692	-652.472	79435.7	60828.9	10322.3	293.228	178.254	0	0	0	0	0	0	0	200	903	0	0	0	0	0	0	0	603	903	0
88	0	29.1841	67.0641	-650.03	79161	60218.5	10093.5	292.64	178.22	0	0	0	0	0	0	0	200	903	0	0	0	0	0	0	0	603	903	0
88	1	29.4892	64.4701	-645.453	78794.8	59791.3	10505.4	292.635	177.923	0	0	0	0	0	0	0	200	903	0	0	0	0	0	0	0	603	903	0
88	2	28.5737	64.1649	-643.622	77787.7	59730.2	10413.9	292.803	179.141	0	0	0	0	0	0	0	200	903	0	0	0	0	0	0	0	603	903	0
88	3	29.0315	63.2494	-640.265	77513.1	59547.1	10047.7	293.004	178.936	0	0	0	0	0	0	0	200	903	0	0	0	0	0	0	0	603	903	0
88	4	29.6418	63.4019	-639.349	77696.1	59486.1	10230.8	293.042	178.476	0	0	0	0	0	0	0	200	903	0	0	0	0	0	0	0	603	903	0
88	5	31.3203	62.7916	-639.044	77329.9	59058.8	9864.58	292.418	178.991	0	0	0	0	0	0	0	200	903	0	0	0	0	0	0	0	603	903	0
88	6	29.7944	62.639	-637.213	75956.6	59303	9681.47	293.066	180.799	0	0	0	0	0	0	0	200	903	0	0	0	0	0	0	0	603	903	0
88	7	28.7263	62.3338	-635.077	76506	59058.8	9635.7	292.995	179.533	0	0	0	0	0	0	0	200	903	0	0	0	0	0	0	0	603	903	0
88	8	28.5737	61.1131	-633.246	76048.2	58753.7	9681.47	292.782	179.907	0	0	0	0	0	0	0	200	903	0	0	0	0	0	0	0	603	903	0
88	9	31.1677	60.3502	-631.109	75132.7	58753.7	9727.25	293.096	180.951	0	0	0	0	0	0	0	200	903	0	0	0	0	0	0	0	603	903	0
89	0	28.8789	60.1976	-627.752	74949.6	58509.5	9544.14	293.205	180.607	0	0	0	0	0	0	0	200	903	0	0	0	0	0	0	0	603	903	0
89	1	29.1841	59.2821	-624.09	75041.1	58570.6	9361.04	293.849	179.759	0	0	0	0	0	0	0	200	903	0	0	0	0	0	0	0	603	903	0
89	2	29.6418	58.3665	-623.785	74949.6	58753.7	9452.59	294.189	179.847	0	0	0	0	0	0	0	200	903	0	0	0	0	0	0	0	603	903	0
89	3	29.3367	58.0614	-622.564	74125.6	58265.4	9223.71	293.589	180.935	0	0	0	0	0	0	0	200	903	0	0	0	0	0	0	0	603	903	0
89	4	30.5574	57.451	-621.954	73484.7	58265.4	9406.82	293.681	181.849	0	0	0	0	0	0	0	200	903	0	0	0	0	0	0	0	603	903	0
89	5	29.4892	56.0777	-620.733	73301.6	57960.2	9406.82	293.374	181.911	0	0	0	0	0	0	0	200	903	0	0	0	0	0	0	0	603	903	0
89	6	29.1841	55.3148	-618.902	72843.9	57594	8903.28	293.058	182.302	0	0	0	0	0	0	0	200	903	0	0	0	0	0	0	0	603	903	0
89	7	28.8789	55.1622	-615.851	72203	57838.1	8949.05	293.916	182.759	0	0	0	0	0	0	0	200	903	0	0	0	0	0	0	0	603	903	0
89	8	29.7944	54.2467	-613.714	72477.7	57716.1	8857.5	294.044	181.903	0	0	0	0	0	0	0	200	903	0	0	0	0	0	0	0	603	903	0
89	9	29.3367	52.8734	-612.494	72203	57594	8765.95	294.032	182.116	0	0	0	0	0	0	0	200	903	0	0	0	0	0	0	0	603	903	0
90	0	29.947	52.4156	-611.883	71470.5	57044.7	8537.06	293.228	183.196	0	0	0	0	0	0	0	200	903	0	0	0	0	0	0	0	603	903	0
90	1	30.0996	51.8053	-607.916	71104.3	57105.7	8537.06	293.937	183.036	0	0	0	0	0	0	0	200	903	0	0	0	0	0	0	0	603	903	0
90	2	30.7099	50.8897	-610.052	71836.8	56556.4	8537.06	292.707	182.245	0	0	0	0	0	0	0	200	903	0	0	0	0	0	0	0	603	903	0
90	3	30.2522	49.669	-607.916	70829.7	56739.5	8537.06	293.334	183.488	0	0	0	0	0	0	0	200	903	0	0	0	0	0	0	0	603	903	0
90	4	30.0996	50.1268	-603.033	70097.3	56556.4	8445.51	293.787	183.759	0	0	0	0	0	0	0	200	903	0	0	0	0	0	0	0	603	903	0
90	5	29.6418	48.4483	-603.643	70188.8	56861.6	8079.3	294.197	183.725	0	0	0	0	0	0	0	200	903	0	0	0	0	0	0	0	603	903	0
90	6	30.0996	47.9906	-602.423	70555	56312.3	8308.18	293.476	182.881	0	0	0	0	0	0	0	200	903	0	0	0	0	0	0	0	603	903	0
90	7	30.0996	47.838	-599.981	70097.3	56739.5	7941.97	294.569	183.168	0	0	0	0	0	0	0	200	903	0	0	0	0	0	0	0	603	903	0
90	8	29.7944	47.5328	-599.066	69273.3	56190.2	8033.52	293.796	184.365	0	0	0	0	0	0	0	200	903	0	0	0	0	0	0	0	603	903	0
90	9	30.4048	46.6173	-596.624	68907.1	56068.1	7896.2	293.976	184.505	0	0	0	0	0	0	0	200	903	0	0	0	0	0	0	0	603	903	0
91	0	30.4048	45.3966	-593.268	68540.9	56190.2	7529.99	294.713	184.469	0	0	0	0	0	0	0	200	903	0	0	0	0	0	0	0	603	903	0
91	1	31.1677	44.7862	-595.404	68632.4	55946	7667.31	293.963	184.73	0	0	0	0	0	0	0	200	903	0	0	0	0	0	0	0	603	903	0
91	2	30.0996	45.0914	-593.268	67533.8	56129.1	7575.76	294.61	186.166	0	0	0	0	0	0	0	200	903	0	0	0	0	0	0	0	603	903	0
91	3	29.4892	43.8707	-593.268	68357.8	55518.8	7529.99	293.581	184.778	0	0	0	0	0	0	0	200	903	0	0	0	0	0	0	0	603	903	0
91	4	29.1841	42.65	-591.436	67900	55640.9	7484.21	294.078	185.195	0	0	0	0	0	0	0	200	903	0	0	0	0	0	0	0	603	903	0
91	5	30.5574	43.1078	-588.995	67167.6	55457.8	7163.77	294.157	185.962	0	0	0	0	0	0	0	200	903	0	0	0	0	0	0	0	603	903	0
91	6	29.3367	42.9552	-586.554	66343.6	55213.6	7346.88	294.132	186.893	0	0	0	0	0	0	0	200	903	0	0	0	0	0	0	0	603	903	0
91	7	29.0315	41.5819	-583.502	67350.7	55091.6	7255.33	294.415	184.575	0	0	0	0	0	0	0	200	903	0	0	0	0	0	0	0	603	903	0
91	8	28.8789	40.9715	-585.333	67350.7	55091.6	7026.44	294.12	184.936	0	0	0	0	0	0	0	200	903	0	0	0	0	0	0	0	603	903	0
91	9	29.4892	40.2086	-583.807	66343.6	55030.5	6614.46	294.261	186.36	0	0	0	0	0	0	0	200	903	0	0	0	0	0	0	0	603	903	0
92	0	30.0996	40.6664	-583.197	66252.1	55030.5	6706.01	294.36	186.398	0	0	0	0	0	0	0	200	903	0	0	0	0	0	0	0	603	903	0
92	1	29.0315	39.9034	-583.502	66435.1	54786.4	6797.56	293.892	186.144	0	0	0	0	0	0	0	200	903	0	0	0	0	0	0	0	603	903	0
92	2	29.1841	39.1405	-577.398	66343.6	54481.2	6614.46	294.356	185.099	0	0	0	0	0	0	0	200	903	0	0	0	0	0	0	0	603	903	0
92	3	27.8108	38.3775	-579.535	65519.6	54664.3	6568.68	294.325	186.944	0	0	0	0	0	0	0	200	903	0	0	0	0	0	0	0	603	903	0
92	4	27.9634	37.6146	-578.009	65245	54359.1	6385.58	294.046	187.121	0	0	0	0	0	0	0	200	903	0	0	0	0	0	0	0	603	903	0
92	5	27.9634	37.6146	-575.872	65611.2	54115	6294.02	293.97	186.067	0	0	0	0	0	0	0	200	903	0	0	0	0	0	0	0	603	903	0
92	6	28.2685	35.1732	-574.652	65428.1	54054	6110.92	294.064	186.143	0	0	0	0	0	0	0	200	903	0	0	0	0	0	0	0	603	903	0
92	7	27.9634	34.868	-572.21	64512.5	53748.8	5927.81	293.932	187.257	0	0	0	0	0	0	0	200	903	0	0	0	0	0	0	0	603	903	0
92	8	27.8108	36.2413	-570.99	64695.6	53809.8	5882.04	294.24	186.696	0	0	0	0	0	0	0	200	903	0	0	0	0	0	0	0	603	903	0
92	9	27.9634	35.0206	-571.905	63413.9	53687.7	5653.15	293.875	189.118	0	0	0	0	0	0	0	200	903	0	0	0	0	0	0	0	603	903	0
93	0	27.9634	34.2577	-570.685	63780.1	53321.5	5744.71	293.434	188.239	0	0	0	0	0	0	0	200	903	0	0	0	0	0	0	0	603	903	0
93	1	27.0478	34.2577	-569.769	63413.9	53382.6	5927.81	293.692	188.702	0	0	0	0	0	0	0	200	903	0	0	0	0	0	0	0	603	903	0
93	2	26.5901	34.1051	-569.159	64146.3	53138.4	5286.94	293.363	187.296	0	0	0	0	0	0	0	200	903	0	0	0	0	0	0	0	603	903	0
93	3	27.5056	32.7318	-565.497	63963.2	53199.5	5332.72	294.076	186.89	0	0	0	0	0	0	0	200	903	0	0	0	0	0	0	0	603	903	0
93	4	27.2004	31.9688	-566.107	63230.8	53199.5	5332.72	293.974	188.306	0	0	0	0	0	0	0	200	903	0	0	0	0	0	0	0	603	903	0
93	5	25.6745	32.274	-561.834	63230.8	52833.2	5058.06	294.037	187.456	0	0	0	0	0	0	0	200	903	0	0	0	0	0	0	0	603	903	0
93	6	26.7427	31.9688	-564.276	63871.7	52833.2	5332.72	293.63	186.808	0	0	0	0	0	0	0	200	903	0	0	0	0	0	0	0	603	903	0
93	7	26.5901	31.0533	-565.802	63413.9	53016.4	4874.96	293.701	187.922	0	0	0	0	0	0	0	200	903	0	0	0	0	0	0	0	603	903	0
93	8	26.7427	30.5956	-563.055	62498.4	52589.1	4874.96	293.4	189.001	0	0	0	0	0	0	0	200	903	0	0	0	0	0	0	0	603	903	0
93	9	26.4375	29.0697	-560.614	62681.5	52345	5195.39	293.371	188.191	0	0	0	0	0	0	0	200	903	0	0	0	0	0	0	0	603	903	0
94	0	25.2168	29.2223	-562.14	63047.7	52283.9	4462.97	293.009	187.843	0	0	0	0	0	0	0	200	903	0	0	0	0	0	0	0	603	903	0
94	1	24.6064	27.3912	-560.919	63047.7	52161.9	4554.52	292.994	187.599	0	0	0	0	0	0	0	200	903	0	0	0	0	0	0	0	603	903	0
94	2	25.0642	28.6119	-558.477	62223.7	52406	4417.19	293.837	188.583	0	0	0	0	0	0	0	200	903	0	0	0	0	0	0	0	603	903	0
94	3	24.6064	27.5438	-559.698	62223.7	51856.7	4234.09	292.651	188.826	0	0	0	0	0	0	0	200	903	0	0	0	0	0	0	0	603	903	0
94	4	25.2168	26.0179	-556.952	62498.4	52039.8	4188.31	293.437	187.785	0	0	0	0	0	0	0	200	903	0	0	0	0	0	0	0	603	903	0
94	5	24.759	26.3231	-557.562	62956.1	51978.8	3822.1	293.225	187.087	0	0	0	0	0	0	0	200	903	0	0	0	0	0	0	0	603	903	0
94	6	24.6064	26.1705	-557.867	62223.7	51856.7	3959.43	292.955	188.461	0	0	0	0	0	0	0	200	903	0	0	0	0	0	0	0	603	903	0
94	7	25.0642	26.0179	-556.952	61949.1	51856.7	4050.98	293.108	188.771	0	0	0	0	0	0	0	200	903	0	0	0	0	0	0	0	603	903	0
94	8	23.8435	24.7972	-556.036	61582.9	51490.5	3776.32	292.603	189.247	0	0	0	0	0	0	0	200	903	0	0	0	0	0	0	0	603	903	0
94	9	24.1487	23.8817	-556.952	61399.8	51368.4	3730.55	292.231	189.757	0	0	0	0	0	0	0	200	903	0	0	0	0	0	0	0	603	903	0
95	0	24.9116	24.492	-553.9	61949.1	51734.6	3730.55	293.401	188.158	0	0	0	0	0	0	0	200	903	0	0	0	0	0	0	0	603	903	0
95	1	24.1487	23.7291	-553.9	61674.4	51551.5	3730.55	293.07	188.654	0	0	0	0	0	0	0	200	903	0	0	0	0	0	0	0	603	903	0
95	2	24.1487	22.661	-550.848	61857.5	51673.6	3593.22	293.807	187.705	0	0	0	0	0	0	0	200	903	0	0	0	0	0	0	0	603	903	0
95	3	23.9961	22.3558	-553.289	61216.7	51734.6	3501.66	293.504	189.359	0	0	0	0	0	0	0	200	903	0	0	0	0	0	0	0	603	903	0
95	4	24.3013	21.898	-552.984	61308.2	51185.3	3593.22	292.562	189.132	0	0	0	0	0	0	0	200	903	0	0	0	0	0	0	0	603	903	0
95	5	23.9961	21.898	-551.764	61766	51246.3	3455.89	292.877	188.057	0	0	0	0	0	0	0	200	903	0	0	0	0	0	0	0	603	903	0
95	6	24.4538	20.8299	-552.679	61399.8	50513.9	3318.56	291.398	188.905	0	0	0	0	0	0	0	200	903	0	0	0	0	0	0	0	603	903	0
95	7	23.6909	19.7618	-552.679	60484.2	51124.3	3135.45	292.503	190.562	0	0	0	0	0	0	0	200	903	0	0	0	0	0	0	0	603	903	0
95	8	22.4702	20.2196	-550.848	60667.3	50636	3089.68	291.924	189.866	0	0	0	0	0	0	0	200	903	0	0	0	0	0	0	0	603	903	0
95	9	22.928	19.9144	-548.102	61125.1	50697	2860.79	292.496	188.479	0	0	0	0	0	0	0	200	903	0	0	0	0	0	0	0	603	903	0
96	0	23.2331	18.5411	-547.186	61033.6	50636	2815.02	292.539	188.459	0	0	0	0	0	0	0	200	903	0	0	0	0	0	0	0	603	903	0
96	1	23.5383	17.1678	-546.576	59843.4	50208.7	2952.35	291.861	190.512	0	0	0	0	0	0	0	200	903	0	0	0	0	0	0	0	603	903	0
96	2	23.6909	17.3204	-546.881	60026.5	50636	2906.57	292.591	190.239	0	0	0	0	0	0	0	200	903	0	0	0	0	0	0	0	603	903	0
96	3	23.9961	18.6937	-547.491	61216.7	50513.9	2723.47	292.264	188.187	0	0	0	0	0	0	0	200	903	0	0	0	0	0	0	0	603	903	0
96	4	24.4538	17.0152	-546.881	60484.2	50391.8	2906.57	292.144	189.401	0	0	0	0	0	0	0	200	903	0	0	0	0	0	0	0	603	903	0
96	5	23.6909	16.8626	-546.27	59934.9	50391.8	2631.91	292.247	190.283	0	0	0	0	0	0	0	200	903	0	0	0	0	0	0	0	603	903	0
96	6	23.3857	15.4893	-546.881	59751.8	50269.8	2815.02	291.921	190.741	0	0	0	0	0	0	0	200	903	0	0	0	0	0	0	0	603	903	0
96	7	22.6228	15.4893	-546.27	60667.3	50452.9	2448.81	292.359	188.943	0	0	0	0	0	0	0	200	903	0	0	0	0	0	0	0	603	903	0
96	8	23.0806	15.3368	-542.608	61033.6	50391.8	2403.03	292.87	187.518	0	0	0	0	0	0	0	200	903	0	0	0	0	0	0	0	603	903	0
96	9	23.2331	15.7945	-543.829	59385.6	50025.6	2677.69	291.988	190.801	0	0	0	0	0	0	0	200	903	0	0	0	0	0	0	0	603	903	0
97	0	23.0806	14.879	-538.336	59934.9	50147.7	2403.03	293.153	188.666	0	0	0	0	0	0	0	200	903	0	0	0	0	0	0	0	603	903	0
97	1	22.928	13.6583	-541.693	59934.9	49903.6	2357.25	292.125	189.356	0	0	0	0	0	0	0	200	903	0	0	0	0	0	0	0	603	903	0
97	2	23.2331	13.0479	-540.777	59110.9	49720.5	2265.7	291.943	190.693	0	0	0	0	0	0	0	200	903	0	0	0	0	0	0	0	603	903	0
97	3	23.3857	13.6583	-542.914	59019.4	49720.5	2128.37	291.581	191.291	0	0	0	0	0	0	0	200	903	0	0	0	0	0	0	0	603	903	0
97	4	23.2331	13.0479	-541.998	58927.8	49842.5	2036.82	291.961	191.277	0	0	0	0	0	0	0	200	903	0	0	0	0	0	0	0	603	903	0
97	5	23.8435	11.2169	-539.251	59294	49659.4	2082.6	292.09	190.044	0	0	0	0	0	0	0	200	903	0	0	0	0	0	0	0	603	903	0
97	6	22.4702	11.3695	-540.472	58836.3	49781.5	1945.27	292.107	191.139	0	0	0	0	0	0	0	200	903	0	0	0	0	0	0	0	603	903	0
97	7	22.6228	12.1324	-540.472	58836.3	49171.1	1853.72	290.978	191.139	0	0	0	0	0	0	0	200	903	0	0	0	0	0	0	0	603	903	0
97	8	24.4538	11.6747	-537.726	59019.4	49781.5	1853.72	292.578	190.243	0	0	0	0	0	0	0	200	903	0	0	0	0	0	0	0	603	903	0
97	9	23.2331	9.99619	-538.946	58836.3	49537.4	1945.27	291.915	190.831	0	0	0	0	0	0	0	200	903	0	0	0	0	0	0	0	603	903	0
98	0	22.3176	9.23325	-537.726	58287	49598.4	1716.39	292.237	191.605	0	0	0	0	0	0	0	200	903	0	0	0	0	0	0	0	603	903	0
98	1	23.0806	9.8436	-537.115	58103.9	49781.5	1487.5	292.683	191.822	0	0	0	0	0	0	0	200	903	0	0	0	0	0	0	0	603	903	0
98	2	23.2331	9.38583	-537.42	58561.6	49781.5	1441.73	292.63	191.032	0	0	0	0	0	0	0	200	903	0	0	0	0	0	0	0	603	903	0
98	3	23.6909	8.01254	-538.641	58470.1	49964.6	1441.73	292.761	191.449	0	0	0	0	0	0	0	200	903	0	0	0	0	0	0	0	603	903	0
98	4	23.5383	6.79184	-538.031	57554.6	49354.2	1762.16	291.731	193.027	0	0	0	0	0	0	0	200	903	0	0	0	0	0	0	0	603	903	0
98	5	22.928	7.55478	-535.894	57554.6	49415.3	1167.07	292.211	192.601	0	0	0	0	0	0	0	200	903	0	0	0	0	0	0	0	603	903	0
98	6	22.3176	7.2496	-537.726	58195.4	48866	1258.62	290.875	191.775	0	0	0	0	0	0	0	200	903	0	0	0	0	0	0	0	603	903	0
98	7	22.4702	6.63925	-537.115	57188.3	49293.2	1212.85	291.774	193.527	0	0	0	0	0	0	0	200	903	0	0	0	0	0	0	0	603	903	0
98	8	22.928	5.87631	-535.589	57005.2	49354.2	1167.07	292.149	193.565	0	0	0	0	0	0	0	200	903	0	0	0	0	0	0	0	603	903	0
98	9	22.0124	6.0289	-535.284	56730.6	49232.2	1258.62	291.974	194.018	0	0	0	0	0	0	0	200	903	0	0	0	0	0	0	0	603	903	0
99	0	21.8598	5.87631	-533.148	57279.9	49049.1	800.859	291.999	192.563	0	0	0	0	0	0	0	200	903	0	0	0	0	0	0	0	603	903	0
99	1	21.5547	5.11337	-533.453	57188.3	49354.2	938.188	292.518	192.796	0	0	0	0	0	0	0	200	903	0	0	0	0	0	0	0	603	903	0
99	2	23.0806	4.35043	-533.453	56639	49110.1	892.411	292.061	193.826	0	0	0	0	0	0	0	200	903	0	0	0	0	0	0	0	603	903	0
99	3	22.3176	4.8082	-535.589	55815	49110.1	1121.29	291.694	195.788	0	0	0	0	0	0	0	200	903	0	0	0	0	0	0	0	603	903	0
99	4	22.165	4.19785	-536.505	57005.2	49415.3	617.753	292.106	193.747	0	0	0	0	0	0	0	200	903	0	0	0	0	0	0	0	603	903	0
99	5	22.7754	3.89267	-534.063	56547.5	49537.4	663.529	292.756	194.118	0	0	0	0	0	0	0	200	903	0	0	0	0	0	0	0	603	903	0
99	6	21.0969	2.82455	-535.284	56181.2	49293.2	571.977	292.088	195.044	0	0	0	0	0	0	0	200	903	0	0	0	0	0	0	0	603	903	0
99	7	21.2495	3.28232	-535.894	56089.7	48927	571.977	291.3	195.334	0	0	0	0	0	0	0	200	903	0	0	0	0	0	0	0	603	903	0
99	8	20.6391	2.67197	-533.758	56181.2	48927	480.424	291.665	194.744	0	0	0	0	0	0	0	200	903	0	0	0	0	0	0	0	603	903	0
99	9	20.7917	1.60385	-533.148	56272.8	48927	251.542	291.77	194.452	0	0	0	0	0	0	0	200	903	0	0	0	0	0	0	0	603	903	0
100	0	20.334	1.60385	-528.57	55540.4	48866	297.318	292.449	194.923	0	0	0	0	0	0	0	200	903	0	0	0	0	0	0	0	603	903	0
100	1	21.2495	1.29868	-534.063	55082.6	48804.9	205.766	291.384	196.861	0	0	0	0	0	0	0	200	903	0	0	0	0	0	0	0	603	903	0
100	2	20.6391	0.688324	-532.843	55631.9	49049.1	114.213	292.052	195.594	0	0	0	0	0	0	0	200	903	0	0	0	0	0	0	0	603	903	0
100	3	21.0969	0.840912	-535.284	55723.5	48682.9	22.6601	290.948	195.899	0	0	0	0	0	0	0	200	903	0	0	0	0	0	0	0	603	903	0
100	4	20.4866	0.535736	-534.063	55174.2	49049.1	434.647	291.841	196.69	0	0	0	0	0	0	0	200	903	0	0	0	0	0	0	0	603	903	0
100	5	20.6391	0.535736	-532.232	54716.4	48988	-206.222	292.043	197.195	0	0	0	0	0	0	0	200	903	0	0	0	0	0	0	0	603	903	0
100	6	19.571	0.0779722	-535.894	55448.8	49110.1	68.4364	291.641	196.53	0	0	0	0	0	0	0	200	903	0	0	0	0	0	0	0	603	903	0
100	7	19.4184	-0.684967	-535.589	54991.1	49110.1	-251.998	291.694	197.326	0	0	0	0	0	0	0	200	903	0	0	0	0	0	0	0	603	903	0
100	8	20.1814	-0.990143	-533.758	54624.9	49049.1	-343.551	291.894	197.66	0	0	0	0	0	0	0	200	903	0	0	0	0	0	0	0	603	903	0
100	9	19.2659	-0.837555	-533.148	54441.8	49232.2	-389.327	292.342	197.886	0	0	0	0	0	0	0	200	903	0	0	0	0	0	0	0	603	903	0
101	0	19.571	-1.14273	-533.453	54624.9	49049.1	-389.327	291.946	197.601	0	0	0	0	0	0	0	200	903	0	0	0	0	0	0	0	603	903	0
101	1	19.2659	-2.21085	-534.369	54441.8	48743.9	-435.104	291.218	198.119	0	0	0	0	0	0	0	200	903	0	0	0	0	0	0	0	603	903	0
101	2	19.2659	-2.36343	-534.063	54075.5	49110.1	-480.88	291.956	198.747	0	0	0	0	0	0	0	200	903	0	0	0	0	0	0	0	603	903	0
101	3	20.6391	-1.75308	-534.369	53984	49354.2	-435.104	292.36	198.976	0	0	0	0	0	0	0	200	903	0	0	0	0	0	0	0	603	903	0
101	4	18.9607	-2.21085	-535.894	54167.1	49354.2	-663.985	292.097	198.922	0	0	0	0	0	0	0	200	903	0	0	0	0	0	0	0	603	903	0
101	5	19.1133	-3.27896	-536.2	54258.7	49293.2	-526.656	291.931	198.809	0	0	0	0	0	0	0	200	903	0	0	0	0	0	0	0	603	903	0
101	6	18.3503	-3.88931	-536.505	53526.2	48866	-847.091	291.082	200.232	0	0	0	0	0	0	0	200	903	0	0	0	0	0	0	0	603	903	0
101	7	18.3503	-3.43155	-537.42	53434.7	48804.9	-1030.2	290.813	200.572	0	0	0	0	0	0	0	200	903	0	0	0	0	0	0	0	603	903	0
101	8	17.5874	-2.8212	-533.148	53984	49232.2	-1167.53	292.342	198.745	0	0	0	0	0	0	0	200	903	0	0	0	0	0	0	0	603	903	0
101	9	18.3503	-5.11002	-536.81	53709.3	49476.3	-1030.2	292.167	199.947	0	0	0	0	0	0	0	200	903	0	0	0	0	0	0	0	603	903	0
102	0	18.0452	-3.73673	-537.42	53160	49293.2	-1167.53	291.722	201.083	0	0	0	0	0	0	0	200	903	0	0	0	0	0	0	0	603	903	0
102	1	18.8081	-3.73673	-536.81	53160	48621.8	-1121.75	290.576	200.971	0	0	0	0	0	0	0	200	903	0	0	0	0	0	0	0	603	903	0
102	2	18.8081	-5.2626	-537.115	52702.2	49720.5	-1213.3	292.569	201.879	0	0	0	0	0	0	0	200	903	0	0	0	0	0	0	0	603	903	0
102	3	19.8762	-4.80484	-539.251	52427.6	49659.4	-1350.63	292.09	202.777	0	0	0	0	0	0	0	200	903	0	0	0	0	0	0	0	603	903	0
102	4	18.8081	-4.95743	-540.777	52519.1	49415.3	-801.315	291.378	202.882	0	0	0	0	0	0	0	200	903	0	0	0	0	0	0	0	603	903	0
102	5	18.8081	-5.41519	-537.726	53343.1	49781.5	-1304.85	292.578	200.799	0	0	0	0	0	0	0	200	903	0	0	0	0	0	0	0	603	903	0
102	6	18.1977	-6.17813	-539.557	52976.9	49720.5	-1442.18	292.151	201.814	0	0	0	0	0	0	0	200	903	0	0	0	0	0	0	0	603	903	0
102	7	17.8926	-6.48331	-541.082	52244.5	49903.6	-1442.18	292.229	203.444	0	0	0	0	0	0	0	200	903	0	0	0	0	0	0	0	603	903	0
102	8	18.3503	-6.02554	-540.167	52336	49964.6	-1625.29	292.498	203.111	0	0	0	0	0	0	0	200	903	0	0	0	0	0	0	0	603	903	0
102	9	17.74	-6.63589	-540.777	52793.8	49415.3	-1442.18	291.378	202.374	0	0	0	0	0	0	0	200	903	0	0	0	0	0	0	0	603	903	0
103	0	19.7236	-6.78848	-540.472	52427.6	50086.7	-1579.51	292.672	202.997	0	0	0	0	0	0	0	200	903	0	0	0	0	0	0	0	603	903	0
103	1	18.9607	-7.39883	-540.167	51878.3	49842.5	-1854.17	292.272	203.959	0	0	0	0	0	0	0	200	903	0	0	0	0	0	0	0	603	903	0
103	2	19.1133	-7.39883	-542.303	51512.1	50208.7	-1716.84	292.584	205.012	0	0	0	0	0	0	0	200	903	0	0	0	0	0	0	0	603	903	0
103	3	19.2659	-7.55142	-545.05	52610.7	50147.7	-1716.84	292.006	203.475	0	0	0	0	0	0	0	200	903	0	0	0	0	0	0	0	603	903	0
103	4	18.8081	-7.8566	-544.439	52152.9	49598.4	-1945.72	291.1	204.208	0	0	0	0	0	0	0	200	903	0	0	0	0	0	0	0	603	903	0
103	5	18.5029	-8.31436	-540.777	52519.1	50697	-1625.29	293.748	202.882	0	0	0	0	0	0	0	200	903	0	0	0	0	0	0	0	603	903	0
103	6	18.5029	-7.70401	-545.965	52061.4	50452.9	-1991.5	292.41	204.643	0	0	0	0	0	0	0	200	903	0	0	0	0	0	0	0	603	903	0
103	7	19.1133	-7.8566	-546.576	51512.1	50391.8	-1854.17	292.196	205.755	0	0	0	0	0	0	0	200	903	0	0	0	0	0	0	0	603	903	0
103	8	19.1133	-9.22989	-545.66	52244.5	50697	-1808.4	292.91	204.255	0	0	0	0	0	0	0	200	903	0	0	0	0	0	0	0	603	903	0
103	9	19.4184	-9.38248	-546.881	52427.6	50880.1	-2037.28	293.037	204.133	0	0	0	0	0	0	0	200	903	0	0	0	0	0	0	0	603	903	0
104	0	19.2659	-8.31436	-546.881	51786.7	51246.3	-1945.72	293.707	205.305	0	0	0	0	0	0	0	200	903	0	0	0	0	0	0	0	603	903	0
104	1	19.7236	-9.22989	-548.102	50962.8	50941.2	-1991.5	292.941	207.02	0	0	0	0	0	0	0	200	903	0	0	0	0	0	0	0	603	903	0
104	2	20.0288	-10.298	-549.933	51878.3	50636	-1762.62	292.077	205.664	0	0	0	0	0	0	0	200	903	0	0	0	0	0	0	0	603	903	0
104	3	19.7236	-9.99283	-550.543	51420.5	51002.2	-2174.61	292.64	206.6	0	0	0	0	0	0	0	200	903	0	0	0	0	0	0	0	603	903	0
104	4	19.571	-9.99283	-550.238	50871.2	50941.2	-2311.94	292.58	207.547	0	0	0	0	0	0	0	200	903	0	0	0	0	0	0	0	603	903	0
104	5	19.7236	-9.68765	-551.764	51054.3	51185.3	-2266.16	292.767	207.471	0	0	0	0	0	0	0	200	903	0	0	0	0	0	0	0	603	903	0
104	6	19.2659	-10.9084	-553.595	51420.5	51063.2	-2220.38	292.239	207.115	0	0	0	0	0	0	0	200	903	0	0	0	0	0	0	0	603	903	0
104	7	19.7236	-11.6713	-553.9	50779.6	50941.2	-2678.15	291.968	208.323	0	0	0	0	0	0	0	200	903	0	0	0	0	0	0	0	603	903	0
104	8	20.334	-10.6032	-552.374	50596.5	51612.5	-2678.15	293.438	208.402	0	0	0	0	0	0	0	200	903	0	0	0	0	0	0	0	603	903	0
104	9	20.0288	-10.7558	-553.289	51329	51551.5	-2357.71	293.173	207.229	0	0	0	0	0	0	0	200	903	0	0	0	0	0	0	0	603	903	0
105	0	20.4866	-12.5868	-551.458	51329	51429.4	-2449.26	293.261	206.921	0	0	0	0	0	0	0	200	903	0	0	0	0	0	0	0	603	903	0
105	1	20.7917	-12.4342	-555.731	50505	51917.7	-2586.59	293.422	209.12	0	0	0	0	0	0	0	200	903	0	0	0	0	0	0	0	603	903	0
105	2	21.0969	-11.6713	-556.341	50596.5	51612.5	-2357.71	292.771	209.055	0	0	0	0	0	0	0	200	903	0	0	0	0	0	0	0	603	903	0
105	3	22.0124	-11.8239	-556.646	50962.8	51978.8	-2723.92	293.378	208.447	0	0	0	0	0	0	0	200	903	0	0	0	0	0	0	0	603	903	0
105	4	21.4021	-13.1972	-557.562	50871.2	51490.5	-2632.37	292.349	208.761	0	0	0	0	0	0	0	200	903	0	0	0	0	0	0	0	603	903	0
105	5	20.9443	-13.8075	-560.919	50138.8	51368.4	-2403.49	291.579	210.613	0	0	0	0	0	0	0	200	903	0	0	0	0	0	0	0	603	903	0
105	6	20.1814	-12.892	-559.698	50230.3	52222.9	-2769.7	293.305	210.255	0	0	0	0	0	0	0	200	903	0	0	0	0	0	0	0	603	903	0
105	7	20.334	-13.6549	-561.224	50779.6	52283.9	-2861.25	293.161	209.52	0	0	0	0	0	0	0	200	903	0	0	0	0	0	0	0	603	903	0
105	8	20.334	-15.3334	-560.614	50413.4	52283.9	-2815.48	293.262	210.075	0	0	0	0	0	0	0	200	903	0	0	0	0	0	0	0	603	903	0
105	9	20.9443	-14.7231	-561.224	49955.7	52345	-2632.37	293.269	210.988	0	0	0	0	0	0	0	200	903	0	0	0	0	0	0	0	603	903	0
106	0	20.4866	-15.1808	-562.14	49772.6	52222.9	-2952.8	292.9	211.459	0	0	0	0	0	0	0	200	903	0	0	0	0	0	0	0	603	903	0
106	1	22.165	-14.8756	-563.36	50871.2	52345	-3090.13	292.916	209.7	0	0	0	0	0	0	0	200	903	0	0	0	0	0	0	0	603	903	0
106	2	21.8598	-15.486	-564.886	50688.1	52283.9	-3135.91	292.557	210.268	0	0	0	0	0	0	0	200	903	0	0	0	0	0	0	0	603	903	0
106	3	21.8598	-15.1808	-564.276	50230.3	52772.2	-3090.13	293.522	210.983	0	0	0	0	0	0	0	200	903	0	0	0	0	0	0	0	603	903	0
106	4	21.7073	-15.486	-567.022	50047.2	52894.3	-3273.24	293.284	211.737	0	0	0	0	0	0	0	200	903	0	0	0	0	0	0	0	603	903	0
106	5	22.165	-16.8593	-569.769	49681	53077.4	-3227.46	293.156	212.805	0	0	0	0	0	0	0	200	903	0	0	0	0	0	0	0	603	903	0
106	6	21.2495	-16.5541	-566.717	49955.7	53138.4	-3135.91	293.765	211.851	0	0	0	0	0	0	0	200	903	0	0	0	0	0	0	0	603	903	0
106	7	21.2495	-16.8593	-570.685	50047.2	53504.6	-3456.34	293.755	212.303	0	0	0	0	0	0	0	200	903	0	0	0	0	0	0	0	603	903	0
106	8	22.0124	-17.4696	-571.6	50413.4	53443.6	-3364.79	293.498	211.803	0	0	0	0	0	0	0	200	903	0	0	0	0	0	0	0	603	903	0
106	9	21.7073	-17.9274	-571.295	50321.9	53199.5	-3502.12	293.121	211.916	0	0	0	0	0	0	0	200	903	0	0	0	0	0	0	0	603	903	0
107	0	21.4021	-18.5378	-571.6	49955.7	53565.7	-3731	293.712	212.604	0	0	0	0	0	0	0	200	903	0	0	0	0	0	0	0	603	903	0
107	1	22.0124	-18.3852	-572.21	50138.8	53443.6	-3593.67	293.399	212.377	0	0	0	0	0	0	0	200	903	0	0	0	0	0	0	0	603	903	0
107	2	22.0124	-19.911	-573.126	50047.2	53443.6	-3685.23	293.249	212.677	0	0	0	0	0	0	0	200	903	0	0	0	0	0	0	0	603	903	0
107	3	22.165	-20.674	-574.347	49955.7	53809.8	-3822.56	293.689	213.022	0	0	0	0	0	0	0	200	903	0	0	0	0	0	0	0	603	903	0
107	4	22.3176	-20.3688	-576.788	49772.6	53565.7	-4005.66	292.869	213.707	0	0	0	0	0	0	0	200	903	0	0	0	0	0	0	0	603	903	0
107	5	22.6228	-20.3688	-578.314	49864.1	53992.9	-4097.21	293.363	213.777	0	0	0	0	0	0	0	200	903	0	0	0	0	0	0	0	603	903	0
107	6	23.0806	-20.674	-575.567	50138.8	54115	-4142.99	294.02	212.888	0	0	0	0	0	0	0	200	903	0	0	0	0	0	0	0	603	903	0
107	7	22.3176	-22.1999	-580.145	50047.2	53687.7	-3639.45	292.542	213.733	0	0	0	0	0	0	0	200	903	0	0	0	0	0	0	0	603	903	0
107	8	22.0124	-22.9628	-580.45	49589.4	54115	-4371.87	293.229	214.567	0	0	0	0	0	0	0	200	903	0	0	0	0	0	0	0	603	903	0
107	9	23.0806	-22.505	-580.45	49864.1	54054	-4554.98	293.124	214.094	0	0	0	0	0	0	0	200	903	0	0	0	0	0	0	0	603	903	0
108	0	23.0806	-22.6576	-581.366	50047.2	54176	-4280.32	293.188	213.914	0	0	0	0	0	0	0	200	903	0	0	0	0	0	0	0	603	903	0
108	1	23.3857	-23.8783	-582.281	49955.7	54359.1	-4371.87	293.355	214.207	0	0	0	0	0	0	0	200	903	0	0	0	0	0	0	0	603	903	0
108	2	23.6909	-24.7939	-583.502	49497.9	54481.2	-4234.54	293.369	215.171	0	0	0	0	0	0	0	200	903	0	0	0	0	0	0	0	603	903	0
108	3	23.5383	-24.9464	-584.112	49497.9	54542.2	-4554.98	293.376	215.26	0	0	0	0	0	0	0	200	903	0	0	0	0	0	0	0	603	903	0
108	4	24.4538	-25.099	-583.502	50230.3	54969.5	-4417.65	294.206	213.916	0	0	0	0	0	0	0	200	903	0	0	0	0	0	0	0	603	903	0
108	5	23.8435	-26.1671	-587.774	49589.4	54908.4	-4692.31	293.418	215.632	0	0	0	0	0	0	0	200	903	0	0	0	0	0	0	0	603	903	0
108	6	24.3013	-26.9301	-588.69	49223.2	55457.8	-4646.53	294.205	216.385	0	0	0	0	0	0	0	200	903	0	0	0	0	0	0	0	603	903	0
108	7	23.3857	-27.2353	-590.216	49131.7	54847.4	-4875.41	292.928	216.756	0	0	0	0	0	0	0	200	903	0	0	0	0	0	0	0	603	903	0
108	8	23.3857	-27.8456	-589.911	49772.6	55091.6	-4554.98	293.39	215.627	0	0	0	0	0	0	0	200	903	0	0	0	0	0	0	0	603	903	0
108	9	24.9116	-28.6086	-588.69	49589.4	55335.7	-5241.62	293.998	215.763	0	0	0	0	0	0	0	200	903	0	0	0	0	0	0	0	603	903	0
109	0	23.5383	-29.3715	-590.826	48582.4	55518.8	-4966.97	293.968	217.772	0	0	0	0	0	0	0	200	903	0	0	0	0	0	0	0	603	903	0
109	1	23.8435	-29.6767	-591.131	48765.5	55579.8	-4966.97	294.023	217.505	0	0	0	0	0	0	0	200	903	0	0	0	0	0	0	0	603	903	0
109	2	24.759	-28.9137	-592.657	49497.9	55640.9	-5516.28	293.884	216.481	0	0	0	0	0	0	0	200	903	0	0	0	0	0	0	0	603	903	0
109	3	24.4538	-31.6603	-593.878	49131.7	55824	-5195.85	293.999	217.27	0	0	0	0	0	0	0	200	903	0	0	0	0	0	0	0	603	903	0
109	4	24.9116	-30.5922	-595.099	48582.4	55640.9	-4829.64	293.499	218.362	0	0	0	0	0	0	0	200	903	0	0	0	0	0	0	0	603	903	0
109	5	25.3694	-31.6603	-596.93	48124.6	56068.1	-5287.4	293.928	219.38	0	0	0	0	0	0	0	200	903	0	0	0	0	0	0	0	603	903	0
109	6	25.522	-31.6603	-594.183	49314.8	56068.1	-5195.85	294.362	217.004	0	0	0	0	0	0	0	200	903	0	0	0	0	0	0	0	603	903	0
109	7	24.4538	-33.0336	-598.761	49223.2	55946	-5653.61	293.436	217.791	0	0	0	0	0	0	0	200	903	0	0	0	0	0	0	0	603	903	0
109	8	24.9116	-32.7284	-599.371	48307.7	56739.5	-5653.61	294.665	219.403	0	0	0	0	0	0	0	200	903	0	0	0	0	0	0	0	603	903	0
109	9	26.7427	-34.8647	-599.066	48124.6	56190.2	-5607.83	293.796	219.667	0	0	0	0	0	0	0	200	903	0	0	0	0	0	0	0	603	903	0
110	0	25.6745	-34.8647	-598.456	48399.3	56495.4	-5653.61	294.402	219.126	0	0	0	0	0	0	0	200	903	0	0	0	0	0	0	0	603	903	0
110	1	24.6064	-35.3224	-597.845	48490.8	56800.5	-6019.82	295.009	218.891	0	0	0	0	0	0	0	200	903	0	0	0	0	0	0	0	603	903	0
110	2	25.6745	-34.4069	-599.981	47666.9	56373.3	-5790.94	293.958	220.553	0	0	0	0	0	0	0	200	903	0	0	0	0	0	0	0	603	903	0
110	3	26.8953	-36.3905	-600.897	47209.1	56983.6	-5836.72	294.831	221.436	0	0	0	0	0	0	0	200	903	0	0	0	0	0	0	0	603	903	0
110	4	26.1323	-35.3224	-602.423	47941.5	56739.5	-5882.49	294.186	220.419	0	0	0	0	0	0	0	200	903	0	0	0	0	0	0	0	603	903	0
110	5	25.8271	-38.5268	-605.169	47850	56678.5	-6157.15	293.657	220.931	0	0	0	0	0	0	0	200	903	0	0	0	0	0	0	0	603	903	0
110	6	25.6745	-36.6957	-604.559	47300.6	57288.8	-6477.59	294.761	221.76	0	0	0	0	0	0	0	200	903	0	0	0	0	0	0	0	603	903	0
110	7	25.9797	-38.2216	-606.39	46934.4	57105.7	-6157.15	294.173	222.6	0	0	0	0	0	0	0	200	903	0	0	0	0	0	0	0	603	903	0
110	8	26.7427	-38.2216	-607.306	47209.1	57288.8	-6202.93	294.333	222.265	0	0	0	0	0	0	0	200	903	0	0	0	0	0	0	0	603	903	0
110	9	26.2849	-38.3742	-606.695	47483.8	57533	-6431.81	294.83	221.734	0	0	0	0	0	0	0	200	903	0	0	0	0	0	0	0	603	903	0
111	0	26.4375	-39.1371	-607	46659.8	57227.8	-6294.48	294.28	223.131	0	0	0	0	0	0	0	200	903	0	0	0	0	0	0	0	603	903	0
111	1	27.5056	-37.9164	-608.221	46476.7	57960.2	-6431.81	295.295	223.586	0	0	0	0	0	0	0	200	903	0	0	0	0	0	0	0	603	903	0
111	2	27.9634	-38.5268	-610.052	46934.4	57899.2	-5882.49	294.909	223.065	0	0	0	0	0	0	0	200	903	0	0	0	0	0	0	0	603	903	0
111	3	29.4892	-40.3578	-611.578	46568.2	57594	-6248.7	294.173	223.856	0	0	0	0	0	0	0	200	903	0	0	0	0	0	0	0	603	903	0
111	4	27.353	-40.5104	-611.883	46018.9	57899.2	-6386.03	294.625	224.791	0	0	0	0	0	0	0	200	903	0	0	0	0	0	0	0	603	903	0
111	5	27.5056	-39.9001	-613.714	46018.9	57838.1	-6569.14	294.243	225.016	0	0	0	0	0	0	0	200	903	0	0	0	0	0	0	0	603	903	0
111	6	27.8108	-40.2052	-613.409	45927.3	57960.2	-6569.14	294.489	225.128	0	0	0	0	0	0	0	200	903	0	0	0	0	0	0	0	603	903	0
111	7	27.353	-41.5785	-613.714	45652.7	58265.4	-6660.69	294.939	225.612	0	0	0	0	0	0	0	200	903	0	0	0	0	0	0	0	603	903	0
111	8	28.116	-42.1889	-612.799	44828.7	58082.3	-6660.69	294.782	226.846	0	0	0	0	0	0	0	200	903	0	0	0	0	0	0	0	603	903	0
111	9	26.7427	-41.5785	-614.935	45011.8	58692.6	-7072.68	295.445	226.802	0	0	0	0	0	0	0	200	903	0	0	0	0	0	0	0	603	903	0
112	0	27.2004	-41.7311	-616.156	45652.7	58570.6	-6935.35	295.058	225.907	0	0	0	0	0	0	0	200	903	0	0	0	0	0	0	0	603	903	0
112	1	28.5737	-43.1044	-616.156	45103.4	58143.3	-6889.57	294.365	226.799	0	0	0	0	0	0	0	200	903	0	0	0	0	0	0	0	603	903	0
112	2	28.116	-43.257	-617.682	44645.6	58875.7	-7210.01	295.317	227.721	0	0	0	0	0	0	0	200	903	0	0	0	0	0	0	0	603	903	0
112	3	28.8789	-43.257	-620.733	44279.4	59119.9	-6981.13	295.242	228.666	0	0	0	0	0	0	0	200	903	0	0	0	0	0	0	0	603	903	0
112	4	28.5737	-43.257	-622.259	45194.9	59119.9	-7026.9	295.008	227.37	0	0	0	0	0	0	0	200	903	0	0	0	0	0	0	0	603	903	0
112	5	29.947	-44.0199	-620.733	44462.5	59303	-7164.23	295.537	228.371	0	0	0	0	0	0	0	200	903	0	0	0	0	0	0	0	603	903	0
112	6	28.7263	-44.9355	-623.175	43730.1	59486.1	-6935.35	295.457	229.827	0	0	0	0	0	0	0	200	903	0	0	0	0	0	0	0	603	903	0
112	7	27.6582	-45.851	-625.616	43638.5	59425	-7072.68	294.986	230.247	0	0	0	0	0	0	0	200	903	0	0	0	0	0	0	0	603	903	0
112	8	28.5737	-45.6984	-625.006	44279.4	59791.3	-7118.45	295.665	229.154	0	0	0	0	0	0	0	200	903	0	0	0	0	0	0	0	603	903	0
112	9	28.7263	-47.5294	-625.006	44004.7	59791.3	-7255.78	295.665	229.593	0	0	0	0	0	0	0	200	903	0	0	0	0	0	0	0	603	903	0
113	0	28.7263	-46.3087	-622.259	42814.5	60218.5	-6431.81	296.774	231.195	0	0	0	0	0	0	0	200	903	0	0	0	0	0	0	0	603	903	0
113	1	29.4892	-48.1398	-626.837	42539.9	60401.6	-7484.67	296.359	232.136	0	0	0	0	0	0	0	200	903	0	0	0	0	0	0	0	603	903	0
113	2	28.8789	-46.0036	-628.973	43272.3	60096.4	-7301.56	295.547	231.202	0	0	0	0	0	0	0	200	903	0	0	0	0	0	0	0	603	903	0
113	3	29.3367	-49.3605	-629.889	42906.1	60462.6	-7530.44	295.989	231.883	0	0	0	0	0	0	0	200	903	0	0	0	0	0	0	0	603	903	0
113	4	30.2522	-47.3769	-630.194	42448.3	60584.7	-7484.67	296.137	232.642	0	0	0	0	0	0	0	200	903	0	0	0	0	0	0	0	603	903	0
113	5	30.2522	-48.2924	-632.635	41715.9	60096.4	-7393.11	294.994	234.06	0	0	0	0	0	0	0	200	903	0	0	0	0	0	0	0	603	903	0
113	6	29.947	-50.1234	-633.551	42356.8	60584.7	-7118.45	295.627	233.144	0	0	0	0	0	0	0	200	903	0	0	0	0	0	0	0	603	903	0
113	7	30.0996	-49.6657	-635.382	42356.8	60767.8	-7530.44	295.64	233.336	0	0	0	0	0	0	0	200	903	0	0	0	0	0	0	0	603	903	0
113	8	29.947	-49.3605	-635.382	41258.2	60950.9	-7621.99	295.928	235.066	0	0	0	0	0	0	0	200	903	0	0	0	0	0	0	0	603	903	0
113	9	30.8625	-49.6657	-636.602	41166.6	61195.1	-7301.56	296.128	235.334	0	0	0	0	0	0	0	200	903	0	0	0	0	0	0	0	603	903	0
114	0	31.3203	-49.5131	-639.349	41075.1	61012	-7347.34	295.428	235.755	0	0	0	0	0	0	0	200	903	0	0	0	0	0	0	0	603	903	0
114	1	31.3203	-51.039	-639.349	41075.1	61439.2	-7530.44	296.096	235.755	0	0	0	0	0	0	0	200	903	0	0	0	0	0	0	0	603	903	0
114	2	31.3203	-49.9709	-644.537	40800.4	61622.3	-7713.55	295.607	236.698	0	0	0	0	0	0	0	200	903	0	0	0	0	0	0	0	603	903	0
114	3	31.4729	-50.8864	-643.316	40068	61744.4	-7667.77	295.978	237.717	0	0	0	0	0	0	0	200	903	0	0	0	0	0	0	0	603	903	0
114	4	31.9307	-51.1916	-643.927	40251.1	62049.6	-7667.77	296.361	237.491	0	0	0	0	0	0	0	200	903	0	0	0	0	0	0	0	603	903	0
114	5	31.1677	-52.1071	-646.063	40251.1	62049.6	-7576.22	296.043	237.698	0	0	0	0	0	0	0	200	903	0	0	0	0	0	0	0	603	903	0
114	6	31.1677	-51.4967	-647.894	39610.2	61622.3	-7805.1	295.112	238.863	0	0	0	0	0	0	0	200	903	0	0	0	0	0	0	0	603	903	0
114	7	32.0832	-52.2597	-646.063	39335.5	62598.9	-7530.44	296.893	239.115	0	0	0	0	0	0	0	200	903	0	0	0	0	0	0	0	603	903	0
114	8	31.3203	-51.8019	-647.894	39244	62720.9	-7988.21	296.807	239.428	0	0	0	0	0	0	0	200	903	0	0	0	0	0	0	0	603	903	0
114	9	31.4729	-52.87	-646.368	39060.9	62598.9	-7850.88	296.847	239.569	0	0	0	0	0	0	0	200	903	0	0	0	0	0	0	0	603	903	0
115	0	32.6936	-53.3278	-650.946	38420	62843	-7988.21	296.541	240.978	0	0	0	0	0	0	0	200	903	0	0	0	0	0	0	0	603	903	0
115	1	32.541	-52.7174	-654.303	38328.5	63087.2	-8079.76	296.419	241.421	0	0	0	0	0	0	0	200	903	0	0	0	0	0	0	0	603	903	0
115	2	33.6091	-53.1752	-656.134	38603.1	63514.4	-8079.76	296.801	241.166	0	0	0	0	0	0	0	200	903	0	0	0	0	0	0	0	603	903	0
115	3	33.6091	-54.3959	-658.575	38603.1	63758.5	-8079.76	296.813	241.384	0	0	0	0	0	0	0	200	903	0	0	0	0	0	0	0	603	903	0
115	4	32.8462	-53.9381	-660.101	37779.2	63758.5	-7988.21	296.589	242.768	0	0	0	0	0	0	0	200	903	0	0	0	0	0	0	0	603	903	0
115	5	32.8462	-55.1588	-661.322	37412.9	64063.7	-7988.21	296.872	243.427	0	0	0	0	0	0	0	200	903	0	0	0	0	0	0	0	603	903	0
115	6	32.541	-54.7011	-662.542	38053.8	64491	-8217.09	297.339	242.564	0	0	0	0	0	0	0	200	903	0	0	0	0	0	0	0	603	903	0
115	7	32.541	-55.0063	-661.322	37779.2	64246.8	-7942.43	297.149	242.873	0	0	0	0	0	0	0	200	903	0	0	0	0	0	0	0	603	903	0
115	8	33.4565	-55.464	-663.763	36863.6	64674.1	-7850.88	297.435	244.463	0	0	0	0	0	0	0	200	903	0	0	0	0	0	0	0	603	903	0
115	9	32.541	-55.3114	-665.289	36222.8	64674.1	-7759.32	297.212	245.553	0	0	0	0	0	0	0	200	903	0	0	0	0	0	0	0	603	903	0
116	0	34.2195	-56.5321	-667.425	36222.8	64979.3	-8079.76	297.358	245.728	0	0	0	0	0	0	0	200	903	0	0	0	0	0	0	0	603	903	0
116	1	34.2195	-56.3795	-666.205	36955.2	65345.5	-8033.98	298.086	244.529	0	0	0	0	0	0	0	200	903	0	0	0	0	0	0	0	603	903	0
116	2	34.3721	-56.5321	-668.951	35215.7	65345.5	-8171.31	297.683	247.357	0	0	0	0	0	0	0	200	903	0	0	0	0	0	0	0	603	903	0
116	3	35.8979	-56.9899	-671.698	35765	65650.6	-7805.1	297.738	246.754	0	0	0	0	0	0	0	200	903	0	0	0	0	0	0	0	603	903	0
116	4	33.7617	-57.2951	-674.139	34941	65711.7	-8354.42	297.475	248.169	0	0	0	0	0	0	0	200	903	0	0	0	0	0	0	0	603	903	0
116	5	35.2876	-57.6003	-675.665	35398.8	65711.7	-8171.31	297.255	247.609	0	0	0	0	0	0	0	200	903	0	0	0	0	0	0	0	603	903	0
116	6	34.9824	-56.9899	-675.97	34117.1	66200	-8079.76	297.933	249.529	0	0	0	0	0	0	0	200	903	0	0	0	0	0	0	0	603	903	0
116	7	34.8298	-57.4477	-678.717	33842.4	66261	-8217.09	297.627	250.138	0	0	0	0	0	0	0	200	903	0	0	0	0	0	0	0	603	903	0
116	8	36.2031	-58.058	-679.632	34117.1	66322	-8079.76	297.585	249.801	0	0	0	0	0	0	0	200	903	0	0	0	0	0	0	0	603	903	0
116	9	34.8298	-58.058	-679.022	33750.8	66749.3	-7942.43	298.302	250.295	0	0	0	0	0	0	0	200	903	0	0	0	0	0	0	0	603	903	0
117	0	35.5928	-57.9054	-680.548	33201.5	66627.2	-8171.31	297.902	251.214	0	0	0	0	0	0	0	200	903	0	0	0	0	0	0	0	603	903	0
117	1	36.5083	-58.058	-682.074	33201.5	67481.7	-7850.88	298.936	251.323	0	0	0	0	0	0	0	200	903	0	0	0	0	0	0	0	603	903	0
117	2	35.8979	-59.1261	-685.431	32652.2	67542.7	-7942.43	298.541	252.363	0	0	0	0	0	0	0	200	903	0	0	0	0	0	0	0	603	903	0
117	3	36.0505	-59.5839	-686.041	32469.1	67298.6	-8171.31	298.097	252.672	0	0	0	0	0	0	0	200	903	0	0	0	0	0	0	0	603	903	0
117	4	37.1186	-59.2787	-688.788	32194.4	67481.7	-7988.21	297.972	253.259	0	0	0	0	0	0	0	200	903	0	0	0	0	0	0	0	603	903	0
117	5	37.1186	-59.2787	-691.229	31736.7	67725.8	-8079.76	297.979	254.087	0	0	0	0	0	0	0	200	903	0	0	0	0	0	0	0	603	903	0
117	6	37.1186	-60.3468	-689.093	31462	68092	-8125.54	298.814	254.343	0	0	0	0	0	0	0	200	903	0	0	0	0	0	0	0	603	903	0
117	7	36.0505	-60.8046	-693.67	30912.7	68214.1	-7896.65	298.338	255.436	0	0	0	0	0	0	0	200	903	0	0	0	0	0	0	0	603	903	0
117	8	36.0505	-59.7365	-694.281	30729.6	67909	-8171.31	297.812	255.739	0	0	0	0	0	0	0	200	903	0	0	0	0	0	0	0	603	903	0
117	9	36.8135	-60.8046	-694.891	30821.1	68641.4	-8033.98	298.78	255.646	0	0	0	0	0	0	0	200	903	0	0	0	0	0	0	0	603	903	0
118	0	37.4238	-61.2624	-696.417	30271.8	68580.3	-7988.21	298.476	256.532	0	0	0	0	0	0	0	200	903	0	0	0	0	0	0	0	603	903	0
118	1	36.6609	-61.8727	-699.469	29814.1	68885.5	-7621.99	298.483	257.376	0	0	0	0	0	0	0	200	903	0	0	0	0	0	0	0	603	903	0
118	2	37.5764	-60.8046	-699.469	29631	69251.7	-7896.65	299.006	257.638	0	0	0	0	0	0	0	200	903	0	0	0	0	0	0	0	603	903	0
118	3	38.0342	-61.4149	-704.352	29447.9	69251.7	-8033.98	298.32	258.192	0	0	0	0	0	0	0	200	903	0	0	0	0	0	0	0	603	903	0
118	4	37.2712	-62.9408	-704.352	29173.2	69923.1	-8125.54	299.273	258.581	0	0	0	0	0	0	0	200	903	0	0	0	0	0	0	0	603	903	0
118	5	36.5083	-62.6357	-708.319	28440.8	69984.1	-7896.65	298.803	259.848	0	0	0	0	0	0	0	200	903	0	0	0	0	0	0	0	603	903	0
118	6	36.5083	-63.0934	-710.15	28623.9	69923.1	-8033.98	298.462	259.693	0	0	0	0	0	0	0	200	903	0	0	0	0	0	0	0	603	903	0
118	7	35.2876	-63.0934	-712.286	29264.7	70411.4	-8445.97	298.853	258.914	0	0	0	0	0	0	0	200	903	0	0	0	0	0	0	0	603	903	0
118	8	34.6772	-64.6193	-711.065	28440.8	70716.6	-8033.98	299.452	260.003	0	0	0	0	0	0	0	200	903	0	0	0	0	0	0	0	603	903	0
118	9	34.9824	-64.1615	-715.338	28257.7	71021.7	-8537.52	299.284	260.497	0	0	0	0	0	0	0	200	903	0	0	0	0	0	0	0	603	903	0
119	0	34.5246	-65.2296	-716.253	27708.4	70777.6	-8537.52	298.816	261.315	0	0	0	0	0	0	0	200	903	0	0	0	0	0	0	0	603	903	0
119	1	36.5083	-67.0607	-718.39	28623.9	70838.6	-8583.3	298.608	260.155	0	0	0	0	0	0	0	200	903	0	0	0	0	0	0	0	603	903	0
119	2	35.5928	-67.8236	-719.915	28257.7	71265.9	-8812.18	298.992	260.749	0	0	0	0	0	0	0	200	903	0	0	0	0	0	0	0	603	903	0
119	3	35.7453	-67.9762	-721.747	26884.4	71693.1	-8537.52	299.333	262.751	0	0	0	0	0	0	0	200	903	0	0	0	0	0	0	0	603	903	0
119	4	35.5928	-68.8918	-726.324	27525.2	71387.9	-8583.3	298.287	262.103	0	0	0	0	0	0	0	200	903	0	0	0	0	0	0	0	603	903	0
119	5	36.0505	-70.265	-727.545	27250.6	71937.3	-8674.85	298.877	262.544	0	0	0	0	0	0	0	200	903	0	0	0	0	0	0	0	603	903	0
119	6	37.5764	-70.8754	-727.545	26701.3	72059.3	-8537.52	299.045	263.3	0	0	0	0	0	0	0	200	903	0	0	0	0	0	0	0	603	903	0
119	7	36.0505	-70.265	-730.291	26426.6	72059.3	-8812.18	298.672	263.814	0	0	0	0	0	0	0	200	903	0	0	0	0	0	0	0	603	903	0
119	8	35.8979	-71.4857	-731.512	26609.7	72425.6	-8583.3	299.008	263.624	0	0	0	0	0	0	0	200	903	0	0	0	0	0	0	0	603	903	0
119	9	36.0505	-73.4694	-731.512	26609.7	72364.5	-8903.73	298.925	263.624	0	0	0	0	0	0	0	200	903	0	0	0	0	0	0	0	603	903	0
120	0	35.8979	-73.9272	-732.428	27159	72852.8	-8674.85	299.468	262.919	0	0	0	0	0	0	0	200	903	0	0	0	0	0	0	0	603	903	0
120	1	36.8135	-73.622	-734.259	25694.2	73035.9	-9178.39	299.469	265.007	0	0	0	0	0	0	0	200	903	0	0	0	0	0	0	0	603	903	0
120	2	36.6609	-74.5375	-736.395	25236.4	72913.8	-8857.96	299.015	265.73	0	0	0	0	0	0	0	200	903	0	0	0	0	0	0	0	603	903	0
120	3	37.5764	-76.0634	-740.057	25328	72974.8	-9086.84	298.607	265.776	0	0	0	0	0	0	0	200	903	0	0	0	0	0	0	0	603	903	0
120	4	36.6609	-76.216	-741.278	25144.9	73280	-9178.39	298.856	266.079	0	0	0	0	0	0	0	200	903	0	0	0	0	0	0	0	603	903	0
120	5	36.3557	-76.216	-742.193	25144.9	73341.1	-8583.3	298.817	266.121	0	0	0	0	0	0	0	200	903	0	0	0	0	0	0	0	603	903	0
120	6	36.6609	-76.9789	-742.498	23863.1	73341.1	-9178.39	298.776	267.861	0	0	0	0	0	0	0	200	903	0	0	0	0	0	0	0	603	903	0
120	7	36.6609	-78.5048	-743.414	24870.2	73646.3	-8812.18	299.065	266.546	0	0	0	0	0	0	0	200	903	0	0	0	0	0	0	0	603	903	0
120	8	36.2031	-79.7255	-740.057	24595.6	73646.3	-9132.62	299.514	266.765	0	0	0	0	0	0	0	200	903	0	0	0	0	0	0	0	603	903	0
120	9	37.2712	-78.81	-744.635	23588.5	74317.6	-9269.95	299.804	268.322	0	0	0	0	0	0	0	200	903	0	0	0	0	0	0	0	603	903	0
121	0	37.5764	-80.4884	-745.55	23222.3	73707.3	-8949.51	298.863	268.852	0	0	0	0	0	0	0	200	903	0	0	0	0	0	0	0	603	903	0
121	1	38.3393	-81.404	-747.686	23222.3	74317.6	-8949.51	299.397	268.941	0	0	0	0	0	0	0	200	903	0	0	0	0	0	0	0	603	903	0
121	2	37.8816	-81.8617	-747.076	23405.4	74012.5	-9315.72	299.07	268.671	0	0	0	0	0	0	0	200	903	0	0	0	0	0	0	0	603	903	0
121	3	38.6445	-82.4721	-746.771	22764.5	74195.5	-9178.39	299.355	269.516	0	0	0	0	0	0	0	200	903	0	0	0	0	0	0	0	603	903	0
121	4	39.1023	-82.1669	-751.043	22398.3	74928	-8903.73	299.765	270.177	0	0	0	0	0	0	0	200	903	0	0	0	0	0	0	0	603	903	0
121	5	38.6445	-82.7773	-750.738	22306.7	74439.7	-9407.27	299.155	270.287	0	0	0	0	0	0	0	200	903	0	0	0	0	0	0	0	603	903	0
121	6	38.9497	-83.8454	-749.823	22215.2	74622.8	-8720.63	299.521	270.373	0	0	0	0	0	0	0	200	903	0	0	0	0	0	0	0	603	903	0
121	7	37.8816	-84.4557	-752.569	21299.7	74805.9	-9407.27	299.401	271.697	0	0	0	0	0	0	0	200	903	0	0	0	0	0	0	0	603	903	0
121	8	37.5764	-84.6083	-753.485	21482.8	74744.9	-9453.05	299.199	271.489	0	0	0	0	0	0	0	200	903	0	0	0	0	0	0	0	603	903	0
121	9	39.2549	-84.1505	-752.874	21299.7	74928	-9361.5	299.523	271.709	0	0	0	0	0	0	0	200	903	0	0	0	0	0	0	0	603	903	0
122	0	38.4919	-85.9816	-753.485	20750.3	74744.9	-9453.05	299.199	272.461	0	0	0	0	0	0	0	200	903	0	0	0	0	0	0	0	603	903	0
122	1	38.3393	-87.2023	-753.79	20475.7	74805.9	-9636.16	299.24	272.836	0	0	0	0	0	0	0	200	903	0	0	0	0	0	0	0	603	903	0
122	2	38.1868	-87.2023	-755.011	20292.6	75294.2	-9681.93	299.726	273.123	0	0	0	0	0	0	0	200	903	0	0	0	0	0	0	0	603	903	0
122	3	38.4919	-88.1178	-755.011	20109.5	75294.2	-9636.16	299.726	273.365	0	0	0	0	0	0	0	200	903	0	0	0	0	0	0	0	603	903	0
122	4	40.7808	-89.1859	-757.147	20017.9	75477.3	-9315.72	299.686	273.561	0	0	0	0	0	0	0	200	903	0	0	0	0	0	0	0	603	903	0
122	5	39.1023	-90.4066	-759.588	20017.9	75233.2	-9544.6	299.045	273.646	0	0	0	0	0	0	0	200	903	0	0	0	0	0	0	0	603	903	0
122	6	39.1023	-91.3222	-759.283	19285.5	75233.2	-9681.93	299.084	274.6	0	0	0	0	0	0	0	200	903	0	0	0	0	0	0	0	603	903	0
122	7	38.0342	-91.7799	-759.588	19560.2	75233.2	-9773.49	299.045	274.249	0	0	0	0	0	0	0	200	903	0	0	0	0	0	0	0	603	903	0
122	8	38.3393	-94.2213	-760.199	19285.5	75538.3	-9773.49	299.367	274.631	0	0	0	0	0	0	0	200	903	0	0	0	0	0	0	0	603	903	0
122	9	39.7126	-93.611	-759.588	19193.9	75477.3	-9819.26	299.366	274.731	0	0	0	0	0	0	0	200	903	0	0	0	0	0	0	0	603	903	0
123	0	37.729	-94.2213	-758.673	19285.5	75660.4	-10048.1	299.727	274.58	0	0	0	0	0	0	0	200	903	0	0	0	0	0	0	0	603	903	0
123	1	37.8816	-96.205	-755.926	19010.8	75538.3	-10185.5	299.928	274.851	0	0	0	0	0	0	0	200	903	0	0	0	0	0	0	0	603	903	0
123	2	38.6445	-96.8153	-758.368	17912.2	75721.5	-10368.6	299.848	276.381	0	0	0	0	0	0	0	200	903	0	0	0	0	0	0	0	603	903	0
123	3	38.3393	-97.5783	-761.114	17820.7	75660.4	-9636.16	299.407	276.586	0	0	0	0	0	0	0	200	903	0	0	0	0	0	0	0	603	903	0
123	4	38.4919	-98.3412	-762.03	18003.8	75416.2	-10368.6	298.968	276.374	0	0	0	0	0	0	0	200	903	0	0	0	0	0	0	0	603	903	0
123	5	37.8816	-99.2567	-762.945	17912.2	75355.2	-10643.2	298.769	276.522	0	0	0	0	0	0	0	200	903	0	0	0	0	0	0	0	603	903	0
123	6	38.0342	-99.8671	-760.504	17179.8	75660.4	-10505.9	299.487	277.41	0	0	0	0	0	0	0	200	903	0	0	0	0	0	0	0	603	903	0
123	7	37.1186	-100.172	-762.335	17179.8	75416.2	-10734.8	298.928	277.464	0	0	0	0	0	0	0	200	903	0	0	0	0	0	0	0	603	903	0
123	8	37.1186	-101.088	-762.945	17454.4	75843.5	-10368.6	299.409	277.122	0	0	0	0	0	0	0	200	903	0	0	0	0	0	0	0	603	903	0
123	9	37.8816	-102.461	-760.504	17088.2	75599.4	-10597.5	299.407	277.53	0	0	0	0	0	0	0	200	903	0	0	0	0	0	0	0	603	903	0
124	0	36.6609	-102.614	-760.809	17088.2	75782.5	-10505.9	299.608	277.539	0	0	0	0	0	0	0	200	903	0	0	0	0	0	0	0	603	903	0
124	1	36.8135	-103.682	-757.147	16355.8	75721.5	-10780.6	300.009	278.398	0	0	0	0	0	0	0	200	903	0	0	0	0	0	0	0	603	903	0
124	2	36.9661	-105.665	-760.809	16630.5	75599.4	-10643.2	299.367	278.141	0	-0.748904	4.46747	-29.4849	1688.05	-701.302	711.548	176.215	845.749	0	0	0	0	0	0	0	603	903	0
124	3	36.0505	-106.581	-760.504	16264.3	75721.5	-10917.9	299.568	278.614	0	-3.80066	-0.720516	-48.4058	3152.9	-1433.72	665.771	170.381	837.865	0	0	0	0	0	0	0	603	903	0
124	4	36.9661	-106.886	-761.419	15714.9	75416.2	-11055.2	299.047	279.361	0	-7.61536	-15.2164	-42.6075	2786.69	-1372.69	1031.98	167.783	837.596	0	0	0	0	0	0	0	603	903	0
124	5	35.8979	-107.802	-761.419	15531.8	75294.2	-11558.8	298.887	279.601	0	-0.901492	-19.3362	-29.1798	1230.29	-1067.51	1764.4	163.416	860.838	0	0	0	0	0	0	0	603	903	0
124	6	35.8979	-108.87	-761.419	15348.7	75294.2	-11467.2	298.887	279.842	0	6.57531	-11.4017	-21.2452	1321.84	-151.986	1672.85	192.846	840.782	0	0	0	0	0	0	0	603	903	0
124	7	34.5246	-109.328	-759.588	14982.5	75172.1	-11284.1	298.964	280.275	0	5.35461	-15.6741	-29.7901	1688.05	-457.162	1947.51	184.654	846.335	0	0	0	0	0	0	0	603	903	0
124	8	34.6772	-110.548	-759.893	14982.5	74989	-11787.6	298.684	280.283	0	0.929563	-26.813	-44.4385	2786.69	-1250.62	2267.94	171.857	840.291	0	0	0	0	0	0	0	603	903	0
124	9	35.2876	-111.159	-759.893	14982.5	75294.2	-11604.5	299.085	280.283	0	-0.748904	-24.0665	-45.9644	2969.79	-1555.79	1718.63	166.152	838.389	0	0	0	0	0	0	0	603	903	0
125	0	33.9143	-111.464	-757.757	15165.6	74195.5	-11741.9	297.915	279.986	0	1.53991	-18.8785	-40.7764	2420.47	-884.408	2039.06	178.311	843.64	0	0	0	0	0	0	0	603	903	0
125	1	32.3884	-112.074	-755.926	14341.7	74989	-12016.5	299.202	281.028	0	4.74426	-25.5923	-49.3214	3427.55	-1311.65	2130.61	173.406	833.506	0	0	0	0	0	0	0	603	903	0
125	2	34.8298	-113.6	-755.316	13609.2	75416.2	-11741.9	299.847	281.982	0	-0.443728	-31.6959	-62.4439	4800.85	-1860.97	1810.18	170.198	826.117	0	0	0	0	0	0	0	603	903	0
125	3	35.8979	-114.363	-754.4	14341.7	74683.8	-11787.6	298.998	280.989	0	-9.44641	-27.8812	-69.463	5350.16	-2288.22	1489.75	167.058	825.978	0	0	0	0	0	0	0	603	903	0
125	4	34.6772	-114.21	-750.433	14067	74622.8	-12062.3	299.44	281.255	0	-4.5636	-25.4398	-76.482	6174.14	-2410.29	1672.85	168.486	822.273	0	0	0	0	0	0	0	603	903	0
125	5	32.9988	-114.821	-754.095	13700.8	74744.9	-11513	299.119	281.832	0	2.15027	-29.1019	-80.1441	6448.8	-2044.08	1535.52	174.495	822.535	0	0	0	0	0	0	0	603	903	0
125	6	32.6936	-116.194	-753.79	12876.8	74378.7	-11879.2	298.673	282.917	0	-4.86878	-28.4915	-89.6046	7638.98	-2410.29	1169.31	173.101	817.748	0	0	0	0	0	0	0	603	903	0
125	7	34.0669	-117.262	-751.349	13059.9	74378.7	-12062.3	298.994	282.618	0	-11.4301	-24.5242	-103.032	8279.85	-3203.74	1535.52	168.905	822.638	0	0	0	0	0	0	0	603	903	0
125	8	33.4565	-117.415	-749.823	13517.7	74073.5	-12199.6	298.788	281.972	0	-2.88513	-25.5923	-108.831	8829.16	-3203.74	1443.97	170.562	821.872	0	0	0	0	0	0	0	603	903	0
125	9	32.541	-118.33	-749.823	12693.7	74195.5	-12382.7	298.951	283.071	0	0.471799	-23.6087	-110.662	9286.93	-2532.36	1306.64	177.116	819.078	0	0	0	0	0	0	0	603	903	0
126	0	31.6255	-119.551	-745.55	12419	73768.3	-12016.5	298.945	283.342	0	-2.1222	-17.8104	-116.46	9653.14	-2837.53	1947.51	175.635	820.112	0	0	0	0	0	0	0	603	903	0
126	1	31.3203	-120.619	-743.719	11961.3	73402.1	-11970.8	298.696	283.917	0	-2.88513	-19.9466	-127.752	10294	-3081.67	1535.52	175.878	822.422	0	0	0	0	0	0	0	603	903	0
126	2	31.7781	-119.398	-741.583	12235.9	73585.2	-12794.7	299.227	283.5	0	0.0140353	-21.0147	-134.465	10751.8	-3203.74	1810.18	176.174	823.041	0	0	0	0	0	0	0	603	903	0
126	3	32.9988	-121.229	-740.362	12235.9	72974.8	-12703.2	298.566	283.473	0	3.98132	-14.3008	-134.771	11667.3	-3081.67	2222.17	177.134	816.428	0	0	0	0	0	0	0	603	903	0
126	4	32.2358	-121.687	-739.142	11045.8	73035.9	-12382.7	298.812	285.056	0	3.21838	-9.11285	-135.991	11484.2	-2959.6	2039.06	178.237	818.552	0	0	0	0	0	0	0	603	903	0
126	5	31.4729	-122.145	-739.142	11137.3	73096.9	-12565.8	298.894	284.932	0	3.37097	-10.7913	-141.79	11575.7	-2959.6	1672.85	179.127	821.36	0	0	0	0	0	0	0	603	903	0
126	6	31.3203	-122.908	-736.09	11412	72242.4	-12474.3	298.143	284.497	0	3.67614	-8.19732	-148.809	12125.1	-2898.57	2176.39	180.522	821.519	0	0	0	0	0	0	0	603	903	0
126	7	31.7781	-122.908	-734.259	11228.9	72364.5	-12565.8	298.555	284.707	0	5.04944	1.26313	-150.945	12399.7	-3142.71	1672.85	179.18	820.853	0	0	0	0	0	0	0	603	903	0
126	8	31.4729	-123.823	-730.597	10588	72242.4	-12840.5	298.881	285.508	0	5.5072	2.63642	-149.419	12308.2	-2471.32	1535.52	183.46	820.627	0	0	0	0	0	0	0	603	903	0
126	9	30.4048	-124.434	-729.376	10404.9	71998.3	-12474.3	298.712	285.735	0	6.27014	2.02607	-151.86	12582.8	-2654.43	1947.51	182.521	820.142	0	0	0	0	0	0	0	603	903	0
127	0	29.4892	-124.586	-726.629	10679.5	71876.2	-12657.4	298.917	285.303	0	5.81238	7.82441	-156.438	12674.4	-3020.64	2039.06	180.691	821.982	0	0	0	0	0	0	0	603	903	0
127	1	30.0996	-125.654	-725.409	10496.4	71326.9	-12474.3	298.327	285.53	0	6.42273	13.165	-163.152	12949	-2471.32	1489.75	184.853	823.632	0	0	0	0	0	0	0	603	903	0
127	2	30.8625	-124.586	-721.441	9580.91	71510	-12703.2	299.121	286.72	0	10.2374	13.0124	-163.152	13406.8	-2471.32	2039.06	184.853	820.826	0	0	0	0	0	0	0	603	903	0
127	3	29.7944	-125.044	-717.779	9397.8	71143.8	-12520.1	299.117	286.907	0	12.3737	14.6909	-167.73	13132.1	-2715.46	1947.51	183.81	824.706	0	0	0	0	0	0	0	603	903	0
127	4	31.1677	-125.197	-715.948	9580.91	70655.5	-12611.6	298.688	286.618	0	10.8478	20.3366	-173.528	13132.1	-2105.11	1535.52	187.869	827.323	0	0	0	0	0	0	0	603	903	0
127	5	29.947	-126.57	-714.727	9123.14	70411.4	-12611.6	298.515	287.236	0	12.0685	23.541	-178.411	13864.6	-2166.15	2359.5	187.859	825.289	0	0	0	0	0	0	0	603	903	0
127	6	29.1841	-127.333	-712.286	8848.49	69923.1	-12794.7	298.167	287.577	0	15.2728	23.541	-181.157	14322.3	-2715.46	1901.73	185.01	823.94	0	0	0	0	0	0	0	603	903	0
127	7	27.9634	-127.791	-708.319	8299.17	69740	-12932.1	298.459	288.283	0	15.7306	27.5082	-182.378	14688.5	-2288.22	1627.08	187.453	822.461	0	0	0	0	0	0	0	603	903	0
127	8	28.5737	-127.028	-704.657	8482.28	69617.9	-12794.7	298.797	287.963	0	15.4254	32.5436	-188.787	14413.9	-1922.01	1855.96	189.819	826.65	0	0	0	0	0	0	0	603	903	0
127	9	29.1841	-128.706	-699.164	8116.06	68824.5	-13023.6	298.438	288.392	0	18.172	31.9333	-194.28	14505.4	-2349.25	1901.73	187.908	828.337	0	0	0	0	0	0	0	603	903	0
128	0	26.7427	-128.096	-697.943	7658.3	68824.5	-13160.9	298.61	289.027	0	20.4608	32.2385	-200.078	14780.1	-2410.29	1535.52	187.953	829.128	0	0	0	0	0	0	0	603	903	0
128	1	27.2004	-129.011	-692.45	7841.4	68214.1	-12840.5	298.511	288.676	0	21.8341	39.1049	-205.877	15237.9	-2288.22	1581.3	188.886	828.986	0	0	0	0	0	0	0	603	903	0
128	2	27.353	-129.164	-690.008	7292.09	68092	-12932.1	298.683	289.432	0	21.8341	39.1049	-213.811	15421	-2532.36	1672.85	188.156	830.876	0	0	0	0	0	0	0	603	903	0
128	3	26.8953	-129.774	-686.956	7383.64	67176.5	-13115.2	297.789	289.252	0	22.597	36.3583	-221.746	15970.3	-2593.39	986.206	188.305	830.979	0	0	0	0	0	0	0	603	903	0
128	4	28.5737	-130.385	-686.651	7200.53	67054.5	-12748.9	297.654	289.514	0	22.1393	43.8351	-228.46	16336.5	-2776.5	1443.97	187.847	831.493	0	0	0	0	0	0	0	603	903	0
128	5	26.1323	-130.232	-681.463	7017.43	67115.5	-13115.2	298.487	289.702	0	23.5126	46.2766	-238.836	16977.4	-3264.78	1398.19	186.33	831.916	0	0	0	0	0	0	0	603	903	0
128	6	25.8271	-130.385	-679.327	7383.64	66871.3	-12977.8	298.438	289.131	0	25.0385	42.3093	-246.16	17343.6	-3325.81	619.995	186.489	832.544	0	0	0	0	0	0	0	603	903	0
128	7	25.3694	-131.3	-675.055	6468.11	65955.8	-12565.8	297.704	290.418	0	23.5126	47.1921	-254.399	17709.8	-3203.74	894.653	187.407	833.386	0	0	0	0	0	0	0	603	903	0
128	8	24.759	-131.453	-671.087	6376.56	65833.8	-12977.8	298.1	290.498	0	22.4445	50.549	-264.775	18076	-3569.96	894.653	186.517	834.731	0	0	0	0	0	0	0	603	903	0
128	9	26.1323	-131.453	-664.984	5827.24	65528.6	-13069.4	298.542	291.237	0	23.2074	49.9387	-272.405	18716.9	-3814.1	162.231	185.998	834.29	0	0	0	0	0	0	0	603	903	0
129	0	23.8435	-131.605	-659.185	6559.66	64979.3	-12382.7	298.575	290.049	0	25.3436	50.549	-279.119	19266.2	-3325.81	253.784	188.085	833.975	0	0	0	0	0	0	0	603	903	0
129	1	23.0806	-132.521	-652.777	5918.8	64613	-13115.2	298.982	290.933	0	23.0548	54.5163	-289.19	19357.7	-4058.24	70.6785	185.967	836.062	0	0	0	0	0	0	0	603	903	0
129	2	23.2331	-132.979	-653.387	5369.48	64185.8	-12977.8	298.235	291.782	0	21.5289	53.4482	-296.819	19540.8	-4302.38	-158.203	185.505	837.166	0	0	0	0	0	0	0	603	903	0
129	3	22.0124	-132.826	-649.42	5552.58	63758.5	-13069.4	298.178	291.45	0	23.8177	55.8896	-302.617	19907	-4302.38	-20.8743	185.783	837.217	0	0	0	0	0	0	0	603	903	0
129	4	22.6228	-132.826	-645.147	5735.69	63697.5	-13344	298.733	291.109	0	23.9703	58.7888	-309.941	20181.7	-4546.52	-432.862	185.331	837.885	0	0	0	0	0	0	0	603	903	0
129	5	22.3176	-133.284	-641.18	4637.06	63087.2	-12748.9	298.392	292.768	0	23.36	60.4672	-316.35	20547.9	-5034.8	-890.625	184.085	838.047	0	0	0	0	0	0	0	603	903	0
129	6	21.4021	-133.589	-638.434	4179.29	62782	-13023.6	298.338	293.454	0	22.597	61.8405	-321.233	20364.8	-4729.62	-707.52	185.277	839.604	0	0	0	0	0	0	0	603	903	0
129	7	20.334	-133.436	-633.246	4270.85	61683.4	-12657.4	297.408	293.256	0	23.36	62.756	-327.947	19632.4	-5034.8	-387.085	184.648	843.135	0	0	0	0	0	0	0	603	903	0
129	8	21.4021	-132.826	-628.058	4728.61	61561.3	-13115.2	298.019	292.471	0	24.5807	64.5871	-336.187	20639.5	-5095.84	-799.073	184.842	841.607	0	0	0	0	0	0	0	603	903	0
129	9	19.4184	-132.673	-621.954	4270.85	61378.2	-12977.8	298.686	293.133	0	24.5807	69.0121	-337.712	21738.1	-4973.77	-844.849	185.272	838.631	0	0	0	0	0	0	0	603	903	0
130	0	21.4021	-133.284	-618.597	3904.64	60523.7	-12611.6	297.84	293.688	0	23.5126	68.5544	-344.426	21371.9	-5095.84	-615.967	185.205	840.949	0	0	0	0	0	0	0	603	903	0
130	1	19.4184	-132.673	-612.799	3629.98	60218.5	-12703.2	298.268	294.076	0	23.9703	67.7914	-348.394	21097.2	-5095.84	-936.402	185.373	842.444	0	0	0	0	0	0	0	603	903	0
130	2	18.9607	-131.911	-607	3996.19	59669.2	-12657.4	298.302	293.417	0	25.4962	74.9631	-353.276	21463.4	-5095.84	-661.744	185.576	842.245	0	0	0	0	0	0	0	603	903	0
130	3	18.6555	-132.368	-603.643	3263.77	59058.8	-12840.5	297.837	294.593	0	27.4799	73.5898	-358.77	21646.5	-5401.01	-753.296	184.946	842.665	0	0	0	0	0	0	0	603	903	0
130	4	18.1977	-132.216	-599.066	2714.45	58692.6	-12703.2	297.974	295.469	0	26.1066	73.895	-361.211	21738.1	-5584.12	-1165.28	184.541	842.819	0	0	0	0	0	0	0	603	903	0
130	5	16.8244	-131.758	-592.047	3080.66	57899.2	-12565.8	297.795	294.797	0	27.0221	76.7941	-364.263	21646.5	-5462.05	-844.849	185.005	843.574	0	0	0	0	0	0	0	603	903	0
130	6	16.0615	-132.063	-587.469	2897.56	57227.8	-12428.5	297.414	295.068	0	26.7169	77.0993	-372.197	21921.2	-5462.05	-432.862	185.325	844.103	0	0	0	0	0	0	0	603	903	0
130	7	16.8244	-131.758	-580.755	1890.48	57044.7	-12520.1	298.225	296.745	0	27.1747	76.6415	-380.742	22104.3	-6072.4	-936.402	184.051	844.944	0	0	0	0	0	0	0	603	903	0
130	8	15.6037	-132.216	-574.652	2439.79	56251.2	-12611.6	297.888	295.754	0	26.8695	78.6252	-385.93	22104.3	-6255.5	-936.402	183.791	845.725	0	0	0	0	0	0	0	603	903	0
130	9	14.9934	-131.453	-568.548	2073.58	56007.1	-12337	298.509	296.353	0	24.4281	80.6088	-393.865	21463.4	-6438.61	-890.625	183.653	848.506	0	0	0	0	0	0	0	603	903	0
131	0	15.4512	-131.148	-563.055	1890.48	55152.6	-12520.1	297.952	296.642	0	25.6488	79.5407	-400.579	22012.8	-6804.82	-982.178	183.013	848.048	0	0	0	0	0	0	0	603	903	0
131	1	14.8408	-130.842	-556.036	1798.92	54237.1	-12428.5	297.542	296.765	0	26.4117	81.6769	-408.513	21738.1	-6987.93	-936.402	182.894	849.787	0	0	0	0	0	0	0	603	903	0
131	2	15.4512	-130.537	-552.069	1432.71	54115	-12199.6	298.022	297.405	0	23.8177	84.1183	-415.227	21829.7	-7048.96	-1165.28	183.024	850.427	0	0	0	0	0	0	0	603	903	0
131	3	14.5356	-129.927	-546.576	1798.92	53321.5	-12382.7	297.556	296.709	0	22.7496	84.2709	-418.889	21555	-7476.21	-1256.84	182.152	851.543	0	0	0	0	0	0	0	603	903	0
131	4	14.0779	-129.927	-537.115	1341.16	52528.1	-12016.5	297.797	297.503	0	23.8177	84.4235	-424.077	21921.2	-7598.28	-1256.84	182.083	851.309	0	0	0	0	0	0	0	603	903	0
131	5	12.552	-129.317	-534.369	974.948	52100.8	-12382.7	297.5	298.176	0	22.597	87.0175	-431.401	21829.7	-7659.31	-1027.95	182.246	852.398	0	0	0	0	0	0	0	603	903	0
131	6	11.9416	-128.554	-527.35	700.29	51368.4	-12016.5	297.409	298.672	0	21.3763	88.5434	-435.064	22379	-7964.49	-1119.51	181.694	851.562	0	0	0	0	0	0	0	603	903	0
131	7	12.7046	-128.401	-519.72	791.842	50941.2	-12062.3	298.017	298.476	0	19.6979	89.6115	-438.726	21188.8	-8452.77	-1668.82	180.733	854.704	0	0	0	0	0	0	0	603	903	0
131	8	11.3313	-127.943	-512.396	700.29	50330.8	-11879.2	298.226	298.633	0	19.6979	90.9848	-442.693	21005.7	-8086.56	-1348.39	181.733	855.55	0	0	0	0	0	0	0	603	903	0
131	9	11.0261	-127.028	-503.241	59.4204	49110.1	-11741.9	297.588	299.882	0	18.6298	92.8159	-446.965	21280.3	-8147.59	-1394.17	181.771	855.389	0	0	0	0	0	0	0	603	903	0
132	0	9.958	-125.96	-497.747	-123.685	48621.8	-11879.2	297.684	300.249	0	20.003	95.1047	-449.407	21005.7	-8941.05	-1485.72	180.105	856.259	0	0	0	0	0	0	0	603	903	0
132	1	10.5683	-125.197	-491.339	242.526	47950.4	-11925	297.591	299.506	0	19.0875	95.5624	-452.764	20547.9	-8635.88	-1577.27	180.926	857.617	0	0	0	0	0	0	0	603	903	0
132	2	11.9416	-125.044	-485.235	-32.1323	47584.2	-11604.5	298.064	300.066	0	19.3927	98.6142	-452.764	20639.5	-8818.98	-1806.15	180.522	857.415	0	0	0	0	0	0	0	603	903	0
132	3	9.80541	-123.213	-478.521	-1039.21	46851.8	-11604.5	297.91	302.172	0	17.4091	101.819	-455.815	20181.7	-9185.19	-1943.48	179.849	858.724	0	0	0	0	0	0	0	603	903	0
132	4	9.65282	-122.908	-471.197	-764.554	45509	-11604.5	296.582	301.623	0	17.2565	100.75	-458.257	19998.6	-8880.02	-1714.6	180.622	859.359	0	0	0	0	0	0	0	603	903	0
132	5	7.51659	-121.535	-466.009	-489.896	45509	-11513	297.657	301.051	0	16.6461	102.734	-458.867	19907	-9490.37	-2035.03	179.318	859.617	0	0	0	0	0	0	0	603	903	0
132	6	6.60106	-120.772	-457.464	-764.554	44593.5	-11192.6	297.48	301.671	0	15.7306	105.938	-460.088	19540.8	-9795.54	-2035.03	178.709	860.528	0	0	0	0	0	0	0	603	903	0
132	7	8.88988	-119.551	-448.614	-1130.77	44044.2	-11146.8	298.178	302.521	0	15.1202	104.87	-459.783	19357.7	-9185.19	-2172.36	180.023	860.898	0	0	0	0	0	0	0	603	903	0
132	8	5.68553	-118.635	-441.29	-1313.87	43372.8	-10551.7	298.286	302.977	0	16.3409	105.938	-463.445	18991.5	-9551.4	-2172.36	179.39	862.021	0	0	0	0	0	0	0	603	903	0
132	9	6.29589	-116.347	-434.881	-1130.77	42152.1	-10963.7	296.928	302.6	0	15.4254	108.532	-463.75	18808.4	-9917.61	-2355.47	178.614	862.443	0	0	0	0	0	0	0	603	903	0
133	0	5.38036	-114.516	-426.336	-1405.42	42030	-10826.3	298.584	303.297	0	14.2047	108.532	-465.886	18900	-10039.7	-2172.36	178.45	862.432	0	0	0	0	0	0	0	603	903	0
133	1	5.22777	-113.447	-418.402	-1771.63	41053.5	-10734.8	298.12	304.234	0	14.5099	108.227	-465.581	18533.8	-9795.54	-2630.13	178.961	863.192	0	0	0	0	0	0	0	603	903	0
133	2	4.9226	-113.753	-411.993	-2229.4	40076.9	-10460.1	297.276	305.411	0	14.8151	108.532	-466.802	18350.6	-10222.8	-2630.13	178.1	863.689	0	0	0	0	0	0	0	603	903	0
133	3	3.70189	-110.701	-403.143	-1954.74	39161.4	-10368.6	297.14	304.849	0	14.2047	110.058	-468.633	18533.8	-10222.8	-2401.25	178.186	863.451	0	0	0	0	0	0	0	603	903	0
133	4	4.61742	-109.328	-391.852	-2046.29	38490	-10460.1	298.226	305.222	0	13.8995	109.295	-468.023	17984.4	-10222.8	-2492.8	178.157	864.574	0	0	0	0	0	0	0	603	903	0
133	5	2.48119	-106.734	-386.969	-1863.19	37940.7	-10277	298.046	304.815	0	14.0521	108.38	-466.802	17709.8	-10528	-2950.56	177.447	865.062	0	0	0	0	0	0	0	603	903	0
133	6	1.87084	-105.208	-378.424	-2961.82	37269.3	-9956.59	298.486	307.827	0	14.0521	110.974	-470.769	17801.3	-10283.8	-2950.56	178.155	865.187	0	0	0	0	0	0	0	603	903	0
133	7	2.3286	-104.445	-369.268	-2229.4	36170.7	-10002.4	297.952	306.037	0	14.2047	110.974	-469.243	17343.6	-10344.9	-2859.01	177.954	866.039	0	0	0	0	0	0	0	603	903	0
133	8	0.650134	-101.546	-361.029	-3144.93	35438.2	-10002.4	298.159	308.711	0	13.5944	111.126	-470.159	17160.5	-10711.1	-2996.34	177.218	866.501	0	0	0	0	0	0	0	603	903	0
133	9	0.19237	-98.799	-350.042	-3602.69	34827.9	-9041.06	299.496	310.292	0	14.6625	111.584	-470.464	16611.1	-10466.9	-3042.12	177.752	867.692	0	0	0	0	0	0	0	603	903	0
134	0	1.71825	-97.5783	-343.939	-2870.27	33790.3	-9498.83	298.245	308.345	0	11.6107	112.805	-469.548	16519.6	-10466.9	-3133.67	177.709	867.818	0	0	0	0	0	0	0	603	903	0
134	1	0.650134	-95.7472	-336.004	-3144.93	32996.8	-9315.72	298.204	309.36	0	12.984	112.957	-472.295	16061.8	-10589	-3179.44	177.58	868.992	0	0	0	0	0	0	0	603	903	0
134	2	0.344958	-93.3058	-330.206	-3602.69	32264.4	-9086.84	297.71	310.91	0	12.6788	112.347	-472.6	15878.7	-11565.6	-2859.01	175.528	869.401	0	0	0	0	0	0	0	603	903	0
134	3	0.19237	-90.5592	-321.661	-3236.48	31654.1	-8949.51	298.408	310.062	0	11.3055	114.331	-471.379	15604.1	-11260.4	-3271	176.112	869.897	0	0	0	0	0	0	0	603	903	0
134	4	0.19237	-89.0334	-312.811	-3602.69	31104.7	-8766.41	299.436	311.517	0	11.0004	115.551	-484.502	15054.8	-11565.6	-3682.98	176.129	871.927	0	0	0	0	0	0	0	603	903	0
134	5	-1.33351	-87.2023	-305.182	-3694.24	29884	-8308.64	297.922	312.105	0	9.62707	117.23	-492.437	15329.4	-12542.1	-3774.54	174.53	871.87	0	0	0	0	0	0	0	603	903	0
134	6	-2.09645	-84.6083	-297.552	-4243.56	29456.8	-7942.43	298.997	314.262	0	6.11755	123.181	-495.183	14047.7	-12603.2	-4094.97	174.549	874.631	0	0	0	0	0	0	0	603	903	0
134	7	-2.40162	-82.3195	-286.566	-4426.67	28358.2	-8079.76	298.959	315.447	0	4.43908	128.674	-499.15	13406.8	-12481.1	-4461.18	174.995	876.141	0	0	0	0	0	0	0	603	903	0
134	8	-3.46974	-78.81	-277.105	-3694.24	27747.8	-7942.43	300.134	313.332	0	6.88049	128.674	-501.592	12857.5	-13152.5	-4369.63	173.779	877.367	0	0	0	0	0	0	0	603	903	0
134	9	-2.24904	-77.1315	-270.697	-4335.11	27137.5	-7667.77	300.25	316.015	0	1.23474	130.047	-507.085	12949	-13091.4	-4186.52	174.183	877.464	0	0	0	0	0	0	0	603	903	0
135	0	-1.63868	-75.6056	-263.067	-4975.98	25611.6	-7164.23	297.358	318.915	0	-1.81702	132.794	-512.883	12857.5	-13457.7	-4461.18	173.761	877.931	0	0	0	0	0	0	0	603	903	0
135	1	-1.94386	-73.1642	-256.353	-4884.43	25794.7	-7576.22	300.622	319.053	0	-1.35926	136.151	-515.02	12308.2	-13762.8	-4232.3	173.277	879.102	0	0	0	0	0	0	0	603	903	0
135	2	-2.40162	-70.4176	-250.86	-4060.45	24696	-7164.23	298.445	316.186	0	-2.42737	140.881	-518.071	11575.7	-13884.9	-4323.85	173.199	880.656	0	0	0	0	0	0	0	603	903	0
135	3	-1.33351	-66.9081	-242.621	-4518.22	24207.8	-6431.81	299.776	318.623	0	-2.42737	144.238	-523.87	11484.2	-13945.9	-4552.73	173.379	881.078	0	0	0	0	0	0	0	603	903	0
135	4	-1.94386	-62.9408	-236.517	-4792.88	23841.6	-6569.14	300.803	320.264	0	-3.49549	145.154	-529.973	11118	-14251.1	-4690.06	173.11	882.022	0	0	0	0	0	0	0	603	903	0
135	5	-2.40162	-60.9572	-229.498	-4518.22	22559.8	-6202.93	298.301	319.687	0	-3.3429	145.611	-534.246	11026.4	-14617.3	-4323.85	172.639	882.361	0	0	0	0	0	0	0	603	903	0
135	6	-3.31715	-58.3632	-222.174	-4335.11	22620.9	-5882.49	301.816	319.512	0	0.166623	146.679	-538.213	10751.8	-15471.8	-4049.19	171.253	883.023	0	0	0	0	0	0	0	603	903	0
135	7	-2.40162	-56.227	-214.85	-4884.43	21583.2	-5790.94	300.458	322.734	0	-1.05408	147.29	-539.434	10568.7	-14800.4	-4003.42	172.563	883.408	0	0	0	0	0	0	0	603	903	0
135	8	-2.55421	-54.0907	-207.22	-4975.98	21033.9	-5470.51	301.505	324.013	0	-5.02137	145.459	-544.011	11118	-15105.6	-4278.08	172.233	882.563	0	0	0	0	0	0	0	603	903	0
135	9	-2.40162	-52.1071	-200.506	-4975.98	20484.6	-5195.85	302.164	324.817	0	-4.25843	143.933	-547.673	10751.8	-15410.8	-4094.97	171.861	883.368	0	0	0	0	0	0	0	603	903	0
136	0	-2.55421	-50.7338	-193.182	-4152.01	19508.1	-4692.31	300.983	321.493	0	-5.02137	145.001	-551.03	10294	-15288.7	-4003.42	172.254	884.319	0	0	0	0	0	0	0	603	903	0
136	1	-1.94386	-47.9872	-185.858	-5067.53	19202.9	-5012.74	303.32	327.266	0	-6.08948	141.949	-551.03	10110.9	-15654.9	-4186.52	171.59	884.651	0	0	0	0	0	0	0	603	903	0
136	2	-2.55421	-46.3087	-181.28	-5433.75	18653.6	-4738.08	302.899	329.974	0	-8.53089	141.491	-557.439	10202.5	-15777	-4232.3	171.697	884.698	0	0	0	0	0	0	0	603	903	0
136	3	-1.4861	-46.3087	-174.261	-5067.53	17554.9	-5058.52	300.739	329.08	0	-8.53089	140.271	-561.406	10202.5	-15777	-4003.42	171.897	884.827	0	0	0	0	0	0	0	603	903	0
136	4	-1.63868	-45.2406	-167.242	-4884.43	17249.8	-4921.19	303.142	329.206	0	-7.46277	138.592	-565.068	9378.48	-16021.1	-4094.97	171.647	886.403	0	0	0	0	0	0	0	603	903	0
136	5	-2.85939	-43.1044	-163.885	-4975.98	16517.3	-4554.98	300.786	330.363	0	-8.68347	141.186	-568.12	8920.72	-16570.4	-4232.3	170.833	887.298	0	0	0	0	0	0	0	603	903	0
136	6	-1.79127	-42.1889	-157.782	-4884.43	16273.2	-4783.86	303.137	330.957	0	-9.90418	141.186	-569.646	9012.27	-16387.3	-4323.85	171.232	887.179	0	0	0	0	0	0	0	603	903	0
136	7	-0.112806	-40.3578	-151.068	-4884.43	15845.9	-4326.1	304.893	332.333	0	-9.90418	140.118	-572.087	8554.51	-16387.3	-4094.97	171.355	888.047	0	0	0	0	0	0	0	603	903	0
136	8	-1.02833	-38.9845	-146.49	-4975.98	14930.4	-4234.54	301.921	333.968	0	-9.44641	144.085	-577.886	8279.85	-17058.7	-4369.63	170.481	888.672	0	0	0	0	0	0	0	603	903	0
136	9	-1.18092	-38.8319	-140.081	-4518.22	14869.4	-4234.54	306.148	332.254	0	-10.0568	144.848	-579.717	7730.53	-17241.8	-4506.96	170.258	889.665	0	0	0	0	0	0	0	603	903	0
137	0	-0.265393	-38.3742	-137.03	-4792.88	14259	-4097.21	304.058	334.977	0	-11.2775	145.611	-581.853	8005.19	-17180.8	-4415.41	170.472	889.242	0	0	0	0	0	0	0	603	903	0
137	1	-0.570569	-36.0854	-131.842	-4609.77	13831.8	-3914.11	304.912	334.964	0	-10.6671	147.595	-587.041	7913.64	-17424.9	-4644.29	170.317	889.52	0	0	0	0	0	0	0	603	903	0
137	2	1.1079	-33.0336	-129.4	-4426.67	13526.6	-3639.45	304.533	334.209	0	-10.8197	148.51	-587.957	7181.22	-17608	-4735.84	170.052	890.786	0	0	0	0	0	0	0	603	903	0
137	3	1.1079	-33.1862	-124.823	-4609.77	12305.9	-3502.12	298.587	336.931	0	-12.193	150.036	-592.229	7181.22	-17730.1	-4644.29	170.062	890.874	0	0	0	0	0	0	0	603	903	0
137	4	0.344958	-31.5077	-115.973	-4518.22	12550	-3273.24	308.216	338.959	0	-11.7352	150.799	-593.145	7181.22	-17791.1	-4598.51	170.005	890.893	0	0	0	0	0	0	0	603	903	0
137	5	0.344958	-28.456	-115.362	-4152.01	11634.5	-3135.91	300.852	335.991	0	-12.3456	151.41	-596.196	7730.53	-17669.1	-4873.17	170.364	890.034	0	0	0	0	0	0	0	603	903	0
137	6	0.802722	-27.2353	-111.395	-4426.67	11573.5	-2861.25	303.896	339.738	0	-12.4982	151.257	-598.943	6906.56	-17913.2	-4690.06	170.092	891.469	0	0	0	0	0	0	0	603	903	0
137	7	0.344958	-26.4723	-105.902	-4426.67	11024.2	-3090.13	304.098	341.8	0	-13.5663	150.647	-602.3	6631.9	-17974.2	-4369.63	170.157	891.989	0	0	0	0	0	0	0	603	903	0
137	8	0.344958	-27.3878	-100.714	-4335.11	10658	-2769.7	305.824	343.044	0	-12.6508	151.257	-602.91	6082.58	-18462.5	-4552.73	169.378	892.911	0	0	0	0	0	0	0	603	903	0
137	9	1.41307	-24.0309	-95.831	-3968.9	10230.7	-2815.48	306.758	341.416	0	-15.0922	150.952	-606.267	6631.9	-18279.4	-4781.62	169.849	892.061	0	0	0	0	0	0	0	603	903	0
138	0	1.87084	-24.1835	-93.6948	-4243.56	9864.5	-2861.25	305.283	345.291	0	-15.5499	150.036	-607.793	6448.8	-18401.5	-4140.75	169.724	892.39	0	0	0	0	0	0	0	603	903	0
138	1	1.26049	-22.9628	-87.5912	-3968.9	9254.15	-2266.16	305.652	345.312	0	-16.1603	149.731	-611.15	5533.27	-19011.8	-4598.51	168.892	893.946	0	0	0	0	0	0	0	603	903	0
138	2	1.1079	-22.9628	-87.5912	-3144.93	8948.97	-2266.16	302.167	335.905	0	-17.5336	149.731	-612.371	5899.48	-18706.7	-4506.96	169.452	893.366	0	0	0	0	0	0	0	603	903	0
138	3	2.3286	-22.3524	-83.624	-3053.37	8704.83	-2357.71	304.095	336.513	0	-16.618	150.189	-613.897	5807.93	-19195	-4278.08	168.733	893.539	0	0	0	0	0	0	0	603	903	0
138	4	2.3286	-21.2843	-76.9101	-3602.69	8643.79	-2266.16	312.388	346.843	0	-19.3646	148.053	-616.948	5807.93	-19561.2	-4598.51	168.294	893.586	0	0	0	0	0	0	0	603	903	0
138	5	1.56566	-20.9792	-76.6049	-3968.9	8155.51	-1945.72	306.462	351.81	0	-19.8224	148.663	-619.39	5716.37	-19378.1	-4506.96	168.714	893.771	0	0	0	0	0	0	0	603	903	0
138	6	1.26049	-20.2162	-72.9428	-2961.82	7545.16	-2083.05	303.439	340.605	0	-19.975	147.29	-620.916	4892.4	-19133.9	-4323.85	169.184	895.121	0	0	0	0	0	0	0	603	903	0
138	7	3.39672	-19.7585	-68.6703	-2870.27	7423.09	-1808.4	308.098	341.798	0	-22.1112	147.29	-623.662	5441.72	-19744.3	-4232.3	168.341	894.275	0	0	0	0	0	0	0	603	903	0
138	8	0.802722	-18.9955	-64.3979	-3236.48	7056.88	-1899.95	309.583	350.258	0	-23.0267	146.679	-626.104	5441.72	-19927.4	-4506.96	168.172	894.309	0	0	0	0	0	0	0	603	903	0
138	9	1.1079	-18.9955	-61.3461	-3419.58	6629.63	-1854.17	308.069	355.742	0	-22.7216	146.985	-630.071	4892.4	-19561.2	-4323.85	168.954	895.235	0	0	0	0	0	0	0	603	903	0
139	0	1.71825	-18.9955	-58.5995	-2870.27	6324.46	-1304.85	307.927	348.981	0	-23.1793	146.069	-631.292	5167.06	-20171.5	-4094.97	168.047	894.815	0	0	0	0	0	0	0	603	903	0
139	1	2.02342	-17.7748	-56.1581	-2687.16	6080.32	-1808.4	308.271	347.85	0	-23.7897	145.459	-633.733	4709.29	-20354.6	-4186.52	167.881	895.569	0	0	0	0	0	0	0	603	903	0
139	2	3.5493	-18.2326	-55.853	-3053.37	6019.28	-1808.4	307.77	354.668	0	-25.0104	146.222	-636.174	4983.95	-19988.4	-4506.96	168.58	895.166	0	0	0	0	0	0	0	603	903	0
139	3	2.48119	-16.8593	-51.2753	-2961.82	6141.35	-1030.2	319.772	357.763	0	-24.8578	145.306	-637.395	4709.29	-20171.5	-4506.96	168.353	895.612	0	0	0	0	0	0	0	603	903	0
139	4	2.02342	-15.7912	-48.8339	-2504.06	5225.83	-1625.29	307.012	351.277	0	-24.4	143.628	-640.142	4892.4	-20293.6	-4461.18	168.298	895.357	0	0	0	0	0	0	0	603	903	0
139	5	2.02342	-15.7912	-46.6977	-2687.16	4798.58	-1350.63	302.758	357.544	0	-23.1793	144.696	-641.668	4526.19	-20232.6	-4278.08	168.469	895.946	0	0	0	0	0	0	0	603	903	0
139	6	1.1079	-14.7231	-45.7822	-2778.71	4859.62	-1442.18	306.147	360.694	0	-24.0949	144.696	-643.499	4343.08	-20659.8	-4323.85	167.895	896.251	0	0	0	0	0	0	0	603	903	0
139	7	1.56566	-13.1972	-41.8149	-2412.5	5164.79	-1350.63	323.516	357.695	0	-26.3837	143.475	-645.33	4068.42	-20659.8	-4461.18	167.986	896.696	0	0	0	0	0	0	0	603	903	0
139	8	2.17601	-11.9765	-40.289	-2229.4	4493.4	-1075.97	311.529	355.335	0	-26.2311	144.238	-646.856	4617.74	-20659.8	-4186.52	168.061	895.861	0	0	0	0	0	0	0	603	903	0
139	9	1.56566	-11.3661	-38.1528	-2046.29	3883.05	-984.42	301.776	353.634	0	-25.7733	143.475	-648.381	3885.32	-20476.7	-4278.08	168.419	897.008	0	0	0	0	0	0	0	603	903	0
140	0	2.02342	-10.7558	-36.6269	-2320.95	4127.19	-938.644	312.682	363.367	0	-25.7733	141.949	-648.076	3885.32	-21148.1	-4140.75	167.368	897.005	0	0	0	0	0	0	0	603	903	0
140	1	1.87084	-9.0773	-33.5751	-1954.74	3822.02	-709.762	313.835	358.22	0	-26.994	142.56	-651.128	4068.42	-21148.1	-4140.75	167.521	896.752	0	0	0	0	0	0	0	603	903	0
140	2	2.93895	-8.46695	-33.27	-1680.08	3516.84	-709.762	305.706	350.499	0	-27.6044	142.102	-652.654	3885.32	-20781.9	-4278.08	168.158	897.047	0	0	0	0	0	0	0	603	903	0
140	3	2.48119	-8.46695	-31.1337	-1313.87	3699.95	-343.551	318.841	342.201	0	-27.9095	141.797	-655.4	4251.53	-21331.2	-4415.41	167.453	896.513	0	0	0	0	0	0	0	603	903	0
140	4	1.71825	-8.46695	-29.3027	-2137.85	3089.6	-435.104	305.437	372.957	0	-27.2992	140.271	-656.926	3976.87	-21392.2	-3866.09	167.436	896.946	0	0	0	0	0	0	0	603	903	0
140	5	1.1079	-8.16177	-28.082	-1771.63	3150.63	-618.209	312.194	363.088	0	-28.6725	139.355	-656.621	3519.11	-21148.1	-4186.52	167.793	897.641	0	0	0	0	0	0	0	603	903	0
140	6	1.1079	-7.24625	-24.725	-1130.77	2967.53	-480.88	320.021	345.734	0	-26.2311	139.355	-658.452	3976.87	-21026	-3866.09	168.068	896.96	0	0	0	0	0	0	0	603	903	0
140	7	0.95531	-8.92471	-22.2836	-1771.63	2357.17	-343.551	305.781	379.504	0	-28.9777	137.829	-659.368	3793.77	-21148.1	-4003.42	167.927	897.246	0	0	0	0	0	0	0	603	903	0
140	8	0.802722	-6.48331	-20.1474	-1771.63	2479.24	-297.775	323.055	387.934	0	-28.3673	137.372	-659.673	3519.11	-21148.1	-3820.31	167.942	897.665	0	0	0	0	0	0	0	603	903	0
140	9	0.19237	-6.17813	-17.706	-1313.87	2296.14	-389.327	329.682	374.205	0	-28.2147	135.54	-658.757	3519.11	-21270.1	-3637.21	167.712	897.658	0	0	0	0	0	0	0	603	903	0
141	0	1.56566	-4.34708	-16.7905	-764.554	1990.96	-206.222	318.577	345.535	0	-29.588	135.998	-662.419	3519.11	-21758.4	-3957.64	167.153	897.688	0	0	0	0	0	0	0	603	903	0
141	1	2.02342	-5.87296	-15.2646	-856.107	1868.89	-23.1163	322.433	356.085	0	-30.0458	135.54	-661.504	3610.66	-21514.3	-3911.87	167.477	897.542	0	0	0	0	0	0	0	603	903	0
141	2	3.70189	-2.8212	-16.1801	-1496.98	1807.86	-23.1163	311.733	392.52	0	-29.1303	134.32	-662.725	3336	-21209.1	-3637.21	167.997	897.966	0	0	0	0	0	0	0	603	903	0
141	3	1.41307	-2.05826	-14.9594	-1588.53	1929.93	22.6601	329.011	406.189	0	-28.8251	134.015	-664.861	3061.34	-21758.4	-4003.42	167.274	898.396	0	0	0	0	0	0	0	603	903	0
141	4	1.87084	-0.379791	-14.0439	150.973	1929.93	159.989	337.421	289.25	0	-30.0458	133.557	-664.556	3793.77	-21880.5	-3820.31	167.075	897.291	0	0	0	0	0	0	0	603	903	0
141	5	1.1079	0.23056	-12.518	-1313.87	1563.72	343.095	324.918	404.959	0	-30.6561	133.557	-664.861	3336	-21758.4	-4140.75	167.274	897.982	0	0	0	0	0	0	0	603	903	0
141	6	0.95531	1.90903	-12.2128	-1039.21	1868.89	571.977	353.027	385.092	0	-28.6725	132.489	-663.03	3793.77	-21331.2	-3820.31	167.828	897.278	0	0	0	0	0	0	0	603	903	0
141	7	1.87084	2.67197	-10.6869	-581.449	1807.86	480.424	369.165	354.407	0	-27.2992	131.115	-666.692	3610.66	-21697.4	-3591.43	167.455	897.584	0	0	0	0	0	0	0	603	903	0
141	8	0	0	0	0	0	0	200	300	0	-28.3673	131.268	-667.302	3519.11	-21514.3	-3957.64	167.759	897.726	0	0	0	0	0	0	0	603	903	0
141	9	0	0	0	0	0	0	200	300	0	-30.5035	130.81	-667.302	3152.9	-21636.4	-3728.76	167.576	898.275	0	0	0	0	0	0	0	603	903	0
142	0	0	0	0	0	0	0	200	300	0	-30.5035	129.59	-666.997	3793.77	-21453.3	-3911.87	167.836	897.312	0	0	0	0	0	0	0	603	903	0
142	1	0	0	0	0	0	0	200	300	0	-29.4354	128.674	-667.607	3336	-21331.2	-3499.88	168.048	898.003	0	0	0	0	0	0	0	603	903	0
142	2	0	0	0	0	0	0	200	300	0	-28.8251	128.216	-668.828	3152.9	-21514.3	-3408.33	167.833	898.286	0	0	0	0	0	0	0	603	903	0
142	3	0	0	0	0	0	0	200	300	0	-30.1984	126.69	-668.828	3152.9	-21758.4	-3087.89	167.468	898.286	0	0	0	0	0	0	0	603	903	0
142	4	0	0	0	0	0	0	200	300	0	-26.8414	126.69	-668.218	3610.66	-22185.7	-3545.66	166.799	897.597	0	0	0	0	0	0	0	603	903	0
142	5	0	0	0	0	0	0	200	300	0	-30.1984	126.08	-667.913	3610.66	-21392.2	-3362.55	167.972	897.594	0	0	0	0	0	0	0	603	903	0
142	6	0	0	0	0	0	0	200	300	0	-28.8251	124.402	-668.523	3427.55	-21758.4	-3271	167.453	897.873	0	0	0	0	0	0	0	603	903	0
142	7	0	0	0	0	0	0	200	300	0	-28.3673	122.876	-666.997	2969.79	-21758.4	-3271	167.379	898.548	0	0	0	0	0	0	0	603	903	0
142	8	0	0	0	0	0	0	200	300	0	-29.7406	122.418	-666.997	2969.79	-21636.4	-3408.33	167.562	898.548	0	0	0	0	0	0	0	603	903	0
142	9	0	0	0	0	0	0	200	300	0	-29.7406	122.265	-668.523	3519.11	-21392.2	-3271	168.001	897.736	0	0	0	0	0	0	0	603	903	0
143	0	0	0	0	0	0	0	200	300	0	-28.2147	120.739	-666.997	4068.42	-21636.4	-3042.12	167.562	896.9	0	0	0	0	0	0	0	603	903	0
143	1	0	0	0	0	0	0	200	300	0	-28.3673	121.35	-667.302	3061.34	-21209.1	-3133.67	168.217	898.412	0	0	0	0	0	0	0	603	903	0
143	2	0	0	0	0	0	0	200	300	0	-28.6725	119.977	-667.302	3244.45	-21270.1	-3225.22	168.125	898.138	0	0	0	0	0	0	0	603	903	0
143	3	0	0	0	0	0	0	200	300	0	-27.9095	118.756	-666.387	3519.11	-21514.3	-3042.12	167.715	897.719	0	0	0	0	0	0	0	603	903	0
143	4	0	0	0	0	0	0	200	300	0	-28.9777	118.603	-666.692	3519.11	-20965	-2767.46	168.554	897.722	0	0	0	0	0	0	0	603	903	0
143	5	0	0	0	0	0	0	200	300	0	-27.6044	117.993	-666.997	3885.32	-21087	-2904.79	168.385	897.175	0	0	0	0	0	0	0	603	903	0
143	6	0	0	0	0	0	0	200	300	0	-27.2992	116.009	-666.692	3793.77	-21636.4	-2675.9	167.547	897.31	0	0	0	0	0	0	0	603	903	0
143	7	0	0	0	0	0	0	200	300	0	-28.5199	115.857	-665.166	3610.66	-21148.1	-2401.25	168.206	897.572	0	0	0	0	0	0	0	603	903	0
143	8	0	0	0	0	0	0	200	300	0	-26.5363	115.246	-665.471	3885.32	-21148.1	-2630.13	168.221	897.162	0	0	0	0	0	0	0	603	903	0
143	9	0	0	0	0	0	0	200	300	0	-28.0621	113.72	-663.335	3519.11	-21331.2	-2630.13	167.843	897.695	0	0	0	0	0	0	0	603	903	0
144	0	0	0	0	0	0	0	200	300	0	-26.8414	111.126	-661.809	3702.21	-20842.9	-2355.47	168.506	897.406	0	0	0	0	0	0	0	603	903	0
144	1	0	0	0	0	0	0	200	300	0	-26.0785	113.263	-662.725	3519.11	-21209.1	-2584.35	167.997	897.69	0	0	0	0	0	0	0	603	903	0
144	2	0	0	0	0	0	0	200	300	0	-27.4518	111.126	-662.419	3610.66	-21453.3	-2767.46	167.614	897.549	0	0	0	0	0	0	0	603	903	0
144	3	0	0	0	0	0	0	200	300	0	-25.9259	110.211	-660.588	3793.77	-21209.1	-2675.9	167.894	897.257	0	0	0	0	0	0	0	603	903	0
144	4	0	0	0	0	0	0	200	300	0	-26.5363	109.143	-658.452	3793.77	-20781.9	-2263.92	168.438	897.238	0	0	0	0	0	0	0	603	903	0
144	5	0	0	0	0	0	0	200	300	0	-25.9259	108.532	-660.283	3610.66	-21026	-2035.03	168.156	897.532	0	0	0	0	0	0	0	603	903	0
144	6	0	0	0	0	0	0	200	300	0	-25.9259	107.769	-656.926	3702.21	-21209.1	-2126.59	167.715	897.364	0	0	0	0	0	0	0	603	903	0
144	7	0	0	0	0	0	0	200	300	0	-27.1466	106.549	-657.537	3702.21	-20537.7	-2218.14	168.766	897.37	0	0	0	0	0	0	0	603	903	0
144	8	0	0	0	0	0	0	200	300	0	-26.5363	105.175	-654.485	3793.77	-20720.8	-2447.02	168.34	897.203	0	0	0	0	0	0	0	603	903	0
144	9	0	0	0	0	0	0	200	300	0	-25.4681	104.413	-655.4	4068.42	-20720.8	-1897.71	168.384	896.793	0	0	0	0	0	0	0	603	903	0
145	0	0	0	0	0	0	0	200	300	0	-25.0104	104.107	-654.79	4068.42	-20354.6	-1989.26	168.914	896.787	0	0	0	0	0	0	0	603	903	0
145	1	0	0	0	0	0	0	200	300	0	-25.7733	102.124	-648.076	4159.98	-20293.6	-1989.26	168.686	896.581	0	0	0	0	0	0	0	603	903	0
145	2	0	0	0	0	0	0	200	300	0	-25.7733	101.819	-650.212	3702.21	-20049.4	-1714.6	169.165	897.306	0	0	0	0	0	0	0	603	903	0
145	3	0	0	0	0	0	0	200	300	0	-24.7052	101.513	-648.381	3885.32	-19988.4	-1714.6	169.172	897.008	0	0	0	0	0	0	0	603	903	0
145	4	0	0	0	0	0	0	200	300	0	-23.7897	99.6823	-647.771	4251.53	-20293.6	-1577.27	168.672	896.437	0	0	0	0	0	0	0	603	903	0
145	5	0	0	0	0	0	0	200	300	0	-24.8578	99.6823	-647.161	4159.98	-20354.6	-1760.38	168.548	896.572	0	0	0	0	0	0	0	603	903	0
145	6	0	0	0	0	0	0	200	300	0	-24.8578	99.6823	-645.635	3793.77	-19927.4	-1760.38	169.135	897.124	0	0	0	0	0	0	0	603	903	0
145	7	0	0	0	0	0	0	200	300	0	-23.3319	97.8513	-643.804	3885.32	-19866.3	-1623.05	169.142	896.965	0	0	0	0	0	0	0	603	903	0
145	8	0	0	0	0	0	0	200	300	0	-20.8905	96.478	-641.362	3702.21	-20171.5	-1577.27	168.549	897.228	0	0	0	0	0	0	0	603	903	0
145	9	0	0	0	0	0	0	200	300	0	-21.9586	97.2409	-641.057	3610.66	-20537.7	-1668.82	167.963	897.368	0	0	0	0	0	0	0	603	903	0
146	0	0	0	0	0	0	0	200	300	0	-21.1957	96.1728	-639.836	3610.66	-19683.2	-1851.93	169.237	897.357	0	0	0	0	0	0	0	603	903	0
146	1	0	0	0	0	0	0	200	300	0	-23.6371	92.8159	-638.005	3793.77	-19866.3	-1760.38	168.862	897.054	0	0	0	0	0	0	0	603	903	0
146	2	0	0	0	0	0	0	200	300	0	-21.3483	93.884	-635.869	3336	-19805.3	-1256.84	168.853	897.754	0	0	0	0	0	0	0	603	903	0
146	3	0	0	0	0	0	0	200	300	0	-21.1957	93.4262	-635.259	3427.55	-19439.1	-1394.17	169.4	897.605	0	0	0	0	0	0	0	603	903	0
146	4	0	0	0	0	0	0	200	300	0	-22.4164	92.2055	-634.343	3519.11	-19683.2	-1302.61	168.971	897.452	0	0	0	0	0	0	0	603	903	0
146	5	0	0	0	0	0	0	200	300	0	-23.0267	91.9003	-630.071	3702.21	-19378.1	-844.849	169.245	897.124	0	0	0	0	0	0	0	603	903	0
146	6	0	0	0	0	0	0	200	300	0	-20.8905	90.8322	-630.071	3519.11	-18950.8	-1119.51	169.923	897.415	0	0	0	0	0	0	0	603	903	0
146	7	0	0	0	0	0	0	200	300	0	-20.4327	89.4589	-627.935	3427.55	-19256	-844.849	169.334	897.542	0	0	0	0	0	0	0	603	903	0
146	8	0	0	0	0	0	0	200	300	0	-21.3483	90.3745	-625.493	3336	-19317	-753.296	169.117	897.667	0	0	0	0	0	0	0	603	903	0
146	9	0	0	0	0	0	0	200	300	0	-21.5009	88.8486	-624.883	3152.9	-18645.6	-1027.95	170.161	897.954	0	0	0	0	0	0	0	603	903	0
147	0	0	0	0	0	0	0	200	300	0	-20.2802	87.7805	-621.526	3519.11	-19011.8	-936.402	169.411	897.338	0	0	0	0	0	0	0	603	903	0
147	1	0	0	0	0	0	0	200	300	0	-19.6698	87.4753	-618.474	2969.79	-19133.9	-844.849	169.063	898.198	0	0	0	0	0	0	0	603	903	0
147	2	0	0	0	0	0	0	200	300	0	-20.2802	86.7123	-618.474	2878.24	-18828.7	-799.073	169.556	898.346	0	0	0	0	0	0	0	603	903	0
147	3	0	0	0	0	0	0	200	300	0	-18.1439	86.102	-615.728	2786.69	-19195	-1027.95	168.826	898.474	0	0	0	0	0	0	0	603	903	0
147	4	0	0	0	0	0	0	200	300	0	-19.6698	84.2709	-609.929	2786.69	-18706.7	-432.862	169.33	898.431	0	0	0	0	0	0	0	603	903	0
147	5	0	0	0	0	0	0	200	300	0	-18.7543	84.4235	-612.065	2878.24	-18462.5	-753.296	169.836	898.298	0	0	0	0	0	0	0	603	903	0
147	6	0	0	0	0	0	0	200	300	0	-18.4491	83.6606	-610.54	2512.03	-18889.8	-753.296	169.061	898.886	0	0	0	0	0	0	0	603	903	0
147	7	0	0	0	0	0	0	200	300	0	-19.6698	83.9658	-606.572	2054.26	-18584.6	-387.085	169.361	899.613	0	0	0	0	0	0	0	603	903	0
147	8	0	0	0	0	0	0	200	300	0	-19.5172	83.0502	-605.962	3244.45	-18157.4	-203.98	170.035	897.646	0	0	0	0	0	0	0	603	903	0
147	9	0	0	0	0	0	0	200	300	0	-17.9913	81.8295	-604.131	3244.45	-18035.3	-524.414	170.147	897.63	0	0	0	0	0	0	0	603	903	0
148	0	0	0	0	0	0	0	200	300	0	-17.9913	81.2192	-601.079	2145.82	-17669.1	-387.085	170.604	899.43	0	0	0	0	0	0	0	603	903	0
148	1	0	0	0	0	0	0	200	300	0	-18.4491	81.2192	-600.774	2786.69	-17852.2	-203.98	170.285	898.362	0	0	0	0	0	0	0	603	903	0
148	2	0	0	0	0	0	0	200	300	0	-17.9913	79.8459	-597.722	2420.47	-17913.2	-387.085	170.031	898.951	0	0	0	0	0	0	0	603	903	0
148	3	0	0	0	0	0	0	200	300	0	-17.5336	79.2355	-594.06	2328.92	-18096.3	-478.638	169.538	899.08	0	0	0	0	0	0	0	603	903	0
148	4	0	0	0	0	0	0	200	300	0	-17.2284	77.5571	-591.924	2695.13	-17913.2	-432.862	169.737	898.447	0	0	0	0	0	0	0	603	903	0
148	5	0	0	0	0	0	0	200	300	0	-17.6862	78.0148	-591.314	2328.92	-17791.1	-249.756	169.913	899.062	0	0	0	0	0	0	0	603	903	0
148	6	0	0	0	0	0	0	200	300	0	-16.9232	77.5571	-589.788	1962.71	-18096.3	-249.756	169.317	899.672	0	0	0	0	0	0	0	603	903	0
148	7	0	0	0	0	0	0	200	300	0	-16.3129	75.4208	-586.736	2054.26	-17913.2	-20.8743	169.47	899.499	0	0	0	0	0	0	0	603	903	0
148	8	0	0	0	0	0	0	200	300	0	-14.1766	76.3364	-586.431	2054.26	-17363.9	-20.8743	170.391	899.497	0	0	0	0	0	0	0	603	903	0
148	9	0	0	0	0	0	0	200	300	0	-16.1603	76.1838	-583.684	1138.74	-17180.8	70.6785	170.565	901.049	0	0	0	0	0	0	0	603	903	0
149	0	0	0	0	0	0	0	200	300	0	-15.3973	75.8786	-582.158	1230.29	-17424.9	24.9021	170.068	900.887	0	0	0	0	0	0	0	603	903	0
149	1	0	0	0	0	0	0	200	300	0	-16.4655	74.5053	-580.022	1779.6	-17424.9	-66.6507	169.958	899.932	0	0	0	0	0	0	0	603	903	0
149	2	0	0	0	0	0	0	200	300	0	-15.8551	74.0475	-578.191	1596.5	-17058.7	70.6785	170.496	900.239	0	0	0	0	0	0	0	603	903	0
149	3	0	0	0	0	0	0	200	300	0	-15.8551	74.0475	-576.36	955.63	-17486	-20.8743	169.661	901.342	0	0	0	0	0	0	0	603	903	0
149	4	0	0	0	0	0	0	200	300	0	-16.1603	71.1484	-573.613	955.63	-17608	253.784	169.303	901.334	0	0	0	0	0	0	0	603	903	0
149	5	0	0	0	0	0	0	200	300	0	-16.1603	72.0639	-573.308	1047.18	-16997.7	162.231	170.352	901.174	0	0	0	0	0	0	0	603	903	0
149	6	0	0	0	0	0	0	200	300	0	-15.7025	72.3691	-572.087	1230.29	-17363.9	70.6785	169.648	900.85	0	0	0	0	0	0	0	603	903	0
149	7	0	0	0	0	0	0	200	300	0	-14.3292	71.9113	-568.731	680.971	-17058.7	162.231	170.006	901.803	0	0	0	0	0	0	0	603	903	0
149	8	0	0	0	0	0	0	200	300	0	-15.7025	70.8432	-569.036	406.313	-16753.5	436.889	170.558	902.286	0	0	0	0	0	0	0	603	903	0
149	9	0	0	0	0	0	0	200	300	0	-15.0922	71.1484	-566.899	314.761	-17180.8	482.666	169.693	902.445	0	0	0	0	0	0	0	603	903	0
150	0	0	0	0	0	0	0	200	300	0	-16.0077	69.9277	-566.594	589.419	-16997.7	208.008	170	901.96	0	0	0	0	0	0	0	603	903	0
150	1	0	0	0	0	0	0	200	300	0	-14.3292	69.0121	-563.237	1047.18	-16692.5	345.337	170.363	901.141	0	0	0	0	0	0	0	603	903	0
150	2	0	0	0	0	0	0	200	300	0	-15.2448	69.0121	-562.017	40.1024	-16631.5	391.113	170.408	902.929	0	0	0	0	0	0	0	603	903	0
150	3	0	0	0	0	0	0	200	300	0	-15.5499	68.5544	-562.017	406.313	-16875.6	482.666	169.973	902.277	0	0	0	0	0	0	0	603	903	0
150	4	0	0	0	0	0	0	200	300	0	-15.5499	67.4863	-558.965	-692.32	-16753.5	711.548	170.028	904.239	0	0	0	0	0	0	0	603	903	0
150	5	0	0	0	0	0	0	200	300	0	-14.9396	67.4863	-557.744	131.655	-16570.4	253.784	170.29	902.764	0	0	0	0	0	0	0	603	903	0
150	6	0	0	0	0	0	0	200	300	0	-14.1766	66.5707	-556.829	406.313	-16631.5	528.442	170.132	902.27	0	0	0	0	0	0	0	603	903	0
150	7	0	0	0	0	0	0	200	300	0	-15.3973	65.1974	-554.998	-326.109	-16448.4	986.206	170.363	903.588	0	0	0	0	0	0	0	603	903	0
150	8	0	0	0	0	0	0	200	300	0	-14.9396	65.1974	-555.303	-234.556	-16448.4	574.219	170.379	903.422	0	0	0	0	0	0	0	603	903	0
150	9	0	0	0	0	0	0	200	300	0	-16.1603	64.1293	-553.472	-326.109	-16570.4	665.771	170.061	903.589	0	0	0	0	0	0	0	603	903	0
151	0	0	0	0	0	0	0	200	300	0	-13.8715	63.6716	-551.946	-417.661	-16509.4	848.877	170.089	903.757	0	0	0	0	0	0	0	603	903	0
151	1	0	0	0	0	0	0	200	300	0	-14.3292	62.756	-550.115	-600.767	-16326.3	757.324	170.322	904.092	0	0	0	0	0	0	0	603	903	0
151	2	0	0	0	0	0	0	200	300	0	-14.6344	62.756	-548.894	-783.872	-16570.4	894.653	169.811	904.428	0	0	0	0	0	0	0	603	903	0
151	3	0	0	0	0	0	0	200	300	0	-14.3292	61.3828	-547.979	-692.32	-16143.2	757.324	170.54	904.263	0	0	0	0	0	0	0	603	903	0
151	4	0	0	0	0	0	0	200	300	0	-13.7189	61.2302	-547.063	-417.661	-16021.1	848.877	170.714	903.764	0	0	0	0	0	0	0	603	903	0
151	5	0	0	0	0	0	0	200	300	0	-13.5663	60.6198	-546.148	-1058.53	-16570.4	986.206	169.659	904.938	0	0	0	0	0	0	0	603	903	0
151	6	0	0	0	0	0	0	200	300	0	-14.1766	59.3991	-544.927	-1241.64	-16509.4	1215.09	169.703	905.279	0	0	0	0	0	0	0	603	903	0
151	7	0	0	0	0	0	0	200	300	0	-13.4137	59.2465	-544.622	-1150.08	-16204.2	1031.98	170.247	905.112	0	0	0	0	0	0	0	603	903	0
151	8	0	0	0	0	0	0	200	300	0	-12.9559	58.6362	-544.622	-600.767	-16448.4	894.653	169.799	904.103	0	0	0	0	0	0	0	603	903	0
151	9	0	0	0	0	0	0	200	300	0	-13.5663	54.8215	-542.791	-783.872	-16387.3	1306.64	169.809	904.444	0	0	0	0	0	0	0	603	903	0
152	0	0	0	0	0	0	0	200	300	0	-14.4818	57.1103	-541.265	-1241.64	-15960.1	986.206	170.513	905.294	0	0	0	0	0	0	0	603	903	0
152	1	0	0	0	0	0	0	200	300	0	-13.1085	56.6525	-542.791	-1424.74	-16082.2	1077.76	170.371	905.625	0	0	0	0	0	0	0	603	903	0
152	2	0	0	0	0	0	0	200	300	0	-13.4137	54.5163	-541.265	-1424.74	-16326.3	1215.09	169.837	905.632	0	0	0	0	0	0	0	603	903	0
152	3	0	0	0	0	0	0	200	300	0	-13.5663	55.5844	-540.044	-1241.64	-15716	1077.76	170.899	905.299	0	0	0	0	0	0	0	603	903	0
152	4	0	0	0	0	0	0	200	300	0	-12.9559	54.5163	-540.96	-2065.61	-15899.1	1169.31	170.61	906.818	0	0	0	0	0	0	0	603	903	0
152	5	0	0	0	0	0	0	200	300	0	-13.5663	52.2275	-539.739	-1699.4	-15960.1	1352.42	170.43	906.149	0	0	0	0	0	0	0	603	903	0
152	6	0	0	0	0	0	0	200	300	0	-14.0241	53.143	-539.128	-1607.85	-15777	1489.75	170.736	905.982	0	0	0	0	0	0	0	603	903	0
152	7	0	0	0	0	0	0	200	300	0	-12.4982	52.8378	-538.213	-875.425	-15960.1	1398.19	170.346	904.627	0	0	0	0	0	0	0	603	903	0
152	8	0	0	0	0	0	0	200	300	0	-11.5826	51.4645	-536.077	-1699.4	-16143.2	1489.75	169.886	906.17	0	0	0	0	0	0	0	603	903	0
152	9	0	0	0	0	0	0	200	300	0	-13.2611	51.6171	-536.077	-2157.16	-16082.2	1489.75	170	907.024	0	0	0	0	0	0	0	603	903	0
153	0	0	0	0	0	0	0	200	300	0	-12.3456	51.1594	-537.297	-2248.72	-15960.1	1489.75	170.296	907.185	0	0	0	0	0	0	0	603	903	0
153	1	0	0	0	0	0	0	200	300	0	-13.4137	49.7861	-536.382	-2157.16	-16509.4	1535.52	169.221	907.022	0	0	0	0	0	0	0	603	903	0
153	2	0	0	0	0	0	0	200	300	0	-13.1085	50.0913	-534.856	-1974.06	-16143.2	1398.19	169.818	906.691	0	0	0	0	0	0	0	603	903	0
153	3	0	0	0	0	0	0	200	300	0	-13.1085	48.8705	-534.551	-2248.72	-15777	1535.52	170.486	907.207	0	0	0	0	0	0	0	603	903	0
153	4	0	0	0	0	0	0	200	300	0	-13.7189	48.1076	-536.687	-2706.48	-15899.1	1581.3	170.376	908.043	0	0	0	0	0	0	0	603	903	0
153	5	0	0	0	0	0	0	200	300	0	-13.8715	47.955	-531.194	-2889.58	-16204.2	1581.3	169.495	908.44	0	0	0	0	0	0	0	603	903	0
153	6	0	0	0	0	0	0	200	300	0	-13.7189	47.0395	-535.466	-2065.61	-15654.9	1581.3	170.764	906.858	0	0	0	0	0	0	0	603	903	0
153	7	0	0	0	0	0	0	200	300	0	-12.8033	46.124	-535.161	-2981.14	-15716	1627.08	170.633	908.571	0	0	0	0	0	0	0	603	903	0
153	8	0	0	0	0	0	0	200	300	0	-14.1766	44.9033	-533.94	-2798.03	-15899.1	2130.61	170.223	908.24	0	0	0	0	0	0	0	603	903	0
153	9	0	0	0	0	0	0	200	300	0	-13.8715	46.7343	-535.161	-2981.14	-15960.1	1810.18	170.177	908.571	0	0	0	0	0	0	0	603	903	0
154	0	0	0	0	0	0	0	200	300	0	-12.8033	44.5981	-534.246	-2614.93	-16021.1	1855.96	170.012	907.895	0	0	0	0	0	0	0	603	903	0
154	1	0	0	0	0	0	0	200	300	0	-13.4137	44.7507	-531.804	-3072.69	-16326.3	1718.63	169.3	908.778	0	0	0	0	0	0	0	603	903	0
154	2	0	0	0	0	0	0	200	300	0	-13.7189	45.0559	-533.94	-3438.9	-15838	1627.08	170.337	909.441	0	0	0	0	0	0	0	603	903	0
154	3	0	0	0	0	0	0	200	300	0	-13.7189	43.6826	-533.33	-3530.45	-16021.1	1810.18	169.96	909.62	0	0	0	0	0	0	0	603	903	0
154	4	0	0	0	0	0	0	200	300	0	-13.2611	43.9877	-532.72	-2798.03	-16509.4	1993.29	169.009	908.252	0	0	0	0	0	0	0	603	903	0
154	5	0	0	0	0	0	0	200	300	0	-13.2611	44.1403	-533.33	-3530.45	-16265.3	1627.08	169.502	909.62	0	0	0	0	0	0	0	603	903	0
154	6	0	0	0	0	0	0	200	300	0	-14.1766	42.767	-533.025	-3622.01	-16143.2	1672.85	169.714	909.795	0	0	0	0	0	0	0	603	903	0
154	7	0	0	0	0	0	0	200	300	0	-15.0922	42.3093	-532.109	-4262.88	-16326.3	1901.73	169.318	911.011	0	0	0	0	0	0	0	603	903	0
154	8	0	0	0	0	0	0	200	300	0	-12.9559	43.3774	-533.635	-3805.11	-16570.4	1627.08	168.948	910.131	0	0	0	0	0	0	0	603	903	0
154	9	0	0	0	0	0	0	200	300	0	-13.1085	42.1567	-533.33	-3896.67	-16387.3	1901.73	169.274	910.306	0	0	0	0	0	0	0	603	903	0
155	0	0	0	0	0	0	0	200	300	0	-14.6344	41.5463	-533.635	-4354.43	-16265.3	2039.06	169.52	911.16	0	0	0	0	0	0	0	603	903	0
155	1	0	0	0	0	0	0	200	300	0	-13.5663	40.936	-532.415	-4445.98	-16387.3	1901.73	169.221	911.351	0	0	0	0	0	0	0	603	903	0
155	2	0	0	0	0	0	0	200	300	0	-14.1766	41.2412	-534.246	-4720.64	-16509.4	2130.61	169.098	911.836	0	0	0	0	0	0	0	603	903	0
155	3	0	0	0	0	0	0	200	300	0	-13.4137	41.5463	-533.94	-4445.98	-16570.4	1993.29	168.966	911.327	0	0	0	0	0	0	0	603	903	0
155	4	0	0	0	0	0	0	200	300	0	-13.5663	40.0205	-533.33	-4720.64	-16448.4	2267.94	169.159	911.851	0	0	0	0	0	0	0	603	903	0
155	5	0	0	0	0	0	0	200	300	0	-14.4818	40.7834	-534.551	-5086.85	-15960.1	2039.06	170.143	912.516	0	0	0	0	0	0	0	603	903	0
155	6	0	0	0	0	0	0	200	300	0	-14.3292	40.6308	-533.025	-5086.85	-16326.3	2084.84	169.37	912.543	0	0	0	0	0	0	0	603	903	0
155	7	0	0	0	0	0	0	200	300	0	-12.9559	39.8679	-533.025	-4903.75	-16753.5	2039.06	168.569	912.2	0	0	0	0	0	0	0	603	903	0
155	8	0	0	0	0	0	0	200	300	0	-13.5663	40.3256	-535.161	-5819.27	-16204.2	1855.96	169.721	913.874	0	0	0	0	0	0	0	603	903	0
155	9	0	0	0	0	0	0	200	300	0	-14.1766	40.173	-532.72	-5544.61	-16326.3	2039.06	169.353	913.408	0	0	0	0	0	0	0	603	903	0
156	0	0	0	0	0	0	0	200	300	0	-14.6344	39.8679	-533.635	-6368.59	-16509.4	1901.73	169.062	914.934	0	0	0	0	0	0	0	603	903	0
156	1	0	0	0	0	0	0	200	300	0	-12.6508	39.4101	-533.94	-5819.27	-16692.5	2039.06	168.737	913.899	0	0	0	0	0	0	0	603	903	0
156	2	0	0	0	0	0	0	200	300	0	-12.4982	38.9523	-533.94	-6185.48	-16631.5	2313.72	168.851	914.585	0	0	0	0	0	0	0	603	903	0
156	3	0	0	0	0	0	0	200	300	0	-14.6344	39.4101	-534.246	-6185.48	-16692.5	2130.61	168.755	914.578	0	0	0	0	0	0	0	603	903	0
156	4	0	0	0	0	0	0	200	300	0	-11.8878	37.2739	-531.804	-6551.7	-16875.6	2084.84	168.267	915.32	0	0	0	0	0	0	0	603	903	0
156	5	0	0	0	0	0	0	200	300	0	-14.1766	37.579	-536.077	-6643.25	-16448.4	2359.5	169.317	915.392	0	0	0	0	0	0	0	603	903	0
156	6	0	0	0	0	0	0	200	300	0	-12.6508	38.342	-536.077	-6460.14	-16997.7	2222.17	168.292	915.051	0	0	0	0	0	0	0	603	903	0
156	7	0	0	0	0	0	0	200	300	0	-12.4982	37.1213	-534.856	-7009.46	-17058.7	2405.27	168.106	916.105	0	0	0	0	0	0	0	603	903	0
156	8	0	0	0	0	0	0	200	300	0	-14.787	36.8161	-536.382	-7192.56	-16631.5	2313.72	168.993	916.409	0	0	0	0	0	0	0	603	903	0
156	9	0	0	0	0	0	0	200	300	0	-13.7189	37.1213	-536.382	-7101.01	-16875.6	2267.94	168.538	916.239	0	0	0	0	0	0	0	603	903	0
157	0	0	0	0	0	0	0	200	300	0	-12.3456	36.2058	-537.297	-7101.01	-17119.8	2679.93	168.137	916.216	0	0	0	0	0	0	0	603	903	0
157	1	0	0	0	0	0	0	200	300	0	-12.8033	36.2058	-536.992	-7650.33	-16814.6	2405.27	168.687	917.247	0	0	0	0	0	0	0	603	903	0
157	2	0	0	0	0	0	0	200	300	0	-13.2611	36.0532	-538.213	-7558.78	-17302.9	2359.5	167.851	917.044	0	0	0	0	0	0	0	603	903	0
157	3	0	0	0	0	0	0	200	300	0	-13.7189	36.2058	-538.823	-7924.99	-17302.9	2496.83	167.888	917.708	0	0	0	0	0	0	0	603	903	0
157	4	0	0	0	0	0	0	200	300	0	-12.4982	33.4592	-539.739	-7467.22	-17180.8	2451.05	168.168	916.835	0	0	0	0	0	0	0	603	903	0
157	5	0	0	0	0	0	0	200	300	0	-12.193	35.1376	-539.128	-7924.99	-17424.9	2634.16	167.679	917.7	0	0	0	0	0	0	0	603	903	0
157	6	0	0	0	0	0	0	200	300	0	-14.0241	35.4428	-540.654	-8291.2	-17363.9	2405.27	167.884	918.336	0	0	0	0	0	0	0	603	903	0
157	7	0	0	0	0	0	0	200	300	0	-11.7352	34.5273	-541.57	-8565.86	-17058.7	2679.93	168.501	918.817	0	0	0	0	0	0	0	603	903	0
157	8	0	0	0	0	0	0	200	300	0	-13.2611	34.3747	-540.349	-8474.3	-17180.8	2222.17	168.204	918.683	0	0	0	0	0	0	0	603	903	0
157	9	0	0	0	0	0	0	200	300	0	-12.3456	34.3747	-542.485	-8474.3	-17852.2	2634.16	167.092	918.621	0	0	0	0	0	0	0	603	903	0
158	0	0	0	0	0	0	0	200	300	0	-12.3456	33.0014	-544.316	-9023.62	-17363.9	2771.48	168.1	919.578	0	0	0	0	0	0	0	603	903	0
158	1	0	0	0	0	0	0	200	300	0	-14.0241	32.8488	-544.316	-8382.75	-17241.8	2588.38	168.324	918.401	0	0	0	0	0	0	0	603	903	0
158	2	0	0	0	0	0	0	200	300	0	-13.1085	33.0014	-544.927	-9389.83	-17486	2817.26	167.911	920.231	0	0	0	0	0	0	0	603	903	0
158	3	0	0	0	0	0	0	200	300	0	-11.4301	31.9333	-545.842	-9572.94	-17791.1	2954.59	167.406	920.538	0	0	0	0	0	0	0	603	903	0
158	4	0	0	0	0	0	0	200	300	0	-12.8033	31.9333	-545.842	-9481.38	-17302.9	2588.38	168.301	920.37	0	0	0	0	0	0	0	603	903	0
158	5	0	0	0	0	0	0	200	300	0	-11.8878	30.8652	-547.673	-9664.49	-18035.3	2725.71	167.069	920.646	0	0	0	0	0	0	0	603	903	0
158	6	0	0	0	0	0	0	200	300	0	-13.1085	31.1704	-547.368	-10122.3	-17913.2	2817.26	167.274	921.493	0	0	0	0	0	0	0	603	903	0
158	7	0	0	0	0	0	0	200	300	0	-12.3456	31.4755	-547.063	-10396.9	-17669.1	2863.04	167.702	922.005	0	0	0	0	0	0	0	603	903	0
158	8	0	0	0	0	0	0	200	300	0	-11.7352	31.0178	-548.284	-10030.7	-17852.2	2908.81	167.44	921.295	0	0	0	0	0	0	0	603	903	0
158	9	0	0	0	0	0	0	200	300	0	-11.8878	30.8652	-548.589	-9939.15	-18340.5	2725.71	166.568	921.118	0	0	0	0	0	0	0	603	903	0
159	0	0	0	0	0	0	0	200	300	0	-12.9559	30.4074	-549.504	-10396.9	-17913.2	3000.37	167.401	921.921	0	0	0	0	0	0	0	603	903	0
159	1	0	0	0	0	0	0	200	300	0	-12.6508	30.1022	-550.725	-11312.4	-18096.3	2863.04	167.141	923.541	0	0	0	0	0	0	0	603	903	0
159	2	0	0	0	0	0	0	200	300	0	-11.8878	29.9496	-552.556	-10671.6	-18584.6	2863.04	166.366	922.313	0	0	0	0	0	0	0	603	903	0
159	3	0	0	0	0	0	0	200	300	0	-10.3619	27.966	-553.167	-11129.3	-18157.4	2634.16	167.176	923.119	0	0	0	0	0	0	0	603	903	0
159	4	0	0	0	0	0	0	200	300	0	-12.9559	29.4919	-554.082	-11312.4	-18218.4	2771.48	167.12	923.417	0	0	0	0	0	0	0	603	903	0
159	5	0	0	0	0	0	0	200	300	0	-12.9559	29.1867	-555.608	-11953.3	-18584.6	3046.14	166.551	924.514	0	0	0	0	0	0	0	603	903	0
159	6	0	0	0	0	0	0	200	300	0	-13.2611	27.0505	-556.523	-11678.7	-18706.7	3137.7	166.387	923.985	0	0	0	0	0	0	0	603	903	0
159	7	0	0	0	0	0	0	200	300	0	-12.6508	28.8815	-557.134	-11861.8	-18523.6	3091.92	166.752	924.291	0	0	0	0	0	0	0	603	903	0
159	8	0	0	0	0	0	0	200	300	0	-12.3456	28.7289	-558.049	-12228	-18889.8	3137.7	166.15	924.912	0	0	0	0	0	0	0	603	903	0
159	9	0	0	0	0	0	0	200	300	0	-13.5663	27.5082	-559.575	-12044.9	-18828.7	3137.7	166.352	924.525	0	0	0	0	0	0	0	603	903	0
160	0	0	0	0	0	0	0	200	300	0	-13.2611	27.8134	-558.355	-12960.4	-18767.7	3183.47	166.387	926.212	0	0	0	0	0	0	0	603	903	0
160	1	0	0	0	0	0	0	200	300	0	-12.3456	27.8134	-562.017	-12044.9	-19195	3046.14	165.846	924.432	0	0	0	0	0	0	0	603	903	0
160	2	0	0	0	0	0	0	200	300	0	-12.6508	27.2031	-562.627	-12502.6	-19500.1	3183.47	165.341	925.222	0	0	0	0	0	0	0	603	903	0
160	3	0	0	0	0	0	0	200	300	0	-13.7189	27.0505	-562.017	-13051.9	-18950.8	3046.14	166.281	926.223	0	0	0	0	0	0	0	603	903	0
160	4	0	0	0	0	0	0	200	300	0	-12.0404	27.2031	-562.627	-13509.7	-19072.9	3046.14	166.1	927.012	0	0	0	0	0	0	0	603	903	0
160	5	0	0	0	0	0	0	200	300	0	-13.8715	25.0668	-565.374	-13784.4	-19317	3137.7	165.833	927.381	0	0	0	0	0	0	0	603	903	0
160	6	0	0	0	0	0	0	200	300	0	-12.9559	26.8979	-564.763	-13601.3	-19256	3137.7	165.904	927.083	0	0	0	0	0	0	0	603	903	0
160	7	0	0	0	0	0	0	200	300	0	-13.5663	26.5927	-567.205	-13143.5	-19500.1	3229.25	165.621	926.172	0	0	0	0	0	0	0	603	903	0
160	8	0	0	0	0	0	0	200	300	0	-14.3292	23.6935	-567.205	-14242.1	-19439.1	3366.58	165.728	928.109	0	0	0	0	0	0	0	603	903	0
160	9	0	0	0	0	0	0	200	300	0	-12.6508	26.135	-567.205	-14333.7	-19561.2	3046.14	165.513	928.271	0	0	0	0	0	0	0	603	903	0
161	0	0	0	0	0	0	0	200	300	0	-14.1766	25.6772	-569.951	-14791.4	-19317	3458.13	166.108	928.952	0	0	0	0	0	0	0	603	903	0
161	1	0	0	0	0	0	0	200	300	0	-13.7189	25.2194	-569.646	-14425.2	-19805.3	3275.02	165.232	928.323	0	0	0	0	0	0	0	603	903	0
161	2	0	0	0	0	0	0	200	300	0	-13.2611	24.9142	-569.646	-14608.3	-19988.4	3275.02	164.911	928.645	0	0	0	0	0	0	0	603	903	0
161	3	0	0	0	0	0	0	200	300	0	-13.8715	24.1513	-571.782	-14883	-19561.2	3275.02	165.789	929.029	0	0	0	0	0	0	0	603	903	0
161	4	0	0	0	0	0	0	200	300	0	-14.0241	24.3039	-572.087	-15066.1	-19988.4	3641.24	165.061	929.335	0	0	0	0	0	0	0	603	903	0
161	5	0	0	0	0	0	0	200	300	0	-12.193	24.1513	-573.613	-15066.1	-20354.6	3458.13	164.515	929.265	0	0	0	0	0	0	0	603	903	0
161	6	0	0	0	0	0	0	200	300	0	-11.8878	23.8461	-574.834	-15523.9	-19744.3	3412.35	165.652	930.006	0	0	0	0	0	0	0	603	903	0
161	7	0	0	0	0	0	0	200	300	0	-14.6344	23.3884	-574.529	-16073.2	-20232.6	3458.13	164.784	930.976	0	0	0	0	0	0	0	603	903	0
161	8	0	0	0	0	0	0	200	300	0	-11.4301	23.3884	-574.529	-16530.9	-20598.8	3275.02	164.147	931.773	0	0	0	0	0	0	0	603	903	0
161	9	0	0	0	0	0	0	200	300	0	-13.2611	22.6254	-576.36	-16073.2	-20293.6	3549.68	164.79	930.887	0	0	0	0	0	0	0	603	903	0
162	0	0	0	0	0	0	0	200	300	0	-13.2611	22.0151	-576.665	-16164.7	-20842.9	3549.68	163.856	931.031	0	0	0	0	0	0	0	603	903	0
162	1	0	0	0	0	0	0	200	300	0	-14.1766	22.4728	-578.191	-16805.6	-20354.6	3320.8	164.796	932.066	0	0	0	0	0	0	0	603	903	0
162	2	0	0	0	0	0	0	200	300	0	-14.0241	21.5573	-578.801	-17080.3	-20171.5	3366.58	165.15	932.51	0	0	0	0	0	0	0	603	903	0
162	3	0	0	0	0	0	0	200	300	0	-14.9396	21.4047	-580.632	-17263.4	-20293.6	3641.24	165.049	932.732	0	0	0	0	0	0	0	603	903	0
162	4	0	0	0	0	0	0	200	300	0	-14.0241	22.0151	-581.853	-17080.3	-20781.9	3366.58	164.283	932.355	0	0	0	0	0	0	0	603	903	0
162	5	0	0	0	0	0	0	200	300	0	-14.1766	21.4047	-582.158	-17904.2	-20476.7	3549.68	164.826	933.755	0	0	0	0	0	0	0	603	903	0
162	6	0	0	0	0	0	0	200	300	0	-16.0077	20.947	-581.853	-17446.5	-20232.6	3549.68	165.227	932.984	0	0	0	0	0	0	0	603	903	0
162	7	0	0	0	0	0	0	200	300	0	-15.8551	20.3366	-583.989	-18087.3	-20415.7	3732.79	165.041	933.972	0	0	0	0	0	0	0	603	903	0
162	8	0	0	0	0	0	0	200	300	0	-14.3292	19.8788	-584.905	-18178.9	-20781.9	4007.45	164.47	934.08	0	0	0	0	0	0	0	603	903	0
162	9	0	0	0	0	0	0	200	300	0	-14.3292	19.8788	-584.905	-18087.3	-20781.9	3549.68	164.47	933.924	0	0	0	0	0	0	0	603	903	0
163	0	0	0	0	0	0	0	200	300	0	-14.4818	19.1159	-585.82	-18911.3	-21209.1	3595.46	163.796	935.282	0	0	0	0	0	0	0	603	903	0
163	1	0	0	0	0	0	0	200	300	0	-16.1603	19.5737	-587.346	-19277.5	-21392.2	3778.56	163.578	935.821	0	0	0	0	0	0	0	603	903	0
163	2	0	0	0	0	0	0	200	300	0	-15.3973	19.2685	-588.567	-18911.3	-21331.2	3778.56	163.757	935.131	0	0	0	0	0	0	0	603	903	0
163	3	0	0	0	0	0	0	200	300	0	-14.3292	18.353	-588.872	-19735.3	-21636.4	3595.46	163.258	936.514	0	0	0	0	0	0	0	603	903	0
163	4	0	0	0	0	0	0	200	300	0	-14.4818	19.2685	-591.314	-19643.7	-21575.3	3503.91	163.513	936.221	0	0	0	0	0	0	0	603	903	0
163	5	0	0	0	0	0	0	200	300	0	-14.1766	18.5056	-589.482	-20010	-21270.1	3595.46	163.917	936.945	0	0	0	0	0	0	0	603	903	0
163	6	0	0	0	0	0	0	200	300	0	-14.0241	17.59	-591.619	-20284.6	-21758.4	3870.12	163.222	937.287	0	0	0	0	0	0	0	603	903	0
163	7	0	0	0	0	0	0	200	300	0	-15.3973	17.8952	-593.45	-20284.6	-21880.5	4007.45	163.13	937.181	0	0	0	0	0	0	0	603	903	0
163	8	0	0	0	0	0	0	200	300	0	-15.2448	17.8952	-594.67	-20650.8	-21697.4	3915.89	163.514	937.727	0	0	0	0	0	0	0	603	903	0
163	9	0	0	0	0	0	0	200	300	0	-15.2448	17.4374	-594.06	-20650.8	-21697.4	3870.12	163.476	937.762	0	0	0	0	0	0	0	603	903	0
164	0	0	0	0	0	0	0	200	300	0	-16.3129	17.59	-595.586	-21383.2	-21880.5	4007.45	163.262	938.903	0	0	0	0	0	0	0	603	903	0
164	1	0	0	0	0	0	0	200	300	0	-15.7025	17.2849	-595.891	-21200.1	-21575.3	3961.67	163.793	938.577	0	0	0	0	0	0	0	603	903	0
164	2	0	0	0	0	0	0	200	300	0	-14.9396	16.9797	-597.417	-21383.2	-21758.4	3915.89	163.579	938.793	0	0	0	0	0	0	0	603	903	0
164	3	0	0	0	0	0	0	200	300	0	-15.2448	16.8271	-598.333	-21749.5	-22185.7	3687.01	162.921	939.35	0	0	0	0	0	0	0	603	903	0
164	4	0	0	0	0	0	0	200	300	0	-16.3129	16.5219	-598.333	-22207.2	-22002.6	4053.22	163.227	940.115	0	0	0	0	0	0	0	603	903	0
164	5	0	0	0	0	0	0	200	300	0	-15.5499	16.2167	-599.248	-22756.5	-21697.4	3961.67	163.792	940.975	0	0	0	0	0	0	0	603	903	0
164	6	0	0	0	0	0	0	200	300	0	-14.787	16.0642	-598.333	-22756.5	-22429.8	4053.22	162.513	941.033	0	0	0	0	0	0	0	603	903	0
164	7	0	0	0	0	0	0	200	300	0	-14.4818	16.6745	-600.774	-22665	-22307.7	4053.22	162.868	940.726	0	0	0	0	0	0	0	603	903	0
164	8	0	0	0	0	0	0	200	300	0	-16.1603	16.0642	-601.384	-23580.5	-22185.7	3961.67	163.109	942.21	0	0	0	0	0	0	0	603	903	0
164	9	0	0	0	0	0	0	200	300	0	-14.6344	15.4538	-601.995	-23763.6	-22185.7	4144.77	163.146	942.475	0	0	0	0	0	0	0	603	903	0
165	0	0	0	0	0	0	0	200	300	0	-14.787	15.4538	-601.995	-23580.5	-22429.8	4099	162.741	942.171	0	0	0	0	0	0	0	603	903	0
165	1	0	0	0	0	0	0	200	300	0	-13.8715	15.4538	-603.215	-23672.1	-22674	4099	162.412	942.243	0	0	0	0	0	0	0	603	903	0
165	2	0	0	0	0	0	0	200	300	0	-15.0922	14.996	-602.3	-24221.4	-23162.2	4053.22	161.544	943.215	0	0	0	0	0	0	0	603	903	0
165	3	0	0	0	0	0	0	200	300	0	-16.4655	14.6909	-604.741	-24679.1	-22368.8	4099	163.011	943.81	0	0	0	0	0	0	0	603	903	0
165	4	0	0	0	0	0	0	200	300	0	-16.1603	13.7753	-605.046	-24770.7	-22551.9	4053.22	162.727	943.94	0	0	0	0	0	0	0	603	903	0
165	5	0	0	0	0	0	0	200	300	0	-14.6344	14.2331	-608.098	-24862.2	-23101.2	4465.21	162.011	943.885	0	0	0	0	0	0	0	603	903	0
165	6	0	0	0	0	0	0	200	300	0	-14.787	13.7753	-606.572	-25320	-23162.2	4144.77	161.815	944.743	0	0	0	0	0	0	0	603	903	0
165	7	0	0	0	0	0	0	200	300	0	-16.4655	13.0124	-606.878	-24312.9	-22918.1	4236.33	162.236	943.062	0	0	0	0	0	0	0	603	903	0
165	8	0	0	0	0	0	0	200	300	0	-15.0922	13.6227	-610.234	-26052.4	-22918.1	4053.22	162.444	945.693	0	0	0	0	0	0	0	603	903	0
165	9	0	0	0	0	0	0	200	300	0	-15.8551	12.8598	-608.403	-25960.9	-22979.1	4236.33	162.23	945.671	0	0	0	0	0	0	0	603	903	0
166	0	0	0	0	0	0	0	200	300	0	-14.4818	13.3176	-609.014	-26327.1	-23589.5	4465.21	161.266	946.229	0	0	0	0	0	0	0	603	903	0
166	1	0	0	0	0	0	0	200	300	0	-14.787	12.8598	-608.098	-26784.9	-23162.2	4327.88	161.91	947.047	0	0	0	0	0	0	0	603	903	0
166	2	0	0	0	0	0	0	200	300	0	-16.0077	12.5546	-608.709	-26693.3	-23345.3	4373.66	161.648	946.852	0	0	0	0	0	0	0	603	903	0
166	3	0	0	0	0	0	0	200	300	0	-15.7025	12.7072	-609.624	-27608.8	-22918.1	4465.21	162.406	948.288	0	0	0	0	0	0	0	603	903	0
166	4	0	0	0	0	0	0	200	300	0	-14.787	11.9443	-608.403	-27608.8	-23162.2	4510.99	161.929	948.379	0	0	0	0	0	0	0	603	903	0
166	5	0	0	0	0	0	0	200	300	0	-14.3292	12.0969	-611.15	-27791.9	-23284.3	4373.66	161.901	948.475	0	0	0	0	0	0	0	603	903	0
166	6	0	0	0	0	0	0	200	300	0	-15.7025	11.9443	-611.76	-28615.9	-23345.3	4327.88	161.839	949.776	0	0	0	0	0	0	0	603	903	0
166	7	0	0	0	0	0	0	200	300	0	-15.0922	11.4865	-612.371	-28524.4	-23345.3	4282.1	161.877	949.58	0	0	0	0	0	0	0	603	903	0
166	8	0	0	0	0	0	0	200	300	0	-15.7025	9.65546	-612.676	-28615.9	-23650.5	4602.54	161.398	949.706	0	0	0	0	0	0	0	603	903	0
166	9	0	0	0	0	0	0	200	300	0	-14.787	10.8762	-611.76	-28707.5	-23650.5	4419.43	161.34	949.926	0	0	0	0	0	0	0	603	903	0
167	0	0	0	0	0	0	0	200	300	0	-15.7025	10.8762	-613.286	-29256.8	-23467.4	4556.76	161.735	950.705	0	0	0	0	0	0	0	603	903	0
167	1	0	0	0	0	0	0	200	300	0	-14.6344	10.1132	-612.676	-29531.4	-23284.3	4327.88	161.996	951.201	0	0	0	0	0	0	0	603	903	0
167	2	0	0	0	0	0	0	200	300	0	-16.618	9.35028	-612.065	-29623	-23833.6	4602.54	161.06	951.398	0	0	0	0	0	0	0	603	903	0
167	3	0	0	0	0	0	0	200	300	0	-12.6508	10.1132	-614.507	-29897.6	-23711.6	4831.42	161.414	951.653	0	0	0	0	0	0	0	603	903	0
167	4	0	0	0	0	0	0	200	300	0	-15.7025	10.1132	-614.507	-30721.6	-23589.5	4785.64	161.612	952.994	0	0	0	0	0	0	0	603	903	0
167	5	0	0	0	0	0	0	200	300	0	-14.3292	9.50287	-613.286	-30721.6	-24077.8	4739.87	160.74	953.093	0	0	0	0	0	0	0	603	903	0
167	6	0	0	0	0	0	0	200	300	0	-16.618	8.12958	-612.981	-30447	-23833.6	4648.31	161.118	952.67	0	0	0	0	0	0	0	603	903	0
167	7	0	0	0	0	0	0	200	300	0	-15.0922	8.58735	-615.117	-31270.9	-23894.7	4602.54	161.154	953.837	0	0	0	0	0	0	0	603	903	0
167	8	0	0	0	0	0	0	200	300	0	-14.9396	8.89252	-613.897	-32094.9	-24260.9	4602.54	160.481	955.281	0	0	0	0	0	0	0	603	903	0
167	9	0	0	0	0	0	0	200	300	0	-16.618	9.04511	-614.507	-32094.9	-24444	4327.88	160.222	955.229	0	0	0	0	0	0	0	603	903	0
168	0	0	0	0	0	0	0	200	300	0	-16.1603	7.82441	-610.845	-31728.7	-24016.7	4465.21	160.683	954.942	0	0	0	0	0	0	0	603	903	0
168	1	0	0	0	0	0	0	200	300	0	-15.5499	7.06147	-614.507	-31362.5	-24382.9	4739.87	160.321	954.037	0	0	0	0	0	0	0	603	903	0
168	2	0	0	0	0	0	0	200	300	0	-15.2448	7.82441	-615.728	-32461.1	-24260.9	4648.31	160.598	955.72	0	0	0	0	0	0	0	603	903	0
168	3	0	0	0	0	0	0	200	300	0	-17.0758	7.21405	-614.202	-33193.6	-23955.7	4831.42	160.997	957.043	0	0	0	0	0	0	0	603	903	0
168	4	0	0	0	0	0	0	200	300	0	-15.5499	7.21405	-614.507	-33102	-23955.7	4831.42	161.016	956.868	0	0	0	0	0	0	0	603	903	0
168	5	0	0	0	0	0	0	200	300	0	-16.4655	6.6037	-614.507	-33285.1	-24444	5060.3	160.222	957.166	0	0	0	0	0	0	0	603	903	0
168	6	0	0	0	0	0	0	200	300	0	-16.0077	6.45111	-616.643	-33468.2	-23955.7	4922.97	161.151	957.275	0	0	0	0	0	0	0	603	903	0
168	7	0	0	0	0	0	0	200	300	0	-15.5499	4.77265	-619.39	-34292.2	-24138.8	5014.53	161.028	958.365	0	0	0	0	0	0	0	603	903	0
168	8	0	0	0	0	0	0	200	300	0	-17.0758	6.14594	-616.033	-34475.3	-24566	4968.75	160.122	958.963	0	0	0	0	0	0	0	603	903	0
168	9	0	0	0	0	0	0	200	300	0	-17.5336	5.53559	-616.338	-34383.7	-24321.9	4831.42	160.538	958.787	0	0	0	0	0	0	0	603	903	0
169	0	0	0	0	0	0	0	200	300	0	-16.1603	5.23041	-616.033	-35116.1	-24199.8	4877.2	160.717	960.004	0	0	0	0	0	0	0	603	903	0
169	1	0	0	0	0	0	0	200	300	0	-16.0077	4.46747	-614.812	-36031.7	-24749.2	5106.08	159.745	961.606	0	0	0	0	0	0	0	603	903	0
169	2	0	0	0	0	0	0	200	300	0	-17.0758	5.68818	-617.559	-35940.1	-24688.1	5380.74	160.023	961.197	0	0	0	0	0	0	0	603	903	0
169	3	0	0	0	0	0	0	200	300	0	-16.7706	4.77265	-616.948	-35665.5	-24260.9	5060.3	160.676	960.81	0	0	0	0	0	0	0	603	903	0
169	4	0	0	0	0	0	0	200	300	0	-16.618	4.46747	-616.033	-36214.8	-25359.5	4831.42	158.834	961.787	0	0	0	0	0	0	0	603	903	0
169	5	0	0	0	0	0	0	200	300	0	-16.7706	4.92524	-617.559	-37130.3	-25237.4	5014.53	159.134	963.124	0	0	0	0	0	0	0	603	903	0
169	6	0	0	0	0	0	0	200	300	0	-17.381	3.55194	-618.169	-36947.2	-24749.2	4968.75	159.964	962.769	0	0	0	0	0	0	0	603	903	0
169	7	0	0	0	0	0	0	200	300	0	-17.381	3.70453	-617.864	-36947.2	-25176.4	5060.3	159.253	962.798	0	0	0	0	0	0	0	603	903	0
169	8	0	0	0	0	0	0	200	300	0	-17.2284	4.00971	-618.779	-37221.9	-24993.3	5243.41	159.609	963.154	0	0	0	0	0	0	0	603	903	0
169	9	0	0	0	0	0	0	200	300	0	-17.0758	2.94159	-619.39	-38228.9	-25054.3	5014.53	159.55	964.72	0	0	0	0	0	0	0	603	903	0
170	0	0	0	0	0	0	0	200	300	0	-17.381	2.33124	-619.085	-38686.7	-25420.5	5563.84	158.939	965.49	0	0	0	0	0	0	0	603	903	0
170	1	0	0	0	0	0	0	200	300	0	-17.6862	2.63642	-619.085	-38045.8	-25359.5	4922.97	159.037	964.455	0	0	0	0	0	0	0	603	903	0
170	2	0	0	0	0	0	0	200	300	0	-16.9232	2.33124	-619.39	-38137.4	-24932.3	5334.96	159.747	964.573	0	0	0	0	0	0	0	603	903	0
170	3	0	0	0	0	0	0	200	300	0	-16.9232	2.02607	-618.779	-39327.6	-24749.2	5289.19	160.003	966.557	0	0	0	0	0	0	0	603	903	0
170	4	0	0	0	0	0	0	200	300	0	-18.2965	0.95795	-619.085	-39419.1	-25542.6	5380.74	158.741	966.673	0	0	0	0	0	0	0	603	903	0
170	5	0	0	0	0	0	0	200	300	0	-17.5336	1.41571	-620	-39419.1	-25298.5	5426.51	159.196	966.579	0	0	0	0	0	0	0	603	903	0
170	6	0	0	0	0	0	0	200	300	0	-17.0758	1.41571	-619.39	-38778.3	-25237.4	5151.85	159.254	965.607	0	0	0	0	0	0	0	603	903	0
170	7	0	0	0	0	0	0	200	300	0	-16.7706	0.652775	-618.169	-40700.9	-25603.6	5243.41	158.581	968.841	0	0	0	0	0	0	0	603	903	0
170	8	0	0	0	0	0	0	200	300	0	-18.2965	0.0424231	-620	-40609.3	-25298.5	5472.29	159.196	968.499	0	0	0	0	0	0	0	603	903	0
170	9	0	0	0	0	0	0	200	300	0	-17.9913	0.652775	-620	-41158.6	-25481.6	5334.96	158.901	969.385	0	0	0	0	0	0	0	603	903	0
171	0	0	0	0	0	0	0	200	300	0	-16.7706	-0.415341	-620.61	-40243.1	-25847.8	5380.74	158.351	967.844	0	0	0	0	0	0	0	603	903	0
171	1	0	0	0	0	0	0	200	300	0	-17.5336	-0.262753	-622.441	-40975.5	-25786.8	5334.96	158.572	968.83	0	0	0	0	0	0	0	603	903	0
171	2	0	0	0	0	0	0	200	300	0	-18.6017	-0.720516	-621.221	-41433.3	-25603.6	5426.51	158.785	969.697	0	0	0	0	0	0	0	603	903	0
171	3	0	0	0	0	0	0	200	300	0	-18.2965	-0.567928	-621.831	-42531.9	-25908.8	5746.95	158.335	971.398	0	0	0	0	0	0	0	603	903	0
171	4	0	0	0	0	0	0	200	300	0	-17.0758	0.0424231	-623.052	-42440.4	-26030.9	5518.07	158.22	971.117	0	0	0	0	0	0	0	603	903	0
171	5	0	0	0	0	0	0	200	300	0	-17.2284	-0.262753	-621.526	-42440.4	-25847.8	5609.62	158.412	971.284	0	0	0	0	0	0	0	603	903	0
171	6	0	0	0	0	0	0	200	300	0	-19.5172	-1.17828	-621.831	-43447.5	-25847.8	5426.51	158.433	972.87	0	0	0	0	0	0	0	603	903	0
171	7	0	0	0	0	0	0	200	300	0	-18.6017	-1.17828	-623.357	-43813.7	-26091.9	5472.29	158.143	973.287	0	0	0	0	0	0	0	603	903	0
171	8	0	0	0	0	0	0	200	300	0	-16.618	-3.00933	-623.967	-43630.6	-25664.7	5701.17	158.869	972.924	0	0	0	0	0	0	0	603	903	0
171	9	0	0	0	0	0	0	200	300	0	-14.6344	-1.33087	-621.831	-43996.8	-26458.1	5609.62	157.451	973.754	0	0	0	0	0	0	0	603	903	0
172	0	0	0	0	0	0	0	200	300	0	-18.1439	-1.48346	-623.357	-44637.6	-26336.1	5472.29	157.751	974.608	0	0	0	0	0	0	0	603	903	0
172	1	0	0	0	0	0	0	200	300	0	-17.5336	-2.70416	-623.052	-45003.8	-25908.8	5563.84	158.416	975.231	0	0	0	0	0	0	0	603	903	0
172	2	0	0	0	0	0	0	200	300	0	-17.8387	-1.94122	-620.61	-45278.5	-25969.9	5746.95	158.154	975.958	0	0	0	0	0	0	0	603	903	0
172	3	0	0	0	0	0	0	200	300	0	-16.9232	-2.85675	-624.273	-45644.7	-26336.1	5563.84	157.813	976.117	0	0	0	0	0	0	0	603	903	0
172	4	0	0	0	0	0	0	200	300	0	-17.6862	-2.39898	-624.883	-46102.5	-26091.9	5655.4	158.245	976.778	0	0	0	0	0	0	0	603	903	0
172	5	0	0	0	0	0	0	200	300	0	-18.6017	-4.07745	-623.052	-46468.7	-26153	5380.74	158.024	977.582	0	0	0	0	0	0	0	603	903	0
172	6	0	0	0	0	0	0	200	300	0	-18.4491	-3.31451	-625.188	-46468.7	-26519.2	5746.95	157.582	977.328	0	0	0	0	0	0	0	603	903	0
172	7	0	0	0	0	0	0	200	300	0	-17.381	-3.4671	-625.493	-46010.9	-26702.3	5884.28	157.31	976.56	0	0	0	0	0	0	0	603	903	0
172	8	0	0	0	0	0	0	200	300	0	-17.2284	-3.31451	-621.221	-47201.1	-26397.1	6113.16	157.508	978.981	0	0	0	0	0	0	0	603	903	0
172	9	0	0	0	0	0	0	200	300	0	-18.7543	-3.77227	-625.493	-47109.6	-26641.2	5563.84	157.408	978.316	0	0	0	0	0	0	0	603	903	0
173	0	0	0	0	0	0	0	200	300	0	-18.6017	-4.38263	-626.409	-48116.6	-26641.2	5884.28	157.47	979.814	0	0	0	0	0	0	0	603	903	0
173	1	0	0	0	0	0	0	200	300	0	-17.6862	-6.06109	-625.493	-47842	-26275	5930.05	157.993	979.487	0	0	0	0	0	0	0	603	903	0
173	2	0	0	0	0	0	0	200	300	0	-16.618	-4.84039	-627.935	-48116.6	-26702.3	6433.59	157.476	979.627	0	0	0	0	0	0	0	603	903	0
173	3	0	0	0	0	0	0	200	300	0	-17.381	-5.29815	-627.324	-48940.6	-26885.4	5975.83	157.143	981.015	0	0	0	0	0	0	0	603	903	0
173	4	0	0	0	0	0	0	200	300	0	-18.6017	-5.29815	-621.526	-49032.2	-26763.3	5838.5	156.939	981.89	0	0	0	0	0	0	0	603	903	0
173	5	0	0	0	0	0	0	200	300	0	-18.4491	-5.29815	-627.324	-49489.9	-27129.5	5838.5	156.754	981.891	0	0	0	0	0	0	0	603	903	0
173	6	0	0	0	0	0	0	200	300	0	-16.9232	-6.36627	-627.935	-49581.5	-26824.3	6021.61	157.282	981.96	0	0	0	0	0	0	0	603	903	0
173	7	0	0	0	0	0	0	200	300	0	-16.9232	-5.45074	-625.188	-50588.6	-27129.5	6021.61	156.606	983.917	0	0	0	0	0	0	0	603	903	0
173	8	0	0	0	0	0	0	200	300	0	-18.4491	-6.67144	-627.629	-49947.7	-26763.3	5838.5	157.358	982.582	0	0	0	0	0	0	0	603	903	0
173	9	0	0	0	0	0	0	200	300	0	-18.7543	-7.12921	-627.019	-50588.6	-27190.6	5838.5	156.635	983.681	0	0	0	0	0	0	0	603	903	0
174	0	0	0	0	0	0	0	200	300	0	-17.0758	-7.2818	-626.714	-51046.3	-26702.3	6158.94	157.393	984.451	0	0	0	0	0	0	0	603	903	0
174	1	0	0	0	0	0	0	200	300	0	-16.9232	-7.73956	-629.155	-51595.6	-26824.3	6113.16	157.365	985.008	0	0	0	0	0	0	0	603	903	0
174	2	0	0	0	0	0	0	200	300	0	-17.5336	-7.73956	-628.24	-52236.5	-27495.7	6296.27	156.234	986.147	0	0	0	0	0	0	0	603	903	0
174	3	0	0	0	0	0	0	200	300	0	-16.1603	-8.65509	-627.935	-52328.1	-26824.3	5975.83	157.282	986.334	0	0	0	0	0	0	0	603	903	0
174	4	0	0	0	0	0	0	200	300	0	-18.2965	-8.04473	-629.766	-52053.4	-26946.4	5975.83	157.212	985.655	0	0	0	0	0	0	0	603	903	0
174	5	0	0	0	0	0	0	200	300	0	-17.381	-9.57061	-629.766	-52602.7	-27190.6	6479.37	156.824	986.528	0	0	0	0	0	0	0	603	903	0
174	6	0	0	0	0	0	0	200	300	0	-16.9232	-9.41803	-629.461	-53152	-27007.5	6296.27	157.094	987.441	0	0	0	0	0	0	0	603	903	0
174	7	0	0	0	0	0	0	200	300	0	-18.2965	-9.7232	-625.798	-53518.3	-27129.5	6250.49	156.648	988.52	0	0	0	0	0	0	0	603	903	0
174	8	0	0	0	0	0	0	200	300	0	-18.9069	-10.181	-628.85	-53152	-26824.3	6342.04	157.344	987.523	0	0	0	0	0	0	0	603	903	0
174	9	0	0	0	0	0	0	200	300	0	-17.2284	-10.7913	-630.376	-53243.6	-27068.5	6387.82	157.06	987.463	0	0	0	0	0	0	0	603	903	0
175	0	0	0	0	0	0	0	200	300	0	-17.0758	-11.0965	-630.376	-54433.8	-27068.5	6479.37	157.06	989.351	0	0	0	0	0	0	0	603	903	0
175	1	0	0	0	0	0	0	200	300	0	-18.2965	-11.7068	-630.986	-54159.1	-27678.8	6296.27	156.134	988.833	0	0	0	0	0	0	0	603	903	0
175	2	0	0	0	0	0	0	200	300	0	-17.8387	-11.8594	-629.766	-55074.6	-27373.7	6342.04	156.534	990.453	0	0	0	0	0	0	0	603	903	0
175	3	0	0	0	0	0	0	200	300	0	-17.2284	-12.4698	-631.597	-54983.1	-27373.7	6433.59	156.66	990.054	0	0	0	0	0	0	0	603	903	0
175	4	0	0	0	0	0	0	200	300	0	-14.787	-12.6224	-631.597	-55440.9	-28045.1	6479.37	155.597	990.779	0	0	0	0	0	0	0	603	903	0
175	5	0	0	0	0	0	0	200	300	0	-17.5336	-12.012	-631.902	-56356.4	-27495.7	6433.59	156.487	992.185	0	0	0	0	0	0	0	603	903	0
175	6	0	0	0	0	0	0	200	300	0	-17.9913	-12.4698	-634.038	-56539.5	-27739.9	6433.59	156.249	992.174	0	0	0	0	0	0	0	603	903	0
175	7	0	0	0	0	0	0	200	300	0	-17.9913	-13.2327	-631.902	-56539.5	-27861.9	6433.59	155.908	992.475	0	0	0	0	0	0	0	603	903	0
175	8	0	0	0	0	0	0	200	300	0	-16.9232	-13.9957	-633.123	-56814.2	-27923	6067.38	155.896	992.737	0	0	0	0	0	0	0	603	903	0
175	9	0	0	0	0	0	0	200	300	0	-16.7706	-14.606	-635.869	-57821.2	-27434.7	6387.82	156.855	993.933	0	0	0	0	0	0	0	603	903	0
176	0	0	0	0	0	0	0	200	300	0	-17.6862	-14.7586	-634.038	-56722.6	-28045.1	6525.15	155.768	992.462	0	0	0	0	0	0	0	603	903	0
176	1	0	0	0	0	0	0	200	300	0	-18.2965	-14.4534	-636.48	-57729.7	-28167.1	6570.92	155.745	993.702	0	0	0	0	0	0	0	603	903	0
176	2	0	0	0	0	0	0	200	300	0	-14.787	-15.369	-637.395	-57821.2	-27495.7	6662.48	156.862	993.715	0	0	0	0	0	0	0	603	903	0
176	3	0	0	0	0	0	0	200	300	0	-16.3129	-16.7422	-634.648	-58279	-27617.8	6479.37	156.483	994.829	0	0	0	0	0	0	0	603	903	0
176	4	0	0	0	0	0	0	200	300	0	-15.2448	-16.4371	-639.836	-59103	-27984	6799.81	156.264	995.372	0	0	0	0	0	0	0	603	903	0
176	5	0	0	0	0	0	0	200	300	0	-16.1603	-17.0474	-640.142	-59103	-27739.9	6525.15	156.666	995.328	0	0	0	0	0	0	0	603	903	0
176	6	0	0	0	0	0	0	200	300	0	-16.0077	-17.9629	-638.921	-58828.3	-27739.9	6708.25	156.583	995.075	0	0	0	0	0	0	0	603	903	0
176	7	0	0	0	0	0	0	200	300	0	-15.2448	-18.2681	-641.973	-59560.7	-28045.1	6708.25	156.314	995.778	0	0	0	0	0	0	0	603	903	0
176	8	0	0	0	0	0	0	200	300	0	-14.4818	-19.9466	-643.804	-60110.1	-27984	6616.7	156.533	996.367	0	0	0	0	0	0	0	603	903	0
176	9	0	0	0	0	0	0	200	300	0	-14.787	-19.9466	-643.499	-60384.7	-28106.1	6937.13	156.323	996.838	0	0	0	0	0	0	0	603	903	0
177	0	0	0	0	0	0	0	200	300	0	-15.2448	-19.4888	-644.414	-61117.1	-28350.2	6616.7	156.006	997.841	0	0	0	0	0	0	0	603	903	0
177	1	0	0	0	0	0	0	200	300	0	-14.3292	-20.5569	-645.635	-60293.2	-27923	6937.13	156.751	996.386	0	0	0	0	0	0	0	603	903	0
177	2	0	0	0	0	0	0	200	300	0	-14.787	-21.9302	-646.856	-61391.8	-28167.1	6662.48	156.455	997.908	0	0	0	0	0	0	0	603	903	0
177	3	0	0	0	0	0	0	200	300	0	-13.1085	-22.2354	-648.687	-61849.5	-28411.3	6754.03	156.202	998.346	0	0	0	0	0	0	0	603	903	0
177	4	0	0	0	0	0	0	200	300	0	-13.1085	-22.9983	-649.602	-62032.6	-28777.5	6754.03	155.7	998.493	0	0	0	0	0	0	0	603	903	0
177	5	0	0	0	0	0	0	200	300	0	-13.4137	-22.5406	-650.518	-61666.4	-28167.1	6708.25	156.7	997.796	0	0	0	0	0	0	0	603	903	0
177	6	0	0	0	0	0	0	200	300	0	-12.193	-23.6087	-652.654	-62215.8	-28472.3	6708.25	156.375	998.327	0	0	0	0	0	0	0	603	903	0
177	7	0	0	0	0	0	0	200	300	0	-14.6344	-24.0665	-654.18	-62948.2	-28655.4	6754.03	156.196	999.225	0	0	0	0	0	0	0	603	903	0
177	8	0	0	0	0	0	0	200	300	0	-14.0241	-24.0665	-653.569	-62948.2	-28289.2	6708.25	156.716	999.315	0	0	0	0	0	0	0	603	903	0
177	9	0	0	0	0	0	0	200	300	0	-12.8033	-25.1346	-655.706	-62765.1	-28594.4	6891.36	156.391	998.721	0	0	0	0	0	0	0	603	903	0
178	0	0	0	0	0	0	0	200	300	0	-11.1249	-25.2872	-656.926	-63222.8	-28777.5	6708.25	156.194	999.24	0	0	0	0	0	0	0	603	903	0
178	1	0	0	0	0	0	0	200	300	0	-13.4137	-26.2027	-656.621	-63772.2	-28411.3	6708.25	156.731	1000.12	0	0	0	0	0	0	0	603	903	0
178	2	0	0	0	0	0	0	200	300	0	-11.5826	-26.9656	-658.757	-64596.1	-28655.4	6982.91	156.501	1001.06	0	0	0	0	0	0	0	603	903	0
178	3	0	0	0	0	0	0	200	300	0	-13.1085	-28.1863	-660.588	-64504.6	-29021.6	6799.81	156.067	1000.65	0	0	0	0	0	0	0	603	903	0
178	4	0	0	0	0	0	0	200	300	0	-12.193	-27.2708	-659.673	-64413	-28472.3	6845.58	156.839	1000.64	0	0	0	0	0	0	0	603	903	0
178	5	0	0	0	0	0	0	200	300	0	-12.6508	-28.4915	-661.504	-65053.9	-28716.4	6799.81	156.589	1001.34	0	0	0	0	0	0	0	603	903	0
178	6	0	0	0	0	0	0	200	300	0	-12.6508	-29.5596	-662.725	-64687.7	-29021.6	6616.7	156.209	1000.61	0	0	0	0	0	0	0	603	903	0
178	7	0	0	0	0	0	0	200	300	0	-13.1085	-29.7122	-663.335	-66244.1	-29204.7	6662.48	155.973	1002.87	0	0	0	0	0	0	0	603	903	0
178	8	0	0	0	0	0	0	200	300	0	-12.193	-30.3226	-666.082	-66427.2	-28716.4	6525.15	156.888	1002.73	0	0	0	0	0	0	0	603	903	0
178	9	0	0	0	0	0	0	200	300	0	-12.3456	-30.6277	-666.997	-66427.2	-29509.9	6570.92	155.757	1002.59	0	0	0	0	0	0	0	603	903	0
179	0	0	0	0	0	0	0	200	300	0	-13.7189	-31.5433	-666.692	-67068.1	-29448.9	6616.7	155.828	1003.6	0	0	0	0	0	0	0	603	903	0
179	1	0	0	0	0	0	0	200	300	0	-12.193	-32.1536	-670.049	-67342.7	-29265.8	6570.92	156.323	1003.5	0	0	0	0	0	0	0	603	903	0
179	2	0	0	0	0	0	0	200	300	0	-10.2094	-32.764	-669.439	-67434.3	-29693	6845.58	155.645	1003.73	0	0	0	0	0	0	0	603	903	0
179	3	0	0	0	0	0	0	200	300	0	-11.2775	-32.764	-670.354	-66976.5	-29509.9	6570.92	155.979	1002.91	0	0	0	0	0	0	0	603	903	0
179	4	0	0	0	0	0	0	200	300	0	-13.7189	-32.9166	-671.88	-68075.1	-29265.8	6754.03	156.442	1004.32	0	0	0	0	0	0	0	603	903	0
179	5	0	0	0	0	0	0	200	300	0	-14.9396	-33.8321	-672.49	-68258.3	-29204.7	6433.59	156.572	1004.5	0	0	0	0	0	0	0	603	903	0
179	6	0	0	0	0	0	0	200	300	0	-14.3292	-34.1373	-674.932	-68258.3	-29815.1	6708.25	155.825	1004.13	0	0	0	0	0	0	0	603	903	0
179	7	0	0	0	0	0	0	200	300	0	-14.0241	-34.2899	-674.932	-68807.6	-29387.8	6708.25	156.458	1004.95	0	0	0	0	0	0	0	603	903	0
179	8	0	0	0	0	0	0	200	300	0	-14.0241	-34.9002	-676.458	-69173.8	-29693	6525.15	156.105	1005.26	0	0	0	0	0	0	0	603	903	0
179	9	0	0	0	0	0	0	200	300	0	-15.7025	-35.2054	-677.983	-70180.8	-30059.2	6250.49	155.664	1006.51	0	0	0	0	0	0	0	603	903	0
180	0	0	0	0	0	0	0	200	300	0	-15.7025	-35.8157	-675.542	-69997.7	-29876.1	6570.92	155.775	1006.62	0	0	0	0	0	0	0	603	903	0
180	1	0	0	0	0	0	0	200	300	0	-14.6344	-36.2735	-679.204	-69997.7	-30120.2	6433.59	155.654	1006.06	0	0	0	0	0	0	0	603	903	0
180	2	0	0	0	0	0	0	200	300	0	-14.3292	-36.2735	-679.815	-70180.8	-30486.5	6433.59	155.155	1006.24	0	0	0	0	0	0	0	603	903	0
180	3	0	0	0	0	0	0	200	300	0	-15.3973	-37.7994	-678.594	-71004.8	-30059.2	6616.7	155.704	1007.64	0	0	0	0	0	0	0	603	903	0
180	4	0	0	0	0	0	0	200	300	0	-16.1603	-37.7994	-682.256	-71645.7	-30120.2	6433.59	155.852	1008.01	0	0	0	0	0	0	0	603	903	0
180	5	0	0	0	0	0	0	200	300	0	-16.7706	-38.2571	-684.087	-71645.7	-30669.6	6250.49	155.167	1007.73	0	0	0	0	0	0	0	603	903	0
180	6	0	0	0	0	0	0	200	300	0	-17.6862	-40.2408	-684.392	-71554.2	-30669.6	6342.04	155.187	1007.55	0	0	0	0	0	0	0	603	903	0
180	7	0	0	0	0	0	0	200	300	0	-17.6862	-39.6304	-686.528	-72561.2	-30425.4	6113.16	155.682	1008.69	0	0	0	0	0	0	0	603	903	0
180	8	0	0	0	0	0	0	200	300	0	-19.3646	-39.0201	-687.139	-72652.8	-30852.7	6204.71	155.1	1008.73	0	0	0	0	0	0	0	603	903	0
180	9	0	0	0	0	0	0	200	300	0	-19.5172	-40.2408	-686.223	-72652.8	-31157.8	6387.82	154.595	1008.87	0	0	0	0	0	0	0	603	903	0
181	0	0	0	0	0	0	0	200	300	0	-18.6017	-40.2408	-688.97	-72561.2	-30364.4	6204.71	155.928	1008.32	0	0	0	0	0	0	0	603	903	0
181	1	0	0	0	0	0	0	200	300	0	-19.6698	-40.8511	-691.411	-73568.3	-31218.9	6387.82	154.848	1009.4	0	0	0	0	0	0	0	603	903	0
181	2	0	0	0	0	0	0	200	300	0	-21.6534	-41.7667	-690.801	-73385.2	-30913.7	6158.94	155.249	1009.23	0	0	0	0	0	0	0	603	903	0
181	3	0	0	0	0	0	0	200	300	0	-21.806	-42.5296	-692.022	-73385.2	-31157.8	6525.15	154.976	1009.04	0	0	0	0	0	0	0	603	903	0
181	4	0	0	0	0	0	0	200	300	0	-20.2802	-43.2925	-693.242	-73934.5	-31279.9	6433.59	154.879	1009.65	0	0	0	0	0	0	0	603	903	0
181	5	0	0	0	0	0	0	200	300	0	-21.3483	-43.5977	-695.684	-74483.9	-31463	6296.27	154.774	1010.07	0	0	0	0	0	0	0	603	903	0
181	6	0	0	0	0	0	0	200	300	0	-22.4164	-44.5132	-695.073	-74850.1	-31218.9	6433.59	155.085	1010.69	0	0	0	0	0	0	0	603	903	0
181	7	0	0	0	0	0	0	200	300	0	-22.569	-45.4288	-694.768	-74850.1	-31157.8	6158.94	155.154	1010.73	0	0	0	0	0	0	0	603	903	0
181	8	0	0	0	0	0	0	200	300	0	-21.806	-46.1917	-697.515	-75033.1	-31646.1	6342.04	154.63	1010.57	0	0	0	0	0	0	0	603	903	0
181	9	0	0	0	0	0	0	200	300	0	-21.6534	-46.3443	-698.125	-75857.1	-31402	6158.94	155.02	1011.66	0	0	0	0	0	0	0	603	903	0
182	0	0	0	0	0	0	0	200	300	0	-23.4845	-46.3443	-698.43	-75857.1	-31524.1	6021.61	154.864	1011.61	0	0	0	0	0	0	0	603	903	0
182	1	0	0	0	0	0	0	200	300	0	-23.7897	-48.0228	-699.041	-75582.5	-31402	6204.71	155.078	1011.12	0	0	0	0	0	0	0	603	903	0
182	2	0	0	0	0	0	0	200	300	0	-22.7216	-49.3961	-697.82	-74758.5	-31218.9	6158.94	155.262	1010.13	0	0	0	0	0	0	0	603	903	0
182	3	0	0	0	0	0	0	200	300	0	-23.0267	-48.4805	-700.872	-76223.4	-31463	6433.59	155.109	1011.76	0	0	0	0	0	0	0	603	903	0
182	4	0	0	0	0	0	0	200	300	0	-24.7052	-50.7693	-701.482	-76314.9	-31340.9	6296.27	155.322	1011.79	0	0	0	0	0	0	0	603	903	0
182	5	0	0	0	0	0	0	200	300	0	-25.9259	-51.99	-700.872	-76040.2	-31402	6250.49	155.196	1011.49	0	0	0	0	0	0	0	603	903	0
182	6	0	0	0	0	0	0	200	300	0	-25.163	-51.6849	-703.313	-76498	-31402	6296.27	155.351	1011.77	0	0	0	0	0	0	0	603	903	0
182	7	0	0	0	0	0	0	200	300	0	-26.0785	-53.6685	-703.008	-76589.6	-32073.4	6479.37	154.377	1011.95	0	0	0	0	0	0	0	603	903	0
182	8	0	0	0	0	0	0	200	300	0	-27.2992	-52.753	-699.956	-77505.1	-31707.2	6616.7	154.701	1013.73	0	0	0	0	0	0	0	603	903	0
182	9	0	0	0	0	0	0	200	300	0	-26.6888	-53.6685	-702.703	-77230.4	-31524.1	6570.92	155.139	1012.9	0	0	0	0	0	0	0	603	903	0
183	0	0	0	0	0	0	0	200	300	0	-28.9777	-55.6522	-702.398	-76681.1	-31890.3	6708.25	154.598	1012.17	0	0	0	0	0	0	0	603	903	0
183	1	0	0	0	0	0	0	200	300	0	-28.5199	-54.7366	-701.177	-77322	-31646.1	7074.46	154.867	1013.27	0	0	0	0	0	0	0	603	903	0
183	2	0	0	0	0	0	0	200	300	0	-28.6725	-55.8047	-701.177	-78054.4	-31463	6708.25	155.128	1014.32	0	0	0	0	0	0	0	603	903	0
183	3	0	0	0	0	0	0	200	300	0	-28.8251	-56.4151	-703.313	-78054.4	-32378.5	6799.81	153.963	1013.98	0	0	0	0	0	0	0	603	903	0
183	4	0	0	0	0	0	0	200	300	0	-29.588	-56.5677	-699.651	-77596.6	-32012.3	6891.36	154.245	1013.91	0	0	0	0	0	0	0	603	903	0
183	5	0	0	0	0	0	0	200	300	0	-28.2147	-57.6358	-700.261	-77505.1	-31279.9	6708.25	155.331	1013.68	0	0	0	0	0	0	0	603	903	0
183	6	0	0	0	0	0	0	200	300	0	-28.5199	-59.772	-699.041	-78237.5	-32012.3	6616.7	154.205	1014.92	0	0	0	0	0	0	0	603	903	0
183	7	0	0	0	0	0	0	200	300	0	-28.0621	-59.772	-699.346	-77779.8	-31890.3	6204.71	154.4	1014.22	0	0	0	0	0	0	0	603	903	0
183	8	0	0	0	0	0	0	200	300	0	-27.2992	-59.9246	-698.125	-77047.3	-32073.4	6616.7	154.058	1013.36	0	0	0	0	0	0	0	603	903	0
183	9	0	0	0	0	0	0	200	300	0	-26.994	-61.6031	-697.82	-77413.5	-32012.3	6479.37	154.125	1013.94	0	0	0	0	0	0	0	603	903	0
184	0	0	0	0	0	0	0	200	300	0	-26.8414	-61.7557	-697.21	-78512.2	-31768.2	6799.81	154.435	1015.61	0	0	0	0	0	0	0	603	903	0
184	1	0	0	0	0	0	0	200	300	0	-26.3837	-62.9764	-699.346	-78329	-31463	6891.36	155.011	1015	0	0	0	0	0	0	0	603	903	0
184	2	0	0	0	0	0	0	200	300	0	-26.2311	-62.5186	-697.82	-78603.7	-31157.8	6662.48	155.35	1015.64	0	0	0	0	0	0	0	603	903	0
184	3	0	0	0	0	0	0	200	300	0	-24.8578	-61.7557	-695.073	-78420.6	-31035.8	6708.25	155.349	1015.82	0	0	0	0	0	0	0	603	903	0
184	4	0	0	0	0	0	0	200	300	0	-23.6371	-63.4341	-695.989	-78878.4	-30791.6	6754.03	155.758	1016.33	0	0	0	0	0	0	0	603	903	0
184	5	0	0	0	0	0	0	200	300	0	-24.2474	-64.1971	-695.989	-79702.3	-30913.7	6937.13	155.583	1017.52	0	0	0	0	0	0	0	603	903	0
184	6	0	0	0	0	0	0	200	300	0	-23.9423	-62.9764	-694.768	-79244.6	-31402	6891.36	154.802	1017.06	0	0	0	0	0	0	0	603	903	0
184	7	0	0	0	0	0	0	200	300	0	-23.9423	-65.4178	-695.073	-78878.4	-31646.1	6754.03	154.471	1016.48	0	0	0	0	0	0	0	603	903	0
184	8	0	0	0	0	0	0	200	300	0	-22.569	-67.0963	-692.937	-78237.5	-31035.8	6799.81	155.211	1015.91	0	0	0	0	0	0	0	603	903	0
184	9	0	0	0	0	0	0	200	300	0	-22.8741	-66.7911	-693.242	-79702.3	-31218.9	6616.7	154.967	1017.97	0	0	0	0	0	0	0	603	903	0
185	0	0	0	0	0	0	0	200	300	0	-21.9586	-68.7747	-692.632	-79977	-31340.9	6754.03	154.751	1018.47	0	0	0	0	0	0	0	603	903	0
185	1	0	0	0	0	0	0	200	300	0	-21.9586	-69.2325	-689.885	-80068.5	-30974.7	6891.36	155.102	1019.06	0	0	0	0	0	0	0	603	903	0
185	2	0	0	0	0	0	0	200	300	0	-22.569	-69.0799	-690.496	-79244.6	-31157.8	6342.04	154.876	1017.76	0	0	0	0	0	0	0	603	903	0
185	3	0	0	0	0	0	0	200	300	0	-22.1112	-71.2161	-690.19	-79702.3	-31035.8	6616.7	155.033	1018.48	0	0	0	0	0	0	0	603	903	0
185	4	0	0	0	0	0	0	200	300	0	-21.3483	-71.8265	-689.275	-80434.8	-30547.5	6937.13	155.682	1019.69	0	0	0	0	0	0	0	603	903	0
185	5	0	0	0	0	0	0	200	300	0	-21.9586	-71.6739	-688.359	-80068.5	-30425.4	6937.13	155.8	1019.32	0	0	0	0	0	0	0	603	903	0
185	6	0	0	0	0	0	0	200	300	0	-22.569	-72.2842	-688.054	-79977	-30669.6	6799.81	155.426	1019.24	0	0	0	0	0	0	0	603	903	0
185	7	0	0	0	0	0	0	200	300	0	-21.806	-72.1317	-686.834	-79702.3	-30181.3	6982.91	156.057	1019.04	0	0	0	0	0	0	0	603	903	0
185	8	0	0	0	0	0	0	200	300	0	-21.1957	-73.5049	-686.528	-80343.2	-30364.4	7028.69	155.771	1020.03	0	0	0	0	0	0	0	603	903	0
185	9	0	0	0	0	0	0	200	300	0	-22.4164	-73.6575	-685.308	-80251.7	-30303.4	6891.36	155.781	1020.1	0	0	0	0	0	0	0	603	903	0
186	0	0	0	0	0	0	0	200	300	0	-21.9586	-73.8101	-684.697	-80801	-30242.3	6616.7	155.831	1021.01	0	0	0	0	0	0	0	603	903	0
186	1	0	0	0	0	0	0	200	300	0	-20.4327	-74.8782	-685.918	-79977	-30425.4	6754.03	155.643	1019.6	0	0	0	0	0	0	0	603	903	0
186	2	0	0	0	0	0	0	200	300	0	-21.0431	-75.4886	-682.256	-79977	-30730.6	6845.58	154.957	1020.22	0	0	0	0	0	0	0	603	903	0
186	3	0	0	0	0	0	0	200	300	0	-21.1957	-74.5731	-681.646	-81258.7	-30120.2	6937.13	155.812	1022.21	0	0	0	0	0	0	0	603	903	0
186	4	0	0	0	0	0	0	200	300	0	-19.5172	-76.8619	-682.866	-81441.9	-30181.3	6982.91	155.802	1022.26	0	0	0	0	0	0	0	603	903	0
186	5	0	0	0	0	0	0	200	300	0	-21.5009	-76.7093	-681.035	-80709.4	-30669.6	6799.81	154.966	1021.51	0	0	0	0	0	0	0	603	903	0
186	6	0	0	0	0	0	0	200	300	0	-19.8224	-77.3196	-679.815	-80709.4	-30303.4	7028.69	155.424	1021.72	0	0	0	0	0	0	0	603	903	0
186	7	0	0	0	0	0	0	200	300	0	-20.5853	-78.5403	-678.899	-81533.4	-29754	6937.13	156.173	1023.1	0	0	0	0	0	0	0	603	903	0
186	8	0	0	0	0	0	0	200	300	0	-21.806	-80.3714	-677.983	-81533.4	-30303.4	7211.79	155.304	1023.26	0	0	0	0	0	0	0	603	903	0
186	9	0	0	0	0	0	0	200	300	0	-21.3483	-79.3033	-677.983	-80801	-30364.4	7120.24	155.214	1022.18	0	0	0	0	0	0	0	603	903	0
187	0	0	0	0	0	0	0	200	300	0	-20.4327	-81.1343	-676.152	-80343.2	-29876.1	6937.13	155.815	1021.82	0	0	0	0	0	0	0	603	903	0
187	1	0	0	0	0	0	0	200	300	0	-20.1276	-81.2869	-674.321	-81258.7	-29448.9	7257.57	156.328	1023.5	0	0	0	0	0	0	0	603	903	0
187	2	0	0	0	0	0	0	200	300	0	-21.1957	-81.8973	-675.237	-81533.4	-29937.1	7028.69	155.664	1023.75	0	0	0	0	0	0	0	603	903	0
187	3	0	0	0	0	0	0	200	300	0	-21.1957	-81.7447	-674.932	-81075.6	-29693	7303.35	156.006	1023.12	0	0	0	0	0	0	0	603	903	0
187	4	0	0	0	0	0	0	200	300	0	-20.7379	-83.118	-672.185	-81258.7	-29632	7028.69	155.917	1023.89	0	0	0	0	0	0	0	603	903	0
187	5	0	0	0	0	0	0	200	300	0	-19.8224	-83.8809	-670.964	-81075.6	-29937.1	7074.46	155.382	1023.83	0	0	0	0	0	0	0	603	903	0
187	6	0	0	0	0	0	0	200	300	0	-20.4327	-85.1016	-671.88	-81716.5	-29082.6	7028.69	156.715	1024.62	0	0	0	0	0	0	0	603	903	0
187	7	0	0	0	0	0	0	200	300	0	-20.8905	-85.4068	-668.828	-81075.6	-29143.7	7074.46	156.426	1024.22	0	0	0	0	0	0	0	603	903	0
187	8	0	0	0	0	0	0	200	300	0	-19.0595	-85.8646	-668.218	-80160.1	-29448.9	7211.79	155.929	1022.96	0	0	0	0	0	0	0	603	903	0
187	9	0	0	0	0	0	0	200	300	0	-19.212	-86.7801	-665.776	-81533.4	-29082.6	7166.02	156.318	1025.46	0	0	0	0	0	0	0	603	903	0
188	0	0	0	0	0	0	0	200	300	0	-20.1276	-87.0853	-663.64	-81716.5	-29143.7	7120.24	156.085	1026.13	0	0	0	0	0	0	0	603	903	0
188	1	0	0	0	0	0	0	200	300	0	-18.6017	-87.543	-664.251	-81991.1	-29021.6	7303.35	156.309	1026.43	0	0	0	0	0	0	0	603	903	0
188	2	0	0	0	0	0	0	200	300	0	-19.3646	-89.0689	-662.725	-81808.1	-29204.7	7257.57	155.932	1026.44	0	0	0	0	0	0	0	603	903	0
188	3	0	0	0	0	0	0	200	300	0	-17.9913	-89.3741	-660.894	-81350.3	-29326.8	7349.12	155.626	1026.09	0	0	0	0	0	0	0	603	903	0
188	4	0	0	0	0	0	0	200	300	0	-19.0595	-89.9844	-658.452	-81808.1	-29082.6	7120.24	155.832	1027.24	0	0	0	0	0	0	0	603	903	0
188	5	0	0	0	0	0	0	200	300	0	-19.3646	-90.7474	-657.232	-81350.3	-29082.6	7120.24	155.75	1026.78	0	0	0	0	0	0	0	603	903	0
188	6	0	0	0	0	0	0	200	300	0	-19.3646	-91.2051	-656.316	-81441.9	-28716.4	7257.57	156.246	1027.09	0	0	0	0	0	0	0	603	903	0
188	7	0	0	0	0	0	0	200	300	0	-18.1439	-92.4258	-653.569	-80984.1	-28960.6	7166.02	155.689	1026.91	0	0	0	0	0	0	0	603	903	0
188	8	0	0	0	0	0	0	200	300	0	-17.5336	-93.1888	-653.569	-81624.9	-28716.4	7120.24	156.062	1027.89	0	0	0	0	0	0	0	603	903	0
188	9	0	0	0	0	0	0	200	300	0	-19.6698	-92.731	-651.433	-81350.3	-28350.2	7166.02	156.48	1027.88	0	0	0	0	0	0	0	603	903	0
189	0	0	0	0	0	0	0	200	300	0	-19.212	-94.5621	-648.687	-81167.2	-28594.4	7349.12	155.92	1028.13	0	0	0	0	0	0	0	603	903	0
189	1	0	0	0	0	0	0	200	300	0	-16.9232	-95.0198	-648.687	-81167.2	-28472.3	7349.12	156.108	1028.13	0	0	0	0	0	0	0	603	903	0
189	2	0	0	0	0	0	0	200	300	0	-17.0758	-94.5621	-646.55	-81624.9	-28228.2	7166.02	156.34	1029.25	0	0	0	0	0	0	0	603	903	0
189	3	0	0	0	0	0	0	200	300	0	-18.9069	-96.088	-645.33	-80984.1	-28533.3	7349.12	155.785	1028.49	0	0	0	0	0	0	0	603	903	0
189	4	0	0	0	0	0	0	200	300	0	-18.6017	-96.3931	-641.362	-80709.4	-28167.1	7486.45	156.082	1028.84	0	0	0	0	0	0	0	603	903	0
189	5	0	0	0	0	0	0	200	300	0	-17.0758	-96.8509	-640.752	-79610.8	-27984	7303.35	156.326	1027.25	0	0	0	0	0	0	0	603	903	0
189	6	0	0	0	0	0	0	200	300	0	-16.7706	-97.919	-638.616	-81441.9	-28228.2	7394.9	155.798	1030.53	0	0	0	0	0	0	0	603	903	0
189	7	0	0	0	0	0	0	200	300	0	-18.1439	-98.0716	-635.564	-80343.2	-28228.2	7257.57	155.586	1029.41	0	0	0	0	0	0	0	603	903	0
189	8	0	0	0	0	0	0	200	300	0	-18.1439	-98.8345	-633.733	-80526.3	-27556.8	7349.12	156.517	1030.07	0	0	0	0	0	0	0	603	903	0
189	9	0	0	0	0	0	0	200	300	0	-16.9232	-99.7501	-632.512	-79336.1	-27739.9	7303.35	156.143	1028.43	0	0	0	0	0	0	0	603	903	0
190	0	0	0	0	0	0	0	200	300	0	-16.618	-99.9026	-630.071	-80160.1	-27556.8	7211.79	156.264	1030.22	0	0	0	0	0	0	0	603	903	0
190	1	0	0	0	0	0	0	200	300	0	-17.5336	-100.208	-627.019	-80251.7	-27190.6	7303.35	156.635	1030.99	0	0	0	0	0	0	0	603	903	0
190	2	0	0	0	0	0	0	200	300	0	-17.8387	-100.971	-624.578	-80068.5	-26946.4	7394.9	156.857	1031.2	0	0	0	0	0	0	0	603	903	0
190	3	0	0	0	0	0	0	200	300	0	-15.2448	-101.886	-621.526	-79885.5	-27129.5	7440.67	156.35	1031.53	0	0	0	0	0	0	0	603	903	0
190	4	0	0	0	0	0	0	200	300	0	-15.8551	-101.429	-620.305	-79702.3	-26641.2	7349.12	157.051	1031.49	0	0	0	0	0	0	0	603	903	0
190	5	0	0	0	0	0	0	200	300	0	-15.8551	-102.497	-618.169	-79977	-26580.2	7486.45	157.002	1032.38	0	0	0	0	0	0	0	603	903	0
190	6	0	0	0	0	0	0	200	300	0	-16.9232	-102.497	-614.202	-79519.2	-26397.1	7349.12	157.022	1032.47	0	0	0	0	0	0	0	603	903	0
190	7	0	0	0	0	0	0	200	300	0	-16.618	-102.344	-612.371	-78786.8	-26336.1	7532.23	156.993	1031.66	0	0	0	0	0	0	0	603	903	0
190	8	0	0	0	0	0	0	200	300	0	-15.0922	-102.954	-611.15	-78969.9	-26153	7440.67	157.207	1032.22	0	0	0	0	0	0	0	603	903	0
190	9	0	0	0	0	0	0	200	300	0	-14.787	-102.191	-604.436	-79336.1	-26275	7303.35	156.53	1034.26	0	0	0	0	0	0	0	603	903	0
191	0	0	0	0	0	0	0	200	300	0	-15.0922	-102.649	-604.131	-79336.1	-26030.9	7349.12	156.912	1034.32	0	0	0	0	0	0	0	603	903	0
191	1	0	0	0	0	0	0	200	300	0	-15.0922	-104.633	-601.384	-78512.2	-25847.8	7394.9	157.02	1033.55	0	0	0	0	0	0	0	603	903	0
191	2	0	0	0	0	0	0	200	300	0	-13.8715	-103.87	-596.196	-77962.8	-26214	6982.91	156.031	1033.77	0	0	0	0	0	0	0	603	903	0
191	3	0	0	0	0	0	0	200	300	0	-13.2611	-104.48	-594.365	-78878.4	-25420.5	7257.57	157.231	1035.71	0	0	0	0	0	0	0	603	903	0
191	4	0	0	0	0	0	0	200	300	0	-14.4818	-105.854	-591.008	-78237.5	-25298.5	7257.57	157.194	1035.38	0	0	0	0	0	0	0	603	903	0
191	5	0	0	0	0	0	0	200	300	0	-14.0241	-105.243	-588.872	-77505.1	-25725.7	7120.24	156.314	1034.62	0	0	0	0	0	0	0	603	903	0
191	6	0	0	0	0	0	0	200	300	0	-12.8033	-106.464	-584.6	-77413.5	-24688.1	7028.69	157.769	1035.42	0	0	0	0	0	0	0	603	903	0
191	7	0	0	0	0	0	0	200	300	0	-12.193	-106.464	-580.327	-77413.5	-24505	7211.79	157.774	1036.4	0	0	0	0	0	0	0	603	903	0
191	8	0	0	0	0	0	0	200	300	0	-13.7189	-106.922	-576.665	-77322	-25054.3	7166.02	156.553	1037.08	0	0	0	0	0	0	0	603	903	0
191	9	0	0	0	0	0	0	200	300	0	-12.9559	-106.922	-575.444	-76498	-24627.1	7349.12	157.203	1035.94	0	0	0	0	0	0	0	603	903	0
192	0	0	0	0	0	0	0	200	300	0	-10.9723	-107.227	-570.867	-76040.2	-24016.7	7394.9	157.929	1036.2	0	0	0	0	0	0	0	603	903	0
192	1	0	0	0	0	0	0	200	300	0	-10.8197	-106.311	-567.815	-75857.1	-24199.8	6982.91	157.381	1036.59	0	0	0	0	0	0	0	603	903	0
192	2	0	0	0	0	0	0	200	300	0	-11.7352	-106.922	-564.763	-76131.8	-23772.6	7257.57	157.907	1037.8	0	0	0	0	0	0	0	603	903	0
192	3	0	0	0	0	0	0	200	300	0	-10.6671	-107.227	-556.829	-74392.3	-23345.3	7211.79	158.074	1036.6	0	0	0	0	0	0	0	603	903	0
192	4	0	0	0	0	0	0	200	300	0	-9.14124	-106.159	-556.523	-75124.7	-23650.5	7349.12	157.503	1037.99	0	0	0	0	0	0	0	603	903	0
192	5	0	0	0	0	0	0	200	300	0	-8.22571	-107.379	-553.167	-74392.3	-23467.4	7028.69	157.576	1037.48	0	0	0	0	0	0	0	603	903	0
192	6	0	0	0	0	0	0	200	300	0	-8.98865	-106.006	-547.673	-73934.5	-23040.2	6891.36	157.931	1038	0	0	0	0	0	0	0	603	903	0
192	7	0	0	0	0	0	0	200	300	0	-7.92054	-106.769	-544.927	-74666.9	-22857.1	6937.13	158.055	1040.02	0	0	0	0	0	0	0	603	903	0
192	8	0	0	0	0	0	0	200	300	0	-6.85242	-106.311	-540.044	-74209.2	-22674	6982.91	158.015	1040.41	0	0	0	0	0	0	0	603	903	0
192	9	0	0	0	0	0	0	200	300	0	-5.93689	-104.938	-535.161	-73385.2	-22429.8	6799.81	158.088	1040.13	0	0	0	0	0	0	0	603	903	0
193	0	0	0	0	0	0	0	200	300	0	-6.24207	-104.785	-530.889	-73293.7	-22124.6	7074.46	158.325	1041.06	0	0	0	0	0	0	0	603	903	0
193	1	0	0	0	0	0	0	200	300	0	-6.54724	-106.311	-525.701	-72835.9	-22246.7	6799.81	157.682	1041.55	0	0	0	0	0	0	0	603	903	0
193	2	0	0	0	0	0	0	200	300	0	-4.86878	-105.243	-523.259	-72561.2	-21697.4	6799.81	158.534	1041.67	0	0	0	0	0	0	0	603	903	0
193	3	0	0	0	0	0	0	200	300	0	-1.96961	-104.633	-515.325	-72195	-21453.3	6479.37	158.369	1043.1	0	0	0	0	0	0	0	603	903	0
193	4	0	0	0	0	0	0	200	300	0	-3.64807	-105.396	-513.799	-71554.2	-21392.2	6799.81	158.365	1042.26	0	0	0	0	0	0	0	603	903	0
193	5	0	0	0	0	0	0	200	300	0	-3.49549	-104.785	-508.916	-71462.6	-20659.8	6708.25	159.404	1043.42	0	0	0	0	0	0	0	603	903	0
193	6	0	0	0	0	0	0	200	300	0	-5.02137	-105.091	-504.644	-70547.1	-20659.8	6479.37	159.061	1042.8	0	0	0	0	0	0	0	603	903	0
193	7	0	0	0	0	0	0	200	300	0	-0.748904	-105.396	-500.066	-70272.4	-20781.9	6708.25	158.442	1043.53	0	0	0	0	0	0	0	603	903	0
193	8	0	0	0	0	0	0	200	300	0	-0.748904	-102.344	-492.742	-69906.2	-20354.6	6570.92	158.691	1044.87	0	0	0	0	0	0	0	603	903	0
193	9	0	0	0	0	0	0	200	300	0	-0.596316	-103.412	-491.216	-69265.3	-19866.3	6250.49	159.557	1044.01	0	0	0	0	0	0	0	603	903	0
194	0	0	0	0	0	0	0	200	300	0	-0.596316	-102.649	-485.112	-68624.5	-19683.2	6204.71	159.425	1044.46	0	0	0	0	0	0	0	603	903	0
194	1	0	0	0	0	0	0	200	300	0	0.624387	-101.581	-481.755	-68349.8	-19744.3	6204.71	159.016	1044.88	0	0	0	0	0	0	0	603	903	0
194	2	0	0	0	0	0	0	200	300	0	0.471799	-101.429	-476.567	-68349.8	-19378.1	6754.03	159.338	1046.42	0	0	0	0	0	0	0	603	903	0
194	3	0	0	0	0	0	0	200	300	0	-0.138553	-100.513	-471.074	-67892.1	-19195	6113.16	159.253	1047.12	0	0	0	0	0	0	0	603	903	0
194	4	0	0	0	0	0	0	200	300	0	-0.138553	-99.4449	-465.581	-66610.3	-19195	6113.16	158.772	1046.07	0	0	0	0	0	0	0	603	903	0
194	5	0	0	0	0	0	0	200	300	0	1.53991	-99.5975	-459.783	-66518.7	-18401.5	6067.38	159.978	1047.67	0	0	0	0	0	0	0	603	903	0
194	6	0	0	0	0	0	0	200	300	0	1.6925	-98.6819	-452.153	-65969.4	-18462.5	6113.16	159.168	1048.9	0	0	0	0	0	0	0	603	903	0
194	7	0	0	0	0	0	0	200	300	0	2.45544	-98.0716	-450.322	-65511.7	-18279.4	5930.05	159.408	1048.48	0	0	0	0	0	0	0	603	903	0
194	8	0	0	0	0	0	0	200	300	0	1.53991	-98.0716	-444.219	-64413	-17669.1	5655.4	160.224	1048	0	0	0	0	0	0	0	603	903	0
194	9	0	0	0	0	0	0	200	300	0	3.37097	-95.9354	-437.505	-63589.1	-17547	5563.84	159.893	1048.34	0	0	0	0	0	0	0	603	903	0
195	0	0	0	0	0	0	0	200	300	0	4.2865	-96.6983	-432.012	-63406	-17302.9	5655.4	159.948	1049.77	0	0	0	0	0	0	0	603	903	0
195	1	0	0	0	0	0	0	200	300	0	3.67614	-95.1724	-426.824	-62856.6	-16692.5	5746.95	160.891	1050.27	0	0	0	0	0	0	0	603	903	0
195	2	0	0	0	0	0	0	200	300	0	4.13391	-95.0198	-420.72	-61941.1	-16875.6	5334.96	159.889	1050.23	0	0	0	0	0	0	0	603	903	0
195	3	0	0	0	0	0	0	200	300	0	4.74426	-92.8836	-414.312	-60750.9	-16509.4	5197.63	160.152	1049.63	0	0	0	0	0	0	0	603	903	0
195	4	0	0	0	0	0	0	200	300	0	5.96496	-93.9517	-409.124	-61117.1	-15838	5380.74	161.288	1052.39	0	0	0	0	0	0	0	603	903	0
195	5	0	0	0	0	0	0	200	300	0	5.20202	-92.5784	-403.02	-59835.4	-15777	5426.51	160.853	1051.47	0	0	0	0	0	0	0	603	903	0
195	6	0	0	0	0	0	0	200	300	0	5.96496	-91.5103	-396.611	-58279	-15716	5151.85	160.374	1049.94	0	0	0	0	0	0	0	603	903	0
195	7	0	0	0	0	0	0	200	300	0	8.10119	-90.7474	-391.729	-57363.5	-15410.8	5106.08	160.66	1049.44	0	0	0	0	0	0	0	603	903	0
195	8	0	0	0	0	0	0	200	300	0	8.25378	-88.9163	-385.015	-57638.1	-15410.8	4922.97	159.974	1052.7	0	0	0	0	0	0	0	603	903	0
195	9	0	0	0	0	0	0	200	300	0	7.49084	-88.4586	-381.047	-57638.1	-15227.7	4694.09	160.037	1054.26	0	0	0	0	0	0	0	603	903	0
196	0	0	0	0	0	0	0	200	300	0	10.39	-87.543	-374.028	-56997.3	-14617.3	4694.09	160.919	1055.39	0	0	0	0	0	0	0	603	903	0
196	1	0	0	0	0	0	0	200	300	0	8.10119	-84.949	-369.451	-55624	-14800.4	4648.31	159.939	1053.56	0	0	0	0	0	0	0	603	903	0
196	2	0	0	0	0	0	0	200	300	0	10.2374	-85.5594	-363.347	-54616.9	-14373.2	4419.43	160.442	1053.32	0	0	0	0	0	0	0	603	903	0
196	3	0	0	0	0	0	0	200	300	0	9.47448	-84.4913	-355.718	-54525.3	-13884.9	4373.66	160.967	1056.28	0	0	0	0	0	0	0	603	903	0
196	4	0	0	0	0	0	0	200	300	0	8.25378	-81.7447	-350.835	-54433.8	-13884.9	4190.55	160.423	1058.15	0	0	0	0	0	0	0	603	903	0
196	5	0	0	0	0	0	0	200	300	0	9.01672	-81.5921	-343.816	-53243.6	-13701.8	4282.1	160.148	1057.86	0	0	0	0	0	0	0	603	903	0
196	6	0	0	0	0	0	0	200	300	0	10.39	-80.9818	-336.492	-51778.7	-13640.8	4190.55	159.462	1056.88	0	0	0	0	0	0	0	603	903	0
196	7	0	0	0	0	0	0	200	300	0	9.93225	-77.7774	-330.999	-51046.3	-12969.4	3961.67	160.817	1057.22	0	0	0	0	0	0	0	603	903	0
196	8	0	0	0	0	0	0	200	300	0	9.01672	-77.93	-323.98	-50405.5	-12725.2	3732.79	160.722	1058.58	0	0	0	0	0	0	0	603	903	0
196	9	0	0	0	0	0	0	200	300	0	11.0004	-78.0826	-318.181	-49856.1	-12175.9	4099	161.733	1059.69	0	0	0	0	0	0	0	603	903	0
197	0	0	0	0	0	0	0	200	300	0	10.8478	-74.7256	-312.383	-48208.2	-12298	3824.34	160.632	1057.32	0	0	0	0	0	0	0	603	903	0
197	1	0	0	0	0	0	0	200	300	0	12.8314	-73.9627	-305.669	-47567.3	-11870.7	3915.89	161.165	1058.62	0	0	0	0	0	0	0	603	903	0
197	2	0	0	0	0	0	0	200	300	0	9.93225	-72.1317	-298.04	-47201.1	-11504.5	4144.77	161.399	1061.37	0	0	0	0	0	0	0	603	903	0
197	3	0	0	0	0	0	0	200	300	0	10.6952	-71.2161	-291.936	-46377.1	-11443.5	3458.13	160.801	1061.86	0	0	0	0	0	0	0	603	903	0
197	4	0	0	0	0	0	0	200	300	0	10.39	-68.317	-284.612	-45278.5	-11565.6	3824.34	159.364	1062.09	0	0	0	0	0	0	0	603	903	0
197	5	0	0	0	0	0	0	200	300	0	12.2211	-68.0118	-278.508	-44637.6	-10833.1	3641.24	161.103	1063.27	0	0	0	0	0	0	0	603	903	0
197	6	0	0	0	0	0	0	200	300	0	10.0848	-66.1807	-271.794	-43996.8	-10772.1	3595.46	160.367	1064.88	0	0	0	0	0	0	0	603	903	0
197	7	0	0	0	0	0	0	200	300	0	11.9159	-64.8074	-266.912	-43539	-10528	3687.01	160.556	1066.12	0	0	0	0	0	0	0	603	903	0
197	8	0	0	0	0	0	0	200	300	0	11.6107	-62.6712	-259.587	-42165.7	-10283.8	3732.79	160.384	1065.43	0	0	0	0	0	0	0	603	903	0
197	9	0	0	0	0	0	0	200	300	0	12.6788	-61.1453	-254.399	-41524.8	-10283.8	3595.46	159.576	1066.23	0	0	0	0	0	0	0	603	903	0
198	0	0	0	0	0	0	0	200	300	0	9.77966	-58.2462	-246.465	-40700.9	-10161.8	3458.13	158.77	1068.14	0	0	0	0	0	0	0	603	903	0
198	1	0	0	0	0	0	0	200	300	0	8.71154	-57.4832	-240.361	-39968.5	-9429.33	3687.01	160.77	1069.28	0	0	0	0	0	0	0	603	903	0
198	2	0	0	0	0	0	0	200	300	0	7.94861	-56.8729	-235.173	-38503.6	-9551.4	3412.35	159.386	1066.72	0	0	0	0	0	0	0	603	903	0
198	3	0	0	0	0	0	0	200	300	0	8.55896	-55.9573	-229.375	-37862.7	-9307.26	3320.8	159.423	1068.07	0	0	0	0	0	0	0	603	903	0
198	4	0	0	0	0	0	0	200	300	0	7.64343	-54.4315	-223.882	-37405	-9063.12	3458.13	159.518	1070.07	0	0	0	0	0	0	0	603	903	0
198	5	0	0	0	0	0	0	200	300	0	5.20202	-53.2108	-217.473	-34841.5	-9368.3	3275.02	156.922	1063.21	0	0	0	0	0	0	0	603	903	0
198	6	0	0	0	0	0	0	200	300	0	6.42273	-53.2108	-210.149	-35482.4	-8574.84	3275.02	159.196	1071.84	0	0	0	0	0	0	0	603	903	0
198	7	0	0	0	0	0	0	200	300	0	7.18567	-51.6849	-204.656	-34658.4	-8147.59	3229.25	160.189	1072.35	0	0	0	0	0	0	0	603	903	0
198	8	0	0	0	0	0	0	200	300	0	9.16931	-50.159	-198.857	-33742.9	-8208.63	3320.8	158.721	1072.68	0	0	0	0	0	0	0	603	903	0
198	9	0	0	0	0	0	0	200	300	0	8.10119	-48.6331	-193.669	-33102	-8208.63	3549.68	157.615	1073.92	0	0	0	0	0	0	0	603	903	0
199	0	0	0	0	0	0	0	200	300	0	6.7279	-48.3279	-188.787	-32369.6	-7720.35	2954.59	159.105	1074.46	0	0	0	0	0	0	0	603	903	0
199	1	0	0	0	0	0	0	200	300	0	4.43908	-46.4969	-184.819	-31545.6	-7476.21	3046.14	159.549	1073.68	0	0	0	0	0	0	0	603	903	0
199	2	0	0	0	0	0	0	200	300	0	6.42273	-45.8865	-179.631	-30721.6	-7720.35	3046.14	157.021	1074.03	0	0	0	0	0	0	0	603	903	0
199	3	0	0	0	0	0	0	200	300	0	4.89685	-43.9029	-175.054	-30263.9	-7598.28	3091.92	156.595	1075.88	0	0	0	0	0	0	0	603	903	0
199	4	0	0	0	0	0	0	200	300	0	3.98132	-42.0718	-170.476	-29531.4	-7110	2863.04	158.293	1076.23	0	0	0	0	0	0	0	603	903	0
199	5	0	0	0	0	0	0	200	300	0	2.76062	-40.0882	-163.457	-28341.3	-7171.03	2863.04	156.129	1076.39	0	0	0	0	0	0	0	603	903	0
199	6	0	0	0	0	0	0	200	300	0	3.21838	-39.783	-159.185	-28158.1	-6560.68	3275.02	158.786	1079.89	0	0	0	0	0	0	0	603	903	0
199	7	0	0	0	0	0	0	200	300	0	3.21838	-38.4097	-154.912	-27608.8	-6804.82	3275.02	156.073	1081.22	0	0	0	0	0	0	0	603	903	0
199	8	0	0	0	0	0	0	200	300	0	1.6925	-36.2735	-149.114	-26052.4	-7171.03	3183.47	151.909	1077.72	0	0	0	0	0	0	0	603	903	0
199	9	0	0	0	0	0	0	200	300	0	1.08215	-35.358	-144.536	-24770.7	-6804.82	3000.37	152.92	1074.38	0	0	0	0	0	0	0	603	903	0
200	0	0	0	0	0	0	0	200	300	0	1.6925	-34.595	-141.179	-24129.8	-6133.43	3137.7	156.556	1073.92	0	0	0	0	0	0	0	603	903	0
200	1	0	0	0	0	0	0	200	300	0	1.38733	-33.3743	-135.686	-23305.9	-6438.61	3137.7	152.548	1074.76	0	0	0	0	0	0	0	603	903	0
200	2	0	0	0	0	0	0	200	300	0	0.319211	-31.3907	-132.634	-23122.7	-6255.5	3320.8	152.836	1077.33	0	0	0	0	0	0	0	603	903	0
200	3	0	0	0	0	0	0	200	300	0	0.0140353	-31.0855	-127.752	-22390.3	-5767.22	3366.58	154.856	1078.26	0	0	0	0	0	0	0	603	903	0
200	4	0	0	0	0	0	0	200	300	0	0.929563	-30.17	-121.648	-21566.3	-5645.15	2817.26	153.594	1080.28	0	0	0	0	0	0	0	603	903	0
200	5	0	0	0	0	0	0	200	300	0	1.84509	-28.4915	-117.07	-21383.2	-5645.15	3000.37	151.78	1085.65	0	0	0	0	0	0	0	603	903	0
[truncated: 1,604 more rows]
