# Supplementary material for: The Effects of an Extemporaneous Speech Dual-task on Older Adult Gait Control
Source: Research Square preprint supplement (doi:10.21203/rs.3.rs-7674245/v1), 2025-11-18
Supplement: Supplementary file 15 [file DT1Walk02.xlsx]

## Sheet: Sheet1
Trajectories
		01:LFHD			01:RFHD			01:LBHD			01:RBHD			01:C7			01:T10			01:CLAV			01:STRN			01:RBAK			01:LSHO			01:LUPA			01:LELB			01:LFRM			01:LWRA			01:LWRB			01:LFIN
Frame	Sub Frame	X	Y	Z	X	Y	Z	X	Y	Z	X	Y	Z	X	Y	Z	X	Y	Z	X	Y	Z	X	Y	Z	X	Y	Z	X	Y	Z	X	Y	Z	X	Y	Z	X	Y	Z	X	Y	Z	X	Y	Z	X	Y	Z
		mm	mm	mm	mm	mm	mm	mm	mm	mm	mm	mm	mm	mm	mm	mm	mm	mm	mm	mm	mm	mm	mm	mm	mm	mm	mm	mm	mm	mm	mm	mm	mm	mm	mm	mm	mm	mm	mm	mm	mm	mm	mm	mm	mm	mm	mm	mm	mm
1	0	315.482	2297.66	1540.64	217.053	2298.27	1535.66	329.429	2460.38	1574.44	200.404	2439.62	1568.61	285.314	2536.16	1429.38	285.464	2645.23	1180.29	268.576	2403.25	1319.85	277.576	2362.86	1137.91	238.519	2647	1257.1	446.85	2457.95	1362.69	530.489	2547.99	1155.96	537.839	2563.23	1077.2	574.25	2527.61	955.873	538.181	2442.74	863.596	586.293	2493.97	852.418	575.202	2438.64	778.131
2	0	319.139	2284.24	1541.61	220.657	2284.6	1537.27	332.879	2447.1	1574.53	203.865	2426.1	1569.64	287.333	2521.89	1429.99	285.208	2631.17	1180.87	270.354	2388.68	1320.63	278.186	2347.83	1138.69	238.832	2632.42	1258.08	448.588	2444.21	1362.04	531.071	2535.03	1155.02	538.163	2549.92	1076.41	575.284	2515.47	955.1	540.288	2430.86	862.165	587.947	2482.57	851.482	577.681	2427.4	776.687
3	0	322.666	2270.89	1542.67	224.14	2271.01	1538.97	336.198	2433.89	1574.76	207.204	2412.64	1570.8	289.266	2507.74	1430.72	284.994	2617.21	1181.63	272.021	2374.23	1321.56	278.748	2332.96	1139.61	239.149	2618	1259.2	450.227	2430.52	1361.58	531.634	2521.98	1154.29	538.495	2536.55	1075.82	576.267	2503.13	954.528	542.207	2418.8	860.976	589.517	2470.9	850.78	579.966	2415.97	775.507
4	0	326.062	2257.63	1543.82	227.501	2257.49	1540.75	339.386	2420.75	1575.12	210.422	2399.25	1572.08	291.114	2493.7	1431.6	284.821	2603.35	1182.55	273.579	2359.92	1322.62	279.263	2318.27	1140.66	239.469	2603.75	1260.48	451.766	2416.87	1361.33	532.179	2508.84	1153.77	538.837	2523.12	1075.41	577.2	2490.61	954.157	543.937	2406.57	860.028	591.004	2458.97	850.312	582.057	2404.36	774.589
5	0	329.326	2244.45	1545.05	230.741	2244.05	1542.61	342.442	2407.69	1575.61	213.517	2385.92	1573.5	292.877	2479.78	1432.6	284.69	2589.59	1183.64	275.027	2345.75	1323.82	279.729	2303.74	1141.85	239.793	2589.65	1261.89	453.204	2403.28	1361.28	532.707	2495.6	1153.46	539.188	2509.62	1075.19	578.083	2477.9	953.986	545.48	2394.17	859.322	592.407	2446.77	850.075	583.953	2392.56	773.933
6	0	332.456	2231.36	1546.36	233.856	2230.7	1544.56	345.364	2394.7	1576.23	216.488	2372.66	1575.04	294.554	2465.97	1433.73	284.602	2575.93	1184.89	276.363	2331.7	1325.16	280.146	2289.39	1143.17	240.122	2575.72	1263.46	454.543	2389.75	1361.42	533.217	2482.27	1153.36	539.549	2496.07	1075.16	578.916	2465.01	954.014	546.837	2381.6	858.857	593.726	2434.3	850.068	585.654	2380.56	773.537
7	0	335.451	2218.35	1547.75	236.844	2217.42	1546.58	348.15	2381.78	1576.97	219.331	2359.48	1576.7	296.145	2452.29	1435	284.558	2562.39	1186.29	277.588	2317.8	1326.63	280.511	2275.21	1144.62	240.455	2561.95	1265.15	455.779	2376.26	1361.76	533.712	2468.85	1153.46	539.92	2482.45	1075.32	579.699	2451.93	954.237	548.011	2368.85	858.631	594.96	2421.56	850.287	587.161	2368.35	773.396
8	0	338.306	2205.43	1549.21	239.7	2204.23	1548.68	350.796	2368.95	1577.84	222.043	2346.36	1578.47	297.648	2438.72	1436.38	284.559	2548.95	1187.85	278.699	2304.03	1328.22	280.82	2261.21	1146.19	240.794	2548.34	1266.98	456.914	2362.83	1362.29	534.191	2455.36	1153.76	540.301	2468.78	1075.65	580.432	2438.67	954.65	549.004	2355.92	858.641	596.106	2408.55	850.725	588.473	2355.92	773.505
9	0	341.016	2192.61	1550.75	242.42	2191.14	1550.84	353.296	2356.21	1578.82	224.617	2333.33	1580.35	299.062	2425.27	1437.88	284.607	2535.63	1189.55	279.694	2290.41	1329.93	281.069	2247.39	1147.87	241.139	2534.9	1268.94	457.945	2349.46	1363	534.655	2441.8	1154.24	540.691	2455.06	1076.15	581.116	2425.23	955.248	549.821	2342.8	858.884	597.163	2395.28	851.375	589.594	2343.24	773.855
10	0	343.575	2179.88	1552.36	244.994	2178.14	1553.07	355.646	2343.55	1579.91	227.046	2320.39	1582.32	300.385	2411.96	1439.5	284.702	2522.43	1191.38	280.571	2276.93	1331.76	281.252	2233.77	1149.65	241.492	2521.63	1271	458.872	2336.15	1363.88	535.107	2428.17	1154.91	541.092	2441.3	1076.82	581.751	2411.61	956.022	550.469	2329.49	859.357	598.128	2381.74	852.225	590.526	2330.29	774.437
11	0	345.976	2167.25	1554.03	247.416	2165.24	1555.35	357.838	2330.99	1581.1	229.321	2307.53	1584.38	301.614	2398.77	1441.21	284.846	2509.35	1193.33	281.33	2263.61	1333.68	281.363	2220.34	1151.51	241.854	2508.54	1273.17	459.693	2322.91	1364.94	535.547	2414.5	1155.74	541.503	2427.48	1077.64	582.336	2397.82	956.964	550.957	2315.99	860.052	598.996	2367.94	853.264	591.277	2317.05	775.238
12	0	348.211	2154.73	1555.76	249.675	2152.46	1557.67	359.864	2318.54	1582.39	231.435	2294.79	1586.52	302.748	2385.72	1443.02	285.038	2496.42	1195.39	281.967	2250.45	1335.7	281.397	2207.12	1153.46	242.225	2495.61	1275.42	460.407	2309.74	1366.15	535.977	2400.79	1156.73	541.922	2413.64	1078.6	582.872	2383.86	958.062	551.293	2302.28	860.966	599.764	2353.89	854.477	591.853	2303.5	776.247
13	0	350.272	2142.31	1557.54	251.764	2139.79	1560.03	361.717	2306.19	1583.76	233.376	2282.14	1588.71	303.784	2372.81	1444.91	285.279	2483.63	1197.54	282.483	2237.44	1337.79	281.348	2194.12	1155.47	242.606	2482.87	1277.74	461.016	2296.64	1367.5	536.396	2387.05	1157.87	542.348	2399.76	1079.69	583.357	2369.75	959.306	551.487	2288.38	862.09	600.428	2339.59	855.851	592.263	2289.61	777.452
14	0	352.151	2130.02	1559.36	253.672	2127.24	1562.4	363.39	2293.95	1585.21	235.137	2269.62	1590.94	304.72	2360.05	1446.87	285.566	2470.98	1199.76	282.878	2224.6	1339.95	281.212	2181.34	1157.52	242.996	2470.29	1280.12	461.518	2283.63	1368.99	536.805	2373.3	1159.13	542.779	2385.85	1080.9	583.791	2355.48	960.684	551.549	2274.26	863.419	600.984	2325.05	857.371	592.519	2275.38	778.844
15	0	353.84	2117.84	1561.21	255.39	2114.82	1564.78	364.877	2281.83	1586.73	236.71	2257.22	1593.19	305.553	2347.42	1448.89	285.898	2458.48	1202.04	283.154	2211.93	1342.15	280.987	2168.78	1159.61	243.394	2457.9	1282.53	461.915	2270.71	1370.6	537.202	2359.55	1160.51	543.214	2371.93	1082.22	584.174	2341.08	962.183	551.49	2259.95	864.946	601.427	2310.27	859.022	592.632	2260.79	780.417
16	0	355.332	2105.78	1563.09	256.91	2102.52	1567.15	366.171	2269.83	1588.31	238.086	2244.94	1595.46	306.283	2334.95	1450.95	286.27	2446.14	1204.37	283.312	2199.43	1344.39	280.673	2156.43	1161.72	243.799	2445.67	1284.97	462.209	2257.89	1372.32	537.586	2345.8	1161.99	543.65	2358	1083.62	584.503	2326.53	963.792	551.318	2245.42	866.663	601.753	2295.28	860.792	592.612	2245.84	782.164
17	0	356.622	2093.83	1564.99	258.226	2090.37	1569.5	367.271	2257.95	1589.94	239.262	2232.79	1597.72	306.908	2322.62	1453.05	286.679	2433.95	1206.72	283.359	2187.09	1346.66	280.275	2144.31	1163.85	244.21	2433.61	1287.42	462.404	2245.17	1374.14	537.954	2332.07	1163.56	544.085	2344.06	1085.11	584.778	2311.87	965.5	551.041	2230.7	868.565	601.96	2280.08	862.668	592.466	2230.51	784.086
18	0	357.706	2082.01	1566.89	259.334	2078.34	1571.8	368.174	2246.18	1591.61	240.235	2220.77	1599.96	307.429	2310.44	1455.16	287.12	2421.92	1209.08	283.299	2174.92	1348.93	279.797	2132.4	1165.98	244.623	2421.72	1289.86	462.502	2232.56	1376.04	538.305	2318.37	1165.22	544.516	2330.12	1086.67	584.998	2297.08	967.293	550.665	2215.78	870.643	602.046	2264.67	864.639	592.203	2214.83	786.182
19	0	358.583	2070.31	1568.79	260.23	2066.45	1574.06	368.881	2234.54	1593.31	241.003	2208.89	1602.17	307.848	2298.41	1457.27	287.585	2410.03	1211.44	283.139	2162.93	1351.2	279.25	2120.69	1168.1	245.035	2409.99	1292.26	462.508	2220.06	1378.02	538.634	2304.7	1166.94	544.941	2316.18	1088.29	585.161	2282.19	969.163	550.194	2200.68	872.889	602.007	2249.08	866.695	591.826	2198.8	788.454
20	0	359.253	2058.71	1570.66	260.914	2054.7	1576.25	369.395	2223	1595.03	241.568	2197.13	1604.33	308.165	2286.52	1459.36	288.069	2398.28	1213.76	282.89	2151.09	1353.44	278.643	2109.17	1170.21	245.443	2398.41	1294.62	462.429	2207.68	1380.05	538.942	2291.07	1168.72	545.36	2302.26	1089.95	585.267	2267.2	971.095	549.63	2185.4	875.294	601.846	2233.3	868.827	591.335	2182.43	790.905
21	0	359.719	2047.23	1572.51	261.389	2043.08	1578.36	369.722	2211.57	1596.76	241.937	2185.51	1606.42	308.385	2274.77	1461.43	288.562	2386.68	1216.04	282.558	2139.41	1355.66	277.991	2097.82	1172.3	245.842	2386.97	1296.93	462.27	2195.43	1382.12	539.227	2277.5	1170.54	545.773	2288.35	1091.65	585.316	2252.12	973.08	548.974	2169.95	877.847	601.561	2217.36	871.027	590.729	2165.74	793.538
22	0	359.987	2035.86	1574.32	261.659	2031.58	1580.37	369.87	2200.25	1598.5	242.114	2174.01	1608.44	308.512	2263.16	1463.45	289.058	2375.2	1218.26	282.156	2127.89	1357.83	277.307	2086.63	1174.36	246.229	2375.67	1299.15	462.039	2183.3	1384.23	539.489	2263.98	1172.4	546.179	2274.46	1093.38	585.307	2236.95	975.104	548.225	2154.35	880.536	601.154	2201.25	873.285	590.007	2148.75	796.352
23	0	360.065	2024.58	1576.07	261.732	2020.22	1582.28	369.847	2189.02	1600.22	242.111	2162.63	1610.37	308.549	2251.68	1465.4	289.547	2363.84	1220.39	281.693	2116.51	1359.93	276.607	2075.58	1176.37	246.6	2364.49	1301.27	461.743	2171.3	1386.34	539.73	2250.53	1174.27	546.58	2260.59	1095.11	585.241	2221.7	977.154	547.381	2138.62	883.346	600.629	2185	875.593	589.162	2131.48	799.345
24	0	359.961	2013.4	1577.76	261.618	2008.96	1584.06	369.666	2177.89	1601.91	241.938	2151.36	1612.2	308.503	2240.33	1467.28	290.02	2352.59	1222.43	281.181	2105.27	1361.96	275.906	2064.64	1178.34	246.948	2353.41	1303.29	461.388	2159.42	1388.45	539.952	2237.15	1176.15	546.978	2246.74	1096.83	585.119	2206.38	979.216	546.44	2122.76	886.26	599.988	2168.6	877.939	588.192	2113.96	802.509
25	0	359.687	2002.31	1579.36	261.33	1997.82	1585.71	369.34	2166.84	1603.56	241.609	2140.21	1613.91	308.379	2229.1	1469.06	290.467	2341.45	1224.35	280.629	2094.15	1363.89	275.219	2053.8	1180.24	247.27	2342.44	1305.17	460.984	2147.66	1390.52	540.157	2223.84	1178.02	547.373	2232.92	1098.53	584.943	2190.99	981.275	545.401	2106.79	889.261	599.235	2152.08	880.313	587.09	2096.22	805.833
26	0	359.257	1991.3	1580.87	260.88	1986.79	1587.22	368.881	2155.86	1605.15	241.138	2129.16	1615.5	308.183	2217.98	1470.73	290.879	2330.4	1226.13	280.049	2083.15	1365.72	274.558	2043.04	1182.05	247.559	2331.56	1306.92	460.536	2136.03	1392.55	540.351	2210.61	1179.85	547.77	2219.11	1100.19	584.714	2175.54	983.315	544.262	2090.74	892.327	598.377	2135.44	882.699	585.853	2078.28	809.299
27	0	358.685	1980.36	1582.27	260.285	1975.85	1588.58	368.305	2144.95	1606.67	240.541	2118.21	1616.95	307.921	2206.95	1472.28	291.248	2319.44	1227.77	279.449	2072.26	1367.41	273.936	2032.34	1183.76	247.811	2320.75	1308.51	460.051	2124.52	1394.5	540.536	2197.44	1181.62	548.168	2205.34	1101.79	584.435	2160.05	985.319	543.023	2074.61	895.436	597.417	2118.69	885.085	584.479	2060.18	812.885
28	0	357.987	1969.48	1583.55	259.56	1964.99	1589.78	367.626	2134.1	1608.09	239.834	2107.34	1618.24	307.598	2196.02	1473.68	291.564	2308.55	1229.25	278.838	2061.45	1368.95	273.362	2021.69	1185.35	248.021	2310.01	1309.94	459.536	2113.12	1396.35	540.717	2184.35	1183.32	548.57	2191.58	1103.31	584.107	2144.5	987.27	541.685	2058.42	898.564	596.361	2101.85	887.453	582.966	2041.95	816.563
29	0	357.177	1958.66	1584.7	258.722	1954.21	1590.81	366.859	2123.3	1609.4	239.032	2096.55	1619.38	307.222	2185.16	1474.94	291.82	2297.74	1230.56	278.223	2050.73	1370.33	272.845	2011.07	1186.78	248.181	2299.32	1311.19	458.996	2101.82	1398.08	540.896	2171.32	1184.91	548.977	2177.84	1104.72	583.734	2128.92	989.149	540.249	2042.2	901.686	595.215	2084.93	889.786	581.315	2023.61	820.304
30	0	356.271	1947.89	1585.7	257.789	1943.5	1591.67	366.019	2112.55	1610.58	238.151	2085.83	1620.35	306.797	2174.37	1476.03	292.009	2286.98	1231.69	277.611	2040.07	1371.52	272.39	2000.48	1188.05	248.288	2288.67	1312.26	458.435	2090.62	1399.67	541.075	2158.36	1186.37	549.388	2164.11	1106.02	583.316	2113.3	990.94	538.72	2025.94	904.776	593.986	2067.95	892.067	579.529	2005.2	824.072
31	0	355.284	1937.15	1586.55	256.777	1932.84	1592.35	365.117	2101.84	1611.62	237.206	2075.16	1621.14	306.327	2163.63	1476.95	292.125	2276.27	1232.64	277.006	2029.46	1372.51	272	1989.91	1189.13	248.336	2278.06	1313.15	457.857	2079.51	1401.09	541.255	2145.44	1187.68	549.801	2150.4	1107.17	582.857	2097.67	992.626	537.101	2009.68	907.81	592.678	2050.92	894.277	577.611	1986.75	827.834
32	0	354.231	1926.45	1587.23	255.7	1922.23	1592.84	364.167	2091.15	1612.5	236.209	2064.54	1621.74	305.816	2152.94	1477.7	292.162	2265.62	1233.39	276.411	2018.9	1373.28	271.675	1979.34	1189.99	248.319	2267.47	1313.84	457.264	2068.49	1402.33	541.435	2132.58	1188.83	550.213	2136.69	1108.17	582.357	2082.02	994.191	535.399	1993.42	910.764	591.298	2033.86	896.4	575.568	1968.3	831.554
33	0	353.124	1915.76	1587.73	254.574	1911.65	1593.15	363.179	2080.47	1613.21	235.172	2053.95	1622.15	305.268	2142.27	1478.26	292.116	2255	1233.96	275.827	2008.36	1373.82	271.413	1968.78	1190.61	248.234	2256.9	1314.35	456.657	2057.53	1403.37	541.611	2119.75	1189.79	550.619	2123	1109	581.816	2066.37	995.622	533.619	1977.18	913.615	589.851	2016.79	898.42	573.409	1949.87	835.199
34	0	351.974	1905.09	1588.05	253.41	1901.08	1593.27	362.161	2069.81	1613.74	234.106	2043.39	1622.37	304.685	2131.63	1478.63	291.985	2244.41	1234.33	275.256	1997.85	1374.12	271.208	1958.21	1191	248.076	2246.33	1314.67	456.037	2046.64	1404.2	541.779	2106.95	1190.55	551.012	2109.32	1109.64	581.234	2050.73	996.908	531.769	1960.98	916.343	588.342	1999.73	900.322	571.141	1931.51	838.736
35	0	350.791	1894.43	1588.18	252.219	1890.53	1593.19	361.12	2059.15	1614.08	233.017	2032.84	1622.4	304.067	2121	1478.81	291.766	2233.86	1234.52	274.694	1987.34	1374.18	271.054	1947.65	1191.12	247.841	2235.78	1314.8	455.402	2035.8	1404.8	541.931	2094.18	1191.09	551.385	2095.64	1110.1	580.61	2035.12	998.037	529.855	1944.82	918.928	586.776	1982.69	902.093	568.776	1913.24	842.137
36	0	349.584	1883.76	1588.13	251.01	1879.98	1592.92	360.061	2048.49	1614.23	231.912	2022.29	1622.23	303.415	2110.38	1478.81	291.458	2223.32	1234.52	274.139	1976.84	1374	270.94	1937.07	1190.99	247.526	2225.22	1314.75	454.751	2025.01	1405.17	542.059	2081.43	1191.42	551.727	2081.97	1110.35	579.943	2019.54	999.002	527.884	1928.73	921.357	585.157	1965.69	903.725	566.325	1895.09	845.377
37	0	348.356	1873.08	1587.87	249.787	1869.43	1592.47	358.986	2037.82	1614.18	230.794	2011.73	1621.87	302.729	2099.76	1478.62	291.06	2212.8	1234.34	273.586	1966.33	1373.57	270.857	1926.49	1190.6	247.13	2214.65	1314.52	454.08	2014.25	1405.31	542.152	2068.71	1191.53	552.028	2068.33	1110.4	579.228	2004.01	999.799	525.864	1912.71	923.615	583.488	1948.77	905.209	563.8	1877.1	848.435
38	0	347.112	1862.39	1587.43	248.555	1858.85	1591.82	357.896	2027.12	1613.94	229.663	2001.15	1621.33	302.005	2089.13	1478.26	290.575	2202.29	1233.99	273.028	1955.81	1372.91	270.79	1915.89	1189.96	246.649	2204.07	1314.12	453.387	2003.53	1405.22	542.2	2056	1191.42	552.275	2054.7	1110.26	578.463	1988.56	1000.43	523.8	1896.79	925.694	581.773	1931.94	906.539	561.211	1859.28	851.296
39	0	345.853	1851.68	1586.79	247.315	1848.26	1591	356.789	2016.41	1613.52	228.519	1990.55	1620.61	301.241	2078.49	1477.71	290.002	2191.78	1233.47	272.459	1945.27	1372.03	270.726	1905.28	1189.08	246.085	2193.49	1313.55	452.666	1992.83	1404.91	542.189	2043.31	1191.1	552.456	2041.1	1109.92	577.643	1973.18	1000.88	521.699	1880.97	927.586	580.013	1915.21	907.714	558.572	1841.67	853.945
40	0	344.577	1840.96	1585.98	246.065	1837.64	1590	355.662	2005.68	1612.92	227.358	1979.93	1619.71	300.433	2067.85	1477	289.345	2181.28	1232.78	271.87	1934.72	1370.94	270.65	1894.65	1187.98	245.436	2182.88	1312.82	451.912	1982.15	1404.39	542.107	2030.64	1190.57	552.557	2027.54	1109.39	576.763	1957.9	1001.17	519.564	1865.28	929.289	578.211	1898.62	908.733	555.892	1824.28	856.374
41	0	343.283	1830.21	1584.99	244.802	1826.99	1588.84	354.508	1994.92	1612.14	226.174	1969.27	1618.67	299.577	2057.19	1476.12	288.606	2170.76	1231.93	271.252	1924.14	1369.67	270.546	1884	1186.69	244.703	2172.27	1311.94	451.12	1971.48	1403.67	541.941	2018.01	1189.85	552.565	2014.03	1108.69	575.817	1942.74	1001.29	517.4	1849.72	930.799	576.365	1882.17	909.597	553.181	1807.13	858.577
42	0	341.964	1819.44	1583.83	243.52	1816.31	1587.52	353.321	1984.14	1611.2	224.961	1958.58	1617.47	298.668	2046.53	1475.1	287.789	2160.23	1230.93	270.595	1913.55	1368.23	270.399	1873.32	1185.23	243.889	2161.63	1310.9	450.282	1960.82	1402.77	541.68	2005.41	1188.95	552.468	2000.58	1107.82	574.799	1927.72	1001.25	515.209	1834.31	932.12	574.477	1865.9	910.311	550.448	1790.25	860.552
43	0	340.616	1808.65	1582.53	242.211	1805.6	1586.07	352.092	1973.34	1610.12	223.711	1947.86	1616.14	297.699	2035.86	1473.93	286.9	2149.68	1229.79	269.889	1902.93	1366.65	270.193	1862.62	1183.63	242.996	2150.97	1309.72	449.393	1950.16	1401.71	541.312	1992.87	1187.89	552.253	1987.2	1106.8	573.701	1912.84	1001.07	512.993	1819.07	933.255	572.545	1849.82	910.879	547.701	1773.65	862.297
44	0	339.23	1797.85	1581.1	240.867	1794.86	1584.49	350.813	1962.52	1608.9	222.413	1937.11	1614.69	296.665	2025.19	1472.64	285.942	2139.09	1228.51	269.124	1892.29	1364.96	269.915	1851.88	1181.92	242.026	2140.29	1308.41	448.445	1939.51	1400.5	540.827	1980.39	1186.69	551.909	1973.91	1105.65	572.516	1898.12	1000.74	510.753	1804.01	934.209	570.566	1833.96	911.307	544.943	1757.34	863.816
45	0	337.798	1787.03	1579.56	239.479	1784.1	1582.81	349.472	1951.68	1607.57	221.057	1926.34	1613.15	295.558	2014.53	1471.23	284.92	2128.47	1227.1	268.288	1881.63	1363.19	269.549	1841.11	1180.12	240.983	2129.59	1306.96	447.432	1928.85	1399.18	540.216	1967.97	1185.37	551.425	1960.72	1104.39	571.239	1883.59	1000.29	508.486	1789.15	934.992	568.539	1818.32	911.604	542.179	1741.35	865.113
46	0	336.312	1776.21	1577.93	238.036	1773.33	1581.05	348.06	1940.84	1606.15	219.633	1915.54	1611.51	294.374	2003.86	1469.73	283.841	2117.8	1225.57	267.373	1870.95	1361.35	269.084	1830.3	1178.28	239.871	2118.86	1305.39	446.346	1918.19	1397.77	539.473	1955.65	1183.95	550.794	1947.65	1103.03	569.86	1869.25	999.716	506.193	1774.49	935.61	566.46	1802.94	911.775	539.41	1725.68	866.195
47	0	334.764	1765.39	1576.24	236.528	1762.53	1579.23	346.565	1929.99	1604.65	218.13	1904.73	1609.81	293.104	1993.21	1468.14	282.709	2107.08	1223.93	266.367	1860.25	1359.49	268.509	1819.45	1176.43	238.695	2108.1	1303.71	445.181	1907.51	1396.3	538.591	1943.42	1182.45	550.008	1934.7	1101.6	568.373	1855.11	999.04	503.868	1760.05	936.076	564.322	1787.82	911.829	536.636	1710.33	867.071
48	0	333.143	1754.56	1574.51	234.945	1751.73	1577.38	344.979	1919.15	1603.1	216.537	1893.92	1608.06	291.744	1982.57	1466.48	281.531	2096.29	1222.18	265.261	1849.53	1357.62	267.816	1808.54	1174.59	237.46	2097.32	1301.92	443.931	1896.83	1394.78	537.568	1931.31	1180.9	549.062	1921.9	1100.11	566.772	1841.2	998.273	501.508	1745.85	936.398	562.121	1772.99	911.775	533.853	1695.33	867.751
49	0	331.441	1743.75	1572.76	233.277	1740.92	1575.51	343.29	1908.32	1601.51	214.844	1883.1	1606.29	290.288	1971.94	1464.77	280.313	2085.44	1220.35	264.048	1838.8	1355.77	266.997	1797.57	1172.79	236.17	2086.5	1300.03	442.591	1886.13	1393.25	536.4	1919.32	1179.31	547.953	1909.25	1098.58	565.049	1827.53	997.43	499.107	1731.9	936.59	559.849	1758.47	911.619	531.059	1680.68	868.248
50	0	329.652	1732.94	1571.04	231.515	1730.11	1573.66	341.491	1897.5	1599.91	213.043	1872.29	1604.51	288.731	1961.34	1463.03	279.06	2074.51	1218.44	262.72	1828.04	1353.97	266.048	1786.54	1171.06	234.831	2075.65	1298.06	441.157	1875.42	1391.74	535.087	1907.46	1177.72	546.677	1896.75	1097.05	563.2	1814.1	996.525	496.658	1718.2	936.661	557.499	1744.26	911.369	528.247	1666.38	868.576
51	0	327.767	1722.15	1569.35	229.653	1719.31	1571.84	339.573	1886.69	1598.32	211.126	1861.48	1602.74	287.07	1950.75	1461.27	277.778	2063.5	1216.46	261.271	1817.27	1352.24	264.966	1775.43	1169.42	233.449	2064.76	1296.02	439.625	1864.69	1390.26	533.629	1895.74	1176.13	545.236	1884.43	1095.52	561.219	1800.92	995.572	494.153	1704.77	936.624	555.062	1730.38	911.034	525.41	1652.44	868.749
52	0	325.782	1711.38	1567.73	227.684	1708.51	1570.09	337.532	1875.91	1596.77	209.087	1850.69	1601	285.302	1940.19	1459.52	276.474	2052.41	1214.44	259.698	1806.48	1350.59	263.751	1764.23	1167.89	232.029	2053.84	1293.92	437.992	1853.94	1388.85	532.03	1884.16	1174.59	543.63	1872.28	1094.03	559.103	1788	994.588	491.584	1691.63	936.488	552.531	1716.85	910.62	522.54	1638.85	868.782
53	0	323.692	1700.62	1566.21	225.603	1697.71	1568.43	335.363	1865.15	1595.27	206.923	1839.91	1599.32	283.425	1929.65	1457.8	275.154	2041.22	1212.39	257.997	1795.68	1349.06	262.406	1752.95	1166.5	230.578	2042.88	1291.78	436.258	1843.17	1387.53	530.292	1872.73	1173.1	541.863	1860.31	1092.59	556.849	1775.35	993.587	488.941	1678.78	936.263	549.895	1703.67	910.136	519.628	1625.64	868.69
54	0	321.495	1689.87	1564.8	223.408	1686.92	1566.88	333.064	1854.4	1593.85	204.63	1829.13	1597.71	281.441	1919.13	1456.13	273.823	2029.95	1210.34	256.169	1784.86	1347.66	260.932	1741.56	1165.26	229.102	2031.88	1289.62	434.423	1832.37	1386.33	528.419	1861.44	1171.69	539.938	1848.52	1091.22	554.454	1762.97	992.586	486.215	1666.24	935.96	547.148	1690.85	909.588	516.666	1612.78	868.485
55	0	319.189	1679.14	1563.53	221.098	1676.14	1565.45	330.635	1843.68	1592.53	202.208	1818.38	1596.2	279.352	1908.62	1454.53	272.488	2018.59	1208.3	254.215	1774.02	1346.4	259.337	1730.08	1164.19	227.606	2020.84	1287.46	432.488	1821.54	1385.26	526.417	1850.29	1170.39	537.862	1836.9	1089.95	551.919	1750.86	991.599	483.396	1654.01	935.587	544.281	1678.4	908.987	513.642	1600.3	868.18
56	0	316.775	1668.43	1562.42	218.674	1665.36	1564.18	328.078	1832.97	1591.34	199.659	1807.62	1594.8	277.161	1898.13	1453.02	271.156	2007.14	1206.3	252.141	1763.16	1345.29	257.629	1718.5	1163.3	226.099	2009.76	1285.32	430.457	1810.68	1384.34	524.292	1839.26	1169.21	535.643	1825.44	1088.79	549.245	1739.02	990.644	480.473	1642.11	935.153	541.289	1666.33	908.341	510.546	1588.19	867.786
57	0	314.254	1657.71	1561.49	216.139	1654.58	1563.07	325.398	1822.27	1590.29	196.989	1796.88	1593.53	274.876	1887.65	1451.62	269.831	1995.62	1204.37	249.952	1752.29	1344.36	255.816	1706.82	1162.6	224.586	1998.65	1283.23	428.336	1799.79	1383.6	522.053	1828.35	1168.18	533.288	1814.15	1087.77	546.434	1727.44	989.736	477.439	1630.54	934.665	538.167	1654.62	907.66	507.369	1576.45	867.311
58	0	311.631	1647	1560.74	213.498	1643.8	1562.13	322.601	1811.58	1589.4	194.202	1786.12	1592.41	272.504	1877.17	1450.35	268.522	1984.02	1202.54	247.659	1741.41	1343.61	253.912	1695.04	1162.11	223.075	1987.5	1281.21	426.131	1788.86	1383.05	519.707	1817.53	1167.31	530.807	1803.02	1086.9	543.492	1716.14	988.891	474.284	1619.3	934.133	534.913	1643.29	906.957	504.098	1565.11	866.762
59	0	308.911	1636.28	1560.2	210.757	1633	1561.37	319.698	1800.88	1588.7	191.308	1775.37	1591.46	270.056	1866.69	1449.23	267.233	1972.35	1200.83	245.273	1730.51	1343.06	251.93	1683.19	1161.83	221.573	1976.32	1279.29	423.852	1777.9	1382.7	517.266	1806.79	1166.63	528.213	1792.02	1086.21	540.424	1705.09	988.126	471.002	1608.42	933.565	531.526	1632.33	906.244	500.723	1554.15	866.144
60	0	306.102	1625.56	1559.86	207.925	1622.2	1560.81	316.699	1790.16	1588.19	188.317	1764.6	1590.68	267.544	1856.21	1448.29	265.971	1960.64	1199.27	242.809	1719.6	1342.7	249.886	1671.27	1161.78	220.086	1965.11	1277.51	421.51	1766.9	1382.58	514.741	1796.1	1166.16	525.517	1781.16	1085.71	537.24	1694.28	987.456	467.588	1597.87	932.971	528.011	1621.73	905.535	497.231	1543.6	865.462
61	0	303.213	1614.81	1559.73	205.012	1611.38	1560.43	313.617	1779.43	1587.9	185.243	1753.81	1590.09	264.982	1845.72	1447.53	264.741	1948.88	1197.88	240.284	1708.67	1342.56	247.799	1659.3	1161.94	218.62	1953.88	1275.87	419.117	1755.86	1382.68	512.146	1785.45	1165.91	522.734	1770.42	1085.41	533.949	1683.72	986.896	464.039	1587.68	932.36	524.375	1611.48	904.847	493.61	1533.46	864.719
62	0	300.255	1604.04	1559.81	202.03	1600.54	1560.24	310.469	1768.67	1587.82	182.101	1742.99	1589.69	262.387	1835.21	1446.96	263.548	1937.11	1196.7	237.717	1697.74	1342.61	245.689	1647.29	1162.32	217.183	1942.64	1274.42	416.687	1744.8	1383.02	509.495	1774.82	1165.89	519.88	1759.79	1085.32	530.567	1673.39	986.46	460.357	1577.83	931.744	520.627	1601.57	904.194	489.849	1523.74	863.918
63	0	297.239	1593.25	1560.09	198.99	1589.68	1560.25	307.272	1757.88	1587.97	178.907	1732.15	1589.49	259.775	1824.68	1446.61	262.395	1925.32	1195.74	235.128	1686.81	1342.88	243.576	1635.29	1162.91	215.778	1931.38	1273.17	414.238	1733.7	1383.6	506.806	1764.17	1166.12	516.97	1749.26	1085.46	527.107	1663.27	986.159	456.546	1568.33	931.134	516.783	1591.97	903.595	485.936	1514.44	863.062
64	0	294.18	1582.42	1560.59	195.908	1578.8	1560.43	304.044	1747.05	1588.35	175.678	1721.29	1589.49	257.164	1814.13	1446.47	261.285	1913.54	1195.02	232.538	1675.87	1343.35	241.483	1623.3	1163.71	214.412	1920.12	1272.14	411.785	1722.57	1384.41	504.097	1753.5	1166.59	514.024	1738.83	1085.83	523.588	1653.36	986.004	452.616	1559.16	930.542	512.861	1582.68	903.065	481.862	1505.57	862.156
65	0	291.092	1571.56	1561.27	192.799	1567.91	1560.78	300.806	1736.17	1588.95	172.436	1710.4	1589.69	254.573	1803.54	1446.55	260.218	1901.78	1194.56	229.971	1664.93	1344.02	239.431	1611.35	1164.71	213.086	1908.87	1271.35	409.346	1711.42	1385.45	501.387	1742.79	1167.31	511.06	1728.48	1086.43	520.029	1643.64	986.003	448.581	1550.31	929.98	508.884	1573.66	902.619	477.621	1497.1	861.205
66	0	287.991	1560.67	1562.14	189.678	1556.99	1561.3	297.579	1725.26	1589.78	169.199	1699.48	1590.08	252.021	1792.93	1446.84	259.195	1890.07	1194.35	227.449	1654	1344.87	237.443	1599.47	1165.89	211.803	1897.62	1270.82	406.94	1700.25	1386.72	498.698	1732.02	1168.27	508.098	1718.21	1087.25	516.454	1634.1	986.158	444.461	1541.77	929.461	504.881	1564.89	902.273	473.213	1489.02	860.218
67	0	284.894	1549.75	1563.17	186.563	1546.07	1561.96	294.385	1714.3	1590.81	165.99	1688.55	1590.65	249.525	1782.29	1447.35	258.213	1878.41	1194.42	224.994	1643.07	1345.9	235.539	1587.68	1167.22	210.564	1886.4	1270.54	404.585	1689.07	1388.19	496.05	1721.2	1169.46	505.158	1708.03	1088.28	512.886	1624.72	986.472	440.282	1533.51	928.998	500.882	1556.35	902.038	468.645	1481.31	859.21
68	0	281.819	1538.79	1564.36	183.471	1535.14	1562.77	291.243	1703.3	1592.04	162.828	1677.6	1591.39	247.103	1771.61	1448.07	257.269	1866.82	1194.74	222.628	1632.15	1347.1	233.74	1575.99	1168.69	209.368	1875.2	1270.53	402.3	1677.89	1389.85	493.465	1710.33	1170.86	502.26	1697.92	1089.51	509.353	1615.5	986.943	436.074	1525.51	928.603	496.922	1548.01	901.923	463.935	1473.92	858.198
69	0	278.783	1527.81	1565.7	180.42	1524.2	1563.7	288.176	1692.27	1593.45	159.735	1666.64	1592.28	244.771	1760.9	1448.98	256.359	1855.31	1195.32	220.371	1621.24	1348.43	232.061	1564.43	1170.27	208.214	1864.03	1270.78	400.101	1666.71	1391.67	490.962	1699.42	1172.45	499.426	1687.9	1090.93	505.88	1606.43	987.564	431.876	1517.73	928.286	493.039	1539.84	901.934	459.113	1466.79	857.207
70	0	275.805	1516.8	1567.15	177.428	1513.27	1564.74	285.203	1681.21	1595.01	156.731	1655.69	1593.31	242.543	1750.16	1450.07	255.475	1843.89	1196.15	218.24	1610.33	1349.88	230.518	1553.01	1171.94	207.099	1852.89	1271.28	398.006	1655.54	1393.62	488.562	1688.47	1174.2	496.672	1677.96	1092.5	502.498	1597.48	988.327	427.73	1510.14	928.058	489.273	1531.81	902.074	454.224	1459.86	856.27
71	0	272.902	1505.77	1568.7	174.514	1502.34	1565.87	282.344	1670.12	1596.71	153.834	1644.73	1594.46	240.432	1739.38	1451.33	254.613	1832.58	1197.21	216.251	1599.44	1351.43	229.122	1541.72	1173.66	206.019	1841.8	1272.04	396.027	1644.4	1395.69	486.279	1677.52	1176.09	494.018	1668.13	1094.21	499.236	1588.66	989.221	423.684	1502.7	927.927	485.664	1523.9	902.341	449.328	1453.06	855.426
72	0	270.094	1494.72	1570.34	171.695	1491.43	1567.08	279.615	1659.01	1598.51	151.064	1633.79	1595.71	238.449	1728.57	1452.73	253.764	1821.37	1198.48	214.415	1588.56	1353.06	227.879	1530.59	1175.42	204.972	1830.76	1273.02	394.177	1633.28	1397.83	484.128	1666.59	1178.07	491.478	1658.4	1096.02	496.121	1579.96	990.229	419.79	1495.37	927.9	482.255	1516.08	902.729	444.501	1446.3	854.722
73	0	267.397	1483.66	1572.04	168.988	1480.52	1568.35	277.033	1647.88	1600.4	148.435	1622.86	1597.03	236.601	1717.73	1454.26	252.921	1810.28	1199.94	212.742	1577.7	1354.74	226.794	1519.59	1177.18	203.951	1819.76	1274.22	392.466	1622.19	1400.01	482.12	1655.72	1180.13	489.067	1648.78	1097.92	493.183	1571.36	991.336	416.104	1488.1	927.982	479.083	1508.32	903.229	439.836	1439.49	854.211
74	0	264.828	1472.59	1573.77	166.411	1469.62	1569.66	274.61	1636.74	1602.33	145.964	1611.94	1598.41	234.896	1706.86	1455.89	252.078	1799.31	1201.57	211.238	1566.85	1356.45	225.864	1508.74	1178.93	202.953	1808.82	1275.61	390.901	1611.15	1402.21	480.262	1644.94	1182.21	486.795	1639.29	1099.86	490.448	1562.87	992.521	412.684	1480.85	928.178	476.188	1500.63	903.828	435.439	1432.56	853.951
75	0	262.404	1461.51	1575.52	163.979	1458.74	1571	272.357	1625.6	1604.29	143.661	1601.04	1599.83	233.336	1695.97	1457.59	251.226	1788.46	1203.33	209.904	1556.01	1358.16	225.086	1498.02	1180.63	201.972	1797.93	1277.17	389.485	1600.15	1404.38	478.557	1634.29	1184.3	484.672	1629.94	1101.81	487.941	1554.48	993.765	409.588	1473.56	928.49	473.602	1492.96	904.509	431.427	1425.41	854.002
76	0	260.138	1450.42	1577.26	161.707	1447.86	1572.34	270.284	1614.44	1606.24	141.537	1590.15	1601.26	231.922	1685.05	1459.35	250.361	1777.73	1205.19	208.738	1545.19	1359.85	224.45	1487.42	1182.28	201.005	1787.1	1278.87	388.221	1589.21	1406.51	477.005	1623.8	1186.36	482.702	1620.72	1103.76	485.682	1546.19	995.046	406.876	1466.21	928.919	471.354	1485.32	905.254	427.922	1417.98	854.422
77	0	258.043	1439.33	1578.96	159.608	1436.98	1573.67	268.397	1603.29	1608.16	139.6	1579.26	1602.68	230.654	1674.12	1461.14	249.477	1767.11	1207.13	207.736	1534.39	1361.5	223.944	1476.93	1183.84	200.047	1776.32	1280.68	387.106	1578.32	1408.55	475.602	1613.52	1188.36	480.888	1611.66	1105.67	483.692	1537.99	996.342	404.602	1458.73	929.464	469.468	1477.69	906.043	425.05	1410.21	855.265
78	0	256.13	1428.23	1580.61	157.692	1426.1	1574.97	266.7	1592.13	1610.02	137.855	1568.37	1604.07	229.528	1663.17	1462.93	248.571	1756.59	1209.12	206.891	1523.61	1363.09	223.553	1466.53	1185.32	199.096	1765.6	1282.57	386.139	1567.5	1410.49	474.341	1603.46	1190.28	479.232	1602.75	1107.51	481.985	1529.87	997.632	402.82	1451.09	930.123	467.961	1470.06	906.853	422.934	1402.06	856.577
79	0	254.408	1417.13	1582.17	155.968	1415.21	1576.21	265.194	1580.97	1611.8	136.305	1557.48	1605.42	228.54	1652.21	1464.7	247.641	1746.18	1211.11	206.192	1512.86	1364.6	223.261	1456.22	1186.69	198.151	1754.94	1284.5	385.311	1556.74	1412.29	473.213	1593.67	1192.08	477.732	1593.98	1109.26	480.57	1521.83	998.893	401.578	1443.24	930.895	466.843	1462.43	907.663	421.686	1393.52	858.389
80	0	252.883	1406.02	1583.63	154.444	1404.3	1577.39	263.878	1569.8	1613.47	134.949	1546.56	1606.7	227.683	1641.24	1466.43	246.687	1735.86	1213.08	205.626	1502.13	1366.02	223.048	1445.98	1187.94	197.211	1744.32	1286.45	384.617	1546.04	1413.95	472.205	1584.14	1193.76	476.384	1585.36	1110.9	479.456	1513.86	1000.11	400.918	1435.16	931.774	466.117	1454.78	908.451	421.409	1384.6	860.715
81	0	251.56	1394.9	1584.97	153.122	1393.36	1578.48	262.75	1558.63	1615	133.788	1535.63	1607.91	226.949	1630.27	1468.08	245.712	1725.62	1215.01	205.181	1491.42	1367.32	222.896	1435.79	1189.06	196.277	1733.75	1288.38	384.046	1535.4	1415.43	471.304	1574.89	1195.29	475.183	1576.87	1112.41	478.644	1505.94	1001.25	400.874	1426.81	932.755	465.779	1447.1	909.196	422.182	1375.33	863.548
82	0	250.44	1383.78	1586.16	152.005	1382.39	1579.47	261.805	1547.45	1616.39	132.815	1524.66	1609.02	226.331	1619.31	1469.64	244.72	1715.46	1216.86	204.841	1480.74	1368.49	222.784	1425.66	1190.04	195.352	1723.23	1290.26	383.588	1524.82	1416.72	470.497	1565.91	1196.65	474.124	1568.48	1113.78	478.133	1498.05	1002.32	401.475	1418.16	933.829	465.82	1439.39	909.879	424.066	1365.77	866.858
83	0	249.521	1372.64	1587.18	151.09	1371.39	1580.34	261.036	1536.26	1617.61	132.026	1513.66	1610.02	225.818	1608.35	1471.09	243.717	1705.35	1218.6	204.592	1470.09	1369.53	222.694	1415.57	1190.88	194.441	1712.75	1292.06	383.232	1514.3	1417.82	469.769	1557.18	1197.83	473.198	1560.19	1114.99	477.919	1490.19	1003.28	402.739	1409.21	934.988	466.226	1431.63	910.483	427.094	1356	870.586
84	0	248.799	1361.49	1588.04	150.375	1360.34	1581.07	260.437	1525.06	1618.66	131.412	1502.61	1610.9	225.402	1597.39	1472.4	242.712	1695.29	1220.21	204.418	1459.47	1370.41	222.609	1405.51	1191.56	193.547	1702.31	1293.75	382.966	1503.83	1418.71	469.107	1548.68	1198.83	472.399	1551.96	1116.03	477.994	1482.33	1004.13	404.678	1399.93	936.218	466.979	1423.8	910.992	431.27	1346.11	874.652
85	0	248.269	1350.33	1588.7	149.852	1349.25	1581.66	259.998	1513.85	1619.51	130.964	1491.51	1611.64	225.073	1586.45	1473.57	241.715	1685.26	1221.67	204.306	1448.87	1371.13	222.514	1395.48	1192.08	192.679	1691.9	1295.31	382.778	1493.41	1419.38	468.499	1540.38	1199.64	471.72	1543.75	1116.89	478.351	1474.44	1004.85	407.292	1390.33	937.503	468.057	1415.9	911.395	436.568	1336.22	878.949
86	0	247.923	1339.16	1589.16	149.513	1338.11	1582.09	259.709	1502.63	1620.16	130.673	1480.35	1612.24	224.822	1575.52	1474.57	240.736	1675.26	1222.96	204.241	1438.3	1371.69	222.396	1385.47	1192.43	191.842	1681.51	1296.72	382.657	1483.01	1419.83	467.937	1532.21	1200.25	471.157	1535.54	1117.56	478.978	1466.5	1005.44	410.575	1380.41	938.826	469.44	1407.91	911.681	442.931	1326.44	883.355
87	0	247.749	1327.97	1589.41	149.349	1326.92	1582.35	259.562	1491.39	1620.6	130.527	1469.15	1612.68	224.641	1564.6	1475.39	239.787	1665.27	1224.07	204.211	1427.74	1372.06	222.246	1375.48	1192.6	191.045	1671.15	1297.96	382.591	1472.64	1420.06	467.412	1524.15	1200.65	470.705	1527.29	1118.05	479.864	1458.49	1005.89	414.512	1370.18	940.165	471.109	1399.8	911.846	450.271	1316.85	887.732
88	0	247.736	1316.77	1589.44	149.347	1315.68	1582.44	259.544	1480.14	1620.83	130.516	1457.89	1612.97	224.522	1553.69	1476.03	238.881	1655.27	1224.99	204.205	1417.21	1372.26	222.055	1365.51	1192.6	190.295	1660.8	1299	382.57	1462.29	1420.07	466.923	1516.11	1200.85	470.36	1518.95	1118.35	481	1450.38	1006.19	419.078	1359.67	941.493	473.045	1391.57	911.884	458.476	1307.56	891.937
89	0	247.873	1305.56	1589.27	149.495	1304.4	1582.36	259.647	1468.88	1620.85	130.628	1446.57	1613.09	224.458	1542.79	1476.47	238.03	1645.27	1225.69	204.213	1406.69	1372.26	221.819	1355.55	1192.41	189.6	1650.47	1299.84	382.585	1451.93	1419.85	466.468	1508.05	1200.85	470.124	1510.49	1118.47	482.374	1442.15	1006.35	424.239	1348.9	942.784	475.233	1383.2	911.794	467.407	1298.63	895.832
90	0	248.145	1294.34	1588.87	149.781	1293.08	1582.09	259.86	1457.6	1620.65	130.851	1435.21	1613.04	224.444	1531.9	1476.7	237.245	1635.24	1226.18	204.228	1396.17	1372.08	221.537	1345.59	1192.04	188.968	1640.14	1300.47	382.629	1441.56	1419.43	466.054	1499.91	1200.66	469.998	1501.88	1118.4	483.977	1433.77	1006.35	429.954	1337.92	944.006	477.661	1374.68	911.574	476.909	1290.11	899.288
91	0	248.54	1283.1	1588.26	150.19	1281.73	1581.64	260.173	1446.32	1620.23	131.177	1423.81	1612.82	224.474	1521.01	1476.73	236.537	1625.17	1226.45	204.245	1385.65	1371.7	221.206	1335.63	1191.48	188.405	1629.8	1300.88	382.694	1431.17	1418.79	465.689	1491.61	1200.27	469.985	1493.09	1118.15	485.8	1425.23	1006.21	436.171	1326.76	945.127	480.322	1366	911.227	486.817	1282.02	902.198
92	0	249.045	1271.86	1587.44	150.709	1270.34	1581.02	260.576	1435.03	1619.61	131.593	1412.38	1612.42	224.547	1510.13	1476.54	235.916	1615.06	1226.5	204.259	1375.13	1371.13	220.83	1325.66	1190.74	187.919	1619.46	1301.07	382.775	1420.74	1417.94	465.386	1483.12	1199.7	470.089	1484.08	1117.72	487.833	1416.52	1005.91	442.831	1315.48	946.115	483.208	1357.16	910.752	496.959	1274.33	904.478
93	0	249.648	1260.61	1586.42	151.326	1258.93	1580.21	261.062	1423.73	1618.78	132.093	1400.91	1611.85	224.659	1499.24	1476.14	235.388	1604.89	1226.33	204.268	1364.59	1370.38	220.411	1315.66	1189.83	187.513	1609.1	1301.02	382.871	1410.26	1416.9	465.161	1474.37	1198.95	470.318	1474.85	1117.14	490.068	1407.63	1005.47	449.869	1304.11	946.938	486.317	1348.16	910.152	507.169	1267.02	906.075
94	0	250.336	1249.35	1585.21	152.029	1247.5	1579.24	261.621	1412.42	1617.75	132.666	1389.42	1611.11	224.81	1488.34	1475.53	234.96	1594.65	1225.93	204.273	1354.02	1369.44	219.953	1305.63	1188.73	187.194	1598.71	1300.75	382.98	1399.72	1415.66	465.032	1465.33	1198.03	470.677	1465.37	1116.39	492.496	1398.55	1004.89	457.213	1292.71	947.563	489.645	1338.99	909.429	517.29	1260.01	906.967
95	0	251.1	1238.08	1583.83	152.807	1236.05	1578.11	262.249	1401.12	1616.52	133.306	1377.92	1610.19	225.003	1477.42	1474.71	234.634	1584.34	1225.31	204.277	1343.41	1368.31	219.46	1295.55	1187.48	186.963	1588.27	1300.26	383.103	1389.1	1414.24	465.017	1455.97	1196.96	471.174	1455.65	1115.48	495.108	1389.29	1004.17	464.788	1281.31	947.966	493.189	1329.68	908.583	527.185	1253.23	907.16
96	0	251.933	1226.81	1582.28	153.651	1224.59	1576.83	262.939	1389.82	1615.11	134.008	1366.41	1609.11	225.237	1466.48	1473.69	234.412	1573.94	1224.48	204.283	1332.76	1367.01	218.939	1285.41	1186.06	186.823	1577.79	1299.54	383.241	1378.4	1412.64	465.135	1446.26	1195.73	471.815	1445.68	1114.43	497.892	1379.85	1003.31	472.516	1269.96	948.124	496.941	1320.23	907.615	536.735	1246.58	906.685
97	0	252.826	1215.53	1580.58	154.555	1213.13	1575.4	263.688	1378.51	1613.52	134.768	1354.89	1607.86	225.517	1455.49	1472.47	234.293	1563.44	1223.44	204.298	1322.04	1365.54	218.398	1275.2	1184.49	186.774	1567.25	1298.62	383.401	1367.61	1410.87	465.403	1436.19	1194.37	472.602	1435.47	1113.24	500.835	1370.23	1002.31	480.32	1258.7	948.018	500.892	1310.66	906.526	545.848	1239.96	905.592
98	0	253.777	1204.24	1578.75	155.513	1201.65	1573.85	264.493	1367.21	1611.76	135.583	1343.37	1606.46	225.847	1444.46	1471.06	234.272	1552.85	1222.2	204.331	1311.25	1363.9	217.845	1264.89	1182.77	186.814	1556.62	1297.48	383.587	1356.71	1408.93	465.834	1425.77	1192.86	473.539	1425.05	1111.91	503.921	1360.47	1001.19	488.126	1247.54	947.64	505.027	1300.98	905.317	554.454	1233.28	903.942
99	0	254.783	1192.93	1576.8	156.522	1190.17	1572.19	265.355	1355.9	1609.84	136.454	1331.86	1604.9	226.231	1433.36	1469.47	234.344	1542.14	1220.77	204.391	1300.37	1362.1	217.291	1254.48	1180.91	186.941	1545.9	1296.16	383.808	1345.7	1406.82	466.438	1415.02	1191.23	474.624	1414.42	1110.45	507.132	1350.56	999.932	495.862	1236.52	946.985	509.325	1291.21	903.988	562.511	1226.45	901.803
100	0	255.843	1181.6	1574.76	157.582	1178.68	1570.43	266.274	1344.59	1607.77	137.38	1320.34	1603.2	226.674	1422.19	1467.71	234.501	1531.32	1219.15	204.49	1289.39	1360.16	216.749	1243.96	1178.92	187.149	1535.08	1294.65	384.072	1334.58	1404.57	467.217	1403.97	1189.47	475.853	1403.63	1108.86	510.447	1340.52	998.551	503.463	1225.63	946.055	513.76	1281.36	902.539	569.996	1219.39	899.245
101	0	256.959	1170.24	1572.65	158.694	1167.16	1568.59	267.254	1333.26	1605.57	138.366	1308.82	1601.37	227.182	1410.93	1465.8	234.733	1520.37	1217.38	204.641	1278.29	1358.09	216.232	1233.31	1176.8	187.432	1524.13	1292.98	384.39	1323.34	1402.16	468.17	1392.64	1187.59	477.217	1392.68	1107.14	513.84	1330.38	997.046	510.872	1214.89	944.858	518.298	1271.46	900.97	576.906	1212.04	896.335
102	0	258.137	1158.85	1570.47	159.862	1155.63	1566.69	268.299	1321.91	1603.25	139.416	1297.29	1599.42	227.761	1399.58	1463.76	235.028	1509.29	1215.45	204.858	1267.07	1355.89	215.758	1222.52	1174.57	187.783	1513.05	1291.16	384.772	1311.99	1399.62	469.289	1381.1	1185.6	478.703	1381.62	1105.29	517.284	1320.15	995.419	518.038	1204.29	943.406	522.901	1261.51	899.281	583.252	1204.36	893.137
103	0	259.381	1147.41	1568.26	161.094	1144.06	1564.74	269.417	1310.53	1600.83	140.537	1285.74	1597.36	228.415	1388.11	1461.6	235.374	1498.07	1213.4	205.154	1255.7	1353.58	215.346	1211.58	1172.23	188.191	1501.82	1289.22	385.229	1300.52	1396.96	470.559	1369.38	1183.5	480.295	1370.48	1103.33	520.747	1309.86	993.672	524.918	1193.83	941.718	527.524	1251.53	897.474	589.057	1196.35	889.71
104	0	260.701	1135.91	1566.03	162.396	1132.44	1562.76	270.614	1299.12	1598.33	141.737	1274.16	1595.21	229.148	1376.52	1459.35	235.757	1486.7	1211.23	205.545	1244.17	1351.17	215.013	1200.48	1169.79	188.647	1490.43	1287.18	385.771	1288.94	1394.19	471.959	1357.55	1181.29	481.973	1359.28	1101.25	524.197	1299.51	991.808	531.478	1183.49	939.813	532.121	1241.53	895.55	594.354	1187.98	886.112
105	0	262.105	1124.35	1563.8	163.779	1120.76	1560.77	271.898	1287.64	1595.76	143.024	1262.53	1592.99	229.967	1364.8	1457.03	236.162	1475.18	1208.99	206.045	1232.49	1348.69	214.782	1189.21	1167.27	189.14	1478.87	1285.06	386.41	1277.26	1391.32	473.464	1345.66	1178.98	483.712	1348.04	1099.06	527.599	1289.12	989.831	537.688	1173.27	937.714	536.645	1231.51	893.513	599.179	1179.28	882.394
106	0	263.604	1112.7	1561.59	165.255	1109.01	1558.8	273.279	1276.1	1593.15	144.408	1250.85	1590.74	230.872	1352.94	1454.66	236.575	1463.51	1206.7	206.667	1220.63	1346.15	214.672	1177.75	1164.68	189.658	1467.12	1282.89	387.153	1265.48	1388.38	475.045	1333.76	1176.58	485.484	1336.8	1096.76	530.918	1278.72	987.746	543.528	1163.14	935.446	541.047	1221.48	891.367	603.572	1170.28	878.605
107	0	265.209	1100.97	1559.41	166.836	1097.17	1556.85	274.765	1264.48	1590.53	145.899	1239.08	1588.46	231.869	1340.93	1452.28	236.983	1451.68	1204.37	207.423	1208.59	1343.59	214.704	1166.1	1162.05	190.19	1455.18	1280.72	388.01	1253.6	1385.39	476.667	1321.89	1174.1	487.261	1325.56	1094.38	534.118	1268.31	985.56	548.981	1153.09	933.034	545.281	1211.45	889.119	607.569	1161	874.791
108	0	266.932	1089.12	1557.3	168.533	1085.23	1554.96	276.364	1252.76	1587.93	147.505	1227.23	1586.2	232.957	1328.76	1449.91	237.372	1439.68	1202.06	208.323	1196.37	1341.03	214.895	1154.25	1159.41	190.727	1443.05	1278.55	388.988	1241.65	1382.37	478.298	1310.09	1171.55	489.013	1314.35	1091.91	537.165	1257.91	983.283	554.037	1143.11	930.504	549.302	1201.41	886.778	611.208	1151.5	870.991
109	0	268.784	1077.17	1555.26	170.36	1073.17	1553.14	278.082	1240.93	1585.37	149.235	1215.26	1583.99	234.139	1316.45	1447.59	237.734	1427.52	1199.79	209.374	1183.96	1338.5	215.262	1142.19	1156.78	191.259	1430.73	1276.44	390.09	1229.62	1379.36	479.905	1298.38	1168.95	490.708	1303.18	1089.38	540.026	1247.52	980.928	558.689	1133.18	927.882	553.07	1191.38	884.357	614.518	1141.81	867.241
110	0	270.773	1065.09	1553.32	172.327	1060.98	1551.42	279.925	1228.98	1582.89	151.095	1203.16	1581.85	235.413	1303.97	1445.35	238.058	1415.2	1197.59	210.581	1171.38	1336.04	215.816	1129.91	1154.2	191.779	1418.21	1274.42	391.32	1217.53	1376.37	481.454	1286.8	1166.31	492.317	1292.04	1086.81	542.673	1237.14	978.512	562.936	1123.29	925.194	556.549	1181.35	881.869	617.524	1131.99	863.569
111	0	272.909	1052.88	1551.49	174.444	1048.65	1549.81	281.895	1216.9	1580.52	153.09	1190.91	1579.82	236.78	1291.35	1443.22	238.339	1402.71	1195.5	211.947	1158.61	1333.68	216.566	1117.4	1151.71	192.281	1405.5	1272.51	392.677	1205.39	1373.45	482.916	1275.34	1163.66	493.812	1280.95	1084.21	545.077	1226.79	976.053	566.776	1113.43	922.466	559.706	1171.31	879.333	620.243	1122.07	859.997
112	0	275.195	1040.53	1549.8	176.717	1036.17	1548.35	283.994	1204.68	1578.29	155.222	1178.51	1577.94	238.236	1278.58	1441.23	238.575	1390.07	1193.55	213.469	1145.68	1331.46	217.514	1104.68	1149.36	192.761	1392.62	1270.76	394.158	1193.19	1370.62	484.267	1264.01	1161.02	495.168	1269.9	1081.63	547.218	1216.46	973.574	570.214	1103.58	919.725	562.514	1161.28	876.768	622.682	1112.1	856.54
113	0	277.635	1028.06	1548.27	179.151	1023.53	1547.04	286.218	1192.32	1576.24	157.489	1165.95	1576.24	239.778	1265.68	1439.42	238.766	1377.27	1191.77	215.142	1132.59	1329.41	218.659	1091.73	1147.17	193.22	1379.55	1269.19	395.76	1180.96	1367.93	485.485	1252.8	1158.44	496.363	1258.89	1079.08	549.076	1206.14	971.099	573.254	1093.74	916.995	564.953	1151.26	874.198	624.845	1102.11	853.209
114	0	280.225	1015.45	1546.91	181.745	1010.75	1545.9	288.563	1179.82	1574.39	159.887	1153.21	1574.75	241.401	1252.65	1437.81	238.916	1364.34	1190.2	216.957	1119.36	1327.58	219.992	1078.57	1145.2	193.658	1366.34	1267.83	397.472	1168.7	1365.39	486.554	1241.69	1155.93	497.38	1247.9	1076.61	550.637	1195.84	968.654	575.902	1083.9	914.303	567.007	1141.23	871.646	626.726	1092.13	850.01
115	0	282.962	1002.71	1545.74	184.494	997.805	1544.97	291.02	1167.18	1572.79	162.41	1140.31	1573.51	243.099	1239.51	1436.42	239.029	1351.27	1188.87	218.902	1106	1326	221.5	1065.21	1143.49	194.077	1352.97	1266.7	399.286	1156.41	1363.05	487.463	1230.68	1153.53	498.205	1236.93	1074.23	551.894	1185.55	966.267	578.167	1074.06	911.674	568.665	1131.19	869.141	628.315	1082.19	846.948
116	0	285.834	989.858	1544.79	187.389	984.723	1544.24	293.578	1154.41	1571.45	165.045	1127.24	1572.53	244.865	1226.27	1435.28	239.114	1338.08	1187.78	220.962	1092.54	1324.69	223.163	1051.66	1142.07	194.483	1339.49	1265.84	401.186	1144.09	1360.93	488.208	1219.73	1151.28	498.828	1225.97	1071.98	552.841	1175.26	963.968	580.057	1064.19	909.133	569.923	1121.14	866.709	629.603	1072.31	844.026
117	0	288.828	976.902	1544.05	190.418	971.513	1543.74	296.222	1141.51	1570.39	167.779	1114.02	1571.84	246.69	1212.95	1434.41	239.18	1324.78	1186.97	223.118	1078.99	1323.68	224.958	1037.95	1140.98	194.88	1325.9	1265.24	403.159	1131.76	1359.07	488.789	1208.81	1149.2	499.247	1215	1069.9	553.48	1164.96	961.784	581.584	1054.3	906.705	570.783	1111.08	864.378	630.576	1062.48	841.251
118	0	291.924	963.86	1543.55	193.56	958.191	1543.48	298.935	1128.52	1569.64	170.593	1100.67	1571.46	248.563	1199.57	1433.81	239.238	1311.4	1186.45	225.347	1065.38	1323	226.855	1024.1	1140.23	195.276	1312.23	1264.94	405.186	1119.41	1357.47	489.211	1197.91	1147.34	499.461	1204.01	1068.02	553.817	1154.65	959.744	582.759	1044.37	904.414	571.252	1100.99	862.178	631.225	1052.71	838.63
119	0	295.101	950.75	1543.28	196.795	944.779	1543.47	301.699	1115.44	1569.21	173.468	1087.2	1571.39	250.473	1186.16	1433.51	239.297	1297.95	1186.23	227.627	1051.73	1322.66	228.825	1010.15	1139.85	195.675	1298.51	1264.92	407.248	1107.05	1356.15	489.484	1186.98	1145.72	499.475	1192.99	1066.35	553.862	1144.3	957.874	583.595	1034.4	902.285	571.344	1090.87	860.135	631.544	1042.99	836.175
120	0	298.331	937.595	1543.27	200.094	931.304	1543.7	304.491	1102.3	1569.1	176.381	1073.65	1571.64	252.406	1172.72	1433.5	239.37	1284.46	1186.31	229.933	1038.08	1322.66	230.834	996.125	1139.85	196.084	1284.75	1265.2	409.326	1094.69	1355.14	489.622	1176.01	1144.36	499.301	1181.93	1064.93	553.632	1133.9	956.197	584.108	1024.37	900.34	571.077	1080.69	858.275	631.534	1033.3	833.9
121	0	301.588	924.416	1543.51	203.428	917.791	1544.19	307.289	1089.12	1569.31	179.306	1060.04	1572.2	254.35	1159.29	1433.77	239.464	1270.94	1186.68	232.238	1024.43	1323.01	232.848	982.068	1140.22	196.51	1270.99	1265.77	411.398	1082.31	1354.44	489.642	1164.98	1143.28	498.951	1170.82	1063.77	553.145	1123.45	954.735	584.314	1014.27	898.6	570.475	1070.45	856.622	631.199	1023.61	831.823
122	0	304.84	911.24	1544	206.765	904.271	1544.93	310.069	1075.93	1569.84	182.219	1046.41	1573.08	256.29	1145.89	1434.34	239.589	1257.41	1187.34	234.517	1010.82	1323.68	234.836	968.017	1140.94	196.956	1257.24	1266.62	413.446	1069.93	1354.04	489.562	1153.85	1142.49	498.444	1159.65	1062.89	552.426	1112.92	953.505	584.231	1004.08	897.084	569.567	1060.13	855.196	630.554	1013.89	829.962
123	0	308.055	898.088	1544.74	210.072	890.774	1545.91	312.805	1062.75	1570.68	185.091	1032.78	1574.25	258.212	1132.52	1435.17	239.751	1243.91	1188.28	236.743	997.272	1324.68	236.764	954.009	1142.01	197.428	1243.54	1267.73	415.449	1057.54	1353.95	489.401	1142.61	1141.99	497.8	1148.42	1062.28	551.501	1102.3	952.52	583.878	993.772	895.81	568.385	1049.71	854.013	629.617	1004.08	828.337
124	0	311.201	884.985	1545.72	213.312	877.329	1547.13	315.475	1049.61	1571.79	187.897	1019.2	1575.7	260.1	1119.22	1436.26	239.958	1230.45	1189.47	238.893	983.804	1325.98	238.603	940.082	1143.39	197.928	1229.91	1269.09	417.388	1045.16	1354.15	489.181	1131.26	1141.78	497.042	1137.11	1061.95	550.4	1091.57	951.79	583.276	983.338	894.79	566.966	1039.16	853.089	628.415	994.161	826.964
125	0	314.248	871.951	1546.93	216.453	863.962	1548.58	318.053	1036.53	1573.18	190.609	1005.7	1577.4	261.94	1106	1437.59	240.212	1217.05	1190.9	240.942	970.435	1327.55	240.328	926.268	1145.05	198.459	1216.37	1270.67	419.245	1032.78	1354.64	488.921	1119.79	1141.86	496.198	1125.73	1061.91	549.156	1080.73	951.319	582.449	972.751	894.037	565.349	1028.47	852.43	626.978	984.063	825.86
126	0	317.164	859.007	1548.35	219.463	850.699	1550.23	320.517	1023.54	1574.8	193.204	992.296	1579.32	263.718	1092.86	1439.14	240.517	1203.74	1192.55	242.871	957.181	1329.36	241.914	912.597	1146.95	199.021	1202.94	1272.46	421.006	1020.4	1355.39	488.639	1108.18	1142.2	495.293	1114.27	1062.12	547.801	1069.74	951.109	581.419	961.99	893.556	563.573	1017.62	852.044	625.342	973.739	825.037
127	0	319.923	846.167	1549.98	222.311	837.561	1552.08	322.848	1010.66	1576.63	195.658	979.025	1581.44	265.422	1079.84	1440.88	240.874	1190.53	1194.38	244.662	944.055	1331.38	243.344	899.095	1149.06	199.616	1189.64	1274.42	422.655	1008.04	1356.38	488.352	1096.45	1142.8	494.355	1102.72	1062.6	546.369	1058.6	951.156	580.211	951.032	893.354	561.681	1006.58	851.931	623.544	963.141	824.503
128	0	322.5	833.444	1551.79	224.97	824.563	1554.09	325.025	997.893	1578.64	197.951	965.903	1583.71	267.038	1066.92	1442.79	241.284	1177.43	1196.37	246.298	931.067	1333.58	244.601	885.78	1151.32	200.24	1176.47	1276.53	424.181	995.678	1357.6	488.076	1084.59	1143.64	493.411	1091.09	1063.31	544.895	1047.3	951.456	578.85	939.857	893.43	559.713	995.332	852.089	621.622	952.223	824.263
129	0	324.875	820.846	1553.75	227.419	811.718	1556.25	327.034	985.257	1580.79	200.066	952.946	1586.12	268.556	1054.13	1444.83	241.743	1164.46	1198.49	247.769	918.223	1335.91	245.677	872.669	1153.71	200.892	1163.46	1278.75	425.575	983.334	1359.01	487.823	1072.62	1144.68	492.486	1079.37	1064.24	543.41	1035.82	951.998	577.363	928.445	893.783	557.709	983.865	852.513	619.614	940.948	824.318
130	0	327.031	808.378	1555.86	229.639	799.033	1558.53	328.86	972.757	1583.06	201.987	940.164	1588.61	269.967	1041.46	1446.99	242.251	1151.64	1200.72	249.066	905.53	1338.34	246.564	859.773	1156.17	201.568	1150.61	1281.07	426.829	971.006	1360.6	487.604	1060.54	1145.92	491.604	1067.56	1065.37	541.946	1024.14	952.771	575.775	916.78	894.41	555.706	972.158	853.194	617.555	929.286	824.665
131	0	328.954	796.041	1558.07	231.616	786.51	1560.91	330.495	960.395	1585.41	203.704	927.559	1591.16	271.263	1028.92	1449.24	242.802	1138.96	1203.03	250.184	892.988	1340.84	247.261	847.096	1158.68	202.264	1137.93	1283.45	427.94	958.698	1362.33	487.428	1048.35	1147.33	490.787	1055.65	1066.67	540.531	1012.27	953.76	574.112	904.848	895.304	553.739	960.2	854.122	615.48	917.216	825.299
132	0	330.636	783.832	1560.37	233.34	774.147	1563.35	331.93	948.168	1587.8	205.209	915.132	1593.74	272.439	1016.5	1451.54	243.393	1126.42	1205.38	251.122	880.596	1343.38	247.77	834.639	1161.21	202.977	1125.41	1285.87	428.905	946.412	1364.19	487.302	1036.08	1148.88	490.053	1043.66	1068.12	539.19	1000.18	954.949	572.399	892.638	896.456	551.838	947.978	855.285	613.418	904.726	826.215
133	0	332.073	771.745	1562.72	234.807	761.938	1565.83	333.163	936.072	1590.22	206.498	902.876	1596.32	273.491	1004.21	1453.87	244.019	1114.04	1207.76	251.882	868.353	1345.92	248.099	822.397	1163.71	203.701	1113.06	1288.3	429.726	934.152	1366.14	487.232	1023.72	1150.55	489.418	1031.57	1069.7	537.946	987.89	956.321	570.663	880.146	897.858	550.031	935.484	856.667	611.397	891.814	827.402
134	0	333.262	759.773	1565.1	236.015	749.874	1568.31	334.191	924.098	1592.63	207.568	890.781	1598.86	274.419	992.043	1456.21	244.674	1101.81	1210.13	252.469	856.254	1348.44	248.256	810.362	1166.19	204.433	1100.87	1290.71	430.406	921.922	1368.16	487.221	1011.28	1152.32	488.895	1019.39	1071.38	536.817	975.381	957.856	568.928	867.366	899.495	548.341	922.711	858.252	609.441	878.483	828.851
135	0	334.205	747.905	1567.48	236.967	737.944	1570.77	335.016	912.234	1595.01	208.421	878.836	1601.34	275.222	979.993	1458.53	245.354	1089.72	1212.48	252.891	844.292	1350.91	248.255	798.52	1168.6	205.166	1088.84	1293.08	430.949	909.724	1370.24	487.272	998.782	1154.17	488.493	1007.12	1073.15	535.819	962.655	959.532	567.216	854.301	901.356	546.787	909.656	860.021	607.571	864.747	830.551
136	0	334.908	736.128	1569.83	237.668	726.135	1573.18	335.643	900.467	1597.34	209.062	867.026	1603.74	275.904	968.055	1460.8	246.052	1077.76	1214.78	253.159	832.461	1353.32	248.112	786.855	1170.94	205.898	1076.96	1295.39	431.363	897.562	1372.34	487.387	986.22	1156.07	488.218	994.762	1074.96	534.964	949.714	961.329	565.55	840.953	903.425	545.384	896.317	861.956	605.805	850.62	832.487
137	0	335.376	724.432	1572.13	238.125	714.433	1575.5	336.076	888.784	1599.58	209.497	855.336	1606.02	276.468	956.224	1463.01	246.763	1065.92	1217	253.286	820.752	1355.64	247.844	775.348	1173.2	206.624	1065.22	1297.62	431.657	885.438	1374.44	487.565	973.607	1158.01	488.073	982.314	1076.81	534.261	936.562	963.221	563.95	827.329	905.685	544.144	882.695	864.036	604.16	836.122	834.647
138	0	335.621	712.803	1574.34	238.349	702.825	1577.72	336.325	877.172	1601.73	209.735	843.75	1608.17	276.919	944.492	1465.13	247.483	1054.2	1219.12	253.284	809.155	1357.85	247.469	763.977	1175.35	207.339	1053.61	1299.74	431.839	873.355	1376.51	487.804	960.949	1159.94	488.06	969.778	1078.66	533.714	923.201	965.187	562.432	813.438	908.118	543.076	868.792	866.24	602.647	821.273	837.013
139	0	335.652	701.228	1576.46	238.351	691.296	1579.81	336.398	865.616	1603.76	209.785	832.253	1610.18	277.265	932.85	1467.14	248.203	1042.58	1221.13	253.169	797.661	1359.94	247.006	752.72	1177.4	208.039	1042.1	1301.73	431.92	861.314	1378.55	488.104	948.254	1161.86	488.177	957.156	1080.48	533.326	909.638	967.202	561.013	799.291	910.703	542.184	854.613	868.544	601.279	806.096	839.567
140	0	335.481	689.696	1578.45	238.146	679.833	1581.75	336.306	854.104	1605.66	209.659	820.83	1612.01	277.511	921.291	1469.02	248.919	1031.05	1223	252.955	786.257	1361.9	246.477	741.554	1179.33	208.72	1030.7	1303.58	431.908	849.316	1380.51	488.46	935.53	1163.73	488.421	944.451	1082.26	533.097	895.878	969.241	559.705	784.9	913.419	541.471	840.165	870.927	600.063	790.611	842.29
141	0	335.122	678.198	1580.29	237.747	668.426	1583.51	336.061	842.625	1607.4	209.369	809.47	1613.66	277.665	909.804	1470.76	249.622	1019.6	1224.72	252.657	774.934	1363.7	245.899	730.458	1181.13	209.375	1019.39	1305.27	431.815	837.364	1382.39	488.87	922.784	1165.54	488.79	931.663	1083.97	533.025	881.929	971.281	558.517	770.279	916.243	540.936	825.456	873.365	599.007	774.84	845.159
142	0	334.589	666.723	1581.98	237.169	657.063	1585.1	335.674	831.17	1608.98	208.929	798.161	1615.11	277.733	898.382	1472.34	250.306	1008.21	1226.27	252.289	763.68	1365.33	245.292	719.411	1182.78	210.001	1008.15	1306.78	431.649	825.456	1384.16	489.329	910.024	1167.25	489.276	918.793	1085.59	533.105	867.799	973.3	557.456	755.442	919.152	540.576	810.495	875.835	598.113	758.805	848.151
143	0	333.895	655.264	1583.49	236.428	645.737	1586.48	335.157	819.73	1610.38	208.352	786.893	1616.36	277.722	887.015	1473.74	250.963	996.866	1227.64	251.862	752.482	1366.79	244.672	708.395	1184.27	210.591	996.964	1308.11	431.419	813.593	1385.79	489.832	897.255	1168.85	489.876	905.841	1087.09	533.33	853.494	975.274	556.523	740.405	922.12	540.385	795.295	878.315	597.379	742.527	851.238
144	0	333.054	643.816	1584.82	235.538	634.44	1587.66	334.524	808.3	1611.59	207.651	775.66	1617.38	277.636	875.692	1474.95	251.584	985.565	1228.81	251.389	741.329	1368.05	244.055	697.393	1185.58	211.138	985.828	1309.23	431.131	801.772	1387.28	490.373	884.482	1170.31	490.581	892.807	1088.46	533.692	839.025	977.183	555.718	725.183	925.124	540.355	779.867	880.783	596.803	726.025	854.396
145	0	332.08	632.375	1585.96	234.515	623.167	1588.63	333.786	796.876	1612.59	206.84	764.457	1618.19	277.482	864.405	1475.96	252.161	974.294	1229.79	250.88	730.21	1369.11	243.453	686.39	1186.71	211.637	974.724	1310.16	430.793	789.992	1388.6	490.945	871.707	1171.62	491.383	879.691	1089.67	534.18	824.399	979.008	555.037	709.792	928.138	540.474	764.226	883.218	596.375	709.321	857.597
146	0	330.986	620.937	1586.89	233.37	611.915	1589.39	332.956	785.455	1613.39	205.932	753.28	1618.76	277.264	853.144	1476.77	252.685	963.044	1230.55	250.341	719.114	1369.95	242.878	675.375	1187.63	212.08	963.642	1310.87	430.41	778.251	1389.74	491.543	858.933	1172.77	492.274	866.494	1090.73	534.782	809.627	980.732	554.472	694.249	931.138	540.731	748.388	885.602	596.083	692.435	860.816
147	0	329.782	609.501	1587.62	232.119	600.682	1589.93	332.044	774.036	1613.96	204.938	742.128	1619.11	276.983	841.901	1477.37	253.148	951.807	1231.1	249.778	708.029	1370.58	242.336	664.338	1188.33	212.46	952.571	1311.37	429.984	766.544	1390.68	492.16	846.157	1173.72	493.244	853.215	1091.61	535.484	794.718	982.34	554.011	678.57	934.103	541.109	732.369	887.917	595.912	675.387	864.027
148	0	328.48	598.067	1588.15	230.771	589.467	1590.26	331.061	762.619	1614.32	203.87	730.999	1619.23	276.641	830.669	1477.75	253.542	940.574	1231.44	249.195	696.947	1370.97	241.832	653.27	1188.81	212.771	941.5	1311.66	429.519	754.869	1391.42	492.788	833.379	1174.48	494.282	839.853	1092.3	536.271	779.683	983.82	553.641	662.771	937.01	541.592	716.187	890.148	595.843	658.198	867.208
149	0	327.089	586.637	1588.47	229.336	578.271	1590.39	330.017	751.204	1614.46	202.738	719.895	1619.12	276.24	819.439	1477.91	253.857	929.34	1231.56	248.592	685.857	1371.14	241.366	642.166	1189.04	213.005	930.421	1311.72	429.016	743.221	1391.95	493.419	820.593	1175.04	495.376	826.411	1092.8	537.126	764.532	985.161	553.347	646.872	939.839	542.161	699.861	892.281	595.855	640.89	870.339
150	0	325.618	575.212	1588.59	227.824	567.096	1590.3	328.918	739.795	1614.38	201.55	708.817	1618.79	275.778	808.206	1477.86	254.088	918.098	1231.47	247.97	674.753	1371.07	240.937	631.02	1189.03	213.156	919.326	1311.58	428.473	731.595	1392.27	494.046	807.794	1175.4	496.51	812.889	1093.1	538.031	749.279	986.356	553.109	630.887	942.573	542.795	683.411	894.307	595.925	623.483	873.402
151	0	324.072	563.795	1588.5	226.241	555.942	1590.03	327.772	728.392	1614.08	200.313	697.767	1618.25	275.254	796.965	1477.59	254.227	906.842	1231.17	247.325	663.626	1370.77	240.538	619.827	1188.78	213.216	908.209	1311.22	427.889	719.987	1392.37	494.66	794.978	1175.55	497.671	799.29	1093.21	538.966	733.935	987.4	552.908	614.835	945.197	543.475	666.856	896.216	596.029	606	876.38
152	0	322.458	552.389	1588.23	224.593	544.814	1589.56	326.583	717	1613.57	199.032	686.747	1617.51	274.665	785.712	1477.1	254.268	895.567	1230.65	246.652	652.471	1370.24	240.161	608.583	1188.29	213.181	897.062	1310.66	427.261	708.391	1392.25	495.25	782.136	1175.49	498.842	785.617	1093.13	539.913	718.514	988.29	552.724	598.734	947.696	544.176	650.219	898.001	596.141	588.462	879.262
153	0	320.779	540.997	1587.76	222.883	533.712	1588.92	325.353	705.621	1612.87	197.71	675.758	1616.58	274.008	774.445	1476.42	254.206	884.268	1229.94	245.946	641.282	1369.49	239.795	597.285	1187.56	213.045	885.881	1309.89	426.584	696.802	1391.92	495.808	769.265	1175.23	500.004	771.875	1092.86	540.849	703.03	989.026	552.536	582.6	950.061	544.876	633.521	899.657	596.238	570.892	882.034
154	0	319.039	529.623	1587.13	221.114	522.639	1588.1	324.082	694.259	1611.98	196.348	664.802	1615.47	273.278	763.161	1475.53	254.037	872.938	1229.03	245.198	630.055	1368.53	239.427	585.93	1186.61	212.802	874.663	1308.93	425.852	685.216	1391.39	496.321	756.359	1174.78	501.139	758.068	1092.42	541.754	687.498	989.609	552.324	566.452	952.282	545.552	616.784	901.18	596.295	553.314	884.687
155	0	317.238	518.271	1586.32	219.289	511.596	1587.14	322.771	682.916	1610.92	194.946	653.88	1614.21	272.471	751.86	1474.46	253.758	861.572	1227.92	244.402	618.786	1367.38	239.042	574.515	1185.46	212.451	863.402	1307.77	425.06	673.628	1390.66	496.778	743.414	1174.15	502.227	744.204	1091.8	542.606	671.933	990.043	552.068	550.307	954.354	546.182	600.03	902.571	596.289	535.751	887.214
156	0	315.377	506.943	1585.36	217.406	500.586	1586.02	321.415	671.595	1609.71	193.501	642.991	1612.8	271.579	740.543	1473.21	253.367	850.165	1226.64	243.546	607.475	1366.05	238.623	563.039	1184.12	211.987	852.096	1306.44	424.199	662.034	1389.76	497.167	730.429	1173.35	503.248	730.29	1091.02	543.384	656.352	990.334	551.749	534.183	956.273	546.741	583.281	903.828	596.2	518.228	889.609
157	0	313.456	495.642	1584.26	215.465	489.608	1584.78	320.01	660.298	1608.36	192.01	632.135	1611.28	270.598	729.21	1471.79	252.863	838.71	1225.18	242.622	596.118	1364.56	238.155	551.499	1182.61	211.409	840.743	1304.93	423.264	650.429	1388.69	497.472	717.402	1172.39	504.18	716.336	1090.11	544.067	640.77	990.489	551.35	518.097	958.037	547.209	566.56	904.955	596.008	500.768	891.866
158	0	311.473	484.371	1583.04	213.466	478.661	1583.42	318.549	649.029	1606.89	190.466	621.31	1609.64	269.521	717.863	1470.23	252.246	827.202	1223.56	241.62	584.715	1362.92	237.621	539.895	1180.97	210.714	829.339	1303.26	422.245	638.81	1387.48	497.681	704.336	1171.3	505.004	702.351	1089.06	544.635	625.206	990.518	550.856	502.068	959.646	547.565	549.89	905.954	595.697	483.397	893.982
159	0	309.427	473.13	1581.71	211.405	467.743	1581.97	317.026	637.787	1605.33	188.862	610.512	1607.92	268.341	706.504	1468.54	251.517	815.634	1221.78	240.53	573.266	1361.18	237.006	528.225	1179.21	209.904	817.883	1301.43	421.135	627.173	1386.15	497.777	691.235	1170.08	505.697	688.345	1087.91	545.068	609.676	990.431	550.252	486.113	961.102	547.789	533.293	906.83	595.253	466.139	895.954
160	0	307.315	461.92	1580.29	209.281	456.853	1580.43	315.431	626.574	1603.69	187.191	599.738	1606.14	267.051	695.135	1466.73	250.677	804.001	1219.87	239.344	561.771	1359.34	236.295	516.487	1177.37	208.977	806.372	1299.47	419.926	615.517	1384.72	497.745	678.103	1168.77	506.241	674.332	1086.66	545.349	594.199	990.24	549.527	470.249	962.409	547.864	516.791	907.589	594.663	449.02	897.78
161	0	305.134	450.74	1578.8	207.09	445.986	1578.83	313.756	615.389	1602.01	185.445	588.983	1604.31	265.645	683.759	1464.83	249.73	792.298	1217.83	238.052	550.23	1357.43	235.477	504.681	1175.48	207.934	794.807	1297.38	418.61	603.839	1383.21	497.569	664.948	1167.39	506.615	660.323	1085.35	545.459	578.793	989.958	548.671	454.494	963.571	547.775	500.407	908.236	593.918	432.063	899.458
162	0	302.883	439.588	1577.26	204.83	435.136	1577.18	311.992	604.232	1600.29	183.615	578.24	1602.45	264.117	672.378	1462.85	248.677	780.519	1215.68	236.647	538.645	1355.49	234.54	492.803	1173.56	206.778	783.185	1295.17	417.181	592.137	1381.65	497.236	651.778	1165.94	506.802	646.332	1083.98	545.386	563.478	989.6	547.676	438.865	964.596	547.507	484.163	908.779	593.012	415.294	900.989
163	0	300.558	428.462	1575.7	202.498	424.297	1575.51	310.129	593.101	1598.57	181.691	567.501	1600.59	262.461	660.992	1460.83	247.522	768.66	1213.44	235.123	527.016	1353.53	233.478	480.852	1171.64	205.508	771.505	1292.87	415.632	580.411	1380.07	496.73	638.602	1164.47	506.786	632.372	1082.59	545.114	548.272	989.179	546.537	423.38	965.49	547.049	468.082	909.224	591.94	398.736	902.373
164	0	298.157	417.358	1574.13	200.092	413.463	1573.84	308.158	581.992	1596.87	179.667	556.759	1598.75	260.672	649.604	1458.77	246.269	756.718	1211.13	233.474	515.345	1351.59	232.284	468.825	1169.75	204.128	759.768	1290.49	413.959	568.66	1378.5	496.039	625.429	1162.99	506.55	618.46	1081.19	544.635	533.194	988.713	545.25	408.055	966.263	546.391	452.185	909.582	590.702	382.411	903.612
165	0	295.68	406.271	1572.58	197.61	402.625	1572.19	306.072	570.901	1595.2	177.534	546.005	1596.95	258.747	638.213	1456.71	244.921	744.69	1208.78	231.695	503.634	1349.69	230.956	456.719	1167.92	202.64	747.972	1288.06	412.157	556.883	1376.96	495.153	612.271	1161.53	506.085	604.608	1079.82	543.94	518.263	988.216	543.814	392.907	966.922	545.528	436.493	909.86	589.297	366.34	904.71
166	0	293.125	395.194	1571.08	195.049	391.773	1570.57	303.865	559.824	1593.6	175.286	535.229	1595.2	256.683	626.819	1454.66	243.483	732.576	1206.4	229.786	491.883	1347.85	229.492	444.53	1166.18	201.048	736.118	1285.6	410.226	545.081	1375.48	494.063	599.139	1160.1	505.379	590.832	1078.48	543.022	503.498	987.706	542.229	377.953	967.479	544.453	421.029	910.068	587.729	350.543	905.671
167	0	290.491	384.121	1569.64	192.411	380.9	1569.02	301.53	548.754	1592.09	172.919	524.42	1593.54	254.481	615.423	1452.66	241.958	720.376	1204.02	227.745	480.095	1346.1	227.895	432.255	1164.55	199.354	724.206	1283.13	408.165	533.255	1374.1	492.762	586.042	1158.74	504.426	577.146	1077.21	541.879	488.917	987.199	540.498	363.209	967.943	543.167	405.811	910.216	586.003	335.038	906.5
168	0	287.781	373.046	1568.28	189.696	369.995	1567.55	299.065	537.685	1590.68	170.428	513.571	1591.97	252.14	604.022	1450.73	240.353	708.092	1201.67	225.575	468.271	1344.48	226.168	419.894	1163.06	197.563	712.238	1280.68	405.975	521.405	1372.82	491.249	572.993	1157.46	503.224	563.565	1076.02	540.511	474.537	986.711	538.623	348.689	968.324	541.669	390.86	910.314	584.124	319.841	907.204
169	0	284.995	361.96	1567.04	186.904	359.048	1566.18	296.468	526.609	1589.4	167.813	502.669	1590.53	249.664	592.614	1448.9	238.672	695.726	1199.38	223.278	456.412	1342.99	224.317	407.445	1161.73	195.682	700.216	1278.28	403.661	509.534	1371.69	489.521	560.001	1156.3	501.772	550.102	1074.94	538.922	460.374	986.259	536.609	334.409	968.634	539.962	376.194	910.373	582.1	304.966	907.788
170	0	282.136	350.854	1565.92	184.041	348.052	1564.94	293.741	515.518	1588.27	165.075	491.705	1589.23	247.059	581.197	1447.19	236.921	683.286	1197.17	220.861	444.523	1341.66	222.35	394.912	1160.59	193.715	688.142	1275.95	401.227	497.641	1370.73	487.584	547.078	1155.26	500.074	536.77	1074	537.115	446.444	985.859	534.462	320.381	968.88	538.052	361.833	910.403	579.939	290.429	908.26
171	0	279.21	339.722	1564.95	181.109	336.996	1563.84	290.887	504.403	1587.31	162.215	480.671	1588.09	244.332	569.768	1445.62	235.107	670.778	1195.09	218.332	432.604	1340.52	220.278	382.299	1159.65	191.67	676.02	1273.72	398.682	485.73	1369.95	485.442	534.232	1154.38	498.138	523.58	1073.2	535.101	432.762	985.527	532.189	306.619	969.074	535.946	347.793	910.415	577.65	276.242	908.626
172	0	276.221	328.555	1564.14	178.115	325.874	1562.89	287.911	493.255	1586.54	159.241	469.557	1587.13	241.493	558.325	1444.22	233.238	658.212	1193.16	215.703	420.66	1339.57	218.113	369.614	1158.94	189.556	663.855	1271.64	396.037	473.803	1369.38	483.108	521.474	1153.68	495.977	510.544	1072.58	532.89	419.34	985.278	529.797	293.134	969.223	533.654	334.09	910.42	575.24	262.417	908.893
173	0	273.177	317.345	1563.51	175.065	314.678	1562.11	284.824	482.065	1585.98	156.159	458.357	1586.36	238.555	546.863	1443.01	231.323	645.6	1191.4	212.986	408.694	1338.85	215.871	356.869	1158.46	187.382	651.652	1269.71	393.305	461.861	1369.04	480.595	508.811	1153.17	493.606	497.669	1072.15	530.498	406.189	985.126	527.295	279.939	969.337	531.187	320.739	910.427	572.717	248.968	909.066
174	0	270.085	306.086	1563.06	171.969	303.404	1561.51	281.635	470.824	1585.65	152.981	447.064	1585.8	235.532	535.381	1442.01	229.371	632.955	1189.85	210.198	396.71	1338.35	213.569	344.078	1158.22	185.158	639.418	1267.98	390.499	449.909	1368.95	477.921	496.25	1152.89	491.044	484.965	1071.93	527.94	393.319	985.085	524.691	267.041	969.422	528.559	307.755	910.446	570.088	235.908	909.151
175	0	266.955	294.77	1562.82	168.835	292.048	1561.1	278.361	459.524	1585.55	149.72	435.676	1585.47	232.441	523.876	1441.24	227.391	620.291	1188.54	207.357	384.714	1338.08	211.226	331.261	1158.24	182.896	627.162	1266.48	387.636	437.95	1369.11	475.108	483.796	1152.84	488.314	472.437	1071.94	525.235	380.738	985.166	521.995	254.451	969.486	525.785	295.149	910.487	567.359	223.247	909.152
176	0	263.797	283.393	1562.77	165.674	280.609	1560.88	275.016	448.157	1585.7	146.39	424.188	1585.37	229.3	512.346	1440.71	225.396	607.625	1187.49	204.483	372.711	1338.07	208.865	318.437	1158.52	180.607	614.891	1265.21	384.735	425.988	1369.53	472.181	471.452	1153.04	485.442	460.092	1072.18	522.405	368.453	985.378	519.218	242.176	969.533	522.88	282.932	910.556	564.535	210.998	909.07
177	0	260.624	271.95	1562.92	162.5	269.085	1560.84	271.62	436.716	1586.1	143.011	412.602	1585.5	226.13	500.791	1440.43	223.394	594.973	1186.71	201.597	360.707	1338.3	206.507	305.63	1159.04	178.305	602.615	1264.22	381.815	414.03	1370.22	469.169	459.219	1153.51	482.456	447.934	1072.68	519.473	356.467	985.729	516.373	230.221	969.569	519.865	271.111	910.661	561.622	199.169	908.909
178	0	257.447	260.438	1563.27	159.323	257.48	1561	268.194	425.197	1586.76	139.602	400.919	1585.87	222.95	489.21	1440.41	221.396	582.351	1186.23	198.724	348.708	1338.77	204.178	292.864	1159.82	176	590.344	1263.5	378.895	402.082	1371.18	466.103	447.097	1154.25	479.388	435.965	1073.43	516.463	344.782	986.223	513.472	218.59	969.596	516.758	259.691	910.807	558.625	187.768	908.667
179	0	254.281	248.858	1563.82	156.159	245.797	1561.34	264.76	413.597	1587.67	136.183	389.145	1586.47	219.782	477.604	1440.64	219.412	569.776	1186.05	195.885	336.721	1339.48	201.901	280.162	1160.83	173.705	578.088	1263.08	375.998	390.151	1372.41	463.017	435.084	1155.27	476.268	424.187	1074.43	513.401	333.4	986.863	510.53	207.287	969.616	513.582	248.675	910.997	555.553	176.796	908.347
180	0	251.14	237.208	1564.55	153.021	234.043	1561.85	261.343	401.914	1588.83	132.779	377.285	1587.3	216.646	465.975	1441.14	217.449	557.264	1186.18	193.105	324.753	1340.42	199.703	267.547	1162.06	171.43	565.856	1262.95	373.144	378.247	1373.89	459.947	423.177	1156.57	473.129	412.6	1075.69	510.314	322.319	987.646	507.565	196.311	969.631	510.361	238.061	911.233	552.416	166.252	907.948
181	0	248.041	225.493	1565.45	149.926	222.223	1562.52	257.966	390.15	1590.21	129.413	365.348	1588.35	213.565	454.326	1441.89	215.515	544.83	1186.61	190.407	312.808	1341.58	197.606	255.04	1163.49	169.186	553.658	1263.13	370.354	366.378	1375.62	456.928	411.369	1158.13	470.005	401.205	1077.19	507.229	311.534	988.567	504.594	185.66	969.639	507.12	227.845	911.514	549.226	156.129	907.471
182	0	244.999	213.715	1566.51	146.888	210.348	1563.34	254.653	378.308	1591.82	126.109	353.344	1589.59	210.556	442.659	1442.88	213.615	532.486	1187.33	187.813	300.893	1342.94	195.633	242.657	1165.09	166.98	541.503	1263.6	367.647	354.553	1377.56	453.995	399.659	1159.95	466.925	389.999	1078.91	504.172	301.041	989.619	501.639	175.332	969.638	503.886	218.019	911.838	546.002	146.416	906.917
183	0	242.029	201.881	1567.71	143.925	198.427	1564.29	251.429	366.392	1593.62	122.889	341.285	1591.02	207.638	430.979	1444.09	211.752	520.245	1188.34	185.344	289.013	1344.47	193.804	230.412	1166.84	164.82	529.399	1264.36	365.043	342.782	1379.71	451.18	388.042	1161.99	463.92	378.981	1080.85	501.169	290.833	990.789	498.72	165.321	969.624	500.686	208.572	912.2	542.764	137.097	906.29
184	0	239.149	189.998	1569.04	141.052	186.47	1565.36	248.315	354.412	1595.6	119.777	329.182	1592.61	204.828	419.29	1445.51	209.929	508.116	1189.62	183.017	277.172	1346.16	192.135	218.315	1168.71	162.711	517.353	1265.39	362.559	331.074	1382.02	448.513	376.516	1164.24	461.015	368.146	1082.98	498.247	280.902	992.063	495.862	155.619	969.594	497.549	199.491	912.594	539.54	128.155	905.592
185	0	236.374	178.074	1570.47	138.284	174.488	1566.54	245.334	342.375	1597.72	116.793	317.049	1594.34	202.14	407.596	1447.12	208.147	496.107	1191.13	180.847	265.374	1347.97	190.64	206.368	1170.67	160.658	505.372	1266.68	360.21	319.437	1384.48	446.018	365.083	1166.66	458.235	357.492	1085.26	495.428	271.237	993.424	493.089	146.216	969.543	494.505	190.76	913.011	536.359	119.567	904.828
186	0	233.719	166.119	1571.99	135.637	162.493	1567.79	242.502	330.291	1599.96	113.956	304.898	1596.19	199.586	395.904	1448.89	206.406	484.222	1192.87	178.847	253.623	1349.9	189.327	194.573	1172.7	158.665	493.461	1268.19	358.007	307.878	1387.05	443.713	353.746	1169.22	455.598	347.012	1087.67	492.733	261.829	994.854	490.428	137.104	969.463	491.58	182.36	913.443	533.254	111.313	904.004
187	0	231.198	154.142	1573.57	133.124	150.494	1569.12	239.837	318.174	1602.3	111.283	292.741	1598.12	197.177	384.217	1450.79	204.705	472.463	1194.78	177.024	241.922	1351.89	188.2	182.925	1174.76	156.732	481.623	1269.91	355.961	296.404	1389.69	441.61	342.512	1171.88	453.118	336.702	1090.18	490.182	252.666	996.331	487.904	128.271	969.348	488.804	174.272	913.881	530.263	103.37	903.125
188	0	228.823	142.153	1575.19	130.759	138.502	1570.49	237.352	306.034	1604.69	108.788	280.59	1600.12	194.919	372.541	1452.81	203.042	460.832	1196.85	175.383	230.272	1353.94	187.259	171.415	1176.83	154.862	469.86	1271.8	354.079	285.018	1392.37	439.714	331.391	1174.6	450.805	326.555	1092.74	487.79	243.737	997.836	485.545	119.704	969.192	486.201	166.476	914.314	527.423	95.7168	902.197
189	0	226.605	130.162	1576.83	128.552	126.526	1571.89	235.056	293.883	1607.11	106.482	268.455	1602.16	192.818	360.882	1454.9	201.417	449.324	1199.04	173.925	218.676	1356.01	186.498	160.034	1178.9	153.055	458.173	1273.83	352.364	273.724	1395.06	438.022	320.395	1177.34	448.665	316.565	1095.34	485.572	235.029	999.346	483.375	111.391	968.987	483.795	158.95	914.731	524.77	88.3354	901.225
190	0	224.552	118.18	1578.47	126.513	114.574	1573.31	232.957	281.734	1609.53	104.373	256.346	1604.22	190.876	349.243	1457.05	199.826	437.935	1201.31	172.647	207.134	1358.09	185.908	148.767	1180.92	151.311	446.561	1275.96	350.817	262.521	1397.73	436.525	309.537	1180.07	446.698	306.724	1097.93	483.537	226.53	1000.84	481.418	103.319	968.726	481.606	151.674	915.122	522.343	81.209	900.215
191	0	222.672	106.213	1580.09	124.648	102.651	1574.72	231.059	269.598	1611.92	102.465	244.269	1606.27	189.092	337.628	1459.21	198.271	426.658	1203.63	171.544	195.646	1360.13	185.475	137.601	1182.9	149.632	435.024	1278.17	349.436	251.409	1400.33	435.208	298.833	1182.75	444.899	297.025	1100.49	481.693	218.228	1002.3	479.697	95.4747	968.401	479.652	144.627	915.475	520.175	74.3232	899.168
192	0	220.969	94.2714	1581.67	122.962	90.764	1576.11	229.363	257.486	1614.25	100.76	232.232	1608.29	187.466	326.041	1461.37	196.75	415.484	1205.96	170.608	184.212	1362.13	185.182	126.523	1184.81	148.015	423.556	1280.41	348.216	240.384	1402.85	434.053	288.296	1185.35	443.261	287.46	1102.97	480.043	210.11	1003.7	478.232	87.8447	968.005	477.944	137.788	915.779	518.298	67.6664	898.087
193	0	219.446	82.36	1583.19	121.457	78.9152	1577.46	227.865	245.406	1616.5	99.2567	220.239	1610.25	185.992	314.482	1463.49	195.264	404.403	1208.27	169.827	172.83	1364.07	185.012	115.517	1186.63	146.463	412.155	1282.66	347.151	229.441	1405.26	433.037	277.94	1187.83	441.774	278.018	1105.36	478.588	202.165	1005.03	477.038	80.416	967.53	476.493	131.139	916.022	516.736	61.2288	896.97
194	0	218.102	70.4841	1584.64	120.134	67.1065	1578.77	226.563	233.367	1618.63	97.9513	208.292	1612.14	184.665	302.954	1465.54	193.816	393.404	1210.52	169.189	161.496	1365.91	184.943	104.572	1188.36	144.975	400.813	1284.87	346.231	218.571	1407.52	432.137	267.772	1190.16	440.426	268.691	1107.63	477.326	194.38	1006.26	476.129	73.1759	966.968	475.303	124.66	916.194	515.511	55.002	895.814
195	0	216.935	58.647	1585.99	118.989	55.3377	1580	225.449	221.373	1620.63	96.8369	196.392	1613.92	183.479	291.454	1467.5	192.407	382.475	1212.69	168.681	150.207	1367.64	184.954	93.676	1189.96	143.552	389.526	1287.02	345.448	207.766	1409.62	431.33	257.797	1192.33	439.201	259.466	1109.76	476.254	186.741	1007.38	475.514	66.1117	966.31	474.374	118.335	916.282	514.636	48.9787	894.614
196	0	215.943	46.85	1587.22	118.02	43.6067	1581.16	224.514	209.429	1622.47	95.9052	184.537	1615.6	182.427	279.98	1469.35	191.042	371.604	1214.75	168.289	138.957	1369.24	185.025	82.8202	1191.44	142.195	378.287	1289.07	344.79	197.014	1411.53	430.595	248.013	1194.3	438.087	250.333	1111.72	475.365	179.237	1008.38	475.197	59.2112	965.548	473.703	112.147	916.275	514.12	43.1518	893.361
197	0	215.119	35.0926	1588.34	117.22	31.9098	1582.21	223.748	197.535	1624.14	95.1459	172.726	1617.13	181.498	268.528	1471.06	189.725	360.779	1216.67	167.999	127.738	1370.69	185.137	71.9965	1192.76	140.906	367.087	1291	344.246	186.303	1413.24	429.913	238.412	1196.07	437.07	241.279	1113.5	474.651	171.855	1009.24	475.179	52.4622	964.673	473.285	106.081	916.162	513.962	37.5144	892.046
198	0	214.457	23.3724	1589.31	116.582	20.2417	1583.16	223.14	185.692	1625.6	94.548	160.952	1618.51	180.687	257.093	1472.61	188.464	349.987	1218.42	167.797	116.545	1371.98	185.273	61.1987	1193.92	139.687	355.92	1292.79	343.805	175.619	1414.73	429.269	228.981	1197.62	436.137	232.29	1115.09	474.102	164.581	1009.95	475.455	45.8532	963.675	473.107	100.124	915.93	514.155	32.0589	890.655
199	0	213.95	11.6855	1590.12	116.099	8.59545	1583.98	222.677	173.896	1626.86	94.0994	149.209	1619.71	179.983	245.669	1473.97	187.264	339.217	1220	167.671	105.367	1373.09	185.417	50.4217	1194.9	138.541	344.778	1294.41	343.455	164.946	1415.99	428.651	219.699	1198.94	435.277	223.351	1116.47	473.708	157.401	1010.5	476.016	39.3725	962.545	473.158	94.262	915.571	514.686	26.7772	889.177
200	0	213.589	0.025803	1590.77	115.761	-3.03716	1584.65	222.349	162.142	1627.89	93.7882	137.49	1620.73	179.38	234.248	1475.15	186.133	328.458	1221.38	167.609	94.1956	1374	185.559	39.6613	1195.68	137.469	333.653	1295.84	343.188	154.27	1417.01	428.052	210.539	1200.01	434.483	214.447	1117.63	473.458	150.303	1010.87	476.85	33.0092	961.274	473.422	88.4842	915.073	515.534	21.6605	887.597
201	0	213.366	-11.6137	1591.24	115.56	-14.6653	1585.18	222.142	150.424	1628.68	93.6027	125.784	1621.54	178.87	222.82	1476.11	185.077	317.699	1222.55	167.6	83.0218	1374.7	185.69	28.9137	1196.25	136.474	322.537	1297.07	342.993	143.576	1417.78	427.47	201.473	1200.85	433.748	205.562	1118.57	473.341	143.272	1011.07	477.94	26.7522	959.851	473.881	82.78	914.427	516.674	16.6989	885.902
202	0	213.273	-23.2416	1591.52	115.487	-26.2988	1585.53	222.047	138.732	1629.21	93.5317	114.082	1622.14	178.446	211.379	1476.85	184.106	306.93	1223.5	167.637	71.8354	1375.17	185.804	18.1748	1196.59	135.561	311.423	1298.09	342.863	132.849	1418.29	426.906	192.466	1201.44	433.067	196.681	1119.28	473.347	136.294	1011.09	479.266	20.591	958.27	474.519	77.14	913.626	518.075	11.882	884.08
203	0	213.302	-34.867	1591.6	115.534	-37.9479	1585.71	222.055	127.056	1629.5	93.5654	102.372	1622.51	178.104	199.914	1477.36	183.226	296.14	1224.23	167.711	60.627	1375.41	185.901	7.44035	1196.69	134.731	300.302	1298.88	342.791	122.073	1418.54	426.364	183.483	1201.8	432.44	187.788	1119.77	473.463	129.354	1010.92	480.806	14.5153	956.523	475.317	71.5552	912.663	519.703	7.19861	882.121
204	0	213.444	-46.5	1591.46	115.692	-49.6229	1585.69	222.157	115.387	1629.51	93.6952	90.643	1622.66	177.838	188.416	1477.64	182.444	285.321	1224.73	167.819	49.3872	1375.41	185.98	-3.29519	1196.54	133.988	289.169	1299.44	342.772	111.236	1418.53	425.852	174.489	1201.91	431.866	178.868	1120.04	473.68	122.44	1010.56	482.537	8.51484	954.602	476.254	66.0175	911.532	521.523	2.63719	880.014
205	0	213.695	-58.1506	1591.11	115.956	-61.3336	1585.47	222.347	103.713	1629.27	93.914	78.885	1622.56	177.646	176.877	1477.67	181.765	274.464	1224.99	167.956	38.1069	1375.15	186.044	-14.0383	1196.13	133.334	278.014	1299.77	342.803	100.324	1418.25	425.379	165.447	1201.8	431.346	169.906	1120.07	473.988	115.537	1010.01	484.434	2.57969	952.504	477.314	60.519	910.229	523.499	-1.81427	877.753
206	0	214.048	-69.829	1590.53	116.319	-73.0894	1585.04	222.62	92.023	1628.75	94.2168	67.0873	1622.22	177.526	165.287	1477.46	181.195	263.561	1225.02	168.122	26.7777	1374.64	186.098	-24.797	1195.46	132.774	266.83	1299.86	342.883	89.3265	1417.71	424.956	156.324	1201.46	430.885	160.89	1119.89	474.379	108.632	1009.26	486.472	-3.30013	950.224	478.477	55.0517	908.754	525.596	-6.16824	875.334
207	0	214.5	-81.545	1589.72	116.777	-84.8985	1584.4	222.973	80.3053	1627.96	94.6002	55.2408	1621.63	177.48	153.639	1477	180.737	252.604	1224.82	168.318	15.3917	1373.87	186.148	-35.5804	1194.52	132.31	255.609	1299.71	343.013	78.2341	1416.92	424.594	147.091	1200.9	430.484	151.807	1119.49	474.843	101.711	1008.33	488.627	-9.13467	947.762	479.728	49.6073	907.105	527.779	-10.4377	872.757
208	0	215.046	-93.3076	1588.68	117.327	-96.7684	1583.54	223.406	68.5501	1626.9	95.0629	43.3377	1620.8	177.507	141.925	1476.29	180.393	241.585	1224.38	168.545	3.94148	1372.84	186.201	-46.3991	1193.33	131.945	244.342	1299.33	343.193	67.0385	1415.87	424.305	137.721	1200.12	430.149	142.646	1118.88	475.374	94.7634	1007.22	490.876	-14.9342	945.117	481.05	44.1769	905.283	530.018	-14.6364	870.023
209	0	215.687	-105.125	1587.41	117.967	-108.705	1582.46	223.921	56.7481	1625.59	95.6055	31.3713	1619.73	177.612	130.14	1475.35	180.163	230.497	1223.71	168.808	-7.57992	1371.55	186.264	-57.2649	1191.88	131.681	233.022	1298.71	343.429	55.7335	1414.57	424.099	128.194	1199.14	429.882	133.399	1118.05	475.963	87.7758	1005.92	493.198	-20.7094	942.291	482.428	38.7509	903.291	532.288	-18.7789	867.135
210	0	216.422	-117.005	1585.91	118.698	-120.714	1581.16	224.519	44.8911	1624.02	96.2306	19.3366	1618.41	177.797	118.275	1474.17	180.045	219.334	1222.82	169.114	-19.1789	1370.02	186.346	-68.1901	1190.18	131.52	221.638	1297.87	343.724	44.3146	1413.03	423.985	118.494	1197.95	429.689	124.059	1117.02	476.606	80.7368	1004.44	495.572	-26.4715	939.288	483.849	33.3184	901.132	534.564	-22.881	864.1
211	0	217.254	-128.954	1584.2	119.522	-132.798	1579.65	225.207	32.9721	1622.2	96.9426	7.22989	1616.88	178.069	106.328	1472.76	180.038	208.087	1221.71	169.468	-30.8614	1368.25	186.455	-79.1875	1188.25	131.463	210.181	1296.8	344.085	32.7794	1411.26	423.971	108.61	1196.57	429.57	114.619	1115.79	477.296	73.635	1002.79	497.981	-32.2323	936.112	485.301	27.8674	898.812	536.829	-26.9595	860.925
212	0	218.185	-140.977	1582.27	120.442	-144.961	1577.95	225.99	20.9855	1620.15	97.7477	-4.95125	1615.12	178.433	94.2926	1471.14	180.136	196.751	1220.39	169.88	-42.6332	1366.25	186.599	-90.2698	1186.1	131.512	198.642	1295.53	344.519	21.127	1409.26	424.061	98.5383	1194.99	429.53	105.073	1114.36	478.027	66.4595	1000.96	500.41	-38.0046	932.771	486.773	22.3848	896.335	539.069	-31.0332	857.616
213	0	219.22	-153.079	1580.15	121.463	-157.205	1576.05	226.875	8.92664	1617.87	98.6537	-17.2082	1613.16	178.895	82.1654	1469.32	180.335	185.319	1218.87	170.359	-54.4994	1364.04	186.788	-101.449	1183.74	131.666	187.012	1294.06	345.035	9.35833	1407.05	424.259	88.2788	1193.21	429.57	95.4198	1112.74	478.795	59.1994	998.977	502.845	-43.8021	929.273	488.255	16.8561	893.71	541.273	-35.1222	854.184
214	0	220.366	-165.263	1577.84	122.592	-169.53	1573.99	227.873	-3.20821	1615.39	99.6695	-29.5417	1611	179.464	69.9432	1467.32	180.629	173.782	1217.15	170.917	-66.4649	1361.63	187.031	-112.737	1181.19	131.923	175.28	1292.4	345.64	-2.52395	1404.63	424.567	77.8365	1191.25	429.69	85.6545	1110.93	479.595	51.8439	996.837	505.276	-49.6397	925.629	489.739	11.2656	890.945	543.436	-39.248	850.637
215	0	221.629	-177.532	1575.38	123.835	-181.938	1571.77	228.992	-15.4221	1612.73	100.805	-41.9522	1608.68	180.145	57.6233	1465.14	181.01	162.134	1215.27	171.564	-78.5344	1359.05	187.339	-124.145	1178.48	132.282	163.438	1290.58	346.344	-14.5158	1402.03	424.982	67.2202	1189.1	429.891	75.7751	1108.94	480.423	44.3823	994.551	507.691	-55.5332	921.852	491.216	5.59633	888.05	545.554	-43.4339	846.985
216	0	223.019	-189.889	1572.78	125.201	-194.431	1569.42	230.243	-27.7176	1609.91	102.071	-54.4398	1606.22	180.946	45.2036	1462.83	181.472	150.369	1213.23	172.311	-90.7119	1356.31	187.721	-135.681	1175.61	132.74	151.476	1288.61	347.155	-26.6118	1399.25	425.501	56.4417	1186.77	430.17	65.7795	1106.79	481.272	36.8038	992.13	510.083	-61.4997	917.956	492.679	-0.169654	885.038	547.625	-47.704	843.238
217	0	224.543	-202.336	1570.07	126.7	-207.008	1566.98	231.636	-40.0972	1606.96	103.478	-67.0054	1603.63	181.874	32.6828	1460.4	182.006	138.479	1211.05	173.172	-103.001	1353.44	188.188	-147.354	1172.62	133.294	139.388	1286.53	348.08	-38.8054	1396.32	426.12	45.5148	1184.28	430.525	55.6656	1104.48	482.14	29.0973	989.587	512.444	-67.5572	913.957	494.121	-6.0514	881.921	549.648	-52.0835	839.407
218	0	226.211	-214.875	1567.28	128.339	-219.67	1564.46	233.182	-52.5633	1603.9	105.038	-79.6499	1600.95	182.933	20.0599	1457.87	182.604	126.459	1208.77	174.155	-115.405	1350.47	188.752	-159.172	1169.53	133.939	127.164	1284.34	349.129	-51.0893	1393.26	426.831	34.4545	1181.62	430.954	45.4316	1102.02	483.019	21.2519	986.937	514.767	-73.7246	909.877	495.535	-12.0687	878.718	551.625	-56.5981	835.508
219	0	228.03	-227.507	1564.44	130.129	-232.42	1561.89	234.89	-65.1186	1600.78	106.759	-92.3753	1598.22	184.131	7.33452	1455.29	183.258	114.303	1206.4	175.273	-127.927	1347.44	189.423	-171.141	1166.37	134.67	114.799	1282.09	350.307	-63.4556	1390.1	427.626	23.276	1178.83	431.45	35.0755	1099.44	483.906	13.2563	984.198	517.043	-80.0215	905.735	496.913	-18.2421	875.446	553.553	-61.2734	831.553
220	0	230.008	-240.233	1561.57	132.077	-245.259	1559.31	236.767	-77.7659	1597.62	108.651	-105.184	1595.47	185.47	-5.49294	1452.67	183.96	102.007	1203.97	176.534	-140.567	1344.37	190.211	-183.267	1163.17	135.482	102.289	1279.81	351.619	-75.8959	1386.85	428.497	11.994	1175.91	432.011	24.5954	1096.76	484.792	5.09949	981.391	519.267	-86.4677	901.559	498.248	-24.5923	872.127	555.429	-66.1354	827.563
221	0	232.152	-253.056	1558.72	134.19	-258.189	1556.75	238.82	-90.508	1594.47	110.721	-118.08	1592.73	186.953	-18.4215	1450.07	184.703	89.5663	1201.53	177.946	-153.327	1341.31	191.126	-195.554	1159.96	136.371	89.6278	1277.52	353.071	-88.4022	1383.56	429.435	0.621891	1172.89	432.628	13.9892	1094	485.673	-3.22975	978.537	521.431	-93.0835	897.376	499.532	-31.1403	868.785	557.249	-71.2096	823.558
222	0	234.465	-265.977	1555.92	136.474	-271.213	1554.25	241.053	-103.348	1591.36	112.975	-131.066	1590.05	188.581	-31.4493	1447.51	185.481	76.9795	1199.11	179.516	-166.206	1338.29	192.176	-208.008	1156.8	137.329	76.8153	1275.28	354.664	-100.966	1380.27	430.429	-10.8284	1169.81	433.296	3.2548	1091.19	486.54	-11.7424	975.664	523.526	-99.8892	893.216	500.756	-37.9073	865.446	559.004	-76.5213	819.564
223	0	236.952	-278.995	1553.19	138.933	-284.331	1551.84	243.469	-116.288	1588.34	115.414	-144.146	1587.46	190.355	-44.5737	1445.03	186.289	64.2455	1196.74	181.245	-179.202	1335.35	193.367	-220.631	1153.71	138.353	63.8509	1273.1	356.398	-113.581	1377	431.47	-22.3474	1166.69	434.007	-7.60973	1088.37	487.387	-20.4493	972.799	525.546	-106.905	889.113	501.911	-44.9139	862.142	560.684	-82.095	815.608
224	0	239.612	-292.111	1550.59	141.567	-297.547	1549.56	246.065	-129.33	1585.46	118.039	-157.324	1585.02	192.272	-57.7908	1442.66	187.122	51.3651	1194.47	183.136	-192.311	1332.54	194.703	-233.427	1150.75	139.437	50.7364	1271.04	358.273	-126.239	1373.79	432.548	-33.9276	1163.58	434.753	-18.6064	1085.56	488.207	-29.3609	969.973	527.481	-114.15	885.101	502.989	-52.1805	858.901	562.275	-87.955	811.723
225	0	242.441	-305.323	1548.14	144.375	-310.859	1547.43	248.838	-142.476	1582.74	120.845	-170.602	1582.76	194.328	-71.096	1440.45	187.978	38.3412	1192.34	185.186	-205.53	1329.91	196.186	-246.395	1147.96	140.577	37.476	1269.14	360.284	-138.935	1370.69	433.654	-45.5645	1160.51	435.526	-29.7373	1082.8	488.99	-38.4871	967.217	529.322	-121.644	881.219	503.98	-59.7267	855.759	563.762	-94.1246	807.943
226	0	245.435	-318.63	1545.87	147.351	-324.268	1545.5	251.78	-155.725	1580.25	123.825	-183.981	1580.71	196.516	-84.483	1438.43	188.854	25.1789	1190.37	187.389	-218.85	1327.48	197.814	-259.536	1145.4	141.768	24.0761	1267.41	362.425	-151.663	1367.74	434.78	-57.2558	1157.54	436.318	-41.0042	1080.14	489.732	-47.8376	964.564	531.063	-129.407	877.502	504.878	-67.5715	852.748	565.13	-100.627	804.307
227	0	248.583	-332.028	1543.82	150.488	-337.771	1543.79	254.88	-169.076	1578	126.97	-197.461	1578.92	198.831	-97.9446	1436.64	189.751	11.8855	1188.62	189.739	-232.265	1325.31	199.582	-272.846	1143.09	143.008	10.5458	1265.92	364.688	-164.42	1364.98	435.918	-69.0019	1154.71	437.122	-52.4091	1077.61	490.425	-57.4214	962.046	532.695	-137.455	873.989	505.674	-75.7328	849.902	566.362	-107.483	800.854
228	0	251.872	-345.511	1542.01	153.772	-351.365	1542.32	258.125	-182.524	1576.04	130.265	-211.039	1577.41	201.26	-111.472	1435.09	190.667	-1.52889	1187.12	192.222	-245.763	1323.43	201.483	-286.318	1141.1	144.292	-3.10361	1264.67	367.061	-177.202	1362.44	437.062	-80.8058	1152.06	437.928	-63.9536	1075.24	491.066	-67.2467	959.695	534.212	-145.807	870.713	506.364	-84.2274	847.255	567.445	-114.714	797.621
229	0	255.288	-359.073	1540.47	157.189	-365.042	1541.13	261.498	-196.064	1574.4	133.693	-224.71	1576.22	203.793	-125.056	1433.83	191.604	-15.0518	1185.89	194.823	-259.333	1321.88	203.504	-299.941	1139.45	145.616	-16.8582	1263.7	369.529	-190.006	1360.16	438.206	-92.6726	1149.64	438.732	-75.6394	1073.08	491.649	-77.3211	957.54	535.61	-154.48	867.709	506.944	-93.0707	844.836	568.366	-122.341	794.647
230	0	258.809	-372.704	1539.22	160.719	-378.793	1540.23	264.978	-209.689	1573.09	137.233	-238.466	1575.37	206.414	-138.686	1432.86	192.561	-28.6682	1184.96	197.525	-272.962	1320.67	205.631	-313.702	1138.19	146.978	-30.7019	1263.04	372.078	-202.83	1358.17	439.346	-104.609	1147.48	439.526	-87.4678	1071.16	492.174	-87.6516	955.609	536.884	-163.488	865.007	507.413	-102.276	842.674	569.118	-130.383	791.966
231	0	262.415	-386.394	1538.28	164.341	-392.609	1539.64	268.545	-223.386	1572.14	140.864	-252.296	1574.86	209.108	-152.349	1432.21	193.54	-42.3606	1184.35	200.307	-286.633	1319.84	207.846	-327.58	1137.32	148.371	-44.6161	1262.69	374.689	-215.672	1356.49	440.477	-116.624	1145.62	440.306	-99.4394	1069.5	492.64	-98.2441	953.925	538.035	-172.848	862.631	507.774	-111.857	840.792	569.696	-138.857	789.608
232	0	266.081	-400.131	1537.65	168.03	-406.475	1539.36	272.171	-237.143	1571.54	144.559	-266.186	1574.71	211.858	-166.033	1431.88	194.54	-56.1096	1184.08	203.145	-300.332	1319.39	210.127	-341.552	1136.87	149.793	-58.5807	1262.67	377.342	-228.531	1355.15	441.597	-128.725	1144.08	441.069	-111.555	1068.13	493.052	-109.104	952.507	539.064	-182.574	860.603	508.032	-121.821	839.208	570.105	-147.782	787.597
233	0	269.78	-413.899	1537.34	171.76	-420.377	1539.4	275.832	-250.945	1571.32	148.29	-280.12	1574.92	214.645	-179.724	1431.87	195.561	-69.8941	1184.15	206.013	-314.04	1319.32	212.45	-355.591	1136.84	151.239	-72.5737	1262.99	380.015	-241.405	1354.16	442.705	-140.923	1142.89	441.813	-123.813	1067.06	493.412	-120.234	951.368	539.974	-192.679	858.935	508.196	-132.179	837.937	570.351	-157.174	785.95
234	0	273.484	-427.683	1537.34	175.501	-434.297	1539.76	279.499	-264.775	1571.44	152.029	-294.081	1575.47	217.448	-193.408	1432.2	196.603	-83.692	1184.57	208.885	-327.741	1319.64	214.792	-369.668	1137.22	152.703	-86.5724	1263.64	382.687	-254.292	1353.52	443.799	-153.225	1142.05	442.537	-136.212	1066.31	493.73	-131.639	950.517	540.771	-203.175	857.636	508.278	-142.935	836.985	570.451	-167.049	784.675
235	0	277.165	-441.466	1537.66	179.225	-448.217	1540.42	283.142	-278.613	1571.92	155.746	-308.049	1576.37	220.247	-207.073	1432.84	197.664	-97.4803	1185.32	211.732	-341.418	1320.34	217.123	-383.75	1138	154.18	-100.553	1264.61	385.334	-267.193	1353.23	444.878	-165.638	1141.56	443.245	-148.75	1065.87	494.015	-143.321	949.957	541.464	-214.074	856.707	508.294	-154.094	836.352	570.424	-177.424	783.77
236	0	280.792	-455.232	1538.27	182.901	-462.119	1541.37	286.733	-292.441	1572.71	159.41	-322.003	1577.57	223.021	-220.702	1433.78	198.744	-111.237	1186.39	214.527	-355.052	1321.38	219.417	-397.805	1139.15	155.665	-114.493	1265.89	387.934	-280.106	1353.28	445.943	-178.167	1141.41	443.941	-161.424	1065.74	494.28	-155.279	949.684	542.062	-225.385	856.142	508.262	-165.656	836.033	570.295	-188.314	783.225
237	0	284.336	-468.963	1539.17	186.497	-475.984	1542.6	290.241	-306.239	1573.81	162.99	-335.922	1579.07	225.752	-234.285	1435	199.842	-124.939	1187.76	217.242	-368.629	1322.75	221.644	-411.801	1140.63	157.154	-128.369	1267.45	390.466	-293.03	1353.66	446.994	-190.814	1141.6	444.628	-174.229	1065.9	494.539	-167.514	949.69	542.577	-237.119	855.93	508.205	-177.622	836.016	570.094	-199.731	783.019
238	0	287.77	-482.643	1540.32	189.986	-489.793	1544.07	293.638	-319.986	1575.17	166.458	-349.786	1580.82	228.418	-247.809	1436.48	200.957	-138.566	1189.41	219.85	-382.135	1324.42	223.777	-425.708	1142.41	158.643	-142.159	1269.27	392.91	-305.965	1354.35	448.031	-203.579	1142.09	445.316	-187.16	1066.35	494.807	-180.026	949.96	543.02	-249.28	856.052	508.146	-189.988	836.284	569.852	-211.69	783.126
239	0	291.066	-496.255	1541.71	193.338	-503.528	1545.77	296.897	-333.665	1576.76	169.784	-363.575	1582.79	231.002	-261.262	1438.19	202.089	-152.1	1191.3	222.327	-395.558	1326.34	225.789	-439.498	1144.44	160.127	-155.845	1271.32	395.247	-318.91	1355.32	449.057	-216.461	1142.86	446.012	-200.214	1067.06	495.101	-192.813	950.476	543.403	-261.876	856.486	508.11	-202.749	836.817	569.6	-224.199	783.512
240	0	294.2	-509.785	1543.31	196.528	-517.174	1547.67	299.993	-347.259	1578.55	172.943	-377.272	1584.94	233.488	-274.636	1440.09	203.239	-165.524	1193.4	224.65	-408.886	1328.49	227.655	-453.148	1146.67	161.604	-169.409	1273.56	397.46	-331.865	1356.54	450.074	-229.455	1143.88	446.727	-213.383	1068.01	495.439	-205.871	951.216	543.739	-274.909	857.208	508.122	-215.898	837.589	569.369	-237.268	784.139
241	0	297.149	-523.221	1545.08	199.53	-530.716	1549.72	302.903	-360.753	1580.5	175.911	-390.86	1587.23	235.86	-287.923	1442.17	204.407	-178.825	1195.68	226.801	-422.113	1330.8	229.353	-466.636	1149.06	163.071	-182.836	1275.96	399.537	-344.829	1357.99	451.084	-242.557	1145.12	447.469	-226.665	1069.15	495.838	-219.199	952.157	544.038	-288.38	858.189	508.208	-229.428	838.574	569.187	-250.901	784.968
242	0	299.893	-536.553	1547	202.326	-544.143	1551.9	305.61	-374.134	1582.58	178.669	-404.327	1589.62	238.106	-301.118	1444.38	205.592	-191.993	1198.09	228.765	-435.232	1333.25	230.866	-479.949	1151.55	164.526	-196.115	1278.48	401.465	-357.801	1359.63	452.091	-255.76	1146.53	448.252	-240.053	1070.48	496.312	-232.793	953.273	544.308	-302.29	859.4	508.39	-243.329	839.746	569.078	-265.101	785.963
243	0	302.418	-549.772	1549.04	204.897	-557.445	1554.18	308.096	-387.392	1584.74	181.2	-417.662	1592.08	240.215	-314.216	1446.69	206.796	-205.021	1200.61	230.53	-448.239	1335.8	232.179	-493.074	1154.1	165.965	-209.237	1281.09	403.237	-370.782	1361.42	453.101	-269.058	1148.1	449.084	-253.544	1071.94	496.879	-246.65	954.537	544.556	-316.636	860.812	508.692	-257.592	841.077	569.058	-279.867	787.087
244	0	304.709	-562.872	1551.17	207.23	-570.615	1556.52	310.35	-400.522	1586.95	183.492	-430.857	1594.56	242.179	-327.215	1449.06	208.018	-217.907	1203.19	232.089	-461.133	1338.4	233.283	-506.008	1156.68	167.389	-222.198	1283.76	404.846	-383.771	1363.33	454.117	-282.445	1149.78	449.976	-267.134	1073.53	497.55	-260.766	955.923	544.786	-331.413	862.396	509.131	-272.206	842.54	569.14	-295.195	788.309
245	0	306.759	-575.852	1553.36	209.316	-583.649	1558.9	312.366	-413.518	1589.18	185.535	-443.908	1597.04	243.993	-340.115	1451.47	209.258	-230.65	1205.81	233.439	-473.914	1341.01	234.174	-518.749	1159.24	168.794	-234.996	1286.44	406.292	-396.765	1365.34	455.145	-295.916	1151.55	450.94	-280.822	1075.2	498.336	-275.139	957.406	544.999	-346.615	864.125	509.723	-287.162	844.111	569.328	-311.078	789.604
246	0	308.563	-588.708	1555.57	211.148	-596.544	1561.27	314.138	-426.381	1591.4	187.328	-456.813	1599.47	245.654	-352.915	1453.88	210.514	-243.252	1208.42	234.58	-486.583	1343.61	234.852	-531.304	1161.75	170.181	-247.631	1289.1	407.574	-409.764	1367.41	456.191	-309.466	1153.39	451.982	-294.605	1076.93	499.247	-289.765	958.962	545.19	-362.233	865.975	510.479	-302.452	845.767	569.62	-327.508	790.948
247	0	310.118	-601.443	1557.79	212.726	-609.301	1563.62	315.668	-439.11	1593.59	188.868	-469.571	1601.84	247.159	-365.618	1456.27	211.785	-255.72	1211	235.517	-499.145	1346.17	235.322	-543.68	1164.2	171.545	-260.109	1291.72	408.694	-422.766	1369.52	457.263	-323.091	1155.26	453.113	-308.482	1078.7	500.287	-304.643	960.568	545.355	-378.257	867.921	511.407	-318.068	847.486	570.005	-344.472	792.326
248	0	311.426	-614.059	1559.99	214.05	-621.922	1565.92	316.96	-451.709	1595.71	190.162	-482.185	1604.11	248.51	-378.227	1458.6	213.067	-268.06	1213.52	236.258	-511.603	1348.64	235.595	-555.892	1166.55	172.886	-272.434	1294.27	409.657	-435.767	1371.64	458.365	-336.788	1157.14	454.338	-322.455	1080.47	501.459	-319.77	962.202	545.483	-394.675	869.943	512.509	-334.003	849.25	570.469	-361.959	793.726
249	0	312.494	-626.559	1562.14	215.125	-634.41	1568.15	318.022	-464.183	1597.74	191.215	-494.658	1606.26	249.709	-390.744	1460.85	214.356	-280.281	1215.95	236.812	-523.963	1351.03	235.684	-567.954	1168.8	174.201	-284.617	1296.72	410.469	-448.764	1373.74	459.506	-350.556	1159.03	455.663	-336.523	1082.24	502.764	-335.146	963.845	545.562	-411.474	872.021	513.784	-350.252	851.042	570.992	-379.955	795.139
250	0	313.328	-638.949	1564.22	215.961	-646.77	1570.27	318.862	-476.538	1599.67	192.039	-506.996	1608.28	250.76	-403.174	1463.01	215.647	-292.395	1218.26	237.191	-536.231	1353.29	235.606	-579.886	1170.93	175.486	-296.667	1299.05	411.137	-461.753	1375.81	460.692	-364.392	1160.89	457.092	-350.69	1083.97	504.198	-350.77	965.479	545.577	-428.639	874.137	515.226	-366.812	852.846	571.549	-398.442	796.562
251	0	313.939	-651.234	1566.22	216.566	-659.009	1572.29	319.494	-488.781	1601.48	192.646	-519.205	1610.15	251.666	-415.522	1465.04	216.934	-304.412	1220.44	237.409	-548.416	1355.42	235.38	-591.705	1172.92	176.738	-308.597	1301.23	411.67	-474.731	1377.82	461.927	-378.295	1162.72	458.628	-364.956	1085.65	505.756	-366.642	967.089	545.51	-446.152	876.276	516.825	-383.682	854.651	572.113	-417.406	797.992
252	0	314.339	-663.421	1568.1	216.956	-671.133	1574.17	319.932	-500.92	1603.15	193.051	-531.29	1611.85	252.435	-427.793	1466.92	218.208	-316.344	1222.47	237.481	-560.524	1357.41	235.027	-603.432	1174.78	177.95	-320.42	1303.26	412.075	-487.693	1379.75	463.216	-392.265	1164.5	460.272	-379.325	1087.27	507.429	-382.761	968.66	545.343	-463.996	878.422	518.567	-400.859	856.444	572.653	-436.828	799.43
253	0	314.541	-675.517	1569.87	217.143	-683.149	1575.91	320.191	-512.961	1604.66	193.269	-543.26	1613.37	253.071	-439.993	1468.65	219.461	-328.203	1224.33	237.421	-572.563	1359.22	234.57	-615.085	1176.49	179.117	-332.15	1305.11	412.362	-500.633	1381.59	464.562	-406.303	1166.21	462.021	-393.8	1088.81	509.207	-399.128	970.18	545.056	-482.149	880.562	520.435	-418.345	858.216	573.139	-456.688	800.878
254	0	314.561	-687.527	1571.5	217.143	-695.064	1577.49	320.285	-524.913	1606.01	193.319	-555.122	1614.71	253.58	-452.127	1470.21	220.681	-339.999	1226	237.244	-584.543	1360.87	234.029	-626.682	1178.03	180.232	-343.8	1306.77	412.538	-513.547	1383.33	465.964	-420.407	1167.84	463.873	-408.385	1090.25	511.075	-415.743	971.637	544.629	-500.588	882.682	522.409	-436.139	859.959	573.539	-476.962	802.337
255	0	314.412	-699.457	1572.97	216.971	-706.887	1578.91	320.232	-536.783	1607.19	193.215	-566.882	1615.86	253.969	-464.2	1471.58	221.858	-351.745	1227.48	236.966	-596.471	1362.33	233.429	-638.239	1179.42	181.287	-355.386	1308.23	412.612	-526.431	1384.93	467.422	-434.58	1169.37	465.822	-423.085	1091.58	513.019	-432.604	973.022	544.044	-519.29	884.769	524.464	-454.241	861.664	573.825	-497.624	803.809
256	0	314.11	-711.314	1574.29	216.645	-718.624	1580.15	320.045	-548.576	1608.18	192.973	-578.548	1616.82	254.243	-476.219	1472.76	222.979	-363.451	1228.75	236.599	-608.357	1363.59	232.788	-649.77	1180.63	182.274	-366.921	1309.49	412.591	-539.279	1386.4	468.93	-448.821	1170.8	467.862	-437.901	1092.79	515.02	-449.71	974.326	543.283	-538.226	886.811	526.576	-472.649	863.328	573.966	-518.644	805.297
257	0	313.67	-723.103	1575.44	216.178	-730.283	1581.22	319.739	-560.3	1608.98	192.61	-590.128	1617.57	254.406	-488.19	1473.73	224.032	-375.126	1229.81	236.156	-620.208	1364.66	232.127	-661.289	1181.65	183.183	-378.418	1310.52	412.482	-552.086	1387.71	470.481	-463.134	1172.11	469.981	-452.839	1093.87	517.059	-467.057	975.544	542.33	-557.367	888.798	528.716	-491.361	864.946	573.939	-539.991	806.801
258	0	313.104	-734.831	1576.41	215.585	-741.87	1582.1	319.326	-571.959	1609.59	192.138	-601.627	1618.12	254.463	-500.117	1474.5	225.004	-386.779	1230.65	235.65	-632.033	1365.52	231.462	-672.807	1182.48	184.005	-389.889	1311.34	412.29	-564.85	1388.86	472.066	-477.518	1173.28	472.169	-467.901	1094.82	519.114	-484.641	976.67	541.173	-576.682	890.719	530.856	-510.371	866.515	573.717	-561.626	808.323
259	0	312.425	-746.501	1577.2	214.88	-753.391	1582.8	318.817	-583.561	1609.99	191.569	-613.054	1618.46	254.419	-512.006	1475.05	225.884	-398.419	1231.27	235.089	-643.839	1366.16	230.807	-684.333	1183.11	184.731	-401.348	1311.93	412.02	-577.567	1389.83	473.673	-491.978	1174.32	474.411	-483.087	1095.62	521.164	-502.453	977.699	539.802	-596.138	892.563	532.967	-529.67	868.032	573.283	-583.508	809.864
260	0	311.644	-758.119	1577.8	214.072	-764.854	1583.31	318.222	-595.109	1610.19	190.914	-624.414	1618.6	254.275	-523.863	1475.39	226.66	-410.053	1231.67	234.481	-655.634	1366.59	230.175	-695.876	1183.54	185.353	-412.803	1312.29	411.676	-590.233	1390.63	475.288	-506.515	1175.2	476.689	-498.399	1096.27	523.184	-520.484	978.631	538.21	-615.699	894.321	535.019	-549.247	869.497	572.62	-605.595	811.422
261	0	310.77	-769.689	1578.21	213.173	-776.263	1583.63	317.549	-606.609	1610.19	190.181	-635.714	1618.54	254.035	-535.692	1475.5	227.322	-421.688	1231.84	233.834	-667.423	1366.8	229.574	-707.444	1183.75	185.861	-424.265	1312.43	411.261	-602.847	1391.23	476.894	-521.131	1175.92	478.986	-513.835	1096.76	525.15	-538.72	979.462	536.396	-635.331	895.985	536.984	-569.084	870.91	571.714	-627.841	812.996
262	0	309.81	-781.215	1578.44	212.189	-787.624	1583.76	316.802	-618.065	1609.98	189.375	-646.96	1618.28	253.699	-547.497	1475.4	227.86	-433.329	1231.79	233.151	-679.214	1366.79	229.009	-719.043	1183.75	186.249	-435.742	1312.33	410.777	-615.408	1391.63	478.474	-535.829	1176.48	481.28	-529.391	1097.1	527.039	-557.143	980.194	534.36	-654.998	897.546	538.835	-589.162	872.271	570.557	-650.199	814.585
263	0	308.77	-792.702	1578.47	211.127	-798.942	1583.7	315.985	-629.481	1609.57	188.502	-658.158	1617.81	253.269	-559.281	1475.08	228.269	-444.983	1231.52	232.435	-691.01	1366.57	228.481	-730.679	1183.54	186.511	-447.242	1312.01	410.225	-627.916	1391.84	480.01	-550.608	1176.87	483.549	-545.063	1097.27	528.826	-575.735	980.824	532.108	-674.664	898.998	540.545	-609.454	873.581	569.144	-672.621	816.184
264	0	307.653	-804.154	1578.31	209.991	-810.223	1583.46	315.101	-640.862	1608.97	187.563	-669.314	1617.15	252.745	-571.049	1474.55	228.541	-456.655	1231.02	231.686	-702.817	1366.13	227.991	-742.359	1183.11	186.64	-458.771	1311.47	409.605	-640.372	1391.86	481.483	-565.469	1177.08	485.767	-560.842	1097.3	530.488	-594.471	981.355	529.65	-694.294	900.335	542.091	-629.931	874.839	567.475	-695.06	817.79
265	0	306.462	-815.574	1577.97	208.782	-821.471	1583.03	314.149	-652.211	1608.17	186.559	-680.434	1616.31	252.126	-582.803	1473.81	228.675	-468.351	1230.31	230.903	-714.638	1365.48	227.533	-754.088	1182.46	186.634	-470.334	1310.7	408.916	-652.778	1391.67	482.872	-580.408	1177.12	487.91	-576.72	1097.16	532.002	-613.325	981.785	526.997	-713.856	901.552	543.452	-650.558	876.045	565.555	-717.47	819.397
266	0	305.198	-826.966	1577.45	207.501	-832.691	1582.42	313.127	-663.532	1607.2	185.488	-691.523	1615.28	251.412	-594.546	1472.87	228.668	-480.076	1229.38	230.083	-726.477	1364.62	227.1	-765.873	1181.62	186.492	-481.936	1309.72	408.157	-665.138	1391.3	484.16	-595.42	1176.99	489.952	-592.683	1096.87	533.347	-632.267	982.116	524.168	-733.316	902.642	544.609	-671.298	877.198	563.391	-739.807	821
267	0	303.859	-838.334	1576.76	206.148	-843.888	1581.64	312.033	-674.831	1606.05	184.347	-702.588	1614.07	250.601	-606.279	1471.74	228.522	-491.837	1228.24	229.22	-738.335	1363.57	226.683	-777.72	1180.57	186.213	-493.581	1308.52	407.325	-677.456	1390.73	485.325	-610.498	1176.68	491.864	-608.718	1096.43	534.502	-651.263	982.347	521.18	-752.647	903.604	545.547	-692.107	878.295	561	-762.028	822.591
268	0	302.443	-849.682	1575.91	204.719	-855.067	1580.69	310.863	-686.109	1604.74	183.132	-713.634	1612.7	249.694	-618.005	1470.42	228.24	-503.639	1226.89	228.309	-750.216	1362.34	226.27	-789.636	1179.34	185.8	-505.272	1307.11	406.418	-689.738	1389.99	486.351	-625.631	1176.21	493.621	-624.808	1095.84	535.451	-670.278	982.48	518.054	-771.822	904.435	546.252	-712.941	879.334	558.398	-784.09	824.162
269	0	300.948	-861.014	1574.91	203.212	-866.232	1579.6	309.61	-697.372	1603.29	181.837	-724.665	1611.18	248.687	-629.726	1468.93	227.827	-515.489	1225.35	227.344	-762.122	1360.93	225.845	-801.625	1177.95	185.257	-517.012	1305.5	405.432	-701.992	1389.08	487.218	-640.805	1175.57	495.196	-640.936	1095.11	536.178	-689.276	982.515	514.813	-790.817	905.133	546.715	-733.751	880.311	555.609	-805.956	825.704
270	0	299.369	-872.335	1573.77	201.622	-877.389	1578.35	308.271	-708.624	1601.71	180.456	-735.689	1609.52	247.582	-641.443	1467.28	227.291	-527.392	1223.62	226.315	-774.053	1359.37	225.395	-813.693	1176.4	184.59	-528.802	1303.7	404.365	-714.226	1388.01	487.909	-656.004	1174.78	496.565	-657.081	1094.25	536.669	-708.217	982.451	511.481	-809.611	905.698	546.928	-754.489	881.218	552.655	-827.588	827.207
271	0	297.7	-883.65	1572.51	199.943	-888.541	1576.99	306.838	-719.87	1600.01	178.983	-746.709	1607.73	246.377	-653.158	1465.48	226.641	-539.355	1221.71	225.215	-786.014	1357.67	224.901	-825.846	1174.71	183.807	-540.643	1301.73	403.211	-726.449	1386.8	488.409	-671.21	1173.84	497.705	-673.222	1093.25	536.913	-727.062	982.291	508.081	-828.187	906.132	546.887	-775.101	882.049	549.564	-848.951	828.657
272	0	295.938	-894.963	1571.16	198.17	-899.694	1575.51	305.306	-731.115	1598.22	177.41	-757.731	1605.84	245.072	-664.873	1463.56	225.888	-551.384	1219.64	224.034	-798.003	1355.85	224.348	-838.087	1172.91	182.919	-552.538	1299.58	401.969	-738.671	1385.47	488.701	-686.403	1172.75	498.594	-689.335	1092.14	536.903	-745.77	982.033	504.637	-846.529	906.438	546.588	-795.537	882.798	546.364	-870.012	830.042
273	0	294.075	-906.281	1569.72	196.296	-910.853	1573.94	303.669	-742.365	1596.36	175.732	-768.761	1603.86	243.669	-676.59	1461.54	225.044	-563.485	1217.42	222.766	-810.025	1353.93	223.716	-850.421	1171.03	181.936	-564.486	1297.29	400.634	-750.903	1384.03	488.774	-701.56	1171.54	499.215	-705.397	1090.92	536.632	-764.301	981.682	501.17	-864.625	906.621	546.029	-815.745	883.454	543.081	-890.74	831.348
274	0	292.108	-917.609	1568.23	194.317	-922.024	1572.3	301.923	-753.627	1594.46	173.944	-779.804	1601.82	242.168	-688.312	1459.44	224.123	-575.663	1215.07	221.401	-822.079	1351.93	222.989	-862.85	1169.08	180.87	-576.489	1294.87	399.204	-763.155	1382.52	488.616	-716.661	1170.22	499.552	-721.383	1089.61	536.098	-782.617	981.24	497.699	-882.463	906.688	545.213	-835.675	884.011	539.743	-911.103	832.564
275	0	290.031	-928.956	1566.71	192.228	-933.213	1570.62	300.063	-764.906	1592.53	172.04	-790.866	1599.73	240.572	-700.041	1457.27	223.138	-587.922	1212.62	219.932	-834.167	1349.89	222.149	-875.375	1167.1	179.734	-588.545	1292.34	397.677	-775.438	1380.95	488.217	-731.681	1168.8	499.593	-737.268	1088.22	535.298	-800.678	980.712	494.241	-900.035	906.649	544.14	-855.276	884.461	536.376	-931.076	833.677
276	0	287.84	-940.328	1565.19	190.023	-944.425	1568.92	298.087	-776.212	1590.61	170.017	-801.953	1597.63	238.885	-711.781	1455.08	222.104	-600.267	1210.09	218.354	-846.291	1347.83	221.182	-887.997	1165.11	178.543	-600.655	1289.73	396.051	-787.762	1379.35	487.57	-746.6	1167.3	499.328	-753.027	1086.77	534.234	-818.449	980.104	490.81	-917.331	906.513	542.813	-874.503	884.798	533.004	-950.63	834.678
277	0	285.532	-951.732	1563.69	187.699	-955.668	1567.22	295.993	-787.552	1588.73	167.874	-813.072	1595.55	237.108	-723.535	1452.88	221.035	-612.698	1207.52	216.661	-858.45	1345.78	220.074	-900.714	1163.14	177.31	-612.817	1287.07	394.327	-800.138	1377.76	486.67	-761.397	1165.74	498.753	-768.635	1085.27	532.911	-835.895	979.425	487.417	-934.342	906.295	541.237	-893.311	885.018	529.646	-969.742	835.559
278	0	283.105	-963.178	1562.24	185.254	-966.949	1565.56	293.781	-798.935	1586.91	165.609	-824.231	1593.51	235.249	-735.306	1450.72	219.945	-625.216	1204.92	214.852	-870.645	1343.77	218.814	-913.526	1161.23	176.048	-625.031	1284.39	392.505	-812.573	1376.19	485.516	-776.052	1164.15	497.867	-784.07	1083.76	531.331	-852.986	978.686	484.067	-951.059	906.008	539.416	-911.661	885.12	526.32	-988.386	836.315
279	0	280.56	-974.673	1560.86	182.689	-978.274	1563.95	291.453	-810.369	1585.19	163.225	-835.437	1591.53	233.312	-747.097	1448.61	218.846	-637.822	1202.35	212.923	-882.876	1341.83	217.394	-926.428	1159.41	174.77	-637.295	1281.72	390.587	-825.073	1374.69	484.107	-790.55	1162.55	496.67	-799.308	1082.26	529.503	-869.694	977.898	480.764	-967.472	905.668	537.356	-929.515	885.105	523.041	-1006.54	836.946
280	0	277.9	-986.224	1559.6	180.005	-989.651	1562.44	289.012	-821.864	1583.59	160.723	-846.698	1589.66	231.304	-758.912	1446.58	217.751	-650.512	1199.83	210.878	-895.141	1339.99	215.81	-939.414	1157.7	173.488	-649.605	1279.09	388.577	-837.644	1373.28	482.449	-804.875	1160.97	495.169	-814.33	1080.78	527.435	-885.995	977.079	477.506	-983.569	905.293	535.063	-946.843	884.979	519.817	-1024.18	837.452
281	0	275.127	-997.841	1558.46	177.206	-1001.09	1561.04	286.463	-833.427	1582.14	158.11	-858.022	1587.93	229.232	-770.752	1444.68	216.67	-663.281	1197.4	208.72	-907.437	1338.29	214.06	-952.479	1156.16	172.212	-661.96	1276.55	386.48	-850.287	1371.99	480.55	-819.016	1159.46	493.375	-829.117	1079.37	525.137	-901.87	976.244	474.29	-999.338	904.901	532.545	-963.619	884.752	516.652	-1041.29	837.84
282	0	272.249	-1009.53	1557.48	174.299	-1012.59	1559.79	283.814	-845.066	1580.87	155.391	-869.418	1586.35	227.104	-782.62	1442.93	215.611	-676.125	1195.1	206.455	-919.761	1336.75	212.148	-965.612	1154.8	170.951	-674.355	1274.13	384.303	-863.001	1370.86	478.42	-832.966	1158.02	491.301	-843.651	1078.04	522.621	-917.303	975.415	471.106	-1014.76	904.511	529.809	-979.822	884.435	513.545	-1057.85	838.117
283	0	269.276	-1021.29	1556.67	171.294	-1024.17	1558.69	281.073	-856.788	1579.8	152.577	-880.891	1584.95	224.93	-794.516	1441.35	214.582	-689.035	1192.97	204.092	-932.108	1335.41	210.082	-978.802	1153.66	169.714	-686.786	1271.86	382.054	-875.784	1369.91	476.074	-846.719	1156.72	488.966	-857.92	1076.84	519.899	-932.283	974.612	467.944	-1029.83	904.142	526.864	-995.438	884.046	510.489	-1073.83	838.295
284	0	266.219	-1033.14	1556.05	168.202	-1035.82	1557.78	278.25	-868.597	1578.96	149.677	-892.45	1583.77	222.718	-806.442	1439.98	213.586	-702.002	1191.03	201.643	-944.474	1334.29	207.874	-992.037	1152.76	168.504	-699.248	1269.78	379.744	-888.628	1369.18	473.534	-860.274	1155.57	486.389	-871.91	1075.78	516.987	-946.804	973.858	464.793	-1044.53	903.813	523.721	-1010.46	883.606	507.473	-1089.22	838.388
285	0	263.091	-1045.07	1555.65	165.038	-1047.55	1557.07	275.36	-880.497	1578.37	146.705	-904.1	1582.82	220.48	-818.395	1438.83	212.628	-715.015	1189.32	199.122	-956.85	1333.42	205.542	-1005.3	1152.14	167.327	-711.735	1267.91	377.385	-901.524	1368.68	470.82	-873.633	1154.61	483.597	-885.612	1074.9	513.9	-960.866	973.177	461.638	-1058.84	903.543	520.391	-1024.89	883.139	504.478	-1104.01	838.412
286	0	259.911	-1057.08	1555.47	161.82	-1059.37	1556.58	272.414	-892.489	1578.03	143.675	-915.844	1582.11	218.225	-830.375	1437.93	211.708	-728.062	1187.86	196.548	-969.231	1332.82	203.105	-1018.57	1151.81	166.185	-724.242	1266.28	374.991	-914.461	1368.43	467.961	-886.801	1153.87	480.618	-899.02	1074.22	510.656	-974.47	972.592	458.464	-1072.75	903.349	516.888	-1038.72	882.67	501.483	-1118.19	838.386
287	0	256.695	-1069.18	1555.51	158.567	-1071.28	1556.31	269.431	-904.572	1577.97	140.604	-927.685	1581.66	215.965	-842.379	1437.28	210.824	-741.13	1186.68	193.938	-981.609	1332.5	200.591	-1031.84	1151.79	165.077	-736.762	1264.92	372.577	-927.422	1368.46	464.986	-899.782	1153.39	477.482	-912.127	1073.76	507.275	-987.626	972.125	455.258	-1086.25	903.247	513.229	-1051.98	882.227	498.464	-1131.75	838.33
288	0	253.466	-1081.36	1555.79	155.301	-1083.27	1556.27	266.426	-916.741	1578.18	137.51	-939.621	1581.48	213.711	-854.405	1436.91	209.973	-754.206	1185.8	191.315	-993.978	1332.48	198.028	-1045.08	1152.09	164.002	-749.289	1263.83	370.16	-940.393	1368.77	461.928	-912.585	1153.18	474.224	-924.931	1073.54	503.777	-1000.34	971.797	452.007	-1099.31	903.251	509.43	-1064.68	881.84	495.391	-1144.7	838.263
289	0	250.246	-1093.62	1556.31	152.044	-1095.34	1556.47	263.418	-928.993	1578.66	134.413	-951.653	1581.57	211.474	-866.45	1436.81	209.149	-767.276	1185.22	188.7	-1006.33	1332.75	195.448	-1058.27	1152.7	162.956	-761.816	1263.04	367.757	-953.353	1369.36	458.822	-925.218	1153.26	470.878	-937.432	1073.59	500.186	-1012.64	971.625	448.699	-1111.95	903.374	505.514	-1076.84	881.535	492.238	-1157.05	838.204
290	0	247.056	-1105.94	1557.05	148.821	-1107.49	1556.89	260.428	-941.318	1579.4	131.333	-963.774	1581.91	209.265	-878.509	1436.99	208.346	-780.325	1184.94	186.118	-1018.66	1333.33	192.886	-1071.39	1153.63	161.936	-774.337	1262.55	365.387	-966.284	1370.24	455.705	-937.689	1153.64	467.48	-949.63	1073.89	496.526	-1024.53	971.625	445.326	-1124.15	903.624	501.505	-1088.5	881.337	488.977	-1168.81	838.172
291	0	243.921	-1118.32	1558.01	145.655	-1119.71	1557.55	257.475	-953.709	1580.4	128.293	-975.979	1582.51	207.095	-890.581	1437.44	207.555	-793.338	1184.97	183.592	-1030.96	1334.19	190.377	-1084.43	1154.84	160.934	-786.845	1262.36	363.069	-979.168	1371.39	452.614	-950.003	1154.31	464.069	-961.53	1074.46	492.823	-1036.03	971.806	441.886	-1135.91	904.007	497.428	-1099.68	881.271	485.587	-1180.02	838.184
292	0	240.864	-1130.76	1559.19	142.572	-1132	1558.41	254.579	-966.155	1581.63	125.314	-988.26	1583.35	204.974	-902.663	1438.15	206.767	-806.303	1185.31	181.147	-1043.23	1335.32	187.956	-1097.36	1156.32	159.945	-799.335	1262.46	360.82	-991.985	1372.8	449.583	-962.165	1155.29	460.681	-973.138	1075.3	489.104	-1047.18	972.174	438.379	-1147.25	904.524	493.313	-1110.43	881.353	482.049	-1190.7	838.255
293	0	237.908	-1143.23	1560.55	139.593	-1144.35	1559.48	251.761	-978.644	1583.08	122.418	-1000.61	1584.42	202.912	-914.752	1439.1	205.972	-819.204	1185.93	178.807	-1055.47	1336.7	185.66	-1110.18	1158.04	158.96	-811.802	1262.86	358.659	-1004.72	1374.46	446.648	-974.176	1156.54	457.351	-984.46	1076.38	485.397	-1057.99	972.73	434.809	-1158.16	905.173	489.191	-1120.79	881.597	478.355	-1200.91	838.396
294	0	235.073	-1155.74	1562.09	136.741	-1156.75	1560.73	249.042	-991.167	1584.72	119.627	-1013.01	1585.68	200.918	-926.846	1440.29	205.16	-832.03	1186.82	176.592	-1067.67	1338.31	183.52	-1122.87	1159.96	157.973	-824.24	1263.53	356.601	-1017.35	1376.32	443.839	-986.034	1158.05	454.114	-995.506	1077.7	481.731	-1068.48	973.47	431.189	-1168.66	905.947	485.094	-1130.78	882.011	474.505	-1210.68	838.617
295	0	232.378	-1168.27	1563.77	134.035	-1169.18	1562.15	246.44	-1003.71	1586.52	116.961	-1025.46	1587.11	199	-938.945	1441.68	204.323	-844.769	1187.96	174.523	-1079.84	1340.11	181.565	-1135.43	1162.03	156.975	-836.646	1264.45	354.663	-1029.87	1378.37	441.182	-997.734	1159.79	450.999	-1006.29	1079.23	478.134	-1078.69	974.385	427.534	-1178.77	906.837	481.055	-1140.46	882.595	470.511	-1220.06	838.926
296	0	229.842	-1180.82	1565.59	131.492	-1181.65	1563.71	243.974	-1016.27	1588.45	114.438	-1037.95	1588.7	197.166	-951.048	1443.26	203.451	-857.41	1189.34	172.619	-1091.98	1342.07	179.821	-1147.84	1164.21	155.961	-849.016	1265.62	352.857	-1042.26	1380.57	438.7	-1009.27	1161.72	448.035	-1016.81	1080.95	474.635	-1088.64	975.463	423.867	-1188.5	907.829	477.108	-1149.85	883.345	466.396	-1229.12	839.325
297	0	227.478	-1193.37	1567.5	129.127	-1194.13	1565.38	241.659	-1028.83	1590.49	112.076	-1050.46	1590.4	195.421	-963.154	1445	202.537	-869.946	1190.92	170.893	-1104.09	1344.16	178.308	-1160.13	1166.47	154.923	-861.347	1267	351.193	-1054.52	1382.89	436.411	-1020.63	1163.83	445.244	-1027.1	1082.83	471.26	-1098.34	976.685	420.215	-1197.89	908.907	473.285	-1158.99	884.25	462.195	-1237.88	839.814
298	0	225.299	-1205.92	1569.49	126.952	-1206.64	1567.14	239.51	-1041.39	1592.61	109.888	-1062.98	1592.19	193.772	-975.263	1446.87	201.574	-882.369	1192.68	169.356	-1116.18	1346.32	177.04	-1172.27	1168.75	153.856	-873.637	1268.57	349.68	-1066.64	1385.29	434.324	-1031.8	1166.05	442.644	-1037.16	1084.84	468.035	-1107.82	978.032	416.61	-1206.96	910.052	469.619	-1167.92	885.293	457.954	-1246.41	840.39
299	0	223.315	-1218.46	1571.53	124.975	-1219.14	1568.97	237.538	-1053.94	1594.76	107.888	-1075.52	1594.05	192.222	-987.375	1448.84	200.558	-894.676	1194.58	168.018	-1128.24	1348.53	176.026	-1184.3	1171.03	152.757	-885.884	1270.31	348.324	-1078.62	1387.72	432.445	-1042.77	1168.36	440.25	-1047.02	1086.95	464.984	-1117.1	979.48	413.087	-1215.74	911.243	466.14	-1176.65	886.453	453.728	-1254.73	841.044
300	0	221.532	-1230.98	1573.58	123.204	-1231.65	1570.83	235.753	-1066.47	1596.94	106.083	-1088.05	1595.94	190.774	-999.487	1450.89	199.486	-906.864	1196.6	166.881	-1140.28	1350.76	175.267	-1196.21	1173.25	151.623	-898.088	1272.18	347.126	-1090.45	1390.17	430.773	-1053.53	1170.72	438.07	-1056.67	1089.12	462.128	-1126.19	981.003	409.687	-1224.25	912.457	462.875	-1185.2	887.704	449.582	-1262.88	841.764
301	0	219.955	-1243.49	1575.61	121.641	-1244.14	1572.69	234.161	-1078.99	1599.1	104.481	-1100.57	1597.84	189.429	-1011.6	1452.98	198.355	-918.933	1198.71	165.945	-1152.3	1352.96	174.761	-1208.01	1175.4	150.451	-910.248	1274.16	346.087	-1102.14	1392.59	429.302	-1064.06	1173.08	436.107	-1066.14	1091.32	459.484	-1135.11	982.575	406.449	-1232.52	913.672	459.85	-1193.6	889.018	445.585	-1270.89	842.533
302	0	218.586	-1255.98	1577.6	120.29	-1256.63	1574.53	232.766	-1091.48	1601.22	103.084	-1113.08	1599.72	188.189	-1023.71	1455.09	197.167	-930.885	1200.86	165.208	-1164.3	1355.11	174.498	-1219.72	1177.45	149.241	-922.366	1276.21	345.203	-1113.69	1394.95	428.023	-1074.37	1175.42	434.359	-1075.45	1093.52	457.068	-1143.87	984.167	403.416	-1240.6	914.864	457.087	-1201.84	890.362	441.807	-1278.76	843.329
303	0	217.426	-1268.44	1579.53	119.149	-1269.11	1576.33	231.567	-1103.95	1603.27	101.892	-1125.58	1601.57	187.052	-1035.82	1457.18	195.922	-942.724	1203.05	164.662	-1176.28	1357.18	174.463	-1231.35	1179.37	147.996	-934.441	1278.31	344.469	-1125.11	1397.22	426.922	-1084.44	1177.71	432.821	-1084.61	1095.69	454.892	-1152.47	985.751	400.628	-1248.49	916.009	454.603	-1209.94	891.703	438.32	-1286.52	844.128
304	0	216.471	-1280.87	1581.35	118.216	-1281.57	1578.05	230.562	-1116.39	1605.24	100.904	-1138.07	1603.36	186.017	-1047.93	1459.23	194.626	-954.456	1205.22	164.297	-1188.24	1359.15	174.637	-1242.91	1181.16	146.718	-946.477	1280.42	343.878	-1136.4	1399.38	425.981	-1094.28	1179.9	431.484	-1093.63	1097.81	452.964	-1160.93	987.298	398.124	-1256.24	917.083	452.415	-1217.9	893.009	435.19	-1294.16	844.901
305	0	215.72	-1293.28	1583.06	117.486	-1294.01	1579.67	229.747	-1128.81	1607.1	100.113	-1150.54	1605.06	185.08	-1060.03	1461.22	193.284	-966.089	1207.35	164.099	-1200.18	1360.98	174.997	-1254.41	1182.79	145.412	-958.474	1282.51	343.42	-1147.58	1401.4	425.184	-1103.88	1181.98	430.336	-1102.53	1099.84	451.288	-1169.25	988.782	395.939	-1263.87	918.063	450.533	-1225.72	894.248	432.479	-1301.68	845.617
306	0	215.165	-1305.66	1584.62	116.955	-1306.44	1581.18	229.112	-1141.2	1608.83	99.5112	-1163	1606.66	184.239	-1072.12	1463.12	191.904	-977.631	1209.42	164.054	-1212.11	1362.68	175.518	-1265.87	1184.26	144.083	-970.437	1284.56	343.084	-1158.66	1403.26	424.512	-1113.27	1183.93	429.364	-1111.33	1101.76	449.868	-1177.43	990.176	394.103	-1271.41	918.926	448.964	-1233.39	895.387	430.237	-1309.08	846.245
307	0	214.8	-1318.01	1586.03	116.614	-1318.85	1582.55	228.649	-1153.56	1610.41	99.0893	-1175.45	1608.15	183.488	-1084.21	1464.89	190.496	-989.092	1211.4	164.146	-1224.01	1364.2	176.171	-1277.28	1185.56	142.741	-982.367	1286.54	342.859	-1169.66	1404.94	423.947	-1122.46	1185.72	428.553	-1120.04	1103.55	448.701	-1185.5	991.456	392.64	-1278.87	919.651	447.714	-1240.91	896.398	428.505	-1316.35	846.751
308	0	214.616	-1330.33	1587.25	116.454	-1331.25	1583.76	228.346	-1165.89	1611.82	98.8354	-1187.88	1609.5	182.824	-1096.29	1466.53	189.073	-1000.48	1213.26	164.356	-1235.9	1365.55	176.93	-1288.66	1186.68	141.393	-994.268	1288.41	342.732	-1180.59	1406.43	423.472	-1131.47	1187.34	427.887	-1128.68	1105.2	447.784	-1193.44	992.601	391.566	-1286.27	920.216	446.783	-1248.3	897.254	427.309	-1323.49	847.106
309	0	214.604	-1342.62	1588.28	116.467	-1343.64	1584.8	228.189	-1178.19	1613.05	98.7366	-1200.31	1610.7	182.243	-1108.37	1468.01	187.647	-1011.81	1214.99	164.666	-1247.77	1366.71	177.765	-1300.01	1187.61	140.051	-1006.14	1290.16	342.691	-1191.46	1407.7	423.073	-1140.33	1188.78	427.352	-1137.28	1106.68	447.111	-1201.27	993.59	390.891	-1293.62	920.602	446.168	-1255.53	897.934	426.661	-1330.5	847.279
310	0	214.754	-1354.89	1589.09	116.642	-1356.02	1585.66	228.166	-1190.47	1614.08	98.7793	-1212.74	1611.73	181.739	-1120.44	1469.32	186.234	-1023.1	1216.55	165.06	-1259.62	1367.67	178.649	-1311.33	1188.34	138.725	-1017.99	1291.76	342.724	-1202.3	1408.76	422.736	-1149.08	1190.02	426.932	-1145.83	1107.98	446.674	-1209	994.406	390.616	-1300.95	920.789	445.864	-1262.62	898.418	426.562	-1337.36	847.247
311	0	215.056	-1367.12	1589.69	116.968	-1368.39	1586.32	228.264	-1202.72	1614.9	98.9496	-1225.18	1612.59	181.31	-1132.51	1470.43	184.849	-1034.34	1217.94	165.519	-1271.46	1368.41	179.556	-1322.63	1188.87	137.429	-1029.83	1293.2	342.819	-1213.13	1409.58	422.452	-1157.75	1191.06	426.615	-1154.37	1109.1	446.463	-1216.63	995.037	390.735	-1308.26	920.76	445.862	-1269.57	898.69	426.996	-1344.09	846.987
312	0	215.497	-1379.34	1590.06	117.433	-1380.76	1586.78	228.468	-1214.95	1615.49	99.2338	-1237.61	1613.25	180.95	-1144.57	1471.33	183.509	-1045.56	1219.13	166.027	-1283.3	1368.94	180.464	-1333.9	1189.18	136.174	-1041.64	1294.44	342.966	-1223.96	1410.16	422.211	-1166.38	1191.89	426.388	-1162.92	1110.03	446.466	-1224.19	995.469	391.234	-1315.55	920.5	446.15	-1276.39	898.74	427.936	-1350.67	846.484
313	0	216.068	-1391.53	1590.19	118.027	-1393.14	1587.02	228.768	-1227.15	1615.85	99.6189	-1250.05	1613.71	180.659	-1156.64	1472.01	182.229	-1056.77	1220.12	166.569	-1295.13	1369.23	181.352	-1345.15	1189.27	134.973	-1053.44	1295.49	343.155	-1234.82	1410.5	422.011	-1175	1192.5	426.242	-1171.49	1110.75	446.67	-1231.68	995.695	392.092	-1322.82	919.995	446.717	-1283.09	898.558	429.347	-1357.12	845.726
314	0	216.757	-1403.71	1590.08	118.739	-1405.51	1587.04	229.15	-1239.33	1615.97	100.093	-1262.51	1613.95	180.432	-1168.71	1472.45	181.027	-1067.97	1220.89	167.132	-1306.95	1369.29	182.202	-1356.38	1189.14	133.84	-1065.23	1296.32	343.38	-1245.71	1410.6	421.847	-1183.66	1192.89	426.169	-1180.1	1111.26	447.064	-1239.13	995.709	393.286	-1330.08	919.234	447.546	-1289.67	898.142	431.182	-1363.45	844.707
315	0	217.555	-1415.86	1589.72	119.559	-1417.89	1586.82	229.606	-1251.49	1615.85	100.645	-1274.97	1613.98	180.271	-1180.79	1472.66	179.917	-1079.18	1221.43	167.705	-1318.78	1369.11	183.001	-1367.59	1188.78	132.788	-1077	1296.92	343.633	-1256.66	1410.44	421.721	-1192.39	1193.06	426.163	-1188.77	1111.55	447.633	-1246.53	995.508	394.783	-1337.33	918.207	448.62	-1296.15	897.49	433.392	-1369.66	843.424
316	0	218.453	-1428.01	1589.1	120.478	-1430.28	1586.38	230.128	-1263.64	1615.46	101.266	-1287.46	1613.77	180.173	-1192.88	1472.62	178.914	-1090.41	1221.74	168.279	-1330.62	1368.69	183.737	-1378.8	1188.18	131.828	-1088.78	1297.28	343.912	-1267.69	1410.03	421.634	-1201.24	1193.01	426.218	-1197.52	1111.64	448.364	-1253.93	995.091	396.551	-1344.56	916.908	449.922	-1302.54	896.604	435.921	-1375.75	841.88
317	0	219.441	-1440.14	1588.24	121.486	-1442.68	1585.7	230.708	-1275.77	1614.82	101.949	-1299.95	1613.34	180.141	-1204.98	1472.33	178.032	-1101.66	1221.8	168.848	-1342.47	1368.03	184.403	-1390	1187.35	130.973	-1100.55	1297.4	344.213	-1278.8	1409.37	421.591	-1210.22	1192.74	426.331	-1206.36	1111.51	449.242	-1261.32	994.459	398.555	-1351.76	915.333	451.432	-1308.86	895.488	438.714	-1381.74	840.078
318	0	220.514	-1452.26	1587.13	122.577	-1455.09	1584.79	231.344	-1287.9	1613.93	102.69	-1312.47	1612.67	180.176	-1217.09	1471.79	177.279	-1112.95	1221.61	169.406	-1354.34	1367.13	184.994	-1401.2	1186.28	130.234	-1112.32	1297.27	344.535	-1290	1408.46	421.596	-1219.37	1192.25	426.503	-1215.31	1111.16	450.256	-1268.74	993.615	400.759	-1358.94	913.481	453.13	-1315.13	894.149	441.714	-1387.65	838.026
319	0	221.665	-1464.38	1585.78	123.745	-1467.51	1583.65	232.032	-1300.01	1612.78	103.484	-1325	1611.76	180.281	-1229.21	1471	176.666	-1124.29	1221.17	169.954	-1366.23	1365.99	185.508	-1412.42	1184.98	129.619	-1124.1	1296.89	344.882	-1301.31	1407.3	421.657	-1228.71	1191.54	426.731	-1224.38	1110.6	451.39	-1276.19	992.563	403.126	-1366.09	911.353	454.996	-1321.36	892.594	444.869	-1393.47	835.732
320	0	222.89	-1476.5	1584.19	124.985	-1479.94	1582.28	232.773	-1312.13	1611.38	104.331	-1337.54	1610.62	180.462	-1241.36	1469.97	176.199	-1135.68	1220.48	170.491	-1378.15	1364.62	185.947	-1423.66	1183.46	129.137	-1135.89	1296.27	345.255	-1312.74	1405.91	421.781	-1238.26	1190.62	427.018	-1233.6	1109.83	452.633	-1283.69	991.309	405.624	-1373.21	908.954	457.011	-1327.57	890.832	448.129	-1399.21	833.205
321	0	224.187	-1488.62	1582.36	126.295	-1492.38	1580.7	233.569	-1324.24	1609.74	105.232	-1350.1	1609.26	180.722	-1253.52	1468.69	175.879	-1147.13	1219.55	171.023	-1390.1	1363.03	186.313	-1434.94	1181.73	128.795	-1147.69	1295.39	345.66	-1324.29	1404.29	421.974	-1248.04	1189.49	427.363	-1242.96	1108.85	453.971	-1291.27	989.86	408.219	-1380.3	906.29	459.154	-1333.77	888.874	451.45	-1404.89	830.452
322	0	225.555	-1500.74	1580.33	127.674	-1504.83	1578.91	234.423	-1336.35	1607.86	106.191	-1362.67	1607.67	181.067	-1265.71	1467.19	175.71	-1158.65	1218.36	171.554	-1402.09	1361.22	186.614	-1446.26	1179.79	128.596	-1159.52	1294.28	346.103	-1335.96	1402.44	422.242	-1258.05	1188.15	427.768	-1252.48	1107.66	455.394	-1298.94	988.224	410.884	-1387.36	903.371	461.406	-1339.99	886.732	454.794	-1410.52	827.483
323	0	226.994	-1512.86	1578.1	129.123	-1517.29	1576.92	235.342	-1348.46	1605.77	107.213	-1375.24	1605.89	181.504	-1277.93	1465.46	175.688	-1170.25	1216.95	172.095	-1414.12	1359.22	186.859	-1457.65	1177.65	128.543	-1171.39	1292.94	346.592	-1347.75	1400.38	422.593	-1268.29	1186.6	428.233	-1262.17	1106.27	456.888	-1306.7	986.411	413.592	-1394.41	900.211	463.749	-1346.24	884.418	458.128	-1416.11	824.305
324	0	228.508	-1525	1575.68	130.644	-1529.75	1574.77	236.333	-1360.57	1603.48	108.305	-1387.82	1603.91	182.039	-1290.17	1463.54	175.809	-1181.93	1215.31	172.654	-1426.2	1357.03	187.06	-1469.11	1175.35	128.638	-1183.29	1291.38	347.135	-1359.66	1398.13	423.032	-1278.78	1184.85	428.76	-1272.04	1104.68	458.443	-1314.57	984.43	416.322	-1401.44	896.823	466.164	-1352.55	881.945	461.429	-1421.66	820.928
325	0	230.1	-1537.14	1573.11	132.242	-1542.22	1572.46	237.405	-1372.7	1601.02	109.475	-1400.41	1601.77	182.678	-1302.45	1461.44	176.067	-1193.71	1213.45	173.245	-1438.33	1354.69	187.231	-1480.66	1172.89	128.877	-1195.24	1289.62	347.744	-1371.69	1395.68	423.561	-1289.49	1182.9	429.347	-1282.08	1102.91	460.048	-1322.58	982.294	419.055	-1408.47	893.227	468.635	-1358.91	879.328	464.678	-1427.19	817.362
326	0	231.775	-1549.29	1570.42	133.922	-1554.7	1570.03	238.568	-1384.83	1598.4	110.734	-1412.99	1599.48	183.429	-1314.76	1459.17	176.453	-1205.59	1211.41	173.881	-1450.53	1352.2	187.388	-1492.3	1170.3	129.256	-1207.25	1287.69	348.427	-1383.83	1393.08	424.184	-1300.43	1180.76	429.994	-1292.3	1100.95	461.692	-1330.71	980.018	421.775	-1415.51	889.445	471.144	-1365.37	876.585	467.863	-1432.72	813.619
327	0	233.541	-1561.46	1567.62	135.693	-1567.19	1567.5	239.832	-1396.98	1595.65	112.091	-1425.58	1597.08	184.296	-1327.12	1456.78	176.956	-1217.58	1209.2	174.578	-1462.79	1349.6	187.55	-1504.06	1167.6	129.77	-1219.34	1285.6	349.194	-1396.08	1390.32	424.9	-1311.59	1178.44	430.697	-1302.7	1098.83	463.366	-1339	977.619	424.472	-1422.58	885.502	473.678	-1371.92	873.733	470.976	-1438.26	809.713
328	0	235.404	-1573.64	1564.77	137.563	-1579.68	1564.92	241.209	-1409.14	1592.81	113.558	-1438.17	1594.59	185.285	-1339.52	1454.29	177.564	-1229.69	1206.85	175.349	-1475.13	1346.92	187.735	-1515.94	1164.83	130.41	-1231.51	1283.39	350.056	-1408.42	1387.45	425.708	-1322.96	1175.96	431.455	-1313.29	1096.57	465.058	-1347.43	975.116	427.136	-1429.69	881.427	476.219	-1378.59	870.793	474.016	-1443.84	805.664
329	0	237.373	-1585.85	1561.88	139.54	-1592.19	1562.31	242.707	-1421.32	1589.91	115.145	-1450.77	1592.05	186.4	-1351.97	1451.73	178.262	-1241.92	1204.39	176.21	-1487.56	1344.19	187.964	-1527.95	1162.01	131.165	-1243.77	1281.09	351.021	-1420.84	1384.49	426.605	-1334.51	1173.33	432.261	-1324.06	1094.17	466.76	-1356.03	972.531	429.761	-1436.88	877.254	478.756	-1385.4	867.79	476.981	-1449.47	801.497
330	0	239.455	-1598.08	1559	141.634	-1604.72	1559.71	244.338	-1433.52	1586.99	116.864	-1463.37	1589.5	187.642	-1364.48	1449.14	179.037	-1254.28	1201.87	177.175	-1500.07	1341.45	188.257	-1540.1	1159.17	132.024	-1256.13	1278.73	352.097	-1433.34	1381.46	427.584	-1346.24	1170.57	433.11	-1335	1091.66	468.461	-1364.79	969.89	432.34	-1444.15	873.02	481.273	-1392.36	864.75	479.873	-1455.18	797.241
331	0	241.659	-1610.35	1556.18	143.854	-1617.27	1557.17	246.11	-1445.75	1584.09	118.724	-1475.99	1586.97	189.014	-1377.05	1446.56	179.873	-1266.78	1199.31	178.257	-1512.68	1338.73	188.634	-1552.4	1156.37	132.974	-1268.61	1276.37	353.29	-1445.91	1378.4	428.637	-1358.12	1167.72	433.996	-1346.11	1089.08	470.152	-1373.73	967.22	434.871	-1451.54	868.765	483.757	-1399.49	861.702	482.694	-1460.99	792.934
332	0	243.99	-1622.65	1553.45	146.207	-1629.85	1554.73	248.028	-1458.02	1581.25	120.731	-1488.62	1584.51	190.514	-1389.7	1444.02	180.753	-1279.41	1196.77	179.467	-1525.39	1336.09	189.113	-1564.86	1153.63	134	-1281.22	1274.04	354.604	-1458.54	1375.35	429.753	-1370.13	1164.8	434.91	-1357.39	1086.45	471.825	-1382.84	964.553	437.351	-1459.07	864.533	486.196	-1406.8	858.678	485.446	-1466.95	788.618
333	0	246.455	-1634.99	1550.84	148.701	-1642.46	1552.43	250.098	-1470.33	1578.51	122.892	-1501.28	1582.17	192.139	-1402.42	1441.57	181.662	-1292.19	1194.28	180.814	-1538.21	1333.55	189.712	-1577.49	1151	135.088	-1293.96	1271.78	356.041	-1471.22	1372.35	430.922	-1382.27	1161.86	435.846	-1368.83	1083.81	473.469	-1392.14	961.922	439.777	-1466.76	860.372	488.576	-1414.32	855.714	488.127	-1473.07	784.343
334	0	249.055	-1647.38	1548.41	151.338	-1655.12	1550.31	252.321	-1482.69	1575.91	125.209	-1513.98	1579.98	193.884	-1415.22	1439.25	182.586	-1305.12	1191.9	182.302	-1551.13	1331.16	190.442	-1590.3	1148.52	136.223	-1306.84	1269.64	357.6	-1483.94	1369.43	432.13	-1394.5	1158.94	436.794	-1380.41	1081.2	475.076	-1401.62	959.361	442.146	-1474.66	856.331	490.884	-1422.06	852.843	490.736	-1479.39	780.161
335	0	251.793	-1659.82	1546.19	154.121	-1667.83	1548.4	254.696	-1495.09	1573.49	127.682	-1526.72	1577.99	195.742	-1428.11	1437.1	183.511	-1318.18	1189.68	183.934	-1564.18	1328.97	191.315	-1603.29	1146.25	137.39	-1319.86	1267.67	359.276	-1496.69	1366.64	433.364	-1406.8	1156.08	437.746	-1392.14	1078.66	476.637	-1411.29	956.906	444.455	-1482.77	852.46	493.108	-1430.03	850.104	493.266	-1485.95	776.13
336	0	254.665	-1672.32	1544.21	157.047	-1680.6	1546.75	257.219	-1507.56	1571.29	130.308	-1539.51	1576.23	197.705	-1441.09	1435.15	184.424	-1331.39	1187.64	185.707	-1577.33	1327.02	192.337	-1616.46	1144.21	138.576	-1333.03	1265.91	361.065	-1509.48	1364.02	434.611	-1419.17	1153.34	438.694	-1403.99	1076.23	478.145	-1421.16	954.592	446.701	-1491.14	848.809	495.235	-1438.26	847.533	495.71	-1492.79	772.307
337	0	257.666	-1684.88	1542.5	160.113	-1693.42	1545.38	259.881	-1520.09	1569.34	133.079	-1552.35	1574.74	199.76	-1454.15	1433.45	185.315	-1344.72	1185.85	187.616	-1590.59	1325.33	193.508	-1629.82	1142.46	139.769	-1346.33	1264.39	362.957	-1522.29	1361.61	435.858	-1431.57	1150.76	439.629	-1415.96	1073.95	479.593	-1431.23	952.455	448.88	-1499.78	845.425	497.256	-1446.76	845.164	498.057	-1499.93	768.75
338	0	260.788	-1697.5	1541.09	163.307	-1706.3	1544.32	262.672	-1532.69	1567.69	135.985	-1565.25	1573.55	201.896	-1467.3	1432.01	186.178	-1358.18	1184.34	189.652	-1603.96	1323.95	194.826	-1643.35	1141.03	140.957	-1359.77	1263.15	364.94	-1535.12	1359.44	437.093	-1444.01	1148.4	440.546	-1428.05	1071.87	480.974	-1441.5	950.526	450.987	-1508.73	842.356	499.158	-1455.55	843.033	500.294	-1507.41	765.511
339	0	264.017	-1710.18	1540	166.618	-1719.25	1543.59	265.575	-1545.34	1566.35	139.011	-1578.22	1572.69	204.098	-1480.52	1430.87	187.006	-1371.74	1183.13	191.8	-1617.42	1322.91	196.282	-1657.05	1139.95	142.133	-1373.33	1262.23	367	-1547.96	1357.56	438.307	-1456.46	1146.29	441.437	-1440.23	1070.02	482.284	-1451.97	948.836	453.018	-1518.01	839.641	500.934	-1464.64	841.168	502.409	-1515.26	762.639
340	0	267.336	-1722.92	1539.25	170.028	-1732.25	1543.21	268.574	-1558.07	1565.34	142.138	-1591.24	1572.18	206.351	-1493.82	1430.05	187.796	-1385.39	1182.27	194.043	-1630.96	1322.23	197.863	-1670.9	1139.26	143.287	-1386.99	1261.65	369.12	-1560.82	1355.98	439.49	-1468.92	1144.49	442.3	-1452.51	1068.43	483.519	-1462.66	947.411	454.967	-1527.64	837.316	502.575	-1474.06	839.595	504.386	-1523.52	760.175
341	0	270.727	-1735.71	1538.85	173.516	-1745.31	1543.17	271.646	-1570.84	1564.68	145.345	-1604.32	1572.03	208.638	-1507.18	1429.56	188.549	-1399.12	1181.76	196.361	-1644.58	1321.91	199.552	-1684.89	1138.96	144.416	-1400.75	1261.42	371.283	-1573.7	1354.73	440.636	-1481.38	1143.02	443.131	-1464.88	1067.14	484.677	-1473.57	946.271	456.828	-1537.65	835.411	504.077	-1483.83	838.335	506.214	-1532.22	758.152
342	0	274.164	-1748.55	1538.79	177.058	-1758.41	1543.5	274.766	-1583.67	1564.38	148.607	-1617.45	1572.25	210.942	-1520.59	1429.42	189.266	-1412.9	1181.63	198.731	-1658.24	1321.99	201.326	-1698.99	1139.06	145.515	-1414.57	1261.56	373.469	-1586.58	1353.84	441.74	-1493.84	1141.91	443.929	-1477.33	1066.16	485.757	-1484.7	945.435	458.597	-1548.05	833.947	505.437	-1493.95	837.402	507.88	-1541.38	756.589
343	0	277.621	-1761.43	1539.08	180.625	-1771.54	1544.17	277.908	-1596.54	1564.44	151.897	-1630.62	1572.82	213.244	-1534.04	1429.61	189.952	-1426.71	1181.87	201.127	-1671.94	1322.44	203.162	-1713.17	1139.57	146.584	-1428.43	1262.06	375.658	-1599.47	1353.31	442.8	-1506.3	1141.19	444.696	-1489.84	1065.52	486.762	-1496.06	944.91	460.268	-1558.85	832.938	506.655	-1504.44	836.806	509.374	-1551.04	755.5
344	0	281.07	-1774.33	1539.71	184.186	-1784.69	1545.18	281.042	-1609.43	1564.85	155.183	-1643.82	1573.75	215.527	-1547.51	1430.15	190.612	-1440.52	1182.48	203.522	-1685.66	1323.27	205.033	-1727.4	1140.48	147.623	-1442.31	1262.93	377.829	-1612.37	1353.14	443.813	-1518.77	1140.86	445.434	-1502.43	1065.22	487.693	-1507.65	944.702	461.837	-1570.08	832.387	507.732	-1515.33	836.547	510.691	-1561.21	754.881
345	0	284.479	-1787.24	1540.66	187.71	-1797.84	1546.52	284.139	-1622.34	1565.6	158.435	-1657.02	1575.02	217.774	-1560.98	1431.01	191.255	-1454.31	1183.45	205.89	-1699.36	1324.46	206.91	-1741.63	1141.77	148.634	-1456.17	1264.15	379.962	-1625.27	1353.35	444.782	-1531.25	1140.91	446.149	-1515.09	1065.27	488.556	-1519.49	944.809	463.299	-1581.74	832.292	508.674	-1526.62	836.62	511.828	-1571.93	754.722
346	0	287.816	-1800.15	1541.93	191.162	-1810.98	1548.15	287.169	-1635.25	1566.67	161.619	-1670.22	1576.6	219.969	-1574.43	1432.19	191.891	-1468.05	1184.77	208.201	-1713.03	1325.99	208.764	-1755.84	1143.4	149.621	-1470	1265.69	382.037	-1638.18	1353.9	445.708	-1543.74	1141.35	446.846	-1527.81	1065.65	489.357	-1531.59	945.221	464.651	-1593.84	832.64	509.487	-1538.33	837.016	512.784	-1583.2	755
347	0	291.048	-1813.04	1543.47	194.508	-1824.08	1550.05	290.099	-1648.13	1568.03	164.704	-1683.38	1578.46	222.095	-1587.85	1433.66	192.53	-1481.73	1186.4	210.429	-1726.65	1327.83	210.565	-1769.98	1145.35	150.59	-1483.75	1267.54	384.036	-1651.08	1354.8	446.597	-1556.27	1142.15	447.534	-1540.59	1066.36	490.103	-1543.94	945.926	465.891	-1606.38	833.411	510.182	-1550.46	837.716	513.565	-1595.05	755.684
348	0	294.144	-1825.9	1545.28	197.712	-1837.12	1552.2	292.903	-1660.97	1569.67	167.658	-1696.5	1580.57	224.139	-1601.21	1435.39	193.182	-1495.31	1188.33	212.549	-1740.2	1329.95	212.286	-1784.01	1147.57	151.547	-1497.41	1269.66	385.941	-1663.99	1356.02	447.455	-1568.83	1143.29	448.22	-1553.44	1067.37	490.802	-1556.55	946.905	467.017	-1619.36	834.58	510.769	-1563.03	838.699	514.177	-1607.49	756.738
349	0	297.071	-1838.7	1547.31	200.743	-1850.1	1554.55	295.551	-1673.76	1571.55	170.451	-1709.54	1582.89	226.089	-1614.51	1437.35	193.858	-1508.77	1190.5	214.537	-1753.66	1332.32	213.899	-1797.91	1150.02	152.496	-1510.95	1272.01	387.737	-1676.89	1357.53	448.288	-1581.44	1144.73	448.915	-1566.35	1068.66	491.464	-1569.44	948.135	468.028	-1632.77	836.115	511.26	-1576.04	839.939	514.631	-1620.52	758.121
350	0	299.803	-1851.44	1549.55	203.569	-1862.99	1557.08	298.021	-1686.48	1573.63	173.056	-1722.49	1585.39	227.932	-1627.72	1439.52	194.568	-1522.1	1192.89	216.372	-1767.01	1334.89	215.38	-1811.64	1152.66	153.446	-1524.34	1274.57	389.411	-1689.78	1359.31	449.104	-1594.11	1146.45	449.627	-1579.34	1070.2	492.098	-1582.6	949.59	468.925	-1646.6	837.981	511.67	-1589.48	841.41	514.94	-1634.13	759.789
351	0	302.312	-1864.1	1551.96	206.163	-1875.77	1559.75	300.29	-1699.12	1575.88	175.45	-1735.33	1588.02	229.661	-1640.82	1441.86	195.319	-1535.27	1195.47	218.037	-1780.23	1337.62	216.709	-1825.18	1155.43	154.401	-1537.57	1277.28	390.952	-1702.66	1361.32	449.912	-1606.86	1148.39	450.365	-1592.39	1071.96	492.712	-1596.04	951.243	469.709	-1660.85	840.141	512.011	-1603.37	843.081	515.117	-1648.33	761.703
352	0	304.577	-1876.67	1554.5	208.502	-1888.43	1562.53	302.341	-1711.66	1578.28	177.613	-1748.05	1590.75	231.267	-1653.81	1444.34	196.118	-1548.29	1198.17	219.518	-1793.32	1340.47	217.87	-1838.5	1158.3	155.365	-1550.62	1280.12	392.35	-1715.53	1363.53	450.718	-1619.69	1150.52	451.137	-1605.53	1073.9	493.317	-1609.76	953.065	470.384	-1675.5	842.557	512.299	-1617.7	844.924	515.179	-1663.11	763.823
353	0	306.582	-1889.14	1557.14	210.567	-1900.97	1565.37	304.161	-1724.1	1580.77	179.53	-1760.62	1593.54	232.747	-1666.68	1446.91	196.97	-1561.12	1200.98	220.807	-1806.25	1343.4	218.851	-1851.59	1161.23	156.343	-1563.49	1283.04	393.601	-1728.39	1365.9	451.531	-1632.62	1152.81	451.949	-1618.75	1076	493.92	-1623.77	955.028	470.952	-1690.54	845.19	512.545	-1632.45	846.91	515.14	-1678.43	766.115
354	0	308.312	-1901.51	1559.87	212.344	-1913.36	1568.25	305.741	-1736.42	1583.34	181.191	-1773.05	1596.34	234.096	-1679.42	1449.56	197.876	-1573.78	1203.86	221.897	-1819.04	1346.38	219.646	-1864.45	1164.17	157.335	-1576.15	1286	394.699	-1741.22	1368.41	452.355	-1645.66	1155.21	452.806	-1632.06	1078.21	494.528	-1638.06	957.103	471.419	-1705.94	848.006	512.764	-1647.63	849.013	515.016	-1694.28	768.552
355	0	309.759	-1913.76	1562.63	213.824	-1925.62	1571.14	307.078	-1748.63	1585.95	182.592	-1785.32	1599.14	235.313	-1692.01	1452.24	198.835	-1586.26	1206.75	222.789	-1831.66	1349.37	220.252	-1877.07	1167.09	158.343	-1588.61	1288.97	395.643	-1754.03	1371.01	453.197	-1658.82	1157.68	453.712	-1645.48	1080.51	495.147	-1652.64	959.265	471.79	-1721.69	850.969	512.968	-1663.22	851.209	514.819	-1710.64	771.109
356	0	310.923	-1925.91	1565.41	215.004	-1937.73	1574	308.172	-1760.72	1588.57	183.731	-1797.43	1601.89	236.399	-1704.46	1454.93	199.845	-1598.55	1209.65	223.486	-1844.13	1352.33	220.674	-1889.45	1169.97	159.365	-1600.87	1291.92	396.432	-1766.8	1373.68	454.059	-1672.11	1160.2	454.667	-1658.99	1082.85	495.784	-1667.49	961.488	472.072	-1737.76	854.048	513.166	-1679.2	853.476	514.563	-1727.46	773.768
357	0	311.803	-1937.94	1568.18	215.886	-1949.69	1576.81	309.028	-1772.69	1591.18	184.615	-1809.38	1604.58	237.354	-1716.76	1457.6	200.899	-1610.67	1212.5	223.995	-1856.43	1355.24	220.919	-1901.6	1172.79	160.398	-1612.93	1294.81	397.07	-1779.54	1376.38	454.943	-1685.53	1162.74	455.673	-1672.62	1085.22	496.441	-1682.61	963.748	472.27	-1754.14	857.216	513.368	-1695.57	855.794	514.258	-1744.71	776.516
358	0	312.408	-1949.86	1570.91	216.478	-1961.51	1579.54	309.652	-1784.54	1593.74	185.25	-1821.16	1607.17	238.182	-1728.92	1460.21	201.991	-1622.61	1215.28	224.326	-1868.57	1358.08	220.999	-1913.54	1175.52	161.437	-1624.8	1297.61	397.558	-1792.23	1379.08	455.85	-1699.08	1165.25	456.727	-1686.37	1087.58	497.122	-1698	966.025	472.394	-1770.8	860.446	513.583	-1712.3	858.148	513.912	-1762.36	779.34
359	0	312.749	-1961.68	1573.58	216.79	-1973.19	1582.18	310.058	-1796.28	1596.25	185.65	-1832.8	1609.64	238.886	-1740.94	1462.75	203.11	-1634.4	1217.96	224.493	-1880.55	1360.81	220.93	-1925.28	1178.15	162.476	-1636.49	1300.31	397.903	-1804.88	1381.77	456.78	-1712.76	1167.73	457.826	-1700.24	1089.9	497.827	-1713.64	968.297	472.45	-1787.71	863.716	513.817	-1729.37	860.521	513.535	-1780.37	782.232
360	0	312.84	-1973.39	1576.17	216.84	-1984.73	1584.69	310.258	-1807.91	1598.66	185.83	-1844.28	1611.98	239.473	-1752.81	1465.18	204.245	-1646.04	1220.53	224.51	-1892.39	1363.43	220.73	-1936.85	1180.66	163.508	-1648.02	1302.87	398.11	-1817.46	1384.4	457.729	-1726.57	1170.15	458.965	-1714.24	1092.17	498.558	-1729.53	970.548	472.446	-1804.86	867.004	514.076	-1746.77	862.901	513.133	-1798.71	785.182
361	0	312.701	-1985	1578.65	216.647	-1996.15	1587.07	310.269	-1819.44	1600.97	185.806	-1855.62	1614.17	239.946	-1764.55	1467.49	205.383	-1657.54	1222.95	224.394	-1904.07	1365.91	220.419	-1948.25	1183.05	164.524	-1659.39	1305.28	398.186	-1829.98	1386.97	458.694	-1740.5	1172.48	460.139	-1728.36	1094.36	499.312	-1745.65	972.76	472.39	-1822.23	870.293	514.362	-1764.46	865.276	512.711	-1817.35	788.182
362	0	312.35	-1996.52	1581	216.232	-2007.46	1589.29	310.108	-1830.86	1603.16	185.599	-1866.83	1616.2	240.313	-1776.16	1469.67	206.51	-1668.92	1225.21	224.162	-1915.63	1368.23	220.018	-1959.52	1185.3	165.514	-1670.62	1307.51	398.138	-1842.43	1389.43	459.672	-1754.55	1174.72	461.341	-1742.61	1096.45	500.089	-1761.99	974.917	472.29	-1839.79	873.564	514.677	-1782.44	867.633	512.275	-1836.25	791.219
363	0	311.811	-2007.95	1583.21	215.62	-2018.65	1591.35	309.792	-1842.19	1605.2	185.228	-1877.93	1618.05	240.577	-1787.65	1471.68	207.612	-1680.19	1227.29	223.831	-1927.06	1370.38	219.549	-1970.68	1187.4	166.468	-1681.73	1309.56	397.974	-1854.8	1391.78	460.655	-1768.69	1176.83	462.563	-1756.98	1098.41	500.883	-1778.53	977.005	472.154	-1857.51	876.803	515.023	-1800.66	869.963	511.831	-1855.39	794.284
364	0	311.106	-2019.3	1585.27	214.836	-2029.75	1593.23	309.339	-1853.42	1607.09	184.713	-1888.91	1619.72	240.746	-1799.03	1473.52	208.672	-1691.36	1229.19	223.419	-1938.37	1372.35	219.035	-1981.73	1189.34	167.374	-1692.74	1311.4	397.704	-1867.09	1393.99	461.637	-1782.92	1178.81	463.797	-1771.47	1100.24	501.691	-1795.24	979.012	471.99	-1875.39	879.995	515.397	-1819.11	872.255	511.387	-1874.75	797.362
365	0	310.26	-2030.57	1587.15	213.904	-2040.76	1594.93	308.767	-1864.58	1608.8	184.073	-1899.8	1621.19	240.824	-1810.31	1475.17	209.677	-1702.45	1230.87	222.94	-1949.59	1374.13	218.494	-1992.71	1191.11	168.223	-1703.66	1313.04	397.337	-1879.29	1396.04	462.61	-1797.22	1180.64	465.035	-1786.08	1101.92	502.508	-1812.12	980.926	471.803	-1893.39	883.127	515.798	-1837.75	874.499	510.948	-1894.3	800.44
366	0	309.294	-2041.78	1588.85	212.85	-2051.69	1596.43	308.092	-1875.66	1610.33	183.326	-1910.61	1622.45	240.816	-1821.5	1476.63	210.611	-1713.48	1232.35	222.409	-1960.72	1375.71	217.946	-2003.63	1192.69	169.003	-1714.52	1314.46	396.882	-1891.41	1397.93	463.563	-1811.57	1182.3	466.266	-1800.78	1103.43	503.326	-1829.14	982.735	471.6	-1911.49	886.187	516.22	-1856.57	876.687	510.522	-1914.02	803.504
367	0	308.229	-2052.92	1590.37	211.697	-2062.56	1597.73	307.329	-1886.66	1611.65	182.491	-1921.35	1623.52	240.726	-1832.61	1477.88	211.46	-1724.45	1233.61	221.84	-1971.77	1377.07	217.408	-2014.51	1194.08	169.702	-1725.31	1315.66	396.349	-1903.43	1399.62	464.486	-1825.96	1183.79	467.48	-1815.58	1104.76	504.139	-1846.28	984.431	471.386	-1929.68	889.164	516.659	-1875.52	878.81	510.116	-1933.9	806.541
368	0	307.086	-2064	1591.68	210.465	-2073.36	1598.82	306.494	-1897.6	1612.78	181.581	-1932.03	1624.37	240.557	-1843.65	1478.92	212.212	-1735.37	1234.65	221.243	-1982.76	1378.21	216.893	-2025.35	1195.25	170.312	-1736.07	1316.64	395.75	-1915.36	1401.12	465.368	-1840.36	1185.08	468.666	-1830.46	1105.91	504.938	-1863.5	986.007	471.164	-1947.94	892.05	517.107	-1894.58	880.86	509.735	-1953.91	809.54
369	0	305.881	-2075.04	1592.78	209.174	-2084.12	1599.71	305.596	-1908.49	1613.68	180.609	-1942.68	1625.01	240.313	-1854.64	1479.75	212.856	-1746.25	1235.47	220.626	-1993.71	1379.12	216.413	-2036.17	1196.19	170.823	-1746.81	1317.39	395.093	-1927.21	1402.42	466.196	-1854.77	1186.18	469.814	-1845.41	1106.86	505.713	-1880.8	987.455	470.936	-1966.24	894.837	517.557	-1913.73	882.832	509.384	-1974.03	812.49
370	0	304.63	-2086.02	1593.68	207.839	-2094.84	1600.39	304.647	-1919.33	1614.37	179.588	-1953.28	1625.43	239.995	-1865.58	1480.37	213.382	-1757.12	1236.07	219.997	-2004.62	1379.8	215.975	-2046.97	1196.9	171.225	-1757.54	1317.92	394.389	-1938.96	1403.5	466.956	-1869.15	1187.07	470.911	-1860.39	1107.62	506.456	-1898.14	988.773	470.704	-1984.56	897.518	517.999	-1932.92	884.719	509.065	-1994.25	815.383
371	0	303.343	-2096.98	1594.36	206.474	-2105.53	1600.87	303.654	-1930.12	1614.84	178.524	-1963.87	1625.65	239.604	-1876.5	1480.77	213.781	-1767.96	1236.45	219.36	-2015.5	1380.24	215.584	-2057.77	1197.37	171.512	-1768.26	1318.23	393.646	-1950.62	1404.36	467.637	-1883.49	1187.75	471.945	-1875.41	1108.19	507.157	-1915.5	989.956	470.468	-2002.88	900.091	518.426	-1952.12	886.519	508.776	-2014.52	818.216
372	0	302.031	-2107.9	1594.84	205.089	-2116.2	1601.13	302.624	-1940.88	1615.09	177.425	-1974.45	1625.65	239.139	-1887.39	1480.96	214.048	-1778.79	1236.62	218.715	-2026.38	1380.45	215.24	-2068.58	1197.6	171.678	-1779	1318.34	392.871	-1962.19	1405.02	468.225	-1897.77	1188.22	472.906	-1890.44	1108.56	507.805	-1932.85	991.005	470.224	-2021.19	902.553	518.826	-1971.32	888.228	508.515	-2034.82	820.983
373	0	300.698	-2118.8	1595.1	203.688	-2126.86	1601.19	301.558	-1951.62	1615.12	176.293	-1985.03	1625.45	238.6	-1898.28	1480.94	214.179	-1789.61	1236.59	218.063	-2037.26	1380.42	214.942	-2079.39	1197.57	171.717	-1789.75	1318.23	392.069	-1973.69	1405.46	468.707	-1911.98	1188.48	473.782	-1905.45	1108.75	508.392	-1950.17	991.92	469.971	-2039.46	904.902	519.189	-1990.46	889.845	508.274	-2055.11	823.683
374	0	299.348	-2129.68	1595.15	202.276	-2137.52	1601.04	300.459	-1962.34	1614.93	175.129	-1995.61	1625.04	237.985	-1909.16	1480.71	214.172	-1800.44	1236.36	217.401	-2048.14	1380.16	214.684	-2090.22	1197.3	171.627	-1800.53	1317.93	391.244	-1985.1	1405.69	469.074	-1926.1	1188.54	474.562	-1920.44	1108.75	508.907	-1967.43	992.702	469.704	-2057.67	907.139	519.506	-2009.53	891.37	508.047	-2075.36	826.316
375	0	297.981	-2140.56	1595	200.852	-2148.17	1600.7	299.324	-1973.05	1614.53	173.933	-2006.21	1624.44	237.29	-1920.05	1480.29	214.026	-1811.26	1235.93	216.723	-2059.04	1379.67	214.457	-2101.07	1196.79	171.405	-1811.34	1317.43	390.396	-1996.44	1405.71	469.315	-1940.11	1188.39	475.236	-1935.38	1108.57	509.342	-1984.6	993.356	469.419	-2075.8	909.266	519.764	-2028.49	892.803	507.825	-2095.53	828.883
376	0	296.593	-2151.43	1594.65	199.413	-2158.84	1600.16	298.15	-1983.76	1613.93	172.702	-2016.82	1623.65	236.514	-1930.95	1479.68	213.742	-1822.1	1235.33	216.023	-2069.96	1378.97	214.251	-2111.94	1196.04	171.05	-1822.18	1316.76	389.525	-2007.72	1405.55	469.423	-1954	1188.06	475.795	-1950.25	1108.23	509.688	-2001.67	993.885	469.109	-2093.82	911.284	519.955	-2047.31	894.145	507.598	-2115.58	831.385
377	0	295.181	-2162.3	1594.12	197.955	-2169.52	1599.45	296.931	-1994.47	1613.14	171.429	-2027.46	1622.68	235.652	-1941.87	1478.89	213.323	-1832.96	1234.55	215.292	-2080.9	1378.06	214.053	-2122.84	1195.08	170.562	-1833.06	1315.9	388.628	-2018.93	1405.2	469.392	-1967.76	1187.54	476.23	-1965.03	1107.72	509.938	-2018.6	994.294	468.77	-2111.72	913.197	520.066	-2065.97	895.397	507.358	-2135.48	833.825
378	0	293.737	-2173.17	1593.41	196.468	-2180.22	1598.55	295.66	-2005.19	1612.17	170.109	-2038.12	1621.54	234.7	-1952.81	1477.93	212.773	-1843.83	1233.61	214.523	-2091.88	1376.96	213.85	-2133.78	1193.92	169.945	-1843.98	1314.88	387.702	-2030.09	1404.68	469.219	-1981.38	1186.86	476.536	-1979.71	1107.08	510.083	-2035.37	994.589	468.393	-2129.48	915.007	520.088	-2084.43	896.561	507.098	-2155.19	836.206
379	0	292.252	-2184.06	1592.52	194.945	-2190.94	1597.49	294.327	-2015.93	1611.03	168.732	-2048.8	1620.24	233.653	-1963.78	1476.82	212.096	-1854.73	1232.5	213.704	-2102.88	1375.68	213.624	-2144.76	1192.57	169.199	-1854.95	1313.7	386.741	-2041.19	1404	468.901	-1994.85	1186.03	476.707	-1994.27	1106.3	510.118	-2051.96	994.776	467.971	-2147.06	916.717	520.012	-2102.67	897.637	506.812	-2174.68	838.53
380	0	290.715	-2194.96	1591.49	193.373	-2201.69	1596.28	292.923	-2026.69	1609.74	167.288	-2059.52	1618.79	232.507	-1974.77	1475.55	211.3	-1865.66	1231.25	212.825	-2113.92	1374.24	213.362	-2155.78	1191.06	168.329	-1865.95	1312.37	385.74	-2052.26	1403.18	468.439	-2008.15	1185.06	476.739	-2008.68	1105.4	510.038	-2068.36	994.86	467.497	-2164.46	918.33	519.829	-2120.67	898.627	506.494	-2193.9	840.799
381	0	289.115	-2205.87	1590.31	191.741	-2212.46	1594.92	291.438	-2037.48	1608.33	165.766	-2070.26	1617.2	231.257	-1985.78	1474.14	210.39	-1876.63	1229.86	211.875	-2125	1372.67	213.046	-2166.85	1189.41	167.341	-1877	1310.89	384.689	-2063.29	1402.23	467.834	-2021.29	1183.98	476.629	-2022.94	1104.39	509.837	-2084.53	994.849	466.964	-2181.64	919.847	519.53	-2138.4	899.532	506.138	-2212.84	843.015
382	0	287.439	-2216.81	1589.02	190.036	-2223.26	1593.44	289.859	-2048.29	1606.79	164.156	-2081.04	1615.5	229.9	-1996.83	1472.61	209.374	-1887.64	1228.34	210.845	-2136.11	1370.97	212.661	-2177.98	1187.64	166.238	-1888.1	1309.27	383.582	-2074.29	1401.16	467.088	-2034.27	1182.79	476.375	-2037.03	1103.29	509.51	-2100.47	994.749	466.362	-2198.59	921.272	519.107	-2155.84	900.352	505.742	-2231.46	845.177
383	0	285.677	-2227.76	1587.61	188.245	-2234.1	1591.84	288.175	-2059.14	1605.17	162.445	-2091.84	1613.69	228.432	-2007.89	1470.98	208.259	-1898.69	1226.69	209.723	-2147.25	1369.17	212.192	-2189.17	1185.78	165.028	-1899.23	1307.53	382.407	-2085.27	1400.01	466.207	-2047.08	1181.51	475.977	-2050.93	1102.11	509.056	-2116.15	994.567	465.686	-2215.28	922.603	518.554	-2172.97	901.089	505.297	-2249.73	847.281
384	0	283.815	-2238.73	1586.12	186.357	-2244.96	1590.14	286.376	-2070.01	1603.47	160.623	-2102.67	1611.8	226.849	-2018.98	1469.24	207.056	-1909.81	1224.93	208.5	-2158.43	1367.3	211.624	-2200.42	1183.86	163.717	-1910.41	1305.67	381.155	-2096.25	1398.77	465.193	-2059.73	1180.17	475.436	-2064.64	1100.87	508.47	-2131.56	994.309	464.926	-2231.69	923.842	517.865	-2189.76	901.743	504.795	-2267.63	849.322
385	0	281.843	-2249.73	1584.57	184.358	-2255.84	1588.37	284.45	-2080.92	1601.72	158.678	-2113.53	1609.83	225.15	-2030.09	1467.43	205.77	-1920.98	1223.07	207.167	-2169.65	1365.37	210.947	-2211.74	1181.91	162.313	-1921.64	1303.7	379.814	-2107.23	1397.48	464.053	-2072.21	1178.78	474.754	-2078.15	1099.58	507.752	-2146.69	993.984	464.076	-2247.8	924.988	517.036	-2206.21	902.314	504.222	-2285.12	851.287
386	0	279.751	-2260.74	1582.97	182.24	-2266.76	1586.54	282.387	-2091.86	1599.94	156.6	-2124.41	1607.82	223.332	-2041.21	1465.56	204.413	-1932.23	1221.11	205.716	-2180.89	1363.42	210.147	-2223.13	1179.94	160.824	-1932.91	1301.64	378.374	-2118.22	1396.14	462.791	-2084.54	1177.36	473.933	-2091.45	1098.27	506.898	-2161.52	993.598	463.128	-2263.6	926.039	516.063	-2222.29	902.801	503.56	-2302.18	853.161
387	0	277.53	-2271.78	1581.36	179.991	-2277.7	1584.67	280.18	-2102.83	1598.15	154.382	-2135.31	1605.78	221.395	-2052.34	1463.64	202.991	-1943.55	1219.07	204.14	-2192.17	1361.46	209.216	-2234.6	1177.98	159.257	-1944.22	1299.49	376.825	-2129.24	1394.78	461.414	-2096.72	1175.93	472.977	-2104.53	1096.93	505.91	-2176.04	993.161	462.078	-2279.06	926.991	514.943	-2238	903.204	502.788	-2318.79	854.922
388	0	275.173	-2282.83	1579.75	177.605	-2288.67	1582.8	277.82	-2113.82	1596.38	152.016	-2146.24	1603.73	219.339	-2063.48	1461.7	201.514	-1954.96	1216.97	202.435	-2203.48	1359.52	208.145	-2246.15	1176.07	157.62	-1955.58	1297.26	375.157	-2140.29	1393.42	459.927	-2108.76	1174.5	471.886	-2117.39	1095.61	504.786	-2190.25	992.679	460.919	-2294.17	927.843	513.676	-2253.3	903.522	501.886	-2334.93	856.549
389	0	272.676	-2293.91	1578.17	175.076	-2299.66	1580.93	275.304	-2124.84	1594.64	149.497	-2157.19	1601.69	217.164	-2074.64	1459.75	199.99	-1966.45	1214.81	200.594	-2214.82	1357.61	206.929	-2257.8	1174.23	155.921	-1966.98	1294.98	373.364	-2151.38	1392.07	458.335	-2120.67	1173.11	470.667	-2130.04	1094.3	503.526	-2204.13	992.163	459.647	-2308.91	928.589	512.262	-2268.19	903.756	500.831	-2350.58	858.016
390	0	270.035	-2305	1576.64	172.401	-2310.68	1579.11	272.627	-2135.89	1592.97	146.823	-2168.16	1599.69	214.874	-2085.79	1457.82	198.427	-1978.03	1212.62	198.616	-2226.19	1355.78	205.562	-2269.54	1172.47	154.168	-1978.43	1292.66	371.441	-2162.53	1390.75	456.645	-2132.45	1171.77	469.319	-2142.46	1093.04	502.131	-2217.68	991.621	458.257	-2323.26	929.223	510.702	-2282.67	903.904	499.601	-2365.72	859.296
391	0	267.252	-2316.11	1575.19	169.578	-2321.71	1577.34	269.789	-2146.95	1591.38	143.992	-2179.16	1597.76	212.471	-2096.95	1455.92	196.832	-1989.71	1210.41	196.5	-2237.59	1354.03	204.043	-2281.38	1170.83	152.368	-1989.93	1290.31	369.385	-2173.73	1389.5	454.862	-2144.12	1170.51	467.848	-2154.66	1091.84	500.603	-2230.88	991.064	456.747	-2337.21	929.741	508.999	-2296.7	903.966	498.177	-2380.34	860.363
392	0	264.328	-2327.23	1573.84	166.608	-2332.78	1575.67	266.792	-2158.03	1589.9	141.007	-2190.18	1595.9	209.958	-2108.1	1454.08	195.213	-2001.49	1208.21	194.247	-2249.01	1352.39	202.37	-2293.34	1169.34	150.529	-2001.47	1287.96	367.196	-2184.99	1388.32	452.989	-2155.68	1169.33	466.253	-2166.65	1090.72	498.942	-2243.75	990.501	455.114	-2350.75	930.138	507.156	-2310.29	903.942	496.537	-2394.42	861.19
393	0	261.269	-2338.37	1572.61	163.497	-2343.86	1574.11	263.638	-2169.13	1588.55	137.873	-2201.22	1594.16	207.341	-2119.25	1452.32	193.574	-2013.36	1206.04	191.859	-2260.46	1350.88	200.546	-2305.4	1168	148.655	-2013.07	1285.63	364.875	-2196.32	1387.23	451.032	-2167.14	1168.27	464.536	-2178.43	1089.7	497.151	-2256.27	989.944	453.357	-2363.85	930.406	505.177	-2323.42	903.834	494.666	-2407.97	861.754
394	0	258.083	-2349.53	1571.53	160.25	-2354.97	1572.68	260.335	-2180.24	1587.35	134.596	-2212.29	1592.54	204.627	-2130.4	1450.66	191.922	-2025.33	1203.92	189.342	-2271.94	1349.52	198.574	-2317.58	1166.85	146.754	-2024.71	1283.34	362.43	-2207.72	1386.27	448.993	-2178.51	1167.35	462.699	-2190.02	1088.79	495.231	-2268.45	989.405	451.476	-2376.53	930.544	503.067	-2336.08	903.643	492.551	-2420.96	862.035
395	0	254.779	-2360.71	1570.61	156.877	-2366.1	1571.41	256.891	-2191.36	1586.32	131.187	-2223.39	1591.08	201.821	-2141.54	1449.12	190.262	-2037.38	1201.87	186.704	-2283.44	1348.32	196.461	-2329.86	1165.91	144.83	-2036.39	1281.11	359.866	-2219.18	1385.45	446.875	-2189.79	1166.59	460.741	-2201.41	1088.02	493.187	-2280.28	988.895	449.472	-2388.75	930.549	500.832	-2348.26	903.375	490.184	-2433.38	862.018
396	0	251.37	-2371.91	1569.87	153.389	-2377.26	1570.32	253.318	-2202.49	1585.47	127.658	-2234.52	1589.79	198.933	-2152.67	1447.72	188.599	-2049.52	1199.93	183.954	-2294.97	1347.32	194.217	-2342.24	1165.18	142.889	-2048.12	1278.97	357.195	-2230.7	1384.79	444.682	-2201	1166.01	458.663	-2212.62	1087.41	491.021	-2291.77	988.427	447.346	-2400.52	930.42	498.479	-2359.97	903.035	487.564	-2445.24	861.693
397	0	247.87	-2383.13	1569.33	149.8	-2388.45	1569.43	249.63	-2213.64	1584.83	124.023	-2245.69	1588.69	195.972	-2163.79	1446.49	186.935	-2061.74	1198.12	181.104	-2306.51	1346.51	191.855	-2354.72	1164.7	140.936	-2059.9	1276.95	354.428	-2242.29	1384.31	442.415	-2212.13	1165.62	456.466	-2223.65	1086.97	488.737	-2302.92	988.015	445.102	-2411.83	930.16	496.016	-2371.18	902.633	484.698	-2456.51	861.062
398	0	244.294	-2394.36	1568.99	146.126	-2399.66	1568.75	245.842	-2224.8	1584.41	120.299	-2256.89	1587.8	192.95	-2174.9	1445.44	185.276	-2074.02	1196.46	178.171	-2318.06	1345.91	189.39	-2367.28	1164.47	138.974	-2071.7	1275.07	351.581	-2253.93	1384.04	440.079	-2223.21	1165.44	454.151	-2234.53	1086.72	486.342	-2313.74	987.672	442.745	-2422.67	929.775	493.45	-2381.9	902.179	481.6	-2467.19	860.132
399	0	240.66	-2405.62	1568.86	142.382	-2410.9	1568.28	241.973	-2235.97	1584.22	116.505	-2268.13	1587.14	189.877	-2186	1444.58	183.625	-2086.35	1194.98	175.169	-2329.63	1345.54	186.841	-2379.89	1164.49	137.01	-2083.54	1273.35	348.669	-2265.61	1383.97	437.677	-2234.22	1165.5	451.721	-2245.25	1086.67	483.842	-2324.23	987.41	440.281	-2433.06	929.273	490.792	-2392.14	901.686	478.296	-2477.27	858.925
400	0	236.985	-2416.9	1568.96	138.588	-2422.17	1568.04	238.042	-2247.16	1584.27	112.66	-2279.41	1586.7	186.768	-2197.08	1443.93	181.984	-2098.71	1193.71	172.119	-2341.2	1345.4	184.228	-2392.54	1164.78	135.047	-2095.4	1271.81	345.712	-2277.34	1384.14	435.212	-2245.19	1165.79	449.182	-2255.83	1086.83	481.245	-2334.4	987.243	437.718	-2442.98	928.667	488.051	-2401.89	901.171	474.822	-2486.75	857.47
401	0	233.285	-2428.2	1569.27	134.763	-2433.46	1568.03	234.071	-2258.37	1584.55	108.787	-2290.72	1586.49	183.637	-2208.16	1443.5	180.357	-2111.1	1192.65	169.04	-2352.77	1345.48	181.576	-2405.2	1165.33	133.09	-2107.27	1270.48	342.727	-2289.09	1384.54	432.69	-2256.1	1166.33	446.54	-2266.28	1087.22	478.561	-2344.25	987.183	435.066	-2452.46	927.971	485.242	-2411.17	900.651	471.224	-2495.62	855.809
402	0	229.58	-2439.52	1569.79	130.927	-2444.77	1568.25	230.081	-2269.59	1585.08	104.908	-2302.07	1586.52	180.497	-2219.21	1443.3	178.747	-2123.48	1191.84	165.954	-2364.33	1345.8	178.91	-2417.84	1166.13	131.143	-2119.14	1269.38	339.736	-2300.86	1385.19	430.119	-2266.96	1167.12	443.807	-2276.6	1087.84	475.8	-2353.81	987.239	432.334	-2461.51	927.202	482.376	-2419.98	900.144	467.556	-2503.89	853.993
403	0	225.886	-2450.85	1570.52	127.099	-2456.1	1568.68	226.096	-2280.82	1585.84	101.044	-2313.45	1586.78	177.366	-2230.25	1443.33	177.154	-2135.85	1191.28	162.882	-2375.88	1346.35	176.255	-2430.43	1167.18	129.212	-2131.01	1268.51	336.759	-2312.64	1386.08	427.506	-2277.78	1168.16	440.994	-2286.81	1088.68	472.976	-2363.09	987.421	429.535	-2470.14	926.378	479.47	-2428.36	899.669	463.881	-2511.57	852.083
404	0	222.221	-2462.2	1571.44	123.302	-2467.44	1569.31	222.139	-2292.06	1586.82	97.2182	-2324.85	1587.27	174.258	-2241.28	1443.58	175.58	-2148.18	1190.99	159.848	-2387.41	1347.11	173.64	-2442.95	1168.44	127.298	-2142.86	1267.9	333.816	-2324.42	1387.21	424.864	-2288.56	1169.44	438.119	-2296.9	1089.75	470.104	-2372.1	987.733	426.682	-2478.38	925.517	476.539	-2436.32	899.245	460.264	-2518.69	850.143
405	0	218.602	-2473.56	1572.53	119.555	-2478.78	1570.14	218.233	-2303.32	1588.01	93.4528	-2336.27	1587.97	171.19	-2252.29	1444.05	174.025	-2160.45	1190.95	156.872	-2398.91	1348.07	171.09	-2455.37	1169.91	125.405	-2154.68	1267.53	330.929	-2336.19	1388.56	422.206	-2299.29	1170.94	435.201	-2306.89	1091.04	467.2	-2380.85	988.179	423.789	-2486.26	924.638	473.601	-2443.91	898.888	456.769	-2525.27	848.237
406	0	215.044	-2484.92	1573.79	115.88	-2490.12	1571.15	214.4	-2314.58	1589.4	89.7684	-2347.69	1588.85	168.176	-2263.28	1444.74	172.488	-2172.66	1191.18	153.977	-2410.37	1349.22	168.632	-2467.66	1171.54	123.537	-2166.47	1267.42	328.117	-2347.93	1390.13	419.55	-2309.97	1172.66	432.26	-2316.78	1092.54	464.282	-2389.37	988.758	420.87	-2493.81	923.76	470.674	-2451.14	898.612	453.448	-2531.36	846.424
407	0	211.564	-2496.29	1575.2	112.299	-2501.46	1572.31	210.662	-2325.84	1590.96	86.1847	-2359.12	1589.92	165.23	-2274.26	1445.63	170.968	-2184.78	1191.65	151.181	-2421.79	1350.53	166.29	-2479.8	1173.31	121.693	-2178.2	1267.56	325.399	-2359.63	1391.9	416.914	-2320.59	1174.55	429.32	-2326.58	1094.23	461.369	-2397.68	989.467	417.942	-2501.06	922.897	467.777	-2458.06	898.43	450.34	-2537.02	844.753
408	0	208.177	-2507.64	1576.72	108.833	-2512.78	1573.6	207.04	-2337.09	1592.66	82.7193	-2370.53	1591.14	162.367	-2285.22	1446.7	169.462	-2196.8	1192.37	148.502	-2433.17	1351.99	164.086	-2491.78	1175.18	119.876	-2189.87	1267.94	322.793	-2371.29	1393.84	414.321	-2331.16	1176.61	426.406	-2336.28	1096.08	458.48	-2405.8	990.299	415.022	-2508.06	922.065	464.929	-2464.71	898.351	447.462	-2542.3	843.255
409	0	204.899	-2518.99	1578.34	105.501	-2524.08	1574.99	203.55	-2348.34	1594.48	79.3881	-2381.91	1592.48	159.6	-2296.16	1447.94	167.967	-2208.7	1193.31	145.956	-2444.48	1353.57	162.039	-2503.59	1177.13	118.086	-2201.47	1268.56	320.315	-2382.89	1395.92	411.792	-2341.66	1178.79	423.54	-2345.89	1098.07	455.636	-2413.74	991.246	412.129	-2514.86	921.277	462.148	-2471.13	898.38	444.811	-2547.26	841.946
410	0	201.742	-2530.32	1580.04	102.324	-2535.35	1576.47	200.211	-2359.58	1596.4	76.2043	-2393.27	1593.94	156.939	-2307.1	1449.32	166.482	-2220.48	1194.46	143.556	-2455.74	1355.24	160.164	-2515.23	1179.11	116.324	-2213	1269.38	317.976	-2394.41	1398.12	409.352	-2352.08	1181.07	420.747	-2355.41	1100.18	452.856	-2421.54	992.294	409.283	-2521.48	920.543	459.452	-2477.37	898.518	442.359	-2551.97	840.822
411	0	198.722	-2541.63	1581.8	99.3188	-2546.59	1578.02	197.036	-2370.8	1598.38	73.1787	-2404.59	1595.47	154.396	-2318.02	1450.83	165.003	-2232.13	1195.78	141.311	-2466.93	1356.98	158.471	-2526.69	1181.1	114.589	-2224.44	1270.4	315.786	-2405.85	1400.4	407.02	-2362.42	1183.41	418.048	-2364.83	1102.37	450.159	-2429.21	993.43	406.505	-2527.99	919.872	456.857	-2483.46	898.763	440.069	-2556.51	839.866
412	0	195.852	-2552.9	1583.59	96.5029	-2557.8	1579.6	194.036	-2382	1600.4	70.3196	-2415.87	1597.07	151.978	-2328.93	1452.44	163.527	-2243.63	1197.26	139.228	-2478.05	1358.77	156.969	-2537.99	1183.07	112.881	-2235.8	1271.58	313.749	-2417.19	1402.73	404.815	-2372.66	1185.79	415.464	-2374.16	1104.61	447.564	-2436.77	994.638	403.814	-2534.43	919.268	454.379	-2489.45	899.112	437.898	-2560.94	839.051
413	0	193.144	-2564.15	1585.39	93.8908	-2568.96	1581.19	191.222	-2393.17	1602.43	67.6326	-2427.1	1598.7	149.694	-2339.84	1454.13	162.054	-2254.99	1198.87	137.311	-2489.09	1360.57	155.657	-2549.13	1185	111.202	-2247.06	1272.92	311.866	-2428.43	1405.07	402.751	-2382.79	1188.16	413.01	-2383.4	1106.88	445.085	-2444.23	995.902	401.232	-2540.83	918.737	452.032	-2495.36	899.556	435.808	-2565.33	838.349
414	0	190.612	-2575.35	1587.19	91.4946	-2580.09	1582.78	188.599	-2404.31	1604.46	65.121	-2438.28	1600.35	147.549	-2350.73	1455.88	160.581	-2266.2	1200.57	135.56	-2500.06	1362.37	154.535	-2560.12	1186.87	109.551	-2258.23	1274.39	310.136	-2439.53	1407.4	400.838	-2392.81	1190.51	410.701	-2392.53	1109.14	442.739	-2451.62	997.203	398.775	-2547.23	918.279	449.827	-2501.24	900.086	433.771	-2569.74	837.733
415	0	188.265	-2586.52	1588.97	89.3239	-2591.17	1584.34	186.173	-2415.43	1606.45	62.7854	-2449.41	1602	145.548	-2361.62	1457.66	159.108	-2277.26	1202.35	133.973	-2510.95	1364.14	153.596	-2570.98	1188.66	107.928	-2269.31	1275.95	308.551	-2450.51	1409.68	399.081	-2402.68	1192.8	408.547	-2401.57	1111.37	440.538	-2458.96	998.527	396.463	-2553.66	917.895	447.773	-2507.1	900.69	431.772	-2574.21	837.182
416	0	186.115	-2597.64	1590.71	87.3853	-2602.22	1585.86	183.946	-2426.51	1608.39	60.6249	-2460.49	1603.63	143.693	-2372.49	1459.46	157.636	-2288.17	1204.18	132.546	-2521.75	1365.88	152.831	-2581.73	1190.37	106.335	-2280.29	1277.59	307.104	-2461.33	1411.9	397.48	-2412.42	1195.01	406.553	-2410.5	1113.55	438.491	-2466.24	999.857	394.31	-2560.15	917.583	445.879	-2512.97	901.357	429.804	-2578.78	836.679
417	0	184.171	-2608.72	1592.39	85.6826	-2613.22	1587.32	181.918	-2437.56	1610.26	58.6365	-2471.52	1605.23	141.986	-2383.36	1461.25	156.165	-2298.94	1206.03	131.274	-2532.48	1367.55	152.227	-2592.37	1191.99	104.772	-2291.17	1279.27	305.787	-2472	1414.01	396.029	-2422	1197.12	404.724	-2419.33	1115.65	436.608	-2473.48	1001.18	392.328	-2566.72	917.341	444.149	-2518.87	902.074	427.87	-2583.47	836.208
418	0	182.438	-2619.75	1594.02	84.2164	-2624.19	1588.71	180.088	-2448.58	1612.05	56.8163	-2482.5	1606.78	140.428	-2394.21	1463.01	154.697	-2309.57	1207.88	130.149	-2543.12	1369.16	151.77	-2602.93	1193.51	103.242	-2301.96	1280.98	304.59	-2482.51	1416.01	394.721	-2431.42	1199.12	403.059	-2428.05	1117.67	434.894	-2480.7	1002.48	390.529	-2573.38	917.166	442.588	-2524.81	902.828	425.977	-2588.29	835.759
419	0	180.922	-2630.74	1595.58	82.985	-2635.12	1590.01	178.455	-2459.56	1613.74	55.1595	-2493.44	1608.27	139.016	-2405.04	1464.74	153.234	-2320.07	1209.69	129.164	-2553.69	1370.69	151.445	-2613.41	1194.93	101.746	-2312.67	1282.69	303.504	-2492.86	1417.88	393.544	-2440.66	1201	401.557	-2436.66	1119.57	433.352	-2487.89	1003.75	388.921	-2580.14	917.052	441.197	-2530.81	903.608	424.136	-2593.26	835.323
420	0	179.624	-2641.68	1597.06	81.9847	-2646.01	1591.22	177.014	-2470.52	1615.32	53.6611	-2504.35	1609.69	137.75	-2415.86	1466.41	151.78	-2330.45	1211.46	128.31	-2564.17	1372.13	151.235	-2623.82	1196.25	100.287	-2323.29	1284.39	302.52	-2503.06	1419.6	392.487	-2449.73	1202.73	400.214	-2445.16	1121.37	431.986	-2495.07	1004.97	387.509	-2587.01	916.996	439.977	-2536.88	904.401	422.356	-2598.38	834.89
421	0	178.543	-2652.57	1598.46	81.2102	-2656.88	1592.33	175.762	-2481.45	1616.79	52.3163	-2515.22	1611.04	136.628	-2426.66	1468	150.337	-2340.71	1213.17	127.579	-2574.58	1373.48	151.126	-2634.17	1197.48	98.866	-2333.82	1286.04	301.63	-2513.1	1421.15	391.536	-2458.61	1204.33	399.025	-2453.56	1123.03	430.796	-2502.24	1006.15	386.299	-2594	916.992	438.927	-2543.01	905.197	420.648	-2603.64	834.455
422	0	177.674	-2663.42	1599.77	80.656	-2667.71	1593.33	174.696	-2492.35	1618.13	51.1204	-2526.06	1612.3	135.647	-2437.43	1469.52	148.909	-2350.86	1214.79	126.964	-2584.92	1374.72	151.103	-2644.48	1198.61	97.487	-2344.27	1287.64	300.825	-2522.98	1422.53	390.679	-2467.31	1205.78	397.984	-2461.85	1124.57	429.782	-2509.4	1007.26	385.292	-2601.09	917.036	438.045	-2549.21	905.986	419.023	-2609.04	834.01
423	0	177.01	-2674.2	1601.01	80.3163	-2678.51	1594.22	173.81	-2503.23	1619.34	50.0695	-2536.87	1613.47	134.805	-2448.18	1470.94	147.5	-2360.9	1216.31	126.457	-2595.19	1375.85	151.152	-2654.73	1199.64	96.1524	-2354.64	1289.16	300.1	-2532.73	1423.74	389.903	-2475.83	1207.08	397.086	-2470.04	1125.98	428.941	-2516.55	1008.31	384.493	-2608.31	917.124	437.33	-2555.49	906.76	417.489	-2614.56	833.55
424	0	176.544	-2684.94	1602.16	80.1859	-2689.29	1595	173.101	-2514.08	1620.41	49.1605	-2547.66	1614.54	134.097	-2458.9	1472.26	146.113	-2370.84	1217.73	126.052	-2605.39	1376.87	151.263	-2664.94	1200.57	94.8647	-2364.94	1290.6	299.452	-2542.33	1424.76	389.2	-2484.17	1208.23	396.326	-2478.12	1127.24	428.274	-2523.71	1009.29	383.903	-2615.64	917.255	436.778	-2561.85	907.51	416.055	-2620.21	833.07
425	0	176.266	-2695.62	1603.23	80.2606	-2700.05	1595.66	172.567	-2524.91	1621.35	48.3909	-2558.43	1615.51	133.522	-2469.59	1473.48	144.75	-2380.69	1219.04	125.745	-2615.53	1377.78	151.427	-2675.11	1201.41	93.626	-2375.17	1291.95	298.877	-2551.81	1425.6	388.562	-2492.33	1209.23	395.699	-2486.1	1128.37	427.777	-2530.86	1010.2	383.524	-2623.08	917.424	436.389	-2568.29	908.231	414.729	-2625.98	832.568
426	0	176.17	-2706.23	1604.22	80.5372	-2710.78	1596.2	172.204	-2535.71	1622.15	47.7588	-2569.18	1616.37	133.078	-2480.24	1474.59	143.415	-2390.45	1220.22	125.53	-2625.6	1378.57	151.637	-2685.24	1202.16	92.4383	-2385.32	1293.19	298.374	-2561.16	1426.25	387.982	-2500.33	1210.08	395.202	-2493.98	1129.36	427.449	-2538.02	1011.03	383.357	-2630.63	917.632	436.159	-2574.8	908.918	413.517	-2631.86	832.04
427	0	176.251	-2716.79	1605.12	81.0135	-2721.48	1596.62	172.009	-2546.49	1622.81	47.263	-2579.91	1617.13	132.762	-2490.87	1475.58	142.108	-2400.13	1221.28	125.405	-2635.61	1379.24	151.888	-2695.33	1202.8	91.3029	-2395.41	1294.34	297.942	-2570.39	1426.71	387.457	-2508.15	1210.78	394.831	-2501.77	1130.2	427.29	-2545.18	1011.78	383.403	-2638.29	917.875	436.087	-2581.4	909.568	412.425	-2637.85	831.486
428	0	176.504	-2727.29	1605.95	81.6882	-2732.16	1596.92	171.983	-2557.24	1623.32	46.9027	-2590.62	1617.77	132.574	-2501.45	1476.45	140.831	-2409.72	1222.21	125.369	-2645.55	1379.8	152.178	-2705.37	1203.35	90.2208	-2405.43	1295.37	297.58	-2579.5	1426.98	386.984	-2515.8	1211.32	394.586	-2509.45	1130.9	427.297	-2552.35	1012.46	383.662	-2646.07	918.154	436.172	-2588.08	910.178	411.458	-2643.96	830.906
429	0	176.928	-2737.72	1606.7	82.5605	-2742.82	1597.11	172.123	-2567.97	1623.69	46.6774	-2601.31	1618.31	132.513	-2512	1477.21	139.586	-2419.22	1223.01	125.42	-2655.44	1380.24	152.505	-2715.38	1203.8	89.1926	-2415.38	1296.29	297.288	-2588.5	1427.06	386.561	-2523.29	1211.72	394.465	-2517.05	1131.47	427.47	-2559.52	1013.05	384.134	-2653.95	918.468	436.413	-2594.84	910.748	410.618	-2650.17	830.3
430	0	177.52	-2748.1	1607.37	83.6303	-2753.45	1597.17	172.429	-2578.68	1623.92	46.587	-2611.99	1618.74	132.578	-2522.52	1477.86	138.372	-2428.65	1223.68	125.556	-2665.27	1380.55	152.868	-2725.35	1204.15	88.2184	-2425.26	1297.1	297.066	-2597.39	1426.96	386.188	-2530.61	1211.96	394.467	-2524.54	1131.89	427.809	-2566.69	1013.57	384.819	-2661.94	918.816	436.81	-2601.68	911.275	409.907	-2656.49	829.668
431	0	178.281	-2758.41	1607.96				172.902	-2589.36	1624	46.6314	-2622.65	1619.05	132.77	-2533	1478.38	137.19	-2437.99	1224.22	125.779	-2675.03	1380.75	153.267	-2735.28	1204.4	87.2985	-2435.07	1297.8	296.914	-2606.16	1426.66	385.865	-2537.77	1212.05	394.593	-2531.95	1132.17	428.314	-2573.87	1014	385.717	-2670.04	919.198	437.362	-2608.6	911.761	409.326	-2662.92	829.011
[truncated: 69 more columns]

## Sheet: Sheet2
Devices
		025370 - Force			025370 - Moment			025370 - CoP			027571 - Force			027571 - Moment			027571 - CoP			037720 - Force			037720 - Moment			037720 - CoP
Frame	Sub Frame	Fx	Fy	Fz	Mx	My	Mz	Cx	Cy	Cz	Fx	Fy	Fz	Mx	My	Mz	Cx	Cy	Cz	Fx	Fy	Fz	Mx	My	Mz	Cx	Cy	Cz
		N	N	N	N.mm	N.mm	N.mm	mm	mm	mm	N	N	N	N.mm	N.mm	N.mm	mm	mm	mm	N	N	N	N.mm	N.mm	N.mm	mm	mm	mm
1	0	0	0	0	0	0	0	200	300	0	0	0	0	0	0	0	200	903	0	0	0	0	0	0	0	603	903	0
1	1	0	0	0	0	0	0	200	300	0	0	0	0	0	0	0	200	903	0	0	0	0	0	0	0	603	903	0
1	2	0	0	0	0	0	0	200	300	0	0	0	0	0	0	0	200	903	0	0	0	0	0	0	0	603	903	0
1	3	0	0	0	0	0	0	200	300	0	0	0	0	0	0	0	200	903	0	0	0	0	0	0	0	603	903	0
1	4	0	0	0	0	0	0	200	300	0	0	0	0	0	0	0	200	903	0	0	0	0	0	0	0	603	903	0
1	5	0	0	0	0	0	0	200	300	0	0	0	0	0	0	0	200	903	0	0	0	0	0	0	0	603	903	0
1	6	0	0	0	0	0	0	200	300	0	0	0	0	0	0	0	200	903	0	0	0	0	0	0	0	603	903	0
1	7	0	0	0	0	0	0	200	300	0	0	0	0	0	0	0	200	903	0	0	0	0	0	0	0	603	903	0
1	8	0	0	0	0	0	0	200	300	0	0	0	0	0	0	0	200	903	0	0	0	0	0	0	0	603	903	0
1	9	0	0	0	0	0	0	200	300	0	0	0	0	0	0	0	200	903	0	0	0	0	0	0	0	603	903	0
2	0	0	0	0	0	0	0	200	300	0	0	0	0	0	0	0	200	903	0	0	0	0	0	0	0	603	903	0
2	1	0	0	0	0	0	0	200	300	0	0	0	0	0	0	0	200	903	0	0	0	0	0	0	0	603	903	0
2	2	0	0	0	0	0	0	200	300	0	0	0	0	0	0	0	200	903	0	0	0	0	0	0	0	603	903	0
2	3	0	0	0	0	0	0	200	300	0	0	0	0	0	0	0	200	903	0	0	0	0	0	0	0	603	903	0
2	4	0	0	0	0	0	0	200	300	0	0	0	0	0	0	0	200	903	0	0	0	0	0	0	0	603	903	0
2	5	0	0	0	0	0	0	200	300	0	0	0	0	0	0	0	200	903	0	0	0	0	0	0	0	603	903	0
2	6	0	0	0	0	0	0	200	300	0	0	0	0	0	0	0	200	903	0	0	0	0	0	0	0	603	903	0
2	7	0	0	0	0	0	0	200	300	0	0	0	0	0	0	0	200	903	0	0	0	0	0	0	0	603	903	0
2	8	0	0	0	0	0	0	200	300	0	0	0	0	0	0	0	200	903	0	0	0	0	0	0	0	603	903	0
2	9	0	0	0	0	0	0	200	300	0	0	0	0	0	0	0	200	903	0	0	0	0	0	0	0	603	903	0
3	0	0	0	0	0	0	0	200	300	0	0	0	0	0	0	0	200	903	0	0	0	0	0	0	0	603	903	0
3	1	0	0	0	0	0	0	200	300	0	0	0	0	0	0	0	200	903	0	0	0	0	0	0	0	603	903	0
3	2	0	0	0	0	0	0	200	300	0	0	0	0	0	0	0	200	903	0	0	0	0	0	0	0	603	903	0
3	3	0	0	0	0	0	0	200	300	0	0	0	0	0	0	0	200	903	0	0	0	0	0	0	0	603	903	0
3	4	0	0	0	0	0	0	200	300	0	0	0	0	0	0	0	200	903	0	0	0	0	0	0	0	603	903	0
3	5	0	0	0	0	0	0	200	300	0	0	0	0	0	0	0	200	903	0	0	0	0	0	0	0	603	903	0
3	6	0	0	0	0	0	0	200	300	0	0	0	0	0	0	0	200	903	0	0	0	0	0	0	0	603	903	0
3	7	0	0	0	0	0	0	200	300	0	0	0	0	0	0	0	200	903	0	0	0	0	0	0	0	603	903	0
3	8	0	0	0	0	0	0	200	300	0	0	0	0	0	0	0	200	903	0	0	0	0	0	0	0	603	903	0
3	9	0	0	0	0	0	0	200	300	0	0	0	0	0	0	0	200	903	0	0	0	0	0	0	0	603	903	0
4	0	0	0	0	0	0	0	200	300	0	0	0	0	0	0	0	200	903	0	0	0	0	0	0	0	603	903	0
4	1	0	0	0	0	0	0	200	300	0	0	0	0	0	0	0	200	903	0	0	0	0	0	0	0	603	903	0
4	2	0	0	0	0	0	0	200	300	0	0	0	0	0	0	0	200	903	0	0	0	0	0	0	0	603	903	0
4	3	0	0	0	0	0	0	200	300	0	0	0	0	0	0	0	200	903	0	0	0	0	0	0	0	603	903	0
4	4	0	0	0	0	0	0	200	300	0	0	0	0	0	0	0	200	903	0	0	0	0	0	0	0	603	903	0
4	5	0	0	0	0	0	0	200	300	0	0	0	0	0	0	0	200	903	0	0	0	0	0	0	0	603	903	0
4	6	0	0	0	0	0	0	200	300	0	0	0	0	0	0	0	200	903	0	0	0	0	0	0	0	603	903	0
4	7	0	0	0	0	0	0	200	300	0	0	0	0	0	0	0	200	903	0	0	0	0	0	0	0	603	903	0
4	8	0	0	0	0	0	0	200	300	0	0	0	0	0	0	0	200	903	0	0	0	0	0	0	0	603	903	0
4	9	0	0	0	0	0	0	200	300	0	0	0	0	0	0	0	200	903	0	0	0	0	0	0	0	603	903	0
5	0	0	0	0	0	0	0	200	300	0	0	0	0	0	0	0	200	903	0	0	0	0	0	0	0	603	903	0
5	1	0	0	0	0	0	0	200	300	0	0	0	0	0	0	0	200	903	0	0	0	0	0	0	0	603	903	0
5	2	0	0	0	0	0	0	200	300	0	0	0	0	0	0	0	200	903	0	0	0	0	0	0	0	603	903	0
5	3	0	0	0	0	0	0	200	300	0	0	0	0	0	0	0	200	903	0	0	0	0	0	0	0	603	903	0
5	4	0	0	0	0	0	0	200	300	0	0	0	0	0	0	0	200	903	0	0	0	0	0	0	0	603	903	0
5	5	0	0	0	0	0	0	200	300	0	0	0	0	0	0	0	200	903	0	0	0	0	0	0	0	603	903	0
5	6	0	0	0	0	0	0	200	300	0	0	0	0	0	0	0	200	903	0	0	0	0	0	0	0	603	903	0
5	7	0	0	0	0	0	0	200	300	0	0	0	0	0	0	0	200	903	0	0	0	0	0	0	0	603	903	0
5	8	0	0	0	0	0	0	200	300	0	0	0	0	0	0	0	200	903	0	0	0	0	0	0	0	603	903	0
5	9	0	0	0	0	0	0	200	300	0	0	0	0	0	0	0	200	903	0	0	0	0	0	0	0	603	903	0
6	0	0	0	0	0	0	0	200	300	0	0	0	0	0	0	0	200	903	0	0	0	0	0	0	0	603	903	0
6	1	0	0	0	0	0	0	200	300	0	0	0	0	0	0	0	200	903	0	0	0	0	0	0	0	603	903	0
6	2	0	0	0	0	0	0	200	300	0	0	0	0	0	0	0	200	903	0	0	0	0	0	0	0	603	903	0
6	3	0	0	0	0	0	0	200	300	0	0	0	0	0	0	0	200	903	0	0	0	0	0	0	0	603	903	0
6	4	0	0	0	0	0	0	200	300	0	0	0	0	0	0	0	200	903	0	0	0	0	0	0	0	603	903	0
6	5	0	0	0	0	0	0	200	300	0	0	0	0	0	0	0	200	903	0	0	0	0	0	0	0	603	903	0
6	6	0	0	0	0	0	0	200	300	0	0	0	0	0	0	0	200	903	0	0	0	0	0	0	0	603	903	0
6	7	0	0	0	0	0	0	200	300	0	0	0	0	0	0	0	200	903	0	0	0	0	0	0	0	603	903	0
6	8	0	0	0	0	0	0	200	300	0	0	0	0	0	0	0	200	903	0	0	0	0	0	0	0	603	903	0
6	9	0	0	0	0	0	0	200	300	0	0	0	0	0	0	0	200	903	0	0	0	0	0	0	0	603	903	0
7	0	0	0	0	0	0	0	200	300	0	0	0	0	0	0	0	200	903	0	0	0	0	0	0	0	603	903	0
7	1	0	0	0	0	0	0	200	300	0	0	0	0	0	0	0	200	903	0	0	0	0	0	0	0	603	903	0
7	2	0	0	0	0	0	0	200	300	0	0	0	0	0	0	0	200	903	0	0	0	0	0	0	0	603	903	0
7	3	0	0	0	0	0	0	200	300	0	0	0	0	0	0	0	200	903	0	0	0	0	0	0	0	603	903	0
7	4	0	0	0	0	0	0	200	300	0	0	0	0	0	0	0	200	903	0	0	0	0	0	0	0	603	903	0
7	5	0	0	0	0	0	0	200	300	0	0	0	0	0	0	0	200	903	0	0	0	0	0	0	0	603	903	0
7	6	0	0	0	0	0	0	200	300	0	0	0	0	0	0	0	200	903	0	0	0	0	0	0	0	603	903	0
7	7	0	0	0	0	0	0	200	300	0	0	0	0	0	0	0	200	903	0	0	0	0	0	0	0	603	903	0
7	8	0	0	0	0	0	0	200	300	0	0	0	0	0	0	0	200	903	0	0	0	0	0	0	0	603	903	0
7	9	0	0	0	0	0	0	200	300	0	0	0	0	0	0	0	200	903	0	0	0	0	0	0	0	603	903	0
8	0	0	0	0	0	0	0	200	300	0	0	0	0	0	0	0	200	903	0	0	0	0	0	0	0	603	903	0
8	1	0	0	0	0	0	0	200	300	0	0	0	0	0	0	0	200	903	0	0	0	0	0	0	0	603	903	0
8	2	0	0	0	0	0	0	200	300	0	0	0	0	0	0	0	200	903	0	0	0	0	0	0	0	603	903	0
8	3	0	0	0	0	0	0	200	300	0	0	0	0	0	0	0	200	903	0	0	0	0	0	0	0	603	903	0
8	4	0	0	0	0	0	0	200	300	0	0	0	0	0	0	0	200	903	0	0	0	0	0	0	0	603	903	0
8	5	0	0	0	0	0	0	200	300	0	0	0	0	0	0	0	200	903	0	0	0	0	0	0	0	603	903	0
8	6	0	0	0	0	0	0	200	300	0	0	0	0	0	0	0	200	903	0	0	0	0	0	0	0	603	903	0
8	7	0	0	0	0	0	0	200	300	0	0	0	0	0	0	0	200	903	0	0	0	0	0	0	0	603	903	0
8	8	0	0	0	0	0	0	200	300	0	0	0	0	0	0	0	200	903	0	0	0	0	0	0	0	603	903	0
8	9	0	0	0	0	0	0	200	300	0	0	0	0	0	0	0	200	903	0	0	0	0	0	0	0	603	903	0
9	0	0	0	0	0	0	0	200	300	0	0	0	0	0	0	0	200	903	0	0	0	0	0	0	0	603	903	0
9	1	0	0	0	0	0	0	200	300	0	0	0	0	0	0	0	200	903	0	0	0	0	0	0	0	603	903	0
9	2	0	0	0	0	0	0	200	300	0	0	0	0	0	0	0	200	903	0	0	0	0	0	0	0	603	903	0
9	3	0	0	0	0	0	0	200	300	0	0	0	0	0	0	0	200	903	0	0	0	0	0	0	0	603	903	0
9	4	0	0	0	0	0	0	200	300	0	0	0	0	0	0	0	200	903	0	0	0	0	0	0	0	603	903	0
9	5	0	0	0	0	0	0	200	300	0	0	0	0	0	0	0	200	903	0	0	0	0	0	0	0	603	903	0
9	6	0	0	0	0	0	0	200	300	0	0	0	0	0	0	0	200	903	0	0	0	0	0	0	0	603	903	0
9	7	0	0	0	0	0	0	200	300	0	0	0	0	0	0	0	200	903	0	0	0	0	0	0	0	603	903	0
9	8	0	0	0	0	0	0	200	300	0	0	0	0	0	0	0	200	903	0	0	0	0	0	0	0	603	903	0
9	9	0	0	0	0	0	0	200	300	0	0	0	0	0	0	0	200	903	0	0	0	0	0	0	0	603	903	0
10	0	0	0	0	0	0	0	200	300	0	0	0	0	0	0	0	200	903	0	0	0	0	0	0	0	603	903	0
10	1	0	0	0	0	0	0	200	300	0	0	0	0	0	0	0	200	903	0	0	0	0	0	0	0	603	903	0
10	2	0	0	0	0	0	0	200	300	0	0	0	0	0	0	0	200	903	0	0	0	0	0	0	0	603	903	0
10	3	0	0	0	0	0	0	200	300	0	0	0	0	0	0	0	200	903	0	0	0	0	0	0	0	603	903	0
10	4	0	0	0	0	0	0	200	300	0	0	0	0	0	0	0	200	903	0	0	0	0	0	0	0	603	903	0
10	5	0	0	0	0	0	0	200	300	0	0	0	0	0	0	0	200	903	0	0	0	0	0	0	0	603	903	0
10	6	0	0	0	0	0	0	200	300	0	0	0	0	0	0	0	200	903	0	0	0	0	0	0	0	603	903	0
10	7	0	0	0	0	0	0	200	300	0	0	0	0	0	0	0	200	903	0	0	0	0	0	0	0	603	903	0
10	8	0	0	0	0	0	0	200	300	0	0	0	0	0	0	0	200	903	0	0	0	0	0	0	0	603	903	0
10	9	0	0	0	0	0	0	200	300	0	0	0	0	0	0	0	200	903	0	0	0	0	0	0	0	603	903	0
11	0	0	0	0	0	0	0	200	300	0	0	0	0	0	0	0	200	903	0	0	0	0	0	0	0	603	903	0
11	1	0	0	0	0	0	0	200	300	0	0	0	0	0	0	0	200	903	0	0	0	0	0	0	0	603	903	0
11	2	0	0	0	0	0	0	200	300	0	0	0	0	0	0	0	200	903	0	0	0	0	0	0	0	603	903	0
11	3	0	0	0	0	0	0	200	300	0	0	0	0	0	0	0	200	903	0	0	0	0	0	0	0	603	903	0
11	4	0	0	0	0	0	0	200	300	0	0	0	0	0	0	0	200	903	0	0	0	0	0	0	0	603	903	0
11	5	0	0	0	0	0	0	200	300	0	0	0	0	0	0	0	200	903	0	0	0	0	0	0	0	603	903	0
11	6	0	0	0	0	0	0	200	300	0	0	0	0	0	0	0	200	903	0	0	0	0	0	0	0	603	903	0
11	7	0	0	0	0	0	0	200	300	0	0	0	0	0	0	0	200	903	0	0	0	0	0	0	0	603	903	0
11	8	0	0	0	0	0	0	200	300	0	0	0	0	0	0	0	200	903	0	0	0	0	0	0	0	603	903	0
11	9	0	0	0	0	0	0	200	300	0	0	0	0	0	0	0	200	903	0	0	0	0	0	0	0	603	903	0
12	0	0	0	0	0	0	0	200	300	0	0	0	0	0	0	0	200	903	0	0	0	0	0	0	0	603	903	0
12	1	0	0	0	0	0	0	200	300	0	0	0	0	0	0	0	200	903	0	0	0	0	0	0	0	603	903	0
12	2	0	0	0	0	0	0	200	300	0	0	0	0	0	0	0	200	903	0	0	0	0	0	0	0	603	903	0
12	3	0	0	0	0	0	0	200	300	0	0	0	0	0	0	0	200	903	0	0	0	0	0	0	0	603	903	0
12	4	0	0	0	0	0	0	200	300	0	0	0	0	0	0	0	200	903	0	0	0	0	0	0	0	603	903	0
12	5	0	0	0	0	0	0	200	300	0	0	0	0	0	0	0	200	903	0	0	0	0	0	0	0	603	903	0
12	6	0	0	0	0	0	0	200	300	0	0	0	0	0	0	0	200	903	0	0	0	0	0	0	0	603	903	0
12	7	0	0	0	0	0	0	200	300	0	0	0	0	0	0	0	200	903	0	0	0	0	0	0	0	603	903	0
12	8	0	0	0	0	0	0	200	300	0	0	0	0	0	0	0	200	903	0	0	0	0	0	0	0	603	903	0
12	9	0	0	0	0	0	0	200	300	0	0	0	0	0	0	0	200	903	0	0	0	0	0	0	0	603	903	0
13	0	0	0	0	0	0	0	200	300	0	0	0	0	0	0	0	200	903	0	0	0	0	0	0	0	603	903	0
13	1	0	0	0	0	0	0	200	300	0	0	0	0	0	0	0	200	903	0	0	0	0	0	0	0	603	903	0
13	2	0	0	0	0	0	0	200	300	0	0	0	0	0	0	0	200	903	0	0	0	0	0	0	0	603	903	0
13	3	0	0	0	0	0	0	200	300	0	0	0	0	0	0	0	200	903	0	0	0	0	0	0	0	603	903	0
13	4	0	0	0	0	0	0	200	300	0	0	0	0	0	0	0	200	903	0	0	0	0	0	0	0	603	903	0
13	5	0	0	0	0	0	0	200	300	0	0	0	0	0	0	0	200	903	0	0	0	0	0	0	0	603	903	0
13	6	0	0	0	0	0	0	200	300	0	0	0	0	0	0	0	200	903	0	0	0	0	0	0	0	603	903	0
13	7	0	0	0	0	0	0	200	300	0	0	0	0	0	0	0	200	903	0	0	0	0	0	0	0	603	903	0
13	8	0	0	0	0	0	0	200	300	0	0	0	0	0	0	0	200	903	0	0	0	0	0	0	0	603	903	0
13	9	0	0	0	0	0	0	200	300	0	0	0	0	0	0	0	200	903	0	0	0	0	0	0	0	603	903	0
14	0	0	0	0	0	0	0	200	300	0	0	0	0	0	0	0	200	903	0	0	0	0	0	0	0	603	903	0
14	1	0	0	0	0	0	0	200	300	0	0	0	0	0	0	0	200	903	0	0	0	0	0	0	0	603	903	0
14	2	0	0	0	0	0	0	200	300	0	0	0	0	0	0	0	200	903	0	0	0	0	0	0	0	603	903	0
14	3	0	0	0	0	0	0	200	300	0	0	0	0	0	0	0	200	903	0	0	0	0	0	0	0	603	903	0
14	4	0	0	0	0	0	0	200	300	0	0	0	0	0	0	0	200	903	0	0	0	0	0	0	0	603	903	0
14	5	0	0	0	0	0	0	200	300	0	0	0	0	0	0	0	200	903	0	0	0	0	0	0	0	603	903	0
14	6	0	0	0	0	0	0	200	300	0	0	0	0	0	0	0	200	903	0	0	0	0	0	0	0	603	903	0
14	7	0	0	0	0	0	0	200	300	0	0	0	0	0	0	0	200	903	0	0	0	0	0	0	0	603	903	0
14	8	0	0	0	0	0	0	200	300	0	0	0	0	0	0	0	200	903	0	0	0	0	0	0	0	603	903	0
14	9	0	0	0	0	0	0	200	300	0	0	0	0	0	0	0	200	903	0	0	0	0	0	0	0	603	903	0
15	0	0	0	0	0	0	0	200	300	0	0	0	0	0	0	0	200	903	0	0	0	0	0	0	0	603	903	0
15	1	0	0	0	0	0	0	200	300	0	0	0	0	0	0	0	200	903	0	0	0	0	0	0	0	603	903	0
15	2	0	0	0	0	0	0	200	300	0	0	0	0	0	0	0	200	903	0	0	0	0	0	0	0	603	903	0
15	3	0	0	0	0	0	0	200	300	0	0	0	0	0	0	0	200	903	0	0	0	0	0	0	0	603	903	0
15	4	0	0	0	0	0	0	200	300	0	0	0	0	0	0	0	200	903	0	0	0	0	0	0	0	603	903	0
15	5	0	0	0	0	0	0	200	300	0	0	0	0	0	0	0	200	903	0	0	0	0	0	0	0	603	903	0
15	6	0	0	0	0	0	0	200	300	0	0	0	0	0	0	0	200	903	0	0	0	0	0	0	0	603	903	0
15	7	0	0	0	0	0	0	200	300	0	0	0	0	0	0	0	200	903	0	0	0	0	0	0	0	603	903	0
15	8	0	0	0	0	0	0	200	300	0	0	0	0	0	0	0	200	903	0	0	0	0	0	0	0	603	903	0
15	9	0	0	0	0	0	0	200	300	0	0	0	0	0	0	0	200	903	0	0	0	0	0	0	0	603	903	0
16	0	0	0	0	0	0	0	200	300	0	0	0	0	0	0	0	200	903	0	0	0	0	0	0	0	603	903	0
16	1	0	0	0	0	0	0	200	300	0	0	0	0	0	0	0	200	903	0	0	0	0	0	0	0	603	903	0
16	2	0	0	0	0	0	0	200	300	0	0	0	0	0	0	0	200	903	0	0	0	0	0	0	0	603	903	0
16	3	0	0	0	0	0	0	200	300	0	0	0	0	0	0	0	200	903	0	0	0	0	0	0	0	603	903	0
16	4	0	0	0	0	0	0	200	300	0	0	0	0	0	0	0	200	903	0	0	0	0	0	0	0	603	903	0
16	5	0	0	0	0	0	0	200	300	0	0	0	0	0	0	0	200	903	0	0	0	0	0	0	0	603	903	0
16	6	0	0	0	0	0	0	200	300	0	0	0	0	0	0	0	200	903	0	0	0	0	0	0	0	603	903	0
16	7	0	0	0	0	0	0	200	300	0	0	0	0	0	0	0	200	903	0	0	0	0	0	0	0	603	903	0
16	8	0	0	0	0	0	0	200	300	0	0	0	0	0	0	0	200	903	0	0	0	0	0	0	0	603	903	0
16	9	0	0	0	0	0	0	200	300	0	0	0	0	0	0	0	200	903	0	0	0	0	0	0	0	603	903	0
17	0	0	0	0	0	0	0	200	300	0	0	0	0	0	0	0	200	903	0	0	0	0	0	0	0	603	903	0
17	1	0	0	0	0	0	0	200	300	0	0	0	0	0	0	0	200	903	0	0	0	0	0	0	0	603	903	0
17	2	0	0	0	0	0	0	200	300	0	0	0	0	0	0	0	200	903	0	0	0	0	0	0	0	603	903	0
17	3	0	0	0	0	0	0	200	300	0	0	0	0	0	0	0	200	903	0	0	0	0	0	0	0	603	903	0
17	4	0	0	0	0	0	0	200	300	0	0	0	0	0	0	0	200	903	0	0	0	0	0	0	0	603	903	0
17	5	0	0	0	0	0	0	200	300	0	0	0	0	0	0	0	200	903	0	0	0	0	0	0	0	603	903	0
17	6	0	0	0	0	0	0	200	300	0	0	0	0	0	0	0	200	903	0	0	0	0	0	0	0	603	903	0
17	7	0	0	0	0	0	0	200	300	0	0	0	0	0	0	0	200	903	0	0	0	0	0	0	0	603	903	0
17	8	0	0	0	0	0	0	200	300	0	0	0	0	0	0	0	200	903	0	0	0	0	0	0	0	603	903	0
17	9	0	0	0	0	0	0	200	300	0	0	0	0	0	0	0	200	903	0	0	0	0	0	0	0	603	903	0
18	0	0	0	0	0	0	0	200	300	0	0	0	0	0	0	0	200	903	0	0	0	0	0	0	0	603	903	0
18	1	0	0	0	0	0	0	200	300	0	0	0	0	0	0	0	200	903	0	0	0	0	0	0	0	603	903	0
18	2	0	0	0	0	0	0	200	300	0	0	0	0	0	0	0	200	903	0	0	0	0	0	0	0	603	903	0
18	3	0	0	0	0	0	0	200	300	0	0	0	0	0	0	0	200	903	0	0	0	0	0	0	0	603	903	0
18	4	0	0	0	0	0	0	200	300	0	0	0	0	0	0	0	200	903	0	0	0	0	0	0	0	603	903	0
18	5	0	0	0	0	0	0	200	300	0	0	0	0	0	0	0	200	903	0	0	0	0	0	0	0	603	903	0
18	6	0	0	0	0	0	0	200	300	0	0	0	0	0	0	0	200	903	0	0	0	0	0	0	0	603	903	0
18	7	0	0	0	0	0	0	200	300	0	0	0	0	0	0	0	200	903	0	0	0	0	0	0	0	603	903	0
18	8	0	0	0	0	0	0	200	300	0	0	0	0	0	0	0	200	903	0	0	0	0	0	0	0	603	903	0
18	9	0	0	0	0	0	0	200	300	0	0	0	0	0	0	0	200	903	0	0	0	0	0	0	0	603	903	0
19	0	0	0	0	0	0	0	200	300	0	0	0	0	0	0	0	200	903	0	0	0	0	0	0	0	603	903	0
19	1	0	0	0	0	0	0	200	300	0	0	0	0	0	0	0	200	903	0	0	0	0	0	0	0	603	903	0
19	2	0	0	0	0	0	0	200	300	0	0	0	0	0	0	0	200	903	0	0	0	0	0	0	0	603	903	0
19	3	0	0	0	0	0	0	200	300	0	0	0	0	0	0	0	200	903	0	0	0	0	0	0	0	603	903	0
19	4	0	0	0	0	0	0	200	300	0	0	0	0	0	0	0	200	903	0	0	0	0	0	0	0	603	903	0
19	5	0	0	0	0	0	0	200	300	0	0	0	0	0	0	0	200	903	0	0	0	0	0	0	0	603	903	0
19	6	0	0	0	0	0	0	200	300	0	0	0	0	0	0	0	200	903	0	0	0	0	0	0	0	603	903	0
19	7	0	0	0	0	0	0	200	300	0	0	0	0	0	0	0	200	903	0	0	0	0	0	0	0	603	903	0
19	8	0	0	0	0	0	0	200	300	0	0	0	0	0	0	0	200	903	0	0	0	0	0	0	0	603	903	0
19	9	0	0	0	0	0	0	200	300	0	0	0	0	0	0	0	200	903	0	0	0	0	0	0	0	603	903	0
20	0	0	0	0	0	0	0	200	300	0	0	0	0	0	0	0	200	903	0	0	0	0	0	0	0	603	903	0
20	1	0	0	0	0	0	0	200	300	0	0	0	0	0	0	0	200	903	0	0	0	0	0	0	0	603	903	0
20	2	0	0	0	0	0	0	200	300	0	0	0	0	0	0	0	200	903	0	0	0	0	0	0	0	603	903	0
20	3	0	0	0	0	0	0	200	300	0	0	0	0	0	0	0	200	903	0	0	0	0	0	0	0	603	903	0
20	4	0	0	0	0	0	0	200	300	0	0	0	0	0	0	0	200	903	0	0	0	0	0	0	0	603	903	0
20	5	0	0	0	0	0	0	200	300	0	0	0	0	0	0	0	200	903	0	0	0	0	0	0	0	603	903	0
20	6	0	0	0	0	0	0	200	300	0	0	0	0	0	0	0	200	903	0	0	0	0	0	0	0	603	903	0
20	7	0	0	0	0	0	0	200	300	0	0	0	0	0	0	0	200	903	0	0	0	0	0	0	0	603	903	0
20	8	0	0	0	0	0	0	200	300	0	0	0	0	0	0	0	200	903	0	0	0	0	0	0	0	603	903	0
20	9	0	0	0	0	0	0	200	300	0	0	0	0	0	0	0	200	903	0	0	0	0	0	0	0	603	903	0
21	0	0	0	0	0	0	0	200	300	0	0	0	0	0	0	0	200	903	0	0	0	0	0	0	0	603	903	0
21	1	0	0	0	0	0	0	200	300	0	0	0	0	0	0	0	200	903	0	0	0	0	0	0	0	603	903	0
21	2	0	0	0	0	0	0	200	300	0	0	0	0	0	0	0	200	903	0	0	0	0	0	0	0	603	903	0
21	3	0	0	0	0	0	0	200	300	0	0	0	0	0	0	0	200	903	0	0	0	0	0	0	0	603	903	0
21	4	0	0	0	0	0	0	200	300	0	0	0	0	0	0	0	200	903	0	0	0	0	0	0	0	603	903	0
21	5	0	0	0	0	0	0	200	300	0	0	0	0	0	0	0	200	903	0	0	0	0	0	0	0	603	903	0
21	6	0	0	0	0	0	0	200	300	0	0	0	0	0	0	0	200	903	0	0	0	0	0	0	0	603	903	0
21	7	0	0	0	0	0	0	200	300	0	0	0	0	0	0	0	200	903	0	0	0	0	0	0	0	603	903	0
21	8	0	0	0	0	0	0	200	300	0	0	0	0	0	0	0	200	903	0	0	0	0	0	0	0	603	903	0
21	9	0	0	0	0	0	0	200	300	0	0	0	0	0	0	0	200	903	0	0	0	0	0	0	0	603	903	0
22	0	0	0	0	0	0	0	200	300	0	0	0	0	0	0	0	200	903	0	0	0	0	0	0	0	603	903	0
22	1	0	0	0	0	0	0	200	300	0	0	0	0	0	0	0	200	903	0	0	0	0	0	0	0	603	903	0
22	2	0	0	0	0	0	0	200	300	0	0	0	0	0	0	0	200	903	0	0	0	0	0	0	0	603	903	0
22	3	0	0	0	0	0	0	200	300	0	0	0	0	0	0	0	200	903	0	0	0	0	0	0	0	603	903	0
22	4	0	0	0	0	0	0	200	300	0	0	0	0	0	0	0	200	903	0	0	0	0	0	0	0	603	903	0
22	5	0	0	0	0	0	0	200	300	0	0	0	0	0	0	0	200	903	0	0	0	0	0	0	0	603	903	0
22	6	0	0	0	0	0	0	200	300	0	0	0	0	0	0	0	200	903	0	0	0	0	0	0	0	603	903	0
22	7	0	0	0	0	0	0	200	300	0	0	0	0	0	0	0	200	903	0	0	0	0	0	0	0	603	903	0
22	8	0	0	0	0	0	0	200	300	0	0	0	0	0	0	0	200	903	0	0	0	0	0	0	0	603	903	0
22	9	0	0	0	0	0	0	200	300	0	0	0	0	0	0	0	200	903	0	0	0	0	0	0	0	603	903	0
23	0	0	0	0	0	0	0	200	300	0	0	0	0	0	0	0	200	903	0	0	0	0	0	0	0	603	903	0
23	1	0	0	0	0	0	0	200	300	0	0	0	0	0	0	0	200	903	0	0	0	0	0	0	0	603	903	0
23	2	0	0	0	0	0	0	200	300	0	0	0	0	0	0	0	200	903	0	0	0	0	0	0	0	603	903	0
23	3	0	0	0	0	0	0	200	300	0	0	0	0	0	0	0	200	903	0	0	0	0	0	0	0	603	903	0
23	4	0	0	0	0	0	0	200	300	0	0	0	0	0	0	0	200	903	0	0	0	0	0	0	0	603	903	0
23	5	0	0	0	0	0	0	200	300	0	0	0	0	0	0	0	200	903	0	0	0	0	0	0	0	603	903	0
23	6	0	0	0	0	0	0	200	300	0	0	0	0	0	0	0	200	903	0	0	0	0	0	0	0	603	903	0
23	7	0	0	0	0	0	0	200	300	0	0	0	0	0	0	0	200	903	0	0	0	0	0	0	0	603	903	0
23	8	0	0	0	0	0	0	200	300	0	0	0	0	0	0	0	200	903	0	0	0	0	0	0	0	603	903	0
23	9	0	0	0	0	0	0	200	300	0	0	0	0	0	0	0	200	903	0	0	0	0	0	0	0	603	903	0
24	0	0	0	0	0	0	0	200	300	0	0	0	0	0	0	0	200	903	0	0	0	0	0	0	0	603	903	0
24	1	0	0	0	0	0	0	200	300	0	0	0	0	0	0	0	200	903	0	0	0	0	0	0	0	603	903	0
24	2	0	0	0	0	0	0	200	300	0	0	0	0	0	0	0	200	903	0	0	0	0	0	0	0	603	903	0
24	3	0	0	0	0	0	0	200	300	0	0	0	0	0	0	0	200	903	0	0	0	0	0	0	0	603	903	0
24	4	0	0	0	0	0	0	200	300	0	0	0	0	0	0	0	200	903	0	0	0	0	0	0	0	603	903	0
24	5	0	0	0	0	0	0	200	300	0	0	0	0	0	0	0	200	903	0	0	0	0	0	0	0	603	903	0
24	6	0	0	0	0	0	0	200	300	0	0	0	0	0	0	0	200	903	0	0	0	0	0	0	0	603	903	0
24	7	0	0	0	0	0	0	200	300	0	0	0	0	0	0	0	200	903	0	0	0	0	0	0	0	603	903	0
24	8	0	0	0	0	0	0	200	300	0	0	0	0	0	0	0	200	903	0	0	0	0	0	0	0	603	903	0
24	9	0	0	0	0	0	0	200	300	0	0	0	0	0	0	0	200	903	0	0	0	0	0	0	0	603	903	0
25	0	0	0	0	0	0	0	200	300	0	0	0	0	0	0	0	200	903	0	0	0	0	0	0	0	603	903	0
25	1	0	0	0	0	0	0	200	300	0	0	0	0	0	0	0	200	903	0	0	0	0	0	0	0	603	903	0
25	2	0	0	0	0	0	0	200	300	0	0	0	0	0	0	0	200	903	0	0	0	0	0	0	0	603	903	0
25	3	0	0	0	0	0	0	200	300	0	0	0	0	0	0	0	200	903	0	0	0	0	0	0	0	603	903	0
25	4	0	0	0	0	0	0	200	300	0	0	0	0	0	0	0	200	903	0	0	0	0	0	0	0	603	903	0
25	5	0	0	0	0	0	0	200	300	0	0	0	0	0	0	0	200	903	0	0	0	0	0	0	0	603	903	0
25	6	0	0	0	0	0	0	200	300	0	0	0	0	0	0	0	200	903	0	0	0	0	0	0	0	603	903	0
25	7	0	0	0	0	0	0	200	300	0	0	0	0	0	0	0	200	903	0	0	0	0	0	0	0	603	903	0
25	8	0	0	0	0	0	0	200	300	0	0	0	0	0	0	0	200	903	0	0	0	0	0	0	0	603	903	0
25	9	0	0	0	0	0	0	200	300	0	0	0	0	0	0	0	200	903	0	0	0	0	0	0	0	603	903	0
26	0	0	0	0	0	0	0	200	300	0	0	0	0	0	0	0	200	903	0	0	0	0	0	0	0	603	903	0
26	1	0	0	0	0	0	0	200	300	0	0	0	0	0	0	0	200	903	0	0	0	0	0	0	0	603	903	0
26	2	0	0	0	0	0	0	200	300	0	0	0	0	0	0	0	200	903	0	0	0	0	0	0	0	603	903	0
26	3	0	0	0	0	0	0	200	300	0	0	0	0	0	0	0	200	903	0	0	0	0	0	0	0	603	903	0
26	4	0	0	0	0	0	0	200	300	0	0	0	0	0	0	0	200	903	0	0	0	0	0	0	0	603	903	0
26	5	0	0	0	0	0	0	200	300	0	0	0	0	0	0	0	200	903	0	0	0	0	0	0	0	603	903	0
26	6	0	0	0	0	0	0	200	300	0	0	0	0	0	0	0	200	903	0	0	0	0	0	0	0	603	903	0
26	7	0	0	0	0	0	0	200	300	0	0	0	0	0	0	0	200	903	0	0	0	0	0	0	0	603	903	0
26	8	0	0	0	0	0	0	200	300	0	0	0	0	0	0	0	200	903	0	0	0	0	0	0	0	603	903	0
26	9	0	0	0	0	0	0	200	300	0	0	0	0	0	0	0	200	903	0	0	0	0	0	0	0	603	903	0
27	0	0	0	0	0	0	0	200	300	0	0	0	0	0	0	0	200	903	0	0	0	0	0	0	0	603	903	0
27	1	0	0	0	0	0	0	200	300	0	0	0	0	0	0	0	200	903	0	0	0	0	0	0	0	603	903	0
27	2	0	0	0	0	0	0	200	300	0	0	0	0	0	0	0	200	903	0	0	0	0	0	0	0	603	903	0
27	3	0	0	0	0	0	0	200	300	0	0	0	0	0	0	0	200	903	0	0	0	0	0	0	0	603	903	0
27	4	0	0	0	0	0	0	200	300	0	0	0	0	0	0	0	200	903	0	0	0	0	0	0	0	603	903	0
27	5	0	0	0	0	0	0	200	300	0	0	0	0	0	0	0	200	903	0	0	0	0	0	0	0	603	903	0
27	6	0	0	0	0	0	0	200	300	0	0	0	0	0	0	0	200	903	0	0	0	0	0	0	0	603	903	0
27	7	0	0	0	0	0	0	200	300	0	0	0	0	0	0	0	200	903	0	0	0	0	0	0	0	603	903	0
27	8	0	0	0	0	0	0	200	300	0	0	0	0	0	0	0	200	903	0	0	0	0	0	0	0	603	903	0
27	9	0	0	0	0	0	0	200	300	0	0	0	0	0	0	0	200	903	0	0	0	0	0	0	0	603	903	0
28	0	0	0	0	0	0	0	200	300	0	0	0	0	0	0	0	200	903	0	0	0	0	0	0	0	603	903	0
28	1	0	0	0	0	0	0	200	300	0	0	0	0	0	0	0	200	903	0	0	0	0	0	0	0	603	903	0
28	2	0	0	0	0	0	0	200	300	0	0	0	0	0	0	0	200	903	0	0	0	0	0	0	0	603	903	0
28	3	0	0	0	0	0	0	200	300	0	0	0	0	0	0	0	200	903	0	0	0	0	0	0	0	603	903	0
28	4	0	0	0	0	0	0	200	300	0	0	0	0	0	0	0	200	903	0	0	0	0	0	0	0	603	903	0
28	5	0	0	0	0	0	0	200	300	0	0	0	0	0	0	0	200	903	0	0	0	0	0	0	0	603	903	0
28	6	0	0	0	0	0	0	200	300	0	0	0	0	0	0	0	200	903	0	0	0	0	0	0	0	603	903	0
28	7	0	0	0	0	0	0	200	300	0	0	0	0	0	0	0	200	903	0	0	0	0	0	0	0	603	903	0
28	8	0	0	0	0	0	0	200	300	0	0	0	0	0	0	0	200	903	0	0	0	0	0	0	0	603	903	0
28	9	0	0	0	0	0	0	200	300	0	0	0	0	0	0	0	200	903	0	0	0	0	0	0	0	603	903	0
29	0	0	0	0	0	0	0	200	300	0	0	0	0	0	0	0	200	903	0	0	0	0	0	0	0	603	903	0
29	1	0	0	0	0	0	0	200	300	0	0	0	0	0	0	0	200	903	0	0	0	0	0	0	0	603	903	0
29	2	0	0	0	0	0	0	200	300	0	0	0	0	0	0	0	200	903	0	0	0	0	0	0	0	603	903	0
29	3	0	0	0	0	0	0	200	300	0	0	0	0	0	0	0	200	903	0	0	0	0	0	0	0	603	903	0
29	4	0	0	0	0	0	0	200	300	0	0	0	0	0	0	0	200	903	0	0	0	0	0	0	0	603	903	0
29	5	0	0	0	0	0	0	200	300	0	0	0	0	0	0	0	200	903	0	0	0	0	0	0	0	603	903	0
29	6	0	0	0	0	0	0	200	300	0	0	0	0	0	0	0	200	903	0	0	0	0	0	0	0	603	903	0
29	7	0	0	0	0	0	0	200	300	0	0	0	0	0	0	0	200	903	0	0	0	0	0	0	0	603	903	0
29	8	0	0	0	0	0	0	200	300	0	0	0	0	0	0	0	200	903	0	0	0	0	0	0	0	603	903	0
29	9	0	0	0	0	0	0	200	300	0	0	0	0	0	0	0	200	903	0	0	0	0	0	0	0	603	903	0
30	0	0	0	0	0	0	0	200	300	0	0	0	0	0	0	0	200	903	0	0	0	0	0	0	0	603	903	0
30	1	0	0	0	0	0	0	200	300	0	0	0	0	0	0	0	200	903	0	0	0	0	0	0	0	603	903	0
30	2	0	0	0	0	0	0	200	300	0	0	0	0	0	0	0	200	903	0	0	0	0	0	0	0	603	903	0
30	3	0	0	0	0	0	0	200	300	0	0	0	0	0	0	0	200	903	0	0	0	0	0	0	0	603	903	0
30	4	0	0	0	0	0	0	200	300	0	0	0	0	0	0	0	200	903	0	0	0	0	0	0	0	603	903	0
30	5	0	0	0	0	0	0	200	300	0	0	0	0	0	0	0	200	903	0	0	0	0	0	0	0	603	903	0
30	6	0	0	0	0	0	0	200	300	0	0	0	0	0	0	0	200	903	0	0	0	0	0	0	0	603	903	0
30	7	0	0	0	0	0	0	200	300	0	0	0	0	0	0	0	200	903	0	0	0	0	0	0	0	603	903	0
30	8	0	0	0	0	0	0	200	300	0	0	0	0	0	0	0	200	903	0	0	0	0	0	0	0	603	903	0
30	9	0	0	0	0	0	0	200	300	0	0	0	0	0	0	0	200	903	0	0	0	0	0	0	0	603	903	0
31	0	0	0	0	0	0	0	200	300	0	0	0	0	0	0	0	200	903	0	0	0	0	0	0	0	603	903	0
31	1	0	0	0	0	0	0	200	300	0	0	0	0	0	0	0	200	903	0	0	0	0	0	0	0	603	903	0
31	2	0	0	0	0	0	0	200	300	0	0	0	0	0	0	0	200	903	0	0	0	0	0	0	0	603	903	0
31	3	0	0	0	0	0	0	200	300	0	0	0	0	0	0	0	200	903	0	0	0	0	0	0	0	603	903	0
31	4	0	0	0	0	0	0	200	300	0	0	0	0	0	0	0	200	903	0	0	0	0	0	0	0	603	903	0
31	5	0	0	0	0	0	0	200	300	0	0	0	0	0	0	0	200	903	0	0	0	0	0	0	0	603	903	0
31	6	0	0	0	0	0	0	200	300	0	0	0	0	0	0	0	200	903	0	0	0	0	0	0	0	603	903	0
31	7	0	0	0	0	0	0	200	300	0	0	0	0	0	0	0	200	903	0	0	0	0	0	0	0	603	903	0
31	8	0	0	0	0	0	0	200	300	0	0	0	0	0	0	0	200	903	0	0	0	0	0	0	0	603	903	0
31	9	0	0	0	0	0	0	200	300	0	0	0	0	0	0	0	200	903	0	0	0	0	0	0	0	603	903	0
32	0	0	0	0	0	0	0	200	300	0	0	0	0	0	0	0	200	903	0	0	0	0	0	0	0	603	903	0
32	1	0	0	0	0	0	0	200	300	0	0	0	0	0	0	0	200	903	0	0	0	0	0	0	0	603	903	0
32	2	0	0	0	0	0	0	200	300	0	0	0	0	0	0	0	200	903	0	0	0	0	0	0	0	603	903	0
32	3	0	0	0	0	0	0	200	300	0	0	0	0	0	0	0	200	903	0	0	0	0	0	0	0	603	903	0
32	4	0	0	0	0	0	0	200	300	0	0	0	0	0	0	0	200	903	0	0	0	0	0	0	0	603	903	0
32	5	0	0	0	0	0	0	200	300	0	0	0	0	0	0	0	200	903	0	0	0	0	0	0	0	603	903	0
32	6	0	0	0	0	0	0	200	300	0	0	0	0	0	0	0	200	903	0	0	0	0	0	0	0	603	903	0
32	7	0	0	0	0	0	0	200	300	0	0	0	0	0	0	0	200	903	0	0	0	0	0	0	0	603	903	0
32	8	0	0	0	0	0	0	200	300	0	0	0	0	0	0	0	200	903	0	0	0	0	0	0	0	603	903	0
32	9	0	0	0	0	0	0	200	300	0	0	0	0	0	0	0	200	903	0	0	0	0	0	0	0	603	903	0
33	0	0	0	0	0	0	0	200	300	0	0	0	0	0	0	0	200	903	0	0	0	0	0	0	0	603	903	0
33	1	0	0	0	0	0	0	200	300	0	0	0	0	0	0	0	200	903	0	0	0	0	0	0	0	603	903	0
33	2	0	0	0	0	0	0	200	300	0	0	0	0	0	0	0	200	903	0	0	0	0	0	0	0	603	903	0
33	3	0	0	0	0	0	0	200	300	0	0	0	0	0	0	0	200	903	0	0	0	0	0	0	0	603	903	0
33	4	0	0	0	0	0	0	200	300	0	0	0	0	0	0	0	200	903	0	0	0	0	0	0	0	603	903	0
33	5	0	0	0	0	0	0	200	300	0	0	0	0	0	0	0	200	903	0	0	0	0	0	0	0	603	903	0
33	6	0	0	0	0	0	0	200	300	0	0	0	0	0	0	0	200	903	0	0	0	0	0	0	0	603	903	0
33	7	0	0	0	0	0	0	200	300	0	0	0	0	0	0	0	200	903	0	0	0	0	0	0	0	603	903	0
33	8	0	0	0	0	0	0	200	300	0	0	0	0	0	0	0	200	903	0	0	0	0	0	0	0	603	903	0
33	9	0	0	0	0	0	0	200	300	0	0	0	0	0	0	0	200	903	0	0	0	0	0	0	0	603	903	0
34	0	0	0	0	0	0	0	200	300	0	0	0	0	0	0	0	200	903	0	0	0	0	0	0	0	603	903	0
34	1	0	0	0	0	0	0	200	300	0	0	0	0	0	0	0	200	903	0	0	0	0	0	0	0	603	903	0
34	2	0	0	0	0	0	0	200	300	0	0	0	0	0	0	0	200	903	0	0	0	0	0	0	0	603	903	0
34	3	0	0	0	0	0	0	200	300	0	0	0	0	0	0	0	200	903	0	0	0	0	0	0	0	603	903	0
34	4	0	0	0	0	0	0	200	300	0	0	0	0	0	0	0	200	903	0	0	0	0	0	0	0	603	903	0
34	5	0	0	0	0	0	0	200	300	0	0	0	0	0	0	0	200	903	0	0	0	0	0	0	0	603	903	0
34	6	0	0	0	0	0	0	200	300	0	0	0	0	0	0	0	200	903	0	0	0	0	0	0	0	603	903	0
34	7	0	0	0	0	0	0	200	300	0	0	0	0	0	0	0	200	903	0	0	0	0	0	0	0	603	903	0
34	8	0	0	0	0	0	0	200	300	0	0	0	0	0	0	0	200	903	0	0	0	0	0	0	0	603	903	0
34	9	0	0	0	0	0	0	200	300	0	0	0	0	0	0	0	200	903	0	0	0	0	0	0	0	603	903	0
35	0	0	0	0	0	0	0	200	300	0	0	0	0	0	0	0	200	903	0	0	0	0	0	0	0	603	903	0
35	1	0	0	0	0	0	0	200	300	0	0	0	0	0	0	0	200	903	0	0	0	0	0	0	0	603	903	0
35	2	0	0	0	0	0	0	200	300	0	0	0	0	0	0	0	200	903	0	0	0	0	0	0	0	603	903	0
35	3	0	0	0	0	0	0	200	300	0	0	0	0	0	0	0	200	903	0	0	0	0	0	0	0	603	903	0
35	4	0	0	0	0	0	0	200	300	0	0	0	0	0	0	0	200	903	0	0	0	0	0	0	0	603	903	0
35	5	0	0	0	0	0	0	200	300	0	0	0	0	0	0	0	200	903	0	0	0	0	0	0	0	603	903	0
35	6	0	0	0	0	0	0	200	300	0	0	0	0	0	0	0	200	903	0	0	0	0	0	0	0	603	903	0
35	7	0	0	0	0	0	0	200	300	0	0	0	0	0	0	0	200	903	0	0	0	0	0	0	0	603	903	0
35	8	0	0	0	0	0	0	200	300	0	0	0	0	0	0	0	200	903	0	0	0	0	0	0	0	603	903	0
35	9	0	0	0	0	0	0	200	300	0	0	0	0	0	0	0	200	903	0	0	0	0	0	0	0	603	903	0
36	0	0	0	0	0	0	0	200	300	0	0	0	0	0	0	0	200	903	0	0	0	0	0	0	0	603	903	0
36	1	0	0	0	0	0	0	200	300	0	0	0	0	0	0	0	200	903	0	0	0	0	0	0	0	603	903	0
36	2	0	0	0	0	0	0	200	300	0	0	0	0	0	0	0	200	903	0	0	0	0	0	0	0	603	903	0
36	3	0	0	0	0	0	0	200	300	0	0	0	0	0	0	0	200	903	0	0	0	0	0	0	0	603	903	0
36	4	0	0	0	0	0	0	200	300	0	0	0	0	0	0	0	200	903	0	0	0	0	0	0	0	603	903	0
36	5	0	0	0	0	0	0	200	300	0	0	0	0	0	0	0	200	903	0	0	0	0	0	0	0	603	903	0
36	6	0	0	0	0	0	0	200	300	0	0	0	0	0	0	0	200	903	0	0	0	0	0	0	0	603	903	0
36	7	0	0	0	0	0	0	200	300	0	0	0	0	0	0	0	200	903	0	0	0	0	0	0	0	603	903	0
36	8	0	0	0	0	0	0	200	300	0	0	0	0	0	0	0	200	903	0	0	0	0	0	0	0	603	903	0
36	9	0	0	0	0	0	0	200	300	0	0	0	0	0	0	0	200	903	0	0	0	0	0	0	0	603	903	0
37	0	0	0	0	0	0	0	200	300	0	0	0	0	0	0	0	200	903	0	0	0	0	0	0	0	603	903	0
37	1	0	0	0	0	0	0	200	300	0	0	0	0	0	0	0	200	903	0	0	0	0	0	0	0	603	903	0
37	2	0	0	0	0	0	0	200	300	0	0	0	0	0	0	0	200	903	0	0	0	0	0	0	0	603	903	0
37	3	0	0	0	0	0	0	200	300	0	0	0	0	0	0	0	200	903	0	0	0	0	0	0	0	603	903	0
37	4	0	0	0	0	0	0	200	300	0	0	0	0	0	0	0	200	903	0	0	0	0	0	0	0	603	903	0
37	5	0	0	0	0	0	0	200	300	0	0	0	0	0	0	0	200	903	0	0	0	0	0	0	0	603	903	0
37	6	0	0	0	0	0	0	200	300	0	0	0	0	0	0	0	200	903	0	0	0	0	0	0	0	603	903	0
37	7	0	0	0	0	0	0	200	300	0	0	0	0	0	0	0	200	903	0	0	0	0	0	0	0	603	903	0
37	8	0	0	0	0	0	0	200	300	0	0	0	0	0	0	0	200	903	0	0	0	0	0	0	0	603	903	0
37	9	0	0	0	0	0	0	200	300	0	0	0	0	0	0	0	200	903	0	0	0	0	0	0	0	603	903	0
38	0	0	0	0	0	0	0	200	300	0	0	0	0	0	0	0	200	903	0	0	0	0	0	0	0	603	903	0
38	1	0	0	0	0	0	0	200	300	0	0	0	0	0	0	0	200	903	0	0	0	0	0	0	0	603	903	0
38	2	0	0	0	0	0	0	200	300	0	0	0	0	0	0	0	200	903	0	0	0	0	0	0	0	603	903	0
38	3	0	0	0	0	0	0	200	300	0	0	0	0	0	0	0	200	903	0	0	0	0	0	0	0	603	903	0
38	4	0	0	0	0	0	0	200	300	0	0	0	0	0	0	0	200	903	0	0	0	0	0	0	0	603	903	0
38	5	0	0	0	0	0	0	200	300	0	0	0	0	0	0	0	200	903	0	0	0	0	0	0	0	603	903	0
38	6	0	0	0	0	0	0	200	300	0	0	0	0	0	0	0	200	903	0	0	0	0	0	0	0	603	903	0
38	7	0	0	0	0	0	0	200	300	0	0	0	0	0	0	0	200	903	0	0	0	0	0	0	0	603	903	0
38	8	0	0	0	0	0	0	200	300	0	0	0	0	0	0	0	200	903	0	0	0	0	0	0	0	603	903	0
38	9	0	0	0	0	0	0	200	300	0	0	0	0	0	0	0	200	903	0	0	0	0	0	0	0	603	903	0
39	0	0	0	0	0	0	0	200	300	0	0	0	0	0	0	0	200	903	0	0	0	0	0	0	0	603	903	0
39	1	0	0	0	0	0	0	200	300	0	0	0	0	0	0	0	200	903	0	0	0	0	0	0	0	603	903	0
39	2	0	0	0	0	0	0	200	300	0	0	0	0	0	0	0	200	903	0	0	0	0	0	0	0	603	903	0
39	3	0	0	0	0	0	0	200	300	0	0	0	0	0	0	0	200	903	0	0	0	0	0	0	0	603	903	0
39	4	0	0	0	0	0	0	200	300	0	0	0	0	0	0	0	200	903	0	0	0	0	0	0	0	603	903	0
39	5	0	0	0	0	0	0	200	300	0	0	0	0	0	0	0	200	903	0	0	0	0	0	0	0	603	903	0
39	6	0	0	0	0	0	0	200	300	0	0	0	0	0	0	0	200	903	0	0	0	0	0	0	0	603	903	0
39	7	0	0	0	0	0	0	200	300	0	0	0	0	0	0	0	200	903	0	0	0	0	0	0	0	603	903	0
39	8	0	0	0	0	0	0	200	300	0	0	0	0	0	0	0	200	903	0	0	0	0	0	0	0	603	903	0
39	9	0	0	0	0	0	0	200	300	0	0	0	0	0	0	0	200	903	0	0	0	0	0	0	0	603	903	0
40	0	0	0	0	0	0	0	200	300	0	0	0	0	0	0	0	200	903	0	0	0	0	0	0	0	603	903	0
40	1	0	0	0	0	0	0	200	300	0	0	0	0	0	0	0	200	903	0	0	0	0	0	0	0	603	903	0
40	2	0	0	0	0	0	0	200	300	0	0	0	0	0	0	0	200	903	0	0	0	0	0	0	0	603	903	0
40	3	0	0	0	0	0	0	200	300	0	0	0	0	0	0	0	200	903	0	0	0	0	0	0	0	603	903	0
40	4	0	0	0	0	0	0	200	300	0	0	0	0	0	0	0	200	903	0	0	0	0	0	0	0	603	903	0
40	5	0	0	0	0	0	0	200	300	0	0	0	0	0	0	0	200	903	0	0	0	0	0	0	0	603	903	0
40	6	0	0	0	0	0	0	200	300	0	0	0	0	0	0	0	200	903	0	0	0	0	0	0	0	603	903	0
40	7	0	0	0	0	0	0	200	300	0	0	0	0	0	0	0	200	903	0	0	0	0	0	0	0	603	903	0
40	8	0	0	0	0	0	0	200	300	0	0	0	0	0	0	0	200	903	0	0	0	0	0	0	0	603	903	0
40	9	0	0	0	0	0	0	200	300	0	0	0	0	0	0	0	200	903	0	0	0	0	0	0	0	603	903	0
41	0	0	0	0	0	0	0	200	300	0	0	0	0	0	0	0	200	903	0	0	0	0	0	0	0	603	903	0
41	1	0	0	0	0	0	0	200	300	0	0	0	0	0	0	0	200	903	0	0	0	0	0	0	0	603	903	0
41	2	0	0	0	0	0	0	200	300	0	0	0	0	0	0	0	200	903	0	0	0	0	0	0	0	603	903	0
41	3	0	0	0	0	0	0	200	300	0	0	0	0	0	0	0	200	903	0	0	0	0	0	0	0	603	903	0
41	4	0	0	0	0	0	0	200	300	0	0	0	0	0	0	0	200	903	0	0	0	0	0	0	0	603	903	0
41	5	0	0	0	0	0	0	200	300	0	0	0	0	0	0	0	200	903	0	0	0	0	0	0	0	603	903	0
41	6	0	0	0	0	0	0	200	300	0	0	0	0	0	0	0	200	903	0	0	0	0	0	0	0	603	903	0
41	7	0	0	0	0	0	0	200	300	0	0	0	0	0	0	0	200	903	0	0	0	0	0	0	0	603	903	0
41	8	0	0	0	0	0	0	200	300	0	0	0	0	0	0	0	200	903	0	0	0	0	0	0	0	603	903	0
41	9	0	0	0	0	0	0	200	300	0	0	0	0	0	0	0	200	903	0	0	0	0	0	0	0	603	903	0
42	0	0	0	0	0	0	0	200	300	0	0	0	0	0	0	0	200	903	0	0	0	0	0	0	0	603	903	0
42	1	0	0	0	0	0	0	200	300	0	0	0	0	0	0	0	200	903	0	0	0	0	0	0	0	603	903	0
42	2	0	0	0	0	0	0	200	300	0	0	0	0	0	0	0	200	903	0	0	0	0	0	0	0	603	903	0
42	3	0	0	0	0	0	0	200	300	0	0	0	0	0	0	0	200	903	0	0	0	0	0	0	0	603	903	0
42	4	0	0	0	0	0	0	200	300	0	0	0	0	0	0	0	200	903	0	0	0	0	0	0	0	603	903	0
42	5	0	0	0	0	0	0	200	300	0	0	0	0	0	0	0	200	903	0	0	0	0	0	0	0	603	903	0
42	6	0	0	0	0	0	0	200	300	0	0	0	0	0	0	0	200	903	0	0	0	0	0	0	0	603	903	0
42	7	0	0	0	0	0	0	200	300	0	0	0	0	0	0	0	200	903	0	0	0	0	0	0	0	603	903	0
42	8	0	0	0	0	0	0	200	300	0	0	0	0	0	0	0	200	903	0	0	0	0	0	0	0	603	903	0
42	9	0	0	0	0	0	0	200	300	0	0	0	0	0	0	0	200	903	0	0	0	0	0	0	0	603	903	0
43	0	0	0	0	0	0	0	200	300	0	0	0	0	0	0	0	200	903	0	0	0	0	0	0	0	603	903	0
43	1	0	0	0	0	0	0	200	300	0	0	0	0	0	0	0	200	903	0	0	0	0	0	0	0	603	903	0
43	2	0	0	0	0	0	0	200	300	0	0	0	0	0	0	0	200	903	0	0	0	0	0	0	0	603	903	0
43	3	0	0	0	0	0	0	200	300	0	0	0	0	0	0	0	200	903	0	0	0	0	0	0	0	603	903	0
43	4	0	0	0	0	0	0	200	300	0	0	0	0	0	0	0	200	903	0	0	0	0	0	0	0	603	903	0
43	5	0	0	0	0	0	0	200	300	0	0	0	0	0	0	0	200	903	0	0	0	0	0	0	0	603	903	0
43	6	0	0	0	0	0	0	200	300	0	0	0	0	0	0	0	200	903	0	0	0	0	0	0	0	603	903	0
43	7	0	0	0	0	0	0	200	300	0	0	0	0	0	0	0	200	903	0	0	0	0	0	0	0	603	903	0
43	8	0	0	0	0	0	0	200	300	0	0	0	0	0	0	0	200	903	0	0	0	0	0	0	0	603	903	0
43	9	0	0	0	0	0	0	200	300	0	0	0	0	0	0	0	200	903	0	0	0	0	0	0	0	603	903	0
44	0	0	0	0	0	0	0	200	300	0	0	0	0	0	0	0	200	903	0	0	0	0	0	0	0	603	903	0
44	1	0	0	0	0	0	0	200	300	0	0	0	0	0	0	0	200	903	0	0	0	0	0	0	0	603	903	0
44	2	0	0	0	0	0	0	200	300	0	0	0	0	0	0	0	200	903	0	0	0	0	0	0	0	603	903	0
44	3	0	0	0	0	0	0	200	300	0	0	0	0	0	0	0	200	903	0	0	0	0	0	0	0	603	903	0
44	4	0	0	0	0	0	0	200	300	0	0	0	0	0	0	0	200	903	0	0	0	0	0	0	0	603	903	0
44	5	0	0	0	0	0	0	200	300	0	0	0	0	0	0	0	200	903	0	0	0	0	0	0	0	603	903	0
44	6	0	0	0	0	0	0	200	300	0	0	0	0	0	0	0	200	903	0	0	0	0	0	0	0	603	903	0
44	7	0	0	0	0	0	0	200	300	0	0	0	0	0	0	0	200	903	0	0	0	0	0	0	0	603	903	0
44	8	0	0	0	0	0	0	200	300	0	0	0	0	0	0	0	200	903	0	0	0	0	0	0	0	603	903	0
44	9	0	0	0	0	0	0	200	300	0	0	0	0	0	0	0	200	903	0	0	0	0	0	0	0	603	903	0
45	0	0	0	0	0	0	0	200	300	0	0	0	0	0	0	0	200	903	0	0	0	0	0	0	0	603	903	0
45	1	0	0	0	0	0	0	200	300	0	0	0	0	0	0	0	200	903	0	0	0	0	0	0	0	603	903	0
45	2	0	0	0	0	0	0	200	300	0	0	0	0	0	0	0	200	903	0	0	0	0	0	0	0	603	903	0
45	3	0	0	0	0	0	0	200	300	0	0	0	0	0	0	0	200	903	0	0	0	0	0	0	0	603	903	0
45	4	0	0	0	0	0	0	200	300	0	0	0	0	0	0	0	200	903	0	0	0	0	0	0	0	603	903	0
45	5	0	0	0	0	0	0	200	300	0	0	0	0	0	0	0	200	903	0	0	0	0	0	0	0	603	903	0
45	6	0	0	0	0	0	0	200	300	0	0	0	0	0	0	0	200	903	0	0	0	0	0	0	0	603	903	0
45	7	0	0	0	0	0	0	200	300	0	0	0	0	0	0	0	200	903	0	0	0	0	0	0	0	603	903	0
45	8	0	0	0	0	0	0	200	300	0	0	0	0	0	0	0	200	903	0	0	0	0	0	0	0	603	903	0
45	9	0	0	0	0	0	0	200	300	0	0	0	0	0	0	0	200	903	0	0	0	0	0	0	0	603	903	0
46	0	0	0	0	0	0	0	200	300	0	0	0	0	0	0	0	200	903	0	0	0	0	0	0	0	603	903	0
46	1	0	0	0	0	0	0	200	300	0	0	0	0	0	0	0	200	903	0	0	0	0	0	0	0	603	903	0
46	2	0	0	0	0	0	0	200	300	0	0	0	0	0	0	0	200	903	0	0	0	0	0	0	0	603	903	0
46	3	0	0	0	0	0	0	200	300	0	0	0	0	0	0	0	200	903	0	0	0	0	0	0	0	603	903	0
46	4	0	0	0	0	0	0	200	300	0	0	0	0	0	0	0	200	903	0	0	0	0	0	0	0	603	903	0
46	5	0	0	0	0	0	0	200	300	0	0	0	0	0	0	0	200	903	0	0	0	0	0	0	0	603	903	0
46	6	0	0	0	0	0	0	200	300	0	0	0	0	0	0	0	200	903	0	0	0	0	0	0	0	603	903	0
46	7	0	0	0	0	0	0	200	300	0	0	0	0	0	0	0	200	903	0	0	0	0	0	0	0	603	903	0
46	8	0	0	0	0	0	0	200	300	0	0	0	0	0	0	0	200	903	0	0	0	0	0	0	0	603	903	0
46	9	0	0	0	0	0	0	200	300	0	0	0	0	0	0	0	200	903	0	0	0	0	0	0	0	603	903	0
47	0	0	0	0	0	0	0	200	300	0	0	0	0	0	0	0	200	903	0	0	0	0	0	0	0	603	903	0
47	1	0	0	0	0	0	0	200	300	0	0	0	0	0	0	0	200	903	0	0	0	0	0	0	0	603	903	0
47	2	0	0	0	0	0	0	200	300	0	0	0	0	0	0	0	200	903	0	0	0	0	0	0	0	603	903	0
47	3	0	0	0	0	0	0	200	300	0	0	0	0	0	0	0	200	903	0	0	0	0	0	0	0	603	903	0
47	4	0	0	0	0	0	0	200	300	0	0	0	0	0	0	0	200	903	0	0	0	0	0	0	0	603	903	0
47	5	0	0	0	0	0	0	200	300	0	0	0	0	0	0	0	200	903	0	0	0	0	0	0	0	603	903	0
47	6	0	0	0	0	0	0	200	300	0	0	0	0	0	0	0	200	903	0	0	0	0	0	0	0	603	903	0
47	7	0	0	0	0	0	0	200	300	0	0	0	0	0	0	0	200	903	0	0	0	0	0	0	0	603	903	0
47	8	0	0	0	0	0	0	200	300	0	0	0	0	0	0	0	200	903	0	0	0	0	0	0	0	603	903	0
47	9	0	0	0	0	0	0	200	300	0	0	0	0	0	0	0	200	903	0	0	0	0	0	0	0	603	903	0
48	0	0	0	0	0	0	0	200	300	0	0	0	0	0	0	0	200	903	0	0	0	0	0	0	0	603	903	0
48	1	0	0	0	0	0	0	200	300	0	0	0	0	0	0	0	200	903	0	0	0	0	0	0	0	603	903	0
48	2	0	0	0	0	0	0	200	300	0	0	0	0	0	0	0	200	903	0	0	0	0	0	0	0	603	903	0
48	3	0	0	0	0	0	0	200	300	0	0	0	0	0	0	0	200	903	0	0	0	0	0	0	0	603	903	0
48	4	0	0	0	0	0	0	200	300	0	0	0	0	0	0	0	200	903	0	0	0	0	0	0	0	603	903	0
48	5	0	0	0	0	0	0	200	300	0	0	0	0	0	0	0	200	903	0	0	0	0	0	0	0	603	903	0
48	6	0	0	0	0	0	0	200	300	0	0	0	0	0	0	0	200	903	0	0	0	0	0	0	0	603	903	0
48	7	0	0	0	0	0	0	200	300	0	0	0	0	0	0	0	200	903	0	0	0	0	0	0	0	603	903	0
48	8	0	0	0	0	0	0	200	300	0	0	0	0	0	0	0	200	903	0	0	0	0	0	0	0	603	903	0
48	9	0	0	0	0	0	0	200	300	0	0	0	0	0	0	0	200	903	0	0	0	0	0	0	0	603	903	0
49	0	0	0	0	0	0	0	200	300	0	0	0	0	0	0	0	200	903	0	0	0	0	0	0	0	603	903	0
49	1	0	0	0	0	0	0	200	300	0	0	0	0	0	0	0	200	903	0	0	0	0	0	0	0	603	903	0
49	2	0	0	0	0	0	0	200	300	0	0	0	0	0	0	0	200	903	0	0	0	0	0	0	0	603	903	0
49	3	0	0	0	0	0	0	200	300	0	0	0	0	0	0	0	200	903	0	0	0	0	0	0	0	603	903	0
49	4	0	0	0	0	0	0	200	300	0	0	0	0	0	0	0	200	903	0	0	0	0	0	0	0	603	903	0
49	5	0	0	0	0	0	0	200	300	0	0	0	0	0	0	0	200	903	0	0	0	0	0	0	0	603	903	0
49	6	0	0	0	0	0	0	200	300	0	0	0	0	0	0	0	200	903	0	0	0	0	0	0	0	603	903	0
49	7	0	0	0	0	0	0	200	300	0	0	0	0	0	0	0	200	903	0	0	0	0	0	0	0	603	903	0
49	8	0	0	0	0	0	0	200	300	0	0	0	0	0	0	0	200	903	0	0	0	0	0	0	0	603	903	0
49	9	0	0	0	0	0	0	200	300	0	0	0	0	0	0	0	200	903	0	0	0	0	0	0	0	603	903	0
50	0	0	0	0	0	0	0	200	300	0	0	0	0	0	0	0	200	903	0	0	0	0	0	0	0	603	903	0
50	1	0	0	0	0	0	0	200	300	0	0	0	0	0	0	0	200	903	0	0	0	0	0	0	0	603	903	0
50	2	0	0	0	0	0	0	200	300	0	0	0	0	0	0	0	200	903	0	0	0	0	0	0	0	603	903	0
50	3	0	0	0	0	0	0	200	300	0	0	0	0	0	0	0	200	903	0	0	0	0	0	0	0	603	903	0
50	4	0	0	0	0	0	0	200	300	0	0	0	0	0	0	0	200	903	0	0	0	0	0	0	0	603	903	0
50	5	0	0	0	0	0	0	200	300	0	0	0	0	0	0	0	200	903	0	0	0	0	0	0	0	603	903	0
50	6	0	0	0	0	0	0	200	300	0	0	0	0	0	0	0	200	903	0	0	0	0	0	0	0	603	903	0
50	7	0	0	0	0	0	0	200	300	0	0	0	0	0	0	0	200	903	0	0	0	0	0	0	0	603	903	0
50	8	0	0	0	0	0	0	200	300	0	0	0	0	0	0	0	200	903	0	0	0	0	0	0	0	603	903	0
50	9	0	0	0	0	0	0	200	300	0	0	0	0	0	0	0	200	903	0	0	0	0	0	0	0	603	903	0
51	0	0	0	0	0	0	0	200	300	0	0	0	0	0	0	0	200	903	0	0	0	0	0	0	0	603	903	0
51	1	0	0	0	0	0	0	200	300	0	0	0	0	0	0	0	200	903	0	0	0	0	0	0	0	603	903	0
51	2	0	0	0	0	0	0	200	300	0	0	0	0	0	0	0	200	903	0	0	0	0	0	0	0	603	903	0
51	3	0	0	0	0	0	0	200	300	0	0	0	0	0	0	0	200	903	0	0	0	0	0	0	0	603	903	0
51	4	0	0	0	0	0	0	200	300	0	0	0	0	0	0	0	200	903	0	0	0	0	0	0	0	603	903	0
51	5	0	0	0	0	0	0	200	300	0	0	0	0	0	0	0	200	903	0	0	0	0	0	0	0	603	903	0
51	6	0	0	0	0	0	0	200	300	0	0	0	0	0	0	0	200	903	0	0	0	0	0	0	0	603	903	0
51	7	0	0	0	0	0	0	200	300	0	0	0	0	0	0	0	200	903	0	0	0	0	0	0	0	603	903	0
51	8	0	0	0	0	0	0	200	300	0	0	0	0	0	0	0	200	903	0	0	0	0	0	0	0	603	903	0
51	9	0	0	0	0	0	0	200	300	0	0	0	0	0	0	0	200	903	0	0	0	0	0	0	0	603	903	0
52	0	0	0	0	0	0	0	200	300	0	0	0	0	0	0	0	200	903	0	0	0	0	0	0	0	603	903	0
52	1	0	0	0	0	0	0	200	300	0	0	0	0	0	0	0	200	903	0	0	0	0	0	0	0	603	903	0
52	2	0	0	0	0	0	0	200	300	0	0	0	0	0	0	0	200	903	0	0	0	0	0	0	0	603	903	0
52	3	0	0	0	0	0	0	200	300	0	0	0	0	0	0	0	200	903	0	0	0	0	0	0	0	603	903	0
52	4	0	0	0	0	0	0	200	300	0	0	0	0	0	0	0	200	903	0	0	0	0	0	0	0	603	903	0
52	5	0	0	0	0	0	0	200	300	0	0	0	0	0	0	0	200	903	0	0	0	0	0	0	0	603	903	0
52	6	0	0	0	0	0	0	200	300	0	0	0	0	0	0	0	200	903	0	0	0	0	0	0	0	603	903	0
52	7	0	0	0	0	0	0	200	300	0	0	0	0	0	0	0	200	903	0	0	0	0	0	0	0	603	903	0
52	8	0	0	0	0	0	0	200	300	0	0	0	0	0	0	0	200	903	0	0	0	0	0	0	0	603	903	0
52	9	0	0	0	0	0	0	200	300	0	0	0	0	0	0	0	200	903	0	0	0	0	0	0	0	603	903	0
53	0	0	0	0	0	0	0	200	300	0	0	0	0	0	0	0	200	903	0	0	0	0	0	0	0	603	903	0
53	1	0	0	0	0	0	0	200	300	0	0	0	0	0	0	0	200	903	0	0	0	0	0	0	0	603	903	0
53	2	0	0	0	0	0	0	200	300	0	0	0	0	0	0	0	200	903	0	0	0	0	0	0	0	603	903	0
53	3	0	0	0	0	0	0	200	300	0	0	0	0	0	0	0	200	903	0	0	0	0	0	0	0	603	903	0
53	4	0	0	0	0	0	0	200	300	0	0	0	0	0	0	0	200	903	0	0	0	0	0	0	0	603	903	0
53	5	0	0	0	0	0	0	200	300	0	0	0	0	0	0	0	200	903	0	0	0	0	0	0	0	603	903	0
53	6	0	0	0	0	0	0	200	300	0	0	0	0	0	0	0	200	903	0	0	0	0	0	0	0	603	903	0
53	7	0	0	0	0	0	0	200	300	0	0	0	0	0	0	0	200	903	0	0	0	0	0	0	0	603	903	0
53	8	0	0	0	0	0	0	200	300	0	0	0	0	0	0	0	200	903	0	0	0	0	0	0	0	603	903	0
53	9	0	0	0	0	0	0	200	300	0	0	0	0	0	0	0	200	903	0	0	0	0	0	0	0	603	903	0
54	0	0	0	0	0	0	0	200	300	0	0	0	0	0	0	0	200	903	0	0	0	0	0	0	0	603	903	0
54	1	0	0	0	0	0	0	200	300	0	0	0	0	0	0	0	200	903	0	0	0	0	0	0	0	603	903	0
54	2	0	0	0	0	0	0	200	300	0	0	0	0	0	0	0	200	903	0	0	0	0	0	0	0	603	903	0
54	3	0	0	0	0	0	0	200	300	0	0	0	0	0	0	0	200	903	0	0	0	0	0	0	0	603	903	0
54	4	0	0	0	0	0	0	200	300	0	0	0	0	0	0	0	200	903	0	0	0	0	0	0	0	603	903	0
54	5	0	0	0	0	0	0	200	300	0	0	0	0	0	0	0	200	903	0	0	0	0	0	0	0	603	903	0
54	6	0	0	0	0	0	0	200	300	0	0	0	0	0	0	0	200	903	0	0	0	0	0	0	0	603	903	0
54	7	0	0	0	0	0	0	200	300	0	0	0	0	0	0	0	200	903	0	0	0	0	0	0	0	603	903	0
54	8	0	0	0	0	0	0	200	300	0	0	0	0	0	0	0	200	903	0	0	0	0	0	0	0	603	903	0
54	9	0	0	0	0	0	0	200	300	0	0	0	0	0	0	0	200	903	0	0	0	0	0	0	0	603	903	0
55	0	0	0	0	0	0	0	200	300	0	0	0	0	0	0	0	200	903	0	0	0	0	0	0	0	603	903	0
55	1	0	0	0	0	0	0	200	300	0	0	0	0	0	0	0	200	903	0	0	0	0	0	0	0	603	903	0
55	2	0	0	0	0	0	0	200	300	0	0	0	0	0	0	0	200	903	0	0	0	0	0	0	0	603	903	0
55	3	0	0	0	0	0	0	200	300	0	0	0	0	0	0	0	200	903	0	0	0	0	0	0	0	603	903	0
55	4	0	0	0	0	0	0	200	300	0	0	0	0	0	0	0	200	903	0	0	0	0	0	0	0	603	903	0
55	5	0	0	0	0	0	0	200	300	0	0	0	0	0	0	0	200	903	0	0	0	0	0	0	0	603	903	0
55	6	0	0	0	0	0	0	200	300	0	0	0	0	0	0	0	200	903	0	0	0	0	0	0	0	603	903	0
55	7	0	0	0	0	0	0	200	300	0	0	0	0	0	0	0	200	903	0	0	0	0	0	0	0	603	903	0
55	8	0	0	0	0	0	0	200	300	0	0	0	0	0	0	0	200	903	0	0	0	0	0	0	0	603	903	0
55	9	0	0	0	0	0	0	200	300	0	0	0	0	0	0	0	200	903	0	0	0	0	0	0	0	603	903	0
56	0	0	0	0	0	0	0	200	300	0	0	0	0	0	0	0	200	903	0	0	0	0	0	0	0	603	903	0
56	1	0	0	0	0	0	0	200	300	0	0	0	0	0	0	0	200	903	0	0	0	0	0	0	0	603	903	0
56	2	0	0	0	0	0	0	200	300	0	0	0	0	0	0	0	200	903	0	0	0	0	0	0	0	603	903	0
56	3	0	0	0	0	0	0	200	300	0	0	0	0	0	0	0	200	903	0	0	0	0	0	0	0	603	903	0
56	4	0	0	0	0	0	0	200	300	0	0	0	0	0	0	0	200	903	0	0	0	0	0	0	0	603	903	0
56	5	0	0	0	0	0	0	200	300	0	0	0	0	0	0	0	200	903	0	0	0	0	0	0	0	603	903	0
56	6	0	0	0	0	0	0	200	300	0	0	0	0	0	0	0	200	903	0	0	0	0	0	0	0	603	903	0
56	7	0	0	0	0	0	0	200	300	0	0	0	0	0	0	0	200	903	0	0	0	0	0	0	0	603	903	0
56	8	0	0	0	0	0	0	200	300	0	0	0	0	0	0	0	200	903	0	0	0	0	0	0	0	603	903	0
56	9	0	0	0	0	0	0	200	300	0	0	0	0	0	0	0	200	903	0	0	0	0	0	0	0	603	903	0
57	0	0	0	0	0	0	0	200	300	0	0	0	0	0	0	0	200	903	0	0	0	0	0	0	0	603	903	0
57	1	0	0	0	0	0	0	200	300	0	0	0	0	0	0	0	200	903	0	0	0	0	0	0	0	603	903	0
57	2	0	0	0	0	0	0	200	300	0	0	0	0	0	0	0	200	903	0	0	0	0	0	0	0	603	903	0
57	3	0	0	0	0	0	0	200	300	0	0	0	0	0	0	0	200	903	0	0	0	0	0	0	0	603	903	0
57	4	0	0	0	0	0	0	200	300	0	0	0	0	0	0	0	200	903	0	0	0	0	0	0	0	603	903	0
57	5	0	0	0	0	0	0	200	300	0	0	0	0	0	0	0	200	903	0	0	0	0	0	0	0	603	903	0
57	6	0	0	0	0	0	0	200	300	0	0	0	0	0	0	0	200	903	0	0	0	0	0	0	0	603	903	0
57	7	0	0	0	0	0	0	200	300	0	0	0	0	0	0	0	200	903	0	0	0	0	0	0	0	603	903	0
57	8	0	0	0	0	0	0	200	300	0	0	0	0	0	0	0	200	903	0	0	0	0	0	0	0	603	903	0
57	9	0	0	0	0	0	0	200	300	0	0	0	0	0	0	0	200	903	0	0	0	0	0	0	0	603	903	0
58	0	0	0	0	0	0	0	200	300	0	0	0	0	0	0	0	200	903	0	0	0	0	0	0	0	603	903	0
58	1	0	0	0	0	0	0	200	300	0	0	0	0	0	0	0	200	903	0	0	0	0	0	0	0	603	903	0
58	2	0	0	0	0	0	0	200	300	0	0	0	0	0	0	0	200	903	0	0	0	0	0	0	0	603	903	0
58	3	0	0	0	0	0	0	200	300	0	0	0	0	0	0	0	200	903	0	0	0	0	0	0	0	603	903	0
58	4	0	0	0	0	0	0	200	300	0	0	0	0	0	0	0	200	903	0	0	0	0	0	0	0	603	903	0
58	5	0	0	0	0	0	0	200	300	0	0	0	0	0	0	0	200	903	0	0	0	0	0	0	0	603	903	0
58	6	0	0	0	0	0	0	200	300	0	0	0	0	0	0	0	200	903	0	0	0	0	0	0	0	603	903	0
58	7	0	0	0	0	0	0	200	300	0	0	0	0	0	0	0	200	903	0	0	0	0	0	0	0	603	903	0
58	8	0	0	0	0	0	0	200	300	0	0	0	0	0	0	0	200	903	0	0	0	0	0	0	0	603	903	0
58	9	0	0	0	0	0	0	200	300	0	0	0	0	0	0	0	200	903	0	0	0	0	0	0	0	603	903	0
59	0	0	0	0	0	0	0	200	300	0	0	0	0	0	0	0	200	903	0	0	0	0	0	0	0	603	903	0
59	1	0	0	0	0	0	0	200	300	0	0	0	0	0	0	0	200	903	0	0	0	0	0	0	0	603	903	0
59	2	0	0	0	0	0	0	200	300	0	0	0	0	0	0	0	200	903	0	0	0	0	0	0	0	603	903	0
59	3	0	0	0	0	0	0	200	300	0	0	0	0	0	0	0	200	903	0	0	0	0	0	0	0	603	903	0
59	4	0	0	0	0	0	0	200	300	0	0	0	0	0	0	0	200	903	0	0	0	0	0	0	0	603	903	0
59	5	0	0	0	0	0	0	200	300	0	0	0	0	0	0	0	200	903	0	0	0	0	0	0	0	603	903	0
59	6	0	0	0	0	0	0	200	300	0	0	0	0	0	0	0	200	903	0	0	0	0	0	0	0	603	903	0
59	7	0	0	0	0	0	0	200	300	0	0	0	0	0	0	0	200	903	0	0	0	0	0	0	0	603	903	0
59	8	0	0	0	0	0	0	200	300	0	0	0	0	0	0	0	200	903	0	0	0	0	0	0	0	603	903	0
59	9	0	0	0	0	0	0	200	300	0	0	0	0	0	0	0	200	903	0	0	0	0	0	0	0	603	903	0
60	0	0	0	0	0	0	0	200	300	0	0	0	0	0	0	0	200	903	0	0	0	0	0	0	0	603	903	0
60	1	0	0	0	0	0	0	200	300	0	0	0	0	0	0	0	200	903	0	0	0	0	0	0	0	603	903	0
60	2	0	0	0	0	0	0	200	300	0	0	0	0	0	0	0	200	903	0	0	0	0	0	0	0	603	903	0
60	3	0	0	0	0	0	0	200	300	0	0	0	0	0	0	0	200	903	0	0	0	0	0	0	0	603	903	0
60	4	0	0	0	0	0	0	200	300	0	0	0	0	0	0	0	200	903	0	0	0	0	0	0	0	603	903	0
60	5	0	0	0	0	0	0	200	300	0	0	0	0	0	0	0	200	903	0	0	0	0	0	0	0	603	903	0
60	6	0	0	0	0	0	0	200	300	0	0	0	0	0	0	0	200	903	0	0	0	0	0	0	0	603	903	0
60	7	0	0	0	0	0	0	200	300	0	0	0	0	0	0	0	200	903	0	0	0	0	0	0	0	603	903	0
60	8	0	0	0	0	0	0	200	300	0	0	0	0	0	0	0	200	903	0	0	0	0	0	0	0	603	903	0
60	9	0	0	0	0	0	0	200	300	0	0	0	0	0	0	0	200	903	0	0	0	0	0	0	0	603	903	0
61	0	0	0	0	0	0	0	200	300	0	0	0	0	0	0	0	200	903	0	0	0	0	0	0	0	603	903	0
61	1	0	0	0	0	0	0	200	300	0	0	0	0	0	0	0	200	903	0	0	0	0	0	0	0	603	903	0
61	2	0	0	0	0	0	0	200	300	0	0	0	0	0	0	0	200	903	0	0	0	0	0	0	0	603	903	0
61	3	0	0	0	0	0	0	200	300	0	0	0	0	0	0	0	200	903	0	0	0	0	0	0	0	603	903	0
61	4	0	0	0	0	0	0	200	300	0	0	0	0	0	0	0	200	903	0	0	0	0	0	0	0	603	903	0
61	5	0	0	0	0	0	0	200	300	0	0	0	0	0	0	0	200	903	0	0	0	0	0	0	0	603	903	0
61	6	0	0	0	0	0	0	200	300	0	0	0	0	0	0	0	200	903	0	0	0	0	0	0	0	603	903	0
61	7	0	0	0	0	0	0	200	300	0	0	0	0	0	0	0	200	903	0	0	0	0	0	0	0	603	903	0
61	8	0	0	0	0	0	0	200	300	0	0	0	0	0	0	0	200	903	0	0	0	0	0	0	0	603	903	0
61	9	0	0	0	0	0	0	200	300	0	0	0	0	0	0	0	200	903	0	0	0	0	0	0	0	603	903	0
62	0	0	0	0	0	0	0	200	300	0	0	0	0	0	0	0	200	903	0	0	0	0	0	0	0	603	903	0
62	1	0	0	0	0	0	0	200	300	0	0	0	0	0	0	0	200	903	0	0	0	0	0	0	0	603	903	0
62	2	0	0	0	0	0	0	200	300	0	0	0	0	0	0	0	200	903	0	0	0	0	0	0	0	603	903	0
62	3	0	0	0	0	0	0	200	300	0	0	0	0	0	0	0	200	903	0	0	0	0	0	0	0	603	903	0
62	4	0	0	0	0	0	0	200	300	0	0	0	0	0	0	0	200	903	0	0	0	0	0	0	0	603	903	0
62	5	0	0	0	0	0	0	200	300	0	0	0	0	0	0	0	200	903	0	0	0	0	0	0	0	603	903	0
62	6	0	0	0	0	0	0	200	300	0	0	0	0	0	0	0	200	903	0	0	0	0	0	0	0	603	903	0
62	7	0	0	0	0	0	0	200	300	0	0	0	0	0	0	0	200	903	0	0	0	0	0	0	0	603	903	0
62	8	0	0	0	0	0	0	200	300	0	0	0	0	0	0	0	200	903	0	0	0	0	0	0	0	603	903	0
62	9	0	0	0	0	0	0	200	300	0	0	0	0	0	0	0	200	903	0	0	0	0	0	0	0	603	903	0
63	0	0	0	0	0	0	0	200	300	0	0	0	0	0	0	0	200	903	0	0	0	0	0	0	0	603	903	0
63	1	0	0	0	0	0	0	200	300	0	0	0	0	0	0	0	200	903	0	0	0	0	0	0	0	603	903	0
63	2	0	0	0	0	0	0	200	300	0	0	0	0	0	0	0	200	903	0	0	0	0	0	0	0	603	903	0
63	3	0	0	0	0	0	0	200	300	0	0	0	0	0	0	0	200	903	0	0	0	0	0	0	0	603	903	0
63	4	0	0	0	0	0	0	200	300	0	0	0	0	0	0	0	200	903	0	0	0	0	0	0	0	603	903	0
63	5	0	0	0	0	0	0	200	300	0	0	0	0	0	0	0	200	903	0	0	0	0	0	0	0	603	903	0
63	6	0	0	0	0	0	0	200	300	0	0	0	0	0	0	0	200	903	0	0	0	0	0	0	0	603	903	0
63	7	0	0	0	0	0	0	200	300	0	0	0	0	0	0	0	200	903	0	0	0	0	0	0	0	603	903	0
63	8	0	0	0	0	0	0	200	300	0	0	0	0	0	0	0	200	903	0	0	0	0	0	0	0	603	903	0
63	9	0	0	0	0	0	0	200	300	0	0	0	0	0	0	0	200	903	0	0	0	0	0	0	0	603	903	0
64	0	0	0	0	0	0	0	200	300	0	0	0	0	0	0	0	200	903	0	0	0	0	0	0	0	603	903	0
64	1	0	0	0	0	0	0	200	300	0	0	0	0	0	0	0	200	903	0	0	0	0	0	0	0	603	903	0
64	2	0	0	0	0	0	0	200	300	0	0	0	0	0	0	0	200	903	0	0	0	0	0	0	0	603	903	0
64	3	0	0	0	0	0	0	200	300	0	0	0	0	0	0	0	200	903	0	0	0	0	0	0	0	603	903	0
64	4	0	0	0	0	0	0	200	300	0	0	0	0	0	0	0	200	903	0	0	0	0	0	0	0	603	903	0
64	5	0	0	0	0	0	0	200	300	0	0	0	0	0	0	0	200	903	0	0	0	0	0	0	0	603	903	0
64	6	0	0	0	0	0	0	200	300	0	0	0	0	0	0	0	200	903	0	0	0	0	0	0	0	603	903	0
64	7	0	0	0	0	0	0	200	300	0	0	0	0	0	0	0	200	903	0	0	0	0	0	0	0	603	903	0
64	8	0	0	0	0	0	0	200	300	0	0	0	0	0	0	0	200	903	0	0	0	0	0	0	0	603	903	0
64	9	0	0	0	0	0	0	200	300	0	0	0	0	0	0	0	200	903	0	0	0	0	0	0	0	603	903	0
65	0	0	0	0	0	0	0	200	300	0	0	0	0	0	0	0	200	903	0	0	0	0	0	0	0	603	903	0
65	1	0	0	0	0	0	0	200	300	0	0	0	0	0	0	0	200	903	0	0	0	0	0	0	0	603	903	0
65	2	0	0	0	0	0	0	200	300	0	0	0	0	0	0	0	200	903	0	0	0	0	0	0	0	603	903	0
65	3	0	0	0	0	0	0	200	300	0	0	0	0	0	0	0	200	903	0	0	0	0	0	0	0	603	903	0
65	4	0	0	0	0	0	0	200	300	0	0	0	0	0	0	0	200	903	0	0	0	0	0	0	0	603	903	0
65	5	0	0	0	0	0	0	200	300	0	0	0	0	0	0	0	200	903	0	0	0	0	0	0	0	603	903	0
65	6	0	0	0	0	0	0	200	300	0	0	0	0	0	0	0	200	903	0	0	0	0	0	0	0	603	903	0
65	7	0	0	0	0	0	0	200	300	0	0	0	0	0	0	0	200	903	0	0	0	0	0	0	0	603	903	0
65	8	0	0	0	0	0	0	200	300	0	0	0	0	0	0	0	200	903	0	0	0	0	0	0	0	603	903	0
65	9	0	0	0	0	0	0	200	300	0	0	0	0	0	0	0	200	903	0	0	0	0	0	0	0	603	903	0
66	0	0	0	0	0	0	0	200	300	0	0	0	0	0	0	0	200	903	0	0	0	0	0	0	0	603	903	0
66	1	0	0	0	0	0	0	200	300	0	0	0	0	0	0	0	200	903	0	0	0	0	0	0	0	603	903	0
66	2	0	0	0	0	0	0	200	300	0	0	0	0	0	0	0	200	903	0	0	0	0	0	0	0	603	903	0
66	3	0	0	0	0	0	0	200	300	0	0	0	0	0	0	0	200	903	0	0	0	0	0	0	0	603	903	0
66	4	0	0	0	0	0	0	200	300	0	0	0	0	0	0	0	200	903	0	0	0	0	0	0	0	603	903	0
66	5	0	0	0	0	0	0	200	300	0	0	0	0	0	0	0	200	903	0	0	0	0	0	0	0	603	903	0
66	6	0	0	0	0	0	0	200	300	0	0	0	0	0	0	0	200	903	0	0	0	0	0	0	0	603	903	0
66	7	0	0	0	0	0	0	200	300	0	0	0	0	0	0	0	200	903	0	0	0	0	0	0	0	603	903	0
66	8	0	0	0	0	0	0	200	300	0	0	0	0	0	0	0	200	903	0	0	0	0	0	0	0	603	903	0
66	9	0	0	0	0	0	0	200	300	0	0	0	0	0	0	0	200	903	0	0	0	0	0	0	0	603	903	0
67	0	0	0	0	0	0	0	200	300	0	0	0	0	0	0	0	200	903	0	0	0	0	0	0	0	603	903	0
67	1	0	0	0	0	0	0	200	300	0	0	0	0	0	0	0	200	903	0	0	0	0	0	0	0	603	903	0
67	2	0	0	0	0	0	0	200	300	0	0	0	0	0	0	0	200	903	0	0	0	0	0	0	0	603	903	0
67	3	0	0	0	0	0	0	200	300	0	0	0	0	0	0	0	200	903	0	0	0	0	0	0	0	603	903	0
67	4	0	0	0	0	0	0	200	300	0	0	0	0	0	0	0	200	903	0	0	0	0	0	0	0	603	903	0
67	5	0	0	0	0	0	0	200	300	0	0	0	0	0	0	0	200	903	0	0	0	0	0	0	0	603	903	0
67	6	0	0	0	0	0	0	200	300	0	0	0	0	0	0	0	200	903	0	0	0	0	0	0	0	603	903	0
67	7	0	0	0	0	0	0	200	300	0	0	0	0	0	0	0	200	903	0	0	0	0	0	0	0	603	903	0
67	8	0	0	0	0	0	0	200	300	0	0	0	0	0	0	0	200	903	0	0	0	0	0	0	0	603	903	0
67	9	0	0	0	0	0	0	200	300	0	0	0	0	0	0	0	200	903	0	0	0	0	0	0	0	603	903	0
68	0	0	0	0	0	0	0	200	300	0	0	0	0	0	0	0	200	903	0	0	0	0	0	0	0	603	903	0
68	1	0	0	0	0	0	0	200	300	0	0	0	0	0	0	0	200	903	0	0	0	0	0	0	0	603	903	0
68	2	0	0	0	0	0	0	200	300	0	0	0	0	0	0	0	200	903	0	0	0	0	0	0	0	603	903	0
68	3	0	0	0	0	0	0	200	300	0	0	0	0	0	0	0	200	903	0	0	0	0	0	0	0	603	903	0
68	4	0	0	0	0	0	0	200	300	0	0	0	0	0	0	0	200	903	0	0	0	0	0	0	0	603	903	0
68	5	0	0	0	0	0	0	200	300	0	0	0	0	0	0	0	200	903	0	0	0	0	0	0	0	603	903	0
68	6	0	0	0	0	0	0	200	300	0	0	0	0	0	0	0	200	903	0	0	0	0	0	0	0	603	903	0
68	7	0	0	0	0	0	0	200	300	0	0	0	0	0	0	0	200	903	0	0	0	0	0	0	0	603	903	0
68	8	0	0	0	0	0	0	200	300	0	0	0	0	0	0	0	200	903	0	0	0	0	0	0	0	603	903	0
68	9	0	0	0	0	0	0	200	300	0	0	0	0	0	0	0	200	903	0	0	0	0	0	0	0	603	903	0
69	0	0	0	0	0	0	0	200	300	0	0	0	0	0	0	0	200	903	0	0	0	0	0	0	0	603	903	0
69	1	0	0	0	0	0	0	200	300	0	0	0	0	0	0	0	200	903	0	0	0	0	0	0	0	603	903	0
69	2	0	0	0	0	0	0	200	300	0	0	0	0	0	0	0	200	903	0	0	0	0	0	0	0	603	903	0
69	3	0	0	0	0	0	0	200	300	0	0	0	0	0	0	0	200	903	0	0	0	0	0	0	0	603	903	0
69	4	0	0	0	0	0	0	200	300	0	0	0	0	0	0	0	200	903	0	0	0	0	0	0	0	603	903	0
69	5	0	0	0	0	0	0	200	300	0	0	0	0	0	0	0	200	903	0	0	0	0	0	0	0	603	903	0
69	6	0	0	0	0	0	0	200	300	0	0	0	0	0	0	0	200	903	0	0	0	0	0	0	0	603	903	0
69	7	0	0	0	0	0	0	200	300	0	0	0	0	0	0	0	200	903	0	0	0	0	0	0	0	603	903	0
69	8	0	0	0	0	0	0	200	300	0	0	0	0	0	0	0	200	903	0	0	0	0	0	0	0	603	903	0
69	9	0	0	0	0	0	0	200	300	0	0	0	0	0	0	0	200	903	0	0	0	0	0	0	0	603	903	0
70	0	0	0	0	0	0	0	200	300	0	0	0	0	0	0	0	200	903	0	0	0	0	0	0	0	603	903	0
70	1	0	0	0	0	0	0	200	300	0	0	0	0	0	0	0	200	903	0	0	0	0	0	0	0	603	903	0
70	2	0	0	0	0	0	0	200	300	0	0	0	0	0	0	0	200	903	0	0	0	0	0	0	0	603	903	0
70	3	0	0	0	0	0	0	200	300	0	0	0	0	0	0	0	200	903	0	0	0	0	0	0	0	603	903	0
70	4	0	0	0	0	0	0	200	300	0	0	0	0	0	0	0	200	903	0	0	0	0	0	0	0	603	903	0
70	5	0	0	0	0	0	0	200	300	0	0	0	0	0	0	0	200	903	0	0	0	0	0	0	0	603	903	0
70	6	0	0	0	0	0	0	200	300	0	0	0	0	0	0	0	200	903	0	0	0	0	0	0	0	603	903	0
70	7	0	0	0	0	0	0	200	300	0	0	0	0	0	0	0	200	903	0	0	0	0	0	0	0	603	903	0
70	8	0	0	0	0	0	0	200	300	0	0	0	0	0	0	0	200	903	0	0	0	0	0	0	0	603	903	0
70	9	0	0	0	0	0	0	200	300	0	0	0	0	0	0	0	200	903	0	0	0	0	0	0	0	603	903	0
71	0	0	0	0	0	0	0	200	300	0	0	0	0	0	0	0	200	903	0	0	0	0	0	0	0	603	903	0
71	1	0	0	0	0	0	0	200	300	0	0	0	0	0	0	0	200	903	0	0	0	0	0	0	0	603	903	0
71	2	0	0	0	0	0	0	200	300	0	0	0	0	0	0	0	200	903	0	0	0	0	0	0	0	603	903	0
71	3	0	0	0	0	0	0	200	300	0	0	0	0	0	0	0	200	903	0	0	0	0	0	0	0	603	903	0
71	4	0	0	0	0	0	0	200	300	0	0	0	0	0	0	0	200	903	0	0	0	0	0	0	0	603	903	0
71	5	0	0	0	0	0	0	200	300	0	0	0	0	0	0	0	200	903	0	0	0	0	0	0	0	603	903	0
71	6	0	0	0	0	0	0	200	300	0	0	0	0	0	0	0	200	903	0	0	0	0	0	0	0	603	903	0
71	7	0	0	0	0	0	0	200	300	0	0	0	0	0	0	0	200	903	0	0	0	0	0	0	0	603	903	0
71	8	0	0	0	0	0	0	200	300	0	0	0	0	0	0	0	200	903	0	0	0	0	0	0	0	603	903	0
71	9	0	0	0	0	0	0	200	300	0	0	0	0	0	0	0	200	903	0	0	0	0	0	0	0	603	903	0
72	0	0	0	0	0	0	0	200	300	0	0	0	0	0	0	0	200	903	0	0	0	0	0	0	0	603	903	0
72	1	0	0	0	0	0	0	200	300	0	0	0	0	0	0	0	200	903	0	0	0	0	0	0	0	603	903	0
72	2	0	0	0	0	0	0	200	300	0	0	0	0	0	0	0	200	903	0	0	0	0	0	0	0	603	903	0
72	3	0	0	0	0	0	0	200	300	0	0	0	0	0	0	0	200	903	0	0	0	0	0	0	0	603	903	0
72	4	0	0	0	0	0	0	200	300	0	0	0	0	0	0	0	200	903	0	0	0	0	0	0	0	603	903	0
72	5	0	0	0	0	0	0	200	300	0	0	0	0	0	0	0	200	903	0	0	0	0	0	0	0	603	903	0
72	6	0	0	0	0	0	0	200	300	0	0	0	0	0	0	0	200	903	0	0	0	0	0	0	0	603	903	0
72	7	0	0	0	0	0	0	200	300	0	0	0	0	0	0	0	200	903	0	0	0	0	0	0	0	603	903	0
72	8	0	0	0	0	0	0	200	300	0	0	0	0	0	0	0	200	903	0	0	0	0	0	0	0	603	903	0
72	9	0	0	0	0	0	0	200	300	0	0	0	0	0	0	0	200	903	0	0	0	0	0	0	0	603	903	0
73	0	0	0	0	0	0	0	200	300	0	0	0	0	0	0	0	200	903	0	0	0	0	0	0	0	603	903	0
73	1	0	0	0	0	0	0	200	300	0	0	0	0	0	0	0	200	903	0	0	0	0	0	0	0	603	903	0
73	2	0	0	0	0	0	0	200	300	0	0	0	0	0	0	0	200	903	0	0	0	0	0	0	0	603	903	0
73	3	0	0	0	0	0	0	200	300	0	0	0	0	0	0	0	200	903	0	0	0	0	0	0	0	603	903	0
73	4	0	0	0	0	0	0	200	300	0	0	0	0	0	0	0	200	903	0	0	0	0	0	0	0	603	903	0
73	5	0	0	0	0	0	0	200	300	0	0	0	0	0	0	0	200	903	0	0	0	0	0	0	0	603	903	0
73	6	0	0	0	0	0	0	200	300	0	0	0	0	0	0	0	200	903	0	0	0	0	0	0	0	603	903	0
73	7	0	0	0	0	0	0	200	300	0	0	0	0	0	0	0	200	903	0	0	0	0	0	0	0	603	903	0
73	8	0	0	0	0	0	0	200	300	0	0	0	0	0	0	0	200	903	0	0	0	0	0	0	0	603	903	0
73	9	0	0	0	0	0	0	200	300	0	0	0	0	0	0	0	200	903	0	0	0	0	0	0	0	603	903	0
74	0	0	0	0	0	0	0	200	300	0	0	0	0	0	0	0	200	903	0	0	0	0	0	0	0	603	903	0
74	1	0	0	0	0	0	0	200	300	0	0	0	0	0	0	0	200	903	0	0	0	0	0	0	0	603	903	0
74	2	0	0	0	0	0	0	200	300	0	0	0	0	0	0	0	200	903	0	0	0	0	0	0	0	603	903	0
74	3	0	0	0	0	0	0	200	300	0	0	0	0	0	0	0	200	903	0	0	0	0	0	0	0	603	903	0
74	4	0	0	0	0	0	0	200	300	0	0	0	0	0	0	0	200	903	0	0	0	0	0	0	0	603	903	0
74	5	0	0	0	0	0	0	200	300	0	0	0	0	0	0	0	200	903	0	0	0	0	0	0	0	603	903	0
74	6	0	0	0	0	0	0	200	300	0	0	0	0	0	0	0	200	903	0	0	0	0	0	0	0	603	903	0
74	7	0	0	0	0	0	0	200	300	0	0	0	0	0	0	0	200	903	0	0	0	0	0	0	0	603	903	0
74	8	0	0	0	0	0	0	200	300	0	0	0	0	0	0	0	200	903	0	0	0	0	0	0	0	603	903	0
74	9	0	0	0	0	0	0	200	300	0	0	0	0	0	0	0	200	903	0	0	0	0	0	0	0	603	903	0
75	0	0	0	0	0	0	0	200	300	0	0	0	0	0	0	0	200	903	0	0	0	0	0	0	0	603	903	0
75	1	0	0	0	0	0	0	200	300	0	0	0	0	0	0	0	200	903	0	0	0	0	0	0	0	603	903	0
75	2	0	0	0	0	0	0	200	300	0	0	0	0	0	0	0	200	903	0	0	0	0	0	0	0	603	903	0
75	3	0	0	0	0	0	0	200	300	0	0	0	0	0	0	0	200	903	0	0	0	0	0	0	0	603	903	0
75	4	0	0	0	0	0	0	200	300	0	0	0	0	0	0	0	200	903	0	0	0	0	0	0	0	603	903	0
75	5	0	0	0	0	0	0	200	300	0	0	0	0	0	0	0	200	903	0	0	0	0	0	0	0	603	903	0
75	6	0	0	0	0	0	0	200	300	0	0	0	0	0	0	0	200	903	0	0	0	0	0	0	0	603	903	0
75	7	0	0	0	0	0	0	200	300	0	0	0	0	0	0	0	200	903	0	0	0	0	0	0	0	603	903	0
75	8	0	0	0	0	0	0	200	300	0	0	0	0	0	0	0	200	903	0	0	0	0	0	0	0	603	903	0
75	9	0	0	0	0	0	0	200	300	0	0	0	0	0	0	0	200	903	0	0	0	0	0	0	0	603	903	0
76	0	0	0	0	0	0	0	200	300	0	0	0	0	0	0	0	200	903	0	0	0	0	0	0	0	603	903	0
76	1	0	0	0	0	0	0	200	300	0	0	0	0	0	0	0	200	903	0	0	0	0	0	0	0	603	903	0
76	2	0	0	0	0	0	0	200	300	0	0	0	0	0	0	0	200	903	0	0	0	0	0	0	0	603	903	0
76	3	0	0	0	0	0	0	200	300	0	0	0	0	0	0	0	200	903	0	0	0	0	0	0	0	603	903	0
76	4	0	0	0	0	0	0	200	300	0	0	0	0	0	0	0	200	903	0	0	0	0	0	0	0	603	903	0
76	5	0	0	0	0	0	0	200	300	0	0	0	0	0	0	0	200	903	0	0	0	0	0	0	0	603	903	0
76	6	0	0	0	0	0	0	200	300	0	0	0	0	0	0	0	200	903	0	0	0	0	0	0	0	603	903	0
76	7	0	0	0	0	0	0	200	300	0	0	0	0	0	0	0	200	903	0	0	0	0	0	0	0	603	903	0
76	8	0	0	0	0	0	0	200	300	0	0	0	0	0	0	0	200	903	0	0	0	0	0	0	0	603	903	0
76	9	0	0	0	0	0	0	200	300	0	0	0	0	0	0	0	200	903	0	0	0	0	0	0	0	603	903	0
77	0	0	0	0	0	0	0	200	300	0	0	0	0	0	0	0	200	903	0	0	0	0	0	0	0	603	903	0
77	1	0	0	0	0	0	0	200	300	0	0	0	0	0	0	0	200	903	0	0	0	0	0	0	0	603	903	0
77	2	0	0	0	0	0	0	200	300	0	0	0	0	0	0	0	200	903	0	0	0	0	0	0	0	603	903	0
77	3	0	0	0	0	0	0	200	300	0	0	0	0	0	0	0	200	903	0	0	0	0	0	0	0	603	903	0
77	4	0	0	0	0	0	0	200	300	0	0	0	0	0	0	0	200	903	0	0	0	0	0	0	0	603	903	0
77	5	0	0	0	0	0	0	200	300	0	0	0	0	0	0	0	200	903	0	0	0	0	0	0	0	603	903	0
77	6	0	0	0	0	0	0	200	300	0	0	0	0	0	0	0	200	903	0	0	0	0	0	0	0	603	903	0
77	7	0	0	0	0	0	0	200	300	0	0	0	0	0	0	0	200	903	0	0	0	0	0	0	0	603	903	0
77	8	0	0	0	0	0	0	200	300	0	0	0	0	0	0	0	200	903	0	0	0	0	0	0	0	603	903	0
77	9	0	0	0	0	0	0	200	300	0	0	0	0	0	0	0	200	903	0	0	0	0	0	0	0	603	903	0
78	0	0	0	0	0	0	0	200	300	0	0	0	0	0	0	0	200	903	0	0	0	0	0	0	0	603	903	0
78	1	0	0	0	0	0	0	200	300	0	0	0	0	0	0	0	200	903	0	0	0	0	0	0	0	603	903	0
78	2	0	0	0	0	0	0	200	300	0	0	0	0	0	0	0	200	903	0	0	0	0	0	0	0	603	903	0
78	3	0	0	0	0	0	0	200	300	0	0	0	0	0	0	0	200	903	0	0	0	0	0	0	0	603	903	0
78	4	0	0	0	0	0	0	200	300	0	0	0	0	0	0	0	200	903	0	0	0	0	0	0	0	603	903	0
78	5	0	0	0	0	0	0	200	300	0	0	0	0	0	0	0	200	903	0	0	0	0	0	0	0	603	903	0
78	6	0	0	0	0	0	0	200	300	0	0	0	0	0	0	0	200	903	0	0	0	0	0	0	0	603	903	0
78	7	0	0	0	0	0	0	200	300	0	0	0	0	0	0	0	200	903	0	0	0	0	0	0	0	603	903	0
78	8	0	0	0	0	0	0	200	300	0	0	0	0	0	0	0	200	903	0	0	0	0	0	0	0	603	903	0
78	9	0	0	0	0	0	0	200	300	0	0	0	0	0	0	0	200	903	0	0	0	0	0	0	0	603	903	0
79	0	0	0	0	0	0	0	200	300	0	0	0	0	0	0	0	200	903	0	0	0	0	0	0	0	603	903	0
79	1	0	0	0	0	0	0	200	300	0	0	0	0	0	0	0	200	903	0	0	0	0	0	0	0	603	903	0
79	2	0	0	0	0	0	0	200	300	0	0	0	0	0	0	0	200	903	0	0	0	0	0	0	0	603	903	0
79	3	0	0	0	0	0	0	200	300	0	0	0	0	0	0	0	200	903	0	0	0	0	0	0	0	603	903	0
79	4	0	0	0	0	0	0	200	300	0	0	0	0	0	0	0	200	903	0	0	0	0	0	0	0	603	903	0
79	5	0	0	0	0	0	0	200	300	0	0	0	0	0	0	0	200	903	0	0	0	0	0	0	0	603	903	0
79	6	0	0	0	0	0	0	200	300	0	0	0	0	0	0	0	200	903	0	0	0	0	0	0	0	603	903	0
79	7	0	0	0	0	0	0	200	300	0	0	0	0	0	0	0	200	903	0	0	0	0	0	0	0	603	903	0
79	8	0	0	0	0	0	0	200	300	0	0	0	0	0	0	0	200	903	0	0	0	0	0	0	0	603	903	0
79	9	0	0	0	0	0	0	200	300	0	0	0	0	0	0	0	200	903	0	0	0	0	0	0	0	603	903	0
80	0	0	0	0	0	0	0	200	300	0	0	0	0	0	0	0	200	903	0	0	0	0	0	0	0	603	903	0
80	1	0	0	0	0	0	0	200	300	0	0	0	0	0	0	0	200	903	0	0	0	0	0	0	0	603	903	0
80	2	0	0	0	0	0	0	200	300	0	0	0	0	0	0	0	200	903	0	0	0	0	0	0	0	603	903	0
80	3	0	0	0	0	0	0	200	300	0	0	0	0	0	0	0	200	903	0	0	0	0	0	0	0	603	903	0
80	4	0	0	0	0	0	0	200	300	0	0	0	0	0	0	0	200	903	0	0	0	0	0	0	0	603	903	0
80	5	0	0	0	0	0	0	200	300	0	0	0	0	0	0	0	200	903	0	0	0	0	0	0	0	603	903	0
80	6	0	0	0	0	0	0	200	300	0	0	0	0	0	0	0	200	903	0	0	0	0	0	0	0	603	903	0
80	7	0	0	0	0	0	0	200	300	0	0	0	0	0	0	0	200	903	0	0	0	0	0	0	0	603	903	0
80	8	0	0	0	0	0	0	200	300	0	0	0	0	0	0	0	200	903	0	0	0	0	0	0	0	603	903	0
80	9	0	0	0	0	0	0	200	300	0	0	0	0	0	0	0	200	903	0	0	0	0	0	0	0	603	903	0
81	0	0	0	0	0	0	0	200	300	0	0	0	0	0	0	0	200	903	0	0	0	0	0	0	0	603	903	0
81	1	0	0	0	0	0	0	200	300	0	0	0	0	0	0	0	200	903	0	0	0	0	0	0	0	603	903	0
81	2	0	0	0	0	0	0	200	300	0	0	0	0	0	0	0	200	903	0	0	0	0	0	0	0	603	903	0
81	3	0	0	0	0	0	0	200	300	0	0	0	0	0	0	0	200	903	0	0	0	0	0	0	0	603	903	0
81	4	0	0	0	0	0	0	200	300	0	0	0	0	0	0	0	200	903	0	0	0	0	0	0	0	603	903	0
81	5	0	0	0	0	0	0	200	300	0	0	0	0	0	0	0	200	903	0	0	0	0	0	0	0	603	903	0
81	6	0	0	0	0	0	0	200	300	0	0	0	0	0	0	0	200	903	0	0	0	0	0	0	0	603	903	0
81	7	0	0	0	0	0	0	200	300	0	0	0	0	0	0	0	200	903	0	0	0	0	0	0	0	603	903	0
81	8	0	0	0	0	0	0	200	300	0	0	0	0	0	0	0	200	903	0	0	0	0	0	0	0	603	903	0
81	9	0	0	0	0	0	0	200	300	0	0	0	0	0	0	0	200	903	0	0	0	0	0	0	0	603	903	0
82	0	0	0	0	0	0	0	200	300	0	0	0	0	0	0	0	200	903	0	0	0	0	0	0	0	603	903	0
82	1	0	0	0	0	0	0	200	300	0	0	0	0	0	0	0	200	903	0	0	0	0	0	0	0	603	903	0
82	2	0	0	0	0	0	0	200	300	0	0	0	0	0	0	0	200	903	0	0	0	0	0	0	0	603	903	0
82	3	0	0	0	0	0	0	200	300	0	0	0	0	0	0	0	200	903	0	0	0	0	0	0	0	603	903	0
82	4	0	0	0	0	0	0	200	300	0	0	0	0	0	0	0	200	903	0	0	0	0	0	0	0	603	903	0
82	5	0	0	0	0	0	0	200	300	0	0	0	0	0	0	0	200	903	0	0	0	0	0	0	0	603	903	0
82	6	0	0	0	0	0	0	200	300	0	0	0	0	0	0	0	200	903	0	0	0	0	0	0	0	603	903	0
82	7	0	0	0	0	0	0	200	300	0	0	0	0	0	0	0	200	903	0	0	0	0	0	0	0	603	903	0
82	8	0	0	0	0	0	0	200	300	0	0	0	0	0	0	0	200	903	0	0	0	0	0	0	0	603	903	0
82	9	0	0	0	0	0	0	200	300	0	0	0	0	0	0	0	200	903	0	0	0	0	0	0	0	603	903	0
83	0	0	0	0	0	0	0	200	300	0	0	0	0	0	0	0	200	903	0	0	0	0	0	0	0	603	903	0
83	1	0	0	0	0	0	0	200	300	0	0	0	0	0	0	0	200	903	0	0	0	0	0	0	0	603	903	0
83	2	0	0	0	0	0	0	200	300	0	0	0	0	0	0	0	200	903	0	0	0	0	0	0	0	603	903	0
83	3	0	0	0	0	0	0	200	300	0	0	0	0	0	0	0	200	903	0	0	0	0	0	0	0	603	903	0
83	4	0	0	0	0	0	0	200	300	0	0	0	0	0	0	0	200	903	0	0	0	0	0	0	0	603	903	0
83	5	0	0	0	0	0	0	200	300	0	0	0	0	0	0	0	200	903	0	0	0	0	0	0	0	603	903	0
83	6	0	0	0	0	0	0	200	300	0	0	0	0	0	0	0	200	903	0	0	0	0	0	0	0	603	903	0
83	7	0	0	0	0	0	0	200	300	0	0	0	0	0	0	0	200	903	0	0	0	0	0	0	0	603	903	0
83	8	0	0	0	0	0	0	200	300	0	0	0	0	0	0	0	200	903	0	0	0	0	0	0	0	603	903	0
83	9	0	0	0	0	0	0	200	300	0	0	0	0	0	0	0	200	903	0	0	0	0	0	0	0	603	903	0
84	0	0	0	0	0	0	0	200	300	0	0	0	0	0	0	0	200	903	0	0	0	0	0	0	0	603	903	0
84	1	0	0	0	0	0	0	200	300	0	0	0	0	0	0	0	200	903	0	0	0	0	0	0	0	603	903	0
84	2	0	0	0	0	0	0	200	300	0	0	0	0	0	0	0	200	903	0	0	0	0	0	0	0	603	903	0
84	3	0	0	0	0	0	0	200	300	0	0	0	0	0	0	0	200	903	0	0	0	0	0	0	0	603	903	0
84	4	0	0	0	0	0	0	200	300	0	0	0	0	0	0	0	200	903	0	0	0	0	0	0	0	603	903	0
84	5	0	0	0	0	0	0	200	300	0	0	0	0	0	0	0	200	903	0	0	0	0	0	0	0	603	903	0
84	6	0	0	0	0	0	0	200	300	0	0	0	0	0	0	0	200	903	0	0	0	0	0	0	0	603	903	0
84	7	0	0	0	0	0	0	200	300	0	0	0	0	0	0	0	200	903	0	0	0	0	0	0	0	603	903	0
84	8	0	0	0	0	0	0	200	300	0	0	0	0	0	0	0	200	903	0	0	0	0	0	0	0	603	903	0
84	9	0	0	0	0	0	0	200	300	0	0	0	0	0	0	0	200	903	0	0	0	0	0	0	0	603	903	0
85	0	0	0	0	0	0	0	200	300	0	0	0	0	0	0	0	200	903	0	0	0	0	0	0	0	603	903	0
85	1	0	0	0	0	0	0	200	300	0	0	0	0	0	0	0	200	903	0	0	0	0	0	0	0	603	903	0
85	2	0	0	0	0	0	0	200	300	0	0	0	0	0	0	0	200	903	0	0	0	0	0	0	0	603	903	0
85	3	0	0	0	0	0	0	200	300	0	0	0	0	0	0	0	200	903	0	0	0	0	0	0	0	603	903	0
85	4	0	0	0	0	0	0	200	300	0	0	0	0	0	0	0	200	903	0	0	0	0	0	0	0	603	903	0
85	5	0	0	0	0	0	0	200	300	0	0	0	0	0	0	0	200	903	0	0	0	0	0	0	0	603	903	0
85	6	0	0	0	0	0	0	200	300	0	0	0	0	0	0	0	200	903	0	0	0	0	0	0	0	603	903	0
85	7	0	0	0	0	0	0	200	300	0	0	0	0	0	0	0	200	903	0	0	0	0	0	0	0	603	903	0
85	8	0	0	0	0	0	0	200	300	0	0	0	0	0	0	0	200	903	0	0	0	0	0	0	0	603	903	0
85	9	0	0	0	0	0	0	200	300	0	0	0	0	0	0	0	200	903	0	0	0	0	0	0	0	603	903	0
86	0	0	0	0	0	0	0	200	300	0	0	0	0	0	0	0	200	903	0	0	0	0	0	0	0	603	903	0
86	1	0	0	0	0	0	0	200	300	0	0	0	0	0	0	0	200	903	0	0	0	0	0	0	0	603	903	0
86	2	0	0	0	0	0	0	200	300	0	0	0	0	0	0	0	200	903	0	0	0	0	0	0	0	603	903	0
86	3	0	0	0	0	0	0	200	300	0	0	0	0	0	0	0	200	903	0	0	0	0	0	0	0	603	903	0
86	4	0	0	0	0	0	0	200	300	0	0	0	0	0	0	0	200	903	0	0	0	0	0	0	0	603	903	0
86	5	0	0	0	0	0	0	200	300	0	0	0	0	0	0	0	200	903	0	0	0	0	0	0	0	603	903	0
86	6	0	0	0	0	0	0	200	300	0	0	0	0	0	0	0	200	903	0	0	0	0	0	0	0	603	903	0
86	7	0	0	0	0	0	0	200	300	0	0	0	0	0	0	0	200	903	0	0	0	0	0	0	0	603	903	0
86	8	0	0	0	0	0	0	200	300	0	0	0	0	0	0	0	200	903	0	0	0	0	0	0	0	603	903	0
86	9	0	0	0	0	0	0	200	300	0	0	0	0	0	0	0	200	903	0	0	0	0	0	0	0	603	903	0
87	0	0	0	0	0	0	0	200	300	0	0	0	0	0	0	0	200	903	0	0	0	0	0	0	0	603	903	0
87	1	0	0	0	0	0	0	200	300	0	0	0	0	0	0	0	200	903	0	0	0	0	0	0	0	603	903	0
87	2	0	0	0	0	0	0	200	300	0	0	0	0	0	0	0	200	903	0	0	0	0	0	0	0	603	903	0
87	3	0	0	0	0	0	0	200	300	0	0	0	0	0	0	0	200	903	0	0	0	0	0	0	0	603	903	0
87	4	0	0	0	0	0	0	200	300	0	0	0	0	0	0	0	200	903	0	0	0	0	0	0	0	603	903	0
87	5	0	0	0	0	0	0	200	300	0	0	0	0	0	0	0	200	903	0	0	0	0	0	0	0	603	903	0
87	6	0	0	0	0	0	0	200	300	0	0	0	0	0	0	0	200	903	0	0	0	0	0	0	0	603	903	0
87	7	0	0	0	0	0	0	200	300	0	0	0	0	0	0	0	200	903	0	0	0	0	0	0	0	603	903	0
87	8	0	0	0	0	0	0	200	300	0	0	0	0	0	0	0	200	903	0	0	0	0	0	0	0	603	903	0
87	9	0	0	0	0	0	0	200	300	0	0	0	0	0	0	0	200	903	0	0	0	0	0	0	0	603	903	0
88	0	0	0	0	0	0	0	200	300	0	0	0	0	0	0	0	200	903	0	0	0	0	0	0	0	603	903	0
88	1	0	0	0	0	0	0	200	300	0	0	0	0	0	0	0	200	903	0	0	0	0	0	0	0	603	903	0
88	2	0	0	0	0	0	0	200	300	0	0	0	0	0	0	0	200	903	0	0	0	0	0	0	0	603	903	0
88	3	0	0	0	0	0	0	200	300	0	0	0	0	0	0	0	200	903	0	0	0	0	0	0	0	603	903	0
88	4	0	0	0	0	0	0	200	300	0	0	0	0	0	0	0	200	903	0	0	0	0	0	0	0	603	903	0
88	5	0	0	0	0	0	0	200	300	0	0	0	0	0	0	0	200	903	0	0	0	0	0	0	0	603	903	0
88	6	0	0	0	0	0	0	200	300	0	0	0	0	0	0	0	200	903	0	0	0	0	0	0	0	603	903	0
88	7	0	0	0	0	0	0	200	300	0	0	0	0	0	0	0	200	903	0	0	0	0	0	0	0	603	903	0
88	8	0	0	0	0	0	0	200	300	0	0	0	0	0	0	0	200	903	0	0	0	0	0	0	0	603	903	0
88	9	0	0	0	0	0	0	200	300	0	0	0	0	0	0	0	200	903	0	0	0	0	0	0	0	603	903	0
89	0	0	0	0	0	0	0	200	300	0	0	0	0	0	0	0	200	903	0	0	0	0	0	0	0	603	903	0
89	1	0	0	0	0	0	0	200	300	0	0	0	0	0	0	0	200	903	0	0	0	0	0	0	0	603	903	0
89	2	0	0	0	0	0	0	200	300	0	0	0	0	0	0	0	200	903	0	0	0	0	0	0	0	603	903	0
89	3	0	0	0	0	0	0	200	300	0	0	0	0	0	0	0	200	903	0	0	0	0	0	0	0	603	903	0
89	4	0	0	0	0	0	0	200	300	0	0	0	0	0	0	0	200	903	0	0	0	0	0	0	0	603	903	0
89	5	0	0	0	0	0	0	200	300	0	0	0	0	0	0	0	200	903	0	0	0	0	0	0	0	603	903	0
89	6	0	0	0	0	0	0	200	300	0	0	0	0	0	0	0	200	903	0	0	0	0	0	0	0	603	903	0
89	7	0	0	0	0	0	0	200	300	0	0	0	0	0	0	0	200	903	0	0	0	0	0	0	0	603	903	0
89	8	0	0	0	0	0	0	200	300	0	0	0	0	0	0	0	200	903	0	0	0	0	0	0	0	603	903	0
89	9	0	0	0	0	0	0	200	300	0	0	0	0	0	0	0	200	903	0	0	0	0	0	0	0	603	903	0
90	0	0	0	0	0	0	0	200	300	0	0	0	0	0	0	0	200	903	0	0	0	0	0	0	0	603	903	0
90	1	0	0	0	0	0	0	200	300	0	0	0	0	0	0	0	200	903	0	0	0	0	0	0	0	603	903	0
90	2	0	0	0	0	0	0	200	300	0	0	0	0	0	0	0	200	903	0	0	0	0	0	0	0	603	903	0
90	3	0	0	0	0	0	0	200	300	0	0	0	0	0	0	0	200	903	0	0	0	0	0	0	0	603	903	0
90	4	0	0	0	0	0	0	200	300	0	0	0	0	0	0	0	200	903	0	0	0	0	0	0	0	603	903	0
90	5	0	0	0	0	0	0	200	300	0	0	0	0	0	0	0	200	903	0	0	0	0	0	0	0	603	903	0
90	6	0	0	0	0	0	0	200	300	0	0	0	0	0	0	0	200	903	0	0	0	0	0	0	0	603	903	0
90	7	0	0	0	0	0	0	200	300	0	0	0	0	0	0	0	200	903	0	0	0	0	0	0	0	603	903	0
90	8	0	0	0	0	0	0	200	300	0	0	0	0	0	0	0	200	903	0	0	0	0	0	0	0	603	903	0
90	9	0	0	0	0	0	0	200	300	0	0	0	0	0	0	0	200	903	0	0	0	0	0	0	0	603	903	0
91	0	0	0	0	0	0	0	200	300	0	0	0	0	0	0	0	200	903	0	0	0	0	0	0	0	603	903	0
91	1	0	0	0	0	0	0	200	300	0	0	0	0	0	0	0	200	903	0	0	0	0	0	0	0	603	903	0
91	2	0	0	0	0	0	0	200	300	0	0	0	0	0	0	0	200	903	0	0	0	0	0	0	0	603	903	0
91	3	0	0	0	0	0	0	200	300	0	0	0	0	0	0	0	200	903	0	0	0	0	0	0	0	603	903	0
91	4	0	0	0	0	0	0	200	300	0	0	0	0	0	0	0	200	903	0	0	0	0	0	0	0	603	903	0
91	5	0	0	0	0	0	0	200	300	0	0	0	0	0	0	0	200	903	0	0	0	0	0	0	0	603	903	0
91	6	0	0	0	0	0	0	200	300	0	0	0	0	0	0	0	200	903	0	0	0	0	0	0	0	603	903	0
91	7	0	0	0	0	0	0	200	300	0	0	0	0	0	0	0	200	903	0	0	0	0	0	0	0	603	903	0
91	8	0	0	0	0	0	0	200	300	0	0	0	0	0	0	0	200	903	0	0	0	0	0	0	0	603	903	0
91	9	0	0	0	0	0	0	200	300	0	0	0	0	0	0	0	200	903	0	0	0	0	0	0	0	603	903	0
92	0	0	0	0	0	0	0	200	300	0	0	0	0	0	0	0	200	903	0	0	0	0	0	0	0	603	903	0
92	1	0	0	0	0	0	0	200	300	0	0	0	0	0	0	0	200	903	0	0	0	0	0	0	0	603	903	0
92	2	0	0	0	0	0	0	200	300	0	0	0	0	0	0	0	200	903	0	0	0	0	0	0	0	603	903	0
92	3	0	0	0	0	0	0	200	300	0	0	0	0	0	0	0	200	903	0	0	0	0	0	0	0	603	903	0
92	4	0	0	0	0	0	0	200	300	0	0	0	0	0	0	0	200	903	0	0	0	0	0	0	0	603	903	0
92	5	0	0	0	0	0	0	200	300	0	0	0	0	0	0	0	200	903	0	0	0	0	0	0	0	603	903	0
92	6	0	0	0	0	0	0	200	300	0	0	0	0	0	0	0	200	903	0	0	0	0	0	0	0	603	903	0
92	7	0	0	0	0	0	0	200	300	0	0	0	0	0	0	0	200	903	0	0	0	0	0	0	0	603	903	0
92	8	0	0	0	0	0	0	200	300	0	0	0	0	0	0	0	200	903	0	0	0	0	0	0	0	603	903	0
92	9	0	0	0	0	0	0	200	300	0	0	0	0	0	0	0	200	903	0	0	0	0	0	0	0	603	903	0
93	0	0	0	0	0	0	0	200	300	0	0	0	0	0	0	0	200	903	0	0	0	0	0	0	0	603	903	0
93	1	0	0	0	0	0	0	200	300	0	0	0	0	0	0	0	200	903	0	0	0	0	0	0	0	603	903	0
93	2	0	0	0	0	0	0	200	300	0	0	0	0	0	0	0	200	903	0	0	0	0	0	0	0	603	903	0
93	3	0	0	0	0	0	0	200	300	0	0	0	0	0	0	0	200	903	0	0	0	0	0	0	0	603	903	0
93	4	0	0	0	0	0	0	200	300	0	0	0	0	0	0	0	200	903	0	0	0	0	0	0	0	603	903	0
93	5	0	0	0	0	0	0	200	300	0	0	0	0	0	0	0	200	903	0	0	0	0	0	0	0	603	903	0
93	6	0	0	0	0	0	0	200	300	0	0	0	0	0	0	0	200	903	0	0	0	0	0	0	0	603	903	0
93	7	0	0	0	0	0	0	200	300	0	0	0	0	0	0	0	200	903	0	0	0	0	0	0	0	603	903	0
93	8	0	0	0	0	0	0	200	300	0	0	0	0	0	0	0	200	903	0	0	0	0	0	0	0	603	903	0
93	9	0	0	0	0	0	0	200	300	0	0	0	0	0	0	0	200	903	0	0	0	0	0	0	0	603	903	0
94	0	0	0	0	0	0	0	200	300	0	0	0	0	0	0	0	200	903	0	0	0	0	0	0	0	603	903	0
94	1	0	0	0	0	0	0	200	300	0	0	0	0	0	0	0	200	903	0	0	0	0	0	0	0	603	903	0
94	2	0	0	0	0	0	0	200	300	0	0	0	0	0	0	0	200	903	0	0	0	0	0	0	0	603	903	0
94	3	0	0	0	0	0	0	200	300	0	0	0	0	0	0	0	200	903	0	0	0	0	0	0	0	603	903	0
94	4	0	0	0	0	0	0	200	300	0	0	0	0	0	0	0	200	903	0	0	0	0	0	0	0	603	903	0
94	5	0	0	0	0	0	0	200	300	0	0	0	0	0	0	0	200	903	0	0	0	0	0	0	0	603	903	0
94	6	0	0	0	0	0	0	200	300	0	0	0	0	0	0	0	200	903	0	0	0	0	0	0	0	603	903	0
94	7	0	0	0	0	0	0	200	300	0	0	0	0	0	0	0	200	903	0	0	0	0	0	0	0	603	903	0
94	8	0	0	0	0	0	0	200	300	0	0	0	0	0	0	0	200	903	0	0	0	0	0	0	0	603	903	0
94	9	0	0	0	0	0	0	200	300	0	0	0	0	0	0	0	200	903	0	0	0	0	0	0	0	603	903	0
95	0	0	0	0	0	0	0	200	300	0	0	0	0	0	0	0	200	903	0	0	0	0	0	0	0	603	903	0
95	1	0	0	0	0	0	0	200	300	0	0	0	0	0	0	0	200	903	0	0	0	0	0	0	0	603	903	0
95	2	0	0	0	0	0	0	200	300	0	0	0	0	0	0	0	200	903	0	0	0	0	0	0	0	603	903	0
95	3	0	0	0	0	0	0	200	300	0	0	0	0	0	0	0	200	903	0	0	0	0	0	0	0	603	903	0
95	4	0	0	0	0	0	0	200	300	0	0	0	0	0	0	0	200	903	0	0	0	0	0	0	0	603	903	0
95	5	0	0	0	0	0	0	200	300	0	0	0	0	0	0	0	200	903	0	0	0	0	0	0	0	603	903	0
95	6	0	0	0	0	0	0	200	300	0	0	0	0	0	0	0	200	903	0	0	0	0	0	0	0	603	903	0
95	7	0	0	0	0	0	0	200	300	0	0	0	0	0	0	0	200	903	0	0	0	0	0	0	0	603	903	0
95	8	0	0	0	0	0	0	200	300	0	0	0	0	0	0	0	200	903	0	0	0	0	0	0	0	603	903	0
95	9	0	0	0	0	0	0	200	300	0	0	0	0	0	0	0	200	903	0	0	0	0	0	0	0	603	903	0
96	0	0	0	0	0	0	0	200	300	0	0	0	0	0	0	0	200	903	0	0	0	0	0	0	0	603	903	0
96	1	0	0	0	0	0	0	200	300	0	0	0	0	0	0	0	200	903	0	0	0	0	0	0	0	603	903	0
96	2	0	0	0	0	0	0	200	300	0	0	0	0	0	0	0	200	903	0	0	0	0	0	0	0	603	903	0
96	3	0	0	0	0	0	0	200	300	0	0	0	0	0	0	0	200	903	0	0	0	0	0	0	0	603	903	0
96	4	0	0	0	0	0	0	200	300	0	0	0	0	0	0	0	200	903	0	0	0	0	0	0	0	603	903	0
96	5	0	0	0	0	0	0	200	300	0	0	0	0	0	0	0	200	903	0	0	0	0	0	0	0	603	903	0
96	6	0	0	0	0	0	0	200	300	0	0	0	0	0	0	0	200	903	0	0	0	0	0	0	0	603	903	0
96	7	0	0	0	0	0	0	200	300	0	0	0	0	0	0	0	200	903	0	0	0	0	0	0	0	603	903	0
96	8	0	0	0	0	0	0	200	300	0	0	0	0	0	0	0	200	903	0	0	0	0	0	0	0	603	903	0
96	9	0	0	0	0	0	0	200	300	0	0	0	0	0	0	0	200	903	0	0	0	0	0	0	0	603	903	0
97	0	0	0	0	0	0	0	200	300	0	0	0	0	0	0	0	200	903	0	0	0	0	0	0	0	603	903	0
97	1	0	0	0	0	0	0	200	300	0	0	0	0	0	0	0	200	903	0	0	0	0	0	0	0	603	903	0
97	2	0	0	0	0	0	0	200	300	0	0	0	0	0	0	0	200	903	0	0	0	0	0	0	0	603	903	0
97	3	0	0	0	0	0	0	200	300	0	0	0	0	0	0	0	200	903	0	0	0	0	0	0	0	603	903	0
97	4	0	0	0	0	0	0	200	300	0	0	0	0	0	0	0	200	903	0	0	0	0	0	0	0	603	903	0
97	5	0	0	0	0	0	0	200	300	0	0	0	0	0	0	0	200	903	0	0	0	0	0	0	0	603	903	0
97	6	0	0	0	0	0	0	200	300	0	0	0	0	0	0	0	200	903	0	0	0	0	0	0	0	603	903	0
97	7	0	0	0	0	0	0	200	300	0	0	0	0	0	0	0	200	903	0	0	0	0	0	0	0	603	903	0
97	8	0	0	0	0	0	0	200	300	0	0	0	0	0	0	0	200	903	0	0	0	0	0	0	0	603	903	0
97	9	0	0	0	0	0	0	200	300	0	0	0	0	0	0	0	200	903	0	0	0	0	0	0	0	603	903	0
98	0	0	0	0	0	0	0	200	300	0	0	0	0	0	0	0	200	903	0	0	0	0	0	0	0	603	903	0
98	1	0	0	0	0	0	0	200	300	0	0	0	0	0	0	0	200	903	0	0	0	0	0	0	0	603	903	0
98	2	0	0	0	0	0	0	200	300	0	0	0	0	0	0	0	200	903	0	0	0	0	0	0	0	603	903	0
98	3	0	0	0	0	0	0	200	300	0	0	0	0	0	0	0	200	903	0	0	0	0	0	0	0	603	903	0
98	4	0	0	0	0	0	0	200	300	0	0	0	0	0	0	0	200	903	0	0	0	0	0	0	0	603	903	0
98	5	0	0	0	0	0	0	200	300	0	0	0	0	0	0	0	200	903	0	0	0	0	0	0	0	603	903	0
98	6	0	0	0	0	0	0	200	300	0	0	0	0	0	0	0	200	903	0	0	0	0	0	0	0	603	903	0
98	7	0	0	0	0	0	0	200	300	0	0	0	0	0	0	0	200	903	0	0	0	0	0	0	0	603	903	0
98	8	0	0	0	0	0	0	200	300	0	0	0	0	0	0	0	200	903	0	0	0	0	0	0	0	603	903	0
98	9	0	0	0	0	0	0	200	300	0	0	0	0	0	0	0	200	903	0	0	0	0	0	0	0	603	903	0
99	0	0	0	0	0	0	0	200	300	0	0	0	0	0	0	0	200	903	0	0	0	0	0	0	0	603	903	0
99	1	0	0	0	0	0	0	200	300	0	0	0	0	0	0	0	200	903	0	0	0	0	0	0	0	603	903	0
99	2	0	0	0	0	0	0	200	300	0	0	0	0	0	0	0	200	903	0	0	0	0	0	0	0	603	903	0
99	3	0	0	0	0	0	0	200	300	0	0	0	0	0	0	0	200	903	0	0	0	0	0	0	0	603	903	0
99	4	0	0	0	0	0	0	200	300	0	0	0	0	0	0	0	200	903	0	0	0	0	0	0	0	603	903	0
99	5	0	0	0	0	0	0	200	300	0	0	0	0	0	0	0	200	903	0	0	0	0	0	0	0	603	903	0
99	6	0	0	0	0	0	0	200	300	0	0	0	0	0	0	0	200	903	0	0	0	0	0	0	0	603	903	0
99	7	0	0	0	0	0	0	200	300	0	0	0	0	0	0	0	200	903	0	0	0	0	0	0	0	603	903	0
99	8	0	0	0	0	0	0	200	300	0	0	0	0	0	0	0	200	903	0	0	0	0	0	0	0	603	903	0
99	9	0	0	0	0	0	0	200	300	0	0	0	0	0	0	0	200	903	0	0	0	0	0	0	0	603	903	0
100	0	0	0	0	0	0	0	200	300	0	0	0	0	0	0	0	200	903	0	0	0	0	0	0	0	603	903	0
100	1	0	0	0	0	0	0	200	300	0	0	0	0	0	0	0	200	903	0	0	0	0	0	0	0	603	903	0
100	2	0	0	0	0	0	0	200	300	0	0	0	0	0	0	0	200	903	0	0	0	0	0	0	0	603	903	0
100	3	0	0	0	0	0	0	200	300	0	0	0	0	0	0	0	200	903	0	0	0	0	0	0	0	603	903	0
100	4	0	0	0	0	0	0	200	300	0	0	0	0	0	0	0	200	903	0	0	0	0	0	0	0	603	903	0
100	5	0	0	0	0	0	0	200	300	0	0	0	0	0	0	0	200	903	0	0	0	0	0	0	0	603	903	0
100	6	0	0	0	0	0	0	200	300	0	0	0	0	0	0	0	200	903	0	0	0	0	0	0	0	603	903	0
100	7	0	0	0	0	0	0	200	300	0	0	0	0	0	0	0	200	903	0	0	0	0	0	0	0	603	903	0
100	8	0	0	0	0	0	0	200	300	0	0	0	0	0	0	0	200	903	0	0	0	0	0	0	0	603	903	0
100	9	0	0	0	0	0	0	200	300	0	0	0	0	0	0	0	200	903	0	0	0	0	0	0	0	603	903	0
101	0	0	0	0	0	0	0	200	300	0	0	0	0	0	0	0	200	903	0	0	0	0	0	0	0	603	903	0
101	1	0	0	0	0	0	0	200	300	0	0	0	0	0	0	0	200	903	0	0	0	0	0	0	0	603	903	0
101	2	0	0	0	0	0	0	200	300	0	0	0	0	0	0	0	200	903	0	0	0	0	0	0	0	603	903	0
101	3	0	0	0	0	0	0	200	300	0	0	0	0	0	0	0	200	903	0	0	0	0	0	0	0	603	903	0
101	4	0	0	0	0	0	0	200	300	0	0	0	0	0	0	0	200	903	0	0	0	0	0	0	0	603	903	0
101	5	0	0	0	0	0	0	200	300	0	0	0	0	0	0	0	200	903	0	0	0	0	0	0	0	603	903	0
101	6	0	0	0	0	0	0	200	300	0	0	0	0	0	0	0	200	903	0	0	0	0	0	0	0	603	903	0
101	7	0	0	0	0	0	0	200	300	0	0	0	0	0	0	0	200	903	0	0	0	0	0	0	0	603	903	0
101	8	0	0	0	0	0	0	200	300	0	0	0	0	0	0	0	200	903	0	0	0	0	0	0	0	603	903	0
101	9	0	0	0	0	0	0	200	300	0	0	0	0	0	0	0	200	903	0	0	0	0	0	0	0	603	903	0
102	0	0	0	0	0	0	0	200	300	0	0	0	0	0	0	0	200	903	0	0	0	0	0	0	0	603	903	0
102	1	0	0	0	0	0	0	200	300	0	0	0	0	0	0	0	200	903	0	0	0	0	0	0	0	603	903	0
102	2	0	0	0	0	0	0	200	300	0	0	0	0	0	0	0	200	903	0	0	0	0	0	0	0	603	903	0
102	3	0	0	0	0	0	0	200	300	0	0	0	0	0	0	0	200	903	0	0	0	0	0	0	0	603	903	0
102	4	0	0	0	0	0	0	200	300	0	0	0	0	0	0	0	200	903	0	0	0	0	0	0	0	603	903	0
102	5	0	0	0	0	0	0	200	300	0	0	0	0	0	0	0	200	903	0	0	0	0	0	0	0	603	903	0
102	6	0	0	0	0	0	0	200	300	0	0	0	0	0	0	0	200	903	0	0	0	0	0	0	0	603	903	0
102	7	0	0	0	0	0	0	200	300	0	0	0	0	0	0	0	200	903	0	0	0	0	0	0	0	603	903	0
102	8	0	0	0	0	0	0	200	300	0	0	0	0	0	0	0	200	903	0	0	0	0	0	0	0	603	903	0
102	9	0	0	0	0	0	0	200	300	0	0	0	0	0	0	0	200	903	0	0	0	0	0	0	0	603	903	0
103	0	0	0	0	0	0	0	200	300	0	0	0	0	0	0	0	200	903	0	0	0	0	0	0	0	603	903	0
103	1	0	0	0	0	0	0	200	300	0	0	0	0	0	0	0	200	903	0	0	0	0	0	0	0	603	903	0
103	2	0	0	0	0	0	0	200	300	0	0	0	0	0	0	0	200	903	0	0	0	0	0	0	0	603	903	0
103	3	0	0	0	0	0	0	200	300	0	0	0	0	0	0	0	200	903	0	0	0	0	0	0	0	603	903	0
103	4	0	0	0	0	0	0	200	300	0	0	0	0	0	0	0	200	903	0	0	0	0	0	0	0	603	903	0
103	5	0	0	0	0	0	0	200	300	0	0	0	0	0	0	0	200	903	0	0	0	0	0	0	0	603	903	0
103	6	0	0	0	0	0	0	200	300	0	0	0	0	0	0	0	200	903	0	0	0	0	0	0	0	603	903	0
103	7	0	0	0	0	0	0	200	300	0	0	0	0	0	0	0	200	903	0	0	0	0	0	0	0	603	903	0
103	8	0	0	0	0	0	0	200	300	0	0	0	0	0	0	0	200	903	0	0	0	0	0	0	0	603	903	0
103	9	0	0	0	0	0	0	200	300	0	0	0	0	0	0	0	200	903	0	0	0	0	0	0	0	603	903	0
104	0	0	0	0	0	0	0	200	300	0	0	0	0	0	0	0	200	903	0	0	0	0	0	0	0	603	903	0
104	1	0	0	0	0	0	0	200	300	0	0	0	0	0	0	0	200	903	0	0	0	0	0	0	0	603	903	0
104	2	0	0	0	0	0	0	200	300	0	0	0	0	0	0	0	200	903	0	0	0	0	0	0	0	603	903	0
104	3	0	0	0	0	0	0	200	300	0	0	0	0	0	0	0	200	903	0	0	0	0	0	0	0	603	903	0
104	4	0	0	0	0	0	0	200	300	0	0	0	0	0	0	0	200	903	0	0	0	0	0	0	0	603	903	0
104	5	0	0	0	0	0	0	200	300	0	0	0	0	0	0	0	200	903	0	0	0	0	0	0	0	603	903	0
104	6	0	0	0	0	0	0	200	300	0	0	0	0	0	0	0	200	903	0	0	0	0	0	0	0	603	903	0
104	7	0	0	0	0	0	0	200	300	0	0	0	0	0	0	0	200	903	0	0	0	0	0	0	0	603	903	0
104	8	0	0	0	0	0	0	200	300	0	0	0	0	0	0	0	200	903	0	0	0	0	0	0	0	603	903	0
104	9	0	0	0	0	0	0	200	300	0	0	0	0	0	0	0	200	903	0	0	0	0	0	0	0	603	903	0
105	0	0	0	0	0	0	0	200	300	0	0	0	0	0	0	0	200	903	0	0	0	0	0	0	0	603	903	0
105	1	0	0	0	0	0	0	200	300	0	0	0	0	0	0	0	200	903	0	0	0	0	0	0	0	603	903	0
105	2	0	0	0	0	0	0	200	300	0	0	0	0	0	0	0	200	903	0	0	0	0	0	0	0	603	903	0
105	3	0	0	0	0	0	0	200	300	0	0	0	0	0	0	0	200	903	0	0	0	0	0	0	0	603	903	0
105	4	0	0	0	0	0	0	200	300	0	0	0	0	0	0	0	200	903	0	0	0	0	0	0	0	603	903	0
105	5	0	0	0	0	0	0	200	300	0	0	0	0	0	0	0	200	903	0	0	0	0	0	0	0	603	903	0
105	6	0	0	0	0	0	0	200	300	0	0	0	0	0	0	0	200	903	0	0	0	0	0	0	0	603	903	0
105	7	0	0	0	0	0	0	200	300	0	0	0	0	0	0	0	200	903	0	0	0	0	0	0	0	603	903	0
105	8	0	0	0	0	0	0	200	300	0	0	0	0	0	0	0	200	903	0	0	0	0	0	0	0	603	903	0
105	9	0	0	0	0	0	0	200	300	0	0	0	0	0	0	0	200	903	0	0	0	0	0	0	0	603	903	0
106	0	0	0	0	0	0	0	200	300	0	0	0	0	0	0	0	200	903	0	0	0	0	0	0	0	603	903	0
106	1	0	0	0	0	0	0	200	300	0	0	0	0	0	0	0	200	903	0	0	0	0	0	0	0	603	903	0
106	2	0	0	0	0	0	0	200	300	0	0	0	0	0	0	0	200	903	0	0	0	0	0	0	0	603	903	0
106	3	0	0	0	0	0	0	200	300	0	0	0	0	0	0	0	200	903	0	0	0	0	0	0	0	603	903	0
106	4	0	0	0	0	0	0	200	300	0	0	0	0	0	0	0	200	903	0	0	0	0	0	0	0	603	903	0
106	5	0	0	0	0	0	0	200	300	0	0	0	0	0	0	0	200	903	0	0	0	0	0	0	0	603	903	0
106	6	0	0	0	0	0	0	200	300	0	0	0	0	0	0	0	200	903	0	0	0	0	0	0	0	603	903	0
106	7	0	0	0	0	0	0	200	300	0	0	0	0	0	0	0	200	903	0	0	0	0	0	0	0	603	903	0
106	8	0	0	0	0	0	0	200	300	0	0	0	0	0	0	0	200	903	0	0	0	0	0	0	0	603	903	0
106	9	0	0	0	0	0	0	200	300	0	0	0	0	0	0	0	200	903	0	0	0	0	0	0	0	603	903	0
107	0	0	0	0	0	0	0	200	300	0	0	0	0	0	0	0	200	903	0	0	0	0	0	0	0	603	903	0
107	1	0	0	0	0	0	0	200	300	0	0	0	0	0	0	0	200	903	0	0	0	0	0	0	0	603	903	0
107	2	0	0	0	0	0	0	200	300	0	0	0	0	0	0	0	200	903	0	0	0	0	0	0	0	603	903	0
107	3	0	0	0	0	0	0	200	300	0	0	0	0	0	0	0	200	903	0	0	0	0	0	0	0	603	903	0
107	4	0	0	0	0	0	0	200	300	0	0	0	0	0	0	0	200	903	0	0	0	0	0	0	0	603	903	0
107	5	0	0	0	0	0	0	200	300	0	0	0	0	0	0	0	200	903	0	0	0	0	0	0	0	603	903	0
107	6	0	0	0	0	0	0	200	300	0	0	0	0	0	0	0	200	903	0	0	0	0	0	0	0	603	903	0
107	7	0	0	0	0	0	0	200	300	0	0	0	0	0	0	0	200	903	0	0	0	0	0	0	0	603	903	0
107	8	0	0	0	0	0	0	200	300	0	0	0	0	0	0	0	200	903	0	0	0	0	0	0	0	603	903	0
107	9	0	0	0	0	0	0	200	300	0	0	0	0	0	0	0	200	903	0	0	0	0	0	0	0	603	903	0
108	0	0	0	0	0	0	0	200	300	0	0	0	0	0	0	0	200	903	0	0	0	0	0	0	0	603	903	0
108	1	0	0	0	0	0	0	200	300	0	0	0	0	0	0	0	200	903	0	0	0	0	0	0	0	603	903	0
108	2	0	0	0	0	0	0	200	300	0	0	0	0	0	0	0	200	903	0	0	0	0	0	0	0	603	903	0
108	3	0	0	0	0	0	0	200	300	0	0	0	0	0	0	0	200	903	0	0	0	0	0	0	0	603	903	0
108	4	0	0	0	0	0	0	200	300	0	0	0	0	0	0	0	200	903	0	0	0	0	0	0	0	603	903	0
108	5	0	0	0	0	0	0	200	300	0	0	0	0	0	0	0	200	903	0	0	0	0	0	0	0	603	903	0
108	6	0	0	0	0	0	0	200	300	0	0	0	0	0	0	0	200	903	0	0	0	0	0	0	0	603	903	0
108	7	0	0	0	0	0	0	200	300	0	0	0	0	0	0	0	200	903	0	0	0	0	0	0	0	603	903	0
108	8	0	0	0	0	0	0	200	300	0	0	0	0	0	0	0	200	903	0	0	0	0	0	0	0	603	903	0
108	9	0	0	0	0	0	0	200	300	0	0	0	0	0	0	0	200	903	0	0	0	0	0	0	0	603	903	0
109	0	0	0	0	0	0	0	200	300	0	0	0	0	0	0	0	200	903	0	0	0	0	0	0	0	603	903	0
109	1	0	0	0	0	0	0	200	300	0	0	0	0	0	0	0	200	903	0	0	0	0	0	0	0	603	903	0
109	2	0	0	0	0	0	0	200	300	0	0	0	0	0	0	0	200	903	0	0	0	0	0	0	0	603	903	0
109	3	0	0	0	0	0	0	200	300	0	0	0	0	0	0	0	200	903	0	0	0	0	0	0	0	603	903	0
109	4	0	0	0	0	0	0	200	300	0	0	0	0	0	0	0	200	903	0	0	0	0	0	0	0	603	903	0
109	5	0	0	0	0	0	0	200	300	0	0	0	0	0	0	0	200	903	0	0	0	0	0	0	0	603	903	0
109	6	0	0	0	0	0	0	200	300	0	0	0	0	0	0	0	200	903	0	0	0	0	0	0	0	603	903	0
109	7	0	0	0	0	0	0	200	300	0	0	0	0	0	0	0	200	903	0	0	0	0	0	0	0	603	903	0
109	8	0	0	0	0	0	0	200	300	0	0	0	0	0	0	0	200	903	0	0	0	0	0	0	0	603	903	0
109	9	0	0	0	0	0	0	200	300	0	0	0	0	0	0	0	200	903	0	0	0	0	0	0	0	603	903	0
110	0	0	0	0	0	0	0	200	300	0	0	0	0	0	0	0	200	903	0	0	0	0	0	0	0	603	903	0
110	1	0	0	0	0	0	0	200	300	0	0	0	0	0	0	0	200	903	0	0	0	0	0	0	0	603	903	0
110	2	0	0	0	0	0	0	200	300	0	0	0	0	0	0	0	200	903	0	0	0	0	0	0	0	603	903	0
110	3	0	0	0	0	0	0	200	300	0	0	0	0	0	0	0	200	903	0	0	0	0	0	0	0	603	903	0
110	4	0	0	0	0	0	0	200	300	0	0	0	0	0	0	0	200	903	0	0	0	0	0	0	0	603	903	0
110	5	0	0	0	0	0	0	200	300	0	0	0	0	0	0	0	200	903	0	0	0	0	0	0	0	603	903	0
110	6	0	0	0	0	0	0	200	300	0	0	0	0	0	0	0	200	903	0	0	0	0	0	0	0	603	903	0
110	7	0	0	0	0	0	0	200	300	0	0	0	0	0	0	0	200	903	0	0	0	0	0	0	0	603	903	0
110	8	0	0	0	0	0	0	200	300	0	0	0	0	0	0	0	200	903	0	0	0	0	0	0	0	603	903	0
110	9	0	0	0	0	0	0	200	300	0	0	0	0	0	0	0	200	903	0	0	0	0	0	0	0	603	903	0
111	0	0	0	0	0	0	0	200	300	0	0	0	0	0	0	0	200	903	0	0	0	0	0	0	0	603	903	0
111	1	0	0	0	0	0	0	200	300	0	0	0	0	0	0	0	200	903	0	0	0	0	0	0	0	603	903	0
111	2	0	0	0	0	0	0	200	300	0	0	0	0	0	0	0	200	903	0	0	0	0	0	0	0	603	903	0
111	3	0	0	0	0	0	0	200	300	0	0	0	0	0	0	0	200	903	0	0	0	0	0	0	0	603	903	0
111	4	0	0	0	0	0	0	200	300	0	0	0	0	0	0	0	200	903	0	0	0	0	0	0	0	603	903	0
111	5	0	0	0	0	0	0	200	300	0	0	0	0	0	0	0	200	903	0	0	0	0	0	0	0	603	903	0
111	6	0	0	0	0	0	0	200	300	0	0	0	0	0	0	0	200	903	0	0	0	0	0	0	0	603	903	0
111	7	0	0	0	0	0	0	200	300	0	0	0	0	0	0	0	200	903	0	0	0	0	0	0	0	603	903	0
111	8	0	0	0	0	0	0	200	300	0	0	0	0	0	0	0	200	903	0	0	0	0	0	0	0	603	903	0
111	9	0	0	0	0	0	0	200	300	0	0	0	0	0	0	0	200	903	0	0	0	0	0	0	0	603	903	0
112	0	0	0	0	0	0	0	200	300	0	0	0	0	0	0	0	200	903	0	0	0	0	0	0	0	603	903	0
112	1	0	0	0	0	0	0	200	300	0	0	0	0	0	0	0	200	903	0	0	0	0	0	0	0	603	903	0
112	2	0	0	0	0	0	0	200	300	0	0	0	0	0	0	0	200	903	0	0	0	0	0	0	0	603	903	0
112	3	0	0	0	0	0	0	200	300	0	0	0	0	0	0	0	200	903	0	0	0	0	0	0	0	603	903	0
112	4	0	0	0	0	0	0	200	300	0	0	0	0	0	0	0	200	903	0	0	0	0	0	0	0	603	903	0
112	5	0	0	0	0	0	0	200	300	0	0	0	0	0	0	0	200	903	0	0	0	0	0	0	0	603	903	0
112	6	0	0	0	0	0	0	200	300	0	0	0	0	0	0	0	200	903	0	0	0	0	0	0	0	603	903	0
112	7	0	0	0	0	0	0	200	300	0	0	0	0	0	0	0	200	903	0	0	0	0	0	0	0	603	903	0
112	8	0	0	0	0	0	0	200	300	0	0	0	0	0	0	0	200	903	0	0	0	0	0	0	0	603	903	0
112	9	0	0	0	0	0	0	200	300	0	0	0	0	0	0	0	200	903	0	0	0	0	0	0	0	603	903	0
113	0	0	0	0	0	0	0	200	300	0	0	0	0	0	0	0	200	903	0	0	0	0	0	0	0	603	903	0
113	1	0	0	0	0	0	0	200	300	0	0	0	0	0	0	0	200	903	0	0	0	0	0	0	0	603	903	0
113	2	0	0	0	0	0	0	200	300	0	0	0	0	0	0	0	200	903	0	0	0	0	0	0	0	603	903	0
113	3	0	0	0	0	0	0	200	300	0	0	0	0	0	0	0	200	903	0	0	0	0	0	0	0	603	903	0
113	4	0	0	0	0	0	0	200	300	0	0	0	0	0	0	0	200	903	0	0	0	0	0	0	0	603	903	0
113	5	0	0	0	0	0	0	200	300	0	0	0	0	0	0	0	200	903	0	0	0	0	0	0	0	603	903	0
113	6	0	0	0	0	0	0	200	300	0	0	0	0	0	0	0	200	903	0	0	0	0	0	0	0	603	903	0
113	7	0	0	0	0	0	0	200	300	0	0	0	0	0	0	0	200	903	0	0	0	0	0	0	0	603	903	0
113	8	0	0	0	0	0	0	200	300	0	0	0	0	0	0	0	200	903	0	0	0	0	0	0	0	603	903	0
113	9	0	0	0	0	0	0	200	300	0	0	0	0	0	0	0	200	903	0	0	0	0	0	0	0	603	903	0
114	0	0	0	0	0	0	0	200	300	0	0	0	0	0	0	0	200	903	0	0	0	0	0	0	0	603	903	0
114	1	0	0	0	0	0	0	200	300	0	-8.07312	-9.11285	-16.9727	-1882.51	1862.17	-249.756	309.716	1013.91	0	0	0	0	0	0	0	603	903	0
114	2	0	0	0	0	0	0	200	300	0	0	0	0	0	0	0	200	903	0	0	0	0	0	0	0	603	903	0
114	3	0	0	0	0	0	0	200	300	0	0	0	0	0	0	0	200	903	0	0	0	0	0	0	0	603	903	0
114	4	0	0	0	0	0	0	200	300	0	0	0	0	0	0	0	200	903	0	0	0	0	0	0	0	603	903	0
114	5	0	0	0	0	0	0	200	300	0	0	0	0	0	0	0	200	903	0	0	0	0	0	0	0	603	903	0
114	6	0	0	0	0	0	0	200	300	0	0	0	0	0	0	0	200	903	0	0	0	0	0	0	0	603	903	0
114	7	0	0	0	0	0	0	200	300	0	0	0	0	0	0	0	200	903	0	0	0	0	0	0	0	603	903	0
114	8	0	0	0	0	0	0	200	300	0	0	0	0	0	0	0	200	903	0	0	0	0	0	0	0	603	903	0
114	9	0	0	0	0	0	0	200	300	0	0	0	0	0	0	0	200	903	0	0	0	0	0	0	0	603	903	0
115	0	0	0	0	0	0	0	200	300	0	0	0	0	0	0	0	200	903	0	0	0	0	0	0	0	603	903	0
115	1	0	0	0	0	0	0	200	300	0	0	0	0	0	0	0	200	903	0	0	0	0	0	0	0	603	903	0
115	2	0	0	0	0	0	0	200	300	0	0	0	0	0	0	0	200	903	0	0	0	0	0	0	0	603	903	0
115	3	0	0	0	0	0	0	200	300	0	0	0	0	0	0	0	200	903	0	0	0	0	0	0	0	603	903	0
115	4	0	0	0	0	0	0	200	300	0	0	0	0	0	0	0	200	903	0	0	0	0	0	0	0	603	903	0
115	5	0	0	0	0	0	0	200	300	0	0	0	0	0	0	0	200	903	0	0	0	0	0	0	0	603	903	0
115	6	0	0	0	0	0	0	200	300	0	1.23474	-1.02569	-22.4659	-1607.85	2106.32	208.008	293.756	974.568	0	0	0	0	0	0	0	603	903	0
115	7	0	0	0	0	0	0	200	300	0	3.06579	0.652775	-25.2125	-1424.74	2960.81	711.548	317.434	959.509	0	0	0	0	0	0	0	603	903	0
115	8	0	0	0	0	0	0	200	300	0	2.60803	1.41571	-28.8746	-1699.4	3449.09	528.442	319.451	961.855	0	0	0	0	0	0	0	603	903	0
115	9	0	0	0	0	0	0	200	300	0	0.929563	2.78901	-37.1143	-1882.51	3449.09	1077.76	292.931	953.722	0	0	0	0	0	0	0	603	903	0
116	0	0	0	0	0	0	0	200	300	0	3.37097	6.29853	-41.0816	-1607.85	3754.27	1352.42	291.386	942.138	0	0	0	0	0	0	0	603	903	0
116	1	0	0	0	0	0	0	200	300	0	0.624387	7.97699	-43.2178	-1424.74	4669.79	848.877	308.052	935.967	0	0	0	0	0	0	0	603	903	0
116	2	0	0	0	0	0	0	200	300	0	0.929563	7.36664	-49.6265	-1516.29	5219.11	1169.31	305.168	933.554	0	0	0	0	0	0	0	603	903	0
116	3	0	0	0	0	0	0	200	300	0	1.38733	8.43476	-56.9507	-1333.19	5341.18	1260.86	293.786	926.41	0	0	0	0	0	0	0	603	903	0
116	4	0	0	0	0	0	0	200	300	0	3.67614	10.1132	-62.7491	-1333.19	5890.49	1169.31	293.874	924.246	0	0	0	0	0	0	0	603	903	0
116	5	0	0	0	0	0	0	200	300	0	2.30285	9.35028	-69.7681	-1790.95	6622.92	1306.64	294.928	928.67	0	0	0	0	0	0	0	603	903	0
116	6	0	0	0	0	0	0	200	300	0	5.04944	9.50287	-75.5665	-1150.08	6806.02	1489.75	290.067	918.219	0	0	0	0	0	0	0	603	903	0
116	7	0	0	0	0	0	0	200	300	0	0.471799	11.0288	-83.501	-1516.29	7599.48	1352.42	291.011	921.159	0	0	0	0	0	0	0	603	903	0
116	8	0	0	0	0	0	0	200	300	0	0.929563	11.4865	-91.7408	-1241.64	8087.76	1627.08	288.159	916.534	0	0	0	0	0	0	0	603	903	0
116	9	0	0	0	0	0	0	200	300	0	2.15027	12.0969	-99.6754	-234.556	8698.11	1947.51	287.264	905.353	0	0	0	0	0	0	0	603	903	0
117	0	0	0	0	0	0	0	200	300	0	-0.138553	14.996	-106.694	-875.425	9674.67	1535.52	290.677	911.205	0	0	0	0	0	0	0	603	903	0
117	1	0	0	0	0	0	0	200	300	0	-3.95325	15.9116	-114.324	-417.661	10040.9	1947.51	287.828	906.653	0	0	0	0	0	0	0	603	903	0
117	2	0	0	0	0	0	0	200	300	0	-5.17395	14.3857	-121.953	-509.214	9552.6	2451.05	278.33	907.176	0	0	0	0	0	0	0	603	903	0
117	3	0	0	0	0	0	0	200	300	0	-5.02137	16.5219	-127.446	-326.109	10834.3	2130.61	285.011	905.559	0	0	0	0	0	0	0	603	903	0
117	4	0	0	0	0	0	0	200	300	0	-5.32654	17.2849	-135.076	-509.214	11322.6	2130.61	283.824	906.77	0	0	0	0	0	0	0	603	903	0
117	5	0	0	0	0	0	0	200	300	0	-7.1576	15.6064	-139.043	-875.425	11261.6	2496.83	280.994	909.296	0	0	0	0	0	0	0	603	903	0
117	6	0	0	0	0	0	0	200	300	0	-7.92054	14.0805	-147.893	-326.109	11994	1993.29	281.099	905.205	0	0	0	0	0	0	0	603	903	0
117	7	0	0	0	0	0	0	200	300	0	-6.39466	13.9279	-155.217	-234.556	11871.9	1947.51	276.486	904.511	0	0	0	0	0	0	0	603	903	0
117	8	0	0	0	0	0	0	200	300	0	-10.0568	11.7917	-161.016	223.208	12238.2	1627.08	276.006	901.614	0	0	0	0	0	0	0	603	903	0
117	9	0	0	0	0	0	0	200	300	0	-12.4982	8.58735	-165.898	-51.4504	12665.4	1352.42	276.344	903.31	0	0	0	0	0	0	0	603	903	0
118	0	0	0	0	0	0	0	200	300	0	-14.3292	6.29853	-173.833	1321.84	12970.6	1398.19	274.615	895.396	0	0	0	0	0	0	0	603	903	0
118	1	0	0	0	0	0	0	200	300	0	-14.9396	4.1623	-177.8	406.313	12909.5	1169.31	272.607	900.715	0	0	0	0	0	0	0	603	903	0
118	2	0	0	0	0	0	0	200	300	0	-17.2284	0.805363	-181.768	864.077	13458.9	711.548	274.044	898.246	0	0	0	0	0	0	0	603	903	0
118	3	0	0	0	0	0	0	200	300	0	-17.381	-1.48346	-188.787	1047.18	14008.2	574.219	274.201	897.453	0	0	0	0	0	0	0	603	903	0
118	4	0	0	0	0	0	0	200	300	0	-19.6698	-4.07745	-195.806	1504.95	14008.2	528.442	271.541	895.314	0	0	0	0	0	0	0	603	903	0
118	5	0	0	0	0	0	0	200	300	0	-22.569	-6.82403	-202.825	1596.5	14069.2	-112.427	269.366	895.129	0	0	0	0	0	0	0	603	903	0
118	6	0	0	0	0	0	0	200	300	0	-23.7897	-10.6387	-210.149	2145.82	14435.4	-387.085	268.691	892.789	0	0	0	0	0	0	0	603	903	0
118	7	0	0	0	0	0	0	200	300	0	-25.3156	-13.0801	-215.032	2328.92	14862.7	-478.638	269.118	892.169	0	0	0	0	0	0	0	603	903	0
118	8	0	0	0	0	0	0	200	300	0	-27.2992	-16.1319	-220.22	2603.58	15228.9	-1302.61	269.153	891.177	0	0	0	0	0	0	0	603	903	0
118	9	0	0	0	0	0	0	200	300	0	-28.0621	-21.3199	-228.154	2512.03	15595.1	-1485.72	268.353	891.99	0	0	0	0	0	0	0	603	903	0
119	0	0	0	0	0	0	0	200	300	0	-29.588	-23.6087	-234.258	3244.45	16022.3	-1989.26	268.396	889.15	0	0	0	0	0	0	0	603	903	0
119	1	0	0	0	0	0	0	200	300	0	-29.7406	-25.1346	-240.361	3244.45	16205.4	-2630.13	267.421	889.502	0	0	0	0	0	0	0	603	903	0
119	2	0	0	0	0	0	0	200	300	0	-30.1984	-29.2545	-244.939	3793.77	16815.8	-2721.68	268.653	887.511	0	0	0	0	0	0	0	603	903	0
119	3	0	0	0	0	0	0	200	300	0	-31.1139	-33.2217	-250.127	4800.85	17182	-2859.01	268.693	883.806	0	0	0	0	0	0	0	603	903	0
119	4	0	0	0	0	0	0	200	300	0	-32.6398	-33.8321	-258.062	4617.74	16998.9	-3499.88	265.871	885.106	0	0	0	0	0	0	0	603	903	0
119	5	0	0	0	0	0	0	200	300	0	-32.6398	-35.2054	-262.944	5899.48	18219.6	-3682.98	269.291	880.564	0	0	0	0	0	0	0	603	903	0
119	6	0	0	0	0	0	0	200	300	0	-31.7242	-38.8675	-264.47	5716.37	18707.9	-3820.31	270.737	881.386	0	0	0	0	0	0	0	603	903	0
119	7	0	0	0	0	0	0	200	300	0	-31.8768	-41.6141	-272.405	5624.82	18524.8	-4140.75	268.005	882.351	0	0	0	0	0	0	0	603	903	0
119	8	0	0	0	0	0	0	200	300	0	-32.4872	-42.377	-277.593	5807.93	19074.1	-4506.96	268.713	882.078	0	0	0	0	0	0	0	603	903	0
119	9	0	0	0	0	0	0	200	300	0	-32.7924	-43.5977	-279.424	6540.35	19379.3	-4369.63	269.354	879.594	0	0	0	0	0	0	0	603	903	0
120	0	0	0	0	0	0	0	200	300	0	-32.0294	-45.8865	-284.612	7455.88	19501.3	-4964.72	268.519	876.803	0	0	0	0	0	0	0	603	903	0
120	1	0	0	0	0	0	0	200	300	0	-31.5717	-47.8702	-291.631	6631.9	20050.7	-5056.28	268.754	880.259	0	0	0	0	0	0	0	603	903	0
120	2	0	0	0	0	0	0	200	300	0	-32.6398	-46.8021	-294.988	6998.11	20477.9	-5239.38	269.42	879.277	0	0	0	0	0	0	0	603	903	0
120	3	0	0	0	0	0	0	200	300	0	-33.4027	-48.7857	-300.176	7547.43	20355.8	-5514.04	267.813	877.857	0	0	0	0	0	0	0	603	903	0
120	4	0	0	0	0	0	0	200	300	0	-31.8768	-48.9383	-302.617	7913.64	21271.4	-5605.59	270.291	876.849	0	0	0	0	0	0	0	603	903	0
120	5	0	0	0	0	0	0	200	300	0	-32.7924	-50.6168	-307.805	7913.64	21637.6	-5514.04	270.296	877.29	0	0	0	0	0	0	0	603	903	0
120	6	0	0	0	0	0	0	200	300	0	-30.351	-51.5323	-313.604	8829.16	21698.6	-6063.36	269.191	874.846	0	0	0	0	0	0	0	603	903	0
120	7	0	0	0	0	0	0	200	300	0	-30.9613	-53.5159	-316.35	9012.27	22125.9	-6017.58	269.941	874.512	0	0	0	0	0	0	0	603	903	0
120	8	0	0	0	0	0	0	200	300	0	-32.182	-52.1426	-318.181	9836.24	22797.2	-6017.58	271.649	872.086	0	0	0	0	0	0	0	603	903	0
120	9	0	0	0	0	0	0	200	300	0	-32.6398	-52.9056	-323.98	9103.82	22614.1	-6154.91	269.801	874.9	0	0	0	0	0	0	0	603	903	0
121	0	0	0	0	0	0	0	200	300	0	-30.9613	-55.1944	-328.252	9836.24	22675.2	-5971.8	269.079	873.035	0	0	0	0	0	0	0	603	903	0
121	1	0	0	0	0	0	0	200	300	0	-30.5035	-53.5159	-328.557	9744.69	23407.6	-6154.91	271.244	873.341	0	0	0	0	0	0	0	603	903	0
121	2	0	0	0	0	0	0	200	300	0	-30.6561	-53.5159	-334.05	10110.9	23468.6	-6292.24	270.255	872.732	0	0	0	0	0	0	0	603	903	0
121	3	0	0	0	0	0	0	200	300	0	-30.0458	-54.7366	-338.628	10202.5	23834.8	-6109.13	270.387	872.871	0	0	0	0	0	0	0	603	903	0
121	4	0	0	0	0	0	0	200	300	0	-29.588	-56.2625	-344.121	11026.4	24506.2	-6338.02	271.214	870.958	0	0	0	0	0	0	0	603	903	0
121	5	0	0	0	0	0	0	200	300	0	-28.0621	-54.7366	-351.751	11026.4	24628.3	-6383.79	270.016	871.653	0	0	0	0	0	0	0	603	903	0
121	6	0	0	0	0	0	0	200	300	0	-27.6044	-57.0254	-356.939	11758.9	25360.7	-6750	271.051	870.056	0	0	0	0	0	0	0	603	903	0
121	7	0	0	0	0	0	0	200	300	0	-27.6044	-59.1617	-361.211	11667.3	25849	-6566.9	271.562	870.7	0	0	0	0	0	0	0	603	903	0
121	8	0	0	0	0	0	0	200	300	0	-26.3837	-58.8565	-368.23	12949	26520.4	-6063.36	272.021	867.834	0	0	0	0	0	0	0	603	903	0
121	9	0	0	0	0	0	0	200	300	0	-23.1793	-59.3143	-374.028	13681.5	26825.6	-6566.9	271.721	866.421	0	0	0	0	0	0	0	603	903	0
122	0	0	0	0	0	0	0	200	300	0	-23.1793	-62.8238	-377.69	14047.7	27558	-6200.69	272.964	865.806	0	0	0	0	0	0	0	603	903	0
122	1	0	0	0	0	0	0	200	300	0	-23.6371	-62.5186	-380.742	14688.5	28290.4	-6429.57	274.303	864.421	0	0	0	0	0	0	0	603	903	0
122	2	0	0	0	0	0	0	200	300	0	-20.5853	-63.5867	-386.235	14871.6	28229.4	-6338.02	273.089	864.496	0	0	0	0	0	0	0	603	903	0
122	3	0	0	0	0	0	0	200	300	0	-18.2965	-66.0281	-389.898	15237.9	28900.8	-6154.91	274.124	863.918	0	0	0	0	0	0	0	603	903	0
122	4	0	0	0	0	0	0	200	300	0	-18.2965	-66.6385	-392.644	15695.6	29267	-6338.02	274.538	863.026	0	0	0	0	0	0	0	603	903	0
122	5	0	0	0	0	0	0	200	300	0	-17.5336	-68.0118	-398.442	16244.9	29267	-6154.91	273.453	862.229	0	0	0	0	0	0	0	603	903	0
122	6	0	0	0	0	0	0	200	300	0	-15.7025	-69.5377	-399.053	16428	30121.5	-6246.46	275.482	861.832	0	0	0	0	0	0	0	603	903	0
122	7	0	0	0	0	0	0	200	300	0	-14.1766	-71.8265	-402.715	16885.8	30182.5	-6200.69	274.948	861.07	0	0	0	0	0	0	0	603	903	0
122	8	0	0	0	0	0	0	200	300	0	-12.6508	-73.3524	-406.987	17709.8	29938.4	-5971.8	273.561	859.486	0	0	0	0	0	0	0	603	903	0
122	9	0	0	0	0	0	0	200	300	0	-14.1766	-74.1153	-407.598	18167.5	30731.8	-6063.36	275.397	858.428	0	0	0	0	0	0	0	603	903	0
123	0	0	0	0	0	0	0	200	300	0	-11.1249	-75.7938	-410.039	18533.8	31037	-5926.03	275.693	857.8	0	0	0	0	0	0	0	603	903	0
123	1	0	0	0	0	0	0	200	300	0	-8.98865	-77.93	-410.955	18533.8	30853.9	-5880.25	275.079	857.901	0	0	0	0	0	0	0	603	903	0
123	2	0	0	0	0	0	0	200	300	0	-8.53089	-78.0826	-414.312	18808.4	31464.2	-6338.02	275.943	857.603	0	0	0	0	0	0	0	603	903	0
123	3	0	0	0	0	0	0	200	300	0	-8.53089	-79.3033	-416.143	19266.2	32074.6	-6246.46	277.076	856.703	0	0	0	0	0	0	0	603	903	0
123	4	0	0	0	0	0	0	200	300	0	-6.69983	-80.0662	-419.5	19815.5	32074.6	-6017.58	276.459	855.764	0	0	0	0	0	0	0	603	903	0
123	5	0	0	0	0	0	0	200	300	0	-5.02137	-80.9818	-421.941	19815.5	32257.7	-6017.58	276.451	856.037	0	0	0	0	0	0	0	603	903	0
123	6	0	0	0	0	0	0	200	300	0	-4.86878	-81.1343	-421.331	19815.5	32074.6	-5926.03	276.127	855.969	0	0	0	0	0	0	0	603	903	0
123	7	0	0	0	0	0	0	200	300	0	-3.3429	-82.355	-424.382	20547.9	32379.8	-6200.69	276.299	854.582	0	0	0	0	0	0	0	603	903	0
123	8	0	0	0	0	0	0	200	300	0	-2.1222	-81.5921	-424.993	21188.8	32684.9	-6017.58	276.907	853.143	0	0	0	0	0	0	0	603	903	0
123	9	0	0	0	0	0	0	200	300	0	-1.66443	-82.2025	-424.993	21097.2	33234.3	-5926.03	278.2	853.359	0	0	0	0	0	0	0	603	903	0
124	0	0	0	0	0	0	0	200	300	0	-1.35926	-83.5757	-428.35	21005.7	33173.2	-6017.58	277.444	853.961	0	0	0	0	0	0	0	603	903	0
124	1	0	0	0	0	0	0	200	300	0	-0.901492	-82.8128	-429.876	21555	32746	-6063.36	276.176	852.858	0	0	0	0	0	0	0	603	903	0
124	2	0	0	0	0	0	0	200	300	0	0.0140353	-84.0335	-431.401	21829.7	33783.6	-6154.91	278.311	852.398	0	0	0	0	0	0	0	603	903	0
124	3	0	0	0	0	0	0	200	300	0	0.319211	-84.6439	-432.622	22836.7	33966.7	-6292.24	278.514	850.213	0	0	0	0	0	0	0	603	903	0
124	4	0	0	0	0	0	0	200	300	0	0.0140353	-86.7801	-435.979	22195.9	33539.4	-6200.69	276.929	852.09	0	0	0	0	0	0	0	603	903	0
124	5	0	0	0	0	0	0	200	300	0	0.471799	-85.8646	-433.232	22470.5	34149.8	-6200.69	278.826	851.133	0	0	0	0	0	0	0	603	903	0
124	6	0	0	0	0	0	0	200	300	0	1.38733	-86.1697	-437.505	22928.3	34271.9	-6521.12	278.335	850.593	0	0	0	0	0	0	0	603	903	0
124	7	0	0	0	0	0	0	200	300	0	1.6925	-88.306	-439.641	23111.4	34393.9	-6383.79	278.232	850.431	0	0	0	0	0	0	0	603	903	0
124	8	0	0	0	0	0	0	200	300	0	1.53991	-89.2215	-439.031	23569.2	35004.3	-6566.9	279.731	849.316	0	0	0	0	0	0	0	603	903	0
124	9	0	0	0	0	0	0	200	300	0	1.6925	-87.8482	-444.524	23202.9	34638.1	-6704.23	277.922	850.803	0	0	0	0	0	0	0	603	903	0
125	0	0	0	0	0	0	0	200	300	0	2.60803	-90.5948	-445.745	23843.8	34882.2	-6566.9	278.256	849.508	0	0	0	0	0	0	0	603	903	0
125	1	0	0	0	0	0	0	200	300	0	2.60803	-90.9	-445.745	24026.9	35248.4	-6978.88	279.078	849.097	0	0	0	0	0	0	0	603	903	0
125	2	0	0	0	0	0	0	200	300	0	2.15027	-90.9	-450.322	23843.8	35309.5	-6933.11	278.409	850.052	0	0	0	0	0	0	0	603	903	0
125	3	0	0	0	0	0	0	200	300	0	1.99768	-92.2733	-452.459	24667.8	35126.4	-7253.54	277.634	848.481	0	0	0	0	0	0	0	603	903	0
125	4	0	0	0	0	0	0	200	300	0	2.30285	-93.7991	-454.29	25491.8	35675.7	-7116.21	278.531	846.887	0	0	0	0	0	0	0	603	903	0
125	5	0	0	0	0	0	0	200	300	0	2.60803	-92.4258	-457.952	25400.2	36286	-6841.56	279.235	847.535	0	0	0	0	0	0	0	603	903	0
125	6	0	0	0	0	0	0	200	300	0	1.84509	-94.5621	-460.393	25308.7	36225	-7207.77	278.683	848.028	0	0	0	0	0	0	0	603	903	0
125	7	0	0	0	0	0	0	200	300	0	2.45544	-94.5621	-463.14	26132.6	36347.1	-7253.54	278.48	846.575	0	0	0	0	0	0	0	603	903	0
125	8	0	0	0	0	0	0	200	300	0	3.06579	-93.9517	-467.717	27139.7	36774.3	-7207.77	278.625	844.974	0	0	0	0	0	0	0	603	903	0
125	9	0	0	0	0	0	0	200	300	0	2.30285	-95.9354	-476.262	27872.1	37811.9	-7345.1	279.393	844.477	0	0	0	0	0	0	0	603	903	0
126	0	0	0	0	0	0	0	200	300	0	7.03308	-98.0716	-485.418	28604.6	38483.3	-7116.21	279.279	844.072	0	0	0	0	0	0	0	603	903	0
126	1	0	0	0	0	0	0	200	300	0	9.01672	-99.2923	-487.859	29703.2	39154.7	-7299.32	280.258	842.115	0	0	0	0	0	0	0	603	903	0
126	2	0	0	0	0	0	0	200	300	0	9.01672	-102.191	-495.794	30984.9	39765	-7482.42	280.205	840.504	0	0	0	0	0	0	0	603	903	0
126	3	0	0	0	0	0	0	200	300	0	8.25378	-102.802	-502.202	32083.6	39643	-7528.2	278.938	839.114	0	0	0	0	0	0	0	603	903	0
126	4	0	0	0	0	0	0	200	300	0	10.8478	-104.48	-507.085	32816	41168.8	-7345.1	281.187	838.285	0	0	0	0	0	0	0	603	903	0
126	5	0	0	0	0	0	0	200	300	0	12.6788	-108.753	-516.24	32816	41840.2	-7390.87	281.048	839.433	0	0	0	0	0	0	0	603	903	0
126	6	0	0	0	0	0	0	200	300	0	12.8314	-108.753	-521.733	33731.5	41779.2	-7299.32	280.078	838.347	0	0	0	0	0	0	0	603	903	0
126	7	0	0	0	0	0	0	200	300	0	11.6107	-109.211	-526.921	34738.6	42938.9	-7482.42	281.49	837.073	0	0	0	0	0	0	0	603	903	0
126	8	0	0	0	0	0	0	200	300	0	13.2892	-115.467	-535.772	35471	43427.1	-7528.2	281.055	836.795	0	0	0	0	0	0	0	603	903	0
126	9	0	0	0	0	0	0	200	300	0	13.7469	-115.772	-539.434	36203.4	43427.1	-7253.54	280.505	835.886	0	0	0	0	0	0	0	603	903	0
127	0	0	0	0	0	0	0	200	300	0	12.0685	-112.873	-543.401	36478.1	43793.3	-7207.77	280.591	835.871	0	0	0	0	0	0	0	603	903	0
127	1	0	0	0	0	0	0	200	300	0	12.3737	-116.687	-550.725	37027.4	44525.8	-7665.53	280.849	835.766	0	0	0	0	0	0	0	603	903	0
127	2	0	0	0	0	0	0	200	300	0	12.8314	-117.603	-554.692	37210.5	44892	-7299.32	280.931	835.917	0	0	0	0	0	0	0	603	903	0
127	3	0	0	0	0	0	0	200	300	0	13.2892	-113.941	-559.88	37759.8	45136.1	-7528.2	280.617	835.557	0	0	0	0	0	0	0	603	903	0
127	4	0	0	0	0	0	0	200	300	0	13.8995	-115.161	-564.763	37759.8	45746.5	-7528.2	281.001	836.14	0	0	0	0	0	0	0	603	903	0
127	5	0	0	0	0	0	0	200	300	0	14.2047	-114.551	-568.12	38766.9	45990.6	-6887.33	280.952	834.763	0	0	0	0	0	0	0	603	903	0
127	6	0	0	0	0	0	0	200	300	0	14.0521	-112.11	-570.867	39499.3	46295.8	-7390.87	281.097	833.808	0	0	0	0	0	0	0	603	903	0
127	7	0	0	0	0	0	0	200	300	0	16.0358	-112.262	-577.275	39407.8	46906.1	-7253.54	281.254	834.735	0	0	0	0	0	0	0	603	903	0
127	8	0	0	0	0	0	0	200	300	0	13.4418	-111.957	-580.327	39957.1	47089.2	-7116.21	281.143	834.147	0	0	0	0	0	0	0	603	903	0
127	9	0	0	0	0	0	0	200	300	0	13.8995	-110.889	-585.82	40506.4	47089.2	-6704.23	280.382	833.855	0	0	0	0	0	0	0	603	903	0
128	0	0	0	0	0	0	0	200	300	0	13.8995	-109.821	-587.651	40872.6	48126.8	-6521.12	281.897	833.448	0	0	0	0	0	0	0	603	903	0
128	1	0	0	0	0	0	0	200	300	0	13.5944	-110.279	-590.093	42154.4	48309.9	-6750	281.868	831.563	0	0	0	0	0	0	0	603	903	0
128	2	0	0	0	0	0	0	200	300	0	14.0521	-110.431	-594.67	41513.5	48187.9	-6521.12	281.033	833.191	0	0	0	0	0	0	0	603	903	0
128	3	0	0	0	0	0	0	200	300	0	14.2047	-109.668	-598.333	42520.6	48737.2	-7207.77	281.455	831.935	0	0	0	0	0	0	0	603	903	0
128	4	0	0	0	0	0	0	200	300	0	15.4254	-110.126	-599.858	42978.3	48981.3	-7024.66	281.655	831.353	0	0	0	0	0	0	0	603	903	0
128	5	0	0	0	0	0	0	200	300	0	15.1202	-111.042	-602.91	42886.8	49103.4	-6704.23	281.444	831.867	0	0	0	0	0	0	0	603	903	0
128	6	0	0	0	0	0	0	200	300	0	15.578	-112.567	-607.183	43527.7	49530.6	-7161.99	281.575	831.312	0	0	0	0	0	0	0	603	903	0
128	7	0	0	0	0	0	0	200	300	0	15.7306	-112.873	-610.54	44260.1	49774.8	-6978.88	281.526	830.507	0	0	0	0	0	0	0	603	903	0
128	8	0	0	0	0	0	0	200	300	0	16.6461	-113.025	-612.065	44901	50080	-6795.78	281.821	829.64	0	0	0	0	0	0	0	603	903	0
128	9	0	0	0	0	0	0	200	300	0	18.172	-115.314	-617.253	45084.1	50202	-6978.88	281.331	829.96	0	0	0	0	0	0	0	603	903	0
129	0	0	0	0	0	0	0	200	300	0	19.2401	-115.924	-618.474	45267.2	50812.4	-6292.24	282.158	829.808	0	0	0	0	0	0	0	603	903	0
129	1	0	0	0	0	0	0	200	300	0	19.3927	-114.856	-622.136	46091.1	50873.4	-6475.34	281.772	828.915	0	0	0	0	0	0	0	603	903	0
129	2	0	0	0	0	0	0	200	300	0	20.1556	-115.161	-621.221	46640.4	51056.5	-6612.67	282.187	827.921	0	0	0	0	0	0	0	603	903	0
129	3	0	0	0	0	0	0	200	300	0	20.1556	-116.84	-627.019	46732	51972.1	-6246.46	282.888	828.47	0	0	0	0	0	0	0	603	903	0
129	4	0	0	0	0	0	0	200	300	0	20.3082	-114.551	-628.24	46548.9	51666.9	-6292.24	282.241	828.906	0	0	0	0	0	0	0	603	903	0
129	5	0	0	0	0	0	0	200	300	0	22.597	-114.551	-631.597	47098.2	51422.7	-6292.24	281.417	828.43	0	0	0	0	0	0	0	603	903	0
129	6	0	0	0	0	0	0	200	300	0	22.9022	-113.483	-631.902	47281.3	52277.2	-5926.03	282.73	828.176	0	0	0	0	0	0	0	603	903	0
129	7	0	0	0	0	0	0	200	300	0	22.4445	-112.873	-635.869	47464.4	52521.4	-6063.36	282.598	828.355	0	0	0	0	0	0	0	603	903	0
129	8	0	0	0	0	0	0	200	300	0	22.597	-112.567	-639.226	48105.3	52765.5	-6017.58	282.546	827.745	0	0	0	0	0	0	0	603	903	0
129	9	0	0	0	0	0	0	200	300	0	24.2755	-112.567	-642.888	48288.4	52948.6	-5468.26	282.361	827.888	0	0	0	0	0	0	0	603	903	0
130	0	0	0	0	0	0	0	200	300	0	25.191	-111.042	-642.888	48563.1	53070.7	-5376.71	282.55	827.461	0	0	0	0	0	0	0	603	903	0
130	1	0	0	0	0	0	0	200	300	0	25.6488	-109.821	-646.245	48380	53375.9	-5422.49	282.594	828.137	0	0	0	0	0	0	0	603	903	0
130	2	0	0	0	0	0	0	200	300	0	24.4281	-110.431	-648.687	48837.7	53986.2	-5056.28	283.224	827.713	0	0	0	0	0	0	0	603	903	0
130	3	0	0	0	0	0	0	200	300	0	27.6324	-108.142	-651.128	49112.4	54047.2	-4918.95	283.006	827.573	0	0	0	0	0	0	0	603	903	0
130	4	0	0	0	0	0	0	200	300	0	25.4962	-106.922	-653.569	49112.4	53681	-5102.05	282.135	827.855	0	0	0	0	0	0	0	603	903	0
130	5	0	0	0	0	0	0	200	300	0	27.4799	-107.99	-655.095	49661.7	54352.4	-5102.05	282.969	827.192	0	0	0	0	0	0	0	603	903	0
130	6	0	0	0	0	0	0	200	300	0	26.4117	-106.617	-654.18	49936.4	54718.6	-4644.29	283.645	826.666	0	0	0	0	0	0	0	603	903	0
130	7	0	0	0	0	0	0	200	300	0	27.785	-105.854	-660.588	50119.5	54657.6	-4552.73	282.741	827.129	0	0	0	0	0	0	0	603	903	0
130	8	0	0	0	0	0	0	200	300	0	27.4799	-105.396	-663.03	50394.1	54535.5	-4918.95	282.252	826.994	0	0	0	0	0	0	0	603	903	0
130	9	0	0	0	0	0	0	200	300	0	26.1066	-106.159	-663.03	50302.6	55145.9	-4598.51	283.173	827.132	0	0	0	0	0	0	0	603	903	0
131	0	0	0	0	0	0	0	200	300	0	26.2592	-105.091	-666.692	51126.5	54962.8	-4552.73	282.441	826.313	0	0	0	0	0	0	0	603	903	0
131	1	0	0	0	0	0	0	200	300	0	27.0221	-104.938	-670.354	51126.5	55268	-4323.85	282.446	826.732	0	0	0	0	0	0	0	603	903	0
131	2	0	0	0	0	0	0	200	300	0	27.785	-105.396	-670.659	50851.9	55329	-4232.3	282.499	827.176	0	0	0	0	0	0	0	603	903	0
131	3	0	0	0	0	0	0	200	300	0	26.2592	-104.023	-674.016	51675.9	55512.1	-4003.42	282.36	826.331	0	0	0	0	0	0	0	603	903	0
131	4	0	0	0	0	0	0	200	300	0	26.5643	-104.48	-674.627	52133.6	55695.2	-4094.97	282.557	825.722	0	0	0	0	0	0	0	603	903	0
131	5	0	0	0	0	0	0	200	300	0	27.4799	-105.091	-674.627	52408.3	56244.5	-4003.42	283.371	825.315	0	0	0	0	0	0	0	603	903	0
131	6	0	0	0	0	0	0	200	300	0	27.6324	-102.954	-679.509	52225.2	56061.4	-3911.87	282.503	826.143	0	0	0	0	0	0	0	603	903	0
131	7	0	0	0	0	0	0	200	300	0	26.4117	-102.954	-681.951	52682.9	56183.5	-4323.85	282.386	825.747	0	0	0	0	0	0	0	603	903	0
131	8	0	0	0	0	0	0	200	300	0	26.4117	-101.123	-679.204	52957.6	56671.8	-4094.97	283.439	825.03	0	0	0	0	0	0	0	603	903	0
131	9	0	0	0	0	0	0	200	300	0	27.785	-100.666	-684.087	52866	56244.5	-4003.42	282.218	825.72	0	0	0	0	0	0	0	603	903	0
132	0	0	0	0	0	0	0	200	300	0	28.3954	-101.123	-685.613	52774.5	56427.6	-3866.09	282.302	826.026	0	0	0	0	0	0	0	603	903	0
132	1	0	0	0	0	0	0	200	300	0	25.8014	-98.9871	-683.477	53049.2	56915.9	-4003.42	283.274	825.383	0	0	0	0	0	0	0	603	903	0
132	2	0	0	0	0	0	0	200	300	0	26.2592	-97.7664	-688.054	53781.6	56915.9	-3774.54	282.72	824.835	0	0	0	0	0	0	0	603	903	0
132	3	0	0	0	0	0	0	200	300	0	27.9376	-99.5975	-689.275	53781.6	56793.8	-3362.55	282.396	824.974	0	0	0	0	0	0	0	603	903	0
132	4	0	0	0	0	0	0	200	300	0	27.1747	-97.0035	-689.58	53690	57343.1	-3408.33	283.157	825.141	0	0	0	0	0	0	0	603	903	0
132	5	0	0	0	0	0	0	200	300	0	28.2428	-95.9354	-692.022	53781.6	57526.3	-3408.33	283.128	825.283	0	0	0	0	0	0	0	603	903	0
132	6	0	0	0	0	0	0	200	300	0	25.4962	-94.7147	-692.937	54239.3	57465.2	-3316.77	282.93	824.726	0	0	0	0	0	0	0	603	903	0
132	7	0	0	0	0	0	0	200	300	0	28.0902	-95.7828	-692.327	54422.4	57160	-3133.67	282.562	824.392	0	0	0	0	0	0	0	603	903	0
132	8	0	0	0	0	0	0	200	300	0	27.0221	-94.1043	-694.768	53964.7	57465.2	-2996.34	282.711	825.327	0	0	0	0	0	0	0	603	903	0
132	9	0	0	0	0	0	0	200	300	0	26.5643	-91.9681	-693.853	53690	57404.2	-3225.22	282.733	825.62	0	0	0	0	0	0	0	603	903	0
133	0	0	0	0	0	0	0	200	300	0	28.0902	-92.731	-694.768	54147.8	57648.3	-3316.77	282.975	825.064	0	0	0	0	0	0	0	603	903	0
133	1	0	0	0	0	0	0	200	300	0	27.4799	-92.1207	-696.294	53598.5	57282.1	-2904.79	282.267	826.023	0	0	0	0	0	0	0	603	903	0
133	2	0	0	0	0	0	0	200	300	0	26.8695	-91.0526	-693.547	54239.3	57465.2	-2675.9	282.857	824.794	0	0	0	0	0	0	0	603	903	0
133	3	0	0	0	0	0	0	200	300	0	26.8695	-90.5948	-695.378	55063.3	57038	-2675.9	282.024	823.815	0	0	0	0	0	0	0	603	903	0
133	4	0	0	0	0	0	0	200	300	0	26.7169	-90.137	-695.989	54880.2	57892.5	-2813.23	283.18	824.148	0	0	0	0	0	0	0	603	903	0
133	5	0	0	0	0	0	0	200	300	0	26.1066	-90.2896	-695.684	54514	57648.3	-2675.9	282.866	824.64	0	0	0	0	0	0	0	603	903	0
133	6	0	0	0	0	0	0	200	300	0	26.2592	-89.5267	-695.684	54605.6	57282.1	-2263.92	282.339	824.508	0	0	0	0	0	0	0	603	903	0
133	7	0	0	0	0	0	0	200	300	0	25.8014	-89.3741	-695.073	55154.9	57709.4	-2630.13	283.026	823.649	0	0	0	0	0	0	0	603	903	0
133	8	0	0	0	0	0	0	200	300	0	27.4799	-88.4586	-696.294	55429.5	57648.3	-2538.58	282.793	823.393	0	0	0	0	0	0	0	603	903	0
133	9	0	0	0	0	0	0	200	300	0	25.6488	-87.3904	-695.989	54605.6	57648.3	-2172.36	282.829	824.543	0	0	0	0	0	0	0	603	903	0
134	0	0	0	0	0	0	0	200	300	0	26.8695	-87.0853	-693.547	54697.1	58014.5	-2309.69	283.649	824.134	0	0	0	0	0	0	0	603	903	0
134	1	0	0	0	0	0	0	200	300	0	26.5643	-86.3223	-695.989	55063.3	57465.2	-2355.47	282.566	823.885	0	0	0	0	0	0	0	603	903	0
134	2	0	0	0	0	0	0	200	300	0	27.785	-85.1016	-694.768	55063.3	57404.2	-2126.59	282.624	823.746	0	0	0	0	0	0	0	603	903	0
134	3	0	0	0	0	0	0	200	300	0	27.1747	-84.949	-690.19	54697.1	57526.3	-2355.47	283.348	823.751	0	0	0	0	0	0	0	603	903	0
134	4	0	0	0	0	0	0	200	300	0	26.8695	-85.4068	-693.547	54514	57465.2	-2172.36	282.857	824.398	0	0	0	0	0	0	0	603	903	0
134	5	0	0	0	0	0	0	200	300	0	25.4962	-84.0335	-693.242	54971.8	56427.6	-1851.93	281.397	823.703	0	0	0	0	0	0	0	603	903	0
134	6	0	0	0	0	0	0	200	300	0	25.8014	-83.2706	-691.411	55521.1	57343.1	-1989.26	282.936	822.699	0	0	0	0	0	0	0	603	903	0
134	7	0	0	0	0	0	0	200	300	0	24.5807	-83.4232	-691.106	54971.8	57526.3	-1943.48	283.238	823.458	0	0	0	0	0	0	0	603	903	0
134	8	0	0	0	0	0	0	200	300	0	26.5643	-82.9654	-691.411	54971.8	56488.7	-1668.82	281.701	823.493	0	0	0	0	0	0	0	603	903	0
134	9	0	0	0	0	0	0	200	300	0	24.7333	-81.4395	-692.327	55246.4	57038	-1806.15	282.386	823.202	0	0	0	0	0	0	0	603	903	0
135	0	0	0	0	0	0	0	200	300	0	27.0221	-80.9818	-690.19	55338	57099	-1851.93	282.729	822.822	0	0	0	0	0	0	0	603	903	0
135	1	0	0	0	0	0	0	200	300	0	24.5807	-79.1507	-687.139	54880.2	56732.8	-1897.71	282.564	823.132	0	0	0	0	0	0	0	603	903	0
135	2	0	0	0	0	0	0	200	300	0	26.1066	-79.761	-688.359	54697.1	56793.8	-1394.17	282.506	823.54	0	0	0	0	0	0	0	603	903	0
135	3	0	0	0	0	0	0	200	300	0	24.2755	-79.761	-686.528	54880.2	56793.8	-1668.82	282.726	823.061	0	0	0	0	0	0	0	603	903	0
135	4	0	0	0	0	0	0	200	300	0	25.0385	-77.6248	-685.918	55246.4	56305.6	-1851.93	282.088	822.456	0	0	0	0	0	0	0	603	903	0
135	5	0	0	0	0	0	0	200	300	0	22.9022	-77.93	-684.392	54971.8	56366.6	-1668.82	282.36	822.678	0	0	0	0	0	0	0	603	903	0
135	6	0	0	0	0	0	0	200	300	0	24.1229	-77.1671	-678.899	54605.6	56671.8	-1577.27	283.476	822.568	0	0	0	0	0	0	0	603	903	0
135	7	0	0	0	0	0	0	200	300	0	23.36	-76.4041	-681.646	54880.2	56061.4	-1394.17	282.244	822.489	0	0	0	0	0	0	0	603	903	0
135	8	0	0	0	0	0	0	200	300	0	24.7333	-77.6248	-680.12	55063.3	56000.4	-1165.28	282.339	822.039	0	0	0	0	0	0	0	603	903	0
135	9	0	0	0	0	0	0	200	300	0	23.8177	-75.6412	-677.678	55063.3	55939.3	-1439.94	282.546	821.747	0	0	0	0	0	0	0	603	903	0
136	0	0	0	0	0	0	0	200	300	0	22.7496	-75.336	-677.068	54788.7	55817.3	-1211.06	282.44	822.08	0	0	0	0	0	0	0	603	903	0
136	1	0	0	0	0	0	0	200	300	0	23.6652	-75.7938	-675.237	55063.3	55512.1	-1027.95	282.211	821.453	0	0	0	0	0	0	0	603	903	0
136	2	0	0	0	0	0	0	200	300	0	23.6652	-73.6575	-673.406	55063.3	55817.3	-1302.61	282.888	821.232	0	0	0	0	0	0	0	603	903	0
136	3	0	0	0	0	0	0	200	300	0	23.6652	-73.6575	-671.575	54788.7	55206.9	-1211.06	282.205	821.418	0	0	0	0	0	0	0	603	903	0
136	4	0	0	0	0	0	0	200	300	0	21.9867	-73.3524	-667.913	54514	55634.2	-1302.61	283.296	821.382	0	0	0	0	0	0	0	603	903	0
136	5	0	0	0	0	0	0	200	300	0	22.597	-72.5894	-666.692	54697.1	55451.1	-1073.73	283.173	820.957	0	0	0	0	0	0	0	603	903	0
136	6	0	0	0	0	0	0	200	300	0	23.8177	-71.3687	-665.776	54788.7	55145.9	-1165.28	282.829	820.707	0	0	0	0	0	0	0	603	903	0
136	7	0	0	0	0	0	0	200	300	0	22.9022	-71.3687	-663.03	54239.3	53925.2	-1439.94	281.331	821.195	0	0	0	0	0	0	0	603	903	0
136	8	0	0	0	0	0	0	200	300	0	21.5289	-70.4532	-660.894	54514	54840.7	-1165.28	282.98	820.515	0	0	0	0	0	0	0	603	903	0
136	9	0	0	0	0	0	0	200	300	0	21.6815	-71.3687	-660.588	54605.6	54718.6	-890.625	282.833	820.338	0	0	0	0	0	0	0	603	903	0
137	0	0	0	0	0	0	0	200	300	0	23.2074	-69.6902	-657.232	54880.2	54108.3	-753.296	282.328	819.498	0	0	0	0	0	0	0	603	903	0
137	1	0	0	0	0	0	0	200	300	0	22.9022	-68.7747	-656.011	54697.1	54169.3	-1073.73	282.574	819.622	0	0	0	0	0	0	0	603	903	0
137	2	0	0	0	0	0	0	200	300	0	23.2074	-69.0799	-654.18	54514	54474.5	-982.178	283.271	819.668	0	0	0	0	0	0	0	603	903	0
137	3	0	0	0	0	0	0	200	300	0	23.2074	-68.7747	-650.212	54330.9	53925.2	-661.744	282.935	819.441	0	0	0	0	0	0	0	603	903	0
137	4	0	0	0	0	0	0	200	300	0	22.597	-66.9437	-649.297	54605.6	53314.8	-753.296	282.112	818.901	0	0	0	0	0	0	0	603	903	0
137	5	0	0	0	0	0	0	200	300	0	20.766	-66.7911	-648.076	54056.2	53925.2	-844.849	283.208	819.59	0	0	0	0	0	0	0	603	903	0
137	6	0	0	0	0	0	0	200	300	0	20.4608	-66.6385	-645.33	53873.1	53314.8	-753.296	282.616	819.518	0	0	0	0	0	0	0	603	903	0
137	7	0	0	0	0	0	0	200	300	0	21.5289	-64.8074	-642.888	53232.3	53192.8	-799.073	282.74	820.198	0	0	0	0	0	0	0	603	903	0
137	8	0	0	0	0	0	0	200	300	0	22.1393	-65.5704	-641.362	53964.7	53070.7	-707.52	282.747	818.859	0	0	0	0	0	0	0	603	903	0
137	9	0	0	0	0	0	0	200	300	0	21.0712	-65.2652	-639.226	53873.1	52521.4	-615.967	282.164	818.721	0	0	0	0	0	0	0	603	903	0
138	0	0	0	0	0	0	0	200	300	0	20.3082	-63.7393	-638.616	53323.8	52765.5	-478.638	282.625	819.501	0	0	0	0	0	0	0	603	903	0
138	1	0	0	0	0	0	0	200	300	0	20.766	-63.8919	-636.174	53506.9	52582.4	-432.862	282.654	818.893	0	0	0	0	0	0	0	603	903	0
138	2	0	0	0	0	0	0	200	300	0	20.766	-63.7393	-633.733	53690	52521.4	-158.203	282.876	818.28	0	0	0	0	0	0	0	603	903	0
138	3	0	0	0	0	0	0	200	300	0	20.3082	-61.2979	-629.155	53964.7	52277.2	-432.862	283.091	817.227	0	0	0	0	0	0	0	603	903	0
138	4	0	0	0	0	0	0	200	300	0	20.3082	-62.0608	-630.681	54330.9	52460.3	-524.415	283.18	816.854	0	0	0	0	0	0	0	603	903	0
138	5	0	0	0	0	0	0	200	300	0	21.2238	-61.2979	-627.935	54056.2	52216.2	-295.533	283.155	816.914	0	0	0	0	0	0	0	603	903	0
138	6	0	0	0	0	0	0	200	300	0	21.0712	-60.8401	-625.493	53781.6	52094.1	-295.533	283.285	817.017	0	0	0	0	0	0	0	603	903	0
138	7	0	0	0	0	0	0	200	300	0	20.766	-60.0772	-625.798	53506.9	51972.1	-158.203	283.049	817.498	0	0	0	0	0	0	0	603	903	0
138	8	0	0	0	0	0	0	200	300	0	20.1556	-59.6194	-621.221	53873.1	51850	-341.309	283.465	816.279	0	0	0	0	0	0	0	603	903	0
138	9	0	0	0	0	0	0	200	300	0	21.2238	-58.3987	-619.39	53781.6	51544.8	-295.533	283.219	816.17	0	0	0	0	0	0	0	603	903	0
139	0	0	0	0	0	0	0	200	300	0	20.766	-58.3987	-616.643	53049.2	51666.9	-295.533	283.787	816.971	0	0	0	0	0	0	0	603	903	0
139	1	0	0	0	0	0	0	200	300	0	20.3082	-58.0936	-614.202	53232.3	51483.8	-203.98	283.822	816.331	0	0	0	0	0	0	0	603	903	0
139	2	0	0	0	0	0	0	200	300	0	20.6134	-56.7203	-613.286	54056.2	50080	-66.6507	281.658	814.858	0	0	0	0	0	0	0	603	903	0
139	3	0	0	0	0	0	0	200	300	0	20.9186	-57.3306	-611.15	52774.5	51300.7	-112.427	283.941	816.647	0	0	0	0	0	0	0	603	903	0
139	4	0	0	0	0	0	0	200	300	0	20.6134	-56.2625	-609.929	53232.3	51117.6	24.9021	283.809	815.724	0	0	0	0	0	0	0	603	903	0
139	5	0	0	0	0	0	0	200	300	0	20.3082	-55.6522	-608.709	52774.5	50568.2	299.56	283.075	816.301	0	0	0	0	0	0	0	603	903	0
139	6	0	0	0	0	0	0	200	300	0	20.4608	-54.7366	-605.657	53506.9	50690.3	253.784	283.695	814.655	0	0	0	0	0	0	0	603	903	0
139	7	0	0	0	0	0	0	200	300	0	21.2238	-53.9737	-603.215	53781.6	50690.3	162.231	284.034	813.842	0	0	0	0	0	0	0	603	903	0
139	8	0	0	0	0	0	0	200	300	0	21.0712	-53.0582	-601.995	52866	50385.1	24.9021	283.697	815.182	0	0	0	0	0	0	0	603	903	0
139	9	0	0	0	0	0	0	200	300	0	20.9186	-52.9056	-602.3	52499.8	50202	162.231	283.351	815.834	0	0	0	0	0	0	0	603	903	0
140	0	0	0	0	0	0	0	200	300	0	20.6134	-52.6004	-600.164	53140.7	49896.9	436.889	283.139	814.456	0	0	0	0	0	0	0	603	903	0
140	1	0	0	0	0	0	0	200	300	0	20.9186	-51.6849	-597.112	52866	49774.8	208.008	283.359	814.464	0	0	0	0	0	0	0	603	903	0
140	2	0	0	0	0	0	0	200	300	0	21.9867	-50.9219	-594.365	52957.6	49713.8	208.008	283.642	813.901	0	0	0	0	0	0	0	603	903	0
140	3	0	0	0	0	0	0	200	300	0	20.4608	-50.3116	-593.45	52591.4	49286.5	391.113	283.051	814.38	0	0	0	0	0	0	0	603	903	0
140	4	0	0	0	0	0	0	200	300	0	21.0712	-49.8538	-591.619	52866	49469.6	482.666	283.617	813.642	0	0	0	0	0	0	0	603	903	0
140	5	0	0	0	0	0	0	200	300	0	21.2238	-49.3961	-590.703	53690	49530.6	436.889	283.85	812.108	0	0	0	0	0	0	0	603	903	0
140	6	0	0	0	0	0	0	200	300	0	21.5289	-49.5486	-588.872	52499.8	49835.8	803.101	284.629	813.847	0	0	0	0	0	0	0	603	903	0
140	7	0	0	0	0	0	0	200	300	0	20.766	-48.1754	-586.736	52774.5	49164.4	711.548	283.793	813.054	0	0	0	0	0	0	0	603	903	0
140	8	0	0	0	0	0	0	200	300	0	20.766	-47.1072	-585.82	53049.2	49164.4	574.219	283.924	812.445	0	0	0	0	0	0	0	603	903	0
140	9	0	0	0	0	0	0	200	300	0	21.9867	-47.2598	-584.905	53323.8	49408.6	665.771	284.473	811.833	0	0	0	0	0	0	0	603	903	0
141	0	0	0	0	0	0	0	200	300	0	21.9867	-47.4124	-580.327	52866	49225.5	894.653	284.824	811.903	0	0	0	0	0	0	0	603	903	0
141	1	0	0	0	0	0	0	200	300	0	21.5289	-45.5814	-580.022	52408.3	48554.1	803.101	283.711	812.644	0	0	0	0	0	0	0	603	903	0
141	2	0	0	0	0	0	0	200	300	0	21.5289	-45.1236	-577.886	52682.9	48859.3	803.101	284.548	811.835	0	0	0	0	0	0	0	603	903	0
141	3	0	0	0	0	0	0	200	300	0	21.3763	-44.8184	-576.055	53140.7	48554.1	848.877	284.287	810.751	0	0	0	0	0	0	0	603	903	0
141	4	0	0	0	0	0	0	200	300	0	22.2919	-43.4451	-573.919	52499.8	48432	803.101	284.388	811.524	0	0	0	0	0	0	0	603	903	0
141	5	0	0	0	0	0	0	200	300	0	21.3763	-44.3607	-572.087	52408.3	48676.2	1215.09	285.085	811.391	0	0	0	0	0	0	0	603	903	0
141	6	0	0	0	0	0	0	200	300	0	21.8341	-42.9874	-571.477	52957.6	48615.1	1169.31	285.069	810.332	0	0	0	0	0	0	0	603	903	0
141	7	0	0	0	0	0	0	200	300	0	22.2919	-41.7667	-569.646	53049.2	47760.6	1169.31	283.843	809.874	0	0	0	0	0	0	0	603	903	0
141	8	0	0	0	0	0	0	200	300	0	21.6815	-40.6985	-569.646	52591.4	48554.1	1169.31	285.236	810.677	0	0	0	0	0	0	0	603	903	0
141	9	0	0	0	0	0	0	200	300	0	21.2238	-40.8511	-565.679	51859	48493.1	1260.86	285.725	811.324	0	0	0	0	0	0	0	603	903	0
142	0	0	0	0	0	0	0	200	300	0	22.2919	-40.0882	-564.458	53140.7	47516.5	1535.52	284.181	808.855	0	0	0	0	0	0	0	603	903	0
142	1	0	0	0	0	0	0	200	300	0	22.7496	-38.4097	-564.153	52866	48065.8	1169.31	285.2	809.291	0	0	0	0	0	0	0	603	903	0
142	2	0	0	0	0	0	0	200	300	0	23.0548	-38.5623	-562.322	53049.2	48004.8	1260.86	285.369	808.661	0	0	0	0	0	0	0	603	903	0
142	3	0	0	0	0	0	0	200	300	0	21.6815	-37.7994	-559.88	52316.7	47821.7	1764.4	285.414	809.557	0	0	0	0	0	0	0	603	903	0
142	4	0	0	0	0	0	0	200	300	0	21.6815	-36.5787	-558.965	52957.6	47821.7	1672.85	285.554	808.258	0	0	0	0	0	0	0	603	903	0
142	5	0	0	0	0	0	0	200	300	0	23.2074	-36.8838	-556.829	53140.7	47577.5	1627.08	285.444	807.565	0	0	0	0	0	0	0	603	903	0
142	6	0	0	0	0	0	0	200	300	0	23.0548	-35.9683	-556.523	52957.6	47272.3	1535.52	284.942	807.842	0	0	0	0	0	0	0	603	903	0
142	7	0	0	0	0	0	0	200	300	0	21.5289	-34.9002	-555.913	52957.6	47638.6	2039.06	285.694	807.738	0	0	0	0	0	0	0	603	903	0
142	8	0	0	0	0	0	0	200	300	0	21.9867	-35.5106	-554.387	52957.6	47577.5	2039.06	285.82	807.476	0	0	0	0	0	0	0	603	903	0
142	9	0	0	0	0	0	0	200	300	0	23.0548	-34.2899	-553.472	53140.7	47272.3	1993.29	285.411	806.987	0	0	0	0	0	0	0	603	903	0
143	0	0	0	0	0	0	0	200	300	0	22.9022	-34.2899	-551.336	53049.2	47150.3	2130.61	285.52	806.781	0	0	0	0	0	0	0	603	903	0
143	1	0	0	0	0	0	0	200	300	0	22.2919	-33.0691	-549.81	52682.9	47760.6	2130.61	286.868	807.18	0	0	0	0	0	0	0	603	903	0
143	2	0	0	0	0	0	0	200	300	0	22.1393	-32.6114	-548.589	52866	47150.3	2176.39	285.948	806.633	0	0	0	0	0	0	0	603	903	0
143	3	0	0	0	0	0	0	200	300	0	23.9703	-31.8484	-549.81	53415.4	46662	2359.5	284.869	805.848	0	0	0	0	0	0	0	603	903	0
143	4	0	0	0	0	0	0	200	300	0	23.6652	-31.0855	-547.063	53049.2	46967.2	1764.4	285.853	806.029	0	0	0	0	0	0	0	603	903	0
143	5	0	0	0	0	0	0	200	300	0	24.4281	-30.3226	-544.622	53049.2	46723	2130.61	285.79	805.594	0	0	0	0	0	0	0	603	903	0
143	6	0	0	0	0	0	0	200	300	0	22.597	-30.17	-545.232	52866	46662	2267.94	285.582	806.039	0	0	0	0	0	0	0	603	903	0
143	7	0	0	0	0	0	0	200	300	0	25.954	-29.7122	-543.401	53415.4	46417.9	2634.16	285.421	804.702	0	0	0	0	0	0	0	603	903	0
143	8	0	0	0	0	0	0	200	300	0	23.0548	-28.4915	-543.401	53323.8	46051.6	2451.05	284.747	804.87	0	0	0	0	0	0	0	603	903	0
143	9	0	0	0	0	0	0	200	300	0	22.1393	-28.3389	-541.875	53140.7	46539.9	2405.27	285.887	804.932	0	0	0	0	0	0	0	603	903	0
144	0	0	0	0	0	0	0	200	300	0	22.4445	-29.407	-539.739	53873.1	46601	2496.83	286.34	803.187	0	0	0	0	0	0	0	603	903	0
144	1	0	0	0	0	0	0	200	300	0	23.8177	-27.4234	-541.875	53873.1	46234.8	2954.59	285.324	803.58	0	0	0	0	0	0	0	603	903	0
144	2	0	0	0	0	0	0	200	300	0	22.4445	-27.1182	-539.739	53140.7	46295.8	2863.04	285.774	804.544	0	0	0	0	0	0	0	603	903	0
144	3	0	0	0	0	0	0	200	300	0	21.8341	-26.9656	-534.551	53873.1	46112.7	2771.49	286.264	802.218	0	0	0	0	0	0	0	603	903	0
144	4	0	0	0	0	0	0	200	300	0	23.36	-26.3553	-536.687	53873.1	46173.7	2771.49	286.035	802.619	0	0	0	0	0	0	0	603	903	0
144	5	0	0	0	0	0	0	200	300	0	22.9022	-25.7449	-536.382	53049.2	46356.8	3000.37	286.425	804.098	0	0	0	0	0	0	0	603	903	0
144	6	0	0	0	0	0	0	200	300	0	22.4445	-24.982	-535.161	53323.8	45624.4	3046.14	285.254	803.359	0	0	0	0	0	0	0	603	903	0
144	7	0	0	0	0	0	0	200	300	0	21.8341	-24.8294	-533.025	53323.8	45929.6	3000.37	286.168	802.96	0	0	0	0	0	0	0	603	903	0
144	8	0	0	0	0	0	0	200	300	0	23.5126	-24.3716	-532.109	53323.8	45685.4	2725.71	285.857	802.788	0	0	0	0	0	0	0	603	903	0
144	9	0	0	0	0	0	0	200	300	0	22.4445	-24.5242	-531.194	53598.5	45685.4	2908.81	286.005	802.098	0	0	0	0	0	0	0	603	903	0
145	0	0	0	0	0	0	0	200	300	0	21.2238	-24.0665	-530.584	53781.6	45624.4	3000.37	285.989	801.637	0	0	0	0	0	0	0	603	903	0
145	1	0	0	0	0	0	0	200	300	0	21.0712	-24.3716	-531.194	54147.8	45685.4	2954.59	286.005	801.064	0	0	0	0	0	0	0	603	903	0
145	2	0	0	0	0	0	0	200	300	0	21.5289	-22.9983	-527.532	53690	45929.6	3000.37	287.065	801.224	0	0	0	0	0	0	0	603	903	0
145	3	0	0	0	0	0	0	200	300	0	21.2238	-22.5406	-526.921	54147.8	45624.4	2908.81	286.587	800.238	0	0	0	0	0	0	0	603	903	0
145	4	0	0	0	0	0	0	200	300	0	20.6134	-22.5406	-525.701	53781.6	45441.3	3458.13	286.439	800.695	0	0	0	0	0	0	0	603	903	0
145	5	0	0	0	0	0	0	200	300	0	20.6134	-21.6251	-524.785	54330.9	45685.4	3183.47	287.055	799.47	0	0	0	0	0	0	0	603	903	0
145	6	0	0	0	0	0	0	200	300	0	21.0712	-21.3199	-524.48	54697.1	45258.2	3183.47	286.292	798.712	0	0	0	0	0	0	0	603	903	0
145	7	0	0	0	0	0	0	200	300	0	21.0712	-20.8621	-522.649	54330.9	45136.1	3183.47	286.36	799.047	0	0	0	0	0	0	0	603	903	0
145	8	0	0	0	0	0	0	200	300	0	19.5453	-20.0992	-522.039	54056.2	45441.3	3366.58	287.046	799.452	0	0	0	0	0	0	0	603	903	0
145	9	0	0	0	0	0	0	200	300	0	19.3927	-19.0311	-522.039	54697.1	45197.2	3320.8	286.578	798.224	0	0	0	0	0	0	0	603	903	0
146	0	0	0	0	0	0	0	200	300	0	21.0712	-19.1837	-519.292	54880.2	44953	3687.01	286.566	797.317	0	0	0	0	0	0	0	603	903	0
146	1	0	0	0	0	0	0	200	300	0	19.0875	-18.5733	-518.987	54697.1	45258.2	3320.8	287.205	797.608	0	0	0	0	0	0	0	603	903	0
146	2	0	0	0	0	0	0	200	300	0	21.6815	-18.1155	-520.208	54422.4	45014	3366.58	286.531	798.383	0	0	0	0	0	0	0	603	903	0
146	3	0	0	0	0	0	0	200	300	0	19.5453	-17.6578	-518.071	55063.3	44769.9	3503.91	286.417	796.715	0	0	0	0	0	0	0	603	903	0
146	4	0	0	0	0	0	0	200	300	0	19.2401	-16.8948	-517.461	55795.7	45319.2	3595.46	287.58	795.174	0	0	0	0	0	0	0	603	903	0
146	5	0	0	0	0	0	0	200	300	0	17.7142	-16.5897	-517.766	55063.3	45075.1	3641.24	287.057	796.652	0	0	0	0	0	0	0	603	903	0
146	6	0	0	0	0	0	0	200	300	0	17.2565	-16.7422	-516.545	54880.2	44892	4053.22	286.908	796.755	0	0	0	0	0	0	0	603	903	0
146	7	0	0	0	0	0	0	200	300	0	18.172	-15.5215	-515.325	54788.7	44953	3732.79	287.232	796.681	0	0	0	0	0	0	0	603	903	0
146	8	0	0	0	0	0	0	200	300	0	18.172	-14.4534	-515.63	55246.4	44892	3641.24	287.062	795.856	0	0	0	0	0	0	0	603	903	0
146	9	0	0	0	0	0	0	200	300	0	17.1039	-14.606	-514.409	55338	44769.9	3687.01	287.032	795.424	0	0	0	0	0	0	0	603	903	0
147	0	0	0	0	0	0	0	200	300	0	17.2565	-14.1483	-514.104	55795.7	45075.1	3778.57	287.677	794.47	0	0	0	0	0	0	0	603	903	0
147	1	0	0	0	0	0	0	200	300	0	18.172	-13.2327	-512.578	55887.3	44708.9	4007.45	287.224	793.968	0	0	0	0	0	0	0	603	903	0
147	2	0	0	0	0	0	0	200	300	0	17.1039	-12.3172	-514.409	55795.7	44464.7	3915.89	286.438	794.534	0	0	0	0	0	0	0	603	903	0
147	3	0	0	0	0	0	0	200	300	0	18.0194	-12.3172	-513.494	56161.9	44830.9	3778.57	287.306	793.628	0	0	0	0	0	0	0	603	903	0
147	4	0	0	0	0	0	0	200	300	0	15.578	-12.1646	-512.883	56436.6	44525.8	3915.89	286.815	792.962	0	0	0	0	0	0	0	603	903	0
147	5	0	0	0	0	0	0	200	300	0	18.0194	-11.4017	-514.104	56436.6	44464.7	3824.34	286.49	793.223	0	0	0	0	0	0	0	603	903	0
147	6	0	0	0	0	0	0	200	300	0	15.578	-11.2491	-513.799	56436.6	45014	3961.67	287.61	793.158	0	0	0	0	0	0	0	603	903	0
147	7	0	0	0	0	0	0	200	300	0	14.6625	-10.7913	-511.357	57169	45746.5	4007.45	289.461	791.202	0	0	0	0	0	0	0	603	903	0
147	8	0	0	0	0	0	0	200	300	0	15.578	-10.0284	-513.494	57260.6	44769.9	3961.67	287.187	791.488	0	0	0	0	0	0	0	603	903	0
147	9	0	0	0	0	0	0	200	300	0	16.4935	-10.3336	-512.883	56802.8	44830.9	4373.66	287.41	792.248	0	0	0	0	0	0	0	603	903	0
148	0	0	0	0	0	0	0	200	300	0	14.2047	-9.41803	-511.052	57169	44953	4053.22	287.962	791.135	0	0	0	0	0	0	0	603	903	0
148	1	0	0	0	0	0	0	200	300	0	14.8151	-9.41803	-512.883	57809.9	44037.5	4144.77	285.863	790.285	0	0	0	0	0	0	0	603	903	0
148	2	0	0	0	0	0	0	200	300	0	14.3573	-8.19732	-512.273	57443.7	44892	4099	287.633	790.865	0	0	0	0	0	0	0	603	903	0
148	3	0	0	0	0	0	0	200	300	0	15.1202	-8.34991	-511.968	57535.2	45075.1	4373.66	288.043	790.62	0	0	0	0	0	0	0	603	903	0
148	4	0	0	0	0	0	0	200	300	0	16.6461	-7.73956	-512.578	57901.4	44647.8	4236.33	287.104	790.039	0	0	0	0	0	0	0	603	903	0
148	5	0	0	0	0	0	0	200	300	0	14.8151	-6.67144	-512.883	58817	45014	4053.22	287.767	788.321	0	0	0	0	0	0	0	603	903	0
148	6	0	0	0	0	0	0	200	300	0	14.6625	-7.43438	-510.442	58267.7	45441.3	4282.1	289.023	788.849	0	0	0	0	0	0	0	603	903	0
148	7	0	0	0	0	0	0	200	300	0	14.0521	-7.12921	-514.104	58176.1	44892	4510.99	287.321	789.84	0	0	0	0	0	0	0	603	903	0
148	8	0	0	0	0	0	0	200	300	0	14.2047	-6.06109	-513.799	59000.1	44892	4373.66	287.373	788.169	0	0	0	0	0	0	0	603	903	0
148	9	0	0	0	0	0	0	200	300	0	14.9676	-6.82403	-513.799	59549.4	45075.1	4190.55	287.729	787.1	0	0	0	0	0	0	0	603	903	0
149	0	0	0	0	0	0	0	200	300	0	15.2728	-5.29815	-512.883	59549.4	45197.2	4419.43	288.124	786.893	0	0	0	0	0	0	0	603	903	0
149	1	0	0	0	0	0	0	200	300	0	14.2047	-5.14557	-513.494	59549.4	45319.2	4648.31	288.257	787.031	0	0	0	0	0	0	0	603	903	0
149	2	0	0	0	0	0	0	200	300	0	15.2728	-4.6878	-514.104	60190.3	45258.2	4922.97	288.033	785.922	0	0	0	0	0	0	0	603	903	0
149	3	0	0	0	0	0	0	200	300	0	15.8832	-4.84039	-513.799	60281.8	45075.1	4556.76	287.729	785.674	0	0	0	0	0	0	0	603	903	0
149	4	0	0	0	0	0	0	200	300	0	15.2728	-3.92486	-513.494	60281.8	45380.3	4510.99	288.375	785.605	0	0	0	0	0	0	0	603	903	0
149	5	0	0	0	0	0	0	200	300	0	15.4254	-4.6878	-514.714	60190.3	45868.5	4831.42	289.115	786.061	0	0	0	0	0	0	0	603	903	0
149	6	0	0	0	0	0	0	200	300	0	16.0358	-3.92486	-515.325	61197.3	45197.2	5151.85	287.706	784.245	0	0	0	0	0	0	0	603	903	0
149	7	0	0	0	0	0	0	200	300	0	16.3409	-3.31451	-514.714	61380.5	45075.1	4785.64	287.573	783.749	0	0	0	0	0	0	0	603	903	0
149	8	0	0	0	0	0	0	200	300	0	14.5099	-4.07745	-515.02	60922.7	46234.8	4602.54	289.773	784.708	0	0	0	0	0	0	0	603	903	0
149	9	0	0	0	0	0	0	200	300	0	14.8151	-3.16192	-515.02	62112.9	45807.5	4877.2	288.943	782.397	0	0	0	0	0	0	0	603	903	0
150	0	0	0	0	0	0	0	200	300	0	17.1039	-3.16192	-515.63	62662.2	45685.4	5060.3	288.601	781.475	0	0	0	0	0	0	0	603	903	0
150	1	0	0	0	0	0	0	200	300	0	17.1039	-4.6878	-515.325	62296	45990.6	5106.08	289.246	782.113	0	0	0	0	0	0	0	603	903	0
150	2	0	0	0	0	0	0	200	300	0	16.4935	-2.55157	-515.935	62845.3	46295.8	5106.08	289.732	781.192	0	0	0	0	0	0	0	603	903	0
150	3	0	0	0	0	0	0	200	300	0	16.3409	-1.94122	-516.545	63394.6	45807.5	5609.62	288.68	780.272	0	0	0	0	0	0	0	603	903	0
150	4	0	0	0	0	0	0	200	300	0	17.7142	-1.63604	-517.461	63577.7	46662	5243.41	290.175	780.135	0	0	0	0	0	0	0	603	903	0
150	5	0	0	0	0	0	0	200	300	0	16.9513	-1.63604	-517.156	63486.2	46234.8	5518.07	289.402	780.24	0	0	0	0	0	0	0	603	903	0
150	6	0	0	0	0	0	0	200	300	0	17.2565	-1.02569	-518.377	63669.3	45990.6	5563.84	288.72	780.176	0	0	0	0	0	0	0	603	903	0
150	7	0	0	0	0	0	0	200	300	0	18.3246	-1.94122	-516.545	64493.2	46784.1	5334.96	290.571	778.145	0	0	0	0	0	0	0	603	903	0
150	8	0	0	0	0	0	0	200	300	0	18.6298	-1.48346	-519.292	64218.6	46967.2	5426.52	290.445	779.334	0	0	0	0	0	0	0	603	903	0
150	9	0	0	0	0	0	0	200	300	0	17.5616	-1.02569	-520.818	64584.8	46539.9	5472.29	289.359	778.994	0	0	0	0	0	0	0	603	903	0
151	0	0	0	0	0	0	0	200	300	0	17.5616	-0.873104	-518.071	65958.1	46845.1	5334.96	290.422	775.685	0	0	0	0	0	0	0	603	903	0
151	1	0	0	0	0	0	0	200	300	0	19.8505	-1.02569	-521.123	65775	47333.4	5380.74	290.83	776.782	0	0	0	0	0	0	0	603	903	0
151	2	0	0	0	0	0	0	200	300	0	18.4772	-0.567928	-521.733	65958.1	47028.2	5609.62	290.138	776.579	0	0	0	0	0	0	0	603	903	0
151	3	0	0	0	0	0	0	200	300	0	18.9349	-0.415341	-524.175	66049.6	46662	5701.17	289.02	776.993	0	0	0	0	0	0	0	603	903	0
151	4	0	0	0	0	0	0	200	300	0	19.8505	-0.567928	-522.344	66324.3	46723	5792.73	289.449	776.026	0	0	0	0	0	0	0	603	903	0
151	5	0	0	0	0	0	0	200	300	0	20.3082	0.0424231	-522.649	66690.5	47516.5	5426.52	290.915	775.399	0	0	0	0	0	0	0	603	903	0
151	6	0	0	0	0	0	0	200	300	0	19.3927	0.347599	-521.428	67148.3	47516.5	5746.95	291.128	774.222	0	0	0	0	0	0	0	603	903	0
151	7	0	0	0	0	0	0	200	300	0	19.6979	0.0424231	-523.565	67514.5	47577.5	5746.95	290.872	774.048	0	0	0	0	0	0	0	603	903	0
151	8	0	0	0	0	0	0	200	300	0	20.6134	0.95795	-525.701	68246.9	47394.4	5930.06	290.155	773.179	0	0	0	0	0	0	0	603	903	0
151	9	0	0	0	0	0	0	200	300	0	20.9186	0.500187	-524.48	68521.6	47882.7	5930.06	291.296	772.353	0	0	0	0	0	0	0	603	903	0
152	0	0	0	0	0	0	0	200	300	0	21.9867	0.652775	-526.006	68704.6	48126.8	5838.5	291.495	772.384	0	0	0	0	0	0	0	603	903	0
152	1	0	0	0	0	0	0	200	300	0	20.9186	0.95795	-528.753	69528.6	48187.9	5884.28	291.135	771.504	0	0	0	0	0	0	0	603	903	0
152	2	0	0	0	0	0	0	200	300	0	22.4445	1.11054	-528.753	69711.8	48065.8	5838.5	290.904	771.158	0	0	0	0	0	0	0	603	903	0
152	3	0	0	0	0	0	0	200	300	0	20.766	1.11054	-529.363	70078	48615.1	5884.28	291.837	770.618	0	0	0	0	0	0	0	603	903	0
152	4	0	0	0	0	0	0	200	300	0	21.5289	1.26313	-529.668	70352.6	49286.5	6021.61	293.052	770.176	0	0	0	0	0	0	0	603	903	0
152	5	0	0	0	0	0	0	200	300	0	22.597	0.95795	-531.499	71451.3	48615.1	6342.04	291.468	768.567	0	0	0	0	0	0	0	603	903	0
152	6	0	0	0	0	0	0	200	300	0	21.6815	1.5683	-531.194	71176.6	49042.4	6250.49	292.325	769.006	0	0	0	0	0	0	0	603	903	0
152	7	0	0	0	0	0	0	200	300	0	21.3763	1.87348	-533.33	71634.3	49347.5	6158.94	292.527	768.685	0	0	0	0	0	0	0	603	903	0
152	8	0	0	0	0	0	0	200	300	0	21.3763	2.02607	-533.025	72458.3	49103.4	6296.27	292.122	767.062	0	0	0	0	0	0	0	603	903	0
152	9	0	0	0	0	0	0	200	300	0	22.9022	2.02607	-534.551	72641.4	49530.6	6296.27	292.658	767.108	0	0	0	0	0	0	0	603	903	0
153	0	0	0	0	0	0	0	200	300	0	23.0548	2.33124	-535.772	72641.4	49591.7	6342.04	292.561	767.417	0	0	0	0	0	0	0	603	903	0
153	1	0	0	0	0	0	0	200	300	0	21.5289	2.94159	-538.213	73282.3	49347.5	6433.6	291.688	766.841	0	0	0	0	0	0	0	603	903	0
153	2	0	0	0	0	0	0	200	300	0	21.5289	2.17865	-537.908	73923.2	49347.5	6433.6	291.74	765.573	0	0	0	0	0	0	0	603	903	0
153	3	0	0	0	0	0	0	200	300	0	21.8341	2.33124	-538.823	74655.6	50080	6479.37	292.943	764.447	0	0	0	0	0	0	0	603	903	0
153	4	0	0	0	0	0	0	200	300	0	22.9022	2.78901	-541.875	74564	49835.8	6479.37	291.969	765.396	0	0	0	0	0	0	0	603	903	0
153	5	0	0	0	0	0	0	200	300	0	21.5289	1.87348	-543.096	75113.4	49957.9	6158.94	291.987	764.694	0	0	0	0	0	0	0	603	903	0
153	6	0	0	0	0	0	0	200	300	0	21.3763	3.24677	-542.791	76120.4	50629.3	6433.6	293.276	762.761	0	0	0	0	0	0	0	603	903	0
153	7	0	0	0	0	0	0	200	300	0	23.0548	2.94159	-545.537	76303.5	50263.1	6570.92	292.135	763.131	0	0	0	0	0	0	0	603	903	0
153	8	0	0	0	0	0	0	200	300	0	23.36	2.17865	-546.453	76212	50629.3	6891.36	292.651	763.533	0	0	0	0	0	0	0	603	903	0
153	9	0	0	0	0	0	0	200	300	0	22.597	3.55194	-547.063	76395.1	50934.5	6479.37	293.105	763.354	0	0	0	0	0	0	0	603	903	0
154	0	0	0	0	0	0	0	200	300	0	22.7496	3.85712	-548.589	78043.1	50812.4	6525.15	292.624	760.739	0	0	0	0	0	0	0	603	903	0
154	1	0	0	0	0	0	0	200	300	0	22.597	3.70453	-549.199	78043.1	51117.6	6662.48	293.077	760.897	0	0	0	0	0	0	0	603	903	0
154	2	0	0	0	0	0	0	200	300	0	22.9022	3.85712	-549.81	78134.6	51483.8	6845.58	293.639	760.888	0	0	0	0	0	0	0	603	903	0
154	3	0	0	0	0	0	0	200	300	0	22.4445	4.00971	-552.251	78317.7	50934.5	6799.81	292.231	761.185	0	0	0	0	0	0	0	603	903	0
154	4	0	0	0	0	0	0	200	300	0	21.3763	3.70453	-553.472	79599.4	51544.8	6799.81	293.13	759.182	0	0	0	0	0	0	0	603	903	0
154	5	0	0	0	0	0	0	200	300	0	23.6652	4.1623	-552.556	80240.3	51972.1	6799.81	294.058	757.783	0	0	0	0	0	0	0	603	903	0
154	6	0	0	0	0	0	0	200	300	0	24.2755	3.55194	-556.218	80148.7	52094.1	7074.46	293.658	758.904	0	0	0	0	0	0	0	603	903	0
154	7	0	0	0	0	0	0	200	300	0	22.1393	4.62006	-557.134	81064.3	51911	6891.36	293.175	757.498	0	0	0	0	0	0	0	603	903	0
154	8	0	0	0	0	0	0	200	300	0	22.4445	5.23041	-555.303	81705.2	52582.4	7211.79	294.691	755.864	0	0	0	0	0	0	0	603	903	0
154	9	0	0	0	0	0	0	200	300	0	22.597	4.92524	-558.355	82162.9	52704.5	6937.14	294.392	755.848	0	0	0	0	0	0	0	603	903	0
155	0	0	0	0	0	0	0	200	300	0	21.3763	4.46747	-561.101	82254.5	52399.3	6845.58	293.387	756.405	0	0	0	0	0	0	0	603	903	0
155	1	0	0	0	0	0	0	200	300	0	22.2919	3.39936	-562.322	83353.1	52826.5	7074.46	293.944	754.77	0	0	0	0	0	0	0	603	903	0
155	2	0	0	0	0	0	0	200	300	0	22.4445	5.84076	-563.848	83627.8	53009.7	6754.03	294.014	754.684	0	0	0	0	0	0	0	603	903	0
155	3	0	0	0	0	0	0	200	300	0	21.9867	5.07782	-565.374	83994	52826.5	7074.46	293.437	754.436	0	0	0	0	0	0	0	603	903	0
155	4	0	0	0	0	0	0	200	300	0	21.2238	5.383	-565.374	83994	53497.9	6845.58	294.624	754.436	0	0	0	0	0	0	0	603	903	0
155	5	0	0	0	0	0	0	200	300	0	21.3763	5.383	-568.425	85184.1	53375.9	7074.46	293.901	753.14	0	0	0	0	0	0	0	603	903	0
155	6	0	0	0	0	0	0	200	300	0	22.4445	5.68818	-568.425	85641.9	53192.8	6937.14	293.579	752.335	0	0	0	0	0	0	0	603	903	0
155	7	0	0	0	0	0	0	200	300	0	21.8341	5.383	-569.646	86099.7	54169.3	6982.91	295.093	751.854	0	0	0	0	0	0	0	603	903	0
155	8	0	0	0	0	0	0	200	300	0	20.766	6.14594	-571.782	86374.3	54108.3	6891.36	294.631	751.938	0	0	0	0	0	0	0	603	903	0
155	9	0	0	0	0	0	0	200	300	0	20.766	5.68818	-574.224	87381.4	53314.8	7394.9	292.847	750.827	0	0	0	0	0	0	0	603	903	0
156	0	0	0	0	0	0	0	200	300	0	21.8341	6.29853	-575.139	88113.8	54291.4	7120.24	294.397	749.796	0	0	0	0	0	0	0	603	903	0
156	1	0	0	0	0	0	0	200	300	0	21.9867	7.06147	-575.139	88297	54535.5	7394.9	294.821	749.477	0	0	0	0	0	0	0	603	903	0
156	2	0	0	0	0	0	0	200	300	0	20.9186	6.90888	-576.36	88297	54352.4	7303.35	294.303	749.802	0	0	0	0	0	0	0	603	903	0
156	3	0	0	0	0	0	0	200	300	0	20.9186	7.06147	-576.97	89212.5	55023.8	7303.35	295.367	748.378	0	0	0	0	0	0	0	603	903	0
156	4	0	0	0	0	0	0	200	300	0	22.1393	8.43476	-579.107	89761.8	54657.6	7578	294.383	748	0	0	0	0	0	0	0	603	903	0
156	5	0	0	0	0	0	0	200	300	0	21.5289	7.51923	-581.243	89944.9	54840.7	7166.02	294.351	748.254	0	0	0	0	0	0	0	603	903	0
156	6	0	0	0	0	0	0	200	300	0	20.766	7.67182	-579.107	90036.4	55023.8	7257.57	295.015	747.525	0	0	0	0	0	0	0	603	903	0
156	7	0	0	0	0	0	0	200	300	0	20.766	8.28217	-583.684	90768.9	55634.2	7303.35	295.316	747.49	0	0	0	0	0	0	0	603	903	0
156	8	0	0	0	0	0	0	200	300	0	22.1393	8.28217	-583.684	91135.1	55268	7715.33	294.688	746.862	0	0	0	0	0	0	0	603	903	0
156	9	0	0	0	0	0	0	200	300	0	21.3763	8.28217	-583.684	92416.8	55390	7532.23	294.897	744.666	0	0	0	0	0	0	0	603	903	0
157	0	0	0	0	0	0	0	200	300	0	20.9186	9.1977	-586.126	91867.5	56183.5	7806.89	295.856	746.263	0	0	0	0	0	0	0	603	903	0
157	1	0	0	0	0	0	0	200	300	0	20.9186	8.28217	-587.041	92416.8	55817.3	7806.89	295.082	745.572	0	0	0	0	0	0	0	603	903	0
157	2	0	0	0	0	0	0	200	300	0	21.9867	9.04511	-590.093	93332.4	56061.4	7898.44	295.004	744.834	0	0	0	0	0	0	0	603	903	0
157	3	0	0	0	0	0	0	200	300	0	21.8341	9.96064	-591.314	93973.2	56183.5	7852.66	295.015	744.077	0	0	0	0	0	0	0	603	903	0
157	4	0	0	0	0	0	0	200	300	0	21.0712	10.4184	-590.703	93881.7	56122.4	7852.66	295.01	744.068	0	0	0	0	0	0	0	603	903	0
157	5	0	0	0	0	0	0	200	300	0	21.8341	9.50287	-589.788	95255	56305.6	7806.89	295.468	741.493	0	0	0	0	0	0	0	603	903	0
157	6	0	0	0	0	0	0	200	300	0	22.2919	11.0288	-594.06	95529.6	56671.8	7944.22	295.397	742.192	0	0	0	0	0	0	0	603	903	0
157	7	0	0	0	0	0	0	200	300	0	21.9867	11.1813	-595.586	95804.3	56488.7	7898.44	294.846	742.143	0	0	0	0	0	0	0	603	903	0
157	8	0	0	0	0	0	0	200	300	0	21.6815	10.571	-594.67	96353.6	57038	8127.32	295.915	740.971	0	0	0	0	0	0	0	603	903	0
157	9	0	0	0	0	0	0	200	300	0	22.1393	11.7917	-597.112	96994.5	56549.7	7989.99	294.705	740.561	0	0	0	0	0	0	0	603	903	0
158	0	0	0	0	0	0	0	200	300	0	24.8859	11.6391	-598.333	97635.3	57038	8493.53	295.328	739.821	0	0	0	0	0	0	0	603	903	0
158	1	0	0	0	0	0	0	200	300	0	22.4445	12.5546	-599.248	97635.3	57099	8401.98	295.284	740.07	0	0	0	0	0	0	0	603	903	0
158	2	0	0	0	0	0	0	200	300	0	23.2074	12.2495	-599.248	98276.2	57892.5	8264.65	296.609	739.001	0	0	0	0	0	0	0	603	903	0
158	3	0	0	0	0	0	0	200	300	0	23.0548	13.165	-601.384	99283.3	57648.3	8493.53	295.859	737.909	0	0	0	0	0	0	0	603	903	0
158	4	0	0	0	0	0	0	200	300	0	23.8177	13.3176	-601.079	99558	57709.4	8585.08	296.01	737.368	0	0	0	0	0	0	0	603	903	0
158	5	0	0	0	0	0	0	200	300	0	21.8341	13.6227	-601.69	99466.4	58075.6	8585.08	296.521	737.688	0	0	0	0	0	0	0	603	903	0
158	6	0	0	0	0	0	0	200	300	0	22.4445	14.5383	-604.741	100199	57770.4	8997.07	295.529	737.311	0	0	0	0	0	0	0	603	903	0
158	7	0	0	0	0	0	0	200	300	0	23.6652	14.8434	-604.436	100840	57892.5	8493.53	295.779	736.167	0	0	0	0	0	0	0	603	903	0
158	8	0	0	0	0	0	0	200	300	0	24.1229	15.6064	-605.352	101297	58502.8	8676.64	296.643	735.664	0	0	0	0	0	0	0	603	903	0
158	9	0	0	0	0	0	0	200	300	0	23.0548	16.2167	-605.046	101023	58075.6	8859.74	295.985	736.033	0	0	0	0	0	0	0	603	903	0
159	0	0	0	0	0	0	0	200	300	0	22.597	16.3693	-606.267	101847	58441.8	8630.86	296.396	735.01	0	0	0	0	0	0	0	603	903	0
159	1	0	0	0	0	0	0	200	300	0	24.2755	16.6745	-606.572	102488	59052.1	8768.19	297.354	734.038	0	0	0	0	0	0	0	603	903	0
159	2	0	0	0	0	0	0	200	300	0	23.8177	16.0642	-607.793	102854	58563.9	9088.62	296.355	733.775	0	0	0	0	0	0	0	603	903	0
159	3	0	0	0	0	0	0	200	300	0	23.5126	17.4374	-609.319	103495	58808	9317.5	296.514	733.147	0	0	0	0	0	0	0	603	903	0
159	4	0	0	0	0	0	0	200	300	0	23.36	17.4374	-611.15	104319	59357.3	9271.73	297.124	732.308	0	0	0	0	0	0	0	603	903	0
159	5	0	0	0	0	0	0	200	300	0	24.1229	18.0478	-611.15	104136	59174.2	9363.28	296.824	732.607	0	0	0	0	0	0	0	603	903	0
159	6	0	0	0	0	0	0	200	300	0	24.8859	17.8952	-611.76	104319	59174.2	9225.95	296.728	732.478	0	0	0	0	0	0	0	603	903	0
159	7	0	0	0	0	0	0	200	300	0	24.7333	19.1159	-611.76	104776	59235.2	9683.72	296.828	731.73	0	0	0	0	0	0	0	603	903	0
159	8	0	0	0	0	0	0	200	300	0	24.1229	19.1159	-610.845	105600	59479.4	9454.83	297.372	730.124	0	0	0	0	0	0	0	603	903	0
159	9	0	0	0	0	0	0	200	300	0	25.8014	19.7263	-613.591	105875	59540.4	9317.5	297.036	730.45	0	0	0	0	0	0	0	603	903	0
160	0	0	0	0	0	0	0	200	300	0	25.0385	20.4892	-614.202	105692	59662.5	9500.61	297.138	730.92	0	0	0	0	0	0	0	603	903	0
160	1	0	0	0	0	0	0	200	300	0	26.4117	20.6418	-615.117	106516	59662.5	9592.16	296.994	729.836	0	0	0	0	0	0	0	603	903	0
160	2	0	0	0	0	0	0	200	300	0	25.954	20.7944	-617.253	107523	59662.5	9637.94	296.658	728.804	0	0	0	0	0	0	0	603	903	0
160	3	0	0	0	0	0	0	200	300	0	25.8014	21.2521	-616.948	107615	59967.7	9775.27	297.2	728.57	0	0	0	0	0	0	0	603	903	0
160	4	0	0	0	0	0	0	200	300	0	25.0385	22.4728	-617.559	108255	60150.8	9912.6	297.401	727.704	0	0	0	0	0	0	0	603	903	0
160	5	0	0	0	0	0	0	200	300	0	25.191	20.7944	-618.169	108072	60272.8	10278.8	297.502	728.174	0	0	0	0	0	0	0	603	903	0
160	6	0	0	0	0	0	0	200	300	0	26.4117	23.541	-619.695	108896	60700.1	10324.6	297.952	727.274	0	0	0	0	0	0	0	603	903	0
160	7	0	0	0	0	0	0	200	300	0	26.2592	23.9987	-620.305	108805	60272.8	10278.8	297.166	727.595	0	0	0	0	0	0	0	603	903	0
160	8	0	0	0	0	0	0	200	300	0	25.8014	23.3884	-621.221	109354	60517	10324.6	297.416	726.969	0	0	0	0	0	0	0	603	903	0
160	9	0	0	0	0	0	0	200	300	0	26.4117	25.0668	-619.085	110361	61432.5	10507.7	299.231	724.735	0	0	0	0	0	0	0	603	903	0
161	0	0	0	0	0	0	0	200	300	0	27.6324	25.6772	-623.662	110727	60517	10553.5	297.035	725.456	0	0	0	0	0	0	0	603	903	0
161	1	0	0	0	0	0	0	200	300	0	27.4799	25.8298	-624.578	111185	61188.4	10645	297.968	724.984	0	0	0	0	0	0	0	603	903	0
161	2	0	0	0	0	0	0	200	300	0	26.4117	25.5246	-622.747	111551	61676.6	10507.7	299.04	723.872	0	0	0	0	0	0	0	603	903	0
161	3	0	0	0	0	0	0	200	300	0	26.8695	27.0505	-625.798	112558	61432.5	10736.6	298.167	723.136	0	0	0	0	0	0	0	603	903	0
161	4	0	0	0	0	0	0	200	300	0	27.9376	27.0505	-627.019	112284	61737.7	11102.8	298.462	723.924	0	0	0	0	0	0	0	603	903	0
161	5	0	0	0	0	0	0	200	300	0	27.3273	27.3557	-626.104	113382	61798.7	10782.4	298.704	721.908	0	0	0	0	0	0	0	603	903	0
161	6	0	0	0	0	0	0	200	300	0	29.1583	27.8134	-628.24	113566	61798.7	10873.9	298.368	722.232	0	0	0	0	0	0	0	603	903	0
161	7	0	0	0	0	0	0	200	300	0	29.1583	28.7289	-630.376	114206	62409.1	11011.2	299.003	721.828	0	0	0	0	0	0	0	603	903	0
161	8	0	0	0	0	0	0	200	300	0	27.9376	29.6445	-630.376	114756	62592.2	11194.3	299.293	720.957	0	0	0	0	0	0	0	603	903	0
161	9	0	0	0	0	0	0	200	300	0	27.4799	29.1867	-630.986	115122	61920.8	11331.7	298.133	720.552	0	0	0	0	0	0	0	603	903	0
162	0	0	0	0	0	0	0	200	300	0	27.0221	30.56	-632.817	115671	62775.3	11331.7	299.2	720.212	0	0	0	0	0	0	0	603	903	0
162	1	0	0	0	0	0	0	200	300	0	28.2428	31.0178	-633.123	115763	62897.3	11285.9	299.345	720.156	0	0	0	0	0	0	0	603	903	0
162	2	0	0	0	0	0	0	200	300	0	28.0902	32.2385	-635.564	116312	61920.8	11469	297.427	719.994	0	0	0	0	0	0	0	603	903	0
162	3	0	0	0	0	0	0	200	300	0	27.3273	34.2221	-636.785	116953	63019.4	11469	298.965	719.338	0	0	0	0	0	0	0	603	903	0
162	4	0	0	0	0	0	0	200	300	0	26.8695	33.154	-638.005	117868	63263.6	11514.8	299.158	718.255	0	0	0	0	0	0	0	603	903	0
162	5	0	0	0	0	0	0	200	300	0	27.4799	34.5273	-639.531	118418	62714.2	11560.6	298.063	717.837	0	0	0	0	0	0	0	603	903	0
162	6	0	0	0	0	0	0	200	300	0	27.0221	35.5954	-643.499	118326	63751.8	11514.8	299.071	719.12	0	0	0	0	0	0	0	603	903	0
162	7	0	0	0	0	0	0	200	300	0	26.1066	36.2058	-643.499	118601	63629.8	11743.7	298.881	718.694	0	0	0	0	0	0	0	603	903	0
162	8	0	0	0	0	0	0	200	300	0	25.6488	37.1213	-645.94	120157	63202.5	11789.4	297.846	716.981	0	0	0	0	0	0	0	603	903	0
162	9	0	0	0	0	0	0	200	300	0	27.0221	37.8842	-647.466	120615	64301.2	11789.4	299.312	716.712	0	0	0	0	0	0	0	603	903	0
163	0	0	0	0	0	0	0	200	300	0	26.1066	37.2739	-650.823	120249	64484.3	11789.4	299.081	718.236	0	0	0	0	0	0	0	603	903	0
163	1	0	0	0	0	0	0	200	300	0	28.0902	40.4782	-651.128	120707	64240.1	12109.9	298.66	717.619	0	0	0	0	0	0	0	603	903	0
163	2	0	0	0	0	0	0	200	300	0	26.4117	40.936	-652.959	122080	64667.4	12064.1	299.037	716.036	0	0	0	0	0	0	0	603	903	0
163	3	0	0	0	0	0	0	200	300	0	27.9376	39.5627	-653.264	122446	64789.5	12155.6	299.178	715.563	0	0	0	0	0	0	0	603	903	0
163	4	0	0	0	0	0	0	200	300	0	26.2592	42.4619	-654.79	122538	64911.5	12247.2	299.133	715.86	0	0	0	0	0	0	0	603	903	0
163	5	0	0	0	0	0	0	200	300	0	26.7169	43.2248	-657.232	122538	65277.7	12247.2	299.322	716.555	0	0	0	0	0	0	0	603	903	0
163	6	0	0	0	0	0	0	200	300	0	27.0221	42.9196	-659.368	124186	65216.7	11926.8	298.908	714.66	0	0	0	0	0	0	0	603	903	0
163	7	0	0	0	0	0	0	200	300	0	27.0221	44.9033	-659.673	124277	65155.7	12430.3	298.77	714.608	0	0	0	0	0	0	0	603	903	0
163	8	0	0	0	0	0	0	200	300	0	26.1066	45.361	-660.894	124277	65460.8	12430.3	299.049	714.956	0	0	0	0	0	0	0	603	903	0
163	9	0	0	0	0	0	0	200	300	0	26.7169	45.361	-664.556	125742	65827	12659.2	299.054	713.788	0	0	0	0	0	0	0	603	903	0
164	0	0	0	0	0	0	0	200	300	0	27.0221	46.8869	-662.725	126108	65643.9	12888.1	299.052	712.713	0	0	0	0	0	0	0	603	903	0
164	1	0	0	0	0	0	0	200	300	0	26.4117	47.1921	-667.302	126566	66193.2	12430.3	299.195	713.332	0	0	0	0	0	0	0	603	903	0
164	2	0	0	0	0	0	0	200	300	0	26.2592	47.8024	-669.744	126932	66620.5	12659.2	299.472	713.477	0	0	0	0	0	0	0	603	903	0
164	3	0	0	0	0	0	0	200	300	0	26.7169	48.8705	-670.049	127756	66376.4	12750.7	299.062	712.333	0	0	0	0	0	0	0	603	903	0
164	4	0	0	0	0	0	0	200	300	0	27.4799	50.0913	-673.406	128214	66437.4	12705	298.659	712.604	0	0	0	0	0	0	0	603	903	0
164	5	0	0	0	0	0	0	200	300	0	27.3273	49.4809	-674.016	128397	67047.7	12613.4	299.475	712.505	0	0	0	0	0	0	0	603	903	0
164	6	0	0	0	0	0	0	200	300	0	26.5643	51.9223	-673.101	128855	66315.3	12888.1	298.522	711.565	0	0	0	0	0	0	0	603	903	0
164	7	0	0	0	0	0	0	200	300	0	27.1747	52.5327	-677.068	129679	66986.7	13025.4	298.936	711.47	0	0	0	0	0	0	0	603	903	0
164	8	0	0	0	0	0	0	200	300	0	28.8531	50.8542	-674.016	129953	67352.9	13071.2	299.928	710.195	0	0	0	0	0	0	0	603	903	0
164	9	0	0	0	0	0	0	200	300	0	27.4799	54.0585	-678.899	130594	67475	13025.4	299.389	710.638	0	0	0	0	0	0	0	603	903	0
165	0	0	0	0	0	0	0	200	300	0	29.1583	55.5844	-679.815	130869	66925.6	13300.1	298.447	710.493	0	0	0	0	0	0	0	603	903	0
165	1	0	0	0	0	0	0	200	300	0	29.0057	54.3637	-680.12	131784	68024.3	13666.3	300.018	709.233	0	0	0	0	0	0	0	603	903	0
165	2	0	0	0	0	0	0	200	300	0	29.1583	55.8896	-682.256	132608	68146.4	13208.5	299.884	708.632	0	0	0	0	0	0	0	603	903	0
165	3	0	0	0	0	0	0	200	300	0	28.548	53.7534	-680.73	132517	67841.2	13574.7	299.659	708.331	0	0	0	0	0	0	0	603	903	0
165	4	0	0	0	0	0	0	200	300	0	28.7006	56.1948	-685.613	133066	68268.4	13574.7	299.573	708.916	0	0	0	0	0	0	0	603	903	0
165	5	0	0	0	0	0	0	200	300	0	29.9213	55.8896	-684.697	133249	68390.5	13666.3	299.884	708.39	0	0	0	0	0	0	0	603	903	0
165	6	0	0	0	0	0	0	200	300	0	30.9894	57.2629	-687.749	134806	68146.4	13895.1	299.086	706.99	0	0	0	0	0	0	0	603	903	0
165	7	0	0	0	0	0	0	200	300	0	30.2264	58.1784	-688.359	134531	68512.6	13757.8	299.53	707.563	0	0	0	0	0	0	0	603	903	0
165	8	0	0	0	0	0	0	200	300	0	30.5316	57.8732	-688.359	134714	69061.9	14124	300.328	707.297	0	0	0	0	0	0	0	603	903	0
165	9	0	0	0	0	0	0	200	300	0	31.4471	59.2465	-690.496	134531	69733.3	13940.9	300.99	708.167	0	0	0	0	0	0	0	603	903	0
166	0	0	0	0	0	0	0	200	300	0	31.9049	60.0095	-690.496	136179	69061.9	14078.3	300.018	705.781	0	0	0	0	0	0	0	603	903	0
166	1	0	0	0	0	0	0	200	300	0	32.3627	60.925	-691.411	136179	69184	14124	300.062	706.042	0	0	0	0	0	0	0	603	903	0
166	2	0	0	0	0	0	0	200	300	0	31.5997	61.0776	-693.853	136362	69672.3	14215.6	300.414	706.471	0	0	0	0	0	0	0	603	903	0
166	3	0	0	0	0	0	0	200	300	0	33.5834	61.9931	-693.547	136820	69245	14307.1	299.842	705.725	0	0	0	0	0	0	0	603	903	0
166	4	0	0	0	0	0	0	200	300	0	33.5834	62.6035	-695.684	137003	69733.3	14764.9	300.237	706.067	0	0	0	0	0	0	0	603	903	0
166	5	0	0	0	0	0	0	200	300	0	33.4308	63.0612	-698.125	137827	69977.4	14627.6	300.236	705.575	0	0	0	0	0	0	0	603	903	0
166	6	0	0	0	0	0	0	200	300	0	32.8204	63.0612	-696.599	138926	69611.2	14948	299.93	703.566	0	0	0	0	0	0	0	603	903	0
166	7	0	0	0	0	0	0	200	300	0	34.0411	65.5026	-699.346	138926	70221.5	14902.2	300.41	704.349	0	0	0	0	0	0	0	603	903	0
166	8	0	0	0	0	0	0	200	300	0	35.4144	65.5026	-700.261	139200	69977.4	15405.8	299.93	704.217	0	0	0	0	0	0	0	603	903	0
166	9	0	0	0	0	0	0	200	300	0	35.4144	67.3337	-697.515	139658	70038.5	15222.7	300.411	702.778	0	0	0	0	0	0	0	603	903	0
167	0	0	0	0	0	0	0	200	300	0	35.4144	68.5544	-702.398	140207	70160.5	15314.2	299.887	703.388	0	0	0	0	0	0	0	603	903	0
167	1	0	0	0	0	0	0	200	300	0	36.4825	68.4018	-702.398	140574	70648.8	15543.1	300.582	702.866	0	0	0	0	0	0	0	603	903	0
167	2	0	0	0	0	0	0	200	300	0	38.0084	70.0803	-702.398	140116	70465.7	15543.1	300.322	703.518	0	0	0	0	0	0	0	603	903	0
167	3	0	0	0	0	0	0	200	300	0	38.6188	71.301	-705.144	140848	70587.8	15909.3	300.104	703.256	0	0	0	0	0	0	0	603	903	0
167	4	0	0	0	0	0	0	200	300	0	38.9239	69.1647	-705.144	141764	70831.9	16138.2	300.45	701.958	0	0	0	0	0	0	0	603	903	0
167	5	0	0	0	0	0	0	200	300	0	41.6705	72.5217	-705.144	141764	71625.4	16275.5	301.576	701.958	0	0	0	0	0	0	0	603	903	0
167	6	0	0	0	0	0	0	200	300	0	39.6869	73.5898	-706.06	141764	70893	16229.7	300.407	702.218	0	0	0	0	0	0	0	603	903	0
167	7	0	0	0	0	0	0	200	300	0	39.3817	72.9794	-707.28	141855	71076	17053.7	300.492	702.436	0	0	0	0	0	0	0	603	903	0
167	8	0	0	0	0	0	0	200	300	0	40.2972	76.0312	-705.449	142405	71137.1	17053.7	300.839	701.136	0	0	0	0	0	0	0	603	903	0
167	9	0	0	0	0	0	0	200	300	0	40.2972	77.0993	-706.365	142679	71076	17099.5	300.622	701.009	0	0	0	0	0	0	0	603	903	0
168	0	0	0	0	0	0	0	200	300	0	39.6869	77.2519	-706.365	142222	71320.2	16779.1	300.968	701.657	0	0	0	0	0	0	0	603	903	0
168	1	0	0	0	0	0	0	200	300	0	39.3817	78.9304	-702.703	143229	71320.2	17191	301.494	699.175	0	0	0	0	0	0	0	603	903	0
168	2	0	0	0	0	0	0	200	300	0	40.4498	81.2192	-707.586	143229	70526.8	17328.4	299.672	700.581	0	0	0	0	0	0	0	603	903	0
168	3	0	0	0	0	0	0	200	300	0	38.7714	81.2192	-706.975	143045	71381.2	17099.5	300.967	700.666	0	0	0	0	0	0	0	603	903	0
168	4	0	0	0	0	0	0	200	300	0	40.1446	82.2873	-704.839	143412	71259.2	17053.7	301.1	699.533	0	0	0	0	0	0	0	603	903	0
168	5	0	0	0	0	0	0	200	300	0	40.1446	83.0502	-708.501	143778	70343.6	16962.2	299.285	700.068	0	0	0	0	0	0	0	603	903	0
168	6	0	0	0	0	0	0	200	300	0	39.3817	81.8295	-708.196	144144	71320.2	17099.5	300.707	699.463	0	0	0	0	0	0	0	603	903	0
168	7	0	0	0	0	0	0	200	300	0	37.2455	83.0502	-707.28	144419	71076	17191	300.492	698.811	0	0	0	0	0	0	0	603	903	0
168	8	0	0	0	0	0	0	200	300	0	36.7877	83.8132	-707.891	144602	71015	17099.5	300.319	698.729	0	0	0	0	0	0	0	603	903	0
168	9	0	0	0	0	0	0	200	300	0	37.5507	81.3718	-710.027	145060	71503.3	17053.7	300.705	698.698	0	0	0	0	0	0	0	603	903	0
169	0	0	0	0	0	0	0	200	300	0	36.9403	85.0339	-708.806	144877	71198.1	17191	300.448	698.605	0	0	0	0	0	0	0	603	903	0
169	1	0	0	0	0	0	0	200	300	0	36.6351	85.4916	-710.027	145334	70770.9	17511.5	299.674	698.312	0	0	0	0	0	0	0	603	903	0
169	2	0	0	0	0	0	0	200	300	0	36.1774	83.508	-708.806	145151	71381.2	17511.5	300.706	698.217	0	0	0	0	0	0	0	603	903	0
169	3	0	0	0	0	0	0	200	300	0	36.7877	87.0175	-708.806	145151	71320.2	17557.2	300.62	698.217	0	0	0	0	0	0	0	603	903	0
169	4	0	0	0	0	0	0	200	300	0	36.7877	87.7805	-707.891	145517	70221.5	17969.2	299.198	697.435	0	0	0	0	0	0	0	603	903	0
169	5	0	0	0	0	0	0	200	300	0	36.4825	88.2382	-708.196	145700	70831.9	17465.7	300.017	697.265	0	0	0	0	0	0	0	603	903	0
169	6	0	0	0	0	0	0	200	300	0	36.1774	90.8322	-707.28	146250	71259.2	17511.5	300.751	696.222	0	0	0	0	0	0	0	603	903	0
169	7	0	0	0	0	0	0	200	300	0	37.0929	91.29	-707.586	146158	70648.8	17694.6	299.845	696.441	0	0	0	0	0	0	0	603	903	0
169	8	0	0	0	0	0	0	200	300	0	37.2455	88.8486	-707.586	146341	70831.9	17877.7	300.104	696.182	0	0	0	0	0	0	0	603	903	0
169	9	0	0	0	0	0	0	200	300	0	36.1774	92.3581	-706.365	146158	71137.1	17877.7	300.709	696.084	0	0	0	0	0	0	0	603	903	0
170	0	0	0	0	0	0	0	200	300	0	36.9403	93.2736	-706.975	147349	70343.6	17648.8	299.499	694.579	0	0	0	0	0	0	0	603	903	0
170	1	0	0	0	0	0	0	200	300	0	36.9403	92.8159	-706.365	146708	70831.9	17831.9	300.277	695.306	0	0	0	0	0	0	0	603	903	0
170	2	0	0	0	0	0	0	200	300	0	37.0929	94.3417	-706.67	146708	70954	17969.2	300.406	695.396	0	0	0	0	0	0	0	603	903	0
170	3	0	0	0	0	0	0	200	300	0	36.6351	96.0202	-706.365	146708	70404.7	18243.9	299.672	695.306	0	0	0	0	0	0	0	603	903	0
170	4	0	0	0	0	0	0	200	300	0	37.8558	94.3417	-705.449	147532	70343.6	18106.6	299.715	693.869	0	0	0	0	0	0	0	603	903	0
170	5	0	0	0	0	0	0	200	300	0	38.0084	97.0883	-703.313	146891	70160.5	18472.8	299.757	694.145	0	0	0	0	0	0	0	603	903	0
170	6	0	0	0	0	0	0	200	300	0	37.7032	97.2409	-704.534	146891	70343.6	18472.8	299.844	694.507	0	0	0	0	0	0	0	603	903	0
170	7	0	0	0	0	0	0	200	300	0	38.0084	97.3935	-703.618	147165	70282.6	18564.3	299.887	693.845	0	0	0	0	0	0	0	603	903	0
170	8	0	0	0	0	0	0	200	300	0	38.3136	100.14	-701.482	147257	69489.1	18335.4	299.06	693.078	0	0	0	0	0	0	0	603	903	0
170	9	0	0	0	0	0	0	200	300	0	37.7032	100.75	-701.482	147074	70099.5	18655.9	299.931	693.338	0	0	0	0	0	0	0	603	903	0
171	0	0	0	0	0	0	0	200	300	0	37.7032	99.9875	-699.346	147257	69855.3	18793.2	299.887	692.436	0	0	0	0	0	0	0	603	903	0
171	1	0	0	0	0	0	0	200	300	0	37.8558	101.666	-699.346	147440	69855.3	18839	299.887	692.174	0	0	0	0	0	0	0	603	903	0
171	2	0	0	0	0	0	0	200	300	0	38.4662	102.887	-699.041	147806	69733.3	18610.1	299.756	691.558	0	0	0	0	0	0	0	603	903	0
171	3	0	0	0	0	0	0	200	300	0	37.8558	102.887	-697.21	147440	69916.4	18839	300.28	691.529	0	0	0	0	0	0	0	603	903	0
171	4	0	0	0	0	0	0	200	300	0	38.7714	104.26	-696.904	146891	69122.9	18976.3	299.186	692.224	0	0	0	0	0	0	0	603	903	0
171	5	0	0	0	0	0	0	200	300	0	38.6188	104.87	-696.904	147623	69550.2	18930.5	299.799	691.173	0	0	0	0	0	0	0	603	903	0
171	6	0	0	0	0	0	0	200	300	0	40.4498	105.786	-694.463	147440	69428.1	19113.6	299.974	690.692	0	0	0	0	0	0	0	603	903	0
171	7	3.85448	-8.31436	-11.6025	334.079	-450.444	343.095	161.177	271.206	0	39.6869	107.464	-693.853	147349	69611.2	19251	300.326	690.637	0	0	0	0	0	0	0	603	903	0
171	8	6.75365	-17.1645	-21.9784	-32.1323	-877.69	1395.95	160.066	301.462	0	37.8558	107.617	-692.327	147349	70038.5	19022.1	301.164	690.169	0	0	0	0	0	0	0	603	903	0
171	9	5.07518	-18.8429	-23.8095	150.973	-877.69	1487.5	163.137	293.659	0	38.7714	107.617	-691.411	147349	69061.9	19525.6	299.885	689.887	0	0	0	0	0	0	0	603	903	0
172	0	1.26049	-10.1454	-15.8749	883.395	-511.479	434.647	167.781	244.353	0	39.3817	109.295	-688.97	147165	69184	19617.2	300.417	689.398	0	0	0	0	0	0	0	603	903	0
172	1	2.48119	-6.48331	-8.55071	-215.238	-206.303	343.095	175.873	325.172	0	38.161	110.669	-690.496	146616	68756.7	19479.9	299.576	690.665	0	0	0	0	0	0	0	603	903	0
172	2	1.71825	-10.9084	-9.77141	-856.107	-206.303	800.859	178.887	387.613	0	38.3136	109.448	-688.054	146616	68939.8	19342.5	300.195	689.912	0	0	0	0	0	0	0	603	903	0
172	3	1.71825	-12.892	-16.7905	700.29	-145.268	846.635	191.348	258.292	0	38.4662	111.737	-684.087	147165	68878.8	19388.3	300.687	687.873	0	0	0	0	0	0	0	603	903	0
172	4	2.63378	-12.7394	-18.9267	608.737	-450.444	800.859	176.201	267.837	0	38.7714	112.5	-684.697	146433	68695.7	19846.1	300.33	689.135	0	0	0	0	0	0	0	603	903	0
172	5	3.5493	-11.3661	-14.9594	700.29	-1060.8	1075.52	129.088	253.187	0	38.0084	112.652	-683.782	146341	67963.3	19800.3	299.393	688.982	0	0	0	0	0	0	0	603	903	0
172	6	0.802722	-13.6549	-13.7387	242.526	-267.338	755.082	180.541	282.347	0	36.33	114.789	-679.815	146250	68024.3	19571.4	300.063	687.868	0	0	0	0	0	0	0	603	903	0
172	7	0.95531	-15.486	-18.9267	334.079	-511.479	663.529	172.976	282.349	0	38.161	114.941	-680.12	145243	68268.4	19617.2	300.377	689.445	0	0	0	0	0	0	0	603	903	0
172	8	3.39672	-16.2489	-23.1992	791.843	-999.76	1121.29	156.905	265.868	0	37.7032	114.331	-678.899	145884	67841.2	19846.1	299.928	688.117	0	0	0	0	0	0	0	603	903	0
172	9	0.19237	-16.7067	-23.8095	974.948	-633.549	983.964	173.391	259.052	0	36.9403	114.636	-675.847	145884	67658.1	19800.3	300.109	687.147	0	0	0	0	0	0	0	603	903	0
173	0	-3.16456	-20.3688	-25.3354	974.948	-1182.87	480.424	153.312	261.518	0	36.9403	116.772	-675.847	145700	67047.7	19617.2	299.205	687.418	0	0	0	0	0	0	0	603	903	0
173	1	-3.01198	-24.1835	-32.3544	608.737	-1243.9	983.964	161.554	281.185	0	37.3981	117.077	-673.101	145884	66925.6	19617.2	299.429	686.266	0	0	0	0	0	0	0	603	903	0
173	2	-5.45338	-21.8947	-39.9838	1707.37	-1671.15	1624.83	158.204	257.298	0	37.7032	117.383	-670.049	144877	66925.6	19846.1	299.882	686.782	0	0	0	0	0	0	0	603	903	0
173	3	-7.28444	-22.1999	-43.3408	2439.79	-2220.46	571.977	148.767	243.707	0	37.2455	118.756	-668.828	144236	66681.5	19525.6	299.699	687.346	0	0	0	0	0	0	0	603	903	0
173	4	-6.67408	-22.6576	-47.6132	2348.24	-2342.53	755.082	150.801	250.681	0	36.33	119.061	-666.997	144968	66010.2	19846.1	298.966	685.656	0	0	0	0	0	0	0	603	903	0
173	5	-5.91115	-20.2162	-52.496	1982.03	-2586.68	1304.4	150.726	262.244	0	36.33	118.603	-664.251	144602	65888.1	19937.6	299.192	685.308	0	0	0	0	0	0	0	603	903	0
173	6	-4.69044	-18.6903	-61.6513	3721.53	-3258.06	938.188	147.153	239.636	0	36.33	119.519	-663.64	143961	66132.2	19983.4	299.651	686.074	0	0	0	0	0	0	0	603	903	0
173	7	-2.7068	-19.6059	-66.8393	3355.32	-3685.31	663.529	144.863	249.8	0	36.4825	120.587	-661.504	143869	65704.9	19983.4	299.327	685.512	0	0	0	0	0	0	0	603	903	0
173	8	-1.94386	-18.3852	-74.4687	3629.98	-4051.52	1167.07	145.594	251.255	0	36.4825	120.892	-659.673	143869	65033.6	20166.5	298.585	684.908	0	0	0	0	0	0	0	603	903	0
173	9	-1.33351	-16.4015	-81.4877	5369.48	-4112.55	709.306	149.532	234.107	0	35.2618	121.655	-657.537	144053	65643.9	20029.2	299.833	683.921	0	0	0	0	0	0	0	603	903	0
174	0	1.26049	-17.0119	-95.5258	5277.93	-4783.94	571.977	149.92	244.749	0	35.8722	121.35	-654.79	143137	64667.4	20578.5	298.76	684.4	0	0	0	0	0	0	0	603	903	0
174	1	0.0397824	-18.2326	-103.766	4911.72	-5699.47	1075.52	145.074	252.665	0	35.8722	121.045	-650.212	142496	64850.5	20029.2	299.737	683.847	0	0	0	0	0	0	0	603	903	0
174	2	1.26049	-18.2326	-109.869	6285.01	-5821.54	983.964	147.014	242.796	0	36.0248	123.333	-649.602	142496	64911.5	19983.4	299.925	683.641	0	0	0	0	0	0	0	603	903	0
174	3	3.70189	-17.0119	-117.804	6925.88	-6065.68	709.306	148.51	241.208	0	34.6515	122.876	-647.466	142405	63812.9	19708.7	298.558	683.058	0	0	0	0	0	0	0	603	903	0
174	4	5.07518	-17.6222	-130.926	6925.88	-6859.14	1212.85	147.611	247.101	0	34.9567	123.791	-641.668	141489	63873.9	19983.4	299.544	682.498	0	0	0	0	0	0	0	603	903	0
174	5	4.9226	-18.9955	-141.302	7932.96	-6920.17	1670.61	151.026	243.858	0	35.2618	123.944	-641.668	141123	63873.9	19708.7	299.544	683.069	0	0	0	0	0	0	0	603	903	0
174	6	7.97435	-17.6222	-149.542	8573.83	-7469.49	1167.07	150.051	242.666	0	36.1774	124.707	-638.921	140665	63507.7	20075	299.398	682.84	0	0	0	0	0	0	0	603	903	0
174	7	9.80541	-15.9438	-158.697	9031.59	-7835.7	1579.06	150.625	243.089	0	35.4144	125.317	-635.259	140665	62775.3	20075	298.818	681.57	0	0	0	0	0	0	0	603	903	0
174	8	10.2632	-16.0963	-169.378	10862.6	-8140.88	1991.04	151.937	235.868	0	32.8204	124.707	-632.207	140207	63019.4	19891.8	299.682	681.226	0	0	0	0	0	0	0	603	903	0
174	9	12.3994	-17.4696	-179.754	10771.1	-9117.44	1899.49	149.278	240.079	0	33.8885	122.265	-628.545	139383	62531.1	19846.1	299.486	681.244	0	0	0	0	0	0	0	603	903	0
175	0	13.9253	-15.9438	-189.52	11686.6	-9422.62	1853.72	150.282	238.336	0	34.3463	125.775	-624.578	137644	61859.8	19937.6	299.043	682.621	0	0	0	0	0	0	0	603	903	0
175	1	16.0615	-15.3334	-201.727	13426.1	-9849.86	2540.36	151.172	233.444	0	32.8204	125.775	-623.052	138468	62042.9	20120.7	299.579	680.759	0	0	0	0	0	0	0	603	903	0
175	2	15.9089	-17.6222	-214.85	13975.4	-10216.1	2265.7	152.45	234.952	0	30.8368	123.639	-621.221	138102	61737.7	19525.6	299.381	680.693	0	0	0	0	0	0	0	603	903	0
175	3	18.1977	-19.6059	-226.141	14067	-10643.3	2494.58	152.935	237.796	0	31.142	125.927	-615.728	137919	60944.2	19617.2	298.979	679.007	0	0	0	0	0	0	0	603	903	0
175	4	18.1977	-20.9792	-236.212	15348.7	-11131.6	3135.45	152.875	235.021	0	32.3627	125.927	-612.065	137369	61005.3	19663	299.671	678.565	0	0	0	0	0	0	0	603	903	0
175	5	20.0288	-24.7939	-245.672	16813.6	-11558.8	3684.77	152.95	231.561	0	32.0575	125.317	-608.098	135996	60517	19251	299.518	679.359	0	0	0	0	0	0	0	603	903	0
175	6	19.2659	-29.6767	-254.217	17271.3	-11864	3455.89	153.331	232.061	0	31.5997	125.927	-605.657	135538	59479.4	19251	298.206	679.213	0	0	0	0	0	0	0	603	903	0
175	7	20.1814	-31.8129	-263.983	17912.2	-12169.2	4096.76	153.902	232.146	0	29.7687	125.622	-597.417	135355	59540.4	19434.1	299.663	676.433	0	0	0	0	0	0	0	603	903	0
175	8	22.6228	-32.7284	-276.8	19377.1	-13084.7	4508.74	152.729	229.996	0	31.5997	125.47	-596.807	134348	59174.2	19571.4	299.151	677.889	0	0	0	0	0	0	0	603	903	0
175	9	24.6064	-38.2216	-281.683	20017.9	-13634	4829.18	151.598	228.935	0	30.6842	126.385	-593.45	133066	58502.8	19342.5	298.581	678.775	0	0	0	0	0	0	0	603	903	0
176	0	26.4375	-42.3415	-292.975	21574.3	-13695.1	5470.05	153.255	226.361	0	30.379	125.927	-590.703	132883	57709.4	19113.6	297.696	678.043	0	0	0	0	0	0	0	603	903	0
176	1	27.2004	-47.0717	-303.045	22215.2	-13634	5882.04	155.01	226.694	0	29.1583	125.47	-585.21	132700	57587.3	18839	298.404	676.244	0	0	0	0	0	0	0	603	903	0
176	2	27.9634	-48.7502	-314.642	23130.7	-14427.5	6431.35	154.146	226.486	0	29.3109	123.639	-577.886	131510	57038	18747.4	298.701	675.429	0	0	0	0	0	0	0	603	903	0
176	3	27.8108	-53.3278	-323.492	23588.5	-14854.7	6614.46	154.08	227.082	0	27.9376	125.622	-575.75	130503	56549.7	18564.3	298.219	676.334	0	0	0	0	0	0	0	603	903	0
176	4	29.0315	-59.7365	-329.29	25053.3	-15098.9	7301.1	154.147	223.917	0	28.548	125.012	-572.393	130045	56244.5	18747.4	298.262	675.805	0	0	0	0	0	0	0	603	903	0
176	5	30.2522	-63.246	-333.868	24961.8	-15648.2	7255.33	153.131	225.235	0	26.1066	124.402	-567.205	129862	55512.1	18472.8	297.87	674.049	0	0	0	0	0	0	0	603	903	0
176	6	29.6418	-65.0771	-345.16	26060.4	-15465.1	7621.54	155.194	224.498	0	26.1066	124.859	-562.322	128397	55145.9	18610.1	298.068	674.666	0	0	0	0	0	0	0	603	903	0
176	7	28.7263	-69.6547	-350.958	27067.5	-15953.4	8262.41	154.543	222.875	0	25.4962	124.402	-557.439	127390	55023.8	18747.4	298.708	674.473	0	0	0	0	0	0	0	603	903	0
176	8	29.3367	-74.2323	-355.23	27891.5	-16502.7	8308.18	153.544	221.483	0	27.6324	123.181	-552.251	126108	54352.4	17969.2	298.42	674.647	0	0	0	0	0	0	0	603	903	0
176	9	29.1841	-75.7582	-358.893	28532.3	-16380.6	8125.08	154.358	220.499	0	25.0385	124.096	-549.199	125742	53497.9	18381.2	297.411	674.045	0	0	0	0	0	0	0	603	903	0
177	0	30.4048	-76.8263	-364.996	28715.4	-16868.9	8903.28	153.783	221.327	0	24.7333	123.791	-542.18	124827	53253.8	18106.6	298.222	672.769	0	0	0	0	0	0	0	603	903	0
177	1	31.4729	-80.4884	-369.879	30088.7	-16991	8903.28	154.063	218.652	0	23.36	123.181	-538.213	123545	52704.5	17648.8	297.925	673.454	0	0	0	0	0	0	0	603	903	0
177	2	30.0996	-83.235	-374.151	31278.9	-17296.1	9086.38	153.772	216.4	0	23.9703	122.57	-532.72	122355	51911	17831.9	297.445	673.321	0	0	0	0	0	0	0	603	903	0
177	3	30.2522	-83.0824	-379.034	31004.3	-17479.3	9681.47	153.885	218.202	0	21.8341	122.723	-528.753	122080	51422.7	17282.6	297.253	672.117	0	0	0	0	0	0	0	603	903	0
177	4	31.4729	-84.4557	-386.053	31370.5	-17723.4	9452.59	154.091	218.741	0	20.766	122.876	-522.039	121164	51056.5	17328.4	297.802	670.902	0	0	0	0	0	0	0	603	903	0
177	5	30.7099	-88.1178	-390.631	32652.2	-17845.5	9452.59	154.316	216.412	0	19.8505	122.113	-515.63	119333	50018.9	17282.6	297.005	671.568	0	0	0	0	0	0	0	603	903	0
177	6	29.6418	-89.3385	-394.293	33567.7	-18577.9	9864.58	152.883	214.866	0	18.9349	121.808	-510.137	117960	49957.9	16962.2	297.93	671.768	0	0	0	0	0	0	0	603	903	0
177	7	29.7944	-89.6437	-397.65	33933.9	-18638.9	9727.25	153.127	214.664	0	19.0875	121.502	-504.644	117777	49408.6	16733.3	297.908	669.614	0	0	0	0	0	0	0	603	903	0
177	8	28.7263	-89.9489	-403.143	33933.9	-19188.2	9589.92	152.403	215.827	0	17.2565	120.739	-499.761	116221	48004.8	16824.8	296.055	670.448	0	0	0	0	0	0	0	603	903	0
177	9	27.2004	-91.7799	-408.941	35215.7	-19432.4	9635.7	152.481	213.886	0	16.6461	118.756	-491.216	114756	48493.1	16595.9	298.72	669.384	0	0	0	0	0	0	0	603	903	0
178	0	26.7427	-92.8481	-411.383	35398.8	-19920.7	9727.25	151.576	213.952	0	16.7987	119.824	-487.554	114573	47638.6	16367.1	297.709	668.005	0	0	0	0	0	0	0	603	903	0
178	1	25.9797	-92.0851	-415.655	35948.1	-20103.8	9406.82	151.634	213.515	0	16.1884	119.519	-482.061	113016	46234.8	15817.8	295.911	668.556	0	0	0	0	0	0	0	603	903	0
178	2	24.3013	-92.2377	-419.622	36955.2	-20653.1	9223.71	150.782	211.932	0	15.4254	117.993	-477.178	111551	46295.8	15955.1	297.02	669.227	0	0	0	0	0	0	0	603	903	0
178	3	21.7073	-93.9162	-429.388	37596.1	-21019.3	9177.93	151.048	212.443	0	16.3409	117.84	-468.023	109720	45746.5	15588.9	297.744	668.566	0	0	0	0	0	0	0	603	903	0
178	4	19.4184	-95.5946	-435.797	38420	-22117.9	9040.6	149.247	211.84	0	13.2892	116.62	-464.055	108988	44281.6	15680.4	295.423	668.14	0	0	0	0	0	0	0	603	903	0
178	5	20.0288	-95.2895	-443.731	40159.5	-22179	8765.95	150.017	209.496	0	15.7306	114.941	-457.647	107431	44159.6	15131.1	296.493	668.252	0	0	0	0	0	0	0	603	903	0
178	6	16.6719	-96.5102	-449.225	40342.6	-22667.2	8491.29	149.541	210.195	0	11.6107	114.789	-451.238	106333	43732.3	14627.6	296.916	667.353	0	0	0	0	0	0	0	603	903	0
178	7	14.8408	-98.3412	-456.549	42356.8	-23155.5	8399.74	149.281	207.224	0	11.153	114.026	-445.134	104776	43244	14764.9	297.148	667.618	0	0	0	0	0	0	0	603	903	0
178	8	12.2468	-99.4093	-462.652	42539.9	-23704.8	8170.85	148.763	208.052	0	13.4418	111.737	-437.81	103769	42572.6	14536	297.24	665.981	0	0	0	0	0	0	0	603	903	0
178	9	9.19506	-100.477	-471.197	43821.6	-24132.1	8308.18	148.786	206.999	0	11.9159	111.432	-431.401	102854	41962.3	14169.8	297.27	664.582	0	0	0	0	0	0	0	603	903	0
179	0	7.82176	-103.071	-476.69	44737.2	-24742.4	8125.08	148.095	206.15	0	9.93225	111.279	-427.434	101023	40863.7	14032.5	295.602	666.653	0	0	0	0	0	0	0	603	903	0
179	1	5.38036	-105.36	-482.489	45469.6	-24986.6	7667.32	148.213	205.76	0	7.79602	108.99	-419.194	99374.8	40619.5	13712	296.899	665.939	0	0	0	0	0	0	0	603	903	0
179	2	4.77001	-107.191	-486.456	46293.6	-25596.9	7804.64	147.381	204.835	0	9.01672	108.38	-412.175	98550.9	39948.1	13620.5	296.92	663.901	0	0	0	0	0	0	0	603	903	0
179	3	1.1079	-108.565	-491.644	48307.7	-26451.4	7209.55	146.198	201.742	0	9.16931	107.617	-406.377	96994.5	38849.5	13712	295.6	664.319	0	0	0	0	0	0	0	603	903	0
179	4	-0.723157	-110.243	-495.001	48307.7	-26512.5	7026.44	146.44	202.409	0	6.57531	105.938	-397.527	95071.8	38361.2	13254.3	296.5	663.842	0	0	0	0	0	0	0	603	903	0
179	5	0.0397824	-112.379	-499.884	48582.4	-26756.6	7163.78	146.474	202.813	0	7.64343	105.175	-391.423	93607	37872.9	12567.6	296.757	663.855	0	0	0	0	0	0	0	603	903	0
179	6	-0.570569	-115.431	-504.156	50413.4	-27305.9	6934.89	145.838	200.004	0	6.57531	103.039	-385.625	92142.1	36896.4	12613.4	295.679	664.058	0	0	0	0	0	0	0	603	903	0
179	7	-2.85939	-116.499	-506.292	50871.2	-27794.2	6797.56	145.102	199.522	0	7.94861	101.361	-377.385	91135.1	36163.9	12384.5	295.828	661.509	0	0	0	0	0	0	0	603	903	0
179	8	-3.9275	-116.194	-513.311	51603.6	-27794.2	6706.01	145.853	199.469	0	5.96496	101.208	-370.977	89120.9	35675.7	12018.3	296.167	662.767	0	0	0	0	0	0	0	603	903	0
179	9	-4.38527	-118.178	-516.974	51786.7	-28099.4	6477.13	145.646	199.827	0	4.13391	99.2245	-363.347	87656.1	34943.2	11560.6	296.17	661.754	0	0	0	0	0	0	0	603	903	0
180	0	-5.91115	-120.619	-516.363	52244.5	-28343.5	6522.9	145.109	198.822	0	2.91321	96.7831	-357.549	86374.3	34271.9	11652.1	295.852	661.427	0	0	0	0	0	0	0	603	903	0
180	1	-8.50514	-121.687	-524.603	53800.9	-28953.9	6568.68	144.808	197.445	0	4.59167	94.7995	-349.919	84543.3	33905.6	11377.4	296.896	661.392	0	0	0	0	0	0	0	603	903	0
180	2	-8.81032	-122.45	-528.57	54167.1	-29320.1	6385.58	144.529	197.522	0	4.2865	93.884	-343.816	82803.8	32746	11102.8	295.243	662.162	0	0	0	0	0	0	0	603	903	0
180	3	-8.65773	-123.823	-531.012	53984	-29198	6294.02	145.014	198.338	0	3.37097	92.3581	-334.356	81430.5	32013.6	10553.5	295.747	659.455	0	0	0	0	0	0	0	603	903	0
180	4	-11.2517	-125.349	-533.758	54899.5	-29869.4	6248.25	144.039	197.145	0	1.38733	89.3063	-327.336	79782.5	31769.4	10553.5	297.054	659.268	0	0	0	0	0	0	0	603	903	0
180	5	-12.0147	-127.18	-537.115	56272.8	-30418.7	6431.35	143.367	195.231	0	1.08215	88.3908	-320.317	78043.1	30548.7	10461.9	295.37	659.357	0	0	0	0	0	0	0	603	903	0
180	6	-12.7776	-127.028	-539.862	56639	-30235.6	6110.92	143.994	195.086	0	1.84509	88.0856	-312.383	75937.3	29694.2	10553.5	295.057	659.909	0	0	0	0	0	0	0	603	903	0
180	7	-12.7776	-127.791	-544.745	57371.4	-30784.9	6385.58	143.487	194.682	0	0.624387	86.102	-305.059	74381	29328	10095.7	296.139	659.175	0	0	0	0	0	0	0	603	903	0
180	8	-12.1672	-128.706	-546.576	58103.9	-30662.9	6431.35	143.9	193.695	0	0.319211	85.4916	-297.429	73099.2	28351.4	9729.49	295.322	657.23	0	0	0	0	0	0	0	603	903	0
180	9	-13.8457	-129.622	-552.374	59110.9	-30968	6477.13	143.936	192.987	0	0.624387	83.3554	-288.884	70901.9	27619	9592.16	295.606	657.566	0	0	0	0	0	0	0	603	903	0
181	0	-13.8457	-130.079	-555.426	58836.3	-31578.4	6294.02	143.146	194.07	0	0.624387	81.2192	-281.865	69254	27008.7	9363.28	295.821	657.301	0	0	0	0	0	0	0	603	903	0
181	1	-12.9302	-130.69	-557.257	59660.2	-31395.3	6339.8	143.661	192.939	0	0.0140353	80.6088	-275.457	67606	26520.4	9225.95	296.278	657.568	0	0	0	0	0	0	0	603	903	0
181	2	-15.3716	-131.758	-561.529	60575.8	-31761.5	6568.68	143.438	192.124	0	-0.596316	78.9304	-266.912	66049.6	25604.9	8905.52	295.93	655.541	0	0	0	0	0	0	0	603	903	0
181	3	-16.4397	-132.521	-563.971	60942	-32371.8	6614.46	142.6	191.941	0	-0.138553	76.7941	-259.587	64310.1	25299.7	8859.74	297.461	655.26	0	0	0	0	0	0	0	603	903	0
181	4	-16.7449	-132.521	-565.497	60942	-32066.7	6568.68	143.295	192.233	0	0.929563	74.3527	-255.01	62570.6	24933.5	8997.07	297.775	657.634	0	0	0	0	0	0	0	603	903	0
181	5	-17.0501	-133.436	-567.328	61857.5	-32616	6614.46	142.509	190.967	0	-0.291141	72.6743	-247.991	60831.1	23773.8	8310.42	295.866	657.704	0	0	0	0	0	0	0	603	903	0
181	6	-16.2871	-133.894	-569.464	62589.9	-32799.1	6889.12	142.404	190.09	0	0.0140353	71.6061	-239.751	60190.3	23529.7	8630.86	298.142	651.947	0	0	0	0	0	0	0	603	903	0
181	7	-15.5242	-134.199	-573.736	63322.4	-33470.5	6614.46	141.662	189.632	0	1.84509	69.6225	-233.953	58084.6	22919.3	8401.98	297.966	654.725	0	0	0	0	0	0	0	603	903	0
181	8	-15.9819	-134.81	-582.586	64421	-34508.1	6751.79	140.768	189.422	0	1.99768	67.3337	-226.323	56619.7	21637.6	8493.53	295.605	652.828	0	0	0	0	0	0	0	603	903	0
181	9	-18.2708	-135.878	-592.962	66709.8	-35118.4	6522.9	140.775	187.497	0	1.6925	65.6552	-220.22	54971.8	21332.4	8356.2	296.869	653.378	0	0	0	0	0	0	0	603	903	0
182	0	-22.8484	-139.693	-599.066	68174.6	-35301.5	6019.36	141.072	186.198	0	0.471799	64.7397	-215.032	53781.6	21088.3	8127.32	298.07	652.89	0	0	0	0	0	0	0	603	903	0
182	1	-24.5269	-141.371	-605.475	69548	-36156	6110.92	140.285	185.135	0	1.84509	62.6035	-206.792	52408.3	20477.9	7761.11	299.027	649.565	0	0	0	0	0	0	0	603	903	0
182	2	-27.7312	-141.829	-611.273	69822.6	-36278.1	5744.71	140.652	185.775	0	1.6925	61.9931	-202.825	50211	20111.7	7669.56	299.158	655.441	0	0	0	0	0	0	0	603	903	0
182	3	-30.1726	-142.287	-618.292	71287.4	-36827.4	5058.06	140.437	184.703	0	0.776975	60.6198	-196.111	48746.2	19379.3	7623.78	298.818	654.436	0	0	0	0	0	0	0	603	903	0
182	4	-30.02	-144.728	-619.513	72660.7	-37193.6	5012.28	139.963	182.713	0	0.929563	59.3991	-190.618	48563.1	18707.9	7623.78	298.143	648.233	0	0	0	0	0	0	0	603	903	0
182	5	-33.377	-145.643	-623.785	73393.2	-37681.9	5195.39	139.592	182.342	0	2.76062	58.6362	-183.599	46640.4	18402.7	7486.45	300.233	648.965	0	0	0	0	0	0	0	603	903	0
182	6	-34.1399	-147.932	-629.278	73942.5	-38292.2	4691.85	139.149	182.496	0	2.30285	56.4999	-178.411	44626.3	17853.4	7349.12	300.069	652.868	0	0	0	0	0	0	0	603	903	0
182	7	-34.1399	-149.153	-634.161	74308.7	-38475.3	4600.3	139.329	182.824	0	2.30285	55.1267	-171.086	43253	17059.9	7715.33	299.715	650.186	0	0	0	0	0	0	0	603	903	0
182	8	-32.0037	-150.679	-639.654	76322.8	-38597.4	5012.28	139.659	180.681	0	2.30285	52.9904	-166.814	42429	16571.7	7257.57	299.342	648.651	0	0	0	0	0	0	0	603	903	0
182	9	-32.0037	-151.137	-642.401	75590.4	-38536.4	4691.85	140.012	182.331	0	3.06579	50.8542	-160.1	41238.9	15595.1	7578	297.408	645.418	0	0	0	0	0	0	0	603	903	0
183	0	-31.8511	-152.357	-646.063	77513.1	-39390.9	4874.96	139.029	180.022	0	4.13391	49.0231	-154.607	38858.5	15473	7120.24	300.08	651.663	0	0	0	0	0	0	0	603	903	0
183	1	-31.3933	-151.747	-649.115	77696.1	-39451.9	4966.51	139.222	180.304	0	3.06579	48.4128	-150.64	37668.3	14984.7	7120.24	299.474	652.945	0	0	0	0	0	0	0	603	903	0
183	2	-31.2407	-150.526	-649.115	77970.8	-39635	4783.4	138.94	179.881	0	3.06579	46.2766	-143.926	36844.3	14191.3	6845.58	298.601	647.005	0	0	0	0	0	0	0	603	903	0
183	3	-32.1563	-149.916	-653.387	79710.3	-39879.2	4554.52	138.966	178.004	0	3.52356	45.0559	-138.738	35471	14008.2	6525.15	300.969	647.331	0	0	0	0	0	0	0	603	903	0
183	4	-32.1563	-150.831	-656.439	79710.3	-39635	4783.4	139.621	178.572	0	4.43908	43.8351	-132.94	33823.1	13397.8	6296.27	300.781	648.576	0	0	0	0	0	0	0	603	903	0
183	5	-33.377	-149.916	-657.049	79893.4	-40367.4	4600.3	138.563	178.406	0	4.74426	41.2412	-128.972	32083.6	12604.4	6479.37	297.729	654.237	0	0	0	0	0	0	0	603	903	0
183	6	-33.8347	-147.78	-660.711	80717.4	-40733.6	4417.19	138.349	177.833	0	3.98132	40.3256	-121.343	31168	12543.3	5975.83	303.371	646.141	0	0	0	0	0	0	0	603	903	0
183	7	-32.614	-147.322	-661.932	81266.7	-40062.3	4966.51	139.477	177.228	0	5.96496	38.9523	-119.817	30618.7	11994	5975.83	300.103	647.454	0	0	0	0	0	0	0	603	903	0
183	8	-33.0718	-146.712	-661.322	81816	-40672.6	4783.4	138.498	176.284	0	3.82873	36.5109	-114.019	28513	12055	5884.28	305.729	652.927	0	0	0	0	0	0	0	603	903	0
183	9	-32.4614	-146.254	-667.73	81632.9	-40916.8	4417.19	138.723	177.746	0	4.89685	35.2902	-106.084	27597.5	11383.7	5930.06	307.308	642.853	0	0	0	0	0	0	0	603	903	0
184	0	-32.9192	-144.27	-669.561	82182.2	-40855.7	4234.09	138.981	177.26	0	3.52356	34.6799	-105.779	26773.5	10712.3	5426.52	301.27	649.892	0	0	0	0	0	0	0	603	903	0
184	1	-32.9192	-143.812	-668.341	83647.1	-41344	4142.53	138.139	174.844	0	7.18567	31.9333	-100.896	25674.9	10590.2	5380.74	304.962	648.531	0	0	0	0	0	0	0	603	903	0
184	2	-32.614	-143.812	-675.055	83555.5	-41221.9	4188.31	138.935	176.224	0	5.81238	31.4755	-93.877	24301.6	10101.9	5334.96	307.608	644.134	0	0	0	0	0	0	0	603	903	0
184	3	-32.614	-143.66	-677.801	83830.2	-41466.1	4188.31	138.823	176.32	0	4.89685	30.56	-92.3511	22745.2	9247.43	4922.97	300.133	656.71	0	0	0	0	0	0	0	603	903	0
184	4	-32.7666	-142.744	-679.632	84837.3	-42259.5	4417.19	137.82	175.172	0	4.43908	27.0505	-86.2476	21738.1	9003.29	4968.75	304.389	650.957	0	0	0	0	0	0	0	603	903	0
184	5	-35.0554	-142.592	-682.379	85569.7	-41588.1	4050.98	139.054	174.601	0	6.27014	27.966	-81.67	21005.7	8759.15	4419.43	307.25	645.798	0	0	0	0	0	0	0	603	903	0
184	6	-35.3606	-142.897	-685.125	85386.6	-41893.3	3913.65	138.853	175.371	0	4.2865	26.7453	-79.2286	19723.9	7904.65	4327.88	299.77	654.05	0	0	0	0	0	0	0	603	903	0
184	7	-33.377	-142.744	-687.567	86027.5	-42076.4	4096.76	138.804	174.881	0	5.65979	24.1513	-74.6509	18900	7843.62	4282.1	305.071	649.822	0	0	0	0	0	0	0	603	903	0
184	8	-36.5813	-142.897	-688.177	86668.3	-42381.6	3684.77	138.415	174.061	0	2.91321	23.9987	-70.6837	17984.4	7477.41	4099	305.787	648.564	0	0	0	0	0	0	0	603	903	0
184	9	-37.0391	-142.134	-689.398	87950	-42747.8	3547.44	137.993	172.425	0	5.5072	22.0151	-67.9371	16885.8	6867.06	3870.12	301.08	654.449	0	0	0	0	0	0	0	603	903	0
185	0	-37.3442	-141.981	-691.839	87675.4	-43114	3593.22	137.682	173.272	0	2.91321	21.5573	-63.0543	16061.8	6989.13	3732.79	310.843	648.27	0	0	0	0	0	0	0	603	903	0
185	1	-37.802	-142.134	-695.196	88041.6	-42930.9	3318.56	138.246	173.357	0	3.52356	19.5737	-59.087	14871.6	6134.63	3595.46	303.824	651.309	0	0	0	0	0	0	0	603	903	0
185	2	-38.7175	-141.981	-697.638	88133.2	-43663.3	3227.01	137.413	173.669	0	1.6925	18.5056	-57.2559	14047.7	6134.63	3320.8	307.144	657.651	0	0	0	0	0	0	0	603	903	0
185	3	-38.565	-141.218	-698.858	89598	-43907.5	3089.68	137.173	171.794	0	4.89685	17.4374	-53.5938	13406.8	5951.53	3458.13	311.049	652.844	0	0	0	0	0	0	0	603	903	0
185	4	-39.4805	-140.455	-702.826	90055.8	-43968.5	2998.12	137.44	171.866	0	1.84509	15.9116	-50.2369	12674.4	5585.32	3046.14	311.18	650.708	0	0	0	0	0	0	0	603	903	0
185	5	-40.0908	-138.93	-705.877	89231.8	-44212.6	2723.47	137.365	173.587	0	3.82873	15.3012	-47.4903	11484.2	5097.04	2771.49	307.328	661.178	0	0	0	0	0	0	0	603	903	0
185	6	-42.3797	-138.319	-704.657	90238.9	-45067.1	2723.47	136.044	171.939	0	3.06579	13.7753	-44.1334	11026.4	4974.97	2588.38	312.726	653.157	0	0	0	0	0	0	0	603	903	0
185	7	-42.5322	-137.709	-708.319	91703.7	-44517.8	2540.36	137.15	170.533	0	4.59167	12.7072	-41.0816	10110.9	4425.65	2542.6	307.728	656.883	0	0	0	0	0	0	0	603	903	0
185	8	-42.5322	-136.488	-710.15	91612.1	-45006.1	2357.25	136.624	170.996	0	2.76062	11.3339	-38.6402	9195.38	4181.51	2176.39	308.217	665.026	0	0	0	0	0	0	0	603	903	0
185	9	-41.9219	-135.573	-711.065	91062.9	-44762	2311.48	137.049	171.935	0	1.84509	10.2658	-35.8936	8554.51	4120.47	2313.72	314.797	664.671	0	0	0	0	0	0	0	603	903	0
186	0	-44.2107	-134.047	-713.202	91520.6	-44762	2128.37	137.238	171.676	0	0.776975	9.35028	-33.4522	8096.74	4120.47	2084.84	323.175	660.961	0	0	0	0	0	0	0	603	903	0
186	1	-44.2107	-133.284	-713.812	92710.8	-45372.3	1762.16	136.437	170.119	0	1.84509	9.35028	-30.7056	7822.09	3388.05	1901.73	310.34	648.256	0	0	0	0	0	0	0	603	903	0
186	2	-44.9736	-132.063	-711.065	92527.7	-45128.2	1670.61	136.534	169.875	0	1.53991	8.58735	-28.5694	6631.9	3510.12	1901.73	322.863	670.867	0	0	0	0	0	0	0	603	903	0
186	3	-44.0581	-131.148	-717.169	92802.3	-45189.2	1716.39	136.989	170.599	0	-0.291141	7.67182	-26.4332	6357.24	3265.98	1810.18	323.556	662.498	0	0	0	0	0	0	0	603	903	0
186	4	-44.0581	-130.232	-717.474	92802.3	-45616.5	1853.72	136.421	170.654	0	0.166623	6.90888	-23.0762	5533.27	2838.74	1627.08	323.016	663.218	0	0	0	0	0	0	0	603	903	0
186	5	-43.7529	-128.554	-719.915	92344.6	-45677.5	1762.16	136.552	171.729	0	1.84509	5.99335	-20.94	4983.95	2777.7	1947.51	332.651	664.989	0	0	0	0	0	0	0	603	903	0
186	6	-44.3633	-128.401	-722.052	93992.6	-45494.4	1441.73	136.993	169.826	0	1.23474	6.90888	-19.4141	3885.32	2594.6	1443.97	333.645	702.872	0	0	0	0	0	0	0	603	903	0
186	7	-43.7529	-126.112	-722.357	93809.4	-45372.3	1670.61	137.189	170.134	0	0	0	0	0	0	0	200	903	0	0	0	0	0	0	0	603	903	0
186	8	-44.2107	-126.57	-723.883	93077	-45677.5	1533.28	136.899	171.42	0	0	0	0	0	0	0	200	903	0	0	0	0	0	0	0	603	903	0
186	9	-44.6685	-125.349	-726.324	93717.9	-45799.6	1624.83	136.943	170.97	0	0	0	0	0	0	0	200	903	0	0	0	0	0	0	0	603	903	0
187	0	-44.8211	-122.908	-725.409	95091.2	-45677.5	1212.85	137.032	168.914	0	0	0	0	0	0	0	200	903	0	0	0	0	0	0	0	603	903	0
187	1	-41.9219	-123.06	-727.24	94908	-45799.6	1395.95	137.023	169.496	0	0	0	0	0	0	0	200	903	0	0	0	0	0	0	0	603	903	0
187	2	-44.2107	-122.145	-726.019	94358.8	-45860.6	1716.39	136.833	170.033	0	0	0	0	0	0	0	200	903	0	0	0	0	0	0	0	603	903	0
187	3	-44.9736	-120.619	-727.545	94358.8	-46470.9	1350.18	136.126	170.305	0	0	0	0	0	0	0	200	903	0	0	0	0	0	0	0	603	903	0
187	4	-44.0581	-118.941	-728.766	95365.8	-46104.7	1395.95	136.736	169.141	0	0	0	0	0	0	0	200	903	0	0	0	0	0	0	0	603	903	0
187	5	-43.2952	-118.941	-726.629	95823.6	-46165.8	1304.4	136.466	168.126	0	0	0	0	0	0	0	200	903	0	0	0	0	0	0	0	603	903	0
187	6	-42.6848	-118.025	-728.766	94725	-46654.1	1121.29	135.982	170.02	0	0	0	0	0	0	0	200	903	0	0	0	0	0	0	0	603	903	0
187	7	-41.6167	-116.347	-730.597	94633.4	-46287.8	1624.83	136.644	170.471	0	0	0	0	0	0	0	200	903	0	0	0	0	0	0	0	603	903	0
187	8	-43.6004	-114.973	-731.512	96006.7	-46776.1	1075.52	136.056	168.756	0	0	0	0	0	0	0	200	903	0	0	0	0	0	0	0	603	903	0
187	9	-42.5322	-114.668	-731.512	96098.2	-46959.2	1121.29	135.805	168.631	0	0	0	0	0	0	0	200	903	0	0	0	0	0	0	0	603	903	0
188	0	-42.3797	-112.837	-730.902	95365.8	-46348.9	1258.62	136.587	169.523	0	0	0	0	0	0	0	200	903	0	0	0	0	0	0	0	603	903	0
188	1	-43.9055	-110.701	-732.428	94816.5	-46715.1	846.635	136.219	170.545	0	0	0	0	0	0	0	200	903	0	0	0	0	0	0	0	603	903	0
188	2	-44.0581	-110.853	-732.428	96098.2	-46837.2	938.188	136.052	168.795	0	0	0	0	0	0	0	200	903	0	0	0	0	0	0	0	603	903	0
188	3	-41.6167	-109.328	-731.512	97013.8	-46226.8	1167.07	136.807	167.379	0	0	0	0	0	0	0	200	903	0	0	0	0	0	0	0	603	903	0
188	4	-42.5322	-107.954	-730.291	94999.6	-46898.2	1029.74	135.782	169.915	0	0	0	0	0	0	0	200	903	0	0	0	0	0	0	0	603	903	0
188	5	-42.6848	-107.039	-730.902	96006.7	-46409.9	938.188	136.503	168.646	0	0	0	0	0	0	0	200	903	0	0	0	0	0	0	0	603	903	0
188	6	-41.0064	-106.276	-731.207	95182.7	-46409.9	755.082	136.53	169.828	0	0	0	0	0	0	0	200	903	0	0	0	0	0	0	0	603	903	0
188	7	-41.7693	-105.055	-731.512	96647.6	-46532	663.529	136.389	167.88	0	0	0	0	0	0	0	200	903	0	0	0	0	0	0	0	603	903	0
188	8	-41.6167	-103.071	-728.46	96189.8	-46348.9	617.753	136.374	167.955	0	0	0	0	0	0	0	200	903	0	0	0	0	0	0	0	603	903	0
188	9	-39.7857	-102.003	-731.512	94908	-46165.8	800.859	136.89	170.258	0	0	0	0	0	0	0	200	903	0	0	0	0	0	0	0	603	903	0
189	0	-40.8538	-101.24	-729.681	95823.6	-46715.1	800.859	135.979	168.677	0	0	0	0	0	0	0	200	903	0	0	0	0	0	0	0	603	903	0
189	1	-41.3115	-99.7145	-729.071	96281.4	-46470.9	526.2	136.26	167.94	0	0	0	0	0	0	0	200	903	0	0	0	0	0	0	0	603	903	0
189	2	-41.3115	-98.9516	-726.324	95365.8	-46776.1	800.859	135.599	168.701	0	0	0	0	0	0	0	200	903	0	0	0	0	0	0	0	603	903	0
189	3	-40.8538	-98.036	-726.629	95274.3	-46715.1	571.977	135.71	168.882	0	0	0	0	0	0	0	200	903	0	0	0	0	0	0	0	603	903	0
189	4	-41.0064	-97.1205	-726.324	95365.8	-46287.8	617.753	136.271	168.701	0	0	0	0	0	0	0	200	903	0	0	0	0	0	0	0	603	903	0
189	5	-39.7857	-96.205	-723.883	94541.8	-46470.9	434.647	135.803	169.396	0	0	0	0	0	0	0	200	903	0	0	0	0	0	0	0	603	903	0
189	6	-41.0064	-94.6791	-723.883	95091.2	-46104.7	388.871	136.309	168.637	0	0	0	0	0	0	0	200	903	0	0	0	0	0	0	0	603	903	0
189	7	-39.9382	-93.3058	-719.305	95457.4	-45860.6	571.977	136.243	167.292	0	0	0	0	0	0	0	200	903	0	0	0	0	0	0	0	603	903	0
189	8	-38.7175	-93.1532	-719.305	95640.5	-46226.8	571.977	135.734	167.038	0	0	0	0	0	0	0	200	903	0	0	0	0	0	0	0	603	903	0
189	9	-39.0227	-92.0851	-717.779	94725	-45677.5	434.647	136.363	168.031	0	0	0	0	0	0	0	200	903	0	0	0	0	0	0	0	603	903	0
190	0	-36.2761	-90.7118	-717.474	94633.4	-45799.6	526.2	136.166	168.102	0	0	0	0	0	0	0	200	903	0	0	0	0	0	0	0	603	903	0
190	1	-37.802	-89.6437	-715.948	94908	-45921.6	800.859	135.859	167.437	0	0	0	0	0	0	0	200	903	0	0	0	0	0	0	0	603	903	0
190	2	-37.802	-89.4911	-714.727	94816.5	-45555.4	663.529	136.262	167.339	0	0	0	0	0	0	0	200	903	0	0	0	0	0	0	0	603	903	0
190	3	-38.565	-88.7282	-711.371	94175.6	-45494.4	663.529	136.047	167.614	0	0	0	0	0	0	0	200	903	0	0	0	0	0	0	0	603	903	0
190	4	-38.565	-86.5919	-709.845	93992.6	-45677.5	343.095	135.651	167.587	0	0	0	0	0	0	0	200	903	0	0	0	0	0	0	0	603	903	0
190	5	-38.565	-85.829	-708.624	94633.4	-45372.3	480.424	135.971	166.455	0	0	0	0	0	0	0	200	903	0	0	0	0	0	0	0	603	903	0
190	6	-37.4968	-85.5238	-704.657	94267.2	-45494.4	800.859	135.438	166.223	0	0	0	0	0	0	0	200	903	0	0	0	0	0	0	0	603	903	0
190	7	-37.9546	-84.4557	-703.741	93443.2	-45372.3	388.871	135.527	167.219	0	0	0	0	0	0	0	200	903	0	0	0	0	0	0	0	603	903	0
190	8	-37.3442	-84.3031	-701.3	93443.2	-44578.9	709.306	136.434	166.757	0	0	0	0	0	0	0	200	903	0	0	0	0	0	0	0	603	903	0
190	9	-36.2761	-81.2514	-698.553	94175.6	-45067.1	434.647	135.485	165.185	0	0	0	0	0	0	0	200	903	0	0	0	0	0	0	0	603	903	0
191	0	-35.971	-83.0824	-698.248	93626.3	-45067.1	480.424	135.457	165.912	0	0	0	0	0	0	0	200	903	0	0	0	0	0	0	0	603	903	0
191	1	-33.5296	-80.641	-699.164	93260.1	-44639.9	755.082	136.152	166.612	0	0	0	0	0	0	0	200	903	0	0	0	0	0	0	0	603	903	0
191	2	-35.8184	-78.3522	-695.196	92069.9	-44823	205.766	135.525	167.563	0	0	0	0	0	0	0	200	903	0	0	0	0	0	0	0	603	903	0
191	3	-35.3606	-78.9626	-693.365	92069.9	-44700.9	434.647	135.53	167.213	0	0	0	0	0	0	0	200	903	0	0	0	0	0	0	0	603	903	0
191	4	-33.9873	-78.5048	-688.482	92069.9	-44395.8	251.542	135.516	166.271	0	0	0	0	0	0	0	200	903	0	0	0	0	0	0	0	603	903	0
191	5	-36.1235	-76.9789	-689.398	91245.9	-44639.9	571.977	135.248	167.644	0	0	0	0	0	0	0	200	903	0	0	0	0	0	0	0	603	903	0
191	6	-36.1235	-76.5211	-686.651	91795.3	-44334.7	251.542	135.433	166.315	0	0	0	0	0	0	0	200	903	0	0	0	0	0	0	0	603	903	0
191	7	-34.5977	-75.1479	-682.989	91795.3	-44212.6	22.6601	135.266	165.598	0	0	0	0	0	0	0	200	903	0	0	0	0	0	0	0	603	903	0
191	8	-36.1235	-74.5375	-681.158	91337.5	-44334.7	251.542	134.913	165.909	0	0	0	0	0	0	0	200	903	0	0	0	0	0	0	0	603	903	0
191	9	-35.0554	-73.3168	-676.581	90696.7	-43907.5	388.871	135.104	165.948	0	0	0	0	0	0	0	200	903	0	0	0	0	0	0	0	603	903	0
192	0	-34.4451	-72.7065	-675.97	91795.3	-43724.4	297.318	135.316	164.202	0	0	0	0	0	0	0	200	903	0	0	0	0	0	0	0	603	903	0
192	1	-34.4451	-72.4013	-674.139	91154.4	-44029.5	22.6601	134.688	164.784	0	0	0	0	0	0	0	200	903	0	0	0	0	0	0	0	603	903	0
192	2	-33.8347	-71.6383	-672.918	90422	-43358.2	388.871	135.567	165.627	0	0	0	0	0	0	0	200	903	0	0	0	0	0	0	0	603	903	0
192	3	-33.9873	-70.5702	-670.172	90238.9	-43785.4	205.766	134.665	165.35	0	0	0	0	0	0	0	200	903	0	0	0	0	0	0	0	603	903	0
192	4	-34.4451	-70.1125	-664.068	90605.1	-43968.5	68.4365	133.789	163.561	0	0	0	0	0	0	0	200	903	0	0	0	0	0	0	0	603	903	0
192	5	-35.5132	-70.8754	-664.984	90422	-43053	159.989	135.257	164.024	0	0	0	0	0	0	0	200	903	0	0	0	0	0	0	0	603	903	0
192	6	-35.0554	-67.8236	-661.627	89506.4	-43236.1	-23.1163	134.652	164.718	0	0	0	0	0	0	0	200	903	0	0	0	0	0	0	0	603	903	0
192	7	-33.8347	-67.2133	-657.66	88865.6	-42808.8	-68.8927	134.907	164.876	0	0	0	0	0	0	0	200	903	0	0	0	0	0	0	0	603	903	0
192	8	-34.9028	-67.2133	-656.134	88682.5	-42747.8	68.4365	134.849	164.841	0	0	0	0	0	0	0	200	903	0	0	0	0	0	0	0	603	903	0
192	9	-35.0554	-66.6029	-651.861	88590.9	-43053	22.6601	133.954	164.095	0	0	0	0	0	0	0	200	903	0	0	0	0	0	0	0	603	903	0
193	0	-33.2244	-64.9245	-652.166	88499.4	-42442.6	22.6601	134.921	164.299	0	0	0	0	0	0	0	200	903	0	0	0	0	0	0	0	603	903	0
193	1	-33.0718	-64.1615	-649.115	88590.9	-42320.6	-160.445	134.803	163.52	0	0	0	0	0	0	0	200	903	0	0	0	0	0	0	0	603	903	0
193	2	-31.0881	-64.3141	-650.03	88590.9	-42625.7	-114.669	134.425	163.713	0	0	0	0	0	0	0	200	903	0	0	0	0	0	0	0	603	903	0
193	3	-33.2244	-63.5512	-646.368	87858.5	-42137.5	-251.998	134.809	164.074	0	0	0	0	0	0	0	200	903	0	0	0	0	0	0	0	603	903	0
193	4	-33.0718	-62.0253	-643.622	87492.3	-42381.6	68.4365	134.151	164.062	0	0	0	0	0	0	0	200	903	0	0	0	0	0	0	0	603	903	0
193	5	-32.7666	-61.8727	-641.18	87858.5	-42076.4	-206.222	134.377	162.974	0	0	0	0	0	0	0	200	903	0	0	0	0	0	0	0	603	903	0
193	6	-33.0718	-62.6357	-638.434	87492.3	-41771.2	-160.445	134.572	162.958	0	0	0	0	0	0	0	200	903	0	0	0	0	0	0	0	603	903	0
193	7	-33.8347	-60.9572	-637.518	86851.4	-42320.6	-297.775	133.617	163.766	0	0	0	0	0	0	0	200	903	0	0	0	0	0	0	0	603	903	0
193	8	-32.614	-60.652	-632.33	86485.2	-41160.9	-435.104	134.906	163.228	0	0	0	0	0	0	0	200	903	0	0	0	0	0	0	0	603	903	0
193	9	-33.377	-58.9735	-628.973	87217.6	-41527.1	-251.998	133.976	161.333	0	0	0	0	0	0	0	200	903	0	0	0	0	0	0	0	603	903	0
194	0	-32.9192	-58.3632	-625.311	86485.2	-41710.2	-435.104	133.297	161.693	0	0	0	0	0	0	0	200	903	0	0	0	0	0	0	0	603	903	0
194	1	-31.5459	-56.9899	-625.006	86210.5	-41038.8	-480.88	134.339	162.064	0	0	0	0	0	0	0	200	903	0	0	0	0	0	0	0	603	903	0
194	2	-31.8511	-56.0744	-623.175	85478.1	-41405	-114.669	133.558	162.834	0	0	0	0	0	0	0	200	903	0	0	0	0	0	0	0	603	903	0
194	3	-31.2407	-56.227	-623.175	84562.6	-41283	-480.88	133.754	164.304	0	0	0	0	0	0	0	200	903	0	0	0	0	0	0	0	603	903	0
194	4	-30.9356	-55.6166	-620.123	85111.9	-41099.9	-526.656	133.723	162.75	0	0	0	0	0	0	0	200	903	0	0	0	0	0	0	0	603	903	0
194	5	-31.2407	-54.0907	-619.513	84928.8	-41038.8	-251.998	133.756	162.91	0	0	0	0	0	0	0	200	903	0	0	0	0	0	0	0	603	903	0
194	6	-30.1726	-53.4804	-613.714	84287.9	-41283	-572.433	132.733	162.659	0	0	0	0	0	0	0	200	903	0	0	0	0	0	0	0	603	903	0
194	7	-32.1563	-53.0226	-614.019	85386.6	-40428.5	-663.985	134.158	160.938	0	0	0	0	0	0	0	200	903	0	0	0	0	0	0	0	603	903	0
194	8	-32.3088	-52.5648	-611.578	84379.5	-40733.6	-297.775	133.396	162.03	0	0	0	0	0	0	0	200	903	0	0	0	0	0	0	0	603	903	0
194	9	-30.783	-51.039	-606.39	84471.1	-41283	-709.762	131.92	160.698	0	0	0	0	0	0	0	200	903	0	0	0	0	0	0	0	603	903	0
195	0	-32.9192	-50.7338	-605.78	84562.6	-40855.7	-847.091	132.557	160.407	0	0	0	0	0	0	0	200	903	0	0	0	0	0	0	0	603	903	0
195	1	-32.1563	-50.7338	-603.033	84471.1	-40794.7	-389.327	132.351	159.923	0	0	0	0	0	0	0	200	903	0	0	0	0	0	0	0	603	903	0
195	2	-31.3933	-49.9709	-601.507	83647.1	-40550.5	-1030.2	132.585	160.938	0	0	0	0	0	0	0	200	903	0	0	0	0	0	0	0	603	903	0
195	3	-30.4778	-48.2924	-599.371	83280.9	-40428.5	-1030.2	132.549	161.053	0	0	0	0	0	0	0	200	903	0	0	0	0	0	0	0	603	903	0
195	4	-31.5459	-47.3769	-597.54	83830.2	-40428.5	-709.762	132.342	159.708	0	0	0	0	0	0	0	200	903	0	0	0	0	0	0	0	603	903	0
195	5	-30.6304	-47.0717	-597.54	83830.2	-40367.4	-1304.85	132.444	159.708	0	0	0	0	0	0	0	200	903	0	0	0	0	0	0	0	603	903	0
195	6	-30.3252	-46.6139	-595.404	83097.8	-40367.4	-1167.53	132.202	160.435	0	0	0	0	0	0	0	200	903	0	0	0	0	0	0	0	603	903	0
195	7	-30.783	-44.9355	-591.742	83006.2	-40123.3	-709.762	132.195	159.726	0	0	0	0	0	0	0	200	903	0	0	0	0	0	0	0	603	903	0
195	8	-32.4614	-44.4777	-593.268	83372.4	-39940.2	-938.644	132.678	159.469	0	0	0	0	0	0	0	200	903	0	0	0	0	0	0	0	603	903	0
195	9	-32.0037	-44.4777	-590.216	83464	-40367.4	-1304.85	131.606	158.587	0	0	0	0	0	0	0	200	903	0	0	0	0	0	0	0	603	903	0
196	0	-30.9356	-43.8673	-585.638	82731.6	-40367.4	-1259.08	131.071	158.733	0	0	0	0	0	0	0	200	903	0	0	0	0	0	0	0	603	903	0
196	1	-32.3088	-43.1044	-585.943	82182.2	-39512.9	-1487.96	132.565	159.744	0	0	0	0	0	0	0	200	903	0	0	0	0	0	0	0	603	903	0
196	2	-32.3088	-42.3415	-582.281	82823.1	-40062.3	-1442.18	131.198	157.761	0	0	0	0	0	0	0	200	903	0	0	0	0	0	0	0	603	903	0
196	3	-31.5459	-44.0199	-581.671	83006.2	-40306.4	-1350.63	130.706	157.297	0	0	0	0	0	0	0	200	903	0	0	0	0	0	0	0	603	903	0
196	4	-31.8511	-41.5785	-579.84	82548.4	-39696	-1579.51	131.54	157.636	0	0	0	0	0	0	0	200	903	0	0	0	0	0	0	0	603	903	0
196	5	-30.1726	-40.5104	-579.229	82090.7	-40062.3	-1808.4	130.835	158.276	0	0	0	0	0	0	0	200	903	0	0	0	0	0	0	0	603	903	0
196	6	-31.6985	-40.3578	-579.229	81266.7	-39635	-1533.74	131.573	159.699	0	0	0	0	0	0	0	200	903	0	0	0	0	0	0	0	603	903	0
196	7	-31.6985	-40.3578	-576.788	81449.8	-39757.1	-1991.5	131.072	158.787	0	0	0	0	0	0	0	200	903	0	0	0	0	0	0	0	603	903	0
196	8	-33.2244	-38.6794	-575.262	81999.1	-40062.3	-1854.17	130.358	157.458	0	0	0	0	0	0	0	200	903	0	0	0	0	0	0	0	603	903	0
196	9	-33.0718	-37.9164	-574.652	82365.4	-39390.9	-2083.05	131.453	156.669	0	0	0	0	0	0	0	200	903	0	0	0	0	0	0	0	603	903	0
197	0	-31.3933	-37.6112	-571.295	81907.6	-39268.8	-2128.83	131.264	156.628	0	0	0	0	0	0	0	200	903	0	0	0	0	0	0	0	603	903	0
197	1	-33.0718	-37.9164	-570.99	80992	-39879.2	-1625.29	130.158	158.155	0	0	0	0	0	0	0	200	903	0	0	0	0	0	0	0	603	903	0
197	2	-33.9873	-36.5431	-568.243	81449.8	-39390.9	-2311.94	130.68	156.664	0	0	0	0	0	0	0	200	903	0	0	0	0	0	0	0	603	903	0
197	3	-31.6985	-35.6276	-567.328	82365.4	-39879.2	-2220.38	129.707	154.819	0	0	0	0	0	0	0	200	903	0	0	0	0	0	0	0	603	903	0
197	4	-33.0718	-35.9328	-566.412	81358.2	-39757.1	-2174.61	129.809	156.362	0	0	0	0	0	0	0	200	903	0	0	0	0	0	0	0	603	903	0
197	5	-33.0718	-35.475	-564.886	80900.5	-39024.7	-2449.26	130.916	156.784	0	0	0	0	0	0	0	200	903	0	0	0	0	0	0	0	603	903	0
197	6	-33.5296	-34.5595	-565.802	80717.4	-40001.2	-2357.71	129.302	157.34	0	0	0	0	0	0	0	200	903	0	0	0	0	0	0	0	603	903	0
197	7	-33.5296	-33.7965	-563.36	81541.4	-39696	-2678.15	129.537	155.259	0	0	0	0	0	0	0	200	903	0	0	0	0	0	0	0	603	903	0
197	8	-33.6821	-34.1017	-556.341	81358.2	-39390.9	-2586.59	129.197	153.762	0	0	0	0	0	0	0	200	903	0	0	0	0	0	0	0	603	903	0
197	9	-34.4451	-33.7965	-561.834	80442.8	-39574	-2540.82	129.563	156.821	0	0	0	0	0	0	0	200	903	0	0	0	0	0	0	0	603	903	0
198	0	-34.1399	-31.8129	-559.698	80534.3	-39268.8	-2815.48	129.839	156.111	0	0	0	0	0	0	0	200	903	0	0	0	0	0	0	0	603	903	0
198	1	-31.8511	-31.9655	-557.867	81632.9	-39390.9	-2632.37	129.39	153.67	0	0	0	0	0	0	0	200	903	0	0	0	0	0	0	0	603	903	0
198	2	-34.2925	-31.5077	-554.51	80992	-39451.9	-2907.03	128.853	153.939	0	0	0	0	0	0	0	200	903	0	0	0	0	0	0	0	603	903	0
198	3	-34.2925	-31.5077	-553.9	80534.3	-38902.6	-3090.13	129.766	154.605	0	0	0	0	0	0	0	200	903	0	0	0	0	0	0	0	603	903	0
198	4	-33.6821	-31.5077	-554.205	80625.8	-39329.8	-2952.8	129.034	154.52	0	0	0	0	0	0	0	200	903	0	0	0	0	0	0	0	603	903	0
198	5	-33.6821	-30.7448	-552.679	80259.6	-39207.8	-2815.48	129.059	154.781	0	0	0	0	0	0	0	200	903	0	0	0	0	0	0	0	603	903	0
198	6	-33.9873	-30.5922	-550.543	80351.2	-38902.6	-3364.79	129.338	154.051	0	0	0	0	0	0	0	200	903	0	0	0	0	0	0	0	603	903	0
198	7	-33.5296	-28.7611	-550.848	80259.6	-39207.8	-3319.02	128.823	154.298	0	0	0	0	0	0	0	200	903	0	0	0	0	0	0	0	603	903	0
198	8	-33.0718	-28.7611	-549.933	80625.8	-38963.6	-3135.91	129.148	153.39	0	0	0	0	0	0	0	200	903	0	0	0	0	0	0	0	603	903	0
198	9	-35.0554	-28.7611	-546.27	80717.4	-39574	-3502.12	127.556	152.239	0	0	0	0	0	0	0	200	903	0	0	0	0	0	0	0	603	903	0
199	0	-34.2925	-28.1508	-548.712	80168.1	-39512.9	-3639.45	127.99	153.898	0	0	0	0	0	0	0	200	903	0	0	0	0	0	0	0	603	903	0
199	1	-34.1399	-27.5404	-546.27	80351.2	-39024.7	-3456.34	128.562	152.91	0	0	0	0	0	0	0	200	903	0	0	0	0	0	0	0	603	903	0
199	2	-33.8347	-27.0827	-544.134	79161	-39146.7	-3502.12	128.057	154.519	0	0	0	0	0	0	0	200	903	0	0	0	0	0	0	0	603	903	0
199	3	-33.9873	-26.6249	-543.219	79618.7	-38902.6	-3456.34	128.385	153.432	0	0	0	0	0	0	0	200	903	0	0	0	0	0	0	0	603	903	0
199	4	-34.2925	-24.6413	-541.082	80351.2	-39146.7	-3593.67	127.651	151.499	0	0	0	0	0	0	0	200	903	0	0	0	0	0	0	0	603	903	0
199	5	-32.9192	-24.1835	-542.914	80259.6	-39207.8	-3181.69	127.783	152.169	0	0	0	0	0	0	0	200	903	0	0	0	0	0	0	0	603	903	0
199	6	-32.0037	-24.9464	-540.472	80351.2	-38475.3	-3547.9	128.812	151.332	0	0	0	0	0	0	0	200	903	0	0	0	0	0	0	0	603	903	0
199	7	-30.783	-23.268	-542.303	80259.6	-39268.8	-3456.34	127.589	152.002	0	0	0	0	0	0	0	200	903	0	0	0	0	0	0	0	603	903	0
199	8	-33.0718	-22.8102	-542.608	80625.8	-39207.8	-3822.56	127.742	151.411	0	0	0	0	0	0	0	200	903	0	0	0	0	0	0	0	603	903	0
199	9	-32.7666	-22.9628	-541.082	80717.4	-39024.7	-3547.9	127.877	150.822	0	0	0	0	0	0	0	200	903	0	0	0	0	0	0	0	603	903	0
200	0	-33.2244	-22.3524	-540.472	79710.3	-38719.5	-3547.9	128.36	152.517	0	0	0	0	0	0	0	200	903	0	0	0	0	0	0	0	603	903	0
200	1	-33.377	-21.1317	-540.777	79618.7	-38963.6	-3776.78	127.949	152.77	0	0	0	0	0	0	0	200	903	0	0	0	0	0	0	0	603	903	0
200	2	-32.1563	-20.674	-539.557	80717.4	-39207.8	-3822.56	127.333	150.401	0	0	0	0	0	0	0	200	903	0	0	0	0	0	0	0	603	903	0
200	3	-33.6821	-22.1999	-537.726	80442.8	-38719.5	-3547.9	127.994	150.402	0	0	0	0	0	0	0	200	903	0	0	0	0	0	0	0	603	903	0
200	4	-32.7666	-19.1481	-537.115	80351.2	-39024.7	-4051.44	127.344	150.402	0	0	0	0	0	0	0	200	903	0	0	0	0	0	0	0	603	903	0
200	5	-32.614	-18.6903	-536.81	79893.4	-38963.6	-3868.33	127.416	151.17	0	0	0	0	0	0	0	200	903	0	0	0	0	0	0	0	603	903	0
[truncated: 2,314 more rows]
