# Supplementary material for: The Effects of an Extemporaneous Speech Dual-task on Older Adult Gait Control
Source: Research Square preprint supplement (doi:10.21203/rs.3.rs-7674245/v1), 2025-11-18
Supplement: Supplementary file 17 [file DT1Walk3.xlsx]

## Sheet: Sheet1
Trajectories
		01:LFHD			01:RFHD			01:LBHD			01:RBHD			01:C7			01:T10			01:CLAV			01:STRN			01:RBAK			01:LSHO			01:LUPA			01:LELB			01:LFRM			01:LWRA			01:LWRB			01:LFIN
Frame	Sub Frame	X	Y	Z	X	Y	Z	X	Y	Z	X	Y	Z	X	Y	Z	X	Y	Z	X	Y	Z	X	Y	Z	X	Y	Z	X	Y	Z	X	Y	Z	X	Y	Z	X	Y	Z	X	Y	Z	X	Y	Z	X	Y	Z
		mm	mm	mm	mm	mm	mm	mm	mm	mm	mm	mm	mm	mm	mm	mm	mm	mm	mm	mm	mm	mm	mm	mm	mm	mm	mm	mm	mm	mm	mm	mm	mm	mm	mm	mm	mm	mm	mm	mm	mm	mm	mm	mm	mm	mm	mm	mm	mm
247	0	178.603	-2187.37	1589.78	275.647	-2180.87	1587.43	170.071	-2351.57	1610.53	294.972	-2322.71	1609.29	216.337	-2417.2	1461.7	205.854	-2502.93	1206.51	233.534	-2272.43	1364.88	220.498	-2214.84	1187.44	253.636	-2511.69	1281.01	56.1599	-2326.94	1406.24	-30.1394	-2376.33	1188.63	-34.4806	-2386.25	1105.01	-60.3651	-2313.55	994.521	-3.57754	-2224.63	920.237	-62.5095	-2256.48	901.86	-38.5398	-2190.85	844.629
248	0	179.115	-2175.94	1591.01	276.172	-2169.6	1588.61	170.66	-2340.17	1612.33	295.642	-2311.29	1610.98	217.046	-2406.19	1463.57	207.217	-2492.66	1208.51	233.692	-2261.6	1366.29	220.165	-2204.47	1188.66	254.885	-2501.02	1283.02	56.2659	-2316.36	1408.14	-29.4778	-2366.5	1190.15	-33.3302	-2377.04	1106.61	-59.7319	-2305.85	995.667	-3.01574	-2218.36	919.663	-62.0451	-2250.7	902.033	-37.8006	-2186.19	843.345
249	0	179.482	-2164.5	1592.04	276.548	-2158.3	1589.61	171.138	-2328.78	1613.91	296.198	-2299.83	1612.49	217.695	-2395.16	1465.26	208.549	-2482.38	1210.33	233.793	-2250.75	1367.52	219.811	-2194.09	1189.71	256.104	-2490.33	1284.86	56.3656	-2305.85	1409.8	-28.8645	-2356.8	1191.51	-32.2717	-2367.93	1108.06	-59.217	-2298.25	996.674	-2.70775	-2212.03	919.059	-61.7663	-2244.91	902.139	-37.3778	-2181.44	842.092
250	0	179.704	-2153.06	1592.88	276.778	-2146.96	1590.44	171.504	-2317.37	1615.29	296.638	-2288.35	1613.82	218.282	-2384.1	1466.75	209.852	-2472.09	1211.98	233.838	-2239.89	1368.59	219.436	-2183.72	1190.6	257.293	-2479.62	1286.54	56.4587	-2295.43	1411.22	-28.2993	-2347.23	1192.73	-31.3052	-2358.91	1109.34	-58.8202	-2290.76	997.54	-2.65316	-2205.65	918.425	-61.6729	-2239.09	902.177	-37.2708	-2176.59	840.87
251	0	179.781	-2141.61	1593.52	276.86	-2135.59	1591.1	171.76	-2305.96	1616.45	296.963	-2276.83	1614.98	218.808	-2373.01	1468.07	211.124	-2461.79	1213.45	233.826	-2229	1369.48	219.04	-2173.36	1191.33	258.452	-2468.89	1288.04	56.5445	-2285.09	1412.39	-27.7822	-2337.79	1193.79	-30.4305	-2349.97	1110.48	-58.5413	-2283.38	998.266	-2.85087	-2199.21	917.761	-61.7641	-2233.27	902.147	-37.478	-2171.64	839.678
252	0	179.715	-2130.15	1593.96	276.797	-2124.18	1591.59	171.904	-2294.55	1617.41	297.174	-2265.29	1615.95	219.272	-2361.91	1469.19	212.364	-2451.49	1214.76	233.758	-2218.11	1370.2	218.626	-2163	1191.89	259.579	-2458.15	1289.38	56.6218	-2274.82	1413.31	-27.3129	-2328.48	1194.71	-29.6478	-2341.13	1111.45	-58.3793	-2276.11	998.851	-3.29859	-2192.72	917.064	-62.0381	-2227.43	902.047	-37.996	-2166.59	838.514
253	0	179.508	-2118.69	1594.21	276.59	-2112.73	1591.9	171.939	-2283.13	1618.15	297.272	-2253.71	1616.75	219.674	-2350.77	1470.13	213.571	-2441.17	1215.9	233.635	-2207.19	1370.74	218.192	-2152.64	1192.28	260.673	-2447.38	1290.55	56.6883	-2264.62	1414	-26.8911	-2319.3	1195.47	-28.9571	-2332.37	1112.28	-58.333	-2268.93	999.295	-3.99239	-2186.17	916.334	-62.492	-2221.58	901.875	-38.8189	-2161.45	837.374
254	0	179.161	-2107.21	1594.27	276.242	-2101.25	1592.04	171.865	-2271.69	1618.68	297.256	-2242.11	1617.37	220.014	-2339.61	1470.88	214.739	-2430.84	1216.86	233.457	-2196.26	1371.11	217.741	-2142.29	1192.5	261.732	-2436.59	1291.54	56.7409	-2254.48	1414.44	-26.5162	-2310.25	1196.08	-28.3584	-2323.7	1112.94	-58.4004	-2261.86	999.596	-4.92644	-2179.57	915.564	-63.1211	-2215.71	901.628	-39.9379	-2156.21	836.254
255	0	178.678	-2095.73	1594.12	275.756	-2089.73	1592	171.682	-2260.26	1619	297.129	-2230.48	1617.81	220.292	-2328.42	1471.44	215.865	-2420.5	1217.64	233.226	-2185.31	1371.3	217.274	-2131.93	1192.55	262.751	-2425.78	1292.37	56.7754	-2244.38	1414.65	-26.1878	-2301.32	1196.54	-27.8516	-2315.1	1113.45	-58.5787	-2254.87	999.752	-6.09277	-2172.91	914.75	-63.9192	-2209.83	901.299	-41.341	-2150.87	835.146
256	0	178.063	-2084.24	1593.78	275.137	-2078.18	1591.79	171.393	-2248.81	1619.11	296.891	-2218.83	1618.06	220.506	-2317.21	1471.81	216.943	-2410.14	1218.25	232.943	-2174.35	1371.31	216.793	-2121.58	1192.42	263.725	-2414.94	1293.02	56.7868	-2234.31	1414.63	-25.9056	-2292.5	1196.85	-27.4367	-2306.57	1113.8	-58.8645	-2247.96	999.762	-7.48119	-2166.2	913.885	-64.8783	-2203.93	900.884	-43.0128	-2145.44	834.041
257	0	177.321	-2072.74	1593.24	274.389	-2066.6	1591.4	170.997	-2237.35	1619	296.545	-2207.15	1618.13	220.655	-2305.96	1471.99	217.965	-2399.76	1218.69	232.609	-2163.37	1371.13	216.3	-2111.22	1192.1	264.65	-2404.09	1293.49	56.7695	-2224.25	1414.38	-25.6692	-2283.78	1196.99	-27.1132	-2298.1	1114	-59.2536	-2241.13	999.623	-9.07937	-2159.45	912.96	-65.9885	-2198.02	900.374	-44.9345	-2139.92	832.928
258	0	176.456	-2061.24	1592.5	273.518	-2054.98	1590.83	170.498	-2225.88	1618.69	296.091	-2195.45	1618.02	220.738	-2294.68	1471.97	218.923	-2389.35	1218.94	232.226	-2152.37	1370.77	215.798	-2100.85	1191.6	265.519	-2393.2	1293.79	56.7174	-2214.19	1413.91	-25.4784	-2275.15	1196.98	-26.8809	-2289.68	1114.04	-59.7417	-2234.36	999.332	-10.8729	-2152.64	911.966	-67.2381	-2192.08	899.76	-47.0842	-2134.3	831.791
259	0	175.474	-2049.73	1591.56	272.53	-2043.33	1590.09	169.897	-2214.39	1618.17	295.532	-2183.72	1617.73	220.752	-2283.37	1471.77	219.808	-2378.92	1219.01	231.797	-2141.35	1370.22	215.29	-2090.47	1190.92	266.325	-2382.3	1293.92	56.6244	-2204.09	1413.22	-25.333	-2266.61	1196.81	-26.7389	-2281.3	1113.92	-60.324	-2227.63	998.888	-12.8458	-2145.78	910.89	-68.6142	-2186.13	899.034	-49.4375	-2128.61	830.617
260	0	174.381	-2038.21	1590.43	271.431	-2031.65	1589.16	169.196	-2202.89	1617.44	294.869	-2171.98	1617.25	220.697	-2272.03	1471.37	220.612	-2368.44	1218.9	231.323	-2130.32	1369.48	214.777	-2080.06	1190.04	267.06	-2371.36	1293.86	56.4845	-2193.94	1412.33	-25.2328	-2258.12	1196.47	-26.6862	-2272.94	1113.64	-60.9955	-2220.93	998.288	-14.9801	-2138.88	909.721	-70.1023	-2180.16	898.186	-51.9678	-2122.83	829.387
261	0	173.182	-2026.68	1589.1	270.228	-2019.95	1588.06	168.395	-2191.38	1616.5	294.103	-2160.23	1616.59	220.569	-2260.65	1470.78	221.325	-2357.92	1218.6	230.806	-2119.25	1368.56	214.265	-2069.62	1188.98	267.717	-2360.4	1293.63	56.2925	-2183.72	1411.23	-25.1775	-2249.69	1195.97	-26.7212	-2264.57	1113.19	-61.7513	-2214.23	997.529	-17.2571	-2131.93	908.446	-71.6871	-2174.16	897.205	-54.6472	-2116.99	828.082
262	0	171.882	-2015.15	1587.59	268.924	-2008.22	1586.79	167.498	-2179.86	1615.36	293.235	-2148.46	1615.75	220.365	-2249.24	1469.99	221.937	-2347.35	1218.11	230.247	-2108.16	1367.44	213.756	-2059.15	1187.73	268.288	-2349.4	1293.21	56.0433	-2173.42	1409.93	-25.1663	-2241.28	1195.3	-26.8419	-2256.2	1112.59	-62.5862	-2207.52	996.612	-19.6569	-2124.93	907.05	-73.3525	-2168.13	896.081	-57.4471	-2111.08	826.685
263	0	170.488	-2003.61	1585.89	267.526	-1996.46	1585.35	166.505	-2168.32	1614.03	292.266	-2136.68	1614.73	220.082	-2237.79	1469.03	222.443	-2336.72	1217.44	229.646	-2097.02	1366.15	213.253	-2048.63	1186.3	268.766	-2338.36	1292.61	55.7324	-2163.03	1408.44	-25.199	-2232.89	1194.45	-27.0457	-2247.78	1111.83	-63.4951	-2200.78	995.534	-22.1591	-2117.89	905.52	-75.082	-2162.07	894.805	-60.3391	-2105.11	825.174
264	0	169.001	-1992.08	1584.02	266.039	-1984.69	1583.75	165.418	-2156.77	1612.51	291.195	-2124.9	1613.54	219.717	-2226.3	1467.87	222.835	-2326.03	1216.57	229.005	-2085.85	1364.67	212.759	-2038.05	1184.69	269.145	-2327.29	1291.83	55.3557	-2152.52	1406.77	-25.2758	-2224.48	1193.42	-27.3294	-2239.31	1110.9	-64.4723	-2193.98	994.296	-24.7434	-2110.8	903.843	-76.8593	-2155.97	893.37	-63.2956	-2099.08	823.534
265	0	167.426	-1980.54	1582	264.464	-1972.9	1582	164.236	-2145.21	1610.82	290.023	-2113.11	1612.19	219.265	-2214.77	1466.55	223.11	-2315.26	1215.53	228.321	-2074.64	1363.03	212.276	-2027.4	1182.92	269.42	-2316.17	1290.88	54.9093	-2141.89	1404.92	-25.3981	-2216.04	1192.21	-27.6888	-2230.76	1109.8	-65.5118	-2187.1	992.899	-27.3892	-2103.67	902.008	-78.668	-2149.83	891.769	-66.2905	-2093.01	821.746
266	0	165.766	-1968.99	1579.83	262.804	-1961.09	1580.12	162.961	-2133.64	1608.95	288.748	-2101.31	1610.68	218.724	-2203.2	1465.05	223.266	-2304.41	1214.3	227.593	-2063.36	1361.23	211.804	-2016.68	1180.98	269.588	-2304.99	1289.76	54.3893	-2131.14	1402.9	-25.5681	-2207.52	1190.81	-28.1191	-2222.11	1108.55	-66.6066	-2180.12	991.346	-30.0765	-2096.49	900.003	-80.4922	-2143.63	889.997	-69.3001	-2086.9	819.796
267	0	164.021	-1957.45	1577.53	261.062	-1949.28	1578.11	161.593	-2122.06	1606.92	287.371	-2089.51	1609.03	218.089	-2191.59	1463.4	223.306	-2293.47	1212.9	226.817	-2052.03	1359.29	211.343	-2005.88	1178.91	269.646	-2293.75	1288.48	53.7918	-2120.27	1400.72	-25.7889	-2198.91	1189.24	-28.6144	-2213.34	1107.13	-67.749	-2173.02	989.641	-32.7856	-2089.25	897.821	-82.3162	-2137.38	888.054	-72.3028	-2080.74	817.675
268	0	162.191	-1945.9	1575.13	259.235	-1937.45	1576.01	160.131	-2110.46	1604.75	285.889	-2077.72	1607.25	217.358	-2179.93	1461.6	223.231	-2282.43	1211.34	225.99	-2040.64	1357.21	210.89	-1994.98	1176.7	269.594	-2282.45	1287.05	53.1129	-2109.26	1398.39	-26.0641	-2190.16	1187.48	-29.1682	-2204.43	1105.55	-68.9302	-2165.77	987.788	-35.4979	-2081.96	895.456	-84.125	-2131.06	885.939	-75.2802	-2074.54	815.374
269	0	160.276	-1934.35	1572.64	257.325	-1925.62	1573.83	158.574	-2098.86	1602.46	284.301	-2065.91	1605.36	216.525	-2168.22	1459.68	223.049	-2271.29	1209.62	225.104	-2029.16	1355.02	210.441	-1983.99	1174.38	269.433	-2271.07	1285.48	52.3487	-2098.14	1395.92	-26.3976	-2181.24	1185.55	-29.7732	-2195.37	1103.82	-70.1405	-2158.38	985.796	-38.1953	-2074.61	892.908	-85.9049	-2124.67	883.656	-78.2164	-2068.29	812.891
270	0	158.274	-1922.79	1570.1	255.328	-1913.77	1571.59	156.922	-2087.26	1600.07	282.606	-2054.11	1603.37	215.59	-2156.46	1457.65	222.768	-2260.04	1207.78	224.156	-2017.61	1352.74	209.988	-1972.89	1171.97	269.165	-2259.61	1283.78	51.4952	-2086.89	1393.34	-26.7928	-2172.13	1183.44	-30.4212	-2186.13	1101.94	-71.3693	-2150.82	983.674	-40.8608	-2067.19	890.178	-87.6429	-2118.2	881.214	-81.0985	-2062	810.229
271	0	156.183	-1911.22	1567.52	253.242	-1901.92	1569.34	155.172	-2075.64	1597.59	280.803	-2042.29	1601.31	214.549	-2144.64	1455.54	222.398	-2248.66	1205.82	223.136	-2005.97	1350.39	209.524	-1961.67	1169.49	268.796	-2248.05	1281.99	50.5485	-2075.53	1390.65	-27.2521	-2162.79	1181.19	-31.1039	-2176.7	1099.92	-72.6055	-2143.09	981.434	-43.4784	-2059.7	887.275	-89.3281	-2111.64	878.624	-83.9157	-2055.66	807.397
272	0	154	-1899.64	1564.95	251.063	-1890.05	1567.08	153.323	-2064.01	1595.06	278.889	-2030.47	1599.21	213.4	-2132.76	1453.36	221.951	-2237.16	1203.76	222.039	-1994.24	1348	209.037	-1950.33	1166.96	268.33	-2236.39	1280.13	49.5048	-2064.06	1387.88	-27.7771	-2153.21	1178.78	-31.8123	-2167.07	1097.78	-73.8374	-2135.17	979.091	-46.033	-2052.13	884.211	-90.9514	-2104.98	875.902	-86.6594	-2049.25	804.41
273	0	151.721	-1888.05	1562.41	248.788	-1878.16	1564.86	151.374	-2052.36	1592.5	276.864	-2018.63	1597.1	212.143	-2120.81	1451.15	221.438	-2225.53	1201.65	220.857	-1982.4	1345.59	208.515	-1938.85	1164.42	267.775	-2224.61	1278.21	48.3609	-2052.48	1385.06	-28.3672	-2143.36	1176.26	-32.5374	-2157.23	1095.54	-75.0537	-2127.06	976.663	-48.511	-2044.46	881.003	-92.5055	-2098.19	873.071	-89.3227	-2042.76	801.287
274	0	149.343	-1876.42	1559.93	246.413	-1866.26	1562.71	149.324	-2040.7	1589.93	274.728	-2006.77	1594.99	210.776	-2108.78	1448.93	220.873	-2213.75	1199.5	219.582	-1970.45	1343.19	207.945	-1927.24	1161.89	267.139	-2212.7	1276.27	47.114	-2040.81	1382.2	-29.0195	-2133.24	1173.63	-33.2702	-2147.17	1093.2	-76.243	-2118.75	974.171	-50.8995	-2036.7	877.676	-93.9854	-2091.28	870.156	-91.8993	-2036.19	798.054
275	0	146.864	-1864.77	1557.55	243.934	-1854.32	1560.66	147.171	-2029.01	1587.4	272.479	-1994.89	1592.93	209.3	-2096.67	1446.73	220.267	-2201.83	1197.35	218.209	-1958.39	1340.83	207.313	-1915.47	1159.41	266.428	-2200.66	1274.34	45.762	-2029.05	1379.34	-29.7288	-2122.84	1170.92	-34.0018	-2136.9	1090.8	-77.3947	-2110.24	971.638	-53.1874	-2028.82	874.257	-95.388	-2084.22	867.188	-94.3839	-2029.51	794.743
276	0	144.281	-1853.09	1555.29	241.35	-1842.35	1558.74	144.915	-2017.3	1584.93	270.118	-1982.96	1590.94	207.717	-2084.47	1444.59	219.632	-2189.76	1195.23	216.732	-1946.21	1338.55	206.605	-1903.55	1157.01	265.652	-2188.48	1272.46	44.3041	-2017.21	1376.5	-30.4873	-2112.17	1168.17	-34.7242	-2126.41	1088.36	-78.4989	-2101.53	969.091	-55.3648	-2020.82	870.782	-96.7117	-2076.99	864.199	-96.7711	-2022.71	791.389
277	0	141.593	-1841.35	1553.2	238.657	-1830.34	1556.99	142.556	-2005.55	1582.55	267.646	-1971	1589.06	206.028	-2072.18	1442.53	218.978	-2177.54	1193.19	215.148	-1933.9	1336.37	205.809	-1891.45	1154.71	264.818	-2176.14	1270.65	42.7408	-2005.28	1373.72	-31.286	-2101.24	1165.41	-35.4296	-2115.69	1085.91	-79.5469	-2092.61	966.556	-57.4232	-2012.68	867.286	-97.9563	-2069.58	861.227	-99.0552	-2015.76	788.031
278	0	138.801	-1829.57	1551.29	235.855	-1818.28	1555.43	140.095	-1993.75	1580.29	265.066	-1958.98	1587.31	204.237	-2059.79	1440.59	218.314	-2165.16	1191.24	213.455	-1921.47	1334.33	204.913	-1879.17	1152.56	263.934	-2163.65	1268.95	41.074	-1993.28	1371.03	-32.1142	-2090.06	1162.66	-36.1113	-2104.77	1083.48	-80.5314	-2083.48	964.063	-59.3559	-2004.38	863.812	-99.1219	-2061.97	858.309	-101.23	-2008.65	784.711
279	0	135.906	-1817.72	1549.59	232.946	-1806.17	1554.09	137.534	-1981.91	1578.18	262.379	-1946.9	1585.73	202.348	-2047.29	1438.79	217.646	-2152.63	1189.43	211.653	-1908.9	1332.46	203.911	-1866.71	1150.59	263.006	-2151	1267.39	39.3077	-1981.21	1368.46	-32.9611	-2078.66	1159.98	-36.7638	-2093.64	1081.11	-81.4463	-2074.14	961.643	-61.1578	-1995.91	860.402	-100.209	-2054.13	855.484	-103.29	-2001.35	781.471
280	0	132.912	-1805.81	1548.13	229.933	-1793.99	1552.99	134.878	-1970.01	1576.26	259.591	-1934.76	1584.34	200.366	-2034.7	1437.17	216.981	-2139.94	1187.8	209.746	-1896.21	1330.78	202.796	-1854.06	1148.83	262.04	-2138.2	1266.02	37.4477	-1969.06	1366.04	-33.8162	-2067.06	1157.39	-37.3828	-2082.31	1078.82	-82.2874	-2064.59	959.325	-62.8257	-1987.26	857.101	-101.216	-2046.05	852.789	-105.227	-1993.84	778.352
281	0	129.824	-1793.83	1546.92	226.82	-1781.74	1552.16	132.132	-1958.05	1574.54	256.708	-1922.55	1583.16	198.3	-2021.99	1435.76	216.32	-2127.11	1186.37	207.739	-1883.39	1329.33	201.567	-1841.22	1147.32	261.04	-2125.24	1264.85	35.5018	-1956.84	1363.79	-34.6697	-2055.28	1154.94	-37.9653	-2070.79	1076.66	-83.0521	-2054.82	957.139	-64.3583	-1978.39	853.951	-102.144	-2037.7	850.257	-107.034	-1986.1	775.394
282	0	126.65	-1781.76	1545.98	223.616	-1769.42	1551.6	129.301	-1946.02	1573.06	253.736	-1910.26	1582.23	196.156	-2009.19	1434.56	215.666	-2114.14	1185.17	205.643	-1870.45	1328.12	200.227	-1828.18	1146.07	260.012	-2112.14	1263.91	33.4798	-1944.54	1361.76	-35.5133	-2043.35	1152.65	-38.51	-2059.1	1074.64	-83.7391	-2044.84	955.113	-65.7561	-1969.31	850.996	-102.991	-2029.09	847.921	-108.705	-1978.11	772.636
283	0	123.4	-1769.62	1545.32	220.329	-1757.01	1551.33	126.396	-1933.92	1571.82	250.686	-1897.88	1581.56	193.945	-1996.28	1433.62	215.017	-2101.05	1184.23	203.468	-1857.4	1327.18	198.782	-1814.96	1145.11	258.958	-2098.9	1263.22	31.3936	-1932.18	1359.95	-36.3406	-2031.28	1150.58	-39.0171	-2047.24	1072.81	-84.3494	-2034.63	953.272	-67.0218	-1959.98	848.274	-103.757	-2020.18	845.809	-110.234	-1969.83	770.111
284	0	120.087	-1757.4	1544.95	216.972	-1744.53	1551.35	123.428	-1921.74	1570.85	247.569	-1885.42	1581.16	191.678	-1983.28	1432.93	214.371	-2087.84	1183.57	201.228	-1844.25	1326.52	197.243	-1801.57	1144.45	257.881	-2085.55	1262.82	29.2568	-1919.74	1358.4	-37.1471	-2019.1	1148.73	-39.4882	-2035.23	1071.19	-84.8854	-2024.21	951.639	-68.1596	-1950.39	845.82	-104.44	-2010.97	843.943	-111.616	-1961.26	767.849
285	0	116.726	-1745.09	1544.86	213.559	-1731.97	1551.67	120.408	-1909.47	1570.15	244.398	-1872.88	1581.04	189.367	-1970.2	1432.52	213.726	-2074.53	1183.21	198.941	-1831.01	1326.15	195.624	-1788.03	1144.11	256.785	-2072.1	1262.7	27.0844	-1907.24	1357.11	-37.9305	-2006.81	1147.15	-39.9269	-2023.07	1069.8	-85.3513	-2013.56	950.234	-69.1754	-1940.52	843.666	-105.042	-2001.44	842.343	-112.847	-1952.36	765.872
286	0	113.332	-1732.7	1545.05	210.108	-1719.33	1552.27	117.352	-1897.14	1569.73	241.189	-1860.26	1581.2	187.025	-1957.04	1432.39	213.078	-2061.15	1183.15	196.625	-1817.7	1326.08	193.942	-1774.36	1144.08	255.671	-2058.56	1262.88	24.8926	-1894.67	1356.11	-38.6902	-1994.44	1145.85	-40.3376	-2010.78	1068.65	-85.753	-2002.68	949.072	-70.0768	-1930.35	841.836	-105.563	-1991.58	841.021	-113.927	-1943.12	764.201
287	0	109.925	-1720.23	1545.52	206.637	-1706.62	1553.15	114.278	-1884.72	1569.6	237.961	-1847.56	1581.65	184.667	-1943.83	1432.55	212.42	-2047.71	1183.4	194.299	-1804.34	1326.3	192.217	-1760.59	1144.38	254.541	-2044.97	1263.36	22.6986	-1882.03	1355.39	-39.4277	-1981.99	1144.85	-40.7266	-1998.37	1067.78	-86.0981	-1991.58	948.164	-70.8725	-1919.88	840.35	-106.007	-1981.38	839.986	-114.857	-1933.51	762.848
288	0	106.526	-1707.69	1546.24	203.169	-1693.84	1554.29	111.204	-1872.23	1569.75	234.733	-1834.78	1582.38	182.307	-1930.57	1432.98	211.75	-2034.23	1183.96	191.986	-1790.95	1326.81	190.471	-1746.76	1144.98	253.397	-2031.35	1264.15	20.5196	-1869.34	1354.97	-40.1457	-1969.46	1144.16	-41.1009	-1985.85	1067.17	-86.3957	-1980.25	947.517	-71.572	-1909.07	839.219	-106.379	-1970.84	839.24	-115.641	-1923.52	761.818
289	0	103.158	-1695.09	1547.21	199.726	-1681	1555.67	108.151	-1859.68	1570.17	231.527	-1821.94	1583.37	179.962	-1917.28	1433.69	211.06	-2020.75	1184.83	189.707	-1777.55	1327.61	188.727	-1732.91	1145.87	252.241	-2017.72	1265.22	18.3728	-1856.59	1354.84	-40.8484	-1956.87	1143.78	-41.4685	-1973.22	1066.85	-86.6563	-1968.68	947.133	-72.1856	-1897.93	838.448	-106.685	-1959.93	838.782	-116.286	-1913.11	761.114
290	0	99.844	-1682.43	1548.39	196.333	-1668.11	1557.26	105.141	-1847.06	1570.85	228.365	-1809.05	1584.61	177.646	-1903.98	1434.66	210.346	-2007.28	1185.98	187.483	-1764.16	1328.66	187.009	-1719.06	1147.02	251.074	-2004.11	1266.57	16.2749	-1843.8	1355	-41.5409	-1944.2	1143.7	-41.8382	-1960.5	1066.8	-86.8913	-1956.87	947.008	-72.7235	-1886.44	838.039	-106.933	-1948.65	838.604	-116.802	-1902.28	760.73
291	0	96.6091	-1669.73	1549.77	193.017	-1655.19	1559.05	102.197	-1834.4	1571.78	225.272	-1796.12	1586.09	175.374	-1890.7	1435.88	209.602	-1993.84	1187.41	185.335	-1750.81	1329.96	185.34	-1705.26	1148.42	249.897	-1990.56	1268.18	14.2415	-1830.98	1355.43	-42.2289	-1931.48	1143.92	-42.2192	-1947.69	1067.01	-87.1129	-1944.81	947.135	-73.1961	-1874.59	837.982	-107.135	-1937	838.694	-117.199	-1891	760.657
292	0	93.4784	-1657	1551.32	189.804	-1642.24	1560.99	99.3401	-1821.69	1572.93	222.272	-1783.15	1587.77	173.162	-1877.43	1437.32	208.822	-1980.48	1189.08	183.283	-1737.51	1331.47	183.744	-1691.55	1150.03	248.711	-1977.08	1270.02	12.2873	-1818.12	1356.13	-42.9186	-1918.68	1144.41	-42.6206	-1934.8	1067.48	-87.3338	-1932.52	947.502	-73.6134	-1862.37	838.265	-107.302	-1924.97	839.039	-117.493	-1879.25	760.882
293	0	90.4764	-1644.25	1553.02	186.721	-1629.28	1563.06	96.5947	-1808.96	1574.3	219.389	-1770.17	1589.63	171.022	-1864.22	1438.97	208.003	-1967.19	1190.97	181.345	-1724.29	1333.18	182.243	-1677.97	1151.82	247.517	-1963.7	1272.07	10.425	-1805.25	1357.07	-43.6166	-1905.83	1145.17	-43.052	-1921.84	1068.19	-87.5668	-1919.97	948.095	-73.9846	-1849.79	838.871	-107.447	-1912.56	839.618	-117.699	-1867.02	761.387
294	0	87.6272	-1631.49	1554.84	183.792	-1616.32	1565.23	93.982	-1796.21	1575.84	216.647	-1757.18	1591.64	168.967	-1851.06	1440.79	207.141	-1954.02	1193.06	179.536	-1711.17	1335.04	180.857	-1664.54	1153.76	246.316	-1950.45	1274.3	8.66584	-1792.37	1358.23	-44.3293	-1892.92	1146.16	-43.5223	-1908.82	1069.11	-87.8241	-1907.18	948.894	-74.3183	-1836.84	839.777	-107.583	-1899.75	840.413	-117.833	-1854.31	762.153
295	0	84.9534	-1618.73	1556.74	181.044	-1603.39	1567.46	91.5221	-1783.46	1577.55	214.067	-1744.21	1593.77	167.009	-1837.98	1442.77	206.231	-1940.97	1195.31	177.871	-1698.16	1337.04	179.602	-1651.3	1155.81	245.108	-1937.34	1276.68	7.01926	-1779.5	1359.59	-45.0629	-1879.95	1147.36	-44.0402	-1895.74	1070.23	-88.1179	-1894.14	949.88	-74.622	-1823.52	840.96	-107.724	-1886.55	841.4	-117.913	-1841.09	763.161
296	0	82.4756	-1605.99	1558.71	178.497	-1590.48	1569.73	89.2333	-1770.72	1579.39	211.669	-1731.26	1595.99	165.158	-1824.99	1444.87	205.274	-1928.06	1197.68	176.36	-1685.27	1339.15	178.495	-1638.26	1157.93	243.894	-1924.39	1279.17	5.4926	-1766.64	1361.12	-45.823	-1866.93	1148.74	-44.6137	-1882.6	1071.52	-88.459	-1880.86	951.031	-74.9023	-1809.84	842.394	-107.884	-1872.96	842.559	-117.956	-1827.36	764.391
297	0	80.212	-1593.28	1560.73	176.173	-1577.62	1572.01	87.1312	-1758	1581.34	209.47	-1718.36	1598.27	163.42	-1812.11	1447.07	204.267	-1915.31	1200.16	175.01	-1672.52	1341.32	177.545	-1625.44	1160.1	242.676	-1911.61	1281.74	4.09129	-1753.8	1362.81	-46.6148	-1853.86	1150.27	-45.2498	-1869.42	1072.95	-88.8574	-1867.32	952.324	-75.165	-1795.81	844.053	-108.075	-1858.99	843.868	-117.979	-1813.13	765.822
298	0	78.178	-1580.6	1562.76	174.087	-1564.82	1574.27	85.2289	-1745.3	1583.38	207.486	-1705.5	1600.59	161.803	-1799.33	1449.33	203.212	-1902.72	1202.69	173.827	-1659.9	1343.55	176.761	-1612.85	1162.29	241.455	-1899.01	1284.36	2.8188	-1740.99	1364.61	-47.4423	-1840.75	1151.93	-45.9548	-1856.19	1074.5	-89.3217	-1853.55	953.738	-75.4149	-1781.43	845.911	-108.309	-1844.62	845.305	-117.998	-1798.38	767.439
299	0	76.3859	-1567.96	1564.79	172.253	-1552.09	1576.48	83.5359	-1732.65	1585.47	205.728	-1692.72	1602.9	160.312	-1786.68	1451.64	202.109	-1890.3	1205.27	172.813	-1647.44	1345.78	176.147	-1600.5	1164.48	240.233	-1886.59	1286.99	1.67672	-1728.22	1366.51	-48.3086	-1827.6	1153.69	-46.7336	-1842.92	1076.14	-89.8588	-1839.54	955.251	-75.6562	-1766.72	847.945	-108.598	-1829.88	846.851	-118.026	-1783.14	769.224
300	0	74.8446	-1555.38	1566.8	170.682	-1539.43	1578.63	82.059	-1720.04	1587.6	204.203	-1680.01	1605.19	158.948	-1774.15	1453.96	200.961	-1878.06	1207.84	171.966	-1635.13	1348.02	175.703	-1588.37	1166.63	239.012	-1874.37	1289.62	0.664879	-1715.49	1368.49	-49.2158	-1814.41	1155.52	-47.59	-1829.62	1077.84	-90.4745	-1825.29	956.844	-75.8928	-1751.69	850.131	-108.95	-1814.77	848.491	-118.075	-1767.4	771.166
301	0	73.5597	-1542.85	1568.76	169.379	-1526.86	1580.7	80.8012	-1707.48	1589.73	202.915	-1667.38	1607.42	157.714	-1761.74	1456.26	199.773	-1865.98	1210.39	171.284	-1622.96	1350.22	175.426	-1576.48	1168.73	237.794	-1862.33	1292.21	-0.218438	-1702.82	1370.51	-50.1647	-1801.2	1157.4	-48.5267	-1816.29	1079.59	-91.1726	-1810.82	958.496	-76.1279	-1736.36	852.449	-109.374	-1799.29	850.207	-118.156	-1751.19	773.252
302	0	72.533	-1530.39	1570.67	168.347	-1514.38	1582.66	79.7627	-1694.99	1591.86	201.867	-1654.85	1609.59	156.608	-1749.47	1458.53	198.547	-1854.07	1212.9	170.761	-1610.95	1352.37	175.307	-1564.8	1170.77	236.583	-1850.47	1294.73	-0.976296	-1690.21	1372.55	-51.1556	-1787.97	1159.3	-49.5452	-1802.93	1081.36	-91.9555	-1796.13	960.19	-76.3647	-1720.74	854.883	-109.875	-1783.46	851.989	-118.276	-1734.51	775.472
303	0	71.7632	-1518	1572.51	167.584	-1501.99	1584.51	78.9405	-1682.56	1593.95	201.055	-1642.42	1611.66	155.629	-1737.32	1460.74	197.291	-1842.31	1215.32	170.389	-1599.07	1354.45	175.338	-1553.31	1172.74	235.382	-1838.79	1297.17	-1.61285	-1677.65	1374.59	-52.1876	-1774.73	1161.22	-50.6458	-1789.54	1083.13	-92.8241	-1781.23	961.911	-76.6062	-1704.84	857.416	-110.458	-1767.29	853.825	-118.44	-1717.4	777.819
304	0	71.2455	-1505.67	1574.27	167.087	-1489.71	1586.24	78.3289	-1670.21	1595.99	200.475	-1630.09	1613.62	154.775	-1725.29	1462.88	196.009	-1830.7	1217.65	170.16	-1587.33	1356.44	175.504	-1542.01	1174.61	234.195	-1827.27	1299.49	-2.13309	-1665.17	1376.61	-53.2592	-1761.49	1163.12	-51.8278	-1776.13	1084.88	-93.7776	-1766.13	963.643	-76.8553	-1688.69	860.036	-111.126	-1750.79	855.705	-118.652	-1699.86	780.286
305	0	70.9723	-1493.42	1575.93	166.845	-1477.53	1587.83	77.9199	-1657.92	1597.96	200.117	-1617.88	1615.46	154.042	-1713.39	1464.91	194.71	-1819.22	1219.87	170.062	-1575.72	1358.33	175.792	-1530.86	1176.39	233.025	-1815.9	1301.69	-2.54261	-1652.75	1378.59	-54.3684	-1748.24	1165	-53.0895	-1762.7	1086.59	-94.8139	-1750.84	965.374	-77.115	-1672.3	862.73	-111.88	-1733.99	857.623	-118.912	-1681.94	782.865
306	0	70.9333	-1481.24	1577.48	166.85	-1465.46	1589.27	77.7034	-1645.71	1599.83	199.972	-1605.77	1617.15	153.424	-1701.6	1466.83	193.402	-1807.87	1221.95	170.086	-1564.23	1360.1	176.184	-1519.85	1178.06	231.877	-1804.66	1303.74	-2.8474	-1640.4	1380.51	-55.5124	-1735.01	1166.84	-54.428	-1749.25	1088.25	-95.9293	-1735.37	967.092	-77.3877	-1655.69	865.489	-112.718	-1716.89	859.572	-119.22	-1663.65	785.551
307	0	71.1159	-1469.14	1578.92	167.087	-1453.49	1590.57	77.6679	-1633.57	1601.61	200.027	-1593.78	1618.69	152.918	-1689.91	1468.61	192.094	-1796.62	1223.88	170.219	-1552.85	1361.74	176.662	-1508.96	1179.6	230.757	-1793.55	1305.63	-3.05362	-1628.11	1382.35	-56.6882	-1721.79	1168.61	-55.8398	-1735.78	1089.83	-97.1192	-1719.74	968.786	-77.6759	-1638.86	868.304	-113.637	-1699.52	861.547	-119.572	-1645.03	788.337
308	0	71.506	-1457.11	1580.24	167.54	-1441.62	1591.71	77.8008	-1621.51	1603.26	200.268	-1581.9	1620.07	152.52	-1678.32	1470.25	190.797	-1785.46	1225.64	170.451	-1541.57	1363.23	177.208	-1498.15	1181.02	229.67	-1782.55	1307.34	-3.16739	-1615.9	1384.09	-57.8917	-1708.59	1170.32	-57.3201	-1722.29	1091.33	-98.3776	-1703.95	970.447	-77.9811	-1621.84	871.166	-114.632	-1681.89	863.543	-119.964	-1626.11	791.217
309	0	72.0879	-1445.16	1581.42	168.192	-1429.85	1592.69	78.0889	-1609.53	1604.78	200.681	-1570.12	1621.28	152.223	-1666.82	1471.73	189.522	-1774.39	1227.23	170.771	-1530.37	1364.57	177.804	-1487.42	1182.3	228.622	-1771.63	1308.87	-3.19467	-1603.76	1385.72	-59.1186	-1695.42	1171.94	-58.8636	-1708.78	1092.74	-99.6973	-1688.02	972.066	-78.3044	-1604.65	874.068	-115.697	-1664.03	865.557	-120.392	-1606.91	794.184
310	0	72.8455	-1433.27	1582.47	169.027	-1418.18	1593.51	78.5188	-1597.61	1606.15	201.25	-1558.45	1622.31	152.024	-1655.41	1473.05	188.28	-1763.38	1228.64	171.168	-1519.25	1365.75	178.432	-1476.74	1183.43	227.621	-1760.79	1310.21	-3.1411	-1591.68	1387.23	-60.3635	-1682.27	1173.46	-60.4638	-1695.25	1094.03	-101.07	-1671.96	973.636	-78.6459	-1587.29	877.002	-116.822	-1645.95	867.585	-120.851	-1587.47	797.234
311	0	73.7624	-1421.46	1583.37	170.025	-1406.6	1594.17	79.0772	-1585.77	1607.37	201.961	-1546.87	1623.16	151.919	-1644.06	1474.19	187.085	-1752.42	1229.86	171.632	-1508.2	1366.75	179.077	-1466.09	1184.41	226.672	-1750.01	1311.36	-3.01184	-1579.67	1388.59	-61.6204	-1669.14	1174.86	-62.1134	-1681.69	1095.2	-102.488	-1655.78	975.152	-79.0044	-1569.79	879.962	-117.999	-1627.67	869.624	-121.333	-1567.82	800.359
312	0	74.8226	-1409.71	1584.12	171.17	-1395.11	1594.66	79.7517	-1574	1608.42	202.798	-1535.4	1623.83	151.904	-1632.78	1475.15	185.947	-1741.51	1230.88	172.155	-1497.2	1367.56	179.724	-1455.46	1185.21	225.784	-1739.28	1312.3	-2.81153	-1567.72	1389.81	-62.8821	-1656.05	1176.14	-63.8044	-1668.11	1096.24	-103.94	-1639.49	976.607	-79.3777	-1552.16	882.941	-119.215	-1609.22	871.672	-121.831	-1547.99	803.554
313	0	76.0108	-1398.02	1584.72	172.445	-1383.69	1594.99	80.5302	-1562.29	1609.31	203.749	-1524	1624.31	151.976	-1621.55	1475.93	184.878	-1730.64	1231.71	172.729	-1486.24	1368.19	180.36	-1444.83	1185.83	224.963	-1728.59	1313.04	-2.54418	-1555.83	1390.86	-64.1408	-1642.97	1177.28	-65.5276	-1654.49	1097.14	-105.415	-1623.11	977.999	-79.7621	-1534.41	885.934	-120.457	-1590.62	873.725	-122.338	-1528.01	806.814
314	0	77.313	-1386.4	1585.16	173.834	-1372.35	1595.15	81.4023	-1550.64	1610.01	204.8	-1512.69	1624.61	152.133	-1610.36	1476.51	183.891	-1719.79	1232.34	173.348	-1475.32	1368.62	180.977	-1434.2	1186.26	224.217	-1717.91	1313.59	-2.21315	-1544.01	1391.75	-65.3874	-1629.92	1178.28	-67.2732	-1640.85	1097.9	-106.903	-1606.64	979.325	-80.1528	-1516.56	888.934	-121.712	-1571.88	875.782	-122.846	-1507.9	810.134
315	0	78.7167	-1374.83	1585.44	175.324	-1361.07	1595.14	82.3584	-1539.05	1610.54	205.94	-1501.46	1624.72	152.372	-1599.22	1476.91	182.994	-1708.96	1232.77	174.008	-1464.43	1368.85	181.567	-1423.56	1186.5	223.552	-1707.26	1313.93	-1.82107	-1532.23	1392.47	-66.6123	-1616.88	1179.13	-69.0305	-1627.17	1098.52	-108.392	-1590.09	980.583	-80.5433	-1498.62	891.938	-122.966	-1553.04	877.841	-123.346	-1487.7	813.511
316	0	80.211	-1363.31	1585.55	176.902	-1349.86	1594.97	83.3906	-1527.51	1610.88	207.16	-1490.29	1624.65	152.692	-1588.1	1477.12	182.196	-1698.15	1233	174.703	-1453.55	1368.88	182.126	-1412.9	1186.54	222.974	-1696.6	1314.08	-1.36983	-1520.51	1393.01	-67.8049	-1603.87	1179.82	-70.7881	-1613.45	1098.99	-109.868	-1573.48	981.773	-80.9259	-1480.62	894.94	-124.202	-1534.1	879.901	-123.827	-1467.43	816.941
317	0	81.7869	-1351.83	1585.5	178.56	-1338.7	1594.63	84.4925	-1516.02	1611.05	208.451	-1479.18	1624.4	153.093	-1577.02	1477.15	181.505	-1687.34	1233.05	175.432	-1442.69	1368.72	182.653	-1402.21	1186.38	222.49	-1685.95	1314.03	-0.860582	-1508.83	1393.37	-68.9542	-1590.86	1180.35	-72.5341	-1599.7	1099.32	-111.319	-1556.82	982.897	-81.2917	-1462.56	897.937	-125.404	-1515.1	881.96	-124.281	-1447.11	820.421
318	0	83.4374	-1340.4	1585.29	180.289	-1327.58	1594.12	85.6594	-1504.57	1611.03	209.808	-1468.12	1623.97	153.574	-1565.95	1476.99	180.927	-1676.55	1232.91	176.194	-1431.82	1368.36	183.148	-1391.49	1186.02	222.103	-1675.29	1313.8	-0.293725	-1497.2	1393.56	-70.0489	-1577.86	1180.71	-74.256	-1585.9	1099.5	-112.731	-1540.11	983.955	-81.6308	-1444.47	900.927	-126.557	-1496.04	884.018	-124.695	-1426.77	823.951
319	0	85.1573	-1329.01	1584.92	182.083	-1316.52	1593.46	86.888	-1493.16	1610.84	211.225	-1457.12	1623.37	154.135	-1554.89	1476.66	180.465	-1665.75	1232.59	176.989	-1420.96	1367.8	183.616	-1380.74	1185.47	221.818	-1664.62	1313.38	0.331073	-1485.61	1393.58	-71.0776	-1564.87	1180.92	-75.9409	-1572.06	1099.54	-114.091	-1523.37	984.95	-81.9324	-1426.36	903.907	-127.644	-1476.96	886.072	-125.058	-1406.44	827.526
320	0	86.9431	-1317.66	1584.39	183.939	-1305.49	1592.64	88.1767	-1481.79	1610.47	212.701	-1446.16	1622.61	154.777	-1543.85	1476.15	180.121	-1654.94	1232.09	177.82	-1410.1	1367.07	184.064	-1369.96	1184.72	221.636	-1653.93	1312.78	1.01483	-1474.06	1393.43	-72.0292	-1551.89	1180.96	-77.5757	-1558.19	1099.44	-115.385	-1506.61	985.885	-82.1849	-1408.24	906.877	-128.648	-1457.87	888.122	-125.356	-1386.12	831.144
321	0	88.7932	-1306.34	1583.71	185.856	-1294.5	1591.68	89.5254	-1470.45	1609.94	214.234	-1435.23	1621.68	155.5	-1532.83	1475.47	179.896	-1644.14	1231.41	178.689	-1399.23	1366.17	184.499	-1359.14	1183.8	221.56	-1643.23	1312.02	1.75918	-1462.55	1393.12	-72.8927	-1538.91	1180.86	-79.1471	-1544.27	1099.22	-116.6	-1489.83	986.763	-82.3767	-1390.14	909.833	-129.552	-1438.79	890.165	-125.577	-1365.85	834.804
322	0	90.7075	-1295.05	1582.89	187.833	-1283.54	1590.56	90.9353	-1459.15	1609.25	215.825	-1424.35	1620.61	156.307	-1521.81	1474.63	179.788	-1633.32	1230.57	179.601	-1388.35	1365.1	184.933	-1348.28	1182.72	221.589	-1632.51	1311.09	2.56636	-1451.06	1392.67	-73.6582	-1525.93	1180.61	-80.6419	-1530.32	1098.87	-117.72	-1473.05	987.588	-82.4957	-1372.06	912.776	-130.339	-1419.74	892.2	-125.705	-1345.65	838.5
323	0	92.6873	-1283.8	1581.92	189.872	-1272.62	1589.32	92.4091	-1447.87	1608.41	217.475	-1413.5	1619.39	157.198	-1510.81	1473.65	179.795	-1622.48	1229.57	180.561	-1377.46	1363.89	185.378	-1337.39	1181.48	221.723	-1621.78	1309.99	3.43909	-1439.6	1392.08	-74.3165	-1512.96	1180.21	-82.0469	-1516.33	1098.42	-118.734	-1456.28	988.362	-82.53	-1354.03	915.704	-130.995	-1400.75	894.224	-125.729	-1325.53	842.228
324	0	94.735	-1272.57	1580.83	191.975	-1261.73	1587.95	93.9504	-1436.63	1607.44	219.189	-1402.69	1618.04	158.175	-1499.83	1472.52	179.913	-1611.62	1228.42	181.576	-1366.56	1362.55	185.845	-1326.46	1180.12	221.96	-1611.02	1308.75	4.38052	-1428.16	1391.36	-74.859	-1499.98	1179.7	-83.349	-1502.32	1097.86	-119.628	-1439.53	989.091	-82.4679	-1336.06	918.616	-131.502	-1381.82	896.234	-125.632	-1305.52	845.981
325	0	96.8539	-1261.38	1579.63	194.146	-1250.87	1586.47	95.5641	-1425.42	1606.33	220.971	-1391.91	1616.57	159.24	-1488.86	1471.25	180.137	-1600.74	1227.11	182.653	-1355.64	1361.1	186.35	-1315.49	1178.64	222.297	-1600.25	1307.35	5.3942	-1416.75	1390.53	-75.2787	-1487.01	1179.06	-84.5354	-1488.28	1097.21	-120.389	-1422.82	989.775	-82.2982	-1318.17	921.509	-131.847	-1362.98	898.224	-125.403	-1285.65	849.751
326	0	99.0483	-1250.23	1578.33	196.39	-1240.04	1584.89	97.2554	-1414.24	1605.11	222.825	-1381.17	1614.99	160.395	-1477.91	1469.86	180.461	-1589.83	1225.67	183.798	-1344.72	1359.55	186.905	-1304.48	1177.07	222.731	-1589.46	1305.81	6.48393	-1405.34	1389.61	-75.569	-1474.05	1178.32	-85.5938	-1474.22	1096.48	-121.003	-1406.16	990.42	-82.01	-1300.37	924.38	-132.017	-1344.25	900.191	-125.028	-1265.92	853.528
327	0	101.323	-1239.11	1576.95	198.712	-1229.25	1583.23	99.0302	-1403.11	1603.78	224.758	-1370.47	1613.31	161.64	-1466.99	1468.36	180.878	-1578.88	1224.08	185.021	-1333.79	1357.93	187.525	-1293.42	1175.43	223.257	-1578.65	1304.14	7.65374	-1393.95	1388.61	-75.7247	-1461.09	1177.49	-86.512	-1460.16	1095.69	-121.461	-1389.56	991.028	-81.5932	-1282.69	927.226	-131.997	-1325.66	902.129	-124.495	-1246.36	857.3
328	0	103.682	-1228.03	1575.5	201.116	-1218.5	1581.51	100.895	-1392.02	1602.37	226.775	-1359.81	1611.56	162.979	-1456.09	1466.77	181.382	-1567.88	1222.37	186.328	-1322.85	1356.25	188.222	-1282.33	1173.74	223.871	-1567.82	1302.34	8.90774	-1382.56	1387.54	-75.7412	-1448.13	1176.58	-87.2788	-1446.09	1094.83	-121.749	-1373.04	991.6	-81.0383	-1265.13	930.041	-131.777	-1307.21	904.031	-123.793	-1227	861.054
329	0	106.131	-1217	1574.01	203.61	-1207.8	1579.74	102.855	-1380.98	1600.89	228.884	-1349.19	1609.74	164.412	-1445.22	1465.08	181.965	-1556.84	1220.55	187.728	-1311.9	1354.54	189.011	-1271.19	1172.03	224.569	-1556.97	1300.42	10.2501	-1371.17	1386.42	-75.6148	-1435.18	1175.61	-87.8834	-1432.02	1093.94	-121.858	-1356.61	992.141	-80.3364	-1247.72	932.821	-131.347	-1288.94	905.892	-122.912	-1207.86	864.775
330	0	108.674	-1206.02	1572.49	206.197	-1197.13	1577.95	104.918	-1369.99	1599.35	231.09	-1338.63	1607.86	165.941	-1434.38	1463.33	182.62	-1545.73	1218.61	189.228	-1300.94	1352.83	189.901	-1259.99	1170.33	225.344	-1546.1	1298.4	11.6848	-1359.77	1385.28	-75.3424	-1422.24	1174.6	-88.3159	-1417.97	1093.02	-121.779	-1340.29	992.652	-79.4792	-1230.47	935.558	-130.697	-1270.86	907.705	-121.843	-1188.95	868.446
331	0	111.316	-1195.09	1570.97	208.882	-1186.52	1576.16	107.088	-1359.06	1597.77	233.398	-1328.12	1605.96	167.567	-1423.57	1461.52	183.34	-1534.56	1216.58	190.835	-1289.97	1351.12	190.904	-1248.75	1168.65	226.191	-1535.2	1296.27	13.2158	-1348.37	1384.13	-74.9217	-1409.3	1173.56	-88.5673	-1403.94	1092.09	-121.501	-1324.1	993.136	-78.4592	-1213.41	938.245	-129.822	-1252.99	909.463	-120.578	-1170.31	872.05
332	0	114.06	-1184.21	1569.47	211.668	-1175.96	1574.38	109.371	-1348.19	1596.17	235.814	-1317.66	1604.03	169.289	-1412.79	1459.67	184.118	-1523.31	1214.46	192.555	-1278.99	1349.45	192.029	-1237.44	1167.02	227.106	-1524.27	1294.07	14.8467	-1336.95	1382.99	-74.3508	-1396.38	1172.51	-88.6296	-1389.94	1091.15	-121.019	-1308.04	993.595	-77.2692	-1196.54	940.873	-128.714	-1235.36	911.16	-119.11	-1151.94	875.569
333	0	116.908	-1173.4	1568.01	214.56	-1165.44	1572.65	111.77	-1337.38	1594.57	238.341	-1307.27	1602.11	171.109	-1402.05	1457.8	184.948	-1511.98	1212.28	194.392	-1268	1347.83	193.281	-1226.06	1165.47	228.083	-1513.32	1291.79	16.5809	-1325.51	1381.89	-73.6282	-1383.46	1171.46	-88.4959	-1375.98	1090.23	-120.326	-1292.14	994.033	-75.9028	-1179.88	943.432	-127.371	-1217.98	912.789	-117.433	-1133.87	878.983
334	0	119.862	-1162.64	1566.62	217.557	-1154.99	1570.98	114.288	-1326.65	1592.98	240.983	-1296.93	1600.21	173.025	-1391.34	1455.92	185.824	-1500.57	1210.05	196.351	-1257.01	1346.29	194.668	-1214.62	1164.02	229.118	-1502.33	1289.46	18.421	-1314.04	1380.83	-72.7531	-1370.55	1170.44	-88.1607	-1362.07	1089.34	-119.418	-1276.41	994.453	-74.3538	-1163.45	945.913	-125.79	-1200.87	914.346	-115.542	-1116.12	882.274
335	0	122.922	-1151.95	1565.31	220.659	-1144.59	1569.4	116.928	-1315.98	1591.42	243.741	-1286.65	1598.35	175.037	-1380.65	1454.05	186.739	-1489.07	1207.78	198.433	-1246	1344.84	196.191	-1203.09	1162.69	230.204	-1491.3	1287.08	20.369	-1302.55	1379.84	-71.7248	-1357.64	1169.47	-87.62	-1348.22	1088.5	-118.29	-1260.86	994.858	-72.617	-1147.26	948.305	-123.97	-1184.04	915.825	-113.433	-1098.7	885.422
336	0	126.086	-1141.31	1564.1	223.865	-1134.24	1567.92	119.689	-1305.39	1589.91	246.614	-1276.43	1596.54	177.143	-1370	1452.21	187.689	-1477.48	1205.49	200.64	-1234.99	1343.51	197.852	-1191.48	1161.49	231.338	-1480.24	1284.69	22.426	-1291.02	1378.94	-70.5433	-1344.75	1168.55	-86.8709	-1334.44	1087.71	-116.941	-1245.5	995.252	-70.6872	-1131.34	950.597	-121.913	-1167.52	917.222	-111.103	-1081.64	888.41
337	0	129.35	-1130.74	1563.03	227.171	-1123.94	1566.57	122.57	-1294.86	1588.48	249.602	-1266.27	1594.82	179.34	-1359.37	1450.42	188.668	-1465.81	1203.22	202.971	-1223.96	1342.31	199.651	-1179.78	1160.45	232.513	-1469.13	1282.3	24.5918	-1279.46	1378.15	-69.2089	-1331.86	1167.72	-85.9124	-1320.73	1087	-115.37	-1230.35	995.641	-68.5601	-1115.68	952.779	-119.622	-1151.32	918.535	-108.549	-1064.95	891.221
338	0	132.711	-1120.23	1562.09	230.572	-1113.7	1565.37	125.569	-1284.4	1587.13	252.7	-1256.15	1593.18	181.624	-1348.76	1448.69	189.673	-1454.04	1200.97	205.421	-1212.92	1341.24	201.583	-1168	1159.58	233.725	-1457.97	1279.93	26.8649	-1267.85	1377.48	-67.7229	-1318.99	1166.98	-84.7451	-1307.11	1086.38	-113.579	-1215.43	996.029	-66.2317	-1100.32	954.84	-117.1	-1135.44	919.762	-105.769	-1048.63	893.837
339	0	136.162	-1109.76	1561.31	234.061	-1103.49	1564.32	128.679	-1274.01	1585.88	255.905	-1246.08	1591.65	183.99	-1338.16	1447.05	190.699	-1442.2	1198.78	207.987	-1201.86	1340.34	203.642	-1156.13	1158.9	234.969	-1446.78	1277.6	29.2419	-1256.2	1376.96	-66.087	-1306.13	1166.36	-83.3714	-1293.58	1085.86	-111.57	-1200.72	996.422	-63.6987	-1085.25	956.769	-114.354	-1119.91	920.902	-102.765	-1032.71	896.245
340	0	139.694	-1099.35	1560.7	237.631	-1093.32	1563.44	131.896	-1263.67	1584.76	259.209	-1236.05	1590.26	186.433	-1327.57	1445.52	191.74	-1430.27	1196.66	210.659	-1190.79	1339.6	205.819	-1144.17	1158.41	236.237	-1435.53	1275.33	31.7178	-1244.5	1376.59	-64.3043	-1293.28	1165.86	-81.7954	-1280.16	1085.46	-109.348	-1186.26	996.825	-60.9586	-1070.49	958.558	-111.393	-1104.73	921.955	-99.5345	-1017.19	898.432
341	0	143.299	-1088.97	1560.27	241.27	-1083.17	1562.74	135.211	-1253.37	1583.78	262.604	-1226.04	1589	188.943	-1316.99	1444.11	192.791	-1418.29	1194.65	213.428	-1179.71	1339.04	208.102	-1132.13	1158.12	237.524	-1424.24	1273.16	34.2855	-1232.76	1376.4	-62.3792	-1280.45	1165.52	-80.0235	-1266.83	1085.19	-106.92	-1172.03	997.246	-58.0096	-1056.06	960.197	-108.224	-1089.9	922.923	-96.0807	-1002.09	900.388
342	0	146.966	-1078.62	1560.02	244.969	-1073.04	1562.23	138.614	-1243.12	1582.95	266.081	-1216.05	1587.9	191.513	-1306.4	1442.84	193.846	-1406.24	1192.77	216.281	-1168.61	1338.65	210.475	-1120.03	1158.03	238.823	-1412.91	1271.1	36.9356	-1220.98	1376.39	-60.3177	-1267.63	1165.33	-78.0642	-1253.62	1085.07	-104.293	-1158.05	997.69	-54.8514	-1041.96	961.679	-104.86	-1075.45	923.808	-92.406	-987.404	902.105
343	0	150.684	-1068.3	1559.97	248.716	-1062.92	1561.9	142.092	-1232.88	1582.29	269.627	-1206.06	1586.96	194.131	-1295.8	1441.73	194.898	-1394.16	1191.05	219.202	-1157.5	1338.45	212.922	-1107.88	1158.15	240.125	-1401.54	1269.18	39.6567	-1209.14	1376.58	-58.1277	-1254.83	1165.32	-75.9283	-1240.52	1085.09	-101.477	-1144.33	998.165	-51.4849	-1028.2	962.998	-101.313	-1061.36	924.615	-88.514	-973.152	903.576
344	0	154.439	-1057.98	1560.12	252.497	-1052.79	1561.77	145.633	-1222.66	1581.81	273.23	-1196.07	1586.2	196.783	-1285.19	1440.79	195.942	-1382.05	1189.5	222.173	-1146.38	1338.44	215.421	-1095.69	1158.47	241.423	-1390.14	1267.42	42.4349	-1197.27	1376.98	-55.8195	-1242.05	1165.49	-73.6289	-1227.53	1085.28	-98.4843	-1130.85	998.677	-47.9129	-1014.79	964.15	-97.5983	-1047.64	925.349	-84.4099	-959.336	904.799
345	0	158.217	-1047.66	1560.46	256.298	-1042.64	1561.82	149.22	-1212.43	1581.53	276.873	-1186.05	1585.62	199.458	-1274.56	1440.04	196.968	-1369.94	1188.16	225.174	-1135.25	1338.6	217.95	-1083.49	1158.97	242.708	-1378.72	1265.86	45.2544	-1185.36	1377.58	-53.4059	-1229.3	1165.86	-71.1814	-1214.67	1085.65	-95.3297	-1117.62	999.231	-44.1407	-1001.74	965.132	-93.7328	-1034.29	926.016	-80.1005	-945.96	905.772
346	0	162.003	-1037.32	1560.99	260.105	-1032.47	1562.05	152.836	-1202.19	1581.45	280.541	-1175.99	1585.23	202.138	-1263.9	1439.48	197.971	-1357.83	1187.05	228.184	-1124.11	1338.94	220.481	-1071.29	1159.66	243.973	-1367.27	1264.5	48.0972	-1173.43	1378.4	-50.9024	-1216.56	1166.44	-68.6036	-1201.93	1086.19	-92.0294	-1104.65	999.834	-40.1759	-989.055	965.945	-89.7357	-1021.31	926.623	-75.5941	-933.029	906.499
347	0	165.782	-1026.96	1561.7	263.902	-1022.26	1562.46	156.462	-1191.91	1581.58	284.214	-1165.89	1585.02	204.809	-1253.2	1439.14	198.944	-1345.75	1186.18	231.177	-1112.97	1339.46	222.989	-1059.13	1160.52	245.211	-1355.81	1263.37	50.9438	-1161.46	1379.43	-48.3268	-1203.85	1167.21	-65.9154	-1189.32	1086.91	-88.6023	-1091.93	1000.49	-36.0295	-976.739	966.591	-85.6284	-1008.7	927.178	-70.9015	-920.544	906.984
348	0	169.535	-1016.55	1562.59	267.67	-1012	1563.03	160.076	-1181.59	1581.92	287.871	-1155.73	1585	207.454	-1242.47	1439	199.883	-1333.72	1185.56	234.129	-1101.82	1340.13	225.445	-1047.02	1161.53	246.414	-1344.35	1262.49	53.773	-1149.49	1380.68	-45.6998	-1191.16	1168.19	-63.1389	-1176.84	1087.82	-85.0695	-1079.47	1001.2	-31.7162	-964.795	967.074	-81.4348	-996.444	927.689	-66.0363	-908.505	907.234
349	0	173.244	-1006.1	1563.65	271.393	-1001.68	1563.74	163.658	-1171.21	1582.48	291.493	-1145.51	1585.16	210.057	-1231.69	1439.09	200.783	-1321.75	1185.22	237.015	-1090.67	1340.96	227.82	-1035	1162.68	247.578	-1332.9	1261.86	56.5629	-1137.51	1382.12	-43.0437	-1178.49	1169.37	-60.2973	-1164.49	1088.9	-81.4544	-1067.24	1001.98	-27.2546	-953.223	967.401	-77.1811	-984.543	928.165	-61.0154	-896.909	907.258
350	0	176.889	-995.576	1564.86	275.05	-991.301	1564.59	167.183	-1160.76	1583.24	295.056	-1135.2	1585.5	212.6	-1220.88	1439.39	201.643	-1309.85	1185.15	239.809	-1079.53	1341.93	230.086	-1023.07	1163.94	248.699	-1321.46	1261.5	59.291	-1125.54	1383.76	-40.3827	-1165.85	1170.74	-57.4156	-1152.28	1090.15	-77.7821	-1055.27	1002.81	-22.6675	-942.022	967.58	-72.8955	-972.985	928.613	-55.8595	-885.751	907.067
351	0	180.451	-984.986	1566.21	278.622	-980.846	1565.57	170.627	-1150.23	1584.2	298.536	-1124.81	1586.01	215.067	-1210.01	1439.91	202.463	-1298.04	1185.36	242.486	-1068.39	1343.03	232.217	-1011.26	1165.3	249.775	-1310.04	1261.41	61.935	-1113.59	1385.58	-37.7418	-1153.24	1172.28	-54.519	-1140.22	1091.57	-74.0797	-1043.54	1003.69	-17.9825	-931.187	967.62	-68.6086	-961.762	929.04	-50.5942	-875.024	906.675
352	0	183.909	-974.316	1567.69	282.087	-970.311	1566.64	173.967	-1139.61	1585.36	301.91	-1114.33	1586.68	217.444	-1199.11	1440.64	203.245	-1286.34	1185.83	245.024	-1057.25	1344.23	234.186	-999.59	1166.73	250.807	-1298.66	1261.59	64.4732	-1101.67	1387.55	-35.1463	-1140.67	1173.99	-51.6329	-1128.3	1093.13	-70.3759	-1032.05	1004.63	-13.2317	-920.713	967.534	-64.3526	-950.863	929.452	-45.2506	-864.72	906.095
353	0	187.241	-963.561	1569.27	285.423	-959.692	1567.81	177.178	-1128.89	1586.69	305.154	-1103.76	1587.51	219.717	-1188.15	1441.57	203.994	-1274.75	1186.58	247.4	-1046.13	1345.53	235.973	-988.058	1168.22	251.795	-1287.31	1262.05	66.8849	-1089.8	1389.66	-32.6203	-1128.15	1175.84	-48.7824	-1116.53	1094.83	-66.7003	-1020.79	1005.62	-8.45199	-910.59	967.333	-60.161	-940.278	929.853	-39.8654	-854.827	905.343
354	0	190.425	-952.718	1570.93	288.61	-948.984	1569.06	180.237	-1118.07	1588.19	308.245	-1093.08	1588.48	221.873	-1177.15	1442.69	204.715	-1263.27	1187.57	249.596	-1035.01	1346.92	237.56	-976.674	1169.75	252.744	-1276.01	1262.76	69.1513	-1078	1391.88	-30.187	-1115.69	1177.82	-45.9914	-1104.93	1096.64	-63.0833	-1009.78	1006.65	-3.68485	-900.807	967.029	-56.0684	-930	930.245	-34.4816	-845.332	904.435
355	0	193.441	-941.782	1572.66	291.625	-938.186	1570.36	183.123	-1107.15	1589.84	311.162	-1082.31	1589.57	223.901	-1166.11	1443.98	205.418	-1251.93	1188.81	251.598	-1023.91	1348.37	238.932	-965.437	1171.29	253.658	-1264.75	1263.72	71.2559	-1066.26	1394.19	-27.8666	-1103.31	1179.88	-43.282	-1093.49	1098.54	-59.5554	-999.016	1007.71	1.02427	-891.35	966.634	-52.1097	-920.018	930.627	-29.1483	-836.222	903.388
356	0	196.269	-930.753	1574.44	294.449	-927.296	1571.71	185.816	-1096.12	1591.61	313.884	-1071.43	1590.78	225.793	-1155.03	1445.44	206.11	-1240.71	1190.26	253.392	-1012.83	1349.87	240.081	-954.342	1172.84	254.543	-1253.55	1264.91	73.1848	-1054.62	1396.56	-25.6768	-1091.03	1182.01	-40.6743	-1082.23	1100.52	-56.1471	-988.491	1008.78	5.62636	-882.204	966.161	-48.3194	-910.329	930.996	-23.9206	-827.479	902.216
357	0	198.89	-919.633	1576.25	297.062	-916.312	1573.09	188.297	-1084.99	1593.49	316.394	-1060.45	1592.1	227.54	-1143.91	1447.03	206.802	-1229.61	1191.9	254.972	-1001.76	1351.41	241.004	-943.381	1174.39	255.406	-1242.4	1266.32	74.927	-1043.06	1398.96	-23.6314	-1078.88	1184.19	-38.1859	-1071.17	1102.53	-52.8877	-978.215	1009.86	10.0698	-873.351	965.62	-44.7314	-900.926	931.345	-18.8583	-819.089	900.936
358	0	201.288	-908.423	1578.06	299.448	-905.236	1574.49	190.554	-1073.76	1595.44	318.676	-1049.37	1593.49	229.139	-1132.76	1448.74	207.502	-1218.64	1193.71	256.333	-990.71	1352.96	241.703	-932.541	1175.92	256.253	-1231.31	1267.92	76.4749	-1031.62	1401.36	-21.7405	-1066.89	1186.37	-35.8313	-1060.3	1104.57	-49.8055	-968.192	1010.93	14.3013	-864.772	965.019	-41.3779	-891.808	931.666	-14.0254	-811.033	899.561
359	0	203.448	-897.128	1579.86	301.592	-894.07	1575.89	192.573	-1062.44	1597.45	320.72	-1038.19	1594.96	230.586	-1121.58	1450.54	208.22	-1207.79	1195.66	257.477	-979.679	1354.53	242.186	-921.806	1177.42	257.092	-1220.27	1269.68	77.8239	-1020.28	1403.74	-20.01	-1055.08	1188.54	-33.6222	-1049.64	1106.6	-46.9266	-958.428	1011.96	18.2674	-856.446	964.365	-38.2893	-882.975	931.945	-9.488	-803.294	898.103
360	0	205.361	-885.752	1581.62	303.484	-882.816	1577.29	194.349	-1051.03	1599.48	322.516	-1026.91	1596.49	231.88	-1110.37	1452.42	208.963	-1197.05	1197.72	258.407	-968.666	1356.08	242.465	-911.16	1178.88	257.929	-1209.28	1271.57	78.973	-1009.07	1406.05	-18.4425	-1043.49	1190.65	-31.5673	-1039.2	1108.59	-44.2749	-948.932	1012.95	21.9157	-848.354	963.662	-35.493	-874.429	932.167	-5.31294	-795.853	896.572
361	0	207.018	-874.301	1583.33	305.116	-871.477	1578.66	195.875	-1039.53	1601.51	324.061	-1015.54	1598.04	233.023	-1099.15	1454.34	209.737	-1186.41	1199.84	259.129	-957.672	1357.61	242.556	-900.585	1180.31	258.769	-1198.35	1273.57	79.9241	-997.964	1408.28	-17.0367	-1032.14	1192.69	-29.6724	-1028.99	1110.52	-41.8714	-939.711	1013.87	25.1964	-840.476	962.909	-33.0132	-866.173	932.315	-1.56533	-788.691	894.976
362	0	208.415	-862.782	1584.96	306.484	-860.058	1580	197.153	-1027.96	1603.5	325.353	-1004.09	1599.61	234.016	-1087.9	1456.27	210.547	-1175.85	1202.01	259.656	-946.694	1359.11	242.482	-890.066	1181.68	259.615	-1187.45	1275.63	80.682	-986.976	1410.4	-15.7888	-1021.08	1194.63	-27.9405	-1019.01	1112.37	-39.7339	-930.771	1014.7	28.0639	-832.79	962.105	-30.8704	-858.211	932.37	1.69342	-781.79	893.32
363	0	209.552	-851.201	1586.5	307.588	-848.562	1581.28	198.185	-1016.33	1605.44	326.396	-992.555	1601.18	234.864	-1076.64	1458.19	211.394	-1165.38	1204.19	259.999	-935.731	1360.55	242.263	-879.587	1182.99	260.469	-1176.59	1277.74	81.2538	-976.099	1412.38	-14.693	-1010.33	1196.44	-26.3725	-1009.28	1114.12	-37.8765	-922.12	1015.41	30.4783	-825.28	961.242	-29.081	-850.548	932.31	4.408	-775.132	891.607
364	0	210.432	-839.566	1587.93	308.434	-836.996	1582.51	198.977	-1004.64	1607.29	327.196	-980.944	1602.71	235.572	-1065.36	1460.07	212.277	-1154.96	1206.35	260.174	-924.777	1361.92	241.925	-869.134	1184.22	261.33	-1165.76	1279.85	81.6493	-965.323	1414.19	-13.7417	-999.912	1198.1	-24.967	-999.79	1115.73	-36.3096	-913.762	1016	32.4065	-817.928	960.312	-27.657	-843.189	932.115	6.53129	-768.7	889.836
365	0	211.062	-827.883	1589.24	309.027	-825.363	1583.66	199.539	-992.901	1609.03	327.761	-969.265	1604.19	236.145	-1054.07	1461.89	213.194	-1144.6	1208.44	260.195	-913.83	1363.21	241.492	-858.696	1185.37	262.196	-1154.94	1281.93	81.8794	-954.638	1415.81	-12.9268	-989.837	1199.59	-23.7213	-990.544	1117.19	-35.0395	-905.699	1016.45	33.8237	-810.719	959.301	-26.6057	-836.138	931.765	8.02627	-762.476	888.004
366	0	211.451	-816.157	1590.4	309.38	-813.67	1584.72	199.882	-981.121	1610.62	328.104	-957.524	1605.59	236.589	-1042.75	1463.61	214.139	-1134.27	1210.46	260.079	-902.882	1364.4	240.989	-848.265	1186.41	263.065	-1144.14	1283.95	81.9568	-944.031	1417.23	-12.2399	-980.115	1200.88	-22.6311	-981.535	1118.49	-34.0685	-897.932	1016.72	34.714	-803.643	958.194	-25.9295	-829.396	931.24	8.8675	-756.448	886.106
367	0	211.612	-804.395	1591.42	309.504	-801.92	1585.67	200.019	-969.307	1612.05	328.239	-945.725	1606.89	236.913	-1031.41	1465.22	215.104	-1123.96	1212.36	259.843	-891.926	1365.47	240.438	-837.832	1187.33	263.928	-1133.34	1285.89	81.8949	-933.487	1418.42	-11.6725	-970.745	1201.98	-21.6915	-972.755	1119.62	-33.3948	-890.456	1016.82	35.0707	-796.69	956.972	-25.6262	-822.964	930.523	9.04202	-750.604	884.133
368	0	211.556	-792.6	1592.26	309.415	-790.118	1586.5	199.964	-957.463	1613.29	328.179	-933.874	1608.07	237.122	-1020.05	1466.68	216.079	-1113.66	1214.12	259.503	-880.956	1366.4	239.861	-827.394	1188.11	264.78	-1122.53	1287.71	81.7075	-922.987	1419.37	-11.2167	-961.714	1202.86	-20.8967	-964.188	1120.55	-33.0132	-883.263	1016.72	34.8968	-789.854	955.618	-25.6889	-816.839	929.597	8.5498	-744.932	882.077
369	0	211.3	-780.776	1592.92	309.128	-778.269	1587.2	199.734	-945.595	1614.33	327.939	-921.976	1609.1	237.223	-1008.65	1467.98	217.054	-1103.36	1215.73	259.073	-869.963	1367.17	239.276	-816.947	1188.73	265.612	-1111.7	1289.39	81.4083	-912.514	1420.07	-10.8651	-952.999	1203.53	-20.2407	-955.817	1121.28	-32.9148	-876.343	1016.43	34.2042	-783.133	954.11	-26.1066	-811.016	928.452	7.4035	-739.428	879.925
370	0	210.857	-768.927	1593.39	308.659	-766.374	1587.75	199.341	-933.706	1615.13	327.536	-910.034	1609.96	237.224	-997.214	1469.1	218.015	-1093.04	1217.16	258.569	-858.939	1367.77	238.697	-806.488	1189.17	266.415	-1100.85	1290.91	81.0109	-902.048	1420.5	-10.6109	-944.569	1203.97	-19.7173	-947.62	1121.81	-33.0878	-869.68	1015.92	33.0134	-776.525	952.431	-26.8643	-805.487	927.079	5.62773	-734.086	877.665
371	0	210.243	-757.054	1593.66	308.023	-754.437	1588.13	198.802	-921.798	1615.7	326.984	-898.052	1610.63	237.13	-985.734	1470.02	218.95	-1082.69	1218.4	258.004	-847.875	1368.19	238.137	-796.015	1189.42	267.179	-1089.96	1292.26	80.5278	-891.569	1420.66	-10.4485	-936.382	1204.2	-19.3202	-939.57	1122.13	-33.5178	-863.255	1015.2	31.3526	-770.034	950.562	-27.9439	-800.241	925.472	3.25783	-728.906	875.286
372	0	209.47	-745.158	1593.72	307.235	-742.459	1588.34	198.129	-909.875	1616.02	326.295	-886.03	1611.11	236.947	-974.206	1470.72	219.844	-1072.3	1219.43	257.387	-836.762	1368.39	237.605	-785.524	1189.45	267.893	-1079.03	1293.4	79.9704	-881.057	1420.55	-10.373	-928.389	1204.2	-19.0436	-931.641	1122.24	-34.1885	-857.046	1014.27	29.2564	-763.663	948.485	-29.3248	-795.263	923.631	0.338294	-723.889	872.774
373	0	208.55	-733.241	1593.56	306.306	-730.442	1588.36	197.334	-897.936	1616.08	325.483	-873.972	1611.37	236.678	-962.622	1471.2	220.683	-1061.86	1220.25	256.729	-825.593	1368.38	237.105	-775.011	1189.24	268.548	-1068.05	1294.34	79.3487	-870.494	1420.16	-10.3806	-920.537	1203.99	-18.8816	-923.801	1122.14	-35.082	-851.028	1013.13	26.7644	-757.417	946.188	-30.9846	-790.537	921.56	-3.079	-719.039	870.117
374	0	207.495	-721.304	1593.18	305.247	-718.388	1588.19	196.428	-885.983	1615.87	324.556	-861.877	1611.4	236.329	-950.98	1471.45	221.454	-1051.37	1220.84	256.036	-814.36	1368.14	236.642	-764.472	1188.8	269.134	-1057.01	1295.05	78.671	-859.863	1419.5	-10.4685	-912.767	1203.57	-18.8287	-916.017	1121.83	-36.1794	-845.172	1011.79	23.9201	-751.301	943.659	-32.8996	-786.042	919.263	-6.93676	-714.36	867.304
375	0	206.311	-709.346	1592.57	304.065	-706.296	1587.81	195.417	-874.016	1615.4	323.523	-849.746	1611.2	235.9	-939.273	1471.45	222.144	-1040.8	1221.2	255.314	-803.056	1367.66	236.214	-753.9	1188.11	269.64	-1045.92	1295.54	77.9436	-849.147	1418.57	-10.6353	-905.018	1202.95	-18.8797	-908.258	1121.32	-37.4617	-839.448	1010.25	20.769	-745.321	940.888	-35.046	-781.757	916.752	-11.1742	-709.858	864.324
376	0	205.004	-697.37	1591.73	302.767	-694.169	1587.22	194.308	-862.036	1614.65	322.389	-837.581	1610.76	235.394	-927.5	1471.2	222.74	-1030.16	1221.32	254.566	-791.676	1366.94	235.821	-743.288	1187.17	270.059	-1034.75	1295.8	77.1707	-838.333	1417.38	-10.8802	-897.23	1202.13	-19.0297	-900.49	1120.62	-38.9096	-833.827	1008.52	17.3578	-739.481	937.872	-37.3996	-777.655	914.039	-15.7289	-705.539	861.169
377	0	203.578	-685.375	1590.66	301.355	-682.007	1586.42	193.103	-850.043	1613.65	321.158	-825.381	1610.09	234.809	-915.658	1470.7	223.233	-1019.43	1221.2	253.792	-780.213	1365.98	235.458	-732.625	1185.98	270.382	-1023.52	1295.81	76.3544	-827.411	1415.93	-11.2036	-889.346	1201.12	-19.2737	-892.682	1119.72	-40.5043	-828.276	1006.61	13.7323	-733.783	934.608	-39.9373	-773.711	911.14	-20.5386	-701.407	857.832
378	0	202.035	-673.363	1589.36	299.83	-669.811	1585.4	191.805	-838.039	1612.39	319.831	-813.147	1609.19	234.144	-903.746	1469.96	223.613	-1008.6	1220.85	252.99	-768.665	1364.76	235.121	-721.902	1184.55	270.602	-1012.2	1295.59	75.4947	-816.371	1414.23	-11.6068	-881.311	1199.93	-19.6072	-884.802	1118.62	-42.2278	-822.763	1004.54	9.93712	-728.227	931.099	-42.6364	-769.897	908.071	-25.5428	-697.464	854.308
379	0	200.374	-661.335	1587.85	298.191	-657.584	1584.18	190.413	-826.024	1610.88	318.405	-800.882	1608.05	233.398	-891.763	1468.98	223.875	-997.677	1220.25	252.156	-757.027	1363.31	234.801	-711.107	1182.87	270.715	-1000.81	1295.13	74.5892	-805.209	1412.29	-12.0914	-873.08	1198.55	-20.0256	-876.823	1117.35	-44.0627	-817.258	1002.32	6.01422	-722.81	927.348	-45.4756	-766.183	904.852	-30.6838	-693.712	850.595
380	0	198.592	-649.292	1586.12	296.435	-645.326	1582.76	188.923	-813.999	1609.13	316.88	-788.585	1606.7	232.565	-879.711	1467.76	224.015	-986.645	1219.42	251.285	-745.297	1361.63	234.491	-700.23	1180.97	270.717	-989.331	1294.44	73.6338	-793.923	1410.13	-12.6598	-864.611	1196.99	-20.5244	-868.719	1115.89	-45.9927	-811.729	999.955	2.00245	-717.526	923.365	-48.4345	-762.54	901.502	-35.9079	-690.148	846.691
381	0	196.686	-637.236	1584.2	294.557	-633.04	1581.14	187.332	-801.965	1607.17	315.249	-776.259	1605.15	231.641	-867.592	1466.31	224.031	-975.5	1218.36	250.367	-733.474	1359.73	234.179	-689.259	1178.87	270.604	-977.765	1293.52	72.6225	-782.513	1407.75	-13.314	-855.872	1195.26	-21.099	-860.466	1114.25	-48.0023	-806.149	997.464	-2.06288	-712.363	919.161	-51.494	-758.938	898.04	-41.1662	-686.766	842.599
382	0	194.65	-625.167	1582.09	292.55	-620.727	1579.36	185.634	-789.924	1605	313.508	-763.905	1603.41	230.622	-855.406	1464.66	223.926	-964.239	1217.07	249.394	-721.558	1357.63	233.853	-678.184	1176.57	270.376	-966.107	1292.38	71.5479	-770.985	1405.18	-14.0559	-846.84	1193.33	-21.7447	-852.046	1112.45	-50.0767	-800.491	994.858	-6.15019	-707.309	914.751	-54.6357	-755.347	894.489	-46.4147	-683.555	838.326
383	0	192.479	-613.087	1579.82	290.409	-608.389	1577.41	183.823	-777.875	1602.65	311.649	-751.526	1601.5	229.501	-843.159	1462.81	223.704	-952.856	1215.58	248.354	-709.548	1355.35	233.499	-666.993	1174.1	270.035	-954.355	1291.03	70.4012	-759.344	1402.43	-14.8866	-837.501	1191.23	-22.4568	-843.443	1110.47	-52.2021	-794.729	992.151	-10.2316	-702.344	910.154	-57.842	-751.736	890.868	-51.6151	-680.5	833.878
384	0	190.167	-600.997	1577.4	288.126	-596.027	1575.32	181.891	-765.819	1600.14	309.665	-739.122	1599.44	228.273	-830.852	1460.79	223.37	-941.35	1213.88	247.235	-697.445	1352.9	233.102	-655.68	1171.48	269.582	-942.505	1289.5	69.1732	-747.6	1399.51	-15.8062	-827.85	1188.95	-23.2302	-834.644	1108.34	-54.3648	-788.841	989.357	-14.2825	-697.449	905.39	-61.0958	-748.078	887.198	-56.7341	-677.584	829.271
385	0	187.709	-588.894	1574.87	285.696	-583.642	1573.13	179.831	-753.755	1597.49	307.549	-726.694	1597.26	226.932	-818.49	1458.62	222.933	-929.718	1212.01	246.023	-685.251	1350.32	232.646	-644.235	1168.74	269.023	-930.556	1287.8	67.8542	-735.765	1396.46	-16.8134	-817.891	1186.49	-24.0597	-825.642	1106.06	-56.5519	-782.807	986.491	-18.2815	-692.598	900.485	-64.3799	-744.342	883.501	-61.7435	-674.781	824.522
386	0	185.099	-576.778	1572.25	283.112	-571.233	1570.85	177.637	-741.682	1594.75	305.294	-714.242	1594.99	225.473	-806.076	1456.33	222.403	-917.959	1209.99	244.706	-672.966	1347.64	232.113	-632.653	1165.91	268.361	-918.504	1285.95	66.4348	-723.852	1393.28	-17.9055	-807.636	1183.86	-24.9398	-816.433	1103.63	-58.7504	-776.609	983.569	-22.2097	-687.767	895.467	-67.6772	-740.502	879.799	-66.6198	-672.065	819.654
387	0	182.334	-564.646	1569.56	280.37	-558.8	1568.51	175.303	-729.595	1591.94	302.892	-701.765	1592.65	223.891	-793.613	1453.95	221.792	-906.072	1207.84	243.271	-660.593	1344.88	231.485	-620.928	1163.02	267.606	-906.348	1283.99	64.9061	-711.876	1390.01	-19.0777	-797.107	1181.07	-25.8643	-807.018	1101.08	-60.9474	-770.233	980.608	-26.0505	-682.926	890.369	-70.97	-736.529	876.114	-71.3433	-669.403	814.695
388	0	179.41	-552.496	1566.85	277.466	-546.341	1566.16	172.822	-717.49	1589.09	300.339	-689.262	1590.29	222.184	-781.105	1451.52	221.113	-894.059	1205.59	241.706	-648.133	1342.09	230.744	-609.056	1160.09	266.764	-894.086	1281.95	63.2602	-699.851	1386.68	-20.3236	-786.33	1178.14	-26.8271	-797.4	1098.42	-63.13	-763.667	977.629	-29.7889	-678.044	885.227	-74.2402	-732.398	872.471	-75.8977	-666.759	809.679
389	0	176.328	-540.321	1564.15	274.399	-533.853	1563.81	170.192	-705.363	1586.24	297.63	-676.73	1587.94	220.35	-768.554	1449.06	220.377	-881.92	1203.28	240	-635.591	1339.3	229.874	-597.033	1157.16	265.845	-881.717	1279.86	61.4906	-687.792	1383.31	-21.6347	-775.338	1175.08	-27.8212	-787.587	1095.68	-65.2852	-756.9	974.652	-33.4111	-673.092	880.079	-77.4691	-728.083	868.894	-80.269	-664.092	804.644
390	0	173.088	-528.116	1561.48	271.169	-521.331	1561.51	167.411	-693.207	1583.43	294.764	-664.164	1585.64	218.388	-755.964	1446.63	219.597	-869.658	1200.95	238.145	-622.968	1336.55	228.859	-584.858	1154.28	264.857	-869.242	1277.76	59.5928	-675.714	1379.94	-23.001	-764.169	1171.94	-28.8396	-777.59	1092.88	-67.4	-749.926	971.701	-36.9046	-668.037	874.97	-80.6371	-723.56	865.41	-84.4452	-661.359	799.635
391	0	169.693	-515.876	1558.9	267.778	-508.771	1559.29	164.478	-681.014	1580.7	291.741	-651.562	1583.42	216.301	-743.336	1444.25	218.786	-857.277	1198.64	236.135	-610.269	1333.89	227.684	-572.53	1151.48	263.812	-856.661	1275.7	57.5641	-663.633	1376.6	-24.4107	-752.863	1168.73	-29.8747	-767.424	1090.05	-69.4612	-742.739	968.804	-40.2573	-662.846	869.945	-83.7244	-718.805	862.045	-88.4156	-658.513	794.698
392	0	166.149	-503.594	1556.42	264.233	-496.17	1557.18	161.397	-668.777	1578.09	288.562	-638.916	1581.32	214.092	-730.673	1441.98	217.953	-844.781	1196.4	233.967	-597.499	1331.35	226.341	-560.049	1148.8	262.719	-843.976	1273.71	55.4045	-651.56	1373.34	-25.8511	-741.462	1165.5	-30.919	-757.105	1087.23	-71.4561	-735.337	965.987	-43.4582	-657.487	865.053	-86.7106	-713.796	858.828	-92.1701	-655.506	789.887
393	0	162.465	-491.264	1554.09	260.541	-483.52	1555.23	158.171	-656.488	1575.64	285.234	-626.222	1579.38	211.767	-717.979	1439.84	217.108	-832.177	1194.26	231.641	-584.665	1328.98	224.82	-547.418	1146.29	261.587	-831.191	1271.84	53.1164	-639.507	1370.2	-27.3086	-730.007	1162.3	-31.9649	-746.653	1084.45	-73.3723	-727.718	963.279	-46.4969	-651.928	860.345	-89.5752	-708.512	855.787	-95.6989	-652.286	785.252
394	0	158.651	-478.879	1551.94	256.712	-470.819	1553.46	154.811	-644.14	1573.39	281.764	-613.476	1577.64	209.333	-705.257	1437.87	216.259	-819.472	1192.28	229.16	-571.774	1326.82	223.12	-534.642	1143.99	260.424	-818.312	1270.13	50.705	-627.486	1367.21	-28.7696	-718.538	1159.18	-33.0049	-736.086	1081.76	-75.198	-719.882	960.712	-49.3637	-646.137	855.871	-92.2983	-702.933	852.949	-98.9925	-648.804	780.848
395	0	154.722	-466.435	1550	252.761	-458.061	1551.9	151.324	-631.726	1571.36	278.164	-600.673	1576.12	206.8	-692.511	1436.13	215.412	-806.674	1190.5	226.532	-558.834	1324.91	221.24	-521.727	1141.94	259.24	-805.345	1268.63	48.1783	-615.505	1364.42	-30.221	-707.092	1156.19	-34.0322	-725.426	1079.19	-76.9229	-711.83	958.314	-52.0503	-640.084	851.681	-94.8605	-697.041	850.341	-102.042	-645.007	776.726
396	0	150.694	-453.926	1548.3	248.703	-445.245	1550.57	147.727	-619.241	1569.6	274.447	-587.809	1574.87	204.178	-679.749	1434.62	214.57	-793.796	1188.96	223.768	-545.857	1323.28	219.188	-508.685	1140.2	258.04	-792.301	1267.36	45.5471	-603.572	1361.86	-31.6508	-695.7	1153.38	-35.0406	-714.691	1076.79	-78.5376	-703.564	956.117	-54.5499	-633.738	847.824	-97.2438	-690.817	847.987	-104.838	-640.846	772.935
397	0	146.585	-441.353	1546.85	244.557	-432.37	1549.51	144.033	-606.683	1568.13	270.629	-574.883	1573.91	201.48	-666.975	1433.4	213.736	-780.849	1187.69	220.88	-532.855	1321.98	216.973	-495.527	1138.78	256.831	-779.19	1266.37	42.8249	-591.692	1359.57	-33.0488	-684.388	1150.81	-36.0248	-703.9	1074.6	-80.035	-695.086	954.146	-56.8573	-627.072	844.342	-99.4323	-684.246	845.909	-107.373	-636.271	769.518
398	0	142.417	-428.713	1545.69	240.345	-419.437	1548.72	140.262	-594.049	1566.98	266.731	-561.896	1573.25	198.721	-654.198	1432.47	212.911	-767.847	1186.73	217.888	-519.842	1321.02	214.61	-482.273	1137.74	255.617	-766.028	1265.67	40.0274	-579.869	1357.58	-34.4065	-673.174	1148.53	-36.9808	-693.071	1072.66	-81.4097	-686.397	952.426	-58.9695	-620.059	841.274	-101.413	-677.313	844.126	-109.641	-631.238	766.511
399	0	138.213	-416.011	1544.82	236.088	-406.449	1548.22	136.435	-581.342	1566.16	262.773	-548.85	1572.92	195.914	-641.427	1431.87	212.093	-754.806	1186.1	214.811	-506.832	1320.43	212.121	-468.942	1137.09	254.403	-752.828	1265.31	37.1728	-568.107	1355.92	-35.7184	-662.07	1146.57	-37.9059	-682.216	1071.01	-82.6587	-677.498	950.979	-60.8863	-612.673	838.654	-103.175	-670.004	842.65	-111.637	-625.703	763.943
400	0	133.995	-403.25	1544.25	231.812	-393.413	1548.03	132.573	-568.566	1565.69	258.78	-535.751	1572.92	193.077	-628.672	1431.6	211.281	-741.743	1185.81	211.673	-493.842	1320.23	209.527	-455.559	1136.86	253.192	-739.609	1265.28	34.2807	-556.405	1354.62	-36.9811	-651.079	1144.98	-38.7987	-671.348	1069.66	-83.7815	-668.389	949.82	-62.6099	-604.89	836.505	-104.712	-662.308	841.49	-113.359	-619.628	761.834
401	0	129.792	-390.44	1543.99	227.544	-380.337	1548.13	128.702	-555.729	1565.57	254.777	-522.608	1573.25	190.226	-615.944	1431.67	210.473	-728.675	1185.89	208.498	-480.887	1320.42	206.856	-442.149	1137.06	251.985	-726.39	1265.6	31.3721	-544.765	1353.68	-38.194	-640.198	1143.78	-39.6596	-660.476	1068.64	-84.7802	-659.069	948.959	-64.1454	-596.691	834.844	-106.021	-654.215	840.649	-114.808	-612.981	760.193
402	0	125.627	-377.589	1544.03	223.309	-367.233	1548.53	124.846	-542.842	1565.79	250.79	-509.431	1573.92	187.378	-603.253	1432.07	209.665	-715.621	1186.33	205.314	-467.985	1321	204.139	-428.743	1137.67	250.783	-713.19	1266.26	28.4687	-533.183	1353.11	-39.3587	-629.419	1142.99	-40.4903	-649.603	1067.96	-85.6591	-649.536	948.401	-65.5004	-588.056	833.677	-107.104	-645.715	840.122	-115.988	-605.732	759.019
403	0	121.529	-364.71	1544.37	219.135	-354.114	1549.22	121.03	-529.916	1566.36	246.845	-496.233	1574.91	184.549	-590.61	1432.81	208.854	-702.6	1187.12	202.148	-455.151	1321.96	201.406	-415.369	1138.7	249.587	-700.03	1267.27	25.5926	-521.657	1352.92	-40.4787	-618.726	1142.61	-41.2938	-638.734	1067.63	-86.4252	-639.787	948.145	-66.6848	-578.971	833.002	-107.966	-636.801	839.902	-116.908	-597.861	758.301
404	0	117.524	-351.817	1545	215.051	-340.996	1550.19	117.281	-516.967	1567.25	242.971	-483.031	1576.2	181.756	-578.026	1433.87	208.034	-689.629	1188.25	199.027	-442.399	1323.28	198.691	-402.057	1140.12	248.395	-686.93	1268.6	22.7653	-510.182	1353.09	-41.5588	-608.101	1142.64	-42.0742	-627.865	1067.64	-87.0874	-629.819	948.181	-67.7106	-569.424	832.805	-108.617	-627.466	839.974	-117.579	-589.35	758.02
405	0	113.638	-338.926	1545.9	211.084	-327.895	1551.41	113.624	-504.012	1568.44	239.193	-469.841	1577.78	179.015	-565.511	1435.22	207.203	-676.728	1189.7	195.979	-429.743	1324.94	196.027	-388.836	1141.91	247.207	-673.909	1270.24	20.0078	-498.752	1353.61	-42.6048	-597.523	1143.06	-42.8363	-616.993	1067.98	-87.6564	-619.626	948.496	-68.5908	-559.407	833.065	-109.071	-617.707	840.316	-118.016	-580.188	758.146
406	0	109.896	-326.051	1547.04	207.26	-314.83	1552.86	110.083	-491.066	1569.91	235.538	-456.682	1579.61	176.34	-553.074	1436.85	206.356	-663.914	1191.45	193.029	-417.194	1326.91	193.448	-375.732	1144.01	246.019	-660.987	1272.15	17.3398	-487.36	1354.45	-43.6227	-586.967	1143.85	-43.5858	-606.109	1068.63	-88.1442	-609.201	949.069	-69.3391	-548.919	833.753	-109.344	-607.52	840.906	-118.24	-570.371	758.645
407	0	106.323	-313.21	1548.41	203.606	-301.817	1554.53	106.681	-478.148	1571.63	232.03	-443.572	1581.67	173.746	-540.72	1438.73	205.488	-651.201	1193.46	190.204	-404.762	1329.15	190.985	-362.769	1146.4	244.831	-648.181	1274.31	14.7794	-475.999	1355.58	-44.6185	-576.409	1144.96	-44.3282	-595.204	1069.57	-88.5639	-598.54	949.877	-69.9695	-537.959	834.83	-109.455	-596.904	841.715	-118.271	-559.9	759.478
408	0	102.94	-300.417	1549.97	200.144	-288.874	1556.37	103.439	-465.274	1573.56	228.691	-430.528	1583.91	171.245	-528.458	1440.81	204.597	-638.605	1195.69	187.523	-392.452	1331.61	188.666	-349.966	1149.01	243.641	-635.506	1276.68	12.3425	-464.66	1356.97	-45.5974	-565.823	1146.37	-45.0691	-584.263	1070.75	-88.9289	-587.633	950.891	-70.4952	-526.534	836.256	-109.426	-585.86	842.712	-118.136	-548.781	760.603
409	0	99.7671	-287.687	1551.7	196.896	-276.016	1558.35	100.374	-452.459	1575.67	225.541	-417.569	1586.31	168.847	-516.289	1443.08	203.679	-626.139	1198.11	185.007	-380.269	1334.26	186.519	-337.34	1151.8	242.446	-622.974	1279.23	10.043	-453.335	1358.59	-46.5637	-555.185	1148.01	-45.8137	-573.273	1072.15	-89.253	-576.475	952.08	-70.9287	-514.653	837.983	-109.279	-574.389	843.868	-117.86	-537.026	761.975
410	0	96.8202	-275.032	1553.56	193.88	-263.259	1560.45	97.5043	-439.719	1577.92	222.597	-404.709	1588.83	166.563	-504.218	1445.49	202.733	-613.811	1200.69	182.671	-368.214	1337.04	184.563	-324.905	1154.7	241.247	-610.595	1281.91	7.89186	-442.017	1360.39	-47.5207	-544.469	1149.85	-46.5668	-562.216	1073.72	-89.5494	-565.055	953.414	-71.2809	-502.33	839.964	-109.039	-562.495	845.151	-117.471	-524.649	763.554
411	0	94.1134	-262.463	1555.52	191.111	-250.613	1562.62	94.8415	-427.065	1580.28	219.873	-391.961	1591.42	164.401	-492.245	1448	201.758	-601.629	1203.37	180.528	-356.288	1339.9	182.818	-312.667	1157.68	240.042	-598.377	1284.69	5.89771	-430.697	1362.34	-48.4705	-533.652	1151.84	-47.3324	-551.073	1075.43	-89.8309	-553.368	954.86	-71.5613	-489.58	842.151	-108.729	-550.181	846.53	-116.997	-511.67	765.299
412	0	91.6572	-249.99	1557.55	188.601	-238.09	1564.84	92.3959	-414.506	1582.72	217.38	-379.335	1594.06	162.366	-480.371	1450.58	200.754	-589.599	1206.13	178.587	-344.488	1342.81	181.293	-300.631	1160.67	238.833	-586.323	1287.53	4.06616	-419.369	1364.4	-49.4142	-522.714	1153.92	-48.1138	-539.827	1077.24	-90.1093	-541.405	956.387	-71.7778	-476.422	844.497	-108.373	-537.453	847.978	-116.465	-498.113	767.175
413	0	89.4588	-237.619	1559.61	186.359	-225.695	1567.07	90.1749	-402.05	1585.2	215.125	-366.839	1596.71	160.464	-468.592	1453.2	199.721	-577.723	1208.92	176.852	-332.81	1345.73	179.997	-288.797	1163.64	237.621	-574.436	1290.39	2.40016	-408.028	1366.53	-50.3518	-511.634	1156.05	-48.9137	-528.46	1079.11	-90.3954	-529.159	957.965	-71.9368	-462.877	846.957	-107.993	-524.317	849.469	-115.9	-484.003	769.15
414	0	87.5221	-225.354	1561.68	184.388	-213.433	1569.27	88.1823	-389.701	1587.69	213.113	-354.478	1599.33	158.698	-456.909	1455.81	198.661	-565.999	1211.71	175.324	-321.248	1348.6	178.93	-277.162	1166.54	236.407	-562.714	1293.24	0.900041	-396.669	1368.71	-51.2831	-500.397	1158.2	-49.7343	-516.953	1081	-90.6991	-516.624	959.566	-72.0434	-448.965	849.49	-107.611	-510.781	850.981	-115.326	-469.367	771.195
415	0	85.8478	-213.197	1563.72	182.691	-201.306	1571.42	86.4196	-377.461	1590.17	211.345	-342.254	1601.9	157.07	-445.316	1458.4	197.578	-554.425	1214.46	174	-309.796	1351.4	178.088	-265.718	1169.34	235.194	-551.153	1296.04	-0.436231	-385.287	1370.89	-52.2076	-488.988	1160.32	-50.5771	-505.29	1082.88	-91.0288	-503.795	961.166	-72.1016	-434.708	852.06	-107.247	-496.852	852.494	-114.762	-454.235	773.288
416	0	84.4336	-201.15	1565.7	181.265	-189.314	1573.48	84.8851	-365.33	1592.59	209.82	-330.168	1604.38	155.58	-433.812	1460.92	196.474	-542.996	1217.15	172.877	-298.448	1354.09	177.462	-254.455	1172.01	233.987	-539.747	1298.77	-1.61273	-373.883	1373.05	-53.125	-477.396	1162.38	-51.4434	-493.456	1084.72	-91.3918	-490.668	962.742	-72.1146	-420.129	854.634	-106.918	-482.539	853.99	-114.226	-438.637	775.408
417	0	83.2742	-189.21	1567.6	180.106	-177.455	1575.43	83.5752	-353.307	1594.95	208.533	-318.216	1606.76	154.227	-422.39	1463.35	195.355	-531.705	1219.74	171.945	-287.194	1356.64	177.04	-243.36	1174.52	232.788	-528.489	1301.39	-2.63522	-362.454	1375.16	-54.0353	-465.613	1164.36	-52.3346	-481.439	1086.49	-91.7941	-477.242	964.273	-72.0852	-405.248	857.182	-106.642	-467.85	855.458	-113.73	-422.603	777.539
418	0	82.3622	-177.374	1569.4	179.204	-165.723	1577.25	82.4837	-341.387	1597.22	207.477	-306.395	1609.01	153.01	-411.047	1465.66	194.225	-520.544	1222.2	171.195	-276.028	1359.04	176.804	-232.418	1176.86	231.604	-517.368	1303.87	-3.51072	-351.002	1377.21	-54.9394	-453.636	1166.22	-53.2516	-469.229	1088.17	-92.2406	-463.516	965.743	-72.016	-390.086	859.681	-106.431	-452.795	856.884	-113.281	-406.164	779.666
419	0	81.6876	-165.639	1571.07	178.55	-154.113	1578.9	81.6031	-329.566	1599.38	206.644	-294.698	1611.11	151.927	-399.777	1467.83	193.092	-509.501	1224.52	170.616	-264.941	1361.26	176.735	-221.611	1179.02	230.44	-506.373	1306.2	-4.24714	-339.528	1379.17	-55.8388	-441.462	1167.97	-54.196	-456.818	1089.74	-92.735	-449.491	967.136	-71.9098	-374.662	862.112	-106.298	-437.384	858.261	-112.885	-389.349	781.778
420	0	81.239	-153.999	1572.59	178.132	-142.617	1580.39	80.9241	-317.839	1601.41	206.023	-283.118	1613.04	150.973	-388.576	1469.85	191.961	-498.568	1226.67	170.194	-253.925	1363.29	176.813	-210.922	1180.98	229.301	-495.494	1308.36	-4.85281	-328.034	1381.02	-56.7358	-429.093	1169.57	-55.1689	-444.202	1091.19	-93.2797	-435.173	968.44	-71.7692	-358.993	864.457	-106.25	-421.627	859.581	-112.543	-372.186	783.862
421	0	81.0034	-142.448	1573.94	177.936	-131.229	1581.68	80.4368	-306.197	1603.29	205.603	-271.647	1614.79	150.146	-377.438	1471.68	190.842	-487.732	1228.63	169.916	-242.973	1365.1	177.013	-200.334	1182.73	228.195	-484.718	1310.33	-5.33616	-316.524	1382.76	-57.633	-416.536	1171.02	-56.1717	-431.38	1092.49	-93.8759	-420.567	969.644	-71.5973	-343.096	866.704	-106.294	-405.536	860.839	-112.25	-354.704	785.909
422	0	80.9668	-130.979	1575.12	177.947	-119.938	1582.76	80.1302	-294.634	1605.01	205.373	-260.275	1616.34	149.441	-366.356	1473.33	189.742	-476.983	1230.39	169.769	-232.077	1366.7	177.314	-189.828	1184.27	227.129	-474.033	1312.09	-5.70543	-305.001	1384.35	-58.5333	-403.797	1172.3	-57.2056	-418.354	1093.64	-94.5235	-405.68	970.74	-71.3973	-326.986	868.844	-106.433	-389.122	862.03	-112.003	-336.927	787.909
423	0	81.1149	-119.586	1576.11	178.15	-108.734	1583.64	79.9933	-283.143	1606.56	205.318	-248.993	1617.68	148.854	-355.326	1474.78	188.67	-466.308	1231.94	169.741	-221.23	1368.06	177.694	-179.39	1185.59	226.108	-463.426	1313.63	-5.96837	-293.47	1385.8	-59.4395	-390.887	1173.42	-58.2713	-405.127	1094.62	-95.2211	-390.525	971.721	-71.172	-310.677	870.87	-106.667	-372.4	863.152	-111.792	-318.88	789.854
424	0	81.4329	-108.26	1576.9	178.528	-97.6096	1584.29	80.0148	-271.717	1607.93	205.428	-237.792	1618.81	148.382	-344.341	1476.01	187.635	-455.697	1233.28	169.819	-210.424	1369.19	178.13	-169.002	1186.68	225.142	-452.885	1314.95	-6.13211	-281.935	1387.08	-60.3539	-377.82	1174.36	-59.369	-391.709	1095.44	-95.9658	-375.112	972.581	-70.9245	-294.182	872.778	-106.994	-355.383	864.203	-111.609	-300.585	791.738
425	0	81.9063	-96.9935	1577.49	179.065	-86.5533	1584.72	80.1837	-260.347	1609.09	205.688	-226.662	1619.72	148.021	-333.396	1477.03	186.647	-445.14	1234.38	169.992	-199.654	1370.07	178.604	-158.651	1187.54	224.237	-442.399	1316.04	-6.20301	-270.399	1388.2	-61.2776	-364.609	1175.12	-60.4978	-378.109	1096.07	-96.7533	-359.457	973.316	-70.657	-277.513	874.566	-107.408	-338.087	865.183	-111.442	-282.063	793.556
426	0	82.5213	-85.7797	1577.87	179.748	-75.5556	1584.93	80.4892	-249.028	1610.06	206.088	-215.592	1620.4	147.766	-322.485	1477.82	185.715	-434.627	1235.26	170.25	-188.912	1370.72	179.099	-148.326	1188.16	223.4	-431.956	1316.9	-6.18653	-258.868	1389.13	-62.2103	-351.272	1175.7	-61.6557	-364.339	1096.53	-97.5777	-343.577	973.927	-70.3714	-260.681	876.237	-107.901	-320.529	866.091	-111.281	-263.334	795.305
427	0	83.2648	-74.6107	1578.05	180.561	-64.6072	1584.91	80.9208	-237.751	1610.81	206.615	-204.574	1620.85	147.616	-311.602	1478.39	184.848	-424.147	1235.91	170.584	-178.193	1371.11	179.601	-138.013	1188.54	222.639	-421.546	1317.53	-6.08717	-247.346	1389.88	-63.1499	-337.827	1176.1	-62.8392	-350.414	1096.8	-98.4314	-327.488	974.411	-70.0686	-243.699	877.793	-108.461	-302.729	866.93	-111.114	-244.415	796.984
428	0	84.1249	-63.479	1578.02	181.491	-53.699	1584.68	81.469	-226.51	1611.35	207.258	-193.6	1621.07	147.567	-300.741	1478.74	184.056	-413.693	1236.33	170.988	-167.49	1371.27	180.099	-127.705	1188.67	221.961	-411.159	1317.93	-5.90842	-235.835	1390.44	-64.0923	-324.291	1176.32	-64.043	-336.351	1096.89	-99.3052	-311.212	974.771	-69.7482	-226.577	879.241	-109.075	-284.705	867.702	-110.931	-225.324	798.598
429	0	85.091	-52.3778	1577.78	182.527	-42.8228	1584.24	82.1247	-215.3	1611.68	208.009	-182.661	1621.07	147.618	-289.899	1478.87	183.345	-403.255	1236.53	171.455	-156.799	1371.18	180.587	-117.391	1188.56	221.372	-400.785	1318.1	-5.65271	-224.338	1390.8	-65.0311	-310.683	1176.36	-65.2601	-322.168	1096.8	-100.188	-294.768	975.012	-69.4089	-209.326	880.591	-109.725	-266.479	868.412	-110.722	-206.077	800.152
430	0	86.1537	-41.3007	1577.35	183.659	-31.971	1583.59	82.8798	-204.116	1611.79	208.857	-171.75	1620.85	147.766	-279.068	1478.79	182.725	-392.826	1236.51	171.982	-146.114	1370.86	181.062	-107.063	1188.22	220.878	-390.417	1318.05	-5.32137	-212.859	1390.97	-65.9576	-297.023	1176.22	-66.4812	-307.883	1096.54	-101.068	-278.179	975.137	-69.0482	-191.958	881.853	-110.395	-248.075	869.064	-110.477	-186.692	801.656
431	0	87.3058	-30.2417	1576.73	184.879	-21.1372	1582.76	83.7273	-192.952	1611.7	209.797	-160.863	1620.42	148.01	-268.246	1478.5	182.201	-382.398	1236.28	172.567	-135.43	1370.32	181.522	-96.7135	1187.64	220.485	-380.046	1317.8	-4.91463	-201.397	1390.95	-66.8607	-283.331	1175.92	-67.6953	-293.516	1096.11	-101.932	-261.469	975.155	-68.662	-174.485	883.042	-111.064	-229.517	869.667	-110.19	-167.184	803.123
432	0	88.5411	-19.196	1575.94	186.179	-10.3157	1581.74	84.6612	-181.806	1611.39	210.82	-149.995	1619.78	148.352	-257.427	1478.02	181.781	-371.963	1235.86	173.211	-124.744	1369.56	181.973	-86.335	1186.84	220.196	-369.665	1317.33	-4.43168	-189.955	1390.74	-67.7273	-269.624	1175.45	-68.8893	-279.087	1095.52	-102.764	-244.662	975.073	-68.2454	-156.919	884.174	-111.711	-210.831	870.228	-109.851	-147.572	804.568
433	0	89.8555	-8.15975	1574.99	187.555	0.49775	1580.57	85.6769	-170.674	1610.89	211.923	-139.141	1618.95	148.791	-246.609	1477.34	181.468	-361.514	1235.24	173.914	-114.05	1368.6	182.423	-75.9198	1185.83	220.018	-359.268	1316.68	-3.87063	-178.532	1390.34	-68.5426	-255.921	1174.84	-70.0487	-264.617	1094.78	-103.547	-227.781	974.902	-67.792	-139.273	885.265	-112.314	-192.043	870.757	-109.453	-127.873	806.01
434	0	91.2466	2.86995	1573.89	189.003	11.3062	1579.26	86.7713	-159.555	1610.2	213.102	-128.301	1617.95	149.329	-235.788	1476.49	181.268	-351.043	1234.44	174.681	-103.345	1367.46	182.88	-65.4607	1184.62	219.952	-348.847	1315.85	-3.22864	-167.127	1389.77	-69.2903	-242.24	1174.08	-71.1574	-250.126	1093.9	-104.267	-210.853	974.652	-67.2948	-121.562	886.335	-112.849	-173.181	871.263	-108.991	-108.106	807.468
435	0	92.7134	13.8945	1572.66	190.523	22.1114	1577.83	87.9427	-148.45	1609.33	214.356	-117.474	1616.78	149.969	-224.962	1475.48	181.182	-340.543	1233.48	175.515	-92.6257	1366.15	183.359	-54.9506	1183.25	220.003	-338.397	1314.84	-2.50194	-155.738	1389.04	-69.9531	-228.597	1173.19	-72.1983	-235.632	1092.9	-104.905	-193.901	974.334	-66.7455	-103.801	887.403	-113.294	-154.274	871.756	-108.456	-88.2919	808.963
436	0	94.2567	24.9141	1571.31	192.115	32.9136	1576.29	89.1912	-137.359	1608.29	215.685	-106.66	1615.47	150.712	-214.128	1474.32	181.214	-330.006	1232.36	176.424	-81.8885	1364.69	183.874	-44.3831	1181.72	220.171	-327.912	1313.67	-1.68602	-144.361	1388.16	-70.5131	-215.008	1172.19	-73.1538	-221.155	1091.78	-105.443	-176.95	973.963	-66.1351	-86.0052	888.489	-113.627	-135.35	872.248	-107.841	-68.4526	810.516
437	0	95.8787	35.9271	1569.88	193.78	43.7116	1574.68	90.5188	-126.286	1607.1	217.09	-95.8623	1614.02	151.562	-203.287	1473.03	181.363	-319.425	1231.09	177.413	-71.1306	1363.11	184.442	-33.7518	1180.06	220.459	-317.387	1312.36	-0.775749	-132.995	1387.15	-70.9528	-201.489	1171.09	-74.0063	-206.712	1090.56	-105.865	-160.024	973.55	-65.4539	-68.1934	889.61	-113.825	-116.437	872.749	-107.14	-48.6112	812.149
438	0	97.583	46.9307	1568.38	195.522	54.503	1573	91.929	-115.235	1605.78	218.577	-85.0838	1612.47	152.524	-192.437	1471.61	181.63	-308.79	1229.69	178.492	-60.3493	1361.41	185.079	-23.0514	1178.31	220.866	-306.818	1310.9	0.234449	-121.633	1386.01	-71.255	-188.05	1169.9	-74.7382	-192.318	1089.26	-106.155	-143.146	973.107	-64.6914	-50.3837	890.786	-113.866	-97.5654	873.268	-106.344	-28.7917	813.878
439	0	99.3743	57.9207	1566.82	197.347	65.2837	1571.3	93.4271	-104.211	1604.34	220.149	-74.3296	1610.83	153.601	-181.579	1470.09	182.014	-298.096	1228.17	179.669	-49.5422	1359.64	185.802	-12.277	1176.48	221.392	-296.198	1309.32	1.35039	-110.272	1384.78	-71.4041	-174.703	1168.65	-75.3328	-177.989	1087.9	-106.295	-126.337	972.649	-63.8367	-32.5954	892.031	-113.733	-78.7617	873.815	-105.443	-9.01963	815.721
440	0	101.258	68.8915	1565.25	199.259	76.0487	1569.58	95.0199	-93.2208	1602.8	221.815	-63.6055	1609.12	154.798	-170.713	1468.48	182.511	-287.334	1226.53	180.951	-38.7073	1357.8	186.628	-1.42423	1174.61	222.036	-285.525	1307.61	2.57795	-98.9061	1383.47	-71.3859	-161.457	1167.34	-75.7748	-163.736	1086.49	-106.273	-109.618	972.188	-62.8788	-14.849	893.359	-113.407	-60.0533	874.398	-104.43	10.6791	817.69
441	0	103.242	79.8366	1563.66	201.266	86.7921	1567.87	96.7156	-82.2724	1601.19	223.582	-52.9182	1607.35	156.12	-159.841	1466.78	183.12	-276.497	1224.78	182.348	-27.8428	1355.92	187.571	9.51055	1172.7	222.796	-274.795	1305.8	3.9229	-87.5294	1382.1	-71.1884	-148.317	1165.99	-76.05	-149.57	1085.04	-106.073	-93.0078	971.733	-61.8062	2.83474	894.78	-112.871	-41.4664	875.024	-103.292	30.278	819.793
442	0	105.332	90.7488	1562.1	203.375	97.5071	1566.19	98.5232	-71.3737	1599.51	225.459	-42.2746	1605.55	157.572	-148.964	1465.02	183.836	-265.578	1222.94	183.868	-16.9469	1354.02	188.642	20.5306	1170.8	223.669	-264.005	1303.88	5.39079	-76.1366	1380.68	-70.8022	-135.286	1164.62	-76.146	-135.501	1083.58	-105.686	-76.5229	971.298	-60.6078	20.4343	896.3	-112.114	-23.0261	875.696	-102.02	49.75	822.034
443	0	107.536	101.621	1560.58	205.596	108.187	1564.56	100.452	-60.5327	1597.8	227.457	-31.6819	1603.73	159.157	-138.084	1463.21	184.654	-254.571	1221	185.518	-6.01855	1352.12	189.853	31.6387	1168.92	224.652	-253.152	1301.86	6.98677	-64.7222	1379.25	-70.2201	-122.366	1163.25	-76.0526	-121.534	1082.12	-105.1	-60.1794	970.89	-59.2727	37.928	897.922	-111.122	-4.7562	876.417	-100.602	69.0681	824.411
444	0	109.861	112.445	1559.12	207.934	118.825	1563.01	102.513	-49.7572	1596.07	229.586	-21.1467	1601.91	160.88	-127.204	1461.37	185.569	-243.471	1218.99	187.303	4.94343	1350.24	191.211	42.8379	1167.08	225.74	-242.235	1299.76	8.71552	-53.281	1377.81	-69.4379	-109.553	1161.88	-75.7612	-107.674	1080.68	-104.309	-43.991	970.519	-57.7904	55.2939	899.645	-109.888	13.3208	877.19	-99.0275	88.2053	826.917
445	0	112.314	123.214	1557.74	210.4	129.414	1561.53	104.714	-39.0542	1594.34	231.854	-10.6752	1600.11	162.744	-116.326	1459.5	186.577	-232.272	1216.9	189.231	15.9398	1348.39	192.72	54.1309	1165.29	226.929	-231.253	1297.58	10.5811	-41.8086	1376.4	-68.4536	-96.8424	1160.53	-75.2655	-93.9241	1079.26	-103.305	-27.9702	970.193	-56.1514	72.51	901.464	-108.404	31.1836	878.012	-97.2856	107.134	829.54
446	0	114.902	133.922	1556.47	213	139.949	1560.16	107.065	-28.4299	1592.64	234.271	-0.272373	1598.34	164.753	-105.453	1457.62	187.67	-220.971	1214.76	191.306	26.971	1346.6	194.382	65.5206	1163.58	228.215	-220.206	1295.33	12.5868	-30.3011	1375.03	-67.2679	-84.2265	1159.21	-74.561	-80.2835	1077.9	-102.085	-12.1276	969.919	-54.3468	89.5547	903.369	-106.668	48.8121	878.882	-95.3664	125.828	832.263
447	0	117.629	144.562	1555.31	215.74	150.424	1558.91	109.573	-17.8889	1590.99	236.844	10.0581	1596.63	166.907	-94.5861	1455.76	188.842	-209.565	1212.57	193.53	38.0372	1344.87	196.197	77.01	1161.96	229.591	-209.094	1293.03	14.735	-18.7555	1373.72	-65.8838	-71.6949	1157.95	-73.6454	-66.7509	1076.6	-100.647	3.52769	969.705	-52.3686	106.406	905.348	-104.677	66.1874	879.795	-93.2607	144.26	835.063
448	0	120.501	155.132	1554.29	218.626	160.836	1557.79	112.245	-7.43448	1589.41	239.58	20.3139	1594.98	169.209	-83.7285	1453.92	190.089	-198.052	1210.34	195.905	49.1382	1343.23	198.162	88.6022	1160.44	231.052	-197.917	1290.68	17.0273	-7.16937	1372.5	-64.3062	-59.2348	1156.75	-72.518	-53.3229	1075.38	-98.9892	18.9878	969.556	-50.2103	123.043	907.389	-102.432	83.2921	880.75	-90.9607	162.403	837.916
449	0	123.518	165.627	1553.42	221.659	171.183	1556.82	115.084	2.93163	1587.93	242.482	30.4945	1593.43	171.659	-72.8815	1452.12	191.403	-186.432	1208.1	198.433	60.2732	1341.7	200.272	100.299	1159.04	232.593	-186.677	1288.31	19.4639	4.4586	1371.38	-62.5418	-46.8321	1155.63	-71.1801	-39.995	1074.25	-97.1144	34.2462	969.481	-47.8661	139.445	909.473	-99.9376	100.11	881.741	-88.4596	180.232	840.795
450	0	126.683	176.045	1552.72	224.842	181.463	1556	118.094	13.2093	1586.56	245.552	40.6006	1591.98	174.254	-62.0466	1450.37	192.778	-174.707	1205.86	201.11	71.441	1340.28	202.522	112.103	1157.79	234.206	-175.376	1285.93	22.0438	16.129	1370.39	-60.5986	-34.471	1154.62	-69.6346	-26.7617	1073.25	-95.0253	49.2979	969.487	-45.3317	155.592	911.584	-97.1993	116.625	882.764	-85.7517	197.721	843.67
451	0	129.994	186.387	1552.2	228.173	191.677	1555.34	121.273	23.3999	1585.32	248.791	50.6347	1590.65	176.992	-51.2244	1448.71	194.207	-162.877	1203.64	203.935	82.6395	1339	204.903	124.014	1156.68	235.887	-164.016	1283.56	24.7646	27.8416	1369.56	-58.486	-22.1353	1153.73	-67.8865	-13.617	1072.37	-92.727	64.1387	969.582	-42.6036	171.463	913.704	-94.2259	132.825	883.818	-82.8327	214.845	846.513
452	0	133.447	196.653	1551.87	231.649	201.827	1554.87	124.62	33.5064	1584.23	252.194	60.6007	1589.47	179.867	-40.4154	1447.14	195.684	-150.949	1201.47	206.902	93.8662	1337.87	207.407	136.029	1155.75	237.627	-152.601	1281.22	27.6221	39.595	1368.89	-56.2144	-9.8088	1152.98	-65.9422	-0.55497	1071.65	-90.226	78.7656	969.774	-39.6797	187.04	915.817	-91.028	148.697	884.9	-79.6987	231.582	849.296
453	0	137.038	206.845	1551.74	235.263	211.915	1554.58	128.13	43.5329	1583.32	255.757	70.5036	1588.44	182.875	-29.6195	1445.69	197.202	-138.928	1199.36	210.003	105.118	1336.91	210.023	148.144	1155	239.42	-141.134	1278.94	30.6105	51.3869	1368.42	-53.7949	2.52407	1152.4	-63.81	12.4302	1071.11	-87.5309	93.1767	970.074	-36.5588	202.306	917.907	-87.6187	164.232	886.011	-76.3472	247.91	851.992
454	0	140.757	216.967	1551.83	239.009	221.945	1554.49	131.794	53.4849	1582.6	259.472	80.3495	1587.58	186.004	-18.8361	1444.38	198.753	-126.823	1197.35	213.229	116.39	1336.13	212.739	160.352	1154.46	241.258	-129.62	1276.74	33.7216	63.2142	1368.16	-51.2394	14.8774	1152.01	-61.5003	25.3436	1070.75	-84.6516	107.371	970.49	-33.2412	217.243	919.959	-84.0131	179.421	887.152	-72.7762	263.81	854.577
455	0	144.596	227.024	1552.13	242.874	231.924	1554.61	135.604	63.3688	1582.07	263.327	90.1454	1586.9	189.246	-8.06419	1443.21	200.331	-114.643	1195.46	216.567	127.679	1335.56	215.541	172.642	1154.14	243.134	-118.064	1274.64	36.9452	75.0724	1368.13	-48.5606	27.2634	1151.84	-59.0251	38.1897	1070.6	-81.6	121.348	971.033	-29.7284	231.837	921.961	-80.2282	194.26	888.326	-68.9843	279.266	857.031
456	0	148.542	237.021	1552.66	246.848	241.856	1554.94	139.545	73.1919	1581.77	267.31	99.8985	1586.42	192.587	2.69772	1442.22	201.926	-102.4	1193.72	220.002	138.978	1335.19	218.414	184.999	1154.05	245.04	-106.472	1272.67	40.2687	86.956	1368.35	-45.7724	39.6914	1151.89	-56.3989	50.9714	1070.68	-78.3896	135.109	971.713	-26.0234	246.073	923.904	-76.283	208.745	889.538	-64.971	294.262	859.337
457	0	152.583	246.965	1553.43	250.915	251.747	1555.48	143.603	82.9623	1581.68	271.406	109.616	1586.14	196.013	13.4513	1441.41	203.533	-90.1097	1192.16	223.516	150.283	1335.04	221.339	197.407	1154.2	246.967	-94.8527	1270.86	43.6774	98.8587	1368.83	-42.8894	52.1681	1152.2	-53.6377	63.6907	1071	-75.0359	148.655	972.538	-22.1313	259.94	925.781	-72.1983	222.877	890.795	-60.7371	308.79	861.485
458	0	156.704	256.862	1554.42	255.061	261.606	1556.25	147.762	92.6883	1581.83	275.596	119.307	1586.07	199.506	24.1984	1440.8	205.142	-77.7863	1190.79	227.09	161.587	1335.13	224.295	209.845	1154.61	248.907	-83.2127	1269.23	47.1541	110.773	1369.58	-39.9277	64.6963	1152.77	-50.76	76.3479	1071.57	-71.5558	161.989	973.517	-18.0591	273.428	927.587	-67.9964	236.657	892.102	-56.2844	322.842	863.466
459	0	160.887	266.72	1555.66	259.267	271.437	1557.24	152.001	102.379	1582.2	279.863	128.976	1586.22	203.048	34.941	1440.41	206.747	-65.4471	1189.66	230.7	172.883	1335.45	227.262	222.29	1155.26	250.852	-71.5609	1267.81	50.6795	122.69	1370.61	-36.905	77.2759	1153.62	-47.7861	88.9419	1072.4	-67.9684	175.114	974.656	-13.8164	286.532	929.321	-63.7014	250.092	893.469	-51.6169	336.415	865.279
460	0	165.115	276.546	1557.13	263.517	281.248	1558.45	156.301	112.041	1582.81	284.184	138.631	1586.57	206.618	45.681	1440.24	208.34	-53.1099	1188.77	234.324	184.165	1336	230.215	234.718	1156.17	252.792	-59.9066	1266.61	54.2327	134.6	1371.91	-33.8403	89.903	1154.76	-44.7382	101.47	1073.5	-64.2943	188.033	975.96	-9.41543	299.247	930.984	-59.339	263.189	894.903	-46.741	349.512	866.926
461	0	169.37	286.348	1558.84	267.791	291.042	1559.88	160.638	121.685	1583.65	288.539	148.278	1587.14	210.197	56.42	1440.3	209.916	-40.7926	1188.14	237.936	195.427	1336.79	233.129	247.104	1157.32	254.72	-48.259	1265.67	57.791	146.494	1373.48	-30.7546	102.57	1156.18	-41.6399	113.927	1074.85	-60.556	200.752	977.43	-4.87205	311.572	932.579	-54.9358	275.96	896.412	-41.6666	362.138	868.414
462	0	173.632	296.133	1560.76	272.07	300.826	1561.52	164.99	131.318	1584.7	292.904	157.92	1587.9	213.761	67.1594	1440.59	211.468	-28.5136	1187.79	241.51	206.664	1337.8	235.978	259.422	1158.7	256.627	-36.6279	1264.98	61.3308	158.36	1375.32	-27.6698	115.267	1157.88	-38.5163	126.308	1076.47	-56.7772	213.274	979.067	-0.205641	323.512	934.111	-50.5198	288.418	898.001	-36.4075	374.306	869.752
463	0	177.882	305.908	1562.91	276.333	310.604	1563.36	169.331	140.946	1585.96	297.255	167.561	1588.84	217.288	77.9001	1441.11	212.992	-16.2903	1187.72	245.019	217.87	1339.02	238.739	271.65	1160.29	258.508	-25.0226	1264.56	64.8279	170.186	1377.41	-24.6094	127.981	1159.86	-35.393	138.605	1078.32	-52.9833	225.604	980.864	4.56032	335.073	935.588	-46.1199	300.577	899.675	-30.9826	386.029	870.954
464	0	182.096	315.678	1565.25	280.56	320.379	1565.38	173.637	150.576	1587.41	301.566	177.206	1589.96	220.757	88.6425	1441.85	214.485	-4.13965	1187.94	248.437	229.04	1340.44	241.385	283.765	1162.07	260.357	-13.4522	1264.42	68.2581	181.961	1379.72	-21.5972	140.695	1162.08	-32.2961	150.809	1080.41	-49.2007	237.746	982.816	9.39802	346.267	937.016	-41.7655	312.454	901.437	-25.4167	397.331	872.036
465	0	186.256	325.448	1567.77	284.729	330.153	1567.57	177.881	160.215	1589.04	305.815	186.855	1591.23	224.146	99.3865	1442.82	215.947	7.92293	1188.43	251.74	240.171	1342.05	243.895	295.749	1164.02	262.169	-1.92536	1264.55	71.5974	193.671	1382.24	-18.6574	153.391	1164.53	-29.2509	162.91	1082.71	-45.4563	249.703	984.909	14.2752	357.11	938.404	-37.4863	324.066	903.284	-19.7413	408.234	873.017
466	0	190.337	335.225	1570.47	288.819	339.931	1569.91	182.038	169.866	1590.83	309.974	196.512	1592.64	227.437	110.132	1443.98	217.377	19.8836	1189.2	254.904	251.26	1343.81	246.248	307.589	1166.1	263.942	9.55011	1264.95	74.8231	205.305	1384.93	-15.8133	166.047	1167.18	-26.2822	174.896	1085.18	-41.7778	261.477	987.129	19.1554	367.62	939.761	-33.3119	335.43	905.215	-13.995	418.767	873.915
467	0	194.319	345.012	1573.3	292.807	349.714	1572.38	186.082	179.535	1592.75	314.02	206.178	1594.17	230.61	120.877	1445.34	218.778	31.7305	1190.22	257.909	262.305	1345.72	248.429	319.274	1168.29	265.674	20.9673	1265.6	77.9141	216.852	1387.76	-13.0869	178.64	1170	-23.4126	186.754	1087.81	-38.1926	273.07	989.456	23.9979	377.82	941.095	-29.2716	346.562	907.22	-8.22395	428.963	874.751
468	0	198.179	354.813	1576.25	296.673	359.504	1574.95	189.991	189.224	1594.77	317.929	215.855	1595.79	233.649	131.62	1446.86	220.152	43.4541	1191.47	260.737	273.304	1347.73	250.423	330.8	1170.55	267.365	32.3202	1266.5	80.8514	228.301	1390.7	-10.4979	191.143	1172.93	-20.6629	198.472	1090.55	-34.7274	284.481	991.87	28.7586	387.738	942.415	-25.3936	357.477	909.289	-2.48199	438.855	875.543
469	0	201.896	364.63	1579.29	300.395	369.303	1577.61	193.739	198.938	1596.89	321.678	225.545	1597.48	236.541	142.359	1448.53	221.504	55.0473	1192.94	263.375	284.257	1349.84	252.223	342.166	1172.86	269.016	43.6041	1267.63	83.6187	239.641	1393.71	-8.06291	203.528	1175.95	-18.0507	210.036	1093.38	-31.4081	295.709	994.347	33.3907	397.402	943.726	-21.7052	368.186	911.408	3.17012	448.477	876.312
470	0	205.45	374.467	1582.39	303.952	379.115	1580.32	197.307	208.678	1599.06	325.247	235.251	1599.23	239.274	153.092	1450.32	222.84	66.5055	1194.59	265.811	295.163	1352	253.826	353.378	1175.19	270.627	54.8154	1268.95	86.2028	250.866	1396.74	-5.79503	215.765	1179.02	-15.5906	221.432	1096.26	-28.2588	306.75	996.859	37.8454	406.843	945.034	-18.2316	378.7	913.559	8.66568	457.866	877.073
471	0	208.82	384.326	1585.53	307.325	388.941	1583.06	200.675	218.448	1601.26	328.616	244.976	1601.02	241.84	163.815	1452.21	224.164	77.8271	1196.38	268.038	306.023	1354.2	255.232	364.443	1177.52	272.203	65.9521	1270.44	88.5939	261.969	1399.77	-3.70314	227.824	1182.08	-13.2938	232.647	1099.14	-25.3019	317.6	999.379	42.0733	416.094	946.343	-14.9963	389.026	915.721	13.9337	467.057	877.843
472	0	211.988	394.208	1588.66	310.496	398.785	1585.8	203.825	228.248	1603.47	331.769	254.722	1602.82	244.232	174.527	1454.18	225.483	89.0129	1198.3	270.056	316.838	1356.42	256.447	375.374	1179.81	273.745	77.0133	1272.08	90.7857	272.945	1402.75	-1.79165	239.673	1185.11	-11.1677	243.667	1102	-22.5571	328.253	1001.88	46.0256	425.187	947.653	-12.0205	399.168	917.871	18.901	476.085	878.632
473	0	214.94	404.116	1591.75	313.448	408.65	1588.52	206.746	238.081	1605.66	334.691	264.494	1604.61	246.448	185.223	1456.18	226.803	100.066	1200.3	271.865	327.608	1358.62	257.482	386.183	1182.06	275.258	87.9997	1273.84	92.7754	283.793	1405.65	-0.060513	251.282	1188.06	-9.2161	254.482	1104.8	-20.0414	338.702	1004.33	49.6554	434.154	948.962	-9.32276	409.129	919.984	23.4949	484.981	879.449
474	0	217.661	414.051	1594.78	316.169	418.54	1591.2	209.425	247.949	1607.8	337.373	274.295	1606.39	248.487	195.902	1458.21	228.127	110.992	1202.34	273.471	338.334	1360.79	258.352	396.886	1184.25	276.743	98.9132	1275.67	94.5638	294.513	1408.44	1.49465	262.624	1190.9	-7.43936	265.08	1107.51	-17.7687	348.943	1006.7	52.9191	443.028	950.266	-6.91902	418.907	922.034	27.6459	493.775	880.298
475	0	220.142	424.014	1597.72	318.646	428.457	1593.8	211.857	257.852	1609.88	339.805	284.13	1608.13	250.352	206.56	1460.22	229.459	121.799	1204.4	274.882	349.017	1362.91	259.074	407.498	1186.35	278.203	109.757	1277.55	96.1549	305.108	1411.08	2.88206	273.673	1193.59	-5.83465	275.456	1110.09	-15.7498	358.97	1008.96	55.7781	451.835	951.557	-4.82225	428.502	923.993	31.2909	502.494	881.175
476	0	222.374	434.008	1600.53	320.873	438.407	1596.31	214.036	267.793	1611.86	341.985	294.004	1609.82	252.045	217.197	1462.19	230.803	132.496	1206.43	276.109	359.659	1364.94	259.669	418.033	1188.35	279.639	120.536	1279.44	97.5555	315.583	1413.55	4.11316	284.41	1196.1	-4.39639	285.605	1112.52	-13.9919	368.779	1011.09	58.1997	460.603	952.823	-3.04226	437.91	925.833	34.3752	511.158	882.076
477	0	224.353	444.035	1603.19	322.844	448.393	1598.71	215.964	277.772	1613.73	343.912	303.921	1611.44	253.574	227.812	1464.09	232.157	143.092	1208.41	277.166	370.263	1366.88	260.158	428.505	1190.24	281.053	131.255	1281.3	98.7749	325.945	1415.83	5.20189	294.819	1198.42	-3.11673	295.526	1114.78	-12.4986	378.366	1013.06	60.1585	469.351	954.05	-1.58553	447.13	927.529	36.8557	519.786	882.987
478	0	226.078	454.095	1605.67	324.56	458.421	1600.97	217.643	287.791	1615.47	345.588	313.886	1612.98	254.946	238.404	1465.91	233.522	153.601	1210.3	278.067	380.83	1368.71	260.565	438.925	1192.01	282.444	141.919	1283.12	99.8244	336.205	1417.89	6.16384	304.895	1200.51	-1.98613	305.221	1116.85	-11.2703	387.733	1014.85	61.6374	478.099	955.219	-0.455053	456.16	929.054	38.702	528.391	883.892
479	0	227.552	464.193	1607.95	326.022	468.495	1603.07	219.08	297.853	1617.05	347.02	323.905	1614.42	256.168	248.975	1467.6	234.894	164.032	1212.08	278.828	391.364	1370.4	260.91	449.302	1193.63	283.809	152.537	1284.85	100.717	346.374	1419.72	7.01544	314.637	1202.36	-0.993867	314.698	1118.71	-10.3038	396.881	1016.43	62.6281	486.857	956.31	0.349769	464.998	930.383	39.8978	536.979	884.766
480	0	228.78	474.331	1610.01	327.235	478.621	1605	220.285	307.959	1618.46	348.217	333.982	1615.75	257.251	259.527	1469.17	236.268	174.398	1213.71	279.465	401.867	1371.95	261.215	459.645	1195.1	285.146	163.115	1286.48	101.466	356.466	1421.3	7.77311	324.056	1203.96	-0.12862	323.969	1120.34	-9.59271	405.817	1017.79	63.1313	495.635	957.298	0.833141	473.646	931.494	40.4413	545.553	885.584
481	0	229.77	484.512	1611.83	328.209	488.803	1606.74	221.27	318.113	1619.69	349.19	344.125	1616.95	258.204	270.063	1470.57	237.639	184.712	1215.18	279.993	412.343	1373.32	261.498	469.959	1196.39	286.45	173.659	1287.96	102.086	366.494	1422.63	8.45252	333.168	1205.29	0.621083	333.049	1121.73	-9.12767	414.548	1018.92	63.1569	504.434	958.155	1.00277	482.106	932.367	40.3449	554.111	886.313
482	0	230.532	494.74	1613.39	328.954	499.047	1608.27	222.048	328.317	1620.72	349.953	354.338	1618.02	259.037	280.587	1471.81	238.999	194.984	1216.47	280.426	422.798	1374.51	261.776	480.25	1197.5	287.717	184.177	1289.3	102.59	376.476	1423.69	9.06791	342.001	1206.36	1.26644	341.958	1122.89	-8.89681	423.086	1019.79	62.7234	513.252	958.854	0.869639	490.383	932.985	39.634	562.646	886.922
483	0	231.079	505.021	1614.69	329.483	509.36	1609.57	222.636	338.577	1621.54	350.521	364.627	1618.93	259.759	291.103	1472.85	240.34	205.227	1217.56	280.78	433.234	1375.51	262.06	490.522	1198.42	288.94	194.675	1290.45	102.994	386.426	1424.49	9.63155	350.589	1207.16	1.81806	350.72	1123.8	-8.88614	431.446	1020.41	61.8569	522.083	959.364	0.447673	498.482	933.332	38.3457	571.149	887.374
484	0	231.425	515.357	1615.71	329.81	519.746	1610.65	223.05	348.895	1622.15	350.911	374.999	1619.67	260.38	301.618	1473.7	241.652	215.451	1218.45	281.065	443.656	1376.29	262.361	500.779	1199.12	290.115	205.161	1291.42	103.309	396.36	1425.01	10.1533	358.974	1207.68	2.28574	359.359	1124.46	-9.08003	439.643	1020.76	60.5901	530.915	959.657	-0.246716	506.41	933.397	36.5265	579.605	887.636
485	0	231.584	525.754	1616.45	329.95	530.211	1611.49	223.306	359.275	1622.54	351.139	385.457	1620.24	260.909	312.136	1474.35	242.926	225.667	1219.12	281.293	454.072	1376.86	262.684	511.026	1199.6	291.234	215.64	1292.18	103.547	406.295	1425.27	10.6403	367.201	1207.95	2.67831	367.903	1124.88	-9.46174	447.695	1020.84	58.9613	539.736	959.702	-1.19513	514.177	933.172	34.2303	588	887.673
486	0	231.572	536.217	1616.91	329.92	540.76	1612.07	223.421	369.723	1622.71	351.222	396.008	1620.63	261.351	322.665	1474.77	244.15	235.885	1219.57	281.473	464.485	1377.2	263.032	521.268	1199.85	292.29	226.12	1292.74	103.719	416.245	1425.27	11.097	375.321	1207.95	3.00358	376.381	1125.06	-10.0139	455.621	1020.65	57.0123	548.53	959.474	-2.37775	521.79	932.653	31.5159	596.315	887.453
487	0	231.405	546.749	1617.07	329.734	551.398	1612.4	223.411	380.242	1622.66	351.176	406.655	1620.84	261.715	333.21	1474.98	245.316	246.116	1219.79	281.611	474.902	1377.3	263.403	531.51	1199.87	293.278	236.605	1293.08	103.833	426.225	1425.01	11.5251	383.388	1207.72	3.26831	384.823	1125	-10.7189	463.44	1020.2	54.7874	557.277	958.949	-3.77386	529.26	931.836	28.4448	604.532	886.949
488	0	231.097	557.356	1616.96	329.409	562.128	1612.47	223.291	390.836	1622.39	351.016	417.402	1620.85	262.005	343.779	1474.98	246.412	256.368	1219.8	281.712	485.331	1377.17	263.795	541.76	1199.65	294.192	247.102	1293.2	103.896	436.248	1424.51	11.924	391.455	1207.24	3.47823	393.255	1124.71	-11.5594	471.171	1019.48	52.3317	565.961	958.104	-5.36245	536.596	930.725	25.0789	612.631	886.136
489	0	230.663	568.04	1616.56	328.959	572.953	1612.29	223.074	401.508	1621.91	350.754	428.251	1620.66	262.226	354.378	1474.75	247.431	266.651	1219.58	281.78	495.778	1376.81	264.201	552.028	1199.2	295.026	257.618	1293.11	103.913	446.327	1423.77	12.2908	399.573	1206.55	3.63812	401.706	1124.2	-12.5187	478.832	1018.52	49.6895	574.562	956.925	-7.12268	543.806	929.322	21.4787	620.596	884.994
490	0	230.116	578.805	1615.9	328.397	583.874	1611.85	222.771	412.262	1621.22	350.404	439.203	1620.28	262.38	365.014	1474.31	248.362	276.975	1219.15	281.817	506.251	1376.21	264.614	562.321	1198.52	295.776	268.157	1292.8	103.887	456.473	1422.81	12.6211	407.791	1205.65	3.75189	410.201	1123.49	-13.5808	486.442	1017.31	46.9034	583.064	955.398	-9.03437	550.898	927.635	17.7015	628.407	883.506
491	0	229.468	589.654	1614.97	327.737	594.892	1611.16	222.391	423.101	1620.33	349.973	450.258	1619.71	262.47	375.695	1473.65	249.201	287.348	1218.52	281.821	516.759	1375.39	265.025	572.652	1197.62	296.438	278.728	1292.28	103.821	466.695	1421.64	12.9091	416.153	1204.55	3.8227	418.76	1122.57	-14.7308	494.014	1015.87	44.0128	591.449	953.516	-11.0783	557.881	925.674	13.8002	636.049	881.664
492	0	228.73	600.587	1613.8	326.989	606.006	1610.24	221.942	434.024	1619.24	349.47	461.415	1618.96	262.496	386.428	1472.8	249.94	297.78	1217.68	281.793	527.311	1374.35	265.425	583.031	1196.52	297.009	289.337	1291.56	103.714	477.003	1420.26	13.1483	424.695	1203.28	3.85306	427.404	1121.46	-15.9552	501.565	1014.2	41.0532	599.704	951.278	-13.2367	564.761	923.452	9.82191	643.507	879.462
493	0	227.91	611.607	1612.4	326.161	617.216	1609.09	221.427	445.035	1617.98	348.9	472.671	1618.02	262.458	397.22	1471.74	250.577	308.279	1216.66	281.727	537.918	1373.11	265.803	593.472	1195.22	297.488	299.993	1290.65	103.565	487.404	1418.7	13.3322	433.448	1201.84	3.84498	436.15	1120.18	-17.2415	509.104	1012.34	38.0557	607.818	948.686	-15.4929	571.542	920.981	5.80767	650.769	876.901
494	0	227.015	622.712	1610.78	325.262	628.519	1607.73	220.85	456.132	1616.54	348.266	484.024	1616.9	262.355	408.08	1470.5	251.11	318.855	1215.45	281.622	548.591	1371.68	266.149	603.985	1193.74	297.875	310.704	1289.54	103.372	497.905	1416.97	13.4545	442.435	1200.24	3.80006	445.008	1118.73	-18.5787	516.643	1010.28	35.0461	615.781	945.748	-17.8319	578.229	918.279	1.79175	657.824	873.984
495	0	226.05	633.904	1608.97	324.295	639.912	1606.18	220.21	467.317	1614.94	347.569	495.469	1615.63	262.187	419.016	1469.08	251.539	329.515	1214.07	281.471	559.34	1370.07	266.453	614.584	1192.1	298.17	321.48	1288.27	103.131	508.513	1415.08	13.5098	451.669	1198.5	3.71968	453.991	1117.12	-19.957	524.19	1008.04	32.0457	623.587	942.477	-20.24	584.827	915.363	-2.1983	664.665	870.721
496	0	225.017	645.183	1606.98	323.264	651.392	1604.46	219.507	478.589	1613.2	346.807	507.004	1614.2	261.951	430.036	1467.5	251.867	340.269	1212.53	281.269	570.18	1368.3	266.704	625.279	1190.32	298.377	332.332	1286.83	102.838	519.232	1413.04	13.494	461.157	1196.63	3.6051	463.103	1115.36	-21.3675	531.751	1005.64	29.0703	631.235	938.889	-22.7046	591.336	912.25	-6.14142	671.288	867.126
497	0	223.918	656.547	1604.85	322.169	662.958	1602.58	218.737	489.947	1611.31	345.978	518.624	1612.63	261.644	441.151	1465.77	252.097	351.124	1210.84	281.01	581.122	1366.38	266.893	636.081	1188.4	298.498	343.269	1285.24	102.488	530.068	1410.85	13.4045	470.897	1194.63	3.45764	472.349	1113.47	-22.8024	539.33	1003.1	26.1316	638.724	935.005	-25.2139	597.76	908.96	-10.0226	677.691	863.217
498	0	222.752	667.998	1602.58	321.01	674.606	1600.57	217.897	501.392	1609.3	345.077	530.326	1610.94	261.266	452.37	1463.91	252.235	362.088	1209.02	280.688	592.179	1364.34	267.011	647	1186.36	298.539	354.305	1283.52	102.076	541.025	1408.55	13.2406	480.881	1192.51	3.27879	481.73	1111.45	-24.2548	546.93	1000.42	23.2367	646.057	930.848	-27.7571	604.101	905.513	-13.8322	683.875	859.014
499	0	221.515	679.536	1600.2	319.784	686.336	1598.47	216.98	512.923	1607.17	344.101	542.109	1609.13	260.812	463.704	1461.92	252.287	373.17	1207.08	280.296	603.367	1362.19	267.051	658.044	1184.22	298.506	365.45	1281.68	101.598	552.107	1406.13	13.0032	491.094	1190.29	3.07038	491.245	1109.32	-25.718	554.554	997.62	20.3897	653.239	926.445	-30.3236	610.36	901.931	-17.5652	689.843	854.542
500	0	220.205	691.162	1597.74	318.487	698.148	1596.28	215.982	524.544	1604.94	343.042	553.971	1607.23	260.282	475.162	1459.83	252.263	384.378	1205.04	279.828	614.697	1359.94	267.005	669.223	1181.98	298.404	376.719	1279.74	101.049	563.319	1403.6	12.6951	501.517	1187.96	2.83466	500.891	1107.08	-27.1861	562.202	994.723	17.5915	660.28	921.827	-32.9029	616.541	898.234	-21.22	695.603	849.829
501	0	218.816	702.879	1595.23	317.113	710.043	1594.03	214.895	536.255	1602.63	341.894	565.914	1605.24	259.672	486.756	1457.65	252.169	395.718	1202.91	279.277	626.183	1357.61	266.868	680.543	1179.65	298.24	388.123	1277.73	100.424	574.664	1400.98	12.3207	512.128	1185.53	2.57437	510.664	1104.74	-28.6529	569.875	991.742	14.841	667.19	917.023	-35.4848	622.645	894.445	-24.7978	701.163	844.907
502	0	217.343	714.689	1592.67	315.657	722.024	1591.76	213.713	548.06	1600.25	340.65	577.941	1603.2	258.982	498.496	1455.41	252.017	407.199	1200.72	278.639	637.837	1355.22	266.636	692.011	1177.25	298.023	399.675	1275.66	99.7184	586.145	1398.27	11.8858	522.901	1183.01	2.29282	520.56	1102.32	-30.1126	577.573	988.694	12.1356	673.981	912.069	-38.0586	628.678	890.588	-28.3015	706.533	839.809
503	0	215.779	726.598	1590.1	314.111	734.098	1589.47	212.43	559.963	1597.81	339.304	590.056	1601.11	258.207	510.392	1453.12	251.814	418.826	1198.49	277.907	649.671	1352.79	266.307	703.634	1174.78	297.759	411.387	1273.55	98.929	597.765	1395.49	11.3971	533.812	1180.42	1.99385	530.572	1099.83	-31.559	585.296	985.597	9.47227	680.667	907	-40.6134	634.644	886.687	-31.7347	711.728	834.573
504	0	214.118	738.611	1587.54	312.468	746.268	1587.21	211.04	571.971	1595.33	337.85	602.265	1599.01	257.349	522.453	1450.81	251.571	430.607	1196.23	277.077	661.696	1350.33	265.88	715.42	1172.26	297.457	423.272	1271.43	98.0524	609.527	1392.66	10.8623	544.836	1177.75	1.68181	540.695	1097.28	-32.986	593.044	982.471	6.84755	687.265	901.852	-43.1382	640.55	882.767	-35.101	716.762	829.239
505	0	212.353	750.735	1585.02	310.72	758.544	1584.98	209.538	584.09	1592.83	336.281	614.576	1596.9	256.404	534.689	1448.5	251.296	442.548	1193.97	276.146	673.92	1347.86	265.356	727.374	1169.71	297.121	435.338	1269.33	97.0858	621.432	1389.78	10.2893	555.95	1175.04	1.36144	550.922	1094.69	-34.387	600.82	979.338	4.25857	693.79	896.666	-45.6212	646.405	878.854	-38.403	721.654	823.847
506	0	210.478	762.977	1582.54	308.862	770.935	1582.82	207.918	596.327	1590.33	334.593	626.998	1594.81	255.373	547.106	1446.21	250.998	454.653	1191.74	275.109	686.351	1345.4	264.736	739.504	1167.14	296.759	447.597	1267.26	96.0273	633.481	1386.88	9.68636	567.135	1172.28	1.03771	561.248	1092.07	-35.7553	608.625	976.217	1.70332	700.263	891.479	-48.0505	652.219	874.976	-41.6417	726.423	818.44
507	0	208.488	775.344	1580.13	306.885	783.448	1580.75	206.178	608.69	1587.86	332.781	639.54	1592.76	254.255	559.711	1443.97	250.686	466.929	1189.55	273.965	698.994	1342.97	264.024	751.817	1164.56	296.377	460.056	1265.26	94.8758	645.675	1383.97	9.06152	578.373	1169.5	0.715632	571.668	1089.45	-37.0841	616.464	973.134	-0.818984	706.701	886.332	-50.4138	658.005	871.162	-44.8163	731.089	813.063
508	0	206.378	787.843	1577.82	304.785	796.093	1578.77	204.314	621.186	1585.43	330.843	652.211	1590.78	253.052	572.507	1441.8	250.365	479.378	1187.45	272.712	711.852	1340.6	263.224	764.319	1162.02	295.977	472.722	1263.35	93.6308	658.013	1381.07	8.4225	589.653	1166.72	0.40009	582.177	1086.85	-38.3666	624.34	970.111	-3.30766	713.126	881.265	-52.6987	663.777	867.438	-47.9234	735.678	807.761
509	0	204.144	800.482	1575.62	302.558	808.879	1576.93	202.326	633.822	1583.07	328.777	665.02	1588.89	251.763	585.497	1439.72	250.042	492.004	1185.44	271.35	724.925	1338.31	262.338	777.015	1159.53	295.566	485.599	1261.55	92.2931	670.492	1378.21	7.7764	600.965	1163.96	0.095633	592.771	1084.29	-39.5957	632.262	967.174	-5.76037	719.559	876.319	-54.8931	669.554	863.835	-50.9572	740.213	802.577
510	0	201.786	813.266	1573.55	300.2	821.812	1575.22	200.214	646.605	1580.79	326.583	677.976	1587.11	250.391	598.68	1437.76	249.721	504.808	1183.56	269.879	738.211	1336.12	261.372	789.911	1157.13	295.143	498.689	1259.88	90.8641	683.11	1375.41	7.12959	612.303	1161.25	-0.193685	603.45	1081.79	-40.765	640.238	964.349	-8.17314	726.023	871.533	-56.9849	675.355	860.38	-53.9095	744.724	797.555
511	0	199.303	826.198	1571.63	297.71	834.899	1573.68	197.98	659.537	1578.63	324.263	691.084	1585.47	248.938	612.053	1435.94	249.407	517.79	1181.83	268.301	751.705	1334.06	260.329	803.01	1154.85	294.712	511.993	1258.38	89.3467	695.862	1372.7	6.48753	623.668	1158.62	-0.464457	614.21	1079.39	-41.8683	648.278	961.66	-10.5404	732.54	866.945	-58.9629	681.201	857.102	-56.7698	749.239	792.737
512	0	196.697	839.282	1569.88	295.091	848.143	1572.32	195.627	672.623	1576.61	321.82	704.348	1583.98	247.409	625.611	1434.28	249.103	530.947	1180.27	266.619	765.399	1332.15	259.211	816.313	1152.72	294.274	525.506	1257.06	87.7449	708.742	1370.1	5.8547	635.06	1156.08	-0.714032	625.053	1077.1	-42.8999	656.395	959.133	-12.855	739.135	862.591	-60.8168	687.119	854.027	-59.5256	753.791	788.163
513	0	193.972	852.517	1568.31	292.344	861.544	1571.14	193.16	685.861	1574.75	319.259	717.77	1582.67	245.807	639.344	1432.8	248.811	544.275	1178.9	264.837	779.281	1330.43	258.021	829.818	1150.77	293.828	539.222	1255.94	86.0639	721.742	1367.64	5.2346	646.485	1153.68	-0.940572	635.98	1074.96	-43.855	664.602	956.793	-15.1089	745.834	858.507	-62.5378	693.133	851.18	-62.1636	758.413	783.868
514	0	191.134	865.9	1566.93	289.475	875.099	1570.18	190.586	699.248	1573.07	316.588	731.346	1581.55	244.139	653.243	1431.53	248.532	557.766	1177.75	262.96	793.339	1328.91	256.761	843.52	1149.04	293.374	553.131	1255.03	84.3105	734.854	1365.34	4.62976	657.95	1151.44	-1.14308	646.992	1072.98	-44.73	672.915	954.66	-17.2928	752.662	854.722	-64.1183	699.272	848.585	-64.6693	763.143	779.886
515	0	188.191	879.425	1565.77	286.492	888.804	1569.43	187.915	712.779	1571.59	313.815	745.071	1580.65	242.413	667.293	1430.48	248.267	571.41	1176.83	260.997	807.553	1327.61	255.431	857.409	1147.55	292.914	567.22	1254.37	82.4929	748.065	1363.24	4.04183	669.466	1149.39	-1.32138	658.094	1071.2	-45.5221	681.352	952.758	-19.3972	759.646	851.265	-65.5532	705.567	846.261	-67.0286	768.019	776.244
516	0	185.155	893.084	1564.82	283.406	902.647	1568.91	185.156	726.444	1570.32	310.952	758.937	1579.98	240.636	681.479	1429.65	248.017	585.192	1176.16	258.956	821.906	1326.56	254.033	871.471	1146.32	292.447	581.47	1253.95	80.6205	761.365	1361.35	3.47172	681.042	1147.56	-1.47609	669.288	1069.63	-46.2301	689.93	951.103	-21.4121	766.813	848.159	-66.8393	712.048	844.225	-69.2286	773.083	772.967
517	0	182.038	906.863	1564.1	280.229	916.618	1568.63	182.323	740.232	1569.28	308.011	772.931	1579.55	238.818	695.78	1429.08	247.781	599.097	1175.75	256.847	836.373	1325.77	252.566	885.688	1145.38	291.975	595.862	1253.78	78.7043	774.74	1359.71	2.91971	692.688	1145.96	-1.60859	680.577	1068.3	-46.8543	698.667	949.711	-23.3282	774.192	845.425	-67.9758	718.75	842.492	-71.2579	778.376	770.073
518	0	178.854	920.75	1563.62	276.975	930.7	1568.59	179.43	754.127	1568.49	305.008	787.038	1579.37	236.969	710.176	1428.75	247.559	613.106	1175.61	254.682	850.932	1325.25	251.03	900.037	1144.73	291.498	610.37	1253.88	76.7563	788.174	1358.32	2.38564	704.415	1144.62	-1.72101	691.965	1067.22	-47.3964	707.585	948.594	-25.1369	781.812	843.077	-68.9646	725.703	841.071	-73.1077	783.944	767.576
519	0	175.622	934.725	1563.37	273.664	944.874	1568.78	176.493	768.112	1567.94	301.957	801.239	1579.44	235.102	724.643	1428.68	247.348	627.196	1175.75	252.475	865.554	1325.01	249.428	914.491	1144.39	291.018	624.967	1254.26	74.7895	801.651	1357.2	1.86902	716.229	1143.57	-1.8162	703.453	1066.4	-47.8599	716.701	947.76	-26.8308	789.701	841.127	-69.8103	732.943	839.968	-74.7722	789.834	765.484
520	0	172.358	948.77	1563.35	270.312	959.119	1569.21	173.53	782.167	1567.64	298.879	815.513	1579.76	233.23	739.157	1428.87	247.147	641.344	1176.16	250.24	880.211	1325.04	247.761	929.019	1144.35	290.537	639.625	1254.9	72.8175	815.154	1356.38	1.36915	728.136	1142.8	-1.89777	715.045	1065.86	-48.2498	726.035	947.213	-28.4041	797.886	839.578	-70.5196	740.501	839.185	-76.2492	796.09	763.798
521	0	169.085	962.863	1563.56	266.942	973.413	1569.87	170.56	796.271	1567.59	295.791	829.839	1580.34	231.363	753.691	1429.32	246.953	655.524	1176.85	247.995	894.874	1325.36	246.035	943.586	1144.61	290.057	654.31	1255.8	70.8546	828.665	1355.85	0.885153	740.137	1142.32	-1.97007	726.739	1065.6	-48.5728	735.603	946.951	-29.853	806.397	838.43	-71.102	748.41	838.717	-77.5401	802.762	762.517
522	0	165.823	976.98	1564	263.575	987.731	1570.75	167.603	810.4	1567.79	292.714	844.191	1581.15	229.517	768.217	1430.03	246.762	669.71	1177.81	245.754	909.514	1325.94	244.257	958.157	1145.15	289.58	668.99	1256.96	68.915	842.167	1355.61	0.415929	752.232	1142.15	-2.0382	738.536	1065.61	-48.837	745.424	946.971	-31.1757	815.26	837.679	-71.5687	756.7	838.558	-78.6503	809.894	761.633
523	0	162.594	991.099	1564.64	260.236	1002.05	1571.84	164.679	824.53	1568.23	289.671	858.546	1582.21	227.703	782.708	1430.97	246.57	683.874	1179.03	243.537	924.101	1326.79	242.436	972.696	1145.96	289.107	683.63	1258.37	67.0126	855.642	1355.68	-0.039918	764.416	1142.27	-2.108	750.431	1065.9	-49.0518	755.511	947.264	-32.3728	824.499	837.315	-71.9327	765.399	838.694	-79.5887	817.532	761.132
524	0	159.421	1005.2	1565.49	256.948	1016.34	1573.12	161.81	838.639	1568.9	286.681	872.877	1583.48	225.933	797.136	1432.14	246.37	697.989	1180.49	241.36	938.605	1327.88	240.585	987.165	1147.02	288.639	698.2	1260.01	65.1611	869.073	1356.04	-0.484201	776.68	1142.67	-2.18598	762.422	1066.45	-49.2277	765.877	947.815	-33.4469	834.137	837.322	-72.2082	774.533	839.111	-80.3674	825.716	760.999
525	0	156.327	1019.25	1566.51	253.736	1030.58	1574.57	159.017	852.701	1569.79	283.768	887.161	1584.96	224.22	811.476	1433.53	246.158	712.027	1182.17	239.241	952.999	1329.2	238.719	1001.53	1148.3	288.175	712.665	1261.86	63.3729	882.442	1356.68	-0.919296	789.017	1143.35	-2.27926	774.504	1067.25	-49.376	776.533	948.608	-34.4026	844.194	837.682	-72.4103	784.124	839.789	-81.0012	834.486	761.213
526	0	153.335	1033.23	1567.7	250.624	1044.74	1576.17	156.32	866.695	1570.88	280.952	901.374	1586.62	222.574	825.701	1435.12	245.927	725.963	1184.07	237.197	967.257	1330.73	236.856	1015.75	1149.79	287.716	726.996	1263.9	61.6591	895.736	1357.59	-1.34828	801.416	1144.29	-2.39541	786.671	1068.28	-49.5085	787.487	949.625	-35.2464	854.688	838.375	-72.5544	794.191	840.705	-81.5069	843.873	761.753
527	0	150.465	1047.12	1569.04	247.635	1058.8	1577.91	153.74	880.6	1572.16	278.254	915.493	1588.44	221.003	839.789	1436.89	245.671	739.772	1186.14	235.242	981.356	1332.44	235.016	1029.81	1151.45	287.259	741.168	1266.11	60.0296	908.94	1358.75	-1.77504	813.864	1145.47	-2.54232	798.916	1069.53	-49.6371	798.744	950.843	-35.986	865.631	839.378	-72.6562	804.749	841.836	-81.9023	853.905	762.595
528	0	147.738	1060.9	1570.51	244.792	1072.75	1579.75	151.292	894.396	1573.61	275.692	929.498	1590.4	219.516	853.72	1438.81	245.382	753.432	1188.37	233.391	995.277	1334.33	233.217	1043.67	1153.27	286.803	755.154	1268.45	58.4919	922.042	1360.15	-2.20434	826.352	1146.86	-2.72804	811.231	1070.97	-49.7739	810.308	952.239	-36.6303	877.033	840.666	-72.7308	815.808	843.156	-82.2057	864.604	763.715
529	0	145.172	1074.56	1572.1	242.114	1086.57	1581.68	148.993	908.067	1575.22	273.284	943.373	1592.48	218.118	867.476	1440.86	245.057	766.925	1190.73	231.653	1009	1336.35	231.482	1057.31	1155.21	286.343	768.937	1270.91	57.0521	935.033	1361.76	-2.64181	838.868	1148.45	-2.96055	823.61	1072.59	-49.9303	822.18	953.79	-37.1885	888.898	842.215	-72.793	827.377	844.642	-82.4347	875.983	765.088
530	0	142.781	1088.08	1573.77	239.618	1100.23	1583.68	146.856	921.6	1576.95	271.043	957.1	1594.65	216.812	881.044	1443.03	244.688	780.236	1193.2	230.039	1022.52	1338.5	229.827	1070.72	1157.25	285.879	782.501	1273.46	55.7137	947.904	1363.56	-3.09386	851.405	1150.21	-3.24766	836.045	1074.34	-50.1172	834.357	955.471	-37.6703	901.229	843.999	-72.8564	839.456	846.268	-82.6058	888.05	766.691
531	0	140.578	1101.45	1575.52	237.32	1113.73	1585.71	144.89	934.982	1578.8	268.981	970.668	1596.88	215.602	894.411	1445.28	244.273	793.354	1195.74	228.552	1035.81	1340.74	228.27	1083.88	1159.39	285.405	795.835	1276.07	54.4784	960.649	1365.53	-3.56757	863.954	1152.11	-3.59674	848.529	1076.22	-50.3447	846.838	957.259	-38.0852	914.022	845.995	-72.9337	852.045	848.011	-82.7337	900.805	768.503
532	0	138.572	1114.66	1577.32	235.231	1127.06	1587.77	143.102	948.207	1580.74	267.107	984.066	1599.16	214.488	907.572	1447.6	243.809	806.273	1198.34	227.197	1048.88	1343.05	226.825	1096.78	1161.58	284.921	808.933	1278.72	53.3457	973.262	1367.64	-4.07045	876.508	1154.14	-4.01463	861.055	1078.2	-50.6217	859.615	959.131	-38.4423	927.27	848.181	-73.0361	865.139	849.85	-82.8308	914.242	770.504
533	0	136.77	1127.71	1579.16	233.357	1140.22	1589.83	141.496	961.269	1582.75	265.425	997.289	1601.45	213.468	920.522	1449.95	243.294	818.991	1200.96	225.972	1061.73	1345.42	225.503	1109.43	1163.83	284.423	821.793	1281.37	52.3135	985.743	1369.86	-4.61016	889.064	1156.26	-4.50751	873.618	1080.25	-50.956	872.682	961.065	-38.7504	940.963	850.536	-73.1737	878.728	851.765	-82.9076	928.347	772.676
534	0	135.174	1140.59	1581.03	231.702	1153.19	1591.87	140.07	974.166	1584.82	263.935	1010.33	1603.74	212.541	933.261	1452.32	242.729	831.51	1203.57	224.876	1074.34	1347.82	224.309	1121.83	1166.1	283.91	834.417	1284.01	51.3776	998.089	1372.18	-5.19418	901.616	1158.47	-5.08074	886.211	1082.35	-51.3544	886.03	963.042	-39.0177	955.087	853.039	-73.355	892.801	853.737	-82.9724	943.102	775.003
535	0	133.782	1153.31	1582.89	230.266	1165.98	1593.86	138.823	986.897	1586.91	262.637	1023.19	1606	211.701	945.791	1454.68	242.116	843.835	1206.16	223.903	1086.74	1350.24	223.246	1133.98	1168.39	283.382	846.813	1286.61	50.533	1010.3	1374.55	-5.82946	914.162	1160.72	-5.73882	898.83	1084.47	-51.822	899.647	965.04	-39.2521	969.625	855.674	-73.587	907.34	855.753	-83.0322	958.481	777.474
536	0	132.59	1165.87	1584.74	229.044	1178.6	1595.81	137.746	999.466	1589.01	261.523	1035.87	1608.21	210.945	958.118	1457.01	241.459	855.974	1208.7	223.045	1098.93	1352.64	222.313	1145.91	1170.68	282.839	858.989	1289.15	49.7732	1022.38	1376.97	-6.52212	926.698	1163.01	-6.48528	911.471	1086.6	-52.3632	913.523	967.045	-39.4607	984.558	858.423	-73.8752	922.329	857.798	-83.0921	974.454	780.076
537	0	131.591	1178.26	1586.55	228.028	1191.04	1597.68	136.832	1011.88	1591.11	260.586	1048.36	1610.35	210.268	970.25	1459.29	240.763	867.938	1211.17	222.295	1110.92	1355.02	221.504	1157.64	1172.95	282.284	870.959	1291.6	49.0913	1034.34	1379.41	-7.277	939.222	1165.3	-7.32261	924.131	1088.7	-52.9807	927.645	969.039	-39.6502	999.862	861.272	-74.224	937.745	859.862	-83.1568	990.989	782.799
538	0	130.772	1190.51	1588.32	227.207	1203.31	1599.46	136.07	1024.13	1593.16	259.814	1060.69	1612.4	209.662	982.198	1461.49	240.037	879.74	1213.55	221.641	1122.72	1357.34	220.811	1169.17	1175.19	281.718	882.738	1293.95	48.48	1046.17	1381.82	-8.09745	951.731	1167.58	-8.25221	936.807	1090.77	-53.6764	942	971.007	-39.8271	1015.51	864.204	-74.6361	953.566	861.935	-83.2303	1008.05	785.637
539	0	130.122	1202.6	1590.02	226.566	1215.42	1601.14	135.445	1036.24	1595.16	259.194	1072.85	1614.35	209.124	993.974	1463.61	239.288	891.394	1215.81	221.074	1134.35	1359.6	220.221	1180.55	1177.38	281.146	894.343	1296.18	47.932	1057.89	1384.21	-8.98505	964.225	1169.82	-9.27434	949.499	1092.77	-54.4508	956.572	972.937	-39.997	1031.49	867.207	-75.1135	969.766	864.009	-83.3166	1025.59	788.581
540	0	129.625	1214.56	1591.64	226.091	1227.37	1602.71	134.945	1048.22	1597.09	258.711	1084.84	1616.18	208.646	1005.59	1465.61	238.528	902.914	1217.93	220.583	1145.82	1361.77	219.722	1191.78	1179.5	280.573	905.793	1298.27	47.44	1069.49	1386.53	-9.93939	976.7	1172.01	-10.3881	962.205	1094.69	-55.3035	971.348	974.816	-40.1656	1047.75	870.266	-75.6568	986.319	866.078	-83.4195	1043.58	791.626
541	0	129.266	1226.4	1593.16	225.762	1239.18	1604.15	134.554	1060.06	1598.92	258.349	1096.69	1617.87	208.223	1017.07	1467.48	237.768	914.314	1219.91	220.156	1157.16	1363.83	219.297	1202.89	1181.54	280.004	917.107	1300.21	46.9975	1081	1388.77	-10.9581	989.155	1174.12	-11.5915	974.925	1096.52	-56.2332	986.313	976.635	-40.338	1064.28	873.37	-76.2657	1003.2	868.137	-83.5429	1061.96	794.765
542	0	129.028	1238.11	1594.56	225.561	1250.87	1605.46	134.259	1071.79	1600.64	258.092	1108.4	1619.42	207.85	1028.41	1469.21	237.02	925.609	1221.73	219.783	1168.38	1365.77	218.932	1213.9	1183.46	279.446	928.304	1301.98	46.5982	1092.41	1390.9	-12.0366	1001.59	1176.12	-12.8814	987.661	1098.22	-57.2376	1001.45	978.384	-40.5186	1081.05	876.504	-76.9388	1020.37	870.183	-83.6908	1080.7	797.993
543	0	128.893	1249.71	1595.84	225.47	1262.43	1606.61	134.044	1083.41	1602.22	257.924	1119.99	1620.8	207.523	1039.65	1470.78	236.296	936.812	1223.38	219.453	1179.51	1367.56	218.608	1224.84	1185.26	278.906	939.403	1303.58	46.2368	1103.74	1392.9	-13.1687	1014	1178.01	-14.2535	1000.41	1099.8	-58.3133	1016.75	980.055	-40.7118	1098.02	879.658	-77.6739	1037.8	872.212	-83.8669	1099.74	801.302
544	0	128.847	1261.22	1596.98	225.47	1273.88	1607.61	133.896	1094.93	1603.65	257.83	1131.46	1622.01	207.237	1050.8	1472.19	235.609	947.936	1224.84	219.158	1190.55	1369.2	218.309	1235.71	1186.91	278.391	950.422	1305	45.9086	1114.99	1394.75	-14.3463	1026.38	1179.75	-15.7026	1013.18	1101.23	-59.4564	1032.19	981.643	-40.921	1115.17	882.819	-78.4681	1055.47	874.223	-84.0741	1119.05	804.687
545	0	128.874	1272.65	1597.96	225.547	1285.23	1608.45	133.804	1106.37	1604.91	257.797	1142.83	1623.05	206.991	1061.86	1473.42	234.97	958.993	1226.11	218.888	1201.54	1370.65	218.02	1246.54	1188.39	277.909	961.379	1306.24	45.6099	1126.17	1396.44	-15.5601	1038.73	1181.34	-17.2224	1025.97	1102.51	-60.6619	1047.76	983.144	-41.1492	1132.46	885.976	-79.3173	1073.34	876.213	-84.3149	1138.57	808.138
546	0	128.96	1283.99	1598.78	225.683	1296.51	1609.11	133.757	1117.73	1606	257.812	1154.11	1623.9	206.782	1072.87	1474.47	234.391	969.993	1227.19	218.637	1212.48	1371.92	217.726	1257.34	1189.68	277.468	972.29	1307.28	45.3377	1137.3	1397.96	-16.7999	1051.06	1182.77	-18.8058	1038.79	1103.62	-61.9242	1063.44	984.554	-41.3985	1149.88	889.118	-80.2168	1091.38	878.183	-84.5902	1158.26	811.647
547	0	129.095	1295.28	1599.43	225.867	1307.71	1609.61	133.745	1129.03	1606.9	257.865	1165.32	1624.55	206.607	1083.83	1475.33	233.881	980.946	1228.08	218.398	1223.39	1372.98	217.413	1268.12	1190.77	277.075	983.17	1308.14	45.0902	1148.37	1399.29	-18.0549	1063.37	1184.01	-20.4448	1051.63	1104.57	-63.2369	1079.22	985.873	-41.6706	1167.38	892.236	-81.1613	1109.56	880.132	-84.8998	1178.08	815.203
548	0	129.269	1306.51	1599.9	226.088	1318.86	1609.92	133.763	1140.28	1607.6	257.949	1176.46	1625.02	206.468	1094.76	1476	233.449	991.86	1228.78	218.168	1234.28	1373.83	217.07	1278.89	1191.64	276.736	994.031	1308.8	44.8662	1159.4	1400.42	-19.3142	1075.64	1185.06	-22.1308	1064.49	1105.34	-64.5929	1095.08	987.1	-41.9659	1184.94	895.319	-82.1445	1127.84	882.06	-85.2414	1197.97	818.794
549	0	129.474	1317.69	1600.18	226.338	1329.96	1610.04	133.806	1151.48	1608.11	258.058	1187.56	1625.28	206.365	1105.67	1476.48	233.101	1002.74	1229.28	217.942	1245.18	1374.46	216.69	1289.66	1192.29	276.459	1004.89	1309.28	44.6657	1170.4	1401.35	-20.5672	1087.9	1185.92	-23.8545	1077.39	1105.94	-65.9843	1111.01	988.237	-42.2843	1202.53	898.359	-83.1596	1146.21	883.966	-85.6108	1217.89	822.406
550	0	129.706	1328.85	1600.28	226.612	1341.02	1609.99	133.87	1162.65	1608.41	258.189	1198.61	1625.35	206.298	1116.58	1476.77	232.841	1013.6	1229.6	217.719	1256.08	1374.88	216.264	1300.43	1192.7	276.248	1015.74	1309.57	44.4894	1181.38	1402.08	-21.8042	1100.14	1186.59	-25.6062	1090.32	1106.36	-67.4026	1126.99	989.287	-42.6246	1220.13	901.348	-84.1992	1164.62	885.85	-86.0021	1237.8	826.024
551	0	129.962	1339.98	1600.2	226.906	1352.06	1609.75	133.957	1173.8	1608.52	258.342	1209.64	1625.23	206.269	1127.49	1476.86	232.672	1024.45	1229.73	217.499	1267	1375.07	215.791	1311.21	1192.87	276.108	1026.61	1309.68	44.3391	1192.33	1402.61	-23.016	1112.36	1187.06	-27.3758	1103.29	1106.63	-68.8389	1143.01	990.252	-42.9848	1237.71	904.28	-85.2555	1183.04	887.711	-86.4069	1257.66	829.631
552	0	130.241	1351.09	1599.93	227.22	1363.09	1609.33	134.067	1184.92	1608.43	258.517	1220.65	1624.92	206.282	1138.4	1476.78	232.594	1035.28	1229.69	217.284	1277.94	1375.04	215.269	1322	1192.82	276.044	1037.5	1309.62	44.2171	1203.27	1402.95	-24.1947	1124.57	1187.35	-29.1526	1116.29	1106.73	-70.2835	1159.05	991.137	-43.3617	1255.24	907.148	-86.3202	1201.45	889.548	-86.8154	1277.42	833.211
553	0	130.546	1362.2	1599.47	227.556	1374.1	1608.73	134.204	1196.04	1608.15	258.717	1231.66	1624.43	206.34	1149.34	1476.51	232.607	1046.12	1229.48	217.076	1288.91	1374.81	214.701	1332.81	1192.53	276.057	1048.42	1309.4	44.1267	1214.21	1403.09	-25.3335	1136.78	1187.47	-30.9262	1129.32	1106.68	-71.7265	1175.09	991.945	-43.7512	1272.71	909.944	-87.3845	1219.82	891.36	-87.2159	1297.06	836.743
554	0	130.881	1373.3	1598.85	227.918	1385.12	1607.96	134.372	1207.16	1607.68	258.949	1242.66	1623.77	206.446	1160.29	1476.07	232.707	1056.96	1229.1	216.881	1299.92	1374.37	214.093	1343.65	1192.03	276.15	1059.37	1309.01	44.0721	1225.14	1403.06	-26.4267	1148.99	1187.41	-32.6855	1142.39	1106.49	-73.1572	1191.13	992.682	-44.1479	1290.09	912.664	-88.4394	1238.12	893.142	-87.5953	1316.53	840.209
555	0	131.25	1384.4	1598.06	228.312	1396.14	1607.03	134.579	1218.27	1607.05	259.218	1253.66	1622.93	206.604	1171.27	1475.46	232.891	1067.81	1228.57	216.704	1310.96	1373.74	213.453	1354.51	1191.33	276.322	1070.35	1308.46	44.0577	1236.08	1402.85	-27.4697	1161.2	1187.2	-34.4198	1155.5	1106.17	-74.5651	1207.13	993.352	-44.5454	1307.35	915.301	-89.4756	1256.33	894.892	-87.9397	1335.8	843.59
556	0	131.66	1395.5	1597.11	228.745	1407.17	1605.94	134.832	1229.39	1606.26	259.532	1264.67	1621.94	206.819	1182.28	1474.7	233.154	1078.68	1227.89	216.552	1322.04	1372.94	212.792	1365.41	1190.44	276.572	1081.36	1307.77	44.0886	1247.02	1402.49	-28.4584	1173.43	1186.85	-36.1181	1168.63	1105.73	-75.939	1223.09	993.958	-44.9365	1324.48	917.849	-90.4836	1274.42	896.605	-88.2349	1354.85	846.866
557	0	132.119	1406.61	1596.01	229.225	1418.2	1604.71	135.138	1240.51	1605.33	259.9	1275.68	1620.81	207.096	1193.32	1473.78	233.489	1089.58	1227.07	216.432	1333.16	1371.97	212.123	1376.34	1189.38	276.9	1092.42	1306.93	44.1702	1257.99	1401.98	-29.3895	1185.67	1186.38	-37.7695	1181.78	1105.19	-77.2677	1238.99	994.503	-45.3125	1341.46	920.302	-91.4537	1292.36	898.276	-88.4666	1373.64	850.02
558	0	132.636	1417.73	1594.79	229.763	1429.25	1603.35	135.508	1251.65	1604.26	260.331	1286.71	1619.55	207.437	1204.38	1472.74	233.889	1100.51	1226.11	216.355	1344.32	1370.86	211.461	1387.31	1188.18	277.301	1103.52	1305.95	44.3084	1268.97	1401.34	-30.2598	1197.93	1185.8	-39.3631	1194.95	1104.56	-78.5399	1254.8	994.991	-45.6642	1358.26	922.653	-92.376	1310.13	899.899	-88.6214	1392.16	853.032
559	0	133.22	1428.86	1593.46	230.366	1440.31	1601.87	135.95	1262.78	1603.08	260.835	1297.75	1618.16	207.848	1215.46	1471.56	234.345	1111.49	1225.02	216.33	1355.51	1369.63	210.823	1398.33	1186.86	277.771	1114.67	1304.84	44.5088	1279.98	1400.59	-31.0661	1210.2	1185.13	-40.8879	1208.14	1103.86	-79.7443	1270.52	995.425	-45.9816	1374.88	924.895	-93.2404	1327.71	901.466	-88.687	1410.39	855.889
560	0	133.882	1440	1592.03	231.047	1451.38	1600.28	136.474	1273.93	1601.81	261.421	1308.8	1616.68	208.333	1226.57	1470.27	234.851	1122.52	1223.8	216.365	1366.74	1368.29	210.225	1409.41	1185.44	278.306	1125.85	1303.6	44.7771	1291.02	1399.74	-31.8051	1222.5	1184.38	-42.3329	1221.32	1103.08	-80.8697	1286.13	995.804	-46.2541	1391.29	927.021	-94.037	1345.08	902.971	-88.6531	1428.31	858.574
561	0	134.629	1451.14	1590.52	231.814	1462.45	1598.61	137.089	1285.08	1600.46	262.099	1319.86	1615.1	208.895	1237.7	1468.88	235.397	1133.61	1222.47	216.472	1378	1366.86	209.685	1420.55	1183.95	278.899	1137.09	1302.24	45.1189	1302.09	1398.81	-32.4726	1234.81	1183.57	-43.6872	1234.5	1102.26	-81.9051	1301.6	996.131	-46.4709	1407.49	929.021	-94.7558	1362.22	904.404	-88.5114	1445.9	861.075
562	0	135.471	1462.29	1588.94	232.677	1473.54	1596.87	137.802	1296.25	1599.05	262.876	1330.93	1613.46	209.537	1248.85	1467.39	235.973	1144.77	1221.02	216.659	1389.3	1365.37	209.219	1431.77	1182.4	279.542	1148.37	1300.76	45.5391	1313.21	1397.81	-33.0639	1247.14	1182.71	-44.9397	1247.67	1101.4	-82.8396	1316.93	996.405	-46.6211	1423.46	930.888	-95.3869	1379.12	905.759	-88.2561	1463.16	863.379
563	0	136.416	1473.45	1587.33	233.644	1484.64	1595.08	138.623	1307.41	1597.6	263.763	1342	1611.75	210.261	1260.01	1465.84	236.571	1156	1219.47	216.936	1400.63	1363.83	208.841	1443.06	1180.83	280.229	1159.69	1299.18	46.0423	1324.38	1396.76	-33.5735	1259.48	1181.82	-46.0795	1260.81	1100.51	-83.6628	1332.1	996.627	-46.6941	1439.18	932.613	-95.9208	1395.74	907.026	-87.8841	1480.07	865.478
564	0	137.471	1484.62	1585.69	234.722	1495.74	1593.25	139.557	1318.59	1596.12	264.765	1353.08	1610.02	211.069	1271.19	1464.22	237.182	1167.31	1217.83	217.312	1411.99	1362.27	208.567	1454.43	1179.26	280.95	1171.06	1297.49	46.6321	1335.59	1395.68	-33.9953	1271.83	1180.9	-47.0954	1273.91	1099.61	-84.3649	1347.09	996.796	-46.6798	1454.65	934.187	-96.3481	1412.08	908.196	-87.3948	1496.63	867.362
565	0	138.642	1495.8	1584.05	235.918	1506.85	1591.4	140.611	1329.77	1594.65	265.888	1364.17	1608.26	211.961	1282.37	1462.55	237.796	1178.71	1216.1	217.793	1423.38	1360.69	208.408	1465.9	1177.71	281.698	1182.47	1295.72	47.3114	1346.86	1394.58	-34.3224	1284.18	1179.98	-47.9767	1286.97	1098.7	-84.9362	1361.89	996.91	-46.5689	1469.86	935.6	-96.6599	1428.12	909.26	-86.79	1512.82	869.024
566	0	139.933	1506.98	1582.41	237.236	1517.97	1589.55	141.788	1340.96	1593.2	267.136	1375.27	1606.51	212.937	1293.56	1460.85	238.403	1190.19	1214.3	218.386	1434.79	1359.13	208.374	1477.46	1176.19	282.462	1193.92	1293.86	48.082	1358.18	1393.48	-34.5475	1296.53	1179.06	-48.7128	1299.98	1097.8	-85.3681	1376.5	996.971	-46.3533	1484.8	936.844	-96.8481	1443.84	910.212	-86.0738	1528.63	870.458
567	0	141.348	1518.18	1580.82	238.68	1529.1	1587.72	143.09	1352.16	1591.79	268.512	1386.38	1604.77	213.995	1304.76	1459.14	238.996	1201.77	1212.43	219.096	1446.23	1357.6	208.473	1489.13	1174.74	283.233	1205.42	1291.93	48.9445	1369.57	1392.39	-34.6632	1308.87	1178.15	-49.2936	1312.93	1096.91	-85.6526	1390.88	996.978	-46.026	1499.47	937.912	-96.905	1459.24	911.044	-85.2518	1544.07	871.659
568	0	142.885	1529.39	1579.27	240.249	1540.25	1585.92	144.519	1363.37	1590.44	270.017	1397.5	1603.08	215.134	1315.95	1457.44	239.564	1213.43	1210.52	219.925	1457.69	1356.12	208.707	1500.9	1173.36	284.001	1216.95	1289.94	49.8982	1381.01	1391.34	-34.662	1321.21	1177.27	-49.7094	1325.82	1096.05	-85.7826	1405.04	996.932	-45.5816	1513.84	938.796	-96.824	1474.29	911.751	-84.331	1559.12	872.622
569	0	144.546	1540.62	1577.78	241.943	1551.41	1584.17	146.073	1374.6	1589.17	271.648	1408.64	1601.44	216.35	1327.15	1455.75	240.1	1225.19	1208.58	220.874	1469.17	1354.7	209.081	1512.79	1172.08	284.758	1228.52	1287.92	50.9413	1392.52	1390.33	-34.537	1333.53	1176.41	-49.9517	1338.63	1095.23	-85.7522	1418.97	996.836	-45.0158	1527.93	939.493	-96.5994	1488.98	912.328	-83.319	1573.77	873.346
570	0	146.325	1551.87	1576.39	243.758	1562.59	1582.48	147.748	1385.85	1588	273.403	1419.81	1599.88	217.637	1338.34	1454.11	240.595	1237.03	1206.63	221.942	1480.67	1353.36	209.591	1524.78	1170.91	285.492	1240.11	1285.87	52.0702	1404.09	1389.4	-34.2817	1345.83	1175.61	-50.0132	1351.35	1094.45	-85.5566	1432.65	996.691	-44.326	1541.72	939.998	-96.2267	1503.31	912.774	-82.2237	1588.02	873.826
571	0	148.218	1563.15	1575.08	245.69	1573.8	1580.89	149.539	1397.14	1586.95	275.276	1431	1598.43	218.99	1349.53	1452.53	241.043	1248.96	1204.7	223.126	1492.18	1352.12	210.236	1536.89	1169.86	286.197	1251.74	1283.82	53.2804	1415.72	1388.55	-33.8909	1358.12	1174.85	-49.8879	1364	1093.73	-85.1925	1446.08	996.504	-43.5105	1555.2	940.311	-95.7027	1517.26	913.087	-81.0525	1601.84	874.062
572	0	150.218	1574.46	1573.9	247.731	1585.03	1579.39	151.439	1408.45	1586.05	277.258	1442.22	1597.09	220.401	1360.72	1451.04	241.437	1260.97	1202.79	224.42	1503.71	1351	211.01	1549.09	1168.97	286.863	1263.39	1281.8	54.5653	1427.41	1387.8	-33.3609	1370.39	1174.17	-49.5717	1376.55	1093.09	-84.6578	1459.26	996.281	-42.5691	1568.37	940.434	-95.0255	1530.82	913.273	-79.812	1615.24	874.056
573	0	152.315	1585.81	1572.84	249.871	1596.31	1578	153.438	1419.81	1585.3	279.341	1453.49	1595.89	221.862	1371.9	1449.64	241.771	1273.05	1200.95	225.817	1515.24	1350.01	211.902	1561.39	1168.22	287.482	1275.06	1279.81	55.9171	1439.16	1387.18	-32.6895	1382.64	1173.58	-49.0629	1389.01	1092.54	-83.9524	1472.17	996.031	-41.5025	1581.23	940.373	-94.1948	1543.99	913.334	-78.5077	1628.2	873.809
574	0	154.498	1597.2	1571.92	252.1	1607.63	1576.74	155.524	1431.22	1584.72	281.511	1464.8	1594.85	223.364	1383.07	1448.37	242.04	1285.18	1199.19	227.306	1526.78	1349.16	212.903	1573.77	1167.65	288.048	1286.73	1277.9	57.3266	1450.95	1386.69	-31.8771	1394.86	1173.08	-48.362	1401.38	1092.08	-83.0779	1484.81	995.763	-40.3121	1593.77	940.135	-93.212	1556.76	913.281	-77.1433	1640.69	873.329
575	0	156.755	1608.65	1571.16	254.402	1619	1575.62	157.685	1442.67	1584.34	283.756	1476.16	1593.98	224.895	1394.24	1447.24	242.24	1297.36	1197.55	228.875	1538.31	1348.47	214	1586.22	1167.27	288.554	1298.42	1276.08	58.783	1462.79	1386.36	-30.9266	1407.07	1172.7	-47.4727	1413.64	1091.75	-82.0381	1497.18	995.491	-39.0006	1605.97	939.733	-92.0803	1569.13	913.123	-75.7212	1652.72	872.623
576	0	159.07	1620.14	1570.56	256.763	1630.42	1574.66	159.905	1454.19	1584.16	286.06	1487.58	1593.29	226.444	1405.39	1446.27	242.37	1309.57	1196.04	230.509	1549.84	1347.95	215.177	1598.73	1167.07	288.996	1310.1	1274.38	60.2742	1474.67	1386.21	-29.8441	1419.26	1172.45	-46.4017	1425.81	1091.54	-80.839	1509.28	995.228	-37.5712	1617.85	939.179	-90.8047	1581.08	912.875	-74.2415	1664.27	871.704
577	0	161.427	1631.7	1570.12	259.167	1641.9	1573.85	162.169	1465.77	1584.19	288.407	1499.07	1592.8	227.998	1416.55	1445.48	242.428	1321.8	1194.7	232.193	1561.36	1347.62	216.416	1611.26	1167.09	289.369	1321.77	1272.83	61.7869	1486.57	1386.24	-28.6387	1431.42	1172.36	-45.1591	1437.86	1091.47	-79.4889	1521.11	994.988	-36.028	1629.39	938.493	-89.3923	1592.63	912.552	-72.703	1675.33	870.588
578	0	163.811	1643.31	1569.87	261.595	1653.44	1573.21	164.459	1477.4	1584.44	290.779	1510.62	1592.51	229.544	1427.69	1444.88	242.415	1334.03	1193.54	233.907	1572.86	1347.49	217.7	1623.8	1167.31	289.671	1333.42	1271.45	63.3067	1498.49	1386.48	-27.3236	1443.55	1172.44	-43.7587	1449.81	1091.57	-77.9989	1532.66	994.787	-34.3766	1640.59	937.693	-87.8521	1603.78	912.171	-71.1031	1685.89	869.295
579	0	166.202	1654.98	1569.79	264.029	1665.04	1572.75	166.757	1489.11	1584.91	293.158	1522.23	1592.43	231.067	1438.82	1444.49	242.332	1346.25	1192.59	235.632	1584.33	1347.55	219.007	1636.32	1167.75	289.9	1345.05	1270.25	64.8184	1510.43	1386.92	-25.9151	1455.65	1172.7	-42.2178	1461.64	1091.83	-76.3826	1543.94	994.64	-32.6234	1651.44	936.802	-86.1953	1614.53	911.751	-69.4381	1695.95	867.847
580	0	168.582	1666.71	1569.89	266.449	1676.69	1572.46	169.044	1500.87	1585.6	295.523	1533.91	1592.55	232.554	1449.94	1444.3	242.183	1358.43	1191.87	237.348	1595.78	1347.81	220.316	1648.8	1168.4	290.057	1356.65	1269.27	66.3061	1522.36	1387.58	-24.4333	1467.72	1173.15	-40.5574	1473.35	1092.27	-74.656	1554.96	994.561	-30.7765	1661.94	935.843	-84.435	1624.88	911.312	-67.7041	1705.51	866.271
581	0	170.933	1678.49	1570.17	268.836	1688.4	1572.35	171.301	1512.69	1586.5	297.856	1545.64	1592.88	233.989	1461.05	1444.33	241.972	1370.57	1191.38	239.033	1607.2	1348.28	221.605	1661.21	1169.26	290.143	1368.21	1268.52	67.7538	1534.28	1388.45	-22.9018	1479.75	1173.81	-38.8014	1484.93	1092.89	-72.8378	1565.7	994.563	-28.8458	1672.09	934.841	-82.5867	1634.85	910.872	-65.898	1714.58	864.594
582	0	173.236	1690.31	1570.62	271.169	1700.15	1572.41	173.507	1524.56	1587.6	300.135	1557.43	1593.41	235.361	1472.15	1444.57	241.708	1382.64	1191.14	240.664	1618.57	1348.95	222.85	1673.53	1170.32	290.161	1379.73	1268	69.145	1546.18	1389.52	-21.3467	1491.72	1174.66	-36.9769	1496.38	1093.69	-70.949	1576.19	994.657	-26.8431	1681.91	933.82	-80.6673	1644.46	910.448	-64.0179	1723.18	862.846
583	0	175.471	1702.18	1571.24	273.432	1711.94	1572.63	175.644	1536.48	1588.89	302.342	1569.26	1594.12	236.654	1483.24	1445.02	241.398	1394.63	1191.15	242.221	1629.9	1349.81	224.031	1685.73	1171.55	290.116	1391.2	1267.72	70.4638	1558.05	1390.8	-19.7964	1503.63	1175.72	-35.1127	1507.68	1094.67	-69.0123	1586.43	994.85	-24.7827	1691.38	932.803	-78.696	1653.72	910.056	-62.0646	1731.31	861.057
584	0	177.622	1714.08	1572.01	275.604	1723.77	1573.02	177.692	1548.43	1590.35	304.457	1581.12	1595	237.857	1494.32	1445.68	241.051	1406.53	1191.41	243.681	1641.19	1350.84	225.125	1697.79	1172.95	290.013	1402.61	1267.69	71.6945	1569.86	1392.26	-18.2804	1515.46	1176.97	-33.2393	1518.83	1095.83	-67.0522	1596.42	995.148	-22.6814	1700.53	931.812	-76.6933	1662.64	909.711	-60.0423	1739.01	859.257
585	0	179.671	1726.01	1572.93	277.67	1735.61	1573.55	179.631	1560.42	1591.95	306.46	1593.01	1596.03	238.959	1505.39	1446.53	240.678	1418.32	1191.9	245.026	1652.42	1352.04	226.111	1709.69	1174.49	289.862	1413.97	1267.91	72.8224	1581.62	1393.88	-16.8281	1527.2	1178.4	-31.3872	1529.83	1097.14	-65.094	1606.17	995.55	-20.5584	1709.37	930.868	-74.6809	1671.25	909.423	-57.9596	1746.31	857.474
586	0	181.603	1737.95	1573.97	279.613	1747.46	1574.22	181.444	1572.42	1593.69	308.332	1604.91	1597.19	239.949	1516.45	1447.55	240.289	1430.01	1192.63	246.236	1663.6	1353.37	226.969	1721.43	1176.13	289.669	1425.28	1268.35	73.834	1593.3	1395.64	-15.4678	1538.84	1179.99	-29.5866	1540.66	1098.6	-63.1635	1615.69	996.056	-18.4357	1717.91	929.986	-72.6818	1679.58	909.198	-55.83	1753.26	855.735
587	0	183.401	1749.89	1575.13	281.419	1759.31	1575.01	183.115	1584.43	1595.52	310.059	1616.81	1598.46	240.821	1527.5	1448.75	239.896	1441.56	1193.57	247.295	1674.73	1354.83	227.684	1733	1177.84	289.444	1436.52	1269.03	74.7173	1604.91	1397.52	-14.2254	1550.35	1181.71	-27.8658	1551.32	1100.19	-61.2861	1624.99	996.659	-16.3378	1726.17	929.181	-70.7191	1687.64	909.041	-53.6724	1759.88	854.063
588	0	185.054	1761.84	1576.38	283.075	1771.16	1575.9	184.626	1596.44	1597.43	311.622	1628.7	1599.83	241.565	1538.54	1450.09	239.51	1452.99	1194.71	248.189	1685.81	1356.37	228.241	1744.38	1179.61	289.197	1447.7	1269.92	75.4619	1616.41	1399.48	-13.1228	1561.72	1183.54	-26.2508	1561.8	1101.87	-59.4865	1634.07	997.35	-14.2911	1734.18	928.461	-68.8164	1695.45	908.953	-51.5109	1766.23	852.479
589	0	186.55	1773.77	1577.7	284.571	1782.97	1576.88	185.965	1608.44	1599.38	313.009	1640.57	1601.25	242.179	1549.57	1451.55	239.14	1464.29	1196.02	248.906	1696.84	1357.99	228.629	1755.59	1181.39	288.935	1458.81	1271	76.0595	1627.82	1401.49	-12.1776	1572.94	1185.45	-24.764	1572.09	1103.64	-57.7876	1642.96	998.119	-12.3236	1741.97	927.834	-66.9969	1703.05	908.929	-49.3747	1772.36	851.001
590	0	187.878	1785.68	1579.07	285.896	1794.76	1577.93	187.119	1620.42	1601.36	314.209	1652.41	1602.73	242.659	1560.59	1453.11	238.797	1475.45	1197.49	249.439	1707.82	1359.64	228.841	1766.63	1183.16	288.669	1469.87	1272.26	76.5042	1639.11	1403.52	-11.4017	1583.98	1187.4	-23.4236	1582.19	1105.46	-56.2105	1651.64	998.95	-10.4639	1749.54	927.303	-65.2829	1710.44	908.966	-47.2967	1778.32	849.642
591	0	189.031	1797.56	1580.47	287.044	1806.51	1579.02	188.078	1632.37	1603.34	315.21	1664.21	1604.22	243.003	1571.61	1454.76	238.487	1486.48	1199.09	249.781	1718.75	1361.31	228.872	1777.51	1184.9	288.407	1480.86	1273.67	76.792	1650.29	1405.55	-10.8011	1594.82	1189.37	-22.2436	1592.1	1107.3	-54.7735	1660.14	999.83	-8.74064	1756.94	926.867	-63.6955	1717.66	909.055	-45.3131	1784.14	848.413
592	0	190.001	1809.41	1581.87	288.007	1818.21	1580.13	188.834	1644.3	1605.29	316.006	1675.96	1605.72	243.212	1582.61	1456.46	238.217	1497.38	1200.79	249.931	1729.62	1362.98	228.723	1788.23	1186.57	288.155	1491.8	1275.21	76.9216	1661.34	1407.54	-10.3759	1605.45	1191.33	-21.2332	1601.82	1109.14	-53.492	1668.46	1000.74	-7.18122	1764.18	926.523	-62.2542	1724.72	909.187	-43.4611	1789.89	847.321
593	0	190.783	1821.22	1583.25	288.78	1829.86	1581.25	189.383	1656.19	1607.18	316.592	1687.66	1607.2	243.288	1593.6	1458.19	237.991	1508.15	1202.56	249.891	1740.46	1364.61	228.396	1798.82	1188.16	287.919	1502.68	1276.86	76.8936	1672.27	1409.46	-10.1207	1615.85	1193.24	-20.3969	1611.34	1110.96	-52.3784	1676.61	1001.67	-5.81093	1771.29	926.263	-60.976	1731.63	909.35	-41.7782	1795.6	846.37
594	0	191.374	1832.99	1584.59	289.361	1841.46	1582.36	189.721	1668.03	1609.01	316.964	1699.31	1608.65	243.234	1604.59	1459.93	237.811	1518.8	1204.37	249.663	1751.25	1366.19	227.898	1809.29	1189.66	287.703	1513.5	1278.57	76.711	1683.07	1411.29	-10.0253	1626.02	1195.08	-19.7349	1620.66	1112.74	-51.4416	1684.59	1002.59	-4.652	1778.29	926.079	-59.8758	1738.42	909.531	-40.2998	1801.31	845.559
595	0	191.771	1844.71	1585.87	289.747	1853	1583.43	189.849	1679.82	1610.74	317.124	1710.9	1610.04	243.054	1615.55	1461.65	237.679	1529.34	1206.21	249.255	1761.99	1367.7	227.237	1819.65	1191.05	287.51	1524.28	1280.34	76.3787	1693.74	1413.02	-10.0756	1635.93	1196.83	-19.2433	1629.79	1114.44	-50.687	1692.42	1003.5	-3.72277	1785.21	925.957	-58.9654	1745.1	909.719	-39.0579	1807.06	844.884
596	0	191.974	1856.37	1587.06	289.937	1864.48	1584.46	189.769	1691.56	1612.37	317.074	1722.43	1611.38	242.754	1626.51	1463.34	237.59	1539.77	1208.03	248.676	1772.7	1369.12	226.427	1829.92	1192.31	287.339	1535	1282.13	75.9032	1704.29	1414.61	-10.255	1645.59	1198.46	-18.9154	1638.73	1116.06	-50.1171	1700.1	1004.37	-3.03713	1792.06	925.883	-58.2539	1751.69	909.898	-38.08	1812.88	844.34
597	0	191.984	1867.98	1588.16	289.934	1875.9	1585.41	189.485	1703.25	1613.87	316.818	1733.91	1612.63	242.34	1637.45	1464.96	237.541	1550.11	1209.82	247.937	1783.36	1370.44	225.481	1840.11	1193.45	287.188	1545.68	1283.91	75.2927	1714.73	1416.05	-10.5457	1655	1199.97	-18.7414	1647.5	1117.58	-49.7312	1707.64	1005.19	-2.60405	1798.85	925.841	-57.7468	1758.19	910.055	-37.3878	1818.8	843.914
598	0	191.802	1879.53	1589.14	289.738	1887.27	1586.29	189.004	1714.88	1615.24	316.362	1745.33	1613.79	241.817	1648.37	1466.51	237.524	1560.38	1211.54	247.05	1793.99	1371.64	224.416	1850.22	1194.45	287.053	1556.32	1285.65	74.556	1725.05	1417.34	-10.9295	1664.15	1201.33	-18.7101	1656.1	1118.97	-49.5261	1715.06	1005.94	-2.42752	1805.6	925.812	-57.447	1764.62	910.176	-36.9961	1824.83	843.595
599	0	191.432	1891.02	1589.99	289.353	1898.59	1587.07	188.334	1726.45	1616.45	315.715	1756.7	1614.85	241.193	1659.28	1467.95	237.531	1570.57	1213.18	246.029	1804.59	1372.71	223.247	1860.28	1195.31	286.929	1566.92	1287.34	73.7033	1735.29	1418.45	-11.3893	1673.06	1202.54	-18.8089	1664.55	1120.24	-49.4961	1722.36	1006.61	-2.5066	1812.32	925.779	-57.3538	1770.99	910.248	-36.9132	1830.99	843.364
600	0	190.879	1902.46	1590.7	288.784	1909.85	1587.74	187.485	1737.97	1617.5	314.886	1768.02	1615.8	240.473	1670.17	1469.28	237.552	1580.71	1214.71	244.887	1815.15	1373.64	221.994	1870.3	1196.01	286.807	1577.49	1288.93	72.7447	1745.43	1419.38	-11.9098	1681.76	1203.58	-19.025	1672.85	1121.37	-49.6334	1729.57	1007.19	-2.83576	1819.03	925.719	-57.4638	1777.31	910.256	-37.14	1837.29	843.202
601	0	190.147	1913.84	1591.25	288.037	1921.07	1588.3	186.468	1749.42	1618.39	313.885	1779.29	1616.62	239.663	1681.05	1470.47	237.575	1590.8	1216.12	243.641	1825.7	1374.43	220.674	1880.28	1196.56	286.678	1588.03	1290.43	71.6907	1755.51	1420.11	-12.4779	1690.25	1204.46	-19.3454	1681.04	1122.34	-49.929	1736.68	1007.66	-3.40533	1825.73	925.614	-57.771	1783.59	910.187	-37.671	1843.73	843.084
602	0	189.242	1925.16	1591.64	287.117	1932.25	1588.73	185.293	1760.81	1619.09	312.724	1790.53	1617.32	238.77	1691.9	1471.51	237.586	1600.87	1217.39	242.305	1836.21	1375.06	219.305	1890.22	1196.95	286.534	1598.54	1291.79	70.5517	1765.53	1420.66	-13.0833	1698.57	1205.16	-19.758	1689.12	1123.15	-50.3725	1743.72	1008.02	-4.20218	1832.42	925.441	-58.2667	1789.85	910.028	-38.4945	1850.29	842.986
603	0	188.171	1936.43	1591.86	286.031	1943.4	1589.02	183.972	1772.15	1619.61	311.412	1801.73	1617.87	237.798	1702.75	1472.4	237.573	1610.91	1218.5	240.892	1846.72	1375.52	217.904	1900.15	1197.18	286.363	1609.03	1293.01	69.3375	1775.52	1421	-13.7186	1706.75	1205.68	-20.2515	1697.13	1123.8	-50.9525	1750.71	1008.24	-5.21035	1839.12	925.181	-58.9402	1796.1	909.766	-39.5936	1856.99	842.879
604	0	186.941	1947.65	1591.91	284.785	1954.52	1589.17	182.517	1783.43	1619.93	309.962	1812.9	1618.28	236.752	1713.58	1473.1	237.521	1620.95	1219.43	239.417	1857.2	1375.81	216.486	1910.06	1197.24	286.155	1619.51	1294.07	68.0575	1785.47	1421.14	-14.3792	1714.83	1206.03	-20.8158	1705.07	1124.28	-51.6574	1757.66	1008.33	-6.41182	1845.83	924.813	-59.7791	1802.34	909.389	-40.9469	1863.79	842.732
605	0	185.558	1958.83	1591.77	283.387	1965.61	1589.17	180.937	1794.66	1620.06	308.382	1824.05	1618.54	235.637	1724.41	1473.63	237.418	1630.98	1220.19	237.892	1867.69	1375.93	215.066	1919.96	1197.13	285.899	1629.98	1294.95	66.7199	1795.42	1421.07	-15.063	1722.84	1206.2	-21.4422	1712.98	1124.58	-52.4754	1764.58	1008.26	-7.78722	1852.56	924.317	-60.7698	1808.59	908.885	-42.53	1870.68	842.516
606	0	184.028	1969.96	1591.45	281.843	1976.68	1589.02	179.244	1805.84	1619.98	306.683	1835.18	1618.63	234.456	1735.22	1473.97	237.252	1641.03	1220.76	236.329	1878.16	1375.87	213.656	1929.87	1196.85	285.586	1640.43	1295.65	65.3321	1805.37	1420.8	-15.7703	1730.83	1206.19	-22.1233	1720.89	1124.7	-53.3949	1771.5	1008.04	-9.31644	1859.31	923.677	-61.8976	1814.85	908.245	-44.3159	1877.65	842.201
607	0	182.359	1981.05	1590.95	280.159	1987.74	1588.71	177.446	1816.97	1619.71	304.874	1846.3	1618.57	233.212	1746.03	1474.11	237.01	1651.1	1221.13	234.737	1888.64	1375.62	212.266	1939.78	1196.39	285.206	1650.89	1296.15	63.9003	1815.34	1420.33	-16.503	1738.82	1206	-22.8531	1728.8	1124.63	-54.4045	1778.43	1007.65	-10.9793	1866.09	922.875	-63.1477	1821.14	907.458	-46.2765	1884.67	841.756
608	0	180.555	1992.1	1590.25	278.34	1998.79	1588.24	175.552	1828.07	1619.22	302.963	1857.41	1618.34	231.907	1756.84	1474.05	236.684	1661.2	1221.3	233.124	1899.13	1375.19	210.903	1949.71	1195.75	284.75	1661.34	1296.45	62.4293	1825.35	1419.65	-17.2645	1746.86	1205.64	-23.6268	1736.76	1124.39	-55.4934	1785.39	1007.09	-12.7561	1872.91	921.897	-64.5051	1827.45	906.515	-48.3831	1891.72	841.153
609	0	178.624	2003.12	1589.37	276.393	2009.84	1587.61	173.57	1839.12	1618.53	300.956	1868.51	1617.93	230.543	1767.64	1473.79	236.264	1671.33	1221.26	231.497	1909.63	1374.57	209.572	1959.67	1194.94	284.213	1671.8	1296.54	60.9226	1835.39	1418.77	-18.0593	1754.98	1205.09	-24.4408	1744.77	1123.95	-56.6516	1792.4	1006.36	-14.6279	1879.77	920.729	-65.9552	1833.82	905.409	-50.6076	1898.77	840.365
610	0	176.569	2014.11	1588.3	274.321	2020.89	1586.82	171.504	1850.14	1617.63	298.86	1879.62	1617.36	229.119	1778.45	1473.32	235.747	1681.51	1221.02	229.858	1920.15	1373.76	208.276	1969.66	1193.96	283.588	1682.26	1296.43	59.3822	1845.49	1417.7	-18.8921	1763.22	1204.36	-25.2923	1752.87	1123.32	-57.8697	1799.47	1005.44	-16.5772	1886.67	919.36	-67.4844	1840.22	904.134	-52.9231	1905.82	839.368
611	0	174.395	2025.07	1587.05	272.129	2031.94	1585.86	169.361	1861.13	1616.53	296.679	1890.74	1616.62	227.636	1789.27	1472.65	235.127	1691.73	1220.57	228.209	1930.69	1372.77	207.016	1979.69	1192.81	282.871	1692.75	1296.1	57.8089	1855.64	1416.43	-19.7679	1771.59	1203.45	-26.1794	1761.06	1122.5	-59.1396	1806.62	1004.33	-18.5879	1893.63	917.78	-69.0799	1846.69	902.683	-55.3044	1912.85	838.14
612	0	172.106	2036.01	1585.62	269.82	2043	1584.74	167.143	1872.09	1615.22	294.416	1901.86	1615.7	226.092	1800.09	1471.77	234.403	1702.01	1219.91	226.549	1941.26	1371.6	205.788	1989.77	1191.49	282.06	1703.25	1295.55	56.2018	1865.86	1414.97	-20.6917	1780.13	1202.36	-27.1008	1769.38	1121.49	-60.4537	1813.85	1003.03	-20.6457	1900.65	915.982	-70.7301	1853.22	901.054	-57.7291	1919.83	836.664
613	0	169.705	2046.93	1584.02	267.397	2054.06	1583.47	164.853	1883.03	1613.72	292.075	1912.98	1614.62	224.486	1810.92	1470.7	233.578	1712.34	1219.04	224.876	1951.87	1370.26	204.586	1999.92	1190.02	281.153	1713.79	1294.81	54.5591	1876.15	1413.32	-21.6679	1788.84	1201.08	-28.0553	1777.83	1120.29	-61.8055	1821.19	1001.55	-22.7381	1907.73	913.961	-72.425	1859.82	899.244	-60.1774	1926.77	834.924
614	0	167.195	2057.83	1582.25	264.862	2065.14	1582.05	162.491	1893.94	1612.03	289.656	1924.12	1613.37	222.815	1821.77	1469.44	232.653	1722.74	1217.98	223.184	1962.51	1368.74	203.405	2010.14	1188.39	280.15	1724.35	1293.85	52.8773	1886.51	1411.5	-22.7006	1797.75	1199.62	-29.0424	1786.43	1118.89	-63.1895	1828.64	999.87	-24.8547	1914.89	911.713	-74.1558	1866.5	897.253	-62.6331	1933.65	832.91
615	0	164.577	2068.72	1580.34	262.218	2076.23	1580.49	160.058	1904.83	1610.16	287.16	1935.27	1611.96	221.075	1832.63	1467.99	231.633	1733.2	1216.71	221.465	1973.2	1367.07	202.233	2020.43	1186.62	279.054	1734.96	1292.7	51.1521	1896.93	1409.5	-23.7928	1806.86	1197.97	-30.0612	1795.18	1117.3	-64.6008	1836.21	998.005	-26.987	1922.12	909.24	-75.9151	1873.26	895.081	-65.0831	1940.48	830.619
616	0	161.854	2079.6	1578.29	259.465	2087.32	1578.8	157.552	1915.7	1608.13	284.585	1946.42	1610.4	219.264	1843.52	1466.37	230.525	1743.74	1215.26	219.711	1983.93	1365.24	201.059	2030.82	1184.71	277.866	1745.62	1291.37	49.3781	1907.43	1407.34	-24.9468	1816.18	1196.13	-31.1108	1804.1	1115.52	-66.0351	1843.91	995.957	-29.1283	1929.43	906.543	-77.6965	1880.11	892.733	-67.5179	1947.25	828.05
617	0	159.026	2090.46	1576.12	256.605	2098.43	1576.99	154.97	1926.56	1605.94	281.93	1957.59	1608.7	217.377	1854.42	1464.6	229.337	1754.36	1213.63	217.912	1994.72	1363.28	199.869	2041.29	1182.68	276.592	1756.34	1289.86	47.549	1917.99	1405.02	-26.1639	1825.7	1194.1	-32.1903	1813.19	1113.56	-67.4888	1851.74	993.732	-31.2737	1936.83	903.627	-79.4948	1887.05	890.214	-69.9312	1953.98	825.208
618	0	156.093	2101.32	1573.84	253.639	2109.55	1575.08	152.31	1937.41	1603.63	279.193	1968.76	1606.88	215.41	1865.36	1462.68	228.076	1765.06	1211.84	216.055	2005.57	1361.19	198.647	2051.86	1180.54	275.234	1767.12	1288.2	45.658	1928.61	1402.57	-27.4443	1835.42	1191.89	-33.2981	1822.46	1111.41	-68.9584	1859.72	991.337	-33.42	1944.32	900.502	-81.3054	1894.09	887.533	-72.3196	1960.67	822.104
619	0	153.055	2112.18	1571.48	250.565	2120.68	1573.08	149.567	1948.25	1601.2	276.371	1979.95	1604.95	213.358	1876.32	1460.64	226.753	1775.85	1209.9	214.129	2016.47	1359.01	197.377	2062.53	1178.3	273.799	1777.98	1286.39	43.6976	1939.28	1399.98	-28.7867	1845.33	1189.5	-34.4324	1831.89	1109.1	-70.4408	1867.83	988.784	-35.5655	1951.9	897.18	-83.1242	1901.22	884.7	-74.6823	1967.34	818.755
620	0	149.912	2123.05	1569.05	247.385	2131.82	1571.02	146.737	1959.09	1598.68	273.459	1991.14	1602.94	211.218	1887.32	1458.49	225.375	1786.73	1207.83	212.12	2027.45	1356.73	196.042	2073.31	1175.98	272.292	1788.92	1284.47	41.6605	1950	1397.28	-30.1888	1855.43	1186.94	-35.5909	1841.5	1106.62	-71.933	1876.07	986.087	-37.7095	1959.57	893.677	-84.9473	1908.45	881.73	-77.0207	1974	815.183
621	0	146.664	2133.92	1566.59	244.099	2142.97	1568.92	143.816	1969.94	1596.1	270.455	2002.35	1600.86	208.983	1898.36	1456.27	223.95	1797.72	1205.65	210.017	2038.5	1354.4	194.625	2084.2	1173.59	270.719	1799.96	1282.46	39.5392	1960.76	1394.48	-31.6472	1865.69	1184.22	-36.7708	1851.28	1104	-73.4318	1884.46	983.264	-39.8522	1967.35	890.015	-86.7708	1915.79	878.639	-79.3375	1980.67	811.416
622	0	143.31	2144.8	1564.12	240.705	2154.15	1566.8	140.8	1980.79	1593.48	267.354	2013.57	1598.74	206.651	1909.45	1453.99	222.488	1808.81	1203.4	207.808	2049.62	1352.02	193.11	2095.21	1171.17	269.084	1811.09	1280.37	37.3264	1971.56	1391.61	-33.1573	1876.11	1181.35	-37.9694	1861.21	1101.26	-74.9342	1892.97	980.335	-41.9946	1975.22	886.219	-88.5908	1923.22	875.448	-81.6363	1987.37	807.486
623	0	139.849	2155.7	1561.66	237.204	2165.34	1564.68	137.684	1991.67	1590.86	264.154	2024.81	1596.61	204.217	1920.59	1451.68	220.994	1820.01	1201.1	205.481	2060.83	1349.64	191.481	2106.34	1168.74	267.393	1822.34	1278.26	35.0157	1982.39	1388.69	-34.7138	1886.66	1178.37	-39.1835	1871.3	1098.4	-76.4371	1901.62	977.322	-44.1375	1983.2	882.319	-90.403	1930.75	872.179	-83.9208	1994.11	803.432
624	0	136.282	2166.63	1559.24	233.596	2176.55	1562.6	134.466	2002.56	1588.27	260.852	2036.07	1594.5	201.679	1931.78	1449.38	219.474	1831.33	1198.78	203.028	2072.12	1347.28	189.725	2117.59	1166.32	265.65	1833.7	1276.13	32.6013	1993.25	1385.74	-36.3108	1897.32	1175.29	-40.4102	1881.53	1095.47	-77.9371	1910.38	974.252	-46.2818	1991.29	878.349	-92.2025	1938.39	868.86	-86.194	2000.92	799.295
625	0	132.609	2177.6	1556.89	229.883	2187.79	1560.58	131.144	2013.49	1585.74	257.445	2047.36	1592.45	199.033	1943.03	1447.12	217.931	1842.77	1196.47	200.442	2083.49	1344.96	187.833	2128.97	1163.95	263.857	1845.18	1274.03	30.0786	2004.13	1382.79	-37.9422	1908.07	1172.15	-41.647	1891.89	1092.49	-79.4313	1919.26	971.154	-48.4276	1999.49	874.345	-93.9843	1946.13	865.518	-88.4579	2007.82	795.119
626	0	128.834	2188.6	1554.65	226.065	2199.05	1558.65	127.716	2024.45	1583.3	253.933	2058.67	1590.47	196.279	1954.35	1444.91	216.367	1854.34	1194.21	197.718	2094.96	1342.73	185.796	2140.48	1161.66	262.017	1856.79	1271.99	27.4447	2015.04	1379.86	-39.602	1918.89	1168.97	-42.8916	1902.37	1089.49	-80.9166	1928.26	968.057	-50.5744	2007.8	870.349	-95.7427	1953.98	862.186	-90.7127	2014.83	790.952
627	0	124.957	2199.65	1552.53	222.147	2210.36	1556.84	124.182	2035.47	1580.99	250.316	2070.03	1588.6	193.414	1965.74	1442.81	214.782	1866.04	1192.03	194.854	2106.52	1340.61	183.611	2152.12	1159.48	260.131	1868.53	1270.05	24.6982	2025.98	1377	-41.2848	1929.76	1165.8	-44.1429	1912.95	1086.51	-82.3905	1937.36	964.994	-52.7205	2016.25	866.402	-97.4723	1961.94	858.894	-92.9565	2021.96	786.841
628	0	120.985	2210.75	1550.57	218.132	2221.71	1555.17	120.545	2046.54	1578.84	246.594	2081.43	1586.88	190.44	1977.2	1440.82	213.174	1877.86	1189.97	191.851	2118.18	1338.64	181.278	2163.91	1157.45	258.198	1880.4	1268.23	21.8398	2036.94	1374.23	-42.9861	1940.67	1162.68	-45.4004	1923.64	1083.57	-83.851	1946.57	961.998	-54.8631	2024.82	862.548	-99.1671	1970.01	855.677	-95.1851	2029.24	782.833
629	0	116.922	2221.91	1548.79	214.026	2233.11	1553.67	116.807	2057.68	1576.88	242.773	2092.88	1585.32	187.359	1988.75	1438.99	211.542	1889.8	1188.06	188.714	2129.93	1336.84	178.802	2175.84	1155.61	256.217	1892.39	1266.58	18.8726	2047.95	1371.57	-44.7027	1951.59	1159.65	-46.6648	1934.42	1080.72	-85.2967	1955.88	959.101	-56.9984	2033.53	858.83	-100.822	1978.21	852.568	-97.3923	2036.68	778.976
630	0	112.777	2233.15	1547.21	209.837	2244.56	1552.36	112.973	2068.89	1575.14	238.854	2104.38	1583.96	184.173	2000.37	1437.35	209.88	1901.87	1186.33	185.45	2141.77	1335.25	176.193	2187.91	1153.98	254.187	1904.51	1265.12	15.802	2058.99	1369.06	-46.4327	1962.53	1156.75	-47.9382	1945.29	1077.99	-86.727	1965.3	956.337	-59.1215	2042.38	855.29	-102.432	1986.53	849.598	-99.57	2044.3	775.311
631	0	108.557	2244.45	1545.85	205.572	2256.07	1551.26	109.049	2080.18	1573.64	234.846	2115.95	1582.82	180.889	2012.07	1435.91	208.185	1914.05	1184.82	182.072	2153.7	1333.88	173.463	2200.13	1152.59	252.106	1916.75	1263.87	12.6357	2070.09	1366.73	-48.1756	1973.46	1154.01	-49.2235	1956.23	1075.42	-88.1422	1974.82	953.736	-61.2272	2051.39	851.966	-103.994	1995	846.8	-101.709	2052.12	771.88
632	0	104.275	2255.83	1544.72	201.243	2267.65	1550.38	105.044	2091.56	1572.39	230.756	2127.57	1581.91	177.513	2023.85	1434.69	206.453	1926.33	1183.55	178.592	2165.71	1332.77	170.63	2212.49	1151.47	249.973	1929.09	1262.87	9.38424	2081.24	1364.59	-49.9325	1984.38	1151.49	-50.5249	1967.24	1073.04	-89.5436	1984.45	951.326	-63.3094	2060.56	848.895	-105.505	2003.61	844.201	-103.798	2060.14	768.716
633	0	99.9415	2267.3	1543.84	196.861	2279.29	1549.74	100.968	2103.03	1571.43	226.593	2139.27	1581.27	174.054	2035.71	1433.73	204.679	1938.7	1182.55	175.03	2177.81	1331.91	167.714	2224.97	1150.64	247.786	1941.52	1262.14	6.06033	2092.45	1362.68	-51.7056	1995.32	1149.21	-51.8475	1978.33	1070.88	-90.9339	1994.21	949.135	-65.3624	2069.9	846.108	-106.965	2012.4	841.828	-105.829	2068.4	765.849
634	0	95.5711	2278.84	1543.2	192.439	2291	1549.35	96.8334	2114.59	1570.74	222.37	2151.04	1580.88	170.523	2047.64	1433.02	202.861	1951.15	1181.83	171.404	2189.96	1331.34	164.738	2237.56	1150.11	245.545	1954.02	1261.69	2.67892	2103.73	1361.01	-53.4982	2006.26	1147.2	-53.1968	1989.49	1068.97	-92.3165	2004.09	947.185	-67.3808	2079.42	843.63	-108.376	2021.36	839.703	-107.793	2076.89	763.303
635	0	91.1787	2290.47	1542.82	187.992	2302.77	1549.19	92.653	2126.25	1570.35	218.099	2162.88	1580.77	166.933	2059.63	1432.58	200.995	1963.65	1181.41	167.738	2202.18	1331.04	161.728	2250.24	1149.89	243.252	1966.58	1261.54	-0.743171	2115.09	1359.6	-55.3142	2017.23	1145.49	-54.5787	2000.72	1067.32	-93.6962	2014.11	945.493	-69.3601	2089.13	841.482	-109.742	2030.52	837.845	-109.681	2085.64	761.095
636	0	86.781	2302.18	1542.68	183.537	2314.62	1549.28	88.4425	2138	1570.25	213.797	2174.79	1580.92	163.299	2071.68	1432.42	199.081	1976.18	1181.31	164.055	2214.44	1331.03	158.709	2262.99	1149.97	240.91	1979.17	1261.69	-4.18768	2126.52	1358.45	-57.1577	2028.24	1144.09	-55.9994	2012.03	1065.96	-95.0786	2024.28	944.074	-71.2969	2099.04	839.679	-111.07	2039.9	836.266	-111.49	2094.65	759.237
637	0	82.3961	2313.97	1542.77	179.091	2326.52	1549.6	84.2192	2149.84	1570.43	209.48	2186.76	1581.35	159.637	2083.77	1432.54	197.117	1988.72	1181.51	160.381	2226.72	1331.3	155.708	2275.78	1150.35	238.522	1991.77	1262.14	-7.63531	2138.03	1357.59	-59.0328	2039.32	1143.01	-57.4647	2023.42	1064.89	-96.4703	2034.61	942.936	-73.189	2109.16	838.226	-112.367	2049.5	834.977	-113.218	2103.94	757.73
638	0	78.0429	2325.82	1543.09	174.674	2338.49	1550.15	80.0016	2161.75	1570.88	205.167	2198.8	1582.03	155.964	2095.89	1432.92	195.105	2001.25	1182.02	156.741	2239.02	1331.84	152.752	2288.58	1151.02	236.092	2004.35	1262.89	-11.0663	2149.62	1356.99	-60.9432	2050.47	1142.25	-58.9799	2034.9	1064.12	-97.8787	2045.12	942.085	-75.036	2119.49	837.127	-113.645	2059.35	833.982	-114.865	2113.52	756.575
639	0	73.7419	2337.73	1543.61	170.305	2350.5	1550.9	75.8095	2173.74	1571.59	200.878	2210.9	1582.96	152.298	2108.04	1433.57	193.044	2013.74	1182.84	153.162	2251.3	1332.64	149.866	2301.35	1151.94	233.626	2016.89	1263.93	-14.4607	2161.28	1356.68	-62.8916	2061.72	1141.8	-60.5503	2046.46	1063.64	-99.3119	2055.82	941.517	-76.8387	2130.06	836.375	-114.915	2069.47	833.279	-116.437	2123.4	755.762
640	0	69.514	2349.7	1544.32	166.007	2362.56	1551.84	71.6636	2185.8	1572.53	196.635	2223.03	1584.12	148.657	2120.18	1434.47	190.936	2026.17	1183.94	149.667	2263.57	1333.67	147.072	2314.07	1153.1	231.131	2029.37	1265.24	-17.7993	2173.01	1356.63	-64.8801	2073.09	1141.65	-62.1802	2058.12	1063.44	-100.778	2066.72	941.229	-78.5996	2140.86	835.961	-116.192	2079.86	832.864	-117.941	2133.6	755.278
641	0	65.3809	2361.7	1545.19	161.801	2374.65	1552.95	67.5851	2197.9	1573.69	192.461	2235.21	1585.48	145.06	2132.31	1435.61	188.785	2038.52	1185.3	146.28	2275.78	1334.91	144.394	2326.69	1154.48	228.612	2041.76	1266.81	-21.0637	2184.8	1356.84	-66.9099	2084.58	1141.79	-63.8734	2069.87	1063.53	-102.285	2077.83	941.207	-80.3222	2151.9	835.868	-117.488	2090.55	832.726	-119.387	2144.13	755.106
642	0	61.3641	2373.72	1546.21	157.71	2386.76	1554.21	63.5953	2210.03	1575.04	188.376	2247.4	1587.03	141.524	2144.41	1436.95	186.591	2050.76	1186.91	143.022	2287.94	1336.35	141.85	2339.2	1156.03	226.077	2054.04	1268.6	-24.2371	2196.63	1357.3	-68.9811	2096.21	1142.18	-65.6332	2081.71	1063.86	-103.842	2089.16	941.44	-82.0116	2163.19	836.076	-118.82	2101.55	832.852	-120.788	2155.01	755.223
643	0	57.4849	2385.76	1547.35	153.756	2398.87	1555.58	59.7153	2222.19	1576.55	184.405	2259.6	1588.74	138.067	2156.45	1438.49	184.359	2062.88	1188.73	139.91	2300.01	1337.95	139.455	2351.56	1157.72	223.533	2066.18	1270.59	-27.3045	2208.51	1357.98	-71.0929	2107.98	1142.81	-67.462	2093.66	1064.44	-105.456	2100.72	941.908	-83.6738	2174.75	836.563	-120.2	2112.86	833.224	-122.158	2166.24	755.607
644	0	53.764	2397.78	1548.58	149.961	2410.96	1557.06	55.9651	2234.34	1578.2	180.569	2271.79	1590.59	134.704	2168.44	1440.2	182.093	2074.85	1190.73	136.96	2311.99	1339.69	137.223	2363.74	1159.53	220.986	2078.17	1272.74	-30.2532	2220.4	1358.88	-73.2439	2119.9	1143.64	-69.3618	2105.7	1065.22	-107.134	2112.52	942.592	-85.3159	2186.56	837.304	-121.642	2124.5	833.823	-123.513	2177.83	756.234
645	0	50.2204	2409.79	1549.89	146.345	2423.04	1558.61	52.3635	2246.48	1579.96	176.889	2283.95	1592.54	131.449	2180.34	1442.05	179.796	2086.67	1192.89	134.183	2323.86	1341.55	135.161	2375.74	1161.42	218.443	2090	1275.04	-33.0726	2232.3	1359.96	-75.4318	2131.95	1144.65	-71.3336	2117.83	1066.2	-108.882	2124.55	943.471	-86.9458	2198.63	838.273	-123.157	2136.46	834.63	-124.869	2189.8	757.08
646	0	46.8714	2421.77	1551.26	142.927	2435.06	1560.22	48.9273	2258.59	1581.81	173.383	2296.07	1594.57	128.315	2192.16	1444.01	177.473	2098.32	1195.17	131.586	2335.6	1343.49	133.273	2387.53	1163.38	215.911	2101.65	1277.44	-35.755	2244.2	1361.21	-77.6538	2144.13	1145.81	-73.3783	2130.06	1067.33	-110.707	2136.82	944.523	-88.5719	2210.97	839.447	-124.756	2148.76	835.622	-126.242	2202.15	758.121
647	0	43.7323	2433.69	1552.68	139.724	2447.03	1561.86	45.671	2270.65	1583.72	170.068	2308.12	1596.65	125.313	2203.86	1446.07	175.13	2109.79	1197.53	129.174	2347.21	1345.49	131.56	2399.11	1165.36	213.397	2113.12	1279.91	-38.2954	2256.07	1362.61	-79.9067	2156.43	1147.09	-75.4958	2142.37	1068.61	-112.611	2149.32	945.725	-90.2031	2223.57	840.801	-126.446	2161.39	836.78	-127.646	2214.88	759.337
648	0	40.8154	2445.55	1554.12	136.749	2458.92	1563.52	42.6066	2282.65	1585.68	166.957	2320.1	1598.77	122.451	2215.46	1448.19	172.774	2121.09	1199.96	126.946	2358.68	1347.54	130.016	2410.46	1167.35	210.907	2124.4	1282.43	-40.6911	2267.9	1364.14	-82.187	2168.84	1148.48	-77.686	2154.77	1070	-114.598	2162.05	947.057	-91.8483	2236.44	842.315	-128.235	2174.35	838.083	-129.094	2227.99	760.711
649	0	38.1301	2457.34	1555.58	134.013	2470.72	1565.18	39.7431	2294.56	1587.66	164.061	2331.99	1600.89	119.735	2226.92	1450.36	170.411	2132.2	1202.42	124.899	2370.01	1349.6	128.633	2421.6	1169.34	208.448	2135.5	1284.96	-42.9422	2279.68	1365.78	-84.4911	2181.34	1149.94	-79.9479	2167.23	1071.47	-116.671	2175	948.499	-93.5166	2249.57	843.972	-130.127	2187.64	839.514	-130.599	2241.48	762.226
650	0	35.6825	2469.04	1557.04	131.524	2482.42	1566.83	37.0864	2306.39	1589.64	161.388	2343.77	1603	117.17	2238.27	1452.54	168.05	2143.14	1204.88	123.025	2381.18	1351.66	127.396	2432.51	1171.31	206.026	2146.41	1287.49	-45.0511	2291.39	1367.5	-86.8155	2193.9	1151.47	-82.2807	2179.76	1073.02	-118.83	2188.16	950.033	-95.2164	2262.95	845.757	-132.124	2201.24	841.056	-132.17	2255.33	763.872
651	0	33.4755	2480.65	1558.49	129.285	2494	1568.45	34.6394	2318.12	1591.61	158.941	2355.43	1605.08	114.758	2249.47	1454.73	165.698	2153.91	1207.32	121.316	2392.2	1353.71	126.291	2443.23	1173.25	203.646	2157.15	1289.97	-47.0221	2303.01	1369.3	-89.157	2206.52	1153.05	-84.683	2192.34	1074.63	-121.075	2201.53	951.641	-96.9558	2276.58	847.658	-134.226	2215.15	842.694	-133.814	2269.55	765.64
652	0	31.5085	2492.16	1559.93	127.296	2505.46	1570.03	32.4019	2329.73	1593.56	156.72	2366.96	1607.11	112.499	2260.55	1456.89	163.364	2164.52	1209.71	119.759	2403.08	1355.72	125.297	2453.74	1175.15	201.317	2167.72	1292.39	-48.8612	2314.55	1371.16	-91.5129	2219.16	1154.67	-87.1534	2204.95	1076.27	-123.405	2215.08	953.309	-98.7421	2290.46	849.668	-136.433	2229.36	844.417	-135.536	2284.11	767.524
653	0	29.7777	2503.56	1561.35	125.556	2516.78	1571.57	30.3704	2341.23	1595.48	154.722	2378.35	1609.07	110.39	2271.49	1459.01	161.058	2174.97	1212.04	118.341	2413.81	1357.7	124.393	2464.08	1177	199.042	2178.13	1294.74	-50.5756	2325.97	1373.05	-93.8808	2231.8	1156.32	-89.69	2217.6	1077.92	-125.819	2228.81	955.022	-100.582	2304.57	851.779	-138.742	2243.85	846.213	-137.339	2299	769.521
654	0	28.2761	2514.84	1562.74	124.055	2527.95	1573.05	28.5389	2352.61	1597.34	152.94	2389.59	1610.96	108.429	2282.29	1461.07	158.787	2185.29	1214.28	117.048	2424.4	1359.61	123.556	2474.25	1178.79	196.827	2188.4	1296.98	-52.1736	2337.28	1374.96	-96.2592	2244.42	1157.99	-92.291	2230.26	1079.59	-128.313	2242.69	956.769	-102.479	2318.91	853.987	-141.15	2258.61	848.072	-139.227	2314.21	771.628
655	0	26.994	2526.02	1564.08	122.786	2538.99	1574.46	26.899	2363.86	1599.14	151.366	2400.69	1612.76	106.612	2292.97	1463.05	156.562	2195.48	1216.42	115.865	2434.86	1361.45	122.763	2484.28	1180.53	194.678	2198.54	1299.11	-53.6637	2348.47	1376.88	-98.6466	2257	1159.67	-94.9541	2242.92	1081.25	-130.886	2256.72	958.537	-104.44	2333.46	856.288	-143.652	2273.62	849.985	-141.199	2329.73	773.843
656	0	25.9193	2537.08	1565.38	121.736	2549.87	1575.8	25.4402	2374.99	1600.87	149.988	2411.63	1614.46	104.931	2303.52	1464.94	154.39	2205.56	1218.43	114.777	2445.19	1363.22	121.993	2494.17	1182.19	192.6	2208.56	1301.11	-55.0547	2359.53	1378.79	-101.042	2269.52	1161.36	-97.6766	2255.58	1082.88	-133.534	2270.88	960.316	-106.466	2348.22	858.678	-146.243	2288.87	851.946	-143.255	2345.52	776.166
657	0	25.0381	2548.02	1566.62	120.889	2560.61	1577.05	24.1501	2385.99	1602.52	148.791	2422.42	1616.04	103.381	2313.95	1466.73	152.281	2215.53	1220.31	113.77	2455.4	1364.88	121.225	2503.97	1183.78	190.598	2218.49	1302.97	-56.3551	2370.46	1380.67	-103.445	2281.96	1163.04	-100.455	2268.22	1084.49	-136.252	2285.15	962.094	-108.56	2363.16	861.151	-148.916	2304.34	853.945	-145.395	2361.59	778.593
658	0	24.3349	2558.86	1567.79	120.23	2571.21	1578.21	23.0154	2396.87	1604.08	147.762	2433.06	1617.51	101.954	2324.27	1468.39	150.244	2225.43	1222.05	112.829	2465.51	1366.45	120.442	2513.67	1185.28	188.675	2228.32	1304.67	-57.573	2381.26	1382.5	-105.853	2294.3	1164.69	-103.287	2280.83	1086.05	-139.035	2299.51	963.862	-110.723	2378.29	863.703	-151.664	2320	855.975	-147.616	2377.9	781.121
659	0	23.7933	2569.59	1568.89	119.741	2581.67	1579.27	22.022	2407.64	1605.54	146.884	2443.56	1618.85	100.642	2334.48	1469.93	148.285	2235.24	1223.63	111.943	2475.53	1367.9	119.627	2523.3	1186.68	186.838	2238.09	1306.21	-58.7157	2391.93	1384.26	-108.265	2306.54	1166.31	-106.166	2293.4	1087.55	-141.879	2313.96	965.608	-112.955	2393.58	866.327	-154.481	2335.85	858.029	-149.918	2394.45	783.745
660	0	23.3965	2580.23	1569.89	119.403	2592	1580.22	21.1554	2418.29	1606.88	146.142	2453.93	1620.05	99.4395	2344.61	1471.32	146.413	2245	1225.05	111.1	2485.46	1369.21	118.769	2532.88	1187.96	185.09	2247.79	1307.59	-59.7897	2402.47	1385.93	-110.679	2318.65	1167.89	-109.087	2305.93	1088.97	-144.778	2328.47	967.324	-115.254	2409.01	869.012	-157.359	2351.85	860.098	-152.298	2411.2	786.459
661	0	23.1277	2590.77	1570.81	119.199	2602.21	1581.05	20.4012	2428.84	1608.1	145.518	2464.17	1621.11	98.3377	2354.64	1472.57	144.635	2254.71	1226.3	110.291	2495.32	1370.39	117.859	2542.42	1189.12	183.434	2257.45	1308.78	-60.8006	2412.88	1387.5	-113.092	2330.65	1169.39	-112.043	2318.42	1090.31	-147.724	2343.03	969	-117.618	2424.58	871.749	-160.29	2367.99	862.174	-154.755	2428.15	789.253
662	0	22.9708	2601.23	1571.61	119.111	2612.32	1581.76	19.7458	2439.3	1609.2	144.997	2474.29	1622.02	97.3305	2364.6	1473.66	142.956	2264.37	1227.38	109.507	2505.12	1371.42	116.893	2551.94	1190.13	181.876	2267.07	1309.8	-61.753	2423.17	1388.95	-115.498	2342.53	1170.82	-115.027	2330.86	1091.56	-150.711	2357.62	970.627	-120.044	2440.26	874.526	-163.267	2384.25	864.25	-157.286	2445.27	792.119
663	0	22.9102	2611.61	1572.29	119.12	2622.33	1582.33	19.1761	2449.68	1610.16	144.566	2484.31	1622.78	96.4117	2374.5	1474.58	141.382	2274	1228.28	108.744	2514.87	1372.28	115.869	2561.44	1190.98	180.419	2276.68	1310.65	-62.6504	2433.35	1390.27	-117.892	2354.29	1172.14	-118.03	2343.25	1092.69	-153.731	2372.25	972.197	-122.527	2456.03	877.329	-166.28	2400.6	866.317	-159.887	2462.54	795.045
664	0	22.9318	2621.92	1572.84	119.213	2632.25	1582.76	18.6804	2459.98	1610.96	144.21	2494.24	1623.37	95.5763	2384.34	1475.34	139.919	2283.61	1229	107.996	2524.58	1372.98	114.788	2570.93	1191.67	179.065	2286.26	1311.31	-63.4953	2443.42	1391.43	-120.267	2365.93	1173.35	-121.04	2355.6	1093.71	-156.775	2386.88	973.701	-125.063	2471.88	880.145	-169.323	2417.01	868.367	-162.555	2479.92	798.019
665	0	23.0227	2632.18	1573.25	119.373	2642.11	1583.04	18.2485	2470.23	1611.62	143.918	2504.1	1623.8	94.8199	2394.13	1475.93	138.57	2293.19	1229.55	107.261	2534.27	1373.49	113.656	2580.43	1192.17	177.82	2295.84	1311.8	-64.2892	2453.38	1392.42	-122.614	2377.46	1174.42	-124.048	2367.91	1094.6	-159.833	2401.51	975.135	-127.645	2487.78	882.958	-172.386	2433.48	870.394	-165.286	2497.41	801.029
666	0	23.1719	2642.38	1573.52	119.59	2651.92	1583.16	17.8716	2480.43	1612.12	143.681	2513.9	1624.06	94.1397	2403.88	1476.35	137.338	2302.76	1229.93	106.538	2543.93	1373.83	112.478	2589.93	1192.48	176.684	2305.43	1312.11	-65.0327	2463.25	1393.24	-124.924	2388.89	1175.36	-127.04	2380.17	1095.36	-162.894	2416.12	976.491	-130.266	2503.72	885.754	-175.462	2449.97	872.39	-168.074	2514.96	804.062
667	0	23.3702	2652.55	1573.62	119.851	2661.68	1583.12	17.5429	2490.59	1612.46	143.491	2523.65	1624.16	93.5334	2413.61	1476.59	136.226	2312.32	1230.14	105.829	2553.57	1373.97	111.265	2599.44	1192.6	175.662	2315.02	1312.25	-65.7254	2473.02	1393.88	-127.188	2400.23	1176.14	-130.004	2392.39	1095.97	-165.948	2430.71	977.767	-132.917	2519.67	888.518	-178.54	2466.45	874.349	-170.914	2532.56	807.104
668	0	23.6102	2662.68	1573.57	120.15	2671.41	1582.91	17.2576	2500.73	1612.63	143.341	2533.37	1624.08	93.0002	2423.31	1476.67	135.234	2321.87	1230.18	105.136	2563.21	1373.93	110.027	2608.96	1192.52	174.753	2324.62	1312.23	-66.3659	2482.72	1394.34	-129.393	2411.5	1176.76	-132.924	2404.58	1096.45	-168.982	2445.26	978.958	-135.59	2535.61	891.237	-181.612	2482.91	876.265	-173.798	2550.15	810.144
669	0	23.8866	2672.8	1573.35	120.48	2681.13	1582.54	17.0127	2510.85	1612.64	143.229	2543.07	1623.84	92.5402	2432.99	1476.58	134.364	2331.42	1230.07	104.463	2572.85	1373.7	108.776	2618.5	1192.25	173.961	2334.24	1312.04	-66.9521	2492.34	1394.61	-131.527	2422.69	1177.22	-135.788	2416.74	1096.78	-171.985	2459.76	980.064	-138.275	2551.51	893.896	-184.669	2499.32	878.132	-176.719	2567.73	813.169
670	0	24.1962	2682.89	1572.96	120.837	2690.83	1582	16.8073	2520.97	1612.48	143.154	2552.77	1623.44	92.1546	2442.67	1476.32	133.613	2340.97	1229.79	103.816	2582.49	1373.29	107.524	2628.05	1191.78	173.284	2343.88	1311.69	-67.4811	2501.9	1394.7	-133.58	2433.83	1177.52	-138.581	2428.87	1096.98	-174.943	2474.2	981.082	-140.962	2567.36	896.483	-187.701	2515.66	879.944	-179.667	2585.24	816.168
671	0	24.5378	2692.98	1572.4	121.221	2700.55	1581.29	16.6425	2531.09	1612.16	143.115	2562.47	1622.87	91.8454	2452.35	1475.91	132.981	2350.53	1229.37	103.202	2592.13	1372.7	106.285	2637.63	1191.13	172.723	2353.54	1311.19	-67.9494	2511.41	1394.61	-135.539	2444.91	1177.66	-141.287	2440.97	1097.04	-177.844	2488.56	982.013	-143.641	2583.12	898.987	-190.698	2531.89	881.696	-182.631	2602.67	819.127
672	0	24.9121	2703.06	1571.68	121.632	2710.27	1580.42	16.5209	2541.22	1611.68	143.115	2572.19	1622.15	91.6153	2462.02	1475.34	132.463	2360.09	1228.8	102.627	2601.78	1371.95	105.073	2647.23	1190.31	172.275	2363.23	1310.54	-68.3529	2520.87	1394.36	-137.393	2455.95	1177.64	-143.893	2453.04	1096.97	-180.675	2502.83	982.856	-146.299	2598.78	901.396	-193.65	2548.01	883.384	-185.602	2619.96	822.038
673	0	25.322	2713.15	1570.81	122.073	2720.01	1579.4	16.4472	2551.36	1611.04	143.159	2581.92	1621.29	91.4677	2471.7	1474.63	132.056	2369.67	1228.08	102.1	2611.44	1371.04	103.902	2656.86	1189.34	171.94	2372.94	1309.75	-68.6869	2530.3	1393.94	-139.131	2466.95	1177.48	-146.386	2465.07	1096.77	-183.423	2517	983.614	-148.925	2614.31	903.7	-196.546	2563.97	885.001	-188.567	2637.09	824.888
674	0	25.7718	2723.23	1569.77	122.549	2729.77	1578.22	16.4274	2561.52	1610.26	143.253	2591.68	1620.28	91.4064	2481.38	1473.77	131.755	2379.26	1227.23	101.63	2621.11	1369.98	102.784	2666.52	1188.21	171.714	2382.68	1308.82	-68.9465	2539.71	1393.37	-140.742	2477.92	1177.18	-148.751	2477.07	1096.47	-186.075	2531.06	984.287	-151.508	2629.7	905.891	-199.375	2579.77	886.544	-191.513	2654.03	827.668
675	0	26.2676	2733.32	1568.6	123.068	2739.55	1576.9	16.4689	2571.7	1609.35	143.405	2601.46	1619.14	91.4353	2491.07	1472.79	131.553	2388.87	1226.25	101.226	2630.78	1368.79	101.732	2676.2	1186.97	171.593	2392.45	1307.75	-69.1267	2549.1	1392.67	-142.217	2488.85	1176.75	-150.978	2489.03	1096.06	-188.619	2544.99	984.878	-154.035	2644.9	907.962	-202.128	2595.38	888.006	-194.426	2670.74	830.368
676	0	26.8168	2743.42	1567.3	123.636	2749.35	1575.46	16.5802	2581.9	1608.31	143.623	2611.28	1617.89	91.5588	2500.77	1471.69	131.443	2398.51	1225.15	100.898	2640.47	1367.48	100.759	2685.93	1185.61	171.572	2402.24	1306.56	-69.2224	2558.49	1391.85	-143.549	2499.75	1176.21	-153.053	2500.93	1095.56	-191.044	2558.77	985.388	-156.495	2659.92	909.904	-204.793	2610.76	889.384	-197.292	2687.19	832.978
677	0	27.4277	2753.53	1565.88	124.264	2759.17	1573.9	16.7706	2592.12	1607.15	143.916	2621.12	1616.52	91.7807	2510.48	1470.48	131.418	2408.18	1223.93	100.655	2650.17	1366.08	99.8746	2695.68	1184.17	171.646	2412.06	1305.24	-69.2284	2567.89	1390.93	-144.73	2510.62	1175.57	-154.968	2512.78	1094.98	-193.338	2572.4	985.821	-158.875	2674.72	911.714	-207.358	2625.92	890.672	-200.096	2703.35	835.487
678	0	28.1096	2763.65	1564.36	124.961	2769.02	1572.24	17.0501	2602.36	1605.9	144.295	2631	1615.07	92.1051	2520.2	1469.17	131.469	2417.89	1222.59	100.506	2659.88	1364.58	99.089	2705.48	1182.66	171.809	2421.91	1303.81	-69.1402	2577.31	1389.93	-145.755	2521.44	1174.85	-156.713	2524.56	1094.33	-195.492	2585.85	986.178	-161.164	2689.28	913.385	-209.815	2640.81	891.867	-202.823	2719.19	837.886
679	0	28.8719	2773.77	1562.75	125.739	2778.88	1570.5	17.4291	2612.61	1604.56	144.772	2640.9	1613.53	92.5355	2529.94	1467.77	131.588	2427.63	1221.16	100.459	2669.61	1363.03	98.4103	2715.32	1181.09	172.054	2431.78	1302.27	-68.9535	2586.75	1388.86	-146.62	2532.23	1174.06	-158.28	2536.27	1093.63	-197.496	2599.11	986.464	-163.351	2703.58	914.913	-212.15	2655.42	892.963	-205.46	2734.69	840.164
680	0	29.7244	2783.89	1561.09	126.606	2788.76	1568.69	17.9177	2622.87	1603.15	145.355	2650.82	1611.93	93.0746	2539.68	1466.3	131.766	2437.42	1219.62	100.524	2679.34	1361.42	97.8455	2725.2	1179.49	172.373	2441.67	1300.64	-68.6646	2596.24	1387.75	-147.323	2542.97	1173.22	-159.663	2547.89	1092.88	-199.341	2612.17	986.681	-165.424	2717.62	916.296	-214.354	2669.74	893.957	-207.99	2749.83	842.31
681	0	30.6766	2794.02	1559.37	127.573	2798.65	1566.83	18.5262	2633.14	1601.7	146.056	2660.77	1610.28	93.7249	2549.44	1464.78	131.992	2447.26	1218.01	100.707	2689.1	1359.79	97.3998	2735.13	1177.88	172.759	2451.58	1298.91	-68.2705	2605.77	1386.62	-147.861	2553.65	1172.34	-160.855	2559.41	1092.11	-201.019	2625.02	986.834	-167.371	2731.36	917.531	-216.415	2683.73	894.846	-210.399	2764.58	844.313
682	0	31.7373	2804.16	1557.64	128.649	2808.56	1564.95	19.2641	2643.41	1600.21	146.885	2670.74	1608.6	94.4877	2559.2	1463.21	132.258	2457.15	1216.31	101.014	2698.88	1358.14	97.077	2745.11	1176.28	173.204	2461.52	1297.1	-67.7692	2615.35	1385.48	-148.235	2564.29	1171.44	-161.854	2570.83	1091.33	-202.523	2637.64	986.928	-169.184	2744.8	918.617	-218.324	2697.4	895.629	-212.674	2778.93	846.164
683	0	32.9145	2814.29	1555.9	129.844	2818.47	1563.05	20.1399	2653.69	1598.72	147.849	2680.73	1606.91	95.3634	2568.98	1461.61	132.554	2467.1	1214.56	101.451	2708.67	1356.51	96.8793	2755.15	1174.7	173.698	2471.47	1295.23	-67.1593	2625	1384.36	-148.445	2574.86	1170.54	-162.657	2582.14	1090.55	-203.847	2650.01	986.969	-170.851	2757.91	919.552	-220.068	2710.71	896.303	-214.799	2792.87	847.849
684	0	34.215	2824.43	1554.17	131.163	2828.39	1561.17	21.1608	2663.96	1597.24	148.957	2690.73	1605.23	96.3516	2578.76	1460.01	132.871	2477.1	1212.76	102.021	2718.49	1354.91	96.8076	2765.25	1173.17	174.234	2481.44	1293.3	-66.4405	2634.72	1383.27	-148.494	2585.37	1169.65	-163.262	2593.33	1089.79	-204.984	2662.14	986.963	-172.363	2770.7	920.338	-221.639	2723.66	896.87	-216.763	2806.37	849.36
685	0	35.6442	2834.57	1552.49	132.612	2838.32	1559.32	22.3325	2674.23	1595.79	150.214	2700.75	1603.56	97.4507	2588.55	1458.42	133.199	2487.17	1210.92	102.727	2728.33	1353.36	96.8614	2775.42	1171.7	174.804	2491.43	1291.33	-65.6136	2644.52	1382.24	-148.383	2595.81	1168.8	-163.669	2604.4	1089.06	-205.929	2674.01	986.918	-173.71	2783.14	920.976	-223.025	2736.22	897.332	-218.552	2819.42	850.686
686	0	37.2057	2844.71	1550.87	134.196	2848.26	1557.52	23.6589	2684.5	1594.39	151.623	2710.78	1601.95	98.6577	2598.35	1456.85	133.531	2497.3	1209.08	103.569	2738.2	1351.89	97.0392	2785.66	1170.32	175.399	2501.43	1289.34	-64.6802	2654.4	1381.29	-148.117	2606.19	1167.99	-163.878	2615.33	1088.38	-206.678	2685.61	986.843	-174.883	2795.23	921.468	-224.217	2748.39	897.691	-220.151	2832.02	851.818
687	0	38.9012	2854.85	1549.32	135.915	2858.2	1555.78	25.1417	2694.76	1593.08	153.187	2720.83	1600.39	99.969	2608.16	1455.34	133.859	2507.5	1207.23	104.548	2748.1	1350.5	97.3386	2795.97	1169.04	176.012	2511.44	1287.35	-63.6429	2664.36	1380.44	-147.697	2616.49	1167.24	-163.892	2626.13	1087.76	-207.227	2696.93	986.746	-175.872	2806.96	921.818	-225.205	2760.17	897.953	-221.55	2844.16	852.749
688	0	40.7307	2865	1547.88	137.77	2868.14	1554.14	26.7803	2705.01	1591.86	154.904	2730.89	1598.92	101.379	2617.98	1453.89	134.176	2517.76	1205.41	105.659	2758.03	1349.23	97.7563	2806.37	1167.9	176.635	2521.47	1285.37	-62.5056	2674.4	1379.71	-147.13	2626.73	1166.58	-163.714	2636.8	1087.23	-207.572	2707.97	986.64	-176.669	2818.31	922.032	-225.98	2771.52	898.125	-222.735	2855.82	853.476
689	0	42.692	2875.15	1546.56	139.759	2878.09	1552.6	28.5722	2715.27	1590.77	156.771	2740.96	1597.56	102.883	2627.8	1452.52	134.476	2528.07	1203.63	106.9	2767.98	1348.09	98.2882	2816.86	1166.91	177.261	2531.51	1283.42	-61.2731	2684.53	1379.11	-146.42	2636.9	1166.03	-163.346	2647.33	1086.8	-207.711	2718.72	986.535	-177.263	2829.29	922.116	-226.536	2782.46	898.217	-223.695	2867	853.995
690	0	44.7808	2885.31	1545.37	141.877	2888.06	1551.18	30.5122	2725.52	1589.81	158.784	2751.04	1596.31	104.471	2637.62	1451.26	134.753	2538.45	1201.92	108.263	2777.96	1347.1	98.9294	2827.42	1166.09	177.884	2541.56	1281.53	-59.9515	2694.75	1378.67	-145.572	2647.01	1165.59	-162.794	2657.72	1086.48	-207.641	2729.18	986.446	-177.647	2839.9	922.078	-226.864	2792.98	898.238	-224.417	2877.7	854.307
691	0	46.9909	2895.47	1544.35	144.117	2898.02	1549.91	32.5933	2735.76	1589.01	160.934	2761.13	1595.21	106.136	2647.46	1450.12	135.003	2548.89	1200.3	109.742	2787.97	1346.29	99.6741	2838.07	1165.46	178.497	2551.62	1279.71	-58.5477	2705.05	1378.4	-144.593	2657.06	1165.29	-162.064	2667.98	1086.3	-207.362	2739.35	986.384	-177.81	2850.11	921.929	-226.959	2803.08	898.202	-224.891	2887.9	854.418
692	0	49.3143	2905.65	1543.49	146.471	2908	1548.8	34.8062	2746.01	1588.39	163.213	2771.23	1594.26	107.868	2657.3	1449.13	135.222	2559.37	1198.79	111.326	2798	1345.65	100.516	2848.8	1165.05	179.094	2561.69	1277.99	-57.0699	2715.43	1378.31	-143.49	2667.06	1165.16	-161.161	2678.1	1086.26	-206.875	2749.24	986.364	-177.746	2859.94	921.679	-226.818	2812.76	898.121	-225.106	2897.61	854.333
693	0	51.7411	2915.82	1542.82	148.929	2917.99	1547.86	37.1399	2756.26	1587.97	165.609	2781.34	1593.49	109.656	2667.14	1448.28	135.406	2569.9	1197.41	113.003	2808.06	1345.22	101.446	2859.61	1164.86	179.67	2571.78	1276.39	-55.5271	2725.88	1378.43	-142.272	2677.02	1165.2	-160.094	2688.09	1086.38	-206.18	2758.83	986.4	-177.446	2869.39	921.343	-226.438	2822.02	898.012	-225.051	2906.82	854.064
694	0	54.26	2926.01	1542.35	151.479	2927.99	1547.1	39.5817	2766.51	1587.74	168.109	2791.45	1592.89	111.488	2677	1447.6	135.554	2580.47	1196.18	114.761	2818.15	1345	102.456	2870.47	1164.91	180.22	2581.87	1274.92	-53.9296	2736.41	1378.75	-140.948	2686.94	1165.43	-158.872	2697.95	1086.68	-205.281	2768.15	986.505	-176.904	2878.45	920.934	-225.818	2830.87	897.89	-224.717	2915.53	853.624
695	0	56.8584	2936.2	1542.09	154.108	2938	1546.55	42.1173	2776.76	1587.73	170.701	2801.56	1592.49	113.35	2686.86	1447.1	135.662	2591.07	1195.13	116.584	2828.25	1344.99	103.537	2881.39	1165.2	180.737	2591.98	1273.62	-52.2881	2746.99	1379.29	-139.53	2696.83	1165.86	-157.505	2707.68	1087.16	-204.184	2777.19	986.691	-176.114	2887.14	920.467	-224.96	2839.33	897.769	-224.095	2923.76	853.028
696	0	59.5224	2946.39	1542.05	156.803	2948.02	1546.19	44.7314	2787	1587.93	173.368	2811.67	1592.28	115.23	2696.74	1446.79	135.731	2601.69	1194.27	118.457	2838.38	1345.2	104.675	2892.34	1165.73	181.218	2602.09	1272.49	-50.6144	2757.64	1380.06	-138.031	2706.69	1166.51	-156.004	2717.29	1087.83	-202.895	2785.96	986.969	-175.075	2895.45	919.959	-223.868	2847.41	897.665	-223.178	2931.49	852.292
697	0	62.2374	2956.58	1542.22	159.547	2958.04	1546.05	47.4077	2797.24	1588.34	176.095	2821.78	1592.27	117.113	2706.63	1446.66	135.759	2612.31	1193.61	120.362	2848.52	1345.63	105.86	2903.31	1166.5	181.659	2612.22	1271.54	-48.921	2768.33	1381.04	-136.465	2716.54	1167.38	-154.382	2726.76	1088.69	-201.423	2794.49	987.346	-173.784	2903.39	919.426	-222.548	2855.14	897.591	-221.961	2938.75	851.435
698	0	64.988	2966.78	1542.62	162.327	2968.07	1546.11	50.129	2807.47	1588.97	178.865	2831.87	1592.45	118.985	2716.53	1446.73	135.746	2622.94	1193.16	122.281	2858.68	1346.26	107.077	2914.28	1167.5	182.055	2622.34	1270.8	-47.2208	2779.07	1382.24	-134.849	2726.37	1168.46	-152.655	2736.12	1089.75	-199.78	2802.78	987.828	-172.244	2910.99	918.881	-221.007	2862.52	897.558	-220.44	2945.55	850.476
699	0	67.7582	2976.96	1543.24	165.125	2978.09	1546.38	52.8776	2817.69	1589.81	181.663	2841.95	1592.82	120.831	2726.45	1446.98	135.694	2633.56	1192.93	124.197	2868.85	1347.1	108.311	2925.22	1168.71	182.404	2632.47	1270.27	-45.5275	2789.84	1383.64	-133.199	2736.19	1169.76	-150.839	2745.35	1090.99	-197.979	2810.85	988.417	-170.459	2918.24	918.34	-219.258	2869.59	897.577	-218.615	2951.92	849.431
700	0	70.5314	2987.14	1544.08	167.926	2988.11	1546.86	55.6357	2827.88	1590.84	184.47	2852.01	1593.37	122.638	2736.39	1447.42	135.604	2644.16	1192.92	126.089	2879.02	1348.12	109.548	2936.12	1170.09	182.705	2642.61	1269.95	-43.8549	2800.63	1385.23	-131.537	2746	1171.27	-148.952	2754.47	1092.41	-196.036	2818.72	989.111	-168.439	2925.19	917.812	-217.313	2876.38	897.653	-216.49	2957.86	848.318
701	0	73.2912	2997.3	1545.12	170.713	2998.11	1547.53	58.3851	2838.06	1592.05	187.269	2862.04	1594.08	124.391	2746.34	1448.02	135.479	2654.73	1193.13	127.939	2889.21	1349.3	110.772	2946.96	1171.63	182.956	2652.74	1269.84	-42.2174	2811.44	1386.98	-129.88	2755.79	1172.97	-147.012	2763.48	1093.99	-193.969	2826.4	989.905	-166.195	2931.83	917.309	-215.187	2882.9	897.789	-214.074	2963.42	847.153
702	0	76.0205	3007.44	1546.36	173.469	3008.1	1548.38	61.108	2848.2	1593.42	190.043	2872.04	1594.94	126.078	2756.31	1448.79	135.323	2665.26	1193.56	129.73	2899.39	1350.63	111.967	2957.71	1173.29	183.158	2662.87	1269.94	-40.629	2822.26	1388.89	-128.25	2765.58	1174.85	-145.04	2772.38	1095.72	-191.796	2833.93	990.792	-163.744	2938.21	916.835	-212.899	2889.2	897.986	-211.378	2968.62	845.948
703	0	78.7026	3017.56	1547.78	176.177	3018.07	1549.4	63.7867	2858.3	1594.94	192.775	2882.01	1595.92	127.686	2766.31	1449.71	135.141	2675.74	1194.18	131.443	2909.58	1352.07	113.116	2968.37	1175.03	183.313	2672.99	1270.25	-39.1036	2833.07	1390.91	-126.667	2775.36	1176.86	-143.055	2781.18	1097.58	-189.538	2841.31	991.758	-161.105	2944.35	916.396	-210.468	2895.31	898.24	-208.422	2973.51	844.717
704	0	81.3205	3027.64	1549.35	178.822	3028	1550.57	66.4041	2868.37	1596.57	195.448	2891.93	1597	129.203	2776.32	1450.75	134.939	2686.17	1194.99	133.062	2919.75	1353.59	114.205	2978.92	1176.82	183.422	2683.1	1270.75	-37.6545	2843.87	1393.02	-125.149	2785.12	1179	-141.078	2789.9	1099.53	-187.216	2848.56	992.79	-158.302	2950.28	915.993	-207.915	2901.26	898.544	-205.23	2978.13	843.47
705	0	83.8576	3037.7	1551.07	181.386	3037.91	1551.86	68.9436	2878.38	1598.3	198.045	2901.81	1598.16	130.62	2786.35	1451.91	134.721	2696.53	1195.97	134.572	2929.92	1355.17	115.219	2989.34	1178.61	183.488	2693.2	1271.43	-36.2944	2854.64	1395.18	-123.714	2794.86	1181.22	-139.126	2798.53	1101.55	-184.852	2855.72	993.87	-155.362	2956.03	915.624	-205.265	2907.08	898.89	-201.83	2982.52	842.215
706	0	86.2974	3047.71	1552.91	183.854	3047.78	1553.26	71.3894	2888.35	1600.1	200.55	2911.64	1599.38	131.929	2796.41	1453.15	134.494	2706.81	1197.11	135.958	2940.08	1356.79	116.146	2999.63	1180.38	183.517	2703.28	1272.27	-35.0347	2865.38	1397.38	-122.378	2804.57	1183.49	-137.22	2807.08	1103.62	-182.468	2862.8	994.98	-152.316	2961.65	915.287	-202.542	2912.8	899.267	-198.257	2986.74	840.963
707	0	88.624	3057.68	1554.84	186.208	3057.61	1554.74	73.7267	2898.26	1601.94	202.947	2921.41	1600.63	133.121	2806.48	1454.47	134.265	2717.02	1198.37	137.209	2950.22	1358.4	116.972	3009.79	1182.08	183.512	2713.33	1273.26	-33.8855	2876.07	1399.57	-121.153	2814.26	1185.77	-135.374	2815.57	1105.69	-180.086	2869.81	996.101	-149.197	2967.15	914.977	-199.771	2918.45	899.662	-194.552	2990.82	839.718
708	0	90.8218	3067.61	1556.84	188.435	3067.4	1556.27	75.9413	2908.11	1603.8	205.222	2931.14	1601.89	134.192	2816.56	1455.83	134.04	2727.15	1199.74	138.315	2960.35	1360	117.688	3019.81	1183.71	183.479	2723.36	1274.37	-32.8554	2886.71	1401.73	-120.047	2823.91	1188.04	-133.603	2824	1107.75	-177.728	2876.77	997.214	-146.04	2972.58	914.687	-196.978	2924.07	900.063	-190.756	2994.82	838.487
709	0	92.8762	3077.48	1558.89	190.518	3077.14	1557.84	78.0203	2917.91	1605.65	207.36	2940.81	1603.13	135.138	2826.65	1457.22	133.827	2737.19	1201.19	139.27	2970.45	1361.54	118.288	3029.71	1185.22	183.425	2733.35	1275.59	-31.9511	2897.27	1403.83	-119.066	2833.52	1190.25	-131.92	2832.37	1109.77	-175.414	2883.71	998.301	-142.879	2977.97	914.412	-194.19	2929.67	900.456	-186.916	2998.8	837.277
710	0	94.7731	3087.31	1560.95	192.443	3086.85	1559.42	79.9522	2927.64	1607.48	209.349	2950.44	1604.35	135.957	2836.75	1458.63	133.63	2747.15	1202.7	140.068	2980.53	1363.02	118.764	3039.48	1186.61	183.356	2743.31	1276.9	-31.1775	2907.76	1405.84	-118.209	2843.08	1192.38	-130.335	2840.7	1111.71	-173.164	2890.64	999.343	-139.752	2983.37	914.146	-191.433	2935.29	900.829	-183.08	3002.78	836.091
711	0	96.4998	3097.08	1563	194.197	3096.5	1560.99	81.7264	2937.31	1609.26	211.178	2960.01	1605.51	136.65	2846.84	1460.02	133.456	2757.02	1204.25	140.708	2990.57	1364.42	119.115	3049.14	1187.87	183.277	2753.23	1278.27	-30.5371	2918.16	1407.75	-117.475	2852.59	1194.4	-128.855	2848.98	1113.57	-170.995	2897.57	1000.33	-136.693	2988.78	913.882	-188.733	2940.96	901.171	-179.296	3006.83	834.937
712	0	98.0448	3106.79	1565.02	195.768	3106.12	1562.53	83.334	2946.91	1610.96	212.835	2969.54	1606.62	137.218	2856.93	1461.39	133.31	2766.81	1205.8	141.191	3000.59	1365.72	119.341	3058.68	1188.98	183.197	2763.11	1279.68	-30.0304	2928.46	1409.52	-116.855	2862.02	1196.29	-127.487	2857.24	1115.31	-168.925	2904.51	1001.23	-133.736	2994.26	913.613	-186.115	2946.68	901.472	-175.609	3010.97	833.818
713	0	99.3983	3116.45	1567	197.145	3115.69	1564.03	84.7676	2956.45	1612.58	214.314	2979.03	1607.65	137.664	2867.01	1462.72	133.197	2776.51	1207.35	141.52	3010.56	1366.92	119.444	3068.13	1189.95	183.121	2772.94	1281.1	-29.6557	2938.66	1411.16	-116.341	2871.36	1198.02	-126.234	2865.46	1116.91	-166.967	2911.48	1002.06	-130.912	2999.82	913.337	-183.603	2952.48	901.725	-172.066	3015.26	832.741
714	0	100.552	3126.04	1568.91	198.319	3125.22	1565.47	86.0214	2965.92	1614.1	215.607	2988.47	1608.6	137.993	2877.07	1463.98	133.12	2786.14	1208.85	141.701	3020.49	1368	119.43	3077.49	1190.77	183.054	2782.72	1282.53	-29.4094	2948.76	1412.65	-115.92	2880.62	1199.58	-125.096	2873.66	1118.38	-165.136	2918.49	1002.79	-128.25	3005.48	913.049	-181.219	2958.38	901.922	-168.707	3019.72	831.709
715	0	101.5	3135.57	1570.73	199.284	3134.7	1566.85	87.0911	2975.32	1615.5	216.71	2997.87	1609.46	138.212	2887.11	1465.18	133.08	2795.69	1210.31	141.741	3030.38	1368.96	119.305	3086.76	1191.45	183.001	2792.46	1283.93	-29.2861	2958.75	1413.97	-115.582	2889.77	1200.96	-124.076	2881.83	1119.69	-163.441	2925.54	1003.43	-125.775	3011.28	912.745	-178.982	2964.39	902.061	-165.569	3024.39	830.727
716	0	102.238	3145.03	1572.47	200.035	3144.15	1568.16	87.9743	2984.65	1616.77	217.618	3007.23	1610.23	138.326	2897.11	1466.3	133.081	2805.18	1211.69	141.651	3040.22	1369.79	119.079	3095.97	1191.99	182.966	2802.14	1285.29	-29.2793	2968.64	1415.12	-115.315	2898.81	1202.16	-123.17	2889.98	1120.84	-161.892	2932.65	1003.96	-123.509	3017.21	912.424	-176.911	2970.53	902.138	-162.684	3029.29	829.799
717	0	102.764	3154.43	1574.1	200.569	3153.56	1569.39	88.6701	2993.91	1617.91	218.332	3016.56	1610.89	138.342	2907.09	1467.32	133.12	2814.6	1212.99	141.44	3050	1370.5	118.762	3105.1	1192.4	182.95	2811.78	1286.59	-29.3814	2978.42	1416.1	-115.107	2907.73	1203.16	-122.377	2898.12	1121.82	-160.496	2939.81	1004.39	-121.467	3023.3	912.084	-175.021	2976.8	902.153	-160.079	3034.44	828.927
718	0	103.079	3163.75	1575.62	200.887	3162.93	1570.55	89.1793	3003.1	1618.9	218.852	3025.84	1611.46	138.269	2917.02	1468.25	133.197	2823.96	1214.18	141.12	3059.74	1371.07	118.366	3114.18	1192.69	182.954	2821.37	1287.81	-29.5841	2988.1	1416.91	-114.948	2916.54	1203.98	-121.694	2906.24	1122.64	-159.258	2947.04	1004.71	-119.664	3029.55	911.725	-173.324	2983.21	902.105	-157.773	3039.87	828.112
719	0	103.186	3173.01	1577.03	200.992	3172.26	1571.63	89.5045	3012.22	1619.74	219.181	3035.08	1611.93	138.113	2926.92	1469.06	133.307	2833.26	1215.26	140.705	3069.41	1371.52	117.902	3123.21	1192.85	182.978	2830.92	1288.95	-29.8791	2997.68	1417.56	-114.833	2925.24	1204.61	-121.118	2914.35	1123.3	-158.181	2954.34	1004.92	-118.107	3035.97	911.346	-171.83	2989.77	901.996	-155.781	3045.58	827.353
720	0	103.09	3182.21	1578.32	200.889	3181.55	1572.63	89.6493	3021.27	1620.42	219.322	3044.28	1612.31	137.882	2936.77	1469.77	133.447	2842.52	1216.22	140.204	3079.03	1371.84	117.381	3132.19	1192.91	183.017	2840.43	1289.98	-30.258	3007.18	1418.03	-114.755	2933.82	1205.06	-120.646	2922.46	1123.79	-157.268	2961.71	1005.04	-116.803	3042.57	910.946	-170.546	2996.49	901.826	-154.112	3051.58	826.648
721	0	102.799	3191.33	1579.5	200.586	3190.8	1573.57	89.619	3030.24	1620.95	219.281	3053.45	1612.58	137.582	2946.58	1470.36	133.61	2851.73	1217.05	139.63	3088.59	1372.02	116.813	3141.12	1192.86	183.07	2849.9	1290.9	-30.7127	3016.59	1418.34	-114.712	2942.3	1205.35	-120.275	2930.56	1124.13	-156.518	2969.16	1005.06	-115.75	3049.35	910.526	-169.476	3003.37	901.599	-152.767	3057.87	825.994
722	0	102.321	3200.39	1580.56	200.093	3200.02	1574.43	89.4198	3039.14	1621.31	219.066	3062.57	1612.76	137.219	2956.34	1470.82	133.789	2860.91	1217.75	138.994	3098.1	1372.08	116.209	3150.02	1192.7	183.131	2859.34	1291.7	-31.2358	3025.93	1418.5	-114.703	2950.69	1205.47	-120.003	2938.66	1124.32	-155.93	2976.69	1004.97	-114.948	3056.32	910.085	-168.622	3010.4	901.314	-151.743	3064.46	825.384
723	0	101.666	3209.39	1581.5	199.421	3209.21	1575.23	89.059	3047.98	1621.52	218.685	3071.65	1612.84	136.799	2966.07	1471.17	133.975	2870.06	1218.32	138.304	3107.56	1372.01	115.573	3158.89	1192.45	183.193	2868.75	1292.37	-31.8205	3035.2	1418.5	-114.73	2959.01	1205.44	-119.826	2946.77	1124.36	-155.502	2984.3	1004.8	-114.392	3063.46	909.623	-167.98	3017.6	900.973	-151.034	3071.34	824.812
724	0	100.848	3218.33	1582.32	198.582	3218.36	1575.95	88.5446	3056.75	1621.56	218.146	3080.68	1612.83	136.326	2975.75	1471.39	134.159	2879.18	1218.74	137.568	3116.97	1371.82	114.914	3167.73	1192.09	183.251	2878.14	1292.91	-32.4612	3044.41	1418.35	-114.796	2967.27	1205.27	-119.743	2954.89	1124.27	-155.23	2991.99	1004.53	-114.074	3070.78	909.139	-167.55	3024.95	900.576	-150.625	3078.5	824.269
725	0	99.8782	3227.21	1583.03	197.592	3227.47	1576.61	87.885	3065.46	1621.45	217.458	3089.68	1612.72	135.802	2985.4	1471.48	134.332	2888.29	1219.02	136.793	3126.33	1371.51	114.233	3176.55	1191.65	183.295	2887.51	1293.31	-33.1531	3053.57	1418.07	-114.905	2975.49	1204.97	-119.751	2963.02	1124.04	-155.11	2999.77	1004.17	-113.985	3078.29	908.632	-167.323	3032.46	900.122	-150.503	3085.92	823.746
726	0	98.7702	3236.05	1583.62	196.463	3236.55	1577.19	87.0891	3074.12	1621.19	216.632	3098.64	1612.53	135.23	2995.01	1471.44	134.481	2897.39	1219.16	135.983	3135.66	1371.08	113.533	3185.37	1191.11	183.318	2896.87	1293.57	-33.8926	3062.68	1417.65	-115.063	2983.68	1204.55	-119.85	2971.17	1123.69	-155.136	3007.62	1003.73	-114.115	3085.98	908.102	-167.294	3040.12	899.613	-150.648	3093.59	823.232
727	0	97.5373	3244.84	1584.09	195.211	3245.59	1577.71	86.1659	3082.73	1620.77	215.676	3107.56	1612.25	134.611	3004.59	1471.28	134.598	2906.49	1219.16	135.139	3144.97	1370.54	112.816	3194.18	1190.48	183.311	2906.22	1293.68	-34.6771	3071.76	1417.11	-115.276	2991.86	1204.02	-120.038	2979.35	1123.22	-155.304	3015.56	1003.19	-114.453	3093.85	907.547	-167.453	3047.92	899.044	-151.041	3101.5	822.717
728	0	96.1927	3253.59	1584.45	193.851	3254.6	1578.15	85.1241	3091.31	1620.21	214.601	3116.44	1611.88	133.944	3014.14	1471	134.67	2915.6	1219.02	134.263	3154.25	1369.89	112.079	3203	1189.76	183.264	2915.57	1293.66	-35.5052	3080.82	1416.44	-115.548	3000.05	1203.38	-120.314	2987.56	1122.63	-155.607	3023.59	1002.57	-114.99	3101.9	906.963	-167.79	3055.88	898.414	-151.659	3109.62	822.189
729	0	94.7492	3262.31	1584.69	192.397	3263.57	1578.51	83.9723	3099.84	1619.52	213.416	3125.29	1611.42	133.228	3023.66	1470.58	134.689	2924.72	1218.75	133.353	3163.52	1369.13	111.322	3211.85	1188.96	183.169	2924.92	1293.49	-36.3767	3089.86	1415.65	-115.885	3008.26	1202.64	-120.677	2995.8	1121.93	-156.039	3031.69	1001.86	-115.716	3110.14	906.347	-168.296	3063.97	897.721	-152.481	3117.94	821.637
730	0	93.2184	3271	1584.81	190.862	3272.51	1578.79	82.7184	3108.35	1618.68	212.129	3134.11	1610.88	132.46	3033.17	1470.04	134.643	2933.87	1218.33	132.408	3172.79	1368.28	110.543	3220.73	1188.07	183.017	2934.29	1293.19	-37.2922	3098.89	1414.75	-116.292	3016.51	1201.81	-121.126	3004.09	1121.13	-156.594	3039.89	1001.06	-116.619	3118.55	905.694	-168.959	3072.19	896.961	-153.486	3126.43	821.05
731	0	91.6113	3279.68	1584.82	189.258	3281.42	1578.98	81.3696	3116.85	1617.73	210.749	3142.9	1610.25	131.636	3042.66	1469.38	134.525	2943.06	1217.78	131.424	3182.06	1367.34	109.738	3229.65	1187.11	182.799	2943.67	1292.74	-38.2534	3107.93	1413.74	-116.773	3024.81	1200.88	-121.659	3012.43	1120.21	-157.266	3048.17	1000.18	-117.689	3127.15	904.998	-169.769	3080.55	896.129	-154.652	3135.09	820.414
732	0	89.9375	3288.34	1584.71	187.598	3290.29	1579.08	79.9321	3125.33	1616.65	209.281	3151.66	1609.53	130.753	3052.15	1468.59	134.327	2952.28	1217.1	130.398	3191.35	1366.31	108.906	3238.64	1186.07	182.506	2953.06	1292.15	-39.2628	3116.97	1412.61	-117.33	3033.16	1199.86	-122.276	3020.82	1119.2	-158.05	3056.55	999.197	-118.915	3135.92	904.252	-170.717	3089.04	895.222	-155.96	3143.89	819.721
733	0	88.2052	3297	1584.48	185.891	3299.13	1579.09	78.411	3133.82	1615.46	207.732	3160.41	1608.73	129.806	3061.63	1467.69	134.041	2961.55	1216.28	129.325	3200.66	1365.19	108.043	3247.69	1184.95	182.131	2962.48	1291.43	-40.3236	3126.04	1411.37	-117.967	3041.58	1198.75	-122.977	3029.26	1118.07	-158.939	3065.01	998.123	-120.284	3144.86	903.45	-171.792	3097.65	894.236	-157.392	3152.83	818.958
734	0	86.4215	3305.66	1584.15	184.145	3307.95	1579	76.8103	3142.3	1614.16	206.106	3169.15	1607.85	128.788	3071.11	1466.67	133.662	2970.88	1215.33	128.201	3210	1364	107.147	3256.82	1183.75	181.667	2971.93	1290.58	-41.4395	3135.13	1410.03	-118.685	3050.07	1197.54	-123.76	3037.77	1116.84	-159.929	3073.58	996.951	-121.784	3153.98	902.583	-172.986	3106.39	893.167	-158.933	3161.9	818.116
735	0	84.5918	3314.33	1583.71	182.368	3316.73	1578.81	75.1326	3150.8	1612.76	204.408	3177.87	1606.88	127.695	3080.59	1465.54	133.187	2980.27	1214.25	127.022	3219.38	1362.72	106.216	3266.04	1182.49	181.107	2981.42	1289.6	-42.6148	3144.26	1408.58	-119.486	3058.64	1196.24	-124.624	3046.35	1115.49	-161.015	3082.24	995.68	-123.398	3163.25	901.642	-174.29	3115.27	892.013	-160.57	3171.09	817.188
736	0	82.7202	3323.01	1583.17	180.564	3325.49	1578.53	73.3794	3159.32	1611.28	202.638	3186.58	1605.83	126.521	3090.08	1464.3	132.613	2989.72	1213.05	125.784	3228.81	1361.37	105.247	3275.35	1181.15	180.448	2990.94	1288.5	-43.8538	3153.43	1407.02	-120.371	3067.29	1194.83	-125.57	3055.01	1114.04	-162.192	3091.02	994.308	-125.114	3172.67	900.62	-175.697	3124.27	890.77	-162.291	3180.4	816.167
737	0	80.8097	3331.71	1582.53	178.738	3334.23	1578.16	71.5509	3167.86	1609.71	200.798	3195.29	1604.71	125.259	3099.59	1462.96	131.938	2999.24	1211.73	124.483	3238.28	1359.95	104.239	3284.77	1179.75	179.683	3000.5	1287.28	-45.1611	3162.64	1405.36	-121.339	3076.02	1193.31	-126.595	3063.75	1112.48	-163.455	3099.9	992.834	-126.917	3182.23	899.511	-177.201	3133.42	889.438	-164.087	3189.84	815.048
738	0	78.8618	3340.44	1581.81	176.891	3342.94	1577.7	69.6462	3176.44	1608.08	198.888	3204.01	1603.52	123.904	3109.12	1461.53	131.162	3008.83	1210.3	123.115	3247.81	1358.47	103.188	3294.3	1178.28	178.812	3010.12	1285.96	-46.5411	3171.91	1403.6	-122.392	3084.86	1191.68	-127.7	3072.57	1110.8	-164.802	3108.9	991.258	-128.793	3191.92	898.308	-178.795	3142.71	888.018	-165.951	3199.41	813.831
739	0	76.8775	3349.19	1581.02	175.024	3351.65	1577.17	67.6634	3185.05	1606.38	196.907	3212.72	1602.26	122.452	3118.68	1460.03	130.286	3018.5	1208.77	121.676	3257.39	1356.94	102.094	3303.93	1176.76	177.831	3019.78	1284.54	-47.9978	3181.24	1401.75	-123.529	3093.79	1189.94	-128.883	3081.49	1109.02	-166.226	3118.03	989.582	-130.73	3201.75	897.011	-180.473	3152.15	886.512	-167.878	3209.11	812.515
740	0	74.8565	3357.99	1580.17	173.135	3360.34	1576.56	65.5998	3193.71	1604.63	194.853	3221.45	1600.95	120.897	3128.26	1458.46	129.314	3028.25	1207.15	120.166	3267.04	1355.36	100.953	3313.67	1175.19	176.742	3029.49	1283.04	-49.535	3190.63	1399.8	-124.749	3102.82	1188.09	-130.143	3090.51	1107.13	-167.725	3127.29	987.813	-132.716	3211.71	895.62	-182.23	3161.74	884.924	-169.861	3218.97	811.108
741	0	72.7983	3366.82	1579.27	171.225	3369.03	1575.91	63.4522	3202.42	1602.84	192.723	3230.19	1599.6	119.237	3137.88	1456.83	128.246	3038.08	1205.46	118.58	3276.75	1353.75	99.765	3323.52	1173.58	175.543	3039.26	1281.48	-51.1556	3200.08	1397.78	-126.049	3111.95	1186.14	-131.48	3099.63	1105.15	-169.294	3136.69	985.956	-134.743	3221.79	894.14	-184.06	3171.51	883.262	-171.898	3228.99	809.616
742	0	70.7022	3375.71	1578.33	169.289	3377.72	1575.21	61.2172	3211.19	1601.03	190.514	3238.95	1598.22	117.468	3147.53	1455.17	127.087	3048	1203.7	116.919	3286.52	1352.12	98.5275	3333.48	1171.94	174.236	3049.09	1279.86	-52.8617	3209.6	1395.7	-127.428	3121.2	1184.08	-132.892	3108.88	1103.08	-170.929	3146.24	984.022	-136.801	3232	892.582	-185.956	3181.45	881.536	-173.984	3239.2	808.055
743	0	68.5674	3384.65	1577.39	167.325	3386.42	1574.5	58.8915	3220.03	1599.22	188.224	3247.73	1596.83	115.589	3157.23	1453.5	125.839	3058	1201.91	115.182	3296.37	1350.48	97.2398	3343.55	1170.3	172.825	3058.98	1278.22	-54.6546	3219.19	1393.57	-128.882	3130.56	1181.94	-134.376	3118.25	1100.93	-172.627	3155.95	982.025	-138.884	3242.36	890.958	-187.912	3191.58	879.76	-176.115	3249.6	806.441
744	0	66.3936	3393.65	1576.45	165.329	3395.14	1573.79	56.4719	3228.93	1597.41	185.849	3256.53	1595.45	113.598	3166.97	1451.83	124.507	3068.08	1200.1	113.371	3306.28	1348.87	95.9017	3353.72	1168.66	171.311	3068.93	1276.57	-56.5342	3228.86	1391.41	-130.409	3140.04	1179.72	-135.932	3127.75	1098.72	-174.382	3165.83	979.981	-140.984	3252.85	889.289	-189.922	3201.92	877.948	-178.285	3260.22	804.796
745	0	64.1813	3402.72	1575.54	163.3	3403.88	1573.11	53.9563	3237.92	1595.64	183.387	3265.37	1594.1	111.498	3176.76	1450.19	123.094	3078.24	1198.3	111.488	3316.26	1347.29	94.5143	3363.99	1167.04	169.698	3078.95	1274.93	-58.4994	3238.6	1389.24	-132.005	3149.64	1177.46	-137.557	3137.39	1096.48	-176.19	3175.88	977.909	-143.096	3263.51	887.596	-191.978	3212.46	876.12	-180.487	3271.07	803.146
746	0	61.9324	3411.85	1574.67	161.234	3412.65	1572.47	51.3431	3246.99	1593.92	180.837	3274.23	1592.8	109.289	3186.6	1448.59	121.602	3088.49	1196.53	109.538	3326.31	1345.77	93.08	3374.37	1165.48	167.99	3089.02	1273.34	-60.5475	3248.42	1387.08	-133.667	3159.36	1175.16	-139.247	3147.18	1094.22	-178.047	3186.11	975.83	-145.212	3274.33	885.906	-194.071	3223.22	874.298	-182.716	3282.18	801.52
747	0	59.6499	3421.07	1573.88	159.131	3421.47	1571.91	48.6326	3256.15	1592.28	178.199	3283.13	1591.58	106.975	3196.49	1447.07	120.034	3098.81	1194.82	107.527	3336.42	1344.34	91.6034	3384.84	1164	166.191	3099.16	1271.81	-62.6742	3258.33	1384.97	-135.389	3169.21	1172.86	-141.001	3157.12	1091.96	-179.948	3196.54	973.77	-147.328	3285.33	884.249	-196.194	3234.21	872.505	-184.962	3293.55	799.949
748	0	57.3386	3430.36	1573.17	156.99	3430.34	1571.43	45.8264	3265.41	1590.73	175.476	3292.06	1590.46	104.56	3206.43	1445.65	118.393	3109.21	1193.19	105.464	3346.6	1343.02	90.0913	3395.41	1162.62	164.304	3109.36	1270.38	-64.8737	3268.31	1382.92	-137.168	3179.19	1170.59	-142.816	3167.23	1089.74	-181.886	3207.18	971.755	-149.437	3296.53	882.656	-198.337	3245.44	870.766	-187.214	3305.21	798.467
749	0	55.0053	3439.73	1572.57	154.814	3439.27	1571.08	42.9283	3274.77	1589.29	172.669	3301.04	1589.46	102.052	3216.43	1444.34	116.681	3119.68	1191.67	103.357	3356.84	1341.83	88.5528	3406.07	1161.38	162.333	3119.62	1269.06	-67.1384	3278.39	1380.97	-139.001	3189.3	1168.38	-144.687	3177.51	1087.58	-183.857	3218.03	969.81	-151.531	3307.94	881.161	-200.489	3256.93	869.11	-189.462	3317.17	797.109
750	0	52.6588	3449.19	1572.1	152.609	3448.27	1570.86	39.9441	3284.23	1588	169.784	3310.06	1588.61	99.4564	3226.47	1443.17	114.901	3130.22	1190.29	101.218	3367.13	1340.8	86.9999	3416.82	1160.3	160.282	3129.92	1267.88	-69.4589	3288.55	1379.13	-140.883	3199.56	1166.26	-146.611	3187.96	1085.51	-185.854	3229.11	967.964	-153.603	3319.57	879.798	-202.641	3268.68	867.563	-191.694	3329.45	795.911
751	0	50.3096	3458.73	1571.77	150.383	3457.33	1570.81	36.8816	3293.81	1586.86	166.829	3319.12	1587.93	96.7832	3236.55	1442.17	113.054	3140.81	1189.08	99.0614	3377.47	1339.95	85.4471	3427.65	1159.42	158.157	3140.27	1266.88	-71.824	3298.81	1377.44	-142.81	3209.96	1164.26	-148.585	3198.59	1083.56	-187.87	3240.41	966.245	-155.646	3331.43	878.6	-204.782	3280.7	866.154	-193.896	3342.04	794.908
752	0	47.9706	3468.36	1571.61	148.146	3466.45	1570.92	33.7509	3303.49	1585.89	163.812	3328.22	1587.44	94.0425	3246.68	1441.35	111.146	3151.45	1188.05	96.9014	3387.85	1339.31	83.911	3438.56	1158.75	155.96	3150.66	1266.06	-74.2205	3309.16	1375.92	-144.778	3220.5	1162.42	-150.604	3209.41	1081.75	-189.9	3251.96	964.678	-157.649	3343.55	877.601	-206.9	3293.01	864.91	-196.053	3354.97	794.132
753	0	45.6559	3478.08	1571.62	145.912	3475.64	1571.23	30.5642	3313.28	1585.12	160.743	3337.36	1587.16	91.2459	3256.85	1440.72	109.178	3162.13	1187.23	94.7548	3398.26	1338.89	82.4106	3449.52	1158.32	153.697	3161.07	1265.44	-76.6338	3319.61	1374.59	-146.784	3231.21	1160.77	-152.664	3220.42	1080.11	-191.936	3263.75	963.29	-159.603	3355.91	876.831	-208.983	3305.6	863.856	-198.151	3368.23	793.615
754	0	43.3819	3487.88	1571.81	143.698	3484.89	1571.73	27.3358	3323.17	1584.54	157.637	3346.53	1587.09	88.4068	3267.04	1440.31	107.157	3172.85	1186.63	92.6393	3408.69	1338.7	80.9663	3460.54	1158.14	151.375	3171.5	1265.05	-79.0474	3330.17	1373.47	-148.822	3242.08	1159.32	-154.761	3231.62	1078.67	-193.97	3275.8	962.103	-161.498	3368.54	876.316	-211.02	3318.5	863.016	-200.175	3381.84	793.383
755	0	41.1658	3497.76	1572.18	141.522	3494.19	1572.44	24.0819	3333.17	1584.17	154.508	3355.74	1587.24	85.5394	3277.27	1440.1	105.086	3183.58	1186.27	90.5738	3419.14	1338.76	79.5993	3471.58	1158.23	148.998	3181.93	1264.9	-81.4437	3340.82	1372.57	-150.889	3253.12	1158.11	-156.89	3243.03	1077.43	-195.996	3288.11	961.137	-163.321	3381.45	876.081	-212.999	3331.69	862.411	-202.106	3395.78	793.459
756	0	39.0262	3507.72	1572.75	139.405	3503.53	1573.36	20.8205	3343.27	1584.01	151.373	3364.98	1587.63	82.6593	3287.51	1440.12	102.971	3194.33	1186.16	88.5776	3429.58	1339.06	78.3313	3482.63	1158.58	146.575	3192.36	1264.98	-83.8041	3351.57	1371.91	-152.981	3264.34	1157.15	-159.046	3254.64	1076.43	-198.004	3300.69	960.409	-165.06	3394.62	876.145	-214.909	3345.19	862.059	-203.931	3410.07	793.862
757	0	36.9824	3517.74	1573.5	137.369	3512.9	1574.48	17.5716	3353.45	1584.07	148.249	3374.24	1588.24	79.7827	3297.77	1440.37	100.819	3205.07	1186.29	86.67	3440.01	1339.6	77.1832	3493.66	1159.2	144.111	3202.77	1265.3	-86.1092	3362.42	1371.48	-155.091	3275.75	1156.46	-161.224	3266.46	1075.65	-199.988	3313.53	959.931	-166.704	3408.07	876.52	-216.738	3359.01	861.973	-205.631	3424.69	794.605
758	0	35.0542	3527.82	1574.42	135.433	3522.29	1575.79	14.356	3363.72	1584.32	145.157	3383.51	1589.07	76.9266	3308.03	1440.83	98.6358	3215.8	1186.68	84.8705	3450.42	1340.38	76.175	3504.66	1160.07	141.615	3213.16	1265.87	-88.3392	3373.36	1371.29	-157.214	3287.35	1156.03	-163.419	3278.48	1075.13	-201.939	3326.65	959.714	-168.238	3421.79	877.217	-218.476	3373.14	862.164	-207.19	3439.65	795.694
759	0	33.2618	3537.95	1575.52	133.621	3531.68	1577.29	11.1961	3374.07	1584.78	142.116	3392.8	1590.11	74.1085	3318.29	1441.5	96.4267	3226.5	1187.31	83.1976	3460.79	1341.38	75.3249	3515.59	1161.18	139.094	3223.5	1266.66	-90.4746	3384.4	1371.33	-159.344	3299.15	1155.87	-165.625	3290.71	1074.85	-203.848	3340.04	959.761	-169.649	3435.79	878.239	-220.11	3387.58	862.639	-208.593	3454.92	797.133
760	0	31.6249	3548.11	1576.77	131.95	3541.07	1578.95	8.11453	3384.48	1585.42	139.148	3402.08	1591.34	71.3457	3328.54	1442.36	94.1977	3237.15	1188.17	81.669	3471.11	1342.58	74.6488	3526.44	1162.5	136.555	3233.79	1267.66	-92.4961	3395.53	1371.61	-161.473	3311.15	1155.97	-167.836	3303.14	1074.81	-205.708	3353.7	960.075	-170.924	3450.04	879.582	-221.63	3402.34	863.399	-209.825	3470.51	798.92
761	0	30.1631	3558.3	1578.16	130.441	3550.45	1580.77	5.13461	3394.94	1586.22	136.276	3411.36	1592.75	68.6557	3338.77	1443.42	91.9544	3247.74	1189.24	80.3011	3481.36	1343.96	74.1601	3537.17	1164.01	134.005	3244.01	1268.87	-94.3851	3406.74	1372.1	-163.593	3323.34	1156.32	-170.046	3315.77	1075.01	-207.509	3367.64	960.65	-172.05	3464.55	881.241	-223.026	3417.4	864.442	-210.869	3486.4	801.047
762	0	28.8951	3568.5	1579.68	129.111	3559.8	1582.71	2.27945	3405.44	1587.18	133.519	3420.61	1594.3	66.0554	3348.97	1444.63	89.702	3258.25	1190.51	79.1087	3491.55	1345.5	73.8696	3547.77	1165.67	131.451	3254.15	1270.26	-96.1243	3418.02	1372.79	-165.694	3335.73	1156.91	-172.248	3328.6	1075.44	-209.244	3381.84	961.482	-173.014	3479.3	883.203	-224.288	3432.76	865.763	-211.715	3502.58	803.503
763	0	27.8387	3578.7	1581.29	127.974	3569.11	1584.75	-0.428284	3415.96	1588.26	130.9	3429.84	1595.99	63.5609	3359.14	1445.99	87.4452	3268.66	1191.96	78.105	3501.65	1347.16	73.7851	3558.22	1167.44	128.899	3264.2	1271.81	-97.6976	3429.37	1373.66	-167.769	3348.31	1157.72	-174.435	3341.62	1076.08	-210.904	3396.3	962.559	-173.805	3494.29	885.452	-225.404	3448.42	867.352	-212.348	3519.03	806.272
764	0	27.0105	3588.89	1582.99	127.044	3578.38	1586.87	-2.96676	3426.51	1589.46	128.439	3439.04	1597.77	61.1876	3369.27	1447.48	85.1882	3278.98	1193.56	77.301	3511.66	1348.92	73.9116	3568.5	1169.29	126.355	3274.15	1273.49	-99.0904	3440.78	1374.69	-169.805	3361.07	1158.73	-176.599	3354.84	1076.92	-212.479	3411.02	963.869	-174.411	3509.48	887.97	-226.366	3464.35	869.197	-212.759	3535.74	809.334
765	0	26.4259	3599.04	1584.75	126.336	3587.6	1589.05	-5.31537	3437.05	1590.74	126.154	3448.19	1599.62	58.9494	3379.36	1449.06	82.9348	3289.17	1195.28	76.706	3521.57	1350.74	74.2515	3578.61	1171.19	123.825	3283.98	1275.28	-100.29	3452.25	1375.86	-171.793	3374.01	1159.91	-178.733	3368.23	1077.94	-213.961	3425.98	965.397	-174.822	3524.88	890.734	-227.164	3480.55	871.283	-212.936	3552.69	812.669
766	0	26.0988	3609.16	1586.55	125.859	3596.77	1591.26	-7.45503	3447.58	1592.09	124.065	3457.28	1601.52	56.8593	3389.39	1450.73	80.6879	3299.23	1197.1	76.3273	3531.37	1352.6	74.8052	3588.52	1173.1	121.314	3293.7	1277.15	-101.285	3463.75	1377.15	-173.72	3387.11	1161.23	-180.827	3381.81	1079.12	-215.341	3441.18	967.127	-175.03	3540.45	893.722	-227.789	3497	873.596	-212.869	3569.85	816.254
767	0	26.0415	3619.22	1588.37	125.624	3605.87	1593.47	-9.36846	3458.09	1593.48	122.186	3466.31	1603.43	54.9285	3399.37	1452.46	78.4501	3309.16	1199	76.1704	3541.06	1354.47	75.5707	3598.24	1174.99	118.827	3303.27	1279.09	-102.067	3475.29	1378.53	-175.577	3400.36	1162.69	-182.874	3395.56	1080.44	-216.609	3456.6	969.043	-175.027	3556.19	896.911	-228.234	3513.69	876.12	-212.551	3587.22	820.065
768	0	26.2651	3629.22	1590.19	125.641	3614.91	1595.66	-11.0404	3468.56	1594.9	120.531	3475.27	1605.34	53.1668	3409.28	1454.22	76.2231	3318.94	1200.95	76.2391	3550.63	1356.31	76.5447	3607.76	1176.83	116.368	3312.72	1281.06	-102.629	3486.85	1379.99	-177.35	3413.74	1164.24	-184.866	3409.47	1081.89	-217.755	3472.23	971.129	-174.805	3572.07	900.278	-228.49	3530.6	878.838	-211.973	3604.76	824.079
769	0	26.7788	3639.15	1592	125.916	3623.87	1597.82	-12.4576	3478.99	1596.33	119.114	3484.15	1607.22	51.5825	3419.13	1456	74.0078	3328.57	1202.93	76.5353	3560.08	1358.11	77.7226	3617.08	1178.59	113.941	3322.01	1283.05	-102.965	3498.43	1381.51	-179.031	3427.26	1165.88	-186.792	3423.54	1083.45	-218.772	3488.06	973.367	-174.359	3588.07	903.8	-228.551	3547.72	881.734	-211.125	3622.45	828.273
770	0	27.5907	3648.99	1593.79	126.457	3632.75	1599.91	-13.6091	3489.37	1597.75	117.944	3492.94	1609.04	50.1823	3428.91	1457.79	71.8049	3338.04	1204.92	77.0597	3569.4	1359.85	79.0992	3626.2	1180.25	111.549	3331.16	1285.03	-103.071	3510.01	1383.08	-180.608	3440.89	1167.58	-188.647	3437.76	1085.1	-219.65	3504.08	975.745	-173.683	3604.19	907.458	-228.411	3565.02	884.796	-209.999	3640.28	832.625
771	0	28.7073	3658.73	1595.53	127.27	3641.55	1601.94	-14.4857	3499.68	1599.15	117.029	3501.64	1610.8	48.9713	3438.61	1459.57	69.6144	3347.36	1206.91	77.8119	3578.59	1361.5	80.6685	3635.11	1181.81	109.195	3340.16	1286.99	-102.945	3521.6	1384.66	-182.073	3454.64	1169.33	-190.422	3452.13	1086.84	-220.382	3520.27	978.249	-172.773	3620.4	911.234	-228.066	3582.51	888.01	-208.586	3658.23	837.116
772	0	30.1338	3668.37	1597.23	128.361	3650.25	1603.87	-15.0803	3509.93	1600.53	116.375	3510.24	1612.47	47.9536	3448.24	1461.32	67.4361	3356.53	1208.86	78.7904	3587.64	1363.05	82.425	3643.83	1183.24	106.882	3349	1288.92	-102.586	3533.18	1386.27	-183.418	3468.48	1171.12	-192.111	3466.65	1088.64	-220.962	3536.62	980.867	-171.623	3636.69	915.112	-227.51	3600.16	891.365	-206.879	3676.27	841.729
773	0	31.8744	3677.91	1598.86	129.734	3658.86	1605.71	-15.3876	3520.11	1601.87	115.987	3518.74	1614.05	47.132	3457.79	1463.05	65.2696	3365.53	1210.79	79.9935	3596.57	1364.5	84.3631	3652.34	1184.53	104.612	3357.69	1290.81	-101.993	3544.76	1387.88	-184.634	3482.42	1172.93	-193.707	3481.3	1090.5	-221.382	3553.14	983.592	-170.23	3653.05	919.079	-226.741	3617.96	894.854	-204.87	3694.4	846.451
774	0	33.9322	3687.34	1600.44	131.395	3667.36	1607.43	-15.4038	3530.21	1603.16	115.869	3527.13	1615.52	46.5083	3467.26	1464.73	63.1143	3374.38	1212.67	81.4194	3605.36	1365.83	86.4779	3660.65	1185.68	102.387	3366.22	1292.64	-101.167	3556.32	1389.49	-185.718	3496.44	1174.76	-195.206	3496.08	1092.42	-221.638	3569.79	986.415	-168.591	3669.46	923.125	-225.756	3635.91	898.468	-202.551	3712.59	851.27
775	0	36.3091	3696.65	1601.94	133.346	3675.76	1609.04	-15.126	3540.24	1604.41	116.023	3535.4	1616.89	46.0837	3476.65	1466.36	60.9697	3383.07	1214.5	83.0661	3614.01	1367.03	88.7655	3668.77	1186.68	100.208	3374.6	1294.41	-100.107	3567.86	1391.09	-186.664	3510.54	1176.6	-196.604	3510.99	1094.39	-221.727	3586.6	989.332	-166.703	3685.92	927.241	-224.552	3654	902.203	-199.917	3730.86	856.177
776	0	39.0068	3705.84	1603.37	135.591	3684.04	1610.54	-14.5529	3550.18	1605.61	116.449	3543.57	1618.13	45.8589	3485.96	1467.95	58.8355	3391.6	1216.28	84.9322	3622.53	1368.11	91.2225	3676.69	1187.54	98.0754	3382.82	1296.11	-98.8147	3579.39	1392.69	-187.469	3524.73	1178.45	-197.899	3526.02	1096.41	-221.645	3603.54	992.339	-164.564	3702.43	931.422	-223.129	3672.23	906.056	-196.962	3749.17	861.167
777	0	42.026	3714.92	1604.73	138.13	3692.2	1611.91	-13.6834	3560.04	1606.76	117.15	3551.61	1619.25	45.8342	3495.19	1469.48	56.7115	3399.98	1217.99	87.0168	3630.91	1369.05	93.8467	3684.41	1188.24	95.9905	3390.89	1297.74	-97.2904	3590.89	1394.27	-188.13	3538.99	1180.3	-199.087	3541.18	1098.47	-221.39	3620.61	995.433	-162.174	3718.97	935.665	-221.486	3690.59	910.025	-193.684	3767.54	866.236
778	0	45.3671	3723.87	1606.01	140.965	3700.25	1613.15	-12.517	3569.81	1607.85	118.124	3559.55	1620.25	46.0098	3504.33	1470.96	54.5974	3408.2	1219.65	89.319	3639.16	1369.87	96.6367	3691.93	1188.79	93.9536	3398.81	1299.3	-95.5341	3602.37	1395.84	-188.648	3553.32	1182.16	-200.169	3556.46	1100.57	-220.963	3637.82	998.613	-159.531	3735.56	939.968	-219.622	3709.09	914.107	-190.08	3785.96	871.381
779	0	49.0304	3732.71	1607.21	144.094	3708.18	1614.27	-11.0536	3579.5	1608.89	119.372	3567.37	1621.13	46.3856	3513.39	1472.39	52.4933	3416.27	1221.25	91.8386	3647.26	1370.55	99.5919	3699.26	1189.19	91.9647	3406.56	1300.79	-93.5463	3613.83	1397.4	-189.02	3567.73	1184.02	-201.144	3571.86	1102.71	-220.361	3655.16	1001.88	-156.635	3752.18	944.329	-217.537	3727.72	918.303	-186.151	3804.42	876.601
780	0	53.016	3741.42	1608.34	147.519	3716	1615.27	-9.29302	3589.11	1609.87	120.894	3575.07	1621.88	46.9618	3522.37	1473.76	50.3992	3424.18	1222.78	94.5754	3655.23	1371.1	102.712	3706.39	1189.43	90.0239	3414.17	1302.21	-91.3269	3625.27	1398.95	-189.247	3582.21	1185.89	-202.011	3587.39	1104.9	-219.585	3672.64	1005.23	-153.485	3768.83	948.748	-215.231	3746.47	922.612	-181.895	3822.93	881.895
[truncated: 69 more columns]

## Sheet: Sheet2
Devices
		025370 - Force			025370 - Moment			025370 - CoP			027571 - Force			027571 - Moment			027571 - CoP			037720 - Force			037720 - Moment			037720 - CoP
Frame	Sub Frame	Fx	Fy	Fz	Mx	My	Mz	Cx	Cy	Cz	Fx	Fy	Fz	Mx	My	Mz	Cx	Cy	Cz	Fx	Fy	Fz	Mx	My	Mz	Cx	Cy	Cz
		N	N	N	N.mm	N.mm	N.mm	mm	mm	mm	N	N	N	N.mm	N.mm	N.mm	mm	mm	mm	N	N	N	N.mm	N.mm	N.mm	mm	mm	mm
247	0	0	0	0	0	0	0	200	300	0	0	0	0	0	0	0	200	903	0	0	0	0	0	0	0	603	903	0
247	1	0	0	0	0	0	0	200	300	0	0	0	0	0	0	0	200	903	0	0	0	0	0	0	0	603	903	0
247	2	0	0	0	0	0	0	200	300	0	0	0	0	0	0	0	200	903	0	0	0	0	0	0	0	603	903	0
247	3	0	0	0	0	0	0	200	300	0	0	0	0	0	0	0	200	903	0	0	0	0	0	0	0	603	903	0
247	4	0	0	0	0	0	0	200	300	0	0	0	0	0	0	0	200	903	0	0	0	0	0	0	0	603	903	0
247	5	0	0	0	0	0	0	200	300	0	0	0	0	0	0	0	200	903	0	0	0	0	0	0	0	603	903	0
247	6	0	0	0	0	0	0	200	300	0	0	0	0	0	0	0	200	903	0	0	0	0	0	0	0	603	903	0
247	7	0	0	0	0	0	0	200	300	0	0	0	0	0	0	0	200	903	0	0	0	0	0	0	0	603	903	0
247	8	0	0	0	0	0	0	200	300	0	0	0	0	0	0	0	200	903	0	0	0	0	0	0	0	603	903	0
247	9	0	0	0	0	0	0	200	300	0	0	0	0	0	0	0	200	903	0	0	0	0	0	0	0	603	903	0
248	0	0	0	0	0	0	0	200	300	0	0	0	0	0	0	0	200	903	0	0	0	0	0	0	0	603	903	0
248	1	0	0	0	0	0	0	200	300	0	0	0	0	0	0	0	200	903	0	0	0	0	0	0	0	603	903	0
248	2	0	0	0	0	0	0	200	300	0	0	0	0	0	0	0	200	903	0	0	0	0	0	0	0	603	903	0
248	3	0	0	0	0	0	0	200	300	0	0	0	0	0	0	0	200	903	0	0	0	0	0	0	0	603	903	0
248	4	0	0	0	0	0	0	200	300	0	0	0	0	0	0	0	200	903	0	0	0	0	0	0	0	603	903	0
248	5	0	0	0	0	0	0	200	300	0	0	0	0	0	0	0	200	903	0	0	0	0	0	0	0	603	903	0
248	6	0	0	0	0	0	0	200	300	0	0	0	0	0	0	0	200	903	0	0	0	0	0	0	0	603	903	0
248	7	0	0	0	0	0	0	200	300	0	0	0	0	0	0	0	200	903	0	0	0	0	0	0	0	603	903	0
248	8	0	0	0	0	0	0	200	300	0	0	0	0	0	0	0	200	903	0	0	0	0	0	0	0	603	903	0
248	9	0	0	0	0	0	0	200	300	0	0	0	0	0	0	0	200	903	0	0	0	0	0	0	0	603	903	0
249	0	0	0	0	0	0	0	200	300	0	0	0	0	0	0	0	200	903	0	0	0	0	0	0	0	603	903	0
249	1	0	0	0	0	0	0	200	300	0	0	0	0	0	0	0	200	903	0	0	0	0	0	0	0	603	903	0
249	2	0	0	0	0	0	0	200	300	0	0	0	0	0	0	0	200	903	0	0	0	0	0	0	0	603	903	0
249	3	0	0	0	0	0	0	200	300	0	0	0	0	0	0	0	200	903	0	0	0	0	0	0	0	603	903	0
249	4	0	0	0	0	0	0	200	300	0	0	0	0	0	0	0	200	903	0	0	0	0	0	0	0	603	903	0
249	5	0	0	0	0	0	0	200	300	0	0	0	0	0	0	0	200	903	0	0	0	0	0	0	0	603	903	0
249	6	0	0	0	0	0	0	200	300	0	0	0	0	0	0	0	200	903	0	0	0	0	0	0	0	603	903	0
249	7	0	0	0	0	0	0	200	300	0	0	0	0	0	0	0	200	903	0	0	0	0	0	0	0	603	903	0
249	8	0	0	0	0	0	0	200	300	0	0	0	0	0	0	0	200	903	0	0	0	0	0	0	0	603	903	0
249	9	0	0	0	0	0	0	200	300	0	0	0	0	0	0	0	200	903	0	0	0	0	0	0	0	603	903	0
250	0	0	0	0	0	0	0	200	300	0	0	0	0	0	0	0	200	903	0	0	0	0	0	0	0	603	903	0
250	1	0	0	0	0	0	0	200	300	0	0	0	0	0	0	0	200	903	0	0	0	0	0	0	0	603	903	0
250	2	0	0	0	0	0	0	200	300	0	0	0	0	0	0	0	200	903	0	0	0	0	0	0	0	603	903	0
250	3	0	0	0	0	0	0	200	300	0	0	0	0	0	0	0	200	903	0	0	0	0	0	0	0	603	903	0
250	4	0	0	0	0	0	0	200	300	0	0	0	0	0	0	0	200	903	0	0	0	0	0	0	0	603	903	0
250	5	0	0	0	0	0	0	200	300	0	0	0	0	0	0	0	200	903	0	0	0	0	0	0	0	603	903	0
250	6	0	0	0	0	0	0	200	300	0	0	0	0	0	0	0	200	903	0	0	0	0	0	0	0	603	903	0
250	7	0	0	0	0	0	0	200	300	0	0	0	0	0	0	0	200	903	0	0	0	0	0	0	0	603	903	0
250	8	0	0	0	0	0	0	200	300	0	0	0	0	0	0	0	200	903	0	0	0	0	0	0	0	603	903	0
250	9	0	0	0	0	0	0	200	300	0	0	0	0	0	0	0	200	903	0	0	0	0	0	0	0	603	903	0
251	0	0	0	0	0	0	0	200	300	0	0	0	0	0	0	0	200	903	0	0	0	0	0	0	0	603	903	0
251	1	0	0	0	0	0	0	200	300	0	0	0	0	0	0	0	200	903	0	0	0	0	0	0	0	603	903	0
251	2	0	0	0	0	0	0	200	300	0	0	0	0	0	0	0	200	903	0	0	0	0	0	0	0	603	903	0
251	3	0	0	0	0	0	0	200	300	0	0	0	0	0	0	0	200	903	0	0	0	0	0	0	0	603	903	0
251	4	0	0	0	0	0	0	200	300	0	0	0	0	0	0	0	200	903	0	0	0	0	0	0	0	603	903	0
251	5	0	0	0	0	0	0	200	300	0	0	0	0	0	0	0	200	903	0	0	0	0	0	0	0	603	903	0
251	6	0	0	0	0	0	0	200	300	0	0	0	0	0	0	0	200	903	0	0	0	0	0	0	0	603	903	0
251	7	0	0	0	0	0	0	200	300	0	0	0	0	0	0	0	200	903	0	0	0	0	0	0	0	603	903	0
251	8	0	0	0	0	0	0	200	300	0	0	0	0	0	0	0	200	903	0	0	0	0	0	0	0	603	903	0
251	9	0	0	0	0	0	0	200	300	0	0	0	0	0	0	0	200	903	0	0	0	0	0	0	0	603	903	0
252	0	0	0	0	0	0	0	200	300	0	0	0	0	0	0	0	200	903	0	0	0	0	0	0	0	603	903	0
252	1	0	0	0	0	0	0	200	300	0	0	0	0	0	0	0	200	903	0	0	0	0	0	0	0	603	903	0
252	2	0	0	0	0	0	0	200	300	0	0	0	0	0	0	0	200	903	0	0	0	0	0	0	0	603	903	0
252	3	0	0	0	0	0	0	200	300	0	0	0	0	0	0	0	200	903	0	0	0	0	0	0	0	603	903	0
252	4	0	0	0	0	0	0	200	300	0	0	0	0	0	0	0	200	903	0	0	0	0	0	0	0	603	903	0
252	5	0	0	0	0	0	0	200	300	0	0	0	0	0	0	0	200	903	0	0	0	0	0	0	0	603	903	0
252	6	0	0	0	0	0	0	200	300	0	0	0	0	0	0	0	200	903	0	0	0	0	0	0	0	603	903	0
252	7	0	0	0	0	0	0	200	300	0	0	0	0	0	0	0	200	903	0	0	0	0	0	0	0	603	903	0
252	8	0	0	0	0	0	0	200	300	0	0	0	0	0	0	0	200	903	0	0	0	0	0	0	0	603	903	0
252	9	0	0	0	0	0	0	200	300	0	0	0	0	0	0	0	200	903	0	0	0	0	0	0	0	603	903	0
253	0	0	0	0	0	0	0	200	300	0	0	0	0	0	0	0	200	903	0	0	0	0	0	0	0	603	903	0
253	1	0	0	0	0	0	0	200	300	0	0	0	0	0	0	0	200	903	0	0	0	0	0	0	0	603	903	0
253	2	0	0	0	0	0	0	200	300	0	0	0	0	0	0	0	200	903	0	0	0	0	0	0	0	603	903	0
253	3	0	0	0	0	0	0	200	300	0	0	0	0	0	0	0	200	903	0	0	0	0	0	0	0	603	903	0
253	4	0	0	0	0	0	0	200	300	0	0	0	0	0	0	0	200	903	0	0	0	0	0	0	0	603	903	0
253	5	0	0	0	0	0	0	200	300	0	0	0	0	0	0	0	200	903	0	0	0	0	0	0	0	603	903	0
253	6	0	0	0	0	0	0	200	300	0	0	0	0	0	0	0	200	903	0	0	0	0	0	0	0	603	903	0
253	7	0	0	0	0	0	0	200	300	0	0	0	0	0	0	0	200	903	0	0	0	0	0	0	0	603	903	0
253	8	0	0	0	0	0	0	200	300	0	0	0	0	0	0	0	200	903	0	0	0	0	0	0	0	603	903	0
253	9	0	0	0	0	0	0	200	300	0	0	0	0	0	0	0	200	903	0	0	0	0	0	0	0	603	903	0
254	0	0	0	0	0	0	0	200	300	0	0	0	0	0	0	0	200	903	0	0	0	0	0	0	0	603	903	0
254	1	0	0	0	0	0	0	200	300	0	0	0	0	0	0	0	200	903	0	0	0	0	0	0	0	603	903	0
254	2	0	0	0	0	0	0	200	300	0	0	0	0	0	0	0	200	903	0	0	0	0	0	0	0	603	903	0
254	3	0	0	0	0	0	0	200	300	0	0	0	0	0	0	0	200	903	0	0	0	0	0	0	0	603	903	0
254	4	0	0	0	0	0	0	200	300	0	0	0	0	0	0	0	200	903	0	0	0	0	0	0	0	603	903	0
254	5	0	0	0	0	0	0	200	300	0	0	0	0	0	0	0	200	903	0	0	0	0	0	0	0	603	903	0
254	6	0	0	0	0	0	0	200	300	0	0	0	0	0	0	0	200	903	0	0	0	0	0	0	0	603	903	0
254	7	0	0	0	0	0	0	200	300	0	0	0	0	0	0	0	200	903	0	0	0	0	0	0	0	603	903	0
254	8	0	0	0	0	0	0	200	300	0	0	0	0	0	0	0	200	903	0	0	0	0	0	0	0	603	903	0
254	9	0	0	0	0	0	0	200	300	0	0	0	0	0	0	0	200	903	0	0	0	0	0	0	0	603	903	0
255	0	0	0	0	0	0	0	200	300	0	0	0	0	0	0	0	200	903	0	0	0	0	0	0	0	603	903	0
255	1	0	0	0	0	0	0	200	300	0	0	0	0	0	0	0	200	903	0	0	0	0	0	0	0	603	903	0
255	2	0	0	0	0	0	0	200	300	0	0	0	0	0	0	0	200	903	0	0	0	0	0	0	0	603	903	0
255	3	0	0	0	0	0	0	200	300	0	0	0	0	0	0	0	200	903	0	0	0	0	0	0	0	603	903	0
255	4	0	0	0	0	0	0	200	300	0	0	0	0	0	0	0	200	903	0	0	0	0	0	0	0	603	903	0
255	5	0	0	0	0	0	0	200	300	0	0	0	0	0	0	0	200	903	0	0	0	0	0	0	0	603	903	0
255	6	0	0	0	0	0	0	200	300	0	0	0	0	0	0	0	200	903	0	0	0	0	0	0	0	603	903	0
255	7	0	0	0	0	0	0	200	300	0	0	0	0	0	0	0	200	903	0	0	0	0	0	0	0	603	903	0
255	8	0	0	0	0	0	0	200	300	0	0	0	0	0	0	0	200	903	0	0	0	0	0	0	0	603	903	0
255	9	0	0	0	0	0	0	200	300	0	0	0	0	0	0	0	200	903	0	0	0	0	0	0	0	603	903	0
256	0	0	0	0	0	0	0	200	300	0	0	0	0	0	0	0	200	903	0	0	0	0	0	0	0	603	903	0
256	1	0	0	0	0	0	0	200	300	0	0	0	0	0	0	0	200	903	0	0	0	0	0	0	0	603	903	0
256	2	0	0	0	0	0	0	200	300	0	0	0	0	0	0	0	200	903	0	0	0	0	0	0	0	603	903	0
256	3	0	0	0	0	0	0	200	300	0	0	0	0	0	0	0	200	903	0	0	0	0	0	0	0	603	903	0
256	4	0	0	0	0	0	0	200	300	0	0	0	0	0	0	0	200	903	0	0	0	0	0	0	0	603	903	0
256	5	0	0	0	0	0	0	200	300	0	0	0	0	0	0	0	200	903	0	0	0	0	0	0	0	603	903	0
256	6	0	0	0	0	0	0	200	300	0	0	0	0	0	0	0	200	903	0	0	0	0	0	0	0	603	903	0
256	7	0	0	0	0	0	0	200	300	0	0	0	0	0	0	0	200	903	0	0	0	0	0	0	0	603	903	0
256	8	0	0	0	0	0	0	200	300	0	0	0	0	0	0	0	200	903	0	0	0	0	0	0	0	603	903	0
256	9	0	0	0	0	0	0	200	300	0	0	0	0	0	0	0	200	903	0	0	0	0	0	0	0	603	903	0
257	0	0	0	0	0	0	0	200	300	0	0	0	0	0	0	0	200	903	0	0	0	0	0	0	0	603	903	0
257	1	0	0	0	0	0	0	200	300	0	0	0	0	0	0	0	200	903	0	0	0	0	0	0	0	603	903	0
257	2	0	0	0	0	0	0	200	300	0	0	0	0	0	0	0	200	903	0	0	0	0	0	0	0	603	903	0
257	3	0	0	0	0	0	0	200	300	0	0	0	0	0	0	0	200	903	0	0	0	0	0	0	0	603	903	0
257	4	0	0	0	0	0	0	200	300	0	0	0	0	0	0	0	200	903	0	0	0	0	0	0	0	603	903	0
257	5	0	0	0	0	0	0	200	300	0	0	0	0	0	0	0	200	903	0	0	0	0	0	0	0	603	903	0
257	6	0	0	0	0	0	0	200	300	0	0	0	0	0	0	0	200	903	0	0	0	0	0	0	0	603	903	0
257	7	0	0	0	0	0	0	200	300	0	0	0	0	0	0	0	200	903	0	0	0	0	0	0	0	603	903	0
257	8	0	0	0	0	0	0	200	300	0	0	0	0	0	0	0	200	903	0	0	0	0	0	0	0	603	903	0
257	9	0	0	0	0	0	0	200	300	0	0	0	0	0	0	0	200	903	0	0	0	0	0	0	0	603	903	0
258	0	0	0	0	0	0	0	200	300	0	0	0	0	0	0	0	200	903	0	0	0	0	0	0	0	603	903	0
258	1	0	0	0	0	0	0	200	300	0	0	0	0	0	0	0	200	903	0	0	0	0	0	0	0	603	903	0
258	2	0	0	0	0	0	0	200	300	0	0	0	0	0	0	0	200	903	0	0	0	0	0	0	0	603	903	0
258	3	0	0	0	0	0	0	200	300	0	0	0	0	0	0	0	200	903	0	0	0	0	0	0	0	603	903	0
258	4	0	0	0	0	0	0	200	300	0	0	0	0	0	0	0	200	903	0	0	0	0	0	0	0	603	903	0
258	5	0	0	0	0	0	0	200	300	0	0	0	0	0	0	0	200	903	0	0	0	0	0	0	0	603	903	0
258	6	0	0	0	0	0	0	200	300	0	0	0	0	0	0	0	200	903	0	0	0	0	0	0	0	603	903	0
258	7	0	0	0	0	0	0	200	300	0	0	0	0	0	0	0	200	903	0	0	0	0	0	0	0	603	903	0
258	8	0	0	0	0	0	0	200	300	0	0	0	0	0	0	0	200	903	0	0	0	0	0	0	0	603	903	0
258	9	0	0	0	0	0	0	200	300	0	0	0	0	0	0	0	200	903	0	0	0	0	0	0	0	603	903	0
259	0	0	0	0	0	0	0	200	300	0	0	0	0	0	0	0	200	903	0	0	0	0	0	0	0	603	903	0
259	1	0	0	0	0	0	0	200	300	0	0	0	0	0	0	0	200	903	0	0	0	0	0	0	0	603	903	0
259	2	0	0	0	0	0	0	200	300	0	0	0	0	0	0	0	200	903	0	0	0	0	0	0	0	603	903	0
259	3	0	0	0	0	0	0	200	300	0	0	0	0	0	0	0	200	903	0	0	0	0	0	0	0	603	903	0
259	4	0	0	0	0	0	0	200	300	0	0	0	0	0	0	0	200	903	0	0	0	0	0	0	0	603	903	0
259	5	0	0	0	0	0	0	200	300	0	0	0	0	0	0	0	200	903	0	0	0	0	0	0	0	603	903	0
259	6	0	0	0	0	0	0	200	300	0	0	0	0	0	0	0	200	903	0	0	0	0	0	0	0	603	903	0
259	7	0	0	0	0	0	0	200	300	0	0	0	0	0	0	0	200	903	0	0	0	0	0	0	0	603	903	0
259	8	0	0	0	0	0	0	200	300	0	0	0	0	0	0	0	200	903	0	0	0	0	0	0	0	603	903	0
259	9	0	0	0	0	0	0	200	300	0	0	0	0	0	0	0	200	903	0	0	0	0	0	0	0	603	903	0
260	0	0	0	0	0	0	0	200	300	0	0	0	0	0	0	0	200	903	0	0	0	0	0	0	0	603	903	0
260	1	0	0	0	0	0	0	200	300	0	0	0	0	0	0	0	200	903	0	0	0	0	0	0	0	603	903	0
260	2	0	0	0	0	0	0	200	300	0	0	0	0	0	0	0	200	903	0	0	0	0	0	0	0	603	903	0
260	3	0	0	0	0	0	0	200	300	0	0	0	0	0	0	0	200	903	0	0	0	0	0	0	0	603	903	0
260	4	0	0	0	0	0	0	200	300	0	0	0	0	0	0	0	200	903	0	0	0	0	0	0	0	603	903	0
260	5	0	0	0	0	0	0	200	300	0	0	0	0	0	0	0	200	903	0	0	0	0	0	0	0	603	903	0
260	6	0	0	0	0	0	0	200	300	0	0	0	0	0	0	0	200	903	0	0	0	0	0	0	0	603	903	0
260	7	0	0	0	0	0	0	200	300	0	0	0	0	0	0	0	200	903	0	0	0	0	0	0	0	603	903	0
260	8	0	0	0	0	0	0	200	300	0	0	0	0	0	0	0	200	903	0	0	0	0	0	0	0	603	903	0
260	9	0	0	0	0	0	0	200	300	0	0	0	0	0	0	0	200	903	0	0	0	0	0	0	0	603	903	0
261	0	0	0	0	0	0	0	200	300	0	0	0	0	0	0	0	200	903	0	0	0	0	0	0	0	603	903	0
261	1	0	0	0	0	0	0	200	300	0	0	0	0	0	0	0	200	903	0	0	0	0	0	0	0	603	903	0
261	2	0	0	0	0	0	0	200	300	0	0	0	0	0	0	0	200	903	0	0	0	0	0	0	0	603	903	0
261	3	0	0	0	0	0	0	200	300	0	0	0	0	0	0	0	200	903	0	0	0	0	0	0	0	603	903	0
261	4	0	0	0	0	0	0	200	300	0	0	0	0	0	0	0	200	903	0	0	0	0	0	0	0	603	903	0
261	5	0	0	0	0	0	0	200	300	0	0	0	0	0	0	0	200	903	0	0	0	0	0	0	0	603	903	0
261	6	0	0	0	0	0	0	200	300	0	0	0	0	0	0	0	200	903	0	0	0	0	0	0	0	603	903	0
261	7	0	0	0	0	0	0	200	300	0	0	0	0	0	0	0	200	903	0	0	0	0	0	0	0	603	903	0
261	8	0	0	0	0	0	0	200	300	0	0	0	0	0	0	0	200	903	0	0	0	0	0	0	0	603	903	0
261	9	0	0	0	0	0	0	200	300	0	0	0	0	0	0	0	200	903	0	0	0	0	0	0	0	603	903	0
262	0	0	0	0	0	0	0	200	300	0	0	0	0	0	0	0	200	903	0	0	0	0	0	0	0	603	903	0
262	1	0	0	0	0	0	0	200	300	0	0	0	0	0	0	0	200	903	0	0	0	0	0	0	0	603	903	0
262	2	0	0	0	0	0	0	200	300	0	0	0	0	0	0	0	200	903	0	0	0	0	0	0	0	603	903	0
262	3	0	0	0	0	0	0	200	300	0	0	0	0	0	0	0	200	903	0	0	0	0	0	0	0	603	903	0
262	4	0	0	0	0	0	0	200	300	0	0	0	0	0	0	0	200	903	0	0	0	0	0	0	0	603	903	0
262	5	0	0	0	0	0	0	200	300	0	0	0	0	0	0	0	200	903	0	0	0	0	0	0	0	603	903	0
262	6	0	0	0	0	0	0	200	300	0	0	0	0	0	0	0	200	903	0	0	0	0	0	0	0	603	903	0
262	7	0	0	0	0	0	0	200	300	0	0	0	0	0	0	0	200	903	0	0	0	0	0	0	0	603	903	0
262	8	0	0	0	0	0	0	200	300	0	0	0	0	0	0	0	200	903	0	0	0	0	0	0	0	603	903	0
262	9	0	0	0	0	0	0	200	300	0	0	0	0	0	0	0	200	903	0	0	0	0	0	0	0	603	903	0
263	0	0	0	0	0	0	0	200	300	0	0	0	0	0	0	0	200	903	0	0	0	0	0	0	0	603	903	0
263	1	0	0	0	0	0	0	200	300	0	0	0	0	0	0	0	200	903	0	0	0	0	0	0	0	603	903	0
263	2	0	0	0	0	0	0	200	300	0	0	0	0	0	0	0	200	903	0	0	0	0	0	0	0	603	903	0
263	3	0	0	0	0	0	0	200	300	0	0	0	0	0	0	0	200	903	0	0	0	0	0	0	0	603	903	0
263	4	0	0	0	0	0	0	200	300	0	0	0	0	0	0	0	200	903	0	0	0	0	0	0	0	603	903	0
263	5	0	0	0	0	0	0	200	300	0	0	0	0	0	0	0	200	903	0	0	0	0	0	0	0	603	903	0
263	6	0	0	0	0	0	0	200	300	0	0	0	0	0	0	0	200	903	0	0	0	0	0	0	0	603	903	0
263	7	0	0	0	0	0	0	200	300	0	0	0	0	0	0	0	200	903	0	0	0	0	0	0	0	603	903	0
263	8	0	0	0	0	0	0	200	300	0	0	0	0	0	0	0	200	903	0	0	0	0	0	0	0	603	903	0
263	9	0	0	0	0	0	0	200	300	0	0	0	0	0	0	0	200	903	0	0	0	0	0	0	0	603	903	0
264	0	0	0	0	0	0	0	200	300	0	0	0	0	0	0	0	200	903	0	0	0	0	0	0	0	603	903	0
264	1	0	0	0	0	0	0	200	300	0	0	0	0	0	0	0	200	903	0	0	0	0	0	0	0	603	903	0
264	2	0	0	0	0	0	0	200	300	0	0	0	0	0	0	0	200	903	0	0	0	0	0	0	0	603	903	0
264	3	0	0	0	0	0	0	200	300	0	0	0	0	0	0	0	200	903	0	0	0	0	0	0	0	603	903	0
264	4	0	0	0	0	0	0	200	300	0	0	0	0	0	0	0	200	903	0	0	0	0	0	0	0	603	903	0
264	5	0	0	0	0	0	0	200	300	0	0	0	0	0	0	0	200	903	0	0	0	0	0	0	0	603	903	0
264	6	0	0	0	0	0	0	200	300	0	0	0	0	0	0	0	200	903	0	0	0	0	0	0	0	603	903	0
264	7	0	0	0	0	0	0	200	300	0	0	0	0	0	0	0	200	903	0	0	0	0	0	0	0	603	903	0
264	8	0	0	0	0	0	0	200	300	0	0	0	0	0	0	0	200	903	0	0	0	0	0	0	0	603	903	0
264	9	0	0	0	0	0	0	200	300	0	0	0	0	0	0	0	200	903	0	0	0	0	0	0	0	603	903	0
265	0	0	0	0	0	0	0	200	300	0	0	0	0	0	0	0	200	903	0	0	0	0	0	0	0	603	903	0
265	1	0	0	0	0	0	0	200	300	0	0	0	0	0	0	0	200	903	0	0	0	0	0	0	0	603	903	0
265	2	0	0	0	0	0	0	200	300	0	0	0	0	0	0	0	200	903	0	0	0	0	0	0	0	603	903	0
265	3	0	0	0	0	0	0	200	300	0	0	0	0	0	0	0	200	903	0	0	0	0	0	0	0	603	903	0
265	4	0	0	0	0	0	0	200	300	0	0	0	0	0	0	0	200	903	0	0	0	0	0	0	0	603	903	0
265	5	0	0	0	0	0	0	200	300	0	0	0	0	0	0	0	200	903	0	0	0	0	0	0	0	603	903	0
265	6	0	0	0	0	0	0	200	300	0	0	0	0	0	0	0	200	903	0	0	0	0	0	0	0	603	903	0
265	7	0	0	0	0	0	0	200	300	0	0	0	0	0	0	0	200	903	0	0	0	0	0	0	0	603	903	0
265	8	0	0	0	0	0	0	200	300	0	0	0	0	0	0	0	200	903	0	0	0	0	0	0	0	603	903	0
265	9	0	0	0	0	0	0	200	300	0	0	0	0	0	0	0	200	903	0	0	0	0	0	0	0	603	903	0
266	0	0	0	0	0	0	0	200	300	0	0	0	0	0	0	0	200	903	0	0	0	0	0	0	0	603	903	0
266	1	0	0	0	0	0	0	200	300	0	0	0	0	0	0	0	200	903	0	0	0	0	0	0	0	603	903	0
266	2	0	0	0	0	0	0	200	300	0	0	0	0	0	0	0	200	903	0	0	0	0	0	0	0	603	903	0
266	3	0	0	0	0	0	0	200	300	0	0	0	0	0	0	0	200	903	0	0	0	0	0	0	0	603	903	0
266	4	0	0	0	0	0	0	200	300	0	0	0	0	0	0	0	200	903	0	0	0	0	0	0	0	603	903	0
266	5	0	0	0	0	0	0	200	300	0	0	0	0	0	0	0	200	903	0	0	0	0	0	0	0	603	903	0
266	6	0	0	0	0	0	0	200	300	0	0	0	0	0	0	0	200	903	0	0	0	0	0	0	0	603	903	0
266	7	0	0	0	0	0	0	200	300	0	0	0	0	0	0	0	200	903	0	0	0	0	0	0	0	603	903	0
266	8	0	0	0	0	0	0	200	300	0	0	0	0	0	0	0	200	903	0	0	0	0	0	0	0	603	903	0
266	9	0	0	0	0	0	0	200	300	0	0	0	0	0	0	0	200	903	0	0	0	0	0	0	0	603	903	0
267	0	0	0	0	0	0	0	200	300	0	0	0	0	0	0	0	200	903	0	0	0	0	0	0	0	603	903	0
267	1	0	0	0	0	0	0	200	300	0	0	0	0	0	0	0	200	903	0	0	0	0	0	0	0	603	903	0
267	2	0	0	0	0	0	0	200	300	0	0	0	0	0	0	0	200	903	0	0	0	0	0	0	0	603	903	0
267	3	0	0	0	0	0	0	200	300	0	0	0	0	0	0	0	200	903	0	0	0	0	0	0	0	603	903	0
267	4	0	0	0	0	0	0	200	300	0	0	0	0	0	0	0	200	903	0	0	0	0	0	0	0	603	903	0
267	5	0	0	0	0	0	0	200	300	0	0	0	0	0	0	0	200	903	0	0	0	0	0	0	0	603	903	0
267	6	0	0	0	0	0	0	200	300	0	0	0	0	0	0	0	200	903	0	0	0	0	0	0	0	603	903	0
267	7	0	0	0	0	0	0	200	300	0	0	0	0	0	0	0	200	903	0	0	0	0	0	0	0	603	903	0
267	8	0	0	0	0	0	0	200	300	0	0	0	0	0	0	0	200	903	0	0	0	0	0	0	0	603	903	0
267	9	0	0	0	0	0	0	200	300	0	0	0	0	0	0	0	200	903	0	0	0	0	0	0	0	603	903	0
268	0	0	0	0	0	0	0	200	300	0	0	0	0	0	0	0	200	903	0	0	0	0	0	0	0	603	903	0
268	1	0	0	0	0	0	0	200	300	0	0	0	0	0	0	0	200	903	0	0	0	0	0	0	0	603	903	0
268	2	0	0	0	0	0	0	200	300	0	0	0	0	0	0	0	200	903	0	0	0	0	0	0	0	603	903	0
268	3	0	0	0	0	0	0	200	300	0	0	0	0	0	0	0	200	903	0	0	0	0	0	0	0	603	903	0
268	4	0	0	0	0	0	0	200	300	0	0	0	0	0	0	0	200	903	0	0	0	0	0	0	0	603	903	0
268	5	0	0	0	0	0	0	200	300	0	0	0	0	0	0	0	200	903	0	0	0	0	0	0	0	603	903	0
268	6	0	0	0	0	0	0	200	300	0	0	0	0	0	0	0	200	903	0	0	0	0	0	0	0	603	903	0
268	7	0	0	0	0	0	0	200	300	0	0	0	0	0	0	0	200	903	0	0	0	0	0	0	0	603	903	0
268	8	0	0	0	0	0	0	200	300	0	0	0	0	0	0	0	200	903	0	0	0	0	0	0	0	603	903	0
268	9	0	0	0	0	0	0	200	300	0	0	0	0	0	0	0	200	903	0	0	0	0	0	0	0	603	903	0
269	0	0	0	0	0	0	0	200	300	0	0	0	0	0	0	0	200	903	0	0	0	0	0	0	0	603	903	0
269	1	0	0	0	0	0	0	200	300	0	0	0	0	0	0	0	200	903	0	0	0	0	0	0	0	603	903	0
269	2	0	0	0	0	0	0	200	300	0	0	0	0	0	0	0	200	903	0	0	0	0	0	0	0	603	903	0
269	3	0	0	0	0	0	0	200	300	0	0	0	0	0	0	0	200	903	0	0	0	0	0	0	0	603	903	0
269	4	0	0	0	0	0	0	200	300	0	0	0	0	0	0	0	200	903	0	0	0	0	0	0	0	603	903	0
269	5	0	0	0	0	0	0	200	300	0	0	0	0	0	0	0	200	903	0	0	0	0	0	0	0	603	903	0
269	6	0	0	0	0	0	0	200	300	0	0	0	0	0	0	0	200	903	0	0	0	0	0	0	0	603	903	0
269	7	0	0	0	0	0	0	200	300	0	0	0	0	0	0	0	200	903	0	0	0	0	0	0	0	603	903	0
269	8	0	0	0	0	0	0	200	300	0	0	0	0	0	0	0	200	903	0	0	0	0	0	0	0	603	903	0
269	9	0	0	0	0	0	0	200	300	0	0	0	0	0	0	0	200	903	0	0	0	0	0	0	0	603	903	0
270	0	0	0	0	0	0	0	200	300	0	0	0	0	0	0	0	200	903	0	0	0	0	0	0	0	603	903	0
270	1	0	0	0	0	0	0	200	300	0	0	0	0	0	0	0	200	903	0	0	0	0	0	0	0	603	903	0
270	2	0	0	0	0	0	0	200	300	0	0	0	0	0	0	0	200	903	0	0	0	0	0	0	0	603	903	0
270	3	0	0	0	0	0	0	200	300	0	0	0	0	0	0	0	200	903	0	0	0	0	0	0	0	603	903	0
270	4	0	0	0	0	0	0	200	300	0	0	0	0	0	0	0	200	903	0	0	0	0	0	0	0	603	903	0
270	5	0	0	0	0	0	0	200	300	0	0	0	0	0	0	0	200	903	0	0	0	0	0	0	0	603	903	0
270	6	0	0	0	0	0	0	200	300	0	0	0	0	0	0	0	200	903	0	0	0	0	0	0	0	603	903	0
270	7	0	0	0	0	0	0	200	300	0	0	0	0	0	0	0	200	903	0	0	0	0	0	0	0	603	903	0
270	8	0	0	0	0	0	0	200	300	0	0	0	0	0	0	0	200	903	0	0	0	0	0	0	0	603	903	0
270	9	0	0	0	0	0	0	200	300	0	0	0	0	0	0	0	200	903	0	0	0	0	0	0	0	603	903	0
271	0	0	0	0	0	0	0	200	300	0	0	0	0	0	0	0	200	903	0	0	0	0	0	0	0	603	903	0
271	1	0	0	0	0	0	0	200	300	0	0	0	0	0	0	0	200	903	0	0	0	0	0	0	0	603	903	0
271	2	0	0	0	0	0	0	200	300	0	0	0	0	0	0	0	200	903	0	0	0	0	0	0	0	603	903	0
271	3	0	0	0	0	0	0	200	300	0	0	0	0	0	0	0	200	903	0	0	0	0	0	0	0	603	903	0
271	4	0	0	0	0	0	0	200	300	0	0	0	0	0	0	0	200	903	0	0	0	0	0	0	0	603	903	0
271	5	0	0	0	0	0	0	200	300	0	0	0	0	0	0	0	200	903	0	0	0	0	0	0	0	603	903	0
271	6	0	0	0	0	0	0	200	300	0	0	0	0	0	0	0	200	903	0	0	0	0	0	0	0	603	903	0
271	7	0	0	0	0	0	0	200	300	0	0	0	0	0	0	0	200	903	0	0	0	0	0	0	0	603	903	0
271	8	0	0	0	0	0	0	200	300	0	0	0	0	0	0	0	200	903	0	0	0	0	0	0	0	603	903	0
271	9	0	0	0	0	0	0	200	300	0	0	0	0	0	0	0	200	903	0	0	0	0	0	0	0	603	903	0
272	0	0	0	0	0	0	0	200	300	0	0	0	0	0	0	0	200	903	0	0	0	0	0	0	0	603	903	0
272	1	0	0	0	0	0	0	200	300	0	0	0	0	0	0	0	200	903	0	0	0	0	0	0	0	603	903	0
272	2	0	0	0	0	0	0	200	300	0	0	0	0	0	0	0	200	903	0	0	0	0	0	0	0	603	903	0
272	3	0	0	0	0	0	0	200	300	0	0	0	0	0	0	0	200	903	0	0	0	0	0	0	0	603	903	0
272	4	0	0	0	0	0	0	200	300	0	0	0	0	0	0	0	200	903	0	0	0	0	0	0	0	603	903	0
272	5	0	0	0	0	0	0	200	300	0	0	0	0	0	0	0	200	903	0	0	0	0	0	0	0	603	903	0
272	6	0	0	0	0	0	0	200	300	0	0	0	0	0	0	0	200	903	0	0	0	0	0	0	0	603	903	0
272	7	0	0	0	0	0	0	200	300	0	0	0	0	0	0	0	200	903	0	0	0	0	0	0	0	603	903	0
272	8	0	0	0	0	0	0	200	300	0	0	0	0	0	0	0	200	903	0	0	0	0	0	0	0	603	903	0
272	9	0	0	0	0	0	0	200	300	0	0	0	0	0	0	0	200	903	0	0	0	0	0	0	0	603	903	0
273	0	0	0	0	0	0	0	200	300	0	0	0	0	0	0	0	200	903	0	0	0	0	0	0	0	603	903	0
273	1	0	0	0	0	0	0	200	300	0	0	0	0	0	0	0	200	903	0	0	0	0	0	0	0	603	903	0
273	2	0	0	0	0	0	0	200	300	0	0	0	0	0	0	0	200	903	0	0	0	0	0	0	0	603	903	0
273	3	0	0	0	0	0	0	200	300	0	0	0	0	0	0	0	200	903	0	0	0	0	0	0	0	603	903	0
273	4	0	0	0	0	0	0	200	300	0	0	0	0	0	0	0	200	903	0	0	0	0	0	0	0	603	903	0
273	5	0	0	0	0	0	0	200	300	0	0	0	0	0	0	0	200	903	0	0	0	0	0	0	0	603	903	0
273	6	0	0	0	0	0	0	200	300	0	0	0	0	0	0	0	200	903	0	0	0	0	0	0	0	603	903	0
273	7	0	0	0	0	0	0	200	300	0	0	0	0	0	0	0	200	903	0	0	0	0	0	0	0	603	903	0
273	8	0	0	0	0	0	0	200	300	0	0	0	0	0	0	0	200	903	0	0	0	0	0	0	0	603	903	0
273	9	0	0	0	0	0	0	200	300	0	0	0	0	0	0	0	200	903	0	0	0	0	0	0	0	603	903	0
274	0	0	0	0	0	0	0	200	300	0	0	0	0	0	0	0	200	903	0	0	0	0	0	0	0	603	903	0
274	1	0	0	0	0	0	0	200	300	0	0	0	0	0	0	0	200	903	0	0	0	0	0	0	0	603	903	0
274	2	0	0	0	0	0	0	200	300	0	0	0	0	0	0	0	200	903	0	0	0	0	0	0	0	603	903	0
274	3	0	0	0	0	0	0	200	300	0	0	0	0	0	0	0	200	903	0	0	0	0	0	0	0	603	903	0
274	4	0	0	0	0	0	0	200	300	0	0	0	0	0	0	0	200	903	0	0	0	0	0	0	0	603	903	0
274	5	0	0	0	0	0	0	200	300	0	0	0	0	0	0	0	200	903	0	0	0	0	0	0	0	603	903	0
274	6	0	0	0	0	0	0	200	300	0	0	0	0	0	0	0	200	903	0	0	0	0	0	0	0	603	903	0
274	7	0	0	0	0	0	0	200	300	0	0	0	0	0	0	0	200	903	0	0	0	0	0	0	0	603	903	0
274	8	0	0	0	0	0	0	200	300	0	0	0	0	0	0	0	200	903	0	0	0	0	0	0	0	603	903	0
274	9	0	0	0	0	0	0	200	300	0	0	0	0	0	0	0	200	903	0	0	0	0	0	0	0	603	903	0
275	0	0	0	0	0	0	0	200	300	0	0	0	0	0	0	0	200	903	0	0	0	0	0	0	0	603	903	0
275	1	0	0	0	0	0	0	200	300	0	0	0	0	0	0	0	200	903	0	0	0	0	0	0	0	603	903	0
275	2	0	0	0	0	0	0	200	300	0	0	0	0	0	0	0	200	903	0	0	0	0	0	0	0	603	903	0
275	3	0	0	0	0	0	0	200	300	0	0	0	0	0	0	0	200	903	0	0	0	0	0	0	0	603	903	0
275	4	0	0	0	0	0	0	200	300	0	0	0	0	0	0	0	200	903	0	0	0	0	0	0	0	603	903	0
275	5	0	0	0	0	0	0	200	300	0	0	0	0	0	0	0	200	903	0	0	0	0	0	0	0	603	903	0
275	6	0	0	0	0	0	0	200	300	0	0	0	0	0	0	0	200	903	0	0	0	0	0	0	0	603	903	0
275	7	0	0	0	0	0	0	200	300	0	0	0	0	0	0	0	200	903	0	0	0	0	0	0	0	603	903	0
275	8	0	0	0	0	0	0	200	300	0	0	0	0	0	0	0	200	903	0	0	0	0	0	0	0	603	903	0
275	9	0	0	0	0	0	0	200	300	0	0	0	0	0	0	0	200	903	0	0	0	0	0	0	0	603	903	0
276	0	0	0	0	0	0	0	200	300	0	0	0	0	0	0	0	200	903	0	0	0	0	0	0	0	603	903	0
276	1	0	0	0	0	0	0	200	300	0	0	0	0	0	0	0	200	903	0	0	0	0	0	0	0	603	903	0
276	2	0	0	0	0	0	0	200	300	0	0	0	0	0	0	0	200	903	0	0	0	0	0	0	0	603	903	0
276	3	0	0	0	0	0	0	200	300	0	0	0	0	0	0	0	200	903	0	0	0	0	0	0	0	603	903	0
276	4	0	0	0	0	0	0	200	300	0	0	0	0	0	0	0	200	903	0	0	0	0	0	0	0	603	903	0
276	5	0	0	0	0	0	0	200	300	0	0	0	0	0	0	0	200	903	0	0	0	0	0	0	0	603	903	0
276	6	0	0	0	0	0	0	200	300	0	0	0	0	0	0	0	200	903	0	0	0	0	0	0	0	603	903	0
276	7	0	0	0	0	0	0	200	300	0	0	0	0	0	0	0	200	903	0	0	0	0	0	0	0	603	903	0
276	8	0	0	0	0	0	0	200	300	0	0	0	0	0	0	0	200	903	0	0	0	0	0	0	0	603	903	0
276	9	0	0	0	0	0	0	200	300	0	0	0	0	0	0	0	200	903	0	0	0	0	0	0	0	603	903	0
277	0	0	0	0	0	0	0	200	300	0	0	0	0	0	0	0	200	903	0	0	0	0	0	0	0	603	903	0
277	1	0	0	0	0	0	0	200	300	0	0	0	0	0	0	0	200	903	0	0	0	0	0	0	0	603	903	0
277	2	0	0	0	0	0	0	200	300	0	0	0	0	0	0	0	200	903	0	0	0	0	0	0	0	603	903	0
277	3	0	0	0	0	0	0	200	300	0	0	0	0	0	0	0	200	903	0	0	0	0	0	0	0	603	903	0
277	4	0	0	0	0	0	0	200	300	0	0	0	0	0	0	0	200	903	0	0	0	0	0	0	0	603	903	0
277	5	0	0	0	0	0	0	200	300	0	0	0	0	0	0	0	200	903	0	0	0	0	0	0	0	603	903	0
277	6	0	0	0	0	0	0	200	300	0	0	0	0	0	0	0	200	903	0	0	0	0	0	0	0	603	903	0
277	7	0	0	0	0	0	0	200	300	0	0	0	0	0	0	0	200	903	0	0	0	0	0	0	0	603	903	0
277	8	0	0	0	0	0	0	200	300	0	0	0	0	0	0	0	200	903	0	0	0	0	0	0	0	603	903	0
277	9	0	0	0	0	0	0	200	300	0	0	0	0	0	0	0	200	903	0	0	0	0	0	0	0	603	903	0
278	0	0	0	0	0	0	0	200	300	0	0	0	0	0	0	0	200	903	0	0	0	0	0	0	0	603	903	0
278	1	0	0	0	0	0	0	200	300	0	0	0	0	0	0	0	200	903	0	0	0	0	0	0	0	603	903	0
278	2	0	0	0	0	0	0	200	300	0	0	0	0	0	0	0	200	903	0	0	0	0	0	0	0	603	903	0
278	3	0	0	0	0	0	0	200	300	0	0	0	0	0	0	0	200	903	0	0	0	0	0	0	0	603	903	0
278	4	0	0	0	0	0	0	200	300	0	0	0	0	0	0	0	200	903	0	0	0	0	0	0	0	603	903	0
278	5	0	0	0	0	0	0	200	300	0	0	0	0	0	0	0	200	903	0	0	0	0	0	0	0	603	903	0
278	6	0	0	0	0	0	0	200	300	0	0	0	0	0	0	0	200	903	0	0	0	0	0	0	0	603	903	0
278	7	0	0	0	0	0	0	200	300	0	0	0	0	0	0	0	200	903	0	0	0	0	0	0	0	603	903	0
278	8	0	0	0	0	0	0	200	300	0	0	0	0	0	0	0	200	903	0	0	0	0	0	0	0	603	903	0
278	9	0	0	0	0	0	0	200	300	0	0	0	0	0	0	0	200	903	0	0	0	0	0	0	0	603	903	0
279	0	0	0	0	0	0	0	200	300	0	0	0	0	0	0	0	200	903	0	0	0	0	0	0	0	603	903	0
279	1	0	0	0	0	0	0	200	300	0	0	0	0	0	0	0	200	903	0	0	0	0	0	0	0	603	903	0
279	2	0	0	0	0	0	0	200	300	0	0	0	0	0	0	0	200	903	0	0	0	0	0	0	0	603	903	0
279	3	0	0	0	0	0	0	200	300	0	0	0	0	0	0	0	200	903	0	0	0	0	0	0	0	603	903	0
279	4	0	0	0	0	0	0	200	300	0	0	0	0	0	0	0	200	903	0	0	0	0	0	0	0	603	903	0
279	5	0	0	0	0	0	0	200	300	0	0	0	0	0	0	0	200	903	0	0	0	0	0	0	0	603	903	0
279	6	0	0	0	0	0	0	200	300	0	0	0	0	0	0	0	200	903	0	0	0	0	0	0	0	603	903	0
279	7	0	0	0	0	0	0	200	300	0	0	0	0	0	0	0	200	903	0	0	0	0	0	0	0	603	903	0
279	8	0	0	0	0	0	0	200	300	0	0	0	0	0	0	0	200	903	0	0	0	0	0	0	0	603	903	0
279	9	0	0	0	0	0	0	200	300	0	0	0	0	0	0	0	200	903	0	0	0	0	0	0	0	603	903	0
280	0	0	0	0	0	0	0	200	300	0	0	0	0	0	0	0	200	903	0	0	0	0	0	0	0	603	903	0
280	1	0	0	0	0	0	0	200	300	0	0	0	0	0	0	0	200	903	0	0	0	0	0	0	0	603	903	0
280	2	0	0	0	0	0	0	200	300	0	0	0	0	0	0	0	200	903	0	0	0	0	0	0	0	603	903	0
280	3	0	0	0	0	0	0	200	300	0	0	0	0	0	0	0	200	903	0	0	0	0	0	0	0	603	903	0
280	4	0	0	0	0	0	0	200	300	0	0	0	0	0	0	0	200	903	0	0	0	0	0	0	0	603	903	0
280	5	0	0	0	0	0	0	200	300	0	0	0	0	0	0	0	200	903	0	0	0	0	0	0	0	603	903	0
280	6	0	0	0	0	0	0	200	300	0	0	0	0	0	0	0	200	903	0	0	0	0	0	0	0	603	903	0
280	7	0	0	0	0	0	0	200	300	0	0	0	0	0	0	0	200	903	0	0	0	0	0	0	0	603	903	0
280	8	0	0	0	0	0	0	200	300	0	0	0	0	0	0	0	200	903	0	0	0	0	0	0	0	603	903	0
280	9	0	0	0	0	0	0	200	300	0	0	0	0	0	0	0	200	903	0	0	0	0	0	0	0	603	903	0
281	0	0	0	0	0	0	0	200	300	0	0	0	0	0	0	0	200	903	0	0	0	0	0	0	0	603	903	0
281	1	0	0	0	0	0	0	200	300	0	0	0	0	0	0	0	200	903	0	0	0	0	0	0	0	603	903	0
281	2	0	0	0	0	0	0	200	300	0	0	0	0	0	0	0	200	903	0	0	0	0	0	0	0	603	903	0
281	3	0	0	0	0	0	0	200	300	0	0	0	0	0	0	0	200	903	0	0	0	0	0	0	0	603	903	0
281	4	0	0	0	0	0	0	200	300	0	0	0	0	0	0	0	200	903	0	0	0	0	0	0	0	603	903	0
281	5	0	0	0	0	0	0	200	300	0	0	0	0	0	0	0	200	903	0	0	0	0	0	0	0	603	903	0
281	6	0	0	0	0	0	0	200	300	0	0	0	0	0	0	0	200	903	0	0	0	0	0	0	0	603	903	0
281	7	0	0	0	0	0	0	200	300	0	0	0	0	0	0	0	200	903	0	0	0	0	0	0	0	603	903	0
281	8	0	0	0	0	0	0	200	300	0	0	0	0	0	0	0	200	903	0	0	0	0	0	0	0	603	903	0
281	9	0	0	0	0	0	0	200	300	0	0	0	0	0	0	0	200	903	0	0	0	0	0	0	0	603	903	0
282	0	0	0	0	0	0	0	200	300	0	0	0	0	0	0	0	200	903	0	0	0	0	0	0	0	603	903	0
282	1	0	0	0	0	0	0	200	300	0	0	0	0	0	0	0	200	903	0	0	0	0	0	0	0	603	903	0
282	2	0	0	0	0	0	0	200	300	0	0	0	0	0	0	0	200	903	0	0	0	0	0	0	0	603	903	0
282	3	0	0	0	0	0	0	200	300	0	0	0	0	0	0	0	200	903	0	0	0	0	0	0	0	603	903	0
282	4	0	0	0	0	0	0	200	300	0	0	0	0	0	0	0	200	903	0	0	0	0	0	0	0	603	903	0
282	5	0	0	0	0	0	0	200	300	0	0	0	0	0	0	0	200	903	0	0	0	0	0	0	0	603	903	0
282	6	0	0	0	0	0	0	200	300	0	0	0	0	0	0	0	200	903	0	0	0	0	0	0	0	603	903	0
282	7	0	0	0	0	0	0	200	300	0	0	0	0	0	0	0	200	903	0	0	0	0	0	0	0	603	903	0
282	8	0	0	0	0	0	0	200	300	0	0	0	0	0	0	0	200	903	0	0	0	0	0	0	0	603	903	0
282	9	0	0	0	0	0	0	200	300	0	0	0	0	0	0	0	200	903	0	0	0	0	0	0	0	603	903	0
283	0	0	0	0	0	0	0	200	300	0	0	0	0	0	0	0	200	903	0	0	0	0	0	0	0	603	903	0
283	1	0	0	0	0	0	0	200	300	0	0	0	0	0	0	0	200	903	0	0	0	0	0	0	0	603	903	0
283	2	0	0	0	0	0	0	200	300	0	0	0	0	0	0	0	200	903	0	0	0	0	0	0	0	603	903	0
283	3	0	0	0	0	0	0	200	300	0	0	0	0	0	0	0	200	903	0	0	0	0	0	0	0	603	903	0
283	4	0	0	0	0	0	0	200	300	0	0	0	0	0	0	0	200	903	0	0	0	0	0	0	0	603	903	0
283	5	0	0	0	0	0	0	200	300	0	0	0	0	0	0	0	200	903	0	0	0	0	0	0	0	603	903	0
283	6	0	0	0	0	0	0	200	300	0	0	0	0	0	0	0	200	903	0	0	0	0	0	0	0	603	903	0
283	7	0	0	0	0	0	0	200	300	0	0	0	0	0	0	0	200	903	0	0	0	0	0	0	0	603	903	0
283	8	0	0	0	0	0	0	200	300	0	0	0	0	0	0	0	200	903	0	0	0	0	0	0	0	603	903	0
283	9	0	0	0	0	0	0	200	300	0	0	0	0	0	0	0	200	903	0	0	0	0	0	0	0	603	903	0
284	0	0	0	0	0	0	0	200	300	0	0	0	0	0	0	0	200	903	0	0	0	0	0	0	0	603	903	0
284	1	0	0	0	0	0	0	200	300	0	0	0	0	0	0	0	200	903	0	0	0	0	0	0	0	603	903	0
284	2	0	0	0	0	0	0	200	300	0	0	0	0	0	0	0	200	903	0	0	0	0	0	0	0	603	903	0
284	3	0	0	0	0	0	0	200	300	0	0	0	0	0	0	0	200	903	0	0	0	0	0	0	0	603	903	0
284	4	0	0	0	0	0	0	200	300	0	0	0	0	0	0	0	200	903	0	0	0	0	0	0	0	603	903	0
284	5	0	0	0	0	0	0	200	300	0	0	0	0	0	0	0	200	903	0	0	0	0	0	0	0	603	903	0
284	6	0	0	0	0	0	0	200	300	0	0	0	0	0	0	0	200	903	0	0	0	0	0	0	0	603	903	0
284	7	0	0	0	0	0	0	200	300	0	0	0	0	0	0	0	200	903	0	0	0	0	0	0	0	603	903	0
284	8	0	0	0	0	0	0	200	300	0	0	0	0	0	0	0	200	903	0	0	0	0	0	0	0	603	903	0
284	9	0	0	0	0	0	0	200	300	0	0	0	0	0	0	0	200	903	0	0	0	0	0	0	0	603	903	0
285	0	0	0	0	0	0	0	200	300	0	0	0	0	0	0	0	200	903	0	0	0	0	0	0	0	603	903	0
285	1	0	0	0	0	0	0	200	300	0	0	0	0	0	0	0	200	903	0	0	0	0	0	0	0	603	903	0
285	2	0	0	0	0	0	0	200	300	0	0	0	0	0	0	0	200	903	0	0	0	0	0	0	0	603	903	0
285	3	0	0	0	0	0	0	200	300	0	0	0	0	0	0	0	200	903	0	0	0	0	0	0	0	603	903	0
285	4	0	0	0	0	0	0	200	300	0	0	0	0	0	0	0	200	903	0	0	0	0	0	0	0	603	903	0
285	5	0	0	0	0	0	0	200	300	0	0	0	0	0	0	0	200	903	0	0	0	0	0	0	0	603	903	0
285	6	0	0	0	0	0	0	200	300	0	0	0	0	0	0	0	200	903	0	0	0	0	0	0	0	603	903	0
285	7	0	0	0	0	0	0	200	300	0	0	0	0	0	0	0	200	903	0	0	0	0	0	0	0	603	903	0
285	8	0	0	0	0	0	0	200	300	0	0	0	0	0	0	0	200	903	0	0	0	0	0	0	0	603	903	0
285	9	0	0	0	0	0	0	200	300	0	0	0	0	0	0	0	200	903	0	0	0	0	0	0	0	603	903	0
286	0	0	0	0	0	0	0	200	300	0	0	0	0	0	0	0	200	903	0	0	0	0	0	0	0	603	903	0
286	1	0	0	0	0	0	0	200	300	0	0	0	0	0	0	0	200	903	0	0	0	0	0	0	0	603	903	0
286	2	0	0	0	0	0	0	200	300	0	0	0	0	0	0	0	200	903	0	0	0	0	0	0	0	603	903	0
286	3	0	0	0	0	0	0	200	300	0	0	0	0	0	0	0	200	903	0	0	0	0	0	0	0	603	903	0
286	4	0	0	0	0	0	0	200	300	0	0	0	0	0	0	0	200	903	0	0	0	0	0	0	0	603	903	0
286	5	0	0	0	0	0	0	200	300	0	0	0	0	0	0	0	200	903	0	0	0	0	0	0	0	603	903	0
286	6	0	0	0	0	0	0	200	300	0	0	0	0	0	0	0	200	903	0	0	0	0	0	0	0	603	903	0
286	7	0	0	0	0	0	0	200	300	0	0	0	0	0	0	0	200	903	0	0	0	0	0	0	0	603	903	0
286	8	0	0	0	0	0	0	200	300	0	0	0	0	0	0	0	200	903	0	0	0	0	0	0	0	603	903	0
286	9	0	0	0	0	0	0	200	300	0	0	0	0	0	0	0	200	903	0	0	0	0	0	0	0	603	903	0
287	0	0	0	0	0	0	0	200	300	0	0	0	0	0	0	0	200	903	0	0	0	0	0	0	0	603	903	0
287	1	0	0	0	0	0	0	200	300	0	0	0	0	0	0	0	200	903	0	0	0	0	0	0	0	603	903	0
287	2	0	0	0	0	0	0	200	300	0	0	0	0	0	0	0	200	903	0	0	0	0	0	0	0	603	903	0
287	3	0	0	0	0	0	0	200	300	0	0	0	0	0	0	0	200	903	0	0	0	0	0	0	0	603	903	0
287	4	0	0	0	0	0	0	200	300	0	0	0	0	0	0	0	200	903	0	0	0	0	0	0	0	603	903	0
287	5	0	0	0	0	0	0	200	300	0	0	0	0	0	0	0	200	903	0	0	0	0	0	0	0	603	903	0
287	6	0	0	0	0	0	0	200	300	0	0	0	0	0	0	0	200	903	0	0	0	0	0	0	0	603	903	0
287	7	0	0	0	0	0	0	200	300	0	0	0	0	0	0	0	200	903	0	0	0	0	0	0	0	603	903	0
287	8	0	0	0	0	0	0	200	300	0	0	0	0	0	0	0	200	903	0	0	0	0	0	0	0	603	903	0
287	9	0	0	0	0	0	0	200	300	0	0	0	0	0	0	0	200	903	0	0	0	0	0	0	0	603	903	0
288	0	0	0	0	0	0	0	200	300	0	0	0	0	0	0	0	200	903	0	0	0	0	0	0	0	603	903	0
288	1	0	0	0	0	0	0	200	300	0	0	0	0	0	0	0	200	903	0	0	0	0	0	0	0	603	903	0
288	2	0	0	0	0	0	0	200	300	0	0	0	0	0	0	0	200	903	0	0	0	0	0	0	0	603	903	0
288	3	0	0	0	0	0	0	200	300	0	0	0	0	0	0	0	200	903	0	0	0	0	0	0	0	603	903	0
288	4	0	0	0	0	0	0	200	300	0	0	0	0	0	0	0	200	903	0	0	0	0	0	0	0	603	903	0
288	5	0	0	0	0	0	0	200	300	0	0	0	0	0	0	0	200	903	0	0	0	0	0	0	0	603	903	0
288	6	0	0	0	0	0	0	200	300	0	0	0	0	0	0	0	200	903	0	0	0	0	0	0	0	603	903	0
288	7	0	0	0	0	0	0	200	300	0	0	0	0	0	0	0	200	903	0	0	0	0	0	0	0	603	903	0
288	8	0	0	0	0	0	0	200	300	0	0	0	0	0	0	0	200	903	0	0	0	0	0	0	0	603	903	0
288	9	0	0	0	0	0	0	200	300	0	0	0	0	0	0	0	200	903	0	0	0	0	0	0	0	603	903	0
289	0	0	0	0	0	0	0	200	300	0	0	0	0	0	0	0	200	903	0	0	0	0	0	0	0	603	903	0
289	1	0	0	0	0	0	0	200	300	0	0	0	0	0	0	0	200	903	0	0	0	0	0	0	0	603	903	0
289	2	0	0	0	0	0	0	200	300	0	0	0	0	0	0	0	200	903	0	0	0	0	0	0	0	603	903	0
289	3	0	0	0	0	0	0	200	300	0	0	0	0	0	0	0	200	903	0	0	0	0	0	0	0	603	903	0
289	4	0	0	0	0	0	0	200	300	0	0	0	0	0	0	0	200	903	0	0	0	0	0	0	0	603	903	0
289	5	0	0	0	0	0	0	200	300	0	0	0	0	0	0	0	200	903	0	0	0	0	0	0	0	603	903	0
289	6	0	0	0	0	0	0	200	300	0	0	0	0	0	0	0	200	903	0	0	0	0	0	0	0	603	903	0
289	7	0	0	0	0	0	0	200	300	0	0	0	0	0	0	0	200	903	0	0	0	0	0	0	0	603	903	0
289	8	0	0	0	0	0	0	200	300	0	0	0	0	0	0	0	200	903	0	0	0	0	0	0	0	603	903	0
289	9	0	0	0	0	0	0	200	300	0	0	0	0	0	0	0	200	903	0	0	0	0	0	0	0	603	903	0
290	0	0	0	0	0	0	0	200	300	0	0	0	0	0	0	0	200	903	0	0	0	0	0	0	0	603	903	0
290	1	0	0	0	0	0	0	200	300	0	0	0	0	0	0	0	200	903	0	0	0	0	0	0	0	603	903	0
290	2	0	0	0	0	0	0	200	300	0	0	0	0	0	0	0	200	903	0	0	0	0	0	0	0	603	903	0
290	3	0	0	0	0	0	0	200	300	0	0	0	0	0	0	0	200	903	0	0	0	0	0	0	0	603	903	0
290	4	0	0	0	0	0	0	200	300	0	0	0	0	0	0	0	200	903	0	0	0	0	0	0	0	603	903	0
290	5	0	0	0	0	0	0	200	300	0	0	0	0	0	0	0	200	903	0	0	0	0	0	0	0	603	903	0
290	6	0	0	0	0	0	0	200	300	0	0	0	0	0	0	0	200	903	0	0	0	0	0	0	0	603	903	0
290	7	0	0	0	0	0	0	200	300	0	0	0	0	0	0	0	200	903	0	0	0	0	0	0	0	603	903	0
290	8	0	0	0	0	0	0	200	300	0	0	0	0	0	0	0	200	903	0	0	0	0	0	0	0	603	903	0
290	9	0	0	0	0	0	0	200	300	0	0	0	0	0	0	0	200	903	0	0	0	0	0	0	0	603	903	0
291	0	0	0	0	0	0	0	200	300	0	0	0	0	0	0	0	200	903	0	0	0	0	0	0	0	603	903	0
291	1	0	0	0	0	0	0	200	300	0	0	0	0	0	0	0	200	903	0	0	0	0	0	0	0	603	903	0
291	2	0	0	0	0	0	0	200	300	0	0	0	0	0	0	0	200	903	0	0	0	0	0	0	0	603	903	0
291	3	0	0	0	0	0	0	200	300	0	0	0	0	0	0	0	200	903	0	0	0	0	0	0	0	603	903	0
291	4	0	0	0	0	0	0	200	300	0	0	0	0	0	0	0	200	903	0	0	0	0	0	0	0	603	903	0
291	5	0	0	0	0	0	0	200	300	0	0	0	0	0	0	0	200	903	0	0	0	0	0	0	0	603	903	0
291	6	0	0	0	0	0	0	200	300	0	0	0	0	0	0	0	200	903	0	0	0	0	0	0	0	603	903	0
291	7	0	0	0	0	0	0	200	300	0	0	0	0	0	0	0	200	903	0	0	0	0	0	0	0	603	903	0
291	8	0	0	0	0	0	0	200	300	0	0	0	0	0	0	0	200	903	0	0	0	0	0	0	0	603	903	0
291	9	0	0	0	0	0	0	200	300	0	0	0	0	0	0	0	200	903	0	0	0	0	0	0	0	603	903	0
292	0	0	0	0	0	0	0	200	300	0	0	0	0	0	0	0	200	903	0	0	0	0	0	0	0	603	903	0
292	1	0	0	0	0	0	0	200	300	0	0	0	0	0	0	0	200	903	0	0	0	0	0	0	0	603	903	0
292	2	0	0	0	0	0	0	200	300	0	0	0	0	0	0	0	200	903	0	0	0	0	0	0	0	603	903	0
292	3	0	0	0	0	0	0	200	300	0	0	0	0	0	0	0	200	903	0	0	0	0	0	0	0	603	903	0
292	4	0	0	0	0	0	0	200	300	0	0	0	0	0	0	0	200	903	0	0	0	0	0	0	0	603	903	0
292	5	0	0	0	0	0	0	200	300	0	0	0	0	0	0	0	200	903	0	0	0	0	0	0	0	603	903	0
292	6	0	0	0	0	0	0	200	300	0	0	0	0	0	0	0	200	903	0	0	0	0	0	0	0	603	903	0
292	7	0	0	0	0	0	0	200	300	0	0	0	0	0	0	0	200	903	0	0	0	0	0	0	0	603	903	0
292	8	0	0	0	0	0	0	200	300	0	0	0	0	0	0	0	200	903	0	0	0	0	0	0	0	603	903	0
292	9	0	0	0	0	0	0	200	300	0	0	0	0	0	0	0	200	903	0	0	0	0	0	0	0	603	903	0
293	0	0	0	0	0	0	0	200	300	0	0	0	0	0	0	0	200	903	0	0	0	0	0	0	0	603	903	0
293	1	0	0	0	0	0	0	200	300	0	0	0	0	0	0	0	200	903	0	0	0	0	0	0	0	603	903	0
293	2	0	0	0	0	0	0	200	300	0	0	0	0	0	0	0	200	903	0	0	0	0	0	0	0	603	903	0
293	3	0	0	0	0	0	0	200	300	0	0	0	0	0	0	0	200	903	0	0	0	0	0	0	0	603	903	0
293	4	0	0	0	0	0	0	200	300	0	0	0	0	0	0	0	200	903	0	0	0	0	0	0	0	603	903	0
293	5	0	0	0	0	0	0	200	300	0	0	0	0	0	0	0	200	903	0	0	0	0	0	0	0	603	903	0
293	6	0	0	0	0	0	0	200	300	0	0	0	0	0	0	0	200	903	0	0	0	0	0	0	0	603	903	0
293	7	0	0	0	0	0	0	200	300	0	0	0	0	0	0	0	200	903	0	0	0	0	0	0	0	603	903	0
293	8	0	0	0	0	0	0	200	300	0	0	0	0	0	0	0	200	903	0	0	0	0	0	0	0	603	903	0
293	9	0	0	0	0	0	0	200	300	0	0	0	0	0	0	0	200	903	0	0	0	0	0	0	0	603	903	0
294	0	0	0	0	0	0	0	200	300	0	0	0	0	0	0	0	200	903	0	0	0	0	0	0	0	603	903	0
294	1	0	0	0	0	0	0	200	300	0	0	0	0	0	0	0	200	903	0	0	0	0	0	0	0	603	903	0
294	2	0	0	0	0	0	0	200	300	0	0	0	0	0	0	0	200	903	0	0	0	0	0	0	0	603	903	0
294	3	0	0	0	0	0	0	200	300	0	0	0	0	0	0	0	200	903	0	0	0	0	0	0	0	603	903	0
294	4	0	0	0	0	0	0	200	300	0	0	0	0	0	0	0	200	903	0	0	0	0	0	0	0	603	903	0
294	5	0	0	0	0	0	0	200	300	0	0	0	0	0	0	0	200	903	0	0	0	0	0	0	0	603	903	0
294	6	0	0	0	0	0	0	200	300	0	0	0	0	0	0	0	200	903	0	0	0	0	0	0	0	603	903	0
294	7	0	0	0	0	0	0	200	300	0	0	0	0	0	0	0	200	903	0	0	0	0	0	0	0	603	903	0
294	8	0	0	0	0	0	0	200	300	0	0	0	0	0	0	0	200	903	0	0	0	0	0	0	0	603	903	0
294	9	0	0	0	0	0	0	200	300	0	0	0	0	0	0	0	200	903	0	0	0	0	0	0	0	603	903	0
295	0	0	0	0	0	0	0	200	300	0	0	0	0	0	0	0	200	903	0	0	0	0	0	0	0	603	903	0
295	1	0	0	0	0	0	0	200	300	0	0	0	0	0	0	0	200	903	0	0	0	0	0	0	0	603	903	0
295	2	0	0	0	0	0	0	200	300	0	0	0	0	0	0	0	200	903	0	0	0	0	0	0	0	603	903	0
295	3	0	0	0	0	0	0	200	300	0	0	0	0	0	0	0	200	903	0	0	0	0	0	0	0	603	903	0
295	4	0	0	0	0	0	0	200	300	0	0	0	0	0	0	0	200	903	0	0	0	0	0	0	0	603	903	0
295	5	0	0	0	0	0	0	200	300	0	0	0	0	0	0	0	200	903	0	0	0	0	0	0	0	603	903	0
295	6	0	0	0	0	0	0	200	300	0	0	0	0	0	0	0	200	903	0	0	0	0	0	0	0	603	903	0
295	7	0	0	0	0	0	0	200	300	0	0	0	0	0	0	0	200	903	0	0	0	0	0	0	0	603	903	0
295	8	0	0	0	0	0	0	200	300	0	0	0	0	0	0	0	200	903	0	0	0	0	0	0	0	603	903	0
295	9	0	0	0	0	0	0	200	300	0	0	0	0	0	0	0	200	903	0	0	0	0	0	0	0	603	903	0
296	0	0	0	0	0	0	0	200	300	0	0	0	0	0	0	0	200	903	0	0	0	0	0	0	0	603	903	0
296	1	0	0	0	0	0	0	200	300	0	0	0	0	0	0	0	200	903	0	0	0	0	0	0	0	603	903	0
296	2	0	0	0	0	0	0	200	300	0	0	0	0	0	0	0	200	903	0	0	0	0	0	0	0	603	903	0
296	3	0	0	0	0	0	0	200	300	0	0	0	0	0	0	0	200	903	0	0	0	0	0	0	0	603	903	0
296	4	0	0	0	0	0	0	200	300	0	0	0	0	0	0	0	200	903	0	0	0	0	0	0	0	603	903	0
296	5	0	0	0	0	0	0	200	300	0	0	0	0	0	0	0	200	903	0	0	0	0	0	0	0	603	903	0
296	6	0	0	0	0	0	0	200	300	0	0	0	0	0	0	0	200	903	0	0	0	0	0	0	0	603	903	0
296	7	0	0	0	0	0	0	200	300	0	0	0	0	0	0	0	200	903	0	0	0	0	0	0	0	603	903	0
296	8	0	0	0	0	0	0	200	300	0	0	0	0	0	0	0	200	903	0	0	0	0	0	0	0	603	903	0
296	9	0	0	0	0	0	0	200	300	0	0	0	0	0	0	0	200	903	0	0	0	0	0	0	0	603	903	0
297	0	0	0	0	0	0	0	200	300	0	0	0	0	0	0	0	200	903	0	0	0	0	0	0	0	603	903	0
297	1	0	0	0	0	0	0	200	300	0	0	0	0	0	0	0	200	903	0	0	0	0	0	0	0	603	903	0
297	2	0	0	0	0	0	0	200	300	0	0	0	0	0	0	0	200	903	0	0	0	0	0	0	0	603	903	0
297	3	0	0	0	0	0	0	200	300	0	0	0	0	0	0	0	200	903	0	0	0	0	0	0	0	603	903	0
297	4	0	0	0	0	0	0	200	300	0	0	0	0	0	0	0	200	903	0	0	0	0	0	0	0	603	903	0
297	5	0	0	0	0	0	0	200	300	0	0	0	0	0	0	0	200	903	0	0	0	0	0	0	0	603	903	0
297	6	0	0	0	0	0	0	200	300	0	0	0	0	0	0	0	200	903	0	0	0	0	0	0	0	603	903	0
297	7	0	0	0	0	0	0	200	300	0	0	0	0	0	0	0	200	903	0	0	0	0	0	0	0	603	903	0
297	8	0	0	0	0	0	0	200	300	0	0	0	0	0	0	0	200	903	0	0	0	0	0	0	0	603	903	0
297	9	0	0	0	0	0	0	200	300	0	0	0	0	0	0	0	200	903	0	0	0	0	0	0	0	603	903	0
298	0	0	0	0	0	0	0	200	300	0	0	0	0	0	0	0	200	903	0	0	0	0	0	0	0	603	903	0
298	1	0	0	0	0	0	0	200	300	0	0	0	0	0	0	0	200	903	0	0	0	0	0	0	0	603	903	0
298	2	0	0	0	0	0	0	200	300	0	0	0	0	0	0	0	200	903	0	0	0	0	0	0	0	603	903	0
298	3	0	0	0	0	0	0	200	300	0	0	0	0	0	0	0	200	903	0	0	0	0	0	0	0	603	903	0
298	4	0	0	0	0	0	0	200	300	0	0	0	0	0	0	0	200	903	0	0	0	0	0	0	0	603	903	0
298	5	0	0	0	0	0	0	200	300	0	0	0	0	0	0	0	200	903	0	0	0	0	0	0	0	603	903	0
298	6	0	0	0	0	0	0	200	300	0	0	0	0	0	0	0	200	903	0	0	0	0	0	0	0	603	903	0
298	7	0	0	0	0	0	0	200	300	0	0	0	0	0	0	0	200	903	0	0	0	0	0	0	0	603	903	0
298	8	0	0	0	0	0	0	200	300	0	0	0	0	0	0	0	200	903	0	0	0	0	0	0	0	603	903	0
298	9	0	0	0	0	0	0	200	300	0	0	0	0	0	0	0	200	903	0	0	0	0	0	0	0	603	903	0
299	0	0	0	0	0	0	0	200	300	0	0	0	0	0	0	0	200	903	0	0	0	0	0	0	0	603	903	0
299	1	0	0	0	0	0	0	200	300	0	0	0	0	0	0	0	200	903	0	0	0	0	0	0	0	603	903	0
299	2	0	0	0	0	0	0	200	300	0	0	0	0	0	0	0	200	903	0	0	0	0	0	0	0	603	903	0
299	3	0	0	0	0	0	0	200	300	0	0	0	0	0	0	0	200	903	0	0	0	0	0	0	0	603	903	0
299	4	0	0	0	0	0	0	200	300	0	0	0	0	0	0	0	200	903	0	0	0	0	0	0	0	603	903	0
299	5	0	0	0	0	0	0	200	300	0	0	0	0	0	0	0	200	903	0	0	0	0	0	0	0	603	903	0
299	6	0	0	0	0	0	0	200	300	0	0	0	0	0	0	0	200	903	0	0	0	0	0	0	0	603	903	0
299	7	0	0	0	0	0	0	200	300	0	0	0	0	0	0	0	200	903	0	0	0	0	0	0	0	603	903	0
299	8	0	0	0	0	0	0	200	300	0	0	0	0	0	0	0	200	903	0	0	0	0	0	0	0	603	903	0
299	9	0	0	0	0	0	0	200	300	0	0	0	0	0	0	0	200	903	0	0	0	0	0	0	0	603	903	0
300	0	0	0	0	0	0	0	200	300	0	0	0	0	0	0	0	200	903	0	0	0	0	0	0	0	603	903	0
300	1	0	0	0	0	0	0	200	300	0	0	0	0	0	0	0	200	903	0	0	0	0	0	0	0	603	903	0
300	2	0	0	0	0	0	0	200	300	0	0	0	0	0	0	0	200	903	0	0	0	0	0	0	0	603	903	0
300	3	0	0	0	0	0	0	200	300	0	0	0	0	0	0	0	200	903	0	0	0	0	0	0	0	603	903	0
300	4	0	0	0	0	0	0	200	300	0	0	0	0	0	0	0	200	903	0	0	0	0	0	0	0	603	903	0
300	5	0	0	0	0	0	0	200	300	0	0	0	0	0	0	0	200	903	0	0	0	0	0	0	0	603	903	0
300	6	0	0	0	0	0	0	200	300	0	0	0	0	0	0	0	200	903	0	0	0	0	0	0	0	603	903	0
300	7	0	0	0	0	0	0	200	300	0	0	0	0	0	0	0	200	903	0	0	0	0	0	0	0	603	903	0
300	8	0	0	0	0	0	0	200	300	0	0	0	0	0	0	0	200	903	0	0	0	0	0	0	0	603	903	0
300	9	0	0	0	0	0	0	200	300	0	0	0	0	0	0	0	200	903	0	0	0	0	0	0	0	603	903	0
301	0	0	0	0	0	0	0	200	300	0	0	0	0	0	0	0	200	903	0	0	0	0	0	0	0	603	903	0
301	1	0	0	0	0	0	0	200	300	0	0	0	0	0	0	0	200	903	0	0	0	0	0	0	0	603	903	0
301	2	0	0	0	0	0	0	200	300	0	0	0	0	0	0	0	200	903	0	0	0	0	0	0	0	603	903	0
301	3	0	0	0	0	0	0	200	300	0	0	0	0	0	0	0	200	903	0	0	0	0	0	0	0	603	903	0
301	4	0	0	0	0	0	0	200	300	0	0	0	0	0	0	0	200	903	0	0	0	0	0	0	0	603	903	0
301	5	0	0	0	0	0	0	200	300	0	0	0	0	0	0	0	200	903	0	0	0	0	0	0	0	603	903	0
301	6	0	0	0	0	0	0	200	300	0	0	0	0	0	0	0	200	903	0	0	0	0	0	0	0	603	903	0
301	7	0	0	0	0	0	0	200	300	0	0	0	0	0	0	0	200	903	0	0	0	0	0	0	0	603	903	0
301	8	0	0	0	0	0	0	200	300	0	0	0	0	0	0	0	200	903	0	0	0	0	0	0	0	603	903	0
301	9	0	0	0	0	0	0	200	300	0	0	0	0	0	0	0	200	903	0	0	0	0	0	0	0	603	903	0
302	0	0	0	0	0	0	0	200	300	0	0	0	0	0	0	0	200	903	0	0	0	0	0	0	0	603	903	0
302	1	0	0	0	0	0	0	200	300	0	0	0	0	0	0	0	200	903	0	0	0	0	0	0	0	603	903	0
302	2	0	0	0	0	0	0	200	300	0	0	0	0	0	0	0	200	903	0	0	0	0	0	0	0	603	903	0
302	3	0	0	0	0	0	0	200	300	0	0	0	0	0	0	0	200	903	0	0	0	0	0	0	0	603	903	0
302	4	0	0	0	0	0	0	200	300	0	0	0	0	0	0	0	200	903	0	0	0	0	0	0	0	603	903	0
302	5	0	0	0	0	0	0	200	300	0	0	0	0	0	0	0	200	903	0	0	0	0	0	0	0	603	903	0
302	6	0	0	0	0	0	0	200	300	0	0	0	0	0	0	0	200	903	0	0	0	0	0	0	0	603	903	0
302	7	0	0	0	0	0	0	200	300	0	0	0	0	0	0	0	200	903	0	0	0	0	0	0	0	603	903	0
302	8	0	0	0	0	0	0	200	300	0	0	0	0	0	0	0	200	903	0	0	0	0	0	0	0	603	903	0
302	9	0	0	0	0	0	0	200	300	0	0	0	0	0	0	0	200	903	0	0	0	0	0	0	0	603	903	0
303	0	0	0	0	0	0	0	200	300	0	0	0	0	0	0	0	200	903	0	0	0	0	0	0	0	603	903	0
303	1	0	0	0	0	0	0	200	300	0	0	0	0	0	0	0	200	903	0	0	0	0	0	0	0	603	903	0
303	2	0	0	0	0	0	0	200	300	0	0	0	0	0	0	0	200	903	0	0	0	0	0	0	0	603	903	0
303	3	0	0	0	0	0	0	200	300	0	0	0	0	0	0	0	200	903	0	0	0	0	0	0	0	603	903	0
303	4	0	0	0	0	0	0	200	300	0	0	0	0	0	0	0	200	903	0	0	0	0	0	0	0	603	903	0
303	5	0	0	0	0	0	0	200	300	0	0	0	0	0	0	0	200	903	0	0	0	0	0	0	0	603	903	0
303	6	0	0	0	0	0	0	200	300	0	0	0	0	0	0	0	200	903	0	0	0	0	0	0	0	603	903	0
303	7	0	0	0	0	0	0	200	300	0	0	0	0	0	0	0	200	903	0	0	0	0	0	0	0	603	903	0
303	8	0	0	0	0	0	0	200	300	0	0	0	0	0	0	0	200	903	0	0	0	0	0	0	0	603	903	0
303	9	0	0	0	0	0	0	200	300	0	0	0	0	0	0	0	200	903	0	0	0	0	0	0	0	603	903	0
304	0	0	0	0	0	0	0	200	300	0	0	0	0	0	0	0	200	903	0	0	0	0	0	0	0	603	903	0
304	1	0	0	0	0	0	0	200	300	0	0	0	0	0	0	0	200	903	0	0	0	0	0	0	0	603	903	0
304	2	0	0	0	0	0	0	200	300	0	0	0	0	0	0	0	200	903	0	0	0	0	0	0	0	603	903	0
304	3	0	0	0	0	0	0	200	300	0	0	0	0	0	0	0	200	903	0	0	0	0	0	0	0	603	903	0
304	4	0	0	0	0	0	0	200	300	0	0	0	0	0	0	0	200	903	0	0	0	0	0	0	0	603	903	0
304	5	0	0	0	0	0	0	200	300	0	0	0	0	0	0	0	200	903	0	0	0	0	0	0	0	603	903	0
304	6	0	0	0	0	0	0	200	300	0	0	0	0	0	0	0	200	903	0	0	0	0	0	0	0	603	903	0
304	7	0	0	0	0	0	0	200	300	0	0	0	0	0	0	0	200	903	0	0	0	0	0	0	0	603	903	0
304	8	0	0	0	0	0	0	200	300	0	0	0	0	0	0	0	200	903	0	0	0	0	0	0	0	603	903	0
304	9	0	0	0	0	0	0	200	300	0	0	0	0	0	0	0	200	903	0	0	0	0	0	0	0	603	903	0
305	0	0	0	0	0	0	0	200	300	0	0	0	0	0	0	0	200	903	0	0	0	0	0	0	0	603	903	0
305	1	0	0	0	0	0	0	200	300	0	0	0	0	0	0	0	200	903	0	0	0	0	0	0	0	603	903	0
305	2	0	0	0	0	0	0	200	300	0	0	0	0	0	0	0	200	903	0	0	0	0	0	0	0	603	903	0
305	3	0	0	0	0	0	0	200	300	0	0	0	0	0	0	0	200	903	0	0	0	0	0	0	0	603	903	0
305	4	0	0	0	0	0	0	200	300	0	0	0	0	0	0	0	200	903	0	0	0	0	0	0	0	603	903	0
305	5	0	0	0	0	0	0	200	300	0	0	0	0	0	0	0	200	903	0	0	0	0	0	0	0	603	903	0
305	6	0	0	0	0	0	0	200	300	0	0	0	0	0	0	0	200	903	0	0	0	0	0	0	0	603	903	0
305	7	0	0	0	0	0	0	200	300	0	0	0	0	0	0	0	200	903	0	0	0	0	0	0	0	603	903	0
305	8	0	0	0	0	0	0	200	300	0	0	0	0	0	0	0	200	903	0	0	0	0	0	0	0	603	903	0
305	9	0	0	0	0	0	0	200	300	0	0	0	0	0	0	0	200	903	0	0	0	0	0	0	0	603	903	0
306	0	0	0	0	0	0	0	200	300	0	0	0	0	0	0	0	200	903	0	0	0	0	0	0	0	603	903	0
306	1	0	0	0	0	0	0	200	300	0	0	0	0	0	0	0	200	903	0	0	0	0	0	0	0	603	903	0
306	2	0	0	0	0	0	0	200	300	0	0	0	0	0	0	0	200	903	0	0	0	0	0	0	0	603	903	0
306	3	0	0	0	0	0	0	200	300	0	0	0	0	0	0	0	200	903	0	0	0	0	0	0	0	603	903	0
306	4	0	0	0	0	0	0	200	300	0	0	0	0	0	0	0	200	903	0	0	0	0	0	0	0	603	903	0
306	5	0	0	0	0	0	0	200	300	0	0	0	0	0	0	0	200	903	0	0	0	0	0	0	0	603	903	0
306	6	0	0	0	0	0	0	200	300	0	0	0	0	0	0	0	200	903	0	0	0	0	0	0	0	603	903	0
306	7	0	0	0	0	0	0	200	300	0	0	0	0	0	0	0	200	903	0	0	0	0	0	0	0	603	903	0
306	8	0	0	0	0	0	0	200	300	0	0	0	0	0	0	0	200	903	0	0	0	0	0	0	0	603	903	0
306	9	0	0	0	0	0	0	200	300	0	0	0	0	0	0	0	200	903	0	0	0	0	0	0	0	603	903	0
307	0	0	0	0	0	0	0	200	300	0	0	0	0	0	0	0	200	903	0	0	0	0	0	0	0	603	903	0
307	1	0	0	0	0	0	0	200	300	0	0	0	0	0	0	0	200	903	0	0	0	0	0	0	0	603	903	0
307	2	0	0	0	0	0	0	200	300	0	0	0	0	0	0	0	200	903	0	0	0	0	0	0	0	603	903	0
307	3	0	0	0	0	0	0	200	300	0	0	0	0	0	0	0	200	903	0	0	0	0	0	0	0	603	903	0
307	4	0	0	0	0	0	0	200	300	0	0	0	0	0	0	0	200	903	0	0	0	0	0	0	0	603	903	0
307	5	0	0	0	0	0	0	200	300	0	0	0	0	0	0	0	200	903	0	0	0	0	0	0	0	603	903	0
307	6	0	0	0	0	0	0	200	300	0	0	0	0	0	0	0	200	903	0	0	0	0	0	0	0	603	903	0
307	7	0	0	0	0	0	0	200	300	0	0	0	0	0	0	0	200	903	0	0	0	0	0	0	0	603	903	0
307	8	0	0	0	0	0	0	200	300	0	0	0	0	0	0	0	200	903	0	0	0	0	0	0	0	603	903	0
307	9	0	0	0	0	0	0	200	300	0	0	0	0	0	0	0	200	903	0	0	0	0	0	0	0	603	903	0
308	0	0	0	0	0	0	0	200	300	0	0	0	0	0	0	0	200	903	0	0	0	0	0	0	0	603	903	0
308	1	0	0	0	0	0	0	200	300	0	0	0	0	0	0	0	200	903	0	0	0	0	0	0	0	603	903	0
308	2	0	0	0	0	0	0	200	300	0	0	0	0	0	0	0	200	903	0	0	0	0	0	0	0	603	903	0
308	3	0	0	0	0	0	0	200	300	0	0	0	0	0	0	0	200	903	0	0	0	0	0	0	0	603	903	0
308	4	0	0	0	0	0	0	200	300	0	0	0	0	0	0	0	200	903	0	0	0	0	0	0	0	603	903	0
308	5	0	0	0	0	0	0	200	300	0	0	0	0	0	0	0	200	903	0	0	0	0	0	0	0	603	903	0
308	6	0	0	0	0	0	0	200	300	0	0	0	0	0	0	0	200	903	0	0	0	0	0	0	0	603	903	0
308	7	0	0	0	0	0	0	200	300	0	0	0	0	0	0	0	200	903	0	0	0	0	0	0	0	603	903	0
308	8	0	0	0	0	0	0	200	300	0	0	0	0	0	0	0	200	903	0	0	0	0	0	0	0	603	903	0
308	9	0	0	0	0	0	0	200	300	0	0	0	0	0	0	0	200	903	0	0	0	0	0	0	0	603	903	0
309	0	0	0	0	0	0	0	200	300	0	0	0	0	0	0	0	200	903	0	0	0	0	0	0	0	603	903	0
309	1	0	0	0	0	0	0	200	300	0	0	0	0	0	0	0	200	903	0	0	0	0	0	0	0	603	903	0
309	2	0	0	0	0	0	0	200	300	0	0	0	0	0	0	0	200	903	0	0	0	0	0	0	0	603	903	0
309	3	0	0	0	0	0	0	200	300	0	0	0	0	0	0	0	200	903	0	0	0	0	0	0	0	603	903	0
309	4	0	0	0	0	0	0	200	300	0	0	0	0	0	0	0	200	903	0	0	0	0	0	0	0	603	903	0
309	5	0	0	0	0	0	0	200	300	0	0	0	0	0	0	0	200	903	0	0	0	0	0	0	0	603	903	0
309	6	0	0	0	0	0	0	200	300	0	0	0	0	0	0	0	200	903	0	0	0	0	0	0	0	603	903	0
309	7	0	0	0	0	0	0	200	300	0	0	0	0	0	0	0	200	903	0	0	0	0	0	0	0	603	903	0
309	8	0	0	0	0	0	0	200	300	0	0	0	0	0	0	0	200	903	0	0	0	0	0	0	0	603	903	0
309	9	0	0	0	0	0	0	200	300	0	0	0	0	0	0	0	200	903	0	0	0	0	0	0	0	603	903	0
310	0	0	0	0	0	0	0	200	300	0	0	0	0	0	0	0	200	903	0	0	0	0	0	0	0	603	903	0
310	1	0	0	0	0	0	0	200	300	0	0	0	0	0	0	0	200	903	0	0	0	0	0	0	0	603	903	0
310	2	0	0	0	0	0	0	200	300	0	0	0	0	0	0	0	200	903	0	0	0	0	0	0	0	603	903	0
310	3	0	0	0	0	0	0	200	300	0	0	0	0	0	0	0	200	903	0	0	0	0	0	0	0	603	903	0
310	4	0	0	0	0	0	0	200	300	0	0	0	0	0	0	0	200	903	0	0	0	0	0	0	0	603	903	0
310	5	0	0	0	0	0	0	200	300	0	0	0	0	0	0	0	200	903	0	0	0	0	0	0	0	603	903	0
310	6	0	0	0	0	0	0	200	300	0	0	0	0	0	0	0	200	903	0	0	0	0	0	0	0	603	903	0
310	7	0	0	0	0	0	0	200	300	0	0	0	0	0	0	0	200	903	0	0	0	0	0	0	0	603	903	0
310	8	0	0	0	0	0	0	200	300	0	0	0	0	0	0	0	200	903	0	0	0	0	0	0	0	603	903	0
310	9	0	0	0	0	0	0	200	300	0	0	0	0	0	0	0	200	903	0	0	0	0	0	0	0	603	903	0
311	0	0	0	0	0	0	0	200	300	0	0	0	0	0	0	0	200	903	0	0	0	0	0	0	0	603	903	0
311	1	0	0	0	0	0	0	200	300	0	0	0	0	0	0	0	200	903	0	0	0	0	0	0	0	603	903	0
311	2	0	0	0	0	0	0	200	300	0	0	0	0	0	0	0	200	903	0	0	0	0	0	0	0	603	903	0
311	3	0	0	0	0	0	0	200	300	0	0	0	0	0	0	0	200	903	0	0	0	0	0	0	0	603	903	0
311	4	0	0	0	0	0	0	200	300	0	0	0	0	0	0	0	200	903	0	0	0	0	0	0	0	603	903	0
311	5	0	0	0	0	0	0	200	300	0	0	0	0	0	0	0	200	903	0	0	0	0	0	0	0	603	903	0
311	6	0	0	0	0	0	0	200	300	0	0	0	0	0	0	0	200	903	0	0	0	0	0	0	0	603	903	0
311	7	0	0	0	0	0	0	200	300	0	0	0	0	0	0	0	200	903	0	0	0	0	0	0	0	603	903	0
311	8	0	0	0	0	0	0	200	300	0	0	0	0	0	0	0	200	903	0	0	0	0	0	0	0	603	903	0
311	9	0	0	0	0	0	0	200	300	0	0	0	0	0	0	0	200	903	0	0	0	0	0	0	0	603	903	0
312	0	0	0	0	0	0	0	200	300	0	0	0	0	0	0	0	200	903	0	0	0	0	0	0	0	603	903	0
312	1	0	0	0	0	0	0	200	300	0	0	0	0	0	0	0	200	903	0	0	0	0	0	0	0	603	903	0
312	2	0	0	0	0	0	0	200	300	0	0	0	0	0	0	0	200	903	0	0	0	0	0	0	0	603	903	0
312	3	0	0	0	0	0	0	200	300	0	0	0	0	0	0	0	200	903	0	0	0	0	0	0	0	603	903	0
312	4	0	0	0	0	0	0	200	300	0	0	0	0	0	0	0	200	903	0	0	0	0	0	0	0	603	903	0
312	5	0	0	0	0	0	0	200	300	0	0	0	0	0	0	0	200	903	0	0	0	0	0	0	0	603	903	0
312	6	0	0	0	0	0	0	200	300	0	0	0	0	0	0	0	200	903	0	0	0	0	0	0	0	603	903	0
312	7	0	0	0	0	0	0	200	300	0	0	0	0	0	0	0	200	903	0	0	0	0	0	0	0	603	903	0
312	8	0	0	0	0	0	0	200	300	0	0	0	0	0	0	0	200	903	0	0	0	0	0	0	0	603	903	0
312	9	0	0	0	0	0	0	200	300	0	0	0	0	0	0	0	200	903	0	0	0	0	0	0	0	603	903	0
313	0	0	0	0	0	0	0	200	300	0	0	0	0	0	0	0	200	903	0	0	0	0	0	0	0	603	903	0
313	1	0	0	0	0	0	0	200	300	0	0	0	0	0	0	0	200	903	0	0	0	0	0	0	0	603	903	0
313	2	0	0	0	0	0	0	200	300	0	0	0	0	0	0	0	200	903	0	0	0	0	0	0	0	603	903	0
313	3	0	0	0	0	0	0	200	300	0	0	0	0	0	0	0	200	903	0	0	0	0	0	0	0	603	903	0
313	4	0	0	0	0	0	0	200	300	0	0	0	0	0	0	0	200	903	0	0	0	0	0	0	0	603	903	0
313	5	0	0	0	0	0	0	200	300	0	0	0	0	0	0	0	200	903	0	0	0	0	0	0	0	603	903	0
313	6	0	0	0	0	0	0	200	300	0	0	0	0	0	0	0	200	903	0	0	0	0	0	0	0	603	903	0
313	7	0	0	0	0	0	0	200	300	0	0	0	0	0	0	0	200	903	0	0	0	0	0	0	0	603	903	0
313	8	0	0	0	0	0	0	200	300	0	0	0	0	0	0	0	200	903	0	0	0	0	0	0	0	603	903	0
313	9	0	0	0	0	0	0	200	300	0	0	0	0	0	0	0	200	903	0	0	0	0	0	0	0	603	903	0
314	0	0	0	0	0	0	0	200	300	0	0	0	0	0	0	0	200	903	0	0	0	0	0	0	0	603	903	0
314	1	0	0	0	0	0	0	200	300	0	0	0	0	0	0	0	200	903	0	0	0	0	0	0	0	603	903	0
314	2	0	0	0	0	0	0	200	300	0	0	0	0	0	0	0	200	903	0	0	0	0	0	0	0	603	903	0
314	3	0	0	0	0	0	0	200	300	0	0	0	0	0	0	0	200	903	0	0	0	0	0	0	0	603	903	0
314	4	0	0	0	0	0	0	200	300	0	0	0	0	0	0	0	200	903	0	0	0	0	0	0	0	603	903	0
314	5	0	0	0	0	0	0	200	300	0	0	0	0	0	0	0	200	903	0	0	0	0	0	0	0	603	903	0
314	6	0	0	0	0	0	0	200	300	0	0	0	0	0	0	0	200	903	0	0	0	0	0	0	0	603	903	0
314	7	0	0	0	0	0	0	200	300	0	0	0	0	0	0	0	200	903	0	0	0	0	0	0	0	603	903	0
314	8	0	0	0	0	0	0	200	300	0	0	0	0	0	0	0	200	903	0	0	0	0	0	0	0	603	903	0
314	9	0	0	0	0	0	0	200	300	0	0	0	0	0	0	0	200	903	0	0	0	0	0	0	0	603	903	0
315	0	0	0	0	0	0	0	200	300	0	0	0	0	0	0	0	200	903	0	0	0	0	0	0	0	603	903	0
315	1	0	0	0	0	0	0	200	300	0	0	0	0	0	0	0	200	903	0	0	0	0	0	0	0	603	903	0
315	2	0	0	0	0	0	0	200	300	0	0	0	0	0	0	0	200	903	0	0	0	0	0	0	0	603	903	0
315	3	0	0	0	0	0	0	200	300	0	0	0	0	0	0	0	200	903	0	0	0	0	0	0	0	603	903	0
315	4	0	0	0	0	0	0	200	300	0	0	0	0	0	0	0	200	903	0	0	0	0	0	0	0	603	903	0
315	5	0	0	0	0	0	0	200	300	0	0	0	0	0	0	0	200	903	0	0	0	0	0	0	0	603	903	0
315	6	0	0	0	0	0	0	200	300	0	0	0	0	0	0	0	200	903	0	0	0	0	0	0	0	603	903	0
315	7	0	0	0	0	0	0	200	300	0	0	0	0	0	0	0	200	903	0	0	0	0	0	0	0	603	903	0
315	8	0	0	0	0	0	0	200	300	0	0	0	0	0	0	0	200	903	0	0	0	0	0	0	0	603	903	0
315	9	0	0	0	0	0	0	200	300	0	0	0	0	0	0	0	200	903	0	0	0	0	0	0	0	603	903	0
316	0	0	0	0	0	0	0	200	300	0	0	0	0	0	0	0	200	903	0	0	0	0	0	0	0	603	903	0
316	1	0	0	0	0	0	0	200	300	0	0	0	0	0	0	0	200	903	0	0	0	0	0	0	0	603	903	0
316	2	0	0	0	0	0	0	200	300	0	0	0	0	0	0	0	200	903	0	0	0	0	0	0	0	603	903	0
316	3	0	0	0	0	0	0	200	300	0	0	0	0	0	0	0	200	903	0	0	0	0	0	0	0	603	903	0
316	4	0	0	0	0	0	0	200	300	0	0	0	0	0	0	0	200	903	0	0	0	0	0	0	0	603	903	0
316	5	0	0	0	0	0	0	200	300	0	0	0	0	0	0	0	200	903	0	0	0	0	0	0	0	603	903	0
316	6	0	0	0	0	0	0	200	300	0	0	0	0	0	0	0	200	903	0	0	0	0	0	0	0	603	903	0
316	7	0	0	0	0	0	0	200	300	0	0	0	0	0	0	0	200	903	0	0	0	0	0	0	0	603	903	0
316	8	0	0	0	0	0	0	200	300	0	0	0	0	0	0	0	200	903	0	0	0	0	0	0	0	603	903	0
316	9	0	0	0	0	0	0	200	300	0	0	0	0	0	0	0	200	903	0	0	0	0	0	0	0	603	903	0
317	0	0	0	0	0	0	0	200	300	0	0	0	0	0	0	0	200	903	0	0	0	0	0	0	0	603	903	0
317	1	0	0	0	0	0	0	200	300	0	0	0	0	0	0	0	200	903	0	0	0	0	0	0	0	603	903	0
317	2	0	0	0	0	0	0	200	300	0	0	0	0	0	0	0	200	903	0	0	0	0	0	0	0	603	903	0
317	3	0	0	0	0	0	0	200	300	0	0	0	0	0	0	0	200	903	0	0	0	0	0	0	0	603	903	0
317	4	0	0	0	0	0	0	200	300	0	0	0	0	0	0	0	200	903	0	0	0	0	0	0	0	603	903	0
317	5	0	0	0	0	0	0	200	300	0	0	0	0	0	0	0	200	903	0	0	0	0	0	0	0	603	903	0
317	6	0	0	0	0	0	0	200	300	0	0	0	0	0	0	0	200	903	0	0	0	0	0	0	0	603	903	0
317	7	0	0	0	0	0	0	200	300	0	0	0	0	0	0	0	200	903	0	0	0	0	0	0	0	603	903	0
317	8	0	0	0	0	0	0	200	300	0	0	0	0	0	0	0	200	903	0	0	0	0	0	0	0	603	903	0
317	9	0	0	0	0	0	0	200	300	0	0	0	0	0	0	0	200	903	0	0	0	0	0	0	0	603	903	0
318	0	0	0	0	0	0	0	200	300	0	0	0	0	0	0	0	200	903	0	0	0	0	0	0	0	603	903	0
318	1	0	0	0	0	0	0	200	300	0	0	0	0	0	0	0	200	903	0	0	0	0	0	0	0	603	903	0
318	2	0	0	0	0	0	0	200	300	0	0	0	0	0	0	0	200	903	0	0	0	0	0	0	0	603	903	0
318	3	0	0	0	0	0	0	200	300	0	0	0	0	0	0	0	200	903	0	0	0	0	0	0	0	603	903	0
318	4	0	0	0	0	0	0	200	300	0	0	0	0	0	0	0	200	903	0	0	0	0	0	0	0	603	903	0
318	5	0	0	0	0	0	0	200	300	0	0	0	0	0	0	0	200	903	0	0	0	0	0	0	0	603	903	0
318	6	0	0	0	0	0	0	200	300	0	0	0	0	0	0	0	200	903	0	0	0	0	0	0	0	603	903	0
318	7	0	0	0	0	0	0	200	300	0	0	0	0	0	0	0	200	903	0	0	0	0	0	0	0	603	903	0
318	8	0	0	0	0	0	0	200	300	0	0	0	0	0	0	0	200	903	0	0	0	0	0	0	0	603	903	0
318	9	0	0	0	0	0	0	200	300	0	0	0	0	0	0	0	200	903	0	0	0	0	0	0	0	603	903	0
319	0	0	0	0	0	0	0	200	300	0	0	0	0	0	0	0	200	903	0	0	0	0	0	0	0	603	903	0
319	1	0	0	0	0	0	0	200	300	0	0	0	0	0	0	0	200	903	0	0	0	0	0	0	0	603	903	0
319	2	0	0	0	0	0	0	200	300	0	0	0	0	0	0	0	200	903	0	0	0	0	0	0	0	603	903	0
319	3	0	0	0	0	0	0	200	300	0	0	0	0	0	0	0	200	903	0	0	0	0	0	0	0	603	903	0
319	4	0	0	0	0	0	0	200	300	0	0	0	0	0	0	0	200	903	0	0	0	0	0	0	0	603	903	0
319	5	0	0	0	0	0	0	200	300	0	0	0	0	0	0	0	200	903	0	0	0	0	0	0	0	603	903	0
319	6	0	0	0	0	0	0	200	300	0	0	0	0	0	0	0	200	903	0	0	0	0	0	0	0	603	903	0
319	7	0	0	0	0	0	0	200	300	0	0	0	0	0	0	0	200	903	0	0	0	0	0	0	0	603	903	0
319	8	0	0	0	0	0	0	200	300	0	0	0	0	0	0	0	200	903	0	0	0	0	0	0	0	603	903	0
319	9	0	0	0	0	0	0	200	300	0	0	0	0	0	0	0	200	903	0	0	0	0	0	0	0	603	903	0
320	0	0	0	0	0	0	0	200	300	0	0	0	0	0	0	0	200	903	0	0	0	0	0	0	0	603	903	0
320	1	0	0	0	0	0	0	200	300	0	0	0	0	0	0	0	200	903	0	0	0	0	0	0	0	603	903	0
320	2	0	0	0	0	0	0	200	300	0	0	0	0	0	0	0	200	903	0	0	0	0	0	0	0	603	903	0
320	3	0	0	0	0	0	0	200	300	0	0	0	0	0	0	0	200	903	0	0	0	0	0	0	0	603	903	0
320	4	0	0	0	0	0	0	200	300	0	0	0	0	0	0	0	200	903	0	0	0	0	0	0	0	603	903	0
320	5	0	0	0	0	0	0	200	300	0	0	0	0	0	0	0	200	903	0	0	0	0	0	0	0	603	903	0
320	6	0	0	0	0	0	0	200	300	0	0	0	0	0	0	0	200	903	0	0	0	0	0	0	0	603	903	0
320	7	0	0	0	0	0	0	200	300	0	0	0	0	0	0	0	200	903	0	0	0	0	0	0	0	603	903	0
320	8	0	0	0	0	0	0	200	300	0	0	0	0	0	0	0	200	903	0	0	0	0	0	0	0	603	903	0
320	9	0	0	0	0	0	0	200	300	0	0	0	0	0	0	0	200	903	0	0	0	0	0	0	0	603	903	0
321	0	0	0	0	0	0	0	200	300	0	0	0	0	0	0	0	200	903	0	0	0	0	0	0	0	603	903	0
321	1	0	0	0	0	0	0	200	300	0	0	0	0	0	0	0	200	903	0	0	0	0	0	0	0	603	903	0
321	2	0	0	0	0	0	0	200	300	0	0	0	0	0	0	0	200	903	0	0	0	0	0	0	0	603	903	0
321	3	0	0	0	0	0	0	200	300	0	0	0	0	0	0	0	200	903	0	0	0	0	0	0	0	603	903	0
321	4	0	0	0	0	0	0	200	300	0	0	0	0	0	0	0	200	903	0	0	0	0	0	0	0	603	903	0
321	5	0	0	0	0	0	0	200	300	0	0	0	0	0	0	0	200	903	0	0	0	0	0	0	0	603	903	0
321	6	0	0	0	0	0	0	200	300	0	0	0	0	0	0	0	200	903	0	0	0	0	0	0	0	603	903	0
321	7	0	0	0	0	0	0	200	300	0	0	0	0	0	0	0	200	903	0	0	0	0	0	0	0	603	903	0
321	8	0	0	0	0	0	0	200	300	0	0	0	0	0	0	0	200	903	0	0	0	0	0	0	0	603	903	0
321	9	0	0	0	0	0	0	200	300	0	0	0	0	0	0	0	200	903	0	0	0	0	0	0	0	603	903	0
322	0	0	0	0	0	0	0	200	300	0	0	0	0	0	0	0	200	903	0	0	0	0	0	0	0	603	903	0
322	1	0	0	0	0	0	0	200	300	0	0	0	0	0	0	0	200	903	0	0	0	0	0	0	0	603	903	0
322	2	0	0	0	0	0	0	200	300	0	0	0	0	0	0	0	200	903	0	0	0	0	0	0	0	603	903	0
322	3	0	0	0	0	0	0	200	300	0	0	0	0	0	0	0	200	903	0	0	0	0	0	0	0	603	903	0
322	4	0	0	0	0	0	0	200	300	0	0	0	0	0	0	0	200	903	0	0	0	0	0	0	0	603	903	0
322	5	0	0	0	0	0	0	200	300	0	0	0	0	0	0	0	200	903	0	0	0	0	0	0	0	603	903	0
322	6	0	0	0	0	0	0	200	300	0	0	0	0	0	0	0	200	903	0	0	0	0	0	0	0	603	903	0
322	7	0	0	0	0	0	0	200	300	0	0	0	0	0	0	0	200	903	0	0	0	0	0	0	0	603	903	0
322	8	0	0	0	0	0	0	200	300	0	0	0	0	0	0	0	200	903	0	0	0	0	0	0	0	603	903	0
322	9	0	0	0	0	0	0	200	300	0	0	0	0	0	0	0	200	903	0	0	0	0	0	0	0	603	903	0
323	0	0	0	0	0	0	0	200	300	0	0	0	0	0	0	0	200	903	0	0	0	0	0	0	0	603	903	0
323	1	0	0	0	0	0	0	200	300	0	0	0	0	0	0	0	200	903	0	0	0	0	0	0	0	603	903	0
323	2	0	0	0	0	0	0	200	300	0	0	0	0	0	0	0	200	903	0	0	0	0	0	0	0	603	903	0
323	3	0	0	0	0	0	0	200	300	0	0	0	0	0	0	0	200	903	0	0	0	0	0	0	0	603	903	0
323	4	0	0	0	0	0	0	200	300	0	0	0	0	0	0	0	200	903	0	0	0	0	0	0	0	603	903	0
323	5	0	0	0	0	0	0	200	300	0	0	0	0	0	0	0	200	903	0	0	0	0	0	0	0	603	903	0
323	6	0	0	0	0	0	0	200	300	0	0	0	0	0	0	0	200	903	0	0	0	0	0	0	0	603	903	0
323	7	0	0	0	0	0	0	200	300	0	0	0	0	0	0	0	200	903	0	0	0	0	0	0	0	603	903	0
323	8	0	0	0	0	0	0	200	300	0	0	0	0	0	0	0	200	903	0	0	0	0	0	0	0	603	903	0
323	9	0	0	0	0	0	0	200	300	0	0	0	0	0	0	0	200	903	0	0	0	0	0	0	0	603	903	0
324	0	0	0	0	0	0	0	200	300	0	0	0	0	0	0	0	200	903	0	0	0	0	0	0	0	603	903	0
324	1	0	0	0	0	0	0	200	300	0	0	0	0	0	0	0	200	903	0	0	0	0	0	0	0	603	903	0
324	2	0	0	0	0	0	0	200	300	0	0	0	0	0	0	0	200	903	0	0	0	0	0	0	0	603	903	0
324	3	0	0	0	0	0	0	200	300	0	0	0	0	0	0	0	200	903	0	0	0	0	0	0	0	603	903	0
324	4	0	0	0	0	0	0	200	300	0	0	0	0	0	0	0	200	903	0	0	0	0	0	0	0	603	903	0
324	5	0	0	0	0	0	0	200	300	0	0	0	0	0	0	0	200	903	0	0	0	0	0	0	0	603	903	0
324	6	0	0	0	0	0	0	200	300	0	0	0	0	0	0	0	200	903	0	0	0	0	0	0	0	603	903	0
324	7	0	0	0	0	0	0	200	300	0	0	0	0	0	0	0	200	903	0	0	0	0	0	0	0	603	903	0
324	8	0	0	0	0	0	0	200	300	0	0	0	0	0	0	0	200	903	0	0	0	0	0	0	0	603	903	0
324	9	0	0	0	0	0	0	200	300	0	0	0	0	0	0	0	200	903	0	0	0	0	0	0	0	603	903	0
325	0	0	0	0	0	0	0	200	300	0	0	0	0	0	0	0	200	903	0	0	0	0	0	0	0	603	903	0
325	1	0	0	0	0	0	0	200	300	0	0	0	0	0	0	0	200	903	0	0	0	0	0	0	0	603	903	0
325	2	0	0	0	0	0	0	200	300	0	0	0	0	0	0	0	200	903	0	0	0	0	0	0	0	603	903	0
325	3	0	0	0	0	0	0	200	300	0	0	0	0	0	0	0	200	903	0	0	0	0	0	0	0	603	903	0
325	4	0	0	0	0	0	0	200	300	0	0	0	0	0	0	0	200	903	0	0	0	0	0	0	0	603	903	0
325	5	0	0	0	0	0	0	200	300	0	0	0	0	0	0	0	200	903	0	0	0	0	0	0	0	603	903	0
325	6	0	0	0	0	0	0	200	300	0	0	0	0	0	0	0	200	903	0	0	0	0	0	0	0	603	903	0
325	7	0	0	0	0	0	0	200	300	0	0	0	0	0	0	0	200	903	0	0	0	0	0	0	0	603	903	0
325	8	0	0	0	0	0	0	200	300	0	0	0	0	0	0	0	200	903	0	0	0	0	0	0	0	603	903	0
325	9	0	0	0	0	0	0	200	300	0	0	0	0	0	0	0	200	903	0	0	0	0	0	0	0	603	903	0
326	0	0	0	0	0	0	0	200	300	0	0	0	0	0	0	0	200	903	0	0	0	0	0	0	0	603	903	0
326	1	0	0	0	0	0	0	200	300	0	0	0	0	0	0	0	200	903	0	0	0	0	0	0	0	603	903	0
326	2	0	0	0	0	0	0	200	300	0	0	0	0	0	0	0	200	903	0	0	0	0	0	0	0	603	903	0
326	3	0	0	0	0	0	0	200	300	0	0	0	0	0	0	0	200	903	0	0	0	0	0	0	0	603	903	0
326	4	0	0	0	0	0	0	200	300	0	0	0	0	0	0	0	200	903	0	0	0	0	0	0	0	603	903	0
326	5	0	0	0	0	0	0	200	300	0	0	0	0	0	0	0	200	903	0	0	0	0	0	0	0	603	903	0
326	6	0	0	0	0	0	0	200	300	0	0	0	0	0	0	0	200	903	0	0	0	0	0	0	0	603	903	0
326	7	0	0	0	0	0	0	200	300	0	0	0	0	0	0	0	200	903	0	0	0	0	0	0	0	603	903	0
326	8	0	0	0	0	0	0	200	300	0	0	0	0	0	0	0	200	903	0	0	0	0	0	0	0	603	903	0
326	9	0	0	0	0	0	0	200	300	0	0	0	0	0	0	0	200	903	0	0	0	0	0	0	0	603	903	0
327	0	0	0	0	0	0	0	200	300	0	0	0	0	0	0	0	200	903	0	0	0	0	0	0	0	603	903	0
327	1	0	0	0	0	0	0	200	300	0	0	0	0	0	0	0	200	903	0	0	0	0	0	0	0	603	903	0
327	2	0	0	0	0	0	0	200	300	0	0	0	0	0	0	0	200	903	0	0	0	0	0	0	0	603	903	0
327	3	0	0	0	0	0	0	200	300	0	0	0	0	0	0	0	200	903	0	0	0	0	0	0	0	603	903	0
327	4	0	0	0	0	0	0	200	300	0	0	0	0	0	0	0	200	903	0	0	0	0	0	0	0	603	903	0
327	5	0	0	0	0	0	0	200	300	0	0	0	0	0	0	0	200	903	0	0	0	0	0	0	0	603	903	0
327	6	0	0	0	0	0	0	200	300	0	0	0	0	0	0	0	200	903	0	0	0	0	0	0	0	603	903	0
327	7	0	0	0	0	0	0	200	300	0	0	0	0	0	0	0	200	903	0	0	0	0	0	0	0	603	903	0
327	8	0	0	0	0	0	0	200	300	0	0	0	0	0	0	0	200	903	0	0	0	0	0	0	0	603	903	0
327	9	0	0	0	0	0	0	200	300	0	0	0	0	0	0	0	200	903	0	0	0	0	0	0	0	603	903	0
328	0	0	0	0	0	0	0	200	300	0	0	0	0	0	0	0	200	903	0	0	0	0	0	0	0	603	903	0
328	1	0	0	0	0	0	0	200	300	0	0	0	0	0	0	0	200	903	0	0	0	0	0	0	0	603	903	0
328	2	0	0	0	0	0	0	200	300	0	0	0	0	0	0	0	200	903	0	0	0	0	0	0	0	603	903	0
328	3	0	0	0	0	0	0	200	300	0	0	0	0	0	0	0	200	903	0	0	0	0	0	0	0	603	903	0
328	4	0	0	0	0	0	0	200	300	0	0	0	0	0	0	0	200	903	0	0	0	0	0	0	0	603	903	0
328	5	0	0	0	0	0	0	200	300	0	0	0	0	0	0	0	200	903	0	0	0	0	0	0	0	603	903	0
328	6	0	0	0	0	0	0	200	300	0	0	0	0	0	0	0	200	903	0	0	0	0	0	0	0	603	903	0
328	7	0	0	0	0	0	0	200	300	0	0	0	0	0	0	0	200	903	0	0	0	0	0	0	0	603	903	0
328	8	0	0	0	0	0	0	200	300	0	0	0	0	0	0	0	200	903	0	0	0	0	0	0	0	603	903	0
328	9	0	0	0	0	0	0	200	300	0	0	0	0	0	0	0	200	903	0	0	0	0	0	0	0	603	903	0
329	0	0	0	0	0	0	0	200	300	0	0	0	0	0	0	0	200	903	0	0	0	0	0	0	0	603	903	0
329	1	0	0	0	0	0	0	200	300	0	0	0	0	0	0	0	200	903	0	0	0	0	0	0	0	603	903	0
329	2	0	0	0	0	0	0	200	300	0	0	0	0	0	0	0	200	903	0	0	0	0	0	0	0	603	903	0
329	3	0	0	0	0	0	0	200	300	0	0	0	0	0	0	0	200	903	0	0	0	0	0	0	0	603	903	0
329	4	0	0	0	0	0	0	200	300	0	0	0	0	0	0	0	200	903	0	0	0	0	0	0	0	603	903	0
329	5	0	0	0	0	0	0	200	300	0	0	0	0	0	0	0	200	903	0	0	0	0	0	0	0	603	903	0
329	6	0	0	0	0	0	0	200	300	0	0	0	0	0	0	0	200	903	0	0	0	0	0	0	0	603	903	0
329	7	0	0	0	0	0	0	200	300	0	0	0	0	0	0	0	200	903	0	0	0	0	0	0	0	603	903	0
329	8	0	0	0	0	0	0	200	300	0	0	0	0	0	0	0	200	903	0	0	0	0	0	0	0	603	903	0
329	9	0	0	0	0	0	0	200	300	0	0	0	0	0	0	0	200	903	0	0	0	0	0	0	0	603	903	0
330	0	0	0	0	0	0	0	200	300	0	0	0	0	0	0	0	200	903	0	0	0	0	0	0	0	603	903	0
330	1	0	0	0	0	0	0	200	300	0	0	0	0	0	0	0	200	903	0	0	0	0	0	0	0	603	903	0
330	2	0	0	0	0	0	0	200	300	0	0	0	0	0	0	0	200	903	0	0	0	0	0	0	0	603	903	0
330	3	0	0	0	0	0	0	200	300	0	0	0	0	0	0	0	200	903	0	0	0	0	0	0	0	603	903	0
330	4	0	0	0	0	0	0	200	300	0	0	0	0	0	0	0	200	903	0	0	0	0	0	0	0	603	903	0
330	5	0	0	0	0	0	0	200	300	0	0	0	0	0	0	0	200	903	0	0	0	0	0	0	0	603	903	0
330	6	0	0	0	0	0	0	200	300	0	0	0	0	0	0	0	200	903	0	0	0	0	0	0	0	603	903	0
330	7	0	0	0	0	0	0	200	300	0	0	0	0	0	0	0	200	903	0	0	0	0	0	0	0	603	903	0
330	8	0	0	0	0	0	0	200	300	0	0	0	0	0	0	0	200	903	0	0	0	0	0	0	0	603	903	0
330	9	0	0	0	0	0	0	200	300	0	0	0	0	0	0	0	200	903	0	0	0	0	0	0	0	603	903	0
331	0	0	0	0	0	0	0	200	300	0	0	0	0	0	0	0	200	903	0	0	0	0	0	0	0	603	903	0
331	1	0	0	0	0	0	0	200	300	0	0	0	0	0	0	0	200	903	0	0	0	0	0	0	0	603	903	0
331	2	0	0	0	0	0	0	200	300	0	0	0	0	0	0	0	200	903	0	0	0	0	0	0	0	603	903	0
331	3	0	0	0	0	0	0	200	300	0	0	0	0	0	0	0	200	903	0	0	0	0	0	0	0	603	903	0
331	4	0	0	0	0	0	0	200	300	0	0	0	0	0	0	0	200	903	0	0	0	0	0	0	0	603	903	0
331	5	0	0	0	0	0	0	200	300	0	0	0	0	0	0	0	200	903	0	0	0	0	0	0	0	603	903	0
331	6	0	0	0	0	0	0	200	300	0	0	0	0	0	0	0	200	903	0	0	0	0	0	0	0	603	903	0
331	7	0	0	0	0	0	0	200	300	0	0	0	0	0	0	0	200	903	0	0	0	0	0	0	0	603	903	0
331	8	0	0	0	0	0	0	200	300	0	0	0	0	0	0	0	200	903	0	0	0	0	0	0	0	603	903	0
331	9	0	0	0	0	0	0	200	300	0	0	0	0	0	0	0	200	903	0	0	0	0	0	0	0	603	903	0
332	0	0	0	0	0	0	0	200	300	0	0	0	0	0	0	0	200	903	0	0	0	0	0	0	0	603	903	0
332	1	0	0	0	0	0	0	200	300	0	0	0	0	0	0	0	200	903	0	0	0	0	0	0	0	603	903	0
332	2	0	0	0	0	0	0	200	300	0	0	0	0	0	0	0	200	903	0	0	0	0	0	0	0	603	903	0
332	3	0	0	0	0	0	0	200	300	0	0	0	0	0	0	0	200	903	0	0	0	0	0	0	0	603	903	0
332	4	0	0	0	0	0	0	200	300	0	0	0	0	0	0	0	200	903	0	0	0	0	0	0	0	603	903	0
332	5	0	0	0	0	0	0	200	300	0	0	0	0	0	0	0	200	903	0	0	0	0	0	0	0	603	903	0
332	6	0	0	0	0	0	0	200	300	0	0	0	0	0	0	0	200	903	0	0	0	0	0	0	0	603	903	0
332	7	0	0	0	0	0	0	200	300	0	0	0	0	0	0	0	200	903	0	0	0	0	0	0	0	603	903	0
332	8	0	0	0	0	0	0	200	300	0	0	0	0	0	0	0	200	903	0	0	0	0	0	0	0	603	903	0
332	9	0	0	0	0	0	0	200	300	0	0	0	0	0	0	0	200	903	0	0	0	0	0	0	0	603	903	0
333	0	0	0	0	0	0	0	200	300	0	0	0	0	0	0	0	200	903	0	0	0	0	0	0	0	603	903	0
333	1	0	0	0	0	0	0	200	300	0	0	0	0	0	0	0	200	903	0	0	0	0	0	0	0	603	903	0
333	2	0	0	0	0	0	0	200	300	0	0	0	0	0	0	0	200	903	0	0	0	0	0	0	0	603	903	0
333	3	0	0	0	0	0	0	200	300	0	0	0	0	0	0	0	200	903	0	0	0	0	0	0	0	603	903	0
333	4	0	0	0	0	0	0	200	300	0	0	0	0	0	0	0	200	903	0	0	0	0	0	0	0	603	903	0
333	5	0	0	0	0	0	0	200	300	0	0	0	0	0	0	0	200	903	0	0	0	0	0	0	0	603	903	0
333	6	0	0	0	0	0	0	200	300	0	0	0	0	0	0	0	200	903	0	0	0	0	0	0	0	603	903	0
333	7	0	0	0	0	0	0	200	300	0	0	0	0	0	0	0	200	903	0	0	0	0	0	0	0	603	903	0
333	8	0	0	0	0	0	0	200	300	0	0	0	0	0	0	0	200	903	0	0	0	0	0	0	0	603	903	0
333	9	0	0	0	0	0	0	200	300	0	0	0	0	0	0	0	200	903	0	0	0	0	0	0	0	603	903	0
334	0	0	0	0	0	0	0	200	300	0	0	0	0	0	0	0	200	903	0	0	0	0	0	0	0	603	903	0
334	1	0	0	0	0	0	0	200	300	0	0	0	0	0	0	0	200	903	0	0	0	0	0	0	0	603	903	0
334	2	0	0	0	0	0	0	200	300	0	0	0	0	0	0	0	200	903	0	0	0	0	0	0	0	603	903	0
334	3	0	0	0	0	0	0	200	300	0	0	0	0	0	0	0	200	903	0	0	0	0	0	0	0	603	903	0
334	4	0	0	0	0	0	0	200	300	0	0	0	0	0	0	0	200	903	0	0	0	0	0	0	0	603	903	0
334	5	0	0	0	0	0	0	200	300	0	0	0	0	0	0	0	200	903	0	0	0	0	0	0	0	603	903	0
334	6	0	0	0	0	0	0	200	300	0	0	0	0	0	0	0	200	903	0	0	0	0	0	0	0	603	903	0
334	7	0	0	0	0	0	0	200	300	0	0	0	0	0	0	0	200	903	0	0	0	0	0	0	0	603	903	0
334	8	0	0	0	0	0	0	200	300	0	0	0	0	0	0	0	200	903	0	0	0	0	0	0	0	603	903	0
334	9	0	0	0	0	0	0	200	300	0	0	0	0	0	0	0	200	903	0	0	0	0	0	0	0	603	903	0
335	0	0	0	0	0	0	0	200	300	0	0	0	0	0	0	0	200	903	0	0	0	0	0	0	0	603	903	0
335	1	0	0	0	0	0	0	200	300	0	0	0	0	0	0	0	200	903	0	0	0	0	0	0	0	603	903	0
335	2	0	0	0	0	0	0	200	300	0	0	0	0	0	0	0	200	903	0	0	0	0	0	0	0	603	903	0
335	3	0	0	0	0	0	0	200	300	0	0	0	0	0	0	0	200	903	0	0	0	0	0	0	0	603	903	0
335	4	0	0	0	0	0	0	200	300	0	0	0	0	0	0	0	200	903	0	0	0	0	0	0	0	603	903	0
335	5	0	0	0	0	0	0	200	300	0	0	0	0	0	0	0	200	903	0	0	0	0	0	0	0	603	903	0
335	6	0	0	0	0	0	0	200	300	0	0	0	0	0	0	0	200	903	0	0	0	0	0	0	0	603	903	0
335	7	0	0	0	0	0	0	200	300	0	0	0	0	0	0	0	200	903	0	0	0	0	0	0	0	603	903	0
335	8	0	0	0	0	0	0	200	300	0	0	0	0	0	0	0	200	903	0	0	0	0	0	0	0	603	903	0
335	9	0	0	0	0	0	0	200	300	0	0	0	0	0	0	0	200	903	0	0	0	0	0	0	0	603	903	0
336	0	0	0	0	0	0	0	200	300	0	0	0	0	0	0	0	200	903	0	0	0	0	0	0	0	603	903	0
336	1	0	0	0	0	0	0	200	300	0	0	0	0	0	0	0	200	903	0	0	0	0	0	0	0	603	903	0
336	2	0	0	0	0	0	0	200	300	0	0	0	0	0	0	0	200	903	0	0	0	0	0	0	0	603	903	0
336	3	0	0	0	0	0	0	200	300	0	0	0	0	0	0	0	200	903	0	0	0	0	0	0	0	603	903	0
336	4	0	0	0	0	0	0	200	300	0	0	0	0	0	0	0	200	903	0	0	0	0	0	0	0	603	903	0
336	5	0	0	0	0	0	0	200	300	0	0	0	0	0	0	0	200	903	0	0	0	0	0	0	0	603	903	0
336	6	0	0	0	0	0	0	200	300	0	0	0	0	0	0	0	200	903	0	0	0	0	0	0	0	603	903	0
336	7	0	0	0	0	0	0	200	300	0	0	0	0	0	0	0	200	903	0	0	0	0	0	0	0	603	903	0
336	8	0	0	0	0	0	0	200	300	0	0	0	0	0	0	0	200	903	0	0	0	0	0	0	0	603	903	0
336	9	0	0	0	0	0	0	200	300	0	0	0	0	0	0	0	200	903	0	0	0	0	0	0	0	603	903	0
337	0	0	0	0	0	0	0	200	300	0	0	0	0	0	0	0	200	903	0	0	0	0	0	0	0	603	903	0
337	1	0	0	0	0	0	0	200	300	0	0	0	0	0	0	0	200	903	0	0	0	0	0	0	0	603	903	0
337	2	0	0	0	0	0	0	200	300	0	0	0	0	0	0	0	200	903	0	0	0	0	0	0	0	603	903	0
337	3	0	0	0	0	0	0	200	300	0	0	0	0	0	0	0	200	903	0	0	0	0	0	0	0	603	903	0
337	4	0	0	0	0	0	0	200	300	0	0	0	0	0	0	0	200	903	0	0	0	0	0	0	0	603	903	0
337	5	0	0	0	0	0	0	200	300	0	0	0	0	0	0	0	200	903	0	0	0	0	0	0	0	603	903	0
337	6	0	0	0	0	0	0	200	300	0	0	0	0	0	0	0	200	903	0	0	0	0	0	0	0	603	903	0
337	7	0	0	0	0	0	0	200	300	0	0	0	0	0	0	0	200	903	0	0	0	0	0	0	0	603	903	0
337	8	0	0	0	0	0	0	200	300	0	0	0	0	0	0	0	200	903	0	0	0	0	0	0	0	603	903	0
337	9	0	0	0	0	0	0	200	300	0	0	0	0	0	0	0	200	903	0	0	0	0	0	0	0	603	903	0
338	0	0	0	0	0	0	0	200	300	0	0	0	0	0	0	0	200	903	0	0	0	0	0	0	0	603	903	0
338	1	0	0	0	0	0	0	200	300	0	0	0	0	0	0	0	200	903	0	0	0	0	0	0	0	603	903	0
338	2	0	0	0	0	0	0	200	300	0	0	0	0	0	0	0	200	903	0	0	0	0	0	0	0	603	903	0
338	3	0	0	0	0	0	0	200	300	0	0	0	0	0	0	0	200	903	0	0	0	0	0	0	0	603	903	0
338	4	0	0	0	0	0	0	200	300	0	0	0	0	0	0	0	200	903	0	0	0	0	0	0	0	603	903	0
338	5	0	0	0	0	0	0	200	300	0	0	0	0	0	0	0	200	903	0	0	0	0	0	0	0	603	903	0
338	6	0	0	0	0	0	0	200	300	0	0	0	0	0	0	0	200	903	0	0	0	0	0	0	0	603	903	0
338	7	0	0	0	0	0	0	200	300	0	0	0	0	0	0	0	200	903	0	0	0	0	0	0	0	603	903	0
338	8	0	0	0	0	0	0	200	300	0	0	0	0	0	0	0	200	903	0	0	0	0	0	0	0	603	903	0
338	9	0	0	0	0	0	0	200	300	0	0	0	0	0	0	0	200	903	0	0	0	0	0	0	0	603	903	0
339	0	0	0	0	0	0	0	200	300	0	0	0	0	0	0	0	200	903	0	0	0	0	0	0	0	603	903	0
339	1	0	0	0	0	0	0	200	300	0	0	0	0	0	0	0	200	903	0	0	0	0	0	0	0	603	903	0
339	2	0	0	0	0	0	0	200	300	0	0	0	0	0	0	0	200	903	0	0	0	0	0	0	0	603	903	0
339	3	0	0	0	0	0	0	200	300	0	0	0	0	0	0	0	200	903	0	0	0	0	0	0	0	603	903	0
339	4	0	0	0	0	0	0	200	300	0	0	0	0	0	0	0	200	903	0	0	0	0	0	0	0	603	903	0
339	5	0	0	0	0	0	0	200	300	0	0	0	0	0	0	0	200	903	0	0	0	0	0	0	0	603	903	0
339	6	0	0	0	0	0	0	200	300	0	0	0	0	0	0	0	200	903	0	0	0	0	0	0	0	603	903	0
339	7	0	0	0	0	0	0	200	300	0	0	0	0	0	0	0	200	903	0	0	0	0	0	0	0	603	903	0
339	8	0	0	0	0	0	0	200	300	0	0	0	0	0	0	0	200	903	0	0	0	0	0	0	0	603	903	0
339	9	0	0	0	0	0	0	200	300	0	0	0	0	0	0	0	200	903	0	0	0	0	0	0	0	603	903	0
340	0	0	0	0	0	0	0	200	300	0	0	0	0	0	0	0	200	903	0	0	0	0	0	0	0	603	903	0
340	1	0	0	0	0	0	0	200	300	0	0	0	0	0	0	0	200	903	0	0	0	0	0	0	0	603	903	0
340	2	0	0	0	0	0	0	200	300	0	0	0	0	0	0	0	200	903	0	0	0	0	0	0	0	603	903	0
340	3	0	0	0	0	0	0	200	300	0	0	0	0	0	0	0	200	903	0	0	0	0	0	0	0	603	903	0
340	4	0	0	0	0	0	0	200	300	0	0	0	0	0	0	0	200	903	0	0	0	0	0	0	0	603	903	0
340	5	0	0	0	0	0	0	200	300	0	0	0	0	0	0	0	200	903	0	0	0	0	0	0	0	603	903	0
340	6	0	0	0	0	0	0	200	300	0	0	0	0	0	0	0	200	903	0	0	0	0	0	0	0	603	903	0
340	7	0	0	0	0	0	0	200	300	0	0	0	0	0	0	0	200	903	0	0	0	0	0	0	0	603	903	0
340	8	0	0	0	0	0	0	200	300	0	0	0	0	0	0	0	200	903	0	0	0	0	0	0	0	603	903	0
340	9	0	0	0	0	0	0	200	300	0	0	0	0	0	0	0	200	903	0	0	0	0	0	0	0	603	903	0
341	0	0	0	0	0	0	0	200	300	0	0	0	0	0	0	0	200	903	0	0	0	0	0	0	0	603	903	0
341	1	0	0	0	0	0	0	200	300	0	0	0	0	0	0	0	200	903	0	0	0	0	0	0	0	603	903	0
341	2	0	0	0	0	0	0	200	300	0	0	0	0	0	0	0	200	903	0	0	0	0	0	0	0	603	903	0
341	3	0	0	0	0	0	0	200	300	0	0	0	0	0	0	0	200	903	0	0	0	0	0	0	0	603	903	0
341	4	0	0	0	0	0	0	200	300	0	0	0	0	0	0	0	200	903	0	0	0	0	0	0	0	603	903	0
341	5	0	0	0	0	0	0	200	300	0	0	0	0	0	0	0	200	903	0	0	0	0	0	0	0	603	903	0
341	6	0	0	0	0	0	0	200	300	0	0	0	0	0	0	0	200	903	0	0	0	0	0	0	0	603	903	0
341	7	0	0	0	0	0	0	200	300	0	0	0	0	0	0	0	200	903	0	0	0	0	0	0	0	603	903	0
341	8	0	0	0	0	0	0	200	300	0	0	0	0	0	0	0	200	903	0	0	0	0	0	0	0	603	903	0
341	9	0	0	0	0	0	0	200	300	0	0	0	0	0	0	0	200	903	0	0	0	0	0	0	0	603	903	0
342	0	0	0	0	0	0	0	200	300	0	0	0	0	0	0	0	200	903	0	0	0	0	0	0	0	603	903	0
342	1	0	0	0	0	0	0	200	300	0	0	0	0	0	0	0	200	903	0	0	0	0	0	0	0	603	903	0
342	2	0	0	0	0	0	0	200	300	0	0	0	0	0	0	0	200	903	0	0	0	0	0	0	0	603	903	0
342	3	0	0	0	0	0	0	200	300	0	0	0	0	0	0	0	200	903	0	0	0	0	0	0	0	603	903	0
342	4	0	0	0	0	0	0	200	300	0	0	0	0	0	0	0	200	903	0	0	0	0	0	0	0	603	903	0
342	5	0	0	0	0	0	0	200	300	0	0	0	0	0	0	0	200	903	0	0	0	0	0	0	0	603	903	0
342	6	0	0	0	0	0	0	200	300	0	0	0	0	0	0	0	200	903	0	0	0	0	0	0	0	603	903	0
342	7	0	0	0	0	0	0	200	300	0	0	0	0	0	0	0	200	903	0	0	0	0	0	0	0	603	903	0
342	8	0	0	0	0	0	0	200	300	0	0	0	0	0	0	0	200	903	0	0	0	0	0	0	0	603	903	0
342	9	0	0	0	0	0	0	200	300	0	0	0	0	0	0	0	200	903	0	0	0	0	0	0	0	603	903	0
343	0	0	0	0	0	0	0	200	300	0	0	0	0	0	0	0	200	903	0	0	0	0	0	0	0	603	903	0
343	1	0	0	0	0	0	0	200	300	0	0	0	0	0	0	0	200	903	0	0	0	0	0	0	0	603	903	0
343	2	0	0	0	0	0	0	200	300	0	0	0	0	0	0	0	200	903	0	0	0	0	0	0	0	603	903	0
343	3	0	0	0	0	0	0	200	300	0	0	0	0	0	0	0	200	903	0	0	0	0	0	0	0	603	903	0
343	4	0	0	0	0	0	0	200	300	0	0	0	0	0	0	0	200	903	0	0	0	0	0	0	0	603	903	0
343	5	0	0	0	0	0	0	200	300	0	0	0	0	0	0	0	200	903	0	0	0	0	0	0	0	603	903	0
343	6	0	0	0	0	0	0	200	300	0	0	0	0	0	0	0	200	903	0	0	0	0	0	0	0	603	903	0
343	7	0	0	0	0	0	0	200	300	0	0	0	0	0	0	0	200	903	0	0	0	0	0	0	0	603	903	0
343	8	0	0	0	0	0	0	200	300	0	0	0	0	0	0	0	200	903	0	0	0	0	0	0	0	603	903	0
343	9	0	0	0	0	0	0	200	300	0	0	0	0	0	0	0	200	903	0	0	0	0	0	0	0	603	903	0
344	0	0	0	0	0	0	0	200	300	0	0	0	0	0	0	0	200	903	0	0	0	0	0	0	0	603	903	0
344	1	0	0	0	0	0	0	200	300	0	0	0	0	0	0	0	200	903	0	0	0	0	0	0	0	603	903	0
344	2	0	0	0	0	0	0	200	300	0	0	0	0	0	0	0	200	903	0	0	0	0	0	0	0	603	903	0
344	3	0	0	0	0	0	0	200	300	0	0	0	0	0	0	0	200	903	0	0	0	0	0	0	0	603	903	0
344	4	0	0	0	0	0	0	200	300	0	0	0	0	0	0	0	200	903	0	0	0	0	0	0	0	603	903	0
344	5	0	0	0	0	0	0	200	300	0	0	0	0	0	0	0	200	903	0	0	0	0	0	0	0	603	903	0
344	6	0	0	0	0	0	0	200	300	0	0	0	0	0	0	0	200	903	0	0	0	0	0	0	0	603	903	0
344	7	0	0	0	0	0	0	200	300	0	0	0	0	0	0	0	200	903	0	0	0	0	0	0	0	603	903	0
344	8	0	0	0	0	0	0	200	300	0	0	0	0	0	0	0	200	903	0	0	0	0	0	0	0	603	903	0
344	9	0	0	0	0	0	0	200	300	0	0	0	0	0	0	0	200	903	0	0	0	0	0	0	0	603	903	0
345	0	0	0	0	0	0	0	200	300	0	0	0	0	0	0	0	200	903	0	0	0	0	0	0	0	603	903	0
345	1	0	0	0	0	0	0	200	300	0	0	0	0	0	0	0	200	903	0	0	0	0	0	0	0	603	903	0
345	2	0	0	0	0	0	0	200	300	0	0	0	0	0	0	0	200	903	0	0	0	0	0	0	0	603	903	0
345	3	0	0	0	0	0	0	200	300	0	0	0	0	0	0	0	200	903	0	0	0	0	0	0	0	603	903	0
345	4	0	0	0	0	0	0	200	300	0	0	0	0	0	0	0	200	903	0	0	0	0	0	0	0	603	903	0
345	5	0	0	0	0	0	0	200	300	0	0	0	0	0	0	0	200	903	0	0	0	0	0	0	0	603	903	0
345	6	0	0	0	0	0	0	200	300	0	0	0	0	0	0	0	200	903	0	0	0	0	0	0	0	603	903	0
345	7	0	0	0	0	0	0	200	300	0	0	0	0	0	0	0	200	903	0	0	0	0	0	0	0	603	903	0
345	8	0	0	0	0	0	0	200	300	0	0	0	0	0	0	0	200	903	0	0	0	0	0	0	0	603	903	0
345	9	0	0	0	0	0	0	200	300	0	0	0	0	0	0	0	200	903	0	0	0	0	0	0	0	603	903	0
346	0	0	0	0	0	0	0	200	300	0	0	0	0	0	0	0	200	903	0	0	0	0	0	0	0	603	903	0
346	1	0	0	0	0	0	0	200	300	0	0	0	0	0	0	0	200	903	0	0	0	0	0	0	0	603	903	0
346	2	0	0	0	0	0	0	200	300	0	0	0	0	0	0	0	200	903	0	0	0	0	0	0	0	603	903	0
346	3	0	0	0	0	0	0	200	300	0	0	0	0	0	0	0	200	903	0	0	0	0	0	0	0	603	903	0
346	4	0	0	0	0	0	0	200	300	0	0	0	0	0	0	0	200	903	0	0	0	0	0	0	0	603	903	0
346	5	0	0	0	0	0	0	200	300	0	0	0	0	0	0	0	200	903	0	0	0	0	0	0	0	603	903	0
346	6	0	0	0	0	0	0	200	300	0	0	0	0	0	0	0	200	903	0	0	0	0	0	0	0	603	903	0
346	7	0	0	0	0	0	0	200	300	0	0	0	0	0	0	0	200	903	0	0	0	0	0	0	0	603	903	0
346	8	0	0	0	0	0	0	200	300	0	0	0	0	0	0	0	200	903	0	0	0	0	0	0	0	603	903	0
346	9	0	0	0	0	0	0	200	300	0	0	0	0	0	0	0	200	903	0	0	0	0	0	0	0	603	903	0
347	0	0	0	0	0	0	0	200	300	0	0	0	0	0	0	0	200	903	0	0	0	0	0	0	0	603	903	0
347	1	0	0	0	0	0	0	200	300	0	0	0	0	0	0	0	200	903	0	0	0	0	0	0	0	603	903	0
347	2	0	0	0	0	0	0	200	300	0	0	0	0	0	0	0	200	903	0	0	0	0	0	0	0	603	903	0
347	3	0	0	0	0	0	0	200	300	0	0	0	0	0	0	0	200	903	0	0	0	0	0	0	0	603	903	0
347	4	0	0	0	0	0	0	200	300	0	0	0	0	0	0	0	200	903	0	0	0	0	0	0	0	603	903	0
347	5	0	0	0	0	0	0	200	300	0	0	0	0	0	0	0	200	903	0	0	0	0	0	0	0	603	903	0
347	6	0	0	0	0	0	0	200	300	0	0	0	0	0	0	0	200	903	0	0	0	0	0	0	0	603	903	0
347	7	0	0	0	0	0	0	200	300	0	0	0	0	0	0	0	200	903	0	0	0	0	0	0	0	603	903	0
347	8	0	0	0	0	0	0	200	300	0	0	0	0	0	0	0	200	903	0	0	0	0	0	0	0	603	903	0
347	9	0	0	0	0	0	0	200	300	0	0	0	0	0	0	0	200	903	0	0	0	0	0	0	0	603	903	0
348	0	0	0	0	0	0	0	200	300	0	0	0	0	0	0	0	200	903	0	0	0	0	0	0	0	603	903	0
348	1	0	0	0	0	0	0	200	300	0	0	0	0	0	0	0	200	903	0	0	0	0	0	0	0	603	903	0
348	2	0	0	0	0	0	0	200	300	0	0	0	0	0	0	0	200	903	0	0	0	0	0	0	0	603	903	0
348	3	0	0	0	0	0	0	200	300	0	0	0	0	0	0	0	200	903	0	0	0	0	0	0	0	603	903	0
348	4	0	0	0	0	0	0	200	300	0	0	0	0	0	0	0	200	903	0	0	0	0	0	0	0	603	903	0
348	5	0	0	0	0	0	0	200	300	0	0	0	0	0	0	0	200	903	0	0	0	0	0	0	0	603	903	0
348	6	0	0	0	0	0	0	200	300	0	0	0	0	0	0	0	200	903	0	0	0	0	0	0	0	603	903	0
348	7	0	0	0	0	0	0	200	300	0	0	0	0	0	0	0	200	903	0	0	0	0	0	0	0	603	903	0
348	8	0	0	0	0	0	0	200	300	0	0	0	0	0	0	0	200	903	0	0	0	0	0	0	0	603	903	0
348	9	0	0	0	0	0	0	200	300	0	0	0	0	0	0	0	200	903	0	0	0	0	0	0	0	603	903	0
349	0	0	0	0	0	0	0	200	300	0	0	0	0	0	0	0	200	903	0	0	0	0	0	0	0	603	903	0
349	1	0	0	0	0	0	0	200	300	0	0	0	0	0	0	0	200	903	0	0	0	0	0	0	0	603	903	0
349	2	0	0	0	0	0	0	200	300	0	0	0	0	0	0	0	200	903	0	0	0	0	0	0	0	603	903	0
349	3	0	0	0	0	0	0	200	300	0	0	0	0	0	0	0	200	903	0	0	0	0	0	0	0	603	903	0
349	4	0	0	0	0	0	0	200	300	0	0	0	0	0	0	0	200	903	0	0	0	0	0	0	0	603	903	0
349	5	0	0	0	0	0	0	200	300	0	0	0	0	0	0	0	200	903	0	0	0	0	0	0	0	603	903	0
349	6	0	0	0	0	0	0	200	300	0	0	0	0	0	0	0	200	903	0	0	0	0	0	0	0	603	903	0
349	7	0	0	0	0	0	0	200	300	0	0	0	0	0	0	0	200	903	0	0	0	0	0	0	0	603	903	0
349	8	0	0	0	0	0	0	200	300	0	0	0	0	0	0	0	200	903	0	0	0	0	0	0	0	603	903	0
349	9	0	0	0	0	0	0	200	300	0	0	0	0	0	0	0	200	903	0	0	0	0	0	0	0	603	903	0
350	0	0	0	0	0	0	0	200	300	0	0	0	0	0	0	0	200	903	0	0	0	0	0	0	0	603	903	0
350	1	0	0	0	0	0	0	200	300	0	0	0	0	0	0	0	200	903	0	0	0	0	0	0	0	603	903	0
350	2	0	0	0	0	0	0	200	300	0	0	0	0	0	0	0	200	903	0	0	0	0	0	0	0	603	903	0
350	3	0	0	0	0	0	0	200	300	0	0	0	0	0	0	0	200	903	0	0	0	0	0	0	0	603	903	0
350	4	0	0	0	0	0	0	200	300	0	0	0	0	0	0	0	200	903	0	0	0	0	0	0	0	603	903	0
350	5	0	0	0	0	0	0	200	300	0	0	0	0	0	0	0	200	903	0	0	0	0	0	0	0	603	903	0
350	6	0	0	0	0	0	0	200	300	0	0	0	0	0	0	0	200	903	0	0	0	0	0	0	0	603	903	0
350	7	0	0	0	0	0	0	200	300	0	0	0	0	0	0	0	200	903	0	0	0	0	0	0	0	603	903	0
350	8	0	0	0	0	0	0	200	300	0	0	0	0	0	0	0	200	903	0	0	0	0	0	0	0	603	903	0
350	9	0	0	0	0	0	0	200	300	0	0	0	0	0	0	0	200	903	0	0	0	0	0	0	0	603	903	0
351	0	0	0	0	0	0	0	200	300	0	0	0	0	0	0	0	200	903	0	0	0	0	0	0	0	603	903	0
351	1	0	0	0	0	0	0	200	300	0	0	0	0	0	0	0	200	903	0	0	0	0	0	0	0	603	903	0
351	2	0	0	0	0	0	0	200	300	0	0	0	0	0	0	0	200	903	0	0	0	0	0	0	0	603	903	0
351	3	0	0	0	0	0	0	200	300	0	0	0	0	0	0	0	200	903	0	0	0	0	0	0	0	603	903	0
351	4	0	0	0	0	0	0	200	300	0	0	0	0	0	0	0	200	903	0	0	0	0	0	0	0	603	903	0
351	5	0	0	0	0	0	0	200	300	0	0	0	0	0	0	0	200	903	0	0	0	0	0	0	0	603	903	0
351	6	0	0	0	0	0	0	200	300	0	0	0	0	0	0	0	200	903	0	0	0	0	0	0	0	603	903	0
351	7	0	0	0	0	0	0	200	300	0	0	0	0	0	0	0	200	903	0	0	0	0	0	0	0	603	903	0
351	8	0	0	0	0	0	0	200	300	0	0	0	0	0	0	0	200	903	0	0	0	0	0	0	0	603	903	0
351	9	0	0	0	0	0	0	200	300	0	0	0	0	0	0	0	200	903	0	0	0	0	0	0	0	603	903	0
352	0	0	0	0	0	0	0	200	300	0	0	0	0	0	0	0	200	903	0	0	0	0	0	0	0	603	903	0
352	1	0	0	0	0	0	0	200	300	0	0	0	0	0	0	0	200	903	0	0	0	0	0	0	0	603	903	0
352	2	0	0	0	0	0	0	200	300	0	0	0	0	0	0	0	200	903	0	0	0	0	0	0	0	603	903	0
352	3	0	0	0	0	0	0	200	300	0	0	0	0	0	0	0	200	903	0	0	0	0	0	0	0	603	903	0
352	4	0	0	0	0	0	0	200	300	0	0	0	0	0	0	0	200	903	0	0	0	0	0	0	0	603	903	0
352	5	0	0	0	0	0	0	200	300	0	0	0	0	0	0	0	200	903	0	0	0	0	0	0	0	603	903	0
352	6	0	0	0	0	0	0	200	300	0	0	0	0	0	0	0	200	903	0	0	0	0	0	0	0	603	903	0
352	7	0	0	0	0	0	0	200	300	0	0	0	0	0	0	0	200	903	0	0	0	0	0	0	0	603	903	0
352	8	0	0	0	0	0	0	200	300	0	0	0	0	0	0	0	200	903	0	0	0	0	0	0	0	603	903	0
352	9	0	0	0	0	0	0	200	300	0	0	0	0	0	0	0	200	903	0	0	0	0	0	0	0	603	903	0
353	0	0	0	0	0	0	0	200	300	0	0	0	0	0	0	0	200	903	0	0	0	0	0	0	0	603	903	0
353	1	0	0	0	0	0	0	200	300	0	0	0	0	0	0	0	200	903	0	0	0	0	0	0	0	603	903	0
353	2	0	0	0	0	0	0	200	300	0	0	0	0	0	0	0	200	903	0	0	0	0	0	0	0	603	903	0
353	3	0	0	0	0	0	0	200	300	0	0	0	0	0	0	0	200	903	0	0	0	0	0	0	0	603	903	0
353	4	0	0	0	0	0	0	200	300	0	0	0	0	0	0	0	200	903	0	0	0	0	0	0	0	603	903	0
353	5	0	0	0	0	0	0	200	300	0	0	0	0	0	0	0	200	903	0	0	0	0	0	0	0	603	903	0
353	6	0	0	0	0	0	0	200	300	0	0	0	0	0	0	0	200	903	0	0	0	0	0	0	0	603	903	0
353	7	0	0	0	0	0	0	200	300	0	0	0	0	0	0	0	200	903	0	0	0	0	0	0	0	603	903	0
353	8	0	0	0	0	0	0	200	300	0	0	0	0	0	0	0	200	903	0	0	0	0	0	0	0	603	903	0
353	9	0	0	0	0	0	0	200	300	0	0	0	0	0	0	0	200	903	0	0	0	0	0	0	0	603	903	0
354	0	0	0	0	0	0	0	200	300	0	0	0	0	0	0	0	200	903	0	0	0	0	0	0	0	603	903	0
354	1	0	0	0	0	0	0	200	300	0	0	0	0	0	0	0	200	903	0	0	0	0	0	0	0	603	903	0
354	2	0	0	0	0	0	0	200	300	0	0	0	0	0	0	0	200	903	0	0	0	0	0	0	0	603	903	0
354	3	0	0	0	0	0	0	200	300	0	0	0	0	0	0	0	200	903	0	0	0	0	0	0	0	603	903	0
354	4	0	0	0	0	0	0	200	300	0	0	0	0	0	0	0	200	903	0	0	0	0	0	0	0	603	903	0
354	5	0	0	0	0	0	0	200	300	0	0	0	0	0	0	0	200	903	0	0	0	0	0	0	0	603	903	0
354	6	0	0	0	0	0	0	200	300	0	0	0	0	0	0	0	200	903	0	0	0	0	0	0	0	603	903	0
354	7	0	0	0	0	0	0	200	300	0	0	0	0	0	0	0	200	903	0	0	0	0	0	0	0	603	903	0
354	8	0	0	0	0	0	0	200	300	0	0	0	0	0	0	0	200	903	0	0	0	0	0	0	0	603	903	0
354	9	0	0	0	0	0	0	200	300	0	0	0	0	0	0	0	200	903	0	0	0	0	0	0	0	603	903	0
355	0	0	0	0	0	0	0	200	300	0	0	0	0	0	0	0	200	903	0	0	0	0	0	0	0	603	903	0
355	1	0	0	0	0	0	0	200	300	0	0	0	0	0	0	0	200	903	0	0	0	0	0	0	0	603	903	0
355	2	0	0	0	0	0	0	200	300	0	0	0	0	0	0	0	200	903	0	0	0	0	0	0	0	603	903	0
355	3	0	0	0	0	0	0	200	300	0	0	0	0	0	0	0	200	903	0	0	0	0	0	0	0	603	903	0
355	4	0	0	0	0	0	0	200	300	0	0	0	0	0	0	0	200	903	0	0	0	0	0	0	0	603	903	0
355	5	0	0	0	0	0	0	200	300	0	0	0	0	0	0	0	200	903	0	0	0	0	0	0	0	603	903	0
355	6	0	0	0	0	0	0	200	300	0	0	0	0	0	0	0	200	903	0	0	0	0	0	0	0	603	903	0
355	7	0	0	0	0	0	0	200	300	0	0	0	0	0	0	0	200	903	0	0	0	0	0	0	0	603	903	0
355	8	0	0	0	0	0	0	200	300	0	0	0	0	0	0	0	200	903	0	0	0	0	0	0	0	603	903	0
355	9	0	0	0	0	0	0	200	300	0	0	0	0	0	0	0	200	903	0	0	0	0	0	0	0	603	903	0
356	0	0	0	0	0	0	0	200	300	0	0	0	0	0	0	0	200	903	0	0	0	0	0	0	0	603	903	0
356	1	0	0	0	0	0	0	200	300	0	0	0	0	0	0	0	200	903	0	0	0	0	0	0	0	603	903	0
356	2	0	0	0	0	0	0	200	300	0	0	0	0	0	0	0	200	903	0	0	0	0	0	0	0	603	903	0
356	3	0	0	0	0	0	0	200	300	0	0	0	0	0	0	0	200	903	0	0	0	0	0	0	0	603	903	0
356	4	0	0	0	0	0	0	200	300	0	0	0	0	0	0	0	200	903	0	0	0	0	0	0	0	603	903	0
356	5	0	0	0	0	0	0	200	300	0	0	0	0	0	0	0	200	903	0	0	0	0	0	0	0	603	903	0
356	6	0	0	0	0	0	0	200	300	0	0	0	0	0	0	0	200	903	0	0	0	0	0	0	0	603	903	0
356	7	0	0	0	0	0	0	200	300	0	0	0	0	0	0	0	200	903	0	0	0	0	0	0	0	603	903	0
356	8	0	0	0	0	0	0	200	300	0	0	0	0	0	0	0	200	903	0	0	0	0	0	0	0	603	903	0
356	9	0	0	0	0	0	0	200	300	0	0	0	0	0	0	0	200	903	0	0	0	0	0	0	0	603	903	0
357	0	0	0	0	0	0	0	200	300	0	0	0	0	0	0	0	200	903	0	0	0	0	0	0	0	603	903	0
357	1	0	0	0	0	0	0	200	300	0	0	0	0	0	0	0	200	903	0	0	0	0	0	0	0	603	903	0
357	2	0	0	0	0	0	0	200	300	0	0	0	0	0	0	0	200	903	0	0	0	0	0	0	0	603	903	0
357	3	0	0	0	0	0	0	200	300	0	0	0	0	0	0	0	200	903	0	0	0	0	0	0	0	603	903	0
357	4	0	0	0	0	0	0	200	300	0	0	0	0	0	0	0	200	903	0	0	0	0	0	0	0	603	903	0
357	5	0	0	0	0	0	0	200	300	0	0	0	0	0	0	0	200	903	0	0	0	0	0	0	0	603	903	0
357	6	0	0	0	0	0	0	200	300	0	0	0	0	0	0	0	200	903	0	0	0	0	0	0	0	603	903	0
357	7	0	0	0	0	0	0	200	300	0	0	0	0	0	0	0	200	903	0	0	0	0	0	0	0	603	903	0
357	8	0	0	0	0	0	0	200	300	0	0	0	0	0	0	0	200	903	0	0	0	0	0	0	0	603	903	0
357	9	0	0	0	0	0	0	200	300	0	0	0	0	0	0	0	200	903	0	0	0	0	0	0	0	603	903	0
358	0	0	0	0	0	0	0	200	300	0	0	0	0	0	0	0	200	903	0	0	0	0	0	0	0	603	903	0
358	1	0	0	0	0	0	0	200	300	0	0	0	0	0	0	0	200	903	0	0	0	0	0	0	0	603	903	0
358	2	0	0	0	0	0	0	200	300	0	0	0	0	0	0	0	200	903	0	0	0	0	0	0	0	603	903	0
358	3	0	0	0	0	0	0	200	300	0	0	0	0	0	0	0	200	903	0	0	0	0	0	0	0	603	903	0
358	4	0	0	0	0	0	0	200	300	0	0	0	0	0	0	0	200	903	0	0	0	0	0	0	0	603	903	0
358	5	0	0	0	0	0	0	200	300	0	0	0	0	0	0	0	200	903	0	0	0	0	0	0	0	603	903	0
358	6	0	0	0	0	0	0	200	300	0	0	0	0	0	0	0	200	903	0	0	0	0	0	0	0	603	903	0
358	7	0	0	0	0	0	0	200	300	0	0	0	0	0	0	0	200	903	0	0	0	0	0	0	0	603	903	0
358	8	0	0	0	0	0	0	200	300	0	0	0	0	0	0	0	200	903	0	0	0	0	0	0	0	603	903	0
358	9	0	0	0	0	0	0	200	300	0	0	0	0	0	0	0	200	903	0	0	0	0	0	0	0	603	903	0
359	0	0	0	0	0	0	0	200	300	0	0	0	0	0	0	0	200	903	0	0	0	0	0	0	0	603	903	0
359	1	0	0	0	0	0	0	200	300	0	0	0	0	0	0	0	200	903	0	0	0	0	0	0	0	603	903	0
359	2	0	0	0	0	0	0	200	300	0	0	0	0	0	0	0	200	903	0	0	0	0	0	0	0	603	903	0
359	3	0	0	0	0	0	0	200	300	0	0	0	0	0	0	0	200	903	0	0	0	0	0	0	0	603	903	0
359	4	0	0	0	0	0	0	200	300	0	0	0	0	0	0	0	200	903	0	0	0	0	0	0	0	603	903	0
359	5	0	0	0	0	0	0	200	300	0	0	0	0	0	0	0	200	903	0	0	0	0	0	0	0	603	903	0
359	6	0	0	0	0	0	0	200	300	0	0	0	0	0	0	0	200	903	0	0	0	0	0	0	0	603	903	0
359	7	0	0	0	0	0	0	200	300	0	0	0	0	0	0	0	200	903	0	0	0	0	0	0	0	603	903	0
359	8	0	0	0	0	0	0	200	300	0	0	0	0	0	0	0	200	903	0	0	0	0	0	0	0	603	903	0
359	9	0	0	0	0	0	0	200	300	0	0	0	0	0	0	0	200	903	0	0	0	0	0	0	0	603	903	0
360	0	0	0	0	0	0	0	200	300	0	0	0	0	0	0	0	200	903	0	0	0	0	0	0	0	603	903	0
360	1	0	0	0	0	0	0	200	300	0	0	0	0	0	0	0	200	903	0	0	0	0	0	0	0	603	903	0
360	2	0	0	0	0	0	0	200	300	0	0	0	0	0	0	0	200	903	0	0	0	0	0	0	0	603	903	0
360	3	0	0	0	0	0	0	200	300	0	0	0	0	0	0	0	200	903	0	0	0	0	0	0	0	603	903	0
360	4	0	0	0	0	0	0	200	300	0	0	0	0	0	0	0	200	903	0	0	0	0	0	0	0	603	903	0
360	5	0	0	0	0	0	0	200	300	0	0	0	0	0	0	0	200	903	0	0	0	0	0	0	0	603	903	0
360	6	0	0	0	0	0	0	200	300	0	0	0	0	0	0	0	200	903	0	0	0	0	0	0	0	603	903	0
360	7	0	0	0	0	0	0	200	300	0	0	0	0	0	0	0	200	903	0	0	0	0	0	0	0	603	903	0
360	8	0	0	0	0	0	0	200	300	0	0	0	0	0	0	0	200	903	0	0	0	0	0	0	0	603	903	0
360	9	0	0	0	0	0	0	200	300	0	0	0	0	0	0	0	200	903	0	0	0	0	0	0	0	603	903	0
361	0	0	0	0	0	0	0	200	300	0	0	0	0	0	0	0	200	903	0	0	0	0	0	0	0	603	903	0
361	1	0	0	0	0	0	0	200	300	0	0	0	0	0	0	0	200	903	0	0	0	0	0	0	0	603	903	0
361	2	0	0	0	0	0	0	200	300	0	0	0	0	0	0	0	200	903	0	0	0	0	0	0	0	603	903	0
361	3	0	0	0	0	0	0	200	300	0	0	0	0	0	0	0	200	903	0	0	0	0	0	0	0	603	903	0
361	4	0	0	0	0	0	0	200	300	0	0	0	0	0	0	0	200	903	0	0	0	0	0	0	0	603	903	0
361	5	0	0	0	0	0	0	200	300	0	0	0	0	0	0	0	200	903	0	0	0	0	0	0	0	603	903	0
361	6	0	0	0	0	0	0	200	300	0	0	0	0	0	0	0	200	903	0	0	0	0	0	0	0	603	903	0
361	7	0	0	0	0	0	0	200	300	0	0	0	0	0	0	0	200	903	0	0	0	0	0	0	0	603	903	0
361	8	0	0	0	0	0	0	200	300	0	0	0	0	0	0	0	200	903	0	0	0	0	0	0	0	603	903	0
361	9	0	0	0	0	0	0	200	300	0	0	0	0	0	0	0	200	903	0	0	0	0	0	0	0	603	903	0
362	0	0	0	0	0	0	0	200	300	0	0	0	0	0	0	0	200	903	0	0	0	0	0	0	0	603	903	0
362	1	0	0	0	0	0	0	200	300	0	0	0	0	0	0	0	200	903	0	0	0	0	0	0	0	603	903	0
362	2	0	0	0	0	0	0	200	300	0	0	0	0	0	0	0	200	903	0	0	0	0	0	0	0	603	903	0
362	3	0	0	0	0	0	0	200	300	0	0	0	0	0	0	0	200	903	0	0	0	0	0	0	0	603	903	0
362	4	0	0	0	0	0	0	200	300	0	0	0	0	0	0	0	200	903	0	0	0	0	0	0	0	603	903	0
362	5	0	0	0	0	0	0	200	300	0	0	0	0	0	0	0	200	903	0	0	0	0	0	0	0	603	903	0
362	6	0	0	0	0	0	0	200	300	0	0	0	0	0	0	0	200	903	0	0	0	0	0	0	0	603	903	0
362	7	0	0	0	0	0	0	200	300	0	0	0	0	0	0	0	200	903	0	0	0	0	0	0	0	603	903	0
362	8	0	0	0	0	0	0	200	300	0	0	0	0	0	0	0	200	903	0	0	0	0	0	0	0	603	903	0
362	9	0	0	0	0	0	0	200	300	0	0	0	0	0	0	0	200	903	0	0	0	0	0	0	0	603	903	0
363	0	0	0	0	0	0	0	200	300	0	0	0	0	0	0	0	200	903	0	0	0	0	0	0	0	603	903	0
363	1	0	0	0	0	0	0	200	300	0	0	0	0	0	0	0	200	903	0	0	0	0	0	0	0	603	903	0
363	2	0	0	0	0	0	0	200	300	0	0	0	0	0	0	0	200	903	0	0	0	0	0	0	0	603	903	0
363	3	0	0	0	0	0	0	200	300	0	0	0	0	0	0	0	200	903	0	0	0	0	0	0	0	603	903	0
363	4	0	0	0	0	0	0	200	300	0	0	0	0	0	0	0	200	903	0	0	0	0	0	0	0	603	903	0
363	5	0	0	0	0	0	0	200	300	0	0	0	0	0	0	0	200	903	0	0	0	0	0	0	0	603	903	0
363	6	0	0	0	0	0	0	200	300	0	0	0	0	0	0	0	200	903	0	0	0	0	0	0	0	603	903	0
363	7	0	0	0	0	0	0	200	300	0	0	0	0	0	0	0	200	903	0	0	0	0	0	0	0	603	903	0
363	8	0	0	0	0	0	0	200	300	0	0	0	0	0	0	0	200	903	0	0	0	0	0	0	0	603	903	0
363	9	0	0	0	0	0	0	200	300	0	0	0	0	0	0	0	200	903	0	0	0	0	0	0	0	603	903	0
364	0	0	0	0	0	0	0	200	300	0	0	0	0	0	0	0	200	903	0	0	0	0	0	0	0	603	903	0
364	1	0	0	0	0	0	0	200	300	0	0	0	0	0	0	0	200	903	0	0	0	0	0	0	0	603	903	0
364	2	0	0	0	0	0	0	200	300	0	0	0	0	0	0	0	200	903	0	0	0	0	0	0	0	603	903	0
364	3	0	0	0	0	0	0	200	300	0	0	0	0	0	0	0	200	903	0	0	0	0	0	0	0	603	903	0
364	4	0	0	0	0	0	0	200	300	0	0	0	0	0	0	0	200	903	0	0	0	0	0	0	0	603	903	0
364	5	0	0	0	0	0	0	200	300	0	0	0	0	0	0	0	200	903	0	0	0	0	0	0	0	603	903	0
364	6	0	0	0	0	0	0	200	300	0	0	0	0	0	0	0	200	903	0	0	0	0	0	0	0	603	903	0
364	7	0	0	0	0	0	0	200	300	0	0	0	0	0	0	0	200	903	0	0	0	0	0	0	0	603	903	0
364	8	0	0	0	0	0	0	200	300	0	0	0	0	0	0	0	200	903	0	0	0	0	0	0	0	603	903	0
364	9	0	0	0	0	0	0	200	300	0	0	0	0	0	0	0	200	903	0	0	0	0	0	0	0	603	903	0
365	0	0	0	0	0	0	0	200	300	0	0	0	0	0	0	0	200	903	0	0	0	0	0	0	0	603	903	0
365	1	0	0	0	0	0	0	200	300	0	0	0	0	0	0	0	200	903	0	0	0	0	0	0	0	603	903	0
365	2	0	0	0	0	0	0	200	300	0	0	0	0	0	0	0	200	903	0	0	0	0	0	0	0	603	903	0
365	3	0	0	0	0	0	0	200	300	0	0	0	0	0	0	0	200	903	0	0	0	0	0	0	0	603	903	0
365	4	0	0	0	0	0	0	200	300	0	0	0	0	0	0	0	200	903	0	0	0	0	0	0	0	603	903	0
365	5	0	0	0	0	0	0	200	300	0	0	0	0	0	0	0	200	903	0	0	0	0	0	0	0	603	903	0
365	6	0	0	0	0	0	0	200	300	0	0	0	0	0	0	0	200	903	0	0	0	0	0	0	0	603	903	0
365	7	0	0	0	0	0	0	200	300	0	0	0	0	0	0	0	200	903	0	0	0	0	0	0	0	603	903	0
365	8	0	0	0	0	0	0	200	300	0	0	0	0	0	0	0	200	903	0	0	0	0	0	0	0	603	903	0
365	9	0	0	0	0	0	0	200	300	0	0	0	0	0	0	0	200	903	0	0	0	0	0	0	0	603	903	0
366	0	0	0	0	0	0	0	200	300	0	0	0	0	0	0	0	200	903	0	0	0	0	0	0	0	603	903	0
366	1	0	0	0	0	0	0	200	300	0	0	0	0	0	0	0	200	903	0	0	0	0	0	0	0	603	903	0
366	2	0	0	0	0	0	0	200	300	0	0	0	0	0	0	0	200	903	0	0	0	0	0	0	0	603	903	0
366	3	0	0	0	0	0	0	200	300	0	0	0	0	0	0	0	200	903	0	0	0	0	0	0	0	603	903	0
366	4	0	0	0	0	0	0	200	300	0	0	0	0	0	0	0	200	903	0	0	0	0	0	0	0	603	903	0
366	5	0	0	0	0	0	0	200	300	0	0	0	0	0	0	0	200	903	0	0	0	0	0	0	0	603	903	0
366	6	0	0	0	0	0	0	200	300	0	0	0	0	0	0	0	200	903	0	0	0	0	0	0	0	603	903	0
366	7	0	0	0	0	0	0	200	300	0	0	0	0	0	0	0	200	903	0	0	0	0	0	0	0	603	903	0
366	8	0	0	0	0	0	0	200	300	0	0	0	0	0	0	0	200	903	0	0	0	0	0	0	0	603	903	0
366	9	0	0	0	0	0	0	200	300	0	0	0	0	0	0	0	200	903	0	0	0	0	0	0	0	603	903	0
367	0	0	0	0	0	0	0	200	300	0	0	0	0	0	0	0	200	903	0	0	0	0	0	0	0	603	903	0
367	1	0	0	0	0	0	0	200	300	0	0	0	0	0	0	0	200	903	0	0	0	0	0	0	0	603	903	0
367	2	0	0	0	0	0	0	200	300	0	0	0	0	0	0	0	200	903	0	0	0	0	0	0	0	603	903	0
367	3	0	0	0	0	0	0	200	300	0	0	0	0	0	0	0	200	903	0	0	0	0	0	0	0	603	903	0
367	4	0	0	0	0	0	0	200	300	0	0	0	0	0	0	0	200	903	0	0	0	0	0	0	0	603	903	0
367	5	0	0	0	0	0	0	200	300	0	0	0	0	0	0	0	200	903	0	0	0	0	0	0	0	603	903	0
367	6	0	0	0	0	0	0	200	300	0	0	0	0	0	0	0	200	903	0	0	0	0	0	0	0	603	903	0
367	7	0	0	0	0	0	0	200	300	0	0	0	0	0	0	0	200	903	0	0	0	0	0	0	0	603	903	0
367	8	0	0	0	0	0	0	200	300	0	0	0	0	0	0	0	200	903	0	0	0	0	0	0	0	603	903	0
367	9	0	0	0	0	0	0	200	300	0	0	0	0	0	0	0	200	903	0	0	0	0	0	0	0	603	903	0
368	0	0	0	0	0	0	0	200	300	0	0	0	0	0	0	0	200	903	0	0	0	0	0	0	0	603	903	0
368	1	0	0	0	0	0	0	200	300	0	0	0	0	0	0	0	200	903	0	0	0	0	0	0	0	603	903	0
368	2	0	0	0	0	0	0	200	300	0	0	0	0	0	0	0	200	903	0	0	0	0	0	0	0	603	903	0
368	3	0	0	0	0	0	0	200	300	0	0	0	0	0	0	0	200	903	0	0	0	0	0	0	0	603	903	0
368	4	0	0	0	0	0	0	200	300	0	0	0	0	0	0	0	200	903	0	0	0	0	0	0	0	603	903	0
368	5	0	0	0	0	0	0	200	300	0	0	0	0	0	0	0	200	903	0	0	0	0	0	0	0	603	903	0
368	6	0	0	0	0	0	0	200	300	0	0	0	0	0	0	0	200	903	0	0	0	0	0	0	0	603	903	0
368	7	0	0	0	0	0	0	200	300	0	0	0	0	0	0	0	200	903	0	0	0	0	0	0	0	603	903	0
368	8	0	0	0	0	0	0	200	300	0	0	0	0	0	0	0	200	903	0	0	0	0	0	0	0	603	903	0
368	9	0	0	0	0	0	0	200	300	0	0	0	0	0	0	0	200	903	0	0	0	0	0	0	0	603	903	0
369	0	0	0	0	0	0	0	200	300	0	0	0	0	0	0	0	200	903	0	0	0	0	0	0	0	603	903	0
369	1	0	0	0	0	0	0	200	300	0	0	0	0	0	0	0	200	903	0	0	0	0	0	0	0	603	903	0
369	2	0	0	0	0	0	0	200	300	0	0	0	0	0	0	0	200	903	0	0	0	0	0	0	0	603	903	0
369	3	0	0	0	0	0	0	200	300	0	0	0	0	0	0	0	200	903	0	0	0	0	0	0	0	603	903	0
369	4	0	0	0	0	0	0	200	300	0	0	0	0	0	0	0	200	903	0	0	0	0	0	0	0	603	903	0
369	5	0	0	0	0	0	0	200	300	0	0	0	0	0	0	0	200	903	0	0	0	0	0	0	0	603	903	0
369	6	0	0	0	0	0	0	200	300	0	0	0	0	0	0	0	200	903	0	0	0	0	0	0	0	603	903	0
369	7	0	0	0	0	0	0	200	300	0	0	0	0	0	0	0	200	903	0	0	0	0	0	0	0	603	903	0
369	8	0	0	0	0	0	0	200	300	0	0	0	0	0	0	0	200	903	0	0	0	0	0	0	0	603	903	0
369	9	0	0	0	0	0	0	200	300	0	0	0	0	0	0	0	200	903	0	0	0	0	0	0	0	603	903	0
370	0	0	0	0	0	0	0	200	300	0	0	0	0	0	0	0	200	903	0	0	0	0	0	0	0	603	903	0
370	1	0	0	0	0	0	0	200	300	0	0	0	0	0	0	0	200	903	0	0	0	0	0	0	0	603	903	0
370	2	0	0	0	0	0	0	200	300	0	0	0	0	0	0	0	200	903	0	0	0	0	0	0	0	603	903	0
370	3	0	0	0	0	0	0	200	300	0	0	0	0	0	0	0	200	903	0	0	0	0	0	0	0	603	903	0
370	4	0	0	0	0	0	0	200	300	0	0	0	0	0	0	0	200	903	0	0	0	0	0	0	0	603	903	0
370	5	0	0	0	0	0	0	200	300	0	0	0	0	0	0	0	200	903	0	0	0	0	0	0	0	603	903	0
370	6	0	0	0	0	0	0	200	300	0	0	0	0	0	0	0	200	903	0	0	0	0	0	0	0	603	903	0
370	7	0	0	0	0	0	0	200	300	0	0	0	0	0	0	0	200	903	0	0	0	0	0	0	0	603	903	0
370	8	0	0	0	0	0	0	200	300	0	0	0	0	0	0	0	200	903	0	0	0	0	0	0	0	603	903	0
370	9	0	0	0	0	0	0	200	300	0	0	0	0	0	0	0	200	903	0	0	0	0	0	0	0	603	903	0
371	0	0	0	0	0	0	0	200	300	0	0	0	0	0	0	0	200	903	0	0	0	0	0	0	0	603	903	0
371	1	0	0	0	0	0	0	200	300	0	0	0	0	0	0	0	200	903	0	0	0	0	0	0	0	603	903	0
371	2	0	0	0	0	0	0	200	300	0	0	0	0	0	0	0	200	903	0	0	0	0	0	0	0	603	903	0
371	3	0	0	0	0	0	0	200	300	0	0	0	0	0	0	0	200	903	0	0	0	0	0	0	0	603	903	0
371	4	0	0	0	0	0	0	200	300	0	0	0	0	0	0	0	200	903	0	0	0	0	0	0	0	603	903	0
371	5	0	0	0	0	0	0	200	300	0	0	0	0	0	0	0	200	903	0	0	0	0	0	0	0	603	903	0
371	6	0	0	0	0	0	0	200	300	0	0	0	0	0	0	0	200	903	0	0	0	0	0	0	0	603	903	0
371	7	0	0	0	0	0	0	200	300	0	0	0	0	0	0	0	200	903	0	0	0	0	0	0	0	603	903	0
371	8	0	0	0	0	0	0	200	300	0	0	0	0	0	0	0	200	903	0	0	0	0	0	0	0	603	903	0
371	9	0	0	0	0	0	0	200	300	0	0	0	0	0	0	0	200	903	0	0	0	0	0	0	0	603	903	0
372	0	0	0	0	0	0	0	200	300	0	0	0	0	0	0	0	200	903	0	0	0	0	0	0	0	603	903	0
372	1	0	0	0	0	0	0	200	300	0	0	0	0	0	0	0	200	903	0	0	0	0	0	0	0	603	903	0
372	2	0	0	0	0	0	0	200	300	0	0	0	0	0	0	0	200	903	0	0	0	0	0	0	0	603	903	0
372	3	0	0	0	0	0	0	200	300	0	0	0	0	0	0	0	200	903	0	0	0	0	0	0	0	603	903	0
372	4	0	0	0	0	0	0	200	300	0	0	0	0	0	0	0	200	903	0	0	0	0	0	0	0	603	903	0
372	5	0	0	0	0	0	0	200	300	0	0	0	0	0	0	0	200	903	0	0	0	0	0	0	0	603	903	0
372	6	0	0	0	0	0	0	200	300	0	0	0	0	0	0	0	200	903	0	0	0	0	0	0	0	603	903	0
372	7	0	0	0	0	0	0	200	300	0	0	0	0	0	0	0	200	903	0	0	0	0	0	0	0	603	903	0
372	8	0	0	0	0	0	0	200	300	0	0	0	0	0	0	0	200	903	0	0	0	0	0	0	0	603	903	0
372	9	0	0	0	0	0	0	200	300	0	0	0	0	0	0	0	200	903	0	0	0	0	0	0	0	603	903	0
373	0	0	0	0	0	0	0	200	300	0	0	0	0	0	0	0	200	903	0	0	0	0	0	0	0	603	903	0
373	1	0	0	0	0	0	0	200	300	0	0	0	0	0	0	0	200	903	0	0	0	0	0	0	0	603	903	0
373	2	0	0	0	0	0	0	200	300	0	0	0	0	0	0	0	200	903	0	0	0	0	0	0	0	603	903	0
373	3	0	0	0	0	0	0	200	300	0	0	0	0	0	0	0	200	903	0	0	0	0	0	0	0	603	903	0
373	4	0	0	0	0	0	0	200	300	0	0	0	0	0	0	0	200	903	0	0	0	0	0	0	0	603	903	0
373	5	0	0	0	0	0	0	200	300	0	0	0	0	0	0	0	200	903	0	0	0	0	0	0	0	603	903	0
373	6	0	0	0	0	0	0	200	300	0	0	0	0	0	0	0	200	903	0	0	0	0	0	0	0	603	903	0
373	7	0	0	0	0	0	0	200	300	0	0	0	0	0	0	0	200	903	0	0	0	0	0	0	0	603	903	0
373	8	0	0	0	0	0	0	200	300	0	0	0	0	0	0	0	200	903	0	0	0	0	0	0	0	603	903	0
373	9	0	0	0	0	0	0	200	300	0	0	0	0	0	0	0	200	903	0	0	0	0	0	0	0	603	903	0
374	0	0	0	0	0	0	0	200	300	0	0	0	0	0	0	0	200	903	0	0	0	0	0	0	0	603	903	0
374	1	0	0	0	0	0	0	200	300	0	0	0	0	0	0	0	200	903	0	0	0	0	0	0	0	603	903	0
374	2	0	0	0	0	0	0	200	300	0	0	0	0	0	0	0	200	903	0	0	0	0	0	0	0	603	903	0
374	3	0	0	0	0	0	0	200	300	0	0	0	0	0	0	0	200	903	0	0	0	0	0	0	0	603	903	0
374	4	0	0	0	0	0	0	200	300	0	0	0	0	0	0	0	200	903	0	0	0	0	0	0	0	603	903	0
374	5	0	0	0	0	0	0	200	300	0	0	0	0	0	0	0	200	903	0	0	0	0	0	0	0	603	903	0
374	6	0	0	0	0	0	0	200	300	0	0	0	0	0	0	0	200	903	0	0	0	0	0	0	0	603	903	0
374	7	0	0	0	0	0	0	200	300	0	0	0	0	0	0	0	200	903	0	0	0	0	0	0	0	603	903	0
374	8	0	0	0	0	0	0	200	300	0	0	0	0	0	0	0	200	903	0	0	0	0	0	0	0	603	903	0
374	9	0	0	0	0	0	0	200	300	0	0	0	0	0	0	0	200	903	0	0	0	0	0	0	0	603	903	0
375	0	0	0	0	0	0	0	200	300	0	0	0	0	0	0	0	200	903	0	0	0	0	0	0	0	603	903	0
375	1	0	0	0	0	0	0	200	300	0	0	0	0	0	0	0	200	903	0	0	0	0	0	0	0	603	903	0
375	2	0	0	0	0	0	0	200	300	0	0	0	0	0	0	0	200	903	0	0	0	0	0	0	0	603	903	0
375	3	0	0	0	0	0	0	200	300	0	0	0	0	0	0	0	200	903	0	0	0	0	0	0	0	603	903	0
375	4	0	0	0	0	0	0	200	300	0	0	0	0	0	0	0	200	903	0	0	0	0	0	0	0	603	903	0
375	5	0	0	0	0	0	0	200	300	0	0	0	0	0	0	0	200	903	0	0	0	0	0	0	0	603	903	0
375	6	0	0	0	0	0	0	200	300	0	0	0	0	0	0	0	200	903	0	0	0	0	0	0	0	603	903	0
375	7	0	0	0	0	0	0	200	300	0	0	0	0	0	0	0	200	903	0	0	0	0	0	0	0	603	903	0
375	8	0	0	0	0	0	0	200	300	0	0	0	0	0	0	0	200	903	0	0	0	0	0	0	0	603	903	0
375	9	0	0	0	0	0	0	200	300	0	0	0	0	0	0	0	200	903	0	0	0	0	0	0	0	603	903	0
376	0	0	0	0	0	0	0	200	300	0	0	0	0	0	0	0	200	903	0	0	0	0	0	0	0	603	903	0
376	1	0	0	0	0	0	0	200	300	0	0	0	0	0	0	0	200	903	0	0	0	0	0	0	0	603	903	0
376	2	0	0	0	0	0	0	200	300	0	0	0	0	0	0	0	200	903	0	0	0	0	0	0	0	603	903	0
376	3	0	0	0	0	0	0	200	300	0	0	0	0	0	0	0	200	903	0	0	0	0	0	0	0	603	903	0
376	4	0	0	0	0	0	0	200	300	0	0	0	0	0	0	0	200	903	0	0	0	0	0	0	0	603	903	0
376	5	0	0	0	0	0	0	200	300	0	0	0	0	0	0	0	200	903	0	0	0	0	0	0	0	603	903	0
376	6	0	0	0	0	0	0	200	300	0	0	0	0	0	0	0	200	903	0	0	0	0	0	0	0	603	903	0
376	7	0	0	0	0	0	0	200	300	0	0	0	0	0	0	0	200	903	0	0	0	0	0	0	0	603	903	0
376	8	0	0	0	0	0	0	200	300	0	0	0	0	0	0	0	200	903	0	0	0	0	0	0	0	603	903	0
376	9	0	0	0	0	0	0	200	300	0	0	0	0	0	0	0	200	903	0	0	0	0	0	0	0	603	903	0
377	0	0	0	0	0	0	0	200	300	0	0	0	0	0	0	0	200	903	0	0	0	0	0	0	0	603	903	0
377	1	0	0	0	0	0	0	200	300	0	0	0	0	0	0	0	200	903	0	0	0	0	0	0	0	603	903	0
377	2	0	0	0	0	0	0	200	300	0	0	0	0	0	0	0	200	903	0	0	0	0	0	0	0	603	903	0
377	3	0	0	0	0	0	0	200	300	0	0	0	0	0	0	0	200	903	0	0	0	0	0	0	0	603	903	0
377	4	0	0	0	0	0	0	200	300	0	0	0	0	0	0	0	200	903	0	0	0	0	0	0	0	603	903	0
377	5	0	0	0	0	0	0	200	300	0	0	0	0	0	0	0	200	903	0	0	0	0	0	0	0	603	903	0
377	6	0	0	0	0	0	0	200	300	0	0	0	0	0	0	0	200	903	0	0	0	0	0	0	0	603	903	0
377	7	0	0	0	0	0	0	200	300	0	0	0	0	0	0	0	200	903	0	0	0	0	0	0	0	603	903	0
377	8	0	0	0	0	0	0	200	300	0	0	0	0	0	0	0	200	903	0	0	0	0	0	0	0	603	903	0
377	9	0	0	0	0	0	0	200	300	0	0	0	0	0	0	0	200	903	0	0	0	0	0	0	0	603	903	0
378	0	0	0	0	0	0	0	200	300	0	0	0	0	0	0	0	200	903	0	0	0	0	0	0	0	603	903	0
378	1	0	0	0	0	0	0	200	300	0	0	0	0	0	0	0	200	903	0	0	0	0	0	0	0	603	903	0
378	2	0	0	0	0	0	0	200	300	0	0	0	0	0	0	0	200	903	0	0	0	0	0	0	0	603	903	0
378	3	0	0	0	0	0	0	200	300	0	0	0	0	0	0	0	200	903	0	0	0	0	0	0	0	603	903	0
378	4	0	0	0	0	0	0	200	300	0	0	0	0	0	0	0	200	903	0	0	0	0	0	0	0	603	903	0
378	5	0	0	0	0	0	0	200	300	0	0	0	0	0	0	0	200	903	0	0	0	0	0	0	0	603	903	0
378	6	0	0	0	0	0	0	200	300	0	0	0	0	0	0	0	200	903	0	0	0	0	0	0	0	603	903	0
378	7	0	0	0	0	0	0	200	300	0	0	0	0	0	0	0	200	903	0	0	0	0	0	0	0	603	903	0
378	8	0	0	0	0	0	0	200	300	0	0	0	0	0	0	0	200	903	0	0	0	0	0	0	0	603	903	0
378	9	0	0	0	0	0	0	200	300	0	0	0	0	0	0	0	200	903	0	0	0	0	0	0	0	603	903	0
379	0	0	0	0	0	0	0	200	300	0	0	0	0	0	0	0	200	903	0	0	0	0	0	0	0	603	903	0
379	1	0	0	0	0	0	0	200	300	0	0	0	0	0	0	0	200	903	0	0	0	0	0	0	0	603	903	0
379	2	0	0	0	0	0	0	200	300	0	0	0	0	0	0	0	200	903	0	0	0	0	0	0	0	603	903	0
379	3	0	0	0	0	0	0	200	300	0	0	0	0	0	0	0	200	903	0	0	0	0	0	0	0	603	903	0
379	4	0	0	0	0	0	0	200	300	0	0	0	0	0	0	0	200	903	0	0	0	0	0	0	0	603	903	0
379	5	0	0	0	0	0	0	200	300	0	0	0	0	0	0	0	200	903	0	0	0	0	0	0	0	603	903	0
379	6	0	0	0	0	0	0	200	300	0	0	0	0	0	0	0	200	903	0	0	0	0	0	0	0	603	903	0
379	7	0	0	0	0	0	0	200	300	0	0	0	0	0	0	0	200	903	0	0	0	0	0	0	0	603	903	0
379	8	0	0	0	0	0	0	200	300	0	0	0	0	0	0	0	200	903	0	0	0	0	0	0	0	603	903	0
379	9	0	0	0	0	0	0	200	300	0	0	0	0	0	0	0	200	903	0	0	0	0	0	0	0	603	903	0
380	0	0	0	0	0	0	0	200	300	0	0	0	0	0	0	0	200	903	0	0	0	0	0	0	0	603	903	0
380	1	0	0	0	0	0	0	200	300	0	0	0	0	0	0	0	200	903	0	0	0	0	0	0	0	603	903	0
380	2	0	0	0	0	0	0	200	300	0	0	0	0	0	0	0	200	903	0	0	0	0	0	0	0	603	903	0
380	3	0	0	0	0	0	0	200	300	0	0	0	0	0	0	0	200	903	0	0	0	0	0	0	0	603	903	0
380	4	0	0	0	0	0	0	200	300	0	0	0	0	0	0	0	200	903	0	0	0	0	0	0	0	603	903	0
380	5	0	0	0	0	0	0	200	300	0	0	0	0	0	0	0	200	903	0	0	0	0	0	0	0	603	903	0
380	6	0	0	0	0	0	0	200	300	0	0	0	0	0	0	0	200	903	0	0	0	0	0	0	0	603	903	0
380	7	0	0	0	0	0	0	200	300	0	0	0	0	0	0	0	200	903	0	0	0	0	0	0	0	603	903	0
380	8	0	0	0	0	0	0	200	300	0	0	0	0	0	0	0	200	903	0	0	0	0	0	0	0	603	903	0
380	9	0	0	0	0	0	0	200	300	0	0	0	0	0	0	0	200	903	0	0	0	0	0	0	0	603	903	0
381	0	0	0	0	0	0	0	200	300	0	0	0	0	0	0	0	200	903	0	0	0	0	0	0	0	603	903	0
381	1	0	0	0	0	0	0	200	300	0	0	0	0	0	0	0	200	903	0	0	0	0	0	0	0	603	903	0
381	2	0	0	0	0	0	0	200	300	0	0	0	0	0	0	0	200	903	0	0	0	0	0	0	0	603	903	0
381	3	0	0	0	0	0	0	200	300	0	0	0	0	0	0	0	200	903	0	0	0	0	0	0	0	603	903	0
381	4	0	0	0	0	0	0	200	300	0	0	0	0	0	0	0	200	903	0	0	0	0	0	0	0	603	903	0
381	5	0	0	0	0	0	0	200	300	0	0	0	0	0	0	0	200	903	0	0	0	0	0	0	0	603	903	0
381	6	0	0	0	0	0	0	200	300	0	0	0	0	0	0	0	200	903	0	0	0	0	0	0	0	603	903	0
381	7	0	0	0	0	0	0	200	300	0	0	0	0	0	0	0	200	903	0	0	0	0	0	0	0	603	903	0
381	8	0	0	0	0	0	0	200	300	0	0	0	0	0	0	0	200	903	0	0	0	0	0	0	0	603	903	0
381	9	0	0	0	0	0	0	200	300	0	0	0	0	0	0	0	200	903	0	0	0	0	0	0	0	603	903	0
382	0	0	0	0	0	0	0	200	300	0	0	0	0	0	0	0	200	903	0	0	0	0	0	0	0	603	903	0
382	1	0	0	0	0	0	0	200	300	0	0	0	0	0	0	0	200	903	0	0	0	0	0	0	0	603	903	0
382	2	0	0	0	0	0	0	200	300	0	0	0	0	0	0	0	200	903	0	0	0	0	0	0	0	603	903	0
382	3	0	0	0	0	0	0	200	300	0	0	0	0	0	0	0	200	903	0	0	0	0	0	0	0	603	903	0
382	4	0	0	0	0	0	0	200	300	0	0	0	0	0	0	0	200	903	0	0	0	0	0	0	0	603	903	0
382	5	0	0	0	0	0	0	200	300	0	0	0	0	0	0	0	200	903	0	0	0	0	0	0	0	603	903	0
382	6	0	0	0	0	0	0	200	300	0	0	0	0	0	0	0	200	903	0	0	0	0	0	0	0	603	903	0
382	7	0	0	0	0	0	0	200	300	0	0	0	0	0	0	0	200	903	0	0	0	0	0	0	0	603	903	0
382	8	0	0	0	0	0	0	200	300	0	0	0	0	0	0	0	200	903	0	0	0	0	0	0	0	603	903	0
382	9	0	0	0	0	0	0	200	300	0	0	0	0	0	0	0	200	903	0	0	0	0	0	0	0	603	903	0
383	0	0	0	0	0	0	0	200	300	0	0	0	0	0	0	0	200	903	0	0	0	0	0	0	0	603	903	0
383	1	0	0	0	0	0	0	200	300	0	0	0	0	0	0	0	200	903	0	0	0	0	0	0	0	603	903	0
383	2	0	0	0	0	0	0	200	300	0	0	0	0	0	0	0	200	903	0	0	0	0	0	0	0	603	903	0
383	3	0	0	0	0	0	0	200	300	0	0	0	0	0	0	0	200	903	0	0	0	0	0	0	0	603	903	0
383	4	0	0	0	0	0	0	200	300	0	0	0	0	0	0	0	200	903	0	0	0	0	0	0	0	603	903	0
383	5	0	0	0	0	0	0	200	300	0	0	0	0	0	0	0	200	903	0	0	0	0	0	0	0	603	903	0
383	6	0	0	0	0	0	0	200	300	0	0	0	0	0	0	0	200	903	0	0	0	0	0	0	0	603	903	0
383	7	0	0	0	0	0	0	200	300	0	0	0	0	0	0	0	200	903	0	0	0	0	0	0	0	603	903	0
383	8	0	0	0	0	0	0	200	300	0	0	0	0	0	0	0	200	903	0	0	0	0	0	0	0	603	903	0
383	9	0	0	0	0	0	0	200	300	0	0	0	0	0	0	0	200	903	0	0	0	0	0	0	0	603	903	0
384	0	0	0	0	0	0	0	200	300	0	0	0	0	0	0	0	200	903	0	0	0	0	0	0	0	603	903	0
384	1	0	0	0	0	0	0	200	300	0	0	0	0	0	0	0	200	903	0	0	0	0	0	0	0	603	903	0
384	2	0	0	0	0	0	0	200	300	0	0	0	0	0	0	0	200	903	0	0	0	0	0	0	0	603	903	0
384	3	0	0	0	0	0	0	200	300	0	0	0	0	0	0	0	200	903	0	0	0	0	0	0	0	603	903	0
384	4	0	0	0	0	0	0	200	300	0	0	0	0	0	0	0	200	903	0	0	0	0	0	0	0	603	903	0
384	5	0	0	0	0	0	0	200	300	0	0	0	0	0	0	0	200	903	0	0	0	0	0	0	0	603	903	0
384	6	0	0	0	0	0	0	200	300	0	0	0	0	0	0	0	200	903	0	0	0	0	0	0	0	603	903	0
384	7	0	0	0	0	0	0	200	300	0	0	0	0	0	0	0	200	903	0	0	0	0	0	0	0	603	903	0
384	8	0	0	0	0	0	0	200	300	0	0	0	0	0	0	0	200	903	0	0	0	0	0	0	0	603	903	0
384	9	0	0	0	0	0	0	200	300	0	0	0	0	0	0	0	200	903	0	0	0	0	0	0	0	603	903	0
385	0	0	0	0	0	0	0	200	300	0	0	0	0	0	0	0	200	903	0	0	0	0	0	0	0	603	903	0
385	1	0	0	0	0	0	0	200	300	0	0	0	0	0	0	0	200	903	0	0	0	0	0	0	0	603	903	0
385	2	0	0	0	0	0	0	200	300	0	0	0	0	0	0	0	200	903	0	0	0	0	0	0	0	603	903	0
385	3	0	0	0	0	0	0	200	300	0	0	0	0	0	0	0	200	903	0	0	0	0	0	0	0	603	903	0
385	4	0	0	0	0	0	0	200	300	0	0	0	0	0	0	0	200	903	0	0	0	0	0	0	0	603	903	0
385	5	0	0	0	0	0	0	200	300	0	0	0	0	0	0	0	200	903	0	0	0	0	0	0	0	603	903	0
385	6	0	0	0	0	0	0	200	300	0	0	0	0	0	0	0	200	903	0	0	0	0	0	0	0	603	903	0
385	7	0	0	0	0	0	0	200	300	0	0	0	0	0	0	0	200	903	0	0	0	0	0	0	0	603	903	0
385	8	0	0	0	0	0	0	200	300	0	0	0	0	0	0	0	200	903	0	0	0	0	0	0	0	603	903	0
385	9	0	0	0	0	0	0	200	300	0	0	0	0	0	0	0	200	903	0	0	0	0	0	0	0	603	903	0
386	0	0	0	0	0	0	0	200	300	0	0	0	0	0	0	0	200	903	0	0	0	0	0	0	0	603	903	0
386	1	0	0	0	0	0	0	200	300	0	0	0	0	0	0	0	200	903	0	0	0	0	0	0	0	603	903	0
386	2	0	0	0	0	0	0	200	300	0	0	0	0	0	0	0	200	903	0	0	0	0	0	0	0	603	903	0
386	3	0	0	0	0	0	0	200	300	0	0	0	0	0	0	0	200	903	0	0	0	0	0	0	0	603	903	0
386	4	0	0	0	0	0	0	200	300	0	0	0	0	0	0	0	200	903	0	0	0	0	0	0	0	603	903	0
386	5	0	0	0	0	0	0	200	300	0	0	0	0	0	0	0	200	903	0	0	0	0	0	0	0	603	903	0
386	6	0	0	0	0	0	0	200	300	0	0	0	0	0	0	0	200	903	0	0	0	0	0	0	0	603	903	0
386	7	0	0	0	0	0	0	200	300	0	0	0	0	0	0	0	200	903	0	0	0	0	0	0	0	603	903	0
386	8	0	0	0	0	0	0	200	300	0	0	0	0	0	0	0	200	903	0	0	0	0	0	0	0	603	903	0
386	9	0	0	0	0	0	0	200	300	0	0	0	0	0	0	0	200	903	0	0	0	0	0	0	0	603	903	0
387	0	0	0	0	0	0	0	200	300	0	0	0	0	0	0	0	200	903	0	0	0	0	0	0	0	603	903	0
387	1	0	0	0	0	0	0	200	300	0	0	0	0	0	0	0	200	903	0	0	0	0	0	0	0	603	903	0
387	2	0	0	0	0	0	0	200	300	0	0	0	0	0	0	0	200	903	0	0	0	0	0	0	0	603	903	0
387	3	0	0	0	0	0	0	200	300	0	0	0	0	0	0	0	200	903	0	0	0	0	0	0	0	603	903	0
387	4	0	0	0	0	0	0	200	300	0	0	0	0	0	0	0	200	903	0	0	0	0	0	0	0	603	903	0
387	5	0	0	0	0	0	0	200	300	0	0	0	0	0	0	0	200	903	0	0	0	0	0	0	0	603	903	0
387	6	0	0	0	0	0	0	200	300	0	0	0	0	0	0	0	200	903	0	0	0	0	0	0	0	603	903	0
387	7	0	0	0	0	0	0	200	300	0	0	0	0	0	0	0	200	903	0	0	0	0	0	0	0	603	903	0
387	8	0	0	0	0	0	0	200	300	0	0	0	0	0	0	0	200	903	0	0	0	0	0	0	0	603	903	0
387	9	0	0	0	0	0	0	200	300	0	0	0	0	0	0	0	200	903	0	0	0	0	0	0	0	603	903	0
388	0	0	0	0	0	0	0	200	300	0	0	0	0	0	0	0	200	903	0	0	0	0	0	0	0	603	903	0
388	1	0	0	0	0	0	0	200	300	0	0	0	0	0	0	0	200	903	0	0	0	0	0	0	0	603	903	0
388	2	0	0	0	0	0	0	200	300	0	0	0	0	0	0	0	200	903	0	0	0	0	0	0	0	603	903	0
388	3	0	0	0	0	0	0	200	300	0	0	0	0	0	0	0	200	903	0	0	0	0	0	0	0	603	903	0
388	4	0	0	0	0	0	0	200	300	0	0	0	0	0	0	0	200	903	0	0	0	0	0	0	0	603	903	0
388	5	0	0	0	0	0	0	200	300	0	0	0	0	0	0	0	200	903	0	0	0	0	0	0	0	603	903	0
388	6	0	0	0	0	0	0	200	300	0	0	0	0	0	0	0	200	903	0	0	0	0	0	0	0	603	903	0
388	7	0	0	0	0	0	0	200	300	0	0	0	0	0	0	0	200	903	0	0	0	0	0	0	0	603	903	0
388	8	0	0	0	0	0	0	200	300	0	0	0	0	0	0	0	200	903	0	0	0	0	0	0	0	603	903	0
388	9	0	0	0	0	0	0	200	300	0	0	0	0	0	0	0	200	903	0	0	0	0	0	0	0	603	903	0
389	0	0	0	0	0	0	0	200	300	0	0	0	0	0	0	0	200	903	0	0	0	0	0	0	0	603	903	0
389	1	0	0	0	0	0	0	200	300	0	0	0	0	0	0	0	200	903	0	0	0	0	0	0	0	603	903	0
389	2	0	0	0	0	0	0	200	300	0	0	0	0	0	0	0	200	903	0	0	0	0	0	0	0	603	903	0
389	3	0	0	0	0	0	0	200	300	0	0	0	0	0	0	0	200	903	0	0	0	0	0	0	0	603	903	0
389	4	0	0	0	0	0	0	200	300	0	0	0	0	0	0	0	200	903	0	0	0	0	0	0	0	603	903	0
389	5	0	0	0	0	0	0	200	300	0	0	0	0	0	0	0	200	903	0	0	0	0	0	0	0	603	903	0
389	6	0	0	0	0	0	0	200	300	0	0	0	0	0	0	0	200	903	0	0	0	0	0	0	0	603	903	0
389	7	0	0	0	0	0	0	200	300	0	0	0	0	0	0	0	200	903	0	0	0	0	0	0	0	603	903	0
389	8	0	0	0	0	0	0	200	300	0	0	0	0	0	0	0	200	903	0	0	0	0	0	0	0	603	903	0
389	9	0	0	0	0	0	0	200	300	0	0	0	0	0	0	0	200	903	0	0	0	0	0	0	0	603	903	0
390	0	0	0	0	0	0	0	200	300	0	0	0	0	0	0	0	200	903	0	0	0	0	0	0	0	603	903	0
390	1	0	0	0	0	0	0	200	300	0	0	0	0	0	0	0	200	903	0	0	0	0	0	0	0	603	903	0
390	2	0	0	0	0	0	0	200	300	0	0	0	0	0	0	0	200	903	0	0	0	0	0	0	0	603	903	0
390	3	0	0	0	0	0	0	200	300	0	0	0	0	0	0	0	200	903	0	0	0	0	0	0	0	603	903	0
390	4	0	0	0	0	0	0	200	300	0	0	0	0	0	0	0	200	903	0	0	0	0	0	0	0	603	903	0
390	5	0	0	0	0	0	0	200	300	0	0	0	0	0	0	0	200	903	0	0	0	0	0	0	0	603	903	0
390	6	0	0	0	0	0	0	200	300	0	0	0	0	0	0	0	200	903	0	0	0	0	0	0	0	603	903	0
390	7	0	0	0	0	0	0	200	300	0	0	0	0	0	0	0	200	903	0	0	0	0	0	0	0	603	903	0
390	8	0	0	0	0	0	0	200	300	0	0	0	0	0	0	0	200	903	0	0	0	0	0	0	0	603	903	0
390	9	0	0	0	0	0	0	200	300	0	0	0	0	0	0	0	200	903	0	0	0	0	0	0	0	603	903	0
391	0	0	0	0	0	0	0	200	300	0	0	0	0	0	0	0	200	903	0	0	0	0	0	0	0	603	903	0
391	1	0	0	0	0	0	0	200	300	0	0	0	0	0	0	0	200	903	0	0	0	0	0	0	0	603	903	0
391	2	0	0	0	0	0	0	200	300	0	0	0	0	0	0	0	200	903	0	0	0	0	0	0	0	603	903	0
391	3	0	0	0	0	0	0	200	300	0	0	0	0	0	0	0	200	903	0	0	0	0	0	0	0	603	903	0
391	4	0	0	0	0	0	0	200	300	0	0	0	0	0	0	0	200	903	0	0	0	0	0	0	0	603	903	0
391	5	0	0	0	0	0	0	200	300	0	0	0	0	0	0	0	200	903	0	0	0	0	0	0	0	603	903	0
391	6	0	0	0	0	0	0	200	300	0	0	0	0	0	0	0	200	903	0	0	0	0	0	0	0	603	903	0
391	7	0	0	0	0	0	0	200	300	0	0	0	0	0	0	0	200	903	0	0	0	0	0	0	0	603	903	0
391	8	0	0	0	0	0	0	200	300	0	0	0	0	0	0	0	200	903	0	0	0	0	0	0	0	603	903	0
391	9	0	0	0	0	0	0	200	300	0	0	0	0	0	0	0	200	903	0	0	0	0	0	0	0	603	903	0
392	0	0	0	0	0	0	0	200	300	0	0	0	0	0	0	0	200	903	0	0	0	0	0	0	0	603	903	0
392	1	0	0	0	0	0	0	200	300	0	0	0	0	0	0	0	200	903	0	0	0	0	0	0	0	603	903	0
392	2	0	0	0	0	0	0	200	300	0	0	0	0	0	0	0	200	903	0	0	0	0	0	0	0	603	903	0
392	3	0	0	0	0	0	0	200	300	0	0	0	0	0	0	0	200	903	0	0	0	0	0	0	0	603	903	0
392	4	0	0	0	0	0	0	200	300	0	0	0	0	0	0	0	200	903	0	0	0	0	0	0	0	603	903	0
392	5	0	0	0	0	0	0	200	300	0	0	0	0	0	0	0	200	903	0	0	0	0	0	0	0	603	903	0
392	6	0	0	0	0	0	0	200	300	0	0	0	0	0	0	0	200	903	0	0	0	0	0	0	0	603	903	0
392	7	0	0	0	0	0	0	200	300	0	0	0	0	0	0	0	200	903	0	0	0	0	0	0	0	603	903	0
392	8	0	0	0	0	0	0	200	300	0	0	0	0	0	0	0	200	903	0	0	0	0	0	0	0	603	903	0
392	9	0	0	0	0	0	0	200	300	0	0	0	0	0	0	0	200	903	0	0	0	0	0	0	0	603	903	0
393	0	0	0	0	0	0	0	200	300	0	0	0	0	0	0	0	200	903	0	0	0	0	0	0	0	603	903	0
393	1	0	0	0	0	0	0	200	300	0	0	0	0	0	0	0	200	903	0	0	0	0	0	0	0	603	903	0
393	2	0	0	0	0	0	0	200	300	0	0	0	0	0	0	0	200	903	0	0	0	0	0	0	0	603	903	0
393	3	0	0	0	0	0	0	200	300	0	0	0	0	0	0	0	200	903	0	0	0	0	0	0	0	603	903	0
393	4	0	0	0	0	0	0	200	300	0	0	0	0	0	0	0	200	903	0	0	0	0	0	0	0	603	903	0
393	5	0	0	0	0	0	0	200	300	0	0	0	0	0	0	0	200	903	0	0	0	0	0	0	0	603	903	0
393	6	0	0	0	0	0	0	200	300	0	0	0	0	0	0	0	200	903	0	0	0	0	0	0	0	603	903	0
393	7	0	0	0	0	0	0	200	300	0	0	0	0	0	0	0	200	903	0	0	0	0	0	0	0	603	903	0
393	8	0	0	0	0	0	0	200	300	0	0	0	0	0	0	0	200	903	0	0	0	0	0	0	0	603	903	0
393	9	0	0	0	0	0	0	200	300	0	0	0	0	0	0	0	200	903	0	0	0	0	0	0	0	603	903	0
394	0	0	0	0	0	0	0	200	300	0	0	0	0	0	0	0	200	903	0	0	0	0	0	0	0	603	903	0
394	1	0	0	0	0	0	0	200	300	0	0	0	0	0	0	0	200	903	0	0	0	0	0	0	0	603	903	0
394	2	0	0	0	0	0	0	200	300	0	0	0	0	0	0	0	200	903	0	0	0	0	0	0	0	603	903	0
394	3	0	0	0	0	0	0	200	300	0	0	0	0	0	0	0	200	903	0	0	0	0	0	0	0	603	903	0
394	4	0	0	0	0	0	0	200	300	0	0	0	0	0	0	0	200	903	0	0	0	0	0	0	0	603	903	0
394	5	0	0	0	0	0	0	200	300	0	0	0	0	0	0	0	200	903	0	0	0	0	0	0	0	603	903	0
394	6	0	0	0	0	0	0	200	300	0	0	0	0	0	0	0	200	903	0	0	0	0	0	0	0	603	903	0
394	7	0	0	0	0	0	0	200	300	0	0	0	0	0	0	0	200	903	0	0	0	0	0	0	0	603	903	0
394	8	0	0	0	0	0	0	200	300	0	0	0	0	0	0	0	200	903	0	0	0	0	0	0	0	603	903	0
394	9	0	0	0	0	0	0	200	300	0	0	0	0	0	0	0	200	903	0	0	0	0	0	0	0	603	903	0
395	0	0	0	0	0	0	0	200	300	0	0	0	0	0	0	0	200	903	0	0	0	0	0	0	0	603	903	0
395	1	0	0	0	0	0	0	200	300	0	0	0	0	0	0	0	200	903	0	0	0	0	0	0	0	603	903	0
395	2	0	0	0	0	0	0	200	300	0	0	0	0	0	0	0	200	903	0	0	0	0	0	0	0	603	903	0
395	3	0	0	0	0	0	0	200	300	0	0	0	0	0	0	0	200	903	0	0	0	0	0	0	0	603	903	0
395	4	0	0	0	0	0	0	200	300	0	0	0	0	0	0	0	200	903	0	0	0	0	0	0	0	603	903	0
395	5	0	0	0	0	0	0	200	300	0	0	0	0	0	0	0	200	903	0	0	0	0	0	0	0	603	903	0
395	6	0	0	0	0	0	0	200	300	0	0	0	0	0	0	0	200	903	0	0	0	0	0	0	0	603	903	0
395	7	0	0	0	0	0	0	200	300	0	0	0	0	0	0	0	200	903	0	0	0	0	0	0	0	603	903	0
395	8	0	0	0	0	0	0	200	300	0	0	0	0	0	0	0	200	903	0	0	0	0	0	0	0	603	903	0
395	9	0	0	0	0	0	0	200	300	0	0	0	0	0	0	0	200	903	0	0	0	0	0	0	0	603	903	0
396	0	0	0	0	0	0	0	200	300	0	0	0	0	0	0	0	200	903	0	0	0	0	0	0	0	603	903	0
396	1	0	0	0	0	0	0	200	300	0	0	0	0	0	0	0	200	903	0	0	0	0	0	0	0	603	903	0
396	2	0	0	0	0	0	0	200	300	0	0	0	0	0	0	0	200	903	0	0	0	0	0	0	0	603	903	0
396	3	0	0	0	0	0	0	200	300	0	0	0	0	0	0	0	200	903	0	0	0	0	0	0	0	603	903	0
396	4	0	0	0	0	0	0	200	300	0	0	0	0	0	0	0	200	903	0	0	0	0	0	0	0	603	903	0
396	5	0	0	0	0	0	0	200	300	0	0	0	0	0	0	0	200	903	0	0	0	0	0	0	0	603	903	0
396	6	0	0	0	0	0	0	200	300	0	0	0	0	0	0	0	200	903	0	0	0	0	0	0	0	603	903	0
396	7	0	0	0	0	0	0	200	300	0	0	0	0	0	0	0	200	903	0	0	0	0	0	0	0	603	903	0
396	8	0	0	0	0	0	0	200	300	0	0	0	0	0	0	0	200	903	0	0	0	0	0	0	0	603	903	0
396	9	0	0	0	0	0	0	200	300	0	0	0	0	0	0	0	200	903	0	0	0	0	0	0	0	603	903	0
397	0	0	0	0	0	0	0	200	300	0	0	0	0	0	0	0	200	903	0	0	0	0	0	0	0	603	903	0
397	1	0	0	0	0	0	0	200	300	0	0	0	0	0	0	0	200	903	0	0	0	0	0	0	0	603	903	0
397	2	0	0	0	0	0	0	200	300	0	0	0	0	0	0	0	200	903	0	0	0	0	0	0	0	603	903	0
397	3	0	0	0	0	0	0	200	300	0	0	0	0	0	0	0	200	903	0	0	0	0	0	0	0	603	903	0
397	4	0	0	0	0	0	0	200	300	0	0	0	0	0	0	0	200	903	0	0	0	0	0	0	0	603	903	0
397	5	0	0	0	0	0	0	200	300	0	0	0	0	0	0	0	200	903	0	0	0	0	0	0	0	603	903	0
397	6	0	0	0	0	0	0	200	300	0	0	0	0	0	0	0	200	903	0	0	0	0	0	0	0	603	903	0
397	7	0	0	0	0	0	0	200	300	0	0	0	0	0	0	0	200	903	0	0	0	0	0	0	0	603	903	0
397	8	0	0	0	0	0	0	200	300	0	0	0	0	0	0	0	200	903	0	0	0	0	0	0	0	603	903	0
397	9	0	0	0	0	0	0	200	300	0	0	0	0	0	0	0	200	903	0	0	0	0	0	0	0	603	903	0
398	0	0	0	0	0	0	0	200	300	0	0	0	0	0	0	0	200	903	0	0	0	0	0	0	0	603	903	0
398	1	0	0	0	0	0	0	200	300	0	0	0	0	0	0	0	200	903	0	0	0	0	0	0	0	603	903	0
398	2	0	0	0	0	0	0	200	300	0	0	0	0	0	0	0	200	903	0	0	0	0	0	0	0	603	903	0
398	3	0	0	0	0	0	0	200	300	0	0	0	0	0	0	0	200	903	0	0	0	0	0	0	0	603	903	0
398	4	0	0	0	0	0	0	200	300	0	0	0	0	0	0	0	200	903	0	0	0	0	0	0	0	603	903	0
398	5	0	0	0	0	0	0	200	300	0	0	0	0	0	0	0	200	903	0	0	0	0	0	0	0	603	903	0
398	6	0	0	0	0	0	0	200	300	0	0	0	0	0	0	0	200	903	0	0	0	0	0	0	0	603	903	0
398	7	0	0	0	0	0	0	200	300	0	0	0	0	0	0	0	200	903	0	0	0	0	0	0	0	603	903	0
398	8	0	0	0	0	0	0	200	300	0	0	0	0	0	0	0	200	903	0	0	0	0	0	0	0	603	903	0
398	9	0	0	0	0	0	0	200	300	0	0	0	0	0	0	0	200	903	0	0	0	0	0	0	0	603	903	0
399	0	0	0	0	0	0	0	200	300	0	0	0	0	0	0	0	200	903	0	0	0	0	0	0	0	603	903	0
399	1	0	0	0	0	0	0	200	300	0	0	0	0	0	0	0	200	903	0	0	0	0	0	0	0	603	903	0
399	2	0	0	0	0	0	0	200	300	0	0	0	0	0	0	0	200	903	0	0	0	0	0	0	0	603	903	0
399	3	0	0	0	0	0	0	200	300	0	0	0	0	0	0	0	200	903	0	0	0	0	0	0	0	603	903	0
399	4	0	0	0	0	0	0	200	300	0	0	0	0	0	0	0	200	903	0	0	0	0	0	0	0	603	903	0
399	5	0	0	0	0	0	0	200	300	0	0	0	0	0	0	0	200	903	0	0	0	0	0	0	0	603	903	0
399	6	0	0	0	0	0	0	200	300	0	0	0	0	0	0	0	200	903	0	0	0	0	0	0	0	603	903	0
399	7	0	0	0	0	0	0	200	300	0	0	0	0	0	0	0	200	903	0	0	0	0	0	0	0	603	903	0
399	8	0	0	0	0	0	0	200	300	0	0	0	0	0	0	0	200	903	0	0	0	0	0	0	0	603	903	0
399	9	0	0	0	0	0	0	200	300	0	0	0	0	0	0	0	200	903	0	0	0	0	0	0	0	603	903	0
400	0	0	0	0	0	0	0	200	300	0	0	0	0	0	0	0	200	903	0	0	0	0	0	0	0	603	903	0
400	1	0	0	0	0	0	0	200	300	0	0	0	0	0	0	0	200	903	0	0	0	0	0	0	0	603	903	0
400	2	0	0	0	0	0	0	200	300	0	0	0	0	0	0	0	200	903	0	0	0	0	0	0	0	603	903	0
400	3	0	0	0	0	0	0	200	300	0	0	0	0	0	0	0	200	903	0	0	0	0	0	0	0	603	903	0
400	4	0	0	0	0	0	0	200	300	0	0	0	0	0	0	0	200	903	0	0	0	0	0	0	0	603	903	0
400	5	0	0	0	0	0	0	200	300	0	0	0	0	0	0	0	200	903	0	0	0	0	0	0	0	603	903	0
400	6	0	0	0	0	0	0	200	300	0	0	0	0	0	0	0	200	903	0	0	0	0	0	0	0	603	903	0
400	7	0	0	0	0	0	0	200	300	0	0	0	0	0	0	0	200	903	0	0	0	0	0	0	0	603	903	0
400	8	0	0	0	0	0	0	200	300	0	0	0	0	0	0	0	200	903	0	0	0	0	0	0	0	603	903	0
400	9	0	0	0	0	0	0	200	300	0	0	0	0	0	0	0	200	903	0	0	0	0	0	0	0	603	903	0
401	0	0	0	0	0	0	0	200	300	0	0	0	0	0	0	0	200	903	0	0	0	0	0	0	0	603	903	0
401	1	0	0	0	0	0	0	200	300	0	0	0	0	0	0	0	200	903	0	0	0	0	0	0	0	603	903	0
401	2	0	0	0	0	0	0	200	300	0	0	0	0	0	0	0	200	903	0	0	0	0	0	0	0	603	903	0
401	3	0	0	0	0	0	0	200	300	0	0	0	0	0	0	0	200	903	0	0	0	0	0	0	0	603	903	0
401	4	0	0	0	0	0	0	200	300	0	0	0	0	0	0	0	200	903	0	0	0	0	0	0	0	603	903	0
401	5	0	0	0	0	0	0	200	300	0	0	0	0	0	0	0	200	903	0	0	0	0	0	0	0	603	903	0
401	6	0	0	0	0	0	0	200	300	0	0	0	0	0	0	0	200	903	0	0	0	0	0	0	0	603	903	0
401	7	0	0	0	0	0	0	200	300	0	0	0	0	0	0	0	200	903	0	0	0	0	0	0	0	603	903	0
401	8	0	0	0	0	0	0	200	300	0	0	0	0	0	0	0	200	903	0	0	0	0	0	0	0	603	903	0
401	9	0	0	0	0	0	0	200	300	0	0	0	0	0	0	0	200	903	0	0	0	0	0	0	0	603	903	0
402	0	0	0	0	0	0	0	200	300	0	0	0	0	0	0	0	200	903	0	0	0	0	0	0	0	603	903	0
402	1	0	0	0	0	0	0	200	300	0	0	0	0	0	0	0	200	903	0	0	0	0	0	0	0	603	903	0
402	2	0	0	0	0	0	0	200	300	0	0	0	0	0	0	0	200	903	0	0	0	0	0	0	0	603	903	0
402	3	0	0	0	0	0	0	200	300	0	0	0	0	0	0	0	200	903	0	0	0	0	0	0	0	603	903	0
402	4	0	0	0	0	0	0	200	300	0	0	0	0	0	0	0	200	903	0	0	0	0	0	0	0	603	903	0
402	5	0	0	0	0	0	0	200	300	0	0	0	0	0	0	0	200	903	0	0	0	0	0	0	0	603	903	0
402	6	0	0	0	0	0	0	200	300	0	0	0	0	0	0	0	200	903	0	0	0	0	0	0	0	603	903	0
402	7	0	0	0	0	0	0	200	300	0	0	0	0	0	0	0	200	903	0	0	0	0	0	0	0	603	903	0
402	8	0	0	0	0	0	0	200	300	0	0	0	0	0	0	0	200	903	0	0	0	0	0	0	0	603	903	0
402	9	0	0	0	0	0	0	200	300	0	0	0	0	0	0	0	200	903	0	0	0	0	0	0	0	603	903	0
403	0	0	0	0	0	0	0	200	300	0	0	0	0	0	0	0	200	903	0	0	0	0	0	0	0	603	903	0
403	1	0	0	0	0	0	0	200	300	0	0	0	0	0	0	0	200	903	0	0	0	0	0	0	0	603	903	0
403	2	0	0	0	0	0	0	200	300	0	0	0	0	0	0	0	200	903	0	0	0	0	0	0	0	603	903	0
403	3	0	0	0	0	0	0	200	300	0	0	0	0	0	0	0	200	903	0	0	0	0	0	0	0	603	903	0
403	4	0	0	0	0	0	0	200	300	0	0	0	0	0	0	0	200	903	0	0	0	0	0	0	0	603	903	0
403	5	0	0	0	0	0	0	200	300	0	0	0	0	0	0	0	200	903	0	0	0	0	0	0	0	603	903	0
403	6	0	0	0	0	0	0	200	300	0	0	0	0	0	0	0	200	903	0	0	0	0	0	0	0	603	903	0
403	7	0	0	0	0	0	0	200	300	0	0	0	0	0	0	0	200	903	0	0	0	0	0	0	0	603	903	0
403	8	0	0	0	0	0	0	200	300	0	0	0	0	0	0	0	200	903	0	0	0	0	0	0	0	603	903	0
403	9	0	0	0	0	0	0	200	300	0	0	0	0	0	0	0	200	903	0	0	0	0	0	0	0	603	903	0
404	0	0	0	0	0	0	0	200	300	0	0	0	0	0	0	0	200	903	0	0	0	0	0	0	0	603	903	0
404	1	0	0	0	0	0	0	200	300	0	0	0	0	0	0	0	200	903	0	0	0	0	0	0	0	603	903	0
404	2	0	0	0	0	0	0	200	300	0	0	0	0	0	0	0	200	903	0	0	0	0	0	0	0	603	903	0
404	3	0	0	0	0	0	0	200	300	0	0	0	0	0	0	0	200	903	0	0	0	0	0	0	0	603	903	0
404	4	0	0	0	0	0	0	200	300	0	0	0	0	0	0	0	200	903	0	0	0	0	0	0	0	603	903	0
404	5	0	0	0	0	0	0	200	300	0	0	0	0	0	0	0	200	903	0	0	0	0	0	0	0	603	903	0
404	6	0	0	0	0	0	0	200	300	0	0	0	0	0	0	0	200	903	0	0	0	0	0	0	0	603	903	0
404	7	0	0	0	0	0	0	200	300	0	0	0	0	0	0	0	200	903	0	0	0	0	0	0	0	603	903	0
404	8	0	0	0	0	0	0	200	300	0	0	0	0	0	0	0	200	903	0	0	0	0	0	0	0	603	903	0
404	9	0	0	0	0	0	0	200	300	0	0	0	0	0	0	0	200	903	0	0	0	0	0	0	0	603	903	0
405	0	0	0	0	0	0	0	200	300	0	0	0	0	0	0	0	200	903	0	0	0	0	0	0	0	603	903	0
405	1	0	0	0	0	0	0	200	300	0	0	0	0	0	0	0	200	903	0	0	0	0	0	0	0	603	903	0
405	2	0	0	0	0	0	0	200	300	0	0	0	0	0	0	0	200	903	0	0	0	0	0	0	0	603	903	0
405	3	0	0	0	0	0	0	200	300	0	0	0	0	0	0	0	200	903	0	0	0	0	0	0	0	603	903	0
405	4	0	0	0	0	0	0	200	300	0	0	0	0	0	0	0	200	903	0	0	0	0	0	0	0	603	903	0
405	5	0	0	0	0	0	0	200	300	0	0	0	0	0	0	0	200	903	0	0	0	0	0	0	0	603	903	0
405	6	0	0	0	0	0	0	200	300	0	0	0	0	0	0	0	200	903	0	0	0	0	0	0	0	603	903	0
405	7	0	0	0	0	0	0	200	300	0	0	0	0	0	0	0	200	903	0	0	0	0	0	0	0	603	903	0
405	8	0	0	0	0	0	0	200	300	0	0	0	0	0	0	0	200	903	0	0	0	0	0	0	0	603	903	0
405	9	0	0	0	0	0	0	200	300	0	0	0	0	0	0	0	200	903	0	0	0	0	0	0	0	603	903	0
406	0	0	0	0	0	0	0	200	300	0	0	0	0	0	0	0	200	903	0	0	0	0	0	0	0	603	903	0
406	1	0	0	0	0	0	0	200	300	0	0	0	0	0	0	0	200	903	0	0	0	0	0	0	0	603	903	0
406	2	0	0	0	0	0	0	200	300	0	0	0	0	0	0	0	200	903	0	0	0	0	0	0	0	603	903	0
406	3	0	0	0	0	0	0	200	300	0	0	0	0	0	0	0	200	903	0	0	0	0	0	0	0	603	903	0
406	4	0	0	0	0	0	0	200	300	0	0	0	0	0	0	0	200	903	0	0	0	0	0	0	0	603	903	0
406	5	0	0	0	0	0	0	200	300	0	0	0	0	0	0	0	200	903	0	0	0	0	0	0	0	603	903	0
406	6	0	0	0	0	0	0	200	300	0	0	0	0	0	0	0	200	903	0	0	0	0	0	0	0	603	903	0
406	7	0	0	0	0	0	0	200	300	0	0	0	0	0	0	0	200	903	0	0	0	0	0	0	0	603	903	0
406	8	0	0	0	0	0	0	200	300	0	0	0	0	0	0	0	200	903	0	0	0	0	0	0	0	603	903	0
406	9	0	0	0	0	0	0	200	300	0	0	0	0	0	0	0	200	903	0	0	0	0	0	0	0	603	903	0
407	0	0	0	0	0	0	0	200	300	0	0	0	0	0	0	0	200	903	0	0	0	0	0	0	0	603	903	0
407	1	0	0	0	0	0	0	200	300	0	0	0	0	0	0	0	200	903	0	0	0	0	0	0	0	603	903	0
407	2	0	0	0	0	0	0	200	300	0	0	0	0	0	0	0	200	903	0	0	0	0	0	0	0	603	903	0
407	3	0	0	0	0	0	0	200	300	0	0	0	0	0	0	0	200	903	0	0	0	0	0	0	0	603	903	0
407	4	0	0	0	0	0	0	200	300	0	0	0	0	0	0	0	200	903	0	0	0	0	0	0	0	603	903	0
407	5	0	0	0	0	0	0	200	300	0	0	0	0	0	0	0	200	903	0	0	0	0	0	0	0	603	903	0
407	6	0	0	0	0	0	0	200	300	0	0	0	0	0	0	0	200	903	0	0	0	0	0	0	0	603	903	0
407	7	0	0	0	0	0	0	200	300	0	0	0	0	0	0	0	200	903	0	0	0	0	0	0	0	603	903	0
407	8	0	0	0	0	0	0	200	300	0	0	0	0	0	0	0	200	903	0	0	0	0	0	0	0	603	903	0
407	9	0	0	0	0	0	0	200	300	0	0	0	0	0	0	0	200	903	0	0	0	0	0	0	0	603	903	0
408	0	0	0	0	0	0	0	200	300	0	0	0	0	0	0	0	200	903	0	0	0	0	0	0	0	603	903	0
408	1	0	0	0	0	0	0	200	300	0	0	0	0	0	0	0	200	903	0	0	0	0	0	0	0	603	903	0
408	2	0	0	0	0	0	0	200	300	0	0	0	0	0	0	0	200	903	0	0	0	0	0	0	0	603	903	0
408	3	0	0	0	0	0	0	200	300	0	0	0	0	0	0	0	200	903	0	0	0	0	0	0	0	603	903	0
408	4	0	0	0	0	0	0	200	300	0	0	0	0	0	0	0	200	903	0	0	0	0	0	0	0	603	903	0
408	5	0	0	0	0	0	0	200	300	0	0	0	0	0	0	0	200	903	0	0	0	0	0	0	0	603	903	0
408	6	0	0	0	0	0	0	200	300	0	0	0	0	0	0	0	200	903	0	0	0	0	0	0	0	603	903	0
408	7	0	0	0	0	0	0	200	300	0	0	0	0	0	0	0	200	903	0	0	0	0	0	0	0	603	903	0
408	8	0	0	0	0	0	0	200	300	0	0	0	0	0	0	0	200	903	0	0	0	0	0	0	0	603	903	0
408	9	0	0	0	0	0	0	200	300	0	0	0	0	0	0	0	200	903	0	0	0	0	0	0	0	603	903	0
409	0	0	0	0	0	0	0	200	300	0	0	0	0	0	0	0	200	903	0	0	0	0	0	0	0	603	903	0
409	1	0	0	0	0	0	0	200	300	0	0	0	0	0	0	0	200	903	0	0	0	0	0	0	0	603	903	0
409	2	0	0	0	0	0	0	200	300	0	0	0	0	0	0	0	200	903	0	0	0	0	0	0	0	603	903	0
409	3	0	0	0	0	0	0	200	300	0	0	0	0	0	0	0	200	903	0	0	0	0	0	0	0	603	903	0
409	4	0	0	0	0	0	0	200	300	0	0	0	0	0	0	0	200	903	0	0	0	0	0	0	0	603	903	0
409	5	0	0	0	0	0	0	200	300	0	0	0	0	0	0	0	200	903	0	0	0	0	0	0	0	603	903	0
409	6	0	0	0	0	0	0	200	300	0	0	0	0	0	0	0	200	903	0	0	0	0	0	0	0	603	903	0
409	7	0	0	0	0	0	0	200	300	0	0	0	0	0	0	0	200	903	0	0	0	0	0	0	0	603	903	0
409	8	0	0	0	0	0	0	200	300	0	0	0	0	0	0	0	200	903	0	0	0	0	0	0	0	603	903	0
409	9	0	0	0	0	0	0	200	300	0	0	0	0	0	0	0	200	903	0	0	0	0	0	0	0	603	903	0
410	0	0	0	0	0	0	0	200	300	0	0	0	0	0	0	0	200	903	0	0	0	0	0	0	0	603	903	0
410	1	0	0	0	0	0	0	200	300	0	0	0	0	0	0	0	200	903	0	0	0	0	0	0	0	603	903	0
410	2	0	0	0	0	0	0	200	300	0	0	0	0	0	0	0	200	903	0	0	0	0	0	0	0	603	903	0
410	3	0	0	0	0	0	0	200	300	0	0	0	0	0	0	0	200	903	0	0	0	0	0	0	0	603	903	0
410	4	0	0	0	0	0	0	200	300	0	0	0	0	0	0	0	200	903	0	0	0	0	0	0	0	603	903	0
410	5	0	0	0	0	0	0	200	300	0	0	0	0	0	0	0	200	903	0	0	0	0	0	0	0	603	903	0
410	6	0	0	0	0	0	0	200	300	0	0	0	0	0	0	0	200	903	0	0	0	0	0	0	0	603	903	0
410	7	0	0	0	0	0	0	200	300	0	0	0	0	0	0	0	200	903	0	0	0	0	0	0	0	603	903	0
410	8	0	0	0	0	0	0	200	300	0	0	0	0	0	0	0	200	903	0	0	0	0	0	0	0	603	903	0
410	9	0	0	0	0	0	0	200	300	0	0	0	0	0	0	0	200	903	0	0	0	0	0	0	0	603	903	0
411	0	0	0	0	0	0	0	200	300	0	0	0	0	0	0	0	200	903	0	0	0	0	0	0	0	603	903	0
411	1	0	0	0	0	0	0	200	300	0	0	0	0	0	0	0	200	903	0	0	0	0	0	0	0	603	903	0
411	2	0	0	0	0	0	0	200	300	0	0	0	0	0	0	0	200	903	0	0	0	0	0	0	0	603	903	0
411	3	0	0	0	0	0	0	200	300	0	0	0	0	0	0	0	200	903	0	0	0	0	0	0	0	603	903	0
411	4	0	0	0	0	0	0	200	300	0	0	0	0	0	0	0	200	903	0	0	0	0	0	0	0	603	903	0
411	5	0	0	0	0	0	0	200	300	0	0	0	0	0	0	0	200	903	0	0	0	0	0	0	0	603	903	0
411	6	0	0	0	0	0	0	200	300	0	0	0	0	0	0	0	200	903	0	0	0	0	0	0	0	603	903	0
411	7	0	0	0	0	0	0	200	300	0	0	0	0	0	0	0	200	903	0	0	0	0	0	0	0	603	903	0
411	8	0	0	0	0	0	0	200	300	0	0	0	0	0	0	0	200	903	0	0	0	0	0	0	0	603	903	0
411	9	0	0	0	0	0	0	200	300	0	0	0	0	0	0	0	200	903	0	0	0	0	0	0	0	603	903	0
412	0	0	0	0	0	0	0	200	300	0	0	0	0	0	0	0	200	903	0	0	0	0	0	0	0	603	903	0
412	1	0	0	0	0	0	0	200	300	0	0	0	0	0	0	0	200	903	0	0	0	0	0	0	0	603	903	0
412	2	0	0	0	0	0	0	200	300	0	0	0	0	0	0	0	200	903	0	0	0	0	0	0	0	603	903	0
412	3	0	0	0	0	0	0	200	300	0	0	0	0	0	0	0	200	903	0	0	0	0	0	0	0	603	903	0
412	4	0	0	0	0	0	0	200	300	0	0	0	0	0	0	0	200	903	0	0	0	0	0	0	0	603	903	0
412	5	0	0	0	0	0	0	200	300	0	0	0	0	0	0	0	200	903	0	0	0	0	0	0	0	603	903	0
412	6	0	0	0	0	0	0	200	300	0	0	0	0	0	0	0	200	903	0	0	0	0	0	0	0	603	903	0
412	7	0	0	0	0	0	0	200	300	0	0	0	0	0	0	0	200	903	0	0	0	0	0	0	0	603	903	0
412	8	0	0	0	0	0	0	200	300	0	0	0	0	0	0	0	200	903	0	0	0	0	0	0	0	603	903	0
412	9	0	0	0	0	0	0	200	300	0	0	0	0	0	0	0	200	903	0	0	0	0	0	0	0	603	903	0
413	0	0	0	0	0	0	0	200	300	0	0	0	0	0	0	0	200	903	0	0	0	0	0	0	0	603	903	0
413	1	0	0	0	0	0	0	200	300	0	0	0	0	0	0	0	200	903	0	0	0	0	0	0	0	603	903	0
413	2	0	0	0	0	0	0	200	300	0	0	0	0	0	0	0	200	903	0	0	0	0	0	0	0	603	903	0
413	3	0	0	0	0	0	0	200	300	0	0	0	0	0	0	0	200	903	0	0	0	0	0	0	0	603	903	0
413	4	0	0	0	0	0	0	200	300	0	0	0	0	0	0	0	200	903	0	0	0	0	0	0	0	603	903	0
413	5	0	0	0	0	0	0	200	300	0	0	0	0	0	0	0	200	903	0	0	0	0	0	0	0	603	903	0
413	6	0	0	0	0	0	0	200	300	0	0	0	0	0	0	0	200	903	0	0	0	0	0	0	0	603	903	0
413	7	0	0	0	0	0	0	200	300	0	0	0	0	0	0	0	200	903	0	0	0	0	0	0	0	603	903	0
413	8	0	0	0	0	0	0	200	300	0	0	0	0	0	0	0	200	903	0	0	0	0	0	0	0	603	903	0
413	9	0	0	0	0	0	0	200	300	0	0	0	0	0	0	0	200	903	0	0	0	0	0	0	0	603	903	0
414	0	0	0	0	0	0	0	200	300	0	0	0	0	0	0	0	200	903	0	0	0	0	0	0	0	603	903	0
414	1	0	0	0	0	0	0	200	300	0	0	0	0	0	0	0	200	903	0	0	0	0	0	0	0	603	903	0
414	2	0	0	0	0	0	0	200	300	0	0	0	0	0	0	0	200	903	0	0	0	0	0	0	0	603	903	0
414	3	0	0	0	0	0	0	200	300	0	0	0	0	0	0	0	200	903	0	0	0	0	0	0	0	603	903	0
414	4	0	0	0	0	0	0	200	300	0	0	0	0	0	0	0	200	903	0	0	0	0	0	0	0	603	903	0
414	5	0	0	0	0	0	0	200	300	0	0	0	0	0	0	0	200	903	0	0	0	0	0	0	0	603	903	0
414	6	0	0	0	0	0	0	200	300	0	0	0	0	0	0	0	200	903	0	0	0	0	0	0	0	603	903	0
414	7	0	0	0	0	0	0	200	300	0	0	0	0	0	0	0	200	903	0	0	0	0	0	0	0	603	903	0
414	8	0	0	0	0	0	0	200	300	0	0	0	0	0	0	0	200	903	0	0	0	0	0	0	0	603	903	0
414	9	0	0	0	0	0	0	200	300	0	0	0	0	0	0	0	200	903	0	0	0	0	0	0	0	603	903	0
415	0	0	0	0	0	0	0	200	300	0	0	0	0	0	0	0	200	903	0	0	0	0	0	0	0	603	903	0
415	1	0	0	0	0	0	0	200	300	0	0	0	0	0	0	0	200	903	0	0	0	0	0	0	0	603	903	0
415	2	0	0	0	0	0	0	200	300	0	0	0	0	0	0	0	200	903	0	0	0	0	0	0	0	603	903	0
415	3	0	0	0	0	0	0	200	300	0	0	0	0	0	0	0	200	903	0	0	0	0	0	0	0	603	903	0
415	4	0	0	0	0	0	0	200	300	0	0	0	0	0	0	0	200	903	0	0	0	0	0	0	0	603	903	0
415	5	0	0	0	0	0	0	200	300	0	0	0	0	0	0	0	200	903	0	0	0	0	0	0	0	603	903	0
415	6	0	0	0	0	0	0	200	300	0	0	0	0	0	0	0	200	903	0	0	0	0	0	0	0	603	903	0
415	7	0	0	0	0	0	0	200	300	0	0	0	0	0	0	0	200	903	0	0	0	0	0	0	0	603	903	0
415	8	0	0	0	0	0	0	200	300	0	0	0	0	0	0	0	200	903	0	0	0	0	0	0	0	603	903	0
415	9	0	0	0	0	0	0	200	300	0	0	0	0	0	0	0	200	903	0	0	0	0	0	0	0	603	903	0
416	0	0	0	0	0	0	0	200	300	0	0	0	0	0	0	0	200	903	0	0	0	0	0	0	0	603	903	0
416	1	0	0	0	0	0	0	200	300	0	0	0	0	0	0	0	200	903	0	0	0	0	0	0	0	603	903	0
416	2	0	0	0	0	0	0	200	300	0	0	0	0	0	0	0	200	903	0	0	0	0	0	0	0	603	903	0
416	3	0	0	0	0	0	0	200	300	0	0	0	0	0	0	0	200	903	0	0	0	0	0	0	0	603	903	0
416	4	0	0	0	0	0	0	200	300	0	0	0	0	0	0	0	200	903	0	0	0	0	0	0	0	603	903	0
416	5	0	0	0	0	0	0	200	300	0	0	0	0	0	0	0	200	903	0	0	0	0	0	0	0	603	903	0
416	6	0	0	0	0	0	0	200	300	0	0	0	0	0	0	0	200	903	0	0	0	0	0	0	0	603	903	0
416	7	0	0	0	0	0	0	200	300	0	0	0	0	0	0	0	200	903	0	0	0	0	0	0	0	603	903	0
416	8	0	0	0	0	0	0	200	300	0	0	0	0	0	0	0	200	903	0	0	0	0	0	0	0	603	903	0
416	9	0	0	0	0	0	0	200	300	0	0	0	0	0	0	0	200	903	0	0	0	0	0	0	0	603	903	0
417	0	0	0	0	0	0	0	200	300	0	0	0	0	0	0	0	200	903	0	0	0	0	0	0	0	603	903	0
417	1	0	0	0	0	0	0	200	300	0	0	0	0	0	0	0	200	903	0	0	0	0	0	0	0	603	903	0
417	2	0	0	0	0	0	0	200	300	0	0	0	0	0	0	0	200	903	0	0	0	0	0	0	0	603	903	0
417	3	0	0	0	0	0	0	200	300	0	0	0	0	0	0	0	200	903	0	0	0	0	0	0	0	603	903	0
417	4	0	0	0	0	0	0	200	300	0	0	0	0	0	0	0	200	903	0	0	0	0	0	0	0	603	903	0
417	5	0	0	0	0	0	0	200	300	0	0	0	0	0	0	0	200	903	0	0	0	0	0	0	0	603	903	0
417	6	0	0	0	0	0	0	200	300	0	0	0	0	0	0	0	200	903	0	0	0	0	0	0	0	603	903	0
417	7	0	0	0	0	0	0	200	300	0	0	0	0	0	0	0	200	903	0	0	0	0	0	0	0	603	903	0
417	8	0	0	0	0	0	0	200	300	0	0	0	0	0	0	0	200	903	0	0	0	0	0	0	0	603	903	0
417	9	0	0	0	0	0	0	200	300	0	0	0	0	0	0	0	200	903	0	0	0	0	0	0	0	603	903	0
418	0	0	0	0	0	0	0	200	300	0	0	0	0	0	0	0	200	903	0	0	0	0	0	0	0	603	903	0
418	1	0	0	0	0	0	0	200	300	0	0	0	0	0	0	0	200	903	0	0	0	0	0	0	0	603	903	0
418	2	0	0	0	0	0	0	200	300	0	0	0	0	0	0	0	200	903	0	0	0	0	0	0	0	603	903	0
418	3	0	0	0	0	0	0	200	300	0	0	0	0	0	0	0	200	903	0	0	0	0	0	0	0	603	903	0
418	4	0	0	0	0	0	0	200	300	0	0	0	0	0	0	0	200	903	0	0	0	0	0	0	0	603	903	0
418	5	0	0	0	0	0	0	200	300	0	0	0	0	0	0	0	200	903	0	0	0	0	0	0	0	603	903	0
418	6	0	0	0	0	0	0	200	300	0	0	0	0	0	0	0	200	903	0	0	0	0	0	0	0	603	903	0
418	7	0	0	0	0	0	0	200	300	0	0	0	0	0	0	0	200	903	0	0	0	0	0	0	0	603	903	0
418	8	0	0	0	0	0	0	200	300	0	0	0	0	0	0	0	200	903	0	0	0	0	0	0	0	603	903	0
418	9	0	0	0	0	0	0	200	300	0	0	0	0	0	0	0	200	903	0	0	0	0	0	0	0	603	903	0
419	0	0	0	0	0	0	0	200	300	0	0	0	0	0	0	0	200	903	0	0	0	0	0	0	0	603	903	0
419	1	0	0	0	0	0	0	200	300	0	0	0	0	0	0	0	200	903	0	0	0	0	0	0	0	603	903	0
419	2	0	0	0	0	0	0	200	300	0	0	0	0	0	0	0	200	903	0	0	0	0	0	0	0	603	903	0
419	3	0	0	0	0	0	0	200	300	0	0	0	0	0	0	0	200	903	0	0	0	0	0	0	0	603	903	0
419	4	0	0	0	0	0	0	200	300	0	0	0	0	0	0	0	200	903	0	0	0	0	0	0	0	603	903	0
419	5	0	0	0	0	0	0	200	300	0	0	0	0	0	0	0	200	903	0	0	0	0	0	0	0	603	903	0
419	6	0	0	0	0	0	0	200	300	0	0	0	0	0	0	0	200	903	0	0	0	0	0	0	0	603	903	0
419	7	0	0	0	0	0	0	200	300	0	0	0	0	0	0	0	200	903	0	0	0	0	0	0	0	603	903	0
419	8	0	0	0	0	0	0	200	300	0	0	0	0	0	0	0	200	903	0	0	0	0	0	0	0	603	903	0
419	9	0	0	0	0	0	0	200	300	0	0	0	0	0	0	0	200	903	0	0	0	0	0	0	0	603	903	0
420	0	0	0	0	0	0	0	200	300	0	0	0	0	0	0	0	200	903	0	0	0	0	0	0	0	603	903	0
420	1	0	0	0	0	0	0	200	300	0	0	0	0	0	0	0	200	903	0	0	0	0	0	0	0	603	903	0
420	2	0	0	0	0	0	0	200	300	0	0	0	0	0	0	0	200	903	0	0	0	0	0	0	0	603	903	0
420	3	0	0	0	0	0	0	200	300	0	0	0	0	0	0	0	200	903	0	0	0	0	0	0	0	603	903	0
420	4	0	0	0	0	0	0	200	300	0	0	0	0	0	0	0	200	903	0	0	0	0	0	0	0	603	903	0
420	5	0	0	0	0	0	0	200	300	0	0	0	0	0	0	0	200	903	0	0	0	0	0	0	0	603	903	0
420	6	0	0	0	0	0	0	200	300	0	0	0	0	0	0	0	200	903	0	0	0	0	0	0	0	603	903	0
420	7	0	0	0	0	0	0	200	300	0	0	0	0	0	0	0	200	903	0	0	0	0	0	0	0	603	903	0
420	8	0	0	0	0	0	0	200	300	0	0	0	0	0	0	0	200	903	0	0	0	0	0	0	0	603	903	0
420	9	0	0	0	0	0	0	200	300	0	0	0	0	0	0	0	200	903	0	0	0	0	0	0	0	603	903	0
421	0	0	0	0	0	0	0	200	300	0	0	0	0	0	0	0	200	903	0	0	0	0	0	0	0	603	903	0
421	1	0	0	0	0	0	0	200	300	0	0	0	0	0	0	0	200	903	0	0	0	0	0	0	0	603	903	0
421	2	0	0	0	0	0	0	200	300	0	0	0	0	0	0	0	200	903	0	0	0	0	0	0	0	603	903	0
421	3	0	0	0	0	0	0	200	300	0	0	0	0	0	0	0	200	903	0	0	0	0	0	0	0	603	903	0
421	4	0	0	0	0	0	0	200	300	0	0	0	0	0	0	0	200	903	0	0	0	0	0	0	0	603	903	0
421	5	0	0	0	0	0	0	200	300	0	0	0	0	0	0	0	200	903	0	0	0	0	0	0	0	603	903	0
421	6	0	0	0	0	0	0	200	300	0	0	0	0	0	0	0	200	903	0	0	0	0	0	0	0	603	903	0
421	7	0	0	0	0	0	0	200	300	0	0	0	0	0	0	0	200	903	0	0	0	0	0	0	0	603	903	0
421	8	0	0	0	0	0	0	200	300	0	0	0	0	0	0	0	200	903	0	0	0	0	0	0	0	603	903	0
421	9	0	0	0	0	0	0	200	300	0	0	0	0	0	0	0	200	903	0	0	0	0	0	0	0	603	903	0
422	0	0	0	0	0	0	0	200	300	0	0	0	0	0	0	0	200	903	0	0	0	0	0	0	0	603	903	0
422	1	0	0	0	0	0	0	200	300	0	0	0	0	0	0	0	200	903	0	0	0	0	0	0	0	603	903	0
422	2	0	0	0	0	0	0	200	300	0	0	0	0	0	0	0	200	903	0	0	0	0	0	0	0	603	903	0
422	3	0	0	0	0	0	0	200	300	0	0	0	0	0	0	0	200	903	0	0	0	0	0	0	0	603	903	0
422	4	0	0	0	0	0	0	200	300	0	0	0	0	0	0	0	200	903	0	0	0	0	0	0	0	603	903	0
422	5	0	0	0	0	0	0	200	300	0	0	0	0	0	0	0	200	903	0	0	0	0	0	0	0	603	903	0
422	6	0	0	0	0	0	0	200	300	0	0	0	0	0	0	0	200	903	0	0	0	0	0	0	0	603	903	0
422	7	0	0	0	0	0	0	200	300	0	0	0	0	0	0	0	200	903	0	0	0	0	0	0	0	603	903	0
422	8	0	0	0	0	0	0	200	300	0	0	0	0	0	0	0	200	903	0	0	0	0	0	0	0	603	903	0
422	9	0	0	0	0	0	0	200	300	0	0	0	0	0	0	0	200	903	0	0	0	0	0	0	0	603	903	0
423	0	0	0	0	0	0	0	200	300	0	0	0	0	0	0	0	200	903	0	0	0	0	0	0	0	603	903	0
423	1	0	0	0	0	0	0	200	300	0	0	0	0	0	0	0	200	903	0	0	0	0	0	0	0	603	903	0
423	2	0	0	0	0	0	0	200	300	0	0	0	0	0	0	0	200	903	0	0	0	0	0	0	0	603	903	0
423	3	0	0	0	0	0	0	200	300	0	0	0	0	0	0	0	200	903	0	0	0	0	0	0	0	603	903	0
423	4	0	0	0	0	0	0	200	300	0	0	0	0	0	0	0	200	903	0	0	0	0	0	0	0	603	903	0
423	5	0	0	0	0	0	0	200	300	0	0	0	0	0	0	0	200	903	0	0	0	0	0	0	0	603	903	0
423	6	0	0	0	0	0	0	200	300	0	0	0	0	0	0	0	200	903	0	0	0	0	0	0	0	603	903	0
423	7	0	0	0	0	0	0	200	300	0	0	0	0	0	0	0	200	903	0	0	0	0	0	0	0	603	903	0
423	8	0	0	0	0	0	0	200	300	0	0	0	0	0	0	0	200	903	0	0	0	0	0	0	0	603	903	0
423	9	0	0	0	0	0	0	200	300	0	0	0	0	0	0	0	200	903	0	0	0	0	0	0	0	603	903	0
424	0	0	0	0	0	0	0	200	300	0	0	0	0	0	0	0	200	903	0	0	0	0	0	0	0	603	903	0
424	1	0	0	0	0	0	0	200	300	0	0	0	0	0	0	0	200	903	0	0	0	0	0	0	0	603	903	0
424	2	0	0	0	0	0	0	200	300	0	0	0	0	0	0	0	200	903	0	0	0	0	0	0	0	603	903	0
424	3	0	0	0	0	0	0	200	300	0	0	0	0	0	0	0	200	903	0	0	0	0	0	0	0	603	903	0
424	4	0	0	0	0	0	0	200	300	0	0	0	0	0	0	0	200	903	0	0	0	0	0	0	0	603	903	0
424	5	0	0	0	0	0	0	200	300	0	0	0	0	0	0	0	200	903	0	0	0	0	0	0	0	603	903	0
424	6	0	0	0	0	0	0	200	300	0	0	0	0	0	0	0	200	903	0	0	0	0	0	0	0	603	903	0
424	7	0	0	0	0	0	0	200	300	0	0	0	0	0	0	0	200	903	0	0	0	0	0	0	0	603	903	0
424	8	0	0	0	0	0	0	200	300	0	0	0	0	0	0	0	200	903	0	0	0	0	0	0	0	603	903	0
424	9	0	0	0	0	0	0	200	300	0	0	0	0	0	0	0	200	903	0	0	0	0	0	0	0	603	903	0
425	0	0	0	0	0	0	0	200	300	0	0	0	0	0	0	0	200	903	0	0	0	0	0	0	0	603	903	0
425	1	0	0	0	0	0	0	200	300	0	0	0	0	0	0	0	200	903	0	0	0	0	0	0	0	603	903	0
425	2	0	0	0	0	0	0	200	300	0	0	0	0	0	0	0	200	903	0	0	0	0	0	0	0	603	903	0
425	3	0	0	0	0	0	0	200	300	0	0	0	0	0	0	0	200	903	0	0	0	0	0	0	0	603	903	0
425	4	0	0	0	0	0	0	200	300	0	0	0	0	0	0	0	200	903	0	0	0	0	0	0	0	603	903	0
425	5	0	0	0	0	0	0	200	300	0	0	0	0	0	0	0	200	903	0	0	0	0	0	0	0	603	903	0
425	6	0	0	0	0	0	0	200	300	0	0	0	0	0	0	0	200	903	0	0	0	0	0	0	0	603	903	0
425	7	0	0	0	0	0	0	200	300	0	0	0	0	0	0	0	200	903	0	0	0	0	0	0	0	603	903	0
425	8	0	0	0	0	0	0	200	300	0	0	0	0	0	0	0	200	903	0	0	0	0	0	0	0	603	903	0
425	9	0	0	0	0	0	0	200	300	0	0	0	0	0	0	0	200	903	0	0	0	0	0	0	0	603	903	0
426	0	0	0	0	0	0	0	200	300	0	0	0	0	0	0	0	200	903	0	0	0	0	0	0	0	603	903	0
426	1	0	0	0	0	0	0	200	300	0	0	0	0	0	0	0	200	903	0	0	0	0	0	0	0	603	903	0
426	2	0	0	0	0	0	0	200	300	0	0	0	0	0	0	0	200	903	0	0	0	0	0	0	0	603	903	0
426	3	0	0	0	0	0	0	200	300	0	0	0	0	0	0	0	200	903	0	0	0	0	0	0	0	603	903	0
426	4	0	0	0	0	0	0	200	300	0	0	0	0	0	0	0	200	903	0	0	0	0	0	0	0	603	903	0
426	5	0	0	0	0	0	0	200	300	0	0	0	0	0	0	0	200	903	0	0	0	0	0	0	0	603	903	0
426	6	0	0	0	0	0	0	200	300	0	0	0	0	0	0	0	200	903	0	0	0	0	0	0	0	603	903	0
426	7	0	0	0	0	0	0	200	300	0	0	0	0	0	0	0	200	903	0	0	0	0	0	0	0	603	903	0
426	8	0	0	0	0	0	0	200	300	0	0	0	0	0	0	0	200	903	0	0	0	0	0	0	0	603	903	0
426	9	0	0	0	0	0	0	200	300	0	0	0	0	0	0	0	200	903	0	0	0	0	0	0	0	603	903	0
427	0	0	0	0	0	0	0	200	300	0	0	0	0	0	0	0	200	903	0	0	0	0	0	0	0	603	903	0
427	1	0	0	0	0	0	0	200	300	0	0	0	0	0	0	0	200	903	0	0	0	0	0	0	0	603	903	0
427	2	0	0	0	0	0	0	200	300	0	0	0	0	0	0	0	200	903	0	0	0	0	0	0	0	603	903	0
427	3	0	0	0	0	0	0	200	300	0	0	0	0	0	0	0	200	903	0	0	0	0	0	0	0	603	903	0
427	4	0	0	0	0	0	0	200	300	0	0	0	0	0	0	0	200	903	0	0	0	0	0	0	0	603	903	0
427	5	0	0	0	0	0	0	200	300	0	0	0	0	0	0	0	200	903	0	0	0	0	0	0	0	603	903	0
427	6	0	0	0	0	0	0	200	300	0	0	0	0	0	0	0	200	903	0	0	0	0	0	0	0	603	903	0
427	7	0	0	0	0	0	0	200	300	0	0	0	0	0	0	0	200	903	0	0	0	0	0	0	0	603	903	0
427	8	0	0	0	0	0	0	200	300	0	0	0	0	0	0	0	200	903	0	0	0	0	0	0	0	603	903	0
427	9	0	0	0	0	0	0	200	300	0	0	0	0	0	0	0	200	903	0	0	0	0	0	0	0	603	903	0
428	0	0	0	0	0	0	0	200	300	0	0	0	0	0	0	0	200	903	0	0	0	0	0	0	0	603	903	0
428	1	0	0	0	0	0	0	200	300	0	0	0	0	0	0	0	200	903	0	0	0	0	0	0	0	603	903	0
428	2	0	0	0	0	0	0	200	300	0	0	0	0	0	0	0	200	903	0	0	0	0	0	0	0	603	903	0
428	3	0	0	0	0	0	0	200	300	0	0	0	0	0	0	0	200	903	0	0	0	0	0	0	0	603	903	0
428	4	0	0	0	0	0	0	200	300	0	0	0	0	0	0	0	200	903	0	0	0	0	0	0	0	603	903	0
428	5	0	0	0	0	0	0	200	300	0	0	0	0	0	0	0	200	903	0	0	0	0	0	0	0	603	903	0
428	6	0	0	0	0	0	0	200	300	0	0	0	0	0	0	0	200	903	0	0	0	0	0	0	0	603	903	0
428	7	0	0	0	0	0	0	200	300	0	0	0	0	0	0	0	200	903	0	0	0	0	0	0	0	603	903	0
428	8	0	0	0	0	0	0	200	300	0	0	0	0	0	0	0	200	903	0	0	0	0	0	0	0	603	903	0
428	9	0	0	0	0	0	0	200	300	0	0	0	0	0	0	0	200	903	0	0	0	0	0	0	0	603	903	0
429	0	0	0	0	0	0	0	200	300	0	0	0	0	0	0	0	200	903	0	0	0	0	0	0	0	603	903	0
429	1	0	0	0	0	0	0	200	300	0	0	0	0	0	0	0	200	903	0	0	0	0	0	0	0	603	903	0
429	2	0	0	0	0	0	0	200	300	0	0	0	0	0	0	0	200	903	0	0	0	0	0	0	0	603	903	0
429	3	0	0	0	0	0	0	200	300	0	0	0	0	0	0	0	200	903	0	0	0	0	0	0	0	603	903	0
429	4	0	0	0	0	0	0	200	300	0	0	0	0	0	0	0	200	903	0	0	0	0	0	0	0	603	903	0
429	5	0	0	0	0	0	0	200	300	0	0	0	0	0	0	0	200	903	0	0	0	0	0	0	0	603	903	0
429	6	0	0	0	0	0	0	200	300	0	0	0	0	0	0	0	200	903	0	0	0	0	0	0	0	603	903	0
429	7	0	0	0	0	0	0	200	300	0	0	0	0	0	0	0	200	903	0	0	0	0	0	0	0	603	903	0
429	8	0	0	0	0	0	0	200	300	0	0	0	0	0	0	0	200	903	0	0	0	0	0	0	0	603	903	0
429	9	0	0	0	0	0	0	200	300	0	0	0	0	0	0	0	200	903	0	0	0	0	0	0	0	603	903	0
430	0	0	0	0	0	0	0	200	300	0	0	0	0	0	0	0	200	903	0	0	0	0	0	0	0	603	903	0
430	1	0	0	0	0	0	0	200	300	0	0	0	0	0	0	0	200	903	0	0	0	0	0	0	0	603	903	0
430	2	0	0	0	0	0	0	200	300	0	0	0	0	0	0	0	200	903	0	0	0	0	0	0	0	603	903	0
430	3	0	0	0	0	0	0	200	300	0	0	0	0	0	0	0	200	903	0	0	0	0	0	0	0	603	903	0
430	4	0	0	0	0	0	0	200	300	0	0	0	0	0	0	0	200	903	0	0	0	0	0	0	0	603	903	0
430	5	0	0	0	0	0	0	200	300	0	0	0	0	0	0	0	200	903	0	0	0	0	0	0	0	603	903	0
430	6	0	0	0	0	0	0	200	300	0	0	0	0	0	0	0	200	903	0	0	0	0	0	0	0	603	903	0
430	7	0	0	0	0	0	0	200	300	0	0	0	0	0	0	0	200	903	0	0	0	0	0	0	0	603	903	0
430	8	0	0	0	0	0	0	200	300	0	0	0	0	0	0	0	200	903	0	0	0	0	0	0	0	603	903	0
430	9	0	0	0	0	0	0	200	300	0	0	0	0	0	0	0	200	903	0	0	0	0	0	0	0	603	903	0
431	0	0	0	0	0	0	0	200	300	0	0	0	0	0	0	0	200	903	0	0	0	0	0	0	0	603	903	0
431	1	0	0	0	0	0	0	200	300	0	0	0	0	0	0	0	200	903	0	0	0	0	0	0	0	603	903	0
431	2	0	0	0	0	0	0	200	300	0	0	0	0	0	0	0	200	903	0	0	0	0	0	0	0	603	903	0
431	3	0	0	0	0	0	0	200	300	0	0	0	0	0	0	0	200	903	0	0	0	0	0	0	0	603	903	0
431	4	0	0	0	0	0	0	200	300	0	0	0	0	0	0	0	200	903	0	0	0	0	0	0	0	603	903	0
431	5	0	0	0	0	0	0	200	300	0	0	0	0	0	0	0	200	903	0	0	0	0	0	0	0	603	903	0
431	6	0	0	0	0	0	0	200	300	0	0	0	0	0	0	0	200	903	0	0	0	0	0	0	0	603	903	0
431	7	0	0	0	0	0	0	200	300	0	0	0	0	0	0	0	200	903	0	0	0	0	0	0	0	603	903	0
431	8	0	0	0	0	0	0	200	300	0	0	0	0	0	0	0	200	903	0	0	0	0	0	0	0	603	903	0
431	9	0	0	0	0	0	0	200	300	0	0	0	0	0	0	0	200	903	0	0	0	0	0	0	0	603	903	0
432	0	0	0	0	0	0	0	200	300	0	0	0	0	0	0	0	200	903	0	0	0	0	0	0	0	603	903	0
432	1	0	0	0	0	0	0	200	300	0	0	0	0	0	0	0	200	903	0	0	0	0	0	0	0	603	903	0
432	2	0	0	0	0	0	0	200	300	0	0	0	0	0	0	0	200	903	0	0	0	0	0	0	0	603	903	0
432	3	0	0	0	0	0	0	200	300	0	0	0	0	0	0	0	200	903	0	0	0	0	0	0	0	603	903	0
432	4	0	0	0	0	0	0	200	300	0	0	0	0	0	0	0	200	903	0	0	0	0	0	0	0	603	903	0
432	5	0	0	0	0	0	0	200	300	0	0	0	0	0	0	0	200	903	0	0	0	0	0	0	0	603	903	0
432	6	0	0	0	0	0	0	200	300	0	0	0	0	0	0	0	200	903	0	0	0	0	0	0	0	603	903	0
432	7	0	0	0	0	0	0	200	300	0	0	0	0	0	0	0	200	903	0	0	0	0	0	0	0	603	903	0
432	8	0	0	0	0	0	0	200	300	0	0	0	0	0	0	0	200	903	0	0	0	0	0	0	0	603	903	0
432	9	0	0	0	0	0	0	200	300	0	0	0	0	0	0	0	200	903	0	0	0	0	0	0	0	603	903	0
433	0	0	0	0	0	0	0	200	300	0	0	0	0	0	0	0	200	903	0	0	0	0	0	0	0	603	903	0
433	1	0	0	0	0	0	0	200	300	0	0	0	0	0	0	0	200	903	0	0	0	0	0	0	0	603	903	0
433	2	0	0	0	0	0	0	200	300	0	0	0	0	0	0	0	200	903	0	0	0	0	0	0	0	603	903	0
433	3	0	0	0	0	0	0	200	300	0	0	0	0	0	0	0	200	903	0	0	0	0	0	0	0	603	903	0
433	4	0	0	0	0	0	0	200	300	0	0	0	0	0	0	0	200	903	0	0	0	0	0	0	0	603	903	0
433	5	0	0	0	0	0	0	200	300	0	0	0	0	0	0	0	200	903	0	0	0	0	0	0	0	603	903	0
433	6	0	0	0	0	0	0	200	300	0	0	0	0	0	0	0	200	903	0	0	0	0	0	0	0	603	903	0
433	7	0	0	0	0	0	0	200	300	0	0	0	0	0	0	0	200	903	0	0	0	0	0	0	0	603	903	0
433	8	0	0	0	0	0	0	200	300	0	0	0	0	0	0	0	200	903	0	0	0	0	0	0	0	603	903	0
433	9	0	0	0	0	0	0	200	300	0	0	0	0	0	0	0	200	903	0	0	0	0	0	0	0	603	903	0
434	0	0	0	0	0	0	0	200	300	0	0	0	0	0	0	0	200	903	0	0	0	0	0	0	0	603	903	0
434	1	0	0	0	0	0	0	200	300	0	0	0	0	0	0	0	200	903	0	0	0	0	0	0	0	603	903	0
434	2	0	0	0	0	0	0	200	300	0	0	0	0	0	0	0	200	903	0	0	0	0	0	0	0	603	903	0
434	3	0	0	0	0	0	0	200	300	0	0	0	0	0	0	0	200	903	0	0	0	0	0	0	0	603	903	0
434	4	0	0	0	0	0	0	200	300	0	0	0	0	0	0	0	200	903	0	0	0	0	0	0	0	603	903	0
434	5	0	0	0	0	0	0	200	300	0	0	0	0	0	0	0	200	903	0	0	0	0	0	0	0	603	903	0
434	6	0	0	0	0	0	0	200	300	0	0	0	0	0	0	0	200	903	0	0	0	0	0	0	0	603	903	0
434	7	0	0	0	0	0	0	200	300	0	0	0	0	0	0	0	200	903	0	0	0	0	0	0	0	603	903	0
434	8	0	0	0	0	0	0	200	300	0	0	0	0	0	0	0	200	903	0	0	0	0	0	0	0	603	903	0
434	9	0	0	0	0	0	0	200	300	0	0	0	0	0	0	0	200	903	0	0	0	0	0	0	0	603	903	0
435	0	0	0	0	0	0	0	200	300	0	0	0	0	0	0	0	200	903	0	0	0	0	0	0	0	603	903	0
435	1	0	0	0	0	0	0	200	300	0	0	0	0	0	0	0	200	903	0	0	0	0	0	0	0	603	903	0
435	2	0	0	0	0	0	0	200	300	0	0	0	0	0	0	0	200	903	0	0	0	0	0	0	0	603	903	0
435	3	0	0	0	0	0	0	200	300	0	0	0	0	0	0	0	200	903	0	0	0	0	0	0	0	603	903	0
435	4	0	0	0	0	0	0	200	300	0	0	0	0	0	0	0	200	903	0	0	0	0	0	0	0	603	903	0
435	5	0	0	0	0	0	0	200	300	0	0	0	0	0	0	0	200	903	0	0	0	0	0	0	0	603	903	0
435	6	0	0	0	0	0	0	200	300	0	0	0	0	0	0	0	200	903	0	0	0	0	0	0	0	603	903	0
435	7	0	0	0	0	0	0	200	300	0	0	0	0	0	0	0	200	903	0	0	0	0	0	0	0	603	903	0
435	8	0	0	0	0	0	0	200	300	0	0	0	0	0	0	0	200	903	0	0	0	0	0	0	0	603	903	0
435	9	0	0	0	0	0	0	200	300	0	0	0	0	0	0	0	200	903	0	0	0	0	0	0	0	603	903	0
436	0	0	0	0	0	0	0	200	300	0	0	0	0	0	0	0	200	903	0	0	0	0	0	0	0	603	903	0
436	1	0	0	0	0	0	0	200	300	0	0	0	0	0	0	0	200	903	0	0	0	0	0	0	0	603	903	0
436	2	0	0	0	0	0	0	200	300	0	0	0	0	0	0	0	200	903	0	0	0	0	0	0	0	603	903	0
436	3	0	0	0	0	0	0	200	300	0	0	0	0	0	0	0	200	903	0	0	0	0	0	0	0	603	903	0
436	4	0	0	0	0	0	0	200	300	0	0	0	0	0	0	0	200	903	0	0	0	0	0	0	0	603	903	0
436	5	0	0	0	0	0	0	200	300	0	0	0	0	0	0	0	200	903	0	0	0	0	0	0	0	603	903	0
436	6	0	0	0	0	0	0	200	300	0	0	0	0	0	0	0	200	903	0	0	0	0	0	0	0	603	903	0
436	7	0	0	0	0	0	0	200	300	0	0	0	0	0	0	0	200	903	0	0	0	0	0	0	0	603	903	0
436	8	0	0	0	0	0	0	200	300	0	0	0	0	0	0	0	200	903	0	0	0	0	0	0	0	603	903	0
436	9	0	0	0	0	0	0	200	300	0	0	0	0	0	0	0	200	903	0	0	0	0	0	0	0	603	903	0
437	0	0	0	0	0	0	0	200	300	0	0	0	0	0	0	0	200	903	0	0	0	0	0	0	0	603	903	0
437	1	0	0	0	0	0	0	200	300	0	0	0	0	0	0	0	200	903	0	0	0	0	0	0	0	603	903	0
437	2	0	0	0	0	0	0	200	300	0	0	0	0	0	0	0	200	903	0	0	0	0	0	0	0	603	903	0
437	3	0	0	0	0	0	0	200	300	0	0	0	0	0	0	0	200	903	0	0	0	0	0	0	0	603	903	0
437	4	0	0	0	0	0	0	200	300	0	0	0	0	0	0	0	200	903	0	0	0	0	0	0	0	603	903	0
437	5	0	0	0	0	0	0	200	300	0	0	0	0	0	0	0	200	903	0	0	0	0	0	0	0	603	903	0
437	6	0	0	0	0	0	0	200	300	0	0	0	0	0	0	0	200	903	0	0	0	0	0	0	0	603	903	0
437	7	0	0	0	0	0	0	200	300	0	0	0	0	0	0	0	200	903	0	0	0	0	0	0	0	603	903	0
437	8	0	0	0	0	0	0	200	300	0	0	0	0	0	0	0	200	903	0	0	0	0	0	0	0	603	903	0
437	9	0	0	0	0	0	0	200	300	0	0	0	0	0	0	0	200	903	0	0	0	0	0	0	0	603	903	0
438	0	0	0	0	0	0	0	200	300	0	0	0	0	0	0	0	200	903	0	0	0	0	0	0	0	603	903	0
438	1	0	0	0	0	0	0	200	300	0	0	0	0	0	0	0	200	903	0	0	0	0	0	0	0	603	903	0
438	2	0	0	0	0	0	0	200	300	0	0	0	0	0	0	0	200	903	0	0	0	0	0	0	0	603	903	0
438	3	0	0	0	0	0	0	200	300	0	0	0	0	0	0	0	200	903	0	0	0	0	0	0	0	603	903	0
438	4	0	0	0	0	0	0	200	300	0	0	0	0	0	0	0	200	903	0	0	0	0	0	0	0	603	903	0
438	5	0	0	0	0	0	0	200	300	0	0	0	0	0	0	0	200	903	0	0	0	0	0	0	0	603	903	0
438	6	0	0	0	0	0	0	200	300	0	0	0	0	0	0	0	200	903	0	0	0	0	0	0	0	603	903	0
438	7	0	0	0	0	0	0	200	300	0	0	0	0	0	0	0	200	903	0	0	0	0	0	0	0	603	903	0
438	8	0	0	0	0	0	0	200	300	0	0	0	0	0	0	0	200	903	0	0	0	0	0	0	0	603	903	0
438	9	0	0	0	0	0	0	200	300	0	0	0	0	0	0	0	200	903	0	0	0	0	0	0	0	603	903	0
439	0	0	0	0	0	0	0	200	300	0	0	0	0	0	0	0	200	903	0	0	0	0	0	0	0	603	903	0
439	1	0	0	0	0	0	0	200	300	0	0	0	0	0	0	0	200	903	0	0	0	0	0	0	0	603	903	0
439	2	0	0	0	0	0	0	200	300	0	0	0	0	0	0	0	200	903	0	0	0	0	0	0	0	603	903	0
439	3	0	0	0	0	0	0	200	300	0	0	0	0	0	0	0	200	903	0	0	0	0	0	0	0	603	903	0
439	4	0	0	0	0	0	0	200	300	0	0	0	0	0	0	0	200	903	0	0	0	0	0	0	0	603	903	0
439	5	0	0	0	0	0	0	200	300	0	0	0	0	0	0	0	200	903	0	0	0	0	0	0	0	603	903	0
439	6	0	0	0	0	0	0	200	300	0	0	0	0	0	0	0	200	903	0	0	0	0	0	0	0	603	903	0
439	7	0	0	0	0	0	0	200	300	0	0	0	0	0	0	0	200	903	0	0	0	0	0	0	0	603	903	0
439	8	0	0	0	0	0	0	200	300	0	0	0	0	0	0	0	200	903	0	0	0	0	0	0	0	603	903	0
439	9	0	0	0	0	0	0	200	300	0	0	0	0	0	0	0	200	903	0	0	0	0	0	0	0	603	903	0
440	0	0	0	0	0	0	0	200	300	0	0	0	0	0	0	0	200	903	0	0	0	0	0	0	0	603	903	0
440	1	0	0	0	0	0	0	200	300	0	0	0	0	0	0	0	200	903	0	0	0	0	0	0	0	603	903	0
440	2	0	0	0	0	0	0	200	300	0	0	0	0	0	0	0	200	903	0	0	0	0	0	0	0	603	903	0
440	3	0	0	0	0	0	0	200	300	0	0	0	0	0	0	0	200	903	0	0	0	0	0	0	0	603	903	0
440	4	0	0	0	0	0	0	200	300	0	0	0	0	0	0	0	200	903	0	0	0	0	0	0	0	603	903	0
440	5	0	0	0	0	0	0	200	300	0	0	0	0	0	0	0	200	903	0	0	0	0	0	0	0	603	903	0
440	6	0	0	0	0	0	0	200	300	0	0	0	0	0	0	0	200	903	0	0	0	0	0	0	0	603	903	0
440	7	0	0	0	0	0	0	200	300	0	0	0	0	0	0	0	200	903	0	0	0	0	0	0	0	603	903	0
440	8	0	0	0	0	0	0	200	300	0	0	0	0	0	0	0	200	903	0	0	0	0	0	0	0	603	903	0
440	9	0	0	0	0	0	0	200	300	0	0	0	0	0	0	0	200	903	0	0	0	0	0	0	0	603	903	0
441	0	0	0	0	0	0	0	200	300	0	0	0	0	0	0	0	200	903	0	0	0	0	0	0	0	603	903	0
441	1	0	0	0	0	0	0	200	300	0	0	0	0	0	0	0	200	903	0	0	0	0	0	0	0	603	903	0
441	2	0	0	0	0	0	0	200	300	0	0	0	0	0	0	0	200	903	0	0	0	0	0	0	0	603	903	0
441	3	0	0	0	0	0	0	200	300	0	0	0	0	0	0	0	200	903	0	0	0	0	0	0	0	603	903	0
441	4	0	0	0	0	0	0	200	300	0	0	0	0	0	0	0	200	903	0	0	0	0	0	0	0	603	903	0
441	5	0	0	0	0	0	0	200	300	0	0	0	0	0	0	0	200	903	0	0	0	0	0	0	0	603	903	0
441	6	0	0	0	0	0	0	200	300	0	0	0	0	0	0	0	200	903	0	0	0	0	0	0	0	603	903	0
441	7	0	0	0	0	0	0	200	300	0	0	0	0	0	0	0	200	903	0	0	0	0	0	0	0	603	903	0
441	8	0	0	0	0	0	0	200	300	0	0	0	0	0	0	0	200	903	0	0	0	0	0	0	0	603	903	0
441	9	0	0	0	0	0	0	200	300	0	0	0	0	0	0	0	200	903	0	0	0	0	0	0	0	603	903	0
442	0	0	0	0	0	0	0	200	300	0	0	0	0	0	0	0	200	903	0	0	0	0	0	0	0	603	903	0
442	1	0	0	0	0	0	0	200	300	0	0	0	0	0	0	0	200	903	0	0	0	0	0	0	0	603	903	0
442	2	0	0	0	0	0	0	200	300	0	0	0	0	0	0	0	200	903	0	0	0	0	0	0	0	603	903	0
442	3	0	0	0	0	0	0	200	300	0	0	0	0	0	0	0	200	903	0	0	0	0	0	0	0	603	903	0
442	4	0	0	0	0	0	0	200	300	0	0	0	0	0	0	0	200	903	0	0	0	0	0	0	0	603	903	0
442	5	0	0	0	0	0	0	200	300	0	0	0	0	0	0	0	200	903	0	0	0	0	0	0	0	603	903	0
442	6	0	0	0	0	0	0	200	300	0	0	0	0	0	0	0	200	903	0	0	0	0	0	0	0	603	903	0
442	7	0	0	0	0	0	0	200	300	0	0	0	0	0	0	0	200	903	0	0	0	0	0	0	0	603	903	0
442	8	0	0	0	0	0	0	200	300	0	0	0	0	0	0	0	200	903	0	0	0	0	0	0	0	603	903	0
442	9	0	0	0	0	0	0	200	300	0	0	0	0	0	0	0	200	903	0	0	0	0	0	0	0	603	903	0
443	0	0	0	0	0	0	0	200	300	0	0	0	0	0	0	0	200	903	0	0	0	0	0	0	0	603	903	0
443	1	0	0	0	0	0	0	200	300	0	0	0	0	0	0	0	200	903	0	0	0	0	0	0	0	603	903	0
443	2	0	0	0	0	0	0	200	300	0	0	0	0	0	0	0	200	903	0	0	0	0	0	0	0	603	903	0
443	3	0	0	0	0	0	0	200	300	0	0	0	0	0	0	0	200	903	0	0	0	0	0	0	0	603	903	0
443	4	0	0	0	0	0	0	200	300	0	0	0	0	0	0	0	200	903	0	0	0	0	0	0	0	603	903	0
443	5	0	0	0	0	0	0	200	300	0	0	0	0	0	0	0	200	903	0	0	0	0	0	0	0	603	903	0
443	6	0	0	0	0	0	0	200	300	0	0	0	0	0	0	0	200	903	0	0	0	0	0	0	0	603	903	0
443	7	0	0	0	0	0	0	200	300	0	0	0	0	0	0	0	200	903	0	0	0	0	0	0	0	603	903	0
443	8	0	0	0	0	0	0	200	300	0	0	0	0	0	0	0	200	903	0	0	0	0	0	0	0	603	903	0
443	9	0	0	0	0	0	0	200	300	0	0	0	0	0	0	0	200	903	0	0	0	0	0	0	0	603	903	0
444	0	0	0	0	0	0	0	200	300	0	0	0	0	0	0	0	200	903	0	0	0	0	0	0	0	603	903	0
444	1	0	0	0	0	0	0	200	300	0	0	0	0	0	0	0	200	903	0	0	0	0	0	0	0	603	903	0
444	2	0	0	0	0	0	0	200	300	0	0	0	0	0	0	0	200	903	0	0	0	0	0	0	0	603	903	0
444	3	0	0	0	0	0	0	200	300	0	0	0	0	0	0	0	200	903	0	0	0	0	0	0	0	603	903	0
444	4	0	0	0	0	0	0	200	300	0	0	0	0	0	0	0	200	903	0	0	0	0	0	0	0	603	903	0
444	5	0	0	0	0	0	0	200	300	0	0	0	0	0	0	0	200	903	0	0	0	0	0	0	0	603	903	0
444	6	0	0	0	0	0	0	200	300	0	0	0	0	0	0	0	200	903	0	0	0	0	0	0	0	603	903	0
444	7	0	0	0	0	0	0	200	300	0	0	0	0	0	0	0	200	903	0	0	0	0	0	0	0	603	903	0
444	8	0	0	0	0	0	0	200	300	0	0	0	0	0	0	0	200	903	0	0	0	0	0	0	0	603	903	0
444	9	0	0	0	0	0	0	200	300	0	0	0	0	0	0	0	200	903	0	0	0	0	0	0	0	603	903	0
445	0	0	0	0	0	0	0	200	300	0	0	0	0	0	0	0	200	903	0	0	0	0	0	0	0	603	903	0
445	1	0	0	0	0	0	0	200	300	0	0	0	0	0	0	0	200	903	0	0	0	0	0	0	0	603	903	0
445	2	0	0	0	0	0	0	200	300	0	0	0	0	0	0	0	200	903	0	0	0	0	0	0	0	603	903	0
445	3	0	0	0	0	0	0	200	300	0	0	0	0	0	0	0	200	903	0	0	0	0	0	0	0	603	903	0
445	4	0	0	0	0	0	0	200	300	0	0	0	0	0	0	0	200	903	0	0	0	0	0	0	0	603	903	0
445	5	0	0	0	0	0	0	200	300	0	0	0	0	0	0	0	200	903	0	0	0	0	0	0	0	603	903	0
445	6	0	0	0	0	0	0	200	300	0	0	0	0	0	0	0	200	903	0	0	0	0	0	0	0	603	903	0
445	7	0	0	0	0	0	0	200	300	0	0	0	0	0	0	0	200	903	0	0	0	0	0	0	0	603	903	0
445	8	0	0	0	0	0	0	200	300	0	0	0	0	0	0	0	200	903	0	0	0	0	0	0	0	603	903	0
445	9	0	0	0	0	0	0	200	300	0	0	0	0	0	0	0	200	903	0	0	0	0	0	0	0	603	903	0
446	0	0	0	0	0	0	0	200	300	0	0	0	0	0	0	0	200	903	0	0	0	0	0	0	0	603	903	0
446	1	0	0	0	0	0	0	200	300	0	0	0	0	0	0	0	200	903	0	0	0	0	0	0	0	603	903	0
446	2	0	0	0	0	0	0	200	300	0	0	0	0	0	0	0	200	903	0	0	0	0	0	0	0	603	903	0
446	3	0	0	0	0	0	0	200	300	0	0	0	0	0	0	0	200	903	0	0	0	0	0	0	0	603	903	0
446	4	0	0	0	0	0	0	200	300	0	0	0	0	0	0	0	200	903	0	0	0	0	0	0	0	603	903	0
446	5	0	0	0	0	0	0	200	300	0	0	0	0	0	0	0	200	903	0	0	0	0	0	0	0	603	903	0
[truncated: 3,344 more rows]
