# Supplementary material for: The Effects of an Extemporaneous Speech Dual-task on Older Adult Gait Control
Source: Research Square preprint supplement (doi:10.21203/rs.3.rs-7674245/v1), 2025-11-18
Supplement: Supplementary file 19 [file DT2Walk01.xlsx]

## Sheet: Sheet1
Trajectories
		02:LFHD			02:RFHD			02:LBHD			02:RBHD			02:C7			02:T10			02:CLAV			02:STRN			02:RBAK			02:LSHO			02:LUPA			02:LELB			02:LFRM			02:LWRA			02:LWRB			02:LFIN
Frame	Sub Frame	X	Y	Z	X	Y	Z	X	Y	Z	X	Y	Z	X	Y	Z	X	Y	Z	X	Y	Z	X	Y	Z	X	Y	Z	X	Y	Z	X	Y	Z	X	Y	Z	X	Y	Z	X	Y	Z	X	Y	Z	X	Y	Z
		mm	mm	mm	mm	mm	mm	mm	mm	mm	mm	mm	mm	mm	mm	mm	mm	mm	mm	mm	mm	mm	mm	mm	mm	mm	mm	mm	mm	mm	mm	mm	mm	mm	mm	mm	mm	mm	mm	mm	mm	mm	mm	mm	mm	mm	mm	mm	mm
254	0	304.219	2899.53	1574.26	205.445	2882.3	1568.13	292.148	3072.73	1577.57	179.137	3062.88	1568.86	235.386	3120.82	1413.72	247.657	3178.88	1202.91	248.958	2989.23	1341.63	246.154	2930.6	1207.74	151.313	3184.44	1252.18	417.036	3061.34	1365.63	455.895	3111.03	1138.86	448.411	3133.58	1074.56	478.77	3073.33	969.257	459.964	3060.78	866.254	490.955	3125.28	858.204	520.729	3080.53	774.461
255	0	305.568	2888.12	1575.32	206.941	2870.75	1569.19	292.909	3061.18	1579.73	180.038	3051.04	1571.35	236.631	3109.94	1415.92	249.389	3168.28	1204.95	249.585	2978.52	1343.48	246.617	2919.81	1209.31	153.126	3174.24	1254.25	418.005	3049.39	1367.89	457.327	3098.67	1140.77	450.062	3121.07	1076.35	480.199	3059.76	971.552	461.478	3046.69	868.465	492.688	3111.01	859.984	522.517	3065.7	776.438
256	0	306.812	2876.76	1576.37	208.326	2859.27	1570.21	293.605	3049.69	1581.82	180.867	3039.29	1573.71	237.853	3099.12	1418.07	251.156	3157.77	1206.98	250.18	2967.87	1345.27	247.036	2909.14	1210.85	154.958	3164.11	1256.28	418.919	3037.47	1370.13	458.76	3086.21	1142.71	451.745	3108.45	1078.15	481.563	3046.08	973.87	462.891	3032.47	870.723	494.406	3096.53	861.807	524.184	3050.6	778.5
257	0	307.951	2865.46	1577.39	209.601	2847.86	1571.19	294.235	3038.26	1583.83	181.622	3027.62	1575.95	239.052	3088.35	1420.15	252.959	3147.34	1209	250.744	2957.29	1347.01	247.412	2898.58	1212.36	156.81	3154.06	1258.27	419.777	3025.6	1372.38	460.193	3073.65	1144.66	453.459	3095.75	1079.97	482.862	3032.27	976.209	464.202	3018.13	873.026	496.112	3081.85	863.672	525.73	3035.22	780.648
258	0	308.984	2854.21	1578.4	210.765	2836.53	1572.13	294.799	3026.89	1585.77	182.306	3016.05	1578.07	240.227	3077.64	1422.17	254.795	3137	1211	251.276	2946.79	1348.69	247.745	2888.15	1213.84	158.679	3144.1	1260.23	420.58	3013.77	1374.61	461.625	3060.98	1146.63	455.204	3082.94	1081.8	484.095	3018.36	978.57	465.413	3003.67	875.375	497.804	3066.97	865.579	527.155	3019.56	782.881
259	0	309.914	2843.02	1579.38	211.819	2825.26	1573.03	295.3	3015.59	1587.62	182.918	3004.57	1580.07	241.38	3066.98	1424.14	256.662	3126.73	1212.99	251.777	2936.36	1350.31	248.036	2877.84	1215.29	160.566	3134.21	1262.15	421.327	3001.99	1376.84	463.057	3048.22	1148.61	456.98	3070.04	1083.66	485.263	3004.32	980.952	466.522	2989.08	877.769	499.481	3051.89	867.527	528.459	3003.63	785.2
260	0	310.74	2831.88	1580.35	212.764	2814.06	1573.89	295.737	3004.35	1589.4	183.461	2993.17	1581.95	242.509	3056.37	1426.04	258.556	3116.55	1214.96	252.249	2925.99	1351.87	248.288	2867.64	1216.7	162.465	3124.4	1264.04	422.021	2990.25	1379.06	464.488	3035.37	1150.61	458.784	3057.06	1085.52	486.367	2990.17	983.351	467.53	2974.37	880.205	501.143	3036.62	869.514	529.644	2987.43	787.602
261	0	311.466	2820.8	1581.29	213.601	2802.94	1574.7	296.113	2993.17	1591.09	183.936	2981.87	1583.69	243.614	3045.82	1427.87	260.472	3106.44	1216.91	252.691	2915.7	1353.38	248.502	2857.56	1218.08	164.373	3114.67	1265.88	422.662	2978.57	1381.26	465.916	3022.43	1152.62	460.615	3043.98	1087.4	487.408	2975.92	985.767	468.44	2959.55	882.682	502.787	3021.15	871.536	530.711	2970.97	790.086
262	0	312.092	2809.78	1582.2	214.332	2791.88	1575.47	296.431	2982.07	1592.69	184.346	2970.66	1585.31	244.696	3035.32	1429.64	262.401	3096.41	1218.82	253.107	2905.47	1354.82	248.683	2847.58	1219.42	166.283	3105	1267.67	423.252	2966.93	1383.44	467.341	3009.41	1154.63	462.469	3030.83	1089.28	488.387	2961.56	988.192	469.252	2944.6	885.194	504.412	3005.49	873.589	531.661	2954.24	792.648
263	0	312.624	2798.81	1583.08	214.96	2780.9	1576.19	296.693	2971.02	1594.21	184.694	2959.54	1586.8	245.755	3024.86	1431.33	264.336	3086.43	1220.7	253.498	2895.3	1356.18	248.834	2837.7	1220.71	168.189	3095.4	1269.41	423.792	2955.35	1385.59	468.761	2996.33	1156.63	464.343	3017.61	1091.15	489.307	2947.1	990.623	469.971	2929.54	887.738	506.013	2989.65	875.666	532.497	2937.27	795.283
264	0	313.066	2787.91	1583.93	215.488	2769.99	1576.86	296.905	2960.05	1595.62	184.985	2948.51	1588.15	246.79	3014.46	1432.93	266.267	3076.52	1222.53	253.867	2885.19	1357.47	248.96	2827.91	1221.95	170.082	3085.85	1271.08	424.287	2943.82	1387.7	470.176	2983.2	1158.61	466.233	3004.32	1092.99	490.17	2932.55	993.049	470.598	2914.37	890.305	507.587	2973.63	877.759	533.223	2920.05	797.986
265	0	313.422	2777.06	1584.72	215.923	2759.16	1577.47	297.07	2949.14	1596.93	185.223	2937.57	1589.37	247.801	3004.11	1434.45	268.184	3066.65	1224.29	254.216	2875.14	1358.68	249.063	2818.2	1223.11	171.955	3076.36	1272.69	424.737	2932.36	1389.74	471.583	2970.04	1160.56	468.134	2990.99	1094.81	490.978	2917.92	995.463	471.139	2899.09	892.887	509.129	2957.45	879.857	533.842	2902.62	800.747
266	0	313.7	2766.27	1585.47	216.269	2748.39	1578.01	297.194	2938.3	1598.12	185.414	2926.73	1590.44	248.788	2993.8	1435.86	270.076	3056.83	1225.98	254.547	2865.14	1359.78	249.15	2808.56	1224.2	173.798	3066.9	1274.21	425.147	2920.95	1391.72	472.982	2956.86	1162.46	470.04	2977.62	1096.57	491.737	2903.22	997.852	471.599	2883.72	895.474	510.632	2941.12	881.949	534.358	2884.97	803.557
267	0	313.906	2755.55	1586.15	216.535	2737.7	1578.49	297.281	2927.53	1599.19	185.562	2915.97	1591.36	249.751	2983.53	1437.17	271.931	3047.04	1227.57	254.863	2855.18	1360.79	249.224	2798.99	1225.2	175.601	3057.48	1275.64	425.52	2909.61	1393.6	474.371	2943.69	1164.29	471.944	2964.23	1098.27	492.448	2888.46	1000.2	471.985	2868.25	898.054	512.09	2924.64	884.02	534.777	2867.14	806.402
268	0	314.048	2744.89	1586.77	216.727	2727.08	1578.9	297.337	2916.84	1600.12	185.674	2905.3	1592.13	250.687	2973.31	1438.35	273.74	3037.29	1229.06	255.168	2845.26	1361.67	249.29	2789.46	1226.08	177.357	3048.09	1276.96	425.859	2898.34	1395.37	475.748	2930.54	1166.04	473.839	2950.83	1099.87	493.116	2873.66	1002.5	472.302	2852.7	900.613	513.495	2908.05	886.057	535.104	2849.14	809.267
269	0	314.135	2734.29	1587.3	216.854	2716.54	1579.22	297.368	2906.21	1600.92	185.753	2894.72	1592.74	251.596	2963.12	1439.41	275.491	3027.55	1230.43	255.462	2835.37	1362.43	249.35	2779.97	1226.84	179.054	3038.71	1278.16	426.166	2887.13	1397.01	477.109	2917.43	1167.68	475.717	2937.42	1101.36	493.744	2858.83	1004.74	472.556	2837.07	903.137	514.841	2891.34	888.042	535.344	2831.01	812.138
270	0	314.175	2723.74	1587.74	216.926	2706.05	1579.44	297.376	2895.65	1601.56	185.806	2884.21	1593.18	252.476	2952.97	1440.33	277.172	3017.83	1231.66	255.747	2825.51	1363.06	249.409	2770.51	1227.46	180.684	3029.34	1279.24	426.446	2875.99	1398.51	478.452	2904.37	1169.19	477.569	2924.03	1102.73	494.335	2843.97	1006.89	472.755	2821.37	905.611	516.119	2874.55	889.961	535.502	2812.76	814.995
271	0	314.176	2713.26	1588.07	216.951	2695.64	1579.57	297.368	2885.15	1602.04	185.836	2873.78	1593.46	253.326	2942.85	1441.09	278.774	3008.13	1232.73	256.026	2815.67	1363.53	249.47	2761.07	1227.93	182.238	3019.97	1280.17	426.7	2864.92	1399.84	479.773	2891.37	1170.57	479.386	2910.65	1103.95	494.89	2829.11	1008.95	472.905	2805.61	908.018	517.323	2857.69	891.798	535.584	2794.43	817.821
272	0	314.149	2702.84	1588.3	216.94	2685.28	1579.59	297.345	2874.72	1602.37	185.846	2863.42	1593.57	254.143	2932.76	1441.7	280.287	2998.44	1233.65	256.297	2805.84	1363.85	249.534	2751.64	1228.24	183.709	3010.58	1280.95	426.931	2853.92	1400.98	481.066	2878.44	1171.77	481.158	2897.3	1105	495.41	2814.25	1010.89	473.009	2789.81	910.343	518.444	2840.78	893.537	535.594	2776.05	820.596
273	0	314.1	2692.47	1588.4	216.901	2674.97	1579.5	297.312	2864.35	1602.52	185.842	2853.13	1593.51	254.925	2922.7	1442.15	281.701	2988.75	1234.38	256.56	2796.01	1364.01	249.603	2742.21	1228.38	185.088	3001.19	1281.57	427.141	2842.98	1401.94	482.326	2865.6	1172.81	482.875	2883.97	1105.87	495.896	2799.41	1012.71	473.072	2773.97	912.569	519.476	2823.85	895.165	535.536	2757.64	823.301
274	0	314.038	2682.16	1588.38	216.842	2664.72	1579.28	297.271	2854.04	1602.5	185.824	2842.89	1593.28	255.669	2912.66	1442.42	283.007	2979.06	1234.94	256.815	2786.19	1363.99	249.677	2732.77	1228.34	186.37	2991.77	1282.02	427.329	2832.11	1402.69	483.547	2852.83	1173.65	484.528	2870.67	1106.55	496.345	2784.59	1014.38	473.096	2758.11	914.681	520.414	2806.91	896.667	535.416	2739.26	825.918
275	0	313.971	2671.89	1588.21	216.773	2654.5	1578.93	297.222	2843.78	1602.31	185.794	2832.69	1592.88	256.371	2902.63	1442.52	284.198	2969.37	1235.3	257.058	2776.36	1363.8	249.754	2723.31	1228.12	187.548	2982.32	1282.3	427.497	2821.3	1403.23	484.72	2840.14	1174.29	486.105	2857.39	1107.04	496.756	2769.8	1015.91	473.084	2742.24	916.665	521.251	2789.99	898.033	535.235	2720.91	828.428
276	0	313.903	2661.67	1587.91	216.698	2644.33	1578.46	297.169	2833.56	1601.95	185.755	2822.54	1592.31	257.03	2892.62	1442.45	285.269	2959.66	1235.46	257.287	2766.52	1363.44	249.83	2713.83	1227.73	188.62	2972.84	1282.41	427.643	2810.55	1403.56	485.837	2827.53	1174.73	487.598	2844.15	1107.32	497.125	2755.06	1017.28	473.034	2726.39	918.506	521.984	2773.11	899.252	534.996	2702.65	830.815
277	0	313.839	2651.49	1587.46	216.624	2634.19	1577.84	297.11	2823.39	1601.42	185.706	2812.42	1591.59	257.641	2882.61	1442.19	286.215	2949.94	1235.42	257.497	2756.67	1362.91	249.901	2704.32	1227.16	189.582	2963.33	1282.34	427.765	2799.85	1403.67	486.889	2814.99	1174.96	488.996	2830.92	1107.4	497.447	2740.36	1018.48	472.946	2710.56	920.192	522.609	2756.29	900.318	534.701	2684.48	833.062
278	0	313.784	2641.35	1586.86	216.554	2624.07	1577.1	297.047	2813.26	1600.73	185.648	2802.33	1590.71	258.202	2872.61	1441.75	287.034	2940.18	1235.18	257.682	2746.79	1362.2	249.96	2694.76	1226.44	190.434	2953.76	1282.09	427.859	2789.19	1403.56	487.869	2802.51	1174.99	490.291	2817.71	1107.28	497.716	2725.71	1019.5	472.818	2694.77	921.712	523.125	2739.55	901.224	534.351	2666.46	835.156
279	0	313.737	2631.24	1586.11	216.49	2613.97	1576.22	296.978	2803.15	1599.88	185.58	2792.25	1589.69	258.707	2862.62	1441.14	287.726	2930.39	1234.73	257.838	2736.88	1361.33	249.998	2685.16	1225.55	191.177	2944.16	1281.65	427.922	2778.56	1403.25	488.765	2790.08	1174.81	491.474	2804.52	1106.96	497.926	2711.13	1020.34	472.645	2679.05	923.056	523.531	2722.91	901.966	533.945	2648.59	837.083
280	0	313.699	2621.16	1585.22	216.432	2603.88	1575.21	296.903	2793.07	1598.87	185.501	2782.19	1588.53	259.155	2852.61	1440.35	288.291	2920.55	1234.08	257.956	2726.94	1360.3	250.006	2675.5	1224.53	191.813	2934.49	1281.04	427.95	2767.96	1402.73	489.569	2777.69	1174.45	492.538	2791.34	1106.45	498.071	2696.61	1021	472.425	2663.4	924.216	523.826	2706.39	902.543	533.482	2630.92	838.831
281	0	313.669	2611.1	1584.19	216.379	2593.8	1574.08	296.82	2783.01	1597.72	185.408	2772.13	1587.25	259.542	2842.6	1439.4	288.734	2910.65	1233.23	258.03	2716.96	1359.13	249.974	2665.78	1223.37	192.345	2924.77	1280.25	427.935	2757.36	1402.03	490.271	2765.33	1173.89	493.475	2778.16	1105.78	498.143	2682.15	1021.48	472.152	2647.84	925.186	524.011	2690	902.953	532.963	2613.45	840.391
282	0	313.642	2601.05	1583.02	216.327	2583.72	1572.84	296.726	2772.96	1596.44	185.301	2762.07	1585.85	259.863	2832.57	1438.29	289.061	2900.68	1232.18	258.053	2706.94	1357.82	249.889	2655.99	1222.1	192.778	2914.98	1279.29	427.874	2746.77	1401.15	490.864	2752.98	1173.17	494.279	2764.99	1104.94	498.137	2667.76	1021.78	471.823	2632.39	925.961	524.089	2673.77	903.199	532.386	2596.21	841.755
283	0	313.614	2591.01	1581.73	216.273	2573.64	1571.5	296.619	2762.91	1595.04	185.175	2752.01	1584.36	260.115	2822.52	1437.02	289.276	2890.62	1230.95	258.017	2696.87	1356.38	249.741	2646.12	1220.73	193.118	2905.12	1278.15	427.759	2736.16	1400.1	491.339	2740.64	1172.28	494.947	2751.82	1103.96	498.046	2653.45	1021.9	471.434	2617.08	926.538	524.061	2657.71	903.282	531.749	2579.22	842.917
284	0	313.578	2580.98	1580.33	216.209	2563.55	1570.07	296.496	2752.87	1593.54	185.028	2741.94	1582.79	260.294	2812.44	1435.61	289.389	2880.46	1229.54	257.914	2686.74	1354.84	249.52	2636.17	1219.28	193.368	2895.18	1276.85	427.584	2725.52	1398.92	491.691	2728.29	1171.26	495.473	2738.64	1102.85	497.865	2639.22	1021.84	470.981	2601.9	926.916	523.932	2641.83	903.207	531.052	2562.5	843.87
285	0	313.527	2570.94	1578.83	216.129	2553.45	1568.56	296.352	2742.82	1591.93	184.855	2731.86	1581.14	260.396	2802.33	1434.07	289.405	2870.2	1227.95	257.739	2676.54	1353.2	249.215	2626.11	1217.76	193.535	2885.15	1275.39	427.343	2714.84	1397.6	491.912	2715.93	1170.11	495.856	2725.47	1101.62	497.59	2625.08	1021.62	470.461	2586.88	927.096	523.704	2626.15	902.978	530.294	2546.05	844.613
286	0	313.452	2560.89	1577.25	216.024	2543.33	1567	296.183	2732.76	1590.25	184.653	2721.76	1579.45	260.417	2792.17	1432.41	289.332	2859.8	1226.22	257.483	2666.28	1351.49	248.819	2615.96	1216.19	193.622	2875.02	1273.78	427.031	2704.11	1396.17	492	2703.54	1168.85	496.094	2712.3	1100.3	497.217	2611.02	1021.24	469.873	2572.04	927.081	523.382	2610.67	902.603	529.477	2529.9	845.144
287	0	313.346	2550.83	1575.61	215.887	2533.2	1565.39	295.985	2722.68	1588.5	184.416	2711.64	1577.71	260.353	2781.96	1430.65	289.177	2849.28	1224.34	257.142	2655.94	1349.71	248.324	2605.69	1214.58	193.634	2864.79	1272.03	426.642	2693.32	1394.65	491.949	2691.13	1167.5	496.185	2699.14	1098.9	496.745	2597.06	1020.71	469.216	2557.37	926.874	522.971	2595.42	902.087	528.601	2514.05	845.463
288	0	313.198	2540.74	1573.92	215.708	2523.04	1563.77	295.751	2712.58	1586.71	184.14	2701.49	1575.96	260.2	2771.7	1428.8	288.946	2838.61	1222.34	256.712	2645.52	1347.9	247.725	2595.3	1212.95	193.572	2854.44	1270.14	426.172	2682.46	1393.05	491.76	2678.68	1166.07	496.131	2685.99	1097.44	496.172	2583.2	1020.03	468.491	2542.9	926.484	522.474	2580.41	901.439	527.67	2498.52	845.572
289	0	313	2530.63	1572.2	215.478	2512.85	1562.14	295.477	2702.45	1584.88	183.818	2691.31	1574.2	259.954	2761.37	1426.88	288.644	2827.79	1220.23	256.189	2635.01	1346.06	247.02	2584.78	1211.31	193.437	2843.97	1268.13	425.617	2671.53	1391.4	491.43	2666.2	1164.59	495.931	2672.86	1095.93	495.5	2569.46	1019.23	467.699	2528.63	925.917	521.897	2565.64	900.667	526.686	2483.31	845.475
290	0	312.744	2520.48	1570.48	215.189	2502.63	1560.53	295.157	2692.28	1583.05	183.448	2681.11	1572.46	259.611	2750.96	1424.9	288.272	2816.82	1218.03	255.571	2624.4	1344.22	246.209	2574.13	1209.68	193.229	2833.36	1266.02	424.976	2660.52	1389.7	490.961	2653.69	1163.07	495.588	2659.76	1094.38	494.73	2555.83	1018.3	466.842	2514.58	925.184	521.245	2551.12	899.783	525.655	2468.42	845.179
291	0	312.42	2510.28	1568.78	214.833	2492.38	1558.96	294.784	2682.08	1581.21	183.022	2670.86	1570.74	259.167	2740.48	1422.89	287.833	2805.68	1215.77	254.857	2613.69	1342.39	245.294	2563.33	1208.07	192.944	2822.61	1263.81	424.247	2649.44	1387.98	490.353	2641.16	1161.52	495.103	2646.7	1092.82	493.865	2542.34	1017.27	465.925	2500.75	924.297	520.522	2536.87	898.797	524.583	2453.86	844.691
292	0	312.022	2500.04	1567.12	214.402	2482.08	1557.44	294.354	2671.83	1579.41	182.536	2660.58	1569.08	258.619	2729.92	1420.86	287.326	2794.39	1213.47	254.05	2602.88	1340.6	244.28	2552.37	1206.5	192.579	2811.71	1261.53	423.433	2638.28	1386.26	489.611	2628.61	1159.96	494.479	2633.69	1091.25	492.911	2528.98	1016.15	464.951	2487.14	923.27	519.734	2522.89	897.72	523.475	2439.64	844.023
293	0	311.543	2489.75	1565.51	213.889	2471.74	1556	293.861	2661.53	1577.65	181.986	2650.25	1567.48	257.964	2719.26	1418.84	286.747	2782.94	1211.14	253.152	2591.95	1338.86	243.174	2541.26	1204.98	192.128	2800.66	1259.2	422.535	2627.06	1384.54	488.737	2616.06	1158.4	493.721	2620.76	1089.69	491.873	2515.78	1014.95	463.927	2473.77	922.117	518.886	2509.19	896.565	522.339	2425.76	843.186
294	0	310.977	2479.39	1563.99	213.29	2461.35	1554.65	293.301	2651.17	1575.96	181.369	2639.88	1565.97	257.201	2708.52	1416.84	286.094	2771.34	1208.81	252.168	2580.92	1337.2	241.988	2529.99	1203.53	191.586	2789.45	1256.83	421.558	2615.79	1382.85	487.738	2603.53	1156.85	492.83	2607.91	1088.14	490.757	2502.75	1013.69	462.857	2460.64	920.855	517.982	2495.77	895.346	521.184	2412.23	842.197
295	0	310.321	2468.97	1562.56	212.599	2450.9	1553.42	292.67	2640.76	1574.36	180.682	2629.45	1564.56	256.327	2697.68	1414.89	285.358	2759.6	1206.51	251.105	2569.77	1335.64	240.734	2518.55	1202.16	190.945	2778.08	1254.46	420.508	2604.48	1381.2	486.617	2591.03	1155.34	491.811	2595.17	1086.62	489.572	2489.89	1012.38	461.75	2447.75	919.503	517.026	2482.66	894.077	520.019	2399.03	841.072
296	0	309.57	2458.48	1561.26	211.813	2440.4	1552.31	291.966	2630.27	1572.87	179.923	2618.97	1563.27	255.345	2686.75	1413.02	284.533	2747.72	1204.27	249.972	2558.51	1334.19	239.43	2506.96	1200.89	190.2	2766.55	1252.1	419.395	2593.15	1379.6	485.383	2578.59	1153.86	490.669	2582.55	1085.13	488.326	2477.23	1011.04	460.611	2435.11	918.08	516.023	2469.85	892.773	518.853	2386.19	839.832
297	0	308.723	2447.92	1560.09	210.931	2429.83	1551.34	291.187	2619.72	1571.51	179.091	2608.43	1562.12	254.254	2675.72	1411.24	283.61	2735.72	1202.09	248.778	2547.14	1332.87	238.092	2495.2	1199.74	189.343	2754.87	1249.8	418.227	2581.82	1378.06	484.041	2566.23	1152.43	489.407	2570.08	1083.69	487.028	2464.78	1009.69	459.447	2422.74	916.609	514.975	2457.35	891.45	517.694	2373.69	838.498
298	0	307.78	2437.28	1559.09	209.952	2419.2	1550.53	290.332	2609.1	1570.3	178.189	2597.84	1561.13	253.059	2664.6	1409.59	282.58	2723.61	1200.02	247.536	2535.68	1331.72	236.741	2483.29	1198.72	188.372	2743.05	1247.57	417.017	2570.51	1376.61	482.602	2553.99	1151.06	488.032	2557.78	1082.31	485.688	2452.56	1008.34	458.265	2410.62	915.112	513.887	2445.16	890.125	516.553	2361.55	837.095
299	0	306.742	2426.56	1558.26	208.879	2408.5	1549.89	289.403	2598.4	1569.27	177.217	2587.18	1560.31	251.764	2653.4	1408.08	281.436	2711.42	1198.07	246.259	2524.12	1330.73	235.397	2471.25	1197.85	187.281	2731.1	1245.46	415.778	2559.25	1375.25	481.074	2541.88	1149.76	486.55	2545.67	1080.99	484.315	2440.58	1007.02	457.073	2398.77	913.613	512.759	2433.31	888.815	515.436	2349.75	835.647
300	0	305.612	2415.76	1557.62	207.712	2397.74	1549.44	288.404	2587.62	1568.43	176.18	2576.46	1559.68	250.377	2642.12	1406.74	280.172	2699.14	1196.28	244.962	2512.49	1329.93	234.083	2459.08	1197.14	186.071	2719.03	1243.5	414.523	2548.05	1374	479.469	2529.96	1148.54	484.969	2533.79	1079.74	482.921	2428.85	1005.74	455.876	2387.19	912.137	511.594	2421.79	887.536	514.35	2338.32	834.183
301	0	304.394	2404.87	1557.18	206.458	2386.92	1549.17	287.337	2576.77	1567.8	175.082	2565.69	1559.25	248.907	2630.76	1405.59	278.784	2686.82	1194.67	243.658	2500.78	1329.34	232.819	2446.8	1196.61	184.744	2706.87	1241.72	413.267	2536.95	1372.87	477.797	2518.24	1147.4	483.296	2522.15	1078.58	481.516	2417.41	1004.52	454.682	2375.89	910.709	510.392	2410.61	886.305	513.301	2327.25	832.727
302	0	303.094	2393.92	1556.96	205.12	2376.03	1549.1	286.21	2565.84	1567.4	173.931	2554.85	1559.03	247.363	2619.34	1404.65	277.272	2674.46	1193.26	242.364	2489.02	1328.97	231.626	2434.44	1196.27	183.303	2694.62	1240.15	412.026	2525.95	1371.88	476.072	2506.76	1146.37	481.541	2510.78	1077.52	480.109	2406.25	1003.37	453.494	2364.88	909.352	509.155	2399.77	885.138	512.292	2316.54	831.307
303	0	301.719	2382.88	1556.96	203.708	2365.08	1549.24	285.029	2554.84	1567.24	172.733	2543.97	1559.03	245.76	2607.87	1403.93	275.639	2662.09	1192.09	241.094	2477.23	1328.81	230.522	2422.02	1196.14	181.757	2682.32	1238.83	410.814	2515.08	1371.03	474.308	2495.56	1145.45	479.717	2499.71	1076.57	478.713	2395.41	1002.31	452.319	2354.16	908.093	507.882	2389.3	884.05	511.325	2306.21	829.946
304	0	300.278	2371.78	1557.19	202.228	2354.08	1549.58	283.804	2543.78	1567.32	171.499	2533.04	1559.26	244.109	2596.35	1403.45	273.894	2649.74	1191.16	239.864	2465.42	1328.9	229.524	2409.57	1196.21	180.114	2669.99	1237.78	409.644	2504.35	1370.35	472.521	2484.67	1144.64	477.834	2488.96	1075.73	477.335	2384.88	1001.36	451.16	2343.73	906.951	506.574	2379.18	883.056	510.397	2296.25	828.669
305	0	298.78	2360.62	1557.65	200.691	2343.04	1550.13	282.545	2532.65	1567.65	170.238	2522.07	1559.71	242.427	2584.81	1403.23	272.048	2637.43	1190.51	238.686	2453.61	1329.22	228.646	2397.11	1196.5	178.387	2657.65	1237.02	408.529	2493.77	1369.83	470.727	2474.1	1143.96	475.908	2478.54	1075.02	475.987	2374.69	1000.53	450.021	2333.61	905.95	505.23	2369.43	882.167	509.505	2286.67	827.495
306	0	297.237	2349.4	1558.34	199.108	2331.96	1550.88	281.262	2521.47	1568.24	168.96	2511.07	1560.39	240.729	2573.26	1403.26	270.114	2625.18	1190.15	237.574	2441.81	1329.78	227.898	2384.67	1197.02	176.589	2645.32	1236.56	407.48	2483.35	1369.48	468.944	2463.88	1143.41	473.953	2468.49	1074.45	474.675	2364.85	999.823	448.904	2323.8	905.104	503.851	2360.05	881.395	508.642	2277.47	826.441
307	0	295.659	2338.14	1559.24	197.491	2320.86	1551.82	279.968	2510.25	1569.07	167.678	2500.05	1561.29	239.03	2561.7	1403.56	268.11	2613.02	1190.08	236.538	2430.06	1330.57	227.287	2372.28	1197.75	174.735	2633.03	1236.42	406.506	2473.1	1369.32	467.187	2454.03	1143.01	471.985	2458.8	1074.02	473.409	2355.36	999.256	447.812	2314.3	904.43	502.438	2351.05	880.747	507.801	2268.65	825.52
308	0	294.059	2326.84	1560.37	195.851	2309.74	1552.94	278.676	2499	1570.15	166.403	2489.02	1562.41	237.345	2550.17	1404.12	266.056	2600.97	1190.3	235.587	2418.36	1331.59	226.818	2359.97	1198.71	172.838	2620.79	1236.6	405.613	2463.03	1369.35	465.473	2444.56	1142.77	470.02	2449.48	1073.75	472.194	2346.23	998.832	446.746	2305.12	903.936	500.994	2342.42	880.231	506.972	2260.22	824.743
309	0	292.451	2315.53	1561.69	194.204	2298.62	1554.23	277.397	2487.72	1571.46	165.147	2477.99	1563.72	235.688	2538.67	1404.93	263.97	2589.04	1190.82	234.726	2406.74	1332.83	226.488	2347.76	1199.88	170.914	2608.63	1237.1	404.805	2453.12	1369.57	463.818	2435.47	1142.68	468.075	2440.55	1073.64	471.036	2337.46	998.556	445.707	2296.27	903.629	499.522	2334.16	879.85	506.144	2252.17	824.112
310	0	290.85	2304.21	1563.19	192.564	2287.5	1555.68	276.146	2476.44	1572.99	163.921	2466.96	1565.23	234.071	2527.22	1405.98	261.871	2577.27	1191.63	233.96	2395.22	1334.28	226.296	2335.68	1201.26	168.975	2596.56	1237.89	404.082	2443.38	1369.97	462.235	2426.75	1142.75	466.166	2432	1073.7	469.938	2329.06	998.428	444.695	2287.75	903.51	498.028	2326.27	879.607	505.307	2244.5	823.63
311	0	289.268	2292.89	1564.86	190.944	2276.41	1557.27	274.934	2465.16	1574.72	162.736	2455.96	1566.9	232.506	2515.83	1407.25	259.779	2565.66	1192.7	233.289	2383.8	1335.91	226.231	2323.75	1202.83	167.034	2584.6	1238.96	403.443	2433.8	1370.56	460.736	2418.4	1143	464.305	2423.81	1073.93	468.902	2321.01	998.446	443.711	2279.56	903.575	496.517	2318.74	879.501	504.452	2237.2	823.292
312	0	287.722	2281.59	1566.66	189.362	2265.35	1558.97	273.771	2453.9	1576.62	161.602	2444.99	1568.73	231	2504.52	1408.74	257.707	2554.21	1194.01	232.711	2372.5	1337.7	226.284	2311.99	1204.58	165.101	2572.76	1240.3	402.882	2424.38	1371.33	459.328	2410.4	1143.41	462.507	2415.98	1074.33	467.93	2313.31	998.604	442.756	2271.7	903.815	494.999	2311.57	879.529	503.572	2230.27	823.091
313	0	286.226	2270.33	1568.58	187.831	2254.33	1560.77	272.669	2442.67	1578.68	160.528	2434.06	1570.69	229.559	2493.31	1410.41	255.67	2542.94	1195.54	232.22	2361.33	1339.64	226.436	2300.4	1206.49	163.186	2561.06	1241.86	402.392	2415.1	1372.26	458.016	2402.72	1143.99	460.781	2408.49	1074.9	467.021	2305.95	998.894	441.831	2264.18	904.217	493.483	2304.74	879.685	502.662	2223.69	823.016
314	0	284.795	2259.12	1570.59	186.367	2243.36	1562.64	271.636	2431.48	1580.86	159.52	2423.18	1572.76	228.187	2482.19	1412.23	253.678	2531.85	1197.25	231.808	2350.29	1341.71	226.67	2289	1208.53	161.295	2549.51	1243.62	401.962	2405.95	1373.34	456.803	2395.33	1144.73	459.135	2401.32	1075.64	466.174	2298.92	999.306	440.938	2256.98	904.764	491.979	2298.26	879.963	501.721	2217.46	823.054
315	0	283.441	2247.98	1572.67	184.984	2232.46	1564.58	270.679	2420.36	1583.13	158.585	2412.35	1574.92	226.885	2471.19	1414.19	251.739	2520.94	1199.12	231.464	2339.39	1343.86	226.961	2277.8	1210.69	159.435	2538.1	1245.55	401.58	2396.91	1374.56	455.685	2388.21	1145.62	457.574	2394.45	1076.53	465.385	2292.19	999.828	440.077	2250.11	905.432	490.5	2292.09	880.351	500.752	2211.56	823.187
316	0	282.178	2236.9	1574.77	183.693	2221.63	1566.54	269.802	2409.31	1585.47	157.725	2401.59	1577.14	225.652	2460.3	1416.25	249.858	2510.2	1201.11	231.176	2328.64	1346.08	227.285	2266.8	1212.93	157.612	2526.85	1247.61	401.234	2387.97	1375.89	454.657	2381.33	1146.66	456.097	2387.83	1077.57	464.651	2285.76	1000.44	439.253	2243.56	906.199	489.058	2286.24	880.838	499.764	2205.97	823.397
317	0	281.015	2225.92	1576.89	182.506	2210.88	1568.53	269.008	2398.34	1587.84	156.943	2390.9	1579.4	224.485	2449.52	1418.37	248.04	2499.61	1203.18	230.93	2318.02	1348.34	227.616	2255.98	1215.22	155.831	2515.75	1249.76	400.908	2379.11	1377.32	453.71	2374.63	1147.82	454.705	2381.45	1078.74	463.969	2279.6	1001.13	438.469	2237.31	907.036	487.663	2280.68	881.409	498.766	2200.69	823.664
318	0	279.962	2215.03	1578.99	181.431	2200.21	1570.5	268.298	2387.46	1590.22	156.238	2380.28	1581.67	223.382	2438.87	1420.54	246.287	2489.19	1205.29	230.712	2307.53	1350.62	227.927	2245.35	1217.55	154.095	2504.8	1251.97	400.59	2370.31	1378.81	452.833	2368.1	1149.09	453.392	2375.27	1080.02	463.335	2273.68	1001.88	437.728	2231.37	907.915	486.329	2275.4	882.048	497.776	2195.7	823.965
319	0	279.024	2204.25	1581.04	180.473	2189.62	1572.46	267.669	2376.68	1592.56	155.608	2369.74	1583.94	222.336	2428.33	1422.71	244.6	2478.9	1207.41	230.505	2297.17	1352.87	228.194	2234.9	1219.86	152.409	2494	1254.2	400.265	2361.54	1380.35	452.012	2361.68	1150.45	452.151	2369.25	1081.4	462.743	2267.99	1002.66	437.036	2225.7	908.804	485.063	2270.39	882.737	496.809	2191	824.276
320	0	278.204	2193.58	1583.03	179.634	2179.12	1574.38	267.119	2366.01	1594.85	155.049	2359.27	1586.16	221.343	2417.9	1424.86	242.98	2468.74	1209.51	230.298	2286.93	1355.09	228.395	2224.6	1222.14	150.775	2483.34	1256.41	399.922	2352.8	1381.91	451.232	2355.36	1151.88	450.973	2363.37	1082.86	462.191	2262.5	1003.45	436.4	2220.31	909.672	483.876	2265.64	883.458	495.887	2186.56	824.571
321	0	277.502	2183.03	1584.94	178.915	2168.71	1576.23	266.642	2355.45	1597.05	154.556	2348.87	1588.33	220.396	2407.58	1426.96	241.427	2458.69	1211.56	230.078	2276.8	1357.23	228.513	2214.44	1224.35	149.196	2472.81	1258.57	399.55	2344.06	1383.46	450.479	2349.08	1153.35	449.846	2357.59	1084.36	461.676	2257.18	1004.24	435.823	2215.17	910.49	482.773	2261.12	884.188	495.03	2182.39	824.827
322	0	276.915	2172.59	1586.73	178.311	2158.37	1578.02	266.23	2344.99	1599.13	154.122	2338.55	1590.42	219.49	2397.36	1428.98	239.942	2448.74	1213.52	229.833	2266.77	1359.28	228.534	2204.41	1226.47	147.675	2462.41	1260.65	399.143	2335.3	1384.98	449.737	2342.83	1154.84	448.759	2351.87	1085.89	461.195	2252.01	1005	435.314	2210.27	911.228	481.76	2256.83	884.909	494.259	2178.48	825.017
323	0	276.436	2162.26	1588.4	177.815	2148.12	1579.71	265.875	2334.64	1601.08	153.74	2328.3	1592.4	218.62	2387.23	1430.9	238.523	2438.87	1215.37	229.557	2256.83	1361.21	228.452	2194.47	1228.46	146.214	2452.12	1262.63	398.695	2326.51	1386.44	448.993	2336.56	1156.32	447.701	2346.18	1087.43	460.747	2246.96	1005.7	434.877	2205.58	911.857	480.839	2252.74	885.6	493.593	2174.82	825.116
324	0	276.056	2152.04	1589.93	177.42	2137.94	1581.29	265.569	2324.4	1602.87	153.401	2318.11	1594.26	217.781	2377.19	1432.69	237.171	2429.09	1217.08	229.243	2246.96	1363	228.266	2184.62	1230.3	144.814	2441.93	1264.47	398.204	2317.69	1387.82	448.236	2330.26	1157.76	446.66	2340.5	1088.94	460.331	2242.02	1006.33	434.52	2201.09	912.354	480.01	2248.86	886.241	493.048	2171.41	825.101
325	0	275.766	2141.92	1591.3	177.112	2127.83	1582.74	265.3	2314.25	1604.48	153.097	2307.98	1595.97	216.97	2367.21	1434.33	235.884	2419.36	1218.65	228.89	2237.16	1364.64	227.98	2174.84	1231.97	143.478	2431.84	1266.16	397.671	2308.81	1389.11	447.457	2323.89	1159.13	445.628	2334.79	1090.4	459.947	2237.15	1006.87	434.245	2196.77	912.694	479.274	2245.15	886.813	492.638	2168.25	824.951
326	0	275.55	2131.9	1592.5	176.878	2117.77	1584.06	265.06	2304.19	1605.9	152.819	2297.91	1597.52	216.186	2357.29	1435.82	234.663	2409.69	1220.05	228.496	2227.41	1366.1	227.603	2165.11	1233.44	142.209	2421.84	1267.68	397.1	2299.87	1390.27	446.651	2317.44	1160.43	444.595	2329.02	1091.8	459.596	2232.34	1007.3	434.058	2192.61	912.861	478.626	2241.61	887.301	492.373	2165.33	824.647
327	0	275.396	2121.95	1593.53	176.704	2107.77	1585.22	264.839	2294.21	1607.12	152.559	2287.88	1598.91	215.427	2347.43	1437.13	233.509	2400.07	1221.27	228.065	2217.71	1367.38	227.147	2155.43	1234.72	141.008	2411.91	1269.02	396.497	2290.87	1391.3	445.816	2310.89	1161.62	443.557	2323.16	1093.1	459.281	2227.55	1007.6	433.96	2188.59	912.838	478.064	2238.22	887.691	492.258	2162.64	824.177
328	0	275.288	2112.07	1594.37	176.574	2097.81	1586.22	264.629	2284.29	1608.14	152.31	2277.9	1600.1	214.695	2337.61	1438.26	232.424	2390.49	1222.31	227.6	2208.04	1368.46	226.628	2145.78	1235.77	139.88	2402.06	1270.18	395.87	2281.8	1392.19	444.952	2304.21	1162.68	442.512	2317.21	1094.3	459.002	2222.78	1007.77	433.953	2184.68	912.616	477.583	2234.96	887.972	492.295	2160.19	823.529
329	0	275.21	2102.24	1595.02	176.474	2087.89	1587.04	264.421	2274.42	1608.95	152.065	2267.94	1601.11	213.991	2327.82	1439.19	231.411	2380.93	1223.16	227.107	2198.4	1369.34	226.062	2136.16	1236.6	138.83	2392.27	1271.14	395.228	2272.66	1392.92	444.066	2297.41	1163.61	441.46	2311.12	1095.38	458.764	2218	1007.79	434.036	2180.87	912.189	477.18	2231.82	888.137	492.481	2157.96	822.7
330	0	275.148	2092.45	1595.47	176.388	2077.99	1587.66	264.211	2264.58	1609.56	151.82	2258.01	1601.92	213.32	2318.05	1439.94	230.475	2371.4	1223.84	226.595	2188.77	1370.01	225.467	2126.56	1237.21	137.863	2382.55	1271.91	394.584	2263.44	1393.5	443.164	2290.46	1164.4	440.404	2304.88	1096.32	458.567	2213.19	1007.66	434.207	2177.14	911.557	476.848	2228.77	888.182	492.809	2155.94	821.688
331	0	275.089	2082.68	1595.73	176.303	2068.11	1588.09	263.995	2254.77	1609.96	151.572	2248.09	1602.53	212.686	2308.3	1440.49	229.621	2361.9	1224.33	226.07	2179.16	1370.47	224.859	2116.99	1237.59	136.986	2372.88	1272.49	393.947	2254.14	1393.91	442.257	2283.37	1165.03	439.353	2298.48	1097.13	458.416	2208.33	1007.37	434.463	2173.47	910.722	476.585	2225.81	888.106	493.271	2154.11	820.498
332	0	275.02	2072.92	1595.78	176.206	2058.23	1588.31	263.769	2244.96	1610.16	151.319	2238.19	1602.93	212.095	2298.56	1440.84	228.857	2352.4	1224.65	225.544	2169.55	1370.73	224.254	2107.44	1237.74	136.204	2363.27	1272.88	393.331	2244.77	1394.15	441.358	2276.11	1165.5	438.314	2291.91	1097.79	458.314	2203.41	1006.93	434.8	2169.84	909.693	476.386	2222.89	887.912	493.853	2152.47	819.141
333	0	274.931	2063.15	1595.64	176.089	2048.36	1588.33	263.535	2235.14	1610.17	151.063	2228.28	1603.14	211.554	2288.82	1441.01	228.192	2342.93	1224.8	225.024	2159.94	1370.78	223.664	2097.91	1237.68	135.526	2353.7	1273.09	392.747	2235.31	1394.24	440.481	2268.7	1165.82	437.3	2285.15	1098.31	458.263	2198.41	1006.33	435.211	2166.23	908.481	476.251	2220.01	887.605	494.543	2150.97	817.629
334	0	274.814	2053.36	1595.3	175.943	2038.47	1588.12	263.295	2225.3	1610.01	150.805	2218.38	1603.15	211.07	2279.08	1440.99	227.633	2333.46	1224.79	224.52	2150.33	1370.63	223.102	2088.39	1237.42	134.959	2344.18	1273.13	392.208	2225.77	1394.16	439.642	2261.12	1165.98	436.323	2278.19	1098.68	458.265	2193.32	1005.58	435.692	2162.63	907.1	476.178	2217.14	887.193	495.324	2149.61	815.98
335	0	274.664	2043.53	1594.77	175.764	2028.58	1587.71	263.054	2215.42	1609.67	150.551	2208.46	1602.98	210.651	2269.33	1440.8	227.189	2323.99	1224.64	224.042	2140.7	1370.29	222.577	2078.89	1236.96	134.508	2334.7	1273	391.723	2216.14	1393.93	438.856	2253.38	1165.99	435.398	2271.05	1098.91	458.325	2188.13	1004.7	436.235	2159.01	905.569	476.166	2214.24	886.686	496.182	2148.33	814.213
336	0	274.478	2033.66	1594.04	175.55	2018.67	1587.07	262.816	2205.5	1609.18	150.306	2198.53	1602.62	210.304	2259.56	1440.43	226.869	2314.53	1224.35	223.598	2131.05	1369.77	222.096	2069.39	1236.32	134.178	2325.26	1272.72	391.303	2206.42	1393.55	438.139	2245.47	1165.86	434.539	2263.7	1099	458.445	2182.81	1003.68	436.836	2155.36	903.905	476.218	2211.29	886.094	497.103	2147.12	812.35
337	0	274.258	2023.74	1593.14	175.302	2008.73	1586.23	262.592	2195.53	1608.54	150.078	2188.58	1602.1	210.037	2249.79	1439.89	226.679	2305.07	1223.93	223.196	2121.38	1369.08	221.664	2059.89	1235.52	133.974	2315.84	1272.28	390.957	2196.61	1393.03	437.505	2237.4	1165.58	433.763	2256.17	1098.97	458.626	2177.37	1002.54	437.487	2151.65	902.128	476.334	2208.27	885.428	498.074	2145.92	810.413
338	0	274.006	2013.75	1592.06	175.022	1998.78	1585.19	262.39	2185.5	1607.77	149.875	2178.61	1601.41	209.857	2239.99	1439.21	226.626	2295.61	1223.38	222.845	2111.69	1368.23	221.285	2050.38	1234.57	133.899	2306.44	1271.71	390.693	2186.71	1392.36	436.967	2229.15	1165.18	433.081	2248.44	1098.8	458.872	2171.79	1001.29	438.185	2147.87	900.259	476.519	2205.14	884.699	499.083	2144.69	808.426
339	0	273.729	2003.69	1590.81	174.718	1988.79	1583.94	262.221	2175.4	1606.88	149.709	2168.61	1600.58	209.768	2230.17	1438.37	226.714	2286.14	1222.71	222.552	2101.96	1367.22	220.962	2040.86	1233.48	133.953	2297.06	1271	390.518	2176.7	1391.57	436.538	2220.75	1164.64	432.509	2240.54	1098.52	459.185	2166.06	999.945	438.926	2143.98	898.316	476.776	2201.87	883.917	500.121	2143.38	806.41
340	0	273.434	1993.57	1589.4	174.398	1978.78	1582.51	262.095	2165.23	1605.88	149.588	2158.59	1599.62	209.777	2220.33	1437.4	226.945	2276.65	1221.94	222.322	2092.2	1366.08	220.697	2031.3	1232.27	134.137	2287.67	1270.16	390.436	2166.61	1390.65	436.228	2212.18	1163.99	432.055	2232.47	1098.12	459.567	2160.16	998.511	439.706	2139.97	896.319	477.107	2198.44	883.092	501.183	2141.94	804.384
341	0	273.132	1983.38	1587.84	174.07	1968.74	1580.91	262.025	2154.99	1604.77	149.523	2148.54	1598.53	209.887	2210.47	1436.29	227.319	2267.14	1221.05	222.162	2082.39	1364.81	220.49	2021.71	1230.95	134.446	2278.28	1269.2	390.452	2156.41	1389.61	436.042	2203.46	1163.22	431.731	2224.24	1097.62	460.019	2154.1	997.002	440.525	2135.8	894.285	477.516	2194.8	882.229	502.264	2140.32	802.367
342	0	272.835	1973.11	1586.14	173.748	1958.67	1579.15	262.022	2144.68	1603.59	149.525	2138.47	1597.34	210.1	2200.57	1435.07	227.835	2257.61	1220.05	222.076	2072.54	1363.43	220.343	2012.07	1229.54	134.88	2268.87	1268.12	390.568	2146.12	1388.46	435.986	2194.59	1162.35	431.541	2215.86	1097.01	460.543	2147.86	995.43	441.383	2131.46	892.229	478.006	2190.94	881.336	503.363	2138.47	800.373
343	0	272.554	1962.77	1584.32	173.444	1948.58	1577.25	262.096	2134.3	1602.32	149.603	2128.36	1596.06	210.419	2190.65	1433.73	228.487	2248.04	1218.96	222.07	2062.64	1361.95	220.258	2002.38	1228.05	135.43	2259.43	1266.93	390.785	2135.74	1387.2	436.063	2185.58	1161.37	431.49	2207.35	1096.31	461.141	2141.43	993.806	442.279	2126.91	890.165	478.578	2186.82	880.416	504.482	2136.34	798.415
344	0	272.303	1952.37	1582.38	173.169	1938.46	1575.22	262.258	2123.85	1600.99	149.766	2118.23	1594.7	210.843	2180.68	1432.29	229.269	2238.43	1217.76	222.148	2052.68	1360.38	220.236	1992.61	1226.5	136.093	2249.94	1265.63	391.103	2125.28	1385.84	436.272	2176.44	1160.3	431.579	2198.71	1095.51	461.814	2134.81	992.141	443.217	2122.13	888.106	479.235	2182.42	879.472	505.621	2133.87	796.502
345	0	272.095	1941.91	1580.35	172.938	1928.31	1573.09	262.515	2113.34	1599.62	150.023	2108.06	1593.28	211.37	2170.69	1430.77	230.173	2228.75	1216.45	222.313	2042.65	1358.75	220.279	1982.77	1224.89	136.859	2240.38	1264.23	391.522	2114.75	1384.39	436.61	2167.17	1159.15	431.807	2189.95	1094.63	462.562	2127.98	990.446	444.2	2117.09	886.061	479.976	2177.72	878.506	506.786	2131.03	794.642
346	0	271.943	1931.38	1578.25	172.763	1918.13	1570.88	262.876	2102.77	1598.21	150.379	2097.87	1591.83	211.999	2160.65	1429.16	231.185	2219.01	1215.05	222.568	2032.56	1357.07	220.391	1972.84	1223.26	137.72	2230.75	1262.73	392.038	2104.14	1382.86	437.072	2157.8	1157.92	432.17	2181.09	1093.67	463.387	2120.95	988.731	445.23	2111.77	884.04	480.799	2172.68	877.518	507.98	2127.76	792.837
347	0	271.858	1920.8	1576.09	172.656	1907.93	1568.61	263.345	2092.13	1596.78	150.84	2087.64	1590.35	212.724	2150.56	1427.49	232.294	2209.19	1213.56	222.916	2022.39	1355.35	220.575	1962.82	1221.6	138.666	2221.02	1261.14	392.65	2093.48	1381.26	437.653	2148.32	1156.62	432.662	2172.12	1092.63	464.289	2113.69	987.008	446.312	2106.14	882.05	481.702	2167.28	876.509	509.21	2124.03	791.092
348	0	271.852	1910.17	1573.88	172.627	1897.7	1566.3	263.927	2081.44	1595.34	151.408	2077.38	1588.87	213.541	2140.43	1425.77	233.484	2199.27	1211.97	223.359	2012.14	1353.62	220.835	1952.68	1219.95	139.687	2211.18	1259.47	393.353	2082.77	1379.61	438.342	2138.75	1155.27	433.273	2163.05	1091.53	465.267	2106.21	985.287	447.449	2100.17	880.099	482.681	2161.51	875.479	510.478	2119.81	789.405
349	0	271.934	1899.49	1571.67	172.685	1887.44	1563.97	264.623	2070.7	1593.91	152.087	2067.08	1587.4	214.445	2130.24	1424.01	234.737	2189.24	1210.3	223.899	2001.81	1351.89	221.176	1942.44	1218.31	140.773	2201.22	1257.73	394.143	2072.03	1377.9	439.13	2129.1	1153.87	433.993	2153.88	1090.37	466.321	2098.49	983.579	448.645	2093.84	878.193	483.73	2155.35	874.427	511.791	2115.06	787.779
350	0	272.11	1888.76	1569.45	172.838	1877.15	1561.66	265.433	2059.91	1592.52	152.876	2056.75	1585.97	215.427	2120	1422.22	236.038	2179.08	1208.56	224.535	1991.38	1350.19	221.605	1932.07	1216.72	141.911	2191.12	1255.93	395.017	2061.26	1376.18	440.007	2119.38	1152.43	434.81	2144.61	1089.15	467.448	2090.52	981.896	449.904	2087.13	876.341	484.843	2148.79	873.356	513.152	2109.76	786.212
351	0	272.387	1877.99	1567.27	173.091	1866.82	1559.38	266.356	2049.08	1591.17	153.773	2046.38	1584.58	216.481	2109.7	1420.44	237.367	2168.77	1206.75	225.269	1980.87	1348.53	222.125	1921.56	1215.19	143.09	2180.86	1254.09	395.968	2050.48	1374.44	440.96	2109.58	1150.98	435.712	2135.24	1087.9	468.647	2082.3	980.248	451.227	2080.01	874.548	486.011	2141.8	872.267	514.564	2103.9	784.705
352	0	272.768	1867.18	1565.14	173.447	1856.46	1557.17	267.387	2038.19	1589.88	154.777	2035.96	1583.27	217.6	2099.33	1418.67	238.707	2158.31	1204.9	226.099	1970.26	1346.94	222.743	1910.92	1213.76	144.298	2170.44	1252.22	396.992	2039.7	1372.71	441.979	2099.71	1149.51	436.685	2125.75	1086.61	469.913	2073.81	978.648	452.615	2072.47	872.824	487.227	2134.39	871.164	516.028	2097.46	783.259
353	0	273.253	1856.33	1563.08	173.909	1846.05	1555.04	268.522	2027.26	1588.68	155.882	2025.5	1582.05	218.773	2088.89	1416.93	240.041	2147.69	1203.01	227.024	1959.56	1345.44	223.462	1900.13	1212.43	145.525	2159.85	1250.35	398.082	2028.92	1371.02	443.05	2089.78	1148.06	437.716	2116.14	1085.31	471.243	2065.06	977.108	454.069	2064.5	871.177	488.48	2126.53	870.052	517.544	2090.44	781.877
354	0	273.843	1845.43	1561.12	174.474	1835.6	1553.02	269.754	2016.29	1587.58	157.083	2014.98	1580.94	219.994	2078.38	1415.25	241.353	2136.88	1201.12	228.039	1948.75	1344.05	224.287	1889.19	1211.23	146.759	2149.07	1248.48	399.233	2018.15	1369.37	444.162	2079.76	1146.64	438.792	2106.4	1084.02	472.629	2056.02	975.641	455.586	2056.08	869.616	489.762	2118.23	868.939	519.11	2082.83	780.563
355	0	274.535	1834.49	1559.29	175.141	1825.1	1551.13	271.075	2005.27	1586.59	158.373	2004.42	1579.95	221.254	2067.79	1413.65	242.628	2125.88	1199.24	229.142	1937.85	1342.78	225.217	1878.09	1210.19	147.991	2138.11	1246.66	400.437	2007.39	1367.8	445.305	2069.66	1145.26	439.9	2096.52	1082.73	474.066	2046.69	974.26	457.161	2047.2	868.153	491.062	2109.47	867.833	520.724	2074.64	779.323
356	0	275.325	1823.51	1557.61	175.906	1814.54	1549.4	272.477	1994.2	1585.73	159.744	1993.79	1579.1	222.544	2057.12	1412.14	243.857	2114.7	1197.4	230.326	1926.86	1341.67	226.253	1866.84	1209.32	149.211	2126.96	1244.9	401.688	1996.64	1366.32	446.468	2059.47	1143.94	441.029	2086.47	1081.48	475.545	2037.06	972.978	458.79	2037.84	866.799	492.372	2100.26	866.745	522.378	2065.86	778.164
357	0	276.206	1812.47	1556.09	176.762	1803.92	1547.85	273.951	1983.09	1585.02	161.188	1983.11	1578.4	223.858	2046.37	1410.75	245.031	2103.32	1195.63	231.584	1915.77	1340.71	227.392	1855.44	1208.64	150.411	2115.63	1243.22	402.978	1985.9	1364.96	447.641	2049.18	1142.7	442.169	2076.25	1080.28	477.057	2027.11	971.807	460.464	2028.02	865.567	493.683	2090.58	865.688	524.066	2056.51	777.095
358	0	277.17	1801.39	1554.76	177.702	1793.24	1546.49	275.484	1971.92	1584.47	162.694	1972.36	1577.86	225.187	2035.54	1409.5	246.144	2091.75	1193.97	232.908	1904.59	1339.94	228.627	1843.89	1208.16	151.585	2104.13	1241.67	404.3	1975.16	1363.73	448.817	2038.76	1141.56	443.311	2065.85	1079.14	478.592	2016.86	970.762	462.173	2017.71	864.469	494.987	2080.45	864.676	525.777	2046.59	776.128
359	0	278.211	1790.25	1553.62	178.718	1782.5	1545.34	277.068	1960.71	1584.08	164.253	1961.54	1577.5	226.524	2024.62	1408.41	247.193	2079.99	1192.43	234.286	1893.33	1339.36	229.95	1832.21	1207.89	152.728	2092.47	1240.25	405.644	1964.42	1362.66	449.988	2028.21	1140.53	444.449	2055.24	1078.1	480.14	2006.27	969.855	463.907	2006.93	863.519	496.276	2069.86	863.722	527.502	2036.1	775.272
360	0	279.317	1779.06	1552.71	179.8	1771.68	1544.42	278.69	1949.44	1583.87	165.854	1950.66	1577.32	227.864	2013.62	1407.49	248.179	2068.07	1191.05	235.709	1881.98	1338.98	231.348	1820.4	1207.83	153.835	2080.66	1239.01	407.003	1953.65	1361.76	451.15	2017.51	1139.63	445.577	2044.43	1077.15	481.689	1995.36	969.096	465.652	1995.68	862.731	497.545	2058.8	862.843	529.226	2025.07	774.541
361	0	280.479	1767.82	1552.01	180.939	1760.79	1543.73	280.339	1938.13	1583.83	167.486	1939.7	1577.33	229.2	2002.55	1406.77	249.104	2055.98	1189.86	237.162	1870.57	1338.8	232.807	1808.49	1207.98	154.906	2068.73	1237.97	408.368	1942.86	1361.05	452.298	2006.65	1138.88	446.693	2033.39	1076.33	483.229	1984.11	968.498	467.396	1983.96	862.116	498.79	2047.29	862.054	530.937	2013.49	773.945
362	0	281.686	1756.52	1551.55	182.122	1749.82	1543.28	282.004	1926.76	1583.98	169.137	1928.67	1577.53	230.526	1991.39	1406.25	249.973	2043.77	1188.89	238.633	1859.1	1338.83	234.309	1796.49	1208.34	155.939	2056.7	1237.14	409.73	1932.02	1360.54	453.428	1995.61	1138.28	447.795	2022.13	1075.64	484.747	1972.52	968.069	469.121	1971.78	861.688	500.006	2035.33	861.37	532.619	2001.38	773.497
363	0	282.927	1745.16	1551.32	183.341	1738.78	1543.07	283.672	1915.34	1584.3	170.795	1917.58	1577.92	231.838	1980.16	1405.94	250.793	2031.44	1188.16	240.107	1847.57	1339.07	235.836	1784.42	1208.89	156.936	2044.59	1236.56	411.08	1921.12	1360.24	454.541	1984.38	1137.86	448.884	2010.63	1075.1	486.233	1960.59	967.819	470.814	1959.16	861.455	501.192	2022.93	860.805	534.258	1988.73	773.208
364	0	284.189	1733.75	1551.31	184.582	1727.67	1543.1	285.332	1903.88	1584.81	172.449	1906.41	1578.49	233.132	1968.87	1405.86	251.573	2019.03	1187.68	241.569	1836.01	1339.51	237.366	1772.31	1209.62	157.899	2032.44	1236.23	412.409	1910.15	1360.15	455.635	1972.95	1137.62	449.96	1998.89	1074.72	487.675	1948.33	967.754	472.457	1946.1	861.428	502.346	2010.08	860.374	535.84	1975.57	773.088
365	0	285.462	1722.29	1551.53	185.835	1716.49	1543.36	286.973	1892.37	1585.48	174.087	1895.17	1579.25	234.403	1957.52	1406.01	252.322	2006.58	1187.48	243.005	1824.42	1340.14	238.878	1760.17	1210.53	158.834	2020.28	1236.17	413.709	1899.11	1360.29	456.712	1961.32	1137.56	451.027	1986.91	1074.51	489.062	1935.72	967.879	474.035	1932.62	861.612	503.469	1996.8	860.087	537.351	1961.89	773.146
366	0	286.735	1710.79	1551.96	187.089	1705.24	1543.84	288.584	1880.82	1586.32	175.698	1883.87	1580.19	235.648	1946.12	1406.39	253.052	1994.1	1187.56	244.4	1812.81	1340.96	240.348	1748.04	1211.58	159.747	2008.13	1236.39	414.972	1887.97	1360.64	457.772	1949.46	1137.69	452.091	1974.69	1074.49	490.386	1922.78	968.196	475.53	1918.74	862.011	504.56	1983.11	859.954	538.776	1947.7	773.386
367	0	287.996	1699.24	1552.57	188.333	1693.92	1544.53	290.153	1869.23	1587.31	177.27	1872.51	1581.29	236.866	1934.68	1406.98	253.776	1981.65	1187.92	245.74	1801.2	1341.94	241.756	1735.95	1212.76	160.647	1996.04	1236.88	416.192	1876.74	1361.22	458.82	1937.39	1138.02	453.154	1962.24	1074.64	491.637	1909.51	968.707	476.929	1904.48	862.625	505.62	1969	859.983	540.104	1933.01	773.814
368	0	289.235	1687.66	1553.37	189.556	1682.55	1545.41	291.671	1857.6	1588.44	178.794	1861.1	1582.54	238.053	1923.22	1407.8	254.506	1969.24	1188.56	247.014	1789.61	1343.08	243.08	1723.91	1214.05	161.542	1984.03	1237.63	417.361	1865.4	1362.01	459.858	1925.11	1138.53	454.224	1949.57	1074.97	492.807	1895.93	969.409	478.218	1889.86	863.453	506.653	1954.49	860.177	541.323	1917.83	774.43
369	0	290.442	1676.06	1554.32	190.748	1671.14	1546.45	293.129	1845.95	1589.71	180.26	1849.65	1583.94	239.21	1911.75	1408.82	255.257	1956.93	1189.47	248.21	1778.05	1344.36	244.302	1711.94	1215.43	162.446	1972.14	1238.64	418.475	1853.97	1363	460.891	1912.61	1139.22	455.305	1936.67	1075.47	493.89	1882.04	970.297	479.384	1874.91	864.488	507.658	1939.61	860.54	542.424	1902.17	775.233
370	0	291.607	1664.44	1555.4	191.9	1659.69	1547.62	294.517	1834.29	1591.08	181.659	1838.15	1585.46	240.334	1900.28	1410.03	256.042	1944.74	1190.63	249.319	1766.53	1345.76	245.406	1700.09	1216.89	163.368	1960.38	1239.88	419.53	1842.44	1364.19	461.921	1899.9	1140.09	456.403	1923.58	1076.15	494.88	1867.86	971.367	480.415	1859.64	865.724	508.638	1924.35	861.07	543.398	1886.04	776.221
371	0	292.721	1652.81	1556.58	193.003	1648.21	1548.92	295.829	1822.6	1592.56	182.982	1826.63	1587.08	241.426	1888.83	1411.41	256.875	1932.7	1192.02	250.335	1755.07	1347.26	246.378	1688.36	1218.39	164.322	1948.79	1241.34	420.523	1830.83	1365.55	462.953	1887	1141.12	457.523	1910.28	1076.98	495.773	1853.39	972.611	481.304	1844.08	867.15	509.595	1908.75	861.766	544.237	1869.47	777.387
372	0	293.775	1641.18	1557.85	194.048	1636.71	1550.29	297.058	1810.92	1594.13	184.224	1815.09	1588.8	242.486	1877.41	1412.96	257.769	1920.84	1193.61	251.253	1743.68	1348.84	247.21	1676.76	1219.93	165.318	1937.39	1242.98	421.452	1819.13	1367.07	463.989	1873.91	1142.3	458.67	1896.81	1077.97	496.567	1838.67	974.017	482.044	1828.25	868.754	510.528	1892.81	862.621	544.936	1852.45	778.724
373	0	294.763	1629.57	1559.18	195.029	1625.22	1551.73	298.199	1799.23	1595.76	185.378	1803.54	1590.6	243.513	1866.04	1414.63	258.732	1909.17	1195.39	252.072	1732.37	1350.48	247.898	1665.33	1221.5	166.366	1926.18	1244.79	422.317	1807.38	1368.74	465.033	1860.65	1143.62	459.846	1883.17	1079.08	497.26	1823.7	975.576	482.63	1812.19	870.523	511.439	1876.56	863.629	545.489	1835.03	780.226
374	0	295.678	1617.99	1560.54	195.938	1613.74	1553.2	299.247	1787.56	1597.45	186.44	1792	1592.44	244.508	1854.72	1416.42	259.774	1897.72	1197.32	252.791	1721.14	1352.16	248.443	1654.07	1223.07	167.472	1915.17	1246.72	423.117	1795.57	1370.54	466.085	1847.23	1145.05	461.053	1869.37	1080.32	497.853	1808.5	977.275	483.062	1795.91	872.441	512.327	1860.02	864.782	545.895	1817.22	781.882
375	0	296.515	1606.44	1561.92	196.771	1602.28	1554.68	300.202	1775.92	1599.19	187.408	1780.47	1594.33	245.471	1843.47	1418.3	260.898	1886.49	1199.37	253.414	1710.02	1353.86	248.851	1642.98	1224.64	168.642	1904.38	1248.76	423.855	1783.74	1372.44	467.145	1833.67	1146.58	462.291	1855.43	1081.65	498.345	1793.1	979.1	483.338	1779.44	874.495	513.191	1843.21	866.069	546.152	1799.05	783.685
376	0	297.268	1594.94	1563.29	197.523	1590.85	1556.15	301.06	1764.3	1600.94	188.28	1768.97	1596.22	246.404	1832.29	1420.25	262.105	1875.48	1201.52	253.946	1699	1355.58	249.132	1632.07	1226.2	169.874	1893.79	1250.87	424.534	1771.9	1374.42	468.213	1819.98	1148.2	463.56	1841.37	1083.08	498.739	1777.52	981.038	483.463	1762.81	876.668	514.029	1826.15	867.481	546.26	1780.56	785.623
377	0	297.936	1583.49	1564.64	198.192	1579.48	1557.58	301.822	1752.73	1602.71	189.055	1757.51	1598.11	247.306	1821.2	1422.24	263.391	1864.7	1203.72	254.394	1688.09	1357.28	249.303	1621.35	1227.73	171.166	1883.4	1253.02	425.157	1760.08	1376.47	469.286	1806.19	1149.88	464.857	1827.21	1084.56	499.039	1761.77	983.074	483.44	1746.03	878.947	514.837	1808.87	869.005	546.222	1761.76	787.69
378	0	298.517	1572.1	1565.96	198.776	1568.17	1558.96	302.49	1741.2	1604.48	189.735	1746.11	1599.98	248.179	1810.2	1424.25	264.748	1854.13	1205.95	254.768	1677.29	1358.96	249.382	1610.8	1229.23	172.511	1873.2	1255.19	425.726	1748.29	1378.56	470.361	1792.32	1151.6	466.175	1812.95	1086.09	499.248	1745.9	985.192	483.278	1729.13	881.317	515.613	1791.39	870.628	546.041	1742.7	789.875
379	0	299.011	1560.79	1567.23	199.274	1556.92	1560.27	303.066	1729.73	1606.22	190.323	1734.76	1601.8	249.022	1799.29	1426.25	266.167	1843.77	1208.18	255.078	1666.61	1360.6	249.388	1600.43	1230.69	173.899	1863.17	1257.34	426.248	1736.55	1380.67	471.433	1778.38	1153.35	467.511	1798.61	1087.65	499.371	1729.9	987.378	482.985	1712.14	883.763	516.351	1773.73	872.337	545.724	1723.41	792.17
380	0	299.419	1549.55	1568.44	199.689	1545.76	1561.5	303.553	1718.33	1607.92	190.821	1723.49	1603.56	249.836	1788.48	1428.23	267.633	1833.59	1210.38	255.335	1656.03	1362.18	249.344	1590.22	1232.09	175.318	1853.29	1259.45	426.727	1724.9	1382.78	472.497	1764.4	1155.1	468.855	1784.23	1089.22	499.414	1713.82	989.616	482.571	1695.06	886.271	517.045	1755.92	874.118	545.277	1703.93	794.566
381	0	299.743	1538.39	1569.59	200.022	1534.69	1562.63	303.957	1707.01	1609.57	191.235	1712.3	1605.23	250.621	1777.76	1430.15	269.13	1823.59	1212.53	255.549	1645.55	1363.69	249.271	1580.16	1233.43	176.755	1843.54	1261.5	427.167	1713.33	1384.86	473.547	1750.4	1156.83	470.201	1769.8	1090.77	499.383	1697.68	991.888	482.047	1677.93	888.829	517.691	1737.98	875.955	544.711	1684.29	797.054
382	0	299.988	1527.33	1570.65	200.279	1523.71	1563.67	304.283	1695.77	1611.15	191.57	1701.2	1606.8	251.378	1767.14	1432	270.643	1813.73	1214.6	255.733	1635.18	1365.11	249.188	1570.24	1234.68	178.193	1833.91	1263.47	427.573	1701.86	1386.9	474.577	1736.41	1158.53	471.538	1755.36	1092.29	499.285	1681.5	994.18	481.426	1660.76	891.421	518.28	1719.93	877.833	544.034	1664.52	799.625
383	0	300.158	1516.35	1571.64	200.464	1512.82	1564.59	304.537	1684.62	1612.64	191.831	1690.19	1608.26	252.106	1756.61	1433.76	272.153	1804.01	1216.57	255.895	1624.9	1366.44	249.113	1560.44	1235.84	179.619	1824.37	1265.33	427.949	1690.51	1388.86	475.581	1722.46	1160.17	472.858	1740.92	1093.76	499.127	1665.3	996.474	480.721	1643.56	894.035	518.807	1701.81	879.736	543.258	1644.67	802.269
384	0	300.259	1505.46	1572.54	200.582	1502.04	1565.4	304.726	1673.56	1614.03	192.026	1679.28	1609.57	252.804	1746.16	1435.41	273.642	1794.4	1218.43	256.047	1614.7	1367.65	249.061	1550.74	1236.89	181.016	1814.91	1267.08	428.299	1679.29	1390.72	476.553	1708.56	1161.74	474.152	1726.51	1095.16	498.914	1649.12	998.753	479.942	1626.36	896.657	519.264	1683.64	881.646	542.392	1624.76	804.973
385	0	300.299	1494.67	1573.35	200.642	1491.35	1566.09	304.857	1662.6	1615.31	192.161	1668.47	1610.73	253.473	1735.8	1436.93	275.094	1784.88	1220.15	256.196	1604.59	1368.74	249.044	1541.14	1237.81	182.369	1805.5	1268.7	428.626	1668.19	1392.47	477.489	1694.73	1163.21	475.41	1712.13	1096.46	498.655	1632.96	1001	479.103	1609.17	899.274	519.644	1665.43	883.548	541.447	1604.83	807.726
386	0	300.286	1483.96	1574.06	200.649	1480.77	1566.66	304.936	1651.74	1616.45	192.242	1657.77	1611.73	254.11	1725.52	1438.3	276.492	1775.44	1221.73	256.348	1594.55	1369.69	249.068	1531.61	1238.59	183.665	1796.13	1270.18	428.932	1657.22	1394.08	478.383	1681	1164.56	476.625	1697.8	1097.65	498.355	1616.87	1003.2	478.215	1592	901.871	519.941	1647.22	885.423	540.433	1584.91	810.512
387	0	300.225	1473.35	1574.66	200.613	1470.28	1567.1	304.971	1640.98	1617.44	192.277	1647.16	1612.56	254.714	1715.31	1439.52	277.822	1766.07	1223.15	256.508	1584.57	1370.5	249.14	1522.16	1239.21	184.889	1786.78	1271.5	429.219	1646.38	1395.53	479.231	1667.39	1165.79	477.789	1683.55	1098.72	498.018	1600.84	1005.34	477.288	1574.87	904.436	520.15	1629.03	887.258	539.357	1565.03	813.318
388	0	300.127	1462.82	1575.16	200.54	1459.88	1567.42	304.967	1630.32	1618.27	192.271	1636.65	1613.2	255.283	1705.16	1440.57	279.067	1756.74	1224.4	256.68	1574.65	1371.15	249.259	1512.75	1239.66	186.031	1777.45	1272.66	429.487	1635.68	1396.8	480.029	1653.9	1166.87	478.894	1669.38	1099.64	497.651	1584.91	1007.4	476.33	1557.79	906.956	520.265	1610.88	889.036	538.227	1545.23	816.127
389	0	299.998	1452.37	1575.55	200.439	1449.56	1567.6	304.93	1619.76	1618.94	192.231	1626.23	1613.64	255.813	1695.07	1441.45	280.214	1747.45	1225.48	256.866	1564.79	1371.64	249.426	1503.39	1239.95	187.078	1768.1	1273.65	429.735	1625.11	1397.89	480.775	1640.54	1167.79	479.935	1655.3	1100.42	497.256	1569.08	1009.38	475.349	1540.77	909.418	520.284	1592.79	890.744	537.048	1525.53	818.925
390	0	299.847	1442	1575.81	200.316	1439.31	1567.66	304.865	1609.3	1619.43	192.161	1615.9	1613.89	256.303	1685.03	1442.14	281.251	1738.18	1226.36	257.064	1554.96	1371.97	249.637	1494.06	1240.05	188.02	1758.75	1274.46	429.963	1614.67	1398.77	481.465	1627.33	1168.54	480.906	1641.32	1101.02	496.834	1553.38	1011.24	474.35	1523.84	911.809	520.205	1574.78	892.371	535.823	1505.95	821.693
391	0	299.68	1431.7	1575.95	200.177	1429.14	1567.58	304.777	1598.93	1619.73	192.065	1605.65	1613.95	256.748	1675.04	1442.64	282.167	1728.94	1227.05	257.274	1545.17	1372.12	249.887	1484.75	1239.97	188.848	1749.37	1275.09	430.167	1604.36	1399.43	482.096	1614.27	1169.11	481.803	1627.45	1101.46	496.389	1537.81	1013	473.337	1506.99	914.117	520.026	1556.88	893.905	534.557	1486.53	824.418
392	0	299.503	1421.47	1575.96	200.029	1419.03	1567.37	304.669	1588.64	1619.85	191.947	1595.48	1613.8	257.144	1665.1	1442.94	282.95	1719.7	1227.55	257.492	1535.41	1372.1	250.167	1475.46	1239.71	189.555	1739.96	1275.53	430.346	1594.17	1399.88	482.666	1601.36	1169.51	482.62	1613.68	1101.73	495.918	1522.38	1014.63	472.312	1490.26	916.333	519.75	1539.09	895.338	533.25	1467.28	827.085
393	0	299.321	1411.3	1575.84	199.876	1408.96	1567.02	304.542	1578.43	1619.78	191.81	1585.37	1613.46	257.487	1655.18	1443.05	283.593	1710.47	1227.84	257.714	1525.67	1371.91	250.471	1466.16	1239.28	190.134	1730.51	1275.78	430.496	1584.09	1400.1	483.172	1588.6	1169.72	483.355	1600.02	1101.82	495.422	1507.11	1016.13	471.276	1473.65	918.446	519.38	1521.45	896.665	531.905	1448.23	829.679
394	0	299.139	1401.19	1575.58	199.721	1398.94	1566.53	304.399	1568.3	1619.52	191.654	1575.31	1612.94	257.772	1645.3	1442.97	284.09	1701.23	1227.92	257.934	1515.95	1371.54	250.789	1456.86	1238.68	190.581	1721.02	1275.85	430.612	1574.13	1400.1	483.611	1575.98	1169.75	484.003	1586.47	1101.73	494.899	1491.98	1017.5	470.229	1457.18	920.446	518.918	1503.96	897.879	530.522	1429.39	832.188
395	0	298.959	1391.12	1575.18	199.567	1388.95	1565.92	304.24	1558.24	1619.08	191.481	1565.3	1612.23	257.996	1635.44	1442.69	284.436	1691.98	1227.8	258.146	1506.25	1371.01	251.11	1447.53	1237.92	190.892	1711.48	1275.72	430.691	1564.27	1399.87	483.979	1563.5	1169.6	484.563	1573.03	1101.47	494.347	1477.02	1018.72	469.171	1440.85	922.325	518.371	1486.65	898.978	529.104	1410.79	834.601
396	0	298.783	1381.11	1574.63	199.414	1378.99	1565.16	304.064	1548.23	1618.45	191.29	1555.33	1611.34	258.155	1625.6	1442.22	284.631	1682.72	1227.47	258.341	1496.55	1370.32	251.425	1438.18	1237	191.067	1701.88	1275.41	430.727	1554.51	1399.44	484.275	1551.15	1169.27	485.031	1559.7	1101.05	493.764	1462.23	1019.8	468.101	1424.7	924.075	517.745	1469.52	899.958	527.654	1392.44	836.908
397	0	298.611	1371.13	1573.95	199.264	1369.05	1564.28	303.869	1538.28	1617.65	191.079	1545.39	1610.29	258.243	1615.77	1441.57	284.676	1673.44	1226.93	258.512	1486.85	1369.47	251.721	1428.78	1235.95	191.107	1692.23	1274.9	430.715	1544.82	1398.8	484.493	1538.93	1168.78	485.407	1546.48	1100.47	493.148	1447.59	1020.73	467.018	1408.71	925.69	517.048	1452.59	900.82	526.175	1374.35	839.1
398	0	298.442	1361.18	1573.12	199.113	1359.12	1563.28	303.655	1528.37	1616.69	190.848	1535.47	1609.09	258.258	1605.96	1440.74	284.575	1664.12	1226.2	258.65	1477.14	1368.46	251.989	1419.34	1234.77	191.014	1682.52	1274.21	430.651	1535.21	1397.96	484.634	1526.83	1168.12	485.688	1533.36	1099.75	492.498	1433.13	1021.52	465.923	1392.92	927.163	516.289	1435.88	901.563	524.673	1356.54	841.169
399	0	298.272	1351.27	1572.16	198.959	1349.19	1562.15	303.416	1518.5	1615.56	190.593	1525.57	1607.76	258.197	1596.14	1439.74	284.334	1654.77	1225.28	258.746	1467.42	1367.32	252.218	1409.83	1233.48	190.793	1672.74	1273.34	430.53	1525.65	1396.94	484.693	1514.84	1167.32	485.873	1520.35	1098.88	491.813	1418.84	1022.16	464.817	1377.32	928.491	515.476	1419.39	902.186	523.154	1339.02	843.107
400	0	298.099	1341.38	1571.07	198.797	1339.27	1560.92	303.151	1508.66	1614.29	190.311	1515.67	1606.29	258.056	1586.31	1438.57	283.963	1645.38	1224.18	258.791	1457.68	1366.05	252.396	1400.26	1232.08	190.45	1662.9	1272.3	430.346	1516.12	1395.75	484.67	1502.95	1166.37	485.965	1507.45	1097.89	491.093	1404.72	1022.65	463.7	1361.93	929.667	514.618	1403.14	902.689	521.626	1321.8	844.909
401	0	297.917	1331.51	1569.86	198.623	1329.34	1559.58	302.854	1498.84	1612.88	189.998	1505.78	1604.71	257.833	1576.48	1437.25	283.471	1635.94	1222.9	258.775	1447.9	1364.66	252.515	1390.61	1230.59	189.994	1652.99	1271.08	430.096	1506.62	1394.41	484.564	1491.16	1165.3	485.962	1494.65	1096.79	490.34	1390.76	1022.99	462.576	1346.76	930.689	513.726	1387.13	903.074	520.098	1304.89	846.566
402	0	297.719	1321.65	1568.54	198.429	1319.39	1558.16	302.521	1489.04	1611.35	189.65	1495.88	1603.04	257.528	1566.62	1435.79	282.871	1626.43	1221.46	258.69	1438.09	1363.16	252.563	1380.89	1229.02	189.435	1643.01	1269.7	429.776	1497.12	1392.93	484.377	1479.46	1164.11	485.868	1481.96	1095.58	489.555	1376.98	1023.19	461.448	1331.81	931.553	512.808	1371.39	903.339	518.581	1288.3	848.073
403	0	297.498	1311.79	1567.12	198.209	1309.44	1556.66	302.147	1479.25	1609.71	189.261	1485.97	1601.28	257.139	1556.73	1434.2	282.175	1616.85	1219.88	258.528	1428.23	1361.57	252.533	1371.07	1227.39	188.784	1632.96	1268.17	429.382	1487.6	1391.34	484.108	1467.84	1162.82	485.685	1469.37	1094.28	488.741	1363.37	1023.25	460.322	1317.09	932.256	511.875	1355.91	903.484	517.085	1272.04	849.422
404	0	297.246	1301.94	1565.62	197.954	1299.46	1555.09	301.727	1469.46	1607.98	188.828	1476.05	1599.46	256.666	1546.81	1432.49	281.398	1607.19	1218.16	258.281	1418.31	1359.89	252.414	1361.16	1225.7	188.053	1622.83	1266.5	428.912	1478.04	1389.64	483.76	1456.3	1161.44	485.417	1456.89	1092.9	487.904	1349.93	1023.17	459.204	1302.6	932.797	510.935	1340.71	903.51	515.622	1256.11	850.607
405	0	296.955	1292.07	1564.04	197.655	1289.46	1553.48	301.256	1459.67	1606.17	188.345	1466.1	1597.59	256.112	1536.84	1430.68	280.553	1597.43	1216.31	257.942	1408.32	1358.15	252.2	1351.15	1223.96	187.254	1612.62	1264.7	428.364	1468.41	1387.86	483.336	1444.82	1159.99	485.068	1444.52	1091.46	487.046	1336.66	1022.96	458.098	1288.35	933.172	509.997	1325.79	903.415	514.203	1240.53	851.62
406	0	296.615	1282.19	1562.41	197.304	1279.44	1551.83	300.728	1449.86	1604.3	187.807	1456.14	1595.69	255.476	1526.82	1428.78	279.653	1587.56	1214.37	257.506	1398.26	1356.36	251.883	1341.03	1222.21	186.402	1602.33	1262.78	427.738	1458.71	1386.02	482.842	1433.4	1158.47	484.643	1432.25	1089.95	486.175	1323.55	1022.61	457.014	1274.35	933.379	509.071	1311.16	903.198	512.84	1225.29	852.453
407	0	296.217	1272.29	1560.74	196.892	1269.38	1550.17	300.14	1440.03	1602.39	187.21	1446.14	1593.76	254.762	1516.74	1426.81	278.712	1577.56	1212.33	256.968	1388.11	1354.53	251.456	1330.8	1220.43	185.508	1591.95	1260.77	427.033	1448.91	1384.12	482.279	1422.04	1156.9	484.147	1420.08	1088.41	485.296	1310.62	1022.12	455.958	1260.59	933.418	508.163	1296.82	902.86	511.543	1210.4	853.099
408	0	295.753	1262.36	1559.06	196.411	1259.28	1548.5	299.486	1430.17	1600.45	186.549	1436.11	1591.84	253.973	1506.59	1424.79	277.743	1567.41	1210.21	256.324	1377.87	1352.68	250.914	1320.45	1218.66	184.584	1581.48	1258.66	426.25	1438.99	1382.2	481.655	1410.72	1155.29	483.587	1408.02	1086.82	484.415	1297.86	1021.52	454.937	1247.07	933.287	507.283	1282.79	902.401	510.323	1195.87	853.55
409	0	295.216	1252.39	1557.37	195.853	1249.15	1546.85	298.762	1420.27	1598.51	185.82	1426.04	1589.92	253.111	1496.36	1422.72	276.755	1557.11	1208.04	255.574	1367.52	1350.83	250.254	1309.97	1216.91	183.641	1570.91	1256.48	425.392	1428.94	1380.27	480.973	1399.43	1153.66	482.968	1396.06	1085.22	483.537	1285.26	1020.79	453.959	1233.81	932.985	506.437	1269.08	901.821	509.189	1181.7	853.8
410	0	294.597	1242.38	1555.7	195.212	1238.97	1545.24	297.966	1410.33	1596.58	185.021	1415.93	1588.04	252.181	1486.04	1420.64	275.758	1546.64	1205.82	254.717	1357.06	1349	249.471	1299.36	1215.19	182.689	1560.25	1254.25	424.46	1418.74	1378.34	480.239	1388.17	1152.03	482.294	1384.19	1083.6	482.669	1272.83	1019.94	453.03	1220.81	932.512	505.631	1255.67	901.121	508.15	1167.9	853.842
411	0	293.892	1232.31	1554.07	194.483	1228.75	1543.67	297.094	1400.34	1594.68	184.149	1405.77	1586.2	251.185	1475.63	1418.55	274.76	1535.98	1203.58	253.756	1346.49	1347.2	248.568	1288.61	1213.52	181.734	1549.48	1251.99	423.457	1408.39	1376.44	479.456	1376.93	1150.39	481.571	1372.42	1081.99	481.815	1260.57	1018.99	452.158	1208.06	931.871	504.872	1242.59	900.306	507.213	1154.47	853.67
412	0	293.095	1222.18	1552.5	193.662	1218.47	1542.16	296.146	1390.28	1592.84	183.201	1395.56	1584.43	250.129	1465.13	1416.48	273.764	1525.12	1201.34	252.692	1335.79	1345.44	247.545	1277.72	1211.92	180.783	1538.59	1249.71	422.388	1397.87	1374.57	478.628	1365.7	1148.78	480.802	1360.73	1080.39	480.98	1248.48	1017.93	451.348	1195.56	931.063	504.164	1229.84	899.381	506.384	1141.42	853.282
413	0	292.204	1211.98	1551	192.746	1208.14	1540.74	295.12	1380.17	1591.06	182.178	1385.3	1582.72	249.015	1454.52	1414.45	272.775	1514.06	1199.11	251.532	1324.97	1343.75	246.407	1266.68	1210.4	179.837	1527.59	1247.43	421.256	1387.18	1372.77	477.757	1354.47	1147.2	479.99	1349.13	1078.82	480.168	1236.55	1016.79	450.605	1183.34	930.094	503.513	1217.42	898.351	505.67	1128.76	852.677
414	0	291.219	1201.72	1549.59	191.736	1197.75	1539.41	294.017	1369.98	1589.37	181.08	1374.98	1581.11	247.849	1443.81	1412.47	271.794	1502.79	1196.91	250.283	1314.02	1342.15	245.163	1255.49	1208.97	178.898	1516.47	1245.17	420.067	1376.31	1371.04	476.847	1343.24	1145.67	479.138	1337.61	1077.29	479.382	1224.79	1015.57	449.934	1171.37	928.971	502.922	1205.34	897.227	505.075	1116.49	851.856
415	0	290.14	1191.38	1548.29	190.633	1187.3	1538.18	292.839	1359.72	1587.78	179.908	1364.6	1579.61	246.633	1433	1410.57	270.818	1491.31	1194.77	248.953	1302.95	1340.64	243.824	1244.14	1207.66	177.964	1505.22	1242.95	418.827	1365.28	1369.41	475.897	1331.99	1144.21	478.247	1326.16	1075.83	478.624	1213.2	1014.28	449.338	1159.68	927.702	502.394	1193.61	896.019	504.604	1104.63	850.824
416	0	288.971	1180.96	1547.12	189.44	1176.79	1537.08	291.587	1349.38	1586.32	178.665	1354.16	1578.22	245.372	1422.07	1408.75	269.846	1479.63	1192.7	247.552	1291.76	1339.25	242.402	1232.65	1206.47	177.032	1493.85	1240.8	417.54	1354.09	1367.89	474.908	1320.73	1142.84	477.318	1314.78	1074.44	477.898	1201.78	1012.94	448.821	1148.27	926.3	501.93	1182.23	894.74	504.258	1093.17	849.59
417	0	287.717	1170.46	1546.08	188.165	1166.21	1536.1	290.267	1338.96	1585	177.355	1343.65	1576.96	244.07	1411.05	1407.05	268.873	1467.74	1190.74	246.093	1280.45	1337.99	240.914	1221.01	1205.42	176.097	1482.35	1238.73	416.215	1342.75	1366.5	473.881	1309.46	1141.56	476.352	1303.48	1073.14	477.203	1190.54	1011.56	448.385	1137.13	924.779	501.532	1171.2	893.407	504.041	1082.14	848.165
418	0	286.385	1159.88	1545.18	186.813	1155.57	1535.27	288.882	1328.46	1583.82	175.982	1333.07	1575.85	242.73	1399.93	1405.48	267.892	1455.68	1188.9	244.589	1269.02	1336.86	239.377	1209.23	1204.52	175.152	1470.73	1236.77	414.858	1331.27	1365.25	472.816	1298.16	1140.4	475.347	1292.25	1071.94	476.543	1179.48	1010.17	448.03	1126.28	923.156	501.2	1160.53	892.035	503.953	1071.54	846.566
419	0	284.984	1149.23	1544.45	185.395	1144.87	1534.59	287.44	1317.88	1582.82	174.554	1322.43	1574.89	241.357	1388.72	1404.06	266.898	1443.45	1187.21	243.052	1257.5	1335.89	237.812	1197.31	1203.77	174.19	1458.99	1234.95	413.476	1319.68	1364.17	471.712	1286.86	1139.37	474.304	1281.1	1070.87	475.918	1168.6	1008.77	447.759	1115.72	921.451	500.932	1150.23	890.646	503.995	1061.38	844.811
420	0	283.524	1138.5	1543.88	183.922	1134.1	1534.06	285.948	1307.22	1581.99	173.076	1311.72	1574.1	239.955	1377.42	1402.8	265.885	1431.08	1185.69	241.498	1245.89	1335.09	236.237	1185.28	1203.18	173.205	1447.14	1233.28	412.078	1307.98	1363.26	470.573	1275.55	1138.49	473.223	1270.04	1069.94	475.329	1157.91	1007.4	447.57	1105.45	919.688	500.727	1140.29	889.258	504.165	1051.66	842.925
421	0	282.019	1127.7	1543.49	182.406	1123.27	1533.69	284.413	1296.49	1581.34	171.557	1300.95	1573.48	238.528	1366.05	1401.71	264.845	1418.6	1184.38	239.941	1234.2	1334.46	234.673	1173.15	1202.76	172.188	1435.2	1231.78	410.671	1296.21	1362.53	469.398	1264.26	1137.76	472.105	1259.06	1069.17	474.778	1147.42	1006.06	447.465	1095.48	917.889	500.582	1130.73	887.892	504.462	1042.4	840.933
422	0	280.481	1116.84	1543.27	180.86	1112.38	1533.49	282.845	1285.68	1580.89	170.006	1290.11	1573.04	237.081	1354.63	1400.82	263.777	1406.06	1183.28	238.396	1222.46	1334	233.139	1160.95	1202.5	171.134	1423.18	1230.48	409.263	1284.39	1362	468.193	1252.99	1137.2	470.951	1248.2	1068.55	474.267	1137.14	1004.78	447.44	1085.81	916.082	500.495	1121.53	886.572	504.88	1033.59	838.865
423	0	278.924	1105.92	1543.22	179.298	1101.43	1533.45	281.253	1274.81	1580.64	168.432	1279.22	1572.78	235.62	1343.16	1400.13	262.676	1393.48	1182.43	236.877	1210.68	1333.73	231.654	1148.69	1202.41	170.036	1411.11	1229.4	407.864	1272.55	1361.67	466.96	1241.77	1136.82	469.763	1237.45	1068.11	473.797	1127.08	1003.57	447.496	1076.45	914.293	500.46	1112.71	885.319	505.416	1025.24	836.752
424	0	277.364	1094.95	1543.35	177.736	1090.44	1533.57	279.647	1263.89	1580.59	166.844	1268.27	1572.71	234.149	1331.66	1399.65	261.54	1380.91	1181.83	235.399	1198.89	1333.65	230.234	1136.41	1202.49	168.889	1398.99	1228.54	406.48	1260.72	1361.55	465.708	1230.62	1136.63	468.545	1226.83	1067.85	473.37	1117.25	1002.47	447.628	1067.39	912.551	500.473	1104.25	884.153	506.061	1017.34	834.628
425	0	275.816	1083.95	1543.66	176.189	1079.41	1533.85	278.038	1252.93	1580.75	165.253	1257.28	1572.83	232.673	1320.15	1399.39	260.37	1368.4	1181.5	233.973	1187.1	1333.75	228.898	1124.13	1202.72	167.689	1386.86	1227.94	405.12	1248.93	1361.64	464.441	1219.57	1136.62	467.302	1216.37	1067.79	472.989	1107.65	1001.47	447.836	1058.64	910.884	500.531	1096.14	883.095	506.809	1009.89	832.526
426	0	274.294	1072.92	1544.13	174.671	1068.35	1534.28	276.436	1241.93	1581.1	163.668	1246.25	1573.13	231.196	1308.65	1399.34	259.166	1355.98	1181.44	232.612	1175.34	1334.04	227.657	1111.9	1203.12	166.433	1374.75	1227.58	403.79	1237.22	1361.94	463.169	1208.65	1136.8	466.038	1206.09	1067.91	472.656	1098.31	1000.6	448.115	1050.19	909.317	500.627	1088.39	882.163	507.649	1002.86	830.481
427	0	272.815	1061.88	1544.76	173.198	1057.27	1534.87	274.851	1230.91	1581.66	162.101	1235.18	1573.62	229.724	1297.18	1399.52	257.929	1343.7	1181.66	231.326	1163.64	1334.51	226.527	1099.73	1203.66	165.119	1362.67	1227.48	402.498	1225.62	1362.44	461.901	1197.9	1137.17	464.761	1196	1068.21	472.374	1089.22	999.88	448.462	1042.04	907.877	500.758	1080.98	881.373	508.572	996.255	828.524
428	0	271.392	1050.84	1545.55	171.785	1046.18	1535.59	273.295	1219.88	1582.4	160.56	1224.1	1574.29	228.261	1285.75	1399.92	256.66	1331.6	1182.15	230.124	1152.01	1335.16	225.517	1087.68	1204.36	163.747	1350.65	1227.64	401.249	1214.16	1363.14	460.645	1187.34	1137.72	463.477	1186.13	1068.71	472.145	1080.41	999.308	448.873	1034.19	906.587	500.919	1073.9	880.739	509.568	990.04	826.689
429	0	270.04	1039.82	1546.48	170.444	1035.08	1536.44	271.776	1208.87	1583.33	159.055	1213.02	1575.13	226.81	1274.39	1400.52	255.361	1319.69	1182.89	229.012	1140.48	1335.99	224.637	1075.75	1205.21	162.315	1338.71	1228.04	400.048	1202.88	1364.02	459.411	1177.02	1138.44	462.195	1176.5	1069.38	471.972	1071.87	998.898	449.346	1026.62	905.467	501.106	1067.14	880.273	510.625	984.192	825.005
430	0	268.771	1028.83	1547.53	169.188	1024.01	1537.42	270.303	1197.88	1584.43	157.595	1201.93	1576.13	225.375	1263.12	1401.34	254.034	1308	1183.88	227.995	1129.07	1336.98	223.893	1063.99	1206.19	160.825	1326.88	1228.69	398.9	1191.81	1365.07	458.207	1166.96	1139.32	460.922	1167.13	1070.22	471.857	1063.62	998.656	449.878	1019.33	904.536	501.314	1060.68	879.981	511.734	978.682	823.499
431	0	267.597	1017.89	1548.71	168.031	1012.95	1538.51	268.885	1186.93	1585.69	156.186	1190.87	1577.29	223.958	1251.94	1402.34	252.679	1296.56	1185.09	227.076	1117.79	1338.12	223.29	1052.4	1207.31	159.28	1315.17	1229.57	397.808	1180.98	1366.28	457.042	1157.19	1140.35	459.666	1158.06	1071.21	471.802	1055.67	998.584	450.464	1012.31	903.807	501.541	1054.51	879.867	512.885	973.479	822.194
432	0	266.529	1007.01	1550	166.981	1001.94	1539.71	267.528	1176.03	1587.1	154.837	1179.83	1578.6	222.561	1240.87	1403.53	251.297	1285.37	1186.5	226.255	1106.66	1339.42	222.829	1041.03	1208.56	157.681	1303.6	1230.66	396.772	1170.4	1367.63	455.921	1147.75	1141.52	458.433	1149.28	1072.35	471.809	1048.01	998.684	451.102	1005.55	903.29	501.781	1048.6	879.934	514.072	968.548	821.111
433	0	265.576	996.214	1551.39	166.048	990.985	1541	266.24	1165.21	1588.64	153.552	1168.83	1580.03	221.185	1229.93	1404.88	249.888	1274.43	1188.07	225.531	1095.7	1340.84	222.505	1029.86	1209.93	156.033	1292.17	1231.95	395.795	1160.09	1369.1	454.849	1138.66	1142.8	457.229	1140.83	1073.61	471.878	1040.66	998.951	451.79	999.031	902.991	502.033	1042.94	880.177	515.286	963.857	820.265
434	0	264.745	985.51	1552.87	165.24	980.091	1542.39	265.023	1154.48	1590.3	152.336	1157.88	1581.59	219.833	1219.13	1406.38	248.454	1263.73	1189.79	224.9	1084.9	1342.39	222.312	1018.91	1211.43	154.34	1280.9	1233.41	394.875	1150.08	1370.68	453.829	1129.95	1144.19	456.059	1132.72	1074.97	472.009	1033.62	999.38	452.526	992.746	902.912	502.291	1037.52	880.591	516.522	959.371	819.667
435	0	264.042	974.913	1554.43	164.563	969.274	1543.86	263.882	1143.85	1592.07	151.192	1147	1583.25	218.504	1208.46	1408.01	246.995	1253.27	1191.61	224.355	1074.27	1344.05	222.24	1008.19	1213.05	152.608	1269.79	1235.02	394.009	1140.34	1372.33	452.862	1121.62	1145.66	454.925	1124.95	1076.43	472.203	1026.88	999.963	453.308	986.679	903.051	502.554	1032.31	881.167	517.777	955.062	819.321
436	0	263.471	964.436	1556.05	164.019	958.544	1545.4	262.82	1133.33	1593.91	150.123	1136.2	1585.01	217.199	1197.93	1409.74	245.512	1243.03	1193.53	223.891	1063.81	1345.8	222.275	997.674	1214.77	150.844	1258.83	1236.76	393.195	1130.9	1374.05	451.946	1113.69	1147.2	453.829	1117.54	1077.97	472.456	1020.45	1000.69	454.135	980.818	903.399	502.816	1027.3	881.891	519.048	950.9	819.227
437	0	263.034	954.089	1557.74	163.612	947.909	1547.02	261.836	1122.95	1595.82	149.13	1125.47	1586.84	215.918	1187.54	1411.57	244.007	1232.98	1195.5	223.499	1053.52	1347.62	222.4	987.359	1216.6	149.053	1248.02	1238.6	392.428	1121.73	1375.82	451.078	1106.16	1148.79	452.77	1110.49	1079.56	472.768	1014.31	1001.54	455.005	975.149	903.946	503.075	1022.48	882.749	520.334	946.862	819.379
438	0	262.73	943.88	1559.47	163.341	937.376	1548.7	260.929	1112.7	1597.78	148.212	1114.85	1588.73	214.662	1177.29	1413.46	242.481	1223.12	1197.5	223.168	1043.4	1349.51	222.595	977.225	1218.52	147.244	1237.36	1240.53	391.702	1112.82	1377.6	450.25	1099.02	1150.42	451.746	1103.79	1081.18	473.135	1008.46	1002.5	455.919	969.66	904.675	503.326	1017.83	883.721	521.633	942.929	819.763
439	0	262.558	933.815	1561.24	163.204	926.952	1550.44	260.099	1102.59	1599.75	147.369	1104.32	1590.65	213.429	1167.18	1415.39	240.935	1213.4	1199.5	222.889	1033.42	1351.44	222.842	967.253	1220.52	145.424	1226.83	1242.5	391.01	1104.14	1379.39	449.457	1092.27	1152.06	450.753	1097.44	1082.83	473.552	1002.89	1003.56	456.875	964.338	905.567	503.566	1013.34	884.787	522.945	939.087	820.361
440	0	262.513	923.899	1563.03	163.196	916.639	1552.22	259.343	1092.64	1601.73	146.598	1093.89	1592.6	212.22	1157.18	1417.34	239.37	1203.8	1201.49	222.651	1023.59	1353.39	223.12	957.418	1222.58	143.598	1216.42	1244.51	390.347	1095.68	1381.16	448.689	1085.89	1153.7	449.786	1091.41	1084.48	474.015	997.587	1004.68	457.871	959.171	906.597	503.789	1009	885.925	524.269	935.326	821.147
441	0	262.589	914.132	1564.84	163.313	906.439	1554.03	258.655	1082.83	1603.69	145.895	1083.57	1594.55	211.034	1147.3	1419.29	237.787	1194.29	1203.44	222.445	1013.88	1355.34	223.411	947.695	1224.68	141.773	1206.11	1246.51	389.706	1087.39	1382.9	447.937	1079.83	1155.32	448.839	1085.69	1086.12	474.518	992.527	1005.86	458.907	954.151	907.738	503.993	1004.8	887.11	525.607	931.642	822.091
442	0	262.778	904.512	1566.65	163.546	896.351	1555.87	258.032	1073.18	1605.6	145.258	1073.36	1596.48	209.873	1137.52	1421.2	236.186	1184.86	1205.32	222.261	1004.28	1357.27	223.698	938.063	1226.8	139.955	1195.89	1248.49	389.08	1079.26	1384.58	447.191	1074.08	1156.92	447.905	1080.25	1087.73	475.054	987.695	1007.06	459.98	949.266	908.958	504.173	1000.72	888.317	526.956	928.036	823.158
443	0	263.072	895.036	1568.43	163.885	886.372	1557.71	257.468	1063.67	1607.45	144.682	1063.25	1598.36	208.735	1127.83	1423.07	234.569	1175.46	1207.11	222.092	994.777	1359.16	223.967	928.5	1228.91	138.151	1185.75	1250.41	388.464	1071.24	1386.2	446.442	1068.59	1158.46	446.978	1075.05	1089.29	475.617	983.066	1008.27	461.087	944.508	910.226	504.326	996.771	889.521	528.316	924.511	824.309
444	0	263.458	885.694	1570.19	164.322	876.497	1559.54	256.958	1054.31	1609.21	144.162	1053.25	1600.17	207.622	1118.21	1424.86	232.937	1166.09	1208.8	221.929	985.354	1360.98	224.209	918.987	1230.98	136.365	1175.67	1252.26	387.855	1063.3	1387.72	445.681	1063.32	1159.94	446.051	1070.05	1090.79	476.199	978.615	1009.45	462.225	939.868	911.505	504.449	992.933	890.697	529.683	921.076	825.503
445	0	263.926	876.479	1571.89	164.842	866.721	1561.35	256.495	1045.07	1610.86	143.692	1043.35	1601.9	206.535	1108.66	1426.55	231.293	1156.71	1210.36	221.768	975.995	1362.72	224.417	909.511	1232.98	134.606	1165.63	1254.02	387.248	1055.41	1389.14	444.903	1058.21	1161.34	445.118	1065.2	1092.21	476.793	974.315	1010.58	463.389	935.34	912.759	504.539	989.201	891.82	531.055	917.742	826.695
446	0	264.463	867.376	1573.52	165.436	857.033	1563.11	256.073	1035.95	1612.37	143.269	1033.54	1603.52	205.475	1099.16	1428.12	229.643	1147.32	1211.78	221.604	966.684	1364.34	224.586	900.062	1234.88	132.878	1155.64	1255.65	386.643	1047.54	1390.44	444.101	1053.21	1162.65	444.175	1060.47	1093.55	477.39	970.137	1011.64	464.573	930.915	913.952	504.594	985.569	892.866	532.427	914.519	827.842
447	0	265.055	858.372	1575.07	166.088	847.425	1564.79	255.689	1026.94	1613.74	142.887	1023.81	1605	204.446	1089.7	1429.56	227.992	1137.91	1213.05	221.434	957.408	1365.83	224.716	890.631	1236.64	131.192	1145.68	1257.15	386.04	1039.66	1391.62	443.274	1048.26	1163.86	443.22	1055.8	1094.79	477.985	966.049	1012.61	465.772	926.586	915.048	504.613	982.029	893.814	533.792	911.421	828.902
448	0	265.69	849.451	1576.5	166.786	837.885	1566.38	255.335	1018.01	1614.94	142.542	1014.15	1606.34	203.45	1080.27	1430.85	226.35	1128.47	1214.15	221.258	948.152	1367.17	224.809	881.216	1238.23	129.555	1135.74	1258.49	385.439	1031.73	1392.64	442.421	1043.31	1164.94	442.252	1051.13	1095.91	478.569	962.019	1013.45	466.98	922.345	916.012	504.594	978.572	894.644	535.144	908.458	829.833
449	0	266.354	840.593	1577.8	167.517	828.4	1567.86	255.009	1009.15	1615.96	142.23	1004.56	1607.51	202.491	1070.85	1431.97	224.727	1118.99	1215.06	221.074	938.905	1368.34	224.869	871.814	1239.63	127.977	1125.83	1259.66	384.845	1023.75	1393.52	441.545	1038.31	1165.9	441.271	1046.42	1096.91	479.138	958.017	1014.16	468.188	918.184	916.812	504.537	975.189	895.339	536.474	905.643	830.597
450	0	267.034	831.779	1578.96	168.267	818.958	1569.2	254.708	1000.33	1616.78	141.949	995.012	1608.49	201.574	1061.44	1432.91	223.138	1109.47	1215.8	220.885	929.657	1369.32	224.9	862.424	1240.81	126.468	1115.94	1260.65	384.261	1015.68	1394.23	440.652	1033.2	1166.72	440.283	1041.63	1097.78	479.687	954.01	1014.72	469.39	914.093	917.421	504.443	971.87	895.885	537.773	902.98	831.162
451	0	267.718	822.989	1579.95	169.024	809.545	1570.37	254.43	991.542	1617.4	141.697	985.505	1609.28	200.705	1052.02	1433.66	221.598	1099.93	1216.34	220.692	920.399	1370.11	224.908	853.047	1241.75	125.04	1106.07	1261.45	383.692	1007.51	1394.78	439.75	1027.94	1167.39	439.292	1036.69	1098.51	480.211	949.967	1015.1	470.578	910.062	917.813	504.312	968.602	896.269	539.032	900.475	831.499
452	0	268.395	814.204	1580.75	169.776	800.149	1571.37	254.175	982.758	1617.81	141.472	976.024	1609.86	199.889	1042.59	1434.22	220.124	1090.37	1216.69	220.5	911.121	1370.68	224.899	843.681	1242.44	123.704	1096.23	1262.06	383.147	999.225	1395.15	438.848	1022.49	1167.9	438.308	1031.58	1099.09	480.709	945.858	1015.3	471.745	906.079	917.969	504.145	965.372	896.483	540.24	898.125	831.585
453	0	269.055	805.401	1581.36	170.513	790.756	1572.17	253.943	973.958	1618	141.275	966.554	1610.23	199.134	1033.15	1434.57	218.736	1080.8	1216.86	220.312	901.818	1371.04	224.878	834.327	1242.87	122.471	1086.43	1262.46	382.632	990.803	1395.35	437.961	1016.8	1168.25	437.339	1026.25	1099.52	481.18	941.656	1015.31	472.885	902.13	917.875	503.946	962.163	896.522	541.388	895.925	831.404
454	0	269.69	796.563	1581.76	171.224	781.353	1572.75	253.736	965.122	1617.99	141.106	957.086	1610.38	198.446	1023.68	1434.73	217.452	1071.23	1216.84	220.132	892.485	1371.18	224.852	824.981	1243.02	121.353	1076.66	1262.66	382.155	982.237	1395.37	437.102	1010.84	1168.44	436.399	1020.67	1099.8	481.622	937.334	1015.12	473.99	898.199	917.52	503.718	958.959	896.383	542.466	893.862	830.949
455	0	270.293	787.67	1581.94	171.904	771.93	1573.1	253.557	956.232	1617.76	140.966	947.606	1610.31	197.832	1014.19	1434.68	216.29	1061.67	1216.65	219.968	883.115	1371.1	224.827	815.643	1242.91	120.359	1066.92	1262.67	381.726	973.52	1395.21	436.285	1004.59	1168.46	435.498	1014.82	1099.93	482.039	932.869	1014.73	475.054	894.269	916.902	503.463	955.738	896.068	543.465	891.918	830.215
456	0	270.859	778.704	1581.89	172.544	762.476	1573.22	253.41	947.268	1617.32	140.86	938.105	1610.02	197.299	1004.67	1434.44	215.27	1052.13	1216.29	219.824	873.706	1370.79	224.807	806.309	1242.53	119.498	1057.23	1262.49	381.353	964.646	1394.88	435.528	998.039	1168.32	434.651	1008.68	1099.9	482.432	928.238	1014.14	476.072	890.32	916.023	503.187	952.479	895.58	544.378	890.068	829.208
457	0	271.385	769.652	1581.62	173.141	752.982	1573.1	253.3	938.218	1616.69	140.79	928.574	1609.52	196.855	995.109	1434	214.405	1042.63	1215.77	219.707	864.254	1370.28	224.798	796.975	1241.9	118.778	1047.58	1262.12	381.045	955.611	1394.38	434.844	991.166	1168.01	433.869	1002.25	1099.73	482.804	923.421	1013.34	477.04	886.33	914.889	502.895	949.157	894.926	545.2	888.279	827.939
458	0	271.87	760.501	1581.12	173.693	743.441	1572.73	253.233	929.068	1615.86	140.76	919.005	1608.82	196.506	985.516	1433.38	213.71	1033.16	1215.12	219.624	854.756	1369.55	224.806	787.638	1241.03	118.205	1037.97	1261.58	380.811	946.414	1393.72	434.248	983.97	1167.55	433.165	995.506	1099.41	483.159	918.403	1012.36	477.955	882.277	913.514	502.593	945.748	894.115	545.927	886.513	826.424
459	0	272.315	751.239	1580.4	174.198	733.845	1572.13	253.214	919.809	1614.86	140.774	909.391	1607.92	196.258	975.885	1432.58	213.194	1023.73	1214.33	219.582	845.209	1368.64	224.837	778.292	1239.93	117.784	1028.39	1260.87	380.658	937.059	1392.91	433.752	976.453	1166.94	432.551	988.463	1098.94	483.501	913.169	1011.19	478.812	878.135	911.915	502.289	942.221	893.157	546.558	884.727	824.686
460	0	272.722	741.861	1579.47	174.659	724.192	1571.29	253.249	910.432	1613.7	140.838	899.729	1606.84	196.117	966.215	1431.62	212.864	1014.35	1213.42	219.588	835.611	1367.54	224.897	768.931	1238.64	117.517	1018.85	1260.01	380.593	927.547	1391.95	433.367	968.622	1166.18	432.034	981.126	1098.34	483.835	907.705	1009.86	479.613	873.878	910.111	501.988	938.55	892.065	547.095	882.87	822.752
461	0	273.097	732.361	1578.35	175.079	714.478	1570.23	253.345	900.935	1612.39	140.956	890.014	1605.59	196.087	956.504	1430.51	212.724	1005.01	1212.4	219.649	825.959	1366.27	224.992	759.55	1237.16	117.406	1009.33	1259	380.624	917.886	1390.85	433.102	960.492	1165.28	431.622	973.507	1097.61	484.165	902.003	1008.37	480.356	869.48	908.127	501.701	934.704	890.852	547.543	880.887	820.65
462	0	273.444	722.737	1577.04	175.464	704.7	1568.98	253.508	891.316	1610.95	141.135	880.244	1604.18	196.173	946.751	1429.26	212.773	995.703	1211.29	219.773	816.251	1364.86	225.13	750.139	1235.54	117.45	999.829	1257.86	380.755	908.083	1389.62	432.96	952.08	1164.26	431.32	965.622	1096.77	484.498	896.053	1006.73	481.043	864.911	905.987	501.434	930.652	889.533	547.908	878.723	818.413
463	0	273.772	712.99	1575.56	175.821	694.861	1567.53	253.743	881.576	1609.39	141.378	870.42	1602.65	196.377	936.954	1427.88	213.01	986.419	1210.08	219.966	806.484	1363.32	225.318	740.691	1233.78	117.647	990.325	1256.6	380.99	898.148	1388.28	432.946	943.408	1163.12	431.132	957.49	1095.8	484.839	889.85	1004.97	481.678	860.145	903.721	501.197	926.364	888.121	548.201	876.316	816.073
464	0	274.09	703.123	1573.94	176.158	684.959	1565.93	254.055	871.718	1607.75	141.692	860.541	1601	196.701	927.112	1426.39	213.429	977.142	1208.79	220.237	796.653	1361.68	225.563	731.195	1231.93	117.996	980.807	1255.23	381.334	888.09	1386.84	433.06	934.5	1161.88	431.058	949.13	1094.74	485.193	883.388	1003.11	482.264	855.153	901.354	501	921.81	886.63	548.433	873.609	813.661
465	0	274.406	693.141	1572.21	176.486	674.998	1564.19	254.45	861.748	1606.03	142.08	850.609	1599.26	197.147	917.222	1424.8	214.021	967.855	1207.42	220.59	786.757	1359.95	225.876	721.64	1230.01	118.491	971.259	1253.76	381.788	877.922	1385.31	433.299	925.383	1160.54	431.097	940.564	1093.57	485.565	876.663	1001.15	482.809	849.907	898.915	500.848	916.961	885.075	548.618	870.545	811.208
466	0	274.732	683.049	1570.39	176.814	664.981	1562.33	254.932	851.672	1604.26	142.547	840.626	1597.44	197.715	907.282	1423.13	214.776	958.538	1205.99	221.032	776.792	1358.15	226.262	712.012	1228.04	119.128	961.663	1252.2	382.354	867.654	1383.7	433.658	916.083	1159.12	431.246	931.81	1092.32	485.962	869.671	999.13	483.321	844.38	896.43	500.751	911.79	883.466	548.772	867.069	808.74
467	0	275.078	672.856	1568.5	177.154	654.909	1560.4	255.504	841.498	1602.46	143.098	830.594	1595.58	198.404	897.29	1421.4	215.681	949.167	1204.48	221.57	766.754	1356.32	226.729	702.299	1226.06	119.901	952.004	1250.57	383.033	857.298	1382.02	434.132	906.624	1157.63	431.5	922.886	1090.99	486.39	862.41	997.055	483.808	838.546	893.924	500.716	906.272	881.817	548.91	863.133	806.282
468	0	275.455	662.569	1566.58	177.518	644.787	1558.42	256.169	831.234	1600.65	143.735	820.517	1593.69	199.213	887.242	1419.62	216.722	939.718	1202.92	222.206	756.639	1354.47	227.286	692.487	1224.09	120.804	942.262	1248.87	383.824	846.866	1380.29	434.713	897.03	1156.08	431.855	913.805	1089.59	486.853	854.877	994.947	484.283	832.38	891.422	500.746	900.382	880.138	549.048	858.697	803.855
469	0	275.872	652.197	1564.66	177.916	634.617	1556.43	256.929	820.89	1598.85	144.463	810.398	1591.79	200.141	877.135	1417.82	217.886	930.166	1201.3	222.945	746.444	1352.62	227.936	682.562	1222.15	121.828	932.422	1247.13	384.727	836.367	1378.53	435.392	887.318	1154.48	432.305	904.579	1088.13	487.359	847.07	992.824	484.755	825.86	888.945	500.846	894.102	878.44	549.202	853.725	801.474
470	0	276.34	641.748	1562.76	178.358	624.403	1554.44	257.787	810.474	1597.09	145.282	800.238	1589.92	201.184	866.965	1416	219.156	920.484	1199.64	223.789	736.165	1350.81	228.686	672.514	1220.28	122.969	922.467	1245.34	385.739	825.81	1376.75	436.163	877.505	1152.84	432.844	895.214	1086.62	487.912	838.984	990.704	485.239	818.964	886.513	501.02	887.412	876.731	549.384	848.192	799.155
471	0	276.867	631.23	1560.92	178.854	614.147	1552.5	258.742	799.993	1595.38	146.194	790.04	1588.09	202.34	856.73	1414.19	220.517	910.65	1197.93	224.74	725.799	1349.04	229.536	662.329	1218.5	124.218	912.384	1243.54	386.859	815.202	1374.96	437.015	867.599	1151.17	433.466	885.711	1085.08	488.518	830.615	988.604	485.745	811.674	884.145	501.267	880.298	875.022	549.608	842.08	796.907
472	0	277.461	620.65	1559.17	179.412	603.851	1550.64	259.794	789.455	1593.74	147.202	779.808	1586.32	203.605	846.425	1412.41	221.955	900.639	1196.2	225.798	715.344	1347.35	230.488	651.998	1216.83	125.568	902.162	1241.73	388.085	804.547	1373.19	437.941	857.604	1149.5	434.164	876.067	1083.51	489.18	821.96	986.541	486.285	803.974	881.857	501.588	872.747	873.321	549.885	835.379	794.74
473	0	278.127	610.013	1557.52	180.039	593.516	1548.88	260.943	778.864	1592.2	148.304	769.541	1584.63	204.976	836.049	1410.68	223.457	890.432	1194.46	226.961	704.797	1345.76	231.54	641.513	1215.29	127.013	891.793	1239.94	389.411	793.847	1371.44	438.934	847.518	1147.83	434.934	866.276	1081.93	489.902	813.012	984.532	486.87	795.85	879.665	501.981	864.75	871.638	550.222	828.085	792.659
474	0	278.87	599.324	1556.02	180.74	583.142	1547.25	262.187	768.227	1590.77	149.5	759.24	1583.06	206.448	825.596	1409.02	225.01	880.011	1192.72	228.226	694.157	1344.28	232.688	630.869	1213.9	128.546	881.272	1238.19	390.834	783.101	1369.74	439.988	837.335	1146.17	435.771	856.327	1080.35	490.687	803.764	982.593	487.508	787.29	877.581	502.444	856.298	869.984	550.625	820.203	790.672
475	0	279.693	588.587	1554.68	181.518	572.731	1545.78	263.524	757.547	1589.47	150.788	748.907	1581.61	208.016	815.067	1407.45	226.605	869.365	1191	229.588	683.422	1342.93	233.927	620.063	1212.68	130.159	870.596	1236.5	392.35	772.308	1368.11	441.099	827.041	1144.55	436.671	846.205	1078.8	491.534	794.208	980.74	488.204	778.286	875.619	502.975	847.388	868.371	551.099	811.738	788.785
476	0	280.596	577.804	1553.53	182.374	562.28	1544.49	264.95	746.825	1588.32	152.166	738.541	1580.3	209.677	804.458	1405.99	228.233	858.486	1189.32	231.042	672.593	1341.73	235.248	609.094	1211.64	131.847	859.767	1234.89	393.952	761.463	1366.57	442.261	816.621	1142.99	437.63	835.895	1077.28	492.445	784.336	978.988	488.963	768.832	873.791	503.571	838.015	866.809	551.645	802.703	787.003
477	0	281.578	566.978	1552.57	183.309	551.79	1543.4	266.462	736.062	1587.33	153.631	728.14	1579.15	211.422	793.769	1404.65	229.889	847.37	1187.72	232.578	661.672	1340.7	236.64	597.967	1210.79	133.602	848.792	1233.4	395.635	750.557	1365.13	443.473	806.056	1141.49	438.645	825.379	1075.82	493.417	774.139	977.354	489.784	758.923	872.109	504.228	828.178	865.312	552.262	793.108	785.336
478	0	282.637	556.108	1551.83	184.319	541.258	1542.52	268.054	725.26	1586.52	155.177	717.703	1578.18	213.247	782.999	1403.47	231.567	836.019	1186.22	234.188	650.661	1339.85	238.092	586.686	1210.15	135.418	837.677	1232.04	397.39	739.585	1363.81	444.732	795.322	1140.08	439.716	814.639	1074.44	494.447	763.608	975.85	490.665	748.557	870.582	504.943	817.876	863.895	552.947	782.967	783.79
479	0	283.768	545.195	1551.31	185.4	530.683	1541.86	269.72	714.417	1585.9	156.8	707.23	1577.4	215.145	772.15	1402.45	233.267	824.442	1184.85	235.86	639.563	1339.19	239.59	575.261	1209.73	137.287	826.436	1230.84	399.209	728.537	1362.64	446.037	784.399	1138.77	440.841	803.656	1073.15	495.53	752.732	974.492	491.6	737.735	869.223	505.715	807.112	862.571	553.695	772.293	782.376
480	0	284.966	534.238	1551.03	186.547	520.064	1541.44	271.454	703.533	1585.47	158.492	696.718	1576.82	217.107	761.223	1401.62	234.985	812.652	1183.63	237.583	628.384	1338.73	241.12	563.705	1209.52	139.203	815.084	1229.82	401.083	717.405	1361.63	447.388	773.265	1137.6	442.02	792.417	1071.97	496.66	741.503	973.293	492.582	726.459	868.041	506.542	795.885	861.357	554.502	761.096	781.106
481	0	286.224	523.237	1550.98	187.752	509.399	1541.26	273.247	692.606	1585.24	160.246	686.165	1576.44	219.125	750.222	1400.98	236.721	800.667	1182.6	239.343	617.129	1338.47	242.665	552.034	1209.52	141.158	803.638	1229.01	403.002	706.179	1360.8	448.783	761.9	1136.57	443.252	780.907	1070.93	497.829	729.914	972.265	493.6	714.732	867.047	507.421	784.2	860.267	555.359	749.385	779.991
482	0	287.532	512.192	1551.16	189.007	498.687	1541.32	275.092	681.636	1585.22	162.053	675.572	1576.28	221.192	739.151	1400.55	238.477	788.509	1181.77	241.127	605.806	1338.42	244.212	540.268	1209.73	143.146	792.118	1228.43	404.955	694.851	1360.16	450.224	750.287	1135.7	444.539	769.118	1070.04	499.031	717.958	971.42	494.642	702.56	866.249	508.351	772.06	859.315	556.259	737.166	779.043
483	0	288.882	501.103	1551.57	190.303	487.928	1541.61	276.979	670.622	1585.4	163.905	664.936	1576.32	223.297	728.016	1400.33	240.251	776.207	1181.17	242.921	594.424	1338.57	245.745	528.428	1210.14	145.158	780.547	1228.09	406.932	683.415	1359.72	451.709	738.416	1135	445.881	757.044	1069.32	500.256	705.632	970.767	495.695	689.949	865.657	509.333	759.468	858.515	557.193	724.442	778.274
484	0	290.264	489.971	1552.2	191.628	477.121	1542.14	278.898	659.563	1585.77	165.791	654.258	1576.58	225.433	716.823	1400.33	242.044	763.792	1180.82	244.71	582.992	1338.92	247.248	516.538	1210.74	147.19	768.948	1228	408.92	671.866	1359.49	453.237	726.278	1134.5	447.28	744.685	1068.77	501.495	692.933	970.315	496.746	676.909	865.279	510.364	746.43	857.879	558.153	711.214	777.696
485	0	291.666	478.797	1553.03	192.972	466.268	1542.87	280.839	648.462	1586.34	167.701	643.538	1577.04	227.589	705.581	1400.55	243.858	751.299	1180.73	246.48	571.521	1339.47	248.707	504.626	1211.51	149.235	757.346	1228.18	410.908	660.198	1359.49	454.81	713.872	1134.2	448.736	732.045	1068.42	502.739	679.865	970.071	497.78	663.449	865.12	511.446	732.952	857.417	559.128	697.48	777.32
486	0	293.078	467.585	1554.04	194.324	455.371	1543.81	282.79	637.32	1587.09	169.623	632.778	1577.69	229.757	694.298	1400.99	245.695	738.766	1180.91	248.218	560.022	1340.2	250.11	492.718	1212.42	151.29	745.767	1228.61	412.887	648.412	1359.7	456.424	701.202	1134.1	450.251	719.132	1068.26	503.978	666.431	970.038	498.783	649.581	865.184	512.578	719.041	857.137	560.11	683.239	777.153
487	0	294.489	456.338	1555.23	195.674	444.433	1544.93	284.741	626.139	1588.01	171.546	621.979	1578.53	231.928	682.985	1401.64	247.555	726.233	1181.35	249.911	548.508	1341.1	251.442	480.841	1213.46	153.352	734.236	1229.29	414.843	636.506	1360.13	458.08	688.276	1134.22	451.827	705.96	1068.3	505.203	652.638	970.22	499.743	635.319	865.475	513.758	704.705	857.045	561.089	668.487	777.202
488	0	295.888	445.059	1556.56	197.01	433.457	1546.22	286.68	614.923	1589.08	173.46	611.145	1579.54	234.093	671.653	1402.5	249.441	713.74	1182.06	251.547	536.991	1342.16	252.694	469.021	1214.6	155.42	722.778	1230.23	416.768	624.484	1360.78	459.774	675.108	1134.54	453.464	692.544	1068.54	506.406	638.498	970.617	500.648	620.678	865.993	514.987	689.954	857.144	562.056	653.223	777.471
489	0	297.264	433.756	1558.02	198.321	422.45	1547.64	288.596	603.676	1590.29	175.352	600.279	1580.71	236.244	660.314	1403.54	251.357	701.326	1183.02	253.116	525.484	1343.36	253.855	457.281	1215.82	157.493	711.417	1231.39	418.653	612.35	1361.64	461.506	661.714	1135.07	455.164	678.905	1068.98	507.579	624.025	971.227	501.486	605.675	866.737	516.262	674.8	857.435	562.999	637.447	777.962
490	0	298.608	422.433	1559.58	199.599	411.416	1549.17	290.478	592.404	1591.62	177.213	589.387	1582.01	238.375	648.98	1404.77	253.303	689.03	1184.23	254.609	514	1344.68	254.916	445.645	1217.09	159.574	700.175	1232.78	420.488	600.113	1362.69	463.272	648.115	1135.81	456.927	665.062	1069.62	508.714	609.235	972.045	502.25	590.328	867.703	517.582	659.254	857.917	563.91	621.161	778.674
491	0	299.91	411.098	1561.21	200.833	400.363	1550.79	292.318	581.113	1593.05	179.033	578.473	1583.43	240.478	637.664	1406.15	255.282	676.887	1185.65	256.019	502.553	1346.1	255.87	434.133	1218.39	161.662	689.07	1234.35	422.266	587.783	1363.92	465.071	634.33	1136.73	458.753	651.038	1070.43	509.803	594.148	973.066	502.93	574.659	868.885	518.944	643.333	858.588	564.778	604.373	779.605
492	0	301.161	399.758	1562.89	202.017	389.298	1552.48	294.105	569.809	1594.57	180.803	567.543	1584.95	242.547	626.378	1407.69	257.295	664.928	1187.28	257.34	491.155	1347.6	256.712	422.762	1219.7	163.761	678.12	1236.11	423.98	575.374	1365.33	466.899	620.382	1137.83	460.641	636.854	1071.42	510.84	578.784	974.282	503.52	558.691	870.275	520.344	627.052	859.442	565.591	587.093	780.75
493	0	302.354	388.42	1564.6	203.143	378.23	1554.2	295.832	558.499	1596.15	182.515	556.604	1586.55	244.576	615.134	1409.34	259.343	653.178	1189.08	258.57	479.817	1349.17	257.44	411.547	1221	165.871	667.335	1238.01	425.624	562.902	1366.88	468.753	606.291	1139.1	462.591	622.531	1072.56	511.82	563.165	975.685	504.016	542.446	871.864	521.779	610.43	860.476	566.341	569.338	782.105
494	0	303.482	377.092	1566.32	204.204	367.167	1555.93	297.491	547.19	1597.78	184.163	545.664	1588.21	246.559	603.944	1411.1	261.423	641.658	1191.04	259.707	468.552	1350.79	258.056	400.498	1222.28	167.991	656.725	1240.05	427.195	550.388	1368.56	470.63	592.078	1140.52	464.599	608.089	1073.85	512.736	547.317	977.264	504.413	525.951	873.642	523.243	593.486	861.682	567.015	551.129	783.664
495	0	304.542	365.782	1568.02	205.198	356.118	1557.65	299.079	535.89	1599.45	185.741	534.728	1589.92	248.491	592.818	1412.95	263.532	630.381	1193.13	260.753	457.369	1352.44	258.564	389.624	1223.54	170.119	646.293	1242.18	428.689	537.852	1370.36	472.525	577.762	1142.07	466.663	593.546	1075.27	513.584	531.262	979.008	504.709	509.232	875.597	524.73	576.244	863.055	567.606	532.491	785.422
496	0	305.528	354.498	1569.69	206.12	345.091	1559.35	300.59	524.605	1601.14	187.245	523.805	1591.65	250.369	581.765	1414.87	265.663	619.355	1195.32	261.709	446.276	1354.11	258.97	378.93	1224.77	172.249	636.039	1244.4	430.102	525.318	1372.26	474.432	563.362	1143.74	468.777	578.92	1076.81	514.358	515.027	980.904	504.901	492.317	877.716	526.233	558.725	864.587	568.102	513.457	787.37
497	0	306.438	343.247	1571.32	206.969	334.097	1560.99	302.022	513.344	1602.83	188.673	512.902	1593.38	252.187	570.793	1416.83	267.808	608.58	1197.58	262.582	435.282	1355.78	259.287	368.414	1225.97	174.377	625.958	1246.68	431.435	512.811	1374.23	476.345	548.897	1145.51	470.934	564.227	1078.44	515.056	498.637	982.941	504.991	475.233	879.985	527.744	540.955	866.27	568.496	494.061	789.505
498	0	307.273	332.037	1572.88	207.744	323.143	1562.57	303.374	502.113	1604.52	190.023	502.028	1595.11	253.943	559.909	1418.82	269.957	598.05	1199.9	263.378	424.39	1357.44	259.527	358.072	1227.13	176.493	616.042	1249	432.687	500.357	1376.25	478.256	534.383	1147.36	473.126	549.48	1080.15	515.675	482.119	985.105	504.976	458.007	882.392	529.253	522.959	868.095	568.781	474.342	791.818
499	0	308.031	320.875	1574.37	208.447	312.237	1564.08	304.645	490.921	1606.18	191.296	491.188	1596.81	255.633	549.116	1420.81	272.096	587.757	1202.24	264.104	413.605	1359.08	259.706	347.897	1228.27	178.587	606.278	1251.33	433.86	487.979	1378.32	480.158	519.839	1149.27	475.344	534.693	1081.93	516.211	465.498	987.381	504.86	440.669	884.92	530.75	504.765	870.051	568.951	454.341	794.302
500	0	308.715	309.768	1575.77	209.08	301.389	1565.49	305.837	479.774	1607.82	192.492	480.39	1598.48	257.256	538.418	1422.8	274.215	577.686	1204.59	264.77	402.928	1360.69	259.842	337.877	1229.37	180.649	596.652	1253.66	434.955	475.701	1380.4	482.041	505.283	1151.22	477.576	519.882	1083.75	516.663	448.8	989.755	504.645	423.245	887.557	532.223	486.4	872.129	569	434.103	796.95
501	0	309.328	298.722	1577.09	209.647	290.603	1566.8	306.952	468.68	1609.41	193.613	469.64	1600.09	258.811	527.816	1424.75	276.298	567.818	1206.92	265.384	392.359	1362.25	259.952	327.997	1230.45	182.669	587.147	1255.96	435.977	463.542	1382.48	483.895	490.735	1153.2	479.809	505.057	1085.6	517.031	432.052	992.21	504.334	405.762	890.286	533.659	467.894	874.314	568.927	413.674	799.751
502	0	309.875	287.743	1578.3	210.152	279.886	1567.99	307.992	457.644	1610.94	194.663	458.945	1601.63	260.295	517.309	1426.66	278.335	558.134	1209.2	265.956	381.895	1363.76	260.052	318.242	1231.5	184.636	577.747	1258.23	436.93	451.52	1384.54	485.712	476.212	1155.18	482.032	490.235	1087.45	517.315	415.28	994.73	503.931	388.245	893.091	535.045	449.275	876.593	568.73	393.101	802.695
503	0	310.36	276.835	1579.41	210.601	269.242	1569.08	308.963	446.673	1612.41	195.645	448.308	1603.1	261.71	506.895	1428.5	280.313	548.613	1211.43	266.496	371.532	1365.2	260.158	308.594	1232.52	186.54	568.433	1260.43	437.819	439.648	1386.55	487.482	461.735	1157.15	484.231	475.427	1089.3	517.517	398.508	997.299	503.441	370.719	895.958	536.367	430.573	878.95	568.408	372.429	805.77
504	0	310.791	266.002	1580.41	211.001	258.675	1570.04	309.868	435.771	1613.8	196.564	437.734	1604.47	263.055	496.57	1430.25	282.224	539.234	1213.57	267.012	361.266	1366.57	260.285	299.037	1233.49	188.372	559.187	1262.55	438.648	427.935	1388.5	489.196	447.324	1159.08	486.392	460.649	1091.11	517.64	381.762	999.898	502.87	353.205	898.869	537.612	411.818	881.367	567.963	351.705	808.961
505	0	311.173	255.247	1581.3	211.358	248.187	1570.88	310.712	424.942	1615.1	197.425	427.226	1605.73	264.331	486.329	1431.91	284.058	529.977	1215.61	267.512	351.089	1367.84	260.441	289.555	1234.42	190.125	549.991	1264.57	439.424	416.388	1390.37	490.847	432.998	1160.95	488.502	445.914	1092.87	517.687	365.066	1002.51	502.224	335.725	901.809	538.766	393.04	883.826	567.398	330.975	812.25
506	0	311.516	244.571	1582.08	211.681	237.776	1571.59	311.5	414.19	1616.29	198.232	416.784	1606.88	265.54	476.167	1433.45	285.809	520.82	1217.53	268.004	340.993	1369.01	260.637	280.134	1235.28	191.791	540.828	1266.48	440.151	405.008	1392.14	492.427	418.774	1162.75	490.548	431.237	1094.56	517.661	348.443	1005.11	501.51	318.299	904.761	539.816	374.268	886.307	566.716	310.283	815.621
507	0	311.826	233.975	1582.73	211.976	227.444	1572.17	312.239	403.516	1617.37	198.991	406.408	1607.9	266.682	466.077	1434.85	287.472	511.748	1219.32	268.491	330.971	1370.07	260.878	270.761	1236.06	193.365	531.682	1268.25	440.834	393.794	1393.79	493.932	404.671	1164.46	492.52	416.632	1096.16	517.568	331.915	1007.69	500.735	300.945	907.708	540.75	355.532	888.789	565.922	289.668	819.052
508	0	312.113	223.457	1583.25	212.253	217.186	1572.62	312.934	392.92	1618.32	199.707	396.098	1608.79	267.758	456.051	1436.12	289.04	502.744	1220.96	268.98	321.014	1371	261.165	261.427	1236.75	194.842	522.54	1269.88	441.477	382.742	1395.29	495.357	390.702	1166.05	494.406	402.111	1097.65	517.413	315.502	1010.23	499.905	283.678	910.637	541.558	336.859	891.254	565.02	269.172	822.524
509	0	312.383	213.016	1583.65	212.519	206.999	1572.93	313.59	382.402	1619.13	200.385	385.85	1609.53	268.771	446.082	1437.23	290.511	493.795	1222.44	269.471	311.111	1371.8	261.499	252.123	1237.32	196.217	513.388	1271.35	442.084	371.844	1396.64	496.699	376.882	1167.51	496.197	387.686	1099.02	517.201	299.223	1012.7	499.026	266.514	913.53	542.232	318.276	893.68	564.016	248.829	826.013
510	0	312.645	202.649	1583.91	212.779	196.879	1573.11	314.213	371.96	1619.79	201.031	375.662	1610.11	269.72	436.162	1438.18	291.881	484.889	1223.75	269.967	301.255	1372.46	261.878	242.843	1237.77	197.488	504.216	1272.66	442.657	361.092	1397.83	497.955	363.222	1168.83	497.887	373.369	1100.25	516.937	283.094	1015.1	498.105	249.468	916.373	542.765	299.81	896.05	562.916	228.673	829.497
511	0	312.904	192.35	1584.04	213.042	186.818	1573.16	314.808	361.589	1620.29	201.648	365.529	1610.54	270.606	426.283	1438.96	293.146	476.016	1224.87	270.468	291.436	1372.96	262.298	233.581	1238.07	198.651	495.012	1273.78	443.197	350.477	1398.82	499.125	349.73	1170	499.468	359.169	1101.32	516.626	267.13	1017.4	497.147	232.552	919.151	543.155	281.485	898.345	561.728	208.734	832.955
512	0	313.168	182.115	1584.02	213.312	176.81	1573.07	315.379	351.287	1620.62	202.241	355.444	1610.8	271.43	416.438	1439.56	294.305	467.166	1225.81	270.972	281.646	1373.31	262.752	224.331	1238.22	199.705	485.769	1274.72	443.707	339.988	1399.63	500.207	336.412	1170.99	500.937	345.095	1102.24	516.273	251.344	1019.6	496.157	215.779	921.85	543.401	263.322	900.548	560.458	189.037	836.366
513	0	313.44	171.938	1583.87	213.592	166.848	1572.84	315.93	341.048	1620.79	202.812	345.404	1610.9	272.192	406.62	1439.97	295.354	458.332	1226.56	271.476	271.877	1373.49	263.233	215.087	1238.2	200.648	476.479	1275.47	444.185	329.613	1400.23	501.202	323.272	1171.81	502.291	331.153	1102.98	515.881	235.747	1021.66	495.139	199.161	924.456	543.504	245.344	902.645	559.113	169.606	839.708
514	0	313.724	161.813	1583.56	213.887	156.923	1572.47	316.465	330.866	1620.77	203.365	335.4	1610.83	272.891	396.821	1440.2	296.291	449.505	1227.12	271.978	262.121	1373.51	263.734	205.843	1238.01	201.479	467.136	1276.02	444.631	319.343	1400.63	502.11	310.311	1172.44	503.528	317.349	1103.55	515.454	220.348	1023.6	494.098	182.711	926.956	543.469	227.568	904.624	557.702	150.461	842.963
515	0	314.022	151.733	1583.11	214.197	147.029	1571.98	316.984	320.736	1620.57	203.9	325.427	1610.58	273.526	387.035	1440.24	297.114	440.677	1227.48	272.473	252.371	1373.36	264.246	196.592	1237.64	202.197	457.735	1276.38	445.045	309.166	1400.81	502.933	297.527	1172.88	504.648	303.686	1103.94	514.995	205.152	1025.38	493.037	166.439	929.336	543.304	210.011	906.472	556.233	131.617	846.111
516	0	314.335	141.692	1582.51	214.523	137.157	1571.34	317.491	310.65	1620.19	204.418	315.479	1610.17	274.097	377.256	1440.09	297.822	431.838	1227.64	272.955	242.62	1373.04	264.76	187.325	1237.1	202.802	448.273	1276.53	445.424	299.072	1400.78	503.67	284.917	1173.14	505.653	290.168	1104.16	514.508	190.166	1027.01	491.96	150.358	931.583	543.018	192.69	908.18	554.715	113.089	849.137
517	0	314.662	131.683	1581.77	214.863	127.3	1570.58	317.984	300.602	1619.63	204.92	305.549	1609.6	274.602	367.479	1439.75	298.413	422.979	1227.62	273.421	232.862	1372.56	265.267	178.034	1236.39	203.296	438.745	1276.49	445.766	289.051	1400.54	504.324	272.475	1173.21	506.542	276.796	1104.19	513.993	175.392	1028.47	490.869	134.479	933.686	542.622	175.617	909.74	553.157	94.8875	852.023
518	0	315.001	121.699	1580.87	215.214	117.451	1569.7	318.464	290.587	1618.89	205.405	295.631	1608.87	275.038	357.698	1439.23	298.888	414.088	1227.4	273.862	223.091	1371.92	265.759	168.708	1235.52	203.679	429.149	1276.26	446.068	279.092	1400.1	504.896	260.195	1173.09	507.321	263.57	1104.05	513.455	160.833	1029.77	489.77	118.812	935.633	542.129	158.805	911.146	551.569	77.0231	854.755
519	0	315.348	111.734	1579.84	215.572	107.603	1568.69	318.928	280.598	1617.98	205.87	285.721	1607.98	275.405	347.908	1438.53	299.247	405.153	1227.01	274.274	213.301	1371.13	266.228	159.339	1234.5	203.954	419.482	1275.84	446.327	269.186	1399.46	505.386	248.069	1172.8	507.991	250.488	1103.74	512.894	146.488	1030.88	488.667	103.368	937.412	541.554	142.264	912.392	549.961	59.5035	857.32
520	0	315.698	101.784	1578.67	215.932	97.7522	1567.57	319.373	270.629	1616.9	206.312	275.814	1606.95	275.701	338.104	1437.66	299.493	396.162	1226.43	274.65	203.486	1370.2	266.665	149.916	1233.33	204.124	409.743	1275.22	446.541	259.324	1398.64	505.798	236.087	1172.33	508.557	237.551	1103.26	512.313	132.359	1031.82	487.563	88.1556	939.013	540.913	126.005	913.475	548.347	42.3355	859.705
521	0	316.044	91.8421	1577.37	216.287	87.892	1566.34	319.795	260.675	1615.65	206.727	265.906	1605.78	275.922	328.282	1436.63	299.627	387.1	1225.69	274.983	193.642	1369.13	267.066	140.429	1232.04	204.192	399.929	1274.43	446.706	249.495	1397.64	506.131	224.24	1171.7	509.022	224.755	1102.64	511.715	118.444	1032.58	486.466	73.185	940.428	540.22	110.035	914.392	546.737	25.5251	861.899
522	0	316.38	81.9042	1575.94	216.63	78.0186	1565.01	320.189	250.731	1614.26	207.111	255.992	1604.49	276.068	318.438	1435.43	299.655	377.953	1224.78	275.267	183.763	1367.94	267.423	130.869	1230.64	204.163	390.038	1273.47	446.819	239.691	1396.47	506.387	212.517	1170.91	509.391	212.1	1101.87	511.102	104.741	1033.15	485.381	58.4638	941.648	539.493	94.3644	915.141	545.147	9.07761	863.891
523	0	316.699	71.9662	1574.41	216.953	68.1281	1563.59	320.55	240.794	1612.73	207.458	246.07	1603.08	276.135	308.566	1434.09	299.581	368.705	1223.72	275.496	173.843	1366.64	267.731	121.227	1229.15	204.042	380.068	1272.34	446.876	229.9	1395.16	506.567	200.908	1169.99	509.668	199.582	1100.96	510.479	91.2491	1033.54	484.317	43.999	942.665	538.748	78.9993	915.72	543.59	-7.00205	865.673
524	0	316.991	62.0241	1572.78	217.248	58.2174	1562.09	320.871	230.858	1611.08	207.762	236.136	1601.56	276.124	298.662	1432.62	299.41	359.342	1222.51	275.664	163.878	1365.24	267.984	111.494	1227.58	203.833	370.016	1271.05	446.874	220.114	1393.72	506.673	189.405	1168.93	509.859	187.199	1099.94	509.849	77.9662	1033.75	483.28	29.7968	943.475	538.002	63.9472	916.13	542.081	-22.7094	867.235
525	0	317.247	52.0743	1571.07	217.505	48.2836	1560.53	321.146	220.92	1609.32	208.016	226.188	1599.96	276.031	288.722	1431.02	299.149	349.849	1221.16	275.765	153.862	1363.76	268.179	101.662	1225.94	203.542	359.879	1269.61	446.81	210.321	1392.16	506.706	177.996	1167.76	509.967	174.95	1098.81	509.218	64.8906	1033.78	482.28	15.8623	944.073	537.268	49.215	916.37	540.636	-38.04	868.57
526	0	317.46	42.1133	1569.29	217.715	38.3242	1558.92	321.366	210.977	1607.46	208.214	216.223	1598.28	275.857	278.741	1429.31	298.806	340.213	1219.68	275.794	143.79	1362.21	268.31	91.7216	1224.27	203.175	349.654	1268.04	446.681	200.51	1390.51	506.668	166.674	1166.49	509.999	162.834	1097.58	508.591	52.0206	1033.64	481.327	2.19969	944.457	536.563	34.8095	916.442	539.273	-52.9898	869.671
527	0	317.621	32.1378	1567.46	217.87	28.3368	1557.26	321.526	201.024	1605.52	208.35	206.239	1596.53	275.601	268.715	1427.5	298.386	330.422	1218.07	275.746	133.657	1360.61	268.373	81.6664	1222.57	202.738	339.338	1266.34	446.485	190.67	1388.78	506.561	155.431	1165.14	509.958	150.85	1096.27	507.973	39.3549	1033.33	480.43	-11.1878	944.625	535.9	20.7373	916.347	538.005	-67.5544	870.533
528	0	317.72	22.1444	1565.6	217.963	18.3191	1555.59	321.616	191.06	1603.53	208.416	196.234	1594.73	275.264	258.637	1425.61	297.896	320.465	1216.35	275.618	123.458	1358.97	268.364	71.4884	1220.86	202.236	328.927	1264.53	446.219	180.791	1386.99	506.387	144.261	1163.71	509.85	138.996	1094.89	507.372	26.8922	1032.86	479.6	-24.2977	944.577	535.291	7.00485	916.086	536.851	-81.7294	871.151
529	0	317.751	12.1294	1563.72	217.984	8.26873	1553.91	321.632	181.079	1601.49	208.406	186.203	1592.91	274.844	248.505	1423.66	297.344	310.334	1214.53	275.405	113.188	1357.31	268.279	61.1806	1219.16	201.675	318.418	1262.62	445.883	170.86	1385.16	506.149	133.157	1162.22	509.678	127.272	1093.45	506.795	14.6318	1032.23	478.846	-37.1279	944.316	534.747	-6.38109	915.663	535.826	-95.5102	871.52
530	0	317.708	2.089	1561.85	217.928	-1.81687	1552.24	321.567	171.08	1599.43	208.316	176.146	1591.06	274.345	238.312	1421.65	296.734	300.022	1212.63	275.107	102.843	1355.64	268.115	50.7364	1217.49	201.061	307.806	1260.62	445.475	160.866	1383.31	505.85	122.115	1160.69	509.448	115.678	1091.96	506.248	2.57322	1031.45	478.179	-49.6767	943.845	534.278	-19.4139	915.082	534.944	-108.892	871.637
531	0	317.583	-7.98064	1560.01	217.789	-11.9403	1550.59	321.416	161.056	1597.37	208.14	166.058	1589.21	273.768	228.055	1419.62	296.074	289.524	1210.64	274.721	92.4188	1353.99	267.869	40.1499	1215.86	200.398	297.088	1258.55	444.995	150.799	1381.46	505.493	111.132	1159.13	509.164	104.214	1090.45	505.739	-9.28359	1030.53	477.607	-61.9427	943.169	533.892	-32.087	914.346	534.219	-121.868	871.502
532	0	317.373	-18.0837	1558.22	217.564	-22.1044	1549	321.175	151.006	1595.33	207.876	155.937	1587.38	273.116	217.728	1417.57	295.369	278.839	1208.6	274.249	81.912	1352.37	267.54	29.4163	1214.28	199.692	286.261	1256.43	444.446	140.65	1379.63	505.082	100.204	1157.55	508.829	92.8785	1088.92	505.273	-20.9384	1029.49	477.14	-73.9242	942.296	533.595	-44.3934	913.462	533.665	-134.433	871.113
533	0	317.075	-28.2243	1556.49	217.25	-32.3121	1547.47	320.842	140.923	1593.32	207.521	145.779	1585.59	272.392	207.329	1415.54	294.623	267.967	1206.52	273.69	71.3201	1350.8	267.126	18.5318	1212.78	198.949	275.323	1254.28	443.828	130.411	1377.83	504.62	89.3295	1155.97	508.447	81.6711	1087.39	504.858	-32.3904	1028.32	476.785	-85.6192	941.234	533.392	-56.3266	912.438	533.29	-146.58	870.473
534	0	316.688	-38.4069	1554.85	216.846	-42.5664	1546.02	320.414	130.805	1591.38	207.074	135.581	1583.85	271.601	196.854	1413.53	293.842	256.912	1204.43	273.049	60.6417	1349.28	266.628	7.4946	1211.37	198.172	264.272	1252.11	443.145	120.073	1376.09	504.112	78.5067	1154.42	508.02	70.591	1085.87	504.498	-43.6385	1027.05	476.549	-97.0253	939.993	533.285	-67.8797	911.284	533.105	-158.299	869.586
535	0	316.211	-48.6357	1553.33	216.354	-52.8703	1544.67	319.894	120.647	1589.52	206.537	125.339	1582.18	270.746	186.3	1411.57	293.031	245.677	1202.34	272.33	49.8763	1347.85	266.05	-3.69569	1210.07	197.365	253.109	1249.95	442.401	109.633	1374.42	503.559	67.7344	1152.89	507.552	59.637	1084.38	504.198	-54.681	1025.69	476.436	-108.139	938.586	533.277	-79.0461	910.009	533.115	-169.583	868.457
536	0	315.647	-58.9149	1551.93	215.775	-63.2267	1543.44	319.282	110.444	1587.76	205.912	115.049	1580.59	269.834	175.666	1409.69	292.193	234.272	1200.27	271.538	39.0248	1346.51	265.394	-15.0369	1208.88	196.534	241.834	1247.82	441.6	99.0888	1372.84	502.965	57.0115	1151.41	507.044	48.8084	1082.93	503.961	-65.516	1024.25	476.449	-118.958	937.028	533.367	-89.8197	908.628	533.324	-180.422	867.096
537	0	314.999	-69.248	1550.67	215.114	-73.6381	1542.34	318.584	100.193	1586.12	205.203	104.71	1579.11	268.871	164.951	1407.9	291.334	222.705	1198.27	270.681	28.0895	1345.29	264.669	-26.5244	1207.83	195.681	230.451	1245.74	440.749	88.4393	1371.37	502.333	46.3377	1149.99	506.497	38.1042	1081.54	503.79	-76.1409	1022.76	476.591	-129.476	935.334	533.552	-100.194	907.155	533.734	-190.805	865.515
538	0	314.273	-79.6386	1549.58	214.377	-84.1067	1541.38	317.805	89.8896	1584.62	204.416	94.3169	1577.76	267.864	154.156	1406.22	290.456	210.989	1196.34	269.77	17.0743	1344.18	263.884	-38.1504	1206.91	194.81	218.965	1243.75	439.854	77.6876	1370.03	501.664	35.7133	1148.66	505.912	27.524	1080.23	503.685	-86.5526	1021.22	476.86	-139.69	933.523	533.829	-110.165	905.608	534.343	-200.723	863.729
539	0	313.476	-90.0892	1548.66	213.572	-94.6342	1540.59	316.952	79.5303	1583.28	203.559	83.8681	1576.55	266.819	143.283	1404.69	289.564	199.139	1194.52	268.813	5.9848	1343.21	263.049	-49.9043	1206.16	193.924	207.385	1241.85	438.924	66.8394	1368.83	500.962	25.1393	1147.43	505.289	17.068	1079.01	503.648	-96.7477	1019.65	477.254	-149.594	931.615	534.192	-119.728	904.006	535.148	-210.166	861.756
540	0	312.617	-100.602	1547.93	212.709	-105.222	1539.97	316.035	69.1124	1582.12	202.641	73.3617	1575.49	265.744	132.337	1403.31	288.661	187.17	1192.84	267.822	-5.17188	1342.39	262.179	-61.7716	1205.56	193.026	195.72	1240.09	437.968	55.903	1367.79	500.227	14.6179	1146.31	504.629	6.73736	1077.9	503.677	-106.722	1018.08	477.77	-159.183	929.632	534.636	-128.879	902.368	536.142	-219.124	859.617
541	0	311.705	-111.177	1547.39	211.797	-115.869	1539.52	315.064	58.6341	1581.15	201.671	62.7964	1574.61	264.648	121.321	1402.1	287.75	175.102	1191.32	266.812	-16.3868	1341.73	261.288	-73.735	1205.13	192.118	183.983	1238.48	436.994	44.8894	1366.92	499.462	4.15288	1145.32	503.932	-3.4659	1076.92	503.769	-116.472	1016.52	478.4	-168.452	927.596	535.153	-137.617	900.717	537.314	-227.589	857.337
542	0	310.753	-121.814	1547.05	210.848	-126.575	1539.26	314.051	48.0941	1580.38	200.663	52.1719	1573.9	263.539	110.244	1401.09	286.835	162.958	1189.99	265.795	-27.6493	1341.23	260.394	-85.7734	1204.87	191.204	172.19	1237.05	436.013	33.8125	1366.24	498.67	-6.25041	1144.48	503.199	-13.5383	1076.08	503.923	-125.992	1015	479.137	-177.397	925.533	535.732	-145.942	899.075	538.652	-235.557	854.942
543	0	309.772	-132.513	1546.91	209.875	-137.338	1539.18	313.009	37.4923	1579.82	199.627	41.4889	1573.39	262.426	99.1139	1400.28	285.918	150.76	1188.87	264.784	-38.9473	1340.9	259.514	-97.8633	1204.79	190.286	160.358	1235.82	435.035	22.6883	1365.75	497.855	-16.5845	1143.8	502.432	-23.475	1075.39	504.135	-135.278	1013.53	479.971	-186.014	923.466	536.366	-153.857	897.463	540.141	-243.025	852.462
544	0	308.776	-143.269	1546.98	208.891	-148.155	1539.3	311.95	26.8299	1579.49	198.578	30.749	1573.09	261.317	87.9404	1399.7	285.005	138.535	1187.99	263.796	-50.2674	1340.75	258.666	-109.979	1204.88	189.368	148.506	1234.81	434.071	11.5352	1365.46	497.021	-26.8397	1143.28	501.633	-33.2696	1074.87	504.401	-144.325	1012.12	480.892	-194.301	921.42	537.042	-161.365	895.905	541.761	-249.993	849.926
545	0	307.778	-154.079	1547.25	207.909	-159.021	1539.59	310.89	16.1092	1579.38	197.527	19.9551	1572.99	260.222	76.7352	1399.34	284.098	126.311	1187.36	262.841	-61.5949	1340.77	257.866	-122.092	1205.14	188.453	136.656	1234.04	433.132	0.373466	1365.38	496.173	-37.004	1142.94	500.805	-42.9144	1074.52	504.716	-153.128	1010.81	481.887	-202.257	919.422	537.751	-168.475	894.422	543.493	-256.468	847.365
546	0	306.793	-164.937	1547.71	206.944	-169.93	1540.07	309.84	5.33401	1579.51	196.49	9.11129	1573.11	259.149	65.5112	1399.22	283.2	114.117	1186.99	261.935	-72.9145	1340.98	257.13	-134.174	1205.57	187.544	124.827	1233.53	432.227	-10.7752	1365.51	495.318	-47.063	1142.77	499.953	-52.4001	1074.36	505.077	-161.681	1009.59	482.945	-209.884	917.494	538.479	-175.195	893.032	545.313	-262.458	844.811
547	0	305.835	-175.836	1548.36	206.008	-180.876	1540.71	308.816	-5.49047	1579.86	195.478	-1.77737	1573.43	258.106	54.2823	1399.33	282.316	101.982	1186.89	261.089	-84.2104	1341.36	256.473	-146.197	1206.16	186.643	113.041	1233.28	431.367	-21.8879	1365.84	494.463	-57.0004	1142.8	499.081	-61.7161	1074.37	505.479	-169.981	1008.49	484.051	-217.184	915.66	539.217	-181.54	891.755	547.198	-267.978	842.295
548	0	304.917	-186.766	1549.17	205.116	-191.85	1541.51	307.829	-16.3576	1580.44	194.504	-12.7045	1573.97	257.1	43.0628	1399.68	281.447	89.9357	1187.07	260.312	-95.4669	1341.92	255.906	-158.134	1206.92	185.755	101.319	1233.29	430.561	-32.941	1366.37	493.616	-66.7977	1143	498.196	-70.8507	1074.57	505.918	-178.023	1007.52	485.193	-224.165	913.94	539.954	-187.523	890.604	549.122	-273.051	839.846
549	0	304.052	-197.718	1550.15	204.28	-202.843	1542.46	306.892	-27.2592	1581.24	193.581	-23.6628	1574.72	256.138	31.8674	1400.26	280.595	78.0051	1187.52	259.615	-106.669	1342.65	255.438	-169.957	1207.83	184.879	89.6775	1233.58	429.816	-43.9111	1367.09	492.787	-76.4353	1143.38	497.303	-79.7914	1074.94	506.391	-185.804	1006.68	486.36	-230.833	912.352	540.677	-193.163	889.594	551.06	-277.699	837.493
550	0	303.254	-208.681	1551.26	203.512	-213.846	1543.54	306.017	-38.1859	1582.25	192.718	-34.6439	1575.67	255.225	20.7105	1401.06	279.759	66.2158	1188.23	259.004	-117.802	1343.55	255.076	-181.645	1208.88	184.016	78.1341	1234.13	429.139	-54.7756	1367.99	491.983	-85.8924	1143.92	496.41	-88.5252	1075.48	506.893	-193.321	1005.98	487.54	-237.199	910.913	541.379	-198.481	888.732	552.988	-281.956	835.262
551	0	302.533	-219.643	1552.5	202.823	-224.847	1544.74	305.213	-49.1271	1583.46	191.926	-45.6389	1576.81	254.367	9.6059	1402.08	278.937	54.5897	1189.19	258.483	-128.853	1344.6	254.823	-193.176	1210.08	183.167	66.7021	1234.93	428.534	-65.5134	1369.06	491.212	-95.1477	1144.63	495.522	-97.0388	1076.18	507.42	-200.572	1005.42	488.722	-243.278	909.635	542.049	-203.498	888.026	554.884	-285.854	833.175
552	0	301.902	-230.591	1553.84	202.224	-235.837	1546.03	304.489	-60.0712	1584.85	191.213	-56.638	1578.13	253.566	-1.43369	1403.28	278.128	43.1445	1190.37	258.054	-139.811	1345.8	254.678	-204.534	1211.41	182.329	55.3917	1235.97	428.006	-76.106	1370.28	490.481	-104.18	1145.48	494.646	-105.319	1077.03	507.971	-207.556	1005.01	489.897	-249.084	908.528	542.68	-208.24	887.476	556.729	-289.433	831.252
553	0	301.367	-241.512	1555.26	201.723	-246.803	1547.41	303.852	-71.0061	1586.4	190.586	-67.6313	1579.61	252.824	-12.3972	1404.67	277.327	31.893	1191.76	257.718	-150.667	1347.13	254.637	-215.708	1212.87	181.501	44.2099	1237.24	427.555	-86.5382	1371.62	489.795	-112.97	1146.47	493.786	-113.354	1078.01	508.543	-214.274	1004.73	491.059	-254.636	907.596	543.265	-212.731	887.081	558.506	-292.732	829.511
554	0	300.939	-252.395	1556.75	201.326	-257.736	1548.85	303.307	-81.9192	1588.1	190.05	-78.6088	1581.24	252.143	-23.2755	1406.21	276.529	20.8423	1193.32	257.473	-161.415	1348.58	254.694	-226.692	1214.44	180.679	33.1601	1238.71	427.182	-96.7991	1373.07	489.159	-121.499	1147.56	492.945	-121.132	1079.1	509.132	-220.727	1004.59	492.202	-259.952	906.842	543.797	-216.996	886.837	560.202	-295.792	827.962
555	0	300.622	-263.226	1558.29	201.04	-268.625	1550.34	302.858	-92.7978	1589.93	189.609	-89.5606	1582.99	251.521	-34.0616	1407.88	275.73	9.99405	1195.03	257.314	-172.05	1350.14	254.836	-237.483	1216.11	179.86	22.2425	1240.35	426.883	-106.882	1374.6	488.572	-129.751	1148.75	492.127	-128.645	1080.28	509.735	-226.92	1004.57	493.321	-265.054	906.263	544.271	-221.062	886.733	561.81	-298.656	826.615
556	0	300.42	-273.994	1559.85	200.869	-279.462	1551.87	302.508	-103.63	1591.84	189.264	-100.477	1584.86	250.958	-44.7507	1409.66	274.926	-0.655969	1196.86	257.234	-182.572	1351.79	255.052	-248.087	1217.88	179.042	11.4539	1242.15	426.656	-116.786	1376.18	488.036	-137.714	1150	491.332	-135.885	1081.52	510.352	-232.856	1004.66	494.415	-269.963	905.853	544.683	-224.952	886.758	563.323	-301.361	825.471
557	0	300.337	-284.689	1561.42	200.814	-290.238	1553.42	302.257	-114.404	1593.83	189.016	-111.35	1586.81	250.451	-55.3406	1411.52	274.113	-11.117	1198.77	257.227	-192.98	1353.5	255.325	-258.513	1219.71	178.222	0.788624	1244.07	426.494	-126.514	1377.8	487.547	-145.38	1151.31	490.559	-142.851	1082.82	510.979	-238.545	1004.85	495.482	-274.701	905.602	545.03	-228.692	886.897	564.741	-303.946	824.53
558	0	300.372	-295.303	1562.98	200.874	-300.947	1554.97	302.104	-125.111	1595.86	188.864	-122.17	1588.83	249.997	-65.8312	1413.43	273.289	-21.4029	1200.73	257.282	-203.278	1355.27	255.639	-268.777	1221.6	177.399	-9.76142	1246.08	426.391	-136.075	1379.42	487.101	-152.746	1152.65	489.807	-149.541	1084.14	511.614	-243.994	1005.12	496.523	-279.29	905.496	545.307	-232.303	887.131	566.067	-306.445	823.782
559	0	300.525	-305.829	1564.52	201.049	-311.584	1556.51	302.046	-135.74	1597.91	188.805	-132.933	1590.88	249.593	-76.2248	1415.37	272.451	-31.5305	1202.71	257.391	-213.471	1357.06	255.976	-278.897	1223.53	176.57	-20.2058	1248.15	426.337	-145.481	1381.02	486.69	-159.816	1153.98	489.071	-155.961	1085.46	512.253	-249.216	1005.45	497.538	-283.752	905.517	545.515	-235.808	887.439	567.305	-308.886	823.214
560	0	300.791	-316.262	1566	201.334	-322.145	1558.02	302.079	-146.287	1599.94	188.835	-143.632	1592.95	249.234	-86.5252	1417.31	271.599	-41.5192	1204.69	257.542	-223.568	1358.85	256.32	-288.893	1225.47	175.736	-30.5551	1250.25	426.326	-154.748	1382.58	486.307	-166.597	1155.31	488.348	-162.122	1086.76	512.895	-254.225	1005.82	498.529	-288.106	905.644	545.651	-239.224	887.8	568.462	-311.296	822.809
561	0	301.164	-326.6	1567.42	201.724	-332.628	1559.49	302.198	-156.746	1601.94	188.948	-154.264	1595	248.917	-96.7384	1419.22	270.734	-51.3894	1206.63	257.727	-233.574	1360.61	256.655	-298.789	1227.38	174.896	-40.82	1252.35	426.347	-163.895	1384.07	485.944	-173.107	1156.59	487.634	-168.038	1088.01	513.536	-259.038	1006.22	499.498	-292.371	905.853	545.716	-242.57	888.19	569.545	-313.694	822.543
562	0	301.639	-336.843	1568.76	202.212	-343.035	1560.91	302.397	-167.116	1603.86	189.14	-164.827	1597	248.636	-106.871	1421.07	269.857	-61.1613	1208.5	257.935	-243.501	1362.33	256.969	-308.603	1229.26	174.053	-51.0109	1254.41	426.392	-172.943	1385.46	485.59	-179.367	1157.81	486.922	-173.73	1089.21	514.171	-263.673	1006.62	500.446	-296.565	906.115	545.71	-245.861	888.585	570.565	-316.096	822.388
563	0	302.206	-346.994	1570.01	202.788	-353.368	1562.24	302.668	-177.397	1605.68	189.402	-175.321	1598.94	248.388	-116.932	1422.84	268.974	-70.8542	1210.27	258.157	-253.359	1363.97	257.251	-318.356	1231.05	173.208	-61.1373	1256.4	426.454	-181.913	1386.73	485.237	-185.406	1158.95	486.209	-179.222	1090.32	514.797	-268.154	1007	501.374	-300.704	906.403	545.635	-249.113	888.962	571.528	-318.513	822.314
564	0	302.855	-357.057	1571.13	203.442	-363.63	1563.49	303.003	-187.591	1607.38	189.727	-185.749	1600.79	248.168	-126.93	1424.5	268.088	-80.4853	1211.93	258.387	-263.156	1365.5	257.493	-328.062	1232.73	172.365	-71.2071	1258.3	426.525	-190.828	1387.88	484.875	-191.257	1159.99	485.488	-184.546	1091.34	515.408	-272.503	1007.33	502.283	-304.8	906.686	545.494	-252.335	889.299	572.443	-320.949	822.287
565	0	303.576	-367.04	1572.13	204.166	-373.827	1564.63	303.394	-197.705	1608.93	190.107	-196.114	1602.52	247.974	-136.872	1426.03	267.206	-90.0692	1213.44	258.616	-272.903	1366.91	257.693	-337.73	1234.27	171.529	-81.2268	1260.08	426.6	-199.709	1388.86	484.499	-196.959	1160.91	484.758	-189.736	1092.25	516.001	-276.745	1007.61	503.17	-308.865	906.934	545.29	-255.541	889.574	573.315	-323.408	822.274
566	0	304.358	-376.951	1572.98	204.946	-383.966	1565.65	303.831	-207.746	1610.32	190.533	-206.421	1604.11	247.802	-146.769	1427.42	266.336	-99.6174	1214.81	258.841	-282.61	1368.18	257.848	-347.369	1235.64	170.705	-91.201	1261.72	426.674	-208.576	1389.68	484.1	-202.554	1161.71	484.016	-194.83	1093.03	516.568	-280.909	1007.79	504.035	-312.909	907.116	545.026	-258.739	889.769	574.148	-325.887	822.24
567	0	305.188	-386.801	1573.68	205.772	-394.056	1566.53	304.306	-217.722	1611.52	190.996	-216.678	1605.54	247.651	-156.63	1428.64	265.486	-109.138	1216	259.058	-292.285	1369.27	257.962	-356.981	1236.81	169.9	-101.133	1263.19	426.746	-217.447	1390.33	483.676	-208.087	1162.36	483.259	-199.869	1093.69	517.106	-285.023	1007.88	504.872	-316.938	907.206	544.707	-261.937	889.869	574.944	-328.381	822.151
568	0	306.055	-396.602	1574.2	206.633	-404.107	1567.25	304.811	-227.646	1612.53	191.488	-226.893	1606.79	247.519	-166.462	1429.69	264.665	-118.637	1217	259.265	-301.937	1370.18	258.04	-366.565	1237.76	169.123	-111.024	1264.48	426.813	-226.339	1390.79	483.225	-213.606	1162.86	482.489	-204.895	1094.2	517.607	-289.114	1007.85	505.678	-320.96	907.177	544.338	-265.143	889.862	575.703	-330.883	821.978
569	0	306.947	-406.365	1574.54	207.518	-414.127	1567.8	305.336	-237.53	1613.33	192.002	-237.073	1607.86	247.406	-176.272	1430.55	263.884	-128.115	1217.83	259.462	-311.574	1370.89	258.087	-376.122	1238.46	168.381	-120.875	1265.57	426.877	-235.267	1391.06	482.746	-219.156	1163.21	481.709	-209.95	1094.57	518.068	-293.213	1007.69	506.447	-324.977	907.007	543.924	-268.364	889.74	576.422	-333.386	821.693
570	0	307.855	-416.105	1574.69	208.416	-424.128	1568.17	305.873	-247.386	1613.92	192.53	-247.23	1608.73	247.312	-186.07	1431.21	263.153	-137.573	1218.45	259.649	-321.201	1371.4	258.114	-385.648	1238.91	167.684	-130.685	1266.47	426.939	-244.243	1391.15	482.242	-224.783	1163.4	480.92	-215.076	1094.81	518.484	-297.348	1007.4	507.172	-328.994	906.677	543.471	-271.607	889.496	577.096	-335.881	821.273
571	0	308.769	-425.833	1574.65	209.318	-434.118	1568.36	306.417	-257.227	1614.3	193.066	-257.373	1609.39	247.241	-195.86	1431.68	262.483	-147.008	1218.89	259.829	-330.826	1371.69	258.129	-395.144	1239.11	167.042	-140.453	1267.16	427.003	-253.278	1391.05	481.719	-230.531	1163.43	480.129	-220.314	1094.91	518.852	-301.546	1006.95	507.846	-333.014	906.172	542.985	-274.878	889.129	577.72	-338.359	820.698
572	0	309.679	-435.563	1574.41	210.217	-444.109	1568.34	306.962	-267.066	1614.45	193.604	-267.51	1609.83	247.193	-205.648	1431.95	261.883	-156.417	1219.15	260.004	-340.453	1371.77	258.143	-404.612	1239.05	166.466	-150.181	1267.64	427.072	-262.38	1390.78	481.183	-236.44	1163.31	479.343	-225.7	1094.87	519.168	-305.833	1006.36	508.464	-337.041	905.483	542.472	-278.185	888.641	578.286	-340.817	819.956
573	0	310.578	-445.305	1573.97	211.105	-454.108	1568.13	307.503	-276.916	1614.4	194.141	-277.651	1610.07	247.172	-215.44	1432.02	261.365	-165.795	1219.22	260.179	-350.087	1371.63	258.166	-414.055	1238.73	165.965	-159.868	1267.92	427.153	-271.556	1390.34	480.644	-242.544	1163.04	478.569	-231.268	1094.71	519.433	-310.234	1005.61	509.018	-341.078	904.605	541.939	-281.534	888.036	578.786	-343.249	819.037
574	0	311.461	-455.071	1573.34	211.976	-464.123	1567.71	308.036	-286.787	1614.15	194.672	-287.803	1610.09	247.182	-225.241	1431.91	260.937	-175.139	1219.12	260.359	-359.732	1371.29	258.209	-423.481	1238.18	165.549	-169.515	1268	427.25	-280.812	1389.74	480.11	-248.875	1162.62	477.816	-237.047	1094.43	519.646	-314.772	1004.71	509.504	-345.131	903.537	541.391	-284.936	887.32	579.212	-345.656	817.939
575	0	312.322	-464.869	1572.52	212.826	-474.16	1567.1	308.56	-296.689	1613.7	195.197	-297.973	1609.91	247.229	-235.053	1431.61	260.608	-184.446	1218.86	260.549	-369.393	1370.75	258.28	-432.899	1237.41	165.225	-179.126	1267.89	427.37	-290.151	1389	479.594	-255.456	1162.08	477.092	-243.059	1094.03	519.809	-319.466	1003.66	509.918	-349.207	902.283	540.835	-288.398	886.502	579.558	-348.042	816.664
576	0	313.158	-474.707	1571.51	213.653	-484.225	1566.29	309.076	-306.63	1613.06	195.716	-308.166	1609.53	247.315	-244.881	1431.14	260.385	-193.715	1218.46	260.757	-379.073	1370.02	258.388	-442.32	1236.45	165.001	-188.706	1267.6	427.52	-299.577	1388.12	479.106	-262.306	1161.41	476.407	-249.325	1093.54	519.926	-324.333	1002.47	510.257	-353.314	900.852	540.277	-291.934	885.591	579.818	-350.415	815.218
577	0	313.968	-484.592	1570.34	214.454	-494.321	1565.29	309.584	-316.617	1612.26	196.23	-318.385	1608.95	247.448	-254.728	1430.51	260.274	-202.947	1217.91	260.987	-388.776	1369.12	258.543	-451.755	1235.3	164.882	-198.26	1267.14	427.707	-309.091	1387.13	478.659	-269.435	1160.63	475.771	-255.856	1092.95	520.002	-329.39	1001.15	510.523	-357.464	899.255	539.724	-295.555	884.598	579.99	-352.787	813.612
578	0	314.75	-494.527	1569	215.229	-504.449	1564.11	310.087	-326.654	1611.3	196.742	-328.633	1608.2	247.633	-264.597	1429.72	260.279	-212.149	1217.25	261.249	-398.506	1368.05	258.75	-461.216	1234.01	164.872	-207.797	1266.52	427.937	-318.694	1386.03	478.264	-276.851	1159.75	475.191	-262.659	1092.28	520.042	-334.647	999.699	510.716	-361.672	897.507	539.182	-299.277	883.533	580.073	-355.178	811.86
579	0	315.506	-504.516	1567.53	215.98	-514.611	1562.77	310.59	-336.745	1610.2	197.256	-338.911	1607.28	247.874	-274.49	1428.78	260.404	-221.33	1216.47	261.547	-408.267	1366.84	259.017	-470.715	1232.59	164.974	-217.327	1265.76	428.217	-328.385	1384.84	477.931	-284.551	1158.77	474.675	-269.736	1091.53	520.055	-340.115	998.137	510.842	-365.952	895.624	538.657	-303.115	882.406	580.069	-357.611	809.979
580	0	316.239	-514.561	1565.92	216.71	-524.806	1561.27	311.099	-346.89	1608.98	197.778	-349.217	1606.21	248.178	-284.41	1427.72	260.648	-230.502	1215.58	261.89	-418.063	1365.51	259.347	-480.26	1231.07	165.188	-226.86	1264.85	428.554	-338.164	1383.56	477.671	-292.531	1157.7	474.229	-277.084	1090.71	520.049	-345.801	996.471	510.907	-370.326	893.625	538.154	-307.089	881.227	579.983	-360.113	807.987
581	0	316.953	-524.662	1564.21	217.42	-535.033	1559.65	311.62	-357.089	1607.64	198.314	-359.549	1605	248.549	-294.36	1426.53	261.01	-239.683	1214.6	262.285	-427.899	1364.06	259.745	-489.861	1229.46	165.514	-236.41	1263.82	428.953	-348.029	1382.21	477.49	-300.777	1156.56	473.859	-284.694	1089.82	520.032	-351.71	994.715	510.919	-374.813	891.53	537.679	-311.218	880.002	579.824	-362.719	805.904
582	0	317.652	-534.817	1562.4	218.118	-545.288	1557.91	312.162	-367.342	1606.21	198.872	-369.906	1603.66	248.991	-304.341	1425.24	261.489	-248.893	1213.53	262.737	-437.778	1362.51	260.215	-499.523	1227.8	165.95	-245.989	1262.68	429.42	-357.977	1380.8	477.396	-309.276	1155.34	473.57	-292.556	1088.86	520.016	-357.847	992.881	510.89	-379.437	889.358	537.239	-315.523	878.741	579.603	-365.463	803.751
583	0	318.344	-545.024	1560.52	218.808	-555.569	1556.07	312.733	-377.645	1604.7	199.461	-380.282	1602.22	249.51	-314.358	1423.85	262.08	-258.155	1212.37	263.254	-447.707	1360.89	260.758	-509.254	1226.08	166.492	-255.612	1261.43	429.959	-368.003	1379.32	477.394	-318.007	1154.05	473.363	-300.653	1087.83	520.01	-364.213	990.982	510.831	-384.224	887.128	536.837	-320.028	877.447	579.333	-368.387	801.546
584	0	319.034	-555.282	1558.59	219.498	-565.872	1554.16	313.343	-387.994	1603.13	200.089	-390.675	1600.69	250.107	-324.411	1422.37	262.777	-267.495	1211.12	263.84	-457.689	1359.21	261.377	-519.058	1224.35	167.137	-265.292	1260.07	430.576	-378.105	1377.8	477.487	-326.949	1152.7	473.242	-308.97	1086.75	520.025	-370.81	989.03	510.757	-389.199	884.861	536.481	-324.755	876.126	579.03	-371.534	799.31
585	0	319.733	-565.587	1556.62	220.194	-576.195	1552.19	314.001	-398.386	1601.51	200.765	-401.079	1599.09	250.785	-334.505	1420.81	263.575	-276.937	1209.8	264.502	-467.731	1357.49	262.073	-528.94	1222.6	167.879	-275.045	1258.63	431.273	-388.277	1376.23	477.677	-336.078	1151.29	473.207	-317.489	1085.6	520.072	-377.638	987.04	510.682	-394.391	882.574	536.174	-329.728	874.78	578.711	-374.947	797.059
586	0	320.448	-575.935	1554.63	220.906	-586.534	1550.2	314.717	-408.815	1599.85	201.499	-411.492	1597.44	251.546	-344.641	1419.2	264.465	-286.509	1208.39	265.242	-477.836	1355.74	262.846	-538.905	1220.85	168.714	-284.884	1257.11	432.053	-398.515	1374.62	477.963	-345.372	1149.84	473.258	-326.19	1084.4	520.161	-384.698	985.024	510.622	-399.828	880.285	535.922	-334.972	873.414	578.395	-378.669	794.812
587	0	321.189	-586.323	1552.65	221.642	-596.887	1548.19	315.499	-419.277	1598.17	202.297	-421.909	1595.75	252.392	-354.823	1417.53	265.439	-296.233	1206.9	266.064	-488.01	1353.98	263.698	-548.958	1219.11	169.636	-294.822	1255.51	432.918	-408.813	1372.99	478.344	-354.807	1148.33	473.395	-335.057	1083.14	520.301	-391.99	982.995	510.593	-405.536	878.009	535.727	-340.51	872.028	578.098	-382.744	792.583
588	0	321.964	-596.748	1550.69	222.411	-607.251	1546.21	316.356	-429.768	1596.48	203.169	-432.328	1594.04	253.321	-365.053	1415.83	266.49	-306.13	1205.34	266.97	-498.258	1352.22	264.626	-559.106	1217.41	170.638	-304.872	1253.85	433.869	-419.166	1371.33	478.818	-364.36	1146.79	473.616	-344.075	1081.83	520.502	-399.515	980.967	510.609	-411.543	875.761	535.595	-346.364	870.626	577.84	-387.212	790.384
589	0	322.783	-607.205	1548.78	223.22	-617.626	1544.26	317.296	-440.282	1594.81	204.12	-442.747	1592.34	254.333	-375.335	1414.1	267.608	-316.216	1203.7	267.962	-508.584	1350.49	265.632	-569.355	1215.74	171.716	-315.042	1252.13	434.905	-429.57	1369.65	479.38	-374.015	1145.22	473.918	-353.23	1080.47	520.772	-407.274	978.954	510.686	-417.874	873.556	535.528	-352.556	869.21	577.636	-392.109	788.228
590	0	323.653	-617.694	1546.93	224.079	-628.011	1542.37	318.324	-450.817	1593.15	205.158	-453.165	1590.66	255.426	-385.671	1412.36	268.786	-326.504	1202	269.041	-518.992	1348.8	266.713	-579.712	1214.14	172.863	-325.344	1250.37	436.026	-440.02	1367.97	480.025	-383.755	1143.63	474.301	-362.514	1079.08	521.117	-415.271	976.969	510.838	-424.554	871.408	535.527	-359.106	867.783	577.502	-397.469	786.125
591	0	324.583	-628.21	1545.16	224.995	-638.406	1540.56	319.446	-461.37	1591.54	206.285	-463.581	1589.02	256.599	-396.064	1410.63	270.017	-336.999	1200.25	270.204	-529.484	1347.17	267.867	-590.185	1212.6	174.074	-335.783	1248.58	437.229	-450.513	1366.3	480.75	-393.57	1142.03	474.76	-371.92	1077.65	521.544	-423.508	975.026	511.075	-431.605	869.328	535.596	-366.032	866.349	577.451	-403.318	784.084
592	0	325.579	-638.754	1543.48	225.975	-648.812	1538.86	320.664	-471.937	1589.99	207.505	-473.996	1587.44	257.848	-406.517	1408.93	271.294	-347.704	1198.45	271.451	-540.064	1345.62	269.092	-600.781	1211.16	175.343	-346.364	1246.79	438.512	-461.046	1364.65	481.547	-403.453	1140.43	475.293	-381.447	1076.21	522.056	-431.99	973.14	511.41	-439.046	867.33	535.736	-373.351	864.915	577.493	-409.678	782.115
593	0	326.646	-649.323	1541.93	227.025	-659.232	1537.29	321.98	-482.518	1588.51	208.819	-484.412	1585.95	259.169	-417.031	1407.27	272.61	-358.615	1196.63	272.778	-550.732	1344.16	270.384	-611.505	1209.82	176.664	-357.091	1245	439.87	-471.617	1363.03	482.413	-413.405	1138.85	475.896	-391.098	1074.76	522.657	-440.724	971.325	511.85	-446.895	865.425	535.946	-381.077	863.489	577.637	-416.566	780.226
594	0	327.788	-659.917	1540.51	228.148	-669.668	1535.86	323.392	-493.111	1587.12	210.227	-494.832	1584.55	260.558	-427.609	1405.66	273.96	-369.724	1194.81	274.179	-561.49	1342.81	271.739	-622.363	1208.6	178.032	-367.963	1243.24	441.299	-482.226	1361.47	483.34	-423.428	1137.31	476.566	-400.88	1073.32	523.347	-449.717	969.596	512.4	-455.165	863.627	536.228	-389.221	862.079	577.89	-423.992	778.427
595	0	329.007	-670.536	1539.25	229.348	-680.124	1534.61	324.898	-503.717	1585.85	211.725	-505.259	1583.28	262.012	-438.251	1404.14	275.338	-381.019	1193.02	275.65	-572.336	1341.59	273.15	-633.358	1207.53	179.44	-378.977	1241.54	442.793	-492.875	1359.97	484.324	-433.531	1135.81	477.301	-410.802	1071.91	524.127	-458.977	967.968	513.064	-463.868	861.948	536.583	-397.795	860.699	578.254	-431.964	776.728
596	0	330.305	-681.181	1538.16	230.626	-690.603	1533.53	326.495	-514.336	1584.69	213.309	-515.698	1582.14	263.524	-448.959	1402.73	276.739	-392.486	1191.27	277.184	-583.269	1340.51	274.611	-644.489	1206.62	180.885	-390.128	1239.92	444.346	-503.564	1358.57	485.359	-443.727	1134.39	478.096	-420.876	1070.55	524.995	-468.513	966.456	513.841	-473.014	860.4	537.009	-406.805	859.362	578.732	-440.484	775.14
597	0	331.68	-691.853	1537.25	231.981	-701.109	1532.65	328.174	-524.97	1583.68	214.974	-526.152	1581.16	265.09	-459.732	1401.43	278.157	-404.109	1189.61	278.771	-594.286	1339.59	276.115	-655.755	1205.89	182.359	-401.408	1238.4	445.95	-514.297	1357.27	486.441	-454.031	1133.05	478.949	-431.119	1069.25	525.947	-478.336	965.075	514.73	-482.606	858.997	537.507	-416.258	858.083	579.321	-449.549	773.677
598	0	333.129	-702.552	1536.55	233.411	-711.647	1531.99	329.929	-535.619	1582.83	216.712	-536.626	1580.34	266.704	-470.57	1400.28	279.589	-415.869	1188.05	280.403	-605.383	1338.84	277.651	-667.152	1205.35	183.86	-412.804	1237.01	447.597	-525.081	1356.11	487.565	-464.46	1131.82	479.857	-441.544	1068.04	526.979	-488.454	963.84	515.725	-492.647	857.751	538.078	-426.157	856.878	580.02	-459.158	772.35
599	0	334.648	-713.28	1536.05	234.911	-722.219	1531.55	331.749	-546.285	1582.14	218.513	-547.124	1579.71	268.361	-481.472	1399.29	281.03	-427.746	1186.65	282.069	-616.555	1338.28	279.208	-678.671	1205.02	185.382	-424.303	1235.79	449.281	-535.92	1355.09	488.727	-475.032	1130.72	480.817	-452.168	1066.94	528.085	-498.879	962.764	516.818	-503.139	856.677	538.722	-436.505	855.766	580.824	-469.304	771.174
600	0	336.229	-724.037	1535.78	236.476	-732.829	1531.35	333.624	-556.97	1581.64	220.368	-557.651	1579.27	270.055	-492.434	1398.47	282.477	-439.723	1185.42	283.759	-627.794	1337.91	280.775	-690.301	1204.91	186.922	-435.887	1234.76	450.991	-546.821	1354.25	489.923	-485.766	1129.77	481.828	-463.005	1065.96	529.258	-509.619	961.861	517.999	-514.077	855.785	539.44	-447.302	854.763	581.726	-479.982	770.165
601	0	337.864	-734.825	1535.73	238.096	-743.479	1531.38	335.542	-567.677	1581.33	222.264	-568.209	1579.02	271.782	-503.453	1397.86	283.927	-451.778	1184.4	285.459	-639.093	1337.74	282.339	-702.027	1205.01	188.479	-447.538	1233.94	452.72	-557.794	1353.58	491.15	-496.68	1128.98	482.889	-474.067	1065.13	530.489	-520.681	961.141	519.258	-525.458	855.089	540.232	-458.546	853.888	582.719	-491.187	769.336
602	0	339.543	-745.644	1535.91	239.762	-754.17	1531.65	337.49	-578.406	1581.22	224.191	-578.801	1578.98	273.537	-514.526	1397.45	285.379	-463.893	1183.61	287.158	-650.443	1337.77	283.884	-713.833	1205.34	190.052	-459.232	1233.36	454.46	-568.846	1353.12	492.407	-507.787	1128.37	483.998	-485.364	1064.47	531.771	-532.073	960.616	520.579	-537.275	854.598	541.1	-470.234	853.156	583.795	-502.912	768.701
603	0	341.254	-756.493	1536.33	241.462	-764.903	1532.16	339.454	-589.158	1581.31	226.134	-589.427	1579.15	275.315	-525.646	1397.25	286.835	-476.046	1183.07	288.844	-661.834	1338.01	285.398	-725.697	1205.88	191.64	-470.946	1233.02	456.201	-579.986	1352.87	493.691	-519.1	1127.96	485.156	-496.903	1063.99	533.095	-543.799	960.293	521.95	-549.519	854.321	542.043	-482.362	852.581	584.944	-515.153	768.273
604	0	342.984	-767.372	1536.97	243.183	-775.677	1532.9	341.423	-599.936	1581.59	228.082	-600.089	1579.52	277.112	-536.807	1397.28	288.298	-488.22	1182.8	290.504	-673.256	1338.45	286.864	-737.598	1206.64	193.246	-482.655	1232.96	457.936	-591.222	1352.83	495.003	-530.629	1127.75	486.363	-508.686	1063.7	534.452	-555.862	960.177	523.356	-562.18	854.265	543.064	-494.924	852.176	586.156	-527.906	768.059
605	0	344.719	-778.28	1537.82	244.911	-786.49	1533.86	343.381	-610.738	1582.08	230.021	-610.786	1580.08	278.924	-548.001	1397.54	289.771	-500.393	1182.82	292.126	-684.696	1339.07	288.269	-749.513	1207.58	194.875	-494.333	1233.16	459.658	-602.561	1353.02	496.342	-542.378	1127.74	487.621	-520.711	1063.61	535.833	-568.26	960.272	524.783	-575.246	854.432	544.162	-507.912	851.949	587.422	-541.166	768.068
606	0	346.444	-789.214	1538.88	246.63	-797.337	1535.02	345.317	-621.565	1582.76	231.938	-621.514	1580.84	280.748	-559.218	1398.01	291.263	-512.546	1183.11	293.7	-696.142	1339.88	289.599	-761.417	1208.7	196.531	-505.954	1233.63	461.361	-614.008	1353.43	497.71	-554.349	1127.95	488.932	-532.975	1063.72	537.231	-580.992	960.577	526.217	-588.704	854.823	545.338	-521.316	851.904	588.731	-554.929	768.299
607	0	348.143	-800.174	1540.13	248.326	-808.215	1536.36	347.217	-632.417	1583.61	233.822	-632.271	1581.76	282.582	-570.449	1398.7	292.782	-524.659	1183.68	295.214	-707.581	1340.85	290.839	-773.287	1209.96	198.222	-517.491	1234.36	463.038	-625.568	1354.06	499.11	-566.54	1128.37	490.299	-545.468	1064.03	538.637	-594.053	961.088	527.646	-602.539	855.435	546.591	-535.126	852.044	590.074	-569.191	768.753
608	0	349.801	-811.154	1541.54	249.983	-819.116	1537.87	349.07	-643.292	1584.64	235.66	-643.052	1582.86	284.422	-581.683	1399.6	294.338	-536.711	1184.52	296.661	-718.998	1341.97	291.979	-785.097	1211.35	199.956	-528.92	1235.33	464.683	-637.24	1354.89	500.543	-578.946	1128.99	491.723	-558.181	1064.53	540.045	-607.433	961.799	529.058	-616.736	856.261	547.921	-549.33	852.365	591.441	-583.945	769.423
609	0	351.402	-822.153	1543.1	251.584	-830.035	1539.51	350.866	-654.189	1585.82	237.443	-653.852	1584.09	286.268	-592.909	1400.69	295.944	-548.684	1185.6	298.032	-730.381	1343.23	293.008	-796.825	1212.84	201.742	-540.218	1236.54	466.294	-649.024	1355.92	502.014	-591.56	1129.8	493.21	-571.1	1065.21	541.449	-621.123	962.701	530.442	-631.278	857.293	549.326	-563.914	852.861	592.822	-599.182	770.299
610	0	352.932	-833.166	1544.78	253.116	-840.962	1541.27	352.594	-665.107	1587.14	239.162	-664.664	1585.46	288.115	-604.114	1401.95	297.611	-560.556	1186.91	299.321	-741.716	1344.59	293.918	-808.45	1214.4	203.588	-551.365	1237.95	467.865	-660.914	1357.13	503.524	-604.371	1130.78	494.76	-584.21	1066.06	542.841	-635.111	963.784	531.791	-646.148	858.516	550.804	-578.862	853.524	594.211	-614.891	771.368
611	0	354.377	-844.188	1546.55	254.564	-851.89	1543.1	354.248	-676.042	1588.58	240.808	-675.483	1586.93	289.963	-615.287	1403.37	299.348	-572.31	1188.41	300.525	-752.988	1346.04	294.702	-819.949	1216.01	205.502	-562.343	1239.53	469.394	-672.9	1358.49	505.077	-617.367	1131.92	496.377	-597.498	1067.06	544.219	-649.383	965.032	533.098	-661.326	859.917	552.352	-594.159	854.342	595.597	-631.057	772.615
612	0	355.724	-855.215	1548.39	255.916	-862.81	1544.98	355.819	-686.992	1590.12	242.376	-686.3	1588.49	291.807	-626.416	1404.92	301.163	-583.927	1190.08	301.642	-764.187	1347.56	295.359	-831.305	1217.64	207.491	-573.139	1241.27	470.877	-684.971	1359.99	506.673	-630.536	1133.2	498.063	-610.947	1068.18	545.576	-663.921	966.432	534.357	-676.793	861.479	553.966	-609.786	855.302	596.975	-647.664	774.024
613	0	356.963	-866.242	1550.27	257.161	-873.712	1546.89	357.305	-697.955	1591.75	243.861	-697.109	1590.12	293.646	-637.49	1406.59	303.063	-595.391	1191.89	302.669	-775.299	1349.13	295.889	-842.503	1219.26	209.558	-583.743	1243.12	472.313	-697.11	1361.6	508.314	-643.865	1134.59	499.817	-624.542	1069.41	546.909	-678.71	967.967	535.563	-692.529	863.185	555.64	-625.726	856.391	598.337	-664.691	775.578
614	0	358.085	-877.264	1552.16	258.291	-884.588	1548.8	358.7	-708.926	1593.44	245.259	-707.902	1591.79	295.474	-648.499	1408.35	305.048	-606.688	1193.8	303.61	-786.314	1350.73	296.297	-853.528	1220.86	211.702	-594.153	1245.06	473.698	-709.299	1363.3	509.999	-657.337	1136.06	501.639	-638.269	1070.73	548.215	-693.731	969.623	536.715	-708.512	865.019	557.37	-641.957	857.593	599.678	-682.112	777.26
615	0	359.085	-888.275	1554.05	259.3	-895.429	1550.67	360.005	-719.902	1595.18	246.568	-718.671	1593.5	297.287	-659.433	1410.18	307.115	-617.807	1195.78	304.465	-797.223	1352.34	296.591	-864.372	1222.42	213.921	-604.366	1247.06	475.03	-721.515	1365.08	511.724	-670.937	1137.61	503.525	-652.114	1072.1	549.489	-708.965	971.383	537.809	-724.722	866.963	559.148	-658.46	858.896	600.991	-699.901	779.055
616	0	359.958	-899.27	1555.91	260.183	-906.227	1552.5	361.217	-730.878	1596.95	247.79	-729.411	1595.22	299.079	-670.286	1412.06	309.256	-628.74	1197.81	305.241	-808.019	1353.95	296.781	-875.03	1223.94	216.206	-614.389	1249.09	476.307	-733.735	1366.91	513.485	-684.65	1139.21	505.472	-666.062	1073.52	550.728	-724.391	973.233	538.844	-741.137	869.002	560.966	-675.214	860.285	602.271	-718.028	780.951
617	0	360.705	-910.242	1557.72	260.939	-916.975	1554.26	362.338	-741.85	1598.73	248.924	-740.115	1596.94	300.845	-681.051	1413.97	311.459	-639.482	1199.86	305.942	-818.697	1355.54	296.882	-885.502	1225.41	218.546	-624.23	1251.13	477.529	-745.932	1368.76	515.275	-698.456	1140.84	507.473	-680.102	1074.96	551.929	-739.988	975.158	539.819	-757.735	871.122	562.814	-692.195	861.75	603.513	-736.461	782.937
618	0	361.325	-921.186	1559.46	261.57	-927.666	1555.93	363.371	-752.811	1600.52	249.973	-750.776	1598.64	302.577	-691.723	1415.88	313.71	-650.032	1201.9	306.574	-829.254	1357.1	296.91	-895.791	1226.81	220.927	-633.901	1253.16	478.692	-758.083	1370.63	517.085	-712.337	1142.49	509.518	-694.219	1076.41	553.088	-755.735	977.145	540.733	-774.492	873.311	564.683	-709.383	863.279	604.711	-755.165	785.004
619	0	361.823	-932.097	1561.12	262.08	-938.296	1557.5	364.319	-763.756	1602.28	250.941	-761.389	1600.3	304.269	-702.3	1417.78	315.99	-660.394	1203.92	307.145	-839.687	1358.63	296.883	-905.905	1228.16	223.33	-643.417	1255.16	479.796	-770.162	1372.5	518.905	-726.273	1144.13	511.599	-708.4	1077.86	554.203	-771.609	979.183	541.586	-791.386	875.559	566.56	-726.753	864.863	605.861	-774.108	787.145
620	0	362.205	-942.968	1562.69	262.474	-948.859	1558.96	365.186	-774.679	1604.01	251.831	-771.95	1601.92	305.912	-712.781	1419.65	318.278	-670.575	1205.89	307.661	-850	1360.1	296.817	-915.857	1229.44	225.736	-652.795	1257.11	480.839	-782.146	1374.34	520.723	-740.243	1145.75	513.702	-722.631	1079.29	555.27	-787.587	981.261	542.378	-808.396	877.856	568.434	-744.283	866.494	606.956	-793.254	789.358
621	0	362.48	-953.795	1564.16	262.76	-959.354	1560.31	365.978	-785.573	1605.69	252.649	-782.454	1603.47	307.501	-723.166	1421.48	320.554	-680.586	1207.79	308.131	-860.194	1361.52	296.732	-925.661	1230.67	228.124	-662.055	1258.99	481.821	-794.015	1376.15	522.529	-754.223	1147.35	515.815	-736.897	1080.68	556.285	-803.646	983.369	543.107	-825.498	880.195	570.291	-761.948	868.163	607.992	-812.568	791.639
622	0	362.656	-964.571	1565.51	262.947	-969.778	1561.53	366.699	-796.43	1607.31	253.398	-792.899	1604.95	309.026	-733.457	1423.24	322.795	-690.439	1209.63	308.561	-870.274	1362.87	296.642	-935.333	1231.82	230.471	-671.215	1260.8	482.74	-805.751	1377.91	524.309	-768.192	1148.92	517.924	-751.183	1082.04	557.247	-819.761	985.497	543.773	-842.67	882.57	572.118	-779.726	869.863	608.962	-832.016	793.985
623	0	362.745	-975.294	1566.75	263.047	-980.13	1562.63	367.354	-807.246	1608.84	254.085	-803.284	1606.35	310.482	-743.659	1424.92	324.982	-700.151	1211.37	308.958	-880.248	1364.14	296.563	-944.89	1232.91	232.758	-680.295	1262.52	483.596	-817.339	1379.61	526.052	-782.127	1150.44	520.016	-765.472	1083.36	558.153	-835.908	987.638	544.375	-859.891	884.974	573.901	-797.593	871.589	609.86	-851.564	796.396
624	0	362.76	-985.958	1567.86	263.071	-990.413	1563.6	367.95	-818.013	1610.29	254.713	-813.605	1607.65	311.861	-753.776	1426.51	327.093	-709.739	1213.02	309.327	-890.123	1365.34	296.505	-954.347	1233.93	234.962	-689.314	1264.14	484.388	-828.77	1381.24	527.746	-796.004	1151.9	522.077	-779.748	1084.62	559	-852.063	989.78	544.913	-877.139	887.403	575.627	-815.524	873.333	610.681	-871.181	798.869
625	0	362.711	-996.56	1568.86	263.031	-1000.63	1564.44	368.491	-828.725	1611.63	255.288	-823.865	1608.85	313.157	-763.815	1428	329.11	-719.219	1214.56	309.672	-899.909	1366.44	296.478	-963.721	1234.87	237.066	-698.29	1265.66	485.116	-840.037	1382.78	529.381	-809.802	1153.29	524.092	-793.994	1085.82	559.787	-868.203	991.917	545.386	-894.394	889.85	577.28	-833.496	875.089	611.418	-890.835	801.401
626	0	362.612	-1007.1	1569.72	262.939	-1010.78	1565.16	368.981	-839.377	1612.85	255.813	-834.064	1609.93	314.364	-773.783	1429.36	331.016	-728.608	1215.98	309.998	-909.616	1367.43	296.488	-973.024	1235.71	239.052	-707.241	1267.07	485.779	-851.136	1384.23	530.948	-823.5	1154.61	526.048	-808.194	1086.95	560.51	-884.304	994.038	545.792	-911.636	892.31	578.85	-851.487	876.849	612.066	-910.497	803.989
627	0	362.474	-1017.57	1570.46	262.808	-1020.87	1565.76	369.426	-849.965	1613.95	256.291	-844.203	1610.88	315.476	-783.687	1430.6	332.798	-737.922	1217.28	310.306	-919.255	1368.32	296.538	-982.27	1236.45	240.903	-716.182	1268.35	486.376	-862.067	1385.56	532.437	-837.081	1155.85	527.934	-822.331	1088	561.168	-900.344	996.134	546.129	-928.844	894.776	580.324	-869.474	878.605	612.619	-930.138	806.627
628	0	362.31	-1027.98	1571.07	262.648	-1030.9	1566.23	369.827	-860.486	1614.9	256.726	-854.287	1611.69	316.489	-793.537	1431.71	334.441	-747.177	1218.46	310.598	-928.837	1369.09	296.629	-991.469	1237.08	242.607	-725.128	1269.51	486.907	-872.832	1386.77	533.843	-850.53	1157	529.74	-836.391	1088.96	561.758	-916.303	998.196	546.396	-946.001	897.241	581.691	-887.434	880.35	613.071	-949.731	809.31
629	0	362.128	-1038.32	1571.55	262.471	-1040.89	1566.58	370.188	-870.937	1615.69	257.118	-864.319	1612.37	317.398	-803.34	1432.66	335.937	-756.386	1219.5	310.874	-938.373	1369.73	296.758	-1000.63	1237.57	244.152	-734.091	1270.54	487.371	-883.436	1387.84	535.16	-863.833	1158.04	531.455	-850.361	1089.83	562.28	-932.161	1000.21	546.591	-963.088	899.697	582.943	-905.345	882.076	613.419	-969.252	812.029
630	0	361.939	-1048.6	1571.89	262.283	-1050.83	1566.81	370.51	-881.316	1616.33	257.47	-874.304	1612.89	318.198	-813.104	1433.47	337.277	-765.559	1220.39	311.132	-947.873	1370.24	296.923	-1009.76	1237.93	245.528	-743.082	1271.43	487.766	-893.885	1388.77	536.381	-876.982	1158.97	533.071	-864.226	1090.6	562.73	-947.9	1002.17	546.712	-980.088	902.135	584.071	-923.188	883.774	613.658	-988.675	814.776
631	0	361.748	-1058.82	1572.11	262.094	-1060.74	1566.92	370.793	-891.625	1616.8	257.78	-884.248	1613.25	318.888	-822.838	1434.11	338.454	-774.708	1221.15	311.372	-957.35	1370.6	297.117	-1018.88	1238.13	246.728	-752.112	1272.17	488.091	-904.188	1389.53	537.505	-889.969	1159.79	534.583	-877.977	1091.26	563.107	-963.503	1004.07	546.757	-996.984	904.545	585.071	-940.94	885.435	613.784	-1007.98	817.54
632	0	361.561	-1068.98	1572.18	261.908	-1070.62	1566.9	371.038	-901.864	1617.09	258.047	-894.155	1613.45	319.462	-832.55	1434.58	339.464	-783.84	1221.74	311.589	-966.813	1370.8	297.335	-1027.98	1238.18	247.744	-761.187	1272.77	488.347	-914.353	1390.14	538.527	-902.79	1160.47	535.984	-891.604	1091.8	563.409	-978.958	1005.88	546.725	-1013.76	906.917	585.939	-958.584	887.05	613.797	-1027.14	820.311
633	0	361.383	-1079.08	1572.11	261.73	-1080.48	1566.77	371.243	-912.037	1617.2	258.271	-904.034	1613.49	319.921	-842.246	1434.88	340.303	-792.964	1222.19	311.782	-976.271	1370.84	297.57	-1037.09	1238.06	248.574	-770.316	1273.2	488.53	-924.389	1390.57	539.446	-915.446	1161.01	537.272	-905.1	1092.21	563.633	-994.251	1007.62	546.613	-1030.4	909.239	586.673	-976.099	888.611	613.695	-1046.13	823.075
634	0	361.213	-1089.13	1571.9	261.56	-1090.33	1566.5	371.405	-922.145	1617.13	258.449	-913.888	1613.36	320.262	-851.934	1435.01	340.97	-802.086	1222.46	311.945	-985.734	1370.72	297.812	-1046.2	1237.76	249.216	-779.503	1273.48	488.641	-934.308	1390.82	540.26	-927.936	1161.42	538.443	-918.458	1092.49	563.78	-1009.37	1009.25	546.423	-1046.88	911.5	587.274	-993.468	890.108	613.478	-1064.94	825.82
635	0	361.052	-1099.13	1571.55	261.4	-1100.16	1566.11	371.523	-932.195	1616.88	258.578	-923.726	1613.05	320.484	-861.619	1434.95	341.465	-811.212	1222.57	312.075	-995.209	1370.43	298.053	-1055.34	1237.29	249.669	-788.753	1273.59	488.678	-944.12	1390.88	540.968	-940.263	1161.67	539.495	-931.673	1092.64	563.848	-1024.31	1010.77	546.152	-1063.2	913.686	587.742	-1010.67	891.532	613.148	-1083.54	828.532
636	0	360.897	-1109.09	1571.05	261.246	-1109.99	1565.59	371.592	-942.191	1616.44	258.653	-933.553	1612.58	320.589	-871.308	1434.72	341.788	-820.349	1222.51	312.166	-1004.7	1369.96	298.285	-1064.5	1236.64	249.936	-798.068	1273.54	488.641	-953.837	1390.75	541.571	-952.432	1161.77	540.429	-944.743	1092.64	563.837	-1039.06	1012.18	545.802	-1079.34	915.784	588.083	-1027.7	892.873	612.709	-1101.92	831.197
637	0	360.745	-1119.02	1570.41	261.096	-1119.83	1564.94	371.608	-952.138	1615.83	258.671	-943.375	1611.94	320.576	-881.005	1434.31	341.944	-829.502	1222.27	312.213	-1014.23	1369.32	298.499	-1073.69	1235.81	250.022	-807.453	1273.31	488.529	-963.471	1390.44	542.069	-964.446	1161.71	541.245	-957.665	1092.49	563.746	-1053.62	1013.46	545.375	-1095.28	917.781	588.301	-1044.53	894.123	612.165	-1120.06	833.798
638	0	360.589	-1128.91	1569.62	260.945	-1129.67	1564.15	371.567	-962.044	1615.04	258.628	-953.198	1611.14	320.448	-890.714	1433.71	341.937	-838.678	1221.85	312.211	-1023.78	1368.51	298.685	-1082.93	1234.81	249.933	-816.908	1272.9	488.341	-973.034	1389.93	542.464	-976.314	1161.49	541.944	-970.438	1092.19	563.578	-1067.97	1014.61	544.873	-1111.02	919.664	588.402	-1061.14	895.272	611.521	-1137.94	836.321
639	0	360.425	-1138.78	1568.68	260.785	-1139.52	1563.24	371.463	-971.915	1614.08	258.518	-963.026	1610.18	320.207	-900.44	1432.94	341.774	-847.885	1221.25	312.155	-1033.37	1367.53	298.836	-1092.23	1233.65	249.677	-826.434	1272.32	488.078	-982.541	1389.24	542.757	-988.039	1161.11	542.529	-983.062	1091.75	563.334	-1082.12	1015.61	544.3	-1126.53	921.418	588.395	-1077.53	896.312	610.785	-1155.54	838.749
640	0	360.243	-1148.63	1567.61	260.609	-1149.39	1562.19	371.292	-981.758	1612.96	258.337	-972.865	1609.06	319.857	-910.187	1432	341.461	-857.131	1220.48	312.038	-1043	1366.38	298.943	-1101.58	1232.33	249.266	-836.032	1271.57	487.739	-992.005	1388.37	542.952	-999.631	1160.58	543.002	-995.539	1091.16	563.017	-1096.07	1016.47	543.66	-1141.82	923.031	588.289	-1093.68	897.232	609.966	-1172.85	841.065
641	0	360.036	-1158.46	1566.4	260.41	-1159.27	1561.02	371.047	-991.579	1611.68	258.08	-982.719	1607.8	319.401	-919.958	1430.9	341.01	-866.424	1219.53	311.856	-1052.68	1365.08	298.999	-1110.99	1230.87	248.711	-845.703	1270.63	487.325	-1001.44	1387.32	543.051	-1011.1	1159.89	543.368	-1007.87	1090.42	562.63	-1109.81	1017.16	542.959	-1156.86	924.488	588.092	-1109.58	898.026	609.074	-1189.85	843.253
642	0	359.795	-1168.29	1565.06	260.177	-1169.18	1559.72	370.724	-1001.39	1610.27	257.743	-992.591	1606.41	318.845	-929.756	1429.64	340.429	-875.773	1218.41	311.603	-1062.41	1363.62	298.994	-1120.48	1229.26	248.027	-855.446	1269.53	486.836	-1010.86	1386.11	543.058	-1022.44	1159.04	543.63	-1020.06	1089.53	562.177	-1123.35	1017.7	542.205	-1171.66	925.777	587.816	-1125.22	898.684	608.121	-1206.53	845.294
643	0	359.511	-1178.11	1563.59	259.902	-1179.11	1558.3	370.317	-1011.19	1608.73	257.32	-1002.49	1604.89	318.194	-939.586	1428.22	339.732	-885.19	1217.12	311.275	-1072.19	1362.04	298.922	-1130.03	1227.54	247.23	-865.261	1268.25	486.273	-1020.29	1384.74	542.977	-1033.67	1158.06	543.794	-1032.11	1088.52	561.664	-1136.68	1018.06	541.404	-1186.19	926.886	587.471	-1140.57	899.198	607.118	-1222.88	847.172
644	0	359.174	-1187.94	1562.02	259.575	-1189.06	1556.78	369.824	-1020.99	1607.08	256.809	-1012.4	1603.26	317.454	-949.449	1426.67	338.932	-894.683	1215.68	310.867	-1082.02	1360.33	298.774	-1139.66	1225.71	246.335	-875.149	1266.81	485.638	-1029.74	1383.23	542.812	-1044.8	1156.94	543.865	-1044.03	1087.37	561.095	-1149.81	1018.26	540.566	-1200.46	927.804	587.069	-1155.64	899.563	606.079	-1238.88	848.868
645	0	358.775	-1197.77	1560.36	259.187	-1199.04	1555.16	369.24	-1030.79	1605.33	256.206	-1022.35	1601.53	316.632	-959.351	1425	338.041	-904.265	1214.09	310.377	-1091.92	1358.51	298.545	-1149.37	1223.78	245.359	-885.108	1265.22	484.933	-1039.23	1381.59	542.566	-1055.84	1155.7	543.848	-1055.82	1086.11	560.477	-1162.73	1018.29	539.699	-1214.46	928.519	586.62	-1170.41	899.771	605.017	-1254.52	850.364
646	0	358.307	-1207.61	1558.61	258.73	-1209.04	1553.45	368.561	-1040.62	1603.5	255.51	-1032.32	1599.72	315.734	-969.294	1423.21	337.075	-913.946	1212.36	309.799	-1101.87	1356.61	298.226	-1159.17	1221.79	244.32	-895.139	1263.49	484.158	-1048.77	1379.84	542.245	-1066.79	1154.34	543.748	-1067.5	1084.74	559.816	-1175.46	1018.15	538.813	-1228.18	929.023	586.135	-1184.87	899.818	603.946	-1269.78	851.644
647	0	357.762	-1217.47	1556.8	258.196	-1219.08	1551.67	367.788	-1050.46	1601.61	254.718	-1042.33	1597.84	314.768	-979.282	1421.33	336.048	-923.736	1210.51	309.133	-1111.89	1354.63	297.811	-1169.05	1219.74	243.236	-905.243	1261.63	483.317	-1058.38	1378	541.85	-1077.67	1152.88	543.57	-1079.05	1083.28	559.118	-1188	1017.83	537.918	-1241.62	929.308	585.624	-1199	899.699	602.881	-1284.66	852.691
648	0	357.133	-1227.36	1554.94	257.578	-1229.14	1549.84	366.918	-1060.33	1599.68	253.83	-1052.37	1595.91	313.74	-989.319	1419.37	334.975	-933.648	1208.55	308.376	-1121.97	1352.61	297.293	-1179.03	1217.66	242.122	-915.419	1259.65	482.411	-1068.08	1376.09	541.386	-1088.49	1151.34	543.318	-1090.51	1081.74	558.39	-1200.34	1017.35	537.023	-1254.77	929.368	585.099	-1212.81	899.414	601.835	-1299.15	853.488
649	0	356.414	-1237.28	1553.06	256.869	-1239.24	1547.97	365.951	-1070.23	1597.73	252.848	-1062.44	1593.95	312.659	-999.409	1417.35	333.871	-943.69	1206.5	307.526	-1132.13	1350.56	296.666	-1189.11	1215.57	240.994	-925.669	1257.57	481.443	-1077.89	1374.13	540.856	-1099.26	1149.73	542.995	-1101.87	1080.14	557.637	-1212.5	1016.71	536.137	-1267.63	929.2	584.566	-1226.27	898.96	600.822	-1313.23	854.022
650	0	355.601	-1247.23	1551.18	256.066	-1249.38	1546.09	364.891	-1080.17	1595.78	251.774	-1072.56	1591.98	311.531	-1009.56	1415.3	332.748	-953.873	1204.38	306.585	-1142.36	1348.51	295.925	-1199.29	1213.5	239.868	-935.994	1255.41	480.416	-1087.82	1372.14	540.262	-1110	1148.07	542.605	-1113.14	1078.49	556.865	-1224.47	1015.91	535.27	-1280.2	928.8	584.034	-1239.38	898.341	599.855	-1326.89	854.28
651	0	354.692	-1257.23	1549.31	255.165	-1259.55	1544.22	363.738	-1090.16	1593.84	250.609	-1082.71	1590.02	310.362	-1019.77	1413.23	331.62	-964.204	1202.2	305.553	-1152.66	1346.48	295.068	-1209.57	1211.47	238.754	-946.396	1253.18	479.332	-1097.88	1370.15	539.606	-1120.71	1146.38	542.149	-1124.34	1076.83	556.08	-1236.26	1014.96	534.43	-1292.48	928.171	583.51	-1252.14	897.561	598.944	-1340.12	854.253
652	0	353.684	-1267.27	1547.49	254.164	-1269.76	1542.37	362.498	-1100.19	1591.96	249.36	-1092.9	1588.09	309.159	-1030.04	1411.16	330.498	-974.691	1199.99	304.432	-1163.04	1344.5	294.091	-1219.98	1209.5	237.663	-956.878	1250.92	478.194	-1108.08	1368.18	538.89	-1131.42	1144.68	541.628	-1135.48	1075.15	555.287	-1247.87	1013.88	533.623	-1304.45	927.315	582.999	-1264.52	896.625	598.101	-1352.91	853.934
653	0	352.578	-1277.37	1545.74	253.064	-1280.01	1540.58	361.176	-1110.29	1590.13	248.032	-1103.13	1586.21	307.928	-1040.39	1409.13	329.391	-985.338	1197.77	303.226	-1173.5	1342.58	292.996	-1230.5	1207.62	236.604	-967.443	1248.65	477.005	-1118.44	1366.25	538.113	-1142.14	1142.99	541.042	-1146.56	1073.5	554.488	-1259.31	1012.67	532.856	-1316.13	926.242	582.505	-1276.51	895.544	597.333	-1365.23	853.322
654	0	351.376	-1287.53	1544.07	251.866	-1290.31	1538.87	359.778	-1120.44	1588.39	246.631	-1113.41	1584.41	306.673	-1050.8	1407.15	328.306	-996.149	1195.58	301.938	-1184.04	1340.76	291.784	-1241.15	1205.85	235.581	-978.093	1246.39	475.769	-1128.95	1364.4	537.277	-1152.89	1141.35	540.39	-1157.59	1071.89	553.687	-1270.57	1011.36	532.133	-1327.49	924.96	582.029	-1288.12	894.33	596.648	-1377.09	852.418
655	0	350.081	-1297.76	1542.52	250.574	-1300.65	1537.26	358.311	-1130.66	1586.75	245.164	-1123.73	1582.7	305.399	-1061.3	1405.25	327.25	-1007.12	1193.43	300.576	-1194.66	1339.06	290.461	-1251.92	1204.22	234.597	-988.831	1244.16	474.49	-1139.62	1362.64	536.379	-1163.66	1139.76	539.669	-1168.58	1070.34	552.886	-1281.66	1009.96	531.458	-1338.55	923.484	581.574	-1299.33	892.998	596.051	-1388.46	851.227
656	0	348.699	-1308.05	1541.11	249.193	-1311.04	1535.78	356.785	-1140.95	1585.25	243.641	-1134.1	1581.11	304.109	-1071.87	1403.45	326.224	-1018.26	1191.35	299.146	-1205.38	1337.49	289.034	-1262.82	1202.75	233.651	-999.658	1242	473.171	-1150.45	1361	535.42	-1174.48	1138.26	538.878	-1179.52	1068.88	552.086	-1292.57	1008.48	530.833	-1349.29	921.832	581.138	-1310.14	891.566	595.546	-1399.33	849.763
657	0	347.236	-1318.42	1539.85	247.731	-1321.48	1534.45	355.209	-1151.31	1583.88	242.07	-1144.51	1579.66	302.808	-1082.53	1401.77	325.229	-1029.55	1189.38	297.657	-1216.17	1336.08	287.514	-1273.85	1201.46	232.741	-1010.58	1239.94	471.817	-1161.44	1359.51	534.398	-1185.35	1136.87	538.013	-1190.44	1067.53	551.288	-1303.31	1006.95	530.259	-1359.71	920.024	580.718	-1320.53	890.055	595.132	-1409.69	848.042
658	0	345.701	-1328.86	1538.78	246.195	-1331.97	1533.29	353.592	-1161.73	1582.67	240.461	-1154.97	1578.35	301.498	-1093.26	1400.24	324.263	-1040.99	1187.53	296.12	-1227.05	1334.85	285.913	-1285.01	1200.36	231.86	-1021.59	1237.99	470.433	-1172.58	1358.18	533.312	-1196.27	1135.61	537.07	-1201.31	1066.3	550.492	-1313.85	1005.4	529.735	-1369.8	918.084	580.312	-1330.5	888.486	594.811	-1419.54	846.087
659	0	344.104	-1339.37	1537.89	244.597	-1342.52	1532.32	351.945	-1172.23	1581.64	238.824	-1165.48	1577.21	300.181	-1104.08	1398.87	323.322	-1052.57	1185.84	294.545	-1238.01	1333.8	284.248	-1296.29	1199.47	231.002	-1032.69	1236.19	469.026	-1183.85	1357.04	532.162	-1207.24	1134.51	536.049	-1212.14	1065.23	549.698	-1324.21	1003.83	529.259	-1379.57	916.04	579.915	-1340.06	886.883	594.578	-1428.85	843.924
660	0	342.456	-1349.96	1537.21	242.948	-1353.12	1531.55	350.279	-1182.8	1580.8	237.17	-1176.04	1576.26	298.859	-1114.97	1397.69	322.4	-1064.26	1184.34	292.944	-1249.05	1332.96	282.535	-1307.69	1198.8	230.157	-1043.88	1234.57	467.6	-1195.24	1356.1	530.946	-1218.26	1133.57	534.945	-1222.91	1064.32	548.904	-1334.38	1002.27	528.827	-1389.01	913.921	579.52	-1349.19	885.273	594.428	-1437.63	841.584
661	0	340.77	-1360.63	1536.76	241.261	-1363.78	1531	348.604	-1193.43	1580.15	235.508	-1186.65	1575.49	297.533	-1125.94	1396.71	321.489	-1076.06	1183.04	291.33	-1260.17	1332.34	280.793	-1319.2	1198.35	229.313	-1055.15	1233.15	466.164	-1206.74	1355.38	529.665	-1229.3	1132.81	533.757	-1233.62	1063.59	548.111	-1344.34	1000.76	528.436	-1398.12	911.757	579.12	-1357.9	883.679	594.356	-1445.87	839.105
662	0	339.059	-1371.37	1536.53	239.551	-1374.48	1530.68	346.931	-1204.13	1579.7	233.85	-1197.3	1574.93	296.206	-1136.98	1395.94	320.579	-1087.93	1181.97	289.716	-1271.35	1331.93	279.042	-1330.8	1198.12	228.46	-1066.49	1231.95	464.724	-1218.33	1354.88	528.322	-1240.36	1132.25	532.485	-1244.25	1063.04	547.318	-1354.09	999.296	528.08	-1406.9	909.581	578.707	-1366.2	882.128	594.352	-1453.58	836.523
663	0	337.339	-1382.17	1536.54	237.832	-1385.25	1530.6	345.271	-1214.88	1579.46	232.204	-1208	1574.57	294.879	-1148.09	1395.4	319.661	-1099.85	1181.15	288.117	-1282.6	1331.74	277.303	-1342.48	1198.11	227.583	-1077.9	1230.99	463.289	-1229.97	1354.61	526.919	-1251.4	1131.88	531.128	-1254.78	1062.69	546.523	-1363.61	997.913	527.754	-1415.35	907.425	578.273	-1374.09	880.644	594.406	-1460.76	833.881
664	0	335.625	-1393.04	1536.78	236.121	-1396.06	1530.75	343.633	-1225.69	1579.43	230.58	-1218.75	1574.41	293.552	-1159.26	1395.09	318.723	-1111.81	1180.6	286.545	-1293.9	1331.78	275.595	-1354.22	1198.32	226.671	-1089.37	1230.29	461.865	-1241.65	1354.58	525.461	-1262.4	1131.72	529.69	-1265.19	1062.54	545.729	-1372.9	996.627	527.45	-1423.46	905.321	577.809	-1381.57	879.25	594.507	-1467.43	831.218
665	0	333.932	-1403.96	1537.25	234.432	-1406.93	1531.15	342.026	-1236.54	1579.6	228.987	-1229.53	1574.47	292.228	-1170.47	1395.02	317.754	-1123.76	1180.32	285.014	-1305.24	1332.03	273.939	-1365.99	1198.73	225.71	-1100.88	1229.87	460.462	-1253.33	1354.78	523.952	-1273.33	1131.75	528.174	-1275.45	1062.59	544.933	-1381.95	995.453	527.162	-1431.26	903.301	577.304	-1388.67	877.966	594.64	-1473.6	828.578
666	0	332.276	-1414.94	1537.95	232.783	-1417.84	1531.77	340.46	-1247.43	1579.98	227.434	-1240.36	1574.73	290.907	-1181.72	1395.18	316.741	-1135.68	1180.32	283.537	-1316.61	1332.5	272.355	-1377.78	1199.33	224.69	-1112.41	1229.72	459.088	-1265	1355.21	522.4	-1284.15	1131.98	526.584	-1285.55	1062.83	544.136	-1390.74	994.408	526.883	-1438.74	901.394	576.752	-1395.39	876.812	594.792	-1479.29	826
667	0	330.673	-1425.95	1538.87	231.188	-1428.79	1532.61	338.941	-1258.36	1580.55	225.927	-1251.23	1575.19	289.59	-1193	1395.58	315.674	-1147.56	1180.61	282.125	-1328	1333.17	270.86	-1389.56	1200.1	223.6	-1123.97	1229.86	457.752	-1276.61	1355.86	520.814	-1294.81	1132.4	524.927	-1295.45	1063.26	543.34	-1399.27	993.502	526.605	-1445.91	899.626	576.142	-1401.76	875.801	594.947	-1484.54	823.521
668	0	329.136	-1436.99	1539.98	229.662	-1439.79	1533.66	337.477	-1269.3	1581.31	224.473	-1262.13	1575.85	288.279	-1204.29	1396.21	314.542	-1159.35	1181.17	280.789	-1339.39	1334.03	269.471	-1401.3	1201.04	222.431	-1135.52	1230.28	456.46	-1288.13	1356.71	519.202	-1305.29	1132.99	523.212	-1305.13	1063.86	542.544	-1407.53	992.746	526.321	-1452.78	898.021	575.467	-1407.79	874.947	595.091	-1489.37	821.178
669	0	327.681	-1448.05	1541.29	228.219	-1450.82	1534.9	336.073	-1280.27	1582.25	223.078	-1273.06	1576.68	286.976	-1215.58	1397.07	313.335	-1171.04	1181.99	279.539	-1350.78	1335.07	268.203	-1412.98	1202.12	221.176	-1147.06	1230.98	455.221	-1299.55	1357.75	517.575	-1315.54	1133.74	521.445	-1314.57	1064.63	541.751	-1415.5	992.146	526.025	-1459.38	896.598	574.721	-1413.5	874.258	595.207	-1493.83	819.001
670	0	326.32	-1459.12	1542.76	226.872	-1461.88	1536.32	334.735	-1291.24	1583.35	221.747	-1284.02	1577.68	285.683	-1226.85	1398.14	312.046	-1182.61	1183.07	278.382	-1362.14	1336.28	267.067	-1424.57	1203.33	219.832	-1158.57	1231.94	454.042	-1310.82	1358.97	515.942	-1325.52	1134.64	519.637	-1323.74	1065.55	540.959	-1423.2	991.704	525.71	-1465.71	895.374	573.897	-1418.93	873.738	595.28	-1497.95	817.016
671	0	325.063	-1470.19	1544.38	225.632	-1472.96	1537.89	333.467	-1302.2	1584.6	220.484	-1295	1578.84	284.401	-1238.1	1399.4	310.669	-1194.04	1184.39	277.325	-1373.46	1337.63	266.074	-1436.06	1204.66	218.396	-1170.03	1233.17	452.928	-1321.93	1360.35	514.313	-1335.21	1135.67	517.797	-1332.63	1066.6	540.171	-1430.61	991.422	525.37	-1471.79	894.359	572.992	-1424.09	873.39	595.296	-1501.78	815.244
672	0	323.922	-1481.25	1546.13	224.508	-1484.05	1539.59	332.271	-1313.16	1585.98	219.291	-1306	1580.14	283.133	-1249.3	1400.85	309.204	-1205.33	1185.93	276.372	-1384.73	1339.13	265.229	-1447.41	1206.09	216.87	-1181.44	1234.63	451.884	-1332.84	1361.86	512.698	-1344.57	1136.81	515.933	-1341.21	1067.77	539.387	-1437.73	991.297	525.001	-1477.64	893.559	572.002	-1429.01	873.21	595.242	-1505.36	813.701
673	0	322.904	-1492.3	1547.98	223.508	-1495.16	1541.4	331.15	-1324.1	1587.48	218.171	-1317.02	1581.56	281.881	-1260.45	1402.46	307.651	-1216.45	1187.65	275.525	-1395.94	1340.73	264.534	-1458.63	1207.6	215.257	-1192.78	1236.31	450.913	-1343.56	1363.48	511.106	-1353.6	1138.06	514.056	-1349.48	1069.03	538.605	-1444.56	991.325	524.599	-1483.28	892.978	570.925	-1433.72	873.195	595.106	-1508.73	812.397
674	0	322.014	-1503.31	1549.92	222.638	-1506.27	1543.3	330.105	-1335.01	1589.08	217.126	-1328.03	1583.09	280.648	-1271.54	1404.22	306.015	-1227.41	1189.55	274.784	-1407.08	1342.44	263.988	-1469.68	1209.19	213.566	-1204.04	1238.18	450.017	-1354.05	1365.19	509.545	-1362.26	1139.38	512.172	-1357.43	1070.39	537.826	-1451.12	991.496	524.159	-1488.72	892.612	569.762	-1438.24	873.334	594.88	-1511.95	811.337
675	0	321.258	-1514.28	1551.92	221.902	-1517.37	1545.27	329.137	-1345.88	1590.76	216.154	-1339.05	1584.7	279.435	-1282.56	1406.1	304.305	-1238.2	1191.59	274.148	-1418.13	1344.23	263.587	-1480.58	1210.85	211.803	-1215.22	1240.23	449.196	-1364.32	1366.97	508.019	-1370.56	1140.76	510.29	-1365.06	1071.8	537.049	-1457.4	991.801	523.68	-1494	892.454	568.513	-1442.6	873.618	594.556	-1515.04	810.519
676	0	320.637	-1525.21	1553.96	221.303	-1528.46	1547.28	328.243	-1356.71	1592.5	215.257	-1350.07	1586.39	278.246	-1293.49	1408.09	302.532	-1248.82	1193.75	273.614	-1429.09	1346.09	263.322	-1491.31	1212.57	209.98	-1226.31	1242.41	448.449	-1374.35	1368.8	506.533	-1378.5	1142.2	508.413	-1372.36	1073.27	536.273	-1463.41	992.229	523.16	-1499.12	892.493	567.182	-1446.83	874.033	594.13	-1518.05	809.937
677	0	320.152	-1536.08	1556.01	220.839	-1539.53	1549.31	327.424	-1367.49	1594.28	214.431	-1361.07	1588.12	277.082	-1304.33	1410.15	300.709	-1259.28	1196.01	273.174	-1439.95	1347.99	263.181	-1501.89	1214.33	208.11	-1237.3	1244.72	447.771	-1384.16	1370.65	505.089	-1386.09	1143.67	506.548	-1379.35	1074.78	535.496	-1469.18	992.763	522.6	-1504.1	892.713	565.772	-1450.94	874.563	593.602	-1521.02	809.578
678	0	319.801	-1546.89	1558.07	220.51	-1550.57	1551.34	326.676	-1378.21	1596.09	213.676	-1372.06	1589.88	275.947	-1315.09	1412.26	298.852	-1269.58	1198.32	272.824	-1450.71	1349.92	263.149	-1512.31	1216.13	206.204	-1248.21	1247.1	447.159	-1393.75	1372.51	503.687	-1393.34	1145.17	504.698	-1386.04	1076.3	534.717	-1474.71	993.387	521.998	-1508.96	893.094	564.288	-1454.95	875.189	592.972	-1523.96	809.427
679	0	319.581	-1557.62	1560.1	220.313	-1561.58	1553.35	325.997	-1388.87	1597.9	212.988	-1383.02	1591.65	274.841	-1325.75	1414.41	296.976	-1279.73	1200.67	272.555	-1461.36	1351.86	263.212	-1522.6	1217.96	204.277	-1259.03	1249.54	446.607	-1403.12	1374.35	502.325	-1400.27	1146.67	502.863	-1392.45	1077.83	533.933	-1480.02	994.085	521.358	-1513.72	893.616	562.736	-1458.9	875.894	592.244	-1526.91	809.462
680	0	319.486	-1568.28	1562.09	220.242	-1572.55	1555.32	325.383	-1399.45	1599.68	212.364	-1393.95	1593.41	273.766	-1336.31	1416.55	295.099	-1289.74	1203.02	272.357	-1471.9	1353.78	263.351	-1532.77	1219.81	202.341	-1269.75	1251.99	446.107	-1412.3	1376.15	501	-1406.92	1148.16	501.047	-1398.6	1079.35	533.143	-1485.13	994.835	520.682	-1518.39	894.251	561.123	-1462.78	876.655	591.427	-1529.89	809.657
681	0	319.512	-1578.86	1564.02	220.291	-1583.47	1557.24	324.829	-1409.97	1601.42	211.799	-1404.84	1595.13	272.723	-1346.79	1418.67	293.235	-1299.61	1205.35	272.221	-1482.34	1355.68	263.549	-1542.82	1221.65	200.408	-1280.4	1254.44	445.652	-1421.31	1377.89	499.708	-1413.3	1149.63	499.248	-1404.5	1080.84	532.345	-1490.06	995.618	519.973	-1522.98	894.972	559.457	-1466.63	877.452	590.528	-1532.9	809.982
682	0	319.649	-1589.36	1565.88	220.453	-1594.35	1559.09	324.33	-1420.4	1603.1	211.289	-1415.7	1596.79	271.713	-1357.17	1420.75	291.399	-1309.37	1207.62	272.138	-1492.67	1357.51	263.789	-1552.79	1223.47	198.491	-1290.97	1256.84	445.234	-1430.16	1379.56	498.443	-1419.47	1151.07	497.467	-1410.21	1082.3	531.539	-1494.84	996.411	519.235	-1527.51	895.749	557.746	-1470.45	878.262	589.56	-1535.96	810.406
683	0	319.89	-1599.77	1567.65	220.718	-1605.17	1560.85	323.882	-1430.75	1604.69	210.829	-1426.5	1598.37	270.737	-1367.47	1422.75	289.603	-1319.01	1209.81	272.097	-1502.91	1359.27	264.057	-1562.68	1225.25	196.599	-1301.48	1259.16	444.846	-1438.88	1381.13	497.2	-1425.46	1152.45	495.705	-1415.74	1083.7	530.723	-1499.49	997.192	518.474	-1531.98	896.55	555.997	-1474.25	879.062	588.534	-1539.06	810.895
684	0	320.224	-1610.09	1569.31	221.079	-1615.93	1562.51	323.479	-1441.02	1606.18	210.413	-1437.26	1599.85	269.795	-1377.7	1424.65	287.858	-1328.55	1211.9	272.088	-1513.05	1360.94	264.339	-1572.52	1226.95	194.745	-1311.92	1261.38	444.48	-1447.5	1382.58	495.973	-1431.31	1153.77	493.96	-1421.13	1085.04	529.896	-1504.04	997.94	517.694	-1536.41	897.343	554.22	-1478.04	879.83	587.463	-1542.21	811.412
685	0	320.642	-1620.33	1570.85	221.525	-1626.63	1564.06	323.114	-1451.21	1607.53	210.037	-1447.97	1601.21	268.888	-1387.85	1426.44	286.173	-1338.01	1213.85	272.104	-1523.1	1362.48	264.623	-1582.3	1228.56	192.936	-1322.3	1263.47	444.131	-1456.04	1383.9	494.757	-1437.06	1155	492.235	-1426.42	1086.29	529.059	-1508.51	998.632	516.902	-1540.8	898.096	552.424	-1481.83	880.546	586.361	-1545.41	811.922
686	0	321.133	-1630.48	1572.26	222.045	-1637.27	1565.49	322.783	-1461.31	1608.74	209.695	-1458.62	1602.44	268.017	-1397.95	1428.08	284.555	-1347.39	1215.65	272.136	-1533.08	1363.89	264.902	-1592.05	1230.05	191.183	-1332.63	1265.41	443.793	-1464.53	1385.08	493.55	-1442.76	1156.14	490.53	-1431.65	1087.45	528.213	-1512.93	999.246	516.1	-1545.17	898.778	550.617	-1485.62	881.188	585.239	-1548.63	812.388
687	0	321.685	-1640.55	1573.53	222.629	-1647.86	1566.78	322.479	-1471.33	1609.78	209.383	-1469.22	1603.5	267.183	-1407.99	1429.57	283.01	-1356.71	1217.27	272.178	-1542.99	1365.14	265.169	-1601.78	1231.39	189.495	-1342.92	1267.16	443.464	-1472.99	1386.1	492.349	-1448.44	1157.15	488.848	-1436.86	1088.5	527.358	-1517.33	999.763	515.296	-1549.52	899.358	548.807	-1489.43	881.739	584.109	-1551.87	812.777
688	0	322.29	-1650.54	1574.65	223.267	-1658.38	1567.93	322.198	-1481.27	1610.64	209.094	-1479.76	1604.39	266.387	-1417.99	1430.89	281.543	-1365.97	1218.69	272.224	-1552.84	1366.22	265.421	-1611.47	1232.56	187.881	-1353.16	1268.72	443.141	-1481.44	1386.95	491.154	-1454.15	1158.04	487.193	-1442.09	1089.43	526.498	-1521.73	1000.16	514.492	-1553.85	899.808	547.004	-1493.25	882.182	582.981	-1555.13	813.057
689	0	322.935	-1660.46	1575.62	223.949	-1668.86	1568.94	321.934	-1491.15	1611.31	208.826	-1490.25	1605.09	265.633	-1427.96	1432.02	280.159	-1375.18	1219.91	272.271	-1562.63	1367.11	265.656	-1621.15	1233.53	186.351	-1363.36	1270.06	442.825	-1489.92	1387.61	489.967	-1459.92	1158.78	485.569	-1447.38	1090.24	525.634	-1526.17	1000.43	513.692	-1558.18	900.105	545.214	-1497.09	882.504	581.86	-1558.38	813.199
690	0	323.613	-1670.32	1576.42	224.667	-1679.28	1569.79	321.684	-1500.95	1611.77	208.575	-1500.69	1605.59	264.923	-1437.9	1432.95	278.863	-1384.36	1220.92	272.316	-1572.38	1367.8	265.874	-1630.8	1234.28	184.915	-1373.52	1271.19	442.517	-1498.44	1388.1	488.791	-1465.79	1159.38	483.983	-1452.77	1090.9	524.769	-1530.67	1000.55	512.899	-1562.51	900.227	543.446	-1500.95	882.694	580.754	-1561.61	813.179
691	0	324.313	-1680.12	1577.06	225.411	-1689.65	1570.48	321.444	-1510.7	1612.02	208.338	-1511.09	1605.88	264.261	-1447.82	1433.68	277.662	-1393.51	1221.71	272.359	-1582.09	1368.28	266.079	-1640.44	1234.81	183.584	-1383.64	1272.09	442.221	-1507.02	1388.39	487.634	-1471.8	1159.81	482.44	-1458.3	1091.42	523.909	-1535.25	1000.51	512.115	-1566.84	900.156	541.706	-1504.84	882.744	579.665	-1564.82	812.977
692	0	325.029	-1689.88	1577.54	226.174	-1699.99	1571.01	321.212	-1520.39	1612.04	208.113	-1521.43	1605.96	263.653	-1457.73	1434.21	276.563	-1402.65	1222.28	272.4	-1591.77	1368.54	266.272	-1650.07	1235.09	182.368	-1393.72	1272.76	441.942	-1515.68	1388.5	486.502	-1477.98	1160.07	480.95	-1463.99	1091.79	523.057	-1539.94	1000.3	511.341	-1571.19	899.881	540.003	-1508.77	882.652	578.594	-1568	812.579
693	0	325.753	-1699.59	1577.85	226.95	-1710.28	1571.39	320.986	-1530.04	1611.85	207.899	-1531.74	1605.8	263.105	-1467.64	1434.53	275.573	-1411.78	1222.63	272.442	-1601.44	1368.58	266.458	-1659.68	1235.14	181.28	-1403.76	1273.19	441.685	-1524.43	1388.43	485.407	-1484.35	1160.17	479.521	-1469.89	1092.01	522.218	-1544.75	999.914	510.579	-1575.56	899.393	538.344	-1512.73	882.414	577.54	-1571.13	811.975
694	0	326.481	-1709.27	1578.01	227.734	-1720.54	1571.6	320.767	-1539.65	1611.44	207.696	-1542.01	1605.43	262.622	-1477.56	1434.64	274.702	-1420.91	1222.77	272.489	-1611.09	1368.41	266.642	-1669.28	1234.95	180.33	-1413.75	1273.4	441.459	-1533.3	1388.17	484.358	-1490.95	1160.1	478.163	-1476.01	1092.08	521.398	-1549.72	999.353	509.828	-1579.95	898.689	536.735	-1516.74	882.034	576.502	-1574.23	811.162
695	0	327.209	-1718.93	1578.01	228.521	-1730.78	1571.66	320.555	-1549.23	1610.8	207.507	-1552.24	1604.82	262.211	-1487.48	1434.55	273.961	-1430.05	1222.71	272.545	-1620.74	1368.02	266.83	-1678.89	1234.52	179.529	-1423.7	1273.39	441.271	-1542.29	1387.73	483.37	-1497.8	1159.86	476.885	-1482.39	1092	520.602	-1554.85	998.615	509.09	-1584.39	897.771	535.184	-1520.81	881.517	575.477	-1577.28	810.139
696	0	327.935	-1728.57	1577.87	229.31	-1740.99	1571.57	320.353	-1558.79	1609.96	207.333	-1562.45	1603.99	261.881	-1497.41	1434.26	273.358	-1439.21	1222.45	272.618	-1630.38	1367.42	267.028	-1688.5	1233.87	178.887	-1433.61	1273.16	441.131	-1551.42	1387.14	482.455	-1504.91	1159.46	475.7	-1489.03	1091.78	519.838	-1560.17	997.702	508.366	-1588.87	896.644	533.698	-1524.95	880.869	574.463	-1580.31	808.914
697	0	328.657	-1738.2	1577.59	230.098	-1751.18	1571.34	320.166	-1568.34	1608.9	207.18	-1572.62	1602.94	261.639	-1507.36	1433.78	272.904	-1448.41	1222.01	272.713	-1640.04	1366.62	267.243	-1698.13	1233.01	178.413	-1443.49	1272.73	441.047	-1560.69	1386.38	481.627	-1512.31	1158.9	474.617	-1495.96	1091.41	519.113	-1565.69	996.62	507.658	-1593.42	895.317	532.285	-1529.17	880.099	573.459	-1583.32	807.496
698	0	329.376	-1747.82	1577.19	230.886	-1761.34	1570.97	319.999	-1577.87	1607.65	207.052	-1582.77	1601.67	261.492	-1517.32	1433.11	272.608	-1457.66	1221.39	272.841	-1649.7	1365.62	267.48	-1707.78	1231.96	178.112	-1453.32	1272.11	441.03	-1570.1	1385.48	480.9	-1520	1158.19	473.647	-1503.19	1090.91	518.432	-1571.43	995.376	506.966	-1598.05	893.803	530.953	-1533.49	879.218	572.463	-1586.33	805.899
699	0	330.093	-1757.44	1576.67	231.675	-1771.5	1570.47	319.859	-1587.39	1606.21	206.956	-1592.9	1600.2	261.447	-1527.31	1432.28	272.479	-1466.97	1220.61	273.009	-1659.39	1364.46	267.749	-1717.47	1230.74	177.992	-1463.12	1271.3	441.089	-1579.67	1384.45	480.286	-1527.99	1157.34	472.798	-1510.71	1090.28	517.803	-1577.39	993.982	506.296	-1602.77	892.119	529.709	-1537.93	878.236	571.478	-1589.37	804.141
700	0	330.812	-1767.07	1576.05	232.467	-1781.63	1569.85	319.753	-1596.92	1604.61	206.9	-1603	1598.54	261.514	-1537.31	1431.28	272.523	-1476.36	1219.67	273.226	-1669.09	1363.13	268.055	-1727.2	1229.37	178.054	-1472.9	1270.32	441.233	-1589.38	1383.29	479.798	-1536.28	1156.36	472.081	-1518.53	1089.53	517.235	-1583.59	992.447	505.652	-1607.61	890.282	528.562	-1542.51	877.165	570.507	-1592.48	802.24
701	0	331.537	-1776.71	1575.34	233.264	-1791.75	1569.13	319.691	-1606.45	1602.84	206.891	-1613.08	1596.7	261.697	-1547.33	1430.14	272.746	-1485.84	1218.59	273.504	-1678.83	1361.65	268.408	-1736.98	1227.87	178.299	-1482.67	1269.18	441.471	-1599.25	1382.01	479.446	-1544.86	1155.25	471.502	-1526.65	1088.67	516.735	-1590.03	990.787	505.04	-1612.59	888.312	527.521	-1547.25	876.015	569.556	-1595.68	800.216
702	0	332.272	-1786.36	1574.55	234.072	-1801.85	1568.31	319.682	-1615.98	1600.94	206.939	-1623.14	1594.7	262.002	-1557.36	1428.86	273.149	-1495.42	1217.38	273.851	-1688.59	1360.05	268.814	-1746.82	1226.26	178.727	-1492.42	1267.89	441.811	-1609.26	1380.64	479.238	-1553.74	1154.03	471.068	-1535.04	1087.7	516.311	-1596.73	989.016	504.468	-1617.74	886.23	526.593	-1552.18	874.797	568.635	-1599.03	798.092
703	0	333.023	-1796.02	1573.7	234.894	-1811.93	1567.4	319.738	-1625.53	1598.93	207.053	-1633.17	1592.57	262.435	-1567.41	1427.45	273.733	-1505.12	1216.04	274.276	-1698.4	1358.35	269.283	-1756.71	1224.56	179.333	-1502.19	1266.47	442.26	-1619.41	1379.18	479.182	-1562.89	1152.69	470.784	-1543.71	1086.63	515.971	-1603.68	987.148	503.944	-1623.07	884.058	525.787	-1557.32	873.522	567.755	-1602.56	795.889
704	0	333.795	-1805.69	1572.79	235.736	-1822	1566.43	319.868	-1635.08	1596.82	207.244	-1643.17	1590.31	262.999	-1577.48	1425.94	274.497	-1514.95	1214.59	274.789	-1708.24	1356.57	269.822	-1766.66	1222.8	180.111	-1511.96	1264.92	442.826	-1629.69	1377.64	479.282	-1572.31	1151.27	470.652	-1552.63	1085.47	515.723	-1610.9	985.202	503.48	-1628.62	881.817	525.111	-1562.71	872.197	566.93	-1606.33	793.63
705	0	334.597	-1815.38	1571.85	236.604	-1832.05	1565.39	320.084	-1644.65	1594.64	207.52	-1653.15	1587.96	263.696	-1587.55	1424.33	275.435	-1524.91	1213.03	275.398	-1718.12	1354.73	270.439	-1776.66	1221	181.054	-1521.77	1263.26	443.512	-1640.08	1376.03	479.539	-1581.96	1149.76	470.675	-1561.79	1084.23	515.575	-1618.4	983.193	503.086	-1634.42	879.532	524.573	-1568.37	870.832	566.176	-1610.39	791.335
706	0	335.433	-1825.08	1570.88	237.504	-1842.07	1564.31	320.395	-1654.24	1592.41	207.89	-1663.11	1585.55	264.529	-1597.64	1422.65	276.539	-1535.03	1211.37	276.11	-1728.06	1352.85	271.14	-1786.73	1219.18	182.153	-1531.62	1261.5	444.323	-1650.59	1374.38	479.954	-1591.83	1148.17	470.853	-1571.16	1082.91	515.534	-1626.16	981.141	502.775	-1640.5	877.222	524.179	-1574.33	869.434	565.51	-1614.8	789.024
707	0	336.313	-1834.8	1569.9	238.441	-1852.07	1563.2	320.811	-1663.84	1590.17	208.365	-1673.04	1583.1	265.496	-1607.75	1420.91	277.801	-1545.28	1209.63	276.931	-1738.04	1350.96	271.934	-1796.87	1217.36	183.396	-1541.53	1259.66	445.261	-1661.19	1372.68	480.524	-1601.9	1146.53	471.185	-1580.74	1081.53	515.609	-1634.2	979.065	502.56	-1646.89	874.91	523.934	-1580.62	868.01	564.949	-1619.6	786.718
708	0	337.242	-1844.54	1568.92	239.423	-1862.06	1562.07	321.341	-1673.46	1587.93	208.95	-1682.95	1580.65	266.596	-1617.86	1419.13	279.209	-1555.69	1207.82	277.865	-1748.08	1349.08	272.825	-1807.06	1215.56	184.773	-1551.51	1257.75	446.327	-1671.87	1370.96	481.245	-1612.13	1144.84	471.668	-1590.5	1080.09	515.805	-1642.52	976.982	502.454	-1653.62	872.618	523.843	-1587.27	866.566	564.511	-1624.85	784.435
709	0	338.227	-1854.3	1567.95	240.455	-1872.02	1560.94	321.992	-1683.11	1585.74	209.653	-1692.83	1578.23	267.827	-1627.98	1417.33	280.747	-1566.24	1205.96	278.914	-1758.17	1347.25	273.817	-1817.33	1213.81	186.27	-1561.56	1255.79	447.521	-1682.61	1369.24	482.112	-1622.51	1143.12	472.299	-1600.43	1078.61	516.128	-1651.12	974.913	502.47	-1660.71	870.367	523.909	-1594.3	865.112	564.211	-1630.6	782.193
710	0	339.275	-1864.09	1567	241.544	-1881.96	1559.82	322.77	-1692.78	1583.62	210.478	-1702.69	1575.87	269.184	-1638.12	1415.52	282.401	-1576.93	1204.06	280.081	-1768.33	1345.48	274.913	-1827.67	1212.14	187.875	-1571.7	1253.81	448.84	-1693.42	1367.52	483.117	-1633.02	1141.39	473.073	-1610.52	1077.11	516.583	-1660.01	972.878	502.618	-1668.21	868.176	524.134	-1601.74	863.653	564.065	-1636.88	780.009
711	0	340.393	-1873.89	1566.09	242.696	-1891.89	1558.73	323.679	-1702.48	1581.6	211.428	-1712.54	1573.61	270.662	-1648.27	1413.74	284.155	-1587.76	1202.14	281.362	-1778.54	1343.79	276.112	-1838.08	1210.57	189.576	-1581.94	1251.83	450.279	-1704.27	1365.83	484.254	-1643.63	1139.67	473.984	-1620.74	1075.59	517.173	-1669.19	970.896	502.909	-1676.12	866.066	524.518	-1609.62	862.198	564.083	-1643.73	777.898
712	0	341.585	-1883.72	1565.23	243.915	-1901.8	1557.68	324.722	-1712.21	1579.72	212.506	-1722.38	1571.48	272.253	-1658.43	1411.99	285.993	-1598.72	1200.22	282.754	-1788.82	1342.22	277.413	-1848.59	1209.12	191.36	-1592.28	1249.86	451.834	-1715.15	1364.2	485.512	-1654.33	1137.98	475.027	-1631.11	1074.07	517.902	-1678.66	968.989	503.351	-1684.48	864.057	525.058	-1617.94	860.758	564.277	-1651.19	775.877
713	0	342.856	-1893.57	1564.42	245.207	-1911.7	1556.68	325.897	-1721.98	1578	213.711	-1732.21	1569.52	273.951	-1668.61	1410.32	287.899	-1609.8	1198.34	284.251	-1799.15	1340.79	278.809	-1859.18	1207.82	193.214	-1602.73	1247.94	453.495	-1726.06	1362.63	486.885	-1665.11	1136.34	476.194	-1641.61	1072.57	518.768	-1688.43	967.175	503.95	-1693.31	862.166	525.753	-1626.74	859.342	564.651	-1659.27	773.961
714	0	344.21	-1903.45	1563.69	246.575	-1921.6	1555.76	327.204	-1731.78	1576.47	215.04	-1742.04	1567.76	275.746	-1678.81	1408.73	289.857	-1620.99	1196.5	285.845	-1809.55	1339.51	280.294	-1869.86	1206.7	195.128	-1613.28	1246.08	455.255	-1736.99	1361.15	488.362	-1675.97	1134.77	477.48	-1652.25	1071.12	519.772	-1698.51	965.475	504.709	-1702.62	860.413	526.599	-1636.02	857.964	565.209	-1668.01	772.164
715	0	345.651	-1913.36	1563.03	248.024	-1931.5	1554.93	328.637	-1741.62	1575.16	216.49	-1751.88	1566.23	277.628	-1689.03	1407.25	291.855	-1632.29	1194.75	287.525	-1820.01	1338.41	281.857	-1880.65	1205.78	197.091	-1623.94	1244.33	457.102	-1747.93	1359.78	489.936	-1686.9	1133.29	478.877	-1663.03	1069.73	520.909	-1708.9	963.907	505.629	-1712.43	858.814	527.591	-1645.8	856.636	565.95	-1677.4	770.502
716	0	347.179	-1923.3	1562.47	249.554	-1941.4	1554.2	330.19	-1751.5	1574.09	218.052	-1761.72	1564.96	279.586	-1699.27	1405.9	293.879	-1643.68	1193.1	289.278	-1830.53	1337.5	283.484	-1891.53	1205.07	199.094	-1634.69	1242.7	459.022	-1758.89	1358.55	491.596	-1697.91	1131.93	480.379	-1673.96	1068.42	522.175	-1719.6	962.489	506.705	-1722.75	857.385	528.724	-1656.09	855.374	566.871	-1687.45	768.99
717	0	348.795	-1933.26	1562	251.168	-1951.31	1553.59	331.855	-1761.42	1573.28	219.72	-1771.59	1563.98	281.609	-1709.54	1404.7	295.92	-1655.15	1191.58	291.09	-1841.11	1336.81	285.158	-1902.51	1204.61	201.128	-1645.53	1241.22	461.003	-1769.85	1357.46	493.333	-1709.01	1130.71	481.98	-1685.06	1067.22	523.563	-1730.64	961.239	507.931	-1733.58	856.143	529.992	-1666.88	854.193	567.965	-1698.16	767.643
718	0	350.499	-1943.25	1561.64	252.864	-1961.24	1553.1	333.62	-1771.38	1572.74	221.482	-1781.48	1563.3	283.686	-1719.84	1403.67	297.966	-1666.69	1190.22	292.944	-1851.73	1336.33	286.863	-1913.59	1204.39	203.186	-1656.44	1239.92	463.028	-1780.83	1356.55	495.139	-1720.21	1129.64	483.672	-1696.32	1066.13	525.062	-1742	960.171	509.298	-1744.93	855.1	531.389	-1678.19	853.111	569.224	-1709.53	766.475
719	0	352.288	-1953.26	1561.39	254.643	-1971.18	1552.76	335.474	-1781.38	1572.5	223.328	-1791.4	1562.94	285.803	-1730.16	1402.82	300.012	-1678.29	1189.04	294.825	-1862.4	1336.07	288.579	-1924.74	1204.43	205.261	-1667.43	1238.82	465.082	-1791.83	1355.83	497.003	-1731.53	1128.74	485.449	-1707.77	1065.18	526.662	-1753.7	959.3	510.792	-1756.78	854.269	532.91	-1690.02	852.144	570.635	-1721.56	765.501
720	0	354.158	-1963.29	1561.26	256.5	-1981.14	1552.57	337.403	-1791.41	1572.54	225.245	-1801.35	1562.92	287.948	-1740.52	1402.18	302.048	-1689.93	1188.07	296.713	-1873.12	1336.05	290.286	-1935.96	1204.73	207.348	-1678.46	1237.94	467.147	-1802.85	1355.3	498.918	-1742.98	1128.03	487.305	-1719.41	1064.39	528.351	-1765.74	958.636	512.398	-1769.14	853.659	534.548	-1702.35	851.308	572.187	-1734.22	764.733
721	0	356.104	-1973.33	1561.25	258.432	-1991.13	1552.54	339.39	-1801.47	1572.87	227.217	-1811.35	1563.23	290.108	-1750.91	1401.75	304.072	-1701.59	1187.33	298.591	-1883.87	1336.25	291.964	-1947.24	1205.27	209.442	-1689.52	1237.29	469.208	-1813.9	1354.99	500.873	-1754.58	1127.51	489.235	-1731.26	1063.77	530.114	-1778.13	958.19	514.098	-1782	853.28	536.298	-1715.19	850.619	573.864	-1747.52	764.184
722	0	358.12	-1983.38	1561.36	260.434	-2001.14	1552.68	341.421	-1811.56	1573.48	229.231	-1821.38	1563.87	292.271	-1761.32	1401.53	306.078	-1713.26	1186.82	300.441	-1894.65	1336.68	293.593	-1958.55	1206.06	211.539	-1700.6	1236.89	471.247	-1824.99	1354.9	502.861	-1766.35	1127.2	491.233	-1743.33	1063.33	531.936	-1790.87	957.969	515.872	-1795.34	853.138	538.153	-1728.52	850.092	575.65	-1761.43	763.864
723	0	360.198	-1993.44	1561.59	262.5	-2011.17	1552.98	343.477	-1821.67	1574.36	231.271	-1831.46	1564.84	294.424	-1771.77	1401.54	308.065	-1724.92	1186.57	302.244	-1905.45	1337.32	295.154	-1969.88	1207.06	213.637	-1711.67	1236.75	473.248	-1836.12	1355.03	504.874	-1778.3	1127.1	493.293	-1755.62	1063.08	533.802	-1803.95	957.977	517.7	-1809.14	853.237	540.105	-1742.34	849.738	577.528	-1775.94	763.781
724	0	362.329	-2003.48	1561.93	264.62	-2021.22	1553.45	345.543	-1831.79	1575.49	233.321	-1841.58	1566.13	296.557	-1782.25	1401.76	310.034	-1736.54	1186.57	303.986	-1916.26	1338.16	296.63	-1981.2	1208.26	215.734	-1722.71	1236.86	475.196	-1847.31	1355.38	506.904	-1790.44	1127.21	495.41	-1768.13	1063.02	535.697	-1817.39	958.217	519.56	-1823.39	853.577	542.149	-1756.63	849.569	579.48	-1791.04	763.94
725	0	364.504	-2013.52	1562.37	266.788	-2031.3	1554.08	347.6	-1841.92	1576.86	235.365	-1851.74	1567.72	298.658	-1792.75	1402.2	311.987	-1748.11	1186.83	305.649	-1927.08	1339.19	298.005	-1992.51	1209.64	217.83	-1733.7	1237.22	477.075	-1858.55	1355.96	508.943	-1802.77	1127.54	497.58	-1780.87	1063.17	537.604	-1831.16	958.689	521.433	-1838.06	854.159	544.276	-1771.38	849.591	581.488	-1806.71	764.345
726	0	366.71	-2023.53	1562.92	268.992	-2041.39	1554.87	349.633	-1852.05	1578.44	237.389	-1861.95	1569.58	300.717	-1803.27	1402.85	313.927	-1759.61	1187.34	307.22	-1937.9	1340.39	299.263	-2003.77	1211.15	219.929	-1744.63	1237.83	478.873	-1869.87	1356.75	510.986	-1815.3	1128.07	499.798	-1793.83	1063.5	539.509	-1845.27	959.39	523.299	-1853.13	854.979	546.477	-1786.57	849.81	583.533	-1822.92	764.995
727	0	368.938	-2033.51	1563.55	271.224	-2051.49	1555.8	351.624	-1862.16	1580.19	239.378	-1872.19	1571.69	302.725	-1813.8	1403.7	315.862	-1771.02	1188.08	308.689	-1948.71	1341.73	300.393	-2014.98	1212.78	222.032	-1755.47	1238.66	480.579	-1881.26	1357.74	513.027	-1828.04	1128.8	502.058	-1807	1064.03	541.397	-1859.71	960.316	525.139	-1868.58	856.031	548.742	-1802.17	850.227	585.595	-1839.65	765.888
728	0	371.174	-2043.45	1564.26	273.472	-2061.6	1556.87	353.56	-1872.26	1582.09	241.32	-1882.47	1574.02	304.675	-1824.34	1404.73	317.8	-1782.34	1189.04	310.044	-1959.49	1343.2	301.386	-2026.12	1214.49	224.147	-1766.21	1239.7	482.182	-1892.72	1358.92	515.059	-1840.98	1129.72	504.356	-1820.39	1064.74	543.254	-1874.45	961.459	526.937	-1884.37	857.308	551.061	-1818.17	850.843	587.656	-1856.88	767.018
729	0	373.408	-2053.35	1565.02	275.726	-2071.71	1558.05	355.428	-1882.32	1584.11	243.202	-1892.78	1576.54	306.559	-1834.88	1405.93	319.747	-1793.54	1190.21	311.28	-1970.24	1344.77	302.235	-2037.16	1216.24	226.276	-1776.83	1240.92	483.675	-1904.25	1360.28	517.079	-1854.12	1130.81	506.686	-1833.98	1065.63	545.067	-1889.49	962.812	528.678	-1900.49	858.801	553.422	-1834.54	851.655	589.696	-1874.57	768.378
730	0	375.627	-2063.19	1565.83	277.975	-2081.82	1559.33	357.215	-1892.36	1586.22	245.013	-1903.12	1579.22	308.371	-1845.41	1407.28	321.715	-1804.62	1191.56	312.391	-1980.94	1346.43	302.936	-2048.11	1218.03	228.427	-1787.31	1242.31	485.052	-1915.86	1361.8	519.081	-1867.45	1132.08	509.043	-1847.75	1066.68	546.826	-1904.8	964.364	530.35	-1916.9	860.499	555.812	-1851.27	852.657	591.698	-1892.71	769.959
731	0	377.821	-2072.98	1566.66	280.21	-2091.93	1560.7	358.912	-1902.35	1588.39	246.747	-1913.47	1582.02	310.106	-1855.92	1408.76	323.709	-1815.57	1193.06	313.375	-1991.6	1348.15	303.493	-2058.94	1219.81	230.603	-1797.64	1243.82	486.309	-1927.52	1363.47	521.06	-1880.96	1133.49	511.421	-1861.71	1067.88	548.518	-1920.38	966.104	531.941	-1933.58	862.392	558.218	-1868.32	853.845	593.645	-1911.24	771.752
732	0	379.978	-2082.7	1567.51	282.422	-2102.01	1562.12	360.511	-1912.31	1590.6	248.394	-1923.84	1584.92	311.759	-1866.4	1410.36	325.735	-1826.37	1194.7	314.234	-2002.18	1349.91	303.908	-2069.64	1221.57	232.807	-1807.83	1245.45	487.445	-1939.24	1365.26	523.011	-1894.65	1135.04	513.813	-1875.83	1069.23	550.134	-1936.19	968.023	533.442	-1950.5	864.467	560.627	-1885.67	855.212	595.519	-1930.15	773.748
733	0	382.091	-2092.35	1568.35	284.601	-2112.08	1563.58	362.006	-1922.21	1592.81	249.951	-1934.22	1587.87	313.327	-1876.83	1412.04	327.796	-1837.04	1196.44	314.97	-2012.7	1351.7	304.193	-2080.2	1223.3	235.038	-1817.85	1247.15	488.458	-1950.99	1367.17	524.929	-1908.5	1136.72	516.21	-1890.11	1070.7	551.666	-1952.22	970.107	534.847	-1967.63	866.714	563.026	-1903.29	856.75	597.308	-1949.39	775.937
734	0	384.151	-2101.93	1569.16	286.74	-2122.12	1565.06	363.393	-1932.06	1595.01	251.414	-1944.6	1590.86	314.807	-1887.22	1413.79	329.892	-1847.56	1198.26	315.588	-2023.13	1353.5	304.36	-2090.62	1224.98	237.293	-1827.72	1248.9	489.351	-1962.75	1369.16	526.808	-1922.5	1138.5	518.605	-1904.53	1072.29	553.104	-1968.44	972.345	536.148	-1984.95	869.119	565.4	-1921.16	858.451	598.996	-1968.92	778.31
735	0	386.152	-2111.44	1569.95	288.834	-2132.14	1566.54	364.672	-1941.85	1597.17	252.781	-1954.98	1593.85	316.196	-1897.54	1415.59	332.018	-1857.93	1200.14	316.095	-2033.46	1355.29	304.424	-2100.89	1226.61	239.568	-1837.42	1250.68	490.127	-1974.51	1371.23	528.642	-1936.64	1140.38	520.986	-1919.09	1073.98	554.444	-1984.84	974.725	537.342	-2002.42	871.673	567.735	-1939.25	860.307	600.573	-1988.71	780.86
736	0	388.087	-2120.88	1570.68	290.876	-2142.12	1567.98	365.84	-1951.6	1599.27	254.052	-1965.35	1596.8	317.493	-1907.79	1417.42	334.169	-1868.15	1202.05	316.5	-2043.7	1357.07	304.404	-2111	1228.17	241.853	-1846.98	1252.46	490.789	-1986.25	1373.36	530.423	-1950.89	1142.34	523.343	-1933.76	1075.75	555.678	-2001.38	977.235	538.426	-2020.02	874.363	570.018	-1957.54	862.31	602.028	-2008.72	783.578
737	0	389.953	-2130.25	1571.36	292.862	-2152.06	1569.39	366.9	-1961.29	1601.3	255.228	-1975.71	1599.71	318.697	-1917.97	1419.25	336.335	-1878.23	1203.97	316.812	-2053.82	1358.81	304.319	-2120.95	1229.67	244.137	-1856.38	1254.22	491.345	-1997.93	1375.54	532.145	-1965.24	1144.36	525.665	-1948.54	1077.61	556.803	-2018.04	979.862	539.396	-2037.73	877.179	572.236	-1976	864.45	603.352	-2028.9	786.459
738	0	391.747	-2139.55	1571.97	294.788	-2161.98	1570.72	367.856	-1970.93	1603.25	256.312	-1986.06	1602.53	319.809	-1928.06	1421.07	338.505	-1888.17	1205.88	317.042	-2063.83	1360.51	304.186	-2130.74	1231.1	246.409	-1865.65	1255.94	491.8	-2009.54	1377.74	533.801	-1979.67	1146.44	527.937	-1963.41	1079.52	557.814	-2034.81	982.594	540.254	-2055.52	880.11	574.375	-1994.6	866.719	604.539	-2049.24	789.494
739	0	393.467	-2148.78	1572.49	296.651	-2171.85	1571.98	368.711	-1980.51	1605.09	257.307	-1996.39	1605.25	320.83	-1938.06	1422.86	340.665	-1897.98	1207.76	317.2	-2073.73	1362.16	304.024	-2140.37	1232.45	248.657	-1874.79	1257.61	492.162	-2021.05	1379.95	535.384	-1994.16	1148.57	530.149	-1978.35	1081.48	558.711	-2051.64	985.418	540.998	-2073.37	883.144	576.422	-2013.32	869.104	605.585	-2069.68	792.677
740	0	395.111	-2157.95	1572.94	298.449	-2181.69	1573.14	369.471	-1990.06	1606.82	258.216	-2006.69	1607.84	321.762	-1947.96	1424.59	342.803	-1907.66	1209.59	317.298	-2083.51	1363.74	303.849	-2149.86	1233.73	250.865	-1883.82	1259.19	492.439	-2032.45	1382.15	536.889	-2008.67	1150.72	532.287	-1993.35	1083.48	559.491	-2068.52	988.319	541.63	-2091.27	886.272	578.366	-2032.14	871.596	606.484	-2090.2	795.998
741	0	396.678	-2167.07	1573.29	300.178	-2191.49	1574.18	370.142	-1999.55	1608.44	259.046	-2016.97	1610.28	322.607	-1957.77	1426.26	344.906	-1917.22	1211.34	317.345	-2093.17	1365.23	303.674	-2159.2	1234.93	253.022	-1892.74	1260.69	492.639	-2043.72	1384.32	538.311	-2023.19	1152.88	534.339	-2008.38	1085.48	560.156	-2085.43	991.284	542.15	-2109.18	889.48	580.194	-2051.03	874.179	607.235	-2110.77	799.448
742	0	398.168	-2176.14	1573.56	301.836	-2201.25	1575.11	370.731	-2009.02	1609.92	259.8	-2027.21	1612.57	323.37	-1967.49	1427.84	346.96	-1926.66	1213.01	317.353	-2102.72	1366.63	303.512	-2168.41	1236.04	255.115	-1901.57	1262.08	492.772	-2054.85	1386.44	539.646	-2037.69	1155.03	536.294	-2023.43	1087.49	560.706	-2102.33	994.296	542.562	-2127.09	892.756	581.896	-2069.96	876.84	607.837	-2131.36	803.017
743	0	399.579	-2185.16	1573.72	303.419	-2210.98	1575.91	371.246	-2018.44	1611.26	260.484	-2037.42	1614.67	324.054	-1977.12	1429.32	348.953	-1936	1214.57	317.331	-2112.17	1367.93	303.37	-2177.49	1237.05	257.133	-1910.32	1263.35	492.845	-2065.82	1388.5	540.891	-2052.13	1157.17	538.142	-2038.48	1089.47	561.143	-2119.2	997.34	542.867	-2144.99	896.087	583.461	-2088.91	879.564	608.29	-2151.94	806.693
744	0	400.912	-2194.15	1573.8	304.926	-2220.68	1576.57	371.693	-2027.84	1612.46	261.103	-2047.6	1616.57	324.663	-1986.65	1430.68	350.875	-1945.24	1216.01	317.286	-2121.5	1369.11	303.255	-2186.45	1237.95	259.064	-1919	1264.51	492.868	-2076.63	1390.46	542.046	-2066.49	1159.26	539.876	-2053.5	1091.41	561.473	-2136.02	1000.4	543.066	-2162.85	899.458	584.879	-2107.86	882.334	608.594	-2172.48	810.46
745	0	402.165	-2203.12	1573.78	306.352	-2230.36	1577.08	372.081	-2037.22	1613.51	261.663	-2057.74	1618.27	325.204	-1996.11	1431.92	352.715	-1954.38	1217.33	317.228	-2130.75	1370.15	303.172	-2195.32	1238.73	260.899	-1927.63	1265.53	492.848	-2087.27	1392.31	543.109	-2080.75	1161.28	541.49	-2068.47	1093.29	561.696	-2152.76	1003.45	543.161	-2180.66	902.857	586.142	-2126.78	885.132	608.75	-2192.97	814.306
746	0	403.336	-2212.07	1573.66	307.695	-2240	1577.46	372.414	-2046.59	1614.4	262.167	-2067.84	1619.75	325.679	-2005.49	1433.02	354.463	-1963.44	1218.5	317.162	-2139.91	1371.05	303.121	-2204.1	1239.39	262.628	-1936.21	1266.41	492.794	-2097.74	1394.03	544.082	-2094.88	1163.23	542.978	-2083.36	1095.09	561.819	-2169.39	1006.49	543.152	-2198.41	906.266	587.243	-2145.65	887.94	608.761	-2213.37	818.212
747	0	404.425	-2221.02	1573.46	308.949	-2249.63	1577.68	372.702	-2055.94	1615.14	262.62	-2077.9	1621.01	326.094	-2014.79	1433.97	356.112	-1972.42	1219.53	317.094	-2149	1371.8	303.103	-2212.8	1239.9	264.244	-1944.77	1267.15	492.712	-2108.05	1395.59	544.967	-2108.86	1165.07	544.339	-2098.16	1096.79	561.844	-2185.91	1009.48	543.04	-2216.07	909.671	588.174	-2164.45	890.741	608.625	-2233.67	822.163
748	0	405.429	-2229.97	1573.16	310.113	-2259.24	1577.76	372.948	-2065.29	1615.72	263.026	-2087.91	1622.04	326.454	-2024.04	1434.77	357.653	-1981.33	1220.4	317.028	-2158.02	1372.38	303.118	-2221.44	1240.27	265.739	-1953.3	1267.75	492.611	-2118.19	1396.98	545.764	-2122.67	1166.79	545.572	-2112.85	1098.37	561.777	-2202.28	1012.42	542.822	-2233.63	913.057	588.931	-2183.15	893.518	608.345	-2253.84	826.139
749	0	406.347	-2238.93	1572.77	311.18	-2268.84	1577.69	373.157	-2074.65	1616.14	263.387	-2097.89	1622.85	326.761	-2033.24	1435.41	359.078	-1990.17	1221.11	316.968	-2166.99	1372.8	303.164	-2230.02	1240.48	267.105	-1961.82	1268.2	492.495	-2128.18	1398.19	546.478	-2136.29	1168.36	546.677	-2127.4	1099.82	561.62	-2218.48	1015.29	542.498	-2251.08	916.407	589.51	-2201.74	896.252	607.92	-2273.86	830.123
750	0	407.174	-2247.92	1572.3	312.149	-2278.42	1577.47	373.335	-2084.01	1616.39	263.706	-2107.81	1623.42	327.02	-2042.39	1435.88	360.379	-1998.95	1221.65	316.915	-2175.92	1373.04	303.237	-2238.56	1240.52	268.336	-1970.34	1268.51	492.37	-2138.02	1399.19	547.109	-2149.7	1169.78	547.656	-2141.81	1101.11	561.377	-2234.5	1018.07	542.064	-2268.4	919.707	589.909	-2220.18	898.928	607.35	-2293.71	834.095
751	0	407.911	-2256.93	1571.73	313.015	-2288	1577.11	373.484	-2093.38	1616.49	263.986	-2117.7	1623.77	327.232	-2051.51	1436.2	361.55	-2007.67	1222.02	316.87	-2184.82	1373.11	303.334	-2247.08	1240.4	269.427	-1978.87	1268.68	492.239	-2147.71	1399.98	547.661	-2162.91	1171.02	548.512	-2156.04	1102.24	561.051	-2250.33	1020.75	541.518	-2285.57	922.942	590.128	-2238.46	901.531	606.636	-2313.37	838.039
752	0	408.553	-2265.99	1571.08	313.775	-2297.58	1576.61	373.606	-2102.77	1616.42	264.225	-2127.55	1623.9	327.4	-2060.61	1436.34	362.583	-2016.36	1222.22	316.833	-2193.71	1372.99	303.45	-2255.58	1240.11	270.374	-1987.41	1268.71	492.105	-2157.28	1400.54	548.136	-2175.89	1172.08	549.249	-2170.1	1103.2	560.644	-2265.95	1023.3	540.856	-2302.57	926.097	590.167	-2256.56	904.046	605.776	-2332.81	841.937
753	0	409.099	-2275.09	1570.34	314.427	-2307.16	1575.98	373.702	-2112.19	1616.2	264.426	-2137.35	1623.81	327.525	-2069.69	1436.33	363.474	-2025.01	1222.25	316.802	-2202.58	1372.7	303.579	-2264.07	1239.65	271.171	-1995.98	1268.59	491.971	-2166.72	1400.88	548.534	-2188.65	1172.94	549.871	-2183.96	1103.98	560.158	-2281.34	1025.73	540.077	-2319.39	929.161	590.029	-2274.45	906.461	604.771	-2352.02	845.771
754	0	409.547	-2284.24	1569.51	314.969	-2316.73	1575.22	373.773	-2121.62	1615.84	264.587	-2147.12	1623.52	327.607	-2078.76	1436.15	364.217	-2033.63	1222.11	316.775	-2211.47	1372.24	303.716	-2272.56	1239.03	271.818	-2004.58	1268.35	491.836	-2176.05	1400.99	548.858	-2201.17	1173.59	550.382	-2197.62	1104.56	559.596	-2296.5	1028.01	539.18	-2336.01	932.119	589.72	-2292.13	908.764	603.621	-2370.98	849.527
755	0	409.897	-2293.44	1568.6	315.401	-2326.31	1574.33	373.816	-2131.08	1615.32	264.708	-2156.86	1623.03	327.644	-2087.83	1435.81	364.809	-2042.24	1221.81	316.749	-2220.36	1371.61	303.854	-2281.08	1238.25	272.313	-2013.22	1267.98	491.698	-2185.28	1400.87	549.107	-2213.46	1174.04	550.786	-2211.07	1104.96	558.96	-2311.42	1030.15	538.164	-2352.42	934.963	589.244	-2309.57	910.947	602.327	-2389.66	853.19
756	0	410.148	-2302.7	1567.6	315.725	-2335.9	1573.32	373.829	-2140.57	1614.66	264.786	-2166.56	1622.35	327.636	-2096.91	1435.32	365.249	-2050.84	1221.35	316.718	-2229.27	1370.82	303.987	-2289.62	1237.33	272.656	-2021.91	1267.48	491.557	-2194.42	1400.53	549.281	-2225.52	1174.27	551.087	-2224.31	1105.17	558.25	-2326.1	1032.12	537.031	-2368.6	937.68	588.609	-2326.75	913	600.891	-2408.04	856.746
757	0	410.301	-2312.02	1566.52	315.94	-2345.5	1572.2	373.811	-2150.08	1613.87	264.819	-2176.23	1621.51	327.581	-2106.01	1434.68	365.536	-2059.45	1220.73	316.678	-2238.22	1369.89	304.108	-2298.2	1236.27	272.849	-2030.65	1266.86	491.408	-2203.49	1399.97	549.381	-2237.35	1174.3	551.29	-2237.32	1105.2	557.47	-2340.51	1033.92	535.784	-2384.52	940.263	587.826	-2343.65	914.916	599.319	-2426.11	860.181
758	0	410.355	-2321.4	1565.35	316.051	-2355.1	1570.98	373.756	-2159.62	1612.96	264.805	-2185.88	1620.5	327.475	-2115.13	1433.89	365.671	-2068.08	1219.96	316.623	-2247.2	1368.82	304.209	-2306.83	1235.08	272.897	-2039.45	1266.12	491.247	-2212.5	1399.22	549.403	-2248.96	1174.13	551.397	-2250.11	1105.04	556.622	-2354.67	1035.56	534.429	-2400.19	942.702	586.903	-2360.27	916.687	597.615	-2443.85	863.483
759	0	410.313	-2330.83	1564.11	316.062	-2364.72	1569.66	373.661	-2169.19	1611.92	264.739	-2195.5	1619.35	327.317	-2124.27	1432.98	365.66	-2076.73	1219.06	316.545	-2256.22	1367.62	304.283	-2315.51	1233.78	272.803	-2048.32	1265.27	491.069	-2221.46	1398.27	549.349	-2260.36	1173.75	551.413	-2262.68	1104.7	555.71	-2368.57	1037.01	532.972	-2415.58	944.987	585.854	-2376.58	918.309	595.789	-2461.23	866.641
760	0	410.177	-2340.32	1562.8	315.977	-2374.35	1568.26	373.52	-2178.77	1610.77	264.619	-2205.11	1618.06	327.101	-2133.45	1431.93	365.505	-2085.43	1218.03	316.438	-2265.3	1366.31	304.325	-2324.27	1232.39	272.575	-2057.27	1264.31	490.867	-2230.39	1397.14	549.214	-2271.54	1173.19	551.338	-2275.02	1104.21	554.737	-2382.21	1038.28	531.421	-2430.68	947.111	584.692	-2392.57	919.775	593.852	-2478.25	869.641
761	0	409.948	-2349.86	1561.42	315.801	-2384	1566.78	373.327	-2188.38	1609.52	264.441	-2214.7	1616.66	326.825	-2142.67	1430.76	365.216	-2094.18	1216.87	316.295	-2274.43	1364.91	304.327	-2333.1	1230.91	272.217	-2066.29	1263.25	490.634	-2239.31	1395.87	549	-2282.54	1172.45	551.177	-2287.15	1103.56	553.708	-2395.58	1039.37	529.788	-2445.48	949.064	583.43	-2408.24	921.08	591.817	-2494.88	872.47
762	0	409.628	-2359.44	1559.97	315.541	-2393.67	1565.23	373.078	-2198.02	1608.17	264.201	-2224.29	1615.14	326.485	-2151.92	1429.48	364.799	-2102.99	1215.61	316.109	-2283.62	1363.41	304.284	-2342.02	1229.37	271.74	-2075.39	1262.09	490.365	-2248.22	1394.45	548.703	-2293.35	1171.55	550.93	-2299.06	1102.76	552.627	-2408.7	1040.27	528.085	-2459.97	950.836	582.083	-2423.56	922.219	589.699	-2511.12	875.115
763	0	409.221	-2369.07	1558.46	315.203	-2403.36	1563.63	372.767	-2207.67	1606.73	263.895	-2233.87	1613.54	326.079	-2161.23	1428.1	364.265	-2111.88	1214.25	315.873	-2292.87	1361.85	304.188	-2351.02	1227.77	271.151	-2084.59	1260.83	490.053	-2257.14	1392.91	548.323	-2304.01	1170.5	550.601	-2310.76	1101.83	551.503	-2421.56	1040.98	526.326	-2474.15	952.419	580.669	-2438.53	923.186	587.518	-2526.94	877.561
764	0	408.728	-2378.74	1556.91	314.793	-2413.07	1561.97	372.388	-2217.33	1605.22	263.519	-2243.46	1611.85	325.603	-2170.59	1426.62	363.623	-2120.87	1212.8	315.579	-2302.2	1360.23	304.035	-2360.13	1226.12	270.459	-2093.88	1259.48	489.691	-2266.1	1391.27	547.861	-2314.51	1169.31	550.191	-2322.26	1100.79	550.34	-2434.18	1041.5	524.53	-2488	953.802	579.203	-2453.15	923.975	585.295	-2542.35	879.792
765	0	408.153	-2388.44	1555.31	314.316	-2422.82	1560.28	371.936	-2227.02	1603.64	263.07	-2253.06	1610.09	325.056	-2180	1425.05	362.882	-2129.95	1211.27	315.222	-2311.6	1358.56	303.818	-2369.33	1224.44	269.674	-2103.27	1258.04	489.273	-2275.1	1389.55	547.316	-2324.88	1168	549.702	-2333.58	1099.63	549.148	-2446.54	1041.83	522.712	-2501.53	954.972	577.703	-2467.4	924.579	583.051	-2557.33	881.79
766	0	407.498	-2398.17	1553.68	313.778	-2432.59	1558.56	371.408	-2236.72	1602	262.545	-2262.67	1608.28	324.438	-2189.47	1423.41	362.054	-2139.15	1209.67	314.797	-2321.08	1356.85	303.531	-2378.65	1222.74	268.806	-2112.78	1256.52	488.794	-2284.16	1387.76	546.689	-2335.15	1166.58	549.137	-2344.71	1098.37	547.935	-2458.68	1041.97	520.893	-2514.74	955.92	576.186	-2481.28	924.991	580.812	-2571.89	883.536
767	0	406.766	-2407.94	1552.02	313.184	-2442.39	1556.83	370.8	-2246.44	1600.32	261.942	-2272.3	1606.42	323.747	-2199.01	1421.69	361.148	-2148.47	1207.99	314.297	-2330.65	1355.13	303.17	-2388.08	1221.03	267.863	-2122.39	1254.91	488.25	-2293.3	1385.93	545.983	-2345.33	1165.06	548.498	-2355.69	1097.03	546.709	-2470.58	1041.9	519.092	-2527.62	956.632	574.669	-2494.8	925.203	578.602	-2586	885.009
768	0	405.96	-2417.74	1550.35	312.537	-2452.24	1555.09	370.11	-2256.17	1598.6	261.26	-2281.96	1604.54	322.984	-2208.61	1419.92	360.172	-2157.93	1206.26	313.721	-2340.31	1353.39	302.729	-2397.63	1219.31	266.854	-2132.12	1253.23	487.637	-2302.53	1384.05	545.2	-2355.44	1163.45	547.787	-2366.51	1095.6	545.48	-2482.27	1041.64	517.329	-2540.19	957.097	573.17	-2507.94	925.209	576.45	-2599.69	886.19
769	0	405.083	-2427.57	1548.67	311.839	-2462.12	1553.36	369.336	-2265.93	1596.85	260.497	-2291.66	1602.63	322.15	-2218.28	1418.1	359.136	-2167.52	1204.48	313.063	-2350.06	1351.64	302.203	-2407.31	1217.6	265.789	-2141.97	1251.47	486.954	-2311.87	1382.16	544.344	-2365.5	1161.77	547.008	-2377.21	1094.1	544.256	-2493.75	1041.18	515.624	-2552.45	957.304	571.705	-2520.71	925.002	574.38	-2612.95	887.058
770	0	404.138	-2437.43	1546.99	311.092	-2472.05	1551.65	368.48	-2275.72	1595.08	259.653	-2301.39	1600.72	321.249	-2228.03	1416.24	358.047	-2177.27	1202.64	312.322	-2359.91	1349.91	301.586	-2417.12	1215.9	264.676	-2151.94	1249.65	486.2	-2321.33	1380.25	543.417	-2375.54	1160.03	546.162	-2387.8	1092.54	543.047	-2505.04	1040.52	513.996	-2564.41	957.242	570.291	-2533.11	924.575	572.42	-2625.77	887.592
771	0	403.13	-2447.34	1545.34	310.297	-2482.03	1549.97	367.541	-2285.53	1593.31	258.731	-2311.16	1598.82	320.282	-2237.86	1414.36	356.912	-2187.18	1200.77	311.498	-2369.86	1348.2	300.876	-2427.07	1214.22	263.522	-2162.04	1247.77	485.374	-2330.92	1378.35	542.425	-2385.57	1158.24	545.253	-2398.3	1090.91	541.862	-2516.14	1039.67	512.463	-2576.08	956.902	568.942	-2545.13	923.925	570.595	-2638.17	887.776
772	0	402.062	-2457.29	1543.72	309.454	-2492.07	1548.33	366.524	-2295.37	1591.55	257.732	-2320.99	1596.95	319.254	-2247.76	1412.46	355.739	-2197.26	1198.86	310.589	-2379.92	1346.52	300.068	-2437.17	1212.57	262.335	-2172.28	1245.84	484.477	-2340.65	1376.46	541.371	-2395.62	1156.42	544.282	-2408.73	1089.25	540.707	-2527.07	1038.62	511.043	-2587.46	956.279	567.671	-2556.79	923.049	568.928	-2650.14	887.593
773	0	400.938	-2467.3	1542.14	308.562	-2502.15	1546.74	365.432	-2305.26	1589.81	256.659	-2330.87	1595.11	318.168	-2257.75	1410.57	354.533	-2207.51	1196.93	309.598	-2390.09	1344.88	299.16	-2447.42	1210.97	261.122	-2182.65	1243.87	483.512	-2350.52	1374.6	540.26	-2405.69	1154.57	543.252	-2419.1	1087.54	539.59	-2537.83	1037.39	509.75	-2598.56	955.368	566.491	-2568.08	921.948	567.44	-2661.69	887.033
774	0	399.765	-2477.36	1540.62	307.619	-2512.3	1545.23	364.272	-2315.19	1588.1	255.516	-2340.81	1593.32	317.031	-2267.82	1408.69	353.3	-2217.93	1194.98	308.527	-2400.37	1343.3	298.153	-2457.83	1209.42	259.89	-2193.15	1241.88	482.482	-2360.55	1372.77	539.096	-2415.8	1152.7	542.165	-2429.42	1085.8	538.518	-2548.42	1035.97	508.598	-2609.4	954.17	565.412	-2579	920.625	566.151	-2672.82	886.086
775	0	398.546	-2487.51	1539.17	306.625	-2522.51	1543.8	363.049	-2325.18	1586.45	254.311	-2350.82	1591.6	315.846	-2277.99	1406.85	352.045	-2228.53	1193.04	307.38	-2410.77	1341.79	297.046	-2468.39	1207.94	258.643	-2203.79	1239.88	481.39	-2370.74	1370.99	537.884	-2425.97	1150.85	541.023	-2439.72	1084.04	537.497	-2558.86	1034.38	507.597	-2619.96	952.69	564.44	-2589.55	919.087	565.075	-2683.52	884.753
776	0	397.287	-2497.73	1537.81	305.577	-2532.78	1542.46	361.772	-2335.23	1584.86	253.047	-2360.89	1589.96	314.62	-2288.23	1405.06	350.772	-2239.31	1191.1	306.164	-2421.29	1340.36	295.844	-2479.11	1206.53	257.387	-2214.57	1237.88	480.242	-2381.08	1369.27	536.626	-2436.2	1149.01	539.828	-2450	1082.27	536.531	-2569.15	1032.64	506.755	-2630.27	950.936	563.582	-2599.73	917.345	564.224	-2693.79	883.035
777	0	395.994	-2508.04	1536.56	304.475	-2543.11	1541.24	360.45	-2345.34	1583.34	251.734	-2371.04	1588.41	313.359	-2298.57	1403.34	349.484	-2250.26	1189.2	304.886	-2431.92	1339.02	294.551	-2490	1205.23	256.126	-2225.47	1235.91	479.044	-2391.58	1367.62	535.328	-2446.49	1147.21	538.581	-2460.25	1080.51	535.623	-2579.28	1030.75	506.078	-2640.31	948.921	562.841	-2609.55	915.413	563.604	-2703.62	880.945
778	0	394.67	-2518.44	1535.43	303.319	-2553.52	1540.14	359.091	-2355.53	1581.93	250.38	-2381.25	1586.98	312.069	-2309	1401.72	348.186	-2261.38	1187.35	303.554	-2442.66	1337.79	293.177	-2501.04	1204.03	254.863	-2236.5	1233.99	477.801	-2402.23	1366.06	533.991	-2456.86	1145.46	537.286	-2470.5	1078.78	534.778	-2589.26	1028.73	505.568	-2650.08	946.665	562.218	-2618.98	913.31	563.219	-2713.01	878.498
779	0	393.322	-2528.94	1534.43	302.108	-2563.99	1539.18	357.707	-2365.81	1580.63	248.992	-2391.54	1585.68	310.756	-2319.52	1400.2	346.878	-2272.67	1185.57	302.178	-2453.52	1336.69	291.731	-2512.23	1202.96	253.6	-2247.65	1232.14	476.522	-2413.03	1364.61	532.622	-2467.28	1143.78	535.945	-2480.72	1077.08	533.996	-2599.07	1026.6	505.224	-2659.58	944.191	561.71	-2628.04	911.057	563.065	-2721.94	875.72
780	0	391.953	-2539.55	1533.59	300.846	-2574.53	1538.37	356.306	-2376.16	1579.45	247.581	-2401.9	1584.52	309.427	-2330.13	1398.82	345.562	-2284.1	1183.9	300.772	-2464.48	1335.72	290.229	-2523.57	1202.02	252.339	-2258.91	1230.4	475.215	-2423.96	1363.27	531.224	-2477.75	1142.2	534.562	-2490.91	1075.45	533.28	-2608.7	1024.39	505.043	-2668.8	941.526	561.314	-2636.72	908.682	563.138	-2730.42	872.639
781	0	390.568	-2550.25	1532.92	299.533	-2585.13	1537.74	354.9	-2386.61	1578.43	246.156	-2412.34	1583.52	308.088	-2340.82	1397.59	344.239	-2295.66	1182.36	299.346	-2475.53	1334.9	288.685	-2535.05	1201.24	251.077	-2270.26	1228.79	473.889	-2435.01	1362.07	529.802	-2488.26	1140.72	533.142	-2501.06	1073.89	532.63	-2618.16	1022.13	505.019	-2677.73	938.702	561.024	-2645.01	906.211	563.425	-2738.41	869.293
782	0	389.171	-2561.07	1532.42	298.172	-2595.81	1537.27	353.498	-2397.16	1577.57	244.727	-2422.84	1582.68	306.746	-2351.59	1396.53	342.906	-2307.34	1180.98	297.917	-2486.68	1334.25	287.117	-2546.64	1200.62	249.816	-2281.71	1227.34	472.552	-2446.17	1361.03	528.363	-2498.79	1139.37	531.69	-2511.14	1072.43	532.046	-2627.42	1019.82	505.142	-2686.36	935.755	560.831	-2652.91	903.676	563.913	-2745.93	865.723
783	0	387.766	-2571.98	1532.12	296.768	-2606.54	1537	352.11	-2407.79	1576.88	243.305	-2433.42	1582.03	305.406	-2362.44	1395.66	341.563	-2319.11	1179.79	296.499	-2497.91	1333.78	285.546	-2558.34	1200.19	248.551	-2293.22	1226.07	471.215	-2457.41	1360.14	526.912	-2509.31	1138.17	530.214	-2521.14	1071.09	531.529	-2636.46	1017.52	505.403	-2694.68	932.722	560.727	-2660.41	901.109	564.582	-2752.95	861.976
784	0	386.358	-2582.98	1532.02	295.325	-2617.33	1536.91	350.748	-2418.53	1576.38	241.899	-2444.05	1581.56	304.074	-2373.36	1395	340.206	-2330.94	1178.81	295.106	-2509.21	1333.48	283.993	-2570.12	1199.93	247.279	-2304.78	1225.03	469.889	-2468.72	1359.43	525.457	-2519.79	1137.12	528.72	-2531.01	1069.88	531.078	-2645.28	1015.23	505.786	-2702.68	929.642	560.7	-2667.52	898.544	565.411	-2759.47	858.099
785	0	384.95	-2594.08	1532.12	293.847	-2628.18	1537.03	349.419	-2429.36	1576.08	240.519	-2454.75	1581.28	302.756	-2384.34	1394.56	338.834	-2342.81	1178.07	293.755	-2520.56	1333.38	282.478	-2581.96	1199.88	245.995	-2316.38	1224.22	468.584	-2480.07	1358.91	524.007	-2530.2	1136.24	527.219	-2540.75	1068.82	530.692	-2653.85	1012.98	506.276	-2710.34	926.555	560.737	-2674.22	896.012	566.377	-2765.5	854.145
786	0	383.547	-2605.27	1532.44	292.341	-2639.08	1537.34	348.132	-2440.28	1575.99	239.176	-2465.5	1581.21	301.456	-2395.38	1394.34	337.442	-2354.67	1177.6	292.461	-2531.96	1333.48	281.025	-2593.85	1200.02	244.696	-2327.99	1223.68	467.31	-2491.44	1358.59	522.57	-2540.5	1135.53	525.718	-2550.3	1067.93	530.37	-2662.16	1010.81	506.855	-2717.66	923.5	560.827	-2680.53	893.544	567.453	-2771.03	850.165
787	0	382.153	-2616.53	1532.97	290.813	-2650.02	1537.84	346.896	-2451.29	1576.11	237.877	-2476.3	1581.33	300.18	-2406.46	1394.36	336.028	-2366.51	1177.39	291.238	-2543.38	1333.78	279.654	-2605.74	1200.35	243.375	-2339.6	1223.42	466.078	-2502.8	1358.46	521.156	-2550.66	1135.01	524.229	-2559.65	1067.21	530.11	-2670.18	1008.73	507.505	-2724.62	920.514	560.955	-2686.44	891.171	568.613	-2776.06	846.21
788	0	380.774	-2627.86	1533.7	289.268	-2661	1538.54	345.719	-2462.38	1576.44	236.631	-2487.13	1581.65	298.932	-2417.57	1394.62	334.588	-2378.27	1177.48	290.098	-2554.81	1334.27	278.384	-2617.62	1200.89	242.027	-2351.18	1223.44	464.898	-2514.11	1358.53	519.774	-2560.63	1134.67	522.759	-2568.75	1066.68	529.911	-2677.92	1006.76	508.206	-2731.22	917.631	561.107	-2691.96	888.918	569.831	-2780.62	842.326
789	0	379.414	-2639.26	1534.64	287.715	-2672	1539.42	344.607	-2473.54	1576.99	235.445	-2498	1582.16	297.718	-2428.7	1395.12	333.122	-2389.95	1177.85	289.054	-2566.23	1334.96	277.231	-2629.45	1201.62	240.647	-2362.72	1223.77	463.777	-2525.36	1358.8	518.434	-2570.38	1134.52	521.318	-2577.59	1066.34	529.771	-2685.34	1004.92	508.938	-2737.46	914.882	561.271	-2697.1	886.808	571.08	-2784.71	838.56
790	0	378.079	-2650.7	1535.76	286.16	-2683.01	1540.47	343.567	-2484.76	1577.74	234.327	-2508.89	1582.86	296.54	-2439.84	1395.85	331.626	-2401.5	1178.5	288.114	-2577.63	1335.84	276.21	-2641.22	1202.54	239.232	-2374.2	1224.38	462.724	-2536.51	1359.25	517.142	-2579.87	1134.54	519.915	-2586.13	1066.18	529.688	-2692.44	1003.22	509.683	-2743.34	912.293	561.434	-2701.86	884.858	572.337	-2788.37	834.951
791	0	376.771	-2662.18	1537.07	284.612	-2694.04	1541.67	342.603	-2496.03	1578.69	233.28	-2519.8	1583.73	295.402	-2450.97	1396.8	330.101	-2412.9	1179.44	287.284	-2588.99	1336.9	275.328	-2652.9	1203.63	237.777	-2385.6	1225.29	461.743	-2547.53	1359.88	515.908	-2589.06	1134.72	518.554	-2594.34	1066.2	529.658	-2699.2	1001.67	510.423	-2748.87	909.885	561.583	-2706.28	883.083	573.578	-2791.62	831.533
792	0	375.497	-2673.68	1538.53	283.079	-2705.07	1543.02	341.72	-2507.35	1579.82	232.311	-2530.71	1584.77	294.307	-2462.08	1397.96	328.548	-2424.13	1180.63	286.568	-2600.29	1338.11	274.589	-2664.46	1204.88	236.28	-2396.92	1226.47	460.839	-2558.41	1360.67	514.737	-2597.93	1135.06	517.243	-2602.21	1066.4	529.68	-2705.63	1000.29	511.145	-2754.05	907.674	561.708	-2710.34	881.49	574.785	-2794.48	828.333
793	0	374.26	-2685.2	1540.14	281.568	-2716.08	1544.49	340.92	-2518.69	1581.12	231.421	-2541.62	1585.95	293.257	-2473.16	1399.32	326.967	-2435.18	1182.05	285.966	-2611.52	1339.48	273.993	-2675.89	1206.28	234.741	-2408.14	1227.91	460.012	-2569.11	1361.6	513.634	-2606.46	1135.53	515.983	-2609.72	1066.75	529.749	-2711.71	999.06	511.834	-2758.89	905.67	561.798	-2714.09	880.084	575.942	-2797	825.373
794	0	373.063	-2696.72	1541.87	280.088	-2727.07	1546.06	340.207	-2530.05	1582.58	230.615	-2552.52	1587.27	292.254	-2484.19	1400.85	325.361	-2446.04	1183.69	285.475	-2622.66	1340.97	273.533	-2687.17	1207.81	233.161	-2419.25	1229.57	459.262	-2579.63	1362.65	512.6	-2614.61	1136.12	514.777	-2616.86	1067.25	529.862	-2717.45	997.993	512.483	-2763.41	903.878	561.845	-2717.53	878.863	577.036	-2799.21	822.668
795	0	371.911	-2708.23	1543.7	278.645	-2738.04	1547.72	339.581	-2541.41	1584.16	229.893	-2563.41	1588.7	291.298	-2495.16	1402.53	323.733	-2456.7	1185.51	285.088	-2633.71	1342.58	273.197	-2698.29	1209.45	231.54	-2430.26	1231.44	458.588	-2589.94	1363.79	511.637	-2622.38	1136.82	513.626	-2623.63	1067.88	530.015	-2722.85	997.08	513.084	-2767.62	902.297	561.84	-2720.69	877.823	578.059	-2801.14	820.224
796	0	370.806	-2719.71	1545.6	277.246	-2748.96	1549.44	339.043	-2552.75	1585.85	229.255	-2574.26	1590.22	290.391	-2506.08	1404.34	322.087	-2467.15	1187.47	284.795	-2644.65	1344.27	272.971	-2709.23	1211.17	229.885	-2441.15	1233.49	457.984	-2600.04	1365	510.741	-2629.76	1137.6	512.526	-2630.02	1068.62	530.203	-2727.91	996.311	513.634	-2771.55	900.923	561.779	-2723.59	876.953	579.005	-2802.83	818.044
797	0	369.75	-2731.15	1547.56	275.895	-2759.84	1551.21	338.59	-2564.07	1587.62	228.7	-2585.08	1591.81	289.53	-2516.92	1406.26	320.43	-2477.42	1189.54	284.585	-2655.47	1346.02	272.835	-2720.01	1212.97	228.199	-2451.93	1235.67	457.444	-2609.93	1366.26	509.909	-2636.76	1138.44	511.473	-2636.04	1069.44	530.42	-2732.65	995.676	514.132	-2775.22	899.744	561.655	-2726.24	876.242	579.872	-2804.32	816.121
798	0	368.745	-2742.55	1549.55	274.598	-2770.66	1553	338.221	-2575.35	1589.44	228.227	-2595.86	1593.45	288.717	-2527.69	1408.24	318.766	-2487.51	1191.69	284.443	-2666.17	1347.81	272.77	-2730.62	1214.8	226.489	-2462.6	1237.96	456.96	-2619.61	1367.54	509.134	-2643.37	1139.33	510.463	-2641.7	1070.33	530.661	-2737.09	995.16	514.58	-2778.65	898.746	561.465	-2728.68	875.672	580.661	-2805.63	814.445
799	0	367.793	-2753.89	1551.55	273.357	-2781.42	1554.8	337.932	-2586.59	1591.29	227.831	-2606.58	1595.11	287.948	-2538.37	1410.27	317.103	-2497.42	1193.89	284.353	-2676.75	1349.6	272.754	-2741.06	1216.66	224.763	-2473.17	1240.31	456.524	-2629.09	1368.81	508.408	-2649.62	1140.24	509.487	-2647.02	1071.27	530.918	-2741.22	994.749	514.981	-2781.86	897.912	561.207	-2730.92	875.228	581.374	-2806.79	812.998
800	0	366.895	-2765.17	1553.53	272.176	-2792.12	1556.58	337.72	-2597.76	1593.13	227.509	-2617.25	1596.78	287.221	-2548.98	1412.31	315.445	-2507.18	1196.09	284.301	-2687.2	1351.39	272.765	-2751.35	1218.52	223.028	-2483.65	1242.7	456.126	-2638.36	1370.04	507.719	-2655.52	1141.16	508.536	-2652.02	1072.23	531.187	-2745.08	994.423	515.342	-2784.87	897.22	560.878	-2732.99	874.888	582.017	-2807.83	811.76
801	0	366.049	-2776.36	1555.47	271.056	-2802.74	1558.33	337.578	-2608.86	1594.94	227.257	-2627.85	1598.42	286.535	-2559.5	1414.35	313.799	-2516.81	1198.26	284.269	-2697.53	1353.13	272.784	-2761.49	1220.35	221.292	-2494.03	1245.09	455.757	-2647.47	1371.23	507.058	-2661.11	1142.07	507.602	-2656.72	1073.2	531.459	-2748.69	994.165	515.668	-2787.71	896.648	560.479	-2734.89	874.633	582.595	-2808.76	810.705
802	0	365.255	-2787.48	1557.36	269.998	-2813.28	1560.04	337.502	-2619.89	1596.7	227.067	-2638.39	1600.02	285.885	-2569.94	1416.35	312.171	-2526.32	1200.38	284.244	-2707.73	1354.8	272.793	-2771.5	1222.13	219.564	-2504.33	1247.44	455.408	-2656.4	1372.34	506.412	-2666.42	1142.96	506.674	-2661.15	1074.17	531.727	-2752.07	993.956	515.966	-2790.4	896.169	560.009	-2736.66	874.442	583.114	-2809.6	809.805
803	0	364.512	-2798.52	1559.17	269	-2823.75	1561.68	337.485	-2630.83	1598.36	226.935	-2648.85	1601.56	285.267	-2580.3	1418.28	310.563	-2535.72	1202.42	284.211	-2717.82	1356.39	272.778	-2781.39	1223.83	217.85	-2514.56	1249.72	455.072	-2665.2	1373.36	505.769	-2671.48	1143.81	505.742	-2665.36	1075.11	531.983	-2755.25	993.777	516.244	-2792.95	895.758	559.47	-2738.3	874.294	583.578	-2810.36	809.029
804	0	363.818	-2809.47	1560.88	268.062	-2834.14	1563.24	337.52	-2641.69	1599.93	226.853	-2659.24	1603	284.678	-2590.59	1420.12	308.982	-2545.05	1204.34	284.161	-2727.8	1357.86	272.73	-2791.19	1225.42	216.158	-2524.71	1251.91	454.742	-2673.88	1374.28	505.118	-2676.33	1144.6	504.799	-2669.37	1076.02	532.221	-2758.26	993.608	516.506	-2795.39	895.39	558.863	-2739.85	874.171	583.994	-2811.04	808.345
805	0	363.17	-2820.33	1562.48	267.179	-2844.45	1564.71	337.6	-2652.46	1601.36	226.815	-2669.54	1604.35	284.114	-2600.82	1421.86	307.428	-2554.31	1206.13	284.083	-2737.68	1359.2	272.645	-2800.89	1226.89	214.494	-2534.81	1253.98	454.415	-2682.45	1375.08	504.448	-2681.03	1145.33	503.836	-2673.22	1076.87	532.434	-2761.12	993.433	516.759	-2797.73	895.036	558.19	-2741.3	874.054	584.364	-2811.64	807.721
806	0	362.565	-2831.1	1563.96	266.349	-2854.69	1566.07	337.717	-2663.13	1602.64	226.814	-2679.76	1605.56	283.571	-2610.97	1423.46	305.905	-2563.52	1207.77	283.973	-2747.47	1360.39	272.524	-2810.51	1228.21	212.865	-2544.84	1255.9	454.087	-2690.95	1375.75	503.751	-2685.62	1145.99	502.848	-2676.97	1077.66	532.613	-2763.87	993.233	517.006	-2799.99	894.673	557.453	-2742.68	873.926	584.69	-2812.18	807.124
807	0	361.999	-2841.78	1565.3	265.567	-2864.85	1567.31	337.865	-2673.72	1603.76	226.842	-2689.89	1606.64	283.045	-2621.07	1424.92	304.416	-2572.7	1209.25	283.827	-2757.18	1361.42	272.371	-2820.07	1229.37	211.276	-2554.82	1257.65	453.758	-2699.39	1376.28	503.019	-2690.14	1146.57	501.829	-2680.65	1078.39	532.755	-2766.54	992.995	517.249	-2802.18	894.277	556.657	-2744.01	873.773	584.973	-2812.63	806.526
808	0	361.469	-2852.39	1566.49	264.829	-2874.94	1568.43	338.035	-2684.22	1604.7	226.893	-2699.94	1607.57	282.535	-2631.13	1426.23	302.963	-2581.85	1210.55	283.646	-2766.82	1362.27	272.195	-2829.57	1230.33	209.733	-2564.76	1259.23	453.426	-2707.8	1376.68	502.249	-2694.65	1147.06	500.777	-2684.31	1079.04	532.853	-2769.16	992.704	517.489	-2804.32	893.826	555.804	-2745.3	873.584	585.211	-2813.02	805.899
809	0	360.972	-2862.92	1567.53	264.131	-2884.97	1569.41	338.221	-2694.64	1605.45	226.961	-2709.9	1608.33	282.037	-2641.13	1427.36	301.55	-2591	1211.66	283.433	-2776.4	1362.94	272.006	-2839.02	1231.1	208.241	-2574.65	1260.62	453.094	-2716.19	1376.94	501.439	-2699.18	1147.45	499.689	-2688	1079.61	532.902	-2771.76	992.349	517.723	-2806.42	893.302	554.898	-2746.56	873.348	585.402	-2813.33	805.218
810	0	360.504	-2873.37	1568.41	263.47	-2894.94	1570.24	338.418	-2704.99	1606.02	227.039	-2719.78	1608.93	281.552	-2651.1	1428.32	300.18	-2600.15	1212.58	283.192	-2785.94	1363.42	271.816	-2848.42	1231.66	206.805	-2584.49	1261.8	452.765	-2724.58	1377.06	500.589	-2703.78	1147.75	498.567	-2691.75	1080.09	532.901	-2774.38	991.921	517.948	-2808.49	892.688	553.942	-2747.81	873.059	585.541	-2813.56	804.464
811	0	360.061	-2883.77	1569.12	262.844	-2904.86	1570.93	338.618	-2715.26	1606.4	227.122	-2729.58	1609.36	281.08	-2661.04	1429.11	298.86	-2609.31	1213.32	282.93	-2795.44	1363.71	271.634	-2857.79	1232.01	205.433	-2594.3	1262.79	452.443	-2732.98	1377.04	499.702	-2708.5	1147.95	497.412	-2695.61	1080.48	532.846	-2777.05	991.414	518.159	-2810.56	891.974	552.94	-2749.07	872.714	585.625	-2813.72	803.622
812	0	359.642	-2894.1	1569.66	262.25	-2914.75	1571.46	338.818	-2725.48	1606.59	227.206	-2739.3	1609.62	280.621	-2670.96	1429.72	297.597	-2618.48	1213.87	282.656	-2804.93	1363.82	271.469	-2867.11	1232.15	204.129	-2604.07	1263.58	452.133	-2741.42	1376.9	498.784	-2713.36	1148.05	496.228	-2699.63	1080.79	532.738	-2779.79	990.823	518.35	-2812.62	891.149	551.897	-2750.35	872.311	585.646	-2813.81	802.68
813	0	359.244	-2904.39	1570.04	261.687	-2924.6	1571.85	339.013	-2735.64	1606.6	227.286	-2748.94	1609.7	280.179	-2680.86	1430.15	296.398	-2627.67	1214.24	282.379	-2814.39	1363.75	271.327	-2876.4	1232.08	202.902	-2613.81	1264.17	451.843	-2749.91	1376.64	497.844	-2718.41	1148.06	495.022	-2703.83	1081	532.576	-2782.63	990.145	518.514	-2814.7	890.211	550.817	-2751.67	871.851	585.6	-2813.84	801.634
814	0	358.864	-2914.64	1570.26	261.153	-2934.43	1572.07	339.2	-2745.74	1606.44	227.361	-2758.52	1609.62	279.756	-2690.75	1430.41	295.272	-2636.88	1214.45	282.109	-2823.86	1363.52	271.211	-2885.67	1231.81	201.758	-2623.52	1264.57	451.581	-2758.45	1376.27	496.89	-2723.66	1147.97	493.799	-2708.25	1081.13	532.362	-2785.61	989.382	518.644	-2816.81	889.158	549.703	-2753.05	871.338	585.48	-2813.83	800.482
815	0	358.502	-2924.85	1570.32	260.648	-2944.25	1572.15	339.376	-2755.81	1606.11	227.427	-2768.03	1609.38	279.357	-2700.63	1430.51	294.229	-2646.11	1214.5	281.856	-2833.33	1363.12	271.123	-2894.91	1231.35	200.705	-2633.19	1264.79	451.355	-2767.06	1375.8	495.934	-2729.14	1147.79	492.57	-2712.92	1081.17	532.099	-2788.73	988.534	518.733	-2818.96	887.993	548.562	-2754.51	870.779	585.282	-2813.79	799.228
816	0	358.157	-2935.03	1570.23	260.171	-2954.05	1572.08	339.54	-2765.85	1605.63	227.483	-2777.49	1608.98	278.987	-2710.51	1430.45	293.279	-2655.36	1214.41	281.628	-2842.82	1362.57	271.067	-2904.14	1230.72	199.75	-2642.85	1264.85	451.174	-2775.75	1375.24	494.989	-2734.87	1147.53	491.344	-2717.85	1081.13	531.791	-2792.02	987.606	518.777	-2821.18	886.724	547.398	-2756.05	870.18	585.002	-2813.74	797.881
817	0	357.828	-2945.19	1570.01	259.723	-2963.86	1571.86	339.691	-2775.85	1605.01	227.53	-2786.9	1608.43	278.651	-2720.4	1430.24	292.43	-2664.63	1214.19	281.437	-2852.32	1361.89	271.043	-2913.36	1229.93	198.898	-2652.49	1264.75	451.049	-2784.53	1374.61	494.065	-2740.86	1147.19	490.13	-2723.07	1081.02	531.443	-2795.51	986.603	518.771	-2823.48	885.359	546.217	-2757.71	869.549	584.638	-2813.71	796.451
818	0	357.517	-2955.33	1569.64	259.303	-2973.67	1571.51	339.829	-2785.83	1604.26	227.568	-2796.26	1607.74	278.355	-2730.28	1429.89	291.693	-2673.93	1213.85	281.289	-2861.86	1361.08	271.054	-2922.59	1229	198.155	-2662.11	1264.51	450.988	-2793.39	1373.91	493.175	-2747.11	1146.78	488.941	-2728.59	1080.84	531.058	-2799.2	985.53	518.712	-2825.87	883.909	545.023	-2759.51	868.895	584.189	-2813.73	794.951
819	0	357.225	-2965.46	1569.16	258.913	-2983.49	1571.02	339.954	-2795.79	1603.4	227.598	-2805.58	1606.92	278.103	-2740.18	1429.41	291.072	-2683.25	1213.4	281.193	-2871.42	1360.17	271.102	-2931.84	1227.96	197.525	-2671.72	1264.13	451.001	-2802.35	1373.16	492.331	-2753.64	1146.3	487.785	-2734.4	1080.6	530.644	-2803.12	984.394	518.599	-2828.39	882.389	543.821	-2761.45	868.226	583.657	-2813.82	793.398
820	0	356.953	-2975.59	1568.55	258.555	-2993.32	1570.41	340.067	-2805.74	1602.43	227.623	-2814.88	1605.98	277.903	-2750.08	1428.81	290.574	-2692.59	1212.87	281.155	-2881.02	1359.15	271.192	-2941.12	1226.82	197.01	-2681.33	1263.64	451.095	-2811.41	1372.37	491.545	-2760.44	1145.75	486.673	-2740.51	1080.29	530.205	-2807.26	983.202	518.434	-2831.04	880.812	542.618	-2763.56	867.552	583.044	-2814.02	791.808
821	0	356.704	-2985.71	1567.84	258.229	-3003.17	1569.67	340.17	-2815.66	1601.36	227.644	-2824.16	1604.92	277.757	-2760	1428.09	290.203	-2701.95	1212.25	281.181	-2890.66	1358.06	271.327	-2950.44	1225.59	196.613	-2690.94	1263.04	451.278	-2820.58	1371.54	490.826	-2767.51	1145.14	485.613	-2746.92	1079.93	529.747	-2811.64	981.959	518.219	-2833.85	879.192	541.416	-2765.85	866.88	582.356	-2814.36	790.197
822	0	356.478	-2995.82	1567.04	257.938	-3013.04	1568.82	340.264	-2825.58	1600.2	227.666	-2833.42	1603.74	277.672	-2769.92	1427.27	289.96	-2711.34	1211.57	281.277	-2900.34	1356.88	271.513	-2959.81	1224.3	196.334	-2700.57	1262.35	451.555	-2829.85	1370.68	490.184	-2774.84	1144.49	484.614	-2753.63	1079.52	529.276	-2816.27	980.674	517.956	-2836.83	877.543	540.221	-2768.35	866.217	581.598	-2814.88	788.581
823	0	356.28	-3005.93	1566.14	257.682	-3022.92	1567.86	340.351	-2835.48	1598.96	227.689	-2842.69	1602.47	277.652	-2779.87	1426.34	289.848	-2720.75	1210.81	281.446	-2910.07	1355.64	271.756	-2969.24	1222.97	196.175	-2710.2	1261.56	451.93	-2839.23	1369.8	489.629	-2782.42	1143.78	483.682	-2760.62	1079.06	528.796	-2821.15	979.35	517.652	-2840	875.878	539.037	-2771.07	865.569	580.776	-2815.6	786.975
824	0	356.111	-3016.05	1565.16	257.465	-3032.83	1566.8	340.433	-2845.37	1597.65	227.718	-2851.95	1601.09	277.699	-2789.82	1425.32	289.865	-2730.19	1210.01	281.692	-2919.85	1354.34	272.061	-2978.74	1221.59	196.134	-2719.86	1260.68	452.408	-2848.71	1368.91	489.167	-2790.24	1143.02	482.825	-2767.88	1078.55	528.312	-2826.28	977.994	517.311	-2843.37	874.21	537.867	-2774.01	864.939	579.897	-2816.56	785.39
825	0	355.972	-3026.16	1564.1	257.287	-3042.75	1565.64	340.512	-2855.25	1596.27	227.755	-2861.22	1599.62	277.817	-2799.79	1424.2	290.013	-2739.66	1209.15	282.016	-2929.68	1352.98	272.433	-2988.31	1220.19	196.213	-2729.54	1259.73	452.989	-2858.3	1367.99	488.804	-2798.3	1142.22	482.045	-2775.42	1078.01	527.827	-2831.67	976.61	516.939	-2846.97	872.548	536.714	-2777.2	864.332	578.968	-2817.78	783.839
826	0	355.867	-3036.27	1562.97	257.149	-3052.7	1564.38	340.589	-2865.12	1594.83	227.802	-2870.5	1598.06	278.008	-2809.78	1422.99	290.289	-2749.15	1208.25	282.422	-2939.56	1351.58	272.876	-2997.96	1218.77	196.411	-2739.25	1258.7	453.673	-2868	1367.07	488.546	-2806.58	1141.38	481.348	-2783.22	1077.42	527.345	-2837.33	975.201	516.54	-2850.79	870.899	535.581	-2780.63	863.751	577.996	-2819.27	782.328
827	0	355.796	-3046.39	1561.77	257.054	-3062.66	1563.03	340.666	-2874.98	1593.32	227.86	-2879.81	1596.41	278.274	-2819.78	1421.7	290.693	-2758.67	1207.3	282.91	-2949.49	1350.13	273.394	-3007.68	1217.33	196.727	-2748.99	1257.6	454.461	-2877.8	1366.12	488.395	-2815.08	1140.5	480.737	-2791.27	1076.79	526.869	-2843.24	973.769	516.119	-2854.86	869.271	534.469	-2784.32	863.196	576.985	-2821.07	780.866
828	0	355.761	-3056.5	1560.5	257.001	-3072.64	1561.59	340.744	-2884.82	1591.75	227.931	-2889.13	1594.66	278.616	-2829.79	1420.31	291.224	-2768.23	1206.31	283.482	-2959.47	1348.63	273.989	-3017.48	1215.88	197.162	-2758.76	1256.42	455.351	-2887.71	1365.16	488.353	-2823.8	1139.58	480.212	-2799.57	1076.12	526.399	-2849.41	972.316	515.68	-2859.17	867.668	533.38	-2788.28	862.668	575.94	-2823.18	779.455
829	0	355.762	-3066.61	1559.17	256.992	-3082.65	1560.06	340.825	-2894.66	1590.12	228.016	-2898.47	1592.83	279.035	-2839.82	1418.84	291.882	-2777.81	1205.29	284.136	-2969.51	1347.09	274.662	-3027.36	1214.43	197.715	-2768.56	1255.18	456.342	-2897.73	1364.19	488.422	-2832.72	1138.62	479.776	-2808.12	1075.41	525.937	-2855.85	970.844	515.224	-2863.73	866.092	532.315	-2792.5	862.169	574.863	-2825.6	778.1
830	0	355.8	-3076.73	1557.76	257.027	-3092.67	1558.44	340.907	-2904.49	1588.43	228.115	-2907.83	1590.91	279.531	-2849.86	1417.29	292.665	-2787.42	1204.23	284.875	-2979.6	1345.52	275.415	-3037.33	1212.96	198.385	-2778.41	1253.86	457.436	-2907.85	1363.2	488.603	-2841.84	1137.62	479.429	-2816.91	1074.66	525.484	-2862.54	969.352	514.755	-2868.55	864.546	531.274	-2796.99	861.698	573.757	-2828.36	776.8
831	0	355.875	-3086.84	1556.3	257.105	-3102.72	1556.73	340.993	-2914.31	1586.67	228.228	-2917.22	1588.91	280.104	-2859.92	1415.65	293.574	-2797.06	1203.13	285.698	-2989.75	1343.9	276.247	-3047.37	1211.49	199.174	-2788.28	1252.48	458.63	-2918.07	1362.19	488.895	-2851.17	1136.59	479.173	-2825.94	1073.87	525.04	-2869.5	967.842	514.271	-2873.62	863.029	530.258	-2801.74	861.255	572.623	-2831.44	775.557
832	0	355.987	-3096.96	1554.77	257.228	-3112.78	1554.94	341.081	-2924.12	1584.86	228.355	-2926.63	1586.81	280.756	-2870	1413.92	294.608	-2806.73	1201.99	286.604	-2999.95	1342.24	277.158	-3057.49	1210.01	200.081	-2798.2	1251.02	459.925	-2928.41	1361.17	489.299	-2860.7	1135.52	479.006	-2835.22	1073.04	524.605	-2876.72	966.312	513.775	-2878.95	861.543	529.267	-2806.77	860.841	571.46	-2834.85	774.372
[truncated: 69 more columns]

## Sheet: Sheet2
Devices
		025370 - Force			025370 - Moment			025370 - CoP			027571 - Force			027571 - Moment			027571 - CoP			037720 - Force			037720 - Moment			037720 - CoP
Frame	Sub Frame	Fx	Fy	Fz	Mx	My	Mz	Cx	Cy	Cz	Fx	Fy	Fz	Mx	My	Mz	Cx	Cy	Cz	Fx	Fy	Fz	Mx	My	Mz	Cx	Cy	Cz
		N	N	N	N.mm	N.mm	N.mm	mm	mm	mm	N	N	N	N.mm	N.mm	N.mm	mm	mm	mm	N	N	N	N.mm	N.mm	N.mm	mm	mm	mm
254	0	0	0	0	0	0	0	200	300	0	0	0	0	0	0	0	200	903	0	0	0	0	0	0	0	603	903	0
254	1	0	0	0	0	0	0	200	300	0	0	0	0	0	0	0	200	903	0	0	0	0	0	0	0	603	903	0
254	2	0	0	0	0	0	0	200	300	0	0	0	0	0	0	0	200	903	0	0	0	0	0	0	0	603	903	0
254	3	0	0	0	0	0	0	200	300	0	0	0	0	0	0	0	200	903	0	0	0	0	0	0	0	603	903	0
254	4	0	0	0	0	0	0	200	300	0	0	0	0	0	0	0	200	903	0	0	0	0	0	0	0	603	903	0
254	5	0	0	0	0	0	0	200	300	0	0	0	0	0	0	0	200	903	0	0	0	0	0	0	0	603	903	0
254	6	0	0	0	0	0	0	200	300	0	0	0	0	0	0	0	200	903	0	0	0	0	0	0	0	603	903	0
254	7	0	0	0	0	0	0	200	300	0	0	0	0	0	0	0	200	903	0	0	0	0	0	0	0	603	903	0
254	8	0	0	0	0	0	0	200	300	0	0	0	0	0	0	0	200	903	0	0	0	0	0	0	0	603	903	0
254	9	0	0	0	0	0	0	200	300	0	0	0	0	0	0	0	200	903	0	0	0	0	0	0	0	603	903	0
255	0	0	0	0	0	0	0	200	300	0	0	0	0	0	0	0	200	903	0	0	0	0	0	0	0	603	903	0
255	1	0	0	0	0	0	0	200	300	0	0	0	0	0	0	0	200	903	0	0	0	0	0	0	0	603	903	0
255	2	0	0	0	0	0	0	200	300	0	0	0	0	0	0	0	200	903	0	0	0	0	0	0	0	603	903	0
255	3	0	0	0	0	0	0	200	300	0	0	0	0	0	0	0	200	903	0	0	0	0	0	0	0	603	903	0
255	4	0	0	0	0	0	0	200	300	0	0	0	0	0	0	0	200	903	0	0	0	0	0	0	0	603	903	0
255	5	0	0	0	0	0	0	200	300	0	0	0	0	0	0	0	200	903	0	0	0	0	0	0	0	603	903	0
255	6	0	0	0	0	0	0	200	300	0	0	0	0	0	0	0	200	903	0	0	0	0	0	0	0	603	903	0
255	7	0	0	0	0	0	0	200	300	0	0	0	0	0	0	0	200	903	0	0	0	0	0	0	0	603	903	0
255	8	0	0	0	0	0	0	200	300	0	0	0	0	0	0	0	200	903	0	0	0	0	0	0	0	603	903	0
255	9	0	0	0	0	0	0	200	300	0	0	0	0	0	0	0	200	903	0	0	0	0	0	0	0	603	903	0
256	0	0	0	0	0	0	0	200	300	0	0	0	0	0	0	0	200	903	0	0	0	0	0	0	0	603	903	0
256	1	0	0	0	0	0	0	200	300	0	0	0	0	0	0	0	200	903	0	0	0	0	0	0	0	603	903	0
256	2	0	0	0	0	0	0	200	300	0	0	0	0	0	0	0	200	903	0	0	0	0	0	0	0	603	903	0
256	3	0	0	0	0	0	0	200	300	0	0	0	0	0	0	0	200	903	0	0	0	0	0	0	0	603	903	0
256	4	0	0	0	0	0	0	200	300	0	0	0	0	0	0	0	200	903	0	0	0	0	0	0	0	603	903	0
256	5	0	0	0	0	0	0	200	300	0	0	0	0	0	0	0	200	903	0	0	0	0	0	0	0	603	903	0
256	6	0	0	0	0	0	0	200	300	0	0	0	0	0	0	0	200	903	0	0	0	0	0	0	0	603	903	0
256	7	0	0	0	0	0	0	200	300	0	0	0	0	0	0	0	200	903	0	0	0	0	0	0	0	603	903	0
256	8	0	0	0	0	0	0	200	300	0	0	0	0	0	0	0	200	903	0	0	0	0	0	0	0	603	903	0
256	9	0	0	0	0	0	0	200	300	0	0	0	0	0	0	0	200	903	0	0	0	0	0	0	0	603	903	0
257	0	0	0	0	0	0	0	200	300	0	0	0	0	0	0	0	200	903	0	0	0	0	0	0	0	603	903	0
257	1	0	0	0	0	0	0	200	300	0	0	0	0	0	0	0	200	903	0	0	0	0	0	0	0	603	903	0
257	2	0	0	0	0	0	0	200	300	0	0	0	0	0	0	0	200	903	0	0	0	0	0	0	0	603	903	0
257	3	0	0	0	0	0	0	200	300	0	0	0	0	0	0	0	200	903	0	0	0	0	0	0	0	603	903	0
257	4	0	0	0	0	0	0	200	300	0	0	0	0	0	0	0	200	903	0	0	0	0	0	0	0	603	903	0
257	5	0	0	0	0	0	0	200	300	0	0	0	0	0	0	0	200	903	0	0	0	0	0	0	0	603	903	0
257	6	0	0	0	0	0	0	200	300	0	0	0	0	0	0	0	200	903	0	0	0	0	0	0	0	603	903	0
257	7	0	0	0	0	0	0	200	300	0	0	0	0	0	0	0	200	903	0	0	0	0	0	0	0	603	903	0
257	8	0	0	0	0	0	0	200	300	0	0	0	0	0	0	0	200	903	0	0	0	0	0	0	0	603	903	0
257	9	0	0	0	0	0	0	200	300	0	0	0	0	0	0	0	200	903	0	0	0	0	0	0	0	603	903	0
258	0	0	0	0	0	0	0	200	300	0	0	0	0	0	0	0	200	903	0	0	0	0	0	0	0	603	903	0
258	1	0	0	0	0	0	0	200	300	0	0	0	0	0	0	0	200	903	0	0	0	0	0	0	0	603	903	0
258	2	0	0	0	0	0	0	200	300	0	0	0	0	0	0	0	200	903	0	0	0	0	0	0	0	603	903	0
258	3	0	0	0	0	0	0	200	300	0	0	0	0	0	0	0	200	903	0	0	0	0	0	0	0	603	903	0
258	4	0	0	0	0	0	0	200	300	0	0	0	0	0	0	0	200	903	0	0	0	0	0	0	0	603	903	0
258	5	0	0	0	0	0	0	200	300	0	0	0	0	0	0	0	200	903	0	0	0	0	0	0	0	603	903	0
258	6	0	0	0	0	0	0	200	300	0	0	0	0	0	0	0	200	903	0	0	0	0	0	0	0	603	903	0
258	7	0	0	0	0	0	0	200	300	0	0	0	0	0	0	0	200	903	0	0	0	0	0	0	0	603	903	0
258	8	0	0	0	0	0	0	200	300	0	0	0	0	0	0	0	200	903	0	0	0	0	0	0	0	603	903	0
258	9	0	0	0	0	0	0	200	300	0	0	0	0	0	0	0	200	903	0	0	0	0	0	0	0	603	903	0
259	0	0	0	0	0	0	0	200	300	0	0	0	0	0	0	0	200	903	0	0	0	0	0	0	0	603	903	0
259	1	0	0	0	0	0	0	200	300	0	0	0	0	0	0	0	200	903	0	0	0	0	0	0	0	603	903	0
259	2	0	0	0	0	0	0	200	300	0	0	0	0	0	0	0	200	903	0	0	0	0	0	0	0	603	903	0
259	3	0	0	0	0	0	0	200	300	0	0	0	0	0	0	0	200	903	0	0	0	0	0	0	0	603	903	0
259	4	0	0	0	0	0	0	200	300	0	0	0	0	0	0	0	200	903	0	0	0	0	0	0	0	603	903	0
259	5	0	0	0	0	0	0	200	300	0	0	0	0	0	0	0	200	903	0	0	0	0	0	0	0	603	903	0
259	6	0	0	0	0	0	0	200	300	0	0	0	0	0	0	0	200	903	0	0	0	0	0	0	0	603	903	0
259	7	0	0	0	0	0	0	200	300	0	0	0	0	0	0	0	200	903	0	0	0	0	0	0	0	603	903	0
259	8	0	0	0	0	0	0	200	300	0	0	0	0	0	0	0	200	903	0	0	0	0	0	0	0	603	903	0
259	9	0	0	0	0	0	0	200	300	0	0	0	0	0	0	0	200	903	0	0	0	0	0	0	0	603	903	0
260	0	0	0	0	0	0	0	200	300	0	0	0	0	0	0	0	200	903	0	0	0	0	0	0	0	603	903	0
260	1	0	0	0	0	0	0	200	300	0	0	0	0	0	0	0	200	903	0	0	0	0	0	0	0	603	903	0
260	2	0	0	0	0	0	0	200	300	0	0	0	0	0	0	0	200	903	0	0	0	0	0	0	0	603	903	0
260	3	0	0	0	0	0	0	200	300	0	0	0	0	0	0	0	200	903	0	0	0	0	0	0	0	603	903	0
260	4	0	0	0	0	0	0	200	300	0	0	0	0	0	0	0	200	903	0	0	0	0	0	0	0	603	903	0
260	5	0	0	0	0	0	0	200	300	0	0	0	0	0	0	0	200	903	0	0	0	0	0	0	0	603	903	0
260	6	0	0	0	0	0	0	200	300	0	0	0	0	0	0	0	200	903	0	0	0	0	0	0	0	603	903	0
260	7	0	0	0	0	0	0	200	300	0	0	0	0	0	0	0	200	903	0	0	0	0	0	0	0	603	903	0
260	8	0	0	0	0	0	0	200	300	0	0	0	0	0	0	0	200	903	0	0	0	0	0	0	0	603	903	0
260	9	0	0	0	0	0	0	200	300	0	0	0	0	0	0	0	200	903	0	0	0	0	0	0	0	603	903	0
261	0	0	0	0	0	0	0	200	300	0	0	0	0	0	0	0	200	903	0	0	0	0	0	0	0	603	903	0
261	1	0	0	0	0	0	0	200	300	0	0	0	0	0	0	0	200	903	0	0	0	0	0	0	0	603	903	0
261	2	0	0	0	0	0	0	200	300	0	0	0	0	0	0	0	200	903	0	0	0	0	0	0	0	603	903	0
261	3	0	0	0	0	0	0	200	300	0	0	0	0	0	0	0	200	903	0	0	0	0	0	0	0	603	903	0
261	4	0	0	0	0	0	0	200	300	0	0	0	0	0	0	0	200	903	0	0	0	0	0	0	0	603	903	0
261	5	0	0	0	0	0	0	200	300	0	0	0	0	0	0	0	200	903	0	0	0	0	0	0	0	603	903	0
261	6	0	0	0	0	0	0	200	300	0	0	0	0	0	0	0	200	903	0	0	0	0	0	0	0	603	903	0
261	7	0	0	0	0	0	0	200	300	0	0	0	0	0	0	0	200	903	0	0	0	0	0	0	0	603	903	0
261	8	0	0	0	0	0	0	200	300	0	0	0	0	0	0	0	200	903	0	0	0	0	0	0	0	603	903	0
261	9	0	0	0	0	0	0	200	300	0	0	0	0	0	0	0	200	903	0	0	0	0	0	0	0	603	903	0
262	0	0	0	0	0	0	0	200	300	0	0	0	0	0	0	0	200	903	0	0	0	0	0	0	0	603	903	0
262	1	0	0	0	0	0	0	200	300	0	0	0	0	0	0	0	200	903	0	0	0	0	0	0	0	603	903	0
262	2	0	0	0	0	0	0	200	300	0	0	0	0	0	0	0	200	903	0	0	0	0	0	0	0	603	903	0
262	3	0	0	0	0	0	0	200	300	0	0	0	0	0	0	0	200	903	0	0	0	0	0	0	0	603	903	0
262	4	0	0	0	0	0	0	200	300	0	0	0	0	0	0	0	200	903	0	0	0	0	0	0	0	603	903	0
262	5	0	0	0	0	0	0	200	300	0	0	0	0	0	0	0	200	903	0	0	0	0	0	0	0	603	903	0
262	6	0	0	0	0	0	0	200	300	0	0	0	0	0	0	0	200	903	0	0	0	0	0	0	0	603	903	0
262	7	0	0	0	0	0	0	200	300	0	0	0	0	0	0	0	200	903	0	0	0	0	0	0	0	603	903	0
262	8	0	0	0	0	0	0	200	300	0	0	0	0	0	0	0	200	903	0	0	0	0	0	0	0	603	903	0
262	9	0	0	0	0	0	0	200	300	0	0	0	0	0	0	0	200	903	0	0	0	0	0	0	0	603	903	0
263	0	0	0	0	0	0	0	200	300	0	0	0	0	0	0	0	200	903	0	0	0	0	0	0	0	603	903	0
263	1	0	0	0	0	0	0	200	300	0	0	0	0	0	0	0	200	903	0	0	0	0	0	0	0	603	903	0
263	2	0	0	0	0	0	0	200	300	0	0	0	0	0	0	0	200	903	0	0	0	0	0	0	0	603	903	0
263	3	0	0	0	0	0	0	200	300	0	0	0	0	0	0	0	200	903	0	0	0	0	0	0	0	603	903	0
263	4	0	0	0	0	0	0	200	300	0	0	0	0	0	0	0	200	903	0	0	0	0	0	0	0	603	903	0
263	5	0	0	0	0	0	0	200	300	0	0	0	0	0	0	0	200	903	0	0	0	0	0	0	0	603	903	0
263	6	0	0	0	0	0	0	200	300	0	0	0	0	0	0	0	200	903	0	0	0	0	0	0	0	603	903	0
263	7	0	0	0	0	0	0	200	300	0	0	0	0	0	0	0	200	903	0	0	0	0	0	0	0	603	903	0
263	8	0	0	0	0	0	0	200	300	0	0	0	0	0	0	0	200	903	0	0	0	0	0	0	0	603	903	0
263	9	0	0	0	0	0	0	200	300	0	0	0	0	0	0	0	200	903	0	0	0	0	0	0	0	603	903	0
264	0	0	0	0	0	0	0	200	300	0	0	0	0	0	0	0	200	903	0	0	0	0	0	0	0	603	903	0
264	1	0	0	0	0	0	0	200	300	0	0	0	0	0	0	0	200	903	0	0	0	0	0	0	0	603	903	0
264	2	0	0	0	0	0	0	200	300	0	0	0	0	0	0	0	200	903	0	0	0	0	0	0	0	603	903	0
264	3	0	0	0	0	0	0	200	300	0	0	0	0	0	0	0	200	903	0	0	0	0	0	0	0	603	903	0
264	4	0	0	0	0	0	0	200	300	0	0	0	0	0	0	0	200	903	0	0	0	0	0	0	0	603	903	0
264	5	0	0	0	0	0	0	200	300	0	0	0	0	0	0	0	200	903	0	0	0	0	0	0	0	603	903	0
264	6	0	0	0	0	0	0	200	300	0	0	0	0	0	0	0	200	903	0	0	0	0	0	0	0	603	903	0
264	7	0	0	0	0	0	0	200	300	0	0	0	0	0	0	0	200	903	0	0	0	0	0	0	0	603	903	0
264	8	0	0	0	0	0	0	200	300	0	0	0	0	0	0	0	200	903	0	0	0	0	0	0	0	603	903	0
264	9	0	0	0	0	0	0	200	300	0	0	0	0	0	0	0	200	903	0	0	0	0	0	0	0	603	903	0
265	0	0	0	0	0	0	0	200	300	0	0	0	0	0	0	0	200	903	0	0	0	0	0	0	0	603	903	0
265	1	0	0	0	0	0	0	200	300	0	0	0	0	0	0	0	200	903	0	0	0	0	0	0	0	603	903	0
265	2	0	0	0	0	0	0	200	300	0	0	0	0	0	0	0	200	903	0	0	0	0	0	0	0	603	903	0
265	3	0	0	0	0	0	0	200	300	0	0	0	0	0	0	0	200	903	0	0	0	0	0	0	0	603	903	0
265	4	0	0	0	0	0	0	200	300	0	0	0	0	0	0	0	200	903	0	0	0	0	0	0	0	603	903	0
265	5	0	0	0	0	0	0	200	300	0	0	0	0	0	0	0	200	903	0	0	0	0	0	0	0	603	903	0
265	6	0	0	0	0	0	0	200	300	0	0	0	0	0	0	0	200	903	0	0	0	0	0	0	0	603	903	0
265	7	0	0	0	0	0	0	200	300	0	0	0	0	0	0	0	200	903	0	0	0	0	0	0	0	603	903	0
265	8	0	0	0	0	0	0	200	300	0	0	0	0	0	0	0	200	903	0	0	0	0	0	0	0	603	903	0
265	9	0	0	0	0	0	0	200	300	0	0	0	0	0	0	0	200	903	0	0	0	0	0	0	0	603	903	0
266	0	0	0	0	0	0	0	200	300	0	0	0	0	0	0	0	200	903	0	0	0	0	0	0	0	603	903	0
266	1	0	0	0	0	0	0	200	300	0	0	0	0	0	0	0	200	903	0	0	0	0	0	0	0	603	903	0
266	2	0	0	0	0	0	0	200	300	0	0	0	0	0	0	0	200	903	0	0	0	0	0	0	0	603	903	0
266	3	0	0	0	0	0	0	200	300	0	0	0	0	0	0	0	200	903	0	0	0	0	0	0	0	603	903	0
266	4	0	0	0	0	0	0	200	300	0	0	0	0	0	0	0	200	903	0	0	0	0	0	0	0	603	903	0
266	5	0	0	0	0	0	0	200	300	0	0	0	0	0	0	0	200	903	0	0	0	0	0	0	0	603	903	0
266	6	0	0	0	0	0	0	200	300	0	0	0	0	0	0	0	200	903	0	0	0	0	0	0	0	603	903	0
266	7	0	0	0	0	0	0	200	300	0	0	0	0	0	0	0	200	903	0	0	0	0	0	0	0	603	903	0
266	8	0	0	0	0	0	0	200	300	0	0	0	0	0	0	0	200	903	0	0	0	0	0	0	0	603	903	0
266	9	0	0	0	0	0	0	200	300	0	0	0	0	0	0	0	200	903	0	0	0	0	0	0	0	603	903	0
267	0	0	0	0	0	0	0	200	300	0	0	0	0	0	0	0	200	903	0	0	0	0	0	0	0	603	903	0
267	1	0	0	0	0	0	0	200	300	0	0	0	0	0	0	0	200	903	0	0	0	0	0	0	0	603	903	0
267	2	0	0	0	0	0	0	200	300	0	0	0	0	0	0	0	200	903	0	0	0	0	0	0	0	603	903	0
267	3	0	0	0	0	0	0	200	300	0	0	0	0	0	0	0	200	903	0	0	0	0	0	0	0	603	903	0
267	4	0	0	0	0	0	0	200	300	0	0	0	0	0	0	0	200	903	0	0	0	0	0	0	0	603	903	0
267	5	0	0	0	0	0	0	200	300	0	0	0	0	0	0	0	200	903	0	0	0	0	0	0	0	603	903	0
267	6	0	0	0	0	0	0	200	300	0	0	0	0	0	0	0	200	903	0	0	0	0	0	0	0	603	903	0
267	7	0	0	0	0	0	0	200	300	0	0	0	0	0	0	0	200	903	0	0	0	0	0	0	0	603	903	0
267	8	0	0	0	0	0	0	200	300	0	0	0	0	0	0	0	200	903	0	0	0	0	0	0	0	603	903	0
267	9	0	0	0	0	0	0	200	300	0	0	0	0	0	0	0	200	903	0	0	0	0	0	0	0	603	903	0
268	0	0	0	0	0	0	0	200	300	0	0	0	0	0	0	0	200	903	0	0	0	0	0	0	0	603	903	0
268	1	0	0	0	0	0	0	200	300	0	0	0	0	0	0	0	200	903	0	0	0	0	0	0	0	603	903	0
268	2	0	0	0	0	0	0	200	300	0	0	0	0	0	0	0	200	903	0	0	0	0	0	0	0	603	903	0
268	3	0	0	0	0	0	0	200	300	0	0	0	0	0	0	0	200	903	0	0	0	0	0	0	0	603	903	0
268	4	0	0	0	0	0	0	200	300	0	0	0	0	0	0	0	200	903	0	0	0	0	0	0	0	603	903	0
268	5	0	0	0	0	0	0	200	300	0	0	0	0	0	0	0	200	903	0	0	0	0	0	0	0	603	903	0
268	6	0	0	0	0	0	0	200	300	0	0	0	0	0	0	0	200	903	0	0	0	0	0	0	0	603	903	0
268	7	0	0	0	0	0	0	200	300	0	0	0	0	0	0	0	200	903	0	0	0	0	0	0	0	603	903	0
268	8	0	0	0	0	0	0	200	300	0	0	0	0	0	0	0	200	903	0	0	0	0	0	0	0	603	903	0
268	9	0	0	0	0	0	0	200	300	0	0	0	0	0	0	0	200	903	0	0	0	0	0	0	0	603	903	0
269	0	0	0	0	0	0	0	200	300	0	0	0	0	0	0	0	200	903	0	0	0	0	0	0	0	603	903	0
269	1	0	0	0	0	0	0	200	300	0	0	0	0	0	0	0	200	903	0	0	0	0	0	0	0	603	903	0
269	2	0	0	0	0	0	0	200	300	0	0	0	0	0	0	0	200	903	0	0	0	0	0	0	0	603	903	0
269	3	0	0	0	0	0	0	200	300	0	0	0	0	0	0	0	200	903	0	0	0	0	0	0	0	603	903	0
269	4	0	0	0	0	0	0	200	300	0	0	0	0	0	0	0	200	903	0	0	0	0	0	0	0	603	903	0
269	5	0	0	0	0	0	0	200	300	0	0	0	0	0	0	0	200	903	0	0	0	0	0	0	0	603	903	0
269	6	0	0	0	0	0	0	200	300	0	0	0	0	0	0	0	200	903	0	0	0	0	0	0	0	603	903	0
269	7	0	0	0	0	0	0	200	300	0	0	0	0	0	0	0	200	903	0	0	0	0	0	0	0	603	903	0
269	8	0	0	0	0	0	0	200	300	0	0	0	0	0	0	0	200	903	0	0	0	0	0	0	0	603	903	0
269	9	0	0	0	0	0	0	200	300	0	0	0	0	0	0	0	200	903	0	0	0	0	0	0	0	603	903	0
270	0	0	0	0	0	0	0	200	300	0	0	0	0	0	0	0	200	903	0	0	0	0	0	0	0	603	903	0
270	1	0	0	0	0	0	0	200	300	0	0	0	0	0	0	0	200	903	0	0	0	0	0	0	0	603	903	0
270	2	0	0	0	0	0	0	200	300	0	0	0	0	0	0	0	200	903	0	0	0	0	0	0	0	603	903	0
270	3	0	0	0	0	0	0	200	300	0	0	0	0	0	0	0	200	903	0	0	0	0	0	0	0	603	903	0
270	4	0	0	0	0	0	0	200	300	0	0	0	0	0	0	0	200	903	0	0	0	0	0	0	0	603	903	0
270	5	0	0	0	0	0	0	200	300	0	0	0	0	0	0	0	200	903	0	0	0	0	0	0	0	603	903	0
270	6	0	0	0	0	0	0	200	300	0	0	0	0	0	0	0	200	903	0	0	0	0	0	0	0	603	903	0
270	7	0	0	0	0	0	0	200	300	0	0	0	0	0	0	0	200	903	0	0	0	0	0	0	0	603	903	0
270	8	0	0	0	0	0	0	200	300	0	0	0	0	0	0	0	200	903	0	0	0	0	0	0	0	603	903	0
270	9	0	0	0	0	0	0	200	300	0	0	0	0	0	0	0	200	903	0	0	0	0	0	0	0	603	903	0
271	0	0	0	0	0	0	0	200	300	0	0	0	0	0	0	0	200	903	0	0	0	0	0	0	0	603	903	0
271	1	0	0	0	0	0	0	200	300	0	0	0	0	0	0	0	200	903	0	0	0	0	0	0	0	603	903	0
271	2	0	0	0	0	0	0	200	300	0	0	0	0	0	0	0	200	903	0	0	0	0	0	0	0	603	903	0
271	3	0	0	0	0	0	0	200	300	0	0	0	0	0	0	0	200	903	0	0	0	0	0	0	0	603	903	0
271	4	0	0	0	0	0	0	200	300	0	0	0	0	0	0	0	200	903	0	0	0	0	0	0	0	603	903	0
271	5	0	0	0	0	0	0	200	300	0	0	0	0	0	0	0	200	903	0	0	0	0	0	0	0	603	903	0
271	6	0	0	0	0	0	0	200	300	0	0	0	0	0	0	0	200	903	0	0	0	0	0	0	0	603	903	0
271	7	0	0	0	0	0	0	200	300	0	0	0	0	0	0	0	200	903	0	0	0	0	0	0	0	603	903	0
271	8	0	0	0	0	0	0	200	300	0	0	0	0	0	0	0	200	903	0	0	0	0	0	0	0	603	903	0
271	9	0	0	0	0	0	0	200	300	0	0	0	0	0	0	0	200	903	0	0	0	0	0	0	0	603	903	0
272	0	0	0	0	0	0	0	200	300	0	0	0	0	0	0	0	200	903	0	0	0	0	0	0	0	603	903	0
272	1	0	0	0	0	0	0	200	300	0	0	0	0	0	0	0	200	903	0	0	0	0	0	0	0	603	903	0
272	2	0	0	0	0	0	0	200	300	0	0	0	0	0	0	0	200	903	0	0	0	0	0	0	0	603	903	0
272	3	0	0	0	0	0	0	200	300	0	0	0	0	0	0	0	200	903	0	0	0	0	0	0	0	603	903	0
272	4	0	0	0	0	0	0	200	300	0	0	0	0	0	0	0	200	903	0	0	0	0	0	0	0	603	903	0
272	5	0	0	0	0	0	0	200	300	0	0	0	0	0	0	0	200	903	0	0	0	0	0	0	0	603	903	0
272	6	0	0	0	0	0	0	200	300	0	0	0	0	0	0	0	200	903	0	0	0	0	0	0	0	603	903	0
272	7	0	0	0	0	0	0	200	300	0	0	0	0	0	0	0	200	903	0	0	0	0	0	0	0	603	903	0
272	8	0	0	0	0	0	0	200	300	0	0	0	0	0	0	0	200	903	0	0	0	0	0	0	0	603	903	0
272	9	0	0	0	0	0	0	200	300	0	0	0	0	0	0	0	200	903	0	0	0	0	0	0	0	603	903	0
273	0	0	0	0	0	0	0	200	300	0	0	0	0	0	0	0	200	903	0	0	0	0	0	0	0	603	903	0
273	1	0	0	0	0	0	0	200	300	0	0	0	0	0	0	0	200	903	0	0	0	0	0	0	0	603	903	0
273	2	0	0	0	0	0	0	200	300	0	0	0	0	0	0	0	200	903	0	0	0	0	0	0	0	603	903	0
273	3	0	0	0	0	0	0	200	300	0	0	0	0	0	0	0	200	903	0	0	0	0	0	0	0	603	903	0
273	4	0	0	0	0	0	0	200	300	0	0	0	0	0	0	0	200	903	0	0	0	0	0	0	0	603	903	0
273	5	0	0	0	0	0	0	200	300	0	0	0	0	0	0	0	200	903	0	0	0	0	0	0	0	603	903	0
273	6	0	0	0	0	0	0	200	300	0	0	0	0	0	0	0	200	903	0	0	0	0	0	0	0	603	903	0
273	7	0	0	0	0	0	0	200	300	0	0	0	0	0	0	0	200	903	0	0	0	0	0	0	0	603	903	0
273	8	0	0	0	0	0	0	200	300	0	0	0	0	0	0	0	200	903	0	0	0	0	0	0	0	603	903	0
273	9	0	0	0	0	0	0	200	300	0	0	0	0	0	0	0	200	903	0	0	0	0	0	0	0	603	903	0
274	0	0	0	0	0	0	0	200	300	0	0	0	0	0	0	0	200	903	0	0	0	0	0	0	0	603	903	0
274	1	0	0	0	0	0	0	200	300	0	0	0	0	0	0	0	200	903	0	0	0	0	0	0	0	603	903	0
274	2	0	0	0	0	0	0	200	300	0	0	0	0	0	0	0	200	903	0	0	0	0	0	0	0	603	903	0
274	3	0	0	0	0	0	0	200	300	0	0	0	0	0	0	0	200	903	0	0	0	0	0	0	0	603	903	0
274	4	0	0	0	0	0	0	200	300	0	0	0	0	0	0	0	200	903	0	0	0	0	0	0	0	603	903	0
274	5	0	0	0	0	0	0	200	300	0	0	0	0	0	0	0	200	903	0	0	0	0	0	0	0	603	903	0
274	6	0	0	0	0	0	0	200	300	0	0	0	0	0	0	0	200	903	0	0	0	0	0	0	0	603	903	0
274	7	0	0	0	0	0	0	200	300	0	0	0	0	0	0	0	200	903	0	0	0	0	0	0	0	603	903	0
274	8	0	0	0	0	0	0	200	300	0	0	0	0	0	0	0	200	903	0	0	0	0	0	0	0	603	903	0
274	9	0	0	0	0	0	0	200	300	0	0	0	0	0	0	0	200	903	0	0	0	0	0	0	0	603	903	0
275	0	0	0	0	0	0	0	200	300	0	0	0	0	0	0	0	200	903	0	0	0	0	0	0	0	603	903	0
275	1	0	0	0	0	0	0	200	300	0	0	0	0	0	0	0	200	903	0	0	0	0	0	0	0	603	903	0
275	2	0	0	0	0	0	0	200	300	0	0	0	0	0	0	0	200	903	0	0	0	0	0	0	0	603	903	0
275	3	0	0	0	0	0	0	200	300	0	0	0	0	0	0	0	200	903	0	0	0	0	0	0	0	603	903	0
275	4	0	0	0	0	0	0	200	300	0	0	0	0	0	0	0	200	903	0	0	0	0	0	0	0	603	903	0
275	5	0	0	0	0	0	0	200	300	0	0	0	0	0	0	0	200	903	0	0	0	0	0	0	0	603	903	0
275	6	0	0	0	0	0	0	200	300	0	0	0	0	0	0	0	200	903	0	0	0	0	0	0	0	603	903	0
275	7	0	0	0	0	0	0	200	300	0	0	0	0	0	0	0	200	903	0	0	0	0	0	0	0	603	903	0
275	8	0	0	0	0	0	0	200	300	0	0	0	0	0	0	0	200	903	0	0	0	0	0	0	0	603	903	0
275	9	0	0	0	0	0	0	200	300	0	0	0	0	0	0	0	200	903	0	0	0	0	0	0	0	603	903	0
276	0	0	0	0	0	0	0	200	300	0	0	0	0	0	0	0	200	903	0	0	0	0	0	0	0	603	903	0
276	1	0	0	0	0	0	0	200	300	0	0	0	0	0	0	0	200	903	0	0	0	0	0	0	0	603	903	0
276	2	0	0	0	0	0	0	200	300	0	0	0	0	0	0	0	200	903	0	0	0	0	0	0	0	603	903	0
276	3	0	0	0	0	0	0	200	300	0	0	0	0	0	0	0	200	903	0	0	0	0	0	0	0	603	903	0
276	4	0	0	0	0	0	0	200	300	0	0	0	0	0	0	0	200	903	0	0	0	0	0	0	0	603	903	0
276	5	0	0	0	0	0	0	200	300	0	0	0	0	0	0	0	200	903	0	0	0	0	0	0	0	603	903	0
276	6	0	0	0	0	0	0	200	300	0	0	0	0	0	0	0	200	903	0	0	0	0	0	0	0	603	903	0
276	7	0	0	0	0	0	0	200	300	0	0	0	0	0	0	0	200	903	0	0	0	0	0	0	0	603	903	0
276	8	0	0	0	0	0	0	200	300	0	0	0	0	0	0	0	200	903	0	0	0	0	0	0	0	603	903	0
276	9	0	0	0	0	0	0	200	300	0	0	0	0	0	0	0	200	903	0	0	0	0	0	0	0	603	903	0
277	0	0	0	0	0	0	0	200	300	0	0	0	0	0	0	0	200	903	0	0	0	0	0	0	0	603	903	0
277	1	0	0	0	0	0	0	200	300	0	0	0	0	0	0	0	200	903	0	0	0	0	0	0	0	603	903	0
277	2	0	0	0	0	0	0	200	300	0	0	0	0	0	0	0	200	903	0	0	0	0	0	0	0	603	903	0
277	3	0	0	0	0	0	0	200	300	0	0	0	0	0	0	0	200	903	0	0	0	0	0	0	0	603	903	0
277	4	0	0	0	0	0	0	200	300	0	0	0	0	0	0	0	200	903	0	0	0	0	0	0	0	603	903	0
277	5	0	0	0	0	0	0	200	300	0	0	0	0	0	0	0	200	903	0	0	0	0	0	0	0	603	903	0
277	6	0	0	0	0	0	0	200	300	0	0	0	0	0	0	0	200	903	0	0	0	0	0	0	0	603	903	0
277	7	0	0	0	0	0	0	200	300	0	0	0	0	0	0	0	200	903	0	0	0	0	0	0	0	603	903	0
277	8	0	0	0	0	0	0	200	300	0	0	0	0	0	0	0	200	903	0	0	0	0	0	0	0	603	903	0
277	9	0	0	0	0	0	0	200	300	0	0	0	0	0	0	0	200	903	0	0	0	0	0	0	0	603	903	0
278	0	0	0	0	0	0	0	200	300	0	0	0	0	0	0	0	200	903	0	0	0	0	0	0	0	603	903	0
278	1	0	0	0	0	0	0	200	300	0	0	0	0	0	0	0	200	903	0	0	0	0	0	0	0	603	903	0
278	2	0	0	0	0	0	0	200	300	0	0	0	0	0	0	0	200	903	0	0	0	0	0	0	0	603	903	0
278	3	0	0	0	0	0	0	200	300	0	0	0	0	0	0	0	200	903	0	0	0	0	0	0	0	603	903	0
278	4	0	0	0	0	0	0	200	300	0	0	0	0	0	0	0	200	903	0	0	0	0	0	0	0	603	903	0
278	5	0	0	0	0	0	0	200	300	0	0	0	0	0	0	0	200	903	0	0	0	0	0	0	0	603	903	0
278	6	0	0	0	0	0	0	200	300	0	0	0	0	0	0	0	200	903	0	0	0	0	0	0	0	603	903	0
278	7	0	0	0	0	0	0	200	300	0	0	0	0	0	0	0	200	903	0	0	0	0	0	0	0	603	903	0
278	8	0	0	0	0	0	0	200	300	0	0	0	0	0	0	0	200	903	0	0	0	0	0	0	0	603	903	0
278	9	0	0	0	0	0	0	200	300	0	0	0	0	0	0	0	200	903	0	0	0	0	0	0	0	603	903	0
279	0	0	0	0	0	0	0	200	300	0	0	0	0	0	0	0	200	903	0	0	0	0	0	0	0	603	903	0
279	1	0	0	0	0	0	0	200	300	0	0	0	0	0	0	0	200	903	0	0	0	0	0	0	0	603	903	0
279	2	0	0	0	0	0	0	200	300	0	0	0	0	0	0	0	200	903	0	0	0	0	0	0	0	603	903	0
279	3	0	0	0	0	0	0	200	300	0	0	0	0	0	0	0	200	903	0	0	0	0	0	0	0	603	903	0
279	4	0	0	0	0	0	0	200	300	0	0	0	0	0	0	0	200	903	0	0	0	0	0	0	0	603	903	0
279	5	0	0	0	0	0	0	200	300	0	0	0	0	0	0	0	200	903	0	0	0	0	0	0	0	603	903	0
279	6	0	0	0	0	0	0	200	300	0	0	0	0	0	0	0	200	903	0	0	0	0	0	0	0	603	903	0
279	7	0	0	0	0	0	0	200	300	0	0	0	0	0	0	0	200	903	0	0	0	0	0	0	0	603	903	0
279	8	0	0	0	0	0	0	200	300	0	0	0	0	0	0	0	200	903	0	0	0	0	0	0	0	603	903	0
279	9	0	0	0	0	0	0	200	300	0	0	0	0	0	0	0	200	903	0	0	0	0	0	0	0	603	903	0
280	0	0	0	0	0	0	0	200	300	0	0	0	0	0	0	0	200	903	0	0	0	0	0	0	0	603	903	0
280	1	0	0	0	0	0	0	200	300	0	0	0	0	0	0	0	200	903	0	0	0	0	0	0	0	603	903	0
280	2	0	0	0	0	0	0	200	300	0	0	0	0	0	0	0	200	903	0	0	0	0	0	0	0	603	903	0
280	3	0	0	0	0	0	0	200	300	0	0	0	0	0	0	0	200	903	0	0	0	0	0	0	0	603	903	0
280	4	0	0	0	0	0	0	200	300	0	0	0	0	0	0	0	200	903	0	0	0	0	0	0	0	603	903	0
280	5	0	0	0	0	0	0	200	300	0	0	0	0	0	0	0	200	903	0	0	0	0	0	0	0	603	903	0
280	6	0	0	0	0	0	0	200	300	0	0	0	0	0	0	0	200	903	0	0	0	0	0	0	0	603	903	0
280	7	0	0	0	0	0	0	200	300	0	0	0	0	0	0	0	200	903	0	0	0	0	0	0	0	603	903	0
280	8	0	0	0	0	0	0	200	300	0	0	0	0	0	0	0	200	903	0	0	0	0	0	0	0	603	903	0
280	9	0	0	0	0	0	0	200	300	0	0	0	0	0	0	0	200	903	0	0	0	0	0	0	0	603	903	0
281	0	0	0	0	0	0	0	200	300	0	0	0	0	0	0	0	200	903	0	0	0	0	0	0	0	603	903	0
281	1	0	0	0	0	0	0	200	300	0	0	0	0	0	0	0	200	903	0	0	0	0	0	0	0	603	903	0
281	2	0	0	0	0	0	0	200	300	0	0	0	0	0	0	0	200	903	0	0	0	0	0	0	0	603	903	0
281	3	0	0	0	0	0	0	200	300	0	0	0	0	0	0	0	200	903	0	0	0	0	0	0	0	603	903	0
281	4	0	0	0	0	0	0	200	300	0	0	0	0	0	0	0	200	903	0	0	0	0	0	0	0	603	903	0
281	5	0	0	0	0	0	0	200	300	0	0	0	0	0	0	0	200	903	0	0	0	0	0	0	0	603	903	0
281	6	0	0	0	0	0	0	200	300	0	0	0	0	0	0	0	200	903	0	0	0	0	0	0	0	603	903	0
281	7	0	0	0	0	0	0	200	300	0	0	0	0	0	0	0	200	903	0	0	0	0	0	0	0	603	903	0
281	8	0	0	0	0	0	0	200	300	0	0	0	0	0	0	0	200	903	0	0	0	0	0	0	0	603	903	0
281	9	0	0	0	0	0	0	200	300	0	0	0	0	0	0	0	200	903	0	0	0	0	0	0	0	603	903	0
282	0	0	0	0	0	0	0	200	300	0	0	0	0	0	0	0	200	903	0	0	0	0	0	0	0	603	903	0
282	1	0	0	0	0	0	0	200	300	0	0	0	0	0	0	0	200	903	0	0	0	0	0	0	0	603	903	0
282	2	0	0	0	0	0	0	200	300	0	0	0	0	0	0	0	200	903	0	0	0	0	0	0	0	603	903	0
282	3	0	0	0	0	0	0	200	300	0	0	0	0	0	0	0	200	903	0	0	0	0	0	0	0	603	903	0
282	4	0	0	0	0	0	0	200	300	0	0	0	0	0	0	0	200	903	0	0	0	0	0	0	0	603	903	0
282	5	0	0	0	0	0	0	200	300	0	0	0	0	0	0	0	200	903	0	0	0	0	0	0	0	603	903	0
282	6	0	0	0	0	0	0	200	300	0	0	0	0	0	0	0	200	903	0	0	0	0	0	0	0	603	903	0
282	7	0	0	0	0	0	0	200	300	0	0	0	0	0	0	0	200	903	0	0	0	0	0	0	0	603	903	0
282	8	0	0	0	0	0	0	200	300	0	0	0	0	0	0	0	200	903	0	0	0	0	0	0	0	603	903	0
282	9	0	0	0	0	0	0	200	300	0	0	0	0	0	0	0	200	903	0	0	0	0	0	0	0	603	903	0
283	0	0	0	0	0	0	0	200	300	0	0	0	0	0	0	0	200	903	0	0	0	0	0	0	0	603	903	0
283	1	0	0	0	0	0	0	200	300	0	0	0	0	0	0	0	200	903	0	0	0	0	0	0	0	603	903	0
283	2	0	0	0	0	0	0	200	300	0	0	0	0	0	0	0	200	903	0	0	0	0	0	0	0	603	903	0
283	3	0	0	0	0	0	0	200	300	0	0	0	0	0	0	0	200	903	0	0	0	0	0	0	0	603	903	0
283	4	0	0	0	0	0	0	200	300	0	0	0	0	0	0	0	200	903	0	0	0	0	0	0	0	603	903	0
283	5	0	0	0	0	0	0	200	300	0	0	0	0	0	0	0	200	903	0	0	0	0	0	0	0	603	903	0
283	6	0	0	0	0	0	0	200	300	0	0	0	0	0	0	0	200	903	0	0	0	0	0	0	0	603	903	0
283	7	0	0	0	0	0	0	200	300	0	0	0	0	0	0	0	200	903	0	0	0	0	0	0	0	603	903	0
283	8	0	0	0	0	0	0	200	300	0	0	0	0	0	0	0	200	903	0	0	0	0	0	0	0	603	903	0
283	9	0	0	0	0	0	0	200	300	0	0	0	0	0	0	0	200	903	0	0	0	0	0	0	0	603	903	0
284	0	0	0	0	0	0	0	200	300	0	0	0	0	0	0	0	200	903	0	0	0	0	0	0	0	603	903	0
284	1	0	0	0	0	0	0	200	300	0	0	0	0	0	0	0	200	903	0	0	0	0	0	0	0	603	903	0
284	2	0	0	0	0	0	0	200	300	0	0	0	0	0	0	0	200	903	0	0	0	0	0	0	0	603	903	0
284	3	0	0	0	0	0	0	200	300	0	0	0	0	0	0	0	200	903	0	0	0	0	0	0	0	603	903	0
284	4	0	0	0	0	0	0	200	300	0	0	0	0	0	0	0	200	903	0	0	0	0	0	0	0	603	903	0
284	5	0	0	0	0	0	0	200	300	0	0	0	0	0	0	0	200	903	0	0	0	0	0	0	0	603	903	0
284	6	0	0	0	0	0	0	200	300	0	0	0	0	0	0	0	200	903	0	0	0	0	0	0	0	603	903	0
284	7	0	0	0	0	0	0	200	300	0	0	0	0	0	0	0	200	903	0	0	0	0	0	0	0	603	903	0
284	8	0	0	0	0	0	0	200	300	0	0	0	0	0	0	0	200	903	0	0	0	0	0	0	0	603	903	0
284	9	0	0	0	0	0	0	200	300	0	0	0	0	0	0	0	200	903	0	0	0	0	0	0	0	603	903	0
285	0	0	0	0	0	0	0	200	300	0	0	0	0	0	0	0	200	903	0	0	0	0	0	0	0	603	903	0
285	1	0	0	0	0	0	0	200	300	0	0	0	0	0	0	0	200	903	0	0	0	0	0	0	0	603	903	0
285	2	0	0	0	0	0	0	200	300	0	0	0	0	0	0	0	200	903	0	0	0	0	0	0	0	603	903	0
285	3	0	0	0	0	0	0	200	300	0	0	0	0	0	0	0	200	903	0	0	0	0	0	0	0	603	903	0
285	4	0	0	0	0	0	0	200	300	0	0	0	0	0	0	0	200	903	0	0	0	0	0	0	0	603	903	0
285	5	0	0	0	0	0	0	200	300	0	0	0	0	0	0	0	200	903	0	0	0	0	0	0	0	603	903	0
285	6	0	0	0	0	0	0	200	300	0	0	0	0	0	0	0	200	903	0	0	0	0	0	0	0	603	903	0
285	7	0	0	0	0	0	0	200	300	0	0	0	0	0	0	0	200	903	0	0	0	0	0	0	0	603	903	0
285	8	0	0	0	0	0	0	200	300	0	0	0	0	0	0	0	200	903	0	0	0	0	0	0	0	603	903	0
285	9	0	0	0	0	0	0	200	300	0	0	0	0	0	0	0	200	903	0	0	0	0	0	0	0	603	903	0
286	0	0	0	0	0	0	0	200	300	0	0	0	0	0	0	0	200	903	0	0	0	0	0	0	0	603	903	0
286	1	0	0	0	0	0	0	200	300	0	0	0	0	0	0	0	200	903	0	0	0	0	0	0	0	603	903	0
286	2	0	0	0	0	0	0	200	300	0	0	0	0	0	0	0	200	903	0	0	0	0	0	0	0	603	903	0
286	3	0	0	0	0	0	0	200	300	0	0	0	0	0	0	0	200	903	0	0	0	0	0	0	0	603	903	0
286	4	0	0	0	0	0	0	200	300	0	0	0	0	0	0	0	200	903	0	0	0	0	0	0	0	603	903	0
286	5	0	0	0	0	0	0	200	300	0	0	0	0	0	0	0	200	903	0	0	0	0	0	0	0	603	903	0
286	6	0	0	0	0	0	0	200	300	0	0	0	0	0	0	0	200	903	0	0	0	0	0	0	0	603	903	0
286	7	0	0	0	0	0	0	200	300	0	0	0	0	0	0	0	200	903	0	0	0	0	0	0	0	603	903	0
286	8	0	0	0	0	0	0	200	300	0	0	0	0	0	0	0	200	903	0	0	0	0	0	0	0	603	903	0
286	9	0	0	0	0	0	0	200	300	0	0	0	0	0	0	0	200	903	0	0	0	0	0	0	0	603	903	0
287	0	0	0	0	0	0	0	200	300	0	0	0	0	0	0	0	200	903	0	0	0	0	0	0	0	603	903	0
287	1	0	0	0	0	0	0	200	300	0	0	0	0	0	0	0	200	903	0	0	0	0	0	0	0	603	903	0
287	2	0	0	0	0	0	0	200	300	0	0	0	0	0	0	0	200	903	0	0	0	0	0	0	0	603	903	0
287	3	0	0	0	0	0	0	200	300	0	0	0	0	0	0	0	200	903	0	0	0	0	0	0	0	603	903	0
287	4	0	0	0	0	0	0	200	300	0	0	0	0	0	0	0	200	903	0	0	0	0	0	0	0	603	903	0
287	5	0	0	0	0	0	0	200	300	0	0	0	0	0	0	0	200	903	0	0	0	0	0	0	0	603	903	0
287	6	0	0	0	0	0	0	200	300	0	0	0	0	0	0	0	200	903	0	0	0	0	0	0	0	603	903	0
287	7	0	0	0	0	0	0	200	300	0	0	0	0	0	0	0	200	903	0	0	0	0	0	0	0	603	903	0
287	8	0	0	0	0	0	0	200	300	0	0	0	0	0	0	0	200	903	0	0	0	0	0	0	0	603	903	0
287	9	0	0	0	0	0	0	200	300	0	0	0	0	0	0	0	200	903	0	0	0	0	0	0	0	603	903	0
288	0	0	0	0	0	0	0	200	300	0	0	0	0	0	0	0	200	903	0	0	0	0	0	0	0	603	903	0
288	1	0	0	0	0	0	0	200	300	0	0	0	0	0	0	0	200	903	0	0	0	0	0	0	0	603	903	0
288	2	0	0	0	0	0	0	200	300	0	0	0	0	0	0	0	200	903	0	0	0	0	0	0	0	603	903	0
288	3	0	0	0	0	0	0	200	300	0	0	0	0	0	0	0	200	903	0	0	0	0	0	0	0	603	903	0
288	4	0	0	0	0	0	0	200	300	0	0	0	0	0	0	0	200	903	0	0	0	0	0	0	0	603	903	0
288	5	0	0	0	0	0	0	200	300	0	0	0	0	0	0	0	200	903	0	0	0	0	0	0	0	603	903	0
288	6	0	0	0	0	0	0	200	300	0	0	0	0	0	0	0	200	903	0	0	0	0	0	0	0	603	903	0
288	7	0	0	0	0	0	0	200	300	0	0	0	0	0	0	0	200	903	0	0	0	0	0	0	0	603	903	0
288	8	0	0	0	0	0	0	200	300	0	0	0	0	0	0	0	200	903	0	0	0	0	0	0	0	603	903	0
288	9	0	0	0	0	0	0	200	300	0	0	0	0	0	0	0	200	903	0	0	0	0	0	0	0	603	903	0
289	0	0	0	0	0	0	0	200	300	0	0	0	0	0	0	0	200	903	0	0	0	0	0	0	0	603	903	0
289	1	0	0	0	0	0	0	200	300	0	0	0	0	0	0	0	200	903	0	0	0	0	0	0	0	603	903	0
289	2	0	0	0	0	0	0	200	300	0	0	0	0	0	0	0	200	903	0	0	0	0	0	0	0	603	903	0
289	3	0	0	0	0	0	0	200	300	0	0	0	0	0	0	0	200	903	0	0	0	0	0	0	0	603	903	0
289	4	0	0	0	0	0	0	200	300	0	0	0	0	0	0	0	200	903	0	0	0	0	0	0	0	603	903	0
289	5	0	0	0	0	0	0	200	300	0	0	0	0	0	0	0	200	903	0	0	0	0	0	0	0	603	903	0
289	6	0	0	0	0	0	0	200	300	0	0	0	0	0	0	0	200	903	0	0	0	0	0	0	0	603	903	0
289	7	0	0	0	0	0	0	200	300	0	0	0	0	0	0	0	200	903	0	0	0	0	0	0	0	603	903	0
289	8	0	0	0	0	0	0	200	300	0	0	0	0	0	0	0	200	903	0	0	0	0	0	0	0	603	903	0
289	9	0	0	0	0	0	0	200	300	0	0	0	0	0	0	0	200	903	0	0	0	0	0	0	0	603	903	0
290	0	0	0	0	0	0	0	200	300	0	0	0	0	0	0	0	200	903	0	0	0	0	0	0	0	603	903	0
290	1	0	0	0	0	0	0	200	300	0	0	0	0	0	0	0	200	903	0	0	0	0	0	0	0	603	903	0
290	2	0	0	0	0	0	0	200	300	0	0	0	0	0	0	0	200	903	0	0	0	0	0	0	0	603	903	0
290	3	0	0	0	0	0	0	200	300	0	0	0	0	0	0	0	200	903	0	0	0	0	0	0	0	603	903	0
290	4	0	0	0	0	0	0	200	300	0	0	0	0	0	0	0	200	903	0	0	0	0	0	0	0	603	903	0
290	5	0	0	0	0	0	0	200	300	0	0	0	0	0	0	0	200	903	0	0	0	0	0	0	0	603	903	0
290	6	0	0	0	0	0	0	200	300	0	0	0	0	0	0	0	200	903	0	0	0	0	0	0	0	603	903	0
290	7	0	0	0	0	0	0	200	300	0	0	0	0	0	0	0	200	903	0	0	0	0	0	0	0	603	903	0
290	8	0	0	0	0	0	0	200	300	0	0	0	0	0	0	0	200	903	0	0	0	0	0	0	0	603	903	0
290	9	0	0	0	0	0	0	200	300	0	0	0	0	0	0	0	200	903	0	0	0	0	0	0	0	603	903	0
291	0	0	0	0	0	0	0	200	300	0	0	0	0	0	0	0	200	903	0	0	0	0	0	0	0	603	903	0
291	1	0	0	0	0	0	0	200	300	0	0	0	0	0	0	0	200	903	0	0	0	0	0	0	0	603	903	0
291	2	0	0	0	0	0	0	200	300	0	0	0	0	0	0	0	200	903	0	0	0	0	0	0	0	603	903	0
291	3	0	0	0	0	0	0	200	300	0	0	0	0	0	0	0	200	903	0	0	0	0	0	0	0	603	903	0
291	4	0	0	0	0	0	0	200	300	0	0	0	0	0	0	0	200	903	0	0	0	0	0	0	0	603	903	0
291	5	0	0	0	0	0	0	200	300	0	0	0	0	0	0	0	200	903	0	0	0	0	0	0	0	603	903	0
291	6	0	0	0	0	0	0	200	300	0	0	0	0	0	0	0	200	903	0	0	0	0	0	0	0	603	903	0
291	7	0	0	0	0	0	0	200	300	0	0	0	0	0	0	0	200	903	0	0	0	0	0	0	0	603	903	0
291	8	0	0	0	0	0	0	200	300	0	0	0	0	0	0	0	200	903	0	0	0	0	0	0	0	603	903	0
291	9	0	0	0	0	0	0	200	300	0	0	0	0	0	0	0	200	903	0	0	0	0	0	0	0	603	903	0
292	0	0	0	0	0	0	0	200	300	0	0	0	0	0	0	0	200	903	0	0	0	0	0	0	0	603	903	0
292	1	0	0	0	0	0	0	200	300	0	0	0	0	0	0	0	200	903	0	0	0	0	0	0	0	603	903	0
292	2	0	0	0	0	0	0	200	300	0	0	0	0	0	0	0	200	903	0	0	0	0	0	0	0	603	903	0
292	3	0	0	0	0	0	0	200	300	0	0	0	0	0	0	0	200	903	0	0	0	0	0	0	0	603	903	0
292	4	0	0	0	0	0	0	200	300	0	0	0	0	0	0	0	200	903	0	0	0	0	0	0	0	603	903	0
292	5	0	0	0	0	0	0	200	300	0	0	0	0	0	0	0	200	903	0	0	0	0	0	0	0	603	903	0
292	6	0	0	0	0	0	0	200	300	0	0	0	0	0	0	0	200	903	0	0	0	0	0	0	0	603	903	0
292	7	0	0	0	0	0	0	200	300	0	0	0	0	0	0	0	200	903	0	0	0	0	0	0	0	603	903	0
292	8	0	0	0	0	0	0	200	300	0	0	0	0	0	0	0	200	903	0	0	0	0	0	0	0	603	903	0
292	9	0	0	0	0	0	0	200	300	0	0	0	0	0	0	0	200	903	0	0	0	0	0	0	0	603	903	0
293	0	0	0	0	0	0	0	200	300	0	0	0	0	0	0	0	200	903	0	0	0	0	0	0	0	603	903	0
293	1	0	0	0	0	0	0	200	300	0	0	0	0	0	0	0	200	903	0	0	0	0	0	0	0	603	903	0
293	2	0	0	0	0	0	0	200	300	0	0	0	0	0	0	0	200	903	0	0	0	0	0	0	0	603	903	0
293	3	0	0	0	0	0	0	200	300	0	0	0	0	0	0	0	200	903	0	0	0	0	0	0	0	603	903	0
293	4	0	0	0	0	0	0	200	300	0	0	0	0	0	0	0	200	903	0	0	0	0	0	0	0	603	903	0
293	5	0	0	0	0	0	0	200	300	0	0	0	0	0	0	0	200	903	0	0	0	0	0	0	0	603	903	0
293	6	0	0	0	0	0	0	200	300	0	0	0	0	0	0	0	200	903	0	0	0	0	0	0	0	603	903	0
293	7	0	0	0	0	0	0	200	300	0	0	0	0	0	0	0	200	903	0	0	0	0	0	0	0	603	903	0
293	8	0	0	0	0	0	0	200	300	0	0	0	0	0	0	0	200	903	0	0	0	0	0	0	0	603	903	0
293	9	0	0	0	0	0	0	200	300	0	0	0	0	0	0	0	200	903	0	0	0	0	0	0	0	603	903	0
294	0	0	0	0	0	0	0	200	300	0	0	0	0	0	0	0	200	903	0	0	0	0	0	0	0	603	903	0
294	1	0	0	0	0	0	0	200	300	0	0	0	0	0	0	0	200	903	0	0	0	0	0	0	0	603	903	0
294	2	0	0	0	0	0	0	200	300	0	0	0	0	0	0	0	200	903	0	0	0	0	0	0	0	603	903	0
294	3	0	0	0	0	0	0	200	300	0	0	0	0	0	0	0	200	903	0	0	0	0	0	0	0	603	903	0
294	4	0	0	0	0	0	0	200	300	0	0	0	0	0	0	0	200	903	0	0	0	0	0	0	0	603	903	0
294	5	0	0	0	0	0	0	200	300	0	0	0	0	0	0	0	200	903	0	0	0	0	0	0	0	603	903	0
294	6	0	0	0	0	0	0	200	300	0	0	0	0	0	0	0	200	903	0	0	0	0	0	0	0	603	903	0
294	7	0	0	0	0	0	0	200	300	0	0	0	0	0	0	0	200	903	0	0	0	0	0	0	0	603	903	0
294	8	0	0	0	0	0	0	200	300	0	0	0	0	0	0	0	200	903	0	0	0	0	0	0	0	603	903	0
294	9	0	0	0	0	0	0	200	300	0	0	0	0	0	0	0	200	903	0	0	0	0	0	0	0	603	903	0
295	0	0	0	0	0	0	0	200	300	0	0	0	0	0	0	0	200	903	0	0	0	0	0	0	0	603	903	0
295	1	0	0	0	0	0	0	200	300	0	0	0	0	0	0	0	200	903	0	0	0	0	0	0	0	603	903	0
295	2	0	0	0	0	0	0	200	300	0	0	0	0	0	0	0	200	903	0	0	0	0	0	0	0	603	903	0
295	3	0	0	0	0	0	0	200	300	0	0	0	0	0	0	0	200	903	0	0	0	0	0	0	0	603	903	0
295	4	0	0	0	0	0	0	200	300	0	0	0	0	0	0	0	200	903	0	0	0	0	0	0	0	603	903	0
295	5	0	0	0	0	0	0	200	300	0	0	0	0	0	0	0	200	903	0	0	0	0	0	0	0	603	903	0
295	6	0	0	0	0	0	0	200	300	0	0	0	0	0	0	0	200	903	0	0	0	0	0	0	0	603	903	0
295	7	0	0	0	0	0	0	200	300	0	0	0	0	0	0	0	200	903	0	0	0	0	0	0	0	603	903	0
295	8	0	0	0	0	0	0	200	300	0	0	0	0	0	0	0	200	903	0	0	0	0	0	0	0	603	903	0
295	9	0	0	0	0	0	0	200	300	0	0	0	0	0	0	0	200	903	0	0	0	0	0	0	0	603	903	0
296	0	0	0	0	0	0	0	200	300	0	0	0	0	0	0	0	200	903	0	0	0	0	0	0	0	603	903	0
296	1	0	0	0	0	0	0	200	300	0	0	0	0	0	0	0	200	903	0	0	0	0	0	0	0	603	903	0
296	2	0	0	0	0	0	0	200	300	0	0	0	0	0	0	0	200	903	0	0	0	0	0	0	0	603	903	0
296	3	0	0	0	0	0	0	200	300	0	0	0	0	0	0	0	200	903	0	0	0	0	0	0	0	603	903	0
296	4	0	0	0	0	0	0	200	300	0	0	0	0	0	0	0	200	903	0	0	0	0	0	0	0	603	903	0
296	5	0	0	0	0	0	0	200	300	0	0	0	0	0	0	0	200	903	0	0	0	0	0	0	0	603	903	0
296	6	0	0	0	0	0	0	200	300	0	0	0	0	0	0	0	200	903	0	0	0	0	0	0	0	603	903	0
296	7	0	0	0	0	0	0	200	300	0	0	0	0	0	0	0	200	903	0	0	0	0	0	0	0	603	903	0
296	8	0	0	0	0	0	0	200	300	0	0	0	0	0	0	0	200	903	0	0	0	0	0	0	0	603	903	0
296	9	0	0	0	0	0	0	200	300	0	0	0	0	0	0	0	200	903	0	0	0	0	0	0	0	603	903	0
297	0	0	0	0	0	0	0	200	300	0	0	0	0	0	0	0	200	903	0	0	0	0	0	0	0	603	903	0
297	1	0	0	0	0	0	0	200	300	0	0	0	0	0	0	0	200	903	0	0	0	0	0	0	0	603	903	0
297	2	0	0	0	0	0	0	200	300	0	0	0	0	0	0	0	200	903	0	0	0	0	0	0	0	603	903	0
297	3	0	0	0	0	0	0	200	300	0	0	0	0	0	0	0	200	903	0	0	0	0	0	0	0	603	903	0
297	4	0	0	0	0	0	0	200	300	0	0	0	0	0	0	0	200	903	0	0	0	0	0	0	0	603	903	0
297	5	0	0	0	0	0	0	200	300	0	0	0	0	0	0	0	200	903	0	0	0	0	0	0	0	603	903	0
297	6	0	0	0	0	0	0	200	300	0	0	0	0	0	0	0	200	903	0	0	0	0	0	0	0	603	903	0
297	7	0	0	0	0	0	0	200	300	0	0	0	0	0	0	0	200	903	0	0	0	0	0	0	0	603	903	0
297	8	0	0	0	0	0	0	200	300	0	0	0	0	0	0	0	200	903	0	0	0	0	0	0	0	603	903	0
297	9	0	0	0	0	0	0	200	300	0	0	0	0	0	0	0	200	903	0	0	0	0	0	0	0	603	903	0
298	0	0	0	0	0	0	0	200	300	0	0	0	0	0	0	0	200	903	0	0	0	0	0	0	0	603	903	0
298	1	0	0	0	0	0	0	200	300	0	0	0	0	0	0	0	200	903	0	0	0	0	0	0	0	603	903	0
298	2	0	0	0	0	0	0	200	300	0	0	0	0	0	0	0	200	903	0	0	0	0	0	0	0	603	903	0
298	3	0	0	0	0	0	0	200	300	0	0	0	0	0	0	0	200	903	0	0	0	0	0	0	0	603	903	0
298	4	0	0	0	0	0	0	200	300	0	0	0	0	0	0	0	200	903	0	0	0	0	0	0	0	603	903	0
298	5	0	0	0	0	0	0	200	300	0	0	0	0	0	0	0	200	903	0	0	0	0	0	0	0	603	903	0
298	6	0	0	0	0	0	0	200	300	0	0	0	0	0	0	0	200	903	0	0	0	0	0	0	0	603	903	0
298	7	0	0	0	0	0	0	200	300	0	0	0	0	0	0	0	200	903	0	0	0	0	0	0	0	603	903	0
298	8	0	0	0	0	0	0	200	300	0	0	0	0	0	0	0	200	903	0	0	0	0	0	0	0	603	903	0
298	9	0	0	0	0	0	0	200	300	0	0	0	0	0	0	0	200	903	0	0	0	0	0	0	0	603	903	0
299	0	0	0	0	0	0	0	200	300	0	0	0	0	0	0	0	200	903	0	0	0	0	0	0	0	603	903	0
299	1	0	0	0	0	0	0	200	300	0	0	0	0	0	0	0	200	903	0	0	0	0	0	0	0	603	903	0
299	2	0	0	0	0	0	0	200	300	0	0	0	0	0	0	0	200	903	0	0	0	0	0	0	0	603	903	0
299	3	0	0	0	0	0	0	200	300	0	0	0	0	0	0	0	200	903	0	0	0	0	0	0	0	603	903	0
299	4	0	0	0	0	0	0	200	300	0	0	0	0	0	0	0	200	903	0	0	0	0	0	0	0	603	903	0
299	5	0	0	0	0	0	0	200	300	0	0	0	0	0	0	0	200	903	0	0	0	0	0	0	0	603	903	0
299	6	0	0	0	0	0	0	200	300	0	0	0	0	0	0	0	200	903	0	0	0	0	0	0	0	603	903	0
299	7	0	0	0	0	0	0	200	300	0	0	0	0	0	0	0	200	903	0	0	0	0	0	0	0	603	903	0
299	8	0	0	0	0	0	0	200	300	0	0	0	0	0	0	0	200	903	0	0	0	0	0	0	0	603	903	0
299	9	0	0	0	0	0	0	200	300	0	0	0	0	0	0	0	200	903	0	0	0	0	0	0	0	603	903	0
300	0	0	0	0	0	0	0	200	300	0	0	0	0	0	0	0	200	903	0	0	0	0	0	0	0	603	903	0
300	1	0	0	0	0	0	0	200	300	0	0	0	0	0	0	0	200	903	0	0	0	0	0	0	0	603	903	0
300	2	0	0	0	0	0	0	200	300	0	0	0	0	0	0	0	200	903	0	0	0	0	0	0	0	603	903	0
300	3	0	0	0	0	0	0	200	300	0	0	0	0	0	0	0	200	903	0	0	0	0	0	0	0	603	903	0
300	4	0	0	0	0	0	0	200	300	0	0	0	0	0	0	0	200	903	0	0	0	0	0	0	0	603	903	0
300	5	0	0	0	0	0	0	200	300	0	0	0	0	0	0	0	200	903	0	0	0	0	0	0	0	603	903	0
300	6	0	0	0	0	0	0	200	300	0	0	0	0	0	0	0	200	903	0	0	0	0	0	0	0	603	903	0
300	7	0	0	0	0	0	0	200	300	0	0	0	0	0	0	0	200	903	0	0	0	0	0	0	0	603	903	0
300	8	0	0	0	0	0	0	200	300	0	0	0	0	0	0	0	200	903	0	0	0	0	0	0	0	603	903	0
300	9	0	0	0	0	0	0	200	300	0	0	0	0	0	0	0	200	903	0	0	0	0	0	0	0	603	903	0
301	0	0	0	0	0	0	0	200	300	0	0	0	0	0	0	0	200	903	0	0	0	0	0	0	0	603	903	0
301	1	0	0	0	0	0	0	200	300	0	0	0	0	0	0	0	200	903	0	0	0	0	0	0	0	603	903	0
301	2	0	0	0	0	0	0	200	300	0	0	0	0	0	0	0	200	903	0	0	0	0	0	0	0	603	903	0
301	3	0	0	0	0	0	0	200	300	0	0	0	0	0	0	0	200	903	0	0	0	0	0	0	0	603	903	0
301	4	0	0	0	0	0	0	200	300	0	0	0	0	0	0	0	200	903	0	0	0	0	0	0	0	603	903	0
301	5	0	0	0	0	0	0	200	300	0	0	0	0	0	0	0	200	903	0	0	0	0	0	0	0	603	903	0
301	6	0	0	0	0	0	0	200	300	0	0	0	0	0	0	0	200	903	0	0	0	0	0	0	0	603	903	0
301	7	0	0	0	0	0	0	200	300	0	0	0	0	0	0	0	200	903	0	0	0	0	0	0	0	603	903	0
301	8	0	0	0	0	0	0	200	300	0	0	0	0	0	0	0	200	903	0	0	0	0	0	0	0	603	903	0
301	9	0	0	0	0	0	0	200	300	0	0	0	0	0	0	0	200	903	0	0	0	0	0	0	0	603	903	0
302	0	0	0	0	0	0	0	200	300	0	0	0	0	0	0	0	200	903	0	0	0	0	0	0	0	603	903	0
302	1	0	0	0	0	0	0	200	300	0	0	0	0	0	0	0	200	903	0	0	0	0	0	0	0	603	903	0
302	2	0	0	0	0	0	0	200	300	0	0	0	0	0	0	0	200	903	0	0	0	0	0	0	0	603	903	0
302	3	0	0	0	0	0	0	200	300	0	0	0	0	0	0	0	200	903	0	0	0	0	0	0	0	603	903	0
302	4	0	0	0	0	0	0	200	300	0	0	0	0	0	0	0	200	903	0	0	0	0	0	0	0	603	903	0
302	5	0	0	0	0	0	0	200	300	0	0	0	0	0	0	0	200	903	0	0	0	0	0	0	0	603	903	0
302	6	0	0	0	0	0	0	200	300	0	0	0	0	0	0	0	200	903	0	0	0	0	0	0	0	603	903	0
302	7	0	0	0	0	0	0	200	300	0	0	0	0	0	0	0	200	903	0	0	0	0	0	0	0	603	903	0
302	8	0	0	0	0	0	0	200	300	0	0	0	0	0	0	0	200	903	0	0	0	0	0	0	0	603	903	0
302	9	0	0	0	0	0	0	200	300	0	0	0	0	0	0	0	200	903	0	0	0	0	0	0	0	603	903	0
303	0	0	0	0	0	0	0	200	300	0	0	0	0	0	0	0	200	903	0	0	0	0	0	0	0	603	903	0
303	1	0	0	0	0	0	0	200	300	0	0	0	0	0	0	0	200	903	0	0	0	0	0	0	0	603	903	0
303	2	0	0	0	0	0	0	200	300	0	0	0	0	0	0	0	200	903	0	0	0	0	0	0	0	603	903	0
303	3	0	0	0	0	0	0	200	300	0	0	0	0	0	0	0	200	903	0	0	0	0	0	0	0	603	903	0
303	4	0	0	0	0	0	0	200	300	0	0	0	0	0	0	0	200	903	0	0	0	0	0	0	0	603	903	0
303	5	0	0	0	0	0	0	200	300	0	0	0	0	0	0	0	200	903	0	0	0	0	0	0	0	603	903	0
303	6	0	0	0	0	0	0	200	300	0	0	0	0	0	0	0	200	903	0	0	0	0	0	0	0	603	903	0
303	7	0	0	0	0	0	0	200	300	0	0	0	0	0	0	0	200	903	0	0	0	0	0	0	0	603	903	0
303	8	0	0	0	0	0	0	200	300	0	0	0	0	0	0	0	200	903	0	0	0	0	0	0	0	603	903	0
303	9	0	0	0	0	0	0	200	300	0	0	0	0	0	0	0	200	903	0	0	0	0	0	0	0	603	903	0
304	0	0	0	0	0	0	0	200	300	0	0	0	0	0	0	0	200	903	0	0	0	0	0	0	0	603	903	0
304	1	0	0	0	0	0	0	200	300	0	0	0	0	0	0	0	200	903	0	0	0	0	0	0	0	603	903	0
304	2	0	0	0	0	0	0	200	300	0	0	0	0	0	0	0	200	903	0	0	0	0	0	0	0	603	903	0
304	3	0	0	0	0	0	0	200	300	0	0	0	0	0	0	0	200	903	0	0	0	0	0	0	0	603	903	0
304	4	0	0	0	0	0	0	200	300	0	0	0	0	0	0	0	200	903	0	0	0	0	0	0	0	603	903	0
304	5	0	0	0	0	0	0	200	300	0	0	0	0	0	0	0	200	903	0	0	0	0	0	0	0	603	903	0
304	6	0	0	0	0	0	0	200	300	0	0	0	0	0	0	0	200	903	0	0	0	0	0	0	0	603	903	0
304	7	0	0	0	0	0	0	200	300	0	0	0	0	0	0	0	200	903	0	0	0	0	0	0	0	603	903	0
304	8	0	0	0	0	0	0	200	300	0	0	0	0	0	0	0	200	903	0	0	0	0	0	0	0	603	903	0
304	9	0	0	0	0	0	0	200	300	0	0	0	0	0	0	0	200	903	0	0	0	0	0	0	0	603	903	0
305	0	0	0	0	0	0	0	200	300	0	0	0	0	0	0	0	200	903	0	0	0	0	0	0	0	603	903	0
305	1	0	0	0	0	0	0	200	300	0	0	0	0	0	0	0	200	903	0	0	0	0	0	0	0	603	903	0
305	2	0	0	0	0	0	0	200	300	0	0	0	0	0	0	0	200	903	0	0	0	0	0	0	0	603	903	0
305	3	0	0	0	0	0	0	200	300	0	0	0	0	0	0	0	200	903	0	0	0	0	0	0	0	603	903	0
305	4	0	0	0	0	0	0	200	300	0	0	0	0	0	0	0	200	903	0	0	0	0	0	0	0	603	903	0
305	5	0	0	0	0	0	0	200	300	0	0	0	0	0	0	0	200	903	0	0	0	0	0	0	0	603	903	0
305	6	0	0	0	0	0	0	200	300	0	0	0	0	0	0	0	200	903	0	0	0	0	0	0	0	603	903	0
305	7	0	0	0	0	0	0	200	300	0	0	0	0	0	0	0	200	903	0	0	0	0	0	0	0	603	903	0
305	8	0	0	0	0	0	0	200	300	0	0	0	0	0	0	0	200	903	0	0	0	0	0	0	0	603	903	0
305	9	0	0	0	0	0	0	200	300	0	0	0	0	0	0	0	200	903	0	0	0	0	0	0	0	603	903	0
306	0	0	0	0	0	0	0	200	300	0	0	0	0	0	0	0	200	903	0	0	0	0	0	0	0	603	903	0
306	1	0	0	0	0	0	0	200	300	0	0	0	0	0	0	0	200	903	0	0	0	0	0	0	0	603	903	0
306	2	0	0	0	0	0	0	200	300	0	0	0	0	0	0	0	200	903	0	0	0	0	0	0	0	603	903	0
306	3	0	0	0	0	0	0	200	300	0	0	0	0	0	0	0	200	903	0	0	0	0	0	0	0	603	903	0
306	4	0	0	0	0	0	0	200	300	0	0	0	0	0	0	0	200	903	0	0	0	0	0	0	0	603	903	0
306	5	0	0	0	0	0	0	200	300	0	0	0	0	0	0	0	200	903	0	0	0	0	0	0	0	603	903	0
306	6	0	0	0	0	0	0	200	300	0	0	0	0	0	0	0	200	903	0	0	0	0	0	0	0	603	903	0
306	7	0	0	0	0	0	0	200	300	0	0	0	0	0	0	0	200	903	0	0	0	0	0	0	0	603	903	0
306	8	0	0	0	0	0	0	200	300	0	0	0	0	0	0	0	200	903	0	0	0	0	0	0	0	603	903	0
306	9	0	0	0	0	0	0	200	300	0	0	0	0	0	0	0	200	903	0	0	0	0	0	0	0	603	903	0
307	0	0	0	0	0	0	0	200	300	0	0	0	0	0	0	0	200	903	0	0	0	0	0	0	0	603	903	0
307	1	0	0	0	0	0	0	200	300	0	0	0	0	0	0	0	200	903	0	0	0	0	0	0	0	603	903	0
307	2	0	0	0	0	0	0	200	300	0	0	0	0	0	0	0	200	903	0	0	0	0	0	0	0	603	903	0
307	3	0	0	0	0	0	0	200	300	0	0	0	0	0	0	0	200	903	0	0	0	0	0	0	0	603	903	0
307	4	0	0	0	0	0	0	200	300	0	0	0	0	0	0	0	200	903	0	0	0	0	0	0	0	603	903	0
307	5	0	0	0	0	0	0	200	300	0	0	0	0	0	0	0	200	903	0	0	0	0	0	0	0	603	903	0
307	6	0	0	0	0	0	0	200	300	0	0	0	0	0	0	0	200	903	0	0	0	0	0	0	0	603	903	0
307	7	0	0	0	0	0	0	200	300	0	0	0	0	0	0	0	200	903	0	0	0	0	0	0	0	603	903	0
307	8	0	0	0	0	0	0	200	300	0	0	0	0	0	0	0	200	903	0	0	0	0	0	0	0	603	903	0
307	9	0	0	0	0	0	0	200	300	0	0	0	0	0	0	0	200	903	0	0	0	0	0	0	0	603	903	0
308	0	0	0	0	0	0	0	200	300	0	0	0	0	0	0	0	200	903	0	0	0	0	0	0	0	603	903	0
308	1	0	0	0	0	0	0	200	300	0	0	0	0	0	0	0	200	903	0	0	0	0	0	0	0	603	903	0
308	2	0	0	0	0	0	0	200	300	0	0	0	0	0	0	0	200	903	0	0	0	0	0	0	0	603	903	0
308	3	0	0	0	0	0	0	200	300	0	0	0	0	0	0	0	200	903	0	0	0	0	0	0	0	603	903	0
308	4	0	0	0	0	0	0	200	300	0	0	0	0	0	0	0	200	903	0	0	0	0	0	0	0	603	903	0
308	5	0	0	0	0	0	0	200	300	0	0	0	0	0	0	0	200	903	0	0	0	0	0	0	0	603	903	0
308	6	0	0	0	0	0	0	200	300	0	0	0	0	0	0	0	200	903	0	0	0	0	0	0	0	603	903	0
308	7	0	0	0	0	0	0	200	300	0	0	0	0	0	0	0	200	903	0	0	0	0	0	0	0	603	903	0
308	8	0	0	0	0	0	0	200	300	0	0	0	0	0	0	0	200	903	0	0	0	0	0	0	0	603	903	0
308	9	0	0	0	0	0	0	200	300	0	0	0	0	0	0	0	200	903	0	0	0	0	0	0	0	603	903	0
309	0	0	0	0	0	0	0	200	300	0	0	0	0	0	0	0	200	903	0	0	0	0	0	0	0	603	903	0
309	1	0	0	0	0	0	0	200	300	0	0	0	0	0	0	0	200	903	0	0	0	0	0	0	0	603	903	0
309	2	0	0	0	0	0	0	200	300	0	0	0	0	0	0	0	200	903	0	0	0	0	0	0	0	603	903	0
309	3	0	0	0	0	0	0	200	300	0	0	0	0	0	0	0	200	903	0	0	0	0	0	0	0	603	903	0
309	4	0	0	0	0	0	0	200	300	0	0	0	0	0	0	0	200	903	0	0	0	0	0	0	0	603	903	0
309	5	0	0	0	0	0	0	200	300	0	0	0	0	0	0	0	200	903	0	0	0	0	0	0	0	603	903	0
309	6	0	0	0	0	0	0	200	300	0	0	0	0	0	0	0	200	903	0	0	0	0	0	0	0	603	903	0
309	7	0	0	0	0	0	0	200	300	0	0	0	0	0	0	0	200	903	0	0	0	0	0	0	0	603	903	0
309	8	0	0	0	0	0	0	200	300	0	0	0	0	0	0	0	200	903	0	0	0	0	0	0	0	603	903	0
309	9	0	0	0	0	0	0	200	300	0	0	0	0	0	0	0	200	903	0	0	0	0	0	0	0	603	903	0
310	0	0	0	0	0	0	0	200	300	0	0	0	0	0	0	0	200	903	0	0	0	0	0	0	0	603	903	0
310	1	0	0	0	0	0	0	200	300	0	0	0	0	0	0	0	200	903	0	0	0	0	0	0	0	603	903	0
310	2	0	0	0	0	0	0	200	300	0	0	0	0	0	0	0	200	903	0	0	0	0	0	0	0	603	903	0
310	3	0	0	0	0	0	0	200	300	0	0	0	0	0	0	0	200	903	0	0	0	0	0	0	0	603	903	0
310	4	0	0	0	0	0	0	200	300	0	0	0	0	0	0	0	200	903	0	0	0	0	0	0	0	603	903	0
310	5	0	0	0	0	0	0	200	300	0	0	0	0	0	0	0	200	903	0	0	0	0	0	0	0	603	903	0
310	6	0	0	0	0	0	0	200	300	0	0	0	0	0	0	0	200	903	0	0	0	0	0	0	0	603	903	0
310	7	0	0	0	0	0	0	200	300	0	0	0	0	0	0	0	200	903	0	0	0	0	0	0	0	603	903	0
310	8	0	0	0	0	0	0	200	300	0	0	0	0	0	0	0	200	903	0	0	0	0	0	0	0	603	903	0
310	9	0	0	0	0	0	0	200	300	0	0	0	0	0	0	0	200	903	0	0	0	0	0	0	0	603	903	0
311	0	0	0	0	0	0	0	200	300	0	0	0	0	0	0	0	200	903	0	0	0	0	0	0	0	603	903	0
311	1	0	0	0	0	0	0	200	300	0	0	0	0	0	0	0	200	903	0	0	0	0	0	0	0	603	903	0
311	2	0	0	0	0	0	0	200	300	0	0	0	0	0	0	0	200	903	0	0	0	0	0	0	0	603	903	0
311	3	0	0	0	0	0	0	200	300	0	0	0	0	0	0	0	200	903	0	0	0	0	0	0	0	603	903	0
311	4	0	0	0	0	0	0	200	300	0	0	0	0	0	0	0	200	903	0	0	0	0	0	0	0	603	903	0
311	5	0	0	0	0	0	0	200	300	0	0	0	0	0	0	0	200	903	0	0	0	0	0	0	0	603	903	0
311	6	0	0	0	0	0	0	200	300	0	0	0	0	0	0	0	200	903	0	0	0	0	0	0	0	603	903	0
311	7	0	0	0	0	0	0	200	300	0	0	0	0	0	0	0	200	903	0	0	0	0	0	0	0	603	903	0
311	8	0	0	0	0	0	0	200	300	0	0	0	0	0	0	0	200	903	0	0	0	0	0	0	0	603	903	0
311	9	0	0	0	0	0	0	200	300	0	0	0	0	0	0	0	200	903	0	0	0	0	0	0	0	603	903	0
312	0	0	0	0	0	0	0	200	300	0	0	0	0	0	0	0	200	903	0	0	0	0	0	0	0	603	903	0
312	1	0	0	0	0	0	0	200	300	0	0	0	0	0	0	0	200	903	0	0	0	0	0	0	0	603	903	0
312	2	0	0	0	0	0	0	200	300	0	0	0	0	0	0	0	200	903	0	0	0	0	0	0	0	603	903	0
312	3	0	0	0	0	0	0	200	300	0	0	0	0	0	0	0	200	903	0	0	0	0	0	0	0	603	903	0
312	4	0	0	0	0	0	0	200	300	0	0	0	0	0	0	0	200	903	0	0	0	0	0	0	0	603	903	0
312	5	0	0	0	0	0	0	200	300	0	0	0	0	0	0	0	200	903	0	0	0	0	0	0	0	603	903	0
312	6	0	0	0	0	0	0	200	300	0	0	0	0	0	0	0	200	903	0	0	0	0	0	0	0	603	903	0
312	7	0	0	0	0	0	0	200	300	0	0	0	0	0	0	0	200	903	0	0	0	0	0	0	0	603	903	0
312	8	0	0	0	0	0	0	200	300	0	0	0	0	0	0	0	200	903	0	0	0	0	0	0	0	603	903	0
312	9	0	0	0	0	0	0	200	300	0	0	0	0	0	0	0	200	903	0	0	0	0	0	0	0	603	903	0
313	0	0	0	0	0	0	0	200	300	0	0	0	0	0	0	0	200	903	0	0	0	0	0	0	0	603	903	0
313	1	0	0	0	0	0	0	200	300	0	0	0	0	0	0	0	200	903	0	0	0	0	0	0	0	603	903	0
313	2	0	0	0	0	0	0	200	300	0	0	0	0	0	0	0	200	903	0	0	0	0	0	0	0	603	903	0
313	3	0	0	0	0	0	0	200	300	0	0	0	0	0	0	0	200	903	0	0	0	0	0	0	0	603	903	0
313	4	0	0	0	0	0	0	200	300	0	0	0	0	0	0	0	200	903	0	0	0	0	0	0	0	603	903	0
313	5	0	0	0	0	0	0	200	300	0	0	0	0	0	0	0	200	903	0	0	0	0	0	0	0	603	903	0
313	6	0	0	0	0	0	0	200	300	0	0	0	0	0	0	0	200	903	0	0	0	0	0	0	0	603	903	0
313	7	0	0	0	0	0	0	200	300	0	0	0	0	0	0	0	200	903	0	0	0	0	0	0	0	603	903	0
313	8	0	0	0	0	0	0	200	300	0	0	0	0	0	0	0	200	903	0	0	0	0	0	0	0	603	903	0
313	9	0	0	0	0	0	0	200	300	0	0	0	0	0	0	0	200	903	0	0	0	0	0	0	0	603	903	0
314	0	0	0	0	0	0	0	200	300	0	0	0	0	0	0	0	200	903	0	0	0	0	0	0	0	603	903	0
314	1	0	0	0	0	0	0	200	300	0	0	0	0	0	0	0	200	903	0	0	0	0	0	0	0	603	903	0
314	2	0	0	0	0	0	0	200	300	0	0	0	0	0	0	0	200	903	0	0	0	0	0	0	0	603	903	0
314	3	0	0	0	0	0	0	200	300	0	0	0	0	0	0	0	200	903	0	0	0	0	0	0	0	603	903	0
314	4	0	0	0	0	0	0	200	300	0	0	0	0	0	0	0	200	903	0	0	0	0	0	0	0	603	903	0
314	5	0	0	0	0	0	0	200	300	0	0	0	0	0	0	0	200	903	0	0	0	0	0	0	0	603	903	0
314	6	0	0	0	0	0	0	200	300	0	0	0	0	0	0	0	200	903	0	0	0	0	0	0	0	603	903	0
314	7	0	0	0	0	0	0	200	300	0	0	0	0	0	0	0	200	903	0	0	0	0	0	0	0	603	903	0
314	8	0	0	0	0	0	0	200	300	0	0	0	0	0	0	0	200	903	0	0	0	0	0	0	0	603	903	0
314	9	0	0	0	0	0	0	200	300	0	0	0	0	0	0	0	200	903	0	0	0	0	0	0	0	603	903	0
315	0	0	0	0	0	0	0	200	300	0	0	0	0	0	0	0	200	903	0	0	0	0	0	0	0	603	903	0
315	1	0	0	0	0	0	0	200	300	0	0	0	0	0	0	0	200	903	0	0	0	0	0	0	0	603	903	0
315	2	0	0	0	0	0	0	200	300	0	0	0	0	0	0	0	200	903	0	0	0	0	0	0	0	603	903	0
315	3	0	0	0	0	0	0	200	300	0	0	0	0	0	0	0	200	903	0	0	0	0	0	0	0	603	903	0
315	4	0	0	0	0	0	0	200	300	0	0	0	0	0	0	0	200	903	0	0	0	0	0	0	0	603	903	0
315	5	0	0	0	0	0	0	200	300	0	0	0	0	0	0	0	200	903	0	0	0	0	0	0	0	603	903	0
315	6	0	0	0	0	0	0	200	300	0	0	0	0	0	0	0	200	903	0	0	0	0	0	0	0	603	903	0
315	7	0	0	0	0	0	0	200	300	0	0	0	0	0	0	0	200	903	0	0	0	0	0	0	0	603	903	0
315	8	0	0	0	0	0	0	200	300	0	0	0	0	0	0	0	200	903	0	0	0	0	0	0	0	603	903	0
315	9	0	0	0	0	0	0	200	300	0	0	0	0	0	0	0	200	903	0	0	0	0	0	0	0	603	903	0
316	0	0	0	0	0	0	0	200	300	0	0	0	0	0	0	0	200	903	0	0	0	0	0	0	0	603	903	0
316	1	0	0	0	0	0	0	200	300	0	0	0	0	0	0	0	200	903	0	0	0	0	0	0	0	603	903	0
316	2	0	0	0	0	0	0	200	300	0	0	0	0	0	0	0	200	903	0	0	0	0	0	0	0	603	903	0
316	3	0	0	0	0	0	0	200	300	0	0	0	0	0	0	0	200	903	0	0	0	0	0	0	0	603	903	0
316	4	0	0	0	0	0	0	200	300	0	0	0	0	0	0	0	200	903	0	0	0	0	0	0	0	603	903	0
316	5	0	0	0	0	0	0	200	300	0	0	0	0	0	0	0	200	903	0	0	0	0	0	0	0	603	903	0
316	6	0	0	0	0	0	0	200	300	0	0	0	0	0	0	0	200	903	0	0	0	0	0	0	0	603	903	0
316	7	0	0	0	0	0	0	200	300	0	0	0	0	0	0	0	200	903	0	0	0	0	0	0	0	603	903	0
316	8	0	0	0	0	0	0	200	300	0	0	0	0	0	0	0	200	903	0	0	0	0	0	0	0	603	903	0
316	9	0	0	0	0	0	0	200	300	0	0	0	0	0	0	0	200	903	0	0	0	0	0	0	0	603	903	0
317	0	0	0	0	0	0	0	200	300	0	0	0	0	0	0	0	200	903	0	0	0	0	0	0	0	603	903	0
317	1	0	0	0	0	0	0	200	300	0	0	0	0	0	0	0	200	903	0	0	0	0	0	0	0	603	903	0
317	2	0	0	0	0	0	0	200	300	0	0	0	0	0	0	0	200	903	0	0	0	0	0	0	0	603	903	0
317	3	0	0	0	0	0	0	200	300	0	0	0	0	0	0	0	200	903	0	0	0	0	0	0	0	603	903	0
317	4	0	0	0	0	0	0	200	300	0	0	0	0	0	0	0	200	903	0	0	0	0	0	0	0	603	903	0
317	5	0	0	0	0	0	0	200	300	0	0	0	0	0	0	0	200	903	0	0	0	0	0	0	0	603	903	0
317	6	0	0	0	0	0	0	200	300	0	0	0	0	0	0	0	200	903	0	0	0	0	0	0	0	603	903	0
317	7	0	0	0	0	0	0	200	300	0	0	0	0	0	0	0	200	903	0	0	0	0	0	0	0	603	903	0
317	8	0	0	0	0	0	0	200	300	0	0	0	0	0	0	0	200	903	0	0	0	0	0	0	0	603	903	0
317	9	0	0	0	0	0	0	200	300	0	0	0	0	0	0	0	200	903	0	0	0	0	0	0	0	603	903	0
318	0	0	0	0	0	0	0	200	300	0	0	0	0	0	0	0	200	903	0	0	0	0	0	0	0	603	903	0
318	1	0	0	0	0	0	0	200	300	0	0	0	0	0	0	0	200	903	0	0	0	0	0	0	0	603	903	0
318	2	0	0	0	0	0	0	200	300	0	0	0	0	0	0	0	200	903	0	0	0	0	0	0	0	603	903	0
318	3	0	0	0	0	0	0	200	300	0	0	0	0	0	0	0	200	903	0	0	0	0	0	0	0	603	903	0
318	4	0	0	0	0	0	0	200	300	0	0	0	0	0	0	0	200	903	0	0	0	0	0	0	0	603	903	0
318	5	0	0	0	0	0	0	200	300	0	0	0	0	0	0	0	200	903	0	0	0	0	0	0	0	603	903	0
318	6	0	0	0	0	0	0	200	300	0	0	0	0	0	0	0	200	903	0	0	0	0	0	0	0	603	903	0
318	7	0	0	0	0	0	0	200	300	0	0	0	0	0	0	0	200	903	0	0	0	0	0	0	0	603	903	0
318	8	0	0	0	0	0	0	200	300	0	0	0	0	0	0	0	200	903	0	0	0	0	0	0	0	603	903	0
318	9	0	0	0	0	0	0	200	300	0	0	0	0	0	0	0	200	903	0	0	0	0	0	0	0	603	903	0
319	0	0	0	0	0	0	0	200	300	0	0	0	0	0	0	0	200	903	0	0	0	0	0	0	0	603	903	0
319	1	0	0	0	0	0	0	200	300	0	0	0	0	0	0	0	200	903	0	0	0	0	0	0	0	603	903	0
319	2	0	0	0	0	0	0	200	300	0	0	0	0	0	0	0	200	903	0	0	0	0	0	0	0	603	903	0
319	3	0	0	0	0	0	0	200	300	0	0	0	0	0	0	0	200	903	0	0	0	0	0	0	0	603	903	0
319	4	0	0	0	0	0	0	200	300	0	0	0	0	0	0	0	200	903	0	0	0	0	0	0	0	603	903	0
319	5	0	0	0	0	0	0	200	300	0	0	0	0	0	0	0	200	903	0	0	0	0	0	0	0	603	903	0
319	6	0	0	0	0	0	0	200	300	0	0	0	0	0	0	0	200	903	0	0	0	0	0	0	0	603	903	0
319	7	0	0	0	0	0	0	200	300	0	0	0	0	0	0	0	200	903	0	0	0	0	0	0	0	603	903	0
319	8	0	0	0	0	0	0	200	300	0	0	0	0	0	0	0	200	903	0	0	0	0	0	0	0	603	903	0
319	9	0	0	0	0	0	0	200	300	0	0	0	0	0	0	0	200	903	0	0	0	0	0	0	0	603	903	0
320	0	0	0	0	0	0	0	200	300	0	0	0	0	0	0	0	200	903	0	0	0	0	0	0	0	603	903	0
320	1	0	0	0	0	0	0	200	300	0	0	0	0	0	0	0	200	903	0	0	0	0	0	0	0	603	903	0
320	2	0	0	0	0	0	0	200	300	0	0	0	0	0	0	0	200	903	0	0	0	0	0	0	0	603	903	0
320	3	0	0	0	0	0	0	200	300	0	0	0	0	0	0	0	200	903	0	0	0	0	0	0	0	603	903	0
320	4	0	0	0	0	0	0	200	300	0	0	0	0	0	0	0	200	903	0	0	0	0	0	0	0	603	903	0
320	5	0	0	0	0	0	0	200	300	0	0	0	0	0	0	0	200	903	0	0	0	0	0	0	0	603	903	0
320	6	0	0	0	0	0	0	200	300	0	0	0	0	0	0	0	200	903	0	0	0	0	0	0	0	603	903	0
320	7	0	0	0	0	0	0	200	300	0	0	0	0	0	0	0	200	903	0	0	0	0	0	0	0	603	903	0
320	8	0	0	0	0	0	0	200	300	0	0	0	0	0	0	0	200	903	0	0	0	0	0	0	0	603	903	0
320	9	0	0	0	0	0	0	200	300	0	0	0	0	0	0	0	200	903	0	0	0	0	0	0	0	603	903	0
321	0	0	0	0	0	0	0	200	300	0	0	0	0	0	0	0	200	903	0	0	0	0	0	0	0	603	903	0
321	1	0	0	0	0	0	0	200	300	0	0	0	0	0	0	0	200	903	0	0	0	0	0	0	0	603	903	0
321	2	0	0	0	0	0	0	200	300	0	0	0	0	0	0	0	200	903	0	0	0	0	0	0	0	603	903	0
321	3	0	0	0	0	0	0	200	300	0	0	0	0	0	0	0	200	903	0	0	0	0	0	0	0	603	903	0
321	4	0	0	0	0	0	0	200	300	0	0	0	0	0	0	0	200	903	0	0	0	0	0	0	0	603	903	0
321	5	0	0	0	0	0	0	200	300	0	0	0	0	0	0	0	200	903	0	0	0	0	0	0	0	603	903	0
321	6	0	0	0	0	0	0	200	300	0	0	0	0	0	0	0	200	903	0	0	0	0	0	0	0	603	903	0
321	7	0	0	0	0	0	0	200	300	0	0	0	0	0	0	0	200	903	0	0	0	0	0	0	0	603	903	0
321	8	0	0	0	0	0	0	200	300	0	0	0	0	0	0	0	200	903	0	0	0	0	0	0	0	603	903	0
321	9	0	0	0	0	0	0	200	300	0	0	0	0	0	0	0	200	903	0	0	0	0	0	0	0	603	903	0
322	0	0	0	0	0	0	0	200	300	0	0	0	0	0	0	0	200	903	0	0	0	0	0	0	0	603	903	0
322	1	0	0	0	0	0	0	200	300	0	0	0	0	0	0	0	200	903	0	0	0	0	0	0	0	603	903	0
322	2	0	0	0	0	0	0	200	300	0	0	0	0	0	0	0	200	903	0	0	0	0	0	0	0	603	903	0
322	3	0	0	0	0	0	0	200	300	0	0	0	0	0	0	0	200	903	0	0	0	0	0	0	0	603	903	0
322	4	0	0	0	0	0	0	200	300	0	0	0	0	0	0	0	200	903	0	0	0	0	0	0	0	603	903	0
322	5	0	0	0	0	0	0	200	300	0	0	0	0	0	0	0	200	903	0	0	0	0	0	0	0	603	903	0
322	6	0	0	0	0	0	0	200	300	0	0	0	0	0	0	0	200	903	0	0	0	0	0	0	0	603	903	0
322	7	0	0	0	0	0	0	200	300	0	0	0	0	0	0	0	200	903	0	0	0	0	0	0	0	603	903	0
322	8	0	0	0	0	0	0	200	300	0	0	0	0	0	0	0	200	903	0	0	0	0	0	0	0	603	903	0
322	9	0	0	0	0	0	0	200	300	0	0	0	0	0	0	0	200	903	0	0	0	0	0	0	0	603	903	0
323	0	0	0	0	0	0	0	200	300	0	0	0	0	0	0	0	200	903	0	0	0	0	0	0	0	603	903	0
323	1	0	0	0	0	0	0	200	300	0	0	0	0	0	0	0	200	903	0	0	0	0	0	0	0	603	903	0
323	2	0	0	0	0	0	0	200	300	0	0	0	0	0	0	0	200	903	0	0	0	0	0	0	0	603	903	0
323	3	0	0	0	0	0	0	200	300	0	0	0	0	0	0	0	200	903	0	0	0	0	0	0	0	603	903	0
323	4	0	0	0	0	0	0	200	300	0	0	0	0	0	0	0	200	903	0	0	0	0	0	0	0	603	903	0
323	5	0	0	0	0	0	0	200	300	0	0	0	0	0	0	0	200	903	0	0	0	0	0	0	0	603	903	0
323	6	0	0	0	0	0	0	200	300	0	0	0	0	0	0	0	200	903	0	0	0	0	0	0	0	603	903	0
323	7	0	0	0	0	0	0	200	300	0	0	0	0	0	0	0	200	903	0	0	0	0	0	0	0	603	903	0
323	8	0	0	0	0	0	0	200	300	0	0	0	0	0	0	0	200	903	0	0	0	0	0	0	0	603	903	0
323	9	0	0	0	0	0	0	200	300	0	0	0	0	0	0	0	200	903	0	0	0	0	0	0	0	603	903	0
324	0	0	0	0	0	0	0	200	300	0	0	0	0	0	0	0	200	903	0	0	0	0	0	0	0	603	903	0
324	1	0	0	0	0	0	0	200	300	0	0	0	0	0	0	0	200	903	0	0	0	0	0	0	0	603	903	0
324	2	0	0	0	0	0	0	200	300	0	0	0	0	0	0	0	200	903	0	0	0	0	0	0	0	603	903	0
324	3	0	0	0	0	0	0	200	300	0	0	0	0	0	0	0	200	903	0	0	0	0	0	0	0	603	903	0
324	4	0	0	0	0	0	0	200	300	0	0	0	0	0	0	0	200	903	0	0	0	0	0	0	0	603	903	0
324	5	0	0	0	0	0	0	200	300	0	0	0	0	0	0	0	200	903	0	0	0	0	0	0	0	603	903	0
324	6	0	0	0	0	0	0	200	300	0	0	0	0	0	0	0	200	903	0	0	0	0	0	0	0	603	903	0
324	7	0	0	0	0	0	0	200	300	0	0	0	0	0	0	0	200	903	0	0	0	0	0	0	0	603	903	0
324	8	0	0	0	0	0	0	200	300	0	0	0	0	0	0	0	200	903	0	0	0	0	0	0	0	603	903	0
324	9	0	0	0	0	0	0	200	300	0	0	0	0	0	0	0	200	903	0	0	0	0	0	0	0	603	903	0
325	0	0	0	0	0	0	0	200	300	0	0	0	0	0	0	0	200	903	0	0	0	0	0	0	0	603	903	0
325	1	0	0	0	0	0	0	200	300	0	0	0	0	0	0	0	200	903	0	0	0	0	0	0	0	603	903	0
325	2	0	0	0	0	0	0	200	300	0	0	0	0	0	0	0	200	903	0	0	0	0	0	0	0	603	903	0
325	3	0	0	0	0	0	0	200	300	0	0	0	0	0	0	0	200	903	0	0	0	0	0	0	0	603	903	0
325	4	0	0	0	0	0	0	200	300	0	0	0	0	0	0	0	200	903	0	0	0	0	0	0	0	603	903	0
325	5	0	0	0	0	0	0	200	300	0	0	0	0	0	0	0	200	903	0	0	0	0	0	0	0	603	903	0
325	6	0	0	0	0	0	0	200	300	0	0	0	0	0	0	0	200	903	0	0	0	0	0	0	0	603	903	0
325	7	0	0	0	0	0	0	200	300	0	0	0	0	0	0	0	200	903	0	0	0	0	0	0	0	603	903	0
325	8	0	0	0	0	0	0	200	300	0	0	0	0	0	0	0	200	903	0	0	0	0	0	0	0	603	903	0
325	9	0	0	0	0	0	0	200	300	0	0	0	0	0	0	0	200	903	0	0	0	0	0	0	0	603	903	0
326	0	0	0	0	0	0	0	200	300	0	0	0	0	0	0	0	200	903	0	0	0	0	0	0	0	603	903	0
326	1	0	0	0	0	0	0	200	300	0	0	0	0	0	0	0	200	903	0	0	0	0	0	0	0	603	903	0
326	2	0	0	0	0	0	0	200	300	0	0	0	0	0	0	0	200	903	0	0	0	0	0	0	0	603	903	0
326	3	0	0	0	0	0	0	200	300	0	0	0	0	0	0	0	200	903	0	0	0	0	0	0	0	603	903	0
326	4	0	0	0	0	0	0	200	300	0	0	0	0	0	0	0	200	903	0	0	0	0	0	0	0	603	903	0
326	5	0	0	0	0	0	0	200	300	0	0	0	0	0	0	0	200	903	0	0	0	0	0	0	0	603	903	0
326	6	0	0	0	0	0	0	200	300	0	0	0	0	0	0	0	200	903	0	0	0	0	0	0	0	603	903	0
326	7	0	0	0	0	0	0	200	300	0	0	0	0	0	0	0	200	903	0	0	0	0	0	0	0	603	903	0
326	8	0	0	0	0	0	0	200	300	0	0	0	0	0	0	0	200	903	0	0	0	0	0	0	0	603	903	0
326	9	0	0	0	0	0	0	200	300	0	0	0	0	0	0	0	200	903	0	0	0	0	0	0	0	603	903	0
327	0	0	0	0	0	0	0	200	300	0	0	0	0	0	0	0	200	903	0	0	0	0	0	0	0	603	903	0
327	1	0	0	0	0	0	0	200	300	0	0	0	0	0	0	0	200	903	0	0	0	0	0	0	0	603	903	0
327	2	0	0	0	0	0	0	200	300	0	0	0	0	0	0	0	200	903	0	0	0	0	0	0	0	603	903	0
327	3	0	0	0	0	0	0	200	300	0	0	0	0	0	0	0	200	903	0	0	0	0	0	0	0	603	903	0
327	4	0	0	0	0	0	0	200	300	0	0	0	0	0	0	0	200	903	0	0	0	0	0	0	0	603	903	0
327	5	0	0	0	0	0	0	200	300	0	0	0	0	0	0	0	200	903	0	0	0	0	0	0	0	603	903	0
327	6	0	0	0	0	0	0	200	300	0	0	0	0	0	0	0	200	903	0	0	0	0	0	0	0	603	903	0
327	7	0	0	0	0	0	0	200	300	0	0	0	0	0	0	0	200	903	0	0	0	0	0	0	0	603	903	0
327	8	0	0	0	0	0	0	200	300	0	0	0	0	0	0	0	200	903	0	0	0	0	0	0	0	603	903	0
327	9	0	0	0	0	0	0	200	300	0	0	0	0	0	0	0	200	903	0	0	0	0	0	0	0	603	903	0
328	0	0	0	0	0	0	0	200	300	0	0	0	0	0	0	0	200	903	0	0	0	0	0	0	0	603	903	0
328	1	0	0	0	0	0	0	200	300	0	0	0	0	0	0	0	200	903	0	0	0	0	0	0	0	603	903	0
328	2	0	0	0	0	0	0	200	300	0	0	0	0	0	0	0	200	903	0	0	0	0	0	0	0	603	903	0
328	3	0	0	0	0	0	0	200	300	0	0	0	0	0	0	0	200	903	0	0	0	0	0	0	0	603	903	0
328	4	0	0	0	0	0	0	200	300	0	0	0	0	0	0	0	200	903	0	0	0	0	0	0	0	603	903	0
328	5	0	0	0	0	0	0	200	300	0	0	0	0	0	0	0	200	903	0	0	0	0	0	0	0	603	903	0
328	6	0	0	0	0	0	0	200	300	0	0	0	0	0	0	0	200	903	0	0	0	0	0	0	0	603	903	0
328	7	0	0	0	0	0	0	200	300	0	0	0	0	0	0	0	200	903	0	0	0	0	0	0	0	603	903	0
328	8	0	0	0	0	0	0	200	300	0	0	0	0	0	0	0	200	903	0	0	0	0	0	0	0	603	903	0
328	9	0	0	0	0	0	0	200	300	0	0	0	0	0	0	0	200	903	0	0	0	0	0	0	0	603	903	0
329	0	0	0	0	0	0	0	200	300	0	0	0	0	0	0	0	200	903	0	0	0	0	0	0	0	603	903	0
329	1	0	0	0	0	0	0	200	300	0	0	0	0	0	0	0	200	903	0	0	0	0	0	0	0	603	903	0
329	2	0	0	0	0	0	0	200	300	0	0	0	0	0	0	0	200	903	0	0	0	0	0	0	0	603	903	0
329	3	0	0	0	0	0	0	200	300	0	0	0	0	0	0	0	200	903	0	0	0	0	0	0	0	603	903	0
329	4	0	0	0	0	0	0	200	300	0	0	0	0	0	0	0	200	903	0	0	0	0	0	0	0	603	903	0
329	5	0	0	0	0	0	0	200	300	0	0	0	0	0	0	0	200	903	0	0	0	0	0	0	0	603	903	0
329	6	0	0	0	0	0	0	200	300	0	0	0	0	0	0	0	200	903	0	0	0	0	0	0	0	603	903	0
329	7	0	0	0	0	0	0	200	300	0	0	0	0	0	0	0	200	903	0	0	0	0	0	0	0	603	903	0
329	8	0	0	0	0	0	0	200	300	0	0	0	0	0	0	0	200	903	0	0	0	0	0	0	0	603	903	0
329	9	0	0	0	0	0	0	200	300	0	0	0	0	0	0	0	200	903	0	0	0	0	0	0	0	603	903	0
330	0	0	0	0	0	0	0	200	300	0	0	0	0	0	0	0	200	903	0	0	0	0	0	0	0	603	903	0
330	1	0	0	0	0	0	0	200	300	0	0	0	0	0	0	0	200	903	0	0	0	0	0	0	0	603	903	0
330	2	0	0	0	0	0	0	200	300	0	0	0	0	0	0	0	200	903	0	0	0	0	0	0	0	603	903	0
330	3	0	0	0	0	0	0	200	300	0	0	0	0	0	0	0	200	903	0	0	0	0	0	0	0	603	903	0
330	4	0	0	0	0	0	0	200	300	0	0	0	0	0	0	0	200	903	0	0	0	0	0	0	0	603	903	0
330	5	0	0	0	0	0	0	200	300	0	0	0	0	0	0	0	200	903	0	0	0	0	0	0	0	603	903	0
330	6	0	0	0	0	0	0	200	300	0	0	0	0	0	0	0	200	903	0	0	0	0	0	0	0	603	903	0
330	7	0	0	0	0	0	0	200	300	0	0	0	0	0	0	0	200	903	0	0	0	0	0	0	0	603	903	0
330	8	0	0	0	0	0	0	200	300	0	0	0	0	0	0	0	200	903	0	0	0	0	0	0	0	603	903	0
330	9	0	0	0	0	0	0	200	300	0	0	0	0	0	0	0	200	903	0	0	0	0	0	0	0	603	903	0
331	0	0	0	0	0	0	0	200	300	0	0	0	0	0	0	0	200	903	0	0	0	0	0	0	0	603	903	0
331	1	0	0	0	0	0	0	200	300	0	0	0	0	0	0	0	200	903	0	0	0	0	0	0	0	603	903	0
331	2	0	0	0	0	0	0	200	300	0	0	0	0	0	0	0	200	903	0	0	0	0	0	0	0	603	903	0
331	3	0	0	0	0	0	0	200	300	0	0	0	0	0	0	0	200	903	0	0	0	0	0	0	0	603	903	0
331	4	0	0	0	0	0	0	200	300	0	0	0	0	0	0	0	200	903	0	0	0	0	0	0	0	603	903	0
331	5	0	0	0	0	0	0	200	300	0	0	0	0	0	0	0	200	903	0	0	0	0	0	0	0	603	903	0
331	6	0	0	0	0	0	0	200	300	0	0	0	0	0	0	0	200	903	0	0	0	0	0	0	0	603	903	0
331	7	0	0	0	0	0	0	200	300	0	0	0	0	0	0	0	200	903	0	0	0	0	0	0	0	603	903	0
331	8	0	0	0	0	0	0	200	300	0	0	0	0	0	0	0	200	903	0	0	0	0	0	0	0	603	903	0
331	9	0	0	0	0	0	0	200	300	0	0	0	0	0	0	0	200	903	0	0	0	0	0	0	0	603	903	0
332	0	0	0	0	0	0	0	200	300	0	0	0	0	0	0	0	200	903	0	0	0	0	0	0	0	603	903	0
332	1	0	0	0	0	0	0	200	300	0	0	0	0	0	0	0	200	903	0	0	0	0	0	0	0	603	903	0
332	2	0	0	0	0	0	0	200	300	0	0	0	0	0	0	0	200	903	0	0	0	0	0	0	0	603	903	0
332	3	0	0	0	0	0	0	200	300	0	0	0	0	0	0	0	200	903	0	0	0	0	0	0	0	603	903	0
332	4	0	0	0	0	0	0	200	300	0	0	0	0	0	0	0	200	903	0	0	0	0	0	0	0	603	903	0
332	5	0	0	0	0	0	0	200	300	0	0	0	0	0	0	0	200	903	0	0	0	0	0	0	0	603	903	0
332	6	0	0	0	0	0	0	200	300	0	0	0	0	0	0	0	200	903	0	0	0	0	0	0	0	603	903	0
332	7	0	0	0	0	0	0	200	300	0	0	0	0	0	0	0	200	903	0	0	0	0	0	0	0	603	903	0
332	8	0	0	0	0	0	0	200	300	0	0	0	0	0	0	0	200	903	0	0	0	0	0	0	0	603	903	0
332	9	0	0	0	0	0	0	200	300	0	0	0	0	0	0	0	200	903	0	0	0	0	0	0	0	603	903	0
333	0	0	0	0	0	0	0	200	300	0	0	0	0	0	0	0	200	903	0	0	0	0	0	0	0	603	903	0
333	1	0	0	0	0	0	0	200	300	0	0	0	0	0	0	0	200	903	0	0	0	0	0	0	0	603	903	0
333	2	0	0	0	0	0	0	200	300	0	0	0	0	0	0	0	200	903	0	0	0	0	0	0	0	603	903	0
333	3	0	0	0	0	0	0	200	300	0	0	0	0	0	0	0	200	903	0	0	0	0	0	0	0	603	903	0
333	4	0	0	0	0	0	0	200	300	0	0	0	0	0	0	0	200	903	0	0	0	0	0	0	0	603	903	0
333	5	0	0	0	0	0	0	200	300	0	0	0	0	0	0	0	200	903	0	0	0	0	0	0	0	603	903	0
333	6	0	0	0	0	0	0	200	300	0	0	0	0	0	0	0	200	903	0	0	0	0	0	0	0	603	903	0
333	7	0	0	0	0	0	0	200	300	0	0	0	0	0	0	0	200	903	0	0	0	0	0	0	0	603	903	0
333	8	0	0	0	0	0	0	200	300	0	0	0	0	0	0	0	200	903	0	0	0	0	0	0	0	603	903	0
333	9	0	0	0	0	0	0	200	300	0	0	0	0	0	0	0	200	903	0	0	0	0	0	0	0	603	903	0
334	0	0	0	0	0	0	0	200	300	0	0	0	0	0	0	0	200	903	0	0	0	0	0	0	0	603	903	0
334	1	0	0	0	0	0	0	200	300	0	0	0	0	0	0	0	200	903	0	0	0	0	0	0	0	603	903	0
334	2	0	0	0	0	0	0	200	300	0	0	0	0	0	0	0	200	903	0	0	0	0	0	0	0	603	903	0
334	3	0	0	0	0	0	0	200	300	0	0	0	0	0	0	0	200	903	0	0	0	0	0	0	0	603	903	0
334	4	0	0	0	0	0	0	200	300	0	0	0	0	0	0	0	200	903	0	0	0	0	0	0	0	603	903	0
334	5	0	0	0	0	0	0	200	300	0	0	0	0	0	0	0	200	903	0	0	0	0	0	0	0	603	903	0
334	6	0	0	0	0	0	0	200	300	0	0	0	0	0	0	0	200	903	0	0	0	0	0	0	0	603	903	0
334	7	0	0	0	0	0	0	200	300	0	0	0	0	0	0	0	200	903	0	0	0	0	0	0	0	603	903	0
334	8	0	0	0	0	0	0	200	300	0	0	0	0	0	0	0	200	903	0	0	0	0	0	0	0	603	903	0
334	9	0	0	0	0	0	0	200	300	0	0	0	0	0	0	0	200	903	0	0	0	0	0	0	0	603	903	0
335	0	0	0	0	0	0	0	200	300	0	0	0	0	0	0	0	200	903	0	0	0	0	0	0	0	603	903	0
335	1	0	0	0	0	0	0	200	300	0	0	0	0	0	0	0	200	903	0	0	0	0	0	0	0	603	903	0
335	2	0	0	0	0	0	0	200	300	0	0	0	0	0	0	0	200	903	0	0	0	0	0	0	0	603	903	0
335	3	0	0	0	0	0	0	200	300	0	0	0	0	0	0	0	200	903	0	0	0	0	0	0	0	603	903	0
335	4	0	0	0	0	0	0	200	300	0	0	0	0	0	0	0	200	903	0	0	0	0	0	0	0	603	903	0
335	5	0	0	0	0	0	0	200	300	0	0	0	0	0	0	0	200	903	0	0	0	0	0	0	0	603	903	0
335	6	0	0	0	0	0	0	200	300	0	0	0	0	0	0	0	200	903	0	0	0	0	0	0	0	603	903	0
335	7	0	0	0	0	0	0	200	300	0	0	0	0	0	0	0	200	903	0	0	0	0	0	0	0	603	903	0
335	8	0	0	0	0	0	0	200	300	0	0	0	0	0	0	0	200	903	0	0	0	0	0	0	0	603	903	0
335	9	0	0	0	0	0	0	200	300	0	0	0	0	0	0	0	200	903	0	0	0	0	0	0	0	603	903	0
336	0	0	0	0	0	0	0	200	300	0	0	0	0	0	0	0	200	903	0	0	0	0	0	0	0	603	903	0
336	1	0	0	0	0	0	0	200	300	0	0	0	0	0	0	0	200	903	0	0	0	0	0	0	0	603	903	0
336	2	0	0	0	0	0	0	200	300	0	0	0	0	0	0	0	200	903	0	0	0	0	0	0	0	603	903	0
336	3	0	0	0	0	0	0	200	300	0	0	0	0	0	0	0	200	903	0	0	0	0	0	0	0	603	903	0
336	4	0	0	0	0	0	0	200	300	0	0	0	0	0	0	0	200	903	0	0	0	0	0	0	0	603	903	0
336	5	0	0	0	0	0	0	200	300	0	0	0	0	0	0	0	200	903	0	0	0	0	0	0	0	603	903	0
336	6	0	0	0	0	0	0	200	300	0	0	0	0	0	0	0	200	903	0	0	0	0	0	0	0	603	903	0
336	7	0	0	0	0	0	0	200	300	0	0	0	0	0	0	0	200	903	0	0	0	0	0	0	0	603	903	0
336	8	0	0	0	0	0	0	200	300	0	0	0	0	0	0	0	200	903	0	0	0	0	0	0	0	603	903	0
336	9	0	0	0	0	0	0	200	300	0	0	0	0	0	0	0	200	903	0	0	0	0	0	0	0	603	903	0
337	0	0	0	0	0	0	0	200	300	0	0	0	0	0	0	0	200	903	0	0	0	0	0	0	0	603	903	0
337	1	0	0	0	0	0	0	200	300	0	0	0	0	0	0	0	200	903	0	0	0	0	0	0	0	603	903	0
337	2	0	0	0	0	0	0	200	300	0	0	0	0	0	0	0	200	903	0	0	0	0	0	0	0	603	903	0
337	3	0	0	0	0	0	0	200	300	0	0	0	0	0	0	0	200	903	0	0	0	0	0	0	0	603	903	0
337	4	0	0	0	0	0	0	200	300	0	0	0	0	0	0	0	200	903	0	0	0	0	0	0	0	603	903	0
337	5	0	0	0	0	0	0	200	300	0	0	0	0	0	0	0	200	903	0	0	0	0	0	0	0	603	903	0
337	6	0	0	0	0	0	0	200	300	0	0	0	0	0	0	0	200	903	0	0	0	0	0	0	0	603	903	0
337	7	0	0	0	0	0	0	200	300	0	0	0	0	0	0	0	200	903	0	0	0	0	0	0	0	603	903	0
337	8	0	0	0	0	0	0	200	300	0	0	0	0	0	0	0	200	903	0	0	0	0	0	0	0	603	903	0
337	9	0	0	0	0	0	0	200	300	0	0	0	0	0	0	0	200	903	0	0	0	0	0	0	0	603	903	0
338	0	0	0	0	0	0	0	200	300	0	0	0	0	0	0	0	200	903	0	0	0	0	0	0	0	603	903	0
338	1	0	0	0	0	0	0	200	300	0	0	0	0	0	0	0	200	903	0	0	0	0	0	0	0	603	903	0
338	2	0	0	0	0	0	0	200	300	0	0	0	0	0	0	0	200	903	0	0	0	0	0	0	0	603	903	0
338	3	0	0	0	0	0	0	200	300	0	0	0	0	0	0	0	200	903	0	0	0	0	0	0	0	603	903	0
338	4	0	0	0	0	0	0	200	300	0	0	0	0	0	0	0	200	903	0	0	0	0	0	0	0	603	903	0
338	5	0	0	0	0	0	0	200	300	0	0	0	0	0	0	0	200	903	0	0	0	0	0	0	0	603	903	0
338	6	0	0	0	0	0	0	200	300	0	0	0	0	0	0	0	200	903	0	0	0	0	0	0	0	603	903	0
338	7	0	0	0	0	0	0	200	300	0	0	0	0	0	0	0	200	903	0	0	0	0	0	0	0	603	903	0
338	8	0	0	0	0	0	0	200	300	0	0	0	0	0	0	0	200	903	0	0	0	0	0	0	0	603	903	0
338	9	0	0	0	0	0	0	200	300	0	0	0	0	0	0	0	200	903	0	0	0	0	0	0	0	603	903	0
339	0	0	0	0	0	0	0	200	300	0	0	0	0	0	0	0	200	903	0	0	0	0	0	0	0	603	903	0
339	1	0	0	0	0	0	0	200	300	0	0	0	0	0	0	0	200	903	0	0	0	0	0	0	0	603	903	0
339	2	0	0	0	0	0	0	200	300	0	0	0	0	0	0	0	200	903	0	0	0	0	0	0	0	603	903	0
339	3	0	0	0	0	0	0	200	300	0	0	0	0	0	0	0	200	903	0	0	0	0	0	0	0	603	903	0
339	4	0	0	0	0	0	0	200	300	0	0	0	0	0	0	0	200	903	0	0	0	0	0	0	0	603	903	0
339	5	0	0	0	0	0	0	200	300	0	0	0	0	0	0	0	200	903	0	0	0	0	0	0	0	603	903	0
339	6	0	0	0	0	0	0	200	300	0	0	0	0	0	0	0	200	903	0	0	0	0	0	0	0	603	903	0
339	7	0	0	0	0	0	0	200	300	0	0	0	0	0	0	0	200	903	0	0	0	0	0	0	0	603	903	0
339	8	0	0	0	0	0	0	200	300	0	0	0	0	0	0	0	200	903	0	0	0	0	0	0	0	603	903	0
339	9	0	0	0	0	0	0	200	300	0	0	0	0	0	0	0	200	903	0	0	0	0	0	0	0	603	903	0
340	0	0	0	0	0	0	0	200	300	0	0	0	0	0	0	0	200	903	0	0	0	0	0	0	0	603	903	0
340	1	0	0	0	0	0	0	200	300	0	0	0	0	0	0	0	200	903	0	0	0	0	0	0	0	603	903	0
340	2	0	0	0	0	0	0	200	300	0	0	0	0	0	0	0	200	903	0	0	0	0	0	0	0	603	903	0
340	3	0	0	0	0	0	0	200	300	0	0	0	0	0	0	0	200	903	0	0	0	0	0	0	0	603	903	0
340	4	0	0	0	0	0	0	200	300	0	0	0	0	0	0	0	200	903	0	0	0	0	0	0	0	603	903	0
340	5	0	0	0	0	0	0	200	300	0	0	0	0	0	0	0	200	903	0	0	0	0	0	0	0	603	903	0
340	6	0	0	0	0	0	0	200	300	0	0	0	0	0	0	0	200	903	0	0	0	0	0	0	0	603	903	0
340	7	0	0	0	0	0	0	200	300	0	0	0	0	0	0	0	200	903	0	0	0	0	0	0	0	603	903	0
340	8	0	0	0	0	0	0	200	300	0	0	0	0	0	0	0	200	903	0	0	0	0	0	0	0	603	903	0
340	9	0	0	0	0	0	0	200	300	0	0	0	0	0	0	0	200	903	0	0	0	0	0	0	0	603	903	0
341	0	0	0	0	0	0	0	200	300	0	0	0	0	0	0	0	200	903	0	0	0	0	0	0	0	603	903	0
341	1	0	0	0	0	0	0	200	300	0	0	0	0	0	0	0	200	903	0	0	0	0	0	0	0	603	903	0
341	2	0	0	0	0	0	0	200	300	0	0	0	0	0	0	0	200	903	0	0	0	0	0	0	0	603	903	0
341	3	0	0	0	0	0	0	200	300	0	0	0	0	0	0	0	200	903	0	0	0	0	0	0	0	603	903	0
341	4	0	0	0	0	0	0	200	300	0	0	0	0	0	0	0	200	903	0	0	0	0	0	0	0	603	903	0
341	5	0	0	0	0	0	0	200	300	0	0	0	0	0	0	0	200	903	0	0	0	0	0	0	0	603	903	0
341	6	0	0	0	0	0	0	200	300	0	0	0	0	0	0	0	200	903	0	0	0	0	0	0	0	603	903	0
341	7	0	0	0	0	0	0	200	300	0	0	0	0	0	0	0	200	903	0	0	0	0	0	0	0	603	903	0
341	8	0	0	0	0	0	0	200	300	0	0	0	0	0	0	0	200	903	0	0	0	0	0	0	0	603	903	0
341	9	0	0	0	0	0	0	200	300	0	0	0	0	0	0	0	200	903	0	0	0	0	0	0	0	603	903	0
342	0	0	0	0	0	0	0	200	300	0	0	0	0	0	0	0	200	903	0	0	0	0	0	0	0	603	903	0
342	1	0	0	0	0	0	0	200	300	0	0	0	0	0	0	0	200	903	0	0	0	0	0	0	0	603	903	0
342	2	0	0	0	0	0	0	200	300	0	0	0	0	0	0	0	200	903	0	0	0	0	0	0	0	603	903	0
342	3	0	0	0	0	0	0	200	300	0	0	0	0	0	0	0	200	903	0	0	0	0	0	0	0	603	903	0
342	4	0	0	0	0	0	0	200	300	0	0	0	0	0	0	0	200	903	0	0	0	0	0	0	0	603	903	0
342	5	0	0	0	0	0	0	200	300	0	0	0	0	0	0	0	200	903	0	0	0	0	0	0	0	603	903	0
342	6	0	0	0	0	0	0	200	300	0	0	0	0	0	0	0	200	903	0	0	0	0	0	0	0	603	903	0
342	7	0	0	0	0	0	0	200	300	0	0	0	0	0	0	0	200	903	0	0	0	0	0	0	0	603	903	0
342	8	0	0	0	0	0	0	200	300	0	0	0	0	0	0	0	200	903	0	0	0	0	0	0	0	603	903	0
342	9	0	0	0	0	0	0	200	300	0	0	0	0	0	0	0	200	903	0	0	0	0	0	0	0	603	903	0
343	0	0	0	0	0	0	0	200	300	0	0	0	0	0	0	0	200	903	0	0	0	0	0	0	0	603	903	0
343	1	0	0	0	0	0	0	200	300	0	0	0	0	0	0	0	200	903	0	0	0	0	0	0	0	603	903	0
343	2	0	0	0	0	0	0	200	300	0	0	0	0	0	0	0	200	903	0	0	0	0	0	0	0	603	903	0
343	3	0	0	0	0	0	0	200	300	0	0	0	0	0	0	0	200	903	0	0	0	0	0	0	0	603	903	0
343	4	0	0	0	0	0	0	200	300	0	0	0	0	0	0	0	200	903	0	0	0	0	0	0	0	603	903	0
343	5	0	0	0	0	0	0	200	300	0	0	0	0	0	0	0	200	903	0	0	0	0	0	0	0	603	903	0
343	6	0	0	0	0	0	0	200	300	0	0	0	0	0	0	0	200	903	0	0	0	0	0	0	0	603	903	0
343	7	0	0	0	0	0	0	200	300	0	0	0	0	0	0	0	200	903	0	0	0	0	0	0	0	603	903	0
343	8	0	0	0	0	0	0	200	300	0	0	0	0	0	0	0	200	903	0	0	0	0	0	0	0	603	903	0
343	9	0	0	0	0	0	0	200	300	0	0	0	0	0	0	0	200	903	0	0	0	0	0	0	0	603	903	0
344	0	0	0	0	0	0	0	200	300	0	0	0	0	0	0	0	200	903	0	0	0	0	0	0	0	603	903	0
344	1	0	0	0	0	0	0	200	300	0	0	0	0	0	0	0	200	903	0	0	0	0	0	0	0	603	903	0
344	2	0	0	0	0	0	0	200	300	0	0	0	0	0	0	0	200	903	0	0	0	0	0	0	0	603	903	0
344	3	0	0	0	0	0	0	200	300	0	0	0	0	0	0	0	200	903	0	0	0	0	0	0	0	603	903	0
344	4	0	0	0	0	0	0	200	300	0	0	0	0	0	0	0	200	903	0	0	0	0	0	0	0	603	903	0
344	5	0	0	0	0	0	0	200	300	0	0	0	0	0	0	0	200	903	0	0	0	0	0	0	0	603	903	0
344	6	0	0	0	0	0	0	200	300	0	0	0	0	0	0	0	200	903	0	0	0	0	0	0	0	603	903	0
344	7	0	0	0	0	0	0	200	300	0	0	0	0	0	0	0	200	903	0	0	0	0	0	0	0	603	903	0
344	8	0	0	0	0	0	0	200	300	0	0	0	0	0	0	0	200	903	0	0	0	0	0	0	0	603	903	0
344	9	0	0	0	0	0	0	200	300	0	0	0	0	0	0	0	200	903	0	0	0	0	0	0	0	603	903	0
345	0	0	0	0	0	0	0	200	300	0	0	0	0	0	0	0	200	903	0	0	0	0	0	0	0	603	903	0
345	1	0	0	0	0	0	0	200	300	0	0	0	0	0	0	0	200	903	0	0	0	0	0	0	0	603	903	0
345	2	0	0	0	0	0	0	200	300	0	0	0	0	0	0	0	200	903	0	0	0	0	0	0	0	603	903	0
345	3	0	0	0	0	0	0	200	300	0	0	0	0	0	0	0	200	903	0	0	0	0	0	0	0	603	903	0
345	4	0	0	0	0	0	0	200	300	0	0	0	0	0	0	0	200	903	0	0	0	0	0	0	0	603	903	0
345	5	0	0	0	0	0	0	200	300	0	0	0	0	0	0	0	200	903	0	0	0	0	0	0	0	603	903	0
345	6	0	0	0	0	0	0	200	300	0	0	0	0	0	0	0	200	903	0	0	0	0	0	0	0	603	903	0
345	7	0	0	0	0	0	0	200	300	0	0	0	0	0	0	0	200	903	0	0	0	0	0	0	0	603	903	0
345	8	0	0	0	0	0	0	200	300	0	0	0	0	0	0	0	200	903	0	0	0	0	0	0	0	603	903	0
345	9	0	0	0	0	0	0	200	300	0	0	0	0	0	0	0	200	903	0	0	0	0	0	0	0	603	903	0
346	0	0	0	0	0	0	0	200	300	0	0	0	0	0	0	0	200	903	0	0	0	0	0	0	0	603	903	0
346	1	0	0	0	0	0	0	200	300	0	0	0	0	0	0	0	200	903	0	0	0	0	0	0	0	603	903	0
346	2	0	0	0	0	0	0	200	300	0	0	0	0	0	0	0	200	903	0	0	0	0	0	0	0	603	903	0
346	3	0	0	0	0	0	0	200	300	0	0	0	0	0	0	0	200	903	0	0	0	0	0	0	0	603	903	0
346	4	0	0	0	0	0	0	200	300	0	0	0	0	0	0	0	200	903	0	0	0	0	0	0	0	603	903	0
346	5	0	0	0	0	0	0	200	300	0	0	0	0	0	0	0	200	903	0	0	0	0	0	0	0	603	903	0
346	6	0	0	0	0	0	0	200	300	0	0	0	0	0	0	0	200	903	0	0	0	0	0	0	0	603	903	0
346	7	0	0	0	0	0	0	200	300	0	0	0	0	0	0	0	200	903	0	0	0	0	0	0	0	603	903	0
346	8	0	0	0	0	0	0	200	300	0	0	0	0	0	0	0	200	903	0	0	0	0	0	0	0	603	903	0
346	9	0	0	0	0	0	0	200	300	0	0	0	0	0	0	0	200	903	0	0	0	0	0	0	0	603	903	0
347	0	0	0	0	0	0	0	200	300	0	0	0	0	0	0	0	200	903	0	0	0	0	0	0	0	603	903	0
347	1	0	0	0	0	0	0	200	300	0	0	0	0	0	0	0	200	903	0	0	0	0	0	0	0	603	903	0
347	2	0	0	0	0	0	0	200	300	0	0	0	0	0	0	0	200	903	0	0	0	0	0	0	0	603	903	0
347	3	0	0	0	0	0	0	200	300	0	0	0	0	0	0	0	200	903	0	0	0	0	0	0	0	603	903	0
347	4	0	0	0	0	0	0	200	300	0	0	0	0	0	0	0	200	903	0	0	0	0	0	0	0	603	903	0
347	5	0	0	0	0	0	0	200	300	0	0	0	0	0	0	0	200	903	0	0	0	0	0	0	0	603	903	0
347	6	0	0	0	0	0	0	200	300	0	0	0	0	0	0	0	200	903	0	0	0	0	0	0	0	603	903	0
347	7	0	0	0	0	0	0	200	300	0	0	0	0	0	0	0	200	903	0	0	0	0	0	0	0	603	903	0
347	8	0	0	0	0	0	0	200	300	0	0	0	0	0	0	0	200	903	0	0	0	0	0	0	0	603	903	0
347	9	0	0	0	0	0	0	200	300	0	0	0	0	0	0	0	200	903	0	0	0	0	0	0	0	603	903	0
348	0	0	0	0	0	0	0	200	300	0	0	0	0	0	0	0	200	903	0	0	0	0	0	0	0	603	903	0
348	1	0	0	0	0	0	0	200	300	0	0	0	0	0	0	0	200	903	0	0	0	0	0	0	0	603	903	0
348	2	0	0	0	0	0	0	200	300	0	0	0	0	0	0	0	200	903	0	0	0	0	0	0	0	603	903	0
348	3	0	0	0	0	0	0	200	300	0	0	0	0	0	0	0	200	903	0	0	0	0	0	0	0	603	903	0
348	4	0	0	0	0	0	0	200	300	0	0	0	0	0	0	0	200	903	0	0	0	0	0	0	0	603	903	0
348	5	0	0	0	0	0	0	200	300	0	0	0	0	0	0	0	200	903	0	0	0	0	0	0	0	603	903	0
348	6	0	0	0	0	0	0	200	300	0	0	0	0	0	0	0	200	903	0	0	0	0	0	0	0	603	903	0
348	7	0	0	0	0	0	0	200	300	0	0	0	0	0	0	0	200	903	0	0	0	0	0	0	0	603	903	0
348	8	0	0	0	0	0	0	200	300	0	0	0	0	0	0	0	200	903	0	0	0	0	0	0	0	603	903	0
348	9	0	0	0	0	0	0	200	300	0	0	0	0	0	0	0	200	903	0	0	0	0	0	0	0	603	903	0
349	0	0	0	0	0	0	0	200	300	0	0	0	0	0	0	0	200	903	0	0	0	0	0	0	0	603	903	0
349	1	0	0	0	0	0	0	200	300	0	0	0	0	0	0	0	200	903	0	0	0	0	0	0	0	603	903	0
349	2	0	0	0	0	0	0	200	300	0	0	0	0	0	0	0	200	903	0	0	0	0	0	0	0	603	903	0
349	3	0	0	0	0	0	0	200	300	0	0	0	0	0	0	0	200	903	0	0	0	0	0	0	0	603	903	0
349	4	0	0	0	0	0	0	200	300	0	0	0	0	0	0	0	200	903	0	0	0	0	0	0	0	603	903	0
349	5	0	0	0	0	0	0	200	300	0	0	0	0	0	0	0	200	903	0	0	0	0	0	0	0	603	903	0
349	6	0	0	0	0	0	0	200	300	0	0	0	0	0	0	0	200	903	0	0	0	0	0	0	0	603	903	0
349	7	0	0	0	0	0	0	200	300	0	0	0	0	0	0	0	200	903	0	0	0	0	0	0	0	603	903	0
349	8	0	0	0	0	0	0	200	300	0	0	0	0	0	0	0	200	903	0	0	0	0	0	0	0	603	903	0
349	9	0	0	0	0	0	0	200	300	0	0	0	0	0	0	0	200	903	0	0	0	0	0	0	0	603	903	0
350	0	0	0	0	0	0	0	200	300	0	0	0	0	0	0	0	200	903	0	0	0	0	0	0	0	603	903	0
350	1	0	0	0	0	0	0	200	300	0	0	0	0	0	0	0	200	903	0	0	0	0	0	0	0	603	903	0
350	2	0	0	0	0	0	0	200	300	0	0	0	0	0	0	0	200	903	0	0	0	0	0	0	0	603	903	0
350	3	0	0	0	0	0	0	200	300	0	0	0	0	0	0	0	200	903	0	0	0	0	0	0	0	603	903	0
350	4	0	0	0	0	0	0	200	300	0	0	0	0	0	0	0	200	903	0	0	0	0	0	0	0	603	903	0
350	5	0	0	0	0	0	0	200	300	0	0	0	0	0	0	0	200	903	0	0	0	0	0	0	0	603	903	0
350	6	0	0	0	0	0	0	200	300	0	0	0	0	0	0	0	200	903	0	0	0	0	0	0	0	603	903	0
350	7	0	0	0	0	0	0	200	300	0	0	0	0	0	0	0	200	903	0	0	0	0	0	0	0	603	903	0
350	8	0	0	0	0	0	0	200	300	0	0	0	0	0	0	0	200	903	0	0	0	0	0	0	0	603	903	0
350	9	0	0	0	0	0	0	200	300	0	0	0	0	0	0	0	200	903	0	0	0	0	0	0	0	603	903	0
351	0	0	0	0	0	0	0	200	300	0	0	0	0	0	0	0	200	903	0	0	0	0	0	0	0	603	903	0
351	1	0	0	0	0	0	0	200	300	0	0	0	0	0	0	0	200	903	0	0	0	0	0	0	0	603	903	0
351	2	0	0	0	0	0	0	200	300	0	0	0	0	0	0	0	200	903	0	0	0	0	0	0	0	603	903	0
351	3	0	0	0	0	0	0	200	300	0	0	0	0	0	0	0	200	903	0	0	0	0	0	0	0	603	903	0
351	4	0	0	0	0	0	0	200	300	0	0	0	0	0	0	0	200	903	0	0	0	0	0	0	0	603	903	0
351	5	0	0	0	0	0	0	200	300	0	0	0	0	0	0	0	200	903	0	0	0	0	0	0	0	603	903	0
351	6	0	0	0	0	0	0	200	300	0	0	0	0	0	0	0	200	903	0	0	0	0	0	0	0	603	903	0
351	7	0	0	0	0	0	0	200	300	0	0	0	0	0	0	0	200	903	0	0	0	0	0	0	0	603	903	0
351	8	0	0	0	0	0	0	200	300	0	0	0	0	0	0	0	200	903	0	0	0	0	0	0	0	603	903	0
351	9	0	0	0	0	0	0	200	300	0	0	0	0	0	0	0	200	903	0	0	0	0	0	0	0	603	903	0
352	0	0	0	0	0	0	0	200	300	0	0	0	0	0	0	0	200	903	0	0	0	0	0	0	0	603	903	0
352	1	0	0	0	0	0	0	200	300	0	0	0	0	0	0	0	200	903	0	0	0	0	0	0	0	603	903	0
352	2	0	0	0	0	0	0	200	300	0	0	0	0	0	0	0	200	903	0	0	0	0	0	0	0	603	903	0
352	3	0	0	0	0	0	0	200	300	0	0	0	0	0	0	0	200	903	0	0	0	0	0	0	0	603	903	0
352	4	0	0	0	0	0	0	200	300	0	0	0	0	0	0	0	200	903	0	0	0	0	0	0	0	603	903	0
352	5	0	0	0	0	0	0	200	300	0	0	0	0	0	0	0	200	903	0	0	0	0	0	0	0	603	903	0
352	6	0	0	0	0	0	0	200	300	0	0	0	0	0	0	0	200	903	0	0	0	0	0	0	0	603	903	0
352	7	0	0	0	0	0	0	200	300	0	0	0	0	0	0	0	200	903	0	0	0	0	0	0	0	603	903	0
352	8	0	0	0	0	0	0	200	300	0	0	0	0	0	0	0	200	903	0	0	0	0	0	0	0	603	903	0
352	9	0	0	0	0	0	0	200	300	0	0	0	0	0	0	0	200	903	0	0	0	0	0	0	0	603	903	0
353	0	0	0	0	0	0	0	200	300	0	0	0	0	0	0	0	200	903	0	0	0	0	0	0	0	603	903	0
353	1	0	0	0	0	0	0	200	300	0	0	0	0	0	0	0	200	903	0	0	0	0	0	0	0	603	903	0
353	2	0	0	0	0	0	0	200	300	0	0	0	0	0	0	0	200	903	0	0	0	0	0	0	0	603	903	0
353	3	0	0	0	0	0	0	200	300	0	0	0	0	0	0	0	200	903	0	0	0	0	0	0	0	603	903	0
353	4	0	0	0	0	0	0	200	300	0	0	0	0	0	0	0	200	903	0	0	0	0	0	0	0	603	903	0
353	5	0	0	0	0	0	0	200	300	0	0	0	0	0	0	0	200	903	0	0	0	0	0	0	0	603	903	0
353	6	0	0	0	0	0	0	200	300	0	0	0	0	0	0	0	200	903	0	0	0	0	0	0	0	603	903	0
353	7	0	0	0	0	0	0	200	300	0	0	0	0	0	0	0	200	903	0	0	0	0	0	0	0	603	903	0
353	8	0	0	0	0	0	0	200	300	0	0	0	0	0	0	0	200	903	0	0	0	0	0	0	0	603	903	0
353	9	0	0	0	0	0	0	200	300	0	0	0	0	0	0	0	200	903	0	0	0	0	0	0	0	603	903	0
354	0	0	0	0	0	0	0	200	300	0	0	0	0	0	0	0	200	903	0	0	0	0	0	0	0	603	903	0
354	1	0	0	0	0	0	0	200	300	0	0	0	0	0	0	0	200	903	0	0	0	0	0	0	0	603	903	0
354	2	0	0	0	0	0	0	200	300	0	0	0	0	0	0	0	200	903	0	0	0	0	0	0	0	603	903	0
354	3	0	0	0	0	0	0	200	300	0	0	0	0	0	0	0	200	903	0	0	0	0	0	0	0	603	903	0
354	4	0	0	0	0	0	0	200	300	0	0	0	0	0	0	0	200	903	0	0	0	0	0	0	0	603	903	0
354	5	0	0	0	0	0	0	200	300	0	0	0	0	0	0	0	200	903	0	0	0	0	0	0	0	603	903	0
354	6	0	0	0	0	0	0	200	300	0	0	0	0	0	0	0	200	903	0	0	0	0	0	0	0	603	903	0
354	7	0	0	0	0	0	0	200	300	0	0	0	0	0	0	0	200	903	0	0	0	0	0	0	0	603	903	0
354	8	0	0	0	0	0	0	200	300	0	0	0	0	0	0	0	200	903	0	0	0	0	0	0	0	603	903	0
354	9	0	0	0	0	0	0	200	300	0	0	0	0	0	0	0	200	903	0	0	0	0	0	0	0	603	903	0
355	0	0	0	0	0	0	0	200	300	0	0	0	0	0	0	0	200	903	0	0	0	0	0	0	0	603	903	0
355	1	0	0	0	0	0	0	200	300	0	0	0	0	0	0	0	200	903	0	0	0	0	0	0	0	603	903	0
355	2	0	0	0	0	0	0	200	300	0	0	0	0	0	0	0	200	903	0	0	0	0	0	0	0	603	903	0
355	3	0	0	0	0	0	0	200	300	0	0	0	0	0	0	0	200	903	0	0	0	0	0	0	0	603	903	0
355	4	0	0	0	0	0	0	200	300	0	0	0	0	0	0	0	200	903	0	0	0	0	0	0	0	603	903	0
355	5	0	0	0	0	0	0	200	300	0	0	0	0	0	0	0	200	903	0	0	0	0	0	0	0	603	903	0
355	6	0	0	0	0	0	0	200	300	0	0	0	0	0	0	0	200	903	0	0	0	0	0	0	0	603	903	0
355	7	0	0	0	0	0	0	200	300	0	0	0	0	0	0	0	200	903	0	0	0	0	0	0	0	603	903	0
355	8	0	0	0	0	0	0	200	300	0	0	0	0	0	0	0	200	903	0	0	0	0	0	0	0	603	903	0
355	9	0	0	0	0	0	0	200	300	0	0	0	0	0	0	0	200	903	0	0	0	0	0	0	0	603	903	0
356	0	0	0	0	0	0	0	200	300	0	0	0	0	0	0	0	200	903	0	0	0	0	0	0	0	603	903	0
356	1	0	0	0	0	0	0	200	300	0	0	0	0	0	0	0	200	903	0	0	0	0	0	0	0	603	903	0
356	2	0	0	0	0	0	0	200	300	0	0	0	0	0	0	0	200	903	0	0	0	0	0	0	0	603	903	0
356	3	0	0	0	0	0	0	200	300	0	0	0	0	0	0	0	200	903	0	0	0	0	0	0	0	603	903	0
356	4	0	0	0	0	0	0	200	300	0	0	0	0	0	0	0	200	903	0	0	0	0	0	0	0	603	903	0
356	5	0	0	0	0	0	0	200	300	0	0	0	0	0	0	0	200	903	0	0	0	0	0	0	0	603	903	0
356	6	0	0	0	0	0	0	200	300	0	0	0	0	0	0	0	200	903	0	0	0	0	0	0	0	603	903	0
356	7	0	0	0	0	0	0	200	300	0	0	0	0	0	0	0	200	903	0	0	0	0	0	0	0	603	903	0
356	8	0	0	0	0	0	0	200	300	0	0	0	0	0	0	0	200	903	0	0	0	0	0	0	0	603	903	0
356	9	0	0	0	0	0	0	200	300	0	0	0	0	0	0	0	200	903	0	0	0	0	0	0	0	603	903	0
357	0	0	0	0	0	0	0	200	300	0	0	0	0	0	0	0	200	903	0	0	0	0	0	0	0	603	903	0
357	1	0	0	0	0	0	0	200	300	0	0	0	0	0	0	0	200	903	0	0	0	0	0	0	0	603	903	0
357	2	0	0	0	0	0	0	200	300	0	0	0	0	0	0	0	200	903	0	0	0	0	0	0	0	603	903	0
357	3	0	0	0	0	0	0	200	300	0	0	0	0	0	0	0	200	903	0	0	0	0	0	0	0	603	903	0
357	4	0	0	0	0	0	0	200	300	0	0	0	0	0	0	0	200	903	0	0	0	0	0	0	0	603	903	0
357	5	0	0	0	0	0	0	200	300	0	0	0	0	0	0	0	200	903	0	0	0	0	0	0	0	603	903	0
357	6	0	0	0	0	0	0	200	300	0	0	0	0	0	0	0	200	903	0	0	0	0	0	0	0	603	903	0
357	7	0	0	0	0	0	0	200	300	0	0	0	0	0	0	0	200	903	0	0	0	0	0	0	0	603	903	0
357	8	0	0	0	0	0	0	200	300	0	0	0	0	0	0	0	200	903	0	0	0	0	0	0	0	603	903	0
357	9	0	0	0	0	0	0	200	300	0	0	0	0	0	0	0	200	903	0	0	0	0	0	0	0	603	903	0
358	0	0	0	0	0	0	0	200	300	0	0	0	0	0	0	0	200	903	0	0	0	0	0	0	0	603	903	0
358	1	0	0	0	0	0	0	200	300	0	0	0	0	0	0	0	200	903	0	0	0	0	0	0	0	603	903	0
358	2	0	0	0	0	0	0	200	300	0	0	0	0	0	0	0	200	903	0	0	0	0	0	0	0	603	903	0
358	3	0	0	0	0	0	0	200	300	0	0	0	0	0	0	0	200	903	0	0	0	0	0	0	0	603	903	0
358	4	0	0	0	0	0	0	200	300	0	0	0	0	0	0	0	200	903	0	0	0	0	0	0	0	603	903	0
358	5	0	0	0	0	0	0	200	300	0	0	0	0	0	0	0	200	903	0	0	0	0	0	0	0	603	903	0
358	6	0	0	0	0	0	0	200	300	0	0	0	0	0	0	0	200	903	0	0	0	0	0	0	0	603	903	0
358	7	0	0	0	0	0	0	200	300	0	0	0	0	0	0	0	200	903	0	0	0	0	0	0	0	603	903	0
358	8	0	0	0	0	0	0	200	300	0	0	0	0	0	0	0	200	903	0	0	0	0	0	0	0	603	903	0
358	9	0	0	0	0	0	0	200	300	0	0	0	0	0	0	0	200	903	0	0	0	0	0	0	0	603	903	0
359	0	0	0	0	0	0	0	200	300	0	0	0	0	0	0	0	200	903	0	0	0	0	0	0	0	603	903	0
359	1	0	0	0	0	0	0	200	300	0	0	0	0	0	0	0	200	903	0	0	0	0	0	0	0	603	903	0
359	2	0	0	0	0	0	0	200	300	0	0	0	0	0	0	0	200	903	0	0	0	0	0	0	0	603	903	0
359	3	0	0	0	0	0	0	200	300	0	0	0	0	0	0	0	200	903	0	0	0	0	0	0	0	603	903	0
359	4	0	0	0	0	0	0	200	300	0	0	0	0	0	0	0	200	903	0	0	0	0	0	0	0	603	903	0
359	5	0	0	0	0	0	0	200	300	0	0	0	0	0	0	0	200	903	0	0	0	0	0	0	0	603	903	0
359	6	0	0	0	0	0	0	200	300	0	0	0	0	0	0	0	200	903	0	0	0	0	0	0	0	603	903	0
359	7	0	0	0	0	0	0	200	300	0	0	0	0	0	0	0	200	903	0	0	0	0	0	0	0	603	903	0
359	8	0	0	0	0	0	0	200	300	0	0	0	0	0	0	0	200	903	0	0	0	0	0	0	0	603	903	0
359	9	0	0	0	0	0	0	200	300	0	0	0	0	0	0	0	200	903	0	0	0	0	0	0	0	603	903	0
360	0	0	0	0	0	0	0	200	300	0	0	0	0	0	0	0	200	903	0	0	0	0	0	0	0	603	903	0
360	1	0	0	0	0	0	0	200	300	0	0	0	0	0	0	0	200	903	0	0	0	0	0	0	0	603	903	0
360	2	0	0	0	0	0	0	200	300	0	0	0	0	0	0	0	200	903	0	0	0	0	0	0	0	603	903	0
360	3	0	0	0	0	0	0	200	300	0	0	0	0	0	0	0	200	903	0	0	0	0	0	0	0	603	903	0
360	4	0	0	0	0	0	0	200	300	0	0	0	0	0	0	0	200	903	0	0	0	0	0	0	0	603	903	0
360	5	0	0	0	0	0	0	200	300	0	0	0	0	0	0	0	200	903	0	0	0	0	0	0	0	603	903	0
360	6	0	0	0	0	0	0	200	300	0	0	0	0	0	0	0	200	903	0	0	0	0	0	0	0	603	903	0
360	7	0	0	0	0	0	0	200	300	0	0	0	0	0	0	0	200	903	0	0	0	0	0	0	0	603	903	0
360	8	0	0	0	0	0	0	200	300	0	0	0	0	0	0	0	200	903	0	0	0	0	0	0	0	603	903	0
360	9	0	0	0	0	0	0	200	300	0	0	0	0	0	0	0	200	903	0	0	0	0	0	0	0	603	903	0
361	0	0	0	0	0	0	0	200	300	0	0	0	0	0	0	0	200	903	0	0	0	0	0	0	0	603	903	0
361	1	0	0	0	0	0	0	200	300	0	0	0	0	0	0	0	200	903	0	0	0	0	0	0	0	603	903	0
361	2	0	0	0	0	0	0	200	300	0	0	0	0	0	0	0	200	903	0	0	0	0	0	0	0	603	903	0
361	3	0	0	0	0	0	0	200	300	0	0	0	0	0	0	0	200	903	0	0	0	0	0	0	0	603	903	0
361	4	0	0	0	0	0	0	200	300	0	0	0	0	0	0	0	200	903	0	0	0	0	0	0	0	603	903	0
361	5	0	0	0	0	0	0	200	300	0	0	0	0	0	0	0	200	903	0	0	0	0	0	0	0	603	903	0
361	6	0	0	0	0	0	0	200	300	0	0	0	0	0	0	0	200	903	0	0	0	0	0	0	0	603	903	0
361	7	0	0	0	0	0	0	200	300	0	0	0	0	0	0	0	200	903	0	0	0	0	0	0	0	603	903	0
361	8	0	0	0	0	0	0	200	300	0	0	0	0	0	0	0	200	903	0	0	0	0	0	0	0	603	903	0
361	9	0	0	0	0	0	0	200	300	0	0	0	0	0	0	0	200	903	0	0	0	0	0	0	0	603	903	0
362	0	0	0	0	0	0	0	200	300	0	0	0	0	0	0	0	200	903	0	0	0	0	0	0	0	603	903	0
362	1	0	0	0	0	0	0	200	300	0	0	0	0	0	0	0	200	903	0	0	0	0	0	0	0	603	903	0
362	2	0	0	0	0	0	0	200	300	0	0	0	0	0	0	0	200	903	0	0	0	0	0	0	0	603	903	0
362	3	0	0	0	0	0	0	200	300	0	0	0	0	0	0	0	200	903	0	0	0	0	0	0	0	603	903	0
362	4	0	0	0	0	0	0	200	300	0	0	0	0	0	0	0	200	903	0	0	0	0	0	0	0	603	903	0
362	5	0	0	0	0	0	0	200	300	0	0	0	0	0	0	0	200	903	0	0	0	0	0	0	0	603	903	0
362	6	0	0	0	0	0	0	200	300	0	0	0	0	0	0	0	200	903	0	0	0	0	0	0	0	603	903	0
362	7	0	0	0	0	0	0	200	300	0	0	0	0	0	0	0	200	903	0	0	0	0	0	0	0	603	903	0
362	8	0	0	0	0	0	0	200	300	0	0	0	0	0	0	0	200	903	0	0	0	0	0	0	0	603	903	0
362	9	0	0	0	0	0	0	200	300	0	0	0	0	0	0	0	200	903	0	0	0	0	0	0	0	603	903	0
363	0	0	0	0	0	0	0	200	300	0	0	0	0	0	0	0	200	903	0	0	0	0	0	0	0	603	903	0
363	1	0	0	0	0	0	0	200	300	0	0	0	0	0	0	0	200	903	0	0	0	0	0	0	0	603	903	0
363	2	0	0	0	0	0	0	200	300	0	0	0	0	0	0	0	200	903	0	0	0	0	0	0	0	603	903	0
363	3	0	0	0	0	0	0	200	300	0	0	0	0	0	0	0	200	903	0	0	0	0	0	0	0	603	903	0
363	4	0	0	0	0	0	0	200	300	0	0	0	0	0	0	0	200	903	0	0	0	0	0	0	0	603	903	0
363	5	0	0	0	0	0	0	200	300	0	0	0	0	0	0	0	200	903	0	0	0	0	0	0	0	603	903	0
363	6	0	0	0	0	0	0	200	300	0	0	0	0	0	0	0	200	903	0	0	0	0	0	0	0	603	903	0
363	7	0	0	0	0	0	0	200	300	0	0	0	0	0	0	0	200	903	0	0	0	0	0	0	0	603	903	0
363	8	0	0	0	0	0	0	200	300	0	0	0	0	0	0	0	200	903	0	0	0	0	0	0	0	603	903	0
363	9	0	0	0	0	0	0	200	300	0	0	0	0	0	0	0	200	903	0	0	0	0	0	0	0	603	903	0
364	0	0	0	0	0	0	0	200	300	0	0	0	0	0	0	0	200	903	0	0	0	0	0	0	0	603	903	0
364	1	0	0	0	0	0	0	200	300	0	0	0	0	0	0	0	200	903	0	0	0	0	0	0	0	603	903	0
364	2	0	0	0	0	0	0	200	300	0	0	0	0	0	0	0	200	903	0	0	0	0	0	0	0	603	903	0
364	3	0	0	0	0	0	0	200	300	0	0	0	0	0	0	0	200	903	0	0	0	0	0	0	0	603	903	0
364	4	0	0	0	0	0	0	200	300	0	0	0	0	0	0	0	200	903	0	0	0	0	0	0	0	603	903	0
364	5	0	0	0	0	0	0	200	300	0	0	0	0	0	0	0	200	903	0	0	0	0	0	0	0	603	903	0
364	6	0	0	0	0	0	0	200	300	0	0	0	0	0	0	0	200	903	0	0	0	0	0	0	0	603	903	0
364	7	0	0	0	0	0	0	200	300	0	0	0	0	0	0	0	200	903	0	0	0	0	0	0	0	603	903	0
364	8	0	0	0	0	0	0	200	300	0	0	0	0	0	0	0	200	903	0	0	0	0	0	0	0	603	903	0
364	9	0	0	0	0	0	0	200	300	0	0	0	0	0	0	0	200	903	0	0	0	0	0	0	0	603	903	0
365	0	0	0	0	0	0	0	200	300	0	0	0	0	0	0	0	200	903	0	0	0	0	0	0	0	603	903	0
365	1	0	0	0	0	0	0	200	300	0	0	0	0	0	0	0	200	903	0	0	0	0	0	0	0	603	903	0
365	2	0	0	0	0	0	0	200	300	0	0	0	0	0	0	0	200	903	0	0	0	0	0	0	0	603	903	0
365	3	0	0	0	0	0	0	200	300	0	0	0	0	0	0	0	200	903	0	0	0	0	0	0	0	603	903	0
365	4	0	0	0	0	0	0	200	300	0	0	0	0	0	0	0	200	903	0	0	0	0	0	0	0	603	903	0
365	5	0	0	0	0	0	0	200	300	0	0	0	0	0	0	0	200	903	0	0	0	0	0	0	0	603	903	0
365	6	0	0	0	0	0	0	200	300	0	0	0	0	0	0	0	200	903	0	0	0	0	0	0	0	603	903	0
365	7	0	0	0	0	0	0	200	300	0	0	0	0	0	0	0	200	903	0	0	0	0	0	0	0	603	903	0
365	8	0	0	0	0	0	0	200	300	0	0	0	0	0	0	0	200	903	0	0	0	0	0	0	0	603	903	0
365	9	0	0	0	0	0	0	200	300	0	0	0	0	0	0	0	200	903	0	0	0	0	0	0	0	603	903	0
366	0	0	0	0	0	0	0	200	300	0	0	0	0	0	0	0	200	903	0	0	0	0	0	0	0	603	903	0
366	1	0	0	0	0	0	0	200	300	0	0	0	0	0	0	0	200	903	0	0	0	0	0	0	0	603	903	0
366	2	0	0	0	0	0	0	200	300	0	0	0	0	0	0	0	200	903	0	0	0	0	0	0	0	603	903	0
366	3	0	0	0	0	0	0	200	300	0	0	0	0	0	0	0	200	903	0	0	0	0	0	0	0	603	903	0
366	4	0	0	0	0	0	0	200	300	0	0	0	0	0	0	0	200	903	0	0	0	0	0	0	0	603	903	0
366	5	0	0	0	0	0	0	200	300	0	0	0	0	0	0	0	200	903	0	0	0	0	0	0	0	603	903	0
366	6	0	0	0	0	0	0	200	300	0	0	0	0	0	0	0	200	903	0	0	0	0	0	0	0	603	903	0
366	7	0	0	0	0	0	0	200	300	0	0	0	0	0	0	0	200	903	0	0	0	0	0	0	0	603	903	0
366	8	0	0	0	0	0	0	200	300	0	0	0	0	0	0	0	200	903	0	0	0	0	0	0	0	603	903	0
366	9	0	0	0	0	0	0	200	300	0	0	0	0	0	0	0	200	903	0	0	0	0	0	0	0	603	903	0
367	0	0	0	0	0	0	0	200	300	0	0	0	0	0	0	0	200	903	0	0	0	0	0	0	0	603	903	0
367	1	0	0	0	0	0	0	200	300	0	0	0	0	0	0	0	200	903	0	0	0	0	0	0	0	603	903	0
367	2	0	0	0	0	0	0	200	300	0	0	0	0	0	0	0	200	903	0	0	0	0	0	0	0	603	903	0
367	3	0	0	0	0	0	0	200	300	0	0	0	0	0	0	0	200	903	0	0	0	0	0	0	0	603	903	0
367	4	0	0	0	0	0	0	200	300	0	0	0	0	0	0	0	200	903	0	0	0	0	0	0	0	603	903	0
367	5	0	0	0	0	0	0	200	300	0	0	0	0	0	0	0	200	903	0	0	0	0	0	0	0	603	903	0
367	6	0	0	0	0	0	0	200	300	0	0	0	0	0	0	0	200	903	0	0	0	0	0	0	0	603	903	0
367	7	0	0	0	0	0	0	200	300	0	0	0	0	0	0	0	200	903	0	0	0	0	0	0	0	603	903	0
367	8	0	0	0	0	0	0	200	300	0	0	0	0	0	0	0	200	903	0	0	0	0	0	0	0	603	903	0
367	9	0	0	0	0	0	0	200	300	0	0	0	0	0	0	0	200	903	0	0	0	0	0	0	0	603	903	0
368	0	0	0	0	0	0	0	200	300	0	0	0	0	0	0	0	200	903	0	0	0	0	0	0	0	603	903	0
368	1	0	0	0	0	0	0	200	300	0	0	0	0	0	0	0	200	903	0	0	0	0	0	0	0	603	903	0
368	2	0	0	0	0	0	0	200	300	0	0	0	0	0	0	0	200	903	0	0	0	0	0	0	0	603	903	0
368	3	0	0	0	0	0	0	200	300	0	0	0	0	0	0	0	200	903	0	0	0	0	0	0	0	603	903	0
368	4	0	0	0	0	0	0	200	300	0	0	0	0	0	0	0	200	903	0	0	0	0	0	0	0	603	903	0
368	5	0	0	0	0	0	0	200	300	0	0	0	0	0	0	0	200	903	0	0	0	0	0	0	0	603	903	0
368	6	0	0	0	0	0	0	200	300	0	0	0	0	0	0	0	200	903	0	0	0	0	0	0	0	603	903	0
368	7	0	0	0	0	0	0	200	300	0	0	0	0	0	0	0	200	903	0	0	0	0	0	0	0	603	903	0
368	8	0	0	0	0	0	0	200	300	0	0	0	0	0	0	0	200	903	0	0	0	0	0	0	0	603	903	0
368	9	0	0	0	0	0	0	200	300	0	0	0	0	0	0	0	200	903	0	0	0	0	0	0	0	603	903	0
369	0	0	0	0	0	0	0	200	300	0	0	0	0	0	0	0	200	903	0	0	0	0	0	0	0	603	903	0
369	1	0	0	0	0	0	0	200	300	0	0	0	0	0	0	0	200	903	0	0	0	0	0	0	0	603	903	0
369	2	0	0	0	0	0	0	200	300	0	0	0	0	0	0	0	200	903	0	0	0	0	0	0	0	603	903	0
369	3	0	0	0	0	0	0	200	300	0	0	0	0	0	0	0	200	903	0	0	0	0	0	0	0	603	903	0
369	4	0	0	0	0	0	0	200	300	0	0	0	0	0	0	0	200	903	0	0	0	0	0	0	0	603	903	0
369	5	0	0	0	0	0	0	200	300	0	0	0	0	0	0	0	200	903	0	0	0	0	0	0	0	603	903	0
369	6	0	0	0	0	0	0	200	300	0	0	0	0	0	0	0	200	903	0	0	0	0	0	0	0	603	903	0
369	7	0	0	0	0	0	0	200	300	0	0	0	0	0	0	0	200	903	0	0	0	0	0	0	0	603	903	0
369	8	0	0	0	0	0	0	200	300	0	0	0	0	0	0	0	200	903	0	0	0	0	0	0	0	603	903	0
369	9	0	0	0	0	0	0	200	300	0	0	0	0	0	0	0	200	903	0	0	0	0	0	0	0	603	903	0
370	0	0	0	0	0	0	0	200	300	0	0	0	0	0	0	0	200	903	0	0	0	0	0	0	0	603	903	0
370	1	0	0	0	0	0	0	200	300	0	0	0	0	0	0	0	200	903	0	0	0	0	0	0	0	603	903	0
370	2	0	0	0	0	0	0	200	300	0	0	0	0	0	0	0	200	903	0	0	0	0	0	0	0	603	903	0
370	3	0	0	0	0	0	0	200	300	0	0	0	0	0	0	0	200	903	0	0	0	0	0	0	0	603	903	0
370	4	0	0	0	0	0	0	200	300	0	0	0	0	0	0	0	200	903	0	0	0	0	0	0	0	603	903	0
370	5	0	0	0	0	0	0	200	300	0	0	0	0	0	0	0	200	903	0	0	0	0	0	0	0	603	903	0
370	6	0	0	0	0	0	0	200	300	0	0	0	0	0	0	0	200	903	0	0	0	0	0	0	0	603	903	0
370	7	0	0	0	0	0	0	200	300	0	0	0	0	0	0	0	200	903	0	0	0	0	0	0	0	603	903	0
370	8	0	0	0	0	0	0	200	300	0	0	0	0	0	0	0	200	903	0	0	0	0	0	0	0	603	903	0
370	9	0	0	0	0	0	0	200	300	0	0	0	0	0	0	0	200	903	0	0	0	0	0	0	0	603	903	0
371	0	0	0	0	0	0	0	200	300	0	0	0	0	0	0	0	200	903	0	0	0	0	0	0	0	603	903	0
371	1	0	0	0	0	0	0	200	300	0	0	0	0	0	0	0	200	903	0	0	0	0	0	0	0	603	903	0
371	2	0	0	0	0	0	0	200	300	0	0	0	0	0	0	0	200	903	0	0	0	0	0	0	0	603	903	0
371	3	0	0	0	0	0	0	200	300	0	0	0	0	0	0	0	200	903	0	0	0	0	0	0	0	603	903	0
371	4	0	0	0	0	0	0	200	300	0	0	0	0	0	0	0	200	903	0	0	0	0	0	0	0	603	903	0
371	5	0	0	0	0	0	0	200	300	0	0	0	0	0	0	0	200	903	0	0	0	0	0	0	0	603	903	0
371	6	0	0	0	0	0	0	200	300	0	0	0	0	0	0	0	200	903	0	0	0	0	0	0	0	603	903	0
371	7	0	0	0	0	0	0	200	300	0	0	0	0	0	0	0	200	903	0	0	0	0	0	0	0	603	903	0
371	8	0	0	0	0	0	0	200	300	0	0	0	0	0	0	0	200	903	0	0	0	0	0	0	0	603	903	0
371	9	0	0	0	0	0	0	200	300	0	0	0	0	0	0	0	200	903	0	0	0	0	0	0	0	603	903	0
372	0	0	0	0	0	0	0	200	300	0	0	0	0	0	0	0	200	903	0	0	0	0	0	0	0	603	903	0
372	1	0	0	0	0	0	0	200	300	0	0	0	0	0	0	0	200	903	0	0	0	0	0	0	0	603	903	0
372	2	0	0	0	0	0	0	200	300	0	0	0	0	0	0	0	200	903	0	0	0	0	0	0	0	603	903	0
372	3	0	0	0	0	0	0	200	300	0	0	0	0	0	0	0	200	903	0	0	0	0	0	0	0	603	903	0
372	4	0	0	0	0	0	0	200	300	0	0	0	0	0	0	0	200	903	0	0	0	0	0	0	0	603	903	0
372	5	0	0	0	0	0	0	200	300	0	0	0	0	0	0	0	200	903	0	0	0	0	0	0	0	603	903	0
372	6	0	0	0	0	0	0	200	300	0	0	0	0	0	0	0	200	903	0	0	0	0	0	0	0	603	903	0
372	7	0	0	0	0	0	0	200	300	0	0	0	0	0	0	0	200	903	0	0	0	0	0	0	0	603	903	0
372	8	0	0	0	0	0	0	200	300	0	0	0	0	0	0	0	200	903	0	0	0	0	0	0	0	603	903	0
372	9	0	0	0	0	0	0	200	300	0	0	0	0	0	0	0	200	903	0	0	0	0	0	0	0	603	903	0
373	0	0	0	0	0	0	0	200	300	0	0	0	0	0	0	0	200	903	0	0	0	0	0	0	0	603	903	0
373	1	0	0	0	0	0	0	200	300	0	0	0	0	0	0	0	200	903	0	0	0	0	0	0	0	603	903	0
373	2	0	0	0	0	0	0	200	300	0	0	0	0	0	0	0	200	903	0	0	0	0	0	0	0	603	903	0
373	3	0	0	0	0	0	0	200	300	0	0	0	0	0	0	0	200	903	0	0	0	0	0	0	0	603	903	0
373	4	0	0	0	0	0	0	200	300	0	0	0	0	0	0	0	200	903	0	0	0	0	0	0	0	603	903	0
373	5	0	0	0	0	0	0	200	300	0	0	0	0	0	0	0	200	903	0	0	0	0	0	0	0	603	903	0
373	6	0	0	0	0	0	0	200	300	0	0	0	0	0	0	0	200	903	0	0	0	0	0	0	0	603	903	0
373	7	0	0	0	0	0	0	200	300	0	0	0	0	0	0	0	200	903	0	0	0	0	0	0	0	603	903	0
373	8	0	0	0	0	0	0	200	300	0	0	0	0	0	0	0	200	903	0	0	0	0	0	0	0	603	903	0
373	9	0	0	0	0	0	0	200	300	0	0	0	0	0	0	0	200	903	0	0	0	0	0	0	0	603	903	0
374	0	0	0	0	0	0	0	200	300	0	0	0	0	0	0	0	200	903	0	0	0	0	0	0	0	603	903	0
374	1	0	0	0	0	0	0	200	300	0	0	0	0	0	0	0	200	903	0	0	0	0	0	0	0	603	903	0
374	2	0	0	0	0	0	0	200	300	0	0	0	0	0	0	0	200	903	0	0	0	0	0	0	0	603	903	0
374	3	0	0	0	0	0	0	200	300	0	0	0	0	0	0	0	200	903	0	0	0	0	0	0	0	603	903	0
374	4	0	0	0	0	0	0	200	300	0	0	0	0	0	0	0	200	903	0	0	0	0	0	0	0	603	903	0
374	5	0	0	0	0	0	0	200	300	0	0	0	0	0	0	0	200	903	0	0	0	0	0	0	0	603	903	0
374	6	0	0	0	0	0	0	200	300	0	0	0	0	0	0	0	200	903	0	0	0	0	0	0	0	603	903	0
374	7	0	0	0	0	0	0	200	300	0	0	0	0	0	0	0	200	903	0	0	0	0	0	0	0	603	903	0
374	8	0	0	0	0	0	0	200	300	0	0	0	0	0	0	0	200	903	0	0	0	0	0	0	0	603	903	0
374	9	0	0	0	0	0	0	200	300	0	0	0	0	0	0	0	200	903	0	0	0	0	0	0	0	603	903	0
375	0	0	0	0	0	0	0	200	300	0	0	0	0	0	0	0	200	903	0	0	0	0	0	0	0	603	903	0
375	1	0	0	0	0	0	0	200	300	0	0	0	0	0	0	0	200	903	0	0	0	0	0	0	0	603	903	0
375	2	0	0	0	0	0	0	200	300	0	0	0	0	0	0	0	200	903	0	0	0	0	0	0	0	603	903	0
375	3	0	0	0	0	0	0	200	300	0	0	0	0	0	0	0	200	903	0	0	0	0	0	0	0	603	903	0
375	4	0	0	0	0	0	0	200	300	0	0	0	0	0	0	0	200	903	0	0	0	0	0	0	0	603	903	0
375	5	0	0	0	0	0	0	200	300	0	0	0	0	0	0	0	200	903	0	0	0	0	0	0	0	603	903	0
375	6	0	0	0	0	0	0	200	300	0	0	0	0	0	0	0	200	903	0	0	0	0	0	0	0	603	903	0
375	7	0	0	0	0	0	0	200	300	0	0	0	0	0	0	0	200	903	0	0	0	0	0	0	0	603	903	0
375	8	0	0	0	0	0	0	200	300	0	0	0	0	0	0	0	200	903	0	0	0	0	0	0	0	603	903	0
375	9	0	0	0	0	0	0	200	300	0	0	0	0	0	0	0	200	903	0	0	0	0	0	0	0	603	903	0
376	0	0	0	0	0	0	0	200	300	0	0	0	0	0	0	0	200	903	0	0	0	0	0	0	0	603	903	0
376	1	0	0	0	0	0	0	200	300	0	0	0	0	0	0	0	200	903	0	0	0	0	0	0	0	603	903	0
376	2	0	0	0	0	0	0	200	300	0	0	0	0	0	0	0	200	903	0	0	0	0	0	0	0	603	903	0
376	3	0	0	0	0	0	0	200	300	0	0	0	0	0	0	0	200	903	0	0	0	0	0	0	0	603	903	0
376	4	0	0	0	0	0	0	200	300	0	0	0	0	0	0	0	200	903	0	0	0	0	0	0	0	603	903	0
376	5	0	0	0	0	0	0	200	300	0	0	0	0	0	0	0	200	903	0	0	0	0	0	0	0	603	903	0
376	6	0	0	0	0	0	0	200	300	0	0	0	0	0	0	0	200	903	0	0	0	0	0	0	0	603	903	0
376	7	0	0	0	0	0	0	200	300	0	0	0	0	0	0	0	200	903	0	0	0	0	0	0	0	603	903	0
376	8	0	0	0	0	0	0	200	300	0	0	0	0	0	0	0	200	903	0	0	0	0	0	0	0	603	903	0
376	9	0	0	0	0	0	0	200	300	0	0	0	0	0	0	0	200	903	0	0	0	0	0	0	0	603	903	0
377	0	0	0	0	0	0	0	200	300	0	0	0	0	0	0	0	200	903	0	0	0	0	0	0	0	603	903	0
377	1	0	0	0	0	0	0	200	300	0	0	0	0	0	0	0	200	903	0	0	0	0	0	0	0	603	903	0
377	2	0	0	0	0	0	0	200	300	0	0	0	0	0	0	0	200	903	0	0	0	0	0	0	0	603	903	0
377	3	0	0	0	0	0	0	200	300	0	0	0	0	0	0	0	200	903	0	0	0	0	0	0	0	603	903	0
377	4	0	0	0	0	0	0	200	300	0	0	0	0	0	0	0	200	903	0	0	0	0	0	0	0	603	903	0
377	5	0	0	0	0	0	0	200	300	0	0	0	0	0	0	0	200	903	0	0	0	0	0	0	0	603	903	0
377	6	0	0	0	0	0	0	200	300	0	0	0	0	0	0	0	200	903	0	0	0	0	0	0	0	603	903	0
377	7	0	0	0	0	0	0	200	300	0	0	0	0	0	0	0	200	903	0	0	0	0	0	0	0	603	903	0
377	8	0	0	0	0	0	0	200	300	0	0	0	0	0	0	0	200	903	0	0	0	0	0	0	0	603	903	0
377	9	0	0	0	0	0	0	200	300	0	0	0	0	0	0	0	200	903	0	0	0	0	0	0	0	603	903	0
378	0	0	0	0	0	0	0	200	300	0	0	0	0	0	0	0	200	903	0	0	0	0	0	0	0	603	903	0
378	1	0	0	0	0	0	0	200	300	0	0	0	0	0	0	0	200	903	0	0	0	0	0	0	0	603	903	0
378	2	0	0	0	0	0	0	200	300	0	0	0	0	0	0	0	200	903	0	0	0	0	0	0	0	603	903	0
378	3	0	0	0	0	0	0	200	300	0	0	0	0	0	0	0	200	903	0	0	0	0	0	0	0	603	903	0
378	4	0	0	0	0	0	0	200	300	0	0	0	0	0	0	0	200	903	0	0	0	0	0	0	0	603	903	0
378	5	0	0	0	0	0	0	200	300	0	0	0	0	0	0	0	200	903	0	0	0	0	0	0	0	603	903	0
378	6	0	0	0	0	0	0	200	300	0	0	0	0	0	0	0	200	903	0	0	0	0	0	0	0	603	903	0
378	7	0	0	0	0	0	0	200	300	0	0	0	0	0	0	0	200	903	0	0	0	0	0	0	0	603	903	0
378	8	0	0	0	0	0	0	200	300	0	0	0	0	0	0	0	200	903	0	0	0	0	0	0	0	603	903	0
378	9	0	0	0	0	0	0	200	300	0	0	0	0	0	0	0	200	903	0	0	0	0	0	0	0	603	903	0
379	0	0	0	0	0	0	0	200	300	0	0	0	0	0	0	0	200	903	0	0	0	0	0	0	0	603	903	0
379	1	0	0	0	0	0	0	200	300	0	0	0	0	0	0	0	200	903	0	0	0	0	0	0	0	603	903	0
379	2	0	0	0	0	0	0	200	300	0	0	0	0	0	0	0	200	903	0	0	0	0	0	0	0	603	903	0
379	3	0	0	0	0	0	0	200	300	0	0	0	0	0	0	0	200	903	0	0	0	0	0	0	0	603	903	0
379	4	0	0	0	0	0	0	200	300	0	0	0	0	0	0	0	200	903	0	0	0	0	0	0	0	603	903	0
379	5	0	0	0	0	0	0	200	300	0	0	0	0	0	0	0	200	903	0	0	0	0	0	0	0	603	903	0
379	6	0	0	0	0	0	0	200	300	0	0	0	0	0	0	0	200	903	0	0	0	0	0	0	0	603	903	0
379	7	0	0	0	0	0	0	200	300	0	0	0	0	0	0	0	200	903	0	0	0	0	0	0	0	603	903	0
379	8	0	0	0	0	0	0	200	300	0	0	0	0	0	0	0	200	903	0	0	0	0	0	0	0	603	903	0
379	9	0	0	0	0	0	0	200	300	0	0	0	0	0	0	0	200	903	0	0	0	0	0	0	0	603	903	0
380	0	0	0	0	0	0	0	200	300	0	0	0	0	0	0	0	200	903	0	0	0	0	0	0	0	603	903	0
380	1	0	0	0	0	0	0	200	300	0	0	0	0	0	0	0	200	903	0	0	0	0	0	0	0	603	903	0
380	2	0	0	0	0	0	0	200	300	0	0	0	0	0	0	0	200	903	0	0	0	0	0	0	0	603	903	0
380	3	0	0	0	0	0	0	200	300	0	0	0	0	0	0	0	200	903	0	0	0	0	0	0	0	603	903	0
380	4	0	0	0	0	0	0	200	300	0	0	0	0	0	0	0	200	903	0	0	0	0	0	0	0	603	903	0
380	5	0	0	0	0	0	0	200	300	0	0	0	0	0	0	0	200	903	0	0	0	0	0	0	0	603	903	0
380	6	0	0	0	0	0	0	200	300	0	0	0	0	0	0	0	200	903	0	0	0	0	0	0	0	603	903	0
380	7	0	0	0	0	0	0	200	300	0	0	0	0	0	0	0	200	903	0	0	0	0	0	0	0	603	903	0
380	8	0	0	0	0	0	0	200	300	0	0	0	0	0	0	0	200	903	0	0	0	0	0	0	0	603	903	0
380	9	0	0	0	0	0	0	200	300	0	0	0	0	0	0	0	200	903	0	0	0	0	0	0	0	603	903	0
381	0	0	0	0	0	0	0	200	300	0	0	0	0	0	0	0	200	903	0	0	0	0	0	0	0	603	903	0
381	1	0	0	0	0	0	0	200	300	0	0	0	0	0	0	0	200	903	0	0	0	0	0	0	0	603	903	0
381	2	0	0	0	0	0	0	200	300	0	0	0	0	0	0	0	200	903	0	0	0	0	0	0	0	603	903	0
381	3	0	0	0	0	0	0	200	300	0	0	0	0	0	0	0	200	903	0	0	0	0	0	0	0	603	903	0
381	4	0	0	0	0	0	0	200	300	0	0	0	0	0	0	0	200	903	0	0	0	0	0	0	0	603	903	0
381	5	0	0	0	0	0	0	200	300	0	0	0	0	0	0	0	200	903	0	0	0	0	0	0	0	603	903	0
381	6	0	0	0	0	0	0	200	300	0	0	0	0	0	0	0	200	903	0	0	0	0	0	0	0	603	903	0
381	7	0	0	0	0	0	0	200	300	0	0	0	0	0	0	0	200	903	0	0	0	0	0	0	0	603	903	0
381	8	0	0	0	0	0	0	200	300	0	0	0	0	0	0	0	200	903	0	0	0	0	0	0	0	603	903	0
381	9	0	0	0	0	0	0	200	300	0	0	0	0	0	0	0	200	903	0	0	0	0	0	0	0	603	903	0
382	0	0	0	0	0	0	0	200	300	0	0	0	0	0	0	0	200	903	0	0	0	0	0	0	0	603	903	0
382	1	0	0	0	0	0	0	200	300	0	0	0	0	0	0	0	200	903	0	0	0	0	0	0	0	603	903	0
382	2	0	0	0	0	0	0	200	300	0	0	0	0	0	0	0	200	903	0	0	0	0	0	0	0	603	903	0
382	3	0	0	0	0	0	0	200	300	0	0	0	0	0	0	0	200	903	0	0	0	0	0	0	0	603	903	0
382	4	0	0	0	0	0	0	200	300	0	0	0	0	0	0	0	200	903	0	0	0	0	0	0	0	603	903	0
382	5	0	0	0	0	0	0	200	300	0	0	0	0	0	0	0	200	903	0	0	0	0	0	0	0	603	903	0
382	6	0	0	0	0	0	0	200	300	0	0	0	0	0	0	0	200	903	0	0	0	0	0	0	0	603	903	0
382	7	0	0	0	0	0	0	200	300	0	0	0	0	0	0	0	200	903	0	0	0	0	0	0	0	603	903	0
382	8	0	0	0	0	0	0	200	300	0	0	0	0	0	0	0	200	903	0	0	0	0	0	0	0	603	903	0
382	9	0	0	0	0	0	0	200	300	0	0	0	0	0	0	0	200	903	0	0	0	0	0	0	0	603	903	0
383	0	0	0	0	0	0	0	200	300	0	0	0	0	0	0	0	200	903	0	0	0	0	0	0	0	603	903	0
383	1	0	0	0	0	0	0	200	300	0	0	0	0	0	0	0	200	903	0	0	0	0	0	0	0	603	903	0
383	2	0	0	0	0	0	0	200	300	0	0	0	0	0	0	0	200	903	0	0	0	0	0	0	0	603	903	0
383	3	0	0	0	0	0	0	200	300	0	0	0	0	0	0	0	200	903	0	0	0	0	0	0	0	603	903	0
383	4	0	0	0	0	0	0	200	300	0	0	0	0	0	0	0	200	903	0	0	0	0	0	0	0	603	903	0
383	5	0	0	0	0	0	0	200	300	0	0	0	0	0	0	0	200	903	0	0	0	0	0	0	0	603	903	0
383	6	0	0	0	0	0	0	200	300	0	0	0	0	0	0	0	200	903	0	0	0	0	0	0	0	603	903	0
383	7	0	0	0	0	0	0	200	300	0	0	0	0	0	0	0	200	903	0	0	0	0	0	0	0	603	903	0
383	8	0	0	0	0	0	0	200	300	0	0	0	0	0	0	0	200	903	0	0	0	0	0	0	0	603	903	0
383	9	0	0	0	0	0	0	200	300	0	0	0	0	0	0	0	200	903	0	0	0	0	0	0	0	603	903	0
384	0	0	0	0	0	0	0	200	300	0	0	0	0	0	0	0	200	903	0	0	0	0	0	0	0	603	903	0
384	1	0	0	0	0	0	0	200	300	0	0	0	0	0	0	0	200	903	0	0	0	0	0	0	0	603	903	0
384	2	0	0	0	0	0	0	200	300	0	0	0	0	0	0	0	200	903	0	0	0	0	0	0	0	603	903	0
384	3	0	0	0	0	0	0	200	300	0	0	0	0	0	0	0	200	903	0	0	0	0	0	0	0	603	903	0
384	4	0	0	0	0	0	0	200	300	0	0	0	0	0	0	0	200	903	0	0	0	0	0	0	0	603	903	0
384	5	0	0	0	0	0	0	200	300	0	0	0	0	0	0	0	200	903	0	0	0	0	0	0	0	603	903	0
384	6	0	0	0	0	0	0	200	300	0	0	0	0	0	0	0	200	903	0	0	0	0	0	0	0	603	903	0
384	7	0	0	0	0	0	0	200	300	0	0	0	0	0	0	0	200	903	0	0	0	0	0	0	0	603	903	0
384	8	0	0	0	0	0	0	200	300	0	0	0	0	0	0	0	200	903	0	0	0	0	0	0	0	603	903	0
384	9	0	0	0	0	0	0	200	300	0	0	0	0	0	0	0	200	903	0	0	0	0	0	0	0	603	903	0
385	0	0	0	0	0	0	0	200	300	0	0	0	0	0	0	0	200	903	0	0	0	0	0	0	0	603	903	0
385	1	0	0	0	0	0	0	200	300	0	0	0	0	0	0	0	200	903	0	0	0	0	0	0	0	603	903	0
385	2	0	0	0	0	0	0	200	300	0	0	0	0	0	0	0	200	903	0	0	0	0	0	0	0	603	903	0
385	3	0	0	0	0	0	0	200	300	0	0	0	0	0	0	0	200	903	0	0	0	0	0	0	0	603	903	0
385	4	0	0	0	0	0	0	200	300	0	0	0	0	0	0	0	200	903	0	0	0	0	0	0	0	603	903	0
385	5	0	0	0	0	0	0	200	300	0	0	0	0	0	0	0	200	903	0	0	0	0	0	0	0	603	903	0
385	6	0	0	0	0	0	0	200	300	0	0	0	0	0	0	0	200	903	0	0	0	0	0	0	0	603	903	0
385	7	0	0	0	0	0	0	200	300	0	0	0	0	0	0	0	200	903	0	0	0	0	0	0	0	603	903	0
385	8	0	0	0	0	0	0	200	300	0	0	0	0	0	0	0	200	903	0	0	0	0	0	0	0	603	903	0
385	9	0	0	0	0	0	0	200	300	0	0	0	0	0	0	0	200	903	0	0	0	0	0	0	0	603	903	0
386	0	0	0	0	0	0	0	200	300	0	0	0	0	0	0	0	200	903	0	0	0	0	0	0	0	603	903	0
386	1	0	0	0	0	0	0	200	300	0	0	0	0	0	0	0	200	903	0	0	0	0	0	0	0	603	903	0
386	2	0	0	0	0	0	0	200	300	0	0	0	0	0	0	0	200	903	0	0	0	0	0	0	0	603	903	0
386	3	0	0	0	0	0	0	200	300	0	0	0	0	0	0	0	200	903	0	0	0	0	0	0	0	603	903	0
386	4	0	0	0	0	0	0	200	300	0	0	0	0	0	0	0	200	903	0	0	0	0	0	0	0	603	903	0
386	5	0	0	0	0	0	0	200	300	0	0	0	0	0	0	0	200	903	0	0	0	0	0	0	0	603	903	0
386	6	0	0	0	0	0	0	200	300	0	0	0	0	0	0	0	200	903	0	0	0	0	0	0	0	603	903	0
386	7	0	0	0	0	0	0	200	300	0	0	0	0	0	0	0	200	903	0	0	0	0	0	0	0	603	903	0
386	8	0	0	0	0	0	0	200	300	0	0	0	0	0	0	0	200	903	0	0	0	0	0	0	0	603	903	0
386	9	0	0	0	0	0	0	200	300	0	0	0	0	0	0	0	200	903	0	0	0	0	0	0	0	603	903	0
387	0	0	0	0	0	0	0	200	300	0	0	0	0	0	0	0	200	903	0	0	0	0	0	0	0	603	903	0
387	1	0	0	0	0	0	0	200	300	0	0	0	0	0	0	0	200	903	0	0	0	0	0	0	0	603	903	0
387	2	0	0	0	0	0	0	200	300	0	0	0	0	0	0	0	200	903	0	0	0	0	0	0	0	603	903	0
387	3	0	0	0	0	0	0	200	300	0	0	0	0	0	0	0	200	903	0	0	0	0	0	0	0	603	903	0
387	4	0	0	0	0	0	0	200	300	0	0	0	0	0	0	0	200	903	0	0	0	0	0	0	0	603	903	0
387	5	0	0	0	0	0	0	200	300	0	0	0	0	0	0	0	200	903	0	0	0	0	0	0	0	603	903	0
387	6	0	0	0	0	0	0	200	300	0	0	0	0	0	0	0	200	903	0	0	0	0	0	0	0	603	903	0
387	7	0	0	0	0	0	0	200	300	0	0	0	0	0	0	0	200	903	0	0	0	0	0	0	0	603	903	0
387	8	0	0	0	0	0	0	200	300	0	0	0	0	0	0	0	200	903	0	0	0	0	0	0	0	603	903	0
387	9	0	0	0	0	0	0	200	300	0	0	0	0	0	0	0	200	903	0	0	0	0	0	0	0	603	903	0
388	0	0	0	0	0	0	0	200	300	0	0	0	0	0	0	0	200	903	0	0	0	0	0	0	0	603	903	0
388	1	0	0	0	0	0	0	200	300	0	0	0	0	0	0	0	200	903	0	0	0	0	0	0	0	603	903	0
388	2	0	0	0	0	0	0	200	300	0	0	0	0	0	0	0	200	903	0	0	0	0	0	0	0	603	903	0
388	3	0	0	0	0	0	0	200	300	0	0	0	0	0	0	0	200	903	0	0	0	0	0	0	0	603	903	0
388	4	0	0	0	0	0	0	200	300	0	0	0	0	0	0	0	200	903	0	0	0	0	0	0	0	603	903	0
388	5	0	0	0	0	0	0	200	300	0	0	0	0	0	0	0	200	903	0	0	0	0	0	0	0	603	903	0
388	6	0	0	0	0	0	0	200	300	0	0	0	0	0	0	0	200	903	0	0	0	0	0	0	0	603	903	0
388	7	0	0	0	0	0	0	200	300	0	0	0	0	0	0	0	200	903	0	0	0	0	0	0	0	603	903	0
388	8	0	0	0	0	0	0	200	300	0	0	0	0	0	0	0	200	903	0	0	0	0	0	0	0	603	903	0
388	9	0	0	0	0	0	0	200	300	0	0	0	0	0	0	0	200	903	0	0	0	0	0	0	0	603	903	0
389	0	0	0	0	0	0	0	200	300	0	0	0	0	0	0	0	200	903	0	0	0	0	0	0	0	603	903	0
389	1	0	0	0	0	0	0	200	300	0	0	0	0	0	0	0	200	903	0	0	0	0	0	0	0	603	903	0
389	2	0	0	0	0	0	0	200	300	0	0	0	0	0	0	0	200	903	0	0	0	0	0	0	0	603	903	0
389	3	0	0	0	0	0	0	200	300	0	0	0	0	0	0	0	200	903	0	0	0	0	0	0	0	603	903	0
389	4	0	0	0	0	0	0	200	300	0	0	0	0	0	0	0	200	903	0	0	0	0	0	0	0	603	903	0
389	5	0	0	0	0	0	0	200	300	0	0	0	0	0	0	0	200	903	0	0	0	0	0	0	0	603	903	0
389	6	0	0	0	0	0	0	200	300	0	0	0	0	0	0	0	200	903	0	0	0	0	0	0	0	603	903	0
389	7	0	0	0	0	0	0	200	300	0	0	0	0	0	0	0	200	903	0	0	0	0	0	0	0	603	903	0
389	8	0	0	0	0	0	0	200	300	0	0	0	0	0	0	0	200	903	0	0	0	0	0	0	0	603	903	0
389	9	0	0	0	0	0	0	200	300	0	0	0	0	0	0	0	200	903	0	0	0	0	0	0	0	603	903	0
390	0	0	0	0	0	0	0	200	300	0	0	0	0	0	0	0	200	903	0	0	0	0	0	0	0	603	903	0
390	1	0	0	0	0	0	0	200	300	0	0	0	0	0	0	0	200	903	0	0	0	0	0	0	0	603	903	0
390	2	0	0	0	0	0	0	200	300	0	0	0	0	0	0	0	200	903	0	0	0	0	0	0	0	603	903	0
390	3	0	0	0	0	0	0	200	300	0	0	0	0	0	0	0	200	903	0	0	0	0	0	0	0	603	903	0
390	4	0	0	0	0	0	0	200	300	0	0	0	0	0	0	0	200	903	0	0	0	0	0	0	0	603	903	0
390	5	0	0	0	0	0	0	200	300	0	0	0	0	0	0	0	200	903	0	0	0	0	0	0	0	603	903	0
390	6	0	0	0	0	0	0	200	300	0	0	0	0	0	0	0	200	903	0	0	0	0	0	0	0	603	903	0
390	7	0	0	0	0	0	0	200	300	0	0	0	0	0	0	0	200	903	0	0	0	0	0	0	0	603	903	0
390	8	0	0	0	0	0	0	200	300	0	0	0	0	0	0	0	200	903	0	0	0	0	0	0	0	603	903	0
390	9	0	0	0	0	0	0	200	300	0	0	0	0	0	0	0	200	903	0	0	0	0	0	0	0	603	903	0
391	0	0	0	0	0	0	0	200	300	0	0	0	0	0	0	0	200	903	0	0	0	0	0	0	0	603	903	0
391	1	0	0	0	0	0	0	200	300	0	0	0	0	0	0	0	200	903	0	0	0	0	0	0	0	603	903	0
391	2	0	0	0	0	0	0	200	300	0	0	0	0	0	0	0	200	903	0	0	0	0	0	0	0	603	903	0
391	3	0	0	0	0	0	0	200	300	0	0	0	0	0	0	0	200	903	0	0	0	0	0	0	0	603	903	0
391	4	0	0	0	0	0	0	200	300	0	0	0	0	0	0	0	200	903	0	0	0	0	0	0	0	603	903	0
391	5	0	0	0	0	0	0	200	300	0	0	0	0	0	0	0	200	903	0	0	0	0	0	0	0	603	903	0
391	6	0	0	0	0	0	0	200	300	0	0	0	0	0	0	0	200	903	0	0	0	0	0	0	0	603	903	0
391	7	0	0	0	0	0	0	200	300	0	0	0	0	0	0	0	200	903	0	0	0	0	0	0	0	603	903	0
391	8	0	0	0	0	0	0	200	300	0	0	0	0	0	0	0	200	903	0	0	0	0	0	0	0	603	903	0
391	9	0	0	0	0	0	0	200	300	0	0	0	0	0	0	0	200	903	0	0	0	0	0	0	0	603	903	0
392	0	0	0	0	0	0	0	200	300	0	0	0	0	0	0	0	200	903	0	0	0	0	0	0	0	603	903	0
392	1	0	0	0	0	0	0	200	300	0	0	0	0	0	0	0	200	903	0	0	0	0	0	0	0	603	903	0
392	2	0	0	0	0	0	0	200	300	0	0	0	0	0	0	0	200	903	0	0	0	0	0	0	0	603	903	0
392	3	0	0	0	0	0	0	200	300	0	0	0	0	0	0	0	200	903	0	0	0	0	0	0	0	603	903	0
392	4	0	0	0	0	0	0	200	300	0	0	0	0	0	0	0	200	903	0	0	0	0	0	0	0	603	903	0
392	5	0	0	0	0	0	0	200	300	0	0	0	0	0	0	0	200	903	0	0	0	0	0	0	0	603	903	0
392	6	0	0	0	0	0	0	200	300	0	0	0	0	0	0	0	200	903	0	0	0	0	0	0	0	603	903	0
392	7	0	0	0	0	0	0	200	300	0	0	0	0	0	0	0	200	903	0	0	0	0	0	0	0	603	903	0
392	8	0	0	0	0	0	0	200	300	0	0	0	0	0	0	0	200	903	0	0	0	0	0	0	0	603	903	0
392	9	0	0	0	0	0	0	200	300	0	0	0	0	0	0	0	200	903	0	0	0	0	0	0	0	603	903	0
393	0	0	0	0	0	0	0	200	300	0	0	0	0	0	0	0	200	903	0	0	0	0	0	0	0	603	903	0
393	1	0	0	0	0	0	0	200	300	0	0	0	0	0	0	0	200	903	0	0	0	0	0	0	0	603	903	0
393	2	0	0	0	0	0	0	200	300	0	0	0	0	0	0	0	200	903	0	0	0	0	0	0	0	603	903	0
393	3	0	0	0	0	0	0	200	300	0	0	0	0	0	0	0	200	903	0	0	0	0	0	0	0	603	903	0
393	4	0	0	0	0	0	0	200	300	0	0	0	0	0	0	0	200	903	0	0	0	0	0	0	0	603	903	0
393	5	0	0	0	0	0	0	200	300	0	0	0	0	0	0	0	200	903	0	0	0	0	0	0	0	603	903	0
393	6	0	0	0	0	0	0	200	300	0	0	0	0	0	0	0	200	903	0	0	0	0	0	0	0	603	903	0
393	7	0	0	0	0	0	0	200	300	0	0	0	0	0	0	0	200	903	0	0	0	0	0	0	0	603	903	0
393	8	0	0	0	0	0	0	200	300	0	0	0	0	0	0	0	200	903	0	0	0	0	0	0	0	603	903	0
393	9	0	0	0	0	0	0	200	300	0	0	0	0	0	0	0	200	903	0	0	0	0	0	0	0	603	903	0
394	0	0	0	0	0	0	0	200	300	0	0	0	0	0	0	0	200	903	0	0	0	0	0	0	0	603	903	0
394	1	0	0	0	0	0	0	200	300	0	0	0	0	0	0	0	200	903	0	0	0	0	0	0	0	603	903	0
394	2	0	0	0	0	0	0	200	300	0	0	0	0	0	0	0	200	903	0	0	0	0	0	0	0	603	903	0
394	3	0	0	0	0	0	0	200	300	0	0	0	0	0	0	0	200	903	0	0	0	0	0	0	0	603	903	0
394	4	0	0	0	0	0	0	200	300	0	0	0	0	0	0	0	200	903	0	0	0	0	0	0	0	603	903	0
394	5	0	0	0	0	0	0	200	300	0	0	0	0	0	0	0	200	903	0	0	0	0	0	0	0	603	903	0
394	6	0	0	0	0	0	0	200	300	0	0	0	0	0	0	0	200	903	0	0	0	0	0	0	0	603	903	0
394	7	0	0	0	0	0	0	200	300	0	0	0	0	0	0	0	200	903	0	0	0	0	0	0	0	603	903	0
394	8	0	0	0	0	0	0	200	300	0	0	0	0	0	0	0	200	903	0	0	0	0	0	0	0	603	903	0
394	9	0	0	0	0	0	0	200	300	0	0	0	0	0	0	0	200	903	0	0	0	0	0	0	0	603	903	0
395	0	0	0	0	0	0	0	200	300	0	0	0	0	0	0	0	200	903	0	0	0	0	0	0	0	603	903	0
395	1	0	0	0	0	0	0	200	300	0	0	0	0	0	0	0	200	903	0	0	0	0	0	0	0	603	903	0
395	2	0	0	0	0	0	0	200	300	0	0	0	0	0	0	0	200	903	0	0	0	0	0	0	0	603	903	0
395	3	0	0	0	0	0	0	200	300	0	0	0	0	0	0	0	200	903	0	0	0	0	0	0	0	603	903	0
395	4	0	0	0	0	0	0	200	300	0	0	0	0	0	0	0	200	903	0	0	0	0	0	0	0	603	903	0
395	5	0	0	0	0	0	0	200	300	0	0	0	0	0	0	0	200	903	0	0	0	0	0	0	0	603	903	0
395	6	0	0	0	0	0	0	200	300	0	0	0	0	0	0	0	200	903	0	0	0	0	0	0	0	603	903	0
395	7	0	0	0	0	0	0	200	300	0	0	0	0	0	0	0	200	903	0	0	0	0	0	0	0	603	903	0
395	8	0	0	0	0	0	0	200	300	0	0	0	0	0	0	0	200	903	0	0	0	0	0	0	0	603	903	0
395	9	0	0	0	0	0	0	200	300	0	0	0	0	0	0	0	200	903	0	0	0	0	0	0	0	603	903	0
396	0	0	0	0	0	0	0	200	300	0	0	0	0	0	0	0	200	903	0	0	0	0	0	0	0	603	903	0
396	1	0	0	0	0	0	0	200	300	0	0	0	0	0	0	0	200	903	0	0	0	0	0	0	0	603	903	0
396	2	0	0	0	0	0	0	200	300	0	0	0	0	0	0	0	200	903	0	0	0	0	0	0	0	603	903	0
396	3	0	0	0	0	0	0	200	300	0	0	0	0	0	0	0	200	903	0	0	0	0	0	0	0	603	903	0
396	4	0	0	0	0	0	0	200	300	0	0	0	0	0	0	0	200	903	0	0	0	0	0	0	0	603	903	0
396	5	0	0	0	0	0	0	200	300	0	0	0	0	0	0	0	200	903	0	0	0	0	0	0	0	603	903	0
396	6	0	0	0	0	0	0	200	300	0	0	0	0	0	0	0	200	903	0	0	0	0	0	0	0	603	903	0
396	7	0	0	0	0	0	0	200	300	0	0	0	0	0	0	0	200	903	0	0	0	0	0	0	0	603	903	0
396	8	0	0	0	0	0	0	200	300	0	0	0	0	0	0	0	200	903	0	0	0	0	0	0	0	603	903	0
396	9	0	0	0	0	0	0	200	300	0	0	0	0	0	0	0	200	903	0	0	0	0	0	0	0	603	903	0
397	0	0	0	0	0	0	0	200	300	0	0	0	0	0	0	0	200	903	0	0	0	0	0	0	0	603	903	0
397	1	0	0	0	0	0	0	200	300	0	0	0	0	0	0	0	200	903	0	0	0	0	0	0	0	603	903	0
397	2	0	0	0	0	0	0	200	300	0	0	0	0	0	0	0	200	903	0	0	0	0	0	0	0	603	903	0
397	3	0	0	0	0	0	0	200	300	0	0	0	0	0	0	0	200	903	0	0	0	0	0	0	0	603	903	0
397	4	0	0	0	0	0	0	200	300	0	0	0	0	0	0	0	200	903	0	0	0	0	0	0	0	603	903	0
397	5	0	0	0	0	0	0	200	300	0	0	0	0	0	0	0	200	903	0	0	0	0	0	0	0	603	903	0
397	6	0	0	0	0	0	0	200	300	0	0	0	0	0	0	0	200	903	0	0	0	0	0	0	0	603	903	0
397	7	0	0	0	0	0	0	200	300	0	0	0	0	0	0	0	200	903	0	0	0	0	0	0	0	603	903	0
397	8	0	0	0	0	0	0	200	300	0	0	0	0	0	0	0	200	903	0	0	0	0	0	0	0	603	903	0
397	9	0	0	0	0	0	0	200	300	0	0	0	0	0	0	0	200	903	0	0	0	0	0	0	0	603	903	0
398	0	0	0	0	0	0	0	200	300	0	0	0	0	0	0	0	200	903	0	0	0	0	0	0	0	603	903	0
398	1	0	0	0	0	0	0	200	300	0	0	0	0	0	0	0	200	903	0	0	0	0	0	0	0	603	903	0
398	2	0	0	0	0	0	0	200	300	0	0	0	0	0	0	0	200	903	0	0	0	0	0	0	0	603	903	0
398	3	0	0	0	0	0	0	200	300	0	0	0	0	0	0	0	200	903	0	0	0	0	0	0	0	603	903	0
398	4	0	0	0	0	0	0	200	300	0	0	0	0	0	0	0	200	903	0	0	0	0	0	0	0	603	903	0
398	5	0	0	0	0	0	0	200	300	0	0	0	0	0	0	0	200	903	0	0	0	0	0	0	0	603	903	0
398	6	0	0	0	0	0	0	200	300	0	0	0	0	0	0	0	200	903	0	0	0	0	0	0	0	603	903	0
398	7	0	0	0	0	0	0	200	300	0	0	0	0	0	0	0	200	903	0	0	0	0	0	0	0	603	903	0
398	8	0	0	0	0	0	0	200	300	0	0	0	0	0	0	0	200	903	0	0	0	0	0	0	0	603	903	0
398	9	0	0	0	0	0	0	200	300	0	0	0	0	0	0	0	200	903	0	0	0	0	0	0	0	603	903	0
399	0	0	0	0	0	0	0	200	300	0	0	0	0	0	0	0	200	903	0	0	0	0	0	0	0	603	903	0
399	1	0	0	0	0	0	0	200	300	0	0	0	0	0	0	0	200	903	0	0	0	0	0	0	0	603	903	0
399	2	0	0	0	0	0	0	200	300	0	0	0	0	0	0	0	200	903	0	0	0	0	0	0	0	603	903	0
399	3	0	0	0	0	0	0	200	300	0	0	0	0	0	0	0	200	903	0	0	0	0	0	0	0	603	903	0
399	4	0	0	0	0	0	0	200	300	0	0	0	0	0	0	0	200	903	0	0	0	0	0	0	0	603	903	0
399	5	0	0	0	0	0	0	200	300	0	0	0	0	0	0	0	200	903	0	0	0	0	0	0	0	603	903	0
399	6	0	0	0	0	0	0	200	300	0	0	0	0	0	0	0	200	903	0	0	0	0	0	0	0	603	903	0
399	7	0	0	0	0	0	0	200	300	0	0	0	0	0	0	0	200	903	0	0	0	0	0	0	0	603	903	0
399	8	0	0	0	0	0	0	200	300	0	0	0	0	0	0	0	200	903	0	0	0	0	0	0	0	603	903	0
399	9	0	0	0	0	0	0	200	300	0	0	0	0	0	0	0	200	903	0	0	0	0	0	0	0	603	903	0
400	0	0	0	0	0	0	0	200	300	0	0	0	0	0	0	0	200	903	0	0	0	0	0	0	0	603	903	0
400	1	0	0	0	0	0	0	200	300	0	0	0	0	0	0	0	200	903	0	0	0	0	0	0	0	603	903	0
400	2	0	0	0	0	0	0	200	300	0	0	0	0	0	0	0	200	903	0	0	0	0	0	0	0	603	903	0
400	3	0	0	0	0	0	0	200	300	0	0	0	0	0	0	0	200	903	0	0	0	0	0	0	0	603	903	0
400	4	0	0	0	0	0	0	200	300	0	0	0	0	0	0	0	200	903	0	0	0	0	0	0	0	603	903	0
400	5	0	0	0	0	0	0	200	300	0	0	0	0	0	0	0	200	903	0	0	0	0	0	0	0	603	903	0
400	6	0	0	0	0	0	0	200	300	0	0	0	0	0	0	0	200	903	0	0	0	0	0	0	0	603	903	0
400	7	0	0	0	0	0	0	200	300	0	0	0	0	0	0	0	200	903	0	0	0	0	0	0	0	603	903	0
400	8	0	0	0	0	0	0	200	300	0	0	0	0	0	0	0	200	903	0	0	0	0	0	0	0	603	903	0
400	9	0	0	0	0	0	0	200	300	0	0	0	0	0	0	0	200	903	0	0	0	0	0	0	0	603	903	0
401	0	0	0	0	0	0	0	200	300	0	0	0	0	0	0	0	200	903	0	0	0	0	0	0	0	603	903	0
401	1	0	0	0	0	0	0	200	300	0	0	0	0	0	0	0	200	903	0	0	0	0	0	0	0	603	903	0
401	2	0	0	0	0	0	0	200	300	0	0	0	0	0	0	0	200	903	0	0	0	0	0	0	0	603	903	0
401	3	0	0	0	0	0	0	200	300	0	0	0	0	0	0	0	200	903	0	0	0	0	0	0	0	603	903	0
401	4	0	0	0	0	0	0	200	300	0	0	0	0	0	0	0	200	903	0	0	0	0	0	0	0	603	903	0
401	5	0	0	0	0	0	0	200	300	0	0	0	0	0	0	0	200	903	0	0	0	0	0	0	0	603	903	0
401	6	0	0	0	0	0	0	200	300	0	0	0	0	0	0	0	200	903	0	0	0	0	0	0	0	603	903	0
401	7	0	0	0	0	0	0	200	300	0	0	0	0	0	0	0	200	903	0	0	0	0	0	0	0	603	903	0
401	8	0	0	0	0	0	0	200	300	0	0	0	0	0	0	0	200	903	0	0	0	0	0	0	0	603	903	0
401	9	0	0	0	0	0	0	200	300	0	0	0	0	0	0	0	200	903	0	0	0	0	0	0	0	603	903	0
402	0	0	0	0	0	0	0	200	300	0	0	0	0	0	0	0	200	903	0	0	0	0	0	0	0	603	903	0
402	1	0	0	0	0	0	0	200	300	0	0	0	0	0	0	0	200	903	0	0	0	0	0	0	0	603	903	0
402	2	0	0	0	0	0	0	200	300	0	0	0	0	0	0	0	200	903	0	0	0	0	0	0	0	603	903	0
402	3	0	0	0	0	0	0	200	300	0	0	0	0	0	0	0	200	903	0	0	0	0	0	0	0	603	903	0
402	4	0	0	0	0	0	0	200	300	0	0	0	0	0	0	0	200	903	0	0	0	0	0	0	0	603	903	0
402	5	0	0	0	0	0	0	200	300	0	0	0	0	0	0	0	200	903	0	0	0	0	0	0	0	603	903	0
402	6	0	0	0	0	0	0	200	300	0	0	0	0	0	0	0	200	903	0	0	0	0	0	0	0	603	903	0
402	7	0	0	0	0	0	0	200	300	0	0	0	0	0	0	0	200	903	0	0	0	0	0	0	0	603	903	0
402	8	0	0	0	0	0	0	200	300	0	0	0	0	0	0	0	200	903	0	0	0	0	0	0	0	603	903	0
402	9	0	0	0	0	0	0	200	300	0	0	0	0	0	0	0	200	903	0	0	0	0	0	0	0	603	903	0
403	0	0	0	0	0	0	0	200	300	0	0	0	0	0	0	0	200	903	0	0	0	0	0	0	0	603	903	0
403	1	0	0	0	0	0	0	200	300	0	0	0	0	0	0	0	200	903	0	0	0	0	0	0	0	603	903	0
403	2	0	0	0	0	0	0	200	300	0	0	0	0	0	0	0	200	903	0	0	0	0	0	0	0	603	903	0
403	3	0	0	0	0	0	0	200	300	0	0	0	0	0	0	0	200	903	0	0	0	0	0	0	0	603	903	0
403	4	0	0	0	0	0	0	200	300	0	0	0	0	0	0	0	200	903	0	0	0	0	0	0	0	603	903	0
403	5	0	0	0	0	0	0	200	300	0	0	0	0	0	0	0	200	903	0	0	0	0	0	0	0	603	903	0
403	6	0	0	0	0	0	0	200	300	0	0	0	0	0	0	0	200	903	0	0	0	0	0	0	0	603	903	0
403	7	0	0	0	0	0	0	200	300	0	0	0	0	0	0	0	200	903	0	0	0	0	0	0	0	603	903	0
403	8	0	0	0	0	0	0	200	300	0	0	0	0	0	0	0	200	903	0	0	0	0	0	0	0	603	903	0
403	9	0	0	0	0	0	0	200	300	0	0	0	0	0	0	0	200	903	0	0	0	0	0	0	0	603	903	0
404	0	0	0	0	0	0	0	200	300	0	0	0	0	0	0	0	200	903	0	0	0	0	0	0	0	603	903	0
404	1	0	0	0	0	0	0	200	300	0	0	0	0	0	0	0	200	903	0	0	0	0	0	0	0	603	903	0
404	2	0	0	0	0	0	0	200	300	0	0	0	0	0	0	0	200	903	0	0	0	0	0	0	0	603	903	0
404	3	0	0	0	0	0	0	200	300	0	0	0	0	0	0	0	200	903	0	0	0	0	0	0	0	603	903	0
404	4	0	0	0	0	0	0	200	300	0	0	0	0	0	0	0	200	903	0	0	0	0	0	0	0	603	903	0
404	5	0	0	0	0	0	0	200	300	0	0	0	0	0	0	0	200	903	0	0	0	0	0	0	0	603	903	0
404	6	0	0	0	0	0	0	200	300	0	0	0	0	0	0	0	200	903	0	0	0	0	0	0	0	603	903	0
404	7	0	0	0	0	0	0	200	300	0	0	0	0	0	0	0	200	903	0	0	0	0	0	0	0	603	903	0
404	8	0	0	0	0	0	0	200	300	0	0	0	0	0	0	0	200	903	0	0	0	0	0	0	0	603	903	0
404	9	0	0	0	0	0	0	200	300	0	0	0	0	0	0	0	200	903	0	0	0	0	0	0	0	603	903	0
405	0	0	0	0	0	0	0	200	300	0	0	0	0	0	0	0	200	903	0	0	0	0	0	0	0	603	903	0
405	1	0	0	0	0	0	0	200	300	0	0	0	0	0	0	0	200	903	0	0	0	0	0	0	0	603	903	0
405	2	0	0	0	0	0	0	200	300	0	0	0	0	0	0	0	200	903	0	0	0	0	0	0	0	603	903	0
405	3	0	0	0	0	0	0	200	300	0	0	0	0	0	0	0	200	903	0	0	0	0	0	0	0	603	903	0
405	4	0	0	0	0	0	0	200	300	0	0	0	0	0	0	0	200	903	0	0	0	0	0	0	0	603	903	0
405	5	0	0	0	0	0	0	200	300	0	0	0	0	0	0	0	200	903	0	0	0	0	0	0	0	603	903	0
405	6	0	0	0	0	0	0	200	300	0	0	0	0	0	0	0	200	903	0	0	0	0	0	0	0	603	903	0
405	7	0	0	0	0	0	0	200	300	0	0	0	0	0	0	0	200	903	0	0	0	0	0	0	0	603	903	0
405	8	0	0	0	0	0	0	200	300	0	0	0	0	0	0	0	200	903	0	0	0	0	0	0	0	603	903	0
405	9	0	0	0	0	0	0	200	300	0	0	0	0	0	0	0	200	903	0	0	0	0	0	0	0	603	903	0
406	0	0	0	0	0	0	0	200	300	0	0	0	0	0	0	0	200	903	0	0	0	0	0	0	0	603	903	0
406	1	0	0	0	0	0	0	200	300	0	0	0	0	0	0	0	200	903	0	0	0	0	0	0	0	603	903	0
406	2	0	0	0	0	0	0	200	300	0	0	0	0	0	0	0	200	903	0	0	0	0	0	0	0	603	903	0
406	3	0	0	0	0	0	0	200	300	0	0	0	0	0	0	0	200	903	0	0	0	0	0	0	0	603	903	0
406	4	0	0	0	0	0	0	200	300	0	0	0	0	0	0	0	200	903	0	0	0	0	0	0	0	603	903	0
406	5	0	0	0	0	0	0	200	300	0	0	0	0	0	0	0	200	903	0	0	0	0	0	0	0	603	903	0
406	6	0	0	0	0	0	0	200	300	0	0	0	0	0	0	0	200	903	0	0	0	0	0	0	0	603	903	0
406	7	0	0	0	0	0	0	200	300	0	0	0	0	0	0	0	200	903	0	0	0	0	0	0	0	603	903	0
406	8	0	0	0	0	0	0	200	300	0	0	0	0	0	0	0	200	903	0	0	0	0	0	0	0	603	903	0
406	9	0	0	0	0	0	0	200	300	0	0	0	0	0	0	0	200	903	0	0	0	0	0	0	0	603	903	0
407	0	0	0	0	0	0	0	200	300	0	0	0	0	0	0	0	200	903	0	0	0	0	0	0	0	603	903	0
407	1	0	0	0	0	0	0	200	300	0	0	0	0	0	0	0	200	903	0	0	0	0	0	0	0	603	903	0
407	2	0	0	0	0	0	0	200	300	0	0	0	0	0	0	0	200	903	0	0	0	0	0	0	0	603	903	0
407	3	0	0	0	0	0	0	200	300	0	0	0	0	0	0	0	200	903	0	0	0	0	0	0	0	603	903	0
407	4	0	0	0	0	0	0	200	300	0	0	0	0	0	0	0	200	903	0	0	0	0	0	0	0	603	903	0
407	5	0	0	0	0	0	0	200	300	0	0	0	0	0	0	0	200	903	0	0	0	0	0	0	0	603	903	0
407	6	0	0	0	0	0	0	200	300	0	0	0	0	0	0	0	200	903	0	0	0	0	0	0	0	603	903	0
407	7	0	0	0	0	0	0	200	300	0	0	0	0	0	0	0	200	903	0	0	0	0	0	0	0	603	903	0
407	8	0	0	0	0	0	0	200	300	0	0	0	0	0	0	0	200	903	0	0	0	0	0	0	0	603	903	0
407	9	0	0	0	0	0	0	200	300	0	0	0	0	0	0	0	200	903	0	0	0	0	0	0	0	603	903	0
408	0	0	0	0	0	0	0	200	300	0	0	0	0	0	0	0	200	903	0	0	0	0	0	0	0	603	903	0
408	1	0	0	0	0	0	0	200	300	0	0	0	0	0	0	0	200	903	0	0	0	0	0	0	0	603	903	0
408	2	0	0	0	0	0	0	200	300	0	0	0	0	0	0	0	200	903	0	0	0	0	0	0	0	603	903	0
408	3	0	0	0	0	0	0	200	300	0	0	0	0	0	0	0	200	903	0	0	0	0	0	0	0	603	903	0
408	4	0	0	0	0	0	0	200	300	0	0	0	0	0	0	0	200	903	0	0	0	0	0	0	0	603	903	0
408	5	0	0	0	0	0	0	200	300	0	0	0	0	0	0	0	200	903	0	0	0	0	0	0	0	603	903	0
408	6	0	0	0	0	0	0	200	300	0	0	0	0	0	0	0	200	903	0	0	0	0	0	0	0	603	903	0
408	7	0	0	0	0	0	0	200	300	0	0	0	0	0	0	0	200	903	0	0	0	0	0	0	0	603	903	0
408	8	0	0	0	0	0	0	200	300	0	0	0	0	0	0	0	200	903	0	0	0	0	0	0	0	603	903	0
408	9	0	0	0	0	0	0	200	300	0	0	0	0	0	0	0	200	903	0	0	0	0	0	0	0	603	903	0
409	0	0	0	0	0	0	0	200	300	0	0	0	0	0	0	0	200	903	0	0	0	0	0	0	0	603	903	0
409	1	0	0	0	0	0	0	200	300	0	0	0	0	0	0	0	200	903	0	0	0	0	0	0	0	603	903	0
409	2	0	0	0	0	0	0	200	300	0	0	0	0	0	0	0	200	903	0	0	0	0	0	0	0	603	903	0
409	3	0	0	0	0	0	0	200	300	0	0	0	0	0	0	0	200	903	0	0	0	0	0	0	0	603	903	0
409	4	0	0	0	0	0	0	200	300	0	0	0	0	0	0	0	200	903	0	0	0	0	0	0	0	603	903	0
409	5	0	0	0	0	0	0	200	300	0	0	0	0	0	0	0	200	903	0	0	0	0	0	0	0	603	903	0
409	6	0	0	0	0	0	0	200	300	0	0	0	0	0	0	0	200	903	0	0	0	0	0	0	0	603	903	0
409	7	0	0	0	0	0	0	200	300	0	0	0	0	0	0	0	200	903	0	0	0	0	0	0	0	603	903	0
409	8	0	0	0	0	0	0	200	300	0	0	0	0	0	0	0	200	903	0	0	0	0	0	0	0	603	903	0
409	9	0	0	0	0	0	0	200	300	0	0	0	0	0	0	0	200	903	0	0	0	0	0	0	0	603	903	0
410	0	0	0	0	0	0	0	200	300	0	0	0	0	0	0	0	200	903	0	0	0	0	0	0	0	603	903	0
410	1	0	0	0	0	0	0	200	300	0	0	0	0	0	0	0	200	903	0	0	0	0	0	0	0	603	903	0
410	2	0	0	0	0	0	0	200	300	0	0	0	0	0	0	0	200	903	0	0	0	0	0	0	0	603	903	0
410	3	0	0	0	0	0	0	200	300	0	0	0	0	0	0	0	200	903	0	0	0	0	0	0	0	603	903	0
410	4	0	0	0	0	0	0	200	300	0	0	0	0	0	0	0	200	903	0	0	0	0	0	0	0	603	903	0
410	5	0	0	0	0	0	0	200	300	0	0	0	0	0	0	0	200	903	0	0	0	0	0	0	0	603	903	0
410	6	0	0	0	0	0	0	200	300	0	0	0	0	0	0	0	200	903	0	0	0	0	0	0	0	603	903	0
410	7	0	0	0	0	0	0	200	300	0	0	0	0	0	0	0	200	903	0	0	0	0	0	0	0	603	903	0
410	8	0	0	0	0	0	0	200	300	0	0	0	0	0	0	0	200	903	0	0	0	0	0	0	0	603	903	0
410	9	0	0	0	0	0	0	200	300	0	0	0	0	0	0	0	200	903	0	0	0	0	0	0	0	603	903	0
411	0	0	0	0	0	0	0	200	300	0	0	0	0	0	0	0	200	903	0	0	0	0	0	0	0	603	903	0
411	1	0	0	0	0	0	0	200	300	0	0	0	0	0	0	0	200	903	0	0	0	0	0	0	0	603	903	0
411	2	0	0	0	0	0	0	200	300	0	0	0	0	0	0	0	200	903	0	0	0	0	0	0	0	603	903	0
411	3	0	0	0	0	0	0	200	300	0	0	0	0	0	0	0	200	903	0	0	0	0	0	0	0	603	903	0
411	4	0	0	0	0	0	0	200	300	0	0	0	0	0	0	0	200	903	0	0	0	0	0	0	0	603	903	0
411	5	0	0	0	0	0	0	200	300	0	0	0	0	0	0	0	200	903	0	0	0	0	0	0	0	603	903	0
411	6	0	0	0	0	0	0	200	300	0	0	0	0	0	0	0	200	903	0	0	0	0	0	0	0	603	903	0
411	7	0	0	0	0	0	0	200	300	0	0	0	0	0	0	0	200	903	0	0	0	0	0	0	0	603	903	0
411	8	0	0	0	0	0	0	200	300	0	0	0	0	0	0	0	200	903	0	0	0	0	0	0	0	603	903	0
411	9	0	0	0	0	0	0	200	300	0	0	0	0	0	0	0	200	903	0	0	0	0	0	0	0	603	903	0
412	0	0	0	0	0	0	0	200	300	0	0	0	0	0	0	0	200	903	0	0	0	0	0	0	0	603	903	0
412	1	0	0	0	0	0	0	200	300	0	0	0	0	0	0	0	200	903	0	0	0	0	0	0	0	603	903	0
412	2	0	0	0	0	0	0	200	300	0	0	0	0	0	0	0	200	903	0	0	0	0	0	0	0	603	903	0
412	3	0	0	0	0	0	0	200	300	0	0	0	0	0	0	0	200	903	0	0	0	0	0	0	0	603	903	0
412	4	0	0	0	0	0	0	200	300	0	0	0	0	0	0	0	200	903	0	0	0	0	0	0	0	603	903	0
412	5	0	0	0	0	0	0	200	300	0	0	0	0	0	0	0	200	903	0	0	0	0	0	0	0	603	903	0
412	6	0	0	0	0	0	0	200	300	0	0	0	0	0	0	0	200	903	0	0	0	0	0	0	0	603	903	0
412	7	0	0	0	0	0	0	200	300	0	0	0	0	0	0	0	200	903	0	0	0	0	0	0	0	603	903	0
412	8	0	0	0	0	0	0	200	300	0	0	0	0	0	0	0	200	903	0	0	0	0	0	0	0	603	903	0
412	9	0	0	0	0	0	0	200	300	0	0	0	0	0	0	0	200	903	0	0	0	0	0	0	0	603	903	0
413	0	0	0	0	0	0	0	200	300	0	0	0	0	0	0	0	200	903	0	0	0	0	0	0	0	603	903	0
413	1	0	0	0	0	0	0	200	300	0	0	0	0	0	0	0	200	903	0	0	0	0	0	0	0	603	903	0
413	2	0	0	0	0	0	0	200	300	0	0	0	0	0	0	0	200	903	0	0	0	0	0	0	0	603	903	0
413	3	0	0	0	0	0	0	200	300	0	0	0	0	0	0	0	200	903	0	0	0	0	0	0	0	603	903	0
413	4	0	0	0	0	0	0	200	300	0	0	0	0	0	0	0	200	903	0	0	0	0	0	0	0	603	903	0
413	5	0	0	0	0	0	0	200	300	0	0	0	0	0	0	0	200	903	0	0	0	0	0	0	0	603	903	0
413	6	0	0	0	0	0	0	200	300	0	0	0	0	0	0	0	200	903	0	0	0	0	0	0	0	603	903	0
413	7	0	0	0	0	0	0	200	300	0	0	0	0	0	0	0	200	903	0	0	0	0	0	0	0	603	903	0
413	8	0	0	0	0	0	0	200	300	0	0	0	0	0	0	0	200	903	0	0	0	0	0	0	0	603	903	0
413	9	0	0	0	0	0	0	200	300	0	0	0	0	0	0	0	200	903	0	0	0	0	0	0	0	603	903	0
414	0	0	0	0	0	0	0	200	300	0	0	0	0	0	0	0	200	903	0	0	0	0	0	0	0	603	903	0
414	1	0	0	0	0	0	0	200	300	0	0	0	0	0	0	0	200	903	0	0	0	0	0	0	0	603	903	0
414	2	0	0	0	0	0	0	200	300	0	0	0	0	0	0	0	200	903	0	0	0	0	0	0	0	603	903	0
414	3	0	0	0	0	0	0	200	300	0	0	0	0	0	0	0	200	903	0	0	0	0	0	0	0	603	903	0
414	4	0	0	0	0	0	0	200	300	0	0	0	0	0	0	0	200	903	0	0	0	0	0	0	0	603	903	0
414	5	0	0	0	0	0	0	200	300	0	0	0	0	0	0	0	200	903	0	0	0	0	0	0	0	603	903	0
414	6	0	0	0	0	0	0	200	300	0	0	0	0	0	0	0	200	903	0	0	0	0	0	0	0	603	903	0
414	7	0	0	0	0	0	0	200	300	0	0	0	0	0	0	0	200	903	0	0	0	0	0	0	0	603	903	0
414	8	0	0	0	0	0	0	200	300	0	0	0	0	0	0	0	200	903	0	0	0	0	0	0	0	603	903	0
414	9	0	0	0	0	0	0	200	300	0	0	0	0	0	0	0	200	903	0	0	0	0	0	0	0	603	903	0
415	0	0	0	0	0	0	0	200	300	0	0	0	0	0	0	0	200	903	0	0	0	0	0	0	0	603	903	0
415	1	0	0	0	0	0	0	200	300	0	0	0	0	0	0	0	200	903	0	0	0	0	0	0	0	603	903	0
415	2	0	0	0	0	0	0	200	300	0	0	0	0	0	0	0	200	903	0	0	0	0	0	0	0	603	903	0
415	3	0	0	0	0	0	0	200	300	0	0	0	0	0	0	0	200	903	0	0	0	0	0	0	0	603	903	0
415	4	0	0	0	0	0	0	200	300	0	0	0	0	0	0	0	200	903	0	0	0	0	0	0	0	603	903	0
415	5	0	0	0	0	0	0	200	300	0	0	0	0	0	0	0	200	903	0	0	0	0	0	0	0	603	903	0
415	6	0	0	0	0	0	0	200	300	0	0	0	0	0	0	0	200	903	0	0	0	0	0	0	0	603	903	0
415	7	0	0	0	0	0	0	200	300	0	0	0	0	0	0	0	200	903	0	0	0	0	0	0	0	603	903	0
415	8	0	0	0	0	0	0	200	300	0	0	0	0	0	0	0	200	903	0	0	0	0	0	0	0	603	903	0
415	9	0	0	0	0	0	0	200	300	0	0	0	0	0	0	0	200	903	0	0	0	0	0	0	0	603	903	0
416	0	0	0	0	0	0	0	200	300	0	0	0	0	0	0	0	200	903	0	0	0	0	0	0	0	603	903	0
416	1	0	0	0	0	0	0	200	300	0	0	0	0	0	0	0	200	903	0	0	0	0	0	0	0	603	903	0
416	2	0	0	0	0	0	0	200	300	0	0	0	0	0	0	0	200	903	0	0	0	0	0	0	0	603	903	0
416	3	0	0	0	0	0	0	200	300	0	0	0	0	0	0	0	200	903	0	0	0	0	0	0	0	603	903	0
416	4	0	0	0	0	0	0	200	300	0	0	0	0	0	0	0	200	903	0	0	0	0	0	0	0	603	903	0
416	5	0	0	0	0	0	0	200	300	0	0	0	0	0	0	0	200	903	0	0	0	0	0	0	0	603	903	0
416	6	0	0	0	0	0	0	200	300	0	0	0	0	0	0	0	200	903	0	0	0	0	0	0	0	603	903	0
416	7	0	0	0	0	0	0	200	300	0	0	0	0	0	0	0	200	903	0	0	0	0	0	0	0	603	903	0
416	8	0	0	0	0	0	0	200	300	0	0	0	0	0	0	0	200	903	0	0	0	0	0	0	0	603	903	0
416	9	0	0	0	0	0	0	200	300	0	0	0	0	0	0	0	200	903	0	0	0	0	0	0	0	603	903	0
417	0	0	0	0	0	0	0	200	300	0	0	0	0	0	0	0	200	903	0	0	0	0	0	0	0	603	903	0
417	1	0	0	0	0	0	0	200	300	0	0	0	0	0	0	0	200	903	0	0	0	0	0	0	0	603	903	0
417	2	0	0	0	0	0	0	200	300	0	0	0	0	0	0	0	200	903	0	0	0	0	0	0	0	603	903	0
417	3	0	0	0	0	0	0	200	300	0	0	0	0	0	0	0	200	903	0	0	0	0	0	0	0	603	903	0
417	4	0	0	0	0	0	0	200	300	0	0	0	0	0	0	0	200	903	0	0	0	0	0	0	0	603	903	0
417	5	0	0	0	0	0	0	200	300	0	0	0	0	0	0	0	200	903	0	0	0	0	0	0	0	603	903	0
417	6	0	0	0	0	0	0	200	300	0	0	0	0	0	0	0	200	903	0	0	0	0	0	0	0	603	903	0
417	7	0	0	0	0	0	0	200	300	0	0	0	0	0	0	0	200	903	0	0	0	0	0	0	0	603	903	0
417	8	0	0	0	0	0	0	200	300	0	0	0	0	0	0	0	200	903	0	0	0	0	0	0	0	603	903	0
417	9	0	0	0	0	0	0	200	300	0	0	0	0	0	0	0	200	903	0	0	0	0	0	0	0	603	903	0
418	0	0	0	0	0	0	0	200	300	0	0	0	0	0	0	0	200	903	0	0	0	0	0	0	0	603	903	0
418	1	0	0	0	0	0	0	200	300	0	0	0	0	0	0	0	200	903	0	0	0	0	0	0	0	603	903	0
418	2	0	0	0	0	0	0	200	300	0	-2.31476	5.55436	-19.3458	-4324.86	-827.378	389.328	157.232	1126.56	0	0	0	0	0	0	0	603	903	0
418	3	0	0	0	0	0	0	200	300	0	-2.00958	7.99576	-23.0079	-5331.94	-278.061	251.999	187.915	1134.74	0	0	0	0	0	0	0	603	903	0
418	4	0	0	0	0	0	0	200	300	0	-1.55182	10.2846	-26.3648	-4782.62	-644.273	23.1167	175.563	1084.4	0	0	0	0	0	0	0	603	903	0
418	5	0	0	0	0	0	0	200	300	0	-1.85699	11.0475	-31.858	-5698.15	-705.308	23.1167	177.861	1081.86	0	0	0	0	0	0	0	603	903	0
418	6	0	0	0	0	0	0	200	300	0	-2.31476	11.5053	-35.5201	-6522.13	-705.308	206.222	180.143	1086.62	0	0	0	0	0	0	0	603	903	0
418	7	0	0	0	0	0	0	200	300	0	-3.0777	13.4889	-38.5719	-6979.89	-827.378	297.775	178.55	1083.96	0	0	0	0	0	0	0	603	903	0
418	8	0	0	0	0	0	0	200	300	0	-4.14581	14.8622	-41.6236	-7437.65	-1132.55	526.657	172.791	1081.69	0	0	0	0	0	0	0	603	903	0
418	9	0	0	0	0	0	0	200	300	0	-4.45099	15.0148	-48.6427	-7803.87	-1193.59	709.762	175.462	1063.43	0	0	0	0	0	0	0	603	903	0
419	0	0	0	0	0	0	0	200	300	0	-3.68805	14.8622	-50.4737	-8902.5	-1193.59	709.762	176.352	1079.38	0	0	0	0	0	0	0	603	903	0
419	1	0	0	0	0	0	0	200	300	0	-6.58722	13.0312	-54.1358	-9268.71	-1193.59	709.762	177.952	1074.21	0	0	0	0	0	0	0	603	903	0
419	2	0	0	0	0	0	0	200	300	0	-7.04498	13.9467	-57.7979	-9818.03	-1681.87	663.986	170.901	1072.87	0	0	0	0	0	0	0	603	903	0
419	3	0	0	0	0	0	0	200	300	0	-6.58722	13.4889	-60.5445	-9543.37	-1498.77	892.868	175.245	1060.63	0	0	0	0	0	0	0	603	903	0
419	4	0	0	0	0	0	0	200	300	0	-6.73981	12.2682	-64.2066	-10825.1	-1193.59	938.644	181.41	1071.6	0	0	0	0	0	0	0	603	903	0
419	5	0	0	0	0	0	0	200	300	0	-8.72345	11.5053	-66.9532	-10825.1	-2109.12	1075.97	168.499	1064.68	0	0	0	0	0	0	0	603	903	0
419	6	0	0	0	0	0	0	200	300	0	-6.58722	9.97941	-69.0894	-11191.3	-1437.73	1304.85	179.19	1064.98	0	0	0	0	0	0	0	603	903	0
419	7	0	0	0	0	0	0	200	300	0	-8.72345	8.30094	-70.6153	-11923.7	-1376.69	1075.97	180.504	1071.85	0	0	0	0	0	0	0	603	903	0
419	8	0	0	0	0	0	0	200	300	0	-8.57086	7.69059	-74.8878	-11832.2	-1926.01	1259.08	174.281	1061	0	0	0	0	0	0	0	603	903	0
419	9	0	0	0	0	0	0	200	300	0	-8.57086	7.38541	-78.8551	-12656.2	-1803.94	1121.75	177.123	1063.5	0	0	0	0	0	0	0	603	903	0
420	0	0	0	0	0	0	0	200	300	0	-10.0967	4.48624	-80.6861	-13113.9	-1498.77	1167.53	181.425	1065.53	0	0	0	0	0	0	0	603	903	0
420	1	0	0	0	0	0	0	200	300	0	-10.4019	2.5026	-81.2965	-13113.9	-2109.12	1030.2	174.057	1064.31	0	0	0	0	0	0	0	603	903	0
420	2	0	0	0	0	0	0	200	300	0	-9.3338	2.04483	-81.2965	-13297	-1987.05	1442.18	175.558	1066.56	0	0	0	0	0	0	0	603	903	0
420	3	0	0	0	0	0	0	200	300	0	-9.48639	0.518956	-86.4845	-14853.4	-1742.91	1487.96	179.847	1074.75	0	0	0	0	0	0	0	603	903	0
420	4	0	0	0	0	0	0	200	300	0	-10.8597	-0.396572	-91.3673	-14761.9	-1742.91	1533.74	180.924	1064.57	0	0	0	0	0	0	0	603	903	0
420	5	0	0	0	0	0	0	200	300	0	-11.3174	-1.15951	-94.1139	-15128.1	-1864.98	1487.96	180.184	1063.74	0	0	0	0	0	0	0	603	903	0
420	6	0	0	0	0	0	0	200	300	0	-9.63898	-1.61727	-96.2501	-15036.5	-1926.01	1579.51	179.99	1059.22	0	0	0	0	0	0	0	603	903	0
420	7	0	0	0	0	0	0	200	300	0	-9.02863	-2.38021	-97.4708	-15677.4	-1681.87	1396.41	182.745	1063.84	0	0	0	0	0	0	0	603	903	0
420	8	0	0	0	0	0	0	200	300	0	-11.0123	-4.51644	-100.828	-16409.8	-2231.19	1350.63	177.871	1065.75	0	0	0	0	0	0	0	603	903	0
420	9	0	0	0	0	0	0	200	300	0	-9.02863	-3.75351	-105.711	-16409.8	-2109.12	1533.74	180.048	1058.23	0	0	0	0	0	0	0	603	903	0
421	0	0	0	0	0	0	0	200	300	0	-10.4019	-5.1268	-108.762	-16592.9	-1803.94	1579.51	183.414	1055.56	0	0	0	0	0	0	0	603	903	0
421	1	0	0	0	0	0	0	200	300	0	-9.63898	-6.3475	-109.678	-17050.7	-2109.12	1625.29	180.77	1058.46	0	0	0	0	0	0	0	603	903	0
421	2	0	0	0	0	0	0	200	300	0	-9.63898	-6.3475	-112.424	-16684.5	-2170.15	1442.18	180.697	1051.41	0	0	0	0	0	0	0	603	903	0
421	3	0	0	0	0	0	0	200	300	0	-10.5545	-7.5682	-113.035	-16501.4	-2109.12	1442.18	181.341	1048.98	0	0	0	0	0	0	0	603	903	0
421	4	0	0	0	0	0	0	200	300	0	-10.8597	-8.78891	-117.612	-17783.1	-2109.12	1259.08	182.067	1054.2	0	0	0	0	0	0	0	603	903	0
421	5	0	0	0	0	0	0	200	300	0	-8.41827	-9.24667	-119.138	-17783.1	-1803.94	1533.74	184.858	1052.26	0	0	0	0	0	0	0	603	903	0
421	6	0	0	0	0	0	0	200	300	0	-6.89239	-9.70443	-120.054	-18515.5	-1620.84	1167.53	186.499	1057.23	0	0	0	0	0	0	0	603	903	0
421	7	0	0	0	0	0	0	200	300	0	-8.57086	-11.0777	-124.021	-18973.3	-1254.62	1121.75	189.884	1055.98	0	0	0	0	0	0	0	603	903	0
421	8	0	0	0	0	0	0	200	300	0	-9.18121	-13.214	-124.937	-19248	-1864.98	1442.18	185.073	1057.06	0	0	0	0	0	0	0	603	903	0
421	9	0	0	0	0	0	0	200	300	0	-9.63898	-13.3665	-128.599	-19614.2	-1681.87	1213.3	186.922	1055.52	0	0	0	0	0	0	0	603	903	0
422	0	0	0	0	0	0	0	200	300	0	-7.50275	-14.7398	-130.43	-19522.6	-1437.73	1167.53	188.977	1052.68	0	0	0	0	0	0	0	603	903	0
422	1	0	0	0	0	0	0	200	300	0	-7.19757	-16.4183	-132.871	-19980.4	-1803.94	1121.75	186.423	1053.37	0	0	0	0	0	0	0	603	903	0
422	2	0	0	0	0	0	0	200	300	0	-6.43463	-16.8761	-137.449	-20987.5	-1498.77	847.092	189.096	1055.69	0	0	0	0	0	0	0	603	903	0
422	3	0	0	0	0	0	0	200	300	0	-2.61993	-17.639	-142.637	-21445.2	-1193.59	709.762	191.632	1053.35	0	0	0	0	0	0	0	603	903	0
422	4	0	0	0	0	0	0	200	300	0	-1.70441	-18.5545	-147.214	-22177.6	-1193.59	297.775	191.892	1053.65	0	0	0	0	0	0	0	603	903	0
422	5	0	0	0	0	0	0	200	300	0	-0.178527	-21.4537	-153.013	-22269.2	-1254.62	618.209	191.801	1048.54	0	0	0	0	0	0	0	603	903	0
422	6	0	0	0	0	0	0	200	300	0	3.02582	-22.0641	-159.116	-23734	-1071.52	-343.094	193.266	1052.16	0	0	0	0	0	0	0	603	903	0
422	7	0	0	0	0	0	0	200	300	0	3.78876	-24.0477	-163.999	-24283.4	-827.378	-159.989	194.955	1051.07	0	0	0	0	0	0	0	603	903	0
422	8	0	0	0	0	0	0	200	300	0	5.16205	-25.5736	-170.408	-24466.5	-339.097	-388.871	198.01	1046.58	0	0	0	0	0	0	0	603	903	0
422	9	0	0	0	0	0	0	200	300	0	7.60346	-28.3202	-172.544	-24558	-461.167	-663.529	197.327	1045.33	0	0	0	0	0	0	0	603	903	0
423	0	0	0	0	0	0	0	200	300	0	10.9604	-28.4727	-182.92	-26114.4	-94.9558	-571.976	199.481	1045.76	0	0	0	0	0	0	0	603	903	0
423	1	0	0	0	0	0	0	200	300	0	10.6552	-29.9986	-188.413	-27670.8	27.1145	-846.635	200.144	1049.86	0	0	0	0	0	0	0	603	903	0
423	2	0	0	0	0	0	0	200	300	0	10.9604	-31.2193	-194.212	-27762.4	271.255	-1029.74	201.397	1045.95	0	0	0	0	0	0	0	603	903	0
423	3	0	0	0	0	0	0	200	300	0	11.4182	-32.1349	-203.367	-28861	515.396	-1075.52	202.534	1044.92	0	0	0	0	0	0	0	603	903	0
423	4	0	0	0	0	0	0	200	300	0	13.5544	-33.6607	-210.386	-29776.5	210.22	-800.858	200.999	1044.53	0	0	0	0	0	0	0	603	903	0
423	5	0	0	0	0	0	0	200	300	0	16.7587	-35.3392	-216.489	-30234.3	515.396	-1075.52	202.381	1042.66	0	0	0	0	0	0	0	603	903	0
423	6	0	0	0	0	0	0	200	300	0	14.4699	-36.1021	-223.814	-31332.9	637.466	-709.306	202.848	1043	0	0	0	0	0	0	0	603	903	0
423	7	0	0	0	0	0	0	200	300	0	15.0803	-36.4073	-232.358	-32614.7	759.536	-983.964	203.269	1043.36	0	0	0	0	0	0	0	603	903	0
423	8	0	0	0	0	0	0	200	300	0	18.2846	-38.0858	-241.819	-32706.2	820.572	-755.082	203.393	1038.25	0	0	0	0	0	0	0	603	903	0
423	9	0	0	0	0	0	0	200	300	0	19.5053	-39.6117	-249.448	-33255.5	942.642	-1121.29	203.779	1036.32	0	0	0	0	0	0	0	603	903	0
424	0	0	0	0	0	0	0	200	300	0	18.5898	-40.3746	-256.467	-34995	820.572	-571.976	203.2	1039.45	0	0	0	0	0	0	0	603	903	0
424	1	0	0	0	0	0	0	200	300	0	20.4208	-40.8324	-261.35	-36185.2	881.607	-938.187	203.373	1041.45	0	0	0	0	0	0	0	603	903	0
424	2	0	0	0	0	0	0	200	300	0	24.2355	-42.6634	-272.642	-36459.9	759.536	-892.411	202.786	1036.73	0	0	0	0	0	0	0	603	903	0
424	3	0	0	0	0	0	0	200	300	0	21.489	-42.2057	-281.187	-37100.7	759.536	-755.082	202.701	1034.94	0	0	0	0	0	0	0	603	903	0
424	4	0	0	0	0	0	0	200	300	0	21.6415	-43.7315	-289.121	-37650.1	698.501	-938.187	202.416	1033.22	0	0	0	0	0	0	0	603	903	0
424	5	0	0	0	0	0	0	200	300	0	23.0148	-44.7996	-295.835	-39023.4	1186.78	-1212.85	204.012	1034.91	0	0	0	0	0	0	0	603	903	0
424	6	0	0	0	0	0	0	200	300	0	21.6415	-45.2574	-300.108	-39206.5	1308.85	-938.187	204.361	1033.64	0	0	0	0	0	0	0	603	903	0
424	7	0	0	0	0	0	0	200	300	0	22.8622	-46.6307	-309.873	-39755.8	1308.85	-709.306	204.224	1031.3	0	0	0	0	0	0	0	603	903	0
424	8	0	0	0	0	0	0	200	300	0	23.0148	-47.3936	-318.418	-40671.3	1614.03	-1167.07	205.069	1030.73	0	0	0	0	0	0	0	603	903	0
424	9	0	0	0	0	0	0	200	300	0	23.9304	-49.0721	-325.132	-41312.2	1430.92	-1029.74	204.401	1030.06	0	0	0	0	0	0	0	603	903	0
425	0	0	0	0	0	0	0	200	300	0	23.0148	-49.2247	-331.846	-41769.9	1003.68	-1121.29	203.025	1028.87	0	0	0	0	0	0	0	603	903	0
425	1	0	0	0	0	0	0	200	300	0	22.2519	-52.2765	-338.865	-42868.6	1369.89	-1029.74	204.043	1029.51	0	0	0	0	0	0	0	603	903	0
425	2	0	0	0	0	0	0	200	300	0	23.7778	-52.5816	-345.274	-43509.4	1125.75	-892.411	203.26	1029.01	0	0	0	0	0	0	0	603	903	0
425	3	0	0	0	0	0	0	200	300	0	24.6933	-53.8023	-354.429	-43875.6	1308.85	-709.306	203.693	1026.79	0	0	0	0	0	0	0	603	903	0
425	4	0	0	0	0	0	0	200	300	0	22.7097	-55.023	-362.058	-45340.5	1186.78	-938.187	203.278	1028.23	0	0	0	0	0	0	0	603	903	0
425	5	0	0	0	0	0	0	200	300	0	21.6415	-56.8541	-368.162	-45523.6	1614.03	-709.306	204.384	1026.65	0	0	0	0	0	0	0	603	903	0
425	6	0	0	0	0	0	0	200	300	0	20.8786	-58.5326	-373.655	-45157.4	1552.99	-251.541	204.156	1023.85	0	0	0	0	0	0	0	603	903	0
425	7	0	0	0	0	0	0	200	300	0	20.8786	-59.4481	-381.895	-45798.3	1003.68	-480.423	202.628	1022.92	0	0	0	0	0	0	0	603	903	0
425	8	0	0	0	0	0	0	200	300	0	20.5734	-60.6688	-387.998	-46988.5	1247.82	-617.753	203.216	1024.1	0	0	0	0	0	0	0	603	903	0
425	9	0	0	0	0	0	0	200	300	0	18.2846	-62.805	-394.102	-46439.1	1186.78	-480.423	203.011	1020.84	0	0	0	0	0	0	0	603	903	0
426	0	0	0	0	0	0	0	200	300	0	17.8268	-62.6524	-400.205	-46988.5	637.466	-709.306	201.593	1020.41	0	0	0	0	0	0	0	603	903	0
426	1	0	0	0	0	0	0	200	300	0	17.5217	-65.0938	-406.004	-47537.8	942.642	-480.423	202.322	1020.09	0	0	0	0	0	0	0	603	903	0
426	2	0	0	0	0	0	0	200	300	0	17.8268	-66.3145	-412.717	-47904	759.536	-526.2	201.84	1019.07	0	0	0	0	0	0	0	603	903	0
426	3	0	0	0	0	0	0	200	300	0	14.3173	-68.4508	-419.126	-48361.7	149.185	-251.541	200.356	1018.39	0	0	0	0	0	0	0	603	903	0
426	4	0	0	0	0	0	0	200	300	0	12.0285	-69.8241	-426.45	-49002.6	332.29	-159.989	200.779	1017.91	0	0	0	0	0	0	0	603	903	0
426	5	0	0	0	0	0	0	200	300	0	10.1974	-70.7396	-430.112	-48636.4	515.396	-251.541	201.198	1016.08	0	0	0	0	0	0	0	603	903	0
426	6	0	0	0	0	0	0	200	300	0	10.35	-74.2491	-434.08	-47995.5	271.255	-68.436	200.625	1013.57	0	0	0	0	0	0	0	603	903	0
426	7	0	0	0	0	0	0	200	300	0	9.12933	-74.7069	-440.488	-48636.4	-278.061	251.999	199.369	1013.41	0	0	0	0	0	0	0	603	903	0
426	8	0	0	0	0	0	0	200	300	0	7.14569	-75.012	-445.982	-49918.1	210.22	389.328	200.471	1014.93	0	0	0	0	0	0	0	603	903	0
426	9	0	0	0	0	0	0	200	300	0	7.75604	-77.3009	-449.949	-50101.2	-278.061	480.881	199.382	1014.35	0	0	0	0	0	0	0	603	903	0
427	0	0	0	0	0	0	0	200	300	0	5.31464	-79.4371	-453.916	-49551.9	-278.061	526.657	199.387	1012.17	0	0	0	0	0	0	0	603	903	0
427	1	0	0	0	0	0	0	200	300	0	5.61981	-80.0474	-458.494	-50192.8	-278.061	526.657	199.394	1012.47	0	0	0	0	0	0	0	603	903	0
427	2	0	0	0	0	0	0	200	300	0	4.70429	-81.5733	-464.292	-50284.4	-217.026	526.657	199.533	1011.3	0	0	0	0	0	0	0	603	903	0
427	3	0	0	0	0	0	0	200	300	0	3.94135	-83.0992	-464.292	-49826.6	-949.448	938.644	197.955	1010.32	0	0	0	0	0	0	0	603	903	0
427	4	0	0	0	0	0	0	200	300	0	3.17841	-85.0828	-471.006	-51108.3	-400.132	938.644	199.15	1011.51	0	0	0	0	0	0	0	603	903	0
427	5	0	0	0	0	0	0	200	300	0	4.24652	-85.2354	-471.311	-49735	-522.202	709.762	198.892	1008.52	0	0	0	0	0	0	0	603	903	0
427	6	0	0	0	0	0	0	200	300	0	4.24652	-85.6932	-475.584	-49735	-766.343	892.868	198.389	1007.58	0	0	0	0	0	0	0	603	903	0
427	7	0	0	0	0	0	0	200	300	0	3.33099	-86.9139	-479.551	-50284.4	-1010.48	1075.97	197.893	1007.86	0	0	0	0	0	0	0	603	903	0
427	8	0	0	0	0	0	0	200	300	0	5.00946	-88.745	-481.992	-50101.2	-705.308	984.421	198.537	1006.95	0	0	0	0	0	0	0	603	903	0
427	9	0	0	0	0	0	0	200	300	0	2.56805	-87.982	-482.908	-49643.5	-949.448	1167.53	198.034	1005.8	0	0	0	0	0	0	0	603	903	0
428	0	0	0	0	0	0	0	200	300	0	3.78876	-89.9657	-485.654	-49735	-1071.52	1350.63	197.794	1005.41	0	0	0	0	0	0	0	603	903	0
428	1	0	0	0	0	0	0	200	300	0	4.09393	-89.3553	-487.791	-49185.7	-1010.48	847.092	197.928	1003.83	0	0	0	0	0	0	0	603	903	0
428	2	0	0	0	0	0	0	200	300	0	2.72064	-89.5079	-488.401	-50101.2	-1071.52	1167.53	197.806	1005.58	0	0	0	0	0	0	0	603	903	0
428	3	0	0	0	0	0	0	200	300	0	4.09393	-90.576	-487.485	-49368.8	-1010.48	1350.63	197.927	1004.27	0	0	0	0	0	0	0	603	903	0
428	4	0	0	0	0	0	0	200	300	0	3.17841	-90.576	-491.758	-49277.3	-949.448	1304.85	198.069	1003.21	0	0	0	0	0	0	0	603	903	0
428	5	0	0	0	0	0	0	200	300	0	4.5517	-90.576	-490.842	-49002.6	-400.132	1213.3	199.185	1002.83	0	0	0	0	0	0	0	603	903	0
428	6	0	0	0	0	0	0	200	300	0	4.24652	-89.5079	-493.284	-49551.9	-1437.73	1259.08	197.085	1003.45	0	0	0	0	0	0	0	603	903	0
428	7	0	0	0	0	0	0	200	300	0	3.63617	-90.2708	-494.199	-48544.8	-766.343	1487.96	198.449	1001.23	0	0	0	0	0	0	0	603	903	0
428	8	0	0	0	0	0	0	200	300	0	3.17841	-89.5079	-495.115	-49277.3	-888.413	1533.74	198.206	1002.53	0	0	0	0	0	0	0	603	903	0
428	9	0	0	0	0	0	0	200	300	0	4.24652	-90.1182	-497.251	-48270.2	-949.448	1396.41	198.091	1000.07	0	0	0	0	0	0	0	603	903	0
429	0	0	0	0	0	0	0	200	300	0	6.23016	-90.1182	-498.472	-48544.8	-1376.69	1350.63	197.238	1000.39	0	0	0	0	0	0	0	603	903	0
429	1	0	0	0	0	0	0	200	300	0	2.72064	-90.2708	-498.472	-48819.5	-1254.62	1716.84	197.483	1000.94	0	0	0	0	0	0	0	603	903	0
429	2	0	0	0	0	0	0	200	300	0	4.09393	-89.6605	-498.167	-48544.8	-1437.73	1396.41	197.114	1000.45	0	0	0	0	0	0	0	603	903	0
429	3	0	0	0	0	0	0	200	300	0	1.65253	-89.6605	-502.134	-47812.4	-1803.94	1625.29	196.407	998.219	0	0	0	0	0	0	0	603	903	0
429	4	0	0	0	0	0	0	200	300	0	1.9577	-90.7286	-503.66	-47995.5	-1987.05	1991.5	196.055	998.294	0	0	0	0	0	0	0	603	903	0
429	5	0	0	0	0	0	0	200	300	0	0.126648	-90.7286	-503.355	-48453.3	-2048.08	1762.62	195.931	999.261	0	0	0	0	0	0	0	603	903	0
429	6	0	0	0	0	0	0	200	300	0	-1.70441	-90.1182	-503.965	-48270.2	-1742.91	1854.17	196.542	998.781	0	0	0	0	0	0	0	603	903	0
429	7	0	0	0	0	0	0	200	300	0	-2.31476	-90.7286	-504.575	-47720.9	-2048.08	1854.17	195.941	997.576	0	0	0	0	0	0	0	603	903	0
429	8	0	0	0	0	0	0	200	300	0	-3.0777	-90.7286	-507.017	-47080	-1864.98	2220.38	196.322	995.857	0	0	0	0	0	0	0	603	903	0
429	9	0	0	0	0	0	0	200	300	0	-4.60358	-92.1019	-508.237	-47171.6	-2597.4	2083.05	194.889	995.814	0	0	0	0	0	0	0	603	903	0
430	0	0	0	0	0	0	0	200	300	0	-6.12946	-91.6441	-510.068	-46988.5	-2292.22	2174.61	195.506	995.122	0	0	0	0	0	0	0	603	903	0
430	1	0	0	0	0	0	0	200	300	0	-8.26569	-93.9329	-508.237	-47537.8	-2475.33	2311.94	195.13	996.535	0	0	0	0	0	0	0	603	903	0
430	2	0	0	0	0	0	0	200	300	0	-9.3338	-93.17	-511.289	-46439.1	-2536.36	2311.94	195.039	993.828	0	0	0	0	0	0	0	603	903	0
430	3	0	0	0	0	0	0	200	300	0	-9.63898	-94.2381	-513.12	-46805.4	-2902.57	2266.16	194.343	994.217	0	0	0	0	0	0	0	603	903	0
430	4	0	0	0	0	0	0	200	300	0	-8.57086	-95.1536	-514.036	-46805.4	-2719.47	2357.71	194.71	994.055	0	0	0	0	0	0	0	603	903	0
430	5	0	0	0	0	0	0	200	300	0	-11.3174	-96.8321	-515.562	-47171.6	-3085.68	2495.04	194.015	994.495	0	0	0	0	0	0	0	603	903	0
430	6	0	0	0	0	0	0	200	300	0	-13.6063	-97.5951	-516.477	-46805.4	-3207.75	2632.37	193.789	993.624	0	0	0	0	0	0	0	603	903	0
430	7	0	0	0	0	0	0	200	300	0	-14.064	-97.1373	-517.393	-46072.9	-3146.71	2723.92	193.918	992.048	0	0	0	0	0	0	0	603	903	0
430	8	0	0	0	0	0	0	200	300	0	-14.2166	-97.5951	-518.613	-45340.5	-3390.85	2952.8	193.462	990.426	0	0	0	0	0	0	0	603	903	0
430	9	0	0	0	0	0	0	200	300	0	-14.827	-98.2054	-521.665	-45615.2	-3268.78	2998.58	193.734	990.442	0	0	0	0	0	0	0	603	903	0
431	0	0	0	0	0	0	0	200	300	0	-16.658	-99.7313	-523.496	-46164.5	-3329.82	3227.46	193.639	991.185	0	0	0	0	0	0	0	603	903	0
431	1	0	0	0	0	0	0	200	300	0	-15.5899	-99.5787	-524.717	-46072.9	-3634.99	3364.79	193.072	990.805	0	0	0	0	0	0	0	603	903	0
431	2	0	0	0	0	0	0	200	300	0	-18.1839	-99.2735	-525.938	-45432	-3634.99	3273.24	193.089	989.383	0	0	0	0	0	0	0	603	903	0
431	3	0	0	0	0	0	0	200	300	0	-17.2684	-97.9002	-525.938	-45432	-3573.96	3547.9	193.205	989.383	0	0	0	0	0	0	0	603	903	0
431	4	0	0	0	0	0	0	200	300	0	-17.2684	-99.2735	-530.21	-45615.2	-4123.28	3502.12	192.223	989.032	0	0	0	0	0	0	0	603	903	0
431	5	0	0	0	0	0	0	200	300	0	-19.5572	-99.7313	-531.736	-45615.2	-4062.24	3410.57	192.36	988.785	0	0	0	0	0	0	0	603	903	0
431	6	0	0	0	0	0	0	200	300	0	-20.3201	-99.5787	-532.957	-44974.3	-4184.31	3319.02	192.149	987.386	0	0	0	0	0	0	0	603	903	0
431	7	0	0	0	0	0	0	200	300	0	-19.7098	-98.9683	-535.093	-44516.5	-4062.24	3639.45	192.408	986.194	0	0	0	0	0	0	0	603	903	0
431	8	0	0	0	0	0	0	200	300	0	-20.1675	-98.8158	-535.398	-45523.6	-4611.56	3639.45	191.387	988.028	0	0	0	0	0	0	0	603	903	0
431	9	0	0	0	0	0	0	200	300	0	-22.7615	-99.8839	-539.06	-44425	-4062.24	3547.9	192.464	985.412	0	0	0	0	0	0	0	603	903	0
432	0	0	0	0	0	0	0	200	300	0	-21.9986	-100.647	-539.365	-45157.4	-4367.42	3593.67	191.903	986.723	0	0	0	0	0	0	0	603	903	0
432	1	0	0	0	0	0	0	200	300	0	-21.6934	-101.105	-542.417	-44791.2	-4611.56	3822.56	191.498	985.577	0	0	0	0	0	0	0	603	903	0
432	2	0	0	0	0	0	0	200	300	0	-21.846	-100.342	-541.502	-45157.4	-4916.74	3822.56	190.92	986.393	0	0	0	0	0	0	0	603	903	0
432	3	0	0	0	0	0	0	200	300	0	-23.3719	-100.036	-545.469	-45157.4	-4672.6	3502.12	191.434	985.786	0	0	0	0	0	0	0	603	903	0
432	4	0	0	0	0	0	0	200	300	0	-24.1348	-100.036	-548.826	-44608.1	-5221.91	3822.56	190.485	984.279	0	0	0	0	0	0	0	603	903	0
432	5	0	0	0	0	0	0	200	300	0	-24.44	-100.799	-551.267	-45157.4	-5282.95	4097.22	190.417	984.916	0	0	0	0	0	0	0	603	903	0
432	6	0	0	0	0	0	0	200	300	0	-23.8297	-100.494	-551.878	-44608.1	-5405.02	3685.23	190.206	983.83	0	0	0	0	0	0	0	603	903	0
432	7	0	0	0	0	0	0	200	300	0	-23.2193	-99.4261	-554.624	-44974.3	-5282.95	4142.99	190.475	984.09	0	0	0	0	0	0	0	603	903	0
432	8	0	0	0	0	0	0	200	300	0	-24.44	-98.5106	-554.624	-44882.7	-5405.02	4280.32	190.255	983.925	0	0	0	0	0	0	0	603	903	0
432	9	0	0	0	0	0	0	200	300	0	-25.8133	-99.1209	-560.422	-45340.5	-5527.09	4234.55	190.138	983.904	0	0	0	0	0	0	0	603	903	0
433	0	0	0	0	0	0	0	200	300	0	-26.2711	-99.2735	-562.253	-44516.5	-5221.91	4051.44	190.713	982.175	0	0	0	0	0	0	0	603	903	0
433	1	0	0	0	0	0	0	200	300	0	-24.8978	-99.4261	-562.864	-43601	-6015.37	4051.44	189.313	980.463	0	0	0	0	0	0	0	603	903	0
433	2	0	0	0	0	0	0	200	300	0	-25.8133	-100.342	-565.305	-44241.9	-5527.09	4142.99	190.223	981.262	0	0	0	0	0	0	0	603	903	0
433	3	0	0	0	0	0	0	200	300	0	-26.7288	-97.7476	-566.221	-44791.2	-5893.3	3914.11	189.592	982.105	0	0	0	0	0	0	0	603	903	0
433	4	0	0	0	0	0	0	200	300	0	-25.0504	-97.2899	-570.798	-44699.6	-6076.4	4097.22	189.355	981.311	0	0	0	0	0	0	0	603	903	0
433	5	0	0	0	0	0	0	200	300	0	-27.034	-98.0528	-572.324	-44150.3	-6015.37	3822.56	189.49	980.142	0	0	0	0	0	0	0	603	903	0
433	6	0	0	0	0	0	0	200	300	0	-26.4236	-96.8321	-576.597	-44058.7	-5771.23	4097.22	189.991	979.412	0	0	0	0	0	0	0	603	903	0
433	7	0	0	0	0	0	0	200	300	0	-25.3555	-96.5269	-576.292	-44791.2	-6442.62	4051.44	188.821	980.723	0	0	0	0	0	0	0	603	903	0
433	8	0	0	0	0	0	0	200	300	0	-27.034	-96.2218	-577.207	-45065.8	-6198.47	3822.56	189.261	981.076	0	0	0	0	0	0	0	603	903	0
433	9	0	0	0	0	0	0	200	300	0	-26.5762	-95.4588	-579.343	-44425	-6564.69	3914.11	188.669	979.682	0	0	0	0	0	0	0	603	903	0
434	0	0	0	0	0	0	0	200	300	0	-25.5081	-95.1536	-580.259	-44425	-6442.62	4005.66	188.897	979.561	0	0	0	0	0	0	0	603	903	0
434	1	0	0	0	0	0	0	200	300	0	-25.3555	-95.6114	-584.531	-44608.1	-6381.58	3639.45	189.083	979.314	0	0	0	0	0	0	0	603	903	0
434	2	0	0	0	0	0	0	200	300	0	-26.1185	-95.1536	-584.531	-44974.3	-6320.54	3868.33	189.187	979.941	0	0	0	0	0	0	0	603	903	0
434	3	0	0	0	0	0	0	200	300	0	-25.2029	-93.4752	-586.973	-44882.7	-6381.58	4005.66	189.128	979.465	0	0	0	0	0	0	0	603	903	0
434	4	0	0	0	0	0	0	200	300	0	-25.9659	-92.1019	-589.719	-44699.6	-6808.83	4097.22	188.454	978.798	0	0	0	0	0	0	0	603	903	0
434	5	0	0	0	0	0	0	200	300	0	-24.7452	-92.8648	-592.161	-44241.9	-6564.69	3868.33	188.914	977.713	0	0	0	0	0	0	0	603	903	0
434	6	0	0	0	0	0	0	200	300	0	-25.3555	-92.5597	-594.297	-44699.6	-6747.79	3685.23	188.646	978.214	0	0	0	0	0	0	0	603	903	0
434	7	0	0	0	0	0	0	200	300	0	-26.1185	-92.1019	-595.823	-43509.4	-7236.07	3868.33	187.855	976.024	0	0	0	0	0	0	0	603	903	0
434	8	0	0	0	0	0	0	200	300	0	-26.1185	-90.7286	-592.466	-44516.5	-6747.79	3639.45	188.611	978.138	0	0	0	0	0	0	0	603	903	0
434	9	0	0	0	0	0	0	200	300	0	-26.4236	-91.6441	-597.654	-43509.4	-6930.9	3593.67	188.403	975.8	0	0	0	0	0	0	0	603	903	0
435	0	0	0	0	0	0	0	200	300	0	-25.8133	-89.9657	-599.79	-43601	-7602.28	3593.67	187.325	975.694	0	0	0	0	0	0	0	603	903	0
435	1	0	0	0	0	0	0	200	300	0	-25.0504	-90.1182	-600.706	-43967.2	-7358.14	3502.12	187.751	976.193	0	0	0	0	0	0	0	603	903	0
435	2	0	0	0	0	0	0	200	300	0	-26.2711	-89.6605	-601.316	-43967.2	-7297.11	3502.12	187.865	976.118	0	0	0	0	0	0	0	603	903	0
435	3	0	0	0	0	0	0	200	300	0	-26.8814	-88.1346	-597.959	-43143.2	-7785.39	3456.34	186.98	975.151	0	0	0	0	0	0	0	603	903	0
435	4	0	0	0	0	0	0	200	300	0	-25.3555	-88.1346	-604.368	-43234.8	-7724.35	3502.12	187.219	974.537	0	0	0	0	0	0	0	603	903	0
435	5	0	0	0	0	0	0	200	300	0	-24.1348	-88.1346	-604.673	-43143.2	-7663.32	3273.24	187.327	974.35	0	0	0	0	0	0	0	603	903	0
435	6	0	0	0	0	0	0	200	300	0	-26.1185	-88.2872	-605.588	-43143.2	-7541.25	3410.57	187.547	974.242	0	0	0	0	0	0	0	603	903	0
435	7	0	0	0	0	0	0	200	300	0	-24.7452	-86.151	-607.114	-43417.9	-8151.6	3547.9	186.573	974.515	0	0	0	0	0	0	0	603	903	0
435	8	0	0	0	0	0	0	200	300	0	-26.4236	-86.9139	-606.504	-42777	-7663.32	3319.02	187.365	973.531	0	0	0	0	0	0	0	603	903	0
435	9	0	0	0	0	0	0	200	300	0	-25.6607	-86.4561	-606.504	-42685.5	-7907.46	3319.02	186.962	973.38	0	0	0	0	0	0	0	603	903	0
436	0	0	0	0	0	0	0	200	300	0	-26.1185	-86.151	-609.861	-42685.5	-8273.67	3273.24	186.434	972.992	0	0	0	0	0	0	0	603	903	0
436	1	0	0	0	0	0	0	200	300	0	-27.4918	-85.388	-609.556	-43051.7	-8334.7	3364.79	186.327	973.628	0	0	0	0	0	0	0	603	903	0
436	2	0	0	0	0	0	0	200	300	0	-27.1866	-86.4561	-609.556	-42136.1	-8273.67	3273.24	186.427	972.126	0	0	0	0	0	0	0	603	903	0
436	3	0	0	0	0	0	0	200	300	0	-25.6607	-85.2354	-609.556	-41953	-8517.81	3044.36	186.026	971.826	0	0	0	0	0	0	0	603	903	0
436	4	0	0	0	0	0	0	200	300	0	-25.9659	-86.4561	-610.471	-40946	-8578.84	3410.57	185.947	970.073	0	0	0	0	0	0	0	603	903	0
436	5	0	0	0	0	0	0	200	300	0	-26.8814	-84.0147	-609.861	-41312.2	-8456.77	3227.46	186.133	970.74	0	0	0	0	0	0	0	603	903	0
436	6	0	0	0	0	0	0	200	300	0	-27.6443	-84.0147	-611.082	-41403.7	-9006.09	3319.02	185.262	970.755	0	0	0	0	0	0	0	603	903	0
436	7	0	0	0	0	0	0	200	300	0	-25.9659	-83.7096	-611.692	-41129.1	-9128.16	3227.46	185.077	970.238	0	0	0	0	0	0	0	603	903	0
436	8	0	0	0	0	0	0	200	300	0	-26.5762	-83.0992	-610.166	-40946	-8578.84	3044.36	185.94	970.106	0	0	0	0	0	0	0	603	903	0
436	9	0	0	0	0	0	0	200	300	0	-26.2711	-82.9466	-610.471	-41220.6	-8700.91	2952.8	185.747	970.523	0	0	0	0	0	0	0	603	903	0
437	0	0	0	0	0	0	0	200	300	0	-27.7969	-82.3363	-610.471	-40396.6	-9311.26	3044.36	184.747	969.173	0	0	0	0	0	0	0	603	903	0
437	1	0	0	0	0	0	0	200	300	0	-28.5599	-81.7259	-611.387	-39481.1	-8822.98	2998.58	185.569	967.576	0	0	0	0	0	0	0	603	903	0
437	2	0	0	0	0	0	0	200	300	0	-27.7969	-82.1837	-609.251	-38931.8	-8822.98	2952.8	185.518	966.901	0	0	0	0	0	0	0	603	903	0
437	3	0	0	0	0	0	0	200	300	0	-27.3392	-80.6578	-609.861	-39389.6	-9372.3	3181.69	184.632	967.588	0	0	0	0	0	0	0	603	903	0
437	4	0	0	0	0	0	0	200	300	0	-28.5599	-81.2682	-610.166	-40030.4	-9311.26	3410.57	184.74	968.606	0	0	0	0	0	0	0	603	903	0
437	5	0	0	0	0	0	0	200	300	0	-29.0176	-80.5052	-610.471	-39755.8	-9067.12	3044.36	185.147	968.123	0	0	0	0	0	0	0	603	903	0
437	6	0	0	0	0	0	0	200	300	0	-27.4918	-79.7423	-609.556	-39206.5	-9738.51	2998.58	184.024	967.32	0	0	0	0	0	0	0	603	903	0
437	7	0	0	0	0	0	0	200	300	0	-27.1866	-79.5897	-607.114	-39023.4	-9189.19	3181.69	184.864	967.277	0	0	0	0	0	0	0	603	903	0
437	8	0	0	0	0	0	0	200	300	0	-28.1021	-80.0474	-610.471	-39389.6	-9433.33	2998.58	184.547	967.523	0	0	0	0	0	0	0	603	903	0
437	9	0	0	0	0	0	0	200	300	0	-29.628	-79.7423	-610.166	-38931.8	-9921.62	2907.03	183.74	966.805	0	0	0	0	0	0	0	603	903	0
438	0	0	0	0	0	0	0	200	300	0	-29.628	-78.369	-608.335	-38474	-9860.58	2952.8	183.791	966.245	0	0	0	0	0	0	0	603	903	0
438	1	0	0	0	0	0	0	200	300	0	-28.5599	-78.6742	-609.556	-38290.9	-9433.33	3044.36	184.524	965.818	0	0	0	0	0	0	0	603	903	0
438	2	0	0	0	0	0	0	200	300	0	-28.4073	-77.3009	-609.556	-38199.4	-9799.54	3364.79	183.923	965.668	0	0	0	0	0	0	0	603	903	0
438	3	0	0	0	0	0	0	200	300	0	-29.9332	-78.0638	-609.251	-37466.9	-10287.8	2952.8	183.114	964.497	0	0	0	0	0	0	0	603	903	0
438	4	0	0	0	0	0	0	200	300	0	-30.0858	-77.3009	-608.64	-38016.3	-9982.65	3227.46	183.598	965.461	0	0	0	0	0	0	0	603	903	0
438	5	0	0	0	0	0	0	200	300	0	-27.1866	-77.3009	-607.114	-37375.4	-10348.9	2952.8	182.954	964.562	0	0	0	0	0	0	0	603	903	0
438	6	0	0	0	0	0	0	200	300	0	-29.0176	-76.9957	-606.809	-37009.2	-10287.8	3090.13	183.046	963.99	0	0	0	0	0	0	0	603	903	0
438	7	0	0	0	0	0	0	200	300	0	-29.1702	-75.3172	-606.809	-37100.7	-10470.9	3044.36	182.744	964.141	0	0	0	0	0	0	0	603	903	0
438	8	0	0	0	0	0	0	200	300	0	-30.8487	-75.775	-606.809	-36917.6	-10348.9	3044.36	182.945	963.839	0	0	0	0	0	0	0	603	903	0
438	9	0	0	0	0	0	0	200	300	0	-30.0858	-74.7069	-605.283	-36368.3	-10593	2769.7	182.499	963.085	0	0	0	0	0	0	0	603	903	0
439	0	0	0	0	0	0	0	200	300	0	-28.8651	-74.4017	-604.063	-36002.1	-10409.9	2998.58	182.767	962.6	0	0	0	0	0	0	0	603	903	0
439	1	0	0	0	0	0	0	200	300	0	-29.4754	-73.3336	-604.063	-36276.8	-10348.9	2769.7	182.868	963.055	0	0	0	0	0	0	0	603	903	0
439	2	0	0	0	0	0	0	200	300	0	-30.8487	-73.0284	-604.368	-35727.5	-10654	2907.03	182.372	962.115	0	0	0	0	0	0	0	603	903	0
439	3	0	0	0	0	0	0	200	300	0	-29.7806	-72.7232	-601.926	-35361.2	-10959.2	2723.92	181.793	961.747	0	0	0	0	0	0	0	603	903	0
439	4	0	0	0	0	0	0	200	300	0	-28.7125	-73.4862	-601.926	-35269.7	-10287.8	2907.03	182.909	961.595	0	0	0	0	0	0	0	603	903	0
439	5	0	0	0	0	0	0	200	300	0	-26.2711	-72.7232	-599.79	-35178.1	-10837.1	2723.92	181.932	961.651	0	0	0	0	0	0	0	603	903	0
439	6	0	0	0	0	0	0	200	300	0	-27.7969	-71.5025	-600.095	-34903.5	-10959.2	2723.92	181.738	961.163	0	0	0	0	0	0	0	603	903	0
439	7	0	0	0	0	0	0	200	300	0	-28.4073	-70.2818	-596.128	-35178.1	-10470.9	2540.82	182.435	962.011	0	0	0	0	0	0	0	603	903	0
439	8	0	0	0	0	0	0	200	300	0	-29.0176	-71.1973	-600.706	-34995	-10959.2	2769.7	181.756	961.257	0	0	0	0	0	0	0	603	903	0
439	9	0	0	0	0	0	0	200	300	0	-27.7969	-71.3499	-599.18	-34171.1	-10959.2	2769.7	181.71	960.03	0	0	0	0	0	0	0	603	903	0
440	0	0	0	0	0	0	0	200	300	0	-25.5081	-70.2818	-597.349	-34079.5	-10837.1	2632.37	181.858	960.051	0	0	0	0	0	0	0	603	903	0
440	1	0	0	0	0	0	0	200	300	0	-27.034	-71.3499	-597.044	-33987.9	-10654	2952.8	182.155	959.927	0	0	0	0	0	0	0	603	903	0
440	2	0	0	0	0	0	0	200	300	0	-26.8814	-68.9085	-594.297	-33530.2	-11081.3	2769.7	181.354	959.42	0	0	0	0	0	0	0	603	903	0
440	3	0	0	0	0	0	0	200	300	0	-27.4918	-68.9085	-596.433	-33072.4	-10776.1	2769.7	181.932	958.45	0	0	0	0	0	0	0	603	903	0
440	4	0	0	0	0	0	0	200	300	0	-26.1185	-68.6034	-593.687	-33072.4	-11142.3	2769.7	181.232	958.707	0	0	0	0	0	0	0	603	903	0
440	5	0	0	0	0	0	0	200	300	0	-27.1866	-66.7723	-593.687	-32797.8	-11203.4	2632.37	181.129	958.244	0	0	0	0	0	0	0	603	903	0
440	6	0	0	0	0	0	0	200	300	0	-28.2547	-67.0775	-590.94	-32980.9	-11203.4	2586.59	181.041	958.811	0	0	0	0	0	0	0	603	903	0
440	7	0	0	0	0	0	0	200	300	0	-27.9495	-67.0775	-589.414	-31699.1	-10959.2	2540.82	181.407	956.781	0	0	0	0	0	0	0	603	903	0
440	8	0	0	0	0	0	0	200	300	0	-26.2711	-66.1619	-588.499	-31516	-11142.3	2403.49	181.067	956.553	0	0	0	0	0	0	0	603	903	0
440	9	0	0	0	0	0	0	200	300	0	-24.7452	-64.9412	-588.193	-31149.8	-11325.4	2540.82	180.745	955.959	0	0	0	0	0	0	0	603	903	0
441	0	0	0	0	0	0	0	200	300	0	-25.9659	-65.8568	-586.057	-31516	-11081.3	2540.82	181.092	956.776	0	0	0	0	0	0	0	603	903	0
441	1	0	0	0	0	0	0	200	300	0	-27.3392	-65.8568	-583.921	-31424.5	-11325.4	2449.26	180.605	956.816	0	0	0	0	0	0	0	603	903	0
441	2	0	0	0	0	0	0	200	300	0	-27.3392	-64.6361	-579.954	-30692.1	-11386.5	2540.82	180.367	955.922	0	0	0	0	0	0	0	603	903	0
441	3	0	0	0	0	0	0	200	300	0	-25.8133	-65.2464	-581.174	-30600.5	-11264.4	2678.15	180.618	955.653	0	0	0	0	0	0	0	603	903	0
441	4	0	0	0	0	0	0	200	300	0	-25.3555	-63.7205	-580.564	-30417.4	-11264.4	2769.7	180.598	955.393	0	0	0	0	0	0	0	603	903	0
441	5	0	0	0	0	0	0	200	300	0	-25.9659	-64.7887	-577.817	-30509	-11508.5	2495.04	180.083	955.8	0	0	0	0	0	0	0	603	903	0
441	6	0	0	0	0	0	0	200	300	0	-27.3392	-62.805	-573.24	-29501.9	-11142.3	2769.7	180.563	954.465	0	0	0	0	0	0	0	603	903	0
441	7	0	0	0	0	0	0	200	300	0	-24.8978	-63.1102	-574.155	-30325.8	-11142.3	2678.15	180.594	955.818	0	0	0	0	0	0	0	603	903	0
441	8	0	0	0	0	0	0	200	300	0	-26.5762	-62.1947	-572.629	-28769.5	-11508.5	2723.92	179.902	953.241	0	0	0	0	0	0	0	603	903	0
441	9	0	0	0	0	0	0	200	300	0	-25.8133	-61.7369	-570.798	-29227.2	-11081.3	2540.82	180.586	954.204	0	0	0	0	0	0	0	603	903	0
442	0	0	0	0	0	0	0	200	300	0	-25.5081	-61.4317	-565.916	-29135.7	-11386.5	2952.8	179.88	954.484	0	0	0	0	0	0	0	603	903	0
442	1	0	0	0	0	0	0	200	300	0	-25.9659	-61.4317	-567.136	-29044.1	-11630.6	2723.92	179.492	954.212	0	0	0	0	0	0	0	603	903	0
442	2	0	0	0	0	0	0	200	300	0	-26.5762	-61.5843	-565	-28311.7	-11569.6	2723.92	179.523	953.109	0	0	0	0	0	0	0	603	903	0
442	3	0	0	0	0	0	0	200	300	0	-26.4236	-60.211	-561.033	-28037	-11691.6	2907.03	179.161	952.974	0	0	0	0	0	0	0	603	903	0
442	4	0	0	0	0	0	0	200	300	0	-25.9659	-60.8214	-560.728	-27579.3	-11691.6	2723.92	179.149	952.185	0	0	0	0	0	0	0	603	903	0
442	5	0	0	0	0	0	0	200	300	0	-25.5081	-59.6007	-558.897	-27304.6	-11752.7	2769.7	178.972	951.855	0	0	0	0	0	0	0	603	903	0
442	6	0	0	0	0	0	0	200	300	0	-26.1185	-59.4481	-556.76	-27030	-11752.7	2769.7	178.891	951.549	0	0	0	0	0	0	0	603	903	0
442	7	0	0	0	0	0	0	200	300	0	-27.034	-58.8377	-554.319	-27121.5	-11935.8	2815.48	178.468	951.928	0	0	0	0	0	0	0	603	903	0
442	8	0	0	0	0	0	0	200	300	0	-27.4918	-58.38	-550.657	-26389.1	-11691.6	2815.48	178.768	950.923	0	0	0	0	0	0	0	603	903	0
442	9	0	0	0	0	0	0	200	300	0	-25.9659	-58.5326	-549.131	-25839.8	-11447.5	2815.48	179.153	950.056	0	0	0	0	0	0	0	603	903	0
443	0	0	0	0	0	0	0	200	300	0	-25.5081	-57.617	-548.521	-26022.9	-11691.6	2769.7	178.685	950.442	0	0	0	0	0	0	0	603	903	0
443	1	0	0	0	0	0	0	200	300	0	-27.034	-56.7015	-545.774	-25107.3	-11325.4	2998.58	179.249	949.003	0	0	0	0	0	0	0	603	903	0
443	2	0	0	0	0	0	0	200	300	0	-25.6607	-56.7015	-541.502	-25656.7	-11630.6	3044.36	178.522	950.381	0	0	0	0	0	0	0	603	903	0
443	3	0	0	0	0	0	0	200	300	0	-26.2711	-57.3119	-539.06	-25107.3	-11508.5	2998.58	178.651	949.576	0	0	0	0	0	0	0	603	903	0
443	4	0	0	0	0	0	0	200	300	0	-25.3555	-56.5489	-538.145	-25015.8	-11874.7	2998.58	177.934	949.485	0	0	0	0	0	0	0	603	903	0
443	5	0	0	0	0	0	0	200	300	0	-25.9659	-55.9386	-536.619	-24832.7	-11264.4	2815.48	179.009	949.276	0	0	0	0	0	0	0	603	903	0
443	6	0	0	0	0	0	0	200	300	0	-26.2711	-55.786	-533.872	-24100.3	-11508.5	2998.58	178.443	948.142	0	0	0	0	0	0	0	603	903	0
443	7	0	0	0	0	0	0	200	300	0	-24.7452	-55.9386	-531.126	-24466.5	-11813.7	3044.36	177.757	949.065	0	0	0	0	0	0	0	603	903	0
443	8	0	0	0	0	0	0	200	300	0	-25.9659	-55.023	-530.82	-23734	-11813.7	2998.58	177.744	947.712	0	0	0	0	0	0	0	603	903	0
443	9	0	0	0	0	0	0	200	300	0	-25.3555	-53.8023	-526.853	-22727	-11813.7	3181.69	177.577	946.137	0	0	0	0	0	0	0	603	903	0
444	0	0	0	0	0	0	0	200	300	0	-24.7452	-53.9549	-525.022	-23276.3	-11752.7	3090.13	177.615	947.334	0	0	0	0	0	0	0	603	903	0
444	1	0	0	0	0	0	0	200	300	0	-25.9659	-54.1075	-523.496	-23642.5	-11813.7	2907.03	177.433	948.163	0	0	0	0	0	0	0	603	903	0
444	2	0	0	0	0	0	0	200	300	0	-26.5762	-53.192	-520.75	-23184.7	-11386.5	3227.46	178.134	947.522	0	0	0	0	0	0	0	603	903	0
444	3	0	0	0	0	0	0	200	300	0	-25.3555	-52.1239	-515.867	-22727	-11813.7	3090.13	177.099	947.056	0	0	0	0	0	0	0	603	903	0
444	4	0	0	0	0	0	0	200	300	0	-25.0504	-52.7342	-517.698	-21628.3	-11752.7	2998.58	177.298	944.778	0	0	0	0	0	0	0	603	903	0
444	5	0	0	0	0	0	0	200	300	0	-25.0504	-51.5135	-515.867	-21719.9	-11691.6	2769.7	177.336	945.104	0	0	0	0	0	0	0	603	903	0
444	6	0	0	0	0	0	0	200	300	0	-25.2029	-51.8187	-512.51	-22177.6	-11630.6	3227.46	177.307	946.273	0	0	0	0	0	0	0	603	903	0
444	7	0	0	0	0	0	0	200	300	0	-25.6607	-51.5135	-508.848	-21628.3	-11752.7	3044.36	176.903	945.505	0	0	0	0	0	0	0	603	903	0
444	8	0	0	0	0	0	0	200	300	0	-26.1185	-50.9032	-503.66	-20804.4	-11569.6	3044.36	177.029	944.306	0	0	0	0	0	0	0	603	903	0
444	9	0	0	0	0	0	0	200	300	0	-24.44	-50.7506	-507.017	-20712.8	-11508.5	3090.13	177.301	943.852	0	0	0	0	0	0	0	603	903	0
445	0	0	0	0	0	0	0	200	300	0	-22.7615	-49.6825	-504.27	-21170.6	-11752.7	3044.36	176.694	944.983	0	0	0	0	0	0	0	603	903	0
445	1	0	0	0	0	0	0	200	300	0	-25.0504	-49.9876	-501.829	-20712.8	-11996.8	3044.36	176.094	944.275	0	0	0	0	0	0	0	603	903	0
445	2	0	0	0	0	0	0	200	300	0	-25.3555	-49.2247	-498.472	-20621.2	-11630.6	2907.03	176.667	944.369	0	0	0	0	0	0	0	603	903	0
445	3	0	0	0	0	0	0	200	300	0	-25.6607	-48.3092	-496.641	-20621.2	-11691.6	2861.25	176.459	944.522	0	0	0	0	0	0	0	603	903	0
445	4	0	0	0	0	0	0	200	300	0	-23.2193	-48.4618	-495.725	-19797.3	-11752.7	2907.03	176.292	942.936	0	0	0	0	0	0	0	603	903	0
445	5	0	0	0	0	0	0	200	300	0	-23.8297	-47.5462	-494.199	-19980.4	-11447.5	3044.36	176.836	943.43	0	0	0	0	0	0	0	603	903	0
445	6	0	0	0	0	0	0	200	300	0	-24.1348	-47.6988	-492.979	-20346.6	-11203.4	3044.36	177.274	944.273	0	0	0	0	0	0	0	603	903	0
445	7	0	0	0	0	0	0	200	300	0	-22.4564	-48.004	-489.316	-19248	-11630.6	2861.25	176.231	942.336	0	0	0	0	0	0	0	603	903	0
445	8	0	0	0	0	0	0	200	300	0	-23.5245	-46.3255	-486.57	-19248	-11447.5	2998.58	176.473	942.559	0	0	0	0	0	0	0	603	903	0
445	9	0	0	0	0	0	0	200	300	0	-22.4564	-46.9359	-488.096	-18790.2	-11569.6	3090.13	176.297	941.497	0	0	0	0	0	0	0	603	903	0
446	0	0	0	0	0	0	0	200	300	0	-21.5408	-45.8678	-486.57	-19156.4	-11569.6	2907.03	176.222	942.37	0	0	0	0	0	0	0	603	903	0
446	1	0	0	0	0	0	0	200	300	0	-23.0667	-45.8678	-485.349	-18057.8	-11813.7	3090.13	175.659	940.206	0	0	0	0	0	0	0	603	903	0
446	2	0	0	0	0	0	0	200	300	0	-22.6089	-44.7996	-481.687	-18698.6	-11508.5	3090.13	176.108	941.819	0	0	0	0	0	0	0	603	903	0
446	3	0	0	0	0	0	0	200	300	0	-22.6089	-44.1893	-481.382	-17874.7	-11569.6	2861.25	175.966	940.132	0	0	0	0	0	0	0	603	903	0
446	4	0	0	0	0	0	0	200	300	0	-21.2357	-43.4264	-480.466	-18149.3	-11630.6	2998.58	175.793	940.774	0	0	0	0	0	0	0	603	903	0
446	5	0	0	0	0	0	0	200	300	0	-20.6253	-42.816	-476.499	-17691.6	-11752.7	2769.7	175.335	940.128	0	0	0	0	0	0	0	603	903	0
446	6	0	0	0	0	0	0	200	300	0	-21.6934	-43.8841	-477.72	-17783.1	-11386.5	2907.03	176.165	940.225	0	0	0	0	0	0	0	603	903	0
446	7	0	0	0	0	0	0	200	300	0	-21.5408	-42.6634	-473.753	-16776	-11508.5	2632.37	175.708	938.411	0	0	0	0	0	0	0	603	903	0
446	8	0	0	0	0	0	0	200	300	0	-20.015	-42.0531	-472.532	-16409.8	-11264.4	2769.7	176.162	937.727	0	0	0	0	0	0	0	603	903	0
446	9	0	0	0	0	0	0	200	300	0	-19.5572	-41.1375	-472.837	-16959.1	-11447.5	2586.59	175.79	938.867	0	0	0	0	0	0	0	603	903	0
447	0	0	0	0	0	0	0	200	300	0	-19.5572	-41.4427	-470.09	-16684.5	-11447.5	2632.37	175.648	938.492	0	0	0	0	0	0	0	603	903	0
447	1	0	0	0	0	0	0	200	300	0	-18.9468	-41.2901	-468.87	-16776	-11874.7	2449.26	174.674	938.78	0	0	0	0	0	0	0	603	903	0
447	2	0	0	0	0	0	0	200	300	0	-19.7098	-40.3746	-467.649	-16135.2	-11142.3	2723.92	176.174	937.503	0	0	0	0	0	0	0	603	903	0
447	3	0	0	0	0	0	0	200	300	0	-18.7943	-39.9168	-465.513	-16592.9	-11386.5	3135.91	175.54	938.644	0	0	0	0	0	0	0	603	903	0
447	4	0	0	0	0	0	0	200	300	0	-17.5735	-40.222	-464.902	-16226.7	-11325.4	2769.7	175.639	937.904	0	0	0	0	0	0	0	603	903	0
447	5	0	0	0	0	0	0	200	300	0	-18.6417	-39.3065	-464.597	-16501.4	-11264.4	2815.48	175.755	938.518	0	0	0	0	0	0	0	603	903	0
447	6	0	0	0	0	0	0	200	300	0	-18.6417	-39.3065	-463.987	-16135.2	-11874.7	3135.91	174.407	937.775	0	0	0	0	0	0	0	603	903	0
447	7	0	0	0	0	0	0	200	300	0	-17.1158	-38.5435	-460.935	-15402.7	-11447.5	2723.92	175.165	936.416	0	0	0	0	0	0	0	603	903	0
447	8	0	0	0	0	0	0	200	300	0	-15.5899	-38.2384	-458.799	-15311.2	-11447.5	2540.82	175.049	936.372	0	0	0	0	0	0	0	603	903	0
447	9	0	0	0	0	0	0	200	300	0	-15.8951	-36.5599	-458.189	-15494.3	-11020.2	2586.59	175.948	936.816	0	0	0	0	0	0	0	603	903	0
448	0	0	0	0	0	0	0	200	300	0	-15.2847	-36.5599	-458.189	-15036.5	-11691.6	2769.7	174.483	935.817	0	0	0	0	0	0	0	603	903	0
448	1	0	0	0	0	0	0	200	300	0	-17.1158	-36.7125	-457.273	-14761.9	-11203.4	2311.94	175.5	935.282	0	0	0	0	0	0	0	603	903	0
448	2	0	0	0	0	0	0	200	300	0	-16.658	-36.1021	-455.747	-14121	-11447.5	2403.49	174.882	933.984	0	0	0	0	0	0	0	603	903	0
448	3	0	0	0	0	0	0	200	300	0	-15.4373	-35.4918	-454.526	-14487.2	-11447.5	2632.37	174.814	934.873	0	0	0	0	0	0	0	603	903	0
448	4	0	0	0	0	0	0	200	300	0	-16.8106	-34.8814	-453.611	-14853.4	-11569.6	2449.26	174.495	935.745	0	0	0	0	0	0	0	603	903	0
448	5	0	0	0	0	0	0	200	300	0	-16.5054	-34.4237	-452.085	-14212.6	-11081.3	2540.82	175.488	934.438	0	0	0	0	0	0	0	603	903	0
448	6	0	0	0	0	0	0	200	300	0	-14.827	-34.4237	-448.728	-13571.7	-11325.4	2311.94	174.761	933.245	0	0	0	0	0	0	0	603	903	0
448	7	0	0	0	0	0	0	200	300	0	-13.9114	-33.9659	-450.254	-13297	-10959.2	2311.94	175.66	932.532	0	0	0	0	0	0	0	603	903	0
448	8	0	0	0	0	0	0	200	300	0	-14.3692	-33.0504	-448.728	-14212.6	-11142.3	2357.71	175.169	934.673	0	0	0	0	0	0	0	603	903	0
448	9	0	0	0	0	0	0	200	300	0	-15.5899	-33.203	-446.592	-13754.8	-11142.3	2403.49	175.05	933.799	0	0	0	0	0	0	0	603	903	0
449	0	0	0	0	0	0	0	200	300	0	-14.6744	-31.8297	-446.287	-13388.6	-11325.4	2266.16	174.623	933	0	0	0	0	0	0	0	603	903	0
449	1	0	0	0	0	0	0	200	300	0	-13.7589	-32.1349	-442.93	-12381.5	-11020.2	2357.71	175.12	930.954	0	0	0	0	0	0	0	603	903	0
449	2	0	0	0	0	0	0	200	300	0	-13.4537	-32.44	-445.066	-13480.1	-11386.5	2495.04	174.416	933.288	0	0	0	0	0	0	0	603	903	0
449	3	0	0	0	0	0	0	200	300	0	-13.7589	-31.5245	-442.93	-13113.9	-11203.4	2311.94	174.706	932.607	0	0	0	0	0	0	0	603	903	0
449	4	0	0	0	0	0	0	200	300	0	-13.6063	-30.7616	-442.625	-13022.4	-11081.3	2311.94	174.965	932.421	0	0	0	0	0	0	0	603	903	0
449	5	0	0	0	0	0	0	200	300	0	-13.7589	-30.1512	-443.235	-12381.5	-11020.2	2357.71	175.137	930.934	0	0	0	0	0	0	0	603	903	0
449	6	0	0	0	0	0	0	200	300	0	-11.47	-29.846	-438.962	-11740.6	-11386.5	2357.71	174.061	929.746	0	0	0	0	0	0	0	603	903	0
449	7	0	0	0	0	0	0	200	300	0	-12.5381	-29.846	-441.099	-12381.5	-11203.4	2311.94	174.601	931.07	0	0	0	0	0	0	0	603	903	0
449	8	0	0	0	0	0	0	200	300	0	-13.3011	-28.9305	-439.268	-12656.2	-10959.2	2220.38	175.051	931.812	0	0	0	0	0	0	0	603	903	0
449	9	0	0	0	0	0	0	200	300	0	-11.9278	-28.3202	-437.742	-12381.5	-11874.7	2174.61	172.873	931.285	0	0	0	0	0	0	0	603	903	0
450	0	0	0	0	0	0	0	200	300	0	-13.3011	-27.8624	-438.962	-11832.2	-11020.2	1716.84	174.895	929.955	0	0	0	0	0	0	0	603	903	0
450	1	0	0	0	0	0	0	200	300	0	-12.0804	-27.5572	-435.606	-11740.6	-11264.4	1945.72	174.141	929.953	0	0	0	0	0	0	0	603	903	0
450	2	0	0	0	0	0	0	200	300	0	-11.9278	-28.015	-437.437	-11832.2	-11447.5	1899.95	173.831	930.049	0	0	0	0	0	0	0	603	903	0
450	3	0	0	0	0	0	0	200	300	0	-12.6907	-27.0995	-435.606	-11191.3	-11020.2	1808.4	174.701	928.691	0	0	0	0	0	0	0	603	903	0
450	4	0	0	0	0	0	0	200	300	0	-13.7589	-26.0313	-434.69	-11191.3	-10959.2	1945.72	174.788	928.745	0	0	0	0	0	0	0	603	903	0
450	5	0	0	0	0	0	0	200	300	0	-11.9278	-25.7262	-434.08	-10916.7	-11447.5	1854.17	173.628	928.149	0	0	0	0	0	0	0	603	903	0
450	6	0	0	0	0	0	0	200	300	0	-11.7752	-26.0313	-431.333	-10916.7	-10837.1	1945.72	174.875	928.309	0	0	0	0	0	0	0	603	903	0
450	7	0	0	0	0	0	0	200	300	0	-12.0804	-26.3365	-431.333	-11008.2	-10837.1	2266.16	174.875	928.521	0	0	0	0	0	0	0	603	903	0
450	8	0	0	0	0	0	0	200	300	0	-13.6063	-24.5055	-431.333	-10550.4	-11325.4	1899.95	173.743	927.46	0	0	0	0	0	0	0	603	903	0
450	9	0	0	0	0	0	0	200	300	0	-11.3174	-24.8106	-431.333	-11099.8	-10837.1	1808.4	174.875	928.734	0	0	0	0	0	0	0	603	903	0
451	0	0	0	0	0	0	0	200	300	0	-11.3174	-24.8106	-430.418	-10458.9	-11203.4	1671.07	173.971	927.299	0	0	0	0	0	0	0	603	903	0
451	1	0	0	0	0	0	0	200	300	0	-12.3856	-24.2003	-429.502	-10550.4	-11325.4	1899.95	173.631	927.564	0	0	0	0	0	0	0	603	903	0
451	2	0	0	0	0	0	0	200	300	0	-12.5381	-24.3529	-429.502	-10916.7	-11447.5	1991.5	173.347	928.417	0	0	0	0	0	0	0	603	903	0
451	3	0	0	0	0	0	0	200	300	0	-12.9959	-24.3529	-427.366	-10184.2	-11081.3	1716.84	174.071	926.83	0	0	0	0	0	0	0	603	903	0
451	4	0	0	0	0	0	0	200	300	0	-13.1485	-23.7425	-426.45	-10092.7	-11447.5	1899.95	173.156	926.667	0	0	0	0	0	0	0	603	903	0
451	5	0	0	0	0	0	0	200	300	0	-12.5381	-23.2848	-427.061	-9818.03	-11508.5	1991.5	173.052	925.99	0	0	0	0	0	0	0	603	903	0
451	6	0	0	0	0	0	0	200	300	0	-11.7752	-22.827	-426.755	-10367.3	-11264.4	2220.38	173.605	927.293	0	0	0	0	0	0	0	603	903	0
451	7	0	0	0	0	0	0	200	300	0	-13.7589	-22.6744	-426.45	-9818.03	-11203.4	1762.62	173.729	926.023	0	0	0	0	0	0	0	603	903	0
451	8	0	0	0	0	0	0	200	300	0	-13.1485	-22.0641	-425.535	-9451.81	-11630.6	1808.4	172.668	925.212	0	0	0	0	0	0	0	603	903	0
451	9	0	0	0	0	0	0	200	300	0	-12.8433	-21.1485	-424.924	-8902.5	-11386.5	1945.72	173.204	923.951	0	0	0	0	0	0	0	603	903	0
452	0	0	0	0	0	0	0	200	300	0	-13.3011	-21.9115	-424.924	-9177.16	-11447.5	1533.74	173.06	924.597	0	0	0	0	0	0	0	603	903	0
452	1	0	0	0	0	0	0	200	300	0	-14.9796	-20.6908	-424.619	-9177.16	-11874.7	1762.62	172.034	924.613	0	0	0	0	0	0	0	603	903	0
452	2	0	0	0	0	0	0	200	300	0	-13.9114	-20.9959	-424.009	-9085.6	-11813.7	1762.62	172.138	924.428	0	0	0	0	0	0	0	603	903	0
452	3	0	0	0	0	0	0	200	300	0	-14.9796	-20.8433	-422.788	-9085.6	-11447.5	1671.07	172.924	924.49	0	0	0	0	0	0	0	603	903	0
452	4	0	0	0	0	0	0	200	300	0	-13.4537	-20.5382	-419.126	-8353.18	-11813.7	1671.07	171.813	922.93	0	0	0	0	0	0	0	603	903	0
452	5	0	0	0	0	0	0	200	300	0	-13.7589	-20.3856	-420.347	-8353.18	-11935.8	1716.84	171.605	922.872	0	0	0	0	0	0	0	603	903	0
452	6	0	0	0	0	0	0	200	300	0	-15.2847	-19.7752	-422.788	-8627.84	-11264.4	1671.07	173.357	923.407	0	0	0	0	0	0	0	603	903	0
452	7	0	0	0	0	0	0	200	300	0	-13.6063	-20.233	-422.178	-8994.05	-11813.7	1533.74	172.017	924.304	0	0	0	0	0	0	0	603	903	0
452	8	0	0	0	0	0	0	200	300	0	-15.4373	-20.3856	-420.347	-8353.18	-11569.6	1671.07	172.476	922.872	0	0	0	0	0	0	0	603	903	0
452	9	0	0	0	0	0	0	200	300	0	-14.827	-19.1649	-418.821	-8353.18	-11691.6	1762.62	172.084	922.945	0	0	0	0	0	0	0	603	903	0
453	0	0	0	0	0	0	0	200	300	0	-14.9796	-19.7752	-419.126	-8170.08	-11813.7	1671.07	171.813	922.493	0	0	0	0	0	0	0	603	903	0
453	1	0	0	0	0	0	0	200	300	0	-15.5899	-18.4019	-421.567	-8170.08	-12057.8	1716.84	171.398	922.38	0	0	0	0	0	0	0	603	903	0
453	2	0	0	0	0	0	0	200	300	0	-16.3528	-19.0123	-421.262	-8078.52	-11691.6	1808.4	172.246	922.177	0	0	0	0	0	0	0	603	903	0
453	3	0	0	0	0	0	0	200	300	0	-15.2847	-18.5545	-419.431	-7986.97	-11325.4	1671.07	172.998	922.042	0	0	0	0	0	0	0	603	903	0
453	4	0	0	0	0	0	0	200	300	0	-13.7589	-17.639	-418.821	-7712.31	-11935.8	1716.84	171.501	921.414	0	0	0	0	0	0	0	603	903	0
453	5	0	0	0	0	0	0	200	300	0	-16.0477	-17.1812	-419.736	-7986.97	-11813.7	1991.5	171.854	922.029	0	0	0	0	0	0	0	603	903	0
[truncated: 3,794 more rows]
