# Supplementary material for: The Effects of an Extemporaneous Speech Dual-task on Older Adult Gait Control
Source: Research Square preprint supplement (doi:10.21203/rs.3.rs-7674245/v1), 2025-11-18
Supplement: Supplementary file 21 [file DT2Walk02.xlsx]

## Sheet: Sheet1
Trajectories
		02:LFHD			02:RFHD			02:LBHD			02:RBHD			02:C7			02:T10			02:CLAV			02:STRN			02:RBAK			02:LSHO			02:LUPA			02:LELB			02:LFRM			02:LWRA			02:LWRB			02:LFIN
Frame	Sub Frame	X	Y	Z	X	Y	Z	X	Y	Z	X	Y	Z	X	Y	Z	X	Y	Z	X	Y	Z	X	Y	Z	X	Y	Z	X	Y	Z	X	Y	Z	X	Y	Z	X	Y	Z	X	Y	Z	X	Y	Z	X	Y	Z
		mm	mm	mm	mm	mm	mm	mm	mm	mm	mm	mm	mm	mm	mm	mm	mm	mm	mm	mm	mm	mm	mm	mm	mm	mm	mm	mm	mm	mm	mm	mm	mm	mm	mm	mm	mm	mm	mm	mm	mm	mm	mm	mm	mm	mm	mm	mm	mm
779	0	119.917	-2439.85	1589.76	218.017	-2447.09	1583.79	92.9485	-2611.44	1604.41	204.256	-2629.79	1597.91	142.053	-2670.45	1429.96	113.321	-2723.59	1218.11	146.383	-2541.75	1359.81	158.927	-2477.14	1233.19	206.481	-2745.93	1262.98	-26.7726	-2593.76	1386.89	-77.9708	-2611.26	1157.96	-75.3116	-2625.89	1090.8	-103.67	-2545.61	997.198	-88.5816	-2519.88	894.868	-128.684	-2579.97	881.013	-157.393	-2517.22	807.969
780	0	120.787	-2430.38	1589.61	218.909	-2437.7	1583.24	93.6642	-2601.87	1605	204.877	-2620.34	1598.11	141.859	-2661.34	1430.45	113.077	-2714.59	1218.58	146.716	-2532.73	1359.99	159.104	-2468.99	1232.94	205.562	-2737.57	1263.68	-26.6195	-2584.07	1387.61	-78.5301	-2599.47	1158.78	-76.1987	-2613.44	1091.37	-103.626	-2531.23	998.973	-88.2123	-2503.84	897.358	-128.87	-2563.03	882.384	-157.023	-2498.23	810.772
781	0	121.66	-2420.9	1589.33	219.804	-2428.3	1582.6	94.4018	-2592.31	1605.46	205.524	-2610.89	1598.2	141.742	-2652.25	1430.83	112.885	-2705.61	1218.94	147.086	-2523.7	1360.07	159.301	-2460.83	1232.59	204.779	-2729.19	1264.26	-26.4266	-2574.46	1388.19	-79.0114	-2587.78	1159.45	-76.9845	-2601.06	1091.81	-103.491	-2516.97	1000.65	-87.7334	-2487.93	899.768	-128.918	-2546.22	883.69	-156.503	-2479.46	813.515
782	0	122.538	-2411.42	1588.93	220.701	-2418.89	1581.86	95.1613	-2582.76	1605.79	206.197	-2601.44	1598.18	141.702	-2643.17	1431.08	112.745	-2696.67	1219.17	147.493	-2514.66	1360.04	159.519	-2452.64	1232.14	204.131	-2720.78	1264.71	-26.1939	-2564.92	1388.63	-79.4148	-2576.19	1159.98	-77.6688	-2588.76	1092.12	-103.265	-2502.84	1002.24	-87.1449	-2472.16	902.097	-128.826	-2529.54	884.93	-155.831	-2460.9	816.196
783	0	123.421	-2401.93	1588.41	221.601	-2409.48	1581.02	95.9429	-2573.21	1605.99	206.896	-2591.98	1598.05	141.74	-2634.11	1431.2	112.659	-2687.77	1219.28	147.937	-2505.62	1359.89	159.756	-2444.42	1231.59	203.619	-2712.35	1265.03	-25.9211	-2555.46	1388.94	-79.7398	-2564.71	1160.37	-78.2515	-2576.55	1092.31	-102.947	-2488.83	1003.74	-86.4468	-2456.53	904.345	-128.596	-2513	886.104	-155.009	-2442.56	818.816
784	0	124.308	-2392.45	1587.78	222.503	-2400.06	1580.1	96.7468	-2563.68	1606.07	207.621	-2582.51	1597.81	141.855	-2625.06	1431.21	112.627	-2678.9	1219.28	148.418	-2496.57	1359.64	160.016	-2436.19	1230.95	203.242	-2703.89	1265.22	-25.608	-2546.07	1389.1	-79.986	-2553.32	1160.62	-78.7323	-2564.41	1092.37	-102.537	-2474.96	1005.14	-85.6389	-2441.03	906.512	-128.226	-2496.6	887.213	-154.037	-2424.44	821.373
785	0	125.2	-2382.96	1587.03	223.407	-2390.64	1579.08	97.5733	-2554.15	1606.01	208.374	-2573.05	1597.47	142.048	-2616.02	1431.09	112.653	-2670.06	1219.15	148.936	-2487.52	1359.29	160.297	-2427.92	1230.21	203	-2695.41	1265.29	-25.2539	-2536.76	1389.13	-80.1522	-2542.04	1160.73	-79.1104	-2552.35	1092.31	-102.034	-2461.22	1006.44	-84.721	-2425.67	908.598	-127.719	-2480.34	888.258	-152.913	-2406.55	823.869
786	0	126.097	-2373.47	1586.16	224.315	-2381.21	1577.97	98.4231	-2544.63	1605.83	209.154	-2563.57	1597.03	142.318	-2607	1430.85	112.739	-2661.26	1218.91	149.492	-2478.46	1358.82	160.604	-2419.63	1229.38	202.893	-2686.89	1265.22	-24.8576	-2527.52	1389.03	-80.2369	-2530.85	1160.71	-79.3849	-2540.37	1092.12	-101.438	-2447.6	1007.66	-83.6929	-2410.45	910.602	-127.074	-2464.22	889.239	-151.64	-2388.88	826.3
787	0	126.999	-2363.98	1585.17	225.225	-2371.77	1576.77	99.297	-2535.12	1605.53	209.962	-2554.09	1596.48	142.666	-2597.99	1430.5	112.891	-2652.47	1218.56	150.085	-2469.39	1358.25	160.938	-2411.3	1228.47	202.92	-2678.34	1265.03	-24.4177	-2518.35	1388.79	-80.2382	-2519.76	1160.56	-79.5548	-2528.46	1091.82	-100.748	-2434.1	1008.78	-82.5546	-2395.37	912.523	-126.294	-2448.24	890.156	-150.218	-2371.44	828.666
788	0	127.907	-2354.48	1584.08	226.139	-2362.33	1575.48	100.196	-2525.61	1605.11	210.801	-2544.61	1595.83	143.09	-2588.98	1430.02	113.112	-2643.71	1218.09	150.718	-2460.32	1357.58	161.302	-2402.94	1227.47	203.079	-2669.76	1264.72	-23.9321	-2509.24	1388.43	-80.1535	-2508.75	1160.28	-79.6189	-2516.63	1091.41	-99.9622	-2420.74	1009.81	-81.3061	-2380.45	914.36	-125.38	-2432.41	891.011	-148.649	-2354.24	830.964
789	0	128.82	-2344.99	1582.88	227.057	-2352.89	1574.11	101.122	-2516.12	1604.57	211.67	-2535.12	1595.09	143.592	-2579.99	1429.43	113.407	-2634.97	1217.52	151.391	-2451.24	1356.81	161.703	-2394.53	1226.39	203.368	-2661.14	1264.28	-23.3984	-2500.18	1387.95	-79.9802	-2497.83	1159.88	-79.5757	-2504.87	1090.89	-99.0803	-2407.49	1010.74	-79.9479	-2365.67	916.11	-124.334	-2416.74	891.805	-146.936	-2337.29	833.19
790	0	129.74	-2335.5	1581.58	227.981	-2343.43	1572.65	102.077	-2506.62	1603.91	212.573	-2525.62	1594.25	144.17	-2571	1428.73	113.781	-2626.23	1216.84	152.104	-2442.14	1355.95	162.143	-2386.08	1225.25	203.785	-2652.47	1263.72	-22.8135	-2491.17	1387.36	-79.7153	-2486.98	1159.36	-79.4242	-2493.17	1090.27	-98.1008	-2394.37	1011.59	-78.4808	-2351.06	917.771	-123.161	-2401.23	892.536	-145.081	-2320.59	835.34
791	0	130.668	-2326.02	1580.18	228.913	-2333.97	1571.13	103.063	-2497.13	1603.14	213.512	-2516.11	1593.32	144.824	-2562.01	1427.92	114.236	-2617.49	1216.06	152.861	-2433.04	1354.99	162.631	-2377.57	1224.05	204.325	-2643.75	1263.03	-22.1743	-2482.19	1386.65	-79.3558	-2476.2	1158.74	-79.1631	-2481.53	1089.56	-97.023	-2381.37	1012.34	-76.9061	-2336.6	919.339	-121.864	-2385.89	893.207	-143.089	-2304.15	837.409
792	0	131.606	-2316.53	1578.7	229.854	-2324.51	1569.53	104.081	-2487.65	1602.27	214.488	-2506.59	1592.31	145.553	-2553.01	1427.01	114.775	-2608.74	1215.18	153.664	-2423.92	1353.95	163.17	-2369.01	1222.79	204.985	-2634.97	1262.23	-21.4771	-2473.24	1385.84	-78.8991	-2465.48	1158.02	-78.792	-2469.96	1088.76	-95.8463	-2368.49	1012.99	-75.2258	-2322.32	920.81	-120.449	-2370.73	893.814	-140.966	-2287.97	839.389
793	0	132.556	-2307.06	1577.14	230.807	-2315.04	1567.87	105.135	-2478.16	1601.3	215.504	-2497.06	1591.22	146.357	-2544.01	1425.99	115.399	-2599.98	1214.21	154.514	-2414.79	1352.83	163.769	-2360.38	1221.48	205.757	-2626.13	1261.32	-20.7181	-2464.3	1384.94	-78.3428	-2454.81	1157.21	-78.3107	-2458.44	1087.89	-94.5707	-2355.73	1013.55	-73.4426	-2308.21	922.176	-118.919	-2355.75	894.357	-138.72	-2272.05	841.274
794	0	133.52	-2297.59	1575.5	231.776	-2305.56	1566.15	106.227	-2468.68	1600.24	216.563	-2487.52	1590.06	147.233	-2535	1424.88	116.108	-2591.18	1213.15	155.415	-2405.63	1351.63	164.434	-2351.69	1220.13	206.637	-2617.23	1260.29	-19.8935	-2455.35	1383.96	-77.6852	-2444.18	1156.32	-77.7195	-2446.97	1086.94	-93.1967	-2343.08	1014.01	-71.5597	-2294.28	923.432	-117.282	-2340.97	894.833	-136.356	-2256.42	843.053
795	0	134.502	-2288.13	1573.81	232.764	-2296.07	1564.39	107.36	-2459.19	1599.09	217.668	-2477.97	1588.83	148.18	-2525.97	1423.68	116.9	-2582.35	1212	156.371	-2396.45	1350.37	165.172	-2342.93	1218.75	207.615	-2608.25	1259.16	-18.9999	-2446.38	1382.89	-76.9253	-2433.58	1155.35	-77.0197	-2435.55	1085.93	-91.7253	-2330.55	1014.37	-69.5812	-2280.53	924.569	-115.543	-2326.38	895.238	-133.884	-2241.05	844.718
796	0	135.506	-2278.67	1572.06	233.776	-2286.58	1562.58	108.536	-2449.7	1597.87	218.82	-2468.41	1587.55	149.197	-2516.91	1422.4	117.774	-2573.47	1210.77	157.386	-2387.24	1349.05	165.99	-2334.08	1217.35	208.686	-2599.21	1257.93	-18.034	-2437.38	1381.76	-76.063	-2423	1154.32	-76.213	-2424.17	1084.87	-90.1585	-2318.12	1014.63	-67.5121	-2266.98	925.579	-113.711	-2312	895.567	-131.314	-2225.97	846.255
797	0	136.537	-2269.21	1570.27	234.816	-2277.07	1560.75	109.758	-2440.2	1596.58	220.021	-2458.84	1586.21	150.28	-2507.82	1421.04	118.725	-2564.53	1209.46	158.462	-2377.99	1347.68	166.895	-2325.16	1215.92	209.838	-2590.08	1256.61	-16.9931	-2428.32	1380.56	-75.099	-2412.43	1153.23	-75.3021	-2412.84	1083.76	-88.4986	-2305.81	1014.79	-65.3578	-2253.62	926.454	-111.791	-2297.83	895.814	-128.655	-2211.17	847.654
798	0	137.599	-2259.76	1568.46	235.891	-2267.56	1558.89	111.027	-2430.69	1595.23	221.274	-2449.25	1584.84	151.429	-2498.69	1419.61	119.749	-2555.52	1208.09	159.605	-2368.69	1346.27	167.892	-2316.16	1214.48	211.065	-2580.87	1255.2	-15.875	-2419.19	1379.31	-74.0348	-2401.87	1152.09	-74.2902	-2401.54	1082.61	-86.7491	-2293.6	1014.84	-63.1247	-2240.46	927.183	-109.792	-2283.88	895.974	-125.917	-2196.65	848.901
799	0	138.699	-2250.31	1566.62	237.005	-2258.04	1557.02	112.345	-2421.16	1593.84	222.579	-2439.64	1583.44	152.639	-2489.53	1418.13	120.841	-2546.44	1206.65	160.816	-2359.35	1344.83	168.989	-2307.06	1213.04	212.356	-2571.58	1253.71	-14.6783	-2409.98	1378.02	-72.873	-2391.29	1150.91	-73.181	-2390.29	1081.42	-84.9135	-2281.51	1014.77	-60.8195	-2227.49	927.759	-107.722	-2270.16	896.041	-123.111	-2182.42	849.984
800	0	139.841	-2240.84	1564.78	238.164	-2248.5	1555.15	113.713	-2411.62	1592.42	223.936	-2430.02	1582.02	153.908	-2480.31	1416.59	121.995	-2537.28	1205.15	162.101	-2349.95	1343.38	170.19	-2297.88	1211.6	213.703	-2562.19	1252.15	-13.4024	-2400.67	1376.68	-71.6166	-2380.7	1149.69	-71.9788	-2379.07	1080.21	-82.9965	-2269.51	1014.6	-58.4496	-2214.73	928.172	-105.59	-2256.66	896.009	-120.248	-2168.47	850.89
801	0	141.032	-2231.37	1562.94	239.374	-2238.95	1553.29	115.131	-2402.06	1590.98	225.346	-2420.39	1580.59	155.232	-2471.04	1415.02	123.205	-2528.02	1203.6	163.461	-2340.48	1341.91	171.5	-2288.59	1210.17	215.099	-2552.72	1250.53	-12.0476	-2391.26	1375.33	-70.2692	-2370.09	1148.45	-70.6877	-2367.88	1078.98	-81.003	-2257.62	1014.32	-56.0227	-2202.18	928.416	-103.403	-2243.41	895.872	-117.338	-2154.81	851.607
802	0	142.276	-2221.89	1561.12	240.64	-2229.39	1551.45	116.6	-2392.47	1589.53	226.809	-2410.73	1579.17	156.609	-2461.7	1413.42	124.467	-2518.67	1202.01	164.898	-2330.95	1340.46	172.924	-2279.2	1208.76	216.534	-2543.16	1248.87	-10.6148	-2381.72	1373.95	-68.8348	-2359.45	1147.19	-69.3121	-2356.72	1077.73	-78.9383	-2245.84	1013.93	-53.5469	-2189.84	928.486	-101.17	-2230.4	895.626	-114.394	-2141.44	852.126
803	0	143.579	-2212.38	1559.33	241.968	-2219.81	1549.65	118.118	-2382.84	1588.09	228.321	-2401.06	1577.77	158.035	-2452.3	1411.82	125.775	-2509.22	1200.39	166.413	-2321.35	1339.03	174.462	-2269.71	1207.39	218.004	-2533.5	1247.17	-9.10619	-2372.06	1372.57	-67.3177	-2348.78	1145.93	-67.8561	-2345.6	1076.48	-76.8082	-2234.17	1013.42	-51.0302	-2177.7	928.376	-98.9012	-2217.63	895.268	-111.425	-2128.35	852.437
804	0	144.946	-2202.84	1557.58	243.361	-2210.21	1547.89	119.683	-2373.19	1586.68	229.882	-2391.36	1576.4	159.506	-2442.84	1410.21	127.124	-2499.66	1198.75	168.006	-2311.68	1337.64	176.117	-2260.11	1206.06	219.501	-2523.75	1245.46	-7.52455	-2362.27	1371.2	-65.7218	-2338.08	1144.66	-66.3236	-2334.51	1075.23	-74.6186	-2222.6	1012.82	-48.4812	-2165.78	928.087	-96.6036	-2205.12	894.798	-108.444	-2115.56	852.536
805	0	146.38	-2193.27	1555.89	244.824	-2200.59	1546.2	121.295	-2363.49	1585.3	231.489	-2381.64	1575.08	161.019	-2433.3	1408.62	128.511	-2489.99	1197.11	169.678	-2301.92	1336.31	177.888	-2250.4	1204.79	221.022	-2513.9	1243.74	-5.87365	-2352.34	1369.84	-64.0513	-2327.34	1143.41	-64.718	-2323.45	1073.99	-72.3759	-2211.14	1012.11	-45.9083	-2154.08	927.619	-94.2862	-2192.86	894.217	-105.459	-2103.07	852.418
806	0	147.883	-2183.66	1554.27	246.358	-2190.94	1544.58	122.948	-2353.74	1583.98	233.138	-2371.9	1573.82	162.571	-2423.68	1407.07	129.931	-2480.2	1195.47	171.424	-2292.09	1335.04	179.773	-2240.57	1203.6	222.562	-2503.96	1242.03	-4.15812	-2342.27	1368.52	-62.3099	-2316.55	1142.18	-63.0426	-2312.43	1072.78	-70.0862	-2199.79	1011.31	-43.3199	-2142.59	926.976	-91.9574	-2180.88	893.528	-102.484	-2090.88	852.083
807	0	149.459	-2174	1552.74	247.966	-2181.27	1543.05	124.641	-2343.95	1582.73	234.826	-2362.13	1572.64	164.158	-2413.99	1405.57	131.382	-2470.3	1193.87	173.243	-2282.17	1333.86	181.768	-2230.62	1202.49	224.119	-2493.92	1240.36	-2.38334	-2332.08	1367.24	-60.5011	-2305.74	1140.99	-61.2999	-2301.44	1071.6	-67.7563	-2188.56	1010.43	-40.7244	-2131.33	926.166	-89.6248	-2169.16	892.737	-99.5275	-2079	851.534
808	0	151.107	-2164.3	1551.31	249.648	-2171.58	1541.61	126.369	-2334.1	1581.57	236.547	-2352.34	1571.56	165.776	-2404.22	1404.14	132.86	-2460.27	1192.31	175.129	-2272.18	1332.78	183.865	-2220.56	1201.49	225.691	-2483.79	1238.73	-0.555457	-2321.75	1366.03	-58.6281	-2294.89	1139.84	-59.4921	-2290.49	1070.47	-65.3927	-2177.46	1009.47	-38.1304	-2120.3	925.198	-87.2961	-2157.72	891.854	-96.6016	-2067.43	850.778
809	0	152.826	-2154.54	1549.99	251.402	-2161.85	1540.3	128.128	-2324.2	1580.51	238.298	-2342.52	1570.58	167.423	-2394.38	1402.8	134.362	-2450.13	1190.82	177.077	-2262.1	1331.82	186.058	-2210.38	1200.61	227.278	-2473.56	1237.18	1.31878	-2311.3	1364.91	-56.6941	-2284	1138.77	-57.6211	-2279.58	1069.4	-63.0023	-2166.48	1008.46	-35.5462	-2109.5	924.087	-84.9781	-2146.57	890.889	-93.7171	-2056.19	849.825
810	0	154.614	-2144.73	1548.79	253.226	-2152.1	1539.11	129.912	-2314.24	1579.58	240.074	-2332.66	1569.73	169.095	-2384.46	1401.57	135.889	-2439.88	1189.41	179.08	-2251.95	1331	188.334	-2200.09	1199.86	228.88	-2463.24	1235.73	3.23208	-2300.74	1363.88	-54.7021	-2273.1	1137.77	-55.6885	-2268.73	1068.41	-60.592	-2155.64	1007.4	-32.9803	-2098.93	922.848	-82.6773	-2135.72	889.857	-90.885	-2045.29	848.689
811	0	156.466	-2134.86	1547.74	255.115	-2142.31	1538.07	131.717	-2304.23	1578.77	241.87	-2322.78	1569.01	170.79	-2374.46	1400.46	137.438	-2429.51	1188.12	181.128	-2241.73	1330.32	190.681	-2189.69	1199.26	230.499	-2452.84	1234.39	5.17677	-2290.09	1362.96	-52.6553	-2262.18	1136.87	-53.6961	-2257.92	1067.5	-58.1692	-2144.94	1006.32	-30.4408	-2088.61	921.501	-80.3994	-2125.16	888.774	-88.1163	-2034.74	847.385
812	0	158.378	-2124.92	1546.84	257.063	-2132.49	1537.18	133.538	-2294.15	1578.12	243.68	-2312.87	1568.44	172.504	-2364.4	1399.5	139.01	-2419.03	1186.96	183.214	-2231.44	1329.8	193.084	-2179.18	1198.82	232.136	-2442.35	1233.18	7.14492	-2279.34	1362.18	-50.5571	-2251.26	1136.08	-51.6456	-2247.19	1066.71	-55.7413	-2134.39	1005.24	-27.936	-2078.54	920.067	-78.1499	-2114.92	887.657	-85.4215	-2024.54	845.934
813	0	160.341	-2114.93	1546.11	259.063	-2122.63	1536.45	135.369	-2284.03	1577.63	245.499	-2302.92	1568.03	174.234	-2354.27	1398.69	140.606	-2408.45	1185.95	185.326	-2221.09	1329.44	195.527	-2168.59	1198.56	233.793	-2431.8	1232.14	9.1285	-2268.53	1361.55	-48.4114	-2240.35	1135.41	-49.5393	-2236.52	1066.03	-53.316	-2124	1004.16	-25.4739	-2068.72	918.57	-75.9333	-2104.99	886.526	-82.8109	-2014.72	844.358
814	0	162.347	-2104.88	1545.54	261.104	-2112.73	1535.9	137.204	-2273.84	1577.3	247.323	-2292.94	1567.78	175.978	-2344.08	1398.05	142.227	-2397.79	1185.12	187.455	-2210.69	1329.27	197.992	-2157.9	1198.47	235.475	-2421.17	1231.27	11.1195	-2257.67	1361.08	-46.2229	-2229.47	1134.89	-47.3802	-2225.95	1065.49	-50.9013	-2113.78	1003.11	-23.0621	-2059.16	917.033	-73.7535	-2095.39	885.402	-80.2941	-2005.27	842.682
815	0	164.384	-2094.78	1545.16	263.177	-2102.8	1535.53	139.039	-2263.61	1577.16	249.145	-2282.93	1567.71	177.734	-2333.85	1397.59	143.876	-2387.04	1184.48	189.588	-2200.24	1329.28	200.461	-2147.14	1198.57	237.183	-2410.49	1230.6	13.11	-2246.78	1360.78	-43.9971	-2218.62	1134.51	-45.1718	-2215.47	1065.1	-48.5054	-2103.74	1002.11	-20.7082	-2049.86	915.484	-71.6143	-2086.11	884.304	-77.8797	-1996.21	840.932
816	0	166.443	-2084.62	1544.96	265.268	-2092.83	1535.34	140.867	-2253.34	1577.2	250.962	-2272.88	1567.82	179.499	-2323.56	1397.33	145.555	-2376.23	1184.06	191.715	-2189.76	1329.48	202.915	-2136.32	1198.86	238.923	-2399.77	1230.14	15.0924	-2235.88	1360.67	-41.7405	-2207.84	1134.29	-42.919	-2205.1	1064.86	-46.1368	-2093.89	1001.17	-18.4191	-2040.83	913.948	-69.5186	-2077.16	883.254	-75.5754	-1987.55	839.136
817	0	168.509	-2074.42	1544.94	267.366	-2082.83	1535.34	142.683	-2243.02	1577.42	252.769	-2262.81	1568.11	181.272	-2313.25	1397.27	147.269	-2365.37	1183.85	193.823	-2179.26	1329.86	205.334	-2125.46	1199.34	240.697	-2389.02	1229.9	17.0594	-2224.99	1360.75	-39.4603	-2197.14	1134.25	-40.6276	-2194.85	1064.79	-43.8041	-2084.24	1000.32	-16.2016	-2032.06	912.45	-67.469	-2068.55	882.271	-73.3876	-1979.28	837.32
818	0	170.569	-2064.17	1545.12	269.456	-2072.8	1535.52	144.482	-2232.68	1577.84	254.56	-2252.7	1568.59	183.05	-2302.91	1397.41	149.021	-2354.48	1183.88	195.901	-2168.75	1330.43	207.702	-2114.56	1200	242.51	-2378.25	1229.9	19.004	-2214.12	1361.03	-37.165	-2186.53	1134.37	-38.3046	-2184.75	1064.89	-41.516	-2074.81	999.558	-14.0617	-2023.56	911.015	-65.4679	-2060.26	881.373	-71.3212	-1971.4	835.514
819	0	172.609	-2053.9	1545.47	271.523	-2062.73	1535.88	146.259	-2222.3	1578.44	256.331	-2242.56	1569.24	184.831	-2292.55	1397.76	150.816	-2343.58	1184.15	197.938	-2158.23	1331.19	209.999	-2103.66	1200.85	244.365	-2367.47	1230.14	20.9197	-2203.31	1361.5	-34.8639	-2176.05	1134.67	-35.9583	-2174.81	1065.17	-39.2811	-2065.59	998.911	-12.0051	-2015.33	909.665	-63.5175	-2052.31	880.577	-69.3797	-1963.92	833.745
820	0	174.614	-2043.6	1546.01	273.553	-2052.63	1536.42	148.008	-2211.91	1579.22	258.077	-2232.4	1570.06	186.613	-2282.19	1398.32	152.658	-2332.69	1184.65	199.925	-2147.73	1332.11	212.21	-2092.76	1201.86	246.266	-2356.71	1230.63	22.8004	-2192.58	1362.17	-32.5672	-2165.72	1135.14	-33.5978	-2165.04	1065.62	-37.1078	-2056.6	998.385	-10.0368	-2007.36	908.421	-61.6196	-2044.68	879.897	-67.5652	-1956.83	832.037
821	0	176.571	-2033.28	1546.71	275.532	-2042.5	1537.13	149.725	-2201.52	1580.17	259.794	-2222.21	1571.05	188.396	-2271.83	1399.07	154.551	-2321.83	1185.39	201.851	-2137.25	1333.19	214.319	-2081.89	1203.02	248.216	-2345.97	1231.35	24.6407	-2181.93	1363.02	-30.2853	-2155.56	1135.78	-31.2334	-2155.46	1066.24	-35.0042	-2047.85	997.987	-8.16116	-1999.66	907.3	-59.7761	-2037.37	879.344	-65.8783	-1950.1	830.415
822	0	178.466	-2022.96	1547.57	277.446	-2032.35	1537.98	151.405	-2191.12	1581.28	261.479	-2211.99	1572.19	190.177	-2261.5	1400.01	156.498	-2311.03	1186.35	203.709	-2126.8	1334.43	216.314	-2071.06	1204.33	250.218	-2335.27	1232.3	26.4356	-2171.4	1364.04	-28.0294	-2145.58	1136.58	-28.8757	-2146.08	1067.03	-32.9781	-2039.34	997.721	-6.38189	-1992.21	906.317	-57.9888	-2030.36	878.927	-64.318	-1943.73	828.901
823	0	180.284	-2012.63	1548.57	279.281	-2022.18	1538.97	153.044	-2180.72	1582.54	263.126	-2201.76	1573.47	191.955	-2251.18	1401.14	158.503	-2300.31	1187.53	205.492	-2116.4	1335.8	218.184	-2060.29	1205.76	252.272	-2324.62	1233.47	28.1808	-2161	1365.23	-25.8102	-2135.82	1137.53	-26.5359	-2136.93	1067.96	-31.0366	-2031.08	997.591	-4.70203	-1985.02	905.483	-56.2594	-2023.65	878.649	-62.8824	-1937.69	827.514
824	0	182.015	-2002.32	1549.7	281.025	-2012	1540.08	154.637	-2170.34	1583.93	264.733	-2191.51	1574.89	193.727	-2240.91	1402.42	160.565	-2289.69	1188.9	207.194	-2106.06	1337.28	219.92	-2049.6	1207.3	254.38	-2314.04	1234.85	29.8727	-2150.75	1366.56	-23.6385	-2126.29	1138.61	-24.2254	-2128.02	1069.04	-29.186	-2023.08	997.595	-3.12389	-1978.06	904.807	-54.5895	-2017.22	878.514	-61.5684	-1931.96	826.27
825	0	183.646	-1992.02	1550.93	282.668	-2001.8	1541.3	156.18	-2159.99	1585.45	266.295	-2181.24	1576.42	195.492	-2230.68	1403.86	162.684	-2279.19	1190.44	208.81	-2095.78	1338.87	221.517	-2039	1208.93	256.54	-2303.54	1236.41	31.5084	-2140.66	1368.02	-21.5243	-2117.02	1139.81	-21.9551	-2119.35	1070.24	-27.4319	-2015.32	997.729	-1.64911	-1971.34	904.292	-52.9804	-2011.05	878.52	-60.3722	-1926.53	825.181
826	0	185.167	-1981.75	1552.24	284.201	-1991.59	1542.6	157.67	-2149.66	1587.06	267.811	-2170.96	1578.05	197.248	-2220.51	1405.43	164.857	-2268.82	1192.13	210.339	-2085.57	1340.53	222.974	-2028.5	1210.62	258.751	-2293.12	1238.14	33.0858	-2130.74	1369.58	-19.4765	-2108.01	1141.11	-19.7354	-2110.94	1071.54	-25.7789	-2007.83	997.987	-0.278653	-1964.84	903.939	-51.4334	-2005.13	878.661	-59.289	-1921.35	824.256
827	0	186.571	-1971.51	1553.63	285.614	-1981.37	1543.96	159.105	-2139.37	1588.76	269.277	-2160.67	1579.77	198.993	-2210.4	1407.11	167.078	-2258.61	1193.96	211.778	-2075.45	1342.26	224.289	-2018.12	1212.37	261.007	-2282.79	1240.02	34.6034	-2120.99	1371.23	-17.5032	-2099.28	1142.5	-17.5758	-2102.81	1072.94	-24.2307	-2000.59	998.359	0.987085	-1958.55	903.745	-49.9495	-1999.44	878.932	-58.3141	-1916.4	823.499
828	0	187.851	-1961.31	1555.05	286.903	-1971.16	1545.36	160.48	-2129.11	1590.52	270.69	-2150.38	1581.54	200.724	-2200.35	1408.88	169.342	-2248.56	1195.89	213.128	-2065.41	1344.03	225.467	-2007.87	1214.14	263.303	-2272.56	1242.01	36.0608	-2111.43	1372.94	-15.6105	-2090.84	1143.94	-15.4849	-2094.95	1074.41	-22.7899	-1993.6	998.834	2.14826	-1952.45	903.704	-48.5295	-1993.97	879.32	-57.4422	-1911.66	822.912
829	0	189.002	-1951.15	1556.49	288.063	-1960.95	1546.79	161.796	-2118.91	1592.33	272.05	-2140.09	1583.37	202.438	-2190.38	1410.73	171.639	-2238.68	1197.9	214.391	-2055.46	1345.82	226.514	-1997.74	1215.93	265.631	-2262.43	1244.09	37.458	-2102.05	1374.69	-13.8033	-2082.7	1145.44	-13.4698	-2087.37	1075.92	-21.4583	-1986.87	999.398	3.20552	-1946.54	903.806	-47.1738	-1988.7	879.813	-56.6683	-1907.09	822.49
830	0	190.02	-1941.05	1557.94	289.092	-1950.74	1548.22	163.049	-2108.75	1594.15	273.354	-2129.81	1585.22	204.133	-2180.48	1412.62	173.958	-2228.97	1199.96	215.568	-2045.6	1347.61	227.437	-1987.75	1217.71	267.984	-2252.41	1246.23	38.796	-2092.84	1376.46	-12.0846	-2074.85	1146.96	-11.536	-2080.08	1077.47	-20.2366	-1980.38	1000.04	4.1599	-1940.81	904.039	-45.8826	-1983.6	880.396	-55.9874	-1902.69	822.226
831	0	190.905	-1931	1559.37	289.989	-1940.55	1549.64	164.238	-2098.66	1595.98	274.601	-2119.53	1587.09	205.807	-2170.66	1414.53	176.287	-2219.43	1202.05	216.663	-2035.84	1349.38	228.247	-1977.88	1219.47	270.351	-2242.48	1248.42	40.0763	-2083.82	1378.22	-10.4554	-2067.3	1148.48	-9.68741	-2073.06	1079.03	-19.1243	-1974.13	1000.73	5.01282	-1935.23	904.387	-44.6561	-1978.67	881.051	-55.3949	-1898.41	822.107
832	0	191.657	-1921	1560.76	290.755	-1930.36	1551.03	165.364	-2088.62	1597.79	275.79	-2109.26	1588.94	207.455	-2160.91	1416.45	178.615	-2210.06	1204.14	217.68	-2026.17	1351.12	228.955	-1968.15	1221.2	272.722	-2232.65	1250.61	41.3008	-2074.96	1379.95	-8.91542	-2060.05	1149.99	-7.92643	-2066.33	1080.58	-18.1204	-1968.12	1001.46	5.766	-1929.81	904.832	-43.494	-1973.89	881.758	-54.8866	-1894.25	822.118
833	0	192.277	-1911.07	1562.1	291.393	-1920.2	1552.37	166.425	-2078.64	1599.56	276.92	-2099.01	1590.77	209.075	-2151.24	1418.35	180.93	-2200.85	1206.21	218.623	-2016.6	1352.8	229.572	-1958.55	1222.86	275.086	-2222.92	1252.79	42.4718	-2066.25	1381.62	-7.46251	-2053.07	1151.46	-6.25367	-2059.85	1082.1	-17.2226	-1962.32	1002.21	6.42145	-1924.52	905.352	-42.3961	-1969.24	882.497	-54.4589	-1890.19	822.238
834	0	192.771	-1901.2	1563.37	291.908	-1910.05	1553.66	167.423	-2068.72	1601.28	277.992	-2088.77	1592.55	210.664	-2141.64	1420.21	183.221	-2191.79	1208.23	219.497	-2007.11	1354.41	230.109	-1949.06	1224.46	277.434	-2213.26	1254.93	43.5917	-2057.7	1383.23	-6.09331	-2046.36	1152.88	-4.66828	-2053.64	1083.57	-16.428	-1956.73	1002.96	6.9814	-1919.36	905.925	-41.3617	-1964.72	883.247	-54.109	-1886.2	822.443
835	0	193.144	-1891.4	1564.55	292.304	-1899.93	1554.87	168.356	-2058.87	1602.92	279.005	-2078.56	1594.27	212.22	-2132.11	1422.02	185.478	-2182.86	1210.18	220.306	-1997.71	1355.94	230.578	-1939.67	1225.98	279.754	-2203.69	1257	44.663	-2049.28	1384.74	-4.80338	-2039.9	1154.23	-3.16804	-2047.66	1084.98	-15.733	-1951.34	1003.69	7.44835	-1914.31	906.526	-40.3903	-1960.31	883.985	-53.8344	-1882.29	822.708
836	0	193.402	-1881.65	1565.64	292.589	-1889.84	1556.01	169.226	-2049.08	1604.47	279.958	-2068.38	1595.91	213.738	-2122.64	1423.74	187.691	-2174.05	1212.05	221.055	-1988.38	1357.35	230.988	-1930.39	1227.39	282.039	-2194.19	1258.99	45.6875	-2040.98	1386.13	-3.58751	-2033.66	1155.5	-1.74964	-2041.9	1086.31	-15.1332	-1946.12	1004.37	7.82498	-1909.37	907.13	-39.4813	-1956	884.69	-53.6334	-1878.45	823.003
837	0	193.553	-1871.98	1566.63	292.771	-1879.77	1557.05	170.035	-2039.36	1605.91	280.853	-2058.23	1597.45	215.215	-2113.23	1425.37	189.854	-2165.35	1213.8	221.747	-1979.13	1358.66	231.347	-1921.19	1228.69	284.279	-2184.75	1260.87	46.6672	-2032.78	1387.4	-2.44005	-2027.64	1156.66	-0.408848	-2036.34	1087.54	-14.6235	-1941.07	1004.99	8.11422	-1904.52	907.709	-38.6339	-1951.78	885.338	-53.5048	-1874.66	823.298
838	0	193.607	-1862.36	1567.49	292.858	-1869.74	1557.98	170.782	-2029.7	1607.23	281.689	-2048.11	1598.87	216.649	-2103.88	1426.89	191.96	-2156.74	1215.43	222.386	-1969.95	1359.83	231.663	-1912.06	1229.87	286.466	-2175.36	1262.62	47.603	-2024.68	1388.52	-1.35527	-2021.79	1157.71	0.859179	-2030.96	1088.66	-14.1988	-1936.17	1005.53	8.31919	-1899.76	908.237	-37.8475	-1947.64	885.91	-53.4475	-1870.93	823.563
839	0	193.572	-1852.8	1568.23	292.86	-1859.75	1558.81	171.469	-2020.1	1608.41	282.467	-2038.03	1600.18	218.035	-2094.57	1428.27	194.004	-2148.2	1216.91	222.973	-1960.83	1360.85	231.94	-1903	1230.9	288.592	-2166.02	1264.24	48.4955	-2016.66	1389.49	-0.327636	-2016.09	1158.63	2.05961	-2025.72	1089.65	-13.8534	-1931.4	1005.96	8.44319	-1895.08	908.687	-37.1214	-1943.58	886.385	-53.4609	-1867.25	823.767
840	0	193.459	-1843.29	1568.84	292.786	-1849.79	1559.51	172.098	-2010.55	1609.45	283.187	-2027.98	1601.34	219.37	-2085.3	1429.52	195.982	-2139.71	1218.23	223.511	-1951.77	1361.73	232.182	-1894	1231.79	290.651	-2156.72	1265.7	49.3443	-2008.7	1390.29	0.647857	-2010.51	1159.4	3.19769	-2020.6	1090.5	-13.5815	-1926.74	1006.28	8.48971	-1890.48	909.035	-36.4549	-1939.59	886.745	-53.5441	-1863.64	823.881
841	0	193.277	-1833.84	1569.31	292.645	-1839.86	1560.09	172.668	-2001.06	1610.33	283.848	-2017.97	1602.36	220.65	-2076.07	1430.62	197.89	-2131.27	1219.39	224.001	-1942.75	1362.45	232.389	-1885.05	1232.51	292.636	-2147.45	1266.99	50.1482	-2000.79	1390.91	1.57544	-2005.03	1160.03	4.27839	-2015.56	1091.21	-13.3775	-1922.17	1006.46	8.46233	-1885.94	909.257	-35.8474	-1935.67	886.977	-53.6959	-1860.08	823.877
842	0	193.037	-1824.43	1569.64	292.446	-1829.98	1560.53	173.181	-1991.61	1611.05	284.451	-2008.01	1603.22	221.87	-2066.87	1431.56	199.722	-2122.85	1220.36	224.443	-1933.77	1363	232.562	-1876.15	1233.06	294.54	-2138.22	1268.11	50.9055	-1992.93	1391.35	2.45837	-1999.6	1160.5	5.30623	-2010.58	1091.77	-13.236	-1917.67	1006.5	8.36477	-1881.46	909.331	-35.2982	-1931.8	887.065	-53.915	-1856.6	823.73
843	0	192.746	-1815.05	1569.82	292.198	-1820.13	1560.83	173.638	-1982.21	1611.6	284.995	-1998.08	1603.91	223.026	-2057.69	1432.33	201.475	-2114.45	1221.16	224.836	-1924.82	1363.38	232.701	-1867.28	1233.44	296.356	-2129.01	1269.05	51.6135	-1985.09	1391.6	3.29878	-1994.22	1160.81	6.28499	-2005.63	1092.17	-13.152	-1913.22	1006.39	8.20075	-1877.05	909.24	-34.8069	-1928	887.001	-54.1995	-1853.19	823.42
844	0	192.414	-1805.71	1569.86	291.909	-1810.33	1561	174.037	-1972.84	1611.98	285.48	-1988.19	1604.43	224.112	-2048.54	1432.93	203.142	-2106.05	1221.77	225.18	-1915.9	1363.59	232.803	-1858.45	1233.64	298.077	-2119.82	1269.81	52.269	-1977.26	1391.67	4.09762	-1988.83	1160.95	7.21754	-2000.68	1092.41	-13.121	-1908.82	1006.11	7.974	-1872.7	908.968	-34.3727	-1924.25	886.777	-54.5467	-1849.86	822.928
845	0	192.047	-1796.39	1569.74	291.584	-1800.55	1561.01	174.38	-1963.5	1612.18	285.905	-1978.34	1604.79	225.125	-2039.39	1433.36	204.719	-2097.64	1222.2	225.471	-1907	1363.63	232.866	-1849.64	1233.67	299.696	-2110.66	1270.39	52.8681	-1969.44	1391.56	4.85463	-1983.43	1160.94	8.10572	-1995.69	1092.48	-13.1391	-1904.43	1005.67	7.68813	-1868.4	908.504	-33.9954	-1920.56	886.392	-54.9537	-1846.61	822.243
846	0	191.652	-1787.09	1569.48	291.23	-1790.81	1560.88	174.664	-1954.18	1612.22	286.269	-1968.52	1604.96	226.058	-2030.25	1433.62	206.199	-2089.21	1222.45	225.709	-1898.11	1363.5	232.887	-1840.86	1233.52	301.205	-2101.52	1270.8	53.4065	-1961.61	1391.28	5.56837	-1977.98	1160.76	8.95031	-1990.65	1092.41	-13.2034	-1900.04	1005.06	7.34655	-1864.15	907.841	-33.6743	-1916.92	885.844	-55.417	-1843.47	821.355
847	0	191.234	-1777.8	1569.06	290.85	-1781.1	1560.59	174.891	-1944.88	1612.08	286.569	-1958.73	1604.97	226.907	-2021.12	1433.71	207.575	-2080.76	1222.52	225.891	-1889.23	1363.2	232.863	-1832.1	1233.2	302.598	-2092.39	1271.03	53.8798	-1953.75	1390.82	6.23628	-1972.46	1160.43	9.75098	-1985.52	1092.18	-13.3115	-1895.64	1004.28	6.9524	-1859.95	906.976	-33.4093	-1913.33	885.137	-55.9329	-1840.42	820.262
848	0	190.795	-1768.52	1568.5	290.448	-1771.42	1560.16	175.056	-1935.58	1611.78	286.804	-1948.97	1604.81	227.667	-2011.99	1433.64	208.84	-2072.29	1222.42	226.012	-1880.35	1362.74	232.791	-1823.35	1232.71	303.867	-2083.28	1271.09	54.283	-1945.87	1390.21	6.8548	-1966.85	1159.95	10.5063	-1980.28	1091.81	-13.4621	-1891.21	1003.34	6.50836	-1855.81	905.908	-33.2001	-1909.79	884.277	-56.4975	-1837.49	818.963
849	0	190.337	-1759.23	1567.79	290.024	-1761.76	1559.57	175.16	-1926.29	1611.32	286.973	-1939.24	1604.48	228.331	-2002.86	1433.4	209.987	-2063.77	1222.16	226.07	-1871.45	1362.12	232.667	-1814.6	1232.08	305.006	-2074.18	1270.98	54.6113	-1937.95	1389.45	7.4195	-1961.13	1159.34	11.2139	-1974.92	1091.3	-13.6549	-1886.75	1002.23	6.01663	-1851.71	904.642	-33.0467	-1906.29	883.273	-57.1072	-1834.66	817.464
850	0	189.86	-1749.94	1566.95	289.578	-1752.13	1558.85	175.198	-1916.99	1610.71	287.071	-1929.53	1603.99	228.895	-1993.72	1433	211.009	-2055.22	1221.75	226.061	-1862.55	1361.36	232.488	-1805.85	1231.3	306.009	-2065.1	1270.72	54.8598	-1929.98	1388.55	7.92524	-1955.27	1158.6	11.8703	-1969.42	1090.67	-13.8904	-1882.22	1000.98	5.47874	-1847.65	903.184	-32.9493	-1902.83	882.136	-57.7587	-1831.95	815.775
851	0	189.364	-1740.63	1565.97	289.11	-1742.51	1557.98	175.169	-1907.69	1609.96	287.096	-1919.85	1603.35	229.355	-1984.56	1432.45	211.9	-2046.62	1221.19	225.98	-1853.63	1360.46	232.252	-1797.08	1230.39	306.87	-2056.02	1270.32	55.0234	-1921.94	1387.52	8.36639	-1949.27	1157.74	12.4715	-1963.76	1089.92	-14.17	-1877.64	999.586	4.89557	-1843.63	901.546	-32.9082	-1899.41	880.879	-58.4492	-1829.36	813.907
852	0	188.845	-1731.32	1564.87	288.616	-1732.91	1556.98	175.069	-1898.37	1609.07	287.045	-1910.18	1602.57	229.704	-1975.4	1431.76	212.655	-2037.97	1220.51	225.825	-1844.68	1359.43	231.954	-1788.29	1229.37	307.584	-2046.94	1269.77	55.0974	-1913.84	1386.38	8.73695	-1943.11	1156.77	13.0126	-1957.93	1089.07	-14.4961	-1872.97	998.059	4.26718	-1839.65	899.74	-32.9242	-1896.02	879.516	-59.1767	-1826.88	811.876
853	0	188.301	-1721.98	1563.65	288.093	-1723.32	1555.85	174.894	-1889.04	1608.05	286.915	-1900.52	1601.65	229.94	-1966.21	1430.93	213.268	-2029.27	1219.7	225.589	-1835.7	1358.29	231.591	-1779.46	1228.24	308.15	-2037.85	1269.09	55.0772	-1905.66	1385.14	9.0308	-1936.78	1155.71	13.4881	-1951.92	1088.12	-14.8716	-1868.23	996.411	3.59287	-1835.69	897.779	-32.9983	-1892.65	878.061	-59.9402	-1824.51	809.699
854	0	187.725	-1712.63	1562.32	287.535	-1713.75	1554.6	174.641	-1879.7	1606.92	286.702	-1890.89	1600.61	230.057	-1957.01	1429.98	213.735	-2020.51	1218.78	225.27	-1826.68	1357.04	231.162	-1770.59	1227.03	308.563	-2028.75	1268.29	54.9582	-1897.39	1383.81	9.24182	-1930.27	1154.56	13.8922	-1945.73	1087.1	-15.3004	-1863.39	994.655	2.8711	-1831.74	895.68	-33.132	-1889.29	876.529	-60.7396	-1822.23	807.394
855	0	187.115	-1703.26	1560.9	286.939	-1704.19	1553.25	174.306	-1870.33	1605.69	286.402	-1881.26	1599.46	230.053	-1947.78	1428.9	214.053	-2011.68	1217.75	224.863	-1817.61	1355.7	230.663	-1761.67	1225.74	308.823	-2019.63	1267.36	54.7362	-1889.03	1382.4	9.36412	-1923.58	1153.34	14.2188	-1939.35	1085.99	-15.7866	-1858.45	992.803	2.09958	-1827.8	893.46	-33.327	-1885.92	874.933	-61.5759	-1820.04	804.981
856	0	186.462	-1693.87	1559.4	286.297	-1694.64	1551.81	173.885	-1860.95	1604.37	286.012	-1871.65	1598.21	229.923	-1938.53	1427.71	214.221	-2002.78	1216.62	224.365	-1808.5	1354.28	230.091	-1752.68	1224.39	308.928	-2010.47	1266.31	54.4073	-1880.57	1380.91	9.39217	-1916.7	1152.04	14.462	-1932.79	1084.83	-16.335	-1853.4	990.867	1.27532	-1823.86	891.135	-33.5855	-1882.55	873.29	-62.4514	-1817.91	802.481
857	0	185.761	-1684.46	1557.83	285.605	-1685.09	1550.28	173.375	-1851.55	1602.97	285.529	-1862.05	1596.87	229.666	-1929.26	1426.42	214.235	-1993.8	1215.38	223.773	-1799.33	1352.79	229.443	-1743.63	1222.98	308.878	-2001.27	1265.16	53.968	-1872.01	1379.36	9.32102	-1909.63	1150.68	14.6157	-1926.03	1083.6	-16.9503	-1848.24	988.86	0.394767	-1819.88	888.724	-33.9097	-1879.13	871.61	-63.369	-1815.82	799.915
858	0	185.007	-1675.04	1556.2	284.855	-1675.56	1548.69	172.772	-1842.13	1601.51	284.949	-1852.47	1595.46	229.278	-1919.95	1425.04	214.097	-1984.74	1214.06	223.082	-1790.11	1351.24	228.717	-1734.5	1221.54	308.675	-1992.02	1263.89	53.415	-1863.34	1377.76	9.14636	-1902.37	1149.25	14.6744	-1919.09	1082.32	-17.6375	-1842.95	986.795	-0.546058	-1815.87	886.244	-34.3022	-1875.66	869.907	-64.3326	-1813.75	797.301
859	0	184.191	-1665.61	1554.53	284.042	-1666.04	1547.04	172.072	-1832.71	1600	284.269	-1842.89	1593.98	228.759	-1910.6	1423.57	213.805	-1975.57	1212.64	222.292	-1780.81	1349.66	227.91	-1725.28	1220.08	308.319	-1982.7	1262.52	52.7456	-1854.57	1376.1	8.86466	-1894.93	1147.78	14.6328	-1911.97	1080.99	-18.4013	-1837.53	984.686	-1.55135	-1811.79	883.713	-34.7654	-1872.12	868.192	-65.3468	-1811.67	794.661
860	0	183.31	-1656.16	1552.85	283.16	-1656.53	1545.37	171.274	-1823.26	1598.45	283.486	-1833.34	1592.46	228.108	-1901.23	1422.03	213.362	-1966.31	1211.13	221.399	-1771.45	1348.06	227.019	-1715.97	1218.6	307.811	-1973.31	1261.06	51.9578	-1845.68	1374.4	8.47324	-1887.3	1146.26	14.4865	-1904.67	1079.63	-19.2463	-1831.97	982.544	-2.62536	-1807.62	881.15	-35.3016	-1868.48	866.475	-66.4162	-1809.55	792.014
861	0	182.357	-1646.71	1551.16	282.203	-1647.04	1543.68	170.374	-1813.81	1596.88	282.6	-1823.79	1590.91	227.324	-1891.82	1420.43	212.768	-1956.93	1209.53	220.403	-1762.01	1346.44	226.043	-1706.57	1217.12	307.154	-1963.84	1259.5	51.0502	-1836.69	1372.67	7.97032	-1879.5	1144.7	14.2317	-1897.2	1078.23	-20.1763	-1826.26	980.384	-3.77216	-1803.35	878.571	-35.9132	-1864.72	864.766	-67.5457	-1807.34	789.377
862	0	181.326	-1637.24	1549.48	281.168	-1637.55	1541.99	169.37	-1804.36	1595.31	281.608	-1814.26	1589.34	226.407	-1882.36	1418.77	212.025	-1947.43	1207.86	219.303	-1752.5	1344.83	224.978	-1697.06	1215.65	306.351	-1954.28	1257.85	50.022	-1827.6	1370.91	7.35501	-1871.53	1143.1	13.8655	-1889.56	1076.8	-21.1951	-1820.39	978.219	-4.9955	-1798.94	875.995	-36.6019	-1860.8	863.075	-68.7399	-1805.01	786.769
863	0	180.216	-1627.77	1547.84	280.05	-1628.08	1540.33	168.263	-1794.89	1593.75	280.51	-1804.75	1587.77	225.36	-1872.87	1417.08	211.139	-1937.81	1206.1	218.099	-1742.91	1343.24	223.824	-1687.45	1214.21	305.403	-1944.61	1256.13	48.8735	-1818.39	1369.13	6.62731	-1863.39	1141.48	13.3857	-1881.76	1075.35	-22.3053	-1814.36	976.064	-6.29861	-1794.37	873.44	-37.3694	-1856.71	861.409	-70.0027	-1802.53	784.207
864	0	179.022	-1618.3	1546.25	278.847	-1618.61	1538.7	167.052	-1785.43	1592.21	279.306	-1795.26	1586.22	224.184	-1863.34	1415.37	210.111	-1928.05	1204.29	216.792	-1733.24	1341.7	222.58	-1677.72	1212.81	304.314	-1934.85	1254.34	47.606	-1809.09	1367.35	5.78813	-1855.1	1139.84	12.7914	-1873.81	1073.9	-23.5089	-1808.15	973.933	-7.68401	-1789.61	870.925	-38.2168	-1852.41	859.78	-71.3376	-1799.84	781.71
865	0	177.742	-1608.82	1544.74	277.557	-1609.16	1537.15	165.736	-1775.96	1590.71	277.996	-1785.77	1584.7	222.883	-1853.76	1413.65	208.947	-1918.15	1202.41	215.384	-1723.49	1340.2	221.245	-1667.87	1211.48	303.089	-1924.97	1252.5	46.2216	-1799.69	1365.57	4.83918	-1846.66	1138.2	12.0824	-1865.7	1072.43	-24.807	-1801.75	971.843	-9.15339	-1784.63	868.467	-39.1449	-1847.89	858.194	-72.747	-1796.91	779.292
866	0	176.375	-1599.34	1543.32	276.179	-1599.72	1535.67	164.319	-1766.49	1589.28	276.583	-1776.31	1583.23	221.46	-1844.14	1411.94	207.653	-1908.11	1200.49	213.879	-1713.67	1338.78	219.821	-1657.9	1210.22	301.731	-1914.99	1250.63	44.7239	-1790.2	1363.81	3.78298	-1838.08	1136.56	11.2594	-1857.44	1070.98	-26.1999	-1795.16	969.81	-10.7075	-1779.42	866.085	-40.1539	-1843.09	856.663	-74.2319	-1793.69	776.971
867	0	174.922	-1589.86	1542	274.714	-1590.28	1534.3	162.801	-1757.02	1587.92	275.069	-1766.85	1581.83	219.921	-1834.48	1410.26	206.235	-1897.92	1198.55	212.28	-1703.77	1337.45	218.309	-1647.8	1209.05	300.247	-1904.89	1248.73	43.1172	-1780.62	1362.09	2.62276	-1829.36	1134.95	10.3242	-1849.04	1069.56	-27.6866	-1788.37	967.852	-12.3461	-1773.93	863.8	-41.244	-1838.02	855.196	-75.7929	-1790.14	774.763
868	0	173.384	-1580.37	1540.82	273.163	-1580.85	1533.05	161.187	-1747.54	1586.66	273.458	-1757.41	1580.52	218.271	-1824.78	1408.64	204.702	-1887.58	1196.6	210.592	-1693.8	1336.23	216.713	-1637.58	1208	298.642	-1894.69	1246.84	41.4075	-1770.96	1360.42	1.36242	-1820.52	1133.38	9.27911	-1840.5	1068.17	-29.2651	-1781.35	965.984	-14.068	-1768.15	861.631	-42.4146	-1832.62	853.804	-77.4288	-1786.22	772.683
869	0	171.764	-1570.87	1539.78	271.53	-1571.42	1531.94	159.48	-1738.07	1585.51	271.754	-1747.97	1579.31	216.518	-1815.03	1407.08	203.062	-1877.09	1194.67	208.823	-1683.76	1335.12	215.037	-1627.24	1207.09	296.922	-1884.38	1244.97	39.6017	-1761.23	1358.82	0.006454	-1811.55	1131.87	8.12742	-1831.81	1066.83	-30.9326	-1774.11	964.227	-15.8708	-1762.05	859.596	-43.665	-1826.88	852.498	-79.1381	-1781.88	770.747
870	0	170.066	-1561.37	1538.91	269.819	-1561.99	1530.99	157.686	-1728.59	1584.48	269.962	-1738.54	1578.22	214.667	-1805.25	1405.61	201.323	-1866.46	1192.78	206.979	-1673.67	1334.16	213.289	-1616.78	1206.33	295.097	-1873.98	1243.16	37.7077	-1751.42	1357.31	-1.44014	-1802.47	1130.44	6.87292	-1822.98	1065.57	-32.6851	-1766.62	962.597	-17.7513	-1755.61	857.716	-44.9944	-1820.78	851.289	-80.9179	-1777.1	768.97
871	0	168.295	-1551.86	1538.21	268.035	-1552.55	1530.21	155.812	-1719.1	1583.6	268.089	-1729.12	1577.26	212.728	-1795.43	1404.26	199.498	-1855.68	1190.97	205.069	-1663.53	1333.35	211.476	-1606.21	1205.74	293.173	-1863.49	1241.42	35.7347	-1741.55	1355.91	-2.97192	-1793.26	1129.11	5.51993	-1814	1064.4	-34.5176	-1758.88	961.111	-19.7052	-1748.79	856.009	-46.4015	-1814.29	850.188	-82.7652	-1771.83	767.366
872	0	166.457	-1542.33	1537.69	266.184	-1543.11	1529.62	153.863	-1709.6	1582.87	266.142	-1719.69	1576.46	210.708	-1785.58	1403.05	197.596	-1844.78	1189.25	203.104	-1653.34	1332.71	209.608	-1595.53	1205.34	291.16	-1852.92	1239.79	33.6927	-1731.62	1354.65	-4.58308	-1783.93	1127.9	4.07319	-1804.88	1063.33	-36.4244	-1750.87	959.788	-21.7273	-1741.59	854.493	-47.8849	-1807.39	849.209	-84.6762	-1766.05	765.949
873	0	164.56	-1532.79	1537.37	264.275	-1533.65	1529.22	151.847	-1700.09	1582.31	264.127	-1710.25	1575.83	208.618	-1775.71	1401.98	195.628	-1833.75	1187.66	201.092	-1643.12	1332.26	207.696	-1584.77	1205.14	289.067	-1842.3	1238.3	31.5921	-1721.63	1353.54	-6.26756	-1774.48	1126.83	2.53771	-1795.6	1062.39	-38.399	-1742.59	958.642	-23.8118	-1733.98	853.184	-49.4432	-1800.06	848.362	-86.6468	-1759.72	764.733
874	0	162.611	-1523.24	1537.26	262.314	-1524.18	1529.03	149.773	-1690.57	1581.93	262.054	-1700.81	1575.37	206.465	-1765.8	1401.09	193.606	-1822.62	1186.22	199.046	-1632.87	1331.99	205.755	-1573.94	1205.16	286.904	-1831.63	1236.96	29.4442	-1711.59	1352.6	-8.01917	-1764.91	1125.92	0.918645	-1786.17	1061.6	-40.4339	-1734.01	957.689	-25.9519	-1725.95	852.098	-51.0748	-1792.29	847.658	-88.6728	-1752.82	763.73
875	0	160.62	-1513.66	1537.35	260.312	-1514.7	1529.06	147.65	-1681.03	1581.73	259.932	-1691.36	1575.1	204.261	-1755.88	1400.39	191.54	-1811.39	1184.98	196.977	-1622.61	1331.92	203.797	-1563.06	1205.39	284.681	-1820.94	1235.82	27.2606	-1701.49	1351.85	-9.83167	-1755.22	1125.19	-0.778815	-1776.57	1060.96	-42.5216	-1725.13	956.94	-28.1403	-1717.48	851.248	-52.7781	-1784.06	847.108	-90.7498	-1745.33	762.951
876	0	158.597	-1504.06	1537.65	258.278	-1505.19	1529.3	145.488	-1671.48	1581.72	257.769	-1681.9	1575.03	202.013	-1745.94	1399.89	189.44	-1800.1	1183.95	194.897	-1612.35	1332.05	201.837	-1552.14	1205.85	282.407	-1810.23	1234.89	25.0529	-1691.35	1351.3	-11.6989	-1745.39	1124.65	-2.5496	-1766.81	1060.49	-44.6539	-1715.95	956.407	-30.3692	-1708.57	850.644	-54.5515	-1775.36	846.72	-92.8733	-1737.24	762.404
877	0	156.552	-1494.44	1538.16	256.223	-1495.66	1529.76	143.295	-1661.9	1581.91	255.575	-1672.42	1575.15	199.731	-1735.98	1399.6	187.315	-1788.76	1183.16	192.818	-1602.09	1332.39	199.891	-1541.21	1206.52	280.091	-1799.54	1234.2	22.8327	-1681.16	1350.97	-13.6151	-1735.43	1124.32	-4.38886	-1756.87	1060.21	-46.8225	-1706.44	956.097	-32.6304	-1699.2	850.294	-56.3933	-1766.2	846.501	-95.0388	-1728.53	762.095
878	0	154.496	-1484.79	1538.87	254.157	-1486.12	1530.44	141.082	-1652.31	1582.29	253.36	-1662.93	1575.48	197.425	-1726.03	1399.54	185.171	-1777.4	1182.63	190.751	-1591.84	1332.94	197.973	-1530.29	1207.41	277.743	-1788.88	1233.75	20.6112	-1670.92	1350.86	-15.5746	-1725.32	1124.2	-6.29209	-1746.76	1060.11	-49.019	-1696.61	956.014	-34.9151	-1689.38	850.202	-58.3018	-1756.55	846.455	-97.2414	-1719.2	762.028
879	0	152.439	-1475.13	1539.77	252.092	-1476.55	1531.32	138.858	-1642.69	1582.86	251.134	-1653.42	1576.01	195.103	-1716.07	1399.7	183.016	-1766.05	1182.37	188.709	-1581.63	1333.68	196.097	-1519.41	1208.5	275.369	-1778.27	1233.57	18.3993	-1660.64	1350.99	-17.5726	-1715.08	1124.3	-8.25523	-1736.46	1060.21	-51.2349	-1686.45	956.161	-37.2148	-1679.11	850.367	-60.2751	-1746.42	846.585	-99.4765	-1709.24	762.204
880	0	150.393	-1465.44	1540.85	250.038	-1466.96	1532.4	136.635	-1633.05	1583.6	248.907	-1643.9	1576.72	192.774	-1706.12	1400.09	180.853	-1754.74	1182.38	186.701	-1571.45	1334.61	194.278	-1508.57	1209.77	272.977	-1767.74	1233.66	16.2069	-1650.3	1351.34	-19.6044	-1704.68	1124.61	-10.2747	-1725.98	1060.51	-53.462	-1675.95	956.535	-39.5206	-1668.38	850.787	-62.3113	-1735.81	846.89	-101.739	-1698.66	762.619
881	0	148.369	-1455.74	1542.1	248.006	-1457.36	1533.66	134.421	-1623.4	1584.52	246.689	-1634.36	1577.62	190.443	-1696.18	1400.69	178.683	-1743.49	1182.68	184.737	-1561.32	1335.71	192.527	-1497.82	1211.22	270.571	-1757.29	1234.02	14.0433	-1639.93	1351.92	-21.6663	-1694.12	1125.14	-12.3474	-1715.31	1060.99	-55.6924	-1665.11	957.132	-41.824	-1657.2	851.453	-64.4082	-1724.73	847.366	-104.023	-1687.47	763.266
882	0	146.377	-1446.02	1543.49	246.007	-1447.75	1535.08	132.226	-1613.72	1585.6	244.489	-1624.81	1578.7	188.12	-1686.27	1401.51	176.508	-1732.34	1183.26	182.827	-1551.24	1336.98	190.855	-1487.15	1212.8	268.154	-1746.96	1234.65	11.9164	-1629.51	1352.71	-23.7551	-1683.4	1125.88	-14.4709	-1704.46	1061.66	-57.9183	-1653.94	957.942	-44.1165	-1645.59	852.355	-66.5636	-1713.17	848.008	-106.324	-1675.67	764.134
883	0	144.426	-1436.29	1545.01	244.051	-1438.13	1536.64	130.058	-1604.04	1586.83	242.315	-1615.26	1579.93	185.81	-1676.38	1402.53	174.323	-1721.31	1184.09	180.976	-1541.22	1338.4	189.272	-1476.59	1214.51	265.728	-1736.75	1235.52	9.83331	-1619.05	1353.71	-25.8681	-1672.53	1126.8	-16.643	-1693.41	1062.5	-60.1327	-1642.44	958.954	-46.39	-1633.55	853.479	-68.7746	-1701.16	848.805	-108.635	-1663.27	765.211
884	0	142.527	-1426.55	1546.63	242.147	-1428.5	1538.32	127.927	-1594.34	1588.18	240.177	-1605.7	1581.31	183.518	-1666.52	1403.73	172.125	-1710.43	1185.18	179.192	-1531.28	1339.94	187.784	-1466.16	1216.31	263.293	-1726.68	1236.62	7.79965	-1608.56	1354.9	-28.0033	-1661.48	1127.91	-18.8619	-1682.17	1063.5	-62.3285	-1630.6	960.154	-48.6365	-1621.1	854.807	-71.0383	-1688.7	849.747	-110.949	-1650.29	766.481
885	0	140.689	-1416.81	1548.33	240.303	-1418.88	1540.09	125.841	-1584.63	1589.64	238.082	-1596.14	1582.81	181.25	-1656.71	1405.09	169.91	-1699.72	1186.48	177.479	-1521.41	1341.59	186.395	-1455.87	1218.18	260.848	-1716.77	1237.93	5.82	-1598.04	1356.26	-30.1588	-1650.27	1129.17	-21.126	-1670.74	1064.64	-64.4993	-1618.45	961.526	-50.8484	-1608.25	856.319	-73.3512	-1675.8	850.82	-113.26	-1636.76	767.924
886	0	138.917	-1407.07	1550.09	238.527	-1409.28	1541.92	123.805	-1574.92	1591.2	236.037	-1586.58	1584.41	179.011	-1646.94	1406.6	167.673	-1689.2	1187.98	175.838	-1511.63	1343.32	185.107	-1445.72	1220.08	258.393	-1707.02	1239.43	3.89772	-1587.5	1357.77	-32.3328	-1638.9	1130.56	-23.4337	-1659.12	1065.9	-66.639	-1605.98	963.052	-53.0183	-1595.03	857.995	-75.7093	-1662.48	852.01	-115.559	-1622.7	769.523
887	0	137.22	-1397.35	1551.87	236.826	-1399.69	1543.79	121.827	-1565.21	1592.83	234.049	-1577.03	1586.1	176.806	-1637.23	1408.23	165.407	-1678.89	1189.65	174.272	-1501.93	1345.11	183.918	-1435.74	1222	255.928	-1697.44	1241.07	2.03512	-1576.95	1359.4	-34.5236	-1627.36	1132.07	-25.7832	-1647.33	1067.27	-68.7417	-1593.2	964.713	-55.1393	-1581.46	859.811	-78.1081	-1648.76	853.302	-117.84	-1608.12	771.257
888	0	135.602	-1387.64	1553.65	235.205	-1390.13	1545.66	119.912	-1555.51	1594.51	232.122	-1567.49	1587.85	174.637	-1627.58	1409.96	163.112	-1668.79	1191.44	172.779	-1492.33	1346.94	182.823	-1425.92	1223.91	253.452	-1688.03	1242.84	0.23349	-1566.41	1361.15	-36.729	-1615.67	1133.67	-28.172	-1635.36	1068.7	-70.8019	-1580.14	966.49	-57.2042	-1567.55	861.748	-80.5423	-1634.66	854.682	-120.092	-1593.06	773.107
889	0	134.068	-1377.95	1555.42	233.668	-1380.6	1547.52	118.064	-1545.81	1596.23	230.26	-1557.98	1589.64	172.509	-1617.99	1411.77	160.786	-1658.91	1193.34	171.357	-1482.83	1348.79	181.814	-1416.28	1225.79	250.969	-1678.8	1244.7	-1.50676	-1555.89	1362.96	-38.9461	-1603.82	1135.33	-30.5972	-1623.21	1070.2	-72.8142	-1566.8	968.364	-59.2067	-1553.34	863.782	-83.0061	-1620.19	856.135	-122.307	-1577.55	775.056
890	0	132.621	-1368.3	1557.14	232.217	-1371.12	1549.33	116.286	-1536.14	1597.97	228.468	-1548.49	1591.45	170.426	-1608.48	1413.62	158.433	-1649.25	1195.31	170.004	-1473.42	1350.63	180.882	-1406.81	1227.61	248.483	-1669.74	1246.62	-3.18598	-1545.4	1364.84	-41.1715	-1591.83	1137.04	-33.0547	-1610.91	1071.73	-74.7735	-1553.2	970.317	-61.1402	-1538.84	865.895	-85.4926	-1605.38	857.646	-124.477	-1561.6	777.087
891	0	131.26	-1358.68	1558.8	230.854	-1361.68	1551.07	114.581	-1526.48	1599.71	226.747	-1539.04	1593.27	168.39	-1599.05	1415.5	156.058	-1639.8	1197.32	168.713	-1464.12	1352.45	180.015	-1397.51	1229.36	246	-1660.84	1248.57	-4.80516	-1534.97	1366.74	-43.4006	-1579.71	1138.76	-35.5396	-1598.46	1073.27	-76.675	-1539.37	972.332	-62.999	-1524.08	868.068	-87.9943	-1590.25	859.205	-126.592	-1545.26	779.187
892	0	129.988	-1349.1	1560.38	229.579	-1352.3	1552.72	112.951	-1516.85	1601.44	225.098	-1529.62	1595.06	166.406	-1589.7	1417.38	153.672	-1630.56	1199.32	167.481	-1454.91	1354.23	179.198	-1388.39	1231.03	243.531	-1652.1	1250.52	-6.36582	-1524.62	1368.66	-45.628	-1567.47	1140.48	-38.0458	-1585.87	1074.81	-78.5142	-1525.3	974.392	-64.7775	-1509.08	870.285	-90.5023	-1574.81	860.798	-128.644	-1528.54	781.346
893	0	128.802	-1339.57	1561.87	228.39	-1342.98	1554.27	111.395	-1507.25	1603.13	223.523	-1520.24	1596.82	164.476	-1580.42	1419.24	151.286	-1621.51	1201.31	166.3	-1445.8	1355.96	178.418	-1379.44	1232.6	241.085	-1643.5	1252.45	-7.86978	-1514.35	1370.56	-47.8475	-1555.13	1142.18	-40.5659	-1573.15	1076.32	-80.2871	-1511.04	976.483	-66.4709	-1493.88	872.534	-93.0071	-1559.1	862.417	-130.623	-1511.49	783.554
894	0	127.7	-1330.09	1563.24	227.287	-1333.72	1555.7	109.913	-1497.69	1604.77	222.02	-1510.91	1598.53	162.603	-1571.24	1421.06	148.915	-1612.65	1203.25	165.165	-1436.79	1357.6	177.66	-1370.64	1234.06	238.675	-1635.03	1254.33	-9.31907	-1504.19	1372.42	-50.0517	-1542.71	1143.84	-43.0915	-1560.33	1077.79	-81.9901	-1496.61	978.593	-68.075	-1478.48	874.804	-95.4979	-1543.14	864.053	-132.522	-1494.12	785.807
895	0	126.679	-1320.67	1564.51	226.264	-1324.53	1556.99	108.505	-1488.17	1606.35	220.589	-1501.63	1600.17	160.791	-1562.13	1422.83	146.576	-1603.96	1205.12	164.071	-1427.88	1359.16	176.911	-1361.99	1235.4	236.314	-1626.68	1256.15	-10.7157	-1494.15	1374.23	-52.233	-1530.24	1145.45	-45.6132	-1547.43	1079.21	-83.6199	-1482.02	980.709	-69.5864	-1462.92	877.086	-97.9629	-1526.95	865.699	-134.334	-1476.47	788.101
896	0	125.734	-1311.31	1565.65	225.318	-1315.41	1558.15	107.168	-1478.69	1607.86	219.228	-1492.4	1601.72	159.041	-1553.11	1424.51	144.285	-1595.42	1206.9	163.01	-1419.05	1360.62	176.161	-1353.48	1236.63	234.017	-1618.43	1257.88	-12.0615	-1484.24	1375.96	-54.3831	-1517.74	1146.99	-48.1208	-1534.46	1080.56	-85.174	-1467.31	982.823	-71.0025	-1447.21	879.376	-100.389	-1510.55	867.348	-136.05	-1458.58	790.435
897	0	124.859	-1302.01	1566.66	224.443	-1306.37	1559.16	105.9	-1469.27	1609.28	217.935	-1483.23	1603.18	157.357	-1544.17	1426.11	142.059	-1587.01	1208.57	161.978	-1410.31	1361.96	175.399	-1345.08	1237.72	231.796	-1610.27	1259.52	-13.3581	-1474.47	1377.61	-56.4936	-1505.24	1148.45	-50.6032	-1521.45	1081.83	-86.65	-1452.51	984.926	-72.3213	-1431.39	881.669	-102.764	-1493.98	868.996	-137.665	-1440.46	792.809
898	0	124.05	-1292.78	1567.54	223.635	-1297.39	1560.03	104.699	-1459.89	1610.61	216.707	-1474.12	1604.53	155.742	-1535.31	1427.61	139.913	-1578.73	1210.12	160.971	-1401.65	1363.19	174.619	-1336.79	1238.69	229.664	-1602.18	1261.05	-14.6064	-1464.84	1379.15	-58.5561	-1492.76	1149.82	-53.0489	-1508.42	1083.02	-88.0463	-1437.64	987.011	-73.5415	-1415.47	883.963	-105.073	-1477.26	870.639	-139.171	-1422.15	795.226
899	0	123.3	-1283.61	1568.29	222.888	-1288.49	1560.75	103.561	-1450.58	1611.83	215.54	-1465.06	1605.76	154.197	-1526.53	1428.99	137.861	-1570.55	1211.54	159.986	-1393.06	1364.29	173.817	-1328.59	1239.52	227.633	-1594.15	1262.46	-15.8071	-1455.37	1380.57	-60.5625	-1480.34	1151.09	-55.4463	-1495.39	1084.11	-89.3614	-1422.73	989.072	-74.6623	-1399.47	886.26	-107.301	-1460.43	872.274	-140.563	-1403.69	797.689
900	0	122.603	-1274.51	1568.91	222.194	-1279.65	1561.33	102.482	-1441.32	1612.93	214.433	-1456.07	1606.88	152.727	-1517.81	1430.25	135.916	-1562.46	1212.83	159.02	-1384.54	1365.25	172.991	-1320.46	1240.21	225.714	-1586.16	1263.75	-16.9601	-1446.05	1381.86	-62.505	-1467.99	1152.26	-57.7838	-1482.39	1085.1	-90.5939	-1407.82	991.106	-75.6833	-1383.42	888.56	-109.434	-1443.5	873.898	-141.836	-1385.11	800.201
901	0	121.953	-1265.47	1569.4	221.549	-1270.88	1561.78	101.461	-1432.12	1613.92	213.383	-1447.13	1607.86	151.333	-1509.15	1431.38	134.087	-1554.44	1213.98	158.073	-1376.07	1366.08	172.142	-1312.41	1240.77	223.915	-1578.21	1264.91	-18.0648	-1436.88	1383.02	-64.3762	-1455.75	1153.32	-60.0498	-1469.44	1085.98	-91.7429	-1392.93	993.108	-76.6041	-1367.33	890.865	-111.459	-1426.51	875.511	-142.984	-1366.45	802.766
902	0	121.344	-1256.49	1569.78	220.945	-1262.16	1562.09	100.493	-1422.98	1614.78	212.385	-1438.24	1608.72	150.019	-1500.56	1432.38	132.383	-1546.49	1214.99	157.144	-1367.66	1366.76	171.273	-1304.4	1241.19	222.244	-1570.28	1265.94	-19.1199	-1427.86	1384.04	-66.1693	-1443.63	1154.26	-62.2333	-1456.56	1086.76	-92.807	-1378.09	995.077	-77.4243	-1351.24	893.179	-113.361	-1409.49	877.113	-144.002	-1347.74	805.388
903	0	120.769	-1247.57	1570.03	220.378	-1253.5	1562.29	99.5765	-1413.9	1615.52	211.439	-1429.41	1609.44	148.788	-1492.01	1433.25	130.811	-1538.59	1215.86	156.235	-1359.3	1367.31	170.388	-1296.45	1241.48	220.708	-1562.36	1266.84	-20.1237	-1418.97	1384.9	-67.8776	-1431.66	1155.1	-64.3239	-1443.77	1087.43	-93.7852	-1363.33	997.01	-78.1435	-1335.15	895.505	-115.129	-1392.47	878.703	-144.886	-1329.02	808.071
904	0	120.224	-1238.71	1570.17	219.843	-1244.88	1562.36	98.7078	-1404.87	1616.12	210.542	-1420.63	1610.03	147.642	-1483.51	1433.99	129.375	-1530.73	1216.6	155.347	-1350.97	1367.72	169.494	-1288.53	1241.63	219.309	-1554.45	1267.62	-21.0738	-1410.22	1385.62	-69.4952	-1419.85	1155.82	-66.312	-1431.09	1087.99	-94.6759	-1348.68	998.906	-78.761	-1319.11	897.844	-116.751	-1375.48	880.282	-145.633	-1310.33	810.816
905	0	119.705	-1229.9	1570.2	219.334	-1236.31	1562.34	97.8853	-1395.9	1616.6	209.691	-1411.89	1610.49	146.584	-1475.05	1434.59	128.078	-1522.91	1217.2	154.482	-1342.68	1367.99	168.597	-1280.64	1241.66	218.054	-1546.53	1268.27	-21.9677	-1401.59	1386.19	-71.0165	-1408.21	1156.43	-68.1888	-1418.54	1088.46	-95.4774	-1334.15	1000.76	-79.2755	-1303.13	900.199	-118.216	-1358.56	881.852	-146.239	-1291.71	813.624
906	0	119.207	-1221.13	1570.13	218.848	-1227.76	1562.21	97.1072	-1386.98	1616.94	208.887	-1403.19	1610.81	145.616	-1466.62	1435.06	126.922	-1515.11	1217.68	153.645	-1334.42	1368.13	167.705	-1272.78	1241.56	216.943	-1538.6	1268.81	-22.8023	-1393.08	1386.62	-72.4366	-1396.75	1156.93	-69.9467	-1406.12	1088.82	-96.1879	-1319.77	1002.58	-79.6857	-1287.23	902.571	-119.518	-1341.72	883.414	-146.7	-1273.19	816.495
907	0	118.729	-1212.41	1569.96	218.382	-1219.24	1561.99	96.3725	-1378.11	1617.15	208.128	-1394.52	1611.01	144.742	-1458.21	1435.41	125.909	-1507.34	1218.04	152.839	-1326.18	1368.14	166.825	-1264.93	1241.34	215.977	-1530.65	1269.23	-23.5744	-1384.67	1386.91	-73.751	-1385.48	1157.32	-71.5793	-1393.86	1089.09	-96.805	-1305.56	1004.36	-79.9896	-1271.44	904.959	-120.649	-1325.01	884.968	-147.015	-1254.81	819.426
908	0	118.267	-1203.72	1569.7	217.934	-1210.74	1561.69	95.6806	-1369.29	1617.23	207.414	-1385.88	1611.09	143.963	-1449.83	1435.63	125.037	-1499.57	1218.28	152.067	-1317.95	1368.03	165.964	-1257.08	1241.01	215.156	-1522.68	1269.54	-24.2811	-1376.36	1387.07	-74.956	-1374.4	1157.62	-73.0813	-1381.76	1089.27	-97.3268	-1291.54	1006.09	-80.1853	-1255.79	907.362	-121.604	-1308.45	886.515	-147.18	-1236.62	822.412
909	0	117.821	-1195.06	1569.34	217.504	-1202.24	1561.31	95.0316	-1360.5	1617.19	206.746	-1377.27	1611.05	143.281	-1441.45	1435.74	124.305	-1491.8	1218.42	151.335	-1309.73	1367.8	165.131	-1249.24	1240.57	214.48	-1514.68	1269.75	-24.9191	-1368.13	1387.1	-76.0486	-1363.51	1157.83	-74.4492	-1369.83	1089.37	-97.7508	-1277.72	1007.78	-80.2708	-1240.31	909.774	-122.381	-1292.07	888.054	-147.195	-1218.63	825.447
910	0	117.392	-1186.42	1568.91	217.091	-1193.75	1560.86	94.4262	-1351.75	1617.03	206.125	-1368.67	1610.89	142.696	-1433.08	1435.73	123.711	-1484.04	1218.46	150.645	-1301.52	1367.46	164.33	-1241.39	1240.02	213.945	-1506.65	1269.85	-25.4858	-1359.96	1387.01	-77.0266	-1352.8	1157.95	-75.6805	-1358.06	1089.39	-98.0753	-1264.11	1009.43	-80.2442	-1225	912.189	-122.979	-1275.89	889.583	-147.06	-1200.9	828.52
911	0	116.98	-1177.8	1568.39	216.696	-1185.25	1560.34	93.8653	-1343.03	1616.74	205.552	-1360.07	1610.63	142.209	-1424.71	1435.62	123.25	-1476.26	1218.41	150.004	-1293.3	1367.02	163.568	-1233.53	1239.39	213.548	-1498.58	1269.87	-25.9788	-1351.86	1386.82	-77.8887	-1342.27	1157.98	-76.7743	-1346.48	1089.34	-98.2985	-1250.72	1011.02	-80.1042	-1209.91	914.599	-123.4	-1259.93	891.099	-146.774	-1183.44	831.62
912	0	116.588	-1169.19	1567.8	216.322	-1176.74	1559.76	93.3507	-1334.34	1616.35	205.028	-1351.48	1610.27	141.819	-1416.34	1435.4	122.919	-1468.46	1218.27	149.413	-1285.08	1366.47	162.851	-1225.65	1238.66	213.283	-1490.47	1269.79	-26.3963	-1343.8	1386.52	-78.6347	-1331.91	1157.94	-77.7312	-1335.07	1089.23	-98.4194	-1237.57	1012.55	-79.85	-1195.05	916.993	-123.646	-1244.22	892.597	-146.339	-1166.29	834.731
913	0	116.218	-1160.59	1567.13	215.971	-1168.22	1559.12	92.8845	-1325.66	1615.85	204.557	-1342.89	1609.81	141.525	-1407.95	1435.09	122.711	-1460.65	1218.04	148.878	-1276.85	1365.84	162.182	-1217.74	1237.85	213.145	-1482.32	1269.63	-26.7371	-1335.78	1386.14	-79.2654	-1321.71	1157.82	-78.5532	-1323.83	1089.05	-98.4376	-1224.66	1014.03	-79.4815	-1180.43	919.358	-123.722	-1228.79	894.07	-145.758	-1149.47	837.835
914	0	115.875	-1151.99	1566.39	215.648	-1159.67	1558.43	92.4689	-1316.99	1615.25	204.14	-1334.3	1609.26	141.326	-1399.55	1434.69	122.619	-1452.8	1217.75	148.402	-1268.6	1365.12	161.565	-1209.81	1236.96	213.125	-1474.13	1269.38	-27.0005	-1327.77	1385.68	-79.7825	-1311.66	1157.64	-79.2435	-1312.77	1088.81	-98.3534	-1211.99	1015.43	-78.9999	-1166.09	921.677	-123.636	-1213.64	895.508	-145.033	-1133	840.912
915	0	115.563	-1143.39	1565.59	215.356	-1151.11	1557.68	92.1069	-1308.34	1614.56	203.781	-1325.69	1608.63	141.218	-1391.13	1434.2	122.636	-1444.91	1217.38	147.988	-1260.32	1364.32	161.004	-1201.83	1236.01	213.215	-1465.89	1269.06	-27.1867	-1319.78	1385.14	-80.189	-1301.75	1157.39	-79.8064	-1301.89	1088.52	-98.1683	-1199.55	1016.75	-78.4076	-1152.03	923.933	-123.395	-1198.79	896.9	-144.171	-1116.91	843.938
916	0	115.288	-1134.78	1564.73	215.102	-1142.51	1556.89	91.8013	-1299.68	1613.78	203.481	-1317.07	1607.91	141.198	-1382.68	1433.63	122.751	-1436.98	1216.95	147.64	-1252.03	1363.44	160.502	-1193.82	1234.98	213.405	-1457.6	1268.66	-27.2967	-1311.78	1384.53	-80.4884	-1291.96	1157.07	-80.2473	-1291.17	1088.18	-97.8847	-1187.36	1017.98	-77.708	-1138.27	926.107	-123.011	-1184.25	898.234	-143.178	-1101.2	846.887
917	0	115.055	-1126.15	1563.81	214.888	-1133.88	1556.04	91.5554	-1291.02	1612.92	203.244	-1308.43	1607.12	141.262	-1374.2	1432.98	122.954	-1429	1216.44	147.359	-1243.69	1362.5	160.061	-1185.77	1233.89	213.684	-1449.26	1268.18	-27.332	-1303.76	1383.86	-80.6855	-1282.3	1156.69	-80.5725	-1280.61	1087.78	-97.5061	-1175.41	1019.1	-76.9065	-1124.82	928.177	-122.494	-1170.04	899.496	-142.062	-1085.9	849.733
918	0	114.869	-1117.51	1562.83	214.723	-1125.22	1555.15	91.3723	-1282.35	1611.98	203.073	-1299.76	1606.26	141.404	-1365.68	1432.26	123.236	-1420.96	1215.88	147.149	-1235.33	1361.49	159.684	-1177.66	1232.75	214.04	-1440.88	1267.63	-27.2948	-1295.7	1383.14	-80.7857	-1272.73	1156.25	-80.7888	-1270.2	1087.33	-97.0372	-1163.7	1020.12	-76.0097	-1111.69	930.121	-121.858	-1156.17	900.667	-140.831	-1071	852.445
919	0	114.737	-1108.84	1561.81	214.61	-1116.53	1554.2	91.2552	-1273.67	1610.97	202.97	-1291.07	1605.33	141.62	-1357.13	1431.47	123.582	-1412.87	1215.25	147.011	-1226.92	1360.43	159.374	-1169.5	1231.55	214.461	-1432.44	1267.01	-27.1881	-1287.6	1382.36	-80.7951	-1263.26	1155.75	-80.9035	-1259.94	1086.82	-96.4838	-1152.21	1021	-75.0256	-1098.87	931.915	-121.117	-1142.64	901.732	-139.499	-1056.52	854.993
920	0	114.664	-1100.14	1560.73	214.556	-1107.8	1553.22	91.2073	-1264.97	1609.89	202.937	-1282.35	1604.35	141.903	-1348.53	1430.6	123.981	-1404.71	1214.57	146.947	-1218.46	1359.31	159.134	-1161.28	1230.31	214.933	-1423.95	1266.32	-27.0151	-1279.45	1381.53	-80.7199	-1253.87	1155.18	-80.9241	-1249.82	1086.26	-95.8525	-1140.94	1021.75	-73.9639	-1086.38	933.536	-120.285	-1129.45	902.671	-138.077	-1042.46	857.346
921	0	114.656	-1091.42	1559.62	214.565	-1099.03	1552.19	91.2314	-1256.24	1608.76	202.978	-1273.6	1603.3	142.248	-1339.88	1429.67	124.42	-1396.47	1213.82	146.958	-1209.94	1358.14	158.968	-1153	1229.02	215.445	-1415.41	1265.56	-26.7793	-1271.22	1380.64	-80.567	-1244.54	1154.54	-80.8579	-1239.83	1085.63	-95.151	-1129.9	1022.34	-72.8351	-1074.22	934.96	-119.378	-1116.61	903.466	-136.58	-1028.83	859.473
922	0	114.718	-1082.66	1558.46	214.643	-1090.22	1551.12	91.3302	-1247.49	1607.58	203.094	-1264.82	1602.2	142.648	-1331.18	1428.68	124.886	-1388.16	1213.01	147.047	-1201.37	1356.93	158.88	-1144.64	1227.69	215.983	-1406.81	1264.72	-26.4843	-1262.91	1379.71	-80.3428	-1235.27	1153.84	-80.7121	-1229.95	1084.94	-94.3875	-1119.05	1022.76	-71.6513	-1062.38	936.164	-118.411	-1104.13	904.099	-135.023	-1015.61	861.343
923	0	114.854	-1073.87	1557.28	214.792	-1081.37	1550.01	91.5062	-1238.71	1606.36	203.287	-1256.01	1601.04	143.098	-1322.43	1427.63	125.367	-1379.76	1212.15	147.213	-1192.73	1355.68	158.873	-1136.21	1226.34	216.536	-1398.16	1263.82	-26.1338	-1254.5	1378.73	-80.0538	-1226.03	1153.06	-80.4935	-1220.18	1084.19	-93.5708	-1108.4	1023.01	-70.4251	-1050.86	937.127	-117.4	-1092	904.551	-133.424	-1002.82	862.927
924	0	115.069	-1065.04	1556.07	215.018	-1072.48	1548.86	91.7612	-1229.89	1605.1	203.558	-1247.16	1599.85	143.593	-1313.61	1426.51	125.852	-1371.28	1211.22	147.459	-1184.02	1354.4	158.952	-1127.7	1224.96	217.094	-1389.44	1262.84	-25.7309	-1245.99	1377.7	-79.7057	-1216.83	1152.21	-80.2085	-1210.5	1083.37	-92.7097	-1097.94	1023.07	-69.17	-1039.65	937.827	-116.36	-1080.21	904.805	-131.8	-990.455	864.195
925	0	115.366	-1056.17	1554.85	215.324	-1063.56	1547.69	92.0968	-1221.04	1603.8	203.909	-1238.27	1598.6	144.127	-1304.73	1425.35	126.33	-1362.7	1210.23	147.783	-1175.24	1353.09	159.12	-1119.11	1223.56	217.647	-1380.66	1261.79	-25.2786	-1237.35	1376.62	-79.3036	-1207.64	1151.29	-79.8627	-1200.89	1082.47	-91.8134	-1087.66	1022.93	-67.8997	-1028.75	938.248	-115.307	-1068.78	904.847	-130.169	-978.505	865.123
926	0	115.747	-1047.25	1553.61	215.71	-1054.59	1546.49	92.5139	-1212.15	1602.48	204.34	-1229.35	1597.33	144.696	-1295.78	1424.13	126.795	-1354.02	1209.19	148.188	-1166.37	1351.76	159.382	-1110.41	1222.15	218.189	-1371.8	1260.68	-24.7792	-1228.59	1375.5	-78.8517	-1198.45	1150.29	-79.4611	-1191.34	1081.51	-90.8906	-1077.53	1022.59	-66.6282	-1018.14	938.373	-114.254	-1057.69	904.665	-128.55	-966.972	865.687
927	0	116.213	-1038.29	1552.37	216.179	-1045.57	1545.28	93.013	-1203.22	1601.14	204.851	-1220.39	1596.02	145.297	-1286.76	1422.86	127.24	-1345.23	1208.08	148.672	-1157.41	1350.41	159.74	-1101.62	1220.74	218.715	-1362.87	1259.49	-24.2346	-1219.7	1374.33	-78.3533	-1189.25	1149.23	-79.0075	-1181.84	1080.48	-89.9499	-1067.56	1022.04	-65.3692	-1007.83	938.189	-113.217	-1046.95	904.247	-126.962	-955.854	865.868
928	0	116.767	-1029.29	1551.14	216.732	-1036.52	1544.06	93.594	-1194.25	1599.8	205.441	-1211.39	1594.68	145.928	-1277.66	1421.54	127.664	-1336.32	1206.91	149.235	-1148.36	1349.06	160.198	-1092.71	1219.34	219.221	-1353.86	1258.23	-23.646	-1210.66	1373.12	-77.8105	-1180.01	1148.1	-78.5051	-1172.37	1079.39	-88.9992	-1057.74	1021.27	-64.1362	-997.802	937.687	-112.208	-1036.55	903.588	-125.424	-945.148	865.651
929	0	117.407	-1020.24	1549.93	217.369	-1027.43	1542.84	94.2562	-1185.23	1598.44	206.11	-1202.36	1593.32	146.588	-1268.49	1420.19	128.064	-1327.3	1205.69	149.877	-1139.2	1347.71	160.756	-1083.69	1217.95	219.708	-1344.75	1256.9	-23.0139	-1201.48	1371.87	-77.2242	-1170.74	1146.9	-77.9559	-1162.91	1078.23	-88.0457	-1048.04	1020.29	-62.942	-988.048	936.862	-111.238	-1026.49	902.685	-123.954	-934.854	865.025
930	0	118.132	-1011.14	1548.74	218.089	-1018.29	1541.63	94.9983	-1176.17	1597.09	206.857	-1193.28	1591.95	147.275	-1259.23	1418.8	128.446	-1318.13	1204.41	150.597	-1129.95	1346.37	161.416	-1074.54	1216.59	220.178	-1335.54	1255.51	-22.3384	-1192.15	1370.58	-76.5943	-1161.4	1145.64	-77.3606	-1153.46	1077.02	-87.0959	-1038.47	1019.1	-61.7983	-978.562	935.711	-110.319	-1016.76	901.539	-122.571	-924.969	863.986
931	0	118.943	-1001.99	1547.59	218.891	-1009.11	1540.44	95.8185	-1167.07	1595.75	207.679	-1184.17	1590.57	147.99	-1249.89	1417.38	128.813	-1308.83	1203.06	151.394	-1120.58	1345.04	162.177	-1065.25	1215.26	220.634	-1326.22	1254.05	-21.6191	-1182.68	1369.27	-75.9196	-1152	1144.34	-76.719	-1144	1075.75	-86.1553	-1029.02	1017.71	-60.716	-969.334	934.238	-109.46	-1007.36	900.155	-121.29	-915.493	862.533
932	0	119.835	-992.791	1546.48	219.773	-999.883	1539.28	96.7145	-1157.92	1594.42	208.574	-1175.02	1589.19	148.735	-1240.46	1415.93	129.174	-1299.38	1201.67	152.264	-1111.1	1343.73	163.035	-1055.81	1213.97	221.083	-1316.78	1252.53	-20.8552	-1173.05	1367.93	-75.198	-1142.52	1142.99	-76.0298	-1134.52	1074.44	-85.2288	-1019.67	1016.12	-59.7045	-960.36	932.451	-108.667	-998.295	898.542	-120.127	-906.426	860.674
933	0	120.807	-983.543	1545.44	220.732	-990.614	1538.16	97.6834	-1148.73	1593.12	209.539	-1165.82	1587.82	149.511	-1230.94	1414.47	129.538	-1289.78	1200.22	153.206	-1101.5	1342.46	163.988	-1046.23	1212.73	221.534	-1307.21	1250.95	-20.0457	-1163.28	1366.58	-74.4266	-1132.94	1141.61	-75.2907	-1125.01	1073.1	-84.32	-1010.42	1014.35	-58.772	-951.632	930.362	-107.946	-989.549	896.714	-119.096	-897.767	858.421
934	0	121.854	-974.244	1544.46	221.766	-981.301	1537.1	98.7222	-1139.49	1591.85	210.572	-1156.59	1586.47	150.32	-1221.33	1413	129.92	-1280.01	1198.73	154.216	-1091.79	1341.23	165.031	-1036.49	1211.55	221.996	-1297.5	1249.32	-19.1897	-1153.36	1365.22	-73.6023	-1123.27	1140.21	-74.4986	-1115.47	1071.74	-83.432	-1001.28	1012.42	-57.925	-943.146	927.987	-107.3	-981.123	894.689	-118.21	-889.516	855.796
935	0	122.972	-964.893	1543.57	222.869	-971.94	1536.11	99.8271	-1130.2	1590.63	211.669	-1147.31	1585.14	151.166	-1211.63	1411.54	130.33	-1270.07	1197.2	155.291	-1081.96	1340.05	166.157	-1026.58	1210.43	222.478	-1287.65	1247.65	-18.2864	-1143.32	1363.87	-72.7216	-1113.49	1138.8	-73.6498	-1105.89	1070.36	-82.5669	-992.234	1010.33	-57.1686	-934.896	925.35	-106.732	-973.011	892.487	-117.479	-881.673	852.823
936	0	124.157	-955.489	1542.76	224.038	-962.531	1535.2	100.994	-1120.87	1589.46	212.826	-1137.99	1583.85	152.051	-1201.83	1410.09	130.785	-1259.95	1195.63	156.426	-1072.01	1338.93	167.359	-1016.51	1209.39	222.993	-1277.66	1245.94	-17.3353	-1133.14	1362.54	-71.7812	-1103.62	1137.38	-72.7403	-1096.27	1068.99	-81.7262	-983.288	1008.12	-56.5061	-926.878	922.478	-106.238	-965.211	890.136	-116.91	-874.236	849.536
937	0	125.403	-946.032	1542.06	225.268	-953.072	1534.38	102.22	-1111.49	1588.35	214.039	-1128.63	1582.61	152.977	-1191.95	1408.66	131.299	-1249.66	1194.05	157.616	-1061.94	1337.88	168.63	-1006.27	1208.43	223.55	-1267.51	1244.23	-16.3366	-1122.84	1361.23	-70.7782	-1093.65	1135.99	-71.7661	-1086.63	1067.62	-80.9109	-974.446	1005.81	-55.9389	-919.089	919.401	-105.816	-957.716	887.662	-116.508	-867.204	845.974
938	0	126.705	-936.52	1541.46	226.553	-943.561	1533.66	103.499	-1102.06	1587.3	215.306	-1119.21	1581.42	153.946	-1181.97	1407.28	131.884	-1239.2	1192.47	158.856	-1051.76	1336.9	169.959	-995.871	1207.56	224.16	-1257.21	1242.51	-15.291	-1112.44	1359.96	-69.7104	-1083.6	1134.62	-70.7234	-1076.97	1066.29	-80.1214	-965.711	1003.42	-55.4667	-911.526	916.156	-105.46	-950.523	885.098	-116.276	-860.575	842.181
939	0	128.055	-926.952	1540.98	227.886	-933.995	1533.06	104.827	-1092.58	1586.34	216.62	-1109.75	1580.31	154.961	-1171.9	1405.95	132.552	-1228.56	1190.89	160.139	-1041.47	1336	171.339	-985.307	1206.77	224.832	-1246.77	1240.81	-14.1999	-1101.93	1358.75	-68.5766	-1073.47	1133.3	-69.6087	-1067.3	1064.99	-79.3577	-957.091	1000.97	-55.0875	-904.184	912.784	-105.161	-943.625	882.476	-116.211	-854.344	838.206
940	0	129.448	-917.327	1540.63	229.263	-924.372	1532.57	106.2	-1083.06	1585.47	217.979	-1100.24	1579.28	156.021	-1161.75	1404.69	133.314	-1217.76	1189.35	161.46	-1031.09	1335.2	172.758	-974.59	1206.09	225.572	-1236.18	1239.16	-13.0658	-1091.34	1357.62	-67.3768	-1063.3	1132.03	-68.4196	-1057.64	1063.75	-78.6195	-948.596	998.511	-54.7972	-897.06	909.326	-104.908	-937.015	879.832	-116.31	-848.506	834.105
941	0	130.877	-907.645	1540.4	230.675	-914.688	1532.22	107.612	-1073.48	1584.7	219.377	-1090.67	1578.34	157.126	-1151.52	1403.53	134.176	-1206.79	1187.87	162.81	-1020.61	1334.5	174.208	-963.732	1205.51	226.386	-1225.46	1237.57	-11.8917	-1080.67	1356.57	-66.1122	-1053.1	1130.84	-67.1543	-1048.01	1062.59	-77.9062	-940.234	996.058	-54.59	-890.152	905.829	-104.689	-930.687	877.203	-116.562	-843.054	829.932
942	0	132.334	-897.904	1540.31	232.116	-904.943	1531.99	109.059	-1063.84	1584.04	220.81	-1081.04	1577.51	158.277	-1141.21	1402.46	135.143	-1195.69	1186.47	164.184	-1010.06	1333.91	175.679	-952.748	1205.04	227.277	-1214.63	1236.07	-10.6817	-1069.94	1355.63	-64.7855	-1042.91	1129.74	-65.8126	-1038.43	1061.51	-77.217	-932.018	993.646	-54.4581	-883.454	902.341	-104.489	-924.632	874.624	-116.955	-837.977	825.747
943	0	133.812	-888.105	1540.35	233.579	-895.135	1531.91	110.534	-1054.16	1583.5	222.273	-1071.36	1576.79	159.47	-1130.84	1401.52	136.213	-1184.47	1185.18	165.574	-999.432	1333.43	177.161	-941.657	1204.68	228.245	-1203.7	1234.69	-9.44045	-1059.16	1354.81	-63.4009	-1032.75	1128.75	-64.3956	-1028.93	1060.54	-76.5509	-923.959	991.307	-54.3922	-876.964	898.909	-104.292	-918.842	872.131	-117.472	-833.261	821.608
944	0	135.303	-878.247	1540.53	235.056	-885.262	1531.96	112.034	-1044.42	1583.09	223.761	-1061.61	1576.2	160.702	-1120.41	1400.72	137.383	-1173.14	1184.03	166.973	-988.752	1333.07	178.644	-930.481	1204.44	229.29	-1192.69	1233.46	-8.17332	-1048.34	1354.12	-61.9641	-1022.65	1127.89	-62.906	-1019.53	1059.7	-75.9065	-916.071	989.07	-54.3816	-870.675	895.58	-104.084	-913.305	869.759	-118.091	-828.892	817.572
945	0	136.801	-868.333	1540.84	236.541	-875.324	1532.15	113.552	-1034.63	1582.81	225.269	-1051.81	1575.75	161.971	-1109.93	1400.07	138.647	-1161.74	1183.06	168.372	-978.033	1332.84	180.118	-919.244	1204.32	230.407	-1181.62	1232.41	-6.8862	-1037.51	1353.6	-60.4821	-1012.66	1127.16	-61.3481	-1010.26	1058.99	-75.2825	-908.366	986.965	-54.4141	-864.582	892.4	-103.846	-908.01	867.54	-118.788	-824.848	813.694
946	0	138.297	-858.364	1541.29	238.026	-865.323	1532.48	115.084	-1024.78	1582.68	226.791	-1041.94	1575.43	163.271	-1099.41	1399.59	139.994	-1150.3	1182.28	169.765	-967.29	1332.74	181.574	-907.975	1204.32	231.591	-1170.52	1231.54	-5.58532	-1026.67	1353.24	-58.9634	-1002.8	1126.59	-59.7281	-1001.15	1058.44	-74.6771	-900.854	985.019	-54.4766	-858.678	889.413	-103.564	-902.944	865.504	-119.534	-821.106	810.026
947	0	139.786	-848.344	1541.85	239.505	-855.262	1532.93	116.623	-1014.89	1582.69	228.323	-1032.01	1575.27	164.598	-1088.87	1399.28	141.411	-1138.85	1181.72	171.145	-956.542	1332.78	183.002	-896.702	1204.45	232.834	-1159.42	1230.9	-4.27704	-1015.84	1353.06	-57.4174	-993.104	1126.19	-58.0536	-992.214	1058.05	-74.0884	-893.545	983.256	-54.5554	-852.954	886.658	-103.224	-898.089	863.678	-120.301	-817.638	806.612
948	0	141.258	-838.276	1542.53	240.97	-845.143	1533.51	118.164	-1004.94	1582.85	229.859	-1022.02	1575.27	165.947	-1078.32	1399.16	142.883	-1127.43	1181.4	172.505	-945.805	1332.95	184.394	-885.455	1204.7	234.131	-1148.33	1230.5	-2.9677	-1005.05	1353.07	-55.8542	-983.608	1125.98	-56.334	-983.488	1057.85	-73.5141	-886.448	981.697	-54.6366	-847.401	884.168	-102.813	-893.431	862.082	-121.058	-814.411	803.491
949	0	142.709	-828.168	1543.32	242.416	-834.974	1534.2	119.702	-994.955	1583.17	231.393	-1011.98	1575.43	167.312	-1067.77	1399.24	144.396	-1116.07	1181.34	173.839	-935.098	1333.26	185.739	-874.262	1205.08	235.472	-1137.28	1230.34	-1.66335	-994.305	1353.28	-54.2845	-974.336	1125.95	-54.5798	-974.989	1057.83	-72.9519	-879.567	980.361	-54.7065	-842.009	881.973	-102.322	-888.949	860.735	-121.772	-811.391	800.696
950	0	144.132	-818.027	1544.2	243.835	-824.762	1534.98	121.231	-984.927	1583.63	232.921	-1001.89	1575.74	168.689	-1057.25	1399.51	145.935	-1104.8	1181.55	175.14	-924.438	1333.71	187.03	-863.153	1205.59	236.851	-1126.31	1230.44	-0.369564	-983.639	1353.69	-52.7187	-965.313	1126.13	-52.8025	-966.733	1058.01	-72.3991	-872.907	979.259	-54.752	-836.766	880.094	-101.743	-884.624	859.648	-122.415	-808.539	798.249
951	0	145.519	-807.861	1545.16	245.221	-814.517	1535.86	122.747	-974.867	1584.25	234.437	-991.757	1576.21	170.074	-1046.77	1399.98	147.487	-1093.67	1182.02	176.405	-913.843	1334.29	188.26	-852.152	1206.23	238.262	-1115.43	1230.8	0.908732	-973.07	1354.29	-51.1671	-956.555	1126.5	-51.014	-958.736	1058.38	-71.8529	-866.467	978.401	-54.7615	-831.658	878.544	-101.073	-880.431	858.83	-122.959	-805.811	796.166
952	0	146.866	-797.681	1546.19	246.569	-804.248	1536.8	124.244	-964.782	1585.01	235.937	-981.589	1576.84	171.462	-1036.34	1400.64	149.039	-1082.71	1182.75	177.63	-903.329	1335	189.422	-841.284	1206.99	239.7	-1104.67	1231.41	2.16743	-962.622	1355.09	-49.639	-948.077	1127.07	-49.2266	-951.007	1058.95	-71.3104	-860.243	977.79	-54.7247	-826.671	877.332	-100.312	-876.349	858.281	-123.382	-803.165	794.452
953	0	148.167	-787.5	1547.27	247.874	-793.968	1537.8	125.718	-954.683	1585.91	237.416	-971.397	1577.62	172.851	-1025.98	1401.48	150.584	-1071.93	1183.72	178.812	-892.912	1335.83	190.512	-830.57	1207.88	241.163	-1094.03	1232.25	3.40334	-952.316	1356.06	-48.1425	-939.885	1127.84	-47.4519	-943.551	1059.71	-70.7686	-854.23	977.425	-54.6334	-821.791	876.458	-99.4631	-872.354	857.997	-123.664	-800.556	793.108
954	0	149.417	-777.33	1548.38	249.129	-783.69	1538.84	127.165	-944.581	1586.93	238.869	-961.189	1578.54	174.237	-1015.71	1402.48	152.117	-1061.37	1184.92	179.949	-882.605	1336.78	191.526	-820.026	1208.87	242.649	-1083.55	1233.32	4.61425	-942.175	1357.2	-46.6842	-931.983	1128.78	-45.7007	-936.368	1060.65	-70.2247	-848.419	977.301	-54.4815	-817	875.912	-98.5312	-868.419	857.97	-123.794	-797.941	792.125
955	0	150.612	-767.184	1549.52	250.331	-773.428	1539.92	128.58	-934.488	1588.08	240.294	-950.978	1579.59	175.621	-1005.54	1403.65	153.637	-1051.05	1186.32	181.041	-872.42	1337.84	192.465	-809.665	1209.98	244.16	-1073.22	1234.59	5.79899	-932.218	1358.5	-45.2688	-924.369	1129.89	-43.9823	-929.456	1061.75	-69.6758	-842.797	977.406	-54.2654	-812.284	875.684	-97.5251	-864.523	858.187	-123.766	-795.277	791.488
956	0	151.747	-757.078	1550.67	251.474	-763.195	1541.01	129.961	-924.417	1589.33	241.688	-940.777	1580.76	177.001	-995.486	1404.95	155.143	-1040.96	1187.88	182.089	-862.367	1339	193.33	-799.498	1211.18	245.696	-1063.06	1236.03	6.9574	-922.462	1359.92	-43.8991	-917.037	1131.16	-42.3042	-922.807	1063	-69.1194	-837.352	977.729	-53.9839	-807.626	875.752	-96.4549	-860.641	858.63	-123.58	-792.528	791.178
957	0	152.819	-747.025	1551.82	252.557	-753.006	1542.11	131.305	-914.382	1590.67	243.047	-930.597	1582.05	178.377	-985.553	1406.37	156.642	-1031.11	1189.58	183.095	-852.453	1340.24	194.126	-789.53	1212.47	247.259	-1053.06	1237.63	8.09032	-912.919	1361.44	-42.5756	-909.977	1132.55	-40.6722	-916.41	1064.38	-68.5533	-832.068	978.251	-53.6381	-803.008	876.095	-95.3322	-856.753	859.279	-123.245	-789.661	791.173
958	0	153.827	-737.039	1552.96	253.577	-742.874	1543.2	132.61	-904.396	1592.09	244.369	-920.452	1583.43	179.749	-975.752	1407.89	158.136	-1021.5	1191.39	184.061	-842.683	1341.56	194.858	-779.763	1213.85	248.85	-1043.24	1239.35	9.19952	-903.599	1363.05	-41.2968	-903.174	1134.06	-39.0898	-910.249	1065.87	-67.9757	-826.927	978.954	-53.2315	-798.415	876.685	-94.1689	-852.84	860.111	-122.771	-786.649	791.445
959	0	154.768	-727.135	1554.08	254.531	-732.812	1544.29	133.875	-894.474	1593.56	245.655	-910.354	1584.89	181.119	-966.087	1409.5	159.633	-1012.12	1193.26	184.993	-833.061	1342.94	195.536	-770.194	1215.28	250.47	-1033.58	1241.15	10.2876	-894.504	1364.71	-40.059	-896.612	1135.65	-37.5583	-904.308	1067.44	-67.3854	-821.91	979.817	-52.7694	-793.833	877.493	-92.9773	-848.884	861.103	-122.179	-783.472	791.967
960	0	155.642	-717.324	1555.17	255.419	-722.831	1545.37	135.099	-884.628	1595.09	246.902	-900.317	1586.41	182.485	-956.561	1411.16	161.136	-1002.96	1195.17	185.894	-823.585	1344.36	196.169	-760.82	1216.77	252.118	-1024.08	1243.03	11.3577	-885.632	1366.41	-38.8568	-890.271	1137.31	-36.0773	-898.566	1069.09	-66.7818	-817	980.817	-52.2594	-789.247	878.488	-91.7689	-844.874	862.23	-121.488	-780.117	792.707
961	0	156.45	-707.617	1556.24	256.241	-712.942	1546.43	136.281	-874.872	1596.63	248.112	-890.352	1587.98	183.851	-947.176	1412.85	162.651	-994.006	1197.09	186.769	-814.255	1345.82	196.77	-751.631	1218.3	253.792	-1014.74	1244.93	12.4137	-876.978	1368.12	-37.6832	-884.129	1139.01	-34.6444	-893.002	1070.78	-66.165	-812.177	981.93	-51.7102	-784.644	879.637	-90.5546	-840.797	863.466	-120.723	-776.579	793.637
962	0	157.193	-698.023	1557.27	257	-703.153	1547.47	137.423	-865.215	1598.19	249.284	-880.468	1589.57	185.215	-937.928	1414.56	164.178	-985.23	1198.99	187.625	-805.067	1347.3	197.35	-742.614	1219.85	255.49	-1005.53	1246.85	13.4593	-868.529	1369.83	-36.5305	-878.163	1140.74	-33.2557	-887.591	1072.49	-65.5359	-807.423	983.133	-51.1318	-780.013	880.911	-89.344	-836.647	864.785	-119.908	-772.86	794.723
963	0	157.874	-688.55	1558.26	257.698	-693.471	1548.49	138.527	-855.667	1599.73	250.421	-870.677	1591.18	186.577	-928.814	1416.26	165.72	-976.616	1200.85	188.465	-796.013	1348.77	197.919	-733.757	1221.4	257.208	-996.465	1248.74	14.4985	-860.271	1371.5	-35.3905	-872.347	1142.46	-31.9067	-882.308	1074.21	-64.8963	-802.718	984.402	-50.5346	-775.345	882.276	-88.1453	-832.419	866.163	-119.069	-768.965	795.935
964	0	158.498	-679.201	1559.21	258.338	-683.901	1549.48	139.592	-846.235	1601.24	251.522	-860.984	1592.78	187.939	-919.828	1417.94	167.274	-968.144	1202.65	189.295	-787.088	1350.23	198.49	-725.044	1222.94	258.939	-987.516	1250.6	15.5347	-852.184	1373.12	-34.2553	-866.655	1144.16	-30.5918	-877.126	1075.91	-64.2485	-798.044	985.714	-49.9297	-770.632	883.702	-86.9655	-828.111	867.575	-118.227	-764.909	797.24
965	0	159.068	-669.981	1560.12	258.926	-674.447	1550.44	140.623	-836.924	1602.72	252.591	-851.396	1594.35	189.299	-910.962	1419.58	168.839	-959.793	1204.37	190.12	-778.281	1351.66	199.068	-716.457	1224.44	260.678	-978.675	1252.39	16.5708	-844.249	1374.69	-33.1182	-861.057	1145.82	-29.3058	-872.018	1077.58	-63.5953	-793.383	987.046	-49.3273	-765.869	885.161	-85.81	-823.723	868.998	-117.404	-760.708	798.608
966	0	159.592	-660.888	1560.98	259.466	-665.108	1551.38	141.622	-827.735	1604.13	253.63	-841.917	1595.87	190.656	-902.208	1421.15	170.409	-951.545	1206	190.942	-769.585	1353.05	199.663	-707.98	1225.89	262.42	-969.93	1254.1	17.6091	-836.442	1376.17	-31.9735	-855.527	1147.44	-28.0437	-866.956	1079.21	-62.9402	-788.718	988.378	-48.7373	-761.05	886.623	-84.6831	-819.256	870.411	-116.618	-756.381	800.008
967	0	160.074	-651.92	1561.79	259.966	-655.883	1552.27	142.591	-818.67	1605.47	254.641	-832.548	1597.33	192.008	-893.556	1422.64	171.979	-943.383	1207.51	191.764	-760.988	1354.37	200.276	-699.598	1227.27	264.157	-961.27	1255.71	18.6505	-828.741	1377.58	-30.8176	-850.034	1148.98	-26.8013	-861.912	1080.78	-62.2866	-784.032	989.689	-48.1685	-756.172	888.064	-83.5883	-814.714	871.796	-115.882	-751.951	801.411
968	0	160.522	-643.072	1562.55	260.432	-646.771	1553.13	143.534	-809.725	1606.72	255.626	-823.29	1598.72	193.353	-884.997	1424.05	173.543	-935.292	1208.92	192.587	-752.48	1355.63	200.911	-691.295	1228.57	265.881	-952.684	1257.21	19.6951	-821.122	1378.88	-29.6491	-844.551	1150.45	-25.5756	-856.856	1082.28	-61.6382	-779.308	990.961	-47.628	-751.235	889.458	-82.5282	-810.099	873.133	-115.207	-747.438	802.787
969	0	160.943	-634.337	1563.25	260.871	-637.764	1553.93	144.454	-800.895	1607.87	256.589	-814.139	1600.01	194.688	-876.518	1425.35	175.095	-927.257	1210.2	193.413	-744.049	1356.79	201.566	-683.058	1229.77	267.585	-944.163	1258.59	20.7418	-813.564	1380.08	-28.4688	-839.048	1151.83	-24.365	-851.762	1083.7	-60.9986	-774.53	992.176	-47.1214	-746.236	890.784	-81.5047	-805.418	874.407	-114.601	-742.865	804.112
970	0	161.344	-625.706	1563.88	261.289	-628.858	1554.68	145.354	-792.173	1608.91	257.532	-805.092	1601.2	196.009	-868.111	1426.54	176.625	-919.269	1211.36	194.239	-735.687	1357.86	202.239	-674.878	1230.85	269.262	-935.699	1259.84	21.7882	-806.045	1381.18	-27.2797	-833.498	1153.11	-23.1697	-846.601	1085.03	-60.3711	-769.683	993.32	-46.6526	-741.177	892.021	-80.5197	-800.672	875.606	-114.066	-738.25	805.36
971	0	161.731	-617.168	1564.44	261.695	-620.043	1555.36	146.237	-783.55	1609.84	258.457	-796.142	1602.27	197.311	-859.764	1427.61	178.126	-911.317	1212.39	195.065	-727.381	1358.82	202.925	-666.745	1231.8	270.902	-927.285	1260.95	22.831	-798.545	1382.16	-26.0873	-827.874	1154.29	-21.9913	-841.348	1086.27	-59.7589	-764.752	994.378	-46.2239	-736.057	893.151	-79.5749	-795.865	876.718	-113.602	-733.611	806.511
972	0	162.112	-608.713	1564.92	262.095	-611.31	1555.96	147.106	-775.015	1610.65	259.365	-787.283	1603.22	198.59	-851.468	1428.55	179.588	-903.394	1213.3	195.888	-719.122	1359.66	203.62	-658.653	1232.61	272.496	-918.917	1261.93	23.8657	-791.047	1383.04	-24.8987	-822.151	1155.36	-20.8332	-835.979	1087.4	-59.1648	-759.722	995.34	-45.8357	-730.878	894.159	-78.6721	-790.999	877.734	-113.207	-728.961	807.545
973	0	162.493	-600.326	1565.32	262.493	-602.65	1556.47	147.962	-766.556	1611.32	260.259	-778.506	1604.03	199.839	-843.213	1429.37	181.002	-895.494	1214.07	196.705	-710.901	1360.38	204.317	-650.595	1233.28	274.037	-910.589	1262.76	24.8872	-783.533	1383.8	-23.7225	-816.306	1156.31	-19.7004	-830.471	1088.43	-58.5915	-754.581	996.195	-45.4872	-725.639	895.033	-77.8133	-786.077	878.647	-112.876	-724.309	808.446
974	0	162.878	-591.995	1565.63	262.897	-594.053	1556.89	148.806	-758.16	1611.87	261.138	-769.802	1604.7	201.052	-834.99	1430.05	182.359	-887.613	1214.73	197.513	-702.71	1360.97	205.009	-642.568	1233.8	275.514	-902.297	1263.46	25.8895	-775.989	1384.46	-22.5687	-810.318	1157.16	-18.5989	-824.805	1089.35	-58.0414	-749.317	996.935	-45.1766	-720.343	895.761	-77.001	-781.096	879.453	-112.604	-719.663	809.203
975	0	163.273	-583.707	1565.84	263.309	-585.508	1557.2	149.64	-749.814	1612.29	262.003	-761.16	1605.23	202.222	-826.791	1430.6	183.648	-879.746	1215.26	198.307	-694.539	1361.43	205.691	-634.565	1234.17	276.918	-894.04	1264.02	26.8663	-768.4	1385	-21.4479	-804.17	1157.88	-17.5358	-818.964	1090.16	-57.5166	-743.919	997.555	-44.901	-714.987	896.338	-76.2378	-776.057	880.148	-112.381	-715.022	809.804
976	0	163.68	-575.447	1565.94	263.734	-577.004	1557.39	150.463	-741.504	1612.57	262.853	-752.571	1605.62	203.344	-818.608	1431.02	184.858	-871.891	1215.68	199.082	-686.381	1361.76	206.356	-626.582	1234.39	278.242	-885.813	1264.45	27.811	-760.755	1385.43	-20.3712	-797.848	1158.5	-16.5188	-812.935	1090.86	-57.0192	-738.377	998.05	-44.6574	-709.572	896.757	-75.5267	-770.955	880.731	-112.202	-710.384	810.245
977	0	164.101	-567.204	1565.94	264.172	-568.532	1557.46	151.274	-733.217	1612.72	263.687	-744.024	1605.86	204.409	-810.434	1431.3	185.98	-864.044	1215.98	199.835	-678.23	1361.95	206.999	-618.615	1234.46	279.476	-877.615	1264.75	28.7169	-753.043	1385.76	-19.3493	-791.339	1159	-15.5561	-806.71	1091.45	-56.5513	-732.685	998.416	-44.4424	-704.096	897.016	-74.871	-765.786	881.202	-112.059	-705.742	810.523
978	0	164.538	-558.966	1565.82	264.626	-560.083	1557.41	152.07	-724.94	1612.75	264.502	-735.51	1605.95	205.411	-802.263	1431.46	187.005	-856.203	1216.18	200.561	-670.079	1362.02	207.615	-610.656	1234.39	280.613	-869.443	1264.93	29.5774	-745.255	1385.99	-18.3925	-784.636	1159.38	-14.6555	-800.281	1091.93	-56.1148	-726.834	998.653	-44.2528	-698.556	897.117	-74.274	-760.543	881.562	-111.944	-701.084	810.637
979	0	164.99	-550.721	1565.59	265.095	-551.648	1557.21	152.849	-716.663	1612.65	265.296	-727.02	1605.91	206.344	-794.09	1431.5	187.923	-848.364	1216.28	201.255	-661.922	1361.95	208.201	-602.7	1234.18	281.647	-861.294	1264.99	30.3864	-737.384	1386.12	-17.5105	-777.735	1159.66	-13.825	-793.647	1092.3	-55.7119	-720.822	998.761	-44.086	-692.949	897.06	-73.7391	-755.22	881.814	-111.853	-696.398	810.592
980	0	165.456	-542.46	1565.24	265.576	-543.219	1556.89	153.606	-708.373	1612.43	266.064	-718.545	1605.72	207.201	-785.909	1431.41	188.728	-840.525	1216.28	201.914	-653.754	1361.76	208.752	-594.74	1233.85	282.572	-853.164	1264.94	31.138	-729.423	1386.15	-16.7116	-770.633	1159.82	-13.0715	-786.808	1092.57	-55.3447	-714.645	998.741	-43.9398	-687.268	896.852	-73.2694	-749.808	881.958	-111.782	-691.666	810.391
981	0	165.932	-534.176	1564.77	266.068	-534.791	1556.42	154.338	-700.062	1612.09	266.802	-710.078	1605.4	207.978	-777.716	1431.21	189.414	-832.682	1216.19	202.532	-645.57	1361.45	209.268	-586.766	1233.4	283.384	-845.05	1264.78	31.8269	-721.368	1386.08	-16.003	-763.332	1159.88	-12.4015	-779.768	1092.73	-55.0154	-708.302	998.595	-43.8133	-681.508	896.498	-72.868	-744.297	882	-111.726	-686.87	810.045
982	0	166.416	-525.86	1564.19	266.567	-526.358	1555.82	155.038	-691.722	1611.65	267.504	-701.612	1604.95	208.668	-769.506	1430.9	189.978	-824.831	1216.01	203.106	-637.364	1361.02	209.745	-578.774	1232.85	284.081	-836.947	1264.52	32.4484	-713.216	1385.92	-15.3903	-755.838	1159.83	-11.8201	-772.534	1092.78	-54.7266	-701.791	998.328	-43.7062	-675.662	896.007	-72.5375	-738.677	881.941	-111.686	-681.987	809.561
983	0	166.902	-517.508	1563.49	267.067	-517.915	1555.09	155.701	-683.347	1611.09	268.166	-693.141	1604.38	209.268	-761.275	1430.48	190.417	-816.967	1215.75	203.632	-629.133	1360.48	210.182	-570.754	1232.2	284.659	-828.848	1264.16	32.9986	-704.964	1385.66	-14.8778	-748.157	1159.68	-11.3314	-765.114	1092.74	-54.4809	-695.114	997.943	-43.6197	-669.72	895.386	-72.28	-732.937	881.786	-111.662	-676.998	808.951
984	0	167.384	-509.116	1562.67	267.562	-509.459	1554.24	156.321	-674.932	1610.44	268.78	-684.661	1603.69	209.774	-753.021	1429.95	190.733	-809.084	1215.41	204.107	-620.87	1359.84	210.579	-562.7	1231.46	285.119	-820.748	1263.71	33.4739	-696.612	1385.31	-14.468	-740.298	1159.44	-10.9383	-757.519	1092.59	-54.2811	-688.273	997.445	-43.5558	-663.674	894.646	-72.0972	-727.066	881.537	-111.656	-671.88	808.228
985	0	167.856	-500.681	1561.76	268.045	-500.986	1553.26	156.889	-666.473	1609.69	269.342	-676.167	1602.89	210.184	-744.74	1429.33	190.928	-801.177	1214.98	204.528	-612.573	1359.1	210.935	-554.604	1230.65	285.462	-812.64	1263.17	33.8718	-688.161	1384.87	-14.1618	-732.272	1159.09	-10.6422	-749.761	1092.34	-54.13	-681.269	996.84	-43.5176	-657.513	893.798	-71.9901	-721.053	881.198	-111.671	-666.611	807.401
986	0	168.311	-492.201	1560.74	268.511	-492.494	1552.18	157.401	-657.968	1608.85	269.845	-667.657	1602	210.496	-736.427	1428.61	191.004	-793.239	1214.48	204.89	-604.235	1358.28	211.248	-546.46	1229.78	285.689	-804.515	1262.55	34.1901	-679.612	1384.34	-13.9587	-724.092	1158.66	-10.4433	-741.851	1092	-54.0308	-674.105	996.133	-43.5091	-651.226	892.851	-71.9593	-714.886	880.77	-111.712	-661.17	806.485
987	0	168.74	-483.676	1559.63	268.949	-483.982	1551	157.848	-649.416	1607.93	270.282	-659.128	1601.01	210.708	-728.08	1427.8	190.968	-785.263	1213.9	205.191	-595.853	1357.37	211.519	-538.262	1228.84	285.803	-796.364	1261.85	34.4272	-670.968	1383.72	-13.8569	-715.771	1158.13	-10.3407	-733.802	1091.57	-53.9864	-666.784	995.331	-43.5348	-644.802	891.815	-72.0046	-708.555	880.257	-111.784	-655.537	805.489
988	0	169.135	-475.105	1558.44	269.353	-475.448	1549.73	158.225	-640.817	1606.93	270.647	-650.58	1599.94	210.822	-719.695	1426.91	190.826	-777.241	1213.24	205.428	-587.421	1356.39	211.745	-530.004	1227.86	285.808	-788.178	1261.06	34.5822	-662.231	1383.01	-13.8534	-707.322	1157.51	-10.3324	-725.625	1091.04	-53.9998	-659.308	994.44	-43.6	-638.228	890.701	-72.1255	-702.048	879.66	-111.894	-649.693	804.424
989	0	169.488	-466.49	1557.18	269.714	-466.891	1548.38	158.525	-632.171	1605.86	270.935	-642.009	1598.8	210.836	-711.268	1425.93	190.585	-769.164	1212.49	205.599	-578.934	1355.34	211.926	-521.678	1226.84	285.708	-779.947	1260.2	34.6544	-653.406	1382.22	-13.9442	-698.759	1156.8	-10.4151	-717.33	1090.42	-54.0739	-651.682	993.465	-43.7101	-631.494	889.518	-72.3204	-695.356	878.981	-112.046	-643.622	803.3
990	0	169.792	-457.831	1555.86	270.024	-458.31	1546.98	158.742	-623.481	1604.73	271.141	-633.415	1597.59	210.754	-702.796	1424.87	190.253	-761.022	1211.67	205.701	-570.388	1354.24	212.061	-513.28	1225.78	285.509	-771.66	1259.26	34.6439	-644.498	1381.34	-14.1245	-690.093	1156.01	-10.585	-708.927	1089.71	-54.2112	-643.906	992.414	-43.8704	-624.588	888.275	-72.5877	-688.47	878.221	-112.248	-637.307	802.126
991	0	170.039	-449.13	1554.48	270.276	-449.703	1545.52	158.872	-614.747	1603.54	271.26	-624.798	1596.33	210.576	-694.275	1423.74	189.835	-752.806	1210.76	205.732	-561.777	1353.09	212.147	-504.801	1224.69	285.215	-763.306	1258.24	34.5507	-635.509	1380.37	-14.3889	-681.338	1155.14	-10.8375	-700.424	1088.91	-54.4141	-635.983	991.293	-44.0864	-617.498	886.979	-72.9247	-681.381	877.383	-112.505	-630.738	800.908
992	0	170.22	-440.387	1553.07	270.462	-441.07	1544.04	158.911	-605.973	1602.3	271.288	-616.156	1595.02	210.306	-685.7	1422.54	189.342	-744.506	1209.77	205.69	-553.096	1351.89	212.181	-496.236	1223.58	284.832	-754.875	1257.15	34.3753	-626.446	1379.34	-14.7318	-672.501	1154.18	-11.1675	-691.825	1088.03	-54.6845	-627.914	990.109	-44.363	-610.215	885.641	-73.3284	-674.082	876.467	-112.822	-623.902	799.652
993	0	170.33	-431.605	1551.64	270.576	-432.408	1542.53	158.854	-597.16	1601.03	271.223	-607.489	1593.67	209.947	-677.067	1421.28	188.779	-736.11	1208.69	205.573	-544.339	1350.67	212.163	-487.577	1222.45	284.367	-746.355	1255.98	34.1187	-617.313	1378.22	-15.1472	-663.591	1153.15	-11.5693	-683.136	1087.06	-55.0236	-619.7	988.87	-44.7042	-602.727	884.265	-73.7952	-666.566	875.478	-113.203	-616.794	798.365
994	0	170.363	-422.784	1550.2	270.612	-423.717	1541.02	158.7	-588.309	1599.71	271.061	-598.796	1592.3	209.503	-668.373	1419.96	188.154	-727.607	1207.53	205.379	-535.501	1349.43	212.087	-478.818	1221.32	283.827	-737.736	1254.75	33.782	-608.113	1377.04	-15.6291	-654.614	1152.05	-12.0371	-674.358	1086.01	-55.4321	-611.341	987.581	-45.1135	-595.026	882.861	-74.321	-658.828	874.417	-113.651	-609.406	797.052
995	0	170.314	-413.925	1548.76	270.565	-414.993	1539.53	158.447	-579.423	1598.38	270.801	-590.075	1590.91	208.978	-659.612	1418.6	187.474	-718.986	1206.29	205.109	-526.579	1348.18	211.952	-469.951	1220.18	283.216	-729.006	1253.46	33.3666	-598.851	1375.81	-16.1719	-645.571	1150.89	-12.5651	-665.49	1084.89	-55.9097	-602.836	986.254	-45.5931	-587.105	881.434	-74.9013	-650.863	873.29	-114.168	-601.736	795.716
996	0	170.178	-405.027	1547.35	270.432	-406.235	1538.06	158.094	-570.503	1597.03	270.443	-581.325	1589.51	208.376	-650.781	1417.19	186.747	-710.235	1204.97	204.761	-517.566	1346.94	211.754	-460.971	1219.05	282.543	-720.156	1252.1	32.8744	-589.531	1374.52	-16.7697	-636.465	1149.66	-13.1472	-656.531	1083.71	-56.4556	-594.183	984.895	-46.144	-578.956	879.994	-75.5312	-642.669	872.103	-114.753	-593.783	794.364
997	0	169.955	-396.09	1545.96	270.209	-397.441	1536.64	157.642	-561.549	1595.69	269.988	-572.545	1588.13	207.704	-641.876	1415.75	185.978	-701.344	1203.59	204.335	-508.459	1345.7	211.49	-451.87	1217.94	281.814	-711.177	1250.69	32.3077	-580.155	1373.19	-17.4173	-627.294	1148.39	-13.7774	-647.477	1082.47	-57.0678	-585.382	983.515	-46.7662	-570.573	878.548	-76.2055	-634.243	870.862	-115.407	-585.547	793.002
998	0	169.642	-387.112	1544.63	269.897	-388.606	1535.28	157.092	-552.562	1594.35	269.436	-563.732	1586.76	206.966	-632.892	1414.3	185.175	-692.3	1202.14	203.833	-499.255	1344.5	211.158	-442.644	1216.85	281.035	-702.06	1249.23	31.6692	-570.727	1371.83	-18.1092	-618.053	1147.07	-14.4496	-638.325	1081.17	-57.7434	-576.429	982.125	-47.4582	-561.952	877.105	-76.9187	-625.584	869.576	-116.127	-577.032	791.635
999	0	169.239	-378.093	1543.37	269.494	-379.729	1533.99	156.447	-543.542	1593.03	268.791	-554.884	1585.42	206.168	-623.827	1412.84	184.344	-683.095	1200.63	203.255	-489.949	1343.33	210.755	-433.287	1215.81	280.213	-692.798	1247.75	30.9621	-561.247	1370.46	-18.8405	-608.739	1145.73	-15.1579	-629.066	1079.85	-58.4789	-567.321	980.737	-48.2172	-553.091	875.675	-77.6653	-616.692	868.257	-116.909	-568.242	790.271
1000	0	168.748	-369.031	1542.18	269.003	-370.805	1532.79	155.71	-534.487	1591.75	268.054	-545.999	1584.13	205.318	-614.676	1411.39	183.49	-673.719	1199.09	202.603	-480.541	1342.21	210.279	-423.796	1214.81	279.356	-683.385	1246.24	30.1902	-551.719	1369.08	-19.6062	-599.344	1144.37	-15.8965	-619.696	1078.49	-59.2697	-558.056	979.363	-49.0393	-543.986	874.268	-78.4396	-607.567	866.916	-117.748	-559.181	788.919
1001	0	168.171	-359.922	1541.1	268.426	-361.832	1531.69	154.885	-525.396	1590.52	267.231	-537.075	1582.89	204.42	-605.438	1409.96	182.621	-664.166	1197.53	201.88	-471.028	1341.16	209.73	-414.168	1213.89	278.472	-673.817	1244.73	29.3581	-542.143	1367.73	-20.4012	-589.863	1143	-16.6594	-610.208	1077.13	-60.1104	-548.632	978.017	-49.9193	-534.639	872.897	-79.2356	-598.211	865.567	-118.637	-549.857	787.589
1002	0	167.512	-350.764	1540.12	267.767	-352.807	1530.71	153.977	-516.267	1589.35	266.326	-528.108	1581.72	203.482	-596.109	1408.56	181.743	-654.43	1195.95	201.09	-461.411	1340.19	209.107	-404.402	1213.04	277.567	-664.091	1243.22	28.4709	-532.52	1366.41	-21.2205	-580.287	1141.66	-17.4411	-600.596	1075.78	-60.9952	-539.045	976.714	-50.851	-525.049	871.576	-80.0477	-588.626	864.227	-119.572	-540.276	786.294
1003	0	166.776	-341.555	1539.26	267.031	-343.726	1529.87	152.993	-507.098	1588.25	265.345	-519.097	1580.64	202.512	-586.689	1407.22	180.863	-644.509	1194.39	200.238	-451.69	1339.31	208.41	-394.499	1212.28	276.65	-654.207	1241.75	27.5344	-522.852	1365.14	-22.0592	-570.609	1140.34	-18.2359	-590.853	1074.45	-61.9174	-529.294	975.469	-51.8272	-515.219	870.318	-80.8703	-578.815	862.913	-120.542	-530.446	785.047
1004	0	165.969	-332.291	1538.55	266.225	-334.586	1529.18	151.939	-497.887	1587.23	264.295	-510.037	1579.65	201.516	-577.177	1405.95	179.988	-634.403	1192.87	199.328	-441.866	1338.54	207.643	-384.46	1211.63	275.731	-644.167	1240.33	26.5553	-513.139	1363.94	-22.9119	-560.825	1139.08	-19.0384	-580.975	1073.16	-62.8701	-519.377	974.299	-52.8402	-505.152	869.14	-81.6978	-568.782	861.643	-121.542	-520.375	783.865
1005	0	165.099	-322.97	1537.98	265.357	-325.384	1528.64	150.823	-488.631	1586.32	263.182	-500.928	1578.77	200.503	-567.572	1404.77	179.125	-624.117	1191.4	198.368	-431.945	1337.88	206.808	-374.289	1211.11	274.817	-633.975	1238.98	25.5409	-503.383	1362.84	-23.7734	-550.927	1137.88	-19.8437	-570.958	1071.94	-63.8457	-509.293	973.221	-53.8813	-494.851	868.059	-82.5251	-558.53	860.436	-122.562	-510.07	782.765
1006	0	164.173	-313.589	1537.58	264.434	-316.119	1528.27	149.653	-479.327	1585.51	262.015	-491.767	1578	199.479	-557.876	1403.7	178.281	-613.657	1190.02	197.364	-421.929	1337.34	205.909	-363.992	1210.71	273.917	-623.638	1237.73	24.499	-493.583	1361.84	-24.6382	-540.914	1136.78	-20.6469	-560.8	1070.8	-64.8368	-499.043	972.25	-54.9416	-484.323	867.091	-83.3475	-548.063	859.312	-123.594	-499.539	781.764
1007	0	163.201	-304.146	1537.34	263.465	-306.788	1528.09	148.437	-469.974	1584.82	260.803	-482.551	1577.36	198.452	-548.089	1402.74	177.465	-603.035	1188.76	196.324	-411.824	1336.94	204.953	-353.576	1210.46	273.04	-613.166	1236.59	23.4381	-483.741	1360.97	-25.5012	-530.784	1135.78	-21.4439	-550.503	1069.76	-65.8357	-488.627	971.402	-56.0119	-473.572	866.256	-84.1606	-537.386	858.29	-124.63	-488.787	780.882
1008	0	162.192	-294.64	1537.28	262.461	-297.389	1528.09	147.186	-460.568	1584.26	259.554	-473.28	1576.86	197.431	-538.215	1401.92	176.682	-592.264	1187.63	195.258	-401.639	1336.69	203.945	-343.049	1210.35	272.194	-602.572	1235.6	22.3669	-473.857	1360.24	-26.3571	-520.536	1134.91	-22.2311	-540.068	1068.84	-66.8349	-478.048	970.694	-57.0828	-462.606	865.569	-84.961	-526.503	857.39	-125.662	-477.819	780.139
1009	0	161.157	-285.069	1537.4	261.431	-287.924	1528.28	145.908	-451.11	1583.83	258.277	-463.952	1576.5	196.42	-528.258	1401.25	175.939	-581.362	1186.66	194.174	-391.38	1336.58	202.894	-332.424	1210.41	271.385	-591.87	1234.76	21.2943	-463.933	1359.68	-27.2012	-510.174	1134.18	-23.0056	-529.499	1068.06	-67.827	-467.309	970.14	-58.1451	-451.432	865.048	-85.7458	-515.42	856.629	-126.682	-466.64	779.552
1010	0	160.106	-275.434	1537.71	260.386	-278.391	1528.67	144.613	-441.598	1583.54	256.984	-454.568	1576.29	195.428	-518.223	1400.74	175.24	-570.35	1185.87	193.082	-381.057	1336.61	201.808	-321.713	1210.61	270.617	-581.079	1234.11	20.2291	-453.968	1359.28	-28.0295	-499.703	1133.61	-23.7656	-518.804	1067.43	-68.8052	-456.414	969.752	-59.1899	-440.058	864.707	-86.513	-504.141	856.024	-127.682	-455.25	779.14
1011	0	159.049	-265.736	1538.19	259.336	-268.792	1529.26	143.313	-432.033	1583.39	255.683	-445.128	1576.23	194.459	-508.115	1400.4	174.588	-559.249	1185.28	191.992	-370.681	1336.8	200.699	-310.931	1210.98	269.894	-570.219	1233.64	19.18	-443.962	1359.07	-28.8387	-489.129	1133.22	-24.5102	-507.992	1066.96	-69.7631	-445.368	969.541	-60.2086	-428.493	864.56	-87.2618	-492.672	855.588	-128.656	-443.651	778.917
1012	0	157.999	-255.977	1538.86	258.293	-259.129	1530.03	142.017	-422.414	1583.38	254.386	-435.633	1576.31	193.517	-497.941	1400.24	173.981	-548.083	1184.9	190.915	-360.263	1337.13	199.577	-300.094	1211.49	269.214	-559.313	1233.38	18.1548	-433.916	1359.04	-29.6265	-478.461	1133.01	-25.2399	-497.073	1066.67	-70.6951	-434.18	969.515	-61.1933	-416.746	864.617	-87.9919	-481.017	855.332	-129.597	-431.843	778.897
1013	0	156.966	-246.16	1539.7	257.267	-249.406	1530.99	140.735	-412.745	1583.51	253.102	-426.086	1576.55	192.607	-487.711	1400.25	173.418	-536.879	1184.75	189.86	-349.815	1337.61	198.455	-289.221	1212.14	268.576	-548.385	1233.32	17.161	-423.829	1359.2	-30.3922	-467.709	1132.98	-25.9562	-486.061	1066.57	-71.5966	-422.854	969.678	-62.1372	-404.826	864.884	-88.7041	-469.182	855.263	-130.499	-419.824	779.088
1014	0	155.961	-236.288	1540.7	256.268	-239.626	1532.12	139.478	-403.026	1583.77	251.841	-416.489	1576.92	191.731	-477.432	1400.45	172.891	-525.662	1184.82	188.837	-339.349	1338.22	197.346	-278.33	1212.92	267.972	-537.46	1233.48	16.205	-413.699	1359.55	-31.1363	-456.883	1133.15	-26.6621	-474.969	1066.65	-72.4636	-411.401	970.034	-63.0339	-392.744	865.367	-89.4001	-457.173	855.386	-131.359	-407.593	779.496
1015	0	154.995	-226.367	1541.86	255.309	-229.796	1533.42	138.257	-393.261	1584.17	250.614	-406.848	1577.44	190.888	-467.115	1400.82	172.392	-514.458	1185.11	187.855	-328.878	1338.95	196.264	-267.443	1213.82	267.393	-526.565	1233.84	15.2921	-403.525	1360.08	-31.8606	-445.995	1133.5	-27.362	-463.811	1066.91	-73.2933	-399.829	970.581	-63.8785	-380.51	866.065	-90.0824	-444.996	855.7	-132.171	-395.147	780.122
1016	0	154.08	-216.4	1543.17	254.398	-219.922	1534.87	137.079	-383.453	1584.69	249.429	-397.165	1578.07	190.08	-456.77	1401.36	171.908	-503.292	1185.62	186.923	-318.415	1339.79	195.222	-256.579	1214.81	266.829	-515.727	1234.41	14.4269	-393.305	1360.79	-32.5688	-435.056	1134.05	-28.0612	-452.6	1067.36	-74.0839	-388.146	971.315	-64.6671	-368.134	866.973	-90.7543	-432.657	856.203	-132.933	-382.485	780.963
1017	0	153.225	-206.396	1544.6	253.546	-210.01	1536.44	135.954	-373.607	1585.32	248.296	-387.447	1578.83	189.305	-446.407	1402.06	171.425	-492.189	1186.33	186.048	-307.973	1340.74	194.236	-245.761	1215.88	266.263	-504.969	1235.16	13.6126	-383.038	1361.67	-33.2655	-424.074	1134.77	-28.766	-441.351	1067.98	-74.8343	-376.361	972.229	-65.3967	-355.629	868.084	-91.4197	-420.163	856.888	-133.641	-369.608	782.012
1018	0	152.442	-196.358	1546.14	252.763	-200.069	1538.13	134.89	-363.727	1586.06	247.222	-377.699	1579.69	188.561	-436.039	1402.92	170.927	-481.17	1187.23	185.238	-297.565	1341.76	193.318	-235.008	1217.01	265.683	-494.316	1236.09	12.8516	-372.724	1362.69	-33.9565	-413.059	1135.65	-29.4836	-430.075	1068.77	-75.544	-364.485	973.312	-66.0655	-343.006	869.387	-92.0829	-407.521	857.745	-134.295	-356.514	783.259
1019	0	151.738	-186.295	1547.77	252.057	-190.108	1539.91	133.895	-353.817	1586.9	246.214	-367.928	1580.64	187.845	-425.675	1403.92	170.401	-470.258	1188.3	184.497	-287.202	1342.86	192.48	-224.342	1218.18	265.073	-483.789	1237.18	12.1453	-362.362	1363.85	-34.6483	-402.017	1136.69	-30.2215	-418.782	1069.71	-76.2135	-352.524	974.554	-66.6725	-330.276	870.865	-92.7485	-394.74	858.762	-134.893	-343.209	784.689
1020	0	151.122	-176.213	1549.48	251.436	-180.135	1541.76	132.973	-343.883	1587.81	245.278	-358.14	1581.68	187.154	-415.328	1405.05	169.832	-459.469	1189.53	183.831	-276.895	1344.02	191.734	-213.78	1219.37	264.42	-473.408	1238.41	11.4942	-351.954	1365.12	-35.3477	-390.952	1137.87	-30.987	-407.48	1070.78	-76.8433	-340.487	975.938	-67.2176	-317.452	872.503	-93.4212	-381.827	859.926	-135.436	-329.698	786.286
1021	0	150.602	-166.118	1551.25	250.907	-170.158	1543.65	132.132	-333.929	1588.8	244.419	-348.343	1582.77	186.486	-405.007	1406.3	169.208	-448.821	1190.88	183.243	-266.654	1345.22	191.089	-203.34	1220.56	263.71	-463.188	1239.76	10.8983	-341.503	1366.49	-36.0609	-379.867	1139.16	-31.7871	-396.174	1071.98	-77.4341	-328.381	977.451	-67.7013	-304.545	874.281	-94.1056	-368.79	861.222	-135.923	-315.987	788.032
1022	0	150.184	-156.018	1553.05	250.475	-160.188	1545.58	131.373	-323.962	1589.86	243.64	-338.543	1583.92	185.837	-394.723	1407.64	168.521	-438.325	1192.34	182.734	-256.49	1346.45	190.551	-193.037	1221.74	262.936	-453.139	1241.21	10.357	-331.014	1367.94	-36.7938	-368.763	1140.55	-32.6276	-384.867	1073.28	-77.9869	-316.211	979.077	-68.1245	-291.568	876.179	-94.806	-355.639	862.634	-136.355	-302.088	789.907
1023	0	149.872	-145.919	1554.88	250.146	-150.234	1547.51	130.701	-313.985	1590.96	242.945	-328.747	1585.11	185.206	-384.486	1409.07	167.767	-427.992	1193.89	182.306	-246.41	1347.69	190.125	-182.881	1222.89	262.091	-443.27	1242.76	9.86945	-320.495	1369.46	-37.5507	-357.638	1142.03	-33.513	-373.561	1074.66	-78.502	-303.983	980.798	-68.4886	-278.534	878.175	-95.5259	-342.384	864.148	-136.733	-288.014	791.894
1024	0	149.67	-135.828	1556.72	249.922	-140.303	1549.43	130.117	-304.004	1592.1	242.334	-318.962	1586.33	184.59	-374.303	1410.56	166.943	-417.829	1195.51	181.956	-236.421	1348.94	189.811	-172.883	1224.01	261.173	-433.583	1244.37	9.43447	-309.953	1371.01	-38.3346	-346.491	1143.57	-34.446	-362.254	1076.11	-78.9801	-291.703	982.599	-68.7952	-265.454	880.251	-96.2677	-329.032	865.748	-137.06	-273.781	793.974
1025	0	149.579	-125.751	1558.54	249.805	-130.403	1551.32	129.621	-294.024	1593.27	241.808	-309.193	1587.56	183.99	-364.183	1412.11	166.054	-407.84	1197.18	181.685	-226.527	1350.18	189.609	-163.046	1225.09	260.184	-424.077	1246.03	9.05077	-299.4	1372.59	-39.1464	-335.321	1145.15	-35.4272	-350.944	1077.62	-79.421	-279.374	984.464	-69.0459	-252.339	882.387	-97.0329	-315.596	867.422	-137.336	-259.404	796.131
1026	0	149.6	-115.695	1560.33	249.795	-120.543	1553.17	129.214	-284.051	1594.46	241.366	-299.448	1588.79	183.404	-354.131	1413.7	165.104	-398.023	1198.88	181.488	-216.733	1351.41	189.514	-153.373	1226.12	259.13	-414.749	1247.72	8.71698	-288.846	1374.19	-39.9851	-324.126	1146.77	-36.4548	-339.63	1079.16	-79.8246	-267.002	986.378	-69.2425	-239.199	884.565	-97.8214	-302.084	869.155	-137.564	-244.904	798.349
1027	0	149.729	-105.665	1562.09	249.89	-110.729	1554.95	128.894	-274.09	1595.66	241.008	-289.731	1590.02	182.834	-344.153	1415.31	164.104	-388.377	1200.59	181.362	-207.041	1352.61	189.521	-143.859	1227.11	258.017	-405.588	1249.44	8.43168	-278.305	1375.78	-40.8477	-312.907	1148.41	-37.5251	-328.307	1080.72	-80.1904	-254.59	988.326	-69.3866	-226.046	886.769	-98.6315	-288.507	870.936	-137.744	-230.298	800.616
1028	0	149.965	-95.6671	1563.79	250.088	-100.966	1556.66	128.658	-264.146	1596.85	240.731	-280.048	1591.22	182.281	-334.252	1416.93	163.064	-378.895	1202.31	181.304	-197.451	1353.78	189.621	-134.501	1228.05	256.858	-396.585	1251.15	8.19345	-267.788	1377.37	-41.7293	-301.666	1150.04	-38.6317	-316.974	1082.29	-80.5177	-242.143	990.296	-69.4797	-212.887	888.985	-99.4597	-274.874	872.753	-137.88	-215.608	802.919
1029	0	150.303	-85.7074	1565.42	250.383	-91.2596	1558.29	128.505	-254.226	1598.02	240.533	-270.404	1592.39	181.746	-324.432	1418.54	161.996	-369.566	1204.02	181.307	-187.962	1354.91	189.806	-125.288	1228.95	255.664	-387.724	1252.85	8.00088	-257.307	1378.93	-42.6234	-290.406	1151.67	-39.7668	-305.63	1083.85	-80.8059	-229.669	992.273	-69.5233	-199.73	891.201	-100.301	-261.197	874.595	-137.971	-200.853	805.249
1030	0	150.736	-75.7908	1566.98	250.771	-81.6135	1559.82	128.432	-244.333	1599.17	240.411	-260.801	1593.52	181.234	-314.694	1420.12	160.913	-360.38	1205.7	181.368	-178.572	1356	190.064	-116.209	1229.8	254.45	-378.992	1254.53	7.85256	-246.873	1380.45	-43.522	-279.133	1153.26	-40.9206	-294.276	1085.39	-81.0541	-217.172	994.248	-69.5191	-186.582	893.404	-101.149	-247.485	876.451	-138.019	-186.051	807.596
1031	0	151.257	-65.9222	1568.45	251.246	-72.0304	1561.24	128.434	-234.475	1600.29	240.362	-251.245	1594.59	180.746	-305.037	1421.67	159.827	-351.322	1207.34	181.479	-169.277	1357.03	190.386	-107.253	1230.6	253.231	-370.371	1256.16	7.74712	-236.496	1381.93	-44.4163	-267.856	1154.83	-42.0825	-282.913	1086.9	-81.262	-204.66	996.206	-69.4685	-173.45	895.585	-101.995	-233.747	878.31	-138.024	-171.221	809.95
1032	0	151.86	-56.1059	1569.82	251.799	-62.5121	1562.55	128.508	-224.655	1601.35	240.383	-241.736	1595.6	180.287	-295.46	1423.16	158.75	-342.377	1208.93	181.636	-160.072	1358.01	190.759	-98.4042	1231.35	252.019	-361.844	1257.74	7.68329	-226.185	1383.36	-45.2973	-256.583	1156.34	-43.2408	-271.544	1088.36	-81.4291	-192.142	998.138	-69.3729	-160.337	897.735	-102.83	-219.993	880.159	-137.986	-156.38	812.304
1033	0	152.534	-46.3454	1571.09	252.423	-53.0589	1563.74	128.651	-214.879	1602.36	240.469	-232.278	1596.54	179.86	-285.961	1424.59	157.694	-333.531	1210.46	181.834	-150.951	1358.91	191.173	-89.6507	1232.04	250.83	-353.395	1259.24	7.65988	-215.946	1384.72	-46.1555	-245.326	1157.79	-44.3839	-260.175	1089.77	-81.5551	-179.625	1000.03	-69.2336	-147.247	899.847	-103.643	-206.232	881.988	-137.904	-141.541	814.649
1034	0	153.272	-36.6437	1572.25	253.109	-43.6704	1564.81	128.857	-205.151	1603.29	240.617	-222.872	1597.39	179.47	-276.536	1425.94	156.668	-324.769	1211.91	182.068	-141.907	1359.74	191.616	-80.9789	1232.67	249.677	-345.008	1260.66	7.67591	-205.786	1386.01	-46.9819	-234.095	1159.17	-45.5003	-248.813	1091.1	-81.64	-167.119	1001.87	-69.0519	-134.183	901.912	-104.423	-192.473	883.785	-137.778	-126.72	816.975
1035	0	154.064	-27.0027	1573.29	253.85	-34.3448	1565.76	129.123	-195.474	1604.14	240.823	-213.517	1598.14	179.122	-267.182	1427.19	155.682	-316.076	1213.27	182.333	-132.932	1360.48	192.079	-72.3768	1233.23	248.573	-336.667	1261.99	7.73061	-195.709	1387.22	-47.768	-222.903	1160.47	-46.579	-237.463	1092.36	-81.6836	-154.632	1003.66	-68.8285	-121.147	903.923	-105.16	-178.724	885.535	-137.604	-111.927	819.273
1036	0	154.901	-17.4235	1574.22	254.636	-25.0794	1566.57	129.444	-185.853	1604.9	241.085	-204.214	1598.8	178.819	-257.893	1428.34	154.745	-307.441	1214.54	182.624	-124.019	1361.13	192.552	-63.8331	1233.71	247.53	-328.359	1263.21	7.82345	-185.719	1388.33	-48.5059	-211.761	1161.67	-47.6098	-226.134	1093.51	-81.6856	-142.173	1005.37	-68.5637	-108.141	905.873	-105.841	-164.993	887.228	-137.381	-97.173	821.533
1037	0	155.774	-7.9062	1575.01	255.459	-15.8706	1567.26	129.816	-176.288	1605.56	241.398	-194.961	1599.34	178.566	-248.664	1429.38	153.867	-298.854	1215.69	182.939	-115.159	1361.69	193.027	-55.3374	1234.09	246.56	-320.071	1264.31	7.95422	-175.817	1389.33	-49.1888	-200.678	1162.77	-48.5835	-214.833	1094.56	-81.6456	-129.751	1007.01	-68.2573	-95.1651	907.755	-106.456	-151.286	888.851	-137.106	-82.4677	823.744
1038	0	156.675	1.54996	1575.68	256.311	-6.71396	1567.81	130.236	-166.782	1606.1	241.76	-185.756	1599.76	178.37	-239.49	1430.29	153.055	-290.304	1216.73	183.274	-106.345	1362.13	193.497	-46.8803	1234.37	245.675	-311.791	1265.28	8.12298	-166.006	1390.22	-49.8105	-189.664	1163.75	-49.4919	-203.566	1095.5	-81.5627	-117.374	1008.55	-67.9084	-82.2215	909.562	-106.994	-137.612	890.392	-136.773	-67.8187	825.896
1039	0	157.594	10.9467	1576.22	257.184	2.39584	1568.22	130.7	-157.334	1606.53	242.166	-176.597	1600.05	178.233	-230.364	1431.06	152.32	-281.785	1217.65	183.627	-97.5693	1362.46	193.957	-38.4528	1234.54	244.884	-303.511	1266.12	8.3301	-156.288	1390.99	-50.3658	-178.726	1164.61	-50.3281	-192.341	1096.3	-81.4354	-105.049	1009.99	-67.5151	-69.3112	911.287	-107.446	-123.976	891.841	-136.381	-53.2329	827.978
1040	0	158.526	20.2866	1576.63	258.071	11.4645	1568.51	131.204	-147.945	1606.82	242.615	-167.48	1600.22	178.161	-221.28	1431.7	151.669	-273.291	1218.42	183.998	-88.8239	1362.67	194.402	-30.0463	1234.59	244.199	-295.222	1266.82	8.57628	-146.662	1391.62	-50.85	-167.868	1165.34	-51.086	-181.162	1096.97	-81.2619	-92.7815	1011.33	-67.0751	-56.4357	912.924	-107.805	-110.384	893.187	-135.923	-38.7163	829.981
1041	0	159.462	29.5728	1576.9	258.966	20.4981	1568.66	131.744	-138.613	1606.98	243.104	-158.4	1600.24	178.158	-212.235	1432.18	151.112	-264.817	1219.06	184.386	-80.1021	1362.76	194.831	-21.6524	1234.52	243.627	-286.917	1267.38	8.86248	-137.13	1392.12	-51.2592	-157.094	1165.93	-51.7605	-170.035	1097.5	-81.0396	-80.5779	1012.56	-66.5851	-43.5974	914.467	-108.063	-96.8409	894.423	-135.396	-24.2741	831.894
1042	0	160.398	38.8092	1577.03	259.864	29.503	1568.67	132.32	-129.337	1607	243.63	-149.355	1600.13	178.229	-203.221	1432.52	150.658	-256.359	1219.55	184.79	-71.3972	1362.72	195.241	-13.263	1234.31	243.179	-278.591	1267.78	9.18998	-127.691	1392.48	-51.59	-146.405	1166.38	-52.3475	-158.963	1097.89	-80.7655	-68.4426	1013.67	-66.0413	-30.799	915.91	-108.215	-83.3526	895.543	-134.795	-9.9109	833.711
1043	0	161.328	48	1577.03	260.759	38.4856	1568.56	132.927	-120.112	1606.88	244.192	-140.339	1599.87	178.377	-194.235	1432.71	150.315	-247.915	1219.89	185.213	-62.7033	1362.54	195.635	-4.87041	1233.97	242.86	-270.237	1268.04	9.56029	-118.345	1392.69	-51.8394	-135.803	1166.68	-52.8435	-147.95	1098.12	-80.436	-56.3797	1014.65	-65.4395	-18.0441	917.248	-108.258	-69.9236	896.541	-134.117	4.36921	835.425
1044	0	162.248	57.1498	1576.89	261.65	47.4521	1568.32	133.565	-110.937	1606.62	244.79	-131.347	1599.48	178.604	-185.272	1432.74	150.091	-239.48	1220.08	185.655	-54.0148	1362.24	196.015	3.53294	1233.49	242.678	-261.854	1268.15	9.97515	-109.09	1392.76	-52.0046	-125.287	1166.83	-53.2457	-136.999	1098.2	-80.0473	-44.3923	1015.51	-64.7752	-5.33701	918.479	-108.187	-56.5586	897.416	-133.357	18.5622	837.032
1045	0	163.156	66.2631	1576.62	262.532	56.4083	1567.95	134.232	-101.807	1606.22	245.422	-122.374	1598.95	178.914	-176.327	1432.62	149.993	-231.05	1220.11	186.12	-45.3266	1361.8	196.385	11.9539	1232.88	242.637	-253.436	1268.11	10.4365	-99.9232	1392.67	-52.0831	-114.854	1166.83	-53.5518	-126.111	1098.13	-79.5952	-32.4834	1016.24	-64.0436	7.31722	919.598	-108.003	-43.2624	898.166	-132.513	32.6642	838.528
1046	0	164.05	75.3447	1576.21	263.405	65.3597	1567.46	134.928	-92.7189	1605.67	246.088	-113.416	1598.29	179.309	-167.398	1432.35	150.026	-222.623	1219.99	186.611	-36.634	1361.24	196.75	20.3987	1232.15	242.74	-244.982	1267.92	10.9464	-90.8411	1392.44	-52.0727	-104.502	1166.69	-53.7601	-115.288	1097.92	-79.0754	-20.6554	1016.85	-63.2403	19.913	920.604	-107.703	-30.0399	898.79	-131.58	46.6709	839.912
1047	0	164.929	84.399	1575.68	264.268	74.3114	1566.84	135.653	-83.668	1604.99	246.789	-104.466	1597.5	179.79	-158.481	1431.93	150.194	-214.192	1219.72	187.131	-27.9327	1360.55	197.116	28.8728	1231.3	242.989	-236.488	1267.58	11.507	-81.8387	1392.06	-51.9713	-94.2293	1166.39	-53.8688	-104.532	1097.56	-78.4839	-8.91078	1017.32	-62.3611	32.4441	921.496	-107.288	-16.8962	899.292	-130.558	60.5776	841.184
1048	0	165.795	93.4303	1575.01	265.123	83.2676	1566.12	136.409	-74.6501	1604.18	247.527	-95.5223	1596.59	180.357	-149.572	1431.37	150.498	-205.753	1219.3	187.684	-19.2187	1359.74	197.491	37.3811	1230.33	243.382	-227.952	1267.11	12.1203	-72.9098	1391.55	-51.7771	-84.0329	1165.96	-53.8769	-93.8445	1097.05	-77.8169	2.74834	1017.67	-61.4022	44.9038	922.275	-106.758	-3.83692	899.672	-129.443	74.3793	842.345
1049	0	166.648	102.443	1574.23	265.971	92.2321	1565.28	137.196	-65.6609	1603.25	248.302	-86.5789	1595.56	181.01	-140.669	1430.67	150.939	-197.299	1218.74	188.276	-10.4879	1358.82	197.883	45.9275	1229.26	243.918	-219.373	1266.5	12.7883	-64.0468	1390.89	-51.4884	-73.9101	1165.39	-53.7832	-83.2276	1096.42	-77.0709	14.3196	1017.89	-60.3605	57.2852	922.942	-106.114	9.13182	899.934	-128.235	88.07	843.396
1050	0	167.492	111.44	1573.33	266.814	101.208	1564.34	138.017	-56.6963	1602.2	249.117	-77.6326	1594.44	181.748	-131.769	1429.83	151.514	-188.824	1218.04	188.91	-1.73661	1357.79	198.3	54.5158	1228.09	244.591	-210.747	1265.76	13.513	-55.2408	1390.11	-51.104	-63.8585	1164.69	-53.587	-72.6826	1095.65	-76.2434	25.8007	1017.99	-59.2336	69.5808	923.497	-105.359	22.0035	900.083	-126.932	101.643	844.341
1051	0	168.33	120.424	1572.32	267.657	110.198	1563.31	138.875	-47.752	1601.04	249.974	-68.6798	1593.21	182.57	-122.87	1428.88	152.219	-180.318	1217.2	189.591	7.03896	1356.66	198.752	63.1491	1226.84	245.396	-202.073	1264.89	14.2959	-46.4817	1389.21	-50.6232	-53.8759	1163.86	-53.2875	-62.2112	1094.77	-75.3323	37.1889	1017.97	-58.02	81.7834	923.943	-104.492	34.7708	900.122	-125.534	115.091	845.181
1052	0	169.168	129.4	1571.22	268.503	119.203	1562.18	139.772	-38.8241	1599.8	250.877	-59.7175	1591.91	183.474	-113.967	1427.81	153.049	-171.776	1216.24	190.324	15.8426	1355.44	199.248	71.8307	1225.52	246.323	-193.349	1263.9	15.1383	-37.7581	1388.2	-50.0455	-43.9601	1162.93	-52.8844	-51.8152	1093.78	-74.3364	48.4816	1017.84	-56.7193	93.8853	924.284	-103.516	47.4261	900.056	-124.041	128.406	845.918
1053	0	170.009	138.37	1570.02	269.358	128.225	1560.97	140.712	-29.9088	1598.47	251.828	-50.7433	1590.53	184.456	-105.058	1426.63	153.995	-163.186	1215.16	191.113	24.6782	1354.15	199.797	80.5639	1224.14	247.363	-184.572	1262.79	16.0412	-29.0576	1387.09	-49.371	-34.109	1161.89	-52.3773	-41.4957	1092.69	-73.2555	59.6759	1017.6	-55.3317	105.879	924.522	-102.432	59.9612	899.889	-122.455	141.579	846.554
1054	0	170.861	147.336	1568.74	270.226	137.266	1559.69	141.699	-21.0024	1597.08	252.831	-41.7547	1589.09	185.513	-96.1405	1425.36	155.049	-154.541	1213.97	191.963	33.5497	1352.79	200.408	89.3521	1222.71	248.506	-175.741	1261.59	17.0054	-20.3669	1385.89	-48.6005	-24.3205	1160.75	-51.7662	-31.2541	1091.51	-72.0901	70.769	1017.25	-53.8585	117.757	924.659	-101.244	72.3672	899.624	-120.778	154.6	847.091
1055	0	171.729	156.3	1567.4	271.114	146.325	1558.35	142.735	-12.1015	1595.63	253.89	-32.75	1587.61	186.642	-87.2097	1424.01	156.199	-145.831	1212.68	192.877	42.4611	1351.38	201.09	98.1992	1221.25	249.74	-166.853	1260.28	18.0311	-11.6724	1384.61	-47.7352	-14.5923	1159.53	-51.0515	-21.091	1090.25	-70.8414	81.7579	1016.81	-52.302	129.512	924.699	-99.9529	84.6352	899.266	-119.011	167.46	847.527
1056	0	172.62	165.265	1566.01	272.027	155.403	1556.96	143.826	-3.20268	1594.15	255.006	-23.7275	1586.09	187.837	-78.2622	1422.58	157.436	-137.048	1211.29	193.859	51.4165	1349.94	201.85	107.109	1219.77	251.053	-157.905	1258.88	19.1181	-2.96	1383.26	-46.7767	-4.9215	1158.24	-50.2337	-11.0064	1088.92	-69.5115	92.6399	1016.27	-50.6652	141.137	924.644	-98.5621	96.7557	898.819	-117.158	180.147	847.864
1057	0	173.54	174.233	1564.58	272.971	164.501	1555.53	144.973	5.69729	1592.64	256.183	-14.686	1584.55	189.096	-69.2939	1421.09	158.747	-128.182	1209.82	194.911	60.42	1348.47	202.695	116.088	1218.28	252.432	-148.894	1257.4	20.266	5.78429	1381.85	-45.7272	4.69513	1156.89	-49.3139	-0.999762	1087.53	-68.103	103.413	1015.64	-48.9519	152.625	924.496	-97.075	108.719	898.286	-115.224	192.651	848.098
1058	0	174.494	183.206	1563.13	273.951	173.618	1554.07	146.181	14.6015	1591.13	257.423	-5.62412	1583.01	190.412	-60.3006	1419.55	160.121	-119.225	1208.28	196.034	69.4756	1346.99	203.631	125.139	1216.8	253.866	-139.818	1255.85	21.4739	14.574	1380.41	-44.5893	14.2617	1155.49	-48.2934	8.9305	1086.1	-66.6192	114.074	1014.93	-47.1666	163.969	924.257	-95.4952	120.516	897.67	-113.212	204.961	848.227
1059	0	175.489	192.187	1561.68	274.973	182.754	1552.6	147.451	23.513	1589.62	258.729	3.45907	1581.47	191.782	-51.2778	1417.99	161.548	-110.169	1206.68	197.231	78.5871	1345.52	204.664	134.267	1215.34	255.343	-130.674	1254.24	22.7404	23.4218	1378.94	-43.3657	23.7832	1154.05	-47.1737	18.7869	1084.64	-65.0633	124.622	1014.15	-45.3142	175.162	923.928	-93.8271	132.135	896.976	-111.129	217.065	848.249
1060	0	176.529	201.177	1560.23	276.04	191.911	1551.14	148.785	32.4347	1588.15	260.1	12.5646	1579.96	193.2	-42.2211	1416.4	163.017	-101.008	1205.03	198.501	87.7582	1344.07	205.797	143.479	1213.92	256.854	-121.457	1252.58	24.0637	32.3393	1377.46	-42.0596	33.2655	1152.6	-45.9568	28.5728	1083.16	-63.4394	135.056	1013.29	-43.4002	186.197	923.511	-92.0756	143.569	896.207	-108.982	228.953	848.158
1061	0	177.618	210.179	1558.82	277.157	201.088	1549.7	150.185	41.3692	1586.71	261.539	21.6933	1578.49	194.662	-33.126	1414.81	164.521	-91.7348	1203.36	199.843	96.9922	1342.65	207.032	152.779	1212.54	258.389	-112.165	1250.89	25.4416	41.3367	1375.98	-40.674	42.7154	1151.13	-44.6449	38.2928	1081.67	-61.7511	145.374	1012.38	-41.4305	197.069	923.008	-90.246	154.806	895.369	-106.776	240.611	847.953
1062	0	178.76	219.195	1557.46	278.327	210.286	1548.3	151.65	50.3194	1585.34	263.044	30.8462	1577.07	196.163	-23.9883	1413.24	166.051	-82.3457	1201.66	201.255	106.292	1341.3	208.368	162.17	1211.23	259.94	-102.794	1249.18	26.8716	50.4221	1374.51	-39.212	52.1409	1149.67	-43.2403	47.9521	1080.19	-60.0026	155.577	1011.41	-39.411	207.77	922.419	-88.3444	165.837	894.465	-104.521	252.029	847.627
1063	0	179.955	228.228	1556.16	279.55	219.507	1546.94	153.181	59.2875	1584.05	264.614	40.0241	1575.72	197.701	-14.8038	1411.7	167.603	-72.8368	1199.97	202.736	115.659	1340.01	209.806	171.658	1210.01	261.502	-93.3412	1247.47	28.3505	59.602	1373.09	-37.6767	61.5503	1148.23	-41.7456	57.5568	1078.74	-58.1978	165.665	1010.39	-37.3482	218.295	921.748	-86.377	176.652	893.504	-102.223	263.194	847.18
1064	0	181.205	237.28	1554.95	280.827	228.75	1545.67	154.777	68.2758	1582.84	266.248	49.2279	1574.46	199.269	-5.56895	1410.21	169.172	-63.2057	1198.29	204.28	125.096	1338.81	211.34	181.245	1208.88	263.069	-83.8032	1245.77	29.8749	68.8805	1371.71	-36.0709	70.9526	1146.83	-40.1632	67.1131	1077.33	-56.3405	175.637	1009.34	-35.2484	228.637	920.997	-84.3506	187.243	892.491	-99.8929	274.093	846.609
1065	0	182.508	246.354	1553.84	282.158	238.017	1544.48	156.433	77.2862	1581.75	267.943	58.4585	1573.28	200.865	3.71959	1408.78	170.755	-53.4519	1196.65	205.883	134.604	1337.71	212.967	190.933	1207.87	264.64	-74.1781	1244.11	31.441	78.2592	1370.4	-34.3973	80.3569	1145.48	-38.4959	76.6278	1075.98	-54.4347	185.495	1008.26	-33.1182	238.792	920.17	-82.272	197.6	891.436	-97.538	284.714	845.912
1066	0	183.864	255.45	1552.85	283.54	247.31	1543.4	158.149	86.3203	1580.78	269.696	67.7168	1572.22	202.485	13.0644	1407.44	172.354	-43.5765	1195.07	207.538	144.182	1336.73	214.678	200.724	1206.98	266.212	-64.4644	1242.5	33.0446	87.7379	1369.18	-32.6585	89.7717	1144.21	-36.7462	86.107	1074.7	-52.4842	195.237	1007.17	-30.9642	248.752	919.271	-80.1484	207.714	890.349	-95.1679	295.044	845.093
1067	0	185.267	264.572	1552	284.971	256.63	1542.44	159.92	95.3793	1579.94	271.501	77.0034	1571.28	204.126	22.4675	1406.2	173.966	-33.5823	1193.57	209.24	153.829	1335.88	216.465	210.617	1206.24	267.787	-54.6617	1240.98	34.681	97.3137	1368.06	-30.8569	99.2049	1143.02	-34.9171	95.5566	1073.51	-50.4928	204.866	1006.08	-28.7928	258.512	918.308	-77.9866	217.578	889.24	-92.7919	305.071	844.152
1068	0	186.714	273.72	1551.31	286.445	265.978	1541.63	161.742	104.464	1579.25	273.356	86.3189	1570.47	205.785	31.9299	1405.09	175.594	-23.4743	1192.17	210.98	163.544	1335.18	218.316	220.609	1205.65	269.363	-44.7711	1239.55	36.3453	106.982	1367.06	-28.9951	108.663	1141.94	-33.0111	104.982	1072.43	-48.4644	214.379	1004.99	-26.6107	268.068	917.288	-75.7936	227.184	888.122	-90.4193	314.781	843.097
1069	0	188.199	282.895	1550.78	287.957	275.355	1540.97	163.608	113.574	1578.73	275.253	95.6638	1569.81	207.458	41.452	1404.1	177.239	-13.2596	1190.9	212.75	173.322	1334.63	220.221	230.697	1205.22	270.945	-34.7948	1238.24	38.0323	116.735	1366.2	-27.0756	118.15	1140.98	-31.0312	114.385	1071.47	-46.4032	223.776	1003.93	-24.4243	277.414	916.22	-73.5759	236.524	887.008	-88.0594	324.164	841.936
1070	0	189.714	292.097	1550.44	289.499	284.763	1540.49	165.514	122.711	1578.37	277.187	105.038	1569.3	209.142	51.0328	1403.27	178.904	-2.94754	1189.77	214.541	183.161	1334.24	222.165	240.875	1204.97	272.536	-24.7368	1237.07	39.7363	126.565	1365.49	-25.1013	127.668	1140.15	-28.9804	123.77	1070.65	-44.3134	233.057	1002.91	-22.2398	286.545	915.117	-71.3396	245.594	885.911	-85.7211	333.209	840.678
1071	0	191.252	301.327	1550.28	291.065	294.202	1540.18	167.454	131.871	1578.2	279.151	114.442	1568.95	210.836	60.6704	1402.61	180.591	7.45021	1188.81	216.343	193.055	1334.02	224.135	251.135	1204.91	274.137	-14.6027	1236.07	41.4515	136.46	1364.94	-23.0754	137.217	1139.47	-26.8623	133.135	1069.98	-42.1996	242.218	1001.93	-20.0633	295.459	913.989	-69.0905	254.388	884.845	-83.4128	341.907	839.336
1072	0	192.804	310.584	1550.33	292.644	303.671	1540.06	169.42	141.055	1578.2	281.14	123.874	1568.76	212.535	70.3618	1402.12	182.301	17.9197	1188.04	218.146	202.997	1333.98	226.115	261.464	1205.02	275.755	-4.39978	1235.26	43.172	146.41	1364.56	-21.0016	146.793	1138.95	-24.6805	142.48	1069.47	-40.0667	251.257	1001.01	-17.9007	304.151	912.85	-66.834	262.902	883.826	-81.1424	350.249	837.926
1073	0	194.36	319.865	1550.58	294.228	313.171	1540.14	171.406	150.259	1578.4	283.145	133.334	1568.74	214.236	80.1025	1401.81	184.036	28.445	1187.48	219.942	212.98	1334.12	228.09	271.851	1205.33	277.392	5.86292	1234.65	44.8916	156.4	1364.37	-18.8845	156.39	1138.6	-22.4397	151.799	1069.14	-37.92	260.171	1000.16	-15.7576	312.62	911.715	-64.5747	271.135	882.865	-78.9168	358.232	836.464
1074	0	195.911	329.168	1551.04	295.806	322.701	1540.41	173.406	159.482	1578.78	285.16	142.821	1568.89	215.938	89.887	1401.7	185.798	39.0078	1187.13	221.719	222.996	1334.44	230.046	282.281	1205.81	279.053	16.1749	1234.25	46.6042	166.416	1364.36	-16.729	165.998	1138.42	-20.1451	161.087	1068.98	-35.7651	268.955	999.399	-13.6395	320.865	910.598	-62.3172	279.087	881.977	-76.7422	365.854	834.967
1075	0	197.446	338.489	1551.71	297.368	332.258	1540.88	175.411	168.719	1579.35	287.179	152.332	1569.2	217.636	99.7084	1401.78	187.587	49.5885	1187.02	223.47	233.034	1334.93	231.967	292.736	1206.47	280.742	26.5243	1234.09	48.3037	176.441	1364.54	-14.5411	175.605	1138.42	-17.8027	170.336	1069.01	-33.608	277.604	998.729	-11.5512	328.884	909.514	-60.0655	286.759	881.174	-74.6233	373.114	833.453
1076	0	198.957	347.826	1552.57	298.903	341.84	1541.53	177.415	177.967	1580.1	289.193	161.865	1569.68	219.327	109.559	1402.06	189.404	60.1657	1187.15	225.184	243.085	1335.59	233.84	303.199	1207.3	282.464	36.8982	1234.16	49.9841	186.46	1364.92	-12.3275	185.195	1138.6	-15.4194	179.534	1069.22	-31.4552	286.114	998.159	-9.49728	336.68	908.478	-57.8235	294.155	880.465	-72.5639	380.018	831.942
1077	0	200.431	357.173	1553.63	300.399	351.444	1542.37	179.411	187.222	1581.02	291.196	171.418	1570.31	221.009	119.428	1402.53	191.25	70.7173	1187.51	226.853	253.138	1336.42	235.651	313.65	1208.28	284.223	47.2825	1234.48	51.6394	196.455	1365.47	-10.0957	194.752	1138.96	-13.003	188.67	1069.6	-29.3132	294.479	997.695	-7.48205	344.255	907.503	-55.5947	301.28	879.86	-70.5664	386.575	830.452
1078	0	201.861	366.525	1554.87	301.847	361.066	1543.37	181.393	196.478	1582.12	293.182	180.988	1571.09	222.678	129.308	1403.19	193.123	81.2204	1188.11	228.469	263.181	1337.4	237.389	324.07	1209.41	286.02	57.6627	1235.03	53.264	206.408	1366.21	-7.85406	204.255	1139.48	-10.5621	197.729	1070.16	-27.189	302.693	997.341	-5.50926	351.612	906.601	-53.3827	308.143	879.364	-68.6325	392.797	829
1079	0	203.237	375.875	1556.27	303.235	370.701	1544.53	183.354	205.731	1583.38	295.144	190.571	1572.01	224.332	139.186	1404.04	195.025	91.6521	1188.95	230.026	273.203	1338.52	239.042	334.44	1210.66	287.86	68.0238	1235.82	54.8527	216.301	1367.11	-5.61136	213.686	1140.16	-8.1061	206.699	1070.87	-25.0896	310.752	997.1	-3.5823	358.758	905.782	-51.1909	314.754	878.982	-66.7625	398.701	827.602
1080	0	204.55	385.218	1557.82	304.554	380.345	1545.81	185.289	214.975	1584.78	297.077	200.164	1573.05	225.967	149.051	1405.05	196.954	101.99	1189.99	231.518	283.192	1339.76	240.603	344.741	1212.01	289.745	78.3511	1236.83	56.4007	226.118	1368.16	-3.37689	223.022	1140.99	-5.64485	215.562	1071.74	-23.0219	318.649	996.97	-1.70412	365.698	905.057	-49.0229	321.125	878.717	-64.9561	404.307	826.276
1081	0	205.792	394.548	1559.5	305.795	389.993	1547.21	187.193	224.206	1586.31	298.975	209.762	1574.2	227.581	158.892	1406.21	198.909	112.213	1191.24	232.938	293.137	1341.12	242.064	354.955	1213.46	291.674	88.6298	1238.06	57.9034	235.842	1369.34	-1.16011	232.241	1141.95	-3.18854	224.303	1072.74	-20.9927	326.381	996.95	0.122781	372.44	904.43	-46.882	327.269	878.568	-63.2122	409.637	825.033
1082	0	206.957	403.857	1561.28	306.95	399.637	1548.69	189.06	233.417	1587.95	300.834	219.361	1575.45	229.171	168.698	1407.52	200.89	122.303	1192.67	234.284	303.026	1342.56	243.42	365.066	1214.98	293.647	98.8459	1239.48	59.3573	245.459	1370.65	1.02958	241.324	1143.02	-0.747417	232.908	1073.86	-19.0084	333.943	997.035	1.89631	378.995	903.908	-44.7718	333.2	878.532	-61.5294	414.717	823.886
1083	0	208.039	413.14	1563.15	308.012	409.274	1550.24	190.886	242.605	1589.7	302.649	228.958	1576.78	230.734	178.456	1408.94	202.893	132.241	1194.26	235.553	312.849	1344.08	244.67	375.059	1216.55	295.663	108.987	1241.07	60.7593	254.955	1372.04	3.18312	250.249	1144.19	1.66847	241.362	1075.07	-17.0752	341.334	997.219	3.61484	385.37	903.492	-42.6956	338.936	878.605	-59.9059	419.573	822.845
1084	0	209.033	422.391	1565.07	308.976	418.896	1551.82	192.666	251.764	1591.52	304.417	238.547	1578.18	232.268	188.158	1410.47	204.914	142.014	1195.98	236.742	322.596	1345.66	245.812	384.922	1218.14	297.718	119.04	1242.82	62.1069	264.32	1373.52	5.29206	259	1145.44	4.04952	249.651	1076.37	-15.1984	348.55	997.494	5.27711	391.578	903.182	-40.6568	344.491	878.781	-58.3396	424.235	821.916
1085	0	209.936	431.603	1567.03	309.836	428.499	1553.42	194.397	260.889	1593.4	306.133	248.125	1579.62	233.77	197.792	1412.09	206.949	151.613	1197.8	237.852	332.259	1347.27	246.848	394.646	1219.76	299.806	128.996	1244.69	63.3988	273.547	1375.04	7.34879	267.56	1146.74	6.38675	257.764	1077.73	-13.3829	355.591	997.852	6.88224	397.629	902.977	-38.6583	349.883	879.052	-56.8286	428.729	821.104
1086	0	210.744	440.771	1568.99	310.59	438.076	1555.02	196.076	269.977	1595.33	307.795	257.687	1581.1	235.238	207.352	1413.76	208.989	161.029	1199.7	238.884	341.83	1348.91	247.783	404.223	1221.36	301.921	138.848	1246.66	64.6342	282.63	1376.6	9.34671	275.917	1148.09	8.67202	265.692	1079.12	-11.6329	362.457	998.283	8.4296	403.534	902.872	-36.703	355.128	879.408	-55.3711	433.083	820.413
1087	0	211.458	449.892	1570.94	311.238	447.622	1556.58	197.699	279.024	1597.28	309.4	267.228	1582.6	236.67	216.829	1415.48	211.029	170.26	1201.66	239.838	351.304	1350.54	248.621	413.649	1222.95	304.054	148.588	1248.71	65.8132	291.566	1378.18	11.2804	284.061	1149.47	10.8982	273.426	1080.55	-9.95166	369.151	998.775	9.91879	409.304	902.863	-34.7936	360.242	879.839	-53.9654	437.322	819.842
1088	0	212.077	458.96	1572.86	311.781	457.132	1558.1	199.262	288.026	1599.22	310.944	276.744	1584.09	238.066	226.219	1417.22	213.058	179.305	1203.65	240.719	360.675	1352.16	249.37	422.925	1224.5	306.197	158.214	1250.82	66.9367	300.357	1379.75	13.1456	291.988	1150.85	13.0591	280.962	1081.98	-8.34195	375.675	999.317	11.3496	414.951	902.942	-32.9324	365.24	880.333	-52.6101	441.471	819.388
1089	0	212.603	467.974	1574.72	312.219	466.601	1559.55	200.763	296.983	1601.15	312.427	286.231	1585.58	239.422	235.517	1418.96	215.069	188.167	1205.64	241.528	369.94	1353.74	250.038	432.052	1226	308.34	167.726	1252.95	68.0063	309.006	1381.29	14.9394	299.694	1152.22	15.1501	288.298	1083.4	-6.80572	382.034	999.896	12.7217	420.486	903.099	-31.1216	370.137	880.878	-51.3042	445.55	819.045
1090	0	213.039	476.931	1576.52	312.557	476.024	1560.93	202.199	305.891	1603.05	313.844	295.684	1587.03	240.739	244.722	1420.68	217.052	196.853	1207.61	242.271	379.099	1355.27	250.634	441.035	1227.44	310.473	177.123	1255.08	69.0241	317.518	1382.79	16.6599	307.184	1153.57	17.1672	295.436	1084.8	-5.34422	388.233	1000.5	14.0349	425.919	903.323	-29.3632	374.946	881.461	-50.0471	449.578	818.803
1091	0	213.387	485.83	1578.22	312.801	485.398	1562.22	203.567	314.749	1604.89	315.194	305.099	1588.44	242.015	253.833	1422.37	219	205.371	1209.55	242.951	388.15	1356.74	251.166	449.88	1228.81	312.587	186.409	1257.19	69.9927	325.899	1384.24	18.3064	314.464	1154.88	19.1082	302.382	1086.16	-3.95806	394.281	1001.12	15.2889	431.26	903.601	-27.6591	379.681	882.066	-48.8387	453.572	818.653
1092	0	213.654	494.671	1579.81	312.957	494.72	1563.41	204.863	323.559	1606.65	316.474	314.472	1589.8	243.251	262.85	1424.01	220.906	213.731	1211.43	243.574	397.096	1358.13	251.644	458.596	1230.09	314.673	195.59	1259.25	70.9152	334.159	1385.62	19.8792	321.545	1156.14	20.9715	309.143	1087.47	-2.64721	400.187	1001.73	16.4834	436.519	903.919	-26.0108	384.351	882.681	-47.6794	457.545	818.577
1093	0	213.844	503.454	1581.3	313.032	503.985	1564.49	206.085	332.319	1608.33	317.683	323.8	1591.09	244.446	271.776	1425.58	222.765	221.945	1213.24	244.144	405.94	1359.42	252.074	467.19	1231.27	316.723	204.672	1261.26	71.7945	342.306	1386.91	21.3794	328.439	1157.34	22.7567	315.73	1088.71	-1.41106	405.962	1002.33	17.6177	441.706	904.261	-24.42	388.969	883.29	-46.5702	461.506	818.561
1094	0	213.963	512.182	1582.65	313.034	513.194	1565.47	207.229	341.032	1609.9	318.816	333.08	1592.31	245.6	280.615	1427.07	224.571	230.027	1214.95	244.666	414.686	1360.62	252.463	475.673	1232.35	318.73	213.662	1263.17	72.6337	350.352	1388.11	22.8087	335.165	1158.47	24.464	322.16	1089.88	-0.24847	411.618	1002.9	18.6913	446.829	904.609	-22.888	393.544	883.878	-45.5127	465.463	818.584
1095	0	214.018	520.856	1583.87	312.974	522.343	1566.34	208.292	349.7	1611.35	319.874	342.309	1593.43	246.714	289.372	1428.46	226.324	237.992	1216.56	245.143	423.339	1361.7	252.817	484.054	1233.31	320.688	222.567	1264.99	73.4353	358.305	1389.21	24.1694	341.741	1159.51	26.0942	328.45	1090.97	0.84214	417.169	1003.42	19.7034	451.899	904.946	-21.4164	398.085	884.431	-44.5088	469.421	818.626
1096	0	214.017	529.482	1584.95	312.859	531.434	1567.09	209.272	358.325	1612.67	320.852	351.484	1594.47	247.787	298.052	1429.74	228.022	245.855	1218.06	245.581	431.905	1362.67	253.141	492.341	1234.15	322.592	231.396	1266.7	74.2017	366.175	1390.19	25.4641	348.19	1160.47	27.6489	334.618	1091.96	1.86273	422.63	1003.89	20.6535	456.923	905.254	-20.0063	402.6	884.935	-43.561	473.384	818.665
1097	0	213.965	538.062	1585.88	312.699	540.465	1567.74	210.167	366.911	1613.85	321.75	360.605	1595.4	248.82	306.662	1430.91	229.666	253.634	1219.43	245.982	440.392	1363.5	253.438	500.542	1234.85	324.437	240.157	1268.28	74.9346	373.973	1391.04	26.6955	354.534	1161.32	29.1297	340.689	1092.86	2.81554	428.016	1004.3	21.5411	461.911	905.514	-18.6591	407.097	885.377	-42.6718	477.353	818.681
1098	0	213.869	546.603	1586.66	312.504	549.438	1568.27	210.973	375.462	1614.87	322.564	369.67	1596.22	249.812	315.209	1431.96	231.256	261.344	1220.66	246.35	448.808	1364.21	253.709	508.667	1235.42	326.219	248.855	1269.72	75.6349	381.708	1391.78	27.8661	360.797	1162.05	30.5384	346.683	1093.64	3.70292	433.343	1004.62	22.3659	466.87	905.71	-17.3757	411.583	885.743	-41.8436	481.328	818.651
1099	0	213.738	555.109	1587.29	312.281	558.355	1568.69	211.688	383.983	1615.75	323.294	378.679	1596.94	250.761	323.701	1432.88	232.793	269.004	1221.75	246.686	457.162	1364.78	253.955	516.721	1235.85	327.935	257.497	1271.01	76.3029	389.39	1392.38	28.9784	367.001	1162.68	31.8769	352.626	1094.31	4.5273	438.628	1004.85	23.1277	471.808	905.823	-16.1572	416.064	886.022	-41.0787	485.307	818.556
1100	0	213.575	563.587	1587.76	312.038	567.218	1569.01	212.312	392.477	1616.46	323.939	387.633	1597.54	251.668	332.145	1433.67	234.278	276.63	1222.7	246.992	465.461	1365.21	254.178	524.712	1236.13	329.579	266.087	1272.16	76.938	397.026	1392.84	30.0343	373.17	1163.18	33.147	358.54	1094.86	5.29098	443.886	1004.98	23.8269	476.733	905.841	-15.0043	420.547	886.206	-40.3787	489.29	818.379
1101	0	213.389	572.042	1588.09	311.782	576.03	1569.23	212.844	400.952	1617.01	324.496	396.532	1598.03	252.529	340.548	1434.32	235.71	284.239	1223.5	247.27	473.716	1365.5	254.375	532.647	1236.27	331.146	274.632	1273.15	77.5388	404.628	1393.17	31.0352	379.327	1163.55	34.3502	364.45	1095.28	5.99609	449.135	1005	24.4641	481.652	905.75	-13.9175	425.036	886.286	-39.7446	493.274	818.103
1102	0	213.182	580.481	1588.26	311.52	584.794	1569.34	213.282	409.411	1617.4	324.966	405.379	1598.4	253.342	348.92	1434.83	237.088	291.847	1224.14	247.519	481.934	1365.66	254.546	540.534	1236.27	332.632	283.133	1273.98	78.1032	412.204	1393.36	31.9818	385.491	1163.79	35.4876	370.376	1095.58	6.64445	454.389	1004.92	25.0401	486.571	905.54	-12.897	429.537	886.257	-39.1764	497.259	817.715
1103	0	212.961	588.909	1588.28	311.256	593.514	1569.36	213.627	417.861	1617.62	325.348	414.175	1598.65	254.103	357.265	1435.21	238.408	299.468	1224.64	247.739	490.125	1365.68	254.691	548.379	1236.12	334.03	291.594	1274.66	78.6283	419.764	1393.42	32.8741	391.683	1163.9	36.5597	376.34	1095.76	7.23752	459.662	1004.71	25.556	491.497	905.203	-11.9431	434.055	886.114	-38.6734	501.243	817.207
1104	0	212.73	597.332	1588.17	310.993	602.193	1569.27	213.88	426.305	1617.68	325.641	422.922	1598.78	254.808	365.593	1435.45	239.664	307.118	1224.99	247.929	498.297	1365.57	254.807	556.19	1235.84	335.334	300.018	1275.19	79.1108	427.317	1393.34	33.7112	397.919	1163.89	37.5668	382.36	1095.81	7.77628	464.969	1004.38	26.0133	496.437	904.734	-11.0558	438.596	885.856	-38.2336	505.226	816.572
1105	0	212.49	605.756	1587.91	310.734	610.835	1569.09	214.04	434.748	1617.59	325.847	431.623	1598.8	255.454	373.908	1435.56	240.851	314.808	1225.21	248.088	506.46	1365.33	254.893	563.978	1235.43	336.537	308.407	1275.57	79.5466	434.875	1393.14	34.4914	404.215	1163.75	38.508	388.453	1095.74	8.26126	470.322	1003.93	26.4132	501.394	904.131	-10.2352	443.165	885.482	-37.8545	509.211	815.805
1106	0	212.246	614.185	1587.52	310.482	619.443	1568.82	214.11	443.196	1617.35	325.964	440.281	1598.7	256.034	382.216	1435.54	241.959	322.549	1225.28	248.213	514.62	1364.97	254.949	571.75	1234.9	337.633	316.763	1275.81	79.9313	442.446	1392.81	35.2121	410.586	1163.48	39.3821	394.632	1095.55	8.69243	475.733	1003.36	26.7572	506.377	903.394	-9.48123	447.768	884.995	-37.533	513.201	814.907
1107	0	211.998	622.623	1587	310.237	628.021	1568.45	214.09	451.652	1616.96	325.994	448.899	1598.49	256.544	390.523	1435.39	242.979	330.349	1225.23	248.301	522.785	1364.49	254.971	579.518	1234.25	338.615	325.091	1275.9	80.2602	450.043	1392.36	35.87	417.042	1163.1	40.187	400.909	1095.24	9.06926	481.212	1002.66	27.0464	511.39	902.524	-8.79431	452.41	884.397	-37.2656	517.199	813.879
1108	0	211.748	631.073	1586.37	309.999	636.571	1567.99	213.982	460.119	1616.44	325.937	457.479	1598.16	256.977	398.834	1435.12	243.901	338.215	1225.05	248.351	530.961	1363.91	254.961	587.289	1233.5	339.476	333.392	1275.87	80.5284	457.674	1391.8	36.461	423.594	1162.61	40.92	407.295	1094.83	9.39069	486.769	1001.85	27.2819	516.439	901.526	-8.17492	457.098	883.692	-37.0488	521.214	812.725
1109	0	211.496	639.54	1585.62	309.767	645.096	1567.44	213.788	468.601	1615.79	325.793	466.025	1597.73	257.328	407.151	1434.74	244.715	346.151	1224.75	248.358	539.156	1363.22	254.915	595.076	1232.66	340.209	341.67	1275.71	80.7307	465.35	1391.13	36.9806	430.252	1162.01	41.5776	413.796	1094.32	9.65517	492.412	1000.93	27.4642	521.531	900.404	-7.62393	461.841	882.885	-36.8795	525.254	811.451
1110	0	211.242	648.025	1584.76	309.539	653.599	1566.81	213.51	477.099	1615.01	325.564	474.539	1597.19	257.591	415.48	1434.24	245.41	354.16	1224.35	248.319	547.376	1362.44	254.834	602.887	1231.73	340.81	349.93	1275.43	80.8621	473.082	1390.36	37.4237	437.023	1161.31	42.1559	420.42	1093.7	9.8607	498.151	999.895	27.5932	526.672	899.164	-7.14264	466.646	881.983	-36.7552	529.33	810.064
1111	0	210.984	656.53	1583.81	309.314	662.081	1566.08	213.148	485.616	1614.13	325.249	483.023	1596.55	257.762	423.822	1433.63	245.977	362.241	1223.84	248.23	555.624	1361.56	254.715	610.732	1230.73	341.274	358.176	1275.03	80.9179	480.876	1389.49	37.7852	443.913	1160.52	42.6505	427.169	1092.99	10.0049	503.993	998.757	27.6682	531.872	897.814	-6.73287	471.523	880.99	-36.6744	533.454	808.573
1112	0	210.721	665.056	1582.77	309.088	670.544	1565.28	212.706	494.153	1613.14	324.849	491.481	1595.82	257.834	432.181	1432.92	246.408	370.394	1223.23	248.087	563.907	1360.61	254.557	618.621	1229.67	341.598	366.413	1274.53	80.8932	488.742	1388.53	38.0599	450.929	1159.63	43.0569	434.046	1092.19	10.085	509.945	997.521	27.6879	537.137	896.362	-6.39696	476.482	879.913	-36.6368	537.642	806.987
1113	0	210.449	673.605	1581.65	308.858	678.991	1564.39	212.184	502.711	1612.06	324.365	499.915	1594.99	257.804	440.558	1432.11	246.696	378.616	1222.52	247.886	572.228	1359.59	254.359	626.562	1228.55	341.777	374.647	1273.91	80.7836	496.685	1387.48	38.2426	458.073	1158.66	43.3702	441.054	1091.31	10.098	516.013	996.194	27.65	542.477	894.814	-6.13778	481.534	878.758	-36.6435	541.909	805.314
1114	0	210.166	682.176	1580.45	308.62	687.422	1563.44	211.583	511.29	1610.89	323.798	508.328	1594.07	257.668	448.956	1431.21	246.834	386.903	1221.73	247.623	580.591	1358.5	254.118	634.562	1227.38	341.812	382.886	1273.2	80.5853	504.712	1386.35	38.3289	465.35	1157.62	43.586	448.192	1090.35	10.0406	522.206	994.78	27.5516	547.904	893.18	-5.95869	486.691	877.533	-36.697	546.273	803.563
1115	0	209.869	690.769	1579.19	308.37	695.839	1562.41	210.905	519.89	1609.66	323.148	516.721	1593.08	257.423	457.377	1430.22	246.82	395.252	1220.85	247.293	588.999	1357.35	253.831	642.63	1226.18	341.702	391.135	1272.39	80.2947	512.826	1385.15	38.3143	472.763	1156.5	43.7	455.463	1089.31	9.90936	528.529	993.288	27.3893	553.427	891.468	-5.86339	491.966	876.243	-36.8011	550.751	801.746
1116	0	209.552	699.385	1577.88	308.104	704.245	1561.32	210.151	528.512	1608.36	322.415	525.099	1592.01	257.067	465.821	1429.15	246.651	403.658	1219.88	246.893	597.456	1356.17	253.495	650.772	1224.95	341.446	399.403	1271.48	79.9088	521.029	1383.88	38.1954	480.313	1155.31	43.7086	462.864	1088.2	9.70085	534.989	991.726	27.1588	559.059	889.686	-5.85579	497.372	874.896	-36.9609	555.362	799.871
1117	0	209.212	708.022	1576.53	307.815	712.641	1560.17	209.323	537.155	1607.01	321.601	533.463	1590.88	256.599	474.291	1428	246.327	412.118	1218.84	246.42	605.964	1354.94	253.107	658.995	1223.69	341.048	407.699	1270.48	79.4254	529.321	1382.54	37.9695	488	1154.06	43.6089	470.397	1087.03	9.4115	541.592	990.101	26.8554	564.813	887.845	-5.93984	502.923	873.497	-37.1827	560.126	797.949
1118	0	208.844	716.681	1575.15	307.499	721.03	1558.97	208.421	545.819	1605.61	320.706	541.817	1589.7	256.018	482.789	1426.78	245.851	420.63	1217.71	245.868	614.524	1353.69	252.661	667.304	1222.43	340.509	416.03	1269.4	78.8427	537.702	1381.15	37.6345	495.826	1152.74	43.3988	478.061	1085.79	9.0379	548.344	988.424	26.4744	570.703	885.954	-6.1193	508.633	872.055	-37.4734	565.061	795.989
1119	0	208.442	725.36	1573.74	307.151	729.413	1557.74	207.446	554.502	1604.19	319.731	550.164	1588.47	255.327	491.314	1425.51	245.227	429.193	1216.51	245.234	623.14	1352.42	252.153	675.705	1221.16	339.835	424.406	1268.23	78.1598	546.167	1379.71	37.1896	503.789	1151.38	43.0773	485.856	1084.5	8.5768	555.251	986.704	26.0106	576.741	884.025	-6.39752	514.514	870.576	-37.8405	570.186	794.002
1120	0	208.001	734.059	1572.33	306.764	737.793	1556.48	206.399	563.206	1602.75	318.678	558.507	1587.2	254.527	499.87	1424.18	244.462	437.806	1215.24	244.517	631.814	1351.14	251.576	684.202	1219.9	339.031	432.837	1266.99	77.3765	554.713	1378.23	36.6346	511.888	1149.96	42.6445	493.782	1083.16	8.02519	562.318	984.953	25.4591	582.944	882.069	-6.77729	520.583	869.07	-38.2915	575.519	791.999
1121	0	207.517	742.778	1570.92	306.333	746.174	1555.2	205.281	571.928	1601.31	317.548	566.85	1585.91	253.621	508.458	1422.81	243.562	446.474	1213.9	243.711	640.545	1349.88	250.925	692.802	1218.66	338.104	441.332	1265.68	76.4934	563.333	1376.73	35.9706	520.12	1148.51	42.1016	501.839	1081.78	7.38045	569.551	983.183	24.8149	589.325	880.1	-7.26059	526.851	867.544	-38.8337	581.076	789.992
1122	0	206.984	751.515	1569.52	305.853	754.558	1553.92	204.093	580.67	1599.88	316.342	575.196	1584.61	252.613	517.079	1421.4	242.538	455.199	1212.5	242.816	649.336	1348.63	250.192	701.506	1217.45	337.061	449.901	1264.3	75.5116	572.02	1375.21	35.1993	528.481	1147.02	41.4508	510.027	1080.36	6.64034	576.954	981.406	24.0737	595.901	878.13	-7.84849	533.332	866.009	-39.4738	586.873	787.993
1123	0	206.397	760.271	1568.16	305.318	762.949	1552.65	202.837	589.43	1598.47	315.062	583.549	1583.32	251.508	525.735	1419.98	241.401	463.988	1211.04	241.83	658.188	1347.41	249.37	710.321	1216.29	335.91	458.555	1262.87	74.4331	580.766	1373.68	34.3236	536.967	1145.52	40.6955	518.346	1078.93	5.80312	584.531	979.639	23.2316	602.685	876.177	-8.54106	540.038	864.475	-40.218	592.927	786.016
1124	0	205.752	769.045	1566.84	304.724	771.351	1551.41	201.513	598.209	1597.1	313.71	591.914	1582.05	250.312	534.428	1418.55	240.162	472.85	1209.55	240.75	667.102	1346.25	248.453	719.247	1215.18	334.661	467.303	1261.39	73.2605	589.561	1372.17	33.3472	545.571	1144.01	39.8399	526.796	1077.48	4.86757	592.285	977.895	22.2852	609.691	874.257	-9.33733	546.98	862.953	-41.0712	599.249	784.077
1125	0	205.044	777.838	1565.57	304.065	779.767	1550.2	200.124	607.006	1595.79	312.289	600.293	1580.81	249.031	543.16	1417.12	238.833	481.793	1208.01	239.578	676.078	1345.14	247.434	728.289	1214.16	333.324	476.153	1259.88	71.997	598.398	1370.68	32.2745	554.289	1142.51	38.8892	535.377	1076.04	3.83308	600.22	976.193	21.2319	616.934	872.387	-10.2353	554.169	861.457	-42.0371	605.853	782.19
1126	0	204.27	786.648	1564.38	303.338	788.202	1549.05	198.671	615.822	1594.53	310.8	608.692	1579.61	247.671	551.933	1415.72	237.428	490.826	1206.46	238.313	685.117	1344.1	246.308	737.448	1213.22	331.909	485.115	1258.35	70.6465	607.267	1369.24	31.1106	563.113	1141.03	37.8488	544.087	1074.62	2.69965	608.337	974.549	20.07	624.426	870.586	-11.2321	561.614	859.999	-43.1184	612.75	780.375
1127	0	203.426	795.478	1563.28	302.539	796.659	1547.98	197.156	624.656	1593.36	309.248	617.113	1578.49	246.239	560.748	1414.35	235.957	499.961	1204.91	236.958	694.218	1343.16	245.069	746.726	1212.39	330.426	494.195	1256.82	69.2133	616.164	1367.86	29.8611	572.036	1139.59	36.7249	552.927	1073.23	1.46795	616.639	972.98	18.7987	632.177	868.874	-12.3239	569.323	858.593	-44.3161	619.951	778.649
1128	0	202.511	804.326	1562.28	301.666	805.143	1547	195.581	633.509	1592.28	307.635	625.561	1577.44	244.743	569.609	1413.03	234.433	509.205	1203.36	235.514	703.383	1342.32	243.715	756.123	1211.69	328.884	503.397	1255.3	67.7022	625.08	1366.56	28.532	581.051	1138.21	35.5236	561.894	1071.89	0.139336	625.128	971.506	17.4184	640.199	867.271	-13.5066	577.303	857.255	-45.6299	627.464	777.031
1129	0	201.523	813.193	1561.4	300.716	813.657	1546.13	193.95	642.381	1591.3	305.965	634.038	1576.48	243.189	578.516	1411.78	232.866	518.567	1201.84	233.986	712.609	1341.59	242.246	765.639	1211.13	327.293	512.726	1253.82	66.1187	634.012	1365.35	27.1292	590.151	1136.9	34.2508	570.987	1070.62	-1.2841	633.803	970.145	15.9303	648.499	865.797	-14.7754	585.559	856	-47.0581	635.299	775.541
1130	0	200.461	822.079	1560.65	299.691	822.204	1545.38	192.265	651.272	1590.44	304.242	642.549	1575.64	241.583	587.471	1410.61	231.266	528.054	1200.37	232.377	721.895	1340.99	240.662	775.271	1210.73	325.66	522.181	1252.38	64.4686	642.959	1364.27	25.6589	599.33	1135.69	32.9123	580.203	1069.44	-2.79955	642.666	968.913	14.3372	657.083	864.472	-16.1254	594.095	854.841	-48.5977	643.461	774.197
1131	0	199.325	830.986	1560.04	298.588	830.789	1544.77	190.53	660.183	1589.71	302.47	651.094	1574.91	239.931	596.475	1409.54	229.638	537.67	1198.97	230.695	731.241	1340.53	238.967	785.016	1210.49	323.992	531.761	1251.01	62.758	651.92	1363.31	24.1269	608.583	1134.58	31.5132	589.541	1068.36	-4.40348	651.716	967.827	12.6429	665.957	863.313	-17.5518	602.913	853.795	-50.2441	651.957	773.019
1132	0	198.118	839.914	1559.59	297.412	839.412	1544.31	188.75	669.114	1589.11	300.652	659.678	1574.31	238.24	605.531	1408.58	227.989	547.417	1197.65	228.947	740.644	1340.21	237.169	794.87	1210.42	322.296	541.46	1249.73	60.9934	660.899	1362.5	22.5388	617.906	1133.61	30.0579	598.999	1067.4	-6.09167	660.954	966.903	10.8523	675.124	862.339	-19.0499	612.017	852.876	-51.9918	660.791	772.023
1133	0	196.841	848.864	1559.3	296.163	848.078	1544.02	186.927	678.066	1588.66	298.795	668.301	1573.85	236.515	614.637	1407.76	226.322	557.294	1196.45	227.14	750.101	1340.05	235.277	804.826	1210.54	320.574	551.271	1248.56	59.1819	669.899	1361.84	20.8997	627.298	1132.77	28.5497	608.574	1066.58	-7.85922	670.38	966.154	8.97168	684.584	861.565	-20.6157	621.404	852.096	-53.8342	669.967	771.224
1134	0	195.498	857.837	1559.18	294.847	856.788	1543.9	185.068	687.039	1588.36	296.904	676.965	1573.55	234.759	623.796	1407.07	224.639	567.297	1195.37	225.284	759.609	1340.05	233.302	814.875	1210.85	318.829	561.182	1247.53	57.3306	678.928	1361.36	19.214	636.758	1132.1	26.9912	618.264	1065.91	-9.70059	679.992	965.593	7.00826	694.336	861.004	-22.2456	631.075	851.469	-55.7639	679.486	770.638
1135	0	194.095	866.834	1559.25	293.469	865.542	1543.97	183.176	696.033	1588.21	294.982	685.671	1573.39	232.977	633.006	1406.53	222.94	577.417	1194.45	223.389	769.162	1340.2	231.259	825.008	1211.33	317.065	571.18	1246.63	55.447	687.994	1361.06	17.4859	646.288	1131.6	25.3837	628.067	1065.4	-11.6096	689.791	965.228	4.97034	704.377	860.665	-23.9368	641.027	851.005	-57.7726	689.35	770.274
1136	0	192.637	875.855	1559.49	292.034	874.342	1544.23	181.257	705.05	1588.21	293.036	694.418	1573.39	231.173	642.266	1406.15	221.224	587.644	1193.69	221.466	778.757	1340.52	229.166	835.21	1212	315.28	581.248	1245.91	53.5388	697.107	1360.94	15.7185	655.893	1131.28	23.7276	637.984	1065.06	-13.5797	699.776	965.066	2.86706	714.701	860.558	-25.6875	651.257	850.714	-59.8516	699.557	770.14
1137	0	191.132	884.903	1559.91	290.55	883.187	1544.67	179.317	714.09	1588.36	291.071	703.206	1573.55	229.35	651.574	1405.94	219.49	597.963	1193.13	219.526	788.387	1340.99	227.038	845.469	1212.84	313.475	591.367	1245.36	51.6139	706.278	1361.01	13.9146	665.577	1131.15	22.0223	648.012	1064.89	-15.6035	709.947	965.111	0.708303	725.302	860.684	-27.4966	661.76	850.6	-61.9921	710.107	770.242
1138	0	189.588	893.976	1560.52	289.026	892.076	1545.31	177.36	723.154	1588.67	289.092	712.034	1573.86	227.511	660.929	1405.9	217.734	608.357	1192.76	217.581	798.045	1341.61	224.897	855.767	1213.84	311.65	601.516	1245.01	49.6801	715.516	1361.26	12.0762	675.348	1131.22	20.2663	658.151	1064.91	-17.6736	720.304	965.364	-1.49555	736.169	861.045	-29.364	672.531	850.67	-64.185	720.995	770.581
1139	0	188.015	903.077	1561.29	287.471	901.007	1546.12	175.393	732.242	1589.12	287.106	720.9	1574.32	225.658	670.325	1406.03	215.955	618.805	1192.6	215.643	807.724	1342.38	222.76	866.089	1214.97	309.802	611.673	1244.86	47.7452	724.832	1361.7	10.2048	685.214	1131.47	18.4575	668.402	1065.11	-19.7823	730.846	965.823	-3.73381	747.293	861.636	-31.2901	683.565	850.925	-66.4214	732.219	771.153
1140	0	186.422	912.205	1562.23	285.895	909.978	1547.11	173.423	741.355	1589.71	285.118	729.803	1574.93	223.795	679.757	1406.34	214.15	629.284	1192.66	213.723	817.415	1343.28	220.649	876.414	1216.23	307.93	621.815	1244.91	45.8169	734.234	1362.32	8.30134	695.184	1131.92	16.5934	678.763	1065.49	-21.9215	741.573	966.482	-5.99567	758.662	862.45	-33.2761	694.854	851.363	-68.6928	743.772	771.954
1141	0	184.82	921.36	1563.31	284.308	918.985	1548.26	171.453	750.494	1590.43	283.133	738.739	1575.67	221.922	689.221	1406.81	212.315	639.772	1192.93	211.831	827.11	1344.29	218.583	886.725	1217.59	306.031	631.918	1245.16	43.9025	743.73	1363.1	6.36634	705.267	1132.55	14.6712	689.236	1066.04	-24.0834	752.483	967.334	-8.27052	770.262	863.477	-35.3234	706.391	851.982	-70.9911	755.647	772.973
1142	0	183.221	930.542	1564.54	282.722	928.025	1549.55	169.492	759.658	1591.26	281.157	747.704	1576.54	220.042	698.71	1407.44	210.448	650.242	1193.42	209.98	836.799	1345.41	216.579	897.002	1219.03	304.103	641.959	1245.62	42.0089	753.322	1364.04	4.40014	715.471	1133.36	12.6884	699.819	1066.76	-26.2603	763.575	968.369	-10.5481	782.08	864.703	-37.4334	718.167	852.775	-73.3086	767.835	774.199
1143	0	181.636	939.749	1565.88	281.148	937.093	1550.97	167.544	768.848	1592.2	279.196	756.695	1577.52	218.157	708.215	1408.23	208.546	660.668	1194.1	208.178	846.472	1346.61	214.656	907.224	1220.53	302.143	651.915	1246.26	40.1428	763.015	1365.12	2.40306	725.802	1134.33	10.6426	710.512	1067.63	-28.4446	774.847	969.574	-12.8188	794.101	866.11	-39.6074	730.175	853.732	-75.6382	780.327	775.616
1144	0	180.077	948.981	1567.31	279.597	946.182	1552.5	165.615	778.063	1593.23	277.254	765.708	1578.61	216.27	717.727	1409.15	206.606	671.026	1194.98	206.434	856.12	1347.89	212.828	917.374	1222.06	300.146	661.764	1247.09	38.3101	772.808	1366.33	0.375562	736.268	1135.44	8.53231	721.314	1068.64	-30.6292	786.294	970.933	-15.0737	806.311	867.68	-41.8462	742.404	854.844	-77.9732	793.111	777.206
1145	0	178.556	958.236	1568.83	278.081	955.287	1554.12	163.711	787.303	1594.34	275.336	774.737	1579.78	214.382	727.24	1410.2	204.626	681.291	1196.03	204.756	865.732	1349.23	211.11	927.431	1223.6	298.111	671.489	1248.07	36.5161	782.696	1367.64	-1.68155	746.871	1136.69	6.35665	732.224	1069.77	-32.8072	797.913	972.432	-17.3048	818.694	869.391	-44.1495	754.844	856.096	-80.3075	806.175	778.951
1146	0	177.085	967.51	1570.41	276.612	964.401	1555.79	161.837	796.566	1595.52	273.447	783.776	1581.03	212.495	736.741	1411.36	202.604	691.44	1197.24	203.15	875.299	1350.6	209.512	937.38	1225.12	296.035	681.072	1249.21	34.7657	792.674	1369.04	-3.76694	757.611	1138.05	4.116	743.238	1071.01	-34.9722	809.697	974.052	-19.5052	831.236	871.222	-46.5163	767.485	857.474	-82.6351	819.503	780.829
1147	0	175.674	976.802	1572.02	275.201	973.516	1557.51	159.998	805.852	1596.75	271.591	792.821	1582.34	210.613	746.223	1412.62	200.539	701.453	1198.57	201.619	884.81	1351.99	208.043	947.205	1226.62	293.915	690.501	1250.47	33.0631	802.732	1370.51	-5.87859	768.489	1139.5	1.81197	754.355	1072.34	-37.1183	821.641	975.776	-21.6688	843.922	873.151	-48.9441	780.315	858.964	-84.9504	833.079	782.823
1148	0	174.335	986.107	1573.65	273.857	982.625	1559.25	158.199	815.159	1598.02	269.771	801.864	1583.69	208.738	755.676	1413.97	198.433	711.313	1200.01	200.169	894.258	1353.39	206.707	956.891	1228.08	291.753	699.765	1251.83	31.4119	812.858	1372.03	-8.01367	779.5	1141.02	-0.552392	765.57	1073.75	-39.2396	833.736	977.587	-23.7906	856.738	875.157	-51.4287	793.322	860.549	-87.2479	846.887	784.91
1149	0	173.077	995.423	1575.28	272.59	991.72	1560.99	156.444	824.485	1599.31	267.99	810.901	1585.08	206.873	765.091	1415.37	196.287	721.007	1201.54	198.8	903.634	1354.78	205.506	966.43	1229.47	289.549	708.858	1253.28	29.8149	823.036	1373.58	-10.1684	790.637	1142.6	-2.9725	776.878	1075.21	-41.3309	845.974	979.466	-25.8664	869.671	877.219	-53.9647	806.495	862.215	-89.5223	860.909	787.074
1150	0	171.908	1004.74	1576.88	271.409	1000.79	1562.7	154.735	833.827	1600.62	266.251	819.925	1586.48	205.022	774.46	1416.82	194.108	730.526	1203.13	197.513	912.931	1356.15	204.438	975.813	1230.8	287.307	717.778	1254.79	28.2743	833.251	1375.14	-12.3382	801.892	1144.22	-5.44219	788.273	1076.71	-43.3871	858.343	981.399	-27.8928	882.708	879.321	-56.5446	819.82	863.945	-91.7684	875.124	789.296
1151	0	170.835	1014.07	1578.45	270.321	1009.84	1564.36	153.076	843.182	1601.93	264.556	828.93	1587.89	203.189	783.775	1418.31	191.901	739.864	1204.75	196.307	922.143	1357.49	203.498	985.037	1232.06	285.033	726.526	1256.34	26.7919	843.482	1376.7	-14.5173	813.253	1145.85	-7.95368	799.747	1078.23	-45.4034	870.831	983.369	-29.8673	895.835	881.445	-59.1594	833.285	865.727	-93.9808	889.513	791.564
1152	0	169.865	1023.39	1579.96	269.331	1018.84	1565.97	151.47	852.547	1603.23	262.907	837.91	1589.29	201.379	793.03	1419.81	189.674	749.021	1206.39	195.178	931.265	1358.79	202.679	994.102	1233.24	282.733	735.108	1257.91	25.3684	853.711	1378.24	-16.6991	824.704	1147.49	-10.4977	811.291	1079.75	-47.3753	883.427	985.363	-31.7876	909.042	883.579	-61.7984	846.877	867.546	-96.1546	904.056	793.863
1153	0	169.001	1032.7	1581.4	268.444	1027.8	1567.51	149.918	861.918	1604.51	261.304	846.859	1590.67	199.596	802.219	1421.31	187.438	758	1208.03	194.124	940.294	1360.04	201.971	1003.01	1234.34	280.418	743.53	1259.49	24.0041	863.917	1379.76	-18.8762	836.23	1149.11	-13.0635	822.897	1081.27	-49.2985	896.116	987.367	-33.6522	922.316	885.711	-64.4493	860.581	869.39	-98.2843	918.733	796.184
1154	0	168.246	1041.99	1582.76	267.662	1036.71	1568.96	148.422	871.291	1605.75	259.75	855.772	1592.02	197.844	811.338	1422.79	185.203	766.809	1209.64	193.14	949.229	1361.22	201.36	1011.77	1235.36	278.097	751.805	1261.05	22.6985	874.081	1381.23	-21.0405	847.812	1150.71	-15.6392	834.552	1082.77	-51.1689	908.883	989.371	-35.4598	935.648	887.835	-67.0985	874.384	871.247	-100.365	933.524	798.519
1155	0	167.601	1051.27	1584.02	266.986	1045.57	1570.31	146.981	880.66	1606.96	258.243	864.646	1593.32	196.128	820.384	1424.25	182.981	775.459	1211.22	192.22	958.069	1362.34	200.833	1020.39	1236.31	275.782	759.944	1262.58	21.4507	884.184	1382.65	-23.1835	859.428	1152.27	-18.212	846.245	1084.23	-52.9828	921.712	991.364	-37.209	949.028	889.943	-69.7312	888.273	873.107	-102.391	948.409	800.862
1156	0	167.065	1060.52	1585.19	266.415	1054.36	1571.55	145.598	890.022	1608.12	256.784	873.475	1594.58	194.454	829.355	1425.66	180.786	783.962	1212.74	191.36	966.815	1363.39	200.374	1028.88	1237.18	273.487	767.963	1264.06	20.2592	894.21	1384.01	-25.2962	871.056	1153.78	-20.7683	857.96	1085.65	-54.7367	934.587	993.337	-38.8985	962.446	892.031	-72.3316	902.233	874.958	-104.357	963.37	803.208
1157	0	166.635	1069.75	1586.25	265.946	1063.09	1572.69	144.272	899.372	1609.22	255.375	882.257	1595.78	192.826	838.253	1427.02	178.628	792.333	1214.19	190.552	975.469	1364.36	199.969	1037.26	1237.97	271.223	775.877	1265.48	19.122	904.143	1385.3	-27.3699	882.674	1155.23	-23.2942	869.685	1087.01	-56.4272	947.491	995.282	-40.5268	975.895	894.096	-74.8833	916.25	876.793	-106.258	978.389	805.552
1158	0	166.308	1078.94	1587.2	265.575	1071.75	1573.7	143.003	908.704	1610.26	254.014	890.989	1596.9	191.247	847.076	1428.31	176.519	800.588	1215.56	189.791	984.036	1365.25	199.602	1045.54	1238.69	269.002	783.703	1266.83	18.0372	913.972	1386.52	-29.3958	894.258	1156.6	-25.7759	881.403	1088.31	-58.0512	960.406	997.19	-42.092	989.365	896.135	-77.3696	930.311	878.601	-108.086	993.449	807.892
1159	0	166.076	1088.09	1588.04	265.297	1080.34	1574.6	141.79	918.015	1611.22	252.701	899.671	1597.95	189.724	855.829	1429.52	174.471	808.743	1216.84	189.071	992.521	1366.05	199.261	1053.72	1239.33	266.838	791.456	1268.09	17.0026	923.687	1387.65	-31.3657	905.786	1157.9	-28.1997	893.1	1089.53	-59.606	973.314	999.056	-43.5916	1002.85	898.148	-79.7737	944.401	880.372	-109.834	1008.53	810.225
1160	0	165.935	1097.2	1588.75	265.105	1088.86	1575.37	140.633	927.3	1612.09	251.438	908.303	1598.92	188.259	864.512	1430.64	172.492	816.814	1218.02	188.386	1000.93	1366.75	198.931	1061.82	1239.89	264.741	799.153	1269.26	16.0159	933.281	1388.69	-33.2717	917.235	1159.1	-30.5527	904.76	1090.67	-61.0885	986.199	1000.87	-45.0224	1016.34	900.133	-82.0792	958.507	882.099	-111.495	1023.63	812.546
1161	0	165.875	1106.26	1589.35	264.991	1097.33	1576.01	139.531	936.554	1612.89	250.223	916.884	1599.79	186.856	873.132	1431.66	170.591	824.815	1219.1	187.732	1009.27	1367.36	198.602	1069.86	1240.36	262.723	806.809	1270.33	15.0755	942.75	1389.63	-35.1068	928.587	1160.21	-32.8229	916.369	1091.72	-62.496	999.044	1002.63	-46.3806	1029.83	902.088	-84.2706	972.616	883.773	-113.061	1038.72	814.852
1162	0	165.888	1115.28	1589.82	264.946	1105.73	1576.52	138.483	945.774	1613.58	249.057	925.418	1600.56	185.519	881.692	1432.58	168.775	832.76	1220.06	187.104	1017.54	1367.86	198.266	1077.83	1240.74	260.793	814.438	1271.28	14.1795	952.092	1390.47	-36.8645	939.822	1161.21	-34.9991	927.913	1092.66	-63.8255	1011.83	1004.33	-47.6617	1043.3	904.011	-86.333	986.714	885.385	-114.523	1053.8	817.138
1163	0	165.963	1124.25	1590.17	264.962	1114.07	1576.91	137.489	954.959	1614.18	247.94	933.906	1601.23	184.252	890.196	1433.4	167.051	840.659	1220.91	186.498	1025.76	1368.26	197.915	1085.76	1241.01	258.96	822.053	1272.13	13.3271	961.308	1391.2	-38.5391	950.928	1162.1	-37.0715	939.38	1093.5	-65.0739	1024.55	1005.96	-48.8601	1056.76	905.899	-88.2534	1000.79	886.929	-115.871	1068.84	819.401
1164	0	166.091	1133.17	1590.4	265.027	1122.36	1577.18	136.548	964.104	1614.67	246.873	942.354	1601.79	183.058	898.652	1434.09	165.424	848.524	1221.64	185.913	1033.94	1368.56	197.545	1093.64	1241.19	257.233	829.667	1272.85	12.5175	970.4	1391.82	-40.1255	961.891	1162.87	-39.0316	950.76	1094.23	-66.2379	1037.19	1007.51	-49.9697	1070.18	907.75	-90.02	1014.83	888.398	-117.095	1083.85	821.633
1165	0	166.262	1142.05	1590.5	265.133	1130.61	1577.31	135.66	973.208	1615.05	245.857	950.765	1602.24	181.94	907.063	1434.67	163.899	856.36	1222.26	185.347	1042.07	1368.74	197.153	1101.48	1241.25	255.619	837.289	1273.46	11.7507	979.371	1392.32	-41.6192	972.704	1163.53	-40.8719	962.043	1094.84	-67.3138	1049.73	1008.99	-50.9835	1083.57	909.559	-91.6231	1028.81	889.785	-118.185	1098.79	823.83
1166	0	166.464	1150.88	1590.48	265.27	1138.82	1577.33	134.823	982.27	1615.33	244.892	959.145	1602.58	180.901	915.435	1435.12	162.48	864.177	1222.75	184.799	1050.17	1368.82	196.739	1109.29	1241.2	254.125	844.929	1273.94	11.0275	988.226	1392.7	-43.0163	983.363	1164.06	-42.5867	973.223	1095.33	-68.2978	1062.16	1010.39	-51.8943	1096.9	911.322	-93.055	1042.74	891.088	-119.132	1113.68	825.985
1167	0	166.689	1159.67	1590.34	265.428	1147.01	1577.22	134.037	991.29	1615.49	243.98	967.499	1602.8	179.943	923.774	1435.46	161.171	871.977	1223.12	184.27	1058.25	1368.79	196.304	1117.07	1241.04	252.756	852.595	1274.3	10.3489	996.971	1392.95	-44.3133	993.864	1164.47	-44.171	984.296	1095.7	-69.186	1074.48	1011.69	-52.6944	1110.17	913.034	-94.3102	1056.6	892.302	-119.927	1128.48	828.091
1168	0	166.928	1168.41	1590.09	265.6	1155.18	1577	133.302	1000.27	1615.53	243.121	975.833	1602.91	179.07	932.086	1435.66	159.974	879.767	1223.37	183.76	1066.3	1368.64	195.853	1124.84	1240.76	251.517	860.293	1274.54	9.7169	1005.61	1393.09	-45.5072	1004.21	1164.75	-45.6214	995.257	1095.95	-69.974	1086.68	1012.91	-53.3762	1123.36	914.689	-95.3853	1070.37	893.424	-120.562	1143.2	830.141
1169	0	167.171	1177.12	1589.72	265.778	1163.33	1576.67	132.619	1009.2	1615.46	242.318	984.154	1602.91	178.283	940.375	1435.75	158.894	887.55	1223.5	183.272	1074.35	1368.39	195.389	1132.61	1240.37	250.412	868.03	1274.67	9.13374	1014.16	1393.1	-46.5953	1014.41	1164.92	-46.9355	1006.11	1096.08	-70.6578	1098.76	1014.04	-53.9324	1136.46	916.283	-96.2794	1084.05	894.454	-121.03	1157.81	832.13
1170	0	167.413	1185.8	1589.23	265.957	1171.49	1576.22	131.987	1018.1	1615.28	241.572	992.468	1602.8	177.585	948.646	1435.72	157.933	895.331	1223.53	182.809	1082.39	1368.03	194.918	1140.36	1239.87	249.444	875.809	1274.68	8.60226	1022.62	1393	-47.5753	1024.46	1164.96	-48.1119	1016.85	1096.09	-71.2334	1110.7	1015.07	-54.3567	1149.46	917.808	-96.9935	1097.62	895.39	-121.326	1172.3	834.05
1171	0	167.647	1194.45	1588.64	266.13	1179.65	1575.68	131.407	1026.96	1614.99	240.885	1000.78	1602.58	176.978	956.904	1435.57	157.092	903.113	1223.44	182.374	1090.44	1367.57	194.448	1148.13	1239.27	248.615	883.636	1274.57	8.12565	1031	1392.78	-48.4452	1034.37	1164.89	-49.1502	1027.47	1095.99	-71.6975	1122.51	1016	-54.6437	1162.35	919.258	-97.5308	1111.07	896.234	-121.447	1186.66	835.896
1172	0	167.869	1203.07	1587.94	266.296	1187.82	1575.03	130.881	1035.78	1614.59	240.258	1009.09	1602.27	176.463	965.155	1435.3	156.375	910.902	1223.25	181.972	1098.49	1367.02	193.987	1155.9	1238.56	247.925	891.513	1274.36	7.70731	1039.31	1392.44	-49.2034	1044.16	1164.71	-50.051	1038	1095.78	-72.0472	1134.19	1016.83	-54.7897	1175.11	920.628	-97.8965	1124.4	896.986	-121.393	1200.89	837.659
1173	0	168.076	1211.67	1587.14	266.451	1196.01	1574.3	130.408	1044.56	1614.09	239.695	1017.42	1601.85	176.042	973.402	1434.93	155.783	918.702	1222.95	181.606	1106.55	1366.37	193.541	1163.7	1237.77	247.376	899.445	1274.05	7.35076	1047.56	1392	-49.849	1053.84	1164.43	-50.8158	1048.42	1095.47	-72.2803	1145.73	1017.57	-54.7927	1187.73	921.909	-98.0974	1137.59	897.647	-121.166	1214.95	839.335
1174	0	168.269	1220.24	1586.26	266.596	1204.23	1573.49	129.99	1053.32	1613.49	239.196	1025.76	1601.35	175.716	981.65	1434.45	155.315	926.52	1222.56	181.282	1114.63	1365.63	193.119	1171.52	1236.89	246.964	907.433	1273.63	7.05948	1055.75	1391.45	-50.3812	1063.42	1164.04	-51.4469	1058.73	1095.06	-72.396	1157.13	1018.2	-54.653	1200.2	923.097	-98.142	1150.63	898.219	-120.769	1228.84	840.917
1175	0	168.446	1228.81	1585.28	266.732	1212.47	1572.59	129.63	1062.04	1612.79	238.765	1034.11	1600.75	175.484	989.904	1433.86	154.973	934.362	1222.07	181.004	1122.74	1364.81	192.729	1179.38	1235.94	246.688	915.481	1273.12	6.83677	1063.9	1390.81	-50.8003	1072.9	1163.57	-51.9472	1068.96	1094.56	-72.3944	1168.4	1018.72	-54.3728	1212.51	924.184	-98.0401	1163.52	898.702	-120.21	1242.55	842.397
1176	0	168.612	1237.36	1584.23	266.862	1220.75	1571.64	129.329	1070.74	1611.99	238.404	1042.48	1600.08	175.349	998.169	1433.18	154.755	942.236	1221.49	180.777	1130.88	1363.91	192.377	1187.28	1234.92	246.543	923.59	1272.51	6.68562	1072.02	1390.08	-51.107	1082.31	1163.01	-52.3208	1079.09	1093.98	-72.277	1179.53	1019.15	-53.957	1224.66	925.164	-97.8023	1176.24	899.097	-119.498	1256.06	843.771
1177	0	168.768	1245.91	1583.11	266.989	1229.06	1570.62	129.09	1079.41	1611.12	238.116	1050.88	1599.33	175.309	1006.45	1432.41	154.658	950.15	1220.82	180.607	1139.05	1362.95	192.07	1195.23	1233.85	246.526	931.764	1271.82	6.60857	1080.12	1389.27	-51.303	1091.65	1162.37	-52.572	1089.14	1093.31	-72.0469	1190.53	1019.46	-53.4122	1236.63	926.031	-97.4405	1188.78	899.405	-118.645	1269.37	845.031
1178	0	168.921	1254.45	1581.92	267.119	1237.4	1569.55	128.916	1088.06	1610.16	237.903	1059.3	1598.51	175.363	1014.75	1431.55	154.679	958.112	1220.07	180.498	1147.26	1361.92	191.814	1203.24	1232.72	246.63	940.005	1271.03	6.6077	1088.21	1388.39	-51.3906	1100.93	1161.66	-52.7062	1099.1	1092.58	-71.7084	1201.4	1019.68	-52.7474	1248.41	926.779	-96.9671	1201.14	899.625	-117.664	1282.45	846.17
1179	0	169.075	1262.99	1580.69	267.256	1245.79	1568.44	128.808	1096.69	1609.14	237.768	1067.75	1597.62	175.511	1023.08	1430.61	154.814	966.13	1219.23	180.454	1155.51	1360.83	191.615	1211.3	1231.56	246.849	948.314	1270.16	6.68448	1096.3	1387.44	-51.373	1110.17	1160.89	-52.729	1108.98	1091.78	-71.2673	1212.13	1019.78	-51.9734	1260	927.402	-96.3947	1213.31	899.756	-116.571	1295.29	847.181
1180	0	169.238	1271.53	1579.41	267.409	1254.21	1567.29	128.771	1105.31	1608.05	237.714	1076.23	1596.68	175.75	1031.43	1429.6	155.057	974.215	1218.32	180.479	1163.82	1359.7	191.477	1219.44	1230.36	247.173	956.694	1269.21	6.83978	1104.4	1386.42	-51.2543	1119.36	1160.05	-52.6466	1118.78	1090.92	-70.7308	1222.74	1019.78	-51.1025	1271.4	927.893	-95.7366	1225.27	899.796	-115.383	1307.9	848.057
1181	0	169.417	1280.07	1578.1	267.583	1262.68	1566.12	128.807	1113.92	1606.89	237.743	1084.74	1595.68	176.08	1039.82	1428.51	155.4	982.375	1217.34	180.578	1172.18	1358.52	191.405	1227.65	1229.13	247.596	965.148	1268.18	7.07387	1112.52	1385.36	-51.0392	1128.52	1159.16	-52.4655	1128.51	1090.01	-70.1072	1233.22	1019.68	-50.1482	1282.6	928.249	-95.0058	1237.03	899.743	-114.118	1320.25	848.791
1182	0	169.62	1288.63	1576.76	267.786	1271.19	1564.92	128.92	1122.52	1605.69	237.858	1093.29	1594.64	176.496	1048.26	1427.36	155.835	990.617	1216.28	180.754	1180.6	1357.31	191.403	1235.94	1227.88	248.107	973.677	1267.07	7.38643	1120.68	1384.25	-50.7331	1137.65	1158.21	-52.1924	1138.16	1089.05	-69.4057	1243.57	1019.46	-49.1252	1293.6	928.463	-94.2154	1248.57	899.594	-112.795	1332.34	849.376
1183	0	169.855	1297.2	1575.41	268.025	1279.74	1563.72	129.112	1131.12	1604.45	238.061	1101.86	1593.56	176.997	1056.73	1426.15	156.355	998.951	1215.15	181.009	1189.09	1356.08	191.474	1244.32	1226.62	248.698	982.283	1265.89	7.77656	1128.89	1383.1	-50.3418	1146.77	1157.22	-51.8343	1147.74	1088.04	-68.6362	1253.79	1019.14	-48.0485	1304.39	928.533	-93.3783	1259.89	899.347	-111.433	1344.16	849.803
1184	0	170.128	1305.78	1574.05	268.307	1288.34	1562.51	129.386	1139.72	1603.17	238.354	1110.48	1592.44	177.578	1065.26	1424.89	156.949	1007.38	1213.96	181.346	1197.65	1354.82	191.621	1252.79	1225.35	249.359	990.969	1264.64	8.24288	1137.16	1381.92	-49.8715	1155.86	1156.19	-51.3982	1157.26	1087	-67.809	1263.89	1018.71	-46.9334	1314.99	928.454	-92.5068	1270.98	898.999	-110.051	1355.7	850.065
1185	0	170.448	1314.39	1572.7	268.639	1296.98	1561.29	129.745	1148.33	1601.87	238.738	1119.13	1591.29	178.236	1073.85	1423.58	157.609	1015.92	1212.7	181.765	1206.28	1353.55	191.847	1261.37	1224.08	250.08	999.736	1263.31	8.78355	1145.5	1380.72	-49.3284	1164.94	1155.12	-50.8909	1166.72	1085.92	-66.9347	1273.87	1018.17	-45.7949	1325.39	928.224	-91.6127	1281.83	898.548	-108.667	1366.96	850.157
1186	0	170.82	1323.02	1571.35	269.027	1305.67	1560.09	130.191	1156.96	1600.55	239.215	1127.83	1590.13	178.968	1082.49	1422.24	158.324	1024.57	1211.39	182.27	1214.99	1352.28	192.154	1270.06	1222.81	250.851	1008.59	1261.93	9.39632	1153.93	1379.5	-48.7187	1174.01	1154.03	-50.3189	1176.11	1084.82	-66.0236	1283.72	1017.54	-44.6478	1335.58	927.842	-90.7073	1292.45	897.992	-107.3	1377.94	850.072
1187	0	171.252	1331.69	1570.03	269.475	1314.41	1558.89	130.725	1165.61	1599.23	239.785	1136.57	1588.95	179.768	1091.2	1420.86	159.087	1033.34	1210.03	182.858	1223.78	1351.01	192.544	1278.86	1221.56	251.665	1017.52	1260.49	10.0786	1162.44	1378.27	-48.0484	1183.08	1152.91	-49.6884	1185.45	1083.69	-65.0855	1293.45	1016.8	-43.5056	1345.58	927.308	-89.8009	1302.82	897.332	-105.966	1388.62	849.806
1188	0	171.747	1340.39	1568.74	269.989	1323.21	1557.72	131.348	1174.28	1597.91	240.449	1145.36	1587.77	180.632	1099.98	1419.48	159.887	1042.24	1208.63	183.531	1232.66	1349.76	193.019	1287.77	1220.32	252.513	1026.55	1259	10.8277	1171.06	1377.04	-47.3231	1192.14	1151.77	-49.0051	1194.75	1082.55	-64.1299	1303.07	1015.97	-42.381	1355.38	926.622	-88.9031	1312.95	896.569	-104.68	1399	849.355
1189	0	172.31	1349.13	1567.48	270.571	1332.06	1556.57	132.06	1182.99	1596.61	241.205	1154.2	1586.6	181.557	1108.82	1418.08	160.718	1051.26	1207.2	184.286	1241.63	1348.54	193.579	1296.81	1219.13	253.387	1035.66	1257.47	11.6404	1179.78	1375.83	-46.5476	1201.21	1150.62	-48.274	1203.99	1081.41	-63.1652	1312.57	1015.04	-41.2853	1364.98	925.789	-88.0225	1322.82	895.706	-103.456	1409.08	848.718
1190	0	172.943	1357.92	1566.27	271.225	1340.98	1555.45	132.861	1191.73	1595.34	242.052	1163.09	1585.44	182.537	1117.74	1416.69	161.572	1060.42	1205.74	185.121	1250.68	1347.36	194.224	1305.97	1217.97	254.281	1044.87	1255.91	12.5137	1188.62	1374.63	-45.7265	1210.29	1149.48	-47.4995	1213.2	1080.27	-62.1989	1321.95	1014.04	-40.2282	1374.39	924.811	-87.1666	1332.44	894.748	-102.304	1418.85	847.896
1191	0	173.647	1366.76	1565.11	271.95	1349.96	1554.37	133.749	1200.53	1594.1	242.988	1172.05	1584.31	183.568	1126.74	1415.31	162.444	1069.71	1204.27	186.034	1259.83	1346.22	194.954	1315.26	1216.88	255.19	1054.16	1254.33	13.444	1197.58	1373.47	-44.8631	1219.38	1148.34	-46.6851	1222.37	1079.15	-61.2373	1331.22	1012.96	-39.2178	1383.6	923.698	-86.3419	1341.8	893.703	-101.235	1428.32	846.893
1192	0	174.423	1375.67	1564.02	272.746	1359	1553.35	134.721	1209.37	1592.93	244.01	1181.07	1583.22	184.646	1135.82	1413.96	163.329	1079.14	1202.8	187.021	1269.06	1345.15	195.768	1324.68	1215.85	256.109	1063.56	1252.74	14.4279	1206.65	1372.35	-43.9604	1228.5	1147.24	-45.8335	1231.51	1078.05	-60.2857	1340.38	1011.82	-38.2604	1392.61	922.457	-85.5534	1350.89	892.581	-100.257	1437.46	845.715
1193	0	175.27	1384.63	1563	273.613	1368.12	1552.38	135.774	1218.27	1591.82	245.114	1190.15	1582.19	185.767	1144.97	1412.66	164.225	1088.7	1201.35	188.077	1278.39	1344.15	196.661	1334.22	1214.9	257.036	1073.05	1251.16	15.4619	1215.85	1371.29	-43.0204	1237.63	1146.17	-44.9467	1240.63	1077	-59.3482	1349.42	1010.62	-37.3607	1401.43	921.101	-84.8051	1359.73	891.395	-99.3748	1446.29	844.371
1194	0	176.185	1393.66	1562.07	274.548	1377.31	1551.47	136.904	1227.23	1590.79	246.294	1199.3	1581.21	186.927	1154.2	1411.42	165.13	1098.41	1199.92	189.197	1287.81	1343.23	197.631	1343.89	1214.05	257.969	1082.63	1249.6	16.5421	1225.16	1370.29	-42.0444	1246.8	1145.15	-44.0257	1249.72	1076	-58.4277	1358.35	1009.39	-36.5217	1410.04	919.642	-84.0996	1368.3	890.159	-98.5932	1454.79	842.875
1195	0	177.164	1402.77	1561.22	275.547	1386.57	1550.65	138.104	1236.26	1589.85	247.545	1208.51	1580.31	188.122	1163.51	1410.24	166.043	1108.25	1198.54	190.374	1297.31	1342.41	198.671	1353.67	1213.3	258.908	1092.31	1248.08	17.6647	1234.58	1369.38	-41.0335	1256	1144.19	-43.0709	1258.79	1075.07	-57.5261	1367.17	1008.14	-35.7448	1418.46	918.097	-83.438	1376.61	888.889	-97.9138	1462.97	841.242
1196	0	178.202	1411.95	1560.48	276.604	1395.91	1549.91	139.37	1245.35	1589.01	248.861	1217.8	1579.49	189.349	1172.9	1409.16	166.966	1118.22	1197.22	191.602	1306.89	1341.7	199.776	1363.58	1212.67	259.852	1102.09	1246.62	18.8256	1244.12	1368.57	-39.9879	1265.23	1143.32	-42.0819	1267.83	1074.22	-56.6444	1375.86	1006.88	-35.0298	1426.67	916.484	-82.82	1384.65	887.605	-97.3368	1470.81	839.492
1197	0	179.293	1421.2	1559.85	277.715	1405.32	1549.27	140.694	1254.52	1588.28	250.234	1227.17	1578.78	190.604	1182.37	1408.18	167.899	1128.31	1195.98	192.873	1316.55	1341.1	200.937	1373.6	1212.18	260.805	1111.96	1245.24	20.0206	1253.75	1367.86	-38.9079	1274.49	1142.55	-41.058	1276.85	1073.47	-55.7828	1384.45	1005.64	-34.3754	1434.68	914.822	-82.2441	1392.43	886.325	-96.8606	1478.32	837.646
1198	0	180.43	1430.53	1559.33	278.872	1414.82	1548.74	142.068	1263.75	1587.68	251.656	1236.6	1578.17	191.884	1191.91	1407.31	168.846	1138.52	1194.85	194.178	1326.29	1340.63	202.146	1383.71	1211.82	261.768	1121.91	1243.96	21.2453	1263.47	1367.28	-37.7936	1283.78	1141.88	-39.9982	1285.85	1072.83	-54.9411	1392.91	1004.42	-33.779	1442.49	913.133	-81.7072	1399.94	885.07	-96.4818	1485.49	835.73
1199	0	181.606	1439.94	1558.95	280.068	1424.38	1548.33	143.483	1273.06	1587.21	253.118	1246.11	1577.67	193.186	1201.52	1406.57	169.811	1148.82	1193.83	195.509	1336.09	1340.3	203.393	1393.93	1211.61	262.746	1131.95	1242.79	22.4949	1273.28	1366.83	-36.6454	1293.09	1141.34	-38.9011	1294.81	1072.31	-54.1185	1401.24	1003.24	-33.2371	1450.09	911.44	-81.205	1407.19	883.86	-96.1956	1492.33	833.768
1200	0	182.811	1449.42	1558.7	281.294	1434.02	1548.06	144.931	1282.44	1586.87	254.611	1255.68	1577.31	194.506	1211.19	1405.98	170.794	1159.22	1192.96	196.856	1345.95	1340.1	204.667	1404.22	1211.55	263.74	1142.06	1241.77	23.7647	1283.15	1366.53	-35.4638	1302.42	1140.93	-37.7657	1303.73	1071.93	-53.3139	1409.44	1002.13	-32.7454	1457.48	909.766	-80.732	1414.18	882.714	-95.9954	1498.83	831.788
1201	0	184.038	1458.97	1558.6	282.542	1443.74	1547.92	146.401	1291.89	1586.67	256.126	1265.32	1577.07	195.842	1220.93	1405.54	171.801	1169.68	1192.25	198.212	1355.86	1340.05	205.957	1414.59	1211.64	264.756	1152.24	1240.9	25.0495	1293.07	1366.38	-34.2498	1311.74	1140.67	-36.5911	1312.6	1071.69	-52.5264	1417.52	1001.09	-32.299	1464.66	908.134	-80.2817	1420.91	881.653	-95.8733	1505	829.82
1202	0	185.277	1468.6	1558.64	283.803	1453.51	1547.93	147.884	1301.4	1586.61	257.652	1275.03	1576.96	197.19	1230.73	1405.26	172.834	1180.19	1191.71	199.565	1365.82	1340.14	207.251	1425	1211.89	265.797	1162.47	1240.21	26.3441	1303.03	1366.38	-33.0049	1321.05	1140.56	-35.3767	1321.4	1071.6	-51.7549	1425.45	1000.15	-31.8924	1471.64	906.568	-79.8467	1427.4	880.693	-95.82	1510.84	827.889
1203	0	186.519	1478.29	1558.83	285.068	1463.35	1548.08	149.369	1310.98	1586.69	259.178	1284.79	1577	198.547	1240.57	1405.14	173.895	1190.73	1191.37	200.907	1375.8	1340.37	208.539	1435.46	1212.29	266.867	1172.75	1239.7	27.6428	1313.02	1366.55	-31.7315	1330.32	1140.6	-34.1228	1330.13	1071.67	-50.9985	1433.23	999.316	-31.5202	1478.42	905.087	-79.4192	1433.64	879.849	-95.8253	1516.37	826.023
1204	0	187.755	1488.03	1559.16	286.327	1473.24	1548.39	150.846	1320.61	1586.92	260.696	1294.6	1577.17	199.91	1250.45	1405.2	174.987	1201.27	1191.22	202.229	1385.81	1340.75	209.807	1445.93	1212.83	267.97	1183.05	1239.4	28.9402	1323.01	1366.88	-30.4323	1339.54	1140.8	-32.8301	1338.77	1071.9	-50.2564	1440.86	998.596	-31.1765	1485	903.714	-78.9909	1439.66	879.133	-95.8779	1521.6	824.247
1205	0	188.976	1497.83	1559.65	287.571	1483.18	1548.85	152.305	1330.29	1587.27	262.194	1304.46	1577.47	201.275	1260.36	1405.43	176.112	1211.8	1191.29	203.522	1395.82	1341.26	211.044	1456.41	1213.51	269.11	1193.38	1239.3	30.2305	1332.99	1367.37	-29.1109	1348.68	1141.16	-31.5002	1347.31	1072.28	-49.5282	1448.34	998.001	-30.8557	1491.39	902.464	-78.5538	1445.44	878.555	-95.9659	1526.55	822.583
1206	0	190.172	1507.68	1560.27	288.792	1493.16	1549.46	153.736	1340.01	1587.75	263.663	1314.36	1577.9	202.638	1270.3	1405.82	177.271	1222.28	1191.56	204.779	1405.83	1341.9	212.239	1466.87	1214.32	270.289	1203.7	1239.41	31.5078	1342.93	1368.01	-27.7716	1357.72	1141.67	-30.1353	1355.72	1072.8	-48.8138	1455.65	997.537	-30.5521	1497.59	901.354	-78.0997	1451.02	878.121	-96.0772	1531.23	821.05
1207	0	191.336	1517.56	1561.03	289.982	1503.17	1550.22	155.128	1349.77	1588.36	265.093	1324.29	1578.46	203.997	1280.25	1406.38	178.466	1232.69	1192.04	205.991	1415.83	1342.67	213.381	1477.29	1215.24	271.511	1214.01	1239.74	32.7664	1352.82	1368.8	-26.4191	1366.64	1142.32	-28.7384	1364	1073.48	-48.1131	1462.79	997.205	-30.2605	1503.62	900.395	-77.6214	1456.41	877.832	-96.1997	1535.67	819.663
1208	0	192.461	1527.47	1561.91	291.132	1513.21	1551.1	156.473	1359.56	1589.06	266.475	1334.24	1579.13	205.348	1290.2	1407.11	179.699	1243.02	1192.72	207.153	1425.8	1343.55	214.46	1487.66	1216.26	272.778	1224.29	1240.27	34.0009	1362.64	1369.72	-25.0585	1375.41	1143.11	-27.3131	1372.12	1074.28	-47.4263	1469.76	997.007	-29.9761	1509.48	899.595	-77.1122	1461.61	877.687	-96.3219	1539.9	818.436
1209	0	193.539	1537.4	1562.91	292.236	1523.26	1552.11	157.763	1369.37	1589.87	267.8	1344.2	1579.91	206.688	1300.13	1407.97	180.971	1253.24	1193.58	208.259	1435.73	1344.53	215.467	1497.95	1217.37	274.093	1234.54	1240.99	35.2058	1372.37	1370.76	-23.6952	1384.01	1144.01	-25.8637	1380.08	1075.19	-46.7537	1476.56	996.938	-29.6944	1515.19	898.959	-76.5661	1466.65	877.681	-96.433	1543.94	817.375
1210	0	194.564	1547.34	1564.01	293.287	1533.3	1553.23	158.988	1379.19	1590.76	269.06	1354.16	1580.78	208.013	1310.05	1408.98	182.285	1263.33	1194.61	209.303	1445.62	1345.59	216.394	1508.16	1218.55	275.455	1244.73	1241.9	36.3763	1381.99	1371.9	-22.3346	1392.42	1145.01	-24.3948	1387.85	1076.21	-46.0953	1483.17	996.994	-29.4117	1520.76	898.488	-75.9782	1471.54	877.807	-96.5232	1547.83	816.484
1211	0	195.532	1557.27	1565.19	294.28	1543.35	1554.45	160.142	1389.02	1591.71	270.247	1364.12	1581.74	209.322	1319.94	1410.1	183.641	1273.29	1195.8	210.284	1455.45	1346.73	217.237	1518.26	1219.79	276.866	1254.85	1242.97	37.508	1391.48	1373.13	-20.9816	1400.62	1146.09	-22.9114	1395.44	1077.3	-45.4512	1489.61	997.165	-29.1247	1526.2	898.178	-75.3447	1476.3	878.053	-96.5838	1551.59	815.765
1212	0	196.436	1567.2	1566.45	295.211	1553.37	1555.76	161.218	1398.83	1592.72	271.357	1374.07	1582.77	210.61	1329.78	1411.33	185.041	1283.1	1197.11	211.197	1465.21	1347.94	217.99	1528.25	1221.07	278.325	1264.9	1244.2	38.5973	1400.84	1374.42	-19.641	1408.6	1147.23	-21.4185	1402.82	1078.46	-44.8214	1495.87	997.441	-28.8304	1531.54	898.025	-74.6623	1480.96	878.407	-96.6079	1555.25	815.213
1213	0	197.275	1577.11	1567.75	296.075	1563.37	1557.13	162.212	1408.64	1593.78	272.382	1383.99	1583.85	211.875	1339.57	1412.66	186.484	1292.76	1198.53	212.042	1474.9	1349.18	218.655	1538.11	1222.38	279.829	1274.86	1245.55	39.6411	1410.04	1375.75	-18.3168	1416.34	1148.42	-19.9209	1409.99	1079.67	-44.2052	1501.95	997.81	-28.5267	1536.77	898.019	-73.929	1485.52	878.853	-96.5896	1558.86	814.822
1214	0	198.046	1586.98	1569.1	296.87	1573.33	1558.56	163.118	1418.42	1594.86	273.319	1393.87	1584.98	213.114	1349.31	1414.05	187.969	1302.27	1200.04	212.818	1484.5	1350.46	219.23	1547.85	1223.69	281.375	1284.74	1247.01	40.6374	1419.07	1377.11	-17.0122	1423.84	1149.64	-18.4234	1416.95	1080.89	-43.602	1507.87	998.257	-28.2114	1541.92	898.148	-73.1434	1490.01	879.374	-96.5246	1562.43	814.584
1215	0	198.746	1596.82	1570.47	297.593	1583.25	1560.02	163.934	1428.17	1595.95	274.164	1403.72	1586.15	214.325	1358.98	1415.5	189.493	1311.62	1201.6	213.527	1494.02	1351.76	219.72	1557.45	1225.01	282.959	1294.51	1248.56	41.5848	1427.95	1378.47	-15.7296	1431.09	1150.86	-16.93	1423.69	1082.13	-43.0105	1513.61	998.769	-27.883	1546.99	898.398	-72.3047	1494.44	879.954	-96.41	1565.99	814.485
1216	0	199.374	1606.62	1571.85	298.244	1593.11	1561.5	164.657	1437.88	1597.04	274.916	1413.51	1587.33	215.506	1368.57	1416.99	191.053	1320.82	1203.19	214.171	1503.46	1353.06	220.13	1566.92	1226.32	284.573	1304.19	1250.17	42.483	1436.65	1379.81	-14.4703	1438.08	1152.07	-15.4444	1430.22	1083.35	-42.4293	1519.19	999.328	-27.5402	1552	898.753	-71.4129	1498.83	880.575	-96.2442	1569.57	814.514
1217	0	199.932	1616.36	1573.22	298.823	1602.91	1562.99	165.287	1447.55	1598.11	275.573	1423.26	1588.53	216.654	1378.1	1418.49	192.642	1329.88	1204.8	214.752	1512.8	1354.35	220.468	1576.26	1227.6	286.209	1313.77	1251.82	43.3325	1445.2	1381.13	-13.2351	1444.83	1153.26	-13.9696	1436.54	1084.54	-41.8565	1524.62	999.92	-27.1819	1556.96	899.196	-70.4684	1503.19	881.219	-96.0265	1573.18	814.653
1218	0	200.419	1626.04	1574.56	299.329	1612.64	1564.47	165.824	1457.18	1599.17	276.134	1432.94	1589.72	217.766	1387.54	1420	194.253	1338.81	1206.4	215.275	1522.05	1355.62	220.741	1585.47	1228.85	287.861	1323.24	1253.5	44.1345	1453.59	1382.39	-12.0235	1451.34	1154.4	-12.5079	1442.66	1085.7	-41.2899	1529.91	1000.53	-26.8072	1561.88	899.71	-69.4723	1507.53	881.869	-95.7572	1576.83	814.886
1219	0	200.837	1635.66	1575.86	299.765	1622.3	1565.93	166.268	1466.74	1600.19	276.602	1442.55	1590.9	218.842	1396.91	1421.49	195.878	1347.62	1207.98	215.743	1531.21	1356.85	220.96	1594.56	1230.06	289.518	1332.62	1255.17	44.8908	1461.83	1383.59	-10.8346	1457.63	1155.5	-11.0609	1448.59	1086.8	-40.7272	1535.06	1001.14	-26.4155	1566.76	900.274	-68.4259	1511.86	882.508	-95.4372	1580.54	815.194
1220	0	201.188	1645.21	1577.11	300.132	1631.89	1567.35	166.622	1476.26	1601.16	276.978	1452.1	1592.06	219.878	1406.19	1422.95	197.507	1356.32	1209.51	216.161	1540.28	1358.03	221.134	1603.53	1231.21	291.171	1341.91	1256.82	45.6039	1469.94	1384.71	-9.66707	1463.72	1156.53	-9.62994	1454.35	1087.84	-40.166	1540.1	1001.73	-26.0062	1571.62	900.87	-67.3312	1516.19	883.122	-95.0683	1584.32	815.556
1221	0	201.474	1654.68	1578.29	300.433	1641.39	1568.72	166.89	1485.71	1602.09	277.265	1461.58	1593.19	220.875	1415.4	1424.36	199.133	1364.93	1210.98	216.533	1549.27	1359.16	221.273	1612.41	1232.31	292.813	1351.11	1258.44	46.2764	1477.92	1385.75	-8.51908	1469.63	1157.49	-8.21557	1459.94	1088.8	-39.6037	1545.02	1002.3	-25.5788	1576.45	901.478	-66.1907	1520.53	883.695	-94.6524	1588.16	815.952
1222	0	201.699	1664.09	1579.39	300.671	1650.81	1570.02	167.075	1495.1	1602.95	277.467	1470.98	1594.28	221.83	1424.54	1425.71	200.744	1373.45	1212.38	216.866	1558.18	1360.22	221.386	1621.18	1233.33	294.434	1360.23	1259.99	46.9109	1485.81	1386.69	-7.38884	1475.38	1158.36	-6.81816	1465.39	1089.69	-39.0378	1549.86	1002.82	-25.133	1581.26	902.078	-65.0071	1524.87	884.215	-94.1919	1592.06	816.36
1223	0	201.866	1673.41	1580.4	300.85	1660.16	1571.24	167.182	1504.43	1603.75	277.589	1480.31	1595.32	222.742	1433.59	1427	202.334	1381.91	1213.69	217.162	1567.02	1361.21	221.48	1629.88	1234.28	296.026	1369.28	1261.48	47.5101	1493.6	1387.52	-6.27464	1481	1159.16	-5.43782	1470.73	1090.5	-38.4661	1554.62	1003.29	-24.6684	1586.06	902.65	-63.7841	1529.23	884.67	-93.689	1596.02	816.759
1224	0	201.979	1682.67	1581.31	300.973	1669.42	1572.38	167.215	1513.69	1604.47	277.636	1489.57	1596.3	223.61	1442.59	1428.19	203.892	1390.31	1214.91	217.425	1575.79	1362.12	221.563	1638.49	1235.14	297.583	1378.26	1262.89	48.0763	1501.33	1388.25	-5.175	1486.52	1159.86	-4.07463	1475.97	1091.21	-37.8865	1559.32	1003.68	-24.1848	1590.84	903.176	-62.5255	1533.6	885.05	-93.1462	1600.02	817.125
1225	0	202.041	1691.85	1582.11	301.045	1678.6	1573.42	167.182	1522.9	1605.11	277.612	1498.75	1597.22	224.433	1451.51	1429.29	205.413	1398.66	1216.02	217.66	1584.5	1362.93	221.639	1647.04	1235.9	299.098	1387.18	1264.2	48.6112	1509	1388.86	-4.08894	1491.97	1160.46	-2.72879	1481.14	1091.84	-37.2974	1563.97	1004	-23.6819	1595.62	903.639	-61.2363	1537.99	885.346	-92.566	1604.06	817.439
1226	0	202.056	1700.96	1582.79	301.069	1687.72	1574.36	167.087	1532.05	1605.67	277.525	1507.88	1598.08	225.211	1460.38	1430.29	206.888	1406.97	1217.03	217.868	1593.16	1363.65	221.711	1655.52	1236.56	300.563	1396.04	1265.4	49.1162	1516.64	1389.35	-3.01611	1497.39	1160.97	-1.40086	1486.28	1092.37	-36.6973	1568.61	1004.23	-23.1597	1600.39	904.019	-59.9215	1542.38	885.55	-91.9504	1608.13	817.679
1227	0	202.028	1710.01	1583.35	301.05	1696.76	1575.18	166.937	1541.14	1606.15	277.381	1516.93	1598.86	225.941	1469.19	1431.18	208.311	1415.26	1217.92	218.052	1601.77	1364.27	221.782	1663.96	1237.12	301.974	1404.86	1266.49	49.5918	1524.26	1389.73	-1.95691	1502.81	1161.38	-0.091849	1491.4	1092.8	-36.0857	1573.24	1004.36	-22.6182	1605.15	904.303	-58.5872	1546.79	885.657	-91.3016	1612.21	817.826
1228	0	201.96	1719	1583.79	300.991	1705.73	1575.88	166.737	1550.17	1606.53	277.184	1525.93	1599.56	226.624	1477.96	1431.96	209.676	1423.53	1218.69	218.213	1610.34	1364.79	221.851	1672.35	1237.56	303.325	1413.64	1267.46	50.0379	1531.87	1389.98	-0.912658	1508.25	1161.68	1.1966	1496.55	1093.14	-35.4624	1577.88	1004.39	-22.0579	1609.9	904.475	-57.2398	1551.22	885.664	-90.6213	1616.29	817.862
1229	0	201.855	1727.93	1584.09	300.896	1714.65	1576.47	166.493	1559.16	1606.83	276.94	1534.88	1600.18	227.257	1486.69	1432.61	210.977	1431.79	1219.33	218.352	1618.88	1365.2	221.918	1680.71	1237.88	304.608	1422.38	1268.3	50.4537	1539.49	1390.12	0.11443	1513.75	1161.88	2.46218	1501.74	1093.38	-34.8279	1582.55	1004.31	-21.4792	1614.66	904.523	-55.8863	1555.66	885.569	-89.9114	1620.36	817.773
1230	0	201.716	1736.81	1584.27	300.766	1723.52	1576.93	166.21	1568.11	1607.03	276.656	1543.78	1600.71	227.839	1495.38	1433.15	212.208	1440.04	1219.86	218.469	1627.39	1365.5	221.981	1689.04	1238.09	305.82	1431.09	1269.02	50.8377	1547.13	1390.15	1.12119	1519.34	1161.98	3.70193	1507.01	1093.52	-34.1835	1587.28	1004.12	-20.8834	1619.42	904.437	-54.534	1560.11	885.371	-89.1735	1624.42	817.545
1231	0	201.545	1745.65	1584.32	300.606	1732.34	1577.26	165.893	1577.01	1607.14	276.335	1552.63	1601.15	228.369	1504.04	1433.56	213.362	1448.29	1220.26	218.563	1635.89	1365.7	222.035	1697.36	1238.19	306.952	1439.77	1269.61	51.1878	1554.8	1390.07	2.10358	1525.03	1161.98	4.91218	1512.38	1093.58	-33.5311	1592.07	1003.82	-20.2717	1624.18	904.21	-53.1907	1564.58	885.072	-88.4095	1628.45	817.169
1232	0	201.345	1754.45	1584.24	300.416	1741.13	1577.47	165.546	1585.88	1607.15	275.983	1561.45	1601.5	228.844	1512.68	1433.85	214.434	1456.54	1220.55	218.632	1644.37	1365.79	222.078	1705.66	1238.16	308	1448.43	1270.06	51.5012	1562.52	1389.88	3.05674	1530.85	1161.89	6.08867	1517.87	1093.54	-32.8734	1596.94	1003.4	-19.6461	1628.96	903.835	-51.864	1569.06	884.673	-87.6213	1632.45	816.638
1233	0	201.116	1763.22	1584.05	300.198	1749.89	1577.56	165.174	1594.72	1607.08	275.604	1570.25	1601.75	229.263	1521.31	1434.02	215.418	1464.8	1220.72	218.677	1652.85	1365.78	222.105	1713.96	1238.03	308.957	1457.07	1270.39	51.775	1570.28	1389.6	3.97516	1536.83	1161.69	7.22663	1523.51	1093.42	-32.2139	1601.91	1002.86	-19.0093	1633.75	903.309	-50.5619	1573.57	884.181	-86.8115	1636.41	815.949
1234	0	200.859	1771.97	1583.73	299.954	1758.62	1577.52	164.779	1603.54	1606.91	275.2	1579.02	1601.91	229.624	1529.92	1434.08	216.307	1473.07	1220.77	218.693	1661.34	1365.66	222.112	1722.26	1237.79	309.819	1465.7	1270.6	52.0057	1578.11	1389.22	4.85277	1542.97	1161.41	8.32085	1529.32	1093.21	-31.5565	1607	1002.22	-18.3645	1638.57	902.633	-49.292	1578.1	883.598	-85.9829	1640.35	815.101
1235	0	200.575	1780.7	1583.3	299.682	1767.34	1577.36	164.363	1612.34	1606.65	274.774	1587.77	1601.97	229.923	1538.53	1434.02	217.096	1481.35	1220.71	218.679	1669.82	1365.44	222.094	1730.58	1237.45	310.58	1474.31	1270.68	52.1899	1585.99	1388.76	5.68318	1549.29	1161.04	9.36587	1535.3	1092.93	-30.9059	1612.2	1001.47	-17.7152	1643.42	901.808	-48.0618	1582.67	882.932	-85.1391	1644.25	814.097
1236	0	200.265	1789.43	1582.77	299.383	1776.05	1577.09	163.928	1621.13	1606.3	274.329	1596.51	1601.93	230.16	1547.14	1433.84	217.78	1489.65	1220.56	218.633	1678.32	1365.12	222.045	1738.92	1237.01	311.236	1482.91	1270.64	52.3239	1593.95	1388.22	6.45985	1555.81	1160.58	10.3561	1541.48	1092.57	-30.2669	1617.54	1000.61	-17.0659	1648.3	900.838	-46.8785	1587.27	882.188	-84.2846	1648.14	812.941
1237	0	199.927	1798.14	1582.13	299.057	1784.76	1576.71	163.477	1629.91	1605.86	273.866	1605.25	1601.79	230.331	1555.75	1433.57	218.356	1497.96	1220.3	218.552	1686.83	1364.71	221.962	1747.29	1236.49	311.784	1491.51	1270.49	52.4041	1601.98	1387.6	7.17626	1562.52	1160.04	11.286	1547.87	1092.13	-29.6449	1623.03	999.65	-16.4212	1653.24	899.729	-45.7486	1591.92	881.374	-83.4246	1652	811.641
1238	0	199.561	1806.86	1581.41	298.703	1793.46	1576.23	163.008	1638.69	1605.34	273.385	1613.99	1601.55	230.434	1564.38	1433.18	218.82	1506.3	1219.94	218.432	1695.37	1364.21	221.841	1755.69	1235.9	312.22	1500.11	1270.23	52.4271	1610.08	1386.91	7.82609	1569.44	1159.42	12.1501	1554.46	1091.62	-29.0456	1628.66	998.597	-15.7861	1658.23	898.487	-44.6783	1596.63	880.495	-82.565	1655.87	810.207
1239	0	199.167	1815.58	1580.6	298.32	1802.18	1575.64	162.523	1647.48	1604.74	272.888	1622.74	1601.21	230.466	1573.01	1432.7	219.171	1514.65	1219.5	218.272	1703.92	1363.62	221.678	1764.13	1235.23	312.544	1508.71	1269.87	52.3896	1618.26	1386.16	8.40339	1576.56	1158.72	12.9433	1561.26	1091.05	-28.4744	1634.46	997.452	-15.1659	1663.28	897.123	-43.6731	1601.39	879.559	-81.7129	1659.74	808.647
1240	0	198.744	1824.32	1579.71	297.907	1810.91	1574.96	162.021	1656.26	1604.05	272.374	1631.49	1600.77	230.427	1581.67	1432.13	219.408	1523.03	1218.96	218.07	1712.5	1362.95	221.469	1772.63	1234.5	312.753	1517.31	1269.4	52.2886	1626.53	1385.35	8.90271	1583.89	1157.96	13.6609	1568.28	1090.41	-27.937	1640.41	996.223	-14.5661	1668.41	895.644	-42.7381	1606.22	878.57	-80.8756	1663.64	806.974
1241	0	198.29	1833.06	1578.74	297.463	1819.65	1574.2	161.502	1665.06	1603.28	271.843	1640.26	1600.24	230.313	1590.34	1431.46	219.529	1531.43	1218.35	217.822	1721.12	1362.19	221.213	1781.17	1233.7	312.848	1525.93	1268.84	52.1213	1634.88	1384.49	9.31919	1591.42	1157.12	14.2986	1575.51	1089.7	-27.4388	1646.53	994.912	-13.9918	1673.62	894.061	-41.8778	1611.13	877.533	-80.0611	1667.58	805.198
1242	0	197.805	1841.83	1577.72	296.987	1828.41	1573.34	160.966	1673.87	1602.43	271.294	1649.04	1599.6	230.123	1599.04	1430.7	219.536	1539.84	1217.65	217.527	1729.76	1361.36	220.906	1789.78	1232.86	312.827	1534.56	1268.18	51.8853	1643.31	1383.57	9.64861	1599.16	1156.21	14.8526	1582.96	1088.93	-26.9847	1652.82	993.524	-13.4482	1678.93	892.382	-41.0963	1616.12	876.453	-79.2772	1671.58	803.331
1243	0	197.289	1850.61	1576.62	296.478	1837.19	1572.41	160.41	1682.69	1601.51	270.726	1657.85	1598.87	229.854	1607.76	1429.86	219.429	1548.28	1216.87	217.184	1738.45	1360.45	220.547	1798.45	1231.97	312.692	1543.21	1267.43	51.5786	1651.83	1382.59	9.88739	1607.09	1155.24	15.3197	1590.61	1088.1	-26.5792	1659.28	992.064	-12.9401	1684.33	890.616	-40.397	1621.21	875.333	-78.5316	1675.64	801.383
1244	0	196.74	1859.41	1575.48	295.935	1845.99	1571.41	159.834	1691.53	1600.5	270.138	1666.67	1598.04	229.507	1616.51	1428.93	219.209	1556.74	1216.02	216.79	1747.16	1359.47	220.136	1807.18	1231.03	312.443	1551.88	1266.59	51.1995	1660.44	1381.57	10.0326	1615.22	1154.2	15.697	1598.47	1087.21	-26.2265	1665.92	990.533	-12.4717	1689.83	888.771	-39.7829	1626.39	874.176	-77.8317	1679.79	799.362
1245	0	196.159	1868.23	1574.27	295.359	1854.82	1570.33	159.238	1700.39	1599.42	269.531	1675.51	1597.11	229.079	1625.29	1427.91	218.876	1565.22	1215.09	216.346	1755.92	1358.41	219.671	1815.98	1230.05	312.081	1560.58	1265.67	50.7465	1669.13	1380.49	10.0819	1623.54	1153.09	15.9824	1606.54	1086.26	-25.93	1672.73	988.936	-12.0468	1695.45	886.852	-39.2563	1631.68	872.984	-77.1839	1684.03	797.277
1246	0	195.543	1877.08	1573.02	294.747	1863.67	1569.18	158.619	1709.27	1598.27	268.902	1684.38	1596.09	228.569	1634.1	1426.82	218.432	1573.72	1214.09	215.849	1764.72	1357.29	219.152	1824.85	1229.03	311.605	1569.3	1264.66	50.2187	1677.92	1379.37	10.0336	1632.04	1151.92	16.1741	1614.8	1085.24	-25.6924	1679.71	987.274	-11.6684	1701.19	884.867	-38.8192	1637.08	871.758	-76.5938	1688.38	795.133
1247	0	194.894	1885.95	1571.72	294.1	1872.54	1567.97	157.979	1718.17	1597.03	268.251	1693.26	1594.96	227.978	1642.94	1425.64	217.876	1582.24	1213.01	215.3	1773.56	1356.09	218.579	1833.8	1227.97	311.018	1578.06	1263.57	49.615	1686.79	1378.19	9.88628	1640.73	1150.68	16.2706	1623.26	1084.17	-25.516	1686.86	985.548	-11.339	1707.04	882.817	-38.473	1642.6	870.499	-76.0659	1692.84	792.936
1248	0	194.211	1894.84	1570.37	293.418	1881.45	1566.69	157.315	1727.08	1595.72	267.578	1702.17	1593.75	227.304	1651.81	1424.38	217.209	1590.78	1211.86	214.698	1782.44	1354.83	217.951	1842.81	1226.87	310.318	1586.84	1262.39	48.935	1695.76	1376.96	9.63915	1649.6	1149.38	16.2712	1631.91	1083.03	-25.4023	1694.19	983.76	-11.0604	1713.01	880.707	-38.2186	1648.23	869.208	-75.6036	1697.43	790.689
1249	0	193.493	1903.76	1568.98	292.701	1890.38	1565.34	156.628	1736.02	1594.34	266.883	1711.11	1592.43	226.547	1660.72	1423.04	216.431	1599.34	1210.63	214.043	1791.36	1353.49	217.27	1851.9	1225.74	309.508	1595.66	1261.13	48.1783	1704.82	1375.69	9.29162	1658.64	1148.01	16.1752	1640.75	1081.83	-25.3525	1701.69	981.911	-10.8337	1719.11	878.539	-38.0567	1653.98	867.885	-75.2091	1702.15	788.395
1250	0	192.741	1912.7	1567.53	291.948	1899.33	1563.94	155.917	1744.98	1592.87	266.165	1720.07	1591.02	225.708	1669.66	1421.62	215.543	1607.93	1209.33	213.334	1800.32	1352.09	216.534	1861.06	1224.56	308.586	1604.5	1259.79	47.3446	1713.96	1374.36	8.84338	1667.87	1146.57	15.9823	1649.78	1080.57	-25.3669	1709.37	980	-10.6597	1725.34	876.313	-37.9877	1659.86	866.53	-74.8839	1706.99	786.053
1251	0	191.955	1921.67	1566.05	291.16	1908.31	1562.46	155.182	1753.96	1591.34	265.424	1729.05	1589.51	224.785	1678.64	1420.13	214.544	1616.53	1207.96	212.572	1809.33	1350.61	215.744	1870.3	1223.35	307.553	1613.39	1258.37	46.4338	1723.2	1372.98	8.29429	1677.26	1145.07	15.6923	1659.01	1079.25	-25.4461	1717.22	978.029	-10.5387	1731.69	874.029	-38.0117	1665.85	865.143	-74.6287	1711.96	783.666
1252	0	191.134	1930.66	1564.52	290.336	1917.32	1560.92	154.423	1762.96	1589.72	264.66	1738.06	1587.9	223.78	1687.64	1418.55	213.435	1625.15	1206.51	211.756	1818.38	1349.07	214.9	1879.61	1222.1	306.408	1622.3	1256.86	45.446	1732.54	1371.56	7.6443	1686.84	1143.51	15.3051	1668.42	1077.87	-25.59	1725.24	975.996	-10.471	1738.17	871.689	-38.1288	1671.97	863.724	-74.4437	1717.07	781.233
[truncated: 69 more columns]

## Sheet: Sheet2
Devices
		025370 - Force			025370 - Moment			025370 - CoP			027571 - Force			027571 - Moment			027571 - CoP			037720 - Force			037720 - Moment			037720 - CoP
Frame	Sub Frame	Fx	Fy	Fz	Mx	My	Mz	Cx	Cy	Cz	Fx	Fy	Fz	Mx	My	Mz	Cx	Cy	Cz	Fx	Fy	Fz	Mx	My	Mz	Cx	Cy	Cz
		N	N	N	N.mm	N.mm	N.mm	mm	mm	mm	N	N	N	N.mm	N.mm	N.mm	mm	mm	mm	N	N	N	N.mm	N.mm	N.mm	mm	mm	mm
779	0	0	0	0	0	0	0	200	300	0	0	0	0	0	0	0	200	903	0	0	0	0	0	0	0	603	903	0
779	1	0	0	0	0	0	0	200	300	0	0	0	0	0	0	0	200	903	0	0	0	0	0	0	0	603	903	0
779	2	0	0	0	0	0	0	200	300	0	0	0	0	0	0	0	200	903	0	0	0	0	0	0	0	603	903	0
779	3	0	0	0	0	0	0	200	300	0	0	0	0	0	0	0	200	903	0	0	0	0	0	0	0	603	903	0
779	4	0	0	0	0	0	0	200	300	0	0	0	0	0	0	0	200	903	0	0	0	0	0	0	0	603	903	0
779	5	0	0	0	0	0	0	200	300	0	0	0	0	0	0	0	200	903	0	0	0	0	0	0	0	603	903	0
779	6	0	0	0	0	0	0	200	300	0	0	0	0	0	0	0	200	903	0	0	0	0	0	0	0	603	903	0
779	7	0	0	0	0	0	0	200	300	0	0	0	0	0	0	0	200	903	0	0	0	0	0	0	0	603	903	0
779	8	0	0	0	0	0	0	200	300	0	0	0	0	0	0	0	200	903	0	0	0	0	0	0	0	603	903	0
779	9	0	0	0	0	0	0	200	300	0	0	0	0	0	0	0	200	903	0	0	0	0	0	0	0	603	903	0
780	0	0	0	0	0	0	0	200	300	0	0	0	0	0	0	0	200	903	0	0	0	0	0	0	0	603	903	0
780	1	0	0	0	0	0	0	200	300	0	0	0	0	0	0	0	200	903	0	0	0	0	0	0	0	603	903	0
780	2	0	0	0	0	0	0	200	300	0	0	0	0	0	0	0	200	903	0	0	0	0	0	0	0	603	903	0
780	3	0	0	0	0	0	0	200	300	0	0	0	0	0	0	0	200	903	0	0	0	0	0	0	0	603	903	0
780	4	0	0	0	0	0	0	200	300	0	0	0	0	0	0	0	200	903	0	0	0	0	0	0	0	603	903	0
780	5	0	0	0	0	0	0	200	300	0	0	0	0	0	0	0	200	903	0	0	0	0	0	0	0	603	903	0
780	6	0	0	0	0	0	0	200	300	0	0	0	0	0	0	0	200	903	0	0	0	0	0	0	0	603	903	0
780	7	0	0	0	0	0	0	200	300	0	0	0	0	0	0	0	200	903	0	0	0	0	0	0	0	603	903	0
780	8	0	0	0	0	0	0	200	300	0	0	0	0	0	0	0	200	903	0	0	0	0	0	0	0	603	903	0
780	9	0	0	0	0	0	0	200	300	0	0	0	0	0	0	0	200	903	0	0	0	0	0	0	0	603	903	0
781	0	0	0	0	0	0	0	200	300	0	0	0	0	0	0	0	200	903	0	0	0	0	0	0	0	603	903	0
781	1	0	0	0	0	0	0	200	300	0	0	0	0	0	0	0	200	903	0	0	0	0	0	0	0	603	903	0
781	2	0	0	0	0	0	0	200	300	0	0	0	0	0	0	0	200	903	0	0	0	0	0	0	0	603	903	0
781	3	0	0	0	0	0	0	200	300	0	0	0	0	0	0	0	200	903	0	0	0	0	0	0	0	603	903	0
781	4	0	0	0	0	0	0	200	300	0	0	0	0	0	0	0	200	903	0	0	0	0	0	0	0	603	903	0
781	5	0	0	0	0	0	0	200	300	0	0	0	0	0	0	0	200	903	0	0	0	0	0	0	0	603	903	0
781	6	0	0	0	0	0	0	200	300	0	0	0	0	0	0	0	200	903	0	0	0	0	0	0	0	603	903	0
781	7	0	0	0	0	0	0	200	300	0	0	0	0	0	0	0	200	903	0	0	0	0	0	0	0	603	903	0
781	8	0	0	0	0	0	0	200	300	0	0	0	0	0	0	0	200	903	0	0	0	0	0	0	0	603	903	0
781	9	0	0	0	0	0	0	200	300	0	0	0	0	0	0	0	200	903	0	0	0	0	0	0	0	603	903	0
782	0	0	0	0	0	0	0	200	300	0	0	0	0	0	0	0	200	903	0	0	0	0	0	0	0	603	903	0
782	1	0	0	0	0	0	0	200	300	0	0	0	0	0	0	0	200	903	0	0	0	0	0	0	0	603	903	0
782	2	0	0	0	0	0	0	200	300	0	0	0	0	0	0	0	200	903	0	0	0	0	0	0	0	603	903	0
782	3	0	0	0	0	0	0	200	300	0	0	0	0	0	0	0	200	903	0	0	0	0	0	0	0	603	903	0
782	4	0	0	0	0	0	0	200	300	0	0	0	0	0	0	0	200	903	0	0	0	0	0	0	0	603	903	0
782	5	0	0	0	0	0	0	200	300	0	0	0	0	0	0	0	200	903	0	0	0	0	0	0	0	603	903	0
782	6	0	0	0	0	0	0	200	300	0	0	0	0	0	0	0	200	903	0	0	0	0	0	0	0	603	903	0
782	7	0	0	0	0	0	0	200	300	0	0	0	0	0	0	0	200	903	0	0	0	0	0	0	0	603	903	0
782	8	0	0	0	0	0	0	200	300	0	0	0	0	0	0	0	200	903	0	0	0	0	0	0	0	603	903	0
782	9	0	0	0	0	0	0	200	300	0	0	0	0	0	0	0	200	903	0	0	0	0	0	0	0	603	903	0
783	0	0	0	0	0	0	0	200	300	0	0	0	0	0	0	0	200	903	0	0	0	0	0	0	0	603	903	0
783	1	0	0	0	0	0	0	200	300	0	0	0	0	0	0	0	200	903	0	0	0	0	0	0	0	603	903	0
783	2	0	0	0	0	0	0	200	300	0	0	0	0	0	0	0	200	903	0	0	0	0	0	0	0	603	903	0
783	3	0	0	0	0	0	0	200	300	0	0	0	0	0	0	0	200	903	0	0	0	0	0	0	0	603	903	0
783	4	0	0	0	0	0	0	200	300	0	0	0	0	0	0	0	200	903	0	0	0	0	0	0	0	603	903	0
783	5	0	0	0	0	0	0	200	300	0	0	0	0	0	0	0	200	903	0	0	0	0	0	0	0	603	903	0
783	6	0	0	0	0	0	0	200	300	0	0	0	0	0	0	0	200	903	0	0	0	0	0	0	0	603	903	0
783	7	0	0	0	0	0	0	200	300	0	0	0	0	0	0	0	200	903	0	0	0	0	0	0	0	603	903	0
783	8	0	0	0	0	0	0	200	300	0	0	0	0	0	0	0	200	903	0	0	0	0	0	0	0	603	903	0
783	9	0	0	0	0	0	0	200	300	0	0	0	0	0	0	0	200	903	0	0	0	0	0	0	0	603	903	0
784	0	0	0	0	0	0	0	200	300	0	0	0	0	0	0	0	200	903	0	0	0	0	0	0	0	603	903	0
784	1	0	0	0	0	0	0	200	300	0	0	0	0	0	0	0	200	903	0	0	0	0	0	0	0	603	903	0
784	2	0	0	0	0	0	0	200	300	0	0	0	0	0	0	0	200	903	0	0	0	0	0	0	0	603	903	0
784	3	0	0	0	0	0	0	200	300	0	0	0	0	0	0	0	200	903	0	0	0	0	0	0	0	603	903	0
784	4	0	0	0	0	0	0	200	300	0	0	0	0	0	0	0	200	903	0	0	0	0	0	0	0	603	903	0
784	5	0	0	0	0	0	0	200	300	0	0	0	0	0	0	0	200	903	0	0	0	0	0	0	0	603	903	0
784	6	0	0	0	0	0	0	200	300	0	0	0	0	0	0	0	200	903	0	0	0	0	0	0	0	603	903	0
784	7	0	0	0	0	0	0	200	300	0	0	0	0	0	0	0	200	903	0	0	0	0	0	0	0	603	903	0
784	8	0	0	0	0	0	0	200	300	0	0	0	0	0	0	0	200	903	0	0	0	0	0	0	0	603	903	0
784	9	0	0	0	0	0	0	200	300	0	0	0	0	0	0	0	200	903	0	0	0	0	0	0	0	603	903	0
785	0	0	0	0	0	0	0	200	300	0	0	0	0	0	0	0	200	903	0	0	0	0	0	0	0	603	903	0
785	1	0	0	0	0	0	0	200	300	0	0	0	0	0	0	0	200	903	0	0	0	0	0	0	0	603	903	0
785	2	0	0	0	0	0	0	200	300	0	0	0	0	0	0	0	200	903	0	0	0	0	0	0	0	603	903	0
785	3	0	0	0	0	0	0	200	300	0	0	0	0	0	0	0	200	903	0	0	0	0	0	0	0	603	903	0
785	4	0	0	0	0	0	0	200	300	0	0	0	0	0	0	0	200	903	0	0	0	0	0	0	0	603	903	0
785	5	0	0	0	0	0	0	200	300	0	0	0	0	0	0	0	200	903	0	0	0	0	0	0	0	603	903	0
785	6	0	0	0	0	0	0	200	300	0	0	0	0	0	0	0	200	903	0	0	0	0	0	0	0	603	903	0
785	7	0	0	0	0	0	0	200	300	0	0	0	0	0	0	0	200	903	0	0	0	0	0	0	0	603	903	0
785	8	0	0	0	0	0	0	200	300	0	0	0	0	0	0	0	200	903	0	0	0	0	0	0	0	603	903	0
785	9	0	0	0	0	0	0	200	300	0	0	0	0	0	0	0	200	903	0	0	0	0	0	0	0	603	903	0
786	0	0	0	0	0	0	0	200	300	0	0	0	0	0	0	0	200	903	0	0	0	0	0	0	0	603	903	0
786	1	0	0	0	0	0	0	200	300	0	0	0	0	0	0	0	200	903	0	0	0	0	0	0	0	603	903	0
786	2	0	0	0	0	0	0	200	300	0	0	0	0	0	0	0	200	903	0	0	0	0	0	0	0	603	903	0
786	3	0	0	0	0	0	0	200	300	0	0	0	0	0	0	0	200	903	0	0	0	0	0	0	0	603	903	0
786	4	0	0	0	0	0	0	200	300	0	0	0	0	0	0	0	200	903	0	0	0	0	0	0	0	603	903	0
786	5	0	0	0	0	0	0	200	300	0	0	0	0	0	0	0	200	903	0	0	0	0	0	0	0	603	903	0
786	6	0	0	0	0	0	0	200	300	0	0	0	0	0	0	0	200	903	0	0	0	0	0	0	0	603	903	0
786	7	0	0	0	0	0	0	200	300	0	0	0	0	0	0	0	200	903	0	0	0	0	0	0	0	603	903	0
786	8	0	0	0	0	0	0	200	300	0	0	0	0	0	0	0	200	903	0	0	0	0	0	0	0	603	903	0
786	9	0	0	0	0	0	0	200	300	0	0	0	0	0	0	0	200	903	0	0	0	0	0	0	0	603	903	0
787	0	0	0	0	0	0	0	200	300	0	0	0	0	0	0	0	200	903	0	0	0	0	0	0	0	603	903	0
787	1	0	0	0	0	0	0	200	300	0	0	0	0	0	0	0	200	903	0	0	0	0	0	0	0	603	903	0
787	2	0	0	0	0	0	0	200	300	0	0	0	0	0	0	0	200	903	0	0	0	0	0	0	0	603	903	0
787	3	0	0	0	0	0	0	200	300	0	0	0	0	0	0	0	200	903	0	0	0	0	0	0	0	603	903	0
787	4	0	0	0	0	0	0	200	300	0	0	0	0	0	0	0	200	903	0	0	0	0	0	0	0	603	903	0
787	5	0	0	0	0	0	0	200	300	0	0	0	0	0	0	0	200	903	0	0	0	0	0	0	0	603	903	0
787	6	0	0	0	0	0	0	200	300	0	0	0	0	0	0	0	200	903	0	0	0	0	0	0	0	603	903	0
787	7	0	0	0	0	0	0	200	300	0	0	0	0	0	0	0	200	903	0	0	0	0	0	0	0	603	903	0
787	8	0	0	0	0	0	0	200	300	0	0	0	0	0	0	0	200	903	0	0	0	0	0	0	0	603	903	0
787	9	0	0	0	0	0	0	200	300	0	0	0	0	0	0	0	200	903	0	0	0	0	0	0	0	603	903	0
788	0	0	0	0	0	0	0	200	300	0	0	0	0	0	0	0	200	903	0	0	0	0	0	0	0	603	903	0
788	1	0	0	0	0	0	0	200	300	0	0	0	0	0	0	0	200	903	0	0	0	0	0	0	0	603	903	0
788	2	0	0	0	0	0	0	200	300	0	0	0	0	0	0	0	200	903	0	0	0	0	0	0	0	603	903	0
788	3	0	0	0	0	0	0	200	300	0	0	0	0	0	0	0	200	903	0	0	0	0	0	0	0	603	903	0
788	4	0	0	0	0	0	0	200	300	0	0	0	0	0	0	0	200	903	0	0	0	0	0	0	0	603	903	0
788	5	0	0	0	0	0	0	200	300	0	0	0	0	0	0	0	200	903	0	0	0	0	0	0	0	603	903	0
788	6	0	0	0	0	0	0	200	300	0	0	0	0	0	0	0	200	903	0	0	0	0	0	0	0	603	903	0
788	7	0	0	0	0	0	0	200	300	0	0	0	0	0	0	0	200	903	0	0	0	0	0	0	0	603	903	0
788	8	0	0	0	0	0	0	200	300	0	0	0	0	0	0	0	200	903	0	0	0	0	0	0	0	603	903	0
788	9	0	0	0	0	0	0	200	300	0	0	0	0	0	0	0	200	903	0	0	0	0	0	0	0	603	903	0
789	0	0	0	0	0	0	0	200	300	0	0	0	0	0	0	0	200	903	0	0	0	0	0	0	0	603	903	0
789	1	0	0	0	0	0	0	200	300	0	0	0	0	0	0	0	200	903	0	0	0	0	0	0	0	603	903	0
789	2	0	0	0	0	0	0	200	300	0	0	0	0	0	0	0	200	903	0	0	0	0	0	0	0	603	903	0
789	3	0	0	0	0	0	0	200	300	0	0	0	0	0	0	0	200	903	0	0	0	0	0	0	0	603	903	0
789	4	0	0	0	0	0	0	200	300	0	0	0	0	0	0	0	200	903	0	0	0	0	0	0	0	603	903	0
789	5	0	0	0	0	0	0	200	300	0	0	0	0	0	0	0	200	903	0	0	0	0	0	0	0	603	903	0
789	6	0	0	0	0	0	0	200	300	0	0	0	0	0	0	0	200	903	0	0	0	0	0	0	0	603	903	0
789	7	0	0	0	0	0	0	200	300	0	0	0	0	0	0	0	200	903	0	0	0	0	0	0	0	603	903	0
789	8	0	0	0	0	0	0	200	300	0	0	0	0	0	0	0	200	903	0	0	0	0	0	0	0	603	903	0
789	9	0	0	0	0	0	0	200	300	0	0	0	0	0	0	0	200	903	0	0	0	0	0	0	0	603	903	0
790	0	0	0	0	0	0	0	200	300	0	0	0	0	0	0	0	200	903	0	0	0	0	0	0	0	603	903	0
790	1	0	0	0	0	0	0	200	300	0	0	0	0	0	0	0	200	903	0	0	0	0	0	0	0	603	903	0
790	2	0	0	0	0	0	0	200	300	0	0	0	0	0	0	0	200	903	0	0	0	0	0	0	0	603	903	0
790	3	0	0	0	0	0	0	200	300	0	0	0	0	0	0	0	200	903	0	0	0	0	0	0	0	603	903	0
790	4	0	0	0	0	0	0	200	300	0	0	0	0	0	0	0	200	903	0	0	0	0	0	0	0	603	903	0
790	5	0	0	0	0	0	0	200	300	0	0	0	0	0	0	0	200	903	0	0	0	0	0	0	0	603	903	0
790	6	0	0	0	0	0	0	200	300	0	0	0	0	0	0	0	200	903	0	0	0	0	0	0	0	603	903	0
790	7	0	0	0	0	0	0	200	300	0	0	0	0	0	0	0	200	903	0	0	0	0	0	0	0	603	903	0
790	8	0	0	0	0	0	0	200	300	0	0	0	0	0	0	0	200	903	0	0	0	0	0	0	0	603	903	0
790	9	0	0	0	0	0	0	200	300	0	0	0	0	0	0	0	200	903	0	0	0	0	0	0	0	603	903	0
791	0	0	0	0	0	0	0	200	300	0	0	0	0	0	0	0	200	903	0	0	0	0	0	0	0	603	903	0
791	1	0	0	0	0	0	0	200	300	0	0	0	0	0	0	0	200	903	0	0	0	0	0	0	0	603	903	0
791	2	0	0	0	0	0	0	200	300	0	0	0	0	0	0	0	200	903	0	0	0	0	0	0	0	603	903	0
791	3	0	0	0	0	0	0	200	300	0	0	0	0	0	0	0	200	903	0	0	0	0	0	0	0	603	903	0
791	4	0	0	0	0	0	0	200	300	0	0	0	0	0	0	0	200	903	0	0	0	0	0	0	0	603	903	0
791	5	0	0	0	0	0	0	200	300	0	0	0	0	0	0	0	200	903	0	0	0	0	0	0	0	603	903	0
791	6	0	0	0	0	0	0	200	300	0	0	0	0	0	0	0	200	903	0	0	0	0	0	0	0	603	903	0
791	7	0	0	0	0	0	0	200	300	0	0	0	0	0	0	0	200	903	0	0	0	0	0	0	0	603	903	0
791	8	0	0	0	0	0	0	200	300	0	0	0	0	0	0	0	200	903	0	0	0	0	0	0	0	603	903	0
791	9	0	0	0	0	0	0	200	300	0	0	0	0	0	0	0	200	903	0	0	0	0	0	0	0	603	903	0
792	0	0	0	0	0	0	0	200	300	0	0	0	0	0	0	0	200	903	0	0	0	0	0	0	0	603	903	0
792	1	0	0	0	0	0	0	200	300	0	0	0	0	0	0	0	200	903	0	0	0	0	0	0	0	603	903	0
792	2	0	0	0	0	0	0	200	300	0	0	0	0	0	0	0	200	903	0	0	0	0	0	0	0	603	903	0
792	3	0	0	0	0	0	0	200	300	0	0	0	0	0	0	0	200	903	0	0	0	0	0	0	0	603	903	0
792	4	0	0	0	0	0	0	200	300	0	0	0	0	0	0	0	200	903	0	0	0	0	0	0	0	603	903	0
792	5	0	0	0	0	0	0	200	300	0	0	0	0	0	0	0	200	903	0	0	0	0	0	0	0	603	903	0
792	6	0	0	0	0	0	0	200	300	0	0	0	0	0	0	0	200	903	0	0	0	0	0	0	0	603	903	0
792	7	0	0	0	0	0	0	200	300	0	0	0	0	0	0	0	200	903	0	0	0	0	0	0	0	603	903	0
792	8	0	0	0	0	0	0	200	300	0	0	0	0	0	0	0	200	903	0	0	0	0	0	0	0	603	903	0
792	9	0	0	0	0	0	0	200	300	0	0	0	0	0	0	0	200	903	0	0	0	0	0	0	0	603	903	0
793	0	0	0	0	0	0	0	200	300	0	0	0	0	0	0	0	200	903	0	0	0	0	0	0	0	603	903	0
793	1	0	0	0	0	0	0	200	300	0	0	0	0	0	0	0	200	903	0	0	0	0	0	0	0	603	903	0
793	2	0	0	0	0	0	0	200	300	0	0	0	0	0	0	0	200	903	0	0	0	0	0	0	0	603	903	0
793	3	0	0	0	0	0	0	200	300	0	0	0	0	0	0	0	200	903	0	0	0	0	0	0	0	603	903	0
793	4	0	0	0	0	0	0	200	300	0	0	0	0	0	0	0	200	903	0	0	0	0	0	0	0	603	903	0
793	5	0	0	0	0	0	0	200	300	0	0	0	0	0	0	0	200	903	0	0	0	0	0	0	0	603	903	0
793	6	0	0	0	0	0	0	200	300	0	0	0	0	0	0	0	200	903	0	0	0	0	0	0	0	603	903	0
793	7	0	0	0	0	0	0	200	300	0	0	0	0	0	0	0	200	903	0	0	0	0	0	0	0	603	903	0
793	8	0	0	0	0	0	0	200	300	0	0	0	0	0	0	0	200	903	0	0	0	0	0	0	0	603	903	0
793	9	0	0	0	0	0	0	200	300	0	0	0	0	0	0	0	200	903	0	0	0	0	0	0	0	603	903	0
794	0	0	0	0	0	0	0	200	300	0	0	0	0	0	0	0	200	903	0	0	0	0	0	0	0	603	903	0
794	1	0	0	0	0	0	0	200	300	0	0	0	0	0	0	0	200	903	0	0	0	0	0	0	0	603	903	0
794	2	0	0	0	0	0	0	200	300	0	0	0	0	0	0	0	200	903	0	0	0	0	0	0	0	603	903	0
794	3	0	0	0	0	0	0	200	300	0	0	0	0	0	0	0	200	903	0	0	0	0	0	0	0	603	903	0
794	4	0	0	0	0	0	0	200	300	0	0	0	0	0	0	0	200	903	0	0	0	0	0	0	0	603	903	0
794	5	0	0	0	0	0	0	200	300	0	0	0	0	0	0	0	200	903	0	0	0	0	0	0	0	603	903	0
794	6	0	0	0	0	0	0	200	300	0	0	0	0	0	0	0	200	903	0	0	0	0	0	0	0	603	903	0
794	7	0	0	0	0	0	0	200	300	0	0	0	0	0	0	0	200	903	0	0	0	0	0	0	0	603	903	0
794	8	0	0	0	0	0	0	200	300	0	0	0	0	0	0	0	200	903	0	0	0	0	0	0	0	603	903	0
794	9	0	0	0	0	0	0	200	300	0	0	0	0	0	0	0	200	903	0	0	0	0	0	0	0	603	903	0
795	0	0	0	0	0	0	0	200	300	0	0	0	0	0	0	0	200	903	0	0	0	0	0	0	0	603	903	0
795	1	0	0	0	0	0	0	200	300	0	0	0	0	0	0	0	200	903	0	0	0	0	0	0	0	603	903	0
795	2	0	0	0	0	0	0	200	300	0	0	0	0	0	0	0	200	903	0	0	0	0	0	0	0	603	903	0
795	3	0	0	0	0	0	0	200	300	0	0	0	0	0	0	0	200	903	0	0	0	0	0	0	0	603	903	0
795	4	0	0	0	0	0	0	200	300	0	0	0	0	0	0	0	200	903	0	0	0	0	0	0	0	603	903	0
795	5	0	0	0	0	0	0	200	300	0	0	0	0	0	0	0	200	903	0	0	0	0	0	0	0	603	903	0
795	6	0	0	0	0	0	0	200	300	0	0	0	0	0	0	0	200	903	0	0	0	0	0	0	0	603	903	0
795	7	0	0	0	0	0	0	200	300	0	0	0	0	0	0	0	200	903	0	0	0	0	0	0	0	603	903	0
795	8	0	0	0	0	0	0	200	300	0	0	0	0	0	0	0	200	903	0	0	0	0	0	0	0	603	903	0
795	9	0	0	0	0	0	0	200	300	0	0	0	0	0	0	0	200	903	0	0	0	0	0	0	0	603	903	0
796	0	0	0	0	0	0	0	200	300	0	0	0	0	0	0	0	200	903	0	0	0	0	0	0	0	603	903	0
796	1	0	0	0	0	0	0	200	300	0	0	0	0	0	0	0	200	903	0	0	0	0	0	0	0	603	903	0
796	2	0	0	0	0	0	0	200	300	0	0	0	0	0	0	0	200	903	0	0	0	0	0	0	0	603	903	0
796	3	0	0	0	0	0	0	200	300	0	0	0	0	0	0	0	200	903	0	0	0	0	0	0	0	603	903	0
796	4	0	0	0	0	0	0	200	300	0	0	0	0	0	0	0	200	903	0	0	0	0	0	0	0	603	903	0
796	5	0	0	0	0	0	0	200	300	0	0	0	0	0	0	0	200	903	0	0	0	0	0	0	0	603	903	0
796	6	0	0	0	0	0	0	200	300	0	0	0	0	0	0	0	200	903	0	0	0	0	0	0	0	603	903	0
796	7	0	0	0	0	0	0	200	300	0	0	0	0	0	0	0	200	903	0	0	0	0	0	0	0	603	903	0
796	8	0	0	0	0	0	0	200	300	0	0	0	0	0	0	0	200	903	0	0	0	0	0	0	0	603	903	0
796	9	0	0	0	0	0	0	200	300	0	0	0	0	0	0	0	200	903	0	0	0	0	0	0	0	603	903	0
797	0	0	0	0	0	0	0	200	300	0	0	0	0	0	0	0	200	903	0	0	0	0	0	0	0	603	903	0
797	1	0	0	0	0	0	0	200	300	0	0	0	0	0	0	0	200	903	0	0	0	0	0	0	0	603	903	0
797	2	0	0	0	0	0	0	200	300	0	0	0	0	0	0	0	200	903	0	0	0	0	0	0	0	603	903	0
797	3	0	0	0	0	0	0	200	300	0	0	0	0	0	0	0	200	903	0	0	0	0	0	0	0	603	903	0
797	4	0	0	0	0	0	0	200	300	0	0	0	0	0	0	0	200	903	0	0	0	0	0	0	0	603	903	0
797	5	0	0	0	0	0	0	200	300	0	0	0	0	0	0	0	200	903	0	0	0	0	0	0	0	603	903	0
797	6	0	0	0	0	0	0	200	300	0	0	0	0	0	0	0	200	903	0	0	0	0	0	0	0	603	903	0
797	7	0	0	0	0	0	0	200	300	0	0	0	0	0	0	0	200	903	0	0	0	0	0	0	0	603	903	0
797	8	0	0	0	0	0	0	200	300	0	0	0	0	0	0	0	200	903	0	0	0	0	0	0	0	603	903	0
797	9	0	0	0	0	0	0	200	300	0	0	0	0	0	0	0	200	903	0	0	0	0	0	0	0	603	903	0
798	0	0	0	0	0	0	0	200	300	0	0	0	0	0	0	0	200	903	0	0	0	0	0	0	0	603	903	0
798	1	0	0	0	0	0	0	200	300	0	0	0	0	0	0	0	200	903	0	0	0	0	0	0	0	603	903	0
798	2	0	0	0	0	0	0	200	300	0	0	0	0	0	0	0	200	903	0	0	0	0	0	0	0	603	903	0
798	3	0	0	0	0	0	0	200	300	0	0	0	0	0	0	0	200	903	0	0	0	0	0	0	0	603	903	0
798	4	0	0	0	0	0	0	200	300	0	0	0	0	0	0	0	200	903	0	0	0	0	0	0	0	603	903	0
798	5	0	0	0	0	0	0	200	300	0	0	0	0	0	0	0	200	903	0	0	0	0	0	0	0	603	903	0
798	6	0	0	0	0	0	0	200	300	0	0	0	0	0	0	0	200	903	0	0	0	0	0	0	0	603	903	0
798	7	0	0	0	0	0	0	200	300	0	0	0	0	0	0	0	200	903	0	0	0	0	0	0	0	603	903	0
798	8	0	0	0	0	0	0	200	300	0	0	0	0	0	0	0	200	903	0	0	0	0	0	0	0	603	903	0
798	9	0	0	0	0	0	0	200	300	0	0	0	0	0	0	0	200	903	0	0	0	0	0	0	0	603	903	0
799	0	0	0	0	0	0	0	200	300	0	0	0	0	0	0	0	200	903	0	0	0	0	0	0	0	603	903	0
799	1	0	0	0	0	0	0	200	300	0	0	0	0	0	0	0	200	903	0	0	0	0	0	0	0	603	903	0
799	2	0	0	0	0	0	0	200	300	0	0	0	0	0	0	0	200	903	0	0	0	0	0	0	0	603	903	0
799	3	0	0	0	0	0	0	200	300	0	0	0	0	0	0	0	200	903	0	0	0	0	0	0	0	603	903	0
799	4	0	0	0	0	0	0	200	300	0	0	0	0	0	0	0	200	903	0	0	0	0	0	0	0	603	903	0
799	5	0	0	0	0	0	0	200	300	0	0	0	0	0	0	0	200	903	0	0	0	0	0	0	0	603	903	0
799	6	0	0	0	0	0	0	200	300	0	0	0	0	0	0	0	200	903	0	0	0	0	0	0	0	603	903	0
799	7	0	0	0	0	0	0	200	300	0	0	0	0	0	0	0	200	903	0	0	0	0	0	0	0	603	903	0
799	8	0	0	0	0	0	0	200	300	0	0	0	0	0	0	0	200	903	0	0	0	0	0	0	0	603	903	0
799	9	0	0	0	0	0	0	200	300	0	0	0	0	0	0	0	200	903	0	0	0	0	0	0	0	603	903	0
800	0	0	0	0	0	0	0	200	300	0	0	0	0	0	0	0	200	903	0	0	0	0	0	0	0	603	903	0
800	1	0	0	0	0	0	0	200	300	0	0	0	0	0	0	0	200	903	0	0	0	0	0	0	0	603	903	0
800	2	0	0	0	0	0	0	200	300	0	0	0	0	0	0	0	200	903	0	0	0	0	0	0	0	603	903	0
800	3	0	0	0	0	0	0	200	300	0	0	0	0	0	0	0	200	903	0	0	0	0	0	0	0	603	903	0
800	4	0	0	0	0	0	0	200	300	0	0	0	0	0	0	0	200	903	0	0	0	0	0	0	0	603	903	0
800	5	0	0	0	0	0	0	200	300	0	0	0	0	0	0	0	200	903	0	0	0	0	0	0	0	603	903	0
800	6	0	0	0	0	0	0	200	300	0	0	0	0	0	0	0	200	903	0	0	0	0	0	0	0	603	903	0
800	7	0	0	0	0	0	0	200	300	0	0	0	0	0	0	0	200	903	0	0	0	0	0	0	0	603	903	0
800	8	0	0	0	0	0	0	200	300	0	0	0	0	0	0	0	200	903	0	0	0	0	0	0	0	603	903	0
800	9	0	0	0	0	0	0	200	300	0	0	0	0	0	0	0	200	903	0	0	0	0	0	0	0	603	903	0
801	0	0	0	0	0	0	0	200	300	0	0	0	0	0	0	0	200	903	0	0	0	0	0	0	0	603	903	0
801	1	0	0	0	0	0	0	200	300	0	0	0	0	0	0	0	200	903	0	0	0	0	0	0	0	603	903	0
801	2	0	0	0	0	0	0	200	300	0	0	0	0	0	0	0	200	903	0	0	0	0	0	0	0	603	903	0
801	3	0	0	0	0	0	0	200	300	0	0	0	0	0	0	0	200	903	0	0	0	0	0	0	0	603	903	0
801	4	0	0	0	0	0	0	200	300	0	0	0	0	0	0	0	200	903	0	0	0	0	0	0	0	603	903	0
801	5	0	0	0	0	0	0	200	300	0	0	0	0	0	0	0	200	903	0	0	0	0	0	0	0	603	903	0
801	6	0	0	0	0	0	0	200	300	0	0	0	0	0	0	0	200	903	0	0	0	0	0	0	0	603	903	0
801	7	0	0	0	0	0	0	200	300	0	0	0	0	0	0	0	200	903	0	0	0	0	0	0	0	603	903	0
801	8	0	0	0	0	0	0	200	300	0	0	0	0	0	0	0	200	903	0	0	0	0	0	0	0	603	903	0
801	9	0	0	0	0	0	0	200	300	0	0	0	0	0	0	0	200	903	0	0	0	0	0	0	0	603	903	0
802	0	0	0	0	0	0	0	200	300	0	0	0	0	0	0	0	200	903	0	0	0	0	0	0	0	603	903	0
802	1	0	0	0	0	0	0	200	300	0	0	0	0	0	0	0	200	903	0	0	0	0	0	0	0	603	903	0
802	2	0	0	0	0	0	0	200	300	0	0	0	0	0	0	0	200	903	0	0	0	0	0	0	0	603	903	0
802	3	0	0	0	0	0	0	200	300	0	0	0	0	0	0	0	200	903	0	0	0	0	0	0	0	603	903	0
802	4	0	0	0	0	0	0	200	300	0	0	0	0	0	0	0	200	903	0	0	0	0	0	0	0	603	903	0
802	5	0	0	0	0	0	0	200	300	0	0	0	0	0	0	0	200	903	0	0	0	0	0	0	0	603	903	0
802	6	0	0	0	0	0	0	200	300	0	0	0	0	0	0	0	200	903	0	0	0	0	0	0	0	603	903	0
802	7	0	0	0	0	0	0	200	300	0	0	0	0	0	0	0	200	903	0	0	0	0	0	0	0	603	903	0
802	8	0	0	0	0	0	0	200	300	0	0	0	0	0	0	0	200	903	0	0	0	0	0	0	0	603	903	0
802	9	0	0	0	0	0	0	200	300	0	0	0	0	0	0	0	200	903	0	0	0	0	0	0	0	603	903	0
803	0	0	0	0	0	0	0	200	300	0	0	0	0	0	0	0	200	903	0	0	0	0	0	0	0	603	903	0
803	1	0	0	0	0	0	0	200	300	0	0	0	0	0	0	0	200	903	0	0	0	0	0	0	0	603	903	0
803	2	0	0	0	0	0	0	200	300	0	0	0	0	0	0	0	200	903	0	0	0	0	0	0	0	603	903	0
803	3	0	0	0	0	0	0	200	300	0	0	0	0	0	0	0	200	903	0	0	0	0	0	0	0	603	903	0
803	4	0	0	0	0	0	0	200	300	0	0	0	0	0	0	0	200	903	0	0	0	0	0	0	0	603	903	0
803	5	0	0	0	0	0	0	200	300	0	0	0	0	0	0	0	200	903	0	0	0	0	0	0	0	603	903	0
803	6	0	0	0	0	0	0	200	300	0	0	0	0	0	0	0	200	903	0	0	0	0	0	0	0	603	903	0
803	7	0	0	0	0	0	0	200	300	0	0	0	0	0	0	0	200	903	0	0	0	0	0	0	0	603	903	0
803	8	0	0	0	0	0	0	200	300	0	0	0	0	0	0	0	200	903	0	0	0	0	0	0	0	603	903	0
803	9	0	0	0	0	0	0	200	300	0	0	0	0	0	0	0	200	903	0	0	0	0	0	0	0	603	903	0
804	0	0	0	0	0	0	0	200	300	0	0	0	0	0	0	0	200	903	0	0	0	0	0	0	0	603	903	0
804	1	0	0	0	0	0	0	200	300	0	0	0	0	0	0	0	200	903	0	0	0	0	0	0	0	603	903	0
804	2	0	0	0	0	0	0	200	300	0	0	0	0	0	0	0	200	903	0	0	0	0	0	0	0	603	903	0
804	3	0	0	0	0	0	0	200	300	0	0	0	0	0	0	0	200	903	0	0	0	0	0	0	0	603	903	0
804	4	0	0	0	0	0	0	200	300	0	0	0	0	0	0	0	200	903	0	0	0	0	0	0	0	603	903	0
804	5	0	0	0	0	0	0	200	300	0	0	0	0	0	0	0	200	903	0	0	0	0	0	0	0	603	903	0
804	6	0	0	0	0	0	0	200	300	0	0	0	0	0	0	0	200	903	0	0	0	0	0	0	0	603	903	0
804	7	0	0	0	0	0	0	200	300	0	0	0	0	0	0	0	200	903	0	0	0	0	0	0	0	603	903	0
804	8	0	0	0	0	0	0	200	300	0	0	0	0	0	0	0	200	903	0	0	0	0	0	0	0	603	903	0
804	9	0	0	0	0	0	0	200	300	0	0	0	0	0	0	0	200	903	0	0	0	0	0	0	0	603	903	0
805	0	0	0	0	0	0	0	200	300	0	0	0	0	0	0	0	200	903	0	0	0	0	0	0	0	603	903	0
805	1	0	0	0	0	0	0	200	300	0	0	0	0	0	0	0	200	903	0	0	0	0	0	0	0	603	903	0
805	2	0	0	0	0	0	0	200	300	0	0	0	0	0	0	0	200	903	0	0	0	0	0	0	0	603	903	0
805	3	0	0	0	0	0	0	200	300	0	0	0	0	0	0	0	200	903	0	0	0	0	0	0	0	603	903	0
805	4	0	0	0	0	0	0	200	300	0	0	0	0	0	0	0	200	903	0	0	0	0	0	0	0	603	903	0
805	5	0	0	0	0	0	0	200	300	0	0	0	0	0	0	0	200	903	0	0	0	0	0	0	0	603	903	0
805	6	0	0	0	0	0	0	200	300	0	0	0	0	0	0	0	200	903	0	0	0	0	0	0	0	603	903	0
805	7	0	0	0	0	0	0	200	300	0	0	0	0	0	0	0	200	903	0	0	0	0	0	0	0	603	903	0
805	8	0	0	0	0	0	0	200	300	0	0	0	0	0	0	0	200	903	0	0	0	0	0	0	0	603	903	0
805	9	0	0	0	0	0	0	200	300	0	0	0	0	0	0	0	200	903	0	0	0	0	0	0	0	603	903	0
806	0	0	0	0	0	0	0	200	300	0	0	0	0	0	0	0	200	903	0	0	0	0	0	0	0	603	903	0
806	1	0	0	0	0	0	0	200	300	0	0	0	0	0	0	0	200	903	0	0	0	0	0	0	0	603	903	0
806	2	0	0	0	0	0	0	200	300	0	0	0	0	0	0	0	200	903	0	0	0	0	0	0	0	603	903	0
806	3	0	0	0	0	0	0	200	300	0	0	0	0	0	0	0	200	903	0	0	0	0	0	0	0	603	903	0
806	4	0	0	0	0	0	0	200	300	0	0	0	0	0	0	0	200	903	0	0	0	0	0	0	0	603	903	0
806	5	0	0	0	0	0	0	200	300	0	0	0	0	0	0	0	200	903	0	0	0	0	0	0	0	603	903	0
806	6	0	0	0	0	0	0	200	300	0	0	0	0	0	0	0	200	903	0	0	0	0	0	0	0	603	903	0
806	7	0	0	0	0	0	0	200	300	0	0	0	0	0	0	0	200	903	0	0	0	0	0	0	0	603	903	0
806	8	0	0	0	0	0	0	200	300	0	0	0	0	0	0	0	200	903	0	0	0	0	0	0	0	603	903	0
806	9	0	0	0	0	0	0	200	300	0	0	0	0	0	0	0	200	903	0	0	0	0	0	0	0	603	903	0
807	0	0	0	0	0	0	0	200	300	0	0	0	0	0	0	0	200	903	0	0	0	0	0	0	0	603	903	0
807	1	0	0	0	0	0	0	200	300	0	0	0	0	0	0	0	200	903	0	0	0	0	0	0	0	603	903	0
807	2	0	0	0	0	0	0	200	300	0	0	0	0	0	0	0	200	903	0	0	0	0	0	0	0	603	903	0
807	3	0	0	0	0	0	0	200	300	0	0	0	0	0	0	0	200	903	0	0	0	0	0	0	0	603	903	0
807	4	0	0	0	0	0	0	200	300	0	0	0	0	0	0	0	200	903	0	0	0	0	0	0	0	603	903	0
807	5	0	0	0	0	0	0	200	300	0	0	0	0	0	0	0	200	903	0	0	0	0	0	0	0	603	903	0
807	6	0	0	0	0	0	0	200	300	0	0	0	0	0	0	0	200	903	0	0	0	0	0	0	0	603	903	0
807	7	0	0	0	0	0	0	200	300	0	0	0	0	0	0	0	200	903	0	0	0	0	0	0	0	603	903	0
807	8	0	0	0	0	0	0	200	300	0	0	0	0	0	0	0	200	903	0	0	0	0	0	0	0	603	903	0
807	9	0	0	0	0	0	0	200	300	0	0	0	0	0	0	0	200	903	0	0	0	0	0	0	0	603	903	0
808	0	0	0	0	0	0	0	200	300	0	0	0	0	0	0	0	200	903	0	0	0	0	0	0	0	603	903	0
808	1	0	0	0	0	0	0	200	300	0	0	0	0	0	0	0	200	903	0	0	0	0	0	0	0	603	903	0
808	2	0	0	0	0	0	0	200	300	0	0	0	0	0	0	0	200	903	0	0	0	0	0	0	0	603	903	0
808	3	0	0	0	0	0	0	200	300	0	0	0	0	0	0	0	200	903	0	0	0	0	0	0	0	603	903	0
808	4	0	0	0	0	0	0	200	300	0	0	0	0	0	0	0	200	903	0	0	0	0	0	0	0	603	903	0
808	5	0	0	0	0	0	0	200	300	0	0	0	0	0	0	0	200	903	0	0	0	0	0	0	0	603	903	0
808	6	0	0	0	0	0	0	200	300	0	0	0	0	0	0	0	200	903	0	0	0	0	0	0	0	603	903	0
808	7	0	0	0	0	0	0	200	300	0	0	0	0	0	0	0	200	903	0	0	0	0	0	0	0	603	903	0
808	8	0	0	0	0	0	0	200	300	0	0	0	0	0	0	0	200	903	0	0	0	0	0	0	0	603	903	0
808	9	0	0	0	0	0	0	200	300	0	0	0	0	0	0	0	200	903	0	0	0	0	0	0	0	603	903	0
809	0	0	0	0	0	0	0	200	300	0	0	0	0	0	0	0	200	903	0	0	0	0	0	0	0	603	903	0
809	1	0	0	0	0	0	0	200	300	0	0	0	0	0	0	0	200	903	0	0	0	0	0	0	0	603	903	0
809	2	0	0	0	0	0	0	200	300	0	0	0	0	0	0	0	200	903	0	0	0	0	0	0	0	603	903	0
809	3	0	0	0	0	0	0	200	300	0	0	0	0	0	0	0	200	903	0	0	0	0	0	0	0	603	903	0
809	4	0	0	0	0	0	0	200	300	0	0	0	0	0	0	0	200	903	0	0	0	0	0	0	0	603	903	0
809	5	0	0	0	0	0	0	200	300	0	0	0	0	0	0	0	200	903	0	0	0	0	0	0	0	603	903	0
809	6	0	0	0	0	0	0	200	300	0	0	0	0	0	0	0	200	903	0	0	0	0	0	0	0	603	903	0
809	7	0	0	0	0	0	0	200	300	0	0	0	0	0	0	0	200	903	0	0	0	0	0	0	0	603	903	0
809	8	0	0	0	0	0	0	200	300	0	0	0	0	0	0	0	200	903	0	0	0	0	0	0	0	603	903	0
809	9	0	0	0	0	0	0	200	300	0	0	0	0	0	0	0	200	903	0	0	0	0	0	0	0	603	903	0
810	0	0	0	0	0	0	0	200	300	0	0	0	0	0	0	0	200	903	0	0	0	0	0	0	0	603	903	0
810	1	0	0	0	0	0	0	200	300	0	0	0	0	0	0	0	200	903	0	0	0	0	0	0	0	603	903	0
810	2	0	0	0	0	0	0	200	300	0	0	0	0	0	0	0	200	903	0	0	0	0	0	0	0	603	903	0
810	3	0	0	0	0	0	0	200	300	0	0	0	0	0	0	0	200	903	0	0	0	0	0	0	0	603	903	0
810	4	0	0	0	0	0	0	200	300	0	0	0	0	0	0	0	200	903	0	0	0	0	0	0	0	603	903	0
810	5	0	0	0	0	0	0	200	300	0	0	0	0	0	0	0	200	903	0	0	0	0	0	0	0	603	903	0
810	6	0	0	0	0	0	0	200	300	0	0	0	0	0	0	0	200	903	0	0	0	0	0	0	0	603	903	0
810	7	0	0	0	0	0	0	200	300	0	0	0	0	0	0	0	200	903	0	0	0	0	0	0	0	603	903	0
810	8	0	0	0	0	0	0	200	300	0	0	0	0	0	0	0	200	903	0	0	0	0	0	0	0	603	903	0
810	9	0	0	0	0	0	0	200	300	0	0	0	0	0	0	0	200	903	0	0	0	0	0	0	0	603	903	0
811	0	0	0	0	0	0	0	200	300	0	0	0	0	0	0	0	200	903	0	0	0	0	0	0	0	603	903	0
811	1	0	0	0	0	0	0	200	300	0	0	0	0	0	0	0	200	903	0	0	0	0	0	0	0	603	903	0
811	2	0	0	0	0	0	0	200	300	0	0	0	0	0	0	0	200	903	0	0	0	0	0	0	0	603	903	0
811	3	0	0	0	0	0	0	200	300	0	0	0	0	0	0	0	200	903	0	0	0	0	0	0	0	603	903	0
811	4	0	0	0	0	0	0	200	300	0	0	0	0	0	0	0	200	903	0	0	0	0	0	0	0	603	903	0
811	5	0	0	0	0	0	0	200	300	0	0	0	0	0	0	0	200	903	0	0	0	0	0	0	0	603	903	0
811	6	0	0	0	0	0	0	200	300	0	0	0	0	0	0	0	200	903	0	0	0	0	0	0	0	603	903	0
811	7	0	0	0	0	0	0	200	300	0	0	0	0	0	0	0	200	903	0	0	0	0	0	0	0	603	903	0
811	8	0	0	0	0	0	0	200	300	0	0	0	0	0	0	0	200	903	0	0	0	0	0	0	0	603	903	0
811	9	0	0	0	0	0	0	200	300	0	0	0	0	0	0	0	200	903	0	0	0	0	0	0	0	603	903	0
812	0	0	0	0	0	0	0	200	300	0	0	0	0	0	0	0	200	903	0	0	0	0	0	0	0	603	903	0
812	1	0	0	0	0	0	0	200	300	0	0	0	0	0	0	0	200	903	0	0	0	0	0	0	0	603	903	0
812	2	0	0	0	0	0	0	200	300	0	0	0	0	0	0	0	200	903	0	0	0	0	0	0	0	603	903	0
812	3	0	0	0	0	0	0	200	300	0	0	0	0	0	0	0	200	903	0	0	0	0	0	0	0	603	903	0
812	4	0	0	0	0	0	0	200	300	0	0	0	0	0	0	0	200	903	0	0	0	0	0	0	0	603	903	0
812	5	0	0	0	0	0	0	200	300	0	0	0	0	0	0	0	200	903	0	0	0	0	0	0	0	603	903	0
812	6	0	0	0	0	0	0	200	300	0	0	0	0	0	0	0	200	903	0	0	0	0	0	0	0	603	903	0
812	7	0	0	0	0	0	0	200	300	0	0	0	0	0	0	0	200	903	0	0	0	0	0	0	0	603	903	0
812	8	0	0	0	0	0	0	200	300	0	0	0	0	0	0	0	200	903	0	0	0	0	0	0	0	603	903	0
812	9	0	0	0	0	0	0	200	300	0	0	0	0	0	0	0	200	903	0	0	0	0	0	0	0	603	903	0
813	0	0	0	0	0	0	0	200	300	0	0	0	0	0	0	0	200	903	0	0	0	0	0	0	0	603	903	0
813	1	0	0	0	0	0	0	200	300	0	0	0	0	0	0	0	200	903	0	0	0	0	0	0	0	603	903	0
813	2	0	0	0	0	0	0	200	300	0	0	0	0	0	0	0	200	903	0	0	0	0	0	0	0	603	903	0
813	3	0	0	0	0	0	0	200	300	0	0	0	0	0	0	0	200	903	0	0	0	0	0	0	0	603	903	0
813	4	0	0	0	0	0	0	200	300	0	0	0	0	0	0	0	200	903	0	0	0	0	0	0	0	603	903	0
813	5	0	0	0	0	0	0	200	300	0	0	0	0	0	0	0	200	903	0	0	0	0	0	0	0	603	903	0
813	6	0	0	0	0	0	0	200	300	0	0	0	0	0	0	0	200	903	0	0	0	0	0	0	0	603	903	0
813	7	0	0	0	0	0	0	200	300	0	0	0	0	0	0	0	200	903	0	0	0	0	0	0	0	603	903	0
813	8	0	0	0	0	0	0	200	300	0	0	0	0	0	0	0	200	903	0	0	0	0	0	0	0	603	903	0
813	9	0	0	0	0	0	0	200	300	0	0	0	0	0	0	0	200	903	0	0	0	0	0	0	0	603	903	0
814	0	0	0	0	0	0	0	200	300	0	0	0	0	0	0	0	200	903	0	0	0	0	0	0	0	603	903	0
814	1	0	0	0	0	0	0	200	300	0	0	0	0	0	0	0	200	903	0	0	0	0	0	0	0	603	903	0
814	2	0	0	0	0	0	0	200	300	0	0	0	0	0	0	0	200	903	0	0	0	0	0	0	0	603	903	0
814	3	0	0	0	0	0	0	200	300	0	0	0	0	0	0	0	200	903	0	0	0	0	0	0	0	603	903	0
814	4	0	0	0	0	0	0	200	300	0	0	0	0	0	0	0	200	903	0	0	0	0	0	0	0	603	903	0
814	5	0	0	0	0	0	0	200	300	0	0	0	0	0	0	0	200	903	0	0	0	0	0	0	0	603	903	0
814	6	0	0	0	0	0	0	200	300	0	0	0	0	0	0	0	200	903	0	0	0	0	0	0	0	603	903	0
814	7	0	0	0	0	0	0	200	300	0	0	0	0	0	0	0	200	903	0	0	0	0	0	0	0	603	903	0
814	8	0	0	0	0	0	0	200	300	0	0	0	0	0	0	0	200	903	0	0	0	0	0	0	0	603	903	0
814	9	0	0	0	0	0	0	200	300	0	0	0	0	0	0	0	200	903	0	0	0	0	0	0	0	603	903	0
815	0	0	0	0	0	0	0	200	300	0	0	0	0	0	0	0	200	903	0	0	0	0	0	0	0	603	903	0
815	1	0	0	0	0	0	0	200	300	0	0	0	0	0	0	0	200	903	0	0	0	0	0	0	0	603	903	0
815	2	0	0	0	0	0	0	200	300	0	0	0	0	0	0	0	200	903	0	0	0	0	0	0	0	603	903	0
815	3	0	0	0	0	0	0	200	300	0	0	0	0	0	0	0	200	903	0	0	0	0	0	0	0	603	903	0
815	4	0	0	0	0	0	0	200	300	0	0	0	0	0	0	0	200	903	0	0	0	0	0	0	0	603	903	0
815	5	0	0	0	0	0	0	200	300	0	0	0	0	0	0	0	200	903	0	0	0	0	0	0	0	603	903	0
815	6	0	0	0	0	0	0	200	300	0	0	0	0	0	0	0	200	903	0	0	0	0	0	0	0	603	903	0
815	7	0	0	0	0	0	0	200	300	0	0	0	0	0	0	0	200	903	0	0	0	0	0	0	0	603	903	0
815	8	0	0	0	0	0	0	200	300	0	0	0	0	0	0	0	200	903	0	0	0	0	0	0	0	603	903	0
815	9	0	0	0	0	0	0	200	300	0	0	0	0	0	0	0	200	903	0	0	0	0	0	0	0	603	903	0
816	0	0	0	0	0	0	0	200	300	0	0	0	0	0	0	0	200	903	0	0	0	0	0	0	0	603	903	0
816	1	0	0	0	0	0	0	200	300	0	0	0	0	0	0	0	200	903	0	0	0	0	0	0	0	603	903	0
816	2	0	0	0	0	0	0	200	300	0	0	0	0	0	0	0	200	903	0	0	0	0	0	0	0	603	903	0
816	3	0	0	0	0	0	0	200	300	0	0	0	0	0	0	0	200	903	0	0	0	0	0	0	0	603	903	0
816	4	0	0	0	0	0	0	200	300	0	0	0	0	0	0	0	200	903	0	0	0	0	0	0	0	603	903	0
816	5	0	0	0	0	0	0	200	300	0	0	0	0	0	0	0	200	903	0	0	0	0	0	0	0	603	903	0
816	6	0	0	0	0	0	0	200	300	0	0	0	0	0	0	0	200	903	0	0	0	0	0	0	0	603	903	0
816	7	0	0	0	0	0	0	200	300	0	0	0	0	0	0	0	200	903	0	0	0	0	0	0	0	603	903	0
816	8	0	0	0	0	0	0	200	300	0	0	0	0	0	0	0	200	903	0	0	0	0	0	0	0	603	903	0
816	9	0	0	0	0	0	0	200	300	0	0	0	0	0	0	0	200	903	0	0	0	0	0	0	0	603	903	0
817	0	0	0	0	0	0	0	200	300	0	0	0	0	0	0	0	200	903	0	0	0	0	0	0	0	603	903	0
817	1	0	0	0	0	0	0	200	300	0	0	0	0	0	0	0	200	903	0	0	0	0	0	0	0	603	903	0
817	2	0	0	0	0	0	0	200	300	0	0	0	0	0	0	0	200	903	0	0	0	0	0	0	0	603	903	0
817	3	0	0	0	0	0	0	200	300	0	0	0	0	0	0	0	200	903	0	0	0	0	0	0	0	603	903	0
817	4	0	0	0	0	0	0	200	300	0	0	0	0	0	0	0	200	903	0	0	0	0	0	0	0	603	903	0
817	5	0	0	0	0	0	0	200	300	0	0	0	0	0	0	0	200	903	0	0	0	0	0	0	0	603	903	0
817	6	0	0	0	0	0	0	200	300	0	0	0	0	0	0	0	200	903	0	0	0	0	0	0	0	603	903	0
817	7	0	0	0	0	0	0	200	300	0	0	0	0	0	0	0	200	903	0	0	0	0	0	0	0	603	903	0
817	8	0	0	0	0	0	0	200	300	0	0	0	0	0	0	0	200	903	0	0	0	0	0	0	0	603	903	0
817	9	0	0	0	0	0	0	200	300	0	0	0	0	0	0	0	200	903	0	0	0	0	0	0	0	603	903	0
818	0	0	0	0	0	0	0	200	300	0	0	0	0	0	0	0	200	903	0	0	0	0	0	0	0	603	903	0
818	1	0	0	0	0	0	0	200	300	0	0	0	0	0	0	0	200	903	0	0	0	0	0	0	0	603	903	0
818	2	0	0	0	0	0	0	200	300	0	0	0	0	0	0	0	200	903	0	0	0	0	0	0	0	603	903	0
818	3	0	0	0	0	0	0	200	300	0	0	0	0	0	0	0	200	903	0	0	0	0	0	0	0	603	903	0
818	4	0	0	0	0	0	0	200	300	0	0	0	0	0	0	0	200	903	0	0	0	0	0	0	0	603	903	0
818	5	0	0	0	0	0	0	200	300	0	0	0	0	0	0	0	200	903	0	0	0	0	0	0	0	603	903	0
818	6	0	0	0	0	0	0	200	300	0	0	0	0	0	0	0	200	903	0	0	0	0	0	0	0	603	903	0
818	7	0	0	0	0	0	0	200	300	0	0	0	0	0	0	0	200	903	0	0	0	0	0	0	0	603	903	0
818	8	0	0	0	0	0	0	200	300	0	0	0	0	0	0	0	200	903	0	0	0	0	0	0	0	603	903	0
818	9	0	0	0	0	0	0	200	300	0	0	0	0	0	0	0	200	903	0	0	0	0	0	0	0	603	903	0
819	0	0	0	0	0	0	0	200	300	0	0	0	0	0	0	0	200	903	0	0	0	0	0	0	0	603	903	0
819	1	0	0	0	0	0	0	200	300	0	0	0	0	0	0	0	200	903	0	0	0	0	0	0	0	603	903	0
819	2	0	0	0	0	0	0	200	300	0	0	0	0	0	0	0	200	903	0	0	0	0	0	0	0	603	903	0
819	3	0	0	0	0	0	0	200	300	0	0	0	0	0	0	0	200	903	0	0	0	0	0	0	0	603	903	0
819	4	0	0	0	0	0	0	200	300	0	0	0	0	0	0	0	200	903	0	0	0	0	0	0	0	603	903	0
819	5	0	0	0	0	0	0	200	300	0	0	0	0	0	0	0	200	903	0	0	0	0	0	0	0	603	903	0
819	6	0	0	0	0	0	0	200	300	0	0	0	0	0	0	0	200	903	0	0	0	0	0	0	0	603	903	0
819	7	0	0	0	0	0	0	200	300	0	0	0	0	0	0	0	200	903	0	0	0	0	0	0	0	603	903	0
819	8	0	0	0	0	0	0	200	300	0	0	0	0	0	0	0	200	903	0	0	0	0	0	0	0	603	903	0
819	9	0	0	0	0	0	0	200	300	0	0	0	0	0	0	0	200	903	0	0	0	0	0	0	0	603	903	0
820	0	0	0	0	0	0	0	200	300	0	0	0	0	0	0	0	200	903	0	0	0	0	0	0	0	603	903	0
820	1	0	0	0	0	0	0	200	300	0	0	0	0	0	0	0	200	903	0	0	0	0	0	0	0	603	903	0
820	2	0	0	0	0	0	0	200	300	0	0	0	0	0	0	0	200	903	0	0	0	0	0	0	0	603	903	0
820	3	0	0	0	0	0	0	200	300	0	0	0	0	0	0	0	200	903	0	0	0	0	0	0	0	603	903	0
820	4	0	0	0	0	0	0	200	300	0	0	0	0	0	0	0	200	903	0	0	0	0	0	0	0	603	903	0
820	5	0	0	0	0	0	0	200	300	0	0	0	0	0	0	0	200	903	0	0	0	0	0	0	0	603	903	0
820	6	0	0	0	0	0	0	200	300	0	0	0	0	0	0	0	200	903	0	0	0	0	0	0	0	603	903	0
820	7	0	0	0	0	0	0	200	300	0	0	0	0	0	0	0	200	903	0	0	0	0	0	0	0	603	903	0
820	8	0	0	0	0	0	0	200	300	0	0	0	0	0	0	0	200	903	0	0	0	0	0	0	0	603	903	0
820	9	0	0	0	0	0	0	200	300	0	0	0	0	0	0	0	200	903	0	0	0	0	0	0	0	603	903	0
821	0	0	0	0	0	0	0	200	300	0	0	0	0	0	0	0	200	903	0	0	0	0	0	0	0	603	903	0
821	1	0	0	0	0	0	0	200	300	0	0	0	0	0	0	0	200	903	0	0	0	0	0	0	0	603	903	0
821	2	0	0	0	0	0	0	200	300	0	0	0	0	0	0	0	200	903	0	0	0	0	0	0	0	603	903	0
821	3	0	0	0	0	0	0	200	300	0	0	0	0	0	0	0	200	903	0	0	0	0	0	0	0	603	903	0
821	4	0	0	0	0	0	0	200	300	0	0	0	0	0	0	0	200	903	0	0	0	0	0	0	0	603	903	0
821	5	0	0	0	0	0	0	200	300	0	0	0	0	0	0	0	200	903	0	0	0	0	0	0	0	603	903	0
821	6	0	0	0	0	0	0	200	300	0	0	0	0	0	0	0	200	903	0	0	0	0	0	0	0	603	903	0
821	7	0	0	0	0	0	0	200	300	0	0	0	0	0	0	0	200	903	0	0	0	0	0	0	0	603	903	0
821	8	0	0	0	0	0	0	200	300	0	0	0	0	0	0	0	200	903	0	0	0	0	0	0	0	603	903	0
821	9	0	0	0	0	0	0	200	300	0	0	0	0	0	0	0	200	903	0	0	0	0	0	0	0	603	903	0
822	0	0	0	0	0	0	0	200	300	0	0	0	0	0	0	0	200	903	0	0	0	0	0	0	0	603	903	0
822	1	0	0	0	0	0	0	200	300	0	0	0	0	0	0	0	200	903	0	0	0	0	0	0	0	603	903	0
822	2	0	0	0	0	0	0	200	300	0	0	0	0	0	0	0	200	903	0	0	0	0	0	0	0	603	903	0
822	3	0	0	0	0	0	0	200	300	0	0	0	0	0	0	0	200	903	0	0	0	0	0	0	0	603	903	0
822	4	0	0	0	0	0	0	200	300	0	0	0	0	0	0	0	200	903	0	0	0	0	0	0	0	603	903	0
822	5	0	0	0	0	0	0	200	300	0	0	0	0	0	0	0	200	903	0	0	0	0	0	0	0	603	903	0
822	6	0	0	0	0	0	0	200	300	0	0	0	0	0	0	0	200	903	0	0	0	0	0	0	0	603	903	0
822	7	0	0	0	0	0	0	200	300	0	0	0	0	0	0	0	200	903	0	0	0	0	0	0	0	603	903	0
822	8	0	0	0	0	0	0	200	300	0	0	0	0	0	0	0	200	903	0	0	0	0	0	0	0	603	903	0
822	9	0	0	0	0	0	0	200	300	0	0	0	0	0	0	0	200	903	0	0	0	0	0	0	0	603	903	0
823	0	0	0	0	0	0	0	200	300	0	0	0	0	0	0	0	200	903	0	0	0	0	0	0	0	603	903	0
823	1	0	0	0	0	0	0	200	300	0	0	0	0	0	0	0	200	903	0	0	0	0	0	0	0	603	903	0
823	2	0	0	0	0	0	0	200	300	0	0	0	0	0	0	0	200	903	0	0	0	0	0	0	0	603	903	0
823	3	0	0	0	0	0	0	200	300	0	0	0	0	0	0	0	200	903	0	0	0	0	0	0	0	603	903	0
823	4	0	0	0	0	0	0	200	300	0	0	0	0	0	0	0	200	903	0	0	0	0	0	0	0	603	903	0
823	5	0	0	0	0	0	0	200	300	0	0	0	0	0	0	0	200	903	0	0	0	0	0	0	0	603	903	0
823	6	0	0	0	0	0	0	200	300	0	0	0	0	0	0	0	200	903	0	0	0	0	0	0	0	603	903	0
823	7	0	0	0	0	0	0	200	300	0	0	0	0	0	0	0	200	903	0	0	0	0	0	0	0	603	903	0
823	8	0	0	0	0	0	0	200	300	0	0	0	0	0	0	0	200	903	0	0	0	0	0	0	0	603	903	0
823	9	0	0	0	0	0	0	200	300	0	0	0	0	0	0	0	200	903	0	0	0	0	0	0	0	603	903	0
824	0	0	0	0	0	0	0	200	300	0	0	0	0	0	0	0	200	903	0	0	0	0	0	0	0	603	903	0
824	1	0	0	0	0	0	0	200	300	0	0	0	0	0	0	0	200	903	0	0	0	0	0	0	0	603	903	0
824	2	0	0	0	0	0	0	200	300	0	0	0	0	0	0	0	200	903	0	0	0	0	0	0	0	603	903	0
824	3	0	0	0	0	0	0	200	300	0	0	0	0	0	0	0	200	903	0	0	0	0	0	0	0	603	903	0
824	4	0	0	0	0	0	0	200	300	0	0	0	0	0	0	0	200	903	0	0	0	0	0	0	0	603	903	0
824	5	0	0	0	0	0	0	200	300	0	0	0	0	0	0	0	200	903	0	0	0	0	0	0	0	603	903	0
824	6	0	0	0	0	0	0	200	300	0	0	0	0	0	0	0	200	903	0	0	0	0	0	0	0	603	903	0
824	7	0	0	0	0	0	0	200	300	0	0	0	0	0	0	0	200	903	0	0	0	0	0	0	0	603	903	0
824	8	0	0	0	0	0	0	200	300	0	0	0	0	0	0	0	200	903	0	0	0	0	0	0	0	603	903	0
824	9	0	0	0	0	0	0	200	300	0	0	0	0	0	0	0	200	903	0	0	0	0	0	0	0	603	903	0
825	0	0	0	0	0	0	0	200	300	0	0	0	0	0	0	0	200	903	0	0	0	0	0	0	0	603	903	0
825	1	0	0	0	0	0	0	200	300	0	0	0	0	0	0	0	200	903	0	0	0	0	0	0	0	603	903	0
825	2	0	0	0	0	0	0	200	300	0	0	0	0	0	0	0	200	903	0	0	0	0	0	0	0	603	903	0
825	3	0	0	0	0	0	0	200	300	0	0	0	0	0	0	0	200	903	0	0	0	0	0	0	0	603	903	0
825	4	0	0	0	0	0	0	200	300	0	0	0	0	0	0	0	200	903	0	0	0	0	0	0	0	603	903	0
825	5	0	0	0	0	0	0	200	300	0	0	0	0	0	0	0	200	903	0	0	0	0	0	0	0	603	903	0
825	6	0	0	0	0	0	0	200	300	0	0	0	0	0	0	0	200	903	0	0	0	0	0	0	0	603	903	0
825	7	0	0	0	0	0	0	200	300	0	0	0	0	0	0	0	200	903	0	0	0	0	0	0	0	603	903	0
825	8	0	0	0	0	0	0	200	300	0	0	0	0	0	0	0	200	903	0	0	0	0	0	0	0	603	903	0
825	9	0	0	0	0	0	0	200	300	0	0	0	0	0	0	0	200	903	0	0	0	0	0	0	0	603	903	0
826	0	0	0	0	0	0	0	200	300	0	0	0	0	0	0	0	200	903	0	0	0	0	0	0	0	603	903	0
826	1	0	0	0	0	0	0	200	300	0	0	0	0	0	0	0	200	903	0	0	0	0	0	0	0	603	903	0
826	2	0	0	0	0	0	0	200	300	0	0	0	0	0	0	0	200	903	0	0	0	0	0	0	0	603	903	0
826	3	0	0	0	0	0	0	200	300	0	0	0	0	0	0	0	200	903	0	0	0	0	0	0	0	603	903	0
826	4	0	0	0	0	0	0	200	300	0	0	0	0	0	0	0	200	903	0	0	0	0	0	0	0	603	903	0
826	5	0	0	0	0	0	0	200	300	0	0	0	0	0	0	0	200	903	0	0	0	0	0	0	0	603	903	0
826	6	0	0	0	0	0	0	200	300	0	0	0	0	0	0	0	200	903	0	0	0	0	0	0	0	603	903	0
826	7	0	0	0	0	0	0	200	300	0	0	0	0	0	0	0	200	903	0	0	0	0	0	0	0	603	903	0
826	8	0	0	0	0	0	0	200	300	0	0	0	0	0	0	0	200	903	0	0	0	0	0	0	0	603	903	0
826	9	0	0	0	0	0	0	200	300	0	0	0	0	0	0	0	200	903	0	0	0	0	0	0	0	603	903	0
827	0	0	0	0	0	0	0	200	300	0	0	0	0	0	0	0	200	903	0	0	0	0	0	0	0	603	903	0
827	1	0	0	0	0	0	0	200	300	0	0	0	0	0	0	0	200	903	0	0	0	0	0	0	0	603	903	0
827	2	0	0	0	0	0	0	200	300	0	0	0	0	0	0	0	200	903	0	0	0	0	0	0	0	603	903	0
827	3	0	0	0	0	0	0	200	300	0	0	0	0	0	0	0	200	903	0	0	0	0	0	0	0	603	903	0
827	4	0	0	0	0	0	0	200	300	0	0	0	0	0	0	0	200	903	0	0	0	0	0	0	0	603	903	0
827	5	0	0	0	0	0	0	200	300	0	0	0	0	0	0	0	200	903	0	0	0	0	0	0	0	603	903	0
827	6	0	0	0	0	0	0	200	300	0	0	0	0	0	0	0	200	903	0	0	0	0	0	0	0	603	903	0
827	7	0	0	0	0	0	0	200	300	0	0	0	0	0	0	0	200	903	0	0	0	0	0	0	0	603	903	0
827	8	0	0	0	0	0	0	200	300	0	0	0	0	0	0	0	200	903	0	0	0	0	0	0	0	603	903	0
827	9	0	0	0	0	0	0	200	300	0	0	0	0	0	0	0	200	903	0	0	0	0	0	0	0	603	903	0
828	0	0	0	0	0	0	0	200	300	0	0	0	0	0	0	0	200	903	0	0	0	0	0	0	0	603	903	0
828	1	0	0	0	0	0	0	200	300	0	0	0	0	0	0	0	200	903	0	0	0	0	0	0	0	603	903	0
828	2	0	0	0	0	0	0	200	300	0	0	0	0	0	0	0	200	903	0	0	0	0	0	0	0	603	903	0
828	3	0	0	0	0	0	0	200	300	0	0	0	0	0	0	0	200	903	0	0	0	0	0	0	0	603	903	0
828	4	0	0	0	0	0	0	200	300	0	0	0	0	0	0	0	200	903	0	0	0	0	0	0	0	603	903	0
828	5	0	0	0	0	0	0	200	300	0	0	0	0	0	0	0	200	903	0	0	0	0	0	0	0	603	903	0
828	6	0	0	0	0	0	0	200	300	0	0	0	0	0	0	0	200	903	0	0	0	0	0	0	0	603	903	0
828	7	0	0	0	0	0	0	200	300	0	0	0	0	0	0	0	200	903	0	0	0	0	0	0	0	603	903	0
828	8	0	0	0	0	0	0	200	300	0	0	0	0	0	0	0	200	903	0	0	0	0	0	0	0	603	903	0
828	9	0	0	0	0	0	0	200	300	0	0	0	0	0	0	0	200	903	0	0	0	0	0	0	0	603	903	0
829	0	0	0	0	0	0	0	200	300	0	0	0	0	0	0	0	200	903	0	0	0	0	0	0	0	603	903	0
829	1	0	0	0	0	0	0	200	300	0	0	0	0	0	0	0	200	903	0	0	0	0	0	0	0	603	903	0
829	2	0	0	0	0	0	0	200	300	0	0	0	0	0	0	0	200	903	0	0	0	0	0	0	0	603	903	0
829	3	0	0	0	0	0	0	200	300	0	0	0	0	0	0	0	200	903	0	0	0	0	0	0	0	603	903	0
829	4	0	0	0	0	0	0	200	300	0	0	0	0	0	0	0	200	903	0	0	0	0	0	0	0	603	903	0
829	5	0	0	0	0	0	0	200	300	0	0	0	0	0	0	0	200	903	0	0	0	0	0	0	0	603	903	0
829	6	0	0	0	0	0	0	200	300	0	0	0	0	0	0	0	200	903	0	0	0	0	0	0	0	603	903	0
829	7	0	0	0	0	0	0	200	300	0	0	0	0	0	0	0	200	903	0	0	0	0	0	0	0	603	903	0
829	8	0	0	0	0	0	0	200	300	0	0	0	0	0	0	0	200	903	0	0	0	0	0	0	0	603	903	0
829	9	0	0	0	0	0	0	200	300	0	0	0	0	0	0	0	200	903	0	0	0	0	0	0	0	603	903	0
830	0	0	0	0	0	0	0	200	300	0	0	0	0	0	0	0	200	903	0	0	0	0	0	0	0	603	903	0
830	1	0	0	0	0	0	0	200	300	0	0	0	0	0	0	0	200	903	0	0	0	0	0	0	0	603	903	0
830	2	0	0	0	0	0	0	200	300	0	0	0	0	0	0	0	200	903	0	0	0	0	0	0	0	603	903	0
830	3	0	0	0	0	0	0	200	300	0	0	0	0	0	0	0	200	903	0	0	0	0	0	0	0	603	903	0
830	4	0	0	0	0	0	0	200	300	0	0	0	0	0	0	0	200	903	0	0	0	0	0	0	0	603	903	0
830	5	0	0	0	0	0	0	200	300	0	0	0	0	0	0	0	200	903	0	0	0	0	0	0	0	603	903	0
830	6	0	0	0	0	0	0	200	300	0	0	0	0	0	0	0	200	903	0	0	0	0	0	0	0	603	903	0
830	7	0	0	0	0	0	0	200	300	0	0	0	0	0	0	0	200	903	0	0	0	0	0	0	0	603	903	0
830	8	0	0	0	0	0	0	200	300	0	0	0	0	0	0	0	200	903	0	0	0	0	0	0	0	603	903	0
830	9	0	0	0	0	0	0	200	300	0	0	0	0	0	0	0	200	903	0	0	0	0	0	0	0	603	903	0
831	0	0	0	0	0	0	0	200	300	0	0	0	0	0	0	0	200	903	0	0	0	0	0	0	0	603	903	0
831	1	0	0	0	0	0	0	200	300	0	0	0	0	0	0	0	200	903	0	0	0	0	0	0	0	603	903	0
831	2	0	0	0	0	0	0	200	300	0	0	0	0	0	0	0	200	903	0	0	0	0	0	0	0	603	903	0
831	3	0	0	0	0	0	0	200	300	0	0	0	0	0	0	0	200	903	0	0	0	0	0	0	0	603	903	0
831	4	0	0	0	0	0	0	200	300	0	0	0	0	0	0	0	200	903	0	0	0	0	0	0	0	603	903	0
831	5	0	0	0	0	0	0	200	300	0	0	0	0	0	0	0	200	903	0	0	0	0	0	0	0	603	903	0
831	6	0	0	0	0	0	0	200	300	0	0	0	0	0	0	0	200	903	0	0	0	0	0	0	0	603	903	0
831	7	0	0	0	0	0	0	200	300	0	0	0	0	0	0	0	200	903	0	0	0	0	0	0	0	603	903	0
831	8	0	0	0	0	0	0	200	300	0	0	0	0	0	0	0	200	903	0	0	0	0	0	0	0	603	903	0
831	9	0	0	0	0	0	0	200	300	0	0	0	0	0	0	0	200	903	0	0	0	0	0	0	0	603	903	0
832	0	0	0	0	0	0	0	200	300	0	0	0	0	0	0	0	200	903	0	0	0	0	0	0	0	603	903	0
832	1	0	0	0	0	0	0	200	300	0	0	0	0	0	0	0	200	903	0	0	0	0	0	0	0	603	903	0
832	2	0	0	0	0	0	0	200	300	0	0	0	0	0	0	0	200	903	0	0	0	0	0	0	0	603	903	0
832	3	0	0	0	0	0	0	200	300	0	0	0	0	0	0	0	200	903	0	0	0	0	0	0	0	603	903	0
832	4	0	0	0	0	0	0	200	300	0	0	0	0	0	0	0	200	903	0	0	0	0	0	0	0	603	903	0
832	5	0	0	0	0	0	0	200	300	0	0	0	0	0	0	0	200	903	0	0	0	0	0	0	0	603	903	0
832	6	0	0	0	0	0	0	200	300	0	0	0	0	0	0	0	200	903	0	0	0	0	0	0	0	603	903	0
832	7	0	0	0	0	0	0	200	300	0	0	0	0	0	0	0	200	903	0	0	0	0	0	0	0	603	903	0
832	8	0	0	0	0	0	0	200	300	0	0	0	0	0	0	0	200	903	0	0	0	0	0	0	0	603	903	0
832	9	0	0	0	0	0	0	200	300	0	0	0	0	0	0	0	200	903	0	0	0	0	0	0	0	603	903	0
833	0	0	0	0	0	0	0	200	300	0	0	0	0	0	0	0	200	903	0	0	0	0	0	0	0	603	903	0
833	1	0	0	0	0	0	0	200	300	0	0	0	0	0	0	0	200	903	0	0	0	0	0	0	0	603	903	0
833	2	0	0	0	0	0	0	200	300	0	0	0	0	0	0	0	200	903	0	0	0	0	0	0	0	603	903	0
833	3	0	0	0	0	0	0	200	300	0	0	0	0	0	0	0	200	903	0	0	0	0	0	0	0	603	903	0
833	4	0	0	0	0	0	0	200	300	0	0	0	0	0	0	0	200	903	0	0	0	0	0	0	0	603	903	0
833	5	0	0	0	0	0	0	200	300	0	0	0	0	0	0	0	200	903	0	0	0	0	0	0	0	603	903	0
833	6	0	0	0	0	0	0	200	300	0	0	0	0	0	0	0	200	903	0	0	0	0	0	0	0	603	903	0
833	7	0	0	0	0	0	0	200	300	0	0	0	0	0	0	0	200	903	0	0	0	0	0	0	0	603	903	0
833	8	0	0	0	0	0	0	200	300	0	0	0	0	0	0	0	200	903	0	0	0	0	0	0	0	603	903	0
833	9	0	0	0	0	0	0	200	300	0	0	0	0	0	0	0	200	903	0	0	0	0	0	0	0	603	903	0
834	0	0	0	0	0	0	0	200	300	0	0	0	0	0	0	0	200	903	0	0	0	0	0	0	0	603	903	0
834	1	0	0	0	0	0	0	200	300	0	0	0	0	0	0	0	200	903	0	0	0	0	0	0	0	603	903	0
834	2	0	0	0	0	0	0	200	300	0	0	0	0	0	0	0	200	903	0	0	0	0	0	0	0	603	903	0
834	3	0	0	0	0	0	0	200	300	0	0	0	0	0	0	0	200	903	0	0	0	0	0	0	0	603	903	0
834	4	0	0	0	0	0	0	200	300	0	0	0	0	0	0	0	200	903	0	0	0	0	0	0	0	603	903	0
834	5	0	0	0	0	0	0	200	300	0	0	0	0	0	0	0	200	903	0	0	0	0	0	0	0	603	903	0
834	6	0	0	0	0	0	0	200	300	0	0	0	0	0	0	0	200	903	0	0	0	0	0	0	0	603	903	0
834	7	0	0	0	0	0	0	200	300	0	0	0	0	0	0	0	200	903	0	0	0	0	0	0	0	603	903	0
834	8	0	0	0	0	0	0	200	300	0	0	0	0	0	0	0	200	903	0	0	0	0	0	0	0	603	903	0
834	9	0	0	0	0	0	0	200	300	0	0	0	0	0	0	0	200	903	0	0	0	0	0	0	0	603	903	0
835	0	0	0	0	0	0	0	200	300	0	0	0	0	0	0	0	200	903	0	0	0	0	0	0	0	603	903	0
835	1	0	0	0	0	0	0	200	300	0	0	0	0	0	0	0	200	903	0	0	0	0	0	0	0	603	903	0
835	2	0	0	0	0	0	0	200	300	0	0	0	0	0	0	0	200	903	0	0	0	0	0	0	0	603	903	0
835	3	0	0	0	0	0	0	200	300	0	0	0	0	0	0	0	200	903	0	0	0	0	0	0	0	603	903	0
835	4	0	0	0	0	0	0	200	300	0	0	0	0	0	0	0	200	903	0	0	0	0	0	0	0	603	903	0
835	5	0	0	0	0	0	0	200	300	0	0	0	0	0	0	0	200	903	0	0	0	0	0	0	0	603	903	0
835	6	0	0	0	0	0	0	200	300	0	0	0	0	0	0	0	200	903	0	0	0	0	0	0	0	603	903	0
835	7	0	0	0	0	0	0	200	300	0	0	0	0	0	0	0	200	903	0	0	0	0	0	0	0	603	903	0
835	8	0	0	0	0	0	0	200	300	0	0	0	0	0	0	0	200	903	0	0	0	0	0	0	0	603	903	0
835	9	0	0	0	0	0	0	200	300	0	0	0	0	0	0	0	200	903	0	0	0	0	0	0	0	603	903	0
836	0	0	0	0	0	0	0	200	300	0	0	0	0	0	0	0	200	903	0	0	0	0	0	0	0	603	903	0
836	1	0	0	0	0	0	0	200	300	0	0	0	0	0	0	0	200	903	0	0	0	0	0	0	0	603	903	0
836	2	0	0	0	0	0	0	200	300	0	0	0	0	0	0	0	200	903	0	0	0	0	0	0	0	603	903	0
836	3	0	0	0	0	0	0	200	300	0	0	0	0	0	0	0	200	903	0	0	0	0	0	0	0	603	903	0
836	4	0	0	0	0	0	0	200	300	0	0	0	0	0	0	0	200	903	0	0	0	0	0	0	0	603	903	0
836	5	0	0	0	0	0	0	200	300	0	0	0	0	0	0	0	200	903	0	0	0	0	0	0	0	603	903	0
836	6	0	0	0	0	0	0	200	300	0	0	0	0	0	0	0	200	903	0	0	0	0	0	0	0	603	903	0
836	7	0	0	0	0	0	0	200	300	0	0	0	0	0	0	0	200	903	0	0	0	0	0	0	0	603	903	0
836	8	0	0	0	0	0	0	200	300	0	0	0	0	0	0	0	200	903	0	0	0	0	0	0	0	603	903	0
836	9	0	0	0	0	0	0	200	300	0	0	0	0	0	0	0	200	903	0	0	0	0	0	0	0	603	903	0
837	0	0	0	0	0	0	0	200	300	0	0	0	0	0	0	0	200	903	0	0	0	0	0	0	0	603	903	0
837	1	0	0	0	0	0	0	200	300	0	0	0	0	0	0	0	200	903	0	0	0	0	0	0	0	603	903	0
837	2	0	0	0	0	0	0	200	300	0	0	0	0	0	0	0	200	903	0	0	0	0	0	0	0	603	903	0
837	3	0	0	0	0	0	0	200	300	0	0	0	0	0	0	0	200	903	0	0	0	0	0	0	0	603	903	0
837	4	0	0	0	0	0	0	200	300	0	0	0	0	0	0	0	200	903	0	0	0	0	0	0	0	603	903	0
837	5	0	0	0	0	0	0	200	300	0	0	0	0	0	0	0	200	903	0	0	0	0	0	0	0	603	903	0
837	6	0	0	0	0	0	0	200	300	0	0	0	0	0	0	0	200	903	0	0	0	0	0	0	0	603	903	0
837	7	0	0	0	0	0	0	200	300	0	0	0	0	0	0	0	200	903	0	0	0	0	0	0	0	603	903	0
837	8	0	0	0	0	0	0	200	300	0	0	0	0	0	0	0	200	903	0	0	0	0	0	0	0	603	903	0
837	9	0	0	0	0	0	0	200	300	0	0	0	0	0	0	0	200	903	0	0	0	0	0	0	0	603	903	0
838	0	0	0	0	0	0	0	200	300	0	0	0	0	0	0	0	200	903	0	0	0	0	0	0	0	603	903	0
838	1	0	0	0	0	0	0	200	300	0	0	0	0	0	0	0	200	903	0	0	0	0	0	0	0	603	903	0
838	2	0	0	0	0	0	0	200	300	0	0	0	0	0	0	0	200	903	0	0	0	0	0	0	0	603	903	0
838	3	0	0	0	0	0	0	200	300	0	0	0	0	0	0	0	200	903	0	0	0	0	0	0	0	603	903	0
838	4	0	0	0	0	0	0	200	300	0	0	0	0	0	0	0	200	903	0	0	0	0	0	0	0	603	903	0
838	5	0	0	0	0	0	0	200	300	0	0	0	0	0	0	0	200	903	0	0	0	0	0	0	0	603	903	0
838	6	0	0	0	0	0	0	200	300	0	0	0	0	0	0	0	200	903	0	0	0	0	0	0	0	603	903	0
838	7	0	0	0	0	0	0	200	300	0	0	0	0	0	0	0	200	903	0	0	0	0	0	0	0	603	903	0
838	8	0	0	0	0	0	0	200	300	0	0	0	0	0	0	0	200	903	0	0	0	0	0	0	0	603	903	0
838	9	0	0	0	0	0	0	200	300	0	0	0	0	0	0	0	200	903	0	0	0	0	0	0	0	603	903	0
839	0	0	0	0	0	0	0	200	300	0	0	0	0	0	0	0	200	903	0	0	0	0	0	0	0	603	903	0
839	1	0	0	0	0	0	0	200	300	0	0	0	0	0	0	0	200	903	0	0	0	0	0	0	0	603	903	0
839	2	0	0	0	0	0	0	200	300	0	0	0	0	0	0	0	200	903	0	0	0	0	0	0	0	603	903	0
839	3	0	0	0	0	0	0	200	300	0	0	0	0	0	0	0	200	903	0	0	0	0	0	0	0	603	903	0
839	4	0	0	0	0	0	0	200	300	0	0	0	0	0	0	0	200	903	0	0	0	0	0	0	0	603	903	0
839	5	0	0	0	0	0	0	200	300	0	0	0	0	0	0	0	200	903	0	0	0	0	0	0	0	603	903	0
839	6	0	0	0	0	0	0	200	300	0	0	0	0	0	0	0	200	903	0	0	0	0	0	0	0	603	903	0
839	7	0	0	0	0	0	0	200	300	0	0	0	0	0	0	0	200	903	0	0	0	0	0	0	0	603	903	0
839	8	0	0	0	0	0	0	200	300	0	0	0	0	0	0	0	200	903	0	0	0	0	0	0	0	603	903	0
839	9	0	0	0	0	0	0	200	300	0	0	0	0	0	0	0	200	903	0	0	0	0	0	0	0	603	903	0
840	0	0	0	0	0	0	0	200	300	0	0	0	0	0	0	0	200	903	0	0	0	0	0	0	0	603	903	0
840	1	0	0	0	0	0	0	200	300	0	0	0	0	0	0	0	200	903	0	0	0	0	0	0	0	603	903	0
840	2	0	0	0	0	0	0	200	300	0	0	0	0	0	0	0	200	903	0	0	0	0	0	0	0	603	903	0
840	3	0	0	0	0	0	0	200	300	0	0	0	0	0	0	0	200	903	0	0	0	0	0	0	0	603	903	0
840	4	0	0	0	0	0	0	200	300	0	0	0	0	0	0	0	200	903	0	0	0	0	0	0	0	603	903	0
840	5	0	0	0	0	0	0	200	300	0	0	0	0	0	0	0	200	903	0	0	0	0	0	0	0	603	903	0
840	6	0	0	0	0	0	0	200	300	0	0	0	0	0	0	0	200	903	0	0	0	0	0	0	0	603	903	0
840	7	0	0	0	0	0	0	200	300	0	0	0	0	0	0	0	200	903	0	0	0	0	0	0	0	603	903	0
840	8	0	0	0	0	0	0	200	300	0	0	0	0	0	0	0	200	903	0	0	0	0	0	0	0	603	903	0
840	9	0	0	0	0	0	0	200	300	0	0	0	0	0	0	0	200	903	0	0	0	0	0	0	0	603	903	0
841	0	0	0	0	0	0	0	200	300	0	0	0	0	0	0	0	200	903	0	0	0	0	0	0	0	603	903	0
841	1	0	0	0	0	0	0	200	300	0	0	0	0	0	0	0	200	903	0	0	0	0	0	0	0	603	903	0
841	2	0	0	0	0	0	0	200	300	0	0	0	0	0	0	0	200	903	0	0	0	0	0	0	0	603	903	0
841	3	0	0	0	0	0	0	200	300	0	0	0	0	0	0	0	200	903	0	0	0	0	0	0	0	603	903	0
841	4	0	0	0	0	0	0	200	300	0	0	0	0	0	0	0	200	903	0	0	0	0	0	0	0	603	903	0
841	5	0	0	0	0	0	0	200	300	0	0	0	0	0	0	0	200	903	0	0	0	0	0	0	0	603	903	0
841	6	0	0	0	0	0	0	200	300	0	0	0	0	0	0	0	200	903	0	0	0	0	0	0	0	603	903	0
841	7	0	0	0	0	0	0	200	300	0	0	0	0	0	0	0	200	903	0	0	0	0	0	0	0	603	903	0
841	8	0	0	0	0	0	0	200	300	0	0	0	0	0	0	0	200	903	0	0	0	0	0	0	0	603	903	0
841	9	0	0	0	0	0	0	200	300	0	0	0	0	0	0	0	200	903	0	0	0	0	0	0	0	603	903	0
842	0	0	0	0	0	0	0	200	300	0	0	0	0	0	0	0	200	903	0	0	0	0	0	0	0	603	903	0
842	1	0	0	0	0	0	0	200	300	0	0	0	0	0	0	0	200	903	0	0	0	0	0	0	0	603	903	0
842	2	0	0	0	0	0	0	200	300	0	0	0	0	0	0	0	200	903	0	0	0	0	0	0	0	603	903	0
842	3	0	0	0	0	0	0	200	300	0	0	0	0	0	0	0	200	903	0	0	0	0	0	0	0	603	903	0
842	4	0	0	0	0	0	0	200	300	0	0	0	0	0	0	0	200	903	0	0	0	0	0	0	0	603	903	0
842	5	0	0	0	0	0	0	200	300	0	0	0	0	0	0	0	200	903	0	0	0	0	0	0	0	603	903	0
842	6	0	0	0	0	0	0	200	300	0	0	0	0	0	0	0	200	903	0	0	0	0	0	0	0	603	903	0
842	7	0	0	0	0	0	0	200	300	0	0	0	0	0	0	0	200	903	0	0	0	0	0	0	0	603	903	0
842	8	0	0	0	0	0	0	200	300	0	0	0	0	0	0	0	200	903	0	0	0	0	0	0	0	603	903	0
842	9	0	0	0	0	0	0	200	300	0	0	0	0	0	0	0	200	903	0	0	0	0	0	0	0	603	903	0
843	0	0	0	0	0	0	0	200	300	0	0	0	0	0	0	0	200	903	0	0	0	0	0	0	0	603	903	0
843	1	0	0	0	0	0	0	200	300	0	0	0	0	0	0	0	200	903	0	0	0	0	0	0	0	603	903	0
843	2	0	0	0	0	0	0	200	300	0	0	0	0	0	0	0	200	903	0	0	0	0	0	0	0	603	903	0
843	3	0	0	0	0	0	0	200	300	0	0	0	0	0	0	0	200	903	0	0	0	0	0	0	0	603	903	0
843	4	0	0	0	0	0	0	200	300	0	0	0	0	0	0	0	200	903	0	0	0	0	0	0	0	603	903	0
843	5	0	0	0	0	0	0	200	300	0	0	0	0	0	0	0	200	903	0	0	0	0	0	0	0	603	903	0
843	6	0	0	0	0	0	0	200	300	0	0	0	0	0	0	0	200	903	0	0	0	0	0	0	0	603	903	0
843	7	0	0	0	0	0	0	200	300	0	0	0	0	0	0	0	200	903	0	0	0	0	0	0	0	603	903	0
843	8	0	0	0	0	0	0	200	300	0	0	0	0	0	0	0	200	903	0	0	0	0	0	0	0	603	903	0
843	9	0	0	0	0	0	0	200	300	0	0	0	0	0	0	0	200	903	0	0	0	0	0	0	0	603	903	0
844	0	0	0	0	0	0	0	200	300	0	0	0	0	0	0	0	200	903	0	0	0	0	0	0	0	603	903	0
844	1	0	0	0	0	0	0	200	300	0	0	0	0	0	0	0	200	903	0	0	0	0	0	0	0	603	903	0
844	2	0	0	0	0	0	0	200	300	0	0	0	0	0	0	0	200	903	0	0	0	0	0	0	0	603	903	0
844	3	0	0	0	0	0	0	200	300	0	0	0	0	0	0	0	200	903	0	0	0	0	0	0	0	603	903	0
844	4	0	0	0	0	0	0	200	300	0	0	0	0	0	0	0	200	903	0	0	0	0	0	0	0	603	903	0
844	5	0	0	0	0	0	0	200	300	0	0	0	0	0	0	0	200	903	0	0	0	0	0	0	0	603	903	0
844	6	0	0	0	0	0	0	200	300	0	0	0	0	0	0	0	200	903	0	0	0	0	0	0	0	603	903	0
844	7	0	0	0	0	0	0	200	300	0	0	0	0	0	0	0	200	903	0	0	0	0	0	0	0	603	903	0
844	8	0	0	0	0	0	0	200	300	0	0	0	0	0	0	0	200	903	0	0	0	0	0	0	0	603	903	0
844	9	0	0	0	0	0	0	200	300	0	0	0	0	0	0	0	200	903	0	0	0	0	0	0	0	603	903	0
845	0	0	0	0	0	0	0	200	300	0	0	0	0	0	0	0	200	903	0	0	0	0	0	0	0	603	903	0
845	1	0	0	0	0	0	0	200	300	0	0	0	0	0	0	0	200	903	0	0	0	0	0	0	0	603	903	0
845	2	0	0	0	0	0	0	200	300	0	0	0	0	0	0	0	200	903	0	0	0	0	0	0	0	603	903	0
845	3	0	0	0	0	0	0	200	300	0	0	0	0	0	0	0	200	903	0	0	0	0	0	0	0	603	903	0
845	4	0	0	0	0	0	0	200	300	0	0	0	0	0	0	0	200	903	0	0	0	0	0	0	0	603	903	0
845	5	0	0	0	0	0	0	200	300	0	0	0	0	0	0	0	200	903	0	0	0	0	0	0	0	603	903	0
845	6	0	0	0	0	0	0	200	300	0	0	0	0	0	0	0	200	903	0	0	0	0	0	0	0	603	903	0
845	7	0	0	0	0	0	0	200	300	0	0	0	0	0	0	0	200	903	0	0	0	0	0	0	0	603	903	0
845	8	0	0	0	0	0	0	200	300	0	0	0	0	0	0	0	200	903	0	0	0	0	0	0	0	603	903	0
845	9	0	0	0	0	0	0	200	300	0	0	0	0	0	0	0	200	903	0	0	0	0	0	0	0	603	903	0
846	0	0	0	0	0	0	0	200	300	0	0	0	0	0	0	0	200	903	0	0	0	0	0	0	0	603	903	0
846	1	0	0	0	0	0	0	200	300	0	0	0	0	0	0	0	200	903	0	0	0	0	0	0	0	603	903	0
846	2	0	0	0	0	0	0	200	300	0	0	0	0	0	0	0	200	903	0	0	0	0	0	0	0	603	903	0
846	3	0	0	0	0	0	0	200	300	0	0	0	0	0	0	0	200	903	0	0	0	0	0	0	0	603	903	0
846	4	0	0	0	0	0	0	200	300	0	0	0	0	0	0	0	200	903	0	0	0	0	0	0	0	603	903	0
846	5	0	0	0	0	0	0	200	300	0	0	0	0	0	0	0	200	903	0	0	0	0	0	0	0	603	903	0
846	6	0	0	0	0	0	0	200	300	0	0	0	0	0	0	0	200	903	0	0	0	0	0	0	0	603	903	0
846	7	0	0	0	0	0	0	200	300	0	0	0	0	0	0	0	200	903	0	0	0	0	0	0	0	603	903	0
846	8	0	0	0	0	0	0	200	300	0	0	0	0	0	0	0	200	903	0	0	0	0	0	0	0	603	903	0
846	9	0	0	0	0	0	0	200	300	0	0	0	0	0	0	0	200	903	0	0	0	0	0	0	0	603	903	0
847	0	0	0	0	0	0	0	200	300	0	0	0	0	0	0	0	200	903	0	0	0	0	0	0	0	603	903	0
847	1	0	0	0	0	0	0	200	300	0	0	0	0	0	0	0	200	903	0	0	0	0	0	0	0	603	903	0
847	2	0	0	0	0	0	0	200	300	0	0	0	0	0	0	0	200	903	0	0	0	0	0	0	0	603	903	0
847	3	0	0	0	0	0	0	200	300	0	0	0	0	0	0	0	200	903	0	0	0	0	0	0	0	603	903	0
847	4	0	0	0	0	0	0	200	300	0	0	0	0	0	0	0	200	903	0	0	0	0	0	0	0	603	903	0
847	5	0	0	0	0	0	0	200	300	0	0	0	0	0	0	0	200	903	0	0	0	0	0	0	0	603	903	0
847	6	0	0	0	0	0	0	200	300	0	0	0	0	0	0	0	200	903	0	0	0	0	0	0	0	603	903	0
847	7	0	0	0	0	0	0	200	300	0	0	0	0	0	0	0	200	903	0	0	0	0	0	0	0	603	903	0
847	8	0	0	0	0	0	0	200	300	0	0	0	0	0	0	0	200	903	0	0	0	0	0	0	0	603	903	0
847	9	0	0	0	0	0	0	200	300	0	0	0	0	0	0	0	200	903	0	0	0	0	0	0	0	603	903	0
848	0	0	0	0	0	0	0	200	300	0	0	0	0	0	0	0	200	903	0	0	0	0	0	0	0	603	903	0
848	1	0	0	0	0	0	0	200	300	0	0	0	0	0	0	0	200	903	0	0	0	0	0	0	0	603	903	0
848	2	0	0	0	0	0	0	200	300	0	0	0	0	0	0	0	200	903	0	0	0	0	0	0	0	603	903	0
848	3	0	0	0	0	0	0	200	300	0	0	0	0	0	0	0	200	903	0	0	0	0	0	0	0	603	903	0
848	4	0	0	0	0	0	0	200	300	0	0	0	0	0	0	0	200	903	0	0	0	0	0	0	0	603	903	0
848	5	0	0	0	0	0	0	200	300	0	0	0	0	0	0	0	200	903	0	0	0	0	0	0	0	603	903	0
848	6	0	0	0	0	0	0	200	300	0	0	0	0	0	0	0	200	903	0	0	0	0	0	0	0	603	903	0
848	7	0	0	0	0	0	0	200	300	0	0	0	0	0	0	0	200	903	0	0	0	0	0	0	0	603	903	0
848	8	0	0	0	0	0	0	200	300	0	0	0	0	0	0	0	200	903	0	0	0	0	0	0	0	603	903	0
848	9	0	0	0	0	0	0	200	300	0	0	0	0	0	0	0	200	903	0	0	0	0	0	0	0	603	903	0
849	0	0	0	0	0	0	0	200	300	0	0	0	0	0	0	0	200	903	0	0	0	0	0	0	0	603	903	0
849	1	0	0	0	0	0	0	200	300	0	0	0	0	0	0	0	200	903	0	0	0	0	0	0	0	603	903	0
849	2	0	0	0	0	0	0	200	300	0	0	0	0	0	0	0	200	903	0	0	0	0	0	0	0	603	903	0
849	3	0	0	0	0	0	0	200	300	0	0	0	0	0	0	0	200	903	0	0	0	0	0	0	0	603	903	0
849	4	0	0	0	0	0	0	200	300	0	0	0	0	0	0	0	200	903	0	0	0	0	0	0	0	603	903	0
849	5	0	0	0	0	0	0	200	300	0	0	0	0	0	0	0	200	903	0	0	0	0	0	0	0	603	903	0
849	6	0	0	0	0	0	0	200	300	0	0	0	0	0	0	0	200	903	0	0	0	0	0	0	0	603	903	0
849	7	0	0	0	0	0	0	200	300	0	0	0	0	0	0	0	200	903	0	0	0	0	0	0	0	603	903	0
849	8	0	0	0	0	0	0	200	300	0	0	0	0	0	0	0	200	903	0	0	0	0	0	0	0	603	903	0
849	9	0	0	0	0	0	0	200	300	0	0	0	0	0	0	0	200	903	0	0	0	0	0	0	0	603	903	0
850	0	0	0	0	0	0	0	200	300	0	0	0	0	0	0	0	200	903	0	0	0	0	0	0	0	603	903	0
850	1	0	0	0	0	0	0	200	300	0	0	0	0	0	0	0	200	903	0	0	0	0	0	0	0	603	903	0
850	2	0	0	0	0	0	0	200	300	0	0	0	0	0	0	0	200	903	0	0	0	0	0	0	0	603	903	0
850	3	0	0	0	0	0	0	200	300	0	0	0	0	0	0	0	200	903	0	0	0	0	0	0	0	603	903	0
850	4	0	0	0	0	0	0	200	300	0	0	0	0	0	0	0	200	903	0	0	0	0	0	0	0	603	903	0
850	5	0	0	0	0	0	0	200	300	0	0	0	0	0	0	0	200	903	0	0	0	0	0	0	0	603	903	0
850	6	0	0	0	0	0	0	200	300	0	0	0	0	0	0	0	200	903	0	0	0	0	0	0	0	603	903	0
850	7	0	0	0	0	0	0	200	300	0	0	0	0	0	0	0	200	903	0	0	0	0	0	0	0	603	903	0
850	8	0	0	0	0	0	0	200	300	0	0	0	0	0	0	0	200	903	0	0	0	0	0	0	0	603	903	0
850	9	0	0	0	0	0	0	200	300	0	0	0	0	0	0	0	200	903	0	0	0	0	0	0	0	603	903	0
851	0	0	0	0	0	0	0	200	300	0	0	0	0	0	0	0	200	903	0	0	0	0	0	0	0	603	903	0
851	1	0	0	0	0	0	0	200	300	0	0	0	0	0	0	0	200	903	0	0	0	0	0	0	0	603	903	0
851	2	0	0	0	0	0	0	200	300	0	0	0	0	0	0	0	200	903	0	0	0	0	0	0	0	603	903	0
851	3	0	0	0	0	0	0	200	300	0	0	0	0	0	0	0	200	903	0	0	0	0	0	0	0	603	903	0
851	4	0	0	0	0	0	0	200	300	0	0	0	0	0	0	0	200	903	0	0	0	0	0	0	0	603	903	0
851	5	0	0	0	0	0	0	200	300	0	0	0	0	0	0	0	200	903	0	0	0	0	0	0	0	603	903	0
851	6	0	0	0	0	0	0	200	300	0	0	0	0	0	0	0	200	903	0	0	0	0	0	0	0	603	903	0
851	7	0	0	0	0	0	0	200	300	0	0	0	0	0	0	0	200	903	0	0	0	0	0	0	0	603	903	0
851	8	0	0	0	0	0	0	200	300	0	0	0	0	0	0	0	200	903	0	0	0	0	0	0	0	603	903	0
851	9	0	0	0	0	0	0	200	300	0	0	0	0	0	0	0	200	903	0	0	0	0	0	0	0	603	903	0
852	0	0	0	0	0	0	0	200	300	0	0	0	0	0	0	0	200	903	0	0	0	0	0	0	0	603	903	0
852	1	0	0	0	0	0	0	200	300	0	0	0	0	0	0	0	200	903	0	0	0	0	0	0	0	603	903	0
852	2	0	0	0	0	0	0	200	300	0	0	0	0	0	0	0	200	903	0	0	0	0	0	0	0	603	903	0
852	3	0	0	0	0	0	0	200	300	0	0	0	0	0	0	0	200	903	0	0	0	0	0	0	0	603	903	0
852	4	0	0	0	0	0	0	200	300	0	0	0	0	0	0	0	200	903	0	0	0	0	0	0	0	603	903	0
852	5	0	0	0	0	0	0	200	300	0	0	0	0	0	0	0	200	903	0	0	0	0	0	0	0	603	903	0
852	6	0	0	0	0	0	0	200	300	0	0	0	0	0	0	0	200	903	0	0	0	0	0	0	0	603	903	0
852	7	0	0	0	0	0	0	200	300	0	0	0	0	0	0	0	200	903	0	0	0	0	0	0	0	603	903	0
852	8	0	0	0	0	0	0	200	300	0	0	0	0	0	0	0	200	903	0	0	0	0	0	0	0	603	903	0
852	9	0	0	0	0	0	0	200	300	0	0	0	0	0	0	0	200	903	0	0	0	0	0	0	0	603	903	0
853	0	0	0	0	0	0	0	200	300	0	0	0	0	0	0	0	200	903	0	0	0	0	0	0	0	603	903	0
853	1	0	0	0	0	0	0	200	300	0	0	0	0	0	0	0	200	903	0	0	0	0	0	0	0	603	903	0
853	2	0	0	0	0	0	0	200	300	0	0	0	0	0	0	0	200	903	0	0	0	0	0	0	0	603	903	0
853	3	0	0	0	0	0	0	200	300	0	0	0	0	0	0	0	200	903	0	0	0	0	0	0	0	603	903	0
853	4	0	0	0	0	0	0	200	300	0	0	0	0	0	0	0	200	903	0	0	0	0	0	0	0	603	903	0
853	5	0	0	0	0	0	0	200	300	0	0	0	0	0	0	0	200	903	0	0	0	0	0	0	0	603	903	0
853	6	0	0	0	0	0	0	200	300	0	0	0	0	0	0	0	200	903	0	0	0	0	0	0	0	603	903	0
853	7	0	0	0	0	0	0	200	300	0	0	0	0	0	0	0	200	903	0	0	0	0	0	0	0	603	903	0
853	8	0	0	0	0	0	0	200	300	0	0	0	0	0	0	0	200	903	0	0	0	0	0	0	0	603	903	0
853	9	0	0	0	0	0	0	200	300	0	0	0	0	0	0	0	200	903	0	0	0	0	0	0	0	603	903	0
854	0	0	0	0	0	0	0	200	300	0	0	0	0	0	0	0	200	903	0	0	0	0	0	0	0	603	903	0
854	1	0	0	0	0	0	0	200	300	0	0	0	0	0	0	0	200	903	0	0	0	0	0	0	0	603	903	0
854	2	0	0	0	0	0	0	200	300	0	0	0	0	0	0	0	200	903	0	0	0	0	0	0	0	603	903	0
854	3	0	0	0	0	0	0	200	300	0	0	0	0	0	0	0	200	903	0	0	0	0	0	0	0	603	903	0
854	4	0	0	0	0	0	0	200	300	0	0	0	0	0	0	0	200	903	0	0	0	0	0	0	0	603	903	0
854	5	0	0	0	0	0	0	200	300	0	0	0	0	0	0	0	200	903	0	0	0	0	0	0	0	603	903	0
854	6	0	0	0	0	0	0	200	300	0	0	0	0	0	0	0	200	903	0	0	0	0	0	0	0	603	903	0
854	7	0	0	0	0	0	0	200	300	0	0	0	0	0	0	0	200	903	0	0	0	0	0	0	0	603	903	0
854	8	0	0	0	0	0	0	200	300	0	0	0	0	0	0	0	200	903	0	0	0	0	0	0	0	603	903	0
854	9	0	0	0	0	0	0	200	300	0	0	0	0	0	0	0	200	903	0	0	0	0	0	0	0	603	903	0
855	0	0	0	0	0	0	0	200	300	0	0	0	0	0	0	0	200	903	0	0	0	0	0	0	0	603	903	0
855	1	0	0	0	0	0	0	200	300	0	0	0	0	0	0	0	200	903	0	0	0	0	0	0	0	603	903	0
855	2	0	0	0	0	0	0	200	300	0	0	0	0	0	0	0	200	903	0	0	0	0	0	0	0	603	903	0
855	3	0	0	0	0	0	0	200	300	0	0	0	0	0	0	0	200	903	0	0	0	0	0	0	0	603	903	0
855	4	0	0	0	0	0	0	200	300	0	0	0	0	0	0	0	200	903	0	0	0	0	0	0	0	603	903	0
855	5	0	0	0	0	0	0	200	300	0	0	0	0	0	0	0	200	903	0	0	0	0	0	0	0	603	903	0
855	6	0	0	0	0	0	0	200	300	0	0	0	0	0	0	0	200	903	0	0	0	0	0	0	0	603	903	0
855	7	0	0	0	0	0	0	200	300	0	0	0	0	0	0	0	200	903	0	0	0	0	0	0	0	603	903	0
855	8	0	0	0	0	0	0	200	300	0	0	0	0	0	0	0	200	903	0	0	0	0	0	0	0	603	903	0
855	9	0	0	0	0	0	0	200	300	0	0	0	0	0	0	0	200	903	0	0	0	0	0	0	0	603	903	0
856	0	0	0	0	0	0	0	200	300	0	0	0	0	0	0	0	200	903	0	0	0	0	0	0	0	603	903	0
856	1	0	0	0	0	0	0	200	300	0	0	0	0	0	0	0	200	903	0	0	0	0	0	0	0	603	903	0
856	2	0	0	0	0	0	0	200	300	0	0	0	0	0	0	0	200	903	0	0	0	0	0	0	0	603	903	0
856	3	0	0	0	0	0	0	200	300	0	0	0	0	0	0	0	200	903	0	0	0	0	0	0	0	603	903	0
856	4	0	0	0	0	0	0	200	300	0	0	0	0	0	0	0	200	903	0	0	0	0	0	0	0	603	903	0
856	5	0	0	0	0	0	0	200	300	0	0	0	0	0	0	0	200	903	0	0	0	0	0	0	0	603	903	0
856	6	0	0	0	0	0	0	200	300	0	0	0	0	0	0	0	200	903	0	0	0	0	0	0	0	603	903	0
856	7	0	0	0	0	0	0	200	300	0	0	0	0	0	0	0	200	903	0	0	0	0	0	0	0	603	903	0
856	8	0	0	0	0	0	0	200	300	0	0	0	0	0	0	0	200	903	0	0	0	0	0	0	0	603	903	0
856	9	0	0	0	0	0	0	200	300	0	0	0	0	0	0	0	200	903	0	0	0	0	0	0	0	603	903	0
857	0	0	0	0	0	0	0	200	300	0	0	0	0	0	0	0	200	903	0	0	0	0	0	0	0	603	903	0
857	1	0	0	0	0	0	0	200	300	0	0	0	0	0	0	0	200	903	0	0	0	0	0	0	0	603	903	0
857	2	0	0	0	0	0	0	200	300	0	0	0	0	0	0	0	200	903	0	0	0	0	0	0	0	603	903	0
857	3	0	0	0	0	0	0	200	300	0	0	0	0	0	0	0	200	903	0	0	0	0	0	0	0	603	903	0
857	4	0	0	0	0	0	0	200	300	0	0	0	0	0	0	0	200	903	0	0	0	0	0	0	0	603	903	0
857	5	0	0	0	0	0	0	200	300	0	0	0	0	0	0	0	200	903	0	0	0	0	0	0	0	603	903	0
857	6	0	0	0	0	0	0	200	300	0	0	0	0	0	0	0	200	903	0	0	0	0	0	0	0	603	903	0
857	7	0	0	0	0	0	0	200	300	0	0	0	0	0	0	0	200	903	0	0	0	0	0	0	0	603	903	0
857	8	0	0	0	0	0	0	200	300	0	0	0	0	0	0	0	200	903	0	0	0	0	0	0	0	603	903	0
857	9	0	0	0	0	0	0	200	300	0	0	0	0	0	0	0	200	903	0	0	0	0	0	0	0	603	903	0
858	0	0	0	0	0	0	0	200	300	0	0	0	0	0	0	0	200	903	0	0	0	0	0	0	0	603	903	0
858	1	0	0	0	0	0	0	200	300	0	0	0	0	0	0	0	200	903	0	0	0	0	0	0	0	603	903	0
858	2	0	0	0	0	0	0	200	300	0	0	0	0	0	0	0	200	903	0	0	0	0	0	0	0	603	903	0
858	3	0	0	0	0	0	0	200	300	0	0	0	0	0	0	0	200	903	0	0	0	0	0	0	0	603	903	0
858	4	0	0	0	0	0	0	200	300	0	0	0	0	0	0	0	200	903	0	0	0	0	0	0	0	603	903	0
858	5	0	0	0	0	0	0	200	300	0	0	0	0	0	0	0	200	903	0	0	0	0	0	0	0	603	903	0
858	6	0	0	0	0	0	0	200	300	0	0	0	0	0	0	0	200	903	0	0	0	0	0	0	0	603	903	0
858	7	0	0	0	0	0	0	200	300	0	0	0	0	0	0	0	200	903	0	0	0	0	0	0	0	603	903	0
858	8	0	0	0	0	0	0	200	300	0	0	0	0	0	0	0	200	903	0	0	0	0	0	0	0	603	903	0
858	9	0	0	0	0	0	0	200	300	0	0	0	0	0	0	0	200	903	0	0	0	0	0	0	0	603	903	0
859	0	0	0	0	0	0	0	200	300	0	0	0	0	0	0	0	200	903	0	0	0	0	0	0	0	603	903	0
859	1	0	0	0	0	0	0	200	300	0	0	0	0	0	0	0	200	903	0	0	0	0	0	0	0	603	903	0
859	2	0	0	0	0	0	0	200	300	0	0	0	0	0	0	0	200	903	0	0	0	0	0	0	0	603	903	0
859	3	0	0	0	0	0	0	200	300	0	0	0	0	0	0	0	200	903	0	0	0	0	0	0	0	603	903	0
859	4	0	0	0	0	0	0	200	300	0	0	0	0	0	0	0	200	903	0	0	0	0	0	0	0	603	903	0
859	5	0	0	0	0	0	0	200	300	0	0	0	0	0	0	0	200	903	0	0	0	0	0	0	0	603	903	0
859	6	0	0	0	0	0	0	200	300	0	0	0	0	0	0	0	200	903	0	0	0	0	0	0	0	603	903	0
859	7	0	0	0	0	0	0	200	300	0	0	0	0	0	0	0	200	903	0	0	0	0	0	0	0	603	903	0
859	8	0	0	0	0	0	0	200	300	0	0	0	0	0	0	0	200	903	0	0	0	0	0	0	0	603	903	0
859	9	0	0	0	0	0	0	200	300	0	0	0	0	0	0	0	200	903	0	0	0	0	0	0	0	603	903	0
860	0	0	0	0	0	0	0	200	300	0	0	0	0	0	0	0	200	903	0	0	0	0	0	0	0	603	903	0
860	1	0	0	0	0	0	0	200	300	0	0	0	0	0	0	0	200	903	0	0	0	0	0	0	0	603	903	0
860	2	0	0	0	0	0	0	200	300	0	0	0	0	0	0	0	200	903	0	0	0	0	0	0	0	603	903	0
860	3	0	0	0	0	0	0	200	300	0	0	0	0	0	0	0	200	903	0	0	0	0	0	0	0	603	903	0
860	4	0	0	0	0	0	0	200	300	0	0	0	0	0	0	0	200	903	0	0	0	0	0	0	0	603	903	0
860	5	0	0	0	0	0	0	200	300	0	0	0	0	0	0	0	200	903	0	0	0	0	0	0	0	603	903	0
860	6	0	0	0	0	0	0	200	300	0	0	0	0	0	0	0	200	903	0	0	0	0	0	0	0	603	903	0
860	7	0	0	0	0	0	0	200	300	0	0	0	0	0	0	0	200	903	0	0	0	0	0	0	0	603	903	0
860	8	0	0	0	0	0	0	200	300	0	0	0	0	0	0	0	200	903	0	0	0	0	0	0	0	603	903	0
860	9	0	0	0	0	0	0	200	300	0	0	0	0	0	0	0	200	903	0	0	0	0	0	0	0	603	903	0
861	0	0	0	0	0	0	0	200	300	0	0	0	0	0	0	0	200	903	0	0	0	0	0	0	0	603	903	0
861	1	0	0	0	0	0	0	200	300	0	0	0	0	0	0	0	200	903	0	0	0	0	0	0	0	603	903	0
861	2	0	0	0	0	0	0	200	300	0	0	0	0	0	0	0	200	903	0	0	0	0	0	0	0	603	903	0
861	3	0	0	0	0	0	0	200	300	0	0	0	0	0	0	0	200	903	0	0	0	0	0	0	0	603	903	0
861	4	0	0	0	0	0	0	200	300	0	0	0	0	0	0	0	200	903	0	0	0	0	0	0	0	603	903	0
861	5	0	0	0	0	0	0	200	300	0	0	0	0	0	0	0	200	903	0	0	0	0	0	0	0	603	903	0
861	6	0	0	0	0	0	0	200	300	0	0	0	0	0	0	0	200	903	0	0	0	0	0	0	0	603	903	0
861	7	0	0	0	0	0	0	200	300	0	0	0	0	0	0	0	200	903	0	0	0	0	0	0	0	603	903	0
861	8	0	0	0	0	0	0	200	300	0	0	0	0	0	0	0	200	903	0	0	0	0	0	0	0	603	903	0
861	9	0	0	0	0	0	0	200	300	0	0	0	0	0	0	0	200	903	0	0	0	0	0	0	0	603	903	0
862	0	0	0	0	0	0	0	200	300	0	0	0	0	0	0	0	200	903	0	0	0	0	0	0	0	603	903	0
862	1	0	0	0	0	0	0	200	300	0	0	0	0	0	0	0	200	903	0	0	0	0	0	0	0	603	903	0
862	2	0	0	0	0	0	0	200	300	0	0	0	0	0	0	0	200	903	0	0	0	0	0	0	0	603	903	0
862	3	0	0	0	0	0	0	200	300	0	0	0	0	0	0	0	200	903	0	0	0	0	0	0	0	603	903	0
862	4	0	0	0	0	0	0	200	300	0	0	0	0	0	0	0	200	903	0	0	0	0	0	0	0	603	903	0
862	5	0	0	0	0	0	0	200	300	0	0	0	0	0	0	0	200	903	0	0	0	0	0	0	0	603	903	0
862	6	0	0	0	0	0	0	200	300	0	0	0	0	0	0	0	200	903	0	0	0	0	0	0	0	603	903	0
862	7	0	0	0	0	0	0	200	300	0	0	0	0	0	0	0	200	903	0	0	0	0	0	0	0	603	903	0
862	8	0	0	0	0	0	0	200	300	0	0	0	0	0	0	0	200	903	0	0	0	0	0	0	0	603	903	0
862	9	0	0	0	0	0	0	200	300	0	0	0	0	0	0	0	200	903	0	0	0	0	0	0	0	603	903	0
863	0	0	0	0	0	0	0	200	300	0	0	0	0	0	0	0	200	903	0	0	0	0	0	0	0	603	903	0
863	1	0	0	0	0	0	0	200	300	0	0	0	0	0	0	0	200	903	0	0	0	0	0	0	0	603	903	0
863	2	0	0	0	0	0	0	200	300	0	0	0	0	0	0	0	200	903	0	0	0	0	0	0	0	603	903	0
863	3	0	0	0	0	0	0	200	300	0	0	0	0	0	0	0	200	903	0	0	0	0	0	0	0	603	903	0
863	4	0	0	0	0	0	0	200	300	0	0	0	0	0	0	0	200	903	0	0	0	0	0	0	0	603	903	0
863	5	0	0	0	0	0	0	200	300	0	0	0	0	0	0	0	200	903	0	0	0	0	0	0	0	603	903	0
863	6	0	0	0	0	0	0	200	300	0	0	0	0	0	0	0	200	903	0	0	0	0	0	0	0	603	903	0
863	7	0	0	0	0	0	0	200	300	0	0	0	0	0	0	0	200	903	0	0	0	0	0	0	0	603	903	0
863	8	0	0	0	0	0	0	200	300	0	0	0	0	0	0	0	200	903	0	0	0	0	0	0	0	603	903	0
863	9	0	0	0	0	0	0	200	300	0	0	0	0	0	0	0	200	903	0	0	0	0	0	0	0	603	903	0
864	0	0	0	0	0	0	0	200	300	0	0	0	0	0	0	0	200	903	0	0	0	0	0	0	0	603	903	0
864	1	0	0	0	0	0	0	200	300	0	0	0	0	0	0	0	200	903	0	0	0	0	0	0	0	603	903	0
864	2	0	0	0	0	0	0	200	300	0	0	0	0	0	0	0	200	903	0	0	0	0	0	0	0	603	903	0
864	3	0	0	0	0	0	0	200	300	0	0	0	0	0	0	0	200	903	0	0	0	0	0	0	0	603	903	0
864	4	0	0	0	0	0	0	200	300	0	0	0	0	0	0	0	200	903	0	0	0	0	0	0	0	603	903	0
864	5	0	0	0	0	0	0	200	300	0	0	0	0	0	0	0	200	903	0	0	0	0	0	0	0	603	903	0
864	6	0	0	0	0	0	0	200	300	0	0	0	0	0	0	0	200	903	0	0	0	0	0	0	0	603	903	0
864	7	0	0	0	0	0	0	200	300	0	0	0	0	0	0	0	200	903	0	0	0	0	0	0	0	603	903	0
864	8	0	0	0	0	0	0	200	300	0	0	0	0	0	0	0	200	903	0	0	0	0	0	0	0	603	903	0
864	9	0	0	0	0	0	0	200	300	0	0	0	0	0	0	0	200	903	0	0	0	0	0	0	0	603	903	0
865	0	0	0	0	0	0	0	200	300	0	0	0	0	0	0	0	200	903	0	0	0	0	0	0	0	603	903	0
865	1	0	0	0	0	0	0	200	300	0	0	0	0	0	0	0	200	903	0	0	0	0	0	0	0	603	903	0
865	2	0	0	0	0	0	0	200	300	0	0	0	0	0	0	0	200	903	0	0	0	0	0	0	0	603	903	0
865	3	0	0	0	0	0	0	200	300	0	0	0	0	0	0	0	200	903	0	0	0	0	0	0	0	603	903	0
865	4	0	0	0	0	0	0	200	300	0	0	0	0	0	0	0	200	903	0	0	0	0	0	0	0	603	903	0
865	5	0	0	0	0	0	0	200	300	0	0	0	0	0	0	0	200	903	0	0	0	0	0	0	0	603	903	0
865	6	0	0	0	0	0	0	200	300	0	0	0	0	0	0	0	200	903	0	0	0	0	0	0	0	603	903	0
865	7	0	0	0	0	0	0	200	300	0	0	0	0	0	0	0	200	903	0	0	0	0	0	0	0	603	903	0
865	8	0	0	0	0	0	0	200	300	0	0	0	0	0	0	0	200	903	0	0	0	0	0	0	0	603	903	0
865	9	0	0	0	0	0	0	200	300	0	0	0	0	0	0	0	200	903	0	0	0	0	0	0	0	603	903	0
866	0	0	0	0	0	0	0	200	300	0	0	0	0	0	0	0	200	903	0	0	0	0	0	0	0	603	903	0
866	1	0	0	0	0	0	0	200	300	0	0	0	0	0	0	0	200	903	0	0	0	0	0	0	0	603	903	0
866	2	0	0	0	0	0	0	200	300	0	0	0	0	0	0	0	200	903	0	0	0	0	0	0	0	603	903	0
866	3	0	0	0	0	0	0	200	300	0	0	0	0	0	0	0	200	903	0	0	0	0	0	0	0	603	903	0
866	4	0	0	0	0	0	0	200	300	0	0	0	0	0	0	0	200	903	0	0	0	0	0	0	0	603	903	0
866	5	0	0	0	0	0	0	200	300	0	0	0	0	0	0	0	200	903	0	0	0	0	0	0	0	603	903	0
866	6	0	0	0	0	0	0	200	300	0	0	0	0	0	0	0	200	903	0	0	0	0	0	0	0	603	903	0
866	7	0	0	0	0	0	0	200	300	0	0	0	0	0	0	0	200	903	0	0	0	0	0	0	0	603	903	0
866	8	0	0	0	0	0	0	200	300	0	0	0	0	0	0	0	200	903	0	0	0	0	0	0	0	603	903	0
866	9	0	0	0	0	0	0	200	300	0	0	0	0	0	0	0	200	903	0	0	0	0	0	0	0	603	903	0
867	0	0	0	0	0	0	0	200	300	0	0	0	0	0	0	0	200	903	0	0	0	0	0	0	0	603	903	0
867	1	0	0	0	0	0	0	200	300	0	0	0	0	0	0	0	200	903	0	0	0	0	0	0	0	603	903	0
867	2	0	0	0	0	0	0	200	300	0	0	0	0	0	0	0	200	903	0	0	0	0	0	0	0	603	903	0
867	3	0	0	0	0	0	0	200	300	0	0	0	0	0	0	0	200	903	0	0	0	0	0	0	0	603	903	0
867	4	0	0	0	0	0	0	200	300	0	0	0	0	0	0	0	200	903	0	0	0	0	0	0	0	603	903	0
867	5	0	0	0	0	0	0	200	300	0	0	0	0	0	0	0	200	903	0	0	0	0	0	0	0	603	903	0
867	6	0	0	0	0	0	0	200	300	0	0	0	0	0	0	0	200	903	0	0	0	0	0	0	0	603	903	0
867	7	0	0	0	0	0	0	200	300	0	0	0	0	0	0	0	200	903	0	0	0	0	0	0	0	603	903	0
867	8	0	0	0	0	0	0	200	300	0	0	0	0	0	0	0	200	903	0	0	0	0	0	0	0	603	903	0
867	9	0	0	0	0	0	0	200	300	0	0	0	0	0	0	0	200	903	0	0	0	0	0	0	0	603	903	0
868	0	0	0	0	0	0	0	200	300	0	0	0	0	0	0	0	200	903	0	0	0	0	0	0	0	603	903	0
868	1	0	0	0	0	0	0	200	300	0	0	0	0	0	0	0	200	903	0	0	0	0	0	0	0	603	903	0
868	2	0	0	0	0	0	0	200	300	0	0	0	0	0	0	0	200	903	0	0	0	0	0	0	0	603	903	0
868	3	0	0	0	0	0	0	200	300	0	0	0	0	0	0	0	200	903	0	0	0	0	0	0	0	603	903	0
868	4	0	0	0	0	0	0	200	300	0	0	0	0	0	0	0	200	903	0	0	0	0	0	0	0	603	903	0
868	5	0	0	0	0	0	0	200	300	0	0	0	0	0	0	0	200	903	0	0	0	0	0	0	0	603	903	0
868	6	0	0	0	0	0	0	200	300	0	0	0	0	0	0	0	200	903	0	0	0	0	0	0	0	603	903	0
868	7	0	0	0	0	0	0	200	300	0	0	0	0	0	0	0	200	903	0	0	0	0	0	0	0	603	903	0
868	8	0	0	0	0	0	0	200	300	0	0	0	0	0	0	0	200	903	0	0	0	0	0	0	0	603	903	0
868	9	0	0	0	0	0	0	200	300	0	0	0	0	0	0	0	200	903	0	0	0	0	0	0	0	603	903	0
869	0	0	0	0	0	0	0	200	300	0	0	0	0	0	0	0	200	903	0	0	0	0	0	0	0	603	903	0
869	1	0	0	0	0	0	0	200	300	0	0	0	0	0	0	0	200	903	0	0	0	0	0	0	0	603	903	0
869	2	0	0	0	0	0	0	200	300	0	0	0	0	0	0	0	200	903	0	0	0	0	0	0	0	603	903	0
869	3	0	0	0	0	0	0	200	300	0	0	0	0	0	0	0	200	903	0	0	0	0	0	0	0	603	903	0
869	4	0	0	0	0	0	0	200	300	0	0	0	0	0	0	0	200	903	0	0	0	0	0	0	0	603	903	0
869	5	0	0	0	0	0	0	200	300	0	0	0	0	0	0	0	200	903	0	0	0	0	0	0	0	603	903	0
869	6	0	0	0	0	0	0	200	300	0	0	0	0	0	0	0	200	903	0	0	0	0	0	0	0	603	903	0
869	7	0	0	0	0	0	0	200	300	0	0	0	0	0	0	0	200	903	0	0	0	0	0	0	0	603	903	0
869	8	0	0	0	0	0	0	200	300	0	0	0	0	0	0	0	200	903	0	0	0	0	0	0	0	603	903	0
869	9	0	0	0	0	0	0	200	300	0	0	0	0	0	0	0	200	903	0	0	0	0	0	0	0	603	903	0
870	0	0	0	0	0	0	0	200	300	0	0	0	0	0	0	0	200	903	0	0	0	0	0	0	0	603	903	0
870	1	0	0	0	0	0	0	200	300	0	0	0	0	0	0	0	200	903	0	0	0	0	0	0	0	603	903	0
870	2	0	0	0	0	0	0	200	300	0	0	0	0	0	0	0	200	903	0	0	0	0	0	0	0	603	903	0
870	3	0	0	0	0	0	0	200	300	0	0	0	0	0	0	0	200	903	0	0	0	0	0	0	0	603	903	0
870	4	0	0	0	0	0	0	200	300	0	0	0	0	0	0	0	200	903	0	0	0	0	0	0	0	603	903	0
870	5	0	0	0	0	0	0	200	300	0	0	0	0	0	0	0	200	903	0	0	0	0	0	0	0	603	903	0
870	6	0	0	0	0	0	0	200	300	0	0	0	0	0	0	0	200	903	0	0	0	0	0	0	0	603	903	0
870	7	0	0	0	0	0	0	200	300	0	0	0	0	0	0	0	200	903	0	0	0	0	0	0	0	603	903	0
870	8	0	0	0	0	0	0	200	300	0	0	0	0	0	0	0	200	903	0	0	0	0	0	0	0	603	903	0
870	9	0	0	0	0	0	0	200	300	0	0	0	0	0	0	0	200	903	0	0	0	0	0	0	0	603	903	0
871	0	0	0	0	0	0	0	200	300	0	0	0	0	0	0	0	200	903	0	0	0	0	0	0	0	603	903	0
871	1	0	0	0	0	0	0	200	300	0	0	0	0	0	0	0	200	903	0	0	0	0	0	0	0	603	903	0
871	2	0	0	0	0	0	0	200	300	0	0	0	0	0	0	0	200	903	0	0	0	0	0	0	0	603	903	0
871	3	0	0	0	0	0	0	200	300	0	0	0	0	0	0	0	200	903	0	0	0	0	0	0	0	603	903	0
871	4	0	0	0	0	0	0	200	300	0	0	0	0	0	0	0	200	903	0	0	0	0	0	0	0	603	903	0
871	5	0	0	0	0	0	0	200	300	0	0	0	0	0	0	0	200	903	0	0	0	0	0	0	0	603	903	0
871	6	0	0	0	0	0	0	200	300	0	0	0	0	0	0	0	200	903	0	0	0	0	0	0	0	603	903	0
871	7	0	0	0	0	0	0	200	300	0	0	0	0	0	0	0	200	903	0	0	0	0	0	0	0	603	903	0
871	8	0	0	0	0	0	0	200	300	0	0	0	0	0	0	0	200	903	0	0	0	0	0	0	0	603	903	0
871	9	0	0	0	0	0	0	200	300	0	0	0	0	0	0	0	200	903	0	0	0	0	0	0	0	603	903	0
872	0	0	0	0	0	0	0	200	300	0	0	0	0	0	0	0	200	903	0	0	0	0	0	0	0	603	903	0
872	1	0	0	0	0	0	0	200	300	0	0	0	0	0	0	0	200	903	0	0	0	0	0	0	0	603	903	0
872	2	0	0	0	0	0	0	200	300	0	0	0	0	0	0	0	200	903	0	0	0	0	0	0	0	603	903	0
872	3	0	0	0	0	0	0	200	300	0	0	0	0	0	0	0	200	903	0	0	0	0	0	0	0	603	903	0
872	4	0	0	0	0	0	0	200	300	0	0	0	0	0	0	0	200	903	0	0	0	0	0	0	0	603	903	0
872	5	0	0	0	0	0	0	200	300	0	0	0	0	0	0	0	200	903	0	0	0	0	0	0	0	603	903	0
872	6	0	0	0	0	0	0	200	300	0	0	0	0	0	0	0	200	903	0	0	0	0	0	0	0	603	903	0
872	7	0	0	0	0	0	0	200	300	0	0	0	0	0	0	0	200	903	0	0	0	0	0	0	0	603	903	0
872	8	0	0	0	0	0	0	200	300	0	0	0	0	0	0	0	200	903	0	0	0	0	0	0	0	603	903	0
872	9	0	0	0	0	0	0	200	300	0	0	0	0	0	0	0	200	903	0	0	0	0	0	0	0	603	903	0
873	0	0	0	0	0	0	0	200	300	0	0	0	0	0	0	0	200	903	0	0	0	0	0	0	0	603	903	0
873	1	0	0	0	0	0	0	200	300	0	0	0	0	0	0	0	200	903	0	0	0	0	0	0	0	603	903	0
873	2	0	0	0	0	0	0	200	300	0	0	0	0	0	0	0	200	903	0	0	0	0	0	0	0	603	903	0
873	3	0	0	0	0	0	0	200	300	0	0	0	0	0	0	0	200	903	0	0	0	0	0	0	0	603	903	0
873	4	0	0	0	0	0	0	200	300	0	0	0	0	0	0	0	200	903	0	0	0	0	0	0	0	603	903	0
873	5	0	0	0	0	0	0	200	300	0	0	0	0	0	0	0	200	903	0	0	0	0	0	0	0	603	903	0
873	6	0	0	0	0	0	0	200	300	0	0	0	0	0	0	0	200	903	0	0	0	0	0	0	0	603	903	0
873	7	0	0	0	0	0	0	200	300	0	0	0	0	0	0	0	200	903	0	0	0	0	0	0	0	603	903	0
873	8	0	0	0	0	0	0	200	300	0	0	0	0	0	0	0	200	903	0	0	0	0	0	0	0	603	903	0
873	9	0	0	0	0	0	0	200	300	0	0	0	0	0	0	0	200	903	0	0	0	0	0	0	0	603	903	0
874	0	0	0	0	0	0	0	200	300	0	0	0	0	0	0	0	200	903	0	0	0	0	0	0	0	603	903	0
874	1	0	0	0	0	0	0	200	300	0	0	0	0	0	0	0	200	903	0	0	0	0	0	0	0	603	903	0
874	2	0	0	0	0	0	0	200	300	0	0	0	0	0	0	0	200	903	0	0	0	0	0	0	0	603	903	0
874	3	0	0	0	0	0	0	200	300	0	0	0	0	0	0	0	200	903	0	0	0	0	0	0	0	603	903	0
874	4	0	0	0	0	0	0	200	300	0	0	0	0	0	0	0	200	903	0	0	0	0	0	0	0	603	903	0
874	5	0	0	0	0	0	0	200	300	0	0	0	0	0	0	0	200	903	0	0	0	0	0	0	0	603	903	0
874	6	0	0	0	0	0	0	200	300	0	0	0	0	0	0	0	200	903	0	0	0	0	0	0	0	603	903	0
874	7	0	0	0	0	0	0	200	300	0	0	0	0	0	0	0	200	903	0	0	0	0	0	0	0	603	903	0
874	8	0	0	0	0	0	0	200	300	0	0	0	0	0	0	0	200	903	0	0	0	0	0	0	0	603	903	0
874	9	0	0	0	0	0	0	200	300	0	0	0	0	0	0	0	200	903	0	0	0	0	0	0	0	603	903	0
875	0	0	0	0	0	0	0	200	300	0	0	0	0	0	0	0	200	903	0	0	0	0	0	0	0	603	903	0
875	1	0	0	0	0	0	0	200	300	0	0	0	0	0	0	0	200	903	0	0	0	0	0	0	0	603	903	0
875	2	0	0	0	0	0	0	200	300	0	0	0	0	0	0	0	200	903	0	0	0	0	0	0	0	603	903	0
875	3	0	0	0	0	0	0	200	300	0	0	0	0	0	0	0	200	903	0	0	0	0	0	0	0	603	903	0
875	4	0	0	0	0	0	0	200	300	0	0	0	0	0	0	0	200	903	0	0	0	0	0	0	0	603	903	0
875	5	0	0	0	0	0	0	200	300	0	0	0	0	0	0	0	200	903	0	0	0	0	0	0	0	603	903	0
875	6	0	0	0	0	0	0	200	300	0	0	0	0	0	0	0	200	903	0	0	0	0	0	0	0	603	903	0
875	7	0	0	0	0	0	0	200	300	0	0	0	0	0	0	0	200	903	0	0	0	0	0	0	0	603	903	0
875	8	0	0	0	0	0	0	200	300	0	0	0	0	0	0	0	200	903	0	0	0	0	0	0	0	603	903	0
875	9	0	0	0	0	0	0	200	300	0	0	0	0	0	0	0	200	903	0	0	0	0	0	0	0	603	903	0
876	0	0	0	0	0	0	0	200	300	0	0	0	0	0	0	0	200	903	0	0	0	0	0	0	0	603	903	0
876	1	0	0	0	0	0	0	200	300	0	0	0	0	0	0	0	200	903	0	0	0	0	0	0	0	603	903	0
876	2	0	0	0	0	0	0	200	300	0	0	0	0	0	0	0	200	903	0	0	0	0	0	0	0	603	903	0
876	3	0	0	0	0	0	0	200	300	0	0	0	0	0	0	0	200	903	0	0	0	0	0	0	0	603	903	0
876	4	0	0	0	0	0	0	200	300	0	0	0	0	0	0	0	200	903	0	0	0	0	0	0	0	603	903	0
876	5	0	0	0	0	0	0	200	300	0	0	0	0	0	0	0	200	903	0	0	0	0	0	0	0	603	903	0
876	6	0	0	0	0	0	0	200	300	0	0	0	0	0	0	0	200	903	0	0	0	0	0	0	0	603	903	0
876	7	0	0	0	0	0	0	200	300	0	0	0	0	0	0	0	200	903	0	0	0	0	0	0	0	603	903	0
876	8	0	0	0	0	0	0	200	300	0	0	0	0	0	0	0	200	903	0	0	0	0	0	0	0	603	903	0
876	9	0	0	0	0	0	0	200	300	0	0	0	0	0	0	0	200	903	0	0	0	0	0	0	0	603	903	0
877	0	0	0	0	0	0	0	200	300	0	0	0	0	0	0	0	200	903	0	0	0	0	0	0	0	603	903	0
877	1	0	0	0	0	0	0	200	300	0	0	0	0	0	0	0	200	903	0	0	0	0	0	0	0	603	903	0
877	2	0	0	0	0	0	0	200	300	0	0	0	0	0	0	0	200	903	0	0	0	0	0	0	0	603	903	0
877	3	0	0	0	0	0	0	200	300	0	0	0	0	0	0	0	200	903	0	0	0	0	0	0	0	603	903	0
877	4	0	0	0	0	0	0	200	300	0	0	0	0	0	0	0	200	903	0	0	0	0	0	0	0	603	903	0
877	5	0	0	0	0	0	0	200	300	0	0	0	0	0	0	0	200	903	0	0	0	0	0	0	0	603	903	0
877	6	0	0	0	0	0	0	200	300	0	0	0	0	0	0	0	200	903	0	0	0	0	0	0	0	603	903	0
877	7	0	0	0	0	0	0	200	300	0	0	0	0	0	0	0	200	903	0	0	0	0	0	0	0	603	903	0
877	8	0	0	0	0	0	0	200	300	0	0	0	0	0	0	0	200	903	0	0	0	0	0	0	0	603	903	0
877	9	0	0	0	0	0	0	200	300	0	0	0	0	0	0	0	200	903	0	0	0	0	0	0	0	603	903	0
878	0	0	0	0	0	0	0	200	300	0	0	0	0	0	0	0	200	903	0	0	0	0	0	0	0	603	903	0
878	1	0	0	0	0	0	0	200	300	0	0	0	0	0	0	0	200	903	0	0	0	0	0	0	0	603	903	0
878	2	0	0	0	0	0	0	200	300	0	0	0	0	0	0	0	200	903	0	0	0	0	0	0	0	603	903	0
878	3	0	0	0	0	0	0	200	300	0	0	0	0	0	0	0	200	903	0	0	0	0	0	0	0	603	903	0
878	4	0	0	0	0	0	0	200	300	0	0	0	0	0	0	0	200	903	0	0	0	0	0	0	0	603	903	0
878	5	0	0	0	0	0	0	200	300	0	0	0	0	0	0	0	200	903	0	0	0	0	0	0	0	603	903	0
878	6	0	0	0	0	0	0	200	300	0	0	0	0	0	0	0	200	903	0	0	0	0	0	0	0	603	903	0
878	7	0	0	0	0	0	0	200	300	0	0	0	0	0	0	0	200	903	0	0	0	0	0	0	0	603	903	0
878	8	0	0	0	0	0	0	200	300	0	0	0	0	0	0	0	200	903	0	0	0	0	0	0	0	603	903	0
878	9	0	0	0	0	0	0	200	300	0	0	0	0	0	0	0	200	903	0	0	0	0	0	0	0	603	903	0
879	0	0	0	0	0	0	0	200	300	0	0	0	0	0	0	0	200	903	0	0	0	0	0	0	0	603	903	0
879	1	0	0	0	0	0	0	200	300	0	0	0	0	0	0	0	200	903	0	0	0	0	0	0	0	603	903	0
879	2	0	0	0	0	0	0	200	300	0	0	0	0	0	0	0	200	903	0	0	0	0	0	0	0	603	903	0
879	3	0	0	0	0	0	0	200	300	0	0	0	0	0	0	0	200	903	0	0	0	0	0	0	0	603	903	0
879	4	0	0	0	0	0	0	200	300	0	0	0	0	0	0	0	200	903	0	0	0	0	0	0	0	603	903	0
879	5	0	0	0	0	0	0	200	300	0	0	0	0	0	0	0	200	903	0	0	0	0	0	0	0	603	903	0
879	6	0	0	0	0	0	0	200	300	0	0	0	0	0	0	0	200	903	0	0	0	0	0	0	0	603	903	0
879	7	0	0	0	0	0	0	200	300	0	0	0	0	0	0	0	200	903	0	0	0	0	0	0	0	603	903	0
879	8	0	0	0	0	0	0	200	300	0	0	0	0	0	0	0	200	903	0	0	0	0	0	0	0	603	903	0
879	9	0	0	0	0	0	0	200	300	0	0	0	0	0	0	0	200	903	0	0	0	0	0	0	0	603	903	0
880	0	0	0	0	0	0	0	200	300	0	0	0	0	0	0	0	200	903	0	0	0	0	0	0	0	603	903	0
880	1	0	0	0	0	0	0	200	300	0	0	0	0	0	0	0	200	903	0	0	0	0	0	0	0	603	903	0
880	2	0	0	0	0	0	0	200	300	0	0	0	0	0	0	0	200	903	0	0	0	0	0	0	0	603	903	0
880	3	0	0	0	0	0	0	200	300	0	0	0	0	0	0	0	200	903	0	0	0	0	0	0	0	603	903	0
880	4	0	0	0	0	0	0	200	300	0	0	0	0	0	0	0	200	903	0	0	0	0	0	0	0	603	903	0
880	5	0	0	0	0	0	0	200	300	0	0	0	0	0	0	0	200	903	0	0	0	0	0	0	0	603	903	0
880	6	0	0	0	0	0	0	200	300	0	0	0	0	0	0	0	200	903	0	0	0	0	0	0	0	603	903	0
880	7	0	0	0	0	0	0	200	300	0	0	0	0	0	0	0	200	903	0	0	0	0	0	0	0	603	903	0
880	8	0	0	0	0	0	0	200	300	0	0	0	0	0	0	0	200	903	0	0	0	0	0	0	0	603	903	0
880	9	0	0	0	0	0	0	200	300	0	0	0	0	0	0	0	200	903	0	0	0	0	0	0	0	603	903	0
881	0	0	0	0	0	0	0	200	300	0	0	0	0	0	0	0	200	903	0	0	0	0	0	0	0	603	903	0
881	1	0	0	0	0	0	0	200	300	0	0	0	0	0	0	0	200	903	0	0	0	0	0	0	0	603	903	0
881	2	0	0	0	0	0	0	200	300	0	0	0	0	0	0	0	200	903	0	0	0	0	0	0	0	603	903	0
881	3	0	0	0	0	0	0	200	300	0	0	0	0	0	0	0	200	903	0	0	0	0	0	0	0	603	903	0
881	4	0	0	0	0	0	0	200	300	0	0	0	0	0	0	0	200	903	0	0	0	0	0	0	0	603	903	0
881	5	0	0	0	0	0	0	200	300	0	0	0	0	0	0	0	200	903	0	0	0	0	0	0	0	603	903	0
881	6	0	0	0	0	0	0	200	300	0	0	0	0	0	0	0	200	903	0	0	0	0	0	0	0	603	903	0
881	7	0	0	0	0	0	0	200	300	0	0	0	0	0	0	0	200	903	0	0	0	0	0	0	0	603	903	0
881	8	0	0	0	0	0	0	200	300	0	0	0	0	0	0	0	200	903	0	0	0	0	0	0	0	603	903	0
881	9	0	0	0	0	0	0	200	300	0	0	0	0	0	0	0	200	903	0	0	0	0	0	0	0	603	903	0
882	0	0	0	0	0	0	0	200	300	0	0	0	0	0	0	0	200	903	0	0	0	0	0	0	0	603	903	0
882	1	0	0	0	0	0	0	200	300	0	0	0	0	0	0	0	200	903	0	0	0	0	0	0	0	603	903	0
882	2	0	0	0	0	0	0	200	300	0	0	0	0	0	0	0	200	903	0	0	0	0	0	0	0	603	903	0
882	3	0	0	0	0	0	0	200	300	0	0	0	0	0	0	0	200	903	0	0	0	0	0	0	0	603	903	0
882	4	0	0	0	0	0	0	200	300	0	0	0	0	0	0	0	200	903	0	0	0	0	0	0	0	603	903	0
882	5	0	0	0	0	0	0	200	300	0	0	0	0	0	0	0	200	903	0	0	0	0	0	0	0	603	903	0
882	6	0	0	0	0	0	0	200	300	0	0	0	0	0	0	0	200	903	0	0	0	0	0	0	0	603	903	0
882	7	0	0	0	0	0	0	200	300	0	0	0	0	0	0	0	200	903	0	0	0	0	0	0	0	603	903	0
882	8	0	0	0	0	0	0	200	300	0	0	0	0	0	0	0	200	903	0	0	0	0	0	0	0	603	903	0
882	9	0	0	0	0	0	0	200	300	0	0	0	0	0	0	0	200	903	0	0	0	0	0	0	0	603	903	0
883	0	0	0	0	0	0	0	200	300	0	0	0	0	0	0	0	200	903	0	0	0	0	0	0	0	603	903	0
883	1	0	0	0	0	0	0	200	300	0	0	0	0	0	0	0	200	903	0	0	0	0	0	0	0	603	903	0
883	2	0	0	0	0	0	0	200	300	0	0	0	0	0	0	0	200	903	0	0	0	0	0	0	0	603	903	0
883	3	0	0	0	0	0	0	200	300	0	0	0	0	0	0	0	200	903	0	0	0	0	0	0	0	603	903	0
883	4	0	0	0	0	0	0	200	300	0	0	0	0	0	0	0	200	903	0	0	0	0	0	0	0	603	903	0
883	5	0	0	0	0	0	0	200	300	0	0	0	0	0	0	0	200	903	0	0	0	0	0	0	0	603	903	0
883	6	0	0	0	0	0	0	200	300	0	0	0	0	0	0	0	200	903	0	0	0	0	0	0	0	603	903	0
883	7	0	0	0	0	0	0	200	300	0	0	0	0	0	0	0	200	903	0	0	0	0	0	0	0	603	903	0
883	8	0	0	0	0	0	0	200	300	0	0	0	0	0	0	0	200	903	0	0	0	0	0	0	0	603	903	0
883	9	0	0	0	0	0	0	200	300	0	0	0	0	0	0	0	200	903	0	0	0	0	0	0	0	603	903	0
884	0	0	0	0	0	0	0	200	300	0	0	0	0	0	0	0	200	903	0	0	0	0	0	0	0	603	903	0
884	1	0	0	0	0	0	0	200	300	0	0	0	0	0	0	0	200	903	0	0	0	0	0	0	0	603	903	0
884	2	0	0	0	0	0	0	200	300	0	0	0	0	0	0	0	200	903	0	0	0	0	0	0	0	603	903	0
884	3	0	0	0	0	0	0	200	300	0	0	0	0	0	0	0	200	903	0	0	0	0	0	0	0	603	903	0
884	4	0	0	0	0	0	0	200	300	0	0	0	0	0	0	0	200	903	0	0	0	0	0	0	0	603	903	0
884	5	0	0	0	0	0	0	200	300	0	0	0	0	0	0	0	200	903	0	0	0	0	0	0	0	603	903	0
884	6	0	0	0	0	0	0	200	300	0	0	0	0	0	0	0	200	903	0	0	0	0	0	0	0	603	903	0
884	7	0	0	0	0	0	0	200	300	0	0	0	0	0	0	0	200	903	0	0	0	0	0	0	0	603	903	0
884	8	0	0	0	0	0	0	200	300	0	0	0	0	0	0	0	200	903	0	0	0	0	0	0	0	603	903	0
884	9	0	0	0	0	0	0	200	300	0	0	0	0	0	0	0	200	903	0	0	0	0	0	0	0	603	903	0
885	0	0	0	0	0	0	0	200	300	0	0	0	0	0	0	0	200	903	0	0	0	0	0	0	0	603	903	0
885	1	0	0	0	0	0	0	200	300	0	0	0	0	0	0	0	200	903	0	0	0	0	0	0	0	603	903	0
885	2	0	0	0	0	0	0	200	300	0	0	0	0	0	0	0	200	903	0	0	0	0	0	0	0	603	903	0
885	3	0	0	0	0	0	0	200	300	0	0	0	0	0	0	0	200	903	0	0	0	0	0	0	0	603	903	0
885	4	0	0	0	0	0	0	200	300	0	0	0	0	0	0	0	200	903	0	0	0	0	0	0	0	603	903	0
885	5	0	0	0	0	0	0	200	300	0	0	0	0	0	0	0	200	903	0	0	0	0	0	0	0	603	903	0
885	6	0	0	0	0	0	0	200	300	0	0	0	0	0	0	0	200	903	0	0	0	0	0	0	0	603	903	0
885	7	0	0	0	0	0	0	200	300	0	0	0	0	0	0	0	200	903	0	0	0	0	0	0	0	603	903	0
885	8	0	0	0	0	0	0	200	300	0	0	0	0	0	0	0	200	903	0	0	0	0	0	0	0	603	903	0
885	9	0	0	0	0	0	0	200	300	0	0	0	0	0	0	0	200	903	0	0	0	0	0	0	0	603	903	0
886	0	0	0	0	0	0	0	200	300	0	0	0	0	0	0	0	200	903	0	0	0	0	0	0	0	603	903	0
886	1	0	0	0	0	0	0	200	300	0	0	0	0	0	0	0	200	903	0	0	0	0	0	0	0	603	903	0
886	2	0	0	0	0	0	0	200	300	0	0	0	0	0	0	0	200	903	0	0	0	0	0	0	0	603	903	0
886	3	0	0	0	0	0	0	200	300	0	0	0	0	0	0	0	200	903	0	0	0	0	0	0	0	603	903	0
886	4	0	0	0	0	0	0	200	300	0	0	0	0	0	0	0	200	903	0	0	0	0	0	0	0	603	903	0
886	5	0	0	0	0	0	0	200	300	0	0	0	0	0	0	0	200	903	0	0	0	0	0	0	0	603	903	0
886	6	0	0	0	0	0	0	200	300	0	0	0	0	0	0	0	200	903	0	0	0	0	0	0	0	603	903	0
886	7	0	0	0	0	0	0	200	300	0	0	0	0	0	0	0	200	903	0	0	0	0	0	0	0	603	903	0
886	8	0	0	0	0	0	0	200	300	0	0	0	0	0	0	0	200	903	0	0	0	0	0	0	0	603	903	0
886	9	0	0	0	0	0	0	200	300	0	0	0	0	0	0	0	200	903	0	0	0	0	0	0	0	603	903	0
887	0	0	0	0	0	0	0	200	300	0	0	0	0	0	0	0	200	903	0	0	0	0	0	0	0	603	903	0
887	1	0	0	0	0	0	0	200	300	0	0	0	0	0	0	0	200	903	0	0	0	0	0	0	0	603	903	0
887	2	0	0	0	0	0	0	200	300	0	0	0	0	0	0	0	200	903	0	0	0	0	0	0	0	603	903	0
887	3	0	0	0	0	0	0	200	300	0	0	0	0	0	0	0	200	903	0	0	0	0	0	0	0	603	903	0
887	4	0	0	0	0	0	0	200	300	0	0	0	0	0	0	0	200	903	0	0	0	0	0	0	0	603	903	0
887	5	0	0	0	0	0	0	200	300	0	0	0	0	0	0	0	200	903	0	0	0	0	0	0	0	603	903	0
887	6	0	0	0	0	0	0	200	300	0	0	0	0	0	0	0	200	903	0	0	0	0	0	0	0	603	903	0
887	7	0	0	0	0	0	0	200	300	0	0	0	0	0	0	0	200	903	0	0	0	0	0	0	0	603	903	0
887	8	0	0	0	0	0	0	200	300	0	0	0	0	0	0	0	200	903	0	0	0	0	0	0	0	603	903	0
887	9	0	0	0	0	0	0	200	300	0	0	0	0	0	0	0	200	903	0	0	0	0	0	0	0	603	903	0
888	0	0	0	0	0	0	0	200	300	0	0	0	0	0	0	0	200	903	0	0	0	0	0	0	0	603	903	0
888	1	0	0	0	0	0	0	200	300	0	0	0	0	0	0	0	200	903	0	0	0	0	0	0	0	603	903	0
888	2	0	0	0	0	0	0	200	300	0	0	0	0	0	0	0	200	903	0	0	0	0	0	0	0	603	903	0
888	3	0	0	0	0	0	0	200	300	0	0	0	0	0	0	0	200	903	0	0	0	0	0	0	0	603	903	0
888	4	0	0	0	0	0	0	200	300	0	0	0	0	0	0	0	200	903	0	0	0	0	0	0	0	603	903	0
888	5	0	0	0	0	0	0	200	300	0	0	0	0	0	0	0	200	903	0	0	0	0	0	0	0	603	903	0
888	6	0	0	0	0	0	0	200	300	0	0	0	0	0	0	0	200	903	0	0	0	0	0	0	0	603	903	0
888	7	0	0	0	0	0	0	200	300	0	0	0	0	0	0	0	200	903	0	0	0	0	0	0	0	603	903	0
888	8	0	0	0	0	0	0	200	300	0	0	0	0	0	0	0	200	903	0	0	0	0	0	0	0	603	903	0
888	9	0	0	0	0	0	0	200	300	0	0	0	0	0	0	0	200	903	0	0	0	0	0	0	0	603	903	0
889	0	0	0	0	0	0	0	200	300	0	0	0	0	0	0	0	200	903	0	0	0	0	0	0	0	603	903	0
889	1	0	0	0	0	0	0	200	300	0	0	0	0	0	0	0	200	903	0	0	0	0	0	0	0	603	903	0
889	2	0	0	0	0	0	0	200	300	0	0	0	0	0	0	0	200	903	0	0	0	0	0	0	0	603	903	0
889	3	0	0	0	0	0	0	200	300	0	0	0	0	0	0	0	200	903	0	0	0	0	0	0	0	603	903	0
889	4	0	0	0	0	0	0	200	300	0	0	0	0	0	0	0	200	903	0	0	0	0	0	0	0	603	903	0
889	5	0	0	0	0	0	0	200	300	0	0	0	0	0	0	0	200	903	0	0	0	0	0	0	0	603	903	0
889	6	0	0	0	0	0	0	200	300	0	0	0	0	0	0	0	200	903	0	0	0	0	0	0	0	603	903	0
889	7	0	0	0	0	0	0	200	300	0	0	0	0	0	0	0	200	903	0	0	0	0	0	0	0	603	903	0
889	8	0	0	0	0	0	0	200	300	0	0	0	0	0	0	0	200	903	0	0	0	0	0	0	0	603	903	0
889	9	0	0	0	0	0	0	200	300	0	0	0	0	0	0	0	200	903	0	0	0	0	0	0	0	603	903	0
890	0	0	0	0	0	0	0	200	300	0	0	0	0	0	0	0	200	903	0	0	0	0	0	0	0	603	903	0
890	1	0	0	0	0	0	0	200	300	0	0	0	0	0	0	0	200	903	0	0	0	0	0	0	0	603	903	0
890	2	0	0	0	0	0	0	200	300	0	0	0	0	0	0	0	200	903	0	0	0	0	0	0	0	603	903	0
890	3	0	0	0	0	0	0	200	300	0	0	0	0	0	0	0	200	903	0	0	0	0	0	0	0	603	903	0
890	4	0	0	0	0	0	0	200	300	0	0	0	0	0	0	0	200	903	0	0	0	0	0	0	0	603	903	0
890	5	0	0	0	0	0	0	200	300	0	0	0	0	0	0	0	200	903	0	0	0	0	0	0	0	603	903	0
890	6	0	0	0	0	0	0	200	300	0	0	0	0	0	0	0	200	903	0	0	0	0	0	0	0	603	903	0
890	7	0	0	0	0	0	0	200	300	0	0	0	0	0	0	0	200	903	0	0	0	0	0	0	0	603	903	0
890	8	0	0	0	0	0	0	200	300	0	0	0	0	0	0	0	200	903	0	0	0	0	0	0	0	603	903	0
890	9	0	0	0	0	0	0	200	300	0	0	0	0	0	0	0	200	903	0	0	0	0	0	0	0	603	903	0
891	0	0	0	0	0	0	0	200	300	0	0	0	0	0	0	0	200	903	0	0	0	0	0	0	0	603	903	0
891	1	0	0	0	0	0	0	200	300	0	0	0	0	0	0	0	200	903	0	0	0	0	0	0	0	603	903	0
891	2	0	0	0	0	0	0	200	300	0	0	0	0	0	0	0	200	903	0	0	0	0	0	0	0	603	903	0
891	3	0	0	0	0	0	0	200	300	0	0	0	0	0	0	0	200	903	0	0	0	0	0	0	0	603	903	0
891	4	0	0	0	0	0	0	200	300	0	0	0	0	0	0	0	200	903	0	0	0	0	0	0	0	603	903	0
891	5	0	0	0	0	0	0	200	300	0	0	0	0	0	0	0	200	903	0	0	0	0	0	0	0	603	903	0
891	6	0	0	0	0	0	0	200	300	0	0	0	0	0	0	0	200	903	0	0	0	0	0	0	0	603	903	0
891	7	0	0	0	0	0	0	200	300	0	0	0	0	0	0	0	200	903	0	0	0	0	0	0	0	603	903	0
891	8	0	0	0	0	0	0	200	300	0	0	0	0	0	0	0	200	903	0	0	0	0	0	0	0	603	903	0
891	9	0	0	0	0	0	0	200	300	0	0	0	0	0	0	0	200	903	0	0	0	0	0	0	0	603	903	0
892	0	0	0	0	0	0	0	200	300	0	0	0	0	0	0	0	200	903	0	0	0	0	0	0	0	603	903	0
892	1	0	0	0	0	0	0	200	300	0	0	0	0	0	0	0	200	903	0	0	0	0	0	0	0	603	903	0
892	2	0	0	0	0	0	0	200	300	0	0	0	0	0	0	0	200	903	0	0	0	0	0	0	0	603	903	0
892	3	0	0	0	0	0	0	200	300	0	0	0	0	0	0	0	200	903	0	0	0	0	0	0	0	603	903	0
892	4	0	0	0	0	0	0	200	300	0	0	0	0	0	0	0	200	903	0	0	0	0	0	0	0	603	903	0
892	5	0	0	0	0	0	0	200	300	0	0	0	0	0	0	0	200	903	0	0	0	0	0	0	0	603	903	0
892	6	0	0	0	0	0	0	200	300	0	0	0	0	0	0	0	200	903	0	0	0	0	0	0	0	603	903	0
892	7	0	0	0	0	0	0	200	300	0	0	0	0	0	0	0	200	903	0	0	0	0	0	0	0	603	903	0
892	8	0	0	0	0	0	0	200	300	0	0	0	0	0	0	0	200	903	0	0	0	0	0	0	0	603	903	0
892	9	0	0	0	0	0	0	200	300	0	0	0	0	0	0	0	200	903	0	0	0	0	0	0	0	603	903	0
893	0	0	0	0	0	0	0	200	300	0	0	0	0	0	0	0	200	903	0	0	0	0	0	0	0	603	903	0
893	1	0	0	0	0	0	0	200	300	0	0	0	0	0	0	0	200	903	0	0	0	0	0	0	0	603	903	0
893	2	0	0	0	0	0	0	200	300	0	0	0	0	0	0	0	200	903	0	0	0	0	0	0	0	603	903	0
893	3	0	0	0	0	0	0	200	300	0	0	0	0	0	0	0	200	903	0	0	0	0	0	0	0	603	903	0
893	4	0	0	0	0	0	0	200	300	0	0	0	0	0	0	0	200	903	0	0	0	0	0	0	0	603	903	0
893	5	0	0	0	0	0	0	200	300	0	0	0	0	0	0	0	200	903	0	0	0	0	0	0	0	603	903	0
893	6	0	0	0	0	0	0	200	300	0	0	0	0	0	0	0	200	903	0	0	0	0	0	0	0	603	903	0
893	7	0	0	0	0	0	0	200	300	0	0	0	0	0	0	0	200	903	0	0	0	0	0	0	0	603	903	0
893	8	0	0	0	0	0	0	200	300	0	0	0	0	0	0	0	200	903	0	0	0	0	0	0	0	603	903	0
893	9	0	0	0	0	0	0	200	300	0	0	0	0	0	0	0	200	903	0	0	0	0	0	0	0	603	903	0
894	0	0	0	0	0	0	0	200	300	0	0	0	0	0	0	0	200	903	0	0	0	0	0	0	0	603	903	0
894	1	0	0	0	0	0	0	200	300	0	0	0	0	0	0	0	200	903	0	0	0	0	0	0	0	603	903	0
894	2	0	0	0	0	0	0	200	300	0	0	0	0	0	0	0	200	903	0	0	0	0	0	0	0	603	903	0
894	3	0	0	0	0	0	0	200	300	0	0	0	0	0	0	0	200	903	0	0	0	0	0	0	0	603	903	0
894	4	0	0	0	0	0	0	200	300	0	0	0	0	0	0	0	200	903	0	0	0	0	0	0	0	603	903	0
894	5	0	0	0	0	0	0	200	300	0	0	0	0	0	0	0	200	903	0	0	0	0	0	0	0	603	903	0
894	6	0	0	0	0	0	0	200	300	0	0	0	0	0	0	0	200	903	0	0	0	0	0	0	0	603	903	0
894	7	0	0	0	0	0	0	200	300	0	0	0	0	0	0	0	200	903	0	0	0	0	0	0	0	603	903	0
894	8	0	0	0	0	0	0	200	300	0	0	0	0	0	0	0	200	903	0	0	0	0	0	0	0	603	903	0
894	9	0	0	0	0	0	0	200	300	0	0	0	0	0	0	0	200	903	0	0	0	0	0	0	0	603	903	0
895	0	0	0	0	0	0	0	200	300	0	0	0	0	0	0	0	200	903	0	0	0	0	0	0	0	603	903	0
895	1	0	0	0	0	0	0	200	300	0	0	0	0	0	0	0	200	903	0	0	0	0	0	0	0	603	903	0
895	2	0	0	0	0	0	0	200	300	0	0	0	0	0	0	0	200	903	0	0	0	0	0	0	0	603	903	0
895	3	0	0	0	0	0	0	200	300	0	0	0	0	0	0	0	200	903	0	0	0	0	0	0	0	603	903	0
895	4	0	0	0	0	0	0	200	300	0	0	0	0	0	0	0	200	903	0	0	0	0	0	0	0	603	903	0
895	5	0	0	0	0	0	0	200	300	0	0	0	0	0	0	0	200	903	0	0	0	0	0	0	0	603	903	0
895	6	0	0	0	0	0	0	200	300	0	0	0	0	0	0	0	200	903	0	0	0	0	0	0	0	603	903	0
895	7	0	0	0	0	0	0	200	300	0	0	0	0	0	0	0	200	903	0	0	0	0	0	0	0	603	903	0
895	8	0	0	0	0	0	0	200	300	0	0	0	0	0	0	0	200	903	0	0	0	0	0	0	0	603	903	0
895	9	0	0	0	0	0	0	200	300	0	0	0	0	0	0	0	200	903	0	0	0	0	0	0	0	603	903	0
896	0	0	0	0	0	0	0	200	300	0	0	0	0	0	0	0	200	903	0	0	0	0	0	0	0	603	903	0
896	1	0	0	0	0	0	0	200	300	0	0	0	0	0	0	0	200	903	0	0	0	0	0	0	0	603	903	0
896	2	0	0	0	0	0	0	200	300	0	0	0	0	0	0	0	200	903	0	0	0	0	0	0	0	603	903	0
896	3	0	0	0	0	0	0	200	300	0	0	0	0	0	0	0	200	903	0	0	0	0	0	0	0	603	903	0
896	4	0	0	0	0	0	0	200	300	0	0	0	0	0	0	0	200	903	0	0	0	0	0	0	0	603	903	0
896	5	0	0	0	0	0	0	200	300	0	0	0	0	0	0	0	200	903	0	0	0	0	0	0	0	603	903	0
896	6	0	0	0	0	0	0	200	300	0	0	0	0	0	0	0	200	903	0	0	0	0	0	0	0	603	903	0
896	7	0	0	0	0	0	0	200	300	0	0	0	0	0	0	0	200	903	0	0	0	0	0	0	0	603	903	0
896	8	0	0	0	0	0	0	200	300	0	0	0	0	0	0	0	200	903	0	0	0	0	0	0	0	603	903	0
896	9	0	0	0	0	0	0	200	300	0	0	0	0	0	0	0	200	903	0	0	0	0	0	0	0	603	903	0
897	0	0	0	0	0	0	0	200	300	0	0	0	0	0	0	0	200	903	0	0	0	0	0	0	0	603	903	0
897	1	0	0	0	0	0	0	200	300	0	0	0	0	0	0	0	200	903	0	0	0	0	0	0	0	603	903	0
897	2	0	0	0	0	0	0	200	300	0	0	0	0	0	0	0	200	903	0	0	0	0	0	0	0	603	903	0
897	3	0	0	0	0	0	0	200	300	0	0	0	0	0	0	0	200	903	0	0	0	0	0	0	0	603	903	0
897	4	0	0	0	0	0	0	200	300	0	0	0	0	0	0	0	200	903	0	0	0	0	0	0	0	603	903	0
897	5	0	0	0	0	0	0	200	300	0	0	0	0	0	0	0	200	903	0	0	0	0	0	0	0	603	903	0
897	6	0	0	0	0	0	0	200	300	0	0	0	0	0	0	0	200	903	0	0	0	0	0	0	0	603	903	0
897	7	0	0	0	0	0	0	200	300	0	0	0	0	0	0	0	200	903	0	0	0	0	0	0	0	603	903	0
897	8	0	0	0	0	0	0	200	300	0	0	0	0	0	0	0	200	903	0	0	0	0	0	0	0	603	903	0
897	9	0	0	0	0	0	0	200	300	0	0	0	0	0	0	0	200	903	0	0	0	0	0	0	0	603	903	0
898	0	0	0	0	0	0	0	200	300	0	0	0	0	0	0	0	200	903	0	0	0	0	0	0	0	603	903	0
898	1	0	0	0	0	0	0	200	300	0	0	0	0	0	0	0	200	903	0	0	0	0	0	0	0	603	903	0
898	2	0	0	0	0	0	0	200	300	0	0	0	0	0	0	0	200	903	0	0	0	0	0	0	0	603	903	0
898	3	0	0	0	0	0	0	200	300	0	0	0	0	0	0	0	200	903	0	0	0	0	0	0	0	603	903	0
898	4	0	0	0	0	0	0	200	300	0	0	0	0	0	0	0	200	903	0	0	0	0	0	0	0	603	903	0
898	5	0	0	0	0	0	0	200	300	0	0	0	0	0	0	0	200	903	0	0	0	0	0	0	0	603	903	0
898	6	0	0	0	0	0	0	200	300	0	0	0	0	0	0	0	200	903	0	0	0	0	0	0	0	603	903	0
898	7	0	0	0	0	0	0	200	300	0	0	0	0	0	0	0	200	903	0	0	0	0	0	0	0	603	903	0
898	8	0	0	0	0	0	0	200	300	0	0	0	0	0	0	0	200	903	0	0	0	0	0	0	0	603	903	0
898	9	0	0	0	0	0	0	200	300	0	0	0	0	0	0	0	200	903	0	0	0	0	0	0	0	603	903	0
899	0	0	0	0	0	0	0	200	300	0	0	0	0	0	0	0	200	903	0	0	0	0	0	0	0	603	903	0
899	1	0	0	0	0	0	0	200	300	0	0	0	0	0	0	0	200	903	0	0	0	0	0	0	0	603	903	0
899	2	0	0	0	0	0	0	200	300	0	0	0	0	0	0	0	200	903	0	0	0	0	0	0	0	603	903	0
899	3	0	0	0	0	0	0	200	300	0	0	0	0	0	0	0	200	903	0	0	0	0	0	0	0	603	903	0
899	4	0	0	0	0	0	0	200	300	0	0	0	0	0	0	0	200	903	0	0	0	0	0	0	0	603	903	0
899	5	0	0	0	0	0	0	200	300	0	0	0	0	0	0	0	200	903	0	0	0	0	0	0	0	603	903	0
899	6	0	0	0	0	0	0	200	300	0	0	0	0	0	0	0	200	903	0	0	0	0	0	0	0	603	903	0
899	7	0	0	0	0	0	0	200	300	0	0	0	0	0	0	0	200	903	0	0	0	0	0	0	0	603	903	0
899	8	0	0	0	0	0	0	200	300	0	0	0	0	0	0	0	200	903	0	0	0	0	0	0	0	603	903	0
899	9	0	0	0	0	0	0	200	300	0	0	0	0	0	0	0	200	903	0	0	0	0	0	0	0	603	903	0
900	0	0	0	0	0	0	0	200	300	0	0	0	0	0	0	0	200	903	0	0	0	0	0	0	0	603	903	0
900	1	0	0	0	0	0	0	200	300	0	0	0	0	0	0	0	200	903	0	0	0	0	0	0	0	603	903	0
900	2	0	0	0	0	0	0	200	300	0	0	0	0	0	0	0	200	903	0	0	0	0	0	0	0	603	903	0
900	3	0	0	0	0	0	0	200	300	0	0	0	0	0	0	0	200	903	0	0	0	0	0	0	0	603	903	0
900	4	0	0	0	0	0	0	200	300	0	0	0	0	0	0	0	200	903	0	0	0	0	0	0	0	603	903	0
900	5	0	0	0	0	0	0	200	300	0	0	0	0	0	0	0	200	903	0	0	0	0	0	0	0	603	903	0
900	6	0	0	0	0	0	0	200	300	0	0	0	0	0	0	0	200	903	0	0	0	0	0	0	0	603	903	0
900	7	0	0	0	0	0	0	200	300	0	0	0	0	0	0	0	200	903	0	0	0	0	0	0	0	603	903	0
900	8	0	0	0	0	0	0	200	300	0	0	0	0	0	0	0	200	903	0	0	0	0	0	0	0	603	903	0
900	9	0	0	0	0	0	0	200	300	0	0	0	0	0	0	0	200	903	0	0	0	0	0	0	0	603	903	0
901	0	0	0	0	0	0	0	200	300	0	0	0	0	0	0	0	200	903	0	0	0	0	0	0	0	603	903	0
901	1	0	0	0	0	0	0	200	300	0	0	0	0	0	0	0	200	903	0	0	0	0	0	0	0	603	903	0
901	2	0	0	0	0	0	0	200	300	0	0	0	0	0	0	0	200	903	0	0	0	0	0	0	0	603	903	0
901	3	0	0	0	0	0	0	200	300	0	0	0	0	0	0	0	200	903	0	0	0	0	0	0	0	603	903	0
901	4	0	0	0	0	0	0	200	300	0	0	0	0	0	0	0	200	903	0	0	0	0	0	0	0	603	903	0
901	5	0	0	0	0	0	0	200	300	0	0	0	0	0	0	0	200	903	0	0	0	0	0	0	0	603	903	0
901	6	0	0	0	0	0	0	200	300	0	0	0	0	0	0	0	200	903	0	0	0	0	0	0	0	603	903	0
901	7	0	0	0	0	0	0	200	300	0	0	0	0	0	0	0	200	903	0	0	0	0	0	0	0	603	903	0
901	8	0	0	0	0	0	0	200	300	0	0	0	0	0	0	0	200	903	0	0	0	0	0	0	0	603	903	0
901	9	0	0	0	0	0	0	200	300	0	0	0	0	0	0	0	200	903	0	0	0	0	0	0	0	603	903	0
902	0	0	0	0	0	0	0	200	300	0	0	0	0	0	0	0	200	903	0	0	0	0	0	0	0	603	903	0
902	1	0	0	0	0	0	0	200	300	0	0	0	0	0	0	0	200	903	0	0	0	0	0	0	0	603	903	0
902	2	0	0	0	0	0	0	200	300	0	0	0	0	0	0	0	200	903	0	0	0	0	0	0	0	603	903	0
902	3	0	0	0	0	0	0	200	300	0	0	0	0	0	0	0	200	903	0	0	0	0	0	0	0	603	903	0
902	4	0	0	0	0	0	0	200	300	0	0	0	0	0	0	0	200	903	0	0	0	0	0	0	0	603	903	0
902	5	0	0	0	0	0	0	200	300	0	0	0	0	0	0	0	200	903	0	0	0	0	0	0	0	603	903	0
902	6	0	0	0	0	0	0	200	300	0	0	0	0	0	0	0	200	903	0	0	0	0	0	0	0	603	903	0
902	7	0	0	0	0	0	0	200	300	0	0	0	0	0	0	0	200	903	0	0	0	0	0	0	0	603	903	0
902	8	0	0	0	0	0	0	200	300	0	0	0	0	0	0	0	200	903	0	0	0	0	0	0	0	603	903	0
902	9	0	0	0	0	0	0	200	300	0	0	0	0	0	0	0	200	903	0	0	0	0	0	0	0	603	903	0
903	0	0	0	0	0	0	0	200	300	0	0	0	0	0	0	0	200	903	0	0	0	0	0	0	0	603	903	0
903	1	0	0	0	0	0	0	200	300	0	0	0	0	0	0	0	200	903	0	0	0	0	0	0	0	603	903	0
903	2	0	0	0	0	0	0	200	300	0	0	0	0	0	0	0	200	903	0	0	0	0	0	0	0	603	903	0
903	3	0	0	0	0	0	0	200	300	0	0	0	0	0	0	0	200	903	0	0	0	0	0	0	0	603	903	0
903	4	0	0	0	0	0	0	200	300	0	0	0	0	0	0	0	200	903	0	0	0	0	0	0	0	603	903	0
903	5	0	0	0	0	0	0	200	300	0	0	0	0	0	0	0	200	903	0	0	0	0	0	0	0	603	903	0
903	6	0	0	0	0	0	0	200	300	0	0	0	0	0	0	0	200	903	0	0	0	0	0	0	0	603	903	0
903	7	0	0	0	0	0	0	200	300	0	0	0	0	0	0	0	200	903	0	0	0	0	0	0	0	603	903	0
903	8	0	0	0	0	0	0	200	300	0	0	0	0	0	0	0	200	903	0	0	0	0	0	0	0	603	903	0
903	9	0	0	0	0	0	0	200	300	0	0	0	0	0	0	0	200	903	0	0	0	0	0	0	0	603	903	0
904	0	0	0	0	0	0	0	200	300	0	0	0	0	0	0	0	200	903	0	0	0	0	0	0	0	603	903	0
904	1	0	0	0	0	0	0	200	300	0	0	0	0	0	0	0	200	903	0	0	0	0	0	0	0	603	903	0
904	2	0	0	0	0	0	0	200	300	0	0	0	0	0	0	0	200	903	0	0	0	0	0	0	0	603	903	0
904	3	0	0	0	0	0	0	200	300	0	0	0	0	0	0	0	200	903	0	0	0	0	0	0	0	603	903	0
904	4	0	0	0	0	0	0	200	300	0	0	0	0	0	0	0	200	903	0	0	0	0	0	0	0	603	903	0
904	5	0	0	0	0	0	0	200	300	0	0	0	0	0	0	0	200	903	0	0	0	0	0	0	0	603	903	0
904	6	0	0	0	0	0	0	200	300	0	0	0	0	0	0	0	200	903	0	0	0	0	0	0	0	603	903	0
904	7	0	0	0	0	0	0	200	300	0	0	0	0	0	0	0	200	903	0	0	0	0	0	0	0	603	903	0
904	8	0	0	0	0	0	0	200	300	0	0	0	0	0	0	0	200	903	0	0	0	0	0	0	0	603	903	0
904	9	0	0	0	0	0	0	200	300	0	0	0	0	0	0	0	200	903	0	0	0	0	0	0	0	603	903	0
905	0	0	0	0	0	0	0	200	300	0	0	0	0	0	0	0	200	903	0	0	0	0	0	0	0	603	903	0
905	1	0	0	0	0	0	0	200	300	0	0	0	0	0	0	0	200	903	0	0	0	0	0	0	0	603	903	0
905	2	0	0	0	0	0	0	200	300	0	0	0	0	0	0	0	200	903	0	0	0	0	0	0	0	603	903	0
905	3	0	0	0	0	0	0	200	300	0	0	0	0	0	0	0	200	903	0	0	0	0	0	0	0	603	903	0
905	4	0	0	0	0	0	0	200	300	0	0	0	0	0	0	0	200	903	0	0	0	0	0	0	0	603	903	0
905	5	0	0	0	0	0	0	200	300	0	0	0	0	0	0	0	200	903	0	0	0	0	0	0	0	603	903	0
905	6	0	0	0	0	0	0	200	300	0	0	0	0	0	0	0	200	903	0	0	0	0	0	0	0	603	903	0
905	7	0	0	0	0	0	0	200	300	0	0	0	0	0	0	0	200	903	0	0	0	0	0	0	0	603	903	0
905	8	0	0	0	0	0	0	200	300	0	0	0	0	0	0	0	200	903	0	0	0	0	0	0	0	603	903	0
905	9	0	0	0	0	0	0	200	300	0	0	0	0	0	0	0	200	903	0	0	0	0	0	0	0	603	903	0
906	0	0	0	0	0	0	0	200	300	0	0	0	0	0	0	0	200	903	0	0	0	0	0	0	0	603	903	0
906	1	0	0	0	0	0	0	200	300	0	0	0	0	0	0	0	200	903	0	0	0	0	0	0	0	603	903	0
906	2	0	0	0	0	0	0	200	300	0	0	0	0	0	0	0	200	903	0	0	0	0	0	0	0	603	903	0
906	3	0	0	0	0	0	0	200	300	0	0	0	0	0	0	0	200	903	0	0	0	0	0	0	0	603	903	0
906	4	0	0	0	0	0	0	200	300	0	0	0	0	0	0	0	200	903	0	0	0	0	0	0	0	603	903	0
906	5	0	0	0	0	0	0	200	300	0	0	0	0	0	0	0	200	903	0	0	0	0	0	0	0	603	903	0
906	6	0	0	0	0	0	0	200	300	0	0	0	0	0	0	0	200	903	0	0	0	0	0	0	0	603	903	0
906	7	0	0	0	0	0	0	200	300	0	0	0	0	0	0	0	200	903	0	0	0	0	0	0	0	603	903	0
906	8	0	0	0	0	0	0	200	300	0	0	0	0	0	0	0	200	903	0	0	0	0	0	0	0	603	903	0
906	9	0	0	0	0	0	0	200	300	0	0	0	0	0	0	0	200	903	0	0	0	0	0	0	0	603	903	0
907	0	0	0	0	0	0	0	200	300	0	0	0	0	0	0	0	200	903	0	0	0	0	0	0	0	603	903	0
907	1	0	0	0	0	0	0	200	300	0	0	0	0	0	0	0	200	903	0	0	0	0	0	0	0	603	903	0
907	2	0	0	0	0	0	0	200	300	0	0	0	0	0	0	0	200	903	0	0	0	0	0	0	0	603	903	0
907	3	0	0	0	0	0	0	200	300	0	0	0	0	0	0	0	200	903	0	0	0	0	0	0	0	603	903	0
907	4	0	0	0	0	0	0	200	300	0	0	0	0	0	0	0	200	903	0	0	0	0	0	0	0	603	903	0
907	5	0	0	0	0	0	0	200	300	0	0	0	0	0	0	0	200	903	0	0	0	0	0	0	0	603	903	0
907	6	0	0	0	0	0	0	200	300	0	0	0	0	0	0	0	200	903	0	0	0	0	0	0	0	603	903	0
907	7	0	0	0	0	0	0	200	300	0	0	0	0	0	0	0	200	903	0	0	0	0	0	0	0	603	903	0
907	8	0	0	0	0	0	0	200	300	0	0	0	0	0	0	0	200	903	0	0	0	0	0	0	0	603	903	0
907	9	0	0	0	0	0	0	200	300	0	0	0	0	0	0	0	200	903	0	0	0	0	0	0	0	603	903	0
908	0	0	0	0	0	0	0	200	300	0	0	0	0	0	0	0	200	903	0	0	0	0	0	0	0	603	903	0
908	1	0	0	0	0	0	0	200	300	0	0	0	0	0	0	0	200	903	0	0	0	0	0	0	0	603	903	0
908	2	0	0	0	0	0	0	200	300	0	0	0	0	0	0	0	200	903	0	0	0	0	0	0	0	603	903	0
908	3	0	0	0	0	0	0	200	300	0	0	0	0	0	0	0	200	903	0	0	0	0	0	0	0	603	903	0
908	4	0	0	0	0	0	0	200	300	0	0	0	0	0	0	0	200	903	0	0	0	0	0	0	0	603	903	0
908	5	0	0	0	0	0	0	200	300	0	0	0	0	0	0	0	200	903	0	0	0	0	0	0	0	603	903	0
908	6	0	0	0	0	0	0	200	300	0	0	0	0	0	0	0	200	903	0	0	0	0	0	0	0	603	903	0
908	7	0	0	0	0	0	0	200	300	0	0	0	0	0	0	0	200	903	0	0	0	0	0	0	0	603	903	0
908	8	0	0	0	0	0	0	200	300	0	0	0	0	0	0	0	200	903	0	0	0	0	0	0	0	603	903	0
908	9	0	0	0	0	0	0	200	300	0	0	0	0	0	0	0	200	903	0	0	0	0	0	0	0	603	903	0
909	0	0	0	0	0	0	0	200	300	0	0	0	0	0	0	0	200	903	0	0	0	0	0	0	0	603	903	0
909	1	0	0	0	0	0	0	200	300	0	0	0	0	0	0	0	200	903	0	0	0	0	0	0	0	603	903	0
909	2	0	0	0	0	0	0	200	300	0	0	0	0	0	0	0	200	903	0	0	0	0	0	0	0	603	903	0
909	3	0	0	0	0	0	0	200	300	0	0	0	0	0	0	0	200	903	0	0	0	0	0	0	0	603	903	0
909	4	0	0	0	0	0	0	200	300	0	0	0	0	0	0	0	200	903	0	0	0	0	0	0	0	603	903	0
909	5	0	0	0	0	0	0	200	300	0	0	0	0	0	0	0	200	903	0	0	0	0	0	0	0	603	903	0
909	6	0	0	0	0	0	0	200	300	0	0	0	0	0	0	0	200	903	0	0	0	0	0	0	0	603	903	0
909	7	0	0	0	0	0	0	200	300	0	0	0	0	0	0	0	200	903	0	0	0	0	0	0	0	603	903	0
909	8	0	0	0	0	0	0	200	300	0	0	0	0	0	0	0	200	903	0	0	0	0	0	0	0	603	903	0
909	9	0	0	0	0	0	0	200	300	0	0	0	0	0	0	0	200	903	0	0	0	0	0	0	0	603	903	0
910	0	0	0	0	0	0	0	200	300	0	0	0	0	0	0	0	200	903	0	0	0	0	0	0	0	603	903	0
910	1	0	0	0	0	0	0	200	300	0	0	0	0	0	0	0	200	903	0	0	0	0	0	0	0	603	903	0
910	2	0	0	0	0	0	0	200	300	0	0	0	0	0	0	0	200	903	0	0	0	0	0	0	0	603	903	0
910	3	0	0	0	0	0	0	200	300	0	0	0	0	0	0	0	200	903	0	0	0	0	0	0	0	603	903	0
910	4	0	0	0	0	0	0	200	300	0	0	0	0	0	0	0	200	903	0	0	0	0	0	0	0	603	903	0
910	5	0	0	0	0	0	0	200	300	0	0	0	0	0	0	0	200	903	0	0	0	0	0	0	0	603	903	0
910	6	0	0	0	0	0	0	200	300	0	0	0	0	0	0	0	200	903	0	0	0	0	0	0	0	603	903	0
910	7	0	0	0	0	0	0	200	300	0	0	0	0	0	0	0	200	903	0	0	0	0	0	0	0	603	903	0
910	8	0	0	0	0	0	0	200	300	0	0	0	0	0	0	0	200	903	0	0	0	0	0	0	0	603	903	0
910	9	0	0	0	0	0	0	200	300	0	0	0	0	0	0	0	200	903	0	0	0	0	0	0	0	603	903	0
911	0	0	0	0	0	0	0	200	300	0	0	0	0	0	0	0	200	903	0	0	0	0	0	0	0	603	903	0
911	1	0	0	0	0	0	0	200	300	0	0	0	0	0	0	0	200	903	0	0	0	0	0	0	0	603	903	0
911	2	0	0	0	0	0	0	200	300	0	0	0	0	0	0	0	200	903	0	0	0	0	0	0	0	603	903	0
911	3	0	0	0	0	0	0	200	300	0	0	0	0	0	0	0	200	903	0	0	0	0	0	0	0	603	903	0
911	4	0	0	0	0	0	0	200	300	0	0	0	0	0	0	0	200	903	0	0	0	0	0	0	0	603	903	0
911	5	0	0	0	0	0	0	200	300	0	0	0	0	0	0	0	200	903	0	0	0	0	0	0	0	603	903	0
911	6	0	0	0	0	0	0	200	300	0	0	0	0	0	0	0	200	903	0	0	0	0	0	0	0	603	903	0
911	7	0	0	0	0	0	0	200	300	0	0	0	0	0	0	0	200	903	0	0	0	0	0	0	0	603	903	0
911	8	0	0	0	0	0	0	200	300	0	0	0	0	0	0	0	200	903	0	0	0	0	0	0	0	603	903	0
911	9	0	0	0	0	0	0	200	300	0	0	0	0	0	0	0	200	903	0	0	0	0	0	0	0	603	903	0
912	0	0	0	0	0	0	0	200	300	0	0	0	0	0	0	0	200	903	0	0	0	0	0	0	0	603	903	0
912	1	0	0	0	0	0	0	200	300	0	0	0	0	0	0	0	200	903	0	0	0	0	0	0	0	603	903	0
912	2	0	0	0	0	0	0	200	300	0	0	0	0	0	0	0	200	903	0	0	0	0	0	0	0	603	903	0
912	3	0	0	0	0	0	0	200	300	0	0	0	0	0	0	0	200	903	0	0	0	0	0	0	0	603	903	0
912	4	0	0	0	0	0	0	200	300	0	0	0	0	0	0	0	200	903	0	0	0	0	0	0	0	603	903	0
912	5	0	0	0	0	0	0	200	300	0	0	0	0	0	0	0	200	903	0	0	0	0	0	0	0	603	903	0
912	6	0	0	0	0	0	0	200	300	0	0	0	0	0	0	0	200	903	0	0	0	0	0	0	0	603	903	0
912	7	0	0	0	0	0	0	200	300	0	0	0	0	0	0	0	200	903	0	0	0	0	0	0	0	603	903	0
912	8	0	0	0	0	0	0	200	300	0	0	0	0	0	0	0	200	903	0	0	0	0	0	0	0	603	903	0
912	9	0	0	0	0	0	0	200	300	0	0	0	0	0	0	0	200	903	0	0	0	0	0	0	0	603	903	0
913	0	0	0	0	0	0	0	200	300	0	0	0	0	0	0	0	200	903	0	0	0	0	0	0	0	603	903	0
913	1	0	0	0	0	0	0	200	300	0	0	0	0	0	0	0	200	903	0	0	0	0	0	0	0	603	903	0
913	2	0	0	0	0	0	0	200	300	0	0	0	0	0	0	0	200	903	0	0	0	0	0	0	0	603	903	0
913	3	0	0	0	0	0	0	200	300	0	0	0	0	0	0	0	200	903	0	0	0	0	0	0	0	603	903	0
913	4	0	0	0	0	0	0	200	300	0	0	0	0	0	0	0	200	903	0	0	0	0	0	0	0	603	903	0
913	5	0	0	0	0	0	0	200	300	0	0	0	0	0	0	0	200	903	0	0	0	0	0	0	0	603	903	0
913	6	0	0	0	0	0	0	200	300	0	0	0	0	0	0	0	200	903	0	0	0	0	0	0	0	603	903	0
913	7	0	0	0	0	0	0	200	300	0	0	0	0	0	0	0	200	903	0	0	0	0	0	0	0	603	903	0
913	8	0	0	0	0	0	0	200	300	0	0	0	0	0	0	0	200	903	0	0	0	0	0	0	0	603	903	0
913	9	0	0	0	0	0	0	200	300	0	0	0	0	0	0	0	200	903	0	0	0	0	0	0	0	603	903	0
914	0	0	0	0	0	0	0	200	300	0	0	0	0	0	0	0	200	903	0	0	0	0	0	0	0	603	903	0
914	1	0	0	0	0	0	0	200	300	0	0	0	0	0	0	0	200	903	0	0	0	0	0	0	0	603	903	0
914	2	0	0	0	0	0	0	200	300	0	0	0	0	0	0	0	200	903	0	0	0	0	0	0	0	603	903	0
914	3	0	0	0	0	0	0	200	300	0	0	0	0	0	0	0	200	903	0	0	0	0	0	0	0	603	903	0
914	4	0	0	0	0	0	0	200	300	0	0	0	0	0	0	0	200	903	0	0	0	0	0	0	0	603	903	0
914	5	0	0	0	0	0	0	200	300	0	0	0	0	0	0	0	200	903	0	0	0	0	0	0	0	603	903	0
914	6	0	0	0	0	0	0	200	300	0	0	0	0	0	0	0	200	903	0	0	0	0	0	0	0	603	903	0
914	7	0	0	0	0	0	0	200	300	0	0	0	0	0	0	0	200	903	0	0	0	0	0	0	0	603	903	0
914	8	0	0	0	0	0	0	200	300	0	0	0	0	0	0	0	200	903	0	0	0	0	0	0	0	603	903	0
914	9	0	0	0	0	0	0	200	300	0	0	0	0	0	0	0	200	903	0	0	0	0	0	0	0	603	903	0
915	0	0	0	0	0	0	0	200	300	0	0	0	0	0	0	0	200	903	0	0	0	0	0	0	0	603	903	0
915	1	0	0	0	0	0	0	200	300	0	0	0	0	0	0	0	200	903	0	0	0	0	0	0	0	603	903	0
915	2	0	0	0	0	0	0	200	300	0	0	0	0	0	0	0	200	903	0	0	0	0	0	0	0	603	903	0
915	3	0	0	0	0	0	0	200	300	0	0	0	0	0	0	0	200	903	0	0	0	0	0	0	0	603	903	0
915	4	0	0	0	0	0	0	200	300	0	0	0	0	0	0	0	200	903	0	0	0	0	0	0	0	603	903	0
915	5	0	0	0	0	0	0	200	300	0	0	0	0	0	0	0	200	903	0	0	0	0	0	0	0	603	903	0
915	6	0	0	0	0	0	0	200	300	0	0	0	0	0	0	0	200	903	0	0	0	0	0	0	0	603	903	0
915	7	0	0	0	0	0	0	200	300	0	0	0	0	0	0	0	200	903	0	0	0	0	0	0	0	603	903	0
915	8	0	0	0	0	0	0	200	300	0	0	0	0	0	0	0	200	903	0	0	0	0	0	0	0	603	903	0
915	9	0	0	0	0	0	0	200	300	0	0	0	0	0	0	0	200	903	0	0	0	0	0	0	0	603	903	0
916	0	0	0	0	0	0	0	200	300	0	0	0	0	0	0	0	200	903	0	0	0	0	0	0	0	603	903	0
916	1	0	0	0	0	0	0	200	300	0	0	0	0	0	0	0	200	903	0	0	0	0	0	0	0	603	903	0
916	2	0	0	0	0	0	0	200	300	0	0	0	0	0	0	0	200	903	0	0	0	0	0	0	0	603	903	0
916	3	0	0	0	0	0	0	200	300	0	0	0	0	0	0	0	200	903	0	0	0	0	0	0	0	603	903	0
916	4	0	0	0	0	0	0	200	300	0	0	0	0	0	0	0	200	903	0	0	0	0	0	0	0	603	903	0
916	5	0	0	0	0	0	0	200	300	0	0	0	0	0	0	0	200	903	0	0	0	0	0	0	0	603	903	0
916	6	0	0	0	0	0	0	200	300	0	0	0	0	0	0	0	200	903	0	0	0	0	0	0	0	603	903	0
916	7	0	0	0	0	0	0	200	300	0	0	0	0	0	0	0	200	903	0	0	0	0	0	0	0	603	903	0
916	8	0	0	0	0	0	0	200	300	0	0	0	0	0	0	0	200	903	0	0	0	0	0	0	0	603	903	0
916	9	0	0	0	0	0	0	200	300	0	0	0	0	0	0	0	200	903	0	0	0	0	0	0	0	603	903	0
917	0	0	0	0	0	0	0	200	300	0	0	0	0	0	0	0	200	903	0	0	0	0	0	0	0	603	903	0
917	1	0	0	0	0	0	0	200	300	0	0	0	0	0	0	0	200	903	0	0	0	0	0	0	0	603	903	0
917	2	0	0	0	0	0	0	200	300	0	0	0	0	0	0	0	200	903	0	0	0	0	0	0	0	603	903	0
917	3	0	0	0	0	0	0	200	300	0	0	0	0	0	0	0	200	903	0	0	0	0	0	0	0	603	903	0
917	4	0	0	0	0	0	0	200	300	0	0	0	0	0	0	0	200	903	0	0	0	0	0	0	0	603	903	0
917	5	0	0	0	0	0	0	200	300	0	0	0	0	0	0	0	200	903	0	0	0	0	0	0	0	603	903	0
917	6	0	0	0	0	0	0	200	300	0	0	0	0	0	0	0	200	903	0	0	0	0	0	0	0	603	903	0
917	7	0	0	0	0	0	0	200	300	0	0	0	0	0	0	0	200	903	0	0	0	0	0	0	0	603	903	0
917	8	0	0	0	0	0	0	200	300	0	0	0	0	0	0	0	200	903	0	0	0	0	0	0	0	603	903	0
917	9	0	0	0	0	0	0	200	300	0	0	0	0	0	0	0	200	903	0	0	0	0	0	0	0	603	903	0
918	0	0	0	0	0	0	0	200	300	0	0	0	0	0	0	0	200	903	0	0	0	0	0	0	0	603	903	0
918	1	0	0	0	0	0	0	200	300	0	0	0	0	0	0	0	200	903	0	0	0	0	0	0	0	603	903	0
918	2	0	0	0	0	0	0	200	300	0	0	0	0	0	0	0	200	903	0	0	0	0	0	0	0	603	903	0
918	3	0	0	0	0	0	0	200	300	0	0	0	0	0	0	0	200	903	0	0	0	0	0	0	0	603	903	0
918	4	0	0	0	0	0	0	200	300	0	0	0	0	0	0	0	200	903	0	0	0	0	0	0	0	603	903	0
918	5	0	0	0	0	0	0	200	300	0	0	0	0	0	0	0	200	903	0	0	0	0	0	0	0	603	903	0
918	6	0	0	0	0	0	0	200	300	0	0	0	0	0	0	0	200	903	0	0	0	0	0	0	0	603	903	0
918	7	0	0	0	0	0	0	200	300	0	0	0	0	0	0	0	200	903	0	0	0	0	0	0	0	603	903	0
918	8	0	0	0	0	0	0	200	300	0	0	0	0	0	0	0	200	903	0	0	0	0	0	0	0	603	903	0
918	9	0	0	0	0	0	0	200	300	0	0	0	0	0	0	0	200	903	0	0	0	0	0	0	0	603	903	0
919	0	0	0	0	0	0	0	200	300	0	0	0	0	0	0	0	200	903	0	0	0	0	0	0	0	603	903	0
919	1	0	0	0	0	0	0	200	300	0	0	0	0	0	0	0	200	903	0	0	0	0	0	0	0	603	903	0
919	2	0	0	0	0	0	0	200	300	0	0	0	0	0	0	0	200	903	0	0	0	0	0	0	0	603	903	0
919	3	0	0	0	0	0	0	200	300	0	0	0	0	0	0	0	200	903	0	0	0	0	0	0	0	603	903	0
919	4	0	0	0	0	0	0	200	300	0	0	0	0	0	0	0	200	903	0	0	0	0	0	0	0	603	903	0
919	5	0	0	0	0	0	0	200	300	0	0	0	0	0	0	0	200	903	0	0	0	0	0	0	0	603	903	0
919	6	0	0	0	0	0	0	200	300	0	0	0	0	0	0	0	200	903	0	0	0	0	0	0	0	603	903	0
919	7	0	0	0	0	0	0	200	300	0	0	0	0	0	0	0	200	903	0	0	0	0	0	0	0	603	903	0
919	8	0	0	0	0	0	0	200	300	0	0	0	0	0	0	0	200	903	0	0	0	0	0	0	0	603	903	0
919	9	0	0	0	0	0	0	200	300	0	0	0	0	0	0	0	200	903	0	0	0	0	0	0	0	603	903	0
920	0	0	0	0	0	0	0	200	300	0	0	0	0	0	0	0	200	903	0	0	0	0	0	0	0	603	903	0
920	1	0	0	0	0	0	0	200	300	0	0	0	0	0	0	0	200	903	0	0	0	0	0	0	0	603	903	0
920	2	0	0	0	0	0	0	200	300	0	0	0	0	0	0	0	200	903	0	0	0	0	0	0	0	603	903	0
920	3	0	0	0	0	0	0	200	300	0	0	0	0	0	0	0	200	903	0	0	0	0	0	0	0	603	903	0
920	4	0	0	0	0	0	0	200	300	0	0	0	0	0	0	0	200	903	0	0	0	0	0	0	0	603	903	0
920	5	0	0	0	0	0	0	200	300	0	0	0	0	0	0	0	200	903	0	0	0	0	0	0	0	603	903	0
920	6	0	0	0	0	0	0	200	300	0	0	0	0	0	0	0	200	903	0	0	0	0	0	0	0	603	903	0
920	7	0	0	0	0	0	0	200	300	0	0	0	0	0	0	0	200	903	0	0	0	0	0	0	0	603	903	0
920	8	0	0	0	0	0	0	200	300	0	0	0	0	0	0	0	200	903	0	0	0	0	0	0	0	603	903	0
920	9	0	0	0	0	0	0	200	300	0	0	0	0	0	0	0	200	903	0	0	0	0	0	0	0	603	903	0
921	0	0	0	0	0	0	0	200	300	0	0	0	0	0	0	0	200	903	0	0	0	0	0	0	0	603	903	0
921	1	0	0	0	0	0	0	200	300	0	0	0	0	0	0	0	200	903	0	0	0	0	0	0	0	603	903	0
921	2	0	0	0	0	0	0	200	300	0	0	0	0	0	0	0	200	903	0	0	0	0	0	0	0	603	903	0
921	3	0	0	0	0	0	0	200	300	0	0	0	0	0	0	0	200	903	0	0	0	0	0	0	0	603	903	0
921	4	0	0	0	0	0	0	200	300	0	0	0	0	0	0	0	200	903	0	0	0	0	0	0	0	603	903	0
921	5	0	0	0	0	0	0	200	300	0	0	0	0	0	0	0	200	903	0	0	0	0	0	0	0	603	903	0
921	6	0	0	0	0	0	0	200	300	0	0	0	0	0	0	0	200	903	0	0	0	0	0	0	0	603	903	0
921	7	0	0	0	0	0	0	200	300	0	0	0	0	0	0	0	200	903	0	0	0	0	0	0	0	603	903	0
921	8	0	0	0	0	0	0	200	300	0	0	0	0	0	0	0	200	903	0	0	0	0	0	0	0	603	903	0
921	9	0	0	0	0	0	0	200	300	0	0	0	0	0	0	0	200	903	0	0	0	0	0	0	0	603	903	0
922	0	0	0	0	0	0	0	200	300	0	0	0	0	0	0	0	200	903	0	0	0	0	0	0	0	603	903	0
922	1	0	0	0	0	0	0	200	300	0	0	0	0	0	0	0	200	903	0	0	0	0	0	0	0	603	903	0
922	2	0	0	0	0	0	0	200	300	0	0	0	0	0	0	0	200	903	0	0	0	0	0	0	0	603	903	0
922	3	0	0	0	0	0	0	200	300	0	0	0	0	0	0	0	200	903	0	0	0	0	0	0	0	603	903	0
922	4	0	0	0	0	0	0	200	300	0	0	0	0	0	0	0	200	903	0	0	0	0	0	0	0	603	903	0
922	5	0	0	0	0	0	0	200	300	0	0	0	0	0	0	0	200	903	0	0	0	0	0	0	0	603	903	0
922	6	0	0	0	0	0	0	200	300	0	0	0	0	0	0	0	200	903	0	0	0	0	0	0	0	603	903	0
922	7	0	0	0	0	0	0	200	300	0	0	0	0	0	0	0	200	903	0	0	0	0	0	0	0	603	903	0
922	8	0	0	0	0	0	0	200	300	0	0	0	0	0	0	0	200	903	0	0	0	0	0	0	0	603	903	0
922	9	0	0	0	0	0	0	200	300	0	0	0	0	0	0	0	200	903	0	0	0	0	0	0	0	603	903	0
923	0	0	0	0	0	0	0	200	300	0	0	0	0	0	0	0	200	903	0	0	0	0	0	0	0	603	903	0
923	1	0	0	0	0	0	0	200	300	0	0	0	0	0	0	0	200	903	0	0	0	0	0	0	0	603	903	0
923	2	0	0	0	0	0	0	200	300	0	0	0	0	0	0	0	200	903	0	0	0	0	0	0	0	603	903	0
923	3	0	0	0	0	0	0	200	300	0	0	0	0	0	0	0	200	903	0	0	0	0	0	0	0	603	903	0
923	4	0	0	0	0	0	0	200	300	0	0	0	0	0	0	0	200	903	0	0	0	0	0	0	0	603	903	0
923	5	0	0	0	0	0	0	200	300	0	0	0	0	0	0	0	200	903	0	0	0	0	0	0	0	603	903	0
923	6	0	0	0	0	0	0	200	300	0	0	0	0	0	0	0	200	903	0	0	0	0	0	0	0	603	903	0
923	7	0	0	0	0	0	0	200	300	0	0	0	0	0	0	0	200	903	0	0	0	0	0	0	0	603	903	0
923	8	0	0	0	0	0	0	200	300	0	0	0	0	0	0	0	200	903	0	0	0	0	0	0	0	603	903	0
923	9	0	0	0	0	0	0	200	300	0	0	0	0	0	0	0	200	903	0	0	0	0	0	0	0	603	903	0
924	0	0	0	0	0	0	0	200	300	0	0	0	0	0	0	0	200	903	0	0	0	0	0	0	0	603	903	0
924	1	0	0	0	0	0	0	200	300	0	0	0	0	0	0	0	200	903	0	0	0	0	0	0	0	603	903	0
924	2	0	0	0	0	0	0	200	300	0	0	0	0	0	0	0	200	903	0	0	0	0	0	0	0	603	903	0
924	3	0	0	0	0	0	0	200	300	0	0	0	0	0	0	0	200	903	0	0	0	0	0	0	0	603	903	0
924	4	0	0	0	0	0	0	200	300	0	0	0	0	0	0	0	200	903	0	0	0	0	0	0	0	603	903	0
924	5	0	0	0	0	0	0	200	300	0	0	0	0	0	0	0	200	903	0	0	0	0	0	0	0	603	903	0
924	6	0	0	0	0	0	0	200	300	0	0	0	0	0	0	0	200	903	0	0	0	0	0	0	0	603	903	0
924	7	0	0	0	0	0	0	200	300	0	0	0	0	0	0	0	200	903	0	0	0	0	0	0	0	603	903	0
924	8	0	0	0	0	0	0	200	300	0	0	0	0	0	0	0	200	903	0	0	0	0	0	0	0	603	903	0
924	9	0	0	0	0	0	0	200	300	0	0	0	0	0	0	0	200	903	0	0	0	0	0	0	0	603	903	0
925	0	0	0	0	0	0	0	200	300	0	0	0	0	0	0	0	200	903	0	0	0	0	0	0	0	603	903	0
925	1	0	0	0	0	0	0	200	300	0	0	0	0	0	0	0	200	903	0	0	0	0	0	0	0	603	903	0
925	2	0	0	0	0	0	0	200	300	0	0	0	0	0	0	0	200	903	0	0	0	0	0	0	0	603	903	0
925	3	0	0	0	0	0	0	200	300	0	0	0	0	0	0	0	200	903	0	0	0	0	0	0	0	603	903	0
925	4	0	0	0	0	0	0	200	300	0	0	0	0	0	0	0	200	903	0	0	0	0	0	0	0	603	903	0
925	5	0	0	0	0	0	0	200	300	0	0	0	0	0	0	0	200	903	0	0	0	0	0	0	0	603	903	0
925	6	0	0	0	0	0	0	200	300	0	0	0	0	0	0	0	200	903	0	0	0	0	0	0	0	603	903	0
925	7	0	0	0	0	0	0	200	300	0	0	0	0	0	0	0	200	903	0	0	0	0	0	0	0	603	903	0
925	8	0	0	0	0	0	0	200	300	0	0	0	0	0	0	0	200	903	0	0	0	0	0	0	0	603	903	0
925	9	0	0	0	0	0	0	200	300	0	0	0	0	0	0	0	200	903	0	0	0	0	0	0	0	603	903	0
926	0	0	0	0	0	0	0	200	300	0	0	0	0	0	0	0	200	903	0	0	0	0	0	0	0	603	903	0
926	1	0	0	0	0	0	0	200	300	0	0	0	0	0	0	0	200	903	0	0	0	0	0	0	0	603	903	0
926	2	0	0	0	0	0	0	200	300	0	0	0	0	0	0	0	200	903	0	0	0	0	0	0	0	603	903	0
926	3	0	0	0	0	0	0	200	300	0	0	0	0	0	0	0	200	903	0	0	0	0	0	0	0	603	903	0
926	4	0	0	0	0	0	0	200	300	0	0	0	0	0	0	0	200	903	0	0	0	0	0	0	0	603	903	0
926	5	0	0	0	0	0	0	200	300	0	0	0	0	0	0	0	200	903	0	0	0	0	0	0	0	603	903	0
926	6	0	0	0	0	0	0	200	300	0	0	0	0	0	0	0	200	903	0	0	0	0	0	0	0	603	903	0
926	7	0	0	0	0	0	0	200	300	0	0	0	0	0	0	0	200	903	0	0	0	0	0	0	0	603	903	0
926	8	0	0	0	0	0	0	200	300	0	0	0	0	0	0	0	200	903	0	0	0	0	0	0	0	603	903	0
926	9	0	0	0	0	0	0	200	300	0	0	0	0	0	0	0	200	903	0	0	0	0	0	0	0	603	903	0
927	0	0	0	0	0	0	0	200	300	0	0	0	0	0	0	0	200	903	0	0	0	0	0	0	0	603	903	0
927	1	0	0	0	0	0	0	200	300	0	0	0	0	0	0	0	200	903	0	0	0	0	0	0	0	603	903	0
927	2	0	0	0	0	0	0	200	300	0	0	0	0	0	0	0	200	903	0	0	0	0	0	0	0	603	903	0
927	3	0	0	0	0	0	0	200	300	0	0	0	0	0	0	0	200	903	0	0	0	0	0	0	0	603	903	0
927	4	0	0	0	0	0	0	200	300	0	0	0	0	0	0	0	200	903	0	0	0	0	0	0	0	603	903	0
927	5	0	0	0	0	0	0	200	300	0	0	0	0	0	0	0	200	903	0	0	0	0	0	0	0	603	903	0
927	6	0	0	0	0	0	0	200	300	0	0	0	0	0	0	0	200	903	0	0	0	0	0	0	0	603	903	0
927	7	0	0	0	0	0	0	200	300	0	0	0	0	0	0	0	200	903	0	0	0	0	0	0	0	603	903	0
927	8	0	0	0	0	0	0	200	300	0	0	0	0	0	0	0	200	903	0	0	0	0	0	0	0	603	903	0
927	9	0	0	0	0	0	0	200	300	0	0	0	0	0	0	0	200	903	0	0	0	0	0	0	0	603	903	0
928	0	0	0	0	0	0	0	200	300	0	0	0	0	0	0	0	200	903	0	0	0	0	0	0	0	603	903	0
928	1	0	0	0	0	0	0	200	300	0	0	0	0	0	0	0	200	903	0	0	0	0	0	0	0	603	903	0
928	2	0	0	0	0	0	0	200	300	0	0	0	0	0	0	0	200	903	0	0	0	0	0	0	0	603	903	0
928	3	0	0	0	0	0	0	200	300	0	0	0	0	0	0	0	200	903	0	0	0	0	0	0	0	603	903	0
928	4	0	0	0	0	0	0	200	300	0	0	0	0	0	0	0	200	903	0	0	0	0	0	0	0	603	903	0
928	5	0	0	0	0	0	0	200	300	0	0	0	0	0	0	0	200	903	0	0	0	0	0	0	0	603	903	0
928	6	0	0	0	0	0	0	200	300	0	0	0	0	0	0	0	200	903	0	0	0	0	0	0	0	603	903	0
928	7	0	0	0	0	0	0	200	300	0	0	0	0	0	0	0	200	903	0	0	0	0	0	0	0	603	903	0
928	8	0	0	0	0	0	0	200	300	0	0	0	0	0	0	0	200	903	0	0	0	0	0	0	0	603	903	0
928	9	0	0	0	0	0	0	200	300	0	0	0	0	0	0	0	200	903	0	0	0	0	0	0	0	603	903	0
929	0	0	0	0	0	0	0	200	300	0	0	0	0	0	0	0	200	903	0	0	0	0	0	0	0	603	903	0
929	1	0	0	0	0	0	0	200	300	0	0	0	0	0	0	0	200	903	0	0	0	0	0	0	0	603	903	0
929	2	0	0	0	0	0	0	200	300	0	0	0	0	0	0	0	200	903	0	0	0	0	0	0	0	603	903	0
929	3	0	0	0	0	0	0	200	300	0	0	0	0	0	0	0	200	903	0	0	0	0	0	0	0	603	903	0
929	4	0	0	0	0	0	0	200	300	0	0	0	0	0	0	0	200	903	0	0	0	0	0	0	0	603	903	0
929	5	0	0	0	0	0	0	200	300	0	0	0	0	0	0	0	200	903	0	0	0	0	0	0	0	603	903	0
929	6	0	0	0	0	0	0	200	300	0	0	0	0	0	0	0	200	903	0	0	0	0	0	0	0	603	903	0
929	7	0	0	0	0	0	0	200	300	0	0	0	0	0	0	0	200	903	0	0	0	0	0	0	0	603	903	0
929	8	0	0	0	0	0	0	200	300	0	0	0	0	0	0	0	200	903	0	0	0	0	0	0	0	603	903	0
929	9	0	0	0	0	0	0	200	300	0	0	0	0	0	0	0	200	903	0	0	0	0	0	0	0	603	903	0
930	0	0	0	0	0	0	0	200	300	0	0	0	0	0	0	0	200	903	0	0	0	0	0	0	0	603	903	0
930	1	0	0	0	0	0	0	200	300	0	0	0	0	0	0	0	200	903	0	0	0	0	0	0	0	603	903	0
930	2	0	0	0	0	0	0	200	300	0	0	0	0	0	0	0	200	903	0	0	0	0	0	0	0	603	903	0
930	3	0	0	0	0	0	0	200	300	0	0	0	0	0	0	0	200	903	0	0	0	0	0	0	0	603	903	0
930	4	0	0	0	0	0	0	200	300	0	0	0	0	0	0	0	200	903	0	0	0	0	0	0	0	603	903	0
930	5	0	0	0	0	0	0	200	300	0	0	0	0	0	0	0	200	903	0	0	0	0	0	0	0	603	903	0
930	6	0	0	0	0	0	0	200	300	0	0	0	0	0	0	0	200	903	0	0	0	0	0	0	0	603	903	0
930	7	0	0	0	0	0	0	200	300	0	0	0	0	0	0	0	200	903	0	0	0	0	0	0	0	603	903	0
930	8	0	0	0	0	0	0	200	300	0	0	0	0	0	0	0	200	903	0	0	0	0	0	0	0	603	903	0
930	9	0	0	0	0	0	0	200	300	0	0	0	0	0	0	0	200	903	0	0	0	0	0	0	0	603	903	0
931	0	0	0	0	0	0	0	200	300	0	0	0	0	0	0	0	200	903	0	0	0	0	0	0	0	603	903	0
931	1	0	0	0	0	0	0	200	300	0	0	0	0	0	0	0	200	903	0	0	0	0	0	0	0	603	903	0
931	2	0	0	0	0	0	0	200	300	0	0	0	0	0	0	0	200	903	0	0	0	0	0	0	0	603	903	0
931	3	0	0	0	0	0	0	200	300	0	0	0	0	0	0	0	200	903	0	0	0	0	0	0	0	603	903	0
931	4	0	0	0	0	0	0	200	300	0	0	0	0	0	0	0	200	903	0	0	0	0	0	0	0	603	903	0
931	5	0	0	0	0	0	0	200	300	0	0	0	0	0	0	0	200	903	0	0	0	0	0	0	0	603	903	0
931	6	0	0	0	0	0	0	200	300	0	0	0	0	0	0	0	200	903	0	0	0	0	0	0	0	603	903	0
931	7	0	0	0	0	0	0	200	300	0	0	0	0	0	0	0	200	903	0	0	0	0	0	0	0	603	903	0
931	8	0	0	0	0	0	0	200	300	0	0	0	0	0	0	0	200	903	0	0	0	0	0	0	0	603	903	0
931	9	0	0	0	0	0	0	200	300	0	0	0	0	0	0	0	200	903	0	0	0	0	0	0	0	603	903	0
932	0	0	0	0	0	0	0	200	300	0	0	0	0	0	0	0	200	903	0	0	0	0	0	0	0	603	903	0
932	1	0	0	0	0	0	0	200	300	0	0	0	0	0	0	0	200	903	0	0	0	0	0	0	0	603	903	0
932	2	0	0	0	0	0	0	200	300	0	0	0	0	0	0	0	200	903	0	0	0	0	0	0	0	603	903	0
932	3	0	0	0	0	0	0	200	300	0	0	0	0	0	0	0	200	903	0	0	0	0	0	0	0	603	903	0
932	4	0	0	0	0	0	0	200	300	0	0	0	0	0	0	0	200	903	0	0	0	0	0	0	0	603	903	0
932	5	0	0	0	0	0	0	200	300	0	0	0	0	0	0	0	200	903	0	0	0	0	0	0	0	603	903	0
932	6	0	0	0	0	0	0	200	300	0	0	0	0	0	0	0	200	903	0	0	0	0	0	0	0	603	903	0
932	7	0	0	0	0	0	0	200	300	0	0	0	0	0	0	0	200	903	0	0	0	0	0	0	0	603	903	0
932	8	0	0	0	0	0	0	200	300	0	0	0	0	0	0	0	200	903	0	0	0	0	0	0	0	603	903	0
932	9	0	0	0	0	0	0	200	300	0	0	0	0	0	0	0	200	903	0	0	0	0	0	0	0	603	903	0
933	0	0	0	0	0	0	0	200	300	0	0	0	0	0	0	0	200	903	0	0	0	0	0	0	0	603	903	0
933	1	0	0	0	0	0	0	200	300	0	0	0	0	0	0	0	200	903	0	0	0	0	0	0	0	603	903	0
933	2	0	0	0	0	0	0	200	300	0	0	0	0	0	0	0	200	903	0	0	0	0	0	0	0	603	903	0
933	3	0	0	0	0	0	0	200	300	0	0	0	0	0	0	0	200	903	0	0	0	0	0	0	0	603	903	0
933	4	0	0	0	0	0	0	200	300	0	0	0	0	0	0	0	200	903	0	0	0	0	0	0	0	603	903	0
933	5	0	0	0	0	0	0	200	300	0	0	0	0	0	0	0	200	903	0	0	0	0	0	0	0	603	903	0
933	6	0	0	0	0	0	0	200	300	0	0	0	0	0	0	0	200	903	0	0	0	0	0	0	0	603	903	0
933	7	0	0	0	0	0	0	200	300	0	0	0	0	0	0	0	200	903	0	0	0	0	0	0	0	603	903	0
933	8	0	0	0	0	0	0	200	300	0	0	0	0	0	0	0	200	903	0	0	0	0	0	0	0	603	903	0
933	9	0	0	0	0	0	0	200	300	0	0	0	0	0	0	0	200	903	0	0	0	0	0	0	0	603	903	0
934	0	0	0	0	0	0	0	200	300	0	0	0	0	0	0	0	200	903	0	0	0	0	0	0	0	603	903	0
934	1	0	0	0	0	0	0	200	300	0	0	0	0	0	0	0	200	903	0	0	0	0	0	0	0	603	903	0
934	2	0	0	0	0	0	0	200	300	0	0	0	0	0	0	0	200	903	0	0	0	0	0	0	0	603	903	0
934	3	0	0	0	0	0	0	200	300	0	0	0	0	0	0	0	200	903	0	0	0	0	0	0	0	603	903	0
934	4	0	0	0	0	0	0	200	300	0	0	0	0	0	0	0	200	903	0	0	0	0	0	0	0	603	903	0
934	5	0	0	0	0	0	0	200	300	0	0	0	0	0	0	0	200	903	0	0	0	0	0	0	0	603	903	0
934	6	0	0	0	0	0	0	200	300	0	0	0	0	0	0	0	200	903	0	0	0	0	0	0	0	603	903	0
934	7	0	0	0	0	0	0	200	300	0	0	0	0	0	0	0	200	903	0	0	0	0	0	0	0	603	903	0
934	8	0	0	0	0	0	0	200	300	0	0	0	0	0	0	0	200	903	0	0	0	0	0	0	0	603	903	0
934	9	0	0	0	0	0	0	200	300	0	0	0	0	0	0	0	200	903	0	0	0	0	0	0	0	603	903	0
935	0	0	0	0	0	0	0	200	300	0	0	0	0	0	0	0	200	903	0	0	0	0	0	0	0	603	903	0
935	1	0	0	0	0	0	0	200	300	0	0	0	0	0	0	0	200	903	0	0	0	0	0	0	0	603	903	0
935	2	0	0	0	0	0	0	200	300	0	0	0	0	0	0	0	200	903	0	0	0	0	0	0	0	603	903	0
935	3	0	0	0	0	0	0	200	300	0	0	0	0	0	0	0	200	903	0	0	0	0	0	0	0	603	903	0
935	4	0	0	0	0	0	0	200	300	0	0	0	0	0	0	0	200	903	0	0	0	0	0	0	0	603	903	0
935	5	0	0	0	0	0	0	200	300	0	0	0	0	0	0	0	200	903	0	0	0	0	0	0	0	603	903	0
935	6	0	0	0	0	0	0	200	300	0	0	0	0	0	0	0	200	903	0	0	0	0	0	0	0	603	903	0
935	7	0	0	0	0	0	0	200	300	0	0	0	0	0	0	0	200	903	0	0	0	0	0	0	0	603	903	0
935	8	0	0	0	0	0	0	200	300	0	0	0	0	0	0	0	200	903	0	0	0	0	0	0	0	603	903	0
935	9	0	0	0	0	0	0	200	300	0	0	0	0	0	0	0	200	903	0	0	0	0	0	0	0	603	903	0
936	0	0	0	0	0	0	0	200	300	0	0	0	0	0	0	0	200	903	0	0	0	0	0	0	0	603	903	0
936	1	0	0	0	0	0	0	200	300	0	0	0	0	0	0	0	200	903	0	0	0	0	0	0	0	603	903	0
936	2	0	0	0	0	0	0	200	300	0	0	0	0	0	0	0	200	903	0	0	0	0	0	0	0	603	903	0
936	3	0	0	0	0	0	0	200	300	0	0	0	0	0	0	0	200	903	0	0	0	0	0	0	0	603	903	0
936	4	0	0	0	0	0	0	200	300	0	0	0	0	0	0	0	200	903	0	0	0	0	0	0	0	603	903	0
936	5	0	0	0	0	0	0	200	300	0	0	0	0	0	0	0	200	903	0	0	0	0	0	0	0	603	903	0
936	6	0	0	0	0	0	0	200	300	0	0	0	0	0	0	0	200	903	0	0	0	0	0	0	0	603	903	0
936	7	0	0	0	0	0	0	200	300	0	0	0	0	0	0	0	200	903	0	0	0	0	0	0	0	603	903	0
936	8	0	0	0	0	0	0	200	300	0	0	0	0	0	0	0	200	903	0	0	0	0	0	0	0	603	903	0
936	9	0	0	0	0	0	0	200	300	0	0	0	0	0	0	0	200	903	0	0	0	0	0	0	0	603	903	0
937	0	0	0	0	0	0	0	200	300	0	0	0	0	0	0	0	200	903	0	0	0	0	0	0	0	603	903	0
937	1	0	0	0	0	0	0	200	300	0	0	0	0	0	0	0	200	903	0	0	0	0	0	0	0	603	903	0
937	2	0	0	0	0	0	0	200	300	0	0	0	0	0	0	0	200	903	0	0	0	0	0	0	0	603	903	0
937	3	0	0	0	0	0	0	200	300	0	0	0	0	0	0	0	200	903	0	0	0	0	0	0	0	603	903	0
937	4	0	0	0	0	0	0	200	300	0	0	0	0	0	0	0	200	903	0	0	0	0	0	0	0	603	903	0
937	5	0	0	0	0	0	0	200	300	0	0	0	0	0	0	0	200	903	0	0	0	0	0	0	0	603	903	0
937	6	0	0	0	0	0	0	200	300	0	0	0	0	0	0	0	200	903	0	0	0	0	0	0	0	603	903	0
937	7	0	0	0	0	0	0	200	300	0	0	0	0	0	0	0	200	903	0	0	0	0	0	0	0	603	903	0
937	8	0	0	0	0	0	0	200	300	0	0	0	0	0	0	0	200	903	0	0	0	0	0	0	0	603	903	0
937	9	0	0	0	0	0	0	200	300	0	0	0	0	0	0	0	200	903	0	0	0	0	0	0	0	603	903	0
938	0	0	0	0	0	0	0	200	300	0	0	0	0	0	0	0	200	903	0	0	0	0	0	0	0	603	903	0
938	1	0	0	0	0	0	0	200	300	0	0	0	0	0	0	0	200	903	0	0	0	0	0	0	0	603	903	0
938	2	0	0	0	0	0	0	200	300	0	0	0	0	0	0	0	200	903	0	0	0	0	0	0	0	603	903	0
938	3	0	0	0	0	0	0	200	300	0	0	0	0	0	0	0	200	903	0	0	0	0	0	0	0	603	903	0
938	4	0	0	0	0	0	0	200	300	0	0	0	0	0	0	0	200	903	0	0	0	0	0	0	0	603	903	0
938	5	0	0	0	0	0	0	200	300	0	0	0	0	0	0	0	200	903	0	0	0	0	0	0	0	603	903	0
938	6	0	0	0	0	0	0	200	300	0	0	0	0	0	0	0	200	903	0	0	0	0	0	0	0	603	903	0
938	7	0	0	0	0	0	0	200	300	0	0	0	0	0	0	0	200	903	0	0	0	0	0	0	0	603	903	0
938	8	0	0	0	0	0	0	200	300	0	0	0	0	0	0	0	200	903	0	0	0	0	0	0	0	603	903	0
938	9	0	0	0	0	0	0	200	300	0	0	0	0	0	0	0	200	903	0	0	0	0	0	0	0	603	903	0
939	0	0	0	0	0	0	0	200	300	0	0	0	0	0	0	0	200	903	0	0	0	0	0	0	0	603	903	0
939	1	0	0	0	0	0	0	200	300	0	0	0	0	0	0	0	200	903	0	0	0	0	0	0	0	603	903	0
939	2	0	0	0	0	0	0	200	300	0	0	0	0	0	0	0	200	903	0	0	0	0	0	0	0	603	903	0
939	3	0	0	0	0	0	0	200	300	0	0	0	0	0	0	0	200	903	0	0	0	0	0	0	0	603	903	0
939	4	0	0	0	0	0	0	200	300	0	0	0	0	0	0	0	200	903	0	0	0	0	0	0	0	603	903	0
939	5	0	0	0	0	0	0	200	300	0	0	0	0	0	0	0	200	903	0	0	0	0	0	0	0	603	903	0
939	6	0	0	0	0	0	0	200	300	0	0	0	0	0	0	0	200	903	0	0	0	0	0	0	0	603	903	0
939	7	0	0	0	0	0	0	200	300	0	0	0	0	0	0	0	200	903	0	0	0	0	0	0	0	603	903	0
939	8	0	0	0	0	0	0	200	300	0	0	0	0	0	0	0	200	903	0	0	0	0	0	0	0	603	903	0
939	9	0	0	0	0	0	0	200	300	0	0	0	0	0	0	0	200	903	0	0	0	0	0	0	0	603	903	0
940	0	0	0	0	0	0	0	200	300	0	0	0	0	0	0	0	200	903	0	0	0	0	0	0	0	603	903	0
940	1	0	0	0	0	0	0	200	300	0	0	0	0	0	0	0	200	903	0	0	0	0	0	0	0	603	903	0
940	2	0	0	0	0	0	0	200	300	0	0	0	0	0	0	0	200	903	0	0	0	0	0	0	0	603	903	0
940	3	0	0	0	0	0	0	200	300	0	0	0	0	0	0	0	200	903	0	0	0	0	0	0	0	603	903	0
940	4	0	0	0	0	0	0	200	300	0	0	0	0	0	0	0	200	903	0	0	0	0	0	0	0	603	903	0
940	5	0	0	0	0	0	0	200	300	0	0	0	0	0	0	0	200	903	0	0	0	0	0	0	0	603	903	0
940	6	0	0	0	0	0	0	200	300	0	0	0	0	0	0	0	200	903	0	0	0	0	0	0	0	603	903	0
940	7	0	0	0	0	0	0	200	300	0	0	0	0	0	0	0	200	903	0	0	0	0	0	0	0	603	903	0
940	8	0	0	0	0	0	0	200	300	0	0	0	0	0	0	0	200	903	0	0	0	0	0	0	0	603	903	0
940	9	0	0	0	0	0	0	200	300	0	0	0	0	0	0	0	200	903	0	0	0	0	0	0	0	603	903	0
941	0	0	0	0	0	0	0	200	300	0	0	0	0	0	0	0	200	903	0	0	0	0	0	0	0	603	903	0
941	1	0	0	0	0	0	0	200	300	0	0	0	0	0	0	0	200	903	0	0	0	0	0	0	0	603	903	0
941	2	0	0	0	0	0	0	200	300	0	0	0	0	0	0	0	200	903	0	0	0	0	0	0	0	603	903	0
941	3	0	0	0	0	0	0	200	300	0	0	0	0	0	0	0	200	903	0	0	0	0	0	0	0	603	903	0
941	4	0	0	0	0	0	0	200	300	0	0	0	0	0	0	0	200	903	0	0	0	0	0	0	0	603	903	0
941	5	0	0	0	0	0	0	200	300	0	0	0	0	0	0	0	200	903	0	0	0	0	0	0	0	603	903	0
941	6	0	0	0	0	0	0	200	300	0	0	0	0	0	0	0	200	903	0	0	0	0	0	0	0	603	903	0
941	7	0	0	0	0	0	0	200	300	0	0	0	0	0	0	0	200	903	0	0	0	0	0	0	0	603	903	0
941	8	0	0	0	0	0	0	200	300	0	0	0	0	0	0	0	200	903	0	0	0	0	0	0	0	603	903	0
941	9	0	0	0	0	0	0	200	300	0	0	0	0	0	0	0	200	903	0	0	0	0	0	0	0	603	903	0
942	0	0	0	0	0	0	0	200	300	0	0	0	0	0	0	0	200	903	0	0	0	0	0	0	0	603	903	0
942	1	0	0	0	0	0	0	200	300	0	0	0	0	0	0	0	200	903	0	0	0	0	0	0	0	603	903	0
942	2	0	0	0	0	0	0	200	300	0	0	0	0	0	0	0	200	903	0	0	0	0	0	0	0	603	903	0
942	3	0	0	0	0	0	0	200	300	0	0	0	0	0	0	0	200	903	0	0	0	0	0	0	0	603	903	0
942	4	0	0	0	0	0	0	200	300	0	0	0	0	0	0	0	200	903	0	0	0	0	0	0	0	603	903	0
942	5	0	0	0	0	0	0	200	300	0	0	0	0	0	0	0	200	903	0	0	0	0	0	0	0	603	903	0
942	6	0	0	0	0	0	0	200	300	0	0	0	0	0	0	0	200	903	0	0	0	0	0	0	0	603	903	0
942	7	0	0	0	0	0	0	200	300	0	0	0	0	0	0	0	200	903	0	0	0	0	0	0	0	603	903	0
942	8	0	0	0	0	0	0	200	300	0	0	0	0	0	0	0	200	903	0	0	0	0	0	0	0	603	903	0
942	9	0	0	0	0	0	0	200	300	0	0	0	0	0	0	0	200	903	0	0	0	0	0	0	0	603	903	0
943	0	0	0	0	0	0	0	200	300	0	0	0	0	0	0	0	200	903	0	0	0	0	0	0	0	603	903	0
943	1	0	0	0	0	0	0	200	300	0	0	0	0	0	0	0	200	903	0	0	0	0	0	0	0	603	903	0
943	2	0	0	0	0	0	0	200	300	0	0	0	0	0	0	0	200	903	0	0	0	0	0	0	0	603	903	0
943	3	0	0	0	0	0	0	200	300	0	0	0	0	0	0	0	200	903	0	0	0	0	0	0	0	603	903	0
943	4	0	0	0	0	0	0	200	300	0	0	0	0	0	0	0	200	903	0	0	0	0	0	0	0	603	903	0
943	5	0	0	0	0	0	0	200	300	0	0	0	0	0	0	0	200	903	0	0	0	0	0	0	0	603	903	0
943	6	0	0	0	0	0	0	200	300	0	0	0	0	0	0	0	200	903	0	0	0	0	0	0	0	603	903	0
943	7	0	0	0	0	0	0	200	300	0	0	0	0	0	0	0	200	903	0	0	0	0	0	0	0	603	903	0
943	8	0	0	0	0	0	0	200	300	0	0	0	0	0	0	0	200	903	0	0	0	0	0	0	0	603	903	0
943	9	0	0	0	0	0	0	200	300	0	0	0	0	0	0	0	200	903	0	0	0	0	0	0	0	603	903	0
944	0	0	0	0	0	0	0	200	300	0	0	0	0	0	0	0	200	903	0	0	0	0	0	0	0	603	903	0
944	1	0	0	0	0	0	0	200	300	0	0	0	0	0	0	0	200	903	0	0	0	0	0	0	0	603	903	0
944	2	0	0	0	0	0	0	200	300	0	0	0	0	0	0	0	200	903	0	0	0	0	0	0	0	603	903	0
944	3	0	0	0	0	0	0	200	300	0	0	0	0	0	0	0	200	903	0	0	0	0	0	0	0	603	903	0
944	4	0	0	0	0	0	0	200	300	0	0	0	0	0	0	0	200	903	0	0	0	0	0	0	0	603	903	0
944	5	0	0	0	0	0	0	200	300	0	0	0	0	0	0	0	200	903	0	0	0	0	0	0	0	603	903	0
944	6	0	0	0	0	0	0	200	300	0	0	0	0	0	0	0	200	903	0	0	0	0	0	0	0	603	903	0
944	7	0	0	0	0	0	0	200	300	0	0	0	0	0	0	0	200	903	0	0	0	0	0	0	0	603	903	0
944	8	0	0	0	0	0	0	200	300	0	0	0	0	0	0	0	200	903	0	0	0	0	0	0	0	603	903	0
944	9	0	0	0	0	0	0	200	300	0	0	0	0	0	0	0	200	903	0	0	0	0	0	0	0	603	903	0
945	0	0	0	0	0	0	0	200	300	0	0	0	0	0	0	0	200	903	0	0	0	0	0	0	0	603	903	0
945	1	0	0	0	0	0	0	200	300	0	0	0	0	0	0	0	200	903	0	0	0	0	0	0	0	603	903	0
945	2	0	0	0	0	0	0	200	300	0	0	0	0	0	0	0	200	903	0	0	0	0	0	0	0	603	903	0
945	3	0	0	0	0	0	0	200	300	0	0	0	0	0	0	0	200	903	0	0	0	0	0	0	0	603	903	0
945	4	0	0	0	0	0	0	200	300	0	0	0	0	0	0	0	200	903	0	0	0	0	0	0	0	603	903	0
945	5	0	0	0	0	0	0	200	300	0	0	0	0	0	0	0	200	903	0	0	0	0	0	0	0	603	903	0
945	6	0	0	0	0	0	0	200	300	0	0	0	0	0	0	0	200	903	0	0	0	0	0	0	0	603	903	0
945	7	0	0	0	0	0	0	200	300	0	0	0	0	0	0	0	200	903	0	0	0	0	0	0	0	603	903	0
945	8	0	0	0	0	0	0	200	300	0	0	0	0	0	0	0	200	903	0	0	0	0	0	0	0	603	903	0
945	9	0	0	0	0	0	0	200	300	0	0	0	0	0	0	0	200	903	0	0	0	0	0	0	0	603	903	0
946	0	0	0	0	0	0	0	200	300	0	0	0	0	0	0	0	200	903	0	0	0	0	0	0	0	603	903	0
946	1	0	0	0	0	0	0	200	300	0	0	0	0	0	0	0	200	903	0	0	0	0	0	0	0	603	903	0
946	2	0	0	0	0	0	0	200	300	0	0	0	0	0	0	0	200	903	0	0	0	0	0	0	0	603	903	0
946	3	0	0	0	0	0	0	200	300	0	0	0	0	0	0	0	200	903	0	0	0	0	0	0	0	603	903	0
946	4	0	0	0	0	0	0	200	300	0	0	0	0	0	0	0	200	903	0	0	0	0	0	0	0	603	903	0
946	5	0	0	0	0	0	0	200	300	0	0	0	0	0	0	0	200	903	0	0	0	0	0	0	0	603	903	0
946	6	0	0	0	0	0	0	200	300	0	0	0	0	0	0	0	200	903	0	0	0	0	0	0	0	603	903	0
946	7	0	0	0	0	0	0	200	300	0	0	0	0	0	0	0	200	903	0	0	0	0	0	0	0	603	903	0
946	8	0	0	0	0	0	0	200	300	0	0	0	0	0	0	0	200	903	0	0	0	0	0	0	0	603	903	0
946	9	0	0	0	0	0	0	200	300	0	0	0	0	0	0	0	200	903	0	0	0	0	0	0	0	603	903	0
947	0	0	0	0	0	0	0	200	300	0	0	0	0	0	0	0	200	903	0	0	0	0	0	0	0	603	903	0
947	1	0	0	0	0	0	0	200	300	0	0	0	0	0	0	0	200	903	0	0	0	0	0	0	0	603	903	0
947	2	0	0	0	0	0	0	200	300	0	0	0	0	0	0	0	200	903	0	0	0	0	0	0	0	603	903	0
947	3	0	0	0	0	0	0	200	300	0	0	0	0	0	0	0	200	903	0	0	0	0	0	0	0	603	903	0
947	4	0	0	0	0	0	0	200	300	0	0	0	0	0	0	0	200	903	0	0	0	0	0	0	0	603	903	0
947	5	0	0	0	0	0	0	200	300	0	0	0	0	0	0	0	200	903	0	0	0	0	0	0	0	603	903	0
947	6	0	0	0	0	0	0	200	300	0	0	0	0	0	0	0	200	903	0	0	0	0	0	0	0	603	903	0
947	7	0	0	0	0	0	0	200	300	0	0	0	0	0	0	0	200	903	0	0	0	0	0	0	0	603	903	0
947	8	0	0	0	0	0	0	200	300	0	0	0	0	0	0	0	200	903	0	0	0	0	0	0	0	603	903	0
947	9	0	0	0	0	0	0	200	300	0	0	0	0	0	0	0	200	903	0	0	0	0	0	0	0	603	903	0
948	0	0	0	0	0	0	0	200	300	0	0	0	0	0	0	0	200	903	0	0	0	0	0	0	0	603	903	0
948	1	0	0	0	0	0	0	200	300	0	0	0	0	0	0	0	200	903	0	0	0	0	0	0	0	603	903	0
948	2	0	0	0	0	0	0	200	300	0	0	0	0	0	0	0	200	903	0	0	0	0	0	0	0	603	903	0
948	3	0	0	0	0	0	0	200	300	0	0	0	0	0	0	0	200	903	0	0	0	0	0	0	0	603	903	0
948	4	0	0	0	0	0	0	200	300	0	0	0	0	0	0	0	200	903	0	0	0	0	0	0	0	603	903	0
948	5	0	0	0	0	0	0	200	300	0	0	0	0	0	0	0	200	903	0	0	0	0	0	0	0	603	903	0
948	6	0	0	0	0	0	0	200	300	0	0	0	0	0	0	0	200	903	0	0	0	0	0	0	0	603	903	0
948	7	0	0	0	0	0	0	200	300	0	0	0	0	0	0	0	200	903	0	0	0	0	0	0	0	603	903	0
948	8	0	0	0	0	0	0	200	300	0	0	0	0	0	0	0	200	903	0	0	0	0	0	0	0	603	903	0
948	9	0	0	0	0	0	0	200	300	0	0	0	0	0	0	0	200	903	0	0	0	0	0	0	0	603	903	0
949	0	0	0	0	0	0	0	200	300	0	0	0	0	0	0	0	200	903	0	0	0	0	0	0	0	603	903	0
949	1	0	0	0	0	0	0	200	300	0	0	0	0	0	0	0	200	903	0	0	0	0	0	0	0	603	903	0
949	2	0	0	0	0	0	0	200	300	0	0	0	0	0	0	0	200	903	0	0	0	0	0	0	0	603	903	0
949	3	0	0	0	0	0	0	200	300	0	0	0	0	0	0	0	200	903	0	0	0	0	0	0	0	603	903	0
949	4	0	0	0	0	0	0	200	300	0	0	0	0	0	0	0	200	903	0	0	0	0	0	0	0	603	903	0
949	5	0	0	0	0	0	0	200	300	0	0	0	0	0	0	0	200	903	0	0	0	0	0	0	0	603	903	0
949	6	0	0	0	0	0	0	200	300	0	0	0	0	0	0	0	200	903	0	0	0	0	0	0	0	603	903	0
949	7	0	0	0	0	0	0	200	300	0	0	0	0	0	0	0	200	903	0	0	0	0	0	0	0	603	903	0
949	8	0	0	0	0	0	0	200	300	0	0	0	0	0	0	0	200	903	0	0	0	0	0	0	0	603	903	0
949	9	0	0	0	0	0	0	200	300	0	0	0	0	0	0	0	200	903	0	0	0	0	0	0	0	603	903	0
950	0	0	0	0	0	0	0	200	300	0	0	0	0	0	0	0	200	903	0	0	0	0	0	0	0	603	903	0
950	1	0	0	0	0	0	0	200	300	0	0	0	0	0	0	0	200	903	0	0	0	0	0	0	0	603	903	0
950	2	0	0	0	0	0	0	200	300	0	0	0	0	0	0	0	200	903	0	0	0	0	0	0	0	603	903	0
950	3	0	0	0	0	0	0	200	300	0	0	0	0	0	0	0	200	903	0	0	0	0	0	0	0	603	903	0
950	4	0	0	0	0	0	0	200	300	0	0	0	0	0	0	0	200	903	0	0	0	0	0	0	0	603	903	0
950	5	0	0	0	0	0	0	200	300	0	0	0	0	0	0	0	200	903	0	0	0	0	0	0	0	603	903	0
950	6	0	0	0	0	0	0	200	300	0	0	0	0	0	0	0	200	903	0	0	0	0	0	0	0	603	903	0
950	7	0	0	0	0	0	0	200	300	0	0	0	0	0	0	0	200	903	0	0	0	0	0	0	0	603	903	0
950	8	0	0	0	0	0	0	200	300	0	0	0	0	0	0	0	200	903	0	0	0	0	0	0	0	603	903	0
950	9	0	0	0	0	0	0	200	300	0	0	0	0	0	0	0	200	903	0	0	0	0	0	0	0	603	903	0
951	0	0	0	0	0	0	0	200	300	0	0	0	0	0	0	0	200	903	0	0	0	0	0	0	0	603	903	0
951	1	0	0	0	0	0	0	200	300	0	0	0	0	0	0	0	200	903	0	0	0	0	0	0	0	603	903	0
951	2	0	0	0	0	0	0	200	300	0	0	0	0	0	0	0	200	903	0	0	0	0	0	0	0	603	903	0
951	3	0	0	0	0	0	0	200	300	0	0	0	0	0	0	0	200	903	0	0	0	0	0	0	0	603	903	0
951	4	0	0	0	0	0	0	200	300	0	0	0	0	0	0	0	200	903	0	0	0	0	0	0	0	603	903	0
951	5	0	0	0	0	0	0	200	300	0	0	0	0	0	0	0	200	903	0	0	0	0	0	0	0	603	903	0
951	6	0	0	0	0	0	0	200	300	0	0	0	0	0	0	0	200	903	0	0	0	0	0	0	0	603	903	0
951	7	0	0	0	0	0	0	200	300	0	0	0	0	0	0	0	200	903	0	0	0	0	0	0	0	603	903	0
951	8	0	0	0	0	0	0	200	300	0	0	0	0	0	0	0	200	903	0	0	0	0	0	0	0	603	903	0
951	9	0	0	0	0	0	0	200	300	0	0	0	0	0	0	0	200	903	0	0	0	0	0	0	0	603	903	0
952	0	0	0	0	0	0	0	200	300	0	0	0	0	0	0	0	200	903	0	0	0	0	0	0	0	603	903	0
952	1	0	0	0	0	0	0	200	300	0	0	0	0	0	0	0	200	903	0	0	0	0	0	0	0	603	903	0
952	2	0	0	0	0	0	0	200	300	0	0	0	0	0	0	0	200	903	0	0	0	0	0	0	0	603	903	0
952	3	0	0	0	0	0	0	200	300	0	0	0	0	0	0	0	200	903	0	0	0	0	0	0	0	603	903	0
952	4	0	0	0	0	0	0	200	300	0	0	0	0	0	0	0	200	903	0	0	0	0	0	0	0	603	903	0
952	5	0	0	0	0	0	0	200	300	0	0	0	0	0	0	0	200	903	0	0	0	0	0	0	0	603	903	0
952	6	0	0	0	0	0	0	200	300	0	0	0	0	0	0	0	200	903	0	0	0	0	0	0	0	603	903	0
952	7	0	0	0	0	0	0	200	300	0	0	0	0	0	0	0	200	903	0	0	0	0	0	0	0	603	903	0
952	8	0	0	0	0	0	0	200	300	0	0	0	0	0	0	0	200	903	0	0	0	0	0	0	0	603	903	0
952	9	0	0	0	0	0	0	200	300	0	0	0	0	0	0	0	200	903	0	0	0	0	0	0	0	603	903	0
953	0	0	0	0	0	0	0	200	300	0	0	0	0	0	0	0	200	903	0	0	0	0	0	0	0	603	903	0
953	1	0	0	0	0	0	0	200	300	0	0	0	0	0	0	0	200	903	0	0	0	0	0	0	0	603	903	0
953	2	0	0	0	0	0	0	200	300	0	0	0	0	0	0	0	200	903	0	0	0	0	0	0	0	603	903	0
953	3	0	0	0	0	0	0	200	300	0	0	0	0	0	0	0	200	903	0	0	0	0	0	0	0	603	903	0
953	4	0	0	0	0	0	0	200	300	0	0	0	0	0	0	0	200	903	0	0	0	0	0	0	0	603	903	0
953	5	0	0	0	0	0	0	200	300	0	0	0	0	0	0	0	200	903	0	0	0	0	0	0	0	603	903	0
953	6	0	0	0	0	0	0	200	300	0	0	0	0	0	0	0	200	903	0	0	0	0	0	0	0	603	903	0
953	7	0	0	0	0	0	0	200	300	0	0	0	0	0	0	0	200	903	0	0	0	0	0	0	0	603	903	0
953	8	0	0	0	0	0	0	200	300	0	0	0	0	0	0	0	200	903	0	0	0	0	0	0	0	603	903	0
953	9	0	0	0	0	0	0	200	300	0	0	0	0	0	0	0	200	903	0	0	0	0	0	0	0	603	903	0
954	0	0	0	0	0	0	0	200	300	0	0	0	0	0	0	0	200	903	0	0	0	0	0	0	0	603	903	0
954	1	0	0	0	0	0	0	200	300	0	0	0	0	0	0	0	200	903	0	0	0	0	0	0	0	603	903	0
954	2	0	0	0	0	0	0	200	300	0	0	0	0	0	0	0	200	903	0	0	0	0	0	0	0	603	903	0
954	3	0	0	0	0	0	0	200	300	0	0	0	0	0	0	0	200	903	0	0	0	0	0	0	0	603	903	0
954	4	0	0	0	0	0	0	200	300	0	0	0	0	0	0	0	200	903	0	0	0	0	0	0	0	603	903	0
954	5	0	0	0	0	0	0	200	300	0	0	0	0	0	0	0	200	903	0	0	0	0	0	0	0	603	903	0
954	6	0	0	0	0	0	0	200	300	0	0	0	0	0	0	0	200	903	0	0	0	0	0	0	0	603	903	0
954	7	0	0	0	0	0	0	200	300	0	0	0	0	0	0	0	200	903	0	0	0	0	0	0	0	603	903	0
954	8	0	0	0	0	0	0	200	300	0	0	0	0	0	0	0	200	903	0	0	0	0	0	0	0	603	903	0
954	9	0	0	0	0	0	0	200	300	0	0	0	0	0	0	0	200	903	0	0	0	0	0	0	0	603	903	0
955	0	0	0	0	0	0	0	200	300	0	0	0	0	0	0	0	200	903	0	0	0	0	0	0	0	603	903	0
955	1	0	0	0	0	0	0	200	300	0	0	0	0	0	0	0	200	903	0	0	0	0	0	0	0	603	903	0
955	2	0	0	0	0	0	0	200	300	0	0	0	0	0	0	0	200	903	0	0	0	0	0	0	0	603	903	0
955	3	0	0	0	0	0	0	200	300	0	0	0	0	0	0	0	200	903	0	0	0	0	0	0	0	603	903	0
955	4	0	0	0	0	0	0	200	300	0	0	0	0	0	0	0	200	903	0	0	0	0	0	0	0	603	903	0
955	5	0	0	0	0	0	0	200	300	0	0	0	0	0	0	0	200	903	0	0	0	0	0	0	0	603	903	0
955	6	0	0	0	0	0	0	200	300	0	0	0	0	0	0	0	200	903	0	0	0	0	0	0	0	603	903	0
955	7	0	0	0	0	0	0	200	300	0	0	0	0	0	0	0	200	903	0	0	0	0	0	0	0	603	903	0
955	8	0	0	0	0	0	0	200	300	0	0	0	0	0	0	0	200	903	0	0	0	0	0	0	0	603	903	0
955	9	0	0	0	0	0	0	200	300	0	0	0	0	0	0	0	200	903	0	0	0	0	0	0	0	603	903	0
956	0	0	0	0	0	0	0	200	300	0	0	0	0	0	0	0	200	903	0	0	0	0	0	0	0	603	903	0
956	1	0	0	0	0	0	0	200	300	0	0	0	0	0	0	0	200	903	0	0	0	0	0	0	0	603	903	0
956	2	0	0	0	0	0	0	200	300	0	0	0	0	0	0	0	200	903	0	0	0	0	0	0	0	603	903	0
956	3	0	0	0	0	0	0	200	300	0	0	0	0	0	0	0	200	903	0	0	0	0	0	0	0	603	903	0
956	4	0	0	0	0	0	0	200	300	0	0	0	0	0	0	0	200	903	0	0	0	0	0	0	0	603	903	0
956	5	0	0	0	0	0	0	200	300	0	0	0	0	0	0	0	200	903	0	0	0	0	0	0	0	603	903	0
956	6	0	0	0	0	0	0	200	300	0	0	0	0	0	0	0	200	903	0	0	0	0	0	0	0	603	903	0
956	7	0	0	0	0	0	0	200	300	0	0	0	0	0	0	0	200	903	0	0	0	0	0	0	0	603	903	0
956	8	0	0	0	0	0	0	200	300	0	0	0	0	0	0	0	200	903	0	0	0	0	0	0	0	603	903	0
956	9	0	0	0	0	0	0	200	300	0	0	0	0	0	0	0	200	903	0	0	0	0	0	0	0	603	903	0
957	0	0	0	0	0	0	0	200	300	0	0	0	0	0	0	0	200	903	0	0	0	0	0	0	0	603	903	0
957	1	0	0	0	0	0	0	200	300	0	0	0	0	0	0	0	200	903	0	0	0	0	0	0	0	603	903	0
957	2	0	0	0	0	0	0	200	300	0	0	0	0	0	0	0	200	903	0	0	0	0	0	0	0	603	903	0
957	3	0	0	0	0	0	0	200	300	0	0	0	0	0	0	0	200	903	0	0	0	0	0	0	0	603	903	0
957	4	0	0	0	0	0	0	200	300	0	0	0	0	0	0	0	200	903	0	0	0	0	0	0	0	603	903	0
957	5	0	0	0	0	0	0	200	300	0	0	0	0	0	0	0	200	903	0	0	0	0	0	0	0	603	903	0
957	6	0	0	0	0	0	0	200	300	0	0	0	0	0	0	0	200	903	0	0	0	0	0	0	0	603	903	0
957	7	0	0	0	0	0	0	200	300	0	0	0	0	0	0	0	200	903	0	0	0	0	0	0	0	603	903	0
957	8	0	0	0	0	0	0	200	300	0	0	0	0	0	0	0	200	903	0	0	0	0	0	0	0	603	903	0
957	9	0	0	0	0	0	0	200	300	0	0	0	0	0	0	0	200	903	0	0	0	0	0	0	0	603	903	0
958	0	0	0	0	0	0	0	200	300	0	0	0	0	0	0	0	200	903	0	0	0	0	0	0	0	603	903	0
958	1	0	0	0	0	0	0	200	300	0	0	0	0	0	0	0	200	903	0	0	0	0	0	0	0	603	903	0
958	2	0	0	0	0	0	0	200	300	0	0	0	0	0	0	0	200	903	0	0	0	0	0	0	0	603	903	0
958	3	0	0	0	0	0	0	200	300	0	0	0	0	0	0	0	200	903	0	0	0	0	0	0	0	603	903	0
958	4	0	0	0	0	0	0	200	300	0	0	0	0	0	0	0	200	903	0	0	0	0	0	0	0	603	903	0
958	5	0	0	0	0	0	0	200	300	0	0	0	0	0	0	0	200	903	0	0	0	0	0	0	0	603	903	0
958	6	0	0	0	0	0	0	200	300	0	0	0	0	0	0	0	200	903	0	0	0	0	0	0	0	603	903	0
958	7	0	0	0	0	0	0	200	300	0	0	0	0	0	0	0	200	903	0	0	0	0	0	0	0	603	903	0
958	8	0	0	0	0	0	0	200	300	0	0	0	0	0	0	0	200	903	0	0	0	0	0	0	0	603	903	0
958	9	0	0	0	0	0	0	200	300	0	0	0	0	0	0	0	200	903	0	0	0	0	0	0	0	603	903	0
959	0	0	0	0	0	0	0	200	300	0	0	0	0	0	0	0	200	903	0	0	0	0	0	0	0	603	903	0
959	1	0	0	0	0	0	0	200	300	0	0	0	0	0	0	0	200	903	0	0	0	0	0	0	0	603	903	0
959	2	0	0	0	0	0	0	200	300	0	0	0	0	0	0	0	200	903	0	0	0	0	0	0	0	603	903	0
959	3	0	0	0	0	0	0	200	300	0	0	0	0	0	0	0	200	903	0	0	0	0	0	0	0	603	903	0
959	4	0	0	0	0	0	0	200	300	0	0	0	0	0	0	0	200	903	0	0	0	0	0	0	0	603	903	0
959	5	0	0	0	0	0	0	200	300	0	0	0	0	0	0	0	200	903	0	0	0	0	0	0	0	603	903	0
959	6	0	0	0	0	0	0	200	300	0	0	0	0	0	0	0	200	903	0	0	0	0	0	0	0	603	903	0
959	7	0	0	0	0	0	0	200	300	0	0	0	0	0	0	0	200	903	0	0	0	0	0	0	0	603	903	0
959	8	0	0	0	0	0	0	200	300	0	0	0	0	0	0	0	200	903	0	0	0	0	0	0	0	603	903	0
959	9	0	0	0	0	0	0	200	300	0	0	0	0	0	0	0	200	903	0	0	0	0	0	0	0	603	903	0
960	0	0	0	0	0	0	0	200	300	0	0	0	0	0	0	0	200	903	0	0	0	0	0	0	0	603	903	0
960	1	0	0	0	0	0	0	200	300	0	0	0	0	0	0	0	200	903	0	0	0	0	0	0	0	603	903	0
960	2	0	0	0	0	0	0	200	300	0	0	0	0	0	0	0	200	903	0	0	0	0	0	0	0	603	903	0
960	3	0	0	0	0	0	0	200	300	0	0	0	0	0	0	0	200	903	0	0	0	0	0	0	0	603	903	0
960	4	0	0	0	0	0	0	200	300	0	0	0	0	0	0	0	200	903	0	0	0	0	0	0	0	603	903	0
960	5	0	0	0	0	0	0	200	300	0	0	0	0	0	0	0	200	903	0	0	0	0	0	0	0	603	903	0
960	6	0	0	0	0	0	0	200	300	0	0	0	0	0	0	0	200	903	0	0	0	0	0	0	0	603	903	0
960	7	0	0	0	0	0	0	200	300	0	0	0	0	0	0	0	200	903	0	0	0	0	0	0	0	603	903	0
960	8	0	0	0	0	0	0	200	300	0	0	0	0	0	0	0	200	903	0	0	0	0	0	0	0	603	903	0
960	9	0	0	0	0	0	0	200	300	0	0	0	0	0	0	0	200	903	0	0	0	0	0	0	0	603	903	0
961	0	0	0	0	0	0	0	200	300	0	0	0	0	0	0	0	200	903	0	0	0	0	0	0	0	603	903	0
961	1	0	0	0	0	0	0	200	300	0	0	0	0	0	0	0	200	903	0	0	0	0	0	0	0	603	903	0
961	2	0	0	0	0	0	0	200	300	0	0	0	0	0	0	0	200	903	0	0	0	0	0	0	0	603	903	0
961	3	0	0	0	0	0	0	200	300	0	0	0	0	0	0	0	200	903	0	0	0	0	0	0	0	603	903	0
961	4	0	0	0	0	0	0	200	300	0	0	0	0	0	0	0	200	903	0	0	0	0	0	0	0	603	903	0
961	5	0	0	0	0	0	0	200	300	0	0	0	0	0	0	0	200	903	0	0	0	0	0	0	0	603	903	0
961	6	0	0	0	0	0	0	200	300	0	0	0	0	0	0	0	200	903	0	0	0	0	0	0	0	603	903	0
961	7	0	0	0	0	0	0	200	300	0	0	0	0	0	0	0	200	903	0	0	0	0	0	0	0	603	903	0
961	8	0	0	0	0	0	0	200	300	0	0	0	0	0	0	0	200	903	0	0	0	0	0	0	0	603	903	0
961	9	0	0	0	0	0	0	200	300	0	0	0	0	0	0	0	200	903	0	0	0	0	0	0	0	603	903	0
962	0	0	0	0	0	0	0	200	300	0	0	0	0	0	0	0	200	903	0	0	0	0	0	0	0	603	903	0
962	1	0	0	0	0	0	0	200	300	0	0	0	0	0	0	0	200	903	0	0	0	0	0	0	0	603	903	0
962	2	0	0	0	0	0	0	200	300	0	0	0	0	0	0	0	200	903	0	0	0	0	0	0	0	603	903	0
962	3	0	0	0	0	0	0	200	300	0	0	0	0	0	0	0	200	903	0	0	0	0	0	0	0	603	903	0
962	4	0	0	0	0	0	0	200	300	0	0	0	0	0	0	0	200	903	0	0	0	0	0	0	0	603	903	0
962	5	0	0	0	0	0	0	200	300	0	0	0	0	0	0	0	200	903	0	0	0	0	0	0	0	603	903	0
962	6	0	0	0	0	0	0	200	300	0	0	0	0	0	0	0	200	903	0	0	0	0	0	0	0	603	903	0
962	7	0	0	0	0	0	0	200	300	0	0	0	0	0	0	0	200	903	0	0	0	0	0	0	0	603	903	0
962	8	0	0	0	0	0	0	200	300	0	0	0	0	0	0	0	200	903	0	0	0	0	0	0	0	603	903	0
962	9	0	0	0	0	0	0	200	300	0	0	0	0	0	0	0	200	903	0	0	0	0	0	0	0	603	903	0
963	0	0	0	0	0	0	0	200	300	0	0	0	0	0	0	0	200	903	0	0	0	0	0	0	0	603	903	0
963	1	0	0	0	0	0	0	200	300	0	0	0	0	0	0	0	200	903	0	0	0	0	0	0	0	603	903	0
963	2	0	0	0	0	0	0	200	300	0	0	0	0	0	0	0	200	903	0	0	0	0	0	0	0	603	903	0
963	3	0	0	0	0	0	0	200	300	0	0	0	0	0	0	0	200	903	0	0	0	0	0	0	0	603	903	0
963	4	0	0	0	0	0	0	200	300	0	0	0	0	0	0	0	200	903	0	0	0	0	0	0	0	603	903	0
963	5	0	0	0	0	0	0	200	300	0	0	0	0	0	0	0	200	903	0	0	0	0	0	0	0	603	903	0
963	6	0	0	0	0	0	0	200	300	0	0	0	0	0	0	0	200	903	0	0	0	0	0	0	0	603	903	0
963	7	0	0	0	0	0	0	200	300	0	0	0	0	0	0	0	200	903	0	0	0	0	0	0	0	603	903	0
963	8	0	0	0	0	0	0	200	300	0	0	0	0	0	0	0	200	903	0	0	0	0	0	0	0	603	903	0
963	9	0	0	0	0	0	0	200	300	0	0	0	0	0	0	0	200	903	0	0	0	0	0	0	0	603	903	0
964	0	0	0	0	0	0	0	200	300	0	0	0	0	0	0	0	200	903	0	0	0	0	0	0	0	603	903	0
964	1	0	0	0	0	0	0	200	300	0	0	0	0	0	0	0	200	903	0	0	0	0	0	0	0	603	903	0
964	2	0	0	0	0	0	0	200	300	0	0	0	0	0	0	0	200	903	0	0	0	0	0	0	0	603	903	0
964	3	0	0	0	0	0	0	200	300	0	0	0	0	0	0	0	200	903	0	0	0	0	0	0	0	603	903	0
964	4	0	0	0	0	0	0	200	300	0	0	0	0	0	0	0	200	903	0	0	0	0	0	0	0	603	903	0
964	5	0	0	0	0	0	0	200	300	0	0	0	0	0	0	0	200	903	0	0	0	0	0	0	0	603	903	0
964	6	0	0	0	0	0	0	200	300	0	0	0	0	0	0	0	200	903	0	0	0	0	0	0	0	603	903	0
964	7	0	0	0	0	0	0	200	300	0	0	0	0	0	0	0	200	903	0	0	0	0	0	0	0	603	903	0
964	8	0	0	0	0	0	0	200	300	0	0	0	0	0	0	0	200	903	0	0	0	0	0	0	0	603	903	0
964	9	0	0	0	0	0	0	200	300	0	0	0	0	0	0	0	200	903	0	0	0	0	0	0	0	603	903	0
965	0	0	0	0	0	0	0	200	300	0	0	0	0	0	0	0	200	903	0	0	0	0	0	0	0	603	903	0
965	1	0	0	0	0	0	0	200	300	0	0	0	0	0	0	0	200	903	0	0	0	0	0	0	0	603	903	0
965	2	0	0	0	0	0	0	200	300	0	0	0	0	0	0	0	200	903	0	0	0	0	0	0	0	603	903	0
965	3	0	0	0	0	0	0	200	300	0	0	0	0	0	0	0	200	903	0	0	0	0	0	0	0	603	903	0
965	4	0	0	0	0	0	0	200	300	0	0	0	0	0	0	0	200	903	0	0	0	0	0	0	0	603	903	0
965	5	0	0	0	0	0	0	200	300	0	0	0	0	0	0	0	200	903	0	0	0	0	0	0	0	603	903	0
965	6	0	0	0	0	0	0	200	300	0	0	0	0	0	0	0	200	903	0	0	0	0	0	0	0	603	903	0
965	7	0	0	0	0	0	0	200	300	0	0	0	0	0	0	0	200	903	0	0	0	0	0	0	0	603	903	0
965	8	0	0	0	0	0	0	200	300	0	0	0	0	0	0	0	200	903	0	0	0	0	0	0	0	603	903	0
965	9	0	0	0	0	0	0	200	300	0	0	0	0	0	0	0	200	903	0	0	0	0	0	0	0	603	903	0
966	0	0	0	0	0	0	0	200	300	0	0	0	0	0	0	0	200	903	0	0	0	0	0	0	0	603	903	0
966	1	0	0	0	0	0	0	200	300	0	0	0	0	0	0	0	200	903	0	0	0	0	0	0	0	603	903	0
966	2	0	0	0	0	0	0	200	300	0	0	0	0	0	0	0	200	903	0	0	0	0	0	0	0	603	903	0
966	3	0	0	0	0	0	0	200	300	0	0	0	0	0	0	0	200	903	0	0	0	0	0	0	0	603	903	0
966	4	0	0	0	0	0	0	200	300	0	0	0	0	0	0	0	200	903	0	0	0	0	0	0	0	603	903	0
966	5	0	0	0	0	0	0	200	300	0	0	0	0	0	0	0	200	903	0	0	0	0	0	0	0	603	903	0
966	6	0	0	0	0	0	0	200	300	0	0	0	0	0	0	0	200	903	0	0	0	0	0	0	0	603	903	0
966	7	0	0	0	0	0	0	200	300	0	0	0	0	0	0	0	200	903	0	0	0	0	0	0	0	603	903	0
966	8	0	0	0	0	0	0	200	300	0	0	0	0	0	0	0	200	903	0	0	0	0	0	0	0	603	903	0
966	9	0	0	0	0	0	0	200	300	0	0	0	0	0	0	0	200	903	0	0	0	0	0	0	0	603	903	0
967	0	0	0	0	0	0	0	200	300	0	0	0	0	0	0	0	200	903	0	0	0	0	0	0	0	603	903	0
967	1	0	0	0	0	0	0	200	300	0	0	0	0	0	0	0	200	903	0	0	0	0	0	0	0	603	903	0
967	2	0	0	0	0	0	0	200	300	0	0	0	0	0	0	0	200	903	0	0	0	0	0	0	0	603	903	0
967	3	0	0	0	0	0	0	200	300	0	0	0	0	0	0	0	200	903	0	0	0	0	0	0	0	603	903	0
967	4	0	0	0	0	0	0	200	300	0	0	0	0	0	0	0	200	903	0	0	0	0	0	0	0	603	903	0
967	5	0	0	0	0	0	0	200	300	0	0	0	0	0	0	0	200	903	0	0	0	0	0	0	0	603	903	0
967	6	0	0	0	0	0	0	200	300	0	0	0	0	0	0	0	200	903	0	0	0	0	0	0	0	603	903	0
967	7	0	0	0	0	0	0	200	300	0	0	0	0	0	0	0	200	903	0	0	0	0	0	0	0	603	903	0
967	8	0	0	0	0	0	0	200	300	0	0	0	0	0	0	0	200	903	0	0	0	0	0	0	0	603	903	0
967	9	0	0	0	0	0	0	200	300	0	0	0	0	0	0	0	200	903	0	0	0	0	0	0	0	603	903	0
968	0	0	0	0	0	0	0	200	300	0	0	0	0	0	0	0	200	903	0	0	0	0	0	0	0	603	903	0
968	1	0	0	0	0	0	0	200	300	0	0	0	0	0	0	0	200	903	0	0	0	0	0	0	0	603	903	0
968	2	0	0	0	0	0	0	200	300	0	0	0	0	0	0	0	200	903	0	0	0	0	0	0	0	603	903	0
968	3	0	0	0	0	0	0	200	300	0	0	0	0	0	0	0	200	903	0	0	0	0	0	0	0	603	903	0
968	4	0	0	0	0	0	0	200	300	0	0	0	0	0	0	0	200	903	0	0	0	0	0	0	0	603	903	0
968	5	0	0	0	0	0	0	200	300	0	0	0	0	0	0	0	200	903	0	0	0	0	0	0	0	603	903	0
968	6	0	0	0	0	0	0	200	300	0	0	0	0	0	0	0	200	903	0	0	0	0	0	0	0	603	903	0
968	7	0	0	0	0	0	0	200	300	0	0	0	0	0	0	0	200	903	0	0	0	0	0	0	0	603	903	0
968	8	0	0	0	0	0	0	200	300	0	0	0	0	0	0	0	200	903	0	0	0	0	0	0	0	603	903	0
968	9	0	0	0	0	0	0	200	300	0	0	0	0	0	0	0	200	903	0	0	0	0	0	0	0	603	903	0
969	0	0	0	0	0	0	0	200	300	0	0	0	0	0	0	0	200	903	0	0	0	0	0	0	0	603	903	0
969	1	0	0	0	0	0	0	200	300	0	0	0	0	0	0	0	200	903	0	0	0	0	0	0	0	603	903	0
969	2	0	0	0	0	0	0	200	300	0	0	0	0	0	0	0	200	903	0	0	0	0	0	0	0	603	903	0
969	3	0	0	0	0	0	0	200	300	0	0	0	0	0	0	0	200	903	0	0	0	0	0	0	0	603	903	0
969	4	0	0	0	0	0	0	200	300	0	0	0	0	0	0	0	200	903	0	0	0	0	0	0	0	603	903	0
969	5	0	0	0	0	0	0	200	300	0	0	0	0	0	0	0	200	903	0	0	0	0	0	0	0	603	903	0
969	6	0	0	0	0	0	0	200	300	0	0	0	0	0	0	0	200	903	0	0	0	0	0	0	0	603	903	0
969	7	0	0	0	0	0	0	200	300	0	0	0	0	0	0	0	200	903	0	0	0	0	0	0	0	603	903	0
969	8	0	0	0	0	0	0	200	300	0	0	0	0	0	0	0	200	903	0	0	0	0	0	0	0	603	903	0
969	9	0	0	0	0	0	0	200	300	0	0	0	0	0	0	0	200	903	0	0	0	0	0	0	0	603	903	0
970	0	0	0	0	0	0	0	200	300	0	0	0	0	0	0	0	200	903	0	0	0	0	0	0	0	603	903	0
970	1	0	0	0	0	0	0	200	300	0	0	0	0	0	0	0	200	903	0	0	0	0	0	0	0	603	903	0
970	2	0	0	0	0	0	0	200	300	0	0	0	0	0	0	0	200	903	0	0	0	0	0	0	0	603	903	0
970	3	0	0	0	0	0	0	200	300	0	0	0	0	0	0	0	200	903	0	0	0	0	0	0	0	603	903	0
970	4	0	0	0	0	0	0	200	300	0	0	0	0	0	0	0	200	903	0	0	0	0	0	0	0	603	903	0
970	5	0	0	0	0	0	0	200	300	0	0	0	0	0	0	0	200	903	0	0	0	0	0	0	0	603	903	0
970	6	0	0	0	0	0	0	200	300	0	0	0	0	0	0	0	200	903	0	0	0	0	0	0	0	603	903	0
970	7	0	0	0	0	0	0	200	300	0	0	0	0	0	0	0	200	903	0	0	0	0	0	0	0	603	903	0
970	8	0	0	0	0	0	0	200	300	0	0	0	0	0	0	0	200	903	0	0	0	0	0	0	0	603	903	0
970	9	0	0	0	0	0	0	200	300	0	0	0	0	0	0	0	200	903	0	0	0	0	0	0	0	603	903	0
971	0	0	0	0	0	0	0	200	300	0	0	0	0	0	0	0	200	903	0	0	0	0	0	0	0	603	903	0
971	1	0	0	0	0	0	0	200	300	0	0	0	0	0	0	0	200	903	0	0	0	0	0	0	0	603	903	0
971	2	0	0	0	0	0	0	200	300	0	0	0	0	0	0	0	200	903	0	0	0	0	0	0	0	603	903	0
971	3	0	0	0	0	0	0	200	300	0	0	0	0	0	0	0	200	903	0	0	0	0	0	0	0	603	903	0
971	4	0	0	0	0	0	0	200	300	0	0	0	0	0	0	0	200	903	0	0	0	0	0	0	0	603	903	0
971	5	0	0	0	0	0	0	200	300	0	0	0	0	0	0	0	200	903	0	0	0	0	0	0	0	603	903	0
971	6	0	0	0	0	0	0	200	300	0	0	0	0	0	0	0	200	903	0	0	0	0	0	0	0	603	903	0
971	7	0	0	0	0	0	0	200	300	0	0	0	0	0	0	0	200	903	0	0	0	0	0	0	0	603	903	0
971	8	0	0	0	0	0	0	200	300	0	0	0	0	0	0	0	200	903	0	0	0	0	0	0	0	603	903	0
971	9	0	0	0	0	0	0	200	300	0	0	0	0	0	0	0	200	903	0	0	0	0	0	0	0	603	903	0
972	0	0	0	0	0	0	0	200	300	0	0	0	0	0	0	0	200	903	0	0	0	0	0	0	0	603	903	0
972	1	0	0	0	0	0	0	200	300	0	0	0	0	0	0	0	200	903	0	0	0	0	0	0	0	603	903	0
972	2	0	0	0	0	0	0	200	300	0	0	0	0	0	0	0	200	903	0	0	0	0	0	0	0	603	903	0
972	3	0	0	0	0	0	0	200	300	0	0	0	0	0	0	0	200	903	0	0	0	0	0	0	0	603	903	0
972	4	0	0	0	0	0	0	200	300	0	0	0	0	0	0	0	200	903	0	0	0	0	0	0	0	603	903	0
972	5	0	0	0	0	0	0	200	300	0	0	0	0	0	0	0	200	903	0	0	0	0	0	0	0	603	903	0
972	6	0	0	0	0	0	0	200	300	0	0	0	0	0	0	0	200	903	0	0	0	0	0	0	0	603	903	0
972	7	0	0	0	0	0	0	200	300	0	0	0	0	0	0	0	200	903	0	0	0	0	0	0	0	603	903	0
972	8	0	0	0	0	0	0	200	300	0	0	0	0	0	0	0	200	903	0	0	0	0	0	0	0	603	903	0
972	9	0	0	0	0	0	0	200	300	0	0	0	0	0	0	0	200	903	0	0	0	0	0	0	0	603	903	0
973	0	0	0	0	0	0	0	200	300	0	0	0	0	0	0	0	200	903	0	0	0	0	0	0	0	603	903	0
973	1	0	0	0	0	0	0	200	300	0	0	0	0	0	0	0	200	903	0	0	0	0	0	0	0	603	903	0
973	2	0	0	0	0	0	0	200	300	0	0	0	0	0	0	0	200	903	0	0	0	0	0	0	0	603	903	0
973	3	0	0	0	0	0	0	200	300	0	0	0	0	0	0	0	200	903	0	0	0	0	0	0	0	603	903	0
973	4	0	0	0	0	0	0	200	300	0	0	0	0	0	0	0	200	903	0	0	0	0	0	0	0	603	903	0
973	5	0	0	0	0	0	0	200	300	0	0	0	0	0	0	0	200	903	0	0	0	0	0	0	0	603	903	0
973	6	0	0	0	0	0	0	200	300	0	0	0	0	0	0	0	200	903	0	0	0	0	0	0	0	603	903	0
973	7	0	0	0	0	0	0	200	300	0	0	0	0	0	0	0	200	903	0	0	0	0	0	0	0	603	903	0
973	8	0	0	0	0	0	0	200	300	0	0	0	0	0	0	0	200	903	0	0	0	0	0	0	0	603	903	0
973	9	0	0	0	0	0	0	200	300	0	0	0	0	0	0	0	200	903	0	0	0	0	0	0	0	603	903	0
974	0	0	0	0	0	0	0	200	300	0	0	0	0	0	0	0	200	903	0	0	0	0	0	0	0	603	903	0
974	1	0	0	0	0	0	0	200	300	0	0	0	0	0	0	0	200	903	0	0	0	0	0	0	0	603	903	0
974	2	0	0	0	0	0	0	200	300	0	0	0	0	0	0	0	200	903	0	0	0	0	0	0	0	603	903	0
974	3	0	0	0	0	0	0	200	300	0	0	0	0	0	0	0	200	903	0	0	0	0	0	0	0	603	903	0
974	4	0	0	0	0	0	0	200	300	0	0	0	0	0	0	0	200	903	0	0	0	0	0	0	0	603	903	0
974	5	0	0	0	0	0	0	200	300	0	0	0	0	0	0	0	200	903	0	0	0	0	0	0	0	603	903	0
974	6	0	0	0	0	0	0	200	300	0	0	0	0	0	0	0	200	903	0	0	0	0	0	0	0	603	903	0
974	7	0	0	0	0	0	0	200	300	0	0	0	0	0	0	0	200	903	0	0	0	0	0	0	0	603	903	0
974	8	0	0	0	0	0	0	200	300	0	0	0	0	0	0	0	200	903	0	0	0	0	0	0	0	603	903	0
974	9	0	0	0	0	0	0	200	300	0	0	0	0	0	0	0	200	903	0	0	0	0	0	0	0	603	903	0
975	0	0	0	0	0	0	0	200	300	0	0	0	0	0	0	0	200	903	0	0	0	0	0	0	0	603	903	0
975	1	0	0	0	0	0	0	200	300	0	0	0	0	0	0	0	200	903	0	0	0	0	0	0	0	603	903	0
975	2	0	0	0	0	0	0	200	300	0	0	0	0	0	0	0	200	903	0	0	0	0	0	0	0	603	903	0
975	3	0	0	0	0	0	0	200	300	0	0	0	0	0	0	0	200	903	0	0	0	0	0	0	0	603	903	0
975	4	0	0	0	0	0	0	200	300	0	0	0	0	0	0	0	200	903	0	0	0	0	0	0	0	603	903	0
975	5	0	0	0	0	0	0	200	300	0	0	0	0	0	0	0	200	903	0	0	0	0	0	0	0	603	903	0
975	6	0	0	0	0	0	0	200	300	0	0	0	0	0	0	0	200	903	0	0	0	0	0	0	0	603	903	0
975	7	0	0	0	0	0	0	200	300	0	0	0	0	0	0	0	200	903	0	0	0	0	0	0	0	603	903	0
975	8	0	0	0	0	0	0	200	300	0	0	0	0	0	0	0	200	903	0	0	0	0	0	0	0	603	903	0
975	9	0	0	0	0	0	0	200	300	0	0	0	0	0	0	0	200	903	0	0	0	0	0	0	0	603	903	0
976	0	0	0	0	0	0	0	200	300	0	0	0	0	0	0	0	200	903	0	0	0	0	0	0	0	603	903	0
976	1	0	0	0	0	0	0	200	300	0	0	0	0	0	0	0	200	903	0	0	0	0	0	0	0	603	903	0
976	2	0	0	0	0	0	0	200	300	0	0	0	0	0	0	0	200	903	0	0	0	0	0	0	0	603	903	0
976	3	0	0	0	0	0	0	200	300	0	0	0	0	0	0	0	200	903	0	0	0	0	0	0	0	603	903	0
976	4	0	0	0	0	0	0	200	300	0	0	0	0	0	0	0	200	903	0	0	0	0	0	0	0	603	903	0
976	5	0	0	0	0	0	0	200	300	0	0	0	0	0	0	0	200	903	0	0	0	0	0	0	0	603	903	0
976	6	0	0	0	0	0	0	200	300	0	0	0	0	0	0	0	200	903	0	0	0	0	0	0	0	603	903	0
976	7	0	0	0	0	0	0	200	300	0	0	0	0	0	0	0	200	903	0	0	0	0	0	0	0	603	903	0
976	8	0	0	0	0	0	0	200	300	0	0	0	0	0	0	0	200	903	0	0	0	0	0	0	0	603	903	0
976	9	0	0	0	0	0	0	200	300	0	0	0	0	0	0	0	200	903	0	0	0	0	0	0	0	603	903	0
977	0	0	0	0	0	0	0	200	300	0	0	0	0	0	0	0	200	903	0	0	0	0	0	0	0	603	903	0
977	1	0	0	0	0	0	0	200	300	0	0	0	0	0	0	0	200	903	0	0	0	0	0	0	0	603	903	0
977	2	0	0	0	0	0	0	200	300	0	0	0	0	0	0	0	200	903	0	0	0	0	0	0	0	603	903	0
977	3	0	0	0	0	0	0	200	300	0	0	0	0	0	0	0	200	903	0	0	0	0	0	0	0	603	903	0
977	4	0	0	0	0	0	0	200	300	0	0	0	0	0	0	0	200	903	0	0	0	0	0	0	0	603	903	0
977	5	0	0	0	0	0	0	200	300	0	0	0	0	0	0	0	200	903	0	0	0	0	0	0	0	603	903	0
977	6	0	0	0	0	0	0	200	300	0	0	0	0	0	0	0	200	903	0	0	0	0	0	0	0	603	903	0
977	7	0	0	0	0	0	0	200	300	0	0	0	0	0	0	0	200	903	0	0	0	0	0	0	0	603	903	0
977	8	0	0	0	0	0	0	200	300	0	0	0	0	0	0	0	200	903	0	0	0	0	0	0	0	603	903	0
977	9	0	0	0	0	0	0	200	300	0	0	0	0	0	0	0	200	903	0	0	0	0	0	0	0	603	903	0
978	0	0	0	0	0	0	0	200	300	0	0	0	0	0	0	0	200	903	0	0	0	0	0	0	0	603	903	0
978	1	0	0	0	0	0	0	200	300	0	0	0	0	0	0	0	200	903	0	0	0	0	0	0	0	603	903	0
978	2	0	0	0	0	0	0	200	300	0	0	0	0	0	0	0	200	903	0	0	0	0	0	0	0	603	903	0
978	3	0	0	0	0	0	0	200	300	0	0	0	0	0	0	0	200	903	0	0	0	0	0	0	0	603	903	0
978	4	0	0	0	0	0	0	200	300	0	0	0	0	0	0	0	200	903	0	0	0	0	0	0	0	603	903	0
978	5	0	0	0	0	0	0	200	300	0	0	0	0	0	0	0	200	903	0	0	0	0	0	0	0	603	903	0
[truncated: 2,744 more rows]
