# Supplementary material for: The Effects of an Extemporaneous Speech Dual-task on Older Adult Gait Control
Source: Research Square preprint supplement (doi:10.21203/rs.3.rs-7674245/v1), 2025-11-18
Supplement: Supplementary file 23 [file DT2Walk03.xlsx]

## Sheet: Sheet1
Trajectories
		02:LFHD			02:RFHD			02:LBHD			02:RBHD			02:C7			02:T10			02:CLAV			02:STRN			02:RBAK			02:LSHO			02:LUPA			02:LELB			02:LFRM			02:LWRA			02:LWRB			02:LFIN
Frame	Sub Frame	X	Y	Z	X	Y	Z	X	Y	Z	X	Y	Z	X	Y	Z	X	Y	Z	X	Y	Z	X	Y	Z	X	Y	Z	X	Y	Z	X	Y	Z	X	Y	Z	X	Y	Z	X	Y	Z	X	Y	Z	X	Y	Z
		mm	mm	mm	mm	mm	mm	mm	mm	mm	mm	mm	mm	mm	mm	mm	mm	mm	mm	mm	mm	mm	mm	mm	mm	mm	mm	mm	mm	mm	mm	mm	mm	mm	mm	mm	mm	mm	mm	mm	mm	mm	mm	mm	mm	mm	mm	mm	mm
319	0	234.922	2659.04	1576.21	135.587	2655.62	1564.51	240.415	2827.31	1618.83	128.317	2832.54	1608.24	189.215	2895.73	1434.98	206.843	2952.84	1221.47	200.333	2762.47	1368.32	195.167	2702.77	1239.3	110.427	2958.96	1269.27	366.854	2843.57	1392.76	416.409	2863.42	1163.3	412.77	2873.31	1095.04	454.365	2792.96	1007.96	443.092	2757.98	908.563	474.116	2818.34	889.242	510.592	2754.06	821.049
320	0	235.198	2650.25	1575.97	135.795	2646.52	1564.6	240.261	2818.43	1618.86	128.121	2823.34	1608.62	188.252	2887.19	1435.52	205.201	2944.98	1222.14	200.038	2754.02	1368.67	195.174	2694.82	1239.49	108.818	2949.94	1270.1	366.17	2836.04	1393.07	415.785	2857.87	1163.84	412.203	2868.06	1095.64	454.786	2788.46	1008.2	444.073	2753.49	908.694	474.307	2814.42	889.52	511.699	2750.72	821.339
321	0	235.507	2641.43	1575.61	136.051	2637.42	1564.55	240.157	2809.53	1618.78	127.978	2814.14	1608.86	187.399	2878.63	1435.92	203.71	2937.08	1222.67	199.801	2745.55	1368.87	195.212	2686.81	1239.55	107.364	2940.95	1270.77	365.572	2828.42	1393.25	415.229	2852.13	1164.26	411.702	2862.62	1096.13	455.2	2783.81	1008.3	445.009	2748.97	908.655	474.503	2810.43	889.689	512.753	2747.35	821.443
322	0	235.852	2632.58	1575.14	136.353	2628.32	1564.36	240.103	2800.6	1618.57	127.886	2804.92	1608.96	186.658	2870.04	1436.19	202.369	2929.11	1223.07	199.623	2737.06	1368.94	195.279	2678.73	1239.49	106.063	2932	1271.3	365.062	2820.69	1393.32	414.74	2846.2	1164.56	411.264	2856.99	1096.5	455.606	2779.03	1008.25	445.9	2744.43	908.445	474.703	2806.38	889.749	513.753	2743.96	821.361
323	0	236.231	2623.72	1574.55	136.702	2619.21	1564.03	240.1	2791.66	1618.25	127.847	2795.7	1608.93	186.027	2861.43	1436.31	201.179	2921.09	1223.34	199.503	2728.54	1368.87	195.378	2670.6	1239.31	104.918	2923.09	1271.67	364.64	2812.86	1393.26	414.32	2840.09	1164.73	410.892	2851.19	1096.75	456.004	2774.11	1008.06	446.747	2739.85	908.065	474.907	2802.26	889.699	514.7	2740.55	821.093
324	0	236.645	2614.83	1573.83	137.097	2610.1	1563.55	240.148	2782.68	1617.82	127.86	2786.47	1608.76	185.509	2852.79	1436.3	200.139	2913.02	1223.47	199.444	2720	1368.66	195.506	2662.41	1239.01	103.927	2914.21	1271.91	364.305	2804.93	1393.09	413.968	2833.8	1164.78	410.583	2845.19	1096.89	456.394	2769.05	1007.73	447.548	2735.25	907.518	475.116	2798.07	889.542	515.59	2737.11	820.643
325	0	237.094	2605.93	1573	137.539	2600.98	1562.93	240.248	2773.69	1617.26	127.927	2777.23	1608.45	185.102	2844.14	1436.15	199.252	2904.89	1223.46	199.444	2711.44	1368.32	195.666	2654.15	1238.59	103.093	2905.38	1271.99	364.059	2796.9	1392.79	413.685	2827.33	1164.71	410.339	2839.02	1096.91	456.778	2763.84	1007.26	448.303	2730.61	906.809	475.328	2793.81	889.278	516.421	2733.64	820.016
326	0	237.578	2596.99	1572.06	138.028	2591.86	1562.17	240.401	2764.67	1616.6	128.048	2767.98	1608	184.808	2835.45	1435.86	198.519	2896.7	1223.32	199.504	2702.84	1367.83	195.858	2645.83	1238.05	102.415	2896.57	1271.93	363.903	2788.77	1392.37	413.473	2820.67	1164.51	410.159	2832.66	1096.81	457.155	2758.49	1006.65	449.012	2725.92	905.943	475.545	2789.48	888.91	517.19	2730.14	819.217
327	0	238.097	2588.04	1571	138.563	2582.74	1561.27	240.607	2755.62	1615.82	128.225	2758.72	1607.43	184.629	2826.75	1435.44	197.941	2888.45	1223.05	199.626	2694.23	1367.22	196.084	2637.44	1237.4	101.894	2887.8	1271.72	363.837	2780.54	1391.83	413.332	2813.83	1164.19	410.043	2826.13	1096.59	457.528	2752.99	1005.91	449.674	2721.19	904.927	475.767	2785.07	888.438	517.897	2726.6	818.255
328	0	238.651	2579.06	1569.82	139.144	2573.62	1560.23	240.871	2746.56	1614.94	128.461	2749.46	1606.72	184.565	2818.01	1434.88	197.52	2880.13	1222.64	199.812	2685.58	1366.47	196.344	2628.98	1236.63	101.531	2879.05	1271.36	363.863	2772.21	1391.18	413.264	2806.81	1163.74	409.991	2819.41	1096.26	457.899	2747.34	1005.05	450.292	2716.41	903.77	475.992	2780.58	887.865	518.539	2723.01	817.139
329	0	239.242	2570.06	1568.54	139.771	2564.49	1559.07	241.194	2737.47	1613.94	128.759	2740.19	1605.89	184.618	2809.26	1434.19	197.258	2871.75	1222.1	200.064	2676.91	1365.6	196.641	2620.45	1235.77	101.328	2870.32	1270.86	363.984	2763.77	1390.4	413.272	2799.6	1163.17	410.002	2812.51	1095.81	458.27	2741.53	1004.07	450.866	2711.55	902.479	476.221	2775.99	887.192	519.117	2719.36	815.88
330	0	239.871	2561.04	1567.16	140.444	2555.37	1557.78	241.58	2728.35	1612.85	129.12	2730.92	1604.94	184.789	2800.48	1433.37	197.156	2863.3	1221.43	200.383	2668.2	1364.61	196.978	2611.84	1234.8	101.285	2861.6	1270.22	364.202	2755.24	1389.51	413.358	2792.21	1162.47	410.076	2805.43	1095.24	458.645	2735.57	1002.98	451.4	2706.62	901.063	476.455	2771.3	886.42	519.635	2715.63	814.488
331	0	240.538	2551.99	1565.68	141.163	2546.24	1556.37	242.033	2719.22	1611.67	129.551	2721.65	1603.88	185.081	2791.67	1432.42	197.215	2854.76	1220.62	200.773	2659.47	1363.51	197.358	2603.16	1233.74	101.401	2852.9	1269.43	364.519	2746.6	1388.5	413.524	2784.64	1161.65	410.214	2798.18	1094.54	459.028	2729.45	1001.76	451.898	2701.58	899.529	476.695	2766.49	885.548	520.096	2711.82	812.973
332	0	241.245	2542.92	1564.12	141.927	2537.12	1554.86	242.557	2710.06	1610.39	130.054	2712.38	1602.72	185.494	2782.84	1431.36	197.437	2846.14	1219.67	201.237	2650.69	1362.3	197.785	2594.39	1232.59	101.677	2844.19	1268.49	364.939	2737.88	1387.38	413.772	2776.89	1160.71	410.417	2790.75	1093.72	459.423	2723.16	1000.44	452.365	2696.44	897.885	476.943	2761.55	884.575	520.508	2707.9	811.342
333	0	241.994	2533.83	1562.47	142.737	2528	1553.25	243.157	2700.89	1609.04	130.636	2703.11	1601.45	186.031	2773.97	1430.17	197.821	2837.43	1218.59	201.779	2641.87	1360.99	198.264	2585.54	1231.36	102.112	2835.47	1267.42	365.463	2729.05	1386.14	414.104	2768.98	1159.63	410.685	2783.16	1092.78	459.837	2716.7	999.011	452.811	2691.16	896.136	477.201	2756.46	883.5	520.879	2703.84	809.604
334	0	242.787	2524.71	1560.76	143.592	2518.89	1551.55	243.839	2691.69	1607.61	131.301	2693.85	1600.1	186.692	2765.09	1428.88	198.367	2828.61	1217.37	202.402	2633.01	1359.6	198.799	2576.61	1230.07	102.704	2826.73	1266.2	366.095	2720.14	1384.79	414.523	2760.89	1158.43	411.019	2775.39	1091.72	460.275	2710.07	997.47	453.243	2685.73	894.288	477.473	2751.2	882.32	521.22	2699.63	807.765
335	0	243.627	2515.58	1558.99	144.494	2509.78	1549.78	244.609	2682.48	1606.12	132.054	2684.6	1598.68	187.478	2756.17	1427.48	199.073	2819.69	1216.01	203.11	2624.11	1358.14	199.397	2567.59	1228.72	103.45	2817.95	1264.86	366.837	2711.14	1383.34	415.029	2752.65	1157.11	411.419	2767.47	1090.52	460.745	2703.26	995.821	453.671	2680.12	892.347	477.763	2745.76	881.033	521.541	2695.24	805.829
336	0	244.517	2506.42	1557.17	145.442	2500.68	1547.96	245.47	2673.26	1604.58	132.902	2675.36	1597.19	188.389	2747.22	1425.99	199.937	2810.65	1214.52	203.906	2615.15	1356.62	200.063	2558.5	1227.31	104.348	2809.14	1263.38	367.692	2702.05	1381.79	415.624	2744.25	1155.66	411.888	2759.38	1089.21	461.252	2696.27	994.064	454.105	2674.32	890.315	478.076	2740.11	879.637	521.854	2690.63	803.802
337	0	245.459	2497.25	1555.33	146.439	2491.59	1546.11	246.429	2664.02	1603.01	133.848	2666.14	1595.65	189.424	2738.24	1424.41	200.952	2801.49	1212.9	204.795	2606.15	1355.05	200.802	2549.31	1225.88	105.392	2800.27	1261.78	368.659	2692.89	1380.14	416.306	2735.7	1154.1	412.425	2751.14	1087.78	461.804	2689.09	992.202	454.555	2668.31	888.198	478.416	2734.23	878.132	522.171	2685.77	801.687
338	0	246.458	2488.05	1553.48	147.484	2482.5	1544.23	247.49	2654.76	1601.4	134.898	2656.93	1594.09	190.581	2729.23	1422.76	202.115	2792.21	1211.15	205.778	2597.08	1353.45	201.621	2540.04	1224.42	106.578	2791.33	1260.07	369.741	2683.66	1378.41	417.077	2727	1152.43	413.031	2742.74	1086.23	462.407	2681.72	990.238	455.032	2662.05	886.002	478.788	2728.1	876.519	522.503	2680.63	799.49
339	0	247.517	2478.84	1551.63	148.581	2473.42	1542.36	248.657	2645.5	1599.79	136.055	2647.74	1592.51	191.858	2720.19	1421.06	203.416	2782.79	1209.29	206.858	2587.96	1351.84	202.524	2530.69	1222.96	107.899	2782.32	1258.26	370.936	2674.37	1376.62	417.934	2718.18	1150.66	413.707	2734.19	1084.57	463.066	2674.15	988.179	455.543	2655.54	883.735	479.196	2721.71	874.801	522.86	2675.17	797.218
340	0	248.639	2469.61	1549.8	149.73	2464.35	1540.51	249.933	2636.22	1598.19	137.324	2638.56	1590.93	193.251	2711.11	1419.32	204.846	2773.23	1207.33	208.036	2578.78	1350.24	203.516	2521.24	1221.51	109.347	2773.23	1256.36	372.243	2665.01	1374.76	418.876	2709.22	1148.8	414.451	2725.5	1082.83	463.785	2666.38	986.034	456.099	2648.75	881.406	479.645	2715.03	872.984	523.252	2669.38	794.88
341	0	249.827	2460.37	1548.02	150.933	2455.28	1538.7	251.321	2626.93	1596.61	138.705	2629.41	1589.37	194.755	2701.99	1417.56	206.394	2763.54	1205.29	209.313	2569.53	1348.67	204.601	2511.7	1220.1	110.914	2764.04	1254.41	373.659	2655.61	1372.87	419.898	2700.14	1146.86	415.263	2716.66	1081	464.568	2658.41	983.817	456.704	2641.65	879.03	480.136	2708.04	871.077	523.685	2663.2	792.487
342	0	251.084	2451.1	1546.31	152.193	2446.22	1536.96	252.821	2617.62	1595.07	140.2	2620.26	1587.86	196.365	2692.83	1415.79	208.048	2753.72	1203.19	210.688	2560.22	1347.14	205.782	2502.07	1218.74	112.588	2754.75	1252.41	375.181	2646.15	1370.95	420.999	2690.94	1144.88	416.14	2707.68	1079.11	465.417	2650.21	981.543	457.366	2634.25	876.621	480.67	2700.74	869.095	524.164	2656.64	790.053
343	0	252.412	2441.82	1544.67	153.51	2437.15	1535.31	254.434	2608.3	1593.59	141.808	2611.13	1586.41	198.074	2683.63	1414.05	209.793	2743.77	1201.05	212.159	2550.84	1345.68	207.06	2492.35	1217.45	114.36	2745.36	1250.39	376.804	2636.66	1369.04	422.172	2681.63	1142.86	417.08	2698.55	1077.18	466.331	2641.81	979.236	458.087	2626.51	874.202	481.249	2693.1	867.053	524.691	2649.65	787.595
344	0	253.813	2432.51	1543.14	154.886	2428.07	1533.77	256.158	2598.97	1592.19	143.529	2602.01	1585.04	199.874	2674.38	1412.34	211.615	2733.68	1198.9	213.722	2541.39	1344.3	208.436	2482.52	1216.27	116.215	2735.85	1248.38	378.521	2627.13	1367.15	423.412	2672.21	1140.84	418.08	2689.29	1075.23	467.31	2633.17	976.919	458.869	2618.42	871.797	481.872	2685.12	864.972	525.266	2642.23	785.136
345	0	255.287	2423.19	1541.72	156.322	2418.98	1532.36	257.989	2589.61	1590.89	145.358	2592.89	1583.78	201.756	2665.08	1410.7	213.499	2723.47	1196.77	215.372	2531.89	1343.03	209.907	2472.6	1215.2	118.143	2726.23	1246.41	380.324	2617.57	1365.3	424.715	2662.68	1138.84	419.135	2679.88	1073.29	468.351	2624.31	974.623	459.711	2609.99	869.433	482.536	2676.78	862.878	525.889	2634.36	782.7
346	0	256.833	2413.84	1540.44	157.817	2409.87	1531.1	259.924	2580.23	1589.7	147.29	2583.77	1582.64	203.712	2655.74	1409.14	215.429	2713.14	1194.69	217.103	2522.31	1341.88	211.47	2462.58	1214.28	120.129	2716.49	1244.5	382.206	2607.98	1363.52	426.072	2653.06	1136.88	420.242	2670.33	1071.38	469.451	2615.21	972.379	460.61	2601.19	867.144	483.239	2668.08	860.798	526.556	2626.03	780.318
347	0	258.451	2404.46	1539.32	159.372	2400.73	1530.02	261.955	2570.83	1588.64	149.321	2574.64	1581.65	205.731	2646.35	1407.7	217.39	2702.71	1192.69	218.907	2512.68	1340.87	213.118	2452.46	1213.52	122.16	2706.64	1242.68	384.155	2598.37	1361.84	427.477	2643.33	1135	421.396	2660.64	1069.53	470.603	2605.87	970.226	461.561	2592.03	864.964	483.979	2659.01	858.763	527.263	2617.24	778.024
348	0	260.136	2395.05	1538.36	160.985	2391.57	1529.11	264.075	2561.4	1587.73	151.441	2565.5	1580.81	207.804	2636.91	1406.37	219.368	2692.17	1190.8	220.775	2502.98	1340.02	214.844	2442.25	1212.94	124.224	2696.68	1240.98	386.163	2588.73	1360.29	428.923	2633.51	1133.22	422.591	2650.8	1067.77	471.801	2596.28	968.199	462.559	2582.5	862.929	484.753	2649.57	856.808	528.006	2608	775.854
349	0	261.885	2385.61	1537.58	162.653	2382.38	1528.4	266.276	2551.94	1586.97	153.642	2556.34	1580.15	209.92	2627.42	1405.2	221.349	2681.55	1189.07	222.696	2493.23	1339.34	216.637	2431.94	1212.55	126.308	2686.63	1239.43	388.217	2579.07	1358.87	430.403	2623.59	1131.58	423.824	2640.83	1066.12	473.039	2586.44	966.338	463.598	2572.61	861.077	485.558	2639.76	854.965	528.779	2598.28	773.848
350	0	263.692	2376.13	1536.98	164.373	2373.14	1527.91	268.546	2542.45	1586.39	155.913	2547.16	1579.67	212.069	2617.87	1404.2	223.322	2670.85	1187.51	224.659	2483.43	1338.84	218.484	2421.57	1212.37	128.402	2676.48	1238.06	390.306	2569.38	1357.63	431.91	2613.57	1130.1	425.09	2630.71	1064.62	474.307	2576.36	964.679	464.671	2562.35	859.443	486.393	2629.57	853.268	529.576	2588.11	772.045
351	0	265.55	2366.62	1536.59	166.14	2363.87	1527.62	270.874	2532.93	1585.99	158.243	2537.95	1579.4	214.241	2608.28	1403.38	225.277	2660.08	1186.15	226.652	2473.58	1338.53	220.373	2411.12	1212.4	130.496	2666.25	1236.89	392.419	2559.66	1356.56	433.436	2603.45	1128.8	426.386	2620.46	1063.29	475.599	2566.02	963.258	465.771	2551.73	858.062	487.255	2619.02	851.748	530.396	2577.49	770.481
352	0	267.451	2357.07	1536.38	167.946	2354.55	1527.56	273.248	2523.36	1585.78	160.617	2528.7	1579.33	216.427	2598.64	1402.75	227.207	2649.26	1185.02	228.661	2463.69	1338.41	222.287	2400.62	1212.65	132.582	2655.96	1235.94	394.543	2549.9	1355.7	434.977	2593.24	1127.71	427.708	2610.06	1062.15	476.908	2555.44	962.102	466.894	2540.76	856.964	488.145	2608.1	850.434	531.234	2566.41	769.189
353	0	269.383	2347.48	1536.38	169.785	2345.19	1527.72	275.652	2513.76	1585.76	163.023	2519.42	1579.46	218.616	2588.95	1402.33	229.109	2638.41	1184.14	230.672	2453.77	1338.49	224.21	2390.08	1213.1	134.655	2645.62	1235.21	396.668	2540.11	1355.06	436.527	2582.92	1126.84	429.056	2599.53	1061.22	478.226	2544.6	961.237	468.033	2529.45	856.173	489.062	2596.83	849.349	532.091	2554.9	768.199
354	0	271.338	2337.85	1536.57	171.647	2335.77	1528.09	278.074	2504.12	1585.92	165.447	2510.09	1579.8	220.802	2579.22	1402.12	230.979	2627.53	1183.51	232.673	2443.82	1338.75	226.124	2379.51	1213.75	136.71	2635.25	1234.74	398.781	2530.26	1354.64	438.083	2572.51	1126.2	430.427	2588.86	1060.51	479.549	2533.54	960.677	469.184	2517.82	855.706	490.008	2585.22	848.51	532.969	2542.96	767.53
355	0	273.302	2328.18	1536.95	173.522	2326.31	1528.67	280.498	2494.44	1586.28	167.874	2500.72	1580.35	222.974	2569.45	1402.13	232.82	2616.65	1183.16	234.65	2433.84	1339.21	228.013	2368.94	1214.59	138.747	2624.87	1234.51	400.873	2520.36	1354.45	439.643	2561.99	1125.8	431.824	2578.06	1060.03	480.874	2522.24	960.431	470.343	2505.86	855.571	490.984	2573.27	847.927	533.87	2530.61	767.196
356	0	275.264	2318.47	1537.51	175.398	2316.8	1529.44	282.909	2484.71	1586.81	170.288	2491.3	1581.08	225.128	2559.65	1402.34	234.635	2605.78	1183.07	236.589	2423.86	1339.84	229.859	2358.38	1215.59	140.765	2614.5	1234.53	402.934	2510.39	1354.48	441.207	2551.36	1125.65	433.249	2567.13	1059.78	482.198	2510.72	960.495	471.507	2493.61	855.768	491.995	2561	847.605	534.8	2517.85	767.199
357	0	277.21	2308.72	1538.24	177.264	2307.25	1530.39	285.293	2474.95	1587.51	172.675	2481.84	1582	227.256	2549.82	1402.76	236.429	2594.94	1183.26	238.48	2413.87	1340.64	231.644	2347.84	1216.74	142.768	2604.16	1234.8	404.955	2500.36	1354.74	442.775	2540.62	1125.73	434.705	2556.08	1059.76	483.52	2498.99	960.861	472.674	2481.07	856.29	493.045	2548.43	847.542	535.762	2504.7	767.533
358	0	279.126	2298.94	1539.12	179.105	2297.65	1531.51	287.635	2465.15	1588.38	175.02	2472.33	1583.09	229.353	2539.97	1403.39	238.211	2584.14	1183.69	240.31	2403.88	1341.59	233.355	2337.35	1218.02	144.758	2593.89	1235.31	406.929	2490.26	1355.22	444.35	2529.76	1126.05	436.196	2544.9	1059.96	484.841	2487.06	961.508	473.842	2468.26	857.117	494.139	2535.57	847.726	536.761	2491.18	768.18
359	0	280.999	2289.12	1540.13	180.91	2288.01	1532.76	289.919	2455.31	1589.39	177.31	2462.78	1584.33	231.414	2530.1	1404.2	239.99	2573.4	1184.38	242.07	2393.91	1342.67	234.976	2326.93	1219.4	146.742	2583.69	1236.04	408.848	2480.07	1355.91	445.935	2518.79	1126.58	437.73	2533.6	1060.39	486.16	2474.93	962.411	475.009	2455.19	858.226	495.283	2522.43	848.146	537.797	2477.3	769.114
360	0	282.815	2279.27	1541.25	182.664	2278.34	1534.13	292.134	2445.44	1590.53	179.531	2453.19	1585.7	233.436	2520.23	1405.18	241.775	2562.74	1185.28	243.751	2383.96	1343.87	236.496	2316.58	1220.85	148.724	2573.58	1236.98	410.708	2469.81	1356.78	447.536	2507.7	1127.32	439.311	2522.19	1061.01	487.48	2462.63	963.54	476.174	2441.89	859.585	496.483	2509.03	848.782	538.87	2463.09	770.303
361	0	284.561	2269.4	1542.47	184.354	2268.64	1535.59	294.267	2435.53	1591.79	181.672	2443.57	1587.19	235.414	2510.35	1406.32	243.577	2552.17	1186.4	245.346	2374.03	1345.17	237.905	2306.32	1222.34	150.713	2563.6	1238.1	412.503	2459.47	1357.84	449.156	2496.48	1128.25	440.947	2510.66	1061.82	488.8	2450.15	964.862	477.334	2428.38	861.162	497.748	2495.4	849.615	539.977	2448.57	771.71
362	0	286.225	2259.5	1543.75	185.968	2258.92	1537.11	296.306	2425.59	1593.14	183.72	2433.9	1588.77	237.345	2500.49	1407.61	245.404	2541.72	1187.69	246.851	2364.15	1346.54	239.196	2296.17	1223.87	152.713	2553.75	1239.39	414.23	2449.06	1359.06	450.801	2485.13	1129.35	442.644	2499.01	1062.8	490.119	2437.5	966.344	478.484	2414.68	862.921	499.083	2481.54	850.625	541.114	2433.76	773.299
363	0	287.795	2249.59	1545.09	187.494	2249.18	1538.66	298.24	2415.63	1594.58	185.666	2424.21	1590.42	239.227	2490.65	1409.02	247.262	2531.4	1189.14	248.262	2354.31	1347.98	240.365	2286.13	1225.39	154.728	2544.04	1240.82	415.885	2438.58	1360.42	452.475	2473.65	1130.59	444.406	2487.25	1063.92	491.436	2424.68	967.956	479.62	2400.8	864.827	500.495	2467.48	851.793	542.274	2418.69	775.035
364	0	289.262	2239.66	1546.45	188.92	2239.43	1540.23	300.062	2405.63	1596.08	187.501	2414.49	1592.12	241.057	2480.83	1410.54	249.158	2521.22	1190.72	249.576	2344.53	1349.46	241.411	2276.23	1226.9	156.763	2534.5	1242.36	417.467	2428.05	1361.9	454.181	2462.04	1131.97	446.237	2475.38	1065.18	492.746	2411.7	969.673	480.736	2386.76	866.851	501.988	2453.22	853.102	543.447	2403.37	776.889
365	0	290.615	2229.72	1547.81	190.238	2229.67	1541.77	301.763	2395.62	1597.63	189.218	2404.75	1593.85	242.832	2471.05	1412.14	251.093	2511.19	1192.41	250.796	2334.81	1350.96	242.338	2266.47	1228.38	158.817	2525.11	1244	418.975	2417.48	1363.49	455.922	2450.31	1133.46	448.14	2463.4	1066.56	494.043	2398.55	971.475	481.826	2372.6	868.964	503.566	2438.79	854.538	544.623	2387.84	778.84
366	0	291.848	2219.77	1549.17	191.438	2219.92	1543.28	303.339	2385.58	1599.2	190.811	2395	1595.59	244.551	2461.31	1413.81	253.066	2501.34	1194.18	251.921	2325.16	1352.48	243.151	2256.85	1229.81	160.889	2515.9	1245.72	420.408	2406.89	1365.17	457.698	2438.45	1135.04	450.113	2451.31	1068.03	495.319	2385.23	973.348	482.882	2358.33	871.147	505.227	2424.21	856.091	545.791	2372.11	780.873
367	0	292.955	2209.83	1550.49	192.515	2210.18	1544.73	304.783	2375.54	1600.8	192.276	2385.23	1597.32	246.212	2451.63	1415.52	255.073	2491.65	1196.02	252.956	2315.58	1353.98	243.859	2247.38	1231.19	162.976	2506.84	1247.48	421.766	2396.29	1366.91	459.508	2426.48	1136.7	452.154	2439.13	1069.58	496.565	2371.76	975.283	483.896	2343.98	873.383	506.969	2409.49	857.751	546.938	2356.22	782.981
368	0	293.93	2199.89	1551.77	193.464	2200.45	1546.1	306.094	2365.48	1602.39	193.61	2375.46	1599.02	247.811	2442	1417.27	257.107	2482.14	1197.89	253.904	2306.08	1355.46	244.473	2238.05	1232.51	165.073	2497.95	1249.27	423.05	2385.7	1368.71	461.348	2414.4	1138.42	454.258	2426.85	1071.2	497.771	2358.14	977.277	484.859	2329.56	875.662	508.784	2394.63	859.514	548.052	2340.18	785.161
369	0	294.773	2189.97	1552.98	194.283	2190.76	1547.37	307.27	2355.42	1603.97	194.812	2365.7	1600.67	249.349	2432.43	1419.03	259.161	2472.82	1199.79	254.772	2296.67	1356.91	245.006	2228.87	1233.77	167.173	2489.22	1251.08	424.263	2375.13	1370.55	463.213	2402.24	1140.19	456.416	2414.49	1072.87	498.926	2344.38	979.331	485.764	2315.1	877.979	510.663	2379.67	861.372	549.122	2324.02	787.419
370	0	295.48	2180.06	1554.13	194.969	2181.09	1548.54	308.311	2345.37	1605.53	195.881	2355.94	1602.26	250.822	2422.93	1420.78	261.225	2463.66	1201.69	255.566	2287.33	1358.31	245.472	2219.83	1234.95	169.266	2480.62	1252.87	425.405	2364.62	1372.4	465.095	2390	1141.99	458.619	2402.06	1074.57	500.024	2330.49	981.444	486.605	2300.62	880.332	512.592	2364.61	863.321	550.139	2307.75	789.758
371	0	296.053	2170.18	1555.19	195.524	2171.47	1549.59	309.218	2335.32	1607.04	196.819	2346.21	1603.77	252.23	2413.49	1422.5	263.287	2454.68	1203.58	256.291	2278.08	1359.65	245.886	2210.93	1236.06	171.343	2472.16	1254.63	426.48	2354.16	1374.26	466.987	2377.72	1143.82	460.855	2389.58	1076.3	501.056	2316.51	983.617	487.374	2286.13	882.72	514.556	2349.47	865.353	551.093	2291.4	792.187
372	0	296.494	2160.33	1556.17	195.951	2161.89	1550.51	309.995	2325.29	1608.49	197.63	2336.49	1605.19	253.572	2404.13	1424.19	265.338	2445.85	1205.43	256.956	2268.92	1360.92	246.262	2202.14	1237.09	173.395	2463.81	1256.36	427.489	2343.79	1376.1	468.878	2365.41	1145.64	463.11	2377.06	1078.03	502.02	2302.45	985.849	488.07	2271.66	885.142	516.535	2334.26	867.46	551.976	2274.98	794.709
373	0	296.807	2150.51	1557.06	196.253	2152.36	1551.31	310.644	2315.29	1609.89	198.316	2326.82	1606.5	254.847	2394.84	1425.82	267.366	2437.18	1207.23	257.566	2259.83	1362.11	246.614	2193.47	1238.04	175.411	2455.57	1258.02	428.436	2333.51	1377.92	470.759	2353.11	1147.45	465.371	2364.53	1079.76	502.912	2288.34	988.134	488.689	2257.22	887.596	518.509	2319.01	869.629	552.782	2258.5	797.326
374	0	296.995	2140.74	1557.85	196.435	2142.88	1551.97	311.17	2305.32	1611.2	198.883	2317.17	1607.69	256.055	2385.62	1427.38	269.36	2428.64	1208.96	258.129	2250.82	1363.22	246.953	2184.91	1238.9	177.38	2447.42	1259.61	429.323	2323.33	1379.69	472.62	2340.83	1149.24	467.622	2352	1081.46	503.733	2274.22	990.462	489.232	2242.82	890.077	520.454	2303.72	871.847	553.506	2241.98	800.036
375	0	297.065	2131.01	1558.55	196.505	2133.47	1552.49	311.581	2295.39	1612.42	199.336	2307.58	1608.75	257.194	2376.47	1428.85	271.31	2420.21	1210.62	258.651	2241.89	1364.23	247.29	2176.43	1239.67	179.294	2439.34	1261.12	430.153	2313.25	1381.4	474.45	2328.61	1150.99	469.85	2339.49	1083.12	504.486	2260.13	992.82	489.697	2228.46	892.579	522.347	2288.43	874.095	554.141	2225.44	802.83
376	0	297.025	2121.33	1559.16	196.47	2124.11	1552.89	311.882	2285.51	1613.54	199.684	2298.03	1609.67	258.265	2367.38	1430.23	273.204	2411.89	1212.19	259.136	2233.03	1365.13	247.633	2168.04	1240.34	181.141	2431.31	1262.53	430.928	2303.29	1383.03	476.24	2316.46	1152.68	472.041	2327.04	1084.73	505.174	2246.1	995.187	490.084	2214.17	895.089	524.163	2273.14	876.352	554.683	2208.9	805.694
377	0	296.882	2111.7	1559.66	196.339	2114.82	1553.15	312.082	2275.68	1614.56	199.932	2288.55	1610.45	259.267	2358.36	1431.5	275.034	2403.66	1213.65	259.589	2224.24	1365.93	247.987	2159.73	1240.9	182.914	2423.34	1263.83	431.649	2293.45	1384.56	477.98	2304.42	1154.29	474.181	2314.65	1086.26	505.801	2232.16	997.542	490.394	2199.95	897.595	525.88	2257.87	878.594	555.127	2192.37	808.61
378	0	296.647	2102.13	1560.07	196.123	2105.59	1553.29	312.188	2265.91	1615.45	200.09	2279.12	1611.07	260.198	2349.41	1432.65	276.789	2395.49	1215	260.014	2215.51	1366.61	248.355	2151.49	1241.34	184.602	2415.39	1265.02	432.318	2283.73	1385.98	479.663	2292.5	1155.82	476.259	2302.35	1087.71	506.37	2218.33	999.861	490.625	2185.79	900.08	527.477	2242.65	880.798	555.468	2175.87	811.553
379	0	296.328	2092.62	1560.39	195.831	2096.42	1553.3	312.209	2256.21	1616.22	200.164	2269.76	1611.53	261.06	2340.51	1433.68	278.458	2387.39	1216.22	260.412	2206.83	1367.16	248.738	2143.31	1241.67	186.198	2407.47	1266.09	432.934	2274.12	1387.28	481.281	2280.73	1157.24	478.264	2290.15	1089.05	506.883	2204.65	1002.12	490.777	2171.72	902.527	528.935	2227.5	882.939	555.703	2159.43	814.497
380	0	295.937	2083.17	1560.62	195.473	2087.3	1553.2	312.154	2246.58	1616.86	200.165	2260.47	1611.83	261.849	2331.66	1434.57	280.033	2379.33	1217.3	260.786	2198.21	1367.59	249.135	2135.18	1241.86	187.694	2399.57	1267.02	433.498	2264.63	1388.44	482.827	2269.1	1158.55	480.188	2278.07	1090.27	507.341	2191.13	1004.28	490.846	2157.72	904.917	530.238	2212.44	884.994	555.827	2143.09	817.413
381	0	295.484	2073.78	1560.75	195.061	2078.25	1552.99	312.03	2237.02	1617.35	200.1	2251.25	1611.97	262.566	2322.87	1435.32	281.502	2371.31	1218.24	261.135	2189.63	1367.89	249.543	2127.1	1241.92	189.082	2391.66	1267.83	434.008	2255.26	1389.45	484.297	2257.64	1159.73	482.023	2266.12	1091.37	507.746	2177.78	1006.35	490.832	2143.81	907.235	531.377	2197.48	886.944	555.841	2126.85	820.273
382	0	294.98	2064.45	1560.8	194.605	2069.24	1552.68	311.848	2227.54	1617.71	199.976	2242.09	1611.94	263.209	2314.12	1435.93	282.858	2363.31	1219.03	261.459	2181.09	1368.05	249.957	2119.06	1241.85	190.354	2383.75	1268.49	434.462	2246	1390.31	485.684	2246.35	1160.77	483.763	2254.31	1092.33	508.095	2164.61	1008.28	490.738	2129.99	909.464	532.347	2182.64	888.772	555.746	2110.76	823.049
383	0	294.434	2055.18	1560.75	194.114	2060.29	1552.27	311.614	2218.14	1617.91	199.802	2233	1611.76	263.776	2305.41	1436.4	284.091	2355.32	1219.67	261.757	2172.58	1368.09	250.371	2111.06	1241.65	191.506	2375.83	1269.01	434.859	2236.85	1390.99	486.986	2235.22	1161.68	485.404	2242.64	1093.15	508.389	2151.62	1010.08	490.567	2116.26	911.593	533.149	2167.93	890.466	555.547	2094.84	825.716
384	0	293.857	2045.97	1560.62	193.598	2051.37	1551.76	311.335	2208.82	1617.97	199.584	2223.98	1611.42	264.266	2296.74	1436.72	285.193	2347.34	1220.14	262.025	2164.11	1367.99	250.776	2103.07	1241.31	192.53	2367.9	1269.4	435.195	2227.81	1391.51	488.199	2224.27	1162.44	486.943	2231.11	1093.83	508.629	2138.79	1011.73	490.328	2102.62	913.614	533.79	2153.38	892.019	555.256	2079.12	828.252
385	0	293.257	2036.82	1560.41	193.065	2042.5	1551.18	311.018	2199.58	1617.89	199.327	2215.03	1610.94	264.677	2288.1	1436.89	286.156	2339.37	1220.45	262.26	2155.67	1367.76	251.164	2095.1	1240.85	193.422	2359.94	1269.64	435.468	2218.87	1391.86	489.323	2213.48	1163.06	488.378	2219.71	1094.35	508.818	2126.12	1013.24	490.038	2089.07	915.522	534.286	2138.97	893.43	554.888	2063.62	830.641
386	0	292.642	2027.72	1560.11	192.52	2033.66	1550.52	310.668	2190.42	1617.65	199.036	2206.13	1610.31	265.007	2279.5	1436.92	286.974	2331.39	1220.59	262.459	2147.26	1367.41	251.527	2087.14	1240.27	194.178	2351.96	1269.74	435.673	2210.03	1392.04	490.354	2202.86	1163.53	489.71	2208.46	1094.74	508.964	2113.6	1014.62	489.72	2075.62	917.32	534.657	2124.73	894.705	554.468	2048.37	832.871
387	0	292.017	2018.67	1559.73	191.97	2024.85	1549.78	310.29	2181.33	1617.28	198.714	2197.3	1609.55	265.255	2270.92	1436.81	287.643	2323.4	1220.58	262.617	2138.86	1366.93	251.855	2079.18	1239.57	194.796	2343.94	1269.71	435.809	2201.29	1392.05	491.295	2192.39	1163.87	490.938	2197.33	1094.98	509.081	2101.22	1015.87	489.406	2062.26	919.017	534.932	2110.64	895.853	554.026	2033.38	834.938
388	0	291.386	2009.68	1559.27	191.416	2016.07	1548.99	309.885	2172.32	1616.77	198.364	2188.51	1608.66	265.418	2262.36	1436.56	288.159	2315.4	1220.4	262.729	2130.48	1366.33	252.139	2071.21	1238.78	195.274	2335.9	1269.54	435.871	2192.65	1391.89	492.144	2182.06	1164.08	492.066	2186.32	1095.1	509.19	2088.94	1017.01	489.137	2048.98	920.627	535.145	2096.71	896.89	553.603	2018.65	836.847
389	0	290.753	2000.73	1558.74	190.86	2007.31	1548.13	309.456	2163.38	1616.13	197.987	2179.78	1607.66	265.497	2253.83	1436.18	288.52	2307.39	1220.07	262.79	2122.12	1365.63	252.371	2063.22	1237.89	195.612	2327.81	1269.24	435.856	2184.08	1391.58	492.905	2171.87	1164.17	493.098	2175.42	1095.09	509.322	2076.78	1018.07	488.967	2035.75	922.176	535.338	2082.93	897.837	553.245	2004.2	838.61
390	0	290.117	1991.84	1558.14	190.301	1998.58	1547.23	309.004	2154.51	1615.36	197.583	2171.1	1606.56	265.49	2245.31	1435.68	288.725	2299.35	1219.59	262.796	2113.77	1364.82	252.542	2055.21	1236.93	195.813	2319.69	1268.81	435.762	2175.6	1391.13	493.579	2161.81	1164.14	494.04	2164.61	1094.98	509.514	2064.7	1019.07	488.955	2022.58	923.696	535.554	2069.27	898.72	553.005	1990	840.253
391	0	289.476	1982.98	1557.47	189.736	1989.86	1546.28	308.526	2145.71	1614.48	197.15	2162.46	1605.36	265.397	2236.81	1435.05	288.777	2291.29	1218.96	262.74	2105.42	1363.91	252.644	2047.17	1235.89	195.879	2311.51	1268.25	435.586	2167.18	1390.53	494.173	2151.87	1164.02	494.901	2153.88	1094.77	509.81	2052.71	1020.05	489.168	2009.42	925.225	535.844	2055.74	899.571	552.939	1976.03	841.812
392	0	288.827	1974.17	1556.73	189.161	1981.16	1545.29	308.02	2136.96	1613.49	196.686	2153.86	1604.07	265.217	2228.33	1434.31	288.68	2283.2	1218.2	262.618	2097.08	1362.92	252.67	2039.1	1234.8	195.815	2303.3	1267.57	435.326	2158.83	1389.82	494.691	2142.04	1163.82	495.69	2143.22	1094.49	510.264	2040.8	1021.04	489.679	1996.26	926.812	536.259	2042.29	900.424	553.11	1962.26	843.334
393	0	288.164	1965.41	1555.94	188.569	1972.49	1544.27	307.485	2128.27	1612.4	196.188	2145.31	1602.72	264.951	2219.85	1433.46	288.439	2275.06	1217.31	262.424	2088.74	1361.85	252.614	2030.99	1233.66	195.629	2295.02	1266.77	434.982	2150.54	1388.99	495.141	2132.31	1163.54	496.421	2132.62	1094.15	510.931	2028.95	1022.07	490.56	1983.07	928.508	536.852	2028.91	901.317	553.579	1948.63	844.876
394	0	287.481	1956.68	1555.1	187.953	1963.83	1543.23	306.915	2119.64	1611.22	195.652	2136.78	1601.3	264.6	2211.38	1432.51	288.062	2266.87	1216.3	262.155	2080.39	1360.71	252.47	2022.84	1232.48	195.327	2286.7	1265.86	434.553	2142.28	1388.06	495.532	2122.67	1163.2	497.108	2122.06	1093.76	511.866	2017.18	1023.18	491.88	1969.82	930.37	537.674	2015.57	902.292	554.406	1935.11	846.504
395	0	286.77	1947.98	1554.2	187.303	1955.19	1542.16	306.306	2111.05	1609.97	195.073	2128.3	1599.83	264.166	2202.91	1431.46	287.56	2258.62	1215.18	261.805	2072.04	1359.51	252.233	2014.63	1231.28	194.92	2278.32	1264.84	434.038	2134.05	1387.05	495.875	2113.12	1162.82	497.768	2111.53	1093.35	513.124	2005.48	1024.41	493.701	1956.49	932.455	538.774	2002.23	903.391	555.651	1921.62	848.289
396	0	286.02	1939.32	1553.27	186.609	1946.57	1541.08	305.652	2102.5	1608.65	194.446	2119.84	1598.32	263.65	2194.44	1430.33	286.942	2250.31	1213.95	261.371	2063.67	1358.26	251.897	2006.37	1230.05	194.418	2269.87	1263.7	433.44	2125.84	1385.96	496.181	2103.63	1162.41	498.42	2101.02	1092.94	514.75	1993.86	1025.8	496.074	1943.06	934.821	540.195	1988.87	904.657	557.368	1908.11	850.307
397	0	285.223	1930.7	1552.3	185.863	1937.97	1539.98	304.947	2094	1607.27	193.765	2111.41	1596.78	263.055	2185.96	1429.11	286.223	2241.92	1212.62	260.849	2055.28	1356.97	251.46	1998.04	1228.81	193.833	2261.37	1262.46	432.758	2117.63	1384.82	496.462	2094.21	1161.99	499.082	2090.51	1092.54	516.78	1982.3	1027.36	499.037	1929.52	937.523	541.973	1975.47	906.132	559.604	1894.52	852.63
398	0	284.369	1922.1	1551.3	185.053	1929.4	1538.88	304.185	2085.52	1605.85	193.026	2103.01	1595.21	262.384	2177.48	1427.83	285.415	2233.44	1211.2	260.237	2046.87	1355.65	250.918	1989.65	1227.57	193.175	2252.8	1261.11	431.996	2109.41	1383.64	496.733	2084.84	1161.56	499.775	2080	1092.18	519.237	1970.81	1029.14	502.611	1915.86	940.608	544.138	1961.99	907.858	562.399	1880.82	855.331
399	0	283.448	1913.53	1550.28	184.17	1920.85	1537.76	303.361	2077.08	1604.4	192.222	2094.63	1593.63	261.638	2168.98	1426.48	284.534	2224.87	1209.69	259.532	2038.43	1354.31	250.269	1981.18	1226.34	192.458	2244.16	1259.67	431.154	2101.16	1382.43	497.005	2075.5	1161.15	500.514	2069.47	1091.86	522.128	1959.4	1031.16	506.799	1902.09	944.12	546.709	1948.42	909.872	565.784	1866.97	858.477
400	0	282.45	1904.98	1549.24	183.204	1912.32	1536.65	302.468	2068.65	1602.93	191.348	2086.28	1592.05	260.822	2160.47	1425.08	283.594	2216.19	1208.11	258.734	2029.95	1352.97	249.511	1972.63	1225.11	191.692	2235.46	1258.13	430.237	2092.87	1381.2	497.291	2066.19	1160.76	501.318	2058.91	1091.62	525.445	1948.06	1033.43	511.589	1888.23	948.09	549.693	1934.74	912.21	569.778	1852.95	862.132
401	0	281.367	1896.45	1548.2	182.149	1903.81	1535.54	301.501	2060.24	1601.45	190.401	2077.94	1590.47	259.938	2151.94	1423.63	282.61	2207.39	1206.45	257.842	2021.43	1351.63	248.646	1964	1223.9	190.887	2226.68	1256.5	429.246	2084.54	1379.98	497.6	2056.88	1160.41	502.198	2048.32	1091.46	529.164	1936.78	1035.97	516.949	1874.3	952.543	553.089	1920.95	914.901	574.386	1838.75	866.348
402	0	280.193	1887.94	1547.15	180.998	1895.33	1534.43	300.457	2051.84	1599.99	189.375	2069.62	1588.91	258.989	2143.39	1422.15	281.597	2198.47	1204.73	256.857	2012.86	1350.31	247.673	1955.28	1222.72	190.054	2217.83	1254.78	428.185	2076.13	1378.76	497.941	2047.56	1160.12	503.165	2037.68	1091.4	533.248	1925.58	1038.79	522.836	1860.35	957.491	556.884	1907.04	917.971	579.599	1824.4	871.168
403	0	278.922	1879.43	1546.11	179.747	1886.87	1533.34	299.331	2043.45	1598.54	188.269	2061.31	1587.39	257.979	2134.8	1420.65	280.566	2189.43	1202.96	255.78	2004.25	1349.01	246.595	1946.47	1221.57	189.198	2208.91	1252.99	427.058	2067.66	1377.58	498.32	2038.22	1159.9	504.222	2026.99	1091.46	537.651	1914.45	1041.91	529.189	1846.41	962.936	561.053	1893.03	921.438	585.394	1809.91	876.621
404	0	277.551	1870.93	1545.09	178.393	1878.42	1532.26	298.121	2035.05	1597.14	187.079	2053	1585.9	256.909	2126.19	1419.14	279.529	2180.25	1201.14	254.614	1995.58	1347.75	245.416	1937.55	1220.47	188.325	2199.9	1251.14	425.867	2059.1	1376.44	498.738	2028.84	1159.76	505.371	2016.25	1091.64	542.315	1903.39	1045.3	535.941	1832.54	968.867	565.561	1878.92	925.312	591.732	1795.34	882.723
405	0	276.077	1862.43	1544.11	176.935	1869.99	1531.21	296.826	2026.64	1595.78	185.805	2044.69	1584.46	255.782	2117.54	1417.63	278.493	2170.94	1199.29	253.362	1986.84	1346.55	244.141	1928.54	1219.43	187.438	2190.82	1249.23	424.616	2050.46	1375.35	499.195	2019.39	1159.72	506.607	2005.45	1091.96	547.179	1892.42	1048.97	543.017	1818.79	975.265	570.365	1864.75	929.597	598.56	1780.74	889.472
406	0	274.503	1853.92	1543.16	175.376	1861.57	1530.19	295.446	2018.22	1594.49	184.448	2036.37	1583.09	254.601	2108.85	1416.13	277.463	2161.49	1197.43	252.029	1978.05	1345.41	242.776	1919.42	1218.46	186.538	2181.65	1247.29	423.307	2041.73	1374.33	499.69	2009.87	1159.8	507.92	1994.61	1092.43	552.177	1881.53	1052.9	550.335	1805.22	982.099	575.41	1850.53	934.287	605.812	1766.17	896.846
407	0	272.831	1845.4	1542.26	173.719	1853.15	1529.22	293.983	2009.78	1593.29	183.009	2028.04	1581.8	253.366	2100.12	1414.68	276.442	2151.92	1195.57	250.622	1969.18	1344.35	241.331	1910.2	1217.56	185.62	2172.39	1245.33	421.945	2032.91	1373.41	500.214	2000.27	1159.99	509.297	1983.71	1093.05	557.244	1870.74	1057.06	557.815	1791.88	989.33	580.636	1836.3	939.368	613.411	1751.71	904.811
408	0	271.067	1836.86	1541.43	171.971	1844.73	1528.3	292.438	2001.31	1592.18	181.49	2019.69	1580.6	252.08	2091.34	1413.27	275.428	2142.22	1193.73	249.147	1960.25	1343.38	239.814	1900.87	1216.76	184.683	2163.04	1243.37	420.531	2024	1372.58	500.761	1990.58	1160.33	510.723	1972.79	1093.83	562.314	1860.07	1061.44	565.373	1778.81	996.91	585.977	1822.1	944.819	621.272	1737.43	913.314
409	0	269.219	1828.29	1540.67	170.139	1836.3	1527.46	290.818	1992.81	1591.18	179.897	2011.32	1579.5	250.743	2082.51	1411.93	274.418	2132.4	1191.94	247.613	1951.24	1342.52	238.237	1891.44	1216.07	183.718	2153.6	1241.44	419.069	2015.01	1371.86	501.319	1980.79	1160.8	512.177	1961.84	1094.77	567.325	1849.52	1066	572.93	1766.07	1004.79	591.365	1807.96	950.609	629.304	1723.39	922.29
410	0	267.295	1819.7	1540.01	168.235	1827.85	1526.7	289.127	1984.28	1590.3	178.233	2002.92	1578.52	249.357	2073.64	1410.68	273.406	2122.47	1190.21	246.026	1942.16	1341.77	236.612	1881.91	1215.49	182.718	2144.07	1239.56	417.563	2005.93	1371.27	501.877	1970.92	1161.44	513.639	1950.88	1095.89	572.218	1839.1	1070.7	580.407	1753.69	1012.9	596.728	1793.93	956.703	637.414	1709.67	931.666
411	0	265.309	1811.08	1539.46	166.269	1819.38	1526.04	287.373	1975.71	1589.56	176.508	1994.48	1577.67	247.924	2064.71	1409.53	272.384	2112.45	1188.58	244.397	1933.01	1341.14	234.951	1872.29	1215.04	181.675	2134.43	1237.75	416.014	1996.78	1370.82	502.421	1960.96	1162.24	515.089	1939.93	1097.17	576.941	1828.84	1075.52	587.731	1741.7	1021.18	601.998	1780.04	963.06	645.506	1696.32	941.359
412	0	263.272	1802.41	1539.04	164.254	1810.87	1525.51	285.563	1967.1	1588.97	174.726	1986	1576.96	246.444	2055.73	1408.5	271.344	2102.34	1187.07	242.736	1923.79	1340.66	233.269	1862.57	1214.72	180.579	2124.71	1236.05	414.427	1987.56	1370.52	502.937	1950.94	1163.2	516.506	1929.02	1098.63	581.444	1818.74	1080.43	594.833	1730.13	1029.58	607.112	1766.35	969.634	653.487	1683.41	951.281
413	0	261.199	1793.71	1538.75	162.205	1802.32	1525.11	283.708	1958.46	1588.53	172.899	1977.47	1576.4	244.919	2046.7	1407.61	270.276	2092.17	1185.71	241.051	1914.5	1340.32	231.579	1852.77	1214.56	179.421	2114.89	1234.48	412.805	1978.28	1370.38	503.414	1940.87	1164.35	517.87	1918.17	1100.26	585.687	1808.82	1085.38	601.648	1718.98	1038.02	612.011	1752.88	976.375	661.266	1670.96	961.34
414	0	259.105	1784.96	1538.62	160.136	1793.73	1524.87	281.817	1949.77	1588.26	171.034	1968.89	1576	243.351	2037.62	1406.87	269.173	2081.96	1184.54	239.354	1905.15	1340.13	229.895	1842.9	1214.55	178.194	2104.99	1233.07	411.152	1968.96	1370.41	503.838	1930.77	1165.67	519.164	1907.41	1102.05	589.633	1799.09	1090.35	608.118	1708.26	1046.44	616.646	1739.68	983.23	668.759	1659.02	971.443
415	0	257.006	1776.16	1538.65	158.063	1785.08	1524.79	279.9	1941.03	1588.16	169.142	1960.25	1575.77	241.742	2028.48	1406.3	268.024	2071.72	1183.57	237.653	1895.74	1340.1	228.229	1832.96	1214.7	176.89	2095.01	1231.86	409.47	1959.6	1370.62	504.199	1920.68	1167.17	520.372	1896.77	1104.02	593.255	1789.55	1095.31	614.19	1697.96	1054.76	620.98	1726.8	990.143	675.887	1647.61	981.494
416	0	254.917	1767.32	1538.85	156.002	1776.37	1524.89	277.969	1932.26	1588.23	167.233	1951.56	1575.7	240.094	2019.29	1405.9	266.825	2061.47	1182.82	235.957	1886.29	1340.23	226.594	1822.98	1215.01	175.505	2084.97	1230.87	407.765	1950.21	1371	504.488	1910.61	1168.84	521.481	1886.26	1106.13	596.532	1780.21	1100.23	619.821	1688.08	1062.94	624.986	1714.27	997.057	682.583	1636.72	991.4
417	0	252.854	1758.44	1539.24	153.966	1767.6	1525.18	276.033	1923.46	1588.47	165.317	1942.82	1575.81	238.411	2010.06	1405.69	265.568	2051.25	1182.33	234.277	1876.79	1340.52	225.001	1812.97	1215.48	174.035	2074.88	1230.11	406.039	1940.81	1371.57	504.697	1900.6	1170.68	522.482	1875.93	1108.4	599.452	1771.06	1105.1	624.974	1678.58	1070.89	628.648	1702.13	1003.91	688.79	1626.35	1001.07
418	0	250.831	1749.51	1539.8	151.971	1758.76	1525.67	274.105	1914.62	1588.88	163.405	1934.02	1576.09	236.695	2000.78	1405.67	264.25	2041.07	1182.11	232.618	1867.26	1340.98	223.459	1802.94	1216.1	172.478	2064.74	1229.61	404.299	1931.41	1372.32	504.824	1890.69	1172.69	523.367	1865.79	1110.8	602.01	1762.12	1109.89	629.621	1669.45	1078.57	631.962	1690.41	1010.65	694.464	1616.5	1010.41
419	0	248.864	1740.54	1540.56	150.03	1749.86	1526.35	272.194	1905.75	1589.45	161.507	1925.16	1576.53	234.949	1991.47	1405.85	262.866	2030.95	1182.15	230.99	1857.71	1341.58	221.978	1792.91	1216.88	170.835	2054.59	1229.38	402.547	1922.03	1373.24	504.865	1880.89	1174.84	524.134	1855.87	1113.31	604.208	1753.37	1114.58	633.746	1660.65	1085.92	634.934	1679.15	1017.21	699.578	1607.12	1019.35
420	0	246.964	1731.54	1541.49	148.157	1740.9	1527.23	270.311	1896.86	1590.17	159.632	1916.26	1577.14	233.179	1982.14	1406.22	261.414	2020.93	1182.47	229.398	1848.15	1342.33	220.565	1782.89	1217.8	169.107	2044.43	1229.42	400.79	1912.68	1374.31	504.821	1871.24	1177.12	524.78	1846.2	1115.93	606.056	1744.81	1119.15	637.34	1652.14	1092.88	637.576	1668.36	1023.54	704.117	1598.19	1027.81
421	0	245.145	1722.52	1542.59	146.363	1731.88	1528.29	268.464	1887.95	1591.04	157.789	1907.31	1577.9	231.387	1972.79	1406.78	259.893	2011.01	1183.06	227.848	1838.6	1343.22	219.224	1772.91	1218.85	167.298	2034.28	1229.73	399.032	1903.38	1375.54	504.695	1861.76	1179.51	525.306	1836.78	1118.62	607.567	1736.42	1123.57	640.404	1643.89	1099.41	639.909	1658.08	1029.58	708.083	1589.66	1035.71
422	0	243.417	1713.47	1543.84	144.658	1722.81	1529.52	266.661	1879.03	1592.05	155.986	1898.32	1578.8	229.578	1963.43	1407.51	258.301	2001.21	1183.9	226.342	1829.06	1344.24	217.961	1762.98	1220.01	165.41	2024.17	1230.3	397.28	1894.15	1376.89	504.489	1852.47	1181.99	525.712	1827.65	1121.35	608.759	1728.19	1127.83	642.948	1635.86	1105.45	641.956	1648.3	1035.28	711.489	1581.49	1043.02
423	0	241.79	1704.41	1545.24	143.052	1713.69	1530.91	264.91	1870.11	1593.17	154.231	1889.3	1579.83	227.756	1954.07	1408.42	256.635	1991.55	1184.97	224.885	1819.54	1345.37	216.777	1753.12	1221.28	163.451	2014.1	1231.12	395.537	1884.99	1378.35	504.206	1843.41	1184.53	526	1818.8	1124.11	609.654	1720.11	1131.91	644.988	1628.01	1110.98	643.742	1639.05	1040.58	714.358	1573.64	1049.67
424	0	240.27	1695.36	1546.76	141.552	1704.53	1532.43	263.218	1861.19	1594.39	152.529	1880.25	1580.99	225.924	1944.72	1409.47	254.896	1982.03	1186.25	223.477	1810.07	1346.6	215.673	1743.35	1222.63	161.424	2004.11	1232.17	393.811	1875.94	1379.9	503.85	1834.57	1187.1	526.172	1810.26	1126.86	610.272	1712.17	1135.77	646.546	1620.31	1115.95	645.29	1630.31	1045.44	716.721	1566.06	1055.63
425	0	238.866	1686.3	1548.39	140.163	1695.35	1534.08	261.588	1852.29	1595.69	150.885	1871.18	1582.25	224.088	1935.4	1410.66	253.082	1972.67	1187.7	222.119	1800.65	1347.92	214.648	1733.68	1224.05	159.339	1994.2	1233.42	392.105	1866.99	1381.5	503.423	1825.99	1189.66	526.227	1802.02	1129.57	610.634	1704.36	1139.38	647.651	1612.75	1120.34	646.622	1622.1	1049.82	718.612	1558.73	1060.87
426	0	237.582	1677.27	1550.09	138.89	1686.14	1535.81	260.025	1843.41	1597.06	149.304	1862.09	1583.59	222.251	1926.11	1411.97	251.195	1963.46	1189.3	220.809	1791.3	1349.3	213.697	1724.13	1225.51	157.203	1984.39	1234.84	390.425	1858.16	1383.15	502.925	1817.67	1192.19	526.166	1794.09	1132.2	610.759	1696.67	1142.72	648.331	1605.32	1124.12	647.754	1614.4	1053.68	720.068	1551.62	1065.38
427	0	236.421	1668.27	1551.85	137.735	1676.92	1537.62	258.532	1834.56	1598.48	147.786	1853	1585.01	220.418	1916.87	1413.37	249.24	1954.4	1191	219.547	1782.01	1350.73	212.814	1714.7	1227	155.026	1974.68	1236.41	388.776	1849.46	1384.8	502.354	1809.62	1194.63	525.985	1786.47	1134.72	610.661	1689.11	1145.75	648.62	1598	1127.27	648.697	1607.21	1056.99	721.125	1544.72	1069.14
428	0	235.383	1659.3	1553.64	136.699	1667.7	1539.48	257.109	1825.74	1599.93	146.335	1843.92	1586.49	218.593	1907.67	1414.85	247.222	1945.49	1192.78	218.328	1772.81	1352.2	211.993	1705.4	1228.51	152.821	1965.11	1238.1	387.161	1840.88	1386.45	501.709	1801.84	1196.97	525.679	1779.15	1137.1	610.356	1681.69	1148.45	648.552	1590.81	1129.77	649.454	1600.5	1059.72	721.815	1538.03	1072.14
429	0	234.47	1650.37	1555.44	135.78	1658.49	1541.36	255.756	1816.96	1601.39	144.949	1834.84	1588.01	216.781	1898.54	1416.38	245.151	1936.71	1194.59	217.149	1763.7	1353.69	211.223	1696.25	1230.02	150.6	1955.66	1239.86	385.582	1832.44	1388.06	500.983	1794.34	1199.17	525.242	1772.14	1139.31	609.853	1674.41	1150.77	648.162	1583.78	1131.61	650.025	1594.27	1061.85	722.168	1531.56	1074.38
430	0	233.677	1641.5	1557.23	134.975	1649.3	1543.25	254.473	1808.22	1602.85	143.629	1825.78	1589.55	214.987	1889.47	1417.94	243.039	1928.07	1196.43	216.005	1754.67	1355.17	210.493	1687.23	1231.5	148.379	1946.35	1241.68	384.044	1824.13	1389.61	500.169	1787.11	1201.2	524.666	1765.41	1141.32	609.162	1667.3	1152.69	647.487	1576.92	1132.79	650.401	1588.49	1063.36	722.213	1525.32	1075.85
431	0	233	1632.68	1558.99	134.278	1640.14	1545.11	253.259	1799.54	1604.28	142.372	1816.73	1591.11	213.215	1880.46	1419.51	240.901	1919.54	1198.25	214.894	1745.74	1356.64	209.791	1678.35	1232.95	146.171	1937.19	1243.52	382.546	1815.93	1391.1	499.261	1780.15	1203.03	523.944	1758.96	1143.1	608.293	1660.39	1154.17	646.565	1570.27	1133.3	650.571	1583.15	1064.24	721.97	1519.34	1076.55
432	0	232.433	1623.92	1560.68	133.684	1631.01	1546.93	252.109	1790.9	1605.68	141.177	1807.72	1592.65	211.471	1871.53	1421.08	238.754	1911.13	1200.03	213.809	1736.91	1358.08	209.107	1669.61	1234.35	143.993	1928.17	1245.36	381.091	1807.84	1392.49	498.252	1773.45	1204.64	523.066	1752.77	1144.64	607.255	1653.7	1155.2	645.431	1563.86	1133.15	650.52	1578.22	1064.49	721.46	1513.67	1076.46
433	0	231.967	1615.23	1562.31	133.183	1621.91	1548.7	251.021	1782.32	1607.03	140.039	1798.74	1594.17	209.759	1862.68	1422.62	236.614	1902.81	1201.76	212.748	1728.18	1359.48	208.428	1661	1235.69	141.858	1919.29	1247.17	379.68	1799.85	1393.79	497.134	1766.98	1206.01	522.027	1746.82	1145.92	606.059	1647.26	1155.74	644.124	1557.75	1132.34	650.232	1573.7	1064.11	720.7	1508.32	1075.57
434	0	231.592	1606.6	1563.84	132.766	1612.87	1550.38	249.992	1773.78	1608.32	138.957	1789.79	1595.65	208.086	1853.89	1424.12	234.499	1894.58	1203.41	211.707	1719.54	1360.82	207.746	1652.51	1236.96	139.779	1910.55	1248.93	378.312	1791.94	1394.97	495.903	1760.72	1207.13	520.82	1741.09	1146.93	604.72	1641.1	1155.78	642.681	1551.96	1130.88	649.694	1569.55	1063.09	719.706	1503.36	1073.89
435	0	231.298	1598.04	1565.27	132.423	1603.87	1551.97	249.016	1765.3	1609.53	137.926	1780.88	1597.07	206.455	1845.18	1425.56	232.425	1886.43	1204.98	210.684	1710.99	1362.1	207.052	1644.14	1238.14	137.768	1901.95	1250.62	376.99	1784.11	1396.02	494.556	1754.65	1207.99	519.444	1735.56	1147.65	603.252	1635.24	1155.3	641.134	1546.52	1128.8	648.896	1565.77	1061.46	718.495	1498.8	1071.38
436	0	231.071	1589.54	1566.58	132.142	1594.93	1553.44	248.091	1756.86	1610.66	136.942	1772.01	1598.43	204.872	1836.54	1426.92	230.407	1878.35	1206.44	209.678	1702.53	1363.29	206.34	1635.87	1239.23	135.835	1893.47	1252.22	375.712	1776.33	1396.95	493.093	1748.74	1208.59	517.902	1730.2	1148.09	601.674	1629.69	1154.32	639.516	1541.45	1126.12	647.833	1562.33	1059.21	717.085	1494.69	1068.07
437	0	230.9	1581.1	1567.75	131.913	1586.05	1554.78	247.212	1748.46	1611.7	136.004	1763.18	1599.71	203.341	1827.97	1428.2	228.455	1870.33	1207.8	208.688	1694.15	1364.38	205.607	1627.7	1240.21	133.985	1885.12	1253.72	374.481	1768.59	1397.74	491.518	1742.96	1208.93	516.198	1724.97	1148.25	600.006	1624.46	1152.82	637.856	1536.75	1122.86	646.508	1559.22	1056.39	715.497	1491.04	1063.97
438	0	230.773	1572.71	1568.78	131.723	1577.23	1555.98	246.376	1740.1	1612.63	135.107	1754.39	1600.9	201.869	1819.47	1429.38	226.582	1862.37	1209.03	207.714	1685.85	1365.38	204.852	1619.62	1241.06	132.226	1876.89	1255.11	373.298	1760.88	1398.39	489.838	1737.29	1209	514.342	1719.86	1148.13	598.27	1619.54	1150.83	636.178	1532.43	1119.05	644.932	1556.41	1053.03	713.753	1487.88	1059.09
439	0	230.676	1564.38	1569.65	131.564	1568.46	1557.03	245.579	1731.77	1613.46	134.249	1745.64	1601.98	200.458	1811.03	1430.46	224.795	1854.47	1210.15	206.76	1677.62	1366.27	204.078	1611.61	1241.8	130.561	1868.76	1256.38	372.165	1753.18	1398.9	488.064	1731.69	1208.83	512.352	1714.84	1147.76	596.489	1614.91	1148.37	634.505	1528.47	1114.73	643.124	1553.88	1049.15	711.877	1485.2	1053.48
440	0	230.6	1556.08	1570.37	131.424	1559.75	1557.91	244.819	1723.47	1614.18	133.428	1736.93	1602.96	199.114	1802.64	1431.42	223.101	1846.61	1211.13	205.828	1669.46	1367.05	203.287	1603.68	1242.4	128.992	1860.73	1257.53	371.085	1745.5	1399.27	486.21	1726.14	1208.43	510.244	1709.87	1147.14	594.686	1610.54	1145.48	632.853	1524.85	1109.95	641.11	1551.62	1044.82	709.894	1483	1047.19
441	0	230.535	1547.82	1570.92	131.297	1551.1	1558.62	244.095	1715.18	1614.79	132.643	1728.26	1603.82	197.841	1794.31	1432.27	221.504	1838.79	1211.99	204.922	1661.35	1367.7	202.486	1595.81	1242.86	127.521	1852.79	1258.55	370.061	1737.81	1399.5	484.294	1720.61	1207.8	508.044	1704.92	1146.3	592.884	1606.4	1142.21	631.238	1521.52	1104.74	638.922	1549.6	1040.09	707.831	1481.26	1040.29
442	0	230.472	1539.59	1571.3	131.175	1542.5	1559.15	243.405	1706.91	1615.28	131.894	1719.61	1604.56	196.642	1786.03	1433	220.008	1831.02	1212.72	204.046	1653.3	1368.24	201.683	1588.01	1243.19	126.148	1844.92	1259.44	369.097	1730.12	1399.6	482.336	1715.08	1206.98	505.776	1699.98	1145.26	591.105	1602.44	1138.61	629.674	1518.46	1099.16	636.6	1547.79	1035.02	705.715	1479.95	1032.87
443	0	230.406	1531.38	1571.51	131.054	1533.95	1559.5	242.751	1698.64	1615.67	131.181	1711	1605.18	195.521	1777.79	1433.61	218.616	1823.29	1213.33	203.205	1645.29	1368.65	200.885	1580.26	1243.37	124.874	1837.13	1260.2	368.194	1722.41	1399.57	480.358	1709.53	1205.99	503.468	1695.01	1144.05	589.37	1598.6	1134.74	628.17	1515.61	1093.28	634.186	1546.17	1029.68	703.576	1479.02	1025.03
444	0	230.334	1523.18	1571.55	130.931	1525.44	1559.66	242.132	1690.37	1615.94	130.506	1702.42	1605.68	194.481	1769.6	1434.1	217.327	1815.59	1213.82	202.406	1637.32	1368.94	200.103	1572.56	1243.42	123.698	1829.4	1260.84	367.359	1714.69	1399.42	478.383	1703.95	1204.84	501.151	1689.99	1142.7	587.699	1594.86	1130.66	626.738	1512.92	1087.15	631.725	1544.7	1024.15	701.442	1478.44	1016.88
445	0	230.252	1514.99	1571.43	130.804	1516.98	1559.65	241.552	1682.09	1616.11	129.872	1693.85	1606.06	193.525	1761.44	1434.47	216.142	1807.92	1214.19	201.653	1629.39	1369.11	199.346	1564.91	1243.35	122.619	1821.72	1261.36	366.592	1706.96	1399.16	476.436	1698.33	1203.57	498.854	1684.92	1141.24	586.111	1591.14	1126.44	625.388	1510.35	1080.85	629.265	1543.34	1018.5	699.344	1478.14	1008.54
446	0	230.162	1506.8	1571.16	130.674	1508.55	1559.47	241.014	1673.79	1616.17	129.282	1685.3	1606.32	192.654	1753.31	1434.73	215.062	1800.27	1214.45	200.953	1621.47	1369.16	198.623	1557.29	1243.14	121.635	1814.09	1261.77	365.899	1699.21	1398.8	474.54	1692.66	1202.21	496.604	1679.77	1139.69	584.621	1587.42	1122.16	624.132	1507.86	1074.46	626.851	1542.06	1012.82	697.314	1478.06	1000.13
447	0	230.065	1498.61	1570.73	130.543	1500.15	1559.12	240.521	1665.48	1616.13	128.74	1676.76	1606.46	191.871	1745.2	1434.88	214.083	1792.65	1214.6	200.311	1613.58	1369.1	197.945	1549.71	1242.83	120.744	1806.49	1262.07	365.281	1691.45	1398.35	472.719	1686.93	1200.78	494.43	1674.54	1138.09	583.244	1583.66	1117.89	622.984	1505.39	1068.07	624.528	1540.8	1007.19	695.384	1478.13	991.796
448	0	229.965	1490.4	1570.16	130.416	1491.78	1558.61	240.08	1657.15	1616	128.252	1668.24	1606.49	191.176	1737.11	1434.93	213.204	1785.04	1214.66	199.732	1605.69	1368.93	197.32	1542.14	1242.42	119.945	1798.9	1262.26	364.742	1683.67	1397.82	470.993	1681.14	1199.31	492.356	1669.22	1136.46	581.994	1579.84	1113.68	621.961	1502.91	1061.77	622.339	1539.53	1001.67	693.587	1478.28	983.665
449	0	229.869	1482.18	1569.47	130.298	1483.42	1557.97	239.694	1648.79	1615.78	127.823	1659.72	1606.41	190.571	1729.04	1434.88	212.421	1777.45	1214.63	199.22	1597.81	1368.65	196.755	1534.59	1241.91	119.233	1791.33	1262.37	364.283	1675.89	1397.22	469.382	1675.28	1197.82	490.405	1663.8	1134.82	580.883	1575.93	1109.61	621.08	1500.38	1055.65	620.321	1538.19	996.36	691.956	1478.43	975.862
450	0	229.782	1473.94	1568.65	130.194	1475.08	1557.2	239.371	1640.4	1615.47	127.459	1651.2	1606.24	190.056	1720.98	1434.73	211.732	1769.86	1214.52	198.781	1589.93	1368.28	196.257	1527.05	1241.33	118.606	1783.76	1262.38	363.906	1668.1	1396.55	467.903	1669.36	1196.33	488.596	1658.3	1133.19	579.925	1571.92	1105.73	620.364	1497.78	1049.8	618.509	1536.72	991.314	690.525	1478.49	968.502
451	0	229.712	1465.68	1567.74	130.112	1466.75	1556.31	239.117	1631.99	1615.08	127.167	1642.69	1605.97	189.631	1712.92	1434.5	211.132	1762.27	1214.32	198.417	1582.05	1367.81	195.831	1519.5	1240.67	118.059	1776.17	1262.32	363.612	1660.3	1395.84	466.568	1663.37	1194.87	486.945	1652.71	1131.6	579.13	1567.82	1102.08	619.836	1495.07	1044.3	616.933	1535.07	986.594	689.326	1478.41	961.686
452	0	229.668	1457.4	1566.73	130.059	1458.42	1555.34	238.937	1623.55	1614.6	126.952	1634.17	1605.61	189.295	1704.86	1434.18	210.617	1754.67	1214.05	198.132	1574.15	1367.26	195.48	1511.94	1239.97	117.588	1768.56	1262.17	363.4	1652.5	1395.07	465.388	1657.32	1193.43	485.468	1647.04	1130.04	578.51	1563.62	1098.71	619.52	1492.23	1039.23	615.617	1533.19	982.251	688.392	1478.08	955.497
453	0	229.657	1449.09	1565.64	130.043	1450.09	1554.28	238.84	1615.09	1614.06	126.822	1625.65	1605.17	189.049	1696.79	1433.78	210.183	1747.05	1213.71	197.926	1566.23	1366.62	195.207	1504.35	1239.21	117.191	1760.92	1261.96	363.271	1644.69	1394.26	464.37	1651.21	1192.05	484.174	1641.29	1128.53	578.076	1559.33	1095.64	619.438	1489.23	1034.65	614.582	1531.02	978.322	687.753	1477.45	949.999
454	0	229.687	1440.76	1564.48	130.072	1441.76	1553.16	238.829	1606.6	1613.44	126.781	1617.13	1604.64	188.892	1688.71	1433.3	209.826	1739.42	1213.3	197.803	1558.28	1365.91	195.012	1496.73	1238.41	116.862	1753.22	1261.67	363.223	1636.87	1393.41	463.521	1645.05	1190.71	483.073	1635.48	1127.08	577.838	1554.95	1092.89	619.612	1486.05	1030.62	613.846	1528.51	974.835	687.438	1476.45	945.237
455	0	229.768	1432.4	1563.27	130.151	1433.43	1552	238.91	1598.09	1612.75	126.834	1608.61	1604.05	188.822	1680.61	1432.74	209.543	1731.76	1212.82	197.763	1550.31	1365.13	194.895	1489.06	1237.57	116.6	1745.48	1261.31	363.256	1629.04	1392.52	462.842	1638.83	1189.43	482.172	1629.61	1125.7	577.802	1550.48	1090.47	620.057	1482.67	1027.16	613.418	1525.63	971.806	687.469	1475	941.234
456	0	229.907	1424.02	1562.01	130.29	1425.08	1550.79	239.088	1589.56	1611.98	126.985	1600.09	1603.38	188.839	1672.49	1432.11	209.33	1724.07	1212.28	197.805	1542.3	1364.27	194.855	1481.33	1236.69	116.402	1737.67	1260.88	363.367	1621.2	1391.6	462.334	1632.57	1188.2	481.474	1623.68	1124.37	577.973	1545.93	1088.38	620.785	1479.08	1024.3	613.308	1522.35	969.238	687.866	1473.07	937.995
457	0	230.11	1415.62	1560.71	130.493	1416.72	1549.57	239.366	1581.01	1611.15	127.238	1591.56	1602.65	188.941	1664.34	1431.41	209.187	1716.35	1211.67	197.931	1534.25	1363.35	194.889	1473.55	1235.78	116.265	1729.79	1260.38	363.556	1613.33	1390.63	461.997	1626.25	1187.03	480.983	1617.7	1123.1	578.354	1541.27	1086.61	621.797	1475.25	1022.05	613.519	1518.63	967.125	688.639	1470.61	935.509
458	0	230.384	1407.2	1559.38	130.767	1408.35	1548.33	239.745	1572.44	1610.26	127.594	1583.03	1601.86	189.127	1656.16	1430.64	209.114	1708.59	1210.99	198.139	1526.15	1362.37	194.996	1465.69	1234.84	116.19	1721.83	1259.8	363.821	1605.44	1389.64	461.828	1619.87	1185.91	480.697	1611.66	1121.89	578.943	1536.52	1085.15	623.091	1471.17	1020.37	614.05	1514.46	965.451	689.79	1467.6	933.745
459	0	230.735	1398.75	1558.02	131.117	1399.95	1547.08	240.228	1563.86	1609.3	128.053	1574.49	1601.01	189.394	1647.95	1429.8	209.111	1700.8	1210.25	198.429	1518.01	1361.33	195.173	1457.76	1233.87	116.177	1713.8	1259.16	364.158	1597.52	1388.6	461.824	1613.43	1184.83	480.615	1605.56	1120.74	579.732	1531.65	1083.97	624.655	1466.83	1019.25	614.896	1509.85	964.192	691.313	1464.02	932.66
460	0	231.166	1390.28	1556.65	131.547	1391.54	1545.82	240.813	1555.27	1608.27	128.616	1565.94	1600.11	189.742	1639.7	1428.88	209.179	1692.96	1209.44	198.799	1509.81	1360.23	195.417	1449.75	1232.87	116.225	1705.67	1258.44	364.567	1589.56	1387.52	461.983	1606.93	1183.79	480.733	1599.41	1119.62	580.714	1526.65	1083.07	626.471	1462.22	1018.63	616.046	1504.8	963.313	693.193	1459.88	932.198
461	0	231.683	1381.79	1555.25	132.06	1383.11	1544.57	241.498	1546.66	1607.19	129.279	1557.39	1599.15	190.168	1631.4	1427.9	209.321	1685.07	1208.57	199.249	1501.56	1359.08	195.726	1441.64	1231.83	116.337	1697.46	1257.63	365.046	1581.57	1386.4	462.3	1600.34	1182.78	481.045	1593.18	1118.55	581.875	1521.51	1082.39	628.515	1457.34	1018.47	617.485	1499.33	962.775	695.405	1455.19	932.291
462	0	232.287	1373.27	1553.84	132.661	1374.65	1543.31	242.282	1538.05	1606.05	130.041	1548.82	1598.15	190.671	1623.06	1426.85	209.539	1677.14	1207.63	199.778	1493.25	1357.89	196.1	1433.45	1230.77	116.513	1689.16	1256.75	365.592	1573.52	1385.24	462.77	1593.67	1181.8	481.543	1586.87	1117.51	583.201	1516.21	1081.92	630.759	1452.2	1018.7	619.195	1493.47	962.534	697.921	1450	932.865
463	0	232.982	1364.74	1552.42	133.35	1366.17	1542.05	243.16	1529.42	1604.87	130.896	1540.24	1597.11	191.249	1614.68	1425.74	209.836	1669.17	1206.62	200.385	1484.87	1356.66	196.536	1425.16	1229.67	116.756	1680.76	1255.79	366.205	1565.42	1384.03	463.388	1586.89	1180.84	482.217	1580.46	1116.49	584.672	1510.74	1081.62	633.174	1446.79	1019.25	621.153	1487.24	962.542	700.703	1444.34	933.838
464	0	233.768	1356.18	1550.99	134.131	1357.66	1540.8	244.127	1520.78	1603.64	131.84	1531.64	1596.03	191.899	1606.24	1424.56	210.213	1661.14	1205.55	201.068	1476.43	1355.39	197.036	1416.78	1228.55	117.067	1672.27	1254.75	366.884	1557.27	1382.77	464.148	1580	1179.88	483.055	1573.95	1115.49	586.271	1505.07	1081.46	635.727	1441.12	1020.04	623.333	1480.68	962.747	703.711	1438.26	935.127
465	0	234.646	1347.61	1549.56	135.004	1349.11	1539.54	245.178	1512.13	1602.37	132.868	1523.02	1594.91	192.62	1597.75	1423.33	210.674	1653.06	1204.41	201.827	1467.92	1354.09	197.599	1408.28	1227.41	117.448	1663.68	1253.62	367.628	1549.07	1381.47	465.043	1572.98	1178.93	484.046	1567.32	1114.49	587.979	1499.21	1081.39	638.387	1435.21	1021.01	625.705	1473.83	963.099	706.902	1431.82	936.645
466	0	235.617	1339.01	1548.12	135.968	1340.53	1538.28	246.306	1503.46	1601.08	133.972	1514.38	1593.77	193.411	1589.21	1422.04	211.216	1644.92	1203.2	202.661	1459.34	1352.78	198.228	1399.69	1226.24	117.9	1655	1252.41	368.437	1540.8	1380.13	466.066	1565.83	1177.97	485.175	1560.55	1113.48	589.779	1493.14	1081.38	641.124	1429.07	1022.08	628.24	1466.73	963.545	710.229	1425.09	938.304
467	0	236.68	1330.39	1546.69	137.025	1331.92	1537.01	247.506	1494.78	1599.77	135.148	1505.7	1592.61	194.268	1580.62	1420.71	211.84	1636.7	1201.94	203.57	1450.68	1351.45	198.923	1390.98	1225.07	118.424	1646.21	1251.13	369.309	1532.47	1378.74	467.208	1558.52	1176.99	486.429	1553.63	1112.47	591.652	1486.85	1081.4	643.911	1422.71	1023.17	630.907	1459.41	964.035	713.649	1418.11	940.018
468	0	237.833	1321.75	1545.27	138.172	1323.27	1535.75	248.772	1486.09	1598.45	136.389	1497	1591.44	195.19	1571.96	1419.34	212.543	1628.41	1200.61	204.553	1441.96	1350.13	199.689	1382.16	1223.9	119.02	1637.33	1249.78	370.246	1524.08	1377.32	468.458	1551.06	1175.99	487.79	1546.55	1111.45	593.583	1480.35	1081.4	646.723	1416.15	1024.23	633.673	1451.9	964.52	717.116	1410.93	941.701
469	0	239.075	1313.08	1543.87	139.409	1314.57	1534.5	250.098	1477.37	1597.14	137.689	1488.27	1590.27	196.174	1563.25	1417.95	213.32	1620.02	1199.23	205.609	1433.16	1348.82	200.527	1373.24	1222.74	119.686	1628.33	1248.37	371.247	1515.63	1375.87	469.804	1543.43	1174.97	489.244	1539.29	1110.4	595.558	1473.62	1081.35	649.54	1409.39	1025.2	636.507	1444.25	964.951	720.588	1403.61	943.274
470	0	240.402	1304.38	1542.5	140.731	1305.84	1533.26	251.479	1468.64	1595.86	139.044	1479.5	1589.12	197.218	1554.48	1416.54	214.164	1611.52	1197.8	206.739	1424.28	1347.53	201.44	1364.2	1221.6	120.42	1619.23	1246.92	372.313	1507.12	1374.39	471.233	1535.63	1173.91	490.771	1531.84	1109.32	597.565	1466.68	1081.22	652.343	1402.44	1026.01	639.375	1436.48	965.285	724.025	1396.17	944.661
471	0	241.812	1295.66	1541.18	142.137	1297.06	1532.04	252.911	1459.89	1594.6	140.449	1470.69	1587.98	198.319	1545.64	1415.13	215.07	1602.9	1196.32	207.94	1415.33	1346.29	202.432	1355.04	1220.5	121.219	1610.02	1245.42	373.441	1498.55	1372.89	472.729	1527.66	1172.8	492.356	1524.19	1108.22	599.592	1459.52	1080.97	655.117	1395.31	1026.62	642.246	1428.6	965.482	727.393	1388.65	945.796
472	0	243.3	1286.9	1539.91	143.621	1288.24	1530.86	254.389	1451.1	1593.4	141.9	1461.84	1586.88	199.475	1536.74	1413.73	216.027	1594.14	1194.82	209.211	1406.29	1345.09	203.503	1345.78	1219.44	122.078	1600.69	1243.9	374.633	1489.92	1371.39	474.278	1519.52	1171.66	493.979	1516.34	1107.09	601.628	1452.14	1080.59	657.847	1388.01	1026.99	645.087	1420.64	965.505	730.659	1381.08	946.618
473	0	244.862	1278.11	1538.71	145.181	1279.37	1529.73	255.911	1442.3	1592.25	143.394	1452.95	1585.84	200.68	1527.77	1412.36	217.026	1585.21	1193.3	210.55	1397.18	1343.97	204.657	1336.39	1218.45	122.994	1591.23	1242.38	375.886	1481.23	1369.89	475.861	1511.21	1170.47	495.623	1508.27	1105.93	603.661	1444.56	1080.04	660.52	1380.55	1027.09	647.864	1412.61	965.324	733.794	1373.46	947.083
474	0	246.494	1269.28	1537.6	146.81	1270.46	1528.66	257.475	1433.46	1591.19	144.929	1444.01	1584.86	201.932	1518.73	1411.03	218.058	1576.11	1191.78	211.954	1387.98	1342.92	205.893	1326.9	1217.54	123.958	1581.66	1240.87	377.198	1472.47	1368.41	477.462	1502.73	1169.25	497.268	1499.99	1104.74	605.677	1436.77	1079.32	663.121	1372.93	1026.89	650.546	1404.52	964.914	736.772	1365.82	947.154
475	0	248.19	1260.41	1536.59	148.503	1261.5	1527.69	259.077	1424.58	1590.21	146.503	1435.03	1583.95	203.226	1509.61	1409.75	219.112	1566.83	1190.27	213.419	1378.7	1341.97	207.212	1317.29	1216.73	124.965	1571.95	1239.4	378.566	1463.66	1366.97	479.063	1494.09	1167.99	498.896	1491.49	1103.54	607.663	1428.78	1078.41	665.635	1365.14	1026.38	653.099	1396.38	964.258	739.569	1358.15	946.807
476	0	249.946	1251.5	1535.7	150.255	1252.49	1526.82	260.718	1415.67	1589.34	148.114	1426	1583.15	204.556	1500.42	1408.56	220.179	1557.34	1188.81	214.94	1369.34	1341.13	208.611	1307.57	1216.02	126.006	1562.12	1237.99	379.987	1454.78	1365.59	480.645	1485.29	1166.71	500.488	1482.78	1102.32	609.6	1420.59	1077.32	668.041	1357.2	1025.53	655.489	1388.2	963.343	742.16	1350.48	946.031
477	0	251.755	1242.54	1534.95	152.06	1243.42	1526.08	262.394	1406.73	1588.58	149.76	1416.93	1582.45	205.918	1491.15	1407.45	221.25	1547.64	1187.4	216.512	1359.89	1340.41	210.089	1297.74	1215.45	127.075	1552.16	1236.66	381.455	1445.84	1364.27	482.192	1476.34	1165.41	502.026	1473.86	1101.11	611.468	1412.21	1076.04	670.317	1349.11	1024.36	657.682	1379.99	962.164	744.518	1342.81	944.823
478	0	253.612	1233.53	1534.36	153.912	1234.3	1525.48	264.103	1397.74	1587.95	151.44	1407.81	1581.88	207.306	1481.79	1406.45	222.316	1537.73	1186.07	218.129	1350.35	1339.83	211.641	1287.8	1215.01	128.163	1542.07	1235.42	382.965	1436.82	1363.05	483.687	1467.24	1164.12	503.491	1464.74	1099.9	613.242	1403.64	1074.59	672.434	1340.88	1022.86	659.642	1371.75	960.722	746.616	1335.14	943.188
479	0	255.511	1224.46	1533.93	155.805	1225.12	1525.06	265.844	1388.71	1587.45	153.151	1398.63	1581.43	208.713	1472.36	1405.58	223.369	1527.61	1184.85	219.782	1340.73	1339.38	213.261	1277.76	1214.72	129.263	1531.85	1234.32	384.51	1427.73	1361.93	485.113	1458	1162.85	504.864	1455.43	1098.72	614.896	1394.88	1072.97	674.361	1332.49	1021.03	661.333	1363.49	959.023	748.421	1327.5	941.141
480	0	257.446	1215.34	1533.68	157.732	1215.89	1524.83	267.613	1379.63	1587.08	154.889	1389.41	1581.13	210.134	1462.83	1404.85	224.406	1517.28	1183.75	221.464	1331.03	1339.09	214.943	1267.61	1214.59	130.37	1521.51	1233.35	386.085	1418.56	1360.95	486.458	1448.63	1161.61	506.127	1445.94	1097.58	616.401	1385.93	1071.21	676.06	1323.97	1018.89	662.721	1355.22	957.078	749.899	1319.89	938.701
481	0	259.408	1206.15	1533.62	159.686	1206.59	1524.81	269.406	1370.51	1586.86	156.652	1380.14	1580.98	211.564	1453.23	1404.27	225.422	1506.74	1182.81	223.167	1321.24	1338.95	216.678	1257.36	1214.61	131.477	1511.07	1232.55	387.681	1409.31	1360.11	487.706	1439.13	1160.43	507.262	1436.29	1096.49	617.724	1376.81	1069.33	677.493	1315.31	1016.44	663.768	1346.95	954.902	751.015	1312.32	935.896
482	0	261.392	1196.9	1533.76	161.66	1197.22	1525	271.217	1361.34	1586.79	158.434	1370.82	1580.98	212.996	1443.53	1403.84	226.418	1496.02	1182.05	224.88	1311.38	1338.97	218.459	1247.03	1214.8	132.583	1500.52	1231.92	389.292	1399.96	1359.44	488.848	1429.51	1159.33	508.255	1426.49	1095.47	618.835	1367.52	1067.35	678.615	1306.53	1013.69	664.44	1338.68	952.514	751.729	1304.81	932.754
483	0	263.388	1187.58	1534.11	163.645	1187.78	1525.41	273.042	1352.12	1586.86	160.229	1361.44	1581.14	214.427	1433.75	1403.59	227.395	1485.12	1181.47	226.594	1301.44	1339.14	220.272	1236.62	1215.15	133.686	1489.89	1231.48	390.91	1390.51	1358.95	489.874	1419.77	1158.33	509.09	1416.56	1094.53	619.702	1358.06	1065.28	679.384	1297.62	1010.68	664.705	1330.44	949.935	752.004	1297.34	929.309
484	0	265.389	1178.19	1534.66	165.635	1178.28	1526.06	274.872	1342.85	1587.06	162.031	1352.02	1581.45	215.853	1423.88	1403.5	228.36	1474.09	1181.09	228.301	1291.42	1339.47	222.108	1226.13	1215.64	134.789	1479.19	1231.24	392.53	1380.96	1358.64	490.775	1409.92	1157.43	509.755	1406.53	1093.68	620.293	1348.44	1063.15	679.754	1288.6	1007.4	664.53	1322.23	947.186	751.801	1289.93	925.592
485	0	267.383	1168.73	1535.42	167.618	1168.7	1526.93	276.7	1333.52	1587.41	163.831	1342.54	1581.91	217.271	1413.93	1403.6	229.322	1462.93	1180.94	229.99	1281.34	1339.95	223.952	1215.6	1216.28	135.895	1468.44	1231.21	394.146	1371.28	1358.54	491.547	1399.97	1156.66	510.239	1396.4	1092.93	620.583	1338.67	1060.97	679.683	1279.49	1003.87	663.886	1314.07	944.29	751.083	1282.57	921.631
486	0	269.362	1159.21	1536.37	169.586	1159.05	1528.02	278.516	1324.15	1587.89	165.621	1333.01	1582.52	218.679	1403.91	1403.87	230.293	1451.69	1181	231.652	1271.2	1340.57	225.79	1205.02	1217.04	137.013	1457.67	1231.38	395.753	1361.48	1358.64	492.186	1389.92	1156.02	510.532	1386.21	1092.28	620.544	1328.76	1058.75	679.13	1270.28	1000.12	662.748	1305.95	941.267	749.814	1275.23	917.449
487	0	271.313	1149.61	1537.51	171.526	1149.32	1529.32	280.312	1314.72	1588.5	167.393	1323.43	1583.26	220.078	1393.81	1404.31	231.289	1440.39	1181.29	233.28	1261	1341.31	227.608	1194.41	1217.92	138.151	1446.89	1231.75	397.347	1351.54	1358.95	492.69	1379.78	1155.51	510.63	1375.98	1091.74	620.157	1318.73	1056.5	678.057	1260.99	996.145	661.093	1297.89	938.135	747.96	1267.91	913.062
488	0	273.225	1139.95	1538.82	173.427	1139.53	1530.81	282.078	1305.24	1589.22	169.136	1313.8	1584.12	221.467	1383.65	1404.92	232.327	1429.08	1181.79	234.865	1250.76	1342.18	229.39	1183.79	1218.89	139.322	1436.14	1232.32	398.925	1341.47	1359.45	493.059	1369.54	1155.15	510.526	1365.71	1091.31	619.405	1308.58	1054.21	676.431	1251.64	991.966	658.902	1289.88	934.911	745.492	1260.57	908.478
489	0	275.085	1130.21	1540.28	175.278	1129.68	1532.47	283.804	1295.7	1590.05	170.841	1304.12	1585.1	222.848	1373.43	1405.69	233.424	1417.8	1182.51	236.401	1240.48	1343.16	231.12	1173.18	1219.93	140.538	1425.43	1233.07	400.486	1331.25	1360.15	493.292	1359.23	1154.92	510.218	1355.44	1090.99	618.272	1298.34	1051.88	674.224	1242.23	987.592	656.161	1281.94	931.609	742.386	1253.19	903.699
490	0	276.881	1120.42	1541.88	177.066	1119.76	1534.26	285.482	1286.1	1590.97	172.501	1294.4	1586.17	224.223	1363.17	1406.61	234.6	1406.58	1183.44	237.882	1230.18	1344.23	232.785	1162.6	1221.04	141.812	1414.79	1234	402.027	1320.89	1361.02	493.392	1348.82	1154.82	509.705	1345.17	1090.76	616.75	1288.01	1049.5	671.411	1232.78	983.035	652.857	1274.05	928.24	738.622	1245.72	898.726
491	0	278.6	1110.55	1543.59	178.778	1109.79	1536.17	287.101	1276.44	1591.99	174.106	1284.63	1587.33	225.594	1352.87	1407.66	235.872	1395.45	1184.56	239.304	1219.85	1345.37	234.371	1152.05	1222.18	143.154	1404.25	1235.09	403.549	1310.38	1362.05	493.359	1338.34	1154.84	508.986	1334.93	1090.62	614.828	1277.61	1047.05	667.973	1223.3	978.305	648.985	1266.22	924.816	734.186	1238.15	893.555
492	0	280.231	1100.63	1545.39	180.403	1099.77	1538.16	288.655	1266.72	1593.09	175.648	1274.82	1588.56	226.964	1342.54	1408.85	237.251	1384.46	1185.85	240.664	1209.53	1346.58	235.865	1141.55	1223.34	144.576	1393.82	1236.33	405.052	1299.72	1363.23	493.196	1327.79	1154.95	508.062	1324.72	1090.56	612.499	1267.15	1044.51	663.893	1213.79	973.417	644.539	1258.43	921.346	729.065	1230.43	888.18
493	0	281.763	1090.65	1547.25	181.929	1089.7	1540.19	290.136	1256.95	1594.25	177.122	1264.97	1589.84	228.334	1332.19	1410.14	238.749	1373.64	1187.31	241.959	1199.21	1347.84	237.259	1131.13	1224.5	146.084	1383.53	1237.7	406.536	1288.93	1364.53	492.901	1317.16	1155.14	506.934	1314.56	1090.55	609.756	1256.64	1041.88	659.157	1204.27	968.384	639.521	1250.68	917.841	723.248	1222.54	882.602
494	0	283.185	1080.62	1549.14	183.347	1079.61	1542.24	291.539	1247.11	1595.47	178.523	1255.09	1591.16	229.706	1321.84	1411.53	240.367	1363	1188.9	243.189	1188.9	1349.13	238.545	1120.78	1225.65	147.68	1373.39	1239.19	408.001	1278.02	1365.92	492.475	1306.45	1155.39	505.602	1304.44	1090.6	606.588	1246.09	1039.14	653.753	1194.75	963.227	633.931	1242.95	914.313	716.724	1214.46	876.82
495	0	284.489	1070.54	1551.05	184.647	1069.49	1544.28	292.86	1237.21	1596.74	179.845	1245.18	1592.51	231.08	1311.5	1413.01	242.104	1352.56	1190.63	244.353	1178.63	1350.43	239.72	1110.53	1226.77	149.365	1363.41	1240.78	409.447	1267	1367.38	491.915	1295.68	1155.68	504.071	1294.38	1090.68	602.984	1235.5	1036.28	647.67	1185.23	957.968	627.776	1235.23	910.776	709.476	1206.17	870.845
496	0	285.669	1060.42	1552.94	185.823	1059.36	1546.26	294.097	1227.25	1598.05	181.088	1235.24	1593.88	232.457	1301.17	1414.55	243.949	1342.34	1192.46	245.454	1168.39	1351.74	240.783	1100.39	1227.87	151.133	1353.59	1242.47	410.874	1255.88	1368.9	491.22	1284.83	1155.98	502.34	1284.37	1090.78	598.928	1224.89	1033.31	640.895	1175.71	952.637	621.062	1227.5	907.245	701.483	1197.67	864.693
497	0	286.72	1050.26	1554.79	186.871	1049.22	1548.18	295.247	1217.23	1599.38	182.249	1225.28	1595.25	233.835	1290.87	1416.15	245.889	1332.35	1194.37	246.493	1158.2	1353.05	241.736	1090.35	1228.92	152.974	1343.95	1244.23	412.281	1244.7	1370.44	490.386	1273.92	1156.27	500.415	1274.42	1090.88	594.403	1214.25	1030.22	633.419	1166.21	947.268	613.803	1219.76	903.741	692.716	1188.96	858.392
498	0	287.641	1040.07	1556.58	187.788	1039.08	1549.99	296.312	1207.15	1600.74	183.33	1215.31	1596.6	235.212	1280.61	1417.78	247.904	1322.58	1196.36	247.473	1148.07	1354.34	242.585	1080.43	1229.92	154.876	1334.48	1246.05	413.667	1233.46	1371.98	489.409	1262.96	1156.54	498.299	1264.51	1090.97	589.387	1203.57	1027.03	625.229	1156.73	941.902	606.012	1211.98	900.285	683.142	1180.06	851.981
499	0	288.431	1029.86	1558.28	188.573	1028.96	1551.69	297.292	1197.03	1602.1	184.332	1205.32	1597.94	236.585	1270.39	1419.44	249.97	1313.02	1198.39	248.398	1138	1355.59	243.337	1070.64	1230.88	156.824	1325.18	1247.92	415.031	1222.2	1373.51	488.288	1251.93	1156.76	495.998	1254.65	1091.04	583.859	1192.87	1023.77	616.319	1147.27	936.585	597.712	1204.15	896.905	672.727	1170.99	845.512
500	0	289.092	1019.63	1559.89	189.229	1018.86	1553.25	298.191	1186.86	1603.46	185.256	1195.33	1599.25	237.949	1260.23	1421.1	252.061	1303.66	1200.45	249.272	1128.01	1356.81	244.003	1060.97	1231.78	158.799	1316.04	1249.82	416.368	1210.95	1375	487.021	1240.87	1156.93	493.524	1244.83	1091.09	577.801	1182.14	1020.46	606.687	1137.83	931.366	588.933	1196.25	893.629	661.436	1161.78	839.047
501	0	289.629	1009.39	1561.39	189.76	1008.78	1554.66	299.011	1176.65	1604.8	186.108	1185.35	1600.52	239.3	1250.12	1422.76	254.152	1294.49	1202.52	250.098	1118.09	1357.98	244.592	1051.42	1232.63	160.783	1307.04	1251.74	417.678	1199.73	1376.45	485.611	1229.77	1157.03	490.888	1235.03	1091.09	571.2	1171.37	1017.14	596.34	1128.42	926.3	579.716	1188.27	890.486	649.246	1152.44	832.659
502	0	290.048	999.154	1562.75	190.173	998.746	1555.91	299.757	1166.41	1606.12	186.89	1175.36	1601.73	240.632	1240.09	1424.38	256.218	1285.48	1204.57	250.88	1108.26	1359.1	245.119	1041.99	1233.43	162.758	1298.18	1253.66	418.956	1188.55	1377.83	484.063	1218.65	1157.06	488.109	1225.27	1091.06	564.053	1160.56	1013.84	585.302	1119.03	921.441	570.114	1180.19	887.505	636.148	1143.01	826.424
503	0	290.356	988.923	1563.98	190.474	988.748	1556.99	300.434	1156.15	1607.4	187.607	1165.4	1602.88	241.941	1230.12	1425.97	258.238	1276.61	1206.59	251.622	1098.51	1360.14	245.593	1032.68	1234.16	164.706	1289.44	1255.56	420.199	1177.46	1379.14	482.387	1207.53	1157.01	485.209	1215.52	1090.99	556.371	1149.72	1010.63	573.614	1109.68	916.841	560.197	1171.99	884.714	622.161	1133.5	820.422
504	0	290.562	978.707	1565.07	190.673	978.798	1557.91	301.046	1145.87	1608.62	188.264	1155.45	1603.96	243.22	1220.23	1427.51	260.192	1267.87	1208.55	252.328	1088.85	1361.11	246.028	1023.48	1234.83	166.61	1280.8	1257.43	421.404	1166.45	1380.37	480.598	1196.41	1156.88	482.219	1205.79	1090.86	548.186	1138.84	1007.52	561.343	1100.36	912.546	550.051	1163.67	882.134	607.339	1123.94	814.726
505	0	290.676	968.515	1566	190.78	968.898	1558.66	301.598	1135.59	1609.77	188.866	1145.52	1604.96	244.464	1210.41	1428.97	262.067	1259.23	1210.44	253	1079.27	1362	246.433	1014.39	1235.43	168.455	1272.25	1259.24	422.565	1155.56	1381.5	478.717	1185.33	1156.67	479.173	1196.08	1090.7	539.55	1127.95	1004.57	548.586	1091.08	908.599	539.781	1155.2	879.784	591.778	1114.33	809.405
506	0	290.708	958.353	1566.78	190.806	959.052	1559.24	302.096	1125.32	1610.85	189.416	1135.63	1605.87	245.668	1200.66	1430.35	263.851	1250.67	1212.24	253.64	1069.78	1362.8	246.818	1005.39	1235.94	170.228	1263.78	1260.98	423.68	1144.79	1382.53	476.773	1174.3	1156.38	476.115	1186.38	1090.49	530.545	1117.03	1001.8	535.472	1081.83	905.031	529.507	1146.59	877.674	575.631	1104.68	804.513
507	0	290.668	948.23	1567.41	190.76	949.262	1559.66	302.543	1115.07	1611.83	189.919	1125.77	1606.67	246.825	1190.99	1431.62	265.539	1242.17	1213.93	254.25	1060.37	1363.49	247.189	996.482	1236.37	171.916	1255.36	1262.63	424.743	1134.15	1383.45	474.799	1163.34	1156.03	473.092	1176.7	1090.24	521.281	1106.11	999.249	522.165	1072.63	901.862	519.37	1137.82	875.808	559.105	1095	800.092
508	0	290.568	938.15	1567.88	190.656	939.529	1559.91	302.944	1104.84	1612.71	190.379	1115.94	1607.36	247.93	1181.39	1432.79	267.127	1233.73	1215.49	254.829	1051.04	1364.08	247.551	987.652	1236.69	173.512	1246.98	1264.17	425.75	1123.66	1384.25	472.835	1152.48	1155.61	470.158	1167.03	1089.95	511.897	1095.21	996.93	508.86	1063.47	899.101	509.523	1128.88	874.182	542.47	1085.27	796.17
509	0	290.417	928.12	1568.2	190.501	929.853	1560.02	303.302	1094.64	1613.47	190.798	1106.16	1607.94	248.979	1171.85	1433.84	268.614	1225.34	1216.92	255.379	1041.78	1364.55	247.906	978.895	1236.91	175.007	1238.63	1265.58	426.696	1113.3	1384.93	470.924	1141.72	1155.13	467.369	1157.37	1089.62	502.562	1084.34	994.859	495.782	1054.35	896.745	500.127	1119.78	872.788	526.049	1075.5	792.76
510	0	290.224	918.142	1568.37	190.308	920.232	1559.98	303.62	1084.49	1614.11	191.179	1096.43	1608.39	249.968	1162.38	1434.76	270	1216.97	1218.19	255.897	1032.59	1364.9	248.255	970.202	1237.02	176.395	1230.29	1266.86	427.577	1103.09	1385.49	469.115	1131.09	1154.6	464.785	1147.73	1089.25	493.467	1073.51	993.043	483.179	1045.27	894.778	491.35	1110.52	871.609	510.212	1065.69	789.858
511	0	290	908.221	1568.39	190.084	910.664	1559.79	303.9	1074.39	1614.61	191.522	1086.74	1608.7	250.892	1152.97	1435.53	271.288	1208.64	1219.3	256.382	1023.46	1365.12	248.595	961.564	1236.99	177.673	1221.96	1267.98	428.389	1093.03	1385.91	467.457	1120.59	1154.04	462.464	1138.11	1088.85	484.821	1062.75	991.478	471.305	1036.23	893.173	483.353	1101.11	870.626	495.348	1055.83	787.446
512	0	289.752	898.359	1568.26	189.837	901.146	1559.47	304.145	1064.33	1614.98	191.829	1077.09	1608.88	251.748	1143.62	1436.16	272.477	1200.32	1220.25	256.831	1014.39	1365.21	248.923	952.975	1236.84	178.837	1213.63	1268.94	429.128	1083.09	1386.2	465.999	1110.25	1153.46	460.461	1128.51	1088.42	476.839	1052.08	990.157	460.411	1027.21	891.892	476.284	1091.55	869.813	481.847	1045.94	785.491
513	0	289.486	888.556	1567.99	189.574	891.675	1559.01	304.354	1054.34	1615.19	192.099	1067.49	1608.93	252.532	1134.32	1436.64	273.57	1192.03	1221.02	257.24	1005.38	1365.17	249.232	944.428	1236.56	179.886	1205.28	1269.72	429.789	1073.3	1386.35	464.786	1100.06	1152.86	458.827	1118.93	1087.97	469.73	1041.52	989.06	450.728	1018.2	890.891	470.268	1081.87	869.145	470.063	1036.03	783.946
514	0	289.207	878.813	1567.58	189.3	882.247	1558.43	304.528	1044.41	1615.26	192.332	1057.93	1608.83	253.242	1125.08	1436.97	274.566	1183.75	1221.61	257.606	996.406	1365	249.515	935.915	1236.14	180.819	1196.92	1270.34	430.368	1063.62	1386.37	463.858	1090.02	1152.26	457.602	1109.36	1087.5	463.681	1031.09	988.164	442.444	1009.19	890.12	465.396	1072.08	868.59	460.278	1026.11	782.751
515	0	288.921	869.13	1567.03	189.019	872.857	1557.73	304.666	1034.54	1615.19	192.527	1048.41	1608.6	253.875	1115.88	1437.14	275.465	1175.49	1222.02	257.926	987.478	1364.69	249.766	927.431	1235.6	181.638	1188.54	1270.78	430.864	1054.06	1386.26	463.248	1080.14	1151.66	456.817	1099.81	1087	458.845	1020.79	987.438	435.694	1000.15	889.526	461.718	1062.21	868.12	452.674	1016.21	781.837
516	0	288.63	859.505	1566.35	188.732	863.502	1556.91	304.767	1024.73	1614.96	192.681	1038.93	1608.24	254.43	1106.72	1437.15	276.263	1167.23	1222.25	258.193	978.585	1364.26	249.976	918.97	1234.92	182.345	1180.14	1271.03	431.274	1044.62	1386.01	462.975	1070.39	1151.08	456.49	1090.26	1086.49	455.322	1010.66	986.844	430.542	991.062	889.058	459.242	1052.27	867.704	447.307	1006.35	781.13
517	0	288.334	849.936	1565.54	188.441	854.177	1555.98	304.829	1014.98	1614.59	192.793	1029.49	1607.75	254.904	1097.6	1437.01	276.961	1158.98	1222.3	258.405	969.722	1363.69	250.136	910.524	1234.13	182.942	1171.71	1271.12	431.596	1035.26	1385.64	463.047	1060.78	1150.52	456.623	1080.72	1085.97	453.151	1000.68	986.344	426.981	981.907	888.666	457.93	1042.28	867.313	444.106	996.56	780.556
518	0	288.034	840.421	1564.61	188.144	844.878	1554.94	304.85	1005.3	1614.08	192.86	1020.08	1607.13	255.297	1088.52	1436.72	277.555	1150.73	1222.18	258.557	960.881	1363.01	250.24	902.087	1233.23	183.434	1163.25	1271.03	431.828	1026	1385.14	463.46	1051.28	1149.98	457.204	1071.16	1085.44	452.305	990.869	985.899	424.932	972.668	888.307	457.71	1032.26	866.924	442.89	986.842	780.052
519	0	287.728	830.957	1563.57	187.839	835.602	1553.81	304.828	995.67	1613.44	192.878	1010.7	1606.4	255.608	1079.47	1436.28	278.045	1142.48	1221.89	258.645	952.057	1362.21	250.28	893.654	1232.22	183.824	1154.76	1270.77	431.972	1016.81	1384.53	464.193	1041.87	1149.46	458.205	1061.6	1084.9	452.692	981.211	985.475	424.256	963.335	887.946	458.486	1022.2	866.519	443.394	977.191	779.562
520	0	287.413	821.54	1562.42	187.523	826.346	1552.58	304.759	986.1	1612.67	192.846	1001.35	1605.55	255.836	1070.45	1435.7	278.43	1134.22	1221.44	258.665	943.244	1361.29	250.251	885.215	1231.13	184.117	1146.23	1270.34	432.027	1007.68	1383.81	465.215	1032.52	1148.96	459.586	1052.02	1084.34	454.159	971.69	985.045	424.772	953.91	887.552	460.14	1012.11	866.085	445.305	967.585	779.048
521	0	287.086	812.168	1561.17	187.191	817.108	1551.27	304.641	976.584	1611.79	192.759	992.017	1604.6	255.981	1061.45	1434.99	278.708	1125.93	1220.84	258.615	934.433	1360.28	250.15	876.762	1229.96	184.318	1137.68	1269.77	431.993	998.599	1382.99	466.482	1023.22	1148.47	461.295	1042.41	1083.77	456.509	962.28	984.591	426.268	944.398	887.105	462.549	1001.98	865.617	448.302	957.991	778.489
522	0	286.741	802.837	1559.83	186.838	807.884	1549.89	304.468	967.12	1610.79	192.614	982.711	1603.56	256.042	1052.46	1434.15	278.882	1117.62	1220.09	258.492	925.62	1359.18	249.972	868.288	1228.72	184.432	1129.08	1269.04	431.873	989.56	1382.06	467.941	1013.94	1147.98	463.271	1032.77	1083.19	459.514	952.945	984.102	428.521	934.818	886.59	465.582	991.807	865.116	452.076	948.37	777.874
523	0	286.373	793.543	1558.42	186.459	798.674	1548.44	304.24	957.705	1609.69	192.407	973.427	1602.43	256.02	1043.49	1433.19	278.951	1109.27	1219.22	258.293	916.795	1357.99	249.717	859.782	1227.43	184.461	1120.44	1268.18	431.667	980.546	1381.06	469.536	1004.65	1147.48	465.45	1023.1	1082.58	462.933	943.646	983.574	431.309	925.196	885.995	469.112	981.582	864.587	456.355	938.683	777.207
524	0	285.976	784.282	1556.94	186.048	789.474	1546.94	303.95	948.334	1608.49	192.136	964.162	1601.22	255.913	1034.53	1432.12	278.917	1100.86	1218.22	258.017	907.952	1356.72	249.384	851.234	1226.09	184.411	1111.76	1267.19	431.377	971.546	1379.97	471.208	995.318	1146.97	467.763	1013.38	1081.96	466.53	934.34	983.005	434.424	915.563	885.315	473.016	971.298	864.038	460.916	928.895	776.501
525	0	285.545	775.049	1555.41	185.598	780.284	1545.4	303.597	939.006	1607.22	191.797	954.914	1599.94	255.721	1025.57	1430.94	278.781	1092.4	1217.1	257.661	899.084	1355.39	248.973	842.633	1224.71	184.282	1103.03	1266.08	431.005	962.547	1378.81	472.899	985.93	1146.42	470.145	1003.63	1081.3	470.09	924.985	982.398	437.682	905.955	884.543	477.179	960.952	863.48	465.586	918.981	775.772
526	0	285.073	765.842	1553.84	185.105	771.101	1543.83	303.177	929.716	1605.87	191.388	945.682	1598.59	255.445	1016.59	1429.67	278.547	1083.85	1215.88	257.225	890.182	1354	248.485	833.968	1223.32	184.076	1094.24	1264.86	430.552	953.537	1377.58	474.552	976.466	1145.84	472.532	993.825	1080.62	473.431	915.546	981.753	440.926	896.409	883.674	481.495	950.544	862.92	470.243	908.924	775.041
527	0	284.555	756.654	1552.24	184.563	761.924	1542.24	302.686	920.461	1604.46	190.905	936.464	1597.19	255.084	1007.61	1428.32	278.215	1075.22	1214.56	256.707	881.239	1352.57	247.92	825.229	1221.9	183.795	1085.4	1263.54	430.019	944.505	1376.3	476.121	966.909	1145.21	474.863	983.974	1079.91	476.415	906	981.07	444.034	886.961	882.705	485.871	940.082	862.367	474.811	898.718	774.329
528	0	283.984	747.482	1550.63	183.968	752.749	1540.65	302.122	911.236	1602.99	190.345	927.257	1595.74	254.638	998.602	1426.88	277.79	1066.48	1213.15	256.108	872.248	1351.09	247.28	816.403	1220.47	183.44	1076.49	1262.13	429.407	935.438	1374.96	477.561	957.25	1144.53	477.088	974.075	1079.15	478.948	896.333	980.347	446.917	877.638	881.631	490.222	929.577	861.823	479.247	888.368	773.652
529	0	283.357	738.32	1549.02	183.315	743.575	1539.05	301.483	902.036	1601.48	189.708	918.058	1594.25	254.107	989.568	1425.38	277.275	1057.63	1211.66	255.426	863.202	1349.59	246.564	807.481	1219.04	183.012	1067.5	1260.62	428.718	926.326	1373.59	478.839	947.486	1143.79	479.159	964.129	1078.36	480.982	886.547	979.58	449.519	868.46	880.452	494.478	919.045	861.292	483.537	877.885	773.026
530	0	282.668	729.163	1547.42	182.601	734.396	1537.47	300.767	892.857	1599.94	188.99	908.864	1592.73	253.492	980.499	1423.82	276.673	1048.65	1210.08	254.662	854.094	1348.07	245.772	798.453	1217.61	182.511	1058.45	1259.04	427.951	917.158	1372.18	479.928	937.618	1142.99	481.04	954.142	1077.53	482.513	876.655	978.762	451.814	859.436	879.167	498.577	908.508	860.77	487.685	867.289	772.46
531	0	281.914	720.006	1545.83	181.823	725.211	1535.91	299.973	883.693	1598.38	188.192	899.671	1591.19	252.792	971.389	1422.21	275.991	1039.54	1208.44	253.816	844.917	1346.55	244.903	789.31	1216.2	181.938	1049.3	1257.38	427.108	907.925	1370.74	480.809	927.655	1142.13	482.701	944.118	1076.66	483.57	866.679	977.887	453.801	850.564	877.779	502.47	897.99	860.254	491.7	856.605	771.96
532	0	281.092	710.841	1544.28	180.979	716.015	1534.38	299.099	874.537	1596.8	187.313	890.475	1589.64	252.008	962.231	1420.56	275.232	1030.29	1206.74	252.889	835.667	1345.02	243.957	780.046	1214.8	181.295	1040.07	1255.66	426.19	898.62	1369.28	481.47	917.608	1141.22	484.117	934.068	1075.75	484.211	856.647	976.95	455.499	841.826	876.296	506.117	887.517	859.735	495.599	845.863	771.526
533	0	280.2	701.663	1542.76	180.068	706.801	1532.9	298.146	865.383	1595.23	186.352	881.27	1588.09	251.141	953.02	1418.88	274.401	1020.89	1204.98	251.881	826.337	1343.51	242.932	770.654	1213.42	180.584	1030.74	1253.89	425.198	889.236	1367.8	481.906	907.494	1140.25	485.274	924.002	1074.8	484.511	846.589	975.949	456.941	833.194	874.731	509.487	877.116	859.208	499.392	835.096	771.155
534	0	279.237	692.466	1541.3	179.089	697.567	1531.46	297.115	856.224	1593.67	185.31	872.052	1586.55	250.192	943.75	1417.19	273.504	1011.33	1203.18	250.796	816.924	1342.03	241.829	761.13	1212.08	179.806	1021.32	1252.06	424.133	879.768	1366.33	482.117	897.334	1139.24	486.16	913.933	1073.82	484.553	836.534	974.885	458.169	824.631	873.1	512.559	866.811	858.664	503.087	824.338	770.842
535	0	278.202	683.242	1539.9	178.042	688.306	1530.09	296.007	847.053	1592.13	184.19	862.814	1585.03	249.162	934.417	1415.51	272.545	1001.62	1201.34	249.636	807.425	1340.58	240.648	751.472	1210.78	178.964	1011.78	1250.2	422.997	870.215	1364.87	482.109	887.152	1138.2	486.772	903.875	1072.81	484.423	826.507	973.766	459.228	816.092	871.426	515.318	856.626	858.098	506.685	813.626	770.579
536	0	277.095	673.986	1538.57	176.927	679.013	1528.78	294.824	837.862	1590.63	182.993	853.551	1583.55	248.053	925.017	1413.83	271.528	991.756	1199.47	248.403	797.837	1339.18	239.39	741.678	1209.54	178.059	1002.14	1248.31	421.791	860.577	1363.43	481.89	876.971	1137.14	487.109	893.843	1071.79	484.198	816.529	972.602	460.164	807.529	869.736	517.757	846.579	857.509	510.181	802.992	770.361
537	0	275.918	664.692	1537.32	175.747	669.682	1527.55	293.57	828.645	1589.19	181.721	844.257	1582.11	246.866	915.546	1412.19	270.455	981.735	1197.6	247.103	788.159	1337.84	238.058	731.75	1208.36	177.094	992.386	1246.4	420.52	850.855	1362.03	481.471	866.817	1136.08	487.175	883.853	1070.77	483.945	806.614	971.413	461.017	798.896	868.059	519.871	836.683	856.897	513.562	792.468	770.179
538	0	274.672	655.353	1536.17	174.503	660.309	1526.41	292.247	819.395	1587.81	180.38	834.927	1580.74	245.604	906.003	1410.59	269.328	971.562	1195.73	245.741	778.391	1336.58	236.658	721.689	1207.25	176.07	982.516	1244.49	419.187	841.055	1360.68	480.863	856.715	1135.04	486.975	873.92	1069.77	483.718	796.771	970.221	461.821	790.15	866.428	521.664	826.948	856.268	516.81	782.081	770.03
539	0	273.362	645.964	1535.11	173.198	650.888	1525.38	290.861	810.105	1586.51	178.972	825.555	1579.44	244.268	896.385	1409.05	268.15	961.241	1193.88	244.322	768.533	1335.4	235.197	711.499	1206.24	174.988	972.53	1242.6	417.796	831.184	1359.41	480.081	846.689	1134.03	486.519	864.061	1068.79	483.555	787.006	969.055	462.601	781.258	864.878	523.14	817.376	855.631	519.906	771.853	769.911
540	0	271.991	636.522	1534.18	171.836	641.414	1524.45	289.416	800.771	1585.3	177.504	816.138	1578.24	242.863	886.693	1407.59	266.919	950.777	1192.09	242.855	758.589	1334.33	233.683	701.185	1205.34	173.849	962.428	1240.74	416.352	821.25	1358.22	479.136	836.761	1133.08	485.817	854.29	1067.86	483.477	777.318	967.946	463.376	772.19	863.443	524.305	807.965	855.002	522.825	761.801	769.822
541	0	270.564	627.022	1533.37	170.421	631.884	1523.65	287.919	791.388	1584.21	175.98	806.671	1577.14	241.391	876.927	1406.23	265.635	940.18	1190.36	241.347	748.562	1333.37	232.127	690.755	1204.56	172.651	952.211	1238.94	414.861	811.265	1357.14	478.042	826.95	1132.22	484.879	844.62	1067	483.493	767.709	966.928	464.153	762.929	862.16	525.168	798.707	854.398	525.541	751.934	769.768
542	0	269.088	617.462	1532.69	168.958	622.296	1522.99	286.374	781.954	1583.24	174.406	797.151	1576.15	239.857	867.088	1404.99	264.296	929.457	1188.72	239.807	738.457	1332.53	230.543	680.218	1203.9	171.395	941.882	1237.23	413.329	801.241	1356.19	476.811	817.274	1131.46	483.719	835.062	1066.24	483.599	758.177	966.036	464.933	753.467	861.064	525.737	789.589	853.842	528.027	742.256	769.756
543	0	267.57	607.842	1532.17	167.455	612.646	1522.47	284.789	772.465	1582.4	172.791	787.576	1575.3	238.265	857.178	1403.88	262.9	918.621	1187.19	238.244	728.28	1331.84	228.944	669.583	1203.39	170.078	931.448	1235.61	411.764	791.19	1355.39	475.454	807.746	1130.82	482.348	825.627	1065.58	483.785	748.724	965.307	465.711	743.802	860.188	526.021	780.598	853.357	530.257	732.763	769.799
544	0	266.018	598.161	1531.81	165.919	602.934	1522.11	283.171	762.921	1581.72	171.14	777.946	1574.59	236.62	847.202	1402.91	261.445	907.685	1185.82	236.669	718.038	1331.29	227.346	658.863	1203.04	168.698	920.914	1234.13	410.172	781.128	1354.74	473.983	798.376	1130.34	480.779	816.321	1065.06	484.029	739.35	964.773	466.474	733.944	859.566	526.028	771.715	852.969	532.205	723.446	769.911
545	0	264.44	588.421	1531.63	164.357	593.16	1521.92	281.527	753.325	1581.19	169.462	768.261	1574.02	234.928	837.163	1402.11	259.929	896.663	1184.61	235.091	707.74	1330.9	225.762	648.072	1202.85	167.253	910.291	1232.8	408.561	771.068	1354.28	472.407	789.169	1130.01	479.027	807.15	1064.69	484.309	730.062	964.465	467.208	723.909	859.225	525.765	762.922	852.701	533.848	714.293	770.112
546	0	262.849	578.625	1531.62	162.78	583.325	1521.91	279.866	743.677	1580.83	167.765	758.522	1573.62	233.195	827.067	1401.49	258.35	885.573	1183.59	233.521	697.397	1330.67	224.209	637.226	1202.82	165.739	899.591	1231.66	406.938	761.025	1354.01	470.736	780.129	1129.87	477.105	798.115	1064.49	484.597	720.864	964.408	467.896	713.719	859.19	525.24	754.201	852.576	535.166	705.282	770.424
547	0	261.253	568.777	1531.79	161.197	573.432	1522.08	278.195	733.982	1580.64	166.056	748.732	1573.38	231.428	816.922	1401.05	256.707	874.433	1182.78	231.968	687.018	1330.61	222.7	626.344	1202.96	164.155	888.825	1230.72	405.311	751.013	1353.94	468.98	771.252	1129.93	475.028	789.217	1064.46	484.866	711.763	964.62	468.518	703.403	859.479	524.46	745.534	852.615	536.143	696.392	770.869
548	0	259.665	558.884	1532.16	159.621	563.484	1522.43	276.522	724.246	1580.63	164.346	738.894	1573.31	229.634	806.736	1400.81	255.001	863.262	1182.21	230.442	676.617	1330.72	221.249	615.442	1203.28	162.499	878.009	1230.01	403.687	741.044	1354.08	467.148	762.533	1130.18	472.812	780.453	1064.63	485.089	702.768	965.113	469.055	692.99	860.102	523.432	736.905	852.833	536.769	687.597	771.467
549	0	258.098	548.952	1532.71	158.063	553.487	1522.96	274.857	714.475	1580.79	162.641	729.012	1573.4	227.819	796.519	1400.77	253.231	852.084	1181.88	228.952	666.205	1331.01	219.869	604.543	1203.76	160.768	867.16	1229.53	402.071	731.134	1354.44	465.25	753.962	1130.63	470.475	771.819	1065	485.24	693.885	965.889	469.488	682.515	861.059	522.168	728.298	853.24	537.038	678.869	772.237
550	0	256.564	538.991	1533.45	156.535	543.446	1523.68	273.206	704.677	1581.13	160.95	719.093	1573.67	225.991	786.279	1400.93	251.399	840.921	1181.81	227.506	655.797	1331.46	218.569	593.666	1204.4	158.962	856.293	1229.31	400.471	721.295	1354.99	463.296	745.527	1131.29	468.035	763.307	1065.56	485.296	685.119	966.94	469.8	672.014	862.342	520.677	719.701	853.84	536.95	670.18	773.187
551	0	255.076	529.01	1534.36	155.05	533.368	1524.57	271.579	694.861	1581.64	159.283	709.142	1574.09	224.157	776.03	1401.29	249.507	829.795	1181.99	226.11	645.406	1332.07	217.356	582.832	1205.19	157.08	845.427	1229.35	398.89	711.54	1355.75	461.297	737.213	1132.14	465.51	754.909	1066.32	485.235	676.47	968.25	469.978	661.521	863.93	518.973	711.104	854.63	536.513	661.501	774.321
552	0	253.647	519.02	1535.44	153.622	523.262	1525.63	269.983	685.037	1582.32	157.645	699.165	1574.68	222.323	765.784	1401.84	247.558	818.732	1182.41	224.769	635.047	1332.84	216.239	572.061	1206.12	155.123	834.58	1229.65	397.334	701.88	1356.71	459.262	729.003	1133.17	462.92	746.616	1067.25	485.041	667.936	969.792	470.01	651.07	865.794	517.076	702.497	855.598	535.74	652.805	775.631
553	0	252.29	509.032	1536.68	152.263	513.134	1526.83	268.424	675.216	1583.15	156.045	689.17	1575.42	220.496	755.552	1402.59	245.553	807.754	1183.08	223.488	624.732	1333.76	215.219	561.375	1207.18	153.094	823.77	1230.2	395.806	692.328	1357.83	457.202	720.881	1134.36	460.286	738.417	1068.35	484.702	659.51	971.532	469.889	640.692	867.894	515.006	693.875	856.728	534.654	644.066	777.098
554	0	251.017	499.058	1538.06	150.986	502.995	1528.18	266.911	665.408	1584.12	154.49	679.164	1576.29	218.681	745.347	1403.51	243.496	796.884	1183.97	222.271	614.475	1334.81	214.299	550.792	1208.36	150.995	813.013	1231	394.309	682.894	1359.12	455.128	712.829	1135.7	457.628	730.3	1069.6	484.209	651.183	973.428	469.611	630.412	870.183	512.787	685.236	857.998	533.279	635.263	778.697
555	0	249.839	489.111	1539.56	149.802	492.852	1529.64	265.448	655.624	1585.22	152.985	669.155	1577.29	216.883	735.183	1404.6	241.389	786.144	1185.07	221.117	604.29	1335.98	213.477	540.33	1209.63	148.83	802.328	1232.03	392.845	673.586	1360.54	453.051	704.832	1137.15	454.965	722.257	1070.98	483.558	642.942	975.437	469.177	620.253	872.608	510.445	676.577	859.382	531.651	626.38	780.396
556	0	248.768	479.201	1541.16	148.723	482.716	1531.21	264.041	645.876	1586.44	151.535	659.15	1578.41	215.107	725.072	1405.84	239.236	775.554	1186.35	220.027	594.187	1337.27	212.749	530.004	1210.98	146.606	791.728	1233.27	391.414	664.413	1362.07	450.979	696.876	1138.69	452.316	714.278	1072.45	482.75	634.77	977.511	468.587	610.233	875.116	508.01	667.903	860.85	529.806	617.405	782.159
557	0	247.811	469.342	1542.85	147.758	472.594	1532.86	262.694	636.173	1587.74	150.145	649.156	1579.63	213.357	715.023	1407.21	237.042	765.131	1187.78	219	584.177	1338.65	212.11	519.829	1212.39	144.331	781.228	1234.7	390.018	655.38	1363.7	448.922	688.95	1140.29	449.697	706.353	1074	481.785	626.652	979.605	467.848	600.365	877.652	505.508	659.219	862.374	527.784	608.336	783.955
558	0	246.977	459.544	1544.6	146.915	462.496	1534.58	261.411	626.526	1589.13	148.818	639.18	1580.93	211.636	705.049	1408.7	234.814	754.889	1189.35	218.034	574.269	1340.1	211.551	509.813	1213.86	142.015	770.84	1236.29	388.655	646.491	1365.38	446.887	681.045	1141.93	447.122	698.477	1075.59	480.671	618.573	981.68	466.961	590.661	880.168	502.966	650.534	863.926	525.626	599.177	785.752
559	0	246.272	449.817	1546.39	146.202	452.429	1536.34	260.195	616.944	1590.58	147.556	629.23	1582.3	209.948	695.158	1410.28	232.557	744.84	1191.02	217.124	564.47	1341.62	211.061	499.965	1215.36	139.668	760.572	1238.02	387.326	637.745	1367.11	444.879	673.155	1143.58	444.604	690.643	1077.21	479.413	610.524	983.7	465.934	581.128	882.622	500.406	641.859	865.48	523.373	589.943	787.529
560	0	245.698	440.171	1548.21	145.622	442.402	1538.14	259.046	607.435	1592.07	146.361	619.31	1583.73	208.296	685.356	1411.94	230.282	734.991	1192.77	216.266	554.785	1343.18	210.629	490.289	1216.87	137.303	750.432	1239.87	386.028	629.141	1368.85	442.902	665.279	1145.22	442.15	682.85	1078.84	478.019	602.494	985.64	464.768	571.774	884.978	497.85	633.209	867.016	521.062	580.655	789.269
561	0	245.259	430.613	1550.02	145.178	432.421	1539.94	257.966	598.006	1593.58	145.235	609.429	1585.2	206.681	675.651	1413.65	227.999	725.346	1194.57	215.455	545.217	1344.77	210.242	480.784	1218.4	134.932	740.423	1241.8	384.76	620.674	1370.59	440.958	657.418	1146.83	439.766	675.096	1080.45	476.498	594.483	987.48	463.468	562.605	887.213	495.311	624.601	868.517	518.725	571.344	790.964
562	0	244.952	421.151	1551.82	144.87	422.493	1541.74	256.955	588.663	1595.11	144.175	599.59	1586.7	205.105	666.046	1415.39	225.72	715.904	1196.41	214.686	535.768	1346.37	209.886	471.446	1219.92	132.569	730.548	1243.79	383.52	612.338	1372.3	439.048	649.576	1148.4	437.454	667.38	1082.03	474.86	586.49	989.212	462.036	553.624	889.311	492.803	616.051	869.97	516.392	562.047	792.614
563	0	244.777	411.788	1553.58	144.695	412.625	1543.52	256.012	579.408	1596.62	143.183	589.798	1588.21	203.569	656.543	1417.16	223.456	706.659	1198.25	213.951	526.438	1347.97	209.548	462.269	1221.42	130.226	720.806	1245.8	382.304	604.123	1373.97	437.171	641.757	1149.91	435.213	659.707	1083.56	473.116	578.523	990.83	460.477	544.838	891.264	490.332	607.579	871.366	514.084	552.804	794.222
564	0	244.727	402.529	1555.29	144.65	402.82	1545.27	255.136	570.245	1598.11	142.257	580.057	1589.72	202.074	647.143	1418.91	221.22	697.604	1200.07	213.247	517.224	1349.55	209.217	453.241	1222.89	127.914	711.191	1247.82	381.111	596.019	1375.59	435.326	633.969	1151.36	433.039	652.076	1085.04	471.277	570.593	992.337	458.796	536.25	893.071	487.903	599.202	872.701	511.818	543.656	795.791
565	0	244.795	393.373	1556.93	144.727	393.085	1546.96	254.325	561.172	1599.56	141.396	570.371	1591.2	200.62	637.844	1420.65	219.023	688.728	1201.86	212.567	508.123	1351.1	208.883	444.352	1224.32	125.646	701.7	1249.82	379.939	588.016	1377.13	433.509	626.22	1152.72	430.928	644.493	1086.45	469.359	562.711	993.738	457.001	527.861	894.733	485.519	590.938	873.969	509.604	534.646	797.324
566	0	244.974	384.321	1558.49	144.916	383.421	1548.58	253.577	552.19	1600.95	140.597	560.742	1592.66	199.209	628.644	1422.34	216.874	680.015	1203.6	211.907	499.129	1352.59	208.539	435.585	1225.7	123.428	692.324	1251.77	378.785	580.099	1378.59	431.719	618.517	1154.01	428.873	636.959	1087.78	467.376	554.894	995.037	455.105	519.674	896.254	483.18	582.805	875.167	507.448	525.814	798.821
567	0	245.25	375.368	1559.94	145.208	373.832	1550.13	252.889	543.294	1602.28	139.859	551.173	1594.08	197.839	619.539	1423.98	214.781	671.45	1205.27	211.264	490.236	1354.03	208.179	426.926	1227.03	121.269	683.054	1253.66	377.649	572.259	1379.95	429.953	610.867	1155.2	426.869	629.477	1089.03	465.349	547.156	996.237	453.125	511.687	897.637	480.886	574.816	876.292	505.351	517.195	800.271
568	0	245.612	366.512	1561.29	145.589	364.32	1551.59	252.26	534.48	1603.53	139.179	541.663	1595.44	196.51	610.523	1425.55	212.75	663.015	1206.85	210.634	481.435	1355.38	207.802	418.36	1228.28	119.175	673.882	1255.46	376.531	564.48	1381.22	428.211	603.276	1156.3	424.909	622.047	1090.2	463.295	539.511	997.339	451.081	503.898	898.884	478.637	566.986	877.338	503.313	508.822	801.662
569	0	246.047	357.745	1562.51	146.045	354.884	1552.94	251.685	525.74	1604.69	138.555	532.213	1596.73	195.223	601.589	1427.02	210.785	654.693	1208.34	210.016	472.719	1356.65	207.407	409.874	1229.45	117.15	664.797	1257.15	375.43	556.752	1382.37	426.49	595.747	1157.31	422.989	614.67	1091.27	461.236	531.971	998.339	448.998	496.301	899.992	476.434	559.325	878.298	501.329	500.718	802.969
570	0	246.539	349.06	1563.59	146.562	345.523	1554.18	251.163	517.066	1605.75	137.985	522.822	1597.95	193.979	592.731	1428.4	208.888	646.464	1209.72	209.409	464.079	1357.82	206.996	401.454	1230.52	115.199	655.79	1258.73	374.348	549.062	1383.41	424.793	588.281	1158.21	421.104	607.345	1092.23	459.192	524.546	999.231	446.9	488.891	900.956	474.278	551.839	879.164	499.396	492.904	804.166
571	0	247.074	340.445	1564.54	147.123	336.237	1555.29	250.691	508.448	1606.7	137.466	513.488	1599.08	192.777	583.939	1429.66	207.061	638.31	1210.98	208.812	455.505	1358.87	206.576	393.091	1231.49	113.324	646.852	1260.18	373.287	541.398	1384.33	423.12	580.878	1159	419.253	600.068	1093.09	457.182	517.241	1000	444.814	481.659	901.768	472.171	544.535	879.924	497.511	485.392	805.222
572	0	247.635	331.891	1565.32	147.712	327.022	1556.27	250.265	499.875	1607.54	136.997	504.209	1600.11	191.62	575.206	1430.8	205.307	630.213	1212.11	208.228	446.989	1359.81	206.15	384.775	1232.33	111.528	637.974	1261.49	372.252	533.748	1385.12	421.475	573.536	1159.68	417.435	592.835	1093.84	455.225	510.059	1000.65	442.764	474.596	902.418	470.118	537.413	880.571	495.672	478.187	806.107
573	0	248.21	323.386	1565.95	148.315	317.874	1557.1	249.884	491.337	1608.26	136.575	494.982	1601.04	190.51	566.522	1431.81	203.626	622.156	1213.11	207.658	438.52	1360.61	205.725	376.498	1233.06	109.815	629.149	1262.65	371.246	526.102	1385.79	419.862	566.249	1160.25	415.651	585.641	1094.47	453.334	502.998	1001.14	440.771	467.691	902.896	468.121	530.472	881.093	493.881	471.289	806.795
574	0	248.784	314.917	1566.42	148.917	308.789	1557.77	249.545	482.82	1608.85	136.198	485.801	1601.87	189.448	557.88	1432.69	202.022	614.123	1213.98	207.104	430.089	1361.28	205.309	368.255	1233.64	108.19	620.371	1263.66	370.274	518.448	1386.32	418.285	559.011	1160.69	413.905	578.479	1094.98	451.522	496.056	1001.49	438.852	460.935	903.193	466.185	523.708	881.483	492.139	464.689	807.264
575	0	249.343	306.471	1566.71	149.504	299.76	1558.29	249.246	474.314	1609.32	135.864	476.662	1602.58	188.439	549.27	1433.43	200.498	606.1	1214.72	206.571	421.688	1361.81	204.907	360.041	1234.08	106.655	611.635	1264.52	369.342	510.775	1386.72	416.751	551.813	1161.02	412.201	571.344	1095.37	449.795	489.222	1001.66	437.016	454.318	903.303	464.315	517.115	881.735	490.453	458.373	807.504
576	0	249.879	298.037	1566.84	150.064	290.781	1558.64	248.985	465.806	1609.66	135.572	467.56	1603.17	187.486	540.684	1434.02	199.058	598.074	1215.31	206.061	413.308	1362.19	204.527	351.849	1234.37	105.217	602.937	1265.22	368.457	503.073	1386.99	415.266	544.645	1161.22	410.544	564.225	1095.63	448.157	482.489	1001.67	435.269	447.831	903.22	462.515	510.683	881.846	488.832	452.323	807.511
577	0	250.38	289.601	1566.79	150.589	281.846	1558.81	248.76	457.285	1609.88	135.32	458.49	1603.64	186.594	532.114	1434.47	197.711	590.033	1215.78	205.578	404.941	1362.43	204.173	343.675	1234.51	103.88	594.273	1265.78	367.624	495.331	1387.13	413.839	537.496	1161.31	408.942	557.116	1095.77	446.608	475.842	1001.5	433.611	441.467	902.944	460.789	504.402	881.814	487.283	446.517	807.291
578	0	250.841	281.153	1566.57	151.069	272.947	1558.81	248.57	448.741	1609.97	135.105	449.445	1603.98	185.767	523.553	1434.78	196.463	581.97	1216.11	205.127	396.579	1362.52	203.85	335.514	1234.5	102.651	585.642	1266.18	366.851	487.538	1387.14	412.478	530.354	1161.27	407.401	550.009	1095.79	445.147	469.267	1001.16	432.039	435.219	902.478	459.141	498.261	881.641	485.817	440.929	806.858
579	0	251.257	272.682	1566.18	151.502	264.077	1558.64	248.414	440.165	1609.93	134.928	440.42	1604.19	185.012	514.994	1434.94	195.323	573.876	1216.32	204.711	388.215	1362.46	203.563	327.359	1234.33	101.536	577.04	1266.45	366.144	479.686	1387.03	411.19	523.207	1161.12	405.93	542.893	1095.69	443.769	462.749	1000.66	430.544	429.081	901.826	457.573	492.247	881.333	484.443	435.535	806.229
580	0	251.624	264.181	1565.63	151.882	255.228	1558.3	248.291	431.55	1609.77	134.787	431.41	1604.28	184.333	506.431	1434.96	194.3	565.746	1216.41	204.335	379.843	1362.26	203.314	319.205	1234.02	100.541	568.467	1266.57	365.51	471.764	1386.79	409.984	516.039	1160.86	404.538	535.762	1095.48	442.47	456.271	1000	429.121	423.049	900.999	456.089	486.346	880.896	483.169	430.309	805.428
581	0	251.945	255.641	1564.92	152.212	246.394	1557.79	248.2	422.89	1609.5	134.681	422.411	1604.24	183.736	497.858	1434.84	193.402	557.576	1216.37	204.003	371.455	1361.92	203.105	311.043	1233.57	99.6719	559.919	1266.57	364.953	463.764	1386.43	408.868	508.837	1160.49	403.232	528.604	1095.15	441.246	449.816	999.202	427.762	417.115	900.008	454.692	480.545	880.338	482	425.228	804.479
582	0	252.219	247.058	1564.07	152.492	237.569	1557.13	248.143	414.181	1609.1	134.611	413.416	1604.08	183.226	489.27	1434.59	192.637	549.363	1216.23	203.719	363.047	1361.44	202.938	302.865	1232.98	98.9333	551.395	1266.43	364.481	455.679	1385.96	407.849	501.588	1160.02	402.021	521.412	1094.72	440.096	443.369	998.267	426.464	411.271	898.866	453.382	474.83	879.67	480.941	420.273	803.405
583	0	252.452	238.427	1563.08	152.727	228.746	1556.3	248.118	405.42	1608.6	134.577	404.424	1603.79	182.809	480.663	1434.21	192.012	541.103	1215.97	203.485	354.613	1360.82	202.812	294.665	1232.26	98.3298	542.892	1266.18	364.097	447.5	1385.38	406.935	494.278	1159.45	400.912	514.176	1094.2	439.021	436.914	997.215	425.226	405.507	897.588	452.164	469.186	878.902	479.991	415.424	802.229
584	0	252.648	229.746	1561.96	152.923	219.92	1555.34	248.128	396.606	1607.99	134.58	395.43	1603.37	182.489	472.032	1433.7	191.531	532.796	1215.61	203.306	346.147	1360.08	202.728	286.434	1231.43	97.8649	534.405	1265.82	363.807	439.221	1384.68	406.133	486.893	1158.78	399.914	506.886	1093.57	438.021	430.439	996.058	424.052	399.808	896.191	451.039	463.598	878.045	479.15	410.666	800.967
585	0	252.817	221.014	1560.74	153.088	211.088	1554.24	248.175	387.741	1607.28	134.621	386.434	1602.83	182.272	463.374	1433.07	191.198	524.441	1215.15	203.184	337.645	1359.22	202.685	278.163	1230.48	97.5413	525.931	1265.34	363.613	430.838	1383.89	405.447	479.422	1158.03	399.032	499.534	1092.86	437.103	423.932	994.809	422.949	394.161	894.689	450.009	458.051	877.109	478.414	405.986	799.634
586	0	252.964	212.23	1559.41	153.23	202.246	1553.02	248.261	378.825	1606.47	134.703	377.433	1602.18	182.16	454.686	1432.33	191.015	516.035	1214.59	203.122	329.102	1358.25	202.683	269.846	1229.44	97.3605	517.464	1264.75	363.518	422.347	1382.99	404.882	471.855	1157.2	398.273	492.11	1092.07	436.274	417.38	993.479	421.927	388.545	893.097	449.077	452.528	876.105	477.777	401.371	798.238
587	0	253.101	203.397	1557.99	153.361	193.393	1551.7	248.389	369.862	1605.56	134.829	368.428	1601.41	182.158	445.965	1431.48	190.982	507.579	1213.93	203.123	320.512	1357.18	202.72	261.475	1228.3	97.3234	508.997	1264.07	363.526	413.743	1382	404.442	464.181	1156.29	397.642	484.606	1091.19	435.543	410.776	992.079	420.999	382.942	891.427	448.246	447.012	875.039	477.234	396.809	796.785
588	0	253.236	194.517	1556.5	153.489	184.525	1550.29	248.564	360.856	1604.57	135.003	359.419	1600.54	182.267	437.21	1430.52	191.097	499.071	1213.16	203.189	311.871	1356.02	202.797	253.044	1227.09	97.4299	500.524	1263.28	363.636	405.026	1380.91	404.129	456.393	1155.29	397.142	477.011	1090.24	434.922	404.11	990.616	420.179	377.328	889.693	447.517	441.485	873.919	476.779	392.283	795.274
589	0	253.379	185.592	1554.95	153.624	175.645	1548.8	248.789	351.812	1603.5	135.228	350.407	1599.56	182.49	428.417	1429.45	191.359	490.507	1212.3	203.323	303.176	1354.77	202.913	244.546	1225.8	97.6789	492.037	1262.4	363.851	396.195	1379.74	403.945	448.485	1154.23	396.776	469.317	1089.21	434.42	397.373	989.096	419.483	371.679	887.902	446.893	435.929	872.747	476.409	387.778	793.704
590	0	253.541	176.627	1553.36	153.778	166.75	1547.26	249.069	342.735	1602.36	135.509	341.393	1598.48	182.828	419.585	1428.3	191.762	481.886	1211.34	203.528	294.42	1353.44	203.068	235.975	1224.46	98.0687	483.525	1261.41	364.169	387.25	1378.47	403.891	440.45	1153.08	396.547	461.516	1088.11	434.049	390.556	987.525	418.928	365.973	886.064	446.379	430.322	871.528	476.121	383.273	792.073
591	0	253.729	167.625	1551.74	153.96	157.843	1545.67	249.409	333.63	1601.15	135.851	332.38	1597.32	183.28	410.711	1427.05	192.303	473.201	1210.28	203.805	285.601	1352.06	203.263	227.324	1223.06	98.5965	474.979	1260.33	364.592	378.192	1377.13	403.965	432.285	1151.87	396.455	453.598	1086.95	433.82	383.651	985.905	418.526	360.183	884.185	445.978	424.644	870.262	475.913	378.744	790.377
592	0	253.954	158.589	1550.11	154.178	148.925	1544.05	249.815	324.502	1599.88	136.259	323.369	1596.09	183.847	401.795	1425.73	192.976	464.448	1209.11	204.157	276.713	1350.62	203.5	218.586	1221.63	99.2588	466.389	1259.16	365.119	369.023	1375.7	404.167	423.985	1150.59	396.499	445.556	1085.71	433.741	376.646	984.24	418.292	354.287	882.27	445.694	418.872	868.951	475.788	374.162	788.616
593	0	254.223	149.522	1548.48	154.441	139.997	1542.42	250.292	315.356	1598.55	136.739	314.364	1594.78	184.527	392.833	1424.32	193.775	455.618	1207.84	204.585	267.753	1349.14	203.782	209.755	1220.16	100.051	457.743	1257.9	365.747	359.748	1374.21	404.494	415.547	1149.24	396.678	437.38	1084.4	433.819	369.529	982.533	418.234	348.259	880.325	445.53	412.985	867.595	475.75	369.495	786.792
594	0	254.544	140.429	1546.86	154.756	131.061	1540.8	250.845	306.195	1597.19	137.295	305.364	1593.43	185.318	383.823	1422.86	194.691	446.704	1206.48	205.092	258.716	1347.64	204.111	200.824	1218.68	100.968	449.029	1256.54	366.475	350.369	1372.64	404.944	406.969	1147.82	396.991	429.064	1083.03	434.058	362.289	980.787	418.36	342.077	878.352	445.492	406.958	866.195	475.806	364.706	784.908
595	0	254.922	131.311	1545.27	155.13	122.118	1539.2	251.479	297.022	1595.81	137.932	296.372	1592.03	186.217	374.765	1421.33	195.718	437.696	1205.01	205.68	249.599	1346.13	204.493	191.784	1217.19	102.004	440.235	1255.11	367.301	340.893	1371.03	405.513	398.247	1146.34	397.434	420.598	1081.6	434.458	354.91	979.006	418.672	335.717	876.358	445.584	400.77	864.753	475.963	359.758	782.972
596	0	255.364	122.17	1543.73	155.567	113.168	1537.63	252.198	287.841	1594.4	138.655	287.389	1590.6	187.219	365.655	1419.76	196.848	428.582	1203.46	206.349	240.399	1344.62	204.931	182.63	1215.72	103.152	431.35	1253.59	368.222	331.325	1369.36	406.198	389.379	1144.81	398.004	411.976	1080.12	435.019	347.378	977.194	419.17	329.16	874.346	445.808	394.396	863.271	476.235	354.61	780.996
597	0	255.873	113.007	1542.24	156.073	104.213	1536.12	253.006	278.653	1592.99	139.467	278.413	1589.16	188.319	356.492	1418.15	198.07	419.352	1201.82	207.1	231.113	1343.13	205.43	173.352	1214.27	104.402	422.36	1252.01	369.234	321.67	1367.66	406.993	380.363	1143.24	398.695	403.19	1078.59	435.735	339.675	975.357	419.85	322.385	872.323	446.169	387.813	861.754	476.631	349.224	778.993
598	0	256.454	103.822	1540.82	156.65	95.252	1534.67	253.905	269.458	1591.59	140.37	269.444	1587.73	189.513	347.274	1416.52	199.376	409.993	1200.11	207.935	221.738	1341.67	205.997	163.946	1212.87	105.747	413.255	1250.36	370.333	311.937	1365.94	407.894	371.196	1141.62	399.504	394.234	1077.02	436.602	331.786	973.5	420.704	315.373	870.294	446.668	380.999	860.208	477.164	343.561	776.979
599	0	257.108	94.6152	1539.49	157.301	86.2827	1533.3	254.898	260.255	1590.22	141.367	260.481	1586.32	190.794	337.999	1414.88	200.756	400.495	1198.33	208.852	212.272	1340.25	206.635	154.406	1211.52	107.176	404.025	1248.67	371.515	302.131	1364.2	408.896	361.878	1139.98	400.425	385.103	1075.43	437.609	323.693	971.633	421.722	308.107	868.268	447.307	373.931	858.641	477.846	337.585	774.974
600	0	257.839	85.3848	1538.25	158.027	77.3029	1532.03	255.984	251.044	1588.88	142.458	251.52	1584.95	192.155	328.666	1413.25	202.198	390.847	1196.51	209.851	202.715	1338.91	207.349	144.728	1210.24	108.679	394.66	1246.94	372.774	292.26	1362.48	409.992	352.406	1138.33	401.451	375.793	1073.82	438.747	315.38	969.765	422.892	300.569	866.253	448.085	366.588	857.062	478.687	331.262	772.995
601	0	258.645	76.1293	1537.11	158.829	68.3093	1530.86	257.163	241.821	1587.6	143.642	242.556	1583.63	193.588	319.272	1411.64	203.693	381.039	1194.65	210.929	193.065	1337.64	208.144	134.909	1209.06	110.244	385.153	1245.2	374.104	282.33	1360.78	411.176	342.78	1136.67	402.576	366.299	1072.2	440.007	306.832	967.909	424.203	292.745	864.262	449.003	358.948	855.484	479.695	324.563	771.063
602	0	259.529	66.8463	1536.1	159.707	59.2973	1529.82	258.432	232.585	1586.39	144.917	233.586	1582.38	195.085	309.817	1410.07	205.228	371.064	1192.79	212.085	183.324	1336.46	209.021	124.95	1207.99	111.859	375.497	1243.46	375.499	272.349	1359.13	412.442	333.002	1135.04	403.794	356.62	1070.6	441.378	298.034	966.081	425.64	284.619	862.307	450.057	350.993	853.923	480.875	317.461	769.199
603	0	260.488	57.5335	1535.22	160.66	50.2617	1528.91	259.789	223.332	1585.26	146.278	224.603	1581.23	196.637	300.299	1408.57	206.792	360.916	1190.94	213.313	173.491	1335.4	209.981	114.851	1207.04	113.511	365.69	1241.74	376.952	262.323	1357.54	413.783	323.072	1133.44	405.098	346.755	1069.03	442.85	288.972	964.299	427.192	276.176	860.406	451.246	342.704	852.393	482.229	309.933	767.422
604	0	261.521	48.1879	1534.48	161.686	41.1967	1528.15	261.227	214.059	1584.24	147.722	215.6	1580.17	198.236	290.719	1407.13	208.373	350.593	1189.13	214.609	163.569	1334.46	211.025	104.617	1206.24	115.189	355.729	1240.07	378.454	252.255	1356.04	415.19	312.994	1131.9	406.481	336.705	1067.51	444.414	279.638	962.585	428.848	267.403	858.579	452.565	334.067	850.916	483.754	301.958	765.752
605	0	262.627	38.8068	1533.89	162.784	32.096	1527.54	262.741	204.761	1583.32	149.24	206.572	1579.24	199.872	281.075	1405.8	209.961	340.096	1187.38	215.967	153.562	1333.65	212.15	94.254	1205.58	116.879	345.617	1238.47	379.998	242.153	1354.64	416.657	302.771	1130.43	407.936	326.47	1066.07	446.06	270.021	960.961	430.595	258.287	856.849	454.01	325.065	849.51	485.444	293.52	764.209
606	0	263.801	29.3875	1533.46	163.95	22.953	1527.1	264.323	195.434	1582.54	150.826	197.511	1578.44	201.536	271.37	1404.57	211.544	329.43	1185.72	217.38	143.472	1333	213.35	83.771	1205.1	118.568	335.357	1236.96	381.574	232.018	1353.37	418.176	292.407	1129.07	409.456	316.055	1064.71	447.78	260.117	959.455	432.426	248.817	855.24	455.574	315.689	848.199	487.291	284.605	762.813
607	0	265.04	19.9274	1533.19	165.179	13.7611	1526.84	265.963	186.076	1581.89	152.469	188.41	1577.79	203.218	261.602	1403.48	213.113	318.602	1184.18	218.839	133.304	1332.5	214.62	73.1788	1204.79	120.247	324.958	1235.56	383.173	221.853	1352.24	419.74	281.907	1127.83	411.035	305.463	1063.46	449.566	249.922	958.093	434.33	238.983	853.782	457.251	305.927	847.005	489.28	275.203	761.582
608	0	266.338	10.4243	1533.09	166.469	4.51418	1526.75	267.651	176.682	1581.38	154.159	179.263	1577.29	204.908	251.775	1402.53	214.659	307.625	1182.79	220.336	123.063	1332.16	215.953	62.4905	1204.66	121.903	314.428	1234.31	384.787	211.661	1351.28	421.341	271.279	1126.74	412.666	294.701	1062.35	451.41	239.434	956.905	436.299	228.776	852.504	459.033	295.774	845.949	491.396	265.306	760.536
609	0	267.688	0.876564	1533.17	167.811	-4.79346	1526.85	269.375	167.25	1581.03	155.885	170.062	1576.95	206.599	241.89	1401.74	216.175	296.515	1181.56	221.86	112.757	1332	217.338	51.7211	1204.71	123.528	303.781	1233.21	386.407	201.442	1350.5	422.972	260.526	1125.82	414.342	283.775	1061.39	453.303	228.655	955.918	438.321	218.194	851.433	460.912	285.224	845.055	493.621	254.91	759.695
610	0	269.085	-8.71718	1533.42	169.201	-14.1667	1527.13	271.122	157.777	1580.83	157.633	160.802	1576.78	208.282	231.951	1401.12	217.654	285.291	1180.53	223.402	102.393	1332.01	218.766	40.8871	1204.95	125.114	293.034	1232.29	388.023	191.196	1349.91	424.627	249.657	1125.07	416.06	272.693	1060.6	455.236	217.586	955.16	440.389	207.232	850.599	462.879	274.275	844.344	495.938	244.012	759.076
611	0	270.519	-18.3575	1533.84	170.63	-23.6096	1527.6	272.88	148.261	1580.8	159.391	151.478	1576.78	209.949	221.961	1400.68	219.094	273.979	1179.71	224.951	91.9784	1332.2	220.224	30.0064	1205.37	126.655	282.205	1231.57	389.627	180.921	1349.54	426.301	238.677	1124.53	417.813	261.464	1059.99	457.198	206.234	954.655	442.49	195.89	850.028	464.925	262.927	843.833	498.325	232.613	758.699
612	0	271.981	-28.0446	1534.43	172.089	-33.1247	1528.25	274.634	138.701	1580.93	161.144	142.087	1576.94	211.595	211.926	1400.43	220.495	262.603	1179.13	226.497	81.5226	1332.56	221.7	19.0979	1205.96	128.149	271.317	1231.06	391.212	170.616	1349.38	427.989	227.594	1124.21	419.598	250.098	1059.58	459.182	194.605	954.423	444.613	184.173	849.74	467.039	251.184	843.539	500.765	220.712	758.581
613	0	273.461	-37.7777	1535.18	173.568	-42.7134	1529.06	276.371	129.095	1581.22	162.879	132.625	1577.27	213.214	201.851	1400.37	221.857	251.193	1178.78	228.029	71.0354	1333.09	223.182	8.18065	1206.71	129.595	260.394	1230.78	392.773	160.278	1349.45	429.688	216.414	1124.1	421.413	238.605	1059.38	461.175	182.709	954.479	446.746	172.087	849.755	469.212	239.051	843.473	503.237	208.313	758.733
614	0	274.946	-47.5556	1536.08	175.056	-52.3756	1530.04	278.075	119.443	1581.66	164.581	123.092	1577.76	214.802	191.743	1400.51	223.186	239.781	1178.69	229.538	60.5271	1333.77	224.654	-2.72614	1207.62	130.996	249.461	1230.72	394.302	149.903	1349.74	431.396	205.143	1124.23	423.256	226.995	1059.4	463.169	170.558	954.833	448.877	159.639	850.083	471.434	226.537	843.643	505.723	195.421	759.167
615	0	276.426	-57.3767	1537.13	176.541	-62.1098	1531.16	279.735	109.746	1582.26	166.239	113.488	1578.4	216.358	181.609	1400.84	224.49	228.398	1178.86	231.012	50.0086	1334.61	226.105	-13.6037	1208.65	132.359	238.547	1230.89	395.796	139.489	1350.27	433.111	193.787	1124.58	425.126	215.279	1059.63	465.155	158.166	955.487	450.993	146.841	850.73	473.693	213.652	844.049	508.205	182.044	759.887
616	0	277.888	-67.2386	1538.3	178.011	-71.9127	1532.41	281.336	100.003	1583	167.837	103.814	1579.17	217.878	171.457	1401.35	225.78	217.076	1179.28	232.444	39.4908	1335.59	227.519	-24.4341	1209.81	133.693	227.679	1231.28	397.252	129.033	1351.01	434.834	182.35	1125.16	427.023	203.465	1060.08	467.124	145.549	956.432	453.084	133.709	851.693	475.981	200.411	844.687	510.667	168.191	760.888
617	0	279.318	-77.1387	1539.59	179.452	-81.7797	1533.76	282.867	90.2166	1583.87	169.366	94.0729	1580.07	219.365	161.295	1402.05	227.068	205.847	1179.94	233.825	28.9849	1336.7	228.884	-35.2004	1211.06	135.009	216.886	1231.89	398.667	118.531	1351.96	436.567	170.837	1125.96	428.949	191.563	1060.73	469.072	132.726	957.656	455.139	120.259	852.961	478.286	186.831	845.548	513.092	153.877	762.161
618	0	280.702	-87.0739	1540.97	180.85	-91.705	1535.2	284.316	80.3874	1584.87	170.813	84.269	1581.09	220.818	151.132	1402.91	228.368	194.739	1180.84	235.147	18.5021	1337.92	230.187	-45.8866	1212.39	136.322	206.194	1232.71	400.041	107.981	1353.11	438.312	159.251	1126.97	430.905	179.58	1061.59	470.992	119.713	959.135	457.147	106.511	854.517	480.598	172.929	846.618	515.467	139.118	763.689
619	0	282.029	-97.0408	1542.43	182.193	-101.681	1536.71	285.676	70.5172	1585.98	172.171	74.4078	1582.2	222.239	140.978	1403.94	229.697	183.779	1181.94	236.405	8.05322	1339.23	231.415	-56.4782	1213.78	137.644	195.63	1233.73	401.373	97.3823	1354.45	440.071	147.591	1128.17	432.895	167.523	1062.63	472.88	106.531	960.842	459.101	92.4887	856.336	482.91	158.727	847.876	517.778	123.936	765.448
620	0	283.284	-107.036	1543.95	183.466	-111.7	1538.26	286.938	60.6082	1587.19	173.433	64.4961	1583.38	223.63	130.84	1405.11	231.068	172.992	1183.24	237.594	-2.3514	1340.63	232.559	-66.962	1215.21	138.991	185.215	1234.92	402.662	86.7338	1355.96	441.848	135.859	1129.54	434.921	155.396	1063.84	474.733	93.1955	962.745	460.993	78.2157	858.388	485.212	144.247	849.302	520.015	108.357	767.409
621	0	284.455	-117.055	1545.52	184.658	-121.752	1539.82	288.097	50.6629	1588.48	174.592	54.5417	1584.64	224.995	120.729	1406.41	232.495	162.397	1184.71	238.71	-12.7019	1342.09	233.611	-77.3262	1216.67	140.376	174.971	1236.27	403.91	76.0371	1357.62	443.647	124.053	1131.07	436.987	143.202	1065.2	476.548	79.7224	964.808	462.815	63.7195	860.64	487.497	129.512	850.873	522.165	92.4101	769.542
622	0	285.532	-127.096	1547.11	185.755	-131.827	1541.38	289.149	40.6842	1589.85	175.646	44.5531	1585.94	226.335	110.651	1407.82	233.989	152.011	1186.34	239.749	-22.9894	1343.6	234.563	-87.5605	1218.13	141.81	164.911	1237.76	405.117	65.2955	1359.41	445.468	112.17	1132.73	439.094	130.941	1066.7	478.321	66.1241	966.997	464.559	49.0289	863.055	489.758	114.547	852.564	524.222	76.1302	771.815
623	0	286.504	-137.152	1548.71	186.748	-141.914	1542.93	290.093	30.6753	1591.27	176.594	34.54	1587.27	227.653	100.615	1409.34	235.558	141.843	1188.08	240.712	-33.2056	1345.15	235.413	-97.6564	1219.59	143.303	155.049	1239.37	406.283	54.5137	1361.31	447.314	100.207	1134.51	441.243	118.615	1068.31	480.047	52.4106	969.281	466.217	34.1738	865.598	491.989	99.3758	854.356	526.176	59.5552	774.201
624	0	287.362	-147.221	1550.3	187.627	-152.003	1544.43	290.93	20.64	1592.73	177.437	24.5124	1588.61	228.95	90.6287	1410.93	237.207	131.901	1189.93	241.596	-43.3434	1346.72	236.158	-107.608	1221.02	144.86	145.39	1241.08	407.408	43.6986	1363.3	449.184	88.1601	1136.37	443.436	106.22	1070.02	481.719	38.5889	971.632	467.781	19.185	868.237	494.185	84.0226	856.23	528.021	42.7259	776.675
625	0	288.101	-157.297	1551.86	188.386	-162.083	1545.87	291.663	10.5828	1594.23	178.177	14.4807	1589.96	230.229	80.6974	1412.58	238.937	122.184	1191.87	242.403	-53.3968	1348.29	236.801	-117.41	1222.43	146.483	135.936	1242.87	408.493	32.8585	1365.36	451.077	76.0274	1138.31	445.671	93.7571	1071.81	483.328	24.6642	974.026	469.241	4.09339	870.942	496.342	68.5108	858.171	529.752	25.6852	779.216
626	0	288.716	-167.375	1553.38	189.019	-172.142	1547.24	292.295	0.50863	1595.73	178.819	4.45592	1591.29	231.488	70.8272	1414.28	240.742	112.688	1193.86	243.135	-63.361	1349.85	237.344	-127.063	1223.8	148.171	126.684	1244.73	409.538	22.003	1367.48	452.988	63.8067	1140.3	447.944	81.2241	1073.65	484.865	10.6403	976.449	470.588	-11.0709	873.689	498.456	52.8633	860.169	531.363	8.47677	781.809
627	0	289.203	-177.45	1554.85	189.522	-182.169	1548.53	292.833	-9.57693	1597.24	179.369	-5.55111	1592.6	232.73	61.0225	1416.01	242.618	103.404	1195.89	243.794	-73.2324	1351.4	237.793	-136.567	1225.13	149.919	117.627	1246.63	410.54	11.1427	1369.62	454.913	51.4984	1142.33	450.25	68.6212	1075.54	486.318	-3.47896	978.888	471.814	-26.2793	876.456	500.523	37.1019	862.217	532.85	-8.85626	784.447
628	0	289.562	-187.516	1556.25	189.895	-192.154	1549.73	293.284	-19.6675	1598.73	179.834	-15.5295	1593.87	233.952	51.287	1417.74	244.553	94.3191	1197.94	244.383	-83.0088	1352.91	238.155	-145.926	1226.41	151.722	108.753	1248.54	411.501	0.288698	1371.78	456.844	39.1053	1144.38	452.582	55.9501	1077.46	487.676	-17.6885	981.337	472.91	-41.5053	879.228	502.541	21.2476	864.31	534.209	-26.2728	787.122
629	0	289.794	-197.567	1557.57	190.139	-202.086	1550.83	293.656	-29.7563	1600.19	180.222	-25.4685	1595.09	235.155	41.6234	1419.46	246.536	85.4148	1199.99	244.906	-92.6891	1354.38	238.438	-155.147	1227.64	153.569	100.049	1250.47	412.418	-10.5481	1373.93	458.773	26.6334	1146.43	454.932	43.2148	1079.4	488.928	-31.9813	983.793	473.871	-56.7251	881.995	504.505	5.32025	866.447	535.438	-43.7352	789.835
630	0	289.902	-207.596	1558.82	190.256	-211.956	1551.83	293.957	-39.8357	1601.6	180.543	-35.3581	1596.24	236.336	32.0333	1421.16	248.554	76.6719	1202.03	245.367	-102.274	1355.8	238.651	-164.238	1228.8	155.451	91.4967	1252.37	413.291	-21.3573	1376.07	460.69	14.0922	1148.47	457.287	30.4216	1081.33	490.065	-46.3467	986.254	474.694	-71.9184	884.748	506.414	-10.6609	868.625	536.533	-61.2103	792.582
631	0	289.89	-217.598	1559.96	190.252	-221.757	1552.72	294.197	-49.898	1602.96	180.805	-45.1885	1597.33	237.495	22.5173	1422.82	250.592	68.0686	1204.02	245.77	-111.765	1357.15	238.802	-173.209	1229.91	157.355	83.0789	1254.24	414.118	-32.1292	1378.16	462.585	1.49422	1150.48	459.638	17.5796	1083.24	491.083	-60.771	988.718	475.379	-87.0691	887.482	508.262	-26.6775	870.842	537.492	-78.6702	795.363
632	0	289.766	-227.564	1561.01	190.134	-231.48	1553.5	294.386	-59.9349	1604.24	181.018	-54.9509	1598.34	238.629	13.0753	1424.42	252.637	59.5829	1205.97	246.12	-121.164	1358.43	238.901	-182.071	1230.95	159.269	74.7756	1256.06	414.899	-42.8554	1380.19	464.448	-11.1446	1152.45	461.969	4.70062	1085.12	491.978	-75.2363	991.18	475.929	-102.165	890.191	510.045	-42.7119	873.092	538.315	-96.0924	798.175
633	0	289.537	-237.49	1561.96	189.909	-241.119	1554.18	294.531	-69.9383	1605.44	181.191	-64.6377	1599.26	239.736	3.70606	1425.94	254.673	51.193	1207.85	246.42	-130.477	1359.63	238.955	-190.836	1231.91	161.181	66.5672	1257.81	415.633	-53.5287	1382.15	466.269	-23.8056	1154.35	464.269	-8.20146	1086.95	492.752	-89.7213	993.634	476.349	-117.197	892.871	511.758	-58.7469	875.366	539.001	-113.46	801.01
634	0	289.211	-247.368	1562.79	189.588	-250.67	1554.75	294.641	-79.9001	1606.54	181.332	-74.2422	1600.08	240.814	-5.5923	1427.37	256.689	42.8787	1209.63	246.676	-139.706	1360.73	238.972	-199.515	1232.79	163.078	58.4342	1259.47	416.319	-64.143	1384.02	468.036	-36.4685	1156.19	466.522	-21.1108	1088.71	493.409	-104.202	996.07	476.648	-132.161	895.517	513.391	-74.7661	877.65	539.551	-130.759	803.857
635	0	288.799	-257.193	1563.52	189.179	-260.13	1555.22	294.726	-89.8127	1607.53	181.45	-83.7592	1600.8	241.859	-14.8223	1428.7	258.672	34.6216	1211.32	246.891	-148.858	1361.73	238.957	-208.118	1233.58	164.948	50.3582	1261.02	416.957	-74.6935	1385.78	469.742	-49.1116	1157.93	468.716	-34.0106	1090.39	493.956	-118.653	998.474	476.835	-147.054	898.123	514.937	-90.7533	879.927	539.964	-147.98	806.704
636	0	288.311	-266.961	1564.13	188.696	-269.498	1555.58	294.79	-99.6691	1608.4	181.551	-93.1849	1601.4	242.87	-23.9871	1429.91	260.611	26.4062	1212.89	247.069	-157.939	1362.63	238.916	-216.655	1234.26	166.779	42.3219	1262.45	417.546	-85.176	1387.42	471.379	-61.7129	1159.56	470.835	-46.8835	1091.96	494.405	-133.048	1000.83	476.922	-161.874	900.678	516.383	-106.693	882.177	540.243	-165.115	809.531
637	0	287.758	-276.666	1564.62	188.148	-278.772	1555.84	294.842	-109.463	1609.14	181.643	-102.517	1601.88	243.843	-33.0901	1431	262.493	18.2198	1214.33	247.212	-166.954	1363.4	238.853	-225.135	1234.82	168.559	34.3096	1263.75	418.087	-95.5872	1388.91	472.938	-74.2512	1161.07	472.868	-59.7125	1093.41	494.765	-147.362	1003.11	476.92	-176.621	903.172	517.72	-122.568	884.374	540.39	-182.156	812.318
638	0	287.15	-286.306	1565	187.547	-287.955	1556	294.886	-119.189	1609.74	181.73	-111.756	1602.24	244.775	-42.1352	1431.94	264.309	10.0522	1215.63	247.324	-175.911	1364.05	238.77	-233.566	1235.27	170.276	26.3071	1264.91	418.579	-105.924	1390.24	474.413	-86.7065	1162.44	474.802	-72.4816	1094.73	495.05	-161.57	1005.3	476.842	-191.293	905.594	518.936	-138.366	886.495	540.408	-199.096	815.045
639	0	286.5	-295.878	1565.26	186.906	-297.05	1556.06	294.926	-128.844	1610.19	181.817	-120.901	1602.47	245.663	-51.1264	1432.75	266.047	1.89619	1216.78	247.407	-184.815	1364.57	238.671	-241.955	1235.58	171.918	18.302	1265.92	419.022	-116.183	1391.41	475.799	-99.061	1163.66	476.627	-85.1765	1095.89	495.27	-175.654	1007.38	476.697	-205.891	907.928	520.018	-154.07	888.513	540.3	-215.925	817.688
640	0	285.818	-305.38	1565.4	186.234	-306.062	1556.03	294.965	-138.423	1610.49	181.906	-129.956	1602.57	246.502	-60.0677	1433.4	267.698	-6.25354	1217.77	247.463	-193.673	1364.96	238.555	-250.311	1235.75	173.476	10.2838	1266.77	419.417	-126.363	1392.39	477.09	-111.3	1164.71	478.331	-97.7849	1096.88	495.437	-189.596	1009.33	476.495	-220.411	910.16	520.957	-169.667	890.404	540.068	-232.632	820.225
641	0	285.113	-314.812	1565.42	185.543	-314.994	1555.89	295.005	-147.925	1610.63	181.998	-138.924	1602.54	247.289	-68.9635	1433.89	269.25	-14.4007	1218.59	247.493	-202.491	1365.21	238.425	-258.64	1235.79	174.939	2.24329	1267.46	419.764	-136.459	1393.19	478.281	-123.41	1165.58	479.908	-110.297	1097.69	495.558	-203.385	1011.11	476.242	-234.852	912.275	521.742	-185.145	892.146	539.717	-249.206	822.636
642	0	284.396	-324.174	1565.32	184.841	-323.855	1555.66	295.048	-157.35	1610.61	182.095	-147.812	1602.37	248.02	-77.8179	1434.22	270.694	-22.5478	1219.25	247.497	-211.276	1365.32	238.281	-266.95	1235.68	176.295	-5.82724	1267.98	420.062	-146.47	1393.79	479.369	-135.384	1166.27	481.348	-122.705	1098.31	495.638	-217.014	1012.73	475.943	-249.211	914.258	522.365	-200.491	893.72	539.248	-265.632	824.899
643	0	283.676	-333.466	1565.1	184.138	-332.652	1555.34	295.092	-166.697	1610.44	182.195	-156.624	1602.07	248.691	-86.6351	1434.4	272.019	-30.6973	1219.73	247.476	-220.034	1365.29	238.12	-275.249	1235.43	177.537	-13.9343	1268.34	420.312	-156.393	1394.19	480.349	-147.216	1166.76	482.645	-135.005	1098.74	495.679	-230.478	1014.16	475.597	-263.484	916.097	522.822	-215.695	895.11	538.664	-281.898	826.998
644	0	282.958	-342.692	1564.77	183.44	-341.392	1554.93	295.136	-175.967	1610.12	182.296	-165.368	1601.64	249.297	-95.4196	1434.41	273.215	-38.8515	1220.04	247.429	-228.77	1365.13	237.943	-283.545	1235.04	178.655	-22.0834	1268.53	420.512	-166.226	1394.4	481.216	-158.904	1167.06	483.793	-147.195	1098.97	495.68	-243.778	1015.39	475.202	-277.665	917.779	523.107	-230.748	896.307	537.968	-297.991	828.92
645	0	282.251	-351.853	1564.33	182.754	-350.084	1554.42	295.178	-185.164	1609.64	182.395	-174.052	1601.08	249.835	-104.176	1434.27	274.276	-47.0132	1220.19	247.355	-237.491	1364.84	237.748	-291.846	1234.52	179.643	-30.2792	1268.56	420.664	-175.969	1394.41	481.966	-170.447	1167.17	484.788	-159.273	1099	495.636	-256.919	1016.42	474.754	-291.748	919.296	523.219	-245.643	897.305	537.161	-313.896	830.656
646	0	281.558	-360.952	1563.77	182.084	-358.735	1553.83	295.215	-194.289	1609.01	182.489	-182.683	1600.4	250.3	-112.908	1433.97	275.194	-55.1862	1220.16	247.253	-246.201	1364.41	237.533	-300.161	1233.88	180.494	-38.526	1268.42	420.765	-185.62	1394.23	482.596	-181.85	1167.09	485.627	-171.241	1098.84	495.538	-269.905	1017.25	474.243	-305.727	920.64	523.16	-260.372	898.104	536.246	-329.604	832.201
647	0	280.884	-369.994	1563.11	181.433	-367.354	1553.16	295.242	-203.346	1608.23	182.573	-191.27	1599.6	250.69	-121.621	1433.52	275.964	-63.3751	1219.97	247.12	-254.908	1363.86	237.297	-308.5	1233.13	181.206	-46.8274	1268.14	420.814	-195.18	1393.86	483.102	-193.115	1166.82	486.305	-183.101	1098.5	495.376	-282.743	1017.88	473.659	-319.592	921.809	522.931	-274.93	898.709	535.224	-345.104	833.556
648	0	280.229	-378.982	1562.36	180.803	-375.949	1552.4	295.254	-212.339	1607.33	182.641	-199.821	1598.68	251	-130.319	1432.92	276.584	-71.5857	1219.63	246.954	-263.618	1363.19	237.035	-316.872	1232.27	181.774	-55.1869	1267.7	420.811	-204.654	1393.32	483.479	-204.251	1166.38	486.822	-194.856	1097.98	495.136	-295.441	1018.32	472.989	-333.335	922.803	522.534	-289.315	899.13	534.097	-360.389	834.729
649	0	279.595	-387.921	1561.51	180.193	-384.528	1551.58	295.248	-221.273	1606.29	182.688	-208.345	1597.65	251.228	-139.009	1432.18	277.053	-79.8253	1219.13	246.752	-272.335	1362.41	236.747	-325.285	1231.32	182.199	-63.6078	1267.12	420.753	-214.046	1392.62	483.725	-215.264	1165.78	487.177	-206.508	1097.29	494.805	-308.005	1018.58	472.221	-346.947	923.626	521.974	-303.522	899.381	532.866	-375.455	835.73
650	0	278.98	-396.816	1560.58	179.602	-393.098	1550.68	295.217	-230.153	1605.13	182.706	-216.848	1596.53	251.371	-147.695	1431.32	277.373	-88.1021	1218.49	246.511	-281.068	1361.53	236.428	-333.747	1230.29	182.481	-72.0933	1266.41	420.638	-223.361	1391.78	483.839	-226.161	1165.02	487.371	-218.061	1096.46	494.365	-320.442	1018.68	471.341	-360.417	924.285	521.255	-317.55	899.477	531.53	-390.297	836.573
651	0	278.383	-405.674	1559.57	179.026	-401.666	1549.73	295.154	-238.984	1603.86	182.691	-225.338	1595.3	251.428	-156.384	1430.32	277.548	-96.4255	1217.71	246.228	-289.821	1360.55	236.076	-342.268	1229.19	182.626	-80.6467	1265.56	420.466	-232.609	1390.79	483.818	-236.952	1164.12	487.405	-229.516	1095.49	493.805	-332.756	1018.64	470.339	-373.736	924.79	520.382	-331.397	899.435	530.09	-404.914	837.273
652	0	277.799	-414.498	1558.5	178.462	-410.238	1548.72	295.055	-247.772	1602.48	182.634	-233.823	1593.99	251.398	-165.082	1429.21	277.585	-104.806	1216.8	245.899	-298.603	1359.49	235.688	-350.853	1228.03	182.637	-89.2713	1264.59	420.233	-241.801	1389.69	483.664	-247.644	1163.1	487.283	-240.876	1094.4	493.111	-344.948	1018.48	469.203	-386.894	925.154	519.358	-345.063	899.273	528.543	-419.304	837.849
653	0	277.223	-423.297	1557.38	177.904	-418.821	1547.67	294.912	-256.523	1601.02	182.53	-242.31	1592.6	251.28	-173.796	1427.99	277.491	-113.255	1215.77	245.52	-307.419	1358.35	235.26	-359.511	1226.82	182.521	-97.9705	1263.51	419.938	-250.948	1388.48	483.378	-258.244	1161.97	487.011	-252.141	1093.21	492.273	-357.022	1018.2	467.928	-399.882	925.391	518.188	-358.545	899.007	526.885	-433.468	838.315
654	0	276.65	-432.076	1556.21	177.346	-427.42	1546.59	294.719	-265.244	1599.47	182.371	-250.804	1591.13	251.074	-182.534	1426.67	277.277	-121.783	1214.63	245.088	-316.277	1357.14	234.787	-368.248	1225.57	182.288	-106.748	1262.31	419.578	-260.065	1387.19	482.963	-268.761	1160.74	486.594	-263.311	1091.92	491.285	-368.975	1017.83	466.509	-412.694	925.514	516.877	-371.844	898.653	525.113	-447.405	838.684
655	0	276.073	-440.843	1555.01	176.782	-436.041	1545.48	294.471	-273.943	1597.85	182.152	-259.313	1589.6	250.781	-191.302	1425.26	276.952	-130.403	1213.38	244.6	-325.185	1355.88	234.268	-377.07	1224.3	181.947	-115.608	1261.01	419.153	-269.167	1385.82	482.426	-279.201	1159.44	486.042	-274.388	1090.57	490.146	-380.807	1017.39	464.945	-425.323	925.537	515.428	-384.959	898.223	523.221	-461.115	838.968
656	0	275.485	-449.604	1553.79	176.203	-444.69	1544.35	294.161	-282.626	1596.17	181.867	-267.843	1588.01	250.402	-200.109	1423.76	276.527	-139.127	1212.03	244.053	-334.148	1354.57	233.697	-385.985	1223	181.507	-124.554	1259.61	418.66	-278.27	1384.38	481.772	-289.571	1158.06	485.363	-285.37	1089.15	488.858	-392.516	1016.88	463.237	-437.765	925.471	513.847	-397.888	897.726	521.204	-474.599	839.173
657	0	274.878	-458.368	1552.56	175.602	-453.372	1543.22	293.784	-291.302	1594.45	181.511	-276.401	1586.37	249.939	-208.964	1422.2	276.015	-147.966	1210.59	243.443	-343.175	1353.22	233.071	-394.997	1221.68	180.981	-133.59	1258.12	418.1	-287.39	1382.9	481.009	-299.877	1156.63	484.568	-296.258	1087.68	487.428	-404.098	1016.3	461.388	-450.015	925.326	512.14	-410.633	897.169	519.057	-487.858	839.303
658	0	274.245	-467.143	1551.33	174.972	-462.093	1542.09	293.335	-299.978	1592.68	181.078	-284.991	1584.7	249.394	-217.873	1420.58	275.424	-156.93	1209.07	242.769	-352.271	1351.84	232.386	-404.115	1220.36	180.379	-142.721	1256.56	417.471	-296.544	1381.38	480.146	-310.126	1155.16	483.667	-307.052	1086.17	485.867	-415.551	1015.68	459.408	-462.073	925.107	510.313	-423.192	896.556	516.775	-500.893	839.357
659	0	273.577	-475.936	1550.12	174.305	-470.859	1540.97	292.809	-308.664	1590.9	180.564	-293.621	1582.99	248.77	-226.845	1418.92	274.766	-166.029	1207.47	242.028	-361.443	1350.45	231.639	-413.343	1219.04	179.712	-151.95	1254.92	416.774	-305.747	1379.84	479.194	-320.324	1153.65	482.673	-317.751	1084.63	484.188	-426.872	1015	457.304	-473.938	924.82	508.374	-435.566	895.887	514.358	-513.706	839.332
660	0	272.868	-484.756	1548.95	173.594	-479.675	1539.88	292.202	-317.368	1589.11	179.966	-302.297	1581.27	248.07	-235.888	1417.22	274.05	-175.272	1205.81	241.221	-370.698	1349.05	230.826	-422.689	1217.73	178.99	-161.283	1253.21	416.01	-315.014	1378.28	478.16	-330.477	1152.11	481.595	-328.359	1083.08	482.409	-438.058	1014.26	455.09	-485.61	924.464	506.333	-447.753	895.162	511.808	-526.298	839.224
661	0	272.112	-493.612	1547.81	172.834	-488.548	1538.82	291.512	-326.1	1587.32	179.281	-311.025	1579.54	247.297	-245.008	1415.5	273.281	-184.664	1204.09	240.347	-380.039	1347.66	229.947	-432.159	1216.44	178.222	-170.724	1251.45	415.18	-324.357	1376.72	477.055	-340.593	1150.57	480.446	-338.877	1081.51	480.547	-449.11	1013.46	452.78	-497.092	924.039	504.202	-459.752	894.38	509.132	-538.668	839.024
662	0	271.301	-502.512	1546.72	172.018	-497.482	1537.8	290.736	-334.868	1585.56	178.507	-319.812	1577.81	246.455	-254.213	1413.77	272.468	-194.213	1202.33	239.407	-389.472	1346.28	228.999	-441.758	1215.17	177.417	-180.276	1249.65	414.287	-333.788	1375.17	475.888	-350.678	1149.02	479.234	-349.307	1079.95	478.619	-460.027	1012.61	450.39	-508.386	923.54	501.995	-471.563	893.537	506.342	-550.818	838.725
663	0	270.433	-511.465	1545.71	171.142	-506.484	1536.83	289.873	-343.681	1583.83	177.645	-328.662	1576.11	245.548	-263.509	1412.05	271.615	-203.921	1200.53	238.402	-398.999	1344.94	227.982	-451.493	1213.95	176.582	-189.944	1247.82	413.333	-343.314	1373.64	474.666	-360.74	1147.47	477.968	-359.654	1078.39	476.642	-470.811	1011.69	447.938	-519.496	922.963	499.726	-483.182	892.632	503.456	-562.746	838.319
664	0	269.502	-520.477	1544.77	170.203	-515.558	1535.93	288.923	-352.549	1582.16	176.693	-337.583	1574.44	244.579	-272.9	1410.35	270.725	-213.791	1198.71	237.337	-408.623	1343.63	226.897	-461.367	1212.77	175.722	-199.73	1245.96	412.321	-352.944	1372.14	473.397	-370.785	1145.94	476.656	-369.921	1076.85	474.633	-481.464	1010.7	445.443	-530.424	922.304	497.411	-494.607	891.663	500.495	-574.448	837.797
665	0	268.506	-529.556	1543.93	169.199	-524.71	1535.1	287.886	-361.477	1580.55	175.654	-346.579	1572.81	243.553	-282.39	1408.69	269.801	-223.823	1196.89	236.213	-418.345	1342.38	225.748	-471.385	1211.67	174.841	-209.637	1244.11	411.257	-362.679	1370.68	472.085	-380.82	1144.45	475.303	-380.114	1075.34	472.605	-491.99	1009.64	442.925	-541.174	921.559	495.069	-505.832	890.631	497.488	-585.922	837.155
666	0	267.445	-538.708	1543.19	168.13	-533.945	1534.36	286.764	-370.474	1579.04	174.53	-355.655	1571.26	242.473	-291.983	1407.1	268.845	-234.016	1195.08	235.037	-428.165	1341.19	224.538	-481.546	1210.63	173.942	-219.666	1242.28	410.143	-372.521	1369.28	470.736	-390.851	1142.99	473.914	-390.235	1073.86	470.57	-502.39	1008.52	440.405	-551.748	920.726	492.719	-516.853	889.541	494.465	-597.161	836.389
667	0	266.319	-547.939	1542.57	166.996	-543.265	1533.71	285.561	-379.546	1577.62	173.324	-364.815	1569.78	241.344	-301.68	1405.57	267.855	-244.366	1193.3	233.814	-438.081	1340.09	223.272	-491.852	1209.69	173.026	-229.816	1240.48	408.985	-382.468	1367.95	469.352	-400.884	1141.58	472.492	-400.291	1072.45	468.54	-512.67	1007.34	437.903	-562.149	919.804	490.379	-527.664	888.396	491.461	-608.158	835.501
668	0	265.13	-557.253	1542.08	165.8	-552.675	1533.18	284.28	-388.698	1576.32	172.04	-374.062	1568.39	240.17	-311.48	1404.14	266.832	-254.869	1191.57	232.551	-448.09	1339.07	221.959	-502.299	1208.85	172.094	-240.086	1238.73	407.789	-392.517	1366.71	467.935	-410.92	1140.25	471.039	-410.284	1071.09	466.524	-522.829	1006.11	435.44	-572.377	918.796	488.068	-538.255	887.208	488.512	-618.905	834.496
669	0	263.881	-566.653	1541.73	164.546	-562.176	1532.76	282.926	-397.933	1575.16	170.685	-383.4	1567.12	238.955	-321.384	1402.82	265.774	-265.518	1189.91	231.255	-458.189	1338.16	220.606	-512.882	1208.13	171.144	-250.471	1237.06	406.561	-402.661	1365.56	466.487	-420.963	1139	469.556	-420.216	1069.82	464.531	-532.87	1004.85	433.037	-582.431	917.71	485.805	-548.618	885.987	485.651	-629.392	833.381
670	0	262.577	-576.14	1541.53	163.239	-571.768	1532.48	281.506	-407.253	1574.15	169.263	-392.828	1565.97	237.704	-331.387	1401.63	264.681	-276.305	1188.36	229.935	-468.371	1337.36	219.223	-523.594	1207.54	170.174	-260.967	1235.49	405.306	-412.892	1364.53	465.01	-431.01	1137.85	468.044	-430.089	1068.65	462.568	-542.792	1003.56	430.713	-592.308	916.555	483.607	-558.744	884.749	482.914	-639.604	832.169
671	0	261.224	-585.715	1541.5	161.886	-581.453	1532.33	280.025	-416.659	1573.3	167.783	-402.348	1564.95	236.421	-341.487	1400.58	263.552	-287.218	1186.93	228.598	-478.629	1336.69	217.821	-534.423	1207.09	169.183	-271.564	1234.05	404.031	-423.199	1363.62	463.505	-441.058	1136.81	466.503	-439.902	1067.59	460.644	-552.593	1002.28	428.485	-602.004	915.346	481.49	-568.622	883.511	480.331	-649.527	830.875
672	0	259.829	-595.376	1541.64	160.493	-591.228	1532.34	278.492	-426.15	1572.63	166.252	-411.957	1564.09	235.112	-351.676	1399.69	262.386	-298.245	1185.65	227.255	-488.956	1336.16	216.411	-545.355	1206.78	168.168	-282.253	1232.75	402.743	-433.57	1362.85	461.973	-451.101	1135.91	464.934	-449.654	1066.66	458.766	-562.268	1001.02	426.371	-611.514	914.099	479.467	-578.241	882.29	477.927	-659.144	829.518
673	0	258.401	-605.119	1541.96	159.071	-601.09	1532.5	276.915	-435.723	1572.14	164.679	-421.653	1563.39	233.781	-361.948	1398.98	261.183	-309.369	1184.55	225.914	-499.34	1335.77	215.006	-556.375	1206.64	167.126	-293.021	1231.63	401.449	-443.992	1362.24	460.416	-461.131	1135.15	463.337	-459.341	1065.88	456.944	-571.813	999.81	424.384	-620.831	912.836	477.55	-587.59	881.108	475.723	-668.437	828.116
674	0	256.948	-614.939	1542.45	157.627	-611.034	1532.83	275.303	-445.374	1571.84	163.073	-431.432	1562.86	232.434	-372.293	1398.45	259.945	-320.575	1183.64	224.585	-509.771	1335.52	213.618	-567.463	1206.65	166.055	-303.855	1230.69	400.155	-454.448	1361.78	458.838	-471.137	1134.54	461.714	-468.956	1065.26	455.185	-581.219	998.676	422.536	-629.947	911.578	475.749	-596.659	879.983	473.735	-677.388	826.688
675	0	255.482	-624.83	1543.13	156.174	-621.055	1533.32	273.666	-455.097	1571.73	161.443	-441.289	1562.5	231.076	-382.701	1398.11	258.673	-331.841	1182.96	223.277	-520.237	1335.43	212.259	-578.598	1206.82	164.953	-314.739	1229.96	398.869	-464.922	1361.5	457.243	-481.105	1134.11	460.066	-478.493	1064.8	453.498	-590.478	997.639	420.838	-638.854	910.347	474.07	-605.44	878.934	471.97	-685.981	825.255
676	0	254.013	-634.784	1543.99	154.721	-631.146	1533.98	272.014	-464.885	1571.83	159.8	-451.217	1562.32	229.711	-393.161	1397.96	257.368	-343.144	1182.51	221.998	-530.726	1335.5	210.941	-589.759	1207.16	163.817	-325.656	1229.46	397.596	-475.396	1361.38	455.635	-491.02	1133.85	458.398	-487.943	1064.52	451.893	-599.582	996.719	419.296	-647.545	909.167	472.519	-613.925	877.979	470.432	-694.202	823.833
677	0	252.552	-644.792	1545.03	153.279	-641.296	1534.8	270.356	-474.73	1572.11	158.154	-461.208	1562.31	228.346	-403.658	1398.02	256.033	-354.461	1182.31	220.758	-541.224	1335.72	209.676	-600.922	1207.65	162.646	-336.59	1229.19	396.343	-485.849	1361.45	454.022	-500.866	1133.77	456.712	-497.297	1064.43	450.378	-608.523	995.933	417.915	-656.012	908.056	471.098	-622.11	877.132	469.117	-702.041	822.44
678	0	251.111	-654.842	1546.23	151.86	-651.497	1535.78	268.704	-484.621	1572.58	156.515	-471.253	1562.49	226.985	-414.179	1398.28	254.67	-365.765	1182.37	219.564	-551.718	1336.1	208.474	-612.063	1208.29	161.436	-347.521	1229.16	395.116	-496.262	1361.69	452.408	-510.625	1133.86	455.014	-506.543	1064.52	448.962	-617.291	995.293	416.697	-664.251	907.031	469.809	-629.994	876.406	468.015	-709.495	821.089
679	0	249.703	-664.924	1547.59	150.476	-661.737	1536.9	267.069	-494.549	1573.24	154.893	-481.343	1562.83	225.633	-424.71	1398.73	253.278	-377.029	1182.67	218.421	-562.193	1336.62	207.344	-623.159	1209.07	160.186	-358.432	1229.37	393.921	-506.613	1362.1	450.803	-520.277	1134.14	453.309	-515.67	1064.79	447.652	-625.88	994.802	415.641	-672.258	906.105	468.652	-637.58	875.807	467.114	-716.567	819.788
680	0	248.338	-675.025	1549.08	149.137	-672.005	1538.15	265.461	-504.502	1574.07	153.3	-491.467	1563.35	224.294	-435.234	1399.37	251.858	-388.223	1183.21	217.337	-572.637	1337.29	206.297	-634.186	1209.98	158.895	-369.307	1229.82	392.761	-516.881	1362.67	449.214	-529.804	1134.57	451.605	-524.667	1065.23	446.455	-634.283	994.461	414.745	-680.032	905.285	467.626	-644.872	875.34	466.4	-723.267	818.545
681	0	247.03	-685.133	1550.7	147.856	-682.288	1539.53	263.89	-514.469	1575.06	151.744	-501.614	1564.02	222.971	-445.737	1400.19	250.41	-399.321	1183.99	216.315	-583.035	1338.09	205.337	-645.123	1211.01	157.559	-380.128	1230.5	391.642	-527.046	1363.39	447.648	-539.187	1135.16	449.908	-533.52	1065.83	445.375	-642.494	994.261	414.005	-687.576	904.574	466.729	-651.88	875.003	465.858	-729.614	817.364
682	0	245.789	-695.234	1552.41	146.641	-692.574	1541	262.368	-524.437	1576.19	150.236	-511.774	1564.84	221.667	-456.204	1401.18	248.933	-410.296	1184.97	215.36	-593.376	1339.02	204.47	-655.951	1212.15	156.177	-390.88	1231.39	390.566	-537.087	1364.25	446.115	-548.407	1135.89	448.224	-542.219	1066.59	444.414	-650.51	994.19	413.414	-694.894	903.967	465.957	-658.614	874.792	465.472	-735.632	816.247
683	0	244.626	-705.317	1554.21	145.504	-702.852	1542.57	260.902	-534.396	1577.44	148.784	-521.935	1565.79	220.385	-466.619	1402.31	247.425	-421.123	1186.14	214.472	-603.648	1340.05	203.7	-666.65	1213.37	154.748	-401.549	1232.48	389.537	-546.988	1365.22	444.62	-557.447	1136.75	446.561	-550.753	1067.47	443.574	-658.327	994.232	412.966	-701.99	903.46	465.308	-665.087	874.7	465.231	-741.349	815.194
684	0	243.552	-715.37	1556.07	144.454	-713.109	1544.2	259.504	-544.334	1578.81	147.397	-532.088	1566.87	219.128	-476.971	1403.58	245.886	-431.782	1187.46	213.653	-613.84	1341.18	203.027	-677.207	1214.66	153.273	-412.122	1233.74	388.555	-556.732	1366.3	443.169	-566.289	1137.7	444.925	-559.11	1068.46	442.854	-665.943	994.369	412.654	-708.872	903.042	464.775	-671.312	874.714	465.128	-746.797	814.209
685	0	242.576	-725.383	1557.97	143.499	-723.335	1545.88	258.179	-554.241	1580.27	146.081	-542.223	1568.06	217.896	-487.247	1404.96	244.318	-442.256	1188.92	212.902	-623.943	1342.4	202.449	-687.61	1216	151.752	-422.589	1235.16	387.621	-566.307	1367.46	441.768	-574.92	1138.73	443.321	-567.282	1069.55	442.251	-673.356	994.582	412.47	-715.547	902.703	464.353	-677.301	874.823	465.159	-752.007	813.295
686	0	241.705	-735.344	1559.88	142.647	-733.521	1547.6	256.937	-564.107	1581.8	144.844	-552.33	1569.34	216.691	-497.437	1406.44	242.721	-452.533	1190.49	212.217	-633.949	1343.69	201.962	-697.851	1217.39	150.19	-432.94	1236.71	386.737	-575.706	1368.69	440.42	-583.327	1139.83	441.754	-575.261	1070.71	441.758	-680.564	994.852	412.406	-722.022	902.43	464.033	-683.066	875.013	465.324	-757.008	812.458
687	0	240.948	-745.246	1561.79	141.903	-743.659	1549.33	255.783	-573.925	1583.38	143.691	-562.403	1570.7	215.515	-507.532	1407.99	241.1	-462.607	1192.13	211.596	-643.853	1345.04	201.559	-707.925	1218.8	148.591	-443.168	1238.37	385.9	-584.924	1369.96	439.127	-591.502	1140.96	440.228	-583.041	1071.92	441.371	-687.565	995.164	412.454	-728.303	902.212	463.808	-688.618	875.27	465.627	-761.824	811.704
688	0	240.307	-755.083	1563.67	141.272	-753.741	1551.06	254.722	-583.686	1584.99	142.626	-572.434	1572.13	214.369	-517.526	1409.6	239.463	-472.476	1193.82	211.034	-653.65	1346.42	201.234	-717.832	1220.22	146.962	-453.27	1240.11	385.109	-593.961	1371.25	437.888	-599.437	1142.12	438.745	-590.617	1073.16	441.082	-694.359	995.503	412.607	-734.397	902.04	463.666	-693.965	875.581	466.073	-766.473	811.04
689	0	239.788	-764.848	1565.51	140.756	-763.763	1552.78	253.759	-593.385	1586.61	141.653	-582.418	1573.6	213.253	-527.414	1411.24	237.815	-482.143	1195.54	210.528	-663.337	1347.83	200.974	-727.575	1221.64	145.313	-463.243	1241.91	384.362	-602.82	1372.54	436.703	-607.131	1143.28	437.307	-597.988	1074.43	440.882	-700.942	995.859	412.859	-740.307	901.906	463.596	-699.113	875.931	466.664	-770.966	810.472
690	0	239.391	-774.538	1567.29	140.359	-773.719	1554.47	252.895	-603.019	1588.22	140.774	-592.35	1575.11	212.169	-537.195	1412.91	236.168	-491.618	1197.26	210.073	-672.913	1349.24	200.77	-737.16	1223.05	143.652	-473.087	1243.75	383.655	-611.508	1373.83	435.57	-614.585	1144.43	435.916	-605.153	1075.69	440.765	-707.316	996.225	413.202	-746.039	901.803	463.587	-704.068	876.31	467.4	-775.309	810.004
691	0	239.117	-784.15	1568.99	140.078	-783.609	1556.12	252.132	-612.583	1589.8	139.99	-602.227	1576.63	211.117	-546.868	1414.57	234.53	-500.911	1198.96	209.662	-682.379	1350.66	200.609	-746.596	1224.44	141.99	-482.803	1245.59	382.987	-620.037	1375.09	434.485	-621.806	1145.56	434.571	-612.117	1076.94	440.723	-713.48	996.593	413.633	-751.595	901.727	463.628	-708.833	876.704	468.28	-779.501	809.636
692	0	238.963	-793.685	1570.6	139.912	-793.43	1557.72	251.47	-622.078	1591.34	139.302	-612.047	1578.15	210.099	-556.433	1416.21	232.911	-510.036	1200.63	209.291	-691.739	1352.05	200.48	-755.892	1225.79	140.337	-492.396	1247.43	382.352	-628.419	1376.31	433.446	-628.802	1146.65	433.274	-618.885	1078.17	440.75	-719.437	996.958	414.146	-756.982	901.675	463.706	-713.414	877.104	469.293	-783.539	809.363
693	0	238.926	-803.143	1572.11	139.859	-803.183	1559.25	250.909	-631.501	1592.82	138.707	-621.81	1579.65	209.115	-565.894	1417.82	231.321	-519.01	1202.24	208.954	-700.994	1353.4	200.373	-765.059	1227.1	138.703	-501.871	1249.24	381.749	-636.67	1377.47	432.448	-635.587	1147.7	432.023	-625.466	1079.36	440.843	-725.189	997.316	414.738	-762.205	901.642	463.812	-717.816	877.499	470.427	-787.418	809.175
694	0	239.001	-812.526	1573.5	139.914	-812.869	1560.71	250.445	-640.856	1594.22	138.206	-631.514	1581.11	208.167	-575.256	1419.37	229.767	-527.85	1203.79	208.647	-710.151	1354.7	200.278	-774.108	1228.35	137.096	-511.234	1250.99	381.174	-644.808	1378.57	431.489	-642.179	1148.7	430.818	-631.872	1080.51	440.998	-730.744	997.658	415.405	-767.269	901.622	463.937	-722.044	877.877	471.664	-791.133	809.058
695	0	239.183	-821.837	1574.77	140.071	-822.49	1562.08	250.077	-650.144	1595.53	137.794	-641.163	1582.53	207.255	-584.525	1420.86	228.257	-536.574	1205.26	208.366	-719.216	1355.94	200.187	-783.052	1229.53	135.526	-520.494	1252.69	380.624	-652.851	1379.59	430.566	-648.599	1149.64	429.658	-638.118	1081.61	441.213	-736.11	997.977	416.143	-772.184	901.606	464.074	-726.107	878.227	472.982	-794.681	808.989
696	0	239.463	-831.082	1575.91	140.324	-832.049	1563.35	249.799	-659.369	1596.73	137.469	-650.757	1583.87	206.382	-593.706	1422.26	226.795	-545.198	1206.64	208.107	-728.196	1357.09	200.094	-791.898	1230.63	133.999	-529.658	1254.3	380.097	-660.817	1380.51	429.678	-654.868	1150.5	428.544	-644.222	1082.64	441.487	-741.3	998.261	416.948	-776.959	901.582	464.216	-730.015	878.537	474.359	-798.063	808.944
697	0	239.834	-840.265	1576.9	140.666	-841.55	1564.52	249.608	-668.536	1597.81	137.227	-660.3	1585.14	205.549	-602.809	1423.57	225.386	-553.739	1207.91	207.868	-737.099	1358.15	199.997	-800.659	1231.63	132.52	-538.734	1255.81	379.593	-668.725	1381.35	428.825	-661.013	1151.29	427.476	-650.204	1083.59	441.818	-746.33	998.497	417.815	-781.604	901.535	464.362	-733.78	878.795	475.772	-801.283	808.893
698	0	240.288	-849.392	1577.75	141.088	-850.999	1565.56	249.498	-677.651	1598.76	137.062	-669.795	1586.31	204.758	-611.842	1424.78	224.033	-562.212	1209.07	207.648	-745.934	1359.11	199.892	-809.341	1232.52	131.096	-547.732	1257.22	379.111	-676.592	1382.07	428.006	-667.06	1151.99	426.454	-656.087	1084.47	442.204	-751.218	998.669	418.738	-786.131	901.445	464.508	-737.417	878.987	477.198	-804.349	808.803
699	0	240.816	-858.472	1578.44	141.582	-860.401	1566.49	249.463	-686.72	1599.58	136.971	-679.247	1587.38	204.011	-620.813	1425.87	222.738	-570.63	1210.11	207.444	-754.709	1359.95	199.781	-817.955	1233.28	129.732	-556.658	1258.51	378.652	-684.437	1382.68	427.223	-673.038	1152.6	425.479	-661.894	1085.25	442.639	-755.987	998.762	419.707	-790.552	901.291	464.655	-740.94	879.102	478.62	-807.275	808.645
700	0	241.408	-867.51	1578.97	142.141	-869.76	1567.27	249.499	-695.749	1600.26	136.949	-688.661	1588.33	203.313	-629.732	1426.83	221.503	-579.004	1211.02	207.259	-763.435	1360.65	199.666	-826.507	1233.91	128.433	-565.52	1259.67	378.219	-692.275	1383.18	426.479	-678.975	1153.11	424.553	-667.651	1085.93	443.118	-760.661	998.757	420.715	-794.878	901.05	464.804	-744.369	879.127	480.02	-810.076	808.387
701	0	242.056	-876.515	1579.34	142.756	-879.085	1567.92	249.6	-704.748	1600.78	136.991	-698.042	1589.15	202.666	-638.608	1427.66	220.333	-587.345	1211.8	207.093	-772.12	1361.23	199.549	-835.007	1234.4	127.205	-574.325	1260.7	377.815	-700.122	1383.54	425.777	-684.898	1153.52	423.677	-673.382	1086.5	443.635	-765.265	998.639	421.75	-799.121	900.699	464.955	-747.719	879.052	481.387	-812.771	808.006
702	0	242.751	-885.495	1579.55	143.42	-888.379	1568.41	249.76	-713.723	1601.16	137.093	-707.396	1589.84	202.075	-647.451	1428.35	219.23	-595.66	1212.45	206.948	-780.772	1361.65	199.436	-843.461	1234.73	126.056	-583.078	1261.59	377.445	-707.993	1383.79	425.119	-690.836	1153.82	422.854	-679.114	1086.96	444.179	-769.828	998.394	422.799	-803.29	900.217	465.112	-751.01	878.869	482.712	-815.378	807.481
703	0	243.485	-894.458	1579.6	144.123	-897.651	1568.75	249.975	-722.683	1601.39	137.25	-716.727	1590.39	201.545	-656.27	1428.9	218.2	-603.955	1212.96	206.827	-789.402	1361.93	199.33	-851.88	1234.91	124.991	-591.787	1262.34	377.112	-715.899	1383.9	424.51	-696.815	1154	422.085	-684.871	1087.3	444.74	-774.374	998.012	423.851	-807.396	899.587	465.275	-754.26	878.572	483.99	-817.918	806.8
704	0	244.251	-903.412	1579.48	144.861	-906.906	1568.93	250.241	-731.636	1601.47	137.458	-726.042	1590.8	201.08	-665.073	1429.3	217.249	-612.235	1213.34	206.734	-798.017	1362.06	199.239	-860.271	1234.92	124.018	-600.455	1262.95	376.824	-723.853	1383.88	423.954	-702.859	1154.07	421.374	-690.674	1087.51	445.308	-778.932	997.486	424.891	-811.447	898.797	465.449	-757.485	878.16	485.217	-820.409	805.959
705	0	245.042	-912.364	1579.21	145.626	-916.15	1568.95	250.554	-740.59	1601.4	137.716	-735.346	1591.05	200.687	-673.869	1429.56	216.386	-620.504	1213.58	206.673	-806.626	1362.03	199.168	-868.643	1234.78	123.147	-609.089	1263.42	376.586	-731.866	1383.73	423.454	-708.991	1154.02	420.722	-696.545	1087.59	445.871	-783.523	996.812	425.908	-815.453	897.84	465.634	-760.704	877.633	486.395	-822.869	804.96
706	0	245.852	-921.322	1578.78	146.414	-925.388	1568.81	250.91	-749.551	1601.18	138.02	-744.644	1591.16	200.371	-682.667	1429.68	215.619	-628.766	1213.7	206.649	-815.235	1361.84	199.123	-877.007	1234.48	122.386	-617.693	1263.75	376.404	-739.948	1383.45	423.016	-715.231	1153.86	420.133	-702.501	1087.55	446.421	-788.171	995.994	426.891	-819.423	896.715	465.833	-763.931	876.997	487.523	-825.315	803.81
707	0	246.678	-930.292	1578.2	147.22	-934.625	1568.52	251.31	-758.527	1600.83	138.37	-753.939	1591.12	200.139	-691.472	1429.65	214.957	-637.025	1213.69	206.667	-823.854	1361.51	199.111	-885.372	1234.03	121.742	-626.275	1263.95	376.286	-748.108	1383.04	422.643	-721.597	1153.57	419.608	-708.559	1087.39	446.95	-792.894	995.035	427.83	-823.368	895.425	466.046	-767.184	876.256	488.603	-827.762	802.523
708	0	247.516	-939.28	1577.48	148.041	-943.866	1568.06	251.751	-767.524	1600.35	138.764	-763.236	1590.94	199.995	-700.292	1429.48	214.411	-645.283	1213.56	206.733	-832.488	1361.02	199.138	-893.748	1233.43	121.224	-634.839	1264	376.237	-756.353	1382.51	422.34	-728.101	1153.18	419.15	-714.731	1087.09	447.454	-797.708	993.945	428.72	-827.298	893.98	466.276	-770.476	875.422	489.637	-830.222	801.112
709	0	248.364	-948.291	1576.62	148.876	-953.113	1567.45	252.233	-776.546	1599.74	139.203	-772.537	1590.61	199.947	-709.133	1429.17	213.988	-653.545	1213.31	206.851	-841.145	1360.39	199.209	-902.145	1232.69	120.839	-643.393	1263.93	376.264	-764.689	1381.86	422.109	-734.755	1152.67	418.762	-721.027	1086.68	447.931	-802.624	992.733	429.556	-831.228	892.395	466.522	-773.822	874.502	490.628	-832.707	799.597
710	0	249.222	-957.328	1575.63	149.722	-962.37	1566.69	252.758	-785.598	1599.02	139.689	-781.846	1590.15	199.998	-718	1428.73	213.698	-661.815	1212.96	207.029	-849.83	1359.62	199.329	-910.574	1231.83	120.592	-651.945	1263.73	376.374	-773.122	1381.1	421.956	-741.566	1152.05	418.445	-727.454	1086.16	448.385	-807.654	991.413	430.338	-835.172	890.685	466.787	-777.236	873.509	491.578	-835.229	797.993
711	0	250.088	-966.396	1574.53	150.58	-971.637	1565.79	253.328	-794.683	1598.19	140.223	-791.163	1589.55	200.155	-726.897	1428.16	213.548	-670.099	1212.49	207.27	-858.548	1358.72	199.504	-919.043	1230.84	120.489	-660.501	1263.41	376.57	-781.655	1380.22	421.883	-748.539	1151.33	418.202	-734.019	1085.52	448.821	-812.803	989.996	431.07	-839.147	888.869	467.069	-780.732	872.452	492.489	-837.799	796.318
712	0	250.966	-975.496	1573.31	151.452	-980.917	1564.76	253.945	-803.802	1597.25	140.808	-800.489	1588.83	200.421	-735.828	1427.47	213.542	-678.403	1211.92	207.581	-867.306	1357.71	199.738	-927.561	1229.76	120.531	-669.069	1262.97	376.859	-790.291	1379.23	421.895	-755.675	1150.52	418.035	-740.724	1084.77	449.247	-818.078	988.495	431.756	-843.17	886.968	467.372	-784.325	871.34	493.366	-840.428	794.586
713	0	251.857	-984.629	1572	152.339	-990.208	1563.61	254.613	-812.958	1596.23	141.447	-809.824	1587.99	200.8	-744.797	1426.65	213.685	-686.735	1211.26	207.968	-876.109	1356.58	200.035	-936.138	1228.58	120.722	-677.66	1262.41	377.244	-799.03	1378.15	421.993	-762.973	1149.6	417.948	-747.569	1083.93	449.673	-823.484	986.922	432.405	-847.261	884.999	467.697	-788.03	870.184	494.212	-843.131	792.811
714	0	252.765	-993.797	1570.6	153.243	-999.51	1562.36	255.335	-822.15	1595.12	142.145	-819.167	1587.05	201.294	-753.805	1425.73	213.978	-695.104	1210.49	208.434	-884.959	1355.35	200.4	-944.78	1227.32	121.061	-686.281	1261.74	377.73	-807.873	1376.96	422.181	-770.429	1148.6	417.943	-754.556	1082.99	450.11	-829.023	985.289	433.027	-851.44	882.98	468.045	-791.861	868.988	495.033	-845.923	791.002
715	0	253.694	-1003	1569.13	154.169	-1008.82	1561	256.116	-831.378	1593.94	142.905	-828.517	1586.01	201.906	-762.855	1424.7	214.423	-703.52	1209.63	208.985	-893.863	1354.03	200.835	-953.496	1225.99	121.546	-694.943	1260.96	378.319	-816.817	1375.68	422.461	-778.04	1147.51	418.023	-761.681	1081.97	450.573	-834.699	983.605	433.635	-855.729	880.926	468.421	-795.834	867.759	495.834	-848.823	789.168
716	0	254.649	-1012.23	1567.6	155.121	-1018.14	1559.57	256.962	-840.639	1592.69	143.732	-837.873	1584.87	202.636	-771.949	1423.57	215.018	-711.991	1208.67	209.626	-902.823	1352.63	201.346	-962.29	1224.61	122.176	-703.653	1260.07	379.013	-825.859	1374.32	422.834	-785.799	1146.33	418.19	-768.944	1080.86	451.071	-840.518	981.878	434.242	-860.149	878.85	468.827	-799.966	866.501	496.622	-851.853	787.315
717	0	255.633	-1021.49	1566.01	156.104	-1027.47	1558.06	257.876	-849.933	1591.39	144.632	-847.232	1583.66	203.485	-781.086	1422.35	215.759	-720.529	1207.62	210.359	-911.843	1351.17	201.936	-971.169	1223.17	122.946	-712.421	1259.08	379.815	-834.994	1372.88	423.301	-793.698	1145.08	418.447	-776.342	1079.67	451.618	-846.482	980.113	434.862	-864.721	876.763	469.269	-804.272	865.215	497.406	-855.037	785.447
718	0	256.654	-1030.79	1564.4	157.122	-1036.81	1556.5	258.864	-859.257	1590.04	145.608	-856.593	1582.39	204.451	-790.269	1421.04	216.642	-729.145	1206.49	211.19	-920.925	1349.66	202.608	-980.137	1221.7	123.852	-721.258	1258	380.724	-844.218	1371.36	423.863	-801.729	1143.76	418.794	-783.871	1078.42	452.223	-852.597	978.318	435.509	-869.467	874.673	469.753	-808.771	863.901	498.195	-858.402	783.569
719	0	257.715	-1040.11	1562.75	158.18	-1046.14	1554.9	259.93	-868.608	1588.65	146.665	-865.953	1581.06	205.532	-799.496	1419.66	217.661	-737.852	1205.26	212.12	-930.072	1348.11	203.368	-989.199	1220.21	124.888	-730.17	1256.81	381.741	-853.522	1369.79	424.519	-809.885	1142.37	419.233	-791.53	1077.1	452.897	-858.868	976.495	436.196	-874.407	872.585	470.282	-813.478	862.561	499.001	-861.977	781.684
720	0	258.823	-1049.45	1561.1	159.284	-1055.48	1553.28	261.078	-877.984	1587.24	147.807	-875.31	1579.68	206.725	-808.768	1418.21	218.81	-746.659	1203.94	213.152	-939.286	1346.53	204.219	-998.357	1218.7	126.049	-739.167	1255.54	382.865	-862.9	1368.15	425.268	-818.159	1140.91	419.765	-799.316	1075.72	453.645	-865.3	974.65	436.936	-879.562	870.505	470.864	-818.409	861.194	499.836	-865.791	779.796
721	0	259.982	-1058.81	1559.46	160.439	-1064.82	1551.65	262.313	-887.382	1585.82	149.037	-884.664	1578.28	208.028	-818.084	1416.71	220.081	-755.578	1202.55	214.288	-948.569	1344.95	205.165	-1007.61	1217.19	127.326	-748.257	1254.18	384.095	-872.343	1366.47	426.11	-826.542	1139.4	420.389	-807.228	1074.29	454.477	-871.899	972.786	437.741	-884.951	868.438	471.503	-823.582	859.8	500.711	-869.875	777.91
722	0	261.196	-1068.2	1557.83	161.65	-1074.15	1550.02	263.637	-896.8	1584.39	150.36	-894.012	1576.86	209.434	-827.445	1415.17	221.464	-764.621	1201.08	215.53	-957.921	1343.37	206.212	-1016.97	1215.7	128.714	-757.446	1252.74	385.429	-881.841	1364.76	427.042	-835.029	1137.85	421.104	-815.263	1072.82	455.395	-878.671	970.91	438.622	-890.59	866.386	472.204	-829.012	858.381	501.638	-874.255	776.031
723	0	262.47	-1077.61	1556.24	162.92	-1083.48	1548.43	265.053	-906.235	1582.97	151.776	-903.354	1575.45	210.938	-836.849	1413.6	222.952	-773.796	1199.53	216.877	-967.343	1341.82	207.365	-1026.44	1214.23	130.203	-766.741	1251.24	386.864	-891.386	1363.03	428.063	-843.615	1136.26	421.91	-823.421	1071.32	456.403	-885.622	969.027	439.586	-896.496	864.356	472.97	-834.713	856.937	502.629	-878.96	774.168
724	0	263.806	-1087.03	1554.69	164.253	-1092.81	1546.87	266.562	-915.686	1581.58	153.286	-912.691	1574.05	212.536	-846.295	1412.01	224.532	-783.114	1197.93	218.331	-976.834	1340.3	208.627	-1036	1212.8	131.785	-776.149	1249.67	388.396	-900.968	1361.3	429.169	-852.294	1134.64	422.803	-831.702	1069.79	457.506	-892.76	967.146	440.642	-902.686	862.354	473.806	-840.699	855.475	503.693	-884.011	772.326
725	0	265.208	-1096.47	1553.21	165.653	-1102.14	1545.37	268.164	-925.151	1580.22	154.892	-922.023	1572.68	214.219	-855.783	1410.42	226.195	-792.582	1196.28	219.889	-986.395	1338.84	210.002	-1045.68	1211.43	133.452	-785.672	1248.06	390.021	-910.576	1359.58	430.359	-861.063	1133.01	423.783	-840.107	1068.26	458.703	-900.092	965.277	441.795	-909.172	860.386	474.714	-846.982	853.998	504.836	-889.428	770.514
726	0	266.678	-1105.92	1551.8	167.122	-1111.47	1543.95	269.86	-934.63	1578.92	156.592	-931.351	1571.36	215.981	-865.312	1408.85	227.93	-802.206	1194.6	221.55	-996.024	1337.44	211.495	-1055.45	1210.13	135.193	-795.315	1246.41	391.736	-920.2	1357.88	431.63	-869.92	1131.39	424.847	-848.638	1066.72	459.994	-907.625	963.431	443.048	-915.967	858.464	475.694	-853.575	852.517	506.063	-895.228	768.741
727	0	268.217	-1115.39	1550.49	168.661	-1120.8	1542.62	271.647	-944.122	1577.69	158.385	-940.676	1570.11	217.815	-874.882	1407.31	229.725	-811.992	1192.89	223.311	-1005.72	1336.14	213.106	-1065.33	1208.92	137	-805.08	1244.76	393.533	-929.834	1356.24	432.977	-878.863	1129.79	425.991	-857.295	1065.2	461.38	-915.366	961.622	444.404	-923.085	856.599	476.746	-860.487	851.04	507.377	-901.424	767.015
728	0	269.826	-1124.88	1549.29	170.271	-1130.14	1541.4	273.522	-953.627	1576.54	160.268	-950.002	1568.94	219.713	-884.491	1405.83	231.568	-821.943	1191.19	225.168	-1015.48	1334.93	214.838	-1075.3	1207.82	138.862	-814.967	1243.1	395.409	-939.467	1354.66	434.398	-887.891	1128.23	427.211	-866.082	1063.72	462.857	-923.325	959.868	445.861	-930.535	854.804	477.871	-867.728	849.582	508.776	-908.026	765.346
729	0	271.503	-1134.38	1548.21	171.952	-1139.48	1540.31	275.483	-963.146	1575.49	162.236	-959.33	1567.88	221.667	-894.139	1404.41	233.448	-832.06	1189.51	227.116	-1025.3	1333.85	216.689	-1085.37	1206.85	140.77	-824.975	1241.48	397.355	-949.094	1353.17	435.888	-897.004	1126.73	428.505	-875.001	1062.28	464.423	-931.508	958.185	447.419	-938.327	853.096	479.067	-875.308	848.157	510.259	-915.041	763.748
730	0	273.248	-1143.9	1547.27	173.702	-1148.83	1539.35	277.523	-972.68	1574.56	164.285	-968.665	1566.93	223.669	-903.826	1403.08	235.355	-842.34	1187.87	229.148	-1035.18	1332.9	218.658	-1095.54	1206.02	142.714	-835.103	1239.9	399.366	-958.711	1351.79	437.444	-906.203	1125.3	429.869	-884.055	1060.92	466.073	-939.925	956.595	449.071	-946.468	851.493	480.332	-883.234	846.783	511.82	-922.477	762.235
731	0	275.059	-1153.44	1546.48	175.52	-1158.19	1538.55	279.638	-982.228	1573.76	166.408	-978.009	1566.12	225.711	-913.55	1401.86	237.277	-852.781	1186.31	231.257	-1045.11	1332.09	220.738	-1105.79	1205.36	144.685	-845.345	1238.39	401.432	-968.312	1350.53	439.06	-915.487	1123.98	431.299	-893.246	1059.64	467.802	-948.581	955.121	450.813	-954.964	850.016	481.666	-891.512	845.481	513.455	-930.339	760.824
732	0	276.933	-1162.99	1545.86	177.403	-1167.57	1537.93	281.819	-991.792	1573.1	168.599	-987.366	1565.46	227.786	-923.311	1400.77	239.205	-863.375	1184.85	233.435	-1055.09	1331.45	222.923	-1116.12	1204.87	146.672	-855.694	1236.98	403.547	-977.899	1349.42	440.733	-924.859	1122.78	432.79	-902.575	1058.47	469.602	-957.484	953.787	452.637	-963.819	848.688	483.066	-900.147	844.273	515.156	-938.633	759.536
733	0	278.867	-1172.56	1545.41	179.347	-1176.96	1537.48	284.06	-1001.37	1572.6	170.849	-996.74	1564.95	229.887	-933.107	1399.82	241.132	-874.112	1183.5	235.671	-1065.12	1330.97	225.204	-1126.53	1204.57	148.67	-866.144	1235.7	405.701	-987.472	1348.48	442.457	-934.319	1121.73	434.34	-912.045	1057.43	471.468	-966.638	952.618	454.534	-973.035	847.533	484.529	-909.145	843.18	516.918	-947.364	758.393
734	0	280.855	-1182.15	1545.14	181.346	-1186.38	1537.22	286.352	-1010.97	1572.27	173.149	-1006.13	1564.62	232.005	-942.939	1399.02	243.05	-884.979	1182.31	237.955	-1075.19	1330.67	227.568	-1137	1204.47	150.669	-876.682	1234.56	407.885	-997.034	1347.72	444.227	-943.868	1120.84	435.945	-921.656	1056.53	473.391	-976.049	951.64	456.498	-982.61	846.574	486.056	-918.507	842.225	518.734	-956.534	757.421
735	0	282.893	-1191.76	1545.07	183.395	-1195.83	1537.16	288.684	-1020.58	1572.11	175.49	-1015.55	1564.47	234.134	-952.804	1398.4	244.955	-895.961	1181.29	240.275	-1085.29	1330.55	230	-1147.53	1204.57	152.666	-887.297	1233.6	410.091	-1006.59	1347.15	446.038	-953.51	1120.13	437.601	-931.408	1055.79	475.363	-985.716	950.877	458.517	-992.542	845.836	487.642	-928.234	841.43	520.599	-966.146	756.644
736	0	284.975	-1201.39	1545.18	185.488	-1205.3	1537.3	291.046	-1030.22	1572.13	177.861	-1024.99	1564.51	236.268	-962.701	1397.95	246.842	-907.039	1180.47	242.618	-1095.42	1330.62	232.485	-1158.1	1204.88	154.653	-897.973	1232.82	412.31	-1016.15	1346.79	447.885	-963.245	1119.61	439.305	-941.301	1055.23	477.378	-995.64	950.35	460.584	-1002.83	845.34	489.287	-938.325	840.813	522.508	-976.202	756.085
737	0	287.092	-1211.04	1545.49	187.616	-1214.8	1537.65	293.429	-1039.87	1572.33	180.251	-1034.46	1564.74	238.402	-972.626	1397.7	248.711	-918.191	1179.86	244.973	-1105.57	1330.88	235.005	-1168.71	1205.38	156.63	-908.693	1232.25	414.531	-1025.72	1346.63	449.763	-973.075	1119.3	441.054	-951.332	1054.86	479.427	-1005.82	950.077	462.691	-1013.46	845.105	490.988	-948.778	840.391	524.459	-986.699	755.767
738	0	289.236	-1220.7	1546	189.772	-1224.33	1538.2	295.821	-1049.53	1572.71	182.65	-1043.95	1565.16	240.529	-982.577	1397.64	250.561	-929.393	1179.47	247.325	-1115.74	1331.31	237.541	-1179.34	1206.08	158.593	-919.439	1231.9	416.748	-1035.31	1346.7	451.668	-983.004	1119.2	442.846	-961.499	1054.68	481.505	-1016.24	950.071	464.83	-1024.43	845.144	492.744	-959.587	840.175	526.447	-997.634	755.707
739	0	291.4	-1230.38	1546.68	191.945	-1233.89	1538.94	298.211	-1059.22	1573.27	185.046	-1053.48	1565.77	242.646	-992.55	1397.78	252.395	-940.619	1179.32	249.662	-1125.91	1331.92	240.072	-1189.97	1206.96	160.544	-930.19	1231.78	418.95	-1044.93	1346.98	453.597	-993.034	1119.32	444.681	-971.8	1054.71	483.605	-1026.91	950.339	466.996	-1035.72	845.467	494.553	-970.744	840.174	528.471	-1009	755.917
740	0	293.573	-1240.07	1547.54	194.127	-1243.47	1539.87	300.588	-1068.91	1574.01	187.429	-1063.03	1566.55	244.748	-1002.54	1398.12	254.217	-951.84	1179.41	251.971	-1136.08	1332.7	242.578	-1200.6	1208.01	162.485	-940.923	1231.89	421.132	-1054.59	1347.47	455.547	-1003.17	1119.65	446.556	-982.232	1054.94	485.725	-1037.81	950.881	469.182	-1047.33	846.075	496.413	-982.24	840.389	530.53	-1020.79	756.405
741	0	295.745	-1249.77	1548.57	196.306	-1253.09	1540.97	302.941	-1078.62	1574.91	189.787	-1072.61	1567.51	246.834	-1012.54	1398.65	256.034	-963.029	1179.74	254.239	-1146.24	1333.63	245.041	-1211.2	1209.21	164.419	-951.616	1232.24	423.285	-1064.3	1348.17	457.518	-1013.41	1120.2	448.473	-992.792	1055.36	487.86	-1048.92	951.692	471.385	-1059.24	846.964	498.323	-994.062	840.82	532.624	-1032.99	757.17
742	0	297.904	-1259.48	1549.74	198.471	-1262.72	1542.22	305.261	-1088.34	1575.96	192.11	-1082.21	1568.63	248.899	-1022.55	1399.36	257.853	-974.156	1180.29	256.457	-1156.38	1334.7	247.44	-1221.76	1210.53	166.352	-962.245	1232.81	425.405	-1074.07	1349.07	459.508	-1023.76	1120.96	450.433	-1003.48	1055.99	490.008	-1060.25	952.757	473.6	-1071.43	848.121	500.282	-1006.2	841.458	534.751	-1045.59	758.203
743	0	300.041	-1269.2	1551.04	200.612	-1272.38	1543.61	307.537	-1098.07	1577.15	194.389	-1091.84	1569.89	250.943	-1032.55	1400.25	259.684	-985.192	1181.07	258.613	-1166.49	1335.9	249.757	-1232.26	1211.96	168.291	-972.786	1233.6	427.485	-1083.91	1350.16	461.518	-1034.22	1121.9	452.437	-1014.28	1056.79	492.167	-1071.77	954.057	475.823	-1083.89	849.529	502.29	-1018.63	842.291	536.912	-1058.57	759.491
744	0	302.142	-1278.92	1552.45	202.716	-1282.06	1545.12	309.76	-1107.8	1578.46	196.614	-1101.48	1571.28	252.964	-1042.54	1401.3	261.537	-996.109	1182.06	260.699	-1176.57	1337.2	251.978	-1242.69	1213.46	170.244	-983.218	1234.59	429.523	-1093.81	1351.41	463.549	-1044.8	1123.02	454.487	-1025.21	1057.77	494.335	-1083.48	955.564	478.05	-1096.6	851.161	504.347	-1031.35	843.303	539.106	-1071.91	761.012
745	0	304.198	-1288.65	1553.94	204.773	-1291.75	1546.71	311.922	-1117.54	1579.88	198.779	-1111.14	1572.78	254.962	-1052.51	1402.5	263.421	-1006.88	1183.23	262.707	-1186.6	1338.6	254.089	-1253.02	1215.03	172.22	-993.517	1235.77	431.513	-1103.79	1352.82	465.603	-1055.5	1124.3	456.588	-1036.26	1058.89	496.509	-1095.36	957.25	480.276	-1109.54	852.988	506.452	-1044.33	844.476	541.33	-1085.59	762.738
746	0	306.196	-1298.37	1555.5	206.771	-1301.44	1548.37	314.017	-1127.28	1581.39	200.877	-1120.81	1574.37	256.935	-1062.46	1403.83	265.349	-1017.49	1184.56	264.633	-1196.57	1340.07	256.078	-1263.25	1216.62	174.225	-1003.67	1237.1	433.456	-1113.83	1354.36	467.682	-1066.33	1125.71	458.742	-1047.43	1060.15	498.688	-1107.42	959.082	482.497	-1122.69	854.979	508.605	-1057.55	845.789	543.581	-1099.59	764.641
747	0	308.128	-1308.08	1557.11	208.702	-1311.14	1550.08	316.039	-1137.02	1582.97	202.901	-1130.48	1576.04	258.885	-1072.36	1405.28	267.328	-1027.91	1186.05	266.472	-1206.47	1341.59	257.94	-1273.36	1218.23	176.268	-1013.65	1238.58	435.347	-1123.94	1356.02	469.789	-1077.28	1127.24	460.951	-1058.71	1061.53	500.865	-1119.64	961.029	484.705	-1136.04	857.1	510.809	-1071	847.222	545.856	-1113.89	766.687
748	0	309.983	-1317.79	1558.74	210.554	-1320.83	1551.8	317.982	-1146.76	1584.61	204.848	-1140.15	1577.76	260.81	-1082.22	1406.82	269.365	-1038.12	1187.66	268.223	-1216.31	1343.15	259.668	-1283.34	1219.83	178.353	-1023.45	1240.17	437.188	-1134.11	1357.78	471.924	-1088.36	1128.87	463.219	-1070.12	1063	503.036	-1132.02	963.059	486.894	-1149.55	859.319	513.063	-1084.67	848.756	548.147	-1128.47	768.848
749	0	311.753	-1327.48	1560.37	212.321	-1330.5	1553.52	319.844	-1156.49	1586.29	206.714	-1149.81	1579.51	262.711	-1092.02	1408.45	271.466	-1048.13	1189.36	269.885	-1226.06	1344.73	261.265	-1293.17	1221.4	180.485	-1033.06	1241.85	438.977	-1144.33	1359.61	474.089	-1099.58	1130.58	465.547	-1081.64	1064.55	505.194	-1144.57	965.148	489.057	-1163.22	861.608	515.369	-1098.52	850.373	550.448	-1143.29	771.095
750	0	313.431	-1337.16	1561.99	213.995	-1340.16	1555.21	321.621	-1166.2	1587.98	208.498	-1159.45	1581.28	264.587	-1101.76	1410.14	273.631	-1057.92	1191.15	271.459	-1235.72	1346.32	262.733	-1302.85	1222.94	182.664	-1042.47	1243.61	440.715	-1154.57	1361.51	476.284	-1110.92	1132.34	467.935	-1093.28	1066.16	507.33	-1157.28	967.274	491.185	-1177.02	863.941	517.726	-1112.55	852.06	552.749	-1158.34	773.405
751	0	315.013	-1346.81	1563.57	215.571	-1349.78	1556.85	323.314	-1175.9	1589.69	210.199	-1169.07	1583.05	266.438	-1111.42	1411.87	275.859	-1067.49	1193	272.949	-1245.29	1347.9	264.08	-1312.37	1224.44	184.889	-1051.69	1245.41	442.403	-1164.84	1363.45	478.508	-1122.39	1134.15	470.382	-1105.04	1067.81	509.436	-1170.16	969.421	493.269	-1190.94	866.299	520.134	-1126.74	853.804	555.041	-1173.59	775.757
752	0	316.492	-1356.44	1565.11	217.046	-1359.37	1558.43	324.921	-1185.59	1591.39	211.818	-1178.66	1584.8	268.263	-1121	1413.63	278.144	-1076.84	1194.89	274.358	-1254.76	1349.46	265.314	-1321.73	1225.87	187.157	-1060.71	1247.23	444.042	-1175.11	1365.41	480.759	-1133.98	1135.98	472.885	-1116.9	1069.49	511.503	-1183.21	971.579	495.303	-1204.95	868.667	522.59	-1141.07	855.596	557.311	-1189.02	778.139
753	0	317.869	-1366.04	1566.58	218.416	-1368.91	1559.93	326.445	-1195.24	1593.08	213.355	-1188.2	1586.52	270.063	-1130.5	1415.39	280.479	-1085.99	1196.79	275.693	-1264.12	1350.98	266.449	-1330.92	1227.25	189.461	-1069.55	1249.07	445.632	-1185.36	1367.39	483.032	-1145.68	1137.82	475.44	-1128.88	1071.18	513.522	-1196.41	973.741	497.279	-1219.04	871.036	525.091	-1155.53	857.432	559.548	-1204.61	780.539
754	0	319.141	-1375.6	1567.97	219.682	-1378.41	1561.33	327.887	-1204.87	1594.73	214.813	-1197.71	1588.19	271.836	-1139.9	1417.15	282.852	-1094.95	1198.7	276.96	-1273.38	1352.46	267.498	-1339.96	1228.56	191.795	-1078.21	1250.89	447.177	-1195.58	1369.36	485.323	-1157.47	1139.65	478.042	-1140.94	1072.87	515.483	-1209.77	975.905	499.191	-1233.2	873.401	527.63	-1170.11	859.306	561.74	-1220.33	782.952
755	0	320.309	-1385.13	1569.29	220.845	-1387.84	1562.63	329.251	-1214.46	1596.34	216.196	-1207.16	1589.8	273.582	-1149.22	1418.89	285.252	-1103.73	1200.58	278.164	-1282.52	1353.89	268.476	-1348.85	1229.81	194.148	-1086.7	1252.68	448.677	-1205.75	1371.31	487.626	-1169.35	1141.47	480.681	-1153.1	1074.54	517.381	-1223.27	978.071	501.034	-1247.41	875.759	530.2	-1184.79	861.215	563.875	-1236.16	785.375
756	0	321.376	-1394.61	1570.51	221.907	-1397.2	1563.82	330.539	-1224.02	1597.89	217.507	-1216.55	1591.35	275.3	-1158.43	1420.59	287.665	-1112.34	1202.44	279.313	-1291.57	1355.26	269.396	-1357.59	1230.98	196.511	-1095.04	1254.42	450.134	-1215.86	1373.23	489.934	-1181.3	1143.27	483.35	-1165.33	1076.2	519.209	-1236.9	980.24	502.803	-1261.67	878.11	532.79	-1199.56	863.155	565.939	-1252.08	787.806
757	0	322.346	-1404.04	1571.64	222.871	-1406.49	1564.9	331.758	-1233.53	1599.39	218.751	-1225.88	1592.81	276.99	-1167.55	1422.23	290.08	-1120.81	1204.23	280.415	-1300.5	1356.56	270.273	-1366.19	1232.08	198.874	-1103.25	1256.1	451.551	-1225.88	1375.1	492.24	-1193.28	1145.03	486.039	-1177.61	1077.82	520.967	-1250.62	982.412	504.496	-1275.94	880.454	535.387	-1214.4	865.122	567.921	-1268.08	790.243
758	0	323.222	-1413.41	1572.66	223.743	-1415.71	1565.85	332.911	-1242.99	1600.81	219.934	-1235.13	1594.19	278.649	-1176.57	1423.81	292.482	-1129.16	1205.97	281.475	-1309.34	1357.78	271.12	-1374.66	1233.1	201.227	-1111.34	1257.7	452.929	-1235.82	1376.91	494.536	-1205.29	1146.74	488.737	-1189.92	1079.4	522.653	-1264.43	984.585	506.11	-1290.24	882.794	537.979	-1229.3	867.109	569.811	-1284.12	792.685
759	0	324.012	-1422.73	1573.58	224.528	-1424.84	1566.69	334.005	-1252.39	1602.16	221.059	-1244.31	1595.47	280.279	-1185.5	1425.31	294.861	-1137.4	1207.62	282.499	-1318.08	1358.92	271.946	-1383.02	1234.04	203.558	-1119.33	1259.21	454.269	-1245.67	1378.65	496.814	-1217.29	1148.4	491.433	-1202.26	1080.93	524.269	-1278.27	986.757	507.644	-1304.54	885.127	540.548	-1244.25	869.108	571.599	-1300.2	795.129
760	0	324.721	-1431.98	1574.4	225.234	-1433.89	1567.4	335.045	-1261.74	1603.43	222.134	-1253.41	1596.66	281.877	-1194.34	1426.72	297.204	-1145.55	1209.18	283.494	-1326.72	1359.97	272.762	-1391.26	1234.89	205.857	-1127.24	1260.63	455.573	-1255.41	1380.3	499.067	-1229.25	1149.99	494.116	-1214.58	1082.39	525.819	-1292.14	988.921	509.097	-1318.84	887.452	543.08	-1259.24	871.107	573.275	-1316.31	797.571
761	0	325.357	-1441.17	1575.12	225.867	-1442.84	1568	336.036	-1271.03	1604.6	223.163	-1262.44	1597.73	283.443	-1203.09	1428.03	299.501	-1153.63	1210.63	284.463	-1335.28	1360.92	273.574	-1399.41	1235.65	208.116	-1135.08	1261.94	456.842	-1265.05	1381.85	501.289	-1241.16	1151.51	496.777	-1226.88	1083.78	527.306	-1305.98	991.067	510.469	-1333.13	889.765	545.556	-1274.24	873.095	574.831	-1332.42	800.006
762	0	325.928	-1450.3	1575.73	226.436	-1451.71	1568.47	336.985	-1280.25	1605.67	224.152	-1271.38	1598.7	284.974	-1211.77	1429.24	301.744	-1161.65	1211.97	285.41	-1343.76	1361.78	274.387	-1407.47	1236.31	210.324	-1142.88	1263.13	458.075	-1274.58	1383.29	503.471	-1253	1152.93	499.403	-1239.12	1085.1	528.734	-1319.78	993.185	511.759	-1347.4	892.059	547.962	-1289.25	875.058	576.261	-1348.52	802.428
763	0	326.441	-1459.35	1576.23	226.948	-1460.49	1568.84	337.898	-1289.4	1606.64	225.107	-1280.23	1599.55	286.469	-1220.37	1430.33	303.922	-1169.64	1213.19	286.338	-1352.17	1362.54	275.202	-1415.46	1236.87	212.472	-1150.64	1264.2	459.274	-1284.02	1384.6	505.609	-1264.73	1154.27	501.986	-1251.3	1086.32	530.107	-1333.49	995.26	512.969	-1361.63	894.326	550.282	-1304.26	876.98	577.559	-1364.6	804.829
764	0	326.905	-1468.34	1576.64	227.412	-1469.19	1569.1	338.779	-1298.49	1607.51	226.032	-1289.01	1600.29	287.925	-1228.9	1431.3	306.027	-1177.59	1214.29	287.249	-1360.52	1363.19	276.02	-1423.38	1237.31	214.552	-1158.38	1265.16	460.437	-1293.35	1385.79	507.696	-1276.35	1155.49	504.515	-1263.38	1087.44	531.425	-1347.1	997.278	514.098	-1375.81	896.557	552.502	-1319.23	878.849	578.722	-1380.64	807.203
765	0	327.329	-1477.27	1576.94	227.835	-1477.81	1569.25	339.633	-1307.52	1608.26	226.932	-1297.71	1600.92	289.342	-1237.37	1432.15	308.052	-1185.52	1215.25	288.144	-1368.8	1363.74	276.841	-1431.24	1237.65	216.555	-1166.11	1265.98	461.563	-1302.58	1386.83	509.726	-1287.83	1156.6	506.981	-1275.36	1088.45	532.69	-1360.58	999.223	515.146	-1389.93	898.742	554.611	-1334.16	880.648	579.747	-1396.65	809.541
766	0	327.718	-1486.13	1577.14	228.226	-1486.35	1569.31	340.466	-1316.48	1608.9	227.81	-1306.34	1601.43	290.715	-1245.79	1432.88	309.989	-1193.44	1216.07	289.022	-1377.05	1364.17	277.661	-1439.06	1237.87	218.474	-1173.85	1266.68	462.652	-1311.73	1387.72	511.695	-1299.18	1157.59	509.374	-1287.21	1089.34	533.9	-1373.92	1001.08	516.112	-1403.98	900.868	556.6	-1349.03	882.366	580.635	-1412.59	811.837
767	0	328.082	-1494.93	1577.24	228.591	-1494.82	1569.27	341.279	-1325.38	1609.42	228.67	-1314.91	1601.82	292.042	-1254.16	1433.48	311.831	-1201.35	1216.76	289.883	-1385.25	1364.5	278.476	-1446.84	1237.97	220.301	-1181.6	1267.25	463.701	-1320.78	1388.45	513.595	-1310.37	1158.45	511.686	-1298.94	1090.11	535.054	-1387.09	1002.83	516.994	-1417.93	902.924	558.461	-1363.82	883.99	581.388	-1428.45	814.084
768	0	328.425	-1503.68	1577.25	228.937	-1503.23	1569.15	342.076	-1334.21	1609.82	229.513	-1323.41	1602.1	293.32	-1262.5	1433.95	313.571	-1209.27	1217.31	290.725	-1393.42	1364.72	279.283	-1454.6	1237.96	222.03	-1189.37	1267.71	464.709	-1329.76	1389.03	515.421	-1321.41	1159.17	513.907	-1310.53	1090.75	536.148	-1400.09	1004.47	517.793	-1431.78	904.896	560.19	-1378.51	885.51	582.011	-1444.22	816.274
769	0	328.755	-1512.37	1577.16	229.269	-1511.59	1568.94	342.86	-1343	1610.1	230.342	-1331.85	1602.27	294.545	-1270.8	1434.3	315.203	-1217.19	1217.72	291.546	-1401.56	1364.82	280.074	-1462.34	1237.84	223.655	-1197.16	1268.04	465.674	-1338.66	1389.44	517.168	-1332.29	1159.75	516.03	-1321.97	1091.25	537.178	-1412.91	1005.98	518.508	-1445.5	906.771	561.784	-1393.09	886.918	582.512	-1459.88	818.401
770	0	329.077	-1521.02	1576.98	229.594	-1519.91	1568.65	343.63	-1351.73	1610.27	231.157	-1340.25	1602.34	295.714	-1279.08	1434.53	316.722	-1225.11	1218.01	292.343	-1409.69	1364.82	280.846	-1470.08	1237.6	225.17	-1204.98	1268.25	466.593	-1347.48	1389.7	518.828	-1343.02	1160.18	518.045	-1333.28	1091.62	538.14	-1425.55	1007.36	519.139	-1459.09	908.537	563.242	-1407.52	888.207	582.902	-1475.41	820.456
771	0	329.393	-1529.63	1576.71	229.914	-1528.19	1568.28	344.388	-1360.42	1610.32	231.958	-1348.62	1602.3	296.824	-1287.34	1434.64	318.122	-1233.05	1218.16	293.113	-1417.81	1364.72	281.591	-1477.83	1237.26	226.571	-1212.83	1268.36	467.463	-1356.24	1389.8	520.396	-1353.59	1160.48	519.944	-1344.44	1091.85	539.028	-1437.99	1008.59	519.688	-1472.52	910.184	564.563	-1421.8	889.371	583.191	-1490.78	822.433
772	0	329.708	-1538.2	1576.35	230.233	-1536.44	1567.84	345.132	-1369.06	1610.25	232.742	-1356.95	1602.16	297.87	-1295.59	1434.63	319.4	-1241.01	1218.19	293.852	-1425.92	1364.51	282.305	-1485.58	1236.82	227.854	-1220.72	1268.36	468.283	-1364.94	1389.74	521.866	-1364.02	1160.63	521.719	-1355.46	1091.94	539.838	-1450.26	1009.67	520.156	-1485.78	911.7	565.749	-1435.9	890.406	583.392	-1505.96	824.321
773	0	330.023	-1546.74	1575.9	230.552	-1544.68	1567.34	345.86	-1377.67	1610.07	233.509	-1365.26	1601.92	298.849	-1303.84	1434.51	320.554	-1248.98	1218.1	294.556	-1434.04	1364.21	282.982	-1493.36	1236.29	229.017	-1228.64	1268.26	469.049	-1373.58	1389.53	523.231	-1374.31	1160.64	523.364	-1366.35	1091.9	540.566	-1462.33	1010.59	520.547	-1498.86	913.076	566.803	-1449.8	891.309	583.517	-1520.94	826.11
774	0	330.339	-1555.25	1575.38	230.872	-1552.91	1566.78	346.571	-1386.25	1609.78	234.256	-1373.55	1601.6	299.758	-1312.09	1434.28	321.582	-1256.98	1217.9	295.222	-1442.16	1363.81	283.618	-1501.17	1235.67	230.06	-1236.6	1268.07	469.759	-1382.17	1389.18	524.486	-1384.48	1160.52	524.871	-1377.11	1091.73	541.208	-1474.23	1011.37	520.864	-1511.75	914.307	567.727	-1463.48	892.08	583.579	-1535.68	827.792
775	0	330.655	-1563.75	1574.77	231.192	-1561.14	1566.15	347.26	-1394.81	1609.39	234.978	-1381.84	1601.19	300.593	-1320.35	1433.95	322.484	-1264.99	1217.59	295.846	-1450.3	1363.32	284.209	-1509.01	1234.98	230.982	-1244.6	1267.78	470.411	-1390.71	1388.7	525.625	-1394.52	1160.27	526.237	-1387.75	1091.44	541.761	-1485.95	1011.99	521.109	-1524.44	915.386	568.524	-1476.94	892.719	583.591	-1550.15	829.355
776	0	330.97	-1572.24	1574.09	231.512	-1569.38	1565.48	347.923	-1403.34	1608.89	235.671	-1390.13	1600.7	301.353	-1328.62	1433.52	323.262	-1273.04	1217.18	296.423	-1458.46	1362.75	284.752	-1516.89	1234.22	231.786	-1252.65	1267.42	471.004	-1399.21	1388.1	526.644	-1404.45	1159.89	527.457	-1398.28	1091.03	542.223	-1497.49	1012.47	521.288	-1536.91	916.31	569.198	-1490.14	893.225	583.564	-1564.33	830.79
777	0	331.28	-1580.71	1573.34	231.828	-1577.64	1564.75	348.555	-1411.87	1608.3	236.331	-1398.42	1600.13	302.034	-1336.91	1433	323.92	-1281.11	1216.68	296.952	-1466.65	1362.09	285.244	-1524.81	1233.39	232.473	-1260.74	1266.97	471.535	-1407.68	1387.39	527.541	-1414.28	1159.41	528.529	-1408.71	1090.51	542.593	-1508.86	1012.81	521.403	-1549.17	917.077	569.755	-1503.08	893.601	583.507	-1578.18	832.086
778	0	331.583	-1589.19	1572.53	232.136	-1585.92	1563.99	349.152	-1420.38	1607.61	236.952	-1406.74	1599.48	302.636	-1345.22	1432.39	324.462	-1289.22	1216.09	297.427	-1474.87	1361.35	285.684	-1532.79	1232.5	233.047	-1268.89	1266.44	472.002	-1416.13	1386.57	528.312	-1424.03	1158.81	529.453	-1419.03	1089.9	542.871	-1520.07	1013.01	521.461	-1561.2	917.686	570.199	-1515.75	893.849	583.429	-1591.7	833.232
779	0	331.874	-1597.66	1571.67	232.432	-1594.23	1563.18	349.706	-1428.89	1606.84	237.529	-1415.07	1598.76	303.156	-1353.56	1431.7	324.895	-1297.37	1215.43	297.847	-1483.13	1360.54	286.07	-1540.82	1231.57	233.515	-1277.08	1265.84	472.406	-1424.56	1385.67	528.957	-1433.69	1158.13	530.23	-1429.27	1089.19	543.059	-1531.11	1013.08	521.467	-1573	918.138	570.537	-1528.14	893.971	583.337	-1604.86	834.218
780	0	332.147	-1606.15	1570.75	232.71	-1602.57	1562.33	350.214	-1437.41	1605.99	238.055	-1423.42	1597.97	303.593	-1361.95	1430.92	325.225	-1305.57	1214.7	298.207	-1491.45	1359.67	286.401	-1548.92	1230.59	233.881	-1285.34	1265.17	472.744	-1432.99	1384.68	529.478	-1443.28	1157.35	530.862	-1439.42	1088.41	543.161	-1542	1013.03	521.425	-1584.56	918.434	570.776	-1540.23	893.969	583.236	-1617.64	835.032
781	0	332.396	-1614.64	1569.79	232.966	-1610.95	1561.46	350.667	-1445.93	1605.06	238.525	-1431.81	1597.11	303.947	-1370.37	1430.07	325.461	-1313.82	1213.9	298.505	-1499.81	1358.72	286.676	-1557.08	1229.57	234.153	-1293.65	1264.44	473.017	-1441.43	1383.62	529.877	-1452.81	1156.5	531.355	-1449.48	1087.55	543.182	-1552.73	1012.86	521.342	-1595.89	918.574	570.924	-1552.03	893.845	583.129	-1630.03	835.664
782	0	332.615	-1623.15	1568.79	233.191	-1619.37	1560.55	351.06	-1454.46	1604.06	238.932	-1440.23	1596.19	304.219	-1378.85	1429.14	325.612	-1322.13	1213.04	298.739	-1508.24	1357.71	286.895	-1565.32	1228.51	234.337	-1302.03	1263.63	473.223	-1449.88	1382.51	530.158	-1462.29	1155.57	531.714	-1459.47	1086.63	543.13	-1563.3	1012.58	521.224	-1606.99	918.561	570.989	-1563.53	893.6	583.018	-1642.03	836.103
783	0	332.797	-1631.68	1567.76	233.38	-1627.85	1559.62	351.387	-1463	1602.98	239.271	-1448.68	1595.21	304.407	-1387.38	1428.14	325.684	-1330.51	1212.11	298.906	-1516.73	1356.65	287.058	-1573.64	1227.41	234.441	-1310.48	1262.75	473.363	-1458.36	1381.33	530.326	-1471.71	1154.58	531.947	-1469.38	1085.65	543.012	-1573.71	1012.19	521.074	-1617.85	918.394	570.981	-1574.73	893.234	582.905	-1653.64	836.34
784	0	332.935	-1640.24	1566.7	233.526	-1636.37	1558.66	351.642	-1471.57	1601.85	239.536	-1457.19	1594.16	304.514	-1395.97	1427.07	325.688	-1338.97	1211.13	299.004	-1525.3	1355.53	287.163	-1582.05	1226.29	234.471	-1319.01	1261.8	473.436	-1466.89	1380.12	530.389	-1481.1	1153.53	532.063	-1479.22	1084.62	542.837	-1583.98	1011.69	520.899	-1628.47	918.072	570.91	-1585.64	892.745	582.79	-1664.86	836.366
785	0	333.022	-1648.83	1565.62	233.621	-1644.94	1557.69	351.821	-1480.17	1600.66	239.722	-1465.73	1593.05	304.539	-1404.63	1425.93	325.631	-1347.52	1210.09	299.032	-1533.95	1354.36	287.212	-1590.56	1225.13	234.434	-1327.63	1260.78	473.443	-1475.47	1378.86	530.353	-1490.44	1152.43	532.072	-1488.98	1083.54	542.617	-1594.09	1011.08	520.702	-1638.86	917.593	570.785	-1596.26	892.132	582.674	-1675.7	836.178
786	0	333.051	-1657.46	1564.53	233.66	-1653.57	1556.69	351.917	-1488.79	1599.41	239.825	-1474.33	1591.89	304.484	-1413.36	1424.73	325.521	-1356.16	1208.99	298.989	-1542.69	1353.15	287.202	-1599.17	1223.94	234.337	-1336.34	1259.69	473.383	-1484.11	1377.56	530.228	-1499.75	1151.28	531.984	-1498.68	1082.41	542.36	-1604.05	1010.36	520.487	-1649.03	916.954	570.619	-1606.6	891.393	582.558	-1686.17	835.77
787	0	333.016	-1666.13	1563.42	233.637	-1662.26	1555.68	351.928	-1497.45	1598.12	239.84	-1482.98	1590.67	304.35	-1422.17	1423.46	325.364	-1364.91	1207.83	298.872	-1551.53	1351.89	287.134	-1607.89	1222.72	234.186	-1345.15	1258.51	473.257	-1492.84	1376.24	530.021	-1509.04	1150.08	531.81	-1508.31	1081.24	542.076	-1613.86	1009.52	520.258	-1658.96	916.154	570.421	-1616.65	890.526	582.444	-1696.28	835.143
788	0	332.911	-1674.85	1562.31	233.545	-1671.01	1554.65	351.85	-1506.15	1596.78	239.765	-1491.68	1589.41	304.138	-1431.07	1422.13	325.166	-1373.77	1206.61	298.682	-1560.47	1350.6	287.008	-1616.73	1221.48	233.985	-1354.06	1257.26	473.065	-1501.66	1374.88	529.743	-1518.3	1148.83	531.561	-1517.88	1080.03	541.772	-1623.52	1008.56	520.019	-1668.66	915.188	570.203	-1626.43	889.528	582.334	-1706.04	834.298
789	0	332.732	-1683.62	1561.19	233.381	-1679.82	1553.61	351.68	-1514.9	1595.41	239.597	-1500.45	1588.09	303.849	-1440.05	1420.75	324.933	-1382.75	1205.33	298.418	-1569.52	1349.27	286.823	-1625.69	1220.22	233.739	-1363.09	1255.92	472.807	-1510.58	1373.51	529.402	-1527.55	1147.55	531.246	-1527.38	1078.78	541.455	-1633.04	1007.48	519.773	-1678.14	914.055	569.974	-1635.95	888.4	582.232	-1715.48	833.238
790	0	332.475	-1692.44	1560.08	233.141	-1688.7	1552.57	351.417	-1523.69	1594	239.335	-1509.27	1586.73	303.484	-1449.13	1419.31	324.667	-1391.87	1203.98	298.08	-1578.68	1347.92	286.578	-1634.79	1218.94	233.451	-1372.25	1254.5	472.484	-1519.6	1372.12	529.006	-1536.79	1146.23	530.876	-1536.82	1077.5	541.132	-1642.41	1006.28	519.526	-1687.4	912.752	569.746	-1645.21	887.141	582.142	-1724.61	831.968
791	0	332.137	-1701.33	1558.98	232.822	-1697.64	1551.52	351.062	-1532.55	1592.58	238.979	-1518.17	1585.35	303.045	-1458.31	1417.83	324.37	-1401.13	1202.57	297.669	-1587.97	1346.56	286.275	-1644.02	1217.64	233.122	-1381.53	1253	472.096	-1528.75	1370.71	528.561	-1546.02	1144.88	530.458	-1546.19	1076.18	540.806	-1651.65	1004.94	519.282	-1696.44	911.28	569.528	-1654.23	885.754	582.069	-1733.43	830.492
792	0	331.716	-1710.29	1557.89	232.423	-1706.66	1550.47	350.613	-1541.46	1591.14	238.529	-1527.13	1583.93	302.533	-1467.58	1416.32	324.043	-1410.54	1201.1	297.186	-1597.37	1345.19	285.914	-1653.4	1216.34	232.755	-1390.96	1251.41	471.644	-1538.01	1369.29	528.075	-1555.25	1143.5	530	-1555.5	1074.83	540.482	-1660.76	1003.48	519.047	-1705.27	909.641	569.33	-1662.99	884.242	582.019	-1741.96	828.818
793	0	331.213	-1719.31	1556.82	231.942	-1715.75	1549.42	350.072	-1550.43	1589.7	237.988	-1536.16	1582.5	301.948	-1476.96	1414.77	323.685	-1420.1	1199.57	296.632	-1606.9	1343.83	285.494	-1662.93	1215.05	232.348	-1400.53	1249.75	471.129	-1547.39	1367.88	527.55	-1564.48	1142.11	529.508	-1564.76	1073.46	540.163	-1669.73	1001.9	518.827	-1713.88	907.838	569.157	-1671.52	882.611	581.997	-1750.22	826.954
794	0	330.629	-1728.41	1555.77	231.382	-1724.91	1548.39	349.443	-1559.47	1588.27	237.356	-1545.26	1581.06	301.292	-1486.45	1413.2	323.295	-1429.83	1197.98	296.011	-1616.55	1342.47	285.019	-1672.62	1213.76	231.902	-1410.26	1248.02	470.551	-1556.9	1366.47	526.992	-1573.73	1140.7	528.984	-1573.95	1072.08	539.851	-1678.57	1000.2	518.629	-1722.29	905.88	569.018	-1679.82	880.872	582.011	-1758.2	824.911
795	0	329.966	-1737.59	1554.77	230.743	-1734.15	1547.39	348.728	-1568.59	1586.85	236.639	-1554.44	1579.64	300.567	-1496.04	1411.62	322.868	-1439.73	1196.34	295.325	-1626.33	1341.15	284.49	-1682.47	1212.51	231.414	-1420.14	1246.22	469.913	-1566.53	1365.08	526.401	-1582.98	1139.29	528.431	-1583.08	1070.7	539.549	-1687.29	998.395	518.462	-1730.5	903.777	568.916	-1687.88	879.038	582.068	-1765.91	822.701
796	0	329.228	-1746.85	1553.8	230.03	-1743.47	1546.42	347.932	-1577.77	1585.47	235.839	-1563.7	1578.23	299.773	-1505.74	1410.05	322.4	-1449.8	1194.67	294.578	-1636.24	1339.86	283.909	-1692.49	1211.28	230.882	-1430.18	1244.38	469.215	-1576.28	1363.72	525.778	-1592.25	1137.89	527.849	-1592.16	1069.32	539.259	-1695.89	996.491	518.332	-1738.51	901.545	568.854	-1695.71	877.125	582.178	-1773.37	820.342
797	0	328.42	-1756.19	1552.9	229.247	-1752.87	1545.49	347.061	-1587.04	1584.13	234.964	-1573.04	1576.86	298.914	-1515.55	1408.5	321.887	-1460.04	1192.96	293.775	-1646.27	1338.62	283.279	-1702.67	1210.11	230.304	-1440.38	1242.5	468.461	-1586.14	1362.4	525.121	-1601.53	1136.52	527.236	-1601.17	1067.96	538.984	-1704.37	994.509	518.247	-1746.33	899.205	568.831	-1703.31	875.153	582.348	-1780.55	817.853
798	0	327.55	-1765.61	1552.06	228.4	-1762.35	1544.63	346.119	-1596.38	1582.85	234.018	-1582.47	1575.54	297.992	-1525.46	1406.98	321.323	-1470.46	1191.25	292.92	-1656.41	1337.46	282.606	-1713.02	1209.01	229.676	-1450.74	1240.6	467.654	-1596.11	1361.13	524.429	-1610.81	1135.19	526.59	-1610.12	1066.64	538.724	-1712.72	992.468	518.213	-1753.95	896.779	568.847	-1710.69	873.146	582.587	-1787.47	815.26
799	0	326.622	-1775.12	1551.3	227.495	-1771.91	1543.84	345.114	-1605.8	1581.65	233.008	-1591.97	1574.29	297.009	-1535.46	1405.52	320.702	-1481.05	1189.55	292.021	-1666.67	1336.37	281.894	-1723.54	1207.99	228.995	-1461.25	1238.72	466.796	-1606.19	1359.94	523.7	-1620.1	1133.91	525.907	-1619.01	1065.38	538.482	-1720.94	990.394	518.238	-1761.4	894.296	568.895	-1717.82	871.13	582.903	-1794.12	812.591
800	0	325.647	-1784.71	1550.64	226.54	-1781.56	1543.14	344.053	-1615.3	1580.53	231.942	-1601.56	1573.13	295.969	-1545.57	1404.13	320.019	-1491.81	1187.88	291.084	-1677.03	1335.38	281.148	-1734.21	1207.06	228.258	-1471.91	1236.87	465.893	-1616.35	1358.83	522.93	-1629.37	1132.7	525.181	-1627.83	1064.2	538.257	-1729.04	988.314	518.325	-1768.66	891.791	568.969	-1724.73	869.135	583.302	-1800.49	809.881
801	0	324.631	-1794.38	1550.08	225.542	-1791.28	1542.54	342.945	-1624.87	1579.52	230.828	-1611.22	1572.06	294.878	-1555.76	1402.83	319.269	-1502.72	1186.27	290.116	-1687.49	1334.51	280.375	-1745.02	1206.25	227.464	-1482.71	1235.08	464.95	-1626.59	1357.83	522.117	-1638.64	1131.59	524.407	-1636.58	1063.11	538.05	-1737	986.26	518.475	-1775.74	889.297	569.058	-1731.39	867.191	583.786	-1806.58	807.168
802	0	323.585	-1804.14	1549.64	224.511	-1801.09	1542.06	341.797	-1634.53	1578.63	229.673	-1620.97	1571.12	293.739	-1566.04	1401.64	318.45	-1513.76	1184.75	289.125	-1698.02	1333.75	279.582	-1755.98	1205.56	226.611	-1493.64	1233.39	463.972	-1636.89	1356.96	521.257	-1647.87	1130.59	523.58	-1645.25	1062.13	537.861	-1744.82	984.266	518.689	-1782.65	886.855	569.151	-1737.82	865.332	584.357	-1812.37	804.492
803	0	322.518	-1813.96	1549.32	223.456	-1810.98	1541.71	340.619	-1644.26	1577.88	228.488	-1630.8	1570.31	292.56	-1576.4	1400.59	317.559	-1524.93	1183.34	288.121	-1708.63	1333.14	278.776	-1767.05	1205.02	225.698	-1504.67	1231.82	462.965	-1647.25	1356.22	520.35	-1657.07	1129.72	522.695	-1653.84	1061.3	537.688	-1752.49	982.367	518.963	-1789.38	884.506	569.234	-1744	863.59	585.011	-1817.87	801.899
804	0	321.438	-1823.87	1549.14	222.386	-1820.95	1541.5	339.419	-1654.07	1577.27	227.281	-1640.71	1569.65	291.347	-1586.82	1399.68	316.599	-1536.19	1182.09	287.111	-1719.3	1332.67	277.964	-1778.22	1204.62	224.728	-1515.8	1230.4	461.938	-1657.65	1355.64	519.395	-1666.21	1129	521.747	-1662.34	1060.61	537.529	-1760.01	980.601	519.29	-1795.94	882.29	569.291	-1749.95	861.997	585.74	-1823.07	799.433
805	0	320.354	-1833.84	1549.11	221.311	-1830.99	1541.44	338.207	-1663.94	1576.82	226.06	-1650.69	1569.15	290.108	-1597.29	1398.93	315.572	-1547.53	1181.01	286.106	-1730.01	1332.36	277.156	-1789.47	1204.38	223.704	-1526.99	1229.17	460.897	-1668.07	1355.22	518.391	-1675.29	1128.45	520.733	-1670.75	1060.11	537.382	-1767.37	979.001	519.66	-1802.32	880.246	569.307	-1755.66	860.584	586.53	-1827.96	797.14
806	0	319.277	-1843.87	1549.23	220.24	-1841.1	1541.53	336.992	-1673.88	1576.54	224.836	-1660.73	1568.82	288.851	-1607.81	1398.37	314.483	-1558.91	1180.14	285.115	-1740.74	1332.22	276.359	-1800.77	1204.31	222.628	-1538.24	1228.16	459.851	-1678.49	1354.99	517.341	-1684.28	1128.07	519.651	-1679.07	1059.78	537.243	-1774.56	977.6	520.06	-1808.54	878.411	569.266	-1761.14	859.377	587.361	-1832.55	795.06
807	0	318.215	-1853.96	1549.49	219.182	-1851.27	1541.79	335.783	-1683.88	1576.44	223.617	-1670.84	1568.66	287.585	-1618.36	1398	313.341	-1570.29	1179.5	284.146	-1751.48	1332.24	275.583	-1812.09	1204.41	221.506	-1549.5	1227.38	458.808	-1688.9	1354.95	516.248	-1693.18	1127.89	518.503	-1687.28	1059.66	537.108	-1781.58	976.428	520.474	-1814.58	876.818	569.153	-1766.4	858.4	588.212	-1836.84	793.229
808	0	317.176	-1864.1	1549.91	218.146	-1861.49	1542.19	334.589	-1693.93	1576.51	222.413	-1681	1568.7	286.318	-1628.93	1397.83	312.155	-1581.65	1179.12	283.208	-1762.21	1332.43	274.836	-1823.41	1204.69	220.345	-1560.76	1226.85	457.776	-1699.29	1355.1	515.118	-1701.97	1127.92	517.292	-1695.38	1059.75	536.972	-1788.44	975.506	520.887	-1820.47	875.491	568.956	-1771.46	857.671	589.053	-1840.86	791.676
809	0	316.169	-1874.28	1550.47	217.142	-1871.76	1542.75	333.418	-1704.02	1576.78	221.231	-1691.21	1568.92	285.058	-1639.5	1397.87	310.937	-1592.96	1179	282.309	-1772.92	1332.8	274.128	-1834.7	1205.13	219.15	-1572	1226.6	456.763	-1709.62	1355.46	513.957	-1710.63	1128.14	516.02	-1703.37	1060.04	536.83	-1795.14	974.85	521.281	-1826.2	874.449	568.664	-1776.33	857.199	589.856	-1844.61	790.42
810	0	315.202	-1884.49	1551.18	216.176	-1882.07	1543.45	332.278	-1714.15	1577.22	220.081	-1701.46	1569.32	283.814	-1650.05	1398.12	309.696	-1604.16	1179.15	281.457	-1783.58	1333.34	273.466	-1845.93	1205.75	217.928	-1583.18	1226.62	455.778	-1719.89	1356	512.773	-1719.17	1128.57	514.696	-1711.24	1060.54	536.677	-1801.67	974.466	521.64	-1831.78	873.699	568.271	-1781.03	856.989	590.593	-1848.13	789.468
811	0	314.281	-1894.71	1552.01	215.258	-1892.4	1544.28	331.178	-1724.31	1577.85	218.97	-1711.74	1569.91	282.594	-1660.57	1398.57	308.444	-1615.25	1179.57	280.658	-1794.17	1334.03	272.858	-1857.08	1206.52	216.685	-1594.29	1226.91	454.827	-1730.07	1356.73	511.573	-1727.56	1129.19	513.326	-1718.99	1061.24	536.51	-1808.06	974.354	521.95	-1837.24	873.242	567.773	-1785.6	857.036	591.235	-1851.46	788.816
812	0	313.415	-1904.95	1552.96	214.395	-1902.74	1545.23	330.123	-1734.49	1578.65	217.905	-1722.04	1570.67	281.405	-1671.04	1399.22	307.19	-1626.18	1180.27	279.917	-1804.69	1334.89	272.311	-1868.1	1207.45	215.425	-1605.3	1227.48	453.915	-1740.14	1357.64	510.368	-1735.81	1130.01	511.921	-1726.62	1062.14	536.325	-1814.3	974.499	522.201	-1842.57	873.066	567.172	-1790.06	857.329	591.762	-1854.64	788.451
813	0	312.609	-1915.18	1554.01	213.593	-1913.09	1546.28	329.12	-1744.67	1579.61	216.892	-1732.35	1571.6	280.251	-1681.46	1400.07	305.94	-1636.93	1181.21	279.238	-1815.12	1335.88	271.831	-1878.99	1208.52	214.153	-1616.19	1228.31	453.049	-1750.09	1358.7	509.166	-1743.89	1130.99	510.491	-1734.12	1063.2	536.12	-1820.43	974.884	522.384	-1847.82	873.152	566.471	-1794.44	857.849	592.157	-1857.72	788.348
814	0	311.869	-1925.39	1555.15	212.859	-1923.42	1547.41	328.175	-1754.84	1580.72	215.937	-1742.66	1572.69	279.138	-1691.8	1401.09	304.701	-1647.48	1182.38	278.623	-1825.44	1337.01	271.421	-1889.72	1209.71	212.871	-1626.95	1229.37	452.23	-1759.9	1359.91	507.977	-1751.82	1132.13	509.045	-1741.49	1064.42	535.894	-1826.44	975.479	522.496	-1852.99	873.473	565.679	-1798.78	858.573	592.412	-1860.76	788.478
815	0	311.202	-1935.57	1556.35	212.198	-1933.73	1548.62	327.292	-1765	1581.97	215.044	-1752.95	1573.92	278.069	-1702.05	1402.28	303.476	-1657.82	1183.75	278.073	-1835.65	1338.25	271.082	-1900.28	1211.02	211.581	-1637.56	1230.66	451.463	-1769.56	1361.24	506.808	-1759.59	1133.4	507.595	-1748.74	1065.77	535.644	-1832.36	976.254	522.536	-1858.11	873.999	564.805	-1803.1	859.47	592.526	-1863.8	788.806
816	0	310.613	-1945.71	1557.62	211.616	-1944.01	1549.87	326.474	-1775.12	1583.34	214.217	-1763.22	1575.27	277.045	-1712.2	1403.61	302.264	-1667.94	1185.3	277.586	-1845.73	1339.59	270.813	-1910.65	1212.43	210.284	-1648.01	1232.14	450.747	-1779.04	1362.67	505.666	-1767.2	1134.78	506.15	-1755.86	1067.22	535.373	-1838.2	977.174	522.506	-1863.2	874.696	563.863	-1807.44	860.512	592.506	-1866.89	789.299
817	0	310.105	-1955.79	1558.91	211.116	-1954.24	1551.17	325.723	-1785.21	1584.82	213.458	-1773.45	1576.74	276.068	-1722.24	1405.06	301.065	-1677.84	1187	277.161	-1855.68	1341.02	270.611	-1920.83	1213.91	208.981	-1658.3	1233.79	450.082	-1788.35	1364.18	504.555	-1774.64	1136.24	504.718	-1762.85	1068.75	535.078	-1843.97	978.204	522.411	-1868.3	875.53	562.864	-1811.83	861.665	592.364	-1870.1	789.925
818	0	309.681	-1965.81	1560.23	210.701	-1964.41	1552.49	325.042	-1795.23	1586.37	212.768	-1783.64	1578.3	275.138	-1732.17	1406.62	299.877	-1687.52	1188.8	276.793	-1865.5	1342.52	270.469	-1930.81	1215.46	207.673	-1668.42	1235.58	449.466	-1797.49	1365.74	503.478	-1781.92	1137.77	503.305	-1769.72	1070.33	534.76	-1849.69	979.315	522.256	-1873.42	876.471	561.822	-1816.28	862.901	592.116	-1873.45	790.657
819	0	309.345	-1975.75	1561.56	210.373	-1974.51	1553.82	324.43	-1805.2	1587.99	212.149	-1793.77	1579.94	274.253	-1741.98	1408.26	298.697	-1696.99	1190.68	276.476	-1875.19	1344.07	270.378	-1940.59	1217.05	206.362	-1678.37	1237.48	448.895	-1806.44	1367.33	502.436	-1789.04	1139.33	501.918	-1776.47	1071.95	534.418	-1855.38	980.478	522.048	-1878.57	877.492	560.749	-1820.82	864.193	591.779	-1876.98	791.474
820	0	309.097	-1985.6	1562.87	210.134	-1984.54	1555.15	323.887	-1815.09	1589.65	211.598	-1803.84	1581.63	273.41	-1751.67	1409.97	297.522	-1706.27	1192.61	276.205	-1884.74	1345.64	270.329	-1950.18	1218.68	205.05	-1688.16	1239.45	448.364	-1815.22	1368.92	501.428	-1796.02	1140.91	500.559	-1783.09	1073.57	534.051	-1861.04	981.672	521.792	-1883.79	878.572	559.654	-1825.47	865.515	591.372	-1880.71	792.361
821	0	308.937	-1995.36	1564.16	209.982	-1994.48	1556.47	323.411	-1824.89	1591.34	211.114	-1813.84	1583.36	272.608	-1761.23	1411.7	296.351	-1715.37	1194.56	275.972	-1894.16	1347.24	270.31	-1959.59	1220.31	203.74	-1697.8	1241.47	447.868	-1823.84	1370.5	500.451	-1802.85	1142.48	499.232	-1789.61	1075.18	533.656	-1866.68	982.881	521.493	-1889.07	879.694	558.548	-1830.24	866.847	590.909	-1884.66	793.307
822	0	308.863	-2005.02	1565.42	209.915	-2004.33	1557.77	323	-1834.6	1593.02	210.695	-1823.75	1585.11	271.843	-1770.68	1413.46	295.184	-1724.31	1196.49	275.77	-1903.45	1348.82	270.308	-1968.83	1221.93	202.434	-1707.28	1243.51	447.402	-1832.31	1372.05	499.502	-1809.56	1144.04	497.936	-1796.02	1076.76	533.234	-1872.3	984.092	521.157	-1894.43	880.845	557.439	-1835.13	868.174	590.405	-1888.84	794.307
823	0	308.873	-2014.58	1566.63	209.93	-2014.09	1559.03	322.649	-1844.22	1594.68	210.336	-1833.59	1586.86	271.112	-1780.01	1415.21	294.02	-1733.1	1198.38	275.59	-1912.62	1350.38	270.311	-1977.92	1223.53	201.136	-1716.62	1245.54	446.957	-1840.64	1373.55	498.574	-1816.15	1145.56	496.672	-1802.34	1078.3	532.781	-1877.92	985.297	520.785	-1899.88	882.017	556.331	-1840.14	869.482	589.869	-1893.25	795.356
824	0	308.962	-2024.02	1567.78	210.023	-2023.76	1560.26	322.355	-1853.73	1596.3	210.034	-1843.34	1588.59	270.41	-1789.24	1416.93	292.86	-1741.78	1200.22	275.424	-1921.68	1351.91	270.309	-1986.86	1225.09	199.851	-1725.83	1247.54	446.529	-1848.86	1374.99	497.663	-1822.64	1147.03	495.438	-1808.57	1079.78	532.297	-1883.54	986.488	520.382	-1905.41	883.199	555.23	-1845.28	870.76	589.309	-1897.87	796.447
825	0	309.125	-2033.37	1568.87	210.187	-2033.33	1561.44	322.112	-1863.14	1597.86	209.781	-1853	1590.27	269.735	-1798.36	1418.61	291.707	-1750.35	1201.98	275.267	-1930.63	1353.38	270.292	-1995.68	1226.59	198.581	-1734.93	1249.47	446.111	-1856.97	1376.35	496.765	-1829.04	1148.44	494.234	-1814.74	1081.2	531.783	-1889.17	987.659	519.949	-1911.03	884.383	554.14	-1850.55	871.998	588.728	-1902.71	797.573
826	0	309.354	-2042.6	1569.88	210.416	-2042.8	1562.56	321.914	-1872.45	1599.35	209.574	-1862.58	1591.9	269.084	-1807.38	1420.22	290.562	-1758.85	1203.64	275.11	-1939.49	1354.77	270.251	-2004.39	1228.01	197.331	-1743.92	1251.33	445.698	-1865	1377.62	495.874	-1835.39	1149.78	493.056	-1820.84	1082.55	531.237	-1894.81	988.802	519.489	-1916.73	885.558	553.062	-1855.92	873.187	588.129	-1907.75	798.723
827	0	309.641	-2051.74	1570.8	210.702	-2052.19	1563.62	321.756	-1881.65	1600.74	209.405	-1872.07	1593.46	268.452	-1816.32	1421.75	289.428	-1767.27	1205.19	274.95	-1948.26	1356.08	270.18	-2013.01	1229.33	196.105	-1752.82	1253.1	445.285	-1872.97	1378.79	494.988	-1841.7	1151.04	491.904	-1826.91	1083.81	530.663	-1900.47	989.906	519.004	-1922.5	886.71	551.997	-1861.41	874.315	587.515	-1912.96	799.878
828	0	309.978	-2060.78	1571.63	211.036	-2061.49	1564.6	321.63	-1890.77	1602.02	209.268	-1881.48	1594.92	267.84	-1825.17	1423.18	288.308	-1775.64	1206.62	274.78	-1956.96	1357.29	270.077	-2021.55	1230.55	194.906	-1761.63	1254.74	444.87	-1880.9	1379.85	494.105	-1847.99	1152.2	490.777	-1832.96	1084.99	530.063	-1906.15	990.958	518.497	-1928.35	887.824	550.948	-1867	875.374	586.885	-1918.32	801.018
829	0	310.356	-2069.74	1572.37	211.409	-2070.71	1565.5	321.53	-1899.79	1603.18	209.157	-1890.82	1596.28	267.244	-1833.96	1424.51	287.205	-1783.97	1207.92	274.599	-1965.6	1358.38	269.939	-2030.02	1231.64	193.74	-1770.37	1256.27	444.451	-1888.81	1380.81	493.224	-1854.28	1153.27	489.675	-1839.01	1086.07	529.441	-1911.88	991.943	517.972	-1934.27	888.879	549.914	-1872.68	876.35	586.24	-1923.82	802.116
830	0	310.765	-2078.62	1572.99	211.813	-2079.86	1566.3	321.449	-1908.73	1604.22	209.064	-1900.08	1597.52	266.666	-1842.69	1425.72	286.123	-1792.27	1209.07	274.403	-1974.18	1359.36	269.766	-2038.43	1232.59	192.611	-1779.05	1257.65	444.028	-1896.71	1381.64	492.348	-1860.61	1154.24	488.599	-1845.09	1087.05	528.801	-1917.66	992.844	517.43	-1940.25	889.854	548.896	-1878.45	877.234	585.582	-1929.44	803.144
831	0	311.194	-2087.42	1573.5	212.237	-2088.95	1567	321.382	-1917.59	1605.11	208.985	-1909.28	1598.63	266.105	-1851.37	1426.8	285.066	-1800.55	1210.09	274.192	-1982.72	1360.2	269.56	-2046.79	1233.4	191.525	-1787.66	1258.89	443.601	-1904.62	1382.36	491.479	-1866.99	1155.09	487.552	-1851.22	1087.92	528.148	-1923.51	993.643	516.876	-1946.3	890.727	547.897	-1884.3	878.014	584.91	-1935.15	804.072
832	0	311.636	-2096.17	1573.9	212.673	-2097.98	1567.59	321.323	-1926.4	1605.87	208.913	-1918.42	1599.59	265.564	-1860.01	1427.75	284.039	-1808.8	1210.96	273.966	-1991.22	1360.9	269.324	-2055.1	1234.05	190.489	-1796.22	1259.98	443.172	-1912.55	1382.95	490.622	-1873.44	1155.82	486.538	-1857.42	1088.68	527.489	-1929.44	994.323	516.312	-1952.41	891.476	546.917	-1890.23	878.681	584.226	-1940.95	804.873
833	0	312.081	-2104.87	1574.17	213.112	-2106.97	1568.05	321.267	-1935.15	1606.47	208.845	-1927.51	1600.42	265.045	-1868.62	1428.56	283.051	-1817.05	1211.68	273.727	-1999.69	1361.46	269.06	-2063.39	1234.55	189.509	-1804.74	1260.91	442.746	-1920.52	1383.41	489.783	-1880	1156.43	485.559	-1863.72	1089.32	526.829	-1935.46	994.868	515.741	-1958.57	892.081	545.96	-1896.23	879.225	583.528	-1946.82	805.518
834	0	312.521	-2113.54	1574.32	213.546	-2115.92	1568.39	321.211	-1943.86	1606.93	208.776	-1936.57	1601.09	264.551	-1877.2	1429.22	282.108	-1825.28	1212.26	273.476	-2008.14	1361.88	268.775	-2071.64	1234.88	188.592	-1813.21	1261.7	442.326	-1928.53	1383.76	488.968	-1886.67	1156.91	484.623	-1870.14	1089.85	526.174	-1941.6	995.266	515.163	-1964.8	892.524	545.028	-1902.29	879.64	582.816	-1952.74	805.988
835	0	312.948	-2122.18	1574.34	213.969	-2124.84	1568.6	321.151	-1952.55	1607.23	208.703	-1945.59	1601.6	264.087	-1885.77	1429.75	281.22	-1833.51	1212.71	273.217	-2016.58	1362.15	268.471	-2079.88	1235.06	187.747	-1821.63	1262.33	441.917	-1936.6	1383.98	488.185	-1893.48	1157.27	483.735	-1876.69	1090.26	525.529	-1947.86	995.507	514.582	-1971.09	892.794	544.123	-1908.43	879.922	582.09	-1958.71	806.265
836	0	313.358	-2130.81	1574.24	214.375	-2133.75	1568.67	321.086	-1961.22	1607.39	208.627	-1954.59	1601.95	263.657	-1894.33	1430.13	280.398	-1841.72	1213.02	272.954	-2025.02	1362.27	268.155	-2088.1	1235.07	186.981	-1830.02	1262.81	441.525	-1944.74	1384.08	487.442	-1900.45	1157.5	482.9	-1883.41	1090.55	524.898	-1954.26	995.587	513.998	-1977.45	892.882	543.249	-1914.64	880.071	581.349	-1964.74	806.337
837	0	313.745	-2139.44	1574.01	214.758	-2142.65	1568.61	321.015	-1969.88	1607.4	208.546	-1963.57	1602.14	263.267	-1902.88	1430.37	279.651	-1849.92	1213.21	272.691	-2033.45	1362.25	267.831	-2096.33	1234.94	186.302	-1838.37	1263.16	441.156	-1952.95	1384.07	486.747	-1907.58	1157.6	482.126	-1890.3	1090.73	524.288	-1960.81	995.505	513.412	-1983.87	892.786	542.41	-1920.92	880.086	580.592	-1970.8	806.203
838	0	314.106	-2148.07	1573.66	215.117	-2151.55	1568.4	320.941	-1978.55	1607.27	208.462	-1972.54	1602.18	262.922	-1911.44	1430.47	278.99	-1858.12	1213.27	272.434	-2041.9	1362.08	267.506	-2104.55	1234.67	185.717	-1846.7	1263.36	440.816	-1961.24	1383.94	486.11	-1914.9	1157.59	481.418	-1897.37	1090.78	523.7	-1967.53	995.263	512.826	-1990.37	892.509	541.609	-1927.28	879.972	579.82	-1976.91	805.863
839	0	314.439	-2156.72	1573.18	215.448	-2160.44	1568.05	320.864	-1987.23	1607.01	208.377	-1981.51	1602.06	262.628	-1920.01	1430.44	278.425	-1866.3	1213.23	272.187	-2050.36	1361.78	267.185	-2112.8	1234.27	185.23	-1854.99	1263.44	440.511	-1969.61	1383.7	485.536	-1922.4	1157.46	480.781	-1904.64	1090.73	523.14	-1974.41	994.87	512.241	-1996.94	892.059	540.85	-1933.72	879.736	579.034	-1983.06	805.325
840	0	314.743	-2165.38	1572.58	215.751	-2169.35	1567.56	320.788	-1995.93	1606.61	208.294	-1990.48	1601.79	262.39	-1928.59	1430.27	277.966	-1874.47	1213.09	271.957	-2058.83	1361.34	266.875	-2121.06	1233.75	184.847	-1863.26	1263.38	440.247	-1978.07	1383.36	485.034	-1930.09	1157.21	480.221	-1912.12	1090.57	522.61	-1981.47	994.335	511.661	-2003.58	891.448	540.137	-1940.25	879.385	578.239	-1989.26	804.605
841	0	315.019	-2174.08	1571.87	216.028	-2178.27	1566.94	320.718	-2004.66	1606.09	208.219	-1999.45	1601.37	262.214	-1937.19	1429.98	277.62	-1882.63	1212.85	271.749	-2067.34	1360.78	266.581	-2129.35	1233.11	184.571	-1871.52	1263.21	440.03	-1986.62	1382.92	484.608	-1937.99	1156.86	479.741	-1919.79	1090.3	522.115	-1988.7	993.671	511.088	-2010.32	890.689	539.476	-1946.88	878.929	577.439	-1995.51	803.719
842	0	315.269	-2182.81	1571.05	216.28	-2187.2	1566.19	320.658	-2013.42	1605.45	208.157	-2008.43	1600.82	262.104	-1945.81	1429.57	277.393	-1890.78	1212.51	271.57	-2075.87	1360.09	266.31	-2137.67	1232.38	184.405	-1879.77	1262.93	439.865	-1995.27	1382.39	484.265	-1946.08	1156.4	479.346	-1927.67	1089.93	521.656	-1996.11	992.89	510.528	-2017.15	889.799	538.87	-1953.61	878.377	576.642	-2001.83	802.689
843	0	315.497	-2191.58	1570.12	216.511	-2196.15	1565.31	320.615	-2022.22	1604.69	208.114	-2017.42	1600.12	262.066	-1954.45	1429.03	277.291	-1898.92	1212.09	271.427	-2084.44	1359.3	266.068	-2146.04	1231.55	184.348	-1888.03	1262.53	439.759	-2004.01	1381.75	484.009	-1954.37	1155.84	479.039	-1935.74	1089.46	521.238	-2003.69	992.008	509.987	-2024.07	888.794	538.324	-1960.45	877.738	575.858	-2008.22	801.535
844	0	315.706	-2200.39	1569.1	216.725	-2205.12	1564.33	320.596	-2031.05	1603.83	208.096	-2026.42	1599.3	262.103	-1963.13	1428.38	277.314	-1907.07	1211.59	271.325	-2093.05	1358.39	265.859	-2154.46	1230.64	184.401	-1896.29	1262.04	439.715	-2012.85	1381.03	483.841	-1962.84	1155.18	478.821	-1944.01	1088.89	520.864	-2011.43	991.034	509.471	-2031.11	887.69	537.845	-1967.42	877.02	575.1	-2014.7	800.28
845	0	315.902	-2209.24	1568	216.927	-2214.11	1563.23	320.607	-2039.93	1602.88	208.111	-2035.42	1598.36	262.22	-1971.83	1427.62	277.466	-1915.21	1211	271.269	-2101.71	1357.4	265.691	-2162.93	1229.66	184.562	-1904.58	1261.43	439.739	-2021.78	1380.21	483.764	-1971.5	1154.43	478.696	-1952.45	1088.23	520.538	-2019.35	989.981	508.989	-2038.27	886.501	537.436	-1974.52	876.228	574.38	-2021.29	798.943
846	0	316.092	-2218.13	1566.81	217.123	-2223.11	1562.04	320.655	-2048.84	1601.83	208.166	-2044.44	1597.31	262.418	-1980.58	1426.75	277.743	-1923.36	1210.34	271.267	-2110.41	1356.31	265.567	-2171.46	1228.6	184.829	-1912.89	1260.73	439.834	-2030.8	1379.31	483.78	-1980.32	1153.58	478.664	-1961.07	1087.47	520.264	-2027.43	988.854	508.548	-2045.55	885.238	537.103	-1981.77	875.366	573.712	-2028	797.541
847	0	316.281	-2227.05	1565.55	217.321	-2232.12	1560.76	320.748	-2057.8	1600.69	208.267	-2053.46	1596.15	262.702	-1989.36	1425.77	278.145	-1931.53	1209.59	271.323	-2119.17	1355.14	265.493	-2180.05	1227.49	185.199	-1921.25	1259.93	440.005	-2039.91	1378.31	483.887	-1989.3	1152.64	478.725	-1969.84	1086.63	520.047	-2035.66	987.661	508.156	-2052.98	883.91	536.85	-1989.17	874.435	573.111	-2034.87	796.087
848	0	316.476	-2236.02	1564.23	217.525	-2241.15	1559.41	320.892	-2066.79	1599.48	208.423	-2062.48	1594.9	263.071	-1998.18	1424.7	278.669	-1939.73	1208.75	271.443	-2127.99	1353.91	265.474	-2188.7	1226.31	185.67	-1929.67	1259.03	440.255	-2049.11	1377.23	484.085	-1998.42	1151.6	478.88	-1978.75	1085.68	519.892	-2044.04	986.404	507.822	-2060.55	882.524	536.683	-1996.74	873.434	572.591	-2041.9	794.59
849	0	316.684	-2245.03	1562.86	217.743	-2250.19	1558	321.094	-2075.81	1598.19	208.638	-2071.51	1593.56	263.528	-2007.04	1423.53	279.309	-1947.97	1207.83	271.631	-2136.87	1352.61	265.513	-2197.43	1225.09	186.237	-1938.15	1258.03	440.586	-2058.4	1376.07	484.375	-2007.67	1150.47	479.129	-1987.8	1084.65	519.804	-2052.57	985.083	507.553	-2068.28	881.083	536.606	-2004.48	872.361	572.164	-2049.14	793.058
850	0	316.911	-2254.06	1561.45	217.982	-2259.24	1556.54	321.361	-2084.86	1596.85	208.92	-2080.53	1592.15	264.072	-2015.95	1422.27	280.061	-1956.25	1206.82	271.892	-2145.82	1351.26	265.616	-2206.24	1223.82	186.896	-1946.7	1256.93	441.001	-2067.77	1374.82	484.753	-2017.04	1149.26	479.471	-1996.97	1083.52	519.789	-2061.25	983.698	507.358	-2076.19	879.59	536.622	-2012.42	871.213	571.84	-2056.6	791.494
851	0	317.165	-2263.14	1560.01	218.247	-2268.31	1555.05	321.696	-2093.94	1595.45	209.273	-2089.56	1590.67	264.704	-2024.91	1420.94	280.918	-1964.61	1205.71	272.229	-2154.84	1349.87	265.786	-2215.12	1222.5	187.644	-1955.35	1255.74	441.501	-2077.21	1373.49	485.218	-2026.51	1147.95	479.905	-2006.26	1082.3	519.853	-2070.07	982.249	507.244	-2084.28	878.046	536.735	-2020.55	869.985	571.629	-2064.3	789.898
852	0	317.451	-2272.24	1558.57	218.545	-2277.37	1553.53	322.106	-2103.04	1594.02	209.703	-2098.58	1589.14	265.422	-2033.91	1419.52	281.873	-1973.05	1204.51	272.646	-2163.93	1348.45	266.029	-2224.09	1221.16	188.476	-1964.09	1254.45	442.087	-2086.73	1372.09	485.768	-2036.08	1146.56	480.429	-2015.64	1081	520.001	-2079.03	980.735	507.218	-2092.56	876.451	536.948	-2028.89	868.675	571.537	-2072.26	788.271
853	0	317.774	-2281.38	1557.12	218.879	-2286.45	1552.01	322.593	-2112.17	1592.55	210.212	-2107.59	1587.57	266.223	-2042.97	1418.05	282.919	-1981.59	1203.21	273.144	-2173.09	1347.02	266.347	-2233.16	1219.79	189.387	-1972.94	1253.07	442.76	-2096.31	1370.63	486.401	-2045.74	1145.09	481.04	-2025.13	1079.61	520.239	-2088.12	979.157	507.286	-2101.03	874.808	537.262	-2037.44	867.282	571.569	-2080.51	786.614
854	0	318.139	-2290.54	1555.68	219.255	-2295.53	1550.5	323.162	-2121.31	1591.07	210.805	-2116.6	1585.98	267.107	-2052.08	1416.52	284.045	-1990.26	1201.82	273.727	-2182.34	1345.58	266.746	-2242.32	1218.41	190.371	-1981.9	1251.6	443.518	-2105.94	1369.11	487.113	-2055.47	1143.55	481.736	-2034.71	1078.14	520.571	-2097.37	977.518	507.456	-2109.72	873.118	537.678	-2046.21	865.808	571.729	-2089.04	784.924
855	0	318.55	-2299.74	1554.28	219.675	-2304.62	1549.01	323.814	-2130.48	1589.59	211.482	-2125.6	1584.39	268.069	-2061.24	1414.95	285.241	-1999.06	1200.33	274.395	-2191.66	1344.16	267.229	-2251.58	1217.04	191.424	-1990.99	1250.05	444.362	-2115.63	1367.55	487.903	-2065.28	1141.95	482.511	-2044.39	1076.6	521	-2106.75	975.822	507.733	-2118.63	871.386	538.196	-2055.2	864.256	572.017	-2097.87	783.205
856	0	319.01	-2308.96	1552.93	220.143	-2313.71	1547.57	324.55	-2139.66	1588.12	212.245	-2134.6	1582.8	269.105	-2070.46	1413.35	286.496	-2008.03	1198.77	275.148	-2201.07	1342.77	267.8	-2260.95	1215.68	192.539	-2000.21	1248.44	445.287	-2125.36	1365.96	488.765	-2075.17	1140.29	483.36	-2054.16	1075	521.528	-2116.29	974.079	508.121	-2127.76	869.62	538.814	-2064.43	862.634	572.434	-2106.99	781.46
857	0	319.521	-2318.22	1551.64	220.661	-2322.82	1546.19	325.37	-2148.85	1586.68	213.094	-2143.59	1581.24	270.211	-2079.74	1411.75	287.797	-2017.17	1197.13	275.986	-2210.55	1341.42	268.463	-2270.43	1214.36	193.71	-2009.57	1246.77	446.293	-2135.13	1364.35	489.695	-2085.12	1138.6	484.278	-2064.03	1073.36	522.158	-2125.97	972.3	508.623	-2137.13	867.831	539.529	-2073.88	860.954	572.976	-2116.41	779.695
858	0	320.085	-2327.51	1550.44	221.23	-2331.93	1544.88	326.273	-2158.07	1585.29	214.028	-2152.58	1579.72	271.383	-2089.08	1410.15	289.134	-2026.5	1195.43	276.907	-2220.12	1340.13	269.218	-2280.03	1213.1	194.93	-2019.07	1245.07	447.374	-2144.93	1362.75	490.689	-2095.15	1136.89	485.258	-2074	1071.69	522.889	-2135.81	970.502	509.242	-2146.73	866.034	540.337	-2083.56	859.231	573.642	-2126.13	777.921
859	0	320.704	-2336.83	1549.33	221.851	-2341.05	1543.68	327.257	-2167.3	1583.96	215.044	-2161.57	1578.26	272.614	-2098.48	1408.57	290.494	-2036.05	1193.69	277.908	-2229.77	1338.92	270.066	-2289.75	1211.92	196.193	-2028.71	1243.35	448.527	-2154.75	1361.18	491.742	-2105.25	1135.18	486.294	-2084.08	1070.01	523.721	-2145.81	968.703	509.978	-2156.57	864.244	541.233	-2093.48	857.484	574.427	-2136.12	776.151
860	0	321.376	-2346.19	1548.35	222.524	-2350.18	1542.59	328.32	-2176.55	1582.72	216.139	-2170.56	1576.89	273.9	-2107.94	1407.05	291.866	-2045.8	1191.93	278.984	-2239.5	1337.81	271.007	-2299.59	1210.84	197.492	-2038.5	1241.63	449.746	-2164.6	1359.66	492.847	-2115.42	1133.5	487.379	-2094.26	1068.34	524.653	-2155.98	966.928	510.83	-2166.67	862.485	542.21	-2103.62	855.737	575.326	-2146.4	774.404
861	0	322.102	-2355.59	1547.51	223.248	-2359.33	1541.64	329.456	-2185.81	1581.57	217.31	-2179.56	1575.62	275.235	-2117.46	1405.59	293.24	-2055.78	1190.17	280.132	-2249.31	1336.81	272.036	-2309.55	1209.88	198.821	-2048.43	1239.93	451.025	-2174.47	1358.2	493.999	-2125.67	1131.86	488.504	-2104.57	1066.7	525.68	-2166.3	965.203	511.795	-2177.01	860.78	543.262	-2114	854.015	576.331	-2156.94	772.7
862	0	322.881	-2365.03	1546.82	224.023	-2368.5	1540.84	330.661	-2195.1	1580.54	218.551	-2188.57	1574.46	276.613	-2127.05	1404.22	294.608	-2065.99	1188.44	281.344	-2259.2	1335.94	273.15	-2319.64	1209.07	200.174	-2058.51	1238.3	452.358	-2184.37	1356.84	495.19	-2136	1130.29	489.665	-2115	1065.13	526.799	-2176.8	963.556	512.868	-2187.6	859.157	544.38	-2124.6	852.346	577.434	-2167.74	771.065
863	0	323.709	-2374.51	1546.3	224.846	-2377.69	1540.22	331.928	-2204.41	1579.64	219.855	-2197.59	1573.44	278.03	-2136.7	1402.95	295.964	-2076.41	1186.78	282.613	-2269.16	1335.2	274.341	-2329.85	1208.41	201.546	-2068.71	1236.74	453.737	-2194.29	1355.6	496.415	-2146.43	1128.82	490.855	-2125.56	1063.64	528.002	-2187.47	962.018	514.042	-2198.43	857.646	545.557	-2135.43	850.76	578.627	-2178.79	769.527
864	0	324.586	-2384.03	1545.98	225.715	-2386.9	1539.78	333.25	-2213.75	1578.89	221.217	-2206.64	1572.56	279.478	-2146.42	1401.82	297.303	-2087.05	1185.22	283.931	-2279.2	1334.63	275.599	-2340.18	1207.93	202.931	-2079.05	1235.29	455.156	-2204.25	1354.49	497.668	-2156.94	1127.47	492.067	-2136.26	1062.26	529.282	-2198.3	960.622	515.309	-2209.52	856.277	546.783	-2146.49	849.289	579.899	-2190.08	768.116
865	0	325.506	-2393.6	1545.85	226.627	-2396.14	1539.54	334.621	-2223.11	1578.3	222.627	-2215.7	1571.85	280.954	-2156.2	1400.83	298.624	-2097.9	1183.78	285.288	-2289.3	1334.22	276.913	-2350.62	1207.65	204.328	-2089.49	1233.98	456.607	-2214.24	1353.55	498.943	-2167.55	1126.27	493.299	-2147.09	1061.02	530.629	-2209.31	959.399	516.657	-2220.84	855.082	548.052	-2157.76	847.965	581.24	-2201.6	766.863
866	0	326.466	-2403.21	1545.94	227.578	-2405.4	1539.51	336.031	-2232.5	1577.87	224.079	-2224.8	1571.3	282.453	-2166.04	1400	299.926	-2108.93	1182.51	286.675	-2299.47	1333.99	278.271	-2361.17	1207.56	205.732	-2100.04	1232.83	458.082	-2224.27	1352.78	500.234	-2178.26	1125.24	494.547	-2158.06	1059.94	532.033	-2220.5	958.38	518.074	-2232.4	854.094	549.355	-2169.25	846.817	582.639	-2213.35	765.803
867	0	327.462	-2412.87	1546.24	228.564	-2414.7	1539.7	337.471	-2241.93	1577.62	225.562	-2233.93	1570.94	283.97	-2175.94	1399.35	301.21	-2120.13	1181.42	288.082	-2309.7	1333.93	279.658	-2371.81	1207.68	207.144	-2110.68	1231.87	459.573	-2234.36	1352.2	501.539	-2189.07	1124.41	495.808	-2169.17	1059.04	533.481	-2231.86	957.595	519.548	-2244.19	853.341	550.685	-2180.96	845.874	584.085	-2225.32	764.967
868	0	328.487	-2422.57	1546.76	229.579	-2424.04	1540.11	338.932	-2251.38	1577.55	227.068	-2243.1	1570.75	285.502	-2185.9	1398.9	302.479	-2131.47	1180.55	289.498	-2319.98	1334.06	281.06	-2382.53	1208.01	208.562	-2121.38	1231.11	461.072	-2244.51	1351.84	502.854	-2200	1123.78	497.082	-2180.43	1058.35	534.96	-2243.41	957.069	521.063	-2256.2	852.85	552.039	-2192.89	845.162	585.566	-2237.5	764.385
869	0	329.536	-2432.32	1547.5	230.619	-2433.42	1540.75	340.406	-2260.88	1577.66	228.587	-2252.3	1570.75	287.043	-2195.91	1398.64	303.739	-2142.93	1179.91	290.912	-2330.31	1334.37	282.46	-2393.32	1208.54	209.989	-2132.14	1230.59	462.572	-2254.74	1351.69	504.177	-2211.04	1123.38	498.37	-2191.82	1057.88	536.457	-2255.12	956.823	522.606	-2268.42	852.644	553.411	-2205.03	844.702	587.071	-2249.91	764.083
870	0	330.602	-2442.1	1548.46	231.675	-2442.84	1541.6	341.883	-2270.41	1577.95	230.11	-2261.56	1570.93	288.592	-2205.97	1398.59	304.996	-2154.47	1179.54	292.316	-2340.67	1334.86	283.845	-2404.16	1209.26	211.426	-2142.91	1230.3	464.065	-2265.04	1351.76	505.509	-2222.2	1123.22	499.674	-2203.34	1057.64	537.96	-2267.02	956.871	524.162	-2280.85	852.738	554.798	-2217.38	844.508	588.588	-2262.54	764.083
871	0	331.676	-2451.93	1549.62	232.742	-2452.3	1542.67	343.353	-2279.98	1578.41	231.627	-2270.86	1571.29	290.146	-2216.07	1398.74	306.257	-2166.07	1179.43	293.698	-2351.06	1335.52	285.199	-2415.03	1210.17	212.877	-2153.69	1230.26	465.544	-2275.43	1352.05	506.85	-2233.48	1123.3	500.999	-2214.99	1057.63	539.457	-2279.09	957.221	525.718	-2293.48	853.14	556.201	-2229.94	844.588	590.107	-2275.4	764.396
872	0	332.752	-2461.79	1550.98	233.811	-2461.8	1543.93	344.807	-2289.6	1579.04	233.129	-2280.21	1571.82	291.702	-2226.2	1399.1	307.531	-2177.68	1179.6	295.05	-2361.48	1336.35	286.508	-2425.92	1211.24	214.349	-2164.45	1230.47	467.005	-2285.92	1352.56	508.202	-2244.87	1123.62	502.35	-2226.76	1057.87	540.94	-2291.34	957.871	527.261	-2306.3	853.852	557.618	-2242.71	844.944	591.619	-2288.5	765.027
873	0	333.821	-2471.69	1552.5	234.875	-2471.34	1545.38	346.238	-2299.25	1579.83	234.607	-2289.61	1572.51	293.258	-2236.37	1399.66	308.829	-2189.28	1180.04	296.365	-2371.9	1337.32	287.758	-2436.8	1212.46	215.848	-2175.17	1230.93	468.441	-2296.5	1353.29	509.566	-2256.38	1124.17	503.733	-2238.63	1058.33	542.402	-2303.75	958.812	528.78	-2319.3	854.864	559.051	-2255.69	845.567	593.115	-2301.85	765.971
874	0	334.874	-2481.62	1554.18	235.925	-2480.93	1546.97	347.638	-2308.96	1580.76	236.053	-2299.06	1573.34	294.813	-2246.55	1400.42	310.162	-2200.83	1180.73	297.634	-2382.32	1338.43	288.939	-2447.65	1213.79	217.382	-2185.82	1231.62	469.849	-2307.19	1354.21	510.944	-2268.01	1124.95	505.154	-2250.61	1059.02	543.836	-2316.32	960.023	530.265	-2332.48	856.158	560.503	-2268.88	846.444	594.589	-2315.46	767.212
875	0	335.903	-2491.58	1555.98	236.952	-2490.56	1548.7	349	-2318.71	1581.83	237.461	-2308.56	1574.31	296.366	-2256.74	1401.35	311.54	-2212.3	1181.67	298.853	-2392.73	1339.66	290.039	-2458.46	1215.23	218.959	-2196.37	1232.53	471.223	-2317.98	1355.32	512.34	-2279.75	1125.93	506.621	-2262.69	1059.92	545.242	-2329.04	961.477	531.709	-2345.81	857.71	561.977	-2282.26	847.553	596.037	-2329.34	768.724
876	0	336.9	-2501.56	1557.89	237.948	-2500.23	1550.54	350.317	-2328.51	1583	238.823	-2318.12	1575.4	297.916	-2266.93	1402.44	312.975	-2223.65	1182.83	300.017	-2403.12	1340.99	291.052	-2469.19	1216.73	220.588	-2206.81	1233.64	472.56	-2328.86	1356.6	513.756	-2291.6	1127.1	508.141	-2274.84	1061.01	546.617	-2341.89	963.141	533.106	-2359.3	859.486	563.477	-2295.85	848.867	597.453	-2343.49	770.477
877	0	337.855	-2511.57	1559.86	238.904	-2509.93	1552.44	351.585	-2338.36	1584.28	240.134	-2327.72	1576.59	299.46	-2277.11	1403.69	314.478	-2234.85	1184.19	301.124	-2413.47	1342.4	291.971	-2479.85	1218.29	222.276	-2217.12	1234.93	473.859	-2339.84	1358.02	515.194	-2303.56	1128.43	509.72	-2287.06	1062.26	547.962	-2354.88	964.977	534.451	-2372.94	861.45	565.005	-2309.62	850.358	598.836	-2357.92	772.431
878	0	338.761	-2521.6	1561.88	239.813	-2519.67	1554.4	352.799	-2348.26	1585.64	241.39	-2337.38	1577.86	300.998	-2287.27	1405.07	316.056	-2245.88	1185.72	302.17	-2423.78	1343.88	292.793	-2490.4	1219.86	224.029	-2227.28	1236.37	475.117	-2350.89	1359.56	516.654	-2315.61	1129.89	511.362	-2299.35	1063.66	549.278	-2367.99	966.944	535.742	-2386.71	863.561	566.567	-2323.58	851.992	600.184	-2372.62	774.547
879	0	339.611	-2531.64	1563.91	240.667	-2529.44	1556.36	353.957	-2358.21	1587.06	242.587	-2347.07	1579.2	302.528	-2297.4	1406.55	317.716	-2256.72	1187.39	303.157	-2434.04	1345.41	293.519	-2500.82	1221.44	225.851	-2237.29	1237.94	476.332	-2362.01	1361.21	518.139	-2327.76	1131.47	513.071	-2311.69	1065.19	550.566	-2381.21	969.005	536.975	-2400.61	865.781	568.163	-2337.72	853.738	601.496	-2387.59	776.785
880	0	340.399	-2541.7	1565.93	241.459	-2539.23	1558.31	355.056	-2368.2	1588.54	243.723	-2356.81	1580.59	304.046	-2307.49	1408.13	319.459	-2267.35	1189.16	304.086	-2444.23	1346.96	294.152	-2511.12	1222.99	227.742	-2247.12	1239.61	477.502	-2373.18	1362.94	519.645	-2340	1133.14	514.846	-2324.08	1066.8	551.826	-2394.54	971.125	538.15	-2414.62	868.072	569.796	-2352.02	855.567	602.77	-2402.81	779.107
881	0	341.12	-2551.77	1567.9	242.183	-2549.04	1560.22	356.096	-2378.23	1590.05	244.797	-2366.58	1582.02	305.55	-2317.54	1409.78	321.284	-2277.75	1191	304.959	-2454.35	1348.53	294.697	-2521.27	1224.51	229.698	-2256.78	1241.36	478.627	-2384.38	1364.72	521.172	-2352.33	1134.86	516.687	-2336.52	1068.49	553.056	-2407.96	973.272	539.266	-2428.73	870.403	571.464	-2366.48	857.454	604.007	-2418.26	781.48
882	0	341.77	-2561.84	1569.81	242.836	-2558.86	1562.06	357.075	-2388.31	1591.58	245.809	-2376.38	1583.48	307.036	-2327.53	1411.48	323.186	-2287.93	1192.9	305.78	-2464.39	1350.09	295.163	-2531.26	1225.98	231.714	-2266.26	1243.16	479.706	-2395.58	1366.53	522.715	-2364.73	1136.62	518.588	-2348.99	1070.22	554.253	-2421.48	975.426	540.322	-2442.94	872.746	573.165	-2381.07	859.376	605.204	-2433.92	783.879
883	0	342.346	-2571.92	1571.62	243.413	-2568.69	1563.8	357.994	-2398.42	1593.11	246.759	-2386.21	1584.94	308.498	-2337.45	1413.22	325.153	-2297.88	1194.82	306.553	-2474.34	1351.63	295.56	-2541.1	1227.39	233.779	-2275.56	1245	480.737	-2406.77	1368.37	524.27	-2377.19	1138.4	520.541	-2361.49	1071.98	555.413	-2435.08	977.569	541.317	-2457.22	875.083	574.896	-2395.79	861.319	606.362	-2449.75	786.285
884	0	342.848	-2582	1573.33	243.914	-2578.52	1565.44	358.854	-2408.56	1594.65	247.649	-2396.06	1586.4	309.932	-2347.31	1414.97	327.172	-2307.61	1196.74	307.283	-2484.2	1353.15	295.902	-2550.77	1228.73	235.88	-2284.7	1246.84	481.719	-2417.92	1370.2	525.828	-2389.7	1140.18	522.537	-2374.02	1073.75	556.532	-2448.76	979.692	542.25	-2471.57	877.401	576.649	-2410.62	863.269	607.479	-2465.73	788.688
885	0	343.277	-2592.07	1574.91	244.337	-2588.35	1566.95	359.657	-2418.73	1596.16	248.481	-2405.92	1587.85	311.332	-2357.09	1416.71	329.225	-2317.11	1198.64	307.975	-2493.97	1354.63	296.199	-2560.29	1230	238.001	-2293.67	1248.67	482.653	-2429.01	1372.02	527.384	-2402.25	1141.94	524.562	-2386.57	1075.51	557.602	-2462.5	981.793	543.122	-2485.98	879.694	578.415	-2425.54	865.222	608.555	-2481.81	791.084
886	0	343.632	-2602.14	1576.35	244.684	-2598.17	1568.31	360.405	-2428.92	1597.66	249.257	-2415.79	1589.27	312.693	-2366.79	1418.43	331.294	-2326.42	1200.5	308.636	-2503.63	1356.06	296.467	-2569.65	1231.2	240.125	-2302.5	1250.48	483.538	-2440.01	1373.8	528.929	-2414.81	1143.68	526.603	-2399.14	1077.25	558.619	-2476.31	983.872	543.932	-2500.43	881.961	580.183	-2440.54	867.172	609.59	-2497.96	793.474
887	0	343.919	-2612.18	1577.63	244.958	-2607.98	1569.53	361.099	-2439.11	1599.11	249.98	-2425.65	1590.66	314.008	-2376.41	1420.12	333.358	-2335.54	1202.31	309.269	-2513.19	1357.43	296.717	-2578.86	1232.33	242.235	-2311.18	1252.26	484.372	-2450.91	1375.54	530.453	-2427.37	1145.38	528.644	-2411.71	1078.95	559.578	-2490.16	985.934	544.681	-2514.91	884.206	581.941	-2455.59	869.119	610.58	-2514.15	795.865
888	0	344.141	-2622.21	1578.76	245.16	-2617.76	1570.59	361.743	-2449.31	1600.52	250.654	-2435.51	1592.02	315.273	-2385.95	1421.76	335.395	-2344.48	1204.06	309.879	-2522.65	1358.74	296.96	-2587.94	1233.38	244.312	-2319.74	1253.98	485.155	-2461.69	1377.23	531.947	-2439.91	1147.04	530.669	-2424.27	1080.61	560.474	-2504.04	987.986	545.369	-2529.39	886.434	583.674	-2470.68	871.063	611.526	-2530.35	798.262
889	0	344.302	-2632.21	1579.72	245.297	-2627.53	1571.48	362.339	-2459.5	1601.88	251.281	-2445.36	1593.32	316.481	-2395.41	1423.34	337.387	-2353.28	1205.73	310.47	-2532.02	1359.97	297.205	-2596.89	1234.36	246.34	-2328.19	1255.64	485.887	-2472.34	1378.85	533.404	-2452.39	1148.64	532.66	-2436.82	1082.21	561.307	-2517.93	990.032	545.998	-2543.88	888.652	585.367	-2485.79	873.004	612.425	-2546.52	800.672
890	0	344.409	-2642.17	1580.51	245.374	-2637.26	1572.22	362.889	-2469.68	1603.17	251.865	-2455.19	1594.56	317.629	-2404.78	1424.84	339.316	-2361.95	1207.32	311.044	-2541.28	1361.12	297.459	-2605.73	1235.27	248.303	-2336.53	1257.23	486.568	-2482.83	1380.39	534.815	-2464.81	1150.19	534.603	-2449.34	1083.74	562.075	-2531.8	992.074	546.57	-2558.35	890.865	587.003	-2500.9	874.94	613.27	-2562.65	803.102
891	0	344.467	-2652.1	1581.14	245.396	-2646.96	1572.79	363.395	-2479.84	1604.4	252.407	-2465	1595.74	318.712	-2414.07	1426.26	341.165	-2370.5	1208.82	311.603	-2550.46	1362.19	297.728	-2614.46	1236.1	250.185	-2344.8	1258.73	487.195	-2493.18	1381.85	536.172	-2477.13	1151.66	536.482	-2461.82	1085.21	562.781	-2545.63	994.114	547.085	-2572.79	893.078	588.568	-2515.98	876.867	614.057	-2578.71	805.552
892	0	344.483	-2661.99	1581.6	245.37	-2656.63	1573.21	363.859	-2489.97	1605.55	252.911	-2474.78	1596.85	319.727	-2423.28	1427.59	342.922	-2378.97	1210.23	312.148	-2559.54	1363.17	298.013	-2623.1	1236.84	251.976	-2353	1260.15	487.769	-2503.37	1383.21	537.469	-2489.32	1153.07	538.285	-2474.22	1086.59	563.425	-2559.4	996.147	547.545	-2587.18	895.291	590.046	-2531.02	878.781	614.778	-2594.68	808.021
893	0	344.463	-2671.83	1581.9	245.304	-2666.25	1573.47	364.284	-2500.06	1606.62	253.378	-2484.53	1597.87	320.67	-2432.42	1428.81	344.577	-2387.35	1211.55	312.679	-2568.55	1364.05	298.315	-2631.66	1237.5	253.665	-2361.15	1261.47	488.287	-2513.41	1384.47	538.7	-2501.38	1154.39	540	-2486.55	1087.89	564.011	-2573.07	998.165	547.95	-2601.51	897.503	591.422	-2546	880.673	615.421	-2610.57	810.502
894	0	344.412	-2681.62	1582.05	245.205	-2675.83	1573.59	364.67	-2510.11	1607.6	253.809	-2494.24	1598.82	321.538	-2441.48	1429.93	346.121	-2395.68	1212.76	313.193	-2577.48	1364.83	298.632	-2640.14	1238.08	255.242	-2369.26	1262.69	488.75	-2523.3	1385.62	539.862	-2513.29	1155.62	541.617	-2498.79	1089.09	564.542	-2586.63	1000.16	548.297	-2615.76	899.707	592.683	-2560.91	882.532	615.978	-2626.35	812.988
895	0	344.338	-2691.36	1582.05	245.079	-2685.37	1573.56	365.019	-2520.11	1608.49	254.206	-2503.91	1599.67	322.33	-2450.49	1430.93	347.548	-2403.96	1213.86	313.689	-2586.34	1365.5	298.963	-2648.56	1238.55	256.701	-2377.34	1263.79	489.154	-2533.04	1386.64	540.95	-2525.02	1156.75	543.129	-2510.91	1090.18	565.017	-2600.05	1002.11	548.585	-2629.93	901.895	593.818	-2575.72	884.347	616.435	-2642.02	815.464
896	0	344.243	-2701.03	1581.92	244.934	-2694.86	1573.41	365.331	-2530.06	1609.28	254.567	-2513.55	1600.42	323.044	-2459.43	1431.81	348.856	-2412.21	1214.85	314.165	-2595.15	1366.07	299.301	-2656.91	1238.93	258.035	-2385.42	1264.79	489.499	-2542.65	1387.54	541.962	-2536.56	1157.77	544.53	-2522.91	1091.16	565.439	-2613.31	1004	548.809	-2643.99	904.055	594.819	-2590.43	886.104	616.78	-2657.58	817.917
897	0	344.133	-2710.65	1581.65	244.776	-2704.3	1573.12	365.606	-2539.95	1609.97	254.894	-2523.14	1601.08	323.679	-2468.33	1432.57	350.04	-2420.43	1215.73	314.616	-2603.9	1366.53	299.642	-2665.22	1239.2	259.24	-2393.49	1265.66	489.783	-2552.13	1388.3	542.897	-2547.91	1158.69	545.816	-2534.77	1092.02	565.805	-2626.4	1005.82	548.963	-2657.93	906.172	595.678	-2605	887.789	617.003	-2673	820.329
898	0	344.012	-2720.21	1581.26	244.611	-2713.69	1572.71	365.845	-2549.78	1610.55	255.184	-2532.7	1601.63	324.234	-2477.18	1433.21	351.101	-2428.63	1216.5	315.04	-2612.62	1366.87	299.98	-2673.49	1239.37	260.312	-2401.58	1266.41	490.005	-2561.49	1388.92	543.752	-2559.07	1159.48	546.983	-2546.49	1092.76	566.115	-2639.31	1007.54	549.042	-2671.74	908.229	596.391	-2619.44	889.388	617.093	-2688.29	822.684
899	0	343.881	-2729.71	1580.76	244.446	-2723.03	1572.19	366.047	-2559.55	1611.02	255.437	-2542.21	1602.07	324.709	-2485.99	1433.73	352.038	-2436.82	1217.14	315.433	-2621.3	1367.1	300.305	-2681.73	1239.43	261.249	-2409.69	1267.04	490.164	-2570.74	1389.39	544.527	-2570.03	1160.15	548.031	-2558.05	1093.36	566.366	-2652.02	1009.15	549.039	-2685.41	910.211	596.954	-2633.73	890.889	617.042	-2703.44	824.963
900	0	343.743	-2739.16	1580.15	244.284	-2732.31	1571.56	366.211	-2569.26	1611.39	255.651	-2551.68	1602.41	325.103	-2494.78	1434.11	352.851	-2445	1217.66	315.79	-2629.95	1367.21	300.611	-2689.95	1239.37	262.049	-2417.84	1267.53	490.26	-2579.9	1389.72	545.22	-2580.79	1160.69	548.956	-2569.46	1093.83	566.554	-2664.53	1010.64	548.948	-2698.91	912.101	597.368	-2647.85	892.277	616.845	-2718.42	827.148
901	0	343.599	-2748.55	1579.44	244.129	-2741.55	1570.83	366.337	-2578.91	1611.64	255.824	-2561.11	1602.63	325.417	-2503.55	1434.37	353.54	-2453.19	1218.06	316.108	-2638.59	1367.21	300.889	-2698.15	1239.2	262.712	-2426.03	1267.9	490.293	-2588.96	1389.89	545.831	-2591.37	1161.09	549.759	-2580.71	1094.15	566.674	-2676.82	1011.98	548.763	-2712.25	913.882	597.633	-2661.8	893.542	616.501	-2733.23	829.223
902	0	343.448	-2757.89	1578.65	243.985	-2750.74	1570.01	366.422	-2588.5	1611.78	255.952	-2570.51	1602.74	325.652	-2512.31	1434.51	354.108	-2461.37	1218.34	316.38	-2647.22	1367.09	301.13	-2706.35	1238.91	263.236	-2434.28	1268.14	490.262	-2597.96	1389.92	546.358	-2601.77	1161.35	550.439	-2591.81	1094.33	566.723	-2688.92	1013.17	548.482	-2725.4	915.539	597.754	-2675.55	894.675	616.012	-2747.85	831.173
903	0	343.29	-2767.18	1577.77	243.851	-2759.88	1569.1	366.465	-2598.03	1611.8	256.033	-2579.86	1602.75	325.808	-2521.06	1434.53	354.553	-2469.57	1218.49	316.602	-2655.85	1366.87	301.325	-2714.55	1238.52	263.624	-2442.57	1268.25	490.17	-2606.89	1389.8	546.799	-2612.01	1161.48	550.996	-2602.75	1094.37	566.694	-2700.8	1014.21	548.103	-2738.35	917.059	597.733	-2689.11	895.666	615.382	-2762.26	832.982
904	0	343.122	-2776.43	1576.83	243.727	-2768.97	1568.1	366.465	-2607.51	1611.71	256.065	-2589.18	1602.64	325.885	-2529.81	1434.42	354.879	-2477.78	1218.51	316.771	-2664.49	1366.53	301.467	-2722.76	1238.01	263.878	-2450.93	1268.23	490.018	-2615.76	1389.54	547.154	-2622.1	1161.47	551.429	-2613.55	1094.26	566.584	-2712.48	1015.08	547.625	-2751.11	918.43	597.577	-2702.45	896.508	614.619	-2776.45	834.639
905	0	342.944	-2785.64	1575.81	243.61	-2778.03	1567.03	366.418	-2616.93	1611.51	256.042	-2598.47	1602.43	325.885	-2538.58	1434.2	355.087	-2486.01	1218.41	316.879	-2673.13	1366.08	301.547	-2730.99	1237.4	263.999	-2459.36	1268.09	489.808	-2624.59	1389.15	547.419	-2632.04	1161.33	551.739	-2624.22	1094.01	566.388	-2723.97	1015.79	547.052	-2763.64	919.642	597.291	-2715.57	897.198	613.734	-2790.39	836.132
906	0	342.751	-2794.83	1574.74	243.495	-2787.05	1565.89	366.323	-2626.31	1611.2	255.961	-2607.72	1602.12	325.809	-2547.36	1433.87	355.179	-2494.27	1218.19	316.923	-2681.8	1365.52	301.559	-2739.25	1236.69	263.992	-2467.86	1267.82	489.542	-2633.38	1388.62	547.593	-2641.87	1161.06	551.925	-2634.75	1093.62	566.101	-2735.28	1016.34	546.387	-2775.96	920.686	596.883	-2728.45	897.731	612.739	-2804.06	837.452
907	0	342.542	-2803.98	1573.61	243.374	-2796.06	1564.69	366.176	-2635.64	1610.78	255.819	-2616.93	1601.71	325.657	-2556.17	1433.43	355.157	-2502.57	1217.85	316.897	-2690.48	1364.87	301.495	-2747.54	1235.87	263.861	-2476.42	1267.44	489.223	-2642.15	1387.98	547.675	-2651.58	1160.66	551.987	-2645.16	1093.1	565.723	-2746.4	1016.72	545.637	-2788.04	921.555	596.361	-2741.09	898.106	611.65	-2817.45	838.59
908	0	342.313	-2813.11	1572.44	243.236	-2805.05	1563.45	365.975	-2644.94	1610.26	255.611	-2626.11	1601.19	325.429	-2565	1432.88	355.024	-2510.91	1217.4	316.796	-2699.19	1364.11	301.351	-2755.86	1234.96	263.611	-2485.06	1266.93	488.854	-2650.89	1387.23	547.661	-2661.2	1160.13	551.926	-2655.46	1092.45	565.251	-2757.35	1016.95	544.811	-2799.89	922.244	595.732	-2753.48	898.322	610.482	-2830.55	839.54
909	0	342.06	-2822.23	1571.23	243.072	-2814.04	1562.17	365.718	-2654.19	1609.63	255.332	-2635.25	1600.59	325.126	-2573.87	1432.24	354.783	-2519.3	1216.83	316.615	-2707.93	1363.25	301.122	-2764.22	1233.95	263.249	-2493.76	1266.32	488.435	-2659.63	1386.38	547.55	-2670.74	1159.49	551.743	-2665.65	1091.67	564.687	-2768.14	1017.02	543.916	-2811.5	922.748	595.007	-2765.61	898.38	609.249	-2843.33	840.295
910	0	341.781	-2831.34	1569.98	242.869	-2823.04	1560.86	365.4	-2663.41	1608.9	254.978	-2644.35	1599.89	324.75	-2582.77	1431.49	354.438	-2527.74	1216.16	316.349	-2716.7	1362.3	300.804	-2772.63	1232.85	262.78	-2502.54	1265.59	487.969	-2668.36	1385.43	547.34	-2680.21	1158.75	551.438	-2675.75	1090.78	564.033	-2778.77	1016.93	542.961	-2822.86	923.063	594.195	-2777.47	898.281	607.968	-2855.8	840.852
911	0	341.472	-2840.44	1568.71	242.615	-2832.06	1559.54	365.02	-2672.61	1608.07	254.545	-2653.42	1599.11	324.299	-2591.71	1430.66	353.993	-2536.25	1215.38	315.993	-2725.51	1361.26	300.395	-2781.08	1231.67	262.21	-2511.39	1264.77	487.458	-2677.09	1384.4	547.031	-2689.62	1157.9	551.014	-2685.76	1089.78	563.293	-2789.25	1016.7	541.959	-2833.98	923.186	593.306	-2789.06	898.029	606.653	-2867.93	841.208
912	0	341.131	-2849.53	1567.41	242.299	-2841.12	1558.22	364.574	-2681.77	1607.14	254.028	-2662.45	1598.25	323.774	-2600.7	1429.73	353.451	-2544.83	1214.5	315.542	-2734.35	1360.13	299.892	-2789.59	1230.41	261.545	-2520.32	1263.84	486.902	-2685.84	1383.3	546.62	-2698.99	1156.95	550.473	-2695.68	1088.67	562.472	-2799.57	1016.32	540.917	-2844.85	923.116	592.349	-2800.38	897.626	605.318	-2879.72	841.359
913	0	340.756	-2858.63	1566.09	241.907	-2850.23	1556.9	364.06	-2690.91	1606.12	253.424	-2671.43	1597.3	323.176	-2609.73	1428.71	352.817	-2553.48	1213.53	314.991	-2743.23	1358.91	299.295	-2798.16	1229.07	260.791	-2529.31	1262.82	486.302	-2694.6	1382.13	546.107	-2708.32	1155.91	549.819	-2705.53	1087.48	561.576	-2809.75	1015.8	539.846	-2855.47	922.85	591.333	-2811.42	897.074	603.973	-2891.18	841.304
914	0	340.344	-2867.73	1564.76	241.43	-2859.4	1555.59	363.475	-2700.03	1605.01	252.728	-2680.38	1596.29	322.504	-2618.81	1427.61	352.094	-2562.22	1212.47	314.335	-2752.15	1357.61	298.603	-2806.79	1227.66	259.952	-2538.38	1261.7	485.658	-2703.38	1380.91	545.493	-2717.62	1154.78	549.056	-2715.3	1086.19	560.613	-2819.78	1015.13	538.755	-2865.84	922.389	590.266	-2822.19	896.378	602.629	-2902.29	841.041
915	0	339.894	-2876.84	1563.42	240.855	-2868.63	1554.31	362.817	-2709.12	1603.82	251.938	-2689.27	1595.19	321.758	-2627.94	1426.43	351.286	-2571.05	1211.32	313.571	-2761.1	1356.22	297.818	-2815.48	1226.17	259.032	-2547.52	1260.49	484.973	-2712.19	1379.63	544.777	-2726.9	1153.57	548.189	-2724.99	1084.83	559.589	-2829.67	1014.32	537.65	-2875.95	921.732	589.156	-2832.67	895.539	601.294	-2913.05	840.57
916	0	339.404	-2885.96	1562.07	240.174	-2877.94	1553.06	362.085	-2718.19	1602.54	251.05	-2698.13	1594.03	320.939	-2637.12	1425.17	350.396	-2579.97	1210.08	312.695	-2770.09	1354.74	296.941	-2824.25	1224.62	258.035	-2556.73	1259.19	484.245	-2721.03	1378.3	543.96	-2736.15	1152.29	547.221	-2734.61	1083.4	558.51	-2839.41	1013.38	536.535	-2885.82	920.882	588.01	-2842.88	894.56	599.975	-2923.47	839.889
917	0	338.875	-2895.08	1560.71	239.378	-2887.34	1551.85	361.276	-2727.25	1601.17	250.064	-2706.94	1592.8	320.047	-2646.35	1423.82	349.428	-2588.98	1208.75	311.703	-2779.12	1353.19	295.975	-2833.09	1223	256.964	-2566.02	1257.81	483.475	-2729.9	1376.93	543.044	-2745.4	1150.93	546.157	-2744.16	1081.9	557.384	-2849.02	1012.3	535.414	-2895.44	919.84	586.833	-2852.81	893.444	598.675	-2933.54	838.998
918	0	338.304	-2904.22	1559.34	238.461	-2896.84	1550.68	360.39	-2736.28	1599.72	248.977	-2715.7	1591.5	319.081	-2655.64	1422.4	348.383	-2598.09	1207.34	310.593	-2788.19	1351.55	294.921	-2842	1221.32	255.82	-2575.38	1256.34	482.664	-2738.81	1375.52	542.027	-2754.62	1149.5	545.001	-2753.62	1080.34	556.216	-2858.49	1011.08	534.287	-2904.81	918.609	585.628	-2862.46	892.192	597.398	-2943.28	837.895
919	0	337.693	-2913.37	1557.97	237.415	-2906.43	1549.56	359.426	-2745.3	1598.19	247.788	-2724.41	1590.13	318.042	-2664.98	1420.9	347.265	-2607.31	1205.85	309.365	-2797.3	1349.82	293.782	-2851	1219.57	254.607	-2584.81	1254.78	481.812	-2747.76	1374.07	540.913	-2763.84	1148	543.755	-2763.02	1078.73	555.01	-2867.82	1009.73	533.156	-2913.95	917.19	584.4	-2871.84	890.807	596.146	-2952.67	836.582
920	0	337.04	-2922.53	1556.6	236.238	-2916.13	1548.49	358.383	-2754.29	1596.58	246.497	-2733.08	1588.7	316.931	-2674.37	1419.32	346.073	-2616.62	1204.28	308.015	-2806.44	1348.02	292.558	-2860.07	1217.77	253.324	-2594.32	1253.14	480.918	-2756.75	1372.58	539.7	-2773.04	1146.43	542.422	-2772.34	1077.05	553.768	-2877.03	1008.25	532.02	-2922.86	915.586	583.149	-2880.94	889.288	594.921	-2961.72	835.056
921	0	336.345	-2931.7	1555.23	234.926	-2925.93	1547.48	357.261	-2763.27	1594.89	245.104	-2741.7	1587.2	315.746	-2683.82	1417.67	344.81	-2626.04	1202.63	306.545	-2815.62	1346.14	291.251	-2869.23	1215.91	251.972	-2603.9	1251.42	479.984	-2765.77	1371.06	538.389	-2782.24	1144.79	541.002	-2781.58	1075.33	552.494	-2886.09	1006.63	530.882	-2931.52	913.795	581.878	-2889.77	887.638	593.722	-2970.44	833.319
922	0	335.608	-2940.89	1553.85	233.478	-2935.84	1546.51	356.06	-2772.24	1593.12	243.607	-2750.27	1585.63	314.488	-2693.32	1415.94	343.475	-2635.56	1200.9	304.954	-2824.83	1344.17	289.862	-2878.47	1213.99	250.552	-2613.56	1249.62	479.008	-2774.84	1369.5	536.981	-2791.42	1143.08	539.497	-2790.74	1073.54	551.187	-2895.02	1004.89	529.741	-2939.96	911.819	580.586	-2898.32	885.855	592.55	-2978.81	831.369
923	0	334.829	-2950.09	1552.48	231.893	-2945.86	1545.61	354.779	-2781.18	1591.27	242.008	-2758.79	1584	313.156	-2702.87	1414.13	342.069	-2645.18	1199.08	303.241	-2834.09	1342.12	288.389	-2887.79	1212.01	249.064	-2623.29	1247.73	477.991	-2783.94	1367.91	535.475	-2800.59	1141.31	537.906	-2799.83	1071.71	549.849	-2903.82	1003.01	528.597	-2948.15	909.656	579.274	-2906.59	883.94	591.406	-2986.85	829.207
[truncated: 69 more columns]

## Sheet: Sheet2
Devices
		025370 - Force			025370 - Moment			025370 - CoP			027571 - Force			027571 - Moment			027571 - CoP			037720 - Force			037720 - Moment			037720 - CoP
Frame	Sub Frame	Fx	Fy	Fz	Mx	My	Mz	Cx	Cy	Cz	Fx	Fy	Fz	Mx	My	Mz	Cx	Cy	Cz	Fx	Fy	Fz	Mx	My	Mz	Cx	Cy	Cz
		N	N	N	N.mm	N.mm	N.mm	mm	mm	mm	N	N	N	N.mm	N.mm	N.mm	mm	mm	mm	N	N	N	N.mm	N.mm	N.mm	mm	mm	mm
319	0	0	0	0	0	0	0	200	300	0	0	0	0	0	0	0	200	903	0	0	0	0	0	0	0	603	903	0
319	1	0	0	0	0	0	0	200	300	0	0	0	0	0	0	0	200	903	0	0	0	0	0	0	0	603	903	0
319	2	0	0	0	0	0	0	200	300	0	0	0	0	0	0	0	200	903	0	0	0	0	0	0	0	603	903	0
319	3	0	0	0	0	0	0	200	300	0	0	0	0	0	0	0	200	903	0	0	0	0	0	0	0	603	903	0
319	4	0	0	0	0	0	0	200	300	0	0	0	0	0	0	0	200	903	0	0	0	0	0	0	0	603	903	0
319	5	0	0	0	0	0	0	200	300	0	0	0	0	0	0	0	200	903	0	0	0	0	0	0	0	603	903	0
319	6	0	0	0	0	0	0	200	300	0	0	0	0	0	0	0	200	903	0	0	0	0	0	0	0	603	903	0
319	7	0	0	0	0	0	0	200	300	0	0	0	0	0	0	0	200	903	0	0	0	0	0	0	0	603	903	0
319	8	0	0	0	0	0	0	200	300	0	0	0	0	0	0	0	200	903	0	0	0	0	0	0	0	603	903	0
319	9	0	0	0	0	0	0	200	300	0	0	0	0	0	0	0	200	903	0	0	0	0	0	0	0	603	903	0
320	0	0	0	0	0	0	0	200	300	0	0	0	0	0	0	0	200	903	0	0	0	0	0	0	0	603	903	0
320	1	0	0	0	0	0	0	200	300	0	0	0	0	0	0	0	200	903	0	0	0	0	0	0	0	603	903	0
320	2	0	0	0	0	0	0	200	300	0	0	0	0	0	0	0	200	903	0	0	0	0	0	0	0	603	903	0
320	3	0	0	0	0	0	0	200	300	0	0	0	0	0	0	0	200	903	0	0	0	0	0	0	0	603	903	0
320	4	0	0	0	0	0	0	200	300	0	0	0	0	0	0	0	200	903	0	0	0	0	0	0	0	603	903	0
320	5	0	0	0	0	0	0	200	300	0	0	0	0	0	0	0	200	903	0	0	0	0	0	0	0	603	903	0
320	6	0	0	0	0	0	0	200	300	0	0	0	0	0	0	0	200	903	0	0	0	0	0	0	0	603	903	0
320	7	0	0	0	0	0	0	200	300	0	0	0	0	0	0	0	200	903	0	0	0	0	0	0	0	603	903	0
320	8	0	0	0	0	0	0	200	300	0	0	0	0	0	0	0	200	903	0	0	0	0	0	0	0	603	903	0
320	9	0	0	0	0	0	0	200	300	0	0	0	0	0	0	0	200	903	0	0	0	0	0	0	0	603	903	0
321	0	0	0	0	0	0	0	200	300	0	0	0	0	0	0	0	200	903	0	0	0	0	0	0	0	603	903	0
321	1	0	0	0	0	0	0	200	300	0	0	0	0	0	0	0	200	903	0	0	0	0	0	0	0	603	903	0
321	2	0	0	0	0	0	0	200	300	0	0	0	0	0	0	0	200	903	0	0	0	0	0	0	0	603	903	0
321	3	0	0	0	0	0	0	200	300	0	0	0	0	0	0	0	200	903	0	0	0	0	0	0	0	603	903	0
321	4	0	0	0	0	0	0	200	300	0	0	0	0	0	0	0	200	903	0	0	0	0	0	0	0	603	903	0
321	5	0	0	0	0	0	0	200	300	0	0	0	0	0	0	0	200	903	0	0	0	0	0	0	0	603	903	0
321	6	0	0	0	0	0	0	200	300	0	0	0	0	0	0	0	200	903	0	0	0	0	0	0	0	603	903	0
321	7	0	0	0	0	0	0	200	300	0	0	0	0	0	0	0	200	903	0	0	0	0	0	0	0	603	903	0
321	8	0	0	0	0	0	0	200	300	0	0	0	0	0	0	0	200	903	0	0	0	0	0	0	0	603	903	0
321	9	0	0	0	0	0	0	200	300	0	0	0	0	0	0	0	200	903	0	0	0	0	0	0	0	603	903	0
322	0	0	0	0	0	0	0	200	300	0	0	0	0	0	0	0	200	903	0	0	0	0	0	0	0	603	903	0
322	1	0	0	0	0	0	0	200	300	0	0	0	0	0	0	0	200	903	0	0	0	0	0	0	0	603	903	0
322	2	0	0	0	0	0	0	200	300	0	0	0	0	0	0	0	200	903	0	0	0	0	0	0	0	603	903	0
322	3	0	0	0	0	0	0	200	300	0	0	0	0	0	0	0	200	903	0	0	0	0	0	0	0	603	903	0
322	4	0	0	0	0	0	0	200	300	0	0	0	0	0	0	0	200	903	0	0	0	0	0	0	0	603	903	0
322	5	0	0	0	0	0	0	200	300	0	0	0	0	0	0	0	200	903	0	0	0	0	0	0	0	603	903	0
322	6	0	0	0	0	0	0	200	300	0	0	0	0	0	0	0	200	903	0	0	0	0	0	0	0	603	903	0
322	7	0	0	0	0	0	0	200	300	0	0	0	0	0	0	0	200	903	0	0	0	0	0	0	0	603	903	0
322	8	0	0	0	0	0	0	200	300	0	0	0	0	0	0	0	200	903	0	0	0	0	0	0	0	603	903	0
322	9	0	0	0	0	0	0	200	300	0	0	0	0	0	0	0	200	903	0	0	0	0	0	0	0	603	903	0
323	0	0	0	0	0	0	0	200	300	0	0	0	0	0	0	0	200	903	0	0	0	0	0	0	0	603	903	0
323	1	0	0	0	0	0	0	200	300	0	0	0	0	0	0	0	200	903	0	0	0	0	0	0	0	603	903	0
323	2	0	0	0	0	0	0	200	300	0	0	0	0	0	0	0	200	903	0	0	0	0	0	0	0	603	903	0
323	3	0	0	0	0	0	0	200	300	0	0	0	0	0	0	0	200	903	0	0	0	0	0	0	0	603	903	0
323	4	0	0	0	0	0	0	200	300	0	0	0	0	0	0	0	200	903	0	0	0	0	0	0	0	603	903	0
323	5	0	0	0	0	0	0	200	300	0	0	0	0	0	0	0	200	903	0	0	0	0	0	0	0	603	903	0
323	6	0	0	0	0	0	0	200	300	0	0	0	0	0	0	0	200	903	0	0	0	0	0	0	0	603	903	0
323	7	0	0	0	0	0	0	200	300	0	0	0	0	0	0	0	200	903	0	0	0	0	0	0	0	603	903	0
323	8	0	0	0	0	0	0	200	300	0	0	0	0	0	0	0	200	903	0	0	0	0	0	0	0	603	903	0
323	9	0	0	0	0	0	0	200	300	0	0	0	0	0	0	0	200	903	0	0	0	0	0	0	0	603	903	0
324	0	0	0	0	0	0	0	200	300	0	0	0	0	0	0	0	200	903	0	0	0	0	0	0	0	603	903	0
324	1	0	0	0	0	0	0	200	300	0	0	0	0	0	0	0	200	903	0	0	0	0	0	0	0	603	903	0
324	2	0	0	0	0	0	0	200	300	0	0	0	0	0	0	0	200	903	0	0	0	0	0	0	0	603	903	0
324	3	0	0	0	0	0	0	200	300	0	0	0	0	0	0	0	200	903	0	0	0	0	0	0	0	603	903	0
324	4	0	0	0	0	0	0	200	300	0	0	0	0	0	0	0	200	903	0	0	0	0	0	0	0	603	903	0
324	5	0	0	0	0	0	0	200	300	0	0	0	0	0	0	0	200	903	0	0	0	0	0	0	0	603	903	0
324	6	0	0	0	0	0	0	200	300	0	0	0	0	0	0	0	200	903	0	0	0	0	0	0	0	603	903	0
324	7	0	0	0	0	0	0	200	300	0	0	0	0	0	0	0	200	903	0	0	0	0	0	0	0	603	903	0
324	8	0	0	0	0	0	0	200	300	0	0	0	0	0	0	0	200	903	0	0	0	0	0	0	0	603	903	0
324	9	0	0	0	0	0	0	200	300	0	0	0	0	0	0	0	200	903	0	0	0	0	0	0	0	603	903	0
325	0	0	0	0	0	0	0	200	300	0	0	0	0	0	0	0	200	903	0	0	0	0	0	0	0	603	903	0
325	1	0	0	0	0	0	0	200	300	0	0	0	0	0	0	0	200	903	0	0	0	0	0	0	0	603	903	0
325	2	0	0	0	0	0	0	200	300	0	0	0	0	0	0	0	200	903	0	0	0	0	0	0	0	603	903	0
325	3	0	0	0	0	0	0	200	300	0	0	0	0	0	0	0	200	903	0	0	0	0	0	0	0	603	903	0
325	4	0	0	0	0	0	0	200	300	0	0	0	0	0	0	0	200	903	0	0	0	0	0	0	0	603	903	0
325	5	0	0	0	0	0	0	200	300	0	0	0	0	0	0	0	200	903	0	0	0	0	0	0	0	603	903	0
325	6	0	0	0	0	0	0	200	300	0	0	0	0	0	0	0	200	903	0	0	0	0	0	0	0	603	903	0
325	7	0	0	0	0	0	0	200	300	0	0	0	0	0	0	0	200	903	0	0	0	0	0	0	0	603	903	0
325	8	0	0	0	0	0	0	200	300	0	0	0	0	0	0	0	200	903	0	0	0	0	0	0	0	603	903	0
325	9	0	0	0	0	0	0	200	300	0	0	0	0	0	0	0	200	903	0	0	0	0	0	0	0	603	903	0
326	0	0	0	0	0	0	0	200	300	0	0	0	0	0	0	0	200	903	0	0	0	0	0	0	0	603	903	0
326	1	0	0	0	0	0	0	200	300	0	0	0	0	0	0	0	200	903	0	0	0	0	0	0	0	603	903	0
326	2	0	0	0	0	0	0	200	300	0	0	0	0	0	0	0	200	903	0	0	0	0	0	0	0	603	903	0
326	3	0	0	0	0	0	0	200	300	0	0	0	0	0	0	0	200	903	0	0	0	0	0	0	0	603	903	0
326	4	0	0	0	0	0	0	200	300	0	0	0	0	0	0	0	200	903	0	0	0	0	0	0	0	603	903	0
326	5	0	0	0	0	0	0	200	300	0	0	0	0	0	0	0	200	903	0	0	0	0	0	0	0	603	903	0
326	6	0	0	0	0	0	0	200	300	0	0	0	0	0	0	0	200	903	0	0	0	0	0	0	0	603	903	0
326	7	0	0	0	0	0	0	200	300	0	0	0	0	0	0	0	200	903	0	0	0	0	0	0	0	603	903	0
326	8	0	0	0	0	0	0	200	300	0	0	0	0	0	0	0	200	903	0	0	0	0	0	0	0	603	903	0
326	9	0	0	0	0	0	0	200	300	0	0	0	0	0	0	0	200	903	0	0	0	0	0	0	0	603	903	0
327	0	0	0	0	0	0	0	200	300	0	0	0	0	0	0	0	200	903	0	0	0	0	0	0	0	603	903	0
327	1	0	0	0	0	0	0	200	300	0	0	0	0	0	0	0	200	903	0	0	0	0	0	0	0	603	903	0
327	2	0	0	0	0	0	0	200	300	0	0	0	0	0	0	0	200	903	0	0	0	0	0	0	0	603	903	0
327	3	0	0	0	0	0	0	200	300	0	0	0	0	0	0	0	200	903	0	0	0	0	0	0	0	603	903	0
327	4	0	0	0	0	0	0	200	300	0	0	0	0	0	0	0	200	903	0	0	0	0	0	0	0	603	903	0
327	5	0	0	0	0	0	0	200	300	0	0	0	0	0	0	0	200	903	0	0	0	0	0	0	0	603	903	0
327	6	0	0	0	0	0	0	200	300	0	0	0	0	0	0	0	200	903	0	0	0	0	0	0	0	603	903	0
327	7	0	0	0	0	0	0	200	300	0	0	0	0	0	0	0	200	903	0	0	0	0	0	0	0	603	903	0
327	8	0	0	0	0	0	0	200	300	0	0	0	0	0	0	0	200	903	0	0	0	0	0	0	0	603	903	0
327	9	0	0	0	0	0	0	200	300	0	0	0	0	0	0	0	200	903	0	0	0	0	0	0	0	603	903	0
328	0	0	0	0	0	0	0	200	300	0	0	0	0	0	0	0	200	903	0	0	0	0	0	0	0	603	903	0
328	1	0	0	0	0	0	0	200	300	0	0	0	0	0	0	0	200	903	0	0	0	0	0	0	0	603	903	0
328	2	0	0	0	0	0	0	200	300	0	0	0	0	0	0	0	200	903	0	0	0	0	0	0	0	603	903	0
328	3	0	0	0	0	0	0	200	300	0	0	0	0	0	0	0	200	903	0	0	0	0	0	0	0	603	903	0
328	4	0	0	0	0	0	0	200	300	0	0	0	0	0	0	0	200	903	0	0	0	0	0	0	0	603	903	0
328	5	0	0	0	0	0	0	200	300	0	0	0	0	0	0	0	200	903	0	0	0	0	0	0	0	603	903	0
328	6	0	0	0	0	0	0	200	300	0	0	0	0	0	0	0	200	903	0	0	0	0	0	0	0	603	903	0
328	7	0	0	0	0	0	0	200	300	0	0	0	0	0	0	0	200	903	0	0	0	0	0	0	0	603	903	0
328	8	0	0	0	0	0	0	200	300	0	0	0	0	0	0	0	200	903	0	0	0	0	0	0	0	603	903	0
328	9	0	0	0	0	0	0	200	300	0	0	0	0	0	0	0	200	903	0	0	0	0	0	0	0	603	903	0
329	0	0	0	0	0	0	0	200	300	0	0	0	0	0	0	0	200	903	0	0	0	0	0	0	0	603	903	0
329	1	0	0	0	0	0	0	200	300	0	0	0	0	0	0	0	200	903	0	0	0	0	0	0	0	603	903	0
329	2	0	0	0	0	0	0	200	300	0	0	0	0	0	0	0	200	903	0	0	0	0	0	0	0	603	903	0
329	3	0	0	0	0	0	0	200	300	0	0	0	0	0	0	0	200	903	0	0	0	0	0	0	0	603	903	0
329	4	0	0	0	0	0	0	200	300	0	0	0	0	0	0	0	200	903	0	0	0	0	0	0	0	603	903	0
329	5	0	0	0	0	0	0	200	300	0	0	0	0	0	0	0	200	903	0	0	0	0	0	0	0	603	903	0
329	6	0	0	0	0	0	0	200	300	0	0	0	0	0	0	0	200	903	0	0	0	0	0	0	0	603	903	0
329	7	0	0	0	0	0	0	200	300	0	0	0	0	0	0	0	200	903	0	0	0	0	0	0	0	603	903	0
329	8	0	0	0	0	0	0	200	300	0	0	0	0	0	0	0	200	903	0	0	0	0	0	0	0	603	903	0
329	9	0	0	0	0	0	0	200	300	0	0	0	0	0	0	0	200	903	0	0	0	0	0	0	0	603	903	0
330	0	0	0	0	0	0	0	200	300	0	0	0	0	0	0	0	200	903	0	0	0	0	0	0	0	603	903	0
330	1	0	0	0	0	0	0	200	300	0	0	0	0	0	0	0	200	903	0	0	0	0	0	0	0	603	903	0
330	2	0	0	0	0	0	0	200	300	0	0	0	0	0	0	0	200	903	0	0	0	0	0	0	0	603	903	0
330	3	0	0	0	0	0	0	200	300	0	0	0	0	0	0	0	200	903	0	0	0	0	0	0	0	603	903	0
330	4	0	0	0	0	0	0	200	300	0	0	0	0	0	0	0	200	903	0	0	0	0	0	0	0	603	903	0
330	5	0	0	0	0	0	0	200	300	0	0	0	0	0	0	0	200	903	0	0	0	0	0	0	0	603	903	0
330	6	0	0	0	0	0	0	200	300	0	0	0	0	0	0	0	200	903	0	0	0	0	0	0	0	603	903	0
330	7	0	0	0	0	0	0	200	300	0	0	0	0	0	0	0	200	903	0	0	0	0	0	0	0	603	903	0
330	8	0	0	0	0	0	0	200	300	0	0	0	0	0	0	0	200	903	0	0	0	0	0	0	0	603	903	0
330	9	0	0	0	0	0	0	200	300	0	0	0	0	0	0	0	200	903	0	0	0	0	0	0	0	603	903	0
331	0	0	0	0	0	0	0	200	300	0	0	0	0	0	0	0	200	903	0	0	0	0	0	0	0	603	903	0
331	1	0	0	0	0	0	0	200	300	0	0	0	0	0	0	0	200	903	0	0	0	0	0	0	0	603	903	0
331	2	0	0	0	0	0	0	200	300	0	0	0	0	0	0	0	200	903	0	0	0	0	0	0	0	603	903	0
331	3	0	0	0	0	0	0	200	300	0	0	0	0	0	0	0	200	903	0	0	0	0	0	0	0	603	903	0
331	4	0	0	0	0	0	0	200	300	0	0	0	0	0	0	0	200	903	0	0	0	0	0	0	0	603	903	0
331	5	0	0	0	0	0	0	200	300	0	0	0	0	0	0	0	200	903	0	0	0	0	0	0	0	603	903	0
331	6	0	0	0	0	0	0	200	300	0	0	0	0	0	0	0	200	903	0	0	0	0	0	0	0	603	903	0
331	7	0	0	0	0	0	0	200	300	0	0	0	0	0	0	0	200	903	0	0	0	0	0	0	0	603	903	0
331	8	0	0	0	0	0	0	200	300	0	0	0	0	0	0	0	200	903	0	0	0	0	0	0	0	603	903	0
331	9	0	0	0	0	0	0	200	300	0	0	0	0	0	0	0	200	903	0	0	0	0	0	0	0	603	903	0
332	0	0	0	0	0	0	0	200	300	0	0	0	0	0	0	0	200	903	0	0	0	0	0	0	0	603	903	0
332	1	0	0	0	0	0	0	200	300	0	0	0	0	0	0	0	200	903	0	0	0	0	0	0	0	603	903	0
332	2	0	0	0	0	0	0	200	300	0	0	0	0	0	0	0	200	903	0	0	0	0	0	0	0	603	903	0
332	3	0	0	0	0	0	0	200	300	0	0	0	0	0	0	0	200	903	0	0	0	0	0	0	0	603	903	0
332	4	0	0	0	0	0	0	200	300	0	0	0	0	0	0	0	200	903	0	0	0	0	0	0	0	603	903	0
332	5	0	0	0	0	0	0	200	300	0	0	0	0	0	0	0	200	903	0	0	0	0	0	0	0	603	903	0
332	6	0	0	0	0	0	0	200	300	0	0	0	0	0	0	0	200	903	0	0	0	0	0	0	0	603	903	0
332	7	0	0	0	0	0	0	200	300	0	0	0	0	0	0	0	200	903	0	0	0	0	0	0	0	603	903	0
332	8	0	0	0	0	0	0	200	300	0	0	0	0	0	0	0	200	903	0	0	0	0	0	0	0	603	903	0
332	9	0	0	0	0	0	0	200	300	0	0	0	0	0	0	0	200	903	0	0	0	0	0	0	0	603	903	0
333	0	0	0	0	0	0	0	200	300	0	0	0	0	0	0	0	200	903	0	0	0	0	0	0	0	603	903	0
333	1	0	0	0	0	0	0	200	300	0	0	0	0	0	0	0	200	903	0	0	0	0	0	0	0	603	903	0
333	2	0	0	0	0	0	0	200	300	0	0	0	0	0	0	0	200	903	0	0	0	0	0	0	0	603	903	0
333	3	0	0	0	0	0	0	200	300	0	0	0	0	0	0	0	200	903	0	0	0	0	0	0	0	603	903	0
333	4	0	0	0	0	0	0	200	300	0	0	0	0	0	0	0	200	903	0	0	0	0	0	0	0	603	903	0
333	5	0	0	0	0	0	0	200	300	0	0	0	0	0	0	0	200	903	0	0	0	0	0	0	0	603	903	0
333	6	0	0	0	0	0	0	200	300	0	0	0	0	0	0	0	200	903	0	0	0	0	0	0	0	603	903	0
333	7	0	0	0	0	0	0	200	300	0	0	0	0	0	0	0	200	903	0	0	0	0	0	0	0	603	903	0
333	8	0	0	0	0	0	0	200	300	0	0	0	0	0	0	0	200	903	0	0	0	0	0	0	0	603	903	0
333	9	0	0	0	0	0	0	200	300	0	0	0	0	0	0	0	200	903	0	0	0	0	0	0	0	603	903	0
334	0	0	0	0	0	0	0	200	300	0	0	0	0	0	0	0	200	903	0	0	0	0	0	0	0	603	903	0
334	1	0	0	0	0	0	0	200	300	0	0	0	0	0	0	0	200	903	0	0	0	0	0	0	0	603	903	0
334	2	0	0	0	0	0	0	200	300	0	0	0	0	0	0	0	200	903	0	0	0	0	0	0	0	603	903	0
334	3	0	0	0	0	0	0	200	300	0	0	0	0	0	0	0	200	903	0	0	0	0	0	0	0	603	903	0
334	4	0	0	0	0	0	0	200	300	0	0	0	0	0	0	0	200	903	0	0	0	0	0	0	0	603	903	0
334	5	0	0	0	0	0	0	200	300	0	0	0	0	0	0	0	200	903	0	0	0	0	0	0	0	603	903	0
334	6	0	0	0	0	0	0	200	300	0	0	0	0	0	0	0	200	903	0	0	0	0	0	0	0	603	903	0
334	7	0	0	0	0	0	0	200	300	0	0	0	0	0	0	0	200	903	0	0	0	0	0	0	0	603	903	0
334	8	0	0	0	0	0	0	200	300	0	0	0	0	0	0	0	200	903	0	0	0	0	0	0	0	603	903	0
334	9	0	0	0	0	0	0	200	300	0	0	0	0	0	0	0	200	903	0	0	0	0	0	0	0	603	903	0
335	0	0	0	0	0	0	0	200	300	0	0	0	0	0	0	0	200	903	0	0	0	0	0	0	0	603	903	0
335	1	0	0	0	0	0	0	200	300	0	0	0	0	0	0	0	200	903	0	0	0	0	0	0	0	603	903	0
335	2	0	0	0	0	0	0	200	300	0	0	0	0	0	0	0	200	903	0	0	0	0	0	0	0	603	903	0
335	3	0	0	0	0	0	0	200	300	0	0	0	0	0	0	0	200	903	0	0	0	0	0	0	0	603	903	0
335	4	0	0	0	0	0	0	200	300	0	0	0	0	0	0	0	200	903	0	0	0	0	0	0	0	603	903	0
335	5	0	0	0	0	0	0	200	300	0	0	0	0	0	0	0	200	903	0	0	0	0	0	0	0	603	903	0
335	6	0	0	0	0	0	0	200	300	0	0	0	0	0	0	0	200	903	0	0	0	0	0	0	0	603	903	0
335	7	0	0	0	0	0	0	200	300	0	0	0	0	0	0	0	200	903	0	0	0	0	0	0	0	603	903	0
335	8	0	0	0	0	0	0	200	300	0	0	0	0	0	0	0	200	903	0	0	0	0	0	0	0	603	903	0
335	9	0	0	0	0	0	0	200	300	0	0	0	0	0	0	0	200	903	0	0	0	0	0	0	0	603	903	0
336	0	0	0	0	0	0	0	200	300	0	0	0	0	0	0	0	200	903	0	0	0	0	0	0	0	603	903	0
336	1	0	0	0	0	0	0	200	300	0	0	0	0	0	0	0	200	903	0	0	0	0	0	0	0	603	903	0
336	2	0	0	0	0	0	0	200	300	0	0	0	0	0	0	0	200	903	0	0	0	0	0	0	0	603	903	0
336	3	0	0	0	0	0	0	200	300	0	0	0	0	0	0	0	200	903	0	0	0	0	0	0	0	603	903	0
336	4	0	0	0	0	0	0	200	300	0	0	0	0	0	0	0	200	903	0	0	0	0	0	0	0	603	903	0
336	5	0	0	0	0	0	0	200	300	0	0	0	0	0	0	0	200	903	0	0	0	0	0	0	0	603	903	0
336	6	0	0	0	0	0	0	200	300	0	0	0	0	0	0	0	200	903	0	0	0	0	0	0	0	603	903	0
336	7	0	0	0	0	0	0	200	300	0	0	0	0	0	0	0	200	903	0	0	0	0	0	0	0	603	903	0
336	8	0	0	0	0	0	0	200	300	0	0	0	0	0	0	0	200	903	0	0	0	0	0	0	0	603	903	0
336	9	0	0	0	0	0	0	200	300	0	0	0	0	0	0	0	200	903	0	0	0	0	0	0	0	603	903	0
337	0	0	0	0	0	0	0	200	300	0	0	0	0	0	0	0	200	903	0	0	0	0	0	0	0	603	903	0
337	1	0	0	0	0	0	0	200	300	0	0	0	0	0	0	0	200	903	0	0	0	0	0	0	0	603	903	0
337	2	0	0	0	0	0	0	200	300	0	0	0	0	0	0	0	200	903	0	0	0	0	0	0	0	603	903	0
337	3	0	0	0	0	0	0	200	300	0	0	0	0	0	0	0	200	903	0	0	0	0	0	0	0	603	903	0
337	4	0	0	0	0	0	0	200	300	0	0	0	0	0	0	0	200	903	0	0	0	0	0	0	0	603	903	0
337	5	0	0	0	0	0	0	200	300	0	0	0	0	0	0	0	200	903	0	0	0	0	0	0	0	603	903	0
337	6	0	0	0	0	0	0	200	300	0	0	0	0	0	0	0	200	903	0	0	0	0	0	0	0	603	903	0
337	7	0	0	0	0	0	0	200	300	0	0	0	0	0	0	0	200	903	0	0	0	0	0	0	0	603	903	0
337	8	0	0	0	0	0	0	200	300	0	0	0	0	0	0	0	200	903	0	0	0	0	0	0	0	603	903	0
337	9	0	0	0	0	0	0	200	300	0	0	0	0	0	0	0	200	903	0	0	0	0	0	0	0	603	903	0
338	0	0	0	0	0	0	0	200	300	0	0	0	0	0	0	0	200	903	0	0	0	0	0	0	0	603	903	0
338	1	0	0	0	0	0	0	200	300	0	0	0	0	0	0	0	200	903	0	0	0	0	0	0	0	603	903	0
338	2	0	0	0	0	0	0	200	300	0	0	0	0	0	0	0	200	903	0	0	0	0	0	0	0	603	903	0
338	3	0	0	0	0	0	0	200	300	0	0	0	0	0	0	0	200	903	0	0	0	0	0	0	0	603	903	0
338	4	0	0	0	0	0	0	200	300	0	0	0	0	0	0	0	200	903	0	0	0	0	0	0	0	603	903	0
338	5	0	0	0	0	0	0	200	300	0	0	0	0	0	0	0	200	903	0	0	0	0	0	0	0	603	903	0
338	6	0	0	0	0	0	0	200	300	0	0	0	0	0	0	0	200	903	0	0	0	0	0	0	0	603	903	0
338	7	0	0	0	0	0	0	200	300	0	0	0	0	0	0	0	200	903	0	0	0	0	0	0	0	603	903	0
338	8	0	0	0	0	0	0	200	300	0	0	0	0	0	0	0	200	903	0	0	0	0	0	0	0	603	903	0
338	9	0	0	0	0	0	0	200	300	0	0	0	0	0	0	0	200	903	0	0	0	0	0	0	0	603	903	0
339	0	0	0	0	0	0	0	200	300	0	0	0	0	0	0	0	200	903	0	0	0	0	0	0	0	603	903	0
339	1	0	0	0	0	0	0	200	300	0	0	0	0	0	0	0	200	903	0	0	0	0	0	0	0	603	903	0
339	2	0	0	0	0	0	0	200	300	0	0	0	0	0	0	0	200	903	0	0	0	0	0	0	0	603	903	0
339	3	0	0	0	0	0	0	200	300	0	0	0	0	0	0	0	200	903	0	0	0	0	0	0	0	603	903	0
339	4	0	0	0	0	0	0	200	300	0	0	0	0	0	0	0	200	903	0	0	0	0	0	0	0	603	903	0
339	5	0	0	0	0	0	0	200	300	0	0	0	0	0	0	0	200	903	0	0	0	0	0	0	0	603	903	0
339	6	0	0	0	0	0	0	200	300	0	0	0	0	0	0	0	200	903	0	0	0	0	0	0	0	603	903	0
339	7	0	0	0	0	0	0	200	300	0	0	0	0	0	0	0	200	903	0	0	0	0	0	0	0	603	903	0
339	8	0	0	0	0	0	0	200	300	0	0	0	0	0	0	0	200	903	0	0	0	0	0	0	0	603	903	0
339	9	0	0	0	0	0	0	200	300	0	0	0	0	0	0	0	200	903	0	0	0	0	0	0	0	603	903	0
340	0	0	0	0	0	0	0	200	300	0	0	0	0	0	0	0	200	903	0	0	0	0	0	0	0	603	903	0
340	1	0	0	0	0	0	0	200	300	0	0	0	0	0	0	0	200	903	0	0	0	0	0	0	0	603	903	0
340	2	0	0	0	0	0	0	200	300	0	0	0	0	0	0	0	200	903	0	0	0	0	0	0	0	603	903	0
340	3	0	0	0	0	0	0	200	300	0	0	0	0	0	0	0	200	903	0	0	0	0	0	0	0	603	903	0
340	4	0	0	0	0	0	0	200	300	0	0	0	0	0	0	0	200	903	0	0	0	0	0	0	0	603	903	0
340	5	0	0	0	0	0	0	200	300	0	0	0	0	0	0	0	200	903	0	0	0	0	0	0	0	603	903	0
340	6	0	0	0	0	0	0	200	300	0	0	0	0	0	0	0	200	903	0	0	0	0	0	0	0	603	903	0
340	7	0	0	0	0	0	0	200	300	0	0	0	0	0	0	0	200	903	0	0	0	0	0	0	0	603	903	0
340	8	0	0	0	0	0	0	200	300	0	0	0	0	0	0	0	200	903	0	0	0	0	0	0	0	603	903	0
340	9	0	0	0	0	0	0	200	300	0	0	0	0	0	0	0	200	903	0	0	0	0	0	0	0	603	903	0
341	0	0	0	0	0	0	0	200	300	0	0	0	0	0	0	0	200	903	0	0	0	0	0	0	0	603	903	0
341	1	0	0	0	0	0	0	200	300	0	0	0	0	0	0	0	200	903	0	0	0	0	0	0	0	603	903	0
341	2	0	0	0	0	0	0	200	300	0	0	0	0	0	0	0	200	903	0	0	0	0	0	0	0	603	903	0
341	3	0	0	0	0	0	0	200	300	0	0	0	0	0	0	0	200	903	0	0	0	0	0	0	0	603	903	0
341	4	0	0	0	0	0	0	200	300	0	0	0	0	0	0	0	200	903	0	0	0	0	0	0	0	603	903	0
341	5	0	0	0	0	0	0	200	300	0	0	0	0	0	0	0	200	903	0	0	0	0	0	0	0	603	903	0
341	6	0	0	0	0	0	0	200	300	0	0	0	0	0	0	0	200	903	0	0	0	0	0	0	0	603	903	0
341	7	0	0	0	0	0	0	200	300	0	0	0	0	0	0	0	200	903	0	0	0	0	0	0	0	603	903	0
341	8	0	0	0	0	0	0	200	300	0	0	0	0	0	0	0	200	903	0	0	0	0	0	0	0	603	903	0
341	9	0	0	0	0	0	0	200	300	0	0	0	0	0	0	0	200	903	0	0	0	0	0	0	0	603	903	0
342	0	0	0	0	0	0	0	200	300	0	0	0	0	0	0	0	200	903	0	0	0	0	0	0	0	603	903	0
342	1	0	0	0	0	0	0	200	300	0	0	0	0	0	0	0	200	903	0	0	0	0	0	0	0	603	903	0
342	2	0	0	0	0	0	0	200	300	0	0	0	0	0	0	0	200	903	0	0	0	0	0	0	0	603	903	0
342	3	0	0	0	0	0	0	200	300	0	0	0	0	0	0	0	200	903	0	0	0	0	0	0	0	603	903	0
342	4	0	0	0	0	0	0	200	300	0	0	0	0	0	0	0	200	903	0	0	0	0	0	0	0	603	903	0
342	5	0	0	0	0	0	0	200	300	0	0	0	0	0	0	0	200	903	0	0	0	0	0	0	0	603	903	0
342	6	0	0	0	0	0	0	200	300	0	0	0	0	0	0	0	200	903	0	0	0	0	0	0	0	603	903	0
342	7	0	0	0	0	0	0	200	300	0	0	0	0	0	0	0	200	903	0	0	0	0	0	0	0	603	903	0
342	8	0	0	0	0	0	0	200	300	0	0	0	0	0	0	0	200	903	0	0	0	0	0	0	0	603	903	0
342	9	0	0	0	0	0	0	200	300	0	0	0	0	0	0	0	200	903	0	0	0	0	0	0	0	603	903	0
343	0	0	0	0	0	0	0	200	300	0	0	0	0	0	0	0	200	903	0	0	0	0	0	0	0	603	903	0
343	1	0	0	0	0	0	0	200	300	0	0	0	0	0	0	0	200	903	0	0	0	0	0	0	0	603	903	0
343	2	0	0	0	0	0	0	200	300	0	0	0	0	0	0	0	200	903	0	0	0	0	0	0	0	603	903	0
343	3	0	0	0	0	0	0	200	300	0	0	0	0	0	0	0	200	903	0	0	0	0	0	0	0	603	903	0
343	4	0	0	0	0	0	0	200	300	0	0	0	0	0	0	0	200	903	0	0	0	0	0	0	0	603	903	0
343	5	0	0	0	0	0	0	200	300	0	0	0	0	0	0	0	200	903	0	0	0	0	0	0	0	603	903	0
343	6	0	0	0	0	0	0	200	300	0	0	0	0	0	0	0	200	903	0	0	0	0	0	0	0	603	903	0
343	7	0	0	0	0	0	0	200	300	0	0	0	0	0	0	0	200	903	0	0	0	0	0	0	0	603	903	0
343	8	0	0	0	0	0	0	200	300	0	0	0	0	0	0	0	200	903	0	0	0	0	0	0	0	603	903	0
343	9	0	0	0	0	0	0	200	300	0	0	0	0	0	0	0	200	903	0	0	0	0	0	0	0	603	903	0
344	0	0	0	0	0	0	0	200	300	0	0	0	0	0	0	0	200	903	0	0	0	0	0	0	0	603	903	0
344	1	0	0	0	0	0	0	200	300	0	0	0	0	0	0	0	200	903	0	0	0	0	0	0	0	603	903	0
344	2	0	0	0	0	0	0	200	300	0	0	0	0	0	0	0	200	903	0	0	0	0	0	0	0	603	903	0
344	3	0	0	0	0	0	0	200	300	0	0	0	0	0	0	0	200	903	0	0	0	0	0	0	0	603	903	0
344	4	0	0	0	0	0	0	200	300	0	0	0	0	0	0	0	200	903	0	0	0	0	0	0	0	603	903	0
344	5	0	0	0	0	0	0	200	300	0	0	0	0	0	0	0	200	903	0	0	0	0	0	0	0	603	903	0
344	6	0	0	0	0	0	0	200	300	0	0	0	0	0	0	0	200	903	0	0	0	0	0	0	0	603	903	0
344	7	0	0	0	0	0	0	200	300	0	0	0	0	0	0	0	200	903	0	0	0	0	0	0	0	603	903	0
344	8	0	0	0	0	0	0	200	300	0	0	0	0	0	0	0	200	903	0	0	0	0	0	0	0	603	903	0
344	9	0	0	0	0	0	0	200	300	0	0	0	0	0	0	0	200	903	0	0	0	0	0	0	0	603	903	0
345	0	0	0	0	0	0	0	200	300	0	0	0	0	0	0	0	200	903	0	0	0	0	0	0	0	603	903	0
345	1	0	0	0	0	0	0	200	300	0	0	0	0	0	0	0	200	903	0	0	0	0	0	0	0	603	903	0
345	2	0	0	0	0	0	0	200	300	0	0	0	0	0	0	0	200	903	0	0	0	0	0	0	0	603	903	0
345	3	0	0	0	0	0	0	200	300	0	0	0	0	0	0	0	200	903	0	0	0	0	0	0	0	603	903	0
345	4	0	0	0	0	0	0	200	300	0	0	0	0	0	0	0	200	903	0	0	0	0	0	0	0	603	903	0
345	5	0	0	0	0	0	0	200	300	0	0	0	0	0	0	0	200	903	0	0	0	0	0	0	0	603	903	0
345	6	0	0	0	0	0	0	200	300	0	0	0	0	0	0	0	200	903	0	0	0	0	0	0	0	603	903	0
345	7	0	0	0	0	0	0	200	300	0	0	0	0	0	0	0	200	903	0	0	0	0	0	0	0	603	903	0
345	8	0	0	0	0	0	0	200	300	0	0	0	0	0	0	0	200	903	0	0	0	0	0	0	0	603	903	0
345	9	0	0	0	0	0	0	200	300	0	0	0	0	0	0	0	200	903	0	0	0	0	0	0	0	603	903	0
346	0	0	0	0	0	0	0	200	300	0	0	0	0	0	0	0	200	903	0	0	0	0	0	0	0	603	903	0
346	1	0	0	0	0	0	0	200	300	0	0	0	0	0	0	0	200	903	0	0	0	0	0	0	0	603	903	0
346	2	0	0	0	0	0	0	200	300	0	0	0	0	0	0	0	200	903	0	0	0	0	0	0	0	603	903	0
346	3	0	0	0	0	0	0	200	300	0	0	0	0	0	0	0	200	903	0	0	0	0	0	0	0	603	903	0
346	4	0	0	0	0	0	0	200	300	0	0	0	0	0	0	0	200	903	0	0	0	0	0	0	0	603	903	0
346	5	0	0	0	0	0	0	200	300	0	0	0	0	0	0	0	200	903	0	0	0	0	0	0	0	603	903	0
346	6	0	0	0	0	0	0	200	300	0	0	0	0	0	0	0	200	903	0	0	0	0	0	0	0	603	903	0
346	7	0	0	0	0	0	0	200	300	0	0	0	0	0	0	0	200	903	0	0	0	0	0	0	0	603	903	0
346	8	0	0	0	0	0	0	200	300	0	0	0	0	0	0	0	200	903	0	0	0	0	0	0	0	603	903	0
346	9	0	0	0	0	0	0	200	300	0	0	0	0	0	0	0	200	903	0	0	0	0	0	0	0	603	903	0
347	0	0	0	0	0	0	0	200	300	0	0	0	0	0	0	0	200	903	0	0	0	0	0	0	0	603	903	0
347	1	0	0	0	0	0	0	200	300	0	0	0	0	0	0	0	200	903	0	0	0	0	0	0	0	603	903	0
347	2	0	0	0	0	0	0	200	300	0	0	0	0	0	0	0	200	903	0	0	0	0	0	0	0	603	903	0
347	3	0	0	0	0	0	0	200	300	0	0	0	0	0	0	0	200	903	0	0	0	0	0	0	0	603	903	0
347	4	0	0	0	0	0	0	200	300	0	0	0	0	0	0	0	200	903	0	0	0	0	0	0	0	603	903	0
347	5	0	0	0	0	0	0	200	300	0	0	0	0	0	0	0	200	903	0	0	0	0	0	0	0	603	903	0
347	6	0	0	0	0	0	0	200	300	0	0	0	0	0	0	0	200	903	0	0	0	0	0	0	0	603	903	0
347	7	0	0	0	0	0	0	200	300	0	0	0	0	0	0	0	200	903	0	0	0	0	0	0	0	603	903	0
347	8	0	0	0	0	0	0	200	300	0	0	0	0	0	0	0	200	903	0	0	0	0	0	0	0	603	903	0
347	9	0	0	0	0	0	0	200	300	0	0	0	0	0	0	0	200	903	0	0	0	0	0	0	0	603	903	0
348	0	0	0	0	0	0	0	200	300	0	0	0	0	0	0	0	200	903	0	0	0	0	0	0	0	603	903	0
348	1	0	0	0	0	0	0	200	300	0	0	0	0	0	0	0	200	903	0	0	0	0	0	0	0	603	903	0
348	2	0	0	0	0	0	0	200	300	0	0	0	0	0	0	0	200	903	0	0	0	0	0	0	0	603	903	0
348	3	0	0	0	0	0	0	200	300	0	0	0	0	0	0	0	200	903	0	0	0	0	0	0	0	603	903	0
348	4	0	0	0	0	0	0	200	300	0	0	0	0	0	0	0	200	903	0	0	0	0	0	0	0	603	903	0
348	5	0	0	0	0	0	0	200	300	0	0	0	0	0	0	0	200	903	0	0	0	0	0	0	0	603	903	0
348	6	0	0	0	0	0	0	200	300	0	0	0	0	0	0	0	200	903	0	0	0	0	0	0	0	603	903	0
348	7	0	0	0	0	0	0	200	300	0	0	0	0	0	0	0	200	903	0	0	0	0	0	0	0	603	903	0
348	8	0	0	0	0	0	0	200	300	0	0	0	0	0	0	0	200	903	0	0	0	0	0	0	0	603	903	0
348	9	0	0	0	0	0	0	200	300	0	0	0	0	0	0	0	200	903	0	0	0	0	0	0	0	603	903	0
349	0	0	0	0	0	0	0	200	300	0	0	0	0	0	0	0	200	903	0	0	0	0	0	0	0	603	903	0
349	1	0	0	0	0	0	0	200	300	0	0	0	0	0	0	0	200	903	0	0	0	0	0	0	0	603	903	0
349	2	0	0	0	0	0	0	200	300	0	0	0	0	0	0	0	200	903	0	0	0	0	0	0	0	603	903	0
349	3	0	0	0	0	0	0	200	300	0	0	0	0	0	0	0	200	903	0	0	0	0	0	0	0	603	903	0
349	4	0	0	0	0	0	0	200	300	0	0	0	0	0	0	0	200	903	0	0	0	0	0	0	0	603	903	0
349	5	0	0	0	0	0	0	200	300	0	0	0	0	0	0	0	200	903	0	0	0	0	0	0	0	603	903	0
349	6	0	0	0	0	0	0	200	300	0	0	0	0	0	0	0	200	903	0	0	0	0	0	0	0	603	903	0
349	7	0	0	0	0	0	0	200	300	0	0	0	0	0	0	0	200	903	0	0	0	0	0	0	0	603	903	0
349	8	0	0	0	0	0	0	200	300	0	0	0	0	0	0	0	200	903	0	0	0	0	0	0	0	603	903	0
349	9	0	0	0	0	0	0	200	300	0	0	0	0	0	0	0	200	903	0	0	0	0	0	0	0	603	903	0
350	0	0	0	0	0	0	0	200	300	0	0	0	0	0	0	0	200	903	0	0	0	0	0	0	0	603	903	0
350	1	0	0	0	0	0	0	200	300	0	0	0	0	0	0	0	200	903	0	0	0	0	0	0	0	603	903	0
350	2	0	0	0	0	0	0	200	300	0	0	0	0	0	0	0	200	903	0	0	0	0	0	0	0	603	903	0
350	3	0	0	0	0	0	0	200	300	0	0	0	0	0	0	0	200	903	0	0	0	0	0	0	0	603	903	0
350	4	0	0	0	0	0	0	200	300	0	0	0	0	0	0	0	200	903	0	0	0	0	0	0	0	603	903	0
350	5	0	0	0	0	0	0	200	300	0	0	0	0	0	0	0	200	903	0	0	0	0	0	0	0	603	903	0
350	6	0	0	0	0	0	0	200	300	0	0	0	0	0	0	0	200	903	0	0	0	0	0	0	0	603	903	0
350	7	0	0	0	0	0	0	200	300	0	0	0	0	0	0	0	200	903	0	0	0	0	0	0	0	603	903	0
350	8	0	0	0	0	0	0	200	300	0	0	0	0	0	0	0	200	903	0	0	0	0	0	0	0	603	903	0
350	9	0	0	0	0	0	0	200	300	0	0	0	0	0	0	0	200	903	0	0	0	0	0	0	0	603	903	0
351	0	0	0	0	0	0	0	200	300	0	0	0	0	0	0	0	200	903	0	0	0	0	0	0	0	603	903	0
351	1	0	0	0	0	0	0	200	300	0	0	0	0	0	0	0	200	903	0	0	0	0	0	0	0	603	903	0
351	2	0	0	0	0	0	0	200	300	0	0	0	0	0	0	0	200	903	0	0	0	0	0	0	0	603	903	0
351	3	0	0	0	0	0	0	200	300	0	0	0	0	0	0	0	200	903	0	0	0	0	0	0	0	603	903	0
351	4	0	0	0	0	0	0	200	300	0	0	0	0	0	0	0	200	903	0	0	0	0	0	0	0	603	903	0
351	5	0	0	0	0	0	0	200	300	0	0	0	0	0	0	0	200	903	0	0	0	0	0	0	0	603	903	0
351	6	0	0	0	0	0	0	200	300	0	0	0	0	0	0	0	200	903	0	0	0	0	0	0	0	603	903	0
351	7	0	0	0	0	0	0	200	300	0	0	0	0	0	0	0	200	903	0	0	0	0	0	0	0	603	903	0
351	8	0	0	0	0	0	0	200	300	0	0	0	0	0	0	0	200	903	0	0	0	0	0	0	0	603	903	0
351	9	0	0	0	0	0	0	200	300	0	0	0	0	0	0	0	200	903	0	0	0	0	0	0	0	603	903	0
352	0	0	0	0	0	0	0	200	300	0	0	0	0	0	0	0	200	903	0	0	0	0	0	0	0	603	903	0
352	1	0	0	0	0	0	0	200	300	0	0	0	0	0	0	0	200	903	0	0	0	0	0	0	0	603	903	0
352	2	0	0	0	0	0	0	200	300	0	0	0	0	0	0	0	200	903	0	0	0	0	0	0	0	603	903	0
352	3	0	0	0	0	0	0	200	300	0	0	0	0	0	0	0	200	903	0	0	0	0	0	0	0	603	903	0
352	4	0	0	0	0	0	0	200	300	0	0	0	0	0	0	0	200	903	0	0	0	0	0	0	0	603	903	0
352	5	0	0	0	0	0	0	200	300	0	0	0	0	0	0	0	200	903	0	0	0	0	0	0	0	603	903	0
352	6	0	0	0	0	0	0	200	300	0	0	0	0	0	0	0	200	903	0	0	0	0	0	0	0	603	903	0
352	7	0	0	0	0	0	0	200	300	0	0	0	0	0	0	0	200	903	0	0	0	0	0	0	0	603	903	0
352	8	0	0	0	0	0	0	200	300	0	0	0	0	0	0	0	200	903	0	0	0	0	0	0	0	603	903	0
352	9	0	0	0	0	0	0	200	300	0	0	0	0	0	0	0	200	903	0	0	0	0	0	0	0	603	903	0
353	0	0	0	0	0	0	0	200	300	0	0	0	0	0	0	0	200	903	0	0	0	0	0	0	0	603	903	0
353	1	0	0	0	0	0	0	200	300	0	0	0	0	0	0	0	200	903	0	0	0	0	0	0	0	603	903	0
353	2	0	0	0	0	0	0	200	300	0	0	0	0	0	0	0	200	903	0	0	0	0	0	0	0	603	903	0
353	3	0	0	0	0	0	0	200	300	0	0	0	0	0	0	0	200	903	0	0	0	0	0	0	0	603	903	0
353	4	0	0	0	0	0	0	200	300	0	0	0	0	0	0	0	200	903	0	0	0	0	0	0	0	603	903	0
353	5	0	0	0	0	0	0	200	300	0	0	0	0	0	0	0	200	903	0	0	0	0	0	0	0	603	903	0
353	6	0	0	0	0	0	0	200	300	0	0	0	0	0	0	0	200	903	0	0	0	0	0	0	0	603	903	0
353	7	0	0	0	0	0	0	200	300	0	0	0	0	0	0	0	200	903	0	0	0	0	0	0	0	603	903	0
353	8	0	0	0	0	0	0	200	300	0	0	0	0	0	0	0	200	903	0	0	0	0	0	0	0	603	903	0
353	9	0	0	0	0	0	0	200	300	0	0	0	0	0	0	0	200	903	0	0	0	0	0	0	0	603	903	0
354	0	0	0	0	0	0	0	200	300	0	0	0	0	0	0	0	200	903	0	0	0	0	0	0	0	603	903	0
354	1	0	0	0	0	0	0	200	300	0	0	0	0	0	0	0	200	903	0	0	0	0	0	0	0	603	903	0
354	2	0	0	0	0	0	0	200	300	0	0	0	0	0	0	0	200	903	0	0	0	0	0	0	0	603	903	0
354	3	0	0	0	0	0	0	200	300	0	0	0	0	0	0	0	200	903	0	0	0	0	0	0	0	603	903	0
354	4	0	0	0	0	0	0	200	300	0	0	0	0	0	0	0	200	903	0	0	0	0	0	0	0	603	903	0
354	5	0	0	0	0	0	0	200	300	0	0	0	0	0	0	0	200	903	0	0	0	0	0	0	0	603	903	0
354	6	0	0	0	0	0	0	200	300	0	0	0	0	0	0	0	200	903	0	0	0	0	0	0	0	603	903	0
354	7	0	0	0	0	0	0	200	300	0	0	0	0	0	0	0	200	903	0	0	0	0	0	0	0	603	903	0
354	8	0	0	0	0	0	0	200	300	0	0	0	0	0	0	0	200	903	0	0	0	0	0	0	0	603	903	0
354	9	0	0	0	0	0	0	200	300	0	0	0	0	0	0	0	200	903	0	0	0	0	0	0	0	603	903	0
355	0	0	0	0	0	0	0	200	300	0	0	0	0	0	0	0	200	903	0	0	0	0	0	0	0	603	903	0
355	1	0	0	0	0	0	0	200	300	0	0	0	0	0	0	0	200	903	0	0	0	0	0	0	0	603	903	0
355	2	0	0	0	0	0	0	200	300	0	0	0	0	0	0	0	200	903	0	0	0	0	0	0	0	603	903	0
355	3	0	0	0	0	0	0	200	300	0	0	0	0	0	0	0	200	903	0	0	0	0	0	0	0	603	903	0
355	4	0	0	0	0	0	0	200	300	0	0	0	0	0	0	0	200	903	0	0	0	0	0	0	0	603	903	0
355	5	0	0	0	0	0	0	200	300	0	0	0	0	0	0	0	200	903	0	0	0	0	0	0	0	603	903	0
355	6	0	0	0	0	0	0	200	300	0	0	0	0	0	0	0	200	903	0	0	0	0	0	0	0	603	903	0
355	7	0	0	0	0	0	0	200	300	0	0	0	0	0	0	0	200	903	0	0	0	0	0	0	0	603	903	0
355	8	0	0	0	0	0	0	200	300	0	0	0	0	0	0	0	200	903	0	0	0	0	0	0	0	603	903	0
355	9	0	0	0	0	0	0	200	300	0	0	0	0	0	0	0	200	903	0	0	0	0	0	0	0	603	903	0
356	0	0	0	0	0	0	0	200	300	0	0	0	0	0	0	0	200	903	0	0	0	0	0	0	0	603	903	0
356	1	0	0	0	0	0	0	200	300	0	0	0	0	0	0	0	200	903	0	0	0	0	0	0	0	603	903	0
356	2	0	0	0	0	0	0	200	300	0	0	0	0	0	0	0	200	903	0	0	0	0	0	0	0	603	903	0
356	3	0	0	0	0	0	0	200	300	0	0	0	0	0	0	0	200	903	0	0	0	0	0	0	0	603	903	0
356	4	0	0	0	0	0	0	200	300	0	0	0	0	0	0	0	200	903	0	0	0	0	0	0	0	603	903	0
356	5	0	0	0	0	0	0	200	300	0	0	0	0	0	0	0	200	903	0	0	0	0	0	0	0	603	903	0
356	6	0	0	0	0	0	0	200	300	0	0	0	0	0	0	0	200	903	0	0	0	0	0	0	0	603	903	0
356	7	0	0	0	0	0	0	200	300	0	0	0	0	0	0	0	200	903	0	0	0	0	0	0	0	603	903	0
356	8	0	0	0	0	0	0	200	300	0	0	0	0	0	0	0	200	903	0	0	0	0	0	0	0	603	903	0
356	9	0	0	0	0	0	0	200	300	0	0	0	0	0	0	0	200	903	0	0	0	0	0	0	0	603	903	0
357	0	0	0	0	0	0	0	200	300	0	0	0	0	0	0	0	200	903	0	0	0	0	0	0	0	603	903	0
357	1	0	0	0	0	0	0	200	300	0	0	0	0	0	0	0	200	903	0	0	0	0	0	0	0	603	903	0
357	2	0	0	0	0	0	0	200	300	0	0	0	0	0	0	0	200	903	0	0	0	0	0	0	0	603	903	0
357	3	0	0	0	0	0	0	200	300	0	0	0	0	0	0	0	200	903	0	0	0	0	0	0	0	603	903	0
357	4	0	0	0	0	0	0	200	300	0	0	0	0	0	0	0	200	903	0	0	0	0	0	0	0	603	903	0
357	5	0	0	0	0	0	0	200	300	0	0	0	0	0	0	0	200	903	0	0	0	0	0	0	0	603	903	0
357	6	0	0	0	0	0	0	200	300	0	0	0	0	0	0	0	200	903	0	0	0	0	0	0	0	603	903	0
357	7	0	0	0	0	0	0	200	300	0	0	0	0	0	0	0	200	903	0	0	0	0	0	0	0	603	903	0
357	8	0	0	0	0	0	0	200	300	0	0	0	0	0	0	0	200	903	0	0	0	0	0	0	0	603	903	0
357	9	0	0	0	0	0	0	200	300	0	0	0	0	0	0	0	200	903	0	0	0	0	0	0	0	603	903	0
358	0	0	0	0	0	0	0	200	300	0	0	0	0	0	0	0	200	903	0	0	0	0	0	0	0	603	903	0
358	1	0	0	0	0	0	0	200	300	0	0	0	0	0	0	0	200	903	0	0	0	0	0	0	0	603	903	0
358	2	0	0	0	0	0	0	200	300	0	0	0	0	0	0	0	200	903	0	0	0	0	0	0	0	603	903	0
358	3	0	0	0	0	0	0	200	300	0	0	0	0	0	0	0	200	903	0	0	0	0	0	0	0	603	903	0
358	4	0	0	0	0	0	0	200	300	0	0	0	0	0	0	0	200	903	0	0	0	0	0	0	0	603	903	0
358	5	0	0	0	0	0	0	200	300	0	0	0	0	0	0	0	200	903	0	0	0	0	0	0	0	603	903	0
358	6	0	0	0	0	0	0	200	300	0	0	0	0	0	0	0	200	903	0	0	0	0	0	0	0	603	903	0
358	7	0	0	0	0	0	0	200	300	0	0	0	0	0	0	0	200	903	0	0	0	0	0	0	0	603	903	0
358	8	0	0	0	0	0	0	200	300	0	0	0	0	0	0	0	200	903	0	0	0	0	0	0	0	603	903	0
358	9	0	0	0	0	0	0	200	300	0	0	0	0	0	0	0	200	903	0	0	0	0	0	0	0	603	903	0
359	0	0	0	0	0	0	0	200	300	0	0	0	0	0	0	0	200	903	0	0	0	0	0	0	0	603	903	0
359	1	0	0	0	0	0	0	200	300	0	0	0	0	0	0	0	200	903	0	0	0	0	0	0	0	603	903	0
359	2	0	0	0	0	0	0	200	300	0	0	0	0	0	0	0	200	903	0	0	0	0	0	0	0	603	903	0
359	3	0	0	0	0	0	0	200	300	0	0	0	0	0	0	0	200	903	0	0	0	0	0	0	0	603	903	0
359	4	0	0	0	0	0	0	200	300	0	0	0	0	0	0	0	200	903	0	0	0	0	0	0	0	603	903	0
359	5	0	0	0	0	0	0	200	300	0	0	0	0	0	0	0	200	903	0	0	0	0	0	0	0	603	903	0
359	6	0	0	0	0	0	0	200	300	0	0	0	0	0	0	0	200	903	0	0	0	0	0	0	0	603	903	0
359	7	0	0	0	0	0	0	200	300	0	0	0	0	0	0	0	200	903	0	0	0	0	0	0	0	603	903	0
359	8	0	0	0	0	0	0	200	300	0	0	0	0	0	0	0	200	903	0	0	0	0	0	0	0	603	903	0
359	9	0	0	0	0	0	0	200	300	0	0	0	0	0	0	0	200	903	0	0	0	0	0	0	0	603	903	0
360	0	0	0	0	0	0	0	200	300	0	0	0	0	0	0	0	200	903	0	0	0	0	0	0	0	603	903	0
360	1	0	0	0	0	0	0	200	300	0	0	0	0	0	0	0	200	903	0	0	0	0	0	0	0	603	903	0
360	2	0	0	0	0	0	0	200	300	0	0	0	0	0	0	0	200	903	0	0	0	0	0	0	0	603	903	0
360	3	0	0	0	0	0	0	200	300	0	0	0	0	0	0	0	200	903	0	0	0	0	0	0	0	603	903	0
360	4	0	0	0	0	0	0	200	300	0	0	0	0	0	0	0	200	903	0	0	0	0	0	0	0	603	903	0
360	5	0	0	0	0	0	0	200	300	0	0	0	0	0	0	0	200	903	0	0	0	0	0	0	0	603	903	0
360	6	0	0	0	0	0	0	200	300	0	0	0	0	0	0	0	200	903	0	0	0	0	0	0	0	603	903	0
360	7	0	0	0	0	0	0	200	300	0	0	0	0	0	0	0	200	903	0	0	0	0	0	0	0	603	903	0
360	8	0	0	0	0	0	0	200	300	0	0	0	0	0	0	0	200	903	0	0	0	0	0	0	0	603	903	0
360	9	0	0	0	0	0	0	200	300	0	0	0	0	0	0	0	200	903	0	0	0	0	0	0	0	603	903	0
361	0	0	0	0	0	0	0	200	300	0	0	0	0	0	0	0	200	903	0	0	0	0	0	0	0	603	903	0
361	1	0	0	0	0	0	0	200	300	0	0	0	0	0	0	0	200	903	0	0	0	0	0	0	0	603	903	0
361	2	0	0	0	0	0	0	200	300	0	0	0	0	0	0	0	200	903	0	0	0	0	0	0	0	603	903	0
361	3	0	0	0	0	0	0	200	300	0	0	0	0	0	0	0	200	903	0	0	0	0	0	0	0	603	903	0
361	4	0	0	0	0	0	0	200	300	0	0	0	0	0	0	0	200	903	0	0	0	0	0	0	0	603	903	0
361	5	0	0	0	0	0	0	200	300	0	0	0	0	0	0	0	200	903	0	0	0	0	0	0	0	603	903	0
361	6	0	0	0	0	0	0	200	300	0	0	0	0	0	0	0	200	903	0	0	0	0	0	0	0	603	903	0
361	7	0	0	0	0	0	0	200	300	0	0	0	0	0	0	0	200	903	0	0	0	0	0	0	0	603	903	0
361	8	0	0	0	0	0	0	200	300	0	0	0	0	0	0	0	200	903	0	0	0	0	0	0	0	603	903	0
361	9	0	0	0	0	0	0	200	300	0	0	0	0	0	0	0	200	903	0	0	0	0	0	0	0	603	903	0
362	0	0	0	0	0	0	0	200	300	0	0	0	0	0	0	0	200	903	0	0	0	0	0	0	0	603	903	0
362	1	0	0	0	0	0	0	200	300	0	0	0	0	0	0	0	200	903	0	0	0	0	0	0	0	603	903	0
362	2	0	0	0	0	0	0	200	300	0	0	0	0	0	0	0	200	903	0	0	0	0	0	0	0	603	903	0
362	3	0	0	0	0	0	0	200	300	0	0	0	0	0	0	0	200	903	0	0	0	0	0	0	0	603	903	0
362	4	0	0	0	0	0	0	200	300	0	0	0	0	0	0	0	200	903	0	0	0	0	0	0	0	603	903	0
362	5	0	0	0	0	0	0	200	300	0	0	0	0	0	0	0	200	903	0	0	0	0	0	0	0	603	903	0
362	6	0	0	0	0	0	0	200	300	0	0	0	0	0	0	0	200	903	0	0	0	0	0	0	0	603	903	0
362	7	0	0	0	0	0	0	200	300	0	0	0	0	0	0	0	200	903	0	0	0	0	0	0	0	603	903	0
362	8	0	0	0	0	0	0	200	300	0	0	0	0	0	0	0	200	903	0	0	0	0	0	0	0	603	903	0
362	9	0	0	0	0	0	0	200	300	0	0	0	0	0	0	0	200	903	0	0	0	0	0	0	0	603	903	0
363	0	0	0	0	0	0	0	200	300	0	0	0	0	0	0	0	200	903	0	0	0	0	0	0	0	603	903	0
363	1	0	0	0	0	0	0	200	300	0	0	0	0	0	0	0	200	903	0	0	0	0	0	0	0	603	903	0
363	2	0	0	0	0	0	0	200	300	0	0	0	0	0	0	0	200	903	0	0	0	0	0	0	0	603	903	0
363	3	0	0	0	0	0	0	200	300	0	0	0	0	0	0	0	200	903	0	0	0	0	0	0	0	603	903	0
363	4	0	0	0	0	0	0	200	300	0	0	0	0	0	0	0	200	903	0	0	0	0	0	0	0	603	903	0
363	5	0	0	0	0	0	0	200	300	0	0	0	0	0	0	0	200	903	0	0	0	0	0	0	0	603	903	0
363	6	0	0	0	0	0	0	200	300	0	0	0	0	0	0	0	200	903	0	0	0	0	0	0	0	603	903	0
363	7	0	0	0	0	0	0	200	300	0	0	0	0	0	0	0	200	903	0	0	0	0	0	0	0	603	903	0
363	8	0	0	0	0	0	0	200	300	0	0	0	0	0	0	0	200	903	0	0	0	0	0	0	0	603	903	0
363	9	0	0	0	0	0	0	200	300	0	0	0	0	0	0	0	200	903	0	0	0	0	0	0	0	603	903	0
364	0	0	0	0	0	0	0	200	300	0	0	0	0	0	0	0	200	903	0	0	0	0	0	0	0	603	903	0
364	1	0	0	0	0	0	0	200	300	0	0	0	0	0	0	0	200	903	0	0	0	0	0	0	0	603	903	0
364	2	0	0	0	0	0	0	200	300	0	0	0	0	0	0	0	200	903	0	0	0	0	0	0	0	603	903	0
364	3	0	0	0	0	0	0	200	300	0	0	0	0	0	0	0	200	903	0	0	0	0	0	0	0	603	903	0
364	4	0	0	0	0	0	0	200	300	0	0	0	0	0	0	0	200	903	0	0	0	0	0	0	0	603	903	0
364	5	0	0	0	0	0	0	200	300	0	0	0	0	0	0	0	200	903	0	0	0	0	0	0	0	603	903	0
364	6	0	0	0	0	0	0	200	300	0	0	0	0	0	0	0	200	903	0	0	0	0	0	0	0	603	903	0
364	7	0	0	0	0	0	0	200	300	0	0	0	0	0	0	0	200	903	0	0	0	0	0	0	0	603	903	0
364	8	0	0	0	0	0	0	200	300	0	0	0	0	0	0	0	200	903	0	0	0	0	0	0	0	603	903	0
364	9	0	0	0	0	0	0	200	300	0	0	0	0	0	0	0	200	903	0	0	0	0	0	0	0	603	903	0
365	0	0	0	0	0	0	0	200	300	0	0	0	0	0	0	0	200	903	0	0	0	0	0	0	0	603	903	0
365	1	0	0	0	0	0	0	200	300	0	0	0	0	0	0	0	200	903	0	0	0	0	0	0	0	603	903	0
365	2	0	0	0	0	0	0	200	300	0	0	0	0	0	0	0	200	903	0	0	0	0	0	0	0	603	903	0
365	3	0	0	0	0	0	0	200	300	0	0	0	0	0	0	0	200	903	0	0	0	0	0	0	0	603	903	0
365	4	0	0	0	0	0	0	200	300	0	0	0	0	0	0	0	200	903	0	0	0	0	0	0	0	603	903	0
365	5	0	0	0	0	0	0	200	300	0	0	0	0	0	0	0	200	903	0	0	0	0	0	0	0	603	903	0
365	6	0	0	0	0	0	0	200	300	0	0	0	0	0	0	0	200	903	0	0	0	0	0	0	0	603	903	0
365	7	0	0	0	0	0	0	200	300	0	0	0	0	0	0	0	200	903	0	0	0	0	0	0	0	603	903	0
365	8	0	0	0	0	0	0	200	300	0	0	0	0	0	0	0	200	903	0	0	0	0	0	0	0	603	903	0
365	9	0	0	0	0	0	0	200	300	0	0	0	0	0	0	0	200	903	0	0	0	0	0	0	0	603	903	0
366	0	0	0	0	0	0	0	200	300	0	0	0	0	0	0	0	200	903	0	0	0	0	0	0	0	603	903	0
366	1	0	0	0	0	0	0	200	300	0	0	0	0	0	0	0	200	903	0	0	0	0	0	0	0	603	903	0
366	2	0	0	0	0	0	0	200	300	0	0	0	0	0	0	0	200	903	0	0	0	0	0	0	0	603	903	0
366	3	0	0	0	0	0	0	200	300	0	0	0	0	0	0	0	200	903	0	0	0	0	0	0	0	603	903	0
366	4	0	0	0	0	0	0	200	300	0	0	0	0	0	0	0	200	903	0	0	0	0	0	0	0	603	903	0
366	5	0	0	0	0	0	0	200	300	0	0	0	0	0	0	0	200	903	0	0	0	0	0	0	0	603	903	0
366	6	0	0	0	0	0	0	200	300	0	0	0	0	0	0	0	200	903	0	0	0	0	0	0	0	603	903	0
366	7	0	0	0	0	0	0	200	300	0	0	0	0	0	0	0	200	903	0	0	0	0	0	0	0	603	903	0
366	8	0	0	0	0	0	0	200	300	0	0	0	0	0	0	0	200	903	0	0	0	0	0	0	0	603	903	0
366	9	0	0	0	0	0	0	200	300	0	0	0	0	0	0	0	200	903	0	0	0	0	0	0	0	603	903	0
367	0	0	0	0	0	0	0	200	300	0	0	0	0	0	0	0	200	903	0	0	0	0	0	0	0	603	903	0
367	1	0	0	0	0	0	0	200	300	0	0	0	0	0	0	0	200	903	0	0	0	0	0	0	0	603	903	0
367	2	0	0	0	0	0	0	200	300	0	0	0	0	0	0	0	200	903	0	0	0	0	0	0	0	603	903	0
367	3	0	0	0	0	0	0	200	300	0	0	0	0	0	0	0	200	903	0	0	0	0	0	0	0	603	903	0
367	4	0	0	0	0	0	0	200	300	0	0	0	0	0	0	0	200	903	0	0	0	0	0	0	0	603	903	0
367	5	0	0	0	0	0	0	200	300	0	0	0	0	0	0	0	200	903	0	0	0	0	0	0	0	603	903	0
367	6	0	0	0	0	0	0	200	300	0	0	0	0	0	0	0	200	903	0	0	0	0	0	0	0	603	903	0
367	7	0	0	0	0	0	0	200	300	0	0	0	0	0	0	0	200	903	0	0	0	0	0	0	0	603	903	0
367	8	0	0	0	0	0	0	200	300	0	0	0	0	0	0	0	200	903	0	0	0	0	0	0	0	603	903	0
367	9	0	0	0	0	0	0	200	300	0	0	0	0	0	0	0	200	903	0	0	0	0	0	0	0	603	903	0
368	0	0	0	0	0	0	0	200	300	0	0	0	0	0	0	0	200	903	0	0	0	0	0	0	0	603	903	0
368	1	0	0	0	0	0	0	200	300	0	0	0	0	0	0	0	200	903	0	0	0	0	0	0	0	603	903	0
368	2	0	0	0	0	0	0	200	300	0	0	0	0	0	0	0	200	903	0	0	0	0	0	0	0	603	903	0
368	3	0	0	0	0	0	0	200	300	0	0	0	0	0	0	0	200	903	0	0	0	0	0	0	0	603	903	0
368	4	0	0	0	0	0	0	200	300	0	0	0	0	0	0	0	200	903	0	0	0	0	0	0	0	603	903	0
368	5	0	0	0	0	0	0	200	300	0	0	0	0	0	0	0	200	903	0	0	0	0	0	0	0	603	903	0
368	6	0	0	0	0	0	0	200	300	0	0	0	0	0	0	0	200	903	0	0	0	0	0	0	0	603	903	0
368	7	0	0	0	0	0	0	200	300	0	0	0	0	0	0	0	200	903	0	0	0	0	0	0	0	603	903	0
368	8	0	0	0	0	0	0	200	300	0	0	0	0	0	0	0	200	903	0	0	0	0	0	0	0	603	903	0
368	9	0	0	0	0	0	0	200	300	0	0	0	0	0	0	0	200	903	0	0	0	0	0	0	0	603	903	0
369	0	0	0	0	0	0	0	200	300	0	0	0	0	0	0	0	200	903	0	0	0	0	0	0	0	603	903	0
369	1	0	0	0	0	0	0	200	300	0	0	0	0	0	0	0	200	903	0	0	0	0	0	0	0	603	903	0
369	2	0	0	0	0	0	0	200	300	0	0	0	0	0	0	0	200	903	0	0	0	0	0	0	0	603	903	0
369	3	0	0	0	0	0	0	200	300	0	0	0	0	0	0	0	200	903	0	0	0	0	0	0	0	603	903	0
369	4	0	0	0	0	0	0	200	300	0	0	0	0	0	0	0	200	903	0	0	0	0	0	0	0	603	903	0
369	5	0	0	0	0	0	0	200	300	0	0	0	0	0	0	0	200	903	0	0	0	0	0	0	0	603	903	0
369	6	0	0	0	0	0	0	200	300	0	0	0	0	0	0	0	200	903	0	0	0	0	0	0	0	603	903	0
369	7	0	0	0	0	0	0	200	300	0	0	0	0	0	0	0	200	903	0	0	0	0	0	0	0	603	903	0
369	8	0	0	0	0	0	0	200	300	0	0	0	0	0	0	0	200	903	0	0	0	0	0	0	0	603	903	0
369	9	0	0	0	0	0	0	200	300	0	0	0	0	0	0	0	200	903	0	0	0	0	0	0	0	603	903	0
370	0	0	0	0	0	0	0	200	300	0	0	0	0	0	0	0	200	903	0	0	0	0	0	0	0	603	903	0
370	1	0	0	0	0	0	0	200	300	0	0	0	0	0	0	0	200	903	0	0	0	0	0	0	0	603	903	0
370	2	0	0	0	0	0	0	200	300	0	0	0	0	0	0	0	200	903	0	0	0	0	0	0	0	603	903	0
370	3	0	0	0	0	0	0	200	300	0	0	0	0	0	0	0	200	903	0	0	0	0	0	0	0	603	903	0
370	4	0	0	0	0	0	0	200	300	0	0	0	0	0	0	0	200	903	0	0	0	0	0	0	0	603	903	0
370	5	0	0	0	0	0	0	200	300	0	0	0	0	0	0	0	200	903	0	0	0	0	0	0	0	603	903	0
370	6	0	0	0	0	0	0	200	300	0	0	0	0	0	0	0	200	903	0	0	0	0	0	0	0	603	903	0
370	7	0	0	0	0	0	0	200	300	0	0	0	0	0	0	0	200	903	0	0	0	0	0	0	0	603	903	0
370	8	0	0	0	0	0	0	200	300	0	0	0	0	0	0	0	200	903	0	0	0	0	0	0	0	603	903	0
370	9	0	0	0	0	0	0	200	300	0	0	0	0	0	0	0	200	903	0	0	0	0	0	0	0	603	903	0
371	0	0	0	0	0	0	0	200	300	0	0	0	0	0	0	0	200	903	0	0	0	0	0	0	0	603	903	0
371	1	0	0	0	0	0	0	200	300	0	0	0	0	0	0	0	200	903	0	0	0	0	0	0	0	603	903	0
371	2	0	0	0	0	0	0	200	300	0	0	0	0	0	0	0	200	903	0	0	0	0	0	0	0	603	903	0
371	3	0	0	0	0	0	0	200	300	0	0	0	0	0	0	0	200	903	0	0	0	0	0	0	0	603	903	0
371	4	0	0	0	0	0	0	200	300	0	0	0	0	0	0	0	200	903	0	0	0	0	0	0	0	603	903	0
371	5	0	0	0	0	0	0	200	300	0	0	0	0	0	0	0	200	903	0	0	0	0	0	0	0	603	903	0
371	6	0	0	0	0	0	0	200	300	0	0	0	0	0	0	0	200	903	0	0	0	0	0	0	0	603	903	0
371	7	0	0	0	0	0	0	200	300	0	0	0	0	0	0	0	200	903	0	0	0	0	0	0	0	603	903	0
371	8	0	0	0	0	0	0	200	300	0	0	0	0	0	0	0	200	903	0	0	0	0	0	0	0	603	903	0
371	9	0	0	0	0	0	0	200	300	0	0	0	0	0	0	0	200	903	0	0	0	0	0	0	0	603	903	0
372	0	0	0	0	0	0	0	200	300	0	0	0	0	0	0	0	200	903	0	0	0	0	0	0	0	603	903	0
372	1	0	0	0	0	0	0	200	300	0	0	0	0	0	0	0	200	903	0	0	0	0	0	0	0	603	903	0
372	2	0	0	0	0	0	0	200	300	0	0	0	0	0	0	0	200	903	0	0	0	0	0	0	0	603	903	0
372	3	0	0	0	0	0	0	200	300	0	0	0	0	0	0	0	200	903	0	0	0	0	0	0	0	603	903	0
372	4	0	0	0	0	0	0	200	300	0	0	0	0	0	0	0	200	903	0	0	0	0	0	0	0	603	903	0
372	5	0	0	0	0	0	0	200	300	0	0	0	0	0	0	0	200	903	0	0	0	0	0	0	0	603	903	0
372	6	0	0	0	0	0	0	200	300	0	0	0	0	0	0	0	200	903	0	0	0	0	0	0	0	603	903	0
372	7	0	0	0	0	0	0	200	300	0	0	0	0	0	0	0	200	903	0	0	0	0	0	0	0	603	903	0
372	8	0	0	0	0	0	0	200	300	0	0	0	0	0	0	0	200	903	0	0	0	0	0	0	0	603	903	0
372	9	0	0	0	0	0	0	200	300	0	0	0	0	0	0	0	200	903	0	0	0	0	0	0	0	603	903	0
373	0	0	0	0	0	0	0	200	300	0	0	0	0	0	0	0	200	903	0	0	0	0	0	0	0	603	903	0
373	1	0	0	0	0	0	0	200	300	0	0	0	0	0	0	0	200	903	0	0	0	0	0	0	0	603	903	0
373	2	0	0	0	0	0	0	200	300	0	0	0	0	0	0	0	200	903	0	0	0	0	0	0	0	603	903	0
373	3	0	0	0	0	0	0	200	300	0	0	0	0	0	0	0	200	903	0	0	0	0	0	0	0	603	903	0
373	4	0	0	0	0	0	0	200	300	0	0	0	0	0	0	0	200	903	0	0	0	0	0	0	0	603	903	0
373	5	0	0	0	0	0	0	200	300	0	0	0	0	0	0	0	200	903	0	0	0	0	0	0	0	603	903	0
373	6	0	0	0	0	0	0	200	300	0	0	0	0	0	0	0	200	903	0	0	0	0	0	0	0	603	903	0
373	7	0	0	0	0	0	0	200	300	0	0	0	0	0	0	0	200	903	0	0	0	0	0	0	0	603	903	0
373	8	0	0	0	0	0	0	200	300	0	0	0	0	0	0	0	200	903	0	0	0	0	0	0	0	603	903	0
373	9	0	0	0	0	0	0	200	300	0	0	0	0	0	0	0	200	903	0	0	0	0	0	0	0	603	903	0
374	0	0	0	0	0	0	0	200	300	0	0	0	0	0	0	0	200	903	0	0	0	0	0	0	0	603	903	0
374	1	0	0	0	0	0	0	200	300	0	0	0	0	0	0	0	200	903	0	0	0	0	0	0	0	603	903	0
374	2	0	0	0	0	0	0	200	300	0	0	0	0	0	0	0	200	903	0	0	0	0	0	0	0	603	903	0
374	3	0	0	0	0	0	0	200	300	0	0	0	0	0	0	0	200	903	0	0	0	0	0	0	0	603	903	0
374	4	0	0	0	0	0	0	200	300	0	0	0	0	0	0	0	200	903	0	0	0	0	0	0	0	603	903	0
374	5	0	0	0	0	0	0	200	300	0	0	0	0	0	0	0	200	903	0	0	0	0	0	0	0	603	903	0
374	6	0	0	0	0	0	0	200	300	0	0	0	0	0	0	0	200	903	0	0	0	0	0	0	0	603	903	0
374	7	0	0	0	0	0	0	200	300	0	0	0	0	0	0	0	200	903	0	0	0	0	0	0	0	603	903	0
374	8	0	0	0	0	0	0	200	300	0	0	0	0	0	0	0	200	903	0	0	0	0	0	0	0	603	903	0
374	9	0	0	0	0	0	0	200	300	0	0	0	0	0	0	0	200	903	0	0	0	0	0	0	0	603	903	0
375	0	0	0	0	0	0	0	200	300	0	0	0	0	0	0	0	200	903	0	0	0	0	0	0	0	603	903	0
375	1	0	0	0	0	0	0	200	300	0	0	0	0	0	0	0	200	903	0	0	0	0	0	0	0	603	903	0
375	2	0	0	0	0	0	0	200	300	0	0	0	0	0	0	0	200	903	0	0	0	0	0	0	0	603	903	0
375	3	0	0	0	0	0	0	200	300	0	0	0	0	0	0	0	200	903	0	0	0	0	0	0	0	603	903	0
375	4	0	0	0	0	0	0	200	300	0	0	0	0	0	0	0	200	903	0	0	0	0	0	0	0	603	903	0
375	5	0	0	0	0	0	0	200	300	0	0	0	0	0	0	0	200	903	0	0	0	0	0	0	0	603	903	0
375	6	0	0	0	0	0	0	200	300	0	0	0	0	0	0	0	200	903	0	0	0	0	0	0	0	603	903	0
375	7	0	0	0	0	0	0	200	300	0	0	0	0	0	0	0	200	903	0	0	0	0	0	0	0	603	903	0
375	8	0	0	0	0	0	0	200	300	0	0	0	0	0	0	0	200	903	0	0	0	0	0	0	0	603	903	0
375	9	0	0	0	0	0	0	200	300	0	0	0	0	0	0	0	200	903	0	0	0	0	0	0	0	603	903	0
376	0	0	0	0	0	0	0	200	300	0	0	0	0	0	0	0	200	903	0	0	0	0	0	0	0	603	903	0
376	1	0	0	0	0	0	0	200	300	0	0	0	0	0	0	0	200	903	0	0	0	0	0	0	0	603	903	0
376	2	0	0	0	0	0	0	200	300	0	0	0	0	0	0	0	200	903	0	0	0	0	0	0	0	603	903	0
376	3	0	0	0	0	0	0	200	300	0	0	0	0	0	0	0	200	903	0	0	0	0	0	0	0	603	903	0
376	4	0	0	0	0	0	0	200	300	0	0	0	0	0	0	0	200	903	0	0	0	0	0	0	0	603	903	0
376	5	0	0	0	0	0	0	200	300	0	0	0	0	0	0	0	200	903	0	0	0	0	0	0	0	603	903	0
376	6	0	0	0	0	0	0	200	300	0	0	0	0	0	0	0	200	903	0	0	0	0	0	0	0	603	903	0
376	7	0	0	0	0	0	0	200	300	0	0	0	0	0	0	0	200	903	0	0	0	0	0	0	0	603	903	0
376	8	0	0	0	0	0	0	200	300	0	0	0	0	0	0	0	200	903	0	0	0	0	0	0	0	603	903	0
376	9	0	0	0	0	0	0	200	300	0	0	0	0	0	0	0	200	903	0	0	0	0	0	0	0	603	903	0
377	0	0	0	0	0	0	0	200	300	0	0	0	0	0	0	0	200	903	0	0	0	0	0	0	0	603	903	0
377	1	0	0	0	0	0	0	200	300	0	0	0	0	0	0	0	200	903	0	0	0	0	0	0	0	603	903	0
377	2	0	0	0	0	0	0	200	300	0	0	0	0	0	0	0	200	903	0	0	0	0	0	0	0	603	903	0
377	3	0	0	0	0	0	0	200	300	0	0	0	0	0	0	0	200	903	0	0	0	0	0	0	0	603	903	0
377	4	0	0	0	0	0	0	200	300	0	0	0	0	0	0	0	200	903	0	0	0	0	0	0	0	603	903	0
377	5	0	0	0	0	0	0	200	300	0	0	0	0	0	0	0	200	903	0	0	0	0	0	0	0	603	903	0
377	6	0	0	0	0	0	0	200	300	0	0	0	0	0	0	0	200	903	0	0	0	0	0	0	0	603	903	0
377	7	0	0	0	0	0	0	200	300	0	0	0	0	0	0	0	200	903	0	0	0	0	0	0	0	603	903	0
377	8	0	0	0	0	0	0	200	300	0	0	0	0	0	0	0	200	903	0	0	0	0	0	0	0	603	903	0
377	9	0	0	0	0	0	0	200	300	0	0	0	0	0	0	0	200	903	0	0	0	0	0	0	0	603	903	0
378	0	0	0	0	0	0	0	200	300	0	0	0	0	0	0	0	200	903	0	0	0	0	0	0	0	603	903	0
378	1	0	0	0	0	0	0	200	300	0	0	0	0	0	0	0	200	903	0	0	0	0	0	0	0	603	903	0
378	2	0	0	0	0	0	0	200	300	0	0	0	0	0	0	0	200	903	0	0	0	0	0	0	0	603	903	0
378	3	0	0	0	0	0	0	200	300	0	0	0	0	0	0	0	200	903	0	0	0	0	0	0	0	603	903	0
378	4	0	0	0	0	0	0	200	300	0	0	0	0	0	0	0	200	903	0	0	0	0	0	0	0	603	903	0
378	5	0	0	0	0	0	0	200	300	0	0	0	0	0	0	0	200	903	0	0	0	0	0	0	0	603	903	0
378	6	0	0	0	0	0	0	200	300	0	0	0	0	0	0	0	200	903	0	0	0	0	0	0	0	603	903	0
378	7	0	0	0	0	0	0	200	300	0	0	0	0	0	0	0	200	903	0	0	0	0	0	0	0	603	903	0
378	8	0	0	0	0	0	0	200	300	0	0	0	0	0	0	0	200	903	0	0	0	0	0	0	0	603	903	0
378	9	0	0	0	0	0	0	200	300	0	0	0	0	0	0	0	200	903	0	0	0	0	0	0	0	603	903	0
379	0	0	0	0	0	0	0	200	300	0	0	0	0	0	0	0	200	903	0	0	0	0	0	0	0	603	903	0
379	1	0	0	0	0	0	0	200	300	0	0	0	0	0	0	0	200	903	0	0	0	0	0	0	0	603	903	0
379	2	0	0	0	0	0	0	200	300	0	0	0	0	0	0	0	200	903	0	0	0	0	0	0	0	603	903	0
379	3	0	0	0	0	0	0	200	300	0	0	0	0	0	0	0	200	903	0	0	0	0	0	0	0	603	903	0
379	4	0	0	0	0	0	0	200	300	0	0	0	0	0	0	0	200	903	0	0	0	0	0	0	0	603	903	0
379	5	0	0	0	0	0	0	200	300	0	0	0	0	0	0	0	200	903	0	0	0	0	0	0	0	603	903	0
379	6	0	0	0	0	0	0	200	300	0	0	0	0	0	0	0	200	903	0	0	0	0	0	0	0	603	903	0
379	7	0	0	0	0	0	0	200	300	0	0	0	0	0	0	0	200	903	0	0	0	0	0	0	0	603	903	0
379	8	0	0	0	0	0	0	200	300	0	0	0	0	0	0	0	200	903	0	0	0	0	0	0	0	603	903	0
379	9	0	0	0	0	0	0	200	300	0	0	0	0	0	0	0	200	903	0	0	0	0	0	0	0	603	903	0
380	0	0	0	0	0	0	0	200	300	0	0	0	0	0	0	0	200	903	0	0	0	0	0	0	0	603	903	0
380	1	0	0	0	0	0	0	200	300	0	0	0	0	0	0	0	200	903	0	0	0	0	0	0	0	603	903	0
380	2	0	0	0	0	0	0	200	300	0	0	0	0	0	0	0	200	903	0	0	0	0	0	0	0	603	903	0
380	3	0	0	0	0	0	0	200	300	0	0	0	0	0	0	0	200	903	0	0	0	0	0	0	0	603	903	0
380	4	0	0	0	0	0	0	200	300	0	0	0	0	0	0	0	200	903	0	0	0	0	0	0	0	603	903	0
380	5	0	0	0	0	0	0	200	300	0	0	0	0	0	0	0	200	903	0	0	0	0	0	0	0	603	903	0
380	6	0	0	0	0	0	0	200	300	0	0	0	0	0	0	0	200	903	0	0	0	0	0	0	0	603	903	0
380	7	0	0	0	0	0	0	200	300	0	0	0	0	0	0	0	200	903	0	0	0	0	0	0	0	603	903	0
380	8	0	0	0	0	0	0	200	300	0	0	0	0	0	0	0	200	903	0	0	0	0	0	0	0	603	903	0
380	9	0	0	0	0	0	0	200	300	0	0	0	0	0	0	0	200	903	0	0	0	0	0	0	0	603	903	0
381	0	0	0	0	0	0	0	200	300	0	0	0	0	0	0	0	200	903	0	0	0	0	0	0	0	603	903	0
381	1	0	0	0	0	0	0	200	300	0	0	0	0	0	0	0	200	903	0	0	0	0	0	0	0	603	903	0
381	2	0	0	0	0	0	0	200	300	0	0	0	0	0	0	0	200	903	0	0	0	0	0	0	0	603	903	0
381	3	0	0	0	0	0	0	200	300	0	0	0	0	0	0	0	200	903	0	0	0	0	0	0	0	603	903	0
381	4	0	0	0	0	0	0	200	300	0	0	0	0	0	0	0	200	903	0	0	0	0	0	0	0	603	903	0
381	5	0	0	0	0	0	0	200	300	0	0	0	0	0	0	0	200	903	0	0	0	0	0	0	0	603	903	0
381	6	0	0	0	0	0	0	200	300	0	0	0	0	0	0	0	200	903	0	0	0	0	0	0	0	603	903	0
381	7	0	0	0	0	0	0	200	300	0	0	0	0	0	0	0	200	903	0	0	0	0	0	0	0	603	903	0
381	8	0	0	0	0	0	0	200	300	0	0	0	0	0	0	0	200	903	0	0	0	0	0	0	0	603	903	0
381	9	0	0	0	0	0	0	200	300	0	0	0	0	0	0	0	200	903	0	0	0	0	0	0	0	603	903	0
382	0	0	0	0	0	0	0	200	300	0	0	0	0	0	0	0	200	903	0	0	0	0	0	0	0	603	903	0
382	1	0	0	0	0	0	0	200	300	0	0	0	0	0	0	0	200	903	0	0	0	0	0	0	0	603	903	0
382	2	0	0	0	0	0	0	200	300	0	0	0	0	0	0	0	200	903	0	0	0	0	0	0	0	603	903	0
382	3	0	0	0	0	0	0	200	300	0	0	0	0	0	0	0	200	903	0	0	0	0	0	0	0	603	903	0
382	4	0	0	0	0	0	0	200	300	0	0	0	0	0	0	0	200	903	0	0	0	0	0	0	0	603	903	0
382	5	0	0	0	0	0	0	200	300	0	0	0	0	0	0	0	200	903	0	0	0	0	0	0	0	603	903	0
382	6	0	0	0	0	0	0	200	300	0	0	0	0	0	0	0	200	903	0	0	0	0	0	0	0	603	903	0
382	7	0	0	0	0	0	0	200	300	0	0	0	0	0	0	0	200	903	0	0	0	0	0	0	0	603	903	0
382	8	0	0	0	0	0	0	200	300	0	0	0	0	0	0	0	200	903	0	0	0	0	0	0	0	603	903	0
382	9	0	0	0	0	0	0	200	300	0	0	0	0	0	0	0	200	903	0	0	0	0	0	0	0	603	903	0
383	0	0	0	0	0	0	0	200	300	0	0	0	0	0	0	0	200	903	0	0	0	0	0	0	0	603	903	0
383	1	0	0	0	0	0	0	200	300	0	0	0	0	0	0	0	200	903	0	0	0	0	0	0	0	603	903	0
383	2	0	0	0	0	0	0	200	300	0	0	0	0	0	0	0	200	903	0	0	0	0	0	0	0	603	903	0
383	3	0	0	0	0	0	0	200	300	0	0	0	0	0	0	0	200	903	0	0	0	0	0	0	0	603	903	0
383	4	0	0	0	0	0	0	200	300	0	0	0	0	0	0	0	200	903	0	0	0	0	0	0	0	603	903	0
383	5	0	0	0	0	0	0	200	300	0	0	0	0	0	0	0	200	903	0	0	0	0	0	0	0	603	903	0
383	6	0	0	0	0	0	0	200	300	0	0	0	0	0	0	0	200	903	0	0	0	0	0	0	0	603	903	0
383	7	0	0	0	0	0	0	200	300	0	0	0	0	0	0	0	200	903	0	0	0	0	0	0	0	603	903	0
383	8	0	0	0	0	0	0	200	300	0	0	0	0	0	0	0	200	903	0	0	0	0	0	0	0	603	903	0
383	9	0	0	0	0	0	0	200	300	0	0	0	0	0	0	0	200	903	0	0	0	0	0	0	0	603	903	0
384	0	0	0	0	0	0	0	200	300	0	0	0	0	0	0	0	200	903	0	0	0	0	0	0	0	603	903	0
384	1	0	0	0	0	0	0	200	300	0	0	0	0	0	0	0	200	903	0	0	0	0	0	0	0	603	903	0
384	2	0	0	0	0	0	0	200	300	0	0	0	0	0	0	0	200	903	0	0	0	0	0	0	0	603	903	0
384	3	0	0	0	0	0	0	200	300	0	0	0	0	0	0	0	200	903	0	0	0	0	0	0	0	603	903	0
384	4	0	0	0	0	0	0	200	300	0	0	0	0	0	0	0	200	903	0	0	0	0	0	0	0	603	903	0
384	5	0	0	0	0	0	0	200	300	0	0	0	0	0	0	0	200	903	0	0	0	0	0	0	0	603	903	0
384	6	0	0	0	0	0	0	200	300	0	0	0	0	0	0	0	200	903	0	0	0	0	0	0	0	603	903	0
384	7	0	0	0	0	0	0	200	300	0	0	0	0	0	0	0	200	903	0	0	0	0	0	0	0	603	903	0
384	8	0	0	0	0	0	0	200	300	0	0	0	0	0	0	0	200	903	0	0	0	0	0	0	0	603	903	0
384	9	0	0	0	0	0	0	200	300	0	0	0	0	0	0	0	200	903	0	0	0	0	0	0	0	603	903	0
385	0	0	0	0	0	0	0	200	300	0	0	0	0	0	0	0	200	903	0	0	0	0	0	0	0	603	903	0
385	1	0	0	0	0	0	0	200	300	0	0	0	0	0	0	0	200	903	0	0	0	0	0	0	0	603	903	0
385	2	0	0	0	0	0	0	200	300	0	0	0	0	0	0	0	200	903	0	0	0	0	0	0	0	603	903	0
385	3	0	0	0	0	0	0	200	300	0	0	0	0	0	0	0	200	903	0	0	0	0	0	0	0	603	903	0
385	4	0	0	0	0	0	0	200	300	0	0	0	0	0	0	0	200	903	0	0	0	0	0	0	0	603	903	0
385	5	0	0	0	0	0	0	200	300	0	0	0	0	0	0	0	200	903	0	0	0	0	0	0	0	603	903	0
385	6	0	0	0	0	0	0	200	300	0	0	0	0	0	0	0	200	903	0	0	0	0	0	0	0	603	903	0
385	7	0	0	0	0	0	0	200	300	0	0	0	0	0	0	0	200	903	0	0	0	0	0	0	0	603	903	0
385	8	0	0	0	0	0	0	200	300	0	0	0	0	0	0	0	200	903	0	0	0	0	0	0	0	603	903	0
385	9	0	0	0	0	0	0	200	300	0	0	0	0	0	0	0	200	903	0	0	0	0	0	0	0	603	903	0
386	0	0	0	0	0	0	0	200	300	0	0	0	0	0	0	0	200	903	0	0	0	0	0	0	0	603	903	0
386	1	0	0	0	0	0	0	200	300	0	0	0	0	0	0	0	200	903	0	0	0	0	0	0	0	603	903	0
386	2	0	0	0	0	0	0	200	300	0	0	0	0	0	0	0	200	903	0	0	0	0	0	0	0	603	903	0
386	3	0	0	0	0	0	0	200	300	0	0	0	0	0	0	0	200	903	0	0	0	0	0	0	0	603	903	0
386	4	0	0	0	0	0	0	200	300	0	0	0	0	0	0	0	200	903	0	0	0	0	0	0	0	603	903	0
386	5	0	0	0	0	0	0	200	300	0	0	0	0	0	0	0	200	903	0	0	0	0	0	0	0	603	903	0
386	6	0	0	0	0	0	0	200	300	0	0	0	0	0	0	0	200	903	0	0	0	0	0	0	0	603	903	0
386	7	0	0	0	0	0	0	200	300	0	0	0	0	0	0	0	200	903	0	0	0	0	0	0	0	603	903	0
386	8	0	0	0	0	0	0	200	300	0	0	0	0	0	0	0	200	903	0	0	0	0	0	0	0	603	903	0
386	9	0	0	0	0	0	0	200	300	0	0	0	0	0	0	0	200	903	0	0	0	0	0	0	0	603	903	0
387	0	0	0	0	0	0	0	200	300	0	0	0	0	0	0	0	200	903	0	0	0	0	0	0	0	603	903	0
387	1	0	0	0	0	0	0	200	300	0	0	0	0	0	0	0	200	903	0	0	0	0	0	0	0	603	903	0
387	2	0	0	0	0	0	0	200	300	0	0	0	0	0	0	0	200	903	0	0	0	0	0	0	0	603	903	0
387	3	0	0	0	0	0	0	200	300	0	0	0	0	0	0	0	200	903	0	0	0	0	0	0	0	603	903	0
387	4	0	0	0	0	0	0	200	300	0	0	0	0	0	0	0	200	903	0	0	0	0	0	0	0	603	903	0
387	5	0	0	0	0	0	0	200	300	0	0	0	0	0	0	0	200	903	0	0	0	0	0	0	0	603	903	0
387	6	0	0	0	0	0	0	200	300	0	0	0	0	0	0	0	200	903	0	0	0	0	0	0	0	603	903	0
387	7	0	0	0	0	0	0	200	300	0	0	0	0	0	0	0	200	903	0	0	0	0	0	0	0	603	903	0
387	8	0	0	0	0	0	0	200	300	0	0	0	0	0	0	0	200	903	0	0	0	0	0	0	0	603	903	0
387	9	0	0	0	0	0	0	200	300	0	0	0	0	0	0	0	200	903	0	0	0	0	0	0	0	603	903	0
388	0	0	0	0	0	0	0	200	300	0	0	0	0	0	0	0	200	903	0	0	0	0	0	0	0	603	903	0
388	1	0	0	0	0	0	0	200	300	0	0	0	0	0	0	0	200	903	0	0	0	0	0	0	0	603	903	0
388	2	0	0	0	0	0	0	200	300	0	0	0	0	0	0	0	200	903	0	0	0	0	0	0	0	603	903	0
388	3	0	0	0	0	0	0	200	300	0	0	0	0	0	0	0	200	903	0	0	0	0	0	0	0	603	903	0
388	4	0	0	0	0	0	0	200	300	0	0	0	0	0	0	0	200	903	0	0	0	0	0	0	0	603	903	0
388	5	0	0	0	0	0	0	200	300	0	0	0	0	0	0	0	200	903	0	0	0	0	0	0	0	603	903	0
388	6	0	0	0	0	0	0	200	300	0	0	0	0	0	0	0	200	903	0	0	0	0	0	0	0	603	903	0
388	7	0	0	0	0	0	0	200	300	0	0	0	0	0	0	0	200	903	0	0	0	0	0	0	0	603	903	0
388	8	0	0	0	0	0	0	200	300	0	0	0	0	0	0	0	200	903	0	0	0	0	0	0	0	603	903	0
388	9	0	0	0	0	0	0	200	300	0	0	0	0	0	0	0	200	903	0	0	0	0	0	0	0	603	903	0
389	0	0	0	0	0	0	0	200	300	0	0	0	0	0	0	0	200	903	0	0	0	0	0	0	0	603	903	0
389	1	0	0	0	0	0	0	200	300	0	0	0	0	0	0	0	200	903	0	0	0	0	0	0	0	603	903	0
389	2	0	0	0	0	0	0	200	300	0	0	0	0	0	0	0	200	903	0	0	0	0	0	0	0	603	903	0
389	3	0	0	0	0	0	0	200	300	0	0	0	0	0	0	0	200	903	0	0	0	0	0	0	0	603	903	0
389	4	0	0	0	0	0	0	200	300	0	0	0	0	0	0	0	200	903	0	0	0	0	0	0	0	603	903	0
389	5	0	0	0	0	0	0	200	300	0	0	0	0	0	0	0	200	903	0	0	0	0	0	0	0	603	903	0
389	6	0	0	0	0	0	0	200	300	0	0	0	0	0	0	0	200	903	0	0	0	0	0	0	0	603	903	0
389	7	0	0	0	0	0	0	200	300	0	0	0	0	0	0	0	200	903	0	0	0	0	0	0	0	603	903	0
389	8	0	0	0	0	0	0	200	300	0	0	0	0	0	0	0	200	903	0	0	0	0	0	0	0	603	903	0
389	9	0	0	0	0	0	0	200	300	0	0	0	0	0	0	0	200	903	0	0	0	0	0	0	0	603	903	0
390	0	0	0	0	0	0	0	200	300	0	0	0	0	0	0	0	200	903	0	0	0	0	0	0	0	603	903	0
390	1	0	0	0	0	0	0	200	300	0	0	0	0	0	0	0	200	903	0	0	0	0	0	0	0	603	903	0
390	2	0	0	0	0	0	0	200	300	0	0	0	0	0	0	0	200	903	0	0	0	0	0	0	0	603	903	0
390	3	0	0	0	0	0	0	200	300	0	0	0	0	0	0	0	200	903	0	0	0	0	0	0	0	603	903	0
390	4	0	0	0	0	0	0	200	300	0	0	0	0	0	0	0	200	903	0	0	0	0	0	0	0	603	903	0
390	5	0	0	0	0	0	0	200	300	0	0	0	0	0	0	0	200	903	0	0	0	0	0	0	0	603	903	0
390	6	0	0	0	0	0	0	200	300	0	0	0	0	0	0	0	200	903	0	0	0	0	0	0	0	603	903	0
390	7	0	0	0	0	0	0	200	300	0	0	0	0	0	0	0	200	903	0	0	0	0	0	0	0	603	903	0
390	8	0	0	0	0	0	0	200	300	0	0	0	0	0	0	0	200	903	0	0	0	0	0	0	0	603	903	0
390	9	0	0	0	0	0	0	200	300	0	0	0	0	0	0	0	200	903	0	0	0	0	0	0	0	603	903	0
391	0	0	0	0	0	0	0	200	300	0	0	0	0	0	0	0	200	903	0	0	0	0	0	0	0	603	903	0
391	1	0	0	0	0	0	0	200	300	0	0	0	0	0	0	0	200	903	0	0	0	0	0	0	0	603	903	0
391	2	0	0	0	0	0	0	200	300	0	0	0	0	0	0	0	200	903	0	0	0	0	0	0	0	603	903	0
391	3	0	0	0	0	0	0	200	300	0	0	0	0	0	0	0	200	903	0	0	0	0	0	0	0	603	903	0
391	4	0	0	0	0	0	0	200	300	0	0	0	0	0	0	0	200	903	0	0	0	0	0	0	0	603	903	0
391	5	0	0	0	0	0	0	200	300	0	0	0	0	0	0	0	200	903	0	0	0	0	0	0	0	603	903	0
391	6	0	0	0	0	0	0	200	300	0	0	0	0	0	0	0	200	903	0	0	0	0	0	0	0	603	903	0
391	7	0	0	0	0	0	0	200	300	0	0	0	0	0	0	0	200	903	0	0	0	0	0	0	0	603	903	0
391	8	0	0	0	0	0	0	200	300	0	0	0	0	0	0	0	200	903	0	0	0	0	0	0	0	603	903	0
391	9	0	0	0	0	0	0	200	300	0	0	0	0	0	0	0	200	903	0	0	0	0	0	0	0	603	903	0
392	0	0	0	0	0	0	0	200	300	0	0	0	0	0	0	0	200	903	0	0	0	0	0	0	0	603	903	0
392	1	0	0	0	0	0	0	200	300	0	0	0	0	0	0	0	200	903	0	0	0	0	0	0	0	603	903	0
392	2	0	0	0	0	0	0	200	300	0	0	0	0	0	0	0	200	903	0	0	0	0	0	0	0	603	903	0
392	3	0	0	0	0	0	0	200	300	0	0	0	0	0	0	0	200	903	0	0	0	0	0	0	0	603	903	0
392	4	0	0	0	0	0	0	200	300	0	0	0	0	0	0	0	200	903	0	0	0	0	0	0	0	603	903	0
392	5	0	0	0	0	0	0	200	300	0	0	0	0	0	0	0	200	903	0	0	0	0	0	0	0	603	903	0
392	6	0	0	0	0	0	0	200	300	0	0	0	0	0	0	0	200	903	0	0	0	0	0	0	0	603	903	0
392	7	0	0	0	0	0	0	200	300	0	0	0	0	0	0	0	200	903	0	0	0	0	0	0	0	603	903	0
392	8	0	0	0	0	0	0	200	300	0	0	0	0	0	0	0	200	903	0	0	0	0	0	0	0	603	903	0
392	9	0	0	0	0	0	0	200	300	0	0	0	0	0	0	0	200	903	0	0	0	0	0	0	0	603	903	0
393	0	0	0	0	0	0	0	200	300	0	0	0	0	0	0	0	200	903	0	0	0	0	0	0	0	603	903	0
393	1	0	0	0	0	0	0	200	300	0	0	0	0	0	0	0	200	903	0	0	0	0	0	0	0	603	903	0
393	2	0	0	0	0	0	0	200	300	0	0	0	0	0	0	0	200	903	0	0	0	0	0	0	0	603	903	0
393	3	0	0	0	0	0	0	200	300	0	0	0	0	0	0	0	200	903	0	0	0	0	0	0	0	603	903	0
393	4	0	0	0	0	0	0	200	300	0	0	0	0	0	0	0	200	903	0	0	0	0	0	0	0	603	903	0
393	5	0	0	0	0	0	0	200	300	0	0	0	0	0	0	0	200	903	0	0	0	0	0	0	0	603	903	0
393	6	0	0	0	0	0	0	200	300	0	0	0	0	0	0	0	200	903	0	0	0	0	0	0	0	603	903	0
393	7	0	0	0	0	0	0	200	300	0	0	0	0	0	0	0	200	903	0	0	0	0	0	0	0	603	903	0
393	8	0	0	0	0	0	0	200	300	0	0	0	0	0	0	0	200	903	0	0	0	0	0	0	0	603	903	0
393	9	0	0	0	0	0	0	200	300	0	0	0	0	0	0	0	200	903	0	0	0	0	0	0	0	603	903	0
394	0	0	0	0	0	0	0	200	300	0	0	0	0	0	0	0	200	903	0	0	0	0	0	0	0	603	903	0
394	1	0	0	0	0	0	0	200	300	0	0	0	0	0	0	0	200	903	0	0	0	0	0	0	0	603	903	0
394	2	0	0	0	0	0	0	200	300	0	0	0	0	0	0	0	200	903	0	0	0	0	0	0	0	603	903	0
394	3	0	0	0	0	0	0	200	300	0	0	0	0	0	0	0	200	903	0	0	0	0	0	0	0	603	903	0
394	4	0	0	0	0	0	0	200	300	0	0	0	0	0	0	0	200	903	0	0	0	0	0	0	0	603	903	0
394	5	0	0	0	0	0	0	200	300	0	0	0	0	0	0	0	200	903	0	0	0	0	0	0	0	603	903	0
394	6	0	0	0	0	0	0	200	300	0	0	0	0	0	0	0	200	903	0	0	0	0	0	0	0	603	903	0
394	7	0	0	0	0	0	0	200	300	0	0	0	0	0	0	0	200	903	0	0	0	0	0	0	0	603	903	0
394	8	0	0	0	0	0	0	200	300	0	0	0	0	0	0	0	200	903	0	0	0	0	0	0	0	603	903	0
394	9	0	0	0	0	0	0	200	300	0	0	0	0	0	0	0	200	903	0	0	0	0	0	0	0	603	903	0
395	0	0	0	0	0	0	0	200	300	0	0	0	0	0	0	0	200	903	0	0	0	0	0	0	0	603	903	0
395	1	0	0	0	0	0	0	200	300	0	0	0	0	0	0	0	200	903	0	0	0	0	0	0	0	603	903	0
395	2	0	0	0	0	0	0	200	300	0	0	0	0	0	0	0	200	903	0	0	0	0	0	0	0	603	903	0
395	3	0	0	0	0	0	0	200	300	0	0	0	0	0	0	0	200	903	0	0	0	0	0	0	0	603	903	0
395	4	0	0	0	0	0	0	200	300	0	0	0	0	0	0	0	200	903	0	0	0	0	0	0	0	603	903	0
395	5	0	0	0	0	0	0	200	300	0	0	0	0	0	0	0	200	903	0	0	0	0	0	0	0	603	903	0
395	6	0	0	0	0	0	0	200	300	0	0	0	0	0	0	0	200	903	0	0	0	0	0	0	0	603	903	0
395	7	0	0	0	0	0	0	200	300	0	0	0	0	0	0	0	200	903	0	0	0	0	0	0	0	603	903	0
395	8	0	0	0	0	0	0	200	300	0	0	0	0	0	0	0	200	903	0	0	0	0	0	0	0	603	903	0
395	9	0	0	0	0	0	0	200	300	0	0	0	0	0	0	0	200	903	0	0	0	0	0	0	0	603	903	0
396	0	0	0	0	0	0	0	200	300	0	0	0	0	0	0	0	200	903	0	0	0	0	0	0	0	603	903	0
396	1	0	0	0	0	0	0	200	300	0	0	0	0	0	0	0	200	903	0	0	0	0	0	0	0	603	903	0
396	2	0	0	0	0	0	0	200	300	0	0	0	0	0	0	0	200	903	0	0	0	0	0	0	0	603	903	0
396	3	0	0	0	0	0	0	200	300	0	0	0	0	0	0	0	200	903	0	0	0	0	0	0	0	603	903	0
396	4	0	0	0	0	0	0	200	300	0	0	0	0	0	0	0	200	903	0	0	0	0	0	0	0	603	903	0
396	5	0	0	0	0	0	0	200	300	0	0	0	0	0	0	0	200	903	0	0	0	0	0	0	0	603	903	0
396	6	0	0	0	0	0	0	200	300	0	0	0	0	0	0	0	200	903	0	0	0	0	0	0	0	603	903	0
396	7	0	0	0	0	0	0	200	300	0	0	0	0	0	0	0	200	903	0	0	0	0	0	0	0	603	903	0
396	8	0	0	0	0	0	0	200	300	0	0	0	0	0	0	0	200	903	0	0	0	0	0	0	0	603	903	0
396	9	0	0	0	0	0	0	200	300	0	0	0	0	0	0	0	200	903	0	0	0	0	0	0	0	603	903	0
397	0	0	0	0	0	0	0	200	300	0	0	0	0	0	0	0	200	903	0	0	0	0	0	0	0	603	903	0
397	1	0	0	0	0	0	0	200	300	0	0	0	0	0	0	0	200	903	0	0	0	0	0	0	0	603	903	0
397	2	0	0	0	0	0	0	200	300	0	0	0	0	0	0	0	200	903	0	0	0	0	0	0	0	603	903	0
397	3	0	0	0	0	0	0	200	300	0	0	0	0	0	0	0	200	903	0	0	0	0	0	0	0	603	903	0
397	4	0	0	0	0	0	0	200	300	0	0	0	0	0	0	0	200	903	0	0	0	0	0	0	0	603	903	0
397	5	0	0	0	0	0	0	200	300	0	0	0	0	0	0	0	200	903	0	0	0	0	0	0	0	603	903	0
397	6	0	0	0	0	0	0	200	300	0	0	0	0	0	0	0	200	903	0	0	0	0	0	0	0	603	903	0
397	7	0	0	0	0	0	0	200	300	0	0	0	0	0	0	0	200	903	0	0	0	0	0	0	0	603	903	0
397	8	0	0	0	0	0	0	200	300	0	0	0	0	0	0	0	200	903	0	0	0	0	0	0	0	603	903	0
397	9	0	0	0	0	0	0	200	300	0	0	0	0	0	0	0	200	903	0	0	0	0	0	0	0	603	903	0
398	0	0	0	0	0	0	0	200	300	0	0	0	0	0	0	0	200	903	0	0	0	0	0	0	0	603	903	0
398	1	0	0	0	0	0	0	200	300	0	0	0	0	0	0	0	200	903	0	0	0	0	0	0	0	603	903	0
398	2	0	0	0	0	0	0	200	300	0	0	0	0	0	0	0	200	903	0	0	0	0	0	0	0	603	903	0
398	3	0	0	0	0	0	0	200	300	0	0	0	0	0	0	0	200	903	0	0	0	0	0	0	0	603	903	0
398	4	0	0	0	0	0	0	200	300	0	0	0	0	0	0	0	200	903	0	0	0	0	0	0	0	603	903	0
398	5	0	0	0	0	0	0	200	300	0	0	0	0	0	0	0	200	903	0	0	0	0	0	0	0	603	903	0
398	6	0	0	0	0	0	0	200	300	0	0	0	0	0	0	0	200	903	0	0	0	0	0	0	0	603	903	0
398	7	0	0	0	0	0	0	200	300	0	0	0	0	0	0	0	200	903	0	0	0	0	0	0	0	603	903	0
398	8	0	0	0	0	0	0	200	300	0	0	0	0	0	0	0	200	903	0	0	0	0	0	0	0	603	903	0
398	9	0	0	0	0	0	0	200	300	0	0	0	0	0	0	0	200	903	0	0	0	0	0	0	0	603	903	0
399	0	0	0	0	0	0	0	200	300	0	0	0	0	0	0	0	200	903	0	0	0	0	0	0	0	603	903	0
399	1	0	0	0	0	0	0	200	300	0	0	0	0	0	0	0	200	903	0	0	0	0	0	0	0	603	903	0
399	2	0	0	0	0	0	0	200	300	0	0	0	0	0	0	0	200	903	0	0	0	0	0	0	0	603	903	0
399	3	0	0	0	0	0	0	200	300	0	0	0	0	0	0	0	200	903	0	0	0	0	0	0	0	603	903	0
399	4	0	0	0	0	0	0	200	300	0	0	0	0	0	0	0	200	903	0	0	0	0	0	0	0	603	903	0
399	5	0	0	0	0	0	0	200	300	0	0	0	0	0	0	0	200	903	0	0	0	0	0	0	0	603	903	0
399	6	0	0	0	0	0	0	200	300	0	0	0	0	0	0	0	200	903	0	0	0	0	0	0	0	603	903	0
399	7	0	0	0	0	0	0	200	300	0	0	0	0	0	0	0	200	903	0	0	0	0	0	0	0	603	903	0
399	8	0	0	0	0	0	0	200	300	0	0	0	0	0	0	0	200	903	0	0	0	0	0	0	0	603	903	0
399	9	0	0	0	0	0	0	200	300	0	0	0	0	0	0	0	200	903	0	0	0	0	0	0	0	603	903	0
400	0	0	0	0	0	0	0	200	300	0	0	0	0	0	0	0	200	903	0	0	0	0	0	0	0	603	903	0
400	1	0	0	0	0	0	0	200	300	0	0	0	0	0	0	0	200	903	0	0	0	0	0	0	0	603	903	0
400	2	0	0	0	0	0	0	200	300	0	0	0	0	0	0	0	200	903	0	0	0	0	0	0	0	603	903	0
400	3	0	0	0	0	0	0	200	300	0	0	0	0	0	0	0	200	903	0	0	0	0	0	0	0	603	903	0
400	4	0	0	0	0	0	0	200	300	0	0	0	0	0	0	0	200	903	0	0	0	0	0	0	0	603	903	0
400	5	0	0	0	0	0	0	200	300	0	0	0	0	0	0	0	200	903	0	0	0	0	0	0	0	603	903	0
400	6	0	0	0	0	0	0	200	300	0	0	0	0	0	0	0	200	903	0	0	0	0	0	0	0	603	903	0
400	7	0	0	0	0	0	0	200	300	0	0	0	0	0	0	0	200	903	0	0	0	0	0	0	0	603	903	0
400	8	0	0	0	0	0	0	200	300	0	0	0	0	0	0	0	200	903	0	0	0	0	0	0	0	603	903	0
400	9	0	0	0	0	0	0	200	300	0	0	0	0	0	0	0	200	903	0	0	0	0	0	0	0	603	903	0
401	0	0	0	0	0	0	0	200	300	0	0	0	0	0	0	0	200	903	0	0	0	0	0	0	0	603	903	0
401	1	0	0	0	0	0	0	200	300	0	0	0	0	0	0	0	200	903	0	0	0	0	0	0	0	603	903	0
401	2	0	0	0	0	0	0	200	300	0	0	0	0	0	0	0	200	903	0	0	0	0	0	0	0	603	903	0
401	3	0	0	0	0	0	0	200	300	0	0	0	0	0	0	0	200	903	0	0	0	0	0	0	0	603	903	0
401	4	0	0	0	0	0	0	200	300	0	0	0	0	0	0	0	200	903	0	0	0	0	0	0	0	603	903	0
401	5	0	0	0	0	0	0	200	300	0	0	0	0	0	0	0	200	903	0	0	0	0	0	0	0	603	903	0
401	6	0	0	0	0	0	0	200	300	0	0	0	0	0	0	0	200	903	0	0	0	0	0	0	0	603	903	0
401	7	0	0	0	0	0	0	200	300	0	0	0	0	0	0	0	200	903	0	0	0	0	0	0	0	603	903	0
401	8	0	0	0	0	0	0	200	300	0	0	0	0	0	0	0	200	903	0	0	0	0	0	0	0	603	903	0
401	9	0	0	0	0	0	0	200	300	0	0	0	0	0	0	0	200	903	0	0	0	0	0	0	0	603	903	0
402	0	0	0	0	0	0	0	200	300	0	0	0	0	0	0	0	200	903	0	0	0	0	0	0	0	603	903	0
402	1	0	0	0	0	0	0	200	300	0	0	0	0	0	0	0	200	903	0	0	0	0	0	0	0	603	903	0
402	2	0	0	0	0	0	0	200	300	0	0	0	0	0	0	0	200	903	0	0	0	0	0	0	0	603	903	0
402	3	0	0	0	0	0	0	200	300	0	0	0	0	0	0	0	200	903	0	0	0	0	0	0	0	603	903	0
402	4	0	0	0	0	0	0	200	300	0	0	0	0	0	0	0	200	903	0	0	0	0	0	0	0	603	903	0
402	5	0	0	0	0	0	0	200	300	0	0	0	0	0	0	0	200	903	0	0	0	0	0	0	0	603	903	0
402	6	0	0	0	0	0	0	200	300	0	0	0	0	0	0	0	200	903	0	0	0	0	0	0	0	603	903	0
402	7	0	0	0	0	0	0	200	300	0	0	0	0	0	0	0	200	903	0	0	0	0	0	0	0	603	903	0
402	8	0	0	0	0	0	0	200	300	0	0	0	0	0	0	0	200	903	0	0	0	0	0	0	0	603	903	0
402	9	0	0	0	0	0	0	200	300	0	0	0	0	0	0	0	200	903	0	0	0	0	0	0	0	603	903	0
403	0	0	0	0	0	0	0	200	300	0	0	0	0	0	0	0	200	903	0	0	0	0	0	0	0	603	903	0
403	1	0	0	0	0	0	0	200	300	0	0	0	0	0	0	0	200	903	0	0	0	0	0	0	0	603	903	0
403	2	0	0	0	0	0	0	200	300	0	0	0	0	0	0	0	200	903	0	0	0	0	0	0	0	603	903	0
403	3	0	0	0	0	0	0	200	300	0	0	0	0	0	0	0	200	903	0	0	0	0	0	0	0	603	903	0
403	4	0	0	0	0	0	0	200	300	0	0	0	0	0	0	0	200	903	0	0	0	0	0	0	0	603	903	0
403	5	0	0	0	0	0	0	200	300	0	0	0	0	0	0	0	200	903	0	0	0	0	0	0	0	603	903	0
403	6	0	0	0	0	0	0	200	300	0	0	0	0	0	0	0	200	903	0	0	0	0	0	0	0	603	903	0
403	7	0	0	0	0	0	0	200	300	0	0	0	0	0	0	0	200	903	0	0	0	0	0	0	0	603	903	0
403	8	0	0	0	0	0	0	200	300	0	0	0	0	0	0	0	200	903	0	0	0	0	0	0	0	603	903	0
403	9	0	0	0	0	0	0	200	300	0	0	0	0	0	0	0	200	903	0	0	0	0	0	0	0	603	903	0
404	0	0	0	0	0	0	0	200	300	0	0	0	0	0	0	0	200	903	0	0	0	0	0	0	0	603	903	0
404	1	0	0	0	0	0	0	200	300	0	0	0	0	0	0	0	200	903	0	0	0	0	0	0	0	603	903	0
404	2	0	0	0	0	0	0	200	300	0	0	0	0	0	0	0	200	903	0	0	0	0	0	0	0	603	903	0
404	3	0	0	0	0	0	0	200	300	0	0	0	0	0	0	0	200	903	0	0	0	0	0	0	0	603	903	0
404	4	0	0	0	0	0	0	200	300	0	0	0	0	0	0	0	200	903	0	0	0	0	0	0	0	603	903	0
404	5	0	0	0	0	0	0	200	300	0	0	0	0	0	0	0	200	903	0	0	0	0	0	0	0	603	903	0
404	6	0	0	0	0	0	0	200	300	0	0	0	0	0	0	0	200	903	0	0	0	0	0	0	0	603	903	0
404	7	0	0	0	0	0	0	200	300	0	0	0	0	0	0	0	200	903	0	0	0	0	0	0	0	603	903	0
404	8	0	0	0	0	0	0	200	300	0	0	0	0	0	0	0	200	903	0	0	0	0	0	0	0	603	903	0
404	9	0	0	0	0	0	0	200	300	0	0	0	0	0	0	0	200	903	0	0	0	0	0	0	0	603	903	0
405	0	0	0	0	0	0	0	200	300	0	0	0	0	0	0	0	200	903	0	0	0	0	0	0	0	603	903	0
405	1	0	0	0	0	0	0	200	300	0	0	0	0	0	0	0	200	903	0	0	0	0	0	0	0	603	903	0
405	2	0	0	0	0	0	0	200	300	0	0	0	0	0	0	0	200	903	0	0	0	0	0	0	0	603	903	0
405	3	0	0	0	0	0	0	200	300	0	0	0	0	0	0	0	200	903	0	0	0	0	0	0	0	603	903	0
405	4	0	0	0	0	0	0	200	300	0	0	0	0	0	0	0	200	903	0	0	0	0	0	0	0	603	903	0
405	5	0	0	0	0	0	0	200	300	0	0	0	0	0	0	0	200	903	0	0	0	0	0	0	0	603	903	0
405	6	0	0	0	0	0	0	200	300	0	0	0	0	0	0	0	200	903	0	0	0	0	0	0	0	603	903	0
405	7	0	0	0	0	0	0	200	300	0	0	0	0	0	0	0	200	903	0	0	0	0	0	0	0	603	903	0
405	8	0	0	0	0	0	0	200	300	0	0	0	0	0	0	0	200	903	0	0	0	0	0	0	0	603	903	0
405	9	0	0	0	0	0	0	200	300	0	0	0	0	0	0	0	200	903	0	0	0	0	0	0	0	603	903	0
406	0	0	0	0	0	0	0	200	300	0	0	0	0	0	0	0	200	903	0	0	0	0	0	0	0	603	903	0
406	1	0	0	0	0	0	0	200	300	0	0	0	0	0	0	0	200	903	0	0	0	0	0	0	0	603	903	0
406	2	0	0	0	0	0	0	200	300	0	0	0	0	0	0	0	200	903	0	0	0	0	0	0	0	603	903	0
406	3	0	0	0	0	0	0	200	300	0	0	0	0	0	0	0	200	903	0	0	0	0	0	0	0	603	903	0
406	4	0	0	0	0	0	0	200	300	0	0	0	0	0	0	0	200	903	0	0	0	0	0	0	0	603	903	0
406	5	0	0	0	0	0	0	200	300	0	0	0	0	0	0	0	200	903	0	0	0	0	0	0	0	603	903	0
406	6	0	0	0	0	0	0	200	300	0	0	0	0	0	0	0	200	903	0	0	0	0	0	0	0	603	903	0
406	7	0	0	0	0	0	0	200	300	0	0	0	0	0	0	0	200	903	0	0	0	0	0	0	0	603	903	0
406	8	0	0	0	0	0	0	200	300	0	0	0	0	0	0	0	200	903	0	0	0	0	0	0	0	603	903	0
406	9	0	0	0	0	0	0	200	300	0	0	0	0	0	0	0	200	903	0	0	0	0	0	0	0	603	903	0
407	0	0	0	0	0	0	0	200	300	0	0	0	0	0	0	0	200	903	0	0	0	0	0	0	0	603	903	0
407	1	0	0	0	0	0	0	200	300	0	0	0	0	0	0	0	200	903	0	0	0	0	0	0	0	603	903	0
407	2	0	0	0	0	0	0	200	300	0	0	0	0	0	0	0	200	903	0	0	0	0	0	0	0	603	903	0
407	3	0	0	0	0	0	0	200	300	0	0	0	0	0	0	0	200	903	0	0	0	0	0	0	0	603	903	0
407	4	0	0	0	0	0	0	200	300	0	0	0	0	0	0	0	200	903	0	0	0	0	0	0	0	603	903	0
407	5	0	0	0	0	0	0	200	300	0	0	0	0	0	0	0	200	903	0	0	0	0	0	0	0	603	903	0
407	6	0	0	0	0	0	0	200	300	0	0	0	0	0	0	0	200	903	0	0	0	0	0	0	0	603	903	0
407	7	0	0	0	0	0	0	200	300	0	0	0	0	0	0	0	200	903	0	0	0	0	0	0	0	603	903	0
407	8	0	0	0	0	0	0	200	300	0	0	0	0	0	0	0	200	903	0	0	0	0	0	0	0	603	903	0
407	9	0	0	0	0	0	0	200	300	0	0	0	0	0	0	0	200	903	0	0	0	0	0	0	0	603	903	0
408	0	0	0	0	0	0	0	200	300	0	0	0	0	0	0	0	200	903	0	0	0	0	0	0	0	603	903	0
408	1	0	0	0	0	0	0	200	300	0	0	0	0	0	0	0	200	903	0	0	0	0	0	0	0	603	903	0
408	2	0	0	0	0	0	0	200	300	0	0	0	0	0	0	0	200	903	0	0	0	0	0	0	0	603	903	0
408	3	0	0	0	0	0	0	200	300	0	0	0	0	0	0	0	200	903	0	0	0	0	0	0	0	603	903	0
408	4	0	0	0	0	0	0	200	300	0	0	0	0	0	0	0	200	903	0	0	0	0	0	0	0	603	903	0
408	5	0	0	0	0	0	0	200	300	0	0	0	0	0	0	0	200	903	0	0	0	0	0	0	0	603	903	0
408	6	0	0	0	0	0	0	200	300	0	0	0	0	0	0	0	200	903	0	0	0	0	0	0	0	603	903	0
408	7	0	0	0	0	0	0	200	300	0	0	0	0	0	0	0	200	903	0	0	0	0	0	0	0	603	903	0
408	8	0	0	0	0	0	0	200	300	0	0	0	0	0	0	0	200	903	0	0	0	0	0	0	0	603	903	0
408	9	0	0	0	0	0	0	200	300	0	0	0	0	0	0	0	200	903	0	0	0	0	0	0	0	603	903	0
409	0	0	0	0	0	0	0	200	300	0	0	0	0	0	0	0	200	903	0	0	0	0	0	0	0	603	903	0
409	1	0	0	0	0	0	0	200	300	0	0	0	0	0	0	0	200	903	0	0	0	0	0	0	0	603	903	0
409	2	0	0	0	0	0	0	200	300	0	0	0	0	0	0	0	200	903	0	0	0	0	0	0	0	603	903	0
409	3	0	0	0	0	0	0	200	300	0	0	0	0	0	0	0	200	903	0	0	0	0	0	0	0	603	903	0
409	4	0	0	0	0	0	0	200	300	0	0	0	0	0	0	0	200	903	0	0	0	0	0	0	0	603	903	0
409	5	0	0	0	0	0	0	200	300	0	0	0	0	0	0	0	200	903	0	0	0	0	0	0	0	603	903	0
409	6	0	0	0	0	0	0	200	300	0	0	0	0	0	0	0	200	903	0	0	0	0	0	0	0	603	903	0
409	7	0	0	0	0	0	0	200	300	0	0	0	0	0	0	0	200	903	0	0	0	0	0	0	0	603	903	0
409	8	0	0	0	0	0	0	200	300	0	0	0	0	0	0	0	200	903	0	0	0	0	0	0	0	603	903	0
409	9	0	0	0	0	0	0	200	300	0	0	0	0	0	0	0	200	903	0	0	0	0	0	0	0	603	903	0
410	0	0	0	0	0	0	0	200	300	0	0	0	0	0	0	0	200	903	0	0	0	0	0	0	0	603	903	0
410	1	0	0	0	0	0	0	200	300	0	0	0	0	0	0	0	200	903	0	0	0	0	0	0	0	603	903	0
410	2	0	0	0	0	0	0	200	300	0	0	0	0	0	0	0	200	903	0	0	0	0	0	0	0	603	903	0
410	3	0	0	0	0	0	0	200	300	0	0	0	0	0	0	0	200	903	0	0	0	0	0	0	0	603	903	0
410	4	0	0	0	0	0	0	200	300	0	0	0	0	0	0	0	200	903	0	0	0	0	0	0	0	603	903	0
410	5	0	0	0	0	0	0	200	300	0	0	0	0	0	0	0	200	903	0	0	0	0	0	0	0	603	903	0
410	6	0	0	0	0	0	0	200	300	0	0	0	0	0	0	0	200	903	0	0	0	0	0	0	0	603	903	0
410	7	0	0	0	0	0	0	200	300	0	0	0	0	0	0	0	200	903	0	0	0	0	0	0	0	603	903	0
410	8	0	0	0	0	0	0	200	300	0	0	0	0	0	0	0	200	903	0	0	0	0	0	0	0	603	903	0
410	9	0	0	0	0	0	0	200	300	0	0	0	0	0	0	0	200	903	0	0	0	0	0	0	0	603	903	0
411	0	0	0	0	0	0	0	200	300	0	0	0	0	0	0	0	200	903	0	0	0	0	0	0	0	603	903	0
411	1	0	0	0	0	0	0	200	300	0	0	0	0	0	0	0	200	903	0	0	0	0	0	0	0	603	903	0
411	2	0	0	0	0	0	0	200	300	0	0	0	0	0	0	0	200	903	0	0	0	0	0	0	0	603	903	0
411	3	0	0	0	0	0	0	200	300	0	0	0	0	0	0	0	200	903	0	0	0	0	0	0	0	603	903	0
411	4	0	0	0	0	0	0	200	300	0	0	0	0	0	0	0	200	903	0	0	0	0	0	0	0	603	903	0
411	5	0	0	0	0	0	0	200	300	0	0	0	0	0	0	0	200	903	0	0	0	0	0	0	0	603	903	0
411	6	0	0	0	0	0	0	200	300	0	0	0	0	0	0	0	200	903	0	0	0	0	0	0	0	603	903	0
411	7	0	0	0	0	0	0	200	300	0	0	0	0	0	0	0	200	903	0	0	0	0	0	0	0	603	903	0
411	8	0	0	0	0	0	0	200	300	0	0	0	0	0	0	0	200	903	0	0	0	0	0	0	0	603	903	0
411	9	0	0	0	0	0	0	200	300	0	0	0	0	0	0	0	200	903	0	0	0	0	0	0	0	603	903	0
412	0	0	0	0	0	0	0	200	300	0	0	0	0	0	0	0	200	903	0	0	0	0	0	0	0	603	903	0
412	1	0	0	0	0	0	0	200	300	0	0	0	0	0	0	0	200	903	0	0	0	0	0	0	0	603	903	0
412	2	0	0	0	0	0	0	200	300	0	0	0	0	0	0	0	200	903	0	0	0	0	0	0	0	603	903	0
412	3	0	0	0	0	0	0	200	300	0	0	0	0	0	0	0	200	903	0	0	0	0	0	0	0	603	903	0
412	4	0	0	0	0	0	0	200	300	0	0	0	0	0	0	0	200	903	0	0	0	0	0	0	0	603	903	0
412	5	0	0	0	0	0	0	200	300	0	0	0	0	0	0	0	200	903	0	0	0	0	0	0	0	603	903	0
412	6	0	0	0	0	0	0	200	300	0	0	0	0	0	0	0	200	903	0	0	0	0	0	0	0	603	903	0
412	7	0	0	0	0	0	0	200	300	0	0	0	0	0	0	0	200	903	0	0	0	0	0	0	0	603	903	0
412	8	0	0	0	0	0	0	200	300	0	0	0	0	0	0	0	200	903	0	0	0	0	0	0	0	603	903	0
412	9	0	0	0	0	0	0	200	300	0	0	0	0	0	0	0	200	903	0	0	0	0	0	0	0	603	903	0
413	0	0	0	0	0	0	0	200	300	0	0	0	0	0	0	0	200	903	0	0	0	0	0	0	0	603	903	0
413	1	0	0	0	0	0	0	200	300	0	0	0	0	0	0	0	200	903	0	0	0	0	0	0	0	603	903	0
413	2	0	0	0	0	0	0	200	300	0	0	0	0	0	0	0	200	903	0	0	0	0	0	0	0	603	903	0
413	3	0	0	0	0	0	0	200	300	0	0	0	0	0	0	0	200	903	0	0	0	0	0	0	0	603	903	0
413	4	0	0	0	0	0	0	200	300	0	0	0	0	0	0	0	200	903	0	0	0	0	0	0	0	603	903	0
413	5	0	0	0	0	0	0	200	300	0	0	0	0	0	0	0	200	903	0	0	0	0	0	0	0	603	903	0
413	6	0	0	0	0	0	0	200	300	0	0	0	0	0	0	0	200	903	0	0	0	0	0	0	0	603	903	0
413	7	0	0	0	0	0	0	200	300	0	0	0	0	0	0	0	200	903	0	0	0	0	0	0	0	603	903	0
413	8	0	0	0	0	0	0	200	300	0	0	0	0	0	0	0	200	903	0	0	0	0	0	0	0	603	903	0
413	9	0	0	0	0	0	0	200	300	0	0	0	0	0	0	0	200	903	0	0	0	0	0	0	0	603	903	0
414	0	0	0	0	0	0	0	200	300	0	0	0	0	0	0	0	200	903	0	0	0	0	0	0	0	603	903	0
414	1	0	0	0	0	0	0	200	300	0	0	0	0	0	0	0	200	903	0	0	0	0	0	0	0	603	903	0
414	2	0	0	0	0	0	0	200	300	0	0	0	0	0	0	0	200	903	0	0	0	0	0	0	0	603	903	0
414	3	0	0	0	0	0	0	200	300	0	0	0	0	0	0	0	200	903	0	0	0	0	0	0	0	603	903	0
414	4	0	0	0	0	0	0	200	300	0	0	0	0	0	0	0	200	903	0	0	0	0	0	0	0	603	903	0
414	5	0	0	0	0	0	0	200	300	0	0	0	0	0	0	0	200	903	0	0	0	0	0	0	0	603	903	0
414	6	0	0	0	0	0	0	200	300	0	0	0	0	0	0	0	200	903	0	0	0	0	0	0	0	603	903	0
414	7	0	0	0	0	0	0	200	300	0	0	0	0	0	0	0	200	903	0	0	0	0	0	0	0	603	903	0
414	8	0	0	0	0	0	0	200	300	0	0	0	0	0	0	0	200	903	0	0	0	0	0	0	0	603	903	0
414	9	0	0	0	0	0	0	200	300	0	0	0	0	0	0	0	200	903	0	0	0	0	0	0	0	603	903	0
415	0	0	0	0	0	0	0	200	300	0	0	0	0	0	0	0	200	903	0	0	0	0	0	0	0	603	903	0
415	1	0	0	0	0	0	0	200	300	0	0	0	0	0	0	0	200	903	0	0	0	0	0	0	0	603	903	0
415	2	0	0	0	0	0	0	200	300	0	0	0	0	0	0	0	200	903	0	0	0	0	0	0	0	603	903	0
415	3	0	0	0	0	0	0	200	300	0	0	0	0	0	0	0	200	903	0	0	0	0	0	0	0	603	903	0
415	4	0	0	0	0	0	0	200	300	0	0	0	0	0	0	0	200	903	0	0	0	0	0	0	0	603	903	0
415	5	0	0	0	0	0	0	200	300	0	0	0	0	0	0	0	200	903	0	0	0	0	0	0	0	603	903	0
415	6	0	0	0	0	0	0	200	300	0	0	0	0	0	0	0	200	903	0	0	0	0	0	0	0	603	903	0
415	7	0	0	0	0	0	0	200	300	0	0	0	0	0	0	0	200	903	0	0	0	0	0	0	0	603	903	0
415	8	0	0	0	0	0	0	200	300	0	0	0	0	0	0	0	200	903	0	0	0	0	0	0	0	603	903	0
415	9	0	0	0	0	0	0	200	300	0	0	0	0	0	0	0	200	903	0	0	0	0	0	0	0	603	903	0
416	0	0	0	0	0	0	0	200	300	0	0	0	0	0	0	0	200	903	0	0	0	0	0	0	0	603	903	0
416	1	0	0	0	0	0	0	200	300	0	0	0	0	0	0	0	200	903	0	0	0	0	0	0	0	603	903	0
416	2	0	0	0	0	0	0	200	300	0	0	0	0	0	0	0	200	903	0	0	0	0	0	0	0	603	903	0
416	3	0	0	0	0	0	0	200	300	0	0	0	0	0	0	0	200	903	0	0	0	0	0	0	0	603	903	0
416	4	0	0	0	0	0	0	200	300	0	0	0	0	0	0	0	200	903	0	0	0	0	0	0	0	603	903	0
416	5	0	0	0	0	0	0	200	300	0	0	0	0	0	0	0	200	903	0	0	0	0	0	0	0	603	903	0
416	6	0	0	0	0	0	0	200	300	0	0	0	0	0	0	0	200	903	0	0	0	0	0	0	0	603	903	0
416	7	0	0	0	0	0	0	200	300	0	0	0	0	0	0	0	200	903	0	0	0	0	0	0	0	603	903	0
416	8	0	0	0	0	0	0	200	300	0	0	0	0	0	0	0	200	903	0	0	0	0	0	0	0	603	903	0
416	9	0	0	0	0	0	0	200	300	0	0	0	0	0	0	0	200	903	0	0	0	0	0	0	0	603	903	0
417	0	0	0	0	0	0	0	200	300	0	0	0	0	0	0	0	200	903	0	0	0	0	0	0	0	603	903	0
417	1	0	0	0	0	0	0	200	300	0	0	0	0	0	0	0	200	903	0	0	0	0	0	0	0	603	903	0
417	2	0	0	0	0	0	0	200	300	0	0	0	0	0	0	0	200	903	0	0	0	0	0	0	0	603	903	0
417	3	0	0	0	0	0	0	200	300	0	0	0	0	0	0	0	200	903	0	0	0	0	0	0	0	603	903	0
417	4	0	0	0	0	0	0	200	300	0	0	0	0	0	0	0	200	903	0	0	0	0	0	0	0	603	903	0
417	5	0	0	0	0	0	0	200	300	0	0	0	0	0	0	0	200	903	0	0	0	0	0	0	0	603	903	0
417	6	0	0	0	0	0	0	200	300	0	0	0	0	0	0	0	200	903	0	0	0	0	0	0	0	603	903	0
417	7	0	0	0	0	0	0	200	300	0	0	0	0	0	0	0	200	903	0	0	0	0	0	0	0	603	903	0
417	8	0	0	0	0	0	0	200	300	0	0	0	0	0	0	0	200	903	0	0	0	0	0	0	0	603	903	0
417	9	0	0	0	0	0	0	200	300	0	0	0	0	0	0	0	200	903	0	0	0	0	0	0	0	603	903	0
418	0	0	0	0	0	0	0	200	300	0	0	0	0	0	0	0	200	903	0	0	0	0	0	0	0	603	903	0
418	1	0	0	0	0	0	0	200	300	0	0	0	0	0	0	0	200	903	0	0	0	0	0	0	0	603	903	0
418	2	0	0	0	0	0	0	200	300	0	0	0	0	0	0	0	200	903	0	0	0	0	0	0	0	603	903	0
418	3	0	0	0	0	0	0	200	300	0	0	0	0	0	0	0	200	903	0	0	0	0	0	0	0	603	903	0
418	4	0	0	0	0	0	0	200	300	0	0	0	0	0	0	0	200	903	0	0	0	0	0	0	0	603	903	0
418	5	0	0	0	0	0	0	200	300	0	0	0	0	0	0	0	200	903	0	0	0	0	0	0	0	603	903	0
418	6	0	0	0	0	0	0	200	300	0	0	0	0	0	0	0	200	903	0	0	0	0	0	0	0	603	903	0
418	7	0	0	0	0	0	0	200	300	0	0	0	0	0	0	0	200	903	0	0	0	0	0	0	0	603	903	0
418	8	0	0	0	0	0	0	200	300	0	0	0	0	0	0	0	200	903	0	0	0	0	0	0	0	603	903	0
418	9	0	0	0	0	0	0	200	300	0	0	0	0	0	0	0	200	903	0	0	0	0	0	0	0	603	903	0
419	0	0	0	0	0	0	0	200	300	0	0	0	0	0	0	0	200	903	0	0	0	0	0	0	0	603	903	0
419	1	0	0	0	0	0	0	200	300	0	0	0	0	0	0	0	200	903	0	0	0	0	0	0	0	603	903	0
419	2	0	0	0	0	0	0	200	300	0	0	0	0	0	0	0	200	903	0	0	0	0	0	0	0	603	903	0
419	3	0	0	0	0	0	0	200	300	0	0	0	0	0	0	0	200	903	0	0	0	0	0	0	0	603	903	0
419	4	0	0	0	0	0	0	200	300	0	0	0	0	0	0	0	200	903	0	0	0	0	0	0	0	603	903	0
419	5	0	0	0	0	0	0	200	300	0	0	0	0	0	0	0	200	903	0	0	0	0	0	0	0	603	903	0
419	6	0	0	0	0	0	0	200	300	0	0	0	0	0	0	0	200	903	0	0	0	0	0	0	0	603	903	0
419	7	0	0	0	0	0	0	200	300	0	0	0	0	0	0	0	200	903	0	0	0	0	0	0	0	603	903	0
419	8	0	0	0	0	0	0	200	300	0	0	0	0	0	0	0	200	903	0	0	0	0	0	0	0	603	903	0
419	9	0	0	0	0	0	0	200	300	0	0	0	0	0	0	0	200	903	0	0	0	0	0	0	0	603	903	0
420	0	0	0	0	0	0	0	200	300	0	0	0	0	0	0	0	200	903	0	0	0	0	0	0	0	603	903	0
420	1	0	0	0	0	0	0	200	300	0	0	0	0	0	0	0	200	903	0	0	0	0	0	0	0	603	903	0
420	2	0	0	0	0	0	0	200	300	0	0	0	0	0	0	0	200	903	0	0	0	0	0	0	0	603	903	0
420	3	0	0	0	0	0	0	200	300	0	0	0	0	0	0	0	200	903	0	0	0	0	0	0	0	603	903	0
420	4	0	0	0	0	0	0	200	300	0	0	0	0	0	0	0	200	903	0	0	0	0	0	0	0	603	903	0
420	5	0	0	0	0	0	0	200	300	0	0	0	0	0	0	0	200	903	0	0	0	0	0	0	0	603	903	0
420	6	0	0	0	0	0	0	200	300	0	0	0	0	0	0	0	200	903	0	0	0	0	0	0	0	603	903	0
420	7	0	0	0	0	0	0	200	300	0	0	0	0	0	0	0	200	903	0	0	0	0	0	0	0	603	903	0
420	8	0	0	0	0	0	0	200	300	0	0	0	0	0	0	0	200	903	0	0	0	0	0	0	0	603	903	0
420	9	0	0	0	0	0	0	200	300	0	0	0	0	0	0	0	200	903	0	0	0	0	0	0	0	603	903	0
421	0	0	0	0	0	0	0	200	300	0	0	0	0	0	0	0	200	903	0	0	0	0	0	0	0	603	903	0
421	1	0	0	0	0	0	0	200	300	0	0	0	0	0	0	0	200	903	0	0	0	0	0	0	0	603	903	0
421	2	0	0	0	0	0	0	200	300	0	0	0	0	0	0	0	200	903	0	0	0	0	0	0	0	603	903	0
421	3	0	0	0	0	0	0	200	300	0	0	0	0	0	0	0	200	903	0	0	0	0	0	0	0	603	903	0
421	4	0	0	0	0	0	0	200	300	0	0	0	0	0	0	0	200	903	0	0	0	0	0	0	0	603	903	0
421	5	0	0	0	0	0	0	200	300	0	0	0	0	0	0	0	200	903	0	0	0	0	0	0	0	603	903	0
421	6	0	0	0	0	0	0	200	300	0	0	0	0	0	0	0	200	903	0	0	0	0	0	0	0	603	903	0
421	7	0	0	0	0	0	0	200	300	0	0	0	0	0	0	0	200	903	0	0	0	0	0	0	0	603	903	0
421	8	0	0	0	0	0	0	200	300	0	0	0	0	0	0	0	200	903	0	0	0	0	0	0	0	603	903	0
421	9	0	0	0	0	0	0	200	300	0	0	0	0	0	0	0	200	903	0	0	0	0	0	0	0	603	903	0
422	0	0	0	0	0	0	0	200	300	0	0	0	0	0	0	0	200	903	0	0	0	0	0	0	0	603	903	0
422	1	0	0	0	0	0	0	200	300	0	0	0	0	0	0	0	200	903	0	0	0	0	0	0	0	603	903	0
422	2	0	0	0	0	0	0	200	300	0	0	0	0	0	0	0	200	903	0	0	0	0	0	0	0	603	903	0
422	3	0	0	0	0	0	0	200	300	0	0	0	0	0	0	0	200	903	0	0	0	0	0	0	0	603	903	0
422	4	0	0	0	0	0	0	200	300	0	0	0	0	0	0	0	200	903	0	0	0	0	0	0	0	603	903	0
422	5	0	0	0	0	0	0	200	300	0	0	0	0	0	0	0	200	903	0	0	0	0	0	0	0	603	903	0
422	6	0	0	0	0	0	0	200	300	0	0	0	0	0	0	0	200	903	0	0	0	0	0	0	0	603	903	0
422	7	0	0	0	0	0	0	200	300	0	0	0	0	0	0	0	200	903	0	0	0	0	0	0	0	603	903	0
422	8	0	0	0	0	0	0	200	300	0	0	0	0	0	0	0	200	903	0	0	0	0	0	0	0	603	903	0
422	9	0	0	0	0	0	0	200	300	0	0	0	0	0	0	0	200	903	0	0	0	0	0	0	0	603	903	0
423	0	0	0	0	0	0	0	200	300	0	0	0	0	0	0	0	200	903	0	0	0	0	0	0	0	603	903	0
423	1	0	0	0	0	0	0	200	300	0	0	0	0	0	0	0	200	903	0	0	0	0	0	0	0	603	903	0
423	2	0	0	0	0	0	0	200	300	0	0	0	0	0	0	0	200	903	0	0	0	0	0	0	0	603	903	0
423	3	0	0	0	0	0	0	200	300	0	0	0	0	0	0	0	200	903	0	0	0	0	0	0	0	603	903	0
423	4	0	0	0	0	0	0	200	300	0	0	0	0	0	0	0	200	903	0	0	0	0	0	0	0	603	903	0
423	5	0	0	0	0	0	0	200	300	0	0	0	0	0	0	0	200	903	0	0	0	0	0	0	0	603	903	0
423	6	0	0	0	0	0	0	200	300	0	0	0	0	0	0	0	200	903	0	0	0	0	0	0	0	603	903	0
423	7	0	0	0	0	0	0	200	300	0	0	0	0	0	0	0	200	903	0	0	0	0	0	0	0	603	903	0
423	8	0	0	0	0	0	0	200	300	0	0	0	0	0	0	0	200	903	0	0	0	0	0	0	0	603	903	0
423	9	0	0	0	0	0	0	200	300	0	0	0	0	0	0	0	200	903	0	0	0	0	0	0	0	603	903	0
424	0	0	0	0	0	0	0	200	300	0	0	0	0	0	0	0	200	903	0	0	0	0	0	0	0	603	903	0
424	1	0	0	0	0	0	0	200	300	0	0	0	0	0	0	0	200	903	0	0	0	0	0	0	0	603	903	0
424	2	0	0	0	0	0	0	200	300	0	0	0	0	0	0	0	200	903	0	0	0	0	0	0	0	603	903	0
424	3	0	0	0	0	0	0	200	300	0	0	0	0	0	0	0	200	903	0	0	0	0	0	0	0	603	903	0
424	4	0	0	0	0	0	0	200	300	0	0	0	0	0	0	0	200	903	0	0	0	0	0	0	0	603	903	0
424	5	0	0	0	0	0	0	200	300	0	0	0	0	0	0	0	200	903	0	0	0	0	0	0	0	603	903	0
424	6	0	0	0	0	0	0	200	300	0	0	0	0	0	0	0	200	903	0	0	0	0	0	0	0	603	903	0
424	7	0	0	0	0	0	0	200	300	0	0	0	0	0	0	0	200	903	0	0	0	0	0	0	0	603	903	0
424	8	0	0	0	0	0	0	200	300	0	0	0	0	0	0	0	200	903	0	0	0	0	0	0	0	603	903	0
424	9	0	0	0	0	0	0	200	300	0	0	0	0	0	0	0	200	903	0	0	0	0	0	0	0	603	903	0
425	0	0	0	0	0	0	0	200	300	0	0	0	0	0	0	0	200	903	0	0	0	0	0	0	0	603	903	0
425	1	0	0	0	0	0	0	200	300	0	0	0	0	0	0	0	200	903	0	0	0	0	0	0	0	603	903	0
425	2	0	0	0	0	0	0	200	300	0	0	0	0	0	0	0	200	903	0	0	0	0	0	0	0	603	903	0
425	3	0	0	0	0	0	0	200	300	0	0	0	0	0	0	0	200	903	0	0	0	0	0	0	0	603	903	0
425	4	0	0	0	0	0	0	200	300	0	0	0	0	0	0	0	200	903	0	0	0	0	0	0	0	603	903	0
425	5	0	0	0	0	0	0	200	300	0	0	0	0	0	0	0	200	903	0	0	0	0	0	0	0	603	903	0
425	6	0	0	0	0	0	0	200	300	0	0	0	0	0	0	0	200	903	0	0	0	0	0	0	0	603	903	0
425	7	0	0	0	0	0	0	200	300	0	0	0	0	0	0	0	200	903	0	0	0	0	0	0	0	603	903	0
425	8	0	0	0	0	0	0	200	300	0	0	0	0	0	0	0	200	903	0	0	0	0	0	0	0	603	903	0
425	9	0	0	0	0	0	0	200	300	0	0	0	0	0	0	0	200	903	0	0	0	0	0	0	0	603	903	0
426	0	0	0	0	0	0	0	200	300	0	0	0	0	0	0	0	200	903	0	0	0	0	0	0	0	603	903	0
426	1	0	0	0	0	0	0	200	300	0	0	0	0	0	0	0	200	903	0	0	0	0	0	0	0	603	903	0
426	2	0	0	0	0	0	0	200	300	0	0	0	0	0	0	0	200	903	0	0	0	0	0	0	0	603	903	0
426	3	0	0	0	0	0	0	200	300	0	0	0	0	0	0	0	200	903	0	0	0	0	0	0	0	603	903	0
426	4	0	0	0	0	0	0	200	300	0	0	0	0	0	0	0	200	903	0	0	0	0	0	0	0	603	903	0
426	5	0	0	0	0	0	0	200	300	0	0	0	0	0	0	0	200	903	0	0	0	0	0	0	0	603	903	0
426	6	0	0	0	0	0	0	200	300	0	0	0	0	0	0	0	200	903	0	0	0	0	0	0	0	603	903	0
426	7	0	0	0	0	0	0	200	300	0	0	0	0	0	0	0	200	903	0	0	0	0	0	0	0	603	903	0
426	8	0	0	0	0	0	0	200	300	0	0	0	0	0	0	0	200	903	0	0	0	0	0	0	0	603	903	0
426	9	0	0	0	0	0	0	200	300	0	0	0	0	0	0	0	200	903	0	0	0	0	0	0	0	603	903	0
427	0	0	0	0	0	0	0	200	300	0	0	0	0	0	0	0	200	903	0	0	0	0	0	0	0	603	903	0
427	1	0	0	0	0	0	0	200	300	0	0	0	0	0	0	0	200	903	0	0	0	0	0	0	0	603	903	0
427	2	0	0	0	0	0	0	200	300	0	0	0	0	0	0	0	200	903	0	0	0	0	0	0	0	603	903	0
427	3	0	0	0	0	0	0	200	300	0	0	0	0	0	0	0	200	903	0	0	0	0	0	0	0	603	903	0
427	4	0	0	0	0	0	0	200	300	0	0	0	0	0	0	0	200	903	0	0	0	0	0	0	0	603	903	0
427	5	0	0	0	0	0	0	200	300	0	0	0	0	0	0	0	200	903	0	0	0	0	0	0	0	603	903	0
427	6	0	0	0	0	0	0	200	300	0	0	0	0	0	0	0	200	903	0	0	0	0	0	0	0	603	903	0
427	7	0	0	0	0	0	0	200	300	0	0	0	0	0	0	0	200	903	0	0	0	0	0	0	0	603	903	0
427	8	0	0	0	0	0	0	200	300	0	0	0	0	0	0	0	200	903	0	0	0	0	0	0	0	603	903	0
427	9	0	0	0	0	0	0	200	300	0	0	0	0	0	0	0	200	903	0	0	0	0	0	0	0	603	903	0
428	0	0	0	0	0	0	0	200	300	0	0	0	0	0	0	0	200	903	0	0	0	0	0	0	0	603	903	0
428	1	0	0	0	0	0	0	200	300	0	0	0	0	0	0	0	200	903	0	0	0	0	0	0	0	603	903	0
428	2	0	0	0	0	0	0	200	300	0	0	0	0	0	0	0	200	903	0	0	0	0	0	0	0	603	903	0
428	3	0	0	0	0	0	0	200	300	0	0	0	0	0	0	0	200	903	0	0	0	0	0	0	0	603	903	0
428	4	0	0	0	0	0	0	200	300	0	0	0	0	0	0	0	200	903	0	0	0	0	0	0	0	603	903	0
428	5	0	0	0	0	0	0	200	300	0	0	0	0	0	0	0	200	903	0	0	0	0	0	0	0	603	903	0
428	6	0	0	0	0	0	0	200	300	0	0	0	0	0	0	0	200	903	0	0	0	0	0	0	0	603	903	0
428	7	0	0	0	0	0	0	200	300	0	0	0	0	0	0	0	200	903	0	0	0	0	0	0	0	603	903	0
428	8	0	0	0	0	0	0	200	300	0	0	0	0	0	0	0	200	903	0	0	0	0	0	0	0	603	903	0
428	9	0	0	0	0	0	0	200	300	0	0	0	0	0	0	0	200	903	0	0	0	0	0	0	0	603	903	0
429	0	0	0	0	0	0	0	200	300	0	0	0	0	0	0	0	200	903	0	0	0	0	0	0	0	603	903	0
429	1	0	0	0	0	0	0	200	300	0	0	0	0	0	0	0	200	903	0	0	0	0	0	0	0	603	903	0
429	2	0	0	0	0	0	0	200	300	0	0	0	0	0	0	0	200	903	0	0	0	0	0	0	0	603	903	0
429	3	0	0	0	0	0	0	200	300	0	0	0	0	0	0	0	200	903	0	0	0	0	0	0	0	603	903	0
429	4	0	0	0	0	0	0	200	300	0	0	0	0	0	0	0	200	903	0	0	0	0	0	0	0	603	903	0
429	5	0	0	0	0	0	0	200	300	0	0	0	0	0	0	0	200	903	0	0	0	0	0	0	0	603	903	0
429	6	0	0	0	0	0	0	200	300	0	0	0	0	0	0	0	200	903	0	0	0	0	0	0	0	603	903	0
429	7	0	0	0	0	0	0	200	300	0	0	0	0	0	0	0	200	903	0	0	0	0	0	0	0	603	903	0
429	8	0	0	0	0	0	0	200	300	0	0	0	0	0	0	0	200	903	0	0	0	0	0	0	0	603	903	0
429	9	0	0	0	0	0	0	200	300	0	0	0	0	0	0	0	200	903	0	0	0	0	0	0	0	603	903	0
430	0	0	0	0	0	0	0	200	300	0	0	0	0	0	0	0	200	903	0	0	0	0	0	0	0	603	903	0
430	1	0	0	0	0	0	0	200	300	0	0	0	0	0	0	0	200	903	0	0	0	0	0	0	0	603	903	0
430	2	0	0	0	0	0	0	200	300	0	0	0	0	0	0	0	200	903	0	0	0	0	0	0	0	603	903	0
430	3	0	0	0	0	0	0	200	300	0	0	0	0	0	0	0	200	903	0	0	0	0	0	0	0	603	903	0
430	4	0	0	0	0	0	0	200	300	0	0	0	0	0	0	0	200	903	0	0	0	0	0	0	0	603	903	0
430	5	0	0	0	0	0	0	200	300	0	0	0	0	0	0	0	200	903	0	0	0	0	0	0	0	603	903	0
430	6	0	0	0	0	0	0	200	300	0	0	0	0	0	0	0	200	903	0	0	0	0	0	0	0	603	903	0
430	7	0	0	0	0	0	0	200	300	0	0	0	0	0	0	0	200	903	0	0	0	0	0	0	0	603	903	0
430	8	0	0	0	0	0	0	200	300	0	0	0	0	0	0	0	200	903	0	0	0	0	0	0	0	603	903	0
430	9	0	0	0	0	0	0	200	300	0	0	0	0	0	0	0	200	903	0	0	0	0	0	0	0	603	903	0
431	0	0	0	0	0	0	0	200	300	0	0	0	0	0	0	0	200	903	0	0	0	0	0	0	0	603	903	0
431	1	0	0	0	0	0	0	200	300	0	0	0	0	0	0	0	200	903	0	0	0	0	0	0	0	603	903	0
431	2	0	0	0	0	0	0	200	300	0	0	0	0	0	0	0	200	903	0	0	0	0	0	0	0	603	903	0
431	3	0	0	0	0	0	0	200	300	0	0	0	0	0	0	0	200	903	0	0	0	0	0	0	0	603	903	0
431	4	0	0	0	0	0	0	200	300	0	0	0	0	0	0	0	200	903	0	0	0	0	0	0	0	603	903	0
431	5	0	0	0	0	0	0	200	300	0	0	0	0	0	0	0	200	903	0	0	0	0	0	0	0	603	903	0
431	6	0	0	0	0	0	0	200	300	0	0	0	0	0	0	0	200	903	0	0	0	0	0	0	0	603	903	0
431	7	0	0	0	0	0	0	200	300	0	0	0	0	0	0	0	200	903	0	0	0	0	0	0	0	603	903	0
431	8	0	0	0	0	0	0	200	300	0	0	0	0	0	0	0	200	903	0	0	0	0	0	0	0	603	903	0
431	9	0	0	0	0	0	0	200	300	0	0	0	0	0	0	0	200	903	0	0	0	0	0	0	0	603	903	0
432	0	0	0	0	0	0	0	200	300	0	0	0	0	0	0	0	200	903	0	0	0	0	0	0	0	603	903	0
432	1	0	0	0	0	0	0	200	300	0	0	0	0	0	0	0	200	903	0	0	0	0	0	0	0	603	903	0
432	2	0	0	0	0	0	0	200	300	0	0	0	0	0	0	0	200	903	0	0	0	0	0	0	0	603	903	0
432	3	0	0	0	0	0	0	200	300	0	0	0	0	0	0	0	200	903	0	0	0	0	0	0	0	603	903	0
432	4	0	0	0	0	0	0	200	300	0	0	0	0	0	0	0	200	903	0	0	0	0	0	0	0	603	903	0
432	5	0	0	0	0	0	0	200	300	0	0	0	0	0	0	0	200	903	0	0	0	0	0	0	0	603	903	0
432	6	0	0	0	0	0	0	200	300	0	0	0	0	0	0	0	200	903	0	0	0	0	0	0	0	603	903	0
432	7	0	0	0	0	0	0	200	300	0	0	0	0	0	0	0	200	903	0	0	0	0	0	0	0	603	903	0
432	8	0	0	0	0	0	0	200	300	0	0	0	0	0	0	0	200	903	0	0	0	0	0	0	0	603	903	0
432	9	0	0	0	0	0	0	200	300	0	0	0	0	0	0	0	200	903	0	0	0	0	0	0	0	603	903	0
433	0	0	0	0	0	0	0	200	300	0	0	0	0	0	0	0	200	903	0	0	0	0	0	0	0	603	903	0
433	1	0	0	0	0	0	0	200	300	0	0	0	0	0	0	0	200	903	0	0	0	0	0	0	0	603	903	0
433	2	0	0	0	0	0	0	200	300	0	0	0	0	0	0	0	200	903	0	0	0	0	0	0	0	603	903	0
433	3	0	0	0	0	0	0	200	300	0	0	0	0	0	0	0	200	903	0	0	0	0	0	0	0	603	903	0
433	4	0	0	0	0	0	0	200	300	0	0	0	0	0	0	0	200	903	0	0	0	0	0	0	0	603	903	0
433	5	0	0	0	0	0	0	200	300	0	0	0	0	0	0	0	200	903	0	0	0	0	0	0	0	603	903	0
433	6	0	0	0	0	0	0	200	300	0	0	0	0	0	0	0	200	903	0	0	0	0	0	0	0	603	903	0
433	7	0	0	0	0	0	0	200	300	0	0	0	0	0	0	0	200	903	0	0	0	0	0	0	0	603	903	0
433	8	0	0	0	0	0	0	200	300	0	0	0	0	0	0	0	200	903	0	0	0	0	0	0	0	603	903	0
433	9	0	0	0	0	0	0	200	300	0	0	0	0	0	0	0	200	903	0	0	0	0	0	0	0	603	903	0
434	0	0	0	0	0	0	0	200	300	0	0	0	0	0	0	0	200	903	0	0	0	0	0	0	0	603	903	0
434	1	0	0	0	0	0	0	200	300	0	0	0	0	0	0	0	200	903	0	0	0	0	0	0	0	603	903	0
434	2	0	0	0	0	0	0	200	300	0	0	0	0	0	0	0	200	903	0	0	0	0	0	0	0	603	903	0
434	3	0	0	0	0	0	0	200	300	0	0	0	0	0	0	0	200	903	0	0	0	0	0	0	0	603	903	0
434	4	0	0	0	0	0	0	200	300	0	0	0	0	0	0	0	200	903	0	0	0	0	0	0	0	603	903	0
434	5	0	0	0	0	0	0	200	300	0	0	0	0	0	0	0	200	903	0	0	0	0	0	0	0	603	903	0
434	6	0	0	0	0	0	0	200	300	0	0	0	0	0	0	0	200	903	0	0	0	0	0	0	0	603	903	0
434	7	0	0	0	0	0	0	200	300	0	0	0	0	0	0	0	200	903	0	0	0	0	0	0	0	603	903	0
434	8	0	0	0	0	0	0	200	300	0	0	0	0	0	0	0	200	903	0	0	0	0	0	0	0	603	903	0
434	9	0	0	0	0	0	0	200	300	0	0	0	0	0	0	0	200	903	0	0	0	0	0	0	0	603	903	0
435	0	0	0	0	0	0	0	200	300	0	0	0	0	0	0	0	200	903	0	0	0	0	0	0	0	603	903	0
435	1	0	0	0	0	0	0	200	300	0	0	0	0	0	0	0	200	903	0	0	0	0	0	0	0	603	903	0
435	2	0	0	0	0	0	0	200	300	0	0	0	0	0	0	0	200	903	0	0	0	0	0	0	0	603	903	0
435	3	0	0	0	0	0	0	200	300	0	0	0	0	0	0	0	200	903	0	0	0	0	0	0	0	603	903	0
435	4	0	0	0	0	0	0	200	300	0	0	0	0	0	0	0	200	903	0	0	0	0	0	0	0	603	903	0
435	5	0	0	0	0	0	0	200	300	0	0	0	0	0	0	0	200	903	0	0	0	0	0	0	0	603	903	0
435	6	0	0	0	0	0	0	200	300	0	0	0	0	0	0	0	200	903	0	0	0	0	0	0	0	603	903	0
435	7	0	0	0	0	0	0	200	300	0	0	0	0	0	0	0	200	903	0	0	0	0	0	0	0	603	903	0
435	8	0	0	0	0	0	0	200	300	0	0	0	0	0	0	0	200	903	0	0	0	0	0	0	0	603	903	0
435	9	0	0	0	0	0	0	200	300	0	0	0	0	0	0	0	200	903	0	0	0	0	0	0	0	603	903	0
436	0	0	0	0	0	0	0	200	300	0	0	0	0	0	0	0	200	903	0	0	0	0	0	0	0	603	903	0
436	1	0	0	0	0	0	0	200	300	0	0	0	0	0	0	0	200	903	0	0	0	0	0	0	0	603	903	0
436	2	0	0	0	0	0	0	200	300	0	0	0	0	0	0	0	200	903	0	0	0	0	0	0	0	603	903	0
436	3	0	0	0	0	0	0	200	300	0	0	0	0	0	0	0	200	903	0	0	0	0	0	0	0	603	903	0
436	4	0	0	0	0	0	0	200	300	0	0	0	0	0	0	0	200	903	0	0	0	0	0	0	0	603	903	0
436	5	0	0	0	0	0	0	200	300	0	0	0	0	0	0	0	200	903	0	0	0	0	0	0	0	603	903	0
436	6	0	0	0	0	0	0	200	300	0	0	0	0	0	0	0	200	903	0	0	0	0	0	0	0	603	903	0
436	7	0	0	0	0	0	0	200	300	0	0	0	0	0	0	0	200	903	0	0	0	0	0	0	0	603	903	0
436	8	0	0	0	0	0	0	200	300	0	0	0	0	0	0	0	200	903	0	0	0	0	0	0	0	603	903	0
436	9	0	0	0	0	0	0	200	300	0	0	0	0	0	0	0	200	903	0	0	0	0	0	0	0	603	903	0
437	0	0	0	0	0	0	0	200	300	0	0	0	0	0	0	0	200	903	0	0	0	0	0	0	0	603	903	0
437	1	0	0	0	0	0	0	200	300	0	0	0	0	0	0	0	200	903	0	0	0	0	0	0	0	603	903	0
437	2	0	0	0	0	0	0	200	300	0	0	0	0	0	0	0	200	903	0	0	0	0	0	0	0	603	903	0
437	3	0	0	0	0	0	0	200	300	0	0	0	0	0	0	0	200	903	0	0	0	0	0	0	0	603	903	0
437	4	0	0	0	0	0	0	200	300	0	0	0	0	0	0	0	200	903	0	0	0	0	0	0	0	603	903	0
437	5	0	0	0	0	0	0	200	300	0	0	0	0	0	0	0	200	903	0	0	0	0	0	0	0	603	903	0
437	6	0	0	0	0	0	0	200	300	0	0	0	0	0	0	0	200	903	0	0	0	0	0	0	0	603	903	0
437	7	0	0	0	0	0	0	200	300	0	0	0	0	0	0	0	200	903	0	0	0	0	0	0	0	603	903	0
437	8	0	0	0	0	0	0	200	300	0	0	0	0	0	0	0	200	903	0	0	0	0	0	0	0	603	903	0
437	9	0	0	0	0	0	0	200	300	0	0	0	0	0	0	0	200	903	0	0	0	0	0	0	0	603	903	0
438	0	0	0	0	0	0	0	200	300	0	0	0	0	0	0	0	200	903	0	0	0	0	0	0	0	603	903	0
438	1	0	0	0	0	0	0	200	300	0	0	0	0	0	0	0	200	903	0	0	0	0	0	0	0	603	903	0
438	2	0	0	0	0	0	0	200	300	0	0	0	0	0	0	0	200	903	0	0	0	0	0	0	0	603	903	0
438	3	0	0	0	0	0	0	200	300	0	0	0	0	0	0	0	200	903	0	0	0	0	0	0	0	603	903	0
438	4	0	0	0	0	0	0	200	300	0	0	0	0	0	0	0	200	903	0	0	0	0	0	0	0	603	903	0
438	5	0	0	0	0	0	0	200	300	0	0	0	0	0	0	0	200	903	0	0	0	0	0	0	0	603	903	0
438	6	0	0	0	0	0	0	200	300	0	0	0	0	0	0	0	200	903	0	0	0	0	0	0	0	603	903	0
438	7	0	0	0	0	0	0	200	300	0	0	0	0	0	0	0	200	903	0	0	0	0	0	0	0	603	903	0
438	8	0	0	0	0	0	0	200	300	0	0	0	0	0	0	0	200	903	0	0	0	0	0	0	0	603	903	0
438	9	0	0	0	0	0	0	200	300	0	0	0	0	0	0	0	200	903	0	0	0	0	0	0	0	603	903	0
439	0	0	0	0	0	0	0	200	300	0	0	0	0	0	0	0	200	903	0	0	0	0	0	0	0	603	903	0
439	1	0	0	0	0	0	0	200	300	0	0	0	0	0	0	0	200	903	0	0	0	0	0	0	0	603	903	0
439	2	0	0	0	0	0	0	200	300	0	0	0	0	0	0	0	200	903	0	0	0	0	0	0	0	603	903	0
439	3	0	0	0	0	0	0	200	300	0	0	0	0	0	0	0	200	903	0	0	0	0	0	0	0	603	903	0
439	4	0	0	0	0	0	0	200	300	0	0	0	0	0	0	0	200	903	0	0	0	0	0	0	0	603	903	0
439	5	0	0	0	0	0	0	200	300	0	0	0	0	0	0	0	200	903	0	0	0	0	0	0	0	603	903	0
439	6	0	0	0	0	0	0	200	300	0	0	0	0	0	0	0	200	903	0	0	0	0	0	0	0	603	903	0
439	7	0	0	0	0	0	0	200	300	0	0	0	0	0	0	0	200	903	0	0	0	0	0	0	0	603	903	0
439	8	0	0	0	0	0	0	200	300	0	0	0	0	0	0	0	200	903	0	0	0	0	0	0	0	603	903	0
439	9	0	0	0	0	0	0	200	300	0	0	0	0	0	0	0	200	903	0	0	0	0	0	0	0	603	903	0
440	0	0	0	0	0	0	0	200	300	0	0	0	0	0	0	0	200	903	0	0	0	0	0	0	0	603	903	0
440	1	0	0	0	0	0	0	200	300	0	0	0	0	0	0	0	200	903	0	0	0	0	0	0	0	603	903	0
440	2	0	0	0	0	0	0	200	300	0	0	0	0	0	0	0	200	903	0	0	0	0	0	0	0	603	903	0
440	3	0	0	0	0	0	0	200	300	0	0	0	0	0	0	0	200	903	0	0	0	0	0	0	0	603	903	0
440	4	0	0	0	0	0	0	200	300	0	0	0	0	0	0	0	200	903	0	0	0	0	0	0	0	603	903	0
440	5	0	0	0	0	0	0	200	300	0	0	0	0	0	0	0	200	903	0	0	0	0	0	0	0	603	903	0
440	6	0	0	0	0	0	0	200	300	0	0	0	0	0	0	0	200	903	0	0	0	0	0	0	0	603	903	0
440	7	0	0	0	0	0	0	200	300	0	0	0	0	0	0	0	200	903	0	0	0	0	0	0	0	603	903	0
440	8	0	0	0	0	0	0	200	300	0	0	0	0	0	0	0	200	903	0	0	0	0	0	0	0	603	903	0
440	9	0	0	0	0	0	0	200	300	0	0	0	0	0	0	0	200	903	0	0	0	0	0	0	0	603	903	0
441	0	0	0	0	0	0	0	200	300	0	0	0	0	0	0	0	200	903	0	0	0	0	0	0	0	603	903	0
441	1	0	0	0	0	0	0	200	300	0	0	0	0	0	0	0	200	903	0	0	0	0	0	0	0	603	903	0
441	2	0	0	0	0	0	0	200	300	0	0	0	0	0	0	0	200	903	0	0	0	0	0	0	0	603	903	0
441	3	0	0	0	0	0	0	200	300	0	0	0	0	0	0	0	200	903	0	0	0	0	0	0	0	603	903	0
441	4	0	0	0	0	0	0	200	300	0	0	0	0	0	0	0	200	903	0	0	0	0	0	0	0	603	903	0
441	5	0	0	0	0	0	0	200	300	0	0	0	0	0	0	0	200	903	0	0	0	0	0	0	0	603	903	0
441	6	0	0	0	0	0	0	200	300	0	0	0	0	0	0	0	200	903	0	0	0	0	0	0	0	603	903	0
441	7	0	0	0	0	0	0	200	300	0	0	0	0	0	0	0	200	903	0	0	0	0	0	0	0	603	903	0
441	8	0	0	0	0	0	0	200	300	0	0	0	0	0	0	0	200	903	0	0	0	0	0	0	0	603	903	0
441	9	0	0	0	0	0	0	200	300	0	0	0	0	0	0	0	200	903	0	0	0	0	0	0	0	603	903	0
442	0	0	0	0	0	0	0	200	300	0	0	0	0	0	0	0	200	903	0	0	0	0	0	0	0	603	903	0
442	1	0	0	0	0	0	0	200	300	0	0	0	0	0	0	0	200	903	0	0	0	0	0	0	0	603	903	0
442	2	0	0	0	0	0	0	200	300	0	0	0	0	0	0	0	200	903	0	0	0	0	0	0	0	603	903	0
442	3	0	0	0	0	0	0	200	300	0	0	0	0	0	0	0	200	903	0	0	0	0	0	0	0	603	903	0
442	4	0	0	0	0	0	0	200	300	0	0	0	0	0	0	0	200	903	0	0	0	0	0	0	0	603	903	0
442	5	0	0	0	0	0	0	200	300	0	0	0	0	0	0	0	200	903	0	0	0	0	0	0	0	603	903	0
442	6	0	0	0	0	0	0	200	300	0	0	0	0	0	0	0	200	903	0	0	0	0	0	0	0	603	903	0
442	7	0	0	0	0	0	0	200	300	0	0	0	0	0	0	0	200	903	0	0	0	0	0	0	0	603	903	0
442	8	0	0	0	0	0	0	200	300	0	0	0	0	0	0	0	200	903	0	0	0	0	0	0	0	603	903	0
442	9	0	0	0	0	0	0	200	300	0	0	0	0	0	0	0	200	903	0	0	0	0	0	0	0	603	903	0
443	0	0	0	0	0	0	0	200	300	0	0	0	0	0	0	0	200	903	0	0	0	0	0	0	0	603	903	0
443	1	0	0	0	0	0	0	200	300	0	0	0	0	0	0	0	200	903	0	0	0	0	0	0	0	603	903	0
443	2	0	0	0	0	0	0	200	300	0	0	0	0	0	0	0	200	903	0	0	0	0	0	0	0	603	903	0
443	3	0	0	0	0	0	0	200	300	0	0	0	0	0	0	0	200	903	0	0	0	0	0	0	0	603	903	0
443	4	0	0	0	0	0	0	200	300	0	0	0	0	0	0	0	200	903	0	0	0	0	0	0	0	603	903	0
443	5	0	0	0	0	0	0	200	300	0	0	0	0	0	0	0	200	903	0	0	0	0	0	0	0	603	903	0
443	6	0	0	0	0	0	0	200	300	0	0	0	0	0	0	0	200	903	0	0	0	0	0	0	0	603	903	0
443	7	0	0	0	0	0	0	200	300	0	0	0	0	0	0	0	200	903	0	0	0	0	0	0	0	603	903	0
443	8	0	0	0	0	0	0	200	300	0	0	0	0	0	0	0	200	903	0	0	0	0	0	0	0	603	903	0
443	9	0	0	0	0	0	0	200	300	0	0	0	0	0	0	0	200	903	0	0	0	0	0	0	0	603	903	0
444	0	0	0	0	0	0	0	200	300	0	0	0	0	0	0	0	200	903	0	0	0	0	0	0	0	603	903	0
444	1	0	0	0	0	0	0	200	300	0	0	0	0	0	0	0	200	903	0	0	0	0	0	0	0	603	903	0
444	2	0	0	0	0	0	0	200	300	0	0	0	0	0	0	0	200	903	0	0	0	0	0	0	0	603	903	0
444	3	0	0	0	0	0	0	200	300	0	0	0	0	0	0	0	200	903	0	0	0	0	0	0	0	603	903	0
444	4	0	0	0	0	0	0	200	300	0	0	0	0	0	0	0	200	903	0	0	0	0	0	0	0	603	903	0
444	5	0	0	0	0	0	0	200	300	0	0	0	0	0	0	0	200	903	0	0	0	0	0	0	0	603	903	0
444	6	0	0	0	0	0	0	200	300	0	0	0	0	0	0	0	200	903	0	0	0	0	0	0	0	603	903	0
444	7	0	0	0	0	0	0	200	300	0	0	0	0	0	0	0	200	903	0	0	0	0	0	0	0	603	903	0
444	8	0	0	0	0	0	0	200	300	0	0	0	0	0	0	0	200	903	0	0	0	0	0	0	0	603	903	0
444	9	0	0	0	0	0	0	200	300	0	0	0	0	0	0	0	200	903	0	0	0	0	0	0	0	603	903	0
445	0	0	0	0	0	0	0	200	300	0	0	0	0	0	0	0	200	903	0	0	0	0	0	0	0	603	903	0
445	1	0	0	0	0	0	0	200	300	0	0	0	0	0	0	0	200	903	0	0	0	0	0	0	0	603	903	0
445	2	0	0	0	0	0	0	200	300	0	0	0	0	0	0	0	200	903	0	0	0	0	0	0	0	603	903	0
445	3	0	0	0	0	0	0	200	300	0	0	0	0	0	0	0	200	903	0	0	0	0	0	0	0	603	903	0
445	4	0	0	0	0	0	0	200	300	0	0	0	0	0	0	0	200	903	0	0	0	0	0	0	0	603	903	0
445	5	0	0	0	0	0	0	200	300	0	0	0	0	0	0	0	200	903	0	0	0	0	0	0	0	603	903	0
445	6	0	0	0	0	0	0	200	300	0	0	0	0	0	0	0	200	903	0	0	0	0	0	0	0	603	903	0
445	7	0	0	0	0	0	0	200	300	0	0	0	0	0	0	0	200	903	0	0	0	0	0	0	0	603	903	0
445	8	0	0	0	0	0	0	200	300	0	0	0	0	0	0	0	200	903	0	0	0	0	0	0	0	603	903	0
445	9	0	0	0	0	0	0	200	300	0	0	0	0	0	0	0	200	903	0	0	0	0	0	0	0	603	903	0
446	0	0	0	0	0	0	0	200	300	0	0	0	0	0	0	0	200	903	0	0	0	0	0	0	0	603	903	0
446	1	0	0	0	0	0	0	200	300	0	0	0	0	0	0	0	200	903	0	0	0	0	0	0	0	603	903	0
446	2	0	0	0	0	0	0	200	300	0	0	0	0	0	0	0	200	903	0	0	0	0	0	0	0	603	903	0
446	3	0	0	0	0	0	0	200	300	0	0	0	0	0	0	0	200	903	0	0	0	0	0	0	0	603	903	0
446	4	0	0	0	0	0	0	200	300	0	0	0	0	0	0	0	200	903	0	0	0	0	0	0	0	603	903	0
446	5	0	0	0	0	0	0	200	300	0	0	0	0	0	0	0	200	903	0	0	0	0	0	0	0	603	903	0
446	6	0	0	0	0	0	0	200	300	0	0	0	0	0	0	0	200	903	0	0	0	0	0	0	0	603	903	0
446	7	0	0	0	0	0	0	200	300	0	0	0	0	0	0	0	200	903	0	0	0	0	0	0	0	603	903	0
446	8	0	0	0	0	0	0	200	300	0	0	0	0	0	0	0	200	903	0	0	0	0	0	0	0	603	903	0
446	9	0	0	0	0	0	0	200	300	0	0	0	0	0	0	0	200	903	0	0	0	0	0	0	0	603	903	0
447	0	0	0	0	0	0	0	200	300	0	0	0	0	0	0	0	200	903	0	0	0	0	0	0	0	603	903	0
447	1	0	0	0	0	0	0	200	300	0	0	0	0	0	0	0	200	903	0	0	0	0	0	0	0	603	903	0
447	2	0	0	0	0	0	0	200	300	0	0	0	0	0	0	0	200	903	0	0	0	0	0	0	0	603	903	0
447	3	0	0	0	0	0	0	200	300	0	0	0	0	0	0	0	200	903	0	0	0	0	0	0	0	603	903	0
447	4	0	0	0	0	0	0	200	300	0	0	0	0	0	0	0	200	903	0	0	0	0	0	0	0	603	903	0
447	5	0	0	0	0	0	0	200	300	0	0	0	0	0	0	0	200	903	0	0	0	0	0	0	0	603	903	0
447	6	0	0	0	0	0	0	200	300	0	0	0	0	0	0	0	200	903	0	0	0	0	0	0	0	603	903	0
447	7	0	0	0	0	0	0	200	300	0	0	0	0	0	0	0	200	903	0	0	0	0	0	0	0	603	903	0
447	8	0	0	0	0	0	0	200	300	0	0	0	0	0	0	0	200	903	0	0	0	0	0	0	0	603	903	0
447	9	0	0	0	0	0	0	200	300	0	0	0	0	0	0	0	200	903	0	0	0	0	0	0	0	603	903	0
448	0	0	0	0	0	0	0	200	300	0	0	0	0	0	0	0	200	903	0	0	0	0	0	0	0	603	903	0
448	1	0	0	0	0	0	0	200	300	0	0	0	0	0	0	0	200	903	0	0	0	0	0	0	0	603	903	0
448	2	0	0	0	0	0	0	200	300	0	0	0	0	0	0	0	200	903	0	0	0	0	0	0	0	603	903	0
448	3	0	0	0	0	0	0	200	300	0	0	0	0	0	0	0	200	903	0	0	0	0	0	0	0	603	903	0
448	4	0	0	0	0	0	0	200	300	0	0	0	0	0	0	0	200	903	0	0	0	0	0	0	0	603	903	0
448	5	0	0	0	0	0	0	200	300	0	0	0	0	0	0	0	200	903	0	0	0	0	0	0	0	603	903	0
448	6	0	0	0	0	0	0	200	300	0	0	0	0	0	0	0	200	903	0	0	0	0	0	0	0	603	903	0
448	7	0	0	0	0	0	0	200	300	0	0	0	0	0	0	0	200	903	0	0	0	0	0	0	0	603	903	0
448	8	0	0	0	0	0	0	200	300	0	0	0	0	0	0	0	200	903	0	0	0	0	0	0	0	603	903	0
448	9	0	0	0	0	0	0	200	300	0	0	0	0	0	0	0	200	903	0	0	0	0	0	0	0	603	903	0
449	0	0	0	0	0	0	0	200	300	0	0	0	0	0	0	0	200	903	0	0	0	0	0	0	0	603	903	0
449	1	0	0	0	0	0	0	200	300	0	0	0	0	0	0	0	200	903	0	0	0	0	0	0	0	603	903	0
449	2	0	0	0	0	0	0	200	300	0	0	0	0	0	0	0	200	903	0	0	0	0	0	0	0	603	903	0
449	3	0	0	0	0	0	0	200	300	0	0	0	0	0	0	0	200	903	0	0	0	0	0	0	0	603	903	0
449	4	0	0	0	0	0	0	200	300	0	0	0	0	0	0	0	200	903	0	0	0	0	0	0	0	603	903	0
449	5	0	0	0	0	0	0	200	300	0	0	0	0	0	0	0	200	903	0	0	0	0	0	0	0	603	903	0
449	6	0	0	0	0	0	0	200	300	0	0	0	0	0	0	0	200	903	0	0	0	0	0	0	0	603	903	0
449	7	0	0	0	0	0	0	200	300	0	0	0	0	0	0	0	200	903	0	0	0	0	0	0	0	603	903	0
449	8	0	0	0	0	0	0	200	300	0	0	0	0	0	0	0	200	903	0	0	0	0	0	0	0	603	903	0
449	9	0	0	0	0	0	0	200	300	0	0	0	0	0	0	0	200	903	0	0	0	0	0	0	0	603	903	0
450	0	0	0	0	0	0	0	200	300	0	0	0	0	0	0	0	200	903	0	0	0	0	0	0	0	603	903	0
450	1	0	0	0	0	0	0	200	300	0	0	0	0	0	0	0	200	903	0	0	0	0	0	0	0	603	903	0
450	2	0	0	0	0	0	0	200	300	0	0	0	0	0	0	0	200	903	0	0	0	0	0	0	0	603	903	0
450	3	0	0	0	0	0	0	200	300	0	0	0	0	0	0	0	200	903	0	0	0	0	0	0	0	603	903	0
450	4	0	0	0	0	0	0	200	300	0	0	0	0	0	0	0	200	903	0	0	0	0	0	0	0	603	903	0
450	5	0	0	0	0	0	0	200	300	0	0	0	0	0	0	0	200	903	0	0	0	0	0	0	0	603	903	0
450	6	0	0	0	0	0	0	200	300	0	0	0	0	0	0	0	200	903	0	0	0	0	0	0	0	603	903	0
450	7	0	0	0	0	0	0	200	300	0	0	0	0	0	0	0	200	903	0	0	0	0	0	0	0	603	903	0
450	8	0	0	0	0	0	0	200	300	0	0	0	0	0	0	0	200	903	0	0	0	0	0	0	0	603	903	0
450	9	0	0	0	0	0	0	200	300	0	0	0	0	0	0	0	200	903	0	0	0	0	0	0	0	603	903	0
451	0	0	0	0	0	0	0	200	300	0	0	0	0	0	0	0	200	903	0	0	0	0	0	0	0	603	903	0
451	1	0	0	0	0	0	0	200	300	0	0	0	0	0	0	0	200	903	0	0	0	0	0	0	0	603	903	0
451	2	0	0	0	0	0	0	200	300	0	0	0	0	0	0	0	200	903	0	0	0	0	0	0	0	603	903	0
451	3	0	0	0	0	0	0	200	300	0	0	0	0	0	0	0	200	903	0	0	0	0	0	0	0	603	903	0
451	4	0	0	0	0	0	0	200	300	0	0	0	0	0	0	0	200	903	0	0	0	0	0	0	0	603	903	0
451	5	0	0	0	0	0	0	200	300	0	0	0	0	0	0	0	200	903	0	0	0	0	0	0	0	603	903	0
451	6	0	0	0	0	0	0	200	300	0	0	0	0	0	0	0	200	903	0	0	0	0	0	0	0	603	903	0
451	7	0	0	0	0	0	0	200	300	0	0	0	0	0	0	0	200	903	0	0	0	0	0	0	0	603	903	0
451	8	0	0	0	0	0	0	200	300	0	0	0	0	0	0	0	200	903	0	0	0	0	0	0	0	603	903	0
451	9	0	0	0	0	0	0	200	300	0	0	0	0	0	0	0	200	903	0	0	0	0	0	0	0	603	903	0
452	0	0	0	0	0	0	0	200	300	0	0	0	0	0	0	0	200	903	0	0	0	0	0	0	0	603	903	0
452	1	0	0	0	0	0	0	200	300	0	0	0	0	0	0	0	200	903	0	0	0	0	0	0	0	603	903	0
452	2	0	0	0	0	0	0	200	300	0	0	0	0	0	0	0	200	903	0	0	0	0	0	0	0	603	903	0
452	3	0	0	0	0	0	0	200	300	0	0	0	0	0	0	0	200	903	0	0	0	0	0	0	0	603	903	0
452	4	0	0	0	0	0	0	200	300	0	0	0	0	0	0	0	200	903	0	0	0	0	0	0	0	603	903	0
452	5	0	0	0	0	0	0	200	300	0	0	0	0	0	0	0	200	903	0	0	0	0	0	0	0	603	903	0
452	6	0	0	0	0	0	0	200	300	0	0	0	0	0	0	0	200	903	0	0	0	0	0	0	0	603	903	0
452	7	0	0	0	0	0	0	200	300	0	0	0	0	0	0	0	200	903	0	0	0	0	0	0	0	603	903	0
452	8	0	0	0	0	0	0	200	300	0	0	0	0	0	0	0	200	903	0	0	0	0	0	0	0	603	903	0
452	9	0	0	0	0	0	0	200	300	0	0	0	0	0	0	0	200	903	0	0	0	0	0	0	0	603	903	0
453	0	0	0	0	0	0	0	200	300	0	0	0	0	0	0	0	200	903	0	0	0	0	0	0	0	603	903	0
453	1	0	0	0	0	0	0	200	300	0	0	0	0	0	0	0	200	903	0	0	0	0	0	0	0	603	903	0
453	2	0	0	0	0	0	0	200	300	0	0	0	0	0	0	0	200	903	0	0	0	0	0	0	0	603	903	0
453	3	0	0	0	0	0	0	200	300	0	0	0	0	0	0	0	200	903	0	0	0	0	0	0	0	603	903	0
453	4	0	0	0	0	0	0	200	300	0	0	0	0	0	0	0	200	903	0	0	0	0	0	0	0	603	903	0
453	5	0	0	0	0	0	0	200	300	0	0	0	0	0	0	0	200	903	0	0	0	0	0	0	0	603	903	0
453	6	0	0	0	0	0	0	200	300	0	0	0	0	0	0	0	200	903	0	0	0	0	0	0	0	603	903	0
453	7	0	0	0	0	0	0	200	300	0	0	0	0	0	0	0	200	903	0	0	0	0	0	0	0	603	903	0
453	8	0	0	0	0	0	0	200	300	0	0	0	0	0	0	0	200	903	0	0	0	0	0	0	0	603	903	0
453	9	0	0	0	0	0	0	200	300	0	0	0	0	0	0	0	200	903	0	0	0	0	0	0	0	603	903	0
454	0	0	0	0	0	0	0	200	300	0	0	0	0	0	0	0	200	903	0	0	0	0	0	0	0	603	903	0
454	1	0	0	0	0	0	0	200	300	0	0	0	0	0	0	0	200	903	0	0	0	0	0	0	0	603	903	0
454	2	0	0	0	0	0	0	200	300	0	0	0	0	0	0	0	200	903	0	0	0	0	0	0	0	603	903	0
454	3	0	0	0	0	0	0	200	300	0	0	0	0	0	0	0	200	903	0	0	0	0	0	0	0	603	903	0
454	4	0	0	0	0	0	0	200	300	0	0	0	0	0	0	0	200	903	0	0	0	0	0	0	0	603	903	0
454	5	0	0	0	0	0	0	200	300	0	0	0	0	0	0	0	200	903	0	0	0	0	0	0	0	603	903	0
454	6	0	0	0	0	0	0	200	300	0	0	0	0	0	0	0	200	903	0	0	0	0	0	0	0	603	903	0
454	7	0	0	0	0	0	0	200	300	0	0	0	0	0	0	0	200	903	0	0	0	0	0	0	0	603	903	0
454	8	0	0	0	0	0	0	200	300	0	0	0	0	0	0	0	200	903	0	0	0	0	0	0	0	603	903	0
454	9	0	0	0	0	0	0	200	300	0	0	0	0	0	0	0	200	903	0	0	0	0	0	0	0	603	903	0
455	0	0	0	0	0	0	0	200	300	0	0	0	0	0	0	0	200	903	0	0	0	0	0	0	0	603	903	0
455	1	0	0	0	0	0	0	200	300	0	0	0	0	0	0	0	200	903	0	0	0	0	0	0	0	603	903	0
455	2	0	0	0	0	0	0	200	300	0	0	0	0	0	0	0	200	903	0	0	0	0	0	0	0	603	903	0
455	3	0	0	0	0	0	0	200	300	0	0	0	0	0	0	0	200	903	0	0	0	0	0	0	0	603	903	0
455	4	0	0	0	0	0	0	200	300	0	0	0	0	0	0	0	200	903	0	0	0	0	0	0	0	603	903	0
455	5	0	0	0	0	0	0	200	300	0	0	0	0	0	0	0	200	903	0	0	0	0	0	0	0	603	903	0
455	6	0	0	0	0	0	0	200	300	0	0	0	0	0	0	0	200	903	0	0	0	0	0	0	0	603	903	0
455	7	0	0	0	0	0	0	200	300	0	0	0	0	0	0	0	200	903	0	0	0	0	0	0	0	603	903	0
455	8	0	0	0	0	0	0	200	300	0	0	0	0	0	0	0	200	903	0	0	0	0	0	0	0	603	903	0
455	9	0	0	0	0	0	0	200	300	0	0	0	0	0	0	0	200	903	0	0	0	0	0	0	0	603	903	0
456	0	0	0	0	0	0	0	200	300	0	0	0	0	0	0	0	200	903	0	0	0	0	0	0	0	603	903	0
456	1	0	0	0	0	0	0	200	300	0	0	0	0	0	0	0	200	903	0	0	0	0	0	0	0	603	903	0
456	2	0	0	0	0	0	0	200	300	0	0	0	0	0	0	0	200	903	0	0	0	0	0	0	0	603	903	0
456	3	0	0	0	0	0	0	200	300	0	0	0	0	0	0	0	200	903	0	0	0	0	0	0	0	603	903	0
456	4	0	0	0	0	0	0	200	300	0	0	0	0	0	0	0	200	903	0	0	0	0	0	0	0	603	903	0
456	5	0	0	0	0	0	0	200	300	0	0	0	0	0	0	0	200	903	0	0	0	0	0	0	0	603	903	0
456	6	0	0	0	0	0	0	200	300	0	0	0	0	0	0	0	200	903	0	0	0	0	0	0	0	603	903	0
456	7	0	0	0	0	0	0	200	300	0	0	0	0	0	0	0	200	903	0	0	0	0	0	0	0	603	903	0
456	8	0	0	0	0	0	0	200	300	0	0	0	0	0	0	0	200	903	0	0	0	0	0	0	0	603	903	0
456	9	0	0	0	0	0	0	200	300	0	0	0	0	0	0	0	200	903	0	0	0	0	0	0	0	603	903	0
457	0	0	0	0	0	0	0	200	300	0	0	0	0	0	0	0	200	903	0	0	0	0	0	0	0	603	903	0
457	1	0	0	0	0	0	0	200	300	0	0	0	0	0	0	0	200	903	0	0	0	0	0	0	0	603	903	0
457	2	0	0	0	0	0	0	200	300	0	0	0	0	0	0	0	200	903	0	0	0	0	0	0	0	603	903	0
457	3	0	0	0	0	0	0	200	300	0	0	0	0	0	0	0	200	903	0	0	0	0	0	0	0	603	903	0
457	4	0	0	0	0	0	0	200	300	0	0	0	0	0	0	0	200	903	0	0	0	0	0	0	0	603	903	0
457	5	0	0	0	0	0	0	200	300	0	0	0	0	0	0	0	200	903	0	0	0	0	0	0	0	603	903	0
457	6	0	0	0	0	0	0	200	300	0	0	0	0	0	0	0	200	903	0	0	0	0	0	0	0	603	903	0
457	7	0	0	0	0	0	0	200	300	0	0	0	0	0	0	0	200	903	0	0	0	0	0	0	0	603	903	0
457	8	0	0	0	0	0	0	200	300	0	0	0	0	0	0	0	200	903	0	0	0	0	0	0	0	603	903	0
457	9	0	0	0	0	0	0	200	300	0	0	0	0	0	0	0	200	903	0	0	0	0	0	0	0	603	903	0
458	0	0	0	0	0	0	0	200	300	0	0	0	0	0	0	0	200	903	0	0	0	0	0	0	0	603	903	0
458	1	0	0	0	0	0	0	200	300	0	0	0	0	0	0	0	200	903	0	0	0	0	0	0	0	603	903	0
458	2	0	0	0	0	0	0	200	300	0	0	0	0	0	0	0	200	903	0	0	0	0	0	0	0	603	903	0
458	3	0	0	0	0	0	0	200	300	0	0	0	0	0	0	0	200	903	0	0	0	0	0	0	0	603	903	0
458	4	0	0	0	0	0	0	200	300	0	0	0	0	0	0	0	200	903	0	0	0	0	0	0	0	603	903	0
458	5	0	0	0	0	0	0	200	300	0	0	0	0	0	0	0	200	903	0	0	0	0	0	0	0	603	903	0
458	6	0	0	0	0	0	0	200	300	0	0	0	0	0	0	0	200	903	0	0	0	0	0	0	0	603	903	0
458	7	0	0	0	0	0	0	200	300	0	0	0	0	0	0	0	200	903	0	0	0	0	0	0	0	603	903	0
458	8	0	0	0	0	0	0	200	300	0	0	0	0	0	0	0	200	903	0	0	0	0	0	0	0	603	903	0
458	9	0	0	0	0	0	0	200	300	0	0	0	0	0	0	0	200	903	0	0	0	0	0	0	0	603	903	0
459	0	0	0	0	0	0	0	200	300	0	0	0	0	0	0	0	200	903	0	0	0	0	0	0	0	603	903	0
459	1	0	0	0	0	0	0	200	300	0	0	0	0	0	0	0	200	903	0	0	0	0	0	0	0	603	903	0
459	2	0	0	0	0	0	0	200	300	0	0	0	0	0	0	0	200	903	0	0	0	0	0	0	0	603	903	0
459	3	0	0	0	0	0	0	200	300	0	0	0	0	0	0	0	200	903	0	0	0	0	0	0	0	603	903	0
459	4	0	0	0	0	0	0	200	300	0	0	0	0	0	0	0	200	903	0	0	0	0	0	0	0	603	903	0
459	5	0	0	0	0	0	0	200	300	0	0	0	0	0	0	0	200	903	0	0	0	0	0	0	0	603	903	0
459	6	0	0	0	0	0	0	200	300	0	0	0	0	0	0	0	200	903	0	0	0	0	0	0	0	603	903	0
459	7	0	0	0	0	0	0	200	300	0	0	0	0	0	0	0	200	903	0	0	0	0	0	0	0	603	903	0
459	8	0	0	0	0	0	0	200	300	0	0	0	0	0	0	0	200	903	0	0	0	0	0	0	0	603	903	0
459	9	0	0	0	0	0	0	200	300	0	0	0	0	0	0	0	200	903	0	0	0	0	0	0	0	603	903	0
460	0	0	0	0	0	0	0	200	300	0	0	0	0	0	0	0	200	903	0	0	0	0	0	0	0	603	903	0
460	1	0	0	0	0	0	0	200	300	0	0	0	0	0	0	0	200	903	0	0	0	0	0	0	0	603	903	0
460	2	0	0	0	0	0	0	200	300	0	0	0	0	0	0	0	200	903	0	0	0	0	0	0	0	603	903	0
460	3	0	0	0	0	0	0	200	300	0	0	0	0	0	0	0	200	903	0	0	0	0	0	0	0	603	903	0
460	4	0	0	0	0	0	0	200	300	0	0	0	0	0	0	0	200	903	0	0	0	0	0	0	0	603	903	0
460	5	0	0	0	0	0	0	200	300	0	0	0	0	0	0	0	200	903	0	0	0	0	0	0	0	603	903	0
460	6	0	0	0	0	0	0	200	300	0	0	0	0	0	0	0	200	903	0	0	0	0	0	0	0	603	903	0
460	7	0	0	0	0	0	0	200	300	0	0	0	0	0	0	0	200	903	0	0	0	0	0	0	0	603	903	0
460	8	0	0	0	0	0	0	200	300	0	0	0	0	0	0	0	200	903	0	0	0	0	0	0	0	603	903	0
460	9	0	0	0	0	0	0	200	300	0	0	0	0	0	0	0	200	903	0	0	0	0	0	0	0	603	903	0
461	0	0	0	0	0	0	0	200	300	0	0	0	0	0	0	0	200	903	0	0	0	0	0	0	0	603	903	0
461	1	0	0	0	0	0	0	200	300	0	0	0	0	0	0	0	200	903	0	0	0	0	0	0	0	603	903	0
461	2	0	0	0	0	0	0	200	300	0	0	0	0	0	0	0	200	903	0	0	0	0	0	0	0	603	903	0
461	3	0	0	0	0	0	0	200	300	0	0	0	0	0	0	0	200	903	0	0	0	0	0	0	0	603	903	0
461	4	0	0	0	0	0	0	200	300	0	0	0	0	0	0	0	200	903	0	0	0	0	0	0	0	603	903	0
461	5	0	0	0	0	0	0	200	300	0	0	0	0	0	0	0	200	903	0	0	0	0	0	0	0	603	903	0
461	6	0	0	0	0	0	0	200	300	0	0	0	0	0	0	0	200	903	0	0	0	0	0	0	0	603	903	0
461	7	0	0	0	0	0	0	200	300	0	0	0	0	0	0	0	200	903	0	0	0	0	0	0	0	603	903	0
461	8	0	0	0	0	0	0	200	300	0	0	0	0	0	0	0	200	903	0	0	0	0	0	0	0	603	903	0
461	9	0	0	0	0	0	0	200	300	0	0	0	0	0	0	0	200	903	0	0	0	0	0	0	0	603	903	0
462	0	0	0	0	0	0	0	200	300	0	0	0	0	0	0	0	200	903	0	0	0	0	0	0	0	603	903	0
462	1	0	0	0	0	0	0	200	300	0	0	0	0	0	0	0	200	903	0	0	0	0	0	0	0	603	903	0
462	2	0	0	0	0	0	0	200	300	0	0	0	0	0	0	0	200	903	0	0	0	0	0	0	0	603	903	0
462	3	0	0	0	0	0	0	200	300	0	0	0	0	0	0	0	200	903	0	0	0	0	0	0	0	603	903	0
462	4	0	0	0	0	0	0	200	300	0	0	0	0	0	0	0	200	903	0	0	0	0	0	0	0	603	903	0
462	5	0	0	0	0	0	0	200	300	0	0	0	0	0	0	0	200	903	0	0	0	0	0	0	0	603	903	0
462	6	0	0	0	0	0	0	200	300	0	0	0	0	0	0	0	200	903	0	0	0	0	0	0	0	603	903	0
462	7	0	0	0	0	0	0	200	300	0	0	0	0	0	0	0	200	903	0	0	0	0	0	0	0	603	903	0
462	8	0	0	0	0	0	0	200	300	0	0	0	0	0	0	0	200	903	0	0	0	0	0	0	0	603	903	0
462	9	0	0	0	0	0	0	200	300	0	0	0	0	0	0	0	200	903	0	0	0	0	0	0	0	603	903	0
463	0	0	0	0	0	0	0	200	300	0	0	0	0	0	0	0	200	903	0	0	0	0	0	0	0	603	903	0
463	1	0	0	0	0	0	0	200	300	0	0	0	0	0	0	0	200	903	0	0	0	0	0	0	0	603	903	0
463	2	0	0	0	0	0	0	200	300	0	0	0	0	0	0	0	200	903	0	0	0	0	0	0	0	603	903	0
463	3	0	0	0	0	0	0	200	300	0	0	0	0	0	0	0	200	903	0	0	0	0	0	0	0	603	903	0
463	4	0	0	0	0	0	0	200	300	0	0	0	0	0	0	0	200	903	0	0	0	0	0	0	0	603	903	0
463	5	0	0	0	0	0	0	200	300	0	0	0	0	0	0	0	200	903	0	0	0	0	0	0	0	603	903	0
463	6	0	0	0	0	0	0	200	300	0	0	0	0	0	0	0	200	903	0	0	0	0	0	0	0	603	903	0
463	7	0	0	0	0	0	0	200	300	0	0	0	0	0	0	0	200	903	0	0	0	0	0	0	0	603	903	0
463	8	0	0	0	0	0	0	200	300	0	0	0	0	0	0	0	200	903	0	0	0	0	0	0	0	603	903	0
463	9	0	0	0	0	0	0	200	300	0	0	0	0	0	0	0	200	903	0	0	0	0	0	0	0	603	903	0
464	0	0	0	0	0	0	0	200	300	0	0	0	0	0	0	0	200	903	0	0	0	0	0	0	0	603	903	0
464	1	0	0	0	0	0	0	200	300	0	0	0	0	0	0	0	200	903	0	0	0	0	0	0	0	603	903	0
464	2	0	0	0	0	0	0	200	300	0	0	0	0	0	0	0	200	903	0	0	0	0	0	0	0	603	903	0
464	3	0	0	0	0	0	0	200	300	0	0	0	0	0	0	0	200	903	0	0	0	0	0	0	0	603	903	0
464	4	0	0	0	0	0	0	200	300	0	0	0	0	0	0	0	200	903	0	0	0	0	0	0	0	603	903	0
464	5	0	0	0	0	0	0	200	300	0	0	0	0	0	0	0	200	903	0	0	0	0	0	0	0	603	903	0
464	6	0	0	0	0	0	0	200	300	0	0	0	0	0	0	0	200	903	0	0	0	0	0	0	0	603	903	0
464	7	0	0	0	0	0	0	200	300	0	0	0	0	0	0	0	200	903	0	0	0	0	0	0	0	603	903	0
464	8	0	0	0	0	0	0	200	300	0	0	0	0	0	0	0	200	903	0	0	0	0	0	0	0	603	903	0
464	9	0	0	0	0	0	0	200	300	0	0	0	0	0	0	0	200	903	0	0	0	0	0	0	0	603	903	0
465	0	0	0	0	0	0	0	200	300	0	0	0	0	0	0	0	200	903	0	0	0	0	0	0	0	603	903	0
465	1	0	0	0	0	0	0	200	300	0	0	0	0	0	0	0	200	903	0	0	0	0	0	0	0	603	903	0
465	2	0	0	0	0	0	0	200	300	0	0	0	0	0	0	0	200	903	0	0	0	0	0	0	0	603	903	0
465	3	0	0	0	0	0	0	200	300	0	0	0	0	0	0	0	200	903	0	0	0	0	0	0	0	603	903	0
465	4	0	0	0	0	0	0	200	300	0	0	0	0	0	0	0	200	903	0	0	0	0	0	0	0	603	903	0
465	5	0	0	0	0	0	0	200	300	0	0	0	0	0	0	0	200	903	0	0	0	0	0	0	0	603	903	0
465	6	0	0	0	0	0	0	200	300	0	0	0	0	0	0	0	200	903	0	0	0	0	0	0	0	603	903	0
465	7	0	0	0	0	0	0	200	300	0	0	0	0	0	0	0	200	903	0	0	0	0	0	0	0	603	903	0
465	8	0	0	0	0	0	0	200	300	0	0	0	0	0	0	0	200	903	0	0	0	0	0	0	0	603	903	0
465	9	0	0	0	0	0	0	200	300	0	0	0	0	0	0	0	200	903	0	0	0	0	0	0	0	603	903	0
466	0	0	0	0	0	0	0	200	300	0	0	0	0	0	0	0	200	903	0	0	0	0	0	0	0	603	903	0
466	1	0	0	0	0	0	0	200	300	0	0	0	0	0	0	0	200	903	0	0	0	0	0	0	0	603	903	0
466	2	0	0	0	0	0	0	200	300	0	0	0	0	0	0	0	200	903	0	0	0	0	0	0	0	603	903	0
466	3	0	0	0	0	0	0	200	300	0	0	0	0	0	0	0	200	903	0	0	0	0	0	0	0	603	903	0
466	4	0	0	0	0	0	0	200	300	0	0	0	0	0	0	0	200	903	0	0	0	0	0	0	0	603	903	0
466	5	0	0	0	0	0	0	200	300	0	0	0	0	0	0	0	200	903	0	0	0	0	0	0	0	603	903	0
466	6	0	0	0	0	0	0	200	300	0	0	0	0	0	0	0	200	903	0	0	0	0	0	0	0	603	903	0
466	7	0	0	0	0	0	0	200	300	0	0	0	0	0	0	0	200	903	0	0	0	0	0	0	0	603	903	0
466	8	0	0	0	0	0	0	200	300	0	0	0	0	0	0	0	200	903	0	0	0	0	0	0	0	603	903	0
466	9	0	0	0	0	0	0	200	300	0	0	0	0	0	0	0	200	903	0	0	0	0	0	0	0	603	903	0
467	0	0	0	0	0	0	0	200	300	0	0	0	0	0	0	0	200	903	0	0	0	0	0	0	0	603	903	0
467	1	0	0	0	0	0	0	200	300	0	0	0	0	0	0	0	200	903	0	0	0	0	0	0	0	603	903	0
467	2	0	0	0	0	0	0	200	300	0	0	0	0	0	0	0	200	903	0	0	0	0	0	0	0	603	903	0
467	3	0	0	0	0	0	0	200	300	0	0	0	0	0	0	0	200	903	0	0	0	0	0	0	0	603	903	0
467	4	0	0	0	0	0	0	200	300	0	0	0	0	0	0	0	200	903	0	0	0	0	0	0	0	603	903	0
467	5	0	0	0	0	0	0	200	300	0	0	0	0	0	0	0	200	903	0	0	0	0	0	0	0	603	903	0
467	6	0	0	0	0	0	0	200	300	0	0	0	0	0	0	0	200	903	0	0	0	0	0	0	0	603	903	0
467	7	0	0	0	0	0	0	200	300	0	0	0	0	0	0	0	200	903	0	0	0	0	0	0	0	603	903	0
467	8	0	0	0	0	0	0	200	300	0	0	0	0	0	0	0	200	903	0	0	0	0	0	0	0	603	903	0
467	9	0	0	0	0	0	0	200	300	0	0	0	0	0	0	0	200	903	0	0	0	0	0	0	0	603	903	0
468	0	0	0	0	0	0	0	200	300	0	0	0	0	0	0	0	200	903	0	0	0	0	0	0	0	603	903	0
468	1	0	0	0	0	0	0	200	300	0	0	0	0	0	0	0	200	903	0	0	0	0	0	0	0	603	903	0
468	2	0	0	0	0	0	0	200	300	0	0	0	0	0	0	0	200	903	0	0	0	0	0	0	0	603	903	0
468	3	0	0	0	0	0	0	200	300	0	0	0	0	0	0	0	200	903	0	0	0	0	0	0	0	603	903	0
468	4	0	0	0	0	0	0	200	300	0	0	0	0	0	0	0	200	903	0	0	0	0	0	0	0	603	903	0
468	5	0	0	0	0	0	0	200	300	0	0	0	0	0	0	0	200	903	0	0	0	0	0	0	0	603	903	0
468	6	0	0	0	0	0	0	200	300	0	0	0	0	0	0	0	200	903	0	0	0	0	0	0	0	603	903	0
468	7	0	0	0	0	0	0	200	300	0	0	0	0	0	0	0	200	903	0	0	0	0	0	0	0	603	903	0
468	8	0	0	0	0	0	0	200	300	0	0	0	0	0	0	0	200	903	0	0	0	0	0	0	0	603	903	0
468	9	0	0	0	0	0	0	200	300	0	0	0	0	0	0	0	200	903	0	0	0	0	0	0	0	603	903	0
469	0	0	0	0	0	0	0	200	300	0	0	0	0	0	0	0	200	903	0	0	0	0	0	0	0	603	903	0
469	1	0	0	0	0	0	0	200	300	0	0	0	0	0	0	0	200	903	0	0	0	0	0	0	0	603	903	0
469	2	0	0	0	0	0	0	200	300	0	0	0	0	0	0	0	200	903	0	0	0	0	0	0	0	603	903	0
469	3	0	0	0	0	0	0	200	300	0	0	0	0	0	0	0	200	903	0	0	0	0	0	0	0	603	903	0
469	4	0	0	0	0	0	0	200	300	0	0	0	0	0	0	0	200	903	0	0	0	0	0	0	0	603	903	0
469	5	0	0	0	0	0	0	200	300	0	0	0	0	0	0	0	200	903	0	0	0	0	0	0	0	603	903	0
469	6	0	0	0	0	0	0	200	300	0	0	0	0	0	0	0	200	903	0	0	0	0	0	0	0	603	903	0
469	7	0	0	0	0	0	0	200	300	0	0	0	0	0	0	0	200	903	0	0	0	0	0	0	0	603	903	0
469	8	0	0	0	0	0	0	200	300	0	0	0	0	0	0	0	200	903	0	0	0	0	0	0	0	603	903	0
469	9	0	0	0	0	0	0	200	300	0	0	0	0	0	0	0	200	903	0	0	0	0	0	0	0	603	903	0
470	0	0	0	0	0	0	0	200	300	0	0	0	0	0	0	0	200	903	0	0	0	0	0	0	0	603	903	0
470	1	0	0	0	0	0	0	200	300	0	0	0	0	0	0	0	200	903	0	0	0	0	0	0	0	603	903	0
470	2	0	0	0	0	0	0	200	300	0	0	0	0	0	0	0	200	903	0	0	0	0	0	0	0	603	903	0
470	3	0	0	0	0	0	0	200	300	0	0	0	0	0	0	0	200	903	0	0	0	0	0	0	0	603	903	0
470	4	0	0	0	0	0	0	200	300	0	0	0	0	0	0	0	200	903	0	0	0	0	0	0	0	603	903	0
470	5	0	0	0	0	0	0	200	300	0	0	0	0	0	0	0	200	903	0	0	0	0	0	0	0	603	903	0
470	6	0	0	0	0	0	0	200	300	0	0	0	0	0	0	0	200	903	0	0	0	0	0	0	0	603	903	0
470	7	0	0	0	0	0	0	200	300	0	0	0	0	0	0	0	200	903	0	0	0	0	0	0	0	603	903	0
470	8	0	0	0	0	0	0	200	300	0	0	0	0	0	0	0	200	903	0	0	0	0	0	0	0	603	903	0
470	9	0	0	0	0	0	0	200	300	0	0	0	0	0	0	0	200	903	0	0	0	0	0	0	0	603	903	0
471	0	0	0	0	0	0	0	200	300	0	0	0	0	0	0	0	200	903	0	0	0	0	0	0	0	603	903	0
471	1	0	0	0	0	0	0	200	300	0	0	0	0	0	0	0	200	903	0	0	0	0	0	0	0	603	903	0
471	2	0	0	0	0	0	0	200	300	0	0	0	0	0	0	0	200	903	0	0	0	0	0	0	0	603	903	0
471	3	0	0	0	0	0	0	200	300	0	0	0	0	0	0	0	200	903	0	0	0	0	0	0	0	603	903	0
471	4	0	0	0	0	0	0	200	300	0	0	0	0	0	0	0	200	903	0	0	0	0	0	0	0	603	903	0
471	5	0	0	0	0	0	0	200	300	0	0	0	0	0	0	0	200	903	0	0	0	0	0	0	0	603	903	0
471	6	0	0	0	0	0	0	200	300	0	0	0	0	0	0	0	200	903	0	0	0	0	0	0	0	603	903	0
471	7	0	0	0	0	0	0	200	300	0	0	0	0	0	0	0	200	903	0	0	0	0	0	0	0	603	903	0
471	8	0	0	0	0	0	0	200	300	0	0	0	0	0	0	0	200	903	0	0	0	0	0	0	0	603	903	0
471	9	0	0	0	0	0	0	200	300	0	0	0	0	0	0	0	200	903	0	0	0	0	0	0	0	603	903	0
472	0	0	0	0	0	0	0	200	300	0	0	0	0	0	0	0	200	903	0	0	0	0	0	0	0	603	903	0
472	1	0	0	0	0	0	0	200	300	0	0	0	0	0	0	0	200	903	0	0	0	0	0	0	0	603	903	0
472	2	0	0	0	0	0	0	200	300	0	0	0	0	0	0	0	200	903	0	0	0	0	0	0	0	603	903	0
472	3	0	0	0	0	0	0	200	300	0	0	0	0	0	0	0	200	903	0	0	0	0	0	0	0	603	903	0
472	4	0	0	0	0	0	0	200	300	0	0	0	0	0	0	0	200	903	0	0	0	0	0	0	0	603	903	0
472	5	0	0	0	0	0	0	200	300	0	0	0	0	0	0	0	200	903	0	0	0	0	0	0	0	603	903	0
472	6	0	0	0	0	0	0	200	300	0	0	0	0	0	0	0	200	903	0	0	0	0	0	0	0	603	903	0
472	7	0	0	0	0	0	0	200	300	0	0	0	0	0	0	0	200	903	0	0	0	0	0	0	0	603	903	0
472	8	0	0	0	0	0	0	200	300	0	0	0	0	0	0	0	200	903	0	0	0	0	0	0	0	603	903	0
472	9	0	0	0	0	0	0	200	300	0	0	0	0	0	0	0	200	903	0	0	0	0	0	0	0	603	903	0
473	0	0	0	0	0	0	0	200	300	0	0	0	0	0	0	0	200	903	0	0	0	0	0	0	0	603	903	0
473	1	0	0	0	0	0	0	200	300	0	0	0	0	0	0	0	200	903	0	0	0	0	0	0	0	603	903	0
473	2	0	0	0	0	0	0	200	300	0	0	0	0	0	0	0	200	903	0	0	0	0	0	0	0	603	903	0
473	3	0	0	0	0	0	0	200	300	0	0	0	0	0	0	0	200	903	0	0	0	0	0	0	0	603	903	0
473	4	0	0	0	0	0	0	200	300	0	0	0	0	0	0	0	200	903	0	0	0	0	0	0	0	603	903	0
473	5	0	0	0	0	0	0	200	300	0	0	0	0	0	0	0	200	903	0	0	0	0	0	0	0	603	903	0
473	6	0	0	0	0	0	0	200	300	0	0	0	0	0	0	0	200	903	0	0	0	0	0	0	0	603	903	0
473	7	0	0	0	0	0	0	200	300	0	0	0	0	0	0	0	200	903	0	0	0	0	0	0	0	603	903	0
473	8	0	0	0	0	0	0	200	300	0	0	0	0	0	0	0	200	903	0	0	0	0	0	0	0	603	903	0
473	9	0	0	0	0	0	0	200	300	0	0	0	0	0	0	0	200	903	0	0	0	0	0	0	0	603	903	0
474	0	0	0	0	0	0	0	200	300	0	0	0	0	0	0	0	200	903	0	0	0	0	0	0	0	603	903	0
474	1	0	0	0	0	0	0	200	300	0	0	0	0	0	0	0	200	903	0	0	0	0	0	0	0	603	903	0
474	2	0	0	0	0	0	0	200	300	0	0	0	0	0	0	0	200	903	0	0	0	0	0	0	0	603	903	0
474	3	0	0	0	0	0	0	200	300	0	0	0	0	0	0	0	200	903	0	0	0	0	0	0	0	603	903	0
474	4	0	0	0	0	0	0	200	300	0	0	0	0	0	0	0	200	903	0	0	0	0	0	0	0	603	903	0
474	5	0	0	0	0	0	0	200	300	0	0	0	0	0	0	0	200	903	0	0	0	0	0	0	0	603	903	0
474	6	0	0	0	0	0	0	200	300	0	0	0	0	0	0	0	200	903	0	0	0	0	0	0	0	603	903	0
474	7	0	0	0	0	0	0	200	300	0	0	0	0	0	0	0	200	903	0	0	0	0	0	0	0	603	903	0
474	8	0	0	0	0	0	0	200	300	0	0	0	0	0	0	0	200	903	0	0	0	0	0	0	0	603	903	0
474	9	0	0	0	0	0	0	200	300	0	0	0	0	0	0	0	200	903	0	0	0	0	0	0	0	603	903	0
475	0	0	0	0	0	0	0	200	300	0	0	0	0	0	0	0	200	903	0	0	0	0	0	0	0	603	903	0
475	1	0	0	0	0	0	0	200	300	0	0	0	0	0	0	0	200	903	0	0	0	0	0	0	0	603	903	0
475	2	0	0	0	0	0	0	200	300	0	0	0	0	0	0	0	200	903	0	0	0	0	0	0	0	603	903	0
475	3	0	0	0	0	0	0	200	300	0	0	0	0	0	0	0	200	903	0	0	0	0	0	0	0	603	903	0
475	4	0	0	0	0	0	0	200	300	0	0	0	0	0	0	0	200	903	0	0	0	0	0	0	0	603	903	0
475	5	0	0	0	0	0	0	200	300	0	0	0	0	0	0	0	200	903	0	0	0	0	0	0	0	603	903	0
475	6	0	0	0	0	0	0	200	300	0	0	0	0	0	0	0	200	903	0	0	0	0	0	0	0	603	903	0
475	7	0	0	0	0	0	0	200	300	0	0	0	0	0	0	0	200	903	0	0	0	0	0	0	0	603	903	0
475	8	0	0	0	0	0	0	200	300	0	0	0	0	0	0	0	200	903	0	0	0	0	0	0	0	603	903	0
475	9	0	0	0	0	0	0	200	300	0	0	0	0	0	0	0	200	903	0	0	0	0	0	0	0	603	903	0
476	0	0	0	0	0	0	0	200	300	0	0	0	0	0	0	0	200	903	0	0	0	0	0	0	0	603	903	0
476	1	0	0	0	0	0	0	200	300	0	0	0	0	0	0	0	200	903	0	0	0	0	0	0	0	603	903	0
476	2	0	0	0	0	0	0	200	300	0	0	0	0	0	0	0	200	903	0	0	0	0	0	0	0	603	903	0
476	3	0	0	0	0	0	0	200	300	0	0	0	0	0	0	0	200	903	0	0	0	0	0	0	0	603	903	0
476	4	0	0	0	0	0	0	200	300	0	0	0	0	0	0	0	200	903	0	0	0	0	0	0	0	603	903	0
476	5	0	0	0	0	0	0	200	300	0	0	0	0	0	0	0	200	903	0	0	0	0	0	0	0	603	903	0
476	6	0	0	0	0	0	0	200	300	0	0	0	0	0	0	0	200	903	0	0	0	0	0	0	0	603	903	0
476	7	0	0	0	0	0	0	200	300	0	0	0	0	0	0	0	200	903	0	0	0	0	0	0	0	603	903	0
476	8	0	0	0	0	0	0	200	300	0	0	0	0	0	0	0	200	903	0	0	0	0	0	0	0	603	903	0
476	9	0	0	0	0	0	0	200	300	0	0	0	0	0	0	0	200	903	0	0	0	0	0	0	0	603	903	0
477	0	0	0	0	0	0	0	200	300	0	0	0	0	0	0	0	200	903	0	0	0	0	0	0	0	603	903	0
477	1	0	0	0	0	0	0	200	300	0	0	0	0	0	0	0	200	903	0	0	0	0	0	0	0	603	903	0
477	2	0	0	0	0	0	0	200	300	0	0	0	0	0	0	0	200	903	0	0	0	0	0	0	0	603	903	0
477	3	0	0	0	0	0	0	200	300	0	0	0	0	0	0	0	200	903	0	0	0	0	0	0	0	603	903	0
477	4	0	0	0	0	0	0	200	300	0	0.279236	13.3363	-18.1251	-5972.81	2529.56	847.092	339.561	1232.53	0	0	0	0	0	0	0	603	903	0
477	5	0	0	0	0	0	0	200	300	0	3.94135	15.32	-22.3975	-5881.26	2834.73	1259.08	326.564	1165.59	0	0	0	0	0	0	0	603	903	0
477	6	0	0	0	0	0	0	200	300	0	2.87323	15.6252	-25.4493	-7620.76	2895.77	1213.3	313.786	1202.45	0	0	0	0	0	0	0	603	903	0
477	7	0	0	0	0	0	0	200	300	0	1.34735	16.2355	-27.8907	-8170.08	3384.05	1121.75	321.332	1195.93	0	0	0	0	0	0	0	603	903	0
477	8	0	0	0	0	0	0	200	300	0	5.16205	17.151	-30.3321	-8627.84	3506.12	1030.2	315.591	1187.45	0	0	0	0	0	0	0	603	903	0
477	9	0	0	0	0	0	0	200	300	0	4.5517	17.3036	-32.7735	-9177.16	3994.4	1030.2	321.879	1183.02	0	0	0	0	0	0	0	603	903	0
478	0	0	0	0	0	0	0	200	300	0	6.23016	18.5243	-34.9098	-10092.7	4299.58	847.092	323.163	1192.11	0	0	0	0	0	0	0	603	903	0
478	1	0	0	0	0	0	0	200	300	0	5.92499	19.1347	-39.4874	-11191.3	4726.82	755.539	319.705	1186.41	0	0	0	0	0	0	0	603	903	0
478	2	0	0	0	0	0	0	200	300	0	5.46722	18.9821	-41.9288	-10825.1	4360.61	1075.97	304	1161.18	0	0	0	0	0	0	0	603	903	0
478	3	0	0	0	0	0	0	200	300	0	6.53534	18.0666	-45.8961	-11832.2	5276.14	572.433	314.958	1160.8	0	0	0	0	0	0	0	603	903	0
478	4	0	0	0	0	0	0	200	300	0	7.45087	19.1347	-48.6427	-12930.8	5581.31	526.657	314.741	1168.83	0	0	0	0	0	0	0	603	903	0
478	5	0	0	0	0	0	0	200	300	0	8.36639	18.5243	-51.9996	-13388.6	5581.31	480.881	307.334	1160.47	0	0	0	0	0	0	0	603	903	0
478	6	0	0	0	0	0	0	200	300	0	6.9931	17.914	-55.9669	-14670.3	6069.59	755.539	308.45	1165.13	0	0	0	0	0	0	0	603	903	0
478	7	0	0	0	0	0	0	200	300	0	6.38275	16.2355	-57.7979	-15585.9	6496.84	68.8931	312.406	1172.66	0	0	0	0	0	0	0	603	903	0
478	8	0	0	0	0	0	0	200	300	0	5.7724	15.32	-60.2393	-15494.3	6252.7	114.67	303.798	1160.21	0	0	0	0	0	0	0	603	903	0
478	9	0	0	0	0	0	0	200	300	0	7.14569	14.0993	-63.5963	-15402.7	6313.74	114.67	299.278	1145.2	0	0	0	0	0	0	0	603	903	0
479	0	0	0	0	0	0	0	200	300	0	8.06122	13.4889	-63.2911	-17050.7	7351.33	-159.989	316.151	1172.4	0	0	0	0	0	0	0	603	903	0
479	1	0	0	0	0	0	0	200	300	0	7.14569	11.0475	-67.2584	-18057.8	7473.4	-297.318	311.115	1171.48	0	0	0	0	0	0	0	603	903	0
479	2	0	0	0	0	0	0	200	300	0	8.36639	11.0475	-71.836	-18515.5	7046.16	23.1167	298.087	1160.75	0	0	0	0	0	0	0	603	903	0
479	3	0	0	0	0	0	0	200	300	0	7.45087	8.91129	-74.2774	-19248	7717.54	-526.2	303.902	1162.14	0	0	0	0	0	0	0	603	903	0
479	4	0	0	0	0	0	0	200	300	0	9.5871	7.84317	-74.8878	-19522.6	7900.65	-434.647	305.5	1163.69	0	0	0	0	0	0	0	603	903	0
479	5	0	0	0	0	0	0	200	300	0	9.28192	6.62247	-77.3292	-20255	7595.47	-571.977	298.223	1164.93	0	0	0	0	0	0	0	603	903	0
479	6	0	0	0	0	0	0	200	300	0	8.21381	6.62247	-79.7706	-20163.5	8022.72	-709.306	300.572	1155.77	0	0	0	0	0	0	0	603	903	0
479	7	0	0	0	0	0	0	200	300	0	8.21381	4.63883	-81.6016	-20895.9	8144.79	-892.411	299.812	1159.07	0	0	0	0	0	0	0	603	903	0
479	8	0	0	0	0	0	0	200	300	0	9.12933	3.41813	-84.0431	-20804.4	8327.9	-800.858	299.091	1150.54	0	0	0	0	0	0	0	603	903	0
479	9	0	0	0	0	0	0	200	300	0	8.97675	2.5026	-87.7052	-21536.8	8572.04	-1395.95	297.737	1148.56	0	0	0	0	0	0	0	603	903	0
480	0	0	0	0	0	0	0	200	300	0	8.06122	1.73966	-87.7052	-21628.3	8877.22	-983.964	301.217	1149.6	0	0	0	0	0	0	0	603	903	0
480	1	0	0	0	0	0	0	200	300	0	7.90863	1.43448	-89.5362	-22727	9060.32	-1212.85	301.192	1156.83	0	0	0	0	0	0	0	603	903	0
480	2	0	0	0	0	0	0	200	300	0	8.36639	0.518956	-91.6724	-23093.2	8694.11	-1395.95	294.839	1154.91	0	0	0	0	0	0	0	603	903	0
480	3	0	0	0	0	0	0	200	300	0	8.36639	-0.701747	-95.6397	-24100.3	9426.53	-1533.28	298.563	1154.99	0	0	0	0	0	0	0	603	903	0
480	4	0	0	0	0	0	0	200	300	0	6.68793	-1.61727	-99.607	-25015.8	9792.75	-892.411	298.314	1154.15	0	0	0	0	0	0	0	603	903	0
480	5	0	0	0	0	0	0	200	300	0	4.70429	-1.76986	-100.217	-25748.2	9609.64	-709.306	295.888	1159.92	0	0	0	0	0	0	0	603	903	0
480	6	0	0	0	0	0	0	200	300	0	6.23016	-4.36386	-103.574	-25748.2	9914.82	-709.306	295.727	1151.6	0	0	0	0	0	0	0	603	903	0
480	7	0	0	0	0	0	0	200	300	0	7.90863	-3.44833	-106.321	-26389.1	9731.71	-526.2	291.531	1151.2	0	0	0	0	0	0	0	603	903	0
480	8	0	0	0	0	0	0	200	300	0	3.48358	-3.90609	-111.814	-27396.2	9914.82	-297.318	288.672	1148.02	0	0	0	0	0	0	0	603	903	0
480	9	0	0	0	0	0	0	200	300	0	3.78876	-4.97421	-110.288	-28037	10036.9	-68.436	291.006	1157.22	0	0	0	0	0	0	0	603	903	0
481	0	0	0	0	0	0	0	200	300	0	0.126648	-5.58456	-116.697	-27945.5	10281	23.1167	288.1	1142.47	0	0	0	0	0	0	0	603	903	0
481	1	0	0	0	0	0	0	200	300	0	1.04218	-6.04232	-118.223	-28861	10220	297.775	286.447	1147.12	0	0	0	0	0	0	0	603	903	0
481	2	0	0	0	0	0	0	200	300	0	-0.178527	-7.11044	-120.054	-29868.1	10464.1	297.775	287.162	1151.79	0	0	0	0	0	0	0	603	903	0
481	3	0	0	0	0	0	0	200	300	0	-2.61993	-7.87338	-124.631	-29959.6	11074.5	435.104	288.858	1143.39	0	0	0	0	0	0	0	603	903	0
481	4	0	0	0	0	0	0	200	300	0	-3.23029	-8.94149	-129.209	-31058.3	11318.6	480.881	287.599	1143.37	0	0	0	0	0	0	0	603	903	0
481	5	0	0	0	0	0	0	200	300	0	-2.46735	-10.0096	-131.345	-31332.9	11013.4	343.551	283.851	1141.55	0	0	0	0	0	0	0	603	903	0
481	6	0	0	0	0	0	0	200	300	0	-2.92511	-11.5355	-135.618	-32340	11501.7	526.657	284.81	1141.46	0	0	0	0	0	0	0	603	903	0
481	7	0	0	0	0	0	0	200	300	0	-5.21393	-12.1458	-136.533	-33438.6	11867.9	526.657	286.923	1147.91	0	0	0	0	0	0	0	603	903	0
481	8	0	0	0	0	0	0	200	300	0	-5.97687	-12.451	-140.806	-34079.5	11806.9	206.222	283.852	1145.03	0	0	0	0	0	0	0	603	903	0
481	9	0	0	0	0	0	0	200	300	0	-5.5191	-13.8243	-144.773	-35361.2	12051	435.104	283.241	1147.25	0	0	0	0	0	0	0	603	903	0
482	0	0	0	0	0	0	0	200	300	0	-5.97687	-15.1976	-149.961	-35635.9	12234.2	206.222	281.582	1140.63	0	0	0	0	0	0	0	603	903	0
482	1	0	0	0	0	0	0	200	300	0	-5.06134	-15.9605	-153.318	-36093.7	12600.4	160.446	282.185	1138.42	0	0	0	0	0	0	0	603	903	0
482	2	0	0	0	0	0	0	200	300	0	-7.50275	-16.7235	-154.539	-37192.3	12844.5	68.8931	283.115	1143.67	0	0	0	0	0	0	0	603	903	0
482	3	0	0	0	0	0	0	200	300	0	-7.80792	-17.639	-160.947	-38474	13454.9	526.657	283.598	1142.05	0	0	0	0	0	0	0	603	903	0
482	4	0	0	0	0	0	0	200	300	0	-9.02863	-18.7071	-165.525	-38657.1	13638	251.999	282.392	1136.54	0	0	0	0	0	0	0	603	903	0
482	5	0	0	0	0	0	0	200	300	0	-9.02863	-19.6226	-170.713	-38931.8	13576.9	251.999	279.531	1131.05	0	0	0	0	0	0	0	603	903	0
482	6	0	0	0	0	0	0	200	300	0	-9.63898	-20.8433	-174.375	-40488.2	14004.2	23.1167	280.311	1135.19	0	0	0	0	0	0	0	603	903	0
482	7	0	0	0	0	0	0	200	300	0	-10.2493	-22.2166	-179.563	-41861.5	14736.6	206.222	282.069	1136.13	0	0	0	0	0	0	0	603	903	0
482	8	0	0	0	0	0	0	200	300	0	-9.48639	-23.2848	-182.004	-42410.8	14675.6	-251.541	280.633	1136.02	0	0	0	0	0	0	0	603	903	0
482	9	0	0	0	0	0	0	200	300	0	-10.5545	-25.421	-185.972	-42685.5	14919.7	-68.436	280.226	1132.53	0	0	0	0	0	0	0	603	903	0
483	0	0	0	0	0	0	0	200	300	0	-9.02863	-24.8106	-191.16	-43967.2	15346.9	-434.647	280.283	1133	0	0	0	0	0	0	0	603	903	0
483	1	0	0	0	0	0	0	200	300	0	-11.0123	-25.5736	-195.432	-45340.5	15957.3	-343.094	281.651	1135	0	0	0	0	0	0	0	603	903	0
483	2	0	0	0	0	0	0	200	300	0	-12.0804	-28.015	-199.705	-45981.4	15896.3	-434.647	279.599	1133.25	0	0	0	0	0	0	0	603	903	0
483	3	0	0	0	0	0	0	200	300	0	-12.8433	-28.9305	-204.587	-46256	16689.7	-297.318	281.577	1129.09	0	0	0	0	0	0	0	603	903	0
483	4	0	0	0	0	0	0	200	300	0	-11.47	-28.9305	-206.724	-47354.7	17055.9	-617.753	282.506	1132.07	0	0	0	0	0	0	0	603	903	0
483	5	0	0	0	0	0	0	200	300	0	-11.1649	-29.9986	-211.912	-48270.2	17361.1	-434.647	281.926	1130.78	0	0	0	0	0	0	0	603	903	0
483	6	0	0	0	0	0	0	200	300	0	-12.5381	-30.7616	-215.574	-48544.8	17605.3	-709.306	281.667	1128.19	0	0	0	0	0	0	0	603	903	0
483	7	0	0	0	0	0	0	200	300	0	-12.9959	-31.9823	-220.762	-49735	17788.4	-617.753	280.577	1128.29	0	0	0	0	0	0	0	603	903	0
483	8	0	0	0	0	0	0	200	300	0	-12.6907	-32.2874	-225.645	-50192.8	17605.3	-800.858	278.022	1125.44	0	0	0	0	0	0	0	603	903	0
483	9	0	0	0	0	0	0	200	300	0	-11.0123	-33.3556	-228.086	-50742.1	18826	-983.964	282.539	1125.47	0	0	0	0	0	0	0	603	903	0
484	0	0	0	0	0	0	0	200	300	0	-11.3174	-33.203	-231.138	-52206.9	18826	-1167.07	281.449	1128.87	0	0	0	0	0	0	0	603	903	0
484	1	0	0	0	0	0	0	200	300	0	-12.5381	-34.5763	-237.241	-52390.1	19131.1	-1029.74	280.64	1123.83	0	0	0	0	0	0	0	603	903	0
484	2	0	0	0	0	0	0	200	300	0	-12.0804	-35.1866	-242.734	-52847.8	19741.5	-1121.29	281.33	1120.72	0	0	0	0	0	0	0	603	903	0
484	3	0	0	0	0	0	0	200	300	0	-11.0123	-36.7125	-243.955	-52664.7	20290.8	-1304.4	283.174	1118.88	0	0	0	0	0	0	0	603	903	0
484	4	0	0	0	0	0	0	200	300	0	-10.8597	-37.1703	-248.838	-54312.7	20168.7	-1579.06	281.052	1121.27	0	0	0	0	0	0	0	603	903	0
484	5	0	0	0	0	0	0	200	300	0	-9.94415	-37.9332	-253.721	-55319.7	20718	-1350.18	281.657	1121.03	0	0	0	0	0	0	0	603	903	0
484	6	0	0	0	0	0	0	200	300	0	-7.80792	-38.5435	-254.636	-56601.5	20473.9	-1395.95	280.405	1125.28	0	0	0	0	0	0	0	603	903	0
484	7	0	0	0	0	0	0	200	300	0	-10.2493	-40.0694	-262.266	-56052.2	21633.6	-1212.85	282.487	1116.72	0	0	0	0	0	0	0	603	903	0
484	8	0	0	0	0	0	0	200	300	0	-9.02863	-39.9168	-268.369	-56967.7	21755.6	-1899.49	281.066	1115.27	0	0	0	0	0	0	0	603	903	0
484	9	0	0	0	0	0	0	200	300	0	-7.19757	-41.5953	-273.557	-58341	22854.3	-1807.94	283.545	1116.27	0	0	0	0	0	0	0	603	903	0
485	0	0	0	0	0	0	0	200	300	0	-6.58722	-42.5108	-277.219	-58707.2	22793.2	-2219.93	282.221	1114.77	0	0	0	0	0	0	0	603	903	0
485	1	0	0	0	0	0	0	200	300	0	-6.73981	-43.7315	-281.797	-58798.7	23342.6	-2448.81	282.835	1111.66	0	0	0	0	0	0	0	603	903	0
485	2	0	0	0	0	0	0	200	300	0	-4.2984	-43.8841	-285.459	-59805.8	23952.9	-2860.79	283.91	1112.51	0	0	0	0	0	0	0	603	903	0
485	3	0	0	0	0	0	0	200	300	0	-2.92511	-45.8678	-290.952	-60355.2	24441.2	-3043.9	284.004	1110.44	0	0	0	0	0	0	0	603	903	0
485	4	0	0	0	0	0	0	200	300	0	-2.00958	-48.4618	-292.478	-61087.6	24380.2	-3501.66	283.357	1111.86	0	0	0	0	0	0	0	603	903	0
485	5	0	0	0	0	0	0	200	300	0	-1.09405	-49.0721	-296.751	-61270.7	25356.7	-3501.66	285.448	1109.47	0	0	0	0	0	0	0	603	903	0
485	6	0	0	0	0	0	0	200	300	0	-0.788879	-50.2928	-299.802	-61362.2	25661.9	-3867.87	285.596	1107.68	0	0	0	0	0	0	0	603	903	0
485	7	0	0	0	0	0	0	200	300	0	0.431824	-52.1239	-303.77	-61820	26333.3	-4325.64	286.688	1106.51	0	0	0	0	0	0	0	603	903	0
485	8	0	0	0	0	0	0	200	300	0	1.34735	-53.192	-306.211	-62827.1	26638.5	-4691.85	286.994	1108.18	0	0	0	0	0	0	0	603	903	0
485	9	0	0	0	0	0	0	200	300	0	0.584412	-54.8704	-311.704	-63101.7	26821.6	-5103.84	286.048	1105.44	0	0	0	0	0	0	0	603	903	0
486	0	0	0	0	0	0	0	200	300	0	2.87323	-57.4644	-313.84	-63101.7	26760.5	-5241.17	285.268	1104.06	0	0	0	0	0	0	0	603	903	0
486	1	0	0	0	0	0	0	200	300	0	3.48358	-59.2955	-316.587	-62277.8	27065.7	-4920.73	285.492	1099.72	0	0	0	0	0	0	0	603	903	0
486	2	0	0	0	0	0	0	200	300	0	4.24652	-60.8214	-318.723	-63284.8	27676.1	-5378.49	286.834	1101.56	0	0	0	0	0	0	0	603	903	0
486	3	0	0	0	0	0	0	200	300	0	3.17841	-61.4317	-321.775	-64108.8	27431.9	-5927.81	285.252	1102.23	0	0	0	0	0	0	0	603	903	0
486	4	0	0	0	0	0	0	200	300	0	5.7724	-61.8895	-323.911	-64383.5	27554	-5698.93	285.066	1101.77	0	0	0	0	0	0	0	603	903	0
486	5	0	0	0	0	0	0	200	300	0	3.63617	-63.2628	-326.047	-64291.9	28347.4	-6110.92	286.943	1100.19	0	0	0	0	0	0	0	603	903	0
486	6	0	0	0	0	0	0	200	300	0	5.00946	-64.7887	-328.489	-64291.9	28286.4	-6156.69	286.111	1098.72	0	0	0	0	0	0	0	603	903	0
486	7	0	0	0	0	0	0	200	300	0	5.46722	-65.8568	-330.015	-64749.7	28103.3	-6294.02	285.158	1099.2	0	0	0	0	0	0	0	603	903	0
486	8	0	0	0	0	0	0	200	300	0	3.94135	-65.8568	-331.846	-64841.2	29018.8	-6248.25	287.447	1098.4	0	0	0	0	0	0	0	603	903	0
486	9	0	0	0	0	0	0	200	300	0	3.78876	-65.399	-333.066	-64749.7	29079.9	-6660.23	287.31	1097.4	0	0	0	0	0	0	0	603	903	0
487	0	0	0	0	0	0	0	200	300	0	6.23016	-66.3145	-333.982	-64566.6	28896.8	-6522.9	286.522	1096.32	0	0	0	0	0	0	0	603	903	0
487	1	0	0	0	0	0	0	200	300	0	5.7724	-66.6197	-334.287	-65390.5	29201.9	-6660.23	287.356	1098.61	0	0	0	0	0	0	0	603	903	0
487	2	0	0	0	0	0	0	200	300	0	4.85687	-66.6197	-338.254	-64841.2	29812.3	-6385.57	288.136	1094.69	0	0	0	0	0	0	0	603	903	0
487	3	0	0	0	0	0	0	200	300	0	5.00946	-67.3827	-337.339	-65115.9	29140.9	-6843.34	286.385	1096.03	0	0	0	0	0	0	0	603	903	0
487	4	0	0	0	0	0	0	200	300	0	5.7724	-66.3145	-337.034	-65024.3	29568.1	-6568.68	287.731	1095.93	0	0	0	0	0	0	0	603	903	0
487	5	0	0	0	0	0	0	200	300	0	7.45087	-65.8568	-340.391	-65573.7	30056.4	-6706.01	288.3	1095.64	0	0	0	0	0	0	0	603	903	0
487	6	0	0	0	0	0	0	200	300	0	6.23016	-66.3145	-343.137	-65848.3	30117.5	-6660.23	287.771	1094.9	0	0	0	0	0	0	0	603	903	0
487	7	0	0	0	0	0	0	200	300	0	5.7724	-66.3145	-344.663	-65939.9	29263	-6706.01	284.903	1094.32	0	0	0	0	0	0	0	603	903	0
487	8	0	0	0	0	0	0	200	300	0	5.92499	-65.8568	-344.968	-65482.1	30361.6	-6706.01	288.013	1092.82	0	0	0	0	0	0	0	603	903	0
487	9	0	0	0	0	0	0	200	300	0	7.29828	-65.8568	-344.358	-65299	30239.5	-6843.34	287.814	1092.63	0	0	0	0	0	0	0	603	903	0
488	0	0	0	0	0	0	0	200	300	0	7.60346	-65.8568	-345.579	-65482.1	30056.4	-6934.89	286.974	1092.49	0	0	0	0	0	0	0	603	903	0
488	1	0	0	0	0	0	0	200	300	0	6.38275	-65.7042	-347.715	-65024.3	30117.5	-6980.67	286.615	1090	0	0	0	0	0	0	0	603	903	0
488	2	0	0	0	0	0	0	200	300	0	7.14569	-65.0938	-348.02	-65848.3	30300.6	-7026.44	287.066	1092.21	0	0	0	0	0	0	0	603	903	0
488	3	0	0	0	0	0	0	200	300	0	8.67157	-66.9249	-347.41	-65115.9	30605.7	-7346.88	288.097	1090.43	0	0	0	0	0	0	0	603	903	0
488	4	0	0	0	0	0	0	200	300	0	9.5871	-67.6878	-348.02	-65207.4	30666.8	-7163.77	288.118	1090.37	0	0	0	0	0	0	0	603	903	0
488	5	0	0	0	0	0	0	200	300	0	9.5871	-66.6197	-347.41	-65848.3	31216.1	-7392.66	289.854	1092.54	0	0	0	0	0	0	0	603	903	0
488	6	0	0	0	0	0	0	200	300	0	12.0285	-67.0775	-348.63	-65848.3	31277.1	-7301.1	289.714	1091.88	0	0	0	0	0	0	0	603	903	0
488	7	0	0	0	0	0	0	200	300	0	10.35	-67.6878	-349.546	-65299	30727.8	-7529.99	287.908	1089.81	0	0	0	0	0	0	0	603	903	0
488	8	0	0	0	0	0	0	200	300	0	11.8759	-69.0611	-350.462	-65115.9	31338.2	-7438.43	289.42	1088.8	0	0	0	0	0	0	0	603	903	0
488	9	0	0	0	0	0	0	200	300	0	13.2492	-69.6715	-351.987	-66031.4	31399.2	-7941.97	289.206	1090.6	0	0	0	0	0	0	0	603	903	0
489	0	0	0	0	0	0	0	200	300	0	12.6389	-69.8241	-352.598	-65665.2	31155.1	-8125.08	288.359	1089.23	0	0	0	0	0	0	0	603	903	0
489	1	0	0	0	0	0	0	200	300	0	14.1647	-69.0611	-353.818	-65115.9	31643.3	-7804.65	289.434	1087.04	0	0	0	0	0	0	0	603	903	0
489	2	0	0	0	0	0	0	200	300	0	15.3854	-68.6034	-352.903	-64749.7	31277.1	-8216.63	288.628	1086.48	0	0	0	0	0	0	0	603	903	0
489	3	0	0	0	0	0	0	200	300	0	17.6743	-69.3663	-357.481	-65207.4	31582.3	-8628.62	288.347	1085.41	0	0	0	0	0	0	0	603	903	0
489	4	0	0	0	0	0	0	200	300	0	17.5217	-71.0448	-358.091	-66031.4	31704.4	-8903.27	288.537	1087.4	0	0	0	0	0	0	0	603	903	0
489	5	0	0	0	0	0	0	200	300	0	19.3527	-69.8241	-356.26	-65756.7	32497.8	-9086.38	291.22	1087.58	0	0	0	0	0	0	0	603	903	0
489	6	0	0	0	0	0	0	200	300	0	18.7424	-71.8077	-359.006	-65024.3	32436.8	-8994.83	290.352	1084.12	0	0	0	0	0	0	0	603	903	0
489	7	0	0	0	0	0	0	200	300	0	20.4208	-71.8077	-360.227	-65299	32314.7	-9406.81	289.707	1084.27	0	0	0	0	0	0	0	603	903	0
489	8	0	0	0	0	0	0	200	300	0	20.726	-72.7232	-361.448	-66031.4	32986.1	-9727.25	291.261	1085.69	0	0	0	0	0	0	0	603	903	0
489	9	0	0	0	0	0	0	200	300	0	20.1157	-72.8758	-359.617	-65390.5	33291.3	-9681.47	292.574	1084.83	0	0	0	0	0	0	0	603	903	0
490	0	0	0	0	0	0	0	200	300	0	20.4208	-74.0965	-364.805	-66123	32925.1	-9956.13	290.254	1084.26	0	0	0	0	0	0	0	603	903	0
490	1	0	0	0	0	0	0	200	300	0	21.9467	-74.5543	-365.72	-66123	33169.2	-10093.5	290.696	1083.8	0	0	0	0	0	0	0	603	903	0
490	2	0	0	0	0	0	0	200	300	0	22.4045	-74.8595	-366.941	-65756.7	33169.2	-10276.6	290.394	1082.2	0	0	0	0	0	0	0	603	903	0
490	3	0	0	0	0	0	0	200	300	0	23.6252	-76.2327	-369.077	-66489.2	33596.4	-10230.8	291.028	1083.15	0	0	0	0	0	0	0	603	903	0
490	4	0	0	0	0	0	0	200	300	0	23.4726	-76.0802	-370.908	-66946.9	33596.4	-10459.7	290.579	1083.49	0	0	0	0	0	0	0	603	903	0
490	5	0	0	0	0	0	0	200	300	0	24.2355	-77.4535	-372.434	-66306.1	34145.8	-10459.7	291.683	1081.03	0	0	0	0	0	0	0	603	903	0
490	6	0	0	0	0	0	0	200	300	0	25.6088	-76.6905	-372.129	-66672.3	34450.9	-10276.6	292.578	1082.16	0	0	0	0	0	0	0	603	903	0
490	7	0	0	0	0	0	0	200	300	0	25.1511	-78.0638	-375.486	-67130	34084.7	-10780.1	290.775	1081.78	0	0	0	0	0	0	0	603	903	0
490	8	0	0	0	0	0	0	200	300	0	25.1511	-78.2164	-376.401	-67404.8	34389.9	-10871.7	291.365	1082.08	0	0	0	0	0	0	0	603	903	0
490	9	0	0	0	0	0	0	200	300	0	25.4562	-78.6742	-379.148	-67221.6	34817.2	-11009	291.83	1080.3	0	0	0	0	0	0	0	603	903	0
491	0	0	0	0	0	0	0	200	300	0	26.5244	-78.9793	-378.233	-67130	34695.1	-11237.9	291.73	1080.48	0	0	0	0	0	0	0	603	903	0
491	1	0	0	0	0	0	0	200	300	0	26.5244	-79.7423	-382.2	-67130	34939.2	-11100.5	291.416	1078.64	0	0	0	0	0	0	0	603	903	0
491	2	0	0	0	0	0	0	200	300	0	26.0666	-80.3526	-383.421	-68045.6	35488.5	-11466.8	292.558	1080.47	0	0	0	0	0	0	0	603	903	0
491	3	0	0	0	0	0	0	200	300	0	26.5244	-79.5897	-384.336	-68320.2	35427.5	-11466.8	292.178	1080.76	0	0	0	0	0	0	0	603	903	0
491	4	0	0	0	0	0	0	200	300	0	28.2028	-80.2	-386.472	-68503.4	35488.5	-11604.1	291.827	1080.25	0	0	0	0	0	0	0	603	903	0
491	5	0	0	0	0	0	0	200	300	0	29.7287	-80.2	-390.44	-68320.2	36343	-11512.5	293.082	1077.98	0	0	0	0	0	0	0	603	903	0
491	6	0	0	0	0	0	0	200	300	0	28.3554	-80.2	-392.881	-70059.7	36221	-11466.8	292.193	1081.32	0	0	0	0	0	0	0	603	903	0
491	7	0	0	0	0	0	0	200	300	0	30.4916	-81.1156	-393.491	-69968.2	35610.6	-11375.2	290.499	1080.81	0	0	0	0	0	0	0	603	903	0
491	8	0	0	0	0	0	0	200	300	0	29.1183	-80.963	-395.628	-69418.9	36648.2	-11695.6	292.633	1078.47	0	0	0	0	0	0	0	603	903	0
491	9	0	0	0	0	0	0	200	300	0	29.2709	-80.2	-398.984	-69968.2	36953.4	-11466.8	292.619	1078.37	0	0	0	0	0	0	0	603	903	0
492	0	0	0	0	0	0	0	200	300	0	30.0339	-80.5052	-402.647	-70975.2	36526.1	-11741.4	290.715	1079.27	0	0	0	0	0	0	0	603	903	0
492	1	0	0	0	0	0	0	200	300	0	29.4235	-79.7423	-401.731	-70792.2	37136.5	-11649.9	292.441	1079.22	0	0	0	0	0	0	0	603	903	0
492	2	0	0	0	0	0	0	200	300	0	29.1183	-80.3526	-407.224	-70975.2	37136.5	-11787.2	291.194	1077.29	0	0	0	0	0	0	0	603	903	0
492	3	0	0	0	0	0	0	200	300	0	29.7287	-80.5052	-409.36	-70883.7	37502.7	-11649.9	291.613	1076.16	0	0	0	0	0	0	0	603	903	0
492	4	0	0	0	0	0	0	200	300	0	30.1865	-79.2845	-408.14	-72073.9	37685.8	-11878.7	292.336	1079.59	0	0	0	0	0	0	0	603	903	0
492	5	0	0	0	0	0	0	200	300	0	28.6606	-79.8949	-413.023	-72440.1	38601.3	-11604.1	293.461	1078.39	0	0	0	0	0	0	0	603	903	0
492	6	0	0	0	0	0	0	200	300	0	29.1183	-79.8949	-416.379	-72531.7	38357.2	-11466.8	292.121	1077.2	0	0	0	0	0	0	0	603	903	0
492	7	0	0	0	0	0	0	200	300	0	29.7287	-80.6578	-419.126	-72989.4	38357.2	-11512.5	291.517	1077.15	0	0	0	0	0	0	0	603	903	0
492	8	0	0	0	0	0	0	200	300	0	29.7287	-80.8104	-421.873	-74454.3	38967.5	-11558.3	292.368	1079.49	0	0	0	0	0	0	0	603	903	0
492	9	0	0	0	0	0	0	200	300	0	28.6606	-80.8104	-423.704	-73630.3	39089.6	-11604.1	292.257	1076.78	0	0	0	0	0	0	0	603	903	0
493	0	0	0	0	0	0	0	200	300	0	28.9658	-79.4371	-425.23	-74637.4	38967.5	-11604.1	291.639	1078.52	0	0	0	0	0	0	0	603	903	0
493	1	0	0	0	0	0	0	200	300	0	30.0339	-77.9112	-428.587	-75003.6	38967.5	-11512.5	290.921	1078	0	0	0	0	0	0	0	603	903	0
493	2	0	0	0	0	0	0	200	300	0	32.6279	-78.369	-432.249	-75461.4	39822	-11649.9	292.128	1077.58	0	0	0	0	0	0	0	603	903	0
493	3	0	0	0	0	0	0	200	300	0	29.5761	-78.8267	-435.606	-75552.9	39272.7	-11375.2	290.157	1076.44	0	0	0	0	0	0	0	603	903	0
493	4	0	0	0	0	0	0	200	300	0	30.1865	-78.5216	-435.606	-76285.3	39394.8	-11421	290.437	1078.12	0	0	0	0	0	0	0	603	903	0
493	5	0	0	0	0	0	0	200	300	0	29.2709	-77.9112	-439.573	-76193.8	39761	-11146.3	290.454	1076.34	0	0	0	0	0	0	0	603	903	0
493	6	0	0	0	0	0	0	200	300	0	29.2709	-78.0638	-442.014	-76560	39944.1	-11466.8	290.368	1076.21	0	0	0	0	0	0	0	603	903	0
493	7	0	0	0	0	0	0	200	300	0	28.8132	-76.6905	-444.761	-77200.8	40310.3	-11329.4	290.634	1076.58	0	0	0	0	0	0	0	603	903	0
493	8	0	0	0	0	0	0	200	300	0	28.508	-76.9957	-445.371	-78024.9	40981.7	-11375.2	292.017	1078.19	0	0	0	0	0	0	0	603	903	0
493	9	0	0	0	0	0	0	200	300	0	28.3554	-77.606	-448.118	-78207.9	41103.8	-11009	291.725	1077.53	0	0	0	0	0	0	0	603	903	0
494	0	0	0	0	0	0	0	200	300	0	29.1183	-75.3172	-447.507	-78848.8	40310.3	-10505.4	290.077	1079.2	0	0	0	0	0	0	0	603	903	0
494	1	0	0	0	0	0	0	200	300	0	28.8132	-75.4698	-454.526	-79306.5	41408.9	-11054.8	291.104	1077.48	0	0	0	0	0	0	0	603	903	0
494	2	0	0	0	0	0	0	200	300	0	28.8132	-74.8595	-456.968	-80222.1	41653.1	-10780.1	291.151	1078.55	0	0	0	0	0	0	0	603	903	0
494	3	0	0	0	0	0	0	200	300	0	28.0502	-75.4698	-459.714	-79947.4	41347.9	-10642.8	289.943	1076.91	0	0	0	0	0	0	0	603	903	0
494	4	0	0	0	0	0	0	200	300	0	29.1183	-74.4017	-461.851	-79581.2	41958.3	-10597	290.848	1075.31	0	0	0	0	0	0	0	603	903	0
494	5	0	0	0	0	0	0	200	300	0	29.2709	-74.4017	-463.377	-81046.1	41653.1	-10551.2	289.89	1077.9	0	0	0	0	0	0	0	603	903	0
494	6	0	0	0	0	0	0	200	300	0	28.8132	-72.8758	-466.123	-81137.6	41775.2	-10368.1	289.623	1077.07	0	0	0	0	0	0	0	603	903	0
494	7	0	0	0	0	0	0	200	300	0	28.2028	-72.4181	-468.87	-82327.8	42080.3	-10505.4	289.749	1078.59	0	0	0	0	0	0	0	603	903	0
494	8	0	0	0	0	0	0	200	300	0	28.6606	-72.1129	-471.311	-82236.2	42751.7	-10505.4	290.708	1077.48	0	0	0	0	0	0	0	603	903	0
494	9	0	0	0	0	0	0	200	300	0	28.3554	-71.9603	-474.363	-82327.8	42446.5	-10413.9	289.481	1076.55	0	0	0	0	0	0	0	603	903	0
495	0	0	0	0	0	0	0	200	300	0	28.2028	-71.5025	-477.415	-83609.5	42995.9	-10276.6	290.06	1078.13	0	0	0	0	0	0	0	603	903	0
495	1	0	0	0	0	0	0	200	300	0	29.4235	-70.587	-478.941	-84158.8	43240	-10734.3	290.283	1078.72	0	0	0	0	0	0	0	603	903	0
495	2	0	0	0	0	0	0	200	300	0	28.0502	-68.9085	-481.382	-83701.1	43423.1	-10230.8	290.205	1076.88	0	0	0	0	0	0	0	603	903	0
495	3	0	0	0	0	0	0	200	300	0	29.8813	-69.2137	-483.518	-84799.7	43423.1	-10139.2	289.807	1078.38	0	0	0	0	0	0	0	603	903	0
495	4	0	0	0	0	0	0	200	300	0	28.2028	-69.6715	-486.875	-85440.6	43911.4	-10185	290.19	1078.49	0	0	0	0	0	0	0	603	903	0
495	5	0	0	0	0	0	0	200	300	0	29.1183	-69.5189	-488.401	-86081.5	43972.4	-9910.35	290.033	1079.25	0	0	0	0	0	0	0	603	903	0
495	6	0	0	0	0	0	0	200	300	0	28.3554	-68.1456	-490.842	-86173	44277.6	-10093.5	290.207	1078.56	0	0	0	0	0	0	0	603	903	0
495	7	0	0	0	0	0	0	200	300	0	28.2028	-67.993	-494.504	-86813.9	44460.7	-9956.13	289.91	1078.56	0	0	0	0	0	0	0	603	903	0
495	8	0	0	0	0	0	0	200	300	0	27.8976	-67.5352	-497.861	-87637.9	45010	-9864.58	290.407	1079.03	0	0	0	0	0	0	0	603	903	0
495	9	0	0	0	0	0	0	200	300	0	26.6769	-66.4671	-500.303	-88004.1	45010	-9956.13	289.966	1078.9	0	0	0	0	0	0	0	603	903	0
496	0	0	0	0	0	0	0	200	300	0	26.8295	-65.2464	-503.355	-88187.2	44949	-9452.59	289.299	1078.2	0	0	0	0	0	0	0	603	903	0
496	1	0	0	0	0	0	0	200	300	0	27.8976	-65.399	-504.575	-88736.5	45620.4	-9406.81	290.413	1078.86	0	0	0	0	0	0	0	603	903	0
496	2	0	0	0	0	0	0	200	300	0	27.4399	-64.6361	-507.322	-89102.7	45864.5	-9452.59	290.405	1078.63	0	0	0	0	0	0	0	603	903	0
496	3	0	0	0	0	0	0	200	300	0	26.2192	-63.8731	-510.679	-89560.5	45620.4	-9544.14	289.333	1078.38	0	0	0	0	0	0	0	603	903	0
496	4	0	0	0	0	0	0	200	300	0	26.2192	-62.805	-513.12	-89926.7	45986.6	-9177.93	289.621	1078.25	0	0	0	0	0	0	0	603	903	0
496	5	0	0	0	0	0	0	200	300	0	27.1347	-63.4154	-515.867	-90476	46963.1	-8903.27	291.037	1078.39	0	0	0	0	0	0	0	603	903	0
496	6	0	0	0	0	0	0	200	300	0	26.5244	-62.4998	-518.308	-90933.8	46474.9	-8903.27	289.666	1078.44	0	0	0	0	0	0	0	603	903	0
496	7	0	0	0	0	0	0	200	300	0	25.7614	-61.8895	-521.055	-91757.7	46535.9	-9040.6	289.311	1079.1	0	0	0	0	0	0	0	603	903	0
496	8	0	0	0	0	0	0	200	300	0	25.3036	-60.974	-521.97	-92032.4	47329.4	-8811.72	290.674	1079.32	0	0	0	0	0	0	0	603	903	0
496	9	0	0	0	0	0	0	200	300	0	26.3718	-60.974	-526.853	-92398.6	47390.4	-8857.5	289.95	1078.38	0	0	0	0	0	0	0	603	903	0
497	0	0	0	0	0	0	0	200	300	0	27.2873	-61.1266	-529.6	-92673.3	47512.5	-8857.5	289.714	1077.99	0	0	0	0	0	0	0	603	903	0
497	1	0	0	0	0	0	0	200	300	0	25.6088	-60.211	-531.431	-93771.9	47817.6	-8857.5	289.979	1079.45	0	0	0	0	0	0	0	603	903	0
497	2	0	0	0	0	0	0	200	300	0	26.9821	-59.7533	-534.482	-93680.4	48122.8	-8537.06	290.036	1078.27	0	0	0	0	0	0	0	603	903	0
497	3	0	0	0	0	0	0	200	300	0	26.2192	-59.4481	-537.534	-94138.1	47939.7	-8628.62	289.184	1078.13	0	0	0	0	0	0	0	603	903	0
497	4	0	0	0	0	0	0	200	300	0	26.2192	-59.6007	-539.67	-94321.2	48611.1	-8262.41	290.076	1077.78	0	0	0	0	0	0	0	603	903	0
497	5	0	0	0	0	0	0	200	300	0	25.914	-59.1429	-543.027	-95145.2	48672.1	-8216.63	289.631	1078.21	0	0	0	0	0	0	0	603	903	0
497	6	0	0	0	0	0	0	200	300	0	24.2355	-58.38	-544.248	-95419.8	48489	-8353.96	289.094	1078.32	0	0	0	0	0	0	0	603	903	0
497	7	0	0	0	0	0	0	200	300	0	24.0829	-57.4644	-547.605	-95603	48855.2	-8445.51	289.216	1077.58	0	0	0	0	0	0	0	603	903	0
497	8	0	0	0	0	0	0	200	300	0	24.2355	-56.7015	-551.267	-95694.5	49221.4	-8216.63	289.288	1076.59	0	0	0	0	0	0	0	603	903	0
497	9	0	0	0	0	0	0	200	300	0	24.6933	-56.8541	-550.352	-95969.2	49404.6	-7941.97	289.769	1077.38	0	0	0	0	0	0	0	603	903	0
498	0	0	0	0	0	0	0	200	300	0	23.32	-57.7696	-555.54	-96701.6	49709.7	-8033.52	289.48	1077.07	0	0	0	0	0	0	0	603	903	0
498	1	0	0	0	0	0	0	200	300	0	24.2355	-56.7015	-555.845	-96884.7	50075.9	-7941.97	290.09	1077.3	0	0	0	0	0	0	0	603	903	0
498	2	0	0	0	0	0	0	200	300	0	25.6088	-55.3282	-559.202	-96884.7	50503.2	-7804.65	290.313	1076.26	0	0	0	0	0	0	0	603	903	0
498	3	0	0	0	0	0	0	200	300	0	26.0666	-55.6334	-562.559	-97525.6	50442.2	-7758.87	289.666	1076.36	0	0	0	0	0	0	0	603	903	0
498	4	0	0	0	0	0	0	200	300	0	23.0148	-56.5489	-565	-98258	50747.3	-7896.2	289.818	1076.91	0	0	0	0	0	0	0	603	903	0
498	5	0	0	0	0	0	0	200	300	0	24.0829	-56.5489	-568.052	-98349.5	51296.6	-7575.76	290.303	1076.13	0	0	0	0	0	0	0	603	903	0
498	6	0	0	0	0	0	0	200	300	0	22.7097	-55.9386	-569.578	-98166.5	50991.5	-7850.42	289.525	1075.35	0	0	0	0	0	0	0	603	903	0
498	7	0	0	0	0	0	0	200	300	0	23.9304	-55.023	-571.714	-98166.5	51174.6	-7621.54	289.511	1074.71	0	0	0	0	0	0	0	603	903	0
498	8	0	0	0	0	0	0	200	300	0	23.6252	-55.3282	-574.461	-99081.9	51479.8	-7667.32	289.614	1075.48	0	0	0	0	0	0	0	603	903	0
498	9	0	0	0	0	0	0	200	300	0	22.0993	-55.023	-575.376	-98715.7	52090.1	-7758.87	290.532	1074.57	0	0	0	0	0	0	0	603	903	0
499	0	0	0	0	0	0	0	200	300	0	22.5571	-56.5489	-578.428	-99814.4	51784.9	-7758.87	289.527	1075.56	0	0	0	0	0	0	0	603	903	0
499	1	0	0	0	0	0	0	200	300	0	23.0148	-55.023	-579.038	-98441.1	52456.3	-7667.32	290.592	1073.01	0	0	0	0	0	0	0	603	903	0
499	2	0	0	0	0	0	0	200	300	0	22.7097	-54.8704	-581.48	-99081.9	52700.5	-7713.09	290.632	1073.4	0	0	0	0	0	0	0	603	903	0
499	3	0	0	0	0	0	0	200	300	0	22.4045	-54.4127	-582.09	-99448.1	52517.3	-7575.76	290.222	1073.85	0	0	0	0	0	0	0	603	903	0
499	4	0	0	0	0	0	0	200	300	0	24.9985	-55.3282	-585.142	-99722.8	52639.4	-7621.54	289.96	1073.43	0	0	0	0	0	0	0	603	903	0
499	5	0	0	0	0	0	0	200	300	0	22.2519	-55.6334	-587.278	-99448.1	53371.8	-7529.99	290.88	1072.34	0	0	0	0	0	0	0	603	903	0
499	6	0	0	0	0	0	0	200	300	0	22.4045	-55.4808	-586.668	-99631.3	52761.5	-7438.43	289.934	1072.83	0	0	0	0	0	0	0	603	903	0
499	7	0	0	0	0	0	0	200	300	0	23.32	-55.3282	-589.719	-99906	53616	-7484.21	290.918	1072.41	0	0	0	0	0	0	0	603	903	0
499	8	0	0	0	0	0	0	200	300	0	22.0993	-54.7179	-590.33	-100364	53860.1	-7667.32	291.237	1073.01	0	0	0	0	0	0	0	603	903	0
499	9	0	0	0	0	0	0	200	300	0	22.5571	-55.3282	-593.381	-99814.4	54104.3	-7529.99	291.18	1071.21	0	0	0	0	0	0	0	603	903	0
500	0	0	0	0	0	0	0	200	300	0	23.9304	-55.786	-593.687	-98807.3	53677	-7621.54	290.413	1069.43	0	0	0	0	0	0	0	603	903	0
500	1	0	0	0	0	0	0	200	300	0	23.6252	-55.786	-595.212	-99265.1	54104.3	-7529.99	290.899	1069.77	0	0	0	0	0	0	0	603	903	0
500	2	0	0	0	0	0	0	200	300	0	24.5407	-55.4808	-594.297	-100272	54104.3	-7804.65	291.039	1071.72	0	0	0	0	0	0	0	603	903	0
500	3	0	0	0	0	0	0	200	300	0	24.5407	-55.023	-595.518	-99814.4	54165.3	-7850.42	290.955	1070.61	0	0	0	0	0	0	0	603	903	0
500	4	0	0	0	0	0	0	200	300	0	22.7097	-54.8704	-598.569	-99265.1	54104.3	-7987.75	290.389	1068.84	0	0	0	0	0	0	0	603	903	0
500	5	0	0	0	0	0	0	200	300	0	24.9985	-55.9386	-599.18	-99081.9	55019.8	-7896.2	291.825	1068.36	0	0	0	0	0	0	0	603	903	0
500	6	0	0	0	0	0	0	200	300	0	24.6933	-55.4808	-598.569	-99631.3	55019.8	-8170.85	291.919	1069.45	0	0	0	0	0	0	0	603	903	0
500	7	0	0	0	0	0	0	200	300	0	23.0148	-55.023	-597.654	-99081.9	54775.6	-7941.97	291.651	1068.78	0	0	0	0	0	0	0	603	903	0
500	8	0	0	0	0	0	0	200	300	0	24.2355	-54.5653	-597.349	-98898.9	55019.8	-7987.75	292.107	1068.56	0	0	0	0	0	0	0	603	903	0
500	9	0	0	0	0	0	0	200	300	0	24.8459	-55.786	-599.485	-97891.8	55080.8	-7804.65	291.88	1066.29	0	0	0	0	0	0	0	603	903	0
501	0	0	0	0	0	0	0	200	300	0	25.3036	-55.3282	-599.18	-98166.5	54836.7	-7621.54	291.52	1066.83	0	0	0	0	0	0	0	603	903	0
501	1	0	0	0	0	0	0	200	300	0	24.3881	-55.786	-597.959	-98349.5	55202.9	-7941.97	292.319	1067.48	0	0	0	0	0	0	0	603	903	0
501	2	0	0	0	0	0	0	200	300	0	25.1511	-54.5653	-597.959	-98624.2	55630.1	-8033.52	293.033	1067.93	0	0	0	0	0	0	0	603	903	0
501	3	0	0	0	0	0	0	200	300	0	26.2192	-54.8704	-597.959	-97617.1	55447	-7758.87	292.727	1066.25	0	0	0	0	0	0	0	603	903	0
501	4	0	0	0	0	0	0	200	300	0	28.508	-54.5653	-598.264	-97708.7	55019.8	-8079.3	291.966	1066.32	0	0	0	0	0	0	0	603	903	0
501	5	0	0	0	0	0	0	200	300	0	26.6769	-55.1756	-598.264	-97525.6	55447	-8308.18	292.68	1066.01	0	0	0	0	0	0	0	603	903	0
501	6	0	0	0	0	0	0	200	300	0	26.5244	-54.1075	-596.738	-97434	55447	-8125.08	292.917	1066.28	0	0	0	0	0	0	0	603	903	0
501	7	0	0	0	0	0	0	200	300	0	26.3718	-54.2601	-595.518	-96610.1	55263.9	-8308.18	292.8	1065.23	0	0	0	0	0	0	0	603	903	0
501	8	0	0	0	0	0	0	200	300	0	27.2873	-53.4972	-593.992	-96518.5	55263.9	-8170.85	293.038	1065.49	0	0	0	0	0	0	0	603	903	0
501	9	0	0	0	0	0	0	200	300	0	26.9821	-53.3446	-594.907	-96152.2	55508.1	-8445.51	293.305	1064.63	0	0	0	0	0	0	0	603	903	0
502	0	0	0	0	0	0	0	200	300	0	26.6769	-53.3446	-594.297	-96060.7	55630.1	-8262.41	293.607	1064.64	0	0	0	0	0	0	0	603	903	0
502	1	0	0	0	0	0	0	200	300	0	26.6769	-53.8023	-592.161	-95419.8	55263.9	-8491.29	293.326	1064.14	0	0	0	0	0	0	0	603	903	0
502	2	0	0	0	0	0	0	200	300	0	28.0502	-52.8868	-590.024	-94412.8	55935.3	-8125.08	294.802	1063.02	0	0	0	0	0	0	0	603	903	0
502	3	0	0	0	0	0	0	200	300	0	28.0502	-51.3609	-587.888	-95145.2	55569.1	-8262.41	294.523	1064.84	0	0	0	0	0	0	0	603	903	0
502	4	0	0	0	0	0	0	200	300	0	27.8976	-51.9713	-589.414	-94870.6	55447	-8399.73	294.071	1063.96	0	0	0	0	0	0	0	603	903	0
502	5	0	0	0	0	0	0	200	300	0	30.6442	-53.0394	-588.499	-94595.9	55630.1	-8353.96	294.529	1063.74	0	0	0	0	0	0	0	603	903	0
502	6	0	0	0	0	0	0	200	300	0	28.9658	-51.8187	-586.057	-93680.4	55569.1	-8125.08	294.819	1062.85	0	0	0	0	0	0	0	603	903	0
502	7	0	0	0	0	0	0	200	300	0	28.8132	-51.5135	-586.057	-93314.2	55508.1	-8262.41	294.714	1062.22	0	0	0	0	0	0	0	603	903	0
502	8	0	0	0	0	0	0	200	300	0	30.0339	-50.4454	-583.616	-93314.2	55019.8	-8170.85	294.274	1062.89	0	0	0	0	0	0	0	603	903	0
502	9	0	0	0	0	0	0	200	300	0	29.1183	-49.9876	-583.005	-93222.6	55386	-8445.51	295.001	1062.9	0	0	0	0	0	0	0	603	903	0
503	0	0	0	0	0	0	0	200	300	0	28.9658	-49.9876	-581.785	-91666.2	55569.1	-8353.96	295.515	1060.56	0	0	0	0	0	0	0	603	903	0
503	1	0	0	0	0	0	0	200	300	0	30.3391	-50.1402	-579.343	-91391.5	54653.6	-8582.84	294.337	1060.75	0	0	0	0	0	0	0	603	903	0
503	2	0	0	0	0	0	0	200	300	0	32.4753	-49.5299	-577.817	-91116.9	54958.8	-8491.29	295.114	1060.69	0	0	0	0	0	0	0	603	903	0
503	3	0	0	0	0	0	0	200	300	0	30.0339	-48.004	-576.902	-91483.1	54714.6	-8765.95	294.842	1061.58	0	0	0	0	0	0	0	603	903	0
503	4	0	0	0	0	0	0	200	300	0	29.7287	-48.9195	-576.292	-90567.5	55019.8	-8308.18	295.472	1060.16	0	0	0	0	0	0	0	603	903	0
503	5	0	0	0	0	0	0	200	300	0	30.4916	-48.3092	-574.155	-89743.6	54775.6	-8628.62	295.402	1059.31	0	0	0	0	0	0	0	603	903	0
503	6	0	0	0	0	0	0	200	300	0	31.7123	-48.3092	-572.019	-89102.7	55508.1	-8765.95	297.039	1058.77	0	0	0	0	0	0	0	603	903	0
503	7	0	0	0	0	0	0	200	300	0	32.0175	-47.3936	-566.831	-89011.2	55141.9	-8765.95	297.281	1060.03	0	0	0	0	0	0	0	603	903	0
503	8	0	0	0	0	0	0	200	300	0	32.933	-47.5462	-568.967	-88919.6	54897.7	-8262.41	296.487	1059.28	0	0	0	0	0	0	0	603	903	0
503	9	0	0	0	0	0	0	200	300	0	31.8649	-46.6307	-567.136	-89377.4	54165.3	-8353.96	295.507	1060.59	0	0	0	0	0	0	0	603	903	0
504	0	0	0	0	0	0	0	200	300	0	31.2546	-46.6307	-565	-87637.9	54958.8	-8399.73	297.272	1058.11	0	0	0	0	0	0	0	603	903	0
504	1	0	0	0	0	0	0	200	300	0	32.4753	-46.6307	-563.169	-87729.4	54165.3	-8399.73	296.179	1058.78	0	0	0	0	0	0	0	603	903	0
504	2	0	0	0	0	0	0	200	300	0	32.7805	-45.5626	-561.643	-87546.4	54287.4	-8170.85	296.658	1058.88	0	0	0	0	0	0	0	603	903	0
504	3	0	0	0	0	0	0	200	300	0	32.3227	-44.9522	-559.202	-86997	54409.4	-8353.96	297.298	1058.57	0	0	0	0	0	0	0	603	903	0
504	4	0	0	0	0	0	0	200	300	0	33.696	-44.6471	-558.897	-86722.4	54287.4	-8353.96	297.133	1058.17	0	0	0	0	0	0	0	603	903	0
504	5	0	0	0	0	0	0	200	300	0	31.7123	-43.2738	-553.403	-85623.7	53616	-8445.51	296.884	1057.72	0	0	0	0	0	0	0	603	903	0
504	6	0	0	0	0	0	0	200	300	0	32.6279	-44.3419	-555.54	-85532.1	53921.2	-8308.18	297.061	1056.96	0	0	0	0	0	0	0	603	903	0
504	7	0	0	0	0	0	0	200	300	0	33.5434	-43.5789	-551.878	-85440.6	53188.7	-8445.51	296.378	1057.82	0	0	0	0	0	0	0	603	903	0
504	8	0	0	0	0	0	0	200	300	0	31.2546	-43.2738	-550.352	-84433.5	53554.9	-8491.29	297.31	1056.42	0	0	0	0	0	0	0	603	903	0
504	9	0	0	0	0	0	0	200	300	0	32.4753	-42.6634	-547.91	-83884.2	53554.9	-8353.96	297.744	1056.1	0	0	0	0	0	0	0	603	903	0
505	0	0	0	0	0	0	0	200	300	0	33.2382	-41.7479	-545.774	-83701.1	53616	-8445.51	298.238	1056.36	0	0	0	0	0	0	0	603	903	0
505	1	0	0	0	0	0	0	200	300	0	33.0856	-42.0531	-543.943	-83609.5	53493.9	-8399.73	298.345	1056.71	0	0	0	0	0	0	0	603	903	0
505	2	0	0	0	0	0	0	200	300	0	31.7123	-42.0531	-540.891	-82968.7	52944.6	-8445.51	297.884	1056.39	0	0	0	0	0	0	0	603	903	0
505	3	0	0	0	0	0	0	200	300	0	32.7805	-41.1375	-539.976	-82327.8	53493.9	-8079.3	299.067	1055.47	0	0	0	0	0	0	0	603	903	0
505	4	0	0	0	0	0	0	200	300	0	33.3908	-40.5272	-539.06	-80862.9	53249.8	-7896.2	298.783	1053.01	0	0	0	0	0	0	0	603	903	0
505	5	0	0	0	0	0	0	200	300	0	33.696	-40.222	-536.924	-81503.8	52883.6	-8262.41	298.494	1054.8	0	0	0	0	0	0	0	603	903	0
505	6	0	0	0	0	0	0	200	300	0	32.0175	-40.222	-536.314	-81503.8	52639.4	-8170.85	298.15	1054.97	0	0	0	0	0	0	0	603	903	0
505	7	0	0	0	0	0	0	200	300	0	32.6279	-39.3065	-531.736	-80954.6	52578.4	-7850.42	298.881	1055.25	0	0	0	0	0	0	0	603	903	0
505	8	0	0	0	0	0	0	200	300	0	32.7805	-38.6961	-530.82	-80496.7	52700.5	-8079.3	299.281	1054.65	0	0	0	0	0	0	0	603	903	0
505	9	0	0	0	0	0	0	200	300	0	34.4589	-38.6961	-528.379	-79855.9	51357.7	-8033.52	297.199	1054.13	0	0	0	0	0	0	0	603	903	0
506	0	0	0	0	0	0	0	200	300	0	31.7123	-37.7806	-527.463	-79398.1	52212.2	-7713.09	298.987	1053.53	0	0	0	0	0	0	0	603	903	0
506	1	0	0	0	0	0	0	200	300	0	33.3908	-37.9332	-526.243	-79215	52090.1	-7804.65	298.985	1053.53	0	0	0	0	0	0	0	603	903	0
506	2	0	0	0	0	0	0	200	300	0	31.5598	-37.3228	-522.886	-78482.6	51846	-7758.87	299.154	1053.1	0	0	0	0	0	0	0	603	903	0
506	3	0	0	0	0	0	0	200	300	0	32.7805	-37.4754	-520.139	-78116.4	51479.8	-7713.09	298.973	1053.18	0	0	0	0	0	0	0	603	903	0
506	4	0	0	0	0	0	0	200	300	0	30.9494	-36.2547	-518.308	-78207.9	51784.9	-7621.54	299.911	1053.89	0	0	0	0	0	0	0	603	903	0
506	5	0	0	0	0	0	0	200	300	0	32.4753	-35.6444	-517.393	-77933.3	51846	-7529.99	300.206	1053.63	0	0	0	0	0	0	0	603	903	0
506	6	0	0	0	0	0	0	200	300	0	30.6442	-35.9496	-513.731	-76743.1	50564.2	-6934.89	298.426	1052.38	0	0	0	0	0	0	0	603	903	0
506	7	0	0	0	0	0	0	200	300	0	31.102	-35.4918	-513.425	-76376.9	51418.7	-7209.55	300.148	1051.76	0	0	0	0	0	0	0	603	903	0
506	8	0	0	0	0	0	0	200	300	0	31.2546	-34.7288	-510.679	-76743.1	51174.6	-7255.33	300.209	1053.28	0	0	0	0	0	0	0	603	903	0
506	9	0	0	0	0	0	0	200	300	0	30.9494	-34.4237	-508.543	-75278.2	50808.4	-6889.11	299.91	1051.03	0	0	0	0	0	0	0	603	903	0
507	0	0	0	0	0	0	0	200	300	0	30.7968	-33.0504	-507.322	-76468.4	50442.2	-7118	299.428	1053.73	0	0	0	0	0	0	0	603	903	0
507	1	0	0	0	0	0	0	200	300	0	30.0339	-32.1349	-504.88	-74088.1	50686.3	-6980.67	300.393	1049.74	0	0	0	0	0	0	0	603	903	0
507	2	0	0	0	0	0	0	200	300	0	30.1865	-33.203	-504.27	-74820.5	49770.8	-7072.22	298.699	1051.37	0	0	0	0	0	0	0	603	903	0
507	3	0	0	0	0	0	0	200	300	0	29.5761	-32.44	-502.134	-73630.3	49831.8	-6706.01	299.24	1049.63	0	0	0	0	0	0	0	603	903	0
507	4	0	0	0	0	0	0	200	300	0	28.508	-31.6771	-499.082	-74362.8	50381.1	-6980.67	300.948	1052	0	0	0	0	0	0	0	603	903	0
507	5	0	0	0	0	0	0	200	300	0	29.2709	-31.2193	-498.472	-72531.7	49953.9	-6294.02	300.214	1048.51	0	0	0	0	0	0	0	603	903	0
507	6	0	0	0	0	0	0	200	300	0	28.9658	-29.9986	-491.758	-73172.5	49587.7	-6614.46	300.838	1051.8	0	0	0	0	0	0	0	603	903	0
507	7	0	0	0	0	0	0	200	300	0	28.2028	-30.7616	-494.199	-72073.9	49770.8	-6706.01	300.71	1048.84	0	0	0	0	0	0	0	603	903	0
507	8	0	0	0	0	0	0	200	300	0	27.7451	-29.9986	-491.758	-72897.9	49770.8	-6706.01	301.21	1051.24	0	0	0	0	0	0	0	603	903	0
507	9	0	0	0	0	0	0	200	300	0	28.2028	-29.2357	-489.622	-72165.5	49709.7	-6477.13	301.527	1050.39	0	0	0	0	0	0	0	603	903	0
508	0	0	0	0	0	0	0	200	300	0	28.508	-28.1676	-488.706	-72165.5	48794.2	-6294.02	299.844	1050.67	0	0	0	0	0	0	0	603	903	0
508	1	0	0	0	0	0	0	200	300	0	27.7451	-28.4727	-486.57	-71799.3	49587.7	-6156.69	301.913	1050.56	0	0	0	0	0	0	0	603	903	0
508	2	0	0	0	0	0	0	200	300	0	29.4235	-27.8624	-486.57	-71616.1	49221.4	-6294.02	301.16	1050.19	0	0	0	0	0	0	0	603	903	0
508	3	0	0	0	0	0	0	200	300	0	27.5925	-26.6417	-484.129	-70609	48672.1	-5836.26	300.536	1048.85	0	0	0	0	0	0	0	603	903	0
508	4	0	0	0	0	0	0	200	300	0	28.3554	-26.1839	-482.603	-70609	48489	-6019.36	300.474	1049.31	0	0	0	0	0	0	0	603	903	0
508	5	0	0	0	0	0	0	200	300	0	28.508	-26.1839	-479.246	-70242.8	48916.3	-5882.03	302.069	1049.57	0	0	0	0	0	0	0	603	903	0
508	6	0	0	0	0	0	0	200	300	0	26.6769	-24.9632	-479.856	-70151.3	47634.5	-5882.03	299.268	1049.19	0	0	0	0	0	0	0	603	903	0
508	7	0	0	0	0	0	0	200	300	0	26.0666	-24.8106	-478.33	-70059.7	48122.8	-5790.48	300.606	1049.47	0	0	0	0	0	0	0	603	903	0
508	8	0	0	0	0	0	0	200	300	0	27.1347	-24.0477	-473.753	-69235.8	48550.1	-5790.48	302.48	1049.14	0	0	0	0	0	0	0	603	903	0
508	9	0	0	0	0	0	0	200	300	0	28.9658	-24.5055	-472.837	-68228.7	48489	-5653.15	302.549	1047.3	0	0	0	0	0	0	0	603	903	0
509	0	0	0	0	0	0	0	200	300	0	27.1347	-23.1322	-470.701	-68686.4	47695.6	-5927.81	301.329	1048.92	0	0	0	0	0	0	0	603	903	0
509	1	0	0	0	0	0	0	200	300	0	26.3718	-22.5218	-470.701	-68411.8	48183.9	-5515.82	302.366	1048.34	0	0	0	0	0	0	0	603	903	0
509	2	0	0	0	0	0	0	200	300	0	25.4562	-22.2166	-469.48	-67587.8	48061.8	-5698.93	302.372	1046.96	0	0	0	0	0	0	0	603	903	0
509	3	0	0	0	0	0	0	200	300	0	26.6769	-23.2848	-469.48	-67038.5	47573.5	-5515.82	301.332	1045.79	0	0	0	0	0	0	0	603	903	0
509	4	0	0	0	0	0	0	200	300	0	27.2873	-21.6063	-465.818	-67862.5	47390.4	-5515.82	301.736	1048.68	0	0	0	0	0	0	0	603	903	0
509	5	0	0	0	0	0	0	200	300	0	25.7614	-20.6908	-464.597	-67313.1	47390.4	-4737.63	302.003	1047.88	0	0	0	0	0	0	0	603	903	0
509	6	0	0	0	0	0	0	200	300	0	26.3718	-19.7752	-463.071	-66763.8	47085.2	-5286.94	301.68	1047.18	0	0	0	0	0	0	0	603	903	0
509	7	0	0	0	0	0	0	200	300	0	26.3718	-19.4701	-463.071	-65115.9	47024.2	-5286.94	301.548	1043.62	0	0	0	0	0	0	0	603	903	0
509	8	0	0	0	0	0	0	200	300	0	26.3718	-19.0123	-460.325	-66214.5	47024.2	-5103.84	302.154	1046.84	0	0	0	0	0	0	0	603	903	0
509	9	0	0	0	0	0	0	200	300	0	26.0666	-20.5382	-458.189	-65573.7	47329.4	-5103.84	303.297	1046.12	0	0	0	0	0	0	0	603	903	0
510	0	0	0	0	0	0	0	200	300	0	25.4562	-17.7916	-457.883	-65482.1	46352.8	-5195.39	301.233	1046.01	0	0	0	0	0	0	0	603	903	0
510	1	0	0	0	0	0	0	200	300	0	25.6088	-17.7916	-458.189	-64658.1	46963.1	-5103.84	302.497	1044.12	0	0	0	0	0	0	0	603	903	0
510	2	0	0	0	0	0	0	200	300	0	26.3718	-17.1812	-456.358	-64658.1	46841.1	-4966.51	302.641	1044.68	0	0	0	0	0	0	0	603	903	0
510	3	0	0	0	0	0	0	200	300	0	24.9985	-17.3338	-453.306	-65024.3	46413.8	-4966.51	302.39	1046.44	0	0	0	0	0	0	0	603	903	0
510	4	0	0	0	0	0	0	200	300	0	25.6088	-16.8761	-453.611	-64658.1	46352.8	-4829.18	302.186	1045.54	0	0	0	0	0	0	0	603	903	0
510	5	0	0	0	0	0	0	200	300	0	25.914	-16.4183	-452.39	-64017.2	46230.7	-4783.4	302.192	1044.51	0	0	0	0	0	0	0	603	903	0
510	6	0	0	0	0	0	0	200	300	0	26.6769	-15.6554	-453.001	-63742.6	46047.6	-4829.18	301.65	1043.71	0	0	0	0	0	0	0	603	903	0
510	7	0	0	0	0	0	0	200	300	0	25.3036	-15.3502	-452.695	-63925.7	46108.7	-4646.07	301.854	1044.21	0	0	0	0	0	0	0	603	903	0
510	8	0	0	0	0	0	0	200	300	0	27.2873	-15.045	-447.202	-63651.1	46352.8	-4783.4	303.651	1045.33	0	0	0	0	0	0	0	603	903	0
510	9	0	0	0	0	0	0	200	300	0	25.4562	-15.045	-448.728	-63010.2	46352.8	-4646.07	303.298	1043.42	0	0	0	0	0	0	0	603	903	0
511	0	0	0	0	0	0	0	200	300	0	26.3718	-14.1295	-447.813	-62827.1	45315.2	-4417.19	301.192	1043.3	0	0	0	0	0	0	0	603	903	0
511	1	0	0	0	0	0	0	200	300	0	25.7614	-12.9088	-449.338	-63101.7	45986.6	-4646.07	302.343	1043.43	0	0	0	0	0	0	0	603	903	0
511	2	0	0	0	0	0	0	200	300	0	25.1511	-13.5191	-448.118	-62644	46047.6	-4462.97	302.758	1042.79	0	0	0	0	0	0	0	603	903	0
511	3	0	0	0	0	0	0	200	300	0	25.3036	-12.9088	-445.371	-61820	45376.2	-4600.3	301.884	1041.81	0	0	0	0	0	0	0	603	903	0
511	4	0	0	0	0	0	0	200	300	0	26.6769	-13.3665	-446.287	-61179.1	45681.4	-4646.07	302.359	1040.08	0	0	0	0	0	0	0	603	903	0
511	5	0	0	0	0	0	0	200	300	0	25.7614	-11.9933	-443.54	-61728.4	45681.4	-4691.85	302.993	1042.17	0	0	0	0	0	0	0	603	903	0
511	6	0	0	0	0	0	0	200	300	0	26.3718	-11.9933	-442.93	-61820	45498.3	-4554.52	302.721	1042.57	0	0	0	0	0	0	0	603	903	0
511	7	0	0	0	0	0	0	200	300	0	25.1511	-10.9251	-440.183	-61545.3	45437.3	-4417.19	303.224	1042.82	0	0	0	0	0	0	0	603	903	0
511	8	0	0	0	0	0	0	200	300	0	25.3036	-11.9933	-442.625	-60996	46108.7	-4462.97	304.171	1040.81	0	0	0	0	0	0	0	603	903	0
511	9	0	0	0	0	0	0	200	300	0	26.3718	-11.3829	-440.183	-60812.9	45559.3	-4371.41	303.501	1041.15	0	0	0	0	0	0	0	603	903	0
512	0	0	0	0	0	0	0	200	300	0	25.7614	-10.7725	-440.488	-61087.6	45376.2	-4234.09	303.013	1041.68	0	0	0	0	0	0	0	603	903	0
512	1	0	0	0	0	0	0	200	300	0	25.4562	-9.85702	-442.014	-61087.6	45681.4	-4325.64	303.348	1041.2	0	0	0	0	0	0	0	603	903	0
512	2	0	0	0	0	0	0	200	300	0	26.0666	-10.1622	-440.488	-60355.2	45803.5	-3867.87	303.983	1040.02	0	0	0	0	0	0	0	603	903	0
512	3	0	0	0	0	0	0	200	300	0	26.2192	-9.55184	-439.573	-60172.1	45193.1	-4188.31	302.811	1039.89	0	0	0	0	0	0	0	603	903	0
512	4	0	0	0	0	0	0	200	300	0	26.2192	-9.39926	-438.962	-60446.7	45010	-3959.43	302.537	1040.7	0	0	0	0	0	0	0	603	903	0
512	5	0	0	0	0	0	0	200	300	0	25.6088	-9.24667	-438.047	-60172.1	45376.2	-4188.31	303.588	1040.36	0	0	0	0	0	0	0	603	903	0
512	6	0	0	0	0	0	0	200	300	0	25.914	-9.24667	-438.352	-59348.1	45193.1	-4234.09	303.098	1038.39	0	0	0	0	0	0	0	603	903	0
512	7	0	0	0	0	0	0	200	300	0	26.5244	-8.48373	-438.047	-58432.5	44888	-4325.64	302.473	1036.39	0	0	0	0	0	0	0	603	903	0
512	8	0	0	0	0	0	0	200	300	0	26.6769	-8.94149	-438.047	-58798.7	45254.2	-3730.55	303.309	1037.23	0	0	0	0	0	0	0	603	903	0
512	9	0	0	0	0	0	0	200	300	0	25.7614	-8.78891	-437.131	-59622.7	45132.1	-4279.86	303.246	1039.4	0	0	0	0	0	0	0	603	903	0
513	0	0	0	0	0	0	0	200	300	0	25.3036	-9.70443	-436.521	-58890.3	45193.1	-4371.41	303.53	1037.91	0	0	0	0	0	0	0	603	903	0
513	1	0	0	0	0	0	0	200	300	0	28.0502	-7.5682	-435.911	-58707.2	45376.2	-4188.31	304.095	1037.68	0	0	0	0	0	0	0	603	903	0
513	2	0	0	0	0	0	0	200	300	0	27.7451	-8.02597	-437.131	-58798.7	44949	-4142.53	302.827	1037.51	0	0	0	0	0	0	0	603	903	0
513	3	0	0	0	0	0	0	200	300	0	26.8295	-8.02597	-436.521	-59348.1	45010	-4005.2	303.111	1038.96	0	0	0	0	0	0	0	603	903	0
513	4	0	0	0	0	0	0	200	300	0	27.1347	-9.24667	-436.521	-58981.9	45437.3	-3776.32	304.09	1038.12	0	0	0	0	0	0	0	603	903	0
513	5	0	0	0	0	0	0	200	300	0	27.1347	-7.87338	-435.606	-58524.1	45315.2	-4005.2	304.028	1037.35	0	0	0	0	0	0	0	603	903	0
513	6	0	0	0	0	0	0	200	300	0	27.1347	-7.5682	-436.521	-58249.4	44460.7	-3730.55	301.852	1036.44	0	0	0	0	0	0	0	603	903	0
513	7	0	0	0	0	0	0	200	300	0	26.6769	-7.41561	-436.826	-58707.2	45437.3	-3867.87	304.017	1037.4	0	0	0	0	0	0	0	603	903	0
513	8	0	0	0	0	0	0	200	300	0	25.6088	-7.72079	-437.437	-58615.6	45376.2	-3730.55	303.732	1037	0	0	0	0	0	0	0	603	903	0
513	9	0	0	0	0	0	0	200	300	0	26.3718	-7.26303	-436.826	-58066.3	44765.9	-3593.22	302.48	1035.93	0	0	0	0	0	0	0	603	903	0
514	0	0	0	0	0	0	0	200	300	0	26.6769	-7.72079	-435.606	-57517	44949	-3547.44	303.187	1035.04	0	0	0	0	0	0	0	603	903	0
514	1	0	0	0	0	0	0	200	300	0	26.9821	-6.65268	-436.216	-58341	45376.2	-3776.32	304.022	1036.74	0	0	0	0	0	0	0	603	903	0
[truncated: 4,098 more rows]
