# Supplementary material for: The Effects of an Extemporaneous Speech Dual-task on Older Adult Gait Control
Source: Research Square preprint supplement (doi:10.21203/rs.3.rs-7674245/v1), 2025-11-18
Supplement: Supplementary file 25 [file DT2Walk04.xlsx]

## Sheet: Sheet1
Trajectories
		02:LFHD			02:RFHD			02:LBHD			02:RBHD			02:C7			02:T10			02:CLAV			02:STRN			02:RBAK			02:LSHO			02:LUPA			02:LELB			02:LFRM			02:LWRA			02:LWRB			02:LFIN
Frame	Sub Frame	X	Y	Z	X	Y	Z	X	Y	Z	X	Y	Z	X	Y	Z	X	Y	Z	X	Y	Z	X	Y	Z	X	Y	Z	X	Y	Z	X	Y	Z	X	Y	Z	X	Y	Z	X	Y	Z	X	Y	Z	X	Y	Z
		mm	mm	mm	mm	mm	mm	mm	mm	mm	mm	mm	mm	mm	mm	mm	mm	mm	mm	mm	mm	mm	mm	mm	mm	mm	mm	mm	mm	mm	mm	mm	mm	mm	mm	mm	mm	mm	mm	mm	mm	mm	mm	mm	mm	mm	mm	mm	mm
675	0	155.108	-2479.19	1574.64	254.148	-2485.48	1570.39	127.57	-2646.26	1607.83	238.759	-2665.69	1605.74	179.98	-2722.63	1437.42	150.839	-2778.53	1227.09	183.954	-2589.06	1366.4	197.341	-2531.15	1237.01	243.859	-2800.4	1275.4	11.8574	-2644.39	1396.77	-52.4534	-2657.57	1172.32	-57.1756	-2669.54	1105.04	-74.8396	-2570.35	1021.2	-55.4129	-2531.49	923.726	-105.217	-2581.29	903.794	-112.632	-2509.21	831.564
676	0	154.887	-2471.38	1573.69	253.896	-2477.53	1569.51	127.633	-2638.55	1606.86	238.857	-2657.76	1604.81	180.55	-2714.95	1436.67	152.215	-2771.39	1226.47	183.809	-2581.41	1365.43	196.987	-2523.64	1236.13	245.281	-2792.32	1274.91	12.1362	-2637.76	1395.99	-52.2568	-2649.12	1171.65	-56.9518	-2660.09	1104.14	-74.2145	-2559.89	1021.57	-54.5693	-2519.82	924.781	-104.454	-2569.11	904.124	-111.712	-2496.12	833.006
677	0	154.742	-2463.53	1572.69	253.724	-2469.54	1568.57	127.777	-2630.8	1605.84	239.032	-2649.79	1603.83	181.165	-2707.22	1435.85	153.601	-2764.15	1225.77	183.749	-2573.7	1364.42	196.704	-2516.05	1235.21	246.724	-2784.19	1274.34	12.464	-2631.03	1395.16	-52.0063	-2640.66	1170.92	-56.6742	-2650.67	1103.19	-73.5764	-2549.52	1021.81	-53.7397	-2508.33	925.666	-103.687	-2557.15	904.331	-110.808	-2483.33	834.255
678	0	154.672	-2455.64	1571.65	253.633	-2461.5	1567.59	128.002	-2623	1604.78	239.286	-2641.78	1602.8	181.824	-2699.45	1434.96	154.996	-2756.81	1224.99	183.772	-2565.91	1363.37	196.492	-2508.38	1234.25	248.186	-2776.02	1273.68	12.8409	-2624.19	1394.28	-51.7022	-2632.18	1170.12	-56.3429	-2641.27	1102.19	-72.9257	-2539.24	1021.93	-52.9242	-2497.02	926.381	-102.916	-2545.4	904.414	-109.919	-2470.82	835.311
679	0	154.677	-2447.7	1570.56	253.622	-2453.42	1566.56	128.307	-2615.17	1603.66	239.617	-2633.73	1601.71	182.527	-2691.62	1434	156.399	-2749.38	1224.14	183.88	-2558.05	1362.28	196.352	-2500.64	1233.24	249.665	-2767.82	1272.94	13.2667	-2617.24	1393.35	-51.3445	-2623.67	1169.26	-55.9581	-2631.9	1101.15	-72.2622	-2529.06	1021.92	-52.1229	-2485.9	926.927	-102.142	-2533.86	904.374	-109.045	-2458.59	836.172
680	0	154.759	-2439.72	1569.43	253.691	-2445.28	1565.48	128.693	-2607.3	1602.51	240.025	-2625.64	1600.57	183.274	-2683.74	1432.97	157.804	-2741.85	1223.21	184.073	-2550.12	1361.16	196.282	-2492.81	1232.18	251.159	-2759.57	1272.11	13.7416	-2610.19	1392.36	-50.9335	-2615.14	1168.35	-55.5201	-2622.56	1100.07	-71.5864	-2518.98	1021.79	-51.336	-2474.95	927.303	-101.365	-2522.53	904.211	-108.186	-2446.66	836.84
681	0	154.917	-2431.7	1568.26	253.841	-2437.1	1564.36	129.16	-2599.38	1601.3	240.512	-2617.51	1599.38	184.065	-2675.81	1431.87	159.207	-2734.22	1222.2	184.35	-2542.11	1360	196.285	-2484.91	1231.09	252.664	-2751.27	1271.19	14.2657	-2603.03	1391.32	-50.4698	-2606.59	1167.37	-55.0297	-2613.24	1098.94	-70.8985	-2508.99	1021.55	-50.5639	-2464.18	927.509	-100.587	-2511.42	903.924	-107.343	-2435.01	837.312
682	0	155.152	-2423.63	1567.04	254.073	-2428.88	1563.19	129.707	-2591.43	1600.06	241.075	-2609.33	1598.13	184.9	-2667.83	1430.7	160.601	-2726.49	1221.12	184.713	-2534.03	1358.81	196.361	-2476.93	1229.95	254.175	-2742.94	1270.19	14.8391	-2595.75	1390.23	-49.9538	-2598.01	1166.34	-54.4876	-2603.94	1097.77	-70.1993	-2499.1	1021.18	-49.8073	-2453.59	927.546	-99.8082	-2500.51	903.515	-106.516	-2423.64	837.588
683	0	155.466	-2415.51	1565.79	254.388	-2420.61	1561.98	130.334	-2583.43	1598.77	241.716	-2601.11	1596.83	185.778	-2659.8	1429.47	161.98	-2718.66	1219.96	185.162	-2525.88	1357.58	196.512	-2468.86	1228.78	255.685	-2734.57	1269.11	15.4623	-2588.37	1389.1	-49.3865	-2589.41	1165.25	-53.8948	-2594.67	1096.56	-69.4895	-2489.29	1020.69	-49.0668	-2443.18	927.414	-99.0306	-2489.81	902.985	-105.705	-2412.56	837.667
684	0	155.859	-2407.35	1564.5	254.785	-2412.29	1560.73	131.041	-2575.4	1597.45	242.434	-2592.85	1595.49	186.699	-2651.72	1428.18	163.338	-2710.71	1218.73	185.697	-2517.65	1356.33	196.739	-2460.71	1227.57	257.189	-2726.15	1267.93	16.136	-2580.86	1387.91	-48.7688	-2580.77	1164.1	-53.2525	-2585.41	1095.31	-68.7702	-2479.59	1020.09	-48.3433	-2432.95	927.115	-98.2569	-2479.32	902.334	-104.91	-2401.77	837.548
685	0	156.333	-2399.14	1563.17	255.266	-2403.92	1559.44	131.828	-2567.31	1596.09	243.229	-2584.55	1594.11	187.663	-2643.58	1426.83	164.668	-2702.66	1217.42	186.319	-2509.34	1355.05	197.046	-2452.46	1226.33	258.681	-2717.68	1266.67	16.8611	-2573.24	1386.69	-48.1018	-2572.1	1162.91	-52.5619	-2576.17	1094.02	-68.0423	-2469.97	1019.37	-47.6377	-2422.9	926.65	-97.4897	-2469.04	901.565	-104.132	-2391.26	837.231
686	0	156.889	-2390.88	1561.82	255.833	-2395.51	1558.13	132.693	-2559.18	1594.7	244.099	-2576.2	1592.69	188.669	-2635.38	1425.42	165.968	-2694.49	1216.04	187.028	-2500.96	1353.74	197.434	-2444.12	1225.07	260.156	-2709.16	1265.32	17.6388	-2565.49	1385.42	-47.3865	-2563.4	1161.67	-51.8239	-2566.95	1092.71	-67.3072	-2460.45	1018.54	-46.9514	-2413.03	926.021	-96.7323	-2458.97	900.682	-103.374	-2381.03	836.717
687	0	157.528	-2382.57	1560.44	256.484	-2387.05	1556.79	133.637	-2551	1593.28	245.045	-2567.8	1591.24	189.719	-2627.13	1423.96	167.235	-2686.19	1214.59	187.824	-2492.49	1352.43	197.906	-2435.68	1223.8	261.608	-2700.58	1263.88	18.4707	-2557.62	1384.12	-46.6237	-2554.65	1160.4	-51.0396	-2557.74	1091.37	-66.5661	-2451.01	1017.6	-46.2857	-2403.33	925.233	-95.9879	-2449.1	899.689	-102.636	-2371.09	836.007
688	0	158.252	-2374.21	1559.05	257.222	-2378.55	1555.43	134.657	-2542.77	1591.86	246.065	-2559.35	1589.77	190.811	-2618.81	1422.45	168.468	-2677.77	1213.08	188.707	-2483.95	1351.1	198.466	-2427.13	1222.53	263.032	-2691.93	1262.36	19.3584	-2549.61	1382.79	-45.814	-2545.86	1159.09	-50.2095	-2548.54	1090	-65.8201	-2441.67	1016.57	-45.6419	-2393.81	924.291	-95.2601	-2439.44	898.591	-101.921	-2361.43	835.104
689	0	159.062	-2365.8	1557.65	258.046	-2369.99	1554.06	135.752	-2534.48	1590.42	247.157	-2550.86	1588.28	191.947	-2610.43	1420.91	169.667	-2669.21	1211.49	189.676	-2475.33	1349.77	199.115	-2418.47	1221.26	264.424	-2683.22	1260.75	20.3035	-2541.47	1381.43	-44.9575	-2537.02	1157.75	-49.3337	-2539.35	1088.62	-65.0703	-2432.41	1015.44	-45.0214	-2384.47	923.2	-94.5521	-2429.99	897.397	-101.234	-2352.05	834.014
690	0	159.956	-2357.32	1556.26	258.956	-2361.39	1552.69	136.92	-2526.14	1588.98	248.321	-2542.3	1586.79	193.126	-2601.99	1419.34	170.834	-2660.5	1209.84	190.73	-2466.62	1348.45	199.856	-2409.7	1220.01	265.78	-2674.42	1259.06	21.3078	-2533.2	1380.06	-44.0541	-2528.13	1156.4	-48.412	-2530.16	1087.23	-64.3177	-2423.24	1014.22	-44.4257	-2375.3	921.97	-93.867	-2420.74	896.114	-100.578	-2342.96	832.743
691	0	160.936	-2348.79	1554.87	259.95	-2352.74	1551.33	138.159	-2517.73	1587.55	249.553	-2533.7	1585.31	194.349	-2593.47	1417.75	171.973	-2651.65	1208.13	191.867	-2457.83	1347.15	200.687	-2400.8	1218.78	267.098	-2665.53	1257.3	22.3728	-2524.79	1378.68	-43.1031	-2519.18	1155.04	-47.4433	-2520.96	1085.84	-63.5627	-2414.15	1012.93	-43.8557	-2366.3	920.609	-93.2071	-2411.69	894.754	-99.9585	-2334.14	831.302
692	0	161.999	-2340.19	1553.5	261.027	-2344.04	1550	139.467	-2509.25	1586.15	250.852	-2525.03	1583.85	195.617	-2584.88	1416.15	173.087	-2642.64	1206.38	193.085	-2448.95	1345.88	201.61	-2391.77	1217.6	268.376	-2656.53	1255.46	23.4994	-2516.24	1377.31	-42.1032	-2510.18	1153.68	-46.4261	-2511.77	1084.46	-62.8059	-2405.15	1011.57	-43.3124	-2357.47	919.131	-92.5741	-2402.85	893.331	-99.3811	-2325.61	829.705
693	0	163.144	-2331.53	1552.17	262.185	-2335.29	1548.69	140.841	-2500.71	1584.77	252.215	-2516.31	1582.42	196.929	-2576.22	1414.55	174.184	-2633.46	1204.58	194.381	-2439.99	1344.64	202.621	-2382.61	1216.46	269.612	-2647.43	1253.56	24.6884	-2507.56	1375.95	-41.0529	-2501.12	1152.34	-45.3584	-2502.58	1083.1	-62.0471	-2396.24	1010.16	-42.7964	-2348.82	917.548	-91.9686	-2394.21	891.858	-98.8518	-2317.36	827.967
694	0	164.367	-2322.8	1550.88	263.42	-2326.48	1547.43	142.276	-2492.09	1583.45	253.638	-2507.51	1581.03	198.287	-2567.47	1412.97	175.269	-2624.12	1202.74	195.751	-2430.93	1343.46	203.718	-2373.32	1215.4	270.808	-2638.21	1251.61	25.9394	-2498.75	1374.63	-39.9502	-2492	1151.03	-44.2377	-2493.38	1081.77	-61.2861	-2387.41	1008.72	-42.3076	-2340.33	915.879	-91.39	-2385.78	890.352	-98.3763	-2309.38	826.108
695	0	165.665	-2313.99	1549.66	264.729	-2317.61	1546.22	143.768	-2483.39	1582.17	255.118	-2498.65	1579.7	199.691	-2558.65	1411.42	176.348	-2614.61	1200.89	197.189	-2421.8	1342.34	204.895	-2363.9	1214.41	271.967	-2628.86	1249.62	27.2516	-2489.81	1373.35	-38.7932	-2482.82	1149.75	-43.0616	-2484.19	1080.48	-60.5223	-2378.66	1007.25	-41.8455	-2332.01	914.14	-90.8366	-2377.56	888.832	-97.9601	-2301.68	824.151
696	0	167.033	-2305.12	1548.51	266.108	-2308.68	1545.09	145.314	-2474.62	1580.97	256.65	-2489.72	1578.44	201.14	-2549.73	1409.92	177.43	-2604.92	1199.04	198.69	-2412.57	1341.3	206.144	-2354.34	1213.52	273.094	-2619.38	1247.61	28.6231	-2480.75	1372.13	-37.5797	-2473.59	1148.54	-41.8272	-2475	1079.26	-59.7548	-2370.01	1005.77	-41.4092	-2323.86	912.352	-90.305	-2369.54	887.317	-97.6076	-2294.26	822.12
697	0	168.464	-2296.17	1547.44	267.549	-2299.69	1544.05	146.909	-2465.75	1579.85	258.229	-2480.72	1577.26	202.634	-2540.74	1408.48	178.522	-2595.06	1197.21	200.246	-2403.27	1340.35	207.458	-2344.64	1212.73	274.195	-2609.78	1245.6	30.0511	-2471.58	1370.98	-36.3079	-2464.32	1147.39	-40.5322	-2465.82	1078.11	-58.9825	-2361.44	1004.31	-40.9968	-2315.87	910.536	-89.7908	-2361.72	885.829	-97.322	-2287.11	820.043
698	0	169.953	-2287.14	1546.48	269.046	-2290.63	1543.1	148.545	-2456.8	1578.83	259.852	-2471.64	1576.18	204.171	-2531.65	1407.12	179.63	-2585.03	1195.41	201.851	-2393.88	1339.51	208.825	-2334.82	1212.06	275.277	-2600.04	1243.6	31.5316	-2462.31	1369.93	-34.9764	-2455.02	1146.33	-39.1748	-2456.65	1077.05	-58.2044	-2352.97	1002.88	-40.606	-2308.05	908.715	-89.288	-2354.12	884.389	-97.1049	-2280.23	817.949
699	0	171.493	-2278.03	1545.63	270.594	-2281.49	1542.27	150.219	-2447.76	1577.91	261.511	-2462.47	1575.22	205.751	-2522.47	1405.86	180.761	-2574.84	1193.68	203.493	-2384.41	1338.78	210.233	-2324.87	1211.51	276.35	-2590.17	1241.66	33.0596	-2452.94	1368.99	-33.5848	-2445.69	1145.36	-37.7537	-2447.5	1076.1	-57.4192	-2344.59	1001.51	-40.2338	-2300.38	906.915	-88.7893	-2346.71	883.019	-96.9558	-2273.62	815.869
700	0	173.073	-2268.84	1544.92	272.182	-2272.28	1541.56	151.923	-2438.63	1577.11	263.202	-2453.23	1574.37	207.369	-2513.2	1404.72	181.919	-2564.51	1192.05	205.165	-2374.86	1338.17	211.669	-2314.81	1211.11	277.421	-2580.18	1239.79	34.6288	-2443.49	1368.17	-32.1337	-2436.34	1144.52	-36.2689	-2438.39	1075.27	-56.6258	-2336.31	1000.2	-39.8764	-2292.87	905.159	-88.2866	-2339.51	881.741	-96.8718	-2267.27	813.834
701	0	174.687	-2259.57	1544.34	273.802	-2263	1540.98	153.651	-2429.41	1576.45	264.916	-2443.91	1573.66	209.024	-2503.84	1403.71	183.111	-2554.04	1190.53	206.854	-2365.25	1337.7	213.119	-2304.64	1210.84	278.5	-2570.07	1238.02	36.2321	-2433.97	1367.5	-30.6248	-2427	1143.8	-34.7213	-2429.32	1074.57	-55.8232	-2328.14	998.98	-39.5299	-2285.52	903.472	-87.7709	-2332.51	880.575	-96.8477	-2261.18	811.876
702	0	176.325	-2250.21	1543.92	275.446	-2253.63	1540.56	155.394	-2420.09	1575.92	266.649	-2434.5	1573.08	210.71	-2494.39	1402.84	184.337	-2543.46	1189.16	208.55	-2355.57	1337.38	214.569	-2294.38	1210.72	279.596	-2559.86	1236.38	37.8611	-2424.4	1366.99	-29.0614	-2417.68	1143.23	-33.1136	-2420.31	1074.02	-55.0107	-2320.08	997.871	-39.1895	-2278.32	901.878	-87.2331	-2325.7	879.54	-96.8754	-2255.34	810.024
703	0	177.976	-2240.78	1543.66	277.103	-2244.19	1540.28	157.147	-2410.69	1575.54	268.391	-2425.01	1572.66	212.422	-2484.86	1402.14	185.6	-2532.79	1187.96	210.241	-2345.83	1337.21	216.002	-2284.04	1210.76	280.717	-2549.55	1234.9	39.5068	-2414.78	1366.65	-27.4485	-2408.4	1142.82	-31.4495	-2411.37	1073.64	-54.1882	-2312.13	996.886	-38.8506	-2271.26	900.401	-86.6643	-2319.08	878.655	-96.9447	-2249.74	808.307
704	0	179.631	-2231.27	1543.56	278.762	-2234.67	1540.16	158.9	-2401.2	1575.32	270.136	-2415.45	1572.39	214.156	-2475.24	1401.61	186.902	-2522.05	1186.96	211.915	-2336.04	1337.19	217.403	-2273.64	1210.94	281.871	-2539.17	1233.61	41.1596	-2405.14	1366.48	-25.7924	-2399.17	1142.57	-29.7347	-2402.51	1073.43	-53.3558	-2304.3	996.041	-38.5084	-2264.34	899.061	-86.0563	-2312.64	877.932	-97.0427	-2244.37	806.75
705	0	181.277	-2221.68	1543.63	280.413	-2225.07	1540.21	160.645	-2391.62	1575.25	271.875	-2405.81	1572.28	215.903	-2465.55	1401.26	188.24	-2511.28	1186.18	213.559	-2326.21	1337.32	218.759	-2263.2	1211.28	283.065	-2528.73	1232.53	42.8095	-2395.48	1366.51	-24.1009	-2390.02	1142.49	-27.9761	-2393.75	1073.39	-52.5143	-2296.59	995.349	-38.1583	-2257.56	897.878	-85.4019	-2306.38	877.385	-97.1547	-2239.21	805.375
706	0	182.906	-2212.02	1543.88	282.046	-2215.39	1540.41	162.376	-2381.97	1575.35	273.601	-2396.09	1572.33	217.659	-2455.79	1401.1	189.615	-2500.51	1185.64	215.162	-2316.35	1337.61	220.055	-2252.74	1211.76	284.305	-2518.24	1231.68	44.4463	-2385.83	1366.72	-22.3831	-2380.97	1142.58	-26.1819	-2385.11	1073.53	-51.6648	-2289.01	994.818	-37.796	-2250.91	896.867	-84.6954	-2300.27	877.019	-97.2645	-2234.24	804.197
707	0	184.505	-2202.3	1544.29	283.649	-2205.65	1540.77	164.082	-2372.26	1575.61	275.305	-2386.31	1572.53	219.414	-2445.97	1401.14	191.025	-2489.76	1185.36	216.713	-2306.47	1338.05	221.278	-2242.28	1212.37	285.595	-2507.73	1231.08	46.0601	-2376.21	1367.13	-20.6492	-2372.03	1142.85	-24.3615	-2376.59	1073.86	-50.809	-2281.57	994.457	-37.4178	-2244.38	896.039	-83.9331	-2294.32	876.839	-97.3551	-2229.43	803.229
708	0	186.063	-2192.52	1544.86	285.211	-2195.84	1541.28	165.757	-2362.48	1576.03	276.98	-2376.46	1572.9	221.164	-2436.1	1401.37	192.468	-2479.06	1185.33	218.202	-2296.57	1338.64	222.418	-2231.85	1213.12	286.94	-2497.21	1230.74	47.6415	-2366.62	1367.72	-18.9098	-2363.22	1143.3	-22.5253	-2368.22	1074.36	-49.9491	-2274.26	994.267	-37.0206	-2237.96	895.404	-83.1131	-2288.5	876.844	-97.4093	-2224.77	802.476
709	0	187.569	-2182.69	1545.58	286.723	-2185.97	1541.93	167.393	-2352.64	1576.6	278.617	-2366.56	1573.41	222.899	-2426.19	1401.79	193.944	-2468.46	1185.56	219.62	-2286.68	1339.36	223.466	-2221.45	1213.98	288.342	-2486.7	1230.66	49.1815	-2357.09	1368.48	-17.1762	-2354.56	1143.9	-20.6838	-2359.99	1075.02	-49.0875	-2267.08	994.249	-36.6019	-2231.65	894.963	-82.2353	-2282.79	877.029	-97.4104	-2220.23	801.94
710	0	189.013	-2172.82	1546.43	288.172	-2176.06	1542.71	168.981	-2342.77	1577.32	280.209	-2356.62	1574.07	224.613	-2416.26	1402.39	195.451	-2457.96	1186.04	220.958	-2276.79	1340.22	224.413	-2211.12	1214.94	289.806	-2476.22	1230.85	50.6724	-2347.63	1369.4	-15.4591	-2346.06	1144.66	-18.8479	-2351.94	1075.85	-48.2266	-2260.05	994.398	-36.1601	-2225.43	894.718	-81.3017	-2277.2	877.384	-97.3431	-2215.77	801.614
711	0	190.384	-2162.93	1547.42	289.55	-2166.11	1543.61	170.514	-2332.86	1578.18	281.748	-2346.64	1574.87	226.3	-2406.31	1403.18	196.99	-2447.6	1186.76	222.211	-2266.93	1341.18	225.257	-2200.87	1215.99	291.331	-2465.78	1231.3	52.1075	-2338.25	1370.46	-13.769	-2337.74	1145.56	-17.0279	-2344.05	1076.81	-47.369	-2253.16	994.706	-35.6943	-2219.3	894.665	-80.3158	-2271.69	877.897	-97.194	-2211.37	801.49
712	0	191.673	-2153.02	1548.5	290.848	-2156.12	1544.61	171.986	-2322.94	1579.17	283.229	-2336.62	1575.79	227.954	-2396.35	1404.13	198.562	-2437.39	1187.71	223.374	-2257.11	1342.26	225.995	-2190.72	1217.12	292.919	-2455.4	1232	53.4812	-2328.98	1371.65	-12.1151	-2329.6	1146.58	-15.2334	-2336.35	1077.9	-46.5171	-2246.4	995.165	-35.2039	-2213.25	894.794	-79.2823	-2266.25	878.552	-96.9522	-2207	801.554
713	0	192.871	-2143.1	1549.68	292.055	-2146.12	1545.69	173.392	-2313	1580.27	284.646	-2326.59	1576.83	229.568	-2386.42	1405.23	200.167	-2427.35	1188.86	224.444	-2247.34	1343.42	226.629	-2180.68	1218.31	294.569	-2445.1	1232.93	54.7897	-2319.83	1372.94	-10.5052	-2321.66	1147.71	-13.4726	-2328.82	1079.09	-45.6726	-2239.78	995.76	-34.6888	-2207.27	895.095	-78.2067	-2260.86	879.33	-96.6097	-2202.63	801.787
714	0	193.97	-2133.19	1550.92	293.165	-2136.12	1546.84	174.725	-2303.07	1581.47	285.993	-2316.55	1577.97	231.14	-2376.5	1406.46	201.808	-2417.49	1190.19	225.421	-2237.62	1344.65	227.161	-2170.77	1219.54	296.278	-2434.88	1234.08	56.0303	-2310.8	1374.3	-8.94513	-2313.91	1148.92	-11.752	-2321.49	1080.37	-44.8368	-2233.3	996.476	-34.1492	-2201.36	895.554	-77.0945	-2255.52	880.21	-96.1616	-2198.22	802.173
715	0	194.963	-2123.3	1552.22	294.17	-2126.11	1548.04	175.981	-2293.16	1582.76	287.265	-2306.5	1579.2	232.664	-2366.63	1407.81	203.484	-2407.81	1191.67	226.306	-2227.97	1345.95	227.598	-2160.98	1220.8	298.042	-2424.76	1235.42	57.2022	-2301.91	1375.72	-7.43875	-2306.37	1150.2	-10.0763	-2314.34	1081.71	-44.0101	-2226.95	997.296	-33.585	-2195.49	896.154	-75.9509	-2250.21	881.17	-95.6068	-2193.77	802.689
716	0	195.845	-2113.44	1553.54	295.067	-2116.12	1549.28	177.158	-2283.27	1584.12	288.461	-2296.47	1580.51	234.138	-2356.81	1409.27	205.196	-2398.32	1193.27	227.101	-2218.4	1347.29	227.949	-2151.34	1222.09	299.857	-2414.75	1236.92	58.3058	-2293.15	1377.17	-5.98754	-2299.03	1151.53	-8.448	-2307.38	1083.08	-43.1921	-2220.72	998.203	-32.9962	-2189.68	896.877	-74.7806	-2244.92	882.19	-94.9469	-2189.25	803.316
717	0	196.612	-2103.62	1554.86	295.85	-2106.15	1550.53	178.251	-2273.42	1585.53	289.576	-2286.46	1581.88	235.559	-2347.05	1410.8	206.942	-2389.01	1194.96	227.81	-2208.91	1348.66	228.225	-2141.84	1223.38	301.715	-2404.86	1238.57	59.3432	-2284.55	1378.63	-4.59078	-2291.88	1152.88	-6.8674	-2300.6	1084.48	-42.3813	-2214.62	999.178	-32.3822	-2183.9	897.704	-73.5869	-2239.64	883.249	-94.1873	-2184.63	804.036
718	0	197.262	-2093.85	1556.18	296.517	-2096.22	1551.78	179.261	-2263.63	1586.99	290.611	-2276.47	1583.3	236.925	-2337.37	1412.4	208.719	-2379.87	1196.72	228.441	-2199.52	1350.04	228.438	-2132.5	1224.68	303.605	-2395.08	1240.34	60.3175	-2276.08	1380.08	-3.24561	-2284.93	1154.24	-5.33271	-2294	1085.88	-41.5754	-2208.63	1000.2	-31.7423	-2178.17	898.616	-72.372	-2234.36	884.326	-93.3355	-2179.92	804.829
719	0	197.796	-2084.15	1557.48	297.069	-2086.33	1553.01	180.185	-2253.89	1588.46	291.563	-2266.52	1584.75	238.236	-2327.77	1414.04	210.521	-2370.89	1198.52	228.998	-2190.23	1351.43	228.6	-2123.29	1225.96	305.519	-2385.43	1242.19	61.233	-2267.77	1381.5	-1.94735	-2278.16	1155.59	-3.84015	-2287.57	1087.27	-40.7715	-2202.75	1001.26	-31.0753	-2172.46	899.592	-71.1369	-2229.08	885.404	-92.4017	-2175.1	805.68
720	0	198.214	-2074.52	1558.72	297.507	-2076.49	1554.22	181.026	-2244.22	1589.94	292.433	-2256.62	1586.22	239.492	-2318.26	1415.71	212.343	-2362.07	1200.33	229.489	-2181.04	1352.82	228.724	-2114.23	1227.23	307.445	-2375.9	1244.1	62.0947	-2259.59	1382.87	-0.689859	-2271.56	1156.92	-2.38434	-2281.3	1088.63	-39.9658	-2196.98	1002.33	-30.3801	-2166.79	900.613	-69.8816	-2223.8	886.466	-91.3972	-2170.17	806.572
721	0	198.521	-2064.96	1559.92	297.834	-2066.71	1555.39	181.783	-2234.62	1591.41	293.223	-2246.77	1587.69	240.691	-2308.85	1417.38	214.174	-2353.39	1202.13	229.922	-2171.95	1354.17	228.824	-2105.31	1228.47	309.371	-2366.5	1246.04	62.9081	-2251.54	1384.19	0.534055	-2265.13	1158.21	-0.958719	-2275.17	1089.94	-39.1546	-2191.3	1003.4	-29.6554	-2161.14	901.659	-68.6052	-2218.52	887.497	-90.3345	-2165.12	807.493
722	0	198.721	-2055.49	1561.04	298.056	-2057.01	1556.5	182.46	-2225.11	1592.85	293.934	-2236.98	1589.15	241.836	-2299.54	1419.04	216.007	-2344.84	1203.91	230.305	-2162.97	1355.5	228.911	-2096.52	1229.67	311.285	-2357.22	1247.99	63.6789	-2243.62	1385.44	1.73207	-2258.84	1159.45	0.443953	-2269.19	1091.2	-38.334	-2185.71	1004.45	-28.9002	-2155.52	902.712	-67.3062	-2213.23	888.485	-89.2261	-2159.98	808.43
723	0	198.823	-2046.12	1562.08	298.178	-2047.37	1557.55	183.059	-2215.68	1594.26	294.569	-2227.26	1590.59	242.926	-2290.34	1420.67	217.832	-2336.41	1205.63	230.645	-2154.1	1356.77	228.995	-2087.86	1230.83	313.176	-2348.06	1249.92	64.4126	-2235.81	1386.61	2.91185	-2252.69	1160.63	1.83104	-2263.33	1092.39	-37.5005	-2180.19	1005.47	-28.1138	-2149.92	903.754	-65.9829	-2207.93	889.418	-88.084	-2154.73	809.369
724	0	198.834	-2036.83	1563.04	298.211	-2037.82	1558.53	183.584	-2206.34	1595.6	295.132	-2217.61	1591.99	243.964	-2281.24	1422.26	219.638	-2328.08	1207.29	230.95	-2145.34	1358	229.085	-2079.31	1231.94	315.033	-2339.02	1251.82	65.1144	-2228.11	1387.7	4.08055	-2246.66	1161.74	3.20949	-2257.58	1093.52	-36.6511	-2174.75	1006.45	-27.2962	-2144.34	904.767	-64.6338	-2202.64	890.286	-86.9196	-2149.41	810.297
725	0	198.763	-2027.64	1563.9	298.162	-2028.35	1559.43	184.04	-2197.09	1596.89	295.627	-2208.04	1593.35	244.95	-2272.24	1423.78	221.417	-2319.84	1208.87	231.226	-2136.68	1359.16	229.187	-2070.88	1232.99	316.848	-2330.1	1253.65	65.7888	-2220.49	1388.7	5.24441	-2240.72	1162.78	4.58528	-2251.93	1094.56	-35.7837	-2169.36	1007.36	-26.4478	-2138.78	905.735	-63.258	-2197.34	891.08	-85.7429	-2144.01	811.202
726	0	198.622	-2018.54	1564.66	298.043	-2018.97	1560.24	184.431	-2187.94	1598.09	296.057	-2198.56	1594.64	245.886	-2263.35	1425.24	223.16	-2311.68	1210.35	231.479	-2128.12	1360.24	229.304	-2062.54	1233.98	318.611	-2321.28	1255.41	66.4395	-2212.96	1389.61	6.40835	-2234.86	1163.73	5.96307	-2246.35	1095.51	-34.8971	-2164.03	1008.2	-25.57	-2133.24	906.642	-61.8549	-2192.05	891.791	-84.5621	-2138.55	812.069
727	0	198.421	-2009.54	1565.31	297.864	-2009.68	1560.96	184.762	-2178.87	1599.21	296.429	-2189.16	1595.85	246.773	-2254.56	1426.61	224.859	-2303.6	1211.73	231.713	-2119.65	1361.24	229.439	-2054.3	1234.89	320.315	-2312.56	1257.07	67.0689	-2205.5	1390.41	7.57569	-2229.07	1164.59	7.34575	-2240.82	1096.38	-33.9912	-2158.73	1008.96	-24.6646	-2127.71	907.475	-60.4251	-2186.77	892.413	-83.3839	-2133.06	812.882
728	0	198.171	-2000.63	1565.86	297.636	-2000.48	1561.59	185.039	-2169.9	1600.23	296.746	-2179.84	1596.99	247.612	-2245.86	1427.88	226.507	-2295.57	1212.99	231.932	-2111.28	1362.14	229.591	-2046.14	1235.71	321.954	-2303.93	1258.62	67.6787	-2198.09	1391.11	8.74803	-2223.32	1165.35	8.73437	-2235.34	1097.15	-33.0669	-2153.46	1009.62	-23.7342	-2122.19	908.218	-58.97	-2181.48	892.937	-82.2131	-2127.54	813.628
729	0	197.884	-1991.81	1566.29	297.371	-1991.38	1562.12	185.267	-2161.01	1601.14	297.013	-2170.62	1598.02	248.404	-2237.25	1429.05	228.096	-2287.6	1214.14	232.14	-2102.99	1362.95	229.76	-2038.07	1236.45	323.52	-2295.39	1260.05	68.2692	-2190.72	1391.71	9.92511	-2217.59	1166.01	10.1279	-2229.87	1097.82	-32.1261	-2148.2	1010.19	-22.7817	-2116.69	908.86	-57.492	-2176.21	893.359	-81.0529	-2122.01	814.289
730	0	197.57	-1983.07	1566.62	297.079	-1982.36	1562.56	185.45	-2152.2	1601.94	297.236	-2161.49	1598.96	249.149	-2228.72	1430.11	229.62	-2279.68	1215.15	232.338	-2094.77	1363.66	229.943	-2030.06	1237.08	325.009	-2286.93	1261.35	68.8399	-2183.38	1392.2	11.1048	-2211.86	1166.57	11.5235	-2224.4	1098.39	-31.1718	-2142.95	1010.64	-21.8107	-2111.2	909.39	-55.9947	-2170.94	893.674	-79.9045	-2116.49	814.852
731	0	197.238	-1974.42	1566.84	296.769	-1973.43	1562.89	185.594	-2143.48	1602.62	297.419	-2152.44	1599.79	249.847	-2220.26	1431.04	231.073	-2271.79	1216.04	232.528	-2086.62	1364.25	230.135	-2022.11	1237.6	326.415	-2278.55	1262.51	69.3889	-2176.06	1392.59	12.2832	-2206.12	1167.03	12.9163	-2218.91	1098.85	-30.2077	-2137.68	1010.97	-20.8249	-2105.71	909.796	-54.4826	-2165.69	893.877	-78.7682	-2110.99	815.3
732	0	196.898	-1965.83	1566.95	296.452	-1964.59	1563.12	185.703	-2134.82	1603.18	297.566	-2143.48	1600.5	250.497	-2211.88	1431.85	232.448	-2263.95	1216.8	232.709	-2078.53	1364.73	230.333	-2014.22	1238.01	327.733	-2270.24	1263.53	69.9138	-2168.74	1392.87	13.4548	-2200.33	1167.37	14.3	-2213.37	1099.22	-29.2381	-2132.39	1011.18	-19.828	-2100.23	910.071	-52.9611	-2160.44	893.966	-77.6425	-2105.53	815.62
733	0	196.557	-1957.31	1566.96	296.133	-1955.82	1563.24	185.781	-2126.23	1603.62	297.681	-2134.61	1601.09	251.099	-2203.55	1432.54	233.739	-2256.14	1217.42	232.881	-2070.49	1365.1	230.532	-2006.37	1238.31	328.958	-2261.99	1264.41	70.4112	-2161.42	1393.04	14.6124	-2194.49	1167.61	15.6668	-2207.77	1099.47	-28.2678	-2127.07	1011.27	-18.824	-2094.75	910.206	-51.4368	-2155.19	893.939	-76.5256	-2100.11	815.8
734	0	196.222	-1948.85	1566.87	295.821	-1947.13	1563.26	185.832	-2117.7	1603.93	297.768	-2125.81	1601.55	251.65	-2195.28	1433.09	234.938	-2248.37	1217.92	233.044	-2062.5	1365.34	230.726	-1998.57	1238.48	330.086	-2253.79	1265.14	70.8772	-2154.07	1393.11	15.7477	-2188.58	1167.74	17.0078	-2202.09	1099.63	-27.3019	-2121.7	1011.22	-17.8169	-2089.27	910.198	-49.9169	-2149.95	893.797	-75.4147	-2094.74	815.829
735	0	195.897	-1940.44	1566.67	295.519	-1938.5	1563.19	185.857	-2109.23	1604.11	297.828	-2117.09	1601.89	252.148	-2187.05	1433.51	236.04	-2240.63	1218.29	233.196	-2054.54	1365.46	230.913	-1990.79	1238.53	331.111	-2245.66	1265.72	71.3075	-2146.7	1393.08	16.8514	-2182.57	1167.76	18.3136	-2196.31	1099.68	-26.3458	-2116.27	1011.05	-16.8107	-2083.79	910.041	-48.4095	-2144.71	893.539	-74.3071	-2089.44	815.699
736	0	195.587	-1932.07	1566.38	295.231	-1929.94	1563.01	185.858	-2100.8	1604.17	297.864	-2108.44	1602.1	252.593	-2178.86	1433.81	237.037	-2232.92	1218.55	233.334	-2046.6	1365.46	231.086	-1983.04	1238.46	332.029	-2237.57	1266.16	71.6974	-2139.28	1392.96	17.9132	-2176.45	1167.68	19.574	-2190.41	1099.63	-25.405	-2110.77	1010.74	-15.8093	-2078.3	909.732	-46.9234	-2139.47	893.169	-73.2001	-2084.2	815.403
737	0	195.293	-1923.73	1565.99	294.958	-1921.43	1562.73	185.837	-2092.41	1604.1	297.876	-2099.86	1602.18	252.98	-2170.69	1433.97	237.923	-2225.24	1218.68	233.457	-2038.69	1365.34	231.242	-1975.3	1238.27	332.837	-2229.53	1266.46	72.0423	-2131.81	1392.74	18.9229	-2170.2	1167.49	20.7791	-2184.39	1099.49	-24.4852	-2105.19	1010.29	-14.817	-2072.8	909.271	-45.4677	-2134.22	892.69	-72.0914	-2079.03	814.938
738	0	195.016	-1915.43	1565.51	294.703	-1912.97	1562.35	185.794	-2084.04	1603.9	297.866	-2091.33	1602.13	253.307	-2162.54	1434	238.691	-2217.59	1218.71	233.561	-2030.78	1365.1	231.378	-1967.58	1237.95	333.53	-2221.52	1266.63	72.3375	-2124.28	1392.42	19.8699	-2163.82	1167.21	21.9188	-2178.22	1099.25	-23.5921	-2099.51	1009.72	-13.8379	-2067.29	908.659	-44.052	-2128.95	892.107	-70.9799	-2073.92	814.302
739	0	194.755	-1907.14	1564.95	294.463	-1904.55	1561.88	185.729	-2075.71	1603.59	297.832	-2082.85	1601.95	253.572	-2154.41	1433.9	239.337	-2209.97	1218.63	233.643	-2022.87	1364.74	231.489	-1959.85	1237.52	334.108	-2213.56	1266.66	72.5785	-2116.68	1392.02	20.744	-2157.28	1166.83	22.9835	-2171.91	1098.93	-22.7313	-2093.73	1009.02	-12.8766	-2061.75	907.896	-42.6861	-2123.66	891.424	-69.8651	-2068.88	813.496
740	0	194.508	-1898.86	1564.3	294.237	-1896.16	1561.31	185.639	-2067.39	1603.16	297.773	-2074.43	1601.65	253.772	-2146.29	1433.68	239.856	-2202.37	1218.45	233.7	-2014.95	1364.26	231.573	-1952.12	1236.97	334.566	-2205.61	1266.57	72.7611	-2109	1391.54	21.5357	-2150.58	1166.35	23.9642	-2165.43	1098.51	-21.9088	-2087.83	1008.2	-11.9377	-2056.2	906.986	-41.3797	-2118.35	890.646	-68.7479	-2063.9	812.523
741	0	194.273	-1890.59	1563.57	294.021	-1887.8	1560.66	185.524	-2059.09	1602.62	297.688	-2066.04	1601.22	253.904	-2138.17	1433.35	240.246	-2194.8	1218.17	233.728	-2007.03	1363.67	231.628	-1944.37	1236.31	334.906	-2197.7	1266.36	72.8813	-2101.24	1390.97	22.2364	-2143.72	1165.78	24.8529	-2158.78	1098.01	-21.1301	-2081.82	1007.26	-11.0264	-2050.61	905.933	-40.1425	-2113	889.78	-67.6307	-2058.97	811.389
742	0	194.045	-1882.32	1562.76	293.812	-1879.47	1559.91	185.381	-2050.79	1601.96	297.574	-2057.68	1600.67	253.965	-2130.04	1432.89	240.504	-2187.25	1217.8	233.722	-1999.08	1362.97	231.649	-1936.61	1235.55	335.125	-2189.79	1266.03	72.9357	-2093.39	1390.32	22.8386	-2136.68	1165.12	25.6424	-2151.96	1097.43	-20.401	-2075.69	1006.2	-10.148	-2044.99	904.743	-38.9838	-2107.6	888.831	-66.5172	-2054.09	810.1
743	0	193.82	-1874.05	1561.88	293.604	-1871.15	1559.08	185.206	-2042.5	1601.21	297.428	-2049.36	1600.01	253.952	-2121.9	1432.32	240.631	-2179.7	1217.34	233.68	-1991.1	1362.17	231.636	-1928.82	1234.69	335.226	-2181.9	1265.58	72.921	-2085.45	1389.59	23.336	-2129.46	1164.38	26.3266	-2144.97	1096.76	-19.7272	-2069.42	1005.03	-9.30816	-2039.33	903.421	-37.9123	-2102.16	887.804	-65.4126	-2049.24	808.665
744	0	193.593	-1865.77	1560.92	293.393	-1862.84	1558.17	184.996	-2034.2	1600.36	297.246	-2041.05	1599.24	253.864	-2113.75	1431.63	240.627	-2172.15	1216.8	233.596	-1983.09	1361.27	231.586	-1921	1233.73	335.209	-2174.01	1265.02	72.8344	-2077.42	1388.78	23.724	-2122.07	1163.55	26.9007	-2137.81	1096.02	-19.1142	-2063.01	1003.76	-8.51305	-2033.62	901.974	-36.9364	-2096.65	886.706	-64.3233	-2044.42	807.092
745	0	193.357	-1857.48	1559.9	293.173	-1854.53	1557.18	184.748	-2025.9	1599.41	297.025	-2032.76	1598.37	253.698	-2105.58	1430.85	240.495	-2164.6	1216.16	233.466	-1975.04	1360.28	231.495	-1913.13	1232.69	335.077	-2166.11	1264.36	72.6736	-2069.29	1387.9	23.9991	-2114.5	1162.63	27.3614	-2130.47	1095.19	-18.5676	-2056.47	1002.38	-7.76901	-2027.85	900.41	-36.0633	-2091.06	885.541	-63.2572	-2039.59	805.392
746	0	193.107	-1849.17	1558.81	292.937	-1846.23	1556.12	184.457	-2017.59	1598.38	296.76	-2024.48	1597.4	253.452	-2097.39	1429.96	240.238	-2157.01	1215.44	233.286	-1966.94	1359.2	231.362	-1905.22	1231.57	334.832	-2158.19	1263.59	72.4364	-2061.06	1386.94	24.1595	-2106.76	1161.64	27.7063	-2122.96	1094.29	-18.0926	-2049.79	1000.92	-7.08265	-2022.02	898.738	-35.2998	-2085.39	884.314	-62.2234	-2034.76	803.578
747	0	192.837	-1840.85	1557.67	292.679	-1837.93	1554.99	184.12	-2009.26	1597.28	296.446	-2016.2	1596.34	253.125	-2089.17	1428.97	239.862	-2149.39	1214.63	233.052	-1958.79	1358.05	231.183	-1897.26	1230.38	334.477	-2150.24	1262.72	72.1212	-2052.75	1385.91	24.2049	-2098.86	1160.56	27.9347	-2115.29	1093.32	-17.6944	-2042.96	999.365	-6.46074	-2016.11	896.966	-34.6512	-2079.63	883.03	-61.2319	-2029.9	801.661
748	0	192.541	-1832.51	1556.48	292.394	-1829.63	1553.81	183.731	-2000.93	1596.1	296.081	-2007.93	1595.2	252.715	-2080.92	1427.88	239.372	-2141.71	1213.73	232.759	-1950.58	1356.82	230.956	-1889.24	1229.13	334.015	-2142.26	1261.76	71.7265	-2044.34	1384.81	24.1361	-2090.8	1159.41	28.0469	-2107.47	1092.27	-17.3778	-2036	997.734	-5.91012	-2010.11	895.105	-34.1218	-2073.76	881.693	-60.2935	-2025	799.654
749	0	192.213	-1824.14	1555.24	292.075	-1821.32	1552.57	183.288	-1992.58	1594.86	295.659	-1999.66	1593.98	252.223	-2072.64	1426.71	238.772	-2133.96	1212.74	232.404	-1942.32	1355.54	230.677	-1881.15	1227.83	333.451	-2134.23	1260.69	71.2511	-2035.85	1383.63	23.9552	-2082.59	1158.18	28.0445	-2099.49	1091.14	-17.1476	-2028.89	996.031	-5.43763	-2004.02	893.166	-33.7147	-2067.77	880.307	-59.4196	-2020.03	797.571
750	0	191.847	-1815.76	1553.97	291.716	-1813.01	1551.29	182.786	-1984.21	1593.57	295.176	-1991.37	1592.69	251.645	-2064.32	1425.46	238.07	-2126.12	1211.66	231.981	-1933.99	1354.2	230.342	-1872.99	1226.48	332.787	-2126.15	1259.52	70.694	-2027.27	1382.39	23.6654	-2074.24	1156.88	27.9303	-2091.36	1089.95	-17.008	-2021.64	994.264	-5.04996	-1997.81	891.16	-33.4316	-2061.66	878.878	-58.6219	-2014.97	795.427
751	0	191.438	-1807.35	1552.67	291.314	-1804.68	1549.97	182.223	-1975.82	1592.24	294.63	-1983.08	1591.35	250.984	-2055.95	1424.14	237.271	-2118.18	1210.48	231.489	-1925.59	1352.83	229.949	-1864.74	1225.09	332.028	-2117.99	1258.27	70.0545	-2018.61	1381.08	23.2707	-2065.76	1155.51	27.7078	-2083.1	1088.69	-16.9627	-2014.25	992.444	-4.75354	-1991.5	889.099	-33.2728	-2055.41	877.408	-57.912	-2009.8	793.234
752	0	190.981	-1798.92	1551.35	290.862	-1796.35	1548.63	181.595	-1967.41	1590.88	294.017	-1974.78	1589.97	250.238	-2047.55	1422.75	236.38	-2110.11	1209.21	230.923	-1917.11	1351.42	229.493	-1856.41	1223.69	331.177	-2109.76	1256.93	69.3321	-2009.88	1379.71	22.7756	-2057.17	1154.08	27.3812	-2074.72	1087.37	-17.0152	-2006.72	990.58	-4.55441	-1985.05	886.996	-33.2375	-2049.01	875.903	-57.3013	-2004.51	791.008
753	0	190.472	-1790.47	1550.03	290.357	-1788	1547.27	180.899	-1958.98	1589.49	293.334	-1966.47	1588.55	249.408	-2039.09	1421.29	235.404	-2101.9	1207.85	230.28	-1908.56	1350	228.971	-1847.98	1222.27	330.237	-2101.44	1255.5	68.5266	-2001.07	1378.29	22.1851	-2048.47	1152.59	26.9557	-2066.21	1085.99	-17.1682	-1999.05	988.681	-4.45811	-1978.46	884.864	-33.3231	-2042.46	874.367	-56.8007	-1999.06	788.763
754	0	189.907	-1781.99	1548.72	289.795	-1779.63	1545.92	180.134	-1950.53	1588.1	292.58	-1958.13	1587.11	248.494	-2030.59	1419.8	234.347	-2093.54	1206.4	229.558	-1899.93	1348.57	228.381	-1839.45	1220.86	329.213	-2093.02	1254	67.638	-1992.19	1376.81	21.5046	-2039.66	1151.05	26.4363	-2057.59	1084.56	-17.4242	-1991.26	986.759	-4.46954	-1971.71	882.717	-33.5263	-2035.75	872.807	-56.4201	-1993.45	786.514
755	0	189.283	-1773.48	1547.43	289.173	-1771.25	1544.58	179.298	-1942.05	1586.71	291.752	-1949.78	1585.67	247.497	-2022.03	1418.26	233.213	-2085.01	1204.87	228.756	-1891.21	1347.15	227.718	-1830.8	1219.47	328.107	-2084.49	1252.43	66.6666	-1983.25	1375.3	20.7394	-2030.77	1149.48	25.8287	-2048.86	1083.08	-17.7845	-1983.32	984.827	-4.59285	-1964.8	880.569	-33.8424	-2028.86	871.23	-56.1686	-1987.65	784.275
756	0	188.599	-1764.95	1546.18	288.489	-1762.85	1543.27	178.391	-1933.55	1585.34	290.851	-1941.41	1584.22	246.419	-2013.41	1416.7	232.008	-2076.31	1203.27	227.872	-1882.41	1345.76	226.98	-1822.04	1218.11	326.923	-2075.85	1250.8	65.6133	-1974.24	1373.77	19.8949	-2021.79	1147.87	25.1385	-2040.04	1081.57	-18.2503	-1975.25	982.897	-4.83131	-1957.72	878.437	-34.266	-2021.79	869.641	-56.0538	-1981.64	782.062
757	0	187.852	-1756.38	1544.98	287.743	-1754.43	1542.01	177.412	-1925.02	1584.01	289.875	-1933.02	1582.8	245.262	-2004.73	1415.14	230.736	-2067.42	1201.61	226.906	-1873.51	1344.4	226.166	-1813.15	1216.8	325.665	-2067.08	1249.14	64.4793	-1965.17	1372.21	18.9765	-2012.73	1146.24	24.3711	-2031.11	1080.04	-18.8215	-1967.05	980.984	-5.18722	-1950.45	876.336	-34.791	-2014.53	868.051	-56.082	-1975.4	779.889
758	0	187.041	-1747.78	1543.85	286.932	-1745.98	1540.8	176.362	-1916.46	1582.72	288.825	-1924.6	1581.42	244.027	-1995.98	1413.57	229.401	-2058.35	1199.9	225.86	-1864.53	1343.1	225.275	-1804.12	1215.55	324.337	-2058.19	1247.44	63.2666	-1956.04	1370.66	17.9892	-2003.59	1144.62	23.5319	-2022.09	1078.5	-19.4977	-1958.72	979.102	-5.6618	-1942.97	874.283	-35.411	-2007.08	866.468	-56.2577	-1968.92	777.772
759	0	186.167	-1739.15	1542.81	286.058	-1737.51	1539.67	175.242	-1907.86	1581.49	287.703	-1916.15	1580.08	242.718	-1987.17	1412.03	228.008	-2049.08	1198.17	224.734	-1855.46	1341.86	224.305	-1794.97	1214.39	322.944	-2049.16	1245.73	61.9776	-1946.85	1369.12	16.9382	-1994.38	1143	22.6259	-2012.97	1076.97	-20.2772	-1950.24	977.268	-6.25512	-1935.29	872.293	-36.1191	-1999.42	864.905	-56.5839	-1962.18	775.727
760	0	185.23	-1730.47	1541.87	285.121	-1729	1538.64	174.053	-1899.23	1580.34	286.51	-1907.67	1578.82	241.338	-1978.28	1410.53	226.56	-2039.63	1196.42	223.532	-1846.3	1340.71	223.259	-1785.67	1213.32	321.489	-2039.99	1244.04	60.6157	-1937.61	1367.61	15.8281	-1985.1	1141.41	21.658	-2003.76	1075.46	-21.1578	-1941.63	975.498	-6.96608	-1927.39	870.386	-36.9088	-1991.55	863.375	-57.0615	-1955.16	773.77
761	0	184.23	-1721.76	1541.05	284.121	-1720.45	1537.72	172.798	-1890.57	1579.27	285.25	-1899.16	1577.63	239.891	-1969.32	1409.08	225.063	-2029.98	1194.68	222.258	-1837.05	1339.65	222.138	-1776.23	1212.38	319.979	-2030.69	1242.37	59.185	-1928.31	1366.15	14.6635	-1975.74	1139.87	20.6326	-1994.45	1073.98	-22.1362	-1932.87	973.809	-7.79241	-1919.26	868.578	-37.7737	-1983.47	861.891	-57.6899	-1947.84	771.918
762	0	183.17	-1713	1540.36	283.061	-1711.87	1536.92	171.481	-1881.86	1578.32	283.924	-1890.61	1576.55	238.383	-1960.29	1407.71	223.522	-2020.15	1192.98	220.916	-1827.72	1338.71	220.946	-1766.66	1211.56	318.419	-2021.25	1240.75	57.6905	-1918.95	1364.76	13.4488	-1966.3	1138.39	19.5536	-1985.04	1072.57	-23.2083	-1923.97	972.219	-8.73063	-1910.89	866.887	-38.708	-1975.16	860.469	-58.4665	-1940.23	770.187
763	0	182.052	-1704.2	1539.82	281.944	-1703.24	1536.27	170.105	-1873.12	1577.48	282.538	-1882.02	1575.58	236.817	-1951.17	1406.43	221.943	-2010.14	1191.34	219.513	-1818.29	1337.9	219.688	-1756.95	1210.89	316.815	-2011.68	1239.21	56.1383	-1909.53	1363.46	12.188	-1956.79	1136.99	18.4248	-1975.53	1071.22	-24.3692	-1914.91	970.745	-9.77618	-1902.28	865.331	-39.7062	-1966.61	859.126	-59.3872	-1932.3	768.596
764	0	180.878	-1695.35	1539.44	280.772	-1694.56	1535.78	168.674	-1864.32	1576.77	281.097	-1873.39	1574.74	235.201	-1941.98	1405.26	220.331	-1999.96	1189.79	218.056	-1808.79	1337.22	218.369	-1747.1	1210.38	315.172	-2001.98	1237.77	54.535	-1900.06	1362.27	10.8851	-1947.19	1135.7	17.2493	-1965.91	1069.98	-25.613	-1905.69	969.406	-10.9234	-1893.4	863.927	-40.764	-1957.83	857.88	-60.446	-1924.03	767.162
765	0	179.653	-1686.45	1539.23	279.548	-1685.83	1535.45	167.195	-1855.49	1576.21	279.605	-1864.71	1574.03	233.541	-1932.71	1404.22	218.692	-1989.62	1188.35	216.553	-1799.21	1336.7	216.998	-1737.14	1210.05	313.498	-1992.16	1236.45	52.8883	-1890.52	1361.21	9.54368	-1937.51	1134.54	16.0299	-1956.19	1068.84	-26.9335	-1896.31	968.217	-12.1658	-1884.27	862.691	-41.8776	-1948.8	856.748	-61.6359	-1915.44	765.902
766	0	178.379	-1677.5	1539.2	278.278	-1677.05	1535.31	165.673	-1846.61	1575.79	278.07	-1855.98	1573.48	231.844	-1923.37	1403.32	217.034	-1979.14	1187.06	215.014	-1789.56	1336.33	215.583	-1727.05	1209.89	311.799	-1982.23	1235.27	51.2064	-1880.92	1360.29	8.16723	-1927.73	1133.51	14.7689	-1946.35	1067.84	-28.3236	-1886.75	967.196	-13.4959	-1874.87	861.64	-43.044	-1939.51	855.748	-62.9483	-1906.49	764.833
767	0	177.061	-1668.5	1539.35	276.964	-1668.21	1535.36	164.115	-1837.68	1575.53	276.499	-1847.2	1573.09	230.118	-1913.95	1402.58	215.36	-1968.53	1185.92	213.449	-1779.85	1336.13	214.134	-1716.87	1209.92	310.08	-1972.2	1234.26	49.498	-1871.26	1359.54	6.75882	-1917.86	1132.65	13.4682	-1936.39	1066.99	-29.7758	-1877.01	966.356	-14.9056	-1865.19	860.787	-44.2613	-1929.95	854.898	-64.3738	-1897.19	763.969
768	0	175.705	-1659.44	1539.69	275.614	-1659.31	1535.6	162.527	-1828.7	1575.44	274.9	-1838.37	1572.87	228.369	-1904.46	1402.01	213.678	-1957.81	1184.97	211.867	-1770.07	1336.11	212.663	-1706.59	1210.14	308.348	-1962.09	1233.43	47.7723	-1861.54	1358.97	5.32121	-1907.89	1131.96	12.1289	-1926.31	1066.3	-31.2826	-1867.09	965.71	-16.3863	-1855.24	860.144	-45.5282	-1920.13	854.212	-65.902	-1887.53	763.324
769	0	174.317	-1650.34	1540.22	274.231	-1650.35	1536.04	160.92	-1819.68	1575.5	273.281	-1829.49	1572.82	226.605	-1894.91	1401.61	211.992	-1947	1184.22	210.281	-1760.25	1336.25	211.181	-1696.25	1210.54	306.606	-1951.91	1232.8	46.0383	-1851.74	1358.59	3.85672	-1897.81	1131.45	10.7517	-1916.11	1065.79	-32.8361	-1856.97	965.27	-17.9288	-1845.01	859.721	-46.8441	-1910.02	853.704	-67.5222	-1877.5	762.908
770	0	172.902	-1641.18	1540.94	272.824	-1641.33	1536.68	159.3	-1810.61	1575.73	271.652	-1820.55	1572.94	224.834	-1885.29	1401.39	210.304	-1936.11	1183.68	208.701	-1750.38	1336.57	209.701	-1685.85	1211.12	304.859	-1941.68	1232.37	44.3052	-1841.88	1358.41	2.36715	-1887.63	1131.15	9.33675	-1905.78	1065.47	-34.4286	-1846.66	965.043	-19.5239	-1834.51	859.526	-48.2091	-1899.64	853.386	-69.2231	-1867.1	762.729
771	0	171.468	-1631.98	1541.83	271.397	-1632.26	1537.52	157.677	-1801.51	1576.12	270.022	-1811.55	1573.24	223.062	-1875.62	1401.37	208.616	-1925.18	1183.38	207.138	-1740.48	1337.06	208.236	-1675.41	1211.87	303.108	-1931.43	1232.16	42.5815	-1831.95	1358.45	0.853704	-1877.34	1131.05	7.88326	-1895.32	1065.34	-36.0525	-1836.14	965.034	-21.1622	-1823.72	859.562	-49.6236	-1888.96	853.265	-70.9932	-1856.32	762.792
772	0	170.022	-1622.74	1542.9	269.96	-1623.12	1538.53	156.061	-1792.36	1576.67	268.4	-1802.51	1573.71	221.295	-1865.9	1401.53	206.928	-1914.22	1183.3	205.604	-1730.55	1337.71	206.8	-1664.96	1212.78	301.352	-1921.16	1232.17	40.8754	-1821.93	1358.69	-0.68305	-1866.93	1131.17	6.38997	-1884.74	1065.41	-37.7004	-1825.42	965.245	-22.8346	-1812.66	859.831	-51.0885	-1878	853.345	-72.8212	-1845.17	763.097
773	0	168.573	-1613.46	1544.13	268.519	-1613.93	1539.72	154.461	-1783.18	1577.36	266.798	-1793.41	1574.33	219.538	-1856.15	1401.87	205.237	-1903.27	1183.46	204.107	-1720.61	1338.51	205.404	-1654.51	1213.83	299.591	-1910.91	1232.39	39.1942	-1811.84	1359.14	-2.2432	-1856.41	1131.49	4.85494	-1874.04	1065.69	-39.3656	-1814.49	965.676	-24.532	-1801.33	860.331	-52.6048	-1866.74	853.627	-74.6962	-1833.64	763.641
774	0	167.13	-1604.15	1545.5	267.084	-1604.69	1541.08	152.886	-1773.97	1578.2	265.224	-1784.27	1575.11	217.797	-1846.36	1402.4	203.537	-1892.34	1183.85	202.659	-1710.67	1339.45	204.063	-1644.09	1215	297.82	-1900.7	1232.82	37.5444	-1801.68	1359.8	-3.82743	-1845.78	1132.02	3.2757	-1863.2	1066.15	-41.0415	-1803.35	966.321	-26.2457	-1789.73	861.055	-54.1736	-1855.19	854.108	-76.6075	-1821.73	764.415
775	0	165.701	-1594.81	1547	265.663	-1595.41	1542.57	151.348	-1764.73	1579.16	263.688	-1775.08	1576.03	216.075	-1836.55	1403.09	201.825	-1881.46	1184.45	201.267	-1700.73	1340.52	202.788	-1633.71	1216.27	296.036	-1890.55	1233.45	35.9317	-1791.42	1360.65	-5.43696	-1835.02	1132.74	1.64935	-1852.25	1066.81	-42.7222	-1792.01	967.173	-27.9676	-1777.88	861.996	-55.7958	-1843.36	854.782	-78.5454	-1809.45	765.41
776	0	164.296	-1585.45	1548.61	264.266	-1586.08	1544.18	149.854	-1755.46	1580.25	262.2	-1765.85	1577.08	214.375	-1826.73	1403.95	200.09	-1870.66	1185.26	199.94	-1690.81	1341.71	201.591	-1623.4	1217.61	294.232	-1880.47	1234.26	34.361	-1781.09	1361.68	-7.07332	-1824.15	1133.65	-0.027243	-1841.17	1067.65	-44.4019	-1780.45	968.223	-29.6899	-1765.78	863.142	-57.4726	-1831.24	855.638	-80.5004	-1796.81	766.611
777	0	162.926	-1576.07	1550.3	262.902	-1576.73	1545.89	148.414	-1746.18	1581.43	260.768	-1756.59	1578.24	212.698	-1816.91	1404.95	198.327	-1859.95	1186.26	198.683	-1680.91	1342.99	200.481	-1613.16	1219.01	292.402	-1870.51	1235.25	32.8364	-1770.68	1362.88	-8.73813	-1813.16	1134.74	-1.75719	-1829.97	1068.65	-46.0755	-1768.69	969.456	-31.4054	-1753.44	864.479	-59.2043	-1818.84	856.665	-82.4643	-1783.81	768.002
778	0	161.598	-1566.67	1552.07	261.579	-1567.34	1547.68	147.035	-1736.88	1582.71	259.399	-1747.3	1579.51	211.048	-1807.11	1406.08	196.526	-1849.38	1187.43	197.501	-1671.05	1344.34	199.466	-1603.02	1220.44	290.54	-1860.66	1236.38	31.3615	-1760.19	1364.22	-10.4329	-1802.04	1135.98	-3.5433	-1818.65	1069.81	-47.7381	-1756.73	970.86	-33.1074	-1740.88	865.991	-60.9915	-1806.18	857.849	-84.4295	-1770.45	769.564
779	0	160.323	-1557.28	1553.88	260.308	-1557.94	1549.51	145.725	-1727.56	1584.06	258.101	-1737.98	1580.85	209.425	-1797.32	1407.34	194.683	-1838.94	1188.75	196.4	-1661.24	1345.76	198.553	-1592.99	1221.88	288.641	-1850.96	1237.65	29.9391	-1749.64	1365.7	-12.1584	-1790.8	1137.37	-5.38781	-1807.21	1071.11	-49.3849	-1744.57	972.417	-34.7897	-1728.1	867.662	-62.8341	-1793.25	859.174	-86.3895	-1756.77	771.278
780	0	159.109	-1547.88	1555.71	259.096	-1548.53	1551.37	144.489	-1718.24	1585.48	256.878	-1728.65	1582.25	207.832	-1787.56	1408.69	192.792	-1828.67	1190.21	195.379	-1651.48	1347.21	197.746	-1583.09	1223.31	286.703	-1841.41	1239.04	28.5716	-1739.02	1367.28	-13.9149	-1779.44	1138.87	-7.29203	-1795.66	1072.52	-51.0113	-1732.23	974.112	-36.4465	-1715.13	869.473	-64.7312	-1780.08	860.626	-88.3386	-1742.76	773.125
781	0	157.964	-1538.48	1557.54	257.952	-1539.12	1553.23	143.332	-1708.92	1586.94	255.735	-1719.3	1583.71	206.269	-1777.85	1410.12	190.852	-1818.58	1191.77	194.442	-1641.78	1348.69	197.046	-1573.32	1224.72	284.723	-1832.03	1240.52	27.2613	-1728.35	1368.96	-15.7015	-1767.96	1140.48	-9.2561	-1784	1074.03	-52.6128	-1719.7	975.927	-38.0724	-1701.97	871.406	-66.6817	-1766.66	862.188	-90.2721	-1728.44	775.086
782	0	156.895	-1529.09	1559.36	256.883	-1529.71	1555.06	142.258	-1699.59	1588.44	254.675	-1709.95	1585.19	204.738	-1768.18	1411.63	188.863	-1808.68	1193.43	193.586	-1632.15	1350.18	196.452	-1563.69	1226.09	282.705	-1822.82	1242.07	26.0098	-1717.64	1370.7	-17.5158	-1756.36	1142.18	-11.2788	-1772.23	1075.63	-54.185	-1706.99	977.845	-39.6626	-1688.64	873.445	-68.6832	-1753.02	863.848	-92.186	-1713.84	777.146
783	0	155.909	-1519.71	1561.13	255.894	-1520.31	1556.84	141.269	-1690.26	1589.95	253.698	-1700.6	1586.69	203.241	-1758.58	1413.18	186.831	-1798.97	1195.15	192.81	-1622.6	1351.66	195.961	-1554.22	1227.4	280.65	-1813.78	1243.68	24.8183	-1706.91	1372.5	-19.3543	-1744.64	1143.94	-13.3572	-1760.36	1077.29	-55.7234	-1694.12	979.851	-41.2122	-1675.15	875.571	-70.7327	-1739.15	865.591	-94.0768	-1698.97	779.289
784	0	155.011	-1510.34	1562.85	254.991	-1510.93	1558.55	140.366	-1680.94	1591.48	252.806	-1691.26	1588.19	201.781	-1749.04	1414.77	184.763	-1789.47	1196.92	192.11	-1613.14	1353.12	195.566	-1544.9	1228.66	278.567	-1804.92	1245.33	23.6879	-1696.19	1374.33	-21.2118	-1732.82	1145.75	-15.4869	-1748.39	1078.99	-57.2236	-1681.1	981.928	-42.7167	-1661.51	877.77	-72.8257	-1725.09	867.406	-95.9417	-1683.86	781.503
785	0	154.203	-1501	1564.49	254.178	-1501.58	1560.18	139.548	-1671.62	1592.99	251.998	-1681.93	1589.67	200.358	-1739.58	1416.37	182.669	-1780.16	1198.72	191.482	-1603.76	1354.54	195.257	-1535.73	1229.84	276.463	-1796.23	1247	22.619	-1685.48	1376.19	-23.0821	-1720.91	1147.58	-17.6619	-1736.33	1080.73	-58.6815	-1667.93	984.064	-44.1719	-1647.75	880.027	-74.9566	-1710.83	869.283	-97.7778	-1668.52	783.778
786	0	153.489	-1491.68	1566.04	253.457	-1492.26	1561.7	138.814	-1662.31	1594.49	251.271	-1672.62	1591.13	198.975	-1730.19	1417.98	180.559	-1771.05	1200.54	190.921	-1594.48	1355.91	195.026	-1526.72	1230.96	274.348	-1787.71	1248.67	21.6114	-1674.81	1378.04	-24.9577	-1708.91	1149.44	-19.8746	-1724.19	1082.49	-60.0931	-1654.63	986.245	-45.5739	-1633.87	882.33	-77.1181	-1696.39	871.212	-99.5824	-1652.98	786.107
787	0	152.87	-1482.38	1567.5	252.83	-1482.99	1563.11	138.16	-1653.02	1595.96	250.623	-1663.33	1592.54	197.635	-1720.89	1419.57	178.448	-1762.12	1202.34	190.42	-1585.29	1357.23	194.858	-1517.85	1232.01	272.233	-1779.34	1250.33	20.6647	-1664.2	1379.88	-26.8304	-1696.84	1151.29	-22.116	-1711.98	1084.24	-61.4547	-1641.21	988.458	-46.9188	-1619.88	884.667	-79.3019	-1681.79	873.185	-101.353	-1637.25	788.483
788	0	152.346	-1473.12	1568.85	252.296	-1473.76	1564.39	137.585	-1643.74	1597.39	250.048	-1654.08	1593.91	196.339	-1711.67	1421.13	176.347	-1753.37	1204.13	189.972	-1576.2	1358.48	194.742	-1509.13	1232.98	270.131	-1771.11	1251.96	19.7775	-1653.66	1381.7	-28.6916	-1684.73	1153.13	-24.3762	-1699.72	1085.98	-62.7634	-1627.69	990.692	-48.2033	-1605.81	887.029	-81.4979	-1667.03	875.195	-103.085	-1621.37	790.903
789	0	151.916	-1463.88	1570.08	251.855	-1464.58	1565.54	137.082	-1634.49	1598.77	249.543	-1644.87	1595.2	195.09	-1702.54	1422.64	174.27	-1744.78	1205.87	189.57	-1567.21	1359.65	194.664	-1500.54	1233.88	268.051	-1763.01	1253.54	18.9481	-1643.22	1383.48	-30.5327	-1672.58	1154.94	-26.6445	-1687.41	1087.7	-64.0164	-1614.1	992.937	-49.4243	-1591.65	889.406	-83.695	-1652.15	877.233	-104.775	-1605.34	793.362
790	0	151.577	-1454.69	1571.19	251.505	-1455.46	1566.55	136.647	-1625.26	1600.09	249.103	-1635.7	1596.42	193.888	-1693.49	1424.1	172.228	-1736.33	1207.56	189.207	-1558.31	1360.74	194.61	-1492.07	1234.7	266.007	-1755.02	1255.07	18.1741	-1632.88	1385.22	-32.3455	-1660.43	1156.71	-28.9098	-1675.08	1089.38	-65.2121	-1600.43	995.182	-50.5791	-1577.43	891.79	-85.8808	-1637.14	879.292	-106.42	-1589.2	795.859
791	0	151.327	-1445.54	1572.18	251.242	-1446.4	1567.42	136.274	-1616.05	1601.33	248.72	-1626.58	1597.56	192.735	-1684.53	1425.49	170.233	-1728.02	1209.18	188.875	-1549.5	1361.74	194.568	-1483.72	1235.44	264.007	-1747.13	1256.53	17.4528	-1622.67	1386.88	-34.1226	-1648.3	1158.43	-31.1612	-1662.74	1091.01	-66.3494	-1586.73	997.417	-51.6655	-1563.15	894.175	-88.042	-1622.03	881.362	-108.013	-1572.97	798.388
792	0	151.16	-1436.43	1573.04	251.062	-1437.41	1568.15	135.958	-1606.88	1602.5	248.391	-1617.52	1598.6	191.631	-1675.65	1426.8	168.293	-1719.81	1210.71	188.567	-1540.77	1362.64	194.526	-1475.47	1236.09	262.061	-1739.32	1257.91	16.7809	-1612.58	1388.48	-35.8576	-1636.21	1160.09	-33.3877	-1650.42	1092.57	-67.4278	-1573	999.632	-52.682	-1548.84	896.552	-90.1647	-1606.84	883.434	-109.548	-1556.65	800.947
793	0	151.072	-1427.37	1573.78	250.961	-1428.49	1568.74	135.692	-1597.74	1603.58	248.107	-1608.51	1599.53	190.577	-1666.85	1428.01	166.417	-1711.69	1212.15	188.278	-1532.13	1363.44	194.475	-1467.31	1236.64	260.178	-1731.56	1259.2	16.1552	-1602.62	1389.98	-37.545	-1624.19	1161.66	-35.5792	-1638.12	1094.06	-68.4477	-1559.27	1001.82	-53.6274	-1534.5	898.916	-92.2349	-1591.59	885.497	-111.019	-1540.28	803.53
794	0	151.057	-1418.35	1574.39	250.932	-1419.63	1569.19	135.471	-1588.64	1604.56	247.864	-1599.56	1600.36	189.572	-1658.12	1429.12	164.612	-1703.65	1213.47	188.002	-1523.57	1364.13	194.408	-1459.24	1237.1	258.365	-1723.86	1260.38	15.5722	-1592.79	1391.39	-39.1806	-1612.25	1163.15	-37.7265	-1625.87	1095.46	-69.4098	-1545.56	1003.96	-54.501	-1520.14	901.259	-94.2385	-1576.31	887.538	-112.42	-1523.86	806.132
795	0	151.107	-1409.38	1574.88	250.968	-1410.85	1569.5	135.288	-1579.58	1605.44	247.656	-1590.68	1601.08	188.618	-1649.45	1430.11	162.883	-1695.67	1214.68	187.733	-1515.07	1364.7	194.318	-1451.24	1237.46	256.629	-1716.19	1261.45	15.0286	-1583.09	1392.67	-40.761	-1600.42	1164.54	-39.8212	-1613.68	1096.76	-70.3154	-1531.9	1006.05	-55.3024	-1505.78	903.574	-96.1619	-1561	889.544	-113.742	-1507.43	808.744
796	0	151.216	-1400.46	1575.25	251.063	-1402.13	1569.69	135.137	-1570.56	1606.2	247.477	-1581.85	1601.67	187.713	-1640.85	1430.99	161.237	-1687.74	1215.75	187.47	-1506.63	1365.16	194.202	-1443.29	1237.7	254.976	-1708.54	1262.4	14.5213	-1573.53	1393.84	-42.2838	-1588.71	1165.82	-41.8559	-1601.58	1097.95	-71.1656	-1518.3	1008.08	-56.0315	-1491.44	905.853	-97.9925	-1545.7	891.501	-114.978	-1490.99	811.359
797	0	151.376	-1391.59	1575.51	251.208	-1393.48	1569.75	135.014	-1561.58	1606.85	247.323	-1573.09	1602.14	186.858	-1632.3	1431.74	159.678	-1679.84	1216.69	187.208	-1498.25	1365.5	194.059	-1435.41	1237.83	253.411	-1700.89	1263.23	14.0474	-1564.08	1394.86	-43.747	-1577.14	1166.97	-43.8243	-1589.57	1099.02	-71.9619	-1504.79	1010.04	-56.6885	-1477.13	908.088	-99.7187	-1530.42	893.397	-116.12	-1474.57	813.967
798	0	151.579	-1382.77	1575.65	251.397	-1384.9	1569.69	134.914	-1552.64	1607.38	247.188	-1564.39	1602.48	186.052	-1623.79	1432.37	158.211	-1671.96	1217.49	186.947	-1489.91	1365.71	193.888	-1427.56	1237.83	251.939	-1693.24	1263.93	13.6049	-1554.75	1395.74	-45.1491	-1565.72	1168	-45.7208	-1577.68	1099.97	-72.7052	-1491.38	1011.92	-57.2736	-1462.87	910.271	-101.331	-1515.21	895.218	-117.163	-1458.18	816.557
799	0	151.817	-1373.99	1575.68	251.621	-1376.36	1569.52	134.832	-1543.75	1607.79	247.07	-1555.74	1602.69	185.295	-1615.33	1432.86	156.84	-1664.09	1218.14	186.687	-1481.62	1365.81	193.694	-1419.74	1237.72	250.565	-1685.58	1264.5	13.1919	-1545.53	1396.47	-46.4886	-1554.46	1168.9	-47.5408	-1565.9	1100.78	-73.3963	-1478.09	1013.7	-57.787	-1448.67	912.394	-102.82	-1500.06	896.951	-118.097	-1441.85	819.119
800	0	152.082	-1365.25	1575.61	251.874	-1367.88	1569.23	134.764	-1534.9	1608.07	246.965	-1547.14	1602.78	184.589	-1606.9	1433.22	155.568	-1656.23	1218.65	186.429	-1473.35	1365.78	193.48	-1411.95	1237.48	249.292	-1677.89	1264.95	12.8074	-1536.41	1397.04	-47.7641	-1543.37	1169.65	-49.2798	-1554.25	1101.46	-74.0352	-1464.94	1015.38	-58.2289	-1434.56	914.448	-104.179	-1485.02	898.586	-118.919	-1425.6	821.642
801	0	152.369	-1356.55	1575.42	252.147	-1359.44	1568.85	134.709	-1526.08	1608.22	246.871	-1538.59	1602.75	183.933	-1598.5	1433.45	154.4	-1648.36	1219.01	186.175	-1465.11	1365.63	193.253	-1404.17	1237.11	248.124	-1670.18	1265.26	12.4511	-1527.38	1397.43	-48.9736	-1532.43	1170.25	-50.934	-1542.74	1101.99	-74.6217	-1451.94	1016.95	-58.5994	-1420.54	916.425	-105.405	-1470.11	900.112	-119.622	-1409.45	824.114
802	0	152.669	-1347.88	1575.13	252.434	-1351.04	1568.36	134.662	-1517.3	1608.24	246.786	-1530.08	1602.59	183.328	-1590.12	1433.55	153.339	-1640.49	1219.23	185.927	-1456.89	1365.37	193.018	-1396.4	1236.63	247.064	-1662.44	1265.45	12.1232	-1518.44	1397.67	-50.115	-1521.67	1170.71	-52.4996	-1531.37	1102.37	-75.1545	-1439.1	1018.4	-58.8984	-1406.63	918.316	-106.493	-1455.33	901.522	-120.203	-1393.42	826.525
803	0	152.977	-1339.25	1574.74	252.73	-1342.66	1567.78	134.624	-1508.56	1608.14	246.709	-1521.6	1602.31	182.775	-1581.75	1433.52	152.387	-1632.61	1219.31	185.69	-1448.68	1365	192.784	-1388.62	1236.04	246.114	-1654.66	1265.52	11.8246	-1509.57	1397.73	-51.1856	-1511.06	1171.01	-53.9729	-1520.15	1102.61	-75.6319	-1426.44	1019.73	-59.1255	-1392.85	920.114	-107.442	-1440.72	902.808	-120.657	-1377.54	828.863
804	0	153.288	-1330.63	1574.25	253.029	-1334.3	1567.12	134.594	-1499.84	1607.92	246.641	-1513.15	1601.92	182.275	-1573.4	1433.37	151.546	-1624.72	1219.26	185.467	-1440.47	1364.51	192.558	-1380.84	1235.33	245.276	-1646.84	1265.47	11.5569	-1500.77	1397.64	-52.1822	-1500.61	1171.17	-55.35	-1509.07	1102.71	-76.0514	-1413.95	1020.93	-59.2803	-1379.21	921.81	-108.251	-1426.3	903.967	-120.985	-1361.82	831.117
805	0	153.598	-1322.04	1573.67	253.328	-1325.95	1566.37	134.571	-1491.14	1607.57	246.583	-1504.72	1601.42	181.831	-1565.05	1433.1	150.818	-1616.81	1219.09	185.264	-1432.27	1363.93	192.349	-1373.03	1234.53	244.551	-1638.98	1265.31	11.322	-1492.02	1397.38	-53.1014	-1490.31	1171.19	-56.6271	-1498.14	1102.66	-76.4102	-1401.65	1022	-59.3621	-1365.74	923.396	-108.922	-1412.07	904.995	-121.183	-1346.3	833.276
806	0	153.906	-1313.45	1572.99	253.624	-1317.61	1565.55	134.556	-1482.47	1607.11	246.535	-1496.29	1600.82	181.442	-1556.7	1432.71	150.203	-1608.89	1218.8	185.085	-1424.06	1363.24	192.165	-1365.2	1233.63	243.937	-1631.07	1265.05	11.1225	-1483.32	1396.98	-53.9392	-1480.15	1171.06	-57.8001	-1487.35	1102.48	-76.7049	-1389.53	1022.93	-59.3702	-1352.44	924.866	-109.456	-1398.06	905.891	-121.253	-1331	835.332
807	0	154.209	-1304.88	1572.23	253.916	-1309.25	1564.66	134.552	-1473.81	1606.53	246.5	-1487.87	1600.12	181.112	-1548.34	1432.22	149.7	-1600.94	1218.4	184.935	-1415.83	1362.47	192.014	-1357.33	1232.65	243.434	-1623.12	1264.68	10.961	-1474.67	1396.43	-54.6914	-1470.12	1170.79	-58.865	-1476.7	1102.16	-76.9319	-1377.61	1023.72	-59.3036	-1339.32	926.212	-109.855	-1384.28	906.653	-121.196	-1315.93	837.272
808	0	154.507	-1296.3	1571.38	254.205	-1300.89	1563.7	134.56	-1465.16	1605.85	246.48	-1479.45	1599.34	180.841	-1539.98	1431.63	149.307	-1592.97	1217.9	184.821	-1407.59	1361.61	191.902	-1349.43	1231.6	243.04	-1615.12	1264.23	10.8406	-1466.04	1395.75	-55.3541	-1460.22	1170.4	-59.8176	-1466.19	1101.72	-77.0877	-1365.88	1024.37	-59.1616	-1326.4	927.426	-110.124	-1370.74	907.281	-121.014	-1301.12	839.086
809	0	154.803	-1287.72	1570.45	254.491	-1292.5	1562.68	134.585	-1456.51	1605.07	246.481	-1471.02	1598.47	180.632	-1531.6	1430.94	149.02	-1584.96	1217.3	184.747	-1399.33	1360.67	191.836	-1341.48	1230.49	242.752	-1607.07	1263.69	10.7642	-1457.44	1394.95	-55.9231	-1450.43	1169.88	-60.6542	-1455.81	1101.16	-77.1687	-1354.34	1024.88	-58.9437	-1313.69	928.502	-110.265	-1357.45	907.776	-120.71	-1286.59	840.763
810	0	155.097	-1279.14	1569.45	254.776	-1284.09	1561.61	134.629	-1447.86	1604.19	246.504	-1462.56	1597.53	180.486	-1523.2	1430.16	148.837	-1576.93	1216.63	184.717	-1391.04	1359.67	191.821	-1333.49	1229.32	242.564	-1598.96	1263.07	10.7349	-1448.86	1394.04	-56.3947	-1440.74	1169.25	-61.3713	-1445.55	1100.5	-77.1719	-1342.98	1025.25	-58.6496	-1301.2	929.433	-110.282	-1344.41	908.139	-120.289	-1272.37	842.291
811	0	155.394	-1270.54	1568.38	255.065	-1275.65	1560.5	134.698	-1439.22	1603.23	246.556	-1454.09	1596.52	180.405	-1514.77	1429.31	148.751	-1568.85	1215.88	184.738	-1382.72	1358.59	191.862	-1325.44	1228.11	242.473	-1590.81	1262.37	10.7554	-1440.29	1393.03	-56.7658	-1431.15	1168.52	-61.9658	-1435.41	1099.73	-77.0947	-1331.81	1025.47	-58.2795	-1288.93	930.212	-110.18	-1331.65	908.368	-119.755	-1258.46	843.66
812	0	155.698	-1261.92	1567.25	255.361	-1267.17	1559.35	134.795	-1430.56	1602.19	246.64	-1445.6	1595.45	180.39	-1506.31	1428.37	148.756	-1560.73	1215.05	184.813	-1374.36	1357.46	191.963	-1317.33	1226.87	242.473	-1582.6	1261.6	10.8285	-1431.71	1391.94	-57.0336	-1421.63	1167.69	-62.4355	-1425.37	1098.86	-76.9352	-1320.81	1025.55	-57.8341	-1276.89	930.832	-109.965	-1319.15	908.465	-119.114	-1244.88	844.855
813	0	156.014	-1253.28	1566.07	255.671	-1258.66	1558.16	134.927	-1421.89	1601.07	246.762	-1437.07	1594.32	180.443	-1497.82	1427.37	148.847	-1552.55	1214.16	184.946	-1365.95	1356.28	192.127	-1309.15	1225.59	242.558	-1574.33	1260.76	10.9567	-1423.13	1390.77	-57.1965	-1412.19	1166.77	-62.7789	-1415.44	1097.91	-76.6923	-1309.99	1025.49	-57.3148	-1265.1	931.287	-109.642	-1306.94	908.429	-118.373	-1231.65	845.864
814	0	156.348	-1244.62	1564.85	256	-1250.1	1556.95	135.098	-1413.21	1599.9	246.928	-1428.51	1593.14	180.564	-1489.29	1426.29	149.016	-1544.31	1213.21	185.141	-1357.49	1355.06	192.356	-1300.9	1224.3	242.721	-1565.99	1259.85	11.1421	-1414.53	1389.54	-57.2533	-1402.81	1165.77	-62.9955	-1405.61	1096.89	-76.3658	-1299.35	1025.28	-56.7237	-1253.54	931.571	-109.216	-1295	908.258	-117.539	-1218.78	846.675
815	0	156.708	-1235.93	1563.59	256.355	-1241.5	1555.71	135.315	-1404.51	1598.66	247.142	-1419.91	1591.92	180.753	-1480.72	1425.16	149.257	-1536.01	1212.2	185.402	-1348.98	1353.79	192.653	-1292.57	1222.99	242.956	-1557.59	1258.88	11.3868	-1405.89	1388.26	-57.2038	-1393.49	1164.69	-63.0858	-1395.86	1095.79	-75.9563	-1288.86	1024.93	-56.0635	-1242.23	931.678	-108.695	-1283.34	907.951	-116.62	-1206.28	847.273
816	0	157.098	-1227.22	1562.3	256.741	-1232.86	1554.46	135.583	-1395.78	1597.38	247.411	-1411.27	1590.66	181.013	-1472.09	1423.97	149.563	-1527.62	1211.14	185.73	-1340.4	1352.5	193.018	-1284.15	1221.67	243.257	-1549.12	1257.84	11.6923	-1397.22	1386.94	-57.0485	-1384.2	1163.55	-63.051	-1386.19	1094.63	-75.4653	-1278.54	1024.44	-55.3378	-1231.17	931.602	-108.086	-1271.96	907.506	-115.622	-1194.14	847.646
817	0	157.526	-1218.47	1561	257.166	-1224.17	1553.2	135.907	-1387.04	1596.06	247.738	-1402.59	1589.37	181.342	-1463.42	1422.73	149.927	-1519.15	1210.02	186.128	-1331.76	1351.18	193.453	-1275.64	1220.34	243.618	-1540.58	1256.74	12.0601	-1388.51	1385.58	-56.789	-1374.95	1162.35	-62.8935	-1376.59	1093.41	-74.8952	-1268.37	1023.81	-54.5508	-1220.36	931.34	-107.396	-1260.87	906.921	-114.557	-1182.39	847.783
818	0	157.999	-1209.69	1559.68	257.636	-1215.43	1551.94	136.293	-1378.26	1594.71	248.129	-1393.87	1588.05	181.742	-1454.68	1421.45	150.345	-1510.58	1208.84	186.597	-1323.04	1349.84	193.957	-1267.03	1219.02	244.032	-1531.95	1255.57	12.4913	-1379.74	1384.2	-56.4272	-1365.72	1161.1	-62.6163	-1367.05	1092.15	-74.2492	-1258.34	1023.04	-53.7072	-1209.79	930.887	-106.634	-1250.05	906.195	-113.432	-1171.01	847.672
819	0	158.521	-1200.87	1558.36	258.157	-1206.65	1550.67	136.744	-1369.46	1593.34	248.588	-1385.11	1586.71	182.212	-1445.88	1420.12	150.811	-1501.9	1207.61	187.139	-1314.25	1348.49	194.532	-1258.31	1217.7	244.496	-1523.23	1254.33	12.9864	-1370.91	1382.8	-55.9657	-1356.5	1159.8	-62.2229	-1357.58	1090.84	-73.5309	-1248.46	1022.14	-52.8124	-1199.48	930.243	-105.808	-1239.52	905.327	-112.256	-1160.01	847.305
820	0	159.1	-1192.02	1557.05	258.734	-1197.82	1549.42	137.266	-1360.62	1591.95	249.119	-1376.3	1585.37	182.752	-1437.02	1418.76	151.321	-1493.11	1206.32	187.754	-1305.38	1347.14	195.176	-1249.48	1216.4	245.005	-1514.42	1253.04	13.5459	-1362.01	1381.39	-55.4075	-1347.29	1158.47	-61.7172	-1348.15	1089.49	-72.7447	-1238.73	1021.1	-51.8723	-1189.42	929.407	-104.926	-1229.28	904.316	-111.041	-1149.39	846.677
821	0	159.74	-1183.12	1555.75	259.372	-1188.94	1548.17	137.862	-1351.75	1590.57	249.724	-1367.45	1584.01	183.361	-1428.09	1417.38	151.874	-1484.19	1204.98	188.44	-1296.42	1345.79	195.89	-1240.54	1215.11	245.555	-1505.51	1251.68	14.1698	-1353.04	1379.97	-54.756	-1338.09	1157.1	-61.1033	-1338.77	1088.12	-71.8953	-1229.12	1019.93	-50.893	-1179.6	928.382	-103.995	-1219.31	903.165	-109.796	-1139.15	845.785
822	0	160.445	-1174.19	1554.48	260.076	-1180.02	1546.95	138.533	-1342.85	1589.2	250.406	-1358.55	1582.67	184.039	-1419.08	1415.97	152.466	-1475.14	1203.6	189.198	-1287.37	1344.46	196.671	-1231.48	1213.85	246.145	-1496.49	1250.25	14.8576	-1343.99	1378.55	-54.0144	-1328.88	1155.71	-60.3854	-1329.44	1086.73	-70.9875	-1219.65	1018.65	-49.8809	-1170.03	927.172	-103.024	-1209.62	901.879	-108.53	-1129.29	844.631
823	0	161.218	-1165.22	1553.25	260.848	-1171.05	1545.75	139.283	-1333.9	1587.84	251.166	-1349.61	1581.34	184.785	-1410.01	1414.55	153.099	-1465.96	1202.16	190.024	-1278.23	1343.15	197.517	-1222.29	1212.63	246.773	-1487.36	1248.78	15.6084	-1334.86	1377.15	-53.1862	-1319.66	1154.31	-59.5675	-1320.14	1085.32	-70.0266	-1210.31	1017.25	-48.8422	-1160.71	925.784	-102.018	-1200.21	900.463	-107.255	-1119.81	843.218
824	0	162.062	-1156.21	1552.06	261.691	-1162.04	1544.59	140.111	-1324.92	1586.52	252.004	-1340.62	1580.03	185.598	-1400.85	1413.12	153.772	-1456.63	1200.68	190.917	-1269.01	1341.88	198.425	-1212.98	1211.44	247.439	-1478.12	1247.25	16.4208	-1325.65	1375.77	-52.2747	-1310.43	1152.9	-58.6533	-1310.88	1083.92	-69.0175	-1201.1	1015.75	-47.7835	-1151.63	924.229	-100.986	-1191.09	898.927	-105.981	-1110.71	841.557
825	0	162.978	-1147.16	1550.92	262.605	-1152.98	1543.48	141.018	-1315.9	1585.25	252.921	-1331.59	1578.76	186.476	-1391.63	1411.71	154.488	-1447.15	1199.16	191.872	-1259.69	1340.65	199.391	-1203.53	1210.32	248.144	-1468.76	1245.67	17.2929	-1316.36	1374.41	-51.2831	-1301.18	1151.51	-57.6462	-1301.65	1082.53	-67.9654	-1192.02	1014.16	-46.7108	-1142.8	922.519	-99.9316	-1182.24	897.282	-104.718	-1101.98	839.662
826	0	163.966	-1138.06	1549.85	263.591	-1143.87	1542.42	142.002	-1306.83	1584.04	253.913	-1322.51	1577.53	187.419	-1382.33	1410.31	155.248	-1437.53	1197.62	192.885	-1250.28	1339.47	200.41	-1193.95	1209.26	248.887	-1459.27	1244.07	18.222	-1306.99	1373.1	-50.2145	-1291.92	1150.13	-56.5492	-1292.46	1081.16	-66.8752	-1183.07	1012.5	-45.63	-1134.22	920.67	-98.8602	-1173.68	895.545	-103.476	-1093.62	837.551
827	0	165.025	-1128.93	1548.86	264.649	-1134.72	1541.42	143.061	-1297.72	1582.89	254.979	-1313.39	1576.36	188.422	-1372.96	1408.95	156.055	-1427.76	1196.07	193.95	-1240.78	1338.37	201.476	-1184.24	1208.27	249.671	-1449.66	1242.44	19.2047	-1297.55	1371.85	-49.0721	-1282.64	1148.79	-55.365	-1283.3	1079.82	-65.7518	-1174.25	1010.78	-44.5466	-1125.87	918.702	-97.7752	-1165.39	893.731	-102.263	-1085.65	835.246
828	0	166.154	-1119.74	1547.96	265.775	-1125.53	1540.49	144.191	-1288.56	1581.84	256.116	-1304.22	1575.27	189.484	-1363.51	1407.64	156.911	-1417.84	1194.52	195.06	-1231.19	1337.34	202.581	-1174.4	1207.38	250.496	-1439.93	1240.82	20.2368	-1288.04	1370.66	-47.8591	-1273.36	1147.49	-54.0958	-1274.19	1078.54	-64.5999	-1165.57	1009.01	-43.4656	-1117.77	916.635	-96.6794	-1157.39	891.863	-101.089	-1078.05	832.775
829	0	167.35	-1110.52	1547.15	266.968	-1116.29	1539.65	145.388	-1279.36	1580.87	257.318	-1295.01	1574.26	190.601	-1354	1406.4	157.821	-1407.78	1192.99	196.209	-1221.53	1336.4	203.717	-1164.43	1206.59	251.366	-1430.07	1239.2	21.3135	-1278.46	1369.56	-46.5791	-1264.07	1146.26	-52.7442	-1265.11	1077.32	-63.4241	-1157.02	1007.23	-42.3912	-1109.91	914.493	-95.5746	-1149.66	889.962	-99.961	-1070.83	830.168
830	0	168.608	-1101.24	1546.46	268.224	-1107.01	1538.91	146.647	-1270.11	1580.02	258.581	-1285.75	1573.34	191.769	-1344.42	1405.23	158.784	-1397.58	1191.51	197.388	-1211.79	1335.57	204.875	-1154.34	1205.91	252.281	-1420.1	1237.63	22.4291	-1268.83	1368.55	-45.2359	-1254.79	1145.11	-51.3122	-1256.09	1076.18	-62.2288	-1148.61	1005.46	-41.3273	-1102.28	912.301	-94.4617	-1142.22	888.054	-98.8843	-1063.98	827.46
831	0	169.925	-1091.93	1545.89	269.537	-1097.69	1538.27	147.962	-1260.82	1579.3	259.897	-1276.46	1572.53	192.983	-1334.78	1404.16	159.802	-1387.27	1190.11	198.589	-1201.99	1334.86	206.044	-1144.15	1205.36	253.241	-1410.02	1236.11	23.5771	-1259.16	1367.66	-43.8341	-1245.51	1144.05	-49.8027	-1247.12	1075.14	-61.0184	-1140.35	1003.7	-40.2768	-1094.89	910.086	-93.3409	-1135.06	886.166	-97.8637	-1057.51	824.685
832	0	171.294	-1082.57	1545.45	270.902	-1088.33	1537.76	149.325	-1251.48	1578.7	261.26	-1267.12	1571.83	194.238	-1325.08	1403.2	160.874	-1376.85	1188.79	199.803	-1192.12	1334.26	207.215	-1133.85	1204.94	254.247	-1399.84	1234.69	24.7504	-1249.44	1366.9	-42.3787	-1236.26	1143.1	-48.2187	-1238.21	1074.21	-59.7975	-1132.24	1001.99	-39.2425	-1087.74	907.876	-92.2118	-1128.18	884.324	-96.9016	-1051.42	821.883
833	0	172.709	-1073.17	1545.16	272.312	-1078.93	1537.37	150.728	-1242.1	1578.25	262.661	-1257.75	1571.27	195.527	-1315.33	1402.37	161.998	-1366.35	1187.61	201.021	-1182.21	1333.81	208.377	-1123.47	1204.67	255.298	-1389.57	1233.38	25.9416	-1239.69	1366.27	-40.8759	-1227.04	1142.28	-46.5641	-1229.37	1073.41	-58.5706	-1124.28	1000.35	-38.226	-1080.81	905.699	-91.0735	-1121.57	882.555	-95.9985	-1045.7	819.09
834	0	174.162	-1063.73	1545.03	273.759	-1069.49	1537.13	152.163	-1232.68	1577.95	264.093	-1248.34	1570.84	196.844	-1305.54	1401.68	163.17	-1355.78	1186.57	202.233	-1172.25	1333.49	209.52	-1113.02	1204.55	256.393	-1379.23	1232.21	27.1427	-1229.93	1365.81	-39.3324	-1217.88	1141.59	-44.844	-1220.62	1072.74	-57.3421	-1116.47	998.798	-37.2291	-1074.11	903.583	-89.9249	-1115.24	880.888	-95.1526	-1040.34	816.346
835	0	175.645	-1054.25	1545.04	275.235	-1060.02	1537.02	153.62	-1223.22	1577.8	265.545	-1238.9	1570.55	198.181	-1295.71	1401.15	164.385	-1345.16	1185.72	203.431	-1162.27	1333.33	210.633	-1102.52	1204.58	257.529	-1368.84	1231.2	28.3456	-1220.15	1365.51	-37.7558	-1208.77	1141.06	-43.0645	-1211.96	1072.23	-56.1169	-1108.84	997.354	-36.2527	-1067.62	901.555	-88.7651	-1109.17	879.345	-94.3602	-1035.33	813.687
836	0	177.147	-1044.73	1545.23	276.73	-1050.52	1537.07	155.09	-1213.73	1577.82	267.008	-1229.43	1570.41	199.532	-1285.86	1400.79	165.637	-1334.53	1185.06	204.604	-1152.27	1333.31	211.706	-1091.99	1204.76	258.705	-1358.4	1230.39	29.5423	-1210.38	1365.39	-36.1548	-1199.75	1140.69	-41.233	-1203.41	1071.88	-54.9	-1101.36	996.037	-35.2978	-1061.35	899.639	-87.593	-1103.36	877.951	-93.6154	-1030.67	811.145
837	0	178.659	-1035.18	1545.57	278.234	-1041	1537.27	156.562	-1204.21	1578	268.472	-1219.94	1570.42	200.889	-1275.99	1400.61	166.918	-1323.92	1184.64	205.745	-1142.26	1333.46	212.731	-1081.45	1205.11	259.917	-1347.95	1229.79	30.7249	-1200.63	1365.46	-34.5385	-1190.81	1140.48	-39.3583	-1194.97	1071.7	-53.6964	-1094.06	994.863	-34.3651	-1055.28	897.859	-86.4086	-1097.79	876.725	-92.9104	-1026.34	808.752
838	0	180.17	-1025.61	1546.08	279.736	-1031.46	1537.63	158.027	-1194.67	1578.34	269.927	-1210.43	1570.58	202.245	-1266.12	1400.61	168.223	-1313.34	1184.44	206.846	-1132.27	1333.75	213.7	-1070.93	1205.6	261.163	-1337.49	1229.41	31.8858	-1190.91	1365.7	-32.9167	-1181.99	1140.44	-37.4505	-1186.66	1071.69	-52.5116	-1086.94	993.844	-33.4556	-1049.41	896.235	-85.2123	-1092.46	875.683	-92.236	-1022.31	806.533
839	0	181.668	-1016.02	1546.75	281.225	-1021.9	1538.13	159.472	-1185.11	1578.84	271.362	-1200.91	1570.9	203.592	-1256.25	1400.79	169.544	-1302.83	1184.5	207.899	-1122.3	1334.2	214.604	-1060.44	1206.24	262.441	-1327.06	1229.27	33.0182	-1181.24	1366.13	-31.2995	-1173.3	1140.58	-35.5206	-1178.49	1071.86	-51.3509	-1079.99	992.99	-32.5706	-1043.71	894.783	-84.0058	-1087.35	874.836	-91.5819	-1018.56	804.508
840	0	183.141	-1006.42	1547.56	282.689	-1012.34	1538.78	160.889	-1175.54	1579.49	272.768	-1191.38	1571.36	204.925	-1246.4	1401.16	170.875	-1292.42	1184.8	208.899	-1112.37	1334.8	215.438	-1050.02	1207.02	263.75	-1316.67	1229.37	34.1157	-1171.63	1366.73	-29.6969	-1164.74	1140.89	-33.5808	-1170.47	1072.2	-50.2201	-1073.21	992.307	-31.7113	-1038.19	893.516	-82.792	-1082.44	874.192	-90.9374	-1015.06	802.693
841	0	184.578	-996.816	1548.51	284.116	-1002.77	1539.56	162.267	-1165.98	1580.29	274.134	-1181.86	1571.97	206.238	-1236.59	1401.7	172.212	-1282.14	1185.34	209.839	-1102.49	1335.55	216.196	-1039.68	1207.93	265.089	-1306.34	1229.72	35.1729	-1162.11	1367.5	-28.1188	-1156.34	1141.37	-31.6434	-1162.61	1072.7	-49.1246	-1066.61	991.798	-30.8797	-1032.82	892.445	-81.5749	-1077.72	873.752	-90.2918	-1011.78	801.097
842	0	185.964	-987.218	1549.6	285.493	-993.221	1540.47	163.595	-1156.42	1581.22	275.451	-1172.35	1572.71	207.525	-1226.82	1402.42	173.554	-1272	1186.12	210.715	-1092.67	1336.42	216.874	-1029.45	1208.96	266.458	-1296.08	1230.29	36.1855	-1152.69	1368.42	-26.5745	-1148.11	1142	-29.7213	-1154.92	1073.36	-48.0701	-1060.18	991.463	-30.0781	-1027.59	891.574	-80.3597	-1073.15	873.515	-89.6354	-1008.69	799.724
843	0	187.288	-977.638	1550.79	286.808	-983.684	1541.49	164.865	-1146.88	1582.28	276.71	-1162.85	1573.58	208.784	-1217.11	1403.31	174.9	-1262.02	1187.11	211.525	-1082.93	1337.42	217.47	-1019.34	1210.09	267.858	-1285.92	1231.1	37.15	-1143.39	1369.47	-25.0722	-1140.06	1142.77	-27.8266	-1147.41	1074.17	-47.0618	-1053.92	991.297	-29.3091	-1022.49	890.904	-79.1522	-1068.72	873.474	-88.9597	-1005.74	798.573
844	0	188.537	-968.086	1552.08	288.048	-974.173	1542.61	166.069	-1137.37	1583.45	277.904	-1153.38	1574.57	210.01	-1207.46	1404.34	176.25	-1252.23	1188.29	212.266	-1073.28	1338.53	217.982	-1009.37	1211.32	269.29	-1275.87	1232.11	38.0642	-1134.24	1370.65	-23.619	-1132.21	1143.67	-25.9711	-1140.09	1075.1	-46.1043	-1047.83	991.293	-28.5754	-1017.5	890.435	-77.9586	-1064.41	873.616	-88.2584	-1002.9	797.639
845	0	189.699	-958.575	1553.44	289.203	-964.696	1543.82	167.199	-1127.91	1584.72	279.026	-1143.93	1575.67	211.203	-1197.9	1405.5	177.607	-1242.62	1189.63	212.938	-1063.73	1339.74	218.41	-999.558	1212.63	270.755	-1265.94	1233.3	38.927	-1125.23	1371.92	-22.2203	-1124.56	1144.69	-24.165	-1132.95	1076.14	-45.202	-1041.9	991.443	-27.8799	-1012.6	890.159	-76.7851	-1060.19	873.929	-87.5275	-1000.12	796.912
846	0	190.764	-949.114	1554.87	290.261	-955.261	1545.1	168.248	-1118.49	1586.06	280.069	-1134.53	1576.86	212.362	-1188.43	1406.79	178.975	-1233.21	1191.12	213.542	-1054.28	1341.03	218.758	-989.907	1214	272.252	-1256.13	1234.66	39.7384	-1116.4	1373.27	-20.8799	-1117.11	1145.79	-22.4169	-1126.01	1077.28	-44.3582	-1036.13	991.733	-27.2254	-1007.77	890.068	-75.6376	-1056.03	874.394	-86.7659	-997.376	796.383
847	0	191.72	-939.716	1556.34	291.212	-945.876	1546.44	169.211	-1109.13	1587.47	281.029	-1125.18	1578.13	213.484	-1179.06	1408.17	180.356	-1224	1192.71	214.078	-1044.95	1342.39	219.028	-980.427	1215.42	273.781	-1246.46	1236.16	40.4996	-1107.75	1374.67	-19.5996	-1109.89	1146.97	-20.7336	-1119.27	1078.49	-43.5753	-1030.51	992.15	-26.6145	-1003.01	890.151	-74.5206	-1051.93	874.991	-85.9756	-994.621	796.037
848	0	192.559	-930.39	1557.83	292.049	-936.549	1547.82	170.084	-1099.84	1588.92	281.902	-1115.87	1579.47	214.571	-1169.79	1409.62	181.752	-1214.98	1194.37	214.55	-1035.74	1343.8	219.226	-971.119	1216.88	275.341	-1236.92	1237.77	41.2125	-1099.29	1376.11	-18.3795	-1102.88	1148.21	-19.1194	-1112.73	1079.76	-42.8547	-1025.03	992.679	-26.0492	-998.298	890.393	-73.4379	-1047.86	875.701	-85.1614	-991.824	795.862
849	0	193.274	-921.147	1559.33	292.764	-927.286	1549.24	170.865	-1090.63	1590.4	282.686	-1106.63	1580.86	215.624	-1160.63	1411.14	183.165	-1206.15	1196.09	214.962	-1026.65	1345.25	219.358	-961.983	1218.37	276.927	-1227.52	1239.47	41.8802	-1091.02	1377.55	-17.2176	-1096.1	1149.48	-17.5767	-1106.38	1081.07	-42.1968	-1019.69	993.303	-25.5315	-993.617	890.779	-72.3915	-1043.81	876.502	-84.331	-988.953	795.842
850	0	193.86	-911.996	1560.82	293.353	-918.092	1550.67	171.551	-1081.51	1591.89	283.378	-1097.45	1582.29	216.642	-1151.59	1412.7	184.596	-1197.5	1197.82	215.316	-1017.69	1346.73	219.433	-953.015	1219.86	278.535	-1218.26	1241.22	42.5063	-1082.94	1378.99	-16.1107	-1089.54	1150.77	-16.1052	-1100.22	1082.39	-41.6008	-1014.48	994.005	-25.0624	-988.958	891.292	-71.382	-1039.76	877.37	-83.4949	-985.982	795.965
851	0	194.314	-902.942	1562.28	293.813	-908.973	1552.1	172.142	-1072.48	1593.38	283.98	-1088.35	1583.75	217.627	-1142.66	1414.27	186.041	-1189	1199.55	215.618	-1008.85	1348.21	219.458	-944.208	1221.36	280.159	-1209.14	1243.01	43.095	-1075.05	1380.39	-15.0538	-1083.2	1152.06	-14.7028	-1094.25	1083.71	-41.0651	-1009.39	994.768	-24.6426	-984.31	891.913	-70.4087	-1035.7	878.285	-82.6651	-982.89	796.214
852	0	194.633	-893.992	1563.71	294.142	-899.932	1553.52	172.638	-1063.55	1594.84	284.492	-1079.31	1585.22	218.58	-1133.85	1415.85	187.498	-1180.65	1201.24	215.872	-1000.13	1349.68	219.441	-935.55	1222.83	281.794	-1200.13	1244.79	43.6505	-1067.34	1381.76	-14.0411	-1077.06	1153.33	-13.3658	-1088.46	1085.01	-40.587	-1004.41	995.575	-24.2724	-979.663	892.621	-69.4696	-1031.62	879.225	-81.8553	-979.659	796.576
853	0	194.82	-885.149	1565.08	294.341	-890.971	1554.92	173.043	-1054.72	1596.27	284.915	-1070.35	1586.68	219.502	-1125.15	1417.4	188.964	-1172.44	1202.89	216.083	-991.537	1351.12	219.39	-927.033	1224.28	283.432	-1191.25	1246.56	44.1772	-1059.8	1383.06	-13.0662	-1071.12	1154.57	-12.089	-1082.83	1086.28	-40.1633	-999.535	996.407	-23.9514	-975.01	893.397	-68.5614	-1027.53	880.168	-81.0799	-976.279	797.035
854	0	194.877	-876.415	1566.39	294.415	-882.092	1556.29	173.357	-1045.99	1597.64	285.253	-1061.47	1588.11	220.393	-1116.55	1418.92	190.434	-1164.34	1204.46	216.256	-983.056	1352.53	219.313	-918.642	1225.69	285.066	-1182.47	1248.29	44.6791	-1052.41	1384.29	-12.1225	-1065.36	1155.76	-10.8664	-1077.36	1087.51	-39.7903	-994.748	997.246	-23.6791	-970.344	894.219	-67.6806	-1023.41	881.095	-80.353	-972.742	797.575
855	0	194.81	-867.789	1567.61	294.367	-873.294	1557.6	173.585	-1037.36	1598.95	285.508	-1052.66	1589.52	221.254	-1108.06	1420.38	191.903	-1156.34	1205.95	216.393	-974.683	1353.88	219.214	-910.365	1227.04	286.689	-1173.79	1249.96	45.1596	-1045.16	1385.43	-11.2038	-1059.76	1156.89	-9.69179	-1072.03	1088.67	-39.4638	-990.039	998.077	-23.4543	-965.659	895.067	-66.823	-1019.26	881.987	-79.6881	-969.047	798.178
856	0	194.624	-859.269	1568.75	294.204	-864.577	1558.86	173.731	-1028.83	1600.18	285.685	-1043.93	1590.87	222.085	-1099.66	1421.77	193.366	-1148.42	1207.33	216.5	-966.412	1355.16	219.097	-902.19	1228.31	288.296	-1165.2	1251.55	45.6214	-1038.04	1386.48	-10.3046	-1054.31	1157.95	-8.55935	-1066.82	1089.76	-39.1795	-985.395	998.881	-23.276	-960.95	895.918	-65.9849	-1015.09	882.826	-79.0973	-965.196	798.828
857	0	194.327	-850.85	1569.79	293.934	-855.938	1560.05	173.799	-1020.4	1601.32	285.787	-1035.27	1592.16	222.884	-1091.34	1423.08	194.819	-1140.57	1208.61	216.577	-958.235	1356.36	218.966	-894.106	1229.51	289.88	-1156.69	1253.04	46.066	-1031.02	1387.43	-9.42069	-1048.98	1158.93	-7.46383	-1061.71	1090.77	-38.933	-980.803	999.642	-23.1425	-956.214	896.751	-65.1628	-1010.88	883.596	-78.5908	-961.195	799.505
858	0	193.93	-842.527	1570.72	293.565	-847.372	1561.15	173.795	-1012.05	1602.35	285.82	-1026.68	1593.37	223.652	-1083.11	1424.29	196.257	-1132.77	1209.76	216.628	-950.142	1357.46	218.82	-886.101	1230.6	291.434	-1148.24	1254.42	46.494	-1024.08	1388.26	-8.54916	-1043.74	1159.8	-6.40114	-1056.67	1091.68	-38.7202	-976.247	1000.35	-23.0523	-951.446	897.546	-64.3544	-1006.65	884.283	-78.1762	-957.054	800.189
859	0	193.442	-834.291	1571.53	293.109	-838.875	1562.15	173.723	-1003.79	1603.28	285.787	-1018.15	1594.5	224.387	-1074.94	1425.39	197.675	-1125.02	1210.79	216.652	-942.126	1358.46	218.658	-878.167	1231.59	292.952	-1139.86	1255.68	46.9046	-1017.22	1388.97	-7.68882	-1038.56	1160.58	-5.36863	-1051.68	1092.49	-38.5373	-971.71	1000.98	-23.0035	-946.644	898.283	-63.5583	-1002.38	884.873	-77.8588	-952.785	800.86
860	0	192.874	-826.133	1572.22	292.574	-830.441	1563.05	173.588	-995.603	1604.09	285.694	-1009.68	1595.52	225.086	-1066.84	1426.37	199.068	-1117.31	1211.68	216.651	-934.176	1359.35	218.48	-870.294	1232.45	294.428	-1131.53	1256.82	47.296	-1010.41	1389.56	-6.84025	-1033.43	1161.24	-4.36519	-1046.72	1093.18	-38.3809	-967.176	1001.52	-22.9939	-941.805	898.944	-62.7745	-998.074	885.357	-77.6409	-948.4	801.498
861	0	192.236	-818.042	1572.77	291.971	-822.062	1563.82	173.396	-987.477	1604.77	285.545	-1001.27	1596.44	225.746	-1058.79	1427.23	200.431	-1109.62	1212.44	216.624	-926.284	1360.11	218.281	-862.476	1233.19	295.856	-1123.24	1257.82	47.6651	-1003.63	1390.02	-6.00589	-1028.3	1161.79	-3.39144	-1041.77	1093.77	-38.2482	-962.627	1001.97	-23.0214	-936.924	899.512	-62.0045	-993.732	885.727	-77.5218	-943.913	802.082
862	0	191.54	-810.006	1573.19	291.311	-813.731	1564.48	173.152	-979.402	1605.32	285.343	-992.896	1597.24	226.363	-1050.78	1427.96	201.757	-1101.94	1213.06	216.569	-918.441	1360.74	218.06	-854.705	1233.78	297.228	-1114.99	1258.68	48.0079	-996.872	1390.35	-5.18987	-1023.16	1162.21	-2.44964	-1036.78	1094.23	-38.1371	-958.045	1002.31	-23.0837	-932.001	899.971	-61.2512	-989.348	885.976	-77.4985	-939.34	802.593
863	0	190.795	-802.013	1573.46	290.603	-805.439	1564.99	172.858	-971.367	1605.74	285.092	-984.561	1597.91	226.934	-1042.8	1428.56	203.039	-1094.28	1213.54	216.487	-910.636	1361.24	217.812	-846.973	1234.23	298.537	-1106.77	1259.39	48.3197	-990.119	1390.56	-4.39793	-1017.97	1162.51	-1.54365	-1031.75	1094.57	-38.0465	-953.411	1002.54	-23.1785	-927.03	900.309	-60.5188	-984.917	886.101	-77.5652	-934.694	803.013
864	0	190.01	-794.05	1573.58	289.857	-797.179	1565.36	172.519	-963.359	1606.02	284.796	-976.256	1598.46	227.454	-1034.85	1429.02	204.266	-1086.62	1213.88	216.373	-902.863	1361.59	217.533	-839.275	1234.53	299.774	-1098.59	1259.97	48.5953	-983.357	1390.64	-3.63719	-1012.7	1162.69	-0.67872	-1026.63	1094.78	-37.976	-948.709	1002.64	-23.3035	-922.009	900.514	-59.813	-980.431	886.101	-77.714	-929.987	803.326
865	0	189.195	-786.105	1573.55	289.079	-788.942	1565.58	172.138	-955.368	1606.17	284.456	-967.97	1598.87	227.918	-1026.92	1429.34	205.43	-1078.96	1214.09	216.227	-895.111	1361.8	217.221	-831.603	1234.67	300.931	-1090.43	1260.41	48.8289	-976.57	1390.6	-2.91586	-1007.35	1162.73	0.138691	-1021.43	1094.87	-37.926	-943.919	1002.61	-23.4567	-916.934	900.579	-59.1406	-975.884	885.975	-77.9354	-925.23	803.517
866	0	188.356	-778.166	1573.37	288.277	-780.718	1565.65	171.716	-947.382	1606.18	284.074	-959.697	1599.15	228.319	-1018.99	1429.53	206.519	-1071.31	1214.17	216.045	-887.372	1361.87	216.873	-823.949	1234.67	302	-1082.3	1260.72	49.0148	-969.747	1390.44	-2.24295	-1001.87	1162.65	0.901181	-1016.1	1094.84	-37.8981	-939.026	1002.46	-23.6363	-911.801	900.496	-58.5094	-971.267	885.727	-78.2187	-920.434	803.574
867	0	187.499	-770.222	1573.05	287.457	-772.501	1565.57	171.256	-939.39	1606.06	283.652	-951.429	1599.3	228.654	-1011.07	1429.58	207.522	-1063.64	1214.14	215.824	-879.64	1361.8	216.485	-816.308	1234.52	302.972	-1074.19	1260.89	49.1472	-962.874	1390.16	-1.62801	-996.264	1162.45	1.60067	-1010.63	1094.68	-37.8947	-934.015	1002.17	-23.841	-906.607	900.263	-57.9283	-966.572	885.362	-78.5524	-915.604	803.488
868	0	186.628	-762.262	1572.57	286.622	-764.283	1565.33	170.758	-931.382	1605.81	283.189	-943.157	1599.31	228.915	-1003.15	1429.51	208.427	-1055.97	1213.99	215.563	-871.905	1361.59	216.058	-808.672	1234.24	303.838	-1066.1	1260.94	49.2206	-955.94	1389.77	-1.08077	-990.503	1162.13	2.22865	-1005.01	1094.41	-37.9188	-928.87	1001.76	-24.0699	-901.346	899.877	-57.4063	-961.789	884.885	-78.9249	-910.746	803.253
869	0	185.746	-754.277	1571.96	285.774	-756.056	1564.94	170.222	-923.35	1605.44	282.686	-934.877	1599.19	229.098	-995.219	1429.31	209.223	-1048.29	1213.73	215.257	-864.16	1361.24	215.588	-801.032	1233.81	304.591	-1058.03	1260.87	49.2296	-948.935	1389.28	-0.610843	-984.577	1161.7	2.77649	-999.223	1094.03	-37.9745	-923.581	1001.21	-24.3231	-896.015	899.34	-56.9532	-956.909	884.303	-79.3251	-905.862	802.863
870	0	184.855	-746.259	1571.21	284.916	-747.815	1564.39	169.648	-915.286	1604.94	282.141	-926.583	1598.94	229.197	-987.272	1428.99	209.9	-1040.6	1213.37	214.905	-856.399	1360.76	215.077	-793.384	1233.26	305.224	-1049.98	1260.68	49.1693	-941.849	1388.69	-0.227445	-978.475	1161.15	3.23568	-993.259	1093.54	-38.0664	-918.137	1000.54	-24.6015	-890.609	898.655	-56.5786	-951.923	883.623	-79.7429	-900.953	802.318
871	0	183.954	-738.202	1570.32	284.046	-739.555	1563.71	169.034	-907.184	1604.33	281.553	-918.268	1598.57	229.207	-979.306	1428.55	210.447	-1032.9	1212.92	214.502	-848.615	1360.15	214.523	-785.717	1232.59	305.729	-1041.94	1260.39	49.035	-934.673	1388.01	0.060887	-972.187	1160.51	3.59815	-987.109	1092.95	-38.1996	-912.529	999.748	-24.9066	-885.124	897.824	-56.2918	-946.823	882.854	-80.1696	-896.016	801.617
872	0	183.041	-730.101	1569.32	283.164	-731.272	1562.88	168.378	-899.039	1603.61	280.921	-909.931	1598.07	229.124	-971.316	1428	210.859	-1025.18	1212.39	214.047	-840.801	1359.42	213.928	-778.027	1231.81	306.102	-1033.9	1259.99	48.8228	-927.399	1387.23	0.246523	-965.71	1159.77	3.85649	-980.768	1092.27	-38.3798	-906.75	998.841	-25.2412	-879.553	896.855	-56.1017	-941.6	882.003	-80.5985	-891.046	800.764
873	0	182.116	-721.953	1568.2	282.267	-722.963	1561.93	167.678	-890.849	1602.79	280.241	-901.567	1597.47	228.944	-963.298	1427.34	211.128	-1017.44	1211.77	213.536	-832.951	1358.58	213.29	-770.304	1230.93	306.339	-1025.87	1259.5	48.5291	-920.021	1386.37	0.322944	-959.039	1158.94	4.00421	-974.235	1091.49	-38.6129	-900.797	997.823	-25.6087	-873.892	895.753	-56.0165	-936.246	881.077	-81.0248	-886.038	799.762
874	0	181.173	-713.756	1566.97	281.35	-714.626	1560.86	166.932	-882.61	1601.88	279.51	-893.176	1596.75	228.663	-955.249	1426.58	211.25	-1009.67	1211.08	212.967	-825.059	1357.64	212.611	-762.543	1229.96	306.437	-1017.83	1258.91	48.1508	-912.535	1385.43	0.28488	-952.175	1158.02	4.03594	-967.509	1090.64	-38.9052	-894.666	996.703	-26.0138	-868.137	894.527	-56.0431	-930.756	880.082	-81.4465	-880.983	798.617
875	0	180.209	-705.509	1565.66	280.411	-706.26	1559.68	166.135	-874.324	1600.88	278.727	-884.756	1595.94	228.279	-947.166	1425.72	211.223	-1001.88	1210.31	212.338	-817.119	1356.6	211.891	-754.734	1228.91	306.394	-1009.78	1258.23	47.6854	-904.935	1384.41	0.128423	-945.118	1157.02	3.9476	-960.591	1089.7	-39.2627	-888.356	995.485	-26.4614	-862.28	893.183	-56.1876	-925.124	879.023	-81.8641	-875.871	797.337
876	0	179.22	-697.214	1564.26	279.443	-697.864	1558.4	165.286	-865.99	1599.8	277.888	-876.307	1595.04	227.789	-939.045	1424.78	211.048	-994.058	1209.47	211.644	-809.125	1355.48	211.129	-746.871	1227.79	306.209	-1001.71	1257.47	47.1309	-897.222	1383.32	-0.148929	-937.874	1155.94	3.73645	-953.487	1088.69	-39.6915	-881.867	994.176	-26.9576	-856.316	891.732	-56.4542	-919.343	877.907	-82.2805	-870.692	795.93
877	0	178.199	-688.871	1562.79	278.442	-689.44	1557.04	164.38	-857.611	1598.65	276.988	-867.83	1594.05	227.193	-930.885	1423.75	210.726	-986.196	1208.56	210.884	-801.074	1354.28	210.325	-738.946	1226.6	305.884	-993.607	1256.62	46.4858	-889.394	1382.15	-0.548258	-930.447	1154.8	3.40121	-946.201	1087.6	-40.1975	-875.201	992.785	-27.5086	-850.239	890.183	-56.8462	-913.41	876.735	-82.7013	-865.432	794.405
878	0	177.141	-680.485	1561.26	277.402	-680.988	1555.61	163.414	-849.188	1597.44	276.027	-859.328	1592.98	226.489	-922.682	1422.64	210.26	-978.289	1207.57	210.055	-792.96	1353.02	209.476	-730.951	1225.37	305.421	-985.468	1255.69	45.7489	-881.452	1380.92	-1.06926	-922.845	1153.58	2.94203	-938.739	1086.44	-40.786	-868.362	991.316	-28.121	-844.044	888.544	-57.3649	-907.32	875.51	-83.1347	-860.079	792.773
879	0	176.041	-672.056	1559.68	276.317	-672.511	1554.12	162.384	-840.724	1596.18	274.999	-850.8	1591.86	225.678	-914.434	1421.45	209.656	-970.331	1206.51	209.154	-784.778	1351.7	208.582	-722.879	1224.09	304.822	-977.282	1254.67	44.9196	-873.399	1379.62	-1.71034	-915.076	1152.29	2.36046	-931.11	1085.22	-41.4616	-861.352	989.779	-28.8013	-837.723	886.825	-58.0101	-901.07	874.237	-83.5907	-854.619	791.044
880	0	174.894	-663.591	1558.08	275.182	-664.01	1552.58	161.288	-832.224	1594.87	273.902	-842.251	1590.67	224.761	-906.14	1420.19	208.919	-962.314	1205.37	208.179	-776.526	1350.33	207.638	-714.721	1222.79	304.093	-969.038	1253.56	43.9976	-865.24	1378.25	-2.46872	-907.15	1150.95	1.65937	-923.321	1083.93	-42.2285	-854.177	988.18	-29.5562	-831.27	885.038	-58.78	-894.658	872.915	-84.0811	-849.038	789.23
881	0	173.694	-655.091	1556.45	273.993	-655.489	1551.02	160.122	-823.691	1593.53	272.733	-833.683	1589.44	223.74	-897.798	1418.87	208.057	-954.23	1204.16	207.126	-768.199	1348.94	206.641	-706.472	1221.46	303.237	-960.725	1252.37	42.9829	-856.979	1376.83	-3.34056	-899.077	1149.54	0.842812	-915.381	1082.59	-43.0897	-846.841	986.527	-30.3915	-824.677	883.192	-59.6713	-888.081	871.547	-84.6188	-843.32	787.343
882	0	172.438	-646.561	1554.82	272.744	-646.948	1549.44	158.883	-815.128	1592.16	271.49	-825.098	1588.17	222.615	-889.405	1417.49	207.077	-946.07	1202.87	205.995	-759.794	1347.52	205.586	-698.122	1220.12	302.26	-952.334	1251.1	41.8759	-848.624	1375.34	-4.32117	-890.868	1148.08	-0.084118	-907.297	1081.18	-44.0477	-839.349	984.829	-31.3129	-817.939	881.298	-60.6793	-881.337	870.135	-85.2176	-837.452	785.398
883	0	171.121	-638.004	1553.2	271.433	-638.391	1547.85	157.569	-806.539	1590.79	270.17	-816.499	1586.88	221.39	-880.96	1416.07	205.987	-937.824	1201.5	204.781	-751.309	1346.09	204.468	-689.668	1218.78	301.168	-943.855	1249.76	40.6775	-840.179	1373.81	-5.40515	-882.533	1146.57	-1.11548	-899.078	1079.72	-45.1037	-831.707	983.095	-32.3249	-811.047	879.369	-61.7979	-874.423	868.682	-85.8913	-831.419	783.408
884	0	169.74	-629.424	1551.6	270.056	-629.82	1546.29	156.178	-797.926	1589.42	268.773	-807.888	1585.58	220.067	-872.461	1414.6	204.796	-929.483	1200.05	203.484	-742.742	1344.67	203.282	-681.102	1217.45	299.967	-935.279	1248.33	39.3886	-831.654	1372.24	-6.58659	-874.082	1145.01	-2.24467	-890.732	1078.22	-46.258	-823.919	981.335	-33.4313	-803.995	877.417	-63.02	-867.338	867.192	-86.6531	-825.206	781.388
885	0	168.293	-620.822	1550.04	268.612	-621.237	1544.75	154.708	-789.293	1588.06	267.295	-799.269	1584.28	218.65	-863.908	1413.11	203.51	-921.037	1198.53	202.101	-734.092	1343.27	202.022	-672.421	1216.14	298.663	-926.597	1246.84	38.0105	-823.055	1370.63	-7.85923	-865.525	1143.42	-3.46461	-882.265	1076.67	-47.5101	-815.99	979.56	-34.6346	-796.775	875.455	-64.3376	-860.081	865.67	-87.5155	-818.8	779.353
886	0	166.78	-612.2	1548.53	267.099	-612.642	1543.26	153.159	-780.64	1586.72	265.738	-790.641	1583	217.141	-855.299	1411.6	202.139	-912.474	1196.94	200.632	-725.357	1341.9	200.683	-663.621	1214.88	297.262	-917.801	1245.29	36.5448	-814.391	1369	-9.21664	-856.87	1141.79	-4.76801	-873.683	1075.1	-48.8583	-807.923	977.783	-35.9363	-789.381	873.498	-65.7421	-852.648	864.123	-88.4894	-812.188	777.321
887	0	165.199	-603.56	1547.09	265.518	-604.037	1541.83	151.529	-771.97	1585.43	264.101	-782.007	1581.74	215.545	-846.632	1410.08	200.688	-903.784	1195.3	199.075	-716.538	1340.58	199.259	-654.698	1213.66	295.77	-908.885	1243.69	34.9931	-805.666	1367.36	-10.6524	-848.125	1140.16	-6.1475	-864.991	1073.5	-50.3002	-799.721	976.017	-37.3365	-781.804	871.56	-67.2247	-845.038	862.56	-89.584	-805.356	775.309
888	0	163.552	-594.901	1545.73	263.869	-595.422	1540.48	149.82	-763.281	1584.2	262.384	-773.367	1580.53	213.865	-837.907	1408.58	199.164	-894.958	1193.62	197.431	-707.635	1339.32	197.746	-645.652	1212.52	294.194	-899.846	1242.06	33.3575	-796.888	1365.72	-12.1602	-839.296	1138.52	-7.59588	-856.192	1071.9	-51.8325	-791.388	974.277	-38.8342	-774.039	869.658	-68.7762	-837.248	860.991	-90.8059	-798.294	773.336
889	0	161.84	-586.223	1544.47	262.154	-586.797	1539.22	148.032	-754.575	1583.03	260.588	-764.721	1579.38	212.105	-829.123	1407.1	197.574	-885.984	1191.9	195.701	-698.648	1338.13	196.141	-636.481	1211.46	292.539	-890.678	1240.4	31.6403	-788.062	1364.1	-13.7339	-830.387	1136.89	-9.10631	-847.291	1070.3	-53.4512	-782.924	972.577	-40.4272	-766.079	867.81	-70.3876	-829.277	859.43	-92.1597	-790.991	771.42
890	0	160.066	-577.525	1543.32	260.377	-578.161	1538.06	146.167	-745.85	1581.95	258.716	-756.07	1578.31	210.268	-820.28	1405.66	195.922	-876.855	1190.18	193.886	-689.582	1337.04	194.442	-627.186	1210.5	290.811	-881.383	1238.75	29.8441	-779.191	1362.52	-15.3679	-821.404	1135.29	-10.6724	-838.289	1068.73	-55.1518	-774.33	970.936	-42.112	-757.919	866.032	-72.0504	-821.121	857.89	-93.6467	-783.436	769.582
891	0	158.234	-568.805	1542.3	258.541	-569.513	1537.02	144.228	-737.105	1580.97	256.77	-747.412	1577.32	208.36	-811.378	1404.28	194.213	-867.562	1188.46	191.99	-680.436	1336.06	192.648	-617.77	1209.66	289.017	-871.96	1237.12	27.9721	-770.278	1361	-17.057	-812.347	1133.74	-12.2885	-829.189	1067.2	-56.929	-765.606	969.371	-43.8842	-749.552	864.345	-73.7567	-812.776	856.389	-95.2659	-775.623	767.842
892	0	156.348	-560.06	1541.43	256.651	-560.851	1536.13	142.216	-728.337	1580.1	254.752	-738.746	1576.44	206.383	-802.417	1402.98	192.451	-858.102	1186.78	190.016	-671.215	1335.2	190.762	-608.235	1208.95	287.16	-862.414	1235.54	26.0279	-761.323	1359.55	-18.7963	-803.219	1132.25	-13.9497	-819.989	1065.73	-58.7774	-756.75	967.9	-45.7386	-740.974	862.767	-75.4993	-804.239	854.946	-97.0132	-767.543	766.219
893	0	154.413	-551.288	1540.71	254.712	-552.172	1535.38	140.137	-719.544	1579.36	252.667	-730.071	1575.68	204.343	-793.398	1401.78	190.639	-848.47	1185.17	187.97	-661.923	1334.48	188.788	-598.586	1208.39	285.246	-852.751	1234.03	24.0159	-752.327	1358.2	-20.5818	-794.019	1130.85	-15.6517	-810.692	1064.34	-60.691	-747.761	966.541	-47.669	-732.181	861.318	-77.2722	-795.505	853.578	-98.8823	-759.19	764.735
894	0	152.436	-542.486	1540.15	252.73	-543.477	1534.79	137.995	-710.725	1578.76	250.52	-721.385	1575.05	202.244	-784.322	1400.69	188.781	-838.667	1183.64	185.858	-652.564	1333.9	186.731	-588.831	1207.99	283.28	-842.98	1232.61	21.941	-743.288	1356.97	-22.4096	-784.746	1129.56	-17.3913	-801.296	1063.05	-62.6639	-738.636	965.312	-49.6687	-723.168	860.017	-79.0704	-786.572	852.308	-100.864	-750.558	763.409
895	0	150.422	-533.652	1539.78	250.713	-534.761	1534.38	135.795	-701.876	1578.3	248.315	-712.686	1574.56	200.091	-775.191	1399.73	186.879	-828.697	1182.23	183.689	-643.144	1333.48	184.6	-578.977	1207.77	281.266	-833.111	1231.32	19.8088	-734.203	1355.88	-24.2767	-775.397	1128.39	-19.1662	-791.801	1061.89	-64.6898	-729.371	964.232	-51.7303	-713.934	858.881	-80.8902	-777.433	851.155	-102.948	-741.644	762.26
896	0	148.38	-524.783	1539.58	248.667	-526.023	1534.15	133.543	-692.995	1578	246.057	-703.973	1574.23	197.888	-766.007	1398.93	184.936	-818.566	1180.96	181.47	-633.668	1333.23	182.407	-569.035	1207.74	279.21	-823.158	1230.17	17.6254	-725.069	1354.94	-26.1805	-765.97	1127.38	-20.9748	-782.207	1060.87	-66.7626	-719.962	963.318	-53.8461	-704.477	857.93	-82.7291	-768.085	850.14	-105.122	-732.444	761.304
897	0	146.318	-515.876	1539.59	246.6	-517.263	1534.12	131.244	-684.082	1577.86	243.753	-695.244	1574.06	195.641	-756.772	1398.28	182.952	-808.286	1179.86	179.211	-624.142	1333.15	180.163	-559.018	1207.89	277.114	-813.136	1229.19	15.3976	-715.881	1354.19	-28.1187	-756.462	1126.53	-22.8166	-772.513	1060.01	-68.8759	-710.407	962.585	-56.0082	-694.794	857.178	-84.5859	-758.524	849.283	-107.372	-722.954	760.558
898	0	144.242	-506.931	1539.79	244.52	-508.477	1534.28	128.907	-675.134	1577.9	241.411	-686.498	1574.05	193.356	-747.49	1397.81	180.93	-797.873	1178.96	176.923	-614.574	1333.24	177.882	-548.94	1208.23	274.981	-803.061	1228.41	13.1325	-706.633	1353.63	-30.0898	-746.869	1125.87	-24.6916	-762.718	1059.33	-71.0239	-700.7	962.047	-58.2085	-684.886	856.639	-86.4608	-748.745	848.6	-109.685	-713.174	760.035
899	0	142.162	-497.946	1540.19	242.436	-499.667	1534.65	126.539	-666.15	1578.1	239.035	-677.734	1574.21	191.037	-738.164	1397.52	178.871	-787.345	1178.27	174.617	-604.97	1333.52	175.581	-538.816	1208.77	272.816	-792.954	1227.84	10.8376	-697.32	1353.27	-32.0926	-737.187	1125.4	-26.6007	-752.823	1058.83	-73.2004	-690.838	961.714	-60.4393	-674.753	856.325	-88.3549	-738.744	848.108	-112.046	-703.1	759.746
900	0	140.087	-488.922	1540.79	240.357	-490.831	1535.22	124.147	-657.13	1578.46	236.635	-668.952	1574.54	188.69	-728.799	1397.43	176.776	-776.728	1177.81	172.303	-595.339	1333.97	173.275	-528.663	1209.49	270.62	-782.834	1227.49	8.52074	-687.936	1353.13	-34.1262	-727.412	1125.15	-28.5454	-742.828	1058.55	-75.3998	-680.817	961.595	-62.6926	-664.397	856.244	-90.2705	-728.519	847.82	-114.441	-692.733	759.696
901	0	138.025	-479.859	1541.58	238.29	-481.971	1535.99	121.74	-648.076	1579	234.218	-660.152	1575.04	186.32	-719.399	1397.53	174.646	-766.047	1177.6	169.995	-585.687	1334.59	170.982	-518.5	1210.39	268.395	-772.721	1227.37	6.18961	-678.476	1353.2	-36.1904	-717.543	1125.11	-30.5278	-732.734	1058.47	-77.6167	-670.635	961.696	-64.9609	-653.82	856.401	-92.2106	-718.068	847.743	-116.857	-682.072	759.889
902	0	135.985	-470.758	1542.56	236.245	-473.089	1536.95	119.326	-638.987	1579.68	231.792	-651.335	1575.7	183.933	-709.97	1397.83	172.48	-755.332	1177.63	167.702	-576.023	1335.38	168.718	-508.343	1211.45	266.141	-762.636	1227.49	3.85194	-668.933	1353.5	-38.2851	-707.577	1125.28	-32.5503	-722.543	1058.6	-79.8461	-660.29	962.018	-67.2371	-643.027	856.797	-94.1788	-707.388	847.883	-119.283	-671.117	760.326
903	0	133.976	-461.622	1543.72	234.229	-464.185	1538.1	116.914	-629.866	1580.52	229.366	-642.501	1576.51	181.535	-700.517	1398.32	170.276	-744.617	1177.91	165.436	-566.354	1336.31	166.499	-498.211	1212.65	263.856	-752.602	1227.85	1.51521	-659.303	1354.02	-40.4108	-697.511	1125.68	-34.6159	-712.255	1058.95	-82.0832	-649.78	962.559	-69.5146	-632.021	857.429	-96.1792	-696.481	848.241	-121.706	-659.869	761
904	0	132.007	-452.454	1545.05	232.253	-455.264	1539.42	114.511	-620.716	1581.49	226.946	-633.653	1577.46	179.129	-691.045	1398.99	168.033	-733.934	1178.44	163.208	-556.69	1337.39	164.342	-488.119	1213.97	261.541	-742.639	1228.44	-0.813421	-649.583	1354.75	-42.5681	-687.345	1126.29	-36.7275	-701.873	1059.51	-84.3236	-639.105	963.314	-71.7872	-620.809	858.292	-98.2159	-685.347	848.813	-124.119	-648.331	761.904
905	0	130.085	-443.258	1546.52	230.322	-446.328	1540.9	112.127	-611.538	1582.59	224.542	-624.793	1578.55	176.722	-681.563	1399.84	165.748	-723.316	1179.2	161.026	-547.039	1338.59	162.26	-478.086	1215.4	259.191	-732.766	1229.24	-3.12723	-639.77	1355.68	-44.7577	-677.078	1127.11	-38.8881	-691.4	1060.27	-86.5635	-628.265	964.273	-74.0492	-609.398	859.375	-100.293	-673.989	849.591	-126.514	-636.507	763.026
906	0	128.219	-434.038	1548.12	228.445	-437.381	1542.51	109.769	-602.335	1583.8	222.161	-615.922	1579.75	174.317	-672.077	1400.85	163.416	-712.797	1180.18	158.901	-537.408	1339.9	160.267	-468.124	1216.9	256.804	-723.002	1230.25	-5.41993	-629.863	1356.8	-46.9806	-666.709	1128.11	-41.1005	-680.837	1061.22	-88.7989	-617.263	965.426	-76.2956	-597.796	860.665	-102.414	-662.413	850.563	-128.885	-624.401	764.349
907	0	126.415	-424.798	1549.83	226.629	-428.427	1544.24	107.446	-593.112	1585.1	219.81	-607.044	1581.05	171.92	-662.594	1402.01	161.035	-702.406	1181.36	156.839	-527.805	1341.29	158.372	-458.248	1218.46	254.378	-713.365	1231.44	-7.68568	-619.865	1358.08	-49.2373	-656.238	1129.3	-43.367	-670.186	1062.34	-91.0264	-606.101	966.757	-78.5216	-586.013	862.146	-104.582	-650.623	851.715	-131.23	-612.022	765.856
908	0	124.681	-415.542	1551.63	224.879	-419.471	1546.07	105.164	-583.872	1586.48	217.497	-598.16	1582.44	169.535	-653.121	1403.3	158.6	-692.17	1182.72	154.846	-518.24	1342.75	156.585	-448.47	1220.04	251.909	-703.868	1232.8	-9.91905	-609.78	1359.51	-51.5281	-645.666	1130.64	-45.6893	-659.45	1063.61	-93.2425	-594.783	968.248	-80.7231	-574.057	863.8	-106.799	-638.626	853.029	-133.546	-599.377	767.527
909	0	123.022	-406.277	1553.49	223.201	-410.517	1547.96	102.93	-574.617	1587.92	215.229	-589.275	1583.89	167.167	-643.666	1404.71	156.11	-682.112	1184.24	152.928	-508.719	1344.26	154.911	-438.802	1221.63	249.397	-694.522	1234.29	-12.115	-599.615	1361.07	-53.8528	-634.994	1132.11	-48.068	-648.631	1065.02	-95.4436	-583.314	969.883	-82.8962	-561.939	865.606	-109.066	-626.433	854.487	-135.833	-586.477	769.341
910	0	121.442	-397.005	1555.39	221.6	-401.568	1549.9	100.751	-565.352	1589.4	213.011	-580.389	1585.39	164.82	-634.237	1406.21	153.564	-672.249	1185.89	151.088	-499.25	1345.81	153.353	-429.251	1223.2	246.843	-685.337	1235.9	-14.2688	-589.381	1362.73	-56.2103	-624.223	1133.71	-50.5024	-637.73	1066.54	-97.626	-571.699	971.641	-85.0373	-549.673	867.543	-111.384	-614.051	856.069	-138.093	-573.337	771.277
911	0	119.945	-387.734	1557.31	220.078	-392.63	1551.86	98.6315	-556.08	1590.91	210.848	-571.507	1586.93	162.499	-624.841	1407.79	150.966	-662.593	1187.64	149.327	-489.84	1347.36	151.911	-419.826	1224.73	244.248	-676.317	1237.6	-16.376	-579.091	1364.47	-58.5986	-613.356	1135.39	-52.9904	-626.75	1068.16	-99.786	-559.944	973.502	-87.1431	-537.268	869.59	-113.75	-601.492	857.754	-140.327	-559.969	773.315
912	0	118.533	-378.465	1559.22	218.638	-383.705	1553.82	96.5762	-546.805	1592.44	208.746	-562.63	1588.48	160.209	-615.484	1409.42	148.321	-653.151	1189.47	147.648	-480.496	1348.91	150.581	-410.533	1226.21	241.618	-667.464	1239.37	-18.4326	-568.762	1366.27	-61.0143	-602.398	1137.15	-55.5286	-615.693	1069.84	-101.919	-548.058	975.448	-89.2104	-524.739	871.725	-116.163	-588.767	859.524	-142.537	-546.391	775.436
913	0	117.208	-369.206	1561.1	217.282	-374.798	1555.75	94.589	-537.53	1593.95	206.707	-553.761	1590.03	157.955	-606.174	1411.09	145.636	-643.925	1191.35	146.048	-471.224	1350.44	149.357	-401.376	1227.62	238.961	-658.778	1241.18	-20.4348	-558.412	1368.1	-63.4531	-591.354	1138.96	-58.1115	-604.563	1071.57	-104.022	-536.048	977.459	-91.2363	-512.098	873.928	-118.617	-575.888	861.36	-144.726	-532.62	777.623
914	0	115.969	-359.958	1562.93	216.009	-365.911	1557.62	92.6729	-528.258	1595.45	204.736	-544.902	1591.56	155.742	-596.916	1412.79	142.925	-634.91	1193.27	144.526	-462.028	1351.93	148.231	-392.357	1228.95	236.285	-650.252	1243.02	-22.3791	-548.061	1369.96	-65.9091	-580.234	1140.8	-60.7322	-593.364	1073.33	-106.089	-523.923	979.519	-93.218	-499.357	876.179	-121.109	-562.867	863.246	-146.897	-518.677	779.86
915	0	114.815	-350.728	1564.7	214.817	-357.047	1559.43	90.8301	-518.994	1596.92	202.835	-536.056	1593.07	153.575	-587.715	1414.49	140.201	-626.099	1195.21	143.079	-452.913	1353.37	147.192	-383.476	1230.19	233.603	-641.881	1244.86	-24.2625	-537.729	1371.81	-68.3753	-569.046	1142.64	-63.3821	-582.102	1075.1	-108.117	-511.695	981.61	-95.1528	-486.529	878.462	-123.63	-549.718	865.166	-149.049	-504.579	782.135
916	0	113.744	-341.519	1566.37	213.706	-348.209	1561.15	89.0621	-509.742	1598.35	201.006	-527.225	1594.53	151.46	-578.577	1416.17	137.478	-617.479	1197.13	141.704	-443.883	1354.75	146.23	-374.73	1231.35	230.926	-633.656	1246.69	-26.0824	-527.439	1373.64	-70.8437	-557.804	1144.48	-66.0515	-570.784	1076.86	-110.1	-499.374	983.718	-97.038	-473.629	880.759	-126.172	-536.452	867.109	-151.185	-490.348	784.436
917	0	112.753	-332.335	1567.96	212.672	-339.4	1562.78	87.3694	-500.505	1599.72	199.249	-518.411	1595.94	149.401	-569.505	1417.83	134.775	-609.035	1199.03	140.396	-434.939	1356.06	145.33	-366.116	1232.41	228.269	-625.564	1248.49	-27.8364	-517.209	1375.45	-73.3052	-546.523	1146.3	-68.7294	-559.417	1078.59	-112.034	-486.974	985.83	-98.871	-460.667	883.058	-128.726	-523.083	869.061	-153.303	-476.003	786.755
918	0	111.838	-323.18	1569.43	211.712	-330.621	1564.29	85.7521	-491.288	1601.03	197.565	-509.617	1597.29	147.402	-560.502	1419.46	132.106	-600.753	1200.89	139.153	-426.083	1357.3	144.482	-357.628	1233.37	225.644	-617.595	1250.25	-29.523	-507.06	1377.2	-75.7502	-535.218	1148.08	-71.4041	-548.012	1080.29	-113.916	-474.507	987.933	-100.649	-447.657	885.346	-131.281	-509.625	871.013	-155.401	-461.565	789.082
919	0	110.993	-314.058	1570.79	210.821	-321.875	1565.68	84.2095	-482.095	1602.27	195.954	-500.845	1598.57	145.467	-551.569	1421.02	129.489	-592.614	1202.7	137.968	-417.315	1358.45	143.674	-349.259	1234.24	223.066	-609.736	1251.96	-31.1407	-497.006	1378.89	-78.1686	-523.909	1149.81	-74.0637	-536.58	1081.93	-115.74	-461.991	990.017	-102.37	-434.61	887.613	-133.826	-496.09	872.955	-157.474	-447.051	791.413
920	0	110.215	-304.972	1572.03	209.994	-313.164	1566.95	82.7402	-472.929	1603.42	194.414	-492.098	1599.77	143.602	-542.708	1422.53	126.936	-584.601	1204.44	136.839	-408.634	1359.51	142.895	-341.002	1235.02	220.547	-601.972	1253.61	-32.6885	-487.062	1380.52	-80.5504	-512.613	1151.47	-76.696	-525.134	1083.51	-117.505	-449.439	992.073	-104.03	-421.538	889.851	-136.348	-482.494	874.878	-159.518	-432.479	793.74
921	0	109.497	-295.926	1573.14	209.227	-304.488	1568.09	81.3425	-463.796	1604.49	192.945	-483.377	1600.88	141.808	-533.92	1423.96	124.46	-576.697	1206.11	135.761	-400.038	1360.47	142.137	-332.849	1235.69	218.099	-594.292	1255.19	-34.166	-477.239	1382.06	-82.8858	-501.35	1153.07	-79.2893	-513.688	1085.02	-119.205	-436.869	994.091	-105.627	-408.454	892.052	-138.834	-468.85	876.775	-161.525	-417.867	796.06
922	0	108.834	-286.923	1574.12	208.514	-295.85	1569.09	80.0142	-454.698	1605.46	191.544	-474.686	1601.9	140.089	-525.202	1425.32	122.073	-568.886	1207.69	134.73	-391.525	1361.34	141.393	-324.792	1236.28	215.734	-586.683	1256.68	-35.5726	-467.544	1383.51	-85.1652	-490.139	1154.58	-81.8325	-502.255	1086.45	-120.84	-424.297	996.064	-107.157	-395.368	894.21	-141.271	-455.173	878.637	-163.488	-403.229	798.368
923	0	108.222	-277.966	1574.97	207.851	-287.251	1569.97	78.7528	-445.641	1606.34	190.21	-466.026	1602.82	138.449	-516.554	1426.58	119.783	-561.155	1209.17	133.745	-383.092	1362.11	140.658	-316.823	1236.76	213.461	-579.133	1258.09	-36.9083	-457.982	1384.87	-87.3802	-478.996	1156.01	-84.3153	-490.85	1087.78	-122.406	-411.741	997.985	-108.619	-382.292	896.32	-143.646	-441.478	880.457	-165.398	-388.582	800.657
924	0	107.654	-269.056	1575.7	207.233	-278.692	1570.73	77.5554	-436.626	1607.11	188.94	-457.4	1603.64	136.888	-507.974	1427.75	117.597	-553.49	1210.56	132.803	-374.735	1362.78	139.93	-308.935	1237.15	211.288	-571.63	1259.41	-38.1729	-448.556	1386.12	-89.5229	-467.937	1157.35	-86.7284	-479.487	1089.03	-123.9	-399.219	999.847	-110.007	-369.237	898.379	-145.946	-427.782	882.227	-167.244	-373.938	802.924
925	0	107.126	-260.195	1576.31	206.654	-270.173	1571.36	76.4192	-427.656	1607.77	187.731	-448.807	1604.36	135.409	-499.459	1428.82	115.522	-545.881	1211.84	131.902	-366.449	1363.34	139.208	-301.12	1237.44	209.222	-564.165	1260.63	-39.3665	-439.265	1387.26	-91.5862	-456.977	1158.58	-89.0636	-468.18	1090.17	-125.322	-386.746	1001.64	-111.32	-356.216	900.38	-148.161	-414.099	883.939	-169.017	-359.311	805.164
926	0	106.633	-251.385	1576.79	206.112	-261.693	1571.87	75.3412	-418.735	1608.32	186.582	-440.25	1604.98	134.014	-491.006	1429.79	113.562	-538.319	1213.02	131.041	-358.23	1363.8	138.492	-293.371	1237.64	207.271	-556.728	1261.75	-40.4888	-430.107	1388.28	-93.5642	-446.126	1159.71	-91.3139	-456.941	1091.2	-126.668	-374.338	1003.37	-112.553	-343.239	902.323	-150.277	-400.445	885.588	-170.705	-344.715	807.371
927	0	106.172	-242.626	1577.16	205.602	-253.253	1572.27	74.3186	-409.862	1608.77	185.489	-431.729	1605.49	132.705	-482.612	1430.65	111.721	-530.794	1214.09	130.221	-350.073	1364.16	137.785	-285.682	1237.74	205.44	-549.31	1262.77	-41.5399	-421.077	1389.18	-95.4517	-435.393	1160.74	-93.4733	-445.783	1092.14	-127.936	-362.011	1005.02	-113.704	-330.319	904.202	-152.286	-386.837	887.167	-172.299	-330.161	809.54
928	0	105.738	-233.917	1577.42	205.121	-244.851	1572.57	73.3487	-401.04	1609.1	184.45	-423.244	1605.91	131.483	-474.273	1431.4	110.004	-523.3	1215.04	129.441	-341.973	1364.42	137.089	-278.045	1237.75	203.732	-541.904	1263.68	-42.5196	-412.172	1389.96	-97.2444	-424.786	1161.66	-95.5369	-434.715	1092.96	-129.124	-349.778	1006.59	-114.768	-317.466	906.016	-154.178	-373.291	888.669	-173.787	-315.662	811.666
929	0	105.329	-225.257	1577.57	204.666	-236.486	1572.76	72.4291	-392.268	1609.33	183.464	-414.793	1606.21	130.348	-465.985	1432.05	108.412	-515.831	1215.88	128.701	-333.925	1364.57	136.41	-270.455	1237.66	202.152	-534.503	1264.49	-43.4275	-403.385	1390.61	-98.9387	-414.309	1162.47	-97.5007	-423.747	1093.67	-130.231	-337.652	1008.08	-115.744	-304.693	907.761	-155.946	-359.822	890.091	-175.162	-301.233	813.743
930	0	104.942	-216.646	1577.61	204.235	-228.155	1572.86	71.5577	-383.545	1609.44	182.528	-406.375	1606.43	129.301	-457.744	1432.58	106.95	-508.381	1216.6	128.004	-325.924	1364.63	135.751	-262.905	1237.47	200.703	-527.101	1265.19	-44.2635	-394.711	1391.14	-100.532	-403.964	1163.17	-99.3614	-412.887	1094.28	-131.253	-325.645	1009.48	-116.627	-292.011	909.434	-157.584	-346.445	891.427	-176.414	-286.887	815.766
931	0	104.575	-208.081	1577.55	203.826	-219.856	1572.86	70.7331	-374.87	1609.45	181.642	-397.988	1606.54	128.344	-449.546	1433.02	105.618	-500.946	1217.21	127.349	-317.965	1364.59	135.117	-255.387	1237.2	199.387	-519.692	1265.79	-45.0273	-386.142	1391.55	-102.02	-393.753	1163.76	-101.116	-402.141	1094.78	-132.188	-313.765	1010.79	-117.415	-279.431	911.034	-159.088	-333.175	892.676	-177.537	-272.637	817.729
932	0	104.226	-199.559	1577.39	203.438	-211.585	1572.78	69.9543	-366.241	1609.36	180.805	-389.629	1606.57	127.477	-441.387	1433.34	104.42	-493.521	1217.71	126.739	-310.042	1364.47	134.513	-247.896	1236.84	198.206	-512.272	1266.29	-45.7187	-377.672	1391.83	-103.404	-383.675	1164.24	-102.763	-391.514	1095.17	-133.035	-302.022	1012.01	-118.107	-266.964	912.557	-160.454	-320.025	893.834	-178.526	-258.5	819.627
933	0	103.894	-191.078	1577.13	203.07	-203.338	1572.62	69.2207	-357.654	1609.17	180.016	-381.294	1606.51	126.699	-433.263	1433.56	103.355	-486.102	1218.1	126.176	-302.151	1364.25	133.943	-240.426	1236.4	197.159	-504.835	1266.68	-46.3375	-369.295	1391.99	-104.679	-373.728	1164.61	-104.301	-381.011	1095.46	-133.793	-290.422	1013.14	-118.701	-254.619	914.002	-161.683	-307.01	894.901	-179.375	-244.49	821.455
934	0	103.579	-182.633	1576.78	202.722	-195.112	1572.38	68.5326	-349.107	1608.89	179.277	-372.979	1606.36	126.011	-425.17	1433.69	102.426	-478.684	1218.38	125.66	-294.287	1363.95	133.411	-232.968	1235.89	196.248	-497.379	1266.98	-46.8836	-361.003	1392.04	-105.846	-363.909	1164.88	-105.727	-370.633	1095.65	-134.459	-278.971	1014.17	-119.196	-242.407	915.365	-162.772	-294.141	895.877	-180.083	-230.624	823.207
935	0	103.279	-174.222	1576.34	202.394	-186.901	1572.05	67.8907	-340.596	1608.52	178.588	-364.679	1606.15	125.412	-417.103	1433.71	101.632	-471.263	1218.56	125.194	-286.444	1363.57	132.921	-225.519	1235.3	195.471	-489.899	1267.18	-47.3573	-352.792	1391.98	-106.903	-354.215	1165.05	-107.041	-360.382	1095.75	-135.032	-267.674	1015.11	-119.593	-230.337	916.644	-163.723	-281.43	896.76	-180.649	-216.918	824.879
936	0	102.997	-165.839	1575.8	202.086	-178.702	1571.65	67.2965	-332.116	1608.07	177.951	-356.389	1605.86	124.902	-409.059	1433.65	100.972	-463.834	1218.64	124.78	-278.618	1363.11	132.476	-218.071	1234.65	194.826	-482.392	1267.29	-47.7587	-344.653	1391.81	-107.851	-344.643	1165.12	-108.242	-350.26	1095.76	-135.513	-256.535	1015.96	-119.891	-218.418	917.838	-164.537	-268.888	897.552	-181.074	-203.388	826.464
937	0	102.733	-157.481	1575.17	201.8	-170.508	1571.16	66.7518	-323.662	1607.54	177.368	-348.104	1605.51	124.479	-401.032	1433.49	100.444	-456.393	1218.62	124.418	-270.804	1362.58	132.078	-210.618	1233.95	194.309	-474.855	1267.31	-48.0886	-336.58	1391.54	-108.688	-335.188	1165.09	-109.328	-340.265	1095.68	-135.902	-245.555	1016.7	-120.093	-206.656	918.942	-165.217	-256.524	898.253	-181.361	-190.052	827.958
938	0	102.488	-149.143	1574.45	201.537	-162.316	1570.6	66.2592	-315.23	1606.94	176.842	-339.818	1605.1	124.142	-393.018	1433.24	100.045	-448.936	1218.51	124.111	-262.996	1361.99	131.729	-203.155	1233.19	193.918	-467.284	1267.24	-48.3477	-328.566	1391.18	-109.416	-325.846	1164.97	-110.3	-330.397	1095.51	-136.199	-234.736	1017.35	-120.2	-195.059	919.955	-165.766	-244.347	898.863	-181.513	-176.924	829.355
939	0	102.265	-140.821	1573.64	201.3	-154.12	1569.96	65.8217	-306.814	1606.28	176.376	-331.527	1604.64	123.89	-385.014	1432.91	99.7693	-441.456	1218.32	123.86	-255.189	1361.33	131.432	-195.675	1232.38	193.647	-459.677	1267.09	-48.537	-320.603	1390.73	-110.035	-316.614	1164.77	-111.158	-320.654	1095.27	-136.407	-224.079	1017.91	-120.216	-183.634	920.871	-166.189	-232.365	899.383	-181.535	-164.02	830.649
940	0	102.066	-132.511	1572.74	201.092	-145.916	1569.23	65.4426	-298.409	1605.56	175.973	-323.223	1604.12	123.72	-377.014	1432.5	99.6126	-433.948	1218.04	123.666	-247.378	1360.61	131.186	-188.173	1231.53	193.489	-452.03	1266.86	-48.658	-312.683	1390.21	-110.546	-307.486	1164.48	-111.901	-311.033	1094.95	-136.527	-213.584	1018.36	-120.145	-172.386	921.687	-166.491	-220.585	899.812	-181.436	-151.354	831.832
941	0	101.894	-124.208	1571.76	200.914	-137.699	1568.42	65.1254	-290.01	1604.79	175.637	-314.902	1603.56	123.631	-369.015	1432.01	99.5674	-426.408	1217.69	123.53	-239.558	1359.83	130.992	-180.643	1230.64	193.439	-444.341	1266.54	-48.7123	-304.797	1389.61	-110.953	-298.458	1164.1	-112.53	-301.532	1094.56	-136.563	-203.249	1018.71	-119.991	-161.318	922.397	-166.678	-209.014	900.148	-181.221	-138.938	832.898
942	0	101.754	-115.908	1570.68	200.772	-129.464	1567.53	64.8738	-281.612	1603.98	175.372	-306.56	1602.96	123.618	-361.011	1431.45	99.6258	-418.828	1217.25	123.454	-231.722	1359	130.853	-173.078	1229.71	193.489	-436.607	1266.15	-48.7016	-296.935	1388.95	-111.256	-289.524	1163.65	-113.046	-292.147	1094.09	-136.518	-193.075	1018.96	-119.759	-150.436	922.997	-166.756	-197.656	900.39	-180.9	-126.783	833.839
943	0	101.649	-107.607	1569.51	200.669	-121.209	1566.54	64.6917	-273.208	1603.12	175.181	-298.191	1602.32	123.68	-352.998	1430.81	99.7788	-411.204	1216.74	123.439	-223.866	1358.12	130.767	-165.474	1228.76	193.629	-428.825	1265.67	-48.6282	-289.087	1388.22	-111.46	-280.68	1163.12	-113.452	-282.873	1093.55	-136.397	-183.057	1019.11	-119.456	-139.743	923.48	-166.732	-186.516	900.535	-180.48	-114.899	834.647
944	0	101.583	-99.2999	1568.26	200.609	-112.929	1565.47	64.5827	-264.795	1602.23	175.067	-289.791	1601.65	123.813	-344.972	1430.1	100.017	-403.53	1216.15	123.485	-215.982	1357.19	130.737	-157.825	1227.77	193.852	-420.994	1265.12	-48.4942	-281.243	1387.43	-111.568	-271.92	1162.51	-113.749	-273.706	1092.95	-136.204	-173.194	1019.14	-119.086	-129.24	923.84	-166.613	-175.597	900.578	-179.973	-103.294	835.312
945	0	101.562	-90.9833	1566.92	200.597	-104.621	1564.3	64.5504	-256.367	1601.31	175.035	-281.356	1600.94	124.014	-336.928	1429.31	100.33	-395.798	1215.49	123.594	-208.066	1356.22	130.763	-150.124	1226.75	194.148	-413.109	1264.48	-48.3018	-273.391	1386.58	-111.584	-263.236	1161.83	-113.941	-264.638	1092.27	-135.945	-163.482	1019.06	-118.658	-118.929	924.069	-166.407	-164.904	900.515	-179.388	-91.9722	835.825
946	0	101.591	-82.6531	1565.49	200.637	-96.2818	1563.04	64.5979	-247.919	1600.36	175.086	-272.884	1600.2	124.278	-328.862	1428.46	100.708	-388.005	1214.75	123.767	-200.112	1355.2	130.847	-142.367	1225.71	194.508	-405.169	1263.77	-48.0533	-265.52	1385.69	-111.512	-254.621	1161.07	-114.03	-255.663	1091.53	-135.624	-153.917	1018.86	-118.176	-108.812	924.161	-166.122	-154.437	900.341	-178.735	-80.9389	836.177
947	0	101.674	-74.3051	1563.99	200.735	-87.9095	1561.69	64.7279	-239.447	1599.38	175.223	-264.372	1599.42	124.604	-320.77	1427.54	101.142	-380.143	1213.94	124.005	-192.113	1354.15	130.99	-134.548	1224.63	194.924	-397.17	1262.97	-47.7507	-257.619	1384.74	-111.356	-246.067	1160.25	-114.02	-246.773	1090.72	-135.248	-144.494	1018.54	-117.648	-98.8877	924.107	-165.765	-144.198	900.048	-178.025	-70.1965	836.357
948	0	101.818	-65.9354	1562.41	200.895	-79.5021	1560.26	64.9426	-230.948	1598.39	175.448	-255.818	1598.62	124.986	-312.646	1426.56	101.623	-372.208	1213.06	124.308	-184.064	1353.06	131.196	-126.662	1223.54	195.387	-389.11	1262.09	-47.3959	-249.676	1383.74	-111.121	-237.564	1159.35	-113.915	-237.96	1089.84	-134.82	-135.208	1018.1	-117.081	-89.1569	923.901	-165.345	-134.187	899.633	-177.267	-59.7464	836.355
949	0	102.027	-57.5402	1560.77	201.122	-71.0578	1558.74	65.2437	-222.416	1597.38	175.763	-247.219	1597.78	125.423	-304.488	1425.51	102.142	-364.192	1212.1	124.678	-175.96	1351.93	131.467	-118.702	1222.41	195.89	-380.986	1261.13	-46.9905	-241.681	1382.69	-110.81	-229.103	1158.38	-113.719	-229.215	1088.9	-134.345	-126.053	1017.53	-116.48	-79.6186	923.537	-164.869	-124.406	899.089	-176.471	-49.5891	836.163
950	0	102.306	-49.1158	1559.06	201.42	-62.5755	1557.15	65.6323	-213.849	1596.35	176.167	-238.577	1596.93	125.911	-296.291	1424.41	102.693	-356.092	1211.07	125.115	-167.795	1350.78	131.805	-110.663	1221.27	196.426	-372.793	1260.08	-46.5355	-233.623	1381.6	-110.427	-220.671	1157.35	-113.435	-220.529	1087.89	-133.828	-117.023	1016.83	-115.851	-70.2716	923.008	-164.344	-114.853	898.412	-175.648	-39.7243	835.773
951	0	102.66	-40.6587	1557.31	201.793	-54.0544	1555.49	66.1087	-205.244	1595.32	176.66	-229.89	1596.04	126.448	-288.051	1423.25	103.27	-347.899	1209.97	125.621	-159.563	1349.61	132.216	-102.537	1220.12	196.989	-364.528	1258.95	-46.0319	-225.493	1380.46	-109.975	-212.258	1156.25	-113.068	-211.891	1086.81	-133.272	-108.111	1016	-115.199	-61.1143	922.312	-163.777	-105.528	897.6	-174.806	-30.1515	835.176
952	0	103.093	-32.1655	1555.51	202.245	-45.4941	1553.77	66.6726	-196.598	1594.28	177.241	-221.158	1595.14	127.031	-279.765	1422.04	103.87	-339.609	1208.79	126.197	-151.261	1348.42	132.701	-94.3192	1218.95	197.576	-356.186	1257.73	-45.4799	-217.283	1379.29	-109.458	-203.852	1155.09	-112.619	-203.292	1085.68	-132.681	-99.3128	1015.04	-114.53	-52.145	921.447	-163.174	-96.4283	896.65	-173.955	-20.8696	834.37
953	0	103.608	-23.6331	1553.69	202.778	-36.8942	1552	67.323	-187.908	1593.24	177.909	-212.383	1594.21	127.658	-271.428	1420.79	104.489	-331.215	1207.54	126.843	-142.884	1347.23	133.266	-86.0012	1217.79	198.182	-347.763	1256.44	-44.8796	-208.984	1378.07	-108.876	-195.44	1153.88	-112.092	-194.722	1084.5	-132.055	-90.6203	1013.95	-113.846	-43.3614	920.412	-162.54	-87.5533	895.564	-173.102	-11.8778	833.352
954	0	104.208	-15.0587	1551.85	203.394	-28.2548	1550.21	68.0584	-179.173	1592.2	178.662	-203.565	1593.28	128.328	-263.038	1419.5	105.127	-322.711	1206.21	127.56	-134.429	1346.04	133.914	-77.5762	1216.63	198.806	-339.253	1255.06	-44.2306	-200.59	1376.82	-108.231	-187.012	1152.62	-111.489	-186.173	1083.27	-131.396	-82.0278	1012.74	-113.152	-34.7612	919.21	-161.881	-78.9005	894.346	-172.254	-3.17514	832.122
955	0	104.896	-6.43976	1550.02	204.096	-19.5758	1548.4	68.8765	-170.391	1591.16	179.496	-194.705	1592.34	129.04	-254.59	1418.19	105.784	-314.088	1204.83	128.347	-125.891	1344.86	134.649	-69.0372	1215.49	199.445	-330.652	1253.62	-43.5324	-192.096	1375.54	-107.523	-178.556	1151.32	-110.812	-177.635	1082	-130.706	-73.5296	1011.41	-112.449	-26.3421	917.846	-161.2	-70.4677	893.002	-171.419	5.23892	830.685
956	0	105.672	2.22592	1548.2	204.883	-10.8575	1546.59	69.7744	-161.563	1590.15	180.409	-185.806	1591.39	129.793	-246.083	1416.86	106.461	-305.342	1203.39	129.206	-117.268	1343.7	135.472	-60.3782	1214.38	200.1	-321.955	1252.11	-42.7842	-183.497	1374.24	-106.753	-170.063	1149.99	-110.06	-169.101	1080.7	-129.984	-65.1206	1009.98	-111.738	-18.1013	916.329	-160.5	-62.2524	891.542	-170.602	13.3649	829.048
957	0	106.537	10.9402	1546.43	205.755	-2.10002	1544.8	70.7488	-152.686	1589.16	181.395	-176.869	1590.46	130.587	-237.513	1415.52	107.16	-296.465	1201.9	130.134	-108.559	1342.58	136.385	-51.594	1213.31	200.769	-313.157	1250.55	-41.9853	-174.79	1372.94	-105.92	-161.525	1148.64	-109.233	-160.566	1079.38	-129.228	-56.7963	1008.46	-111.021	-10.0364	914.669	-159.781	-54.252	889.978	-169.806	21.2029	827.222
958	0	107.49	19.7048	1544.71	206.713	6.6966	1543.06	71.7958	-143.762	1588.2	182.453	-167.897	1589.54	131.421	-228.878	1414.19	107.882	-287.45	1200.36	131.131	-99.7619	1341.5	137.39	-42.6805	1212.3	201.455	-304.255	1248.95	-41.1351	-165.974	1371.63	-105.021	-152.936	1147.28	-108.332	-152.026	1078.05	-128.439	-48.5534	1006.85	-110.296	-2.14467	912.882	-159.044	-46.4637	888.326	-169.036	28.7531	825.224
959	0	108.529	28.5207	1543.07	207.752	15.5323	1541.39	72.9113	-134.791	1587.28	183.575	-158.89	1588.65	132.295	-220.176	1412.89	108.631	-278.292	1198.81	132.195	-90.8767	1340.48	138.484	-33.6354	1211.36	202.158	-295.245	1247.32	-40.2333	-157.048	1370.35	-104.057	-144.292	1145.94	-107.355	-143.477	1076.74	-127.615	-40.3891	1005.19	-109.562	5.5767	910.984	-158.288	-38.8849	886.604	-168.294	36.0156	823.074
960	0	109.653	37.3891	1541.52	208.873	24.4069	1539.8	74.0905	-125.774	1586.41	184.758	-149.851	1587.8	133.21	-211.405	1411.62	109.409	-268.987	1197.24	133.322	-81.904	1339.54	139.667	-24.4579	1210.5	202.879	-286.125	1245.67	-39.2799	-148.013	1369.1	-103.025	-135.592	1144.62	-106.3	-134.919	1075.45	-126.754	-32.3023	1003.47	-108.818	13.1305	908.997	-157.511	-31.5127	884.834	-167.578	42.9904	820.795
961	0	110.856	46.3103	1540.1	210.069	33.3207	1538.31	75.3284	-116.711	1585.61	185.997	-140.781	1587	134.165	-202.565	1410.4	110.219	-259.533	1195.68	134.51	-72.8453	1338.68	140.933	-15.1493	1209.74	203.621	-276.894	1244.04	-38.2754	-138.873	1367.9	-101.923	-126.837	1143.35	-105.166	-126.353	1074.2	-125.853	-24.2925	1001.74	-108.061	20.5195	906.942	-156.708	-24.3441	883.039	-166.889	49.6781	818.416
962	0	112.137	55.2847	1538.8	211.339	42.2734	1536.96	76.6197	-107.604	1584.88	187.286	-131.683	1586.26	135.161	-193.655	1409.26	111.063	-249.93	1194.15	135.754	-63.7035	1337.92	142.278	-5.71284	1209.09	204.385	-267.555	1242.44	-37.2207	-129.631	1366.76	-100.749	-118.031	1142.13	-103.95	-117.784	1073.02	-124.912	-16.3608	1000	-107.286	27.7468	904.846	-155.875	-17.3761	881.246	-166.224	56.0797	815.967
963	0	113.488	64.3122	1537.66	212.676	51.2652	1535.75	77.9589	-98.4542	1584.23	188.619	-122.558	1585.59	136.196	-184.676	1408.2	111.944	-240.183	1192.68	137.049	-54.4822	1337.27	143.694	3.84618	1208.56	205.176	-258.109	1240.89	-36.1175	-120.295	1365.72	-99.5034	-109.18	1141	-102.652	-109.218	1071.91	-123.929	-8.50929	998.287	-106.492	34.8156	902.736	-155.006	-10.6051	879.48	-165.577	62.1971	813.482
964	0	114.904	73.3922	1536.69	214.075	60.2958	1534.7	79.34	-89.2635	1583.68	189.992	-113.406	1585.01	137.272	-175.629	1407.24	112.863	-230.297	1191.28	138.389	-45.1864	1336.74	145.172	13.5202	1208.17	205.995	-248.561	1239.41	-34.9683	-110.872	1364.79	-98.1844	-100.295	1139.97	-101.269	-100.661	1070.91	-122.902	-0.741019	996.618	-105.673	41.7295	900.641	-154.095	-4.0274	877.77	-164.942	68.0335	810.997
965	0	116.379	82.5237	1535.89	215.53	69.3649	1533.83	80.7573	-80.0337	1583.24	191.397	-104.23	1584.53	138.387	-166.517	1406.41	113.822	-220.283	1189.99	139.766	-35.8222	1336.34	146.702	23.2995	1207.92	206.846	-238.918	1238.04	-33.7761	-101.373	1363.98	-96.7926	-91.387	1139.05	-99.8011	-92.1259	1070.03	-121.831	6.93986	995.019	-104.827	48.4924	898.588	-153.134	2.3616	876.143	-164.312	73.5937	808.549
966	0	117.905	91.7052	1535.29	217.035	78.472	1533.15	82.2044	-70.7673	1582.91	192.829	-95.0307	1584.16	139.54	-157.343	1405.71	114.822	-210.157	1188.84	141.174	-26.3969	1336.09	148.272	33.1721	1207.83	207.732	-229.189	1236.8	-32.5448	-91.8092	1363.32	-95.3291	-82.4711	1138.28	-98.2491	-83.6231	1069.28	-120.716	14.5285	993.513	-103.949	55.1088	896.608	-152.118	8.56716	874.628	-163.676	78.8848	806.172
967	0	119.475	100.935	1534.88	218.581	87.6158	1532.67	83.6752	-61.4668	1582.71	194.283	-85.8092	1583.9	140.73	-148.111	1405.15	115.864	-199.938	1187.84	142.604	-16.9188	1335.98	149.869	43.1241	1207.9	208.657	-219.384	1235.71	-31.2789	-82.1949	1362.82	-93.7965	-73.5639	1137.65	-96.6143	-75.1667	1068.69	-119.557	22.0193	992.122	-103.036	61.5838	894.728	-151.04	14.5956	873.248	-163.023	83.9161	803.903
968	0	121.079	110.209	1534.68	220.16	96.7952	1532.39	85.1632	-52.1355	1582.64	195.752	-76.5673	1583.77	141.955	-138.828	1404.76	116.948	-189.647	1187.02	144.049	-7.39721	1336.02	151.48	53.1395	1208.13	209.624	-209.516	1234.8	-29.9834	-72.5452	1362.51	-92.1982	-64.684	1137.19	-94.8996	-66.7714	1068.26	-118.356	29.4066	990.866	-102.086	67.9232	892.976	-149.894	20.4544	872.027	-162.343	88.7	801.773
969	0	122.71	119.525	1534.67	221.765	106.008	1532.31	86.6621	-42.7771	1582.7	197.23	-67.3066	1583.77	143.212	-129.499	1404.53	118.075	-179.31	1186.4	145.498	2.15772	1336.21	153.091	63.2004	1208.52	210.637	-199.599	1234.08	-28.6642	-62.8769	1362.38	-90.5394	-55.8515	1136.9	-93.1097	-58.4528	1068	-117.115	36.6843	989.763	-101.097	74.1338	891.375	-148.676	26.1526	870.983	-161.621	93.252	799.811
970	0	124.356	128.877	1534.87	223.386	115.251	1532.43	88.1655	-33.3958	1582.9	198.711	-58.0292	1583.89	144.5	-120.133	1404.47	119.244	-168.955	1186	146.942	11.735	1336.56	154.686	73.2877	1209.08	211.699	-189.648	1233.57	-27.3271	-53.2082	1362.44	-88.8265	-47.0873	1136.8	-91.2506	-50.2272	1067.94	-115.838	43.8468	988.827	-100.067	80.2228	889.946	-147.383	31.7004	870.133	-160.846	97.5912	798.04
971	0	126.008	138.261	1535.26	225.013	124.523	1532.75	89.6669	-23.9965	1583.23	200.19	-48.7376	1584.15	145.814	-110.738	1404.59	120.454	-158.613	1185.83	148.374	21.3231	1337.05	156.252	83.3811	1209.78	212.814	-179.68	1233.29	-25.9784	-43.5581	1362.71	-87.0672	-38.4126	1136.88	-89.3301	-42.1106	1068.05	-114.529	50.8886	988.069	-98.9973	86.1987	888.707	-146.015	37.1097	869.485	-160.005	101.74	796.48
972	0	127.655	147.67	1535.83	226.637	133.817	1533.25	91.1598	-14.5848	1583.7	201.661	-39.4347	1584.55	147.153	-101.324	1404.89	121.705	-148.312	1185.9	149.782	30.9101	1337.68	157.773	93.4597	1210.63	213.984	-169.712	1233.23	-24.6245	-33.947	1363.17	-85.2703	-29.8485	1137.14	-87.3574	-34.1185	1068.36	-113.193	57.805	987.496	-97.8883	92.0703	887.67	-144.572	42.3938	869.046	-159.087	105.724	795.143
973	0	129.286	157.097	1536.57	228.246	143.132	1533.92	92.6379	-5.16694	1584.3	203.118	-30.1237	1585.06	148.512	-91.9011	1405.36	122.995	-138.084	1186.2	151.16	40.4837	1338.45	159.238	103.503	1211.62	215.212	-159.76	1233.41	-23.2716	-24.3953	1363.82	-83.4457	-21.4152	1137.58	-85.3432	-26.2656	1068.84	-111.837	64.5921	987.11	-96.7424	97.8473	886.844	-143.056	47.5674	868.815	-158.081	109.574	794.033
974	0	130.891	166.535	1537.46	229.831	152.461	1534.74	94.0949	4.25026	1585.02	204.555	-20.8086	1585.7	149.888	-82.4799	1405.99	124.325	-127.957	1186.73	152.499	50.0318	1339.33	160.632	113.489	1212.72	216.503	-149.842	1233.8	-21.9258	-14.924	1364.64	-81.6038	-13.1316	1138.19	-83.2988	-18.5649	1069.49	-110.465	71.2472	986.909	-95.5626	103.54	886.233	-141.473	52.6459	868.787	-156.98	113.32	793.151
975	0	132.457	175.975	1538.48	231.381	161.799	1535.69	95.5246	13.6595	1585.86	205.967	-11.4934	1586.45	151.277	-73.0715	1406.78	125.695	-117.956	1187.47	153.792	59.5422	1340.33	161.946	123.4	1213.92	217.856	-139.975	1234.42	-20.593	-5.55362	1365.63	-79.7553	-5.01484	1138.96	-81.2364	-11.0281	1070.29	-109.086	77.7684	986.888	-94.3531	109.158	885.834	-139.83	57.6457	868.95	-155.778	116.996	792.491
976	0	133.974	185.409	1539.62	232.885	171.141	1536.77	96.9209	23.0533	1586.79	207.349	-2.18267	1587.29	152.675	-63.6873	1407.71	127.104	-108.103	1188.41	155.032	69.0035	1341.42	163.171	133.217	1215.19	219.275	-130.172	1235.24	-19.2786	3.69632	1366.76	-77.9109	2.92051	1139.87	-79.1682	-3.66442	1071.23	-107.705	84.1554	987.037	-93.1185	114.713	885.644	-138.135	62.5831	869.289	-154.473	120.637	792.041
977	0	135.431	194.827	1540.85	234.332	180.48	1537.93	98.2782	32.4236	1587.81	208.695	7.11883	1588.23	154.079	-54.3382	1408.77	128.553	-98.4183	1189.53	156.214	78.4045	1342.58	164.298	142.924	1216.53	220.758	-120.45	1236.24	-17.9876	12.8078	1368	-76.0809	10.6624	1140.89	-77.1062	3.51897	1072.29	-106.329	90.409	987.345	-91.864	120.214	885.651	-136.397	67.4743	869.785	-153.065	124.279	791.787
978	0	136.818	204.221	1542.14	235.713	189.811	1539.17	99.5907	41.7626	1588.9	210.001	16.4061	1589.24	155.485	-45.0344	1409.95	130.042	-88.9143	1190.79	157.335	87.7353	1343.81	165.324	152.505	1217.91	222.306	-110.82	1237.4	-16.7246	21.7651	1369.34	-74.2745	18.2019	1142.01	-75.0618	10.5173	1073.45	-104.963	96.5311	987.796	-90.595	125.671	885.844	-134.626	72.3346	870.418	-151.56	127.954	791.711
979	0	138.125	213.582	1543.49	237.019	199.129	1540.46	100.853	51.0624	1590.04	211.262	25.6741	1590.3	156.888	-35.7857	1411.21	131.571	-79.6006	1192.18	158.39	96.9866	1345.08	166.245	161.95	1219.31	223.916	-101.295	1238.71	-15.4939	30.5555	1370.74	-72.5002	25.5332	1143.21	-73.0451	17.3281	1074.68	-103.614	102.525	988.373	-89.3165	131.094	886.206	-132.831	77.1782	871.164	-149.964	131.696	791.793
980	0	139.343	222.903	1544.86	238.241	208.426	1541.78	102.061	60.3154	1591.23	212.473	34.9177	1591.42	158.283	-26.6007	1412.56	133.14	-70.4819	1193.66	159.378	106.151	1346.38	167.061	171.249	1220.72	225.581	-91.8825	1240.13	-14.299	39.17	1372.18	-70.7648	32.6536	1144.47	-71.065	23.9513	1075.97	-102.283	108.395	989.058	-88.0336	136.489	886.719	-131.022	82.0177	871.999	-148.288	135.532	792.016
981	0	140.465	232.174	1546.24	239.371	217.698	1543.12	103.21	69.5144	1592.44	213.631	44.1317	1592.57	159.667	-17.4869	1413.96	134.745	-61.5583	1195.21	160.299	115.221	1347.7	167.774	180.395	1222.11	227.296	-82.5918	1241.64	-13.143	47.6034	1373.65	-69.0736	39.5641	1145.76	-69.1288	30.3892	1077.28	-100.976	114.146	989.834	-86.7507	141.865	887.364	-129.208	86.8636	872.9	-146.546	139.487	792.36
982	0	141.484	241.39	1547.61	240.404	226.938	1544.46	104.295	78.6529	1593.67	214.732	53.3111	1593.74	161.034	-8.4503	1415.41	136.381	-52.8256	1196.8	161.152	124.192	1349.01	168.389	189.386	1223.47	229.05	-73.4281	1243.22	-12.0281	55.8549	1375.11	-67.4304	46.2686	1147.06	-67.242	36.6461	1078.61	-99.6925	119.785	990.68	-85.4714	147.227	888.123	-127.396	91.7245	873.844	-144.753	143.582	792.808
983	0	142.396	250.544	1548.96	241.334	236.142	1545.79	105.314	87.7248	1594.89	215.772	62.451	1594.92	162.38	0.504347	1416.88	138.042	-44.2764	1198.41	161.938	133.061	1350.31	168.912	198.22	1224.8	230.832	-64.3948	1244.85	-10.9564	63.928	1376.54	-65.8373	52.7743	1148.36	-65.4082	42.7286	1079.94	-98.4345	125.319	991.578	-84.1989	152.579	888.973	-125.591	96.607	874.812	-142.925	147.832	793.344
984	0	143.197	259.629	1550.27	242.159	245.304	1547.08	106.263	96.7248	1596.09	216.749	71.5467	1596.09	163.699	9.37386	1418.36	139.719	-35.9	1200.03	162.661	141.826	1351.58	169.352	206.901	1226.07	232.631	-55.4933	1246.51	-9.92887	71.83	1377.94	-64.295	59.0913	1149.65	-63.6295	48.645	1081.24	-97.2019	130.756	992.513	-82.9358	157.925	889.896	-123.799	101.515	875.785	-141.081	152.245	793.956
985	0	143.887	268.643	1551.53	242.876	254.419	1548.34	107.14	105.648	1597.26	217.659	80.5938	1597.24	164.987	18.1565	1419.84	141.402	-27.6839	1201.62	163.322	150.485	1352.82	169.716	215.433	1227.29	234.431	-46.7228	1248.18	-8.94635	79.5718	1379.28	-62.8029	65.2324	1150.9	-61.906	54.406	1082.51	-95.9941	136.104	993.466	-81.6842	163.268	890.873	-122.023	106.452	876.745	-139.239	156.827	794.631
986	0	144.464	277.58	1552.73	243.485	263.484	1549.56	107.944	114.492	1598.39	218.502	89.5881	1598.36	166.238	26.8521	1421.3	143.08	-19.6137	1203.18	163.926	159.04	1354.01	170.017	223.824	1228.44	236.221	-38.0806	1249.84	-8.00896	87.1672	1380.56	-61.3596	71.213	1152.1	-60.237	60.0239	1083.73	-94.81	141.372	994.422	-80.4458	168.609	891.883	-120.265	111.418	877.68	-137.415	161.575	795.358
987	0	144.929	286.439	1553.87	243.986	272.494	1550.72	108.674	123.254	1599.47	219.276	98.5261	1599.45	167.448	35.4616	1422.73	144.741	-11.6743	1204.7	164.475	167.493	1355.14	170.263	232.082	1229.52	237.987	-29.562	1251.47	-7.11647	94.6326	1381.75	-59.9632	77.0505	1153.26	-58.6204	65.5131	1084.9	-93.6489	146.57	995.368	-79.2222	173.949	892.91	-118.526	116.412	878.576	-135.627	166.484	796.125
988	0	145.286	295.217	1554.93	244.382	281.446	1551.83	109.328	131.931	1600.49	219.979	107.405	1600.49	168.613	43.9875	1424.11	146.375	-3.85019	1206.16	164.974	175.848	1356.21	170.466	240.217	1230.52	239.717	-21.1606	1253.07	-6.2683	101.985	1382.87	-58.6112	82.7643	1154.35	-57.0535	70.8898	1086.01	-92.5097	151.708	996.289	-78.0152	179.289	893.935	-116.808	121.433	879.422	-133.89	171.544	796.922
989	0	145.538	303.914	1555.93	244.675	290.337	1552.88	109.908	140.522	1601.44	220.612	116.221	1601.48	169.73	52.4331	1425.45	147.971	3.87402	1207.55	165.426	184.109	1357.21	170.635	248.24	1231.44	241.4	-12.8687	1254.62	-5.46365	109.244	1383.89	-57.3012	88.3751	1155.37	-55.5336	76.1717	1087.06	-91.3919	156.797	997.173	-76.8267	184.629	894.942	-115.112	126.477	880.21	-132.216	176.739	797.737
990	0	145.688	312.53	1556.84	244.868	299.166	1553.87	110.414	149.029	1602.31	221.175	124.975	1602.41	170.795	60.8028	1426.72	149.522	11.5133	1208.87	165.836	192.281	1358.14	170.779	256.161	1232.28	243.029	-4.67727	1256.11	-4.70162	116.428	1384.82	-56.0313	93.9046	1156.32	-54.0577	81.3783	1088.03	-90.2956	161.849	998.009	-75.6588	189.969	895.915	-113.438	131.543	880.931	-130.616	182.053	798.557
991	0	145.742	321.065	1557.68	244.968	307.932	1554.8	110.848	157.451	1603.1	221.669	133.663	1603.27	171.805	69.1019	1427.92	151.02	19.0817	1210.12	166.207	200.372	1358.98	170.905	263.99	1233.04	244.595	3.42322	1257.54	-3.98135	123.554	1385.65	-54.7998	99.3753	1157.19	-52.6236	86.5302	1088.92	-89.2212	166.875	998.786	-74.514	195.309	896.84	-111.789	136.626	881.578	-129.097	187.466	799.369
992	0	145.705	329.522	1558.44	244.977	316.633	1555.66	111.211	165.792	1603.81	222.094	142.286	1604.06	172.759	77.3362	1429.04	152.46	26.5927	1211.28	166.543	208.388	1359.74	171.019	271.738	1233.7	246.095	11.443	1258.89	-3.30206	130.64	1386.38	-53.6056	104.81	1157.98	-51.2296	91.6491	1089.74	-88.1699	171.887	999.494	-73.3949	200.65	897.701	-110.166	141.724	882.147	-127.665	192.956	800.157
993	0	145.584	337.904	1559.12	244.904	325.271	1556.45	111.506	174.052	1604.43	222.454	150.845	1604.77	173.654	85.5119	1430.08	153.84	34.0584	1212.35	166.847	216.335	1360.41	171.126	279.412	1234.26	247.524	19.3923	1260.16	-2.66324	137.702	1387.01	-52.4487	110.231	1158.69	-49.875	96.7574	1090.47	-87.1434	176.898	1000.12	-72.3046	205.992	898.486	-108.572	146.834	882.631	-126.322	198.501	800.906
994	0	145.384	346.214	1559.72	244.751	333.848	1557.18	111.736	182.237	1604.95	222.748	159.341	1605.4	174.49	93.6356	1431.03	155.155	41.4902	1213.34	167.12	224.223	1360.99	171.228	287.022	1234.73	248.879	27.2814	1261.35	-2.0646	144.756	1387.54	-51.3295	115.661	1159.3	-48.56	101.878	1091.12	-86.144	181.92	1000.67	-71.246	211.336	899.182	-107.01	151.955	883.027	-125.07	204.078	801.598
995	0	145.112	354.457	1560.24	244.527	342.366	1557.84	111.903	190.349	1605.37	222.982	167.775	1605.94	175.265	101.714	1431.89	156.406	48.898	1214.23	167.365	232.059	1361.48	171.327	294.575	1235.1	250.16	35.12	1262.44	-1.50622	151.813	1387.97	-50.2495	121.121	1159.83	-47.2861	107.033	1091.69	-85.1743	186.966	1001.12	-70.2225	216.684	899.778	-105.484	157.086	883.332	-123.907	209.668	802.217
996	0	144.774	362.638	1560.69	244.236	350.827	1558.44	112.01	198.396	1605.7	223.155	176.152	1606.4	175.979	109.754	1432.65	157.591	56.2909	1215.02	167.583	239.85	1361.87	171.423	302.079	1235.36	251.364	42.9172	1263.45	-0.988476	158.885	1388.3	-49.211	126.631	1160.27	-46.0556	112.244	1092.16	-84.2373	192.048	1001.48	-69.2371	222.039	900.264	-104	162.226	883.543	-122.828	215.249	802.746
997	0	144.377	370.764	1561.06	243.885	359.236	1558.97	112.06	206.382	1605.93	223.272	184.474	1606.77	176.632	117.761	1433.31	158.709	63.6766	1215.71	167.775	247.604	1362.16	171.514	309.542	1235.52	252.491	50.6814	1264.35	-0.512151	165.982	1388.53	-48.217	132.211	1160.61	-44.872	117.532	1092.55	-83.3361	197.179	1001.73	-68.2928	227.401	900.632	-102.563	167.377	883.66	-121.83	220.804	803.171
998	0	143.926	378.839	1561.35	243.478	367.598	1559.42	112.058	214.313	1606.06	223.336	192.747	1607.04	177.221	125.743	1433.88	159.759	71.0618	1216.31	167.941	255.329	1362.36	171.597	316.972	1235.57	253.54	58.4201	1265.15	-0.078365	173.113	1388.67	-47.2713	137.878	1160.87	-43.7394	122.916	1092.85	-82.4741	202.371	1001.87	-67.3925	232.774	900.874	-101.179	172.54	883.682	-120.906	226.316	803.477
999	0	143.428	386.872	1561.57	243.022	375.916	1559.8	112.005	222.198	1606.08	223.348	200.974	1607.23	177.748	133.704	1434.33	160.739	78.4517	1216.82	168.08	263.032	1362.46	171.671	324.376	1235.52	254.51	66.1399	1265.86	0.31141	180.285	1388.71	-46.3783	143.649	1161.03	-42.6626	128.414	1093.06	-81.6547	207.635	1001.9	-66.5387	238.161	900.985	-99.8548	177.718	883.61	-120.05	231.774	803.654
1000	0	142.887	394.868	1561.71	242.521	384.197	1560.11	111.905	230.042	1606.02	223.311	209.161	1607.31	178.211	141.651	1434.69	161.648	85.8506	1217.22	168.191	270.72	1362.46	171.73	331.762	1235.36	255.4	73.8467	1266.46	0.655385	187.504	1388.67	-45.5426	149.536	1161.1	-41.647	134.04	1093.19	-80.8813	212.982	1001.82	-65.7341	243.566	900.961	-98.5964	182.916	883.448	-119.255	237.168	803.692
1001	0	142.308	402.835	1561.77	241.98	392.446	1560.34	111.76	237.855	1605.85	223.227	217.314	1607.31	178.608	149.588	1434.95	162.482	93.2614	1217.54	168.272	278.399	1362.36	171.771	339.138	1235.11	256.209	81.5454	1266.96	0.951483	194.775	1388.54	-44.7694	155.552	1161.08	-40.698	139.809	1093.23	-80.1573	218.421	1001.62	-64.9807	248.991	900.8	-97.4108	188.136	883.198	-118.515	242.492	803.586
1002	0	141.696	410.78	1561.75	241.403	400.667	1560.49	111.572	245.642	1605.59	223.099	225.438	1607.21	178.94	157.519	1435.1	163.239	100.686	1217.76	168.323	286.076	1362.17	171.791	346.513	1234.76	256.933	89.2405	1267.37	1.19738	202.101	1388.33	-44.064	161.707	1160.98	-39.8214	145.729	1093.19	-79.4862	223.962	1001.32	-64.2807	254.44	900.501	-96.3047	193.385	882.863	-117.822	247.743	803.33
1003	0	141.054	418.709	1561.65	240.793	408.866	1560.55	111.343	253.412	1605.23	222.927	233.538	1607.01	179.203	165.45	1435.15	163.915	108.126	1217.9	168.339	293.757	1361.89	171.783	353.895	1234.32	257.573	96.936	1267.67	1.39052	209.486	1388.04	-43.4316	168.008	1160.79	-39.023	151.81	1093.06	-78.8713	229.611	1000.9	-63.6363	259.917	900.064	-95.285	198.667	882.448	-117.173	252.92	802.924
1004	0	140.385	426.627	1561.47	240.153	417.049	1560.53	111.075	261.172	1604.79	222.713	241.62	1606.73	179.398	173.382	1435.1	164.505	115.581	1217.95	168.318	301.446	1361.51	171.746	361.291	1233.79	258.124	104.635	1267.88	1.52817	216.932	1387.68	-42.8776	174.462	1160.53	-38.3082	158.056	1092.86	-78.3163	235.375	1000.38	-63.0498	265.427	899.491	-94.3582	203.989	881.958	-116.561	258.029	802.368
1005	0	139.691	434.541	1561.21	239.486	425.219	1560.42	110.767	268.929	1604.25	222.458	249.69	1606.35	179.52	181.32	1434.95	165.007	123.053	1217.92	168.258	309.149	1361.04	171.674	368.709	1233.19	258.585	112.342	1267.98	1.60746	224.442	1387.24	-42.4071	181.071	1160.18	-37.6824	164.47	1092.57	-77.8248	241.259	999.748	-62.5234	270.973	898.785	-93.5305	209.357	881.397	-115.985	263.076	801.666
1006	0	138.973	442.456	1560.86	238.793	433.38	1560.22	110.421	276.688	1603.63	222.161	257.752	1605.88	179.569	189.266	1434.71	165.415	130.54	1217.81	168.156	316.871	1360.49	171.565	376.157	1232.51	258.953	120.059	1268	1.62536	232.018	1386.74	-42.0248	187.836	1159.75	-37.1505	171.052	1092.21	-77.4004	247.266	999.016	-62.0599	276.559	897.95	-92.8076	214.776	880.769	-115.442	268.069	800.823
1007	0	138.232	450.375	1560.43	238.074	441.537	1559.92	110.035	284.455	1602.93	221.822	265.809	1605.32	179.541	197.223	1434.36	165.726	138.043	1217.62	168.007	324.616	1359.85	171.415	383.642	1231.76	259.225	127.791	1267.91	1.57878	239.66	1386.16	-41.7351	194.757	1159.24	-36.717	177.801	1091.77	-77.0469	253.4	998.185	-61.6622	282.191	896.991	-92.1948	220.254	880.077	-114.934	273.022	799.846
1008	0	137.468	458.302	1559.92	237.33	449.691	1559.54	109.61	292.236	1602.15	221.441	273.867	1604.68	179.435	205.192	1433.92	165.937	145.562	1217.36	167.808	332.388	1359.13	171.222	391.17	1230.95	259.399	135.539	1267.74	1.46459	247.369	1385.52	-41.5417	201.83	1158.66	-36.3856	184.713	1091.26	-76.7683	259.66	997.26	-61.3335	287.874	895.913	-91.6966	225.797	879.326	-114.461	277.946	798.742
1009	0	136.68	466.239	1559.33	236.561	457.845	1559.06	109.144	300.033	1601.3	221.015	281.927	1603.95	179.247	213.176	1433.39	166.045	153.099	1217.01	167.556	340.192	1358.33	170.983	398.747	1230.08	259.473	143.308	1267.46	1.27967	255.147	1384.81	-41.4479	209.052	1157.99	-36.1596	191.782	1090.67	-76.5685	266.048	996.243	-61.0774	293.612	894.722	-91.3169	231.412	878.516	-114.029	282.858	797.518
1010	0	135.865	474.19	1558.65	235.764	466.002	1558.48	108.634	307.85	1600.37	220.543	289.992	1603.14	178.976	221.176	1432.76	166.046	160.657	1216.59	167.248	348.029	1357.46	170.695	406.379	1229.16	259.444	151.102	1267.09	1.02095	262.992	1384.04	-41.4561	216.416	1157.26	-36.0416	199.002	1090	-76.4514	272.562	995.138	-60.8979	299.413	893.423	-91.0587	237.104	877.648	-113.641	287.775	796.185
1011	0	135.023	482.154	1557.89	234.938	474.161	1557.82	108.08	315.69	1599.38	220.023	298.065	1602.25	178.619	229.193	1432.04	165.938	168.237	1216.07	166.878	355.905	1356.51	170.357	414.07	1228.19	259.31	158.924	1266.62	0.685458	270.906	1383.19	-41.5682	223.916	1156.44	-36.0332	206.366	1089.26	-76.4209	279.201	993.95	-60.7992	305.281	892.023	-90.924	242.881	876.724	-113.306	292.712	794.75
1012	0	134.149	490.134	1557.06	234.08	482.324	1557.06	107.477	323.555	1598.33	219.453	306.146	1601.29	178.174	237.23	1431.22	165.72	175.844	1215.48	166.444	363.822	1355.5	169.965	421.824	1227.17	259.07	166.781	1266.05	0.270374	278.887	1382.26	-41.7852	231.544	1155.54	-36.1353	213.865	1088.43	-76.4805	285.964	992.68	-60.7856	311.225	890.529	-90.9142	248.75	875.743	-113.032	297.69	793.222
1013	0	133.242	498.129	1556.15	233.188	490.491	1556.22	106.823	331.445	1597.22	218.828	314.236	1600.26	177.639	245.288	1430.32	165.391	183.483	1214.78	165.942	371.783	1354.43	169.518	429.647	1226.1	258.722	174.675	1265.38	-0.226924	286.935	1381.27	-42.1073	239.292	1154.57	-36.348	221.491	1087.53	-76.6337	292.846	991.333	-60.8616	317.253	888.946	-91.0294	254.716	874.703	-112.827	302.725	791.609
1014	0	132.297	506.139	1555.18	232.259	498.663	1555.3	106.115	339.362	1596.05	218.147	322.336	1599.17	177.013	253.367	1429.32	164.95	191.162	1213.99	165.368	379.79	1353.3	169.011	437.541	1224.99	258.265	182.613	1264.6	-0.80881	295.046	1380.2	-42.5341	247.152	1153.51	-36.6706	229.237	1086.54	-76.8835	299.847	989.912	-61.0317	323.371	887.281	-91.269	260.787	873.603	-112.703	307.837	789.918
1015	0	131.311	514.166	1554.13	231.289	506.838	1554.3	105.349	347.305	1594.84	217.405	330.447	1598.01	176.295	261.469	1428.24	164.396	198.888	1213.1	164.719	387.847	1352.12	168.442	445.51	1223.85	257.698	190.599	1263.71	-1.47737	303.219	1379.05	-43.0645	255.116	1152.37	-37.1016	237.095	1085.48	-77.2325	306.963	988.42	-61.3001	329.589	885.543	-91.6309	266.97	872.442	-112.67	313.042	788.159
1016	0	130.281	522.208	1553.03	230.275	515.018	1553.22	104.522	355.275	1593.59	216.6	338.568	1596.81	175.483	269.597	1427.07	163.732	206.67	1212.1	163.991	395.954	1350.89	167.807	453.557	1222.67	257.023	198.641	1262.71	-2.23433	311.451	1377.83	-43.6966	263.177	1151.15	-37.6387	245.058	1084.33	-77.6827	314.194	986.863	-61.6707	335.915	883.738	-92.1124	273.27	871.22	-112.739	318.36	786.339
1017	0	129.202	530.266	1551.88	229.213	523.201	1552.09	103.631	363.271	1592.31	215.728	346.699	1595.55	174.579	277.75	1425.83	162.957	214.519	1210.99	163.18	404.116	1349.63	167.102	461.686	1221.46	256.239	206.742	1261.6	-3.08103	319.737	1376.53	-44.4279	271.329	1149.85	-38.2788	253.12	1083.1	-78.2356	321.536	985.245	-62.1468	342.359	881.874	-92.7098	279.696	869.935	-112.92	323.806	784.467
1018	0	128.072	538.339	1550.68	228.099	531.389	1550.9	102.672	371.293	1591	214.785	354.84	1594.26	173.582	285.93	1424.52	162.076	222.446	1209.77	162.286	412.332	1348.35	166.323	469.9	1220.22	255.349	214.91	1260.39	-4.01837	328.073	1375.16	-45.2555	279.565	1148.48	-39.0184	261.276	1081.79	-78.8918	328.989	983.572	-62.7311	348.931	879.961	-93.4183	286.253	868.588	-113.224	329.397	782.55
1019	0	126.886	546.428	1549.45	226.931	539.58	1549.67	101.642	379.342	1589.68	213.769	362.992	1592.94	172.495	294.141	1423.13	161.091	230.463	1208.44	161.304	420.606	1347.04	165.465	478.203	1218.97	254.353	223.151	1259.07	-5.04672	336.455	1373.72	-46.1756	287.88	1147.03	-39.8531	269.522	1080.41	-79.6514	336.553	981.853	-63.4257	355.639	878.009	-94.2327	292.949	867.181	-113.658	335.15	780.599
1020	0	125.643	554.534	1548.19	225.706	547.776	1548.4	100.538	387.416	1588.35	212.677	371.155	1591.61	171.317	302.382	1421.7	160.007	238.582	1207.01	160.233	428.939	1345.73	164.523	486.597	1217.72	253.255	231.47	1257.65	-6.16591	344.878	1372.23	-47.1842	296.271	1145.51	-40.7782	277.855	1078.96	-80.5137	344.228	980.095	-64.2316	362.494	876.028	-95.1469	299.792	865.718	-114.229	341.079	778.623
1021	0	124.339	562.658	1546.93	224.421	555.978	1547.12	99.3591	395.515	1587.03	211.507	379.328	1590.28	170.052	310.657	1420.22	158.828	246.816	1205.47	159.072	437.333	1344.42	163.494	495.085	1216.48	252.057	239.874	1256.14	-7.37516	353.337	1370.68	-48.2769	304.733	1143.94	-41.7887	286.274	1077.45	-81.4775	352.015	978.308	-65.1489	369.505	874.031	-96.1545	306.787	864.205	-114.941	347.2	776.633
1022	0	122.973	570.799	1545.68	223.073	564.187	1545.84	98.1018	403.64	1585.73	210.256	387.513	1588.95	168.703	318.967	1418.71	157.561	255.178	1203.84	157.82	445.789	1343.14	162.373	503.672	1215.25	250.764	248.368	1254.55	-8.67301	361.827	1369.1	-49.4486	313.265	1142.32	-42.879	294.778	1075.89	-82.5408	359.915	976.506	-66.1769	376.682	872.031	-97.2487	313.944	862.65	-115.799	353.526	774.643
1023	0	121.543	578.961	1544.44	221.66	572.404	1544.57	96.7653	411.791	1584.45	208.925	395.711	1587.65	167.273	327.316	1417.18	156.213	263.68	1202.14	156.478	454.308	1341.88	161.157	512.359	1214.07	249.381	256.959	1252.89	-10.0573	370.345	1367.49	-50.6944	321.864	1140.66	-44.0434	303.365	1074.29	-83.7011	367.93	974.701	-67.3139	384.035	870.044	-98.4228	321.269	861.063	-116.802	360.069	772.665
1024	0	120.047	587.143	1543.25	220.182	580.63	1543.33	95.3488	419.967	1583.23	207.511	403.921	1586.39	165.765	335.706	1415.64	154.791	272.332	1200.37	155.046	462.893	1340.68	159.843	521.15	1212.93	247.914	265.65	1251.18	-11.5252	378.886	1365.88	-52.0087	330.53	1138.99	-45.2761	312.037	1072.67	-84.9552	376.064	972.909	-68.5572	391.573	868.087	-99.6696	328.769	859.457	-117.948	366.844	770.716
1025	0	118.486	595.349	1542.11	218.638	588.868	1542.15	93.8525	428.168	1582.06	206.015	412.145	1585.18	164.186	344.14	1414.13	153.302	281.145	1198.55	153.528	471.543	1339.53	158.431	530.047	1211.87	246.368	274.448	1249.44	-13.0729	387.449	1364.28	-53.3863	339.26	1137.32	-46.5713	320.793	1071.04	-86.2997	384.319	971.146	-69.9032	399.305	866.176	-100.983	336.454	857.847	-119.234	373.862	768.814
1026	0	116.859	603.579	1541.04	217.026	597.12	1541.04	92.277	436.396	1580.96	204.437	420.384	1584.04	162.539	352.621	1412.64	151.756	290.124	1196.72	151.925	480.26	1338.47	156.92	539.051	1210.9	244.752	283.354	1247.7	-14.6961	396.033	1362.7	-54.8217	348.056	1135.66	-47.9233	329.637	1069.42	-87.7304	392.7	969.432	-71.3476	407.239	864.332	-102.355	344.33	856.251	-120.654	381.134	766.976
1027	0	115.168	611.835	1540.08	215.349	605.389	1540.03	90.6238	444.649	1579.96	202.781	428.638	1582.98	160.831	361.151	1411.21	150.16	299.276	1194.89	150.242	489.045	1337.5	155.313	548.162	1210.03	243.073	292.373	1245.96	-16.3894	404.637	1361.17	-56.3093	356.917	1134.04	-49.3267	338.568	1067.84	-89.2429	401.21	967.785	-72.8854	415.383	862.575	-103.782	352.404	854.688	-122.2	388.671	765.223
1028	0	113.414	620.119	1539.23	213.608	613.675	1539.13	88.8955	452.927	1579.05	201.047	436.909	1582.03	159.067	369.734	1409.85	148.523	308.603	1193.08	148.486	497.896	1336.64	153.613	557.381	1209.29	241.34	301.505	1244.27	-18.1469	413.264	1359.72	-57.8442	365.844	1132.48	-50.7763	347.59	1066.31	-90.8323	409.853	966.226	-74.5106	423.743	860.925	-105.257	360.684	853.179	-123.862	396.481	763.575
1029	0	111.601	628.431	1538.51	211.804	621.983	1538.37	87.0953	461.231	1578.25	199.24	445.198	1581.19	157.254	378.372	1408.58	146.852	318.104	1191.34	146.662	506.815	1335.9	151.826	566.705	1208.7	239.563	310.749	1242.64	-19.9617	421.915	1358.36	-59.4211	374.839	1131.01	-52.2675	356.703	1064.85	-92.4932	418.634	964.777	-76.2169	432.327	859.402	-106.775	369.176	851.745	-125.63	404.575	762.053
1030	0	109.731	636.774	1537.95	209.941	630.313	1537.77	85.2276	469.561	1577.58	197.365	453.504	1580.48	155.399	387.068	1407.42	145.154	327.775	1189.69	144.777	515.799	1335.29	149.959	576.131	1208.26	237.75	320.103	1241.1	-21.8263	430.596	1357.12	-61.0355	383.902	1129.64	-53.7963	365.91	1063.49	-94.2199	427.557	963.457	-77.9975	441.139	858.028	-108.333	377.887	850.41	-127.492	412.959	760.68
1031	0	107.809	645.148	1537.56	208.023	638.667	1537.35	83.2976	477.914	1577.04	195.425	461.828	1579.9	153.507	395.822	1406.39	143.438	337.609	1188.15	142.842	524.847	1334.84	148.02	585.654	1207.99	235.911	329.564	1239.68	-23.7328	439.311	1356.01	-62.6832	393.037	1128.4	-55.3593	375.212	1062.25	-96.0065	436.626	962.286	-79.845	450.183	856.823	-109.927	386.822	849.195	-129.436	421.641	759.474
1032	0	105.84	653.552	1537.36	206.055	647.048	1537.12	81.3115	486.291	1576.65	193.429	470.171	1579.48	151.586	404.635	1405.5	141.708	347.594	1186.76	140.864	533.957	1334.54	146.022	595.267	1207.9	234.054	339.124	1238.4	-25.6727	448.066	1355.06	-64.3605	402.246	1127.32	-56.9539	384.611	1061.15	-97.8468	445.847	961.285	-81.7517	459.462	855.805	-111.555	395.985	848.123	-131.449	430.626	758.457
1033	0	103.831	661.986	1537.36	204.043	655.456	1537.11	79.2764	494.689	1576.4	191.384	478.532	1579.21	149.643	413.508	1404.77	139.97	357.715	1185.55	138.856	543.124	1334.41	143.976	604.96	1208	232.188	348.775	1237.29	-27.6376	456.87	1354.29	-66.0642	411.531	1126.4	-58.5783	394.108	1060.22	-99.7344	455.222	960.468	-83.7098	468.978	854.991	-113.214	405.381	847.212	-133.519	439.918	757.646
1034	0	101.788	670.451	1537.57	201.994	663.891	1537.31	77.2004	503.109	1576.31	189.297	486.91	1579.11	147.684	422.439	1404.21	138.228	367.955	1184.53	136.826	552.345	1334.44	141.896	614.725	1208.29	230.32	358.504	1236.36	-29.619	465.729	1353.7	-67.7918	420.896	1125.66	-60.2315	403.703	1059.46	-101.663	464.755	959.853	-85.7113	478.732	854.396	-114.904	415.013	846.481	-135.635	449.522	757.057
1035	0	99.7192	678.944	1538	199.916	672.354	1537.74	75.0923	511.548	1576.37	187.178	495.304	1579.17	145.715	431.426	1403.83	136.483	378.291	1183.73	134.788	561.615	1334.65	139.797	624.547	1208.76	228.454	368.298	1235.64	-31.6086	474.653	1353.32	-69.5414	430.344	1125.13	-61.9137	413.398	1058.89	-103.626	474.45	959.451	-87.7483	488.721	854.031	-116.625	424.882	845.945	-137.787	459.437	756.703
1036	0	97.6339	687.464	1538.64	197.819	680.844	1538.4	72.9616	520.004	1576.59	185.037	503.714	1579.39	143.741	440.467	1403.63	134.738	388.699	1183.17	132.752	570.927	1335.03	137.693	634.412	1209.41	226.594	378.14	1235.13	-33.5986	483.648	1353.15	-71.3121	439.879	1124.81	-63.6257	423.192	1058.53	-105.617	484.31	959.271	-89.8127	498.945	853.905	-118.376	434.991	845.616	-139.965	469.666	756.592
1037	0	95.5416	696.009	1539.5	195.712	689.359	1539.28	70.8184	528.476	1576.95	182.883	512.138	1579.77	141.768	449.556	1403.62	132.989	399.152	1182.85	130.729	580.273	1335.57	135.602	644.307	1210.22	224.741	388.01	1234.84	-35.5818	492.724	1353.2	-73.1033	449.503	1124.71	-65.3695	433.083	1058.38	-107.63	494.335	959.318	-91.8967	509.399	854.024	-120.16	445.339	845.502	-142.16	480.208	756.729
1038	0	93.4529	704.577	1540.57	193.605	697.898	1540.39	68.6732	536.961	1577.47	180.728	520.574	1580.31	139.799	458.689	1403.8	131.234	409.621	1182.78	128.732	589.647	1336.27	133.54	654.212	1211.2	222.892	397.886	1234.79	-37.5515	501.887	1353.47	-74.9156	459.22	1124.83	-67.1477	443.073	1058.44	-109.659	504.529	959.595	-93.9928	520.079	854.388	-121.977	455.924	845.607	-144.364	491.061	757.116
1039	0	91.3791	713.165	1541.83	191.512	706.458	1541.71	66.5367	545.459	1578.12	178.582	529.021	1581	137.838	467.858	1404.16	129.467	420.077	1182.96	126.771	599.039	1337.12	131.522	664.113	1212.31	221.045	407.747	1234.96	-39.5018	511.143	1353.95	-76.7499	469.034	1125.18	-68.9638	453.159	1058.72	-111.699	514.891	960.1	-96.0935	530.979	854.994	-123.829	466.745	845.93	-146.572	502.223	757.747
1040	0	89.3318	721.771	1543.29	189.442	715.035	1543.23	64.4196	553.967	1578.91	176.456	537.475	1581.83	135.888	477.055	1404.7	127.682	430.49	1183.38	124.856	608.44	1338.1	129.565	673.989	1213.54	219.192	417.567	1235.35	-41.4277	520.497	1354.64	-78.608	478.948	1125.73	-70.8218	463.341	1059.2	-113.743	525.422	960.826	-98.1918	542.09	855.837	-125.72	477.798	846.467	-148.778	513.688	758.616
1041	0	87.3232	730.392	1544.9	187.41	723.626	1544.92	62.3324	562.484	1579.82	174.361	545.934	1582.78	133.951	486.271	1405.41	125.867	440.829	1184.03	122.997	617.84	1339.21	127.684	683.825	1214.88	217.325	427.322	1235.95	-43.3247	529.952	1355.53	-80.492	488.964	1126.5	-72.7261	473.617	1059.89	-115.787	536.121	961.765	-100.281	553.407	856.906	-127.65	489.079	847.211	-150.978	525.453	759.71
1042	0	85.3658	739.026	1546.67	185.428	732.226	1546.76	60.2853	571.01	1580.83	172.305	554.396	1583.85	132.028	495.498	1406.28	124.015	451.067	1184.89	121.201	627.227	1340.43	125.892	693.601	1216.29	215.436	436.986	1236.74	-45.189	539.507	1356.6	-82.4042	499.088	1127.46	-74.6812	483.986	1060.77	-117.826	546.987	962.906	-102.354	564.918	858.187	-129.623	500.581	848.151	-153.167	537.51	761.015
1043	0	83.4718	747.669	1548.56	183.509	740.832	1548.73	58.2875	579.542	1581.94	170.299	562.858	1585.02	130.122	504.724	1407.3	122.116	461.177	1185.96	119.477	636.593	1341.74	124.202	703.301	1217.75	213.514	446.538	1237.72	-47.0173	549.161	1357.84	-84.3471	509.32	1128.6	-76.6913	494.448	1061.83	-119.856	558.018	964.233	-104.406	576.614	859.664	-131.64	512.298	849.271	-155.343	549.849	762.513
1044	0	81.6532	756.319	1550.54	181.664	749.437	1550.8	56.3477	588.08	1583.14	168.351	571.316	1586.27	128.232	513.939	1408.45	120.161	471.137	1187.2	117.828	645.924	1343.13	122.623	712.908	1219.25	211.551	455.955	1238.86	-48.807	558.907	1359.23	-86.3224	519.665	1129.9	-78.7602	505.001	1063.04	-121.871	569.213	965.73	-106.431	588.484	861.32	-133.703	524.224	850.558	-157.503	562.463	764.183
1045	0	79.9212	764.973	1552.6	179.906	758.036	1552.95	54.4734	596.623	1584.4	166.467	579.768	1587.59	126.36	523.132	1409.71	118.142	480.925	1188.59	116.26	655.212	1344.57	121.163	722.406	1220.77	209.54	465.218	1240.14	-50.5554	568.737	1360.75	-88.3316	530.123	1131.34	-80.8907	515.645	1064.4	-123.867	580.568	967.378	-108.423	600.518	863.135	-135.815	536.349	851.992	-159.647	575.338	766.007
1046	0	78.2865	773.629	1554.71	178.244	766.624	1555.14	52.671	605.171	1585.72	164.654	588.21	1588.96	124.508	532.292	1411.07	116.058	490.528	1190.11	114.776	664.446	1346.06	119.826	731.783	1222.29	207.475	474.313	1241.54	-52.2605	578.639	1362.38	-90.3751	540.696	1132.91	-83.0844	526.379	1065.88	-125.84	592.078	969.16	-110.378	612.703	865.088	-137.974	548.665	853.558	-161.773	588.462	767.962
1047	0	76.7584	782.284	1556.84	176.689	775.194	1557.35	50.9456	613.723	1587.08	162.915	596.638	1590.37	122.678	541.41	1412.51	113.905	499.932	1191.74	113.376	673.616	1347.57	118.613	741.025	1223.78	205.354	483.228	1243.04	-53.9202	588.598	1364.1	-92.452	551.383	1134.58	-85.3414	537.203	1067.46	-127.786	603.741	971.055	-112.291	625.028	867.158	-140.182	561.163	855.236	-163.878	601.82	770.029
1048	0	75.3451	790.934	1558.96	175.248	783.742	1559.55	49.3009	622.277	1588.47	161.256	605.049	1591.8	120.871	550.475	1414.02	111.687	509.132	1193.46	112.06	682.712	1349.09	117.522	750.123	1225.24	203.177	491.956	1244.62	-55.5325	598.596	1365.89	-94.5603	562.182	1136.33	-87.6601	548.115	1069.12	-129.699	615.55	973.047	-114.158	637.481	869.324	-142.436	573.833	857.012	-165.964	615.397	772.189
1049	0	74.053	799.576	1561.06	173.927	792.259	1561.72	47.7394	630.834	1589.88	159.676	613.438	1593.24	119.089	559.478	1415.58	109.411	518.124	1195.23	110.827	691.726	1350.6	116.547	759.07	1226.66	200.948	500.493	1246.26	-57.0959	608.613	1367.72	-96.6964	573.087	1138.14	-90.0369	559.113	1070.84	-131.576	627.499	975.115	-115.976	650.05	871.567	-144.735	586.667	858.869	-168.027	629.176	774.424
1050	0	72.8874	808.207	1563.11	172.733	800.741	1563.83	46.2622	639.39	1591.28	158.177	621.8	1594.68	117.335	568.411	1417.17	107.085	526.91	1197.06	109.674	700.651	1352.09	115.681	767.86	1228.02	198.674	508.84	1247.94	-58.6086	618.627	1369.59	-98.8553	584.093	1140	-92.4664	570.193	1072.61	-133.411	639.58	977.245	-117.74	662.723	873.868	-147.073	599.654	860.792	-170.068	643.139	776.721
1051	0	71.8516	816.823	1565.1	171.666	809.181	1565.87	44.8689	647.945	1592.68	156.758	630.133	1596.1	115.613	577.266	1418.77	104.721	535.494	1198.9	108.596	709.48	1353.55	114.913	776.491	1229.32	196.363	517.002	1249.64	-60.0695	628.618	1371.48	-101.031	595.188	1141.88	-94.9413	581.35	1074.4	-135.201	651.783	979.418	-119.447	675.489	876.21	-149.445	612.785	862.769	-172.083	657.268	779.065
1052	0	70.9473	825.419	1567	170.73	817.572	1567.81	43.558	656.496	1594.06	155.416	638.43	1597.48	113.925	586.038	1420.38	102.332	543.886	1200.75	107.59	718.209	1354.97	114.231	784.964	1230.56	194.026	524.987	1251.34	-61.4772	638.563	1373.36	-103.215	606.362	1143.77	-97.4524	592.578	1076.2	-136.941	664.099	981.622	-121.096	688.335	878.576	-151.846	626.048	864.787	-174.071	671.546	781.445
1053	0	70.1746	833.991	1568.81	169.923	825.908	1569.65	42.327	665.04	1595.41	154.147	646.687	1598.83	112.275	594.721	1421.96	99.9334	552.096	1202.58	106.65	726.834	1356.34	113.622	793.282	1231.72	191.676	532.805	1253.04	-62.831	648.442	1375.23	-105.399	617.597	1145.65	-99.9892	603.87	1078	-138.628	676.515	983.843	-122.684	701.251	880.953	-154.264	639.434	866.836	-176.028	685.955	783.852
1054	0	69.5322	842.534	1570.51	169.245	834.182	1571.36	41.1723	673.575	1596.71	152.949	654.899	1600.13	110.666	603.313	1423.52	97.5397	560.137	1204.39	105.771	735.352	1357.64	113.073	801.45	1232.81	189.325	540.47	1254.7	-64.1303	658.235	1377.06	-107.574	628.877	1147.51	-102.54	615.214	1079.78	-140.258	689.017	986.068	-124.21	714.225	883.329	-156.692	652.93	868.905	-177.951	700.476	786.279
1055	0	69.0173	851.043	1572.09	168.691	842.389	1572.95	40.0894	682.097	1597.96	151.814	663.062	1601.37	109.1	611.81	1425.04	95.1655	568.024	1206.15	104.947	743.763	1358.88	112.572	809.473	1233.82	186.987	547.995	1256.32	-65.3747	667.926	1378.86	-109.73	640.181	1149.33	-105.091	626.6	1081.52	-141.829	701.589	988.286	-125.671	727.247	885.692	-159.117	666.525	870.984	-179.836	715.092	788.719
1056	0	68.6262	859.514	1573.55	168.257	850.524	1574.41	39.0732	690.604	1599.16	150.738	671.171	1602.54	107.582	620.214	1426.5	92.8243	575.772	1207.85	104.172	752.067	1360.03	112.104	817.361	1234.76	184.676	555.396	1257.89	-66.564	677.501	1380.59	-111.859	651.49	1151.1	-107.63	638.014	1083.21	-143.337	714.215	990.488	-127.067	740.303	888.034	-161.527	680.205	873.064	-181.678	729.787	791.165
1057	0	68.3541	867.942	1574.88	167.939	858.581	1575.73	38.118	699.091	1600.28	149.714	679.222	1603.63	106.115	628.523	1427.89	90.5288	583.396	1209.48	103.442	760.266	1361.11	111.661	825.122	1235.61	182.404	562.689	1259.38	-67.6983	686.95	1382.27	-113.95	662.779	1152.81	-110.144	649.443	1084.85	-144.781	726.876	992.662	-128.397	753.385	890.347	-163.909	693.957	875.135	-183.47	744.544	793.614
1058	0	68.1953	876.322	1576.09	167.729	866.555	1576.92	37.2177	707.555	1601.32	148.734	687.211	1604.65	104.7	636.74	1429.21	88.2902	590.911	1211.03	102.751	768.362	1362.09	111.232	832.764	1236.37	180.184	569.888	1260.8	-68.7776	696.265	1383.86	-115.994	674.029	1154.45	-112.619	660.871	1086.41	-146.159	739.553	994.801	-129.66	766.479	892.623	-166.249	707.764	877.186	-185.205	759.347	796.059
1059	0	68.1439	884.652	1577.17	167.622	874.443	1577.97	36.3661	715.994	1602.27	147.792	695.134	1605.57	103.341	644.869	1430.44	86.1185	598.333	1212.48	102.096	776.359	1362.98	110.811	840.298	1237.04	178.026	577.011	1262.13	-69.8018	705.441	1385.36	-117.985	685.217	1156.01	-115.042	672.282	1087.9	-147.47	752.227	996.895	-130.855	779.575	894.857	-168.532	721.612	879.209	-186.878	774.181	798.497
1060	0	68.1933	892.928	1578.11	167.61	882.242	1578.89	35.5567	724.406	1603.13	146.881	702.99	1606.4	102.04	652.912	1431.57	84.0226	605.672	1213.83	101.473	784.261	1363.77	110.392	847.733	1237.61	175.941	584.07	1263.36	-70.7709	714.478	1386.77	-119.913	696.322	1157.48	-117.404	683.66	1089.3	-148.712	764.877	998.938	-131.982	792.66	897.044	-170.744	735.483	881.193	-188.479	789.03	800.921
1061	0	68.3368	901.149	1578.94	167.686	889.951	1579.69	34.7834	732.787	1603.89	145.993	710.776	1607.14	100.8	660.875	1432.6	82.0105	612.942	1215.07	100.88	792.075	1364.45	109.973	855.078	1238.08	173.94	591.079	1264.49	-71.6848	723.376	1388.06	-121.773	707.327	1158.85	-119.691	694.989	1090.61	-149.886	777.483	1000.92	-133.04	805.723	899.18	-172.872	749.358	883.129	-190.002	803.881	803.329
1062	0	68.5677	909.312	1579.64	167.842	897.568	1580.37	34.0402	741.138	1604.55	145.121	718.493	1607.77	99.6231	668.763	1433.53	80.0898	620.152	1216.19	100.314	799.806	1365.03	109.551	862.344	1238.45	172.032	598.051	1265.51	-72.5432	732.138	1389.24	-123.558	718.215	1160.12	-121.896	706.254	1091.81	-150.99	790.026	1002.84	-134.026	818.751	901.26	-174.902	763.219	885.006	-191.437	818.717	805.714
1063	0	68.8793	917.419	1580.23	168.072	905.094	1580.93	33.3216	749.458	1605.1	144.26	726.14	1608.3	98.5116	676.581	1434.35	78.2671	627.31	1217.19	99.7755	807.46	1365.51	109.128	869.538	1238.7	170.225	604.997	1266.42	-73.3456	740.767	1390.3	-125.264	728.971	1161.28	-124.009	717.44	1092.91	-152.022	802.487	1004.69	-134.94	831.732	903.283	-176.822	777.048	886.818	-192.777	833.524	808.072
1064	0	69.2653	925.47	1580.71	168.369	912.529	1581.4	32.6226	757.746	1605.53	143.404	733.718	1608.73	97.4676	684.336	1435.06	76.5492	634.426	1218.07	99.2627	815.044	1365.88	108.705	876.671	1238.85	168.527	611.927	1267.21	-74.0915	749.27	1391.22	-126.885	739.585	1162.33	-126.023	728.533	1093.9	-152.982	814.849	1006.46	-135.778	844.654	905.245	-178.621	790.824	888.555	-194.013	848.286	810.398
1065	0	69.7195	933.466	1581.08	168.726	919.878	1581.76	31.9391	766.003	1605.85	142.549	741.231	1609.06	96.4933	692.034	1435.65	74.9421	641.504	1218.82	98.7764	822.564	1366.14	108.286	883.753	1238.89	166.945	618.849	1267.9	-74.7802	757.651	1392.02	-128.417	750.048	1163.26	-127.932	739.523	1094.77	-153.867	827.095	1008.14	-136.539	857.501	907.145	-180.288	804.529	890.212	-195.139	862.987	812.689
1066	0	70.2361	941.41	1581.35	169.137	927.143	1582.04	31.2678	774.23	1606.05	141.69	748.682	1609.29	95.5908	699.681	1436.13	73.4518	648.552	1219.45	98.3174	830.028	1366.3	107.876	890.792	1238.83	165.486	625.772	1268.47	-75.4108	765.918	1392.68	-129.857	760.354	1164.07	-129.729	750.397	1095.53	-154.676	839.211	1009.75	-137.22	870.263	908.979	-181.816	818.144	891.782	-196.147	877.609	814.938
1067	0	70.8099	949.306	1581.52	169.597	934.33	1582.25	30.6064	782.43	1606.14	140.826	756.074	1609.41	94.762	707.283	1436.5	72.0837	655.574	1219.97	97.8871	837.441	1366.36	107.479	897.797	1238.66	164.154	632.701	1268.93	-75.9826	774.077	1393.21	-131.201	770.5	1164.77	-131.411	761.148	1096.17	-155.406	851.183	1011.27	-137.816	882.926	910.747	-183.197	831.65	893.261	-197.031	892.136	817.143
1068	0	71.4359	957.157	1581.6	170.1	941.444	1582.38	29.9535	790.605	1606.11	139.956	763.412	1609.45	94.0088	714.846	1436.77	70.8428	662.575	1220.36	97.487	844.812	1366.31	107.099	904.779	1238.39	162.955	639.644	1269.29	-76.4949	782.134	1393.6	-132.446	780.485	1165.35	-132.974	771.767	1096.7	-156.055	863	1012.69	-138.325	895.477	912.447	-184.425	845.03	894.646	-197.786	906.548	819.298
1069	0	72.1096	964.967	1581.6	170.643	948.491	1582.44	29.3091	798.756	1605.97	139.079	770.703	1609.39	93.3326	722.376	1436.93	69.7331	669.559	1220.65	97.1193	852.146	1366.18	106.743	911.745	1238.03	161.891	646.605	1269.54	-76.947	790.096	1393.87	-133.589	790.309	1165.81	-134.413	782.248	1097.12	-156.62	874.652	1014.03	-138.742	907.902	914.076	-185.497	858.266	895.935	-198.408	920.828	821.398
1070	0	72.827	972.742	1581.51	171.221	955.479	1582.45	28.6744	806.885	1605.73	138.198	777.952	1609.25	92.7349	729.879	1436.99	68.7581	676.533	1220.82	96.7861	859.45	1365.95	106.415	918.704	1237.59	160.965	653.589	1269.7	-77.3382	797.97	1394.01	-134.628	799.975	1166.17	-135.728	792.588	1097.44	-157.097	886.133	1015.27	-139.065	920.19	915.632	-186.408	871.344	897.127	-198.892	934.955	823.44
1071	0	73.5843	980.484	1581.35	171.831	962.415	1582.41	28.0515	814.996	1605.38	137.316	785.167	1609.03	92.2169	737.361	1436.96	67.92	683.5	1220.9	96.4895	866.732	1365.64	106.119	925.663	1237.07	160.177	660.6	1269.77	-77.6683	805.76	1394.03	-135.559	809.488	1166.42	-136.915	802.783	1097.65	-157.485	897.434	1016.41	-139.29	932.329	917.114	-187.159	884.247	898.222	-199.236	948.91	825.417
1072	0	74.3779	988.2	1581.11	172.47	969.308	1582.32	27.4439	823.09	1604.93	136.437	792.352	1608.73	91.7792	744.825	1436.84	67.2198	690.465	1220.89	96.2318	873.997	1365.25	105.859	932.63	1236.48	159.527	667.641	1269.76	-77.9371	813.474	1393.94	-136.382	818.852	1166.56	-137.974	812.83	1097.76	-157.779	908.552	1017.47	-139.414	944.306	918.519	-187.748	896.962	899.22	-199.439	962.673	827.324
1073	0	75.2049	995.892	1580.81	173.137	976.167	1582.19	26.8561	831.168	1604.4	135.568	799.516	1608.36	91.4225	752.278	1436.64	66.6572	697.433	1220.78	96.0154	881.253	1364.78	105.637	939.61	1235.83	159.013	674.716	1269.67	-78.1445	821.117	1393.74	-137.094	828.073	1166.61	-138.903	822.728	1097.78	-157.977	919.482	1018.42	-139.434	956.112	919.844	-188.176	909.477	900.124	-199.498	976.224	829.155
1074	0	76.0621	1003.56	1580.45	173.828	983	1582.02	26.2936	839.233	1603.78	134.715	806.665	1607.93	91.147	759.725	1436.36	66.2303	704.41	1220.6	95.8424	888.505	1364.25	105.455	946.61	1235.14	158.632	681.83	1269.5	-78.2907	828.698	1393.46	-137.695	837.157	1166.57	-139.704	832.478	1097.71	-158.078	930.224	1019.29	-139.349	967.736	921.086	-188.448	921.779	900.934	-199.415	989.546	830.905
1075	0	76.9469	1011.22	1580.04	174.543	989.815	1581.81	25.7625	847.283	1603.08	133.888	813.805	1607.43	90.9524	767.17	1436.01	65.9357	711.401	1220.35	95.7148	895.762	1363.66	105.316	953.636	1234.4	158.379	688.984	1269.26	-78.3762	836.222	1393.08	-138.183	846.112	1166.45	-140.376	842.079	1097.56	-158.08	940.776	1020.05	-139.157	979.169	922.241	-188.565	933.858	901.653	-199.191	1002.62	832.565
1076	0	77.8568	1018.87	1579.57	175.281	996.622	1581.56	25.2698	855.32	1602.31	133.095	820.942	1606.88	90.8383	774.619	1435.59	65.7685	718.413	1220.04	95.6348	903.028	1363.01	105.219	960.692	1233.62	158.249	696.182	1268.96	-78.4013	843.698	1392.64	-138.56	854.943	1166.24	-140.92	851.533	1097.34	-157.983	951.138	1020.72	-138.858	990.403	923.305	-188.533	945.705	902.28	-198.826	1015.43	834.128
1077	0	78.7892	1026.5	1579.06	176.04	1003.43	1581.29	24.8227	863.343	1601.48	132.345	828.081	1606.27	90.8041	782.076	1435.1	65.7222	725.452	1219.66	95.6043	910.311	1362.32	105.166	967.783	1232.81	158.235	703.426	1268.6	-78.3667	851.134	1392.12	-138.827	863.658	1165.96	-141.338	860.84	1097.04	-157.787	961.311	1021.29	-138.454	1001.43	924.272	-188.358	957.312	902.816	-198.324	1027.96	835.584
1078	0	79.7421	1034.13	1578.51	176.82	1010.25	1580.98	24.4289	871.351	1600.6	131.65	835.229	1605.61	90.8486	789.545	1434.56	65.7893	732.523	1219.23	95.6253	917.617	1361.57	105.156	974.914	1231.98	158.33	710.721	1268.18	-78.2729	858.54	1391.54	-138.984	872.262	1165.61	-141.633	870.004	1096.68	-157.493	971.295	1021.76	-137.945	1012.24	925.139	-188.046	968.672	903.261	-197.689	1040.2	836.924
1079	0	80.7132	1041.74	1577.92	177.62	1017.08	1580.64	24.0959	879.344	1599.66	131.018	842.389	1604.91	90.9707	797.032	1433.95	65.9614	739.634	1218.74	95.6998	924.952	1360.79	105.19	982.091	1231.13	158.526	718.068	1267.7	-78.1207	865.925	1390.91	-139.035	880.761	1165.19	-141.807	879.027	1096.25	-157.106	981.093	1022.12	-137.335	1022.84	925.897	-187.604	979.779	903.612	-196.924	1052.13	838.138
1080	0	81.7005	1049.36	1577.3	178.44	1023.93	1580.26	23.8312	887.318	1598.67	130.462	849.567	1604.15	91.1691	804.54	1433.29	66.2291	746.791	1218.21	95.8298	932.322	1359.97	105.268	989.319	1230.26	158.814	725.469	1267.17	-77.9105	873.299	1390.23	-138.983	889.162	1164.71	-141.865	887.912	1095.77	-156.626	990.707	1022.38	-136.628	1033.21	926.54	-187.042	990.629	903.867	-196.036	1063.75	839.213
1081	0	82.7021	1056.97	1576.65	179.279	1030.82	1579.86	23.6419	895.273	1597.65	129.989	856.765	1603.36	91.4422	812.074	1432.58	66.5829	753.999	1217.63	96.0173	939.733	1359.12	105.391	996.604	1229.38	159.186	732.927	1266.58	-77.6428	880.674	1389.51	-138.831	897.469	1164.16	-141.809	896.662	1095.22	-156.06	1000.14	1022.53	-135.83	1043.36	927.06	-186.368	1001.22	904.021	-195.031	1075.05	840.137
1082	0	83.7165	1064.58	1575.98	180.139	1037.75	1579.42	23.5347	903.208	1596.59	129.611	863.987	1602.51	91.7885	819.639	1431.81	67.0134	761.266	1217	96.2647	947.191	1358.24	105.562	1003.95	1228.47	159.634	740.444	1265.93	-77.3178	888.06	1388.75	-138.585	905.69	1163.55	-141.645	905.282	1094.61	-155.413	1009.39	1022.56	-134.947	1053.27	927.45	-185.59	1011.55	904.069	-193.916	1086.02	840.897
1083	0	84.742	1072.18	1575.29	181.017	1044.72	1578.94	23.5158	911.12	1595.51	129.335	871.236	1601.63	92.2068	827.237	1430.99	67.5117	768.596	1216.33	96.5743	954.7	1357.32	105.782	1011.37	1227.56	160.149	748.021	1265.23	-76.9354	895.468	1387.95	-138.248	913.828	1162.89	-141.377	913.777	1093.94	-154.689	1018.47	1022.47	-133.985	1062.96	927.701	-184.72	1021.61	904.004	-192.7	1096.66	841.482
1084	0	85.7775	1079.79	1574.58	181.916	1051.73	1578.44	23.5905	919.008	1594.39	129.17	878.514	1600.7	92.6956	834.872	1430.12	68.0693	775.997	1215.61	96.9486	962.264	1356.39	106.054	1018.85	1226.63	160.725	755.661	1264.47	-76.4955	902.908	1387.11	-137.825	921.891	1162.16	-141.011	922.153	1093.21	-153.896	1027.37	1022.26	-132.954	1072.41	927.804	-183.768	1031.4	903.819	-191.393	1106.97	841.877
1085	0	86.822	1087.39	1573.85	182.835	1058.81	1577.89	23.7637	926.872	1593.25	129.121	885.824	1599.74	93.2539	842.548	1429.19	68.6792	783.471	1214.83	97.3902	969.89	1355.43	106.382	1026.42	1225.68	161.354	763.366	1263.65	-75.9971	910.391	1386.23	-137.32	929.884	1161.37	-140.551	930.414	1092.42	-153.039	1036.1	1021.91	-131.86	1081.63	927.751	-182.743	1040.93	903.506	-190.005	1116.94	842.07
1086	0	87.8747	1095	1573.11	183.774	1065.94	1577.32	24.0392	934.71	1592.1	129.196	893.168	1598.73	93.8806	850.267	1428.22	69.3356	791.026	1214	97.9019	977.579	1354.44	106.771	1034.07	1224.73	162.033	771.138	1262.76	-75.4395	917.924	1385.32	-136.739	937.814	1160.52	-140.002	938.568	1091.57	-152.125	1044.67	1021.44	-130.713	1090.62	927.534	-181.655	1050.19	903.06	-188.547	1126.58	842.051
1087	0	88.9355	1102.62	1572.36	184.734	1073.14	1576.71	24.4202	942.523	1590.92	129.398	900.548	1597.69	94.5753	858.031	1427.19	70.0343	798.665	1213.12	98.4863	985.336	1353.45	107.225	1041.81	1223.76	162.755	778.979	1261.8	-74.8211	925.517	1384.37	-136.084	945.688	1159.61	-139.37	946.622	1090.67	-151.159	1053.08	1020.82	-129.522	1099.38	927.146	-180.516	1059.19	902.473	-187.033	1135.89	841.811
1088	0	90.0042	1110.23	1571.6	185.717	1080.41	1576.07	24.9089	950.31	1589.74	129.732	907.964	1596.61	95.3374	865.844	1426.11	70.7727	806.395	1212.17	99.1461	993.163	1352.43	107.749	1049.65	1222.78	163.519	786.892	1260.78	-74.1402	933.176	1383.38	-135.358	953.515	1158.64	-138.657	954.583	1089.7	-150.147	1061.33	1020.07	-128.294	1107.9	926.583	-179.334	1067.91	901.742	-185.474	1144.87	841.34
1089	0	91.0813	1117.86	1570.84	186.722	1087.74	1575.4	25.5068	958.074	1588.54	130.199	915.419	1595.51	96.167	873.705	1424.99	71.5499	814.22	1211.15	99.8837	1001.06	1351.41	108.348	1057.58	1221.8	164.322	794.881	1259.68	-73.3949	940.906	1382.36	-134.564	961.301	1157.62	-137.868	962.458	1088.68	-149.093	1069.43	1019.18	-127.038	1116.19	925.84	-178.119	1076.37	900.862	-183.886	1153.52	840.636
1090	0	92.1676	1125.5	1570.07	187.751	1095.15	1574.71	26.2149	965.814	1587.35	130.802	922.914	1594.38	97.0642	881.616	1423.82	72.3666	822.146	1210.07	100.701	1009.04	1350.39	109.026	1065.62	1220.81	165.163	802.948	1258.5	-72.5831	948.712	1381.3	-133.702	969.054	1156.54	-137.005	970.254	1087.6	-148.002	1077.37	1018.15	-125.76	1124.25	924.917	-176.879	1084.56	899.835	-182.281	1161.84	839.695
1091	0	93.2642	1133.14	1569.31	188.806	1102.63	1574	27.033	973.532	1586.16	131.539	930.449	1593.23	98.0294	889.579	1422.6	73.2247	830.179	1208.91	101.601	1017.09	1349.37	109.789	1073.76	1219.83	166.043	811.099	1257.26	-71.7025	956.596	1380.21	-132.773	976.783	1155.42	-136.069	977.979	1086.48	-146.877	1085.18	1016.99	-124.468	1132.08	923.814	-175.622	1092.49	898.661	-180.673	1169.83	838.52
1092	0	94.3727	1140.8	1568.54	189.887	1110.18	1573.27	27.9605	981.232	1584.97	132.411	938.025	1592.07	99.0632	897.594	1421.36	74.1274	838.326	1207.69	102.584	1025.21	1348.36	110.638	1082.01	1218.87	166.963	819.337	1255.93	-70.7511	964.56	1379.09	-131.777	984.495	1154.26	-135.061	985.64	1085.32	-145.719	1092.84	1015.71	-123.167	1139.68	922.536	-174.353	1100.14	897.347	-179.076	1177.49	837.113
1093	0	95.4948	1148.48	1567.79	190.996	1117.8	1572.53	28.9963	988.915	1583.81	133.415	945.643	1590.91	100.166	905.66	1420.08	75.0787	846.594	1206.39	103.651	1033.42	1347.36	111.578	1090.37	1217.92	167.924	827.666	1254.54	-69.727	972.604	1377.96	-130.712	992.196	1153.06	-133.981	993.242	1084.12	-144.531	1100.36	1014.3	-121.862	1147.05	921.088	-173.079	1107.53	895.899	-177.502	1184.82	835.486
1094	0	96.6328	1156.17	1567.06	192.136	1125.5	1571.8	30.1385	996.585	1582.67	134.55	953.304	1589.76	101.339	913.778	1418.78	76.0828	854.988	1205.02	104.803	1041.69	1346.39	112.608	1098.85	1217.01	168.929	836.091	1253.08	-68.6287	980.726	1376.82	-129.576	999.892	1151.84	-132.827	1000.79	1082.9	-143.314	1107.75	1012.79	-120.558	1154.19	919.481	-171.803	1114.64	894.331	-175.963	1191.82	833.648
1095	0	97.7889	1163.88	1566.35	193.307	1133.27	1571.07	31.3846	1004.24	1581.57	135.811	961.008	1588.63	102.581	921.947	1417.47	77.1441	863.517	1203.59	106.037	1050.05	1345.46	113.73	1107.44	1216.15	169.98	844.615	1251.55	-67.4556	988.926	1375.68	-128.367	1007.59	1150.61	-131.598	1008.29	1081.68	-142.068	1115.01	1011.19	-119.256	1161.11	917.726	-170.528	1121.49	892.655	-174.47	1198.49	831.617
1096	0	98.9655	1171.61	1565.67	194.512	1141.11	1570.37	32.7318	1011.9	1580.52	137.195	968.755	1587.53	103.894	930.167	1416.16	78.2667	872.186	1202.1	107.354	1058.48	1344.57	114.941	1116.16	1215.33	171.081	853.242	1249.97	-66.2075	997.2	1374.55	-127.083	1015.29	1149.38	-130.29	1015.75	1080.45	-140.793	1122.13	1009.5	-117.96	1167.8	915.84	-169.255	1128.07	890.891	-173.031	1204.83	829.412
1097	0	100.165	1179.37	1565.04	195.751	1149.02	1569.69	34.1766	1019.55	1579.52	138.697	976.547	1586.48	105.276	938.438	1414.86	79.454	881.001	1200.58	108.75	1066.99	1343.74	116.239	1124.99	1214.59	172.232	861.973	1248.35	-64.8854	1005.55	1373.44	-125.721	1023	1148.17	-128.902	1023.16	1079.25	-139.489	1129.13	1007.76	-116.67	1174.26	913.841	-167.983	1134.38	889.058	-171.654	1210.83	827.056
1098	0	101.39	1187.15	1564.45	197.027	1156.99	1569.06	35.7152	1027.2	1578.59	140.311	984.383	1585.48	106.725	946.759	1413.59	80.7081	889.966	1199.02	110.221	1075.56	1342.98	117.621	1133.94	1213.93	173.435	870.811	1246.7	-63.4913	1013.96	1372.38	-124.279	1030.71	1146.99	-127.428	1030.54	1078.08	-138.156	1136	1005.97	-115.387	1180.51	911.749	-166.71	1140.42	887.18	-170.343	1216.48	824.577
1099	0	102.642	1194.95	1563.93	198.34	1165.03	1568.49	37.3429	1034.85	1577.75	142.031	992.264	1584.56	108.241	955.128	1412.35	82.0298	899.084	1197.46	111.763	1084.2	1342.3	119.079	1143	1213.36	174.69	879.755	1245.04	-62.0283	1022.44	1371.38	-122.755	1038.43	1145.86	-125.868	1037.88	1076.96	-136.793	1142.74	1004.16	-114.111	1186.53	909.589	-165.434	1146.19	885.281	-169.102	1221.8	822.003
1100	0	103.924	1202.78	1563.48	199.692	1173.13	1567.98	39.055	1042.52	1577	143.851	1000.19	1583.72	109.82	963.546	1411.17	83.4184	908.353	1195.91	113.371	1092.91	1341.7	120.609	1152.18	1212.9	175.998	888.803	1243.39	-60.5006	1030.98	1370.45	-121.149	1046.15	1144.79	-124.218	1045.18	1075.9	-135.401	1149.35	1002.36	-112.842	1192.34	907.385	-164.149	1151.7	883.388	-167.931	1226.76	819.366
1101	0	105.237	1210.65	1563.12	201.082	1181.3	1567.55	40.8457	1050.2	1576.36	145.763	1008.16	1582.98	111.458	972.009	1410.05	84.871	917.772	1194.4	115.038	1101.68	1341.21	122.201	1161.46	1212.56	177.356	897.951	1241.77	-58.9136	1039.57	1369.61	-119.461	1053.87	1143.81	-122.476	1052.44	1074.94	-133.98	1155.84	1000.58	-111.578	1197.93	905.164	-162.851	1156.93	881.529	-166.828	1231.38	816.699
1102	0	106.582	1218.54	1562.85	202.511	1189.52	1567.21	42.709	1057.89	1575.84	147.759	1016.18	1582.34	113.151	980.518	1409.03	86.383	927.333	1192.95	116.756	1110.51	1340.83	123.847	1170.83	1212.35	178.761	907.192	1240.21	-57.2737	1048.22	1368.89	-117.691	1061.59	1142.92	-120.641	1059.66	1074.08	-132.53	1162.19	998.843	-110.318	1203.31	902.953	-161.534	1161.91	879.731	-165.788	1235.65	814.035
1103	0	107.96	1226.47	1562.69	203.978	1197.79	1566.96	44.6381	1065.61	1575.45	149.83	1024.24	1581.83	114.893	989.071	1408.1	87.9478	937.027	1191.6	118.517	1119.38	1340.56	125.538	1180.29	1212.28	180.21	916.52	1238.73	-55.5882	1056.92	1368.3	-115.844	1069.29	1142.15	-118.715	1066.84	1073.34	-131.054	1168.42	997.179	-109.061	1208.48	900.781	-160.192	1166.63	878.022	-164.805	1239.57	811.41
1104	0	109.369	1234.44	1562.65	205.482	1206.12	1566.83	46.6256	1073.36	1575.2	151.967	1032.35	1581.44	116.678	997.664	1407.29	89.5573	946.838	1190.37	120.312	1128.3	1340.42	127.263	1189.82	1212.34	181.696	925.923	1237.35	-53.8652	1065.67	1367.84	-113.923	1076.98	1141.52	-116.7	1073.96	1072.74	-129.552	1174.52	995.607	-107.805	1213.46	898.674	-158.82	1171.11	876.428	-163.87	1243.15	808.855
1105	0	110.811	1242.44	1562.72	207.02	1214.5	1566.81	48.6635	1081.14	1575.1	154.16	1040.51	1581.19	118.498	1006.3	1406.62	91.2022	956.748	1189.3	122.131	1137.26	1340.41	129.011	1199.4	1212.56	183.216	935.39	1236.11	-52.1132	1074.45	1367.55	-111.934	1084.65	1141.02	-114.599	1081.04	1072.29	-128.029	1180.5	994.147	-106.55	1218.26	896.659	-157.412	1175.35	874.974	-162.973	1246.4	806.402
1106	0	112.282	1250.49	1562.93	208.591	1222.93	1566.9	50.7434	1088.95	1575.15	156.398	1048.71	1581.07	120.347	1014.96	1406.08	92.8722	966.735	1188.39	123.964	1146.25	1340.53	130.771	1209.03	1212.93	184.763	944.906	1235.02	-50.3412	1083.27	1367.42	-109.885	1092.28	1140.69	-112.419	1088.07	1072	-126.487	1186.35	992.818	-105.295	1222.87	894.762	-155.964	1179.36	873.682	-162.1	1249.32	804.079
1107	0	113.78	1258.57	1563.26	210.189	1231.41	1567.12	52.856	1096.81	1575.35	158.671	1056.95	1581.11	122.217	1023.66	1405.7	94.5576	976.774	1187.69	125.802	1155.25	1340.79	132.532	1218.69	1213.44	186.332	954.456	1234.11	-48.558	1092.12	1367.47	-107.784	1099.87	1140.52	-110.165	1095.03	1071.89	-124.931	1192.09	991.635	-104.04	1227.33	893.003	-154.475	1183.16	872.57	-161.238	1251.93	801.91
1108	0	115.301	1266.7	1563.72	211.811	1239.92	1567.45	54.9918	1104.7	1575.7	160.967	1065.24	1581.28	124.101	1032.38	1405.48	96.2489	986.835	1187.21	127.633	1164.27	1341.18	134.281	1228.35	1214.1	187.919	964.024	1233.4	-46.7726	1100.98	1367.7	-105.642	1107.41	1140.52	-107.849	1101.93	1071.94	-123.367	1197.7	990.612	-102.785	1231.63	891.402	-152.943	1186.78	871.652	-160.373	1254.26	799.916
1109	0	116.842	1274.87	1564.31	213.451	1248.48	1567.89	57.1409	1112.63	1576.21	163.274	1073.57	1581.59	125.991	1041.12	1405.41	97.9387	996.887	1186.95	129.448	1173.3	1341.7	136.006	1238	1214.89	189.523	973.593	1232.89	-44.9932	1109.85	1368.1	-103.471	1114.89	1140.69	-105.482	1108.77	1072.17	-121.8	1203.2	989.756	-101.53	1235.79	889.974	-151.37	1190.23	870.938	-159.49	1256.32	798.112
1110	0	118.395	1283.07	1565.02	215.104	1257.07	1568.45	59.293	1120.61	1576.85	165.582	1081.94	1582.04	127.88	1049.87	1405.51	99.6215	1006.9	1186.92	131.237	1182.31	1342.34	137.697	1247.61	1215.8	191.141	983.147	1232.6	-43.2278	1118.7	1368.67	-101.281	1122.31	1141.02	-103.075	1115.53	1072.57	-120.236	1208.6	989.073	-100.278	1239.84	888.73	-149.76	1193.53	870.435	-158.576	1258.15	796.507
1111	0	119.957	1291.32	1565.84	216.761	1265.68	1569.1	61.4379	1128.63	1577.64	167.879	1090.35	1582.61	129.763	1058.63	1405.77	101.295	1016.84	1187.12	132.991	1191.31	1343.09	139.341	1257.18	1216.82	192.776	992.668	1232.52	-41.4832	1127.53	1369.41	-99.0872	1129.65	1141.52	-100.642	1122.22	1073.14	-118.681	1213.89	988.565	-99.0296	1243.79	887.678	-148.118	1196.72	870.14	-157.616	1259.79	795.105
1112	0	121.517	1299.61	1566.75	218.415	1274.32	1569.83	63.5654	1136.7	1578.54	170.152	1098.79	1583.3	131.634	1067.39	1406.18	102.958	1026.68	1187.53	134.701	1200.28	1343.95	140.929	1266.68	1217.93	194.43	1002.14	1232.66	-39.7658	1136.32	1370.29	-96.9009	1136.91	1142.17	-98.1994	1128.83	1073.85	-117.143	1219.09	988.227	-97.7878	1247.67	886.818	-146.452	1199.82	870.048	-156.6	1261.26	793.904
1113	0	123.07	1307.93	1567.74	220.058	1282.98	1570.64	65.6653	1144.81	1579.56	172.392	1107.25	1584.1	133.488	1076.13	1406.73	104.616	1036.38	1188.15	136.361	1209.22	1344.89	142.451	1276.1	1219.11	196.109	1011.55	1233	-38.0806	1145.05	1371.29	-94.735	1144.08	1142.95	-95.7605	1135.35	1074.7	-115.626	1224.21	988.054	-96.5551	1251.48	886.15	-144.769	1202.86	870.148	-155.519	1262.63	792.897
1114	0	124.607	1316.27	1568.8	221.681	1291.65	1571.51	67.7282	1152.95	1580.68	174.589	1115.75	1585	135.321	1084.86	1407.41	106.273	1045.93	1188.95	137.964	1218.11	1345.91	143.9	1285.41	1220.35	197.818	1020.89	1233.53	-36.4319	1153.7	1372.4	-92.6008	1151.15	1143.84	-93.3405	1141.78	1075.67	-114.136	1229.24	988.035	-95.3341	1255.27	885.667	-143.078	1205.87	870.424	-154.367	1263.92	792.074
1115	0	126.118	1324.65	1569.91	223.274	1300.33	1572.42	69.7449	1161.13	1581.87	176.732	1124.27	1585.97	137.131	1093.56	1408.21	107.938	1055.31	1189.9	139.506	1226.94	1346.99	145.27	1294.61	1221.62	199.565	1030.14	1234.24	-34.8227	1162.25	1373.58	-90.5087	1158.1	1144.83	-90.9535	1148.11	1076.73	-112.679	1234.21	988.156	-94.1274	1259.03	885.36	-141.391	1208.89	870.857	-153.14	1265.2	791.419
1116	0	127.594	1333.04	1571.04	224.829	1309.02	1573.36	71.7073	1169.35	1583.12	178.814	1132.8	1587.01	138.914	1102.22	1409.11	109.62	1064.49	1190.97	140.983	1235.71	1348.1	146.556	1303.69	1222.91	201.355	1039.29	1235.11	-33.2555	1170.69	1374.82	-88.4674	1164.94	1145.89	-88.6121	1154.35	1077.86	-111.259	1239.11	988.402	-92.9374	1262.81	885.216	-139.714	1211.93	871.423	-151.839	1266.52	790.918
1117	0	129.027	1341.45	1572.18	226.336	1317.71	1574.3	73.6077	1177.58	1584.42	180.829	1141.35	1588.11	140.67	1110.84	1410.09	111.326	1073.47	1192.15	142.395	1244.41	1349.25	147.758	1312.63	1224.18	203.195	1048.33	1236.1	-31.7314	1179	1376.09	-86.4836	1171.66	1147	-86.3275	1160.49	1079.05	-109.877	1243.96	988.757	-91.7657	1266.61	885.22	-138.056	1215.03	872.098	-150.468	1267.91	790.553
1118	0	130.407	1349.87	1573.31	227.786	1326.39	1575.25	75.4399	1185.84	1585.74	182.768	1149.9	1589.24	142.395	1119.4	1411.15	113.065	1082.24	1193.38	143.74	1253.03	1350.41	148.876	1321.43	1225.43	205.085	1057.26	1237.21	-30.251	1187.17	1377.36	-84.5621	1178.24	1148.14	-84.1083	1166.52	1080.25	-108.537	1248.77	989.201	-90.6132	1270.45	885.356	-136.423	1218.21	872.857	-149.034	1269.43	790.308
1119	0	131.728	1358.29	1574.41	229.173	1335.07	1576.17	77.1983	1194.11	1587.08	184.628	1158.46	1590.41	144.089	1127.91	1412.25	114.842	1090.81	1194.66	145.02	1261.57	1351.57	149.915	1330.08	1226.64	207.027	1066.07	1238.4	-28.8141	1195.2	1378.6	-82.7053	1184.68	1149.29	-81.9609	1172.45	1081.47	-107.237	1253.54	989.717	-89.4799	1274.34	885.607	-134.817	1221.49	873.674	-147.546	1271.13	790.169
1120	0	132.982	1366.7	1575.47	230.488	1343.73	1577.07	78.8786	1202.4	1588.4	186.405	1167.02	1591.58	145.751	1136.35	1413.39	116.659	1099.17	1195.95	146.237	1270.02	1352.71	150.879	1338.57	1227.79	209.016	1074.76	1239.65	-27.4198	1203.08	1379.81	-80.9134	1190.98	1150.43	-79.8888	1178.26	1082.67	-105.977	1258.27	990.288	-88.3649	1278.31	885.956	-133.24	1224.88	874.525	-146.018	1273.03	790.123
1121	0	134.164	1375.12	1576.47	231.728	1352.38	1577.92	80.4776	1210.68	1589.7	188.096	1175.58	1592.76	147.38	1144.73	1414.55	118.514	1107.34	1197.23	147.394	1278.38	1353.82	151.776	1346.92	1228.87	211.046	1083.32	1240.95	-26.0664	1210.81	1380.97	-79.1847	1197.13	1151.54	-77.8932	1183.97	1083.84	-104.755	1262.98	990.899	-87.2665	1282.36	886.386	-131.69	1228.38	875.388	-144.464	1275.18	790.162
1122	0	135.269	1383.52	1577.41	232.889	1361.01	1578.73	81.9931	1218.97	1590.97	189.699	1184.13	1593.92	148.974	1153.03	1415.71	120.404	1115.32	1198.5	148.495	1286.65	1354.89	152.617	1355.12	1229.88	213.108	1091.75	1242.28	-24.752	1218.39	1382.06	-77.5156	1203.15	1152.61	-75.9723	1189.58	1084.97	-103.566	1267.66	991.534	-86.1824	1286.49	886.882	-130.165	1232.02	876.246	-142.899	1277.6	790.277
1123	0	136.296	1391.9	1578.26	233.967	1369.63	1579.48	83.4241	1227.25	1592.19	191.215	1192.67	1595.07	150.533	1161.26	1416.87	122.321	1123.13	1199.72	149.546	1294.82	1355.91	153.41	1363.16	1230.81	215.191	1100.06	1243.61	-23.4743	1225.84	1383.07	-75.9012	1209.02	1153.63	-74.1224	1195.08	1086.05	-102.407	1272.33	992.18	-85.1096	1290.72	887.43	-128.658	1235.8	877.08	-141.339	1280.3	790.464
1124	0	137.244	1400.27	1579.03	234.962	1378.22	1580.17	84.7705	1235.52	1593.35	192.643	1201.19	1596.19	152.055	1169.42	1418.02	124.256	1130.78	1200.9	150.55	1302.89	1356.88	154.169	1371.07	1231.66	217.281	1108.23	1244.93	-22.2306	1233.16	1384	-74.3358	1214.77	1154.6	-72.3379	1200.48	1087.07	-101.273	1276.99	992.827	-84.0449	1295.05	888.017	-127.162	1239.7	877.879	-139.798	1283.31	790.719
1125	0	138.113	1408.61	1579.71	235.875	1386.79	1580.8	86.0334	1243.77	1594.44	193.984	1209.69	1597.27	153.541	1177.5	1419.14	126.197	1138.29	1202.03	151.514	1310.88	1357.78	154.903	1378.85	1232.41	219.365	1116.28	1246.24	-21.0182	1240.37	1384.85	-72.813	1220.4	1155.5	-70.6121	1205.79	1088.03	-100.158	1281.65	993.466	-82.9851	1299.47	888.63	-125.671	1243.73	878.632	-138.293	1286.63	791.041
1126	0	138.906	1416.93	1580.3	236.709	1395.33	1581.38	87.2144	1252.01	1595.45	195.24	1218.18	1598.31	154.988	1185.51	1420.23	128.133	1145.67	1203.11	152.444	1318.77	1358.62	155.624	1386.5	1233.09	221.429	1124.2	1247.52	-19.8344	1247.47	1385.62	-71.3264	1225.92	1156.35	-68.9374	1211.02	1088.93	-99.0574	1286.3	994.09	-81.9272	1304	889.26	-124.176	1247.89	879.333	-136.833	1290.26	791.427
1127	0	139.626	1425.23	1580.81	237.468	1403.84	1581.88	88.3161	1260.23	1596.39	196.414	1226.64	1599.3	156.397	1193.45	1421.28	130.052	1152.94	1204.13	153.343	1326.57	1359.38	156.342	1394.04	1233.68	223.461	1132.01	1248.77	-18.6768	1254.49	1386.3	-69.8702	1231.34	1157.13	-67.3062	1216.17	1089.76	-97.9664	1290.96	994.69	-80.8686	1308.62	889.898	-122.67	1252.17	879.975	-135.431	1294.18	791.874
1128	0	140.279	1433.49	1581.22	238.156	1412.32	1582.33	89.3419	1268.42	1597.23	197.509	1235.07	1600.23	157.768	1201.32	1422.29	131.944	1160.11	1205.11	154.216	1334.29	1360.07	157.063	1401.47	1234.19	225.451	1139.7	1249.98	-17.5432	1261.44	1386.91	-68.4389	1236.69	1157.86	-65.7114	1221.26	1090.53	-96.8808	1295.64	995.264	-79.8074	1313.34	890.535	-121.146	1256.56	880.556	-134.092	1298.4	792.379
1129	0	140.87	1441.73	1581.55	238.779	1420.76	1582.73	90.2953	1276.59	1597.99	198.529	1243.47	1601.1	159.1	1209.12	1423.25	133.8	1167.19	1206.03	155.068	1341.93	1360.68	157.794	1408.81	1234.62	227.389	1147.29	1251.15	-16.4317	1268.33	1387.45	-67.028	1241.99	1158.52	-64.1464	1226.31	1091.24	-95.7969	1300.33	995.807	-78.742	1318.17	891.164	-119.601	1261.06	881.075	-132.82	1302.88	792.935
1130	0	141.407	1449.93	1581.8	239.344	1429.17	1583.06	91.1808	1284.74	1598.65	199.477	1251.84	1601.91	160.393	1216.86	1424.17	135.612	1174.2	1206.91	155.902	1349.5	1361.22	158.538	1416.06	1234.97	229.269	1154.78	1252.28	-15.341	1275.18	1387.92	-65.6342	1247.24	1159.13	-62.6063	1231.33	1091.9	-94.712	1305.06	996.315	-77.6716	1323.09	891.779	-118.03	1265.67	881.531	-131.618	1307.62	793.535
1131	0	141.897	1458.1	1581.97	239.858	1437.53	1583.35	92.0028	1292.85	1599.23	200.357	1260.17	1602.65	161.646	1224.55	1425.03	137.375	1181.13	1207.74	156.72	1356.99	1361.69	159.297	1423.23	1235.25	231.085	1162.19	1253.37	-14.2703	1282	1388.33	-64.2553	1252.48	1159.69	-61.0871	1236.33	1092.49	-93.6242	1309.82	996.786	-76.5962	1328.11	892.372	-116.435	1270.37	881.925	-130.482	1312.58	794.169
1132	0	142.346	1466.24	1582.07	240.33	1445.86	1583.59	92.7662	1300.94	1599.71	201.175	1268.47	1603.33	162.861	1232.18	1425.84	139.085	1188	1208.54	157.524	1364.43	1362.07	160.07	1430.32	1235.45	232.834	1169.51	1254.4	-13.2194	1288.79	1388.68	-62.8902	1257.71	1160.19	-59.5868	1241.34	1093.04	-92.5325	1314.63	997.217	-75.516	1333.22	892.938	-114.815	1275.17	882.258	-129.408	1317.75	794.827
1133	0	142.763	1474.35	1582.1	240.765	1454.14	1583.78	93.4757	1308.99	1600.1	201.935	1276.72	1603.93	164.038	1239.77	1426.6	140.742	1194.82	1209.29	158.314	1371.8	1362.39	160.854	1437.35	1235.59	234.515	1176.76	1255.39	-12.1885	1295.57	1388.98	-61.5392	1262.97	1160.64	-58.1046	1246.37	1093.53	-91.4366	1319.5	997.606	-74.4318	1338.43	893.471	-113.177	1280.07	882.534	-128.389	1323.1	795.496
1134	0	143.153	1482.42	1582.08	241.171	1462.37	1583.93	94.1364	1317.02	1600.4	202.641	1284.93	1604.46	165.175	1247.31	1427.3	142.342	1201.58	1210.01	159.091	1379.12	1362.63	161.646	1444.32	1235.65	236.128	1183.95	1256.33	-11.1787	1302.35	1389.23	-60.2039	1268.27	1161.05	-56.6415	1251.43	1093.97	-90.337	1324.44	997.951	-73.3448	1343.74	893.965	-111.525	1285.07	882.752	-127.417	1328.6	796.162
1135	0	143.525	1490.46	1581.99	241.555	1470.56	1584.03	94.7528	1325.02	1600.61	203.297	1293.11	1604.91	166.273	1254.81	1427.94	143.886	1208.31	1210.69	159.855	1386.39	1362.81	162.439	1451.24	1235.66	237.672	1191.08	1257.22	-10.1913	1309.12	1389.44	-58.8866	1273.62	1161.4	-55.2	1256.55	1094.37	-89.2352	1329.46	998.252	-72.2564	1349.14	894.417	-109.867	1290.17	882.918	-126.48	1334.24	796.81
1136	0	143.882	1498.47	1581.86	241.922	1478.7	1584.1	95.3294	1332.99	1600.74	203.909	1301.24	1605.29	167.332	1262.29	1428.52	145.372	1214.99	1211.33	160.604	1393.62	1362.91	163.227	1458.1	1235.59	239.147	1198.16	1258.05	-9.22827	1315.9	1389.61	-57.5909	1279.04	1161.71	-53.7835	1261.74	1094.71	-88.1329	1334.57	998.506	-71.1681	1354.64	894.822	-108.214	1295.36	883.032	-125.569	1340	797.426
1137	0	144.23	1506.45	1581.68	242.278	1486.79	1584.12	95.8707	1340.93	1600.78	204.48	1309.32	1605.6	168.351	1269.73	1429.05	146.8	1221.64	1211.92	161.337	1400.82	1362.95	164.004	1464.93	1235.47	240.555	1205.21	1258.83	-8.29178	1322.68	1389.74	-56.321	1284.55	1161.97	-52.3966	1267.02	1095.01	-87.0328	1339.77	998.713	-70.0817	1360.23	895.174	-106.576	1300.67	883.098	-124.672	1345.86	797.997
1138	0	144.574	1514.39	1581.45	242.627	1494.83	1584.11	96.3802	1348.84	1600.75	205.014	1317.37	1605.83	169.33	1277.14	1429.52	148.168	1228.26	1212.48	162.052	1407.99	1362.93	164.762	1471.73	1235.29	241.895	1212.22	1259.54	-7.38444	1329.48	1389.84	-55.0819	1290.15	1162.18	-51.0447	1272.39	1095.25	-85.9379	1345.09	998.871	-68.9989	1365.91	895.471	-104.962	1306.08	883.119	-123.778	1351.8	798.509
1139	0	144.916	1522.3	1581.18	242.972	1502.83	1584.05	96.8616	1356.72	1600.65	205.515	1325.37	1605.98	170.266	1284.54	1429.92	149.473	1234.86	1212.99	162.747	1415.13	1362.84	165.496	1478.5	1235.05	243.167	1219.21	1260.2	-6.50902	1336.3	1389.9	-53.8787	1295.85	1162.34	-49.7337	1277.87	1095.45	-84.8515	1350.52	998.98	-67.9218	1371.69	895.708	-103.386	1311.6	883.098	-122.878	1357.82	798.953
1140	0	145.258	1530.18	1580.86	243.314	1510.78	1583.96	97.3177	1364.58	1600.47	205.986	1333.33	1606.06	171.158	1291.91	1430.27	150.713	1241.44	1213.45	163.42	1422.26	1362.7	166.199	1485.25	1234.76	244.37	1226.18	1260.79	-5.66842	1343.13	1389.92	-52.7173	1301.65	1162.46	-48.4696	1283.47	1095.6	-83.7778	1356.07	999.038	-66.8526	1377.56	895.883	-101.856	1317.24	883.037	-121.964	1363.9	799.316
1141	0	145.601	1538.04	1580.5	243.656	1518.69	1583.81	97.7511	1372.41	1600.23	206.43	1341.26	1606.07	172.005	1299.28	1430.55	151.884	1248.01	1213.87	164.068	1429.37	1362.49	166.868	1491.99	1234.43	245.503	1233.14	1261.31	-4.8656	1349.99	1389.91	-51.6033	1307.58	1162.53	-47.2589	1289.19	1095.71	-82.7208	1361.75	999.045	-65.7937	1383.52	895.992	-100.385	1322.99	882.937	-121.029	1370.04	799.592
1142	0	145.945	1545.87	1580.11	243.997	1526.56	1583.62	98.1637	1380.23	1599.93	206.849	1349.15	1606.01	172.805	1306.63	1430.76	152.981	1254.58	1214.22	164.691	1436.47	1362.23	167.499	1498.73	1234.04	246.564	1240.09	1261.77	-4.10353	1356.88	1389.86	-50.5426	1313.62	1162.56	-46.1077	1295.03	1095.76	-81.6851	1367.56	999	-64.748	1389.56	896.035	-98.9798	1328.86	882.8	-120.07	1376.24	799.774
1143	0	146.289	1553.67	1579.66	244.336	1534.39	1583.38	98.5569	1388.02	1599.57	207.245	1357.01	1605.88	173.555	1313.98	1430.91	154	1261.15	1214.52	165.286	1443.57	1361.91	168.09	1505.47	1233.61	247.549	1247.03	1262.15	-3.38506	1363.8	1389.78	-49.5408	1319.78	1162.53	-45.0222	1301.01	1095.76	-80.6757	1373.5	998.902	-63.7187	1395.69	896.007	-97.65	1334.85	882.627	-119.083	1382.5	799.857
1144	0	146.632	1561.46	1579.18	244.672	1542.19	1583.08	98.9316	1395.8	1599.15	207.62	1364.84	1605.69	174.252	1321.33	1430.99	154.934	1267.73	1214.76	165.85	1450.68	1361.54	168.641	1512.24	1233.14	248.456	1253.98	1262.46	-2.71295	1370.77	1389.65	-48.6034	1326.06	1162.46	-44.0079	1307.12	1095.71	-79.6974	1379.58	998.749	-62.7096	1401.91	895.909	-96.4021	1340.96	882.416	-118.07	1388.81	799.838
1145	0	146.97	1569.22	1578.64	245.002	1549.97	1582.73	99.2881	1403.56	1598.68	207.975	1372.65	1605.42	174.895	1328.68	1431.01	155.779	1274.33	1214.94	166.384	1457.79	1361.11	169.151	1519.02	1232.62	249.28	1260.93	1262.69	-2.08975	1377.78	1389.48	-47.7354	1332.46	1162.33	-43.0701	1313.36	1095.61	-78.7556	1385.79	998.539	-61.7249	1408.21	895.737	-95.2414	1347.19	882.168	-117.034	1395.17	799.714
1146	0	147.3	1576.97	1578.06	245.324	1557.72	1582.32	99.6264	1411.31	1598.16	208.309	1380.43	1605.1	175.481	1336.04	1430.95	156.529	1280.95	1215.05	166.884	1464.92	1360.63	169.622	1525.83	1232.07	250.02	1267.88	1262.85	-1.51779	1384.85	1389.27	-46.9413	1338.99	1162.15	-42.2131	1319.74	1095.46	-77.8555	1392.13	998.272	-60.7693	1414.58	895.492	-94.172	1353.53	881.881	-115.979	1401.58	799.486
1147	0	147.618	1584.71	1577.42	245.633	1565.45	1581.84	99.9459	1419.05	1597.6	208.625	1388.21	1604.71	176.007	1343.4	1430.83	157.181	1287.61	1215.09	167.35	1472.06	1360.1	170.055	1532.67	1231.47	250.672	1274.85	1262.92	-0.999174	1391.98	1389.01	-46.2251	1345.64	1161.92	-41.441	1326.24	1095.24	-77.0023	1398.6	997.946	-59.8481	1421.03	895.171	-93.1969	1359.97	881.551	-114.913	1408.06	799.154
1148	0	147.921	1592.44	1576.73	245.926	1573.17	1581.29	100.245	1426.79	1596.99	208.92	1395.98	1604.27	176.471	1350.78	1430.63	157.731	1294.31	1215.06	167.779	1479.23	1359.51	170.451	1539.55	1230.83	251.232	1281.83	1262.92	-0.535739	1399.17	1388.7	-45.59	1352.41	1161.63	-40.7567	1332.87	1094.98	-76.2011	1405.2	997.558	-58.9669	1427.56	894.776	-92.3179	1366.53	881.176	-113.844	1414.59	798.72
1149	0	148.202	1600.17	1575.99	246.198	1580.89	1580.68	100.524	1434.52	1596.34	209.195	1403.74	1603.76	176.871	1358.17	1430.36	158.176	1301.07	1214.96	168.171	1486.43	1358.88	170.812	1546.49	1230.16	251.701	1288.83	1262.83	-0.129103	1406.43	1388.33	-45.0384	1359.31	1161.29	-40.1625	1339.63	1094.65	-75.4572	1411.92	997.108	-58.1316	1434.17	894.304	-91.5361	1373.18	880.753	-112.782	1421.18	798.185
1150	0	148.458	1607.9	1575.18	246.445	1588.61	1579.99	100.779	1442.25	1595.65	209.448	1411.51	1603.21	177.205	1365.59	1430.02	158.515	1307.88	1214.78	168.524	1493.65	1358.19	171.139	1553.47	1229.44	252.076	1295.86	1262.67	0.219335	1413.76	1387.9	-44.5721	1366.32	1160.88	-39.6596	1346.51	1094.26	-74.7752	1418.76	996.593	-57.3483	1440.85	893.757	-90.852	1379.93	880.279	-111.741	1427.83	797.554
1151	0	148.682	1615.63	1574.32	246.661	1596.33	1579.23	101.009	1449.99	1594.93	209.679	1419.28	1602.6	177.472	1373.02	1429.6	158.75	1314.75	1214.53	168.837	1500.92	1357.45	171.432	1560.5	1228.68	252.357	1302.91	1262.42	0.508362	1421.17	1387.41	-44.1919	1373.45	1160.42	-39.2485	1353.52	1093.81	-74.1598	1425.72	996.012	-56.6235	1447.61	893.134	-90.2654	1386.78	879.751	-110.731	1434.55	796.829
1152	0	148.869	1623.37	1573.4	246.842	1604.08	1578.39	101.212	1457.74	1594.18	209.884	1427.06	1601.94	177.67	1380.49	1429.11	158.881	1321.7	1214.2	169.106	1508.23	1356.67	171.691	1567.6	1227.88	252.546	1310	1262.09	0.736923	1428.65	1386.86	-43.8977	1380.7	1159.89	-38.9288	1360.64	1093.3	-73.6153	1432.78	995.365	-55.9631	1454.44	892.437	-89.7761	1393.72	879.166	-109.768	1441.33	796.016
1153	0	149.014	1631.11	1572.42	246.981	1611.84	1577.48	101.385	1465.49	1593.4	210.063	1434.86	1601.24	177.8	1387.98	1428.55	158.915	1328.72	1213.79	169.33	1515.58	1355.83	171.915	1574.76	1227.05	252.645	1317.13	1261.68	0.904084	1436.21	1386.24	-43.6889	1388.06	1159.3	-38.6992	1367.87	1092.72	-73.1455	1439.96	994.651	-55.3734	1461.35	891.666	-89.3831	1400.74	878.522	-108.864	1448.17	795.118
1154	0	149.11	1638.88	1571.38	247.075	1619.62	1576.5	101.525	1473.25	1592.58	210.214	1442.68	1600.5	177.859	1395.51	1427.91	158.855	1335.83	1213.3	169.507	1522.99	1354.96	172.103	1581.99	1226.18	252.655	1324.31	1261.18	1.009	1443.85	1385.56	-43.5638	1395.54	1158.64	-38.5577	1375.22	1092.08	-72.754	1447.24	993.869	-54.8602	1468.34	890.824	-89.0854	1407.85	877.817	-108.032	1455.09	794.143
1155	0	149.151	1646.65	1570.28	247.117	1627.44	1575.45	101.629	1481.03	1591.75	210.333	1450.52	1599.71	177.847	1403.07	1427.21	158.708	1343.02	1212.74	169.634	1530.45	1354.05	172.253	1589.3	1225.27	252.582	1331.53	1260.61	1.05086	1451.56	1384.82	-43.5206	1403.12	1157.92	-38.5018	1382.68	1091.37	-72.4439	1454.62	993.022	-54.4288	1475.42	889.913	-88.8819	1415.04	877.051	-107.288	1462.07	793.096
1156	0	149.131	1654.45	1569.14	247.102	1635.29	1574.33	101.695	1488.82	1590.9	210.419	1458.4	1598.9	177.766	1410.68	1426.44	158.481	1350.31	1212.09	169.708	1537.97	1353.1	172.362	1596.68	1224.34	252.427	1338.82	1259.96	1.02891	1459.34	1384	-43.5567	1410.81	1157.13	-38.5285	1390.25	1090.59	-72.218	1462.1	992.108	-54.0842	1482.58	888.936	-88.7711	1422.32	876.223	-106.642	1469.12	791.984
1157	0	149.045	1662.26	1567.94	247.025	1643.18	1573.15	101.72	1496.63	1590.03	210.469	1466.3	1598.05	177.613	1418.32	1425.61	158.183	1357.69	1211.37	169.726	1545.55	1352.12	172.426	1604.15	1223.38	252.197	1346.18	1259.24	0.942352	1467.19	1383.13	-43.6692	1418.6	1156.28	-38.6345	1397.93	1089.75	-72.0784	1469.68	991.132	-53.8307	1489.83	887.895	-88.7516	1429.68	875.335	-106.106	1476.25	790.812
1158	0	148.887	1670.1	1566.71	246.88	1651.11	1571.91	101.7	1504.46	1589.15	210.48	1474.24	1597.17	177.39	1426.02	1424.71	157.819	1365.17	1210.57	169.685	1553.2	1351.11	172.441	1611.71	1222.39	251.894	1353.6	1258.44	0.790402	1475.11	1382.2	-43.855	1426.49	1155.37	-38.816	1405.71	1088.85	-72.027	1477.35	990.094	-53.6719	1497.17	886.795	-88.8214	1437.12	874.388	-105.689	1483.45	789.587
1159	0	148.651	1677.96	1565.45	246.663	1659.09	1570.63	101.632	1512.3	1588.26	210.451	1482.22	1596.28	177.097	1433.76	1423.75	157.398	1372.76	1209.69	169.582	1560.92	1350.08	172.404	1619.37	1221.39	251.522	1361.12	1257.57	0.572265	1483.09	1381.2	-44.1112	1434.47	1154.4	-39.0693	1413.61	1087.88	-72.0651	1485.12	988.999	-53.6108	1504.61	885.639	-88.9788	1444.64	873.384	-105.4	1490.73	788.315
1160	0	148.332	1685.84	1564.16	246.367	1667.12	1569.31	101.513	1520.17	1587.38	210.377	1490.24	1595.37	176.734	1441.56	1422.75	156.926	1380.45	1208.75	169.413	1568.72	1349.04	172.311	1627.12	1220.39	251.085	1368.72	1256.63	0.287176	1491.13	1380.16	-44.4345	1442.55	1153.37	-39.3906	1421.61	1086.86	-72.1933	1492.99	987.85	-53.6494	1512.15	884.433	-89.2216	1452.25	872.327	-105.246	1498.09	787.004
1161	0	147.924	1693.76	1562.85	245.989	1675.2	1567.95	101.342	1528.05	1586.5	210.257	1498.3	1594.45	176.301	1449.41	1421.7	156.409	1388.26	1207.73	169.177	1576.59	1348	172.158	1634.99	1219.38	250.587	1376.42	1255.63	-0.065558	1499.23	1379.07	-44.8219	1450.71	1152.28	-39.7763	1429.72	1085.78	-72.412	1500.95	986.654	-53.7892	1519.79	883.183	-89.5474	1459.95	871.221	-105.228	1505.54	785.66
1162	0	147.424	1701.69	1561.55	245.525	1683.34	1566.59	101.114	1535.96	1585.62	210.087	1506.4	1593.52	175.801	1457.32	1420.61	155.85	1396.18	1206.64	168.87	1584.55	1346.95	171.942	1642.96	1218.38	250.029	1384.22	1254.58	-0.486495	1507.39	1377.94	-45.2706	1458.97	1151.15	-40.2227	1437.94	1084.65	-72.7208	1509.01	985.415	-54.0307	1527.54	881.895	-89.9536	1467.74	870.07	-105.352	1513.07	784.291
1163	0	146.828	1709.66	1560.25	244.97	1691.54	1565.21	100.829	1543.89	1584.77	209.867	1514.55	1592.6	175.232	1465.3	1419.48	155.255	1404.22	1205.49	168.49	1592.6	1345.92	171.66	1651.05	1217.4	249.414	1392.14	1253.46	-0.975984	1515.6	1376.77	-45.7779	1467.31	1149.98	-40.7263	1446.26	1083.48	-73.1188	1517.16	984.142	-54.3736	1535.4	880.576	-90.4376	1475.62	868.883	-105.615	1520.69	782.902
1164	0	146.133	1717.66	1558.97	244.323	1699.79	1563.85	100.482	1551.84	1583.95	209.592	1522.74	1591.7	174.598	1473.34	1418.33	154.625	1412.4	1204.29	168.037	1600.74	1344.9	171.309	1659.27	1216.44	248.743	1400.17	1252.3	-1.53407	1523.87	1375.58	-46.3413	1475.74	1148.77	-41.284	1454.7	1082.27	-73.6045	1525.41	982.843	-54.817	1543.38	879.235	-90.9967	1483.59	867.665	-106.017	1528.4	781.502
1165	0	145.337	1725.69	1557.73	243.58	1708.1	1562.5	100.074	1559.82	1583.15	209.262	1530.98	1590.81	173.898	1481.45	1417.17	153.962	1420.7	1203.03	167.508	1608.97	1343.92	170.888	1667.61	1215.53	248.02	1408.33	1251.1	-2.16041	1532.19	1374.38	-46.9584	1484.26	1147.53	-41.8928	1463.25	1081.03	-74.1759	1533.77	981.527	-55.3591	1551.47	877.882	-91.6278	1491.67	866.426	-106.554	1536.22	780.099
1166	0	144.439	1733.75	1556.54	242.74	1716.47	1561.19	99.6031	1567.82	1582.4	208.875	1539.27	1589.96	173.135	1489.63	1416.01	153.268	1429.14	1201.73	166.905	1617.29	1342.97	170.396	1676.09	1214.67	247.245	1416.62	1249.87	-2.85417	1540.57	1373.16	-47.6269	1492.86	1146.28	-42.5499	1471.91	1079.78	-74.8303	1542.22	980.205	-55.9975	1559.69	876.527	-92.3281	1499.84	865.176	-107.22	1544.13	778.7
1167	0	143.439	1741.85	1555.42	241.803	1724.91	1559.94	99.0681	1575.85	1581.69	208.43	1547.62	1589.14	172.312	1497.89	1414.85	152.544	1437.72	1200.4	166.227	1625.72	1342.07	169.832	1684.7	1213.87	246.421	1425.05	1248.62	-3.61394	1549.01	1371.96	-48.3445	1501.56	1145.01	-43.2524	1480.69	1078.51	-75.5645	1550.78	978.888	-56.729	1568.03	875.18	-93.0943	1508.13	863.925	-108.01	1552.16	777.316
1168	0	142.337	1749.99	1554.37	240.769	1733.4	1558.75	98.4691	1583.92	1581.04	207.926	1556.01	1588.37	171.432	1506.22	1413.72	151.791	1446.45	1199.04	165.476	1634.24	1341.24	169.196	1693.45	1213.15	245.552	1433.61	1247.37	-4.43765	1557.5	1370.76	-49.1088	1510.35	1143.76	-43.9978	1489.58	1077.25	-76.3745	1559.45	977.589	-57.5496	1576.51	873.854	-93.9231	1516.52	862.687	-108.915	1560.3	775.956
1169	0	141.138	1758.17	1553.41	239.64	1741.96	1557.65	97.8067	1592.02	1580.46	207.362	1564.46	1587.66	170.496	1514.64	1412.62	151.01	1455.34	1197.68	164.655	1642.87	1340.47	168.49	1702.33	1212.51	244.639	1442.32	1246.11	-5.32252	1566.05	1369.6	-49.9173	1519.24	1142.52	-44.7835	1498.6	1076	-77.2563	1568.24	976.323	-58.4549	1585.11	872.562	-94.8109	1525.04	861.473	-109.927	1568.55	774.632
1170	0	139.843	1766.39	1552.56	238.417	1750.58	1556.64	97.0821	1600.15	1579.95	206.74	1572.96	1587.01	169.51	1523.14	1411.56	150.203	1464.37	1196.33	163.765	1651.59	1339.79	167.713	1711.36	1211.98	243.688	1451.17	1244.88	-6.26498	1574.67	1368.48	-50.7674	1528.23	1141.31	-45.6067	1507.73	1074.79	-78.2049	1577.14	975.103	-59.4397	1593.86	871.318	-95.7539	1533.67	860.3	-111.036	1576.94	773.357
1171	0	138.458	1774.66	1551.82	237.105	1759.26	1555.75	96.2975	1608.33	1579.52	206.059	1581.52	1586.44	168.478	1531.72	1410.57	149.373	1473.56	1195.01	162.813	1660.42	1339.2	166.87	1720.52	1211.55	242.704	1460.17	1243.68	-7.26066	1583.35	1367.42	-51.6559	1537.32	1140.15	-46.4649	1516.99	1073.62	-79.2153	1586.16	973.945	-60.498	1602.74	870.137	-96.748	1542.44	859.181	-112.232	1585.45	772.145
1172	0	136.989	1782.98	1551.22	235.709	1768.01	1554.99	95.4554	1616.55	1579.17	205.323	1590.14	1585.96	167.405	1540.39	1409.65	148.522	1482.91	1193.74	161.802	1669.34	1338.71	165.963	1729.82	1211.24	241.693	1469.31	1242.54	-8.30445	1592.09	1366.43	-52.5798	1546.51	1139.06	-47.3553	1526.36	1072.52	-80.282	1595.3	972.866	-61.6236	1611.77	869.034	-97.7893	1551.33	858.134	-113.506	1594.09	771.011
1173	0	135.442	1791.36	1550.76	234.234	1776.82	1554.36	94.5594	1624.81	1578.92	204.533	1598.81	1585.56	166.296	1549.15	1408.82	147.654	1492.41	1192.53	160.738	1678.37	1338.33	164.996	1739.25	1211.06	240.661	1478.59	1241.47	-9.39051	1600.9	1365.53	-53.5354	1555.81	1138.04	-48.2752	1535.86	1071.5	-81.399	1604.57	971.881	-62.8097	1620.94	868.025	-98.8734	1560.37	857.174	-114.848	1602.88	769.971
1174	0	133.825	1799.79	1550.46	232.687	1785.69	1553.89	93.614	1633.13	1578.77	203.693	1607.55	1585.27	165.157	1557.99	1408.09	146.774	1502.05	1191.42	159.628	1687.48	1338.06	163.974	1748.79	1211.01	239.615	1488	1240.49	-10.5124	1609.78	1364.73	-54.5194	1565.22	1137.12	-49.2222	1545.48	1070.57	-82.5603	1613.97	971.008	-64.0489	1630.26	867.127	-99.9962	1569.56	856.318	-116.248	1611.82	769.044
1175	0	132.149	1808.28	1550.31	231.077	1794.62	1553.59	92.624	1641.49	1578.72	202.808	1616.34	1585.08	163.994	1566.92	1407.48	145.886	1511.84	1190.42	158.479	1696.68	1337.92	162.903	1758.45	1211.1	238.562	1497.54	1239.62	-11.6633	1618.73	1364.06	-55.5281	1574.72	1136.32	-50.1939	1555.21	1069.75	-83.7596	1623.5	970.26	-65.3338	1639.74	866.354	-101.154	1578.89	855.581	-117.695	1620.91	768.245
1176	0	130.421	1816.83	1550.33	229.413	1803.62	1553.45	91.5954	1649.92	1578.78	201.881	1625.19	1585	162.812	1575.94	1406.99	144.994	1521.76	1189.55	157.298	1705.97	1337.9	161.789	1768.2	1211.32	237.508	1507.19	1238.88	-12.836	1627.76	1363.51	-56.5579	1584.34	1135.64	-51.1883	1565.06	1069.07	-84.9905	1633.17	969.654	-66.6565	1649.37	865.724	-102.341	1588.39	854.98	-119.182	1630.17	767.592
1177	0	128.654	1825.44	1550.51	227.706	1812.68	1553.49	90.5346	1658.39	1578.94	200.919	1634.1	1585.04	161.618	1585.03	1406.64	144.101	1531.79	1188.83	156.095	1715.32	1338.01	160.64	1778.04	1211.68	236.46	1516.95	1238.28	-14.0234	1636.85	1363.11	-57.6058	1594.05	1135.11	-52.2041	1575.01	1068.52	-86.2467	1642.96	969.203	-68.0092	1659.16	865.248	-103.556	1598.05	854.528	-120.698	1639.61	767.1
1178	0	126.858	1834.11	1550.86	225.966	1821.79	1553.71	89.4486	1666.93	1579.21	199.929	1643.06	1585.19	160.416	1594.2	1406.43	143.209	1541.92	1188.29	154.877	1724.75	1338.25	159.464	1787.94	1212.16	235.419	1526.79	1237.84	-15.2184	1646.02	1362.87	-58.669	1603.85	1134.74	-53.2404	1585.07	1068.13	-87.5223	1652.89	968.918	-69.3838	1669.1	864.94	-104.794	1607.88	854.237	-122.235	1649.23	766.785
1179	0	125.046	1842.85	1551.38	224.206	1830.96	1554.1	88.3449	1675.53	1579.59	198.916	1652.09	1585.45	159.212	1603.44	1406.37	142.318	1552.14	1187.93	153.654	1734.22	1338.62	158.272	1797.9	1212.78	234.389	1536.7	1237.56	-16.4144	1655.27	1362.8	-59.7456	1613.75	1134.53	-54.2974	1595.21	1067.9	-88.8113	1662.96	968.809	-70.7726	1679.21	864.811	-106.053	1617.88	854.116	-123.784	1659.05	766.657
1180	0	123.231	1851.64	1552.05	222.438	1840.18	1554.67	87.2314	1684.18	1580.07	197.888	1661.16	1585.83	158.01	1612.74	1406.46	141.425	1562.41	1187.76	152.434	1743.74	1339.11	157.074	1807.89	1213.51	233.367	1546.66	1237.45	-17.6051	1664.6	1362.89	-60.8342	1623.73	1134.5	-55.376	1605.45	1067.85	-90.1083	1673.15	968.883	-72.1681	1689.48	864.868	-107.329	1628.06	854.173	-125.337	1669.07	766.728
1181	0	121.425	1860.49	1552.88	220.675	1849.44	1555.4	86.1159	1692.89	1580.66	196.852	1670.28	1586.32	156.812	1622.1	1406.71	140.526	1572.72	1187.8	151.226	1753.3	1339.73	155.88	1817.89	1214.35	232.351	1556.64	1237.52	-18.7849	1674	1363.16	-61.9346	1633.78	1134.65	-56.4782	1615.76	1067.97	-91.4086	1683.47	969.144	-73.5629	1699.91	865.117	-108.622	1638.42	854.411	-126.886	1679.31	767.002
1182	0	119.641	1869.39	1553.84	218.932	1858.75	1556.28	85.0065	1701.65	1581.34	195.818	1679.44	1586.92	155.622	1631.5	1407.11	139.614	1583.05	1188.04	150.039	1762.87	1340.45	154.703	1827.89	1215.28	231.335	1566.62	1237.77	-19.949	1683.48	1363.61	-63.0475	1643.91	1134.98	-57.6068	1626.13	1068.27	-92.7077	1693.92	969.594	-74.9506	1710.49	865.561	-109.93	1648.97	854.831	-128.424	1689.77	767.482
1183	0	117.893	1878.35	1554.92	217.221	1868.1	1557.3	83.911	1710.47	1582.11	194.791	1688.65	1587.61	154.441	1640.93	1407.65	138.679	1593.36	1188.48	148.88	1772.45	1341.28	153.555	1837.86	1216.29	230.31	1576.57	1238.19	-21.0932	1693.04	1364.23	-64.1742	1654.11	1135.48	-58.7656	1636.57	1068.74	-94.0018	1704.48	970.23	-76.3248	1721.24	866.199	-111.253	1659.69	855.429	-129.945	1700.47	768.166
1184	0	116.194	1887.35	1556.12	215.557	1877.47	1558.44	82.837	1719.34	1582.96	193.78	1697.88	1588.4	153.27	1650.39	1408.34	137.711	1603.64	1189.11	147.757	1782.03	1342.21	152.448	1847.79	1217.37	229.266	1586.48	1238.78	-22.2142	1702.68	1365.01	-65.3174	1664.36	1136.17	-59.959	1647.05	1069.38	-95.2878	1715.17	971.049	-77.6802	1732.14	867.027	-112.591	1670.6	856.199	-131.443	1711.41	769.049
1185	0	114.558	1896.39	1557.4	213.952	1886.87	1559.68	81.7916	1728.26	1583.89	192.792	1707.15	1589.27	152.111	1659.86	1409.16	136.698	1613.85	1189.92	146.677	1791.58	1343.22	151.393	1857.66	1218.5	228.193	1596.3	1239.53	-23.3093	1712.39	1365.94	-66.48	1674.67	1137.02	-61.1918	1657.57	1070.19	-96.5629	1725.96	972.041	-79.012	1743.19	868.04	-113.944	1681.68	857.131	-132.911	1722.59	770.122
1186	0	112.995	1905.47	1558.76	212.419	1896.28	1561.01	80.7813	1737.22	1584.89	191.833	1716.43	1590.22	150.962	1669.33	1410.1	135.627	1623.97	1190.9	145.645	1801.1	1344.3	150.401	1867.45	1219.67	227.078	1606.03	1240.42	-24.3764	1722.17	1367.02	-67.6653	1685.02	1138.03	-62.469	1668.13	1071.15	-97.8248	1736.86	973.198	-80.3162	1754.38	869.228	-115.313	1692.94	858.214	-134.347	1734.03	771.371
1187	0	111.519	1914.58	1560.18	210.971	1905.69	1562.4	79.812	1746.22	1585.95	190.909	1725.73	1591.23	149.824	1678.79	1411.16	134.489	1633.97	1192.03	144.666	1810.58	1345.44	149.481	1877.14	1220.86	225.913	1615.63	1241.45	-25.4139	1732.01	1368.22	-68.8766	1695.42	1139.18	-63.7953	1678.71	1072.24	-99.0717	1747.86	974.506	-81.5894	1765.72	870.58	-116.7	1704.37	859.434	-135.747	1745.72	772.784
1188	0	110.14	1923.71	1561.63	209.619	1915.09	1563.83	78.8886	1755.26	1587.07	190.026	1735.04	1592.3	148.698	1688.22	1412.31	133.274	1643.85	1193.3	143.743	1820	1346.63	148.641	1886.71	1222.06	224.688	1625.1	1242.59	-26.4208	1741.9	1369.54	-70.117	1705.87	1140.45	-65.1747	1689.32	1073.46	-100.302	1758.95	975.953	-82.829	1777.18	872.083	-118.105	1715.96	860.775	-137.109	1757.66	774.343
1189	0	108.868	1932.86	1563.1	208.372	1924.48	1565.29	78.0152	1764.33	1588.23	189.187	1744.34	1593.41	147.582	1697.62	1413.56	131.978	1653.56	1194.68	142.879	1829.35	1347.85	147.885	1896.17	1223.25	223.397	1634.4	1243.83	-27.396	1751.83	1370.95	-71.3885	1716.36	1141.84	-66.6101	1699.94	1074.78	-101.513	1770.13	977.522	-84.033	1788.78	873.722	-119.53	1727.7	862.223	-138.432	1769.84	776.031
1190	0	107.711	1942.03	1564.57	207.239	1933.85	1566.74	77.1949	1773.42	1589.43	188.397	1753.63	1594.56	146.477	1706.97	1414.88	130.598	1663.11	1196.16	142.074	1838.63	1349.1	147.217	1905.48	1224.43	222.037	1643.54	1245.16	-28.3389	1761.78	1372.45	-72.6923	1726.88	1143.33	-68.1031	1710.58	1076.2	-102.705	1781.39	979.2	-85.1999	1800.48	875.482	-120.974	1739.59	863.762	-139.716	1782.26	777.832
1191	0	106.675	1951.2	1566.02	206.226	1943.19	1568.17	76.4299	1782.54	1590.66	187.657	1762.91	1595.73	145.385	1716.26	1416.26	129.137	1672.47	1197.71	141.328	1847.82	1350.36	146.636	1914.65	1225.59	220.609	1652.49	1246.57	-29.249	1771.74	1374	-74.0283	1737.44	1144.89	-69.6532	1721.24	1077.69	-103.874	1792.73	980.97	-86.3288	1812.3	877.348	-122.439	1751.62	865.378	-140.961	1794.9	779.73
1192	0	105.766	1960.38	1567.44	205.338	1952.48	1569.56	75.7214	1791.68	1591.91	186.968	1772.17	1596.92	144.306	1725.49	1417.69	127.601	1681.64	1199.32	140.64	1856.91	1351.63	146.14	1923.67	1226.72	219.115	1661.27	1248.03	-30.1258	1781.7	1375.61	-75.3947	1748.03	1146.51	-71.2584	1731.9	1079.24	-105.019	1804.14	982.818	-87.419	1824.22	879.306	-123.924	1763.78	867.059	-142.17	1807.76	781.71
1193	0	104.986	1969.55	1568.82	204.578	1961.73	1570.9	75.0696	1800.82	1593.17	186.332	1781.39	1598.12	143.243	1734.63	1419.16	126.002	1690.61	1200.98	140.008	1865.9	1352.89	145.723	1932.53	1227.82	217.564	1669.86	1249.53	-30.9691	1791.62	1377.24	-76.7884	1758.65	1148.17	-72.9141	1742.58	1080.83	-106.138	1815.61	984.729	-88.4705	1836.22	881.341	-125.427	1776.06	868.792	-143.344	1820.81	783.759
1194	0	104.338	1978.71	1570.14	203.948	1970.92	1572.18	74.4738	1809.98	1594.44	185.748	1790.58	1599.32	142.198	1743.7	1420.65	124.351	1699.38	1202.66	139.427	1874.78	1354.13	145.379	1941.22	1228.89	215.964	1678.27	1251.07	-31.7787	1801.49	1378.9	-78.2047	1769.29	1149.87	-74.6142	1753.25	1082.45	-107.23	1827.14	986.69	-89.4832	1848.31	883.439	-126.947	1788.45	870.568	-144.486	1834.04	785.868
1195	0	103.82	1987.85	1571.38	203.446	1980.04	1573.37	73.9326	1819.13	1595.72	185.214	1799.73	1600.5	141.173	1752.67	1422.15	122.665	1707.96	1204.34	138.895	1883.56	1355.34	145.098	1949.76	1229.92	214.327	1686.51	1252.62	-32.5546	1811.3	1380.57	-79.6378	1779.94	1151.57	-76.3504	1763.93	1084.09	-108.29	1838.71	988.689	-90.4574	1860.46	885.587	-128.48	1800.94	872.376	-145.6	1847.42	788.026
1196	0	103.43	1996.97	1572.55	203.069	1989.1	1574.47	73.444	1828.29	1596.98	184.728	1808.82	1601.68	140.171	1761.55	1423.65	120.96	1716.36	1206.02	138.405	1892.22	1356.53	144.87	1958.14	1230.92	212.667	1694.58	1254.17	-33.2971	1821.01	1382.23	-81.0806	1790.58	1153.28	-78.113	1774.61	1085.72	-109.319	1850.32	990.713	-91.3935	1872.67	887.772	-130.021	1813.51	874.21	-146.687	1860.93	790.225
1197	0	103.164	2006.07	1573.64	202.814	1998.08	1575.47	73.0051	1837.43	1598.23	184.289	1817.86	1602.83	139.195	1770.34	1425.13	119.255	1724.58	1207.68	137.954	1900.77	1357.67	144.684	1966.37	1231.88	210.998	1702.5	1255.72	-34.0065	1830.62	1383.88	-82.5254	1801.22	1154.97	-79.8911	1785.27	1087.33	-110.315	1861.96	992.751	-92.2922	1884.93	889.984	-131.566	1826.17	876.061	-147.75	1874.56	792.46
1198	0	103.016	2015.12	1574.63	202.673	2006.97	1576.38	72.6129	1846.55	1599.46	183.892	1826.85	1603.94	138.248	1779.02	1426.58	117.566	1732.64	1209.3	137.536	1909.21	1358.77	144.53	1974.46	1232.8	209.335	1710.28	1257.24	-34.6834	1840.1	1385.49	-83.9641	1811.82	1156.63	-81.673	1795.92	1088.92	-111.276	1873.61	994.792	-93.1541	1897.22	892.21	-133.106	1838.88	877.922	-148.79	1888.27	794.723
1199	0	102.98	2024.14	1575.53	202.64	2015.78	1577.17	72.2637	1855.65	1600.66	183.534	1835.76	1605.02	137.332	1787.61	1428	115.909	1740.55	1210.88	137.147	1917.54	1359.81	144.396	1982.42	1233.68	207.691	1717.94	1258.74	-35.3281	1849.45	1387.07	-85.3884	1822.37	1158.25	-83.4466	1806.54	1090.47	-112.201	1885.27	996.826	-93.98	1909.54	894.442	-134.635	1851.65	879.785	-149.808	1902.06	797.009
1200	0	103.047	2033.11	1576.34	202.705	2024.5	1577.86	71.9539	1864.73	1601.82	183.212	1844.61	1606.05	136.45	1796.1	1429.37	114.299	1748.34	1212.41	136.781	1925.77	1360.8	144.274	1990.25	1234.51	206.081	1725.49	1260.19	-35.9414	1858.67	1388.6	-86.7902	1832.85	1159.82	-85.1997	1817.12	1091.97	-113.091	1896.92	998.841	-94.7706	1921.87	896.667	-136.144	1864.46	881.641	-150.803	1915.89	799.312
1201	0	103.209	2042.03	1577.04	202.86	2033.13	1578.44	71.6795	1873.76	1602.94	182.921	1853.39	1607.03	135.606	1804.49	1430.69	112.749	1756.01	1213.87	136.434	1933.9	1361.72	144.153	1997.97	1235.29	204.517	1732.95	1261.59	-36.5236	1867.73	1390.06	-88.1618	1843.26	1161.32	-86.9208	1827.66	1093.4	-113.945	1908.55	1000.83	-95.5268	1934.2	898.877	-137.624	1877.28	883.482	-151.774	1929.74	801.625
1202	0	103.454	2050.9	1577.65	203.095	2041.66	1578.92	71.4366	1882.76	1604	182.657	1862.1	1607.95	134.8	1812.79	1431.93	111.272	1763.59	1215.25	136.103	1941.94	1362.56	144.028	2005.6	1236.01	203.013	1740.34	1262.92	-37.0753	1876.65	1391.46	-89.4961	1853.57	1162.74	-88.5989	1838.13	1094.76	-114.765	1920.13	1002.78	-96.2491	1946.51	901.061	-139.064	1890.12	885.296	-152.72	1943.6	803.941
1203	0	103.774	2059.71	1578.16	203.399	2050.11	1579.28	71.2217	1891.72	1604.99	182.418	1870.73	1608.8	134.037	1821.01	1433.1	109.877	1771.09	1216.54	135.785	1949.89	1363.33	143.893	2013.13	1236.67	201.58	1747.66	1264.19	-37.5965	1885.41	1392.76	-90.7864	1863.76	1164.09	-90.2242	1848.54	1096.04	-115.55	1931.67	1004.68	-96.9381	1958.8	903.21	-140.454	1902.95	887.073	-153.637	1957.45	806.253
1204	0	104.156	2068.45	1578.57	203.76	2058.46	1579.55	71.0311	1900.63	1605.92	182.198	1879.28	1609.57	133.319	1829.15	1434.18	108.574	1778.52	1217.75	135.477	1957.76	1364.01	143.743	2020.59	1237.25	200.228	1754.94	1265.37	-38.0873	1894.03	1393.97	-92.0269	1873.82	1165.33	-91.7879	1858.86	1097.22	-116.301	1943.14	1006.52	-97.5943	1971.04	905.313	-141.786	1915.75	888.802	-154.52	1971.27	808.55
1205	0	104.591	2077.14	1578.88	204.17	2066.73	1579.71	70.8618	1909.49	1606.77	181.995	1887.77	1610.27	132.648	1837.21	1435.17	107.369	1785.9	1218.85	135.178	1965.57	1364.61	143.577	2027.99	1237.75	198.968	1762.18	1266.46	-38.5473	1902.51	1395.08	-93.2123	1883.75	1166.48	-93.2822	1869.09	1098.3	-117.018	1954.53	1008.29	-98.218	1983.23	907.362	-143.049	1928.5	890.471	-155.366	1985.04	810.823
1206	0	105.068	2085.75	1579.1	204.617	2074.91	1579.78	70.7109	1918.29	1607.53	181.806	1896.18	1610.88	132.027	1845.2	1436.06	106.269	1793.23	1219.85	134.887	1973.31	1365.11	143.394	2035.32	1238.17	197.808	1769.4	1267.46	-38.9757	1910.85	1396.07	-94.3378	1893.53	1167.51	-94.7009	1879.23	1099.27	-117.701	1965.82	1009.99	-98.809	1995.34	909.346	-144.235	1941.2	892.068	-156.169	1998.75	813.063
1207	0	105.577	2094.31	1579.22	205.091	2083.02	1579.75	70.5762	1927.04	1608.21	181.628	1904.52	1611.4	131.459	1853.13	1436.85	105.281	1800.52	1220.74	134.605	1980.99	1365.52	143.194	2042.62	1238.49	196.758	1776.61	1268.36	-39.3718	1919.06	1396.94	-95.3993	1903.17	1168.42	-96.0382	1889.26	1100.12	-118.348	1977.02	1011.59	-99.3672	2007.38	911.255	-145.336	1953.81	893.582	-156.923	2012.39	815.257
1208	0	106.107	2102.8	1579.25	205.585	2091.06	1579.63	70.4559	1935.74	1608.78	181.461	1912.8	1611.83	130.946	1861.01	1437.53	104.409	1807.79	1221.52	134.332	1988.63	1365.83	142.978	2049.87	1238.71	195.824	1783.82	1269.15	-39.7342	1927.14	1397.68	-96.393	1912.64	1169.21	-97.2897	1899.18	1100.85	-118.959	1988.1	1013.1	-99.892	2019.32	913.081	-146.347	1966.33	895.004	-157.623	2025.93	817.396
1209	0	106.652	2111.23	1579.18	206.088	2099.04	1579.43	70.3487	1944.38	1609.26	181.301	1921.01	1612.16	130.491	1868.84	1438.11	103.656	1815.03	1222.18	134.069	1996.23	1366.03	142.75	2057.1	1238.82	195.013	1791.05	1269.84	-40.0613	1935.1	1398.29	-97.3152	1921.97	1169.88	-98.4516	1908.98	1101.45	-119.532	1999.05	1014.51	-100.382	2031.14	914.813	-147.261	1978.74	896.324	-158.263	2039.35	819.468
1210	0	107.202	2119.6	1579.02	206.595	2106.96	1579.13	70.2539	1952.96	1609.63	181.15	1929.17	1612.39	130.097	1876.63	1438.57	103.027	1822.26	1222.72	133.819	2003.8	1366.14	142.512	2064.31	1238.83	194.33	1798.28	1270.42	-40.3516	1942.96	1398.75	-98.1628	1931.14	1170.41	-99.5205	1918.67	1101.93	-120.063	2009.88	1015.82	-100.836	2042.85	916.446	-148.074	1991.02	897.535	-158.839	2052.65	821.462
1211	0	107.75	2127.92	1578.77	207.099	2114.83	1578.76	70.1713	1961.49	1609.9	181.008	1937.28	1612.53	129.767	1884.38	1438.93	102.522	1829.47	1223.15	133.585	2011.34	1366.15	142.268	2071.5	1238.73	193.78	1805.54	1270.89	-40.603	1950.71	1399.08	-98.9323	1940.17	1170.82	-100.494	1928.23	1102.27	-120.551	2020.57	1017	-101.253	2054.43	917.97	-148.784	2003.15	898.629	-159.345	2065.81	823.369
1212	0	108.292	2136.18	1578.43	207.596	2122.67	1578.3	70.1013	1969.97	1610.06	180.874	1945.35	1612.57	129.502	1892.11	1439.17	102.145	1836.67	1223.46	133.369	2018.87	1366.05	142.023	2078.69	1238.53	193.365	1812.83	1271.26	-40.8135	1958.37	1399.27	-99.6209	1949.07	1171.09	-101.369	1937.69	1102.48	-120.99	2031.12	1018.08	-101.629	2065.87	919.378	-149.387	2015.14	899.603	-159.777	2078.81	825.178
1213	0	108.822	2144.4	1577.99	208.08	2130.48	1577.76	70.0447	1978.4	1610.1	180.751	1953.38	1612.51	129.305	1899.81	1439.31	101.895	1843.87	1223.65	133.175	2026.37	1365.86	141.782	2085.88	1238.22	193.086	1820.15	1271.51	-40.9808	1965.94	1399.32	-100.225	1957.83	1171.24	-102.144	1947.03	1102.57	-121.377	2041.52	1019.03	-101.961	2077.16	920.666	-149.884	2026.95	900.453	-160.133	2091.63	826.879
1214	0	109.338	2152.57	1577.46	208.551	2138.26	1577.15	70.003	1986.79	1610.05	180.64	1961.38	1612.37	129.178	1907.49	1439.34	101.772	1851.06	1223.74	133.007	2033.87	1365.57	141.549	2093.07	1237.81	192.944	1827.5	1271.66	-41.1026	1973.42	1399.24	-100.743	1966.47	1171.26	-102.816	1956.26	1102.53	-121.708	2051.79	1019.86	-102.248	2088.29	921.828	-150.273	2038.59	901.178	-160.408	2104.27	828.465
1215	0	109.837	2160.71	1576.84	209.005	2146.03	1576.47	69.978	1995.13	1609.88	180.544	1969.36	1612.12	129.123	1915.16	1439.26	101.776	1858.26	1223.71	132.869	2041.37	1365.19	141.328	2100.27	1237.3	192.936	1834.89	1271.71	-41.1767	1980.84	1399.03	-101.171	1975	1171.16	-103.385	1965.39	1102.38	-121.977	2061.91	1020.57	-102.484	2099.27	922.859	-150.555	2050.05	901.778	-160.6	2116.69	829.926
1216	0	110.319	2168.81	1576.14	209.444	2153.79	1575.72	69.972	2003.43	1609.61	180.466	1977.31	1611.8	129.141	1922.81	1439.09	101.904	1865.46	1223.59	132.765	2048.86	1364.72	141.125	2107.48	1236.69	193.062	1842.32	1271.65	-41.2007	1988.2	1398.7	-101.508	1983.44	1170.95	-103.849	1974.42	1102.11	-122.182	2071.89	1021.15	-102.666	2110.08	923.758	-150.731	2061.31	902.253	-160.707	2128.9	831.256
1217	0	110.784	2176.89	1575.35	209.868	2161.55	1574.9	69.9878	2011.69	1609.23	180.41	1985.25	1611.38	129.232	1930.46	1438.82	102.154	1872.67	1223.36	132.698	2056.36	1364.16	140.943	2114.7	1236.01	193.314	1849.78	1271.5	-41.1722	1995.49	1398.25	-101.75	1991.79	1170.62	-104.206	1983.36	1101.73	-122.316	2081.74	1021.62	-102.789	2120.73	924.523	-150.803	2072.39	902.607	-160.729	2140.88	832.447
1218	0	111.234	2184.93	1574.49	210.279	2169.31	1574.02	70.0287	2019.93	1608.76	180.379	1993.18	1610.89	129.396	1938.11	1438.46	102.52	1879.9	1223.04	132.674	2063.87	1363.53	140.788	2121.94	1235.24	193.689	1857.29	1271.26	-41.089	2002.75	1397.7	-101.898	2000.06	1170.19	-104.457	1992.21	1101.25	-122.378	2091.45	1021.96	-102.851	2131.21	925.152	-150.775	2083.26	902.841	-160.663	2152.61	833.495
1219	0	111.671	2192.96	1573.55	210.68	2177.08	1573.09	70.0981	2028.12	1608.2	180.378	2001.1	1610.31	129.635	1945.77	1438.01	102.997	1887.15	1222.63	132.696	2071.39	1362.82	140.664	2129.18	1234.39	194.179	1864.84	1270.92	-40.9489	2009.97	1397.05	-101.95	2008.26	1169.67	-104.601	2000.99	1100.68	-122.362	2101.03	1022.19	-102.847	2141.52	925.647	-150.648	2093.94	902.961	-160.51	2164.1	834.394
1220	0	112.099	2200.96	1572.54	211.074	2184.86	1572.1	70.2	2036.29	1607.54	180.411	2009.02	1609.67	129.946	1953.42	1437.48	103.579	1894.43	1222.14	132.768	2078.92	1362.04	140.575	2136.45	1233.48	194.776	1872.43	1270.5	-40.7501	2017.16	1396.32	-101.906	2016.41	1169.06	-104.639	2009.69	1100.03	-122.268	2110.48	1022.3	-102.773	2151.67	926.007	-150.426	2104.41	902.969	-160.269	2175.32	835.14
1221	0	112.522	2208.95	1571.47	211.466	2192.66	1571.06	70.3385	2044.44	1606.8	180.484	2016.94	1608.95	130.329	1961.09	1436.86	104.258	1901.74	1221.57	132.895	2086.48	1361.19	140.525	2143.74	1232.5	195.471	1880.06	1270	-40.4907	2024.35	1395.51	-101.766	2024.52	1168.36	-104.573	2018.33	1099.3	-122.092	2119.82	1022.29	-102.627	2161.66	926.233	-150.115	2114.69	902.87	-159.941	2186.28	835.729
1222	0	112.945	2216.92	1570.34	211.861	2200.47	1569.98	70.5179	2052.55	1605.97	180.601	2024.85	1608.17	130.783	1968.77	1436.17	105.023	1909.08	1220.92	133.078	2094.07	1360.29	140.519	2151.04	1231.47	196.254	1887.73	1269.41	-40.1693	2031.53	1394.64	-101.533	2032.58	1167.6	-104.404	2026.91	1098.49	-121.835	2129.04	1022.18	-102.406	2171.48	926.327	-149.719	2124.78	902.668	-159.527	2196.98	836.158
1223	0	113.373	2224.88	1569.17	212.264	2208.3	1568.87	70.7429	2060.64	1605.07	180.769	2032.77	1607.32	131.305	1976.46	1435.4	105.866	1916.46	1220.2	133.323	2101.68	1359.33	140.562	2158.38	1230.39	197.113	1895.45	1268.75	-39.7845	2038.72	1393.71	-101.209	2040.63	1166.76	-104.136	2035.44	1097.63	-121.496	2138.15	1021.95	-102.108	2181.14	926.291	-149.243	2134.67	902.365	-159.027	2207.41	836.423
1224	0	113.812	2232.82	1567.96	212.681	2216.15	1567.73	71.0182	2068.71	1604.11	180.991	2040.7	1606.41	131.894	1984.17	1434.55	106.775	1923.89	1219.41	133.631	2109.33	1358.32	140.658	2165.74	1229.27	198.04	1903.21	1268.01	-39.3355	2045.93	1392.72	-100.796	2048.65	1165.86	-103.772	2043.92	1096.7	-121.077	2147.15	1021.62	-101.733	2190.64	926.124	-148.693	2144.38	901.963	-158.444	2217.58	836.524
1225	0	114.268	2240.75	1566.72	213.118	2224.01	1566.56	71.3484	2076.76	1603.07	181.273	2048.62	1605.45	132.547	1991.9	1433.64	107.741	1931.37	1218.55	134.007	2117.01	1357.27	140.813	2173.15	1228.11	199.022	1911.02	1267.19	-38.8218	2053.18	1391.69	-100.299	2056.66	1164.91	-103.316	2052.35	1095.72	-120.579	2156.06	1021.17	-101.28	2199.99	925.829	-148.076	2153.91	901.465	-157.781	2227.49	836.457
1226	0	114.748	2248.67	1565.46	213.581	2231.89	1565.37	71.7381	2084.78	1601.98	181.621	2056.55	1604.43	133.263	1999.66	1432.66	108.752	1938.91	1217.63	134.452	2124.73	1356.19	141.031	2180.6	1226.92	200.05	1918.87	1266.29	-38.243	2060.47	1390.63	-99.7208	2064.66	1163.9	-102.774	2060.75	1094.69	-120.006	2164.87	1020.62	-100.751	2209.19	925.405	-147.398	2163.26	900.871	-157.04	2237.15	836.22
1227	0	115.256	2256.59	1564.18	214.077	2239.79	1564.18	72.1922	2092.78	1600.84	182.039	2064.48	1603.37	134.039	2007.44	1431.61	109.799	1946.51	1216.64	134.968	2132.51	1355.06	141.318	2188.11	1225.7	201.114	1926.77	1265.32	-37.5993	2067.82	1389.52	-99.067	2072.66	1162.84	-102.15	2069.12	1093.61	-119.36	2173.58	1019.97	-100.147	2218.24	924.854	-146.666	2172.44	900.183	-156.226	2246.57	835.814
1228	0	115.799	2264.49	1562.9	214.61	2247.71	1562.97	72.7147	2100.75	1599.65	182.532	2072.41	1602.26	134.874	2015.26	1430.51	110.873	1954.17	1215.59	135.558	2140.33	1353.92	141.678	2195.68	1224.47	202.205	1934.73	1264.26	-36.8909	2075.23	1388.38	-98.3421	2080.66	1161.73	-101.452	2077.45	1092.5	-118.647	2182.21	1019.21	-99.473	2227.14	924.177	-145.886	2181.46	899.402	-155.344	2255.75	835.238
1229	0	116.382	2272.38	1561.63	215.187	2255.64	1561.77	73.3099	2108.71	1598.42	183.104	2080.34	1601.11	135.766	2023.1	1429.35	111.966	1961.91	1214.48	136.223	2148.2	1352.75	142.117	2203.32	1223.22	203.315	1942.74	1263.13	-36.1185	2082.71	1387.21	-97.5506	2088.68	1160.59	-100.683	2085.76	1091.34	-117.871	2190.75	1018.34	-98.7308	2235.9	923.374	-145.065	2190.31	898.528	-154.4	2264.7	834.494
1230	0	117.012	2280.27	1560.37	215.813	2263.59	1560.57	73.9814	2116.64	1597.16	183.759	2088.27	1599.92	136.714	2030.98	1428.13	113.072	1969.73	1213.29	136.962	2156.14	1351.56	142.636	2211.05	1221.97	204.439	1950.81	1261.93	-35.2828	2090.28	1386.01	-96.6971	2096.7	1159.4	-99.8493	2094.05	1090.15	-117.036	2199.21	1017.38	-97.9251	2244.52	922.447	-144.208	2199	897.562	-153.4	2273.44	833.583
1231	0	117.692	2288.16	1559.13	216.493	2271.55	1559.39	74.7323	2124.55	1595.88	184.5	2096.21	1598.71	137.716	2038.9	1426.86	114.187	1977.63	1212.05	137.778	2164.13	1350.38	143.238	2218.86	1220.72	205.571	1958.94	1260.64	-34.3851	2097.92	1384.79	-95.7855	2104.74	1158.19	-98.9561	2102.32	1088.93	-116.147	2207.58	1016.33	-97.0606	2252.99	921.401	-143.322	2207.54	896.507	-152.353	2281.96	832.51
1232	0	118.426	2296.04	1557.93	217.23	2279.53	1558.24	75.5654	2132.44	1594.59	185.33	2104.14	1597.47	138.771	2046.86	1425.55	115.31	1985.63	1210.74	138.669	2172.19	1349.19	143.925	2226.78	1219.48	206.708	1967.14	1259.27	-33.4263	2105.66	1383.55	-94.8192	2112.8	1156.94	-98.0074	2110.57	1087.68	-115.208	2215.89	1015.18	-96.1423	2261.32	920.238	-142.409	2215.92	895.366	-151.268	2290.28	831.28
1233	0	119.219	2303.92	1556.77	218.028	2287.52	1557.11	76.4827	2140.31	1593.3	186.25	2112.08	1596.21	139.879	2054.86	1424.21	116.439	1993.73	1209.37	139.634	2180.32	1348.01	144.697	2234.8	1218.26	207.848	1975.42	1257.83	-32.408	2113.48	1382.29	-93.8009	2120.89	1155.68	-97.0065	2118.81	1086.42	-114.223	2224.11	1013.95	-95.1753	2269.52	918.964	-141.475	2224.15	894.144	-150.151	2298.39	829.901
1234	0	120.072	2311.79	1555.66	218.89	2295.53	1556.02	77.4857	2148.17	1592.01	187.261	2120.02	1594.95	141.039	2062.91	1422.84	117.576	2001.95	1207.94	140.672	2188.52	1346.85	145.551	2242.93	1217.07	208.991	1983.78	1256.32	-31.3317	2121.39	1381.02	-92.7326	2129	1154.4	-95.956	2127.04	1085.15	-113.196	2232.27	1012.65	-94.1647	2277.57	917.588	-140.521	2232.23	892.847	-149.014	2306.31	828.383
1235	0	120.988	2319.68	1554.62	219.817	2303.56	1554.98	78.5749	2156.01	1590.74	188.365	2127.96	1593.7	142.249	2071	1421.45	118.724	2010.28	1206.45	141.78	2196.79	1345.72	146.486	2251.19	1215.92	210.137	1992.23	1254.75	-30.1993	2129.39	1379.76	-91.6157	2137.15	1153.12	-94.8573	2135.27	1083.88	-112.129	2240.36	1011.28	-93.1157	2285.49	916.117	-139.551	2240.16	891.486	-147.865	2314.04	826.738
1236	0	121.968	2327.56	1553.65	220.81	2311.6	1554	79.7504	2163.84	1589.51	189.56	2135.9	1592.46	143.51	2079.14	1420.05	119.885	2018.74	1204.92	142.956	2205.13	1344.64	147.498	2259.56	1214.83	211.289	2000.77	1253.12	-29.0126	2137.48	1378.5	-90.4508	2145.33	1151.85	-93.711	2143.48	1082.61	-111.025	2248.38	1009.87	-92.0328	2293.27	914.563	-138.564	2247.94	890.07	-146.711	2321.57	824.982
1237	0	123.011	2335.45	1552.77	221.869	2319.66	1553.09	81.0112	2171.65	1588.32	190.845	2143.85	1591.24	144.82	2087.33	1418.65	121.063	2027.33	1203.35	144.196	2213.55	1343.61	148.583	2268.06	1213.81	212.449	2009.4	1251.43	-27.774	2145.66	1377.27	-89.2378	2153.55	1150.59	-92.5168	2151.69	1081.37	-109.886	2256.33	1008.41	-90.9206	2300.91	912.939	-137.562	2255.57	888.614	-145.563	2328.9	823.132
1238	0	124.116	2343.35	1551.99	222.992	2327.73	1552.26	82.3556	2179.46	1587.18	192.218	2151.8	1590.07	146.178	2095.56	1417.28	122.264	2036.06	1201.76	145.497	2222.04	1342.64	149.736	2276.68	1212.87	213.62	2018.14	1249.72	-26.4858	2153.92	1376.07	-87.9767	2161.8	1149.37	-91.2737	2159.9	1080.16	-108.714	2264.21	1006.94	-89.7828	2308.42	911.262	-136.543	2263.04	887.132	-144.425	2336.04	821.207
1239	0	125.281	2351.26	1551.32	224.178	2335.82	1551.53	83.7811	2187.26	1586.12	193.676	2159.76	1588.94	147.584	2103.85	1415.93	123.491	2044.94	1200.16	146.853	2230.6	1341.75	150.952	2285.44	1212.02	214.806	2026.99	1247.99	-25.1509	2162.25	1374.92	-86.6668	2170.08	1148.2	-89.9803	2168.1	1079	-107.51	2272.03	1005.46	-88.623	2315.79	909.546	-135.507	2270.36	885.643	-143.305	2342.99	819.23
1240	0	126.504	2359.17	1550.77	225.423	2343.93	1550.9	85.2843	2195.05	1585.15	195.216	2167.73	1587.88	149.035	2112.19	1414.64	124.748	2053.96	1198.56	148.26	2239.24	1340.96	152.223	2294.32	1211.29	216.01	2035.94	1246.25	-23.7723	2170.67	1373.84	-85.3076	2178.39	1147.08	-88.6346	2176.28	1077.91	-106.276	2279.77	1004	-87.4441	2323.02	907.813	-134.45	2277.53	884.165	-142.207	2349.73	817.224
1241	0	127.778	2367.1	1550.36	226.722	2352.06	1550.39	86.8611	2202.84	1584.27	196.832	2175.7	1586.9	150.529	2120.58	1413.4	126.037	2063.13	1196.99	149.713	2247.95	1340.26	153.545	2303.34	1210.67	217.237	2045	1244.53	-22.3534	2179.16	1372.85	-83.8987	2186.73	1146.05	-87.2348	2184.46	1076.9	-105.014	2287.45	1002.57	-86.2484	2330.11	906.081	-133.371	2284.55	882.72	-141.132	2356.27	815.215
1242	0	129.101	2375.03	1550.09	228.071	2360.21	1550.02	88.5065	2210.62	1583.5	198.52	2183.69	1586	152.064	2129.02	1412.24	127.36	2072.45	1195.47	151.204	2256.72	1339.68	154.91	2312.47	1210.19	218.489	2054.17	1242.86	-20.8981	2187.72	1371.96	-82.44	2195.09	1145.11	-85.7793	2192.62	1075.98	-103.724	2295.05	1001.19	-85.038	2337.07	904.371	-132.266	2291.41	881.327	-140.083	2362.6	813.228
1243	0	130.465	2382.98	1549.97	229.464	2368.38	1549.78	90.2147	2218.4	1582.86	200.274	2191.69	1585.21	153.635	2137.5	1411.18	128.716	2081.9	1194.03	152.729	2265.56	1339.22	156.31	2321.73	1209.86	219.769	2063.43	1241.25	-19.4106	2196.34	1371.2	-80.9319	2203.46	1144.29	-84.2669	2200.75	1075.18	-102.409	2302.57	999.88	-83.8144	2343.89	902.706	-131.131	2298.11	880.009	-139.057	2368.73	811.29
1244	0	131.863	2390.94	1550.02	230.894	2376.58	1549.69	91.9794	2226.18	1582.34	202.086	2199.7	1584.53	155.24	2146.03	1410.23	130.102	2091.49	1192.69	154.28	2274.46	1338.9	157.74	2331.09	1209.68	221.078	2072.78	1239.73	-17.8955	2205.03	1370.57	-79.3755	2211.84	1143.59	-82.6971	2208.85	1074.51	-101.069	2310.01	998.659	-82.5789	2350.59	901.106	-129.964	2304.65	878.787	-138.053	2374.66	809.427
1245	0	133.289	2398.92	1550.24	232.353	2384.79	1549.77	93.7935	2233.97	1581.97	203.95	2207.73	1583.97	156.874	2154.61	1409.39	131.516	2101.19	1191.48	155.85	2283.4	1338.72	159.193	2340.54	1209.66	222.417	2082.22	1238.33	-16.3578	2213.77	1370.09	-77.7729	2220.2	1143.03	-81.0701	2216.92	1073.98	-99.707	2317.36	997.542	-81.3328	2357.16	899.593	-128.759	2311.05	877.679	-137.065	2380.38	807.662
1246	0	134.735	2406.9	1550.63	233.833	2393.02	1550	95.6493	2241.75	1581.74	205.858	2215.76	1583.55	158.531	2163.22	1408.7	132.951	2110.98	1190.41	157.432	2292.39	1338.68	160.66	2350.09	1209.81	223.786	2091.73	1237.07	-14.8026	2222.57	1369.78	-76.1266	2228.55	1142.62	-79.3875	2224.94	1073.61	-98.3248	2324.63	996.545	-80.0769	2363.6	898.186	-127.515	2317.28	876.705	-136.088	2385.9	806.02
1247	0	136.191	2414.89	1551.19	235.327	2401.28	1550.41	97.5386	2249.53	1581.66	207.802	2223.82	1583.25	160.207	2171.86	1408.15	134.401	2120.86	1189.52	159.019	2301.41	1338.8	162.136	2359.7	1210.13	225.183	2101.28	1235.97	-13.2356	2231.41	1369.65	-74.4406	2236.88	1142.37	-77.6519	2232.91	1073.4	-96.9251	2331.8	995.683	-78.8123	2369.92	896.903	-126.228	2323.37	875.88	-135.113	2391.23	804.52
1248	0	137.65	2422.89	1551.93	236.825	2409.55	1550.97	99.4527	2257.32	1581.73	209.773	2231.88	1583.1	161.896	2180.54	1407.75	135.859	2130.78	1188.83	160.603	2310.46	1339.06	163.613	2369.36	1210.61	226.61	2110.88	1235.05	-11.6625	2240.28	1369.7	-72.7196	2245.16	1142.3	-75.867	2240.81	1073.36	-95.5105	2338.88	994.964	-77.5403	2376.13	895.762	-124.896	2329.32	875.217	-134.131	2396.37	803.179
1249	0	139.103	2430.9	1552.83	238.318	2417.84	1551.7	101.383	2265.1	1581.95	211.762	2239.96	1583.09	163.593	2189.23	1407.52	137.318	2140.73	1188.34	162.176	2319.52	1339.47	165.084	2379.05	1211.26	228.064	2120.5	1234.33	-10.0891	2249.18	1369.94	-70.9692	2253.39	1142.4	-74.0379	2248.64	1073.5	-94.0845	2345.86	994.399	-76.2623	2382.23	894.774	-123.52	2335.12	874.725	-133.134	2401.33	802.009
1250	0	140.54	2438.91	1553.88	239.798	2426.14	1552.58	103.319	2272.88	1582.33	213.76	2248.05	1583.22	165.291	2197.93	1407.45	138.773	2150.68	1188.07	163.731	2328.58	1340.03	166.54	2388.75	1212.07	229.545	2130.11	1233.82	-8.52116	2258.08	1370.37	-69.1959	2261.56	1142.68	-72.1709	2256.39	1073.81	-92.6506	2352.74	993.992	-74.98	2388.23	893.951	-122.099	2340.8	874.41	-132.112	2406.13	801.02
1251	0	141.954	2446.92	1555.08	241.255	2434.45	1553.6	105.252	2280.66	1582.85	215.759	2256.15	1583.49	166.986	2206.64	1407.54	140.218	2160.6	1188.03	165.26	2337.64	1340.73	167.976	2398.45	1213.02	231.054	2139.71	1233.53	-6.96425	2266.97	1370.97	-67.4071	2269.66	1143.12	-70.2732	2264.06	1074.28	-91.2128	2359.52	993.744	-73.6953	2394.14	893.298	-120.637	2346.36	874.274	-131.057	2410.78	800.214
1252	0	143.335	2454.92	1556.41	242.681	2442.77	1554.74	107.173	2288.43	1583.5	217.747	2264.26	1583.88	168.672	2215.33	1407.79	141.653	2170.45	1188.2	166.757	2346.67	1341.57	169.381	2408.11	1214.11	232.593	2149.28	1233.46	-5.42374	2275.84	1371.75	-65.6105	2277.67	1143.73	-68.3529	2271.62	1074.92	-89.7755	2366.21	993.656	-72.4105	2399.96	892.819	-119.137	2351.81	874.312	-129.959	2415.31	799.589
1253	0	144.675	2462.92	1557.85	244.066	2451.09	1556	109.073	2296.19	1584.28	219.717	2272.37	1584.41	170.344	2224.01	1408.2	143.077	2180.2	1188.59	168.214	2355.67	1342.52	170.749	2417.73	1215.32	234.163	2158.79	1233.6	-3.90456	2284.65	1372.68	-63.8141	2285.58	1144.48	-66.4188	2279.08	1075.69	-88.343	2372.79	993.721	-71.1282	2405.72	892.514	-117.604	2357.17	874.519	-128.812	2419.73	799.14
1254	0	145.965	2470.9	1559.37	245.401	2459.4	1557.34	110.941	2303.95	1585.17	221.659	2280.48	1585.05	172	2232.66	1408.75	144.494	2189.83	1189.18	169.625	2364.62	1343.58	172.072	2427.27	1216.64	235.769	2168.23	1233.95	-2.41117	2293.4	1373.74	-62.0261	2293.39	1145.37	-64.4801	2286.43	1076.6	-86.9197	2379.28	993.932	-69.8508	2411.41	892.377	-116.046	2362.46	874.882	-127.612	2424.07	798.855
1255	0	147.198	2478.87	1560.97	246.678	2467.71	1558.75	112.769	2311.68	1586.17	223.564	2288.59	1585.79	173.636	2241.26	1409.43	145.91	2199.31	1189.95	170.985	2373.51	1344.73	173.343	2436.72	1218.05	237.414	2177.58	1234.5	-0.947502	2302.06	1374.92	-60.2543	2301.07	1146.38	-62.5457	2293.66	1077.61	-85.51	2385.68	994.278	-68.581	2417.05	892.401	-114.47	2367.67	875.387	-126.356	2428.35	798.722
1256	0	148.365	2486.81	1562.6	247.889	2476	1560.22	114.549	2319.4	1587.25	225.424	2296.69	1586.63	175.248	2249.82	1410.23	147.332	2208.62	1190.88	172.289	2382.33	1345.96	174.555	2446.07	1219.53	239.105	2186.84	1235.22	0.483141	2310.61	1376.19	-58.506	2308.63	1147.48	-60.6244	2300.77	1078.71	-84.1178	2391.98	994.747	-67.3211	2422.65	892.575	-112.883	2372.85	876.015	-125.043	2432.6	798.724
1257	0	149.459	2494.72	1564.25	249.026	2484.27	1561.71	116.273	2327.1	1588.4	227.232	2304.78	1587.55	176.835	2258.31	1411.13	148.771	2217.74	1191.94	173.534	2391.08	1347.26	175.703	2455.28	1221.06	240.845	2195.99	1236.11	1.87809	2319.02	1377.53	-56.7878	2316.05	1148.65	-58.7243	2307.76	1079.87	-82.7466	2398.2	995.322	-66.0732	2428.23	892.887	-111.293	2377.99	876.745	-123.677	2436.85	798.844
1258	0	150.473	2502.59	1565.9	250.081	2492.51	1563.2	117.934	2334.77	1589.6	228.98	2312.85	1588.54	178.396	2266.73	1412.11	150.236	2226.65	1193.11	174.717	2399.73	1348.6	176.783	2464.36	1222.61	242.638	2205.01	1237.12	3.23536	2327.29	1378.9	-55.1051	2323.32	1149.86	-56.8525	2314.62	1081.07	-81.399	2404.33	995.987	-64.8386	2433.78	893.323	-109.709	2383.12	877.557	-122.261	2441.13	799.064
1259	0	151.4	2510.42	1567.52	251.047	2500.72	1564.68	119.526	2342.4	1590.84	230.663	2320.91	1589.58	179.928	2275.06	1413.16	151.737	2235.34	1194.36	175.836	2408.29	1349.97	177.793	2473.28	1224.18	244.487	2213.92	1238.26	4.55367	2335.39	1380.29	-53.4621	2330.43	1151.1	-55.0147	2321.34	1082.29	-80.077	2410.38	996.726	-63.6186	2439.32	893.865	-108.135	2388.24	878.429	-120.804	2445.45	799.37
1260	0	152.236	2518.21	1569.1	251.919	2508.9	1566.13	121.044	2350	1592.1	232.275	2328.94	1590.66	181.432	2283.31	1414.27	153.282	2243.8	1195.66	176.892	2416.74	1351.35	178.73	2482.04	1225.73	246.391	2222.7	1239.48	5.83241	2343.31	1381.66	-51.8617	2337.39	1152.33	-53.2153	2327.94	1083.51	-78.7818	2416.35	997.52	-62.4134	2444.86	894.497	-106.578	2393.38	879.339	-119.315	2449.84	799.745
1261	0	152.976	2525.94	1570.61	252.692	2517.03	1567.53	122.484	2357.57	1593.36	233.812	2336.95	1591.76	182.908	2291.46	1415.4	154.877	2252.03	1197	177.883	2425.08	1352.73	179.596	2490.63	1227.26	248.35	2231.34	1240.77	7.07164	2351.06	1383.01	-50.3051	2344.18	1153.54	-51.4572	2334.4	1084.7	-77.5135	2422.24	998.353	-61.2227	2450.39	895.202	-105.041	2398.53	880.266	-117.804	2454.32	800.178
1262	0	153.616	2533.62	1572.05	253.361	2525.13	1568.86	123.843	2365.09	1594.61	235.271	2344.94	1592.88	184.353	2299.51	1416.56	156.523	2260.03	1198.34	178.813	2433.31	1354.1	180.393	2499.05	1228.75	250.359	2239.85	1242.11	8.272	2358.62	1384.3	-48.7923	2350.8	1154.71	-49.7415	2340.73	1085.86	-76.2716	2428.07	999.208	-60.0459	2455.93	895.964	-103.526	2403.7	881.19	-116.284	2458.91	800.656
1263	0	154.153	2541.24	1573.39	253.925	2533.18	1570.13	125.119	2372.56	1595.83	236.651	2352.89	1594	185.769	2307.47	1417.71	158.22	2267.8	1199.67	179.684	2441.42	1355.44	181.126	2507.28	1230.18	252.411	2248.23	1243.47	9.43467	2366	1385.53	-47.322	2357.25	1155.83	-48.068	2346.93	1086.96	-75.0551	2433.82	1000.07	-58.8818	2461.48	896.767	-102.034	2408.91	882.096	-114.767	2463.61	801.172
1264	0	154.588	2548.8	1574.62	254.382	2541.18	1571.31	126.312	2379.98	1597.02	237.95	2360.8	1595.11	187.154	2315.32	1418.86	159.966	2275.35	1200.97	180.498	2449.42	1356.74	181.8	2515.35	1231.54	254.497	2256.48	1244.85	10.5612	2373.2	1386.68	-45.8919	2363.54	1156.87	-46.435	2353	1088	-73.8625	2439.51	1000.92	-57.729	2467.04	897.596	-100.563	2414.15	882.968	-113.266	2468.44	801.719
1265	0	154.92	2556.3	1575.75	254.732	2549.14	1572.4	127.423	2387.35	1598.15	239.168	2368.69	1596.2	188.509	2323.07	1419.98	161.752	2282.7	1202.23	181.26	2457.3	1357.99	182.423	2523.24	1232.83	256.608	2264.6	1246.21	11.6534	2380.24	1387.75	-44.4987	2369.66	1157.83	-44.8398	2358.94	1088.96	-72.692	2445.13	1001.76	-56.5863	2472.6	898.437	-99.1114	2419.41	883.792	-111.792	2473.4	802.291
1266	0	155.151	2563.73	1576.76	254.977	2557.04	1573.41	128.453	2394.67	1599.23	240.307	2376.53	1597.26	189.833	2330.73	1421.06	163.572	2289.85	1203.44	181.974	2465.08	1359.18	183.001	2530.98	1234.03	258.731	2272.6	1247.55	12.7133	2387.13	1388.71	-43.1389	2375.62	1158.71	-43.279	2364.76	1089.85	-71.542	2450.68	1002.56	-55.4523	2478.17	899.276	-97.6763	2424.7	884.557	-110.356	2478.49	802.882
1267	0	155.284	2571.1	1577.66	255.12	2564.9	1574.31	129.404	2401.93	1600.23	241.368	2384.34	1598.28	191.126	2338.29	1422.1	165.415	2296.83	1204.59	182.644	2472.75	1360.31	183.544	2538.57	1235.15	260.856	2280.49	1248.86	13.7429	2393.88	1389.58	-41.8087	2381.44	1159.49	-41.7486	2370.47	1090.65	-70.4109	2456.17	1003.31	-54.326	2483.75	900.102	-96.2535	2430.02	885.254	-108.966	2483.7	803.488
1268	0	155.323	2578.41	1578.44	255.165	2572.71	1575.12	130.28	2409.15	1601.16	242.355	2392.11	1599.24	192.387	2345.77	1423.08	167.271	2303.64	1205.68	183.275	2480.32	1361.35	184.058	2546.03	1236.16	262.97	2288.27	1250.12	14.7441	2400.52	1390.35	-40.5043	2387.13	1160.17	-40.2446	2376.06	1091.38	-69.2974	2461.6	1004.01	-53.2069	2489.32	900.905	-94.8389	2435.35	885.875	-107.629	2489.03	804.104
1269	0	155.274	2585.65	1579.1	255.119	2580.48	1575.84	131.085	2416.3	1602.01	243.271	2399.84	1600.15	193.616	2353.16	1424	169.128	2310.31	1206.69	183.871	2487.8	1362.32	184.551	2553.37	1237.08	265.061	2295.95	1251.33	15.7184	2407.05	1391.02	-39.2225	2392.69	1160.77	-38.7635	2381.56	1092.01	-68.2007	2466.97	1004.66	-52.0945	2494.9	901.675	-93.4281	2440.69	886.415	-106.349	2494.46	804.722
1270	0	155.143	2592.84	1579.65	254.987	2588.2	1576.46	131.825	2423.41	1602.76	244.12	2407.54	1601	194.812	2360.48	1424.86	170.977	2316.85	1207.64	184.436	2495.19	1363.2	185.028	2560.6	1237.9	267.121	2303.55	1252.48	16.6672	2413.51	1391.59	-37.9605	2398.15	1161.27	-37.3021	2386.97	1092.57	-67.1202	2472.29	1005.23	-50.9891	2500.47	902.402	-92.0176	2446.04	886.869	-105.128	2499.98	805.335
1271	0	154.937	2599.97	1580.1	254.778	2595.87	1577	132.503	2430.47	1603.43	244.906	2415.2	1601.77	195.975	2367.74	1425.65	172.808	2323.28	1208.51	184.975	2502.5	1364	185.493	2567.74	1238.61	269.137	2311.06	1253.57	17.5912	2419.91	1392.07	-36.716	2403.52	1161.69	-35.8584	2392.3	1093.05	-66.0558	2477.55	1005.73	-49.8911	2506.03	903.08	-90.6041	2451.38	887.233	-103.967	2505.57	805.935
1272	0	154.665	2607.05	1580.44	254.5	2603.5	1577.44	133.127	2437.48	1604.01	245.635	2422.83	1602.47	197.104	2374.93	1426.36	174.611	2329.62	1209.32	185.489	2509.75	1364.71	185.952	2574.81	1239.22	271.102	2318.49	1254.59	18.4907	2426.27	1392.45	-35.4876	2408.83	1162.02	-34.431	2397.57	1093.45	-65.0075	2482.77	1006.15	-48.8011	2511.58	903.701	-89.1854	2456.71	887.507	-102.863	2511.21	806.512
1273	0	154.334	2614.09	1580.68	254.162	2611.1	1577.81	133.701	2444.46	1604.49	246.31	2430.42	1603.1	198.198	2382.08	1427.01	176.379	2335.9	1210.05	185.982	2516.93	1365.32	186.404	2581.8	1239.73	273.008	2325.86	1255.54	19.3656	2432.6	1392.75	-34.2748	2414.09	1162.29	-33.0198	2402.79	1093.78	-63.9759	2487.94	1006.49	-47.7203	2517.11	904.259	-87.7606	2462.03	887.69	-101.813	2516.89	807.056
1274	0	153.954	2621.09	1580.83	253.774	2618.66	1578.09	134.231	2451.39	1604.88	246.938	2437.98	1603.65	199.256	2389.18	1427.57	178.103	2342.12	1210.71	186.457	2524.06	1365.85	186.851	2588.74	1240.12	274.848	2333.18	1256.41	20.2149	2438.92	1392.98	-33.0778	2419.32	1162.49	-31.6257	2407.98	1094.04	-62.9615	2493.08	1006.75	-46.6498	2522.63	904.751	-86.3298	2467.32	887.784	-100.809	2522.57	807.555
1275	0	153.535	2628.05	1580.89	253.346	2626.19	1578.3	134.723	2458.3	1605.18	247.522	2445.52	1604.11	200.276	2396.25	1428.06	179.776	2348.31	1211.3	186.914	2531.15	1366.29	187.291	2595.62	1240.42	276.615	2340.44	1257.21	21.0376	2445.24	1393.13	-31.8979	2424.54	1162.62	-30.2503	2413.15	1094.24	-61.9652	2498.19	1006.92	-45.5912	2528.12	905.172	-84.8949	2472.59	887.791	-99.8475	2528.25	807.999
1276	0	153.084	2634.99	1580.87	252.886	2633.69	1578.43	135.182	2465.18	1605.4	248.067	2453.03	1604.5	201.258	2403.29	1428.48	181.392	2354.48	1211.83	187.354	2538.2	1366.65	187.724	2602.45	1240.61	278.304	2347.65	1257.93	21.832	2451.57	1393.21	-30.7372	2429.77	1162.71	-28.8963	2418.32	1094.39	-60.988	2503.29	1007.01	-44.5463	2533.59	905.517	-83.4589	2477.83	887.717	-98.9195	2533.91	808.377
1277	0	152.611	2641.9	1580.78	252.406	2641.16	1578.49	135.612	2472.04	1605.53	248.578	2460.52	1604.81	202.201	2410.3	1428.83	182.944	2360.66	1212.29	187.778	2545.22	1366.92	188.145	2609.24	1240.71	279.91	2354.83	1258.58	22.5963	2457.92	1393.24	-29.5983	2435.03	1162.76	-27.5672	2423.5	1094.48	-60.0311	2508.37	1007.02	-43.517	2539.04	905.786	-82.0266	2483.04	887.567	-98.0183	2539.52	808.679
1278	0	152.125	2648.8	1580.61	251.912	2648.61	1578.48	136.019	2478.89	1605.59	249.057	2468	1605.04	203.101	2417.3	1429.12	184.426	2366.85	1212.69	188.185	2552.21	1367.12	188.553	2616	1240.71	281.428	2361.97	1259.15	23.3282	2464.3	1393.22	-28.4846	2440.34	1162.77	-26.2668	2428.71	1094.53	-59.0959	2513.44	1006.96	-42.5056	2544.46	905.975	-80.6038	2488.21	887.349	-97.1367	2545.07	808.897
1279	0	151.633	2655.7	1580.38	251.413	2656.05	1578.4	136.405	2485.74	1605.57	249.509	2475.46	1605.19	203.958	2424.28	1429.33	185.832	2373.06	1213.04	188.576	2559.19	1367.25	188.944	2622.71	1240.64	282.856	2369.09	1259.65	24.0254	2470.72	1393.16	-27.4001	2445.7	1162.75	-24.9997	2433.97	1094.55	-58.184	2518.53	1006.82	-41.5148	2549.85	906.084	-79.1979	2493.36	887.071	-96.2683	2550.55	809.024
1280	0	151.142	2662.6	1580.09	250.917	2663.47	1578.25	136.773	2492.59	1605.49	249.935	2482.91	1605.27	204.769	2431.26	1429.49	187.157	2379.32	1213.32	188.949	2566.15	1367.31	189.313	2629.4	1240.48	284.189	2376.18	1260.08	24.6854	2477.17	1393.06	-26.3491	2451.14	1162.7	-23.7706	2439.28	1094.53	-57.2972	2523.63	1006.61	-40.5478	2555.21	906.111	-77.8172	2498.49	886.742	-95.4078	2555.95	809.054
1281	0	150.658	2669.5	1579.73	250.429	2670.88	1578.04	137.125	2499.44	1605.35	250.338	2490.36	1605.29	205.533	2438.23	1429.58	188.396	2385.63	1213.54	189.302	2573.11	1367.31	189.658	2636.06	1240.26	285.426	2383.24	1260.44	25.3057	2483.66	1392.93	-25.3364	2456.66	1162.64	-22.5844	2444.65	1094.48	-56.438	2528.75	1006.34	-39.6081	2560.55	906.055	-76.4708	2503.58	886.37	-94.5513	2561.26	808.983
1282	0	150.188	2676.41	1579.33	249.956	2678.29	1577.76	137.464	2506.32	1605.16	250.72	2497.8	1605.23	206.247	2445.2	1429.62	189.543	2392	1213.72	189.634	2580.06	1367.25	189.975	2642.7	1239.97	286.565	2390.29	1260.73	25.8838	2490.19	1392.78	-24.3668	2462.26	1162.57	-21.4464	2450.1	1094.41	-55.6089	2533.91	1006	-38.6998	2565.86	905.917	-75.1684	2508.66	885.964	-93.6967	2566.48	808.809
1283	0	149.734	2683.34	1578.87	249.5	2685.69	1577.42	137.788	2513.22	1604.91	251.081	2505.25	1605.12	206.908	2452.18	1429.61	190.596	2398.43	1213.84	189.945	2587.01	1367.13	190.261	2649.34	1239.64	287.603	2397.33	1260.96	26.4172	2496.77	1392.61	-23.4455	2467.97	1162.49	-20.3616	2455.63	1094.32	-54.813	2539.11	1005.62	-37.8275	2571.15	905.696	-73.9198	2513.71	885.532	-92.8435	2571.59	808.53
1284	0	149.301	2690.3	1578.37	249.064	2693.1	1577.02	138.099	2520.14	1604.62	251.421	2512.7	1604.94	207.515	2459.16	1429.54	191.55	2404.93	1213.92	190.231	2593.97	1366.97	190.516	2655.97	1239.26	288.541	2404.35	1261.13	26.9033	2503.4	1392.42	-22.5773	2473.77	1162.39	-19.3352	2461.25	1094.21	-54.0538	2544.35	1005.18	-36.996	2576.41	905.392	-72.735	2518.76	885.082	-91.9932	2576.61	808.149
1285	0	148.889	2697.28	1577.83	248.652	2700.51	1576.56	138.395	2527.1	1604.29	251.74	2520.15	1604.71	208.064	2466.16	1429.43	192.403	2411.5	1213.96	190.492	2600.93	1366.76	190.738	2662.61	1238.85	289.376	2411.36	1261.24	27.3402	2510.07	1392.21	-21.767	2479.67	1162.29	-18.3722	2466.96	1094.09	-53.3352	2549.64	1004.7	-36.2105	2581.66	905.004	-71.6237	2523.79	884.619	-91.1493	2581.53	807.666
1286	0	148.501	2704.3	1577.24	248.263	2707.92	1576.04	138.674	2534.09	1603.92	252.037	2527.62	1604.42	208.553	2473.17	1429.27	193.153	2418.14	1213.95	190.726	2607.91	1366.5	190.927	2669.28	1238.41	290.11	2418.38	1261.29	27.7256	2516.81	1391.99	-21.0193	2485.67	1162.18	-17.4772	2472.77	1093.96	-52.6616	2554.99	1004.18	-35.4765	2586.89	904.534	-70.5946	2528.82	884.147	-90.3169	2586.36	807.085
1287	0	148.136	2711.35	1576.61	247.896	2715.34	1575.47	138.935	2541.12	1603.51	252.31	2535.1	1604.08	208.981	2480.2	1429.06	193.796	2424.85	1213.9	190.93	2614.9	1366.2	191.083	2675.97	1237.95	290.741	2425.39	1261.29	28.0577	2523.6	1391.75	-20.3382	2491.77	1162.05	-16.6549	2478.67	1093.8	-52.0376	2560.4	1003.61	-34.7994	2592.11	903.982	-69.656	2533.84	883.668	-89.5029	2591.1	806.408
1288	0	147.793	2718.43	1575.95	247.552	2722.78	1574.84	139.175	2548.2	1603.07	252.557	2542.6	1603.68	209.343	2487.26	1428.8	194.334	2431.64	1213.81	191.104	2621.92	1365.85	191.208	2682.71	1237.46	291.27	2432.4	1261.23	28.3351	2530.45	1391.48	-19.7277	2497.98	1161.9	-15.9091	2484.66	1093.63	-51.4681	2565.87	1003.01	-34.1843	2597.32	903.346	-68.8146	2538.87	883.183	-88.7156	2595.77	805.639
1289	0	147.471	2725.57	1575.25	247.226	2730.23	1574.15	139.39	2555.33	1602.59	252.775	2550.11	1603.23	209.639	2494.34	1428.5	194.766	2438.48	1213.68	191.246	2628.96	1365.46	191.301	2689.49	1236.95	291.698	2439.43	1261.12	28.5565	2537.38	1391.19	-19.191	2504.28	1161.72	-15.2434	2490.75	1093.43	-50.958	2571.41	1002.36	-33.6365	2602.53	902.627	-68.0759	2543.9	882.688	-87.9645	2600.36	804.781
1290	0	147.167	2732.74	1574.51	246.918	2737.7	1573.42	139.576	2562.5	1602.07	252.962	2557.64	1602.73	209.867	2501.46	1428.14	195.093	2445.39	1213.51	191.354	2636.03	1365.02	191.366	2696.33	1236.43	292.026	2446.46	1260.96	28.7207	2544.37	1390.86	-18.7311	2510.67	1161.51	-14.6607	2496.93	1093.2	-50.5124	2577.01	1001.66	-33.1607	2607.75	901.826	-67.4442	2548.95	882.181	-87.2599	2604.89	803.838
1291	0	146.877	2739.96	1573.73	246.622	2745.18	1572.63	139.73	2569.73	1601.52	253.113	2565.19	1602.18	210.025	2508.61	1427.74	195.317	2452.36	1213.29	191.426	2643.14	1364.53	191.404	2703.24	1235.88	292.256	2453.51	1260.74	28.8271	2551.43	1390.49	-18.3501	2517.17	1161.26	-14.1632	2503.21	1092.94	-50.1359	2582.68	1000.93	-32.7614	2612.96	900.942	-66.9222	2554.01	881.657	-86.6128	2609.38	802.813
1292	0	146.6	2747.23	1572.92	246.336	2752.69	1571.79	139.847	2577.01	1600.93	253.224	2572.76	1601.58	210.111	2515.79	1427.27	195.441	2459.39	1213.02	191.461	2650.28	1363.99	191.416	2710.23	1235.3	292.388	2460.59	1260.46	28.8752	2558.58	1390.08	-18.0498	2523.75	1160.96	-13.7527	2509.58	1092.64	-49.8329	2588.41	1000.14	-32.443	2618.19	899.976	-66.5115	2559.09	881.108	-86.034	2613.82	801.709
1293	0	146.33	2754.55	1572.07	246.055	2760.22	1570.9	139.922	2584.35	1600.29	253.292	2580.36	1600.92	210.125	2523.02	1426.75	195.47	2466.47	1212.7	191.456	2657.46	1363.39	191.402	2717.28	1234.69	292.426	2467.69	1260.12	28.8645	2565.8	1389.61	-17.8312	2530.42	1160.6	-13.4301	2516.04	1092.29	-49.6075	2594.22	999.298	-32.2095	2623.44	898.927	-66.2124	2564.2	880.529	-85.5346	2618.24	800.531
1294	0	146.065	2761.92	1571.17	245.775	2767.77	1569.95	139.951	2591.74	1599.61	253.313	2587.97	1600.21	210.067	2530.3	1426.17	195.407	2473.61	1212.31	191.411	2664.69	1362.73	191.362	2724.43	1234.05	292.372	2474.82	1259.72	28.7949	2573.1	1389.07	-17.6948	2537.19	1160.18	-13.1959	2522.58	1091.88	-49.4631	2600.1	998.402	-32.0646	2628.7	897.797	-66.0244	2569.33	879.91	-85.1249	2622.65	799.282
1295	0	145.799	2769.34	1570.24	245.492	2775.35	1568.97	139.929	2599.2	1598.89	253.282	2595.62	1599.45	209.937	2537.63	1425.53	195.257	2480.81	1211.85	191.324	2671.97	1362.02	191.297	2731.65	1233.37	292.227	2481.99	1259.24	28.6664	2580.49	1388.47	-17.6405	2544.04	1159.69	-13.0496	2529.22	1091.41	-49.4025	2606.05	997.445	-32.0116	2633.99	896.585	-65.9462	2574.5	879.246	-84.8145	2627.05	797.965
1296	0	145.529	2776.82	1569.26	245.199	2782.96	1567.93	139.853	2606.71	1598.12	253.195	2603.29	1598.64	209.733	2545	1424.82	195.024	2488.06	1211.32	191.191	2679.3	1361.24	191.205	2738.97	1232.64	291.995	2489.2	1258.69	28.4788	2587.96	1387.79	-17.6676	2550.99	1159.11	-12.9905	2535.95	1090.87	-49.4281	2612.07	996.426	-32.0532	2639.32	895.294	-65.9755	2579.71	878.53	-84.6122	2631.47	796.584
1297	0	145.25	2784.34	1568.24	244.895	2790.6	1566.84	139.717	2614.28	1597.3	253.049	2610.99	1597.78	209.458	2552.44	1424.04	194.714	2495.38	1210.7	191.011	2686.69	1360.4	191.084	2746.37	1231.87	291.678	2496.46	1258.06	28.2323	2595.5	1387.04	-17.775	2558.02	1158.45	-13.0172	2542.77	1090.25	-49.5415	2618.17	995.342	-32.1916	2644.69	893.924	-66.1097	2584.96	877.755	-84.5255	2635.91	795.143
1298	0	144.959	2791.93	1567.18	244.573	2798.27	1565.71	139.519	2621.91	1596.44	252.84	2618.71	1596.87	209.11	2559.93	1423.2	194.331	2502.78	1210	190.783	2694.13	1359.5	190.931	2753.87	1231.06	291.278	2503.78	1257.35	27.9266	2603.13	1386.2	-17.9609	2565.15	1157.71	-13.1275	2549.68	1089.56	-49.7437	2624.35	994.191	-32.4284	2650.11	892.479	-66.3458	2590.27	876.918	-84.561	2640.39	793.648
1299	0	144.65	2799.56	1566.08	244.23	2805.97	1564.54	139.255	2629.6	1595.54	252.566	2626.47	1595.91	208.692	2567.48	1422.29	193.878	2510.25	1209.2	190.503	2701.64	1358.54	190.742	2761.46	1230.19	290.8	2511.15	1256.56	27.5618	2610.82	1385.27	-18.2236	2572.36	1156.87	-13.3193	2556.69	1088.79	-50.0354	2630.62	992.975	-32.7644	2655.59	890.963	-66.6802	2595.65	876.016	-84.7233	2644.92	792.101
1300	0	144.322	2807.26	1564.94	243.864	2813.71	1563.34	138.921	2637.36	1594.59	252.223	2634.26	1594.92	208.204	2575.09	1421.31	193.361	2517.81	1208.3	190.17	2709.22	1357.53	190.516	2769.16	1229.28	290.243	2518.59	1255.67	27.1374	2618.6	1384.27	-18.5605	2579.66	1155.94	-13.5895	2563.78	1087.94	-50.4164	2636.96	991.694	-33.1997	2661.14	889.381	-67.109	2601.09	875.047	-85.0159	2649.52	790.508
1301	0	143.97	2815	1563.76	243.469	2821.49	1562.1	138.517	2645.17	1593.61	251.808	2642.08	1593.89	207.646	2582.77	1420.27	192.781	2525.47	1207.29	189.783	2716.87	1356.47	190.248	2776.95	1228.34	289.612	2526.1	1254.7	26.6534	2626.44	1383.18	-18.9691	2587.04	1154.93	-13.9351	2570.97	1087.02	-50.886	2643.4	990.351	-33.734	2666.77	887.74	-67.6281	2606.62	874.013	-85.4402	2654.2	788.877
1302	0	143.59	2822.81	1562.56	243.044	2829.3	1560.83	138.039	2653.04	1592.59	251.322	2649.93	1592.84	207.02	2590.51	1419.16	192.141	2533.22	1206.19	189.338	2724.59	1355.36	189.934	2784.85	1227.35	288.907	2533.69	1253.64	26.1092	2634.35	1382.01	-19.4466	2594.51	1153.83	-14.3527	2578.25	1086.01	-51.4433	2649.93	988.953	-34.3659	2672.49	886.049	-68.2332	2612.23	872.917	-85.996	2658.97	787.213
1303	0	143.181	2830.66	1561.34	242.587	2837.14	1559.56	137.487	2660.98	1591.55	250.761	2657.81	1591.76	206.328	2598.32	1418.01	191.444	2541.09	1204.99	188.836	2732.39	1354.22	189.573	2792.85	1226.35	288.131	2541.36	1252.49	25.5046	2642.32	1380.77	-19.9899	2602.07	1152.66	-14.8385	2585.63	1084.93	-52.0868	2656.55	987.505	-35.0936	2678.31	884.317	-68.9195	2617.94	871.762	-86.6811	2663.85	785.526
1304	0	142.74	2838.58	1560.11	242.095	2845.03	1558.27	136.859	2668.97	1590.49	250.126	2665.73	1590.67	205.57	2606.2	1416.8	190.691	2549.08	1203.69	188.274	2740.27	1353.05	189.16	2800.95	1225.32	287.286	2549.13	1251.27	24.8392	2650.36	1379.46	-20.5959	2609.71	1151.41	-15.3889	2593.1	1083.79	-52.8144	2663.27	986.018	-35.9145	2684.24	882.556	-69.6824	2623.77	870.557	-87.4919	2668.85	783.825
1305	0	142.266	2846.54	1558.89	241.567	2852.95	1557	136.157	2677.02	1589.43	249.416	2673.68	1589.58	204.747	2614.15	1415.57	189.882	2557.19	1202.31	187.653	2748.24	1351.88	188.695	2809.17	1224.3	286.373	2556.99	1249.98	24.1129	2658.47	1378.1	-21.2614	2617.44	1150.11	-15.9998	2600.67	1082.59	-53.6239	2670.1	984.5	-36.8256	2690.3	880.779	-70.5166	2629.71	869.31	-88.4231	2673.98	782.12
1306	0	141.756	2854.57	1557.68	241.004	2860.9	1555.75	135.379	2685.12	1588.38	248.632	2681.66	1588.5	203.862	2622.17	1414.3	189.018	2565.42	1200.84	186.973	2756.28	1350.71	188.176	2817.5	1223.28	285.393	2564.95	1248.62	23.3258	2666.63	1376.7	-21.9828	2625.25	1148.77	-16.6673	2608.34	1081.35	-54.5125	2677.03	982.964	-37.8233	2696.49	879	-71.4169	2635.78	868.032	-89.4681	2679.26	780.424
1307	0	141.211	2862.65	1556.5	240.404	2868.9	1554.53	134.528	2693.28	1587.34	247.775	2689.68	1587.45	202.916	2630.26	1413.03	188.101	2573.78	1199.32	186.234	2764.42	1349.55	187.602	2825.93	1222.29	284.35	2573.02	1247.22	22.4785	2674.86	1375.27	-22.7568	2633.14	1147.4	-17.3874	2616.11	1080.08	-55.477	2684.08	981.425	-38.9034	2702.83	877.234	-72.3778	2641.99	866.735	-90.6195	2684.71	778.749
1308	0	140.631	2870.78	1555.37	239.769	2876.93	1553.36	133.605	2701.5	1586.33	246.847	2697.72	1586.42	201.911	2638.43	1411.75	187.13	2582.27	1197.75	185.438	2772.65	1348.43	186.973	2834.49	1221.34	283.246	2581.2	1245.79	21.5718	2683.16	1373.84	-23.5798	2641.12	1146.01	-18.1561	2623.98	1078.79	-56.5139	2691.24	979.897	-40.0614	2709.32	875.499	-73.3936	2648.34	865.434	-91.869	2690.32	777.11
1309	0	140.016	2878.98	1554.31	239.1	2885	1552.27	132.612	2709.77	1585.36	245.85	2705.8	1585.45	200.849	2646.67	1410.49	186.107	2590.9	1196.15	184.586	2780.96	1347.36	186.292	2843.15	1220.45	282.082	2589.5	1244.34	20.6073	2691.52	1372.41	-24.4482	2649.18	1144.63	-18.9693	2631.95	1077.5	-57.6191	2698.52	978.398	-41.2925	2715.98	873.812	-74.4588	2654.85	864.145	-93.2079	2696.12	775.521
1310	0	139.367	2887.22	1553.32	238.397	2893.1	1551.26	131.553	2718.09	1584.45	244.787	2713.91	1584.54	199.734	2654.99	1409.27	185.032	2599.65	1194.55	183.681	2789.37	1346.35	185.56	2851.92	1219.64	280.864	2597.91	1242.89	19.5871	2699.95	1371	-25.3582	2657.33	1143.28	-19.8232	2640.03	1076.24	-58.788	2705.92	976.945	-42.5913	2722.82	872.192	-75.5676	2661.53	862.885	-94.6271	2702.11	773.998
1311	0	138.687	2895.53	1552.43	237.665	2901.25	1550.35	130.431	2726.46	1583.62	243.661	2722.06	1583.7	198.569	2663.38	1408.09	183.908	2608.54	1192.96	182.727	2797.86	1345.42	184.779	2860.81	1218.92	279.595	2606.45	1241.47	18.5142	2708.44	1369.65	-26.3063	2665.57	1141.97	-20.7143	2648.21	1075.01	-60.0159	2713.46	975.556	-43.9525	2729.85	870.656	-76.7144	2668.37	861.672	-96.1173	2708.31	772.558
1312	0	137.977	2903.89	1551.65	236.905	2909.43	1549.56	129.252	2734.88	1582.87	242.478	2730.23	1582.95	197.357	2671.84	1406.98	182.738	2617.56	1191.42	181.729	2806.44	1344.6	183.955	2869.8	1218.31	278.28	2615.1	1240.09	17.3922	2717.01	1368.36	-27.2885	2673.9	1140.73	-21.6389	2656.5	1073.85	-61.2973	2721.12	974.252	-45.3704	2737.07	869.224	-77.8941	2675.4	860.525	-97.6691	2714.72	771.216
1313	0	137.241	2912.31	1551	236.121	2917.64	1548.9	128.019	2743.35	1582.22	241.241	2738.43	1582.31	196.102	2680.37	1405.95	181.525	2626.71	1189.94	180.691	2815.11	1343.89	183.09	2878.9	1217.83	276.925	2623.87	1238.79	16.2257	2725.66	1367.16	-28.3012	2682.33	1139.57	-22.5939	2664.89	1072.76	-62.6268	2728.93	973.051	-46.8391	2744.49	867.914	-79.1017	2682.61	859.463	-99.2735	2721.35	769.99
1314	0	136.482	2920.79	1550.49	235.317	2925.9	1548.38	126.74	2751.88	1581.68	239.957	2746.67	1581.78	194.81	2688.97	1405.02	180.273	2635.98	1188.56	179.618	2823.86	1343.3	182.192	2888.1	1217.49	275.535	2632.76	1237.57	15.0199	2734.38	1366.07	-29.3408	2690.85	1138.53	-23.5764	2673.4	1071.77	-63.9984	2736.88	971.97	-48.3528	2752.12	866.743	-80.3329	2690.02	858.504	-100.921	2728.22	768.896
1315	0	135.704	2929.33	1550.13	234.497	2934.19	1548.03	125.42	2760.44	1581.26	238.632	2754.93	1581.37	193.486	2697.64	1404.21	178.989	2645.39	1187.29	178.518	2832.69	1342.85	181.265	2897.39	1217.29	274.12	2641.75	1236.46	13.7808	2743.17	1365.1	-30.4039	2699.48	1137.61	-24.5841	2682.02	1070.9	-65.4061	2744.99	971.029	-49.9053	2759.96	865.727	-81.584	2697.63	857.667	-102.604	2735.33	767.95
1316	0	134.91	2937.92	1549.93	233.667	2942.51	1547.83	124.068	2769.06	1580.97	237.272	2763.23	1581.1	192.135	2706.37	1403.52	177.679	2654.91	1186.17	177.398	2841.59	1342.54	180.316	2906.76	1217.26	272.684	2650.83	1235.49	12.5151	2752.04	1364.28	-31.4872	2708.2	1136.83	-25.615	2690.75	1070.17	-66.8438	2753.24	970.242	-51.4908	2768.02	864.882	-82.8521	2705.45	856.968	-104.313	2742.69	767.166
1317	0	134.105	2946.58	1549.89	232.83	2950.88	1547.81	122.69	2777.72	1580.82	235.886	2771.55	1580.96	190.762	2715.16	1402.98	176.349	2664.55	1185.22	176.264	2850.55	1342.39	179.352	2916.2	1217.38	271.237	2660	1234.67	11.2296	2760.98	1363.61	-32.5879	2717.03	1136.21	-26.6678	2699.59	1069.58	-68.3054	2761.66	969.623	-53.1031	2776.3	864.218	-84.1352	2713.49	856.422	-106.041	2750.31	766.557
1318	0	133.294	2955.29	1550.02	231.994	2959.28	1547.95	121.295	2786.43	1580.81	234.481	2779.9	1580.98	189.375	2724	1402.58	175.008	2674.29	1184.44	175.123	2859.56	1342.39	178.379	2925.7	1217.66	269.784	2669.25	1234.02	9.93169	2770	1363.12	-33.7035	2725.96	1135.75	-27.7419	2708.55	1069.15	-69.7847	2770.24	969.184	-54.7363	2784.81	863.747	-85.4323	2721.75	856.042	-107.781	2758.2	766.135
1319	0	132.481	2964.06	1550.31	231.163	2967.72	1548.27	119.891	2795.17	1580.95	233.066	2788.28	1581.13	187.978	2732.89	1402.35	173.66	2684.12	1183.87	173.985	2868.62	1342.55	177.406	2935.25	1218.11	268.331	2678.55	1233.55	8.62871	2779.09	1362.81	-34.8323	2735	1135.48	-28.8371	2717.61	1068.89	-71.2761	2778.98	968.935	-56.3846	2793.54	863.476	-86.743	2730.24	855.838	-109.525	2766.37	765.907
1320	0	131.67	2972.89	1550.76	230.343	2976.2	1548.75	118.489	2803.96	1581.24	231.65	2796.69	1581.44	186.577	2741.82	1402.28	172.312	2694.03	1183.51	172.855	2877.72	1342.86	176.44	2944.82	1218.71	266.884	2687.89	1233.27	7.32789	2788.24	1362.68	-35.9731	2744.14	1135.39	-29.9544	2726.78	1068.81	-72.7739	2787.9	968.88	-58.0421	2802.5	863.408	-88.068	2738.97	855.815	-111.27	2774.82	765.88
1321	0	130.869	2981.78	1551.36	229.542	2984.71	1549.38	117.096	2812.79	1581.66	230.241	2805.13	1581.89	185.178	2750.78	1402.37	170.969	2703.99	1183.36	171.743	2886.85	1343.32	175.488	2954.41	1219.45	265.446	2697.24	1233.19	6.03612	2797.46	1362.74	-37.1253	2753.37	1135.49	-31.0951	2736.05	1068.91	-74.2731	2796.99	969.021	-59.7035	2811.67	863.546	-89.4083	2747.94	855.978	-113.01	2783.57	766.056
1322	0	130.081	2990.71	1552.1	228.764	2993.25	1550.16	115.723	2821.65	1582.23	228.849	2813.59	1582.48	183.785	2759.77	1402.63	169.631	2714	1183.43	170.656	2895.98	1343.92	174.56	2963.99	1220.32	264.018	2706.6	1233.3	4.75985	2806.73	1362.99	-38.2891	2762.7	1135.78	-32.2616	2745.43	1069.18	-75.7691	2806.26	969.359	-61.3635	2821.08	863.887	-90.7658	2757.16	856.324	-114.741	2792.62	766.432
1323	0	129.313	2999.69	1552.96	228.018	3001.83	1551.06	114.379	2830.54	1582.93	227.482	2822.07	1583.2	182.403	2768.77	1403.04	168.299	2724.02	1183.72	169.6	2905.13	1344.65	173.663	2973.55	1221.31	262.599	2715.93	1233.6	3.5049	2816.06	1363.42	-39.4657	2772.13	1136.24	-33.4566	2754.89	1069.63	-77.2579	2815.7	969.888	-63.0168	2830.7	864.425	-92.1424	2766.62	856.85	-116.46	2801.99	767.006
1324	0	128.571	3008.71	1553.92	227.31	3010.43	1552.07	113.072	2839.47	1583.75	226.15	2830.58	1584.04	181.034	2777.78	1403.61	166.972	2734.04	1184.2	168.583	2914.26	1345.49	172.805	2983.07	1222.39	261.185	2725.21	1234.09	2.27642	2825.44	1364.03	-40.6566	2781.64	1136.88	-34.6838	2764.45	1070.25	-78.7359	2825.31	970.602	-64.6587	2840.53	865.153	-93.5406	2776.33	857.547	-118.165	2811.67	767.77
1325	0	127.863	3017.77	1554.97	226.647	3019.05	1553.17	111.811	2848.41	1584.69	224.86	2839.1	1584.99	179.681	2786.78	1404.32	165.644	2744.02	1184.88	167.61	2923.37	1346.44	171.995	2992.53	1223.54	259.773	2734.41	1234.75	1.07883	2834.87	1364.81	-41.8644	2791.23	1137.69	-35.9471	2774.09	1071.02	-80.2003	2835.1	971.488	-66.2845	2850.57	866.059	-94.9628	2786.29	858.405	-119.855	2821.69	768.712
1326	0	127.195	3026.85	1556.08	226.035	3027.7	1554.33	110.605	2857.38	1585.73	223.62	2847.63	1586.03	178.347	2795.77	1405.16	164.309	2753.94	1185.74	166.687	2932.45	1347.47	171.241	3001.91	1224.75	258.356	2743.53	1235.57	-0.084167	2844.33	1365.73	-43.0917	2800.9	1138.64	-37.2507	2783.81	1071.94	-81.6487	2845.05	972.535	-67.8897	2860.82	867.132	-96.4111	2796.49	859.409	-121.527	2832.02	769.819
1327	0	126.574	3035.95	1557.23	225.482	3036.35	1555.53	109.459	2866.37	1586.86	222.437	2856.18	1587.16	177.032	2804.73	1406.12	162.961	2763.77	1186.74	165.819	2941.48	1348.57	170.55	3011.2	1225.99	256.927	2752.53	1236.52	-1.20954	2853.83	1366.79	-44.3417	2810.64	1139.73	-38.5989	2793.6	1072.98	-83.0795	2855.17	973.727	-69.4702	2871.26	868.355	-97.8878	2806.94	860.544	-123.182	2842.69	771.076
1328	0	126.009	3045.05	1558.41	224.993	3045	1556.75	108.381	2875.36	1588.06	221.318	2864.73	1588.36	175.739	2813.65	1407.18	161.592	2773.5	1187.88	165.01	2950.46	1349.73	169.929	3020.38	1227.24	255.478	2761.39	1237.59	-2.29482	2863.35	1367.96	-45.6174	2820.46	1140.93	-39.9959	2803.46	1074.14	-84.4912	2865.45	975.047	-71.0218	2881.89	869.715	-99.3944	2817.62	861.793	-124.818	2853.69	772.467
1329	0	125.505	3054.15	1559.58	224.576	3053.65	1557.97	107.377	2884.37	1589.32	220.267	2873.29	1589.61	174.466	2822.53	1408.33	160.194	2783.09	1189.14	164.262	2959.37	1350.92	169.383	3029.43	1228.48	254.001	2770.1	1238.77	-3.33799	2872.9	1369.23	-46.9217	2830.33	1142.24	-41.4452	2813.37	1075.39	-85.8829	2875.88	976.479	-72.5408	2892.71	871.194	-100.932	2828.53	863.138	-126.436	2865.02	773.974
1330	0	125.069	3063.23	1560.73	224.235	3062.29	1559.16	106.45	2893.37	1590.64	219.287	2881.84	1590.9	173.215	2831.34	1409.56	158.762	2792.52	1190.48	163.579	2968.2	1352.12	168.918	3038.34	1229.69	252.492	2778.64	1240.02	-4.33737	2882.45	1370.59	-48.2566	2840.26	1143.63	-42.9498	2823.35	1076.71	-87.254	2886.45	978.005	-74.0236	2903.69	872.777	-102.502	2839.66	864.563	-128.035	2876.66	775.581
1331	0	124.707	3072.29	1561.84	223.976	3070.91	1560.3	105.604	2902.38	1591.99	218.384	2890.38	1592.22	171.987	2840.09	1410.84	157.291	2801.77	1191.89	162.961	2976.95	1353.34	168.536	3047.1	1230.85	250.946	2787	1241.34	-5.2915	2892.01	1372	-49.6235	2850.25	1145.08	-44.5116	2833.37	1078.1	-88.6037	2897.17	979.607	-75.4669	2914.85	874.449	-104.103	2851	866.051	-129.615	2888.61	777.272
1332	0	124.424	3081.31	1562.89	223.802	3079.5	1561.38	104.842	2911.37	1593.37	217.557	2898.91	1593.55	170.782	2848.76	1412.17	155.78	2810.83	1193.35	162.408	2985.6	1354.54	168.238	3055.7	1231.97	249.36	2795.17	1242.7	-6.19909	2901.56	1373.47	-51.0223	2860.29	1146.58	-46.1312	2843.44	1079.54	-89.9311	2908.01	981.271	-76.8675	2926.15	876.196	-105.736	2862.54	867.588	-131.177	2900.86	779.034
1333	0	124.223	3090.29	1563.87	223.717	3088.05	1562.38	104.165	2920.35	1594.76	216.809	2907.42	1594.89	169.602	2857.35	1413.53	154.231	2819.69	1194.84	161.921	2994.16	1355.72	168.026	3064.13	1233.02	247.737	2803.15	1244.09	-7.05898	2911.08	1374.96	-52.4518	2870.37	1148.12	-47.8078	2853.54	1081	-91.2355	2918.97	982.98	-78.223	2937.6	878.004	-107.397	2874.26	869.163	-132.718	2913.38	780.854
1334	0	124.107	3099.22	1564.76	223.723	3096.56	1563.29	103.573	2929.32	1596.15	216.14	2915.91	1596.21	168.449	2865.84	1414.91	152.645	2828.34	1196.34	161.496	3002.6	1356.87	167.895	3072.4	1234.01	246.079	2810.94	1245.5	-7.8701	2920.58	1376.48	-53.9091	2880.49	1149.67	-49.5392	2863.69	1082.48	-92.5157	2930.05	984.723	-79.5311	2949.19	879.861	-109.087	2886.16	870.766	-134.24	2926.17	782.723
1335	0	124.077	3108.08	1565.55	223.821	3105.01	1564.1	103.066	2938.26	1597.54	215.548	2924.38	1597.52	167.323	2874.24	1416.29	151.031	2836.77	1197.85	161.134	3010.93	1357.99	167.844	3080.5	1234.92	244.392	2818.55	1246.91	-8.63157	2930.02	1378	-55.3899	2890.63	1151.22	-51.3212	2873.86	1083.96	-93.7702	2941.22	986.489	-80.79	2960.89	881.759	-110.8	2898.21	872.39	-135.741	2939.2	784.635
1336	0	124.134	3116.86	1566.24	224.01	3113.4	1564.8	102.642	2947.17	1598.91	215.032	2932.81	1598.81	166.228	2882.53	1417.67	149.395	2844.99	1199.34	160.83	3019.15	1359.05	167.865	3088.44	1235.77	242.685	2825.96	1248.31	-9.34272	2939.4	1379.51	-56.8885	2900.8	1152.78	-53.1482	2884.06	1085.44	-94.9974	2952.49	988.268	-81.9983	2972.71	883.688	-112.534	2910.41	874.029	-137.218	2952.45	786.586
1337	0	124.276	3125.56	1566.82	224.29	3121.73	1565.39	102.301	2956.05	1600.26	214.591	2941.21	1600.06	165.167	2890.71	1419.04	147.749	2853	1200.82	160.581	3027.24	1360.07	167.953	3096.22	1236.56	240.967	2833.21	1249.69	-10.0032	2948.7	1381.01	-58.398	2910.97	1154.31	-55.013	2894.26	1086.91	-96.1956	2963.83	990.054	-83.155	2984.63	885.641	-114.283	2922.74	875.679	-138.672	2965.9	788.571
1338	0	124.501	3134.18	1567.29	224.657	3129.98	1565.86	102.039	2964.88	1601.58	214.222	2949.56	1601.27	164.141	2898.79	1420.38	146.103	2860.81	1202.26	160.384	3035.21	1361.03	168.099	3103.84	1237.29	239.248	2840.3	1251.05	-10.613	2957.92	1382.48	-59.9105	2921.14	1155.83	-56.9071	2904.48	1088.35	-97.3627	2975.23	991.84	-84.2595	2996.63	887.613	-116.043	2935.18	877.339	-140.098	2979.52	790.592
1339	0	124.806	3142.7	1567.65	225.109	3138.15	1566.21	101.853	2973.67	1602.85	213.922	2957.87	1602.43	163.155	2906.75	1421.68	144.468	2868.43	1203.66	160.234	3043.07	1361.93	168.295	3111.33	1237.96	237.542	2847.23	1252.38	-11.1725	2967.03	1383.92	-61.4176	2931.29	1157.31	-58.8206	2914.68	1089.76	-98.4967	2986.69	993.623	-85.311	3008.7	889.6	-117.806	2947.72	879.006	-141.495	2993.28	792.649
1340	0	125.189	3151.12	1567.9	225.642	3146.23	1566.46	101.739	2982.41	1604.09	213.688	2966.13	1603.54	162.211	2914.61	1422.95	142.856	2875.88	1205.01	160.127	3050.81	1362.77	168.53	3118.67	1238.57	235.858	2854.04	1253.67	-11.6825	2976.03	1385.32	-62.9104	2941.41	1158.76	-60.7429	2924.88	1091.14	-99.5954	2998.18	995.4	-86.3091	3020.83	891.596	-119.564	2960.35	880.679	-142.859	3007.17	794.741
1341	0	125.644	3159.44	1568.04	226.251	3154.22	1566.59	101.695	2991.09	1605.27	213.518	2974.34	1604.59	161.313	2922.36	1424.16	141.278	2883.17	1206.32	160.059	3058.43	1363.55	168.796	3125.9	1239.14	234.21	2860.73	1254.91	-12.1439	2984.91	1386.68	-64.3802	2951.47	1160.16	-62.6625	2935.04	1092.48	-100.657	3009.7	997.166	-87.253	3033	893.599	-121.311	2973.04	882.356	-144.186	3021.16	796.869
1342	0	126.169	3167.66	1568.09	226.93	3162.11	1566.63	101.716	2999.71	1606.39	213.407	2982.49	1605.58	160.463	2930	1425.32	139.744	2890.32	1207.56	160.027	3065.93	1364.26	169.083	3133	1239.66	232.608	2867.31	1256.09	-12.5579	2993.67	1387.97	-65.8184	2961.48	1161.52	-64.5674	2945.17	1093.77	-101.678	3021.22	998.919	-88.1419	3045.21	895.606	-123.036	2985.79	884.034	-145.472	3035.21	799.034
1343	0	126.758	3175.76	1568.04	227.674	3169.91	1566.56	101.798	3008.26	1607.45	213.353	2990.58	1606.5	159.665	2937.54	1426.42	138.264	2897.33	1208.74	160.027	3073.33	1364.91	169.384	3140	1240.12	231.062	2873.8	1257.21	-12.9257	3002.29	1389.21	-67.2166	2971.4	1162.82	-66.4454	2955.25	1095.01	-102.658	3032.73	1000.66	-88.9749	3057.43	897.613	-124.731	2998.58	885.71	-146.712	3049.32	801.232
1344	0	127.408	3183.77	1567.91	228.476	3177.6	1566.41	101.937	3016.74	1608.44	213.353	2998.61	1607.35	158.922	2944.98	1427.44	136.846	2904.24	1209.86	160.055	3080.63	1365.48	169.69	3146.9	1240.54	229.582	2880.22	1258.27	-13.2482	3010.79	1390.38	-68.5674	2981.23	1164.07	-68.2845	2965.28	1096.19	-103.594	3044.21	1002.38	-89.7506	3069.66	899.616	-126.383	3011.38	887.378	-147.901	3063.46	803.462
1345	0	128.114	3191.67	1567.71	229.332	3185.19	1566.18	102.129	3025.14	1609.36	213.405	3006.57	1608.12	158.237	2952.34	1428.39	135.5	2911.05	1210.9	160.111	3087.83	1365.99	169.997	3153.71	1240.9	228.178	2886.58	1259.26	-13.5262	3019.14	1391.47	-69.8635	2990.95	1165.24	-70.0728	2975.24	1097.31	-104.482	3055.65	1004.07	-90.4675	3081.88	901.61	-127.984	3024.19	889.032	-149.034	3077.6	805.718
1346	0	128.873	3199.48	1567.44	230.234	3192.68	1565.86	102.371	3033.46	1610.2	213.505	3014.46	1608.8	157.613	2959.61	1429.26	134.232	2917.77	1211.86	160.191	3094.94	1366.42	170.298	3160.44	1241.2	226.857	2892.89	1260.17	-13.7599	3027.37	1392.48	-71.0986	3000.56	1166.35	-71.799	2985.13	1098.36	-105.321	3067.04	1005.74	-91.1236	3094.08	903.592	-129.521	3036.99	890.666	-150.105	3091.72	807.993
1347	0	129.679	3207.19	1567.1	231.177	3200.07	1565.48	102.66	3041.71	1610.96	213.652	3022.29	1609.4	157.053	2966.79	1430.04	133.05	2924.41	1212.74	160.296	3101.97	1366.78	170.593	3167.09	1241.43	225.628	2899.16	1261	-13.9494	3035.46	1393.39	-72.2668	3010.05	1167.38	-73.4526	2994.95	1099.33	-106.107	3078.35	1007.37	-91.7164	3106.25	905.556	-130.983	3049.76	892.273	-151.106	3105.8	810.281
1348	0	130.531	3214.81	1566.71	232.155	3207.37	1565.04	102.991	3049.87	1611.63	213.844	3030.03	1609.91	156.559	2973.91	1430.74	131.96	2931	1213.54	160.425	3108.92	1367.06	170.879	3173.67	1241.6	224.497	2905.4	1261.75	-14.0942	3043.42	1394.22	-73.3626	3019.42	1168.33	-75.0239	3004.69	1100.23	-106.835	3089.59	1008.97	-92.2427	3118.37	907.496	-132.361	3062.5	893.844	-152.033	3119.83	812.573
1349	0	131.423	3222.34	1566.27	233.165	3214.58	1564.54	103.362	3057.95	1612.21	214.08	3037.71	1610.32	156.135	2980.96	1431.35	130.968	2937.52	1214.24	160.579	3115.8	1367.28	171.156	3180.19	1241.69	223.47	2911.62	1262.4	-14.1934	3051.26	1394.94	-74.381	3028.66	1169.2	-76.504	3014.34	1101.03	-107.502	3100.74	1010.53	-92.6989	3130.43	909.408	-133.644	3075.18	895.371	-152.876	3133.79	814.858
1350	0	132.353	3229.8	1565.78	234.201	3221.69	1563.99	103.77	3065.95	1612.7	214.358	3045.31	1610.65	155.782	2987.95	1431.87	130.08	2944	1214.86	160.758	3122.62	1367.41	171.427	3186.65	1241.71	222.553	2917.82	1262.97	-14.246	3058.98	1395.56	-75.3174	3037.78	1169.98	-77.8849	3023.91	1101.75	-108.101	3111.79	1012.03	-93.0807	3142.43	911.285	-134.822	3087.81	896.849	-153.63	3147.65	817.128
1351	0	133.319	3237.18	1565.25	235.259	3228.73	1563.39	104.214	3073.88	1613.1	214.678	3052.83	1610.88	155.504	2994.89	1432.29	129.299	2950.43	1215.38	160.964	3129.38	1367.47	171.695	3193.06	1241.65	221.751	2924.02	1263.45	-14.2502	3066.58	1396.08	-76.1673	3046.78	1170.66	-79.1596	3033.4	1102.37	-108.628	3122.74	1013.48	-93.3832	3154.34	913.123	-135.887	3100.36	898.27	-154.287	3161.4	819.372
1352	0	134.319	3244.5	1564.69	236.336	3235.7	1562.74	104.692	3081.73	1613.41	215.038	3060.29	1611.01	155.303	3001.79	1432.62	128.631	2956.81	1215.81	161.198	3136.09	1367.46	171.962	3199.43	1241.51	221.069	2930.22	1263.84	-14.2041	3074.06	1396.49	-76.9266	3055.67	1171.25	-80.3215	3042.8	1102.89	-109.075	3133.57	1014.88	-93.6008	3166.17	914.917	-136.83	3112.83	899.63	-154.837	3175.04	821.58
1353	0	135.35	3251.76	1564.08	237.431	3242.6	1562.05	105.202	3089.5	1613.62	215.44	3067.67	1611.05	155.182	3008.64	1432.86	128.078	2963.16	1216.15	161.464	3142.76	1367.37	172.235	3205.76	1241.3	220.511	2936.42	1264.14	-14.1055	3081.44	1396.79	-77.5914	3064.44	1171.73	-81.3651	3052.11	1103.32	-109.437	3144.29	1016.21	-93.7277	3177.91	916.661	-137.646	3125.21	900.924	-155.273	3188.54	823.743
1354	0	136.412	3258.96	1563.45	238.541	3249.44	1561.32	105.744	3097.21	1613.73	215.882	3074.98	1611	155.142	3015.46	1433.01	127.643	2969.48	1216.39	161.763	3149.39	1367.21	172.518	3212.06	1241.01	220.079	2942.62	1264.35	-13.9521	3088.72	1396.99	-78.1582	3073.11	1172.12	-82.2854	3061.35	1103.65	-109.707	3154.89	1017.47	-93.7575	3189.55	918.352	-138.327	3137.5	902.149	-155.587	3201.89	825.853
1355	0	137.503	3266.12	1562.78	239.666	3256.23	1560.56	106.317	3104.85	1613.76	216.365	3082.22	1610.86	155.186	3022.25	1433.07	127.328	2975.76	1216.55	162.098	3155.99	1366.98	172.816	3218.34	1240.64	219.776	2948.84	1264.47	-13.7413	3095.9	1397.09	-78.6236	3081.68	1172.42	-83.078	3070.5	1103.88	-109.877	3165.37	1018.66	-93.6836	3201.08	919.987	-138.867	3149.69	903.303	-155.769	3215.1	827.902
1356	0	138.624	3273.24	1562.08	240.804	3262.97	1559.76	106.923	3112.43	1613.68	216.889	3089.39	1610.63	155.316	3029.02	1433.05	127.135	2982.01	1216.63	162.472	3162.56	1366.68	173.134	3224.59	1240.2	219.605	2955.08	1264.5	-13.4708	3102.98	1397.09	-78.9846	3090.15	1172.61	-83.7391	3079.56	1104.01	-109.942	3175.73	1019.78	-93.4994	3212.51	921.563	-139.261	3161.77	904.386	-155.811	3228.14	829.884
1357	0	139.775	3280.32	1561.35	241.956	3269.69	1558.93	107.56	3119.95	1613.52	217.455	3096.51	1610.32	155.533	3035.76	1432.94	127.066	2988.23	1216.62	162.886	3169.11	1366.32	173.478	3230.83	1239.69	219.565	2961.33	1264.46	-13.1384	3109.98	1397	-79.2387	3098.55	1172.71	-84.2655	3088.55	1104.05	-109.894	3185.96	1020.83	-93.1982	3223.82	923.077	-139.505	3173.74	905.396	-155.704	3241.01	831.794
1358	0	140.955	3287.38	1560.6	243.123	3276.37	1558.06	108.231	3127.41	1613.27	218.062	3103.57	1609.92	155.84	3042.5	1432.75	127.12	2994.44	1216.53	163.344	3175.64	1365.89	173.85	3237.07	1239.11	219.657	2967.61	1264.33	-12.7418	3116.9	1396.81	-79.3837	3106.87	1172.72	-84.6545	3097.47	1104	-109.728	3196.08	1021.79	-92.7736	3235.02	924.528	-139.592	3185.59	906.334	-155.442	3253.7	833.627
1359	0	142.168	3294.41	1559.82	244.304	3283.03	1557.16	108.936	3134.82	1612.93	218.712	3110.57	1609.44	156.238	3049.22	1432.49	127.298	3000.62	1216.38	163.846	3182.15	1365.39	174.256	3243.29	1238.47	219.881	2973.91	1264.14	-12.2795	3123.74	1396.55	-79.4176	3115.11	1172.64	-84.9038	3106.3	1103.85	-109.439	3206.06	1022.68	-92.2194	3246.1	925.914	-139.52	3197.33	907.2	-155.016	3266.22	835.379
1360	0	143.413	3301.42	1559.02	245.502	3289.67	1556.24	109.676	3142.19	1612.51	219.405	3117.52	1608.88	156.728	3055.93	1432.15	127.6	3006.79	1216.15	164.395	3188.65	1364.83	174.697	3249.51	1237.77	220.235	2980.24	1263.87	-11.75	3130.51	1396.2	-79.339	3123.29	1172.46	-85.0117	3115.06	1103.63	-109.021	3215.93	1023.49	-91.5303	3257.06	927.236	-139.283	3208.93	907.996	-154.419	3278.56	837.05
1361	0	144.692	3308.43	1558.19	246.717	3296.3	1555.29	110.453	3149.5	1612	220.14	3124.42	1608.25	157.311	3062.63	1431.74	128.025	3012.95	1215.86	164.992	3195.14	1364.22	175.176	3255.73	1237.01	220.719	2986.59	1263.53	-11.1522	3137.21	1395.79	-79.1466	3131.4	1172.21	-84.9767	3123.75	1103.31	-108.471	3225.68	1024.23	-90.7011	3267.91	928.492	-138.878	3220.41	908.721	-153.647	3290.72	838.635
1362	0	146.008	3315.43	1557.35	247.95	3302.92	1554.31	111.268	3156.78	1611.41	220.919	3131.28	1607.54	157.987	3069.33	1431.26	128.571	3019.11	1215.51	165.639	3201.63	1363.54	175.696	3261.95	1236.2	221.331	2992.98	1263.12	-10.4854	3143.85	1395.3	-78.8395	3139.45	1171.87	-84.7977	3132.36	1102.92	-107.785	3235.3	1024.88	-89.7276	3278.63	929.681	-138.301	3231.74	909.377	-152.693	3302.69	840.135
1363	0	147.362	3322.43	1556.48	249.202	3309.54	1553.31	112.122	3164.01	1610.74	221.742	3138.09	1606.76	158.757	3076.02	1430.71	129.239	3025.26	1215.11	166.336	3208.11	1362.81	176.258	3268.18	1235.34	222.07	2999.4	1262.66	-9.74919	3150.43	1394.74	-78.4168	3147.45	1171.45	-84.4739	3140.91	1102.45	-106.96	3244.8	1025.45	-88.6063	3289.24	930.805	-137.549	3242.94	909.964	-151.554	3314.48	841.547
1364	0	148.757	3329.43	1555.6	250.475	3316.15	1552.29	113.015	3171.2	1609.99	222.609	3144.86	1605.91	159.621	3082.71	1430.11	130.027	3031.41	1214.65	167.084	3214.59	1362.03	176.862	3274.41	1234.43	222.932	3005.85	1262.13	-8.94313	3156.94	1394.12	-77.8779	3155.38	1170.95	-84.0048	3149.38	1101.9	-105.996	3254.18	1025.94	-87.3343	3299.73	931.862	-136.62	3254	910.481	-150.226	3326.08	842.872
1365	0	150.195	3336.44	1554.7	251.768	3322.77	1551.24	113.95	3178.35	1609.16	223.521	3151.59	1604.99	160.58	3089.39	1429.43	130.932	3037.57	1214.14	167.884	3221.07	1361.19	177.509	3280.65	1233.48	223.918	3012.33	1261.54	-8.0671	3163.4	1393.44	-77.2223	3163.26	1170.38	-83.3899	3157.78	1101.28	-104.89	3263.45	1026.35	-85.9096	3310.09	932.854	-135.514	3264.91	910.931	-148.707	3337.49	844.107
1366	0	151.676	3343.47	1553.79	253.083	3329.38	1550.16	114.925	3185.46	1608.26	224.477	3158.28	1604	161.634	3096.08	1428.7	131.955	3043.73	1213.59	168.736	3227.54	1360.29	178.2	3286.9	1232.48	225.026	3018.86	1260.89	-7.12099	3169.81	1392.7	-76.4494	3171.09	1169.73	-82.6291	3166.12	1100.59	-103.641	3272.59	1026.68	-84.3307	3320.35	933.778	-134.228	3275.68	911.311	-146.995	3348.72	845.253
1367	0	153.203	3350.5	1552.87	254.419	3336	1549.07	115.942	3192.53	1607.27	225.477	3164.92	1602.95	162.782	3102.76	1427.9	133.095	3049.9	1212.98	169.641	3234.02	1359.34	178.935	3293.16	1231.43	226.255	3025.41	1260.18	-6.10478	3176.16	1391.9	-75.559	3178.86	1169.01	-81.7223	3174.39	1099.82	-102.249	3281.62	1026.93	-82.5968	3330.48	934.637	-132.762	3286.29	911.624	-145.089	3359.76	846.309
1368	0	154.775	3357.55	1551.93	255.778	3342.61	1547.95	117.001	3199.57	1606.21	226.523	3171.54	1601.82	164.026	3109.44	1427.04	134.35	3056.07	1212.33	170.597	3240.49	1358.34	179.715	3299.42	1230.35	227.604	3032	1259.42	-5.01845	3182.46	1391.05	-74.5509	3186.57	1168.21	-80.6695	3182.58	1098.98	-100.714	3290.52	1027.1	-80.7074	3340.49	935.428	-131.115	3296.76	911.868	-142.988	3370.61	847.275
1369	0	156.395	3364.62	1550.97	257.158	3349.23	1546.81	118.101	3206.56	1605.07	227.613	3178.11	1600.63	165.364	3116.12	1426.12	135.72	3062.26	1211.63	171.606	3246.96	1357.28	180.538	3305.7	1229.21	229.072	3038.63	1258.59	-3.86201	3188.71	1390.13	-73.4251	3194.23	1167.33	-79.4706	3190.72	1098.07	-99.0349	3299.31	1027.18	-78.6624	3350.38	936.153	-129.289	3307.09	912.043	-140.693	3381.28	848.151
1370	0	158.061	3371.7	1550.01	258.561	3355.85	1545.65	119.244	3213.52	1603.85	228.747	3184.64	1599.38	166.796	3122.8	1425.14	137.206	3068.45	1210.88	172.668	3253.43	1356.17	181.406	3311.99	1228.04	230.661	3045.29	1257.71	-2.63546	3194.9	1389.15	-72.1813	3201.83	1166.39	-78.1256	3198.78	1097.08	-97.2124	3307.97	1027.19	-76.4616	3360.16	936.811	-127.281	3317.26	912.15	-138.203	3391.76	848.936
[truncated: 69 more columns]

## Sheet: Sheet2
Devices
		025370 - Force			025370 - Moment			025370 - CoP			027571 - Force			027571 - Moment			027571 - CoP			037720 - Force			037720 - Moment			037720 - CoP
Frame	Sub Frame	Fx	Fy	Fz	Mx	My	Mz	Cx	Cy	Cz	Fx	Fy	Fz	Mx	My	Mz	Cx	Cy	Cz	Fx	Fy	Fz	Mx	My	Mz	Cx	Cy	Cz
		N	N	N	N.mm	N.mm	N.mm	mm	mm	mm	N	N	N	N.mm	N.mm	N.mm	mm	mm	mm	N	N	N	N.mm	N.mm	N.mm	mm	mm	mm
675	0	0	0	0	0	0	0	200	300	0	0	0	0	0	0	0	200	903	0	0	0	0	0	0	0	603	903	0
675	1	0	0	0	0	0	0	200	300	0	0	0	0	0	0	0	200	903	0	0	0	0	0	0	0	603	903	0
675	2	0	0	0	0	0	0	200	300	0	0	0	0	0	0	0	200	903	0	0	0	0	0	0	0	603	903	0
675	3	0	0	0	0	0	0	200	300	0	0	0	0	0	0	0	200	903	0	0	0	0	0	0	0	603	903	0
675	4	0	0	0	0	0	0	200	300	0	0	0	0	0	0	0	200	903	0	0	0	0	0	0	0	603	903	0
675	5	0	0	0	0	0	0	200	300	0	0	0	0	0	0	0	200	903	0	0	0	0	0	0	0	603	903	0
675	6	0	0	0	0	0	0	200	300	0	0	0	0	0	0	0	200	903	0	0	0	0	0	0	0	603	903	0
675	7	0	0	0	0	0	0	200	300	0	0	0	0	0	0	0	200	903	0	0	0	0	0	0	0	603	903	0
675	8	0	0	0	0	0	0	200	300	0	0	0	0	0	0	0	200	903	0	0	0	0	0	0	0	603	903	0
675	9	0	0	0	0	0	0	200	300	0	0	0	0	0	0	0	200	903	0	0	0	0	0	0	0	603	903	0
676	0	0	0	0	0	0	0	200	300	0	0	0	0	0	0	0	200	903	0	0	0	0	0	0	0	603	903	0
676	1	0	0	0	0	0	0	200	300	0	0	0	0	0	0	0	200	903	0	0	0	0	0	0	0	603	903	0
676	2	0	0	0	0	0	0	200	300	0	0	0	0	0	0	0	200	903	0	0	0	0	0	0	0	603	903	0
676	3	0	0	0	0	0	0	200	300	0	0	0	0	0	0	0	200	903	0	0	0	0	0	0	0	603	903	0
676	4	0	0	0	0	0	0	200	300	0	0	0	0	0	0	0	200	903	0	0	0	0	0	0	0	603	903	0
676	5	0	0	0	0	0	0	200	300	0	0	0	0	0	0	0	200	903	0	0	0	0	0	0	0	603	903	0
676	6	0	0	0	0	0	0	200	300	0	0	0	0	0	0	0	200	903	0	0	0	0	0	0	0	603	903	0
676	7	0	0	0	0	0	0	200	300	0	0	0	0	0	0	0	200	903	0	0	0	0	0	0	0	603	903	0
676	8	0	0	0	0	0	0	200	300	0	0	0	0	0	0	0	200	903	0	0	0	0	0	0	0	603	903	0
676	9	0	0	0	0	0	0	200	300	0	0	0	0	0	0	0	200	903	0	0	0	0	0	0	0	603	903	0
677	0	0	0	0	0	0	0	200	300	0	0	0	0	0	0	0	200	903	0	0	0	0	0	0	0	603	903	0
677	1	0	0	0	0	0	0	200	300	0	0	0	0	0	0	0	200	903	0	0	0	0	0	0	0	603	903	0
677	2	0	0	0	0	0	0	200	300	0	0	0	0	0	0	0	200	903	0	0	0	0	0	0	0	603	903	0
677	3	0	0	0	0	0	0	200	300	0	0	0	0	0	0	0	200	903	0	0	0	0	0	0	0	603	903	0
677	4	0	0	0	0	0	0	200	300	0	0	0	0	0	0	0	200	903	0	0	0	0	0	0	0	603	903	0
677	5	0	0	0	0	0	0	200	300	0	0	0	0	0	0	0	200	903	0	0	0	0	0	0	0	603	903	0
677	6	0	0	0	0	0	0	200	300	0	0	0	0	0	0	0	200	903	0	0	0	0	0	0	0	603	903	0
677	7	0	0	0	0	0	0	200	300	0	0	0	0	0	0	0	200	903	0	0	0	0	0	0	0	603	903	0
677	8	0	0	0	0	0	0	200	300	0	0	0	0	0	0	0	200	903	0	0	0	0	0	0	0	603	903	0
677	9	0	0	0	0	0	0	200	300	0	0	0	0	0	0	0	200	903	0	0	0	0	0	0	0	603	903	0
678	0	0	0	0	0	0	0	200	300	0	0	0	0	0	0	0	200	903	0	0	0	0	0	0	0	603	903	0
678	1	0	0	0	0	0	0	200	300	0	0	0	0	0	0	0	200	903	0	0	0	0	0	0	0	603	903	0
678	2	0	0	0	0	0	0	200	300	0	0	0	0	0	0	0	200	903	0	0	0	0	0	0	0	603	903	0
678	3	0	0	0	0	0	0	200	300	0	0	0	0	0	0	0	200	903	0	0	0	0	0	0	0	603	903	0
678	4	0	0	0	0	0	0	200	300	0	0	0	0	0	0	0	200	903	0	0	0	0	0	0	0	603	903	0
678	5	0	0	0	0	0	0	200	300	0	0	0	0	0	0	0	200	903	0	0	0	0	0	0	0	603	903	0
678	6	0	0	0	0	0	0	200	300	0	0	0	0	0	0	0	200	903	0	0	0	0	0	0	0	603	903	0
678	7	0	0	0	0	0	0	200	300	0	0	0	0	0	0	0	200	903	0	0	0	0	0	0	0	603	903	0
678	8	0	0	0	0	0	0	200	300	0	0	0	0	0	0	0	200	903	0	0	0	0	0	0	0	603	903	0
678	9	0	0	0	0	0	0	200	300	0	0	0	0	0	0	0	200	903	0	0	0	0	0	0	0	603	903	0
679	0	0	0	0	0	0	0	200	300	0	0	0	0	0	0	0	200	903	0	0	0	0	0	0	0	603	903	0
679	1	0	0	0	0	0	0	200	300	0	0	0	0	0	0	0	200	903	0	0	0	0	0	0	0	603	903	0
679	2	0	0	0	0	0	0	200	300	0	0	0	0	0	0	0	200	903	0	0	0	0	0	0	0	603	903	0
679	3	0	0	0	0	0	0	200	300	0	0	0	0	0	0	0	200	903	0	0	0	0	0	0	0	603	903	0
679	4	0	0	0	0	0	0	200	300	0	0	0	0	0	0	0	200	903	0	0	0	0	0	0	0	603	903	0
679	5	0	0	0	0	0	0	200	300	0	0	0	0	0	0	0	200	903	0	0	0	0	0	0	0	603	903	0
679	6	0	0	0	0	0	0	200	300	0	0	0	0	0	0	0	200	903	0	0	0	0	0	0	0	603	903	0
679	7	0	0	0	0	0	0	200	300	0	0	0	0	0	0	0	200	903	0	0	0	0	0	0	0	603	903	0
679	8	0	0	0	0	0	0	200	300	0	0	0	0	0	0	0	200	903	0	0	0	0	0	0	0	603	903	0
679	9	0	0	0	0	0	0	200	300	0	0	0	0	0	0	0	200	903	0	0	0	0	0	0	0	603	903	0
680	0	0	0	0	0	0	0	200	300	0	0	0	0	0	0	0	200	903	0	0	0	0	0	0	0	603	903	0
680	1	0	0	0	0	0	0	200	300	0	0	0	0	0	0	0	200	903	0	0	0	0	0	0	0	603	903	0
680	2	0	0	0	0	0	0	200	300	0	0	0	0	0	0	0	200	903	0	0	0	0	0	0	0	603	903	0
680	3	0	0	0	0	0	0	200	300	0	0	0	0	0	0	0	200	903	0	0	0	0	0	0	0	603	903	0
680	4	0	0	0	0	0	0	200	300	0	0	0	0	0	0	0	200	903	0	0	0	0	0	0	0	603	903	0
680	5	0	0	0	0	0	0	200	300	0	0	0	0	0	0	0	200	903	0	0	0	0	0	0	0	603	903	0
680	6	0	0	0	0	0	0	200	300	0	0	0	0	0	0	0	200	903	0	0	0	0	0	0	0	603	903	0
680	7	0	0	0	0	0	0	200	300	0	0	0	0	0	0	0	200	903	0	0	0	0	0	0	0	603	903	0
680	8	0	0	0	0	0	0	200	300	0	0	0	0	0	0	0	200	903	0	0	0	0	0	0	0	603	903	0
680	9	0	0	0	0	0	0	200	300	0	0	0	0	0	0	0	200	903	0	0	0	0	0	0	0	603	903	0
681	0	0	0	0	0	0	0	200	300	0	0	0	0	0	0	0	200	903	0	0	0	0	0	0	0	603	903	0
681	1	0	0	0	0	0	0	200	300	0	0	0	0	0	0	0	200	903	0	0	0	0	0	0	0	603	903	0
681	2	0	0	0	0	0	0	200	300	0	0	0	0	0	0	0	200	903	0	0	0	0	0	0	0	603	903	0
681	3	0	0	0	0	0	0	200	300	0	0	0	0	0	0	0	200	903	0	0	0	0	0	0	0	603	903	0
681	4	0	0	0	0	0	0	200	300	0	0	0	0	0	0	0	200	903	0	0	0	0	0	0	0	603	903	0
681	5	0	0	0	0	0	0	200	300	0	0	0	0	0	0	0	200	903	0	0	0	0	0	0	0	603	903	0
681	6	0	0	0	0	0	0	200	300	0	0	0	0	0	0	0	200	903	0	0	0	0	0	0	0	603	903	0
681	7	0	0	0	0	0	0	200	300	0	0	0	0	0	0	0	200	903	0	0	0	0	0	0	0	603	903	0
681	8	0	0	0	0	0	0	200	300	0	0	0	0	0	0	0	200	903	0	0	0	0	0	0	0	603	903	0
681	9	0	0	0	0	0	0	200	300	0	0	0	0	0	0	0	200	903	0	0	0	0	0	0	0	603	903	0
682	0	0	0	0	0	0	0	200	300	0	0	0	0	0	0	0	200	903	0	0	0	0	0	0	0	603	903	0
682	1	0	0	0	0	0	0	200	300	0	0	0	0	0	0	0	200	903	0	0	0	0	0	0	0	603	903	0
682	2	0	0	0	0	0	0	200	300	0	0	0	0	0	0	0	200	903	0	0	0	0	0	0	0	603	903	0
682	3	0	0	0	0	0	0	200	300	0	0	0	0	0	0	0	200	903	0	0	0	0	0	0	0	603	903	0
682	4	0	0	0	0	0	0	200	300	0	0	0	0	0	0	0	200	903	0	0	0	0	0	0	0	603	903	0
682	5	0	0	0	0	0	0	200	300	0	0	0	0	0	0	0	200	903	0	0	0	0	0	0	0	603	903	0
682	6	0	0	0	0	0	0	200	300	0	0	0	0	0	0	0	200	903	0	0	0	0	0	0	0	603	903	0
682	7	0	0	0	0	0	0	200	300	0	0	0	0	0	0	0	200	903	0	0	0	0	0	0	0	603	903	0
682	8	0	0	0	0	0	0	200	300	0	0	0	0	0	0	0	200	903	0	0	0	0	0	0	0	603	903	0
682	9	0	0	0	0	0	0	200	300	0	0	0	0	0	0	0	200	903	0	0	0	0	0	0	0	603	903	0
683	0	0	0	0	0	0	0	200	300	0	0	0	0	0	0	0	200	903	0	0	0	0	0	0	0	603	903	0
683	1	0	0	0	0	0	0	200	300	0	0	0	0	0	0	0	200	903	0	0	0	0	0	0	0	603	903	0
683	2	0	0	0	0	0	0	200	300	0	0	0	0	0	0	0	200	903	0	0	0	0	0	0	0	603	903	0
683	3	0	0	0	0	0	0	200	300	0	0	0	0	0	0	0	200	903	0	0	0	0	0	0	0	603	903	0
683	4	0	0	0	0	0	0	200	300	0	0	0	0	0	0	0	200	903	0	0	0	0	0	0	0	603	903	0
683	5	0	0	0	0	0	0	200	300	0	0	0	0	0	0	0	200	903	0	0	0	0	0	0	0	603	903	0
683	6	0	0	0	0	0	0	200	300	0	0	0	0	0	0	0	200	903	0	0	0	0	0	0	0	603	903	0
683	7	0	0	0	0	0	0	200	300	0	0	0	0	0	0	0	200	903	0	0	0	0	0	0	0	603	903	0
683	8	0	0	0	0	0	0	200	300	0	0	0	0	0	0	0	200	903	0	0	0	0	0	0	0	603	903	0
683	9	0	0	0	0	0	0	200	300	0	0	0	0	0	0	0	200	903	0	0	0	0	0	0	0	603	903	0
684	0	0	0	0	0	0	0	200	300	0	0	0	0	0	0	0	200	903	0	0	0	0	0	0	0	603	903	0
684	1	0	0	0	0	0	0	200	300	0	0	0	0	0	0	0	200	903	0	0	0	0	0	0	0	603	903	0
684	2	0	0	0	0	0	0	200	300	0	0	0	0	0	0	0	200	903	0	0	0	0	0	0	0	603	903	0
684	3	0	0	0	0	0	0	200	300	0	0	0	0	0	0	0	200	903	0	0	0	0	0	0	0	603	903	0
684	4	0	0	0	0	0	0	200	300	0	0	0	0	0	0	0	200	903	0	0	0	0	0	0	0	603	903	0
684	5	0	0	0	0	0	0	200	300	0	0	0	0	0	0	0	200	903	0	0	0	0	0	0	0	603	903	0
684	6	0	0	0	0	0	0	200	300	0	0	0	0	0	0	0	200	903	0	0	0	0	0	0	0	603	903	0
684	7	0	0	0	0	0	0	200	300	0	0	0	0	0	0	0	200	903	0	0	0	0	0	0	0	603	903	0
684	8	0	0	0	0	0	0	200	300	0	0	0	0	0	0	0	200	903	0	0	0	0	0	0	0	603	903	0
684	9	0	0	0	0	0	0	200	300	0	0	0	0	0	0	0	200	903	0	0	0	0	0	0	0	603	903	0
685	0	0	0	0	0	0	0	200	300	0	0	0	0	0	0	0	200	903	0	0	0	0	0	0	0	603	903	0
685	1	0	0	0	0	0	0	200	300	0	0	0	0	0	0	0	200	903	0	0	0	0	0	0	0	603	903	0
685	2	0	0	0	0	0	0	200	300	0	0	0	0	0	0	0	200	903	0	0	0	0	0	0	0	603	903	0
685	3	0	0	0	0	0	0	200	300	0	0	0	0	0	0	0	200	903	0	0	0	0	0	0	0	603	903	0
685	4	0	0	0	0	0	0	200	300	0	0	0	0	0	0	0	200	903	0	0	0	0	0	0	0	603	903	0
685	5	0	0	0	0	0	0	200	300	0	0	0	0	0	0	0	200	903	0	0	0	0	0	0	0	603	903	0
685	6	0	0	0	0	0	0	200	300	0	0	0	0	0	0	0	200	903	0	0	0	0	0	0	0	603	903	0
685	7	0	0	0	0	0	0	200	300	0	0	0	0	0	0	0	200	903	0	0	0	0	0	0	0	603	903	0
685	8	0	0	0	0	0	0	200	300	0	0	0	0	0	0	0	200	903	0	0	0	0	0	0	0	603	903	0
685	9	0	0	0	0	0	0	200	300	0	0	0	0	0	0	0	200	903	0	0	0	0	0	0	0	603	903	0
686	0	0	0	0	0	0	0	200	300	0	0	0	0	0	0	0	200	903	0	0	0	0	0	0	0	603	903	0
686	1	0	0	0	0	0	0	200	300	0	0	0	0	0	0	0	200	903	0	0	0	0	0	0	0	603	903	0
686	2	0	0	0	0	0	0	200	300	0	0	0	0	0	0	0	200	903	0	0	0	0	0	0	0	603	903	0
686	3	0	0	0	0	0	0	200	300	0	0	0	0	0	0	0	200	903	0	0	0	0	0	0	0	603	903	0
686	4	0	0	0	0	0	0	200	300	0	0	0	0	0	0	0	200	903	0	0	0	0	0	0	0	603	903	0
686	5	0	0	0	0	0	0	200	300	0	0	0	0	0	0	0	200	903	0	0	0	0	0	0	0	603	903	0
686	6	0	0	0	0	0	0	200	300	0	0	0	0	0	0	0	200	903	0	0	0	0	0	0	0	603	903	0
686	7	0	0	0	0	0	0	200	300	0	0	0	0	0	0	0	200	903	0	0	0	0	0	0	0	603	903	0
686	8	0	0	0	0	0	0	200	300	0	0	0	0	0	0	0	200	903	0	0	0	0	0	0	0	603	903	0
686	9	0	0	0	0	0	0	200	300	0	0	0	0	0	0	0	200	903	0	0	0	0	0	0	0	603	903	0
687	0	0	0	0	0	0	0	200	300	0	0	0	0	0	0	0	200	903	0	0	0	0	0	0	0	603	903	0
687	1	0	0	0	0	0	0	200	300	0	0	0	0	0	0	0	200	903	0	0	0	0	0	0	0	603	903	0
687	2	0	0	0	0	0	0	200	300	0	0	0	0	0	0	0	200	903	0	0	0	0	0	0	0	603	903	0
687	3	0	0	0	0	0	0	200	300	0	0	0	0	0	0	0	200	903	0	0	0	0	0	0	0	603	903	0
687	4	0	0	0	0	0	0	200	300	0	0	0	0	0	0	0	200	903	0	0	0	0	0	0	0	603	903	0
687	5	0	0	0	0	0	0	200	300	0	0	0	0	0	0	0	200	903	0	0	0	0	0	0	0	603	903	0
687	6	0	0	0	0	0	0	200	300	0	0	0	0	0	0	0	200	903	0	0	0	0	0	0	0	603	903	0
687	7	0	0	0	0	0	0	200	300	0	0	0	0	0	0	0	200	903	0	0	0	0	0	0	0	603	903	0
687	8	0	0	0	0	0	0	200	300	0	0	0	0	0	0	0	200	903	0	0	0	0	0	0	0	603	903	0
687	9	0	0	0	0	0	0	200	300	0	0	0	0	0	0	0	200	903	0	0	0	0	0	0	0	603	903	0
688	0	0	0	0	0	0	0	200	300	0	0	0	0	0	0	0	200	903	0	0	0	0	0	0	0	603	903	0
688	1	0	0	0	0	0	0	200	300	0	0	0	0	0	0	0	200	903	0	0	0	0	0	0	0	603	903	0
688	2	0	0	0	0	0	0	200	300	0	0	0	0	0	0	0	200	903	0	0	0	0	0	0	0	603	903	0
688	3	0	0	0	0	0	0	200	300	0	0	0	0	0	0	0	200	903	0	0	0	0	0	0	0	603	903	0
688	4	0	0	0	0	0	0	200	300	0	0	0	0	0	0	0	200	903	0	0	0	0	0	0	0	603	903	0
688	5	0	0	0	0	0	0	200	300	0	0	0	0	0	0	0	200	903	0	0	0	0	0	0	0	603	903	0
688	6	0	0	0	0	0	0	200	300	0	0	0	0	0	0	0	200	903	0	0	0	0	0	0	0	603	903	0
688	7	0	0	0	0	0	0	200	300	0	0	0	0	0	0	0	200	903	0	0	0	0	0	0	0	603	903	0
688	8	0	0	0	0	0	0	200	300	0	0	0	0	0	0	0	200	903	0	0	0	0	0	0	0	603	903	0
688	9	0	0	0	0	0	0	200	300	0	0	0	0	0	0	0	200	903	0	0	0	0	0	0	0	603	903	0
689	0	0	0	0	0	0	0	200	300	0	0	0	0	0	0	0	200	903	0	0	0	0	0	0	0	603	903	0
689	1	0	0	0	0	0	0	200	300	0	0	0	0	0	0	0	200	903	0	0	0	0	0	0	0	603	903	0
689	2	0	0	0	0	0	0	200	300	0	0	0	0	0	0	0	200	903	0	0	0	0	0	0	0	603	903	0
689	3	0	0	0	0	0	0	200	300	0	0	0	0	0	0	0	200	903	0	0	0	0	0	0	0	603	903	0
689	4	0	0	0	0	0	0	200	300	0	0	0	0	0	0	0	200	903	0	0	0	0	0	0	0	603	903	0
689	5	0	0	0	0	0	0	200	300	0	0	0	0	0	0	0	200	903	0	0	0	0	0	0	0	603	903	0
689	6	0	0	0	0	0	0	200	300	0	0	0	0	0	0	0	200	903	0	0	0	0	0	0	0	603	903	0
689	7	0	0	0	0	0	0	200	300	0	0	0	0	0	0	0	200	903	0	0	0	0	0	0	0	603	903	0
689	8	0	0	0	0	0	0	200	300	0	0	0	0	0	0	0	200	903	0	0	0	0	0	0	0	603	903	0
689	9	0	0	0	0	0	0	200	300	0	0	0	0	0	0	0	200	903	0	0	0	0	0	0	0	603	903	0
690	0	0	0	0	0	0	0	200	300	0	0	0	0	0	0	0	200	903	0	0	0	0	0	0	0	603	903	0
690	1	0	0	0	0	0	0	200	300	0	0	0	0	0	0	0	200	903	0	0	0	0	0	0	0	603	903	0
690	2	0	0	0	0	0	0	200	300	0	0	0	0	0	0	0	200	903	0	0	0	0	0	0	0	603	903	0
690	3	0	0	0	0	0	0	200	300	0	0	0	0	0	0	0	200	903	0	0	0	0	0	0	0	603	903	0
690	4	0	0	0	0	0	0	200	300	0	0	0	0	0	0	0	200	903	0	0	0	0	0	0	0	603	903	0
690	5	0	0	0	0	0	0	200	300	0	0	0	0	0	0	0	200	903	0	0	0	0	0	0	0	603	903	0
690	6	0	0	0	0	0	0	200	300	0	0	0	0	0	0	0	200	903	0	0	0	0	0	0	0	603	903	0
690	7	0	0	0	0	0	0	200	300	0	0	0	0	0	0	0	200	903	0	0	0	0	0	0	0	603	903	0
690	8	0	0	0	0	0	0	200	300	0	0	0	0	0	0	0	200	903	0	0	0	0	0	0	0	603	903	0
690	9	0	0	0	0	0	0	200	300	0	0	0	0	0	0	0	200	903	0	0	0	0	0	0	0	603	903	0
691	0	0	0	0	0	0	0	200	300	0	0	0	0	0	0	0	200	903	0	0	0	0	0	0	0	603	903	0
691	1	0	0	0	0	0	0	200	300	0	0	0	0	0	0	0	200	903	0	0	0	0	0	0	0	603	903	0
691	2	0	0	0	0	0	0	200	300	0	0	0	0	0	0	0	200	903	0	0	0	0	0	0	0	603	903	0
691	3	0	0	0	0	0	0	200	300	0	0	0	0	0	0	0	200	903	0	0	0	0	0	0	0	603	903	0
691	4	0	0	0	0	0	0	200	300	0	0	0	0	0	0	0	200	903	0	0	0	0	0	0	0	603	903	0
691	5	0	0	0	0	0	0	200	300	0	0	0	0	0	0	0	200	903	0	0	0	0	0	0	0	603	903	0
691	6	0	0	0	0	0	0	200	300	0	0	0	0	0	0	0	200	903	0	0	0	0	0	0	0	603	903	0
691	7	0	0	0	0	0	0	200	300	0	0	0	0	0	0	0	200	903	0	0	0	0	0	0	0	603	903	0
691	8	0	0	0	0	0	0	200	300	0	0	0	0	0	0	0	200	903	0	0	0	0	0	0	0	603	903	0
691	9	0	0	0	0	0	0	200	300	0	0	0	0	0	0	0	200	903	0	0	0	0	0	0	0	603	903	0
692	0	0	0	0	0	0	0	200	300	0	0	0	0	0	0	0	200	903	0	0	0	0	0	0	0	603	903	0
692	1	0	0	0	0	0	0	200	300	0	0	0	0	0	0	0	200	903	0	0	0	0	0	0	0	603	903	0
692	2	0	0	0	0	0	0	200	300	0	0	0	0	0	0	0	200	903	0	0	0	0	0	0	0	603	903	0
692	3	0	0	0	0	0	0	200	300	0	0	0	0	0	0	0	200	903	0	0	0	0	0	0	0	603	903	0
692	4	0	0	0	0	0	0	200	300	0	0	0	0	0	0	0	200	903	0	0	0	0	0	0	0	603	903	0
692	5	0	0	0	0	0	0	200	300	0	0	0	0	0	0	0	200	903	0	0	0	0	0	0	0	603	903	0
692	6	0	0	0	0	0	0	200	300	0	0	0	0	0	0	0	200	903	0	0	0	0	0	0	0	603	903	0
692	7	0	0	0	0	0	0	200	300	0	0	0	0	0	0	0	200	903	0	0	0	0	0	0	0	603	903	0
692	8	0	0	0	0	0	0	200	300	0	0	0	0	0	0	0	200	903	0	0	0	0	0	0	0	603	903	0
692	9	0	0	0	0	0	0	200	300	0	0	0	0	0	0	0	200	903	0	0	0	0	0	0	0	603	903	0
693	0	0	0	0	0	0	0	200	300	0	0	0	0	0	0	0	200	903	0	0	0	0	0	0	0	603	903	0
693	1	0	0	0	0	0	0	200	300	0	0	0	0	0	0	0	200	903	0	0	0	0	0	0	0	603	903	0
693	2	0	0	0	0	0	0	200	300	0	0	0	0	0	0	0	200	903	0	0	0	0	0	0	0	603	903	0
693	3	0	0	0	0	0	0	200	300	0	0	0	0	0	0	0	200	903	0	0	0	0	0	0	0	603	903	0
693	4	0	0	0	0	0	0	200	300	0	0	0	0	0	0	0	200	903	0	0	0	0	0	0	0	603	903	0
693	5	0	0	0	0	0	0	200	300	0	0	0	0	0	0	0	200	903	0	0	0	0	0	0	0	603	903	0
693	6	0	0	0	0	0	0	200	300	0	0	0	0	0	0	0	200	903	0	0	0	0	0	0	0	603	903	0
693	7	0	0	0	0	0	0	200	300	0	0	0	0	0	0	0	200	903	0	0	0	0	0	0	0	603	903	0
693	8	0	0	0	0	0	0	200	300	0	0	0	0	0	0	0	200	903	0	0	0	0	0	0	0	603	903	0
693	9	0	0	0	0	0	0	200	300	0	0	0	0	0	0	0	200	903	0	0	0	0	0	0	0	603	903	0
694	0	0	0	0	0	0	0	200	300	0	0	0	0	0	0	0	200	903	0	0	0	0	0	0	0	603	903	0
694	1	0	0	0	0	0	0	200	300	0	0	0	0	0	0	0	200	903	0	0	0	0	0	0	0	603	903	0
694	2	0	0	0	0	0	0	200	300	0	0	0	0	0	0	0	200	903	0	0	0	0	0	0	0	603	903	0
694	3	0	0	0	0	0	0	200	300	0	0	0	0	0	0	0	200	903	0	0	0	0	0	0	0	603	903	0
694	4	0	0	0	0	0	0	200	300	0	0	0	0	0	0	0	200	903	0	0	0	0	0	0	0	603	903	0
694	5	0	0	0	0	0	0	200	300	0	0	0	0	0	0	0	200	903	0	0	0	0	0	0	0	603	903	0
694	6	0	0	0	0	0	0	200	300	0	0	0	0	0	0	0	200	903	0	0	0	0	0	0	0	603	903	0
694	7	0	0	0	0	0	0	200	300	0	0	0	0	0	0	0	200	903	0	0	0	0	0	0	0	603	903	0
694	8	0	0	0	0	0	0	200	300	0	0	0	0	0	0	0	200	903	0	0	0	0	0	0	0	603	903	0
694	9	0	0	0	0	0	0	200	300	0	0	0	0	0	0	0	200	903	0	0	0	0	0	0	0	603	903	0
695	0	0	0	0	0	0	0	200	300	0	0	0	0	0	0	0	200	903	0	0	0	0	0	0	0	603	903	0
695	1	0	0	0	0	0	0	200	300	0	0	0	0	0	0	0	200	903	0	0	0	0	0	0	0	603	903	0
695	2	0	0	0	0	0	0	200	300	0	0	0	0	0	0	0	200	903	0	0	0	0	0	0	0	603	903	0
695	3	0	0	0	0	0	0	200	300	0	0	0	0	0	0	0	200	903	0	0	0	0	0	0	0	603	903	0
695	4	0	0	0	0	0	0	200	300	0	0	0	0	0	0	0	200	903	0	0	0	0	0	0	0	603	903	0
695	5	0	0	0	0	0	0	200	300	0	0	0	0	0	0	0	200	903	0	0	0	0	0	0	0	603	903	0
695	6	0	0	0	0	0	0	200	300	0	0	0	0	0	0	0	200	903	0	0	0	0	0	0	0	603	903	0
695	7	0	0	0	0	0	0	200	300	0	0	0	0	0	0	0	200	903	0	0	0	0	0	0	0	603	903	0
695	8	0	0	0	0	0	0	200	300	0	0	0	0	0	0	0	200	903	0	0	0	0	0	0	0	603	903	0
695	9	0	0	0	0	0	0	200	300	0	0	0	0	0	0	0	200	903	0	0	0	0	0	0	0	603	903	0
696	0	0	0	0	0	0	0	200	300	0	0	0	0	0	0	0	200	903	0	0	0	0	0	0	0	603	903	0
696	1	0	0	0	0	0	0	200	300	0	0	0	0	0	0	0	200	903	0	0	0	0	0	0	0	603	903	0
696	2	0	0	0	0	0	0	200	300	0	0	0	0	0	0	0	200	903	0	0	0	0	0	0	0	603	903	0
696	3	0	0	0	0	0	0	200	300	0	0	0	0	0	0	0	200	903	0	0	0	0	0	0	0	603	903	0
696	4	0	0	0	0	0	0	200	300	0	0	0	0	0	0	0	200	903	0	0	0	0	0	0	0	603	903	0
696	5	0	0	0	0	0	0	200	300	0	0	0	0	0	0	0	200	903	0	0	0	0	0	0	0	603	903	0
696	6	0	0	0	0	0	0	200	300	0	0	0	0	0	0	0	200	903	0	0	0	0	0	0	0	603	903	0
696	7	0	0	0	0	0	0	200	300	0	0	0	0	0	0	0	200	903	0	0	0	0	0	0	0	603	903	0
696	8	0	0	0	0	0	0	200	300	0	0	0	0	0	0	0	200	903	0	0	0	0	0	0	0	603	903	0
696	9	0	0	0	0	0	0	200	300	0	0	0	0	0	0	0	200	903	0	0	0	0	0	0	0	603	903	0
697	0	0	0	0	0	0	0	200	300	0	0	0	0	0	0	0	200	903	0	0	0	0	0	0	0	603	903	0
697	1	0	0	0	0	0	0	200	300	0	0	0	0	0	0	0	200	903	0	0	0	0	0	0	0	603	903	0
697	2	0	0	0	0	0	0	200	300	0	0	0	0	0	0	0	200	903	0	0	0	0	0	0	0	603	903	0
697	3	0	0	0	0	0	0	200	300	0	0	0	0	0	0	0	200	903	0	0	0	0	0	0	0	603	903	0
697	4	0	0	0	0	0	0	200	300	0	0	0	0	0	0	0	200	903	0	0	0	0	0	0	0	603	903	0
697	5	0	0	0	0	0	0	200	300	0	0	0	0	0	0	0	200	903	0	0	0	0	0	0	0	603	903	0
697	6	0	0	0	0	0	0	200	300	0	0	0	0	0	0	0	200	903	0	0	0	0	0	0	0	603	903	0
697	7	0	0	0	0	0	0	200	300	0	0	0	0	0	0	0	200	903	0	0	0	0	0	0	0	603	903	0
697	8	0	0	0	0	0	0	200	300	0	0	0	0	0	0	0	200	903	0	0	0	0	0	0	0	603	903	0
697	9	0	0	0	0	0	0	200	300	0	0	0	0	0	0	0	200	903	0	0	0	0	0	0	0	603	903	0
698	0	0	0	0	0	0	0	200	300	0	0	0	0	0	0	0	200	903	0	0	0	0	0	0	0	603	903	0
698	1	0	0	0	0	0	0	200	300	0	0	0	0	0	0	0	200	903	0	0	0	0	0	0	0	603	903	0
698	2	0	0	0	0	0	0	200	300	0	0	0	0	0	0	0	200	903	0	0	0	0	0	0	0	603	903	0
698	3	0	0	0	0	0	0	200	300	0	0	0	0	0	0	0	200	903	0	0	0	0	0	0	0	603	903	0
698	4	0	0	0	0	0	0	200	300	0	0	0	0	0	0	0	200	903	0	0	0	0	0	0	0	603	903	0
698	5	0	0	0	0	0	0	200	300	0	0	0	0	0	0	0	200	903	0	0	0	0	0	0	0	603	903	0
698	6	0	0	0	0	0	0	200	300	0	0	0	0	0	0	0	200	903	0	0	0	0	0	0	0	603	903	0
698	7	0	0	0	0	0	0	200	300	0	0	0	0	0	0	0	200	903	0	0	0	0	0	0	0	603	903	0
698	8	0	0	0	0	0	0	200	300	0	0	0	0	0	0	0	200	903	0	0	0	0	0	0	0	603	903	0
698	9	0	0	0	0	0	0	200	300	0	0	0	0	0	0	0	200	903	0	0	0	0	0	0	0	603	903	0
699	0	0	0	0	0	0	0	200	300	0	0	0	0	0	0	0	200	903	0	0	0	0	0	0	0	603	903	0
699	1	0	0	0	0	0	0	200	300	0	0	0	0	0	0	0	200	903	0	0	0	0	0	0	0	603	903	0
699	2	0	0	0	0	0	0	200	300	0	0	0	0	0	0	0	200	903	0	0	0	0	0	0	0	603	903	0
699	3	0	0	0	0	0	0	200	300	0	0	0	0	0	0	0	200	903	0	0	0	0	0	0	0	603	903	0
699	4	0	0	0	0	0	0	200	300	0	0	0	0	0	0	0	200	903	0	0	0	0	0	0	0	603	903	0
699	5	0	0	0	0	0	0	200	300	0	0	0	0	0	0	0	200	903	0	0	0	0	0	0	0	603	903	0
699	6	0	0	0	0	0	0	200	300	0	0	0	0	0	0	0	200	903	0	0	0	0	0	0	0	603	903	0
699	7	0	0	0	0	0	0	200	300	0	0	0	0	0	0	0	200	903	0	0	0	0	0	0	0	603	903	0
699	8	0	0	0	0	0	0	200	300	0	0	0	0	0	0	0	200	903	0	0	0	0	0	0	0	603	903	0
699	9	0	0	0	0	0	0	200	300	0	0	0	0	0	0	0	200	903	0	0	0	0	0	0	0	603	903	0
700	0	0	0	0	0	0	0	200	300	0	0	0	0	0	0	0	200	903	0	0	0	0	0	0	0	603	903	0
700	1	0	0	0	0	0	0	200	300	0	0	0	0	0	0	0	200	903	0	0	0	0	0	0	0	603	903	0
700	2	0	0	0	0	0	0	200	300	0	0	0	0	0	0	0	200	903	0	0	0	0	0	0	0	603	903	0
700	3	0	0	0	0	0	0	200	300	0	0	0	0	0	0	0	200	903	0	0	0	0	0	0	0	603	903	0
700	4	0	0	0	0	0	0	200	300	0	0	0	0	0	0	0	200	903	0	0	0	0	0	0	0	603	903	0
700	5	0	0	0	0	0	0	200	300	0	0	0	0	0	0	0	200	903	0	0	0	0	0	0	0	603	903	0
700	6	0	0	0	0	0	0	200	300	0	0	0	0	0	0	0	200	903	0	0	0	0	0	0	0	603	903	0
700	7	0	0	0	0	0	0	200	300	0	0	0	0	0	0	0	200	903	0	0	0	0	0	0	0	603	903	0
700	8	0	0	0	0	0	0	200	300	0	0	0	0	0	0	0	200	903	0	0	0	0	0	0	0	603	903	0
700	9	0	0	0	0	0	0	200	300	0	0	0	0	0	0	0	200	903	0	0	0	0	0	0	0	603	903	0
701	0	0	0	0	0	0	0	200	300	0	0	0	0	0	0	0	200	903	0	0	0	0	0	0	0	603	903	0
701	1	0	0	0	0	0	0	200	300	0	0	0	0	0	0	0	200	903	0	0	0	0	0	0	0	603	903	0
701	2	0	0	0	0	0	0	200	300	0	0	0	0	0	0	0	200	903	0	0	0	0	0	0	0	603	903	0
701	3	0	0	0	0	0	0	200	300	0	0	0	0	0	0	0	200	903	0	0	0	0	0	0	0	603	903	0
701	4	0	0	0	0	0	0	200	300	0	0	0	0	0	0	0	200	903	0	0	0	0	0	0	0	603	903	0
701	5	0	0	0	0	0	0	200	300	0	0	0	0	0	0	0	200	903	0	0	0	0	0	0	0	603	903	0
701	6	0	0	0	0	0	0	200	300	0	0	0	0	0	0	0	200	903	0	0	0	0	0	0	0	603	903	0
701	7	0	0	0	0	0	0	200	300	0	0	0	0	0	0	0	200	903	0	0	0	0	0	0	0	603	903	0
701	8	0	0	0	0	0	0	200	300	0	0	0	0	0	0	0	200	903	0	0	0	0	0	0	0	603	903	0
701	9	0	0	0	0	0	0	200	300	0	0	0	0	0	0	0	200	903	0	0	0	0	0	0	0	603	903	0
702	0	0	0	0	0	0	0	200	300	0	0	0	0	0	0	0	200	903	0	0	0	0	0	0	0	603	903	0
702	1	0	0	0	0	0	0	200	300	0	0	0	0	0	0	0	200	903	0	0	0	0	0	0	0	603	903	0
702	2	0	0	0	0	0	0	200	300	0	0	0	0	0	0	0	200	903	0	0	0	0	0	0	0	603	903	0
702	3	0	0	0	0	0	0	200	300	0	0	0	0	0	0	0	200	903	0	0	0	0	0	0	0	603	903	0
702	4	0	0	0	0	0	0	200	300	0	0	0	0	0	0	0	200	903	0	0	0	0	0	0	0	603	903	0
702	5	0	0	0	0	0	0	200	300	0	0	0	0	0	0	0	200	903	0	0	0	0	0	0	0	603	903	0
702	6	0	0	0	0	0	0	200	300	0	0	0	0	0	0	0	200	903	0	0	0	0	0	0	0	603	903	0
702	7	0	0	0	0	0	0	200	300	0	0	0	0	0	0	0	200	903	0	0	0	0	0	0	0	603	903	0
702	8	0	0	0	0	0	0	200	300	0	0	0	0	0	0	0	200	903	0	0	0	0	0	0	0	603	903	0
702	9	0	0	0	0	0	0	200	300	0	0	0	0	0	0	0	200	903	0	0	0	0	0	0	0	603	903	0
703	0	0	0	0	0	0	0	200	300	0	0	0	0	0	0	0	200	903	0	0	0	0	0	0	0	603	903	0
703	1	0	0	0	0	0	0	200	300	0	0	0	0	0	0	0	200	903	0	0	0	0	0	0	0	603	903	0
703	2	0	0	0	0	0	0	200	300	0	0	0	0	0	0	0	200	903	0	0	0	0	0	0	0	603	903	0
703	3	0	0	0	0	0	0	200	300	0	0	0	0	0	0	0	200	903	0	0	0	0	0	0	0	603	903	0
703	4	0	0	0	0	0	0	200	300	0	0	0	0	0	0	0	200	903	0	0	0	0	0	0	0	603	903	0
703	5	0	0	0	0	0	0	200	300	0	0	0	0	0	0	0	200	903	0	0	0	0	0	0	0	603	903	0
703	6	0	0	0	0	0	0	200	300	0	0	0	0	0	0	0	200	903	0	0	0	0	0	0	0	603	903	0
703	7	0	0	0	0	0	0	200	300	0	0	0	0	0	0	0	200	903	0	0	0	0	0	0	0	603	903	0
703	8	0	0	0	0	0	0	200	300	0	0	0	0	0	0	0	200	903	0	0	0	0	0	0	0	603	903	0
703	9	0	0	0	0	0	0	200	300	0	0	0	0	0	0	0	200	903	0	0	0	0	0	0	0	603	903	0
704	0	0	0	0	0	0	0	200	300	0	0	0	0	0	0	0	200	903	0	0	0	0	0	0	0	603	903	0
704	1	0	0	0	0	0	0	200	300	0	0	0	0	0	0	0	200	903	0	0	0	0	0	0	0	603	903	0
704	2	0	0	0	0	0	0	200	300	0	0	0	0	0	0	0	200	903	0	0	0	0	0	0	0	603	903	0
704	3	0	0	0	0	0	0	200	300	0	0	0	0	0	0	0	200	903	0	0	0	0	0	0	0	603	903	0
704	4	0	0	0	0	0	0	200	300	0	0	0	0	0	0	0	200	903	0	0	0	0	0	0	0	603	903	0
704	5	0	0	0	0	0	0	200	300	0	0	0	0	0	0	0	200	903	0	0	0	0	0	0	0	603	903	0
704	6	0	0	0	0	0	0	200	300	0	0	0	0	0	0	0	200	903	0	0	0	0	0	0	0	603	903	0
704	7	0	0	0	0	0	0	200	300	0	0	0	0	0	0	0	200	903	0	0	0	0	0	0	0	603	903	0
704	8	0	0	0	0	0	0	200	300	0	0	0	0	0	0	0	200	903	0	0	0	0	0	0	0	603	903	0
704	9	0	0	0	0	0	0	200	300	0	0	0	0	0	0	0	200	903	0	0	0	0	0	0	0	603	903	0
705	0	0	0	0	0	0	0	200	300	0	0	0	0	0	0	0	200	903	0	0	0	0	0	0	0	603	903	0
705	1	0	0	0	0	0	0	200	300	0	0	0	0	0	0	0	200	903	0	0	0	0	0	0	0	603	903	0
705	2	0	0	0	0	0	0	200	300	0	0	0	0	0	0	0	200	903	0	0	0	0	0	0	0	603	903	0
705	3	0	0	0	0	0	0	200	300	0	0	0	0	0	0	0	200	903	0	0	0	0	0	0	0	603	903	0
705	4	0	0	0	0	0	0	200	300	0	0	0	0	0	0	0	200	903	0	0	0	0	0	0	0	603	903	0
705	5	0	0	0	0	0	0	200	300	0	0	0	0	0	0	0	200	903	0	0	0	0	0	0	0	603	903	0
705	6	0	0	0	0	0	0	200	300	0	0	0	0	0	0	0	200	903	0	0	0	0	0	0	0	603	903	0
705	7	0	0	0	0	0	0	200	300	0	0	0	0	0	0	0	200	903	0	0	0	0	0	0	0	603	903	0
705	8	0	0	0	0	0	0	200	300	0	0	0	0	0	0	0	200	903	0	0	0	0	0	0	0	603	903	0
705	9	0	0	0	0	0	0	200	300	0	0	0	0	0	0	0	200	903	0	0	0	0	0	0	0	603	903	0
706	0	0	0	0	0	0	0	200	300	0	0	0	0	0	0	0	200	903	0	0	0	0	0	0	0	603	903	0
706	1	0	0	0	0	0	0	200	300	0	0	0	0	0	0	0	200	903	0	0	0	0	0	0	0	603	903	0
706	2	0	0	0	0	0	0	200	300	0	0	0	0	0	0	0	200	903	0	0	0	0	0	0	0	603	903	0
706	3	0	0	0	0	0	0	200	300	0	0	0	0	0	0	0	200	903	0	0	0	0	0	0	0	603	903	0
706	4	0	0	0	0	0	0	200	300	0	0	0	0	0	0	0	200	903	0	0	0	0	0	0	0	603	903	0
706	5	0	0	0	0	0	0	200	300	0	0	0	0	0	0	0	200	903	0	0	0	0	0	0	0	603	903	0
706	6	0	0	0	0	0	0	200	300	0	0	0	0	0	0	0	200	903	0	0	0	0	0	0	0	603	903	0
706	7	0	0	0	0	0	0	200	300	0	0	0	0	0	0	0	200	903	0	0	0	0	0	0	0	603	903	0
706	8	0	0	0	0	0	0	200	300	0	0	0	0	0	0	0	200	903	0	0	0	0	0	0	0	603	903	0
706	9	0	0	0	0	0	0	200	300	0	0	0	0	0	0	0	200	903	0	0	0	0	0	0	0	603	903	0
707	0	0	0	0	0	0	0	200	300	0	0	0	0	0	0	0	200	903	0	0	0	0	0	0	0	603	903	0
707	1	0	0	0	0	0	0	200	300	0	0	0	0	0	0	0	200	903	0	0	0	0	0	0	0	603	903	0
707	2	0	0	0	0	0	0	200	300	0	0	0	0	0	0	0	200	903	0	0	0	0	0	0	0	603	903	0
707	3	0	0	0	0	0	0	200	300	0	0	0	0	0	0	0	200	903	0	0	0	0	0	0	0	603	903	0
707	4	0	0	0	0	0	0	200	300	0	0	0	0	0	0	0	200	903	0	0	0	0	0	0	0	603	903	0
707	5	0	0	0	0	0	0	200	300	0	0	0	0	0	0	0	200	903	0	0	0	0	0	0	0	603	903	0
707	6	0	0	0	0	0	0	200	300	0	0	0	0	0	0	0	200	903	0	0	0	0	0	0	0	603	903	0
707	7	0	0	0	0	0	0	200	300	0	0	0	0	0	0	0	200	903	0	0	0	0	0	0	0	603	903	0
707	8	0	0	0	0	0	0	200	300	0	0	0	0	0	0	0	200	903	0	0	0	0	0	0	0	603	903	0
707	9	0	0	0	0	0	0	200	300	0	0	0	0	0	0	0	200	903	0	0	0	0	0	0	0	603	903	0
708	0	0	0	0	0	0	0	200	300	0	0	0	0	0	0	0	200	903	0	0	0	0	0	0	0	603	903	0
708	1	0	0	0	0	0	0	200	300	0	0	0	0	0	0	0	200	903	0	0	0	0	0	0	0	603	903	0
708	2	0	0	0	0	0	0	200	300	0	0	0	0	0	0	0	200	903	0	0	0	0	0	0	0	603	903	0
708	3	0	0	0	0	0	0	200	300	0	0	0	0	0	0	0	200	903	0	0	0	0	0	0	0	603	903	0
708	4	0	0	0	0	0	0	200	300	0	0	0	0	0	0	0	200	903	0	0	0	0	0	0	0	603	903	0
708	5	0	0	0	0	0	0	200	300	0	0	0	0	0	0	0	200	903	0	0	0	0	0	0	0	603	903	0
708	6	0	0	0	0	0	0	200	300	0	0	0	0	0	0	0	200	903	0	0	0	0	0	0	0	603	903	0
708	7	0	0	0	0	0	0	200	300	0	0	0	0	0	0	0	200	903	0	0	0	0	0	0	0	603	903	0
708	8	0	0	0	0	0	0	200	300	0	0	0	0	0	0	0	200	903	0	0	0	0	0	0	0	603	903	0
708	9	0	0	0	0	0	0	200	300	0	0	0	0	0	0	0	200	903	0	0	0	0	0	0	0	603	903	0
709	0	0	0	0	0	0	0	200	300	0	0	0	0	0	0	0	200	903	0	0	0	0	0	0	0	603	903	0
709	1	0	0	0	0	0	0	200	300	0	0	0	0	0	0	0	200	903	0	0	0	0	0	0	0	603	903	0
709	2	0	0	0	0	0	0	200	300	0	0	0	0	0	0	0	200	903	0	0	0	0	0	0	0	603	903	0
709	3	0	0	0	0	0	0	200	300	0	0	0	0	0	0	0	200	903	0	0	0	0	0	0	0	603	903	0
709	4	0	0	0	0	0	0	200	300	0	0	0	0	0	0	0	200	903	0	0	0	0	0	0	0	603	903	0
709	5	0	0	0	0	0	0	200	300	0	0	0	0	0	0	0	200	903	0	0	0	0	0	0	0	603	903	0
709	6	0	0	0	0	0	0	200	300	0	0	0	0	0	0	0	200	903	0	0	0	0	0	0	0	603	903	0
709	7	0	0	0	0	0	0	200	300	0	0	0	0	0	0	0	200	903	0	0	0	0	0	0	0	603	903	0
709	8	0	0	0	0	0	0	200	300	0	0	0	0	0	0	0	200	903	0	0	0	0	0	0	0	603	903	0
709	9	0	0	0	0	0	0	200	300	0	0	0	0	0	0	0	200	903	0	0	0	0	0	0	0	603	903	0
710	0	0	0	0	0	0	0	200	300	0	0	0	0	0	0	0	200	903	0	0	0	0	0	0	0	603	903	0
710	1	0	0	0	0	0	0	200	300	0	0	0	0	0	0	0	200	903	0	0	0	0	0	0	0	603	903	0
710	2	0	0	0	0	0	0	200	300	0	0	0	0	0	0	0	200	903	0	0	0	0	0	0	0	603	903	0
710	3	0	0	0	0	0	0	200	300	0	0	0	0	0	0	0	200	903	0	0	0	0	0	0	0	603	903	0
710	4	0	0	0	0	0	0	200	300	0	0	0	0	0	0	0	200	903	0	0	0	0	0	0	0	603	903	0
710	5	0	0	0	0	0	0	200	300	0	0	0	0	0	0	0	200	903	0	0	0	0	0	0	0	603	903	0
710	6	0	0	0	0	0	0	200	300	0	0	0	0	0	0	0	200	903	0	0	0	0	0	0	0	603	903	0
710	7	0	0	0	0	0	0	200	300	0	0	0	0	0	0	0	200	903	0	0	0	0	0	0	0	603	903	0
710	8	0	0	0	0	0	0	200	300	0	0	0	0	0	0	0	200	903	0	0	0	0	0	0	0	603	903	0
710	9	0	0	0	0	0	0	200	300	0	0	0	0	0	0	0	200	903	0	0	0	0	0	0	0	603	903	0
711	0	0	0	0	0	0	0	200	300	0	0	0	0	0	0	0	200	903	0	0	0	0	0	0	0	603	903	0
711	1	0	0	0	0	0	0	200	300	0	0	0	0	0	0	0	200	903	0	0	0	0	0	0	0	603	903	0
711	2	0	0	0	0	0	0	200	300	0	0	0	0	0	0	0	200	903	0	0	0	0	0	0	0	603	903	0
711	3	0	0	0	0	0	0	200	300	0	0	0	0	0	0	0	200	903	0	0	0	0	0	0	0	603	903	0
711	4	0	0	0	0	0	0	200	300	0	0	0	0	0	0	0	200	903	0	0	0	0	0	0	0	603	903	0
711	5	0	0	0	0	0	0	200	300	0	0	0	0	0	0	0	200	903	0	0	0	0	0	0	0	603	903	0
711	6	0	0	0	0	0	0	200	300	0	0	0	0	0	0	0	200	903	0	0	0	0	0	0	0	603	903	0
711	7	0	0	0	0	0	0	200	300	0	0	0	0	0	0	0	200	903	0	0	0	0	0	0	0	603	903	0
711	8	0	0	0	0	0	0	200	300	0	0	0	0	0	0	0	200	903	0	0	0	0	0	0	0	603	903	0
711	9	0	0	0	0	0	0	200	300	0	0	0	0	0	0	0	200	903	0	0	0	0	0	0	0	603	903	0
712	0	0	0	0	0	0	0	200	300	0	0	0	0	0	0	0	200	903	0	0	0	0	0	0	0	603	903	0
712	1	0	0	0	0	0	0	200	300	0	0	0	0	0	0	0	200	903	0	0	0	0	0	0	0	603	903	0
712	2	0	0	0	0	0	0	200	300	0	0	0	0	0	0	0	200	903	0	0	0	0	0	0	0	603	903	0
712	3	0	0	0	0	0	0	200	300	0	0	0	0	0	0	0	200	903	0	0	0	0	0	0	0	603	903	0
712	4	0	0	0	0	0	0	200	300	0	0	0	0	0	0	0	200	903	0	0	0	0	0	0	0	603	903	0
712	5	0	0	0	0	0	0	200	300	0	0	0	0	0	0	0	200	903	0	0	0	0	0	0	0	603	903	0
712	6	0	0	0	0	0	0	200	300	0	0	0	0	0	0	0	200	903	0	0	0	0	0	0	0	603	903	0
712	7	0	0	0	0	0	0	200	300	0	0	0	0	0	0	0	200	903	0	0	0	0	0	0	0	603	903	0
712	8	0	0	0	0	0	0	200	300	0	0	0	0	0	0	0	200	903	0	0	0	0	0	0	0	603	903	0
712	9	0	0	0	0	0	0	200	300	0	0	0	0	0	0	0	200	903	0	0	0	0	0	0	0	603	903	0
713	0	0	0	0	0	0	0	200	300	0	0	0	0	0	0	0	200	903	0	0	0	0	0	0	0	603	903	0
713	1	0	0	0	0	0	0	200	300	0	0	0	0	0	0	0	200	903	0	0	0	0	0	0	0	603	903	0
713	2	0	0	0	0	0	0	200	300	0	0	0	0	0	0	0	200	903	0	0	0	0	0	0	0	603	903	0
713	3	0	0	0	0	0	0	200	300	0	0	0	0	0	0	0	200	903	0	0	0	0	0	0	0	603	903	0
713	4	0	0	0	0	0	0	200	300	0	0	0	0	0	0	0	200	903	0	0	0	0	0	0	0	603	903	0
713	5	0	0	0	0	0	0	200	300	0	0	0	0	0	0	0	200	903	0	0	0	0	0	0	0	603	903	0
713	6	0	0	0	0	0	0	200	300	0	0	0	0	0	0	0	200	903	0	0	0	0	0	0	0	603	903	0
713	7	0	0	0	0	0	0	200	300	0	0	0	0	0	0	0	200	903	0	0	0	0	0	0	0	603	903	0
713	8	0	0	0	0	0	0	200	300	0	0	0	0	0	0	0	200	903	0	0	0	0	0	0	0	603	903	0
713	9	0	0	0	0	0	0	200	300	0	0	0	0	0	0	0	200	903	0	0	0	0	0	0	0	603	903	0
714	0	0	0	0	0	0	0	200	300	0	0	0	0	0	0	0	200	903	0	0	0	0	0	0	0	603	903	0
714	1	0	0	0	0	0	0	200	300	0	0	0	0	0	0	0	200	903	0	0	0	0	0	0	0	603	903	0
714	2	0	0	0	0	0	0	200	300	0	0	0	0	0	0	0	200	903	0	0	0	0	0	0	0	603	903	0
714	3	0	0	0	0	0	0	200	300	0	0	0	0	0	0	0	200	903	0	0	0	0	0	0	0	603	903	0
714	4	0	0	0	0	0	0	200	300	0	0	0	0	0	0	0	200	903	0	0	0	0	0	0	0	603	903	0
714	5	0	0	0	0	0	0	200	300	0	0	0	0	0	0	0	200	903	0	0	0	0	0	0	0	603	903	0
714	6	0	0	0	0	0	0	200	300	0	0	0	0	0	0	0	200	903	0	0	0	0	0	0	0	603	903	0
714	7	0	0	0	0	0	0	200	300	0	0	0	0	0	0	0	200	903	0	0	0	0	0	0	0	603	903	0
714	8	0	0	0	0	0	0	200	300	0	0	0	0	0	0	0	200	903	0	0	0	0	0	0	0	603	903	0
714	9	0	0	0	0	0	0	200	300	0	0	0	0	0	0	0	200	903	0	0	0	0	0	0	0	603	903	0
715	0	0	0	0	0	0	0	200	300	0	0	0	0	0	0	0	200	903	0	0	0	0	0	0	0	603	903	0
715	1	0	0	0	0	0	0	200	300	0	0	0	0	0	0	0	200	903	0	0	0	0	0	0	0	603	903	0
715	2	0	0	0	0	0	0	200	300	0	0	0	0	0	0	0	200	903	0	0	0	0	0	0	0	603	903	0
715	3	0	0	0	0	0	0	200	300	0	0	0	0	0	0	0	200	903	0	0	0	0	0	0	0	603	903	0
715	4	0	0	0	0	0	0	200	300	0	0	0	0	0	0	0	200	903	0	0	0	0	0	0	0	603	903	0
715	5	0	0	0	0	0	0	200	300	0	0	0	0	0	0	0	200	903	0	0	0	0	0	0	0	603	903	0
715	6	0	0	0	0	0	0	200	300	0	0	0	0	0	0	0	200	903	0	0	0	0	0	0	0	603	903	0
715	7	0	0	0	0	0	0	200	300	0	0	0	0	0	0	0	200	903	0	0	0	0	0	0	0	603	903	0
715	8	0	0	0	0	0	0	200	300	0	0	0	0	0	0	0	200	903	0	0	0	0	0	0	0	603	903	0
715	9	0	0	0	0	0	0	200	300	0	0	0	0	0	0	0	200	903	0	0	0	0	0	0	0	603	903	0
716	0	0	0	0	0	0	0	200	300	0	0	0	0	0	0	0	200	903	0	0	0	0	0	0	0	603	903	0
716	1	0	0	0	0	0	0	200	300	0	0	0	0	0	0	0	200	903	0	0	0	0	0	0	0	603	903	0
716	2	0	0	0	0	0	0	200	300	0	0	0	0	0	0	0	200	903	0	0	0	0	0	0	0	603	903	0
716	3	0	0	0	0	0	0	200	300	0	0	0	0	0	0	0	200	903	0	0	0	0	0	0	0	603	903	0
716	4	0	0	0	0	0	0	200	300	0	0	0	0	0	0	0	200	903	0	0	0	0	0	0	0	603	903	0
716	5	0	0	0	0	0	0	200	300	0	0	0	0	0	0	0	200	903	0	0	0	0	0	0	0	603	903	0
716	6	0	0	0	0	0	0	200	300	0	0	0	0	0	0	0	200	903	0	0	0	0	0	0	0	603	903	0
716	7	0	0	0	0	0	0	200	300	0	0	0	0	0	0	0	200	903	0	0	0	0	0	0	0	603	903	0
716	8	0	0	0	0	0	0	200	300	0	0	0	0	0	0	0	200	903	0	0	0	0	0	0	0	603	903	0
716	9	0	0	0	0	0	0	200	300	0	0	0	0	0	0	0	200	903	0	0	0	0	0	0	0	603	903	0
717	0	0	0	0	0	0	0	200	300	0	0	0	0	0	0	0	200	903	0	0	0	0	0	0	0	603	903	0
717	1	0	0	0	0	0	0	200	300	0	0	0	0	0	0	0	200	903	0	0	0	0	0	0	0	603	903	0
717	2	0	0	0	0	0	0	200	300	0	0	0	0	0	0	0	200	903	0	0	0	0	0	0	0	603	903	0
717	3	0	0	0	0	0	0	200	300	0	0	0	0	0	0	0	200	903	0	0	0	0	0	0	0	603	903	0
717	4	0	0	0	0	0	0	200	300	0	0	0	0	0	0	0	200	903	0	0	0	0	0	0	0	603	903	0
717	5	0	0	0	0	0	0	200	300	0	0	0	0	0	0	0	200	903	0	0	0	0	0	0	0	603	903	0
717	6	0	0	0	0	0	0	200	300	0	0	0	0	0	0	0	200	903	0	0	0	0	0	0	0	603	903	0
717	7	0	0	0	0	0	0	200	300	0	0	0	0	0	0	0	200	903	0	0	0	0	0	0	0	603	903	0
717	8	0	0	0	0	0	0	200	300	0	0	0	0	0	0	0	200	903	0	0	0	0	0	0	0	603	903	0
717	9	0	0	0	0	0	0	200	300	0	0	0	0	0	0	0	200	903	0	0	0	0	0	0	0	603	903	0
718	0	0	0	0	0	0	0	200	300	0	0	0	0	0	0	0	200	903	0	0	0	0	0	0	0	603	903	0
718	1	0	0	0	0	0	0	200	300	0	0	0	0	0	0	0	200	903	0	0	0	0	0	0	0	603	903	0
718	2	0	0	0	0	0	0	200	300	0	0	0	0	0	0	0	200	903	0	0	0	0	0	0	0	603	903	0
718	3	0	0	0	0	0	0	200	300	0	0	0	0	0	0	0	200	903	0	0	0	0	0	0	0	603	903	0
718	4	0	0	0	0	0	0	200	300	0	0	0	0	0	0	0	200	903	0	0	0	0	0	0	0	603	903	0
718	5	0	0	0	0	0	0	200	300	0	0	0	0	0	0	0	200	903	0	0	0	0	0	0	0	603	903	0
718	6	0	0	0	0	0	0	200	300	0	0	0	0	0	0	0	200	903	0	0	0	0	0	0	0	603	903	0
718	7	0	0	0	0	0	0	200	300	0	0	0	0	0	0	0	200	903	0	0	0	0	0	0	0	603	903	0
718	8	0	0	0	0	0	0	200	300	0	0	0	0	0	0	0	200	903	0	0	0	0	0	0	0	603	903	0
718	9	0	0	0	0	0	0	200	300	0	0	0	0	0	0	0	200	903	0	0	0	0	0	0	0	603	903	0
719	0	0	0	0	0	0	0	200	300	0	0	0	0	0	0	0	200	903	0	0	0	0	0	0	0	603	903	0
719	1	0	0	0	0	0	0	200	300	0	0	0	0	0	0	0	200	903	0	0	0	0	0	0	0	603	903	0
719	2	0	0	0	0	0	0	200	300	0	0	0	0	0	0	0	200	903	0	0	0	0	0	0	0	603	903	0
719	3	0	0	0	0	0	0	200	300	0	0	0	0	0	0	0	200	903	0	0	0	0	0	0	0	603	903	0
719	4	0	0	0	0	0	0	200	300	0	0	0	0	0	0	0	200	903	0	0	0	0	0	0	0	603	903	0
719	5	0	0	0	0	0	0	200	300	0	0	0	0	0	0	0	200	903	0	0	0	0	0	0	0	603	903	0
719	6	0	0	0	0	0	0	200	300	0	0	0	0	0	0	0	200	903	0	0	0	0	0	0	0	603	903	0
719	7	0	0	0	0	0	0	200	300	0	0	0	0	0	0	0	200	903	0	0	0	0	0	0	0	603	903	0
719	8	0	0	0	0	0	0	200	300	0	0	0	0	0	0	0	200	903	0	0	0	0	0	0	0	603	903	0
719	9	0	0	0	0	0	0	200	300	0	0	0	0	0	0	0	200	903	0	0	0	0	0	0	0	603	903	0
720	0	0	0	0	0	0	0	200	300	0	0	0	0	0	0	0	200	903	0	0	0	0	0	0	0	603	903	0
720	1	0	0	0	0	0	0	200	300	0	0	0	0	0	0	0	200	903	0	0	0	0	0	0	0	603	903	0
720	2	0	0	0	0	0	0	200	300	0	0	0	0	0	0	0	200	903	0	0	0	0	0	0	0	603	903	0
720	3	0	0	0	0	0	0	200	300	0	0	0	0	0	0	0	200	903	0	0	0	0	0	0	0	603	903	0
720	4	0	0	0	0	0	0	200	300	0	0	0	0	0	0	0	200	903	0	0	0	0	0	0	0	603	903	0
720	5	0	0	0	0	0	0	200	300	0	0	0	0	0	0	0	200	903	0	0	0	0	0	0	0	603	903	0
720	6	0	0	0	0	0	0	200	300	0	0	0	0	0	0	0	200	903	0	0	0	0	0	0	0	603	903	0
720	7	0	0	0	0	0	0	200	300	0	0	0	0	0	0	0	200	903	0	0	0	0	0	0	0	603	903	0
720	8	0	0	0	0	0	0	200	300	0	0	0	0	0	0	0	200	903	0	0	0	0	0	0	0	603	903	0
720	9	0	0	0	0	0	0	200	300	0	0	0	0	0	0	0	200	903	0	0	0	0	0	0	0	603	903	0
721	0	0	0	0	0	0	0	200	300	0	0	0	0	0	0	0	200	903	0	0	0	0	0	0	0	603	903	0
721	1	0	0	0	0	0	0	200	300	0	0	0	0	0	0	0	200	903	0	0	0	0	0	0	0	603	903	0
721	2	0	0	0	0	0	0	200	300	0	0	0	0	0	0	0	200	903	0	0	0	0	0	0	0	603	903	0
721	3	0	0	0	0	0	0	200	300	0	0	0	0	0	0	0	200	903	0	0	0	0	0	0	0	603	903	0
721	4	0	0	0	0	0	0	200	300	0	0	0	0	0	0	0	200	903	0	0	0	0	0	0	0	603	903	0
721	5	0	0	0	0	0	0	200	300	0	0	0	0	0	0	0	200	903	0	0	0	0	0	0	0	603	903	0
721	6	0	0	0	0	0	0	200	300	0	0	0	0	0	0	0	200	903	0	0	0	0	0	0	0	603	903	0
721	7	0	0	0	0	0	0	200	300	0	0	0	0	0	0	0	200	903	0	0	0	0	0	0	0	603	903	0
721	8	0	0	0	0	0	0	200	300	0	0	0	0	0	0	0	200	903	0	0	0	0	0	0	0	603	903	0
721	9	0	0	0	0	0	0	200	300	0	0	0	0	0	0	0	200	903	0	0	0	0	0	0	0	603	903	0
722	0	0	0	0	0	0	0	200	300	0	0	0	0	0	0	0	200	903	0	0	0	0	0	0	0	603	903	0
722	1	0	0	0	0	0	0	200	300	0	0	0	0	0	0	0	200	903	0	0	0	0	0	0	0	603	903	0
722	2	0	0	0	0	0	0	200	300	0	0	0	0	0	0	0	200	903	0	0	0	0	0	0	0	603	903	0
722	3	0	0	0	0	0	0	200	300	0	0	0	0	0	0	0	200	903	0	0	0	0	0	0	0	603	903	0
722	4	0	0	0	0	0	0	200	300	0	0	0	0	0	0	0	200	903	0	0	0	0	0	0	0	603	903	0
722	5	0	0	0	0	0	0	200	300	0	0	0	0	0	0	0	200	903	0	0	0	0	0	0	0	603	903	0
722	6	0	0	0	0	0	0	200	300	0	0	0	0	0	0	0	200	903	0	0	0	0	0	0	0	603	903	0
722	7	0	0	0	0	0	0	200	300	0	0	0	0	0	0	0	200	903	0	0	0	0	0	0	0	603	903	0
722	8	0	0	0	0	0	0	200	300	0	0	0	0	0	0	0	200	903	0	0	0	0	0	0	0	603	903	0
722	9	0	0	0	0	0	0	200	300	0	0	0	0	0	0	0	200	903	0	0	0	0	0	0	0	603	903	0
723	0	0	0	0	0	0	0	200	300	0	0	0	0	0	0	0	200	903	0	0	0	0	0	0	0	603	903	0
723	1	0	0	0	0	0	0	200	300	0	0	0	0	0	0	0	200	903	0	0	0	0	0	0	0	603	903	0
723	2	0	0	0	0	0	0	200	300	0	0	0	0	0	0	0	200	903	0	0	0	0	0	0	0	603	903	0
723	3	0	0	0	0	0	0	200	300	0	0	0	0	0	0	0	200	903	0	0	0	0	0	0	0	603	903	0
723	4	0	0	0	0	0	0	200	300	0	0	0	0	0	0	0	200	903	0	0	0	0	0	0	0	603	903	0
723	5	0	0	0	0	0	0	200	300	0	0	0	0	0	0	0	200	903	0	0	0	0	0	0	0	603	903	0
723	6	0	0	0	0	0	0	200	300	0	0	0	0	0	0	0	200	903	0	0	0	0	0	0	0	603	903	0
723	7	0	0	0	0	0	0	200	300	0	0	0	0	0	0	0	200	903	0	0	0	0	0	0	0	603	903	0
723	8	0	0	0	0	0	0	200	300	0	0	0	0	0	0	0	200	903	0	0	0	0	0	0	0	603	903	0
723	9	0	0	0	0	0	0	200	300	0	0	0	0	0	0	0	200	903	0	0	0	0	0	0	0	603	903	0
724	0	0	0	0	0	0	0	200	300	0	0	0	0	0	0	0	200	903	0	0	0	0	0	0	0	603	903	0
724	1	0	0	0	0	0	0	200	300	0	0	0	0	0	0	0	200	903	0	0	0	0	0	0	0	603	903	0
724	2	0	0	0	0	0	0	200	300	0	0	0	0	0	0	0	200	903	0	0	0	0	0	0	0	603	903	0
724	3	0	0	0	0	0	0	200	300	0	0	0	0	0	0	0	200	903	0	0	0	0	0	0	0	603	903	0
724	4	0	0	0	0	0	0	200	300	0	0	0	0	0	0	0	200	903	0	0	0	0	0	0	0	603	903	0
724	5	0	0	0	0	0	0	200	300	0	0	0	0	0	0	0	200	903	0	0	0	0	0	0	0	603	903	0
724	6	0	0	0	0	0	0	200	300	0	0	0	0	0	0	0	200	903	0	0	0	0	0	0	0	603	903	0
724	7	0	0	0	0	0	0	200	300	0	0	0	0	0	0	0	200	903	0	0	0	0	0	0	0	603	903	0
724	8	0	0	0	0	0	0	200	300	0	0	0	0	0	0	0	200	903	0	0	0	0	0	0	0	603	903	0
724	9	0	0	0	0	0	0	200	300	0	0	0	0	0	0	0	200	903	0	0	0	0	0	0	0	603	903	0
725	0	0	0	0	0	0	0	200	300	0	0	0	0	0	0	0	200	903	0	0	0	0	0	0	0	603	903	0
725	1	0	0	0	0	0	0	200	300	0	0	0	0	0	0	0	200	903	0	0	0	0	0	0	0	603	903	0
725	2	0	0	0	0	0	0	200	300	0	0	0	0	0	0	0	200	903	0	0	0	0	0	0	0	603	903	0
725	3	0	0	0	0	0	0	200	300	0	0	0	0	0	0	0	200	903	0	0	0	0	0	0	0	603	903	0
725	4	0	0	0	0	0	0	200	300	0	0	0	0	0	0	0	200	903	0	0	0	0	0	0	0	603	903	0
725	5	0	0	0	0	0	0	200	300	0	0	0	0	0	0	0	200	903	0	0	0	0	0	0	0	603	903	0
725	6	0	0	0	0	0	0	200	300	0	0	0	0	0	0	0	200	903	0	0	0	0	0	0	0	603	903	0
725	7	0	0	0	0	0	0	200	300	0	0	0	0	0	0	0	200	903	0	0	0	0	0	0	0	603	903	0
725	8	0	0	0	0	0	0	200	300	0	0	0	0	0	0	0	200	903	0	0	0	0	0	0	0	603	903	0
725	9	0	0	0	0	0	0	200	300	0	0	0	0	0	0	0	200	903	0	0	0	0	0	0	0	603	903	0
726	0	0	0	0	0	0	0	200	300	0	0	0	0	0	0	0	200	903	0	0	0	0	0	0	0	603	903	0
726	1	0	0	0	0	0	0	200	300	0	0	0	0	0	0	0	200	903	0	0	0	0	0	0	0	603	903	0
726	2	0	0	0	0	0	0	200	300	0	0	0	0	0	0	0	200	903	0	0	0	0	0	0	0	603	903	0
726	3	0	0	0	0	0	0	200	300	0	0	0	0	0	0	0	200	903	0	0	0	0	0	0	0	603	903	0
726	4	0	0	0	0	0	0	200	300	0	0	0	0	0	0	0	200	903	0	0	0	0	0	0	0	603	903	0
726	5	0	0	0	0	0	0	200	300	0	0	0	0	0	0	0	200	903	0	0	0	0	0	0	0	603	903	0
726	6	0	0	0	0	0	0	200	300	0	0	0	0	0	0	0	200	903	0	0	0	0	0	0	0	603	903	0
726	7	0	0	0	0	0	0	200	300	0	0	0	0	0	0	0	200	903	0	0	0	0	0	0	0	603	903	0
726	8	0	0	0	0	0	0	200	300	0	0	0	0	0	0	0	200	903	0	0	0	0	0	0	0	603	903	0
726	9	0	0	0	0	0	0	200	300	0	0	0	0	0	0	0	200	903	0	0	0	0	0	0	0	603	903	0
727	0	0	0	0	0	0	0	200	300	0	0	0	0	0	0	0	200	903	0	0	0	0	0	0	0	603	903	0
727	1	0	0	0	0	0	0	200	300	0	0	0	0	0	0	0	200	903	0	0	0	0	0	0	0	603	903	0
727	2	0	0	0	0	0	0	200	300	0	0	0	0	0	0	0	200	903	0	0	0	0	0	0	0	603	903	0
727	3	0	0	0	0	0	0	200	300	0	0	0	0	0	0	0	200	903	0	0	0	0	0	0	0	603	903	0
727	4	0	0	0	0	0	0	200	300	0	0	0	0	0	0	0	200	903	0	0	0	0	0	0	0	603	903	0
727	5	0	0	0	0	0	0	200	300	0	0	0	0	0	0	0	200	903	0	0	0	0	0	0	0	603	903	0
727	6	0	0	0	0	0	0	200	300	0	0	0	0	0	0	0	200	903	0	0	0	0	0	0	0	603	903	0
727	7	0	0	0	0	0	0	200	300	0	0	0	0	0	0	0	200	903	0	0	0	0	0	0	0	603	903	0
727	8	0	0	0	0	0	0	200	300	0	0	0	0	0	0	0	200	903	0	0	0	0	0	0	0	603	903	0
727	9	0	0	0	0	0	0	200	300	0	0	0	0	0	0	0	200	903	0	0	0	0	0	0	0	603	903	0
728	0	0	0	0	0	0	0	200	300	0	0	0	0	0	0	0	200	903	0	0	0	0	0	0	0	603	903	0
728	1	0	0	0	0	0	0	200	300	0	0	0	0	0	0	0	200	903	0	0	0	0	0	0	0	603	903	0
728	2	0	0	0	0	0	0	200	300	0	0	0	0	0	0	0	200	903	0	0	0	0	0	0	0	603	903	0
728	3	0	0	0	0	0	0	200	300	0	0	0	0	0	0	0	200	903	0	0	0	0	0	0	0	603	903	0
728	4	0	0	0	0	0	0	200	300	0	0	0	0	0	0	0	200	903	0	0	0	0	0	0	0	603	903	0
728	5	0	0	0	0	0	0	200	300	0	0	0	0	0	0	0	200	903	0	0	0	0	0	0	0	603	903	0
728	6	0	0	0	0	0	0	200	300	0	0	0	0	0	0	0	200	903	0	0	0	0	0	0	0	603	903	0
728	7	0	0	0	0	0	0	200	300	0	0	0	0	0	0	0	200	903	0	0	0	0	0	0	0	603	903	0
728	8	0	0	0	0	0	0	200	300	0	0	0	0	0	0	0	200	903	0	0	0	0	0	0	0	603	903	0
728	9	0	0	0	0	0	0	200	300	0	0	0	0	0	0	0	200	903	0	0	0	0	0	0	0	603	903	0
729	0	0	0	0	0	0	0	200	300	0	0	0	0	0	0	0	200	903	0	0	0	0	0	0	0	603	903	0
729	1	0	0	0	0	0	0	200	300	0	0	0	0	0	0	0	200	903	0	0	0	0	0	0	0	603	903	0
729	2	0	0	0	0	0	0	200	300	0	0	0	0	0	0	0	200	903	0	0	0	0	0	0	0	603	903	0
729	3	0	0	0	0	0	0	200	300	0	0	0	0	0	0	0	200	903	0	0	0	0	0	0	0	603	903	0
729	4	0	0	0	0	0	0	200	300	0	0	0	0	0	0	0	200	903	0	0	0	0	0	0	0	603	903	0
729	5	0	0	0	0	0	0	200	300	0	0	0	0	0	0	0	200	903	0	0	0	0	0	0	0	603	903	0
729	6	0	0	0	0	0	0	200	300	0	0	0	0	0	0	0	200	903	0	0	0	0	0	0	0	603	903	0
729	7	0	0	0	0	0	0	200	300	0	0	0	0	0	0	0	200	903	0	0	0	0	0	0	0	603	903	0
729	8	0	0	0	0	0	0	200	300	0	0	0	0	0	0	0	200	903	0	0	0	0	0	0	0	603	903	0
729	9	0	0	0	0	0	0	200	300	0	0	0	0	0	0	0	200	903	0	0	0	0	0	0	0	603	903	0
730	0	0	0	0	0	0	0	200	300	0	0	0	0	0	0	0	200	903	0	0	0	0	0	0	0	603	903	0
730	1	0	0	0	0	0	0	200	300	0	0	0	0	0	0	0	200	903	0	0	0	0	0	0	0	603	903	0
730	2	0	0	0	0	0	0	200	300	0	0	0	0	0	0	0	200	903	0	0	0	0	0	0	0	603	903	0
730	3	0	0	0	0	0	0	200	300	0	0	0	0	0	0	0	200	903	0	0	0	0	0	0	0	603	903	0
730	4	0	0	0	0	0	0	200	300	0	0	0	0	0	0	0	200	903	0	0	0	0	0	0	0	603	903	0
730	5	0	0	0	0	0	0	200	300	0	0	0	0	0	0	0	200	903	0	0	0	0	0	0	0	603	903	0
730	6	0	0	0	0	0	0	200	300	0	0	0	0	0	0	0	200	903	0	0	0	0	0	0	0	603	903	0
730	7	0	0	0	0	0	0	200	300	0	0	0	0	0	0	0	200	903	0	0	0	0	0	0	0	603	903	0
730	8	0	0	0	0	0	0	200	300	0	0	0	0	0	0	0	200	903	0	0	0	0	0	0	0	603	903	0
730	9	0	0	0	0	0	0	200	300	0	0	0	0	0	0	0	200	903	0	0	0	0	0	0	0	603	903	0
731	0	0	0	0	0	0	0	200	300	0	0	0	0	0	0	0	200	903	0	0	0	0	0	0	0	603	903	0
731	1	0	0	0	0	0	0	200	300	0	0	0	0	0	0	0	200	903	0	0	0	0	0	0	0	603	903	0
731	2	0	0	0	0	0	0	200	300	0	0	0	0	0	0	0	200	903	0	0	0	0	0	0	0	603	903	0
731	3	0	0	0	0	0	0	200	300	0	0	0	0	0	0	0	200	903	0	0	0	0	0	0	0	603	903	0
731	4	0	0	0	0	0	0	200	300	0	0	0	0	0	0	0	200	903	0	0	0	0	0	0	0	603	903	0
731	5	0	0	0	0	0	0	200	300	0	0	0	0	0	0	0	200	903	0	0	0	0	0	0	0	603	903	0
731	6	0	0	0	0	0	0	200	300	0	0	0	0	0	0	0	200	903	0	0	0	0	0	0	0	603	903	0
731	7	0	0	0	0	0	0	200	300	0	0	0	0	0	0	0	200	903	0	0	0	0	0	0	0	603	903	0
731	8	0	0	0	0	0	0	200	300	0	0	0	0	0	0	0	200	903	0	0	0	0	0	0	0	603	903	0
731	9	0	0	0	0	0	0	200	300	0	0	0	0	0	0	0	200	903	0	0	0	0	0	0	0	603	903	0
732	0	0	0	0	0	0	0	200	300	0	0	0	0	0	0	0	200	903	0	0	0	0	0	0	0	603	903	0
732	1	0	0	0	0	0	0	200	300	0	0	0	0	0	0	0	200	903	0	0	0	0	0	0	0	603	903	0
732	2	0	0	0	0	0	0	200	300	0	0	0	0	0	0	0	200	903	0	0	0	0	0	0	0	603	903	0
732	3	0	0	0	0	0	0	200	300	0	0	0	0	0	0	0	200	903	0	0	0	0	0	0	0	603	903	0
732	4	0	0	0	0	0	0	200	300	0	0	0	0	0	0	0	200	903	0	0	0	0	0	0	0	603	903	0
732	5	0	0	0	0	0	0	200	300	0	0	0	0	0	0	0	200	903	0	0	0	0	0	0	0	603	903	0
732	6	0	0	0	0	0	0	200	300	0	0	0	0	0	0	0	200	903	0	0	0	0	0	0	0	603	903	0
732	7	0	0	0	0	0	0	200	300	0	0	0	0	0	0	0	200	903	0	0	0	0	0	0	0	603	903	0
732	8	0	0	0	0	0	0	200	300	0	0	0	0	0	0	0	200	903	0	0	0	0	0	0	0	603	903	0
732	9	0	0	0	0	0	0	200	300	0	0	0	0	0	0	0	200	903	0	0	0	0	0	0	0	603	903	0
733	0	0	0	0	0	0	0	200	300	0	0	0	0	0	0	0	200	903	0	0	0	0	0	0	0	603	903	0
733	1	0	0	0	0	0	0	200	300	0	0	0	0	0	0	0	200	903	0	0	0	0	0	0	0	603	903	0
733	2	0	0	0	0	0	0	200	300	0	0	0	0	0	0	0	200	903	0	0	0	0	0	0	0	603	903	0
733	3	0	0	0	0	0	0	200	300	0	0	0	0	0	0	0	200	903	0	0	0	0	0	0	0	603	903	0
733	4	0	0	0	0	0	0	200	300	0	0	0	0	0	0	0	200	903	0	0	0	0	0	0	0	603	903	0
733	5	0	0	0	0	0	0	200	300	0	0	0	0	0	0	0	200	903	0	0	0	0	0	0	0	603	903	0
733	6	0	0	0	0	0	0	200	300	0	0	0	0	0	0	0	200	903	0	0	0	0	0	0	0	603	903	0
733	7	0	0	0	0	0	0	200	300	0	0	0	0	0	0	0	200	903	0	0	0	0	0	0	0	603	903	0
733	8	0	0	0	0	0	0	200	300	0	0	0	0	0	0	0	200	903	0	0	0	0	0	0	0	603	903	0
733	9	0	0	0	0	0	0	200	300	0	0	0	0	0	0	0	200	903	0	0	0	0	0	0	0	603	903	0
734	0	0	0	0	0	0	0	200	300	0	0	0	0	0	0	0	200	903	0	0	0	0	0	0	0	603	903	0
734	1	0	0	0	0	0	0	200	300	0	0	0	0	0	0	0	200	903	0	0	0	0	0	0	0	603	903	0
734	2	0	0	0	0	0	0	200	300	0	0	0	0	0	0	0	200	903	0	0	0	0	0	0	0	603	903	0
734	3	0	0	0	0	0	0	200	300	0	0	0	0	0	0	0	200	903	0	0	0	0	0	0	0	603	903	0
734	4	0	0	0	0	0	0	200	300	0	0	0	0	0	0	0	200	903	0	0	0	0	0	0	0	603	903	0
734	5	0	0	0	0	0	0	200	300	0	0	0	0	0	0	0	200	903	0	0	0	0	0	0	0	603	903	0
734	6	0	0	0	0	0	0	200	300	0	0	0	0	0	0	0	200	903	0	0	0	0	0	0	0	603	903	0
734	7	0	0	0	0	0	0	200	300	0	0	0	0	0	0	0	200	903	0	0	0	0	0	0	0	603	903	0
734	8	0	0	0	0	0	0	200	300	0	0	0	0	0	0	0	200	903	0	0	0	0	0	0	0	603	903	0
734	9	0	0	0	0	0	0	200	300	0	0	0	0	0	0	0	200	903	0	0	0	0	0	0	0	603	903	0
735	0	0	0	0	0	0	0	200	300	0	0	0	0	0	0	0	200	903	0	0	0	0	0	0	0	603	903	0
735	1	0	0	0	0	0	0	200	300	0	0	0	0	0	0	0	200	903	0	0	0	0	0	0	0	603	903	0
735	2	0	0	0	0	0	0	200	300	0	0	0	0	0	0	0	200	903	0	0	0	0	0	0	0	603	903	0
735	3	0	0	0	0	0	0	200	300	0	0	0	0	0	0	0	200	903	0	0	0	0	0	0	0	603	903	0
735	4	0	0	0	0	0	0	200	300	0	0	0	0	0	0	0	200	903	0	0	0	0	0	0	0	603	903	0
735	5	0	0	0	0	0	0	200	300	0	0	0	0	0	0	0	200	903	0	0	0	0	0	0	0	603	903	0
735	6	0	0	0	0	0	0	200	300	0	0	0	0	0	0	0	200	903	0	0	0	0	0	0	0	603	903	0
735	7	0	0	0	0	0	0	200	300	0	0	0	0	0	0	0	200	903	0	0	0	0	0	0	0	603	903	0
735	8	0	0	0	0	0	0	200	300	0	0	0	0	0	0	0	200	903	0	0	0	0	0	0	0	603	903	0
735	9	0	0	0	0	0	0	200	300	0	0	0	0	0	0	0	200	903	0	0	0	0	0	0	0	603	903	0
736	0	0	0	0	0	0	0	200	300	0	0	0	0	0	0	0	200	903	0	0	0	0	0	0	0	603	903	0
736	1	0	0	0	0	0	0	200	300	0	0	0	0	0	0	0	200	903	0	0	0	0	0	0	0	603	903	0
736	2	0	0	0	0	0	0	200	300	0	0	0	0	0	0	0	200	903	0	0	0	0	0	0	0	603	903	0
736	3	0	0	0	0	0	0	200	300	0	0	0	0	0	0	0	200	903	0	0	0	0	0	0	0	603	903	0
736	4	0	0	0	0	0	0	200	300	0	0	0	0	0	0	0	200	903	0	0	0	0	0	0	0	603	903	0
736	5	0	0	0	0	0	0	200	300	0	0	0	0	0	0	0	200	903	0	0	0	0	0	0	0	603	903	0
736	6	0	0	0	0	0	0	200	300	0	0	0	0	0	0	0	200	903	0	0	0	0	0	0	0	603	903	0
736	7	0	0	0	0	0	0	200	300	0	0	0	0	0	0	0	200	903	0	0	0	0	0	0	0	603	903	0
736	8	0	0	0	0	0	0	200	300	0	0	0	0	0	0	0	200	903	0	0	0	0	0	0	0	603	903	0
736	9	0	0	0	0	0	0	200	300	0	0	0	0	0	0	0	200	903	0	0	0	0	0	0	0	603	903	0
737	0	0	0	0	0	0	0	200	300	0	0	0	0	0	0	0	200	903	0	0	0	0	0	0	0	603	903	0
737	1	0	0	0	0	0	0	200	300	0	0	0	0	0	0	0	200	903	0	0	0	0	0	0	0	603	903	0
737	2	0	0	0	0	0	0	200	300	0	0	0	0	0	0	0	200	903	0	0	0	0	0	0	0	603	903	0
737	3	0	0	0	0	0	0	200	300	0	0	0	0	0	0	0	200	903	0	0	0	0	0	0	0	603	903	0
737	4	0	0	0	0	0	0	200	300	0	0	0	0	0	0	0	200	903	0	0	0	0	0	0	0	603	903	0
737	5	0	0	0	0	0	0	200	300	0	0	0	0	0	0	0	200	903	0	0	0	0	0	0	0	603	903	0
737	6	0	0	0	0	0	0	200	300	0	0	0	0	0	0	0	200	903	0	0	0	0	0	0	0	603	903	0
737	7	0	0	0	0	0	0	200	300	0	0	0	0	0	0	0	200	903	0	0	0	0	0	0	0	603	903	0
737	8	0	0	0	0	0	0	200	300	0	0	0	0	0	0	0	200	903	0	0	0	0	0	0	0	603	903	0
737	9	0	0	0	0	0	0	200	300	0	0	0	0	0	0	0	200	903	0	0	0	0	0	0	0	603	903	0
738	0	0	0	0	0	0	0	200	300	0	0	0	0	0	0	0	200	903	0	0	0	0	0	0	0	603	903	0
738	1	0	0	0	0	0	0	200	300	0	0	0	0	0	0	0	200	903	0	0	0	0	0	0	0	603	903	0
738	2	0	0	0	0	0	0	200	300	0	0	0	0	0	0	0	200	903	0	0	0	0	0	0	0	603	903	0
738	3	0	0	0	0	0	0	200	300	0	0	0	0	0	0	0	200	903	0	0	0	0	0	0	0	603	903	0
738	4	0	0	0	0	0	0	200	300	0	0	0	0	0	0	0	200	903	0	0	0	0	0	0	0	603	903	0
738	5	0	0	0	0	0	0	200	300	0	0	0	0	0	0	0	200	903	0	0	0	0	0	0	0	603	903	0
738	6	0	0	0	0	0	0	200	300	0	0	0	0	0	0	0	200	903	0	0	0	0	0	0	0	603	903	0
738	7	0	0	0	0	0	0	200	300	0	0	0	0	0	0	0	200	903	0	0	0	0	0	0	0	603	903	0
738	8	0	0	0	0	0	0	200	300	0	0	0	0	0	0	0	200	903	0	0	0	0	0	0	0	603	903	0
738	9	0	0	0	0	0	0	200	300	0	0	0	0	0	0	0	200	903	0	0	0	0	0	0	0	603	903	0
739	0	0	0	0	0	0	0	200	300	0	0	0	0	0	0	0	200	903	0	0	0	0	0	0	0	603	903	0
739	1	0	0	0	0	0	0	200	300	0	0	0	0	0	0	0	200	903	0	0	0	0	0	0	0	603	903	0
739	2	0	0	0	0	0	0	200	300	0	0	0	0	0	0	0	200	903	0	0	0	0	0	0	0	603	903	0
739	3	0	0	0	0	0	0	200	300	0	0	0	0	0	0	0	200	903	0	0	0	0	0	0	0	603	903	0
739	4	0	0	0	0	0	0	200	300	0	0	0	0	0	0	0	200	903	0	0	0	0	0	0	0	603	903	0
739	5	0	0	0	0	0	0	200	300	0	0	0	0	0	0	0	200	903	0	0	0	0	0	0	0	603	903	0
739	6	0	0	0	0	0	0	200	300	0	0	0	0	0	0	0	200	903	0	0	0	0	0	0	0	603	903	0
739	7	0	0	0	0	0	0	200	300	0	0	0	0	0	0	0	200	903	0	0	0	0	0	0	0	603	903	0
739	8	0	0	0	0	0	0	200	300	0	0	0	0	0	0	0	200	903	0	0	0	0	0	0	0	603	903	0
739	9	0	0	0	0	0	0	200	300	0	0	0	0	0	0	0	200	903	0	0	0	0	0	0	0	603	903	0
740	0	0	0	0	0	0	0	200	300	0	0	0	0	0	0	0	200	903	0	0	0	0	0	0	0	603	903	0
740	1	0	0	0	0	0	0	200	300	0	0	0	0	0	0	0	200	903	0	0	0	0	0	0	0	603	903	0
740	2	0	0	0	0	0	0	200	300	0	0	0	0	0	0	0	200	903	0	0	0	0	0	0	0	603	903	0
740	3	0	0	0	0	0	0	200	300	0	0	0	0	0	0	0	200	903	0	0	0	0	0	0	0	603	903	0
740	4	0	0	0	0	0	0	200	300	0	0	0	0	0	0	0	200	903	0	0	0	0	0	0	0	603	903	0
740	5	0	0	0	0	0	0	200	300	0	0	0	0	0	0	0	200	903	0	0	0	0	0	0	0	603	903	0
740	6	0	0	0	0	0	0	200	300	0	0	0	0	0	0	0	200	903	0	0	0	0	0	0	0	603	903	0
740	7	0	0	0	0	0	0	200	300	0	0	0	0	0	0	0	200	903	0	0	0	0	0	0	0	603	903	0
740	8	0	0	0	0	0	0	200	300	0	0	0	0	0	0	0	200	903	0	0	0	0	0	0	0	603	903	0
740	9	0	0	0	0	0	0	200	300	0	0	0	0	0	0	0	200	903	0	0	0	0	0	0	0	603	903	0
741	0	0	0	0	0	0	0	200	300	0	0	0	0	0	0	0	200	903	0	0	0	0	0	0	0	603	903	0
741	1	0	0	0	0	0	0	200	300	0	0	0	0	0	0	0	200	903	0	0	0	0	0	0	0	603	903	0
741	2	0	0	0	0	0	0	200	300	0	0	0	0	0	0	0	200	903	0	0	0	0	0	0	0	603	903	0
741	3	0	0	0	0	0	0	200	300	0	0	0	0	0	0	0	200	903	0	0	0	0	0	0	0	603	903	0
741	4	0	0	0	0	0	0	200	300	0	0	0	0	0	0	0	200	903	0	0	0	0	0	0	0	603	903	0
741	5	0	0	0	0	0	0	200	300	0	0	0	0	0	0	0	200	903	0	0	0	0	0	0	0	603	903	0
741	6	0	0	0	0	0	0	200	300	0	0	0	0	0	0	0	200	903	0	0	0	0	0	0	0	603	903	0
741	7	0	0	0	0	0	0	200	300	0	0	0	0	0	0	0	200	903	0	0	0	0	0	0	0	603	903	0
741	8	0	0	0	0	0	0	200	300	0	0	0	0	0	0	0	200	903	0	0	0	0	0	0	0	603	903	0
741	9	0	0	0	0	0	0	200	300	0	0	0	0	0	0	0	200	903	0	0	0	0	0	0	0	603	903	0
742	0	0	0	0	0	0	0	200	300	0	0	0	0	0	0	0	200	903	0	0	0	0	0	0	0	603	903	0
742	1	0	0	0	0	0	0	200	300	0	0	0	0	0	0	0	200	903	0	0	0	0	0	0	0	603	903	0
742	2	0	0	0	0	0	0	200	300	0	0	0	0	0	0	0	200	903	0	0	0	0	0	0	0	603	903	0
742	3	0	0	0	0	0	0	200	300	0	0	0	0	0	0	0	200	903	0	0	0	0	0	0	0	603	903	0
742	4	0	0	0	0	0	0	200	300	0	0	0	0	0	0	0	200	903	0	0	0	0	0	0	0	603	903	0
742	5	0	0	0	0	0	0	200	300	0	0	0	0	0	0	0	200	903	0	0	0	0	0	0	0	603	903	0
742	6	0	0	0	0	0	0	200	300	0	0	0	0	0	0	0	200	903	0	0	0	0	0	0	0	603	903	0
742	7	0	0	0	0	0	0	200	300	0	0	0	0	0	0	0	200	903	0	0	0	0	0	0	0	603	903	0
742	8	0	0	0	0	0	0	200	300	0	0	0	0	0	0	0	200	903	0	0	0	0	0	0	0	603	903	0
742	9	0	0	0	0	0	0	200	300	0	0	0	0	0	0	0	200	903	0	0	0	0	0	0	0	603	903	0
743	0	0	0	0	0	0	0	200	300	0	0	0	0	0	0	0	200	903	0	0	0	0	0	0	0	603	903	0
743	1	0	0	0	0	0	0	200	300	0	0	0	0	0	0	0	200	903	0	0	0	0	0	0	0	603	903	0
743	2	0	0	0	0	0	0	200	300	0	0	0	0	0	0	0	200	903	0	0	0	0	0	0	0	603	903	0
743	3	0	0	0	0	0	0	200	300	0	0	0	0	0	0	0	200	903	0	0	0	0	0	0	0	603	903	0
743	4	0	0	0	0	0	0	200	300	0	0	0	0	0	0	0	200	903	0	0	0	0	0	0	0	603	903	0
743	5	0	0	0	0	0	0	200	300	0	0	0	0	0	0	0	200	903	0	0	0	0	0	0	0	603	903	0
743	6	0	0	0	0	0	0	200	300	0	0	0	0	0	0	0	200	903	0	0	0	0	0	0	0	603	903	0
743	7	0	0	0	0	0	0	200	300	0	0	0	0	0	0	0	200	903	0	0	0	0	0	0	0	603	903	0
743	8	0	0	0	0	0	0	200	300	0	0	0	0	0	0	0	200	903	0	0	0	0	0	0	0	603	903	0
743	9	0	0	0	0	0	0	200	300	0	0	0	0	0	0	0	200	903	0	0	0	0	0	0	0	603	903	0
744	0	0	0	0	0	0	0	200	300	0	0	0	0	0	0	0	200	903	0	0	0	0	0	0	0	603	903	0
744	1	0	0	0	0	0	0	200	300	0	0	0	0	0	0	0	200	903	0	0	0	0	0	0	0	603	903	0
744	2	0	0	0	0	0	0	200	300	0	0	0	0	0	0	0	200	903	0	0	0	0	0	0	0	603	903	0
744	3	0	0	0	0	0	0	200	300	0	0	0	0	0	0	0	200	903	0	0	0	0	0	0	0	603	903	0
744	4	0	0	0	0	0	0	200	300	0	0	0	0	0	0	0	200	903	0	0	0	0	0	0	0	603	903	0
744	5	0	0	0	0	0	0	200	300	0	0	0	0	0	0	0	200	903	0	0	0	0	0	0	0	603	903	0
744	6	0	0	0	0	0	0	200	300	0	0	0	0	0	0	0	200	903	0	0	0	0	0	0	0	603	903	0
744	7	0	0	0	0	0	0	200	300	0	0	0	0	0	0	0	200	903	0	0	0	0	0	0	0	603	903	0
744	8	0	0	0	0	0	0	200	300	0	0	0	0	0	0	0	200	903	0	0	0	0	0	0	0	603	903	0
744	9	0	0	0	0	0	0	200	300	0	0	0	0	0	0	0	200	903	0	0	0	0	0	0	0	603	903	0
745	0	0	0	0	0	0	0	200	300	0	0	0	0	0	0	0	200	903	0	0	0	0	0	0	0	603	903	0
745	1	0	0	0	0	0	0	200	300	0	0	0	0	0	0	0	200	903	0	0	0	0	0	0	0	603	903	0
745	2	0	0	0	0	0	0	200	300	0	0	0	0	0	0	0	200	903	0	0	0	0	0	0	0	603	903	0
745	3	0	0	0	0	0	0	200	300	0	0	0	0	0	0	0	200	903	0	0	0	0	0	0	0	603	903	0
745	4	0	0	0	0	0	0	200	300	0	0	0	0	0	0	0	200	903	0	0	0	0	0	0	0	603	903	0
745	5	0	0	0	0	0	0	200	300	0	0	0	0	0	0	0	200	903	0	0	0	0	0	0	0	603	903	0
745	6	0	0	0	0	0	0	200	300	0	0	0	0	0	0	0	200	903	0	0	0	0	0	0	0	603	903	0
745	7	0	0	0	0	0	0	200	300	0	0	0	0	0	0	0	200	903	0	0	0	0	0	0	0	603	903	0
745	8	0	0	0	0	0	0	200	300	0	0	0	0	0	0	0	200	903	0	0	0	0	0	0	0	603	903	0
745	9	0	0	0	0	0	0	200	300	0	0	0	0	0	0	0	200	903	0	0	0	0	0	0	0	603	903	0
746	0	0	0	0	0	0	0	200	300	0	0	0	0	0	0	0	200	903	0	0	0	0	0	0	0	603	903	0
746	1	0	0	0	0	0	0	200	300	0	0	0	0	0	0	0	200	903	0	0	0	0	0	0	0	603	903	0
746	2	0	0	0	0	0	0	200	300	0	0	0	0	0	0	0	200	903	0	0	0	0	0	0	0	603	903	0
746	3	0	0	0	0	0	0	200	300	0	0	0	0	0	0	0	200	903	0	0	0	0	0	0	0	603	903	0
746	4	0	0	0	0	0	0	200	300	0	0	0	0	0	0	0	200	903	0	0	0	0	0	0	0	603	903	0
746	5	0	0	0	0	0	0	200	300	0	0	0	0	0	0	0	200	903	0	0	0	0	0	0	0	603	903	0
746	6	0	0	0	0	0	0	200	300	0	0	0	0	0	0	0	200	903	0	0	0	0	0	0	0	603	903	0
746	7	0	0	0	0	0	0	200	300	0	0	0	0	0	0	0	200	903	0	0	0	0	0	0	0	603	903	0
746	8	0	0	0	0	0	0	200	300	0	0	0	0	0	0	0	200	903	0	0	0	0	0	0	0	603	903	0
746	9	0	0	0	0	0	0	200	300	0	0	0	0	0	0	0	200	903	0	0	0	0	0	0	0	603	903	0
747	0	0	0	0	0	0	0	200	300	0	0	0	0	0	0	0	200	903	0	0	0	0	0	0	0	603	903	0
747	1	0	0	0	0	0	0	200	300	0	0	0	0	0	0	0	200	903	0	0	0	0	0	0	0	603	903	0
747	2	0	0	0	0	0	0	200	300	0	0	0	0	0	0	0	200	903	0	0	0	0	0	0	0	603	903	0
747	3	0	0	0	0	0	0	200	300	0	0	0	0	0	0	0	200	903	0	0	0	0	0	0	0	603	903	0
747	4	0	0	0	0	0	0	200	300	0	0	0	0	0	0	0	200	903	0	0	0	0	0	0	0	603	903	0
747	5	0	0	0	0	0	0	200	300	0	0	0	0	0	0	0	200	903	0	0	0	0	0	0	0	603	903	0
747	6	0	0	0	0	0	0	200	300	0	0	0	0	0	0	0	200	903	0	0	0	0	0	0	0	603	903	0
747	7	0	0	0	0	0	0	200	300	0	0	0	0	0	0	0	200	903	0	0	0	0	0	0	0	603	903	0
747	8	0	0	0	0	0	0	200	300	0	0	0	0	0	0	0	200	903	0	0	0	0	0	0	0	603	903	0
747	9	0	0	0	0	0	0	200	300	0	0	0	0	0	0	0	200	903	0	0	0	0	0	0	0	603	903	0
748	0	0	0	0	0	0	0	200	300	0	0	0	0	0	0	0	200	903	0	0	0	0	0	0	0	603	903	0
748	1	0	0	0	0	0	0	200	300	0	0	0	0	0	0	0	200	903	0	0	0	0	0	0	0	603	903	0
748	2	0	0	0	0	0	0	200	300	0	0	0	0	0	0	0	200	903	0	0	0	0	0	0	0	603	903	0
748	3	0	0	0	0	0	0	200	300	0	0	0	0	0	0	0	200	903	0	0	0	0	0	0	0	603	903	0
748	4	0	0	0	0	0	0	200	300	0	0	0	0	0	0	0	200	903	0	0	0	0	0	0	0	603	903	0
748	5	0	0	0	0	0	0	200	300	0	0	0	0	0	0	0	200	903	0	0	0	0	0	0	0	603	903	0
748	6	0	0	0	0	0	0	200	300	0	0	0	0	0	0	0	200	903	0	0	0	0	0	0	0	603	903	0
748	7	0	0	0	0	0	0	200	300	0	0	0	0	0	0	0	200	903	0	0	0	0	0	0	0	603	903	0
748	8	0	0	0	0	0	0	200	300	0	0	0	0	0	0	0	200	903	0	0	0	0	0	0	0	603	903	0
748	9	0	0	0	0	0	0	200	300	0	0	0	0	0	0	0	200	903	0	0	0	0	0	0	0	603	903	0
749	0	0	0	0	0	0	0	200	300	0	0	0	0	0	0	0	200	903	0	0	0	0	0	0	0	603	903	0
749	1	0	0	0	0	0	0	200	300	0	0	0	0	0	0	0	200	903	0	0	0	0	0	0	0	603	903	0
749	2	0	0	0	0	0	0	200	300	0	0	0	0	0	0	0	200	903	0	0	0	0	0	0	0	603	903	0
749	3	0	0	0	0	0	0	200	300	0	0	0	0	0	0	0	200	903	0	0	0	0	0	0	0	603	903	0
749	4	0	0	0	0	0	0	200	300	0	0	0	0	0	0	0	200	903	0	0	0	0	0	0	0	603	903	0
749	5	0	0	0	0	0	0	200	300	0	0	0	0	0	0	0	200	903	0	0	0	0	0	0	0	603	903	0
749	6	0	0	0	0	0	0	200	300	0	0	0	0	0	0	0	200	903	0	0	0	0	0	0	0	603	903	0
749	7	0	0	0	0	0	0	200	300	0	0	0	0	0	0	0	200	903	0	0	0	0	0	0	0	603	903	0
749	8	0	0	0	0	0	0	200	300	0	0	0	0	0	0	0	200	903	0	0	0	0	0	0	0	603	903	0
749	9	0	0	0	0	0	0	200	300	0	0	0	0	0	0	0	200	903	0	0	0	0	0	0	0	603	903	0
750	0	0	0	0	0	0	0	200	300	0	0	0	0	0	0	0	200	903	0	0	0	0	0	0	0	603	903	0
750	1	0	0	0	0	0	0	200	300	0	0	0	0	0	0	0	200	903	0	0	0	0	0	0	0	603	903	0
750	2	0	0	0	0	0	0	200	300	0	0	0	0	0	0	0	200	903	0	0	0	0	0	0	0	603	903	0
750	3	0	0	0	0	0	0	200	300	0	0	0	0	0	0	0	200	903	0	0	0	0	0	0	0	603	903	0
750	4	0	0	0	0	0	0	200	300	0	0	0	0	0	0	0	200	903	0	0	0	0	0	0	0	603	903	0
750	5	0	0	0	0	0	0	200	300	0	0	0	0	0	0	0	200	903	0	0	0	0	0	0	0	603	903	0
750	6	0	0	0	0	0	0	200	300	0	0	0	0	0	0	0	200	903	0	0	0	0	0	0	0	603	903	0
750	7	0	0	0	0	0	0	200	300	0	0	0	0	0	0	0	200	903	0	0	0	0	0	0	0	603	903	0
750	8	0	0	0	0	0	0	200	300	0	0	0	0	0	0	0	200	903	0	0	0	0	0	0	0	603	903	0
750	9	0	0	0	0	0	0	200	300	0	0	0	0	0	0	0	200	903	0	0	0	0	0	0	0	603	903	0
751	0	0	0	0	0	0	0	200	300	0	0	0	0	0	0	0	200	903	0	0	0	0	0	0	0	603	903	0
751	1	0	0	0	0	0	0	200	300	0	0	0	0	0	0	0	200	903	0	0	0	0	0	0	0	603	903	0
751	2	0	0	0	0	0	0	200	300	0	0	0	0	0	0	0	200	903	0	0	0	0	0	0	0	603	903	0
751	3	0	0	0	0	0	0	200	300	0	0	0	0	0	0	0	200	903	0	0	0	0	0	0	0	603	903	0
751	4	0	0	0	0	0	0	200	300	0	0	0	0	0	0	0	200	903	0	0	0	0	0	0	0	603	903	0
751	5	0	0	0	0	0	0	200	300	0	0	0	0	0	0	0	200	903	0	0	0	0	0	0	0	603	903	0
751	6	0	0	0	0	0	0	200	300	0	0	0	0	0	0	0	200	903	0	0	0	0	0	0	0	603	903	0
751	7	0	0	0	0	0	0	200	300	0	0	0	0	0	0	0	200	903	0	0	0	0	0	0	0	603	903	0
751	8	0	0	0	0	0	0	200	300	0	0	0	0	0	0	0	200	903	0	0	0	0	0	0	0	603	903	0
751	9	0	0	0	0	0	0	200	300	0	0	0	0	0	0	0	200	903	0	0	0	0	0	0	0	603	903	0
752	0	0	0	0	0	0	0	200	300	0	0	0	0	0	0	0	200	903	0	0	0	0	0	0	0	603	903	0
752	1	0	0	0	0	0	0	200	300	0	0	0	0	0	0	0	200	903	0	0	0	0	0	0	0	603	903	0
752	2	0	0	0	0	0	0	200	300	0	0	0	0	0	0	0	200	903	0	0	0	0	0	0	0	603	903	0
752	3	0	0	0	0	0	0	200	300	0	0	0	0	0	0	0	200	903	0	0	0	0	0	0	0	603	903	0
752	4	0	0	0	0	0	0	200	300	0	0	0	0	0	0	0	200	903	0	0	0	0	0	0	0	603	903	0
752	5	0	0	0	0	0	0	200	300	0	0	0	0	0	0	0	200	903	0	0	0	0	0	0	0	603	903	0
752	6	0	0	0	0	0	0	200	300	0	0	0	0	0	0	0	200	903	0	0	0	0	0	0	0	603	903	0
752	7	0	0	0	0	0	0	200	300	0	0	0	0	0	0	0	200	903	0	0	0	0	0	0	0	603	903	0
752	8	0	0	0	0	0	0	200	300	0	0	0	0	0	0	0	200	903	0	0	0	0	0	0	0	603	903	0
752	9	0	0	0	0	0	0	200	300	0	0	0	0	0	0	0	200	903	0	0	0	0	0	0	0	603	903	0
753	0	0	0	0	0	0	0	200	300	0	0	0	0	0	0	0	200	903	0	0	0	0	0	0	0	603	903	0
753	1	0	0	0	0	0	0	200	300	0	0	0	0	0	0	0	200	903	0	0	0	0	0	0	0	603	903	0
753	2	0	0	0	0	0	0	200	300	0	0	0	0	0	0	0	200	903	0	0	0	0	0	0	0	603	903	0
753	3	0	0	0	0	0	0	200	300	0	0	0	0	0	0	0	200	903	0	0	0	0	0	0	0	603	903	0
753	4	0	0	0	0	0	0	200	300	0	0	0	0	0	0	0	200	903	0	0	0	0	0	0	0	603	903	0
753	5	0	0	0	0	0	0	200	300	0	0	0	0	0	0	0	200	903	0	0	0	0	0	0	0	603	903	0
753	6	0	0	0	0	0	0	200	300	0	0	0	0	0	0	0	200	903	0	0	0	0	0	0	0	603	903	0
753	7	0	0	0	0	0	0	200	300	0	0	0	0	0	0	0	200	903	0	0	0	0	0	0	0	603	903	0
753	8	0	0	0	0	0	0	200	300	0	0	0	0	0	0	0	200	903	0	0	0	0	0	0	0	603	903	0
753	9	0	0	0	0	0	0	200	300	0	0	0	0	0	0	0	200	903	0	0	0	0	0	0	0	603	903	0
754	0	0	0	0	0	0	0	200	300	0	0	0	0	0	0	0	200	903	0	0	0	0	0	0	0	603	903	0
754	1	0	0	0	0	0	0	200	300	0	0	0	0	0	0	0	200	903	0	0	0	0	0	0	0	603	903	0
754	2	0	0	0	0	0	0	200	300	0	0	0	0	0	0	0	200	903	0	0	0	0	0	0	0	603	903	0
754	3	0	0	0	0	0	0	200	300	0	0	0	0	0	0	0	200	903	0	0	0	0	0	0	0	603	903	0
754	4	0	0	0	0	0	0	200	300	0	0	0	0	0	0	0	200	903	0	0	0	0	0	0	0	603	903	0
754	5	0	0	0	0	0	0	200	300	0	0	0	0	0	0	0	200	903	0	0	0	0	0	0	0	603	903	0
754	6	0	0	0	0	0	0	200	300	0	0	0	0	0	0	0	200	903	0	0	0	0	0	0	0	603	903	0
754	7	0	0	0	0	0	0	200	300	0	0	0	0	0	0	0	200	903	0	0	0	0	0	0	0	603	903	0
754	8	0	0	0	0	0	0	200	300	0	0	0	0	0	0	0	200	903	0	0	0	0	0	0	0	603	903	0
754	9	0	0	0	0	0	0	200	300	0	0	0	0	0	0	0	200	903	0	0	0	0	0	0	0	603	903	0
755	0	0	0	0	0	0	0	200	300	0	0	0	0	0	0	0	200	903	0	0	0	0	0	0	0	603	903	0
755	1	0	0	0	0	0	0	200	300	0	0	0	0	0	0	0	200	903	0	0	0	0	0	0	0	603	903	0
755	2	0	0	0	0	0	0	200	300	0	0	0	0	0	0	0	200	903	0	0	0	0	0	0	0	603	903	0
755	3	0	0	0	0	0	0	200	300	0	0	0	0	0	0	0	200	903	0	0	0	0	0	0	0	603	903	0
755	4	0	0	0	0	0	0	200	300	0	0	0	0	0	0	0	200	903	0	0	0	0	0	0	0	603	903	0
755	5	0	0	0	0	0	0	200	300	0	0	0	0	0	0	0	200	903	0	0	0	0	0	0	0	603	903	0
755	6	0	0	0	0	0	0	200	300	0	0	0	0	0	0	0	200	903	0	0	0	0	0	0	0	603	903	0
755	7	0	0	0	0	0	0	200	300	0	0	0	0	0	0	0	200	903	0	0	0	0	0	0	0	603	903	0
755	8	0	0	0	0	0	0	200	300	0	0	0	0	0	0	0	200	903	0	0	0	0	0	0	0	603	903	0
755	9	0	0	0	0	0	0	200	300	0	0	0	0	0	0	0	200	903	0	0	0	0	0	0	0	603	903	0
756	0	0	0	0	0	0	0	200	300	0	0	0	0	0	0	0	200	903	0	0	0	0	0	0	0	603	903	0
756	1	0	0	0	0	0	0	200	300	0	0	0	0	0	0	0	200	903	0	0	0	0	0	0	0	603	903	0
756	2	0	0	0	0	0	0	200	300	0	0	0	0	0	0	0	200	903	0	0	0	0	0	0	0	603	903	0
756	3	0	0	0	0	0	0	200	300	0	0	0	0	0	0	0	200	903	0	0	0	0	0	0	0	603	903	0
756	4	0	0	0	0	0	0	200	300	0	0	0	0	0	0	0	200	903	0	0	0	0	0	0	0	603	903	0
756	5	0	0	0	0	0	0	200	300	0	0	0	0	0	0	0	200	903	0	0	0	0	0	0	0	603	903	0
756	6	0	0	0	0	0	0	200	300	0	0	0	0	0	0	0	200	903	0	0	0	0	0	0	0	603	903	0
756	7	0	0	0	0	0	0	200	300	0	0	0	0	0	0	0	200	903	0	0	0	0	0	0	0	603	903	0
756	8	0	0	0	0	0	0	200	300	0	0	0	0	0	0	0	200	903	0	0	0	0	0	0	0	603	903	0
756	9	0	0	0	0	0	0	200	300	0	0	0	0	0	0	0	200	903	0	0	0	0	0	0	0	603	903	0
757	0	0	0	0	0	0	0	200	300	0	0	0	0	0	0	0	200	903	0	0	0	0	0	0	0	603	903	0
757	1	0	0	0	0	0	0	200	300	0	0	0	0	0	0	0	200	903	0	0	0	0	0	0	0	603	903	0
757	2	0	0	0	0	0	0	200	300	0	0	0	0	0	0	0	200	903	0	0	0	0	0	0	0	603	903	0
757	3	0	0	0	0	0	0	200	300	0	0	0	0	0	0	0	200	903	0	0	0	0	0	0	0	603	903	0
757	4	0	0	0	0	0	0	200	300	0	0	0	0	0	0	0	200	903	0	0	0	0	0	0	0	603	903	0
757	5	0	0	0	0	0	0	200	300	0	0	0	0	0	0	0	200	903	0	0	0	0	0	0	0	603	903	0
757	6	0	0	0	0	0	0	200	300	0	0	0	0	0	0	0	200	903	0	0	0	0	0	0	0	603	903	0
757	7	0	0	0	0	0	0	200	300	0	0	0	0	0	0	0	200	903	0	0	0	0	0	0	0	603	903	0
757	8	0	0	0	0	0	0	200	300	0	0	0	0	0	0	0	200	903	0	0	0	0	0	0	0	603	903	0
757	9	0	0	0	0	0	0	200	300	0	0	0	0	0	0	0	200	903	0	0	0	0	0	0	0	603	903	0
758	0	0	0	0	0	0	0	200	300	0	0	0	0	0	0	0	200	903	0	0	0	0	0	0	0	603	903	0
758	1	0	0	0	0	0	0	200	300	0	0	0	0	0	0	0	200	903	0	0	0	0	0	0	0	603	903	0
758	2	0	0	0	0	0	0	200	300	0	0	0	0	0	0	0	200	903	0	0	0	0	0	0	0	603	903	0
758	3	0	0	0	0	0	0	200	300	0	0	0	0	0	0	0	200	903	0	0	0	0	0	0	0	603	903	0
758	4	0	0	0	0	0	0	200	300	0	0	0	0	0	0	0	200	903	0	0	0	0	0	0	0	603	903	0
758	5	0	0	0	0	0	0	200	300	0	0	0	0	0	0	0	200	903	0	0	0	0	0	0	0	603	903	0
758	6	0	0	0	0	0	0	200	300	0	0	0	0	0	0	0	200	903	0	0	0	0	0	0	0	603	903	0
758	7	0	0	0	0	0	0	200	300	0	0	0	0	0	0	0	200	903	0	0	0	0	0	0	0	603	903	0
758	8	0	0	0	0	0	0	200	300	0	0	0	0	0	0	0	200	903	0	0	0	0	0	0	0	603	903	0
758	9	0	0	0	0	0	0	200	300	0	0	0	0	0	0	0	200	903	0	0	0	0	0	0	0	603	903	0
759	0	0	0	0	0	0	0	200	300	0	0	0	0	0	0	0	200	903	0	0	0	0	0	0	0	603	903	0
759	1	0	0	0	0	0	0	200	300	0	0	0	0	0	0	0	200	903	0	0	0	0	0	0	0	603	903	0
759	2	0	0	0	0	0	0	200	300	0	0	0	0	0	0	0	200	903	0	0	0	0	0	0	0	603	903	0
759	3	0	0	0	0	0	0	200	300	0	0	0	0	0	0	0	200	903	0	0	0	0	0	0	0	603	903	0
759	4	0	0	0	0	0	0	200	300	0	0	0	0	0	0	0	200	903	0	0	0	0	0	0	0	603	903	0
759	5	0	0	0	0	0	0	200	300	0	0	0	0	0	0	0	200	903	0	0	0	0	0	0	0	603	903	0
759	6	0	0	0	0	0	0	200	300	0	0	0	0	0	0	0	200	903	0	0	0	0	0	0	0	603	903	0
759	7	0	0	0	0	0	0	200	300	0	0	0	0	0	0	0	200	903	0	0	0	0	0	0	0	603	903	0
759	8	0	0	0	0	0	0	200	300	0	0	0	0	0	0	0	200	903	0	0	0	0	0	0	0	603	903	0
759	9	0	0	0	0	0	0	200	300	0	0	0	0	0	0	0	200	903	0	0	0	0	0	0	0	603	903	0
760	0	0	0	0	0	0	0	200	300	0	0	0	0	0	0	0	200	903	0	0	0	0	0	0	0	603	903	0
760	1	0	0	0	0	0	0	200	300	0	0	0	0	0	0	0	200	903	0	0	0	0	0	0	0	603	903	0
760	2	0	0	0	0	0	0	200	300	0	0	0	0	0	0	0	200	903	0	0	0	0	0	0	0	603	903	0
760	3	0	0	0	0	0	0	200	300	0	0	0	0	0	0	0	200	903	0	0	0	0	0	0	0	603	903	0
760	4	0	0	0	0	0	0	200	300	0	0	0	0	0	0	0	200	903	0	0	0	0	0	0	0	603	903	0
760	5	0	0	0	0	0	0	200	300	0	0	0	0	0	0	0	200	903	0	0	0	0	0	0	0	603	903	0
760	6	0	0	0	0	0	0	200	300	0	0	0	0	0	0	0	200	903	0	0	0	0	0	0	0	603	903	0
760	7	0	0	0	0	0	0	200	300	0	0	0	0	0	0	0	200	903	0	0	0	0	0	0	0	603	903	0
760	8	0	0	0	0	0	0	200	300	0	0	0	0	0	0	0	200	903	0	0	0	0	0	0	0	603	903	0
760	9	0	0	0	0	0	0	200	300	0	0	0	0	0	0	0	200	903	0	0	0	0	0	0	0	603	903	0
761	0	0	0	0	0	0	0	200	300	0	0	0	0	0	0	0	200	903	0	0	0	0	0	0	0	603	903	0
761	1	0	0	0	0	0	0	200	300	0	0	0	0	0	0	0	200	903	0	0	0	0	0	0	0	603	903	0
761	2	0	0	0	0	0	0	200	300	0	0	0	0	0	0	0	200	903	0	0	0	0	0	0	0	603	903	0
761	3	0	0	0	0	0	0	200	300	0	0	0	0	0	0	0	200	903	0	0	0	0	0	0	0	603	903	0
761	4	0	0	0	0	0	0	200	300	0	0	0	0	0	0	0	200	903	0	0	0	0	0	0	0	603	903	0
761	5	0	0	0	0	0	0	200	300	0	0	0	0	0	0	0	200	903	0	0	0	0	0	0	0	603	903	0
761	6	0	0	0	0	0	0	200	300	0	0	0	0	0	0	0	200	903	0	0	0	0	0	0	0	603	903	0
761	7	0	0	0	0	0	0	200	300	0	0	0	0	0	0	0	200	903	0	0	0	0	0	0	0	603	903	0
761	8	0	0	0	0	0	0	200	300	0	0	0	0	0	0	0	200	903	0	0	0	0	0	0	0	603	903	0
761	9	0	0	0	0	0	0	200	300	0	0	0	0	0	0	0	200	903	0	0	0	0	0	0	0	603	903	0
762	0	0	0	0	0	0	0	200	300	0	0	0	0	0	0	0	200	903	0	0	0	0	0	0	0	603	903	0
762	1	0	0	0	0	0	0	200	300	0	0	0	0	0	0	0	200	903	0	0	0	0	0	0	0	603	903	0
762	2	0	0	0	0	0	0	200	300	0	0	0	0	0	0	0	200	903	0	0	0	0	0	0	0	603	903	0
762	3	0	0	0	0	0	0	200	300	0	0	0	0	0	0	0	200	903	0	0	0	0	0	0	0	603	903	0
762	4	0	0	0	0	0	0	200	300	0	0	0	0	0	0	0	200	903	0	0	0	0	0	0	0	603	903	0
762	5	0	0	0	0	0	0	200	300	0	0	0	0	0	0	0	200	903	0	0	0	0	0	0	0	603	903	0
762	6	0	0	0	0	0	0	200	300	0	0	0	0	0	0	0	200	903	0	0	0	0	0	0	0	603	903	0
762	7	0	0	0	0	0	0	200	300	0	0	0	0	0	0	0	200	903	0	0	0	0	0	0	0	603	903	0
762	8	0	0	0	0	0	0	200	300	0	0	0	0	0	0	0	200	903	0	0	0	0	0	0	0	603	903	0
762	9	0	0	0	0	0	0	200	300	0	0	0	0	0	0	0	200	903	0	0	0	0	0	0	0	603	903	0
763	0	0	0	0	0	0	0	200	300	0	0	0	0	0	0	0	200	903	0	0	0	0	0	0	0	603	903	0
763	1	0	0	0	0	0	0	200	300	0	0	0	0	0	0	0	200	903	0	0	0	0	0	0	0	603	903	0
763	2	0	0	0	0	0	0	200	300	0	0	0	0	0	0	0	200	903	0	0	0	0	0	0	0	603	903	0
763	3	0	0	0	0	0	0	200	300	0	0	0	0	0	0	0	200	903	0	0	0	0	0	0	0	603	903	0
763	4	0	0	0	0	0	0	200	300	0	0	0	0	0	0	0	200	903	0	0	0	0	0	0	0	603	903	0
763	5	0	0	0	0	0	0	200	300	0	0	0	0	0	0	0	200	903	0	0	0	0	0	0	0	603	903	0
763	6	0	0	0	0	0	0	200	300	0	0	0	0	0	0	0	200	903	0	0	0	0	0	0	0	603	903	0
763	7	0	0	0	0	0	0	200	300	0	0	0	0	0	0	0	200	903	0	0	0	0	0	0	0	603	903	0
763	8	0	0	0	0	0	0	200	300	0	0	0	0	0	0	0	200	903	0	0	0	0	0	0	0	603	903	0
763	9	0	0	0	0	0	0	200	300	0	0	0	0	0	0	0	200	903	0	0	0	0	0	0	0	603	903	0
764	0	0	0	0	0	0	0	200	300	0	0	0	0	0	0	0	200	903	0	0	0	0	0	0	0	603	903	0
764	1	0	0	0	0	0	0	200	300	0	0	0	0	0	0	0	200	903	0	0	0	0	0	0	0	603	903	0
764	2	0	0	0	0	0	0	200	300	0	0	0	0	0	0	0	200	903	0	0	0	0	0	0	0	603	903	0
764	3	0	0	0	0	0	0	200	300	0	0	0	0	0	0	0	200	903	0	0	0	0	0	0	0	603	903	0
764	4	0	0	0	0	0	0	200	300	0	0	0	0	0	0	0	200	903	0	0	0	0	0	0	0	603	903	0
764	5	0	0	0	0	0	0	200	300	0	0	0	0	0	0	0	200	903	0	0	0	0	0	0	0	603	903	0
764	6	0	0	0	0	0	0	200	300	0	0	0	0	0	0	0	200	903	0	0	0	0	0	0	0	603	903	0
764	7	0	0	0	0	0	0	200	300	0	0	0	0	0	0	0	200	903	0	0	0	0	0	0	0	603	903	0
764	8	0	0	0	0	0	0	200	300	0	0	0	0	0	0	0	200	903	0	0	0	0	0	0	0	603	903	0
764	9	0	0	0	0	0	0	200	300	0	0	0	0	0	0	0	200	903	0	0	0	0	0	0	0	603	903	0
765	0	0	0	0	0	0	0	200	300	0	0	0	0	0	0	0	200	903	0	0	0	0	0	0	0	603	903	0
765	1	0	0	0	0	0	0	200	300	0	0	0	0	0	0	0	200	903	0	0	0	0	0	0	0	603	903	0
765	2	0	0	0	0	0	0	200	300	0	0	0	0	0	0	0	200	903	0	0	0	0	0	0	0	603	903	0
765	3	0	0	0	0	0	0	200	300	0	0	0	0	0	0	0	200	903	0	0	0	0	0	0	0	603	903	0
765	4	0	0	0	0	0	0	200	300	0	0	0	0	0	0	0	200	903	0	0	0	0	0	0	0	603	903	0
765	5	0	0	0	0	0	0	200	300	0	0	0	0	0	0	0	200	903	0	0	0	0	0	0	0	603	903	0
765	6	0	0	0	0	0	0	200	300	0	0	0	0	0	0	0	200	903	0	0	0	0	0	0	0	603	903	0
765	7	0	0	0	0	0	0	200	300	0	0	0	0	0	0	0	200	903	0	0	0	0	0	0	0	603	903	0
765	8	0	0	0	0	0	0	200	300	0	0	0	0	0	0	0	200	903	0	0	0	0	0	0	0	603	903	0
765	9	0	0	0	0	0	0	200	300	0	0	0	0	0	0	0	200	903	0	0	0	0	0	0	0	603	903	0
766	0	0	0	0	0	0	0	200	300	0	0	0	0	0	0	0	200	903	0	0	0	0	0	0	0	603	903	0
766	1	0	0	0	0	0	0	200	300	0	0	0	0	0	0	0	200	903	0	0	0	0	0	0	0	603	903	0
766	2	0	0	0	0	0	0	200	300	0	0	0	0	0	0	0	200	903	0	0	0	0	0	0	0	603	903	0
766	3	0	0	0	0	0	0	200	300	0	0	0	0	0	0	0	200	903	0	0	0	0	0	0	0	603	903	0
766	4	0	0	0	0	0	0	200	300	0	0	0	0	0	0	0	200	903	0	0	0	0	0	0	0	603	903	0
766	5	0	0	0	0	0	0	200	300	0	0	0	0	0	0	0	200	903	0	0	0	0	0	0	0	603	903	0
766	6	0	0	0	0	0	0	200	300	0	0	0	0	0	0	0	200	903	0	0	0	0	0	0	0	603	903	0
766	7	0	0	0	0	0	0	200	300	0	0	0	0	0	0	0	200	903	0	0	0	0	0	0	0	603	903	0
766	8	0	0	0	0	0	0	200	300	0	0	0	0	0	0	0	200	903	0	0	0	0	0	0	0	603	903	0
766	9	0	0	0	0	0	0	200	300	0	0	0	0	0	0	0	200	903	0	0	0	0	0	0	0	603	903	0
767	0	0	0	0	0	0	0	200	300	0	0	0	0	0	0	0	200	903	0	0	0	0	0	0	0	603	903	0
767	1	0	0	0	0	0	0	200	300	0	0	0	0	0	0	0	200	903	0	0	0	0	0	0	0	603	903	0
767	2	0	0	0	0	0	0	200	300	0	0	0	0	0	0	0	200	903	0	0	0	0	0	0	0	603	903	0
767	3	0	0	0	0	0	0	200	300	0	0	0	0	0	0	0	200	903	0	0	0	0	0	0	0	603	903	0
767	4	0	0	0	0	0	0	200	300	0	0	0	0	0	0	0	200	903	0	0	0	0	0	0	0	603	903	0
767	5	0	0	0	0	0	0	200	300	0	0	0	0	0	0	0	200	903	0	0	0	0	0	0	0	603	903	0
767	6	0	0	0	0	0	0	200	300	0	0	0	0	0	0	0	200	903	0	0	0	0	0	0	0	603	903	0
767	7	0	0	0	0	0	0	200	300	0	0	0	0	0	0	0	200	903	0	0	0	0	0	0	0	603	903	0
767	8	0	0	0	0	0	0	200	300	0	0	0	0	0	0	0	200	903	0	0	0	0	0	0	0	603	903	0
767	9	0	0	0	0	0	0	200	300	0	0	0	0	0	0	0	200	903	0	0	0	0	0	0	0	603	903	0
768	0	0	0	0	0	0	0	200	300	0	0	0	0	0	0	0	200	903	0	0	0	0	0	0	0	603	903	0
768	1	0	0	0	0	0	0	200	300	0	0	0	0	0	0	0	200	903	0	0	0	0	0	0	0	603	903	0
768	2	0	0	0	0	0	0	200	300	0	0	0	0	0	0	0	200	903	0	0	0	0	0	0	0	603	903	0
768	3	0	0	0	0	0	0	200	300	0	0	0	0	0	0	0	200	903	0	0	0	0	0	0	0	603	903	0
768	4	0	0	0	0	0	0	200	300	0	0	0	0	0	0	0	200	903	0	0	0	0	0	0	0	603	903	0
768	5	0	0	0	0	0	0	200	300	0	0	0	0	0	0	0	200	903	0	0	0	0	0	0	0	603	903	0
768	6	0	0	0	0	0	0	200	300	0	0	0	0	0	0	0	200	903	0	0	0	0	0	0	0	603	903	0
768	7	0	0	0	0	0	0	200	300	0	0	0	0	0	0	0	200	903	0	0	0	0	0	0	0	603	903	0
768	8	0	0	0	0	0	0	200	300	0	0	0	0	0	0	0	200	903	0	0	0	0	0	0	0	603	903	0
768	9	0	0	0	0	0	0	200	300	0	0	0	0	0	0	0	200	903	0	0	0	0	0	0	0	603	903	0
769	0	0	0	0	0	0	0	200	300	0	0	0	0	0	0	0	200	903	0	0	0	0	0	0	0	603	903	0
769	1	0	0	0	0	0	0	200	300	0	0	0	0	0	0	0	200	903	0	0	0	0	0	0	0	603	903	0
769	2	0	0	0	0	0	0	200	300	0	0	0	0	0	0	0	200	903	0	0	0	0	0	0	0	603	903	0
769	3	0	0	0	0	0	0	200	300	0	0	0	0	0	0	0	200	903	0	0	0	0	0	0	0	603	903	0
769	4	0	0	0	0	0	0	200	300	0	0	0	0	0	0	0	200	903	0	0	0	0	0	0	0	603	903	0
769	5	0	0	0	0	0	0	200	300	0	0	0	0	0	0	0	200	903	0	0	0	0	0	0	0	603	903	0
769	6	0	0	0	0	0	0	200	300	0	0	0	0	0	0	0	200	903	0	0	0	0	0	0	0	603	903	0
769	7	0	0	0	0	0	0	200	300	0	0	0	0	0	0	0	200	903	0	0	0	0	0	0	0	603	903	0
769	8	0	0	0	0	0	0	200	300	0	0	0	0	0	0	0	200	903	0	0	0	0	0	0	0	603	903	0
769	9	0	0	0	0	0	0	200	300	0	0	0	0	0	0	0	200	903	0	0	0	0	0	0	0	603	903	0
770	0	0	0	0	0	0	0	200	300	0	0	0	0	0	0	0	200	903	0	0	0	0	0	0	0	603	903	0
770	1	0	0	0	0	0	0	200	300	0	0	0	0	0	0	0	200	903	0	0	0	0	0	0	0	603	903	0
770	2	0	0	0	0	0	0	200	300	0	0	0	0	0	0	0	200	903	0	0	0	0	0	0	0	603	903	0
770	3	0	0	0	0	0	0	200	300	0	0	0	0	0	0	0	200	903	0	0	0	0	0	0	0	603	903	0
770	4	0	0	0	0	0	0	200	300	0	0	0	0	0	0	0	200	903	0	0	0	0	0	0	0	603	903	0
770	5	0	0	0	0	0	0	200	300	0	0	0	0	0	0	0	200	903	0	0	0	0	0	0	0	603	903	0
770	6	0	0	0	0	0	0	200	300	0	0	0	0	0	0	0	200	903	0	0	0	0	0	0	0	603	903	0
770	7	0	0	0	0	0	0	200	300	0	0	0	0	0	0	0	200	903	0	0	0	0	0	0	0	603	903	0
770	8	0	0	0	0	0	0	200	300	0	0	0	0	0	0	0	200	903	0	0	0	0	0	0	0	603	903	0
770	9	0	0	0	0	0	0	200	300	0	0	0	0	0	0	0	200	903	0	0	0	0	0	0	0	603	903	0
771	0	0	0	0	0	0	0	200	300	0	0	0	0	0	0	0	200	903	0	0	0	0	0	0	0	603	903	0
771	1	0	0	0	0	0	0	200	300	0	0	0	0	0	0	0	200	903	0	0	0	0	0	0	0	603	903	0
771	2	0	0	0	0	0	0	200	300	0	0	0	0	0	0	0	200	903	0	0	0	0	0	0	0	603	903	0
771	3	0	0	0	0	0	0	200	300	0	0	0	0	0	0	0	200	903	0	0	0	0	0	0	0	603	903	0
771	4	0	0	0	0	0	0	200	300	0	0	0	0	0	0	0	200	903	0	0	0	0	0	0	0	603	903	0
771	5	0	0	0	0	0	0	200	300	0	0	0	0	0	0	0	200	903	0	0	0	0	0	0	0	603	903	0
771	6	0	0	0	0	0	0	200	300	0	0	0	0	0	0	0	200	903	0	0	0	0	0	0	0	603	903	0
771	7	0	0	0	0	0	0	200	300	0	0	0	0	0	0	0	200	903	0	0	0	0	0	0	0	603	903	0
771	8	0	0	0	0	0	0	200	300	0	0	0	0	0	0	0	200	903	0	0	0	0	0	0	0	603	903	0
771	9	0	0	0	0	0	0	200	300	0	0	0	0	0	0	0	200	903	0	0	0	0	0	0	0	603	903	0
772	0	0	0	0	0	0	0	200	300	0	0	0	0	0	0	0	200	903	0	0	0	0	0	0	0	603	903	0
772	1	0	0	0	0	0	0	200	300	0	0	0	0	0	0	0	200	903	0	0	0	0	0	0	0	603	903	0
772	2	0	0	0	0	0	0	200	300	0	0	0	0	0	0	0	200	903	0	0	0	0	0	0	0	603	903	0
772	3	0	0	0	0	0	0	200	300	0	0	0	0	0	0	0	200	903	0	0	0	0	0	0	0	603	903	0
772	4	0	0	0	0	0	0	200	300	0	0	0	0	0	0	0	200	903	0	0	0	0	0	0	0	603	903	0
772	5	0	0	0	0	0	0	200	300	0	0	0	0	0	0	0	200	903	0	0	0	0	0	0	0	603	903	0
772	6	0	0	0	0	0	0	200	300	0	0	0	0	0	0	0	200	903	0	0	0	0	0	0	0	603	903	0
772	7	0	0	0	0	0	0	200	300	0	0	0	0	0	0	0	200	903	0	0	0	0	0	0	0	603	903	0
772	8	0	0	0	0	0	0	200	300	0	0	0	0	0	0	0	200	903	0	0	0	0	0	0	0	603	903	0
772	9	0	0	0	0	0	0	200	300	0	0	0	0	0	0	0	200	903	0	0	0	0	0	0	0	603	903	0
773	0	0	0	0	0	0	0	200	300	0	0	0	0	0	0	0	200	903	0	0	0	0	0	0	0	603	903	0
773	1	0	0	0	0	0	0	200	300	0	0	0	0	0	0	0	200	903	0	0	0	0	0	0	0	603	903	0
773	2	0	0	0	0	0	0	200	300	0	0	0	0	0	0	0	200	903	0	0	0	0	0	0	0	603	903	0
773	3	0	0	0	0	0	0	200	300	0	0	0	0	0	0	0	200	903	0	0	0	0	0	0	0	603	903	0
773	4	0	0	0	0	0	0	200	300	0	0	0	0	0	0	0	200	903	0	0	0	0	0	0	0	603	903	0
773	5	0	0	0	0	0	0	200	300	0	0	0	0	0	0	0	200	903	0	0	0	0	0	0	0	603	903	0
773	6	0	0	0	0	0	0	200	300	0	0	0	0	0	0	0	200	903	0	0	0	0	0	0	0	603	903	0
773	7	0	0	0	0	0	0	200	300	0	0	0	0	0	0	0	200	903	0	0	0	0	0	0	0	603	903	0
773	8	0	0	0	0	0	0	200	300	0	0	0	0	0	0	0	200	903	0	0	0	0	0	0	0	603	903	0
773	9	0	0	0	0	0	0	200	300	0	0	0	0	0	0	0	200	903	0	0	0	0	0	0	0	603	903	0
774	0	0	0	0	0	0	0	200	300	0	0	0	0	0	0	0	200	903	0	0	0	0	0	0	0	603	903	0
774	1	0	0	0	0	0	0	200	300	0	0	0	0	0	0	0	200	903	0	0	0	0	0	0	0	603	903	0
774	2	0	0	0	0	0	0	200	300	0	0	0	0	0	0	0	200	903	0	0	0	0	0	0	0	603	903	0
774	3	0	0	0	0	0	0	200	300	0	0	0	0	0	0	0	200	903	0	0	0	0	0	0	0	603	903	0
774	4	0	0	0	0	0	0	200	300	0	0	0	0	0	0	0	200	903	0	0	0	0	0	0	0	603	903	0
774	5	0	0	0	0	0	0	200	300	0	0	0	0	0	0	0	200	903	0	0	0	0	0	0	0	603	903	0
774	6	0	0	0	0	0	0	200	300	0	0	0	0	0	0	0	200	903	0	0	0	0	0	0	0	603	903	0
774	7	0	0	0	0	0	0	200	300	0	0	0	0	0	0	0	200	903	0	0	0	0	0	0	0	603	903	0
774	8	0	0	0	0	0	0	200	300	0	0	0	0	0	0	0	200	903	0	0	0	0	0	0	0	603	903	0
774	9	0	0	0	0	0	0	200	300	0	0	0	0	0	0	0	200	903	0	0	0	0	0	0	0	603	903	0
775	0	0	0	0	0	0	0	200	300	0	0	0	0	0	0	0	200	903	0	0	0	0	0	0	0	603	903	0
775	1	0	0	0	0	0	0	200	300	0	0	0	0	0	0	0	200	903	0	0	0	0	0	0	0	603	903	0
775	2	0	0	0	0	0	0	200	300	0	0	0	0	0	0	0	200	903	0	0	0	0	0	0	0	603	903	0
775	3	0	0	0	0	0	0	200	300	0	0	0	0	0	0	0	200	903	0	0	0	0	0	0	0	603	903	0
775	4	0	0	0	0	0	0	200	300	0	0	0	0	0	0	0	200	903	0	0	0	0	0	0	0	603	903	0
775	5	0	0	0	0	0	0	200	300	0	0	0	0	0	0	0	200	903	0	0	0	0	0	0	0	603	903	0
775	6	0	0	0	0	0	0	200	300	0	0	0	0	0	0	0	200	903	0	0	0	0	0	0	0	603	903	0
775	7	0	0	0	0	0	0	200	300	0	0	0	0	0	0	0	200	903	0	0	0	0	0	0	0	603	903	0
775	8	0	0	0	0	0	0	200	300	0	0	0	0	0	0	0	200	903	0	0	0	0	0	0	0	603	903	0
775	9	0	0	0	0	0	0	200	300	0	0	0	0	0	0	0	200	903	0	0	0	0	0	0	0	603	903	0
776	0	0	0	0	0	0	0	200	300	0	0	0	0	0	0	0	200	903	0	0	0	0	0	0	0	603	903	0
776	1	0	0	0	0	0	0	200	300	0	0	0	0	0	0	0	200	903	0	0	0	0	0	0	0	603	903	0
776	2	0	0	0	0	0	0	200	300	0	0	0	0	0	0	0	200	903	0	0	0	0	0	0	0	603	903	0
776	3	0	0	0	0	0	0	200	300	0	0	0	0	0	0	0	200	903	0	0	0	0	0	0	0	603	903	0
776	4	0	0	0	0	0	0	200	300	0	0	0	0	0	0	0	200	903	0	0	0	0	0	0	0	603	903	0
776	5	0	0	0	0	0	0	200	300	0	0	0	0	0	0	0	200	903	0	0	0	0	0	0	0	603	903	0
776	6	0	0	0	0	0	0	200	300	0	0	0	0	0	0	0	200	903	0	0	0	0	0	0	0	603	903	0
776	7	0	0	0	0	0	0	200	300	0	0	0	0	0	0	0	200	903	0	0	0	0	0	0	0	603	903	0
776	8	0	0	0	0	0	0	200	300	0	0	0	0	0	0	0	200	903	0	0	0	0	0	0	0	603	903	0
776	9	0	0	0	0	0	0	200	300	0	0	0	0	0	0	0	200	903	0	0	0	0	0	0	0	603	903	0
777	0	0	0	0	0	0	0	200	300	0	0	0	0	0	0	0	200	903	0	0	0	0	0	0	0	603	903	0
777	1	0	0	0	0	0	0	200	300	0	0	0	0	0	0	0	200	903	0	0	0	0	0	0	0	603	903	0
777	2	0	0	0	0	0	0	200	300	0	0	0	0	0	0	0	200	903	0	0	0	0	0	0	0	603	903	0
777	3	0	0	0	0	0	0	200	300	0	0	0	0	0	0	0	200	903	0	0	0	0	0	0	0	603	903	0
777	4	0	0	0	0	0	0	200	300	0	0	0	0	0	0	0	200	903	0	0	0	0	0	0	0	603	903	0
777	5	0	0	0	0	0	0	200	300	0	0	0	0	0	0	0	200	903	0	0	0	0	0	0	0	603	903	0
777	6	0	0	0	0	0	0	200	300	0	0	0	0	0	0	0	200	903	0	0	0	0	0	0	0	603	903	0
777	7	0	0	0	0	0	0	200	300	0	0	0	0	0	0	0	200	903	0	0	0	0	0	0	0	603	903	0
777	8	0	0	0	0	0	0	200	300	0	0	0	0	0	0	0	200	903	0	0	0	0	0	0	0	603	903	0
777	9	0	0	0	0	0	0	200	300	0	0	0	0	0	0	0	200	903	0	0	0	0	0	0	0	603	903	0
778	0	0	0	0	0	0	0	200	300	0	0	0	0	0	0	0	200	903	0	0	0	0	0	0	0	603	903	0
778	1	0	0	0	0	0	0	200	300	0	0	0	0	0	0	0	200	903	0	0	0	0	0	0	0	603	903	0
778	2	0	0	0	0	0	0	200	300	0	0	0	0	0	0	0	200	903	0	0	0	0	0	0	0	603	903	0
778	3	0	0	0	0	0	0	200	300	0	0	0	0	0	0	0	200	903	0	0	0	0	0	0	0	603	903	0
778	4	0	0	0	0	0	0	200	300	0	0	0	0	0	0	0	200	903	0	0	0	0	0	0	0	603	903	0
778	5	0	0	0	0	0	0	200	300	0	0	0	0	0	0	0	200	903	0	0	0	0	0	0	0	603	903	0
778	6	0	0	0	0	0	0	200	300	0	0	0	0	0	0	0	200	903	0	0	0	0	0	0	0	603	903	0
778	7	0	0	0	0	0	0	200	300	0	0	0	0	0	0	0	200	903	0	0	0	0	0	0	0	603	903	0
778	8	0	0	0	0	0	0	200	300	0	0	0	0	0	0	0	200	903	0	0	0	0	0	0	0	603	903	0
778	9	0	0	0	0	0	0	200	300	0	0	0	0	0	0	0	200	903	0	0	0	0	0	0	0	603	903	0
779	0	0	0	0	0	0	0	200	300	0	0	0	0	0	0	0	200	903	0	0	0	0	0	0	0	603	903	0
779	1	0	0	0	0	0	0	200	300	0	0	0	0	0	0	0	200	903	0	0	0	0	0	0	0	603	903	0
779	2	0	0	0	0	0	0	200	300	0	0	0	0	0	0	0	200	903	0	0	0	0	0	0	0	603	903	0
779	3	0	0	0	0	0	0	200	300	0	0	0	0	0	0	0	200	903	0	0	0	0	0	0	0	603	903	0
779	4	0	0	0	0	0	0	200	300	0	0	0	0	0	0	0	200	903	0	0	0	0	0	0	0	603	903	0
779	5	0	0	0	0	0	0	200	300	0	0	0	0	0	0	0	200	903	0	0	0	0	0	0	0	603	903	0
779	6	0	0	0	0	0	0	200	300	0	0	0	0	0	0	0	200	903	0	0	0	0	0	0	0	603	903	0
779	7	0	0	0	0	0	0	200	300	0	0	0	0	0	0	0	200	903	0	0	0	0	0	0	0	603	903	0
779	8	0	0	0	0	0	0	200	300	0	0	0	0	0	0	0	200	903	0	0	0	0	0	0	0	603	903	0
779	9	0	0	0	0	0	0	200	300	0	0	0	0	0	0	0	200	903	0	0	0	0	0	0	0	603	903	0
780	0	0	0	0	0	0	0	200	300	0	0	0	0	0	0	0	200	903	0	0	0	0	0	0	0	603	903	0
780	1	0	0	0	0	0	0	200	300	0	0	0	0	0	0	0	200	903	0	0	0	0	0	0	0	603	903	0
780	2	0	0	0	0	0	0	200	300	0	0	0	0	0	0	0	200	903	0	0	0	0	0	0	0	603	903	0
780	3	0	0	0	0	0	0	200	300	0	0	0	0	0	0	0	200	903	0	0	0	0	0	0	0	603	903	0
780	4	0	0	0	0	0	0	200	300	0	0	0	0	0	0	0	200	903	0	0	0	0	0	0	0	603	903	0
780	5	0	0	0	0	0	0	200	300	0	0	0	0	0	0	0	200	903	0	0	0	0	0	0	0	603	903	0
780	6	0	0	0	0	0	0	200	300	0	0	0	0	0	0	0	200	903	0	0	0	0	0	0	0	603	903	0
780	7	0	0	0	0	0	0	200	300	0	0	0	0	0	0	0	200	903	0	0	0	0	0	0	0	603	903	0
780	8	0	0	0	0	0	0	200	300	0	0	0	0	0	0	0	200	903	0	0	0	0	0	0	0	603	903	0
780	9	0	0	0	0	0	0	200	300	0	0	0	0	0	0	0	200	903	0	0	0	0	0	0	0	603	903	0
781	0	0	0	0	0	0	0	200	300	0	0	0	0	0	0	0	200	903	0	0	0	0	0	0	0	603	903	0
781	1	0	0	0	0	0	0	200	300	0	0	0	0	0	0	0	200	903	0	0	0	0	0	0	0	603	903	0
781	2	0	0	0	0	0	0	200	300	0	0	0	0	0	0	0	200	903	0	0	0	0	0	0	0	603	903	0
781	3	0	0	0	0	0	0	200	300	0	0	0	0	0	0	0	200	903	0	0	0	0	0	0	0	603	903	0
781	4	0	0	0	0	0	0	200	300	0	0	0	0	0	0	0	200	903	0	0	0	0	0	0	0	603	903	0
781	5	0	0	0	0	0	0	200	300	0	0	0	0	0	0	0	200	903	0	0	0	0	0	0	0	603	903	0
781	6	0	0	0	0	0	0	200	300	0	0	0	0	0	0	0	200	903	0	0	0	0	0	0	0	603	903	0
781	7	0	0	0	0	0	0	200	300	0	0	0	0	0	0	0	200	903	0	0	0	0	0	0	0	603	903	0
781	8	0	0	0	0	0	0	200	300	0	0	0	0	0	0	0	200	903	0	0	0	0	0	0	0	603	903	0
781	9	0	0	0	0	0	0	200	300	0	0	0	0	0	0	0	200	903	0	0	0	0	0	0	0	603	903	0
782	0	0	0	0	0	0	0	200	300	0	0	0	0	0	0	0	200	903	0	0	0	0	0	0	0	603	903	0
782	1	0	0	0	0	0	0	200	300	0	0	0	0	0	0	0	200	903	0	0	0	0	0	0	0	603	903	0
782	2	0	0	0	0	0	0	200	300	0	0	0	0	0	0	0	200	903	0	0	0	0	0	0	0	603	903	0
782	3	0	0	0	0	0	0	200	300	0	0	0	0	0	0	0	200	903	0	0	0	0	0	0	0	603	903	0
782	4	0	0	0	0	0	0	200	300	0	0	0	0	0	0	0	200	903	0	0	0	0	0	0	0	603	903	0
782	5	0	0	0	0	0	0	200	300	0	0	0	0	0	0	0	200	903	0	0	0	0	0	0	0	603	903	0
782	6	0	0	0	0	0	0	200	300	0	0	0	0	0	0	0	200	903	0	0	0	0	0	0	0	603	903	0
782	7	0	0	0	0	0	0	200	300	0	0	0	0	0	0	0	200	903	0	0	0	0	0	0	0	603	903	0
782	8	0	0	0	0	0	0	200	300	0	0	0	0	0	0	0	200	903	0	0	0	0	0	0	0	603	903	0
782	9	0	0	0	0	0	0	200	300	0	0	0	0	0	0	0	200	903	0	0	0	0	0	0	0	603	903	0
783	0	0	0	0	0	0	0	200	300	0	0	0	0	0	0	0	200	903	0	0	0	0	0	0	0	603	903	0
783	1	0	0	0	0	0	0	200	300	0	0	0	0	0	0	0	200	903	0	0	0	0	0	0	0	603	903	0
783	2	0	0	0	0	0	0	200	300	0	0	0	0	0	0	0	200	903	0	0	0	0	0	0	0	603	903	0
783	3	0	0	0	0	0	0	200	300	0	0	0	0	0	0	0	200	903	0	0	0	0	0	0	0	603	903	0
783	4	0	0	0	0	0	0	200	300	0	0	0	0	0	0	0	200	903	0	0	0	0	0	0	0	603	903	0
783	5	0	0	0	0	0	0	200	300	0	0	0	0	0	0	0	200	903	0	0	0	0	0	0	0	603	903	0
783	6	0	0	0	0	0	0	200	300	0	0	0	0	0	0	0	200	903	0	0	0	0	0	0	0	603	903	0
783	7	0	0	0	0	0	0	200	300	0	0	0	0	0	0	0	200	903	0	0	0	0	0	0	0	603	903	0
783	8	0	0	0	0	0	0	200	300	0	0	0	0	0	0	0	200	903	0	0	0	0	0	0	0	603	903	0
783	9	0	0	0	0	0	0	200	300	0	0	0	0	0	0	0	200	903	0	0	0	0	0	0	0	603	903	0
784	0	0	0	0	0	0	0	200	300	0	0	0	0	0	0	0	200	903	0	0	0	0	0	0	0	603	903	0
784	1	0	0	0	0	0	0	200	300	0	0	0	0	0	0	0	200	903	0	0	0	0	0	0	0	603	903	0
784	2	0	0	0	0	0	0	200	300	0	0	0	0	0	0	0	200	903	0	0	0	0	0	0	0	603	903	0
784	3	0	0	0	0	0	0	200	300	0	0	0	0	0	0	0	200	903	0	0	0	0	0	0	0	603	903	0
784	4	0	0	0	0	0	0	200	300	0	0	0	0	0	0	0	200	903	0	0	0	0	0	0	0	603	903	0
784	5	0	0	0	0	0	0	200	300	0	0	0	0	0	0	0	200	903	0	0	0	0	0	0	0	603	903	0
784	6	0	0	0	0	0	0	200	300	0	0	0	0	0	0	0	200	903	0	0	0	0	0	0	0	603	903	0
784	7	0	0	0	0	0	0	200	300	0	0	0	0	0	0	0	200	903	0	0	0	0	0	0	0	603	903	0
784	8	0	0	0	0	0	0	200	300	0	0	0	0	0	0	0	200	903	0	0	0	0	0	0	0	603	903	0
784	9	0	0	0	0	0	0	200	300	0	0	0	0	0	0	0	200	903	0	0	0	0	0	0	0	603	903	0
785	0	0	0	0	0	0	0	200	300	0	0	0	0	0	0	0	200	903	0	0	0	0	0	0	0	603	903	0
785	1	0	0	0	0	0	0	200	300	0	0	0	0	0	0	0	200	903	0	0	0	0	0	0	0	603	903	0
785	2	0	0	0	0	0	0	200	300	0	0	0	0	0	0	0	200	903	0	0	0	0	0	0	0	603	903	0
785	3	0	0	0	0	0	0	200	300	0	0	0	0	0	0	0	200	903	0	0	0	0	0	0	0	603	903	0
785	4	0	0	0	0	0	0	200	300	0	0	0	0	0	0	0	200	903	0	0	0	0	0	0	0	603	903	0
785	5	0	0	0	0	0	0	200	300	0	0	0	0	0	0	0	200	903	0	0	0	0	0	0	0	603	903	0
785	6	0	0	0	0	0	0	200	300	0	0	0	0	0	0	0	200	903	0	0	0	0	0	0	0	603	903	0
785	7	0	0	0	0	0	0	200	300	0	0	0	0	0	0	0	200	903	0	0	0	0	0	0	0	603	903	0
785	8	0	0	0	0	0	0	200	300	0	0	0	0	0	0	0	200	903	0	0	0	0	0	0	0	603	903	0
785	9	0	0	0	0	0	0	200	300	0	0	0	0	0	0	0	200	903	0	0	0	0	0	0	0	603	903	0
786	0	0	0	0	0	0	0	200	300	0	0	0	0	0	0	0	200	903	0	0	0	0	0	0	0	603	903	0
786	1	0	0	0	0	0	0	200	300	0	0	0	0	0	0	0	200	903	0	0	0	0	0	0	0	603	903	0
786	2	0	0	0	0	0	0	200	300	0	0	0	0	0	0	0	200	903	0	0	0	0	0	0	0	603	903	0
786	3	0	0	0	0	0	0	200	300	0	0	0	0	0	0	0	200	903	0	0	0	0	0	0	0	603	903	0
786	4	0	0	0	0	0	0	200	300	0	0	0	0	0	0	0	200	903	0	0	0	0	0	0	0	603	903	0
786	5	0	0	0	0	0	0	200	300	0	0	0	0	0	0	0	200	903	0	0	0	0	0	0	0	603	903	0
786	6	0	0	0	0	0	0	200	300	0	0	0	0	0	0	0	200	903	0	0	0	0	0	0	0	603	903	0
786	7	0	0	0	0	0	0	200	300	0	0	0	0	0	0	0	200	903	0	0	0	0	0	0	0	603	903	0
786	8	0	0	0	0	0	0	200	300	0	0	0	0	0	0	0	200	903	0	0	0	0	0	0	0	603	903	0
786	9	0	0	0	0	0	0	200	300	0	0	0	0	0	0	0	200	903	0	0	0	0	0	0	0	603	903	0
787	0	0	0	0	0	0	0	200	300	0	0	0	0	0	0	0	200	903	0	0	0	0	0	0	0	603	903	0
787	1	0	0	0	0	0	0	200	300	0	0	0	0	0	0	0	200	903	0	0	0	0	0	0	0	603	903	0
787	2	0	0	0	0	0	0	200	300	0	0	0	0	0	0	0	200	903	0	0	0	0	0	0	0	603	903	0
787	3	0	0	0	0	0	0	200	300	0	0	0	0	0	0	0	200	903	0	0	0	0	0	0	0	603	903	0
787	4	0	0	0	0	0	0	200	300	0	0	0	0	0	0	0	200	903	0	0	0	0	0	0	0	603	903	0
787	5	0	0	0	0	0	0	200	300	0	0	0	0	0	0	0	200	903	0	0	0	0	0	0	0	603	903	0
787	6	0	0	0	0	0	0	200	300	0	0	0	0	0	0	0	200	903	0	0	0	0	0	0	0	603	903	0
787	7	0	0	0	0	0	0	200	300	0	0	0	0	0	0	0	200	903	0	0	0	0	0	0	0	603	903	0
787	8	0	0	0	0	0	0	200	300	0	0	0	0	0	0	0	200	903	0	0	0	0	0	0	0	603	903	0
787	9	0	0	0	0	0	0	200	300	0	0	0	0	0	0	0	200	903	0	0	0	0	0	0	0	603	903	0
788	0	0	0	0	0	0	0	200	300	0	0	0	0	0	0	0	200	903	0	0	0	0	0	0	0	603	903	0
788	1	0	0	0	0	0	0	200	300	0	0	0	0	0	0	0	200	903	0	0	0	0	0	0	0	603	903	0
788	2	0	0	0	0	0	0	200	300	0	0	0	0	0	0	0	200	903	0	0	0	0	0	0	0	603	903	0
788	3	0	0	0	0	0	0	200	300	0	0	0	0	0	0	0	200	903	0	0	0	0	0	0	0	603	903	0
788	4	0	0	0	0	0	0	200	300	0	0	0	0	0	0	0	200	903	0	0	0	0	0	0	0	603	903	0
788	5	0	0	0	0	0	0	200	300	0	0	0	0	0	0	0	200	903	0	0	0	0	0	0	0	603	903	0
788	6	0	0	0	0	0	0	200	300	0	0	0	0	0	0	0	200	903	0	0	0	0	0	0	0	603	903	0
788	7	0	0	0	0	0	0	200	300	0	0	0	0	0	0	0	200	903	0	0	0	0	0	0	0	603	903	0
788	8	0	0	0	0	0	0	200	300	0	0	0	0	0	0	0	200	903	0	0	0	0	0	0	0	603	903	0
788	9	0	0	0	0	0	0	200	300	0	0	0	0	0	0	0	200	903	0	0	0	0	0	0	0	603	903	0
789	0	0	0	0	0	0	0	200	300	0	0	0	0	0	0	0	200	903	0	0	0	0	0	0	0	603	903	0
789	1	0	0	0	0	0	0	200	300	0	0	0	0	0	0	0	200	903	0	0	0	0	0	0	0	603	903	0
789	2	0	0	0	0	0	0	200	300	0	0	0	0	0	0	0	200	903	0	0	0	0	0	0	0	603	903	0
789	3	0	0	0	0	0	0	200	300	0	0	0	0	0	0	0	200	903	0	0	0	0	0	0	0	603	903	0
789	4	0	0	0	0	0	0	200	300	0	0	0	0	0	0	0	200	903	0	0	0	0	0	0	0	603	903	0
789	5	0	0	0	0	0	0	200	300	0	0	0	0	0	0	0	200	903	0	0	0	0	0	0	0	603	903	0
789	6	0	0	0	0	0	0	200	300	0	0	0	0	0	0	0	200	903	0	0	0	0	0	0	0	603	903	0
789	7	0	0	0	0	0	0	200	300	0	0	0	0	0	0	0	200	903	0	0	0	0	0	0	0	603	903	0
789	8	0	0	0	0	0	0	200	300	0	0	0	0	0	0	0	200	903	0	0	0	0	0	0	0	603	903	0
789	9	0	0	0	0	0	0	200	300	0	0	0	0	0	0	0	200	903	0	0	0	0	0	0	0	603	903	0
790	0	0	0	0	0	0	0	200	300	0	0	0	0	0	0	0	200	903	0	0	0	0	0	0	0	603	903	0
790	1	0	0	0	0	0	0	200	300	0	0	0	0	0	0	0	200	903	0	0	0	0	0	0	0	603	903	0
790	2	0	0	0	0	0	0	200	300	0	0	0	0	0	0	0	200	903	0	0	0	0	0	0	0	603	903	0
790	3	0	0	0	0	0	0	200	300	0	0	0	0	0	0	0	200	903	0	0	0	0	0	0	0	603	903	0
790	4	0	0	0	0	0	0	200	300	0	0	0	0	0	0	0	200	903	0	0	0	0	0	0	0	603	903	0
790	5	0	0	0	0	0	0	200	300	0	0	0	0	0	0	0	200	903	0	0	0	0	0	0	0	603	903	0
790	6	0	0	0	0	0	0	200	300	0	0	0	0	0	0	0	200	903	0	0	0	0	0	0	0	603	903	0
790	7	0	0	0	0	0	0	200	300	0	0	0	0	0	0	0	200	903	0	0	0	0	0	0	0	603	903	0
790	8	0	0	0	0	0	0	200	300	0	0	0	0	0	0	0	200	903	0	0	0	0	0	0	0	603	903	0
790	9	0	0	0	0	0	0	200	300	0	0	0	0	0	0	0	200	903	0	0	0	0	0	0	0	603	903	0
791	0	0	0	0	0	0	0	200	300	0	0	0	0	0	0	0	200	903	0	0	0	0	0	0	0	603	903	0
791	1	0	0	0	0	0	0	200	300	0	0	0	0	0	0	0	200	903	0	0	0	0	0	0	0	603	903	0
791	2	0	0	0	0	0	0	200	300	0	0	0	0	0	0	0	200	903	0	0	0	0	0	0	0	603	903	0
791	3	0	0	0	0	0	0	200	300	0	0	0	0	0	0	0	200	903	0	0	0	0	0	0	0	603	903	0
791	4	0	0	0	0	0	0	200	300	0	0	0	0	0	0	0	200	903	0	0	0	0	0	0	0	603	903	0
791	5	0	0	0	0	0	0	200	300	0	0	0	0	0	0	0	200	903	0	0	0	0	0	0	0	603	903	0
791	6	0	0	0	0	0	0	200	300	0	0	0	0	0	0	0	200	903	0	0	0	0	0	0	0	603	903	0
791	7	0	0	0	0	0	0	200	300	0	0	0	0	0	0	0	200	903	0	0	0	0	0	0	0	603	903	0
791	8	0	0	0	0	0	0	200	300	0	0	0	0	0	0	0	200	903	0	0	0	0	0	0	0	603	903	0
791	9	0	0	0	0	0	0	200	300	0	0	0	0	0	0	0	200	903	0	0	0	0	0	0	0	603	903	0
792	0	0	0	0	0	0	0	200	300	0	0	0	0	0	0	0	200	903	0	0	0	0	0	0	0	603	903	0
792	1	0	0	0	0	0	0	200	300	0	0	0	0	0	0	0	200	903	0	0	0	0	0	0	0	603	903	0
792	2	0	0	0	0	0	0	200	300	0	0	0	0	0	0	0	200	903	0	0	0	0	0	0	0	603	903	0
792	3	0	0	0	0	0	0	200	300	0	0	0	0	0	0	0	200	903	0	0	0	0	0	0	0	603	903	0
792	4	0	0	0	0	0	0	200	300	0	0	0	0	0	0	0	200	903	0	0	0	0	0	0	0	603	903	0
792	5	0	0	0	0	0	0	200	300	0	0	0	0	0	0	0	200	903	0	0	0	0	0	0	0	603	903	0
792	6	0	0	0	0	0	0	200	300	0	0	0	0	0	0	0	200	903	0	0	0	0	0	0	0	603	903	0
792	7	0	0	0	0	0	0	200	300	0	0	0	0	0	0	0	200	903	0	0	0	0	0	0	0	603	903	0
792	8	0	0	0	0	0	0	200	300	0	0	0	0	0	0	0	200	903	0	0	0	0	0	0	0	603	903	0
792	9	0	0	0	0	0	0	200	300	0	0	0	0	0	0	0	200	903	0	0	0	0	0	0	0	603	903	0
793	0	0	0	0	0	0	0	200	300	0	0	0	0	0	0	0	200	903	0	0	0	0	0	0	0	603	903	0
793	1	0	0	0	0	0	0	200	300	0	0	0	0	0	0	0	200	903	0	0	0	0	0	0	0	603	903	0
793	2	0	0	0	0	0	0	200	300	0	0	0	0	0	0	0	200	903	0	0	0	0	0	0	0	603	903	0
793	3	0	0	0	0	0	0	200	300	0	0	0	0	0	0	0	200	903	0	0	0	0	0	0	0	603	903	0
793	4	0	0	0	0	0	0	200	300	0	0	0	0	0	0	0	200	903	0	0	0	0	0	0	0	603	903	0
793	5	0	0	0	0	0	0	200	300	0	0	0	0	0	0	0	200	903	0	0	0	0	0	0	0	603	903	0
793	6	0	0	0	0	0	0	200	300	0	0	0	0	0	0	0	200	903	0	0	0	0	0	0	0	603	903	0
793	7	0	0	0	0	0	0	200	300	0	0	0	0	0	0	0	200	903	0	0	0	0	0	0	0	603	903	0
793	8	0	0	0	0	0	0	200	300	0	0	0	0	0	0	0	200	903	0	0	0	0	0	0	0	603	903	0
793	9	0	0	0	0	0	0	200	300	0	0	0	0	0	0	0	200	903	0	0	0	0	0	0	0	603	903	0
794	0	0	0	0	0	0	0	200	300	0	0	0	0	0	0	0	200	903	0	0	0	0	0	0	0	603	903	0
794	1	0	0	0	0	0	0	200	300	0	0	0	0	0	0	0	200	903	0	0	0	0	0	0	0	603	903	0
794	2	0	0	0	0	0	0	200	300	0	0	0	0	0	0	0	200	903	0	0	0	0	0	0	0	603	903	0
794	3	0	0	0	0	0	0	200	300	0	0	0	0	0	0	0	200	903	0	0	0	0	0	0	0	603	903	0
794	4	0	0	0	0	0	0	200	300	0	0	0	0	0	0	0	200	903	0	0	0	0	0	0	0	603	903	0
794	5	0	0	0	0	0	0	200	300	0	0	0	0	0	0	0	200	903	0	0	0	0	0	0	0	603	903	0
794	6	0	0	0	0	0	0	200	300	0	0	0	0	0	0	0	200	903	0	0	0	0	0	0	0	603	903	0
794	7	0	0	0	0	0	0	200	300	0	0	0	0	0	0	0	200	903	0	0	0	0	0	0	0	603	903	0
794	8	0	0	0	0	0	0	200	300	0	0	0	0	0	0	0	200	903	0	0	0	0	0	0	0	603	903	0
794	9	0	0	0	0	0	0	200	300	0	0	0	0	0	0	0	200	903	0	0	0	0	0	0	0	603	903	0
795	0	0	0	0	0	0	0	200	300	0	0	0	0	0	0	0	200	903	0	0	0	0	0	0	0	603	903	0
795	1	0	0	0	0	0	0	200	300	0	0	0	0	0	0	0	200	903	0	0	0	0	0	0	0	603	903	0
795	2	0	0	0	0	0	0	200	300	0	0	0	0	0	0	0	200	903	0	0	0	0	0	0	0	603	903	0
795	3	0	0	0	0	0	0	200	300	0	0	0	0	0	0	0	200	903	0	0	0	0	0	0	0	603	903	0
795	4	0	0	0	0	0	0	200	300	0	0	0	0	0	0	0	200	903	0	0	0	0	0	0	0	603	903	0
795	5	0	0	0	0	0	0	200	300	0	0	0	0	0	0	0	200	903	0	0	0	0	0	0	0	603	903	0
795	6	0	0	0	0	0	0	200	300	0	0	0	0	0	0	0	200	903	0	0	0	0	0	0	0	603	903	0
795	7	0	0	0	0	0	0	200	300	0	0	0	0	0	0	0	200	903	0	0	0	0	0	0	0	603	903	0
795	8	0	0	0	0	0	0	200	300	0	0	0	0	0	0	0	200	903	0	0	0	0	0	0	0	603	903	0
795	9	0	0	0	0	0	0	200	300	0	0	0	0	0	0	0	200	903	0	0	0	0	0	0	0	603	903	0
796	0	0	0	0	0	0	0	200	300	0	0	0	0	0	0	0	200	903	0	0	0	0	0	0	0	603	903	0
796	1	0	0	0	0	0	0	200	300	0	0	0	0	0	0	0	200	903	0	0	0	0	0	0	0	603	903	0
796	2	0	0	0	0	0	0	200	300	0	0	0	0	0	0	0	200	903	0	0	0	0	0	0	0	603	903	0
796	3	0	0	0	0	0	0	200	300	0	0	0	0	0	0	0	200	903	0	0	0	0	0	0	0	603	903	0
796	4	0	0	0	0	0	0	200	300	0	0	0	0	0	0	0	200	903	0	0	0	0	0	0	0	603	903	0
796	5	0	0	0	0	0	0	200	300	0	0	0	0	0	0	0	200	903	0	0	0	0	0	0	0	603	903	0
796	6	0	0	0	0	0	0	200	300	0	0	0	0	0	0	0	200	903	0	0	0	0	0	0	0	603	903	0
796	7	0	0	0	0	0	0	200	300	0	0	0	0	0	0	0	200	903	0	0	0	0	0	0	0	603	903	0
796	8	0	0	0	0	0	0	200	300	0	0	0	0	0	0	0	200	903	0	0	0	0	0	0	0	603	903	0
796	9	0	0	0	0	0	0	200	300	0	0	0	0	0	0	0	200	903	0	0	0	0	0	0	0	603	903	0
797	0	0	0	0	0	0	0	200	300	0	0	0	0	0	0	0	200	903	0	0	0	0	0	0	0	603	903	0
797	1	0	0	0	0	0	0	200	300	0	0	0	0	0	0	0	200	903	0	0	0	0	0	0	0	603	903	0
797	2	0	0	0	0	0	0	200	300	0	0	0	0	0	0	0	200	903	0	0	0	0	0	0	0	603	903	0
797	3	0	0	0	0	0	0	200	300	0	0	0	0	0	0	0	200	903	0	0	0	0	0	0	0	603	903	0
797	4	0	0	0	0	0	0	200	300	0	0	0	0	0	0	0	200	903	0	0	0	0	0	0	0	603	903	0
797	5	0	0	0	0	0	0	200	300	0	0	0	0	0	0	0	200	903	0	0	0	0	0	0	0	603	903	0
797	6	0	0	0	0	0	0	200	300	0	0	0	0	0	0	0	200	903	0	0	0	0	0	0	0	603	903	0
797	7	0	0	0	0	0	0	200	300	0	0	0	0	0	0	0	200	903	0	0	0	0	0	0	0	603	903	0
797	8	0	0	0	0	0	0	200	300	0	0	0	0	0	0	0	200	903	0	0	0	0	0	0	0	603	903	0
797	9	0	0	0	0	0	0	200	300	0	0	0	0	0	0	0	200	903	0	0	0	0	0	0	0	603	903	0
798	0	0	0	0	0	0	0	200	300	0	0	0	0	0	0	0	200	903	0	0	0	0	0	0	0	603	903	0
798	1	0	0	0	0	0	0	200	300	0	0	0	0	0	0	0	200	903	0	0	0	0	0	0	0	603	903	0
798	2	0	0	0	0	0	0	200	300	0	0	0	0	0	0	0	200	903	0	0	0	0	0	0	0	603	903	0
798	3	0	0	0	0	0	0	200	300	0	0	0	0	0	0	0	200	903	0	0	0	0	0	0	0	603	903	0
798	4	0	0	0	0	0	0	200	300	0	0	0	0	0	0	0	200	903	0	0	0	0	0	0	0	603	903	0
798	5	0	0	0	0	0	0	200	300	0	0	0	0	0	0	0	200	903	0	0	0	0	0	0	0	603	903	0
798	6	0	0	0	0	0	0	200	300	0	0	0	0	0	0	0	200	903	0	0	0	0	0	0	0	603	903	0
798	7	0	0	0	0	0	0	200	300	0	0	0	0	0	0	0	200	903	0	0	0	0	0	0	0	603	903	0
798	8	0	0	0	0	0	0	200	300	0	0	0	0	0	0	0	200	903	0	0	0	0	0	0	0	603	903	0
798	9	0	0	0	0	0	0	200	300	0	0	0	0	0	0	0	200	903	0	0	0	0	0	0	0	603	903	0
799	0	0	0	0	0	0	0	200	300	0	0	0	0	0	0	0	200	903	0	0	0	0	0	0	0	603	903	0
799	1	0	0	0	0	0	0	200	300	0	0	0	0	0	0	0	200	903	0	0	0	0	0	0	0	603	903	0
799	2	0	0	0	0	0	0	200	300	0	0	0	0	0	0	0	200	903	0	0	0	0	0	0	0	603	903	0
799	3	0	0	0	0	0	0	200	300	0	0	0	0	0	0	0	200	903	0	0	0	0	0	0	0	603	903	0
799	4	0	0	0	0	0	0	200	300	0	0	0	0	0	0	0	200	903	0	0	0	0	0	0	0	603	903	0
799	5	0	0	0	0	0	0	200	300	0	0	0	0	0	0	0	200	903	0	0	0	0	0	0	0	603	903	0
799	6	0	0	0	0	0	0	200	300	0	0	0	0	0	0	0	200	903	0	0	0	0	0	0	0	603	903	0
799	7	0	0	0	0	0	0	200	300	0	0	0	0	0	0	0	200	903	0	0	0	0	0	0	0	603	903	0
799	8	0	0	0	0	0	0	200	300	0	0	0	0	0	0	0	200	903	0	0	0	0	0	0	0	603	903	0
799	9	0	0	0	0	0	0	200	300	0	0	0	0	0	0	0	200	903	0	0	0	0	0	0	0	603	903	0
800	0	0	0	0	0	0	0	200	300	0	0	0	0	0	0	0	200	903	0	0	0	0	0	0	0	603	903	0
800	1	0	0	0	0	0	0	200	300	0	0	0	0	0	0	0	200	903	0	0	0	0	0	0	0	603	903	0
800	2	0	0	0	0	0	0	200	300	0	0	0	0	0	0	0	200	903	0	0	0	0	0	0	0	603	903	0
800	3	0	0	0	0	0	0	200	300	0	0	0	0	0	0	0	200	903	0	0	0	0	0	0	0	603	903	0
800	4	0	0	0	0	0	0	200	300	0	0	0	0	0	0	0	200	903	0	0	0	0	0	0	0	603	903	0
800	5	0	0	0	0	0	0	200	300	0	0	0	0	0	0	0	200	903	0	0	0	0	0	0	0	603	903	0
800	6	0	0	0	0	0	0	200	300	0	0	0	0	0	0	0	200	903	0	0	0	0	0	0	0	603	903	0
800	7	0	0	0	0	0	0	200	300	0	0	0	0	0	0	0	200	903	0	0	0	0	0	0	0	603	903	0
800	8	0	0	0	0	0	0	200	300	0	0	0	0	0	0	0	200	903	0	0	0	0	0	0	0	603	903	0
800	9	0	0	0	0	0	0	200	300	0	0	0	0	0	0	0	200	903	0	0	0	0	0	0	0	603	903	0
801	0	0	0	0	0	0	0	200	300	0	0	0	0	0	0	0	200	903	0	0	0	0	0	0	0	603	903	0
801	1	0	0	0	0	0	0	200	300	0	0	0	0	0	0	0	200	903	0	0	0	0	0	0	0	603	903	0
801	2	0	0	0	0	0	0	200	300	0	0	0	0	0	0	0	200	903	0	0	0	0	0	0	0	603	903	0
801	3	0	0	0	0	0	0	200	300	0	0	0	0	0	0	0	200	903	0	0	0	0	0	0	0	603	903	0
801	4	0	0	0	0	0	0	200	300	0	0	0	0	0	0	0	200	903	0	0	0	0	0	0	0	603	903	0
801	5	0	0	0	0	0	0	200	300	0	0	0	0	0	0	0	200	903	0	0	0	0	0	0	0	603	903	0
801	6	0	0	0	0	0	0	200	300	0	0	0	0	0	0	0	200	903	0	0	0	0	0	0	0	603	903	0
801	7	0	0	0	0	0	0	200	300	0	0	0	0	0	0	0	200	903	0	0	0	0	0	0	0	603	903	0
801	8	0	0	0	0	0	0	200	300	0	0	0	0	0	0	0	200	903	0	0	0	0	0	0	0	603	903	0
801	9	0	0	0	0	0	0	200	300	0	0	0	0	0	0	0	200	903	0	0	0	0	0	0	0	603	903	0
802	0	0	0	0	0	0	0	200	300	0	0	0	0	0	0	0	200	903	0	0	0	0	0	0	0	603	903	0
802	1	0	0	0	0	0	0	200	300	0	0	0	0	0	0	0	200	903	0	0	0	0	0	0	0	603	903	0
802	2	0	0	0	0	0	0	200	300	0	0	0	0	0	0	0	200	903	0	0	0	0	0	0	0	603	903	0
802	3	0	0	0	0	0	0	200	300	0	0	0	0	0	0	0	200	903	0	0	0	0	0	0	0	603	903	0
802	4	0	0	0	0	0	0	200	300	0	0	0	0	0	0	0	200	903	0	0	0	0	0	0	0	603	903	0
802	5	0	0	0	0	0	0	200	300	0	0	0	0	0	0	0	200	903	0	0	0	0	0	0	0	603	903	0
802	6	0	0	0	0	0	0	200	300	0	0	0	0	0	0	0	200	903	0	0	0	0	0	0	0	603	903	0
802	7	0	0	0	0	0	0	200	300	0	0	0	0	0	0	0	200	903	0	0	0	0	0	0	0	603	903	0
802	8	0	0	0	0	0	0	200	300	0	0	0	0	0	0	0	200	903	0	0	0	0	0	0	0	603	903	0
802	9	0	0	0	0	0	0	200	300	0	0	0	0	0	0	0	200	903	0	0	0	0	0	0	0	603	903	0
803	0	0	0	0	0	0	0	200	300	0	0	0	0	0	0	0	200	903	0	0	0	0	0	0	0	603	903	0
803	1	0	0	0	0	0	0	200	300	0	0	0	0	0	0	0	200	903	0	0	0	0	0	0	0	603	903	0
803	2	0	0	0	0	0	0	200	300	0	0	0	0	0	0	0	200	903	0	0	0	0	0	0	0	603	903	0
803	3	0	0	0	0	0	0	200	300	0	0	0	0	0	0	0	200	903	0	0	0	0	0	0	0	603	903	0
803	4	0	0	0	0	0	0	200	300	0	0	0	0	0	0	0	200	903	0	0	0	0	0	0	0	603	903	0
803	5	0	0	0	0	0	0	200	300	0	0	0	0	0	0	0	200	903	0	0	0	0	0	0	0	603	903	0
803	6	0	0	0	0	0	0	200	300	0	0	0	0	0	0	0	200	903	0	0	0	0	0	0	0	603	903	0
803	7	0	0	0	0	0	0	200	300	0	0	0	0	0	0	0	200	903	0	0	0	0	0	0	0	603	903	0
803	8	0	0	0	0	0	0	200	300	0	0	0	0	0	0	0	200	903	0	0	0	0	0	0	0	603	903	0
803	9	0	0	0	0	0	0	200	300	0	0	0	0	0	0	0	200	903	0	0	0	0	0	0	0	603	903	0
804	0	0	0	0	0	0	0	200	300	0	0	0	0	0	0	0	200	903	0	0	0	0	0	0	0	603	903	0
804	1	0	0	0	0	0	0	200	300	0	0	0	0	0	0	0	200	903	0	0	0	0	0	0	0	603	903	0
804	2	0	0	0	0	0	0	200	300	0	0	0	0	0	0	0	200	903	0	0	0	0	0	0	0	603	903	0
804	3	0	0	0	0	0	0	200	300	0	0	0	0	0	0	0	200	903	0	0	0	0	0	0	0	603	903	0
804	4	0	0	0	0	0	0	200	300	0	0	0	0	0	0	0	200	903	0	0	0	0	0	0	0	603	903	0
804	5	0	0	0	0	0	0	200	300	0	0	0	0	0	0	0	200	903	0	0	0	0	0	0	0	603	903	0
804	6	0	0	0	0	0	0	200	300	0	0	0	0	0	0	0	200	903	0	0	0	0	0	0	0	603	903	0
804	7	0	0	0	0	0	0	200	300	0	0	0	0	0	0	0	200	903	0	0	0	0	0	0	0	603	903	0
804	8	0	0	0	0	0	0	200	300	0	0	0	0	0	0	0	200	903	0	0	0	0	0	0	0	603	903	0
804	9	0	0	0	0	0	0	200	300	0	0	0	0	0	0	0	200	903	0	0	0	0	0	0	0	603	903	0
805	0	0	0	0	0	0	0	200	300	0	0	0	0	0	0	0	200	903	0	0	0	0	0	0	0	603	903	0
805	1	0	0	0	0	0	0	200	300	0	0	0	0	0	0	0	200	903	0	0	0	0	0	0	0	603	903	0
805	2	0	0	0	0	0	0	200	300	0	0	0	0	0	0	0	200	903	0	0	0	0	0	0	0	603	903	0
805	3	0	0	0	0	0	0	200	300	0	0	0	0	0	0	0	200	903	0	0	0	0	0	0	0	603	903	0
805	4	0	0	0	0	0	0	200	300	0	0	0	0	0	0	0	200	903	0	0	0	0	0	0	0	603	903	0
805	5	0	0	0	0	0	0	200	300	0	0	0	0	0	0	0	200	903	0	0	0	0	0	0	0	603	903	0
805	6	0	0	0	0	0	0	200	300	0	0	0	0	0	0	0	200	903	0	0	0	0	0	0	0	603	903	0
805	7	0	0	0	0	0	0	200	300	0	0	0	0	0	0	0	200	903	0	0	0	0	0	0	0	603	903	0
805	8	0	0	0	0	0	0	200	300	0	0	0	0	0	0	0	200	903	0	0	0	0	0	0	0	603	903	0
805	9	0	0	0	0	0	0	200	300	0	0	0	0	0	0	0	200	903	0	0	0	0	0	0	0	603	903	0
806	0	0	0	0	0	0	0	200	300	0	0	0	0	0	0	0	200	903	0	0	0	0	0	0	0	603	903	0
806	1	0	0	0	0	0	0	200	300	0	0	0	0	0	0	0	200	903	0	0	0	0	0	0	0	603	903	0
806	2	0	0	0	0	0	0	200	300	0	0	0	0	0	0	0	200	903	0	0	0	0	0	0	0	603	903	0
806	3	0	0	0	0	0	0	200	300	0	0	0	0	0	0	0	200	903	0	0	0	0	0	0	0	603	903	0
806	4	0	0	0	0	0	0	200	300	0	0	0	0	0	0	0	200	903	0	0	0	0	0	0	0	603	903	0
806	5	0	0	0	0	0	0	200	300	0	0	0	0	0	0	0	200	903	0	0	0	0	0	0	0	603	903	0
806	6	0	0	0	0	0	0	200	300	0	0	0	0	0	0	0	200	903	0	0	0	0	0	0	0	603	903	0
806	7	0	0	0	0	0	0	200	300	0	0	0	0	0	0	0	200	903	0	0	0	0	0	0	0	603	903	0
806	8	0	0	0	0	0	0	200	300	0	0	0	0	0	0	0	200	903	0	0	0	0	0	0	0	603	903	0
806	9	0	0	0	0	0	0	200	300	0	0	0	0	0	0	0	200	903	0	0	0	0	0	0	0	603	903	0
807	0	0	0	0	0	0	0	200	300	0	0	0	0	0	0	0	200	903	0	0	0	0	0	0	0	603	903	0
807	1	0	0	0	0	0	0	200	300	0	0	0	0	0	0	0	200	903	0	0	0	0	0	0	0	603	903	0
807	2	0	0	0	0	0	0	200	300	0	0	0	0	0	0	0	200	903	0	0	0	0	0	0	0	603	903	0
807	3	0	0	0	0	0	0	200	300	0	0	0	0	0	0	0	200	903	0	0	0	0	0	0	0	603	903	0
807	4	0	0	0	0	0	0	200	300	0	0	0	0	0	0	0	200	903	0	0	0	0	0	0	0	603	903	0
807	5	0	0	0	0	0	0	200	300	0	0	0	0	0	0	0	200	903	0	0	0	0	0	0	0	603	903	0
807	6	0	0	0	0	0	0	200	300	0	0	0	0	0	0	0	200	903	0	0	0	0	0	0	0	603	903	0
807	7	0	0	0	0	0	0	200	300	0	0	0	0	0	0	0	200	903	0	0	0	0	0	0	0	603	903	0
807	8	0	0	0	0	0	0	200	300	0	0	0	0	0	0	0	200	903	0	0	0	0	0	0	0	603	903	0
807	9	0	0	0	0	0	0	200	300	0	0	0	0	0	0	0	200	903	0	0	0	0	0	0	0	603	903	0
808	0	0	0	0	0	0	0	200	300	0	0	0	0	0	0	0	200	903	0	0	0	0	0	0	0	603	903	0
808	1	0	0	0	0	0	0	200	300	0	0	0	0	0	0	0	200	903	0	0	0	0	0	0	0	603	903	0
808	2	0	0	0	0	0	0	200	300	0	0	0	0	0	0	0	200	903	0	0	0	0	0	0	0	603	903	0
808	3	0	0	0	0	0	0	200	300	0	0	0	0	0	0	0	200	903	0	0	0	0	0	0	0	603	903	0
808	4	0	0	0	0	0	0	200	300	0	0	0	0	0	0	0	200	903	0	0	0	0	0	0	0	603	903	0
808	5	0	0	0	0	0	0	200	300	0	0	0	0	0	0	0	200	903	0	0	0	0	0	0	0	603	903	0
808	6	0	0	0	0	0	0	200	300	0	0	0	0	0	0	0	200	903	0	0	0	0	0	0	0	603	903	0
808	7	0	0	0	0	0	0	200	300	0	0	0	0	0	0	0	200	903	0	0	0	0	0	0	0	603	903	0
808	8	0	0	0	0	0	0	200	300	0	0	0	0	0	0	0	200	903	0	0	0	0	0	0	0	603	903	0
808	9	0	0	0	0	0	0	200	300	0	0	0	0	0	0	0	200	903	0	0	0	0	0	0	0	603	903	0
809	0	0	0	0	0	0	0	200	300	0	0	0	0	0	0	0	200	903	0	0	0	0	0	0	0	603	903	0
809	1	0	0	0	0	0	0	200	300	0	0	0	0	0	0	0	200	903	0	0	0	0	0	0	0	603	903	0
809	2	0	0	0	0	0	0	200	300	0	0	0	0	0	0	0	200	903	0	0	0	0	0	0	0	603	903	0
809	3	0	0	0	0	0	0	200	300	0	0	0	0	0	0	0	200	903	0	0	0	0	0	0	0	603	903	0
809	4	0	0	0	0	0	0	200	300	0	0	0	0	0	0	0	200	903	0	0	0	0	0	0	0	603	903	0
809	5	0	0	0	0	0	0	200	300	0	0	0	0	0	0	0	200	903	0	0	0	0	0	0	0	603	903	0
809	6	0	0	0	0	0	0	200	300	0	0	0	0	0	0	0	200	903	0	0	0	0	0	0	0	603	903	0
809	7	0	0	0	0	0	0	200	300	0	0	0	0	0	0	0	200	903	0	0	0	0	0	0	0	603	903	0
809	8	0	0	0	0	0	0	200	300	0	0	0	0	0	0	0	200	903	0	0	0	0	0	0	0	603	903	0
809	9	0	0	0	0	0	0	200	300	0	0	0	0	0	0	0	200	903	0	0	0	0	0	0	0	603	903	0
810	0	0	0	0	0	0	0	200	300	0	0	0	0	0	0	0	200	903	0	0	0	0	0	0	0	603	903	0
810	1	0	0	0	0	0	0	200	300	0	0	0	0	0	0	0	200	903	0	0	0	0	0	0	0	603	903	0
810	2	0	0	0	0	0	0	200	300	0	0	0	0	0	0	0	200	903	0	0	0	0	0	0	0	603	903	0
810	3	0	0	0	0	0	0	200	300	0	0	0	0	0	0	0	200	903	0	0	0	0	0	0	0	603	903	0
810	4	0	0	0	0	0	0	200	300	0	0	0	0	0	0	0	200	903	0	0	0	0	0	0	0	603	903	0
810	5	0	0	0	0	0	0	200	300	0	0	0	0	0	0	0	200	903	0	0	0	0	0	0	0	603	903	0
810	6	0	0	0	0	0	0	200	300	0	0	0	0	0	0	0	200	903	0	0	0	0	0	0	0	603	903	0
810	7	0	0	0	0	0	0	200	300	0	0	0	0	0	0	0	200	903	0	0	0	0	0	0	0	603	903	0
810	8	0	0	0	0	0	0	200	300	0	0	0	0	0	0	0	200	903	0	0	0	0	0	0	0	603	903	0
810	9	0	0	0	0	0	0	200	300	0	0	0	0	0	0	0	200	903	0	0	0	0	0	0	0	603	903	0
811	0	0	0	0	0	0	0	200	300	0	0	0	0	0	0	0	200	903	0	0	0	0	0	0	0	603	903	0
811	1	0	0	0	0	0	0	200	300	0	0	0	0	0	0	0	200	903	0	0	0	0	0	0	0	603	903	0
811	2	0	0	0	0	0	0	200	300	0	0	0	0	0	0	0	200	903	0	0	0	0	0	0	0	603	903	0
811	3	0	0	0	0	0	0	200	300	0	0	0	0	0	0	0	200	903	0	0	0	0	0	0	0	603	903	0
811	4	0	0	0	0	0	0	200	300	0	0	0	0	0	0	0	200	903	0	0	0	0	0	0	0	603	903	0
811	5	0	0	0	0	0	0	200	300	0	0	0	0	0	0	0	200	903	0	0	0	0	0	0	0	603	903	0
811	6	0	0	0	0	0	0	200	300	0	0	0	0	0	0	0	200	903	0	0	0	0	0	0	0	603	903	0
811	7	0	0	0	0	0	0	200	300	0	0	0	0	0	0	0	200	903	0	0	0	0	0	0	0	603	903	0
811	8	0	0	0	0	0	0	200	300	0	0	0	0	0	0	0	200	903	0	0	0	0	0	0	0	603	903	0
811	9	0	0	0	0	0	0	200	300	0	0	0	0	0	0	0	200	903	0	0	0	0	0	0	0	603	903	0
812	0	0	0	0	0	0	0	200	300	0	0	0	0	0	0	0	200	903	0	0	0	0	0	0	0	603	903	0
812	1	0	0	0	0	0	0	200	300	0	0	0	0	0	0	0	200	903	0	0	0	0	0	0	0	603	903	0
812	2	0	0	0	0	0	0	200	300	0	0	0	0	0	0	0	200	903	0	0	0	0	0	0	0	603	903	0
812	3	0	0	0	0	0	0	200	300	0	0	0	0	0	0	0	200	903	0	0	0	0	0	0	0	603	903	0
812	4	0	0	0	0	0	0	200	300	0	0	0	0	0	0	0	200	903	0	0	0	0	0	0	0	603	903	0
812	5	0	0	0	0	0	0	200	300	0	0	0	0	0	0	0	200	903	0	0	0	0	0	0	0	603	903	0
812	6	0	0	0	0	0	0	200	300	0	0	0	0	0	0	0	200	903	0	0	0	0	0	0	0	603	903	0
812	7	0	0	0	0	0	0	200	300	0	0	0	0	0	0	0	200	903	0	0	0	0	0	0	0	603	903	0
812	8	0	0	0	0	0	0	200	300	0	0	0	0	0	0	0	200	903	0	0	0	0	0	0	0	603	903	0
812	9	0	0	0	0	0	0	200	300	0	0	0	0	0	0	0	200	903	0	0	0	0	0	0	0	603	903	0
813	0	0	0	0	0	0	0	200	300	0	0	0	0	0	0	0	200	903	0	0	0	0	0	0	0	603	903	0
813	1	0	0	0	0	0	0	200	300	0	0	0	0	0	0	0	200	903	0	0	0	0	0	0	0	603	903	0
813	2	0	0	0	0	0	0	200	300	0	0	0	0	0	0	0	200	903	0	0	0	0	0	0	0	603	903	0
813	3	0	0	0	0	0	0	200	300	0	0	0	0	0	0	0	200	903	0	0	0	0	0	0	0	603	903	0
813	4	0	0	0	0	0	0	200	300	0	0	0	0	0	0	0	200	903	0	0	0	0	0	0	0	603	903	0
813	5	0	0	0	0	0	0	200	300	0	0	0	0	0	0	0	200	903	0	0	0	0	0	0	0	603	903	0
813	6	0	0	0	0	0	0	200	300	0	0	0	0	0	0	0	200	903	0	0	0	0	0	0	0	603	903	0
813	7	0	0	0	0	0	0	200	300	0	0	0	0	0	0	0	200	903	0	0	0	0	0	0	0	603	903	0
813	8	0	0	0	0	0	0	200	300	0	0	0	0	0	0	0	200	903	0	0	0	0	0	0	0	603	903	0
813	9	0	0	0	0	0	0	200	300	0	0	0	0	0	0	0	200	903	0	0	0	0	0	0	0	603	903	0
814	0	0	0	0	0	0	0	200	300	0	0	0	0	0	0	0	200	903	0	0	0	0	0	0	0	603	903	0
814	1	0	0	0	0	0	0	200	300	0	0	0	0	0	0	0	200	903	0	0	0	0	0	0	0	603	903	0
814	2	0	0	0	0	0	0	200	300	0	0	0	0	0	0	0	200	903	0	0	0	0	0	0	0	603	903	0
814	3	0	0	0	0	0	0	200	300	0	0	0	0	0	0	0	200	903	0	0	0	0	0	0	0	603	903	0
814	4	0	0	0	0	0	0	200	300	0	0	0	0	0	0	0	200	903	0	0	0	0	0	0	0	603	903	0
814	5	0	0	0	0	0	0	200	300	0	0	0	0	0	0	0	200	903	0	0	0	0	0	0	0	603	903	0
814	6	0	0	0	0	0	0	200	300	0	0	0	0	0	0	0	200	903	0	0	0	0	0	0	0	603	903	0
814	7	0	0	0	0	0	0	200	300	0	0	0	0	0	0	0	200	903	0	0	0	0	0	0	0	603	903	0
814	8	0	0	0	0	0	0	200	300	0	0	0	0	0	0	0	200	903	0	0	0	0	0	0	0	603	903	0
814	9	0	0	0	0	0	0	200	300	0	0	0	0	0	0	0	200	903	0	0	0	0	0	0	0	603	903	0
815	0	0	0	0	0	0	0	200	300	0	0	0	0	0	0	0	200	903	0	0	0	0	0	0	0	603	903	0
815	1	0	0	0	0	0	0	200	300	0	0	0	0	0	0	0	200	903	0	0	0	0	0	0	0	603	903	0
815	2	0	0	0	0	0	0	200	300	0	0	0	0	0	0	0	200	903	0	0	0	0	0	0	0	603	903	0
815	3	0	0	0	0	0	0	200	300	0	0	0	0	0	0	0	200	903	0	0	0	0	0	0	0	603	903	0
815	4	0	0	0	0	0	0	200	300	0	0	0	0	0	0	0	200	903	0	0	0	0	0	0	0	603	903	0
815	5	0	0	0	0	0	0	200	300	0	0	0	0	0	0	0	200	903	0	0	0	0	0	0	0	603	903	0
815	6	0	0	0	0	0	0	200	300	0	0	0	0	0	0	0	200	903	0	0	0	0	0	0	0	603	903	0
815	7	0	0	0	0	0	0	200	300	0	0	0	0	0	0	0	200	903	0	0	0	0	0	0	0	603	903	0
815	8	0	0	0	0	0	0	200	300	0	0	0	0	0	0	0	200	903	0	0	0	0	0	0	0	603	903	0
815	9	0	0	0	0	0	0	200	300	0	0	0	0	0	0	0	200	903	0	0	0	0	0	0	0	603	903	0
816	0	0	0	0	0	0	0	200	300	0	0	0	0	0	0	0	200	903	0	0	0	0	0	0	0	603	903	0
816	1	0	0	0	0	0	0	200	300	0	0	0	0	0	0	0	200	903	0	0	0	0	0	0	0	603	903	0
816	2	0	0	0	0	0	0	200	300	0	0	0	0	0	0	0	200	903	0	0	0	0	0	0	0	603	903	0
816	3	0	0	0	0	0	0	200	300	0	0	0	0	0	0	0	200	903	0	0	0	0	0	0	0	603	903	0
816	4	0	0	0	0	0	0	200	300	0	0	0	0	0	0	0	200	903	0	0	0	0	0	0	0	603	903	0
816	5	0	0	0	0	0	0	200	300	0	0	0	0	0	0	0	200	903	0	0	0	0	0	0	0	603	903	0
816	6	0	0	0	0	0	0	200	300	0	0	0	0	0	0	0	200	903	0	0	0	0	0	0	0	603	903	0
816	7	0	0	0	0	0	0	200	300	0	0	0	0	0	0	0	200	903	0	0	0	0	0	0	0	603	903	0
816	8	0	0	0	0	0	0	200	300	0	0	0	0	0	0	0	200	903	0	0	0	0	0	0	0	603	903	0
816	9	0	0	0	0	0	0	200	300	0	0	0	0	0	0	0	200	903	0	0	0	0	0	0	0	603	903	0
817	0	0	0	0	0	0	0	200	300	0	0	0	0	0	0	0	200	903	0	0	0	0	0	0	0	603	903	0
817	1	0	0	0	0	0	0	200	300	0	0	0	0	0	0	0	200	903	0	0	0	0	0	0	0	603	903	0
817	2	0	0	0	0	0	0	200	300	0	0	0	0	0	0	0	200	903	0	0	0	0	0	0	0	603	903	0
817	3	0	0	0	0	0	0	200	300	0	0	0	0	0	0	0	200	903	0	0	0	0	0	0	0	603	903	0
817	4	0	0	0	0	0	0	200	300	0	0	0	0	0	0	0	200	903	0	0	0	0	0	0	0	603	903	0
817	5	0	0	0	0	0	0	200	300	0	0	0	0	0	0	0	200	903	0	0	0	0	0	0	0	603	903	0
817	6	0	0	0	0	0	0	200	300	0	0	0	0	0	0	0	200	903	0	0	0	0	0	0	0	603	903	0
817	7	0	0	0	0	0	0	200	300	0	0	0	0	0	0	0	200	903	0	0	0	0	0	0	0	603	903	0
817	8	0	0	0	0	0	0	200	300	0	0	0	0	0	0	0	200	903	0	0	0	0	0	0	0	603	903	0
817	9	0	0	0	0	0	0	200	300	0	0	0	0	0	0	0	200	903	0	0	0	0	0	0	0	603	903	0
818	0	0	0	0	0	0	0	200	300	0	0	0	0	0	0	0	200	903	0	0	0	0	0	0	0	603	903	0
818	1	0	0	0	0	0	0	200	300	0	0	0	0	0	0	0	200	903	0	0	0	0	0	0	0	603	903	0
818	2	0	0	0	0	0	0	200	300	0	0	0	0	0	0	0	200	903	0	0	0	0	0	0	0	603	903	0
818	3	0	0	0	0	0	0	200	300	0	0	0	0	0	0	0	200	903	0	0	0	0	0	0	0	603	903	0
818	4	0	0	0	0	0	0	200	300	0	0	0	0	0	0	0	200	903	0	0	0	0	0	0	0	603	903	0
818	5	0	0	0	0	0	0	200	300	0	0	0	0	0	0	0	200	903	0	0	0	0	0	0	0	603	903	0
818	6	0	0	0	0	0	0	200	300	0	0	0	0	0	0	0	200	903	0	0	0	0	0	0	0	603	903	0
818	7	0	0	0	0	0	0	200	300	0	0	0	0	0	0	0	200	903	0	0	0	0	0	0	0	603	903	0
818	8	0	0	0	0	0	0	200	300	0	0	0	0	0	0	0	200	903	0	0	0	0	0	0	0	603	903	0
818	9	0	0	0	0	0	0	200	300	0	0	0	0	0	0	0	200	903	0	0	0	0	0	0	0	603	903	0
819	0	0	0	0	0	0	0	200	300	0	0	0	0	0	0	0	200	903	0	0	0	0	0	0	0	603	903	0
819	1	0	0	0	0	0	0	200	300	0	0	0	0	0	0	0	200	903	0	0	0	0	0	0	0	603	903	0
819	2	0	0	0	0	0	0	200	300	0	0	0	0	0	0	0	200	903	0	0	0	0	0	0	0	603	903	0
819	3	0	0	0	0	0	0	200	300	0	0	0	0	0	0	0	200	903	0	0	0	0	0	0	0	603	903	0
819	4	0	0	0	0	0	0	200	300	0	0	0	0	0	0	0	200	903	0	0	0	0	0	0	0	603	903	0
819	5	0	0	0	0	0	0	200	300	0	0	0	0	0	0	0	200	903	0	0	0	0	0	0	0	603	903	0
819	6	0	0	0	0	0	0	200	300	0	0	0	0	0	0	0	200	903	0	0	0	0	0	0	0	603	903	0
819	7	0	0	0	0	0	0	200	300	0	0	0	0	0	0	0	200	903	0	0	0	0	0	0	0	603	903	0
819	8	0	0	0	0	0	0	200	300	0	0	0	0	0	0	0	200	903	0	0	0	0	0	0	0	603	903	0
819	9	0	0	0	0	0	0	200	300	0	0	0	0	0	0	0	200	903	0	0	0	0	0	0	0	603	903	0
820	0	0	0	0	0	0	0	200	300	0	0	0	0	0	0	0	200	903	0	0	0	0	0	0	0	603	903	0
820	1	0	0	0	0	0	0	200	300	0	0	0	0	0	0	0	200	903	0	0	0	0	0	0	0	603	903	0
820	2	0	0	0	0	0	0	200	300	0	0	0	0	0	0	0	200	903	0	0	0	0	0	0	0	603	903	0
820	3	0	0	0	0	0	0	200	300	0	0	0	0	0	0	0	200	903	0	0	0	0	0	0	0	603	903	0
820	4	0	0	0	0	0	0	200	300	0	0	0	0	0	0	0	200	903	0	0	0	0	0	0	0	603	903	0
820	5	0	0	0	0	0	0	200	300	0	0	0	0	0	0	0	200	903	0	0	0	0	0	0	0	603	903	0
820	6	0	0	0	0	0	0	200	300	0	0	0	0	0	0	0	200	903	0	0	0	0	0	0	0	603	903	0
820	7	0	0	0	0	0	0	200	300	0	0	0	0	0	0	0	200	903	0	0	0	0	0	0	0	603	903	0
820	8	0	0	0	0	0	0	200	300	0	0	0	0	0	0	0	200	903	0	0	0	0	0	0	0	603	903	0
820	9	0	0	0	0	0	0	200	300	0	0	0	0	0	0	0	200	903	0	0	0	0	0	0	0	603	903	0
821	0	0	0	0	0	0	0	200	300	0	0	0	0	0	0	0	200	903	0	0	0	0	0	0	0	603	903	0
821	1	0	0	0	0	0	0	200	300	0	0	0	0	0	0	0	200	903	0	0	0	0	0	0	0	603	903	0
821	2	0	0	0	0	0	0	200	300	0	0	0	0	0	0	0	200	903	0	0	0	0	0	0	0	603	903	0
821	3	0	0	0	0	0	0	200	300	0	0	0	0	0	0	0	200	903	0	0	0	0	0	0	0	603	903	0
821	4	0	0	0	0	0	0	200	300	0	0	0	0	0	0	0	200	903	0	0	0	0	0	0	0	603	903	0
821	5	0	0	0	0	0	0	200	300	0	0	0	0	0	0	0	200	903	0	0	0	0	0	0	0	603	903	0
821	6	0	0	0	0	0	0	200	300	0	0	0	0	0	0	0	200	903	0	0	0	0	0	0	0	603	903	0
821	7	0	0	0	0	0	0	200	300	0	0	0	0	0	0	0	200	903	0	0	0	0	0	0	0	603	903	0
821	8	0	0	0	0	0	0	200	300	0	0	0	0	0	0	0	200	903	0	0	0	0	0	0	0	603	903	0
821	9	0	0	0	0	0	0	200	300	0	0	0	0	0	0	0	200	903	0	0	0	0	0	0	0	603	903	0
822	0	0	0	0	0	0	0	200	300	0	0	0	0	0	0	0	200	903	0	0	0	0	0	0	0	603	903	0
822	1	0	0	0	0	0	0	200	300	0	0	0	0	0	0	0	200	903	0	0	0	0	0	0	0	603	903	0
822	2	0	0	0	0	0	0	200	300	0	0	0	0	0	0	0	200	903	0	0	0	0	0	0	0	603	903	0
822	3	0	0	0	0	0	0	200	300	0	0	0	0	0	0	0	200	903	0	0	0	0	0	0	0	603	903	0
822	4	0	0	0	0	0	0	200	300	0	0	0	0	0	0	0	200	903	0	0	0	0	0	0	0	603	903	0
822	5	0	0	0	0	0	0	200	300	0	0	0	0	0	0	0	200	903	0	0	0	0	0	0	0	603	903	0
822	6	0	0	0	0	0	0	200	300	0	0	0	0	0	0	0	200	903	0	0	0	0	0	0	0	603	903	0
822	7	0	0	0	0	0	0	200	300	0	0	0	0	0	0	0	200	903	0	0	0	0	0	0	0	603	903	0
822	8	0	0	0	0	0	0	200	300	0	0	0	0	0	0	0	200	903	0	0	0	0	0	0	0	603	903	0
822	9	0	0	0	0	0	0	200	300	0	0	0	0	0	0	0	200	903	0	0	0	0	0	0	0	603	903	0
823	0	0	0	0	0	0	0	200	300	0	0	0	0	0	0	0	200	903	0	0	0	0	0	0	0	603	903	0
823	1	0	0	0	0	0	0	200	300	0	0	0	0	0	0	0	200	903	0	0	0	0	0	0	0	603	903	0
823	2	0	0	0	0	0	0	200	300	0	0	0	0	0	0	0	200	903	0	0	0	0	0	0	0	603	903	0
823	3	0	0	0	0	0	0	200	300	0	0	0	0	0	0	0	200	903	0	0	0	0	0	0	0	603	903	0
823	4	0	0	0	0	0	0	200	300	0	0	0	0	0	0	0	200	903	0	0	0	0	0	0	0	603	903	0
823	5	0	0	0	0	0	0	200	300	0	0	0	0	0	0	0	200	903	0	0	0	0	0	0	0	603	903	0
823	6	0	0	0	0	0	0	200	300	0	0	0	0	0	0	0	200	903	0	0	0	0	0	0	0	603	903	0
823	7	0	0	0	0	0	0	200	300	0	0	0	0	0	0	0	200	903	0	0	0	0	0	0	0	603	903	0
823	8	0	0	0	0	0	0	200	300	0	0	0	0	0	0	0	200	903	0	0	0	0	0	0	0	603	903	0
823	9	0	0	0	0	0	0	200	300	0	0	0	0	0	0	0	200	903	0	0	0	0	0	0	0	603	903	0
824	0	0	0	0	0	0	0	200	300	0	0	0	0	0	0	0	200	903	0	0	0	0	0	0	0	603	903	0
824	1	0	0	0	0	0	0	200	300	0	0	0	0	0	0	0	200	903	0	0	0	0	0	0	0	603	903	0
824	2	0	0	0	0	0	0	200	300	0	0	0	0	0	0	0	200	903	0	0	0	0	0	0	0	603	903	0
824	3	0	0	0	0	0	0	200	300	0	0	0	0	0	0	0	200	903	0	0	0	0	0	0	0	603	903	0
824	4	0	0	0	0	0	0	200	300	0	0	0	0	0	0	0	200	903	0	0	0	0	0	0	0	603	903	0
824	5	0	0	0	0	0	0	200	300	0	0	0	0	0	0	0	200	903	0	0	0	0	0	0	0	603	903	0
824	6	0	0	0	0	0	0	200	300	0	0	0	0	0	0	0	200	903	0	0	0	0	0	0	0	603	903	0
824	7	0	0	0	0	0	0	200	300	0	0	0	0	0	0	0	200	903	0	0	0	0	0	0	0	603	903	0
824	8	0	0	0	0	0	0	200	300	0	0	0	0	0	0	0	200	903	0	0	0	0	0	0	0	603	903	0
824	9	0	0	0	0	0	0	200	300	0	0	0	0	0	0	0	200	903	0	0	0	0	0	0	0	603	903	0
825	0	0	0	0	0	0	0	200	300	0	0	0	0	0	0	0	200	903	0	0	0	0	0	0	0	603	903	0
825	1	0	0	0	0	0	0	200	300	0	0	0	0	0	0	0	200	903	0	0	0	0	0	0	0	603	903	0
825	2	0	0	0	0	0	0	200	300	0	0	0	0	0	0	0	200	903	0	0	0	0	0	0	0	603	903	0
825	3	0	0	0	0	0	0	200	300	0	0	0	0	0	0	0	200	903	0	0	0	0	0	0	0	603	903	0
825	4	0	0	0	0	0	0	200	300	0	0	0	0	0	0	0	200	903	0	0	0	0	0	0	0	603	903	0
825	5	0	0	0	0	0	0	200	300	0	0	0	0	0	0	0	200	903	0	0	0	0	0	0	0	603	903	0
825	6	0	0	0	0	0	0	200	300	0	0	0	0	0	0	0	200	903	0	0	0	0	0	0	0	603	903	0
825	7	0	0	0	0	0	0	200	300	0	0	0	0	0	0	0	200	903	0	0	0	0	0	0	0	603	903	0
825	8	0	0	0	0	0	0	200	300	0	0	0	0	0	0	0	200	903	0	0	0	0	0	0	0	603	903	0
825	9	0	0	0	0	0	0	200	300	0	0	0	0	0	0	0	200	903	0	0	0	0	0	0	0	603	903	0
826	0	0	0	0	0	0	0	200	300	0	0	0	0	0	0	0	200	903	0	0	0	0	0	0	0	603	903	0
826	1	0	0	0	0	0	0	200	300	0	0	0	0	0	0	0	200	903	0	0	0	0	0	0	0	603	903	0
826	2	0	0	0	0	0	0	200	300	0	0	0	0	0	0	0	200	903	0	0	0	0	0	0	0	603	903	0
826	3	0	0	0	0	0	0	200	300	0	0	0	0	0	0	0	200	903	0	0	0	0	0	0	0	603	903	0
826	4	0	0	0	0	0	0	200	300	0	0	0	0	0	0	0	200	903	0	0	0	0	0	0	0	603	903	0
826	5	0	0	0	0	0	0	200	300	0	0	0	0	0	0	0	200	903	0	0	0	0	0	0	0	603	903	0
826	6	0	0	0	0	0	0	200	300	0	0	0	0	0	0	0	200	903	0	0	0	0	0	0	0	603	903	0
826	7	0	0	0	0	0	0	200	300	0	0	0	0	0	0	0	200	903	0	0	0	0	0	0	0	603	903	0
826	8	0	0	0	0	0	0	200	300	0	0	0	0	0	0	0	200	903	0	0	0	0	0	0	0	603	903	0
826	9	0	0	0	0	0	0	200	300	0	0	0	0	0	0	0	200	903	0	0	0	0	0	0	0	603	903	0
827	0	0	0	0	0	0	0	200	300	0	0	0	0	0	0	0	200	903	0	0	0	0	0	0	0	603	903	0
827	1	0	0	0	0	0	0	200	300	0	0	0	0	0	0	0	200	903	0	0	0	0	0	0	0	603	903	0
827	2	0	0	0	0	0	0	200	300	0	0	0	0	0	0	0	200	903	0	0	0	0	0	0	0	603	903	0
827	3	0	0	0	0	0	0	200	300	0	0	0	0	0	0	0	200	903	0	0	0	0	0	0	0	603	903	0
827	4	0	0	0	0	0	0	200	300	0	0	0	0	0	0	0	200	903	0	0	0	0	0	0	0	603	903	0
827	5	0	0	0	0	0	0	200	300	0	0	0	0	0	0	0	200	903	0	0	0	0	0	0	0	603	903	0
827	6	0	0	0	0	0	0	200	300	0	0	0	0	0	0	0	200	903	0	0	0	0	0	0	0	603	903	0
827	7	0	0	0	0	0	0	200	300	0	0	0	0	0	0	0	200	903	0	0	0	0	0	0	0	603	903	0
827	8	0	0	0	0	0	0	200	300	0	0	0	0	0	0	0	200	903	0	0	0	0	0	0	0	603	903	0
827	9	0	0	0	0	0	0	200	300	0	0	0	0	0	0	0	200	903	0	0	0	0	0	0	0	603	903	0
828	0	0	0	0	0	0	0	200	300	0	0	0	0	0	0	0	200	903	0	0	0	0	0	0	0	603	903	0
828	1	0	0	0	0	0	0	200	300	0	0	0	0	0	0	0	200	903	0	0	0	0	0	0	0	603	903	0
828	2	0	0	0	0	0	0	200	300	0	0	0	0	0	0	0	200	903	0	0	0	0	0	0	0	603	903	0
828	3	0	0	0	0	0	0	200	300	0	0	0	0	0	0	0	200	903	0	0	0	0	0	0	0	603	903	0
828	4	0	0	0	0	0	0	200	300	0	0	0	0	0	0	0	200	903	0	0	0	0	0	0	0	603	903	0
828	5	0	0	0	0	0	0	200	300	0	0	0	0	0	0	0	200	903	0	0	0	0	0	0	0	603	903	0
828	6	0	0	0	0	0	0	200	300	0	0	0	0	0	0	0	200	903	0	0	0	0	0	0	0	603	903	0
828	7	0	0	0	0	0	0	200	300	0	0	0	0	0	0	0	200	903	0	0	0	0	0	0	0	603	903	0
828	8	0	0	0	0	0	0	200	300	0	0	0	0	0	0	0	200	903	0	0	0	0	0	0	0	603	903	0
828	9	0	0	0	0	0	0	200	300	0	0	0	0	0	0	0	200	903	0	0	0	0	0	0	0	603	903	0
829	0	0	0	0	0	0	0	200	300	0	0	0	0	0	0	0	200	903	0	0	0	0	0	0	0	603	903	0
829	1	0	0	0	0	0	0	200	300	0	0	0	0	0	0	0	200	903	0	0	0	0	0	0	0	603	903	0
829	2	0	0	0	0	0	0	200	300	0	0	0	0	0	0	0	200	903	0	0	0	0	0	0	0	603	903	0
829	3	0	0	0	0	0	0	200	300	0	0	0	0	0	0	0	200	903	0	0	0	0	0	0	0	603	903	0
829	4	0	0	0	0	0	0	200	300	0	0	0	0	0	0	0	200	903	0	0	0	0	0	0	0	603	903	0
829	5	0	0	0	0	0	0	200	300	0	0	0	0	0	0	0	200	903	0	0	0	0	0	0	0	603	903	0
829	6	0	0	0	0	0	0	200	300	0	0	0	0	0	0	0	200	903	0	0	0	0	0	0	0	603	903	0
829	7	0	0	0	0	0	0	200	300	0	0	0	0	0	0	0	200	903	0	0	0	0	0	0	0	603	903	0
829	8	0	0	0	0	0	0	200	300	0	0	0	0	0	0	0	200	903	0	0	0	0	0	0	0	603	903	0
829	9	0	0	0	0	0	0	200	300	0	0	0	0	0	0	0	200	903	0	0	0	0	0	0	0	603	903	0
830	0	0	0	0	0	0	0	200	300	0	0	0	0	0	0	0	200	903	0	0	0	0	0	0	0	603	903	0
830	1	0	0	0	0	0	0	200	300	0	0	0	0	0	0	0	200	903	0	0	0	0	0	0	0	603	903	0
830	2	0	0	0	0	0	0	200	300	0	0	0	0	0	0	0	200	903	0	0	0	0	0	0	0	603	903	0
830	3	0	0	0	0	0	0	200	300	0	0	0	0	0	0	0	200	903	0	0	0	0	0	0	0	603	903	0
830	4	0	0	0	0	0	0	200	300	0	0	0	0	0	0	0	200	903	0	0	0	0	0	0	0	603	903	0
830	5	0	0	0	0	0	0	200	300	0	0	0	0	0	0	0	200	903	0	0	0	0	0	0	0	603	903	0
830	6	0	0	0	0	0	0	200	300	0	0	0	0	0	0	0	200	903	0	0	0	0	0	0	0	603	903	0
830	7	0	0	0	0	0	0	200	300	0	0	0	0	0	0	0	200	903	0	0	0	0	0	0	0	603	903	0
830	8	0	0	0	0	0	0	200	300	0	0	0	0	0	0	0	200	903	0	0	0	0	0	0	0	603	903	0
830	9	0	0	0	0	0	0	200	300	0	0	0	0	0	0	0	200	903	0	0	0	0	0	0	0	603	903	0
831	0	0	0	0	0	0	0	200	300	0	0	0	0	0	0	0	200	903	0	0	0	0	0	0	0	603	903	0
831	1	0	0	0	0	0	0	200	300	0	0	0	0	0	0	0	200	903	0	0	0	0	0	0	0	603	903	0
831	2	0	0	0	0	0	0	200	300	0	0	0	0	0	0	0	200	903	0	0	0	0	0	0	0	603	903	0
831	3	0	0	0	0	0	0	200	300	0	0	0	0	0	0	0	200	903	0	0	0	0	0	0	0	603	903	0
831	4	0	0	0	0	0	0	200	300	0	0	0	0	0	0	0	200	903	0	0	0	0	0	0	0	603	903	0
831	5	0	0	0	0	0	0	200	300	0	0	0	0	0	0	0	200	903	0	0	0	0	0	0	0	603	903	0
831	6	0	0	0	0	0	0	200	300	0	0	0	0	0	0	0	200	903	0	0	0	0	0	0	0	603	903	0
831	7	0	0	0	0	0	0	200	300	0	0	0	0	0	0	0	200	903	0	0	0	0	0	0	0	603	903	0
831	8	0	0	0	0	0	0	200	300	0	0	0	0	0	0	0	200	903	0	0	0	0	0	0	0	603	903	0
831	9	0	0	0	0	0	0	200	300	0	0	0	0	0	0	0	200	903	0	0	0	0	0	0	0	603	903	0
832	0	0	0	0	0	0	0	200	300	0	0	0	0	0	0	0	200	903	0	0	0	0	0	0	0	603	903	0
832	1	0	0	0	0	0	0	200	300	0	0	0	0	0	0	0	200	903	0	0	0	0	0	0	0	603	903	0
832	2	0	0	0	0	0	0	200	300	0	0	0	0	0	0	0	200	903	0	0	0	0	0	0	0	603	903	0
832	3	0	0	0	0	0	0	200	300	0	0	0	0	0	0	0	200	903	0	0	0	0	0	0	0	603	903	0
832	4	0	0	0	0	0	0	200	300	0	0	0	0	0	0	0	200	903	0	0	0	0	0	0	0	603	903	0
832	5	0	0	0	0	0	0	200	300	0	0	0	0	0	0	0	200	903	0	0	0	0	0	0	0	603	903	0
832	6	0	0	0	0	0	0	200	300	0	0	0	0	0	0	0	200	903	0	0	0	0	0	0	0	603	903	0
832	7	0	0	0	0	0	0	200	300	0	0	0	0	0	0	0	200	903	0	0	0	0	0	0	0	603	903	0
832	8	0	0	0	0	0	0	200	300	0	0	0	0	0	0	0	200	903	0	0	0	0	0	0	0	603	903	0
832	9	0	0	0	0	0	0	200	300	0	0	0	0	0	0	0	200	903	0	0	0	0	0	0	0	603	903	0
833	0	0	0	0	0	0	0	200	300	0	0	0	0	0	0	0	200	903	0	0	0	0	0	0	0	603	903	0
833	1	0	0	0	0	0	0	200	300	0	0	0	0	0	0	0	200	903	0	0	0	0	0	0	0	603	903	0
833	2	0	0	0	0	0	0	200	300	0	0	0	0	0	0	0	200	903	0	0	0	0	0	0	0	603	903	0
833	3	0	0	0	0	0	0	200	300	0	0	0	0	0	0	0	200	903	0	0	0	0	0	0	0	603	903	0
833	4	0	0	0	0	0	0	200	300	0	0	0	0	0	0	0	200	903	0	0	0	0	0	0	0	603	903	0
833	5	0	0	0	0	0	0	200	300	0	0	0	0	0	0	0	200	903	0	0	0	0	0	0	0	603	903	0
833	6	0	0	0	0	0	0	200	300	0	0	0	0	0	0	0	200	903	0	0	0	0	0	0	0	603	903	0
833	7	0	0	0	0	0	0	200	300	0	0	0	0	0	0	0	200	903	0	0	0	0	0	0	0	603	903	0
833	8	0	0	0	0	0	0	200	300	0	0	0	0	0	0	0	200	903	0	0	0	0	0	0	0	603	903	0
833	9	0	0	0	0	0	0	200	300	0	0	0	0	0	0	0	200	903	0	0	0	0	0	0	0	603	903	0
834	0	0	0	0	0	0	0	200	300	0	0	0	0	0	0	0	200	903	0	0	0	0	0	0	0	603	903	0
834	1	0	0	0	0	0	0	200	300	0	0	0	0	0	0	0	200	903	0	0	0	0	0	0	0	603	903	0
834	2	0	0	0	0	0	0	200	300	0	0	0	0	0	0	0	200	903	0	0	0	0	0	0	0	603	903	0
834	3	0	0	0	0	0	0	200	300	0	0	0	0	0	0	0	200	903	0	0	0	0	0	0	0	603	903	0
834	4	0	0	0	0	0	0	200	300	0	0	0	0	0	0	0	200	903	0	0	0	0	0	0	0	603	903	0
834	5	0	0	0	0	0	0	200	300	0	0	0	0	0	0	0	200	903	0	0	0	0	0	0	0	603	903	0
834	6	0	0	0	0	0	0	200	300	0	0	0	0	0	0	0	200	903	0	0	0	0	0	0	0	603	903	0
834	7	0	0	0	0	0	0	200	300	0	0	0	0	0	0	0	200	903	0	0	0	0	0	0	0	603	903	0
834	8	0	0	0	0	0	0	200	300	0	0	0	0	0	0	0	200	903	0	0	0	0	0	0	0	603	903	0
834	9	0	0	0	0	0	0	200	300	0	0	0	0	0	0	0	200	903	0	0	0	0	0	0	0	603	903	0
835	0	0	0	0	0	0	0	200	300	0	0	0	0	0	0	0	200	903	0	0	0	0	0	0	0	603	903	0
835	1	0	0	0	0	0	0	200	300	0	0	0	0	0	0	0	200	903	0	0	0	0	0	0	0	603	903	0
835	2	0	0	0	0	0	0	200	300	0	0	0	0	0	0	0	200	903	0	0	0	0	0	0	0	603	903	0
835	3	0	0	0	0	0	0	200	300	0	0	0	0	0	0	0	200	903	0	0	0	0	0	0	0	603	903	0
835	4	0	0	0	0	0	0	200	300	0	0	0	0	0	0	0	200	903	0	0	0	0	0	0	0	603	903	0
835	5	0	0	0	0	0	0	200	300	0	0	0	0	0	0	0	200	903	0	0	0	0	0	0	0	603	903	0
835	6	0	0	0	0	0	0	200	300	0	0	0	0	0	0	0	200	903	0	0	0	0	0	0	0	603	903	0
835	7	0	0	0	0	0	0	200	300	0	0	0	0	0	0	0	200	903	0	0	0	0	0	0	0	603	903	0
835	8	0	0	0	0	0	0	200	300	0	0	0	0	0	0	0	200	903	0	0	0	0	0	0	0	603	903	0
835	9	0	0	0	0	0	0	200	300	0	0	0	0	0	0	0	200	903	0	0	0	0	0	0	0	603	903	0
836	0	0	0	0	0	0	0	200	300	0	0	0	0	0	0	0	200	903	0	0	0	0	0	0	0	603	903	0
836	1	0	0	0	0	0	0	200	300	0	0	0	0	0	0	0	200	903	0	0	0	0	0	0	0	603	903	0
836	2	0	0	0	0	0	0	200	300	0	0	0	0	0	0	0	200	903	0	0	0	0	0	0	0	603	903	0
836	3	0	0	0	0	0	0	200	300	0	0	0	0	0	0	0	200	903	0	0	0	0	0	0	0	603	903	0
836	4	0	0	0	0	0	0	200	300	0	0	0	0	0	0	0	200	903	0	0	0	0	0	0	0	603	903	0
836	5	0	0	0	0	0	0	200	300	0	0	0	0	0	0	0	200	903	0	0	0	0	0	0	0	603	903	0
836	6	0	0	0	0	0	0	200	300	0	0	0	0	0	0	0	200	903	0	0	0	0	0	0	0	603	903	0
836	7	0	0	0	0	0	0	200	300	0	0	0	0	0	0	0	200	903	0	0	0	0	0	0	0	603	903	0
836	8	0	0	0	0	0	0	200	300	0	0	0	0	0	0	0	200	903	0	0	0	0	0	0	0	603	903	0
836	9	0	0	0	0	0	0	200	300	0	0	0	0	0	0	0	200	903	0	0	0	0	0	0	0	603	903	0
837	0	0	0	0	0	0	0	200	300	0	0	0	0	0	0	0	200	903	0	0	0	0	0	0	0	603	903	0
837	1	0	0	0	0	0	0	200	300	0	0	0	0	0	0	0	200	903	0	0	0	0	0	0	0	603	903	0
837	2	0	0	0	0	0	0	200	300	0	0	0	0	0	0	0	200	903	0	0	0	0	0	0	0	603	903	0
837	3	0	0	0	0	0	0	200	300	0	0	0	0	0	0	0	200	903	0	0	0	0	0	0	0	603	903	0
837	4	0	0	0	0	0	0	200	300	0	0	0	0	0	0	0	200	903	0	0	0	0	0	0	0	603	903	0
837	5	0	0	0	0	0	0	200	300	0	0	0	0	0	0	0	200	903	0	0	0	0	0	0	0	603	903	0
837	6	0	0	0	0	0	0	200	300	0	0	0	0	0	0	0	200	903	0	0	0	0	0	0	0	603	903	0
837	7	0	0	0	0	0	0	200	300	0	0	0	0	0	0	0	200	903	0	0	0	0	0	0	0	603	903	0
837	8	0	0	0	0	0	0	200	300	0	0	0	0	0	0	0	200	903	0	0	0	0	0	0	0	603	903	0
837	9	0	0	0	0	0	0	200	300	0	0	0	0	0	0	0	200	903	0	0	0	0	0	0	0	603	903	0
838	0	0	0	0	0	0	0	200	300	0	0	0	0	0	0	0	200	903	0	0	0	0	0	0	0	603	903	0
838	1	0	0	0	0	0	0	200	300	0	0	0	0	0	0	0	200	903	0	0	0	0	0	0	0	603	903	0
838	2	0	0	0	0	0	0	200	300	0	0	0	0	0	0	0	200	903	0	0	0	0	0	0	0	603	903	0
838	3	0	0	0	0	0	0	200	300	0	0	0	0	0	0	0	200	903	0	0	0	0	0	0	0	603	903	0
838	4	0	0	0	0	0	0	200	300	0	0	0	0	0	0	0	200	903	0	0	0	0	0	0	0	603	903	0
838	5	0	0	0	0	0	0	200	300	0	0	0	0	0	0	0	200	903	0	0	0	0	0	0	0	603	903	0
838	6	0	0	0	0	0	0	200	300	0	0	0	0	0	0	0	200	903	0	0	0	0	0	0	0	603	903	0
[truncated: 5,323 more rows]
