# Supplementary material for: The Effects of an Extemporaneous Speech Dual-task on Older Adult Gait Control
Source: Research Square preprint supplement (doi:10.21203/rs.3.rs-7674245/v1), 2025-11-18
Supplement: Supplementary file 27 [file DT2Walk05.xlsx]

## Sheet: Sheet1
Trajectories
		02:LFHD			02:RFHD			02:LBHD			02:RBHD			02:C7			02:T10			02:CLAV			02:STRN			02:RBAK			02:LSHO			02:LUPA			02:LELB			02:LFRM			02:LWRA			02:LWRB			02:LFIN
Frame	Sub Frame	X	Y	Z	X	Y	Z	X	Y	Z	X	Y	Z	X	Y	Z	X	Y	Z	X	Y	Z	X	Y	Z	X	Y	Z	X	Y	Z	X	Y	Z	X	Y	Z	X	Y	Z	X	Y	Z	X	Y	Z	X	Y	Z
		mm	mm	mm	mm	mm	mm	mm	mm	mm	mm	mm	mm	mm	mm	mm	mm	mm	mm	mm	mm	mm	mm	mm	mm	mm	mm	mm	mm	mm	mm	mm	mm	mm	mm	mm	mm	mm	mm	mm	mm	mm	mm	mm	mm	mm	mm	mm	mm
379	0	331.083	1853.98	1573.82	232.111	1848.89	1564.3	333.378	2023.68	1607.38	220.55	2027.22	1599.26	279.386	2088.78	1426	296.26	2135.71	1207.89	292.589	1956.41	1361.46	289.685	1888.92	1236	201.237	2147.42	1256.42	458.16	2041.3	1383.26	508.039	2063.21	1153.79	505.029	2075.84	1085.02	537.105	1984.75	1000.73	518.884	1940	906.741	552.48	1998.37	879.989	570.009	1932.74	808.764
380	0	331	1844.55	1574.07	232.037	1839.74	1564.11	333.535	2014.11	1608.72	220.733	2017.97	1600.14	280.949	2080.24	1427.37	298.718	2127.87	1209.45	293.213	1948.09	1362.32	290.035	1881.05	1236.73	203.747	2140.14	1257.83	459.332	2031.55	1385.16	510.489	2051.54	1155.93	508.12	2063.89	1087.12	539.042	1971.54	1003.83	521.047	1926.65	909.823	555.805	1984.16	883.222	572.908	1918.47	812.069
381	0	330.871	1835.18	1574.26	231.918	1830.65	1563.85	333.649	2004.59	1609.93	220.879	2008.78	1600.89	282.44	2071.7	1428.61	301.074	2120.02	1210.88	293.794	1939.78	1363.05	290.35	1873.18	1237.33	206.157	2132.83	1259.11	460.439	2021.84	1386.89	512.836	2040.02	1157.9	511.073	2052.06	1089.04	540.876	1958.46	1006.76	523.045	1913.37	912.799	558.905	1970.05	886.291	575.556	1904.18	815.313
382	0	330.696	1825.86	1574.37	231.754	1821.62	1563.52	333.719	1995.14	1611.02	220.988	1999.65	1601.52	283.858	2063.18	1429.72	303.33	2112.14	1212.15	294.33	1931.46	1363.67	290.63	1865.33	1237.81	208.467	2125.51	1260.26	461.481	2012.18	1388.45	515.08	2028.65	1159.7	513.886	2040.34	1090.81	542.607	1945.52	1009.53	524.877	1900.16	915.669	561.779	1956.02	889.195	577.951	1889.89	818.495
383	0	330.476	1816.6	1574.41	231.546	1812.63	1563.12	333.745	1985.75	1611.98	221.06	1990.57	1602.01	285.204	2054.67	1430.7	305.484	2104.24	1213.28	294.824	1923.14	1364.16	290.877	1857.48	1238.15	210.677	2118.16	1261.29	462.458	2002.56	1389.85	517.221	2017.43	1161.34	516.559	2028.73	1092.4	544.235	1932.71	1012.12	526.544	1887.04	918.431	564.427	1942.08	891.935	580.092	1875.59	821.614
384	0	330.212	1807.39	1574.37	231.293	1803.7	1562.66	333.729	1976.41	1612.8	221.094	1981.55	1602.38	286.475	2046.17	1431.54	307.535	2096.32	1214.26	295.273	1914.83	1364.54	291.089	1849.63	1238.36	212.786	2110.78	1262.19	463.369	1992.99	1391.07	519.258	2006.35	1162.8	519.093	2017.23	1093.83	545.759	1920.04	1014.55	528.045	1873.99	921.086	566.849	1928.23	894.509	581.976	1861.28	824.665
385	0	329.903	1798.23	1574.27	230.998	1794.82	1562.12	333.67	1967.13	1613.5	221.093	1972.59	1602.62	287.673	2037.68	1432.25	309.482	2088.38	1215.1	295.678	1906.52	1364.8	291.267	1841.8	1238.45	214.792	2103.38	1262.96	464.215	1983.46	1392.13	521.192	1995.41	1164.1	521.486	2005.84	1095.09	547.179	1907.5	1016.81	529.382	1861.01	923.631	569.044	1914.47	896.915	583.598	1846.97	827.644
386	0	329.551	1789.12	1574.09	230.66	1785.99	1561.5	333.569	1957.9	1614.07	221.055	1963.68	1602.73	288.796	2029.2	1432.83	311.323	2080.42	1215.79	296.039	1898.2	1364.94	291.412	1833.96	1238.41	216.693	2095.96	1263.61	464.994	1973.98	1393.01	523.02	1984.61	1165.23	523.737	1994.56	1096.19	548.495	1895.09	1018.89	530.556	1848.11	926.067	571.013	1900.8	899.153	584.953	1832.66	830.543
387	0	329.158	1780.07	1573.84	230.282	1777.22	1560.82	333.429	1948.74	1614.52	220.983	1954.82	1602.72	289.842	2020.73	1433.28	313.054	2072.45	1216.35	296.355	1889.89	1364.96	291.522	1826.13	1238.25	218.485	2088.51	1264.14	465.706	1964.54	1393.73	524.741	1973.94	1166.19	525.844	1983.39	1097.11	549.705	1882.81	1020.8	531.567	1835.29	928.39	572.755	1887.22	901.22	586.035	1818.37	833.354
388	0	328.727	1771.07	1573.5	229.865	1768.49	1560.07	333.249	1939.62	1614.83	220.876	1946.02	1602.6	290.81	2012.27	1433.59	314.672	2064.46	1216.76	296.626	1881.58	1364.87	291.599	1818.29	1237.97	220.166	2081.02	1264.54	466.348	1955.16	1394.28	526.351	1963.39	1166.98	527.804	1972.32	1097.86	550.806	1870.66	1022.55	532.419	1822.54	930.599	574.271	1873.73	903.115	586.838	1804.09	836.067
389	0	328.258	1762.12	1573.1	229.412	1759.8	1559.25	333.031	1930.56	1615.03	220.735	1937.26	1602.35	291.697	2003.82	1433.78	316.171	2056.46	1217.05	296.85	1873.27	1364.67	291.642	1810.45	1237.58	221.729	2073.51	1264.83	466.919	1945.82	1394.67	527.846	1952.96	1167.61	529.613	1961.36	1098.45	551.796	1858.64	1024.12	533.111	1809.86	932.693	575.563	1860.33	904.839	587.359	1789.86	838.669
390	0	327.757	1753.21	1572.61	228.926	1751.17	1558.35	332.778	1921.54	1615.1	220.562	1928.54	1602	292.5	1995.38	1433.84	317.547	2048.46	1217.2	297.026	1864.95	1364.36	291.65	1802.6	1237.08	223.169	2065.96	1265	467.417	1936.53	1394.9	529.221	1942.62	1168.06	531.268	1950.5	1098.87	552.668	1846.75	1025.51	533.645	1797.25	934.669	576.631	1847.02	906.391	587.594	1775.68	841.148
391	0	327.224	1744.36	1572.03	228.41	1742.57	1557.39	332.491	1912.57	1615.05	220.355	1919.87	1601.54	293.215	1986.95	1433.77	318.793	2040.44	1217.22	297.152	1856.64	1363.94	291.624	1794.74	1236.49	224.481	2058.38	1265.05	467.838	1927.3	1394.97	530.466	1932.38	1168.34	532.761	1939.74	1099.12	553.418	1834.97	1026.75	534.021	1784.72	936.525	577.478	1833.81	907.773	587.545	1761.56	843.491
392	0	326.665	1735.54	1571.38	227.867	1734.01	1556.35	332.17	1903.65	1614.89	220.117	1911.24	1600.98	293.839	1978.53	1433.58	319.904	2032.42	1217.12	297.226	1848.32	1363.41	291.561	1786.85	1235.8	225.657	2050.75	1264.99	468.181	1918.12	1394.89	531.574	1922.22	1168.47	534.087	1929.09	1099.21	554.038	1823.32	1027.81	534.235	1772.26	938.261	578.104	1820.68	908.987	587.213	1747.53	845.687
393	0	326.081	1726.77	1570.63	227.301	1725.49	1555.25	331.817	1894.77	1614.61	219.847	1902.64	1600.32	294.368	1970.11	1433.27	320.874	2024.39	1216.91	297.246	1839.99	1362.79	291.459	1778.93	1235.02	226.692	2043.07	1264.81	468.441	1908.99	1394.66	532.535	1912.14	1168.43	535.241	1918.53	1099.14	554.519	1811.77	1028.72	534.284	1759.86	939.877	578.51	1807.65	910.037	586.604	1733.61	847.726
394	0	325.476	1718.04	1569.81	226.715	1717	1554.08	331.432	1885.92	1614.22	219.543	1894.07	1599.58	294.798	1961.69	1432.83	321.698	2016.37	1216.57	297.208	1831.65	1362.07	291.316	1770.99	1234.17	227.58	2035.34	1264.52	468.616	1899.91	1394.28	533.338	1902.12	1168.23	536.218	1908.08	1098.92	554.852	1800.34	1029.47	534.159	1747.54	941.375	578.693	1794.69	910.93	585.723	1719.79	849.601
395	0	324.852	1709.34	1568.89	226.112	1708.54	1552.85	331.015	1877.11	1613.72	219.205	1885.52	1598.75	295.125	1953.28	1432.28	322.372	2008.33	1216.12	297.111	1823.31	1361.27	291.129	1763	1233.25	228.315	2027.56	1264.12	468.701	1890.89	1393.77	533.975	1892.16	1167.89	537.013	1897.73	1098.55	555.025	1789	1030.09	533.85	1735.28	942.76	578.651	1781.83	911.673	584.575	1706.1	851.311
396	0	324.211	1700.68	1567.89	225.494	1700.1	1551.56	330.565	1868.34	1613.12	218.831	1877	1597.85	295.344	1944.87	1431.62	322.894	2000.29	1215.56	296.949	1814.96	1360.38	290.893	1754.97	1232.26	228.893	2019.71	1263.61	468.693	1881.91	1393.14	534.437	1882.27	1167.4	537.624	1887.48	1098.04	555.027	1777.77	1030.57	533.344	1723.09	944.041	578.377	1769.04	912.28	583.162	1692.54	852.857
397	0	323.554	1692.05	1566.82	224.862	1691.68	1550.22	330.08	1859.6	1612.42	218.418	1868.49	1596.88	295.452	1936.46	1430.85	323.263	1992.25	1214.9	296.722	1806.58	1359.41	290.606	1746.9	1231.22	229.312	2011.79	1262.99	468.589	1872.97	1392.38	534.718	1872.44	1166.78	538.053	1877.35	1097.4	554.845	1766.64	1030.94	532.622	1710.98	945.232	577.861	1756.32	912.767	581.482	1679.12	854.251
398	0	322.882	1683.45	1565.66	224.216	1683.27	1548.82	329.558	1850.89	1611.63	217.963	1859.99	1595.85	295.445	1928.04	1429.97	323.48	1984.2	1214.13	296.424	1798.2	1358.38	290.262	1738.77	1230.13	229.57	2003.79	1262.26	468.387	1864.08	1391.52	534.814	1862.67	1166.04	538.303	1867.32	1096.65	554.467	1755.61	1031.21	531.667	1698.93	946.353	577.091	1743.67	913.152	579.526	1665.81	855.509
399	0	322.193	1674.88	1564.44	223.556	1674.88	1547.39	328.996	1842.21	1610.75	217.462	1851.51	1594.76	295.32	1919.62	1428.99	323.548	1976.13	1213.26	296.053	1789.78	1357.28	289.856	1730.58	1229	229.666	1995.71	1261.41	468.084	1855.22	1390.55	534.727	1852.98	1165.18	538.381	1857.41	1095.79	553.879	1744.67	1031.41	530.453	1686.96	947.429	576.048	1731.07	913.462	577.276	1652.63	856.657
400	0	321.486	1666.33	1563.15	222.88	1666.49	1545.92	328.389	1833.55	1609.79	216.911	1843.03	1593.61	295.077	1911.19	1427.91	323.471	1968.04	1212.3	295.607	1781.35	1356.12	289.385	1722.33	1227.83	229.604	1987.54	1260.46	467.678	1846.4	1389.5	534.459	1843.37	1164.21	538.3	1847.62	1094.83	553.068	1733.83	1031.56	528.955	1675.06	948.492	574.713	1718.52	913.726	574.701	1639.54	857.734
401	0	320.758	1657.79	1561.82	222.184	1658.1	1544.43	327.733	1824.92	1608.75	216.305	1834.56	1592.42	294.712	1902.74	1426.75	323.253	1959.93	1211.25	295.081	1772.88	1354.92	288.844	1714.01	1226.63	229.386	1979.28	1259.39	467.168	1837.59	1388.36	534.021	1833.86	1163.16	538.075	1837.97	1093.8	552.021	1723.09	1031.68	527.141	1663.26	949.582	573.059	1706	913.977	571.761	1626.53	858.784
402	0	320.004	1649.28	1560.44	221.463	1649.71	1542.93	327.022	1816.31	1607.64	215.639	1826.08	1591.19	294.225	1894.27	1425.5	322.901	1951.78	1210.11	294.475	1764.38	1353.68	288.23	1705.62	1225.42	229.017	1970.92	1258.22	466.553	1828.81	1387.16	533.427	1824.44	1162.04	537.726	1828.44	1092.7	550.726	1712.45	1031.81	524.981	1651.55	950.742	571.059	1693.5	914.257	568.405	1613.58	859.866
403	0	319.217	1640.78	1559.04	220.711	1641.31	1541.42	326.251	1807.72	1606.48	214.907	1817.6	1589.92	293.617	1885.79	1424.18	322.419	1943.6	1208.89	293.786	1755.84	1352.42	287.539	1697.15	1224.19	228.502	1962.45	1256.95	465.835	1820.04	1385.9	532.695	1815.14	1160.86	537.276	1819.06	1091.56	549.168	1701.9	1031.98	522.438	1639.95	952.021	568.678	1681.01	914.61	564.571	1600.65	861.046
404	0	318.392	1632.28	1557.62	219.921	1632.9	1539.92	325.415	1799.14	1605.26	214.105	1809.12	1588.62	292.888	1877.27	1422.8	321.816	1935.36	1207.6	293.012	1747.26	1351.13	286.769	1688.59	1222.95	227.848	1953.89	1255.58	465.013	1811.28	1384.6	531.849	1805.97	1159.63	536.749	1809.8	1090.39	547.335	1691.47	1032.21	519.477	1628.47	953.469	565.883	1668.51	915.081	560.189	1587.73	862.402
405	0	317.52	1623.79	1556.21	219.086	1624.47	1538.43	324.507	1790.59	1604	213.228	1800.63	1587.3	292.041	1868.73	1421.35	321.097	1927.07	1206.24	292.153	1738.62	1349.83	285.918	1679.95	1221.72	227.062	1945.21	1254.13	464.09	1802.51	1383.26	530.917	1796.92	1158.39	536.173	1800.66	1089.2	545.215	1681.14	1032.54	516.061	1617.14	955.136	562.637	1656	915.719	555.183	1574.79	864.014
406	0	316.592	1615.29	1554.82	218.194	1616.02	1536.98	323.523	1782.04	1602.7	212.272	1792.14	1585.95	291.079	1860.15	1419.87	320.269	1918.7	1204.82	291.21	1729.94	1348.53	284.985	1671.21	1220.5	226.151	1936.42	1252.58	463.067	1793.75	1381.9	529.928	1788.01	1157.14	535.575	1791.62	1088.02	542.795	1670.92	1033.01	512.157	1605.97	957.071	558.903	1643.46	916.574	549.48	1561.82	865.967
407	0	315.599	1606.78	1553.46	217.239	1607.55	1535.57	322.457	1773.49	1601.39	211.231	1783.63	1584.59	290.004	1851.54	1418.35	319.338	1910.26	1203.34	290.182	1721.2	1347.25	283.97	1662.37	1219.3	225.124	1927.51	1250.97	461.949	1784.97	1380.53	528.912	1779.22	1155.91	534.979	1782.66	1086.86	540.065	1660.8	1033.64	507.734	1594.99	959.317	554.647	1630.9	917.693	543.006	1548.82	868.344
408	0	314.533	1598.26	1552.16	216.208	1599.04	1534.22	321.304	1764.95	1600.07	210.105	1775.12	1583.23	288.822	1842.88	1416.81	318.307	1901.73	1201.83	289.071	1712.4	1345.99	282.874	1653.43	1218.14	223.986	1918.49	1249.3	460.739	1776.18	1379.16	527.896	1770.54	1154.72	534.407	1773.75	1085.73	537.012	1650.78	1034.45	502.766	1584.23	961.909	549.837	1618.32	919.118	535.698	1535.81	871.219
409	0	313.383	1589.72	1550.93	215.094	1590.51	1532.94	320.062	1756.41	1598.76	208.889	1766.59	1581.86	287.538	1834.17	1415.28	317.181	1893.1	1200.28	287.879	1703.55	1344.76	281.7	1644.39	1217.03	222.746	1909.36	1247.58	459.441	1767.38	1377.81	526.905	1761.93	1153.58	533.876	1764.85	1084.67	533.629	1640.86	1035.48	497.236	1573.71	964.872	544.447	1605.72	920.885	527.502	1522.82	874.658
410	0	312.142	1581.15	1549.79	213.887	1581.94	1531.74	318.729	1747.86	1597.47	207.585	1758.05	1580.51	286.157	1825.42	1413.75	315.963	1884.36	1198.7	286.61	1694.63	1343.59	280.449	1635.23	1215.99	221.41	1900.11	1245.84	458.06	1758.56	1376.48	525.96	1753.37	1152.52	533.397	1755.9	1083.67	529.906	1631.04	1036.73	491.135	1563.46	968.222	538.457	1593.13	923.024	518.38	1509.9	878.707
411	0	310.801	1572.54	1548.75	212.58	1573.34	1530.65	317.303	1739.3	1596.21	206.191	1749.49	1579.18	284.687	1816.62	1412.25	314.654	1875.51	1197.12	285.268	1685.64	1342.48	279.126	1625.96	1215.02	219.984	1890.76	1244.08	456.602	1749.73	1375.2	525.071	1744.81	1151.54	532.973	1746.86	1082.76	525.84	1621.29	1038.23	484.466	1553.51	971.961	531.856	1580.56	925.555	508.314	1497.13	883.393
412	0	309.355	1563.9	1547.84	211.165	1564.7	1529.66	315.785	1730.72	1595	204.709	1740.93	1577.87	283.134	1807.78	1410.8	313.255	1866.52	1195.55	283.857	1676.6	1341.45	277.736	1616.58	1214.15	218.474	1881.3	1242.33	455.071	1740.87	1373.97	524.244	1736.18	1150.68	532.6	1737.67	1081.94	521.429	1611.61	1039.96	477.243	1543.87	976.079	524.645	1568.03	928.485	497.307	1484.57	888.72
413	0	307.799	1555.22	1547.07	209.638	1556.03	1528.79	314.177	1722.13	1593.86	203.142	1732.35	1576.61	281.506	1798.87	1409.42	311.768	1857.4	1194.01	282.382	1667.5	1340.5	276.285	1607.09	1213.38	216.884	1871.74	1240.61	453.475	1731.99	1372.8	523.472	1727.44	1149.94	532.264	1728.29	1081.24	516.676	1601.98	1041.95	469.492	1534.55	980.555	516.834	1555.58	931.813	485.385	1472.33	894.664
414	0	306.131	1546.49	1546.46	207.997	1547.31	1528.06	312.483	1713.51	1592.8	201.493	1723.75	1575.41	279.811	1789.92	1408.11	310.191	1848.14	1192.5	280.851	1658.34	1339.66	274.78	1597.5	1212.74	215.221	1862.08	1238.94	451.818	1723.09	1371.71	522.74	1718.5	1149.33	531.944	1718.65	1080.65	511.588	1592.39	1044.16	461.251	1525.56	985.355	508.448	1543.23	935.526	472.602	1460.5	901.18
415	0	304.35	1537.72	1546.02	206.241	1538.56	1527.48	310.706	1704.86	1591.84	199.768	1715.14	1574.27	278.056	1780.92	1406.91	308.527	1838.73	1191.07	279.27	1649.12	1338.94	273.227	1587.82	1212.23	213.49	1852.34	1237.35	450.109	1714.16	1370.71	522.023	1709.32	1148.87	531.61	1708.71	1080.19	506.178	1582.82	1046.61	452.57	1516.89	990.432	499.526	1531	939.599	459.038	1449.17	908.197
416	0	302.46	1528.9	1545.77	204.372	1529.78	1527.07	308.855	1696.19	1590.99	197.974	1706.52	1573.2	276.251	1771.87	1405.82	306.776	1829.17	1189.72	277.645	1639.86	1338.34	271.634	1578.05	1211.86	211.696	1842.53	1235.86	448.353	1705.22	1369.82	521.286	1699.82	1148.55	531.227	1698.44	1079.85	500.467	1573.26	1049.25	443.507	1508.54	995.734	490.121	1518.93	943.999	444.798	1438.41	915.627
417	0	300.466	1520.03	1545.71	202.396	1520.96	1526.82	306.937	1687.49	1590.25	196.118	1697.89	1572.24	274.403	1762.77	1404.87	304.942	1819.46	1188.48	275.983	1630.55	1337.87	270.01	1568.2	1211.64	209.846	1832.65	1234.5	446.558	1696.25	1369.03	520.489	1689.95	1148.38	530.754	1687.83	1079.65	494.479	1563.69	1052.08	434.132	1500.47	1001.2	480.3	1507.03	948.683	430.015	1428.28	923.365
418	0	298.376	1511.12	1545.85	200.319	1512.1	1526.75	304.961	1678.76	1589.66	194.208	1689.24	1571.37	272.523	1753.63	1404.07	303.028	1809.61	1187.38	274.292	1621.21	1337.55	268.36	1558.3	1211.58	207.945	1822.72	1233.29	444.731	1687.25	1368.37	519.586	1679.69	1148.36	530.151	1676.85	1079.58	488.249	1554.09	1055.05	424.522	1492.65	1006.76	470.148	1495.31	953.603	414.841	1418.81	931.298
419	0	296.201	1502.16	1546.2	198.154	1503.23	1526.88	302.94	1670.01	1589.2	192.256	1680.59	1570.62	270.619	1744.45	1403.42	301.041	1799.63	1186.43	272.579	1611.83	1337.38	266.693	1548.36	1211.67	206.002	1812.75	1232.25	442.878	1678.22	1367.84	518.533	1669.01	1148.49	529.376	1665.52	1079.64	481.815	1544.45	1058.15	414.762	1485.03	1012.35	459.759	1483.77	958.703	399.45	1409.97	939.31
420	0	293.955	1493.18	1546.76	195.913	1494.33	1527.19	300.885	1661.23	1588.89	190.272	1671.92	1570	268.699	1735.23	1402.95	298.988	1789.53	1185.65	270.85	1602.44	1337.35	265.013	1538.38	1211.92	204.023	1802.75	1231.4	441.007	1669.16	1367.44	517.284	1657.92	1148.75	528.391	1653.87	1079.82	475.225	1534.76	1061.33	404.942	1477.55	1017.89	449.246	1472.41	963.929	384.029	1401.73	947.286
421	0	291.655	1484.16	1547.52	193.612	1485.41	1527.71	298.811	1652.44	1588.74	188.266	1663.26	1569.52	266.771	1725.98	1402.65	296.879	1779.33	1185.07	269.111	1593.02	1337.48	263.327	1528.4	1212.31	202.016	1792.75	1230.76	439.123	1660.07	1367.19	515.8	1646.42	1149.14	527.163	1641.94	1080.12	468.531	1525.01	1064.57	395.158	1470.15	1023.33	438.727	1461.21	969.222	368.777	1394	955.121
422	0	289.321	1475.13	1548.49	191.271	1476.47	1528.42	296.731	1643.63	1588.73	186.253	1654.58	1569.18	264.844	1716.71	1402.54	294.725	1769.05	1184.7	267.368	1583.6	1337.76	261.639	1518.43	1212.84	199.988	1782.75	1230.33	437.233	1650.96	1367.07	514.05	1634.58	1149.64	525.668	1629.78	1080.52	461.795	1515.2	1067.83	385.512	1462.76	1028.61	428.331	1450.15	974.526	353.897	1386.65	962.721
423	0	286.974	1466.08	1549.64	188.911	1467.53	1529.33	294.661	1634.82	1588.88	184.244	1645.91	1569	262.922	1707.41	1402.6	292.535	1758.7	1184.54	265.627	1574.18	1338.19	259.954	1508.49	1213.5	197.944	1772.77	1230.14	435.343	1641.81	1367.1	512.013	1622.46	1150.22	523.891	1617.47	1081	455.084	1505.31	1071.08	376.107	1455.3	1033.69	418.191	1439.2	979.789	339.593	1379.53	970.014
424	0	284.636	1457.03	1550.98	186.553	1458.59	1530.43	292.617	1626.01	1589.17	182.253	1637.23	1568.98	261.012	1698.1	1402.85	290.321	1748.33	1184.59	263.891	1564.76	1338.76	258.275	1498.6	1214.27	195.89	1762.82	1230.17	433.458	1632.65	1367.26	509.681	1610.14	1150.87	521.827	1605.09	1081.56	448.47	1495.36	1074.29	367.049	1447.69	1038.51	408.442	1428.31	984.962	326.064	1372.47	976.945
425	0	282.334	1447.99	1552.47	184.224	1449.64	1531.72	290.613	1617.2	1589.59	180.292	1628.56	1569.12	259.116	1688.79	1403.27	288.092	1737.96	1184.86	262.163	1555.36	1339.45	256.604	1488.77	1215.13	193.829	1752.92	1230.42	431.582	1623.46	1367.56	507.058	1597.72	1151.55	519.482	1592.72	1082.16	442.031	1485.35	1077.44	358.442	1439.85	1043.07	399.216	1417.46	990.003	313.498	1365.28	983.486
426	0	280.093	1438.97	1554.11	181.948	1440.7	1533.18	288.667	1608.42	1590.14	178.373	1619.88	1569.42	257.239	1679.47	1403.86	285.854	1727.61	1185.33	260.448	1545.98	1340.27	254.945	1479.02	1216.07	191.762	1743.07	1230.9	429.72	1614.27	1367.99	504.166	1585.31	1152.25	516.87	1580.47	1082.8	435.847	1475.28	1080.5	350.39	1431.71	1047.36	390.638	1406.6	994.878	302.069	1357.76	989.632
427	0	277.94	1429.98	1555.86	179.752	1431.78	1534.81	286.793	1599.66	1590.81	176.51	1611.22	1569.89	255.38	1670.17	1404.61	283.614	1717.34	1185.99	258.747	1536.64	1341.19	253.3	1469.37	1217.06	189.688	1733.29	1231.58	427.873	1605.09	1368.53	501.036	1573.02	1152.94	514.017	1568.41	1083.45	429.999	1465.16	1083.46	342.993	1423.21	1051.39	382.821	1395.7	999.56	291.929	1349.74	995.402
428	0	275.9	1421.04	1557.71	177.661	1422.86	1536.6	285.004	1590.93	1591.57	174.714	1602.55	1570.53	253.54	1660.89	1405.49	281.374	1707.15	1186.83	257.06	1527.33	1342.21	251.67	1459.83	1218.1	187.608	1723.59	1232.45	426.045	1595.91	1369.18	497.713	1560.97	1153.59	510.952	1556.64	1084.09	424.568	1455.01	1086.31	336.343	1414.29	1055.17	375.866	1384.73	1004.03	283.212	1341.05	1000.84
429	0	274	1412.14	1559.62	175.702	1413.96	1538.52	283.313	1582.25	1592.41	172.996	1593.89	1571.33	251.716	1651.64	1406.51	279.136	1697.09	1187.83	255.389	1518.08	1343.31	250.056	1450.41	1219.16	185.517	1713.97	1233.5	424.237	1586.77	1369.94	494.252	1549.26	1154.2	507.712	1545.23	1084.71	419.629	1444.83	1089.04	330.525	1404.89	1058.73	369.857	1373.68	1008.28	276.024	1331.57	1006
430	0	272.263	1403.3	1561.57	173.897	1405.08	1540.56	281.733	1573.62	1593.31	171.365	1585.24	1572.29	249.906	1642.43	1407.64	276.899	1687.18	1188.96	253.731	1508.87	1344.48	248.459	1441.12	1220.24	183.414	1704.45	1234.7	422.448	1577.68	1370.78	490.713	1538.01	1154.74	504.337	1534.25	1085.3	415.252	1434.66	1091.65	325.613	1395.02	1062.14	364.859	1362.53	1012.31	270.446	1321.2	1010.96
431	0	270.711	1394.54	1563.54	172.271	1396.22	1542.72	280.273	1565.04	1594.27	169.831	1576.58	1573.41	248.107	1633.26	1408.87	274.663	1677.43	1190.2	252.088	1499.73	1345.7	246.878	1431.96	1221.31	181.297	1695.02	1236.03	420.679	1568.64	1371.71	487.158	1527.28	1155.22	500.868	1523.75	1085.85	411.499	1424.5	1094.14	321.67	1384.64	1065.42	360.918	1351.3	1016.12	266.53	1309.91	1015.79
432	0	269.364	1385.84	1565.49	170.844	1387.37	1544.96	278.94	1556.53	1595.26	168.402	1567.93	1574.68	246.315	1624.14	1410.18	272.428	1667.87	1191.53	250.456	1490.65	1346.97	245.313	1422.93	1222.38	179.163	1685.69	1237.47	418.929	1559.68	1372.7	483.649	1517.16	1155.63	497.347	1513.77	1086.36	408.419	1414.38	1096.51	318.742	1373.78	1068.63	358.057	1339.98	1019.73	264.301	1297.71	1020.58
433	0	268.239	1377.23	1567.4	169.633	1378.55	1547.27	277.742	1548.09	1596.26	167.084	1559.27	1576.1	244.527	1615.09	1411.56	270.194	1658.5	1192.94	248.833	1481.64	1348.26	243.76	1414.04	1223.43	177.013	1676.46	1239	417.195	1550.81	1373.76	480.24	1507.67	1155.99	493.814	1504.32	1086.83	406.05	1404.32	1098.79	316.861	1362.47	1071.83	356.283	1328.62	1023.16	263.759	1284.64	1025.39
434	0	267.349	1368.71	1569.24	168.652	1369.75	1549.63	276.683	1539.72	1597.27	165.884	1550.61	1577.65	242.738	1606.1	1412.99	267.962	1649.33	1194.39	247.216	1472.71	1349.58	242.219	1405.28	1224.48	174.848	1667.33	1240.59	415.475	1542.03	1374.89	476.979	1498.85	1156.31	490.305	1495.4	1087.27	404.414	1394.35	1100.97	316.044	1350.76	1075.06	355.582	1317.23	1026.43	264.876	1270.81	1030.29
435	0	266.703	1360.28	1570.99	167.915	1360.97	1552.03	275.764	1531.42	1598.27	164.805	1541.94	1579.34	240.945	1597.18	1414.47	265.736	1640.36	1195.87	245.604	1463.86	1350.91	240.684	1396.65	1225.51	172.667	1658.31	1242.23	413.767	1533.36	1376.06	473.899	1490.68	1156.62	486.854	1487.02	1087.7	403.521	1384.5	1103.07	316.293	1338.72	1078.36	355.924	1305.87	1029.55	267.602	1256.36	1035.31
436	0	266.308	1351.94	1572.64	167.428	1352.21	1554.44	274.988	1523.2	1599.25	163.853	1533.27	1581.15	239.146	1588.34	1415.96	263.518	1631.58	1197.38	243.992	1455.09	1352.25	239.152	1388.14	1226.54	170.475	1649.38	1243.9	412.066	1524.81	1377.28	471.024	1483.15	1156.92	483.491	1479.14	1088.13	403.367	1374.8	1105.11	317.593	1326.43	1081.76	357.263	1294.57	1032.57	271.867	1241.46	1040.46
437	0	266.165	1343.7	1574.15	167.196	1343.46	1556.85	274.352	1515.06	1600.19	163.028	1524.58	1583.07	237.339	1579.58	1417.47	261.314	1622.97	1198.9	242.379	1446.41	1353.58	237.618	1379.74	1227.56	168.274	1640.56	1245.58	410.37	1516.37	1378.55	468.364	1476.22	1157.26	480.24	1471.72	1088.57	403.934	1365.28	1107.1	319.916	1313.98	1085.27	359.543	1283.4	1035.49	277.582	1226.31	1045.76
438	0	266.273	1335.55	1575.51	167.221	1334.74	1559.23	273.854	1506.99	1601.09	162.335	1515.88	1585.09	235.522	1570.89	1418.98	259.127	1614.54	1200.4	240.763	1437.81	1354.9	236.079	1371.44	1228.58	166.067	1631.82	1247.25	408.677	1508.06	1379.85	465.918	1469.81	1157.65	477.122	1464.73	1089.05	405.193	1355.97	1109.05	323.222	1301.46	1088.9	362.695	1272.39	1038.34	284.643	1211.09	1051.16
439	0	266.626	1327.49	1576.71	167.499	1326.03	1561.56	273.49	1499	1601.93	161.772	1507.16	1587.2	233.695	1562.29	1420.47	256.959	1606.25	1201.9	239.142	1429.29	1356.2	234.529	1363.23	1229.61	163.857	1623.18	1248.9	406.982	1499.86	1381.18	463.676	1463.85	1158.1	474.154	1458.11	1089.58	407.105	1346.89	1110.96	327.461	1288.99	1092.63	366.643	1261.61	1041.11	292.936	1196.01	1056.63
440	0	267.215	1319.53	1577.73	168.025	1317.35	1563.83	273.254	1491.07	1602.71	161.341	1498.43	1589.37	231.86	1553.77	1421.95	254.812	1598.1	1203.37	237.517	1420.86	1357.47	232.967	1355.1	1230.65	161.647	1614.62	1250.51	405.285	1491.78	1382.54	461.622	1458.26	1158.65	471.351	1451.81	1090.18	409.623	1338.07	1112.83	332.571	1276.65	1096.44	371.307	1251.09	1043.83	302.338	1181.25	1062.09
441	0	268.029	1311.65	1578.56	168.789	1308.68	1566.02	273.141	1483.21	1603.42	161.039	1489.68	1591.59	230.017	1545.33	1423.38	252.689	1590.06	1204.8	235.887	1412.5	1358.72	231.39	1347.03	1231.69	159.441	1606.13	1252.08	403.585	1483.8	1383.91	459.738	1452.93	1159.3	468.723	1445.76	1090.84	412.694	1329.53	1114.67	338.486	1264.53	1100.3	376.601	1240.88	1046.47	312.72	1166.96	1067.49
442	0	269.053	1303.86	1579.19	169.781	1300.03	1568.1	273.143	1475.41	1604.06	160.866	1480.91	1593.85	228.171	1536.97	1424.78	250.59	1582.12	1206.19	234.254	1404.22	1359.93	229.798	1339.03	1232.74	157.241	1597.71	1253.59	401.881	1475.93	1385.28	458.003	1447.77	1160.05	466.28	1439.93	1091.58	416.261	1321.28	1116.45	345.131	1252.73	1104.16	382.436	1231.01	1049.01	323.95	1153.29	1072.72
443	0	270.27	1296.14	1579.62	170.985	1291.4	1570.06	273.252	1467.66	1604.61	160.818	1472.12	1596.12	226.324	1528.67	1426.12	248.516	1574.26	1207.53	232.621	1396.01	1361.08	228.191	1331.07	1233.77	155.05	1589.35	1255.04	400.174	1468.15	1386.65	456.401	1442.69	1160.91	464.031	1434.25	1092.39	420.263	1313.34	1118.17	352.43	1241.3	1107.96	388.725	1221.52	1051.45	335.896	1140.34	1077.71
444	0	271.66	1288.49	1579.84	172.386	1282.78	1571.89	273.459	1459.96	1605.06	160.891	1463.31	1598.38	224.481	1520.43	1427.39	246.465	1566.47	1208.8	230.992	1387.87	1362.19	226.572	1323.17	1234.79	152.873	1581.05	1256.4	398.467	1460.46	1388	454.915	1437.61	1161.86	461.982	1428.68	1093.27	424.64	1305.72	1119.8	360.3	1230.31	1111.64	395.379	1212.43	1053.73	348.425	1128.17	1082.37
445	0	273.204	1280.91	1579.85	173.965	1274.19	1573.56	273.755	1452.3	1605.42	161.08	1454.48	1600.61	222.649	1512.25	1428.59	244.439	1558.73	1210.01	229.371	1379.78	1363.22	224.946	1315.3	1235.78	150.711	1572.79	1257.68	396.763	1452.84	1389.32	453.535	1432.45	1162.9	460.137	1423.18	1094.21	429.332	1298.42	1121.31	368.662	1219.8	1115.14	402.316	1203.76	1055.83	361.405	1116.85	1086.61
446	0	274.881	1273.38	1579.65	175.702	1265.6	1575.06	274.13	1444.67	1605.67	161.378	1445.64	1602.79	220.834	1504.12	1429.7	242.437	1551.04	1211.13	227.764	1371.74	1364.18	223.319	1307.46	1236.72	148.571	1564.58	1258.87	395.067	1445.28	1390.58	452.255	1427.16	1163.99	458.5	1417.71	1095.19	434.279	1291.43	1122.69	377.432	1209.82	1118.39	409.456	1195.5	1057.7	374.711	1106.38	1090.34
447	0	276.667	1265.9	1579.24	177.577	1257.03	1576.38	274.575	1437.06	1605.82	161.779	1436.77	1604.89	219.044	1496.03	1430.73	240.462	1543.39	1212.18	226.177	1363.74	1365.06	221.697	1299.66	1237.6	146.457	1556.41	1259.96	393.383	1437.77	1391.79	451.071	1421.7	1165.13	457.071	1412.24	1096.2	439.424	1284.75	1123.9	386.531	1200.36	1121.32	416.726	1187.67	1059.29	388.219	1096.76	1093.49
448	0	278.542	1258.45	1578.63	179.568	1248.48	1577.51	275.08	1429.47	1605.85	162.274	1427.88	1606.89	217.287	1487.96	1431.65	238.515	1535.78	1213.12	224.619	1355.78	1365.84	220.088	1291.88	1238.4	144.376	1548.26	1260.95	391.721	1430.29	1392.91	449.984	1416.06	1166.28	455.847	1406.76	1097.21	444.713	1278.36	1124.91	395.88	1191.45	1123.88	424.059	1180.26	1060.56	401.813	1087.97	1095.98
449	0	280.484	1251.02	1577.82	181.653	1239.92	1578.44	275.634	1421.87	1605.76	162.855	1418.97	1608.77	215.571	1479.92	1432.47	236.601	1528.21	1213.97	223.096	1347.85	1366.51	218.502	1284.11	1239.11	142.335	1540.15	1261.83	390.087	1422.83	1393.93	448.994	1410.21	1167.41	454.822	1401.24	1098.21	450.095	1272.26	1125.68	405.404	1183.07	1126	431.398	1173.27	1061.46	415.388	1079.97	1097.76
450	0	282.47	1243.61	1576.83	183.811	1231.38	1579.17	276.229	1414.27	1605.56	163.511	1410.05	1610.51	213.908	1471.88	1433.18	234.726	1520.66	1214.7	221.617	1339.93	1367.08	216.947	1276.36	1239.7	140.343	1532.06	1262.6	388.491	1415.39	1394.85	448.101	1404.19	1168.5	453.987	1395.69	1099.16	455.524	1266.42	1126.19	415.031	1175.22	1127.63	438.693	1166.68	1061.94	428.845	1072.7	1098.76
451	0	284.483	1236.19	1575.66	186.021	1222.83	1579.67	276.855	1406.65	1605.23	164.232	1401.1	1612.09	212.306	1463.85	1433.77	232.898	1513.16	1215.33	220.191	1332.03	1367.51	215.434	1268.62	1240.17	138.41	1523.99	1263.26	386.942	1407.94	1395.64	447.306	1398.01	1169.51	453.328	1390.1	1100.05	460.956	1260.83	1126.41	424.692	1167.88	1128.73	445.903	1160.48	1061.98	442.101	1066.13	1098.96
452	0	286.501	1228.77	1574.32	188.26	1214.28	1579.97	277.503	1399	1604.78	165.009	1392.13	1613.5	210.776	1455.82	1434.23	231.125	1505.68	1215.85	218.827	1324.12	1367.82	213.972	1260.87	1240.5	136.548	1515.94	1263.8	385.452	1400.48	1396.29	446.607	1391.7	1170.41	452.829	1384.47	1100.85	466.351	1255.48	1126.31	434.324	1161.01	1129.25	452.996	1154.65	1061.55	455.084	1060.18	1098.33
453	0	288.51	1221.33	1572.82	190.51	1205.72	1580.04	278.166	1391.32	1604.21	165.829	1383.14	1614.72	209.328	1447.77	1434.57	229.418	1498.24	1216.24	217.533	1316.22	1367.99	212.57	1253.11	1240.69	134.768	1507.9	1264.22	384.03	1392.99	1396.78	445.998	1385.3	1171.18	452.469	1378.8	1101.54	471.673	1250.34	1125.87	443.865	1154.6	1129.17	459.943	1149.2	1060.6	467.734	1054.83	1096.86
454	0	290.492	1213.85	1571.18	192.751	1197.15	1579.9	278.836	1383.59	1603.52	166.684	1374.13	1615.73	207.972	1439.71	1434.78	227.789	1490.84	1216.53	216.318	1308.3	1368.02	211.237	1245.34	1240.73	133.082	1499.88	1264.53	382.689	1385.46	1397.12	445.474	1378.86	1171.8	452.225	1373.12	1102.1	476.887	1245.4	1125.07	453.259	1148.61	1128.46	466.725	1144.1	1059.13	480.005	1050.01	1094.54
455	0	292.434	1206.32	1569.41	194.967	1188.56	1579.54	279.507	1375.81	1602.72	167.562	1365.09	1616.54	206.718	1431.62	1434.87	226.248	1483.46	1216.69	215.191	1300.37	1367.91	209.981	1237.54	1240.61	131.502	1491.88	1264.72	381.438	1377.9	1397.29	445.025	1372.41	1172.25	452.07	1367.42	1102.49	481.963	1240.64	1123.9	462.454	1143.01	1127.11	473.324	1139.34	1057.11	491.863	1045.7	1091.38
456	0	294.325	1198.74	1567.54	197.141	1179.96	1578.98	280.174	1367.96	1601.81	168.455	1356.04	1617.14	205.575	1423.5	1434.82	224.808	1476.11	1216.74	214.158	1292.42	1367.65	208.811	1229.72	1240.35	130.04	1483.88	1264.79	380.288	1370.28	1397.28	444.64	1365.98	1172.51	451.979	1361.72	1102.72	486.871	1236.05	1122.34	471.401	1137.78	1125.1	479.725	1134.93	1054.55	503.284	1041.87	1087.41
457	0	296.155	1191.1	1565.56	199.26	1171.32	1578.21	280.833	1360.04	1600.79	169.353	1346.97	1617.51	204.551	1415.35	1434.64	223.478	1468.77	1216.67	213.229	1284.44	1367.25	207.733	1221.86	1239.94	128.707	1475.9	1264.75	379.25	1362.61	1397.09	444.309	1359.61	1172.57	451.921	1356.01	1102.76	491.585	1231.62	1120.39	480.058	1132.89	1122.43	485.914	1130.84	1051.42	514.251	1038.52	1082.64
458	0	297.916	1183.38	1563.51	201.312	1162.67	1577.26	281.481	1352.05	1599.68	170.251	1337.88	1617.66	203.654	1407.17	1434.33	222.269	1461.44	1216.47	212.409	1276.43	1366.7	206.754	1213.95	1239.38	127.511	1467.92	1264.59	378.331	1354.88	1396.72	444.016	1353.29	1172.43	451.87	1350.32	1102.61	496.082	1227.32	1118.05	488.387	1128.33	1119.1	491.874	1127.08	1047.74	524.755	1035.63	1077.1
459	0	299.603	1175.58	1561.39	203.287	1153.98	1576.13	282.116	1343.98	1598.47	171.141	1328.77	1617.6	202.891	1398.95	1433.89	221.189	1454.1	1216.16	211.706	1268.39	1366.01	205.881	1206.01	1238.69	126.463	1459.94	1264.31	377.541	1347.09	1396.17	443.749	1347.05	1172.07	451.798	1344.62	1102.24	500.339	1223.15	1115.31	496.355	1124.06	1115.12	497.588	1123.63	1043.51	534.785	1033.21	1070.81
460	0	301.214	1167.7	1559.22	205.178	1145.26	1574.84	282.74	1335.82	1597.18	172.018	1319.65	1617.31	202.266	1390.7	1433.32	220.245	1446.74	1215.72	211.125	1260.31	1365.19	205.12	1198.01	1237.88	125.566	1451.96	1263.91	376.887	1339.24	1395.44	443.497	1340.89	1171.5	451.681	1338.93	1101.67	504.337	1219.1	1112.19	503.936	1120.08	1110.49	503.034	1120.49	1038.74	544.335	1031.27	1063.81
461	0	302.746	1159.72	1557.02	206.979	1136.51	1573.39	283.352	1327.59	1595.81	172.88	1310.51	1616.82	201.783	1382.4	1432.63	219.441	1439.33	1215.16	210.672	1252.18	1364.24	204.476	1189.96	1236.95	124.827	1443.97	1263.4	376.375	1331.32	1394.53	443.247	1334.78	1170.71	451.497	1333.23	1100.87	508.06	1215.15	1108.69	511.11	1116.38	1105.23	508.187	1117.64	1033.44	553.392	1029.81	1056.11
462	0	304.201	1151.65	1554.81	208.69	1127.73	1571.82	283.957	1319.27	1594.37	173.726	1301.37	1616.13	201.447	1374.06	1431.82	218.781	1431.86	1214.48	210.352	1244.01	1363.17	203.954	1181.86	1235.92	124.246	1435.96	1262.77	376.009	1323.35	1393.45	442.991	1328.71	1169.73	451.23	1327.5	1099.86	511.496	1211.28	1104.81	517.865	1112.93	1099.36	513.016	1115.07	1027.65	561.938	1028.85	1047.73
463	0	305.583	1143.48	1552.61	210.308	1118.92	1570.13	284.558	1310.86	1592.87	174.554	1292.22	1615.26	201.257	1365.69	1430.89	218.266	1424.31	1213.66	210.167	1235.78	1361.98	203.56	1173.7	1234.8	123.825	1427.93	1262.03	375.793	1315.32	1392.2	442.724	1322.66	1168.54	450.868	1321.74	1098.64	514.633	1207.49	1100.58	524.192	1109.75	1092.91	517.49	1112.76	1021.39	569.949	1028.4	1038.7
464	0	306.896	1135.22	1550.42	211.837	1110.07	1568.35	285.159	1302.38	1591.32	175.367	1283.07	1614.2	201.214	1357.26	1429.85	217.894	1416.66	1212.71	210.123	1227.49	1360.7	203.3	1165.49	1233.59	123.561	1419.87	1261.18	375.728	1307.22	1390.8	442.442	1316.6	1167.16	450.402	1315.93	1097.22	517.467	1203.77	1096.01	530.091	1106.82	1085.89	521.573	1110.68	1014.7	577.392	1028.44	1029.04
465	0	308.147	1126.86	1548.27	213.282	1101.2	1566.5	285.768	1293.82	1589.74	176.169	1273.91	1612.99	201.318	1348.79	1428.7	217.662	1408.88	1211.64	210.22	1219.15	1359.33	203.177	1157.2	1232.32	123.45	1411.75	1260.21	375.815	1299.08	1389.25	442.146	1310.49	1165.59	449.831	1310.05	1095.59	519.996	1200.09	1091.12	535.565	1104.15	1078.36	525.231	1108.8	1007.61	584.23	1028.97	1018.76
466	0	309.345	1118.41	1546.16	214.65	1092.3	1564.6	286.392	1285.18	1588.12	176.962	1264.76	1611.64	201.564	1340.27	1427.46	217.566	1400.97	1210.44	210.461	1210.73	1357.88	203.197	1148.85	1230.99	123.487	1403.58	1259.14	376.054	1290.88	1387.57	441.84	1304.31	1163.86	449.158	1304.08	1093.78	522.22	1196.45	1085.94	540.62	1101.71	1070.35	528.434	1107.09	1000.17	590.421	1029.96	1007.92
467	0	310.499	1109.86	1544.12	215.951	1083.37	1562.66	287.037	1276.48	1586.48	177.754	1255.62	1610.16	201.95	1331.7	1426.13	217.599	1392.9	1209.11	210.845	1202.24	1356.36	203.364	1140.43	1229.6	123.664	1395.34	1257.97	376.442	1282.63	1385.76	441.528	1298.03	1161.95	448.391	1298.03	1091.79	524.146	1192.84	1080.49	545.265	1099.52	1061.91	531.156	1105.51	992.442	595.921	1031.38	996.541
468	0	311.622	1101.23	1542.15	217.195	1074.42	1560.71	287.711	1267.71	1584.84	178.552	1246.48	1608.57	202.469	1323.07	1424.72	217.754	1384.67	1207.67	211.374	1193.67	1354.79	203.682	1131.92	1228.18	123.971	1387.01	1256.7	376.974	1274.32	1383.84	441.219	1291.63	1159.9	447.54	1291.86	1089.65	525.783	1189.24	1074.81	549.509	1097.54	1053.1	533.381	1104.04	984.476	600.694	1033.18	984.697
469	0	312.725	1092.52	1540.26	218.395	1065.45	1558.78	288.422	1258.89	1583.2	179.362	1237.34	1606.91	203.116	1314.38	1423.24	218.023	1376.27	1206.12	212.044	1185.01	1353.19	204.154	1123.32	1226.73	124.399	1378.58	1255.35	377.647	1265.97	1381.83	440.921	1285.08	1157.71	446.62	1285.58	1087.36	527.14	1185.64	1068.93	553.359	1095.77	1044	535.104	1102.62	976.334	604.71	1035.31	972.468
470	0	313.821	1083.72	1538.48	219.567	1056.45	1556.88	289.179	1250.01	1581.58	180.192	1228.21	1605.19	203.883	1305.62	1421.71	218.396	1367.69	1204.47	212.855	1176.26	1351.57	204.783	1114.63	1225.26	124.937	1370.04	1253.92	378.453	1257.57	1379.74	440.645	1278.39	1155.4	445.646	1279.19	1084.95	528.231	1182.02	1062.91	556.822	1094.18	1034.68	536.332	1101.23	968.082	607.956	1037.68	959.956
471	0	314.923	1074.86	1536.79	220.724	1047.42	1555.03	289.987	1241.07	1579.99	181.052	1219.08	1603.43	204.761	1296.78	1420.13	218.864	1358.94	1202.75	213.801	1167.41	1349.94	205.571	1105.83	1223.79	125.572	1361.36	1252.43	379.386	1249.12	1377.59	440.397	1271.53	1152.99	444.636	1272.69	1082.45	529.071	1178.38	1056.79	559.9	1092.73	1025.22	537.084	1099.84	959.789	610.432	1040.22	947.286
472	0	316.046	1065.93	1535.22	221.883	1038.37	1553.25	290.854	1232.09	1578.43	181.948	1209.95	1601.66	205.74	1287.87	1418.53	219.416	1350	1200.97	214.88	1158.46	1348.32	206.518	1096.91	1222.33	126.292	1352.54	1250.89	380.436	1240.62	1375.4	440.184	1264.52	1150.51	443.606	1266.07	1079.87	529.676	1174.69	1050.62	562.595	1091.37	1015.72	537.392	1098.42	951.525	612.163	1042.85	934.594
473	0	317.202	1056.93	1533.77	223.058	1029.29	1551.56	291.784	1223.07	1576.94	182.888	1200.81	1599.9	206.812	1278.86	1416.92	220.043	1340.88	1199.16	216.085	1149.4	1346.73	207.623	1087.87	1220.89	127.083	1343.56	1249.32	381.594	1232.07	1373.19	440.012	1257.36	1147.97	442.57	1259.34	1077.25	530.062	1170.94	1044.47	564.906	1090.05	1006.27	537.297	1096.94	943.36	613.187	1045.46	922.03
474	0	318.403	1047.88	1532.45	224.266	1020.18	1549.97	292.782	1214	1575.51	183.879	1191.66	1598.19	207.964	1269.77	1415.32	220.733	1331.59	1197.32	217.41	1140.23	1345.2	208.883	1078.7	1219.5	127.935	1334.42	1247.74	382.849	1223.46	1370.99	439.883	1250.07	1145.4	441.542	1252.52	1074.62	530.247	1167.1	1038.39	566.834	1088.71	996.966	536.848	1095.39	935.362	613.565	1047.96	909.746
475	0	319.66	1038.77	1531.26	225.518	1011.03	1548.5	293.85	1204.89	1574.16	184.926	1182.48	1596.53	209.187	1260.59	1413.74	221.477	1322.14	1195.5	218.847	1130.95	1343.72	210.296	1069.39	1218.16	128.833	1325.09	1246.16	384.193	1214.8	1368.82	439.794	1242.66	1142.84	440.532	1245.62	1072	530.248	1163.16	1032.44	568.381	1087.28	987.912	536.098	1093.72	927.599	613.369	1050.25	897.886
476	0	320.982	1029.6	1530.2	226.829	1001.84	1547.15	294.99	1195.74	1572.91	186.033	1173.28	1594.95	210.471	1251.3	1412.21	222.264	1312.52	1193.72	220.388	1121.55	1342.33	211.855	1059.94	1216.9	129.767	1315.59	1244.61	385.612	1206.08	1366.7	439.742	1235.15	1140.32	439.549	1238.63	1069.44	530.085	1159.09	1026.7	569.555	1085.7	979.197	535.105	1091.93	920.132	612.682	1052.24	886.585
477	0	322.377	1020.39	1529.29	228.206	992.604	1545.95	296.201	1186.54	1571.77	187.201	1164.03	1593.48	211.804	1241.91	1410.75	223.085	1302.74	1191.99	222.024	1112.04	1341.04	213.552	1050.34	1215.74	130.725	1305.91	1243.11	387.097	1197.31	1364.65	439.721	1227.57	1137.87	438.598	1231.57	1066.95	529.777	1154.88	1021.2	570.37	1083.9	970.904	533.922	1089.98	913.021	611.593	1053.85	875.959
478	0	323.849	1011.12	1528.52	229.659	983.315	1544.9	297.48	1177.3	1570.74	188.432	1154.75	1592.13	213.177	1232.43	1409.37	223.932	1292.82	1190.35	223.745	1102.42	1339.86	215.377	1040.59	1214.69	131.701	1296.04	1241.68	388.636	1188.47	1362.71	439.724	1219.92	1135.52	437.683	1224.44	1064.59	529.345	1150.48	1016.02	570.848	1081.82	963.108	532.603	1087.85	906.319	610.19	1054.97	866.102
479	0	325.401	1001.81	1527.89	231.191	973.969	1544.01	298.823	1168	1569.86	189.724	1145.4	1590.92	214.581	1222.84	1408.09	224.8	1282.75	1188.82	225.541	1092.7	1338.81	217.32	1030.71	1213.77	132.685	1285.99	1240.33	390.219	1179.58	1360.9	439.743	1212.22	1133.31	436.807	1217.24	1062.37	528.812	1145.89	1011.18	571.018	1079.41	955.872	531.194	1085.49	900.073	608.557	1055.55	857.085
480	0	327.031	992.443	1527.41	232.805	964.561	1543.27	300.224	1158.66	1569.11	191.073	1136	1589.87	216.008	1213.15	1406.94	225.683	1272.54	1187.43	227.4	1082.87	1337.91	219.366	1020.69	1213	133.673	1275.76	1239.1	391.836	1170.63	1359.24	439.771	1204.48	1131.27	435.973	1209.97	1060.33	528.201	1141.09	1006.74	570.915	1076.63	949.249	529.74	1082.88	894.325	606.777	1055.51	848.955
481	0	328.737	983.029	1527.09	234.497	955.089	1542.7	301.675	1149.27	1568.52	192.474	1126.52	1588.98	217.45	1203.37	1405.92	226.58	1262.21	1186.19	229.312	1072.95	1337.17	221.502	1010.55	1212.38	134.661	1265.38	1237.99	393.477	1161.61	1357.75	439.804	1196.7	1129.43	435.184	1202.63	1058.5	527.535	1136.04	1002.73	570.585	1073.43	943.274	528.278	1079.96	889.11	604.918	1054.8	841.733
482	0	330.512	973.568	1526.91	236.264	945.549	1542.31	303.167	1139.83	1568.09	193.919	1116.98	1588.27	218.902	1193.5	1405.05	227.491	1251.76	1185.13	231.264	1062.94	1336.58	223.711	1000.29	1211.94	135.648	1254.85	1237.03	395.133	1152.52	1356.45	439.838	1188.88	1127.81	434.443	1195.21	1056.9	526.84	1130.75	999.16	570.074	1069.8	937.975	526.841	1076.7	884.454	603.047	1053.39	835.424
483	0	332.347	964.06	1526.89	238.097	935.942	1542.08	304.69	1130.33	1567.82	195.4	1107.36	1587.74	220.357	1183.55	1404.35	228.416	1241.2	1184.25	233.245	1052.86	1336.18	225.976	989.936	1211.69	136.635	1244.19	1236.23	396.797	1143.37	1355.36	439.875	1181.01	1126.45	433.756	1187.69	1055.56	526.14	1125.18	996.056	569.435	1065.71	933.361	525.461	1073.06	880.375	601.216	1051.26	830.012
484	0	334.23	954.506	1527.03	239.984	926.268	1542.01	306.232	1120.77	1567.74	196.906	1097.67	1587.4	221.811	1173.53	1403.81	229.36	1230.54	1183.57	235.243	1042.72	1335.94	228.279	979.496	1211.61	137.624	1233.43	1235.6	398.463	1134.15	1354.49	439.918	1173.07	1125.37	433.129	1180.08	1054.49	525.46	1119.33	993.424	568.72	1061.15	929.435	524.163	1069	876.884	599.474	1048.4	825.467
485	0	336.148	944.907	1527.32	241.912	916.529	1542.12	307.781	1111.17	1567.82	198.425	1087.91	1587.24	223.262	1163.44	1403.46	230.327	1219.79	1183.1	237.247	1032.52	1335.89	230.604	968.991	1211.72	138.619	1222.57	1235.15	400.124	1124.86	1353.86	439.977	1165.06	1124.56	432.57	1172.35	1053.7	524.827	1113.19	991.266	567.979	1056.13	926.185	522.972	1064.49	873.98	597.859	1044.81	821.747
486	0	338.084	935.266	1527.76	243.865	906.73	1542.38	309.327	1101.51	1568.08	199.946	1078.07	1587.27	224.708	1153.3	1403.29	231.322	1208.97	1182.85	239.247	1022.27	1336.02	232.934	958.44	1212.01	139.625	1211.66	1234.89	401.776	1115.5	1353.46	440.062	1156.94	1124.05	432.09	1164.5	1053.2	524.264	1106.75	989.574	567.263	1050.65	923.589	521.911	1059.51	871.654	596.406	1040.51	818.802
487	0	340.023	925.586	1528.36	245.824	896.878	1542.81	310.856	1091.81	1568.52	201.457	1068.18	1587.48	226.147	1143.11	1403.31	232.351	1198.09	1182.8	241.231	1012.01	1336.31	235.252	947.861	1212.47	140.648	1200.72	1234.81	403.415	1106.06	1353.31	440.189	1148.71	1123.83	431.7	1156.52	1052.99	523.796	1100.01	988.336	566.616	1044.71	921.619	521.002	1054.05	869.888	595.143	1035.53	816.574
488	0	341.947	915.87	1529.11	247.771	886.979	1543.38	312.357	1082.07	1569.12	202.943	1058.24	1587.86	227.578	1132.9	1403.51	233.421	1187.17	1182.96	243.19	1001.72	1336.78	237.541	937.274	1213.1	141.696	1189.77	1234.93	405.039	1096.55	1353.4	440.375	1140.34	1123.9	431.416	1148.38	1053.07	523.445	1092.95	987.535	566.078	1038.33	920.236	520.264	1048.09	868.658	594.096	1029.88	815.004
489	0	343.837	906.122	1530	249.686	877.042	1544.1	313.819	1072.28	1569.89	204.395	1048.25	1588.41	229.002	1122.67	1403.89	234.538	1176.22	1183.33	245.115	991.442	1337.41	239.788	926.7	1213.87	142.777	1178.84	1235.23	406.646	1086.96	1353.73	440.639	1131.82	1124.25	431.253	1140.09	1053.43	523.231	1085.58	987.147	565.682	1031.51	919.399	519.714	1041.65	867.93	593.286	1023.61	814.031
490	0	345.676	896.346	1531.04	251.55	867.077	1544.95	315.232	1062.47	1570.81	205.8	1038.23	1589.1	230.419	1112.45	1404.44	235.709	1165.27	1183.88	246.997	981.171	1338.18	241.978	916.157	1214.78	143.898	1167.96	1235.72	408.234	1077.31	1354.29	441.003	1123.13	1124.86	431.226	1131.64	1054.04	523.174	1077.9	987.146	565.456	1024.27	919.061	519.368	1034.73	867.668	592.733	1016.75	813.597
491	0	347.449	886.547	1532.2	253.346	857.093	1545.93	316.588	1052.63	1571.88	207.148	1028.2	1589.92	231.83	1102.23	1405.15	236.94	1154.33	1184.61	248.83	970.926	1339.09	244.098	905.664	1215.8	145.066	1157.17	1236.37	409.801	1067.58	1355.07	441.484	1114.27	1125.71	431.354	1123.02	1054.9	523.289	1069.91	987.502	565.422	1016.63	919.172	519.241	1027.35	867.829	592.454	1009.34	813.644
492	0	349.139	876.73	1533.5	255.055	847.101	1547.01	317.879	1042.77	1573.08	208.43	1018.15	1590.87	233.234	1092.03	1406.02	238.237	1143.43	1185.51	250.606	960.717	1340.12	246.138	895.24	1216.92	146.29	1146.47	1237.18	411.349	1057.79	1356.05	442.101	1105.23	1126.78	431.651	1114.23	1055.98	523.589	1061.6	988.183	565.596	1008.6	919.682	519.342	1019.52	868.369	592.461	1001.42	814.115
493	0	350.734	866.899	1534.9	256.662	837.111	1548.2	319.099	1032.9	1574.4	209.639	1008.11	1591.93	234.633	1081.87	1407.03	239.603	1132.59	1186.56	252.321	950.557	1341.26	248.088	884.9	1218.12	147.574	1135.9	1238.15	412.875	1047.94	1357.22	442.87	1096	1128.04	432.133	1105.26	1057.25	524.085	1053	989.156	565.986	1000.2	920.54	519.678	1011.28	869.243	592.76	993.029	814.954
494	0	352.223	857.06	1536.41	258.155	827.131	1549.47	320.244	1023.02	1575.83	210.769	998.077	1593.07	236.025	1071.76	1408.16	241.041	1121.83	1187.74	253.969	940.457	1342.49	249.94	874.661	1219.37	148.922	1125.48	1239.24	414.38	1038.03	1358.56	443.801	1086.59	1129.46	432.812	1096.13	1058.7	524.784	1044.1	990.388	566.599	991.434	921.698	520.255	1002.65	870.404	593.351	984.193	816.107
495	0	353.595	847.217	1538	259.523	817.172	1550.81	321.31	1013.13	1577.35	211.815	988.074	1594.3	237.411	1061.7	1409.41	242.551	1111.17	1189.05	255.547	930.425	1343.8	251.688	864.536	1220.66	150.335	1115.23	1240.46	415.862	1028.08	1360.06	444.903	1077.01	1131.03	433.699	1086.83	1060.29	525.687	1034.91	991.848	567.432	982.328	923.112	521.071	993.661	871.81	594.227	974.948	817.525
496	0	354.846	837.374	1539.66	260.758	807.24	1552.2	322.297	1003.26	1578.96	212.776	978.103	1595.58	238.79	1051.71	1410.76	244.132	1100.65	1190.46	257.053	920.472	1345.17	253.327	854.536	1221.98	151.813	1105.15	1241.78	417.319	1018.09	1361.68	446.18	1067.26	1132.72	434.8	1077.37	1062.01	526.794	1025.44	993.504	568.482	972.894	924.741	522.123	984.337	873.422	595.374	965.323	819.161
497	0	355.97	827.536	1541.39	261.854	797.344	1553.62	323.204	993.384	1580.63	213.649	968.175	1596.9	240.159	1041.79	1412.19	245.777	1090.27	1191.96	258.485	910.604	1346.59	254.855	844.669	1223.31	153.353	1095.25	1243.2	418.751	1008.09	1363.42	447.63	1057.35	1134.5	436.117	1067.75	1063.82	528.099	1015.7	995.328	569.737	963.148	926.549	523.404	974.708	875.204	596.773	955.345	820.975
498	0	356.966	817.706	1543.15	262.81	787.489	1555.06	324.031	983.525	1582.36	214.436	958.295	1598.25	241.516	1031.96	1413.7	247.48	1080.05	1193.54	259.844	900.827	1348.03	256.273	834.943	1224.63	154.948	1085.56	1244.69	420.156	998.069	1365.24	449.246	1047.31	1136.35	437.648	1058	1065.71	529.595	1005.72	997.293	571.184	953.103	928.508	524.902	964.799	877.128	598.4	945.036	822.935
499	0	357.834	807.89	1544.93	263.625	777.68	1556.51	324.781	973.683	1584.12	215.138	948.47	1599.62	242.859	1022.21	1415.25	249.231	1070.01	1195.17	261.129	891.148	1349.5	257.583	825.361	1225.94	156.591	1076.05	1246.24	421.53	988.054	1367.14	451.018	1037.15	1138.26	439.386	1048.12	1067.65	531.267	995.489	999.376	572.805	942.775	930.593	526.604	954.634	879.169	600.229	934.419	825.017
500	0	358.576	798.09	1546.73	264.302	767.921	1557.94	325.456	963.861	1585.91	215.756	938.702	1600.99	244.184	1012.55	1416.85	251.018	1060.16	1196.85	262.342	881.569	1350.97	258.788	815.923	1227.24	158.272	1066.74	1247.84	422.873	978.056	1369.09	452.929	1026.9	1140.21	441.318	1038.13	1069.63	533.1	985.041	1001.56	574.579	932.181	932.788	528.492	944.235	881.31	602.232	923.511	827.206
501	0	359.195	788.311	1548.51	264.843	758.218	1559.33	326.059	954.063	1587.71	216.295	928.997	1602.35	245.489	1002.99	1418.47	252.829	1050.5	1198.57	263.486	872.093	1352.43	259.893	806.627	1228.51	159.98	1057.62	1249.48	424.18	968.089	1371.08	454.958	1016.57	1142.19	443.427	1028.04	1071.62	535.076	974.391	1003.81	576.482	921.337	935.078	530.548	933.623	883.534	604.379	912.329	829.495
502	0	359.696	778.557	1550.27	265.255	748.571	1560.68	326.592	944.292	1589.5	216.758	919.357	1603.69	246.77	993.526	1420.1	254.65	1041.03	1200.29	264.564	862.72	1353.87	260.907	797.469	1229.75	161.705	1048.67	1251.13	425.451	958.166	1373.07	457.082	1006.19	1144.18	445.691	1017.88	1073.63	537.171	963.558	1006.13	578.49	910.262	937.456	532.748	922.816	885.832	606.646	900.888	831.885
503	0	360.086	768.831	1552	265.543	738.985	1561.97	327.06	934.553	1591.29	217.148	909.783	1604.99	248.023	984.158	1421.73	256.468	1031.75	1202.02	265.58	853.45	1355.29	261.837	788.443	1230.96	163.433	1039.9	1252.78	426.682	948.298	1375.07	459.274	995.785	1146.17	448.084	1007.65	1075.63	539.364	952.567	1008.49	580.576	898.976	939.915	535.07	911.831	888.196	609.005	889.2	834.382
504	0	360.369	759.138	1553.67	265.717	729.46	1563.19	327.466	924.847	1593.05	217.469	900.278	1606.24	249.247	974.885	1423.34	258.27	1022.65	1203.73	266.537	844.28	1356.66	262.692	779.54	1232.12	165.154	1031.28	1254.42	427.872	938.496	1377.04	461.507	985.39	1148.15	450.578	997.392	1077.61	541.63	941.44	1010.88	582.713	887.5	942.451	537.489	900.682	890.619	611.433	877.277	836.994
505	0	360.554	749.48	1555.28	265.783	719.999	1564.33	327.811	915.18	1594.78	217.725	890.842	1607.43	250.437	965.705	1424.91	260.045	1013.72	1205.41	267.44	835.209	1357.98	263.48	770.753	1233.25	166.857	1022.8	1256.04	429.02	928.768	1378.98	463.754	975.024	1150.1	453.141	987.114	1079.56	543.943	930.204	1013.29	584.875	875.856	945.059	539.98	889.385	893.094	613.911	865.13	839.729
506	0	360.648	739.863	1556.83	265.751	710.603	1565.37	328.099	905.554	1596.45	217.92	881.476	1608.55	251.592	956.614	1426.44	261.783	1004.94	1207.05	268.292	826.23	1359.24	264.211	762.069	1234.32	168.531	1014.45	1257.61	430.124	919.122	1380.86	465.988	964.711	1152.02	455.745	976.84	1081.46	546.28	918.884	1015.7	587.037	864.067	947.734	542.518	877.954	895.612	616.419	852.771	842.597
507	0	360.656	730.288	1558.29	265.629	701.273	1566.31	328.331	895.973	1598.07	218.056	872.18	1609.58	252.71	947.608	1427.9	263.474	996.304	1208.62	269.098	817.338	1360.43	264.891	753.48	1235.34	170.167	1006.21	1259.13	431.183	909.561	1382.68	468.186	954.471	1153.88	458.361	966.59	1083.3	548.615	907.506	1018.09	589.175	852.157	950.47	545.079	866.402	898.164	618.941	840.212	845.601
508	0	360.587	720.76	1559.68	265.425	692.008	1567.16	328.51	886.44	1599.61	218.137	862.954	1610.53	253.787	938.681	1429.29	265.111	987.784	1210.11	269.862	808.528	1361.54	265.529	744.975	1236.28	171.757	998.064	1260.58	432.195	900.088	1384.41	470.328	944.318	1155.67	460.96	956.38	1085.06	550.927	896.094	1020.46	591.268	840.15	953.255	547.638	854.742	900.736	621.463	827.467	848.739
509	0	360.446	711.28	1560.97	265.148	682.808	1567.89	328.636	876.958	1601.08	218.164	853.796	1611.38	254.822	929.826	1430.6	266.685	979.366	1211.51	270.586	799.792	1362.55	266.132	736.544	1237.15	173.291	989.994	1261.95	433.161	890.705	1386.05	472.397	934.264	1157.38	463.519	946.226	1086.74	553.195	884.672	1022.78	593.296	828.069	956.076	550.172	842.988	903.315	623.967	814.552	852.001
510	0	360.24	701.851	1562.18	264.806	673.672	1568.51	328.709	867.529	1602.45	218.139	844.706	1612.12	255.813	921.038	1431.81	268.191	971.032	1212.81	271.273	791.124	1363.48	266.703	728.177	1237.93	174.763	981.985	1263.23	434.079	881.41	1387.58	474.38	924.312	1158.98	466.017	936.139	1088.32	555.398	873.26	1025.05	595.243	815.936	958.917	552.658	831.155	905.88	626.438	801.487	855.369
511	0	359.976	692.474	1563.28	264.406	664.599	1569.02	328.732	858.154	1603.73	218.064	835.68	1612.74	256.756	912.309	1432.92	269.623	962.765	1213.99	271.925	782.515	1364.29	267.247	719.865	1238.61	176.166	974.024	1264.41	434.948	872.201	1388.98	476.268	914.462	1160.46	468.438	926.126	1089.78	557.52	861.876	1027.24	597.093	803.773	961.759	555.075	819.256	908.414	628.856	788.293	858.817
512	0	359.657	683.149	1564.29	263.955	655.586	1569.41	328.702	848.834	1604.91	217.94	826.715	1613.24	257.651	903.632	1433.91	270.975	954.55	1215.06	272.543	773.958	1364.99	267.767	711.6	1239.18	177.492	966.095	1265.48	435.766	863.076	1390.25	478.056	904.708	1161.81	470.766	916.193	1091.12	559.545	850.535	1029.33	598.834	791.601	964.578	557.403	807.308	910.894	631.201	774.996	862.313
513	0	359.29	673.875	1565.2	263.459	646.628	1569.69	328.622	839.567	1605.97	217.768	817.807	1613.61	258.493	895.001	1434.79	272.242	946.375	1216	273.127	765.446	1365.57	268.264	703.372	1239.64	178.736	958.187	1266.44	436.532	854.03	1391.39	479.739	895.043	1163.02	472.992	906.341	1092.32	561.46	839.25	1031.32	600.455	779.438	967.351	559.624	795.324	913.301	633.45	761.624	865.817
514	0	358.878	664.652	1565.99	262.925	637.722	1569.85	328.489	830.353	1606.91	217.548	808.95	1613.85	259.28	886.407	1435.54	273.418	938.23	1216.81	273.677	756.973	1366.03	268.739	695.175	1239.97	179.891	950.287	1267.27	437.244	845.059	1392.38	481.315	885.453	1164.06	475.106	896.568	1093.37	563.252	828.029	1033.2	601.946	767.303	970.053	561.718	783.321	915.614	635.578	748.21	869.285
515	0	358.426	655.477	1566.68	262.356	628.863	1569.88	328.305	821.186	1607.73	217.28	800.137	1613.96	260.008	877.846	1436.16	274.499	930.104	1217.49	274.191	748.532	1366.36	269.191	687.001	1240.17	180.952	942.387	1267.98	437.898	836.159	1393.21	482.783	875.927	1164.95	477.102	886.869	1094.27	564.91	816.88	1034.94	603.299	755.21	972.662	563.669	771.313	917.815	637.563	734.786	872.674
516	0	357.937	646.347	1567.26	261.758	620.044	1569.8	328.067	812.064	1608.43	216.964	791.361	1613.94	260.673	869.31	1436.65	275.479	921.992	1218.03	274.666	740.116	1366.57	269.618	678.844	1240.25	181.914	934.477	1268.56	438.494	827.324	1393.89	484.142	866.451	1165.67	478.972	877.239	1095	566.426	805.806	1036.54	604.505	743.176	975.155	565.461	759.314	919.888	639.378	721.387	875.939
517	0	357.414	637.257	1567.72	261.133	611.258	1569.59	327.775	802.981	1609	216.599	782.613	1613.78	261.273	860.794	1437.01	276.354	913.889	1218.45	275.101	731.721	1366.64	270.017	670.697	1240.19	182.773	926.55	1269.02	439.026	818.55	1394.41	485.39	857.013	1166.21	480.71	867.671	1095.57	567.79	794.812	1037.98	605.559	731.212	977.51	567.076	747.336	921.82	641.001	708.046	879.04
518	0	356.859	628.203	1568.05	260.485	602.497	1569.26	327.429	793.93	1609.45	216.186	773.886	1613.5	261.803	852.293	1437.23	277.121	905.791	1218.74	275.491	723.342	1366.58	270.384	662.553	1240	183.525	918.601	1269.34	439.493	809.832	1394.77	486.526	847.604	1166.59	482.311	858.157	1095.98	568.995	783.898	1039.27	606.452	719.33	979.711	568.501	735.391	923.602	642.411	694.795	881.945
519	0	356.273	619.179	1568.26	259.815	593.755	1568.79	327.027	784.904	1609.76	215.723	765.168	1613.08	262.259	843.803	1437.32	277.777	897.695	1218.9	275.831	714.973	1366.39	270.715	654.408	1239.69	184.167	910.626	1269.54	439.892	801.166	1394.98	487.546	838.218	1166.79	483.767	848.69	1096.21	570.035	773.064	1040.4	607.177	707.537	981.743	569.721	723.488	925.226	643.59	681.659	884.626
520	0	355.656	610.179	1568.34	259.123	585.023	1568.2	326.567	775.896	1609.95	215.209	756.452	1612.54	262.639	835.318	1437.29	278.32	889.598	1218.93	276.118	706.61	1366.08	271.004	646.256	1239.26	184.699	902.62	1269.62	440.217	792.545	1395.04	488.448	828.852	1166.84	485.072	839.264	1096.29	570.904	762.312	1041.36	607.727	695.842	983.596	570.723	711.636	926.688	644.521	668.659	887.065
521	0	355.008	601.196	1568.28	258.409	576.294	1567.48	326.05	766.897	1610.02	214.643	747.728	1611.88	262.937	826.837	1437.12	278.748	881.499	1218.84	276.346	698.248	1365.64	271.246	638.093	1238.72	185.119	894.581	1269.57	440.468	783.964	1394.94	489.226	819.507	1166.72	486.221	829.875	1096.2	571.597	751.639	1042.16	608.094	684.247	985.265	571.495	699.843	927.987	645.191	655.809	889.253
522	0	354.328	592.225	1568.07	257.672	567.559	1566.62	325.473	757.899	1609.95	214.024	738.988	1611.1	263.152	818.353	1436.83	279.062	873.395	1218.64	276.509	689.885	1365.08	271.434	629.914	1238.07	185.43	886.506	1269.4	440.64	775.418	1394.7	489.876	810.187	1166.45	487.208	820.519	1095.95	572.11	741.044	1042.78	608.271	672.755	986.745	572.03	688.115	929.124	645.59	643.114	891.19
523	0	353.612	583.258	1567.73	256.908	558.811	1565.64	324.836	748.896	1609.77	213.351	730.224	1610.21	263.279	809.865	1436.42	279.261	865.282	1218.31	276.602	681.514	1364.41	271.561	621.717	1237.32	185.632	878.394	1269.1	440.73	766.9	1394.32	490.393	800.898	1166.04	488.03	811.193	1095.56	572.442	730.526	1043.24	608.249	661.366	988.037	572.319	676.457	930.102	645.71	630.573	892.881
524	0	352.859	574.288	1567.24	256.114	550.045	1564.51	324.137	739.878	1609.47	212.622	721.428	1609.23	263.317	801.369	1435.9	279.349	857.156	1217.87	276.62	673.133	1363.63	271.621	613.499	1236.49	185.728	870.242	1268.69	440.735	758.404	1393.8	490.775	791.646	1165.49	488.681	801.896	1095.03	572.59	720.081	1043.54	608.023	650.077	989.146	572.36	664.877	930.924	645.548	618.178	894.342
525	0	352.063	565.31	1566.6	255.285	541.253	1563.26	323.376	730.84	1609.06	211.836	712.596	1608.14	263.263	792.862	1435.25	279.328	849.015	1217.32	276.557	664.735	1362.75	271.608	605.255	1235.57	185.721	862.049	1268.17	440.652	749.921	1393.16	491.016	782.439	1164.81	489.16	792.627	1094.36	572.554	709.706	1043.68	607.586	638.884	990.076	572.152	653.377	931.596	645.102	605.916	895.59
526	0	351.221	556.317	1565.82	254.416	532.433	1561.89	322.553	721.775	1608.53	210.992	703.723	1606.97	263.115	784.339	1434.5	279.203	840.851	1216.66	276.408	656.318	1361.77	271.515	596.983	1234.59	185.616	853.81	1267.52	440.479	741.444	1392.4	491.114	773.281	1164.02	489.466	783.384	1093.58	572.335	699.398	1043.67	606.933	627.783	990.835	571.698	641.964	932.122	644.373	593.771	896.647
527	0	350.325	547.305	1564.89	253.5	523.579	1560.39	321.667	712.679	1607.89	210.089	694.807	1605.72	262.871	775.798	1433.64	278.977	832.659	1215.88	276.167	647.874	1360.71	271.337	588.679	1233.53	185.416	845.524	1266.77	440.214	732.963	1391.52	491.069	764.176	1163.12	489.598	774.164	1092.68	571.934	689.15	1043.52	606.064	616.767	991.429	571.004	630.641	932.507	643.365	581.725	897.534
528	0	349.372	538.268	1563.83	252.53	514.689	1558.78	320.718	703.548	1607.15	209.125	685.846	1604.4	262.53	767.235	1432.68	278.655	824.431	1215	275.83	639.4	1359.56	271.068	580.338	1232.42	185.125	837.186	1265.89	439.853	724.469	1390.54	490.88	755.122	1162.12	489.557	764.964	1091.68	571.356	678.957	1043.22	604.98	605.83	991.867	570.078	619.411	932.756	642.084	569.759	898.271
529	0	348.354	529.202	1562.62	251.498	505.762	1557.06	319.706	694.38	1606.32	208.099	676.841	1603	262.091	758.645	1431.62	278.243	816.161	1214.01	275.393	630.889	1358.34	270.703	571.954	1231.25	184.747	828.791	1264.91	439.396	715.951	1389.46	490.549	746.114	1161.04	489.347	755.777	1090.59	570.606	668.812	1042.79	603.685	594.967	992.154	568.932	608.277	932.871	640.539	557.859	898.874
530	0	347.265	520.105	1561.29	250.398	496.798	1555.25	318.631	685.173	1605.38	207.011	667.794	1601.56	261.552	750.025	1430.47	277.746	807.839	1212.91	274.852	622.335	1357.05	270.24	563.521	1230.03	184.286	820.335	1263.8	438.84	707.398	1388.29	490.079	737.143	1159.88	488.971	746.597	1089.42	569.689	658.708	1042.23	602.188	584.171	992.293	567.581	597.24	932.853	638.741	546.011	899.355
531	0	346.099	510.975	1559.85	249.222	487.796	1553.36	317.492	675.928	1604.36	205.859	658.707	1600.06	260.913	741.369	1429.23	277.17	799.456	1211.72	274.205	613.732	1355.7	269.675	555.031	1228.76	183.746	811.812	1262.59	438.185	698.8	1387.04	489.473	728.194	1158.66	488.433	737.412	1088.18	568.613	648.637	1041.54	600.5	573.436	992.289	566.04	586.3	932.702	636.707	534.209	899.721
532	0	344.85	501.809	1558.29	247.962	478.76	1551.4	316.291	666.646	1603.26	204.643	649.586	1598.52	260.174	732.674	1427.9	276.52	791.004	1210.42	273.448	605.074	1354.3	269.005	546.473	1227.46	183.129	803.216	1261.26	437.429	690.145	1385.71	488.735	719.249	1157.37	487.74	728.211	1086.87	567.387	638.59	1040.73	598.637	562.759	992.139	564.328	575.454	932.417	634.456	522.451	899.972
533	0	343.513	492.608	1556.65	246.613	469.69	1549.39	315.027	657.329	1602.08	203.362	640.435	1596.95	259.335	723.936	1426.5	275.799	782.471	1209.03	272.58	596.354	1352.86	268.229	537.839	1226.12	182.438	794.539	1259.82	436.573	681.422	1384.32	487.872	710.286	1156.03	486.898	718.98	1085.51	566.021	628.559	1039.81	596.619	552.133	991.84	562.464	564.7	931.993	632.013	510.743	900.1
534	0	342.082	483.373	1554.93	245.167	460.591	1547.34	313.701	647.982	1600.83	202.015	631.261	1595.36	258.395	715.149	1425.03	275.011	773.847	1207.54	271.6	587.567	1351.39	267.345	529.118	1224.76	181.675	785.777	1258.27	435.617	672.622	1382.87	486.889	701.282	1154.63	485.916	709.703	1084.1	564.525	618.534	1038.77	594.468	541.555	991.387	560.468	554.035	931.426	629.407	499.095	900.093
535	0	340.553	474.104	1553.15	243.62	451.466	1545.27	312.313	638.608	1599.53	200.602	622.069	1593.76	257.357	706.309	1423.49	274.16	765.121	1205.97	270.509	578.707	1349.89	266.353	520.3	1223.36	180.844	776.923	1256.61	434.562	663.735	1381.38	485.795	692.212	1153.19	484.8	700.364	1082.64	562.911	608.506	1037.61	592.208	531.02	990.772	558.36	543.455	930.709	626.672	487.523	899.932
536	0	338.923	464.804	1551.33	241.968	442.319	1543.21	310.863	629.211	1598.18	199.122	612.867	1592.15	256.221	697.413	1421.9	273.247	756.281	1204.32	269.307	569.768	1348.38	265.254	511.375	1221.96	179.945	767.971	1254.86	433.409	654.753	1379.85	484.597	683.05	1151.7	483.561	690.946	1081.16	561.192	598.467	1036.36	589.863	520.527	989.987	556.162	532.955	929.836	623.844	476.049	899.592
537	0	337.189	455.475	1549.5	240.208	433.153	1541.18	309.352	619.798	1596.79	197.576	603.662	1590.56	254.989	688.457	1420.27	272.272	747.318	1202.59	267.996	560.745	1346.87	264.05	502.335	1220.54	178.981	758.915	1253.01	432.16	645.669	1378.3	483.303	673.772	1150.18	482.208	681.432	1079.64	559.379	588.408	1035	587.461	510.071	989.023	553.893	522.53	928.801	620.962	464.697	899.048
538	0	335.35	446.12	1547.66	238.339	423.974	1539.19	307.779	610.373	1595.38	195.963	594.458	1588.99	253.663	679.437	1418.6	271.238	738.219	1200.8	266.579	551.635	1345.38	262.741	493.17	1219.13	177.954	749.75	1251.08	430.819	636.477	1376.74	481.922	664.355	1148.63	480.751	671.81	1078.11	557.485	578.321	1033.54	585.026	499.651	987.873	551.571	512.175	927.601	618.064	453.492	898.269
539	0	333.407	436.742	1545.86	236.36	414.785	1537.26	306.147	600.941	1593.97	194.284	585.263	1587.46	252.246	670.352	1416.92	270.145	728.977	1198.96	265.061	542.434	1343.91	261.331	483.876	1217.73	176.866	740.473	1249.08	429.389	627.175	1375.19	480.461	654.783	1147.06	479.2	662.066	1076.57	555.521	568.2	1032	582.583	489.265	986.534	549.214	501.887	926.235	615.182	442.46	897.23
540	0	331.36	427.345	1544.1	234.273	405.589	1535.43	304.456	591.508	1592.57	192.541	576.081	1585.98	250.742	661.198	1415.22	268.993	719.581	1197.08	263.447	533.141	1342.48	259.824	474.449	1216.35	175.72	731.081	1247.03	427.874	617.76	1373.66	478.929	645.04	1145.47	477.565	652.194	1075.02	553.499	558.041	1030.38	580.152	478.914	985.006	546.837	491.662	924.71	612.348	431.624	895.909
541	0	329.213	417.931	1542.42	232.08	396.39	1533.71	302.707	582.077	1591.19	190.735	566.915	1584.57	249.154	651.975	1413.54	267.783	710.026	1195.18	261.742	523.753	1341.1	258.227	464.885	1215.02	174.519	721.572	1244.94	426.28	608.233	1372.17	477.331	635.119	1143.88	475.853	642.189	1073.49	551.428	547.842	1028.71	577.753	468.599	983.3	544.453	481.496	923.035	609.583	421.004	894.291
542	0	326.97	408.505	1540.83	229.787	387.19	1532.11	300.903	572.652	1589.86	188.868	557.769	1583.23	247.487	642.682	1411.89	266.518	700.306	1193.27	259.955	514.272	1339.8	256.544	455.185	1213.75	173.265	711.946	1242.83	424.613	598.597	1370.73	475.673	625.02	1142.31	474.073	632.054	1071.99	549.319	537.604	1026.99	575.401	458.322	981.43	542.07	471.388	921.228	606.904	410.614	892.377
543	0	324.637	399.068	1539.37	227.399	377.991	1530.67	299.046	563.236	1588.6	186.944	548.645	1582	245.748	633.318	1410.29	265.198	690.419	1191.37	258.093	504.699	1338.58	254.784	445.352	1212.55	171.962	702.202	1240.74	422.879	588.856	1369.36	473.957	614.748	1140.77	472.229	621.795	1070.52	547.179	527.332	1025.26	573.107	448.09	979.422	539.697	461.335	919.316	604.317	400.463	890.181
544	0	322.221	389.624	1538.04	224.924	368.795	1529.4	297.139	553.831	1587.43	184.967	539.543	1580.89	243.941	623.885	1408.75	263.827	680.365	1189.52	256.166	495.037	1337.47	252.956	435.39	1211.45	170.613	692.345	1238.67	421.085	579.017	1368.09	472.187	604.317	1139.28	470.325	611.424	1069.12	545.015	517.033	1023.53	570.877	437.908	977.31	537.339	451.337	917.332	601.822	390.551	887.736
545	0	319.73	380.173	1536.89	222.371	359.602	1528.31	295.187	544.438	1586.36	182.942	530.463	1579.9	242.074	614.384	1407.3	262.407	670.148	1187.74	254.184	485.29	1336.48	251.07	425.307	1210.46	169.22	682.378	1236.67	419.24	569.088	1366.93	470.363	593.749	1137.86	468.364	600.961	1067.8	542.834	506.718	1021.84	568.714	427.783	975.137	534.997	441.394	915.316	599.413	380.871	885.091
546	0	317.175	370.718	1535.91	219.75	350.412	1527.43	293.193	535.058	1585.42	180.873	521.404	1579.06	240.153	604.817	1405.96	260.943	659.775	1186.05	252.158	475.462	1335.63	249.139	415.111	1209.6	167.789	672.308	1234.75	417.353	559.079	1365.9	468.485	583.072	1136.56	466.347	590.425	1066.59	540.639	496.401	1020.22	566.617	417.724	972.951	532.673	431.506	913.316	597.081	371.409	882.313
547	0	314.566	361.26	1535.14	217.073	341.225	1526.76	291.164	525.689	1584.63	178.768	512.363	1578.37	238.187	595.188	1404.75	259.437	649.256	1184.48	250.099	465.562	1334.92	247.173	404.815	1208.9	166.32	662.141	1232.96	415.43	549.002	1365.02	466.554	572.32	1135.38	464.275	579.844	1065.5	538.435	486.099	1018.71	564.579	407.74	970.808	530.366	421.676	911.38	594.81	362.146	879.482
548	0	311.915	351.799	1534.58	214.352	332.039	1526.32	289.104	516.333	1584	176.633	503.339	1577.86	236.183	585.5	1403.69	257.895	638.608	1183.07	248.02	455.597	1334.38	245.187	394.43	1208.36	164.817	651.887	1231.31	413.482	538.873	1364.3	464.57	561.53	1134.37	462.149	569.245	1064.57	536.225	475.829	1017.33	562.594	397.839	968.765	528.073	411.905	909.562	592.587	353.054	876.687
549	0	309.235	342.337	1534.25	211.601	322.854	1526.11	287.022	506.987	1583.55	174.476	494.328	1577.53	234.15	575.758	1402.79	256.321	627.847	1181.83	245.931	445.577	1334.02	243.193	383.974	1208	163.282	641.557	1229.84	411.517	528.705	1363.77	462.538	550.74	1133.54	459.972	558.657	1063.83	534.014	465.609	1016.11	560.65	388.029	966.88	525.795	402.197	907.913	590.398	344.106	874.022
550	0	306.539	332.874	1534.15	208.833	313.668	1526.14	284.925	497.651	1583.29	172.306	485.327	1577.38	232.096	565.97	1402.07	254.718	616.998	1180.81	243.846	435.512	1333.83	241.206	373.461	1207.83	161.717	631.165	1228.58	409.544	518.515	1363.42	460.461	539.989	1132.94	457.748	548.109	1063.28	531.804	455.457	1015.1	558.738	378.315	965.209	523.53	392.553	906.482	588.232	335.269	871.577
551	0	303.84	323.41	1534.3	206.064	304.481	1526.4	282.82	488.323	1583.23	170.131	476.333	1577.43	230.03	556.141	1401.55	253.091	606.084	1180.01	241.776	425.414	1333.84	239.239	362.911	1207.87	160.121	620.724	1227.55	407.57	508.321	1363.28	458.349	529.311	1132.58	455.483	537.63	1062.96	529.602	445.389	1014.32	556.848	368.7	963.801	521.281	382.977	905.311	586.082	326.511	869.438
552	0	301.154	313.948	1534.69	203.308	295.292	1526.9	280.716	479.003	1583.37	167.961	467.343	1577.67	227.961	546.281	1401.23	251.442	595.135	1179.46	239.732	415.296	1334.04	237.304	352.341	1208.1	158.494	610.249	1226.76	405.605	498.14	1363.35	456.21	518.737	1132.48	453.188	527.244	1062.87	527.412	435.419	1013.78	554.973	359.186	962.699	519.052	373.471	904.437	583.945	317.802	867.678
553	0	298.493	304.49	1535.31	200.58	286.1	1527.62	278.622	469.692	1583.72	165.806	458.355	1578.11	225.895	536.399	1401.13	249.772	584.181	1179.17	237.724	405.172	1334.42	235.415	341.771	1208.55	156.836	599.757	1226.24	403.654	487.993	1363.63	454.058	508.293	1132.65	450.872	516.974	1063.02	525.243	425.558	1013.51	553.107	349.769	961.935	516.85	364.037	903.886	581.823	309.112	866.356
554	0	295.872	295.037	1536.17	197.895	276.907	1528.56	276.547	460.389	1584.28	163.673	449.368	1578.73	223.841	526.506	1401.23	248.083	573.252	1179.15	235.762	395.055	1335	233.581	331.222	1209.19	155.146	589.265	1225.99	401.725	477.897	1364.12	451.907	497.997	1133.09	448.552	506.839	1063.42	523.102	415.814	1013.52	551.249	340.445	961.531	514.685	354.675	903.673	579.724	300.416	865.512
555	0	293.305	285.594	1537.23	195.267	267.715	1529.69	274.499	451.096	1585.03	161.574	440.38	1579.53	221.805	516.613	1401.55	246.374	562.382	1179.39	233.854	384.96	1335.76	231.812	320.714	1210.02	153.42	578.788	1226.02	399.822	467.872	1364.8	449.772	487.862	1133.8	446.243	496.851	1064.06	520.999	406.194	1013.8	549.402	331.21	961.498	512.57	345.386	903.805	577.663	291.692	865.167
556	0	290.805	276.165	1538.5	192.711	258.526	1531	272.488	441.816	1585.97	159.516	431.392	1580.49	219.793	506.732	1402.08	244.642	551.599	1179.9	232.007	374.902	1336.68	230.115	310.267	1211.04	151.657	568.345	1226.32	397.95	457.935	1365.68	447.669	477.898	1134.75	443.963	487.023	1064.93	518.943	396.7	1014.36	547.574	322.057	961.831	510.52	336.171	904.275	575.658	282.926	865.321
557	0	288.383	266.756	1539.94	190.239	249.344	1532.47	270.521	432.553	1587.08	157.508	422.405	1581.62	217.811	496.875	1402.81	242.884	540.935	1180.66	230.226	364.895	1337.77	228.498	299.901	1212.21	149.853	557.952	1226.89	396.113	448.104	1366.73	445.61	468.109	1135.93	441.729	477.359	1066.01	516.947	387.332	1015.19	545.776	312.98	962.519	508.553	327.028	905.066	573.731	274.107	865.956
558	0	286.052	257.373	1541.53	187.862	240.174	1534.08	268.606	423.31	1588.36	155.557	413.42	1582.89	215.862	487.055	1403.72	241.096	530.416	1181.65	228.515	354.954	1339	226.962	289.636	1213.53	148.006	547.625	1227.72	394.313	438.395	1367.94	443.609	458.497	1137.29	439.556	467.863	1067.28	515.019	378.092	1016.25	544.019	303.974	963.535	506.686	317.958	906.151	571.905	265.232	867.034
559	0	283.821	248.025	1543.25	185.592	231.02	1535.81	266.75	414.093	1589.77	153.67	404.441	1584.28	213.951	477.285	1404.8	239.274	520.063	1182.85	226.875	345.091	1340.36	225.509	279.49	1214.97	146.114	537.379	1228.78	392.552	428.82	1369.28	441.674	449.064	1138.82	437.459	458.535	1068.71	513.169	368.978	1017.54	542.319	295.036	964.847	504.935	308.965	907.497	570.204	256.307	868.505
560	0	281.698	238.72	1545.07	183.436	221.89	1537.62	264.959	404.908	1591.31	151.853	395.47	1585.79	212.08	467.578	1406.03	237.416	509.897	1184.24	225.308	335.319	1341.82	224.137	269.481	1216.51	144.178	527.228	1230.05	390.832	419.391	1370.74	439.812	439.81	1140.46	435.448	449.37	1070.26	511.405	359.99	1019.03	540.692	286.166	966.415	503.312	300.049	909.065	568.646	247.344	870.309
561	0	279.691	229.466	1546.97	181.404	212.79	1539.49	263.239	395.761	1592.95	150.112	386.513	1587.39	210.251	457.944	1407.4	235.52	499.932	1185.78	223.812	325.649	1343.38	222.844	259.622	1218.13	142.198	517.184	1231.51	389.152	410.117	1372.3	438.025	430.734	1142.19	433.529	440.366	1071.91	509.734	351.127	1020.67	539.15	277.369	968.195	501.829	291.218	910.812	567.251	238.364	872.381
562	0	277.805	220.271	1548.9	179.498	203.727	1541.4	261.592	386.66	1594.68	148.448	377.574	1589.06	208.467	448.395	1408.89	233.586	490.175	1187.45	222.385	316.09	1345.01	221.623	249.927	1219.8	140.178	507.259	1233.13	387.513	401.002	1373.92	436.311	421.836	1143.97	431.705	431.517	1073.62	508.158	342.389	1022.45	537.707	268.652	970.14	500.49	282.476	912.696	566.026	229.392	874.653
563	0	276.043	211.146	1550.85	177.723	194.71	1543.32	260.021	377.612	1596.46	146.865	368.659	1590.79	206.727	438.941	1410.46	231.619	480.632	1189.21	221.023	306.65	1346.69	220.468	240.403	1221.49	138.122	497.462	1234.88	385.913	392.05	1375.58	434.666	413.116	1145.77	429.976	422.818	1075.37	506.681	333.78	1024.32	536.37	260.025	972.204	499.296	273.832	914.675	564.977	220.462	877.062
564	0	274.407	202.098	1552.79	176.08	185.744	1545.23	258.53	368.623	1598.27	145.364	359.774	1592.57	205.032	429.588	1412.1	229.625	471.302	1191.05	219.722	297.335	1348.4	219.369	231.057	1223.2	136.039	487.8	1236.73	384.351	383.259	1377.27	433.083	404.572	1147.56	428.338	414.263	1077.14	505.301	325.302	1026.26	535.147	251.5	974.341	498.241	265.295	916.709	564.1	211.608	879.547
565	0	272.895	193.135	1554.7	174.567	176.838	1547.12	257.117	359.7	1600.1	143.946	350.926	1594.37	203.383	420.345	1413.79	227.611	462.179	1192.93	218.475	288.15	1350.12	218.317	221.89	1224.9	133.936	478.28	1238.65	382.827	374.626	1378.97	431.555	396.202	1149.32	426.785	405.848	1078.9	504.016	316.959	1028.22	534.037	243.094	976.51	497.317	256.877	918.762	563.384	202.866	882.053
566	0	271.506	184.264	1556.55	173.181	167.998	1548.96	255.782	350.85	1601.93	142.608	342.119	1596.18	201.779	411.215	1415.51	225.587	453.256	1194.82	217.278	279.097	1351.85	217.301	212.9	1226.57	131.824	468.905	1240.62	381.339	366.145	1380.64	430.073	388.001	1151.04	425.308	397.569	1080.63	502.821	308.757	1030.19	533.04	234.821	978.673	496.511	248.588	920.802	562.812	194.273	884.53
567	0	270.235	175.49	1558.34	171.919	159.23	1550.75	254.523	342.08	1603.74	141.348	333.362	1597.97	200.219	402.202	1417.23	223.563	444.519	1196.71	216.123	270.176	1353.55	216.313	204.08	1228.21	129.713	459.675	1242.6	379.885	357.809	1382.29	428.63	379.962	1152.71	423.897	389.424	1082.32	501.709	300.702	1032.13	532.149	226.695	980.793	495.809	240.44	922.799	562.365	185.859	886.936
568	0	269.077	166.818	1560.03	170.772	150.539	1552.46	253.338	333.394	1605.5	140.164	324.661	1599.75	198.704	393.308	1418.93	221.552	435.956	1198.56	215.006	261.386	1355.21	215.343	195.423	1229.79	127.614	450.592	1244.57	378.465	349.607	1383.88	427.22	372.079	1154.3	422.543	381.409	1083.96	500.674	292.796	1034.03	531.358	218.732	982.842	495.193	232.443	924.728	562.018	177.652	889.234
569	0	268.022	158.25	1561.63	169.732	141.93	1554.09	252.221	324.796	1607.2	139.051	316.02	1601.48	197.231	384.532	1420.6	219.564	427.551	1200.37	213.921	252.725	1356.82	214.384	186.918	1231.3	125.538	441.651	1246.51	377.076	341.529	1385.42	425.837	364.341	1155.82	421.236	373.524	1085.53	499.706	285.046	1035.84	530.655	210.941	984.792	494.647	224.608	926.566	561.748	169.673	891.395
570	0	267.065	149.788	1563.12	168.792	133.406	1555.63	251.169	316.29	1608.83	138.003	307.445	1603.17	195.8	375.871	1422.22	217.609	419.287	1202.11	212.862	244.186	1358.37	213.43	178.554	1232.74	123.495	432.85	1248.38	375.718	333.562	1386.87	424.478	356.738	1157.26	419.969	365.765	1087.02	498.797	277.454	1037.57	530.028	203.331	986.622	494.155	216.941	928.296	561.531	161.936	893.394
571	0	266.194	141.432	1564.49	167.939	124.967	1557.07	250.175	307.879	1610.37	137.016	298.941	1604.78	194.41	367.324	1423.76	215.697	411.15	1203.76	211.825	235.766	1359.83	212.476	170.318	1234.09	121.494	424.183	1250.18	374.39	325.695	1388.24	423.141	349.26	1158.62	418.735	358.132	1088.44	497.938	270.02	1039.18	529.463	195.904	988.314	493.701	209.448	929.901	561.348	154.445	895.216
572	0	265.4	133.18	1565.75	167.165	116.615	1558.41	249.233	299.561	1611.82	136.081	290.51	1606.32	193.061	358.884	1425.23	213.837	403.123	1205.32	210.807	227.456	1361.21	211.52	162.2	1235.35	119.546	415.643	1251.88	373.092	317.914	1389.52	421.825	341.896	1159.89	417.53	350.623	1089.76	497.121	262.743	1040.66	528.948	188.663	989.853	493.271	202.131	931.368	561.18	147.201	896.846
573	0	264.672	125.028	1566.89	166.456	108.348	1559.65	248.338	291.337	1613.15	135.194	282.155	1607.76	191.752	350.546	1426.61	212.038	395.192	1206.77	209.806	219.25	1362.49	210.56	154.185	1236.51	117.659	407.223	1253.48	371.825	310.207	1390.69	420.531	334.634	1161.06	416.349	343.235	1090.98	496.336	255.619	1042.01	528.47	181.603	991.227	492.852	194.991	932.684	561.013	140.196	898.278
574	0	264	116.972	1567.91	165.803	100.164	1560.78	247.483	283.204	1614.37	134.348	273.875	1609.1	190.482	342.303	1427.88	210.306	387.343	1208.1	208.819	211.138	1363.66	209.597	146.265	1237.55	115.839	398.913	1254.95	370.59	302.561	1391.76	419.261	327.466	1162.14	415.192	335.965	1092.11	495.577	248.645	1043.22	528.016	174.718	992.428	492.434	188.026	933.842	560.836	133.419	899.505
575	0	263.373	109.005	1568.82	165.195	92.059	1561.8	246.661	275.159	1615.46	133.536	265.672	1610.34	189.253	334.146	1429.03	208.646	379.565	1209.31	207.845	203.111	1364.72	208.634	138.429	1238.48	114.094	390.707	1256.29	369.388	294.962	1392.71	418.015	320.382	1163.11	414.057	328.811	1093.12	494.837	241.811	1044.27	527.574	168	993.45	492.008	181.231	934.833	560.64	126.854	900.526
576	0	262.782	101.118	1569.61	164.62	84.028	1562.72	245.867	267.195	1616.43	132.753	257.542	1611.46	188.065	326.069	1430.07	207.065	371.847	1210.4	206.885	195.16	1365.65	207.672	130.667	1239.29	112.429	382.596	1257.49	368.221	287.4	1393.55	416.796	313.374	1163.98	412.944	321.766	1094.04	494.111	235.11	1045.16	527.135	161.437	994.287	491.567	174.601	935.652	560.418	120.483	901.339
577	0	262.217	93.3039	1570.29	164.07	76.0646	1563.53	245.096	259.306	1617.27	131.993	249.482	1612.45	186.92	318.061	1430.99	205.568	364.18	1211.35	205.94	187.276	1366.47	206.717	122.971	1239.97	110.851	374.571	1258.55	367.092	279.862	1394.27	415.605	306.434	1164.74	411.855	314.825	1094.84	493.394	228.531	1045.9	526.691	155.017	994.939	491.105	168.125	936.295	560.165	114.288	901.943
578	0	261.67	85.5511	1570.86	163.536	68.1618	1564.24	244.344	251.484	1617.98	131.252	241.489	1613.32	185.819	310.114	1431.78	204.157	356.558	1212.18	205.01	179.449	1367.15	205.771	115.332	1240.52	109.363	366.625	1259.46	366.003	272.338	1394.87	414.445	299.553	1165.38	410.789	307.981	1095.53	492.682	222.063	1046.47	526.235	148.726	995.403	490.616	161.795	936.76	559.877	108.25	902.339
579	0	261.132	77.8487	1571.33	163.011	60.3115	1564.84	243.608	243.718	1618.56	130.528	233.555	1614.05	184.763	302.219	1432.45	202.838	348.974	1212.88	204.099	171.669	1367.71	204.841	107.744	1240.94	107.97	358.75	1260.24	364.957	264.816	1395.36	413.318	292.725	1165.92	409.746	301.225	1096.11	491.974	215.693	1046.89	525.762	142.55	995.682	490.097	155.598	937.047	559.55	102.349	902.529
580	0	260.598	70.185	1571.7	162.486	52.5051	1565.34	242.886	236	1619.01	129.817	225.676	1614.66	183.757	294.366	1432.99	201.614	341.422	1213.45	203.208	163.928	1368.14	203.93	100.197	1241.23	106.676	350.94	1260.87	363.958	257.287	1395.74	412.225	285.939	1166.34	408.729	294.547	1096.59	491.267	209.408	1047.15	525.27	136.475	995.779	489.544	149.52	937.159	559.181	96.5679	902.514
581	0	260.062	62.5475	1571.97	161.958	44.7336	1565.74	242.176	228.316	1619.34	129.119	217.843	1615.13	182.803	286.547	1433.42	200.487	333.9	1213.91	202.341	156.216	1368.44	203.043	92.6851	1241.39	105.483	343.188	1261.38	363.009	249.741	1396.01	411.168	279.185	1166.66	407.737	287.935	1096.96	490.56	203.194	1047.26	524.756	130.485	995.696	488.957	143.546	937.097	558.768	90.8894	902.3
582	0	259.52	54.924	1572.16	161.421	36.9878	1566.03	241.479	220.658	1619.54	128.433	210.05	1615.47	181.903	278.753	1433.72	199.459	326.403	1214.25	201.5	148.526	1368.62	202.184	85.1995	1241.42	104.395	335.487	1261.76	362.114	242.171	1396.18	410.149	272.453	1166.87	406.772	281.375	1097.23	489.855	197.036	1047.23	524.222	124.565	995.442	488.333	137.661	936.87	558.308	85.2978	901.892
583	0	258.968	47.3023	1572.26	160.874	29.2585	1566.23	240.796	213.012	1619.64	127.761	202.287	1615.68	181.062	270.976	1433.92	198.533	318.928	1214.49	200.69	140.849	1368.68	201.356	77.7325	1241.33	103.413	327.833	1262.01	361.276	234.568	1396.25	409.173	265.731	1166.98	405.834	274.854	1097.4	489.15	190.921	1047.06	523.669	118.7	995.021	487.673	131.848	936.482	557.802	79.7786	901.297
584	0	258.406	39.6707	1572.28	160.314	21.5368	1566.34	240.131	205.368	1619.62	127.104	194.548	1615.77	180.283	263.208	1434.01	197.709	311.471	1214.63	199.912	133.178	1368.62	200.561	70.2757	1241.12	102.538	320.221	1262.17	360.497	226.924	1396.22	408.24	259.006	1167	404.925	268.356	1097.48	488.449	184.832	1046.76	523.099	112.875	994.441	486.979	126.088	935.944	557.249	74.3178	900.521
585	0	257.834	32.0183	1572.23	159.742	13.8144	1566.35	239.485	197.715	1619.5	126.467	186.824	1615.73	179.569	255.444	1434	196.986	304.03	1214.69	199.171	125.506	1368.45	199.802	62.821	1240.81	101.771	312.646	1262.22	359.782	219.235	1396.11	407.354	252.263	1166.93	404.048	261.865	1097.48	487.754	178.754	1046.34	522.517	107.074	993.711	486.254	120.365	935.264	556.654	68.902	899.574
586	0	257.251	24.335	1572.1	159.158	6.08338	1566.28	238.864	190.044	1619.28	125.852	179.109	1615.58	178.923	247.675	1433.89	196.364	296.601	1214.66	198.469	117.825	1368.17	199.079	55.3604	1240.4	101.112	305.102	1262.18	359.132	211.492	1395.91	406.519	245.49	1166.78	403.204	255.365	1097.39	487.066	172.672	1045.8	521.927	101.281	992.839	485.502	114.661	934.452	556.019	63.5176	898.463
587	0	256.661	16.6122	1571.9	158.564	-1.66301	1566.12	238.272	182.346	1618.96	125.265	171.395	1615.31	178.348	239.896	1433.7	195.841	289.179	1214.55	197.81	110.13	1367.78	198.393	47.8862	1239.9	100.561	297.586	1262.06	358.549	203.693	1395.63	405.739	238.673	1166.55	402.395	248.839	1097.24	486.39	166.57	1045.15	521.335	95.4808	991.835	484.73	108.959	933.52	555.352	58.1506	897.199
588	0	256.067	8.84252	1571.63	157.963	-9.43074	1565.88	237.715	174.613	1618.55	124.71	163.677	1614.94	177.847	232.101	1433.42	195.415	281.762	1214.38	197.195	102.414	1367.3	197.743	40.3912	1239.32	100.116	290.093	1261.87	358.037	195.831	1395.27	405.017	231.797	1166.24	401.626	242.271	1097.01	485.729	160.432	1044.41	520.747	89.658	990.709	483.945	103.242	932.477	554.659	52.7861	895.791
589	0	255.472	1.01998	1571.3	157.36	-17.2246	1565.57	237.199	166.84	1618.06	124.194	155.949	1614.46	177.423	224.287	1433.06	195.085	274.344	1214.15	196.628	94.6711	1366.74	197.13	32.8688	1238.66	99.7752	282.618	1261.61	357.595	187.904	1394.84	404.356	224.85	1165.88	400.898	235.645	1096.71	485.088	154.245	1043.57	520.17	83.7969	989.469	483.156	97.4941	931.337	553.949	47.4083	894.251
590	0	254.882	-6.85967	1570.9	156.759	-25.0483	1565.18	236.729	159.022	1617.48	123.722	148.209	1613.88	177.077	216.448	1432.63	194.847	266.922	1213.86	196.11	86.8967	1366.08	196.552	25.3131	1237.94	99.5375	275.154	1261.3	357.226	179.908	1394.35	403.761	217.82	1165.44	400.217	228.947	1096.35	484.472	147.993	1042.65	519.609	77.8825	988.127	482.373	91.6998	930.109	553.231	42.0003	892.592
591	0	254.302	-14.7992	1570.45	156.165	-32.9043	1564.73	236.312	151.157	1616.83	123.3	140.452	1613.21	176.812	208.582	1432.13	194.7	259.49	1213.53	195.644	79.0853	1365.35	196.009	17.7189	1237.16	99.4	267.697	1260.93	356.929	171.84	1393.79	403.234	210.697	1164.96	399.586	222.164	1095.93	483.886	141.664	1041.66	519.071	71.9001	986.693	481.605	85.8442	928.805	552.515	36.5443	890.828
592	0	253.737	-22.7997	1569.94	155.585	-40.794	1564.21	235.953	143.243	1616.1	122.934	132.677	1612.45	176.628	200.684	1431.57	194.641	252.043	1213.14	195.231	71.2322	1364.55	195.5	10.0816	1236.33	99.3599	260.239	1260.52	356.707	163.7	1393.16	402.779	203.47	1164.41	399.01	215.284	1095.45	483.335	135.244	1040.59	518.562	65.8354	985.177	480.861	79.9129	927.435	551.809	31.0215	888.971
593	0	253.195	-30.8608	1569.38	155.025	-48.7175	1563.64	235.658	135.279	1615.29	122.63	124.883	1611.61	176.526	192.754	1430.93	194.668	244.576	1212.7	194.874	63.3326	1363.68	195.027	2.39707	1235.45	99.4137	252.774	1260.06	356.558	155.485	1392.47	402.396	196.134	1163.82	398.492	208.298	1094.92	482.825	128.723	1039.46	518.089	59.675	983.591	480.152	73.8921	926.007	551.122	25.4124	887.036
594	0	252.681	-38.981	1568.77	154.49	-56.6742	1563.01	235.433	127.269	1614.41	122.392	117.07	1610.69	176.507	184.787	1430.24	194.777	237.085	1212.22	194.574	55.3823	1362.74	194.588	-5.33844	1234.53	99.5581	245.294	1259.55	356.484	147.195	1391.72	402.089	188.682	1163.18	398.037	201.198	1094.33	482.362	122.091	1038.28	517.657	53.4059	981.943	479.486	67.7684	924.531	550.46	19.6974	885.036
595	0	252.203	-47.1572	1568.1	153.988	-64.6623	1562.33	235.281	119.214	1613.45	122.226	109.239	1609.68	176.572	176.783	1429.48	194.967	229.564	1211.69	194.334	47.377	1361.76	194.187	-13.1286	1233.56	99.7891	237.789	1259	356.484	138.829	1390.9	401.858	181.111	1162.49	397.649	193.978	1093.68	481.951	115.338	1037.04	517.271	47.0164	980.243	478.874	61.529	923.014	549.831	13.8565	882.981
596	0	251.765	-55.3855	1567.4	153.524	-72.6795	1561.61	235.206	111.118	1612.43	122.135	101.392	1608.61	176.72	168.74	1428.65	195.235	222.008	1211.11	194.154	39.3131	1360.72	193.824	-20.9769	1232.56	100.103	230.251	1258.39	356.558	130.387	1390.02	401.703	173.419	1161.75	397.33	186.632	1092.98	481.597	108.457	1035.74	516.936	40.4952	978.501	478.322	55.1611	921.461	549.24	7.87062	880.884
597	0	251.375	-63.6612	1566.65	153.104	-80.7226	1560.85	235.212	102.986	1611.33	122.123	93.5313	1607.46	176.952	160.657	1427.76	195.58	214.412	1210.46	194.038	31.1867	1359.63	193.502	-28.8871	1231.53	100.496	222.671	1257.74	356.707	121.87	1389.08	401.624	165.607	1160.96	397.084	179.159	1092.21	481.305	101.44	1034.4	516.657	33.8326	976.723	477.838	48.6522	919.878	548.695	1.72088	878.754
598	0	251.037	-71.979	1565.87	152.735	-88.7883	1560.06	235.302	94.8233	1610.17	122.193	85.6593	1606.24	177.268	152.532	1426.8	196	206.768	1209.76	193.987	22.9945	1358.5	193.223	-36.8633	1230.46	100.965	215.037	1257.02	356.93	113.278	1388.08	401.621	157.676	1160.12	396.914	171.556	1091.39	481.081	94.2832	1033.01	516.439	27.0197	974.916	477.428	41.9901	918.267	548.201	-4.61048	876.601
599	0	250.757	-80.3333	1565.06	152.42	-96.873	1559.24	235.477	86.6342	1608.94	122.348	77.7791	1604.95	177.667	144.364	1425.78	196.495	199.072	1208.99	194.003	14.7334	1357.34	192.993	-44.9097	1229.36	101.507	207.34	1256.24	357.229	104.612	1387.01	401.693	149.628	1159.22	396.821	163.821	1090.5	480.929	86.9798	1031.57	516.284	20.0489	973.085	477.097	35.1629	916.631	547.764	-11.1399	874.431
600	0	250.539	-88.7184	1564.23	152.166	-104.973	1558.4	235.739	78.4247	1607.65	122.589	69.8938	1603.6	178.151	136.152	1424.69	197.062	191.316	1208.15	194.088	6.40047	1356.15	192.813	-53.031	1228.23	102.118	199.57	1255.39	357.603	95.8708	1385.88	401.84	141.466	1158.25	396.808	155.952	1089.55	480.853	79.5257	1030.09	516.197	12.9135	971.233	476.847	28.1594	914.97	547.391	-17.882	872.253
601	0	250.388	-97.1287	1563.38	151.975	-113.084	1557.56	236.088	70.2001	1606.29	122.917	62.0063	1602.2	178.718	127.896	1423.53	197.703	183.493	1207.23	194.244	-2.00698	1354.93	192.688	-61.2325	1227.08	102.796	191.717	1254.46	358.052	87.0562	1384.69	402.061	133.192	1157.22	396.876	147.949	1088.52	480.856	71.9166	1028.55	516.181	5.60791	969.361	476.682	20.9695	913.282	547.088	-24.8489	870.069
602	0	250.305	-105.559	1562.53	151.852	-121.203	1556.7	236.525	61.9651	1604.88	123.332	54.1194	1600.74	179.368	119.594	1422.31	198.416	175.593	1206.23	194.472	-10.4913	1353.7	192.622	-69.5195	1225.9	103.541	183.77	1253.47	358.578	78.168	1383.44	402.357	124.808	1156.13	397.028	139.81	1087.42	480.944	64.1484	1026.97	516.237	-1.87282	967.469	476.602	13.5847	911.565	546.86	-32.0497	867.884
603	0	250.295	-114.005	1561.68	151.799	-129.328	1555.86	237.049	53.7238	1603.42	123.835	46.2351	1599.23	180.102	111.245	1421.03	199.202	167.608	1205.15	194.775	-19.0544	1352.45	192.618	-77.8975	1224.71	104.35	175.72	1252.39	359.181	69.2066	1382.14	402.729	116.315	1154.95	397.266	131.531	1086.25	481.117	56.217	1025.34	516.369	-9.53299	965.555	476.606	5.9986	909.814	546.714	-39.4898	865.698
604	0	250.359	-122.462	1560.84	151.819	-137.455	1555.02	237.66	45.4796	1601.92	124.425	38.3551	1597.67	180.918	102.847	1419.7	200.059	159.525	1203.99	195.153	-27.6981	1351.21	192.68	-86.3721	1223.5	105.223	167.558	1251.24	359.861	60.1719	1380.78	403.179	107.711	1153.71	397.593	123.111	1085	481.379	48.1184	1023.66	516.578	-17.3764	963.617	476.692	-1.79266	908.023	546.655	-47.1706	863.511
605	0	250.499	-130.927	1560.03	151.914	-145.583	1554.21	238.358	37.235	1600.38	125.102	30.4802	1596.09	181.817	94.4002	1418.31	200.988	151.335	1202.75	195.607	-36.4237	1349.97	192.81	-94.9487	1222.3	106.159	159.277	1250.02	360.617	51.0642	1379.38	403.71	98.9931	1152.39	398.011	114.543	1083.68	481.732	39.8479	1021.93	516.866	-25.4064	961.65	476.858	-9.78998	906.189	546.688	-55.0896	861.319
606	0	250.715	-139.398	1559.25	152.084	-153.711	1553.44	239.139	28.9914	1598.83	125.865	22.6104	1594.49	182.796	85.9023	1416.89	201.987	143.024	1201.42	196.138	-45.232	1348.75	193.012	-103.632	1221.1	107.157	150.869	1248.72	361.45	41.8834	1377.95	404.327	90.1561	1151	398.524	105.822	1082.29	482.176	31.4005	1020.16	517.233	-33.626	959.649	477.101	-17.9909	904.304	546.815	-63.2402	859.118
607	0	251.007	-147.873	1558.52	152.331	-161.839	1552.71	240.004	20.7492	1597.26	126.712	14.7447	1592.88	183.854	77.3522	1415.44	203.054	134.581	1200.03	196.745	-54.1235	1347.56	193.287	-112.427	1219.92	108.216	142.329	1247.37	362.357	32.6299	1376.5	405.032	81.1927	1149.55	399.135	96.9415	1080.84	482.711	22.7708	1018.35	517.678	-42.038	957.61	477.414	-26.3896	902.363	547.039	-71.6125	856.901
608	0	251.376	-156.352	1557.85	152.655	-169.967	1552.04	240.951	12.5078	1595.7	127.641	6.88145	1591.27	184.988	68.7484	1413.97	204.187	125.993	1198.58	197.427	-63.0983	1346.41	193.635	-121.336	1218.77	109.333	133.651	1245.98	363.338	23.3038	1375.04	405.831	72.0939	1148.05	399.846	87.8923	1079.35	483.338	13.9527	1016.5	518.199	-50.6448	955.528	477.794	-34.9762	900.363	547.356	-80.1931	854.658
609	0	251.822	-164.834	1557.25	153.055	-178.098	1551.45	241.976	4.26554	1594.16	128.65	-0.98223	1589.68	186.196	60.0896	1412.5	205.38	117.248	1197.08	198.182	-72.1556	1345.32	194.058	-130.363	1217.67	110.506	124.832	1244.55	364.389	13.9061	1373.58	406.728	62.849	1146.51	400.662	78.6654	1077.81	484.053	4.93952	1014.62	518.792	-59.4484	953.4	478.232	-43.7372	898.302	547.761	-88.9655	852.38
610	0	252.343	-173.322	1556.74	153.531	-186.234	1550.94	243.079	-3.98006	1592.66	129.737	-8.84993	1588.13	187.473	51.3744	1411.04	206.63	108.336	1195.55	199.008	-81.2944	1344.3	194.553	-139.509	1216.63	111.731	115.871	1243.1	365.508	4.43764	1372.15	407.728	53.4465	1144.95	401.584	69.2507	1076.26	484.855	-4.27555	1012.72	519.453	-68.4507	951.222	478.724	-52.6553	896.179	548.248	-97.9096	850.057
611	0	252.938	-181.817	1556.33	154.081	-194.379	1550.53	244.255	-12.2322	1591.2	130.9	-16.726	1586.63	188.815	42.6017	1409.61	207.93	99.2483	1194.01	199.902	-90.513	1343.37	195.119	-148.774	1215.68	113.004	106.766	1241.66	366.69	-5.09996	1370.75	408.831	43.8746	1143.4	402.614	59.6379	1074.7	485.74	-13.6998	1010.82	520.173	-77.6532	948.994	479.261	-61.7094	894	548.805	-107.002	847.679
612	0	253.605	-190.321	1556.04	154.706	-202.535	1550.23	245.502	-20.4948	1589.82	132.133	-24.6156	1585.2	190.216	33.7706	1408.24	209.271	89.9779	1192.48	200.859	-99.809	1342.54	195.754	-158.158	1214.83	114.317	97.5191	1240.25	367.929	-14.7047	1369.41	410.038	34.1218	1141.86	403.75	49.8168	1073.17	486.7	-23.3403	1008.94	520.941	-87.0569	946.718	479.839	-70.8754	891.77	549.42	-116.215	845.239
613	0	254.343	-198.837	1555.86	155.401	-210.709	1550.06	246.815	-28.772	1588.53	133.433	-32.5242	1583.87	191.67	24.8804	1406.93	210.645	80.5218	1191	201.874	-109.179	1341.82	196.453	-167.66	1214.1	115.664	88.1339	1238.89	369.221	-24.374	1368.14	411.348	24.1782	1140.37	404.993	39.7778	1071.68	487.728	-33.204	1007.08	521.745	-96.6629	944.397	480.451	-80.1263	889.503	550.08	-125.519	842.732
614	0	255.149	-207.368	1555.83	156.166	-218.903	1550.03	248.189	-37.0683	1587.34	134.796	-40.4577	1582.64	193.168	15.9308	1405.71	212.041	70.88	1189.57	202.941	-118.62	1341.22	197.213	-177.276	1213.51	117.036	78.6154	1237.61	370.557	-34.1049	1366.98	412.755	14.0358	1138.97	406.337	29.5129	1070.26	488.814	-43.2971	1005.27	522.566	-106.472	942.037	481.093	-89.4335	887.216	550.768	-134.881	840.159
615	0	256.019	-215.916	1555.93	156.996	-227.125	1550.15	249.62	-45.3882	1586.27	136.216	-48.4222	1581.54	194.704	6.92195	1404.61	213.448	61.0564	1188.25	204.053	-128.128	1340.78	198.027	-187.002	1213.08	118.425	68.9704	1236.42	371.93	-43.894	1365.93	414.253	3.68951	1137.66	407.778	19.016	1068.94	489.947	-53.625	1003.53	523.385	-116.483	939.648	481.76	-98.7676	884.928	551.468	-144.266	837.522
616	0	256.951	-224.485	1556.19	157.888	-235.378	1550.43	251.1	-53.7359	1585.34	137.685	-56.4237	1580.58	196.268	-2.14547	1403.62	214.856	51.059	1187.04	205.204	-137.697	1340.48	198.89	-196.832	1212.82	119.822	59.208	1235.36	373.332	-53.7377	1365.01	415.831	-6.86244	1136.5	409.308	8.28405	1067.75	491.112	-64.1915	1001.87	524.176	-126.697	937.241	482.45	-108.1	882.667	552.158	-153.643	834.832
617	0	257.939	-233.078	1556.61	158.838	-243.667	1550.87	252.623	-62.1156	1584.55	139.197	-64.4679	1579.77	197.852	-11.2703	1402.78	216.252	40.8997	1185.97	206.384	-147.321	1340.34	199.795	-206.759	1212.75	121.218	49.3394	1234.45	374.754	-63.6321	1364.25	417.476	-17.6177	1135.49	410.917	-2.68223	1066.71	492.295	-74.9986	1000.33	524.913	-137.112	934.832	483.161	-117.403	880.461	552.82	-162.98	832.103
618	0	258.98	-241.697	1557.19	159.841	-251.996	1551.49	254.181	-70.5307	1583.91	140.744	-72.5604	1579.12	199.447	-20.4506	1402.1	217.628	30.5946	1185.08	207.586	-156.995	1340.37	200.735	-216.774	1212.86	122.604	39.3776	1233.71	376.187	-73.5735	1363.65	419.175	-28.5698	1134.68	412.596	-13.8779	1065.85	493.478	-86.0461	998.925	525.563	-147.724	932.435	483.896	-126.653	878.342	553.434	-172.25	829.356
619	0	260.067	-250.344	1557.93	160.89	-260.37	1552.27	255.764	-78.9844	1583.44	142.316	-80.7061	1578.65	201.044	-29.6841	1401.58	218.974	20.1635	1184.38	208.802	-166.712	1340.57	201.702	-226.866	1213.18	123.973	29.3378	1233.14	377.622	-83.5585	1363.23	420.913	-39.7076	1134.07	414.332	-25.2931	1065.18	494.642	-97.3311	997.666	526.093	-158.531	930.069	484.655	-135.83	876.344	553.981	-181.428	826.62
620	0	261.193	-259.02	1558.83	161.98	-268.792	1553.22	257.362	-87.4791	1583.14	143.904	-88.9093	1578.36	202.634	-38.9674	1401.24	220.283	9.62958	1183.88	210.021	-176.465	1340.94	202.689	-237.022	1213.68	125.318	19.237	1232.78	379.051	-93.5838	1363	422.673	-51.0154	1133.68	416.113	-36.9134	1064.73	495.768	-108.848	996.571	526.468	-169.525	927.752	485.443	-144.919	874.501	554.445	-190.497	823.93
621	0	262.35	-267.727	1559.88	163.103	-277.264	1554.33	258.967	-96.0169	1583.01	145.498	-97.1737	1578.25	204.21	-48.2968	1401.08	221.551	-0.981304	1183.61	211.236	-186.246	1341.48	203.686	-247.227	1214.38	126.637	9.09393	1232.63	380.465	-103.647	1362.97	424.44	-62.4736	1133.54	417.927	-48.7193	1064.51	496.836	-120.587	995.653	526.65	-180.698	925.502	486.266	-153.913	872.845	554.813	-199.449	821.325
622	0	263.532	-276.466	1561.07	164.251	-285.788	1555.6	260.565	-104.599	1583.04	147.086	-105.502	1578.31	205.765	-57.6679	1401.11	222.776	-11.641	1183.55	212.437	-196.048	1342.19	204.685	-257.464	1215.25	127.926	-1.07128	1232.68	381.857	-113.745	1363.13	426.202	-74.0588	1133.63	419.762	-60.6869	1064.52	497.826	-132.537	994.92	526.605	-192.036	923.335	487.131	-162.81	871.407	555.076	-208.284	818.845
623	0	264.728	-285.237	1562.4	165.414	-294.366	1557.01	262.148	-113.227	1583.23	148.658	-113.897	1578.55	207.292	-67.0754	1401.31	223.959	-22.3198	1183.73	213.616	-205.861	1343.04	205.676	-267.716	1216.28	129.187	-11.2376	1232.95	383.219	-123.878	1363.48	427.946	-85.7455	1133.96	421.606	-72.7885	1064.77	498.718	-144.681	994.375	526.298	-203.523	921.265	488.046	-171.617	870.21	555.224	-217.015	816.531
624	0	265.929	-294.04	1563.84	166.584	-302.999	1558.54	263.702	-121.9	1583.58	150.202	-122.36	1578.95	208.787	-76.5137	1401.7	225.105	-32.9873	1184.12	214.766	-215.678	1344.03	206.651	-277.964	1217.45	130.423	-21.3833	1233.42	384.545	-134.043	1364.02	429.664	-97.5066	1134.51	423.449	-84.9937	1065.25	499.494	-157.001	994.016	525.698	-215.139	919.304	489.021	-180.348	869.275	555.25	-225.668	814.418
625	0	267.124	-302.877	1565.39	167.751	-311.686	1560.18	265.217	-130.62	1584.08	151.708	-130.891	1579.5	210.245	-85.9766	1402.25	226.221	-43.613	1184.72	215.878	-225.491	1345.15	207.599	-288.187	1218.73	131.637	-31.4868	1234.09	385.831	-144.239	1364.74	431.349	-109.315	1135.28	425.283	-97.2707	1065.95	500.137	-169.473	993.837	524.78	-226.859	917.459	490.062	-189.024	868.613	555.145	-234.282	812.534
626	0	268.303	-311.747	1567.02	168.904	-320.428	1561.9	266.682	-139.386	1584.71	153.164	-139.49	1580.2	211.664	-95.4575	1402.96	227.317	-54.167	1185.52	216.945	-235.291	1346.37	208.51	-298.366	1220.1	132.836	-41.5271	1234.95	387.071	-154.466	1365.63	432.997	-121.146	1136.24	427.099	-109.587	1066.85	500.631	-182.073	993.827	523.526	-238.653	915.736	491.174	-197.675	868.228	554.901	-242.905	810.899
627	0	269.456	-320.652	1568.71	170.032	-329.224	1563.69	268.087	-148.2	1585.46	154.562	-148.158	1581.01	213.041	-104.95	1403.82	228.404	-64.6208	1186.5	217.962	-245.069	1347.68	209.376	-308.48	1221.53	134.029	-51.484	1235.97	388.262	-164.721	1366.66	434.606	-132.976	1137.36	428.894	-121.912	1067.93	500.963	-194.775	993.973	521.922	-250.488	914.136	492.36	-206.335	868.117	554.504	-251.591	809.518
628	0	270.57	-329.591	1570.44	171.125	-338.073	1565.52	269.423	-157.06	1586.33	155.892	-156.893	1581.94	214.375	-114.446	1404.81	229.494	-74.948	1187.63	218.924	-254.818	1349.07	210.189	-318.511	1222.99	135.222	-61.3394	1237.14	389.401	-175.002	1367.83	436.176	-144.787	1138.62	430.661	-134.217	1069.16	501.123	-207.55	994.256	519.965	-262.328	912.657	493.619	-215.041	868.27	553.939	-260.4	808.386
629	0	271.636	-338.567	1572.19	172.173	-346.974	1567.36	270.681	-165.967	1587.28	157.146	-165.694	1582.96	215.665	-123.94	1405.92	230.6	-85.125	1188.91	219.827	-264.529	1350.5	210.94	-328.441	1224.45	136.423	-71.077	1238.44	390.486	-185.307	1369.12	437.708	-156.565	1139.99	432.398	-146.476	1070.53	501.101	-220.37	994.659	517.661	-274.133	911.296	494.943	-223.834	868.671	553.187	-269.388	807.486
630	0	272.644	-347.579	1573.95	173.166	-355.924	1569.2	271.855	-174.922	1588.32	158.317	-174.558	1584.05	216.911	-133.424	1407.13	231.731	-95.1315	1190.3	220.666	-274.196	1351.97	211.623	-338.253	1225.9	137.638	-80.6835	1239.85	391.515	-195.63	1370.5	439.201	-168.302	1141.44	434.102	-158.668	1071.99	500.892	-233.206	995.163	515.022	-285.866	910.05	496.323	-232.753	869.297	552.223	-278.606	806.789
631	0	273.584	-356.629	1575.69	174.094	-364.923	1571.01	272.94	-183.924	1589.42	159.401	-183.484	1585.2	218.112	-142.892	1408.42	232.897	-104.951	1191.79	221.441	-283.81	1353.45	212.235	-347.936	1227.3	138.874	-90.1484	1241.35	392.488	-205.965	1371.96	440.657	-179.993	1142.96	435.768	-170.774	1073.53	500.493	-246.031	995.747	512.071	-297.489	908.916	497.743	-241.833	870.125	551.022	-288.095	806.258
632	0	274.448	-365.718	1577.39	174.949	-373.968	1572.77	273.931	-192.975	1590.58	160.393	-192.468	1586.39	219.268	-152.338	1409.78	234.104	-114.573	1193.36	222.15	-293.365	1354.92	212.774	-357.48	1228.64	140.132	-99.4644	1242.92	393.404	-216.306	1373.48	442.073	-191.64	1144.5	437.394	-182.782	1075.12	499.902	-258.818	996.396	508.838	-308.966	907.889	499.181	-251.107	871.128	549.558	-297.878	805.856
633	0	275.229	-374.848	1579.04	175.725	-383.057	1574.46	274.825	-202.075	1591.78	161.291	-201.509	1587.61	220.378	-161.756	1411.19	235.354	-123.989	1194.99	222.794	-302.857	1356.38	213.238	-366.88	1229.91	141.414	-108.628	1244.55	394.261	-226.642	1375.04	443.446	-203.244	1146.06	438.973	-194.683	1076.74	499.12	-271.544	997.093	505.357	-320.268	906.969	500.611	-260.6	872.28	547.806	-307.964	805.541
634	0	275.92	-384.017	1580.62	176.415	-392.186	1576.06	275.622	-211.222	1593.01	162.093	-210.601	1588.84	221.441	-171.141	1412.63	236.646	-133.199	1196.67	223.373	-312.278	1357.8	213.631	-376.134	1231.11	142.718	-117.638	1246.21	395.061	-236.963	1376.62	444.77	-214.81	1147.62	440.5	-206.467	1078.37	498.152	-284.185	997.825	501.668	-331.371	906.156	502.004	-270.329	873.552	545.748	-318.342	805.28
635	0	276.519	-393.228	1582.12	177.014	-401.354	1577.56	276.321	-220.417	1594.25	162.8	-219.742	1590.07	222.457	-180.489	1414.1	237.978	-142.204	1198.38	223.889	-321.626	1359.18	213.955	-385.247	1232.22	144.042	-126.497	1247.89	395.803	-247.259	1378.2	446.037	-226.341	1149.17	441.966	-218.132	1080	497.002	-296.723	998.583	497.815	-342.26	905.453	503.326	-280.304	874.919	543.372	-328.983	805.043
636	0	277.021	-402.478	1583.53	177.521	-410.556	1578.95	276.925	-229.658	1595.5	163.414	-228.926	1591.3	223.423	-189.795	1415.58	239.343	-151.013	1200.11	224.345	-330.897	1360.5	214.217	-394.224	1233.24	145.379	-135.211	1249.57	396.488	-257.516	1379.78	447.239	-237.838	1150.69	443.364	-229.67	1081.6	495.678	-309.14	999.357	493.843	-352.929	904.865	504.544	-290.526	876.358	540.679	-339.845	804.813
637	0	277.425	-411.766	1584.83	177.933	-419.788	1580.22	277.436	-238.944	1596.75	163.936	-238.15	1592.49	224.339	-199.056	1417.05	240.734	-159.638	1201.84	224.743	-340.089	1361.75	214.424	-403.076	1234.18	146.724	-143.787	1251.25	397.117	-267.723	1381.34	448.363	-249.299	1152.18	444.684	-241.08	1083.17	494.19	-321.421	1000.14	489.794	-363.381	904.395	505.622	-300.988	877.846	537.68	-350.875	804.58
638	0	277.731	-421.091	1586.03	178.25	-429.046	1581.35	277.857	-248.271	1597.97	164.371	-247.408	1593.65	225.201	-208.271	1418.5	242.139	-168.096	1203.57	225.088	-349.199	1362.92	214.582	-411.815	1235.04	148.068	-152.235	1252.89	397.689	-277.867	1382.87	449.4	-260.716	1153.63	445.916	-252.354	1084.7	492.551	-333.554	1000.93	485.711	-373.628	904.048	506.525	-311.675	879.362	534.398	-362.015	804.345
639	0	277.941	-430.448	1587.1	178.473	-438.327	1582.34	278.194	-257.637	1599.18	164.723	-256.695	1594.77	226.009	-217.438	1419.91	243.55	-176.405	1205.28	225.384	-358.23	1364.01	214.701	-420.453	1235.81	149.402	-160.566	1254.51	398.207	-287.937	1384.35	450.338	-272.077	1155.04	447.049	-263.488	1086.18	490.775	-345.528	1001.72	481.633	-383.693	903.83	507.224	-322.568	880.885	530.871	-373.209	804.118
640	0	278.059	-439.835	1588.06	178.606	-447.624	1583.2	278.45	-267.037	1600.34	164.995	-266.006	1595.83	226.761	-226.556	1421.28	244.953	-184.587	1206.96	225.634	-367.18	1365.01	214.789	-429.003	1236.51	150.717	-168.794	1256.07	398.671	-297.922	1385.77	451.167	-283.364	1156.39	448.075	-274.474	1087.59	488.877	-357.336	1002.52	477.595	-393.602	903.742	507.689	-333.643	882.396	527.144	-384.405	803.911
641	0	278.088	-449.246	1588.88	178.651	-456.934	1583.91	278.631	-276.466	1601.46	165.194	-275.335	1596.83	227.453	-235.626	1422.6	246.336	-192.666	1208.59	225.842	-376.052	1365.9	214.854	-437.479	1237.13	152.004	-176.93	1257.56	399.083	-307.814	1387.12	451.881	-294.555	1157.69	448.987	-285.303	1088.94	486.877	-368.97	1003.3	473.629	-403.39	903.784	507.901	-344.871	883.878	523.27	-395.563	803.743
642	0	278.033	-458.675	1589.58	178.614	-466.251	1584.48	278.743	-285.918	1602.52	165.324	-284.676	1597.76	228.085	-244.647	1423.84	247.687	-200.664	1210.15	226.012	-384.849	1366.69	214.903	-445.889	1237.67	153.252	-184.99	1258.99	399.443	-317.603	1388.39	452.474	-305.625	1158.91	449.778	-295.968	1090.2	484.794	-380.426	1004.08	469.759	-413.094	903.955	507.844	-356.222	885.312	519.306	-406.656	803.631
643	0	277.901	-468.118	1590.15	178.501	-475.571	1584.9	278.791	-295.389	1603.51	165.391	-294.023	1598.6	228.654	-253.622	1425.01	248.991	-208.604	1211.65	226.148	-393.574	1367.37	214.942	-454.244	1238.12	154.452	-192.985	1260.32	399.753	-327.283	1389.57	452.944	-316.55	1160.05	450.445	-306.46	1091.37	482.65	-391.702	1004.84	466.007	-422.753	904.246	507.511	-367.668	886.68	515.309	-417.675	803.59
644	0	277.7	-477.568	1590.58	178.317	-484.888	1585.18	278.78	-304.87	1604.41	165.399	-303.372	1599.35	229.157	-262.552	1426.08	250.238	-216.506	1213.05	226.253	-402.231	1367.93	214.978	-462.55	1238.49	155.593	-200.93	1261.56	400.013	-336.851	1390.65	453.293	-327.301	1161.09	450.987	-316.771	1092.44	480.467	-402.795	1005.58	462.386	-432.401	904.649	506.903	-379.177	887.966	511.335	-428.623	803.631
645	0	277.435	-487.018	1590.89	178.071	-494.198	1585.32	278.715	-314.356	1605.23	165.353	-312.717	1600	229.594	-271.44	1427.05	251.415	-224.388	1214.34	226.328	-410.826	1368.37	215.014	-470.812	1238.75	156.667	-208.837	1262.7	400.224	-346.301	1391.62	453.525	-337.857	1162.03	451.405	-326.896	1093.39	478.266	-413.707	1006.29	458.908	-442.074	905.15	506.028	-390.722	889.154	507.428	-439.52	803.76
646	0	277.116	-496.462	1591.07	177.768	-503.496	1585.32	278.601	-323.84	1605.95	165.257	-322.054	1600.55	229.961	-280.288	1427.92	252.511	-232.265	1215.51	226.378	-419.364	1368.69	215.053	-479.036	1238.92	157.662	-216.717	1263.71	400.386	-355.633	1392.46	453.648	-348.195	1162.84	451.704	-336.83	1094.21	476.071	-424.441	1006.96	455.578	-451.8	905.734	504.901	-402.278	890.229	503.629	-450.395	803.981
647	0	276.749	-505.894	1591.12	177.416	-512.781	1585.19	278.441	-333.315	1606.57	165.116	-331.379	1600.98	230.256	-289.099	1428.67	253.513	-240.147	1216.56	226.402	-427.85	1368.88	215.096	-487.223	1238.97	158.57	-224.581	1264.61	400.5	-364.844	1393.18	453.671	-358.302	1163.52	451.889	-346.574	1094.89	473.9	-435.001	1007.59	452.396	-461.601	906.384	503.542	-413.823	891.177	499.964	-461.286	804.289
648	0	276.342	-515.307	1591.04	177.023	-522.047	1584.94	278.239	-342.775	1607.07	164.931	-340.688	1601.3	230.477	-297.876	1429.3	254.413	-248.043	1217.46	226.402	-436.291	1368.94	215.145	-495.377	1238.9	159.382	-232.44	1265.38	400.566	-373.936	1393.77	453.608	-368.166	1164.05	451.971	-356.13	1095.42	471.774	-445.394	1008.17	449.361	-471.495	907.084	501.974	-425.337	891.99	496.453	-472.234	804.68
649	0	275.902	-524.696	1590.84	176.595	-531.293	1584.56	277.997	-352.216	1607.45	164.707	-349.979	1601.5	230.622	-306.621	1429.81	255.199	-255.957	1218.21	226.377	-444.693	1368.87	215.198	-503.502	1238.71	160.088	-240.302	1266.02	400.583	-382.909	1394.22	453.47	-377.786	1164.42	451.958	-365.506	1095.8	469.707	-455.63	1008.69	446.469	-481.491	907.816	500.223	-436.806	892.66	493.103	-483.279	805.146
650	0	275.437	-534.057	1590.51	176.138	-540.518	1584.06	277.718	-361.63	1607.7	164.444	-359.249	1601.58	230.688	-315.337	1430.19	255.863	-263.89	1218.81	226.328	-453.061	1368.67	215.254	-511.601	1238.39	160.679	-248.175	1266.52	400.55	-391.766	1394.53	453.271	-387.165	1164.64	451.865	-374.711	1096.01	467.713	-465.719	1009.14	443.713	-491.593	908.566	498.318	-448.217	893.183	489.914	-494.458	805.678
651	0	274.95	-543.386	1590.07	175.659	-549.719	1583.44	277.402	-371.015	1607.83	164.143	-368.498	1601.54	230.674	-324.027	1430.43	256.395	-271.84	1219.25	226.252	-461.403	1368.34	215.31	-519.678	1237.95	161.148	-256.069	1266.89	400.467	-400.511	1394.69	453.024	-396.313	1164.7	451.703	-383.759	1096.07	465.8	-475.674	1009.53	441.085	-501.802	909.32	496.286	-459.562	893.559	486.881	-505.801	806.267
652	0	274.448	-552.679	1589.51	175.161	-558.896	1582.71	277.051	-380.367	1607.83	163.805	-377.726	1601.38	230.577	-332.694	1430.54	256.788	-279.805	1219.53	226.15	-469.723	1367.89	215.362	-527.738	1237.38	161.487	-263.988	1267.11	400.33	-409.147	1394.71	452.741	-405.248	1164.6	451.485	-392.668	1095.96	463.977	-485.51	1009.85	438.576	-512.112	910.068	494.154	-470.839	893.792	483.993	-517.332	806.909
653	0	273.934	-561.935	1588.83	174.649	-568.05	1581.88	276.663	-389.683	1607.7	163.43	-386.931	1601.1	230.396	-341.34	1430.52	257.036	-287.781	1219.65	226.017	-478.029	1367.32	215.405	-535.787	1236.69	161.692	-271.94	1267.21	400.14	-417.679	1394.6	452.43	-413.992	1164.36	451.224	-401.457	1095.71	462.244	-495.239	1010.1	436.178	-522.515	910.803	491.946	-482.045	893.891	481.234	-529.063	807.596
654	0	273.411	-571.15	1588.04	174.126	-577.181	1580.95	276.237	-398.962	1607.45	163.017	-396.115	1600.7	230.129	-349.967	1430.37	257.132	-295.764	1219.62	225.852	-486.327	1366.63	215.435	-543.831	1235.89	161.755	-279.93	1267.17	399.894	-426.115	1394.34	452.1	-422.57	1163.98	450.93	-410.145	1095.31	460.601	-504.88	1010.28	433.881	-532.999	911.519	489.687	-493.185	893.865	478.59	-540.999	808.329
655	0	272.879	-580.326	1587.15	173.592	-586.29	1579.92	275.773	-408.202	1607.07	162.564	-405.278	1600.2	229.774	-358.579	1430.09	257.073	-303.751	1219.44	225.651	-494.621	1365.84	215.445	-551.877	1234.98	161.675	-287.964	1267	399.589	-434.461	1393.96	451.752	-431.011	1163.47	450.612	-418.753	1094.78	459.046	-514.447	1010.4	431.677	-543.552	912.215	487.398	-504.263	893.731	476.045	-553.134	809.104
656	0	272.338	-589.461	1586.15	173.048	-595.377	1578.8	275.267	-417.403	1606.57	162.07	-414.422	1599.59	229.331	-367.178	1429.69	256.859	-311.74	1219.13	225.412	-502.918	1364.94	215.43	-559.933	1233.97	161.45	-296.047	1266.7	399.223	-442.726	1393.45	451.391	-439.344	1162.85	450.277	-427.303	1094.14	457.573	-523.955	1010.46	429.557	-554.164	912.891	485.098	-515.289	893.505	473.584	-565.453	809.924
657	0	271.787	-598.557	1585.06	172.492	-604.445	1577.6	274.718	-426.566	1605.96	161.531	-423.549	1598.89	228.798	-375.766	1429.17	256.491	-319.728	1218.67	225.13	-511.224	1363.95	215.383	-568.005	1232.88	161.08	-304.184	1266.29	398.794	-450.919	1392.83	451.013	-447.6	1162.13	449.928	-435.814	1093.39	456.175	-533.421	1010.47	427.517	-564.822	913.549	482.805	-526.273	893.207	471.197	-577.936	810.788
658	0	271.222	-607.616	1583.87	171.922	-613.495	1576.32	274.122	-435.692	1605.25	160.945	-432.659	1598.09	228.177	-384.349	1428.53	255.97	-327.717	1218.1	224.802	-519.544	1362.88	215.299	-576.101	1231.7	160.566	-312.379	1265.76	398.3	-459.052	1392.1	450.615	-455.806	1161.33	449.566	-444.303	1092.55	454.844	-542.858	1010.44	425.549	-575.516	914.193	480.535	-537.225	892.858	468.873	-590.555	811.698
659	0	270.64	-616.639	1582.6	171.334	-622.529	1574.97	273.476	-444.783	1604.43	160.309	-441.756	1597.2	227.466	-392.928	1427.78	255.304	-335.708	1217.41	224.424	-527.883	1361.72	215.173	-584.228	1230.46	159.912	-320.635	1265.11	397.739	-467.134	1391.27	450.193	-463.987	1160.45	449.19	-452.787	1091.63	453.57	-552.279	1010.37	423.65	-586.236	914.829	478.301	-548.159	892.477	466.608	-603.276	812.654
660	0	270.034	-625.629	1581.24	170.723	-631.549	1573.55	272.778	-453.841	1603.52	159.619	-450.84	1596.24	226.668	-401.507	1426.93	254.5	-343.707	1216.62	223.993	-536.247	1360.5	214.999	-592.394	1229.17	159.124	-328.958	1264.36	397.109	-475.178	1390.35	449.739	-472.165	1159.52	448.797	-461.279	1090.65	452.347	-561.696	1010.27	421.815	-596.977	915.461	476.115	-559.083	892.085	464.396	-616.066	813.655
661	0	269.4	-634.591	1579.82	170.084	-640.557	1572.07	272.022	-462.87	1602.53	158.873	-459.914	1595.21	225.782	-410.092	1425.99	253.568	-351.718	1215.74	223.505	-544.642	1359.22	214.774	-600.605	1227.82	158.208	-337.349	1263.51	396.41	-483.198	1389.36	449.247	-480.36	1158.54	448.381	-469.79	1089.63	451.165	-571.121	1010.16	420.043	-607.733	916.096	473.985	-570.01	891.701	462.238	-628.887	814.699
662	0	268.729	-643.527	1578.33	169.41	-649.555	1570.53	271.207	-471.873	1601.46	158.067	-468.978	1594.12	224.812	-418.685	1424.95	252.517	-359.749	1214.78	222.956	-553.073	1357.88	214.492	-608.868	1226.44	157.172	-345.811	1262.56	395.639	-491.205	1388.29	448.709	-488.587	1157.53	447.936	-478.33	1088.56	450.017	-580.561	1010.03	418.33	-618.5	916.737	471.919	-580.947	891.34	460.135	-641.704	815.778
663	0	268.014	-652.443	1576.78	168.694	-658.544	1568.96	270.329	-480.854	1600.32	157.197	-478.036	1592.96	223.759	-427.293	1423.83	251.361	-367.808	1213.73	222.344	-561.544	1356.49	214.152	-617.189	1225.03	156.026	-354.347	1261.53	394.798	-499.214	1387.17	448.119	-496.858	1156.5	447.456	-486.906	1087.47	448.898	-590.026	1009.88	416.675	-629.275	917.387	469.923	-591.902	891.015	458.088	-654.484	816.888
664	0	267.249	-661.343	1575.19	167.929	-667.528	1567.34	269.385	-489.816	1599.13	156.261	-487.087	1591.76	222.627	-435.92	1422.63	250.11	-375.907	1212.62	221.665	-570.062	1355.07	213.748	-625.576	1223.6	154.779	-362.959	1260.4	393.884	-507.238	1386	447.472	-505.18	1155.45	446.933	-495.524	1086.36	447.8	-599.52	1009.74	415.077	-640.058	918.049	467.999	-602.88	890.735	456.101	-667.197	818.016
665	0	266.425	-670.232	1573.56	167.108	-676.508	1565.69	268.372	-498.764	1597.88	155.257	-496.134	1590.51	221.418	-444.57	1421.36	248.778	-384.056	1211.45	220.916	-578.631	1353.62	213.279	-634.036	1222.15	153.442	-371.649	1259.2	392.9	-515.29	1384.78	446.763	-513.559	1154.38	446.363	-504.188	1085.23	446.721	-609.049	1009.59	413.533	-650.847	918.722	466.15	-613.884	890.507	454.177	-679.815	819.152
666	0	265.535	-679.114	1571.9	166.224	-685.486	1564.02	267.289	-507.702	1596.59	154.182	-505.179	1589.22	220.137	-453.249	1420.03	247.376	-392.268	1210.22	220.095	-587.256	1352.15	212.741	-642.574	1220.7	152.026	-380.418	1257.91	391.845	-523.385	1383.53	445.99	-521.998	1153.31	445.74	-512.902	1084.09	445.657	-618.616	1009.44	412.042	-661.642	919.401	464.376	-624.913	890.33	452.318	-692.319	820.282
667	0	264.574	-687.995	1570.22	165.27	-694.465	1562.34	266.134	-516.635	1595.27	153.034	-514.222	1587.9	218.786	-461.962	1418.63	245.916	-400.555	1208.93	219.199	-595.941	1350.66	212.131	-651.197	1219.25	150.541	-389.267	1256.55	390.72	-531.535	1382.25	445.154	-530.5	1152.23	445.062	-521.669	1082.95	444.604	-628.226	1009.28	410.602	-672.442	920.08	462.678	-635.967	890.202	450.525	-704.693	821.391
668	0	263.535	-696.879	1568.53	164.242	-703.447	1560.65	264.907	-525.568	1593.93	151.813	-523.266	1586.56	217.371	-470.713	1417.19	244.409	-408.93	1207.58	218.226	-604.69	1349.17	211.445	-659.912	1217.8	149	-398.196	1255.12	389.527	-539.753	1380.94	444.255	-539.064	1151.14	444.326	-530.491	1081.8	443.56	-637.878	1009.11	409.211	-683.246	920.751	461.053	-647.041	890.118	448.8	-716.927	822.463
669	0	262.415	-705.772	1566.85	163.134	-712.434	1558.96	263.606	-534.504	1592.56	150.518	-532.312	1585.2	215.896	-479.507	1415.71	242.864	-417.407	1206.19	217.174	-613.507	1347.68	210.68	-668.726	1216.37	147.411	-407.207	1253.62	388.268	-548.052	1379.63	443.296	-547.691	1150.05	443.533	-539.371	1080.64	442.525	-647.575	1008.93	407.867	-694.05	921.401	459.501	-658.129	890.066	447.142	-729.016	823.482
670	0	261.21	-714.679	1565.17	161.942	-721.429	1557.29	262.233	-543.449	1591.19	149.15	-541.362	1583.83	214.366	-488.349	1414.19	241.29	-425.998	1204.74	216.041	-622.396	1346.2	209.829	-677.643	1214.96	145.786	-416.301	1252.06	386.943	-556.441	1378.3	442.28	-556.381	1148.95	442.682	-548.313	1079.48	441.496	-657.315	1008.72	406.566	-704.853	922.017	458.02	-669.223	890.033	445.551	-740.96	824.432
671	0	259.916	-723.603	1563.53	160.664	-730.435	1555.64	260.789	-552.407	1589.82	147.71	-550.419	1582.46	212.785	-497.241	1412.65	239.693	-434.718	1203.25	214.826	-631.359	1344.73	208.89	-686.67	1213.58	144.133	-425.476	1250.45	385.556	-564.933	1376.97	441.212	-565.136	1147.85	441.774	-557.321	1078.32	440.472	-667.098	1008.49	405.308	-715.648	922.582	456.606	-680.312	890.003	444.025	-752.76	825.296
672	0	258.535	-732.551	1561.91	159.298	-739.454	1554.03	259.276	-561.382	1588.46	146.2	-559.483	1581.1	211.157	-506.189	1411.09	238.081	-443.576	1201.71	213.529	-640.398	1343.3	207.857	-695.812	1212.24	142.462	-434.735	1248.78	384.108	-573.536	1375.65	440.096	-573.958	1146.73	440.812	-566.397	1077.15	439.452	-676.922	1008.23	404.09	-726.431	923.079	455.258	-691.386	889.961	442.564	-764.423	826.061
673	0	257.065	-741.525	1560.35	157.843	-748.489	1552.46	257.697	-570.378	1587.13	144.622	-568.557	1579.75	209.489	-515.193	1409.53	236.458	-452.585	1200.12	212.148	-649.515	1341.91	206.726	-705.071	1210.95	140.781	-444.077	1247.07	382.602	-582.258	1374.35	438.935	-582.851	1145.62	439.797	-575.548	1075.98	438.436	-686.785	1007.92	402.91	-737.193	923.49	453.972	-702.43	889.887	441.166	-775.954	826.71
674	0	255.508	-750.531	1558.85	156.301	-757.542	1550.95	256.054	-579.399	1585.82	142.98	-577.644	1578.43	207.784	-524.258	1407.98	234.829	-461.753	1198.5	210.685	-658.711	1340.56	205.492	-714.451	1209.71	139.097	-453.501	1245.33	381.041	-591.106	1373.06	437.733	-591.821	1144.49	438.729	-584.779	1074.82	437.42	-696.685	1007.56	401.769	-747.927	923.797	452.747	-713.429	889.765	439.832	-787.359	827.231
675	0	253.866	-759.571	1557.42	154.673	-766.615	1549.51	254.353	-588.45	1584.56	141.278	-586.746	1577.16	206.047	-533.384	1406.44	233.197	-471.088	1196.85	209.14	-667.985	1339.28	204.151	-723.953	1208.55	137.416	-463.008	1243.56	379.427	-600.084	1371.81	436.49	-600.877	1143.37	437.608	-594.096	1073.66	436.404	-706.62	1007.14	400.667	-758.625	923.983	451.579	-724.367	889.58	438.564	-798.642	827.611
676	0	252.143	-768.65	1556.07	152.961	-775.712	1548.16	252.599	-597.532	1583.35	139.521	-595.864	1575.94	204.283	-542.573	1404.94	231.564	-480.597	1195.18	207.516	-677.337	1338.07	202.701	-733.578	1207.47	135.744	-472.596	1241.79	377.764	-609.196	1370.61	435.206	-610.027	1142.25	436.433	-603.506	1072.51	435.385	-716.585	1006.67	399.603	-769.277	924.035	450.466	-735.225	889.315	437.365	-809.804	827.84
677	0	250.344	-777.77	1554.83	151.172	-784.835	1546.91	250.796	-606.651	1582.22	137.715	-605.002	1574.78	202.495	-551.825	1403.5	229.932	-490.283	1193.51	205.815	-686.766	1336.94	201.141	-743.325	1206.48	134.086	-482.263	1240.02	376.055	-618.444	1369.45	433.878	-619.282	1141.14	435.2	-613.014	1071.39	434.362	-726.577	1006.14	398.581	-779.875	923.94	449.403	-745.984	888.961	436.241	-820.843	827.909
678	0	248.475	-786.935	1553.7	149.309	-793.985	1545.77	248.95	-615.807	1581.16	135.865	-614.16	1573.7	200.689	-561.141	1402.11	228.302	-500.147	1191.85	204.041	-696.268	1335.92	199.471	-753.19	1205.61	132.444	-492.008	1238.27	374.303	-627.827	1368.37	432.503	-628.652	1140.06	433.905	-622.628	1070.31	433.331	-736.593	1005.54	397.6	-790.408	923.691	448.385	-756.624	888.51	435.2	-831.75	827.81
679	0	246.541	-796.144	1552.7	147.379	-803.166	1544.77	247.069	-625.004	1580.2	133.979	-623.342	1572.72	198.868	-570.519	1400.81	226.676	-510.19	1190.22	202.2	-705.841	1335	197.694	-763.171	1204.86	130.821	-501.828	1236.57	372.512	-637.342	1367.37	431.077	-638.149	1139.03	432.543	-632.353	1069.27	432.288	-746.627	1004.9	396.662	-800.865	923.282	447.408	-767.124	887.959	434.249	-842.512	827.543
680	0	244.552	-805.402	1551.84	145.39	-812.379	1543.9	245.158	-634.243	1579.34	132.062	-632.549	1571.84	197.036	-579.958	1399.61	225.054	-520.407	1188.65	200.297	-715.481	1334.21	195.814	-773.261	1204.24	129.217	-511.719	1234.94	370.687	-646.985	1366.47	429.593	-647.784	1138.05	431.109	-642.193	1068.31	431.231	-756.675	1004.2	395.769	-811.237	922.714	446.465	-777.463	887.308	433.4	-853.112	827.106
681	0	242.515	-814.707	1551.13	143.349	-821.626	1543.19	243.225	-643.525	1578.6	130.122	-641.783	1571.08	195.196	-589.456	1398.52	223.436	-530.791	1187.16	198.34	-725.182	1333.56	193.838	-783.451	1203.78	127.633	-521.675	1233.39	368.832	-656.749	1365.67	428.046	-657.565	1137.16	429.597	-652.151	1067.43	430.154	-766.73	1003.47	394.92	-821.509	921.992	445.55	-787.619	886.565	432.663	-863.526	826.505
682	0	240.44	-824.061	1550.59	141.268	-830.908	1542.65	241.277	-652.851	1577.99	128.166	-651.046	1570.46	193.352	-599.011	1397.57	221.821	-541.331	1185.77	196.336	-734.939	1333.05	191.775	-793.732	1203.47	126.067	-531.691	1231.96	366.952	-666.626	1365.01	426.429	-667.498	1136.38	428.002	-662.228	1066.67	429.054	-776.786	1002.71	394.113	-831.67	921.126	444.656	-797.571	885.742	432.047	-873.726	825.75
683	0	238.336	-833.463	1550.22	139.155	-840.227	1542.29	239.321	-662.219	1577.52	126.201	-660.339	1569.97	191.507	-608.618	1396.76	220.21	-552.014	1184.52	194.295	-744.745	1332.7	189.638	-804.093	1203.33	124.516	-541.76	1230.67	365.051	-676.604	1364.48	424.737	-677.588	1135.72	426.321	-672.421	1066.03	427.927	-786.834	1001.94	393.348	-841.705	920.132	443.775	-807.302	884.855	431.563	-883.681	824.856
684	0	236.215	-842.911	1550.04	137.021	-849.583	1542.12	237.364	-671.629	1577.19	124.235	-669.662	1569.64	189.664	-618.273	1396.12	218.6	-562.821	1183.44	192.227	-754.592	1332.5	187.439	-814.517	1203.37	122.977	-551.875	1229.53	363.135	-686.67	1364.11	422.967	-687.832	1135.22	424.552	-682.725	1065.55	426.768	-796.866	1001.18	392.619	-851.6	919.026	442.901	-816.794	883.925	431.215	-893.36	823.844
685	0	234.087	-852.403	1550.05	134.878	-858.976	1542.14	235.412	-681.079	1577.03	122.275	-679.017	1569.47	187.824	-627.971	1395.65	216.991	-573.731	1182.54	190.143	-764.472	1332.48	185.194	-824.991	1203.58	121.445	-562.025	1228.58	361.209	-696.809	1363.9	421.118	-698.225	1134.88	422.696	-693.128	1065.23	425.573	-806.871	1000.45	391.922	-861.34	917.833	442.029	-826.035	882.978	431.007	-902.731	822.736
686	0	231.963	-861.936	1550.25	132.737	-868.406	1542.36	233.472	-690.566	1577.02	120.326	-688.403	1569.46	185.992	-637.705	1395.37	215.38	-584.718	1181.86	188.052	-774.375	1332.63	182.92	-835.496	1203.97	119.915	-572.201	1227.83	359.278	-707.003	1363.86	419.192	-708.755	1134.74	420.755	-703.618	1065.1	424.34	-816.839	999.772	391.25	-870.911	916.579	441.154	-835.016	882.041	430.937	-911.764	821.56
687	0	229.856	-871.505	1550.64	130.611	-877.873	1542.78	231.551	-700.087	1577.17	118.395	-697.821	1569.62	184.168	-647.47	1395.27	213.764	-595.753	1181.41	185.968	-784.293	1332.95	180.636	-846.013	1204.54	118.379	-582.393	1227.29	357.35	-717.234	1363.99	417.191	-719.405	1134.8	418.736	-714.176	1065.17	423.068	-826.756	999.156	390.596	-880.3	915.29	440.275	-843.733	881.144	430.999	-920.437	820.343
688	0	227.777	-881.106	1551.23	128.512	-887.373	1543.39	229.652	-709.636	1577.49	116.489	-707.269	1569.95	182.354	-657.257	1395.38	212.14	-606.804	1181.2	183.901	-794.214	1333.44	178.362	-856.523	1205.26	116.832	-592.59	1226.99	355.428	-727.479	1364.31	415.126	-730.152	1135.07	416.648	-724.781	1065.44	421.757	-836.611	998.627	389.955	-889.496	913.995	439.39	-852.187	880.316	431.181	-928.732	819.114
689	0	225.737	-890.734	1551.99	126.451	-896.907	1544.18	227.783	-719.21	1577.97	114.612	-716.747	1570.44	180.553	-667.058	1395.68	210.504	-617.837	1181.25	181.863	-804.128	1334.09	176.117	-867.006	1206.15	115.264	-602.781	1226.93	353.52	-737.718	1364.79	413.005	-740.967	1135.55	414.502	-735.404	1065.91	420.408	-846.388	998.199	389.317	-898.49	912.725	438.501	-860.387	879.585	431.467	-936.641	817.9
690	0	223.746	-900.381	1552.93	124.44	-906.469	1545.15	225.947	-728.802	1578.61	112.769	-726.253	1571.1	178.766	-676.864	1396.17	208.849	-628.818	1181.55	179.865	-814.025	1334.9	173.92	-877.441	1207.17	113.669	-612.954	1227.11	351.631	-747.926	1365.45	410.843	-751.814	1136.24	412.312	-746.016	1066.59	419.025	-856.072	997.886	388.678	-907.276	911.506	437.615	-868.344	878.977	431.835	-944.166	816.724
691	0	221.816	-910.041	1554.02	122.491	-916.058	1546.28	224.149	-738.406	1579.4	110.965	-735.784	1571.9	176.994	-686.665	1396.85	207.172	-639.71	1182.1	177.918	-823.894	1335.85	171.791	-887.809	1208.32	112.04	-623.098	1227.53	349.768	-758.081	1366.28	408.657	-762.655	1137.11	410.096	-756.585	1067.44	417.614	-865.646	997.699	388.032	-915.852	910.364	436.736	-876.076	878.514	432.261	-951.32	815.608
692	0	219.955	-919.707	1555.26	120.613	-925.669	1547.55	222.393	-748.017	1580.34	109.204	-745.337	1572.85	175.238	-696.453	1397.71	205.467	-650.479	1182.89	176.03	-833.725	1336.94	169.747	-898.092	1209.58	110.368	-633.201	1228.18	347.936	-768.158	1367.25	406.463	-773.445	1138.15	407.87	-767.074	1068.47	416.183	-875.095	997.645	387.375	-924.216	909.322	435.873	-883.602	878.213	432.717	-958.124	814.57
693	0	218.173	-929.37	1556.62	118.815	-935.297	1548.95	220.681	-757.627	1581.4	107.488	-754.911	1573.94	173.501	-706.216	1398.74	203.728	-661.096	1183.89	174.21	-843.507	1338.16	167.804	-908.273	1210.93	108.649	-643.253	1229.06	346.141	-778.136	1368.36	404.282	-784.138	1139.34	405.652	-777.447	1069.65	414.742	-884.4	997.726	386.705	-932.373	908.399	435.035	-890.944	878.086	433.174	-964.609	813.622
694	0	216.477	-939.023	1558.09	117.107	-944.938	1550.46	219.019	-767.23	1582.59	105.821	-764.501	1575.14	171.782	-715.948	1399.93	201.954	-671.533	1185.1	172.465	-853.232	1339.47	165.973	-918.339	1212.36	106.88	-653.244	1230.15	344.388	-787.993	1369.59	402.132	-794.686	1140.65	403.459	-787.667	1070.96	413.301	-893.544	997.942	386.021	-940.325	907.612	434.231	-898.124	878.138	433.605	-970.811	812.776
695	0	214.873	-948.657	1559.64	115.495	-954.586	1552.04	217.406	-776.819	1583.88	104.205	-774.104	1576.46	170.083	-725.637	1401.25	200.14	-681.767	1186.48	170.801	-862.891	1340.88	164.265	-928.275	1213.84	105.057	-663.165	1231.42	342.681	-797.714	1370.91	400.031	-805.04	1142.05	401.31	-797.697	1072.36	411.873	-902.508	998.29	385.325	-948.077	906.972	433.468	-905.163	878.37	433.983	-976.771	812.039
696	0	213.369	-958.266	1561.25	113.984	-964.235	1553.69	215.847	-786.388	1585.26	102.643	-783.716	1577.87	168.406	-735.276	1402.7	198.288	-691.784	1188.01	169.22	-872.477	1342.37	162.686	-938.074	1215.37	103.182	-673.006	1232.87	341.025	-807.281	1372.32	397.996	-815.154	1143.52	399.219	-807.501	1073.84	410.469	-911.275	998.763	384.618	-955.636	906.489	432.752	-912.078	878.777	434.287	-982.531	811.419
697	0	211.966	-967.843	1562.9	112.58	-973.88	1555.38	214.342	-795.932	1586.73	101.134	-793.332	1579.36	166.753	-744.859	1404.25	196.399	-701.575	1189.66	167.726	-881.984	1343.91	161.238	-947.73	1216.92	101.259	-682.76	1234.47	339.423	-816.683	1373.79	396.043	-824.984	1145.03	397.2	-817.047	1075.38	409.104	-919.826	999.351	383.905	-963.006	906.166	432.086	-918.879	879.35	434.499	-988.132	810.923
698	0	210.668	-977.379	1564.57	111.284	-983.514	1557.09	212.893	-805.445	1588.26	99.6821	-802.948	1580.92	165.124	-754.378	1405.88	194.479	-711.139	1191.41	166.318	-891.407	1345.49	159.921	-957.24	1218.47	99.2917	-692.422	1236.19	337.877	-825.914	1375.31	394.181	-834.493	1146.56	395.263	-826.305	1076.94	407.788	-928.146	1000.04	383.19	-970.191	906.006	431.47	-925.575	880.073	434.607	-993.61	810.555
699	0	209.477	-986.87	1566.23	110.1	-993.133	1558.79	211.5	-814.921	1589.84	98.2863	-812.56	1582.52	163.521	-763.828	1407.57	192.535	-720.48	1193.23	164.996	-900.742	1347.1	158.728	-966.605	1220.03	97.2891	-701.987	1238	336.39	-834.967	1376.84	392.42	-843.649	1148.09	393.417	-835.248	1078.51	406.534	-936.219	1000.83	382.479	-977.195	906.007	430.9	-932.166	880.93	434.604	-998.998	810.323
700	0	208.392	-996.309	1567.87	109.026	-1002.73	1560.47	210.166	-824.358	1591.45	96.9477	-822.164	1584.16	161.947	-773.206	1409.32	190.575	-729.61	1195.09	163.758	-909.986	1348.72	157.654	-975.829	1221.58	95.2603	-711.452	1239.9	334.961	-843.844	1378.39	390.763	-852.43	1149.61	391.666	-843.857	1080.07	405.351	-944.032	1001.68	381.778	-984.02	906.164	430.372	-938.65	881.899	434.491	-1004.32	810.229
701	0	207.413	-1005.69	1569.46	108.061	-1012.3	1562.11	208.889	-833.75	1593.07	95.6663	-831.755	1585.82	160.403	-782.508	1411.08	188.608	-738.545	1196.98	162.599	-919.14	1350.33	156.688	-984.917	1223.11	93.2157	-720.815	1241.84	333.59	-852.548	1379.91	389.212	-860.822	1151.11	390.013	-852.117	1081.61	404.247	-951.574	1002.6	381.096	-990.667	906.468	429.875	-945.017	882.957	434.27	-1009.6	810.276
702	0	206.537	-1015.02	1570.99	107.204	-1021.84	1563.68	207.669	-843.096	1594.7	94.4422	-841.329	1587.49	158.891	-791.734	1412.85	186.644	-747.303	1198.86	161.516	-928.203	1351.92	155.818	-993.879	1224.61	91.1663	-730.078	1243.81	332.278	-861.084	1381.41	387.763	-868.819	1152.57	388.455	-860.02	1083.12	403.229	-958.837	1003.56	380.441	-997.138	906.907	429.4	-951.256	884.077	433.95	-1014.84	810.461
703	0	205.761	-1024.28	1572.44	106.451	-1031.35	1565.18	206.506	-852.393	1596.31	93.2747	-850.882	1589.14	157.412	-800.883	1414.61	184.693	-755.907	1200.72	160.504	-937.176	1353.47	155.032	-1002.72	1226.06	89.123	-739.241	1245.79	331.02	-869.463	1382.87	386.41	-876.428	1153.98	386.989	-867.564	1084.58	402.302	-965.818	1004.54	379.821	-1003.44	907.465	428.937	-957.354	885.233	433.545	-1020.06	810.777
704	0	205.082	-1033.48	1573.8	105.797	-1040.81	1566.59	205.4	-861.64	1597.89	92.1634	-860.411	1590.77	155.968	-809.955	1416.34	182.762	-764.379	1202.54	159.557	-946.063	1354.98	154.317	-1011.46	1227.47	87.0957	-748.31	1247.74	329.817	-877.695	1384.26	385.145	-883.663	1155.34	385.607	-874.755	1085.98	401.468	-972.516	1005.52	379.245	-1009.56	908.122	428.474	-963.298	886.395	433.069	-1025.25	811.211
705	0	204.494	-1042.61	1575.05	105.238	-1050.23	1567.9	204.348	-870.835	1599.42	91.107	-869.912	1592.35	154.56	-818.954	1418.01	180.858	-772.743	1204.3	158.669	-954.867	1356.41	153.662	-1020.1	1228.81	85.0937	-757.287	1249.65	328.664	-885.793	1385.58	383.958	-890.546	1156.64	384.301	-881.604	1087.32	400.73	-978.935	1006.48	378.722	-1015.52	908.856	428.001	-969.075	887.534	432.539	-1030.41	811.743
706	0	203.991	-1051.68	1576.18	104.768	-1059.61	1569.09	203.35	-879.978	1600.88	90.1045	-879.383	1593.88	153.188	-827.881	1419.62	178.987	-781.018	1205.98	157.836	-963.592	1357.77	153.054	-1028.65	1230.08	83.1247	-766.178	1251.5	327.56	-893.771	1386.82	382.837	-897.108	1157.87	383.062	-888.133	1088.59	400.085	-985.085	1007.41	378.262	-1021.33	909.638	427.509	-974.674	888.622	431.975	-1035.53	812.347
707	0	203.568	-1060.69	1577.19	104.38	-1068.94	1570.16	202.405	-889.07	1602.27	89.1544	-888.821	1595.33	151.856	-836.741	1421.15	177.152	-789.225	1207.57	157.053	-972.243	1359.03	152.486	-1037.12	1231.26	81.1955	-774.99	1253.27	326.501	-901.645	1387.96	381.77	-903.384	1159.02	381.879	-894.366	1089.77	399.531	-990.978	1008.27	377.871	-1026.98	910.44	426.991	-980.089	889.628	431.395	-1040.61	812.991
708	0	203.219	-1069.63	1578.06	104.068	-1078.23	1571.1	201.509	-898.112	1603.57	88.2549	-898.225	1596.69	150.562	-845.537	1422.59	175.355	-797.379	1209.05	156.314	-980.827	1360.19	151.948	-1045.52	1232.35	79.3114	-783.729	1254.93	325.486	-909.429	1388.99	380.745	-909.416	1160.08	380.741	-900.334	1090.85	399.063	-996.63	1009.06	377.555	-1032.49	911.229	426.442	-985.316	890.527	430.819	-1045.62	813.638
709	0	202.937	-1078.52	1578.79	103.826	-1087.47	1571.9	200.662	-907.105	1604.76	87.4043	-907.594	1597.96	149.308	-854.276	1423.91	173.598	-805.493	1210.4	155.616	-989.348	1361.24	151.435	-1053.85	1233.32	77.477	-792.401	1256.49	324.511	-917.139	1389.9	379.751	-915.247	1161.03	379.638	-906.072	1091.83	398.674	-1002.06	1009.74	377.319	-1037.88	911.974	425.857	-990.357	891.294	430.262	-1050.57	814.251
710	0	202.716	-1087.35	1579.38	103.647	-1096.66	1572.56	199.861	-916.052	1605.84	86.6007	-916.927	1599.12	148.096	-862.961	1425.13	171.88	-813.576	1211.63	154.957	-997.813	1362.16	150.943	-1062.12	1234.16	75.6963	-801.014	1257.92	323.575	-924.789	1390.69	378.778	-920.921	1161.85	378.562	-911.619	1092.69	398.356	-1007.3	1010.31	377.163	-1043.15	912.641	425.235	-995.216	891.906	429.742	-1055.44	814.79
711	0	202.549	-1096.13	1579.82	103.523	-1105.81	1573.07	199.103	-924.957	1606.79	85.8422	-926.225	1600.15	146.927	-871.598	1426.21	170.203	-821.635	1212.72	154.332	-1006.23	1362.95	150.47	-1070.33	1234.86	73.9728	-809.572	1259.22	322.678	-932.393	1391.35	377.818	-926.482	1162.55	377.504	-917.015	1093.42	398.099	-1012.37	1010.75	377.084	-1048.32	913.2	424.574	-999.904	892.346	429.272	-1060.22	815.22
712	0	202.429	-1104.87	1580.12	103.45	-1114.92	1573.43	198.388	-933.824	1607.62	85.127	-935.488	1601.05	145.803	-880.194	1427.16	168.568	-829.671	1213.66	153.742	-1014.6	1363.61	150.015	-1078.49	1235.42	72.3103	-818.081	1260.37	321.819	-939.966	1391.88	376.864	-931.973	1163.1	376.458	-922.301	1094.02	397.893	-1017.3	1011.04	377.076	-1053.4	913.622	423.877	-1004.43	892.602	428.862	-1064.9	815.509
713	0	202.351	-1113.56	1580.26	103.42	-1123.99	1573.65	197.714	-942.655	1608.3	84.4533	-944.719	1601.82	144.725	-888.752	1427.98	166.978	-837.686	1214.45	153.184	-1022.93	1364.12	149.58	-1086.6	1235.82	70.7129	-826.545	1261.38	320.999	-947.519	1392.27	375.913	-937.434	1163.51	375.42	-927.517	1094.48	397.725	-1022.12	1011.17	377.132	-1058.4	913.885	423.145	-1008.82	892.667	428.521	-1069.47	815.632
714	0	202.31	-1122.23	1580.27	103.428	-1133.03	1573.72	197.077	-951.457	1608.84	83.8198	-953.919	1602.44	143.697	-897.28	1428.66	165.437	-845.677	1215.1	152.658	-1031.24	1364.48	149.166	-1094.66	1236.06	69.1848	-834.969	1262.25	320.218	-955.065	1392.53	374.962	-942.9	1163.76	374.387	-932.702	1094.81	397.583	-1026.86	1011.14	377.239	-1063.33	913.968	422.381	-1013.08	892.539	428.254	-1073.94	815.57
715	0	202.299	-1130.87	1580.13	103.467	-1142.03	1573.65	196.479	-960.234	1609.24	83.2251	-963.09	1602.91	142.72	-905.782	1429.19	163.95	-853.641	1215.6	152.166	-1039.51	1364.7	148.777	-1102.68	1236.14	67.7311	-843.357	1262.96	319.477	-962.615	1392.65	374.013	-948.405	1163.87	373.358	-937.893	1095	397.456	-1031.55	1010.95	377.383	-1068.2	913.858	421.591	-1017.24	892.222	428.062	-1078.29	815.314
716	0	202.314	-1139.5	1579.85	103.534	-1151.01	1573.43	195.917	-968.993	1609.5	82.6687	-972.235	1603.24	141.798	-914.263	1429.59	162.524	-861.574	1215.96	151.707	-1047.77	1364.78	148.416	-1110.67	1236.07	66.3568	-851.71	1263.53	318.78	-970.178	1392.64	373.066	-953.976	1163.83	372.334	-943.123	1095.05	397.33	-1036.21	1010.6	377.548	-1073.03	913.547	420.779	-1021.31	891.725	427.943	-1082.53	814.861
717	0	202.352	-1148.11	1579.44	103.624	-1159.97	1573.07	195.392	-977.738	1609.61	82.1503	-981.357	1603.42	140.934	-922.727	1429.85	161.167	-869.471	1216.19	151.283	-1056.01	1364.71	148.087	-1118.63	1235.84	65.0675	-860.033	1263.96	318.129	-977.765	1392.51	372.128	-959.639	1163.65	371.316	-948.422	1094.98	397.196	-1040.88	1010.09	377.717	-1077.8	913.033	419.952	-1025.32	891.064	427.893	-1086.65	814.217
718	0	202.41	-1156.72	1578.91	103.733	-1168.91	1572.58	194.904	-986.474	1609.59	81.67	-990.458	1603.46	140.132	-931.179	1429.98	159.886	-877.329	1216.29	150.896	-1064.24	1364.5	147.793	-1126.58	1235.47	63.8685	-868.328	1264.25	317.526	-985.382	1392.26	371.201	-965.413	1163.35	370.309	-953.814	1094.79	397.045	-1045.58	1009.42	377.873	-1082.54	912.319	419.118	-1029.29	890.254	427.904	-1090.66	813.393
719	0	202.484	-1165.32	1578.26	103.859	-1177.83	1571.96	194.453	-995.206	1609.44	81.2285	-999.541	1603.35	139.395	-939.623	1429.97	158.692	-885.146	1216.28	150.548	-1072.46	1364.16	147.54	-1134.51	1234.97	62.7654	-876.599	1264.41	316.975	-993.038	1391.89	370.294	-971.315	1162.94	369.317	-959.32	1094.5	396.872	-1050.33	1008.61	378.003	-1087.25	911.413	418.285	-1033.24	889.316	427.966	-1094.57	812.402
720	0	202.574	-1173.93	1577.49	104	-1186.75	1571.22	194.041	-1003.94	1609.15	80.827	-1008.61	1603.1	138.726	-948.063	1429.84	157.593	-892.92	1216.17	150.24	-1080.69	1363.68	147.329	-1142.44	1234.35	61.7629	-884.849	1264.44	316.479	-1000.74	1391.43	369.415	-977.357	1162.42	368.348	-964.959	1094.11	396.671	-1055.15	1007.67	378.093	-1091.92	910.326	417.463	-1037.18	888.273	428.067	-1098.38	811.262
721	0	202.679	-1182.55	1576.62	104.154	-1195.65	1570.37	193.67	-1012.68	1608.75	80.4673	-1017.66	1602.72	138.128	-956.503	1429.59	156.597	-900.655	1215.95	149.976	-1088.92	1363.09	147.164	-1150.38	1233.62	60.8653	-893.084	1264.36	316.042	-1008.49	1390.87	368.572	-983.548	1161.83	367.408	-970.741	1093.64	396.441	-1060.07	1006.62	378.135	-1096.57	909.074	416.663	-1041.14	887.144	428.194	-1102.1	809.992
722	0	202.8	-1191.19	1575.65	104.323	-1204.54	1569.41	193.341	-1021.42	1608.23	80.1515	-1026.7	1602.21	137.606	-964.946	1429.23	155.712	-908.353	1215.65	149.758	-1097.17	1362.39	147.048	-1158.33	1232.8	60.0764	-901.308	1264.16	315.667	-1016.3	1390.22	367.775	-989.893	1161.16	366.505	-976.678	1093.1	396.186	-1065.08	1005.45	378.123	-1101.2	907.674	415.898	-1045.12	885.953	428.333	-1105.73	808.608
723	0	202.937	-1199.83	1574.6	104.505	-1213.44	1568.35	193.058	-1030.17	1607.6	79.8819	-1035.73	1601.59	137.162	-973.396	1428.75	154.943	-916.022	1215.27	149.589	-1105.43	1361.58	146.982	-1166.31	1231.89	59.3987	-909.528	1263.85	315.357	-1024.17	1389.48	367.033	-996.396	1160.44	365.65	-982.773	1092.51	395.909	-1070.21	1004.19	378.058	-1105.81	906.141	415.178	-1049.15	884.716	428.471	-1109.29	807.126
724	0	203.092	-1208.5	1573.47	104.705	-1222.32	1567.2	192.824	-1038.93	1606.86	79.6616	-1044.74	1600.85	136.798	-981.857	1428.17	154.297	-923.671	1214.81	149.47	-1113.71	1360.68	146.967	-1174.32	1230.92	58.8342	-917.751	1263.43	315.115	-1032.11	1388.68	366.357	-1003.06	1159.66	364.85	-989.032	1091.85	395.619	-1075.47	1002.85	377.944	-1110.43	904.494	414.517	-1053.23	883.45	428.596	-1112.8	805.556
725	0	203.27	-1217.18	1572.27	104.923	-1231.21	1565.98	192.642	-1047.71	1606.03	79.4933	-1053.75	1600	136.517	-990.332	1427.49	153.775	-931.312	1214.28	149.406	-1122.02	1359.69	147.005	-1182.38	1229.88	58.3839	-925.984	1262.92	314.944	-1040.12	1387.8	365.756	-1009.87	1158.85	364.115	-995.454	1091.16	395.325	-1080.85	1001.43	377.792	-1115.04	902.75	413.928	-1057.38	882.167	428.7	-1116.25	803.909
726	0	203.472	-1225.87	1571.01	105.164	-1240.1	1564.68	192.515	-1056.49	1605.11	79.3804	-1062.74	1599.05	136.321	-998.826	1426.71	153.382	-938.96	1213.67	149.398	-1130.37	1358.62	147.096	-1190.49	1228.79	58.0479	-934.236	1262.31	314.847	-1048.2	1386.86	365.238	-1016.84	1158	363.454	-1002.04	1090.42	395.041	-1086.37	999.947	377.613	-1119.68	900.924	413.423	-1061.61	880.877	428.775	-1119.68	802.187
727	0	203.704	-1234.59	1569.7	105.431	-1248.98	1563.34	192.447	-1065.28	1604.1	79.3259	-1071.72	1598	136.212	-1007.34	1425.84	153.116	-946.631	1213	149.449	-1138.76	1357.49	147.24	-1198.65	1227.65	57.8258	-942.515	1261.6	314.826	-1056.36	1385.85	364.81	-1023.95	1157.12	362.877	-1008.78	1089.64	394.779	-1092.03	998.407	377.426	-1124.34	899.028	413.012	-1065.92	879.583	428.816	-1123.07	800.394
728	0	203.97	-1243.32	1568.35	105.728	-1257.86	1561.94	192.44	-1074.08	1603.02	79.3332	-1080.7	1596.87	136.191	-1015.89	1424.89	152.979	-954.345	1212.26	149.561	-1147.2	1356.29	147.438	-1206.88	1226.48	57.7163	-950.833	1260.8	314.883	-1064.61	1384.79	364.479	-1031.2	1156.2	362.391	-1015.69	1088.82	394.556	-1097.82	996.817	377.25	-1129.04	897.076	412.705	-1070.33	878.289	428.822	-1126.46	798.529
729	0	204.275	-1252.06	1566.97	106.061	-1266.75	1560.51	192.499	-1082.89	1601.86	79.4051	-1089.66	1595.66	136.26	-1024.46	1423.85	152.967	-962.12	1211.45	149.739	-1155.69	1355.04	147.691	-1215.17	1225.27	57.7178	-959.198	1259.91	315.02	-1072.93	1383.67	364.25	-1038.6	1155.24	362.003	-1022.74	1087.96	394.386	-1103.75	995.18	377.105	-1133.79	895.077	412.51	-1074.83	876.995	428.798	-1129.85	796.593
730	0	204.623	-1260.82	1565.57	106.434	-1275.63	1559.06	192.626	-1091.71	1600.63	79.5446	-1098.61	1594.38	136.418	-1033.07	1422.74	153.078	-969.978	1210.56	149.983	-1164.25	1353.74	147.998	-1223.54	1224.02	57.828	-967.62	1258.94	315.239	-1081.35	1382.5	364.126	-1046.12	1154.23	361.719	-1029.95	1087.05	394.282	-1109.81	993.502	377.013	-1138.61	893.04	412.434	-1079.44	875.698	428.748	-1133.26	794.588
731	0	205.019	-1269.6	1564.16	106.853	-1284.52	1557.6	192.824	-1100.53	1599.34	79.7543	-1107.55	1593.03	136.666	-1041.73	1421.55	153.309	-977.937	1209.6	150.298	-1172.87	1352.41	148.361	-1231.99	1222.75	58.0443	-976.109	1257.88	315.541	-1089.85	1381.28	364.111	-1053.78	1153.18	361.544	-1037.3	1086.1	394.26	-1116.01	991.788	376.993	-1143.5	890.973	412.48	-1084.17	874.397	428.685	-1136.7	792.515
732	0	205.468	-1278.39	1562.75	107.322	-1293.42	1556.14	193.095	-1109.35	1598	80.0364	-1116.49	1591.62	137.004	-1050.43	1420.3	153.656	-986.017	1208.57	150.684	-1181.56	1351.06	148.781	-1240.52	1221.45	58.3637	-984.676	1256.74	315.926	-1098.44	1380.02	364.206	-1061.56	1152.09	361.48	-1044.79	1085.11	394.33	-1122.34	990.042	377.064	-1148.5	888.883	412.649	-1089.01	873.088	428.62	-1140.18	790.381
733	0	205.975	-1287.2	1561.36	107.847	-1302.32	1554.68	193.441	-1118.18	1596.62	80.3929	-1125.41	1590.17	137.432	-1059.17	1418.99	154.112	-994.236	1207.45	151.145	-1190.33	1349.69	149.262	-1249.15	1220.14	58.7829	-993.33	1255.53	316.396	-1107.13	1378.71	364.41	-1069.47	1150.94	361.528	-1052.42	1084.07	394.501	-1128.8	988.269	377.24	-1153.6	886.777	412.943	-1093.97	871.77	428.571	-1143.72	788.196
734	0	206.543	-1296.03	1559.98	108.43	-1311.23	1553.25	193.863	-1127.02	1595.2	80.8251	-1134.34	1588.69	137.947	-1067.98	1417.63	154.673	-1002.61	1206.26	151.683	-1199.19	1348.31	149.804	-1257.87	1218.81	59.2983	-1002.08	1254.24	316.95	-1115.9	1377.37	364.721	-1077.51	1149.74	361.688	-1060.19	1082.98	394.783	-1135.39	986.477	377.534	-1158.82	884.662	413.358	-1099.07	870.443	428.555	-1147.35	785.972
735	0	207.176	-1304.87	1558.64	109.077	-1320.15	1551.86	194.363	-1135.87	1593.76	81.3342	-1143.27	1587.18	138.548	-1076.84	1416.24	155.334	-1011.15	1205	152.299	-1208.13	1346.94	150.413	-1266.69	1217.47	59.906	-1010.93	1252.89	317.587	-1124.77	1376.01	365.138	-1085.67	1148.5	361.958	-1068.08	1081.85	395.178	-1142.12	984.673	377.953	-1164.18	882.546	413.891	-1104.3	869.107	428.591	-1151.07	783.725
736	0	207.877	-1313.73	1557.34	109.79	-1329.09	1550.5	194.94	-1144.72	1592.3	81.9207	-1152.2	1585.66	139.234	-1085.77	1414.81	156.087	-1019.87	1203.67	152.996	-1217.16	1345.59	151.089	-1275.62	1216.14	60.6017	-1019.9	1251.48	318.308	-1133.72	1374.63	365.658	-1093.96	1147.21	362.333	-1076.11	1080.68	395.691	-1148.98	982.866	378.501	-1169.69	880.438	414.537	-1109.68	867.768	428.698	-1154.92	781.473
737	0	208.647	-1322.62	1556.09	110.572	-1338.05	1549.21	195.595	-1153.6	1590.86	82.5848	-1161.15	1584.14	140.002	-1094.76	1413.36	156.926	-1028.78	1202.29	153.773	-1226.28	1344.27	151.838	-1284.66	1214.83	61.3811	-1028.99	1250.03	319.111	-1142.75	1373.24	366.276	-1102.37	1145.88	362.809	-1084.26	1079.48	396.321	-1155.97	981.068	379.18	-1175.37	878.349	415.289	-1115.22	866.43	428.896	-1158.91	779.238
738	0	209.489	-1331.53	1554.91	111.423	-1347.03	1547.97	196.328	-1162.48	1589.43	83.3259	-1170.11	1582.65	140.849	-1103.82	1411.92	157.845	-1037.89	1200.85	154.631	-1235.5	1343	152.663	-1293.82	1213.56	62.2391	-1038.2	1248.55	319.994	-1151.87	1371.85	366.989	-1110.91	1144.53	363.38	-1092.53	1078.26	397.067	-1163.1	979.292	379.986	-1181.22	876.292	416.141	-1120.93	865.103	429.201	-1163.08	777.041
739	0	210.401	-1340.48	1553.8	112.346	-1356.05	1546.82	197.136	-1171.4	1588.03	84.143	-1179.08	1581.18	141.772	-1112.95	1410.48	158.837	-1047.18	1199.38	155.571	-1244.82	1341.78	153.567	-1303.1	1212.33	63.1709	-1047.54	1247.05	320.955	-1161.07	1370.49	367.79	-1119.56	1143.17	364.039	-1100.93	1077.03	397.925	-1170.38	977.553	380.916	-1187.26	874.28	417.085	-1126.82	863.799	429.628	-1167.45	774.908
740	0	211.386	-1349.46	1552.79	113.34	-1365.09	1545.76	198.019	-1180.34	1586.68	85.0344	-1188.09	1579.77	142.768	-1122.16	1409.07	159.894	-1056.67	1197.89	156.59	-1254.23	1340.64	154.552	-1312.51	1211.17	64.171	-1057.01	1245.55	321.991	-1170.34	1369.16	368.674	-1128.33	1141.81	364.777	-1109.45	1075.81	398.893	-1177.8	975.867	381.961	-1193.51	872.331	418.113	-1132.91	862.532	430.189	-1172.06	772.861
741	0	212.44	-1358.47	1551.87	114.404	-1374.18	1544.8	198.974	-1189.31	1585.41	85.9978	-1197.12	1578.43	143.832	-1131.44	1407.71	161.011	-1066.36	1196.4	157.688	-1263.73	1339.58	155.619	-1322.05	1210.1	65.2339	-1066.62	1244.06	323.1	-1179.68	1367.89	369.635	-1137.21	1140.48	365.588	-1118.09	1074.61	399.963	-1185.38	974.255	383.115	-1199.97	870.461	419.216	-1139.21	861.317	430.896	-1176.93	770.925
742	0	213.562	-1367.53	1551.07	115.536	-1383.31	1543.95	199.997	-1198.31	1584.22	87.0303	-1206.19	1577.17	144.96	-1140.79	1406.4	162.179	-1076.23	1194.92	158.86	-1273.33	1338.63	156.77	-1331.71	1209.14	66.3542	-1076.36	1242.61	324.276	-1189.09	1366.68	370.666	-1146.2	1139.19	366.464	-1126.85	1073.45	401.13	-1193.11	972.733	384.369	-1206.66	868.692	420.387	-1145.73	860.171	431.753	-1182.09	769.123
743	0	214.75	-1376.64	1550.4	116.734	-1392.48	1543.23	201.086	-1207.36	1583.13	88.1282	-1215.3	1576.01	146.149	-1150.22	1405.17	163.392	-1086.29	1193.49	160.104	-1283.01	1337.8	158.003	-1341.49	1208.31	67.5265	-1086.24	1241.22	325.516	-1198.55	1365.56	371.761	-1155.29	1137.97	367.396	-1135.73	1072.35	402.387	-1201	971.324	385.715	-1213.59	867.044	421.618	-1152.48	859.111	432.765	-1187.57	767.48
744	0	215.999	-1385.79	1549.86	117.992	-1401.7	1542.64	202.236	-1216.45	1582.16	89.2873	-1224.46	1574.97	147.393	-1159.72	1404.04	164.644	-1096.52	1192.11	161.415	-1292.78	1337.09	159.315	-1351.41	1207.62	68.7457	-1096.24	1239.9	326.815	-1208.08	1364.54	372.912	-1164.48	1136.85	368.378	-1144.72	1071.33	403.729	-1209.06	970.047	387.144	-1220.78	865.539	422.902	-1159.49	858.158	433.932	-1193.41	766.016
745	0	217.305	-1394.99	1549.47	119.307	-1410.97	1542.21	203.442	-1225.59	1581.33	90.5028	-1233.66	1574.06	148.687	-1169.3	1403.03	165.931	-1106.92	1190.82	162.786	-1302.62	1336.53	160.702	-1361.44	1207.1	70.0072	-1106.36	1238.68	328.168	-1217.66	1363.64	374.112	-1173.75	1135.83	369.404	-1153.83	1070.42	405.147	-1217.3	968.923	388.651	-1228.23	864.2	424.232	-1166.77	857.327	435.251	-1199.62	764.753
746	0	218.661	-1404.25	1549.25	120.673	-1420.3	1541.94	204.698	-1234.78	1580.65	91.7691	-1242.91	1573.3	150.029	-1178.94	1402.14	167.246	-1117.46	1189.64	164.21	-1312.54	1336.11	162.157	-1371.58	1206.75	71.3069	-1116.59	1237.57	329.568	-1227.29	1362.89	375.356	-1183.1	1134.96	370.468	-1163.06	1069.62	406.636	-1225.71	967.969	390.228	-1235.97	863.049	425.603	-1174.33	856.638	436.718	-1206.23	763.708
747	0	220.062	-1413.56	1549.2	122.083	-1429.67	1541.83	205.998	-1244.02	1580.12	93.0799	-1252.2	1572.69	151.412	-1188.64	1401.39	168.586	-1128.14	1188.58	165.68	-1322.52	1335.86	163.671	-1381.83	1206.6	72.6413	-1126.93	1236.6	331.011	-1236.98	1362.28	376.636	-1192.53	1134.24	371.566	-1172.4	1068.97	408.188	-1234.3	967.205	391.87	-1244	862.108	427.009	-1182.18	856.106	438.323	-1213.25	762.898
748	0	221.5	-1422.91	1549.33	123.531	-1439.1	1541.91	207.336	-1253.3	1579.76	94.4287	-1261.55	1572.25	152.833	-1198.41	1400.81	169.949	-1138.95	1187.68	167.186	-1332.55	1335.78	165.235	-1392.18	1206.65	74.0078	-1137.34	1235.79	332.489	-1246.72	1361.83	377.947	-1202.04	1133.71	372.697	-1181.85	1068.48	409.799	-1243.09	966.644	393.573	-1252.33	861.394	428.446	-1190.33	855.746	440.057	-1220.69	762.339
749	0	222.967	-1432.32	1549.64	125.007	-1448.57	1542.17	208.705	-1262.63	1579.57	95.8081	-1270.94	1571.98	154.288	-1208.23	1400.39	171.333	-1149.86	1186.95	168.72	-1342.63	1335.87	166.836	-1402.61	1206.91	75.4048	-1147.83	1235.14	333.997	-1256.51	1361.56	379.284	-1211.61	1133.37	373.858	-1191.42	1068.16	411.461	-1252.07	966.3	395.332	-1260.98	860.924	429.911	-1198.8	855.568	441.908	-1228.58	762.04
750	0	224.454	-1441.78	1550.14	126.504	-1458.09	1542.62	210.096	-1272.01	1579.56	97.2106	-1280.38	1571.88	155.772	-1218.11	1400.14	172.736	-1160.85	1186.4	170.271	-1352.75	1336.13	168.46	-1413.12	1207.37	76.8316	-1158.36	1234.68	335.526	-1266.36	1361.48	380.645	-1221.26	1133.25	375.051	-1201.1	1068.04	413.168	-1261.25	966.181	397.142	-1269.95	860.71	431.401	-1207.58	855.582	443.862	-1236.92	762.01
751	0	225.952	-1451.28	1550.83	128.013	-1467.65	1543.26	211.502	-1281.43	1579.72	98.6282	-1289.85	1571.96	157.281	-1228.02	1400.08	174.161	-1171.91	1186.05	171.828	-1362.9	1336.55	170.094	-1423.69	1208.02	78.2887	-1168.92	1234.42	337.072	-1276.26	1361.58	382.027	-1230.97	1133.34	376.277	-1210.89	1068.11	414.917	-1270.64	966.294	399	-1279.25	860.761	432.914	-1216.69	855.792	445.907	-1245.71	762.252
752	0	227.452	-1460.82	1551.71	129.524	-1477.25	1544.08	212.915	-1290.88	1580.06	100.053	-1299.36	1572.21	158.813	-1237.97	1400.2	175.609	-1183.01	1185.92	173.38	-1373.06	1337.15	171.722	-1434.29	1208.87	79.7779	-1179.49	1234.35	338.627	-1286.22	1361.87	383.43	-1240.76	1133.66	377.54	-1220.8	1068.38	416.7	-1280.23	966.639	400.901	-1288.88	861.078	434.452	-1226.13	856.2	448.027	-1254.95	762.764
753	0	228.944	-1470.39	1552.77	131.026	-1486.88	1545.09	214.326	-1300.37	1580.57	101.476	-1308.9	1572.62	160.363	-1247.94	1400.51	177.082	-1194.14	1185.99	174.918	-1383.22	1337.9	173.327	-1444.92	1209.89	81.3019	-1190.03	1234.49	340.185	-1296.25	1362.35	384.854	-1250.63	1134.2	378.846	-1230.81	1068.85	418.514	-1290.04	967.214	402.842	-1298.84	861.659	436.015	-1235.9	856.802	450.207	-1264.64	763.539
754	0	230.419	-1479.99	1554	132.512	-1496.53	1546.27	215.728	-1309.88	1581.23	102.89	-1318.46	1573.19	161.93	-1257.93	1400.99	178.586	-1205.26	1186.28	176.431	-1393.38	1338.79	174.893	-1455.55	1211.07	82.8647	-1200.53	1234.83	341.739	-1306.33	1363	386.302	-1260.58	1134.95	380.201	-1240.94	1069.52	420.352	-1300.07	968.01	404.816	-1309.13	862.496	437.606	-1246.01	857.589	452.434	-1274.79	764.563
755	0	231.865	-1489.62	1555.39	133.97	-1506.2	1547.61	217.112	-1319.42	1582.04	104.287	-1328.04	1573.91	163.51	-1267.92	1401.66	180.126	-1216.35	1186.78	177.908	-1403.52	1339.82	176.403	-1466.16	1212.38	84.4707	-1210.96	1235.37	343.284	-1316.48	1363.84	387.778	-1270.63	1135.92	381.611	-1251.18	1070.38	422.211	-1310.31	969.017	406.82	-1319.74	863.575	439.229	-1256.44	858.55	454.693	-1285.39	765.816
756	0	233.275	-1499.26	1556.93	135.392	-1515.88	1549.09	218.471	-1328.97	1582.99	105.658	-1337.62	1574.76	165.101	-1277.91	1402.49	181.707	-1227.38	1187.49	179.34	-1413.63	1340.97	177.841	-1476.73	1213.81	86.1249	-1221.3	1236.1	344.813	-1326.7	1364.83	389.286	-1280.78	1137.06	383.085	-1261.54	1071.42	424.085	-1320.78	970.219	408.846	-1330.67	864.877	440.889	-1267.2	859.669	456.972	-1296.43	767.272
757	0	234.64	-1508.9	1558.59	136.768	-1525.56	1550.7	219.798	-1338.52	1584.05	106.997	-1347.21	1575.72	166.7	-1287.89	1403.47	183.335	-1238.34	1188.38	180.719	-1423.7	1342.22	179.194	-1487.23	1215.31	87.8319	-1231.52	1237.01	346.323	-1336.98	1365.98	390.83	-1291.04	1138.37	384.629	-1272.01	1072.61	425.969	-1331.48	971.597	410.888	-1341.9	866.378	442.591	-1278.29	860.927	459.259	-1307.9	768.903
758	0	235.951	-1518.56	1560.37	138.091	-1535.24	1552.42	221.086	-1348.09	1585.22	108.297	-1356.8	1576.8	168.303	-1297.84	1404.6	185.015	-1249.2	1189.45	182.038	-1433.71	1343.56	180.449	-1497.65	1216.88	89.5958	-1241.6	1238.08	347.806	-1347.32	1367.26	392.415	-1301.42	1139.83	386.252	-1282.59	1073.94	427.857	-1342.4	973.13	412.939	-1353.44	868.052	444.339	-1289.7	862.301	461.544	-1319.8	770.674
759	0	237.201	-1528.2	1562.23	139.353	-1544.91	1554.22	222.33	-1357.65	1586.48	109.553	-1366.37	1577.95	169.909	-1307.75	1405.85	186.75	-1259.93	1190.67	183.291	-1443.67	1344.97	181.594	-1507.95	1218.48	91.4196	-1251.53	1239.3	349.26	-1357.71	1368.66	394.046	-1311.93	1141.39	387.958	-1293.3	1075.39	429.745	-1353.55	974.796	414.99	-1365.26	869.871	446.138	-1301.41	863.769	463.819	-1332.12	772.554
760	0	238.385	-1537.84	1564.15	140.547	-1554.56	1556.08	223.523	-1367.2	1587.81	110.758	-1375.93	1579.18	171.512	-1317.62	1407.22	188.542	-1270.51	1192.03	184.473	-1453.54	1346.42	182.623	-1518.13	1220.09	93.3043	-1261.29	1240.65	350.678	-1368.16	1370.16	395.724	-1322.58	1143.04	389.752	-1304.13	1076.93	431.625	-1364.93	976.573	417.032	-1377.35	871.806	447.993	-1313.44	865.311	466.078	-1344.84	774.509
761	0	239.495	-1547.47	1566.12	141.668	-1564.19	1557.98	224.663	-1376.74	1589.2	111.91	-1385.47	1580.46	173.11	-1327.43	1408.68	190.392	-1280.92	1193.51	185.581	-1463.34	1347.91	183.53	-1528.16	1221.68	95.2489	-1270.86	1242.1	352.058	-1378.64	1371.75	397.452	-1333.38	1144.76	391.636	-1315.08	1078.54	433.49	-1376.52	978.437	419.056	-1389.69	873.827	449.906	-1325.76	866.903	468.314	-1357.94	776.51
762	0	240.529	-1557.08	1568.1	142.712	-1573.78	1559.9	225.746	-1386.27	1590.62	113.006	-1394.97	1581.77	174.697	-1337.18	1410.22	192.295	-1291.15	1195.08	186.613	-1473.05	1349.41	184.315	-1538.03	1223.24	97.2498	-1280.25	1243.65	353.394	-1389.14	1373.39	399.227	-1344.33	1146.5	393.61	-1326.16	1080.19	435.333	-1388.34	980.369	421.049	-1402.28	875.91	451.878	-1338.37	868.53	470.526	-1371.43	778.534
763	0	241.484	-1566.66	1570.08	143.675	-1583.34	1561.8	226.771	-1395.77	1592.07	114.042	-1404.45	1583.11	176.269	-1346.85	1411.81	194.247	-1301.18	1196.72	187.57	-1482.65	1350.91	184.981	-1547.74	1224.75	99.3012	-1289.44	1245.26	354.684	-1399.66	1375.08	401.045	-1355.43	1148.27	395.669	-1337.36	1081.87	437.146	-1400.38	982.348	423.002	-1415.09	878.032	453.909	-1351.26	870.176	472.71	-1385.27	780.562
764	0	242.357	-1576.21	1572.04	144.555	-1592.86	1563.68	227.735	-1405.25	1593.53	115.019	-1413.88	1584.44	177.821	-1356.44	1413.45	196.24	-1311.01	1198.42	188.453	-1492.16	1352.39	185.534	-1557.27	1226.2	101.394	-1298.44	1246.92	355.925	-1410.16	1376.8	402.901	-1366.69	1150.02	397.809	-1348.68	1083.56	438.919	-1412.62	984.358	424.902	-1428.11	880.172	455.997	-1364.42	871.83	474.865	-1399.44	782.583
765	0	243.148	-1585.74	1573.95	145.352	-1602.33	1565.5	228.64	-1414.71	1594.97	115.936	-1423.27	1585.77	179.347	-1365.95	1415.11	198.263	-1320.62	1200.14	189.265	-1501.56	1353.84	185.982	-1566.62	1227.58	103.519	-1307.25	1248.6	357.114	-1420.65	1378.53	404.784	-1378.09	1151.76	400.019	-1360.13	1085.24	440.645	-1425.07	986.386	426.739	-1441.32	882.318	458.136	-1377.84	873.486	476.989	-1413.93	784.594
766	0	243.857	-1595.22	1575.8	146.067	-1611.75	1567.25	229.486	-1424.13	1596.4	116.794	-1432.61	1587.08	180.841	-1375.36	1416.78	200.305	-1330.03	1201.88	190.01	-1510.84	1355.25	186.338	-1575.8	1228.89	105.662	-1315.88	1250.3	358.249	-1431.09	1380.26	406.685	-1389.63	1153.46	402.286	-1371.69	1086.89	442.314	-1437.71	988.42	428.501	-1454.72	884.459	460.318	-1391.51	875.14	479.081	-1428.72	786.595
767	0	244.487	-1604.67	1577.57	146.7	-1621.12	1568.91	230.275	-1433.52	1597.8	117.594	-1441.9	1588.35	182.298	-1384.68	1418.44	202.353	-1339.22	1203.61	190.693	-1520.02	1356.61	186.617	-1584.8	1230.11	107.811	-1324.34	1251.98	359.329	-1441.47	1381.97	408.591	-1401.27	1155.12	404.597	-1383.35	1088.52	443.919	-1450.52	990.451	430.178	-1468.27	886.589	462.534	-1405.41	876.791	481.138	-1443.78	788.595
768	0	245.04	-1614.07	1579.24	147.254	-1630.42	1570.48	231.01	-1442.86	1599.15	118.34	-1451.13	1589.57	183.714	-1393.9	1420.07	204.394	-1348.21	1205.31	191.319	-1529.08	1357.9	186.832	-1593.64	1231.26	109.95	-1332.64	1253.64	360.353	-1451.77	1383.65	410.49	-1413	1156.74	406.934	-1395.11	1090.1	445.452	-1463.5	992.472	431.762	-1481.97	888.706	464.771	-1419.53	878.442	483.155	-1459.09	790.603
769	0	245.519	-1623.43	1580.81	147.733	-1639.67	1571.93	231.694	-1452.17	1600.46	119.035	-1460.3	1590.74	185.083	-1403.02	1421.66	206.415	-1357.01	1206.98	191.896	-1538.03	1359.12	187.002	-1602.33	1232.32	112.065	-1340.8	1255.26	361.322	-1461.98	1385.29	412.368	-1424.79	1158.31	409.28	-1406.95	1091.62	446.906	-1476.62	994.479	433.243	-1495.81	890.809	467.015	-1433.87	880.095	485.127	-1474.62	792.633
770	0	245.928	-1632.73	1582.26	148.142	-1648.84	1573.25	232.33	-1461.43	1601.69	119.682	-1469.41	1591.85	186.401	-1412.04	1423.2	208.402	-1365.64	1208.59	192.43	-1546.87	1360.26	187.141	-1610.88	1233.3	114.143	-1348.83	1256.82	362.235	-1472.07	1386.88	414.214	-1436.62	1159.83	411.617	-1418.85	1093.09	448.278	-1489.86	996.466	434.617	-1509.76	892.899	469.251	-1448.39	881.753	487.047	-1490.36	794.695
771	0	246.274	-1641.99	1583.59	148.485	-1657.95	1574.46	232.923	-1470.64	1602.85	120.286	-1478.45	1592.88	187.665	-1420.96	1424.67	210.344	-1374.1	1210.13	192.928	-1555.6	1361.31	187.266	-1619.29	1234.19	116.168	-1356.76	1258.3	363.095	-1482.05	1388.4	416.016	-1448.44	1161.3	413.926	-1430.81	1094.49	449.563	-1503.21	998.43	435.879	-1523.82	894.979	471.459	-1463.08	883.415	488.905	-1506.27	796.8
772	0	246.56	-1651.18	1584.79	148.767	-1666.98	1575.52	233.477	-1479.8	1603.94	120.85	-1487.43	1593.82	188.871	-1429.79	1426.05	212.23	-1382.42	1211.59	193.398	-1564.24	1362.27	187.39	-1627.59	1235	118.128	-1364.59	1259.71	363.903	-1491.89	1389.84	417.766	-1460.24	1162.7	416.191	-1442.8	1095.82	450.76	-1516.63	1000.37	437.026	-1537.96	897.048	473.622	-1477.92	885.079	490.691	-1522.34	798.954
773	0	246.794	-1660.32	1585.86	148.995	-1675.95	1576.46	233.997	-1488.91	1604.93	121.38	-1496.34	1594.68	190.019	-1438.53	1427.35	214.049	-1390.62	1212.96	193.845	-1572.78	1363.13	187.527	-1635.78	1235.72	120.011	-1372.35	1261.02	364.66	-1501.59	1391.21	419.455	-1471.98	1164.03	418.398	-1454.8	1097.07	451.867	-1530.11	1002.27	438.057	-1552.18	899.107	475.72	-1492.89	886.742	492.393	-1538.54	801.158
774	0	246.981	-1669.41	1586.79	149.175	-1684.85	1577.26	234.486	-1497.96	1605.82	121.879	-1505.18	1595.44	191.105	-1447.18	1428.55	215.792	-1398.7	1214.23	194.276	-1581.23	1363.9	187.688	-1643.87	1236.34	121.806	-1380.05	1262.23	365.371	-1511.14	1392.47	421.078	-1483.63	1165.3	420.533	-1466.8	1098.22	452.886	-1543.61	1004.13	438.971	-1566.45	901.154	477.735	-1507.95	888.395	493.999	-1554.85	803.41
775	0	247.127	-1678.43	1587.58	149.314	-1693.67	1577.92	234.95	-1506.95	1606.61	122.351	-1513.95	1596.1	192.129	-1455.75	1429.63	217.451	-1406.7	1215.39	194.697	-1589.59	1364.56	187.881	-1651.88	1236.85	123.505	-1387.71	1263.33	366.036	-1520.55	1393.63	422.632	-1495.18	1166.48	422.585	-1478.78	1099.29	453.818	-1557.12	1005.95	439.772	-1580.76	903.183	479.648	-1523.1	890.028	495.495	-1571.24	805.702
776	0	247.24	-1687.39	1588.25	149.417	-1702.43	1578.45	235.392	-1515.89	1607.29	122.802	-1522.65	1596.66	193.09	-1464.25	1430.61	219.018	-1414.62	1216.43	195.111	-1597.88	1365.11	188.112	-1659.82	1237.27	125.098	-1395.34	1264.31	366.66	-1529.8	1394.69	424.113	-1506.61	1167.57	424.547	-1490.72	1100.25	454.664	-1570.61	1007.72	440.461	-1595.1	905.19	481.443	-1538.29	891.628	496.87	-1587.7	808.022
777	0	247.325	-1696.3	1588.77	149.491	-1711.12	1578.85	235.816	-1524.77	1607.86	123.234	-1531.3	1597.1	193.989	-1472.67	1431.46	220.486	-1422.48	1217.35	195.523	-1606.11	1365.55	188.385	-1667.69	1237.57	126.578	-1402.95	1265.17	367.244	-1538.91	1395.62	425.522	-1517.91	1168.56	426.412	-1502.61	1101.09	455.427	-1584.05	1009.42	441.041	-1609.43	907.165	483.106	-1553.5	893.183	498.111	-1604.19	810.356
778	0	247.388	-1705.14	1589.17	149.544	-1719.74	1579.13	236.225	-1533.59	1608.31	123.651	-1539.87	1597.44	194.825	-1481.03	1432.19	221.851	-1430.28	1218.15	195.935	-1614.27	1365.88	188.702	-1675.5	1237.77	127.941	-1410.56	1265.92	367.791	-1547.87	1396.42	426.857	-1529.08	1169.44	428.176	-1514.43	1101.83	456.107	-1597.43	1011.06	441.514	-1623.74	909.101	484.623	-1568.7	894.678	499.207	-1620.7	812.689
779	0	247.436	-1713.93	1589.43	149.58	-1728.31	1579.28	236.622	-1542.37	1608.64	124.056	-1548.4	1597.66	195.598	-1489.33	1432.79	223.106	-1438.05	1218.82	196.349	-1622.38	1366.1	189.063	-1683.28	1237.85	129.18	-1418.18	1266.54	368.303	-1556.69	1397.1	428.118	-1540.1	1170.2	429.836	-1526.17	1102.43	456.707	-1610.73	1012.62	441.885	-1638.02	910.988	485.984	-1583.87	896.099	500.15	-1637.2	815.002
780	0	247.474	-1722.67	1589.57	149.605	-1736.83	1579.31	237.008	-1551.09	1608.85	124.45	-1556.87	1597.78	196.31	-1497.59	1433.27	224.247	-1445.78	1219.36	196.766	-1630.44	1366.21	189.464	-1691.01	1237.81	130.293	-1425.82	1267.03	368.781	-1565.38	1397.64	429.306	-1550.99	1170.83	431.39	-1537.84	1102.91	457.225	-1623.92	1014.1	442.154	-1652.24	912.817	487.183	-1598.97	897.435	500.932	-1653.66	817.281
781	0	247.508	-1731.35	1589.58	149.626	-1745.29	1579.23	237.387	-1559.76	1608.94	124.836	-1565.29	1597.78	196.961	-1505.8	1433.62	225.27	-1453.5	1219.77	197.186	-1638.46	1366.22	189.901	-1698.73	1237.67	131.278	-1433.48	1267.41	369.228	-1573.94	1398.04	430.42	-1561.75	1171.33	432.836	-1549.41	1103.26	457.663	-1637	1015.49	442.324	-1666.39	914.579	488.213	-1614	898.675	501.545	-1670.06	819.508
782	0	247.541	-1739.99	1589.47	149.646	-1753.72	1579.03	237.757	-1568.39	1608.92	125.214	-1573.67	1597.68	197.552	-1513.97	1433.84	226.173	-1461.19	1220.05	197.606	-1646.45	1366.11	190.369	-1706.42	1237.41	132.133	-1441.17	1267.67	369.643	-1582.38	1398.3	431.459	-1572.38	1171.69	434.175	-1560.88	1103.48	458.02	-1649.96	1016.78	442.396	-1680.45	916.265	489.071	-1628.91	899.81	501.986	-1686.39	821.672
783	0	247.578	-1748.59	1589.23	149.671	-1762.11	1578.72	238.12	-1576.98	1608.79	125.584	-1582.01	1597.47	198.084	-1522.11	1433.94	226.954	-1468.88	1220.2	198.026	-1654.41	1365.9	190.859	-1714.12	1237.05	132.86	-1448.89	1267.81	370.028	-1590.71	1398.43	432.422	-1582.9	1171.91	435.404	-1572.26	1103.56	458.292	-1662.78	1017.98	442.369	-1694.4	917.87	489.756	-1643.7	900.835	502.252	-1702.6	823.759
784	0	247.622	-1757.14	1588.88	149.702	-1770.47	1578.31	238.476	-1585.53	1608.54	125.946	-1590.33	1597.16	198.557	-1530.22	1433.92	227.613	-1476.56	1220.22	198.44	-1662.35	1365.6	191.365	-1721.81	1236.59	133.461	-1456.65	1267.84	370.381	-1598.94	1398.41	433.308	-1593.3	1171.99	436.524	-1583.53	1103.52	458.479	-1675.45	1019.07	442.244	-1708.22	919.389	490.269	-1658.35	901.748	502.342	-1718.69	825.76
785	0	247.675	-1765.66	1588.42	149.742	-1778.8	1577.8	238.822	-1594.05	1608.19	126.299	-1598.63	1596.77	198.973	-1538.31	1433.78	228.152	-1484.24	1220.13	198.847	-1670.28	1365.19	191.875	-1729.52	1236.04	133.938	-1464.45	1267.77	370.703	-1607.08	1398.27	434.114	-1603.61	1171.94	437.534	-1594.69	1103.36	458.579	-1687.98	1020.05	442.02	-1721.91	920.817	490.612	-1672.83	902.549	502.254	-1734.61	827.668
786	0	247.739	-1774.15	1587.84	149.793	-1787.12	1577.19	239.158	-1602.54	1607.74	126.641	-1606.91	1596.28	199.331	-1546.38	1433.53	228.572	-1491.92	1219.91	199.24	-1678.2	1364.69	192.382	-1737.24	1235.41	134.298	-1472.28	1267.59	370.991	-1615.15	1397.99	434.838	-1613.81	1171.76	438.434	-1605.75	1103.07	458.588	-1700.35	1020.93	441.694	-1735.45	922.153	490.787	-1687.14	903.241	501.991	-1750.36	829.477
787	0	247.812	-1782.61	1587.16	149.854	-1795.42	1576.48	239.481	-1611.01	1607.19	126.97	-1615.18	1595.71	199.634	-1554.44	1433.16	228.878	-1499.62	1219.59	199.615	-1686.11	1364.11	192.876	-1744.99	1234.7	134.545	-1480.17	1267.31	371.245	-1623.15	1397.59	435.476	-1623.93	1171.46	439.222	-1616.69	1102.68	458.504	-1712.56	1021.71	441.266	-1748.82	923.396	490.798	-1701.26	903.829	501.555	-1765.9	831.185
788	0	247.894	-1791.05	1586.37	149.926	-1803.72	1575.68	239.788	-1619.46	1606.56	127.282	-1623.44	1595.06	199.882	-1562.5	1432.7	229.075	-1507.33	1219.15	199.966	-1694.04	1363.44	193.347	-1752.77	1233.93	134.687	-1488.09	1266.93	371.462	-1631.1	1397.07	436.027	-1633.96	1171.05	439.898	-1627.53	1102.18	458.326	-1724.61	1022.39	440.733	-1762.03	924.548	490.65	-1715.19	904.318	500.948	-1781.22	832.79
789	0	247.984	-1799.47	1585.49	150.005	-1812.01	1574.8	240.076	-1627.9	1605.85	127.574	-1631.71	1594.35	200.074	-1570.56	1432.13	229.17	-1515.06	1218.62	200.288	-1701.97	1362.69	193.786	-1760.58	1233.09	134.733	-1496.06	1266.46	371.64	-1639.02	1396.43	436.486	-1643.9	1170.53	440.462	-1638.25	1101.6	458.052	-1736.49	1022.96	440.094	-1775.05	925.609	490.348	-1728.91	904.716	500.177	-1796.28	834.291
790	0	248.078	-1807.87	1584.52	150.088	-1820.31	1573.85	240.341	-1636.32	1605.06	127.842	-1639.98	1593.57	200.212	-1578.62	1431.47	229.17	-1522.82	1218	200.575	-1709.93	1361.87	194.184	-1768.43	1232.2	134.69	-1504.08	1265.91	371.777	-1646.91	1395.7	436.852	-1653.76	1169.92	440.912	-1648.86	1100.93	457.681	-1748.21	1023.43	439.348	-1787.89	926.58	489.898	-1742.42	905.031	499.245	-1811.08	835.687
791	0	248.172	-1816.27	1583.47	150.172	-1828.6	1572.82	240.578	-1644.73	1604.21	128.082	-1648.26	1592.72	200.297	-1586.7	1430.71	229.085	-1530.62	1217.28	200.82	-1717.91	1360.98	194.535	-1776.32	1231.27	134.568	-1512.15	1265.26	371.869	-1654.79	1394.87	437.121	-1663.54	1169.24	441.25	-1659.36	1100.19	457.214	-1759.77	1023.81	438.496	-1800.52	927.464	489.305	-1755.71	905.268	498.158	-1825.59	836.978
792	0	248.261	-1824.65	1582.34	150.251	-1836.91	1571.72	240.783	-1653.14	1603.28	128.289	-1656.54	1591.83	200.327	-1594.79	1429.87	228.922	-1538.46	1216.48	201.018	-1725.92	1360.03	194.829	-1784.26	1230.29	134.376	-1520.26	1264.54	371.914	-1662.67	1393.95	437.293	-1673.24	1168.48	441.475	-1669.75	1099.38	456.651	-1771.17	1024.09	437.538	-1812.95	928.261	488.576	-1768.78	905.432	496.924	-1839.81	838.16
793	0	248.339	-1833.02	1581.15	150.319	-1845.22	1570.57	240.95	-1661.53	1602.3	128.458	-1664.84	1590.88	200.303	-1602.9	1428.94	228.692	-1546.35	1215.61	201.163	-1733.97	1359.02	195.061	-1792.26	1229.28	134.123	-1528.43	1263.72	371.91	-1670.57	1392.95	437.367	-1682.87	1167.66	441.59	-1680.03	1098.52	455.995	-1782.4	1024.28	436.478	-1825.18	928.968	487.719	-1781.61	905.526	495.549	-1853.7	839.23
794	0	248.4	-1841.39	1579.91	150.37	-1853.54	1569.38	241.076	-1669.93	1601.26	128.584	-1673.15	1589.88	200.226	-1611.04	1427.94	228.404	-1554.3	1214.66	201.25	-1742.07	1357.95	195.225	-1800.31	1228.24	133.819	-1536.66	1262.83	371.854	-1678.5	1391.87	437.343	-1692.42	1166.78	441.596	-1690.2	1097.6	455.25	-1793.47	1024.36	435.321	-1837.19	929.584	486.742	-1794.22	905.551	494.04	-1867.28	840.182
795	0	248.436	-1849.76	1578.62	150.396	-1861.87	1568.15	241.155	-1678.32	1600.17	128.663	-1681.48	1588.83	200.095	-1619.22	1426.85	228.066	-1562.32	1213.64	201.273	-1750.22	1356.84	195.316	-1808.43	1227.17	133.47	-1544.94	1261.85	371.743	-1686.48	1390.73	437.224	-1701.9	1165.85	441.497	-1700.26	1096.64	454.42	-1804.38	1024.35	434.074	-1848.99	930.104	485.655	-1806.59	905.504	492.407	-1880.52	841.008
796	0	248.44	-1858.12	1577.3	150.391	-1870.21	1566.88	241.181	-1686.7	1599.03	128.688	-1689.82	1587.75	199.91	-1627.44	1425.69	227.688	-1570.41	1212.55	201.228	-1758.43	1355.68	195.33	-1816.63	1226.08	133.085	-1553.29	1260.79	371.576	-1694.52	1389.53	437.012	-1711.31	1164.87	441.299	-1710.22	1095.63	453.511	-1815.15	1024.23	432.743	-1860.57	930.52	484.467	-1818.72	905.38	490.658	-1893.43	841.698
797	0	248.405	-1866.49	1575.96	150.348	-1878.57	1565.6	241.151	-1695.09	1597.84	128.657	-1698.17	1586.62	199.67	-1635.71	1424.46	227.276	-1578.59	1211.4	201.111	-1766.71	1354.47	195.263	-1824.9	1224.96	132.67	-1561.71	1259.65	371.351	-1702.62	1388.27	436.712	-1720.65	1163.85	441.006	-1720.08	1094.58	452.531	-1825.76	1024.01	431.339	-1871.93	930.824	483.191	-1830.61	905.174	488.802	-1906.02	842.24
798	0	248.323	-1874.86	1574.61	150.258	-1886.94	1564.32	241.059	-1703.47	1596.61	128.563	-1706.53	1585.45	199.375	-1644.03	1423.16	226.835	-1586.86	1210.17	200.918	-1775.07	1353.24	195.113	-1833.27	1223.83	132.231	-1570.21	1258.42	371.067	-1710.81	1386.95	436.328	-1729.95	1162.78	440.624	-1729.84	1093.47	451.488	-1836.22	1023.67	429.874	-1883.08	931.004	481.839	-1842.27	904.874	486.851	-1918.27	842.62
799	0	248.189	-1883.23	1573.25	150.115	-1895.32	1563.03	240.902	-1711.85	1595.34	128.404	-1714.91	1584.25	199.024	-1652.41	1421.8	226.373	-1595.24	1208.88	200.648	-1783.51	1351.97	194.877	-1841.73	1222.68	131.771	-1578.78	1257.1	370.722	-1719.08	1385.6	435.868	-1739.19	1161.66	440.16	-1739.51	1092.32	450.39	-1846.55	1023.22	428.359	-1894.01	931.049	480.425	-1853.69	904.471	484.817	-1930.2	842.824
800	0	247.995	-1891.61	1571.9	149.913	-1903.71	1561.76	240.676	-1720.24	1594.04	128.176	-1723.29	1583.03	198.617	-1660.85	1420.37	225.89	-1603.74	1207.52	200.298	-1792.03	1350.68	194.555	-1850.31	1221.51	131.293	-1587.45	1255.7	370.316	-1727.45	1384.2	435.337	-1748.39	1160.49	439.621	-1749.11	1091.12	449.246	-1856.74	1022.64	426.807	-1904.73	930.945	478.964	-1864.87	903.955	482.711	-1941.82	842.837
801	0	247.736	-1899.99	1570.58	149.647	-1912.12	1560.51	240.378	-1728.62	1592.71	127.877	-1731.69	1581.77	198.154	-1669.36	1418.9	225.391	-1612.37	1206.09	199.867	-1800.65	1349.38	194.147	-1858.99	1220.34	130.801	-1596.2	1254.21	369.848	-1735.93	1382.77	434.74	-1757.55	1159.27	439.013	-1758.63	1089.87	448.065	-1866.8	1021.93	425.232	-1915.25	930.681	477.469	-1875.82	903.312	480.549	-1953.12	842.644
802	0	247.409	-1908.39	1569.28	149.313	-1920.54	1559.29	240.007	-1737.01	1591.36	127.504	-1740.11	1580.5	197.634	-1677.95	1417.37	224.874	-1621.14	1204.59	199.357	-1809.37	1348.06	193.652	-1867.8	1219.17	130.294	-1605.06	1252.64	369.321	-1744.51	1381.31	434.085	-1766.7	1158	438.342	-1768.09	1088.57	446.856	-1876.74	1021.1	423.647	-1925.56	930.245	475.957	-1886.54	902.535	478.347	-1964.13	842.232
803	0	247.009	-1916.8	1568.02	148.906	-1928.98	1558.11	239.561	-1745.4	1589.99	127.056	-1748.53	1579.22	197.057	-1686.61	1415.8	224.341	-1630.05	1203.02	198.767	-1818.18	1346.75	193.074	-1876.73	1217.99	129.772	-1614.03	1250.98	368.734	-1753.2	1379.83	433.376	-1775.84	1156.68	437.615	-1777.5	1087.21	445.626	-1886.57	1020.12	422.066	-1935.67	929.625	474.441	-1897.03	901.615	476.122	-1974.84	841.589
804	0	246.534	-1925.22	1566.81	148.425	-1937.43	1556.98	239.038	-1753.8	1588.62	126.533	-1756.97	1577.93	196.422	-1695.36	1414.21	223.788	-1639.13	1201.38	198.1	-1827.1	1345.46	192.415	-1885.8	1216.84	129.236	-1623.1	1249.24	368.088	-1762.01	1378.33	432.617	-1784.98	1155.31	436.835	-1786.87	1085.81	444.384	-1896.28	1019.02	420.5	-1945.59	928.815	472.937	-1907.3	900.547	473.892	-1985.27	840.707
805	0	245.985	-1933.66	1565.66	147.869	-1945.91	1555.91	238.441	-1762.22	1587.25	125.935	-1765.43	1576.65	195.731	-1704.18	1412.59	223.214	-1648.37	1199.68	197.36	-1836.12	1344.18	191.681	-1895	1215.7	128.682	-1632.3	1247.43	367.388	-1770.92	1376.84	431.812	-1794.13	1153.89	436.007	-1796.2	1084.36	443.135	-1905.89	1017.78	418.963	-1955.32	927.81	471.459	-1917.33	899.329	471.676	-1995.41	839.58
806	0	245.36	-1942.13	1564.57	147.239	-1954.41	1554.91	237.771	-1770.64	1585.91	125.264	-1773.91	1575.39	194.983	-1713.08	1410.96	222.615	-1657.78	1197.92	196.551	-1845.24	1342.94	190.876	-1904.36	1214.59	128.109	-1641.62	1245.56	366.634	-1779.94	1375.36	430.961	-1803.31	1152.43	435.132	-1805.52	1082.88	441.885	-1915.4	1016.43	417.463	-1964.87	926.609	470.017	-1927.14	897.966	469.496	-2005.27	838.208
807	0	244.662	-1950.62	1563.56	146.535	-1962.93	1553.98	237.029	-1779.09	1584.59	124.522	-1782.4	1574.16	194.18	-1722.07	1409.33	221.987	-1667.38	1196.11	195.678	-1854.47	1341.75	190.008	-1913.85	1213.54	127.515	-1651.07	1243.63	365.831	-1789.06	1373.9	430.066	-1812.53	1150.94	434.213	-1814.81	1081.37	440.638	-1924.81	1014.96	416.011	-1974.23	925.216	468.624	-1936.72	896.463	467.373	-2014.85	836.593
808	0	243.893	-1959.13	1562.63	145.76	-1971.48	1553.13	236.22	-1787.56	1583.33	123.713	-1790.93	1572.98	193.324	-1731.14	1407.73	221.326	-1677.16	1194.27	194.749	-1863.8	1340.63	189.085	-1923.49	1212.54	126.896	-1660.64	1241.67	364.982	-1798.27	1372.48	429.126	-1821.78	1149.43	433.249	-1824.1	1079.84	439.398	-1934.13	1013.39	414.614	-1983.42	923.639	467.288	-1946.08	894.834	465.327	-2024.14	834.745
809	0	243.058	-1967.68	1561.8	144.919	-1980.06	1552.38	235.347	-1796.06	1582.12	122.842	-1799.48	1571.86	192.416	-1740.29	1406.16	220.629	-1687.12	1192.41	193.771	-1873.22	1339.58	188.118	-1933.27	1211.62	126.249	-1670.35	1239.69	364.092	-1807.58	1371.11	428.141	-1831.08	1147.92	432.24	-1833.38	1078.33	438.168	-1943.35	1011.73	413.277	-1992.42	921.895	466.017	-1955.2	893.095	463.381	-2033.15	832.681
810	0	242.162	-1976.27	1561.07	144.017	-1988.67	1551.73	234.416	-1804.59	1581	121.913	-1808.06	1570.82	191.46	-1749.52	1404.65	219.89	-1697.25	1190.55	192.752	-1882.73	1338.62	187.116	-1943.2	1210.79	125.571	-1680.19	1237.72	363.167	-1816.96	1369.81	427.109	-1840.43	1146.43	431.184	-1842.64	1076.83	436.951	-1952.47	1010.02	412.006	-2001.24	920.002	464.815	-1964.09	891.27	461.554	-2041.87	830.423
811	0	241.21	-1984.89	1560.46	143.059	-1997.32	1551.2	233.434	-1813.16	1579.98	120.933	-1816.68	1569.87	190.458	-1758.82	1403.21	219.107	-1707.56	1188.72	191.701	-1892.33	1337.77	186.092	-1953.25	1210.06	124.86	-1690.16	1235.77	362.212	-1826.41	1368.61	426.029	-1849.82	1144.97	430.08	-1851.9	1075.39	435.749	-1961.49	1008.27	410.802	-2009.88	917.985	463.685	-1972.74	889.386	459.866	-2050.29	828.001
812	0	240.21	-1993.56	1559.98	142.053	-2006.01	1550.79	232.405	-1821.77	1579.07	119.907	-1825.33	1569.03	189.414	-1768.2	1401.86	218.278	-1718.03	1186.95	190.628	-1902.01	1337.03	185.057	-1963.42	1209.46	124.113	-1700.24	1233.88	361.233	-1835.91	1367.51	424.898	-1859.25	1143.58	428.925	-1861.13	1074.02	434.564	-1970.41	1006.51	409.669	-2018.33	915.877	462.627	-1981.14	887.473	458.335	-2058.4	825.451
813	0	239.168	-2002.27	1559.63	141.006	-2014.74	1550.5	231.338	-1830.42	1578.29	118.844	-1834.03	1568.32	188.333	-1777.64	1400.63	217.4	-1728.63	1185.26	189.543	-1911.76	1336.43	184.024	-1973.7	1208.99	123.327	-1710.44	1232.08	360.236	-1845.46	1366.53	423.717	-1868.69	1142.27	427.718	-1870.34	1072.74	433.399	-1979.21	1004.76	408.604	-2026.59	913.71	461.64	-1989.28	885.567	456.974	-2066.18	822.817
814	0	238.094	-2011.03	1559.43	139.927	-2023.52	1550.37	230.241	-1839.12	1577.66	117.751	-1842.77	1567.74	187.22	-1787.14	1399.53	216.474	-1739.36	1183.7	188.457	-1921.56	1335.98	183.004	-1984.08	1208.67	122.501	-1720.74	1230.39	359.228	-1855.04	1365.7	422.486	-1878.14	1141.09	426.459	-1879.5	1071.59	432.257	-1987.88	1003.06	407.609	-2034.64	911.523	460.72	-1997.16	883.703	455.796	-2073.64	820.147
815	0	236.995	-2019.84	1559.38	138.824	-2032.34	1550.38	229.121	-1847.87	1577.18	116.636	-1851.56	1567.31	186.081	-1796.7	1398.59	215.499	-1750.19	1182.29	187.379	-1931.42	1335.68	182.009	-1994.53	1208.51	121.633	-1731.12	1228.86	358.216	-1864.65	1365.03	421.205	-1887.57	1140.04	425.147	-1888.6	1070.59	431.14	-1996.41	1001.43	406.68	-2042.49	909.358	459.86	-2004.77	881.921	454.809	-2080.75	817.492
816	0	235.882	-2028.69	1559.5	137.706	-2041.2	1550.54	227.987	-1856.67	1576.88	115.507	-1860.39	1567.04	184.921	-1806.31	1397.82	214.478	-1761.08	1181.07	186.32	-1941.32	1335.54	181.052	-2005.04	1208.52	120.723	-1741.58	1227.5	357.205	-1874.26	1364.54	419.88	-1896.95	1139.16	423.783	-1897.62	1069.76	430.054	-2004.79	999.909	405.816	-2050.12	907.256	459.056	-2012.1	880.256	454.017	-2087.5	814.907
817	0	234.762	-2037.59	1559.78	136.585	-2050.12	1550.87	226.846	-1865.52	1576.75	114.372	-1869.27	1566.94	183.746	-1815.96	1397.23	213.414	-1772	1180.07	185.288	-1951.24	1335.57	180.142	-2015.58	1208.7	119.77	-1752.09	1226.36	356.204	-1883.86	1364.23	418.513	-1906.27	1138.48	422.373	-1906.54	1069.13	429.003	-2013.01	998.517	405.015	-2057.53	905.257	458.298	-2019.15	878.744	453.419	-2093.89	812.442
818	0	233.646	-2046.54	1560.24	135.468	-2059.08	1551.36	225.707	-1874.42	1576.8	113.24	-1878.2	1567.01	182.564	-1825.64	1396.84	212.31	-1782.93	1179.32	184.294	-1961.17	1335.77	179.289	-2026.13	1209.05	118.774	-1762.63	1225.44	355.217	-1893.44	1364.11	417.114	-1915.5	1138.01	420.919	-1915.34	1068.71	427.992	-2021.05	997.28	404.276	-2064.7	903.4	457.579	-2025.91	877.416	453.008	-2099.9	810.147
819	0	232.542	-2055.53	1560.87	134.366	-2068.08	1552.01	224.577	-1883.36	1577.04	112.118	-1887.17	1567.25	181.38	-1835.35	1396.65	211.172	-1793.82	1178.83	183.345	-1971.11	1336.14	178.501	-2036.67	1209.57	117.735	-1773.2	1224.79	354.251	-1902.98	1364.2	415.69	-1924.61	1137.77	419.431	-1924	1068.51	427.027	-2028.9	996.218	403.597	-2071.65	901.72	456.892	-2032.37	876.297	452.772	-2105.54	808.063
820	0	231.461	-2064.56	1561.67	133.289	-2077.12	1552.83	223.464	-1892.35	1577.47	111.014	-1896.19	1567.65	180.2	-1845.07	1396.67	210.003	-1804.64	1178.63	182.448	-1981.04	1336.68	177.787	-2047.18	1210.27	116.654	-1783.75	1224.4	353.31	-1912.48	1364.48	414.254	-1933.57	1137.76	417.916	-1932.49	1068.55	426.115	-2036.55	995.346	402.98	-2078.36	900.245	456.231	-2038.55	875.408	452.696	-2110.81	806.224
821	0	230.411	-2073.62	1562.63	132.246	-2086.21	1553.79	222.375	-1901.37	1578.07	109.936	-1905.25	1568.23	179.03	-1854.79	1396.91	208.809	-1815.36	1178.71	181.61	-1990.94	1337.38	177.152	-2057.62	1211.12	115.53	-1794.28	1224.29	352.398	-1921.91	1364.95	412.819	-1942.37	1137.99	416.386	-1940.8	1068.81	425.263	-2043.99	994.674	402.427	-2084.84	898.998	455.593	-2044.44	874.76	452.759	-2115.72	804.653
822	0	229.403	-2082.71	1563.75	131.246	-2095.32	1554.91	221.318	-1910.42	1578.83	108.89	-1914.34	1568.96	177.874	-1864.51	1397.34	207.593	-1825.94	1179.07	180.834	-2000.8	1338.23	176.601	-2067.98	1212.12	114.365	-1804.77	1224.46	351.519	-1931.26	1365.61	411.398	-1950.97	1138.45	414.854	-1948.91	1069.3	424.479	-2051.2	994.205	401.94	-2091.09	897.991	454.976	-2050.07	874.357	452.939	-2120.28	803.36
823	0	228.443	-2091.81	1565.01	130.298	-2104.46	1556.16	220.298	-1919.5	1579.76	107.882	-1923.46	1569.84	176.738	-1874.21	1397.98	206.359	-1836.36	1179.71	180.125	-2010.62	1339.22	176.136	-2078.24	1213.26	113.158	-1815.19	1224.9	350.675	-1940.52	1366.44	410.007	-1959.36	1139.12	413.333	-1956.79	1069.99	423.769	-2058.19	993.939	401.524	-2097.13	897.231	454.381	-2055.44	874.195	453.209	-2124.53	802.345
824	0	227.543	-2100.92	1566.4	129.411	-2113.62	1557.52	219.32	-1928.59	1580.83	106.918	-1932.6	1570.86	175.624	-1883.88	1398.8	205.108	-1846.6	1180.61	179.484	-2020.38	1340.34	175.759	-2088.38	1214.51	111.907	-1825.53	1225.6	349.867	-1949.67	1367.42	408.66	-1967.53	1139.98	411.836	-1964.44	1070.87	423.139	-2064.95	993.866	401.185	-2102.96	896.715	453.811	-2060.57	874.261	453.545	-2128.5	801.592
825	0	226.708	-2110.03	1567.89	128.593	-2122.8	1559	218.39	-1937.68	1582.03	106.003	-1941.76	1572	174.536	-1893.51	1399.79	203.841	-1856.64	1181.73	178.911	-2030.07	1341.56	175.467	-2098.39	1215.85	110.615	-1835.78	1226.55	349.096	-1958.71	1368.54	407.37	-1975.45	1141.01	410.375	-1971.84	1071.91	422.597	-2071.47	993.974	400.929	-2108.6	896.43	453.271	-2065.5	874.535	453.921	-2132.22	801.079
826	0	225.946	-2119.14	1569.47	127.851	-2131.98	1560.55	217.511	-1946.77	1583.34	105.141	-1950.93	1573.24	173.474	-1903.09	1400.94	202.557	-1866.47	1183.05	178.405	-2039.67	1342.88	175.258	-2108.25	1217.28	109.279	-1845.92	1227.72	348.362	-1967.62	1369.77	406.149	-1983.12	1142.17	408.963	-1979	1073.08	422.146	-2077.75	994.245	400.759	-2114.07	896.359	452.766	-2070.23	874.991	454.314	-2135.75	800.773
827	0	225.265	-2128.22	1571.12	127.19	-2141.16	1562.18	216.688	-1955.85	1584.74	104.335	-1960.1	1574.57	172.44	-1912.62	1402.22	201.255	-1876.08	1184.54	177.963	-2049.2	1344.27	175.126	-2117.97	1218.75	107.901	-1855.95	1229.09	347.664	-1976.39	1371.08	405.005	-1990.52	1143.43	407.608	-1985.9	1074.35	421.789	-2083.81	994.657	400.682	-2119.37	896.478	452.302	-2074.79	875.598	454.706	-2139.12	800.639
828	0	224.668	-2137.27	1572.82	126.616	-2150.33	1563.85	215.922	-1964.91	1586.2	103.588	-1969.27	1575.98	171.435	-1922.08	1403.61	199.934	-1885.48	1186.15	177.582	-2058.63	1345.72	175.063	-2127.52	1220.27	106.483	-1865.85	1230.62	346.999	-1985.03	1372.46	403.942	-1997.67	1144.75	406.317	-1992.56	1075.68	421.526	-2089.64	995.188	400.698	-2124.54	896.761	451.883	-2079.2	876.323	455.081	-2142.38	800.641
829	0	224.16	-2146.29	1574.53	126.133	-2159.48	1565.56	215.215	-1973.93	1587.72	102.901	-1978.42	1577.44	170.46	-1931.47	1405.09	198.592	-1894.67	1187.86	177.256	-2067.96	1347.2	175.059	-2136.91	1221.8	105.029	-1875.62	1232.28	346.365	-1993.52	1373.87	402.963	-2004.54	1146.1	405.093	-1998.97	1077.05	421.355	-2095.24	995.812	400.807	-2129.57	897.177	451.51	-2083.48	877.132	455.431	-2145.58	800.747
830	0	223.744	-2155.26	1576.25	125.742	-2168.62	1567.27	214.567	-1982.92	1589.26	102.275	-1987.56	1578.94	169.512	-1940.78	1406.63	197.23	-1903.67	1189.62	176.979	-2077.19	1348.7	175.103	-2146.15	1223.32	103.543	-1885.26	1234.05	345.761	-2001.86	1375.29	402.062	-2011.16	1147.45	403.937	-2005.13	1078.42	421.271	-2100.64	996.504	401.005	-2134.49	897.697	451.182	-2087.65	877.993	455.751	-2148.75	800.928
831	0	223.421	-2164.18	1577.94	125.445	-2177.73	1568.98	213.978	-1991.86	1590.8	101.71	-1996.68	1580.47	168.594	-1950	1408.22	195.851	-1912.49	1191.4	176.745	-2086.32	1350.19	175.182	-2155.23	1224.82	102.033	-1894.77	1235.88	345.182	-2010.07	1376.71	401.234	-2017.53	1148.78	402.846	-2011.07	1079.78	421.266	-2105.83	997.242	401.286	-2139.31	898.293	450.895	-2091.71	878.875	456.042	-2151.92	801.163
832	0	223.19	-2173.04	1579.6	125.24	-2186.8	1570.66	213.449	-2000.76	1592.33	101.205	-2005.77	1581.99	167.704	-1959.14	1409.83	194.458	-1921.14	1193.18	176.547	-2095.35	1351.67	175.285	-2164.17	1226.29	100.506	-1904.14	1237.76	344.626	-2018.15	1378.09	400.467	-2023.65	1150.07	401.813	-2016.8	1081.1	421.329	-2110.82	998.002	401.639	-2144.02	898.938	450.642	-2095.67	879.753	456.309	-2155.12	801.437
833	0	223.048	-2181.85	1581.19	125.125	-2195.84	1572.3	212.976	-2009.6	1593.84	100.759	-2014.83	1583.51	166.843	-1968.2	1411.43	193.056	-1929.63	1194.93	176.377	-2104.28	1353.11	175.397	-2172.97	1227.71	98.9718	-1913.38	1239.65	344.089	-2026.1	1379.43	399.747	-2029.55	1151.3	400.83	-2022.31	1082.37	421.449	-2115.63	998.763	402.054	-2148.63	899.608	450.412	-2099.55	880.603	456.56	-2158.35	801.742
834	0	222.992	-2190.59	1582.72	125.096	-2204.84	1573.88	212.557	-2018.38	1595.29	100.368	-2023.86	1584.99	166.01	-1977.17	1413.02	191.653	-1938	1196.63	176.23	-2113.1	1354.51	175.508	-2181.64	1229.06	97.4409	-1922.49	1241.52	343.57	-2033.94	1380.7	399.06	-2035.24	1152.46	399.885	-2027.64	1083.57	421.613	-2120.26	999.507	402.518	-2153.15	900.28	450.195	-2103.33	881.409	456.805	-2161.62	802.071
835	0	223.017	-2199.27	1584.15	125.147	-2213.8	1575.4	212.191	-2027.1	1596.68	100.031	-2032.84	1586.43	165.206	-1986.05	1414.57	190.257	-1946.25	1198.26	176.098	-2121.83	1355.84	175.606	-2190.19	1230.33	95.9236	-1931.47	1243.36	343.066	-2041.68	1381.9	398.39	-2040.75	1153.55	398.968	-2032.79	1084.7	421.807	-2124.74	1000.22	403.017	-2157.57	900.937	449.977	-2107.03	882.155	457.056	-2164.93	802.424
836	0	223.115	-2207.89	1585.48	125.27	-2222.72	1576.83	211.873	-2035.77	1597.99	99.7438	-2041.79	1587.82	164.431	-1994.85	1416.07	188.876	-1954.4	1199.8	175.977	-2130.47	1357.09	175.683	-2198.64	1231.52	94.4304	-1940.33	1245.14	342.575	-2049.34	1383.01	397.721	-2046.1	1154.56	398.065	-2037.79	1085.75	422.018	-2129.07	1000.88	403.537	-2161.9	901.561	449.743	-2110.64	882.83	457.322	-2168.27	802.798
837	0	223.28	-2216.45	1586.7	125.459	-2231.6	1578.16	211.6	-2044.39	1599.21	99.5027	-2050.7	1589.14	163.687	-2003.57	1417.51	187.52	-1962.46	1201.26	175.862	-2139.02	1358.26	175.733	-2206.98	1232.61	92.9713	-1949.08	1246.84	342.096	-2056.93	1384.03	397.039	-2051.32	1155.49	397.164	-2042.65	1086.72	422.232	-2133.28	1001.48	404.066	-2166.14	902.138	449.481	-2114.17	883.426	457.614	-2171.62	803.19
838	0	223.502	-2224.95	1587.8	125.703	-2240.44	1579.39	211.369	-2052.95	1600.34	99.3037	-2059.56	1590.38	162.973	-2012.22	1418.86	186.196	-1970.45	1202.61	175.749	-2147.49	1359.33	175.752	-2215.24	1233.6	91.5559	-1957.72	1248.45	341.629	-2064.46	1384.95	396.336	-2056.42	1156.34	396.256	-2047.4	1087.62	422.437	-2137.37	1002.01	404.593	-2170.29	902.654	449.177	-2117.61	883.937	457.936	-2174.98	803.592
839	0	223.773	-2233.41	1588.77	125.995	-2249.23	1580.51	211.174	-2061.46	1601.35	99.1429	-2068.39	1591.52	162.292	-2020.79	1420.12	184.912	-1978.38	1203.85	175.636	-2155.88	1360.3	175.738	-2223.42	1234.47	90.193	-1966.25	1249.97	341.173	-2071.95	1385.77	395.603	-2061.45	1157.1	395.333	-2052.06	1088.43	422.625	-2141.36	1002.46	405.108	-2174.35	903.097	448.821	-2120.98	884.358	458.292	-2178.33	803.996
840	0	224.083	-2241.81	1589.62	126.325	-2257.98	1581.51	211.013	-2069.93	1602.26	99.0161	-2077.17	1592.57	161.646	-2029.3	1421.29	183.676	-1986.25	1204.98	175.522	-2164.2	1361.16	175.691	-2231.53	1235.22	88.8904	-1974.69	1251.37	340.731	-2079.42	1386.48	394.836	-2066.43	1157.78	394.388	-2056.65	1089.16	422.786	-2145.28	1002.82	405.602	-2178.34	903.456	448.405	-2124.27	884.685	458.679	-2181.64	804.387
841	0	224.424	-2250.18	1590.32	126.683	-2266.7	1582.38	210.882	-2078.36	1603.04	98.9194	-2085.91	1593.51	161.035	-2037.74	1422.35	182.495	-1994.08	1205.99	175.406	-2172.46	1361.9	175.614	-2239.56	1235.84	87.6554	-1983.03	1252.66	340.303	-2086.86	1387.09	394.038	-2071.39	1158.38	393.421	-2061.2	1089.82	422.915	-2149.14	1003.09	406.069	-2182.27	903.72	447.922	-2127.49	884.916	459.092	-2184.89	804.747
842	0	224.786	-2258.51	1590.9	127.062	-2275.38	1583.12	210.776	-2086.75	1603.71	98.849	-2094.62	1594.34	160.463	-2046.13	1423.3	181.375	-2001.87	1206.9	175.288	-2180.66	1362.53	175.512	-2247.54	1236.34	86.4945	-1991.29	1253.83	339.892	-2094.3	1387.59	393.21	-2076.35	1158.89	392.431	-2065.74	1090.4	423.006	-2152.97	1003.25	406.504	-2186.13	903.879	447.372	-2130.65	885.048	459.523	-2188.08	805.057
843	0	225.161	-2266.82	1591.34	127.452	-2284.03	1583.73	210.693	-2095.12	1604.26	98.8016	-2103.3	1595.06	159.931	-2054.48	1424.14	180.322	-2009.63	1207.69	175.171	-2188.81	1363.03	175.389	-2255.45	1236.7	85.4136	-1999.47	1254.87	339.5	-2101.75	1387.99	392.36	-2081.35	1159.31	391.423	-2070.3	1090.9	423.058	-2156.79	1003.31	406.902	-2189.94	903.925	446.754	-2133.77	885.082	459.96	-2191.19	805.294
844	0	225.543	-2275.11	1591.65	127.849	-2292.65	1584.21	210.63	-2103.47	1604.69	98.7743	-2111.94	1595.65	159.443	-2062.78	1424.87	179.343	-2017.35	1208.37	175.055	-2196.91	1363.41	175.252	-2263.32	1236.94	84.418	-2007.57	1255.8	339.132	-2109.22	1388.28	391.497	-2086.41	1159.65	390.402	-2074.9	1091.32	423.069	-2160.61	1003.26	407.26	-2193.72	903.848	446.072	-2136.85	885.016	460.388	-2194.21	805.434
845	0	225.925	-2283.39	1591.82	128.245	-2301.25	1584.55	210.585	-2111.8	1604.99	98.7645	-2120.55	1596.12	159.001	-2071.04	1425.48	178.442	-2025.05	1208.94	174.944	-2204.98	1363.68	175.108	-2271.13	1237.04	83.5125	-2015.6	1256.6	338.792	-2116.7	1388.48	390.632	-2091.56	1159.9	389.377	-2079.58	1091.67	423.039	-2164.47	1003.11	407.574	-2197.48	903.644	445.331	-2139.91	884.852	460.793	-2197.14	805.459
846	0	226.301	-2291.66	1591.88	128.636	-2309.82	1584.75	210.555	-2120.12	1605.19	98.7707	-2129.14	1596.47	158.607	-2079.27	1425.98	177.625	-2032.73	1209.41	174.841	-2213.01	1363.82	174.962	-2278.91	1237.03	82.7013	-2023.57	1257.28	338.482	-2124.22	1388.58	389.777	-2096.82	1160.07	388.359	-2084.35	1091.94	422.97	-2168.38	1002.85	407.843	-2201.22	903.306	444.543	-2142.97	884.594	461.158	-2199.98	805.349
847	0	226.67	-2299.93	1591.81	129.02	-2318.38	1584.83	210.54	-2128.43	1605.27	98.7915	-2137.71	1596.7	158.266	-2087.47	1426.37	176.897	-2040.39	1209.77	174.749	-2221.02	1363.84	174.824	-2286.64	1236.89	81.9881	-2031.48	1257.84	338.207	-2131.77	1388.59	388.943	-2102.21	1160.15	387.359	-2089.26	1092.14	422.866	-2172.37	1002.48	408.064	-2204.96	902.833	443.717	-2146.04	884.247	461.47	-2202.72	805.091
848	0	227.027	-2308.21	1591.63	129.394	-2326.92	1584.78	210.54	-2136.74	1605.25	98.8265	-2146.25	1596.8	157.979	-2095.66	1426.65	176.264	-2048.02	1210.04	174.673	-2229	1363.76	174.697	-2294.35	1236.65	81.3755	-2039.33	1258.29	337.972	-2139.36	1388.51	388.143	-2107.75	1160.15	386.39	-2094.31	1092.27	422.728	-2176.46	1002.01	408.235	-2208.71	902.226	442.868	-2149.14	883.817	461.714	-2205.39	804.677
849	0	227.372	-2316.51	1591.34	129.76	-2335.45	1584.6	210.555	-2145.06	1605.12	98.8758	-2154.78	1596.79	157.749	-2103.83	1426.82	175.728	-2055.64	1210.22	174.616	-2236.98	1363.56	174.59	-2302.04	1236.3	80.8657	-2047.14	1258.63	337.78	-2147	1388.35	387.389	-2113.46	1160.07	385.464	-2099.54	1092.33	422.563	-2180.66	1001.44	408.354	-2212.49	901.487	442.009	-2152.29	883.313	461.88	-2207.99	804.103
850	0	227.706	-2324.82	1590.95	130.117	-2343.98	1584.31	210.586	-2153.38	1604.89	98.9403	-2163.29	1596.66	157.579	-2111.99	1426.89	175.294	-2063.25	1210.31	174.582	-2244.94	1363.26	174.508	-2309.72	1235.86	80.4597	-2054.91	1258.87	337.635	-2154.69	1388.11	386.691	-2119.35	1159.91	384.592	-2104.95	1092.32	422.374	-2185	1000.78	408.421	-2216.3	900.622	441.159	-2155.51	882.746	461.96	-2210.54	803.371
851	0	228.031	-2333.14	1590.48	130.47	-2352.49	1583.91	210.633	-2161.7	1604.58	99.0214	-2171.79	1596.42	157.472	-2120.15	1426.86	174.963	-2070.85	1210.32	174.575	-2252.9	1362.86	174.456	-2317.4	1235.33	80.1579	-2062.65	1259.01	337.541	-2162.44	1387.79	386.06	-2125.44	1159.67	383.785	-2110.56	1092.25	422.167	-2189.5	1000.03	408.435	-2220.15	899.64	440.332	-2158.8	882.127	461.948	-2213.06	802.488
852	0	228.348	-2341.49	1589.91	130.821	-2361	1583.41	210.701	-2170.04	1604.17	99.1213	-2180.27	1596.07	157.428	-2128.3	1426.73	174.737	-2078.43	1210.25	174.6	-2260.87	1362.37	174.439	-2325.08	1234.73	79.9597	-2070.37	1259.05	337.501	-2170.25	1387.4	385.503	-2131.73	1159.37	383.053	-2116.38	1092.13	421.95	-2194.16	999.204	408.398	-2224.06	898.55	439.546	-2162.2	881.467	461.842	-2215.56	801.465
853	0	228.662	-2349.86	1589.28	131.176	-2369.51	1582.82	210.79	-2178.38	1603.68	99.2427	-2188.75	1595.62	157.451	-2136.47	1426.5	174.614	-2086.02	1210.1	174.66	-2268.85	1361.78	174.461	-2332.78	1234.06	79.8639	-2078.07	1258.99	337.518	-2178.12	1386.94	385.028	-2138.22	1159	382.405	-2122.4	1091.94	421.728	-2199.01	998.303	408.314	-2228.03	897.365	438.816	-2165.72	880.778	461.643	-2218.08	800.315
854	0	228.978	-2358.25	1588.58	131.541	-2378.02	1582.15	210.905	-2186.72	1603.11	99.3888	-2197.21	1595.06	157.542	-2144.64	1426.18	174.595	-2093.6	1209.89	174.76	-2276.84	1361.12	174.525	-2340.51	1233.33	79.8685	-2085.77	1258.85	337.595	-2186.05	1386.42	384.639	-2144.93	1158.56	381.845	-2128.64	1091.69	421.511	-2204.04	997.336	408.188	-2232.08	896.096	438.158	-2169.37	880.071	461.356	-2220.64	799.052
855	0	229.301	-2366.67	1587.82	131.922	-2386.54	1581.4	211.048	-2195.08	1602.46	99.5633	-2205.66	1594.4	157.703	-2152.82	1425.77	174.677	-2101.18	1209.61	174.903	-2284.85	1360.37	174.634	-2348.27	1232.55	79.9713	-2093.48	1258.61	337.734	-2194.04	1385.83	384.341	-2151.83	1158.07	381.38	-2135.1	1091.39	421.305	-2209.27	996.307	408.026	-2236.23	894.755	437.584	-2173.17	879.352	460.985	-2223.26	797.693
856	0	229.637	-2375.11	1587.01	132.327	-2395.05	1580.58	211.224	-2203.43	1601.73	99.7703	-2214.1	1593.65	157.934	-2161.02	1425.27	174.858	-2108.77	1209.25	175.092	-2292.9	1359.56	174.791	-2356.08	1231.71	80.1698	-2101.21	1258.29	337.937	-2202.11	1385.17	384.135	-2158.94	1157.51	381.011	-2141.75	1091.03	421.12	-2214.7	995.222	407.839	-2240.49	893.354	437.105	-2177.14	878.627	460.541	-2225.97	796.251
857	0	229.992	-2383.56	1586.16	132.761	-2403.56	1579.71	211.436	-2211.79	1600.93	100.014	-2222.53	1592.81	158.239	-2169.25	1424.69	175.133	-2116.37	1208.83	175.333	-2300.97	1358.67	174.997	-2363.93	1230.83	80.4613	-2108.97	1257.88	338.206	-2210.24	1384.45	384.023	-2166.24	1156.88	380.742	-2148.61	1090.6	420.965	-2220.34	994.085	407.636	-2244.86	891.904	436.731	-2181.3	877.899	460.034	-2228.78	794.74
858	0	230.374	-2392.04	1585.26	133.234	-2412.07	1578.78	211.689	-2220.15	1600.06	100.3	-2230.94	1591.88	158.616	-2177.49	1424.02	175.5	-2123.99	1208.35	175.627	-2309.09	1357.72	175.255	-2371.85	1229.91	80.8431	-2116.77	1257.38	338.544	-2218.44	1383.66	384.004	-2173.72	1156.2	380.573	-2155.66	1090.11	420.849	-2226.18	992.898	407.432	-2249.37	890.413	436.468	-2185.65	877.169	459.477	-2231.73	793.174
859	0	230.789	-2400.53	1584.34	133.75	-2420.59	1577.82	211.988	-2228.5	1599.12	100.633	-2239.35	1590.86	159.069	-2185.76	1423.26	175.955	-2131.63	1207.79	175.978	-2317.25	1356.71	175.567	-2379.82	1228.94	81.3127	-2124.61	1256.8	338.952	-2226.71	1382.81	384.079	-2181.38	1155.45	380.504	-2162.89	1089.56	420.782	-2232.23	991.666	407.239	-2254.04	888.89	436.32	-2190.21	876.432	458.885	-2234.83	791.562
860	0	231.242	-2409.03	1583.39	134.318	-2429.11	1576.82	212.336	-2236.85	1598.11	101.017	-2247.74	1589.77	159.597	-2194.05	1422.42	176.495	-2139.3	1207.15	176.391	-2325.46	1355.65	175.933	-2387.87	1227.94	81.8677	-2132.51	1256.12	339.432	-2235.04	1381.89	384.245	-2189.18	1154.63	380.534	-2170.3	1088.93	420.771	-2238.47	990.387	407.071	-2258.87	887.34	436.288	-2195	875.684	458.275	-2238.12	789.913
861	0	231.741	-2417.53	1582.42	134.941	-2437.62	1575.8	212.739	-2245.19	1597.04	101.458	-2256.12	1588.6	160.203	-2202.38	1421.5	177.118	-2147.01	1206.44	176.867	-2333.72	1354.54	176.357	-2395.98	1226.9	82.506	-2140.48	1255.35	339.987	-2243.44	1380.91	384.501	-2197.13	1153.74	380.664	-2177.86	1088.23	420.825	-2244.92	989.065	406.944	-2263.9	885.767	436.373	-2200.01	874.917	457.665	-2241.6	788.237
862	0	232.29	-2426.05	1581.44	135.625	-2446.13	1574.75	213.202	-2253.52	1595.9	101.961	-2264.49	1587.36	160.887	-2210.73	1420.5	177.82	-2154.76	1205.64	177.411	-2342.04	1353.39	176.84	-2404.18	1225.82	83.2258	-2148.51	1254.49	340.617	-2251.91	1379.87	384.847	-2205.21	1152.78	380.89	-2185.57	1087.45	420.953	-2251.56	987.699	406.87	-2269.13	884.175	436.572	-2205.28	874.122	457.074	-2245.31	786.54
863	0	232.894	-2434.56	1580.44	136.374	-2454.64	1573.7	213.728	-2261.84	1594.71	102.531	-2272.85	1586.05	161.651	-2219.11	1419.43	178.601	-2162.56	1204.76	178.025	-2350.43	1352.2	177.387	-2412.45	1224.7	84.0258	-2156.63	1253.53	341.325	-2260.44	1378.76	385.282	-2213.41	1151.75	381.212	-2193.42	1086.59	421.159	-2258.4	986.291	406.863	-2274.58	882.565	436.882	-2210.79	873.29	456.521	-2249.27	784.827
864	0	233.558	-2443.07	1579.44	137.191	-2463.15	1572.63	214.323	-2270.15	1593.47	103.171	-2281.19	1584.69	162.494	-2227.51	1418.28	179.46	-2170.43	1203.79	178.714	-2358.87	1350.99	178.001	-2420.81	1223.56	84.9046	-2164.84	1252.48	342.113	-2269.03	1377.59	385.805	-2221.72	1150.64	381.629	-2201.41	1085.65	421.451	-2265.43	984.842	406.934	-2280.26	880.939	437.296	-2216.57	872.412	456.025	-2253.5	783.103
865	0	234.286	-2451.58	1578.45	138.076	-2471.65	1571.57	214.99	-2278.45	1592.17	103.887	-2289.52	1583.28	163.42	-2235.95	1417.06	180.397	-2178.37	1202.73	179.479	-2367.38	1349.76	178.687	-2429.26	1222.4	85.8615	-2173.14	1251.34	342.983	-2277.68	1376.37	386.417	-2230.11	1149.47	382.138	-2209.51	1084.63	421.833	-2272.64	983.353	407.095	-2286.2	879.298	437.81	-2222.62	871.479	455.605	-2258.02	781.371
866	0	235.08	-2460.08	1577.46	139.031	-2480.14	1570.51	215.734	-2286.74	1590.84	104.682	-2297.83	1581.83	164.427	-2244.41	1415.79	181.412	-2186.4	1201.58	180.323	-2375.96	1348.53	179.448	-2437.8	1221.22	86.8956	-2181.54	1250.12	343.937	-2286.38	1375.1	387.118	-2238.6	1148.24	382.739	-2217.73	1083.52	422.308	-2280.04	981.828	407.353	-2292.4	877.643	438.417	-2228.93	870.483	455.279	-2262.87	779.635
867	0	235.942	-2468.57	1576.48	140.055	-2488.62	1569.47	216.558	-2295.02	1589.48	105.559	-2306.14	1580.34	165.518	-2252.9	1414.46	182.504	-2194.52	1200.33	181.25	-2384.6	1347.3	180.291	-2446.44	1220.04	88.0065	-2190.03	1248.81	344.977	-2295.13	1373.79	387.908	-2247.16	1146.94	383.43	-2226.06	1082.34	422.88	-2287.62	980.273	407.716	-2298.87	875.977	439.109	-2235.53	869.42	455.062	-2268.07	777.898
868	0	236.873	-2477.05	1575.54	141.148	-2497.1	1568.46	217.466	-2303.3	1588.1	106.521	-2314.43	1578.84	166.692	-2261.41	1413.08	183.675	-2202.76	1199	182.262	-2393.32	1346.09	181.22	-2455.17	1218.86	89.1935	-2198.64	1247.42	346.104	-2303.92	1372.45	388.788	-2255.8	1145.58	384.21	-2234.49	1081.09	423.55	-2295.38	978.692	408.188	-2305.63	874.303	439.88	-2242.4	868.285	454.97	-2273.63	776.163
869	0	237.875	-2485.52	1574.62	142.308	-2505.56	1567.48	218.46	-2311.57	1586.72	107.57	-2322.7	1577.34	167.95	-2269.94	1411.68	184.925	-2211.12	1197.59	183.359	-2402.1	1344.91	182.241	-2463.99	1217.71	90.456	-2207.35	1245.96	347.319	-2312.76	1371.1	389.756	-2264.5	1144.18	385.078	-2243.02	1079.77	424.319	-2303.33	977.096	408.773	-2312.69	872.627	440.724	-2249.55	867.08	455.015	-2279.59	774.432
870	0	238.947	-2493.98	1573.76	143.532	-2514.01	1566.55	219.543	-2319.83	1585.35	108.708	-2330.97	1575.84	169.292	-2278.49	1410.25	186.254	-2219.63	1196.12	184.544	-2410.95	1343.77	183.358	-2472.92	1216.6	91.7931	-2216.17	1244.45	348.624	-2321.64	1369.73	390.812	-2273.28	1142.74	386.033	-2251.65	1078.41	425.187	-2311.45	975.493	409.474	-2320.05	870.955	441.635	-2256.99	865.807	455.207	-2285.96	772.711
871	0	240.088	-2502.43	1572.95	144.82	-2522.44	1565.67	220.716	-2328.1	1583.99	109.935	-2339.23	1574.37	170.718	-2287.07	1408.83	187.661	-2228.28	1194.58	185.817	-2419.87	1342.7	184.574	-2481.95	1215.55	93.2034	-2225.1	1242.9	350.016	-2330.55	1368.38	391.957	-2282.12	1141.27	387.074	-2260.38	1077	426.154	-2319.76	973.896	410.291	-2327.72	869.296	442.607	-2264.72	864.473	455.556	-2292.76	771.003
872	0	241.298	-2510.87	1572.21	146.168	-2530.87	1564.87	221.982	-2336.37	1582.68	111.25	-2347.48	1572.93	172.225	-2295.66	1407.41	189.145	-2237.11	1193.01	187.177	-2428.85	1341.7	185.891	-2491.08	1214.57	94.685	-2234.14	1241.33	351.496	-2339.5	1367.05	393.189	-2291.04	1139.79	388.2	-2269.21	1075.57	427.217	-2328.26	972.321	411.225	-2335.7	867.662	443.635	-2272.73	863.088	456.066	-2300.01	769.318
873	0	242.573	-2519.31	1571.56	147.574	-2539.28	1564.15	223.339	-2344.64	1581.43	112.655	-2355.72	1571.56	173.813	-2304.28	1406.02	190.705	-2246.1	1191.41	188.625	-2437.89	1340.8	187.311	-2500.3	1213.69	96.2356	-2243.28	1239.76	353.062	-2348.48	1365.76	394.506	-2300.03	1138.32	389.409	-2278.15	1074.13	428.376	-2336.95	970.784	412.273	-2344	866.069	444.716	-2281.03	861.667	456.742	-2307.73	767.666
874	0	243.912	-2527.74	1571.01	149.037	-2547.68	1563.54	224.789	-2352.93	1580.25	114.146	-2363.96	1570.26	175.479	-2312.91	1404.67	192.338	-2255.29	1189.82	190.157	-2447	1340	188.832	-2509.63	1212.93	97.8516	-2252.54	1238.21	354.709	-2357.49	1364.52	395.907	-2309.1	1136.87	390.699	-2287.2	1072.71	429.627	-2345.83	969.304	413.434	-2352.62	864.533	445.847	-2289.63	860.229	457.585	-2315.91	766.058
875	0	245.311	-2536.18	1570.57	150.552	-2556.07	1563.04	226.33	-2361.23	1579.16	115.723	-2372.2	1569.06	177.22	-2321.56	1403.39	194.04	-2264.66	1188.27	191.77	-2456.16	1339.33	190.452	-2519.04	1212.31	99.5291	-2261.89	1236.7	356.434	-2366.53	1363.37	397.389	-2318.26	1135.46	392.066	-2296.37	1071.33	430.966	-2354.92	967.901	414.704	-2361.57	863.074	447.025	-2298.51	858.794	458.593	-2324.57	764.514
876	0	246.768	-2544.61	1570.26	152.118	-2564.46	1562.66	227.959	-2369.55	1578.18	117.381	-2380.44	1567.97	179.031	-2330.23	1402.2	195.805	-2274.22	1186.77	193.462	-2465.37	1338.8	192.166	-2528.55	1211.84	101.263	-2271.33	1235.26	358.232	-2375.6	1362.31	398.95	-2327.52	1134.13	393.51	-2305.67	1070	432.39	-2364.21	966.597	416.078	-2370.85	861.716	448.25	-2307.7	857.39	459.761	-2333.7	763.054
877	0	248.279	-2553.06	1570.09	153.733	-2572.84	1562.43	229.675	-2377.89	1577.32	119.116	-2388.68	1567	180.908	-2338.92	1401.11	197.626	-2283.97	1185.36	195.226	-2474.64	1338.42	193.965	-2538.14	1211.54	103.047	-2280.86	1233.92	360.096	-2384.7	1361.36	400.585	-2336.89	1132.9	395.024	-2315.1	1068.76	433.892	-2373.71	965.416	417.55	-2380.45	860.482	449.521	-2317.18	856.044	461.085	-2343.29	761.702
878	0	249.839	-2561.51	1570.07	155.392	-2581.23	1562.35	231.473	-2386.26	1576.6	120.926	-2396.93	1566.18	182.844	-2347.63	1400.14	199.498	-2293.89	1184.07	197.056	-2483.94	1338.2	195.842	-2547.8	1211.44	104.874	-2290.47	1232.71	362.018	-2393.83	1360.55	402.29	-2346.36	1131.78	396.606	-2324.68	1067.63	435.468	-2383.43	964.381	419.112	-2390.39	859.399	450.841	-2326.97	854.787	462.556	-2353.35	760.487
879	0	251.445	-2569.98	1570.2	157.094	-2589.62	1562.44	233.349	-2394.67	1576.04	122.803	-2405.2	1565.52	184.834	-2356.36	1399.3	201.41	-2303.99	1182.92	198.946	-2493.28	1338.15	197.783	-2557.54	1211.53	106.737	-2300.14	1231.64	363.99	-2402.99	1359.87	404.057	-2355.96	1130.82	398.251	-2334.4	1066.63	437.111	-2393.36	963.513	420.754	-2400.65	858.494	452.212	-2337.06	853.649	464.166	-2363.86	759.438
880	0	253.091	-2578.47	1570.49	158.835	-2598.03	1562.69	235.297	-2403.11	1575.63	124.743	-2413.48	1565.02	186.869	-2365.12	1398.62	203.353	-2314.24	1181.96	200.888	-2502.66	1338.27	199.777	-2567.34	1211.83	108.629	-2309.86	1230.74	366.003	-2412.18	1359.35	405.88	-2365.69	1130.03	399.953	-2344.28	1065.78	438.814	-2403.53	962.834	422.468	-2411.23	857.792	453.637	-2347.47	852.662	465.904	-2374.8	758.586
881	0	254.773	-2586.98	1570.95	160.612	-2606.44	1563.13	237.311	-2411.59	1575.39	126.739	-2421.77	1564.69	188.943	-2373.89	1398.1	205.317	-2324.61	1181.19	202.872	-2512.06	1338.57	201.808	-2577.18	1212.34	110.541	-2319.62	1230.03	368.047	-2421.4	1359	407.75	-2375.55	1129.43	401.706	-2354.31	1065.11	440.569	-2413.91	962.364	424.243	-2422.14	857.317	455.119	-2358.19	851.855	467.759	-2386.18	757.962
882	0	256.486	-2595.52	1571.57	162.419	-2614.88	1563.73	239.383	-2420.11	1575.32	128.783	-2430.09	1564.55	191.048	-2382.7	1397.76	207.292	-2335.1	1180.63	204.891	-2521.48	1339.05	203.861	-2587.07	1213.05	112.466	-2329.41	1229.52	370.112	-2430.66	1358.83	409.659	-2385.54	1129.05	403.507	-2364.49	1064.64	442.37	-2424.53	962.116	426.068	-2433.36	857.089	456.664	-2369.24	851.253	469.719	-2397.96	757.592
883	0	258.225	-2604.08	1572.35	164.253	-2623.34	1564.51	241.504	-2428.68	1575.43	130.869	-2438.44	1564.59	193.175	-2391.52	1397.59	209.271	-2345.65	1180.31	206.932	-2530.91	1339.71	205.919	-2596.98	1213.97	114.396	-2339.2	1229.23	372.187	-2439.96	1358.83	411.598	-2395.66	1128.89	405.349	-2374.83	1064.36	444.209	-2435.37	962.103	427.932	-2444.9	857.125	458.275	-2380.61	850.876	471.774	-2410.14	757.498
884	0	259.984	-2612.68	1573.27	166.107	-2631.83	1565.46	243.667	-2437.3	1575.7	132.987	-2446.81	1564.82	195.317	-2400.37	1397.61	211.245	-2356.25	1180.23	208.988	-2540.35	1340.52	207.966	-2606.9	1215.08	116.326	-2348.99	1229.16	374.264	-2449.29	1359.02	413.559	-2405.9	1128.96	407.23	-2385.31	1064.3	446.08	-2446.43	962.332	429.826	-2456.73	857.435	459.956	-2392.29	850.739	473.91	-2422.7	757.697
885	0	261.759	-2621.32	1574.34	167.977	-2640.35	1566.56	245.862	-2445.96	1576.14	135.131	-2455.21	1565.22	197.466	-2409.23	1397.8	213.208	-2366.86	1180.38	211.046	-2549.78	1341.5	209.987	-2616.81	1216.36	118.252	-2358.75	1229.3	376.331	-2458.67	1359.38	415.535	-2416.24	1129.27	409.146	-2395.92	1064.44	447.977	-2457.7	962.804	431.739	-2468.86	858.024	461.711	-2404.3	850.849	476.116	-2435.64	758.197
886	0	263.543	-2629.99	1575.53	169.854	-2648.91	1567.81	248.078	-2454.68	1576.73	137.291	-2463.64	1565.8	199.614	-2418.12	1398.18	215.158	-2377.45	1180.77	213.097	-2559.21	1342.61	211.964	-2626.71	1217.79	120.169	-2368.46	1229.66	378.382	-2468.09	1359.92	417.523	-2426.68	1129.8	411.097	-2406.65	1064.8	449.896	-2469.18	963.516	433.666	-2481.27	858.89	463.541	-2416.62	851.206	478.38	-2448.94	758.997
887	0	265.332	-2638.7	1576.83	171.733	-2657.49	1569.18	250.307	-2463.43	1577.46	139.457	-2472.11	1566.53	201.756	-2427.02	1398.72	217.095	-2387.98	1181.38	215.13	-2568.63	1343.85	213.882	-2636.57	1219.34	122.079	-2378.11	1230.23	380.406	-2477.55	1360.62	419.519	-2437.19	1130.55	413.08	-2417.49	1065.35	451.831	-2480.86	964.458	435.599	-2493.93	860.024	465.447	-2429.23	851.802	480.688	-2462.59	760.087
888	0	267.12	-2647.45	1578.22	173.604	-2666.12	1570.66	252.536	-2472.24	1578.33	141.623	-2480.6	1567.42	203.884	-2435.93	1399.43	219.019	-2398.42	1182.19	217.134	-2578.02	1345.2	215.728	-2646.39	1220.99	123.981	-2387.69	1230.98	382.397	-2487.06	1361.48	421.521	-2447.77	1131.5	415.099	-2428.42	1066.08	453.78	-2492.71	965.617	437.534	-2506.85	861.412	467.427	-2442.14	852.621	483.028	-2476.57	761.449
889	0	268.9	-2656.23	1579.68	175.46	-2674.78	1572.24	254.758	-2481.09	1579.31	143.777	-2489.14	1568.43	205.995	-2444.86	1400.29	220.935	-2408.73	1183.19	219.099	-2587.38	1346.65	217.488	-2656.13	1222.71	125.879	-2397.18	1231.9	384.349	-2496.62	1362.48	423.532	-2458.4	1132.61	417.155	-2439.42	1066.97	455.74	-2504.72	966.976	439.469	-2519.99	863.031	469.479	-2455.31	853.644	485.389	-2490.87	763.058
890	0	270.668	-2665.06	1581.2	177.291	-2683.47	1573.88	256.96	-2489.98	1580.4	145.913	-2497.71	1569.57	208.083	-2453.8	1401.3	222.85	-2418.9	1184.35	221.015	-2596.71	1348.16	219.15	-2665.8	1224.46	127.776	-2406.56	1232.97	386.254	-2506.24	1363.6	425.554	-2469.07	1133.88	419.252	-2450.48	1068	457.709	-2516.89	968.513	441.4	-2533.33	864.858	471.599	-2468.73	854.845	487.76	-2505.48	764.882
891	0	272.418	-2673.92	1582.76	179.089	-2692.19	1575.57	259.135	-2498.9	1581.57	148.021	-2506.31	1570.81	210.146	-2462.74	1402.43	224.771	-2428.9	1185.64	222.872	-2605.99	1349.72	220.701	-2675.36	1226.22	129.677	-2415.82	1234.17	388.109	-2515.9	1364.83	427.591	-2479.76	1135.26	421.394	-2461.6	1069.15	459.686	-2529.18	970.205	443.328	-2546.86	866.864	473.781	-2482.39	856.195	490.128	-2520.38	766.887
892	0	274.145	-2682.83	1584.34	180.843	-2700.95	1577.3	261.273	-2507.87	1582.81	150.094	-2514.95	1572.14	212.179	-2471.68	1403.68	226.707	-2438.69	1187.04	224.661	-2615.23	1351.31	222.134	-2684.82	1227.96	131.589	-2424.94	1235.48	389.909	-2525.63	1366.15	429.65	-2490.49	1136.73	423.586	-2472.76	1070.39	461.669	-2541.6	972.029	445.25	-2560.54	869.018	476.019	-2496.24	857.665	492.486	-2535.53	769.038
893	0	275.844	-2691.77	1585.94	182.544	-2709.74	1579.03	263.368	-2516.87	1584.1	152.125	-2523.62	1573.55	214.181	-2480.62	1405.03	228.664	-2448.28	1188.53	226.373	-2624.42	1352.92	223.44	-2694.14	1229.64	133.515	-2433.93	1236.87	391.651	-2535.41	1367.55	431.736	-2501.23	1138.26	425.833	-2483.95	1071.69	463.658	-2554.11	973.961	447.165	-2574.36	871.292	478.306	-2510.27	859.228	494.826	-2550.93	771.304
894	0	277.511	-2700.75	1587.52	184.184	-2718.55	1580.77	265.411	-2525.9	1585.44	154.109	-2532.33	1575.01	216.149	-2489.56	1406.49	230.65	-2457.64	1190.07	228.001	-2633.54	1354.53	224.612	-2703.33	1231.24	135.461	-2442.77	1238.34	393.331	-2545.25	1369.02	433.854	-2512.01	1139.82	428.138	-2495.17	1073.04	465.651	-2566.72	975.981	449.072	-2588.28	873.655	480.636	-2524.47	860.856	497.142	-2566.55	773.654
895	0	279.142	-2709.76	1589.1	185.755	-2727.38	1582.49	267.398	-2534.96	1586.81	156.04	-2541.08	1576.52	218.083	-2498.49	1408.02	232.672	-2466.77	1191.67	229.538	-2642.61	1356.13	225.646	-2712.36	1232.74	137.432	-2451.45	1239.86	394.948	-2555.15	1370.53	436.008	-2522.81	1141.4	430.506	-2506.43	1074.42	467.647	-2579.41	978.068	450.969	-2602.29	876.082	483.002	-2538.79	862.526	499.428	-2582.36	776.063
896	0	280.734	-2718.81	1590.64	187.248	-2736.23	1584.18	269.324	-2544.05	1588.21	157.914	-2549.86	1578.07	219.98	-2507.42	1409.64	234.733	-2475.65	1193.29	230.979	-2651.61	1357.7	226.538	-2721.23	1234.13	139.429	-2459.97	1241.43	396.5	-2565.1	1372.09	438.203	-2533.65	1142.98	432.939	-2517.71	1075.81	469.645	-2592.18	980.206	452.856	-2616.36	878.551	485.398	-2553.24	864.219	501.683	-2598.33	778.513
897	0	282.286	-2727.9	1592.16	188.658	-2745.1	1585.83	271.185	-2553.16	1589.62	159.727	-2558.68	1579.64	221.841	-2516.33	1411.33	236.837	-2484.28	1194.93	232.318	-2660.54	1359.23	227.287	-2729.93	1235.39	141.458	-2468.33	1243.03	397.984	-2575.11	1373.68	440.44	-2544.53	1144.53	435.44	-2529.01	1077.2	471.643	-2605.01	982.382	454.729	-2630.49	881.044	487.819	-2567.79	865.921	503.905	-2614.45	780.989
898	0	283.795	-2737.02	1593.65	189.978	-2753.97	1587.43	272.978	-2562.31	1591.04	161.479	-2567.53	1581.24	223.666	-2525.24	1413.08	238.986	-2492.65	1196.58	233.554	-2669.39	1360.73	227.889	-2738.45	1236.52	143.519	-2476.51	1244.66	399.401	-2585.18	1375.3	442.721	-2555.46	1146.06	438.009	-2540.35	1078.58	473.641	-2617.9	984.586	456.586	-2644.65	883.546	490.262	-2582.43	867.62	506.094	-2630.7	783.483
899	0	285.259	-2746.18	1595.1	191.204	-2762.86	1588.99	274.703	-2571.47	1592.47	163.165	-2576.42	1582.87	225.453	-2534.13	1414.9	241.181	-2500.78	1198.23	234.684	-2678.18	1362.18	228.346	-2746.79	1237.5	145.613	-2484.53	1246.32	400.749	-2595.3	1376.95	445.048	-2566.45	1147.55	440.648	-2551.72	1079.94	475.636	-2630.85	986.811	458.428	-2658.85	886.048	492.723	-2597.15	869.309	508.248	-2647.05	785.987
900	0	286.677	-2755.38	1596.51	192.333	-2771.76	1590.49	276.357	-2580.67	1593.9	164.787	-2585.34	1584.5	227.203	-2543	1416.79	243.422	-2508.64	1199.89	235.706	-2686.88	1363.58	228.657	-2754.95	1238.33	147.743	-2492.37	1247.99	402.028	-2605.48	1378.61	447.42	-2577.49	1149	443.357	-2563.12	1081.28	477.629	-2643.86	989.052	460.252	-2673.06	888.543	495.2	-2611.94	870.983	510.369	-2663.51	788.5
901	0	288.05	-2764.6	1597.87	193.362	-2780.67	1591.93	277.94	-2589.88	1595.34	166.343	-2594.3	1586.16	228.915	-2551.87	1418.74	245.709	-2516.26	1201.53	236.619	-2695.51	1364.93	228.821	-2762.92	1239.01	149.907	-2500.04	1249.68	403.237	-2615.7	1380.29	449.836	-2588.6	1150.4	446.137	-2574.56	1082.6	479.618	-2656.92	991.307	462.057	-2687.3	891.028	497.692	-2626.8	872.64	512.457	-2680.05	791.02
902	0	289.375	-2773.86	1599.2	194.291	-2789.59	1593.32	279.452	-2599.12	1596.78	167.832	-2603.29	1587.83	230.591	-2560.71	1420.74	248.043	-2523.61	1203.17	237.424	-2704.07	1366.23	228.839	-2770.71	1239.55	152.107	-2507.54	1251.4	404.377	-2625.99	1381.98	452.298	-2599.76	1151.77	448.986	-2586.02	1083.89	481.603	-2670.05	993.575	463.843	-2701.55	893.5	500.199	-2641.73	874.279	514.511	-2696.68	793.545
903	0	290.653	-2783.16	1600.48	195.119	-2798.51	1594.65	280.893	-2608.39	1598.22	169.256	-2612.32	1589.51	232.228	-2569.54	1422.81	250.423	-2530.71	1204.81	238.121	-2712.55	1367.49	228.711	-2778.31	1239.93	154.343	-2514.87	1253.13	405.447	-2636.32	1383.7	454.805	-2610.99	1153.08	451.906	-2597.52	1085.17	483.585	-2683.22	995.856	465.61	-2715.81	895.961	502.72	-2656.73	875.9	516.532	-2713.39	796.077
[truncated: 69 more columns]

## Sheet: Sheet2
Devices
		025370 - Force			025370 - Moment			025370 - CoP			027571 - Force			027571 - Moment			027571 - CoP			037720 - Force			037720 - Moment			037720 - CoP
Frame	Sub Frame	Fx	Fy	Fz	Mx	My	Mz	Cx	Cy	Cz	Fx	Fy	Fz	Mx	My	Mz	Cx	Cy	Cz	Fx	Fy	Fz	Mx	My	Mz	Cx	Cy	Cz
		N	N	N	N.mm	N.mm	N.mm	mm	mm	mm	N	N	N	N.mm	N.mm	N.mm	mm	mm	mm	N	N	N	N.mm	N.mm	N.mm	mm	mm	mm
379	0	0	0	0	0	0	0	200	300	0	0	0	0	0	0	0	200	903	0	0	0	0	0	0	0	603	903	0
379	1	0	0	0	0	0	0	200	300	0	0	0	0	0	0	0	200	903	0	0	0	0	0	0	0	603	903	0
379	2	0	0	0	0	0	0	200	300	0	0	0	0	0	0	0	200	903	0	0	0	0	0	0	0	603	903	0
379	3	0	0	0	0	0	0	200	300	0	0	0	0	0	0	0	200	903	0	0	0	0	0	0	0	603	903	0
379	4	0	0	0	0	0	0	200	300	0	0	0	0	0	0	0	200	903	0	0	0	0	0	0	0	603	903	0
379	5	0	0	0	0	0	0	200	300	0	0	0	0	0	0	0	200	903	0	0	0	0	0	0	0	603	903	0
379	6	0	0	0	0	0	0	200	300	0	0	0	0	0	0	0	200	903	0	0	0	0	0	0	0	603	903	0
379	7	0	0	0	0	0	0	200	300	0	0	0	0	0	0	0	200	903	0	0	0	0	0	0	0	603	903	0
379	8	0	0	0	0	0	0	200	300	0	0	0	0	0	0	0	200	903	0	0	0	0	0	0	0	603	903	0
379	9	0	0	0	0	0	0	200	300	0	0	0	0	0	0	0	200	903	0	0	0	0	0	0	0	603	903	0
380	0	0	0	0	0	0	0	200	300	0	0	0	0	0	0	0	200	903	0	0	0	0	0	0	0	603	903	0
380	1	0	0	0	0	0	0	200	300	0	0	0	0	0	0	0	200	903	0	0	0	0	0	0	0	603	903	0
380	2	0	0	0	0	0	0	200	300	0	0	0	0	0	0	0	200	903	0	0	0	0	0	0	0	603	903	0
380	3	0	0	0	0	0	0	200	300	0	0	0	0	0	0	0	200	903	0	0	0	0	0	0	0	603	903	0
380	4	0	0	0	0	0	0	200	300	0	0	0	0	0	0	0	200	903	0	0	0	0	0	0	0	603	903	0
380	5	0	0	0	0	0	0	200	300	0	0	0	0	0	0	0	200	903	0	0	0	0	0	0	0	603	903	0
380	6	0	0	0	0	0	0	200	300	0	0	0	0	0	0	0	200	903	0	0	0	0	0	0	0	603	903	0
380	7	0	0	0	0	0	0	200	300	0	0	0	0	0	0	0	200	903	0	0	0	0	0	0	0	603	903	0
380	8	0	0	0	0	0	0	200	300	0	0	0	0	0	0	0	200	903	0	0	0	0	0	0	0	603	903	0
380	9	0	0	0	0	0	0	200	300	0	0	0	0	0	0	0	200	903	0	0	0	0	0	0	0	603	903	0
381	0	0	0	0	0	0	0	200	300	0	0	0	0	0	0	0	200	903	0	0	0	0	0	0	0	603	903	0
381	1	0	0	0	0	0	0	200	300	0	0	0	0	0	0	0	200	903	0	0	0	0	0	0	0	603	903	0
381	2	0	0	0	0	0	0	200	300	0	0	0	0	0	0	0	200	903	0	0	0	0	0	0	0	603	903	0
381	3	0	0	0	0	0	0	200	300	0	0	0	0	0	0	0	200	903	0	0	0	0	0	0	0	603	903	0
381	4	0	0	0	0	0	0	200	300	0	0	0	0	0	0	0	200	903	0	0	0	0	0	0	0	603	903	0
381	5	0	0	0	0	0	0	200	300	0	0	0	0	0	0	0	200	903	0	0	0	0	0	0	0	603	903	0
381	6	0	0	0	0	0	0	200	300	0	0	0	0	0	0	0	200	903	0	0	0	0	0	0	0	603	903	0
381	7	0	0	0	0	0	0	200	300	0	0	0	0	0	0	0	200	903	0	0	0	0	0	0	0	603	903	0
381	8	0	0	0	0	0	0	200	300	0	0	0	0	0	0	0	200	903	0	0	0	0	0	0	0	603	903	0
381	9	0	0	0	0	0	0	200	300	0	0	0	0	0	0	0	200	903	0	0	0	0	0	0	0	603	903	0
382	0	0	0	0	0	0	0	200	300	0	0	0	0	0	0	0	200	903	0	0	0	0	0	0	0	603	903	0
382	1	0	0	0	0	0	0	200	300	0	0	0	0	0	0	0	200	903	0	0	0	0	0	0	0	603	903	0
382	2	0	0	0	0	0	0	200	300	0	0	0	0	0	0	0	200	903	0	0	0	0	0	0	0	603	903	0
382	3	0	0	0	0	0	0	200	300	0	0	0	0	0	0	0	200	903	0	0	0	0	0	0	0	603	903	0
382	4	0	0	0	0	0	0	200	300	0	0	0	0	0	0	0	200	903	0	0	0	0	0	0	0	603	903	0
382	5	0	0	0	0	0	0	200	300	0	0	0	0	0	0	0	200	903	0	0	0	0	0	0	0	603	903	0
382	6	0	0	0	0	0	0	200	300	0	0	0	0	0	0	0	200	903	0	0	0	0	0	0	0	603	903	0
382	7	0	0	0	0	0	0	200	300	0	0	0	0	0	0	0	200	903	0	0	0	0	0	0	0	603	903	0
382	8	0	0	0	0	0	0	200	300	0	0	0	0	0	0	0	200	903	0	0	0	0	0	0	0	603	903	0
382	9	0	0	0	0	0	0	200	300	0	0	0	0	0	0	0	200	903	0	0	0	0	0	0	0	603	903	0
383	0	0	0	0	0	0	0	200	300	0	0	0	0	0	0	0	200	903	0	0	0	0	0	0	0	603	903	0
383	1	0	0	0	0	0	0	200	300	0	0	0	0	0	0	0	200	903	0	0	0	0	0	0	0	603	903	0
383	2	0	0	0	0	0	0	200	300	0	0	0	0	0	0	0	200	903	0	0	0	0	0	0	0	603	903	0
383	3	0	0	0	0	0	0	200	300	0	0	0	0	0	0	0	200	903	0	0	0	0	0	0	0	603	903	0
383	4	0	0	0	0	0	0	200	300	0	0	0	0	0	0	0	200	903	0	0	0	0	0	0	0	603	903	0
383	5	0	0	0	0	0	0	200	300	0	0	0	0	0	0	0	200	903	0	0	0	0	0	0	0	603	903	0
383	6	0	0	0	0	0	0	200	300	0	0	0	0	0	0	0	200	903	0	0	0	0	0	0	0	603	903	0
383	7	0	0	0	0	0	0	200	300	0	0	0	0	0	0	0	200	903	0	0	0	0	0	0	0	603	903	0
383	8	0	0	0	0	0	0	200	300	0	0	0	0	0	0	0	200	903	0	0	0	0	0	0	0	603	903	0
383	9	0	0	0	0	0	0	200	300	0	0	0	0	0	0	0	200	903	0	0	0	0	0	0	0	603	903	0
384	0	0	0	0	0	0	0	200	300	0	0	0	0	0	0	0	200	903	0	0	0	0	0	0	0	603	903	0
384	1	0	0	0	0	0	0	200	300	0	0	0	0	0	0	0	200	903	0	0	0	0	0	0	0	603	903	0
384	2	0	0	0	0	0	0	200	300	0	0	0	0	0	0	0	200	903	0	0	0	0	0	0	0	603	903	0
384	3	0	0	0	0	0	0	200	300	0	0	0	0	0	0	0	200	903	0	0	0	0	0	0	0	603	903	0
384	4	0	0	0	0	0	0	200	300	0	0	0	0	0	0	0	200	903	0	0	0	0	0	0	0	603	903	0
384	5	0	0	0	0	0	0	200	300	0	0	0	0	0	0	0	200	903	0	0	0	0	0	0	0	603	903	0
384	6	0	0	0	0	0	0	200	300	0	0	0	0	0	0	0	200	903	0	0	0	0	0	0	0	603	903	0
384	7	0	0	0	0	0	0	200	300	0	0	0	0	0	0	0	200	903	0	0	0	0	0	0	0	603	903	0
384	8	0	0	0	0	0	0	200	300	0	0	0	0	0	0	0	200	903	0	0	0	0	0	0	0	603	903	0
384	9	0	0	0	0	0	0	200	300	0	0	0	0	0	0	0	200	903	0	0	0	0	0	0	0	603	903	0
385	0	0	0	0	0	0	0	200	300	0	0	0	0	0	0	0	200	903	0	0	0	0	0	0	0	603	903	0
385	1	0	0	0	0	0	0	200	300	0	0	0	0	0	0	0	200	903	0	0	0	0	0	0	0	603	903	0
385	2	0	0	0	0	0	0	200	300	0	0	0	0	0	0	0	200	903	0	0	0	0	0	0	0	603	903	0
385	3	0	0	0	0	0	0	200	300	0	0	0	0	0	0	0	200	903	0	0	0	0	0	0	0	603	903	0
385	4	0	0	0	0	0	0	200	300	0	0	0	0	0	0	0	200	903	0	0	0	0	0	0	0	603	903	0
385	5	0	0	0	0	0	0	200	300	0	0	0	0	0	0	0	200	903	0	0	0	0	0	0	0	603	903	0
385	6	0	0	0	0	0	0	200	300	0	0	0	0	0	0	0	200	903	0	0	0	0	0	0	0	603	903	0
385	7	0	0	0	0	0	0	200	300	0	0	0	0	0	0	0	200	903	0	0	0	0	0	0	0	603	903	0
385	8	0	0	0	0	0	0	200	300	0	0	0	0	0	0	0	200	903	0	0	0	0	0	0	0	603	903	0
385	9	0	0	0	0	0	0	200	300	0	0	0	0	0	0	0	200	903	0	0	0	0	0	0	0	603	903	0
386	0	0	0	0	0	0	0	200	300	0	0	0	0	0	0	0	200	903	0	0	0	0	0	0	0	603	903	0
386	1	0	0	0	0	0	0	200	300	0	0	0	0	0	0	0	200	903	0	0	0	0	0	0	0	603	903	0
386	2	0	0	0	0	0	0	200	300	0	0	0	0	0	0	0	200	903	0	0	0	0	0	0	0	603	903	0
386	3	0	0	0	0	0	0	200	300	0	0	0	0	0	0	0	200	903	0	0	0	0	0	0	0	603	903	0
386	4	0	0	0	0	0	0	200	300	0	0	0	0	0	0	0	200	903	0	0	0	0	0	0	0	603	903	0
386	5	0	0	0	0	0	0	200	300	0	0	0	0	0	0	0	200	903	0	0	0	0	0	0	0	603	903	0
386	6	0	0	0	0	0	0	200	300	0	0	0	0	0	0	0	200	903	0	0	0	0	0	0	0	603	903	0
386	7	0	0	0	0	0	0	200	300	0	0	0	0	0	0	0	200	903	0	0	0	0	0	0	0	603	903	0
386	8	0	0	0	0	0	0	200	300	0	0	0	0	0	0	0	200	903	0	0	0	0	0	0	0	603	903	0
386	9	0	0	0	0	0	0	200	300	0	0	0	0	0	0	0	200	903	0	0	0	0	0	0	0	603	903	0
387	0	0	0	0	0	0	0	200	300	0	0	0	0	0	0	0	200	903	0	0	0	0	0	0	0	603	903	0
387	1	0	0	0	0	0	0	200	300	0	0	0	0	0	0	0	200	903	0	0	0	0	0	0	0	603	903	0
387	2	0	0	0	0	0	0	200	300	0	0	0	0	0	0	0	200	903	0	0	0	0	0	0	0	603	903	0
387	3	0	0	0	0	0	0	200	300	0	0	0	0	0	0	0	200	903	0	0	0	0	0	0	0	603	903	0
387	4	0	0	0	0	0	0	200	300	0	0	0	0	0	0	0	200	903	0	0	0	0	0	0	0	603	903	0
387	5	0	0	0	0	0	0	200	300	0	0	0	0	0	0	0	200	903	0	0	0	0	0	0	0	603	903	0
387	6	0	0	0	0	0	0	200	300	0	0	0	0	0	0	0	200	903	0	0	0	0	0	0	0	603	903	0
387	7	0	0	0	0	0	0	200	300	0	0	0	0	0	0	0	200	903	0	0	0	0	0	0	0	603	903	0
387	8	0	0	0	0	0	0	200	300	0	0	0	0	0	0	0	200	903	0	0	0	0	0	0	0	603	903	0
387	9	0	0	0	0	0	0	200	300	0	0	0	0	0	0	0	200	903	0	0	0	0	0	0	0	603	903	0
388	0	0	0	0	0	0	0	200	300	0	0	0	0	0	0	0	200	903	0	0	0	0	0	0	0	603	903	0
388	1	0	0	0	0	0	0	200	300	0	0	0	0	0	0	0	200	903	0	0	0	0	0	0	0	603	903	0
388	2	0	0	0	0	0	0	200	300	0	0	0	0	0	0	0	200	903	0	0	0	0	0	0	0	603	903	0
388	3	0	0	0	0	0	0	200	300	0	0	0	0	0	0	0	200	903	0	0	0	0	0	0	0	603	903	0
388	4	0	0	0	0	0	0	200	300	0	0	0	0	0	0	0	200	903	0	0	0	0	0	0	0	603	903	0
388	5	0	0	0	0	0	0	200	300	0	0	0	0	0	0	0	200	903	0	0	0	0	0	0	0	603	903	0
388	6	0	0	0	0	0	0	200	300	0	0	0	0	0	0	0	200	903	0	0	0	0	0	0	0	603	903	0
388	7	0	0	0	0	0	0	200	300	0	0	0	0	0	0	0	200	903	0	0	0	0	0	0	0	603	903	0
388	8	0	0	0	0	0	0	200	300	0	0	0	0	0	0	0	200	903	0	0	0	0	0	0	0	603	903	0
388	9	0	0	0	0	0	0	200	300	0	0	0	0	0	0	0	200	903	0	0	0	0	0	0	0	603	903	0
389	0	0	0	0	0	0	0	200	300	0	0	0	0	0	0	0	200	903	0	0	0	0	0	0	0	603	903	0
389	1	0	0	0	0	0	0	200	300	0	0	0	0	0	0	0	200	903	0	0	0	0	0	0	0	603	903	0
389	2	0	0	0	0	0	0	200	300	0	0	0	0	0	0	0	200	903	0	0	0	0	0	0	0	603	903	0
389	3	0	0	0	0	0	0	200	300	0	0	0	0	0	0	0	200	903	0	0	0	0	0	0	0	603	903	0
389	4	0	0	0	0	0	0	200	300	0	0	0	0	0	0	0	200	903	0	0	0	0	0	0	0	603	903	0
389	5	0	0	0	0	0	0	200	300	0	0	0	0	0	0	0	200	903	0	0	0	0	0	0	0	603	903	0
389	6	0	0	0	0	0	0	200	300	0	0	0	0	0	0	0	200	903	0	0	0	0	0	0	0	603	903	0
389	7	0	0	0	0	0	0	200	300	0	0	0	0	0	0	0	200	903	0	0	0	0	0	0	0	603	903	0
389	8	0	0	0	0	0	0	200	300	0	0	0	0	0	0	0	200	903	0	0	0	0	0	0	0	603	903	0
389	9	0	0	0	0	0	0	200	300	0	0	0	0	0	0	0	200	903	0	0	0	0	0	0	0	603	903	0
390	0	0	0	0	0	0	0	200	300	0	0	0	0	0	0	0	200	903	0	0	0	0	0	0	0	603	903	0
390	1	0	0	0	0	0	0	200	300	0	0	0	0	0	0	0	200	903	0	0	0	0	0	0	0	603	903	0
390	2	0	0	0	0	0	0	200	300	0	0	0	0	0	0	0	200	903	0	0	0	0	0	0	0	603	903	0
390	3	0	0	0	0	0	0	200	300	0	0	0	0	0	0	0	200	903	0	0	0	0	0	0	0	603	903	0
390	4	0	0	0	0	0	0	200	300	0	0	0	0	0	0	0	200	903	0	0	0	0	0	0	0	603	903	0
390	5	0	0	0	0	0	0	200	300	0	0	0	0	0	0	0	200	903	0	0	0	0	0	0	0	603	903	0
390	6	0	0	0	0	0	0	200	300	0	0	0	0	0	0	0	200	903	0	0	0	0	0	0	0	603	903	0
390	7	0	0	0	0	0	0	200	300	0	0	0	0	0	0	0	200	903	0	0	0	0	0	0	0	603	903	0
390	8	0	0	0	0	0	0	200	300	0	0	0	0	0	0	0	200	903	0	0	0	0	0	0	0	603	903	0
390	9	0	0	0	0	0	0	200	300	0	0	0	0	0	0	0	200	903	0	0	0	0	0	0	0	603	903	0
391	0	0	0	0	0	0	0	200	300	0	0	0	0	0	0	0	200	903	0	0	0	0	0	0	0	603	903	0
391	1	0	0	0	0	0	0	200	300	0	0	0	0	0	0	0	200	903	0	0	0	0	0	0	0	603	903	0
391	2	0	0	0	0	0	0	200	300	0	0	0	0	0	0	0	200	903	0	0	0	0	0	0	0	603	903	0
391	3	0	0	0	0	0	0	200	300	0	0	0	0	0	0	0	200	903	0	0	0	0	0	0	0	603	903	0
391	4	0	0	0	0	0	0	200	300	0	0	0	0	0	0	0	200	903	0	0	0	0	0	0	0	603	903	0
391	5	0	0	0	0	0	0	200	300	0	0	0	0	0	0	0	200	903	0	0	0	0	0	0	0	603	903	0
391	6	0	0	0	0	0	0	200	300	0	0	0	0	0	0	0	200	903	0	0	0	0	0	0	0	603	903	0
391	7	0	0	0	0	0	0	200	300	0	0	0	0	0	0	0	200	903	0	0	0	0	0	0	0	603	903	0
391	8	0	0	0	0	0	0	200	300	0	0	0	0	0	0	0	200	903	0	0	0	0	0	0	0	603	903	0
391	9	0	0	0	0	0	0	200	300	0	0	0	0	0	0	0	200	903	0	0	0	0	0	0	0	603	903	0
392	0	0	0	0	0	0	0	200	300	0	0	0	0	0	0	0	200	903	0	0	0	0	0	0	0	603	903	0
392	1	0	0	0	0	0	0	200	300	0	0	0	0	0	0	0	200	903	0	0	0	0	0	0	0	603	903	0
392	2	0	0	0	0	0	0	200	300	0	0	0	0	0	0	0	200	903	0	0	0	0	0	0	0	603	903	0
392	3	0	0	0	0	0	0	200	300	0	0	0	0	0	0	0	200	903	0	0	0	0	0	0	0	603	903	0
392	4	0	0	0	0	0	0	200	300	0	0	0	0	0	0	0	200	903	0	0	0	0	0	0	0	603	903	0
392	5	0	0	0	0	0	0	200	300	0	0	0	0	0	0	0	200	903	0	0	0	0	0	0	0	603	903	0
392	6	0	0	0	0	0	0	200	300	0	0	0	0	0	0	0	200	903	0	0	0	0	0	0	0	603	903	0
392	7	0	0	0	0	0	0	200	300	0	0	0	0	0	0	0	200	903	0	0	0	0	0	0	0	603	903	0
392	8	0	0	0	0	0	0	200	300	0	0	0	0	0	0	0	200	903	0	0	0	0	0	0	0	603	903	0
392	9	0	0	0	0	0	0	200	300	0	0	0	0	0	0	0	200	903	0	0	0	0	0	0	0	603	903	0
393	0	0	0	0	0	0	0	200	300	0	0	0	0	0	0	0	200	903	0	0	0	0	0	0	0	603	903	0
393	1	0	0	0	0	0	0	200	300	0	0	0	0	0	0	0	200	903	0	0	0	0	0	0	0	603	903	0
393	2	0	0	0	0	0	0	200	300	0	0	0	0	0	0	0	200	903	0	0	0	0	0	0	0	603	903	0
393	3	0	0	0	0	0	0	200	300	0	0	0	0	0	0	0	200	903	0	0	0	0	0	0	0	603	903	0
393	4	0	0	0	0	0	0	200	300	0	0	0	0	0	0	0	200	903	0	0	0	0	0	0	0	603	903	0
393	5	0	0	0	0	0	0	200	300	0	0	0	0	0	0	0	200	903	0	0	0	0	0	0	0	603	903	0
393	6	0	0	0	0	0	0	200	300	0	0	0	0	0	0	0	200	903	0	0	0	0	0	0	0	603	903	0
393	7	0	0	0	0	0	0	200	300	0	0	0	0	0	0	0	200	903	0	0	0	0	0	0	0	603	903	0
393	8	0	0	0	0	0	0	200	300	0	0	0	0	0	0	0	200	903	0	0	0	0	0	0	0	603	903	0
393	9	0	0	0	0	0	0	200	300	0	0	0	0	0	0	0	200	903	0	0	0	0	0	0	0	603	903	0
394	0	0	0	0	0	0	0	200	300	0	0	0	0	0	0	0	200	903	0	0	0	0	0	0	0	603	903	0
394	1	0	0	0	0	0	0	200	300	0	0	0	0	0	0	0	200	903	0	0	0	0	0	0	0	603	903	0
394	2	0	0	0	0	0	0	200	300	0	0	0	0	0	0	0	200	903	0	0	0	0	0	0	0	603	903	0
394	3	0	0	0	0	0	0	200	300	0	0	0	0	0	0	0	200	903	0	0	0	0	0	0	0	603	903	0
394	4	0	0	0	0	0	0	200	300	0	0	0	0	0	0	0	200	903	0	0	0	0	0	0	0	603	903	0
394	5	0	0	0	0	0	0	200	300	0	0	0	0	0	0	0	200	903	0	0	0	0	0	0	0	603	903	0
394	6	0	0	0	0	0	0	200	300	0	0	0	0	0	0	0	200	903	0	0	0	0	0	0	0	603	903	0
394	7	0	0	0	0	0	0	200	300	0	0	0	0	0	0	0	200	903	0	0	0	0	0	0	0	603	903	0
394	8	0	0	0	0	0	0	200	300	0	0	0	0	0	0	0	200	903	0	0	0	0	0	0	0	603	903	0
394	9	0	0	0	0	0	0	200	300	0	0	0	0	0	0	0	200	903	0	0	0	0	0	0	0	603	903	0
395	0	0	0	0	0	0	0	200	300	0	0	0	0	0	0	0	200	903	0	0	0	0	0	0	0	603	903	0
395	1	0	0	0	0	0	0	200	300	0	0	0	0	0	0	0	200	903	0	0	0	0	0	0	0	603	903	0
395	2	0	0	0	0	0	0	200	300	0	0	0	0	0	0	0	200	903	0	0	0	0	0	0	0	603	903	0
395	3	0	0	0	0	0	0	200	300	0	0	0	0	0	0	0	200	903	0	0	0	0	0	0	0	603	903	0
395	4	0	0	0	0	0	0	200	300	0	0	0	0	0	0	0	200	903	0	0	0	0	0	0	0	603	903	0
395	5	0	0	0	0	0	0	200	300	0	0	0	0	0	0	0	200	903	0	0	0	0	0	0	0	603	903	0
395	6	0	0	0	0	0	0	200	300	0	0	0	0	0	0	0	200	903	0	0	0	0	0	0	0	603	903	0
395	7	0	0	0	0	0	0	200	300	0	0	0	0	0	0	0	200	903	0	0	0	0	0	0	0	603	903	0
395	8	0	0	0	0	0	0	200	300	0	0	0	0	0	0	0	200	903	0	0	0	0	0	0	0	603	903	0
395	9	0	0	0	0	0	0	200	300	0	0	0	0	0	0	0	200	903	0	0	0	0	0	0	0	603	903	0
396	0	0	0	0	0	0	0	200	300	0	0	0	0	0	0	0	200	903	0	0	0	0	0	0	0	603	903	0
396	1	0	0	0	0	0	0	200	300	0	0	0	0	0	0	0	200	903	0	0	0	0	0	0	0	603	903	0
396	2	0	0	0	0	0	0	200	300	0	0	0	0	0	0	0	200	903	0	0	0	0	0	0	0	603	903	0
396	3	0	0	0	0	0	0	200	300	0	0	0	0	0	0	0	200	903	0	0	0	0	0	0	0	603	903	0
396	4	0	0	0	0	0	0	200	300	0	0	0	0	0	0	0	200	903	0	0	0	0	0	0	0	603	903	0
396	5	0	0	0	0	0	0	200	300	0	0	0	0	0	0	0	200	903	0	0	0	0	0	0	0	603	903	0
396	6	0	0	0	0	0	0	200	300	0	0	0	0	0	0	0	200	903	0	0	0	0	0	0	0	603	903	0
396	7	0	0	0	0	0	0	200	300	0	0	0	0	0	0	0	200	903	0	0	0	0	0	0	0	603	903	0
396	8	0	0	0	0	0	0	200	300	0	0	0	0	0	0	0	200	903	0	0	0	0	0	0	0	603	903	0
396	9	0	0	0	0	0	0	200	300	0	0	0	0	0	0	0	200	903	0	0	0	0	0	0	0	603	903	0
397	0	0	0	0	0	0	0	200	300	0	0	0	0	0	0	0	200	903	0	0	0	0	0	0	0	603	903	0
397	1	0	0	0	0	0	0	200	300	0	0	0	0	0	0	0	200	903	0	0	0	0	0	0	0	603	903	0
397	2	0	0	0	0	0	0	200	300	0	0	0	0	0	0	0	200	903	0	0	0	0	0	0	0	603	903	0
397	3	0	0	0	0	0	0	200	300	0	0	0	0	0	0	0	200	903	0	0	0	0	0	0	0	603	903	0
397	4	0	0	0	0	0	0	200	300	0	0	0	0	0	0	0	200	903	0	0	0	0	0	0	0	603	903	0
397	5	0	0	0	0	0	0	200	300	0	0	0	0	0	0	0	200	903	0	0	0	0	0	0	0	603	903	0
397	6	0	0	0	0	0	0	200	300	0	0	0	0	0	0	0	200	903	0	0	0	0	0	0	0	603	903	0
397	7	0	0	0	0	0	0	200	300	0	0	0	0	0	0	0	200	903	0	0	0	0	0	0	0	603	903	0
397	8	0	0	0	0	0	0	200	300	0	0	0	0	0	0	0	200	903	0	0	0	0	0	0	0	603	903	0
397	9	0	0	0	0	0	0	200	300	0	0	0	0	0	0	0	200	903	0	0	0	0	0	0	0	603	903	0
398	0	0	0	0	0	0	0	200	300	0	0	0	0	0	0	0	200	903	0	0	0	0	0	0	0	603	903	0
398	1	0	0	0	0	0	0	200	300	0	0	0	0	0	0	0	200	903	0	0	0	0	0	0	0	603	903	0
398	2	0	0	0	0	0	0	200	300	0	0	0	0	0	0	0	200	903	0	0	0	0	0	0	0	603	903	0
398	3	0	0	0	0	0	0	200	300	0	0	0	0	0	0	0	200	903	0	0	0	0	0	0	0	603	903	0
398	4	0	0	0	0	0	0	200	300	0	0	0	0	0	0	0	200	903	0	0	0	0	0	0	0	603	903	0
398	5	0	0	0	0	0	0	200	300	0	0	0	0	0	0	0	200	903	0	0	0	0	0	0	0	603	903	0
398	6	0	0	0	0	0	0	200	300	0	0	0	0	0	0	0	200	903	0	0	0	0	0	0	0	603	903	0
398	7	0	0	0	0	0	0	200	300	0	0	0	0	0	0	0	200	903	0	0	0	0	0	0	0	603	903	0
398	8	0	0	0	0	0	0	200	300	0	0	0	0	0	0	0	200	903	0	0	0	0	0	0	0	603	903	0
398	9	0	0	0	0	0	0	200	300	0	0	0	0	0	0	0	200	903	0	0	0	0	0	0	0	603	903	0
399	0	0	0	0	0	0	0	200	300	0	0	0	0	0	0	0	200	903	0	0	0	0	0	0	0	603	903	0
399	1	0	0	0	0	0	0	200	300	0	0	0	0	0	0	0	200	903	0	0	0	0	0	0	0	603	903	0
399	2	0	0	0	0	0	0	200	300	0	0	0	0	0	0	0	200	903	0	0	0	0	0	0	0	603	903	0
399	3	0	0	0	0	0	0	200	300	0	0	0	0	0	0	0	200	903	0	0	0	0	0	0	0	603	903	0
399	4	0	0	0	0	0	0	200	300	0	0	0	0	0	0	0	200	903	0	0	0	0	0	0	0	603	903	0
399	5	0	0	0	0	0	0	200	300	0	0	0	0	0	0	0	200	903	0	0	0	0	0	0	0	603	903	0
399	6	0	0	0	0	0	0	200	300	0	0	0	0	0	0	0	200	903	0	0	0	0	0	0	0	603	903	0
399	7	0	0	0	0	0	0	200	300	0	0	0	0	0	0	0	200	903	0	0	0	0	0	0	0	603	903	0
399	8	0	0	0	0	0	0	200	300	0	0	0	0	0	0	0	200	903	0	0	0	0	0	0	0	603	903	0
399	9	0	0	0	0	0	0	200	300	0	0	0	0	0	0	0	200	903	0	0	0	0	0	0	0	603	903	0
400	0	0	0	0	0	0	0	200	300	0	0	0	0	0	0	0	200	903	0	0	0	0	0	0	0	603	903	0
400	1	0	0	0	0	0	0	200	300	0	0	0	0	0	0	0	200	903	0	0	0	0	0	0	0	603	903	0
400	2	0	0	0	0	0	0	200	300	0	0	0	0	0	0	0	200	903	0	0	0	0	0	0	0	603	903	0
400	3	0	0	0	0	0	0	200	300	0	0	0	0	0	0	0	200	903	0	0	0	0	0	0	0	603	903	0
400	4	0	0	0	0	0	0	200	300	0	0	0	0	0	0	0	200	903	0	0	0	0	0	0	0	603	903	0
400	5	0	0	0	0	0	0	200	300	0	0	0	0	0	0	0	200	903	0	0	0	0	0	0	0	603	903	0
400	6	0	0	0	0	0	0	200	300	0	0	0	0	0	0	0	200	903	0	0	0	0	0	0	0	603	903	0
400	7	0	0	0	0	0	0	200	300	0	0	0	0	0	0	0	200	903	0	0	0	0	0	0	0	603	903	0
400	8	0	0	0	0	0	0	200	300	0	0	0	0	0	0	0	200	903	0	0	0	0	0	0	0	603	903	0
400	9	0	0	0	0	0	0	200	300	0	0	0	0	0	0	0	200	903	0	0	0	0	0	0	0	603	903	0
401	0	0	0	0	0	0	0	200	300	0	0	0	0	0	0	0	200	903	0	0	0	0	0	0	0	603	903	0
401	1	0	0	0	0	0	0	200	300	0	0	0	0	0	0	0	200	903	0	0	0	0	0	0	0	603	903	0
401	2	0	0	0	0	0	0	200	300	0	0	0	0	0	0	0	200	903	0	0	0	0	0	0	0	603	903	0
401	3	0	0	0	0	0	0	200	300	0	0	0	0	0	0	0	200	903	0	0	0	0	0	0	0	603	903	0
401	4	0	0	0	0	0	0	200	300	0	0	0	0	0	0	0	200	903	0	0	0	0	0	0	0	603	903	0
401	5	0	0	0	0	0	0	200	300	0	0	0	0	0	0	0	200	903	0	0	0	0	0	0	0	603	903	0
401	6	0	0	0	0	0	0	200	300	0	0	0	0	0	0	0	200	903	0	0	0	0	0	0	0	603	903	0
401	7	0	0	0	0	0	0	200	300	0	0	0	0	0	0	0	200	903	0	0	0	0	0	0	0	603	903	0
401	8	0	0	0	0	0	0	200	300	0	0	0	0	0	0	0	200	903	0	0	0	0	0	0	0	603	903	0
401	9	0	0	0	0	0	0	200	300	0	0	0	0	0	0	0	200	903	0	0	0	0	0	0	0	603	903	0
402	0	0	0	0	0	0	0	200	300	0	0	0	0	0	0	0	200	903	0	0	0	0	0	0	0	603	903	0
402	1	0	0	0	0	0	0	200	300	0	0	0	0	0	0	0	200	903	0	0	0	0	0	0	0	603	903	0
402	2	0	0	0	0	0	0	200	300	0	0	0	0	0	0	0	200	903	0	0	0	0	0	0	0	603	903	0
402	3	0	0	0	0	0	0	200	300	0	0	0	0	0	0	0	200	903	0	0	0	0	0	0	0	603	903	0
402	4	0	0	0	0	0	0	200	300	0	0	0	0	0	0	0	200	903	0	0	0	0	0	0	0	603	903	0
402	5	0	0	0	0	0	0	200	300	0	0	0	0	0	0	0	200	903	0	0	0	0	0	0	0	603	903	0
402	6	0	0	0	0	0	0	200	300	0	0	0	0	0	0	0	200	903	0	0	0	0	0	0	0	603	903	0
402	7	0	0	0	0	0	0	200	300	0	0	0	0	0	0	0	200	903	0	0	0	0	0	0	0	603	903	0
402	8	0	0	0	0	0	0	200	300	0	0	0	0	0	0	0	200	903	0	0	0	0	0	0	0	603	903	0
402	9	0	0	0	0	0	0	200	300	0	0	0	0	0	0	0	200	903	0	0	0	0	0	0	0	603	903	0
403	0	0	0	0	0	0	0	200	300	0	0	0	0	0	0	0	200	903	0	0	0	0	0	0	0	603	903	0
403	1	0	0	0	0	0	0	200	300	0	0	0	0	0	0	0	200	903	0	0	0	0	0	0	0	603	903	0
403	2	0	0	0	0	0	0	200	300	0	0	0	0	0	0	0	200	903	0	0	0	0	0	0	0	603	903	0
403	3	0	0	0	0	0	0	200	300	0	0	0	0	0	0	0	200	903	0	0	0	0	0	0	0	603	903	0
403	4	0	0	0	0	0	0	200	300	0	0	0	0	0	0	0	200	903	0	0	0	0	0	0	0	603	903	0
403	5	0	0	0	0	0	0	200	300	0	0	0	0	0	0	0	200	903	0	0	0	0	0	0	0	603	903	0
403	6	0	0	0	0	0	0	200	300	0	0	0	0	0	0	0	200	903	0	0	0	0	0	0	0	603	903	0
403	7	0	0	0	0	0	0	200	300	0	0	0	0	0	0	0	200	903	0	0	0	0	0	0	0	603	903	0
403	8	0	0	0	0	0	0	200	300	0	0	0	0	0	0	0	200	903	0	0	0	0	0	0	0	603	903	0
403	9	0	0	0	0	0	0	200	300	0	0	0	0	0	0	0	200	903	0	0	0	0	0	0	0	603	903	0
404	0	0	0	0	0	0	0	200	300	0	0	0	0	0	0	0	200	903	0	0	0	0	0	0	0	603	903	0
404	1	0	0	0	0	0	0	200	300	0	0	0	0	0	0	0	200	903	0	0	0	0	0	0	0	603	903	0
404	2	0	0	0	0	0	0	200	300	0	0	0	0	0	0	0	200	903	0	0	0	0	0	0	0	603	903	0
404	3	0	0	0	0	0	0	200	300	0	0	0	0	0	0	0	200	903	0	0	0	0	0	0	0	603	903	0
404	4	0	0	0	0	0	0	200	300	0	0	0	0	0	0	0	200	903	0	0	0	0	0	0	0	603	903	0
404	5	0	0	0	0	0	0	200	300	0	0	0	0	0	0	0	200	903	0	0	0	0	0	0	0	603	903	0
404	6	0	0	0	0	0	0	200	300	0	0	0	0	0	0	0	200	903	0	0	0	0	0	0	0	603	903	0
404	7	0	0	0	0	0	0	200	300	0	0	0	0	0	0	0	200	903	0	0	0	0	0	0	0	603	903	0
404	8	0	0	0	0	0	0	200	300	0	0	0	0	0	0	0	200	903	0	0	0	0	0	0	0	603	903	0
404	9	0	0	0	0	0	0	200	300	0	0	0	0	0	0	0	200	903	0	0	0	0	0	0	0	603	903	0
405	0	0	0	0	0	0	0	200	300	0	0	0	0	0	0	0	200	903	0	0	0	0	0	0	0	603	903	0
405	1	0	0	0	0	0	0	200	300	0	0	0	0	0	0	0	200	903	0	0	0	0	0	0	0	603	903	0
405	2	0	0	0	0	0	0	200	300	0	0	0	0	0	0	0	200	903	0	0	0	0	0	0	0	603	903	0
405	3	0	0	0	0	0	0	200	300	0	0	0	0	0	0	0	200	903	0	0	0	0	0	0	0	603	903	0
405	4	0	0	0	0	0	0	200	300	0	0	0	0	0	0	0	200	903	0	0	0	0	0	0	0	603	903	0
405	5	0	0	0	0	0	0	200	300	0	0	0	0	0	0	0	200	903	0	0	0	0	0	0	0	603	903	0
405	6	0	0	0	0	0	0	200	300	0	0	0	0	0	0	0	200	903	0	0	0	0	0	0	0	603	903	0
405	7	0	0	0	0	0	0	200	300	0	0	0	0	0	0	0	200	903	0	0	0	0	0	0	0	603	903	0
405	8	0	0	0	0	0	0	200	300	0	0	0	0	0	0	0	200	903	0	0	0	0	0	0	0	603	903	0
405	9	0	0	0	0	0	0	200	300	0	0	0	0	0	0	0	200	903	0	0	0	0	0	0	0	603	903	0
406	0	0	0	0	0	0	0	200	300	0	0	0	0	0	0	0	200	903	0	0	0	0	0	0	0	603	903	0
406	1	0	0	0	0	0	0	200	300	0	0	0	0	0	0	0	200	903	0	0	0	0	0	0	0	603	903	0
406	2	0	0	0	0	0	0	200	300	0	0	0	0	0	0	0	200	903	0	0	0	0	0	0	0	603	903	0
406	3	0	0	0	0	0	0	200	300	0	0	0	0	0	0	0	200	903	0	0	0	0	0	0	0	603	903	0
406	4	0	0	0	0	0	0	200	300	0	0	0	0	0	0	0	200	903	0	0	0	0	0	0	0	603	903	0
406	5	0	0	0	0	0	0	200	300	0	0	0	0	0	0	0	200	903	0	0	0	0	0	0	0	603	903	0
406	6	0	0	0	0	0	0	200	300	0	0	0	0	0	0	0	200	903	0	0	0	0	0	0	0	603	903	0
406	7	0	0	0	0	0	0	200	300	0	0	0	0	0	0	0	200	903	0	0	0	0	0	0	0	603	903	0
406	8	0	0	0	0	0	0	200	300	0	0	0	0	0	0	0	200	903	0	0	0	0	0	0	0	603	903	0
406	9	0	0	0	0	0	0	200	300	0	0	0	0	0	0	0	200	903	0	0	0	0	0	0	0	603	903	0
407	0	0	0	0	0	0	0	200	300	0	0	0	0	0	0	0	200	903	0	0	0	0	0	0	0	603	903	0
407	1	0	0	0	0	0	0	200	300	0	0	0	0	0	0	0	200	903	0	0	0	0	0	0	0	603	903	0
407	2	0	0	0	0	0	0	200	300	0	0	0	0	0	0	0	200	903	0	0	0	0	0	0	0	603	903	0
407	3	0	0	0	0	0	0	200	300	0	0	0	0	0	0	0	200	903	0	0	0	0	0	0	0	603	903	0
407	4	0	0	0	0	0	0	200	300	0	0	0	0	0	0	0	200	903	0	0	0	0	0	0	0	603	903	0
407	5	0	0	0	0	0	0	200	300	0	0	0	0	0	0	0	200	903	0	0	0	0	0	0	0	603	903	0
407	6	0	0	0	0	0	0	200	300	0	0	0	0	0	0	0	200	903	0	0	0	0	0	0	0	603	903	0
407	7	0	0	0	0	0	0	200	300	0	0	0	0	0	0	0	200	903	0	0	0	0	0	0	0	603	903	0
407	8	0	0	0	0	0	0	200	300	0	0	0	0	0	0	0	200	903	0	0	0	0	0	0	0	603	903	0
407	9	0	0	0	0	0	0	200	300	0	0	0	0	0	0	0	200	903	0	0	0	0	0	0	0	603	903	0
408	0	0	0	0	0	0	0	200	300	0	0	0	0	0	0	0	200	903	0	0	0	0	0	0	0	603	903	0
408	1	0	0	0	0	0	0	200	300	0	0	0	0	0	0	0	200	903	0	0	0	0	0	0	0	603	903	0
408	2	0	0	0	0	0	0	200	300	0	0	0	0	0	0	0	200	903	0	0	0	0	0	0	0	603	903	0
408	3	0	0	0	0	0	0	200	300	0	0	0	0	0	0	0	200	903	0	0	0	0	0	0	0	603	903	0
408	4	0	0	0	0	0	0	200	300	0	0	0	0	0	0	0	200	903	0	0	0	0	0	0	0	603	903	0
408	5	0	0	0	0	0	0	200	300	0	0	0	0	0	0	0	200	903	0	0	0	0	0	0	0	603	903	0
408	6	0	0	0	0	0	0	200	300	0	0	0	0	0	0	0	200	903	0	0	0	0	0	0	0	603	903	0
408	7	0	0	0	0	0	0	200	300	0	0	0	0	0	0	0	200	903	0	0	0	0	0	0	0	603	903	0
408	8	0	0	0	0	0	0	200	300	0	0	0	0	0	0	0	200	903	0	0	0	0	0	0	0	603	903	0
408	9	0	0	0	0	0	0	200	300	0	0	0	0	0	0	0	200	903	0	0	0	0	0	0	0	603	903	0
409	0	0	0	0	0	0	0	200	300	0	0	0	0	0	0	0	200	903	0	0	0	0	0	0	0	603	903	0
409	1	0	0	0	0	0	0	200	300	0	0	0	0	0	0	0	200	903	0	0	0	0	0	0	0	603	903	0
409	2	0	0	0	0	0	0	200	300	0	0	0	0	0	0	0	200	903	0	0	0	0	0	0	0	603	903	0
409	3	0	0	0	0	0	0	200	300	0	0	0	0	0	0	0	200	903	0	0	0	0	0	0	0	603	903	0
409	4	0	0	0	0	0	0	200	300	0	0	0	0	0	0	0	200	903	0	0	0	0	0	0	0	603	903	0
409	5	0	0	0	0	0	0	200	300	0	0	0	0	0	0	0	200	903	0	0	0	0	0	0	0	603	903	0
409	6	0	0	0	0	0	0	200	300	0	0	0	0	0	0	0	200	903	0	0	0	0	0	0	0	603	903	0
409	7	0	0	0	0	0	0	200	300	0	0	0	0	0	0	0	200	903	0	0	0	0	0	0	0	603	903	0
409	8	0	0	0	0	0	0	200	300	0	0	0	0	0	0	0	200	903	0	0	0	0	0	0	0	603	903	0
409	9	0	0	0	0	0	0	200	300	0	0	0	0	0	0	0	200	903	0	0	0	0	0	0	0	603	903	0
410	0	0	0	0	0	0	0	200	300	0	0	0	0	0	0	0	200	903	0	0	0	0	0	0	0	603	903	0
410	1	0	0	0	0	0	0	200	300	0	0	0	0	0	0	0	200	903	0	0	0	0	0	0	0	603	903	0
410	2	0	0	0	0	0	0	200	300	0	0	0	0	0	0	0	200	903	0	0	0	0	0	0	0	603	903	0
410	3	0	0	0	0	0	0	200	300	0	0	0	0	0	0	0	200	903	0	0	0	0	0	0	0	603	903	0
410	4	0	0	0	0	0	0	200	300	0	0	0	0	0	0	0	200	903	0	0	0	0	0	0	0	603	903	0
410	5	0	0	0	0	0	0	200	300	0	0	0	0	0	0	0	200	903	0	0	0	0	0	0	0	603	903	0
410	6	0	0	0	0	0	0	200	300	0	0	0	0	0	0	0	200	903	0	0	0	0	0	0	0	603	903	0
410	7	0	0	0	0	0	0	200	300	0	0	0	0	0	0	0	200	903	0	0	0	0	0	0	0	603	903	0
410	8	0	0	0	0	0	0	200	300	0	0	0	0	0	0	0	200	903	0	0	0	0	0	0	0	603	903	0
410	9	0	0	0	0	0	0	200	300	0	0	0	0	0	0	0	200	903	0	0	0	0	0	0	0	603	903	0
411	0	0	0	0	0	0	0	200	300	0	0	0	0	0	0	0	200	903	0	0	0	0	0	0	0	603	903	0
411	1	0	0	0	0	0	0	200	300	0	0	0	0	0	0	0	200	903	0	0	0	0	0	0	0	603	903	0
411	2	0	0	0	0	0	0	200	300	0	0	0	0	0	0	0	200	903	0	0	0	0	0	0	0	603	903	0
411	3	0	0	0	0	0	0	200	300	0	0	0	0	0	0	0	200	903	0	0	0	0	0	0	0	603	903	0
411	4	0	0	0	0	0	0	200	300	0	0	0	0	0	0	0	200	903	0	0	0	0	0	0	0	603	903	0
411	5	0	0	0	0	0	0	200	300	0	0	0	0	0	0	0	200	903	0	0	0	0	0	0	0	603	903	0
411	6	0	0	0	0	0	0	200	300	0	0	0	0	0	0	0	200	903	0	0	0	0	0	0	0	603	903	0
411	7	0	0	0	0	0	0	200	300	0	0	0	0	0	0	0	200	903	0	0	0	0	0	0	0	603	903	0
411	8	0	0	0	0	0	0	200	300	0	0	0	0	0	0	0	200	903	0	0	0	0	0	0	0	603	903	0
411	9	0	0	0	0	0	0	200	300	0	0	0	0	0	0	0	200	903	0	0	0	0	0	0	0	603	903	0
412	0	0	0	0	0	0	0	200	300	0	0	0	0	0	0	0	200	903	0	0	0	0	0	0	0	603	903	0
412	1	0	0	0	0	0	0	200	300	0	0	0	0	0	0	0	200	903	0	0	0	0	0	0	0	603	903	0
412	2	0	0	0	0	0	0	200	300	0	0	0	0	0	0	0	200	903	0	0	0	0	0	0	0	603	903	0
412	3	0	0	0	0	0	0	200	300	0	0	0	0	0	0	0	200	903	0	0	0	0	0	0	0	603	903	0
412	4	0	0	0	0	0	0	200	300	0	0	0	0	0	0	0	200	903	0	0	0	0	0	0	0	603	903	0
412	5	0	0	0	0	0	0	200	300	0	0	0	0	0	0	0	200	903	0	0	0	0	0	0	0	603	903	0
412	6	0	0	0	0	0	0	200	300	0	0	0	0	0	0	0	200	903	0	0	0	0	0	0	0	603	903	0
412	7	0	0	0	0	0	0	200	300	0	0	0	0	0	0	0	200	903	0	0	0	0	0	0	0	603	903	0
412	8	0	0	0	0	0	0	200	300	0	0	0	0	0	0	0	200	903	0	0	0	0	0	0	0	603	903	0
412	9	0	0	0	0	0	0	200	300	0	0	0	0	0	0	0	200	903	0	0	0	0	0	0	0	603	903	0
413	0	0	0	0	0	0	0	200	300	0	0	0	0	0	0	0	200	903	0	0	0	0	0	0	0	603	903	0
413	1	0	0	0	0	0	0	200	300	0	0	0	0	0	0	0	200	903	0	0	0	0	0	0	0	603	903	0
413	2	0	0	0	0	0	0	200	300	0	0	0	0	0	0	0	200	903	0	0	0	0	0	0	0	603	903	0
413	3	0	0	0	0	0	0	200	300	0	0	0	0	0	0	0	200	903	0	0	0	0	0	0	0	603	903	0
413	4	0	0	0	0	0	0	200	300	0	0	0	0	0	0	0	200	903	0	0	0	0	0	0	0	603	903	0
413	5	0	0	0	0	0	0	200	300	0	0	0	0	0	0	0	200	903	0	0	0	0	0	0	0	603	903	0
413	6	0	0	0	0	0	0	200	300	0	0	0	0	0	0	0	200	903	0	0	0	0	0	0	0	603	903	0
413	7	0	0	0	0	0	0	200	300	0	0	0	0	0	0	0	200	903	0	0	0	0	0	0	0	603	903	0
413	8	0	0	0	0	0	0	200	300	0	0	0	0	0	0	0	200	903	0	0	0	0	0	0	0	603	903	0
413	9	0	0	0	0	0	0	200	300	0	0	0	0	0	0	0	200	903	0	0	0	0	0	0	0	603	903	0
414	0	0	0	0	0	0	0	200	300	0	0	0	0	0	0	0	200	903	0	0	0	0	0	0	0	603	903	0
414	1	0	0	0	0	0	0	200	300	0	0	0	0	0	0	0	200	903	0	0	0	0	0	0	0	603	903	0
414	2	0	0	0	0	0	0	200	300	0	0	0	0	0	0	0	200	903	0	0	0	0	0	0	0	603	903	0
414	3	0	0	0	0	0	0	200	300	0	0	0	0	0	0	0	200	903	0	0	0	0	0	0	0	603	903	0
414	4	0	0	0	0	0	0	200	300	0	0	0	0	0	0	0	200	903	0	0	0	0	0	0	0	603	903	0
414	5	0	0	0	0	0	0	200	300	0	0	0	0	0	0	0	200	903	0	0	0	0	0	0	0	603	903	0
414	6	0	0	0	0	0	0	200	300	0	0	0	0	0	0	0	200	903	0	0	0	0	0	0	0	603	903	0
414	7	0	0	0	0	0	0	200	300	0	0	0	0	0	0	0	200	903	0	0	0	0	0	0	0	603	903	0
414	8	0	0	0	0	0	0	200	300	0	0	0	0	0	0	0	200	903	0	0	0	0	0	0	0	603	903	0
414	9	0	0	0	0	0	0	200	300	0	0	0	0	0	0	0	200	903	0	0	0	0	0	0	0	603	903	0
415	0	0	0	0	0	0	0	200	300	0	0	0	0	0	0	0	200	903	0	0	0	0	0	0	0	603	903	0
415	1	0	0	0	0	0	0	200	300	0	0	0	0	0	0	0	200	903	0	0	0	0	0	0	0	603	903	0
415	2	0	0	0	0	0	0	200	300	0	0	0	0	0	0	0	200	903	0	0	0	0	0	0	0	603	903	0
415	3	0	0	0	0	0	0	200	300	0	0	0	0	0	0	0	200	903	0	0	0	0	0	0	0	603	903	0
415	4	0	0	0	0	0	0	200	300	0	0	0	0	0	0	0	200	903	0	0	0	0	0	0	0	603	903	0
415	5	0	0	0	0	0	0	200	300	0	0	0	0	0	0	0	200	903	0	0	0	0	0	0	0	603	903	0
415	6	0	0	0	0	0	0	200	300	0	0	0	0	0	0	0	200	903	0	0	0	0	0	0	0	603	903	0
415	7	0	0	0	0	0	0	200	300	0	0	0	0	0	0	0	200	903	0	0	0	0	0	0	0	603	903	0
415	8	0	0	0	0	0	0	200	300	0	0	0	0	0	0	0	200	903	0	0	0	0	0	0	0	603	903	0
415	9	0	0	0	0	0	0	200	300	0	0	0	0	0	0	0	200	903	0	0	0	0	0	0	0	603	903	0
416	0	0	0	0	0	0	0	200	300	0	0	0	0	0	0	0	200	903	0	0	0	0	0	0	0	603	903	0
416	1	0	0	0	0	0	0	200	300	0	0	0	0	0	0	0	200	903	0	0	0	0	0	0	0	603	903	0
416	2	0	0	0	0	0	0	200	300	0	0	0	0	0	0	0	200	903	0	0	0	0	0	0	0	603	903	0
416	3	0	0	0	0	0	0	200	300	0	0	0	0	0	0	0	200	903	0	0	0	0	0	0	0	603	903	0
416	4	0	0	0	0	0	0	200	300	0	0	0	0	0	0	0	200	903	0	0	0	0	0	0	0	603	903	0
416	5	0	0	0	0	0	0	200	300	0	0	0	0	0	0	0	200	903	0	0	0	0	0	0	0	603	903	0
416	6	0	0	0	0	0	0	200	300	0	0	0	0	0	0	0	200	903	0	0	0	0	0	0	0	603	903	0
416	7	0	0	0	0	0	0	200	300	0	0	0	0	0	0	0	200	903	0	0	0	0	0	0	0	603	903	0
416	8	0	0	0	0	0	0	200	300	0	0	0	0	0	0	0	200	903	0	0	0	0	0	0	0	603	903	0
416	9	0	0	0	0	0	0	200	300	0	0	0	0	0	0	0	200	903	0	0	0	0	0	0	0	603	903	0
417	0	0	0	0	0	0	0	200	300	0	0	0	0	0	0	0	200	903	0	0	0	0	0	0	0	603	903	0
417	1	0	0	0	0	0	0	200	300	0	0	0	0	0	0	0	200	903	0	0	0	0	0	0	0	603	903	0
417	2	0	0	0	0	0	0	200	300	0	0	0	0	0	0	0	200	903	0	0	0	0	0	0	0	603	903	0
417	3	0	0	0	0	0	0	200	300	0	0	0	0	0	0	0	200	903	0	0	0	0	0	0	0	603	903	0
417	4	0	0	0	0	0	0	200	300	0	0	0	0	0	0	0	200	903	0	0	0	0	0	0	0	603	903	0
417	5	0	0	0	0	0	0	200	300	0	0	0	0	0	0	0	200	903	0	0	0	0	0	0	0	603	903	0
417	6	0	0	0	0	0	0	200	300	0	0	0	0	0	0	0	200	903	0	0	0	0	0	0	0	603	903	0
417	7	0	0	0	0	0	0	200	300	0	0	0	0	0	0	0	200	903	0	0	0	0	0	0	0	603	903	0
417	8	0	0	0	0	0	0	200	300	0	0	0	0	0	0	0	200	903	0	0	0	0	0	0	0	603	903	0
417	9	0	0	0	0	0	0	200	300	0	0	0	0	0	0	0	200	903	0	0	0	0	0	0	0	603	903	0
418	0	0	0	0	0	0	0	200	300	0	0	0	0	0	0	0	200	903	0	0	0	0	0	0	0	603	903	0
418	1	0	0	0	0	0	0	200	300	0	0	0	0	0	0	0	200	903	0	0	0	0	0	0	0	603	903	0
418	2	0	0	0	0	0	0	200	300	0	0	0	0	0	0	0	200	903	0	0	0	0	0	0	0	603	903	0
418	3	0	0	0	0	0	0	200	300	0	0	0	0	0	0	0	200	903	0	0	0	0	0	0	0	603	903	0
418	4	0	0	0	0	0	0	200	300	0	0	0	0	0	0	0	200	903	0	0	0	0	0	0	0	603	903	0
418	5	0	0	0	0	0	0	200	300	0	0	0	0	0	0	0	200	903	0	0	0	0	0	0	0	603	903	0
418	6	0	0	0	0	0	0	200	300	0	0	0	0	0	0	0	200	903	0	0	0	0	0	0	0	603	903	0
418	7	0	0	0	0	0	0	200	300	0	0	0	0	0	0	0	200	903	0	0	0	0	0	0	0	603	903	0
418	8	0	0	0	0	0	0	200	300	0	0	0	0	0	0	0	200	903	0	0	0	0	0	0	0	603	903	0
418	9	0	0	0	0	0	0	200	300	0	0	0	0	0	0	0	200	903	0	0	0	0	0	0	0	603	903	0
419	0	0	0	0	0	0	0	200	300	0	0	0	0	0	0	0	200	903	0	0	0	0	0	0	0	603	903	0
419	1	0	0	0	0	0	0	200	300	0	0	0	0	0	0	0	200	903	0	0	0	0	0	0	0	603	903	0
419	2	0	0	0	0	0	0	200	300	0	0	0	0	0	0	0	200	903	0	0	0	0	0	0	0	603	903	0
419	3	0	0	0	0	0	0	200	300	0	0	0	0	0	0	0	200	903	0	0	0	0	0	0	0	603	903	0
419	4	0	0	0	0	0	0	200	300	0	0	0	0	0	0	0	200	903	0	0	0	0	0	0	0	603	903	0
419	5	0	0	0	0	0	0	200	300	0	0	0	0	0	0	0	200	903	0	0	0	0	0	0	0	603	903	0
419	6	0	0	0	0	0	0	200	300	0	0	0	0	0	0	0	200	903	0	0	0	0	0	0	0	603	903	0
419	7	0	0	0	0	0	0	200	300	0	0	0	0	0	0	0	200	903	0	0	0	0	0	0	0	603	903	0
419	8	0	0	0	0	0	0	200	300	0	0	0	0	0	0	0	200	903	0	0	0	0	0	0	0	603	903	0
419	9	0	0	0	0	0	0	200	300	0	0	0	0	0	0	0	200	903	0	0	0	0	0	0	0	603	903	0
420	0	0	0	0	0	0	0	200	300	0	0	0	0	0	0	0	200	903	0	0	0	0	0	0	0	603	903	0
420	1	0	0	0	0	0	0	200	300	0	0	0	0	0	0	0	200	903	0	0	0	0	0	0	0	603	903	0
420	2	0	0	0	0	0	0	200	300	0	0	0	0	0	0	0	200	903	0	0	0	0	0	0	0	603	903	0
420	3	0	0	0	0	0	0	200	300	0	0	0	0	0	0	0	200	903	0	0	0	0	0	0	0	603	903	0
420	4	0	0	0	0	0	0	200	300	0	0	0	0	0	0	0	200	903	0	0	0	0	0	0	0	603	903	0
420	5	0	0	0	0	0	0	200	300	0	0	0	0	0	0	0	200	903	0	0	0	0	0	0	0	603	903	0
420	6	0	0	0	0	0	0	200	300	0	0	0	0	0	0	0	200	903	0	0	0	0	0	0	0	603	903	0
420	7	0	0	0	0	0	0	200	300	0	0	0	0	0	0	0	200	903	0	0	0	0	0	0	0	603	903	0
420	8	0	0	0	0	0	0	200	300	0	0	0	0	0	0	0	200	903	0	0	0	0	0	0	0	603	903	0
420	9	0	0	0	0	0	0	200	300	0	0	0	0	0	0	0	200	903	0	0	0	0	0	0	0	603	903	0
421	0	0	0	0	0	0	0	200	300	0	0	0	0	0	0	0	200	903	0	0	0	0	0	0	0	603	903	0
421	1	0	0	0	0	0	0	200	300	0	0	0	0	0	0	0	200	903	0	0	0	0	0	0	0	603	903	0
421	2	0	0	0	0	0	0	200	300	0	0	0	0	0	0	0	200	903	0	0	0	0	0	0	0	603	903	0
421	3	0	0	0	0	0	0	200	300	0	0	0	0	0	0	0	200	903	0	0	0	0	0	0	0	603	903	0
421	4	0	0	0	0	0	0	200	300	0	0	0	0	0	0	0	200	903	0	0	0	0	0	0	0	603	903	0
421	5	0	0	0	0	0	0	200	300	0	0	0	0	0	0	0	200	903	0	0	0	0	0	0	0	603	903	0
421	6	0	0	0	0	0	0	200	300	0	0	0	0	0	0	0	200	903	0	0	0	0	0	0	0	603	903	0
421	7	0	0	0	0	0	0	200	300	0	0	0	0	0	0	0	200	903	0	0	0	0	0	0	0	603	903	0
421	8	0	0	0	0	0	0	200	300	0	0	0	0	0	0	0	200	903	0	0	0	0	0	0	0	603	903	0
421	9	0	0	0	0	0	0	200	300	0	0	0	0	0	0	0	200	903	0	0	0	0	0	0	0	603	903	0
422	0	0	0	0	0	0	0	200	300	0	0	0	0	0	0	0	200	903	0	0	0	0	0	0	0	603	903	0
422	1	0	0	0	0	0	0	200	300	0	0	0	0	0	0	0	200	903	0	0	0	0	0	0	0	603	903	0
422	2	0	0	0	0	0	0	200	300	0	0	0	0	0	0	0	200	903	0	0	0	0	0	0	0	603	903	0
422	3	0	0	0	0	0	0	200	300	0	0	0	0	0	0	0	200	903	0	0	0	0	0	0	0	603	903	0
422	4	0	0	0	0	0	0	200	300	0	0	0	0	0	0	0	200	903	0	0	0	0	0	0	0	603	903	0
422	5	0	0	0	0	0	0	200	300	0	0	0	0	0	0	0	200	903	0	0	0	0	0	0	0	603	903	0
422	6	0	0	0	0	0	0	200	300	0	0	0	0	0	0	0	200	903	0	0	0	0	0	0	0	603	903	0
422	7	0	0	0	0	0	0	200	300	0	0	0	0	0	0	0	200	903	0	0	0	0	0	0	0	603	903	0
422	8	0	0	0	0	0	0	200	300	0	0	0	0	0	0	0	200	903	0	0	0	0	0	0	0	603	903	0
422	9	0	0	0	0	0	0	200	300	0	0	0	0	0	0	0	200	903	0	0	0	0	0	0	0	603	903	0
423	0	0	0	0	0	0	0	200	300	0	0	0	0	0	0	0	200	903	0	0	0	0	0	0	0	603	903	0
423	1	0	0	0	0	0	0	200	300	0	0	0	0	0	0	0	200	903	0	0	0	0	0	0	0	603	903	0
423	2	0	0	0	0	0	0	200	300	0	0	0	0	0	0	0	200	903	0	0	0	0	0	0	0	603	903	0
423	3	0	0	0	0	0	0	200	300	0	0	0	0	0	0	0	200	903	0	0	0	0	0	0	0	603	903	0
423	4	0	0	0	0	0	0	200	300	0	0	0	0	0	0	0	200	903	0	0	0	0	0	0	0	603	903	0
423	5	0	0	0	0	0	0	200	300	0	0	0	0	0	0	0	200	903	0	0	0	0	0	0	0	603	903	0
423	6	0	0	0	0	0	0	200	300	0	0	0	0	0	0	0	200	903	0	0	0	0	0	0	0	603	903	0
423	7	0	0	0	0	0	0	200	300	0	0	0	0	0	0	0	200	903	0	0	0	0	0	0	0	603	903	0
423	8	0	0	0	0	0	0	200	300	0	0	0	0	0	0	0	200	903	0	0	0	0	0	0	0	603	903	0
423	9	0	0	0	0	0	0	200	300	0	0	0	0	0	0	0	200	903	0	0	0	0	0	0	0	603	903	0
424	0	0	0	0	0	0	0	200	300	0	0	0	0	0	0	0	200	903	0	0	0	0	0	0	0	603	903	0
424	1	0	0	0	0	0	0	200	300	0	0	0	0	0	0	0	200	903	0	0	0	0	0	0	0	603	903	0
424	2	0	0	0	0	0	0	200	300	0	0	0	0	0	0	0	200	903	0	0	0	0	0	0	0	603	903	0
424	3	0	0	0	0	0	0	200	300	0	0	0	0	0	0	0	200	903	0	0	0	0	0	0	0	603	903	0
424	4	0	0	0	0	0	0	200	300	0	0	0	0	0	0	0	200	903	0	0	0	0	0	0	0	603	903	0
424	5	0	0	0	0	0	0	200	300	0	0	0	0	0	0	0	200	903	0	0	0	0	0	0	0	603	903	0
424	6	0	0	0	0	0	0	200	300	0	0	0	0	0	0	0	200	903	0	0	0	0	0	0	0	603	903	0
424	7	0	0	0	0	0	0	200	300	0	0	0	0	0	0	0	200	903	0	0	0	0	0	0	0	603	903	0
424	8	0	0	0	0	0	0	200	300	0	0	0	0	0	0	0	200	903	0	0	0	0	0	0	0	603	903	0
424	9	0	0	0	0	0	0	200	300	0	0	0	0	0	0	0	200	903	0	0	0	0	0	0	0	603	903	0
425	0	0	0	0	0	0	0	200	300	0	0	0	0	0	0	0	200	903	0	0	0	0	0	0	0	603	903	0
425	1	0	0	0	0	0	0	200	300	0	0	0	0	0	0	0	200	903	0	0	0	0	0	0	0	603	903	0
425	2	0	0	0	0	0	0	200	300	0	0	0	0	0	0	0	200	903	0	0	0	0	0	0	0	603	903	0
425	3	0	0	0	0	0	0	200	300	0	0	0	0	0	0	0	200	903	0	0	0	0	0	0	0	603	903	0
425	4	0	0	0	0	0	0	200	300	0	0	0	0	0	0	0	200	903	0	0	0	0	0	0	0	603	903	0
425	5	0	0	0	0	0	0	200	300	0	0	0	0	0	0	0	200	903	0	0	0	0	0	0	0	603	903	0
425	6	0	0	0	0	0	0	200	300	0	0	0	0	0	0	0	200	903	0	0	0	0	0	0	0	603	903	0
425	7	0	0	0	0	0	0	200	300	0	0	0	0	0	0	0	200	903	0	0	0	0	0	0	0	603	903	0
425	8	0	0	0	0	0	0	200	300	0	0	0	0	0	0	0	200	903	0	0	0	0	0	0	0	603	903	0
425	9	0	0	0	0	0	0	200	300	0	0	0	0	0	0	0	200	903	0	0	0	0	0	0	0	603	903	0
426	0	0	0	0	0	0	0	200	300	0	0	0	0	0	0	0	200	903	0	0	0	0	0	0	0	603	903	0
426	1	0	0	0	0	0	0	200	300	0	0	0	0	0	0	0	200	903	0	0	0	0	0	0	0	603	903	0
426	2	0	0	0	0	0	0	200	300	0	0	0	0	0	0	0	200	903	0	0	0	0	0	0	0	603	903	0
426	3	0	0	0	0	0	0	200	300	0	0	0	0	0	0	0	200	903	0	0	0	0	0	0	0	603	903	0
426	4	0	0	0	0	0	0	200	300	0	0	0	0	0	0	0	200	903	0	0	0	0	0	0	0	603	903	0
426	5	0	0	0	0	0	0	200	300	0	0	0	0	0	0	0	200	903	0	0	0	0	0	0	0	603	903	0
426	6	0	0	0	0	0	0	200	300	0	0	0	0	0	0	0	200	903	0	0	0	0	0	0	0	603	903	0
426	7	0	0	0	0	0	0	200	300	0	0	0	0	0	0	0	200	903	0	0	0	0	0	0	0	603	903	0
426	8	0	0	0	0	0	0	200	300	0	0	0	0	0	0	0	200	903	0	0	0	0	0	0	0	603	903	0
426	9	0	0	0	0	0	0	200	300	0	0	0	0	0	0	0	200	903	0	0	0	0	0	0	0	603	903	0
427	0	0	0	0	0	0	0	200	300	0	0	0	0	0	0	0	200	903	0	0	0	0	0	0	0	603	903	0
427	1	0	0	0	0	0	0	200	300	0	0	0	0	0	0	0	200	903	0	0	0	0	0	0	0	603	903	0
427	2	0	0	0	0	0	0	200	300	0	0	0	0	0	0	0	200	903	0	0	0	0	0	0	0	603	903	0
427	3	0	0	0	0	0	0	200	300	0	0	0	0	0	0	0	200	903	0	0	0	0	0	0	0	603	903	0
427	4	0	0	0	0	0	0	200	300	0	0	0	0	0	0	0	200	903	0	0	0	0	0	0	0	603	903	0
427	5	0	0	0	0	0	0	200	300	0	0	0	0	0	0	0	200	903	0	0	0	0	0	0	0	603	903	0
427	6	0	0	0	0	0	0	200	300	0	0	0	0	0	0	0	200	903	0	0	0	0	0	0	0	603	903	0
427	7	0	0	0	0	0	0	200	300	0	0	0	0	0	0	0	200	903	0	0	0	0	0	0	0	603	903	0
427	8	0	0	0	0	0	0	200	300	0	0	0	0	0	0	0	200	903	0	0	0	0	0	0	0	603	903	0
427	9	0	0	0	0	0	0	200	300	0	0	0	0	0	0	0	200	903	0	0	0	0	0	0	0	603	903	0
428	0	0	0	0	0	0	0	200	300	0	0	0	0	0	0	0	200	903	0	0	0	0	0	0	0	603	903	0
428	1	0	0	0	0	0	0	200	300	0	0	0	0	0	0	0	200	903	0	0	0	0	0	0	0	603	903	0
428	2	0	0	0	0	0	0	200	300	0	0	0	0	0	0	0	200	903	0	0	0	0	0	0	0	603	903	0
428	3	0	0	0	0	0	0	200	300	0	0	0	0	0	0	0	200	903	0	0	0	0	0	0	0	603	903	0
428	4	0	0	0	0	0	0	200	300	0	0	0	0	0	0	0	200	903	0	0	0	0	0	0	0	603	903	0
428	5	0	0	0	0	0	0	200	300	0	0	0	0	0	0	0	200	903	0	0	0	0	0	0	0	603	903	0
428	6	0	0	0	0	0	0	200	300	0	0	0	0	0	0	0	200	903	0	0	0	0	0	0	0	603	903	0
428	7	0	0	0	0	0	0	200	300	0	0	0	0	0	0	0	200	903	0	0	0	0	0	0	0	603	903	0
428	8	0	0	0	0	0	0	200	300	0	0	0	0	0	0	0	200	903	0	0	0	0	0	0	0	603	903	0
428	9	0	0	0	0	0	0	200	300	0	0	0	0	0	0	0	200	903	0	0	0	0	0	0	0	603	903	0
429	0	0	0	0	0	0	0	200	300	0	0	0	0	0	0	0	200	903	0	0	0	0	0	0	0	603	903	0
429	1	0	0	0	0	0	0	200	300	0	0	0	0	0	0	0	200	903	0	0	0	0	0	0	0	603	903	0
429	2	0	0	0	0	0	0	200	300	0	0	0	0	0	0	0	200	903	0	0	0	0	0	0	0	603	903	0
429	3	0	0	0	0	0	0	200	300	0	0	0	0	0	0	0	200	903	0	0	0	0	0	0	0	603	903	0
429	4	0	0	0	0	0	0	200	300	0	0	0	0	0	0	0	200	903	0	0	0	0	0	0	0	603	903	0
429	5	0	0	0	0	0	0	200	300	0	0	0	0	0	0	0	200	903	0	0	0	0	0	0	0	603	903	0
429	6	0	0	0	0	0	0	200	300	0	0	0	0	0	0	0	200	903	0	0	0	0	0	0	0	603	903	0
429	7	0	0	0	0	0	0	200	300	0	0	0	0	0	0	0	200	903	0	0	0	0	0	0	0	603	903	0
429	8	0	0	0	0	0	0	200	300	0	0	0	0	0	0	0	200	903	0	0	0	0	0	0	0	603	903	0
429	9	0	0	0	0	0	0	200	300	0	0	0	0	0	0	0	200	903	0	0	0	0	0	0	0	603	903	0
430	0	0	0	0	0	0	0	200	300	0	0	0	0	0	0	0	200	903	0	0	0	0	0	0	0	603	903	0
430	1	0	0	0	0	0	0	200	300	0	0	0	0	0	0	0	200	903	0	0	0	0	0	0	0	603	903	0
430	2	0	0	0	0	0	0	200	300	0	0	0	0	0	0	0	200	903	0	0	0	0	0	0	0	603	903	0
430	3	0	0	0	0	0	0	200	300	0	0	0	0	0	0	0	200	903	0	0	0	0	0	0	0	603	903	0
430	4	0	0	0	0	0	0	200	300	0	0	0	0	0	0	0	200	903	0	0	0	0	0	0	0	603	903	0
430	5	0	0	0	0	0	0	200	300	0	0	0	0	0	0	0	200	903	0	0	0	0	0	0	0	603	903	0
430	6	0	0	0	0	0	0	200	300	0	0	0	0	0	0	0	200	903	0	0	0	0	0	0	0	603	903	0
430	7	0	0	0	0	0	0	200	300	0	0	0	0	0	0	0	200	903	0	0	0	0	0	0	0	603	903	0
430	8	0	0	0	0	0	0	200	300	0	0	0	0	0	0	0	200	903	0	0	0	0	0	0	0	603	903	0
430	9	0	0	0	0	0	0	200	300	0	0	0	0	0	0	0	200	903	0	0	0	0	0	0	0	603	903	0
431	0	0	0	0	0	0	0	200	300	0	0	0	0	0	0	0	200	903	0	0	0	0	0	0	0	603	903	0
431	1	0	0	0	0	0	0	200	300	0	0	0	0	0	0	0	200	903	0	0	0	0	0	0	0	603	903	0
431	2	0	0	0	0	0	0	200	300	0	0	0	0	0	0	0	200	903	0	0	0	0	0	0	0	603	903	0
431	3	0	0	0	0	0	0	200	300	0	0	0	0	0	0	0	200	903	0	0	0	0	0	0	0	603	903	0
431	4	0	0	0	0	0	0	200	300	0	0	0	0	0	0	0	200	903	0	0	0	0	0	0	0	603	903	0
431	5	0	0	0	0	0	0	200	300	0	0	0	0	0	0	0	200	903	0	0	0	0	0	0	0	603	903	0
431	6	0	0	0	0	0	0	200	300	0	0	0	0	0	0	0	200	903	0	0	0	0	0	0	0	603	903	0
431	7	0	0	0	0	0	0	200	300	0	0	0	0	0	0	0	200	903	0	0	0	0	0	0	0	603	903	0
431	8	0	0	0	0	0	0	200	300	0	0	0	0	0	0	0	200	903	0	0	0	0	0	0	0	603	903	0
431	9	0	0	0	0	0	0	200	300	0	0	0	0	0	0	0	200	903	0	0	0	0	0	0	0	603	903	0
432	0	0	0	0	0	0	0	200	300	0	0	0	0	0	0	0	200	903	0	0	0	0	0	0	0	603	903	0
432	1	0	0	0	0	0	0	200	300	0	0	0	0	0	0	0	200	903	0	0	0	0	0	0	0	603	903	0
432	2	0	0	0	0	0	0	200	300	0	0	0	0	0	0	0	200	903	0	0	0	0	0	0	0	603	903	0
432	3	0	0	0	0	0	0	200	300	0	0	0	0	0	0	0	200	903	0	0	0	0	0	0	0	603	903	0
432	4	0	0	0	0	0	0	200	300	0	0	0	0	0	0	0	200	903	0	0	0	0	0	0	0	603	903	0
432	5	0	0	0	0	0	0	200	300	0	0	0	0	0	0	0	200	903	0	0	0	0	0	0	0	603	903	0
432	6	0	0	0	0	0	0	200	300	0	0	0	0	0	0	0	200	903	0	0	0	0	0	0	0	603	903	0
432	7	0	0	0	0	0	0	200	300	0	0	0	0	0	0	0	200	903	0	0	0	0	0	0	0	603	903	0
432	8	0	0	0	0	0	0	200	300	0	0	0	0	0	0	0	200	903	0	0	0	0	0	0	0	603	903	0
432	9	0	0	0	0	0	0	200	300	0	0	0	0	0	0	0	200	903	0	0	0	0	0	0	0	603	903	0
433	0	0	0	0	0	0	0	200	300	0	0	0	0	0	0	0	200	903	0	0	0	0	0	0	0	603	903	0
433	1	0	0	0	0	0	0	200	300	0	0	0	0	0	0	0	200	903	0	0	0	0	0	0	0	603	903	0
433	2	0	0	0	0	0	0	200	300	0	0	0	0	0	0	0	200	903	0	0	0	0	0	0	0	603	903	0
433	3	0	0	0	0	0	0	200	300	0	0	0	0	0	0	0	200	903	0	0	0	0	0	0	0	603	903	0
433	4	0	0	0	0	0	0	200	300	0	0	0	0	0	0	0	200	903	0	0	0	0	0	0	0	603	903	0
433	5	0	0	0	0	0	0	200	300	0	0	0	0	0	0	0	200	903	0	0	0	0	0	0	0	603	903	0
433	6	0	0	0	0	0	0	200	300	0	0	0	0	0	0	0	200	903	0	0	0	0	0	0	0	603	903	0
433	7	0	0	0	0	0	0	200	300	0	0	0	0	0	0	0	200	903	0	0	0	0	0	0	0	603	903	0
433	8	0	0	0	0	0	0	200	300	0	0	0	0	0	0	0	200	903	0	0	0	0	0	0	0	603	903	0
433	9	0	0	0	0	0	0	200	300	0	0	0	0	0	0	0	200	903	0	0	0	0	0	0	0	603	903	0
434	0	0	0	0	0	0	0	200	300	0	0	0	0	0	0	0	200	903	0	0	0	0	0	0	0	603	903	0
434	1	0	0	0	0	0	0	200	300	0	0	0	0	0	0	0	200	903	0	0	0	0	0	0	0	603	903	0
434	2	0	0	0	0	0	0	200	300	0	0	0	0	0	0	0	200	903	0	0	0	0	0	0	0	603	903	0
434	3	0	0	0	0	0	0	200	300	0	0	0	0	0	0	0	200	903	0	0	0	0	0	0	0	603	903	0
434	4	0	0	0	0	0	0	200	300	0	0	0	0	0	0	0	200	903	0	0	0	0	0	0	0	603	903	0
434	5	0	0	0	0	0	0	200	300	0	0	0	0	0	0	0	200	903	0	0	0	0	0	0	0	603	903	0
434	6	0	0	0	0	0	0	200	300	0	0	0	0	0	0	0	200	903	0	0	0	0	0	0	0	603	903	0
434	7	0	0	0	0	0	0	200	300	0	0	0	0	0	0	0	200	903	0	0	0	0	0	0	0	603	903	0
434	8	0	0	0	0	0	0	200	300	0	0	0	0	0	0	0	200	903	0	0	0	0	0	0	0	603	903	0
434	9	0	0	0	0	0	0	200	300	0	0	0	0	0	0	0	200	903	0	0	0	0	0	0	0	603	903	0
435	0	0	0	0	0	0	0	200	300	0	0	0	0	0	0	0	200	903	0	0	0	0	0	0	0	603	903	0
435	1	0	0	0	0	0	0	200	300	0	0	0	0	0	0	0	200	903	0	0	0	0	0	0	0	603	903	0
435	2	0	0	0	0	0	0	200	300	0	0	0	0	0	0	0	200	903	0	0	0	0	0	0	0	603	903	0
435	3	0	0	0	0	0	0	200	300	0	0	0	0	0	0	0	200	903	0	0	0	0	0	0	0	603	903	0
435	4	0	0	0	0	0	0	200	300	0	0	0	0	0	0	0	200	903	0	0	0	0	0	0	0	603	903	0
435	5	0	0	0	0	0	0	200	300	0	0	0	0	0	0	0	200	903	0	0	0	0	0	0	0	603	903	0
435	6	0	0	0	0	0	0	200	300	0	0	0	0	0	0	0	200	903	0	0	0	0	0	0	0	603	903	0
435	7	0	0	0	0	0	0	200	300	0	0	0	0	0	0	0	200	903	0	0	0	0	0	0	0	603	903	0
435	8	0	0	0	0	0	0	200	300	0	0	0	0	0	0	0	200	903	0	0	0	0	0	0	0	603	903	0
435	9	0	0	0	0	0	0	200	300	0	0	0	0	0	0	0	200	903	0	0	0	0	0	0	0	603	903	0
436	0	0	0	0	0	0	0	200	300	0	0	0	0	0	0	0	200	903	0	0	0	0	0	0	0	603	903	0
436	1	0	0	0	0	0	0	200	300	0	0	0	0	0	0	0	200	903	0	0	0	0	0	0	0	603	903	0
436	2	0	0	0	0	0	0	200	300	0	0	0	0	0	0	0	200	903	0	0	0	0	0	0	0	603	903	0
436	3	0	0	0	0	0	0	200	300	0	0	0	0	0	0	0	200	903	0	0	0	0	0	0	0	603	903	0
436	4	0	0	0	0	0	0	200	300	0	0	0	0	0	0	0	200	903	0	0	0	0	0	0	0	603	903	0
436	5	0	0	0	0	0	0	200	300	0	0	0	0	0	0	0	200	903	0	0	0	0	0	0	0	603	903	0
436	6	0	0	0	0	0	0	200	300	0	0	0	0	0	0	0	200	903	0	0	0	0	0	0	0	603	903	0
436	7	0	0	0	0	0	0	200	300	0	0	0	0	0	0	0	200	903	0	0	0	0	0	0	0	603	903	0
436	8	0	0	0	0	0	0	200	300	0	0	0	0	0	0	0	200	903	0	0	0	0	0	0	0	603	903	0
436	9	0	0	0	0	0	0	200	300	0	0	0	0	0	0	0	200	903	0	0	0	0	0	0	0	603	903	0
437	0	0	0	0	0	0	0	200	300	0	0	0	0	0	0	0	200	903	0	0	0	0	0	0	0	603	903	0
437	1	0	0	0	0	0	0	200	300	0	0	0	0	0	0	0	200	903	0	0	0	0	0	0	0	603	903	0
437	2	0	0	0	0	0	0	200	300	0	0	0	0	0	0	0	200	903	0	0	0	0	0	0	0	603	903	0
437	3	0	0	0	0	0	0	200	300	0	0	0	0	0	0	0	200	903	0	0	0	0	0	0	0	603	903	0
437	4	0	0	0	0	0	0	200	300	0	0	0	0	0	0	0	200	903	0	0	0	0	0	0	0	603	903	0
437	5	0	0	0	0	0	0	200	300	0	0	0	0	0	0	0	200	903	0	0	0	0	0	0	0	603	903	0
437	6	0	0	0	0	0	0	200	300	0	0	0	0	0	0	0	200	903	0	0	0	0	0	0	0	603	903	0
437	7	0	0	0	0	0	0	200	300	0	0	0	0	0	0	0	200	903	0	0	0	0	0	0	0	603	903	0
437	8	0	0	0	0	0	0	200	300	0	0	0	0	0	0	0	200	903	0	0	0	0	0	0	0	603	903	0
437	9	0	0	0	0	0	0	200	300	0	0	0	0	0	0	0	200	903	0	0	0	0	0	0	0	603	903	0
438	0	0	0	0	0	0	0	200	300	0	0	0	0	0	0	0	200	903	0	0	0	0	0	0	0	603	903	0
438	1	0	0	0	0	0	0	200	300	0	0	0	0	0	0	0	200	903	0	0	0	0	0	0	0	603	903	0
438	2	0	0	0	0	0	0	200	300	0	0	0	0	0	0	0	200	903	0	0	0	0	0	0	0	603	903	0
438	3	0	0	0	0	0	0	200	300	0	0	0	0	0	0	0	200	903	0	0	0	0	0	0	0	603	903	0
438	4	0	0	0	0	0	0	200	300	0	0	0	0	0	0	0	200	903	0	0	0	0	0	0	0	603	903	0
438	5	0	0	0	0	0	0	200	300	0	0	0	0	0	0	0	200	903	0	0	0	0	0	0	0	603	903	0
438	6	0	0	0	0	0	0	200	300	0	0	0	0	0	0	0	200	903	0	0	0	0	0	0	0	603	903	0
438	7	0	0	0	0	0	0	200	300	0	0	0	0	0	0	0	200	903	0	0	0	0	0	0	0	603	903	0
438	8	0	0	0	0	0	0	200	300	0	0	0	0	0	0	0	200	903	0	0	0	0	0	0	0	603	903	0
438	9	0	0	0	0	0	0	200	300	0	0	0	0	0	0	0	200	903	0	0	0	0	0	0	0	603	903	0
439	0	0	0	0	0	0	0	200	300	0	0	0	0	0	0	0	200	903	0	0	0	0	0	0	0	603	903	0
439	1	0	0	0	0	0	0	200	300	0	0	0	0	0	0	0	200	903	0	0	0	0	0	0	0	603	903	0
439	2	0	0	0	0	0	0	200	300	0	0	0	0	0	0	0	200	903	0	0	0	0	0	0	0	603	903	0
439	3	0	0	0	0	0	0	200	300	0	0	0	0	0	0	0	200	903	0	0	0	0	0	0	0	603	903	0
439	4	0	0	0	0	0	0	200	300	0	0	0	0	0	0	0	200	903	0	0	0	0	0	0	0	603	903	0
439	5	0	0	0	0	0	0	200	300	0	0	0	0	0	0	0	200	903	0	0	0	0	0	0	0	603	903	0
439	6	0	0	0	0	0	0	200	300	0	0	0	0	0	0	0	200	903	0	0	0	0	0	0	0	603	903	0
439	7	0	0	0	0	0	0	200	300	0	0	0	0	0	0	0	200	903	0	0	0	0	0	0	0	603	903	0
439	8	0	0	0	0	0	0	200	300	0	0	0	0	0	0	0	200	903	0	0	0	0	0	0	0	603	903	0
439	9	0	0	0	0	0	0	200	300	0	0	0	0	0	0	0	200	903	0	0	0	0	0	0	0	603	903	0
440	0	0	0	0	0	0	0	200	300	0	0	0	0	0	0	0	200	903	0	0	0	0	0	0	0	603	903	0
440	1	0	0	0	0	0	0	200	300	0	0	0	0	0	0	0	200	903	0	0	0	0	0	0	0	603	903	0
440	2	0	0	0	0	0	0	200	300	0	0	0	0	0	0	0	200	903	0	0	0	0	0	0	0	603	903	0
440	3	0	0	0	0	0	0	200	300	0	0	0	0	0	0	0	200	903	0	0	0	0	0	0	0	603	903	0
440	4	0	0	0	0	0	0	200	300	0	0	0	0	0	0	0	200	903	0	0	0	0	0	0	0	603	903	0
440	5	0	0	0	0	0	0	200	300	0	0	0	0	0	0	0	200	903	0	0	0	0	0	0	0	603	903	0
440	6	0	0	0	0	0	0	200	300	0	0	0	0	0	0	0	200	903	0	0	0	0	0	0	0	603	903	0
440	7	0	0	0	0	0	0	200	300	0	0	0	0	0	0	0	200	903	0	0	0	0	0	0	0	603	903	0
440	8	0	0	0	0	0	0	200	300	0	0	0	0	0	0	0	200	903	0	0	0	0	0	0	0	603	903	0
440	9	0	0	0	0	0	0	200	300	0	0	0	0	0	0	0	200	903	0	0	0	0	0	0	0	603	903	0
441	0	0	0	0	0	0	0	200	300	0	0	0	0	0	0	0	200	903	0	0	0	0	0	0	0	603	903	0
441	1	0	0	0	0	0	0	200	300	0	0	0	0	0	0	0	200	903	0	0	0	0	0	0	0	603	903	0
441	2	0	0	0	0	0	0	200	300	0	0	0	0	0	0	0	200	903	0	0	0	0	0	0	0	603	903	0
441	3	0	0	0	0	0	0	200	300	0	0	0	0	0	0	0	200	903	0	0	0	0	0	0	0	603	903	0
441	4	0	0	0	0	0	0	200	300	0	0	0	0	0	0	0	200	903	0	0	0	0	0	0	0	603	903	0
441	5	0	0	0	0	0	0	200	300	0	0	0	0	0	0	0	200	903	0	0	0	0	0	0	0	603	903	0
441	6	0	0	0	0	0	0	200	300	0	0	0	0	0	0	0	200	903	0	0	0	0	0	0	0	603	903	0
441	7	0	0	0	0	0	0	200	300	0	0	0	0	0	0	0	200	903	0	0	0	0	0	0	0	603	903	0
441	8	0	0	0	0	0	0	200	300	0	0	0	0	0	0	0	200	903	0	0	0	0	0	0	0	603	903	0
441	9	0	0	0	0	0	0	200	300	0	0	0	0	0	0	0	200	903	0	0	0	0	0	0	0	603	903	0
442	0	0	0	0	0	0	0	200	300	0	0	0	0	0	0	0	200	903	0	0	0	0	0	0	0	603	903	0
442	1	0	0	0	0	0	0	200	300	0	0	0	0	0	0	0	200	903	0	0	0	0	0	0	0	603	903	0
442	2	0	0	0	0	0	0	200	300	0	0	0	0	0	0	0	200	903	0	0	0	0	0	0	0	603	903	0
442	3	0	0	0	0	0	0	200	300	0	0	0	0	0	0	0	200	903	0	0	0	0	0	0	0	603	903	0
442	4	0	0	0	0	0	0	200	300	0	0	0	0	0	0	0	200	903	0	0	0	0	0	0	0	603	903	0
442	5	0	0	0	0	0	0	200	300	0	0	0	0	0	0	0	200	903	0	0	0	0	0	0	0	603	903	0
442	6	0	0	0	0	0	0	200	300	0	0	0	0	0	0	0	200	903	0	0	0	0	0	0	0	603	903	0
442	7	0	0	0	0	0	0	200	300	0	0	0	0	0	0	0	200	903	0	0	0	0	0	0	0	603	903	0
442	8	0	0	0	0	0	0	200	300	0	0	0	0	0	0	0	200	903	0	0	0	0	0	0	0	603	903	0
442	9	0	0	0	0	0	0	200	300	0	0	0	0	0	0	0	200	903	0	0	0	0	0	0	0	603	903	0
443	0	0	0	0	0	0	0	200	300	0	0	0	0	0	0	0	200	903	0	0	0	0	0	0	0	603	903	0
443	1	0	0	0	0	0	0	200	300	0	0	0	0	0	0	0	200	903	0	0	0	0	0	0	0	603	903	0
443	2	0	0	0	0	0	0	200	300	0	0	0	0	0	0	0	200	903	0	0	0	0	0	0	0	603	903	0
443	3	0	0	0	0	0	0	200	300	0	0	0	0	0	0	0	200	903	0	0	0	0	0	0	0	603	903	0
443	4	0	0	0	0	0	0	200	300	0	0	0	0	0	0	0	200	903	0	0	0	0	0	0	0	603	903	0
443	5	0	0	0	0	0	0	200	300	0	0	0	0	0	0	0	200	903	0	0	0	0	0	0	0	603	903	0
443	6	0	0	0	0	0	0	200	300	0	0	0	0	0	0	0	200	903	0	0	0	0	0	0	0	603	903	0
443	7	0	0	0	0	0	0	200	300	0	0	0	0	0	0	0	200	903	0	0	0	0	0	0	0	603	903	0
443	8	0	0	0	0	0	0	200	300	0	0	0	0	0	0	0	200	903	0	0	0	0	0	0	0	603	903	0
443	9	0	0	0	0	0	0	200	300	0	0	0	0	0	0	0	200	903	0	0	0	0	0	0	0	603	903	0
444	0	0	0	0	0	0	0	200	300	0	0	0	0	0	0	0	200	903	0	0	0	0	0	0	0	603	903	0
444	1	0	0	0	0	0	0	200	300	0	0	0	0	0	0	0	200	903	0	0	0	0	0	0	0	603	903	0
444	2	0	0	0	0	0	0	200	300	0	0	0	0	0	0	0	200	903	0	0	0	0	0	0	0	603	903	0
444	3	0	0	0	0	0	0	200	300	0	0	0	0	0	0	0	200	903	0	0	0	0	0	0	0	603	903	0
444	4	0	0	0	0	0	0	200	300	0	0	0	0	0	0	0	200	903	0	0	0	0	0	0	0	603	903	0
444	5	0	0	0	0	0	0	200	300	0	0	0	0	0	0	0	200	903	0	0	0	0	0	0	0	603	903	0
444	6	0	0	0	0	0	0	200	300	0	0	0	0	0	0	0	200	903	0	0	0	0	0	0	0	603	903	0
444	7	0	0	0	0	0	0	200	300	0	0	0	0	0	0	0	200	903	0	0	0	0	0	0	0	603	903	0
444	8	0	0	0	0	0	0	200	300	0	0	0	0	0	0	0	200	903	0	0	0	0	0	0	0	603	903	0
444	9	0	0	0	0	0	0	200	300	0	0	0	0	0	0	0	200	903	0	0	0	0	0	0	0	603	903	0
445	0	0	0	0	0	0	0	200	300	0	0	0	0	0	0	0	200	903	0	0	0	0	0	0	0	603	903	0
445	1	0	0	0	0	0	0	200	300	0	0	0	0	0	0	0	200	903	0	0	0	0	0	0	0	603	903	0
445	2	0	0	0	0	0	0	200	300	0	0	0	0	0	0	0	200	903	0	0	0	0	0	0	0	603	903	0
445	3	0	0	0	0	0	0	200	300	0	0	0	0	0	0	0	200	903	0	0	0	0	0	0	0	603	903	0
445	4	0	0	0	0	0	0	200	300	0	0	0	0	0	0	0	200	903	0	0	0	0	0	0	0	603	903	0
445	5	0	0	0	0	0	0	200	300	0	0	0	0	0	0	0	200	903	0	0	0	0	0	0	0	603	903	0
445	6	0	0	0	0	0	0	200	300	0	0	0	0	0	0	0	200	903	0	0	0	0	0	0	0	603	903	0
445	7	0	0	0	0	0	0	200	300	0	0	0	0	0	0	0	200	903	0	0	0	0	0	0	0	603	903	0
445	8	0	0	0	0	0	0	200	300	0	0	0	0	0	0	0	200	903	0	0	0	0	0	0	0	603	903	0
445	9	0	0	0	0	0	0	200	300	0	0	0	0	0	0	0	200	903	0	0	0	0	0	0	0	603	903	0
446	0	0	0	0	0	0	0	200	300	0	0	0	0	0	0	0	200	903	0	0	0	0	0	0	0	603	903	0
446	1	0	0	0	0	0	0	200	300	0	0	0	0	0	0	0	200	903	0	0	0	0	0	0	0	603	903	0
446	2	0	0	0	0	0	0	200	300	0	0	0	0	0	0	0	200	903	0	0	0	0	0	0	0	603	903	0
446	3	0	0	0	0	0	0	200	300	0	0	0	0	0	0	0	200	903	0	0	0	0	0	0	0	603	903	0
446	4	0	0	0	0	0	0	200	300	0	0	0	0	0	0	0	200	903	0	0	0	0	0	0	0	603	903	0
446	5	0	0	0	0	0	0	200	300	0	0	0	0	0	0	0	200	903	0	0	0	0	0	0	0	603	903	0
446	6	0	0	0	0	0	0	200	300	0	0	0	0	0	0	0	200	903	0	0	0	0	0	0	0	603	903	0
446	7	0	0	0	0	0	0	200	300	0	0	0	0	0	0	0	200	903	0	0	0	0	0	0	0	603	903	0
446	8	0	0	0	0	0	0	200	300	0	0	0	0	0	0	0	200	903	0	0	0	0	0	0	0	603	903	0
446	9	0	0	0	0	0	0	200	300	0	0	0	0	0	0	0	200	903	0	0	0	0	0	0	0	603	903	0
447	0	0	0	0	0	0	0	200	300	0	0	0	0	0	0	0	200	903	0	0	0	0	0	0	0	603	903	0
447	1	0	0	0	0	0	0	200	300	0	0	0	0	0	0	0	200	903	0	0	0	0	0	0	0	603	903	0
447	2	0	0	0	0	0	0	200	300	0	0	0	0	0	0	0	200	903	0	0	0	0	0	0	0	603	903	0
447	3	0	0	0	0	0	0	200	300	0	0	0	0	0	0	0	200	903	0	0	0	0	0	0	0	603	903	0
447	4	0	0	0	0	0	0	200	300	0	0	0	0	0	0	0	200	903	0	0	0	0	0	0	0	603	903	0
447	5	0	0	0	0	0	0	200	300	0	0	0	0	0	0	0	200	903	0	0	0	0	0	0	0	603	903	0
447	6	0	0	0	0	0	0	200	300	0	0	0	0	0	0	0	200	903	0	0	0	0	0	0	0	603	903	0
447	7	0	0	0	0	0	0	200	300	0	0	0	0	0	0	0	200	903	0	0	0	0	0	0	0	603	903	0
447	8	0	0	0	0	0	0	200	300	0	0	0	0	0	0	0	200	903	0	0	0	0	0	0	0	603	903	0
447	9	0	0	0	0	0	0	200	300	0	0	0	0	0	0	0	200	903	0	0	0	0	0	0	0	603	903	0
448	0	0	0	0	0	0	0	200	300	0	0	0	0	0	0	0	200	903	0	0	0	0	0	0	0	603	903	0
448	1	0	0	0	0	0	0	200	300	0	0	0	0	0	0	0	200	903	0	0	0	0	0	0	0	603	903	0
448	2	0	0	0	0	0	0	200	300	0	0	0	0	0	0	0	200	903	0	0	0	0	0	0	0	603	903	0
448	3	0	0	0	0	0	0	200	300	0	0	0	0	0	0	0	200	903	0	0	0	0	0	0	0	603	903	0
448	4	0	0	0	0	0	0	200	300	0	0	0	0	0	0	0	200	903	0	0	0	0	0	0	0	603	903	0
448	5	0	0	0	0	0	0	200	300	0	0	0	0	0	0	0	200	903	0	0	0	0	0	0	0	603	903	0
448	6	0	0	0	0	0	0	200	300	0	0	0	0	0	0	0	200	903	0	0	0	0	0	0	0	603	903	0
448	7	0	0	0	0	0	0	200	300	0	0	0	0	0	0	0	200	903	0	0	0	0	0	0	0	603	903	0
448	8	0	0	0	0	0	0	200	300	0	0	0	0	0	0	0	200	903	0	0	0	0	0	0	0	603	903	0
448	9	0	0	0	0	0	0	200	300	0	0	0	0	0	0	0	200	903	0	0	0	0	0	0	0	603	903	0
449	0	0	0	0	0	0	0	200	300	0	0	0	0	0	0	0	200	903	0	0	0	0	0	0	0	603	903	0
449	1	0	0	0	0	0	0	200	300	0	0	0	0	0	0	0	200	903	0	0	0	0	0	0	0	603	903	0
449	2	0	0	0	0	0	0	200	300	0	0	0	0	0	0	0	200	903	0	0	0	0	0	0	0	603	903	0
449	3	0	0	0	0	0	0	200	300	0	0	0	0	0	0	0	200	903	0	0	0	0	0	0	0	603	903	0
449	4	0	0	0	0	0	0	200	300	0	0	0	0	0	0	0	200	903	0	0	0	0	0	0	0	603	903	0
449	5	0	0	0	0	0	0	200	300	0	0	0	0	0	0	0	200	903	0	0	0	0	0	0	0	603	903	0
449	6	0	0	0	0	0	0	200	300	0	0	0	0	0	0	0	200	903	0	0	0	0	0	0	0	603	903	0
449	7	0	0	0	0	0	0	200	300	0	0	0	0	0	0	0	200	903	0	0	0	0	0	0	0	603	903	0
449	8	0	0	0	0	0	0	200	300	0	0	0	0	0	0	0	200	903	0	0	0	0	0	0	0	603	903	0
449	9	0	0	0	0	0	0	200	300	0	0	0	0	0	0	0	200	903	0	0	0	0	0	0	0	603	903	0
450	0	0	0	0	0	0	0	200	300	0	0	0	0	0	0	0	200	903	0	0	0	0	0	0	0	603	903	0
450	1	0	0	0	0	0	0	200	300	0	0	0	0	0	0	0	200	903	0	0	0	0	0	0	0	603	903	0
450	2	0	0	0	0	0	0	200	300	0	0	0	0	0	0	0	200	903	0	0	0	0	0	0	0	603	903	0
450	3	0	0	0	0	0	0	200	300	0	0	0	0	0	0	0	200	903	0	0	0	0	0	0	0	603	903	0
450	4	0	0	0	0	0	0	200	300	0	0	0	0	0	0	0	200	903	0	0	0	0	0	0	0	603	903	0
450	5	0	0	0	0	0	0	200	300	0	0	0	0	0	0	0	200	903	0	0	0	0	0	0	0	603	903	0
450	6	0	0	0	0	0	0	200	300	0	0	0	0	0	0	0	200	903	0	0	0	0	0	0	0	603	903	0
450	7	0	0	0	0	0	0	200	300	0	0	0	0	0	0	0	200	903	0	0	0	0	0	0	0	603	903	0
450	8	0	0	0	0	0	0	200	300	0	0	0	0	0	0	0	200	903	0	0	0	0	0	0	0	603	903	0
450	9	0	0	0	0	0	0	200	300	0	0	0	0	0	0	0	200	903	0	0	0	0	0	0	0	603	903	0
451	0	0	0	0	0	0	0	200	300	0	0	0	0	0	0	0	200	903	0	0	0	0	0	0	0	603	903	0
451	1	0	0	0	0	0	0	200	300	0	0	0	0	0	0	0	200	903	0	0	0	0	0	0	0	603	903	0
451	2	0	0	0	0	0	0	200	300	0	0	0	0	0	0	0	200	903	0	0	0	0	0	0	0	603	903	0
451	3	0	0	0	0	0	0	200	300	0	0	0	0	0	0	0	200	903	0	0	0	0	0	0	0	603	903	0
451	4	0	0	0	0	0	0	200	300	0	0	0	0	0	0	0	200	903	0	0	0	0	0	0	0	603	903	0
451	5	0	0	0	0	0	0	200	300	0	0	0	0	0	0	0	200	903	0	0	0	0	0	0	0	603	903	0
451	6	0	0	0	0	0	0	200	300	0	0	0	0	0	0	0	200	903	0	0	0	0	0	0	0	603	903	0
451	7	0	0	0	0	0	0	200	300	0	0	0	0	0	0	0	200	903	0	0	0	0	0	0	0	603	903	0
451	8	0	0	0	0	0	0	200	300	0	0	0	0	0	0	0	200	903	0	0	0	0	0	0	0	603	903	0
451	9	0	0	0	0	0	0	200	300	0	0	0	0	0	0	0	200	903	0	0	0	0	0	0	0	603	903	0
452	0	0	0	0	0	0	0	200	300	0	0	0	0	0	0	0	200	903	0	0	0	0	0	0	0	603	903	0
452	1	0	0	0	0	0	0	200	300	0	0	0	0	0	0	0	200	903	0	0	0	0	0	0	0	603	903	0
452	2	0	0	0	0	0	0	200	300	0	0	0	0	0	0	0	200	903	0	0	0	0	0	0	0	603	903	0
452	3	0	0	0	0	0	0	200	300	0	0	0	0	0	0	0	200	903	0	0	0	0	0	0	0	603	903	0
452	4	0	0	0	0	0	0	200	300	0	0	0	0	0	0	0	200	903	0	0	0	0	0	0	0	603	903	0
452	5	0	0	0	0	0	0	200	300	0	0	0	0	0	0	0	200	903	0	0	0	0	0	0	0	603	903	0
452	6	0	0	0	0	0	0	200	300	0	0	0	0	0	0	0	200	903	0	0	0	0	0	0	0	603	903	0
452	7	0	0	0	0	0	0	200	300	0	0	0	0	0	0	0	200	903	0	0	0	0	0	0	0	603	903	0
452	8	0	0	0	0	0	0	200	300	0	0	0	0	0	0	0	200	903	0	0	0	0	0	0	0	603	903	0
452	9	0	0	0	0	0	0	200	300	0	0	0	0	0	0	0	200	903	0	0	0	0	0	0	0	603	903	0
453	0	0	0	0	0	0	0	200	300	0	0	0	0	0	0	0	200	903	0	0	0	0	0	0	0	603	903	0
453	1	0	0	0	0	0	0	200	300	0	0	0	0	0	0	0	200	903	0	0	0	0	0	0	0	603	903	0
453	2	0	0	0	0	0	0	200	300	0	0	0	0	0	0	0	200	903	0	0	0	0	0	0	0	603	903	0
453	3	0	0	0	0	0	0	200	300	0	0	0	0	0	0	0	200	903	0	0	0	0	0	0	0	603	903	0
453	4	0	0	0	0	0	0	200	300	0	0	0	0	0	0	0	200	903	0	0	0	0	0	0	0	603	903	0
453	5	0	0	0	0	0	0	200	300	0	0	0	0	0	0	0	200	903	0	0	0	0	0	0	0	603	903	0
453	6	0	0	0	0	0	0	200	300	0	0	0	0	0	0	0	200	903	0	0	0	0	0	0	0	603	903	0
453	7	0	0	0	0	0	0	200	300	0	0	0	0	0	0	0	200	903	0	0	0	0	0	0	0	603	903	0
453	8	0	0	0	0	0	0	200	300	0	0	0	0	0	0	0	200	903	0	0	0	0	0	0	0	603	903	0
453	9	0	0	0	0	0	0	200	300	0	0	0	0	0	0	0	200	903	0	0	0	0	0	0	0	603	903	0
454	0	0	0	0	0	0	0	200	300	0	0	0	0	0	0	0	200	903	0	0	0	0	0	0	0	603	903	0
454	1	0	0	0	0	0	0	200	300	0	0	0	0	0	0	0	200	903	0	0	0	0	0	0	0	603	903	0
454	2	0	0	0	0	0	0	200	300	0	0	0	0	0	0	0	200	903	0	0	0	0	0	0	0	603	903	0
454	3	0	0	0	0	0	0	200	300	0	0	0	0	0	0	0	200	903	0	0	0	0	0	0	0	603	903	0
454	4	0	0	0	0	0	0	200	300	0	0	0	0	0	0	0	200	903	0	0	0	0	0	0	0	603	903	0
454	5	0	0	0	0	0	0	200	300	0	0	0	0	0	0	0	200	903	0	0	0	0	0	0	0	603	903	0
454	6	0	0	0	0	0	0	200	300	0	0	0	0	0	0	0	200	903	0	0	0	0	0	0	0	603	903	0
454	7	0	0	0	0	0	0	200	300	0	0	0	0	0	0	0	200	903	0	0	0	0	0	0	0	603	903	0
454	8	0	0	0	0	0	0	200	300	0	0	0	0	0	0	0	200	903	0	0	0	0	0	0	0	603	903	0
454	9	0	0	0	0	0	0	200	300	0	0	0	0	0	0	0	200	903	0	0	0	0	0	0	0	603	903	0
455	0	0	0	0	0	0	0	200	300	0	0	0	0	0	0	0	200	903	0	0	0	0	0	0	0	603	903	0
455	1	0	0	0	0	0	0	200	300	0	0	0	0	0	0	0	200	903	0	0	0	0	0	0	0	603	903	0
455	2	0	0	0	0	0	0	200	300	0	0	0	0	0	0	0	200	903	0	0	0	0	0	0	0	603	903	0
455	3	0	0	0	0	0	0	200	300	0	0	0	0	0	0	0	200	903	0	0	0	0	0	0	0	603	903	0
455	4	0	0	0	0	0	0	200	300	0	0	0	0	0	0	0	200	903	0	0	0	0	0	0	0	603	903	0
455	5	0	0	0	0	0	0	200	300	0	0	0	0	0	0	0	200	903	0	0	0	0	0	0	0	603	903	0
455	6	0	0	0	0	0	0	200	300	0	0	0	0	0	0	0	200	903	0	0	0	0	0	0	0	603	903	0
455	7	0	0	0	0	0	0	200	300	0	0	0	0	0	0	0	200	903	0	0	0	0	0	0	0	603	903	0
455	8	0	0	0	0	0	0	200	300	0	0	0	0	0	0	0	200	903	0	0	0	0	0	0	0	603	903	0
455	9	0	0	0	0	0	0	200	300	0	0	0	0	0	0	0	200	903	0	0	0	0	0	0	0	603	903	0
456	0	0	0	0	0	0	0	200	300	0	0	0	0	0	0	0	200	903	0	0	0	0	0	0	0	603	903	0
456	1	0	0	0	0	0	0	200	300	0	0	0	0	0	0	0	200	903	0	0	0	0	0	0	0	603	903	0
456	2	0	0	0	0	0	0	200	300	0	0	0	0	0	0	0	200	903	0	0	0	0	0	0	0	603	903	0
456	3	0	0	0	0	0	0	200	300	0	0	0	0	0	0	0	200	903	0	0	0	0	0	0	0	603	903	0
456	4	0	0	0	0	0	0	200	300	0	0	0	0	0	0	0	200	903	0	0	0	0	0	0	0	603	903	0
456	5	0	0	0	0	0	0	200	300	0	0	0	0	0	0	0	200	903	0	0	0	0	0	0	0	603	903	0
456	6	0	0	0	0	0	0	200	300	0	0	0	0	0	0	0	200	903	0	0	0	0	0	0	0	603	903	0
456	7	0	0	0	0	0	0	200	300	0	0	0	0	0	0	0	200	903	0	0	0	0	0	0	0	603	903	0
456	8	0	0	0	0	0	0	200	300	0	0	0	0	0	0	0	200	903	0	0	0	0	0	0	0	603	903	0
456	9	0	0	0	0	0	0	200	300	0	0	0	0	0	0	0	200	903	0	0	0	0	0	0	0	603	903	0
457	0	0	0	0	0	0	0	200	300	0	0	0	0	0	0	0	200	903	0	0	0	0	0	0	0	603	903	0
457	1	0	0	0	0	0	0	200	300	0	0	0	0	0	0	0	200	903	0	0	0	0	0	0	0	603	903	0
457	2	0	0	0	0	0	0	200	300	0	0	0	0	0	0	0	200	903	0	0	0	0	0	0	0	603	903	0
457	3	0	0	0	0	0	0	200	300	0	0	0	0	0	0	0	200	903	0	0	0	0	0	0	0	603	903	0
457	4	0	0	0	0	0	0	200	300	0	0	0	0	0	0	0	200	903	0	0	0	0	0	0	0	603	903	0
457	5	0	0	0	0	0	0	200	300	0	0	0	0	0	0	0	200	903	0	0	0	0	0	0	0	603	903	0
457	6	0	0	0	0	0	0	200	300	0	0	0	0	0	0	0	200	903	0	0	0	0	0	0	0	603	903	0
457	7	0	0	0	0	0	0	200	300	0	0	0	0	0	0	0	200	903	0	0	0	0	0	0	0	603	903	0
457	8	0	0	0	0	0	0	200	300	0	0	0	0	0	0	0	200	903	0	0	0	0	0	0	0	603	903	0
457	9	0	0	0	0	0	0	200	300	0	0	0	0	0	0	0	200	903	0	0	0	0	0	0	0	603	903	0
458	0	0	0	0	0	0	0	200	300	0	0	0	0	0	0	0	200	903	0	0	0	0	0	0	0	603	903	0
458	1	0	0	0	0	0	0	200	300	0	0	0	0	0	0	0	200	903	0	0	0	0	0	0	0	603	903	0
458	2	0	0	0	0	0	0	200	300	0	0	0	0	0	0	0	200	903	0	0	0	0	0	0	0	603	903	0
458	3	0	0	0	0	0	0	200	300	0	0	0	0	0	0	0	200	903	0	0	0	0	0	0	0	603	903	0
458	4	0	0	0	0	0	0	200	300	0	0	0	0	0	0	0	200	903	0	0	0	0	0	0	0	603	903	0
458	5	0	0	0	0	0	0	200	300	0	0	0	0	0	0	0	200	903	0	0	0	0	0	0	0	603	903	0
458	6	0	0	0	0	0	0	200	300	0	0	0	0	0	0	0	200	903	0	0	0	0	0	0	0	603	903	0
458	7	0	0	0	0	0	0	200	300	0	0	0	0	0	0	0	200	903	0	0	0	0	0	0	0	603	903	0
458	8	0	0	0	0	0	0	200	300	0	0	0	0	0	0	0	200	903	0	0	0	0	0	0	0	603	903	0
458	9	0	0	0	0	0	0	200	300	0	0	0	0	0	0	0	200	903	0	0	0	0	0	0	0	603	903	0
459	0	0	0	0	0	0	0	200	300	0	0	0	0	0	0	0	200	903	0	0	0	0	0	0	0	603	903	0
459	1	0	0	0	0	0	0	200	300	0	0	0	0	0	0	0	200	903	0	0	0	0	0	0	0	603	903	0
459	2	0	0	0	0	0	0	200	300	0	0	0	0	0	0	0	200	903	0	0	0	0	0	0	0	603	903	0
459	3	0	0	0	0	0	0	200	300	0	0	0	0	0	0	0	200	903	0	0	0	0	0	0	0	603	903	0
459	4	0	0	0	0	0	0	200	300	0	0	0	0	0	0	0	200	903	0	0	0	0	0	0	0	603	903	0
459	5	0	0	0	0	0	0	200	300	0	0	0	0	0	0	0	200	903	0	0	0	0	0	0	0	603	903	0
459	6	0	0	0	0	0	0	200	300	0	0	0	0	0	0	0	200	903	0	0	0	0	0	0	0	603	903	0
459	7	0	0	0	0	0	0	200	300	0	0	0	0	0	0	0	200	903	0	0	0	0	0	0	0	603	903	0
459	8	0	0	0	0	0	0	200	300	0	0	0	0	0	0	0	200	903	0	0	0	0	0	0	0	603	903	0
459	9	0	0	0	0	0	0	200	300	0	0	0	0	0	0	0	200	903	0	0	0	0	0	0	0	603	903	0
460	0	0	0	0	0	0	0	200	300	0	0	0	0	0	0	0	200	903	0	0	0	0	0	0	0	603	903	0
460	1	0	0	0	0	0	0	200	300	0	0	0	0	0	0	0	200	903	0	0	0	0	0	0	0	603	903	0
460	2	0	0	0	0	0	0	200	300	0	0	0	0	0	0	0	200	903	0	0	0	0	0	0	0	603	903	0
460	3	0	0	0	0	0	0	200	300	0	0	0	0	0	0	0	200	903	0	0	0	0	0	0	0	603	903	0
460	4	0	0	0	0	0	0	200	300	0	0	0	0	0	0	0	200	903	0	0	0	0	0	0	0	603	903	0
460	5	0	0	0	0	0	0	200	300	0	0	0	0	0	0	0	200	903	0	0	0	0	0	0	0	603	903	0
460	6	0	0	0	0	0	0	200	300	0	0	0	0	0	0	0	200	903	0	0	0	0	0	0	0	603	903	0
460	7	0	0	0	0	0	0	200	300	0	0	0	0	0	0	0	200	903	0	0	0	0	0	0	0	603	903	0
460	8	0	0	0	0	0	0	200	300	0	0	0	0	0	0	0	200	903	0	0	0	0	0	0	0	603	903	0
460	9	0	0	0	0	0	0	200	300	0	0	0	0	0	0	0	200	903	0	0	0	0	0	0	0	603	903	0
461	0	0	0	0	0	0	0	200	300	0	0	0	0	0	0	0	200	903	0	0	0	0	0	0	0	603	903	0
461	1	0	0	0	0	0	0	200	300	0	0	0	0	0	0	0	200	903	0	0	0	0	0	0	0	603	903	0
461	2	0	0	0	0	0	0	200	300	0	0	0	0	0	0	0	200	903	0	0	0	0	0	0	0	603	903	0
461	3	0	0	0	0	0	0	200	300	0	0	0	0	0	0	0	200	903	0	0	0	0	0	0	0	603	903	0
461	4	0	0	0	0	0	0	200	300	0	0	0	0	0	0	0	200	903	0	0	0	0	0	0	0	603	903	0
461	5	0	0	0	0	0	0	200	300	0	0	0	0	0	0	0	200	903	0	0	0	0	0	0	0	603	903	0
461	6	0	0	0	0	0	0	200	300	0	0	0	0	0	0	0	200	903	0	0	0	0	0	0	0	603	903	0
461	7	0	0	0	0	0	0	200	300	0	0	0	0	0	0	0	200	903	0	0	0	0	0	0	0	603	903	0
461	8	0	0	0	0	0	0	200	300	0	0	0	0	0	0	0	200	903	0	0	0	0	0	0	0	603	903	0
461	9	0	0	0	0	0	0	200	300	0	0	0	0	0	0	0	200	903	0	0	0	0	0	0	0	603	903	0
462	0	0	0	0	0	0	0	200	300	0	0	0	0	0	0	0	200	903	0	0	0	0	0	0	0	603	903	0
462	1	0	0	0	0	0	0	200	300	0	0	0	0	0	0	0	200	903	0	0	0	0	0	0	0	603	903	0
462	2	0	0	0	0	0	0	200	300	0	0	0	0	0	0	0	200	903	0	0	0	0	0	0	0	603	903	0
462	3	0	0	0	0	0	0	200	300	0	0	0	0	0	0	0	200	903	0	0	0	0	0	0	0	603	903	0
462	4	0	0	0	0	0	0	200	300	0	0	0	0	0	0	0	200	903	0	0	0	0	0	0	0	603	903	0
462	5	0	0	0	0	0	0	200	300	0	0	0	0	0	0	0	200	903	0	0	0	0	0	0	0	603	903	0
462	6	0	0	0	0	0	0	200	300	0	0	0	0	0	0	0	200	903	0	0	0	0	0	0	0	603	903	0
462	7	0	0	0	0	0	0	200	300	0	0	0	0	0	0	0	200	903	0	0	0	0	0	0	0	603	903	0
462	8	0	0	0	0	0	0	200	300	0	0	0	0	0	0	0	200	903	0	0	0	0	0	0	0	603	903	0
462	9	0	0	0	0	0	0	200	300	0	0	0	0	0	0	0	200	903	0	0	0	0	0	0	0	603	903	0
463	0	0	0	0	0	0	0	200	300	0	0	0	0	0	0	0	200	903	0	0	0	0	0	0	0	603	903	0
463	1	0	0	0	0	0	0	200	300	0	0	0	0	0	0	0	200	903	0	0	0	0	0	0	0	603	903	0
463	2	0	0	0	0	0	0	200	300	0	0	0	0	0	0	0	200	903	0	0	0	0	0	0	0	603	903	0
463	3	0	0	0	0	0	0	200	300	0	0	0	0	0	0	0	200	903	0	0	0	0	0	0	0	603	903	0
463	4	0	0	0	0	0	0	200	300	0	0	0	0	0	0	0	200	903	0	0	0	0	0	0	0	603	903	0
463	5	0	0	0	0	0	0	200	300	0	0	0	0	0	0	0	200	903	0	0	0	0	0	0	0	603	903	0
463	6	0	0	0	0	0	0	200	300	0	0	0	0	0	0	0	200	903	0	0	0	0	0	0	0	603	903	0
463	7	0	0	0	0	0	0	200	300	0	0	0	0	0	0	0	200	903	0	0	0	0	0	0	0	603	903	0
463	8	0	0	0	0	0	0	200	300	0	0	0	0	0	0	0	200	903	0	0	0	0	0	0	0	603	903	0
463	9	0	0	0	0	0	0	200	300	0	0	0	0	0	0	0	200	903	0	0	0	0	0	0	0	603	903	0
464	0	0	0	0	0	0	0	200	300	0	0	0	0	0	0	0	200	903	0	0	0	0	0	0	0	603	903	0
464	1	0	0	0	0	0	0	200	300	0	0	0	0	0	0	0	200	903	0	0	0	0	0	0	0	603	903	0
464	2	0	0	0	0	0	0	200	300	0	0	0	0	0	0	0	200	903	0	0	0	0	0	0	0	603	903	0
464	3	0	0	0	0	0	0	200	300	0	0	0	0	0	0	0	200	903	0	0	0	0	0	0	0	603	903	0
464	4	0	0	0	0	0	0	200	300	0	0	0	0	0	0	0	200	903	0	0	0	0	0	0	0	603	903	0
464	5	0	0	0	0	0	0	200	300	0	0	0	0	0	0	0	200	903	0	0	0	0	0	0	0	603	903	0
464	6	0	0	0	0	0	0	200	300	0	0	0	0	0	0	0	200	903	0	0	0	0	0	0	0	603	903	0
464	7	0	0	0	0	0	0	200	300	0	0	0	0	0	0	0	200	903	0	0	0	0	0	0	0	603	903	0
464	8	0	0	0	0	0	0	200	300	0	0	0	0	0	0	0	200	903	0	0	0	0	0	0	0	603	903	0
464	9	0	0	0	0	0	0	200	300	0	0	0	0	0	0	0	200	903	0	0	0	0	0	0	0	603	903	0
465	0	0	0	0	0	0	0	200	300	0	0	0	0	0	0	0	200	903	0	0	0	0	0	0	0	603	903	0
465	1	0	0	0	0	0	0	200	300	0	0	0	0	0	0	0	200	903	0	0	0	0	0	0	0	603	903	0
465	2	0	0	0	0	0	0	200	300	0	0	0	0	0	0	0	200	903	0	0	0	0	0	0	0	603	903	0
465	3	0	0	0	0	0	0	200	300	0	0	0	0	0	0	0	200	903	0	0	0	0	0	0	0	603	903	0
465	4	0	0	0	0	0	0	200	300	0	0	0	0	0	0	0	200	903	0	0	0	0	0	0	0	603	903	0
465	5	0	0	0	0	0	0	200	300	0	0	0	0	0	0	0	200	903	0	0	0	0	0	0	0	603	903	0
465	6	0	0	0	0	0	0	200	300	0	0	0	0	0	0	0	200	903	0	0	0	0	0	0	0	603	903	0
465	7	0	0	0	0	0	0	200	300	0	0	0	0	0	0	0	200	903	0	0	0	0	0	0	0	603	903	0
465	8	0	0	0	0	0	0	200	300	0	0	0	0	0	0	0	200	903	0	0	0	0	0	0	0	603	903	0
465	9	0	0	0	0	0	0	200	300	0	0	0	0	0	0	0	200	903	0	0	0	0	0	0	0	603	903	0
466	0	0	0	0	0	0	0	200	300	0	0	0	0	0	0	0	200	903	0	0	0	0	0	0	0	603	903	0
466	1	0	0	0	0	0	0	200	300	0	0	0	0	0	0	0	200	903	0	0	0	0	0	0	0	603	903	0
466	2	0	0	0	0	0	0	200	300	0	0	0	0	0	0	0	200	903	0	0	0	0	0	0	0	603	903	0
466	3	0	0	0	0	0	0	200	300	0	0	0	0	0	0	0	200	903	0	0	0	0	0	0	0	603	903	0
466	4	0	0	0	0	0	0	200	300	0	0	0	0	0	0	0	200	903	0	0	0	0	0	0	0	603	903	0
466	5	0	0	0	0	0	0	200	300	0	0	0	0	0	0	0	200	903	0	0	0	0	0	0	0	603	903	0
466	6	0	0	0	0	0	0	200	300	0	0	0	0	0	0	0	200	903	0	0	0	0	0	0	0	603	903	0
466	7	0	0	0	0	0	0	200	300	0	0	0	0	0	0	0	200	903	0	0	0	0	0	0	0	603	903	0
466	8	0	0	0	0	0	0	200	300	0	0	0	0	0	0	0	200	903	0	0	0	0	0	0	0	603	903	0
466	9	0	0	0	0	0	0	200	300	0	0	0	0	0	0	0	200	903	0	0	0	0	0	0	0	603	903	0
467	0	0	0	0	0	0	0	200	300	0	0	0	0	0	0	0	200	903	0	0	0	0	0	0	0	603	903	0
467	1	0	0	0	0	0	0	200	300	0	0	0	0	0	0	0	200	903	0	0	0	0	0	0	0	603	903	0
467	2	0	0	0	0	0	0	200	300	0	0	0	0	0	0	0	200	903	0	0	0	0	0	0	0	603	903	0
467	3	0	0	0	0	0	0	200	300	0	0	0	0	0	0	0	200	903	0	0	0	0	0	0	0	603	903	0
467	4	0	0	0	0	0	0	200	300	0	0	0	0	0	0	0	200	903	0	0	0	0	0	0	0	603	903	0
467	5	0	0	0	0	0	0	200	300	0	0	0	0	0	0	0	200	903	0	0	0	0	0	0	0	603	903	0
467	6	0	0	0	0	0	0	200	300	0	0	0	0	0	0	0	200	903	0	0	0	0	0	0	0	603	903	0
467	7	0	0	0	0	0	0	200	300	0	0	0	0	0	0	0	200	903	0	0	0	0	0	0	0	603	903	0
467	8	0	0	0	0	0	0	200	300	0	0	0	0	0	0	0	200	903	0	0	0	0	0	0	0	603	903	0
467	9	0	0	0	0	0	0	200	300	0	0	0	0	0	0	0	200	903	0	0	0	0	0	0	0	603	903	0
468	0	0	0	0	0	0	0	200	300	0	0	0	0	0	0	0	200	903	0	0	0	0	0	0	0	603	903	0
468	1	0	0	0	0	0	0	200	300	0	0	0	0	0	0	0	200	903	0	0	0	0	0	0	0	603	903	0
468	2	0	0	0	0	0	0	200	300	0	0	0	0	0	0	0	200	903	0	0	0	0	0	0	0	603	903	0
468	3	0	0	0	0	0	0	200	300	0	0	0	0	0	0	0	200	903	0	0	0	0	0	0	0	603	903	0
468	4	0	0	0	0	0	0	200	300	0	0	0	0	0	0	0	200	903	0	0	0	0	0	0	0	603	903	0
468	5	0	0	0	0	0	0	200	300	0	0	0	0	0	0	0	200	903	0	0	0	0	0	0	0	603	903	0
468	6	0	0	0	0	0	0	200	300	0	0	0	0	0	0	0	200	903	0	0	0	0	0	0	0	603	903	0
468	7	0	0	0	0	0	0	200	300	0	0	0	0	0	0	0	200	903	0	0	0	0	0	0	0	603	903	0
468	8	0	0	0	0	0	0	200	300	0	0	0	0	0	0	0	200	903	0	0	0	0	0	0	0	603	903	0
468	9	0	0	0	0	0	0	200	300	0	0	0	0	0	0	0	200	903	0	0	0	0	0	0	0	603	903	0
469	0	0	0	0	0	0	0	200	300	0	0	0	0	0	0	0	200	903	0	0	0	0	0	0	0	603	903	0
469	1	0	0	0	0	0	0	200	300	0	0	0	0	0	0	0	200	903	0	0	0	0	0	0	0	603	903	0
469	2	0	0	0	0	0	0	200	300	0	0	0	0	0	0	0	200	903	0	0	0	0	0	0	0	603	903	0
469	3	0	0	0	0	0	0	200	300	0	0	0	0	0	0	0	200	903	0	0	0	0	0	0	0	603	903	0
469	4	0	0	0	0	0	0	200	300	0	0	0	0	0	0	0	200	903	0	0	0	0	0	0	0	603	903	0
469	5	0	0	0	0	0	0	200	300	0	0	0	0	0	0	0	200	903	0	0	0	0	0	0	0	603	903	0
469	6	0	0	0	0	0	0	200	300	0	0	0	0	0	0	0	200	903	0	0	0	0	0	0	0	603	903	0
469	7	0	0	0	0	0	0	200	300	0	0	0	0	0	0	0	200	903	0	0	0	0	0	0	0	603	903	0
469	8	0	0	0	0	0	0	200	300	0	0	0	0	0	0	0	200	903	0	0	0	0	0	0	0	603	903	0
469	9	0	0	0	0	0	0	200	300	0	0	0	0	0	0	0	200	903	0	0	0	0	0	0	0	603	903	0
470	0	0	0	0	0	0	0	200	300	0	0	0	0	0	0	0	200	903	0	0	0	0	0	0	0	603	903	0
470	1	0	0	0	0	0	0	200	300	0	0	0	0	0	0	0	200	903	0	0	0	0	0	0	0	603	903	0
470	2	0	0	0	0	0	0	200	300	0	0	0	0	0	0	0	200	903	0	0	0	0	0	0	0	603	903	0
470	3	0	0	0	0	0	0	200	300	0	0	0	0	0	0	0	200	903	0	0	0	0	0	0	0	603	903	0
470	4	0	0	0	0	0	0	200	300	0	0	0	0	0	0	0	200	903	0	0	0	0	0	0	0	603	903	0
470	5	0	0	0	0	0	0	200	300	0	0	0	0	0	0	0	200	903	0	0	0	0	0	0	0	603	903	0
470	6	0	0	0	0	0	0	200	300	0	0	0	0	0	0	0	200	903	0	0	0	0	0	0	0	603	903	0
470	7	0	0	0	0	0	0	200	300	0	0	0	0	0	0	0	200	903	0	0	0	0	0	0	0	603	903	0
470	8	0	0	0	0	0	0	200	300	0	0	0	0	0	0	0	200	903	0	0	0	0	0	0	0	603	903	0
470	9	0	0	0	0	0	0	200	300	0	0	0	0	0	0	0	200	903	0	0	0	0	0	0	0	603	903	0
471	0	0	0	0	0	0	0	200	300	0	0	0	0	0	0	0	200	903	0	0	0	0	0	0	0	603	903	0
471	1	0	0	0	0	0	0	200	300	0	0	0	0	0	0	0	200	903	0	0	0	0	0	0	0	603	903	0
471	2	0	0	0	0	0	0	200	300	0	0	0	0	0	0	0	200	903	0	0	0	0	0	0	0	603	903	0
471	3	0	0	0	0	0	0	200	300	0	0	0	0	0	0	0	200	903	0	0	0	0	0	0	0	603	903	0
471	4	0	0	0	0	0	0	200	300	0	0	0	0	0	0	0	200	903	0	0	0	0	0	0	0	603	903	0
471	5	0	0	0	0	0	0	200	300	0	0	0	0	0	0	0	200	903	0	0	0	0	0	0	0	603	903	0
471	6	0	0	0	0	0	0	200	300	0	0	0	0	0	0	0	200	903	0	0	0	0	0	0	0	603	903	0
471	7	0	0	0	0	0	0	200	300	0	0	0	0	0	0	0	200	903	0	0	0	0	0	0	0	603	903	0
471	8	0	0	0	0	0	0	200	300	0	0	0	0	0	0	0	200	903	0	0	0	0	0	0	0	603	903	0
471	9	0	0	0	0	0	0	200	300	0	0	0	0	0	0	0	200	903	0	0	0	0	0	0	0	603	903	0
472	0	0	0	0	0	0	0	200	300	0	0	0	0	0	0	0	200	903	0	0	0	0	0	0	0	603	903	0
472	1	0	0	0	0	0	0	200	300	0	0	0	0	0	0	0	200	903	0	0	0	0	0	0	0	603	903	0
472	2	0	0	0	0	0	0	200	300	0	0	0	0	0	0	0	200	903	0	0	0	0	0	0	0	603	903	0
472	3	0	0	0	0	0	0	200	300	0	0	0	0	0	0	0	200	903	0	0	0	0	0	0	0	603	903	0
472	4	0	0	0	0	0	0	200	300	0	0	0	0	0	0	0	200	903	0	0	0	0	0	0	0	603	903	0
472	5	0	0	0	0	0	0	200	300	0	0	0	0	0	0	0	200	903	0	0	0	0	0	0	0	603	903	0
472	6	0	0	0	0	0	0	200	300	0	0	0	0	0	0	0	200	903	0	0	0	0	0	0	0	603	903	0
472	7	0	0	0	0	0	0	200	300	0	0	0	0	0	0	0	200	903	0	0	0	0	0	0	0	603	903	0
472	8	0	0	0	0	0	0	200	300	0	0	0	0	0	0	0	200	903	0	0	0	0	0	0	0	603	903	0
472	9	0	0	0	0	0	0	200	300	0	0	0	0	0	0	0	200	903	0	0	0	0	0	0	0	603	903	0
473	0	0	0	0	0	0	0	200	300	0	0	0	0	0	0	0	200	903	0	0	0	0	0	0	0	603	903	0
473	1	0	0	0	0	0	0	200	300	0	0	0	0	0	0	0	200	903	0	0	0	0	0	0	0	603	903	0
473	2	0	0	0	0	0	0	200	300	0	0	0	0	0	0	0	200	903	0	0	0	0	0	0	0	603	903	0
473	3	0	0	0	0	0	0	200	300	0	0	0	0	0	0	0	200	903	0	0	0	0	0	0	0	603	903	0
473	4	0	0	0	0	0	0	200	300	0	0	0	0	0	0	0	200	903	0	0	0	0	0	0	0	603	903	0
473	5	0	0	0	0	0	0	200	300	0	0	0	0	0	0	0	200	903	0	0	0	0	0	0	0	603	903	0
473	6	0	0	0	0	0	0	200	300	0	0	0	0	0	0	0	200	903	0	0	0	0	0	0	0	603	903	0
473	7	0	0	0	0	0	0	200	300	0	0	0	0	0	0	0	200	903	0	0	0	0	0	0	0	603	903	0
473	8	0	0	0	0	0	0	200	300	0	0	0	0	0	0	0	200	903	0	0	0	0	0	0	0	603	903	0
473	9	0	0	0	0	0	0	200	300	0	0	0	0	0	0	0	200	903	0	0	0	0	0	0	0	603	903	0
474	0	0	0	0	0	0	0	200	300	0	0	0	0	0	0	0	200	903	0	0	0	0	0	0	0	603	903	0
474	1	0	0	0	0	0	0	200	300	0	0	0	0	0	0	0	200	903	0	0	0	0	0	0	0	603	903	0
474	2	0	0	0	0	0	0	200	300	0	0	0	0	0	0	0	200	903	0	0	0	0	0	0	0	603	903	0
474	3	0	0	0	0	0	0	200	300	0	0	0	0	0	0	0	200	903	0	0	0	0	0	0	0	603	903	0
474	4	0	0	0	0	0	0	200	300	0	0	0	0	0	0	0	200	903	0	0	0	0	0	0	0	603	903	0
474	5	0	0	0	0	0	0	200	300	0	0	0	0	0	0	0	200	903	0	0	0	0	0	0	0	603	903	0
474	6	0	0	0	0	0	0	200	300	0	0	0	0	0	0	0	200	903	0	0	0	0	0	0	0	603	903	0
474	7	0	0	0	0	0	0	200	300	0	0	0	0	0	0	0	200	903	0	0	0	0	0	0	0	603	903	0
474	8	0	0	0	0	0	0	200	300	0	0	0	0	0	0	0	200	903	0	0	0	0	0	0	0	603	903	0
474	9	0	0	0	0	0	0	200	300	0	0	0	0	0	0	0	200	903	0	0	0	0	0	0	0	603	903	0
475	0	0	0	0	0	0	0	200	300	0	0	0	0	0	0	0	200	903	0	0	0	0	0	0	0	603	903	0
475	1	0	0	0	0	0	0	200	300	0	0	0	0	0	0	0	200	903	0	0	0	0	0	0	0	603	903	0
475	2	0	0	0	0	0	0	200	300	0	0	0	0	0	0	0	200	903	0	0	0	0	0	0	0	603	903	0
475	3	0	0	0	0	0	0	200	300	0	0	0	0	0	0	0	200	903	0	0	0	0	0	0	0	603	903	0
475	4	0	0	0	0	0	0	200	300	0	0	0	0	0	0	0	200	903	0	0	0	0	0	0	0	603	903	0
475	5	0	0	0	0	0	0	200	300	0	0	0	0	0	0	0	200	903	0	0	0	0	0	0	0	603	903	0
475	6	0	0	0	0	0	0	200	300	0	0	0	0	0	0	0	200	903	0	0	0	0	0	0	0	603	903	0
475	7	0	0	0	0	0	0	200	300	0	0	0	0	0	0	0	200	903	0	0	0	0	0	0	0	603	903	0
475	8	0	0	0	0	0	0	200	300	0	0	0	0	0	0	0	200	903	0	0	0	0	0	0	0	603	903	0
475	9	0	0	0	0	0	0	200	300	0	0	0	0	0	0	0	200	903	0	0	0	0	0	0	0	603	903	0
476	0	0	0	0	0	0	0	200	300	0	0	0	0	0	0	0	200	903	0	0	0	0	0	0	0	603	903	0
476	1	0	0	0	0	0	0	200	300	0	0	0	0	0	0	0	200	903	0	0	0	0	0	0	0	603	903	0
476	2	0	0	0	0	0	0	200	300	0	0	0	0	0	0	0	200	903	0	0	0	0	0	0	0	603	903	0
476	3	0	0	0	0	0	0	200	300	0	0	0	0	0	0	0	200	903	0	0	0	0	0	0	0	603	903	0
476	4	0	0	0	0	0	0	200	300	0	0	0	0	0	0	0	200	903	0	0	0	0	0	0	0	603	903	0
476	5	0	0	0	0	0	0	200	300	0	0	0	0	0	0	0	200	903	0	0	0	0	0	0	0	603	903	0
476	6	0	0	0	0	0	0	200	300	0	0	0	0	0	0	0	200	903	0	0	0	0	0	0	0	603	903	0
476	7	0	0	0	0	0	0	200	300	0	0	0	0	0	0	0	200	903	0	0	0	0	0	0	0	603	903	0
476	8	0	0	0	0	0	0	200	300	0	0	0	0	0	0	0	200	903	0	0	0	0	0	0	0	603	903	0
476	9	0	0	0	0	0	0	200	300	0	0	0	0	0	0	0	200	903	0	0	0	0	0	0	0	603	903	0
477	0	0	0	0	0	0	0	200	300	0	0	0	0	0	0	0	200	903	0	0	0	0	0	0	0	603	903	0
477	1	0	0	0	0	0	0	200	300	0	0	0	0	0	0	0	200	903	0	0	0	0	0	0	0	603	903	0
477	2	0	0	0	0	0	0	200	300	0	0	0	0	0	0	0	200	903	0	0	0	0	0	0	0	603	903	0
477	3	0	0	0	0	0	0	200	300	0	0	0	0	0	0	0	200	903	0	0	0	0	0	0	0	603	903	0
477	4	0	0	0	0	0	0	200	300	0	0	0	0	0	0	0	200	903	0	0	0	0	0	0	0	603	903	0
477	5	0	0	0	0	0	0	200	300	0	0	0	0	0	0	0	200	903	0	0	0	0	0	0	0	603	903	0
477	6	0	0	0	0	0	0	200	300	0	0	0	0	0	0	0	200	903	0	0	0	0	0	0	0	603	903	0
477	7	0	0	0	0	0	0	200	300	0	0	0	0	0	0	0	200	903	0	0	0	0	0	0	0	603	903	0
477	8	0	0	0	0	0	0	200	300	0	0	0	0	0	0	0	200	903	0	0	0	0	0	0	0	603	903	0
477	9	0	0	0	0	0	0	200	300	0	0	0	0	0	0	0	200	903	0	0	0	0	0	0	0	603	903	0
478	0	0	0	0	0	0	0	200	300	0	0	0	0	0	0	0	200	903	0	0	0	0	0	0	0	603	903	0
478	1	0	0	0	0	0	0	200	300	0	0	0	0	0	0	0	200	903	0	0	0	0	0	0	0	603	903	0
478	2	0	0	0	0	0	0	200	300	0	0	0	0	0	0	0	200	903	0	0	0	0	0	0	0	603	903	0
478	3	0	0	0	0	0	0	200	300	0	0	0	0	0	0	0	200	903	0	0	0	0	0	0	0	603	903	0
478	4	0	0	0	0	0	0	200	300	0	0	0	0	0	0	0	200	903	0	0	0	0	0	0	0	603	903	0
478	5	0	0	0	0	0	0	200	300	0	0	0	0	0	0	0	200	903	0	0	0	0	0	0	0	603	903	0
478	6	0	0	0	0	0	0	200	300	0	0	0	0	0	0	0	200	903	0	0	0	0	0	0	0	603	903	0
478	7	0	0	0	0	0	0	200	300	0	0	0	0	0	0	0	200	903	0	0	0	0	0	0	0	603	903	0
478	8	0	0	0	0	0	0	200	300	0	0	0	0	0	0	0	200	903	0	0	0	0	0	0	0	603	903	0
478	9	0	0	0	0	0	0	200	300	0	1.04218	8.45353	-17.2096	-662.752	2468.52	1304.85	343.439	941.511	0	0	0	0	0	0	0	603	903	0
479	0	0	0	0	0	0	0	200	300	0	0.889588	10.7423	-16.294	-479.647	2834.73	1533.74	373.974	932.437	0	0	0	0	0	0	0	603	903	0
479	1	0	0	0	0	0	0	200	300	0	1.19476	10.8949	-21.482	-754.305	3200.94	1671.07	349.006	938.113	0	0	0	0	0	0	0	603	903	0
479	2	0	0	0	0	0	0	200	300	0	1.9577	12.5734	-25.4493	-204.988	3689.22	1808.4	344.964	911.055	0	0	0	0	0	0	0	603	903	0
479	3	0	0	0	0	0	0	200	300	0	3.17841	13.3363	-29.4166	-296.541	4238.54	1854.17	344.087	913.081	0	0	0	0	0	0	0	603	903	0
479	4	0	0	0	0	0	0	200	300	0	3.78876	13.7941	-31.858	-662.752	3994.4	1945.72	325.381	923.803	0	0	0	0	0	0	0	603	903	0
479	5	0	0	0	0	0	0	200	300	0	4.24652	13.9467	-34.2994	-662.752	4787.86	2220.38	339.59	922.323	0	0	0	0	0	0	0	603	903	0
479	6	0	0	0	0	0	0	200	300	0	4.24652	15.0148	-37.9615	-571.199	4970.96	2174.61	330.947	918.047	0	0	0	0	0	0	0	603	903	0
479	7	0	0	0	0	0	0	200	300	0	4.70429	14.557	-41.3184	-113.436	5093.03	2449.26	323.263	905.745	0	0	0	0	0	0	0	603	903	0
479	8	0	0	0	0	0	0	200	300	0	4.85687	14.2519	-44.3702	-204.988	5764.42	2357.71	329.916	907.62	0	0	0	0	0	0	0	603	903	0
479	9	0	0	0	0	0	0	200	300	0	4.09393	14.0993	-47.7271	-21.8829	6374.77	2403.49	333.567	903.459	0	0	0	0	0	0	0	603	903	0
480	0	0	0	0	0	0	0	200	300	0	5.31464	15.32	-51.0841	69.6699	6618.91	2220.38	329.569	901.636	0	0	0	0	0	0	0	603	903	0
480	1	0	0	0	0	0	0	200	300	0	5.16205	15.1674	-57.1876	69.6699	6618.91	2037.28	315.74	901.782	0	0	0	0	0	0	0	603	903	0
480	2	0	0	0	0	0	0	200	300	0	6.68793	14.0993	-58.1031	161.223	7351.33	2128.83	326.522	900.225	0	0	0	0	0	0	0	603	903	0
480	3	0	0	0	0	0	0	200	300	0	3.63617	12.5734	-61.7652	435.881	7168.23	2174.61	316.056	895.943	0	0	0	0	0	0	0	603	903	0
480	4	0	0	0	0	0	0	200	300	0	5.61981	13.9467	-63.5963	435.881	7412.37	2128.83	316.553	896.146	0	0	0	0	0	0	0	603	903	0
480	5	0	0	0	0	0	0	200	300	0	3.78876	14.2519	-66.3429	710.539	7717.54	1854.17	316.328	892.29	0	0	0	0	0	0	0	603	903	0
480	6	0	0	0	0	0	0	200	300	0	3.94135	12.726	-70.6153	802.092	7900.65	2083.05	311.883	891.641	0	0	0	0	0	0	0	603	903	0
480	7	0	0	0	0	0	0	200	300	0	5.31464	12.1156	-71.836	527.434	8511.01	1808.4	318.478	895.658	0	0	0	0	0	0	0	603	903	0
480	8	0	0	0	0	0	0	200	300	0	3.63617	10.132	-73.6671	985.198	8816.18	1899.95	319.676	889.626	0	0	0	0	0	0	0	603	903	0
480	9	0	0	0	0	0	0	200	300	0	4.24652	10.2846	-76.1085	893.645	9304.46	1716.84	322.253	891.258	0	0	0	0	0	0	0	603	903	0
481	0	0	0	0	0	0	0	200	300	0	4.24652	9.06388	-77.6344	802.092	9670.67	1625.29	324.567	892.668	0	0	0	0	0	0	0	603	903	0
481	1	0	0	0	0	0	0	200	300	0	4.39911	8.60611	-80.6861	161.223	8938.25	1625.29	310.778	901.002	0	0	0	0	0	0	0	603	903	0
481	2	0	0	0	0	0	0	200	300	0	4.09393	6.77506	-82.212	893.645	9914.82	1350.63	320.601	892.13	0	0	0	0	0	0	0	603	903	0
481	3	0	0	0	0	0	0	200	300	0	3.94135	4.63883	-84.6534	1076.75	10281	1350.63	321.449	890.281	0	0	0	0	0	0	0	603	903	0
481	4	0	0	0	0	0	0	200	300	0	4.70429	4.63883	-85.2638	1076.75	10036.9	1075.97	317.716	890.372	0	0	0	0	0	0	0	603	903	0
481	5	0	0	0	0	0	0	200	300	0	4.39911	4.944	-87.4	1168.3	10220	1213.3	316.934	889.633	0	0	0	0	0	0	0	603	903	0
481	6	0	0	0	0	0	0	200	300	0	3.02582	3.7233	-90.1466	893.645	10647.2	1213.3	318.11	893.087	0	0	0	0	0	0	0	603	903	0
481	7	0	0	0	0	0	0	200	300	0	5.46722	2.19742	-92.588	1351.41	10403.1	801.315	312.359	888.404	0	0	0	0	0	0	0	603	903	0
481	8	0	0	0	0	0	0	200	300	0	4.39911	0.671544	-95.3346	1259.86	10647.2	709.762	311.683	889.785	0	0	0	0	0	0	0	603	903	0
481	9	0	0	0	0	0	0	200	300	0	2.56805	0.671544	-97.1656	1717.62	11013.4	755.539	313.347	885.323	0	0	0	0	0	0	0	603	903	0
482	0	0	0	0	0	0	0	200	300	0	1.49994	0.824132	-98.0811	1351.41	10952.4	663.986	311.667	889.222	0	0	0	0	0	0	0	603	903	0
482	1	0	0	0	0	0	0	200	300	0	-0.636291	-0.396572	-102.048	1534.51	10830.3	709.762	306.129	887.963	0	0	0	0	0	0	0	603	903	0
482	2	0	0	0	0	0	0	200	300	0	-1.09405	-2.07504	-105.405	1534.51	11562.8	389.328	309.698	888.442	0	0	0	0	0	0	0	603	903	0
482	3	0	0	0	0	0	0	200	300	0	-0.941467	-3.29574	-109.983	1809.17	11440.7	206.222	304.022	886.55	0	0	0	0	0	0	0	603	903	0
482	4	0	0	0	0	0	0	200	300	0	-2.92511	-3.29574	-111.509	2083.83	11623.8	251.999	304.241	884.312	0	0	0	0	0	0	0	603	903	0
482	5	0	0	0	0	0	0	200	300	0	-3.84064	-3.60092	-112.73	1626.07	11867.9	-159.989	305.278	888.576	0	0	0	0	0	0	0	603	903	0
482	6	0	0	0	0	0	0	200	300	0	-6.43463	-3.90609	-117.612	2266.94	12295.2	-434.647	304.54	883.725	0	0	0	0	0	0	0	603	903	0
482	7	0	0	0	0	0	0	200	300	0	-7.04498	-4.51644	-119.443	2266.94	11867.9	-434.647	299.36	884.021	0	0	0	0	0	0	0	603	903	0
482	8	0	0	0	0	0	0	200	300	0	-7.96051	-6.50009	-121.274	2816.25	12112.1	-755.082	299.873	879.778	0	0	0	0	0	0	0	603	903	0
482	9	0	0	0	0	0	0	200	300	0	-8.57086	-6.80526	-120.969	3182.46	12783.5	-709.306	305.675	876.692	0	0	0	0	0	0	0	603	903	0
483	0	0	0	0	0	0	0	200	300	0	-10.2493	-8.48373	-127.378	3182.46	12051	-1075.52	294.609	878.016	0	0	0	0	0	0	0	603	903	0
483	1	0	0	0	0	0	0	200	300	0	-11.3174	-9.09408	-131.65	3182.46	12966.6	-1212.85	298.492	878.826	0	0	0	0	0	0	0	603	903	0
483	2	0	0	0	0	0	0	200	300	0	-13.6063	-9.70443	-134.092	3274.02	13332.8	-1624.83	299.43	878.584	0	0	0	0	0	0	0	603	903	0
483	3	0	0	0	0	0	0	200	300	0	-11.0123	-11.0777	-135.923	3823.33	13515.9	-1624.83	299.438	874.871	0	0	0	0	0	0	0	603	903	0
483	4	0	0	0	0	0	0	200	300	0	-11.9278	-13.0614	-140.195	3640.23	13699	-1991.04	297.714	877.035	0	0	0	0	0	0	0	603	903	0
483	5	0	0	0	0	0	0	200	300	0	-14.2166	-12.2984	-142.332	4006.44	14187.3	-2082.6	299.678	874.851	0	0	0	0	0	0	0	603	903	0
483	6	0	0	0	0	0	0	200	300	0	-14.5218	-13.5191	-146.909	4097.99	14492.5	-2311.48	298.649	875.105	0	0	0	0	0	0	0	603	903	0
483	7	0	0	0	0	0	0	200	300	0	-13.9114	-15.3502	-150.877	4006.44	14614.5	-2174.15	296.864	876.446	0	0	0	0	0	0	0	603	903	0
483	8	0	0	0	0	0	0	200	300	0	-13.9114	-15.045	-152.402	4738.86	14919.7	-2631.91	297.897	871.906	0	0	0	0	0	0	0	603	903	0
483	9	0	0	0	0	0	0	200	300	0	-16.2003	-17.1812	-158.506	4555.76	15530	-2998.12	297.978	874.258	0	0	0	0	0	0	0	603	903	0
484	0	0	0	0	0	0	0	200	300	0	-16.5054	-17.9442	-162.168	4647.31	16262.5	-3043.9	300.282	874.343	0	0	0	0	0	0	0	603	903	0
484	1	0	0	0	0	0	0	200	300	0	-17.421	-19.6226	-166.441	5105.07	15835.2	-3364.33	295.14	872.328	0	0	0	0	0	0	0	603	903	0
484	2	0	0	0	0	0	0	200	300	0	-15.8951	-20.233	-171.018	5929.05	16933.9	-3318.56	299.018	868.331	0	0	0	0	0	0	0	603	903	0
484	3	0	0	0	0	0	0	200	300	0	-16.2003	-21.4537	-174.68	5471.28	17178	-3501.66	298.34	871.678	0	0	0	0	0	0	0	603	903	0
484	4	0	0	0	0	0	0	200	300	0	-17.2684	-22.5218	-175.291	5929.05	17300.1	-3593.22	298.694	869.176	0	0	0	0	0	0	0	603	903	0
484	5	0	0	0	0	0	0	200	300	0	-15.2847	-23.5899	-182.615	6295.26	17727.3	-3776.32	297.075	868.527	0	0	0	0	0	0	0	603	903	0
484	6	0	0	0	0	0	0	200	300	0	-16.0477	-24.5055	-189.024	6753.02	17971.5	-3730.55	295.075	867.274	0	0	0	0	0	0	0	603	903	0
484	7	0	0	0	0	0	0	200	300	0	-15.1321	-25.2684	-192.075	6753.02	18703.9	-3730.55	297.378	867.842	0	0	0	0	0	0	0	603	903	0
484	8	0	0	0	0	0	0	200	300	0	-15.5899	-25.8787	-193.906	6844.57	18826	-4188.31	297.088	867.702	0	0	0	0	0	0	0	603	903	0
484	9	0	0	0	0	0	0	200	300	0	-15.7425	-27.5572	-199.4	7393.89	19558.4	-4050.98	298.086	865.919	0	0	0	0	0	0	0	603	903	0
485	0	0	0	0	0	0	0	200	300	0	-15.1321	-28.015	-203.672	8126.31	19985.6	-4462.97	298.127	863.101	0	0	0	0	0	0	0	603	903	0
485	1	0	0	0	0	0	0	200	300	0	-14.827	-28.9305	-210.386	8309.42	20290.8	-4279.86	296.446	863.504	0	0	0	0	0	0	0	603	903	0
485	2	0	0	0	0	0	0	200	300	0	-13.9114	-30.1512	-213.438	8492.53	20718	-4417.19	297.068	863.211	0	0	0	0	0	0	0	603	903	0
485	3	0	0	0	0	0	0	200	300	0	-14.5218	-30.609	-216.489	9408.05	21389.4	-4554.52	298.801	859.543	0	0	0	0	0	0	0	603	903	0
485	4	0	0	0	0	0	0	200	300	0	-14.2166	-30.9142	-220.762	9408.05	21206.3	-4554.52	296.06	860.384	0	0	0	0	0	0	0	603	903	0
485	5	0	0	0	0	0	0	200	300	0	-12.8433	-32.8978	-225.95	10048.9	21877.7	-4279.86	296.826	858.526	0	0	0	0	0	0	0	603	903	0
485	6	0	0	0	0	0	0	200	300	0	-10.8597	-33.3556	-231.443	10140.5	22732.2	-4737.63	298.22	859.186	0	0	0	0	0	0	0	603	903	0
485	7	0	0	0	0	0	0	200	300	0	-12.5381	-34.8814	-235.41	10689.8	23159.5	-4646.07	298.379	857.591	0	0	0	0	0	0	0	603	903	0
485	8	0	0	0	0	0	0	200	300	0	-11.9278	-35.1866	-239.378	11147.6	23403.6	-4691.85	297.769	856.431	0	0	0	0	0	0	0	603	903	0
485	9	0	0	0	0	0	0	200	300	0	-11.6226	-36.2547	-243.345	11513.8	24441.2	-4737.63	300.439	855.685	0	0	0	0	0	0	0	603	903	0
486	0	0	0	0	0	0	0	200	300	0	-9.48639	-36.4073	-247.922	12246.2	24746.4	-4462.97	299.815	853.605	0	0	0	0	0	0	0	603	903	0
486	1	0	0	0	0	0	0	200	300	0	-9.18121	-37.3228	-252.805	12246.2	25295.7	-4600.3	300.06	854.559	0	0	0	0	0	0	0	603	903	0
486	2	0	0	0	0	0	0	200	300	0	-8.87604	-38.6961	-259.214	13253.3	26211.2	-4554.52	301.118	851.871	0	0	0	0	0	0	0	603	903	0
486	3	0	0	0	0	0	0	200	300	0	-7.35016	-38.6961	-262.876	13711	26577.4	-4417.19	301.102	850.842	0	0	0	0	0	0	0	603	903	0
486	4	0	0	0	0	0	0	200	300	0	-5.5191	-40.0694	-266.538	14443.5	27065.7	-4096.76	301.545	848.811	0	0	0	0	0	0	0	603	903	0
486	5	0	0	0	0	0	0	200	300	0	-2.92511	-40.6798	-272.337	14260.3	27370.9	-4279.86	300.504	850.637	0	0	0	0	0	0	0	603	903	0
486	6	0	0	0	0	0	0	200	300	0	-2.46735	-42.6634	-274.473	14901.2	28347.4	-4462.97	303.28	848.71	0	0	0	0	0	0	0	603	903	0
486	7	0	0	0	0	0	0	200	300	0	-2.00958	-42.9686	-281.797	15175.9	28835.7	-4188.31	302.328	849.146	0	0	0	0	0	0	0	603	903	0
486	8	0	0	0	0	0	0	200	300	0	-0.941467	-44.6471	-286.375	16183	28713.7	-3913.65	300.266	846.49	0	0	0	0	0	0	0	603	903	0
486	9	0	0	0	0	0	0	200	300	0	0.584412	-44.9522	-289.121	16640.7	29934.4	-4096.76	303.536	845.444	0	0	0	0	0	0	0	603	903	0
487	0	0	0	0	0	0	0	200	300	0	2.56805	-46.1729	-294.614	17373.1	30483.7	-4050.98	303.47	844.031	0	0	0	0	0	0	0	603	903	0
487	1	0	0	0	0	0	0	200	300	0	3.33099	-48.004	-298.887	17647.8	30788.8	-3913.65	303.012	843.955	0	0	0	0	0	0	0	603	903	0
487	2	0	0	0	0	0	0	200	300	0	3.78876	-49.835	-300.413	17190	30972	-4279.86	303.098	845.779	0	0	0	0	0	0	0	603	903	0
487	3	0	0	0	0	0	0	200	300	0	5.61981	-50.598	-304.38	19021.1	31643.3	-4234.09	303.96	840.509	0	0	0	0	0	0	0	603	903	0
487	4	0	0	0	0	0	0	200	300	0	6.68793	-51.3609	-305.601	18654.9	31887.5	-4417.19	304.344	841.957	0	0	0	0	0	0	0	603	903	0
487	5	0	0	0	0	0	0	200	300	0	7.90863	-52.1239	-306.516	19021.1	31704.4	-4417.19	303.435	840.944	0	0	0	0	0	0	0	603	903	0
487	6	0	0	0	0	0	0	200	300	0	7.75604	-53.4972	-311.399	19570.4	32619.9	-4234.09	304.753	840.153	0	0	0	0	0	0	0	603	903	0
487	7	0	0	0	0	0	0	200	300	0	7.45087	-55.4808	-314.146	19753.5	32803	-4462.97	304.42	840.12	0	0	0	0	0	0	0	603	903	0
487	8	0	0	0	0	0	0	200	300	0	8.97675	-56.5489	-315.366	20211.3	32803	-4600.3	304.016	838.912	0	0	0	0	0	0	0	603	903	0
487	9	0	0	0	0	0	0	200	300	0	9.5871	-57.3119	-316.282	21035.3	32925.1	-4462.97	304.1	836.492	0	0	0	0	0	0	0	603	903	0
488	0	0	0	0	0	0	0	200	300	0	9.12933	-57.9222	-320.249	21035.3	33535.4	-4600.3	304.717	837.316	0	0	0	0	0	0	0	603	903	0
488	1	0	0	0	0	0	0	200	300	0	8.97675	-57.9222	-321.775	21126.8	33108.2	-4874.95	302.892	837.343	0	0	0	0	0	0	0	603	903	0
488	2	0	0	0	0	0	0	200	300	0	9.12933	-59.2955	-323.911	21859.2	33840.6	-4874.95	304.475	835.515	0	0	0	0	0	0	0	603	903	0
488	3	0	0	0	0	0	0	200	300	0	10.9604	-60.5162	-324.522	22042.3	34389.9	-4874.95	305.971	835.077	0	0	0	0	0	0	0	603	903	0
488	4	0	0	0	0	0	0	200	300	0	10.1974	-60.6688	-322.691	22500.1	34512	-4829.18	306.951	833.273	0	0	0	0	0	0	0	603	903	0
488	5	0	0	0	0	0	0	200	300	0	9.89227	-59.2955	-325.742	22408.5	34389.9	-5058.06	305.574	834.208	0	0	0	0	0	0	0	603	903	0
488	6	0	0	0	0	0	0	200	300	0	9.43451	-60.6688	-329.404	22591.7	34817.2	-5149.61	305.697	834.417	0	0	0	0	0	0	0	603	903	0
488	7	0	0	0	0	0	0	200	300	0	10.5026	-61.1266	-330.32	23873.4	34389.9	-5058.06	304.111	830.727	0	0	0	0	0	0	0	603	903	0
488	8	0	0	0	0	0	0	200	300	0	11.8759	-61.1266	-330.93	23415.6	34756.1	-5058.06	305.026	832.243	0	0	0	0	0	0	0	603	903	0
488	9	0	0	0	0	0	0	200	300	0	10.35	-61.4317	-332.761	23690.3	35183.4	-5286.94	305.732	831.807	0	0	0	0	0	0	0	603	903	0
489	0	0	0	0	0	0	0	200	300	0	10.1974	-60.8214	-333.677	23873.4	35488.5	-5241.17	306.356	831.454	0	0	0	0	0	0	0	603	903	0
489	1	0	0	0	0	0	0	200	300	0	10.35	-61.4317	-334.592	24239.6	35732.7	-5058.06	306.795	830.555	0	0	0	0	0	0	0	603	903	0
489	2	0	0	0	0	0	0	200	300	0	11.4182	-61.5843	-337.034	24239.6	35366.5	-5241.17	304.935	831.08	0	0	0	0	0	0	0	603	903	0
489	3	0	0	0	0	0	0	200	300	0	11.5707	-61.4317	-337.034	24972	36037.9	-5195.39	306.927	828.907	0	0	0	0	0	0	0	603	903	0
489	4	0	0	0	0	0	0	200	300	0	11.8759	-61.5843	-338.865	24697.4	36159.9	-5012.28	306.709	830.117	0	0	0	0	0	0	0	603	903	0
489	5	0	0	0	0	0	0	200	300	0	11.8759	-62.0421	-342.222	25063.6	35793.7	-4874.95	304.592	829.762	0	0	0	0	0	0	0	603	903	0
489	6	0	0	0	0	0	0	200	300	0	11.7233	-61.4317	-341.917	25887.6	36159.9	-4737.63	305.757	827.287	0	0	0	0	0	0	0	603	903	0
489	7	0	0	0	0	0	0	200	300	0	13.4018	-63.4154	-343.748	25704.4	36648.2	-4646.07	306.614	828.223	0	0	0	0	0	0	0	603	903	0
489	8	0	0	0	0	0	0	200	300	0	14.0121	-64.1783	-344.358	26894.6	36831.3	-4783.4	306.957	824.899	0	0	0	0	0	0	0	603	903	0
489	9	0	0	0	0	0	0	200	300	0	13.5544	-63.4154	-346.494	26528.4	36098.9	-4920.73	304.183	826.438	0	0	0	0	0	0	0	603	903	0
490	0	0	0	0	0	0	0	200	300	0	13.5544	-64.9412	-347.715	26803.1	37136.5	-4920.73	306.802	825.917	0	0	0	0	0	0	0	603	903	0
490	1	0	0	0	0	0	0	200	300	0	15.2328	-64.9412	-349.851	26894.6	37380.6	-5012.28	306.847	826.125	0	0	0	0	0	0	0	603	903	0
490	2	0	0	0	0	0	0	200	300	0	16.1484	-66.6197	-351.377	27810.2	37258.6	-5058.06	306.036	823.854	0	0	0	0	0	0	0	603	903	0
490	3	0	0	0	0	0	0	200	300	0	17.3691	-66.7723	-352.293	27627.1	37136.5	-4874.95	305.414	824.579	0	0	0	0	0	0	0	603	903	0
490	4	0	0	0	0	0	0	200	300	0	16.7587	-69.0611	-352.903	27352.4	37685.8	-5103.84	306.788	825.493	0	0	0	0	0	0	0	603	903	0
490	5	0	0	0	0	0	0	200	300	0	18.132	-67.8404	-355.955	28542.6	38601.3	-5058.06	308.445	822.814	0	0	0	0	0	0	0	603	903	0
490	6	0	0	0	0	0	0	200	300	0	19.9631	-68.6034	-358.091	29000.3	37807.9	-4829.18	305.582	822.014	0	0	0	0	0	0	0	603	903	0
490	7	0	0	0	0	0	0	200	300	0	22.7097	-70.4344	-360.837	29091.9	38967.5	-4646.07	307.992	822.377	0	0	0	0	0	0	0	603	903	0
490	8	0	0	0	0	0	0	200	300	0	21.6415	-70.4344	-363.584	29275	38906.5	-4829.18	307.008	822.482	0	0	0	0	0	0	0	603	903	0
490	9	0	0	0	0	0	0	200	300	0	21.9467	-71.8077	-364.194	29915.9	39028.6	-4646.07	307.164	820.857	0	0	0	0	0	0	0	603	903	0
491	0	0	0	0	0	0	0	200	300	0	23.1674	-71.6551	-365.72	30282.1	39822	-4737.63	308.887	820.199	0	0	0	0	0	0	0	603	903	0
491	1	0	0	0	0	0	0	200	300	0	24.0829	-71.9603	-369.077	31014.5	40066.2	-4554.52	308.558	818.968	0	0	0	0	0	0	0	603	903	0
491	2	0	0	0	0	0	0	200	300	0	25.6088	-73.0284	-371.519	30648.3	39883.1	-4554.52	307.352	820.505	0	0	0	0	0	0	0	603	903	0
491	3	0	0	0	0	0	0	200	300	0	25.1511	-71.9603	-372.739	30739.8	40615.5	-4600.3	308.965	820.53	0	0	0	0	0	0	0	603	903	0
491	4	0	0	0	0	0	0	200	300	0	26.0666	-73.4862	-374.57	31838.5	40737.6	-4462.97	308.758	818	0	0	0	0	0	0	0	603	903	0
491	5	0	0	0	0	0	0	200	300	0	27.5925	-74.4017	-377.012	32296.2	40737.6	-4737.63	308.054	817.336	0	0	0	0	0	0	0	603	903	0
491	6	0	0	0	0	0	0	200	300	0	29.4235	-75.012	-380.064	32296.2	41347.9	-4554.52	308.792	818.024	0	0	0	0	0	0	0	603	903	0
491	7	0	0	0	0	0	0	200	300	0	29.2709	-75.4698	-377.012	32479.3	41775.2	-4646.07	310.806	816.851	0	0	0	0	0	0	0	603	903	0
491	8	0	0	0	0	0	0	200	300	0	28.9658	-77.3009	-384.336	33120.2	42202.4	-4325.64	309.806	816.825	0	0	0	0	0	0	0	603	903	0
491	9	0	0	0	0	0	0	200	300	0	29.1183	-76.9957	-384.946	33028.7	42141.4	-4600.3	309.473	817.199	0	0	0	0	0	0	0	603	903	0
492	0	0	0	0	0	0	0	200	300	0	29.7287	-77.4535	-388.608	34127.3	42629.7	-4600.3	309.698	815.181	0	0	0	0	0	0	0	603	903	0
492	1	0	0	0	0	0	0	200	300	0	31.102	-77.9112	-391.355	34493.5	42812.8	-4600.3	309.396	814.861	0	0	0	0	0	0	0	603	903	0
492	2	0	0	0	0	0	0	200	300	0	30.7968	-78.0638	-389.829	34493.5	42934.8	-4508.74	310.138	814.516	0	0	0	0	0	0	0	603	903	0
492	3	0	0	0	0	0	0	200	300	0	30.0339	-79.8949	-396.848	34768.2	43117.9	-4554.52	308.651	815.389	0	0	0	0	0	0	0	603	903	0
492	4	0	0	0	0	0	0	200	300	0	30.7968	-79.5897	-398.069	34859.7	43362.1	-4691.85	308.931	815.428	0	0	0	0	0	0	0	603	903	0
492	5	0	0	0	0	0	0	200	300	0	32.0175	-79.4371	-400.205	35500.6	43545.2	-4508.74	308.807	814.294	0	0	0	0	0	0	0	603	903	0
492	6	0	0	0	0	0	0	200	300	0	32.3227	-79.4371	-403.562	35866.8	43728.3	-4646.07	308.356	814.125	0	0	0	0	0	0	0	603	903	0
492	7	0	0	0	0	0	0	200	300	0	32.1701	-79.5897	-402.036	35958.4	44460.7	-4554.52	310.589	813.559	0	0	0	0	0	0	0	603	903	0
492	8	0	0	0	0	0	0	200	300	0	32.3227	-80.5052	-408.14	36416.1	44826.9	-4325.64	309.832	813.775	0	0	0	0	0	0	0	603	903	0
492	9	0	0	0	0	0	0	200	300	0	33.8486	-80.3526	-409.666	36690.8	45010	-4279.86	309.87	813.437	0	0	0	0	0	0	0	603	903	0
493	0	0	0	0	0	0	0	200	300	0	31.8649	-78.8267	-412.717	37423.2	45071.1	-4508.74	309.206	812.325	0	0	0	0	0	0	0	603	903	0
493	1	0	0	0	0	0	0	200	300	0	33.0856	-79.4371	-416.99	37514.7	45803.5	-4646.07	309.843	813.034	0	0	0	0	0	0	0	603	903	0
493	2	0	0	0	0	0	0	200	300	0	33.0856	-79.2845	-416.685	37697.8	45620.4	-4646.07	309.484	812.529	0	0	0	0	0	0	0	603	903	0
493	3	0	0	0	0	0	0	200	300	0	32.4753	-79.8949	-420.652	38155.6	45681.4	-4462.97	308.597	812.294	0	0	0	0	0	0	0	603	903	0
493	4	0	0	0	0	0	0	200	300	0	33.0856	-80.2	-424.314	38338.7	46474.9	-4508.74	309.529	812.645	0	0	0	0	0	0	0	603	903	0
493	5	0	0	0	0	0	0	200	300	0	33.5434	-79.4371	-426.755	38888.1	47146.3	-4600.3	310.476	811.875	0	0	0	0	0	0	0	603	903	0
493	6	0	0	0	0	0	0	200	300	0	35.0693	-79.2845	-429.197	39437.4	46596.9	-4096.76	308.568	811.114	0	0	0	0	0	0	0	603	903	0
493	7	0	0	0	0	0	0	200	300	0	33.5434	-79.5897	-430.723	39254.3	47390.4	-4508.74	310.025	811.864	0	0	0	0	0	0	0	603	903	0
493	8	0	0	0	0	0	0	200	300	0	32.0175	-80.8104	-434.69	39803.6	47817.6	-4554.52	310.004	811.432	0	0	0	0	0	0	0	603	903	0
493	9	0	0	0	0	0	0	200	300	0	32.933	-80.2	-436.826	40078.2	47756.6	-4508.74	309.326	811.251	0	0	0	0	0	0	0	603	903	0
494	0	0	0	0	0	0	0	200	300	0	33.3908	-79.2845	-439.878	40536	48428	-4325.64	310.094	810.847	0	0	0	0	0	0	0	603	903	0
494	1	0	0	0	0	0	0	200	300	0	33.8486	-79.4371	-443.54	39986.7	48611.1	-4234.09	309.598	812.847	0	0	0	0	0	0	0	603	903	0
494	2	0	0	0	0	0	0	200	300	0	32.7805	-80.0474	-446.592	40993.7	48672.1	-4462.97	308.986	811.208	0	0	0	0	0	0	0	603	903	0
494	3	0	0	0	0	0	0	200	300	0	35.0693	-78.6742	-449.033	40810.6	48855.2	-4279.86	308.801	812.115	0	0	0	0	0	0	0	603	903	0
494	4	0	0	0	0	0	0	200	300	0	32.3227	-79.5897	-450.559	41726.2	49587.7	-4142.53	310.058	810.39	0	0	0	0	0	0	0	603	903	0
494	5	0	0	0	0	0	0	200	300	0	34.9167	-78.8267	-453.306	42000.8	49770.8	-4142.53	309.795	810.345	0	0	0	0	0	0	0	603	903	0
494	6	0	0	0	0	0	0	200	300	0	33.8486	-77.9112	-458.189	41268.4	49709.7	-4142.53	308.492	812.931	0	0	0	0	0	0	0	603	903	0
494	7	0	0	0	0	0	0	200	300	0	33.5434	-78.2164	-459.409	42184	50381.1	-3867.87	309.665	811.178	0	0	0	0	0	0	0	603	903	0
494	8	0	0	0	0	0	0	200	300	0	33.0856	-78.5216	-462.156	42733.3	50564.2	-4005.2	309.409	810.535	0	0	0	0	0	0	0	603	903	0
494	9	0	0	0	0	0	0	200	300	0	33.696	-77.606	-465.513	42458.6	50564.2	-3776.32	308.621	811.792	0	0	0	0	0	0	0	603	903	0
495	0	0	0	0	0	0	0	200	300	0	34.4589	-76.8431	-467.039	43191	50625.3	-3867.87	308.396	810.522	0	0	0	0	0	0	0	603	903	0
495	1	0	0	0	0	0	0	200	300	0	33.0856	-76.3853	-471.311	43465.7	51235.6	-3730.55	308.709	810.777	0	0	0	0	0	0	0	603	903	0
495	2	0	0	0	0	0	0	200	300	0	35.0693	-76.5379	-473.142	43374.1	51174.6	-3638.99	308.159	811.328	0	0	0	0	0	0	0	603	903	0
495	3	0	0	0	0	0	0	200	300	0	32.7805	-76.2327	-476.499	44198.1	51479.8	-3776.32	308.037	810.244	0	0	0	0	0	0	0	603	903	0
495	4	0	0	0	0	0	0	200	300	0	33.696	-75.4698	-478.025	44564.3	52395.3	-3730.55	309.608	809.774	0	0	0	0	0	0	0	603	903	0
495	5	0	0	0	0	0	0	200	300	0	33.5434	-74.8595	-480.466	44839	52273.2	-3593.22	308.797	809.676	0	0	0	0	0	0	0	603	903	0
495	6	0	0	0	0	0	0	200	300	0	32.4753	-74.2491	-483.823	45113.6	52334.2	-3547.44	308.168	809.756	0	0	0	0	0	0	0	603	903	0
495	7	0	0	0	0	0	0	200	300	0	33.2382	-74.7069	-488.706	44839	53066.7	-3730.55	308.586	811.25	0	0	0	0	0	0	0	603	903	0
495	8	0	0	0	0	0	0	200	300	0	31.8649	-75.775	-492.063	45388.3	53249.8	-3364.33	308.217	810.759	0	0	0	0	0	0	0	603	903	0
495	9	0	0	0	0	0	0	200	300	0	33.0856	-75.6224	-494.199	45022.1	53066.7	-3089.68	307.379	811.899	0	0	0	0	0	0	0	603	903	0
496	0	0	0	0	0	0	0	200	300	0	32.0175	-77.4535	-498.167	44747.4	53616	-3227.01	307.627	813.176	0	0	0	0	0	0	0	603	903	0
496	1	0	0	0	0	0	0	200	300	0	31.2546	-75.6224	-500.303	45113.6	53860.1	-2998.12	307.655	812.827	0	0	0	0	0	0	0	603	903	0
496	2	0	0	0	0	0	0	200	300	0	33.696	-76.6905	-506.406	44655.9	54226.3	-2906.57	307.081	814.818	0	0	0	0	0	0	0	603	903	0
496	3	0	0	0	0	0	0	200	300	0	30.1865	-77.606	-508.543	44655.9	53921.2	-2448.81	306.031	815.189	0	0	0	0	0	0	0	603	903	0
496	4	0	0	0	0	0	0	200	300	0	30.4916	-77.3009	-514.951	45113.6	54714.6	-2082.6	306.252	815.392	0	0	0	0	0	0	0	603	903	0
496	5	0	0	0	0	0	0	200	300	0	31.102	-78.0638	-515.256	44564.3	55019.8	-2357.25	306.781	816.51	0	0	0	0	0	0	0	603	903	0
496	6	0	0	0	0	0	0	200	300	0	29.8813	-78.2164	-517.698	44930.5	54653.6	-2219.93	305.57	816.211	0	0	0	0	0	0	0	603	903	0
496	7	0	0	0	0	0	0	200	300	0	29.8813	-78.0638	-522.581	44655.9	54958.8	-1716.39	305.168	817.547	0	0	0	0	0	0	0	603	903	0
496	8	0	0	0	0	0	0	200	300	0	30.1865	-78.369	-525.938	44930.5	54775.6	-1579.06	304.149	817.571	0	0	0	0	0	0	0	603	903	0
496	9	0	0	0	0	0	0	200	300	0	29.7287	-78.6742	-529.294	45296.7	55386	-1533.28	304.641	817.421	0	0	0	0	0	0	0	603	903	0
497	0	0	0	0	0	0	0	200	300	0	30.1865	-77.606	-531.126	44839	55508.1	-1533.28	304.51	818.577	0	0	0	0	0	0	0	603	903	0
497	1	0	0	0	0	0	0	200	300	0	27.5925	-77.7586	-534.788	45022.1	56118.4	-938.187	304.936	818.813	0	0	0	0	0	0	0	603	903	0
497	2	0	0	0	0	0	0	200	300	0	27.4399	-77.3009	-537.839	45113.6	56240.5	-1350.18	304.567	819.121	0	0	0	0	0	0	0	603	903	0
497	3	0	0	0	0	0	0	200	300	0	27.4399	-76.8431	-542.112	45754.5	56179.5	-1167.07	303.631	818.6	0	0	0	0	0	0	0	603	903	0
497	4	0	0	0	0	0	0	200	300	0	28.8132	-77.1483	-544.248	45479.9	56362.6	-1075.52	303.56	819.435	0	0	0	0	0	0	0	603	903	0
497	5	0	0	0	0	0	0	200	300	0	29.7287	-76.5379	-544.858	45663	56545.7	-1075.52	303.78	819.193	0	0	0	0	0	0	0	603	903	0
497	6	0	0	0	0	0	0	200	300	0	26.9821	-76.2327	-547.91	45846.1	56667.7	-1212.85	303.425	819.326	0	0	0	0	0	0	0	603	903	0
497	7	0	0	0	0	0	0	200	300	0	26.5244	-76.0802	-549.741	45846.1	56606.7	-1029.74	302.97	819.604	0	0	0	0	0	0	0	603	903	0
497	8	0	0	0	0	0	0	200	300	0	26.3718	-75.3172	-552.793	46395.4	57461.2	-1121.29	303.947	819.071	0	0	0	0	0	0	0	603	903	0
497	9	0	0	0	0	0	0	200	300	0	26.8295	-74.0965	-555.54	46670	57461.2	-1395.95	303.433	818.992	0	0	0	0	0	0	0	603	903	0
498	0	0	0	0	0	0	0	200	300	0	29.4235	-75.1646	-558.591	47402.4	57827.4	-1212.85	303.524	818.139	0	0	0	0	0	0	0	603	903	0
498	1	0	0	0	0	0	0	200	300	0	27.5925	-74.0965	-558.286	47310.9	58010.5	-1395.95	303.908	818.257	0	0	0	0	0	0	0	603	903	0
498	2	0	0	0	0	0	0	200	300	0	26.3718	-73.9439	-559.812	48043.3	58559.8	-1258.62	304.606	817.18	0	0	0	0	0	0	0	603	903	0
498	3	0	0	0	0	0	0	200	300	0	27.1347	-72.5706	-558.897	48684.2	58193.6	-1167.07	304.122	815.892	0	0	0	0	0	0	0	603	903	0
498	4	0	0	0	0	0	0	200	300	0	27.8976	-73.3336	-560.728	48958.9	58620.9	-1807.94	304.544	815.687	0	0	0	0	0	0	0	603	903	0
498	5	0	0	0	0	0	0	200	300	0	28.508	-73.0284	-558.897	50057.5	59353.3	-1670.61	306.197	813.435	0	0	0	0	0	0	0	603	903	0
498	6	0	0	0	0	0	0	200	300	0	29.2709	-71.5025	-559.812	50698.3	58987.1	-1624.83	305.369	812.437	0	0	0	0	0	0	0	603	903	0
498	7	0	0	0	0	0	0	200	300	0	29.5761	-71.9603	-560.422	51247.6	59719.5	-1762.16	306.562	811.555	0	0	0	0	0	0	0	603	903	0
498	8	0	0	0	0	0	0	200	300	0	28.8132	-71.5025	-558.897	52529.4	60390.9	-2128.37	308.054	809.012	0	0	0	0	0	0	0	603	903	0
498	9	0	0	0	0	0	0	200	300	0	29.8813	-70.7396	-561.033	53261.8	60635	-1853.72	308.078	808.065	0	0	0	0	0	0	0	603	903	0
499	0	0	0	0	0	0	0	200	300	0	30.6442	-69.6715	-561.338	52987.2	60024.7	-1899.49	306.931	808.606	0	0	0	0	0	0	0	603	903	0
499	1	0	0	0	0	0	0	200	300	0	29.1183	-70.1292	-562.864	53536.5	61123.3	-1853.72	308.593	807.886	0	0	0	0	0	0	0	603	903	0
499	2	0	0	0	0	0	0	200	300	0	29.2709	-68.6034	-563.474	53628	61062.3	-1716.39	308.367	807.826	0	0	0	0	0	0	0	603	903	0
499	3	0	0	0	0	0	0	200	300	0	29.7287	-68.7559	-565	55367.5	61184.3	-1579.06	308.291	805.004	0	0	0	0	0	0	0	603	903	0
499	4	0	0	0	0	0	0	200	300	0	32.7805	-68.7559	-562.253	55550.7	61611.6	-1807.94	309.58	804.2	0	0	0	0	0	0	0	603	903	0
499	5	0	0	0	0	0	0	200	300	0	29.1183	-68.6034	-567.747	55733.8	61489.5	-1487.5	308.305	804.833	0	0	0	0	0	0	0	603	903	0
499	6	0	0	0	0	0	0	200	300	0	29.4235	-70.1292	-567.136	56008.4	62038.8	-1029.74	309.39	804.244	0	0	0	0	0	0	0	603	903	0
499	7	0	0	0	0	0	0	200	300	0	28.8132	-71.6551	-567.136	56466.2	61977.8	-1075.52	309.282	803.436	0	0	0	0	0	0	0	603	903	0
499	8	0	0	0	0	0	0	200	300	0	29.1183	-71.6551	-568.052	57564.8	62771.3	-846.635	310.503	801.663	0	0	0	0	0	0	0	603	903	0
499	9	0	0	0	0	0	0	200	300	0	28.9658	-71.3499	-570.493	57473.2	62649.2	-800.858	309.816	802.257	0	0	0	0	0	0	0	603	903	0
500	0	0	0	0	0	0	0	200	300	0	28.9658	-72.2655	-570.798	57747.9	62771.3	-800.858	309.971	801.83	0	0	0	0	0	0	0	603	903	0
500	1	0	0	0	0	0	0	200	300	0	28.508	-73.3336	-572.629	57931	63015.4	-709.306	310.046	801.833	0	0	0	0	0	0	0	603	903	0
500	2	0	0	0	0	0	0	200	300	0	27.5925	-73.9439	-573.24	58297.2	63381.6	-617.753	310.567	801.302	0	0	0	0	0	0	0	603	903	0
500	3	0	0	0	0	0	0	200	300	0	28.9658	-73.3336	-573.24	59121.2	63137.5	-709.306	310.141	799.865	0	0	0	0	0	0	0	603	903	0
500	4	0	0	0	0	0	0	200	300	0	29.8813	-73.7913	-574.461	59395.9	63137.5	-709.306	309.907	799.606	0	0	0	0	0	0	0	603	903	0
500	5	0	0	0	0	0	0	200	300	0	30.7968	-73.181	-577.207	58755	63625.7	-1075.52	310.23	801.208	0	0	0	0	0	0	0	603	903	0
500	6	0	0	0	0	0	0	200	300	0	30.0339	-70.587	-579.038	58938.1	63930.9	-1899.49	310.409	801.214	0	0	0	0	0	0	0	603	903	0
500	7	0	0	0	0	0	0	200	300	0	30.9494	-68.9085	-577.512	59304.3	63381.6	-1991.04	309.749	800.311	0	0	0	0	0	0	0	603	903	0
500	8	0	0	0	0	0	0	200	300	0	32.4753	-68.9085	-579.038	60219.8	64236.1	-1991.04	310.936	799	0	0	0	0	0	0	0	603	903	0
500	9	0	0	0	0	0	0	200	300	0	32.0175	-65.0938	-579.343	60036.7	64480.2	-2036.82	311.299	799.371	0	0	0	0	0	0	0	603	903	0
501	0	0	0	0	0	0	0	200	300	0	32.1701	-64.3309	-580.564	59762.1	63869.9	-2128.37	310.014	800.062	0	0	0	0	0	0	0	603	903	0
501	1	0	0	0	0	0	0	200	300	0	32.0175	-63.8731	-581.785	60128.3	64358.2	-2357.25	310.622	799.649	0	0	0	0	0	0	0	603	903	0
501	2	0	0	0	0	0	0	200	300	0	32.4753	-62.1947	-580.564	60311.4	64114	-2494.58	310.434	799.116	0	0	0	0	0	0	0	603	903	0
501	3	0	0	0	0	0	0	200	300	0	32.3227	-63.4154	-581.48	61043.8	64358.2	-2174.15	310.68	798.02	0	0	0	0	0	0	0	603	903	0
501	4	0	0	0	0	0	0	200	300	0	32.933	-62.4998	-582.09	60586	64419.2	-2174.15	310.669	798.916	0	0	0	0	0	0	0	603	903	0
501	5	0	0	0	0	0	0	200	300	0	31.7123	-61.7369	-583.311	61226.9	64785.4	-2357.25	311.065	798.036	0	0	0	0	0	0	0	603	903	0
501	6	0	0	0	0	0	0	200	300	0	33.3908	-61.1266	-583.921	60952.2	64846.4	-1945.27	311.053	798.616	0	0	0	0	0	0	0	603	903	0
501	7	0	0	0	0	0	0	200	300	0	31.7123	-61.5843	-584.531	61043.8	64480.2	-2036.82	310.311	798.568	0	0	0	0	0	0	0	603	903	0
501	8	0	0	0	0	0	0	200	300	0	33.0856	-61.7369	-583.005	61776.2	64968.5	-1945.27	311.437	797.038	0	0	0	0	0	0	0	603	903	0
501	9	0	0	0	0	0	0	200	300	0	32.3227	-59.9058	-583.616	61410	64907.5	-1670.61	311.216	797.777	0	0	0	0	0	0	0	603	903	0
502	0	0	0	0	0	0	0	200	300	0	31.5598	-60.8214	-586.057	61043.8	64907.5	-1762.16	310.753	798.84	0	0	0	0	0	0	0	603	903	0
502	1	0	0	0	0	0	0	200	300	0	32.3227	-61.1266	-583.311	61410	64663.3	-2265.7	310.856	797.722	0	0	0	0	0	0	0	603	903	0
502	2	0	0	0	0	0	0	200	300	0	32.1701	-59.7533	-586.362	62325.6	65212.7	-1991.04	311.216	796.708	0	0	0	0	0	0	0	603	903	0
502	3	0	0	0	0	0	0	200	300	0	34.1537	-58.9903	-585.752	62417.1	65151.6	-1716.39	311.227	796.441	0	0	0	0	0	0	0	603	903	0
502	4	0	0	0	0	0	0	200	300	0	32.6279	-59.1429	-585.752	62050.9	64297.1	-2265.7	309.769	797.066	0	0	0	0	0	0	0	603	903	0
502	5	0	0	0	0	0	0	200	300	0	31.7123	-57.617	-584.226	62234	65578.9	-2036.82	312.249	796.476	0	0	0	0	0	0	0	603	903	0
502	6	0	0	0	0	0	0	200	300	0	31.4072	-57.617	-585.447	62966.4	65212.7	-1853.72	311.39	795.447	0	0	0	0	0	0	0	603	903	0
502	7	0	0	0	0	0	0	200	300	0	32.7805	-58.8377	-586.668	62783.3	64907.5	-1945.27	310.638	795.983	0	0	0	0	0	0	0	603	903	0
502	8	0	0	0	0	0	0	200	300	0	32.6279	-58.38	-585.752	62691.8	65212.7	-2174.15	311.332	795.972	0	0	0	0	0	0	0	603	903	0
502	9	0	0	0	0	0	0	200	300	0	30.9494	-57.617	-585.142	63058	64846.4	-1853.72	310.822	795.235	0	0	0	0	0	0	0	603	903	0
503	0	0	0	0	0	0	0	200	300	0	32.933	-56.5489	-584.226	62966.4	65273.7	-2265.7	311.727	795.223	0	0	0	0	0	0	0	603	903	0
503	1	0	0	0	0	0	0	200	300	0	31.102	-57.617	-585.752	63790.4	65212.7	-1899.49	311.332	794.097	0	0	0	0	0	0	0	603	903	0
503	2	0	0	0	0	0	0	200	300	0	32.6279	-56.5489	-584.836	63332.6	65701	-1716.39	312.341	794.709	0	0	0	0	0	0	0	603	903	0
503	3	0	0	0	0	0	0	200	300	0	32.3227	-56.5489	-583.311	64065	65884	-2082.6	312.948	793.17	0	0	0	0	0	0	0	603	903	0
503	4	0	0	0	0	0	0	200	300	0	31.8649	-56.5489	-579.954	63515.7	65151.6	-1670.61	312.339	793.481	0	0	0	0	0	0	0	603	903	0
503	5	0	0	0	0	0	0	200	300	0	33.696	-56.8541	-582.09	63607.3	65212.7	-1395.95	312.032	793.726	0	0	0	0	0	0	0	603	903	0
503	6	0	0	0	0	0	0	200	300	0	31.4072	-55.4808	-583.005	63424.2	65823.1	-1807.94	312.903	794.212	0	0	0	0	0	0	0	603	903	0
503	7	0	0	0	0	0	0	200	300	0	32.6279	-55.4808	-581.48	63881.9	65212.7	-1807.94	312.15	793.139	0	0	0	0	0	0	0	603	903	0
503	8	0	0	0	0	0	0	200	300	0	32.4753	-55.1756	-580.869	63149.5	65212.7	-1304.4	312.267	794.285	0	0	0	0	0	0	0	603	903	0
503	9	0	0	0	0	0	0	200	300	0	31.8649	-54.1075	-576.597	63424.2	65334.7	-1624.83	313.311	793.003	0	0	0	0	0	0	0	603	903	0
504	0	0	0	0	0	0	0	200	300	0	33.3908	-54.2601	-578.123	63698.8	65578.9	-1670.61	313.434	792.818	0	0	0	0	0	0	0	603	903	0
504	1	0	0	0	0	0	0	200	300	0	32.933	-53.6497	-578.428	63241.1	64602.3	-1304.4	311.686	793.667	0	0	0	0	0	0	0	603	903	0
504	2	0	0	0	0	0	0	200	300	0	32.933	-53.9549	-577.817	63790.4	65273.7	-1350.18	312.966	792.601	0	0	0	0	0	0	0	603	903	0
504	3	0	0	0	0	0	0	200	300	0	32.933	-52.1239	-574.766	63058	65334.7	-1258.62	313.672	793.289	0	0	0	0	0	0	0	603	903	0
504	4	0	0	0	0	0	0	200	300	0	31.5598	-52.2765	-574.766	63790.4	64907.5	-1212.85	312.929	792.015	0	0	0	0	0	0	0	603	903	0
504	5	0	0	0	0	0	0	200	300	0	34.4589	-51.6661	-573.24	63607.3	64846.4	-1167.07	313.123	792.039	0	0	0	0	0	0	0	603	903	0
504	6	0	0	0	0	0	0	200	300	0	32.4753	-50.598	-573.24	63698.8	64297.1	-1258.62	312.164	791.879	0	0	0	0	0	0	0	603	903	0
504	7	0	0	0	0	0	0	200	300	0	32.933	-50.2928	-570.188	63973.5	64724.4	-938.187	313.514	790.803	0	0	0	0	0	0	0	603	903	0
504	8	0	0	0	0	0	0	200	300	0	33.8486	-50.598	-570.798	64431.2	64419.2	-1121.29	312.858	790.121	0	0	0	0	0	0	0	603	903	0
504	9	0	0	0	0	0	0	200	300	0	32.6279	-50.4454	-568.357	63698.8	64907.5	-1075.52	314.202	790.925	0	0	0	0	0	0	0	603	903	0
505	0	0	0	0	0	0	0	200	300	0	34.1537	-48.004	-567.747	63515.7	64602.3	-846.635	313.787	791.127	0	0	0	0	0	0	0	603	903	0
505	1	0	0	0	0	0	0	200	300	0	32.6279	-49.2247	-566.526	63881.9	64297.1	-755.082	313.494	790.239	0	0	0	0	0	0	0	603	903	0
505	2	0	0	0	0	0	0	200	300	0	33.2382	-48.1566	-564.39	63698.8	64236.1	-938.187	313.815	790.137	0	0	0	0	0	0	0	603	903	0
505	3	0	0	0	0	0	0	200	300	0	32.3227	-48.004	-563.474	63424.2	64297.1	-617.753	314.108	790.441	0	0	0	0	0	0	0	603	903	0
505	4	0	0	0	0	0	0	200	300	0	32.1701	-47.3936	-560.117	63515.7	64419.2	-846.635	315.01	789.603	0	0	0	0	0	0	0	603	903	0
505	5	0	0	0	0	0	0	200	300	0	31.8649	-47.2411	-558.897	63607.3	63747.8	-938.187	314.06	789.191	0	0	0	0	0	0	0	603	903	0
505	6	0	0	0	0	0	0	200	300	0	32.7805	-47.5462	-557.065	63515.7	64053	-571.976	314.983	788.982	0	0	0	0	0	0	0	603	903	0
505	7	0	0	0	0	0	0	200	300	0	32.4753	-45.5626	-557.065	64065	63808.9	-800.858	314.545	787.996	0	0	0	0	0	0	0	603	903	0
505	8	0	0	0	0	0	0	200	300	0	31.2546	-45.7152	-556.455	63241.1	63503.7	-709.306	314.122	789.35	0	0	0	0	0	0	0	603	903	0
505	9	0	0	0	0	0	0	200	300	0	31.7123	-45.5626	-552.183	63424.2	63381.6	-388.871	314.784	788.139	0	0	0	0	0	0	0	603	903	0
506	0	0	0	0	0	0	0	200	300	0	32.4753	-45.5626	-551.878	63515.7	63442.6	-526.2	314.958	787.91	0	0	0	0	0	0	0	603	903	0
506	1	0	0	0	0	0	0	200	300	0	34.7641	-44.0367	-548.826	62783.3	63137.5	-480.423	315.041	788.604	0	0	0	0	0	0	0	603	903	0
506	2	0	0	0	0	0	0	200	300	0	31.7123	-44.1893	-549.131	62691.8	63076.4	-343.094	314.866	788.835	0	0	0	0	0	0	0	603	903	0
506	3	0	0	0	0	0	0	200	300	0	32.0175	-43.5789	-542.417	62417.1	63198.5	-434.647	316.513	787.928	0	0	0	0	0	0	0	603	903	0
506	4	0	0	0	0	0	0	200	300	0	31.7123	-43.7315	-544.248	63058	62893.3	-297.318	315.56	787.138	0	0	0	0	0	0	0	603	903	0
506	5	0	0	0	0	0	0	200	300	0	32.3227	-43.4264	-541.502	62966.4	62649.2	-68.436	315.695	786.719	0	0	0	0	0	0	0	603	903	0
506	6	0	0	0	0	0	0	200	300	0	33.2382	-42.816	-540.586	62417.1	62221.9	-343.094	315.101	787.538	0	0	0	0	0	0	0	603	903	0
506	7	0	0	0	0	0	0	200	300	0	32.4753	-42.0531	-537.534	62508.7	62405	-205.765	316.095	786.712	0	0	0	0	0	0	0	603	903	0
506	8	0	0	0	0	0	0	200	300	0	31.4072	-41.7479	-538.145	62050.9	61855.7	23.1167	314.943	787.695	0	0	0	0	0	0	0	603	903	0
506	9	0	0	0	0	0	0	200	300	0	30.7968	-41.7479	-536.619	62783.3	61977.8	23.1167	315.497	786.002	0	0	0	0	0	0	0	603	903	0
507	0	0	0	0	0	0	0	200	300	0	32.0175	-40.985	-533.567	62600.2	62038.8	23.1167	316.272	785.676	0	0	0	0	0	0	0	603	903	0
507	1	0	0	0	0	0	0	200	300	0	33.3908	-41.5953	-532.041	62691.8	61855.7	160.446	316.261	785.167	0	0	0	0	0	0	0	603	903	0
507	2	0	0	0	0	0	0	200	300	0	31.4072	-40.0694	-530.21	61776.2	61367.4	251.999	315.742	786.487	0	0	0	0	0	0	0	603	903	0
507	3	0	0	0	0	0	0	200	300	0	30.3391	-39.6117	-529.6	61501.6	61489.5	-68.436	316.106	786.872	0	0	0	0	0	0	0	603	903	0
507	4	0	0	0	0	0	0	200	300	0	29.5761	-38.2384	-526.243	61959.3	61428.5	160.446	316.73	785.261	0	0	0	0	0	0	0	603	903	0
507	5	0	0	0	0	0	0	200	300	0	30.7968	-39.4591	-525.327	61684.7	60451.9	-22.6596	315.075	785.579	0	0	0	0	0	0	0	603	903	0
507	6	0	0	0	0	0	0	200	300	0	30.4916	-38.8487	-521.97	61501.6	60818.1	-159.989	316.516	785.174	0	0	0	0	0	0	0	603	903	0
507	7	0	0	0	0	0	0	200	300	0	29.2709	-38.2384	-519.834	61410	60390.9	-114.212	316.173	784.866	0	0	0	0	0	0	0	603	903	0
507	8	0	0	0	0	0	0	200	300	0	28.8132	-38.0858	-518.613	61226.9	60390.9	160.446	316.447	784.941	0	0	0	0	0	0	0	603	903	0
507	9	0	0	0	0	0	0	200	300	0	30.6442	-37.4754	-517.087	62050.9	60146.7	-205.765	316.318	782.999	0	0	0	0	0	0	0	603	903	0
508	0	0	0	0	0	0	0	200	300	0	31.5598	-37.4754	-515.256	61959.3	60329.8	160.446	317.087	782.751	0	0	0	0	0	0	0	603	903	0
508	1	0	0	0	0	0	0	200	300	0	30.9494	-37.0177	-512.51	61043.8	60207.8	23.1167	317.476	783.892	0	0	0	0	0	0	0	603	903	0
508	2	0	0	0	0	0	0	200	300	0	28.508	-36.7125	-508.848	61226.9	59597.4	-114.212	317.122	782.675	0	0	0	0	0	0	0	603	903	0
508	3	0	0	0	0	0	0	200	300	0	28.2028	-36.8651	-508.848	60402.9	60207.8	114.67	318.322	784.295	0	0	0	0	0	0	0	603	903	0
508	4	0	0	0	0	0	0	200	300	0	29.2709	-35.3392	-508.237	61776.2	59780.5	23.1167	317.623	781.45	0	0	0	0	0	0	0	603	903	0
508	5	0	0	0	0	0	0	200	300	0	31.102	-35.4918	-506.712	61135.3	59475.4	343.551	317.375	782.349	0	0	0	0	0	0	0	603	903	0
508	6	0	0	0	0	0	0	200	300	0	29.2709	-35.797	-503.355	60586	59170.2	-68.436	317.552	782.635	0	0	0	0	0	0	0	603	903	0
508	7	0	0	0	0	0	0	200	300	0	27.8976	-35.1866	-502.134	60586	59475.4	297.775	318.445	782.343	0	0	0	0	0	0	0	603	903	0
508	8	0	0	0	0	0	0	200	300	0	28.0502	-34.1185	-499.998	60769.1	59658.5	206.222	319.318	781.461	0	0	0	0	0	0	0	603	903	0
508	9	0	0	0	0	0	0	200	300	0	28.3554	-33.8133	-499.998	60036.7	58742.9	251.999	317.486	782.926	0	0	0	0	0	0	0	603	903	0
509	0	0	0	0	0	0	0	200	300	0	28.8132	-33.0504	-499.082	60402.9	58865	343.551	317.947	781.972	0	0	0	0	0	0	0	603	903	0
509	1	0	0	0	0	0	0	200	300	0	28.8132	-34.1185	-497.556	60311.4	58865	389.328	318.308	781.785	0	0	0	0	0	0	0	603	903	0
509	2	0	0	0	0	0	0	200	300	0	29.1183	-33.203	-494.199	60219.8	58437.8	526.657	318.247	781.147	0	0	0	0	0	0	0	603	903	0
509	3	0	0	0	0	0	0	200	300	0	26.9821	-31.9823	-489.011	60311.4	58315.7	755.539	319.252	779.667	0	0	0	0	0	0	0	603	903	0
509	4	0	0	0	0	0	0	200	300	0	28.2028	-32.7452	-490.537	60494.5	58315.7	618.209	318.881	779.677	0	0	0	0	0	0	0	603	903	0
509	5	0	0	0	0	0	0	200	300	0	28.3554	-31.8297	-490.232	59945.2	57827.4	892.868	317.959	780.721	0	0	0	0	0	0	0	603	903	0
509	6	0	0	0	0	0	0	200	300	0	26.5244	-31.8297	-490.232	60128.3	57827.4	892.868	317.959	780.347	0	0	0	0	0	0	0	603	903	0
509	7	0	0	0	0	0	0	200	300	0	27.4399	-31.0667	-485.96	59670.5	58071.5	892.868	319.499	780.211	0	0	0	0	0	0	0	603	903	0
509	8	0	0	0	0	0	0	200	300	0	27.5925	-30.7616	-485.349	60586	57766.4	755.539	319.02	778.17	0	0	0	0	0	0	0	603	903	0
509	9	0	0	0	0	0	0	200	300	0	29.7287	-30.1512	-482.297	60311.4	57217.1	938.644	318.634	777.95	0	0	0	0	0	0	0	603	903	0
510	0	0	0	0	0	0	0	200	300	0	27.7451	-29.5409	-481.687	59487.4	57461.2	801.315	319.292	779.502	0	0	0	0	0	0	0	603	903	0
510	1	0	0	0	0	0	0	200	300	0	26.8295	-29.2357	-480.772	59670.5	57522.2	984.421	319.646	778.886	0	0	0	0	0	0	0	603	903	0
510	2	0	0	0	0	0	0	200	300	0	26.8295	-29.5409	-479.551	60311.4	56728.8	984.421	318.296	777.234	0	0	0	0	0	0	0	603	903	0
510	3	0	0	0	0	0	0	200	300	0	27.8976	-28.9305	-477.415	60036.7	56850.8	984.421	319.081	777.246	0	0	0	0	0	0	0	603	903	0
510	4	0	0	0	0	0	0	200	300	0	26.8295	-29.0831	-475.584	60128.3	56972.9	984.421	319.796	776.569	0	0	0	0	0	0	0	603	903	0
510	5	0	0	0	0	0	0	200	300	0	26.6769	-28.015	-474.973	59762.1	56728.8	938.644	319.436	777.178	0	0	0	0	0	0	0	603	903	0
510	6	0	0	0	0	0	0	200	300	0	28.508	-27.5572	-473.753	59670.5	56667.7	801.315	319.615	777.047	0	0	0	0	0	0	0	603	903	0
510	7	0	0	0	0	0	0	200	300	0	26.3718	-27.5572	-472.837	60311.4	56850.8	984.421	320.233	775.448	0	0	0	0	0	0	0	603	903	0
510	8	0	0	0	0	0	0	200	300	0	29.5761	-28.015	-471.311	59853.6	56667.7	1121.75	320.234	776.006	0	0	0	0	0	0	0	603	903	0
510	9	0	0	0	0	0	0	200	300	0	27.5925	-26.9469	-469.175	59579	56423.6	1030.2	320.261	776.013	0	0	0	0	0	0	0	603	903	0
511	0	0	0	0	0	0	0	200	300	0	26.6769	-26.0313	-466.733	59670.5	56728.8	1167.53	321.544	775.153	0	0	0	0	0	0	0	603	903	0
511	1	0	0	0	0	0	0	200	300	0	26.3718	-25.1158	-464.902	59762.1	56484.6	1213.3	321.498	774.453	0	0	0	0	0	0	0	603	903	0
511	2	0	0	0	0	0	0	200	300	0	26.9821	-24.9632	-466.428	59945.2	56362.6	1167.53	320.839	774.48	0	0	0	0	0	0	0	603	903	0
511	3	0	0	0	0	0	0	200	300	0	27.2873	-25.2684	-464.292	59579	56118.4	1167.53	320.869	774.678	0	0	0	0	0	0	0	603	903	0
511	4	0	0	0	0	0	0	200	300	0	26.5244	-24.9632	-464.902	59121.2	56179.5	1487.96	320.841	775.831	0	0	0	0	0	0	0	603	903	0
511	5	0	0	0	0	0	0	200	300	0	26.5244	-24.658	-461.546	59212.8	55874.3	1396.41	321.059	774.708	0	0	0	0	0	0	0	603	903	0
511	6	0	0	0	0	0	0	200	300	0	26.9821	-24.3529	-460.935	59945.2	55691.2	1030.2	320.822	772.949	0	0	0	0	0	0	0	603	903	0
511	7	0	0	0	0	0	0	200	300	0	29.7287	-23.8951	-461.851	59670.5	55996.4	1487.96	321.243	773.801	0	0	0	0	0	0	0	603	903	0
511	8	0	0	0	0	0	0	200	300	0	27.1347	-23.8951	-460.02	59670.5	56057.4	1487.96	321.859	773.287	0	0	0	0	0	0	0	603	903	0
511	9	0	0	0	0	0	0	200	300	0	26.2192	-23.5899	-459.714	59487.4	55691.2	1716.84	321.143	773.599	0	0	0	0	0	0	0	603	903	0
512	0	0	0	0	0	0	0	200	300	0	26.2192	-23.2848	-458.494	59762.1	55569.1	1579.51	321.199	772.656	0	0	0	0	0	0	0	603	903	0
512	1	0	0	0	0	0	0	200	300	0	28.0502	-22.0641	-454.526	59395.9	54897.7	1625.29	320.78	772.324	0	0	0	0	0	0	0	603	903	0
512	2	0	0	0	0	0	0	200	300	0	27.7451	-21.9115	-456.358	59945.2	55447	1442.18	321.499	771.644	0	0	0	0	0	0	0	603	903	0
512	3	0	0	0	0	0	0	200	300	0	26.2192	-22.0641	-459.409	59304.3	55263.9	1808.4	320.293	773.912	0	0	0	0	0	0	0	603	903	0
512	4	0	0	0	0	0	0	200	300	0	27.5925	-22.2166	-456.358	59487.4	55630.1	1487.96	321.9	772.647	0	0	0	0	0	0	0	603	903	0
512	5	0	0	0	0	0	0	200	300	0	26.0666	-21.6063	-456.358	60219.8	55691.2	1716.84	322.034	771.043	0	0	0	0	0	0	0	603	903	0
512	6	0	0	0	0	0	0	200	300	0	27.7451	-20.8433	-454.832	60402.9	54958.8	1854.17	320.833	770.197	0	0	0	0	0	0	0	603	903	0
512	7	0	0	0	0	0	0	200	300	0	27.1347	-20.233	-453.611	60128.3	55325	1854.17	321.966	770.445	0	0	0	0	0	0	0	603	903	0
512	8	0	0	0	0	0	0	200	300	0	25.7614	-19.7752	-454.221	59853.6	55386	1579.51	321.936	771.228	0	0	0	0	0	0	0	603	903	0
512	9	0	0	0	0	0	0	200	300	0	26.5244	-19.6226	-449.644	59762.1	54836.7	1808.4	321.956	770.09	0	0	0	0	0	0	0	603	903	0
513	0	0	0	0	0	0	0	200	300	0	26.5244	-19.9278	-453.001	60402.9	54897.7	1762.62	321.187	769.66	0	0	0	0	0	0	0	603	903	0
513	1	0	0	0	0	0	0	200	300	0	27.2873	-18.7071	-452.085	60402.9	55202.9	1716.84	322.107	769.39	0	0	0	0	0	0	0	603	903	0
513	2	0	0	0	0	0	0	200	300	0	28.8132	-18.4019	-451.17	60311.4	55263.9	1991.5	322.49	769.322	0	0	0	0	0	0	0	603	903	0
513	3	0	0	0	0	0	0	200	300	0	27.7451	-17.639	-451.475	59853.6	54409.4	1945.72	320.515	770.427	0	0	0	0	0	0	0	603	903	0
513	4	0	0	0	0	0	0	200	300	0	25.7614	-16.8761	-449.949	60402.9	55447	1945.72	323.23	768.756	0	0	0	0	0	0	0	603	903	0
513	5	0	0	0	0	0	0	200	300	0	26.5244	-17.1812	-451.17	59853.6	55263.9	2220.38	322.49	770.337	0	0	0	0	0	0	0	603	903	0
513	6	0	0	0	0	0	0	200	300	0	28.8132	-17.3338	-449.644	60860.7	55019.8	1854.17	322.363	767.647	0	0	0	0	0	0	0	603	903	0
513	7	0	0	0	0	0	0	200	300	0	27.1347	-16.4183	-448.728	61318.4	55080.8	2220.38	322.749	766.351	0	0	0	0	0	0	0	603	903	0
513	8	0	0	0	0	0	0	200	300	0	27.4399	-16.4183	-449.338	60311.4	54531.5	2311.94	321.36	768.777	0	0	0	0	0	0	0	603	903	0
513	9	0	0	0	0	0	0	200	300	0	25.914	-15.8079	-450.254	60860.7	55202.9	2174.61	322.604	767.83	0	0	0	0	0	0	0	603	903	0
514	0	0	0	0	0	0	0	200	300	0	27.5925	-15.5028	-449.338	60677.6	55019.8	2266.16	322.446	767.962	0	0	0	0	0	0	0	603	903	0
514	1	0	0	0	0	0	0	200	300	0	26.2192	-15.1976	-446.287	61318.4	55691.2	2311.94	324.788	765.603	0	0	0	0	0	0	0	603	903	0
514	2	0	0	0	0	0	0	200	300	0	26.8295	-14.1295	-448.728	60494.5	55508.1	2266.16	323.701	768.187	0	0	0	0	0	0	0	603	903	0
514	3	0	0	0	0	0	0	200	300	0	26.6769	-13.9769	-449.644	61043.8	55263.9	2266.16	322.906	767.24	0	0	0	0	0	0	0	603	903	0
514	4	0	0	0	0	0	0	200	300	0	27.7451	-12.451	-449.949	60860.7	55691.2	2632.37	323.772	767.739	0	0	0	0	0	0	0	603	903	0
514	5	0	0	0	0	0	0	200	300	0	25.7614	-13.5191	-450.559	61043.8	55630.1	2540.82	323.469	767.516	0	0	0	0	0	0	0	603	903	0
514	6	0	0	0	0	0	0	200	300	0	25.914	-12.9088	-450.864	61959.3	55386	2586.59	322.844	765.577	0	0	0	0	0	0	0	603	903	0
514	7	0	0	0	0	0	0	200	300	0	26.8295	-13.214	-449.949	60769.1	55263.9	2586.59	322.823	767.942	0	0	0	0	0	0	0	603	903	0
514	8	0	0	0	0	0	0	200	300	0	26.9821	-13.0614	-448.728	62325.6	55508.1	2586.59	323.701	764.106	0	0	0	0	0	0	0	603	903	0
514	9	0	0	0	0	0	0	200	300	0	26.0666	-11.6881	-449.338	61959.3	55325	2632.37	323.125	765.11	0	0	0	0	0	0	0	603	903	0
515	0	0	0	0	0	0	0	200	300	0	27.7451	-11.5355	-450.864	61959.3	55386	3090.13	322.844	765.577	0	0	0	0	0	0	0	603	903	0
515	1	0	0	0	0	0	0	200	300	0	26.2192	-11.3829	-450.559	62325.6	56118.4	2769.7	324.553	764.671	0	0	0	0	0	0	0	603	903	0
515	2	0	0	0	0	0	0	200	300	0	26.5244	-10.9251	-452.39	62691.8	55874.3	2998.58	323.509	764.421	0	0	0	0	0	0	0	603	903	0
515	3	0	0	0	0	0	0	200	300	0	27.2873	-10.3148	-450.864	63332.6	55508.1	3227.46	323.115	762.531	0	0	0	0	0	0	0	603	903	0
515	4	0	0	0	0	0	0	200	300	0	27.2873	-9.85702	-451.475	62417.1	56118.4	2907.03	324.3	764.748	0	0	0	0	0	0	0	603	903	0
515	5	0	0	0	0	0	0	200	300	0	25.914	-9.09408	-453.306	62691.8	56240.5	2861.25	324.068	764.701	0	0	0	0	0	0	0	603	903	0
515	6	0	0	0	0	0	0	200	300	0	25.7614	-9.24667	-453.001	63332.6	55630.1	2769.7	322.804	763.193	0	0	0	0	0	0	0	603	903	0
515	7	0	0	0	0	0	0	200	300	0	26.6769	-8.94149	-453.306	64065	56240.5	2998.58	324.068	761.672	0	0	0	0	0	0	0	603	903	0
515	8	0	0	0	0	0	0	200	300	0	29.1183	-7.87338	-452.695	63607.3	56057.4	2907.03	323.83	762.492	0	0	0	0	0	0	0	603	903	0
515	9	0	0	0	0	0	0	200	300	0	26.8295	-8.17855	-453.611	63424.2	56118.4	3135.91	323.715	763.179	0	0	0	0	0	0	0	603	903	0
516	0	0	0	0	0	0	0	200	300	0	25.4562	-8.33114	-452.085	63881.9	56057.4	3319.02	323.997	761.695	0	0	0	0	0	0	0	603	903	0
516	1	0	0	0	0	0	0	200	300	0	24.6933	-7.41561	-455.137	64614.3	56606.7	3273.24	324.373	761.033	0	0	0	0	0	0	0	603	903	0
516	2	0	0	0	0	0	0	200	300	0	26.5244	-7.41561	-455.137	63515.7	56362.6	3273.24	323.837	763.447	0	0	0	0	0	0	0	603	903	0
516	3	0	0	0	0	0	0	200	300	0	26.0666	-7.41561	-454.221	65346.8	56484.6	3044.36	324.355	759.135	0	0	0	0	0	0	0	603	903	0
516	4	0	0	0	0	0	0	200	300	0	25.4562	-8.48373	-452.39	64889	56728.8	3135.91	325.398	759.564	0	0	0	0	0	0	0	603	903	0
516	5	0	0	0	0	0	0	200	300	0	27.1347	-6.50009	-454.832	64614.3	56728.8	3319.02	324.725	760.938	0	0	0	0	0	0	0	603	903	0
516	6	0	0	0	0	0	0	200	300	0	25.1511	-6.19491	-456.663	65438.3	56789.8	3547.9	324.358	759.703	0	0	0	0	0	0	0	603	903	0
516	7	0	0	0	0	0	0	200	300	0	26.5244	-6.65268	-456.968	65713	56484.6	3273.24	323.607	759.198	0	0	0	0	0	0	0	603	903	0
516	8	0	0	0	0	0	0	200	300	0	26.0666	-7.11044	-457.273	65163.7	56972.9	3456.34	324.593	760.495	0	0	0	0	0	0	0	603	903	0
516	9	0	0	0	0	0	0	200	300	0	25.1511	-6.19491	-456.358	64797.5	56728.8	3547.9	324.308	761.012	0	0	0	0	0	0	0	603	903	0
517	0	0	0	0	0	0	0	200	300	0	24.9985	-6.50009	-457.273	65529.9	56911.9	3502.12	324.459	759.694	0	0	0	0	0	0	0	603	903	0
517	1	0	0	0	0	0	0	200	300	0	26.6769	-5.88974	-458.494	66262.3	57522.2	3731	325.459	758.478	0	0	0	0	0	0	0	603	903	0
517	2	0	0	0	0	0	0	200	300	0	27.8976	-6.3475	-458.799	66445.5	57400.2	3959.88	325.11	758.175	0	0	0	0	0	0	0	603	903	0
517	3	0	0	0	0	0	0	200	300	0	26.2192	-5.73715	-460.02	66262.3	56606.7	3685.23	323.053	758.958	0	0	0	0	0	0	0	603	903	0
517	4	0	0	0	0	0	0	200	300	0	25.6088	-5.88974	-459.714	66079.2	57461.2	3593.67	324.993	759.26	0	0	0	0	0	0	0	603	903	0
517	5	0	0	0	0	0	0	200	300	0	25.1511	-5.73715	-460.02	67177.9	57888.4	3639.45	325.839	756.967	0	0	0	0	0	0	0	603	903	0
517	6	0	0	0	0	0	0	200	300	0	26.5244	-6.50009	-460.63	66628.5	57400.2	3456.34	324.612	758.354	0	0	0	0	0	0	0	603	903	0
517	7	0	0	0	0	0	0	200	300	0	26.0666	-5.43197	-462.461	67269.4	57400.2	3959.88	324.119	757.54	0	0	0	0	0	0	0	603	903	0
517	8	0	0	0	0	0	0	200	300	0	25.7614	-5.58456	-460.935	66903.2	57705.3	3822.56	325.192	757.853	0	0	0	0	0	0	0	603	903	0
517	9	0	0	0	0	0	0	200	300	0	26.5244	-4.97421	-461.851	67452.5	57644.3	3822.56	324.812	756.952	0	0	0	0	0	0	0	603	903	0
518	0	0	0	0	0	0	0	200	300	0	25.6088	-5.1268	-460.935	67910.3	57400.2	3731	324.53	755.669	0	0	0	0	0	0	0	603	903	0
518	1	0	0	0	0	0	0	200	300	0	25.914	-4.82162	-462.461	68368	57949.5	3685.23	325.307	755.165	0	0	0	0	0	0	0	603	903	0
518	2	0	0	0	0	0	0	200	300	0	25.7614	-4.05868	-464.902	68276.5	58315.7	3959.88	325.436	756.138	0	0	0	0	0	0	0	603	903	0
518	3	0	0	0	0	0	0	200	300	0	25.1511	-4.82162	-463.987	68276.5	57644.3	4051.44	324.237	755.848	0	0	0	0	0	0	0	603	903	0
518	4	0	0	0	0	0	0	200	300	0	26.6769	-4.21127	-465.513	68642.7	58071.5	4051.44	324.747	755.544	0	0	0	0	0	0	0	603	903	0
518	5	0	0	0	0	0	0	200	300	0	23.7778	-3.90609	-464.902	69192	57949.5	3868.33	324.649	754.169	0	0	0	0	0	0	0	603	903	0
518	6	0	0	0	0	0	0	200	300	0	24.9985	-4.05868	-465.208	69100.4	58193.6	4188.77	325.092	754.463	0	0	0	0	0	0	0	603	903	0
518	7	0	0	0	0	0	0	200	300	0	25.6088	-4.82162	-465.208	69466.6	58254.7	3914.11	325.223	753.676	0	0	0	0	0	0	0	603	903	0
518	8	0	0	0	0	0	0	200	300	0	23.7778	-3.90609	-467.039	69466.6	58437.8	3959.88	325.124	754.261	0	0	0	0	0	0	0	603	903	0
518	9	0	0	0	0	0	0	200	300	0	24.5407	-4.21127	-468.565	69558.2	58681.9	4005.66	325.238	754.55	0	0	0	0	0	0	0	603	903	0
519	0	0	0	0	0	0	0	200	300	0	24.6933	-3.90609	-467.039	70565.3	58437.8	3914.11	325.124	751.909	0	0	0	0	0	0	0	603	903	0
519	1	0	0	0	0	0	0	200	300	0	27.1347	-5.1268	-468.87	71114.6	58498.8	4051.44	324.766	751.328	0	0	0	0	0	0	0	603	903	0
519	2	0	0	0	0	0	0	200	300	0	25.1511	-3.44833	-469.175	70473.8	58742.9	4005.66	325.205	752.792	0	0	0	0	0	0	0	603	903	0
519	3	0	0	0	0	0	0	200	300	0	23.9304	-3.44833	-470.09	70748.4	59597.4	4051.44	326.779	752.501	0	0	0	0	0	0	0	603	903	0
519	4	0	0	0	0	0	0	200	300	0	24.5407	-4.36386	-468.565	71389.2	58804	3914.11	325.498	750.643	0	0	0	0	0	0	0	603	903	0
519	5	0	0	0	0	0	0	200	300	0	25.1511	-4.66903	-471.921	71663.9	59475.4	4142.99	326.028	751.144	0	0	0	0	0	0	0	603	903	0
519	6	0	0	0	0	0	0	200	300	0	26.5244	-4.21127	-471.311	71389.2	59536.4	4188.77	326.321	751.531	0	0	0	0	0	0	0	603	903	0
519	7	0	0	0	0	0	0	200	300	0	24.8459	-4.05868	-472.532	71480.8	59292.2	4005.66	325.478	751.728	0	0	0	0	0	0	0	603	903	0
519	8	0	0	0	0	0	0	200	300	0	25.4562	-3.44833	-474.058	71206.2	59292.2	4188.77	325.074	752.794	0	0	0	0	0	0	0	603	903	0
519	9	0	0	0	0	0	0	200	300	0	23.9304	-3.75351	-474.973	71663.9	59658.5	4326.1	325.604	752.12	0	0	0	0	0	0	0	603	903	0
520	0	0	0	0	0	0	0	200	300	0	25.4562	-3.60092	-475.889	73037.2	60146.7	4326.1	326.388	749.525	0	0	0	0	0	0	0	603	903	0
520	1	0	0	0	0	0	0	200	300	0	26.3718	-3.44833	-475.889	72487.9	59658.5	4371.87	325.362	750.679	0	0	0	0	0	0	0	603	903	0
520	2	0	0	0	0	0	0	200	300	0	25.6088	-3.75351	-475.889	72762.5	59780.5	4509.2	325.619	750.102	0	0	0	0	0	0	0	603	903	0
520	3	0	0	0	0	0	0	200	300	0	24.2355	-4.66903	-476.499	72487.9	59597.4	4371.87	325.074	750.874	0	0	0	0	0	0	0	603	903	0
520	4	0	0	0	0	0	0	200	300	0	23.9304	-3.90609	-480.161	73678.1	59902.6	4463.43	324.755	749.556	0	0	0	0	0	0	0	603	903	0
520	5	0	0	0	0	0	0	200	300	0	25.4562	-4.05868	-480.161	73037.2	60085.7	4417.65	325.137	750.89	0	0	0	0	0	0	0	603	903	0
520	6	0	0	0	0	0	0	200	300	0	24.8459	-3.90609	-479.856	73769.7	60574	4417.65	326.234	749.267	0	0	0	0	0	0	0	603	903	0
520	7	0	0	0	0	0	0	200	300	0	23.9304	-3.60092	-480.466	74135.9	60207.8	4509.2	325.311	748.7	0	0	0	0	0	0	0	603	903	0
520	8	0	0	0	0	0	0	200	300	0	23.9304	-4.05868	-480.161	74227.4	60574	4692.31	326.153	748.412	0	0	0	0	0	0	0	603	903	0
520	9	0	0	0	0	0	0	200	300	0	24.5407	-2.68539	-483.213	75051.4	60513	4142.99	325.23	747.683	0	0	0	0	0	0	0	603	903	0
521	0	0	0	0	0	0	0	200	300	0	26.6769	-3.60092	-484.739	75142.9	60940.2	4417.65	325.718	747.983	0	0	0	0	0	0	0	603	903	0
521	1	0	0	0	0	0	0	200	300	0	24.5407	-4.05868	-485.349	74868.3	60879.2	4600.76	325.434	748.743	0	0	0	0	0	0	0	603	903	0
521	2	0	0	0	0	0	0	200	300	0	23.6252	-3.60092	-483.518	75234.5	60818.1	4280.32	325.783	747.402	0	0	0	0	0	0	0	603	903	0
521	3	0	0	0	0	0	0	200	300	0	24.0829	-3.44833	-486.875	75966.9	61428.5	4692.31	326.169	746.97	0	0	0	0	0	0	0	603	903	0
521	4	0	0	0	0	0	0	200	300	0	24.9985	-2.99057	-485.349	75875.4	61306.4	4463.43	326.314	746.669	0	0	0	0	0	0	0	603	903	0
521	5	0	0	0	0	0	0	200	300	0	24.8459	-3.44833	-487.791	75966.9	60879.2	4554.98	324.806	747.263	0	0	0	0	0	0	0	603	903	0
521	6	0	0	0	0	0	0	200	300	0	23.6252	-3.44833	-486.875	75875.4	61611.6	4417.65	326.545	747.158	0	0	0	0	0	0	0	603	903	0
521	7	0	0	0	0	0	0	200	300	0	23.7778	-2.99057	-488.096	76058.4	61794.7	4829.64	326.604	747.173	0	0	0	0	0	0	0	603	903	0
521	8	0	0	0	0	0	0	200	300	0	24.5407	-3.44833	-487.791	76790.9	61611.6	4829.64	326.307	745.574	0	0	0	0	0	0	0	603	903	0
521	9	0	0	0	0	0	0	200	300	0	24.3881	-2.99057	-491.148	76974	61672.6	4646.53	325.568	746.277	0	0	0	0	0	0	0	603	903	0
522	0	0	0	0	0	0	0	200	300	0	24.8459	-2.99057	-492.368	76974	62099.9	4783.86	326.125	746.666	0	0	0	0	0	0	0	603	903	0
522	1	0	0	0	0	0	0	200	300	0	25.4562	-3.29574	-491.758	77065.6	62344	5012.74	326.778	746.286	0	0	0	0	0	0	0	603	903	0
522	2	0	0	0	0	0	0	200	300	0	23.9304	-2.22763	-491.758	77248.6	61916.8	4921.19	325.909	745.913	0	0	0	0	0	0	0	603	903	0
522	3	0	0	0	0	0	0	200	300	0	24.5407	-3.29574	-494.199	77523.3	62283	4738.09	326.028	746.134	0	0	0	0	0	0	0	603	903	0
522	4	0	0	0	0	0	0	200	300	0	24.9985	-2.5328	-494.504	77614.8	62283	4966.97	325.95	746.045	0	0	0	0	0	0	0	603	903	0
522	5	0	0	0	0	0	0	200	300	0	24.0829	-2.07504	-495.725	77798	61977.8	4875.41	325.025	746.062	0	0	0	0	0	0	0	603	903	0
522	6	0	0	0	0	0	0	200	300	0	23.6252	-2.68539	-496.03	78164.2	62588.1	5058.52	326.178	745.421	0	0	0	0	0	0	0	603	903	0
522	7	0	0	0	0	0	0	200	300	0	25.1511	-2.22763	-496.03	77523.3	62893.3	5058.52	326.793	746.713	0	0	0	0	0	0	0	603	903	0
522	8	0	0	0	0	0	0	200	300	0	24.3881	-2.38021	-496.641	78988.1	62405	4921.19	325.654	743.955	0	0	0	0	0	0	0	603	903	0
522	9	0	0	0	0	0	0	200	300	0	25.1511	-0.549159	-498.472	78621.9	61916.8	5058.52	324.213	745.274	0	0	0	0	0	0	0	603	903	0
523	0	0	0	0	0	0	0	200	300	0	23.9304	-1.76986	-499.998	78805.1	62160.9	5058.52	324.322	745.389	0	0	0	0	0	0	0	603	903	0
523	1	0	0	0	0	0	0	200	300	0	24.3881	-1.15951	-498.777	79079.7	62527.1	5104.3	325.361	744.453	0	0	0	0	0	0	0	603	903	0
523	2	0	0	0	0	0	0	200	300	0	24.9985	-0.854335	-500.303	79720.5	62527.1	5333.18	324.979	743.655	0	0	0	0	0	0	0	603	903	0
523	3	0	0	0	0	0	0	200	300	0	25.1511	-0.549159	-500.913	79537.5	63198.5	5470.51	326.167	744.215	0	0	0	0	0	0	0	603	903	0
523	4	0	0	0	0	0	0	200	300	0	24.0829	-1.92245	-498.472	79171.3	63137.5	5150.07	326.662	744.172	0	0	0	0	0	0	0	603	903	0
523	5	0	0	0	0	0	0	200	300	0	23.9304	-1.00692	-503.355	79903.7	63015.4	5424.73	325.191	744.258	0	0	0	0	0	0	0	603	903	0
523	6	0	0	0	0	0	0	200	300	0	24.5407	-0.243984	-503.049	80178.3	63564.7	5653.61	326.359	743.615	0	0	0	0	0	0	0	603	903	0
523	7	0	0	0	0	0	0	200	300	0	24.2355	0.671544	-503.355	81093.9	63686.8	5562.06	326.525	741.893	0	0	0	0	0	0	0	603	903	0
523	8	0	0	0	0	0	0	200	300	0	24.0829	1.73966	-503.965	80453	63259.5	5562.06	325.524	743.36	0	0	0	0	0	0	0	603	903	0
523	9	0	0	0	0	0	0	200	300	0	25.6088	0.824132	-505.796	80727.7	63503.7	5470.51	325.552	743.395	0	0	0	0	0	0	0	603	903	0
524	0	0	0	0	0	0	0	200	300	0	24.0829	0.518956	-505.796	81460.1	63930.9	5607.84	326.397	741.947	0	0	0	0	0	0	0	603	903	0
524	1	0	0	0	0	0	0	200	300	0	24.8459	0.976719	-505.491	81185.4	63930.9	5562.06	326.473	742.393	0	0	0	0	0	0	0	603	903	0
524	2	0	0	0	0	0	0	200	300	0	25.3036	2.04483	-506.712	81093.9	63381.6	5745.17	325.084	742.961	0	0	0	0	0	0	0	603	903	0
524	3	0	0	0	0	0	0	200	300	0	24.3881	1.43448	-502.744	81460.1	64053	5607.84	327.407	740.969	0	0	0	0	0	0	0	603	903	0
524	4	0	0	0	0	0	0	200	300	0	24.2355	2.04483	-509.153	82009.4	64358.2	5928.27	326.402	741.93	0	0	0	0	0	0	0	603	903	0
524	5	0	0	0	0	0	0	200	300	0	25.1511	2.04483	-509.458	81551.6	64053	5928.27	325.728	742.925	0	0	0	0	0	0	0	603	903	0
524	6	0	0	0	0	0	0	200	300	0	25.4562	2.04483	-509.458	82558.7	64358.2	6111.38	326.327	740.948	0	0	0	0	0	0	0	603	903	0
524	7	0	0	0	0	0	0	200	300	0	26.2192	3.7233	-506.712	81734.8	64358.2	6065.6	327.012	741.696	0	0	0	0	0	0	0	603	903	0
524	8	0	0	0	0	0	0	200	300	0	26.3718	2.96036	-511.289	82284	64236.1	6294.48	325.636	742.066	0	0	0	0	0	0	0	603	903	0
524	9	0	0	0	0	0	0	200	300	0	25.6088	3.41813	-511.9	82741.8	64419.2	6386.03	325.843	741.363	0	0	0	0	0	0	0	603	903	0
525	0	0	0	0	0	0	0	200	300	0	25.4562	2.80777	-513.425	83199.6	64785.4	6157.15	326.183	740.952	0	0	0	0	0	0	0	603	903	0
525	1	0	0	0	0	0	0	200	300	0	26.2192	2.96036	-516.172	83016.4	65151.6	6386.03	326.221	742.169	0	0	0	0	0	0	0	603	903	0
525	2	0	0	0	0	0	0	200	300	0	24.8459	4.33365	-513.731	82924.9	64602.3	6157.15	325.751	741.583	0	0	0	0	0	0	0	603	903	0
525	3	0	0	0	0	0	0	200	300	0	24.9985	4.944	-515.256	83474.2	64907.5	6477.59	325.971	740.995	0	0	0	0	0	0	0	603	903	0
525	4	0	0	0	0	0	0	200	300	0	26.3718	4.944	-514.646	83840.4	64907.5	6386.03	326.121	740.091	0	0	0	0	0	0	0	603	903	0
525	5	0	0	0	0	0	0	200	300	0	26.0666	4.33365	-514.951	84298.2	64968.5	6340.26	326.164	739.299	0	0	0	0	0	0	0	603	903	0
525	6	0	0	0	0	0	0	200	300	0	25.7614	5.55436	-517.087	84115.1	65090.6	5974.05	325.879	740.329	0	0	0	0	0	0	0	603	903	0
525	7	0	0	0	0	0	0	200	300	0	25.6088	5.70694	-517.698	84023.6	65395.8	6660.69	326.32	740.698	0	0	0	0	0	0	0	603	903	0
525	8	0	0	0	0	0	0	200	300	0	25.4562	6.46988	-518.003	84664.4	65090.6	6614.92	325.657	739.556	0	0	0	0	0	0	0	603	903	0
525	9	0	0	0	0	0	0	200	300	0	25.914	6.77506	-520.139	85396.9	64968.5	6706.47	324.906	738.819	0	0	0	0	0	0	0	603	903	0
526	0	0	0	0	0	0	0	200	300	0	26.0666	6.46988	-521.055	84939.1	65273.7	6889.57	325.272	739.986	0	0	0	0	0	0	0	603	903	0
526	1	0	0	0	0	0	0	200	300	0	25.1511	6.46988	-520.75	84389.8	65212.7	6569.14	325.228	740.946	0	0	0	0	0	0	0	603	903	0
526	2	0	0	0	0	0	0	200	300	0	25.3036	6.77506	-520.444	85030.7	65578.9	7164.23	326.006	739.619	0	0	0	0	0	0	0	603	903	0
526	3	0	0	0	0	0	0	200	300	0	26.5244	7.84317	-520.75	86220.8	66006.1	6889.57	326.752	737.429	0	0	0	0	0	0	0	603	903	0
526	4	0	0	0	0	0	0	200	300	0	27.8976	6.92765	-522.581	86037.7	66311.3	6981.13	326.892	738.36	0	0	0	0	0	0	0	603	903	0
526	5	0	0	0	0	0	0	200	300	0	26.3718	8.14835	-523.801	85671.5	65334.7	6935.35	324.732	739.443	0	0	0	0	0	0	0	603	903	0
526	6	0	0	0	0	0	0	200	300	0	25.914	7.99576	-524.717	85763.1	66372.3	7118.46	326.492	739.554	0	0	0	0	0	0	0	603	903	0
526	7	0	0	0	0	0	0	200	300	0	26.2192	7.08024	-522.581	86587.1	66311.3	7118.46	326.892	737.309	0	0	0	0	0	0	0	603	903	0
526	8	0	0	0	0	0	0	200	300	0	27.2873	9.21647	-524.107	86495.5	66067.2	7164.23	326.057	737.966	0	0	0	0	0	0	0	603	903	0
526	9	0	0	0	0	0	0	200	300	0	27.2873	9.67423	-525.022	87044.8	66250.3	7393.11	326.186	737.207	0	0	0	0	0	0	0	603	903	0
527	0	0	0	0	0	0	0	200	300	0	26.2192	9.21647	-526.548	86495.5	66555.5	7393.11	326.4	738.731	0	0	0	0	0	0	0	603	903	0
527	1	0	0	0	0	0	0	200	300	0	28.508	9.97941	-527.158	86678.6	66677.6	7576.22	326.485	738.574	0	0	0	0	0	0	0	603	903	0
527	2	0	0	0	0	0	0	200	300	0	26.5244	9.67423	-527.769	86770.1	66372.3	7667.77	325.76	738.591	0	0	0	0	0	0	0	603	903	0
527	3	0	0	0	0	0	0	200	300	0	27.1347	9.97941	-527.463	87319.5	67165.8	7713.55	327.337	737.454	0	0	0	0	0	0	0	603	903	0
527	4	0	0	0	0	0	0	200	300	0	27.5925	9.97941	-528.074	86953.3	66799.6	7713.55	326.497	738.339	0	0	0	0	0	0	0	603	903	0
527	5	0	0	0	0	0	0	200	300	0	26.6769	10.7423	-528.989	87136.3	66372.3	7942.43	325.47	738.278	0	0	0	0	0	0	0	603	903	0
527	6	0	0	0	0	0	0	200	300	0	27.2873	11.5053	-529.905	87777.2	66982.7	7850.88	326.405	737.353	0	0	0	0	0	0	0	603	903	0
527	7	0	0	0	0	0	0	200	300	0	27.5925	11.5053	-531.431	87960.3	67104.8	7942.43	326.272	737.484	0	0	0	0	0	0	0	603	903	0
527	8	0	0	0	0	0	0	200	300	0	28.3554	11.5053	-530.515	87777.2	66738.5	8079.76	325.8	737.544	0	0	0	0	0	0	0	603	903	0
527	9	0	0	0	0	0	0	200	300	0	27.1347	12.2682	-530.21	87868.7	66738.5	8033.99	325.872	737.276	0	0	0	0	0	0	0	603	903	0
528	0	0	0	0	0	0	0	200	300	0	26.9821	12.8786	-530.21	88235	66860.6	8079.76	326.102	736.585	0	0	0	0	0	0	0	603	903	0
528	1	0	0	0	0	0	0	200	300	0	28.2028	12.5734	-530.82	88051.9	66616.5	8171.32	325.497	737.121	0	0	0	0	0	0	0	603	903	0
528	2	0	0	0	0	0	0	200	300	0	28.2028	13.6415	-532.346	88692.8	66799.6	8400.2	325.482	736.393	0	0	0	0	0	0	0	603	903	0
528	3	0	0	0	0	0	0	200	300	0	27.5925	13.9467	-531.431	88875.8	67104.8	8033.99	326.272	735.761	0	0	0	0	0	0	0	603	903	0
528	4	0	0	0	0	0	0	200	300	0	27.5925	13.4889	-531.736	88601.2	67287.9	8400.2	326.544	736.374	0	0	0	0	0	0	0	603	903	0
528	5	0	0	0	0	0	0	200	300	0	28.8132	13.9467	-530.21	89608.2	67043.8	8354.42	326.448	733.995	0	0	0	0	0	0	0	603	903	0
528	6	0	0	0	0	0	0	200	300	0	27.7451	15.0148	-532.957	89883	67471	8537.53	326.597	734.35	0	0	0	0	0	0	0	603	903	0
528	7	0	0	0	0	0	0	200	300	0	27.8976	15.0148	-533.262	89150.5	67410	8629.08	326.411	735.82	0	0	0	0	0	0	0	603	903	0
528	8	0	0	0	0	0	0	200	300	0	29.2709	14.2519	-534.788	89425.2	66494.4	8537.53	324.338	735.784	0	0	0	0	0	0	0	603	903	0
528	9	0	0	0	0	0	0	200	300	0	27.8976	13.3363	-532.041	89883	67715.1	8583.3	327.274	734.06	0	0	0	0	0	0	0	603	903	0
529	0	0	0	0	0	0	0	200	300	0	28.8132	15.7777	-532.651	89974.5	67715.1	8766.41	327.128	734.082	0	0	0	0	0	0	0	603	903	0
529	1	0	0	0	0	0	0	200	300	0	28.3554	16.2355	-532.957	90615.4	67471	8857.96	326.597	732.976	0	0	0	0	0	0	0	603	903	0
529	2	0	0	0	0	0	0	200	300	0	28.3554	16.5407	-534.177	90066	67348.9	8903.74	326.08	734.393	0	0	0	0	0	0	0	603	903	0
529	3	0	0	0	0	0	0	200	300	0	29.4235	16.3881	-534.482	90157.6	67593	9041.07	326.464	734.318	0	0	0	0	0	0	0	603	903	0
529	4	0	0	0	0	0	0	200	300	0	30.0339	15.9303	-533.262	89974.5	67532	8995.29	326.64	734.275	0	0	0	0	0	0	0	603	903	0
529	5	0	0	0	0	0	0	200	300	0	29.4235	16.6933	-532.651	90523.8	67532	9041.07	326.785	733.051	0	0	0	0	0	0	0	603	903	0
529	6	0	0	0	0	0	0	200	300	0	29.4235	17.6088	-533.567	90066	67715.1	9178.4	326.91	734.2	0	0	0	0	0	0	0	603	903	0
529	7	0	0	0	0	0	0	200	300	0	28.3554	17.7614	-535.703	90706.9	67715.1	9361.5	326.404	733.677	0	0	0	0	0	0	0	603	903	0
529	8	0	0	0	0	0	0	200	300	0	30.6442	18.0666	-536.314	90432.2	67348.9	9498.83	325.577	734.382	0	0	0	0	0	0	0	603	903	0
529	9	0	0	0	0	0	0	200	300	0	29.8813	18.0666	-535.398	90706.9	67776.2	9361.5	326.59	733.58	0	0	0	0	0	0	0	603	903	0
530	0	0	0	0	0	0	0	200	300	0	30.4916	18.6769	-534.177	90981.6	67837.2	9636.16	326.994	732.679	0	0	0	0	0	0	0	603	903	0
530	1	0	0	0	0	0	0	200	300	0	30.6442	19.4399	-534.177	90615.4	67410	9590.38	326.194	733.365	0	0	0	0	0	0	0	603	903	0
530	2	0	0	0	0	0	0	200	300	0	29.4235	20.0502	-536.008	90798.4	67410	9865.04	325.763	733.603	0	0	0	0	0	0	0	603	903	0
530	3	0	0	0	0	0	0	200	300	0	30.0339	20.0502	-533.872	90432.2	67410	9636.16	326.266	733.611	0	0	0	0	0	0	0	603	903	0
530	4	0	0	0	0	0	0	200	300	0	30.6442	20.3554	-534.788	92080.2	67410	9819.27	326.05	730.819	0	0	0	0	0	0	0	603	903	0
530	5	0	0	0	0	0	0	200	300	0	30.6442	21.1183	-534.482	91805.5	67348.9	9773.49	326.008	731.235	0	0	0	0	0	0	0	603	903	0
530	6	0	0	0	0	0	0	200	300	0	30.1865	21.5761	-534.788	91347.8	67898.3	9727.71	326.963	732.189	0	0	0	0	0	0	0	603	903	0
530	7	0	0	0	0	0	0	200	300	0	31.5598	21.1183	-534.482	91439.3	67837.2	10093.9	326.921	731.92	0	0	0	0	0	0	0	603	903	0
530	8	0	0	0	0	0	0	200	300	0	29.7287	22.6442	-535.703	92263.3	67593	10185.5	326.176	730.772	0	0	0	0	0	0	0	603	903	0
530	9	0	0	0	0	0	0	200	300	0	31.5598	22.1864	-536.008	92354.9	67837.2	10505.9	326.56	730.699	0	0	0	0	0	0	0	603	903	0
531	0	0	0	0	0	0	0	200	300	0	30.9494	20.9657	-536.314	91714	67715.1	10322.8	326.26	731.992	0	0	0	0	0	0	0	603	903	0
531	1	0	0	0	0	0	0	200	300	0	30.1865	23.2546	-535.703	91530.9	67532	10322.8	326.062	732.139	0	0	0	0	0	0	0	603	903	0
531	2	0	0	0	0	0	0	200	300	0	30.6442	24.0175	-535.093	92080.2	67532	10368.6	326.206	730.917	0	0	0	0	0	0	0	603	903	0
531	3	0	0	0	0	0	0	200	300	0	31.4072	24.3227	-536.314	93361.9	67776.2	10505.9	326.374	728.919	0	0	0	0	0	0	0	603	903	0
531	4	0	0	0	0	0	0	200	300	0	33.3908	24.933	-535.703	92812.6	67471	10689	325.948	729.746	0	0	0	0	0	0	0	603	903	0
531	5	0	0	0	0	0	0	200	300	0	31.7123	24.933	-536.314	92537.9	67593	10643.2	326.033	730.456	0	0	0	0	0	0	0	603	903	0
531	6	0	0	0	0	0	0	200	300	0	31.102	25.0856	-534.177	92354.9	67898.3	10643.2	327.108	730.108	0	0	0	0	0	0	0	603	903	0
531	7	0	0	0	0	0	0	200	300	0	31.2546	26.1537	-533.262	92904.1	67837.2	10780.6	327.212	728.781	0	0	0	0	0	0	0	603	903	0
531	8	0	0	0	0	0	0	200	300	0	33.0856	26.6115	-535.093	92904.1	67898.3	10872.1	326.891	729.378	0	0	0	0	0	0	0	603	903	0
531	9	0	0	0	0	0	0	200	300	0	32.7805	26.3063	-535.398	93178.9	67410	11101	325.906	728.963	0	0	0	0	0	0	0	603	903	0
532	0	0	0	0	0	0	0	200	300	0	32.6279	26.6115	-535.703	93087.3	67898.3	11055.2	326.746	729.234	0	0	0	0	0	0	0	603	903	0
532	1	0	0	0	0	0	0	200	300	0	32.1701	26.6115	-536.008	92080.2	67715.1	11101	326.332	731.211	0	0	0	0	0	0	0	603	903	0
532	2	0	0	0	0	0	0	200	300	0	32.6279	27.0692	-535.703	93270.4	67837.2	11146.8	326.632	728.892	0	0	0	0	0	0	0	603	903	0
532	3	0	0	0	0	0	0	200	300	0	33.2382	28.1374	-536.314	93361.9	68081.3	11238.3	326.943	728.919	0	0	0	0	0	0	0	603	903	0
532	4	0	0	0	0	0	0	200	300	0	33.2382	28.4425	-536.924	93728.1	68081.3	11696.1	326.799	728.435	0	0	0	0	0	0	0	603	903	0
532	5	0	0	0	0	0	0	200	300	0	33.8486	28.9003	-535.703	94185.9	67287.9	11650.3	325.607	727.183	0	0	0	0	0	0	0	603	903	0
532	6	0	0	0	0	0	0	200	300	0	33.8486	28.9003	-538.755	93361.9	68142.4	11741.9	326.481	729.708	0	0	0	0	0	0	0	603	903	0
532	7	0	0	0	0	0	0	200	300	0	33.2382	29.2055	-536.619	93728.1	68142.4	11925	326.985	728.336	0	0	0	0	0	0	0	603	903	0
532	8	0	0	0	0	0	0	200	300	0	33.5434	30.5788	-536.619	93911.3	67532	11879.2	325.847	727.994	0	0	0	0	0	0	0	603	903	0
532	9	0	0	0	0	0	0	200	300	0	34.3063	29.5107	-536.924	93819.7	67654.1	12153.9	326.003	728.264	0	0	0	0	0	0	0	603	903	0
533	0	0	0	0	0	0	0	200	300	0	34.9167	31.6469	-537.839	94369	67898.3	12199.6	326.243	727.541	0	0	0	0	0	0	0	603	903	0
533	1	0	0	0	0	0	0	200	300	0	34.0012	30.7314	-538.755	94369	67287.9	12016.5	324.895	727.839	0	0	0	0	0	0	0	603	903	0
533	2	0	0	0	0	0	0	200	300	0	33.696	31.4943	-537.229	94643.7	67593	12291.2	325.818	726.83	0	0	0	0	0	0	0	603	903	0
533	3	0	0	0	0	0	0	200	300	0	33.8486	32.1046	-538.755	94735.2	68081.3	12108.1	326.368	727.159	0	0	0	0	0	0	0	603	903	0
533	4	0	0	0	0	0	0	200	300	0	35.2219	31.1891	-538.145	94643.7	68020.3	12153.9	326.398	727.13	0	0	0	0	0	0	0	603	903	0
533	5	0	0	0	0	0	0	200	300	0	34.9167	33.1728	-538.755	95376.1	67532	12199.6	325.348	725.969	0	0	0	0	0	0	0	603	903	0
533	6	0	0	0	0	0	0	200	300	0	34.0012	33.6305	-539.976	95193	67715.1	12291.2	325.404	726.709	0	0	0	0	0	0	0	603	903	0
533	7	0	0	0	0	0	0	200	300	0	35.9848	33.1728	-538.755	95101.4	66921.7	12245.4	324.215	726.479	0	0	0	0	0	0	0	603	903	0
533	8	0	0	0	0	0	0	200	300	0	34.3063	34.0883	-536.314	95742.3	67654.1	12474.3	326.147	724.481	0	0	0	0	0	0	0	603	903	0
533	9	0	0	0	0	0	0	200	300	0	35.6796	33.7831	-539.365	95650.8	67593	12382.7	325.32	725.661	0	0	0	0	0	0	0	603	903	0
534	0	0	0	0	0	0	0	200	300	0	34.9167	35.0038	-539.67	95467.6	68508.6	12520.1	326.945	726.1	0	0	0	0	0	0	0	603	903	0
534	1	0	0	0	0	0	0	200	300	0	34.7641	34.6986	-539.976	95009.9	68264.5	12749	326.421	727.048	0	0	0	0	0	0	0	603	903	0
534	2	0	0	0	0	0	0	200	300	0	34.4589	34.8512	-539.06	95742.3	67898.3	12520.1	325.957	725.39	0	0	0	0	0	0	0	603	903	0
534	3	0	0	0	0	0	0	200	300	0	35.527	36.5297	-535.398	96474.8	68142.4	12977.8	327.274	722.807	0	0	0	0	0	0	0	603	903	0
534	4	0	0	0	0	0	0	200	300	0	36.5952	36.2245	-538.755	96200	67959.2	13069.4	326.141	724.44	0	0	0	0	0	0	0	603	903	0
534	5	0	0	0	0	0	0	200	300	0	35.527	36.6823	-540.586	96200	67776.2	13252.5	325.375	725.045	0	0	0	0	0	0	0	603	903	0
534	6	0	0	0	0	0	0	200	300	0	34.9167	35.7668	-540.281	96200	67776.2	13115.2	325.446	724.944	0	0	0	0	0	0	0	603	903	0
534	7	0	0	0	0	0	0	200	300	0	34.9167	36.2245	-539.06	96657.8	68264.5	13252.5	326.636	723.692	0	0	0	0	0	0	0	603	903	0
534	8	0	0	0	0	0	0	200	300	0	35.9848	36.5297	-540.586	95925.4	67898.3	13252.5	325.601	725.553	0	0	0	0	0	0	0	603	903	0
534	9	0	0	0	0	0	0	200	300	0	35.8322	37.7504	-539.976	97390.2	67898.3	13435.6	325.743	722.64	0	0	0	0	0	0	0	603	903	0
535	0	0	0	0	0	0	0	200	300	0	35.527	38.2082	-539.976	96474.8	67593	13389.8	325.178	724.335	0	0	0	0	0	0	0	603	903	0
535	1	0	0	0	0	0	0	200	300	0	37.2055	37.2926	-540.281	96566.2	67959.2	13435.6	325.785	724.267	0	0	0	0	0	0	0	603	903	0
535	2	0	0	0	0	0	0	200	300	0	37.0529	37.14	-541.196	97207.2	67837.2	13664.5	325.347	723.385	0	0	0	0	0	0	0	603	903	0
535	3	0	0	0	0	0	0	200	300	0	36.5952	38.3608	-539.67	97207.2	67715.1	13664.5	325.475	722.877	0	0	0	0	0	0	0	603	903	0
535	4	0	0	0	0	0	0	200	300	0	37.0529	38.6659	-539.06	97298.7	68081.3	13664.5	326.296	722.503	0	0	0	0	0	0	0	603	903	0
535	5	0	0	0	0	0	0	200	300	0	36.1374	39.5815	-541.502	96566.2	68081.3	13801.8	325.727	724.669	0	0	0	0	0	0	0	603	903	0
535	6	0	0	0	0	0	0	200	300	0	35.527	39.5815	-539.976	97390.2	67471	13984.9	324.952	722.64	0	0	0	0	0	0	0	603	903	0
535	7	0	0	0	0	0	0	200	300	0	36.9003	39.2763	-540.891	97848	67959.2	13939.1	325.643	722.099	0	0	0	0	0	0	0	603	903	0
535	8	0	0	0	0	0	0	200	300	0	38.121	39.734	-540.586	98122.6	67959.2	13801.8	325.714	721.488	0	0	0	0	0	0	0	603	903	0
535	9	0	0	0	0	0	0	200	300	0	36.29	41.2599	-540.891	97756.4	67532	14259.6	324.853	722.268	0	0	0	0	0	0	0	603	903	0
536	0	0	0	0	0	0	0	200	300	0	35.9848	40.6496	-542.112	97939.6	67776.2	14168	325.023	722.337	0	0	0	0	0	0	0	603	903	0
536	1	0	0	0	0	0	0	200	300	0	36.29	41.1073	-539.67	98580.5	67165.8	14351.1	324.457	720.332	0	0	0	0	0	0	0	603	903	0
536	2	0	0	0	0	0	0	200	300	0	37.0529	40.497	-541.196	97939.6	67348.9	14168	324.444	722.031	0	0	0	0	0	0	0	603	903	0
536	3	0	0	0	0	0	0	200	300	0	36.9003	40.9547	-539.67	99129.7	67348.9	14396.9	324.796	719.314	0	0	0	0	0	0	0	603	903	0
536	4	0	0	0	0	0	0	200	300	0	36.1374	42.9384	-540.281	98580.5	67715.1	14213.8	325.333	720.539	0	0	0	0	0	0	0	603	903	0
536	5	0	0	0	0	0	0	200	300	0	38.4262	41.1073	-538.145	98672	67837.2	14671.6	326.058	719.644	0	0	0	0	0	0	0	603	903	0
536	6	0	0	0	0	0	0	200	300	0	36.9003	43.091	-540.586	98946.7	67287.9	14305.3	324.472	719.964	0	0	0	0	0	0	0	603	903	0
536	7	0	0	0	0	0	0	200	300	0	36.1374	43.091	-541.196	99587.5	67898.3	14351.1	325.46	718.986	0	0	0	0	0	0	0	603	903	0
536	8	0	0	0	0	0	0	200	300	0	37.2055	43.091	-540.891	98946.7	67715.1	14442.7	325.192	720.067	0	0	0	0	0	0	0	603	903	0
536	9	0	0	0	0	0	0	200	300	0	36.1374	43.7013	-539.976	98946.7	67532	14213.8	325.065	719.757	0	0	0	0	0	0	0	603	903	0
537	0	0	0	0	0	0	0	200	300	0	36.4426	44.6169	-539.365	99312.9	67471	14671.6	325.093	718.871	0	0	0	0	0	0	0	603	903	0
537	1	0	0	0	0	0	0	200	300	0	39.3417	44.6169	-541.196	99587.5	67776.2	14625.8	325.234	718.986	0	0	0	0	0	0	0	603	903	0
537	2	0	0	0	0	0	0	200	300	0	37.3581	44.3117	-541.502	99770.6	68386.5	14625.8	326.291	718.752	0	0	0	0	0	0	0	603	903	0
537	3	0	0	0	0	0	0	200	300	0	37.2055	42.4806	-540.891	99587.5	67410	14625.8	324.628	718.883	0	0	0	0	0	0	0	603	903	0
537	4	0	0	0	0	0	0	200	300	0	36.4426	44.6169	-540.891	99679.1	67959.2	14946.2	325.643	718.713	0	0	0	0	0	0	0	603	903	0
537	5	0	0	0	0	0	0	200	300	0	36.1374	46.1427	-540.891	99495.9	67837.2	15037.8	325.417	719.052	0	0	0	0	0	0	0	603	903	0
537	6	0	0	0	0	0	0	200	300	0	36.1374	46.1427	-541.502	100228	67593	14946.2	324.825	717.907	0	0	0	0	0	0	0	603	903	0
537	7	0	0	0	0	0	0	200	300	0	38.2736	45.9901	-539.976	100137	67287.9	14946.2	324.613	717.553	0	0	0	0	0	0	0	603	903	0
537	8	0	0	0	0	0	0	200	300	0	37.2055	45.0746	-542.417	100228	67837.2	15129.3	325.065	718.219	0	0	0	0	0	0	0	603	903	0
537	9	0	0	0	0	0	0	200	300	0	36.5952	45.685	-541.502	99770.6	67471	14946.2	324.6	718.752	0	0	0	0	0	0	0	603	903	0
538	0	0	0	0	0	0	0	200	300	0	36.29	47.9738	-541.196	99862.1	67532	14992	324.783	718.479	0	0	0	0	0	0	0	603	903	0
538	1	0	0	0	0	0	0	200	300	0	37.6633	47.8212	-543.027	100869	67837.2	15495.5	324.924	717.246	0	0	0	0	0	0	0	603	903	0
538	2	0	0	0	0	0	0	200	300	0	37.9684	48.279	-541.502	100778	67348.9	15312.4	324.374	716.892	0	0	0	0	0	0	0	603	903	0
538	3	0	0	0	0	0	0	200	300	0	37.2055	48.4316	-544.553	100869	67532	15358.2	324.014	717.767	0	0	0	0	0	0	0	603	903	0
538	4	0	0	0	0	0	0	200	300	0	36.5952	48.5841	-543.027	100045	67654.1	15404	324.587	718.764	0	0	0	0	0	0	0	603	903	0
538	5	0	0	0	0	0	0	200	300	0	36.4426	49.3471	-543.638	100961	67654.1	15358.2	324.447	717.287	0	0	0	0	0	0	0	603	903	0
538	6	0	0	0	0	0	0	200	300	0	38.2736	48.4316	-543.027	101510	67165.8	15495.5	323.688	716.066	0	0	0	0	0	0	0	603	903	0
538	7	0	0	0	0	0	0	200	300	0	36.4426	50.7204	-543.638	101785	67654.1	15724.4	324.447	715.771	0	0	0	0	0	0	0	603	903	0
538	8	0	0	0	0	0	0	200	300	0	37.5107	50.4152	-544.248	101419	67715.1	15632.9	324.42	716.654	0	0	0	0	0	0	0	603	903	0
538	9	0	0	0	0	0	0	200	300	0	36.29	50.873	-542.112	101235	67165.8	15953.3	323.897	716.257	0	0	0	0	0	0	0	603	903	0
539	0	0	0	0	0	0	0	200	300	0	36.29	51.4833	-543.943	101235	67226.8	15907.5	323.592	716.886	0	0	0	0	0	0	0	603	903	0
539	1	0	0	0	0	0	0	200	300	0	36.7477	52.3988	-542.417	102609	67043.8	15587.1	323.602	713.83	0	0	0	0	0	0	0	603	903	0
539	2	0	0	0	0	0	0	200	300	0	38.2736	52.2463	-543.943	102517	67348.9	16044.8	323.816	714.53	0	0	0	0	0	0	0	603	903	0
539	3	0	0	0	0	0	0	200	300	0	36.1374	52.3988	-543.027	102151	67287.9	16136.4	323.913	714.886	0	0	0	0	0	0	0	603	903	0
539	4	0	0	0	0	0	0	200	300	0	35.0693	52.3988	-543.943	102334	67959.2	15861.7	324.938	714.866	0	0	0	0	0	0	0	603	903	0
539	5	0	0	0	0	0	0	200	300	0	35.9848	53.1618	-543.027	102700	67837.2	15861.7	324.924	713.875	0	0	0	0	0	0	0	603	903	0
539	6	0	0	0	0	0	0	200	300	0	36.29	53.6195	-543.638	102151	67593	16136.4	324.335	715.097	0	0	0	0	0	0	0	603	903	0
539	7	0	0	0	0	0	0	200	300	0	36.7477	53.467	-543.333	102334	67898.3	15907.5	324.966	714.655	0	0	0	0	0	0	0	603	903	0
539	8	0	0	0	0	0	0	200	300	0	35.8322	54.9928	-545.469	102151	67776.2	16090.6	324.253	715.728	0	0	0	0	0	0	0	603	903	0
539	9	0	0	0	0	0	0	200	300	0	36.4426	54.3825	-545.164	102426	67837.2	16228	324.435	715.12	0	0	0	0	0	0	0	603	903	0
540	0	0	0	0	0	0	0	200	300	0	35.9848	53.1618	-545.469	103799	67593	16090.6	323.917	712.707	0	0	0	0	0	0	0	603	903	0
540	1	0	0	0	0	0	0	200	300	0	37.0529	55.1454	-543.638	103524	67959.2	16594.2	325.008	712.571	0	0	0	0	0	0	0	603	903	0
540	2	0	0	0	0	0	0	200	300	0	35.9848	56.3661	-544.858	102426	67471	16456.8	323.832	715.014	0	0	0	0	0	0	0	603	903	0
540	3	0	0	0	0	0	0	200	300	0	37.3581	54.9928	-544.248	102883	67654.1	16685.7	324.307	713.962	0	0	0	0	0	0	0	603	903	0
540	4	0	0	0	0	0	0	200	300	0	35.6796	57.2817	-545.469	103433	67287.9	16594.2	323.358	713.378	0	0	0	0	0	0	0	603	903	0
540	5	0	0	0	0	0	0	200	300	0	36.1374	56.2135	-545.469	103433	67471	16777.3	323.694	713.378	0	0	0	0	0	0	0	603	903	0
540	6	0	0	0	0	0	0	200	300	0	36.4426	57.4342	-544.858	103433	67471	16502.6	323.832	713.166	0	0	0	0	0	0	0	603	903	0
540	7	0	0	0	0	0	0	200	300	0	35.527	57.5868	-544.858	102609	67654.1	16685.7	324.168	714.678	0	0	0	0	0	0	0	603	903	0
540	8	0	0	0	0	0	0	200	300	0	35.8322	58.8075	-543.943	103433	67898.3	17006.1	324.826	712.846	0	0	0	0	0	0	0	603	903	0
540	9	0	0	0	0	0	0	200	300	0	36.29	58.9601	-545.469	103890	66982.7	16914.6	322.798	712.539	0	0	0	0	0	0	0	603	903	0
541	0	0	0	0	0	0	0	200	300	0	37.9684	59.8756	-545.469	104165	67776.2	17051.9	324.253	712.036	0	0	0	0	0	0	0	603	903	0
541	1	0	0	0	0	0	0	200	300	0	36.1374	59.2653	-545.774	103799	67593	17006.1	323.848	712.813	0	0	0	0	0	0	0	603	903	0
541	2	0	0	0	0	0	0	200	300	0	35.0693	59.4179	-544.858	104074	67226.8	16914.6	323.384	711.99	0	0	0	0	0	0	0	603	903	0
541	3	0	0	0	0	0	0	200	300	0	35.9848	60.9438	-540.891	104531	66982.7	16914.6	323.838	709.742	0	0	0	0	0	0	0	603	903	0
541	4	0	0	0	0	0	0	200	300	0	36.1374	61.4015	-544.248	104074	66677.6	16960.4	322.513	711.775	0	0	0	0	0	0	0	603	903	0
541	5	0	0	0	0	0	0	200	300	0	35.8322	61.8593	-544.553	104806	67348.9	16731.5	323.677	710.538	0	0	0	0	0	0	0	603	903	0
541	6	0	0	0	0	0	0	200	300	0	34.9167	61.4015	-544.858	104531	67043.8	17097.7	323.048	711.15	0	0	0	0	0	0	0	603	903	0
541	7	0	0	0	0	0	0	200	300	0	37.2055	61.2489	-545.774	104348	67715.1	17280.8	324.072	711.807	0	0	0	0	0	0	0	603	903	0
541	8	0	0	0	0	0	0	200	300	0	35.0693	62.3171	-543.943	104806	67410	16960.4	323.928	710.322	0	0	0	0	0	0	0	603	903	0
541	9	0	0	0	0	0	0	200	300	0	35.527	62.9274	-543.638	105172	67043.8	17143.5	323.324	709.54	0	0	0	0	0	0	0	603	903	0
542	0	0	0	0	0	0	0	200	300	0	35.6796	62.1645	-543.333	104531	67471	17097.7	324.18	710.611	0	0	0	0	0	0	0	603	903	0
542	1	0	0	0	0	0	0	200	300	0	34.7641	64.1481	-544.858	105081	67593	17372.4	324.056	710.141	0	0	0	0	0	0	0	603	903	0
542	2	0	0	0	0	0	0	200	300	0	37.2055	63.6903	-544.553	104623	67165.8	17463.9	323.341	710.874	0	0	0	0	0	0	0	603	903	0
542	3	0	0	0	0	0	0	200	300	0	34.7641	64.3007	-543.027	105355	67348.9	17509.7	324.025	708.985	0	0	0	0	0	0	0	603	903	0
542	4	0	0	0	0	0	0	200	300	0	36.29	64.1481	-543.027	105264	66860.6	17692.8	323.126	709.154	0	0	0	0	0	0	0	603	903	0
542	5	0	0	0	0	0	0	200	300	0	35.9848	65.674	-544.248	104531	67104.8	17647	323.298	710.934	0	0	0	0	0	0	0	603	903	0
542	6	0	0	0	0	0	0	200	300	0	35.0693	65.8266	-543.943	105172	67348.9	17784.4	323.816	709.648	0	0	0	0	0	0	0	603	903	0
542	7	0	0	0	0	0	0	200	300	0	35.9848	65.2162	-543.638	104898	67471	17509.7	324.11	710.045	0	0	0	0	0	0	0	603	903	0
542	8	0	0	0	0	0	0	200	300	0	35.3745	65.8266	-543.027	105447	67410	18104.8	324.137	708.817	0	0	0	0	0	0	0	603	903	0
542	9	0	0	0	0	0	0	200	300	0	35.9848	66.1318	-542.112	104806	66860.6	17784.4	323.334	709.671	0	0	0	0	0	0	0	603	903	0
543	0	0	0	0	0	0	0	200	300	0	36.5952	67.3525	-540.891	104806	67715.1	18013.2	325.192	709.235	0	0	0	0	0	0	0	603	903	0
543	1	0	0	0	0	0	0	200	300	0	35.9848	67.8102	-541.807	104989	67226.8	18104.8	324.079	709.224	0	0	0	0	0	0	0	603	903	0
543	2	0	0	0	0	0	0	200	300	0	36.1374	67.6576	-543.943	105264	66799.6	18242.1	322.806	709.48	0	0	0	0	0	0	0	603	903	0
543	3	0	0	0	0	0	0	200	300	0	37.0529	67.6576	-542.417	104989	67226.8	18013.2	323.939	709.442	0	0	0	0	0	0	0	603	903	0
543	4	0	0	0	0	0	0	200	300	0	37.2055	66.1318	-543.638	105264	67104.8	18059	323.437	709.371	0	0	0	0	0	0	0	603	903	0
543	5	0	0	0	0	0	0	200	300	0	37.5107	68.268	-541.196	105172	66799.6	18196.3	323.43	708.667	0	0	0	0	0	0	0	603	903	0
543	6	-0.0115708	-8.19534	-7.15302	-480.93	132.82	-2.38158	218.568	367.234	0	37.9684	69.4887	-540.281	105081	66555.5	18150.6	323.187	708.507	0	0	0	0	0	0	0	603	903	0
543	7	-0.621922	-8.50052	-6.54267	-23.1659	193.855	43.3948	229.629	303.541	0	35.9848	69.7939	-543.027	105905	66982.7	18333.7	323.35	707.974	0	0	0	0	0	0	0	603	903	0
543	8	0.446193	-8.04276	-8.37373	-206.271	-111.321	-414.369	186.706	324.633	0	37.3581	69.6413	-539.67	105447	67104.8	18379.4	324.344	707.609	0	0	0	0	0	0	0	603	903	0
543	9	-0.316747	-8.50052	-8.37373	-206.271	132.82	134.948	215.862	324.633	0	37.5107	70.099	-541.502	106179	66616.5	18104.8	323.022	706.917	0	0	0	0	0	0	0	603	903	0
544	0	-0.164159	-8.95828	-10.2048	159.94	254.89	-2.38158	224.978	284.327	0	36.9003	70.862	-539.976	105447	66189.3	18379.4	322.578	707.719	0	0	0	0	0	0	0	603	903	0
544	1	-0.77451	-9.87381	-11.1203	-23.1659	71.7849	-185.487	206.455	302.083	0	38.7314	72.2353	-539.06	105355	67043.8	18516.8	324.372	707.557	0	0	0	0	0	0	0	603	903	0
544	2	-1.07969	-10.179	-12.0358	159.94	-50.2855	-185.487	195.822	286.711	0	36.4426	71.3197	-538.45	105722	66494.4	18425.2	323.492	706.656	0	0	0	0	0	0	0	603	903	0
544	3	-2.45298	-10.0264	-10.2048	617.703	254.89	89.1712	224.978	239.469	0	37.5107	72.693	-539.06	105630	66189.3	18562.5	322.786	707.048	0	0	0	0	0	0	0	603	903	0
544	4	-2.60556	-10.7893	-10.8151	-389.377	-50.2855	-48.1579	195.35	336.003	0	37.8159	72.5404	-538.755	105447	66677.6	18562.5	323.762	707.277	0	0	0	0	0	0	0	603	903	0
544	5	-1.99521	-9.87381	-12.9514	251.492	71.7849	43.3948	205.543	280.582	0	36.4426	72.5404	-536.924	105630	66555.5	18608.3	323.957	706.268	0	0	0	0	0	0	0	603	903	0
544	6	-2.30039	-10.6368	-13.5617	-480.93	-111.321	180.724	191.792	335.462	0	39.0366	71.3197	-534.788	105722	66372.3	18837.2	324.11	705.311	0	0	0	0	0	0	0	603	903	0
544	7	-2.91074	-10.9419	-15.3928	251.492	-50.2855	-322.816	196.733	283.662	0	37.6633	74.3715	-536.008	105813	66189.3	18791.4	323.486	705.591	0	0	0	0	0	0	0	603	903	0
544	8	-5.04697	-11.8575	-16.0031	-206.271	-294.426	363.83	181.602	312.889	0	36.9003	74.8293	-535.703	106088	66494.4	19066.1	324.125	704.965	0	0	0	0	0	0	0	603	903	0
544	9	-3.67368	-12.773	-16.9186	68.3869	-111.321	89.1712	193.42	295.958	0	37.3581	74.5241	-534.482	105172	66067.2	18883	323.61	706.226	0	0	0	0	0	0	0	603	903	0
545	0	-6.11509	-13.6885	-17.2238	159.94	71.7849	89.1712	204.168	290.714	0	36.7477	73.1508	-535.093	104714	66128.2	19020.3	323.583	707.306	0	0	0	0	0	0	0	603	903	0
545	1	-5.50473	-14.4514	-17.529	-847.141	10.7497	-93.9343	200.613	348.328	0	37.0529	75.287	-532.957	104989	66250.3	19157.7	324.307	706.006	0	0	0	0	0	0	0	603	903	0
545	2	-6.11509	-14.9092	-21.1911	-206.271	-233.391	226.5	188.986	309.734	0	37.5107	76.3551	-532.957	105447	66250.3	19020.3	324.307	705.147	0	0	0	0	0	0	0	603	903	0
545	3	-6.87803	-15.0618	-22.717	-389.377	-355.461	134.948	184.353	317.14	0	38.2736	76.9655	-533.872	105355	66189.3	19249.2	323.98	705.658	0	0	0	0	0	0	0	603	903	0
545	4	-7.79355	-17.3506	-26.0739	-206.271	-233.391	363.83	191.049	307.911	0	38.121	76.3551	-530.82	104898	66311.3	19157.7	324.922	705.386	0	0	0	0	0	0	0	603	903	0
545	5	-9.62461	-16.2825	-27.5998	251.492	-355.461	-2.38158	187.121	290.888	0	37.5107	76.5077	-532.651	105172	66189.3	19340.8	324.264	705.55	0	0	0	0	0	0	0	603	903	0
545	6	-8.86167	-15.9773	-29.1257	709.256	-538.567	134.948	181.509	275.648	0	37.5107	76.9655	-529.905	104257	65517.8	19340.8	323.641	706.254	0	0	0	0	0	0	0	603	903	0
545	7	-9.7772	-16.7403	-29.1257	434.598	-782.708	272.277	173.127	285.079	0	37.8159	78.3388	-529.294	105081	65578.9	19340.8	323.899	704.47	0	0	0	0	0	0	0	603	903	0
545	8	-8.4039	-17.6558	-31.2619	343.045	-355.461	-48.1579	188.63	289.027	0	38.121	78.3388	-530.515	105081	65701	19615.4	323.844	704.927	0	0	0	0	0	0	0	603	903	0
545	9	-8.4039	-15.2144	-33.3981	68.3869	-416.497	43.3948	187.529	297.952	0	37.9684	76.8129	-524.717	104714	65578.9	19478.1	324.98	703.436	0	0	0	0	0	0	0	603	903	0
546	0	-8.25132	-12.9256	-37.3654	159.94	-904.778	-322.816	175.786	295.72	0	37.8159	78.4914	-528.379	104806	65517.8	19569.6	323.998	704.646	0	0	0	0	0	0	0	603	903	0
546	1	-7.33579	-11.7049	-40.4172	343.045	-965.813	-185.487	176.104	291.512	0	39.1891	78.9491	-526.853	104257	65517.8	19340.8	324.357	705.114	0	0	0	0	0	0	0	603	903	0
546	2	-9.16684	-10.4842	-43.7741	709.256	-904.778	-277.04	179.331	283.797	0	38.5788	79.7121	-526.548	104898	65395.8	19752.7	324.197	703.782	0	0	0	0	0	0	0	603	903	0
546	3	-8.4039	-9.11087	-45.6052	1167.02	-965.813	-231.264	178.822	274.41	0	38.7314	79.4069	-523.191	104440	64846.4	19340.8	323.944	703.379	0	0	0	0	0	0	0	603	903	0
546	4	-9.16684	-9.26346	-46.5207	1350.13	-1087.88	-689.027	176.615	270.978	0	38.2736	81.238	-525.938	104348	64846.4	19615.4	323.297	704.596	0	0	0	0	0	0	0	603	903	0
546	5	-9.62461	-7.73758	-48.0466	1441.68	-1270.99	-505.922	173.547	269.994	0	37.9684	80.7802	-524.107	104074	64968.5	19661.2	323.961	704.427	0	0	0	0	0	0	0	603	903	0
546	6	-9.31943	-7.27982	-52.6242	617.703	-1209.95	-277.04	177.008	288.262	0	38.121	80.9328	-522.581	104348	64968.5	19615.4	324.322	703.321	0	0	0	0	0	0	0	603	903	0
546	7	-7.1832	-6.05911	-56.8967	892.362	-1209.95	-872.133	178.734	284.316	0	38.2736	82.4587	-520.444	104440	64236.1	19890.1	323.426	702.326	0	0	0	0	0	0	0	603	903	0
546	8	-9.47202	-4.22806	-59.0329	800.809	-1759.27	-597.474	170.199	286.435	0	38.5788	79.7121	-518.308	104348	64358.2	19890.1	324.17	701.675	0	0	0	0	0	0	0	603	903	0
546	9	-10.0824	-4.68582	-63.0002	892.362	-1148.92	-963.685	181.763	285.836	0	39.7995	83.3742	-519.529	103890	64419.2	19798.5	323.995	703.029	0	0	0	0	0	0	0	603	903	0
547	0	-11.6083	-2.70218	-67.2727	1258.57	-1087.88	-597.474	183.829	281.291	0	37.8159	82.4587	-518.308	103341	63625.7	19478.1	322.757	703.618	0	0	0	0	0	0	0	603	903	0
547	1	-11.7608	-2.24442	-68.4934	1807.89	-1576.16	-963.685	176.988	273.605	0	36.5952	82.4587	-517.393	103433	63930.9	20118.9	323.564	703.089	0	0	0	0	0	0	0	603	903	0
547	2	-11.7608	-1.32889	-73.3762	1533.23	-1515.13	-963.685	179.351	279.104	0	36.7477	82.0009	-512.51	103067	63503.7	19752.7	323.907	701.898	0	0	0	0	0	0	0	603	903	0
547	3	-11.3031	-0.718539	-77.3435	1807.89	-1576.16	-1192.57	179.621	276.625	0	37.5107	84.2897	-513.731	103524	63381.6	20073.2	323.375	701.485	0	0	0	0	0	0	0	603	903	0
547	4	-9.62461	0.196989	-81.3107	1533.23	-1393.06	-1009.46	182.867	281.144	0	39.0366	84.7475	-511.9	103433	63320.6	19935.8	323.697	700.943	0	0	0	0	0	0	0	603	903	0
547	5	-10.3875	0.959928	-84.0573	1807.89	-1759.27	-917.909	179.071	278.492	0	37.2055	84.5949	-512.205	103067	63625.7	19844.3	324.219	701.779	0	0	0	0	0	0	0	603	903	0
547	6	-10.9979	0.80734	-87.7194	1807.89	-1820.3	-1055.24	179.249	279.39	0	36.7477	84.9001	-509.458	102426	63259.5	19981.6	324.17	701.952	0	0	0	0	0	0	0	603	903	0
547	7	-11.7608	0.959928	-89.5505	2082.55	-1270.99	-963.685	185.807	276.744	0	36.5952	84.1371	-508.543	102426	62832.3	19844.3	323.554	701.59	0	0	0	0	0	0	0	603	903	0
547	8	-12.829	0.654752	-91.3815	1899.44	-1637.2	-1192.57	182.084	279.214	0	37.0529	86.4259	-505.491	102700	62649.2	20073.2	323.937	699.83	0	0	0	0	0	0	0	603	903	0
547	9	-11.9134	-0.260775	-94.4333	2082.55	-2064.45	-1101.02	178.139	277.947	0	37.2055	86.8837	-506.712	102517	62160.9	19707	322.675	700.681	0	0	0	0	0	0	0	603	903	0
548	0	-11.4557	-1.1763	-95.3488	2540.31	-2186.52	-1375.67	177.068	273.358	0	37.2055	86.4259	-504.88	101327	62283	19844.3	323.362	702.305	0	0	0	0	0	0	0	603	903	0
548	1	-11.7608	-1.93924	-100.842	2082.55	-1576.16	-963.685	184.37	279.348	0	36.1374	83.8319	-501.218	101510	62038.8	19844.3	323.776	700.473	0	0	0	0	0	0	0	603	903	0
548	2	-11.7608	-2.24442	-99.3161	1990.99	-1942.38	-1146.79	180.442	279.953	0	35.527	86.4259	-500.303	101235	62221.9	19981.6	324.369	700.652	0	0	0	0	0	0	0	603	903	0
548	3	-12.2186	-1.78665	-105.42	2723.42	-2064.45	-1284.12	180.417	274.166	0	36.9003	87.6466	-498.167	101052	62038.8	20073.2	324.534	700.151	0	0	0	0	0	0	0	603	903	0
548	4	-11.9134	-3.15995	-105.114	2540.31	-2064.45	-1101.02	180.36	275.833	0	36.1374	87.4941	-498.472	100961	61550.6	20027.4	323.479	700.459	0	0	0	0	0	0	0	603	903	0
548	5	-12.829	-4.53324	-108.166	2814.97	-1759.27	-1238.34	183.736	273.976	0	36.9003	88.4096	-495.115	100137	61184.3	20256.3	323.576	700.75	0	0	0	0	0	0	0	603	903	0
548	6	-11.4557	-6.66947	-110.608	3547.39	-1820.3	-1650.33	183.543	267.928	0	35.6796	87.0363	-495.115	100778	61062.3	20347.8	323.33	699.456	0	0	0	0	0	0	0	603	903	0
548	7	-10.5401	-7.58499	-113.354	3181.18	-1820.3	-1513	183.941	271.936	0	37.6633	87.6466	-491.453	99770.6	61123.3	20256.3	324.373	699.988	0	0	0	0	0	0	0	603	903	0
548	8	-9.16684	-9.11087	-120.984	3272.73	-1454.09	-1192.57	187.981	272.949	0	35.3745	89.0199	-489.622	99953.7	60574	20347.8	323.716	698.855	0	0	0	0	0	0	0	603	903	0
548	9	-8.25132	-9.56864	-124.341	3089.63	-1270.99	-1604.56	189.778	275.152	0	36.1374	88.1044	-488.706	99312.9	60757.1	19935.8	324.322	699.784	0	0	0	0	0	0	0	603	903	0
549	0	-7.48838	-10.7893	-127.392	3913.6	-1393.06	-1421.45	189.065	269.279	0	35.3745	89.1725	-486.57	99770.6	60513	20210.5	324.366	697.951	0	0	0	0	0	0	0	603	903	0
549	1	-6.26767	-13.3833	-130.139	3730.5	-1087.88	-1696.11	191.641	271.335	0	35.6796	89.1725	-485.96	98672	60024.7	20302	323.518	699.954	0	0	0	0	0	0	0	603	903	0
549	2	-5.35215	-12.4678	-135.022	4737.58	-721.673	-1284.12	194.655	264.912	0	35.2219	88.5622	-481.992	98214.2	59231.2	20210.5	322.888	699.233	0	0	0	0	0	0	0	603	903	0
549	3	-2.60556	-15.2144	-138.684	5103.79	-782.708	-1192.57	194.356	263.198	0	34.4589	88.8673	-481.077	98763.5	59536.4	20210.5	323.757	697.703	0	0	0	0	0	0	0	603	903	0
549	4	1.36172	-16.8929	-145.092	4829.13	-721.673	-1101.02	195.026	266.717	0	34.9167	90.851	-477.72	97848	58987.1	20118.9	323.476	698.177	0	0	0	0	0	0	0	603	903	0
549	5	0.446193	-17.8084	-150.586	5653.11	-721.673	-1238.34	195.208	262.459	0	34.4589	90.2406	-476.804	98214.2	58742.9	19981.6	323.201	697.016	0	0	0	0	0	0	0	603	903	0
549	6	1.05654	-18.2661	-156.994	5103.79	-477.532	-1101.02	196.958	267.491	0	34.6115	89.9355	-474.058	97115.6	58620.9	19844.3	323.658	698.14	0	0	0	0	0	0	0	603	903	0
549	7	2.27725	-19.6394	-161.877	5744.66	-50.2855	-917.909	199.689	264.512	0	32.7805	88.1044	-468.565	97207.2	58376.7	19935.8	324.586	695.543	0	0	0	0	0	0	0	603	903	0
549	8	3.80313	-20.8601	-165.844	5744.66	-721.673	-826.356	195.649	265.361	0	33.5434	90.0881	-468.565	96932.5	58071.5	19844.3	323.935	696.129	0	0	0	0	0	0	0	603	903	0
549	9	5.63418	-22.0808	-170.727	6843.29	-294.426	-505.922	198.275	259.917	0	33.696	90.0881	-466.733	96566.2	57583.3	19798.5	323.375	696.102	0	0	0	0	0	0	0	603	903	0
550	0	8.38076	-24.6748	-179.883	6751.74	-172.356	-460.145	199.042	262.466	0	35.3745	91.0036	-464.902	96566.2	57095	19752.7	322.811	695.287	0	0	0	0	0	0	0	603	903	0
550	1	9.29629	-26.6585	-188.122	7484.16	10.7497	-139.711	200.057	260.216	0	33.3908	90.2406	-459.409	95376.1	57156	19661.2	324.412	695.394	0	0	0	0	0	0	0	603	903	0
550	2	9.90664	-28.6421	-196.057	7941.92	-355.461	363.83	198.187	259.492	0	32.1701	89.3251	-460.02	95009.9	56972.9	19615.4	323.849	696.466	0	0	0	0	0	0	0	603	903	0
550	3	10.8222	-28.9473	-203.381	8125.03	-294.426	592.711	198.552	260.05	0	32.3227	90.2406	-455.137	94826.8	56789.8	19386.5	324.775	694.652	0	0	0	0	0	0	0	603	903	0
550	4	13.7213	-30.168	-208.874	8765.9	-294.426	501.158	198.59	258.033	0	33.696	91.1562	-452.695	93911.3	56423.6	19615.4	324.639	695.551	0	0	0	0	0	0	0	603	903	0
550	5	12.8058	-31.2361	-216.198	8949	71.7849	501.158	200.332	258.607	0	32.933	89.6303	-450.559	94002.8	55569.1	19615.4	323.334	694.364	0	0	0	0	0	0	0	603	903	0
550	6	14.942	-32.6094	-222.912	9406.77	-904.778	1004.7	195.941	257.801	0	31.4072	91.1562	-448.423	93545.1	55630.1	19661.2	324.057	694.391	0	0	0	0	0	0	0	603	903	0
550	7	15.5524	-33.5249	-230.542	10413.8	-233.391	1050.47	198.988	254.829	0	32.933	90.3932	-445.982	92354.9	55019.8	19661.2	323.368	695.918	0	0	0	0	0	0	0	603	903	0
550	8	16.1627	-35.9663	-240.613	10963.2	-172.356	1325.13	199.284	254.436	0	32.4753	88.4096	-440.794	92354.9	54592.5	19478.1	323.851	693.48	0	0	0	0	0	0	0	603	903	0
550	9	18.299	-39.3233	-244.58	11512.5	-172.356	1508.24	199.295	252.93	0	31.5598	90.3932	-439.878	91988.7	54470.5	19569.6	323.831	693.877	0	0	0	0	0	0	0	603	903	0
551	0	17.8412	-39.9336	-254.956	12153.3	-294.426	1737.12	198.845	252.332	0	31.7123	90.851	-437.131	90615.4	54287.4	19386.5	324.19	695.705	0	0	0	0	0	0	0	603	903	0
551	1	18.299	-41.0017	-260.449	13068.9	-111.321	1737.12	199.573	249.822	0	30.7968	90.851	-434.995	90523.8	53982.2	19478.1	324.098	694.897	0	0	0	0	0	0	0	603	903	0
551	2	19.2145	-42.375	-267.468	13252	-111.321	1920.23	199.584	250.454	0	30.4916	91.1562	-430.112	89425.2	53127.7	19295	323.521	695.089	0	0	0	0	0	0	0	603	903	0
551	3	20.5878	-44.2061	-275.708	14716.8	-416.497	2057.55	198.489	246.622	0	30.6442	90.3932	-428.892	90340.7	52883.6	19478.1	323.303	692.363	0	0	0	0	0	0	0	603	903	0
551	4	23.487	-46.1897	-283.947	15266.1	-538.567	2149.11	198.103	246.236	0	31.8649	90.3932	-424.314	89242	52700.5	19066.1	324.202	692.679	0	0	0	0	0	0	0	603	903	0
551	5	22.724	-49.6993	-292.492	15632.4	-233.391	2515.32	199.202	246.555	0	29.7287	90.851	-420.347	88601.2	51846	18883	323.341	692.219	0	0	0	0	0	0	0	603	903	0
551	6	22.724	-54.4295	-300.427	16456.3	-355.461	2286.44	198.817	245.224	0	28.9658	90.851	-417.905	87868.7	51174.6	18883	322.455	692.74	0	0	0	0	0	0	0	603	903	0
551	7	22.1137	-54.5821	-303.174	17188.8	-477.532	2652.65	198.425	243.304	0	28.0502	90.851	-415.464	87411	51174.6	18608.3	323.175	692.606	0	0	0	0	0	0	0	603	903	0
551	8	21.9611	-56.1079	-312.634	17829.6	-477.532	2744.2	198.473	242.97	0	28.508	89.7829	-411.802	85946.1	50686.3	18471	323.084	694.292	0	0	0	0	0	0	0	603	903	0
551	9	22.724	-57.6338	-320.569	18104.3	-660.637	2606.87	197.939	243.524	0	28.508	87.4941	-408.14	86495.5	49404.6	18379.4	321.048	691.074	0	0	0	0	0	0	0	603	903	0
552	0	23.1818	-60.6856	-327.588	19477.6	-721.673	2652.65	197.797	240.542	0	28.508	89.3251	-403.867	85579.9	50075.9	18562.5	323.991	691.099	0	0	0	0	0	0	0	603	903	0
552	1	23.0292	-61.9063	-338.269	20210	-1087.88	2561.09	196.784	240.255	0	25.914	90.5458	-401.121	84939.1	49526.6	18059	323.471	691.246	0	0	0	0	0	0	0	603	903	0
552	2	21.1981	-65.1106	-345.593	20484.7	-721.673	2561.09	197.912	240.726	0	25.4562	89.3251	-398.374	85030.7	48672.1	18150.6	322.177	689.556	0	0	0	0	0	0	0	603	903	0
552	3	19.6723	-68.4676	-353.528	21766.4	-1087.88	2332.21	196.923	238.431	0	26.2192	89.0199	-393.796	83657.4	48367	18059	322.822	690.562	0	0	0	0	0	0	0	603	903	0
552	4	18.299	-68.9253	-357.19	21674.8	-1637.2	2561.09	195.416	239.318	0	25.4562	88.5622	-391.355	82741.8	48305.9	18059	323.432	691.576	0	0	0	0	0	0	0	603	903	0
552	5	17.9938	-70.2986	-363.904	23414.3	-1820.3	2286.44	194.998	235.658	0	24.5407	88.4096	-386.167	82741.8	47695.6	18196.3	323.51	688.736	0	0	0	0	0	0	0	603	903	0
552	6	17.3834	-71.9771	-372.448	23505.9	-1637.2	2149.11	195.604	236.888	0	23.6252	86.2734	-379.148	81643.2	47024.2	17418.1	324.026	687.667	0	0	0	0	0	0	0	603	903	0
552	7	15.705	-74.1133	-379.773	24055.2	-1759.27	2286.44	195.368	236.659	0	23.4726	88.1044	-377.317	81551.6	46902.1	17738.6	324.304	686.865	0	0	0	0	0	0	0	603	903	0
552	8	14.4843	-76.4021	-388.928	25520.1	-2064.45	1966	194.692	234.384	0	23.9304	87.4941	-375.181	80453	46474.9	17555.5	323.873	688.562	0	0	0	0	0	0	0	603	903	0
552	9	13.111	-77.7754	-395.031	26160.9	-2613.76	2011.78	193.383	233.775	0	23.4726	86.2734	-372.129	79537.5	45681.4	17372.4	322.757	689.264	0	0	0	0	0	0	0	603	903	0
553	0	11.1273	-79.3013	-401.745	27259.6	-2430.66	1782.9	193.95	232.147	0	21.9467	83.5268	-369.688	78988.1	45193.1	17280.8	322.247	689.338	0	0	0	0	0	0	0	603	903	0
553	1	9.60147	-81.4375	-407.544	27442.7	-2613.76	1325.13	193.587	232.663	0	21.9467	85.2052	-363.279	78621.9	44521.7	16914.6	322.555	686.577	0	0	0	0	0	0	0	603	903	0
553	2	8.38076	-82.0479	-412.426	28358.2	-3041.01	1142.03	192.627	231.241	0	21.3364	86.1208	-358.701	77340.2	43850.4	16594.2	322.248	687.388	0	0	0	0	0	0	0	603	903	0
553	3	7.77041	-83.4212	-418.225	29090.6	-3529.29	1279.36	191.561	230.443	0	21.6415	85.2052	-356.565	76790.9	43545.2	16594.2	322.124	687.637	0	0	0	0	0	0	0	603	903	0
553	4	6.7023	-85.5574	-423.108	29823	-3285.15	1004.7	192.236	229.514	0	23.32	83.6794	-348.325	76150	43423.1	16411.1	324.663	684.383	0	0	0	0	0	0	0	603	903	0
553	5	6.24453	-86.1678	-428.906	31013.2	-3285.15	821.593	192.341	227.692	0	21.0312	83.3742	-349.241	75051.4	42873.8	16319.5	322.763	688.101	0	0	0	0	0	0	0	603	903	0
553	6	5.02383	-87.0833	-433.484	32111.9	-3895.5	730.04	191.014	225.921	0	19.8105	82.9164	-342.832	74410.5	42263.4	15999.1	323.277	685.954	0	0	0	0	0	0	0	603	903	0
553	7	3.19278	-88.304	-437.451	32020.3	-4017.57	867.369	190.816	226.803	0	19.2001	82.7638	-340.391	73586.5	41714.1	15770.2	322.548	686.818	0	0	0	0	0	0	0	603	903	0
553	8	2.58242	-89.5247	-441.113	32844.3	-4078.61	821.593	190.754	225.542	0	19.9631	82.1535	-335.813	72487.9	41225.8	15999.1	322.764	687.142	0	0	0	0	0	0	0	603	903	0
553	9	1.6669	-89.9825	-442.334	32569.6	-4017.57	867.369	190.917	226.369	0	20.5734	80.9328	-331.541	72396.3	40127.2	15587.1	321.033	684.637	0	0	0	0	0	0	0	603	903	0
554	0	1.20913	-90.4402	-441.723	33302	-3895.5	775.817	191.181	224.609	0	18.2846	81.0854	-327.879	71389.2	39700	15587.1	321.081	685.269	0	0	0	0	0	0	0	603	903	0
554	1	2.27725	-91.0506	-447.522	33851.3	-4017.57	775.817	191.023	224.358	0	17.5217	80.3224	-321.165	70290.6	39455.8	15266.7	322.852	684.138	0	0	0	0	0	0	0	603	903	0
554	2	2.12466	-91.6609	-451.184	34126	-4505.85	913.146	190.013	224.363	0	16.6061	80.1698	-316.587	70199.1	39028.6	15129.3	323.279	681.263	0	0	0	0	0	0	0	603	903	0
554	3	2.12466	-91.6609	-453.015	34858.4	-4322.75	1050.47	190.458	223.052	0	16.6061	78.1862	-312.62	69832.9	37563.7	14763.1	320.158	679.62	0	0	0	0	0	0	0	603	903	0
554	4	1.05654	-92.1187	-455.151	34950	-4322.75	1004.7	190.503	223.212	0	18.7424	78.7965	-310.789	68642.7	38052	14625.8	322.437	682.134	0	0	0	0	0	0	0	603	903	0
554	5	2.58242	-93.492	-452.71	35499.3	-4322.75	1462.46	190.451	221.585	0	16.1484	77.881	-304.99	67269.4	37563.7	14305.3	323.164	682.438	0	0	0	0	0	0	0	603	903	0
554	6	1.97207	-92.729	-455.456	34950	-4444.82	1187.8	190.241	223.264	0	14.1647	77.1181	-299.802	66628.5	36648.2	13893.4	322.241	680.759	0	0	0	0	0	0	0	603	903	0
554	7	3.34536	-91.8135	-457.592	36048.6	-4811.03	1599.79	189.486	221.221	0	13.8596	77.2707	-296.445	66079.2	36098.9	14030.7	321.773	680.095	0	0	0	0	0	0	0	603	903	0
554	8	2.73501	-92.1187	-459.118	36323.3	-4688.96	1737.12	189.787	220.885	0	13.8596	74.0663	-290.037	65255.2	35305.4	13710.3	321.727	678.01	0	0	0	0	0	0	0	603	903	0
554	9	3.49795	-92.2713	-461.255	36689.5	-4688.96	1737.12	189.834	220.457	0	14.1647	75.1344	-286.985	64522.8	35061.3	13572.9	322.171	678.17	0	0	0	0	0	0	0	603	903	0
555	0	4.41348	-93.1868	-461.865	37330.3	-4749.99	1782.9	189.716	219.175	0	13.5544	74.5241	-283.018	63058	34634	13344	322.374	680.194	0	0	0	0	0	0	0	603	903	0
555	1	3.19278	-93.6446	-460.034	37147.2	-5116.2	2057.55	188.879	219.251	0	11.8759	72.693	-278.44	61959.3	34512	13069.4	323.948	680.477	0	0	0	0	0	0	0	603	903	0
555	2	3.49795	-93.7971	-460.949	37879.7	-5055.17	2515.32	189.033	217.823	0	11.2656	72.693	-273.252	61318.4	33657.5	13115.2	323.174	678.598	0	0	0	0	0	0	0	603	903	0
555	3	2.42984	-93.7971	-460.339	37055.7	-5055.17	2286.44	189.019	219.503	0	12.0285	71.0146	-269.59	60769.1	32986.1	12886.3	322.357	677.587	0	0	0	0	0	0	0	603	903	0
555	4	2.73501	-93.6446	-463.086	38062.8	-5116.2	2194.88	188.952	217.806	0	11.8759	71.1672	-265.317	59395.9	32558.9	12749	322.717	679.133	0	0	0	0	0	0	0	603	903	0
555	5	2.8876	-94.8653	-461.56	37696.6	-5482.41	2286.44	188.122	218.328	0	11.8759	68.8783	-261.045	58480.3	31887.5	12520.1	322.153	678.976	0	0	0	0	0	0	0	603	903	0
555	6	2.12466	-95.0179	-462.78	38337.5	-5482.41	2332.21	188.153	217.158	0	10.9604	68.268	-254.941	56740.8	30910.9	12108.1	321.247	680.436	0	0	0	0	0	0	0	603	903	0
555	7	2.58242	-95.323	-462.475	38703.7	-5543.45	2286.44	188.014	216.312	0	9.89227	67.9628	-251.279	56740.8	30361.6	12199.6	320.828	677.192	0	0	0	0	0	0	0	603	903	0
555	8	0.446193	-95.4756	-463.391	39161.4	-6031.73	2103.33	186.983	215.489	0	10.6552	65.8266	-244.871	56466.2	30239.5	11925	323.492	672.404	0	0	0	0	0	0	0	603	903	0
555	9	0.141017	-96.6963	-462.78	39527.6	-6092.77	2149.11	186.834	214.587	0	12.0285	65.8266	-243.65	55001.3	29385	11467.2	320.603	677.261	0	0	0	0	0	0	0	603	903	0
556	0	-1.53745	-97.0015	-461.865	38978.3	-5787.59	1966	187.469	215.607	0	10.5026	64.3007	-238.462	53994.2	28896.8	11467.2	321.18	676.573	0	0	0	0	0	0	0	603	903	0
556	1	-1.99521	-97.3067	-461.255	39893.8	-5848.62	2332.21	187.32	213.51	0	8.06122	63.5378	-231.443	52437.9	28469.5	11238.3	323.009	676.431	0	0	0	0	0	0	0	603	903	0
556	2	-3.52109	-98.0696	-462.475	39619.2	-6275.87	1920.23	186.43	214.332	0	10.0449	62.9274	-226.255	51888.5	28225.4	11101	324.75	673.664	0	0	0	0	0	0	0	603	903	0
556	3	-4.7418	-98.0696	-464.306	40717.8	-5909.66	1874.45	187.272	212.304	0	8.67157	61.0963	-222.593	51522.3	26516.4	10780.6	319.125	671.536	0	0	0	0	0	0	0	603	903	0
556	4	-6.42026	-99.1377	-464.917	40626.2	-6153.8	1691.34	186.764	212.616	0	8.36639	61.5541	-219.541	50057.5	27004.7	10505.9	323.005	674.99	0	0	0	0	0	0	0	603	903	0
556	5	-7.1832	-99.5955	-465.527	40443.1	-6275.87	1737.12	186.519	213.124	0	8.67157	59.8756	-215.269	49508.2	26211.2	10277	321.76	673.017	0	0	0	0	0	0	0	603	903	0
556	6	-9.31943	-100.053	-465.222	41267.1	-6703.12	1599.79	185.592	211.296	0	7.75604	58.3498	-210.081	48226.4	25356.7	10093.9	320.7	673.438	0	0	0	0	0	0	0	603	903	0
556	7	-11.9134	-100.206	-464.917	40900.9	-6886.22	1370.91	185.188	212.025	0	6.68793	58.3498	-205.808	47677.1	24990.5	10048.1	321.426	671.342	0	0	0	0	0	0	0	603	903	0
556	8	-12.9815	-101.274	-466.137	41267.1	-6642.08	1279.36	185.751	211.47	0	5.92499	58.3498	-201.536	47310.9	23952.9	10048.1	318.852	668.248	0	0	0	0	0	0	0	603	903	0
556	9	-12.829	-100.664	-466.748	41358.7	-6764.15	867.369	185.508	211.39	0	7.29828	57.892	-199.094	46578.5	23830.8	10048.1	319.696	669.048	0	0	0	0	0	0	0	603	903	0
557	0	-14.5074	-100.816	-467.968	41908	-7313.47	1004.7	184.372	210.447	0	7.45087	56.2135	-192.38	44930.5	23342.6	9453.05	321.335	669.45	0	0	0	0	0	0	0	603	903	0
557	1	-16.0333	-101.579	-471.02	42548.9	-7435.54	867.369	184.214	209.667	0	6.53534	55.6032	-188.718	44289.6	23159.5	9727.71	322.72	668.314	0	0	0	0	0	0	0	603	903	0
557	2	-16.9488	-102.647	-467.053	43006.6	-7313.47	821.593	184.341	207.919	0	5.92499	54.6877	-183.225	42733.3	22427	9407.28	322.401	669.772	0	0	0	0	0	0	0	603	903	0
557	3	-19.6954	-102.952	-473.462	42915.1	-7740.71	958.922	183.651	209.359	0	6.23016	54.2299	-179.868	42458.6	21938.7	9453.05	321.971	666.946	0	0	0	0	0	0	0	603	903	0
557	4	-18.4747	-102.8	-474.072	43281.3	-7984.86	684.264	183.157	208.703	0	6.84052	51.0255	-174.375	41543.1	21267.4	8903.74	321.963	664.76	0	0	0	0	0	0	0	603	903	0
557	5	-22.1368	-104.631	-473.156	43098.2	-7862.79	730.04	183.382	208.913	0	8.21381	50.5678	-172.849	40352.9	20718	8720.63	319.862	669.543	0	0	0	0	0	0	0	603	903	0
557	6	-21.8316	-103.563	-476.208	43830.6	-8045.89	501.158	183.104	207.959	0	6.9931	49.4997	-168.272	38888.1	20290.8	8812.19	320.584	671.897	0	0	0	0	0	0	0	603	903	0
557	7	-22.7472	-104.478	-477.429	44013.7	-8229	546.935	182.764	207.811	0	5.61981	48.5841	-162.778	38430.3	19802.5	8354.42	321.653	666.911	0	0	0	0	0	0	0	603	903	0
557	8	-23.3575	-104.478	-479.87	44471.5	-8534.17	501.158	182.216	207.326	0	7.14569	47.516	-158.506	37331.6	19619.4	8400.2	323.777	667.478	0	0	0	0	0	0	0	603	903	0
557	9	-24.273	-105.089	-481.091	45112.4	-8778.31	638.488	181.753	206.229	0	6.84052	44.1591	-153.928	36416.1	18887	8445.97	322.7	666.422	0	0	0	0	0	0	0	603	903	0
558	0	-25.1886	-105.394	-481.396	45478.6	-8595.21	867.369	182.145	205.528	0	6.9931	46.2953	-150.571	35775.3	17605.3	8217.09	316.923	665.403	0	0	0	0	0	0	0	603	903	0
558	1	-25.6463	-105.546	-483.227	45936.3	-8534.17	638.488	182.339	204.939	0	7.75604	44.7694	-147.214	34127.3	17910.4	7988.21	321.662	671.18	0	0	0	0	0	0	0	603	903	0
558	2	-26.7145	-105.394	-482.007	45387	-8961.42	363.83	181.408	205.837	0	6.53534	43.3962	-140.501	33852.6	17483.2	8171.32	324.435	662.057	0	0	0	0	0	0	0	603	903	0
558	3	-27.0196	-104.936	-482.922	45661.7	-9022.45	546.935	181.317	205.447	0	8.06122	43.2436	-135.618	32296.2	16506.6	7988.21	321.714	664.858	0	0	0	0	0	0	0	603	903	0
558	4	-26.4093	-104.478	-484.753	45844.8	-8839.35	592.711	181.765	205.427	0	6.07758	43.091	-132.566	31655.4	16201.4	7896.65	322.214	664.211	0	0	0	0	0	0	0	603	903	0
558	5	-26.7145	-104.326	-488.11	47034.9	-8900.38	775.817	181.766	203.639	0	7.60346	42.1754	-129.819	30831.4	15469	7622	319.158	665.506	0	0	0	0	0	0	0	603	903	0
558	6	-27.3248	-105.089	-488.72	46668.7	-9144.52	684.264	181.289	204.508	0	6.9931	39.734	-122.8	30007.4	15163.8	7530.44	323.484	658.641	0	0	0	0	0	0	0	603	903	0
558	7	-27.9352	-104.783	-489.941	47309.6	-9144.52	363.83	181.335	203.438	0	5.61981	39.1237	-120.969	28725.7	14553.5	7301.56	320.307	665.537	0	0	0	0	0	0	0	603	903	0
558	8	-29.0033	-104.783	-490.857	47492.7	-9144.52	455.382	181.37	203.245	0	5.46722	38.3608	-116.392	27535.5	14614.5	7210.01	325.563	666.424	0	0	0	0	0	0	0	603	903	0
558	9	-29.6136	-104.326	-491.162	47401.1	-9632.8	363.83	180.388	203.492	0	6.68793	37.903	-110.288	27169.3	14126.2	7164.23	328.085	656.652	0	0	0	0	0	0	0	603	903	0
559	0	-29.1559	-104.326	-492.077	47034.9	-9327.63	501.158	181.044	204.416	0	8.21381	35.0038	-108.152	27077.7	13210.7	6614.92	322.15	652.632	0	0	0	0	0	0	0	603	903	0
559	1	-29.0033	-103.563	-493.603	47401.1	-9510.73	272.277	180.732	203.969	0	6.07758	35.6142	-106.016	25612.9	12783.5	6569.14	320.581	661.405	0	0	0	0	0	0	0	603	903	0
559	2	-29.461	-102.952	-497.876	47858.9	-9144.52	501.158	181.633	203.874	0	4.70429	33.3254	-102.048	24605.8	12356.2	6202.93	321.082	661.881	0	0	0	0	0	0	0	603	903	0
559	3	-29.6136	-102.8	-497.876	47767.4	-9815.91	363.83	180.284	204.058	0	5.31464	31.6469	-95.9449	24422.7	12173.1	6294.48	326.876	648.451	0	0	0	0	0	0	0	603	903	0
559	4	-30.8343	-102.647	-499.402	48591.4	-9815.91	501.158	180.345	202.701	0	6.38275	30.7314	-94.7242	23141	11684.8	5928.27	323.356	658.702	0	0	0	0	0	0	0	603	903	0
559	5	-31.7499	-102.8	-500.317	48866	-9876.95	363.83	180.259	202.33	0	6.07758	29.3581	-91.9776	22866.3	11867.9	5790.94	329.031	654.393	0	0	0	0	0	0	0	603	903	0
559	6	-31.9024	-101.884	-502.148	49232.2	-9876.95	318.053	180.331	201.957	0	5.31464	27.9848	-88.0103	21767.7	11074.5	5607.84	325.832	655.669	0	0	0	0	0	0	0	603	903	0
559	7	-31.4447	-102.037	-502.758	49232.2	-9815.91	592.711	180.476	202.076	0	6.38275	26.1537	-85.2638	21126.8	10708.3	5424.73	325.59	655.218	0	0	0	0	0	0	0	603	903	0
559	8	-31.5973	-100.816	-505.81	48957.6	-10182.1	180.724	179.87	203.21	0	5.31464	24.4753	-83.1275	20760.6	10464.1	5241.63	325.88	653.256	0	0	0	0	0	0	0	603	903	0
559	9	-31.7499	-101.579	-508.862	49415.3	-9876.95	455.382	180.59	202.891	0	5.61981	23.102	-80.0758	20211.3	10403.1	4966.97	329.916	650.598	0	0	0	0	0	0	0	603	903	0
560	0	-31.7499	-99.4429	-509.778	49232.2	-10304.2	363.83	179.787	203.424	0	6.38275	21.8813	-74.5826	18929.5	10097.9	5241.63	335.392	649.194	0	0	0	0	0	0	0	603	903	0
560	1	-33.8861	-98.8326	-511.303	49781.5	-10487.3	409.606	179.489	202.638	0	4.85687	20.8131	-73.9723	18563.3	8877.22	4966.97	320.007	652.05	0	0	0	0	0	0	0	603	903	0
560	2	-32.3602	-98.8326	-511.914	50513.9	-10548.3	409.606	179.394	201.323	0	4.5517	19.745	-73.9723	17830.9	9182.39	4600.76	324.133	661.951	0	0	0	0	0	0	0	603	903	0
560	3	-33.1231	-97.6118	-513.44	50880.2	-10365.2	409.606	179.812	200.903	0	5.46722	18.6769	-72.7515	18014	8938.25	4371.87	322.86	655.39	0	0	0	0	0	0	0	603	903	0
560	4	-32.055	-98.0696	-515.881	50880.2	-10670.4	363.83	179.316	201.372	0	5.92499	15.32	-69.6998	17098.5	8511.01	4142.99	322.11	657.684	0	0	0	0	0	0	0	603	903	0
560	5	-32.055	-97.3067	-517.407	50971.7	-10853.5	272.277	179.023	201.486	0	5.16205	13.7941	-64.5118	16366.1	8083.76	3914.11	325.307	649.309	0	0	0	0	0	0	0	603	903	0
560	6	-32.3602	-96.6963	-519.238	50422.4	-10914.5	638.488	178.98	202.892	0	5.31464	13.6415	-63.2911	15816.7	8144.79	4188.77	328.688	653.095	0	0	0	0	0	0	0	603	903	0
560	7	-32.2076	-95.1704	-519.543	51521	-10914.5	226.5	178.992	200.834	0	5.61981	11.8105	-59.9342	15359	7900.65	3822.56	331.822	646.736	0	0	0	0	0	0	0	603	903	0
560	8	-33.1231	-95.1704	-523.205	51246.4	-10975.6	501.158	179.022	202.053	0	5.92499	13.0312	-59.3238	14809.7	6740.98	3639.45	313.63	653.359	0	0	0	0	0	0	0	603	903	0
560	9	-31.1395	-95.1704	-523.205	51521	-10853.5	272.277	179.256	201.528	0	6.23016	11.5053	-56.2721	14351.9	6863.05	3639.45	321.962	647.955	0	0	0	0	0	0	0	603	903	0
561	0	-32.3602	-93.492	-523.205	52802.8	-10792.5	455.382	179.372	199.078	0	5.00946	11.2001	-52.3048	13344.8	6740.98	3410.57	328.879	647.864	0	0	0	0	0	0	0	603	903	0
561	1	-31.9024	-93.0342	-525.341	52985.9	-10975.6	638.488	179.108	199.14	0	4.24652	11.6579	-49.8634	12978.6	6252.7	3181.69	325.397	642.717	0	0	0	0	0	0	0	603	903	0
561	2	-31.4447	-92.5764	-526.867	52985.9	-10975.6	455.382	179.168	199.432	0	4.24652	10.7423	-47.7271	13161.7	5764.42	3364.79	320.779	627.23	0	0	0	0	0	0	0	603	903	0
561	3	-31.1395	-92.2713	-528.698	53260.5	-11097.6	363.83	179.009	199.261	0	5.00946	10.7423	-47.7271	12246.2	5886.49	3044.36	323.336	646.412	0	0	0	0	0	0	0	603	903	0
561	4	-30.9869	-91.6609	-527.783	52894.3	-10914.5	684.264	179.32	199.78	0	4.5517	10.132	-44.6754	11605.3	5398.21	2769.7	320.832	643.23	0	0	0	0	0	0	0	603	903	0
561	5	-31.7499	-91.0506	-530.224	52161.9	-11097.6	592.711	179.07	201.623	0	4.5517	7.99576	-42.5392	10964.5	5398.21	2815.48	326.9	645.25	0	0	0	0	0	0	0	603	903	0
561	6	-30.224	-91.0506	-529.919	53077.4	-11158.7	363.83	178.943	199.839	0	3.63617	9.21647	-39.7926	10506.7	5398.21	2907.03	335.659	638.964	0	0	0	0	0	0	0	603	903	0
561	7	-31.5973	-90.135	-531.75	53718.3	-11219.7	638.488	178.9	198.978	0	5.16205	9.36905	-37.9615	10048.9	5093.03	2540.82	334.163	638.287	0	0	0	0	0	0	0	603	903	0
561	8	-29.461	-90.898	-533.276	53901.4	-11280.8	821.593	178.846	198.924	0	4.5517	8.7587	-37.3512	9499.61	4604.75	2403.49	323.283	648.668	0	0	0	0	0	0	0	603	903	0
561	9	-29.7662	-89.5247	-533.581	54267.6	-11341.8	684.264	178.744	198.295	0	3.78876	7.08024	-32.1632	8858.74	4421.65	2357.71	337.475	627.569	0	0	0	0	0	0	0	603	903	0
562	0	-29.9188	-88.9143	-536.328	54176.1	-11769	684.264	178.056	198.987	0	3.94135	6.62247	-33.3839	8126.31	4177.5	2174.61	325.135	659.58	0	0	0	0	0	0	0	603	903	0
562	1	-29.461	-88.6092	-532.971	53901.4	-11769	684.264	177.918	198.866	0	2.72064	5.55436	-31.2476	7851.65	3994.4	1945.72	327.83	651.728	0	0	0	0	0	0	0	603	903	0
562	2	-30.6817	-87.6936	-537.549	53809.8	-11647	867.369	178.333	199.898	0	4.39911	5.24918	-29.7218	7393.89	4055.44	1945.72	336.447	654.23	0	0	0	0	0	0	0	603	903	0
562	3	-29.7662	-87.6936	-537.854	54359.2	-11463.9	821.593	178.686	198.933	0	3.02582	3.11295	-28.1959	7393.89	3994.4	1762.62	341.666	640.767	0	0	0	0	0	0	0	603	903	0
562	4	-30.0714	-86.9307	-539.38	55457.8	-12196.3	684.264	177.388	197.182	0	3.33099	4.48624	-28.1959	7119.23	3689.22	1808.4	330.843	650.508	0	0	0	0	0	0	0	603	903	0
562	5	-29.3084	-86.4729	-539.074	56007.1	-11524.9	867.369	178.621	196.105	0	3.48358	4.18107	-25.7545	6478.36	3384.05	1808.4	331.396	651.457	0	0	0	0	0	0	0	603	903	0
562	6	-29.461	-86.3203	-540.905	55549.4	-11769	684.264	178.242	197.303	0	2.56805	2.80777	-23.3131	6295.26	2895.77	1854.17	324.212	632.969	0	0	0	0	0	0	0	603	903	0
562	7	-29.1559	-85.8626	-543.652	56098.7	-12135.2	821.593	177.678	196.811	0	4.24652	1.73966	-20.8717	5379.73	3078.87	1854.17	347.514	645.247	0	0	0	0	0	0	0	603	903	0
562	8	-30.8343	-85.8626	-541.211	55549.4	-11952.1	775.817	177.916	197.361	0	2.26288	2.80777	-21.482	5471.28	2834.73	1671.07	331.958	648.309	0	0	0	0	0	0	0	603	903	0
562	9	-29.3084	-84.7945	-543.652	57014.2	-12440.4	775.817	177.117	195.127	0	2.72064	2.5026	-20.5665	5288.18	2712.66	1533.74	331.897	645.874	0	0	0	0	0	0	0	603	903	0
563	0	-29.1559	-84.4893	-543.652	56373.3	-12196.3	867.369	177.566	196.306	0	3.33099	2.04483	-19.0406	4555.76	2895.77	1442.18	352.084	663.735	0	0	0	0	0	0	0	603	903	0
563	1	-29.6136	-84.0315	-542.126	57014.2	-12440.4	867.369	177.053	194.832	0	0	0	0	0	0	0	200	903	0	0	0	0	0	0	0	603	903	0
563	2	-27.9352	-84.0315	-545.178	57471.9	-12562.5	1279.36	176.957	194.581	0	0	0	0	0	0	0	200	903	0	0	0	0	0	0	0	603	903	0
563	3	-27.63	-84.1841	-547.009	57288.8	-12318.4	1004.7	177.481	195.269	0	0	0	0	0	0	0	200	903	0	0	0	0	0	0	0	603	903	0
563	4	-27.4774	-83.7263	-547.924	58112.8	-12318.4	1050.47	177.518	193.94	0	0	0	0	0	0	0	200	903	0	0	0	0	0	0	0	603	903	0
563	5	-28.6981	-83.8789	-548.84	57197.3	-12684.6	867.369	176.888	195.785	0	0	0	0	0	0	0	200	903	0	0	0	0	0	0	0	603	903	0
563	6	-26.7145	-83.4212	-548.23	57746.6	-12562.5	1004.7	177.085	194.667	0	0	0	0	0	0	0	200	903	0	0	0	0	0	0	0	603	903	0
563	7	-28.0877	-82.5056	-547.924	57655.1	-12562.5	958.922	177.073	194.776	0	0	0	0	0	0	0	200	903	0	0	0	0	0	0	0	603	903	0
563	8	-27.0196	-84.3367	-547.924	58112.8	-12684.6	1370.91	176.85	193.94	0	0	0	0	0	0	0	200	903	0	0	0	0	0	0	0	603	903	0
563	9	-27.0196	-82.6582	-548.84	58662.2	-13050.8	1187.8	176.221	193.116	0	0	0	0	0	0	0	200	903	0	0	0	0	0	0	0	603	903	0
564	0	-26.4093	-82.2005	-550.976	59394.6	-12806.6	1050.47	176.756	192.201	0	0	0	0	0	0	0	200	903	0	0	0	0	0	0	0	603	903	0
564	1	-25.7989	-81.7427	-553.418	59303	-12562.5	1279.36	177.3	192.842	0	0	0	0	0	0	0	200	903	0	0	0	0	0	0	0	603	903	0
564	2	-27.4774	-82.2005	-553.723	58295.9	-13111.8	1142.03	176.321	194.72	0	0	0	0	0	0	0	200	903	0	0	0	0	0	0	0	603	903	0
564	3	-26.7145	-81.8953	-552.807	59211.5	-13050.8	1050.47	176.392	192.89	0	0	0	0	0	0	0	200	903	0	0	0	0	0	0	0	603	903	0
564	4	-27.1722	-81.2849	-554.028	59303	-13294.9	1004.7	176.003	192.96	0	0	0	0	0	0	0	200	903	0	0	0	0	0	0	0	603	903	0
564	5	-25.1886	-81.4375	-556.775	59852.3	-13050.8	1462.46	176.56	192.502	0	0	0	0	0	0	0	200	903	0	0	0	0	0	0	0	603	903	0
564	6	-25.6463	-80.8272	-554.944	60310.1	-13478	1279.36	175.713	191.322	0	0	0	0	0	0	0	200	903	0	0	0	0	0	0	0	603	903	0
564	7	-25.6463	-81.1324	-557.995	60676.3	-13722.2	1233.58	175.408	191.26	0	0	0	0	0	0	0	200	903	0	0	0	0	0	0	0	603	903	0
564	8	-26.1041	-81.2849	-557.995	60951	-13417	1233.58	175.955	190.768	0	0	0	0	0	0	0	200	903	0	0	0	0	0	0	0	603	903	0
564	9	-26.2567	-80.3694	-558.606	60310.1	-13539.1	1325.13	175.763	192.035	0	0	0	0	0	0	0	200	903	0	0	0	0	0	0	0	603	903	0
565	0	-26.5619	-79.4539	-557.995	60859.4	-13905.3	1233.58	175.08	190.932	0	0	0	0	0	0	0	200	903	0	0	0	0	0	0	0	603	903	0
565	1	-25.7989	-79.3013	-557.69	60951	-14088.4	1142.03	174.738	190.708	0	0	0	0	0	0	0	200	903	0	0	0	0	0	0	0	603	903	0
565	2	-24.5782	-79.7591	-559.216	61500.3	-13783.2	1325.13	175.353	190.024	0	0	0	0	0	0	0	200	903	0	0	0	0	0	0	0	603	903	0
565	3	-23.6627	-78.3858	-561.657	62232.7	-13966.3	1187.8	175.134	189.198	0	0	0	0	0	0	0	200	903	0	0	0	0	0	0	0	603	903	0
565	4	-24.4256	-78.8435	-562.573	62598.9	-14088.4	1554.01	174.957	188.727	0	0	0	0	0	0	0	200	903	0	0	0	0	0	0	0	603	903	0
565	5	-25.6463	-79.1487	-562.268	62324.3	-14088.4	1050.47	174.944	189.156	0	0	0	0	0	0	0	200	903	0	0	0	0	0	0	0	603	903	0
565	6	-25.036	-78.8435	-562.268	62782	-14149.4	1096.25	174.835	188.341	0	0	0	0	0	0	0	200	903	0	0	0	0	0	0	0	603	903	0
565	7	-25.7989	-77.6228	-562.268	62415.8	-14027.3	1142.03	175.052	188.993	0	0	0	0	0	0	0	200	903	0	0	0	0	0	0	0	603	903	0
565	8	-23.6627	-76.7073	-563.794	63148.2	-14332.5	1187.8	174.578	187.994	0	0	0	0	0	0	0	200	903	0	0	0	0	0	0	0	603	903	0
565	9	-23.5101	-76.7073	-561.963	62965.1	-14637.7	1370.91	173.953	187.955	0	0	0	0	0	0	0	200	903	0	0	0	0	0	0	0	603	903	0
566	0	-23.5101	-76.4021	-564.709	62873.6	-14149.4	1096.25	174.944	188.662	0	0	0	0	0	0	0	200	903	0	0	0	0	0	0	0	603	903	0
566	1	-23.2049	-75.6392	-562.573	63514.4	-14393.6	1599.79	174.415	187.1	0	0	0	0	0	0	0	200	903	0	0	0	0	0	0	0	603	903	0
566	2	-23.9679	-76.097	-564.709	63514.4	-14881.8	1142.03	173.647	187.527	0	0	0	0	0	0	0	200	903	0	0	0	0	0	0	0	603	903	0
566	3	-21.0687	-75.6392	-565.625	63697.5	-14454.6	1508.24	174.445	187.386	0	0	0	0	0	0	0	200	903	0	0	0	0	0	0	0	603	903	0
566	4	-23.5101	-74.8763	-564.404	64430	-14271.5	1462.46	174.714	185.844	0	0	0	0	0	0	0	200	903	0	0	0	0	0	0	0	603	903	0
566	5	-22.2894	-75.0288	-565.014	63606	-14881.8	1325.13	173.661	187.426	0	0	0	0	0	0	0	200	903	0	0	0	0	0	0	0	603	903	0
566	6	-22.1368	-74.1133	-563.488	63606	-14637.7	1279.36	174.023	187.121	0	0	0	0	0	0	0	200	903	0	0	0	0	0	0	0	603	903	0
566	7	-21.5265	-74.4185	-567.761	63789.1	-14820.8	1325.13	173.896	187.648	0	0	0	0	0	0	0	200	903	0	0	0	0	0	0	0	603	903	0
566	8	-22.442	-73.503	-567.151	64338.4	-14515.6	1370.91	174.406	186.559	0	0	0	0	0	0	0	200	903	0	0	0	0	0	0	0	603	903	0
566	9	-22.7472	-73.6555	-568.676	64979.3	-14881.8	1187.8	173.831	185.736	0	0	0	0	0	0	0	200	903	0	0	0	0	0	0	0	603	903	0
567	0	-22.442	-73.6555	-565.93	64613.1	-15064.9	1370.91	173.38	185.829	0	0	0	0	0	0	0	200	903	0	0	0	0	0	0	0	603	903	0
567	1	-22.8998	-72.8926	-562.573	64521.5	-15064.9	1599.79	173.221	185.31	0	0	0	0	0	0	0	200	903	0	0	0	0	0	0	0	603	903	0
567	2	-21.5265	-72.2823	-567.151	64338.4	-15003.9	1737.12	173.545	186.559	0	0	0	0	0	0	0	200	903	0	0	0	0	0	0	0	603	903	0
567	3	-21.3739	-71.9771	-566.845	63606	-15309.1	1370.91	172.992	187.79	0	0	0	0	0	0	0	200	903	0	0	0	0	0	0	0	603	903	0
567	4	-21.3739	-71.9771	-567.761	64704.6	-15370.1	1416.69	172.929	186.035	0	0	0	0	0	0	0	200	903	0	0	0	0	0	0	0	603	903	0
567	5	-22.7472	-70.909	-568.982	65254	-15370.1	1370.91	172.987	185.314	0	0	0	0	0	0	0	200	903	0	0	0	0	0	0	0	603	903	0
567	6	-22.1368	-70.7564	-563.488	64613.1	-15309.1	1416.69	172.832	185.334	0	0	0	0	0	0	0	200	903	0	0	0	0	0	0	0	603	903	0
567	7	-22.442	-70.4512	-565.625	65620.2	-15736.3	1233.58	172.179	183.986	0	0	0	0	0	0	0	200	903	0	0	0	0	0	0	0	603	903	0
567	8	-21.6791	-69.3831	-564.099	64979.3	-15736.3	1233.58	172.104	184.809	0	0	0	0	0	0	0	200	903	0	0	0	0	0	0	0	603	903	0
567	9	-20.7635	-69.0779	-565.014	65162.4	-15431.2	1370.91	172.689	184.671	0	0	0	0	0	0	0	200	903	0	0	0	0	0	0	0	603	903	0
568	0	-21.2213	-68.1624	-566.54	64979.3	-15553.2	913.146	172.547	185.305	0	0	0	0	0	0	0	200	903	0	0	0	0	0	0	0	603	903	0
568	1	-21.2213	-67.2469	-564.404	65345.5	-15858.4	1325.13	171.902	184.222	0	0	0	0	0	0	0	200	903	0	0	0	0	0	0	0	603	903	0
568	2	-22.1368	-67.2469	-564.709	65437.1	-16102.5	1233.58	171.485	184.122	0	0	0	0	0	0	0	200	903	0	0	0	0	0	0	0	603	903	0
568	3	-21.6791	-66.3313	-562.573	66352.6	-15675.3	1142.03	172.136	182.055	0	0	0	0	0	0	0	200	903	0	0	0	0	0	0	0	603	903	0
568	4	-22.7472	-66.9417	-561.352	65803.2	-15797.4	867.369	171.858	182.777	0	0	0	0	0	0	0	200	903	0	0	0	0	0	0	0	603	903	0
568	5	-20.6109	-66.1787	-561.963	65894.8	-16102.5	1096.25	171.346	182.742	0	0	0	0	0	0	0	200	903	0	0	0	0	0	0	0	603	903	0
568	6	-21.3739	-66.3313	-562.878	65437.1	-16041.5	1142.03	171.501	183.746	0	0	0	0	0	0	0	200	903	0	0	0	0	0	0	0	603	903	0
568	7	-21.2213	-65.5684	-563.183	65437.1	-15980.5	913.146	171.625	183.809	0	0	0	0	0	0	0	200	903	0	0	0	0	0	0	0	603	903	0
568	8	-22.7472	-64.1951	-561.963	65345.5	-16163.6	1187.8	171.237	183.719	0	0	0	0	0	0	0	200	903	0	0	0	0	0	0	0	603	903	0
568	9	-21.8316	-63.8899	-560.742	65620.2	-16285.6	958.922	170.957	182.976	0	0	0	0	0	0	0	200	903	0	0	0	0	0	0	0	603	903	0
569	0	-22.7472	-63.127	-558.911	66261	-16041.5	1142.03	171.299	181.446	0	0	0	0	0	0	0	200	903	0	0	0	0	0	0	0	603	903	0
569	1	-23.3575	-63.5848	-558.606	65803.2	-16346.7	1050.47	170.737	182.201	0	0	0	0	0	0	0	200	903	0	0	0	0	0	0	0	603	903	0
569	2	-21.9842	-63.7373	-557.69	66627.2	-16529.8	958.922	170.36	180.53	0	0	0	0	0	0	0	200	903	0	0	0	0	0	0	0	603	903	0
569	3	-22.5946	-63.4322	-558.606	65711.8	-16773.9	958.922	169.972	182.365	0	0	0	0	0	0	0	200	903	0	0	0	0	0	0	0	603	903	0
569	4	-23.2049	-61.7537	-558.911	65894.8	-16529.8	1004.7	170.425	182.101	0	0	0	0	0	0	0	200	903	0	0	0	0	0	0	0	603	903	0
569	5	-24.8834	-62.8218	-557.08	65620.2	-16957	775.817	169.561	182.207	0	0	0	0	0	0	0	200	903	0	0	0	0	0	0	0	603	903	0
569	6	-25.1886	-60.533	-552.807	66352.6	-16957	684.264	169.326	179.972	0	0	0	0	0	0	0	200	903	0	0	0	0	0	0	0	603	903	0
569	7	-25.1886	-61.1433	-555.249	66352.6	-17140.1	821.593	169.131	180.499	0	0	0	0	0	0	0	200	903	0	0	0	0	0	0	0	603	903	0
569	8	-24.8834	-60.3804	-553.112	66444.2	-17018.1	638.488	169.232	179.872	0	0	0	0	0	0	0	200	903	0	0	0	0	0	0	0	603	903	0
569	9	-24.4256	-59.6175	-552.502	65528.6	-17079.1	546.935	169.088	181.397	0	0	0	0	0	0	0	200	903	0	0	0	0	0	0	0	603	903	0
570	0	-24.8834	-57.939	-553.723	66078	-17445.3	730.04	168.495	180.666	0	0	0	0	0	0	0	200	903	0	0	0	0	0	0	0	603	903	0
570	1	-25.036	-58.2442	-552.502	65711.8	-17506.3	730.04	168.314	181.065	0	0	0	0	0	0	0	200	903	0	0	0	0	0	0	0	603	903	0
570	2	-26.1041	-57.0235	-551.587	66261	-17079.1	180.724	169.036	179.872	0	0	0	0	0	0	0	200	903	0	0	0	0	0	0	0	603	903	0
570	3	-24.8834	-57.939	-548.84	66718.8	-17994.6	363.83	167.213	178.437	0	0	0	0	0	0	0	200	903	0	0	0	0	0	0	0	603	903	0
570	4	-26.7145	-57.1761	-546.399	66261	-17445.3	272.277	168.072	178.731	0	0	0	0	0	0	0	200	903	0	0	0	0	0	0	0	603	903	0
570	5	-25.9515	-56.2605	-546.399	65437.1	-17201.2	318.053	168.519	180.239	0	0	0	0	0	0	0	200	903	0	0	0	0	0	0	0	603	903	0
570	6	-26.867	-55.9554	-544.262	65711.8	-17079.1	43.3948	168.62	179.265	0	0	0	0	0	0	0	200	903	0	0	0	0	0	0	0	603	903	0
570	7	-26.5619	-55.0398	-545.178	65528.6	-17506.3	89.1712	167.889	179.803	0	0	0	0	0	0	0	200	903	0	0	0	0	0	0	0	603	903	0
570	8	-27.7826	-55.6502	-543.652	65437.1	-17628.4	180.724	167.574	179.634	0	0	0	0	0	0	0	200	903	0	0	0	0	0	0	0	603	903	0
[truncated: 3,331 more rows]
