# Supplementary material for: The Effects of an Extemporaneous Speech Dual-task on Older Adult Gait Control
Source: Research Square preprint supplement (doi:10.21203/rs.3.rs-7674245/v1), 2025-11-18
Supplement: Supplementary file 29 [file DT2Walk06.xlsx]

## Sheet: Sheet1
Trajectories
		02:LFHD			02:RFHD			02:LBHD			02:RBHD			02:C7			02:T10			02:CLAV			02:STRN			02:RBAK			02:LSHO			02:LUPA			02:LELB			02:LFRM			02:LWRA			02:LWRB			02:LFIN
Frame	Sub Frame	X	Y	Z	X	Y	Z	X	Y	Z	X	Y	Z	X	Y	Z	X	Y	Z	X	Y	Z	X	Y	Z	X	Y	Z	X	Y	Z	X	Y	Z	X	Y	Z	X	Y	Z	X	Y	Z	X	Y	Z	X	Y	Z
		mm	mm	mm	mm	mm	mm	mm	mm	mm	mm	mm	mm	mm	mm	mm	mm	mm	mm	mm	mm	mm	mm	mm	mm	mm	mm	mm	mm	mm	mm	mm	mm	mm	mm	mm	mm	mm	mm	mm	mm	mm	mm	mm	mm	mm	mm	mm	mm
310	0	180.955	-2159.59	1561.17	279.641	-2161.38	1554.99	163.882	-2330.94	1584.78	275.354	-2342.9	1578.09	212.006	-2385.32	1402.81	181.481	-2426.47	1191.69	214.644	-2244.03	1345.66	222.669	-2179.21	1219.98	276.711	-2444.82	1236.14	42.3512	-2306.18	1373.97	-17.3377	-2293.85	1147.01	-20.1842	-2299.41	1078.44	-33.0656	-2203.84	996.088	-13.4262	-2174.53	894.443	-67.3866	-2216.57	879.176	-70.6627	-2156.14	801.152
311	0	181.56	-2150.02	1562.65	280.281	-2151.54	1556.45	164.984	-2321.3	1586.54	276.46	-2333.04	1579.95	213.755	-2376.04	1404.62	183.835	-2417.73	1193.29	215.146	-2235.05	1347.17	222.385	-2170.32	1221.25	279.147	-2435.32	1237.94	43.3615	-2298.73	1375.35	-16.3641	-2287.21	1148.22	-18.9868	-2293.21	1079.6	-32.8585	-2198.45	996.777	-13.4184	-2169.51	895.156	-67.085	-2212.18	879.981	-70.3557	-2152.97	801.118
312	0	182.127	-2140.54	1564.06	280.882	-2141.78	1557.85	166.065	-2311.74	1588.24	277.547	-2323.26	1581.74	215.481	-2366.83	1406.38	186.173	-2409.09	1194.84	215.665	-2226.15	1348.63	222.162	-2161.5	1222.5	281.557	-2425.9	1239.7	44.3787	-2291.32	1376.66	-15.3618	-2280.78	1149.39	-17.7701	-2287.2	1080.74	-32.6344	-2193.22	997.466	-13.3955	-2164.55	895.885	-66.7178	-2207.87	880.77	-70.0404	-2149.74	801.164
313	0	182.656	-2131.14	1565.39	281.444	-2132.09	1559.19	167.125	-2302.28	1589.87	278.618	-2313.54	1583.48	217.183	-2357.7	1408.08	188.493	-2400.54	1196.35	216.202	-2217.31	1350.03	222.002	-2152.75	1223.73	283.938	-2416.57	1241.41	45.4026	-2283.97	1377.93	-14.3305	-2274.56	1150.54	-16.5341	-2281.4	1081.86	-32.3932	-2188.13	998.155	-13.3574	-2159.66	896.632	-66.2849	-2203.63	881.541	-69.7167	-2146.46	801.291
314	0	183.147	-2121.83	1566.65	281.967	-2122.47	1560.46	168.166	-2292.9	1591.44	279.671	-2303.88	1585.17	218.862	-2348.64	1409.71	190.796	-2392.08	1197.82	216.755	-2208.54	1351.38	221.903	-2144.06	1224.93	286.291	-2407.32	1243.07	46.4334	-2276.66	1379.14	-13.2701	-2268.55	1151.66	-15.2784	-2275.8	1082.95	-32.1347	-2183.19	998.843	-13.3042	-2154.84	897.395	-65.786	-2199.47	882.296	-69.3851	-2143.11	801.499
315	0	183.602	-2112.6	1567.83	282.452	-2112.93	1561.67	169.186	-2283.6	1592.96	280.706	-2294.3	1586.79	220.517	-2339.66	1411.3	193.08	-2383.71	1199.25	217.326	-2199.85	1352.68	221.868	-2135.44	1226.11	288.615	-2398.16	1244.69	47.4709	-2269.41	1380.29	-12.1803	-2262.76	1152.74	-14.0024	-2270.39	1084.02	-31.8587	-2178.41	999.529	-13.2356	-2150.09	898.173	-65.2209	-2195.38	883.033	-69.0458	-2139.7	801.785
316	0	184.02	-2103.45	1568.95	282.901	-2103.47	1562.82	170.186	-2274.4	1594.41	281.724	-2284.78	1588.37	222.148	-2330.75	1412.82	195.343	-2375.42	1200.63	217.914	-2191.22	1353.91	221.895	-2126.87	1227.26	290.908	-2389.08	1246.27	48.5151	-2262.2	1381.39	-11.0604	-2257.17	1153.8	-12.705	-2265.18	1085.06	-31.5645	-2173.76	1000.21	-13.1514	-2145.4	898.964	-64.5889	-2191.37	883.751	-68.6998	-2136.24	802.148
317	0	184.405	-2094.39	1569.98	283.315	-2094.08	1563.9	171.167	-2265.27	1595.79	282.726	-2275.34	1589.88	223.754	-2321.92	1414.28	197.581	-2367.22	1201.97	218.519	-2182.66	1355.09	221.987	-2118.37	1228.38	293.169	-2380.08	1247.79	49.5659	-2255.04	1382.43	-9.90974	-2251.78	1154.82	-11.3848	-2260.16	1086.08	-31.2515	-2169.27	1000.89	-13.0511	-2140.79	899.767	-63.8894	-2187.43	884.449	-68.348	-2132.73	802.585
318	0	184.759	-2085.4	1570.95	283.696	-2084.77	1564.91	172.128	-2256.23	1597.11	283.71	-2265.96	1591.33	225.334	-2313.15	1415.69	199.793	-2359.09	1203.26	219.143	-2174.17	1356.21	222.143	-2109.93	1229.47	295.394	-2371.17	1249.26	50.6227	-2247.91	1383.42	-8.72774	-2246.58	1155.81	-10.0401	-2255.32	1087.07	-30.9188	-2164.91	1001.57	-12.9344	-2136.24	900.576	-63.1216	-2183.57	885.124	-67.9916	-2129.16	803.091
319	0	185.084	-2076.5	1571.84	284.049	-2075.54	1565.86	173.07	-2247.27	1598.37	284.677	-2256.65	1592.72	226.889	-2304.46	1417.03	201.973	-2351.02	1204.5	219.783	-2165.75	1357.28	222.364	-2101.55	1230.53	297.581	-2362.34	1250.68	51.685	-2240.81	1384.36	-7.51389	-2241.56	1156.77	-8.66901	-2250.65	1088.03	-30.5652	-2160.69	1002.23	-12.8006	-2131.76	901.387	-62.2849	-2179.79	885.773	-67.632	-2125.55	803.659
320	0	185.386	-2067.68	1572.65	284.377	-2066.38	1566.75	173.994	-2238.4	1599.56	285.628	-2247.41	1594.05	228.416	-2295.83	1418.3	204.117	-2343.03	1205.69	220.442	-2157.39	1358.27	222.649	-2093.22	1231.54	299.727	-2353.59	1252.04	52.7516	-2233.74	1385.23	-6.26806	-2236.7	1157.7	-7.26979	-2246.15	1088.97	-30.1897	-2156.59	1002.89	-12.649	-2127.35	902.193	-61.379	-2176.09	886.392	-67.2705	-2121.91	804.281
321	0	185.667	-2058.93	1573.38	284.684	-2057.3	1567.56	174.9	-2229.6	1600.67	286.562	-2238.24	1595.31	229.915	-2287.27	1419.51	206.22	-2335.08	1206.84	221.117	-2149.09	1359.21	222.996	-2084.96	1232.51	301.826	-2344.92	1253.34	53.8211	-2226.68	1386.05	-4.99064	-2231.98	1158.59	-5.84101	-2241.79	1089.87	-29.7909	-2152.61	1003.52	-12.4786	-2123.01	902.987	-60.404	-2172.46	886.979	-66.9083	-2118.25	804.947
322	0	185.934	-2050.25	1574.03	284.976	-2048.29	1568.3	175.789	-2220.87	1601.72	287.481	-2229.14	1596.51	231.383	-2278.78	1420.65	208.277	-2327.19	1207.92	221.807	-2140.85	1360.08	223.403	-2076.75	1233.42	303.876	-2336.33	1254.58	54.8915	-2219.64	1386.82	-3.68273	-2227.39	1159.45	-4.38189	-2237.55	1090.75	-29.3676	-2148.74	1004.13	-12.2886	-2118.74	903.759	-59.3608	-2168.91	887.527	-66.5462	-2114.56	805.643
323	0	186.192	-2041.65	1574.6	285.258	-2039.36	1568.96	176.662	-2212.21	1602.69	288.384	-2220.1	1597.62	232.819	-2270.35	1421.72	210.282	-2319.33	1208.95	222.513	-2132.66	1360.88	223.865	-2068.6	1234.26	305.87	-2327.82	1255.75	55.9605	-2212.59	1387.52	-2.34631	-2222.9	1160.26	-2.8925	-2233.42	1091.59	-28.9187	-2144.97	1004.71	-12.078	-2114.54	904.499	-58.2512	-2165.44	888.032	-66.1845	-2110.88	806.357
324	0	186.446	-2033.11	1575.09	285.536	-2030.5	1569.55	177.52	-2203.62	1603.59	289.272	-2211.14	1598.67	234.221	-2261.98	1422.72	212.23	-2311.51	1209.92	223.231	-2124.53	1361.61	224.379	-2060.52	1235.03	307.805	-2319.38	1256.86	57.025	-2205.53	1388.16	-0.984326	-2218.47	1161.04	-1.37403	-2229.36	1092.4	-28.4435	-2141.27	1005.26	-11.846	-2110.4	905.197	-57.0784	-2162.03	888.491	-65.8232	-2107.21	807.072
325	0	186.702	-2024.63	1575.5	285.816	-2021.71	1570.05	178.363	-2195.09	1604.41	290.146	-2202.23	1599.63	235.588	-2253.66	1423.64	214.114	-2303.72	1210.82	223.961	-2116.46	1362.26	224.939	-2052.5	1235.72	309.675	-2311.03	1257.88	58.0818	-2198.46	1388.75	0.399156	-2214.08	1161.78	0.170965	-2225.36	1093.18	-27.9414	-2137.63	1005.76	-11.5917	-2106.33	905.842	-55.8467	-2158.69	888.898	-65.4613	-2103.56	807.772
326	0	186.965	-2016.21	1575.82	286.103	-2012.98	1570.47	179.192	-2186.62	1605.16	291.005	-2193.4	1600.51	236.915	-2245.4	1424.48	215.928	-2295.95	1211.66	224.699	-2108.42	1362.84	225.537	-2044.54	1236.32	311.474	-2302.75	1258.84	59.1273	-2191.37	1389.27	1.79897	-2209.7	1162.47	1.73847	-2221.37	1093.92	-27.4124	-2134.03	1006.22	-11.3146	-2102.32	906.421	-54.5623	-2155.41	889.251	-65.0977	-2099.95	808.44
327	0	187.24	-2007.84	1576.05	286.403	-2004.32	1570.81	180.008	-2178.2	1605.82	291.849	-2184.62	1601.31	238.201	-2237.19	1425.25	217.666	-2288.22	1212.43	225.443	-2100.44	1363.33	226.167	-2036.65	1236.83	313.196	-2294.54	1259.71	60.1574	-2184.25	1389.74	3.20882	-2205.3	1163.11	3.32291	-2217.38	1094.62	-26.8572	-2130.45	1006.62	-11.0144	-2098.36	906.924	-53.2326	-2152.19	889.545	-64.7302	-2096.4	809.058
328	0	187.531	-1999.52	1576.2	286.719	-1995.73	1571.06	180.81	-2169.82	1606.4	292.68	-2175.9	1602.02	239.442	-2229.03	1425.93	219.321	-2280.5	1213.13	226.191	-2092.49	1363.75	226.822	-2028.82	1237.25	314.835	-2286.42	1260.5	61.1682	-2177.1	1390.14	4.62143	-2200.84	1163.71	4.91716	-2213.34	1095.27	-26.2771	-2126.87	1006.95	-10.6912	-2094.46	907.341	-51.8671	-2149.01	889.779	-64.3563	-2092.9	809.609
329	0	187.843	-1991.23	1576.26	287.057	-1987.19	1571.22	181.6	-2161.48	1606.89	293.496	-2167.24	1602.64	240.637	-2220.91	1426.52	220.887	-2272.81	1213.75	226.94	-2084.58	1364.08	227.494	-2021.04	1237.56	316.387	-2278.36	1261.2	62.1553	-2169.9	1390.49	6.02857	-2196.3	1164.26	6.51267	-2209.23	1095.89	-25.6744	-2123.26	1007.22	-10.3454	-2090.6	907.661	-50.4764	-2145.87	889.952	-63.9733	-2089.48	810.078
330	0	188.178	-1982.98	1576.23	287.417	-1978.7	1571.28	182.376	-2153.18	1607.31	294.296	-2158.63	1603.16	241.781	-2212.84	1427.04	222.359	-2265.15	1214.3	227.686	-2076.7	1364.33	228.176	-2013.32	1237.78	317.845	-2270.39	1261.82	63.1146	-2162.67	1390.78	7.42128	-2191.64	1164.75	8.09963	-2205.02	1096.45	-25.0519	-2119.61	1007.42	-9.97768	-2086.78	907.876	-49.0729	-2142.75	890.063	-63.5781	-2086.14	810.448
331	0	188.537	-1974.76	1576.12	287.803	-1970.27	1571.25	183.138	-2144.9	1607.64	295.082	-2150.06	1603.6	242.873	-2204.8	1427.47	223.731	-2257.52	1214.78	228.426	-2068.86	1364.5	228.86	-2005.65	1237.91	319.204	-2262.48	1262.35	64.0421	-2155.39	1391.01	8.79002	-2186.85	1165.19	9.66723	-2200.68	1096.97	-24.4134	-2115.89	1007.54	-9.58935	-2082.99	907.979	-47.6704	-2139.64	890.113	-63.1676	-2082.88	810.708
332	0	188.923	-1966.56	1575.92	288.215	-1961.88	1571.13	183.885	-2136.65	1607.89	295.85	-2141.55	1603.93	243.909	-2196.79	1427.81	225	-2249.91	1215.17	229.156	-2061.03	1364.59	229.541	-1998.02	1237.94	320.462	-2254.64	1262.78	64.934	-2148.06	1391.18	10.1249	-2181.89	1165.57	11.2039	-2196.19	1097.44	-23.7635	-2112.08	1007.58	-9.18214	-2079.22	907.963	-46.2834	-2136.52	890.102	-62.7388	-2079.71	810.845
333	0	189.333	-1958.38	1575.63	288.653	-1953.54	1570.92	184.617	-2128.41	1608.05	296.601	-2133.08	1604.18	244.887	-2188.81	1428.06	226.161	-2242.34	1215.49	229.874	-2053.23	1364.59	230.213	-1990.43	1237.88	321.615	-2246.86	1263.13	65.7866	-2140.67	1391.29	11.4158	-2176.75	1165.9	12.6977	-2191.52	1097.86	-23.1075	-2108.15	1007.54	-8.75836	-2075.45	907.825	-44.9273	-2133.39	890.035	-62.2895	-2076.63	810.851
334	0	189.769	-1950.22	1575.26	289.115	-1945.23	1570.61	185.33	-2120.19	1608.13	297.332	-2124.64	1604.33	245.804	-2180.86	1428.23	227.214	-2234.81	1215.73	230.576	-2045.44	1364.51	230.869	-1982.86	1237.74	322.662	-2239.14	1263.39	66.5967	-2133.23	1391.35	12.6528	-2171.41	1166.16	14.1367	-2186.65	1098.22	-22.4513	-2104.1	1007.41	-8.32095	-2071.68	907.561	-43.6181	-2130.22	889.913	-61.8177	-2073.64	810.72
335	0	190.225	-1942.06	1574.81	289.599	-1936.95	1570.21	186.024	-2111.97	1608.12	298.042	-2116.24	1604.38	246.658	-2172.93	1428.31	228.155	-2227.31	1215.89	231.258	-2037.66	1364.35	231.505	-1975.3	1237.52	323.601	-2231.46	1263.56	67.3611	-2125.74	1391.34	13.8263	-2165.86	1166.36	15.5091	-2181.56	1098.53	-21.8013	-2099.9	1007.2	-7.87351	-2067.9	907.17	-42.3712	-2127	889.74	-61.3227	-2070.73	810.446
336	0	190.701	-1933.91	1574.28	290.1	-1928.71	1569.72	186.696	-2103.76	1608.03	298.729	-2107.87	1604.33	247.447	-2165.01	1428.3	228.985	-2219.84	1215.98	231.916	-2029.89	1364.1	232.117	-1967.75	1237.22	324.433	-2223.82	1263.63	68.077	-2118.18	1391.27	14.9273	-2160.09	1166.49	16.8038	-2176.25	1098.77	-21.1643	-2095.53	1006.9	-7.42038	-2064.08	906.652	-41.202	-2123.7	889.519	-60.8047	-2067.89	810.029
337	0	191.19	-1925.76	1573.67	290.614	-1920.48	1569.14	187.343	-2095.56	1607.86	299.391	-2099.53	1604.19	248.168	-2157.1	1428.2	229.704	-2212.4	1215.98	232.549	-2022.12	1363.77	232.701	-1960.2	1236.84	325.159	-2216.22	1263.61	68.7421	-2110.55	1391.14	15.9476	-2154.09	1166.56	18.0105	-2170.7	1098.95	-20.5476	-2090.99	1006.5	-6.96657	-2060.23	906.01	-40.1248	-2120.32	889.254	-60.2656	-2065.11	809.47
338	0	191.687	-1917.61	1572.99	291.137	-1912.28	1568.47	187.964	-2087.35	1607.6	300.024	-2091.21	1603.95	248.821	-2149.2	1428.01	230.314	-2204.99	1215.9	233.151	-2014.34	1363.36	233.255	-1952.64	1236.4	325.781	-2208.64	1263.5	69.3539	-2102.86	1390.95	16.8799	-2147.85	1166.55	19.1201	-2164.9	1099.06	-19.9584	-2086.26	1006.02	-6.51784	-2056.32	905.246	-39.1525	-2116.84	888.947	-59.7084	-2062.38	808.77
339	0	192.187	-1909.45	1572.23	291.661	-1904.08	1567.72	188.554	-2079.13	1607.26	300.627	-2082.91	1603.62	249.404	-2141.3	1427.72	230.816	-2197.59	1215.74	233.72	-2006.54	1362.87	233.777	-1945.06	1235.88	326.3	-2201.06	1263.29	69.9103	-2095.1	1390.68	17.7182	-2141.38	1166.46	20.1249	-2158.86	1099.1	-19.4039	-2081.33	1005.45	-6.08056	-2052.33	904.364	-38.2967	-2113.23	888.601	-59.138	-2059.67	807.935
340	0	192.683	-1901.29	1571.41	292.179	-1895.89	1566.9	189.111	-2070.91	1606.83	301.197	-2074.61	1603.2	249.915	-2133.38	1427.35	231.213	-2190.2	1215.5	234.252	-1998.73	1362.3	234.264	-1937.46	1235.29	326.721	-2193.49	1262.99	70.4094	-2087.26	1390.34	18.4576	-2134.68	1166.3	21.0186	-2152.58	1099.07	-18.8914	-2076.2	1004.79	-5.66171	-2048.27	903.37	-37.5669	-2109.48	888.218	-58.5607	-2056.97	806.973
341	0	193.168	-1893.11	1570.51	292.686	-1887.71	1565.99	189.633	-2062.68	1606.32	301.73	-2066.33	1602.68	250.354	-2125.46	1426.89	231.507	-2182.8	1215.17	234.745	-1990.89	1361.66	234.716	-1929.83	1234.63	327.047	-2185.9	1262.59	70.8494	-2079.34	1389.94	19.0946	-2127.76	1166.05	21.7965	-2146.05	1098.96	-18.4279	-2070.86	1004.05	-5.26872	-2044.11	902.269	-36.9702	-2105.59	887.798	-57.9846	-2054.25	805.891
342	0	193.635	-1884.92	1569.55	293.172	-1879.52	1565.01	190.115	-2054.43	1605.73	302.225	-2058.05	1602.07	250.72	-2117.51	1426.34	231.703	-2175.39	1214.76	235.193	-1983.02	1360.93	235.131	-1922.16	1233.9	327.28	-2178.3	1262.1	71.2285	-2071.35	1389.45	19.6269	-2120.63	1165.72	22.4556	-2139.3	1098.77	-18.0197	-2065.31	1003.22	-4.90938	-2039.83	901.07	-36.5117	-2101.52	887.343	-57.419	-2051.49	804.701
343	0	194.077	-1876.71	1568.53	293.632	-1871.33	1563.97	190.554	-2046.17	1605.06	302.678	-2049.77	1601.38	251.012	-2109.54	1425.7	231.804	-2167.94	1214.27	235.596	-1975.11	1360.13	235.507	-1914.44	1233.1	327.423	-2170.66	1261.52	71.5453	-2063.27	1388.89	20.0537	-2113.29	1165.3	22.9947	-2132.32	1098.49	-17.6732	-2059.55	1002.32	-4.59164	-2035.43	899.779	-36.1938	-2097.28	886.851	-56.8743	-2048.67	803.414
344	0	194.486	-1868.48	1567.45	294.057	-1863.12	1562.85	190.948	-2037.89	1604.31	303.086	-2041.48	1600.6	251.23	-2101.54	1424.97	231.813	-2160.45	1213.68	235.948	-1967.16	1359.26	235.845	-1906.68	1232.23	327.481	-2162.98	1260.84	71.7985	-2055.11	1388.24	20.3751	-2105.75	1164.79	23.4138	-2125.12	1098.13	-17.3936	-2053.58	1001.33	-4.32349	-2030.88	898.407	-36.0166	-2092.84	886.323	-56.362	-2045.75	802.043
345	0	194.855	-1860.23	1566.32	294.44	-1854.88	1561.68	191.292	-2029.58	1603.49	303.446	-2033.17	1599.74	251.375	-2093.5	1424.15	231.736	-2152.89	1213.01	236.248	-1959.16	1358.31	236.141	-1898.86	1231.29	327.457	-2155.24	1260.07	71.9869	-2046.87	1387.51	20.5927	-2098.03	1164.2	23.7147	-2117.73	1097.69	-17.186	-2047.4	1000.27	-4.11277	-2026.18	896.962	-35.9777	-2088.19	885.758	-55.8941	-2042.71	800.601
346	0	195.179	-1851.95	1565.13	294.775	-1846.63	1560.45	191.585	-2021.25	1602.59	303.756	-2024.85	1598.8	251.446	-2085.41	1423.25	231.578	-2145.25	1212.26	236.491	-1951.1	1357.3	236.395	-1890.97	1230.28	327.354	-2147.45	1259.21	72.1094	-2038.54	1386.71	20.709	-2090.15	1163.52	23.9005	-2110.16	1097.15	-17.0544	-2041.02	999.134	-3.96698	-2021.3	895.453	-36.0728	-2083.34	885.153	-55.4828	-2039.51	799.102
347	0	195.451	-1843.63	1563.9	295.056	-1838.34	1559.16	191.822	-2012.89	1601.64	304.012	-2016.51	1597.8	251.445	-2077.28	1422.28	231.342	-2137.51	1211.41	236.677	-1942.98	1356.23	236.604	-1883.01	1229.21	327.175	-2139.58	1258.26	72.1654	-2030.13	1385.82	20.7272	-2082.11	1162.75	23.9754	-2102.41	1096.53	-17.0022	-2034.45	997.938	-3.89311	-2016.25	893.892	-36.2955	-2078.26	884.508	-55.1402	-2036.14	797.56
348	0	195.667	-1835.29	1562.62	295.277	-1830.02	1557.83	192.001	-2004.5	1600.62	304.211	-2008.13	1596.73	251.373	-2069.09	1421.22	231.034	-2129.67	1210.47	236.8	-1934.79	1355.11	236.766	-1874.97	1228.08	326.924	-2131.64	1257.22	72.1544	-2021.63	1384.85	20.6517	-2073.93	1161.89	23.9448	-2094.51	1095.82	-17.0323	-2027.69	996.684	-3.89751	-2010.99	892.29	-36.6379	-2072.95	883.821	-54.878	-2032.55	795.987
349	0	195.821	-1826.9	1561.31	295.434	-1821.66	1556.46	192.119	-1996.07	1599.55	304.351	-1999.72	1595.61	251.23	-2060.83	1420.1	230.658	-2121.7	1209.45	236.861	-1926.53	1353.94	236.879	-1866.84	1226.89	326.604	-2123.6	1256.1	72.0761	-2013.05	1383.81	20.4874	-2065.62	1160.96	23.8149	-2086.47	1095.03	-17.1464	-2020.74	995.38	-3.98568	-2005.52	890.656	-37.0907	-2067.4	883.09	-54.707	-2028.72	794.397
350	0	195.91	-1818.47	1559.97	295.523	-1813.25	1555.05	192.174	-1987.6	1598.44	304.43	-1991.27	1594.44	251.02	-2052.51	1418.91	230.222	-2113.6	1208.34	236.855	-1918.18	1352.72	236.938	-1858.62	1225.67	326.22	-2115.47	1254.9	71.9305	-2004.39	1382.71	20.2398	-2057.2	1159.95	23.5925	-2078.3	1094.16	-17.3458	-2013.61	994.034	-4.1622	-1999.82	889.003	-37.6437	-2061.61	882.316	-54.6368	-2024.63	792.803
351	0	195.93	-1809.99	1558.61	295.541	-1804.78	1553.62	192.164	-1979.09	1597.29	304.444	-1982.77	1593.24	250.743	-2044.12	1417.67	229.728	-2105.35	1207.15	236.781	-1909.76	1351.48	236.941	-1850.29	1224.4	325.773	-2107.24	1253.63	71.7181	-1995.66	1381.54	19.915	-2048.68	1158.88	23.285	-2070.01	1093.22	-17.6309	-2006.31	992.656	-4.43054	-1993.89	887.342	-38.2858	-2055.58	881.498	-54.6758	-2020.23	791.215
352	0	195.88	-1801.46	1557.24	295.487	-1796.27	1552.17	192.087	-1970.53	1596.12	304.391	-1974.22	1592.01	250.403	-2035.66	1416.38	229.183	-2096.96	1205.89	236.638	-1901.24	1350.22	236.884	-1841.85	1223.12	325.27	-2098.89	1252.3	71.4394	-1986.85	1380.32	19.5195	-2040.07	1157.75	22.9003	-2061.62	1092.21	-18.0014	-1998.84	991.255	-4.79304	-1987.71	885.684	-39.0057	-2049.29	880.637	-54.8308	-2015.51	789.644
353	0	195.758	-1792.88	1555.86	295.358	-1787.7	1550.72	191.94	-1961.91	1594.94	304.271	-1965.62	1590.77	250.002	-2027.11	1415.06	228.592	-2088.4	1204.55	236.425	-1892.64	1348.95	236.764	-1833.3	1221.83	324.713	-2090.42	1250.91	71.0955	-1977.97	1379.05	19.0599	-2031.38	1156.57	22.4464	-2053.13	1091.15	-18.4562	-1991.21	989.843	-5.25078	-1981.27	884.041	-39.7917	-2042.74	879.734	-55.1067	-2010.44	788.101
354	0	195.563	-1784.23	1554.49	295.156	-1779.06	1549.27	191.724	-1953.23	1593.75	304.082	-1956.96	1589.52	249.543	-2018.48	1413.71	227.96	-2079.69	1203.16	236.142	-1883.93	1347.69	236.578	-1824.63	1220.54	324.108	-2081.82	1249.47	70.6878	-1969.03	1377.75	18.5431	-2022.61	1155.35	21.9313	-2044.55	1090.04	-18.9933	-1983.41	988.43	-5.80365	-1974.55	882.426	-40.6321	-2035.94	878.793	-55.5067	-2005	786.595
355	0	195.296	-1775.53	1553.14	294.88	-1770.36	1547.85	191.438	-1944.5	1592.58	303.822	-1948.24	1588.29	249.029	-2009.76	1412.35	227.292	-2070.82	1201.71	235.787	-1875.13	1346.44	236.324	-1815.83	1219.28	323.46	-2073.09	1248.01	70.2181	-1960.03	1376.44	17.9761	-2013.78	1154.1	21.3633	-2035.89	1088.89	-19.6101	-1975.45	987.029	-6.45023	-1967.56	880.85	-41.5156	-2028.88	877.819	-56.032	-1999.16	785.135
356	0	194.957	-1766.75	1551.83	294.532	-1761.59	1546.45	191.082	-1935.69	1591.43	303.491	-1939.46	1587.09	248.465	-2000.96	1410.99	226.595	-2061.78	1200.23	235.363	-1866.23	1345.23	235.999	-1806.89	1218.07	322.773	-2064.22	1246.51	69.6888	-1950.97	1375.11	17.3658	-2004.89	1152.84	20.7503	-2027.14	1087.71	-20.3031	-1967.33	985.654	-7.18788	-1960.28	879.327	-42.4311	-2021.55	876.817	-56.682	-1992.92	783.73
357	0	194.549	-1757.91	1550.56	294.115	-1752.76	1545.1	190.656	-1926.83	1590.33	303.091	-1930.61	1585.93	247.853	-1992.06	1409.65	225.872	-2052.58	1198.72	234.87	-1857.23	1344.07	235.603	-1797.83	1216.91	322.054	-2055.2	1245.01	69.1025	-1941.85	1373.8	16.719	-1995.93	1151.59	20.1	-2018.31	1086.52	-21.068	-1959.06	984.317	-8.01273	-1952.71	877.868	-43.3682	-2013.95	875.795	-57.4543	-1986.25	782.39
358	0	194.073	-1749	1549.36	293.63	-1743.85	1543.82	190.162	-1917.89	1589.28	302.622	-1921.69	1584.83	247.199	-1983.08	1408.34	225.131	-2043.21	1197.2	234.312	-1848.12	1342.98	235.133	-1788.62	1215.82	321.307	-2046.04	1243.52	68.4624	-1932.68	1372.52	16.0425	-1986.92	1150.35	19.4201	-2009.4	1085.34	-21.8997	-1950.62	983.033	-8.91977	-1944.84	876.487	-44.3172	-2006.09	874.763	-58.3445	-1979.15	781.124
359	0	193.533	-1740.01	1548.23	293.083	-1734.87	1542.62	189.603	-1908.88	1588.29	302.085	-1912.7	1583.79	246.505	-1973.99	1407.07	224.374	-2033.69	1195.69	233.69	-1838.9	1341.96	234.592	-1779.27	1214.84	320.538	-2036.72	1242.05	67.7722	-1923.46	1371.28	15.3424	-1977.84	1149.14	18.7177	-2000.4	1084.17	-22.7924	-1942.01	981.815	-9.90288	-1936.66	875.197	-45.2691	-1997.96	873.732	-59.3468	-1971.61	779.942
360	0	192.932	-1730.95	1547.19	292.477	-1725.82	1541.51	188.98	-1899.8	1587.39	301.485	-1903.64	1582.84	245.778	-1964.82	1405.87	223.608	-2024	1194.21	233.009	-1829.59	1341.03	233.98	-1769.79	1213.97	319.754	-2027.25	1240.63	67.036	-1914.19	1370.1	14.6249	-1968.7	1147.99	17.9993	-1991.3	1083.03	-23.7397	-1933.24	980.68	-10.955	-1928.17	874.011	-46.2162	-1989.55	872.715	-60.4535	-1963.63	778.855
361	0	192.276	-1721.81	1546.26	291.817	-1716.69	1540.51	188.298	-1890.65	1586.59	300.823	-1894.51	1582	245.02	-1955.55	1404.74	222.838	-2014.16	1192.78	232.273	-1820.17	1340.22	233.298	-1760.16	1213.22	318.959	-2017.64	1239.27	66.2583	-1904.88	1369	13.8952	-1959.49	1146.89	17.2711	-1982.11	1081.95	-24.7347	-1924.3	979.64	-12.0679	-1919.37	872.942	-47.1518	-1980.87	871.728	-61.6556	-1955.19	777.872
362	0	191.569	-1712.6	1545.45	291.108	-1707.49	1539.63	187.561	-1881.42	1585.89	300.106	-1885.31	1581.26	244.236	-1946.2	1403.7	222.068	-2004.17	1191.42	231.487	-1810.66	1339.52	232.552	-1750.4	1212.63	318.16	-2007.87	1237.99	65.4441	-1895.52	1368	13.1583	-1950.19	1145.88	16.5382	-1972.8	1080.93	-25.7699	-1915.18	978.71	-13.2331	-1910.25	872.002	-48.0705	-1971.91	870.785	-62.9431	-1946.32	777.007
363	0	190.818	-1703.31	1544.77	290.357	-1698.22	1538.9	186.775	-1872.12	1585.32	299.337	-1876.04	1580.65	243.431	-1936.75	1402.78	221.302	-1994.02	1190.15	230.657	-1801.05	1338.95	231.745	-1740.5	1212.19	317.36	-1997.96	1236.81	64.5985	-1886.11	1367.11	12.4182	-1940.82	1144.97	15.8053	-1963.38	1080	-26.8375	-1905.87	977.903	-14.4408	-1900.81	871.204	-48.9682	-1962.67	869.904	-64.3044	-1937	776.269
364	0	190.028	-1693.94	1544.23	289.57	-1688.88	1538.31	185.946	-1862.75	1584.87	298.524	-1866.71	1580.17	242.609	-1927.22	1401.97	220.544	-1983.74	1189	229.79	-1791.35	1338.53	230.882	-1730.48	1211.92	316.566	-1987.93	1235.75	63.7271	-1876.65	1366.35	11.6783	-1931.35	1144.17	15.0754	-1953.84	1079.17	-27.9296	-1896.38	977.233	-15.6813	-1891.06	870.558	-49.8424	-1953.15	869.102	-65.7273	-1927.25	775.672
365	0	189.206	-1684.51	1543.85	288.753	-1679.47	1537.88	185.079	-1853.31	1584.56	297.672	-1857.31	1579.83	241.774	-1917.6	1401.3	219.796	-1973.33	1187.99	228.892	-1781.58	1338.25	229.971	-1720.34	1211.82	315.779	-1977.76	1234.82	62.8353	-1867.14	1365.74	10.9409	-1921.78	1143.5	14.3508	-1944.18	1078.45	-29.0381	-1886.68	976.711	-16.9442	-1880.99	870.076	-50.6919	-1943.33	868.395	-67.1989	-1917.08	775.227
366	0	188.361	-1675	1543.63	287.913	-1670	1537.62	184.184	-1843.81	1584.4	296.79	-1847.84	1579.64	240.929	-1907.91	1400.77	219.061	-1962.8	1187.13	227.97	-1771.72	1338.12	229.02	-1710.1	1211.9	315.004	-1967.5	1234.05	61.9287	-1857.58	1365.28	10.2074	-1912.1	1142.97	13.6322	-1934.37	1077.86	-30.1553	-1876.79	976.347	-18.2191	-1870.61	869.766	-51.5168	-1933.21	867.799	-68.7056	-1906.49	774.944
367	0	187.498	-1665.43	1543.57	287.057	-1660.46	1537.52	183.268	-1834.24	1584.38	295.886	-1838.32	1579.59	240.076	-1898.15	1400.4	218.338	-1952.15	1186.45	227.033	-1761.8	1338.15	228.036	-1699.76	1212.16	314.24	-1957.14	1233.45	61.0126	-1847.97	1364.99	9.47778	-1902.32	1142.59	12.9188	-1924.43	1077.42	-31.2733	-1866.68	976.15	-19.4955	-1859.93	869.636	-52.3191	-1922.8	867.331	-70.2335	-1895.5	774.832
368	0	186.627	-1655.8	1543.68	286.194	-1650.86	1537.6	182.339	-1824.61	1584.51	294.967	-1828.73	1579.7	239.219	-1888.33	1400.19	217.625	-1941.42	1185.95	226.088	-1751.82	1338.33	227.03	-1689.35	1212.6	313.486	-1946.71	1233.03	60.0919	-1838.3	1364.88	8.75097	-1892.41	1142.38	12.2081	-1914.34	1077.12	-32.3853	-1856.36	976.124	-20.7631	-1848.93	869.691	-53.1017	-1912.09	867.002	-71.7686	-1884.11	774.899
369	0	185.756	-1646.11	1543.96	285.33	-1641.21	1537.85	181.405	-1814.93	1584.79	294.042	-1819.1	1579.96	238.359	-1878.44	1400.14	216.921	-1930.6	1185.65	225.143	-1741.79	1338.67	226.012	-1678.88	1213.2	312.74	-1936.22	1232.79	59.171	-1828.56	1364.95	8.02444	-1882.39	1142.33	11.4962	-1904.11	1076.98	-33.4847	-1845.82	976.275	-22.012	-1837.64	869.933	-53.8689	-1901.07	866.823	-73.297	-1872.33	775.149
370	0	184.892	-1636.37	1544.4	284.474	-1631.52	1538.27	180.476	-1805.2	1585.22	293.121	-1809.41	1580.37	237.497	-1868.51	1400.25	216.218	-1919.72	1185.55	224.206	-1731.73	1339.15	224.994	-1668.36	1213.96	311.997	-1925.71	1232.75	58.2541	-1818.76	1365.2	7.29434	-1872.24	1142.45	10.7773	-1893.73	1077.01	-34.5657	-1835.06	976.604	-23.2329	-1826.05	870.365	-54.626	-1889.74	866.801	-74.8053	-1860.18	775.583
371	0	184.045	-1626.59	1545	283.633	-1621.77	1538.84	179.56	-1795.42	1585.8	292.211	-1799.69	1580.91	236.632	-1858.54	1400.53	215.51	-1908.81	1185.66	223.285	-1721.63	1339.76	223.987	-1657.83	1214.86	311.25	-1915.19	1232.89	57.3445	-1808.89	1365.63	6.55546	-1861.97	1142.74	10.0442	-1883.22	1077.2	-35.6237	-1824.08	977.108	-24.417	-1814.19	870.982	-55.3793	-1878.11	866.94	-76.2806	-1847.67	776.2
372	0	183.222	-1616.76	1545.74	282.815	-1611.99	1539.56	178.665	-1785.6	1586.5	291.321	-1789.92	1581.59	235.765	-1848.54	1400.97	214.786	-1897.88	1185.97	222.388	-1711.52	1340.51	223.006	-1647.29	1215.87	310.488	-1904.7	1233.22	56.445	-1798.95	1366.24	5.80138	-1851.58	1143.19	9.28797	-1872.56	1077.55	-36.6548	-1812.87	977.783	-25.5562	-1802.05	871.782	-56.1354	-1866.17	867.242	-77.7108	-1834.8	776.996
373	0	182.432	-1606.9	1546.62	282.028	-1602.18	1540.4	177.798	-1775.74	1587.33	290.459	-1780.12	1582.38	234.894	-1838.51	1401.56	214.037	-1886.95	1186.48	221.522	-1701.4	1341.37	222.062	-1636.78	1216.99	309.703	-1894.24	1233.74	55.558	-1788.93	1367	5.02473	-1841.06	1143.81	8.49891	-1861.77	1078.06	-37.6561	-1801.45	978.623	-26.6436	-1789.66	872.757	-56.9014	-1853.93	867.703	-79.0849	-1821.59	777.963
374	0	181.683	-1597.01	1547.62	281.279	-1592.34	1541.36	176.968	-1765.85	1588.28	289.632	-1770.3	1583.28	234.019	-1828.48	1402.3	213.25	-1876.05	1187.17	220.694	-1691.29	1342.33	221.169	-1626.3	1218.18	308.883	-1883.86	1234.42	54.6851	-1778.82	1367.93	4.2174	-1830.41	1144.58	7.66629	-1850.85	1078.72	-38.6253	-1789.81	979.617	-27.6729	-1777.02	873.896	-57.684	-1841.4	868.316	-80.3932	-1808.04	779.088
375	0	180.983	-1587.09	1548.72	280.577	-1582.49	1542.42	176.179	-1755.94	1589.33	288.846	-1760.46	1584.28	233.136	-1818.44	1403.17	212.413	-1865.2	1188.04	219.91	-1681.19	1343.37	220.34	-1615.88	1219.43	308.015	-1873.58	1235.26	53.8278	-1768.64	1368.99	3.37105	-1819.64	1145.49	6.77907	-1839.8	1079.51	-39.5611	-1777.95	980.755	-28.6387	-1764.16	875.189	-58.4897	-1828.57	869.073	-81.6273	-1794.17	780.359
376	0	180.338	-1577.16	1549.91	279.928	-1572.62	1543.56	175.438	-1746.01	1590.47	288.107	-1750.6	1585.35	232.245	-1808.41	1404.16	211.515	-1854.43	1189.06	219.175	-1671.12	1344.49	219.585	-1605.54	1220.71	307.087	-1863.4	1236.25	52.9872	-1758.36	1370.17	2.47751	-1808.75	1146.53	5.82631	-1828.63	1080.44	-40.4623	-1765.89	982.023	-29.5367	-1751.08	876.62	-59.3242	-1815.47	869.962	-82.7803	-1780	781.761
377	0	179.757	-1567.21	1551.18	279.339	-1562.76	1544.75	174.749	-1736.06	1591.7	287.418	-1740.73	1586.49	231.344	-1798.4	1405.27	210.546	-1843.76	1190.22	218.494	-1661.08	1345.66	218.916	-1595.3	1221.99	306.091	-1853.37	1237.37	52.1645	-1748.01	1371.46	1.52939	-1797.73	1147.68	4.79785	-1817.33	1081.47	-41.3281	-1753.64	983.405	-30.3632	-1737.81	878.176	-60.1923	-1802.1	870.97	-83.8468	-1765.53	783.276
378	0	179.244	-1557.26	1552.49	278.816	-1552.89	1545.99	174.115	-1726.09	1592.98	286.783	-1730.86	1587.68	230.432	-1788.41	1406.47	209.498	-1833.2	1191.5	217.871	-1651.09	1346.87	218.34	-1585.17	1223.27	305.017	-1843.48	1238.59	51.3607	-1737.57	1372.83	0.520525	-1786.58	1148.93	3.68483	-1805.92	1082.6	-42.1576	-1741.19	984.886	-31.1152	-1724.36	879.839	-61.0973	-1788.48	872.083	-84.8228	-1750.78	784.888
379	0	178.804	-1547.3	1553.84	278.364	-1543.03	1547.24	173.538	-1716.12	1594.32	286.205	-1720.99	1588.91	229.508	-1778.46	1407.75	208.367	-1822.77	1192.88	217.307	-1641.15	1348.1	217.865	-1575.16	1224.51	303.859	-1833.76	1239.92	50.5773	-1727.05	1374.28	-0.553403	-1775.31	1150.25	2.48031	-1794.4	1083.81	-42.9496	-1728.55	986.451	-31.7902	-1710.75	881.593	-62.041	-1774.63	873.286	-85.7058	-1735.76	786.581
380	0	178.443	-1537.34	1555.2	277.987	-1533.19	1548.48	173.02	-1706.14	1595.7	285.683	-1711.13	1590.16	228.573	-1768.55	1409.1	207.15	-1812.49	1194.34	216.805	-1631.27	1349.35	217.495	-1565.29	1225.7	302.615	-1824.21	1241.32	49.8157	-1716.47	1375.78	-1.69446	-1763.91	1151.64	1.17981	-1782.76	1085.09	-43.7022	-1715.75	988.083	-32.3863	-1697	883.422	-63.0237	-1760.55	874.566	-86.4946	-1720.51	788.338
381	0	178.164	-1527.39	1556.56	277.69	-1523.37	1549.71	172.559	-1696.16	1597.1	285.218	-1701.28	1591.42	227.628	-1758.69	1410.51	205.851	-1802.38	1195.88	216.365	-1621.46	1350.59	217.231	-1555.57	1226.84	301.286	-1814.84	1242.79	49.0779	-1705.82	1377.31	-2.90208	-1752.37	1153.07	-0.218221	-1771.01	1086.42	-44.4132	-1702.77	989.77	-32.9018	-1683.13	885.31	-64.0438	-1746.26	875.911	-87.1891	-1705.03	790.147
382	0	177.967	-1517.44	1557.9	277.474	-1513.58	1550.91	172.156	-1686.17	1598.52	284.809	-1691.45	1592.68	226.674	-1748.88	1411.96	204.473	-1792.43	1197.46	215.987	-1611.72	1351.82	217.071	-1545.99	1227.92	299.875	-1805.64	1244.32	48.3658	-1695.13	1378.87	-4.1729	-1740.71	1154.53	-1.71217	-1759.14	1087.79	-45.0796	-1689.65	991.496	-33.3353	-1669.15	887.242	-65.0977	-1731.79	877.31	-87.7899	-1689.35	791.996
383	0	177.855	-1507.51	1559.21	277.341	-1503.82	1552.05	171.808	-1676.19	1599.93	284.454	-1681.65	1593.93	225.714	-1739.14	1413.43	203.025	-1782.65	1199.09	215.668	-1602.06	1353.03	217.013	-1536.57	1228.92	298.389	-1796.62	1245.87	47.6817	-1684.4	1380.44	-5.50069	-1728.93	1156.02	-3.29704	-1747.17	1089.18	-45.6975	-1676.38	993.249	-33.6857	-1655.08	889.204	-66.1804	-1717.14	878.752	-88.2983	-1673.49	793.874
384	0	177.826	-1497.58	1560.46	277.29	-1494.09	1553.14	171.514	-1666.22	1601.34	284.15	-1671.87	1595.16	224.752	-1729.46	1414.92	201.518	-1773.04	1200.73	215.407	-1592.49	1354.2	217.049	-1527.29	1229.86	296.839	-1787.77	1247.46	47.028	-1673.66	1382	-6.87651	-1717.02	1157.5	-4.96453	-1735.08	1090.58	-46.2629	-1662.97	995.019	-33.9519	-1640.93	891.183	-67.2846	-1702.34	880.23	-88.716	-1657.49	795.775
385	0	177.88	-1487.68	1561.65	277.32	-1484.41	1554.14	171.269	-1656.25	1602.74	283.894	-1662.12	1596.36	223.791	-1719.85	1416.41	199.964	-1763.61	1202.38	215.2	-1583	1355.33	217.172	-1518.16	1230.72	295.234	-1779.08	1249.05	46.407	-1662.91	1383.55	-8.28903	-1704.99	1158.98	-6.70318	-1722.89	1091.98	-46.7711	-1649.44	996.795	-34.1331	-1626.73	893.169	-68.4018	-1687.4	881.738	-89.0445	-1641.35	797.692
386	0	178.014	-1477.8	1562.77	277.429	-1474.78	1555.07	171.071	-1646.29	1604.1	283.682	-1652.4	1597.53	222.837	-1710.32	1417.89	198.376	-1754.34	1204.03	215.044	-1573.6	1356.41	217.372	-1509.17	1231.52	293.588	-1770.53	1250.65	45.8209	-1652.17	1385.08	-9.725	-1692.86	1160.44	-8.49876	-1710.6	1093.37	-47.2175	-1635.8	998.569	-34.2285	-1612.47	895.152	-69.5219	-1672.34	883.27	-89.2853	-1625.11	799.62
387	0	178.223	-1467.94	1563.8	277.614	-1465.2	1555.9	170.915	-1636.35	1605.42	283.51	-1642.73	1598.65	221.892	-1700.85	1419.35	196.768	-1745.22	1205.67	214.933	-1564.29	1357.44	217.637	-1500.3	1232.26	291.915	-1762.11	1252.22	45.2716	-1641.46	1386.58	-11.1698	-1680.63	1161.87	-10.3347	-1698.22	1094.74	-47.5975	-1622.07	1000.33	-34.2375	-1598.17	897.122	-70.6336	-1657.16	884.821	-89.4395	-1608.8	801.554
388	0	178.504	-1458.11	1564.74	277.87	-1455.67	1556.64	170.797	-1626.42	1606.69	283.375	-1633.1	1599.71	220.963	-1691.46	1420.78	195.155	-1736.25	1207.27	214.864	-1555.06	1358.4	217.958	-1491.55	1232.93	290.23	-1753.82	1253.78	44.7608	-1630.8	1388.03	-12.6082	-1668.33	1163.26	-12.1928	-1685.76	1096.08	-47.907	-1608.25	1002.08	-34.1598	-1583.84	899.073	-71.7247	-1641.88	886.386	-89.5074	-1592.42	803.491
389	0	178.851	-1448.32	1565.58	278.192	-1446.19	1557.27	170.713	-1616.52	1607.9	283.272	-1623.51	1600.72	220.054	-1682.13	1422.15	193.55	-1727.4	1208.83	214.831	-1545.93	1359.3	218.321	-1482.91	1233.54	288.545	-1745.62	1255.29	44.2898	-1620.19	1389.44	-14.0247	-1655.96	1164.61	-14.0537	-1673.22	1097.38	-48.1422	-1594.37	1003.8	-33.995	-1569.48	900.997	-72.782	-1626.53	887.959	-89.4888	-1576.01	805.427
390	0	179.257	-1438.56	1566.32	278.575	-1436.77	1557.8	170.659	-1606.64	1609.05	283.196	-1613.97	1601.66	219.169	-1672.88	1423.47	191.965	-1718.68	1210.34	214.829	-1536.87	1360.12	218.715	-1474.36	1234.09	286.876	-1737.52	1256.76	43.8594	-1609.65	1390.79	-15.4047	-1643.55	1165.9	-15.8974	-1660.63	1098.63	-48.3004	-1580.43	1005.5	-33.7433	-1555.12	902.888	-73.7922	-1611.11	889.533	-89.383	-1559.58	807.358
391	0	179.717	-1428.84	1566.95	279.011	-1427.42	1558.23	170.631	-1596.8	1610.11	283.143	-1604.48	1602.53	218.313	-1663.7	1424.72	190.413	-1710.05	1211.79	214.854	-1527.9	1360.86	219.13	-1465.9	1234.58	285.235	-1729.48	1258.16	43.4701	-1599.19	1392.06	-16.7344	-1631.12	1167.13	-17.7045	-1647.99	1099.81	-48.3792	-1566.45	1007.15	-33.4049	-1540.74	904.74	-74.7418	-1595.63	891.101	-89.1883	-1543.15	809.278
392	0	180.223	-1419.16	1567.47	279.495	-1418.12	1558.55	170.625	-1586.98	1611.09	283.111	-1595.04	1603.31	217.491	-1654.58	1425.89	188.905	-1701.51	1213.15	214.901	-1519	1361.52	219.556	-1457.5	1234.99	283.635	-1721.49	1259.49	43.1221	-1588.81	1393.26	-18.0015	-1618.69	1168.28	-19.4559	-1635.32	1100.92	-48.3775	-1552.46	1008.76	-32.9803	-1526.36	906.548	-75.6173	-1580.11	892.654	-88.9027	-1526.73	811.181
393	0	180.767	-1409.53	1567.88	280.02	-1408.87	1558.77	170.637	-1577.21	1611.98	283.094	-1585.66	1604	216.706	-1645.52	1426.97	187.452	-1693.05	1214.42	214.966	-1510.16	1362.09	219.983	-1449.17	1235.34	282.087	-1713.55	1260.73	42.8151	-1578.53	1394.36	-19.1954	-1606.29	1169.34	-21.1342	-1622.64	1101.94	-48.2947	-1538.46	1010.32	-32.4704	-1511.98	908.305	-76.4058	-1564.57	894.182	-88.5238	-1510.33	813.061
394	0	181.343	-1399.94	1568.17	280.577	-1399.69	1558.88	170.663	-1567.48	1612.76	283.091	-1576.33	1604.6	215.962	-1636.52	1427.95	186.063	-1684.64	1215.6	215.046	-1501.4	1362.56	220.405	-1440.9	1235.6	280.605	-1705.62	1261.88	42.5487	-1568.35	1395.37	-20.3071	-1593.92	1170.31	-22.7234	-1609.96	1102.87	-48.1309	-1524.48	1011.82	-31.876	-1497.61	910.005	-77.0954	-1549.02	895.672	-88.0491	-1493.97	814.91
395	0	181.943	-1390.4	1568.36	281.161	-1390.56	1558.89	170.701	-1557.79	1613.42	283.097	-1567.05	1605.09	215.263	-1627.57	1428.82	184.747	-1676.28	1216.66	215.138	-1492.69	1362.92	220.816	-1432.67	1235.77	279.199	-1697.72	1262.92	42.3224	-1558.27	1396.26	-21.3295	-1581.62	1171.18	-24.2094	-1597.3	1103.69	-47.8867	-1510.53	1013.25	-31.1982	-1483.26	911.644	-77.6748	-1533.47	897.114	-87.4757	-1477.65	816.72
396	0	182.56	-1380.91	1568.44	281.764	-1381.49	1558.79	170.748	-1548.14	1613.97	283.111	-1557.83	1605.48	214.613	-1618.66	1429.58	183.515	-1667.96	1217.59	215.239	-1484.03	1363.18	221.211	-1424.47	1235.84	277.878	-1689.81	1263.84	42.1356	-1548.3	1397.03	-22.2566	-1569.39	1171.92	-25.5803	-1584.67	1104.39	-47.5631	-1496.63	1014.6	-30.4385	-1468.93	913.215	-78.1341	-1517.95	898.494	-86.8012	-1461.39	818.483
397	0	183.187	-1371.48	1568.4	282.38	-1372.46	1558.6	170.802	-1538.55	1614.4	283.131	-1548.66	1605.75	214.014	-1609.8	1430.21	182.373	-1659.67	1218.4	215.349	-1475.41	1363.33	221.586	-1416.32	1235.81	276.653	-1681.89	1264.65	41.9874	-1538.43	1397.66	-23.0839	-1557.26	1172.55	-26.8262	-1572.09	1104.95	-47.1614	-1482.78	1015.87	-29.5981	-1454.62	914.711	-78.465	-1502.47	899.799	-86.0233	-1445.18	820.191
398	0	183.818	-1362.08	1568.25	283.002	-1363.48	1558.31	170.861	-1529	1614.69	283.156	-1539.54	1605.9	213.471	-1600.98	1430.71	181.331	-1651.41	1219.07	215.467	-1466.83	1363.36	221.941	-1408.18	1235.66	275.534	-1673.95	1265.32	41.8773	-1528.67	1398.15	-23.8082	-1545.23	1173.03	-27.9395	-1559.56	1105.38	-46.6827	-1469.02	1017.04	-28.6784	-1440.36	916.127	-78.6602	-1487.04	901.017	-85.1402	-1429.04	821.835
399	0	184.446	-1352.74	1568	283.625	-1354.54	1557.93	170.925	-1519.5	1614.85	283.185	-1530.46	1605.94	212.986	-1592.18	1431.08	180.395	-1643.15	1219.59	215.593	-1458.28	1363.27	222.275	-1400.07	1235.4	274.527	-1665.99	1265.86	41.8049	-1519.01	1398.49	-24.4272	-1533.32	1173.38	-28.9144	-1547.11	1105.66	-46.1285	-1455.34	1018.12	-27.6807	-1426.14	917.458	-78.7143	-1471.69	902.137	-84.1505	-1412.97	823.408
400	0	185.066	-1343.44	1567.63	284.243	-1345.63	1557.45	170.992	-1510.06	1614.87	283.217	-1521.43	1605.85	212.561	-1583.41	1431.31	179.572	-1634.91	1219.97	215.728	-1449.75	1363.07	222.59	-1391.97	1235.01	273.64	-1658	1266.27	41.7698	-1509.46	1398.68	-24.9392	-1521.53	1173.58	-29.7471	-1534.73	1105.79	-45.5	-1441.76	1019.08	-26.6065	-1411.98	918.699	-78.623	-1456.43	903.148	-83.0537	-1396.99	824.903
401	0	185.675	-1334.19	1567.16	284.853	-1336.75	1556.88	171.064	-1500.66	1614.75	283.254	-1512.43	1605.64	212.199	-1574.67	1431.41	178.868	-1626.66	1220.2	215.873	-1441.23	1362.74	222.89	-1383.87	1234.51	272.879	-1649.96	1266.53	41.7719	-1500	1398.7	-25.3435	-1509.87	1173.63	-30.4354	-1522.45	1105.76	-44.7981	-1428.3	1019.93	-25.4569	-1397.88	919.844	-78.3836	-1441.28	904.041	-81.8495	-1381.1	826.314
402	0	186.269	-1324.97	1566.59	285.451	-1327.9	1556.22	171.14	-1491.3	1614.5	283.297	-1503.46	1605.31	211.904	-1565.94	1431.36	178.286	-1618.42	1220.27	216.032	-1432.72	1362.3	223.177	-1375.77	1233.88	272.247	-1641.88	1266.66	41.8116	-1490.64	1398.56	-25.6397	-1498.35	1173.52	-30.9785	-1510.26	1105.57	-44.0238	-1414.96	1020.66	-24.233	-1383.85	920.89	-77.9946	-1426.24	904.809	-80.5384	-1365.31	827.635
403	0	186.845	-1315.8	1565.91	286.035	-1319.06	1555.47	171.223	-1481.99	1614.1	283.347	-1494.52	1604.86	211.675	-1557.22	1431.17	177.831	-1610.17	1220.2	216.207	-1424.21	1361.73	223.458	-1367.65	1233.14	271.748	-1633.76	1266.65	41.8894	-1481.37	1398.26	-25.8278	-1486.96	1173.25	-31.377	-1498.17	1105.22	-43.1778	-1401.75	1021.27	-22.9359	-1369.91	921.834	-77.4557	-1411.34	905.446	-79.1213	-1349.63	828.864
404	0	187.403	-1306.65	1565.12	286.604	-1310.23	1554.64	171.315	-1472.73	1613.57	283.407	-1485.61	1604.29	211.517	-1548.5	1430.84	177.504	-1601.91	1219.98	216.402	-1415.7	1361.05	223.739	-1359.52	1232.28	271.382	-1625.58	1266.49	42.0066	-1472.18	1397.79	-25.9083	-1475.7	1172.83	-31.6323	-1486.2	1104.72	-42.2605	-1388.67	1021.75	-21.5664	-1356.06	922.673	-76.7678	-1396.59	905.948	-77.5995	-1334.08	829.996
405	0	187.941	-1297.54	1564.24	287.157	-1301.41	1553.73	171.418	-1463.5	1612.91	283.481	-1476.71	1603.6	211.429	-1539.79	1430.38	177.304	-1593.64	1219.61	216.622	-1407.17	1360.26	224.028	-1351.35	1231.32	271.148	-1617.35	1266.2	42.1645	-1463.07	1397.17	-25.8818	-1464.56	1172.26	-31.747	-1474.33	1104.07	-41.2726	-1375.74	1022.1	-20.1256	-1342.31	923.405	-75.9326	-1382	906.315	-75.9746	-1318.66	831.029
406	0	188.462	-1288.45	1563.27	287.695	-1292.59	1552.74	171.536	-1454.3	1612.12	283.573	-1467.82	1602.8	211.415	-1531.07	1429.78	177.231	-1585.34	1219.1	216.87	-1398.62	1359.35	224.332	-1343.15	1230.26	271.044	-1609.05	1265.78	42.3651	-1454.02	1396.4	-25.7494	-1453.56	1171.54	-31.7241	-1462.58	1103.26	-40.2144	-1362.95	1022.32	-18.6143	-1328.68	924.029	-74.9528	-1367.58	906.545	-74.2487	-1303.39	831.963
407	0	188.967	-1279.38	1562.21	288.221	-1283.76	1551.68	171.673	-1445.14	1611.21	283.686	-1458.93	1601.91	211.475	-1522.35	1429.06	177.28	-1577.02	1218.45	217.154	-1390.04	1358.35	224.661	-1334.89	1229.11	271.066	-1600.7	1265.22	42.6107	-1445.03	1395.47	-25.5122	-1442.68	1170.68	-31.5675	-1450.95	1102.32	-39.0865	-1350.32	1022.41	-17.0336	-1315.17	924.544	-73.8321	-1353.35	906.641	-72.4237	-1288.28	832.795
408	0	189.459	-1270.33	1561.06	288.737	-1274.93	1550.55	171.835	-1436.01	1610.18	283.825	-1450.05	1600.91	211.611	-1513.61	1428.21	177.448	-1568.66	1217.67	217.476	-1381.44	1357.25	225.023	-1326.58	1227.89	271.208	-1592.29	1264.54	42.9041	-1436.09	1394.42	-25.1718	-1431.92	1169.69	-31.2815	-1439.44	1101.24	-37.8897	-1337.84	1022.37	-15.3849	-1301.8	924.949	-72.5751	-1339.3	906.605	-70.5021	-1273.35	833.524
409	0	189.944	-1261.29	1559.84	289.248	-1266.08	1549.37	172.026	-1426.91	1609.05	283.997	-1441.16	1599.82	211.823	-1504.86	1427.25	177.729	-1560.26	1216.77	217.844	-1372.8	1356.07	225.426	-1318.21	1226.59	271.464	-1583.8	1263.73	43.248	-1427.18	1393.23	-24.7302	-1421.27	1168.57	-30.8708	-1428.06	1100.05	-36.6249	-1325.52	1022.21	-13.6698	-1288.57	925.244	-71.1872	-1325.44	906.441	-68.4866	-1258.61	834.151
410	0	190.426	-1252.26	1558.54	289.758	-1257.21	1548.13	172.252	-1417.82	1607.82	284.207	-1432.27	1598.65	212.112	-1496.08	1426.17	178.117	-1551.81	1215.75	218.262	-1364.11	1354.8	225.879	-1309.76	1225.24	271.825	-1575.25	1262.8	43.6457	-1418.3	1391.93	-24.1896	-1410.72	1167.33	-30.3407	-1416.8	1098.74	-35.2936	-1313.36	1021.93	-11.8903	-1275.49	925.431	-69.6748	-1311.79	906.154	-66.3804	-1244.07	834.673
411	0	190.912	-1243.24	1557.19	290.273	-1248.33	1546.84	172.519	-1408.76	1606.51	284.461	-1423.37	1597.41	212.481	-1487.27	1424.99	178.603	-1543.29	1214.61	218.736	-1355.38	1353.46	226.39	-1301.22	1223.85	272.284	-1566.62	1261.75	44.1002	-1409.43	1390.52	-23.5527	-1400.28	1165.99	-29.6964	-1405.67	1097.33	-33.8977	-1301.36	1021.53	-10.0493	-1262.57	925.51	-68.0454	-1298.35	905.749	-64.1871	-1229.75	835.09
412	0	191.41	-1234.22	1555.79	290.801	-1239.42	1545.52	172.833	-1399.71	1605.11	284.766	-1414.46	1596.1	212.928	-1478.44	1423.72	179.181	-1534.71	1213.36	219.271	-1346.6	1352.07	226.965	-1292.6	1222.42	272.832	-1557.92	1260.58	44.6145	-1400.56	1389.03	-22.8225	-1389.94	1164.56	-28.944	-1394.66	1095.83	-32.4395	-1289.53	1021.01	-8.14988	-1249.83	925.481	-66.3075	-1285.12	905.231	-61.9109	-1215.67	835.4
413	0	191.927	-1225.21	1554.36	291.348	-1230.48	1544.17	173.201	-1390.67	1603.66	285.128	-1405.53	1594.73	213.454	-1469.57	1422.36	179.844	-1526.04	1212.02	219.87	-1337.76	1350.62	227.611	-1283.89	1220.97	273.46	-1549.13	1259.31	45.1916	-1391.69	1387.45	-22.0027	-1379.69	1163.04	-28.0891	-1383.79	1094.25	-30.922	-1277.86	1020.38	-6.19627	-1237.27	925.345	-64.4704	-1272.11	904.605	-59.5569	-1201.82	835.6
414	0	192.471	-1216.19	1552.9	291.922	-1221.52	1542.8	173.629	-1381.64	1602.15	285.552	-1396.59	1593.32	214.06	-1460.65	1420.92	180.584	-1517.28	1210.58	220.537	-1328.86	1349.14	228.333	-1275.07	1219.51	274.161	-1540.25	1257.94	45.834	-1382.79	1385.81	-21.0969	-1369.52	1161.45	-27.1381	-1373.04	1092.61	-29.3486	-1266.36	1019.66	-4.19326	-1224.9	925.105	-62.5442	-1259.32	903.879	-57.131	-1188.23	835.689
415	0	193.052	-1207.16	1551.42	292.532	-1212.54	1541.43	174.124	-1372.62	1600.6	286.045	-1387.63	1591.87	214.746	-1451.69	1419.42	181.395	-1508.41	1209.05	221.276	-1319.89	1347.63	229.135	-1266.14	1218.04	274.927	-1531.29	1256.46	46.544	-1373.86	1384.11	-20.1094	-1359.44	1159.81	-26.0971	-1362.42	1090.91	-27.7236	-1255.03	1018.83	-2.14652	-1212.73	924.762	-60.54	-1246.77	903.055	-54.6405	-1174.91	835.663
416	0	193.679	-1198.13	1549.95	293.185	-1203.52	1540.06	174.689	-1363.61	1599.02	286.613	-1378.65	1590.39	215.511	-1442.69	1417.87	182.273	-1499.43	1207.44	222.088	-1310.85	1346.11	230.018	-1257.1	1216.59	275.753	-1522.22	1254.89	47.3232	-1364.9	1382.38	-19.0444	-1349.43	1158.12	-24.9724	-1351.93	1089.16	-26.0515	-1243.86	1017.91	-0.062554	-1200.77	924.316	-58.4693	-1234.45	902.141	-52.0935	-1161.87	835.519
417	0	194.358	-1189.09	1548.49	293.889	-1194.48	1538.71	175.332	-1354.59	1597.43	287.26	-1369.65	1588.9	216.357	-1433.63	1416.27	183.211	-1490.33	1205.75	222.975	-1301.75	1344.6	230.984	-1247.94	1215.17	276.631	-1513.06	1253.24	48.1727	-1355.88	1380.62	-17.9062	-1339.49	1156.4	-23.77	-1341.56	1087.39	-24.3376	-1232.85	1016.91	2.05136	-1189.02	923.772	-56.3442	-1222.38	901.142	-49.4999	-1149.11	835.255
418	0	195.099	-1180.03	1547.07	294.652	-1185.41	1537.38	176.056	-1345.57	1595.84	287.991	-1360.64	1587.41	217.281	-1424.52	1414.65	184.208	-1481.09	1204	223.937	-1292.56	1343.09	232.032	-1238.65	1213.77	277.559	-1503.79	1251.5	49.0931	-1346.82	1378.86	-16.699	-1329.62	1154.66	-22.4958	-1331.31	1085.61	-22.5873	-1222.02	1015.83	4.18718	-1177.5	923.131	-54.177	-1210.55	900.063	-46.8705	-1136.65	834.869
419	0	195.909	-1170.95	1545.69	295.48	-1176.31	1536.1	176.865	-1336.55	1594.27	288.81	-1351.6	1585.92	218.283	-1415.34	1413.01	185.26	-1471.71	1202.19	224.973	-1283.31	1341.62	233.159	-1229.24	1212.43	278.533	-1494.4	1249.7	50.084	-1337.69	1377.1	-15.427	-1319.82	1152.92	-21.1553	-1321.18	1083.82	-20.8068	-1211.35	1014.69	6.33624	-1166.2	922.397	-51.9803	-1198.98	898.91	-44.2179	-1124.5	834.358
420	0	196.792	-1161.86	1544.37	296.379	-1167.18	1534.87	177.762	-1327.52	1592.74	289.718	-1342.54	1584.46	219.363	-1406.11	1411.36	186.365	-1462.19	1200.34	226.081	-1273.97	1340.19	234.36	-1219.69	1211.14	279.551	-1484.91	1247.85	51.1445	-1328.51	1375.37	-14.094	-1310.07	1151.19	-19.7536	-1311.16	1082.04	-19.0023	-1200.85	1013.49	8.48928	-1155.14	921.576	-49.7668	-1187.67	897.691	-41.5561	-1112.66	833.723
421	0	197.755	-1152.74	1543.14	297.354	-1158.03	1533.71	178.748	-1318.48	1591.24	290.718	-1333.46	1583.03	220.519	-1396.81	1409.74	187.524	-1452.51	1198.45	227.257	-1264.56	1338.82	235.631	-1210.02	1209.92	280.611	-1475.3	1245.95	52.2727	-1319.26	1373.67	-12.7034	-1300.38	1149.49	-18.2952	-1301.26	1080.3	-17.1804	-1190.53	1012.24	10.6366	-1144.32	920.672	-47.549	-1176.64	896.414	-38.9	-1101.16	832.965
422	0	198.8	-1143.6	1541.99	298.408	-1148.84	1532.64	179.825	-1309.42	1589.82	291.81	-1324.36	1581.65	221.749	-1387.45	1408.15	188.734	-1442.68	1196.56	228.498	-1255.07	1337.52	236.962	-1200.21	1208.79	281.715	-1465.57	1244.03	53.4659	-1309.95	1372.04	-11.2585	-1290.74	1147.83	-16.7838	-1291.47	1078.6	-15.3479	-1180.36	1010.95	12.7682	-1133.75	919.693	-45.339	-1165.89	895.087	-36.2661	-1089.99	832.086
423	0	199.93	-1134.43	1540.96	299.543	-1139.62	1531.66	180.992	-1300.35	1588.46	292.992	-1315.23	1580.34	223.051	-1378.03	1406.6	189.996	-1432.7	1194.67	229.797	-1245.51	1336.31	238.346	-1190.28	1207.75	282.861	-1455.72	1242.1	54.721	-1300.58	1370.48	-9.76214	-1281.15	1146.23	-15.2228	-1281.78	1076.97	-13.5114	-1170.37	1009.64	14.874	-1123.43	918.648	-43.1485	-1155.43	893.723	-33.6715	-1079.18	831.091
424	0	201.143	-1125.24	1540.05	300.758	-1130.36	1530.79	182.246	-1291.26	1587.21	294.264	-1306.08	1579.09	224.423	-1368.54	1405.13	191.309	-1422.57	1192.81	231.15	-1235.87	1335.2	239.771	-1180.23	1206.82	284.052	-1445.76	1240.19	56.0338	-1291.16	1369.01	-8.21703	-1271.61	1144.71	-13.615	-1272.19	1075.42	-11.6777	-1160.55	1008.32	16.9438	-1113.37	917.545	-40.9886	-1145.26	892.332	-31.1338	-1068.72	829.987
425	0	202.437	-1116.01	1539.28	302.052	-1121.08	1530.05	183.585	-1282.14	1586.05	295.621	-1296.9	1577.94	225.863	-1358.99	1403.74	192.674	-1412.29	1191	232.548	-1226.17	1334.21	241.228	-1170.06	1206.02	285.289	-1435.68	1238.31	57.3996	-1281.68	1367.66	-6.62566	-1262.12	1143.28	-11.9627	-1262.71	1073.97	-9.85359	-1150.91	1007.01	18.9678	-1103.58	916.396	-38.8697	-1135.4	890.928	-28.671	-1058.64	828.783
426	0	203.81	-1106.75	1538.66	303.421	-1111.76	1529.44	185.004	-1273.01	1585.02	297.059	-1287.69	1576.89	227.365	-1349.38	1402.45	194.09	-1401.88	1189.27	233.984	-1216.4	1333.34	242.702	-1159.78	1205.35	286.574	-1425.49	1236.49	58.813	-1272.16	1366.44	-4.99056	-1252.67	1141.97	-10.268	-1253.32	1072.64	-8.0455	-1141.43	1005.72	20.9363	-1094.05	915.213	-36.8014	-1125.86	889.528	-26.3009	-1048.94	827.491
427	0	205.254	-1097.46	1538.21	304.859	-1102.4	1528.98	186.498	-1263.85	1584.12	298.571	-1278.46	1575.95	228.927	-1339.72	1401.28	195.557	-1391.35	1187.65	235.449	-1206.58	1332.62	244.183	-1149.4	1204.81	287.91	-1415.2	1234.76	60.2683	-1262.6	1365.36	-3.31441	-1243.27	1140.79	-8.533	-1244.02	1071.45	-6.25978	-1132.14	1004.47	22.8402	-1084.78	914.01	-34.7922	-1116.64	888.148	-24.0404	-1039.64	826.124
428	0	206.762	-1088.14	1537.92	306.359	-1093.01	1528.68	188.059	-1254.66	1583.36	300.152	-1269.19	1575.14	230.544	-1330	1400.25	197.073	-1380.72	1186.16	236.935	-1196.7	1332.04	245.656	-1138.93	1204.43	289.299	-1404.82	1233.15	61.7592	-1253.02	1364.46	-1.60026	-1233.92	1139.76	-6.76008	-1234.81	1070.42	-4.50256	-1123.02	1003.27	24.6711	-1075.79	912.802	-32.8499	-1107.74	886.806	-21.9052	-1030.75	824.699
429	0	208.324	-1078.78	1537.82	307.911	-1083.58	1528.55	189.681	-1245.45	1582.75	301.793	-1259.9	1574.47	232.211	-1320.23	1399.38	198.637	-1370.01	1184.83	238.432	-1186.78	1331.63	247.109	-1128.39	1204.21	290.741	-1394.37	1231.68	63.2791	-1243.41	1363.74	0.148311	-1224.62	1138.9	-4.95203	-1225.7	1069.57	-2.77982	-1114.08	1002.14	26.4211	-1067.08	911.603	-30.9814	-1099.18	885.521	-19.9096	-1022.26	823.232
430	0	209.93	-1069.4	1537.91	309.506	-1074.12	1528.59	191.353	-1236.22	1582.31	303.485	-1250.58	1573.94	233.922	-1310.42	1398.67	200.246	-1359.23	1183.69	239.932	-1176.83	1331.38	248.529	-1117.79	1204.16	292.239	-1383.84	1230.38	64.8213	-1233.8	1363.21	1.92699	-1215.37	1138.22	-3.11238	-1216.69	1068.9	-1.09741	-1105.32	1001.1	28.083	-1058.63	910.429	-29.193	-1090.94	884.313	-18.0657	-1014.2	821.743
431	0	211.567	-1059.98	1538.18	311.131	-1064.62	1528.81	193.066	-1226.96	1582.03	305.218	-1241.22	1573.57	235.672	-1300.58	1398.14	201.899	-1348.42	1182.77	241.424	-1166.85	1331.29	249.907	-1107.16	1204.27	293.793	-1373.27	1229.27	66.379	-1224.19	1362.9	3.7306	-1206.19	1137.73	-1.24552	-1207.77	1068.44	0.538899	-1096.75	1000.16	29.6504	-1050.47	909.297	-27.4902	-1083.05	883.2	-16.3832	-1006.57	820.253
432	0	213.222	-1050.54	1538.65	312.774	-1055.09	1529.21	194.811	-1217.69	1581.93	306.983	-1231.84	1573.36	237.454	-1290.71	1397.8	203.591	-1337.61	1182.08	242.902	-1156.87	1331.38	251.231	-1096.51	1204.55	295.404	-1362.66	1228.38	67.9454	-1214.6	1362.8	5.553	-1197.08	1137.44	0.643124	-1198.96	1068.19	2.12329	-1088.37	999.335	31.1178	-1042.57	908.221	-25.8779	-1075.48	882.202	-14.8691	-999.358	818.781
433	0	214.881	-1041.07	1539.31	314.421	-1045.52	1529.8	196.576	-1208.39	1581.99	308.768	-1222.43	1573.31	239.261	-1280.82	1397.65	205.32	-1326.82	1181.63	244.357	-1146.87	1331.65	252.494	-1085.87	1205	297.072	-1352.04	1227.72	69.5139	-1205.04	1362.91	7.38704	-1188.05	1137.37	2.54708	-1190.25	1068.15	3.6499	-1080.17	998.64	32.4801	-1034.95	907.217	-24.3607	-1068.24	881.335	-13.5275	-992.571	817.348
434	0	216.53	-1031.59	1540.14	316.059	-1035.93	1530.55	198.349	-1199.08	1582.23	310.561	-1212.99	1573.43	241.086	-1270.92	1397.71	207.08	-1316.09	1181.45	245.782	-1136.89	1332.08	253.689	-1075.24	1205.61	298.795	-1341.42	1227.31	71.0782	-1195.52	1363.25	9.22463	-1179.11	1137.51	4.45891	-1181.66	1068.34	5.11275	-1072.18	998.084	33.733	-1027.59	906.298	-22.9427	-1061.32	880.613	-12.3599	-986.202	815.972
435	0	218.154	-1022.1	1541.15	317.673	-1026.31	1531.48	200.121	-1189.76	1582.64	312.354	-1203.53	1573.71	242.924	-1261.03	1397.96	208.869	-1305.44	1181.54	247.17	-1126.93	1332.68	254.811	-1064.67	1206.37	300.573	-1330.83	1227.16	72.6322	-1186.06	1363.8	11.0569	-1170.27	1137.86	6.37035	-1173.19	1068.74	6.50578	-1064.37	997.673	34.8729	-1020.5	905.475	-21.6279	-1054.71	880.048	-11.3649	-980.238	814.67
436	0	219.74	-1012.6	1542.33	319.25	-1016.67	1532.57	201.879	-1180.44	1583.21	314.133	-1194.05	1574.16	244.767	-1251.14	1398.41	210.683	-1294.89	1181.89	248.517	-1117	1333.43	255.857	-1054.16	1207.29	302.405	-1320.27	1227.27	74.1705	-1176.66	1364.56	12.8743	-1161.55	1138.41	8.27254	-1164.86	1069.35	7.8229	-1056.77	997.411	35.8965	-1013.66	904.758	-20.4199	-1048.39	879.648	-10.5389	-974.665	813.458
437	0	221.273	-1003.11	1543.65	320.775	-1007.02	1533.81	203.614	-1171.11	1583.93	315.888	-1184.56	1574.76	246.608	-1241.28	1399.05	212.518	-1284.48	1182.49	249.818	-1107.12	1334.33	256.826	-1043.73	1208.34	304.289	-1309.77	1227.64	75.6883	-1167.36	1365.51	14.6671	-1152.95	1139.16	10.1564	-1156.67	1070.16	9.05809	-1049.37	997.298	36.8014	-1007.07	904.155	-19.3219	-1042.36	879.419	-9.87618	-969.464	812.347
438	0	222.741	-993.622	1545.1	322.237	-997.356	1535.18	205.314	-1161.8	1584.79	317.611	-1175.06	1575.51	248.442	-1231.46	1399.87	214.374	-1274.23	1183.34	251.069	-1097.3	1335.38	257.718	-1033.42	1209.51	306.223	-1299.35	1228.26	77.1813	-1158.14	1366.63	16.4256	-1144.5	1140.08	12.0128	-1148.64	1071.15	10.2055	-1042.18	997.331	37.5857	-1000.72	903.67	-18.3367	-1036.58	879.359	-9.36966	-964.61	811.348
439	0	224.132	-984.158	1546.66	323.624	-987.699	1536.67	206.972	-1152.5	1585.79	319.29	-1165.55	1576.4	250.264	-1221.67	1400.86	216.25	-1264.14	1184.41	252.27	-1087.54	1336.54	258.536	-1023.22	1210.79	308.206	-1289.01	1229.12	78.646	-1149.04	1367.9	18.1407	-1136.21	1141.16	13.8333	-1140.77	1072.3	11.2599	-1035.18	997.506	38.2479	-994.605	903.306	-17.4663	-1031.06	879.467	-9.01123	-960.077	810.467
440	0	225.435	-974.724	1548.32	324.924	-978.052	1538.26	208.577	-1143.23	1586.91	320.918	-1156.05	1577.42	252.069	-1211.95	1402	218.145	-1254.23	1185.68	253.42	-1077.85	1337.82	259.283	-1013.15	1212.16	310.236	-1278.78	1230.2	80.0796	-1140.05	1369.31	19.804	-1128.1	1142.39	15.6102	-1133.08	1073.59	12.2166	-1028.4	997.812	38.7875	-988.706	903.061	-16.7119	-1025.76	879.733	-8.79242	-955.837	809.709
441	0	226.641	-965.329	1550.05	326.129	-968.423	1539.94	210.122	-1133.99	1588.12	322.488	-1146.56	1578.56	253.851	-1202.28	1403.28	220.061	-1244.51	1187.12	254.518	-1068.25	1339.18	259.966	-1003.23	1213.61	312.308	-1268.66	1231.47	81.48	-1131.2	1370.81	21.4088	-1120.17	1143.73	17.3372	-1125.57	1074.99	13.0719	-1021.82	998.24	39.2048	-983.016	902.932	-16.0732	-1020.68	880.147	-8.70482	-951.857	809.075
442	0	227.742	-955.983	1551.82	327.232	-958.822	1541.68	211.602	-1124.79	1589.43	323.993	-1137.08	1579.81	255.608	-1192.69	1404.67	221.999	-1234.97	1188.7	255.566	-1058.74	1340.63	260.591	-993.459	1215.11	314.421	-1258.66	1232.92	82.846	-1122.47	1372.39	22.9496	-1112.45	1145.16	19.0091	-1118.26	1076.48	13.8231	-1015.44	998.776	39.501	-977.523	902.916	-15.5483	-1015.8	880.696	-8.74051	-948.108	808.565
443	0	228.732	-946.695	1553.63	328.225	-949.256	1543.46	213.011	-1115.63	1590.8	325.428	-1127.63	1581.16	257.337	-1183.18	1406.17	223.96	-1225.63	1190.39	256.567	-1049.33	1342.14	261.166	-983.849	1216.65	316.568	-1248.79	1234.51	84.1771	-1113.89	1374.02	24.4231	-1104.93	1146.66	20.6226	-1111.16	1078.04	14.469	-1009.28	999.406	39.6781	-972.218	903.003	-15.1334	-1011.1	881.363	-8.89226	-944.558	808.178
444	0	229.608	-937.473	1555.43	329.105	-939.735	1545.27	214.346	-1106.53	1592.23	326.79	-1118.21	1582.58	259.034	-1173.76	1407.74	225.943	-1216.46	1192.16	257.524	-1040.02	1343.69	261.7	-974.4	1218.22	318.742	-1239.05	1236.22	85.4734	-1105.45	1375.68	25.8279	-1097.63	1148.2	22.1758	-1104.26	1079.64	15.0099	-1003.31	1000.11	39.7395	-967.089	903.185	-14.8228	-1006.57	882.13	-9.15368	-941.178	807.91
445	0	230.366	-928.326	1557.22	329.87	-930.265	1547.09	215.604	-1097.49	1593.7	328.077	-1108.83	1584.07	260.697	-1164.43	1409.37	227.945	-1207.47	1193.99	258.44	-1030.82	1345.26	262.204	-965.113	1219.8	320.937	-1229.44	1238.03	86.7359	-1097.15	1377.34	27.1648	-1090.55	1149.77	23.6687	-1097.57	1081.25	15.4476	-997.552	1000.88	39.6895	-962.125	903.451	-14.6086	-1002.2	882.979	-9.51911	-937.941	807.757
446	0	231.007	-919.26	1558.98	330.52	-920.854	1548.89	216.784	-1088.52	1595.18	329.288	-1099.48	1585.61	262.325	-1155.2	1411.03	229.964	-1198.63	1195.83	259.32	-1021.72	1346.85	262.688	-955.983	1221.38	323.143	-1219.97	1239.89	87.966	-1088.98	1378.98	28.4366	-1083.7	1151.35	25.1028	-1091.09	1082.87	15.7854	-991.991	1001.7	39.5334	-957.318	903.791	-14.4813	-997.988	883.889	-9.98354	-934.82	807.714
447	0	231.532	-910.281	1560.68	331.055	-911.508	1550.67	217.886	-1079.61	1596.67	330.422	-1090.19	1587.18	263.917	-1146.06	1412.71	231.993	-1189.95	1197.67	260.168	-1012.73	1348.43	263.16	-947.005	1222.94	325.349	-1210.64	1241.79	89.1654	-1080.95	1380.58	29.6476	-1077.06	1152.91	26.4811	-1084.82	1084.46	16.028	-986.625	1002.55	39.2777	-952.658	904.191	-14.4296	-993.925	884.842	-10.5423	-931.795	807.773
448	0	231.946	-901.393	1562.31	331.48	-902.232	1552.4	218.913	-1070.78	1598.14	331.482	-1080.94	1588.78	265.47	-1137.03	1414.39	234.025	-1181.4	1199.49	260.988	-1003.85	1349.99	263.631	-938.172	1224.46	327.546	-1201.43	1243.69	90.3359	-1073.04	1382.13	30.8038	-1070.65	1154.44	27.8076	-1078.76	1086.03	16.1813	-981.449	1003.41	38.9296	-948.136	904.639	-14.4411	-990.004	885.818	-11.1908	-928.847	807.927
449	0	232.254	-892.597	1563.86	331.798	-893.028	1554.08	219.867	-1062.03	1599.59	332.47	-1071.75	1590.37	266.985	-1128.09	1416.05	236.051	-1172.97	1201.25	261.783	-995.066	1351.51	264.107	-929.474	1225.95	329.723	-1192.36	1245.58	91.4794	-1065.24	1383.6	31.912	-1064.44	1155.93	29.0874	-1072.91	1087.54	16.2522	-976.458	1004.27	38.4972	-943.743	905.123	-14.5028	-986.223	886.8	-11.9242	-925.96	808.166
450	0	232.462	-883.896	1565.3	332.018	-883.901	1555.67	220.752	-1053.35	1601	333.39	-1062.62	1591.96	268.46	-1119.26	1417.66	238.061	-1164.65	1202.95	262.557	-986.387	1352.98	264.595	-920.901	1227.37	331.869	-1183.4	1247.42	92.5976	-1057.55	1385	32.9794	-1058.44	1157.37	30.3259	-1067.24	1089	16.2483	-971.641	1005.12	37.989	-939.471	905.627	-14.6012	-982.578	887.77	-12.7368	-923.124	808.479
451	0	232.579	-875.287	1566.64	332.147	-874.85	1557.19	221.572	-1044.75	1602.35	334.245	-1053.55	1593.52	269.894	-1110.52	1419.22	240.046	-1156.43	1204.57	263.312	-977.805	1354.38	265.099	-912.443	1228.73	333.975	-1174.56	1249.2	93.6914	-1049.94	1386.3	34.0133	-1052.61	1158.74	31.5285	-1061.76	1090.39	16.1779	-966.991	1005.95	37.4143	-935.311	906.139	-14.723	-979.063	888.712	-13.6223	-920.329	808.852
452	0	232.615	-866.77	1567.86	332.194	-865.877	1558.6	222.332	-1036.23	1603.64	335.041	-1044.54	1595.04	271.287	-1101.88	1420.71	241.995	-1148.3	1206.08	264.05	-969.315	1355.71	265.618	-904.09	1230.02	336.031	-1165.84	1250.9	94.7615	-1042.42	1387.51	35.0205	-1046.95	1160.03	32.7004	-1056.44	1091.71	16.0493	-962.494	1006.73	36.7824	-931.253	906.646	-14.8558	-975.673	889.612	-14.5732	-917.569	809.272
453	0	232.579	-858.34	1568.95	332.168	-856.98	1559.91	223.037	-1027.77	1604.84	335.783	-1035.59	1596.5	272.638	-1093.32	1422.12	243.899	-1140.25	1207.5	264.772	-960.912	1356.95	266.153	-895.831	1231.21	338.028	-1157.21	1252.5	95.8075	-1034.96	1388.62	36.0069	-1041.44	1161.25	33.8459	-1051.26	1092.95	15.871	-958.137	1007.46	36.103	-927.289	907.135	-14.9877	-972.403	890.455	-15.5807	-914.842	809.723
454	0	232.483	-849.991	1569.91	332.08	-848.156	1561.1	223.694	-1019.39	1605.96	336.475	-1026.7	1597.89	273.946	-1084.84	1423.43	245.747	-1132.26	1208.79	265.477	-952.59	1358.1	266.701	-887.659	1232.3	339.96	-1148.68	1253.99	96.8283	-1027.56	1389.61	36.9772	-1036.05	1162.38	34.9684	-1046.22	1094.1	15.6514	-953.905	1008.14	35.3856	-923.409	907.592	-15.1085	-969.243	891.229	-16.6347	-912.146	810.187
455	0	232.336	-841.719	1570.74	331.94	-839.402	1562.17	224.308	-1011.07	1606.98	337.124	-1017.87	1599.2	275.209	-1076.45	1424.64	247.533	-1124.33	1209.96	266.166	-944.343	1359.13	267.257	-879.565	1233.28	341.819	-1140.23	1255.36	97.822	-1020.21	1390.5	37.9348	-1030.76	1163.42	36.0701	-1041.28	1095.17	15.3985	-949.781	1008.74	34.6399	-919.603	908.007	-15.2094	-966.185	891.927	-17.7241	-909.481	810.648
456	0	232.15	-833.514	1571.43	331.758	-830.714	1563.11	224.884	-1002.81	1607.91	337.734	-1009.09	1600.41	276.425	-1068.12	1425.73	249.246	-1116.46	1211.01	266.835	-936.163	1360.06	267.813	-871.542	1234.15	343.599	-1131.87	1256.59	98.7861	-1012.88	1391.28	38.8814	-1025.54	1164.37	37.1521	-1036.43	1096.15	15.1201	-945.746	1009.27	33.8751	-915.859	908.367	-15.2836	-963.217	892.538	-18.8367	-906.847	811.087
457	0	231.935	-825.368	1571.98	331.546	-822.087	1563.91	225.428	-994.596	1608.72	338.309	-1000.36	1601.52	277.593	-1059.86	1426.72	250.882	-1108.63	1211.93	267.483	-928.045	1360.87	268.363	-863.583	1234.9	345.293	-1123.58	1257.69	99.717	-1005.59	1391.96	39.8171	-1020.38	1165.22	38.214	-1031.63	1097.04	14.8235	-941.78	1009.72	33.1004	-912.168	908.663	-15.3262	-960.325	893.058	-19.9595	-904.246	811.486
458	0	231.701	-817.274	1572.4	331.311	-813.515	1564.58	225.943	-986.426	1609.42	338.853	-991.677	1602.52	278.709	-1051.65	1427.58	252.432	-1100.85	1212.73	268.106	-919.981	1361.55	268.898	-855.682	1235.52	346.897	-1115.35	1258.65	100.611	-998.301	1392.52	40.7406	-1015.25	1165.98	39.2541	-1026.86	1097.83	14.5154	-937.861	1010.08	32.3241	-908.518	908.886	-15.3342	-957.495	893.481	-21.0792	-901.68	811.829
459	0	231.456	-809.22	1572.68	331.063	-804.993	1565.1	226.433	-978.29	1610	339.37	-983.039	1603.39	279.771	-1043.5	1428.31	253.89	-1093.1	1213.39	268.701	-911.965	1362.11	269.41	-847.832	1236	348.405	-1107.19	1259.47	101.463	-991.02	1392.98	41.6488	-1010.11	1166.64	40.2694	-1022.09	1098.54	14.2018	-933.968	1010.35	31.5542	-904.897	909.026	-15.307	-954.708	893.807	-22.1823	-899.148	812.1
460	0	231.207	-801.197	1572.83	330.81	-796.514	1565.48	226.9	-970.18	1610.47	339.861	-974.438	1604.14	280.775	-1035.38	1428.93	255.251	-1085.38	1213.94	269.264	-903.989	1362.55	269.89	-840.028	1236.36	349.811	-1099.08	1260.16	102.269	-983.734	1393.35	42.5374	-1004.96	1167.2	41.2559	-1017.31	1099.16	13.8881	-930.079	1010.52	30.7978	-901.293	909.079	-15.2457	-951.948	894.035	-23.2558	-896.649	812.285
461	0	230.962	-793.196	1572.85	330.557	-788.072	1565.71	227.347	-962.087	1610.83	340.328	-965.871	1604.76	281.718	-1027.31	1429.42	256.509	-1077.69	1214.36	269.79	-896.048	1362.86	270.331	-832.262	1236.59	351.112	-1091.03	1260.7	103.024	-976.436	1393.61	43.4008	-999.752	1167.67	42.2088	-1012.48	1099.69	13.5787	-926.17	1010.6	30.0609	-897.695	909.037	-15.1536	-949.194	894.166	-24.2874	-894.182	812.372
462	0	230.726	-785.206	1572.75	330.31	-779.661	1565.8	227.772	-954.003	1611.07	340.77	-957.331	1605.24	282.594	-1019.26	1429.79	257.659	-1070.02	1214.68	270.275	-888.135	1363.04	270.725	-824.528	1236.7	352.304	-1083.01	1261.12	103.722	-969.118	1393.78	44.2325	-994.477	1168.04	43.1223	-1007.58	1100.13	13.2772	-922.22	1010.59	29.3486	-894.089	908.896	-15.0354	-946.427	894.205	-25.2658	-891.741	812.352
463	0	230.501	-777.218	1572.52	330.073	-771.275	1565.75	228.177	-945.919	1611.2	341.186	-948.815	1605.59	283.401	-1011.24	1430.05	258.696	-1062.37	1214.88	270.715	-880.243	1363.11	271.067	-816.819	1236.68	353.382	-1075.04	1261.4	104.359	-961.771	1393.86	45.0255	-989.111	1168.32	43.9902	-1002.6	1100.49	12.9859	-918.207	1010.47	28.665	-890.464	908.654	-14.8974	-943.625	894.154	-26.1813	-889.32	812.217
464	0	230.29	-769.224	1572.18	329.848	-762.907	1565.57	228.557	-937.827	1611.23	341.575	-940.316	1605.81	284.134	-1003.23	1430.19	259.618	-1054.73	1214.99	271.104	-872.365	1363.06	271.35	-809.127	1236.54	354.344	-1067.1	1261.57	104.929	-954.389	1393.86	45.7721	-983.634	1168.51	44.8061	-997.494	1100.76	12.7063	-914.11	1010.26	28.0129	-886.805	908.308	-14.7471	-940.767	894.019	-27.0259	-886.911	811.963
465	0	230.095	-761.215	1571.73	329.636	-754.553	1565.24	228.912	-929.718	1611.15	341.933	-931.83	1605.9	284.787	-995.236	1430.22	260.421	-1047.1	1215.01	271.44	-864.497	1362.89	271.57	-801.445	1236.3	355.188	-1059.19	1261.63	105.429	-946.967	1393.77	46.4645	-978.03	1168.61	45.5634	-992.264	1100.95	12.4386	-909.909	1009.96	27.394	-883.102	907.858	-14.5927	-937.831	893.806	-27.7936	-884.502	811.585
466	0	229.912	-753.183	1571.17	329.437	-746.208	1564.79	229.236	-921.587	1610.96	342.256	-923.353	1605.87	285.358	-987.243	1430.14	261.102	-1039.48	1214.94	271.716	-856.631	1362.61	271.724	-793.766	1235.95	355.913	-1051.3	1261.59	105.853	-939.496	1393.61	47.0949	-972.283	1168.62	46.2555	-986.889	1101.07	12.1821	-905.587	1009.57	26.8088	-879.339	907.304	-14.4432	-934.798	893.521	-28.4805	-882.08	811.085
467	0	229.742	-745.122	1570.51	329.249	-737.866	1564.21	229.524	-913.425	1610.69	342.539	-914.88	1605.71	285.842	-979.249	1429.96	261.662	-1031.85	1214.79	271.93	-848.763	1362.23	271.811	-786.084	1235.5	356.518	-1043.43	1261.45	106.199	-931.974	1393.37	47.6558	-966.381	1168.55	46.8763	-981.356	1101.1	11.9346	-901.128	1009.08	26.2565	-875.504	906.648	-14.3079	-931.647	893.168	-29.0848	-879.631	810.462
468	0	229.578	-737.026	1569.74	329.068	-729.524	1563.5	229.772	-905.229	1610.32	342.777	-906.406	1605.43	286.234	-971.247	1429.69	262.099	-1024.22	1214.57	272.078	-840.884	1361.74	271.828	-778.391	1234.97	357.003	-1035.56	1261.22	106.463	-924.393	1393.05	48.1402	-960.315	1168.39	47.4199	-975.654	1101.06	11.6933	-896.516	1008.51	25.7352	-871.583	905.89	-14.1957	-928.357	892.753	-29.6071	-877.137	809.72
469	0	229.418	-728.889	1568.88	328.89	-721.177	1562.68	229.971	-896.992	1609.86	342.962	-897.929	1605.05	286.532	-963.233	1429.32	262.414	-1016.58	1214.28	272.157	-832.991	1361.17	271.775	-770.681	1234.35	357.369	-1027.7	1260.91	106.642	-916.75	1392.67	48.5417	-954.076	1168.16	47.8811	-969.776	1100.93	11.4542	-891.739	1007.84	25.2418	-867.562	905.034	-14.1157	-924.912	892.28	-30.05	-874.579	808.862
470	0	229.254	-720.708	1567.94	328.71	-712.822	1561.75	230.115	-888.711	1609.33	343.089	-889.445	1604.56	286.731	-955.202	1428.86	262.61	-1008.93	1213.92	272.162	-825.077	1360.5	271.652	-762.949	1233.66	357.618	-1019.84	1260.52	106.734	-909.042	1392.2	48.8549	-947.66	1167.84	48.2556	-963.717	1100.73	11.2124	-886.786	1007.09	24.7722	-863.428	904.082	-14.0762	-921.293	891.753	-30.4183	-871.937	807.895
471	0	229.079	-712.48	1566.9	328.52	-704.456	1560.71	230.198	-880.382	1608.71	343.151	-880.951	1603.97	286.829	-947.147	1428.32	262.689	-1001.25	1213.5	272.092	-817.136	1359.74	271.459	-755.188	1232.89	357.753	-1011.96	1260.05	106.736	-901.264	1391.67	49.0752	-941.064	1167.43	48.5397	-957.474	1100.45	10.9625	-881.648	1006.26	24.3212	-859.166	903.039	-14.0845	-917.485	891.173	-30.7186	-869.189	806.824
472	0	228.885	-704.203	1565.79	328.315	-696.075	1559.58	230.211	-872.004	1608.02	343.14	-872.445	1603.28	286.823	-939.066	1427.69	262.653	-993.553	1213.02	271.945	-809.163	1358.91	271.199	-747.392	1232.06	357.776	-1004.07	1259.52	106.646	-893.414	1391.06	49.1992	-934.29	1166.95	48.7306	-951.046	1100.09	10.6983	-876.318	1005.35	23.8829	-854.764	901.908	-14.1472	-913.473	890.544	-30.9593	-866.312	805.656
473	0	228.665	-695.874	1564.59	328.084	-687.677	1558.36	230.147	-863.575	1607.26	343.05	-863.924	1602.52	286.71	-930.953	1426.99	262.508	-985.826	1212.48	271.716	-801.151	1358.01	270.871	-739.556	1231.17	357.688	-996.143	1258.92	106.463	-885.49	1390.38	49.2245	-927.339	1166.38	48.8266	-944.434	1099.64	10.4133	-870.792	1004.35	23.4505	-850.206	900.693	-14.2699	-909.243	889.864	-31.1503	-863.282	804.398
474	0	228.408	-687.493	1563.33	327.822	-679.26	1557.06	229.999	-855.094	1606.44	342.874	-855.388	1601.67	286.489	-922.804	1426.21	262.256	-978.064	1211.88	271.405	-793.095	1357.03	270.477	-731.673	1230.22	357.494	-988.188	1258.26	106.186	-877.489	1389.62	49.1498	-920.215	1165.73	48.8268	-937.643	1099.11	10.1008	-865.064	1003.27	23.0167	-845.48	899.398	-14.4571	-904.783	889.132	-31.3029	-860.075	803.057
475	0	228.108	-679.06	1562.01	327.519	-670.821	1555.69	229.76	-846.563	1605.55	342.605	-846.835	1600.74	286.158	-914.615	1425.35	261.902	-970.264	1211.21	271.01	-784.99	1355.99	270.018	-723.737	1229.21	357.195	-980.191	1257.53	105.813	-869.411	1388.78	48.9745	-912.926	1164.99	48.7309	-930.676	1098.5	9.75367	-859.133	1002.12	22.5738	-840.572	898.028	-14.7121	-900.084	888.347	-31.4293	-856.667	801.641
476	0	227.754	-670.574	1560.62	327.166	-662.359	1554.26	229.422	-837.981	1604.6	342.237	-838.264	1599.75	285.714	-906.381	1424.42	261.45	-962.419	1210.47	270.528	-776.83	1354.89	269.494	-715.743	1228.15	356.794	-972.144	1256.74	105.343	-861.253	1387.87	48.6992	-905.477	1164.16	48.5395	-923.539	1097.79	9.36499	-852.998	1000.9	22.114	-835.469	896.586	-15.0373	-895.136	887.505	-31.5425	-853.033	800.155
477	0	227.338	-662.038	1559.19	326.756	-653.871	1552.77	228.981	-829.351	1603.59	341.765	-829.674	1598.7	285.158	-898.099	1423.42	260.903	-954.524	1209.66	269.959	-768.609	1353.74	268.906	-707.681	1227.04	356.291	-964.041	1255.88	104.775	-853.015	1386.87	48.3249	-897.878	1163.25	48.2538	-916.24	1096.99	8.92799	-846.658	999.598	21.6294	-830.158	895.078	-15.434	-889.931	886.604	-31.6561	-849.149	798.607
478	0	226.853	-653.452	1557.72	326.281	-645.357	1551.24	228.429	-820.674	1602.54	341.185	-821.067	1597.59	284.488	-889.765	1422.36	260.264	-946.571	1208.78	269.299	-760.322	1352.54	268.255	-699.546	1225.89	355.687	-955.873	1254.95	104.107	-844.696	1385.79	47.8534	-890.137	1162.25	47.8752	-908.783	1096.1	8.43624	-840.114	998.229	21.1121	-824.628	893.508	-15.9025	-884.464	885.639	-31.7836	-844.991	797.001
479	0	226.292	-644.817	1556.21	325.734	-636.816	1549.69	227.764	-811.953	1601.43	340.49	-812.441	1596.43	283.702	-881.375	1421.23	259.536	-938.553	1207.82	268.549	-751.965	1351.3	267.538	-691.329	1224.7	354.984	-947.633	1253.96	103.338	-836.295	1384.64	47.2865	-882.261	1161.16	47.4057	-901.176	1095.11	7.88387	-833.368	996.792	20.5548	-818.866	891.88	-16.4419	-878.73	884.605	-31.9387	-840.538	795.344
480	0	225.648	-636.135	1554.69	325.107	-628.247	1548.11	226.98	-803.191	1600.29	339.679	-803.798	1595.23	282.802	-872.927	1420.04	258.72	-930.462	1206.78	267.707	-743.532	1350.02	266.757	-683.023	1223.47	354.18	-939.314	1252.9	102.467	-827.811	1383.4	46.6267	-874.258	1159.99	46.8475	-893.424	1094.03	7.26566	-826.42	995.29	19.9507	-812.863	890.2	-17.0508	-872.725	883.499	-32.1345	-835.769	793.64
481	0	224.915	-627.407	1553.16	324.396	-619.649	1546.53	226.074	-794.391	1599.1	338.748	-795.139	1594	281.786	-864.418	1418.79	257.816	-922.288	1205.65	266.772	-735.019	1348.72	265.91	-674.62	1222.22	353.275	-930.907	1251.76	101.493	-819.243	1382.09	45.8764	-866.134	1158.73	46.2027	-885.532	1092.86	6.57718	-819.271	993.729	19.2939	-806.607	888.473	-17.7265	-866.446	882.317	-32.3835	-830.664	791.894
482	0	224.091	-618.634	1551.64	323.596	-611.022	1544.97	225.044	-785.556	1597.89	337.695	-786.465	1592.73	280.656	-855.843	1417.5	256.825	-914.022	1204.45	265.742	-726.421	1347.41	264.995	-666.112	1220.95	352.268	-922.407	1250.56	100.414	-810.591	1380.71	45.0379	-857.894	1157.38	45.4739	-877.504	1091.59	5.81496	-811.924	992.113	18.579	-800.089	886.707	-18.4659	-859.893	881.057	-32.6974	-825.207	790.112
483	0	223.17	-609.82	1550.14	322.703	-602.367	1543.43	223.889	-776.688	1596.66	336.52	-777.777	1591.45	279.41	-847.202	1416.17	255.747	-905.651	1203.16	264.619	-717.736	1346.09	264.012	-657.493	1219.67	351.157	-913.807	1249.3	99.2307	-801.853	1379.26	44.114	-849.541	1155.96	44.6636	-869.34	1090.24	4.97651	-804.378	990.448	17.802	-793.302	884.906	-19.2652	-853.064	879.717	-33.0864	-819.384	788.297
484	0	222.152	-600.964	1548.67	321.715	-593.684	1541.93	222.608	-767.791	1595.42	335.22	-769.077	1590.17	278.052	-838.491	1414.8	254.58	-897.164	1201.79	263.402	-708.959	1344.77	262.96	-648.755	1218.4	349.942	-905.101	1247.97	97.9416	-793.03	1377.75	43.1071	-841.075	1154.47	43.7745	-861.041	1088.81	4.06048	-796.634	988.741	16.9598	-786.237	883.081	-20.1199	-845.96	878.299	-33.5595	-813.182	786.456
485	0	221.035	-592.068	1547.26	320.631	-584.973	1540.49	221.201	-758.867	1594.18	333.797	-760.365	1588.88	276.582	-829.708	1413.42	253.324	-888.548	1200.36	262.092	-700.087	1343.47	261.838	-639.893	1217.14	348.622	-896.282	1246.6	96.5475	-784.118	1376.19	42.0198	-832.497	1152.91	42.8095	-852.605	1087.3	3.0667	-788.69	987.001	16.0507	-778.888	881.239	-21.0255	-838.581	876.805	-34.1242	-806.592	784.595
486	0	219.82	-583.134	1545.92	319.449	-576.236	1539.12	219.67	-749.919	1592.94	332.252	-751.643	1587.61	275.003	-820.852	1412.02	251.979	-879.791	1198.85	260.691	-691.12	1342.2	260.645	-630.903	1215.9	347.198	-887.347	1245.17	95.0493	-775.119	1374.59	40.8548	-823.801	1151.29	41.7716	-844.028	1085.73	1.99622	-780.546	985.238	15.0741	-771.25	879.391	-21.9771	-830.926	875.24	-34.7859	-799.609	782.722
487	0	218.508	-574.162	1544.66	318.172	-567.472	1537.85	218.017	-740.948	1591.73	330.588	-742.912	1586.38	273.318	-811.921	1410.62	250.546	-870.881	1197.29	259.2	-682.054	1340.98	259.383	-621.779	1214.72	345.671	-878.29	1243.72	93.4493	-766.031	1372.97	39.6152	-814.984	1149.64	40.6644	-835.306	1084.11	0.851344	-772.199	983.464	14.0309	-763.317	877.549	-22.9697	-822.997	873.614	-35.5485	-792.227	780.847
488	0	217.101	-565.154	1543.51	316.801	-558.683	1536.69	216.245	-731.955	1590.56	328.807	-734.173	1585.18	271.533	-802.914	1409.24	249.025	-861.805	1195.7	257.623	-672.889	1339.81	258.051	-612.521	1213.59	344.043	-869.109	1242.24	91.7506	-756.853	1371.34	38.3043	-806.04	1147.96	39.4913	-826.432	1082.45	-0.364453	-763.645	981.693	12.923	-755.085	875.725	-23.9985	-814.792	871.937	-36.4134	-784.444	778.981
489	0	215.604	-556.111	1542.49	315.34	-549.869	1535.66	214.359	-722.942	1589.44	326.914	-725.424	1584.05	269.651	-793.83	1407.9	247.418	-852.553	1194.08	255.964	-663.625	1338.71	256.651	-603.126	1212.54	342.318	-859.802	1240.77	89.9578	-747.585	1369.71	36.9257	-796.961	1146.26	38.2563	-817.399	1080.77	-1.64653	-754.881	979.938	11.7538	-746.551	873.935	-25.0591	-806.31	870.223	-37.3805	-776.262	777.138
490	0	214.019	-547.032	1541.6	313.792	-541.03	1534.77	212.365	-713.909	1588.39	324.915	-716.667	1582.98	267.679	-784.669	1406.6	245.731	-843.116	1192.46	254.228	-654.263	1337.7	255.186	-593.594	1211.58	340.503	-850.367	1239.31	88.0767	-738.226	1368.12	35.4838	-787.739	1144.58	36.9636	-808.201	1079.09	-2.9892	-745.9	978.219	10.5278	-737.712	872.195	-26.1471	-797.55	868.491	-38.4474	-767.682	775.332
491	0	212.353	-537.919	1540.86	312.162	-532.167	1534.05	210.269	-704.856	1587.41	322.816	-707.9	1582.01	265.626	-775.43	1405.37	243.968	-833.487	1190.87	252.421	-644.806	1336.8	253.659	-583.929	1210.74	338.606	-840.806	1237.89	86.1144	-728.778	1366.57	33.9833	-778.367	1142.92	35.6176	-798.829	1077.43	-4.38585	-736.698	976.552	9.25067	-728.565	870.521	-27.2592	-788.509	866.76	-39.6097	-758.708	773.583
492	0	210.611	-528.772	1540.29	310.456	-523.279	1533.5	208.078	-695.782	1586.53	320.624	-699.122	1581.14	263.499	-766.116	1404.23	242.137	-823.663	1189.32	250.55	-635.256	1336.01	252.075	-574.132	1210.03	336.635	-831.121	1236.54	84.0796	-719.24	1365.09	32.4296	-768.837	1141.31	34.2232	-789.276	1075.81	-5.82911	-727.27	974.956	7.92906	-719.111	868.932	-28.392	-779.183	865.055	-40.8613	-749.344	771.908
493	0	208.801	-519.591	1539.89	308.682	-514.365	1533.14	205.802	-686.688	1585.76	318.348	-690.331	1580.4	261.308	-756.727	1403.18	240.247	-813.642	1187.85	248.623	-625.617	1335.35	250.437	-564.21	1209.46	334.603	-821.315	1235.27	81.982	-709.615	1363.7	30.8287	-759.142	1139.77	32.785	-779.537	1074.26	-7.31103	-717.609	973.453	6.5704	-709.347	867.447	-29.5433	-769.569	863.4	-42.1941	-739.596	770.329
494	0	206.929	-510.376	1539.69	306.845	-505.424	1532.97	203.451	-677.571	1585.11	315.999	-681.523	1579.78	259.063	-747.265	1402.25	238.31	-803.43	1186.48	246.65	-615.895	1334.83	248.753	-554.169	1209.05	332.521	-811.396	1234.12	79.8324	-699.905	1362.43	29.1867	-749.278	1138.32	31.308	-769.607	1072.79	-8.82325	-707.71	972.063	5.18279	-699.275	866.086	-30.7112	-759.661	861.821	-43.5986	-729.468	768.869
495	0	205.003	-501.129	1539.68	304.954	-496.454	1533.01	201.035	-668.431	1584.6	313.587	-672.698	1579.31	256.775	-737.732	1401.46	236.337	-793.032	1185.24	244.639	-606.096	1334.47	247.029	-544.02	1208.81	330.403	-801.371	1233.11	77.6427	-690.111	1361.29	27.5101	-739.241	1137	29.7968	-759.483	1071.43	-10.3573	-697.568	970.806	3.77481	-688.895	864.868	-31.8945	-749.454	860.346	-45.064	-718.967	767.55
496	0	203.033	-491.848	1539.86	303.017	-487.456	1533.26	198.566	-659.267	1584.23	311.123	-663.85	1579	254.456	-728.133	1400.82	234.34	-782.462	1184.17	242.602	-596.227	1334.26	245.272	-533.774	1208.75	328.262	-791.251	1232.25	75.425	-680.238	1360.3	25.8057	-729.031	1135.82	28.2557	-749.164	1070.21	-11.9046	-687.18	969.703	2.35524	-678.208	863.813	-33.0928	-738.943	859.003	-46.5784	-708.098	766.394
497	0	201.026	-482.536	1540.24	301.044	-478.426	1533.72	196.058	-650.078	1584	308.621	-654.978	1578.85	252.116	-718.472	1400.33	232.332	-771.737	1183.27	240.55	-586.297	1334.23	243.492	-523.444	1208.87	326.111	-781.048	1231.57	73.1922	-670.287	1359.49	24.0796	-718.65	1134.79	26.6883	-738.654	1069.15	-13.4571	-676.542	968.773	0.932862	-667.219	862.938	-34.3063	-728.123	857.815	-48.1289	-696.865	765.423
498	0	198.993	-473.193	1540.82	299.042	-469.363	1534.39	193.523	-640.863	1583.93	306.094	-646.078	1578.86	249.769	-708.754	1400.01	230.325	-760.878	1182.57	238.493	-576.316	1334.36	241.697	-513.045	1209.18	323.962	-770.778	1231.09	70.9568	-660.264	1358.87	22.3375	-708.101	1133.95	25.0976	-727.956	1068.26	-15.0072	-665.656	968.032	-0.483807	-655.93	862.26	-35.5357	-716.989	856.807	-49.7025	-685.271	764.657
499	0	196.943	-463.822	1541.58	297.023	-460.266	1535.25	190.976	-631.622	1584.02	303.556	-637.146	1579.05	247.423	-698.985	1399.87	228.328	-749.911	1182.1	236.443	-566.293	1334.66	239.896	-502.595	1209.66	321.825	-760.458	1230.82	68.731	-650.172	1358.46	20.5844	-697.394	1133.31	23.4854	-717.078	1067.56	-16.5478	-654.521	967.495	-1.88672	-644.347	861.793	-36.7822	-705.539	855.997	-51.2857	-673.321	764.111
500	0	194.887	-454.423	1542.52	294.995	-451.135	1536.3	188.432	-622.354	1584.27	301.021	-628.181	1579.41	245.09	-689.172	1399.9	226.349	-738.866	1181.86	234.411	-556.24	1335.12	238.101	-492.112	1210.32	319.708	-750.108	1230.76	66.5265	-640.013	1358.25	18.824	-686.536	1132.88	21.8523	-706.029	1067.06	-18.0729	-643.142	967.173	-3.26851	-632.477	861.548	-38.0475	-693.771	855.403	-52.8652	-661.015	763.8
501	0	192.833	-444.999	1543.62	292.969	-441.968	1537.52	185.905	-613.06	1584.66	298.504	-619.18	1579.93	242.779	-679.324	1400.11	224.392	-727.775	1181.85	232.408	-546.168	1335.75	236.322	-481.613	1211.14	317.614	-739.748	1230.92	64.3538	-629.793	1358.27	17.0588	-675.539	1132.66	20.1978	-694.821	1066.77	-19.5777	-631.523	967.074	-4.62264	-620.327	861.534	-39.3334	-681.685	855.034	-54.4282	-648.358	763.732
502	0	190.793	-435.554	1544.86	290.956	-432.765	1538.9	183.409	-603.74	1585.21	296.019	-610.141	1580.61	240.498	-669.449	1400.5	222.457	-716.672	1182.08	230.445	-536.089	1336.52	234.571	-471.12	1212.1	315.545	-729.401	1231.29	62.2223	-619.513	1358.5	15.2896	-664.416	1132.66	18.52	-683.467	1066.7	-21.0581	-619.673	967.201	-5.94353	-607.908	861.754	-40.6417	-669.285	854.897	-55.9629	-635.352	763.912
503	0	188.778	-426.089	1546.22	288.964	-423.529	1540.41	180.959	-594.396	1585.89	293.58	-601.063	1581.44	238.253	-659.556	1401.05	220.542	-705.593	1182.55	228.531	-526.015	1337.42	232.86	-460.651	1213.19	313.498	-719.091	1231.87	60.1401	-609.178	1358.95	13.5159	-653.18	1132.89	16.8158	-671.981	1066.84	-22.5113	-607.602	967.554	-7.22661	-595.23	862.21	-41.9741	-656.575	854.991	-57.458	-621.999	764.338
504	0	186.796	-416.609	1547.69	287.005	-414.259	1542.02	178.568	-585.029	1586.71	291.2	-591.945	1582.41	236.05	-649.656	1401.77	218.642	-694.573	1183.23	226.676	-515.958	1338.45	231.201	-450.225	1214.38	311.469	-708.841	1232.65	58.1138	-598.792	1359.6	11.7358	-641.843	1133.33	15.081	-660.376	1067.18	-23.9355	-595.32	968.13	-8.46833	-582.307	862.898	-43.332	-643.565	855.311	-58.9042	-608.304	765.006
505	0	184.86	-407.117	1549.23	285.089	-404.958	1543.72	176.249	-575.64	1587.64	288.893	-582.789	1583.49	233.894	-639.758	1402.63	216.747	-683.646	1184.12	224.886	-505.93	1339.58	229.606	-439.861	1215.66	309.451	-698.674	1233.6	56.1489	-588.359	1360.44	9.94624	-630.419	1133.97	13.3107	-648.668	1067.72	-25.3296	-582.841	968.919	-9.6661	-569.152	863.812	-44.7162	-630.264	855.847	-60.2934	-594.273	765.905
506	0	182.978	-397.616	1550.83	283.226	-395.629	1545.47	174.014	-566.233	1588.68	286.67	-573.595	1584.69	231.787	-629.872	1403.63	214.847	-672.843	1185.19	223.17	-495.943	1340.8	228.086	-429.577	1216.98	307.434	-688.613	1234.71	54.2495	-577.885	1361.45	8.14332	-618.917	1134.79	11.4998	-636.868	1068.45	-26.693	-570.181	969.911	-10.8182	-555.783	864.94	-46.1272	-616.688	856.586	-61.6194	-579.913	767.022
507	0	181.159	-388.11	1552.47	281.424	-386.276	1547.24	171.872	-556.809	1589.81	284.541	-564.366	1585.97	229.732	-620.01	1404.75	212.932	-662.194	1186.42	221.532	-486.008	1342.09	226.651	-419.389	1218.35	305.411	-678.677	1235.95	52.4186	-567.375	1362.63	6.32295	-607.346	1135.8	9.64322	-624.988	1069.33	-28.0255	-557.352	971.091	-11.9235	-542.217	866.271	-47.5646	-602.851	857.509	-62.8779	-565.236	768.341
508	0	179.413	-378.603	1554.11	279.693	-376.904	1549.02	169.833	-547.371	1591.02	282.514	-555.105	1587.33	227.73	-610.181	1405.97	210.991	-651.721	1187.79	219.976	-476.134	1343.43	225.31	-409.313	1219.72	303.372	-668.884	1237.32	50.6582	-556.839	1363.94	4.48127	-595.714	1136.95	7.73658	-613.038	1070.37	-29.3268	-544.372	972.442	-12.9815	-528.471	867.787	-49.0271	-588.772	858.598	-64.0666	-550.254	769.843
509	0	177.746	-369.099	1555.74	278.04	-367.517	1550.78	167.902	-537.923	1592.29	280.597	-545.815	1588.73	225.784	-600.395	1407.28	209.016	-641.444	1189.27	218.505	-466.332	1344.8	224.068	-399.363	1221.09	301.311	-659.248	1238.77	48.9696	-546.286	1365.36	2.61524	-584.026	1138.23	5.77665	-601.026	1071.53	-30.5963	-531.256	973.948	-13.992	-514.566	869.473	-50.5129	-574.471	859.831	-65.1851	-534.984	771.509
510	0	176.166	-359.602	1557.33	276.471	-358.121	1552.49	166.086	-528.467	1593.6	278.794	-536.501	1590.18	223.892	-590.66	1408.66	207.002	-631.376	1190.84	217.121	-456.609	1346.19	222.929	-389.551	1222.43	299.223	-649.78	1240.29	47.3533	-535.727	1366.87	0.723128	-572.285	1139.62	3.7618	-588.96	1072.79	-31.8329	-518.02	975.588	-14.9548	-500.52	871.309	-52.0189	-559.969	861.19	-66.2347	-519.445	773.321
511	0	174.677	-350.115	1558.88	274.994	-348.722	1554.14	164.388	-519.009	1594.96	277.11	-527.169	1591.65	222.057	-580.985	1410.09	204.946	-621.526	1192.47	215.823	-446.974	1347.57	221.894	-379.885	1223.73	297.108	-640.487	1241.87	45.8093	-525.174	1368.45	-1.19505	-560.495	1141.09	1.69234	-576.844	1074.14	-33.0349	-504.678	977.345	-15.8699	-486.354	873.277	-53.5411	-545.286	862.655	-67.2182	-503.66	775.26
512	0	173.284	-340.643	1560.37	273.611	-339.326	1555.7	162.809	-509.552	1596.33	275.545	-517.824	1593.12	220.278	-571.376	1411.56	202.851	-611.896	1194.14	214.61	-437.431	1348.95	220.961	-370.372	1224.98	294.965	-631.372	1243.47	44.3371	-514.642	1370.08	-3.13726	-548.658	1142.62	-0.429195	-564.684	1075.55	-34.1999	-491.245	979.2	-16.7368	-472.086	875.359	-55.0746	-530.445	864.207	-68.1393	-487.653	777.309
513	0	171.989	-331.19	1561.78	272.325	-329.941	1557.17	161.35	-500.1	1597.71	274.1	-508.473	1594.58	218.556	-561.84	1413.05	200.72	-602.484	1195.83	213.48	-427.986	1350.29	220.126	-361.017	1226.17	292.8	-622.434	1245.09	42.9356	-504.145	1371.73	-5.09933	-536.778	1144.2	-2.59797	-552.484	1077	-35.3248	-477.736	981.136	-17.5549	-457.737	877.535	-56.6135	-515.466	865.833	-69.0026	-471.452	779.455
514	0	170.793	-321.761	1563.1	271.139	-320.573	1558.53	160.009	-490.66	1599.09	272.773	-499.123	1596.01	216.891	-552.382	1414.55	198.562	-593.283	1197.53	212.429	-418.642	1351.59	219.382	-351.82	1227.29	290.619	-613.668	1246.71	41.6037	-493.698	1373.4	-7.07494	-524.859	1145.81	-4.80688	-540.249	1078.48	-36.406	-464.164	983.137	-18.3232	-443.324	879.791	-58.1509	-500.371	867.518	-69.8126	-455.085	781.684
515	0	169.697	-312.359	1564.34	270.052	-311.229	1559.78	158.783	-481.236	1600.45	271.56	-489.781	1597.41	215.284	-543.005	1416.04	196.388	-584.283	1199.21	211.452	-409.401	1352.84	218.719	-342.779	1228.33	288.431	-605.065	1248.31	40.3396	-483.314	1375.06	-9.05584	-512.907	1147.42	-7.04667	-527.984	1079.97	-37.4396	-450.543	985.188	-19.0404	-428.865	882.109	-59.6791	-485.179	869.253	-70.5735	-438.583	783.987
516	0	168.698	-302.991	1565.47	269.062	-301.916	1560.91	157.669	-471.834	1601.78	270.459	-480.455	1598.76	213.736	-533.712	1417.51	194.209	-575.47	1200.86	210.544	-400.263	1354.04	218.128	-333.889	1229.31	286.245	-596.616	1249.89	39.1416	-473.007	1376.7	-11.0322	-500.93	1149.03	-9.30627	-515.694	1081.45	-38.4215	-436.887	987.275	-19.7048	-414.376	884.475	-61.1897	-469.91	871.028	-71.2886	-421.977	786.353
517	0	167.794	-293.661	1566.51	268.168	-292.64	1561.92	156.66	-462.459	1603.07	269.463	-471.152	1600.05	212.245	-524.504	1418.95	192.039	-566.827	1202.48	209.701	-391.227	1355.16	217.598	-325.142	1230.2	284.072	-588.307	1251.42	38.0076	-462.788	1378.3	-12.993	-488.938	1150.61	-11.5731	-503.388	1082.92	-39.3479	-423.208	989.387	-20.3143	-399.872	886.877	-62.674	-454.581	872.836	-71.96	-405.298	788.775
518	0	166.981	-284.372	1567.44	267.365	-283.407	1562.81	155.752	-453.118	1604.32	268.566	-461.88	1601.27	210.814	-515.381	1420.35	189.888	-558.337	1204.04	208.916	-382.291	1356.22	217.117	-316.529	1231.03	281.924	-580.125	1252.9	36.9353	-452.667	1379.87	-14.9265	-476.942	1152.17	-13.8337	-491.074	1084.36	-40.2152	-409.52	991.512	-20.8671	-385.368	889.302	-64.1228	-439.211	874.672	-72.5885	-388.574	791.246
519	0	166.256	-275.13	1568.28	266.65	-274.224	1563.59	154.936	-443.816	1605.5	267.761	-452.646	1602.41	209.442	-506.341	1421.69	187.771	-549.98	1205.54	208.184	-373.452	1357.19	216.673	-308.041	1231.78	279.811	-572.052	1254.33	35.9223	-442.651	1381.37	-16.821	-464.957	1153.68	-16.074	-478.76	1085.77	-41.0208	-395.837	993.64	-21.3608	-370.876	891.739	-65.5266	-423.816	876.53	-73.1731	-371.837	793.76
520	0	165.612	-265.939	1569.03	266.016	-265.094	1564.25	154.208	-434.559	1606.62	267.042	-443.456	1603.47	208.129	-497.382	1422.96	185.697	-541.736	1206.98	207.499	-364.704	1358.08	216.255	-299.666	1232.44	277.743	-564.074	1255.68	34.9663	-432.746	1382.81	-18.6653	-452.996	1155.13	-18.2796	-466.459	1087.13	-41.7625	-382.172	995.76	-21.7936	-356.409	894.178	-66.8765	-408.413	878.403	-73.7113	-355.113	796.308
521	0	165.044	-256.801	1569.68	265.458	-256.021	1564.81	153.558	-425.352	1607.66	266.401	-434.317	1604.43	206.875	-488.502	1424.16	183.676	-533.588	1208.33	206.855	-356.043	1358.88	215.855	-291.394	1233.03	275.73	-556.174	1256.96	34.0645	-422.954	1384.18	-20.449	-441.075	1156.53	-20.437	-454.181	1088.43	-42.4393	-368.539	997.864	-22.1637	-341.979	896.609	-68.1632	-393.018	880.286	-74.1995	-338.427	798.883
522	0	164.546	-247.72	1570.24	264.969	-247.01	1565.27	152.98	-416.198	1608.62	265.83	-425.232	1605.3	205.68	-479.694	1425.28	181.718	-525.516	1209.61	206.247	-347.46	1359.59	215.462	-283.213	1233.54	273.78	-548.335	1258.15	33.2146	-413.276	1385.47	-22.1631	-429.211	1157.86	-22.5331	-441.937	1089.68	-43.051	-354.952	999.94	-22.4698	-327.596	899.023	-69.3785	-377.648	882.172	-74.6325	-321.804	801.477
523	0	164.111	-238.697	1570.72	264.543	-238.06	1565.63	152.466	-407.102	1609.49	265.322	-416.207	1606.06	204.544	-470.955	1426.31	179.827	-517.506	1210.79	205.672	-338.95	1360.2	215.07	-275.115	1233.95	271.902	-540.544	1259.25	32.4139	-403.711	1386.66	-23.8002	-417.419	1159.1	-24.5563	-429.739	1090.85	-43.5983	-341.424	1001.98	-22.711	-313.273	901.411	-70.5146	-362.319	884.052	-75.0046	-305.266	804.08
524	0	163.733	-229.734	1571.12	264.174	-229.174	1565.9	152.009	-398.065	1610.27	264.869	-407.243	1606.71	203.466	-462.28	1427.24	178.012	-509.541	1211.88	205.123	-330.505	1360.71	214.672	-267.089	1234.27	270.102	-532.785	1260.26	31.66	-394.257	1387.76	-25.3546	-405.714	1160.27	-26.4963	-417.597	1091.94	-44.0824	-327.97	1003.97	-22.887	-299.019	903.763	-71.5645	-347.048	885.916	-75.3096	-288.832	806.679
525	0	163.406	-220.829	1571.44	263.855	-220.349	1566.08	151.602	-389.09	1610.94	264.465	-398.343	1607.25	202.446	-453.661	1428.06	176.277	-501.611	1212.87	204.599	-322.115	1361.12	214.264	-259.127	1234.49	268.385	-525.047	1261.16	30.9506	-384.909	1388.75	-26.8222	-394.108	1161.34	-28.3443	-405.522	1092.95	-44.5051	-314.601	1005.91	-22.9979	-284.845	906.069	-72.5225	-331.853	887.754	-75.5413	-272.519	809.264
526	0	163.124	-211.982	1571.69	263.579	-211.586	1566.19	151.239	-380.176	1611.5	264.103	-389.506	1607.68	201.483	-445.093	1428.78	174.626	-493.704	1213.75	204.096	-313.775	1361.43	213.842	-251.221	1234.61	266.759	-517.316	1261.96	30.2834	-375.662	1389.63	-28.2007	-382.613	1162.31	-30.0934	-393.522	1093.87	-44.8685	-301.33	1007.78	-23.0442	-270.762	908.321	-73.3835	-316.75	889.554	-75.6942	-256.345	811.82
527	0	162.881	-203.191	1571.87	263.342	-202.879	1566.23	150.913	-371.323	1611.95	263.778	-380.732	1607.98	200.579	-436.57	1429.39	173.063	-485.812	1214.52	203.611	-305.474	1361.64	213.406	-243.361	1234.62	265.228	-509.583	1262.65	29.6565	-366.512	1390.39	-29.4888	-371.239	1163.18	-31.7382	-381.605	1094.68	-45.1746	-288.169	1009.58	-23.027	-256.779	910.507	-74.1439	-301.757	891.304	-75.7632	-240.325	814.334
528	0	162.672	-194.452	1571.97	263.137	-194.227	1566.19	150.618	-362.529	1612.29	263.482	-372.018	1608.17	199.731	-428.085	1429.89	171.593	-477.928	1215.18	203.144	-297.206	1361.73	212.954	-235.539	1234.51	263.797	-501.839	1263.22	29.0682	-357.452	1391.03	-30.6862	-359.991	1163.94	-33.2748	-369.779	1095.4	-45.4254	-275.128	1011.29	-22.9475	-242.907	912.617	-74.801	-286.891	892.991	-75.7445	-224.471	816.793
529	0	162.491	-185.761	1572.01	262.96	-185.623	1566.09	150.35	-353.791	1612.51	263.212	-363.361	1608.24	198.94	-419.632	1430.27	170.217	-470.047	1215.73	202.692	-288.963	1361.73	212.49	-227.747	1234.29	262.469	-494.075	1263.69	28.5169	-348.476	1391.54	-31.7934	-348.874	1164.58	-34.7005	-358.047	1096	-45.6225	-262.215	1012.9	-22.8072	-229.155	914.641	-75.3533	-272.17	894.603	-75.6356	-208.797	819.182
530	0	162.335	-177.114	1571.98	262.805	-177.062	1565.91	150.104	-345.105	1612.61	262.962	-354.758	1608.19	198.206	-411.206	1430.53	168.94	-462.167	1216.16	202.257	-280.737	1361.61	212.015	-219.976	1233.96	261.248	-486.286	1264.04	28.0016	-339.577	1391.93	-32.8111	-337.888	1165.11	-36.0139	-346.414	1096.5	-45.767	-249.44	1014.41	-22.6077	-215.534	916.569	-75.8001	-257.61	896.128	-75.4353	-193.315	821.487
531	0	162.199	-168.504	1571.87	262.669	-168.539	1565.68	149.876	-336.467	1612.59	262.729	-346.202	1608.03	197.528	-402.8	1430.68	167.764	-454.283	1216.47	201.837	-272.521	1361.4	211.534	-212.216	1233.51	260.137	-478.465	1264.28	27.5214	-330.75	1392.18	-33.7402	-327.034	1165.51	-37.2141	-334.884	1096.88	-45.8597	-236.809	1015.81	-22.3508	-202.053	918.391	-76.1418	-243.225	897.554	-75.144	-178.036	823.696
532	0	162.08	-159.927	1571.69	262.549	-160.046	1565.37	149.662	-327.871	1612.46	262.51	-337.689	1607.75	196.907	-394.411	1430.71	166.692	-446.395	1216.67	201.434	-264.308	1361.08	211.051	-204.458	1232.96	259.139	-470.608	1264.41	27.0759	-321.989	1392.29	-34.5815	-316.309	1165.79	-38.301	-323.459	1097.14	-45.9009	-224.329	1017.09	-22.0382	-188.721	920.097	-76.3797	-229.031	898.871	-74.7633	-162.973	825.796
533	0	161.975	-151.377	1571.44	262.442	-151.578	1565.01	149.46	-319.311	1612.21	262.302	-329.212	1607.37	196.341	-386.031	1430.63	165.726	-438.499	1216.76	201.049	-256.092	1360.66	210.573	-196.693	1232.3	258.254	-462.71	1264.43	26.665	-313.288	1392.28	-35.3356	-305.708	1165.95	-39.2748	-312.14	1097.29	-45.8902	-212.004	1018.25	-21.6715	-175.546	921.678	-76.5157	-215.041	900.07	-74.2959	-148.136	827.775
534	0	161.881	-142.848	1571.12	262.346	-143.129	1564.58	149.268	-310.784	1611.84	262.103	-320.766	1606.88	195.833	-377.659	1430.44	164.869	-430.595	1216.73	200.684	-247.867	1360.15	210.105	-188.913	1231.55	257.484	-454.768	1264.35	26.2889	-304.641	1392.13	-36.0027	-295.226	1165.98	-40.136	-300.928	1097.32	-45.827	-199.839	1019.27	-21.2525	-162.538	923.124	-76.5524	-201.265	901.143	-73.7457	-133.536	829.624
535	0	161.798	-134.334	1570.72	262.259	-134.693	1564.09	149.083	-302.282	1611.36	261.912	-312.344	1606.29	195.38	-369.288	1430.14	164.12	-422.678	1216.59	200.342	-239.627	1359.55	209.653	-181.107	1230.71	256.829	-446.778	1264.17	25.9483	-296.042	1391.86	-36.5831	-284.857	1165.89	-40.8853	-289.824	1097.23	-45.7103	-187.835	1020.16	-20.7828	-149.704	924.43	-76.4929	-187.714	902.084	-73.1174	-119.183	831.332
536	0	161.723	-125.831	1570.25	262.18	-126.264	1563.53	148.906	-293.801	1610.78	261.728	-303.942	1605.6	194.985	-360.915	1429.73	163.482	-414.748	1216.35	200.025	-231.366	1358.87	209.225	-173.269	1229.8	256.288	-438.737	1263.89	25.6439	-287.487	1391.47	-37.0764	-274.594	1165.69	-41.5234	-278.827	1097.04	-45.5392	-175.996	1020.92	-20.2639	-137.051	925.587	-76.3406	-174.397	902.887	-72.4162	-105.087	832.892
537	0	161.658	-117.334	1569.71	262.11	-117.838	1562.92	148.737	-285.335	1610.09	261.552	-295.553	1604.83	194.645	-352.536	1429.22	162.954	-406.799	1216.01	199.735	-223.079	1358.11	208.826	-165.392	1228.82	255.859	-430.641	1263.51	25.3771	-278.967	1390.96	-37.4824	-264.43	1165.36	-42.0513	-267.94	1096.74	-45.3125	-164.323	1021.53	-19.6974	-124.587	926.591	-76.0993	-161.321	903.551	-71.6477	-91.2585	834.296
538	0	161.601	-108.84	1569.1	262.048	-109.411	1562.25	148.575	-276.881	1609.3	261.383	-287.174	1603.97	194.363	-344.147	1428.62	162.534	-398.828	1215.57	199.476	-214.76	1357.27	208.462	-157.468	1227.78	255.541	-422.487	1263.04	25.149	-270.477	1390.34	-37.801	-254.361	1164.93	-42.47	-257.161	1096.33	-45.0292	-152.817	1022	-19.0851	-112.317	927.436	-75.7731	-148.491	904.071	-70.8178	-77.7054	835.537
539	0	161.553	-100.344	1568.41	261.996	-100.979	1561.53	148.423	-268.434	1608.43	261.224	-278.799	1603.04	194.138	-335.746	1427.92	162.222	-390.829	1215.04	199.251	-206.404	1356.37	208.139	-149.492	1226.69	255.328	-414.27	1262.48	24.9614	-262.01	1389.61	-38.0321	-244.379	1164.4	-42.781	-246.491	1095.82	-44.6889	-141.477	1022.33	-18.4286	-100.246	928.119	-75.3664	-135.911	904.447	-69.9324	-64.436	836.609
540	0	161.517	-91.8449	1567.66	261.956	-92.5392	1560.76	148.281	-259.991	1607.46	261.076	-270.425	1602.03	193.969	-327.328	1427.13	162.014	-382.796	1214.43	199.064	-198.006	1355.41	207.86	-141.456	1225.56	255.219	-405.989	1261.84	24.8156	-253.558	1388.8	-38.1762	-234.479	1163.76	-42.9861	-235.933	1095.22	-44.2916	-130.305	1022.51	-17.7302	-88.3813	928.638	-74.8839	-123.585	904.677	-68.9972	-51.4575	837.507
541	0	161.494	-83.3403	1566.85	261.929	-84.0908	1559.94	148.152	-251.549	1606.41	260.942	-262.05	1600.96	193.858	-318.89	1426.25	161.907	-374.721	1213.72	198.917	-189.56	1354.39	207.631	-133.357	1224.41	255.206	-397.637	1261.12	24.7135	-245.113	1387.89	-38.2343	-224.657	1163.03	-43.0876	-225.485	1094.52	-43.8377	-119.299	1022.56	-16.9922	-76.7257	928.99	-74.3308	-111.514	904.763	-68.0181	-38.7762	838.226
542	0	161.486	-74.8289	1565.99	261.918	-75.6319	1559.08	148.039	-243.107	1605.29	260.824	-253.671	1599.83	193.804	-310.429	1425.29	161.895	-366.598	1212.94	198.814	-181.062	1353.33	207.454	-125.187	1223.23	255.286	-389.211	1260.31	24.6564	-236.666	1386.91	-38.2079	-214.909	1162.21	-43.0885	-215.15	1093.74	-43.3289	-108.459	1022.46	-16.2174	-65.2835	929.174	-73.7125	-99.7002	904.704	-67.0006	-26.3971	838.762
543	0	161.498	-66.3097	1565.08	261.927	-67.1617	1558.19	147.946	-234.661	1604.09	260.726	-245.286	1598.65	193.806	-301.94	1424.25	161.973	-358.418	1212.08	198.758	-172.507	1352.23	207.333	-116.94	1222.03	255.452	-380.706	1259.42	24.6461	-228.207	1385.85	-38.0994	-205.232	1161.31	-42.9925	-204.928	1092.88	-42.7674	-97.7845	1022.22	-15.409	-54.0578	929.19	-73.0351	-88.1434	904.5	-65.9502	-14.324	839.111
544	0	161.531	-57.7819	1564.12	261.958	-58.6798	1557.27	147.875	-226.212	1602.84	260.652	-236.894	1597.41	193.864	-293.42	1423.14	162.135	-350.173	1211.14	198.752	-163.889	1351.09	207.269	-108.61	1220.83	255.697	-372.119	1258.45	24.6836	-219.729	1384.73	-37.912	-195.623	1160.34	-42.8041	-194.821	1091.93	-42.1564	-87.2746	1021.84	-14.5707	-43.0513	929.037	-72.3049	-76.8435	904.153	-64.8722	-2.55975	839.268
545	0	161.591	-49.2449	1563.12	262.017	-50.1857	1556.32	147.831	-217.756	1601.52	260.605	-228.493	1596.13	193.978	-284.864	1421.96	162.375	-341.853	1210.13	198.797	-155.205	1349.93	207.264	-100.191	1219.62	256.016	-363.445	1257.41	24.7703	-211.22	1383.56	-37.6495	-186.08	1159.29	-42.5284	-184.829	1090.91	-41.5001	-76.9285	1021.32	-13.7067	-32.2659	928.718	-71.5288	-65.8002	903.662	-63.7722	8.89399	839.229
546	0	161.68	-40.6982	1562.1	262.107	-41.6794	1555.35	147.817	-209.293	1600.16	260.59	-220.082	1594.82	194.148	-276.271	1420.71	162.684	-333.45	1209.04	198.897	-146.45	1348.75	207.321	-91.6747	1218.41	256.402	-354.679	1256.28	24.9068	-202.671	1382.33	-37.3165	-176.601	1158.17	-42.1712	-174.953	1089.82	-40.8035	-66.7454	1020.66	-12.8218	-21.7033	928.232	-70.7141	-55.0128	903.029	-62.6558	20.0365	838.992
547	0	161.804	-32.1411	1561.06	262.232	-33.1604	1554.37	147.838	-200.822	1598.76	260.61	-211.66	1593.47	194.371	-267.634	1419.4	163.058	-324.957	1207.88	199.053	-137.619	1347.55	207.438	-83.0554	1217.21	256.849	-345.818	1255.08	25.0935	-194.073	1381.07	-36.918	-167.184	1156.99	-41.7387	-165.192	1088.66	-40.0723	-56.7244	1019.86	-11.9211	-11.3647	927.581	-69.8682	-44.4809	902.253	-61.529	30.8678	838.553
548	0	161.965	-23.5725	1560	262.396	-24.628	1553.39	147.898	-192.34	1597.32	260.67	-203.226	1592.09	194.647	-258.95	1418.03	163.487	-316.365	1206.65	199.267	-128.71	1346.34	207.619	-74.3261	1216.02	257.349	-336.858	1253.81	25.3307	-185.415	1379.76	-36.4594	-157.829	1155.76	-41.2374	-155.547	1087.43	-39.3129	-46.8647	1018.93	-11.0104	-1.25092	926.769	-68.9987	-34.204	901.336	-60.3982	41.3886	837.91
549	0	162.169	-14.9913	1558.95	262.603	-16.0813	1552.41	148	-183.847	1595.85	260.772	-194.777	1590.69	194.976	-250.215	1416.62	163.967	-307.668	1205.36	199.54	-119.719	1345.13	207.862	-65.481	1214.84	257.898	-327.795	1252.46	25.6179	-176.69	1378.43	-35.9463	-148.531	1154.47	-40.6738	-146.015	1086.14	-38.5318	-37.1653	1017.87	-10.0958	8.63737	925.797	-68.1129	-24.182	900.278	-59.2704	51.5995	837.063
550	0	162.418	-6.39554	1557.9	262.857	-7.51873	1551.43	148.149	-175.34	1594.37	260.921	-186.313	1589.28	195.354	-241.425	1415.16	164.491	-298.858	1204	199.872	-110.643	1343.93	208.168	-56.5142	1213.68	258.489	-318.626	1251.04	25.9543	-167.889	1377.07	-35.3842	-139.29	1153.13	-40.0542	-136.595	1084.8	-37.7357	-27.6253	1016.68	-9.18359	18.2996	924.671	-67.2182	-14.4153	899.081	-58.1532	61.5016	836.011
551	0	162.716	2.21692	1556.86	263.16	1.0617	1550.48	148.346	-166.817	1592.87	261.12	-177.83	1587.86	195.78	-232.577	1413.67	165.053	-289.932	1202.57	200.263	-101.48	1342.75	208.536	-47.4211	1212.55	259.117	-309.349	1249.56	26.3389	-159.004	1375.7	-34.7783	-130.103	1151.75	-39.3845	-127.286	1083.41	-36.9314	-18.2438	1015.37	-8.28024	27.7353	923.394	-66.3216	-4.90457	897.749	-57.0551	71.0954	834.757
552	0	163.065	10.8488	1555.86	263.515	9.66262	1549.55	148.596	-158.274	1591.38	261.371	-169.326	1586.44	196.253	-223.666	1412.15	165.649	-280.885	1201.09	200.713	-92.2291	1341.59	208.968	-38.1974	1211.44	259.777	-299.962	1248.02	26.77	-150.03	1374.31	-34.1334	-120.967	1150.33	-38.6701	-118.083	1081.97	-36.1249	-9.01986	1013.94	-7.39226	36.9439	921.974	-65.4293	4.34873	896.286	-55.9849	80.3808	833.305
553	0	163.466	19.5033	1554.89	263.924	18.2872	1548.66	148.899	-149.708	1589.91	261.676	-160.797	1585.03	196.77	-214.69	1410.62	166.275	-271.712	1199.55	201.22	-82.8885	1340.45	209.46	-28.8403	1210.38	260.465	-290.463	1246.43	27.2459	-140.96	1372.93	-33.4535	-111.877	1148.89	-37.9154	-108.983	1080.51	-35.322	0.047495	1012.4	-6.52597	45.9248	920.417	-64.5474	13.3427	894.699	-54.952	89.3572	831.661
554	0	163.922	28.1841	1553.96	264.387	26.9392	1547.81	149.257	-141.117	1588.45	262.037	-152.239	1583.64	197.328	-205.646	1409.08	166.926	-262.413	1197.98	201.783	-73.4585	1339.36	210.014	-19.3478	1209.36	261.176	-280.853	1244.8	27.7641	-131.792	1371.56	-32.7419	-102.83	1147.43	-37.1238	-99.9821	1079.02	-34.5277	8.95913	1010.76	-5.68736	54.6775	918.733	-63.6808	22.075	892.996	-53.9663	98.0227	829.836
555	0	164.431	36.895	1553.09	264.904	35.6226	1547.01	149.671	-132.496	1587.04	262.453	-143.65	1582.28	197.926	-196.531	1407.55	167.6	-252.985	1196.38	202.398	-63.9399	1338.32	210.626	-9.71903	1208.4	261.906	-271.132	1243.14	28.3223	-122.521	1370.22	-32.0009	-93.8217	1145.97	-36.2979	-91.0763	1077.52	-33.746	17.7159	1009.03	-4.88199	63.2011	916.932	-62.8338	30.5427	891.188	-53.0375	106.375	827.84
556	0	164.994	45.64	1552.29	265.475	44.3418	1546.27	150.141	-123.84	1585.67	262.926	-135.023	1580.96	198.561	-187.345	1406.05	168.295	-243.427	1194.76	203.063	-54.3344	1337.35	211.293	0.045248	1207.5	262.654	-261.301	1241.46	28.9175	-113.148	1368.91	-31.2321	-84.8481	1144.52	-35.439	-82.2609	1076.03	-32.9802	26.3187	1007.23	-4.1148	71.4952	915.026	-62.01	38.7428	889.29	-52.1754	114.409	825.69
557	0	165.608	54.4234	1551.57	266.097	53.1015	1545.61	150.665	-115.147	1584.36	263.453	-126.355	1579.69	199.23	-178.086	1404.59	169.009	-233.742	1193.14	203.774	-44.6446	1336.44	212.014	9.94291	1206.69	263.416	-251.364	1239.79	29.5467	-103.673	1367.64	-30.436	-75.905	1143.08	-34.5474	-73.5315	1074.56	-32.2328	34.7681	1005.37	-3.39005	79.559	913.029	-61.2118	46.672	887.319	-51.3889	122.122	823.403
558	0	166.271	63.2492	1550.94	266.768	61.9061	1545.02	151.242	-106.412	1583.13	264.032	-117.643	1578.49	199.93	-168.755	1403.19	169.74	-223.931	1191.54	204.526	-34.8744	1335.62	212.783	19.9701	1205.96	264.191	-241.325	1238.15	30.2064	-94.0985	1366.44	-29.6125	-66.9887	1141.69	-33.6226	-64.884	1073.12	-31.5052	43.0649	1003.47	-2.71118	87.3922	910.957	-60.441	54.3274	885.293	-50.6863	129.507	821.001
559	0	166.978	72.1211	1550.42	267.483	70.7599	1544.53	151.869	-97.6327	1582	264.662	-108.88	1577.37	200.66	-159.353	1401.85	170.487	-213.998	1189.99	205.313	-25.0286	1334.9	213.595	30.1211	1205.34	264.978	-231.19	1236.55	30.8933	-84.4292	1365.33	-28.7608	-58.0963	1140.35	-32.6629	-56.3145	1071.74	-30.7983	51.2096	1001.55	-2.08081	94.995	908.828	-59.6986	61.7062	883.235	-50.0746	136.559	818.506
560	0	167.725	81.0422	1550	268.238	79.6669	1544.15	152.542	-88.8048	1580.96	265.339	-100.065	1576.34	201.416	-149.881	1400.61	171.251	-203.95	1188.5	206.13	-15.113	1334.28	214.444	40.3883	1204.83	265.777	-220.965	1235.02	31.6036	-74.6717	1364.3	-27.8798	-49.2257	1139.09	-31.6663	-47.8203	1070.45	-30.1123	59.2028	999.634	-1.50069	102.368	906.662	-58.9847	68.8062	881.17	-49.5592	143.271	815.946
561	0	168.506	90.0153	1549.7	269.027	88.6304	1543.87	153.258	-79.9265	1580.04	266.057	-91.1939	1575.42	202.196	-140.343	1399.48	172.032	-193.794	1187.11	206.97	-5.13485	1333.79	215.324	50.7617	1204.46	266.589	-210.661	1233.59	32.3335	-64.8344	1363.4	-26.9682	-40.3765	1137.92	-30.6305	-39.399	1069.24	-29.4469	67.0449	997.738	-0.971771	109.512	904.478	-58.2988	75.6264	879.124	-49.1437	149.637	813.347
562	0	169.315	99.0421	1549.53	269.843	97.6529	1543.72	154.011	-70.9962	1579.24	266.813	-82.2645	1574.62	202.998	-130.744	1398.47	172.83	-183.542	1185.83	207.827	4.89776	1333.42	216.226	61.2294	1204.22	267.415	-200.288	1232.28	33.0791	-54.928	1362.62	-26.0249	-31.5494	1136.87	-29.553	-31.0498	1068.16	-28.8015	74.7363	995.887	-0.494263	116.429	902.298	-57.6403	82.167	877.124	-48.8294	155.654	810.739
563	0	170.144	108.123	1549.49	270.68	106.736	1543.69	154.795	-62.0132	1578.58	267.601	-73.2754	1573.94	203.819	-121.088	1397.6	173.648	-173.204	1184.7	208.693	14.9755	1333.19	217.142	71.7774	1204.13	268.257	-189.858	1231.11	33.8367	-44.9653	1361.98	-25.0492	-22.7471	1135.94	-28.4316	-22.7725	1067.21	-28.1752	82.2773	994.105	-0.067724	123.122	900.147	-57.0077	88.4297	875.2	-48.6155	161.316	808.151
564	0	170.986	117.259	1549.59	271.528	115.88	1543.8	155.605	-52.9777	1578.07	268.414	-64.2262	1573.4	204.658	-111.384	1396.89	174.487	-162.797	1183.74	209.56	25.088	1333.1	218.063	82.3895	1204.2	269.119	-179.383	1230.12	34.6023	-34.9609	1361.5	-24.0408	-13.9743	1135.17	-27.2648	-14.5687	1066.42	-27.5675	89.6681	992.412	0.308816	129.596	898.046	-56.3999	94.4185	873.378	-48.4988	166.625	805.612
565	0	171.833	126.448	1549.84	272.381	125.084	1544.05	156.432	-43.8913	1577.71	269.246	-55.1174	1573.01	205.513	-101.638	1396.34	175.348	-152.338	1182.98	210.423	35.224	1333.16	218.978	93.0478	1204.43	270.004	-168.88	1229.32	35.3724	-24.9317	1361.19	-23.0004	-5.23771	1134.55	-26.0518	-6.44109	1065.8	-26.9779	96.909	990.831	0.636727	135.855	896.019	-55.8153	100.139	871.687	-48.4737	171.581	803.152
566	0	172.675	135.686	1550.23	273.229	134.347	1544.45	157.272	-34.7563	1577.5	270.09	-45.9508	1572.77	206.381	-91.86	1395.97	176.236	-141.847	1182.43	211.272	45.3714	1333.38	219.878	103.732	1204.82	270.916	-158.363	1228.72	36.1434	-14.8963	1361.06	-21.9298	3.45382	1134.11	-24.7932	1.60624	1065.36	-26.4065	104	989.38	0.917627	141.908	894.089	-55.2528	105.601	870.151	-48.5322	176.189	800.796
567	0	173.505	144.971	1550.76	274.064	143.664	1544.98	158.115	-25.5765	1577.46	270.938	-36.7294	1572.69	207.262	-82.0605	1395.79	177.154	-131.345	1182.1	212.101	55.5174	1333.75	220.751	114.422	1205.38	271.861	-147.847	1228.36	36.9119	-4.87527	1361.12	-20.8316	12.0892	1133.85	-23.4906	9.56776	1065.11	-25.8537	110.943	988.078	1.15324	147.762	892.277	-54.7114	110.815	868.792	-48.6646	180.46	798.569
568	0	174.313	154.297	1551.44	274.876	153.032	1545.66	158.954	-16.3565	1577.58	271.783	-27.457	1572.77	208.155	-72.2506	1395.79	178.105	-120.856	1182.01	212.902	65.6487	1334.27	221.588	125.096	1206.09	272.843	-137.35	1228.23	37.6749	5.10934	1361.35	-19.7095	20.6554	1133.78	-22.147	17.4366	1065.05	-25.3209	117.736	986.938	1.34528	153.428	890.603	-54.1904	115.795	867.63	-48.8595	184.407	796.492
569	0	175.091	163.657	1552.24	275.659	162.444	1546.46	159.783	-7.1023	1577.85	272.618	-18.1389	1573.01	209.058	-62.4424	1395.99	179.095	-110.404	1182.16	213.669	75.7516	1334.95	222.376	135.729	1206.96	273.868	-126.885	1228.35	38.4294	15.0341	1361.78	-18.568	29.1374	1133.89	-20.7669	25.2047	1065.19	-24.81	124.381	985.973	1.4953	158.916	889.084	-53.6897	120.558	866.678	-49.1044	188.049	794.585
570	0	175.829	173.044	1553.16	276.402	171.894	1547.4	160.594	2.17943	1578.28	273.437	-8.78104	1573.41	209.972	-52.6483	1396.37	180.13	-100.014	1182.56	214.397	85.8127	1335.77	223.106	146.3	1207.98	274.943	-116.47	1228.71	39.1728	24.8749	1362.38	-17.4125	37.5186	1134.19	-19.3558	32.8628	1065.52	-24.3235	130.879	985.19	1.60463	164.242	887.736	-53.2095	125.123	865.947	-49.3862	191.409	792.861
571	0	176.521	182.45	1554.2	277.099	181.373	1548.45	161.38	11.481	1578.86	274.231	0.609776	1573.97	210.896	-42.8814	1396.93	181.216	-89.711	1183.18	215.079	95.8185	1336.73	223.769	156.786	1209.12	276.074	-106.116	1229.31	39.9028	34.6071	1363.14	-16.2487	45.7811	1134.67	-17.9205	40.4009	1066.04	-23.8645	137.23	984.594	1.67437	169.417	886.57	-52.7502	129.51	865.44	-49.6919	194.513	791.333
572	0	177.157	191.864	1555.33	277.74	190.873	1549.61	162.135	20.7942	1579.58	274.995	10.026	1574.67	211.829	-33.1545	1397.67	182.359	-79.5194	1184.03	215.711	105.756	1337.83	224.355	167.165	1210.39	277.267	-95.8388	1230.14	40.6174	44.2065	1364.07	-15.0827	53.9061	1135.32	-16.4685	47.8081	1066.73	-23.4365	143.434	984.187	1.70531	174.459	885.597	-52.3125	133.741	865.159	-50.0089	197.395	790.006
573	0	177.731	201.277	1556.55	278.32	200.385	1550.86	162.852	30.11	1580.42	275.723	19.4598	1575.52	212.771	-23.4802	1398.58	183.567	-69.4622	1185.07	216.29	115.612	1339.04	224.856	177.417	1211.75	278.528	-85.6485	1231.18	41.3147	53.6501	1365.14	-13.9205	61.8746	1136.12	-15.0079	55.0735	1067.58	-23.0433	149.494	983.967	1.69805	179.383	884.822	-51.8971	137.84	865.097	-50.326	200.088	788.885
574	0	178.237	210.679	1557.83	278.832	209.899	1552.18	163.528	39.4195	1581.39	276.41	28.9027	1576.5	213.723	-13.8705	1399.64	184.846	-59.5599	1186.3	216.812	125.377	1340.36	225.268	187.523	1213.21	279.861	-75.5557	1232.43	41.9934	62.9167	1366.33	-12.7679	69.6676	1137.06	-13.5469	62.1859	1068.58	-22.6885	155.408	983.929	1.65303	184.206	884.249	-51.5042	141.827	865.245	-50.6336	202.631	787.971
575	0	178.667	220.06	1559.17	279.27	219.407	1553.57	164.157	48.7134	1582.46	277.052	38.3463	1577.6	214.684	-4.33642	1400.83	186.199	-49.8304	1187.69	217.277	135.039	1341.77	225.585	197.468	1214.73	281.269	-65.5689	1233.85	42.6525	71.9878	1367.63	-11.6303	77.2669	1138.12	-12.0935	69.1343	1069.69	-22.3757	161.179	984.066	1.57061	188.942	883.876	-51.1333	145.724	865.59	-50.9241	205.063	787.262
576	0	179.019	229.41	1560.54	279.63	228.898	1555.01	164.736	57.9826	1583.62	277.645	47.7824	1578.81	215.653	5.11208	1402.15	187.631	-40.2879	1189.22	217.682	144.589	1343.27	225.807	207.239	1216.31	282.753	-55.695	1235.43	43.2914	80.8485	1369.01	-10.5123	84.6558	1139.28	-10.6556	75.9088	1070.91	-22.1077	166.806	984.366	1.45121	193.608	883.701	-50.7831	149.551	866.115	-51.1922	207.421	786.755
577	0	179.287	238.719	1561.93	279.909	238.365	1556.49	165.262	67.2182	1584.86	278.187	57.2029	1580.12	216.63	14.4665	1403.57	189.141	-30.9427	1190.86	218.03	154.019	1344.83	225.933	216.826	1217.93	284.314	-45.9387	1237.14	43.9097	89.4876	1370.47	-9.41751	91.8196	1140.53	-9.23984	82.5	1072.21	-21.887	172.29	984.819	1.29536	198.218	883.719	-50.4515	153.325	866.8	-51.435	209.747	786.445
578	0	179.47	247.977	1563.32	280.102	247.797	1557.98	165.734	76.412	1586.17	278.676	66.5998	1581.51	217.613	23.7197	1405.08	190.728	-21.8003	1192.58	218.32	163.325	1346.45	225.968	226.226	1219.57	285.946	-36.3034	1238.96	44.5078	97.8986	1371.97	-8.34869	98.7463	1141.84	-7.85226	88.9005	1073.58	-21.715	177.633	985.409	1.10381	202.785	883.919	-50.1352	157.063	867.626	-51.6518	212.078	786.323
579	0	179.567	257.177	1564.7	280.21	257.188	1559.47	166.15	85.5563	1587.52	279.111	75.9661	1582.97	218.601	32.8664	1406.66	192.386	-12.8618	1194.37	218.555	172.5	1348.1	225.916	235.437	1221.23	287.645	-26.7902	1240.87	45.0863	106.079	1373.49	-7.30744	105.427	1143.21	-6.49751	95.1043	1074.99	-21.5921	182.835	986.123	0.877583	207.32	884.292	-49.8299	160.776	868.569	-51.844	214.448	786.381
580	0	179.577	266.312	1566.06	280.232	266.53	1560.96	166.511	94.6442	1588.91	279.492	85.2951	1584.49	219.592	41.9028	1408.29	194.107	-4.12371	1196.2	218.739	181.542	1349.77	225.785	244.462	1222.89	289.403	-17.3989	1242.84	45.6462	114.033	1375.03	-6.29429	111.858	1144.6	-5.17897	101.108	1076.42	-21.5179	187.899	986.944	0.617988	211.832	884.824	-49.5307	164.475	869.608	-52.015	216.889	786.609
581	0	179.501	275.375	1567.38	280.168	275.818	1562.43	166.817	103.67	1590.32	279.82	94.5808	1586.05	220.583	50.827	1409.96	195.883	4.42163	1198.05	218.874	190.45	1351.46	225.586	253.308	1224.53	291.21	-8.12776	1244.85	46.1889	121.765	1376.56	-5.30877	118.038	1146.01	-3.8987	106.91	1077.87	-21.4908	192.827	987.855	0.326658	216.331	885.5	-49.232	168.168	870.72	-52.1697	219.432	786.996
582	0	179.342	284.361	1568.65	280.022	285.044	1563.86	167.071	112.628	1591.74	280.096	103.818	1587.64	221.571	59.6385	1411.65	197.701	12.7856	1199.91	218.966	199.225	1353.13	225.328	261.985	1226.16	293.055	1.02643	1246.87	46.7161	129.288	1378.07	-4.34954	123.972	1147.42	-2.65755	112.513	1079.32	-21.508	197.624	988.838	0.005519	220.821	886.302	-48.9278	171.861	871.883	-52.3139	222.098	787.529
583	0	179.104	293.267	1569.87	279.796	294.206	1565.24	167.274	121.516	1593.15	280.324	113.003	1589.24	222.553	68.3386	1413.34	199.55	20.9826	1201.74	219.019	207.867	1354.78	225.022	270.505	1227.76	294.926	10.0677	1248.9	47.2295	136.615	1379.54	-3.41464	129.667	1148.82	-1.45523	117.922	1080.75	-21.5662	202.293	989.877	-0.343212	225.308	887.212	-48.6121	175.559	873.074	-52.4541	224.907	788.194
584	0	178.791	302.09	1571.02	279.493	303.3	1566.57	167.429	130.33	1594.53	280.506	122.132	1590.84	223.527	76.93	1415.02	201.415	29.0291	1203.55	219.038	216.38	1356.4	224.681	278.882	1229.33	296.812	19.001	1250.9	47.7311	143.764	1380.96	-2.50167	135.138	1150.19	-0.290592	123.144	1082.15	-21.6607	206.843	990.954	-0.717033	229.796	888.212	-48.2791	179.264	874.273	-52.5972	227.874	788.974
585	0	178.408	310.828	1572.09	279.12	312.324	1567.84	167.541	139.069	1595.89	280.645	131.203	1592.43	224.489	85.4169	1416.67	203.284	36.9431	1205.31	219.027	224.769	1357.97	224.315	287.127	1230.85	298.698	27.8316	1252.87	48.2226	150.754	1382.32	-1.60806	140.403	1151.53	0.838185	128.193	1083.51	-21.7866	211.28	992.05	-1.11315	234.286	889.279	-47.9236	182.978	875.46	-52.7499	231.008	789.853
586	0	177.961	319.482	1573.08	278.681	321.276	1569.03	167.613	147.732	1597.21	280.745	140.215	1593.98	225.436	93.8045	1418.27	205.144	44.7428	1207.01	218.991	233.039	1359.48	223.935	295.256	1232.3	300.573	36.5652	1254.77	48.7055	157.605	1383.6	-0.731305	145.484	1152.83	1.93336	133.082	1084.82	-21.938	215.615	993.149	-1.52849	238.782	890.392	-47.5413	186.704	876.616	-52.9182	234.312	790.81
587	0	177.456	328.053	1573.98	278.183	330.157	1570.14	167.651	156.32	1598.47	280.812	149.167	1595.49	226.364	102.099	1419.82	206.985	52.4464	1208.64	218.935	241.196	1360.92	223.548	303.278	1233.69	302.424	45.2075	1256.61	49.1812	164.338	1384.81	0.130848	150.404	1154.06	2.99742	137.831	1086.07	-22.1089	219.86	994.233	-1.95968	243.284	891.531	-47.1288	190.444	877.724	-53.1074	237.787	791.825
588	0	176.9	336.544	1574.78	277.631	338.967	1571.15	167.658	164.835	1599.66	280.849	158.059	1596.95	227.271	110.308	1421.3	208.794	60.0708	1210.18	218.863	249.249	1362.26	223.162	311.204	1235	304.241	53.764	1258.36	49.6504	170.976	1385.92	0.980197	155.193	1155.23	4.0329	142.459	1087.25	-22.2929	224.028	995.286	-2.40306	247.793	892.672	-46.6838	194.2	878.768	-53.3217	241.428	792.877
589	0	176.301	344.956	1575.49	277.032	347.709	1572.07	167.64	173.279	1600.78	280.86	166.894	1598.34	228.153	118.439	1422.71	210.563	67.6316	1211.62	218.777	257.205	1363.51	222.783	319.043	1236.21	306.013	62.2402	1260.02	50.1134	177.539	1386.94	1.81794	159.878	1156.33	5.04214	146.991	1088.36	-22.4836	228.134	996.293	-2.8547	252.312	893.795	-46.2056	197.974	879.734	-53.5639	245.225	793.945
590	0	175.664	353.295	1576.09	276.394	356.385	1572.89	167.601	181.656	1601.82	280.852	175.672	1599.65	229.007	126.5	1424.02	212.282	75.1424	1212.95	218.681	265.072	1364.65	222.415	326.801	1237.31	307.729	70.6409	1261.56	50.5699	184.048	1387.85	2.64457	164.492	1157.35	6.0271	151.451	1089.39	-22.6747	232.195	997.238	-3.31043	256.84	894.879	-45.6948	201.772	880.611	-53.8354	249.169	795.006
591	0	174.997	361.565	1576.59	275.721	365	1573.59	167.547	189.97	1602.77	280.827	184.398	1600.87	229.831	134.501	1425.23	213.943	82.6146	1214.17	218.577	272.859	1365.67	222.059	334.484	1238.3	309.38	78.9707	1262.99	51.0191	190.521	1388.65	3.4598	169.064	1158.27	6.98921	155.865	1090.33	-22.8604	236.228	998.109	-3.76593	261.381	895.904	-45.1534	205.597	881.39	-54.1361	253.245	796.038
592	0	174.306	369.772	1576.98	275.02	373.557	1574.19	167.482	198.225	1603.62	280.791	193.074	1601.99	230.621	142.449	1426.33	215.538	90.0576	1215.27	218.466	280.576	1366.57	221.717	342.098	1239.15	310.958	87.2336	1264.28	51.4594	196.979	1389.34	4.2625	173.624	1159.1	7.92917	160.26	1091.18	-23.0351	240.253	998.893	-4.21676	265.936	896.852	-44.5846	209.456	882.062	-54.4645	257.437	797.022
593	0	173.597	377.921	1577.27	274.298	382.063	1574.67	167.41	206.427	1604.37	280.747	201.706	1603.01	231.373	150.353	1427.32	217.062	97.4788	1216.24	218.351	288.231	1367.33	221.388	349.649	1239.86	312.455	95.4331	1265.45	51.8888	203.437	1389.91	5.05065	178.201	1159.83	8.84692	164.663	1091.92	-23.1944	244.287	999.58	-4.65851	270.508	897.705	-43.9932	213.353	882.623	-54.8175	261.73	797.937
594	0	172.875	386.02	1577.44	273.558	390.522	1575.02	167.334	214.582	1605.01	280.698	210.296	1603.91	232.086	158.222	1428.19	218.506	104.884	1217.08	218.23	295.834	1367.95	221.07	357.142	1240.43	313.862	103.572	1266.48	52.3044	209.912	1390.37	5.8214	182.822	1160.45	9.7415	169.099	1092.57	-23.3346	248.35	1000.16	-5.08689	275.099	898.45	-43.385	217.298	883.069	-55.1909	266.107	798.767
595	0	172.145	394.074	1577.51	272.805	398.94	1575.26	167.257	222.696	1605.55	280.647	218.849	1604.69	232.755	166.064	1428.94	219.864	112.277	1217.79	218.105	303.393	1368.43	220.762	364.585	1240.84	315.175	111.654	1267.37	52.703	216.417	1390.71	6.57108	187.511	1160.97	10.611	173.592	1093.11	-23.4531	252.46	1000.63	-5.49786	279.714	899.073	-42.7668	221.296	883.399	-55.5796	270.553	799.494
596	0	171.41	402.089	1577.48	272.043	407.324	1575.38	167.182	230.774	1605.97	280.594	227.37	1605.34	233.376	173.885	1429.57	221.13	119.662	1218.36	217.974	310.917	1368.77	220.459	371.986	1241.09	316.385	119.681	1268.12	53.081	222.967	1390.94	7.2953	192.291	1161.38	11.4528	178.166	1093.54	-23.5485	256.637	1000.98	-5.88776	284.356	899.564	-42.1465	225.355	883.614	-55.9773	275.052	800.105
597	0	170.674	410.073	1577.34	271.276	415.678	1575.38	167.11	238.822	1606.27	280.542	235.864	1605.86	233.948	181.693	1430.07	222.298	127.041	1218.8	217.838	318.415	1368.95	220.16	379.354	1241.19	317.487	127.655	1268.72	53.4342	229.573	1391.05	7.989	197.182	1161.68	12.2632	182.842	1093.88	-23.6207	260.897	1001.2	-6.25349	289.03	899.914	-41.5324	229.482	883.716	-56.3776	279.591	800.589
598	0	169.938	418.03	1577.09	270.505	424.01	1575.26	167.04	246.847	1606.47	280.489	244.334	1606.25	234.465	189.494	1430.45	223.363	134.416	1219.12	217.694	325.896	1369	219.861	386.699	1241.13	318.477	135.578	1269.19	53.758	236.245	1391.05	8.64661	202.202	1161.87	13.0377	187.641	1094.1	-23.6709	265.258	1001.31	-6.59264	293.739	900.118	-40.9331	233.685	883.708	-56.7736	284.159	800.935
599	0	169.205	425.967	1576.76	269.732	432.323	1575.03	166.972	254.852	1606.54	280.434	252.785	1606.5	234.924	197.293	1430.7	224.317	141.79	1219.31	217.542	333.366	1368.9	219.558	394.032	1240.93	319.351	143.452	1269.53	54.048	242.992	1390.94	9.26216	207.366	1161.95	13.7713	192.579	1094.23	-23.7015	269.733	1001.28	-6.90367	298.489	900.17	-40.3577	237.969	883.594	-57.1585	288.744	801.137
600	0	168.473	433.89	1576.32	268.956	440.623	1574.68	166.904	262.843	1606.51	280.376	261.219	1606.63	235.321	205.095	1430.83	225.157	149.165	1219.39	217.379	340.834	1368.66	219.249	401.364	1240.58	320.104	151.281	1269.73	54.299	249.823	1390.73	9.82937	212.689	1161.93	14.4581	197.672	1094.25	-23.716	274.338	1001.13	-7.18597	303.284	900.069	-39.8152	242.342	883.379	-57.5259	293.34	801.19
601	0	167.743	441.802	1575.8	268.18	448.914	1574.22	166.834	270.825	1606.36	280.311	269.64	1606.62	235.652	212.903	1430.84	225.878	156.543	1219.35	217.204	348.306	1368.28	218.931	408.705	1240.1	320.735	159.067	1269.81	54.5061	256.743	1390.42	10.3418	218.181	1161.81	15.0919	202.934	1094.17	-23.719	279.085	1000.85	-7.44004	308.13	899.815	-39.3142	246.807	883.068	-57.8703	297.94	801.09
602	0	167.013	449.709	1575.18	267.4	457.198	1573.66	166.757	278.802	1606.1	280.236	278.049	1606.48	235.914	220.722	1430.73	226.476	163.93	1219.21	217.014	355.79	1367.78	218.601	416.065	1239.5	321.242	166.812	1269.76	54.6644	263.759	1390.02	10.7931	223.853	1161.59	15.6661	208.376	1094	-23.716	283.983	1000.45	-7.66746	313.031	899.407	-38.8632	251.37	882.666	-58.1867	302.541	800.835
603	0	166.282	457.614	1574.49	266.617	465.479	1573.01	166.669	286.775	1605.73	280.146	286.449	1606.22	236.103	228.554	1430.51	226.949	171.327	1218.96	216.806	363.291	1367.16	218.258	423.452	1238.78	321.622	174.522	1269.6	54.7689	270.874	1389.53	11.1769	229.712	1161.27	16.1739	214.007	1093.74	-23.7132	289.043	999.93	-7.87099	317.993	898.85	-38.4698	256.035	882.18	-58.4718	307.14	800.426
604	0	165.545	465.52	1573.72	265.826	473.758	1572.26	166.566	294.749	1605.27	280.035	294.839	1605.83	236.215	236.401	1430.18	227.292	178.74	1218.62	216.577	370.816	1366.43	217.9	430.875	1237.96	321.876	182.201	1269.33	54.8147	278.092	1388.96	11.4871	235.764	1160.87	16.6087	219.836	1093.39	-23.7175	294.271	999.293	-8.05447	323.022	898.146	-38.1409	260.805	881.612	-58.7234	311.738	799.864
605	0	164.801	473.431	1572.88	265.027	482.037	1571.44	166.44	302.725	1604.7	279.899	303.22	1605.33	236.246	244.265	1429.74	227.506	186.174	1218.19	216.324	378.369	1365.59	217.525	438.339	1237.05	322.004	189.854	1268.95	54.7972	285.414	1388.3	11.7181	242.015	1160.37	16.9639	225.867	1092.95	-23.7358	299.674	998.544	-8.22276	328.123	897.301	-37.8827	265.686	880.969	-58.9408	316.337	799.152
606	0	164.046	481.348	1571.98	264.215	490.314	1570.53	166.286	310.704	1604.03	279.73	311.591	1604.72	236.194	252.148	1429.2	227.589	193.635	1217.67	216.043	385.957	1364.67	217.131	445.85	1236.06	322.006	197.487	1268.48	54.7119	292.842	1387.57	11.8646	248.467	1159.79	17.2335	232.104	1092.43	-23.7756	305.257	997.688	-8.38164	333.303	896.32	-37.7003	270.679	880.255	-59.1249	320.942	798.296
607	0	163.275	489.274	1571.02	263.388	498.591	1569.57	166.098	318.688	1603.28	279.523	319.952	1604	236.055	260.05	1428.57	227.542	201.128	1217.07	215.729	393.584	1363.65	216.717	453.413	1235.01	321.884	205.108	1267.9	54.5549	300.377	1386.77	11.922	255.121	1159.12	17.4124	238.548	1091.83	-23.8441	311.022	996.728	-8.53761	338.568	895.212	-37.5981	275.79	879.474	-59.2782	325.558	797.301
608	0	162.485	497.21	1570.02	262.541	506.866	1568.55	165.868	326.676	1602.43	279.271	328.301	1603.18	235.827	267.974	1427.84	227.364	208.663	1216.39	215.379	401.253	1362.57	216.281	461.03	1233.89	321.638	212.722	1267.23	54.3224	308.016	1385.89	11.8864	261.978	1158.38	17.496	245.199	1091.15	-23.9483	316.972	995.672	-8.69776	343.927	893.984	-37.5793	281.022	878.629	-59.4046	330.194	796.173
609	0	161.671	505.157	1568.97	261.671	515.138	1567.48	165.589	334.668	1601.51	278.969	336.635	1602.27	235.508	275.921	1427.02	227.058	216.245	1215.63	214.988	408.97	1361.42	215.821	468.705	1232.73	321.271	220.34	1266.47	54.0109	315.76	1384.96	11.7547	269.034	1157.55	17.481	252.055	1090.4	-24.095	323.107	994.524	-8.86956	349.386	892.645	-37.6464	286.379	877.724	-59.5091	334.861	794.92
610	0	160.83	513.115	1567.9	260.775	523.405	1566.37	165.257	342.665	1600.52	278.61	344.955	1601.27	235.095	283.893	1426.12	226.625	223.882	1214.79	214.551	416.738	1360.22	215.334	476.442	1231.53	320.786	227.97	1265.63	53.6175	323.604	1383.96	11.5249	276.287	1156.66	17.3652	259.112	1089.58	-24.2906	329.427	993.291	-9.06069	354.954	891.203	-37.8008	291.868	876.762	-59.5984	339.57	793.552
611	0	159.957	521.085	1566.81	259.849	531.666	1565.25	164.864	350.664	1599.46	278.189	353.256	1600.2	234.588	291.89	1425.15	226.069	231.584	1213.87	214.063	424.56	1358.98	214.818	484.246	1230.3	320.185	235.622	1264.7	53.1398	331.544	1382.9	11.1958	283.73	1155.69	17.1477	266.366	1088.69	-24.5408	335.932	991.979	-9.27887	360.639	889.67	-38.0433	297.495	875.746	-59.68	344.335	792.077
612	0	159.049	529.067	1565.7	258.889	539.919	1564.11	164.405	358.667	1598.34	277.702	361.538	1599.07	233.987	299.916	1424.11	225.394	239.359	1212.88	213.519	432.44	1357.71	214.269	492.12	1229.07	319.471	243.307	1263.69	52.5757	339.578	1381.78	10.7672	291.358	1154.64	16.8287	273.809	1087.72	-24.8507	342.619	990.595	-9.53172	366.452	888.055	-38.3737	303.265	874.678	-59.7624	349.171	790.506
613	0	158.103	537.061	1564.61	257.894	548.163	1562.97	163.875	366.671	1597.17	277.143	369.798	1597.87	233.29	307.972	1423.01	224.606	247.214	1211.81	212.915	440.382	1356.41	213.683	500.069	1227.82	318.65	251.034	1262.61	51.9237	347.697	1380.62	10.24	299.162	1153.54	16.41	281.435	1086.7	-25.2247	349.487	989.148	-9.82654	372.401	886.369	-38.7912	309.186	873.562	-59.8551	354.098	788.851
614	0	157.116	545.067	1563.53	256.862	556.396	1561.85	163.27	374.677	1595.97	276.51	378.036	1596.62	232.499	316.061	1421.85	223.709	255.16	1210.67	212.245	448.387	1355.11	213.055	508.1	1226.59	317.724	258.815	1261.45	51.1829	355.898	1379.4	9.61629	307.132	1152.36	15.8944	289.236	1085.6	-25.6666	356.532	987.644	-10.1703	378.496	884.625	-39.2941	315.266	872.399	-59.9677	359.132	787.124
615	0	156.086	553.086	1562.48	255.79	564.618	1560.76	162.587	382.684	1594.73	275.8	386.249	1595.34	231.614	324.187	1420.64	222.712	263.204	1209.45	211.504	456.46	1353.81	212.38	516.218	1225.38	316.699	266.662	1260.23	50.3529	364.172	1378.15	8.89916	315.259	1151.13	15.2858	297.202	1084.45	-26.1793	363.751	986.094	-10.5693	384.748	882.834	-39.8799	321.512	871.195	-60.1105	364.294	785.336
616	0	155.011	561.117	1561.48	254.677	572.828	1559.71	161.824	390.691	1593.47	275.01	394.438	1594.02	230.638	332.352	1419.4	221.622	271.355	1208.17	210.689	464.601	1352.52	211.652	524.428	1224.2	315.581	274.587	1258.95	49.4336	372.512	1376.85	8.09267	323.529	1149.84	14.5891	305.324	1083.24	-26.765	371.141	984.506	-11.0292	391.166	881.01	-40.5454	327.932	869.952	-60.2936	369.606	783.502
617	0	153.89	569.162	1560.54	253.523	581.025	1558.71	160.978	398.699	1592.2	274.14	402.602	1592.69	229.572	340.559	1418.13	220.446	279.621	1206.82	209.795	472.815	1351.26	210.864	532.737	1223.06	314.374	282.599	1257.61	48.4257	380.912	1375.53	7.20179	331.932	1148.51	13.81	313.592	1081.99	-27.4252	378.698	982.892	-11.5552	397.761	879.166	-41.2866	334.535	868.675	-60.5269	375.087	781.636
618	0	152.723	577.22	1559.67	252.327	589.21	1557.78	160.049	406.708	1590.93	273.19	410.742	1591.35	228.419	348.813	1416.84	219.193	288.009	1205.42	208.819	481.104	1350.03	210.011	541.151	1221.98	313.086	290.711	1256.23	47.3305	389.365	1374.19	6.23225	340.455	1147.13	12.9549	321.996	1080.68	-28.1608	386.417	981.262	-12.1512	404.542	877.315	-42.0989	341.327	867.37	-60.8201	380.76	779.752
619	0	151.51	585.293	1558.89	251.09	597.384	1556.93	159.037	414.72	1589.68	272.159	418.858	1590.02	227.184	357.117	1415.54	217.873	296.525	1203.96	207.759	489.468	1348.85	209.085	549.673	1220.96	311.723	298.932	1254.8	46.1497	397.864	1372.83	5.19032	349.085	1145.72	12.0305	330.528	1079.34	-28.9718	394.294	979.628	-12.8207	411.519	875.474	-42.9769	348.315	866.044	-61.1821	386.646	777.866
620	0	150.25	593.381	1558.21	249.813	605.548	1556.18	157.944	422.734	1588.46	271.049	426.953	1588.71	225.869	365.474	1414.25	216.492	305.176	1202.47	206.613	497.91	1347.73	208.08	558.309	1220.03	310.291	307.272	1253.36	44.8856	406.404	1371.47	4.08265	357.81	1144.29	11.0436	339.177	1077.98	-29.8578	402.326	978.004	-13.5659	418.701	873.656	-43.9144	355.507	864.704	-61.6211	392.766	775.994
621	0	148.947	601.486	1557.64	248.496	613.703	1555.53	156.771	430.755	1587.28	269.863	435.029	1587.42	224.48	373.889	1412.98	215.058	313.967	1200.95	205.38	506.431	1346.68	206.993	567.06	1219.18	308.798	315.738	1251.9	43.5412	414.981	1370.13	2.91603	366.619	1142.86	10.0014	347.936	1076.6	-30.8178	410.508	976.405	-14.3882	426.096	871.879	-44.9052	362.909	863.361	-62.1445	399.139	774.153
622	0	147.601	609.609	1557.19	247.141	621.853	1555	155.52	438.782	1586.15	268.603	443.088	1586.18	223.021	382.362	1411.74	213.58	322.901	1199.42	204.062	515.031	1345.72	205.817	575.928	1218.44	307.251	324.335	1250.45	42.1198	423.591	1368.81	1.69713	375.503	1141.42	8.91032	356.796	1075.23	-31.85	418.836	974.844	-15.2882	433.713	870.159	-45.9422	370.524	862.025	-62.7584	405.784	772.361
623	0	146.216	617.751	1556.88	245.752	629.998	1554.59	154.196	446.819	1585.09	267.273	451.135	1585	221.497	390.898	1410.54	212.062	331.982	1197.89	202.659	523.711	1344.84	204.552	584.914	1217.8	305.658	333.069	1249.01	40.6257	432.232	1367.52	0.432372	384.451	1140.01	7.77668	365.75	1073.86	-32.9523	427.308	973.337	-16.2652	441.557	868.512	-47.0188	378.358	860.708	-63.4678	412.717	770.636
624	0	144.794	625.914	1556.71	244.329	638.143	1554.32	152.804	454.869	1584.11	265.877	459.172	1583.88	219.914	399.498	1409.4	210.512	341.209	1196.38	201.175	532.469	1344.07	203.195	594.015	1217.28	304.024	341.94	1247.61	39.0634	440.904	1366.3	-0.872342	393.458	1138.64	6.60601	374.793	1072.53	-34.1221	435.92	971.901	-17.318	449.636	866.955	-48.1281	386.415	859.423	-64.276	419.955	768.996
625	0	143.338	634.101	1556.69	242.877	646.289	1554.2	151.346	462.934	1583.22	264.42	467.205	1582.85	218.277	408.162	1408.34	208.933	350.583	1194.92	199.614	541.304	1343.41	201.747	603.229	1216.88	302.357	350.947	1246.27	37.4382	449.606	1365.14	-2.21173	402.519	1137.33	5.40298	383.921	1071.25	-35.3561	444.672	970.551	-18.4441	457.955	865.506	-49.2641	394.698	858.185	-65.1848	427.51	767.459
626	0	141.854	642.312	1556.83	241.4	654.442	1554.22	149.831	471.018	1582.44	262.908	475.237	1581.91	216.593	416.892	1407.36	207.331	360.101	1193.53	197.981	550.214	1342.87	200.211	612.549	1216.62	300.664	360.088	1245	35.7558	458.34	1364.07	-3.58128	411.63	1136.09	4.17128	393.129	1070.03	-36.6506	453.561	969.304	-19.6405	466.516	864.18	-50.4214	403.21	857.009	-66.1941	435.394	766.045
627	0	140.347	650.549	1557.14	239.901	662.602	1554.4	148.263	479.124	1581.77	261.346	483.273	1581.07	214.868	425.687	1406.47	205.709	369.758	1192.22	196.284	559.195	1342.45	198.59	621.971	1216.49	298.951	369.356	1243.82	34.0224	467.108	1363.1	-4.97735	420.791	1134.94	2.91345	402.417	1068.9	-38.0016	462.588	968.176	-20.903	475.325	862.995	-51.5957	411.952	855.91	-67.3025	443.618	764.769
628	0	138.821	658.815	1557.6	238.385	670.775	1554.73	146.65	487.255	1581.22	259.741	491.317	1580.35	213.107	434.544	1405.7	204.069	379.545	1191.03	194.528	568.243	1342.17	196.892	631.484	1216.5	297.224	378.743	1242.76	32.2448	475.912	1362.25	-6.39719	430.001	1133.91	1.63085	411.781	1067.87	-39.4048	471.754	967.182	-22.227	484.382	861.963	-52.7841	420.928	854.904	-68.5065	452.189	763.649
629	0	137.283	667.111	1558.22	236.858	678.963	1555.21	144.998	495.415	1580.81	258.1	499.372	1579.74	211.316	443.462	1405.05	202.416	389.455	1189.97	192.725	577.352	1342.03	195.124	641.079	1216.66	295.489	388.236	1241.82	30.43	484.756	1361.53	-7.83901	439.263	1133	0.323615	421.223	1066.96	-40.8552	481.061	966.335	-23.6072	493.69	861.1	-53.9851	430.138	854.007	-69.8015	461.112	762.699
630	0	135.741	675.439	1559.01	235.326	687.168	1555.85	143.316	503.605	1580.53	256.431	507.444	1579.26	209.501	452.435	1404.54	200.751	399.473	1189.07	190.881	586.516	1342.02	193.296	650.743	1216.95	293.749	397.821	1241.04	28.5851	493.644	1360.95	-9.30202	448.58	1132.23	-1.00934	430.741	1066.18	-42.3479	490.51	965.649	-25.0376	503.247	860.417	-55.1988	439.587	853.234	-71.1814	470.394	761.934
631	0	134.2	683.799	1559.95	233.796	695.392	1556.64	141.611	511.829	1580.39	254.74	515.534	1578.92	207.668	461.461	1404.16	199.075	409.584	1188.33	189.009	595.729	1342.16	191.418	660.463	1217.37	292.009	407.482	1240.41	26.7176	502.578	1360.54	-10.7864	457.957	1131.62	-2.37031	440.337	1065.56	-43.8779	500.106	965.133	-26.5119	513.052	859.925	-56.4269	449.276	852.598	-72.6388	480.037	761.364
632	0	132.67	692.192	1561.03	232.274	703.639	1557.56	139.893	520.088	1580.4	253.036	523.646	1578.71	205.822	470.531	1403.92	197.391	419.771	1187.79	187.117	604.982	1342.43	189.505	670.222	1217.93	290.271	417.199	1239.96	24.8346	511.563	1360.28	-12.2932	467.397	1131.18	-3.76272	450.01	1065.09	-45.44	509.851	964.797	-28.0235	523.104	859.631	-57.6727	459.207	852.11	-74.1655	490.041	760.999
633	0	131.157	700.618	1562.26	230.769	711.907	1558.62	138.169	528.383	1580.55	251.327	531.781	1578.63	203.966	479.64	1403.84	195.697	430.013	1187.44	185.218	614.265	1342.84	187.569	680.004	1218.6	288.536	426.952	1239.68	22.9431	520.601	1360.2	-13.8246	476.906	1130.92	-5.1911	459.762	1064.79	-47.0292	519.75	964.647	-29.5656	533.399	859.541	-58.9409	469.383	851.781	-75.7525	500.408	760.844
634	0	129.672	709.078	1563.6	229.288	720.198	1559.79	136.448	536.717	1580.84	249.621	539.94	1578.68	202.105	488.78	1403.9	193.992	440.287	1187.29	183.32	623.571	1343.37	185.625	689.791	1219.39	286.803	436.718	1239.59	21.0497	529.697	1360.29	-15.3833	486.488	1130.83	-6.66092	469.592	1064.66	-48.6407	529.807	964.686	-31.1312	543.932	859.657	-60.2372	479.805	851.617	-77.3904	511.136	760.903
635	0	128.223	717.569	1565.06	227.841	728.511	1561.07	134.739	545.087	1581.27	247.926	548.122	1578.87	200.242	497.941	1404.11	192.273	450.569	1187.34	181.436	632.888	1344.03	183.688	699.565	1220.28	285.068	446.474	1239.68	19.1604	538.852	1360.55	-16.9729	496.146	1130.93	-8.17852	479.5	1064.71	-50.2698	540.025	964.915	-32.7134	554.697	859.981	-61.5682	490.476	851.623	-79.0693	522.222	761.175
636	0	126.818	726.091	1566.61	226.437	736.845	1562.43	133.05	553.494	1581.84	246.25	556.328	1579.17	198.38	507.114	1404.46	190.537	460.833	1187.6	179.574	642.205	1344.79	181.772	709.307	1221.25	283.328	456.194	1239.95	17.2805	548.067	1360.99	-18.5977	505.884	1131.21	-9.7509	489.486	1064.93	-51.9124	550.407	965.332	-34.3056	565.688	860.509	-62.9412	501.395	851.8	-80.7796	533.663	761.656
637	0	125.467	734.642	1568.25	225.084	745.197	1563.87	131.389	561.937	1582.53	244.602	564.555	1579.59	196.519	516.29	1404.96	188.776	471.053	1188.05	177.744	651.513	1345.66	179.894	718.999	1222.28	281.574	465.854	1240.38	15.4145	557.346	1361.59	-20.2624	515.706	1131.66	-11.3856	499.548	1065.32	-53.5648	560.955	965.932	-35.9012	576.897	861.236	-64.3634	512.562	852.147	-82.5117	545.451	762.34
638	0	124.178	743.218	1569.94	223.792	753.564	1565.37	129.766	570.413	1583.34	242.988	572.8	1580.11	194.66	525.457	1405.58	186.983	481.204	1188.67	175.954	660.801	1346.61	178.067	728.624	1223.37	279.8	475.428	1240.98	13.5661	566.688	1362.34	-21.9718	525.613	1132.28	-13.0904	509.685	1065.87	-55.2237	571.669	966.708	-37.4942	588.314	862.154	-65.842	523.976	852.658	-84.2567	557.58	763.217
639	0	122.96	751.817	1571.69	222.57	761.942	1566.89	128.186	578.92	1584.25	241.415	581.06	1580.73	192.804	534.606	1406.32	185.149	491.258	1189.47	174.213	670.058	1347.63	176.306	738.165	1224.48	277.995	484.895	1241.72	11.738	576.093	1363.24	-23.731	535.607	1133.05	-14.8731	519.897	1066.57	-56.8863	582.55	967.651	-39.0793	599.929	863.252	-67.3833	535.633	853.326	-86.0064	570.041	764.276
640	0	121.821	760.435	1573.47	221.427	770.327	1568.44	126.656	587.453	1585.27	239.889	589.331	1581.44	190.949	543.727	1407.17	183.266	501.192	1190.4	172.526	679.273	1348.71	174.623	747.608	1225.62	276.149	494.23	1242.59	9.93257	585.559	1364.27	-25.5449	545.69	1133.97	-16.7411	530.183	1067.4	-58.5504	593.596	968.748	-40.6514	611.732	864.519	-68.9932	547.527	854.142	-87.7535	582.821	765.502
641	0	120.767	769.067	1575.26	220.37	778.713	1569.99	125.184	596.01	1586.38	238.416	597.606	1582.21	189.095	552.809	1408.12	181.325	510.984	1191.47	170.898	688.436	1349.85	173.028	756.938	1226.75	274.251	503.415	1243.58	8.15121	595.084	1365.42	-27.4178	555.863	1135.02	-18.7011	540.541	1068.35	-60.2139	604.804	969.987	-42.2063	623.708	865.939	-70.6761	559.652	855.094	-89.4919	595.907	766.88
642	0	119.806	777.71	1577.05	219.407	787.095	1571.53	123.773	604.585	1587.56	237.001	605.88	1583.04	187.242	561.842	1409.16	179.317	520.613	1192.64	169.334	697.538	1351.01	171.531	766.147	1227.87	272.294	512.431	1244.66	6.39502	604.664	1366.67	-29.3532	566.128	1136.18	-20.7588	550.971	1069.42	-61.8751	616.17	971.353	-43.7406	635.847	867.499	-72.4352	571.997	856.169	-91.2163	609.283	768.395
643	0	118.943	786.358	1578.84	218.544	795.466	1573.03	122.427	613.174	1588.81	235.646	614.147	1583.92	185.387	570.817	1410.27	177.237	530.062	1193.9	167.837	706.57	1352.19	170.138	775.223	1228.97	270.268	521.265	1245.82	4.66475	614.291	1368	-31.3536	576.485	1137.43	-22.9181	561.472	1070.57	-63.5323	627.688	972.833	-45.2514	648.133	869.181	-74.2721	584.553	857.354	-92.9227	622.931	770.03
644	0	118.182	795.007	1580.6	217.785	803.82	1574.5	121.151	621.771	1590.12	234.353	622.401	1584.83	183.53	579.726	1411.44	175.081	539.32	1195.23	166.407	715.524	1353.39	168.853	784.161	1230.03	268.169	529.906	1247.04	2.96096	623.959	1369.4	-33.4201	586.935	1138.77	-25.1811	572.046	1071.8	-65.1841	639.352	974.411	-46.7368	660.553	870.97	-76.187	597.306	858.637	-94.6085	636.83	771.77
645	0	117.525	803.649	1582.34	217.135	812.149	1575.91	119.944	630.37	1591.48	233.125	630.634	1585.77	181.671	588.562	1412.66	172.848	548.376	1196.62	165.046	724.392	1354.58	167.678	792.955	1231.05	265.994	538.348	1248.32	1.28416	633.657	1370.86	-35.5519	597.477	1140.17	-27.5476	582.691	1073.09	-66.8287	651.154	976.073	-48.1954	673.092	872.85	-78.1784	610.242	860.005	-96.2719	650.959	773.601
646	0	116.974	812.28	1584.04	216.594	820.446	1577.26	118.809	638.966	1592.87	231.962	638.84	1586.71	179.809	597.317	1413.92	170.541	557.227	1198.03	163.75	733.168	1355.77	166.611	801.604	1232.02	263.743	546.588	1249.63	-0.365136	643.373	1372.35	-37.7466	608.111	1141.62	-30.015	593.407	1074.43	-68.4644	663.086	977.806	-49.6267	685.734	874.806	-80.2432	623.346	861.447	-97.9125	665.292	775.511
647	0	116.53	820.894	1585.69	216.164	828.705	1578.55	117.744	647.551	1594.3	230.863	647.012	1587.66	177.945	605.985	1415.2	168.165	565.871	1199.47	162.52	741.846	1356.93	165.648	810.107	1232.95	261.42	554.629	1250.96	-1.98633	653.094	1373.86	-39.9998	618.832	1143.1	-32.5781	604.194	1075.81	-70.0892	675.136	979.598	-51.0307	698.467	876.822	-82.3766	636.602	862.953	-99.5306	679.803	777.488
648	0	116.19	829.482	1587.3	215.841	836.918	1579.76	116.749	656.12	1595.74	229.825	655.142	1588.61	176.08	614.563	1416.5	165.728	574.312	1200.92	161.351	750.424	1358.08	164.785	818.467	1233.84	259.03	562.475	1252.31	-3.57874	662.806	1375.39	-42.3049	629.636	1144.61	-35.2287	615.049	1077.2	-71.7011	687.295	981.436	-52.4078	711.273	878.885	-84.5723	649.993	864.514	-101.127	694.467	779.523
649	0	115.951	838.04	1588.86	215.623	845.078	1580.9	115.821	664.664	1597.2	228.847	663.225	1589.54	174.216	623.046	1417.8	163.239	582.558	1202.37	160.241	758.896	1359.19	164.012	826.686	1234.68	256.583	570.136	1253.67	-5.1416	672.493	1376.92	-44.6539	640.516	1146.13	-37.9564	625.97	1078.61	-73.2976	699.549	983.312	-53.7592	724.141	880.983	-86.8227	663.502	866.123	-102.705	709.254	781.609
650	0	115.808	846.559	1590.36	215.504	853.178	1581.96	114.957	673.179	1598.66	227.925	671.253	1590.46	172.356	631.432	1419.11	160.713	590.619	1203.8	159.183	767.262	1360.28	163.321	834.77	1235.49	254.088	577.624	1255.02	-6.67406	682.139	1378.43	-47.0367	651.462	1147.66	-40.7482	636.952	1080.03	-74.8766	711.886	985.214	-55.0862	737.056	883.104	-89.119	677.111	867.774	-104.264	724.138	783.738
651	0	115.757	855.033	1591.81	215.48	861.212	1582.95	114.152	681.655	1600.11	227.055	679.222	1591.34	170.502	639.72	1420.39	158.162	598.51	1205.22	158.175	775.521	1361.32	162.7	842.727	1236.26	251.559	584.952	1256.36	-8.1752	691.73	1379.93	-49.4423	662.461	1149.17	-43.589	647.99	1081.44	-76.4355	724.291	987.135	-56.3905	750.004	885.239	-91.451	690.802	869.461	-105.808	739.091	785.905
652	0	115.79	863.455	1593.22	215.541	869.174	1583.86	113.403	690.088	1601.56	226.233	687.125	1592.2	168.659	647.91	1421.66	155.601	606.246	1206.61	157.21	783.674	1362.33	162.14	850.562	1237	249.007	592.139	1257.68	-9.64402	701.251	1381.39	-51.8586	673.5	1150.67	-46.4621	659.076	1082.83	-77.972	736.749	989.067	-57.6735	762.975	887.377	-93.8078	704.558	871.178	-107.338	754.087	788.104
653	0	115.899	871.817	1594.56	215.679	877.059	1584.71	112.705	698.47	1602.98	225.454	694.959	1593.01	166.83	656.003	1422.9	153.044	613.844	1207.97	156.285	791.724	1363.29	161.629	858.285	1237.72	246.449	599.2	1258.97	-11.0794	710.688	1382.82	-54.2729	684.56	1152.14	-49.3497	670.203	1084.21	-79.4838	749.245	991.002	-58.9368	775.954	889.51	-96.1777	718.361	872.921	-108.856	769.098	790.331
654	0	116.076	880.115	1595.86	215.887	884.862	1585.49	112.051	706.795	1604.37	224.713	702.719	1593.79	165.021	664.001	1424.1	150.508	621.322	1209.28	155.393	799.672	1364.21	161.156	865.904	1238.42	243.898	606.154	1260.23	-12.4803	720.03	1384.2	-56.6724	695.624	1153.58	-52.2332	681.36	1085.56	-80.9688	761.76	992.931	-60.1815	788.932	891.632	-98.5484	732.193	874.681	-110.363	784.103	792.579
655	0	116.313	888.342	1597.11	216.153	892.581	1586.21	111.438	715.058	1605.73	224.005	710.403	1594.51	163.235	671.908	1425.25	148.006	628.698	1210.55	154.532	807.524	1365.09	160.71	873.426	1239.08	241.37	613.02	1261.44	-13.8454	729.266	1385.53	-59.0445	706.674	1154.98	-55.0942	692.535	1086.87	-82.4247	774.279	994.849	-61.4084	801.896	893.734	-100.907	746.036	876.454	-111.858	799.078	794.844
656	0	116.599	896.494	1598.3	216.468	900.213	1586.87	110.859	723.255	1607.04	223.325	718.008	1595.19	161.479	679.728	1426.36	145.553	635.989	1211.76	153.695	815.285	1365.91	160.282	880.862	1239.72	238.879	619.816	1262.61	-15.1734	738.387	1386.79	-61.377	717.688	1156.32	-57.9145	703.717	1088.14	-83.8496	786.784	996.746	-62.6178	814.837	895.81	-103.242	759.873	878.232	-113.34	814.002	797.119
657	0	116.927	904.567	1599.45	216.822	907.757	1587.48	110.308	731.381	1608.29	222.668	725.534	1595.8	159.757	687.466	1427.4	143.163	643.212	1212.91	152.881	822.961	1366.68	159.864	888.217	1240.33	236.439	626.56	1263.72	-16.4628	747.388	1387.98	-63.6586	728.65	1157.61	-60.677	714.894	1089.36	-85.2415	799.258	998.615	-63.8094	827.744	897.854	-105.539	773.685	880.005	-114.81	828.858	799.396
658	0	117.288	912.558	1600.54	217.207	915.214	1588.03	109.782	739.434	1609.49	222.03	732.982	1596.36	158.076	695.129	1428.38	140.849	650.381	1213.99	152.085	830.559	1367.39	159.448	895.501	1240.91	234.064	633.268	1264.77	-17.7122	756.264	1389.1	-65.8785	739.539	1158.83	-63.3657	726.051	1090.51	-86.5985	811.683	1000.45	-64.9822	840.605	899.86	-107.787	787.457	881.766	-116.263	843.628	801.668
659	0	117.672	920.466	1601.58	217.612	922.585	1588.53	109.275	747.413	1610.61	221.408	740.351	1596.85	156.442	702.722	1429.29	138.623	657.508	1215	151.306	838.085	1368.05	159.03	902.721	1241.44	231.769	639.956	1265.75	-18.9199	765.013	1390.13	-68.0273	750.34	1159.98	-65.9665	737.176	1091.6	-87.9187	824.044	1002.24	-66.1348	853.411	901.821	-109.975	801.17	883.503	-117.696	858.298	803.926
660	0	118.073	928.292	1602.56	218.03	929.873	1588.99	108.784	755.316	1611.66	220.796	747.646	1597.28	154.859	710.254	1430.13	136.498	664.604	1215.93	150.543	845.549	1368.64	158.604	909.884	1241.93	229.564	646.636	1266.66	-20.0841	773.634	1391.06	-70.0962	761.037	1161.04	-68.4668	748.254	1092.61	-89.2	836.323	1003.98	-67.2652	866.152	903.733	-112.091	814.808	885.207	-119.107	872.853	806.162
661	0	118.482	936.036	1603.49	218.452	937.083	1589.39	108.303	763.145	1612.63	220.193	754.87	1597.64	153.334	717.731	1430.89	134.482	671.677	1216.77	149.794	852.958	1369.16	158.168	916.997	1242.36	227.463	653.322	1267.49	-21.2029	782.128	1391.9	-72.0778	771.619	1162.02	-70.8561	759.275	1093.53	-90.4403	848.507	1005.66	-68.3711	878.816	905.589	-114.126	828.355	886.867	-120.489	887.281	808.366
662	0	118.892	943.702	1604.35	218.871	944.221	1589.75	107.831	770.902	1613.5	219.597	762.028	1597.92	151.871	725.161	1431.56	132.584	678.736	1217.52	149.059	860.32	1369.62	157.721	924.069	1242.72	225.475	660.023	1268.23	-22.2743	790.498	1392.63	-73.9654	782.073	1162.9	-73.1258	770.223	1094.36	-91.6375	860.58	1007.27	-69.4497	891.394	907.385	-116.071	841.794	888.474	-121.838	901.571	810.53
663	0	119.299	951.294	1605.14	219.282	951.292	1590.07	107.365	778.591	1614.29	219.005	769.125	1598.13	150.477	732.551	1432.15	130.813	685.784	1218.19	148.34	867.642	1370	157.264	931.105	1243.02	223.61	666.75	1268.9	-23.2962	798.749	1393.25	-75.7535	792.393	1163.68	-75.2694	781.089	1095.1	-92.7894	872.531	1008.81	-70.4981	903.876	909.116	-117.919	855.112	890.017	-123.149	915.712	812.643
664	0	119.698	958.817	1605.87	219.68	958.306	1590.33	106.903	786.214	1614.97	218.418	776.169	1598.27	149.155	739.909	1432.65	129.174	692.826	1218.76	147.638	874.933	1370.31	156.797	938.115	1243.24	221.876	673.508	1269.47	-24.2662	806.886	1393.75	-77.4375	802.572	1164.36	-77.2822	791.859	1095.74	-93.8938	884.347	1010.27	-71.5131	916.251	910.777	-119.663	868.292	891.488	-124.416	929.694	814.699
665	0	120.084	966.278	1606.51	220.06	965.27	1590.54	106.444	793.778	1615.55	217.834	783.167	1598.33	147.911	747.243	1433.06	127.672	699.866	1219.23	146.955	882.201	1370.54	156.324	945.104	1243.38	220.278	680.304	1269.96	-25.1821	814.916	1394.14	-79.0139	812.604	1164.93	-79.1615	802.523	1096.27	-94.9483	896.018	1011.65	-72.4916	928.511	912.365	-121.301	881.324	892.879	-125.632	943.507	816.688
666	0	120.455	973.685	1607.08	220.42	972.192	1590.71	105.988	801.289	1616.02	217.256	790.127	1598.31	146.749	754.559	1433.38	126.309	706.905	1219.61	146.294	889.451	1370.68	155.848	952.081	1243.43	218.821	687.143	1270.36	-26.0414	822.846	1394.41	-80.4801	822.489	1165.39	-80.906	813.071	1096.7	-95.9511	907.533	1012.94	-73.4306	940.644	913.877	-122.826	894.192	894.184	-126.794	957.142	818.605
667	0	120.81	981.045	1607.56	220.758	979.084	1590.81	105.537	808.753	1616.38	216.683	797.058	1598.22	145.671	761.865	1433.61	125.086	713.945	1219.89	145.658	896.693	1370.75	155.374	959.052	1243.39	217.51	694.027	1270.68	-26.8418	830.684	1394.57	-81.8345	832.225	1165.75	-82.5158	823.495	1097.02	-96.8999	918.885	1014.13	-74.327	952.642	915.308	-124.239	906.887	895.397	-127.895	970.589	820.441
668	0	121.149	988.367	1607.96	221.076	985.954	1590.86	105.09	816.179	1616.63	216.119	803.968	1598.05	144.682	769.167	1433.76	124.004	720.989	1220.09	145.05	903.93	1370.73	154.907	966.024	1243.26	216.344	700.961	1270.91	-27.581	838.439	1394.61	-83.0764	841.811	1166	-83.9924	833.787	1097.24	-97.7931	930.067	1015.24	-75.1784	964.496	916.656	-125.538	919.396	896.514	-128.93	983.838	822.193
669	0	121.471	995.66	1608.26	221.373	992.811	1590.86	104.652	823.573	1616.78	215.566	810.866	1597.8	143.785	776.47	1433.81	123.062	728.039	1220.19	144.474	911.171	1370.63	154.451	973.002	1243.03	215.324	707.944	1271.06	-28.2569	846.118	1394.54	-84.2061	851.251	1166.14	-85.3382	843.941	1097.36	-98.6292	941.073	1016.24	-75.9823	976.196	917.919	-126.724	931.711	897.533	-129.896	996.881	823.854
670	0	121.779	1002.93	1608.47	221.651	999.666	1590.79	104.224	830.943	1616.81	215.027	817.76	1597.49	142.98	783.782	1433.78	122.256	735.096	1220.21	143.933	918.42	1370.45	154.012	979.993	1242.72	214.449	714.979	1271.13	-28.8674	853.731	1394.36	-85.2245	860.547	1166.19	-86.5563	853.951	1097.38	-99.407	951.899	1017.15	-76.7367	987.734	919.094	-127.798	943.822	898.451	-130.79	1009.71	825.421
671	0	122.077	1010.19	1608.58	221.916	1006.53	1590.67	103.81	838.298	1616.74	214.507	824.658	1597.1	142.271	791.106	1433.67	121.584	742.164	1220.15	143.432	925.682	1370.18	153.594	987.003	1242.32	213.716	722.067	1271.12	-29.4109	861.286	1394.09	-86.1336	869.702	1166.14	-87.6507	863.814	1097.3	-100.126	962.542	1017.96	-77.4404	999.102	920.177	-128.765	955.721	899.267	-131.608	1022.31	826.888
672	0	122.367	1017.45	1608.6	222.169	1013.4	1590.48	103.414	845.646	1616.56	214.01	831.57	1596.64	141.659	798.448	1433.47	121.041	749.243	1220.01	142.973	932.963	1369.83	153.201	994.034	1241.83	213.122	729.208	1271.04	-29.8858	868.791	1393.71	-86.9359	878.721	1166	-88.6257	873.528	1097.14	-100.785	972.999	1018.66	-78.0927	1010.29	921.167	-129.628	967.401	899.983	-132.349	1034.67	828.252
673	0	122.655	1024.72	1608.52	222.418	1020.3	1590.23	103.04	852.993	1616.28	213.54	838.501	1596.11	141.143	805.813	1433.19	120.622	756.339	1219.8	142.558	940.267	1369.4	152.837	1001.09	1241.25	212.663	736.403	1270.88	-30.2911	876.254	1393.25	-87.6345	887.608	1165.78	-89.4862	883.093	1096.9	-101.385	983.27	1019.27	-78.6934	1021.3	922.06	-130.392	978.857	900.597	-133.013	1046.8	829.509
674	0	122.947	1031.99	1608.35	222.667	1027.22	1589.92	102.694	860.347	1615.9	213.102	845.458	1595.51	140.726	813.204	1432.84	120.321	763.453	1219.52	142.192	947.598	1368.89	152.504	1008.18	1240.6	212.334	743.653	1270.66	-30.6259	883.683	1392.7	-88.2331	896.37	1165.48	-90.2374	892.507	1096.58	-101.926	993.356	1019.78	-79.2433	1032.12	922.853	-131.064	990.082	901.111	-133.6	1058.67	830.654
675	0	123.247	1039.29	1608.09	222.924	1034.18	1589.54	102.381	867.715	1615.43	212.702	852.448	1594.84	140.406	820.625	1432.41	120.133	770.59	1219.18	141.876	954.96	1368.31	152.205	1015.31	1239.87	212.128	750.959	1270.36	-30.8898	891.085	1392.08	-88.7357	905.013	1165.11	-90.8847	901.774	1096.19	-102.41	1003.26	1020.18	-79.7439	1042.74	923.543	-131.65	1001.07	901.526	-134.112	1070.29	831.683
676	0	123.564	1046.61	1607.75	223.194	1041.18	1589.11	102.105	875.102	1614.86	212.343	859.476	1594.1	140.182	828.081	1431.91	120.052	777.753	1218.77	141.612	962.357	1367.66	151.94	1022.47	1239.08	212.041	758.323	1270	-31.0828	898.466	1391.39	-89.147	913.542	1164.67	-91.4336	910.896	1095.73	-102.838	1012.98	1020.49	-80.1975	1053.16	924.126	-132.158	1011.83	901.841	-134.553	1081.64	832.591
677	0	123.903	1053.96	1607.32	223.486	1048.22	1588.61	101.872	882.516	1614.2	212.032	866.547	1593.31	140.055	835.574	1431.33	120.071	784.947	1218.31	141.402	969.792	1366.94	151.711	1029.68	1238.21	212.067	765.746	1269.58	-31.2052	905.835	1390.64	-89.4716	921.964	1164.16	-91.8898	919.878	1095.22	-103.213	1022.52	1020.69	-80.6072	1063.38	924.599	-132.596	1022.34	902.059	-134.926	1092.72	833.373
678	0	124.27	1061.34	1606.81	223.806	1055.31	1588.06	101.687	889.959	1613.46	211.772	873.664	1592.45	140.021	843.106	1430.69	120.185	792.176	1217.79	141.248	977.269	1366.15	151.518	1036.94	1237.29	212.198	773.229	1269.09	-31.2575	913.197	1389.83	-89.7146	930.287	1163.6	-92.259	928.724	1094.65	-103.539	1031.89	1020.79	-80.9769	1073.4	924.957	-132.973	1032.62	902.178	-135.238	1103.52	834.024
679	0	124.673	1068.77	1606.23	224.161	1062.45	1587.45	101.554	897.438	1612.64	211.569	880.83	1591.53	140.079	850.682	1429.97	120.387	799.445	1217.21	141.149	984.792	1365.3	151.361	1044.24	1236.32	212.43	780.776	1268.53	-31.2406	920.559	1388.98	-89.8813	938.518	1162.98	-92.5469	937.442	1094.02	-103.819	1041.09	1020.79	-81.3108	1083.2	925.197	-133.297	1042.65	902.198	-135.494	1114.05	834.537
680	0	125.117	1076.23	1605.58	224.557	1069.65	1586.78	101.479	904.955	1611.75	211.426	888.05	1590.55	140.227	858.303	1429.19	120.671	806.76	1216.58	141.108	992.363	1364.4	151.241	1051.61	1235.29	212.755	788.39	1267.91	-31.1558	927.929	1388.08	-89.9767	946.664	1162.31	-92.759	946.038	1093.35	-104.057	1050.13	1020.69	-81.6142	1092.8	925.313	-133.577	1052.44	902.12	-135.704	1124.29	834.906
681	0	125.607	1083.75	1604.87	225	1076.9	1586.07	101.464	912.515	1610.79	211.347	895.324	1589.51	140.462	865.972	1428.35	121.032	814.126	1215.89	141.124	999.987	1363.44	151.157	1059.04	1234.23	213.167	796.071	1267.22	-31.0044	935.312	1387.13	-90.0059	954.733	1161.59	-92.9008	954.52	1092.63	-104.257	1059.01	1020.48	-81.8922	1102.2	925.302	-133.823	1062	901.941	-135.876	1134.26	835.125
682	0	126.149	1091.31	1604.1	225.495	1084.21	1585.3	101.515	920.121	1609.77	211.335	902.655	1588.43	140.781	873.69	1427.44	121.464	821.55	1215.14	141.199	1007.67	1362.44	151.109	1066.54	1233.13	213.659	803.826	1266.46	-30.788	942.717	1386.16	-89.974	962.734	1160.82	-92.9774	962.899	1091.87	-104.424	1067.74	1020.17	-82.1506	1111.39	925.159	-134.042	1071.32	901.66	-136.019	1143.93	835.187
683	0	126.746	1098.92	1603.27	226.047	1091.57	1584.48	101.634	927.774	1608.7	211.393	910.045	1587.29	141.179	881.462	1426.47	121.963	829.039	1214.34	141.333	1015.41	1361.39	151.098	1074.11	1231.99	214.226	811.655	1265.63	-30.5084	950.15	1385.14	-89.8854	970.676	1160.01	-92.9936	971.183	1091.07	-104.563	1076.33	1019.76	-82.395	1120.37	924.882	-134.244	1080.4	901.277	-136.145	1153.33	835.087
684	0	127.402	1106.58	1602.41	226.66	1098.99	1583.62	101.823	935.477	1607.57	211.524	917.494	1586.11	141.654	889.287	1425.45	122.522	836.599	1213.47	141.526	1023.21	1360.31	151.125	1081.76	1230.83	214.86	819.565	1264.73	-30.1674	957.618	1384.1	-89.7444	978.569	1159.15	-92.9539	979.384	1090.22	-104.677	1084.79	1019.24	-82.631	1129.16	924.467	-134.436	1089.25	900.789	-136.263	1162.44	834.82
685	0	128.118	1114.3	1601.5	227.335	1106.48	1582.72	102.085	943.231	1606.41	211.73	925.004	1584.89	142.201	897.169	1424.37	123.137	844.239	1212.53	141.779	1031.08	1359.2	151.192	1089.51	1229.66	215.556	827.557	1263.75	-29.767	965.129	1383.03	-89.5546	986.421	1158.25	-92.8621	987.51	1089.34	-104.772	1093.12	1018.61	-82.8638	1137.75	923.913	-134.626	1097.88	900.196	-136.386	1171.26	834.38
686	0	128.897	1122.06	1600.56	228.074	1114.02	1581.78	102.422	951.039	1605.21	212.01	932.576	1583.63	142.817	905.11	1423.24	123.804	851.967	1211.54	142.093	1039.02	1358.06	151.3	1097.35	1228.47	216.306	835.637	1262.7	-29.3093	972.692	1381.94	-89.3191	994.245	1157.31	-92.7213	995.573	1088.43	-104.85	1101.33	1017.89	-83.0982	1146.15	923.218	-134.82	1106.28	899.499	-136.523	1179.81	833.767
687	0	129.74	1129.88	1599.59	228.879	1121.62	1580.8	102.834	958.9	1603.98	212.367	940.209	1582.35	143.495	913.111	1422.06	124.519	859.792	1210.47	142.466	1047.03	1356.92	151.452	1105.29	1227.28	217.106	843.809	1261.57	-28.7964	980.314	1380.83	-89.0402	1002.05	1156.34	-92.5341	1003.58	1087.48	-104.914	1109.43	1017.06	-83.3383	1154.36	922.384	-135.023	1114.46	898.698	-136.686	1188.07	832.978
688	0	130.644	1137.76	1598.61	229.748	1129.29	1579.81	103.321	966.816	1602.74	212.8	947.906	1581.05	144.233	921.174	1420.84	125.277	867.723	1209.34	142.9	1055.12	1355.77	151.652	1113.33	1226.1	217.947	852.076	1260.36	-28.2305	988.004	1379.71	-88.7195	1009.85	1155.33	-92.3021	1011.55	1086.5	-104.966	1117.43	1016.13	-83.5875	1162.39	921.412	-135.241	1122.42	897.796	-136.885	1196.06	832.016
689	0	131.61	1145.69	1597.61	230.681	1137.01	1578.79	103.882	974.788	1601.49	213.308	955.666	1579.73	145.025	929.301	1419.59	126.074	875.77	1208.13	143.395	1063.29	1354.62	151.903	1121.5	1224.93	218.824	860.443	1259.08	-27.6136	995.769	1378.57	-88.3578	1017.65	1154.29	-92.0262	1019.49	1085.49	-105.009	1125.33	1015.12	-83.8481	1170.25	920.308	-135.475	1130.17	896.796	-137.127	1203.78	830.882
690	0	132.636	1153.67	1596.61	231.675	1144.8	1577.76	104.518	982.816	1600.25	213.891	963.491	1578.42	145.867	937.495	1418.31	126.906	883.941	1206.87	143.95	1071.54	1353.49	152.209	1129.78	1223.79	219.731	868.913	1257.74	-26.9481	1003.62	1377.43	-87.9553	1025.46	1153.23	-91.7063	1027.4	1084.46	-105.044	1133.14	1014.01	-84.1214	1177.94	919.077	-135.726	1137.72	895.704	-137.422	1211.23	829.584
691	0	133.719	1161.71	1595.62	232.729	1152.66	1576.74	105.225	990.9	1599.02	214.547	971.38	1577.11	146.753	945.756	1417.01	127.768	892.247	1205.54	144.566	1079.87	1352.38	152.574	1138.19	1222.68	220.661	877.488	1256.33	-26.2361	1011.56	1376.29	-87.5113	1033.29	1152.16	-91.3414	1035.3	1083.42	-105.069	1140.86	1012.82	-84.4078	1185.46	917.727	-135.994	1145.07	894.526	-137.775	1218.41	828.13
692	0	134.855	1169.8	1594.65	233.838	1160.57	1575.72	106.002	999.042	1597.81	215.272	979.335	1575.82	147.679	954.086	1415.71	128.657	900.695	1204.16	145.24	1088.3	1351.3	153.001	1146.73	1221.62	221.608	886.172	1254.87	-25.4801	1019.6	1375.16	-87.0244	1041.16	1151.07	-90.9298	1043.19	1082.37	-105.085	1148.5	1011.56	-84.7062	1192.82	916.269	-136.277	1152.21	893.273	-138.191	1225.32	826.533
693	0	136.042	1177.95	1593.71	234.999	1168.55	1574.71	106.845	1007.24	1596.64	216.065	987.355	1574.57	148.641	962.487	1414.41	129.567	909.292	1202.74	145.973	1096.81	1350.27	153.495	1155.4	1220.62	222.566	894.965	1253.36	-24.6824	1027.75	1374.04	-86.493	1049.06	1149.98	-90.4688	1051.08	1081.32	-105.09	1156.07	1010.24	-85.0146	1200.03	914.716	-136.571	1159.17	891.954	-138.671	1231.97	824.806
694	0	137.275	1186.16	1592.8	236.207	1176.6	1573.74	107.751	1015.5	1595.52	216.921	995.441	1573.36	149.633	970.959	1413.12	130.494	918.045	1201.28	146.762	1105.41	1349.3	154.058	1164.21	1219.7	223.528	903.868	1251.82	-23.8455	1036.01	1372.96	-85.9147	1057.01	1148.91	-89.9552	1058.97	1080.27	-105.082	1163.56	1008.88	-85.3296	1207.09	913.081	-136.868	1165.93	890.584	-139.216	1238.37	822.967
695	0	138.548	1194.42	1591.94	237.459	1184.72	1572.82	108.715	1023.81	1594.46	217.837	1003.59	1572.21	150.651	979.503	1411.86	131.435	926.957	1199.81	147.605	1114.09	1348.4	154.691	1173.16	1218.86	224.49	912.879	1250.26	-22.9721	1044.38	1371.93	-85.2873	1065	1147.85	-89.3852	1066.86	1079.25	-105.058	1170.98	1007.48	-85.6469	1214.01	911.383	-137.163	1172.51	889.177	-139.823	1244.51	821.038
696	0	139.859	1202.74	1591.15	238.748	1192.9	1571.94	109.732	1032.18	1593.48	218.807	1011.81	1571.12	151.69	988.12	1410.65	132.383	936.03	1198.34	148.5	1122.87	1347.58	155.398	1182.24	1218.11	225.447	921.997	1248.7	-22.0649	1052.88	1370.94	-84.6081	1073.04	1146.84	-88.7547	1074.75	1078.27	-105.015	1178.32	1006.05	-85.9612	1220.79	909.639	-137.445	1178.91	887.751	-140.487	1250.39	819.041
697	0	141.2	1211.12	1590.42	240.069	1201.14	1571.14	110.797	1040.62	1592.58	219.826	1020.1	1570.13	152.747	996.808	1409.5	133.335	945.263	1196.88	149.444	1131.73	1346.85	156.176	1191.46	1217.48	226.393	931.217	1247.16	-21.1268	1061.49	1370.03	-83.8748	1081.13	1145.87	-88.0595	1082.65	1077.33	-104.95	1185.59	1004.63	-86.2663	1227.43	907.87	-137.704	1185.13	886.324	-141.2	1256.03	817.003
698	0	142.568	1219.56	1589.78	241.418	1209.46	1570.43	111.905	1049.1	1591.77	220.889	1028.45	1569.22	153.818	1005.57	1408.41	134.286	954.651	1195.47	150.433	1140.67	1346.22	157.026	1200.8	1216.96	227.325	940.534	1245.66	-20.161	1070.23	1369.21	-83.0853	1089.27	1144.97	-87.2955	1090.55	1076.46	-104.857	1192.79	1003.22	-86.5554	1233.95	906.096	-137.929	1191.18	884.917	-141.952	1261.43	814.949
699	0	143.957	1228.06	1589.24	242.789	1217.84	1569.8	113.047	1057.65	1591.07	221.988	1036.86	1568.43	154.9	1014.4	1407.42	135.233	964.188	1194.12	151.461	1149.69	1345.7	157.943	1210.27	1216.58	228.241	949.941	1244.22	-19.1707	1079.09	1368.48	-82.2377	1097.44	1144.15	-86.4588	1098.44	1075.66	-104.733	1199.91	1001.85	-86.8213	1240.33	904.34	-138.108	1197.06	883.549	-142.73	1266.59	812.909
700	0	145.361	1236.61	1588.8	244.176	1226.29	1569.29	114.22	1066.26	1590.49	223.119	1045.34	1567.76	155.988	1023.29	1406.53	136.173	973.863	1192.86	152.524	1158.79	1345.3	158.924	1219.84	1216.33	229.138	959.43	1242.87	-18.1592	1088.06	1367.86	-81.3309	1105.64	1143.43	-85.5464	1106.31	1074.96	-104.573	1206.95	1000.53	-87.0565	1246.59	902.625	-138.227	1202.78	882.243	-143.518	1271.52	810.91
701	0	146.775	1245.23	1588.48	245.574	1234.8	1568.89	115.414	1074.92	1590.03	224.274	1053.88	1567.21	157.08	1032.26	1405.76	137.103	983.662	1191.72	153.617	1167.95	1345.03	159.961	1229.51	1216.23	230.016	968.99	1241.63	-17.1303	1097.14	1367.37	-80.3645	1113.87	1142.83	-84.5557	1114.17	1074.37	-104.374	1213.9	999.279	-87.2534	1252.73	900.971	-138.275	1208.33	881.02	-144.301	1276.22	808.981
702	0	148.193	1253.9	1588.28	246.977	1243.38	1568.63	116.624	1083.63	1589.71	225.446	1062.49	1566.8	158.174	1041.28	1405.11	138.02	993.568	1190.71	154.732	1177.17	1344.88	161.047	1239.26	1216.27	230.875	978.611	1240.53	-16.0875	1106.32	1367.03	-79.3389	1122.11	1142.35	-83.4856	1121.99	1073.9	-104.13	1220.77	998.117	-87.4045	1258.75	899.399	-138.24	1213.74	879.898	-145.059	1280.7	807.149
703	0	149.609	1262.63	1588.21	248.378	1252.01	1568.49	117.843	1092.4	1589.52	226.629	1071.14	1566.53	159.266	1050.35	1404.61	138.925	1003.56	1189.88	155.863	1186.44	1344.87	162.173	1249.07	1216.46	231.717	988.281	1239.58	-15.0348	1115.58	1366.83	-78.2554	1130.34	1142.01	-82.3361	1129.77	1073.57	-103.839	1227.56	997.058	-87.5026	1264.66	897.93	-138.111	1219	878.897	-145.772	1284.99	805.437
704	0	151.019	1271.41	1588.26	249.774	1260.71	1568.49	119.064	1101.22	1589.47	227.815	1079.86	1566.41	160.356	1059.48	1404.25	139.817	1013.62	1189.22	157.004	1195.75	1344.99	163.328	1258.93	1216.8	232.545	997.986	1238.8	-13.9761	1124.92	1366.78	-77.1164	1138.56	1141.81	-81.1086	1137.5	1073.38	-103.498	1234.25	996.117	-87.5412	1270.46	896.581	-137.878	1224.12	878.03	-146.42	1289.09	803.867
705	0	152.415	1280.24	1588.45	251.156	1269.46	1568.63	120.28	1110.09	1589.56	228.999	1088.62	1566.44	161.442	1068.65	1404.04	140.697	1023.71	1188.76	158.145	1205.1	1345.25	164.5	1268.82	1217.29	233.363	1007.71	1238.21	-12.9151	1134.31	1366.9	-75.9254	1146.74	1141.77	-79.8061	1145.17	1073.34	-103.104	1240.84	995.305	-87.5143	1276.16	895.367	-137.534	1229.12	877.312	-146.981	1293.01	802.454
706	0	153.792	1289.12	1588.76	252.52	1278.26	1568.91	121.484	1119.01	1589.79	230.172	1097.44	1566.61	162.523	1077.85	1404	141.568	1033.81	1188.52	159.28	1214.47	1345.63	165.676	1278.72	1217.9	234.177	1017.45	1237.81	-11.8557	1143.74	1367.18	-74.6869	1154.88	1141.89	-78.4332	1152.76	1073.46	-102.655	1247.34	994.63	-87.4168	1281.76	894.299	-137.072	1234	876.748	-147.436	1296.78	801.21
707	0	155.144	1298.04	1589.2	253.86	1287.1	1569.32	122.671	1127.96	1590.15	231.33	1106.29	1566.93	163.598	1087.08	1404.11	142.434	1043.9	1188.49	160.402	1223.85	1346.14	166.842	1288.6	1218.64	234.995	1027.18	1237.63	-10.8016	1153.19	1367.62	-73.4064	1162.95	1142.16	-76.9956	1160.26	1073.73	-102.15	1253.74	994.097	-87.2445	1287.28	893.385	-136.488	1238.78	876.342	-147.764	1300.42	800.143
708	0	156.465	1307	1589.75	255.169	1295.99	1569.85	123.834	1136.94	1590.65	232.467	1115.18	1567.39	164.667	1096.33	1404.37	143.299	1053.94	1188.67	161.503	1233.23	1346.76	167.987	1298.46	1219.49	235.824	1036.9	1237.65	-9.7561	1162.63	1368.2	-72.0902	1170.94	1142.57	-75.5005	1167.66	1074.15	-101.59	1260.03	993.706	-86.9944	1292.71	892.63	-135.782	1243.47	876.094	-147.948	1303.95	799.252
709	0	157.748	1315.99	1590.4	256.441	1304.91	1570.49	124.967	1145.96	1591.26	233.577	1124.11	1567.98	165.73	1105.59	1404.78	144.171	1063.92	1189.07	162.576	1242.59	1347.49	169.095	1308.26	1220.43	236.675	1046.59	1237.87	-8.72243	1172.04	1368.92	-70.7451	1178.83	1143.13	-73.9561	1174.95	1074.7	-100.974	1266.23	993.456	-86.6645	1298.06	892.034	-134.955	1248.1	875.998	-147.972	1307.41	798.532
710	0	158.987	1325.01	1591.14	257.671	1313.86	1571.24	126.067	1155	1591.99	234.655	1133.06	1568.69	166.788	1114.84	1405.33	145.057	1073.79	1189.65	163.614	1251.94	1348.31	170.155	1317.99	1221.45	237.558	1056.23	1238.29	-7.70343	1181.4	1369.77	-69.3782	1186.6	1143.81	-72.371	1182.13	1075.38	-100.305	1272.32	993.34	-86.2537	1303.36	891.595	-134.01	1252.67	876.042	-147.822	1310.82	797.975
711	0	160.176	1334.05	1591.96	258.851	1322.83	1572.07	127.128	1164.05	1592.82	235.698	1142.03	1569.51	167.841	1124.08	1406	145.968	1083.55	1190.42	164.611	1261.24	1349.2	171.155	1327.63	1222.53	238.482	1065.83	1238.88	-6.70162	1190.69	1370.71	-67.9966	1194.25	1144.6	-70.7544	1189.17	1076.17	-99.5838	1278.32	993.349	-85.7621	1308.6	891.306	-132.951	1257.21	876.213	-147.491	1314.2	797.567
712	0	161.309	1343.1	1592.85	259.976	1331.82	1572.97	128.147	1173.11	1593.73	236.701	1151.01	1570.43	168.89	1133.29	1406.79	146.912	1093.17	1191.34	165.564	1270.51	1350.16	172.085	1337.18	1223.64	239.46	1075.36	1239.65	-5.71921	1199.88	1371.74	-66.6069	1201.77	1145.47	-69.115	1196.09	1077.04	-98.8122	1284.21	993.471	-85.1903	1313.79	891.156	-131.787	1261.72	876.494	-146.97	1317.6	797.289
713	0	162.38	1352.16	1593.77	261.041	1340.82	1573.93	129.119	1182.17	1594.72	237.662	1160	1571.43	169.936	1142.47	1407.68	147.901	1102.63	1192.39	166.466	1279.71	1351.17	172.937	1346.61	1224.77	240.499	1084.83	1240.55	-4.75805	1208.95	1372.83	-65.215	1209.13	1146.4	-67.4612	1202.87	1077.98	-97.9924	1290.02	993.691	-84.5395	1318.96	891.135	-130.524	1266.23	876.864	-146.259	1321.03	797.125
714	0	163.383	1361.21	1594.73	262.04	1349.83	1574.92	130.043	1191.23	1595.77	238.579	1168.99	1572.51	170.979	1151.6	1408.65	148.944	1111.92	1193.54	167.316	1288.85	1352.21	173.705	1355.92	1225.9	241.609	1094.21	1241.58	-3.81964	1217.88	1373.96	-63.8257	1216.33	1147.38	-65.8004	1209.5	1078.96	-97.1263	1295.73	993.994	-83.8114	1324.09	891.227	-129.171	1270.76	877.302	-145.359	1324.54	797.054
715	0	164.313	1370.25	1595.7	262.968	1358.83	1575.93	130.915	1200.26	1596.86	239.449	1177.98	1573.64	172.021	1160.68	1409.69	150.048	1121.05	1194.77	168.112	1297.92	1353.28	174.387	1365.1	1227.01	242.795	1103.52	1242.72	-2.90514	1226.66	1375.1	-62.4425	1223.38	1148.38	-64.1386	1215.99	1079.96	-96.2153	1301.35	994.362	-83.0079	1329.22	891.418	-127.736	1275.31	877.786	-144.277	1328.14	797.057
716	0	165.165	1379.27	1596.66	263.821	1367.83	1576.95	131.734	1209.28	1597.99	240.272	1186.96	1574.82	173.06	1169.7	1410.78	151.22	1129.99	1196.04	168.851	1306.9	1354.34	174.981	1374.14	1228.09	244.06	1112.73	1243.93	-2.01533	1235.27	1376.23	-61.0675	1230.25	1149.37	-62.4802	1222.33	1080.95	-95.2604	1306.88	994.779	-82.1305	1334.33	891.691	-126.225	1279.89	878.296	-143.02	1331.85	797.117
717	0	165.936	1388.27	1597.61	264.595	1376.81	1577.96	132.499	1218.26	1599.13	241.046	1195.92	1576.03	174.097	1178.65	1411.91	152.464	1138.76	1197.34	169.535	1315.79	1355.4	175.491	1383.04	1229.12	245.403	1121.85	1245.2	-1.15063	1243.7	1377.34	-59.7013	1236.95	1150.34	-60.828	1228.52	1081.93	-94.2622	1312.34	995.228	-81.1808	1339.45	892.032	-124.645	1284.51	878.811	-141.601	1335.71	797.217
718	0	166.623	1397.24	1598.52	265.288	1385.77	1578.94	133.209	1227.21	1600.29	241.771	1204.86	1577.26	175.131	1187.51	1413.05	153.78	1147.35	1198.64	170.164	1324.59	1356.44	175.919	1391.8	1230.11	246.822	1130.87	1246.52	-0.311053	1251.94	1378.4	-58.3429	1243.47	1151.28	-59.1827	1234.57	1082.86	-93.2206	1317.71	995.693	-80.1603	1344.57	892.424	-122.999	1289.19	879.315	-140.036	1339.71	797.346
719	0	167.224	1406.17	1599.39	265.898	1394.71	1579.89	133.864	1236.12	1601.44	242.448	1213.77	1578.5	176.16	1196.3	1414.21	155.165	1155.78	1199.93	170.741	1333.28	1357.45	176.274	1400.42	1231.04	248.31	1139.78	1247.85	0.503755	1260	1379.41	-56.9902	1249.83	1152.16	-57.5435	1240.48	1083.74	-92.135	1323.02	996.16	-79.07	1349.7	892.854	-121.292	1293.92	879.791	-138.341	1343.87	797.493
720	0	167.737	1415.05	1600.21	266.424	1403.62	1580.79	134.464	1244.98	1602.57	243.076	1222.65	1579.74	177.182	1204.99	1415.36	156.614	1164.05	1201.18	171.268	1341.87	1358.43	176.564	1408.9	1231.9	249.859	1148.59	1249.19	1.29449	1267.88	1380.35	-55.6399	1256.03	1152.98	-55.9079	1246.25	1084.56	-91.0046	1328.25	996.617	-77.9109	1354.85	893.307	-119.526	1298.7	880.227	-136.534	1348.2	797.652
721	0	168.163	1423.89	1600.96	266.867	1412.5	1581.64	135.009	1253.78	1603.68	243.657	1231.5	1580.97	178.196	1213.59	1416.5	158.118	1172.17	1202.38	171.75	1350.36	1359.36	176.799	1417.25	1232.71	251.457	1157.29	1250.52	2.06215	1275.58	1381.21	-54.2878	1262.06	1153.72	-54.2724	1251.89	1085.31	-89.8282	1333.43	997.052	-76.6837	1360.01	893.772	-117.7	1303.53	880.614	-134.634	1352.7	797.816
722	0	168.502	1432.68	1601.64	267.228	1421.34	1582.43	135.5	1262.54	1604.77	244.191	1240.3	1582.19	179.199	1222.1	1417.61	159.669	1180.15	1203.54	172.189	1358.74	1360.23	176.99	1425.48	1233.45	253.093	1165.89	1251.82	2.80794	1283.11	1381.98	-52.9297	1267.95	1154.39	-52.6322	1257.4	1085.98	-88.605	1338.54	997.456	-75.3896	1365.19	894.239	-115.815	1308.41	880.942	-132.658	1357.36	797.982
723	0	168.758	1441.42	1602.25	267.508	1430.14	1583.16	135.939	1271.23	1605.81	244.679	1249.07	1583.39	180.189	1230.51	1418.69	161.253	1188.01	1204.63	172.591	1367.01	1361.05	177.149	1433.59	1234.14	254.754	1174.37	1253.1	3.53324	1290.48	1382.68	-51.561	1273.7	1154.98	-50.9825	1262.8	1086.57	-87.3341	1343.6	997.821	-74.0297	1370.38	894.697	-113.871	1313.33	881.208	-130.625	1362.17	798.149
724	0	168.933	1450.1	1602.78	267.711	1438.9	1583.82	136.326	1279.86	1606.8	245.123	1257.79	1584.55	181.163	1238.83	1419.73	162.861	1195.76	1205.66	172.96	1375.17	1361.82	177.286	1441.59	1234.77	256.428	1182.74	1254.34	4.23949	1297.71	1383.28	-50.1777	1279.33	1155.5	-49.3181	1268.09	1087.08	-86.0153	1348.62	998.14	-72.6057	1375.59	895.138	-111.866	1318.29	881.406	-128.549	1367.13	798.313
725	0	169.03	1458.73	1603.23	267.841	1447.61	1584.4	136.665	1288.44	1607.75	245.524	1266.47	1585.69	182.118	1247.05	1420.72	164.48	1203.41	1206.63	173.301	1383.24	1362.52	177.413	1449.48	1235.34	258.102	1191.01	1255.54	4.92808	1304.81	1383.8	-48.7765	1284.85	1155.93	-47.6348	1273.29	1087.52	-84.6489	1353.59	998.409	-71.1196	1380.81	895.554	-109.8	1323.29	881.536	-126.445	1372.22	798.473
726	0	169.055	1467.3	1603.59	267.903	1456.28	1584.92	136.957	1296.95	1608.65	245.885	1275.1	1586.79	183.053	1255.18	1421.67	166.1	1210.96	1207.54	173.618	1391.2	1363.15	177.538	1457.28	1235.87	259.765	1199.18	1256.69	5.60031	1311.8	1384.24	-47.3551	1290.28	1156.28	-45.929	1278.41	1087.88	-83.2362	1358.53	998.623	-69.5743	1386.05	895.939	-107.674	1328.31	881.597	-124.324	1377.42	798.625
727	0	169.013	1475.81	1603.87	267.901	1464.9	1585.36	137.204	1305.41	1609.48	246.206	1283.68	1587.84	183.965	1263.23	1422.56	167.709	1218.44	1208.38	173.916	1399.08	1363.73	177.671	1465	1236.34	261.407	1207.25	1257.78	6.25724	1318.69	1384.6	-45.9127	1295.64	1156.57	-44.1984	1283.47	1088.17	-81.7792	1363.44	998.78	-67.9731	1391.29	896.286	-105.489	1333.34	881.588	-122.196	1382.72	798.765
728	0	168.91	1484.26	1604.07	267.841	1473.46	1585.73	137.41	1313.81	1610.25	246.491	1292.22	1588.85	184.852	1271.19	1423.39	169.3	1225.84	1209.16	174.199	1406.86	1364.23	177.816	1472.63	1236.77	263.019	1215.22	1258.82	6.89966	1325.5	1384.88	-44.4495	1300.94	1156.78	-42.4427	1288.48	1088.39	-80.2808	1368.34	998.878	-66.3202	1396.55	896.589	-103.248	1338.4	881.511	-120.068	1388.08	798.888
729	0	168.751	1492.67	1604.18	267.728	1481.98	1586.03	137.578	1322.15	1610.96	246.742	1300.71	1589.81	185.712	1279.07	1424.16	170.865	1233.18	1209.88	174.469	1414.57	1364.68	177.978	1480.19	1237.14	264.592	1223.1	1259.81	7.52802	1332.24	1385.09	-42.9674	1306.21	1156.93	-40.663	1293.46	1088.55	-78.7449	1373.22	998.914	-64.6203	1401.82	896.843	-100.954	1343.46	881.367	-117.943	1393.51	798.986
730	0	168.544	1501.02	1604.21	267.569	1490.45	1586.25	137.709	1330.44	1611.6	246.96	1309.15	1590.72	186.544	1286.88	1424.87	172.396	1240.47	1210.54	174.731	1422.2	1365.05	178.161	1487.67	1237.47	266.12	1230.9	1260.73	8.14241	1338.94	1385.23	-41.47	1311.45	1157.01	-38.8625	1298.44	1088.65	-77.1762	1378.11	998.886	-62.8788	1407.09	897.043	-98.6142	1348.53	881.156	-115.826	1398.97	799.05
731	0	168.293	1509.32	1604.15	267.37	1498.88	1586.41	137.808	1338.68	1612.17	247.149	1317.55	1591.57	187.345	1294.63	1425.52	173.888	1247.69	1211.14	174.986	1429.77	1365.36	178.365	1495.1	1237.74	267.598	1238.62	1261.59	8.74256	1345.6	1385.31	-39.9617	1316.7	1157.04	-37.0463	1303.42	1088.69	-75.5803	1383	998.795	-61.1018	1412.36	897.182	-96.2358	1353.6	880.882	-113.716	1404.44	799.072
732	0	168.007	1517.57	1604.02	267.136	1507.26	1586.49	137.878	1346.87	1612.66	247.311	1325.91	1592.36	188.115	1302.32	1426.1	175.335	1254.87	1211.69	175.236	1437.29	1365.6	178.588	1502.47	1237.96	269.02	1246.27	1262.39	9.32777	1352.24	1385.33	-38.4489	1321.98	1157.01	-35.2211	1308.43	1088.68	-73.9632	1387.91	998.639	-59.2957	1417.65	897.257	-93.828	1358.67	880.546	-111.615	1409.91	799.041
733	0	167.691	1525.78	1603.81	266.873	1515.59	1586.51	137.922	1355.02	1613.08	247.449	1334.22	1593.09	188.852	1309.96	1426.62	176.732	1262	1212.18	175.482	1444.75	1365.78	178.83	1509.78	1238.13	270.383	1253.87	1263.13	9.89701	1358.88	1385.3	-36.9386	1327.29	1156.92	-33.3953	1313.5	1088.62	-72.3317	1392.86	998.418	-57.4674	1422.93	897.262	-91.4013	1363.74	880.151	-109.519	1415.37	798.947
734	0	167.35	1533.95	1603.53	266.586	1523.89	1586.46	137.944	1363.14	1613.43	247.565	1342.51	1593.75	189.555	1317.56	1427.06	178.076	1269.07	1212.62	175.725	1452.18	1365.89	179.085	1517.06	1238.23	271.681	1261.4	1263.79	10.4488	1365.53	1385.22	-35.439	1332.66	1156.79	-31.5783	1318.62	1088.52	-70.693	1397.85	998.132	-55.624	1428.23	897.193	-88.9674	1368.82	879.699	-107.429	1420.79	798.78
735	0	166.991	1542.08	1603.17	266.28	1532.16	1586.34	137.946	1371.22	1613.69	247.662	1350.76	1594.34	190.222	1325.13	1427.44	179.36	1276.11	1213	175.965	1459.58	1365.93	179.35	1524.3	1238.27	272.914	1268.9	1264.39	10.9815	1372.2	1385.09	-33.959	1338.1	1156.61	-29.7806	1323.84	1088.37	-69.0547	1402.89	997.781	-53.773	1433.53	897.046	-86.5395	1373.9	879.194	-105.342	1426.17	798.532
736	0	166.619	1550.19	1602.75	265.959	1540.39	1586.16	137.931	1379.27	1613.88	247.742	1358.98	1594.85	190.852	1332.68	1427.75	180.581	1283.1	1213.33	176.201	1466.96	1365.91	179.618	1531.51	1238.24	274.076	1276.36	1264.92	11.4929	1378.9	1384.91	-32.5082	1343.64	1156.39	-28.0133	1329.15	1088.19	-67.4245	1407.99	997.367	-51.9222	1438.84	896.818	-84.1314	1378.98	878.64	-103.258	1431.5	798.195
737	0	166.238	1558.27	1602.26	265.627	1548.59	1585.91	137.903	1387.3	1613.99	247.808	1367.19	1595.29	191.444	1340.2	1427.99	181.735	1290.04	1213.61	176.432	1474.33	1365.81	179.885	1538.69	1238.15	275.166	1283.78	1265.37	11.9807	1385.65	1384.7	-31.0961	1349.28	1156.13	-26.2879	1334.57	1087.97	-65.8105	1413.17	996.889	-50.0794	1444.16	896.504	-81.7577	1384.08	878.04	-101.176	1436.77	797.764
738	0	165.852	1566.33	1601.7	265.288	1556.78	1585.6	137.863	1395.32	1614.01	247.86	1375.37	1595.64	191.996	1347.72	1428.16	182.815	1296.94	1213.84	176.658	1481.7	1365.65	180.144	1545.87	1237.98	276.18	1291.19	1265.75	12.4423	1392.45	1384.44	-29.7326	1355.05	1155.83	-24.6158	1340.12	1087.72	-64.2208	1418.44	996.349	-48.253	1449.49	896.104	-79.4332	1389.19	877.399	-99.0984	1441.97	797.233
739	0	165.464	1574.37	1601.09	264.944	1564.95	1585.22	137.813	1403.32	1613.95	247.901	1383.54	1595.9	192.506	1355.24	1428.25	183.818	1303.79	1214.02	176.875	1489.07	1365.42	180.391	1553.04	1237.74	277.116	1298.59	1266.05	12.8749	1399.32	1384.15	-28.4275	1360.94	1155.49	-23.0082	1345.8	1087.43	-62.6636	1423.79	995.749	-46.4515	1454.84	895.614	-77.1729	1394.32	876.722	-97.0265	1447.12	796.601
740	0	165.078	1582.4	1600.41	264.597	1573.11	1584.78	137.756	1411.32	1613.81	247.932	1391.7	1596.08	192.973	1362.77	1428.27	184.737	1310.61	1214.15	177.083	1496.46	1365.13	180.619	1560.21	1237.42	277.971	1305.97	1266.27	13.2756	1406.26	1383.82	-27.19	1366.97	1155.12	-21.4762	1351.63	1087.11	-61.1472	1429.24	995.09	-44.6836	1460.21	895.034	-74.9914	1399.48	876.012	-94.9651	1452.2	795.867
741	0	164.694	1590.43	1599.68	264.25	1581.27	1584.28	137.691	1419.31	1613.58	247.953	1399.86	1596.16	193.395	1370.31	1428.22	185.568	1317.39	1214.24	177.279	1503.87	1364.76	180.826	1567.39	1237.03	278.741	1313.36	1266.42	13.6412	1413.28	1383.46	-26.029	1373.15	1154.71	-20.03	1357.6	1086.77	-59.6799	1434.8	994.373	-42.9587	1465.6	894.364	-72.9031	1404.67	875.274	-92.9199	1457.22	795.034
742	0	164.316	1598.45	1598.88	263.902	1589.43	1583.71	137.62	1427.31	1613.27	247.964	1408.01	1596.15	193.768	1377.87	1428.09	186.305	1324.15	1214.27	177.46	1511.3	1364.32	181.006	1574.59	1236.56	279.423	1320.75	1266.48	13.9687	1420.38	1383.06	-24.9529	1379.48	1154.27	-18.6791	1363.73	1086.39	-58.2703	1440.47	993.601	-41.286	1471.02	893.603	-70.9213	1409.89	874.511	-90.8984	1462.18	794.102
743	0	163.943	1606.48	1598.04	263.556	1597.59	1583.08	137.542	1435.31	1612.87	247.964	1416.18	1596.05	194.092	1385.46	1427.88	186.944	1330.88	1214.24	177.624	1518.77	1363.81	181.157	1581.82	1236.01	280.016	1328.16	1266.46	14.2547	1427.58	1382.62	-23.9691	1385.96	1153.79	-17.4323	1370.01	1085.99	-56.9267	1446.26	992.774	-39.6753	1476.47	892.752	-69.0585	1415.16	873.726	-88.9096	1467.1	793.078
744	0	163.576	1614.52	1597.14	263.21	1605.76	1582.38	137.458	1443.33	1612.39	247.954	1424.35	1595.84	194.364	1393.08	1427.6	187.481	1337.61	1214.17	177.767	1526.28	1363.22	181.278	1589.08	1235.38	280.515	1335.58	1266.36	14.4963	1434.88	1382.15	-23.0841	1392.61	1153.28	-16.2972	1376.45	1085.56	-55.6575	1452.16	991.894	-38.1365	1481.95	891.815	-67.3262	1420.47	872.921	-86.9642	1471.98	791.965
745	0	163.215	1622.57	1596.19	262.865	1613.95	1581.62	137.365	1451.37	1611.83	247.93	1432.53	1595.53	194.581	1400.74	1427.23	187.911	1344.34	1214.03	177.887	1533.84	1362.57	181.365	1596.38	1234.68	280.921	1343.03	1266.17	14.6902	1442.29	1381.64	-22.3035	1399.41	1152.73	-15.2803	1383.04	1085.1	-54.4711	1458.18	990.962	-36.6797	1487.48	890.792	-65.735	1425.84	872.099	-85.0742	1476.83	790.77
746	0	162.86	1630.65	1595.19	262.52	1622.16	1580.79	137.262	1459.42	1611.19	247.892	1440.73	1595.13	194.741	1408.43	1426.79	188.232	1351.09	1213.84	177.979	1541.45	1361.84	181.419	1603.72	1233.9	281.229	1350.5	1265.9	14.8335	1449.79	1381.08	-21.6319	1406.36	1152.15	-14.3874	1389.78	1084.6	-53.3756	1464.33	989.979	-35.315	1493.05	889.686	-64.2939	1431.27	871.259	-83.2526	1481.67	789.499
747	0	162.507	1638.74	1594.14	262.174	1630.39	1579.9	137.148	1467.51	1610.47	247.837	1448.95	1594.62	194.842	1416.18	1426.27	188.443	1357.87	1213.58	178.04	1549.11	1361.05	181.437	1611.11	1233.05	281.441	1358.01	1265.54	14.9233	1457.41	1380.48	-21.0729	1413.47	1151.53	-13.6225	1396.67	1084.07	-52.3792	1470.6	988.946	-34.0526	1498.68	888.501	-63.011	1436.77	870.402	-81.5135	1486.5	788.158
748	0	162.158	1646.86	1593.04	261.825	1638.64	1578.95	137.018	1475.62	1609.67	247.761	1457.19	1594.02	194.882	1423.97	1425.67	188.543	1364.72	1213.24	178.065	1556.83	1360.19	181.418	1618.57	1232.12	281.555	1365.56	1265.1	14.9571	1465.13	1379.82	-20.629	1420.73	1150.87	-12.989	1403.7	1083.5	-51.4894	1476.99	987.864	-32.9024	1504.37	887.242	-61.8929	1442.33	869.527	-79.8715	1491.33	786.753
749	0	161.808	1655.01	1591.91	261.472	1646.93	1577.93	136.871	1483.76	1608.8	247.661	1465.45	1593.32	194.859	1431.82	1424.99	188.534	1371.64	1212.84	178.05	1564.61	1359.26	181.36	1626.08	1231.13	281.572	1373.16	1264.57	14.9324	1472.96	1379.12	-20.3017	1428.13	1150.16	-12.4888	1410.87	1082.89	-50.7136	1483.5	986.734	-31.8741	1510.12	885.912	-60.9451	1447.98	868.633	-78.3418	1496.19	785.293
750	0	161.455	1663.19	1590.72	261.113	1655.24	1576.85	136.702	1491.94	1607.86	247.534	1473.74	1592.53	194.772	1439.72	1424.23	188.416	1378.66	1212.35	177.992	1572.46	1358.27	181.261	1633.67	1230.07	281.493	1380.8	1263.94	14.8469	1480.89	1378.36	-20.0915	1435.67	1149.41	-12.1225	1418.18	1082.23	-50.0584	1490.13	985.558	-30.9768	1515.94	884.516	-60.1716	1453.72	867.718	-76.9396	1501.09	783.782
751	0	161.098	1671.41	1589.5	260.745	1663.58	1575.71	136.508	1500.15	1606.86	247.376	1482.06	1591.65	194.619	1447.68	1423.4	188.194	1385.79	1211.77	177.884	1580.37	1357.22	181.119	1641.33	1228.95	281.319	1388.51	1263.23	14.6988	1488.91	1377.54	-19.9981	1443.33	1148.6	-11.8898	1425.61	1081.52	-49.5301	1496.88	984.337	-30.2192	1521.85	883.062	-59.5751	1459.54	866.781	-75.6801	1506.04	782.229
752	0	160.731	1679.66	1588.25	260.365	1671.96	1574.51	136.286	1508.41	1605.8	247.182	1490.41	1590.69	194.399	1455.69	1422.49	187.873	1393.07	1211.11	177.724	1588.36	1356.12	180.93	1649.07	1227.78	281.052	1396.28	1262.43	14.4863	1497.03	1376.67	-20.0202	1451.13	1147.75	-11.7892	1433.17	1080.77	-49.134	1503.75	983.073	-29.6092	1527.85	881.555	-59.1568	1465.47	865.821	-74.5778	1511.06	780.64
753	0	160.353	1687.96	1586.97	259.971	1680.36	1573.27	136.03	1516.7	1604.69	246.949	1498.78	1589.66	194.111	1463.77	1421.5	187.457	1400.5	1210.35	177.505	1596.41	1354.97	180.69	1656.89	1226.56	280.695	1404.12	1261.54	14.2078	1505.24	1375.73	-20.1555	1459.04	1146.84	-11.8181	1440.84	1079.96	-48.8749	1510.73	981.77	-29.1536	1533.94	880.003	-58.9168	1471.5	864.836	-73.6466	1516.16	779.021
754	0	159.959	1696.29	1585.66	259.559	1688.8	1571.98	135.737	1525.04	1603.54	246.672	1507.19	1588.56	193.756	1471.9	1420.45	186.954	1408.1	1209.49	177.223	1604.54	1353.78	180.394	1664.79	1225.3	280.251	1412.04	1260.57	13.8623	1513.52	1374.74	-20.4011	1467.05	1145.88	-11.9728	1448.63	1079.1	-48.7565	1517.83	980.432	-28.8584	1540.13	878.413	-58.8538	1477.65	863.825	-72.8994	1521.36	777.381
755	0	159.546	1704.66	1584.33	259.126	1697.28	1570.66	135.402	1533.42	1602.36	246.347	1515.62	1587.4	193.334	1480.1	1419.34	186.37	1415.88	1208.54	176.875	1612.75	1352.56	180.039	1672.79	1224.01	279.724	1420.05	1259.51	13.4488	1521.88	1373.69	-20.7535	1475.17	1144.86	-12.249	1456.53	1078.18	-48.7815	1525.05	979.063	-28.7282	1546.45	876.795	-58.9654	1483.91	862.789	-72.3479	1526.68	775.725
756	0	159.109	1713.07	1582.99	258.669	1705.78	1569.3	135.023	1541.85	1601.15	245.972	1524.09	1586.19	192.844	1488.36	1418.18	185.713	1423.86	1207.48	176.456	1621.03	1351.32	179.618	1680.89	1222.71	279.117	1428.14	1258.36	12.9666	1530.3	1372.59	-21.2084	1483.38	1143.8	-12.6413	1464.53	1077.21	-48.9517	1532.38	977.67	-28.7666	1552.89	875.156	-59.2477	1490.31	861.729	-72.0022	1532.13	774.064
757	0	158.644	1721.53	1581.66	258.184	1714.32	1567.93	134.596	1550.32	1599.93	245.542	1532.59	1584.96	192.287	1496.68	1416.96	184.991	1432.03	1206.33	175.963	1629.38	1350.06	179.128	1689.09	1221.39	278.435	1436.34	1257.15	12.4154	1538.77	1371.44	-21.7612	1491.67	1142.68	-13.1441	1472.62	1076.19	-49.2678	1539.82	976.259	-28.9756	1559.46	873.508	-59.6959	1496.84	860.647	-71.8706	1537.74	772.404
758	0	158.147	1730.03	1580.33	257.667	1722.89	1566.55	134.117	1558.83	1598.71	245.055	1541.12	1583.7	191.665	1505.07	1415.71	184.211	1440.41	1205.09	175.392	1637.82	1348.81	178.563	1697.4	1220.09	277.682	1444.63	1255.86	11.7952	1547.3	1370.25	-22.4066	1500.05	1141.53	-13.7509	1480.82	1075.12	-49.7292	1547.37	974.84	-29.3561	1566.17	871.86	-60.3037	1503.51	859.546	-71.9597	1543.51	770.756
759	0	157.614	1738.57	1579.02	257.114	1731.49	1565.18	133.583	1567.4	1597.5	244.508	1549.69	1582.44	190.979	1513.52	1414.43	183.379	1448.99	1203.76	174.742	1646.33	1347.56	177.92	1705.82	1218.8	276.862	1453.04	1254.52	11.1066	1555.86	1369.02	-23.1392	1508.49	1140.34	-14.4551	1489.11	1074.02	-50.3345	1555.04	973.421	-29.9073	1573.04	870.227	-61.0639	1510.33	858.433	-72.2737	1549.46	769.131
760	0	157.041	1747.15	1577.74	256.522	1740.12	1563.82	132.993	1576	1596.31	243.901	1558.29	1581.18	190.23	1522.03	1413.14	182.503	1457.76	1202.36	174.012	1654.92	1346.35	177.195	1714.36	1217.56	275.981	1461.57	1253.12	10.3505	1564.47	1367.78	-23.9534	1517	1139.13	-15.2498	1497.48	1072.88	-51.0808	1562.82	972.016	-30.6272	1580.08	868.619	-61.9685	1517.31	857.314	-72.8146	1555.6	767.541
761	0	156.425	1755.78	1576.5	255.888	1748.79	1562.5	132.344	1584.66	1595.16	243.231	1566.92	1579.96	189.42	1530.6	1411.85	181.587	1466.73	1200.9	173.202	1663.59	1345.18	176.387	1723.01	1216.37	275.043	1470.21	1251.7	9.52851	1573.1	1366.54	-24.8432	1525.57	1137.9	-16.1278	1505.95	1071.72	-51.9643	1570.71	970.635	-31.5123	1587.28	867.051	-63.0083	1524.44	856.199	-73.5821	1561.96	766
762	0	155.762	1764.45	1575.33	255.209	1757.49	1561.23	131.636	1593.35	1594.07	242.498	1575.59	1578.77	188.552	1539.24	1410.57	180.637	1475.88	1199.39	172.312	1672.34	1344.06	175.495	1731.79	1215.25	274.054	1478.99	1250.25	8.6426	1581.77	1365.3	-25.8025	1534.2	1136.68	-17.0822	1514.51	1070.56	-52.9801	1578.72	969.294	-32.5575	1594.67	865.539	-64.1736	1531.75	855.098	-74.5733	1568.54	764.521
763	0	155.049	1773.17	1574.22	254.48	1766.22	1560.03	130.868	1602.1	1593.04	241.702	1584.29	1577.64	187.628	1547.94	1409.32	179.657	1485.21	1197.86	171.346	1681.16	1343.01	174.52	1740.69	1214.22	273.018	1487.88	1248.8	7.69546	1590.46	1364.08	-26.8255	1542.89	1135.47	-18.1057	1523.15	1069.4	-54.1222	1586.85	968.008	-33.7568	1602.25	864.096	-65.4543	1539.24	854.024	-75.7828	1575.35	763.12
764	0	154.284	1781.93	1573.21	253.702	1774.98	1558.91	130.041	1610.88	1592.09	240.846	1593.04	1576.59	186.65	1556.71	1408.11	178.651	1494.7	1196.33	170.306	1690.07	1342.05	173.466	1749.71	1213.29	271.94	1496.91	1247.36	6.69036	1599.19	1362.9	-27.9061	1551.63	1134.29	-19.1917	1531.89	1068.27	-55.384	1595.11	966.793	-35.1027	1610.02	862.741	-66.8397	1546.9	852.992	-77.203	1582.42	761.815
765	0	153.466	1790.73	1572.29	252.872	1783.79	1557.89	129.155	1619.71	1591.24	239.93	1601.82	1575.63	185.622	1565.54	1406.97	177.62	1504.35	1194.82	169.198	1699.05	1341.19	172.336	1758.86	1212.5	270.824	1506.07	1245.96	5.6312	1607.95	1361.79	-29.0385	1560.44	1133.17	-20.3336	1540.72	1067.19	-56.7577	1603.48	965.665	-36.5867	1618	861.489	-68.319	1554.76	852.016	-78.8238	1589.74	760.621
766	0	152.593	1799.57	1571.49	251.989	1792.62	1556.99	128.213	1628.59	1590.5	238.957	1610.64	1574.78	184.547	1574.44	1405.91	176.567	1514.14	1193.36	168.029	1708.1	1340.45	171.138	1768.13	1211.84	269.676	1515.35	1244.62	4.52244	1616.75	1360.75	-30.2172	1569.3	1132.12	-21.5254	1549.64	1066.16	-58.235	1611.99	964.642	-38.1993	1626.2	860.357	-69.8818	1562.81	851.115	-80.633	1597.33	759.558
767	0	151.666	1808.46	1570.83	251.053	1801.5	1556.22	127.216	1637.5	1589.87	237.93	1619.51	1574.05	183.428	1583.4	1404.94	175.493	1524.06	1191.97	166.805	1717.23	1339.84	169.879	1777.52	1211.34	268.498	1524.75	1243.35	3.36904	1625.58	1359.81	-31.4371	1578.23	1131.16	-22.7614	1558.65	1065.22	-59.807	1620.63	963.739	-39.9302	1634.6	859.36	-71.5178	1571.06	850.304	-82.6166	1605.19	758.641
768	0	150.685	1817.38	1570.3	250.066	1810.41	1555.6	126.167	1646.46	1589.37	236.854	1628.42	1573.45	182.268	1592.42	1404.09	174.399	1534.11	1190.67	165.536	1726.43	1339.36	168.57	1787.02	1211.01	267.295	1534.26	1242.19	2.17644	1634.47	1358.98	-32.6933	1587.23	1130.3	-24.037	1567.76	1064.38	-61.4644	1629.41	962.974	-41.7683	1643.23	858.516	-73.2173	1579.52	849.601	-84.7587	1613.33	757.889
769	0	149.653	1826.35	1569.92	249.029	1819.36	1555.14	125.072	1655.45	1589.01	235.733	1637.36	1573	181.071	1601.51	1403.36	173.284	1544.27	1189.49	164.231	1735.7	1339.03	167.222	1796.63	1210.86	266.07	1543.89	1241.15	0.950389	1643.41	1358.29	-33.9814	1596.3	1129.58	-25.3479	1576.98	1063.65	-63.1974	1638.33	962.361	-43.7019	1652.09	857.839	-74.9714	1588.19	849.023	-87.0421	1621.77	757.316
770	0	148.571	1835.35	1569.71	247.946	1828.35	1554.85	123.933	1664.48	1588.79	234.574	1646.35	1572.71	179.841	1610.66	1402.77	172.149	1554.52	1188.46	162.901	1745.03	1338.86	165.848	1806.34	1210.89	264.824	1553.6	1240.24	-0.303099	1652.41	1357.74	-35.2978	1605.45	1129.01	-26.691	1586.3	1063.07	-64.9963	1647.41	961.914	-45.7191	1661.18	857.341	-76.772	1597.08	848.585	-89.4485	1630.49	756.937
771	0	147.444	1844.4	1569.66	246.819	1837.38	1554.75	122.757	1673.55	1588.72	233.381	1655.39	1572.58	178.581	1619.86	1402.33	170.991	1564.86	1187.6	161.556	1754.41	1338.85	164.46	1816.14	1211.11	263.559	1563.4	1239.5	-1.57792	1661.49	1357.35	-36.6392	1614.69	1128.6	-28.0639	1595.73	1062.64	-66.8512	1656.64	961.645	-47.8076	1670.49	857.035	-78.6123	1606.2	848.301	-91.959	1639.51	756.763
772	0	146.277	1853.48	1569.79	245.655	1846.44	1554.83	121.55	1682.65	1588.8	232.161	1664.46	1572.61	177.296	1629.12	1402.05	169.808	1575.27	1186.93	160.208	1763.85	1339	163.075	1826.01	1211.52	262.275	1573.26	1238.94	-2.86796	1670.65	1357.13	-38.0033	1624.02	1128.37	-29.4652	1605.27	1062.38	-68.7522	1666.03	961.562	-49.955	1680.05	856.928	-80.4864	1615.54	848.184	-94.5541	1648.82	756.803
773	0	145.074	1862.59	1570.09	244.459	1855.55	1555.11	120.316	1691.78	1589.03	230.921	1673.57	1572.81	175.989	1638.43	1401.93	168.597	1585.74	1186.45	158.868	1773.34	1339.32	161.705	1835.95	1212.11	260.971	1583.17	1238.56	-4.16727	1679.9	1357.1	-39.3885	1633.45	1128.32	-30.8947	1614.92	1062.29	-70.6898	1675.59	961.673	-52.1488	1689.83	857.028	-82.3894	1625.11	848.241	-97.2144	1658.44	757.062
774	0	143.844	1871.73	1570.56	243.237	1864.69	1555.57	119.063	1700.93	1589.4	229.668	1682.72	1573.17	174.662	1647.79	1401.99	167.354	1596.25	1186.18	157.547	1782.86	1339.79	160.366	1845.93	1212.87	259.646	1593.11	1238.37	-5.47011	1689.24	1357.25	-40.7939	1642.99	1128.47	-32.3531	1624.69	1062.4	-72.6548	1685.32	961.98	-54.3768	1699.85	857.336	-84.3178	1634.92	848.479	-99.9208	1668.37	757.542
775	0	142.593	1880.91	1571.2	241.997	1873.87	1556.22	117.798	1710.11	1589.92	228.409	1691.91	1573.69	173.32	1657.19	1402.21	166.076	1606.78	1186.13	156.256	1792.41	1340.41	159.071	1855.95	1213.79	258.297	1603.06	1238.38	-6.77107	1698.69	1357.59	-42.2197	1652.65	1128.81	-33.8423	1634.57	1062.68	-74.6383	1695.23	962.485	-56.627	1710.1	857.854	-86.2691	1644.97	848.899	-102.655	1678.59	758.241
776	0	141.33	1890.1	1571.99	240.746	1883.08	1557.04	116.528	1719.31	1590.56	227.152	1701.12	1574.36	171.965	1666.62	1402.6	164.755	1617.32	1186.3	155.006	1801.98	1341.17	157.835	1865.98	1214.85	256.918	1612.99	1238.58	-8.06513	1708.26	1358.11	-43.6667	1662.42	1129.34	-35.3651	1644.58	1063.16	-76.6318	1705.33	963.182	-58.8875	1720.58	858.576	-88.2418	1655.27	849.5	-105.398	1689.13	759.151
777	0	140.063	1899.33	1572.94	239.494	1892.31	1558.03	115.26	1728.53	1591.33	225.904	1710.36	1575.17	170.601	1676.09	1403.15	163.387	1627.85	1186.68	153.805	1811.57	1342.07	156.669	1876	1216.03	255.504	1622.89	1238.98	-9.34764	1717.95	1358.81	-45.1366	1672.31	1130.06	-36.9252	1654.7	1063.82	-78.6274	1715.61	964.067	-61.1471	1731.29	859.496	-90.2354	1665.8	850.277	-108.135	1699.96	760.263
778	0	138.801	1908.57	1574.02	238.25	1901.57	1559.18	114.001	1737.77	1592.2	224.672	1719.63	1576.11	169.228	1685.58	1403.85	161.966	1638.35	1187.26	152.662	1821.16	1343.07	155.585	1886.01	1217.3	254.05	1632.73	1239.56	-10.6144	1727.75	1359.68	-46.6315	1682.34	1130.96	-38.5272	1664.95	1064.66	-80.6176	1726.08	965.129	-63.3948	1742.22	860.603	-92.2498	1676.58	851.221	-110.85	1711.1	761.56
779	0	137.555	1917.83	1575.23	237.022	1910.85	1560.46	112.759	1747.02	1593.17	223.463	1728.91	1577.16	167.85	1695.09	1404.7	160.485	1648.79	1188.04	151.584	1830.75	1344.18	154.594	1895.97	1218.65	252.547	1642.48	1240.31	-11.8615	1737.69	1360.71	-48.1541	1692.5	1132.03	-40.176	1675.31	1065.66	-82.5954	1736.74	966.356	-65.6203	1753.37	861.884	-94.2858	1687.61	852.319	-113.529	1722.54	763.025
780	0	136.333	1927.1	1576.53	235.819	1920.14	1561.85	111.541	1756.27	1594.23	222.282	1738.22	1578.3	166.469	1704.6	1405.68	158.94	1659.17	1188.99	150.579	1840.32	1345.37	153.704	1905.88	1220.04	250.991	1652.13	1241.22	-13.0854	1747.75	1361.89	-49.7071	1702.79	1133.25	-41.8766	1685.81	1066.8	-84.554	1747.6	967.732	-67.8136	1764.72	863.322	-96.3441	1698.88	853.557	-116.159	1734.28	764.638
781	0	135.145	1936.39	1577.92	234.651	1929.45	1563.34	110.353	1765.54	1595.35	221.137	1747.53	1579.53	165.087	1714.11	1406.77	157.325	1669.46	1190.1	149.65	1849.86	1346.63	152.922	1915.72	1221.46	249.375	1661.66	1242.26	-14.2827	1757.93	1363.19	-51.2933	1713.23	1134.6	-43.634	1696.42	1068.08	-86.487	1758.65	969.241	-69.9653	1776.28	864.901	-98.4256	1710.4	854.918	-118.73	1746.31	766.377
782	0	134	1945.68	1579.36	233.526	1938.76	1564.9	109.202	1774.81	1596.53	220.032	1756.85	1580.83	163.707	1723.62	1407.97	155.637	1679.65	1191.34	148.801	1859.37	1347.93	152.253	1925.46	1222.87	247.694	1671.05	1243.43	-15.4502	1768.22	1364.6	-52.9146	1723.82	1136.06	-45.4524	1707.17	1069.47	-88.388	1769.9	970.866	-72.0664	1788.04	866.599	-100.531	1722.15	856.386	-121.233	1758.63	768.219
783	0	132.907	1954.98	1580.85	232.453	1948.08	1566.51	108.093	1784.09	1597.75	218.973	1766.17	1582.17	162.331	1733.1	1409.26	153.877	1689.71	1192.71	148.033	1868.83	1349.27	151.7	1935.11	1224.26	245.946	1680.29	1244.7	-16.5848	1778.62	1366.11	-54.5725	1734.56	1137.62	-47.3349	1718.04	1070.96	-90.2508	1781.35	972.588	-74.1085	1799.98	868.399	-102.66	1734.14	857.941	-123.661	1771.23	770.142
784	0	131.874	1964.28	1582.36	231.439	1957.39	1568.14	107.032	1793.37	1599	217.962	1775.48	1583.55	160.964	1742.56	1410.62	152.046	1699.64	1194.17	147.349	1878.24	1350.62	151.263	1944.64	1225.6	244.129	1689.35	1246.06	-17.6835	1789.11	1367.68	-56.267	1745.45	1139.25	-49.2833	1729.03	1072.51	-92.0689	1792.98	974.39	-76.0835	1812.1	870.278	-104.813	1746.36	859.568	-126.008	1784.1	772.126
785	0	130.909	1973.58	1583.86	230.49	1966.69	1569.77	106.023	1802.66	1600.26	217.005	1784.8	1584.94	159.607	1751.99	1412.04	150.147	1709.42	1195.7	146.745	1887.59	1351.97	150.939	1954.05	1226.89	242.246	1698.25	1247.48	-18.7433	1799.68	1369.32	-57.997	1756.5	1140.94	-51.2974	1740.16	1074.13	-93.8362	1804.81	976.253	-77.9842	1824.39	872.218	-106.989	1758.81	861.251	-128.268	1797.24	774.151
786	0	130.017	1982.88	1585.34	229.613	1975.98	1571.38	105.07	1811.95	1601.52	216.104	1794.1	1586.35	158.266	1761.37	1413.5	148.189	1719.03	1197.3	146.221	1896.87	1353.3	150.724	1963.32	1228.1	240.302	1706.97	1248.95	-19.7615	1810.31	1370.99	-59.7595	1767.69	1142.66	-53.375	1751.41	1075.78	-95.5461	1816.82	978.163	-79.8035	1836.83	874.201	-109.185	1771.48	862.975	-130.44	1810.64	776.2
787	0	129.206	1992.17	1586.78	228.812	1985.26	1572.95	104.177	1821.24	1602.78	215.26	1803.39	1587.74	156.943	1770.69	1414.99	146.18	1728.48	1198.93	145.771	1906.07	1354.61	150.611	1972.45	1229.24	238.302	1715.51	1250.45	-20.7356	1820.96	1372.69	-61.55	1779.04	1144.4	-55.5115	1762.79	1077.44	-97.1924	1829.02	980.104	-81.5352	1849.43	876.208	-111.398	1784.37	864.728	-132.52	1824.27	778.262
788	0	128.478	2001.46	1588.17	228.092	1994.51	1574.45	103.346	1830.53	1604.03	214.477	1812.67	1589.12	155.644	1779.97	1416.49	144.133	1737.75	1200.58	145.392	1915.19	1355.88	150.59	1981.44	1230.29	236.258	1723.87	1251.97	-21.6633	1831.63	1374.4	-63.3625	1790.52	1146.14	-57.7002	1774.28	1079.12	-98.769	1841.39	982.064	-83.1738	1862.17	878.227	-113.623	1797.47	866.501	-134.506	1838.14	780.325
789	0	127.838	2010.74	1589.48	227.455	2003.74	1575.87	102.58	1839.81	1605.25	213.754	1821.92	1590.47	154.373	1789.18	1417.99	142.061	1746.85	1202.24	145.077	1924.22	1357.1	150.649	1990.28	1231.27	234.18	1732.07	1253.49	-22.5429	1842.29	1376.11	-65.1892	1802.13	1147.87	-59.9322	1785.89	1080.78	-100.27	1853.92	984.032	-84.7143	1875.04	880.243	-115.855	1810.78	868.287	-136.399	1852.23	782.382
790	0	127.288	2020	1590.7	226.902	2012.94	1577.19	101.879	1849.1	1606.44	213.092	1831.16	1591.78	153.134	1798.32	1419.48	139.977	1755.77	1203.89	144.82	1933.16	1358.27	150.777	1998.99	1232.16	232.082	1740.11	1255.01	-23.3732	1852.91	1377.8	-67.0212	1813.85	1149.58	-62.1966	1797.61	1082.43	-101.691	1866.61	985.998	-86.1528	1888.03	882.246	-118.085	1824.28	870.078	-138.197	1866.53	784.43
791	0	126.829	2029.25	1591.82	226.435	2022.1	1578.4	101.244	1858.38	1607.6	212.491	1840.36	1593.05	151.931	1807.38	1420.95	137.897	1764.52	1205.52	144.612	1942.01	1359.38	150.959	2007.56	1232.97	229.976	1748.01	1256.5	-24.1534	1863.48	1379.47	-68.849	1825.66	1151.25	-64.4809	1809.41	1084.04	-103.026	1879.44	987.956	-87.4861	1901.13	884.23	-120.305	1837.98	871.872	-139.899	1881.02	786.466
792	0	126.461	2038.48	1592.84	226.053	2031.22	1579.49	100.677	1867.65	1608.72	211.951	1849.54	1594.27	150.768	1816.38	1422.38	135.833	1773.1	1207.11	144.447	1950.77	1360.42	151.182	2016	1233.71	227.879	1755.78	1257.96	-24.8835	1873.96	1381.1	-70.662	1837.55	1152.88	-66.771	1821.3	1085.61	-104.273	1892.4	989.897	-88.7117	1914.34	886.186	-122.504	1851.85	873.663	-141.505	1895.69	788.491
793	0	126.183	2047.68	1593.74	225.754	2040.31	1580.45	100.175	1876.91	1609.79	211.47	1858.69	1595.43	149.648	1825.3	1423.76	133.8	1781.53	1208.66	144.317	1959.44	1361.38	151.43	2024.32	1234.38	225.804	1763.43	1259.38	-25.564	1884.34	1382.69	-72.4501	1849.49	1154.47	-69.0525	1833.26	1087.13	-105.429	1905.46	991.817	-89.8283	1927.64	888.113	-124.671	1865.9	875.45	-143.012	1910.53	790.507
794	0	125.992	2056.86	1594.53	225.537	2049.35	1581.27	99.7384	1886.16	1610.81	211.047	1867.8	1596.52	148.574	1834.14	1425.09	131.811	1789.81	1210.15	144.214	1968.02	1362.27	151.69	2032.53	1234.98	223.765	1770.99	1260.75	-26.1959	1894.6	1384.23	-74.2028	1861.44	1155.99	-71.3103	1845.26	1088.6	-106.492	1918.63	993.712	-90.835	1941.02	890.006	-126.792	1880.1	877.228	-144.42	1925.52	792.515
795	0	125.886	2066.01	1595.19	225.398	2058.34	1581.95	99.3658	1895.4	1611.78	210.679	1876.88	1597.55	147.55	1842.9	1426.35	129.875	1797.96	1211.58	144.132	1976.51	1363.08	151.95	2040.64	1235.51	221.776	1778.47	1262.06	-26.7808	1904.74	1385.71	-75.9108	1873.39	1157.45	-73.5295	1857.28	1090	-107.462	1931.86	995.575	-91.732	1954.48	891.864	-128.854	1894.45	878.993	-145.724	1940.65	794.518
796	0	125.859	2075.13	1595.72	225.332	2067.29	1582.48	99.055	1904.61	1612.69	210.366	1885.91	1598.5	146.576	1851.59	1427.54	128.004	1805.99	1212.93	144.062	1984.92	1363.8	152.197	2048.65	1235.98	219.849	1785.88	1263.31	-27.3203	1914.73	1387.11	-77.5653	1885.31	1158.83	-75.6958	1869.32	1091.32	-108.338	1945.14	997.403	-92.5201	1968	893.688	-130.842	1908.92	880.74	-146.923	1955.91	796.518
797	0	125.907	2084.21	1596.13	225.335	2076.18	1582.87	98.8037	1913.8	1613.54	210.104	1894.91	1599.36	145.656	1860.21	1428.65	126.206	1813.92	1214.2	144.001	1993.25	1364.43	152.421	2056.58	1236.38	217.996	1793.25	1264.48	-27.8168	1924.57	1388.43	-79.1586	1897.16	1160.14	-77.7956	1881.34	1092.57	-109.124	1958.46	999.191	-93.2008	1981.58	895.476	-132.742	1923.5	882.462	-148.013	1971.29	798.518
798	0	126.024	2093.25	1596.42	225.402	2085.02	1583.11	98.6091	1922.96	1614.31	209.89	1903.86	1600.14	144.791	1868.76	1429.67	124.489	1821.75	1215.37	143.943	2001.51	1364.97	152.614	2064.44	1236.71	216.227	1800.59	1265.56	-28.2721	1934.27	1389.66	-80.6839	1908.93	1161.36	-79.8169	1893.34	1093.73	-109.82	1971.78	1000.93	-93.7758	1995.19	897.231	-134.538	1938.16	884.153	-148.989	1986.77	800.516
799	0	126.203	2102.25	1596.58	225.525	2093.82	1583.21	98.4681	1932.1	1615.02	209.722	1912.77	1600.83	143.983	1877.24	1430.59	122.859	1829.52	1216.46	143.884	2009.7	1365.41	152.771	2072.22	1236.96	214.552	1807.91	1266.56	-28.6886	1943.8	1390.79	-82.1356	1920.59	1162.49	-81.7487	1905.28	1094.8	-110.43	1985.08	1002.62	-94.2476	2008.84	898.952	-136.216	1952.89	885.802	-149.847	2002.33	802.514
800	0	126.435	2111.21	1596.63	225.699	2102.56	1583.18	98.3773	1941.2	1615.65	209.597	1921.63	1601.42	143.233	1885.67	1431.42	121.324	1837.22	1217.44	143.822	2017.84	1365.76	152.888	2079.95	1237.12	212.979	1815.22	1267.46	-29.0682	1953.19	1391.81	-83.5089	1932.12	1163.51	-83.5816	1917.15	1095.76	-110.956	1998.35	1004.26	-94.6188	2022.51	900.641	-137.763	1967.66	887.402	-150.582	2017.97	804.51
801	0	126.714	2120.13	1596.55	225.917	2111.26	1583.01	98.3329	1950.27	1616.19	209.51	1930.46	1601.91	142.543	1894.04	1432.14	119.889	1844.87	1218.31	143.757	2025.92	1366	152.964	2087.62	1237.2	211.516	1822.55	1268.26	-29.4126	1962.42	1392.71	-84.7998	1943.52	1164.43	-85.3078	1928.95	1096.61	-111.401	2011.56	1005.83	-94.8921	2036.19	902.296	-139.164	1982.45	888.941	-151.191	2033.66	806.499
802	0	127.032	2129	1596.37	226.17	2119.91	1582.71	98.3312	1959.3	1616.65	209.46	1939.24	1602.31	141.914	1902.36	1432.76	118.56	1852.49	1219.08	143.686	2033.96	1366.15	153	2095.25	1237.19	210.169	1829.89	1268.96	-29.723	1971.51	1393.48	-86.005	1954.75	1165.24	-86.9206	1940.65	1097.35	-111.768	2024.7	1007.33	-95.0701	2049.87	903.917	-140.41	1997.23	890.409	-151.668	2049.4	808.478
803	0	127.379	2137.84	1596.07	226.453	2128.52	1582.28	98.3682	1968.29	1617.02	209.442	1947.99	1602.59	141.347	1910.63	1433.26	117.342	1860.08	1219.72	143.612	2041.96	1366.2	152.999	2102.84	1237.09	208.944	1837.25	1269.56	-30.0005	1980.46	1394.12	-87.1215	1965.83	1165.93	-88.4143	1952.24	1097.97	-112.059	2037.74	1008.76	-95.1552	2063.52	905.502	-141.49	2011.98	891.797	-152.01	2065.15	810.443
804	0	127.749	2146.63	1595.67	226.758	2137.09	1581.75	98.4401	1977.25	1617.3	209.454	1956.7	1602.78	140.844	1918.87	1433.66	116.241	1867.65	1220.25	143.537	2049.93	1366.14	152.965	2110.4	1236.88	207.847	1844.64	1270.05	-30.2452	1989.27	1394.61	-88.1463	1976.74	1166.49	-89.7844	1963.72	1098.47	-112.275	2050.68	1010.1	-95.1494	2077.16	907.051	-142.397	2026.68	893.095	-152.213	2080.91	812.386
805	0	128.133	2155.38	1595.16	227.078	2145.63	1581.1	98.5432	1986.18	1617.48	209.494	1965.37	1602.86	140.406	1927.08	1433.94	115.262	1875.21	1220.67	143.462	2057.88	1365.99	152.907	2117.94	1236.58	206.881	1852.07	1270.43	-30.457	1997.96	1394.96	-89.0769	1987.48	1166.92	-91.0269	1975.08	1098.83	-112.418	2063.5	1011.36	-95.054	2090.75	908.559	-143.123	2041.29	894.296	-152.274	2096.64	814.301
806	0	128.525	2164.1	1594.56	227.408	2154.15	1580.36	98.674	1995.06	1617.56	209.559	1974.02	1602.84	140.035	1935.26	1434.11	114.408	1882.76	1220.96	143.393	2065.81	1365.73	152.83	2125.47	1236.18	206.051	1859.55	1270.7	-30.6351	2006.53	1395.16	-89.9104	1998.06	1167.23	-92.1384	1986.32	1099.07	-112.488	2076.18	1012.53	-94.8698	2104.29	910.024	-143.666	2055.81	895.394	-152.189	2112.33	816.183
807	0	128.919	2172.79	1593.86	227.742	2162.64	1579.52	98.8294	2003.92	1617.54	209.647	1982.65	1602.72	139.73	1943.42	1434.17	113.683	1890.31	1221.14	143.332	2073.72	1365.38	152.746	2132.99	1235.68	205.358	1867.07	1270.87	-30.7781	2015	1395.22	-90.644	2008.49	1167.4	-93.1161	1997.44	1099.17	-112.483	2088.72	1013.61	-94.5969	2117.76	911.441	-144.021	2070.21	896.384	-151.958	2127.95	818.023
808	0	129.308	2181.44	1593.07	228.075	2171.12	1578.6	99.0067	2012.74	1617.43	209.757	1991.25	1602.5	139.495	1951.57	1434.13	113.09	1897.87	1221.21	143.286	2081.64	1364.94	152.662	2140.51	1235.09	204.803	1874.63	1270.93	-30.884	2023.37	1395.12	-91.2747	2018.76	1167.44	-93.9574	2008.43	1099.14	-112.401	2101.11	1014.58	-94.2346	2131.16	912.808	-144.189	2084.47	897.263	-151.58	2143.48	819.816
809	0	129.688	2190.07	1592.2	228.404	2179.59	1577.6	99.2039	2021.53	1617.21	209.888	1999.85	1602.19	139.328	1959.7	1433.97	112.63	1905.44	1221.16	143.26	2089.55	1364.4	152.59	2148.04	1234.41	204.387	1882.25	1270.9	-30.9504	2031.65	1394.89	-91.7993	2028.88	1167.35	-94.6602	2019.3	1098.99	-112.241	2113.34	1015.46	-93.7815	2144.47	914.118	-144.17	2098.58	898.029	-151.052	2158.89	821.553
810	0	130.057	2198.68	1591.25	228.727	2188.06	1576.53	99.4197	2030.29	1616.89	210.04	2008.43	1601.79	139.233	1967.84	1433.72	112.305	1913.03	1221.01	143.261	2097.47	1363.78	152.539	2155.59	1233.65	204.109	1889.92	1270.77	-30.9746	2039.86	1394.52	-92.2148	2038.88	1167.14	-95.2225	2030.06	1098.71	-111.997	2125.42	1016.24	-93.2357	2157.68	915.368	-143.966	2112.52	898.683	-150.377	2174.16	823.227
811	0	130.411	2207.28	1590.22	229.041	2196.53	1575.4	99.6532	2039.03	1616.48	210.214	2017.01	1601.3	139.209	1975.97	1433.37	112.113	1920.63	1220.77	143.293	2105.41	1363.08	152.52	2163.16	1232.81	203.966	1897.64	1270.54	-30.9534	2048.01	1394.02	-92.518	2048.75	1166.8	-95.6431	2040.7	1098.32	-111.668	2137.34	1016.91	-92.5948	2170.77	916.552	-143.581	2126.28	899.226	-149.553	2189.26	824.831
812	0	130.749	2215.86	1589.12	229.347	2205.01	1574.22	99.9048	2047.75	1615.97	210.41	2025.58	1600.73	139.257	1984.1	1432.92	112.051	1928.27	1220.42	143.363	2113.36	1362.3	152.541	2170.76	1231.91	203.955	1905.42	1270.23	-30.8832	2056.11	1393.39	-92.7063	2058.52	1166.36	-95.9209	2051.22	1097.81	-111.248	2149.1	1017.49	-91.8559	2183.74	917.665	-143.018	2139.84	899.661	-148.584	2204.17	826.356
813	0	131.073	2224.43	1587.96	229.644	2213.5	1572.99	100.175	2056.44	1615.37	210.632	2034.16	1600.09	139.377	1992.25	1432.38	112.117	1935.93	1219.99	143.477	2121.34	1361.46	152.611	2178.39	1230.94	204.07	1913.25	1269.84	-30.7606	2064.17	1392.65	-92.7772	2068.18	1165.8	-96.0558	2061.64	1097.19	-110.734	2160.7	1017.95	-91.0165	2196.57	918.699	-142.285	2153.21	899.99	-147.469	2218.86	827.796
814	0	131.384	2233	1586.73	229.935	2222	1571.72	100.466	2065.13	1614.68	210.881	2042.75	1599.38	139.57	2000.41	1431.75	112.305	1943.62	1219.47	143.642	2129.35	1360.54	152.737	2186.07	1229.92	204.306	1921.15	1269.36	-30.5819	2072.21	1391.81	-92.7289	2077.75	1165.14	-96.0481	2071.96	1096.48	-110.121	2172.14	1018.32	-90.0738	2209.25	919.648	-141.386	2166.37	900.216	-146.213	2233.32	829.14
815	0	131.685	2241.56	1585.46	230.223	2230.53	1570.42	100.781	2073.8	1613.91	211.16	2051.35	1598.6	139.837	2008.59	1431.04	112.61	1951.36	1218.87	143.861	2137.39	1359.57	152.926	2193.79	1228.85	204.656	1929.1	1268.8	-30.3436	2080.24	1390.88	-92.5604	2087.25	1164.39	-95.8993	2082.18	1095.67	-109.406	2183.43	1018.57	-89.0255	2221.76	920.506	-140.331	2179.32	900.343	-144.816	2247.53	830.38
816	0	131.979	2250.12	1584.13	230.511	2239.08	1569.09	101.122	2082.45	1613.06	211.473	2059.97	1597.77	140.176	2016.8	1430.25	113.025	1959.15	1218.2	144.141	2145.48	1358.54	153.182	2201.57	1227.74	205.112	1937.11	1268.17	-30.0425	2088.27	1389.86	-92.2714	2096.67	1163.55	-95.6115	2092.3	1094.78	-108.586	2194.56	1018.73	-87.8701	2234.11	921.264	-139.128	2192.05	900.373	-143.283	2261.47	831.506
817	0	132.272	2258.69	1582.76	230.805	2247.65	1567.74	101.493	2091.1	1612.14	211.826	2068.6	1596.87	140.589	2025.04	1429.38	113.543	1967	1217.46	144.486	2153.61	1357.47	153.511	2209.4	1226.59	205.666	1945.19	1267.47	-29.6756	2096.32	1388.77	-91.8629	2106.03	1162.63	-95.188	2102.32	1093.81	-107.658	2205.54	1018.77	-86.6067	2246.28	921.916	-137.785	2204.56	900.306	-141.618	2275.13	832.507
818	0	132.57	2267.26	1581.35	231.11	2256.25	1566.37	101.898	2099.75	1611.14	212.221	2077.25	1595.93	141.074	2033.3	1428.44	114.157	1974.91	1216.65	144.9	2161.8	1356.35	153.916	2217.29	1225.41	206.309	1953.33	1266.69	-29.2407	2104.39	1387.61	-91.3367	2115.33	1161.64	-94.633	2112.25	1092.77	-106.623	2216.38	1018.71	-85.2354	2258.26	922.451	-136.313	2216.85	900.143	-139.824	2288.49	833.372
819	0	132.88	2275.83	1579.92	231.431	2264.88	1564.99	102.343	2108.39	1610.09	212.664	2085.92	1594.94	141.632	2041.61	1427.43	114.858	1982.89	1215.77	145.386	2170.04	1355.19	154.399	2225.26	1224.21	207.034	1961.55	1265.83	-28.7358	2112.49	1386.4	-90.6957	2124.58	1160.58	-93.9514	2122.1	1091.66	-105.48	2227.06	1018.53	-83.7577	2270.04	922.864	-134.721	2228.92	899.882	-137.908	2301.55	834.089
820	0	133.208	2284.42	1578.46	231.777	2273.53	1563.6	102.831	2117.03	1608.97	213.159	2094.61	1593.91	142.262	2049.96	1426.37	115.639	1990.95	1214.82	145.946	2178.34	1354.01	154.963	2233.3	1222.99	207.832	1969.83	1264.9	-28.1597	2120.64	1385.14	-89.944	2133.8	1159.45	-93.1493	2131.86	1090.49	-104.231	2237.61	1018.25	-82.176	2281.62	923.145	-133.022	2240.76	899.523	-135.876	2314.29	834.646
821	0	133.563	2293.02	1576.98	232.153	2282.22	1562.2	103.369	2125.68	1607.81	213.711	2103.33	1592.84	142.962	2058.36	1425.24	116.491	1999.11	1213.8	146.584	2186.71	1352.8	155.61	2241.43	1221.76	208.695	1978.18	1263.9	-27.5118	2128.85	1383.84	-89.0864	2142.97	1158.26	-92.2332	2141.53	1089.26	-102.879	2248.02	1017.85	-80.4943	2292.98	923.286	-131.225	2252.36	899.061	-133.734	2326.72	835.031
822	0	133.952	2301.64	1575.5	232.568	2290.94	1560.81	103.96	2134.32	1606.61	214.324	2112.07	1591.75	143.732	2066.81	1424.06	117.408	2007.35	1212.72	147.3	2195.16	1351.57	156.339	2249.66	1220.51	209.615	1986.61	1262.83	-26.7921	2137.12	1382.5	-88.1285	2152.11	1157.02	-91.2101	2151.12	1087.98	-101.428	2258.29	1017.33	-78.718	2304.12	923.281	-129.343	2263.73	898.494	-131.49	2338.83	835.234
823	0	134.382	2310.27	1574.01	233.027	2299.68	1559.43	104.609	2142.98	1605.38	215.003	2120.83	1590.62	144.571	2075.31	1422.83	118.381	2015.71	1211.57	148.095	2203.67	1350.33	157.152	2257.99	1219.27	210.585	1995.13	1261.68	-26.0012	2145.46	1381.13	-87.0763	2161.23	1155.73	-90.0873	2160.64	1086.65	-99.8839	2268.42	1016.7	-76.8535	2315.04	923.123	-127.386	2274.87	897.818	-129.155	2350.62	835.245
824	0	134.86	2318.92	1572.53	233.537	2308.46	1558.05	105.32	2151.65	1604.12	215.751	2129.62	1589.48	145.477	2083.87	1421.56	119.404	2024.17	1210.35	148.968	2212.27	1349.09	158.047	2266.43	1218.02	211.598	2003.72	1260.45	-25.1404	2153.89	1379.75	-85.9361	2170.32	1154.39	-88.8722	2170.08	1085.27	-98.2536	2278.42	1015.95	-74.9089	2325.73	922.806	-125.366	2285.77	897.029	-126.738	2362.08	835.054
825	0	135.394	2327.59	1571.06	234.105	2317.27	1556.7	106.097	2160.32	1602.86	216.57	2138.44	1588.34	146.448	2092.5	1420.26	120.471	2032.75	1209.07	149.919	2220.95	1347.86	159.025	2274.99	1216.8	212.648	2012.41	1259.16	-24.2115	2162.4	1378.35	-84.7142	2179.4	1153.02	-87.572	2179.44	1083.86	-96.5445	2288.29	1015.08	-72.893	2336.19	922.327	-123.293	2296.42	896.124	-124.251	2373.21	834.654
826	0	135.989	2336.29	1569.62	234.736	2326.1	1555.37	106.943	2169.02	1601.59	217.463	2147.28	1587.19	147.482	2101.18	1418.93	121.577	2041.46	1207.72	150.947	2229.71	1346.64	160.084	2283.68	1215.59	213.73	2021.19	1257.8	-23.2166	2171	1376.94	-83.4167	2188.45	1151.61	-86.1933	2188.74	1082.41	-94.765	2298.02	1014.1	-70.8159	2346.4	921.685	-121.178	2306.83	895.101	-121.707	2384.01	834.041
827	0	136.65	2345.01	1568.21	235.434	2334.97	1554.07	107.86	2177.73	1600.34	218.431	2156.15	1586.04	148.577	2109.94	1417.59	122.716	2050.29	1206.32	152.048	2238.56	1345.44	161.223	2292.49	1214.41	214.839	2030.06	1256.38	-22.1586	2179.69	1375.54	-82.0493	2197.5	1150.17	-84.7423	2197.96	1080.93	-92.9239	2307.61	1013.01	-68.6885	2356.38	920.88	-119.031	2316.98	893.962	-119.119	2394.48	833.214
828	0	137.381	2353.76	1566.85	236.203	2343.87	1552.81	108.848	2186.46	1599.11	219.474	2165.05	1584.92	149.73	2118.76	1416.25	123.886	2059.26	1204.88	153.22	2247.5	1344.28	162.441	2301.44	1213.28	215.971	2039.04	1254.9	-21.0406	2188.48	1374.14	-80.6171	2206.53	1148.72	-83.2241	2207.12	1079.44	-91.0304	2317.07	1011.81	-66.5224	2366.11	919.915	-116.863	2326.87	892.708	-116.502	2404.61	832.173
829	0	138.184	2362.54	1565.54	237.045	2352.8	1551.6	109.908	2195.22	1597.91	220.592	2173.98	1583.83	150.938	2127.66	1414.91	125.084	2068.37	1203.39	154.46	2256.52	1343.16	163.735	2310.53	1212.21	217.125	2048.11	1253.39	-19.866	2197.37	1372.77	-79.1245	2215.56	1147.26	-81.6432	2216.21	1077.95	-89.0939	2326.4	1010.52	-64.3294	2375.6	918.795	-114.683	2336.49	891.345	-113.873	2414.4	830.924
830	0	139.06	2371.35	1564.3	237.96	2361.76	1550.45	111.04	2204.01	1596.77	221.784	2182.94	1582.78	152.198	2136.62	1413.6	126.308	2077.63	1201.87	155.763	2265.64	1342.1	165.101	2319.75	1211.21	218.297	2057.3	1251.84	-18.6388	2206.36	1371.43	-77.5752	2224.58	1145.81	-80.003	2225.24	1076.46	-87.1237	2335.58	1009.14	-62.1219	2384.83	917.529	-112.499	2345.84	889.881	-111.247	2423.85	829.476
831	0	140.008	2380.2	1563.14	238.947	2370.76	1549.38	112.241	2212.82	1595.7	223.047	2191.93	1581.79	153.508	2145.66	1412.32	127.558	2087.03	1200.35	157.125	2274.84	1341.11	166.533	2329.12	1210.29	219.487	2066.59	1250.28	-17.3629	2215.44	1370.14	-75.9722	2233.61	1144.38	-78.306	2234.22	1075	-85.1292	2344.62	1007.69	-59.912	2393.81	916.127	-110.32	2354.9	888.328	-108.642	2432.94	827.838
832	0	141.028	2389.08	1562.06	240.005	2379.79	1548.38	113.509	2221.67	1594.7	224.377	2200.96	1580.87	154.864	2154.76	1411.1	128.834	2096.57	1198.83	158.54	2284.13	1340.2	168.027	2338.62	1209.47	220.696	2075.99	1248.72	-16.0424	2224.61	1368.91	-74.3175	2242.63	1142.99	-76.5539	2243.13	1073.57	-83.1192	2353.51	1006.18	-57.7115	2402.53	914.604	-108.153	2363.68	886.699	-106.074	2441.66	826.029
833	0	142.114	2398	1561.1	241.13	2388.86	1547.49	114.84	2230.56	1593.8	225.771	2210.02	1580.03	156.264	2163.94	1409.94	130.137	2106.26	1197.35	160.002	2293.5	1339.39	169.574	2348.26	1208.76	221.925	2085.5	1247.19	-14.6818	2233.87	1367.76	-72.6128	2251.65	1141.66	-74.7476	2251.98	1072.21	-81.1023	2362.25	1004.62	-55.532	2411	912.975	-106.005	2372.16	885.012	-103.561	2450.01	824.066
834	0	143.263	2406.96	1560.25	242.316	2397.96	1546.7	116.229	2239.48	1593	227.224	2219.11	1579.29	157.704	2173.18	1408.86	131.469	2116.09	1195.91	161.505	2302.95	1338.69	171.166	2358.03	1208.18	223.176	2095.12	1245.7	-13.2852	2243.22	1366.71	-70.8595	2260.66	1140.4	-72.8877	2260.77	1070.91	-79.0867	2370.84	1003.05	-53.3842	2419.21	911.26	-103.883	2380.33	883.289	-101.118	2457.98	821.972
835	0	144.467	2415.96	1559.53	243.556	2407.1	1546.03	117.672	2248.43	1592.33	228.73	2228.25	1578.66	159.181	2182.48	1407.89	132.832	2126.05	1194.55	163.041	2312.47	1338.1	172.794	2367.92	1207.74	224.453	2104.84	1244.29	-11.857	2252.63	1365.76	-69.0588	2269.67	1139.23	-70.9744	2269.5	1069.72	-77.0802	2379.27	1001.47	-51.2784	2427.16	909.478	-101.791	2388.19	881.552	-98.7609	2465.56	819.773
836	0	145.719	2425.01	1558.95	244.842	2416.28	1545.49	119.161	2257.42	1591.79	230.283	2237.42	1578.15	160.693	2191.84	1407.03	134.23	2136.13	1193.3	164.603	2322.06	1337.65	174.448	2377.91	1207.45	225.759	2114.66	1242.98	-10.4014	2262.11	1364.95	-67.2119	2278.66	1138.18	-69.0081	2278.17	1068.64	-75.09	2387.54	999.914	-49.2237	2434.85	907.653	-99.7352	2395.73	879.826	-96.5034	2472.74	817.496
837	0	147.009	2434.09	1558.52	246.165	2425.5	1545.1	120.691	2266.45	1591.38	231.875	2246.63	1577.78	162.237	2201.25	1406.3	135.663	2146.31	1192.18	166.185	2331.7	1337.33	176.117	2388.01	1207.32	227.098	2124.57	1241.78	-8.9225	2271.64	1364.27	-65.3203	2287.64	1137.26	-66.9896	2286.77	1067.7	-73.1229	2395.64	998.397	-47.2288	2442.28	905.808	-97.7196	2402.96	878.137	-94.3576	2479.52	815.174
838	0	148.327	2443.2	1558.25	247.515	2434.77	1544.86	122.254	2275.51	1591.13	233.5	2255.88	1577.55	163.812	2210.71	1405.71	137.137	2156.59	1191.22	167.778	2341.4	1337.16	177.791	2398.19	1207.36	228.477	2134.57	1240.73	-7.42426	2281.21	1363.76	-63.3863	2296.59	1136.48	-64.9204	2295.3	1066.91	-71.1854	2403.57	996.942	-45.301	2449.45	903.967	-95.7481	2409.86	876.512	-92.3334	2485.89	812.835
839	0	149.662	2452.36	1558.14	248.88	2444.07	1544.78	123.842	2284.61	1591.03	235.15	2265.17	1577.47	165.413	2220.22	1405.27	138.651	2166.93	1190.43	169.375	2351.13	1337.15	179.457	2408.43	1207.57	229.901	2144.63	1239.85	-5.91045	2290.81	1363.42	-61.4125	2305.5	1135.87	-62.803	2303.74	1066.29	-69.2836	2411.32	995.569	-43.447	2456.37	902.154	-93.8244	2416.45	874.978	-90.4384	2491.84	810.512
840	0	151.003	2461.54	1558.19	250.248	2453.41	1544.86	125.448	2293.73	1591.08	236.817	2274.49	1577.55	167.039	2229.76	1405	140.211	2177.31	1189.84	170.969	2360.9	1337.28	181.104	2418.73	1207.94	231.375	2154.76	1239.16	-4.38469	2300.42	1363.25	-59.4028	2314.36	1135.43	-60.6411	2312.1	1065.86	-67.4234	2418.89	994.298	-41.6725	2463.03	900.394	-91.9519	2422.72	873.56	-88.6773	2497.38	808.236
841	0	152.338	2470.76	1558.41	251.609	2462.78	1545.1	127.064	2302.88	1591.3	238.493	2283.85	1577.78	168.689	2239.32	1404.9	141.816	2187.72	1189.47	172.551	2370.68	1337.57	182.722	2429.05	1208.49	232.904	2164.93	1238.68	-2.8504	2310.02	1363.27	-57.3619	2323.16	1135.18	-58.4397	2320.36	1065.61	-65.6105	2426.28	993.144	-39.9824	2469.45	898.708	-90.1338	2428.69	872.28	-87.0522	2502.52	806.034
842	0	153.656	2480	1558.79	252.949	2472.2	1545.51	128.681	2312.05	1591.67	240.17	2293.25	1578.17	170.359	2248.91	1404.97	143.471	2198.12	1189.32	174.115	2380.47	1338.01	184.3	2439.38	1209.19	234.496	2175.14	1238.41	-1.31086	2319.6	1363.48	-55.2956	2331.87	1135.12	-56.2051	2328.51	1065.56	-63.8505	2433.48	992.123	-38.3807	2475.62	897.117	-88.3735	2434.36	871.159	-85.5626	2507.27	803.934
843	0	154.945	2489.25	1559.33	254.258	2481.64	1546.08	130.292	2321.24	1592.19	241.841	2302.67	1578.71	172.047	2258.5	1405.21	145.177	2208.5	1189.41	175.654	2390.25	1338.59	185.827	2449.7	1210.04	236.154	2185.36	1238.36	0.230817	2329.13	1363.87	-53.2105	2340.49	1135.24	-53.9451	2336.54	1065.71	-62.149	2440.5	991.245	-36.8707	2481.56	895.639	-86.6742	2439.74	870.211	-84.2055	2511.63	801.959
844	0	156.194	2498.52	1560.02	255.524	2491.11	1546.79	131.89	2330.43	1592.85	243.497	2312.12	1579.4	173.751	2268.09	1405.62	146.937	2218.81	1189.72	177.161	2400.02	1339.32	187.294	2459.99	1211.03	237.885	2195.59	1238.53	1.77157	2338.61	1364.44	-51.1146	2348.99	1135.55	-51.6685	2344.45	1066.04	-60.5109	2447.32	990.518	-35.4551	2487.27	894.29	-85.0394	2444.86	869.449	-82.9756	2515.64	800.128
845	0	157.395	2507.79	1560.85	256.738	2500.61	1547.65	133.466	2339.63	1593.64	245.132	2321.59	1580.23	175.47	2277.67	1406.19	148.753	2229.04	1190.25	178.631	2409.75	1340.17	188.692	2470.22	1212.13	239.693	2205.79	1238.93	3.30837	2348	1365.17	-49.0162	2357.35	1136.04	-49.3851	2352.21	1066.56	-58.9415	2453.95	989.946	-34.1357	2492.77	893.081	-83.4723	2449.74	868.878	-81.8661	2519.33	798.456
846	0	158.538	2517.06	1561.79	257.892	2510.12	1548.63	135.014	2348.83	1594.56	246.739	2331.07	1581.19	177.199	2287.22	1406.92	150.627	2239.17	1190.99	180.058	2419.43	1341.13	190.015	2480.38	1213.34	241.579	2215.97	1239.53	4.83819	2357.29	1366.06	-46.9246	2365.56	1136.69	-47.1055	2359.82	1067.25	-57.4452	2460.39	989.529	-32.9137	2498.07	892.023	-81.9761	2454.38	868.501	-80.8688	2522.71	796.955
847	0	159.615	2526.32	1562.84	258.976	2519.65	1549.72	136.528	2358.02	1595.59	248.311	2340.57	1582.27	178.938	2296.74	1407.79	152.561	2249.17	1191.92	181.437	2429.06	1342.2	191.255	2490.44	1214.63	243.547	2226.1	1240.34	6.35788	2366.46	1367.08	-44.8493	2373.6	1137.49	-44.8405	2367.26	1068.09	-56.0263	2466.64	989.264	-31.7894	2503.18	891.12	-80.5534	2458.82	868.313	-79.9748	2525.82	795.631
848	0	160.622	2535.56	1563.98	259.985	2529.18	1550.9	138.001	2367.19	1596.71	249.844	2350.07	1583.46	180.682	2306.21	1408.78	154.555	2259.03	1193.01	182.765	2438.62	1343.36	192.408	2500.39	1215.98	245.597	2236.16	1241.32	7.86422	2375.5	1368.22	-42.7996	2381.46	1138.42	-42.6007	2374.53	1069.06	-54.6881	2472.7	989.145	-30.7624	2508.12	890.376	-79.2063	2463.09	868.307	-79.1752	2528.7	794.486
849	0	161.552	2544.77	1565.18	260.915	2538.71	1552.15	139.429	2376.35	1597.9	251.33	2359.57	1584.73	182.428	2315.62	1409.89	156.611	2268.73	1194.25	184.039	2448.1	1344.58	193.471	2510.21	1217.37	247.725	2246.14	1242.46	9.35388	2384.38	1369.45	-40.7847	2389.11	1139.46	-40.3964	2381.62	1070.13	-53.4334	2478.58	989.164	-29.8316	2512.9	889.788	-77.936	2467.19	868.469	-78.4611	2531.4	793.52
850	0	162.402	2553.96	1566.43	261.762	2548.22	1553.46	140.806	2385.47	1599.16	252.767	2369.06	1586.08	184.174	2324.96	1411.1	158.725	2278.27	1195.6	185.255	2457.48	1345.86	194.442	2519.89	1218.79	249.927	2256.03	1243.73	10.8234	2393.09	1370.75	-38.813	2396.54	1140.59	-38.2371	2388.51	1071.3	-52.2639	2484.27	989.309	-28.9953	2517.54	889.354	-76.7422	2471.15	868.785	-77.8242	2533.94	792.729
851	0	163.172	2563.1	1567.7	262.525	2557.72	1554.8	142.128	2394.56	1600.47	254.15	2378.54	1587.49	185.914	2334.23	1412.38	160.893	2287.63	1197.05	186.412	2466.77	1347.18	195.321	2529.41	1220.21	252.196	2265.81	1245.12	12.2695	2401.63	1372.1	-36.8922	2403.75	1141.79	-36.1307	2395.21	1072.52	-51.1805	2489.79	989.567	-28.2511	2522.05	889.067	-75.6234	2475	869.236	-77.2576	2536.37	792.105
852	0	163.86	2572.2	1568.98	263.203	2567.18	1556.15	143.392	2403.61	1601.8	255.474	2387.99	1588.94	187.645	2343.42	1413.73	163.11	2296.81	1198.55	187.51	2475.95	1348.52	196.11	2538.77	1221.61	254.522	2275.48	1246.59	13.6886	2409.99	1373.48	-35.0286	2410.72	1143.03	-34.0838	2401.71	1073.79	-50.1828	2495.13	989.925	-27.5961	2526.45	888.919	-74.5766	2478.75	869.801	-76.7551	2538.73	791.642
853	0	164.468	2581.24	1570.25	263.798	2576.61	1557.5	144.595	2412.62	1603.15	256.738	2397.41	1590.42	189.361	2352.5	1415.11	165.366	2305.81	1200.09	188.548	2485.01	1349.87	196.814	2547.96	1222.99	256.892	2285.02	1248.13	15.0778	2418.16	1374.86	-33.2272	2417.45	1144.29	-32.1013	2408	1075.08	-49.2696	2500.3	990.369	-27.0267	2530.74	888.899	-73.5971	2482.42	870.46	-76.3119	2541.05	791.33
854	0	164.997	2590.23	1571.5	264.313	2586	1558.83	145.734	2421.57	1604.49	257.939	2406.79	1591.91	191.059	2361.5	1416.53	167.65	2314.64	1201.65	189.527	2493.96	1351.22	197.438	2556.97	1224.34	259.291	2294.43	1249.71	16.4339	2426.14	1376.22	-31.4917	2423.94	1145.56	-30.1862	2414.08	1076.37	-48.4383	2505.31	990.883	-26.5391	2534.95	888.995	-72.679	2486.01	871.191	-75.9245	2543.37	791.158
855	0	165.451	2599.15	1572.7	264.752	2595.33	1560.12	146.808	2430.48	1605.82	259.075	2416.12	1593.4	192.732	2370.38	1417.95	169.95	2323.29	1203.19	190.448	2502.79	1352.55	197.988	2565.82	1225.63	261.705	2303.7	1251.31	17.7544	2433.94	1377.56	-29.824	2430.19	1146.82	-28.3393	2419.96	1077.64	-47.6858	2510.15	991.453	-26.1288	2539.09	889.196	-71.8148	2489.55	871.973	-75.5901	2545.7	791.116
856	0	165.835	2608.01	1573.84	265.118	2604.6	1561.36	147.816	2439.32	1607.13	260.144	2425.4	1594.87	194.375	2379.16	1419.37	172.251	2331.79	1204.71	191.312	2511.49	1353.85	198.474	2574.5	1226.87	264.117	2312.83	1252.9	19.0371	2441.56	1378.86	-28.2248	2436.21	1148.06	-26.5602	2425.64	1078.89	-47.0079	2514.84	992.065	-25.7909	2543.15	889.488	-70.9964	2493.04	872.787	-75.3069	2548.09	791.194
857	0	166.153	2616.79	1574.91	265.419	2613.8	1562.54	148.756	2448.1	1608.39	261.146	2434.63	1596.32	195.985	2387.83	1420.77	174.538	2340.13	1206.19	192.123	2520.08	1355.12	198.904	2583.02	1228.06	266.512	2321.82	1254.48	20.2801	2449.02	1380.1	-26.6932	2441.99	1149.27	-24.8464	2431.13	1080.1	-46.4	2519.39	992.705	-25.5202	2547.16	889.857	-70.2149	2496.49	873.613	-75.0735	2550.54	791.379
858	0	166.411	2625.5	1575.91	265.658	2622.93	1563.65	149.629	2456.82	1609.6	262.079	2443.78	1597.73	197.556	2396.4	1422.13	176.796	2348.33	1207.61	192.882	2528.54	1356.34	199.287	2591.39	1229.18	268.873	2330.67	1256.02	21.4818	2456.32	1381.27	-25.2274	2447.57	1150.43	-23.1945	2436.43	1081.27	-45.8567	2523.8	993.361	-25.3114	2551.12	890.289	-69.4611	2499.89	874.434	-74.8889	2553.06	791.659
859	0	166.613	2634.14	1576.81	265.844	2631.98	1564.68	150.436	2465.48	1610.75	262.945	2452.87	1599.08	199.083	2404.85	1423.45	179.012	2356.39	1208.97	193.591	2536.89	1357.51	199.632	2599.62	1230.24	271.188	2339.39	1257.51	22.6412	2463.48	1382.37	-23.8245	2452.94	1151.53	-21.5999	2441.56	1082.38	-45.3726	2528.08	994.018	-25.1588	2555.04	890.771	-68.7258	2503.26	875.236	-74.7517	2555.68	792.02
860	0	166.765	2642.7	1577.63	265.981	2640.94	1565.63	151.177	2474.07	1611.82	263.743	2461.88	1600.38	200.563	2413.2	1424.72	181.171	2364.33	1210.25	194.254	2545.13	1358.62	199.946	2607.72	1231.23	273.446	2347.97	1258.93	23.7575	2470.51	1383.39	-22.481	2458.14	1152.58	-20.0576	2446.53	1083.44	-44.9416	2532.24	994.667	-25.0568	2558.92	891.288	-68.0006	2506.6	876.004	-74.6606	2558.39	792.449
861	0	166.874	2651.19	1578.35	266.075	2649.82	1566.49	151.853	2482.59	1612.82	264.475	2470.81	1601.6	201.993	2421.44	1425.92	183.263	2372.16	1211.44	194.872	2553.26	1359.67	200.236	2615.7	1232.16	275.636	2356.44	1260.28	24.8302	2477.44	1384.34	-21.1929	2463.18	1153.57	-18.5622	2451.36	1084.44	-44.5581	2536.3	995.297	-24.9997	2562.77	891.827	-67.2773	2509.91	876.727	-74.6135	2561.2	792.931
862	0	166.943	2659.6	1578.97	266.133	2658.61	1567.25	152.466	2491.04	1613.73	265.141	2479.65	1602.73	203.369	2429.58	1427.04	185.279	2379.89	1212.56	195.447	2561.3	1360.64	200.507	2623.59	1233.03	277.753	2364.8	1261.55	25.859	2484.26	1385.2	-19.9557	2468.08	1154.48	-17.1085	2456.06	1085.37	-44.216	2540.26	995.896	-24.9818	2566.6	892.374	-66.5492	2513.2	877.395	-74.6078	2564.1	793.45
863	0	166.979	2667.93	1579.49	266.16	2667.31	1567.93	153.017	2499.42	1614.54	265.744	2488.41	1603.78	204.69	2437.62	1428.09	187.212	2387.52	1213.57	195.981	2569.24	1361.55	200.762	2631.38	1233.82	279.79	2373.07	1262.73	26.8438	2491.01	1385.97	-18.7652	2472.87	1155.33	-15.6918	2460.67	1086.24	-43.9096	2544.14	996.457	-24.9973	2570.42	892.916	-65.8108	2516.47	878.001	-74.6402	2567.08	793.991
864	0	166.984	2676.2	1579.91	266.16	2675.91	1568.51	153.509	2507.73	1615.26	266.284	2497.09	1604.73	205.953	2445.58	1429.04	189.058	2395.07	1214.5	196.475	2577.1	1362.39	201.003	2639.09	1234.55	281.746	2381.24	1263.81	27.7843	2497.7	1386.66	-17.6171	2477.57	1156.11	-14.3082	2465.19	1087.05	-43.6332	2547.95	996.971	-25.0405	2574.23	893.441	-65.0579	2519.72	878.539	-74.7063	2570.14	794.538
865	0	166.963	2684.39	1580.23	266.138	2684.43	1569	153.944	2515.97	1615.87	266.763	2505.67	1605.58	207.157	2453.45	1429.91	190.813	2402.54	1215.33	196.93	2584.89	1363.14	201.23	2646.73	1235.2	283.619	2389.33	1264.78	28.6805	2504.33	1387.26	-16.5077	2482.21	1156.81	-12.9546	2469.66	1087.79	-43.3814	2551.71	997.43	-25.1057	2578.04	893.938	-64.2879	2522.95	879.004	-74.801	2573.26	795.076
866	0	166.919	2692.52	1580.45	266.098	2692.85	1569.4	154.323	2524.14	1616.37	267.185	2514.17	1606.31	208.302	2461.24	1430.67	192.476	2409.94	1216.07	197.346	2592.61	1363.82	201.44	2654.31	1235.78	285.408	2397.37	1265.65	29.5319	2510.92	1387.78	-15.4336	2486.82	1157.44	-11.6292	2474.09	1088.47	-43.149	2555.44	997.83	-25.1872	2581.85	894.397	-63.4998	2526.18	879.395	-74.9183	2576.45	795.59
867	0	166.854	2700.58	1580.57	266.043	2701.19	1569.71	154.65	2532.25	1616.76	267.551	2522.57	1606.93	209.386	2468.96	1431.34	194.048	2417.28	1216.71	197.722	2600.26	1364.41	201.632	2661.82	1236.29	287.116	2405.34	1266.41	30.3384	2517.49	1388.21	-14.3919	2491.42	1158	-10.3311	2478.51	1089.08	-42.9313	2559.14	998.163	-25.2794	2585.68	894.807	-62.6938	2529.42	879.709	-75.0518	2579.68	796.065
868	0	166.771	2708.58	1580.59	265.974	2709.45	1569.93	154.927	2540.29	1617.03	267.862	2530.89	1607.43	210.41	2476.62	1431.9	195.53	2424.57	1217.25	198.06	2607.87	1364.91	201.801	2669.29	1236.71	288.742	2413.27	1267.06	31.0993	2524.04	1388.56	-13.3805	2496.02	1158.47	-9.06018	2482.93	1089.63	-42.7238	2562.84	998.426	-25.3768	2589.54	895.163	-61.8714	2532.66	879.948	-75.1944	2582.95	796.489
869	0	166.671	2716.52	1580.52	265.895	2717.62	1570.07	155.155	2548.27	1617.18	268.122	2539.13	1607.8	211.372	2484.21	1432.35	196.924	2431.8	1217.7	198.357	2615.43	1365.33	201.942	2676.7	1237.04	290.288	2421.17	1267.59	31.8142	2530.58	1388.82	-12.3975	2500.66	1158.88	-7.81744	2487.38	1090.11	-42.5226	2566.55	998.615	-25.4742	2593.42	895.456	-61.0354	2535.92	880.111	-75.339	2586.24	796.849
870	0	166.555	2724.42	1580.36	265.806	2725.72	1570.12	155.337	2556.19	1617.21	268.333	2547.28	1608.04	212.274	2491.75	1432.69	198.231	2438.99	1218.06	198.613	2622.94	1365.66	202.05	2684.06	1237.29	291.755	2429.03	1268.02	32.4824	2537.12	1389	-11.442	2505.35	1159.2	-6.60435	2491.87	1090.52	-42.3243	2570.28	998.728	-25.5667	2597.33	895.68	-60.1887	2539.2	880.201	-75.4784	2589.56	797.135
871	0	166.424	2732.26	1580.11	265.709	2733.74	1570.1	155.474	2564.05	1617.11	268.496	2555.35	1608.15	213.114	2499.25	1432.93	199.453	2446.14	1218.32	198.828	2630.43	1365.9	202.12	2691.38	1237.44	293.145	2436.88	1268.33	33.1031	2543.67	1389.1	-10.5135	2510.1	1159.45	-5.4229	2496.41	1090.86	-42.1257	2574.05	998.762	-25.6497	2601.28	895.832	-59.3354	2542.52	880.219	-75.6055	2592.88	797.339
872	0	166.279	2740.05	1579.78	265.606	2741.7	1569.99	155.568	2571.85	1616.89	268.612	2563.34	1608.12	213.894	2506.69	1433.05	200.591	2453.25	1218.49	198.999	2637.88	1366.04	202.147	2698.65	1237.5	294.458	2444.7	1268.52	33.6755	2550.23	1389.13	-9.61179	2514.93	1159.63	-4.27536	2501.03	1091.14	-41.9245	2577.86	998.717	-25.719	2605.28	895.909	-58.4794	2545.88	880.167	-75.714	2596.22	797.454
873	0	166.12	2747.8	1579.36	265.495	2749.59	1569.8	155.62	2579.59	1616.54	268.684	2571.25	1607.96	214.613	2514.1	1433.07	201.647	2460.33	1218.57	199.127	2645.31	1366.09	202.126	2705.88	1237.46	295.695	2452.51	1268.61	34.1989	2556.81	1389.07	-8.73727	2519.86	1159.73	-3.16403	2505.72	1091.35	-41.7188	2581.73	998.592	-25.771	2609.33	895.908	-57.6247	2549.29	880.049	-75.798	2599.56	797.475
874	0	165.948	2755.51	1578.87	265.379	2757.41	1569.54	155.631	2587.28	1616.07	268.712	2579.08	1607.66	215.272	2521.47	1432.97	202.622	2467.37	1218.57	199.21	2652.71	1366.05	202.054	2713.08	1237.33	296.855	2460.31	1268.59	34.6724	2563.41	1388.94	-7.89045	2524.88	1159.75	-2.09111	2510.5	1091.49	-41.5069	2585.66	998.387	-25.8026	2613.43	895.827	-56.775	2552.75	879.865	-75.8524	2602.91	797.399
875	0	165.761	2763.18	1578.29	265.257	2765.18	1569.2	155.603	2594.92	1615.46	268.697	2586.84	1607.22	215.87	2528.8	1432.76	203.516	2474.38	1218.47	199.247	2660.1	1365.91	201.928	2720.23	1237.09	297.939	2468.11	1268.46	35.0954	2570.03	1388.73	-7.07201	2530.01	1159.71	-1.05857	2515.38	1091.56	-41.2879	2589.67	998.102	-25.8114	2617.59	895.665	-55.9336	2556.27	879.619	-75.8732	2606.25	797.222
876	0	165.561	2770.82	1577.63	265.129	2772.88	1568.79	155.535	2602.5	1614.73	268.64	2594.52	1606.65	216.407	2536.11	1432.44	204.33	2481.36	1218.29	199.238	2667.46	1365.68	201.745	2727.34	1236.76	298.947	2475.9	1268.22	35.4673	2576.67	1388.44	-6.28261	2535.25	1159.58	-0.068013	2520.36	1091.57	-41.061	2593.74	997.736	-25.7957	2621.81	895.423	-55.1029	2559.85	879.311	-75.8573	2609.59	796.945
877	0	165.347	2778.41	1576.9	264.995	2780.53	1568.3	155.428	2610.03	1613.87	268.542	2602.14	1605.93	216.884	2543.38	1432.01	205.064	2488.31	1218.03	199.183	2674.8	1365.36	201.505	2734.43	1236.34	299.879	2483.68	1267.88	35.7876	2583.35	1388.08	-5.52283	2540.61	1159.39	0.879303	2525.43	1091.5	-40.8257	2597.9	997.291	-25.7541	2626.09	895.1	-54.285	2563.49	878.942	-75.8027	2612.94	796.565
878	0	165.119	2785.98	1576.09	264.856	2788.12	1567.74	155.283	2617.51	1612.88	268.402	2609.68	1605.08	217.299	2550.62	1431.47	205.718	2495.23	1217.67	199.08	2682.13	1364.93	201.205	2741.47	1235.81	300.734	2491.46	1267.43	36.0559	2590.05	1387.64	-4.79313	2546.09	1159.11	1.7825	2530.62	1091.37	-40.5819	2602.14	996.766	-25.6859	2630.43	894.695	-53.4811	2567.21	878.514	-75.708	2616.28	796.083
879	0	164.877	2793.5	1575.2	264.712	2795.65	1567.11	155.098	2624.94	1611.76	268.221	2617.14	1604.09	217.655	2557.83	1430.81	206.293	2502.12	1217.24	198.931	2689.44	1364.42	200.845	2748.48	1235.19	301.514	2499.23	1266.87	36.2722	2596.77	1387.13	-4.0938	2551.68	1158.77	2.64104	2535.91	1091.18	-40.3294	2606.45	996.161	-25.5907	2634.83	894.209	-52.6918	2570.99	878.026	-75.5725	2619.63	795.498
880	0	164.62	2801	1574.23	264.562	2803.13	1566.41	154.876	2632.32	1610.52	267.999	2624.54	1602.95	217.949	2565.01	1430.05	206.788	2508.98	1216.72	198.734	2696.73	1363.8	200.425	2755.46	1234.46	302.216	2507	1266.21	36.4363	2603.53	1386.54	-3.42499	2557.39	1158.35	3.45463	2541.3	1090.91	-40.0682	2610.85	995.477	-25.4682	2639.29	893.642	-51.9176	2574.84	877.479	-75.396	2622.97	794.811
881	0	164.35	2808.45	1573.19	264.407	2810.55	1565.63	154.615	2639.65	1609.14	267.736	2631.87	1601.68	218.183	2572.16	1429.18	207.204	2515.82	1216.11	198.49	2704.01	1363.1	199.945	2762.4	1233.64	302.843	2514.77	1265.44	36.5481	2610.32	1385.88	-2.78675	2563.22	1157.86	4.22319	2546.8	1090.58	-39.7983	2615.33	994.713	-25.3186	2643.82	892.993	-51.1585	2578.75	876.874	-75.1783	2626.31	794.021
[truncated: 69 more columns]

## Sheet: Sheet2
Devices
		025370 - Force			025370 - Moment			025370 - CoP			027571 - Force			027571 - Moment			027571 - CoP			037720 - Force			037720 - Moment			037720 - CoP
Frame	Sub Frame	Fx	Fy	Fz	Mx	My	Mz	Cx	Cy	Cz	Fx	Fy	Fz	Mx	My	Mz	Cx	Cy	Cz	Fx	Fy	Fz	Mx	My	Mz	Cx	Cy	Cz
		N	N	N	N.mm	N.mm	N.mm	mm	mm	mm	N	N	N	N.mm	N.mm	N.mm	mm	mm	mm	N	N	N	N.mm	N.mm	N.mm	mm	mm	mm
310	0	0	0	0	0	0	0	200	300	0	0	0	0	0	0	0	200	903	0	0	0	0	0	0	0	603	903	0
310	1	0	0	0	0	0	0	200	300	0	0	0	0	0	0	0	200	903	0	0	0	0	0	0	0	603	903	0
310	2	0	0	0	0	0	0	200	300	0	0	0	0	0	0	0	200	903	0	0	0	0	0	0	0	603	903	0
310	3	0	0	0	0	0	0	200	300	0	0	0	0	0	0	0	200	903	0	0	0	0	0	0	0	603	903	0
310	4	0	0	0	0	0	0	200	300	0	0	0	0	0	0	0	200	903	0	0	0	0	0	0	0	603	903	0
310	5	0	0	0	0	0	0	200	300	0	0	0	0	0	0	0	200	903	0	0	0	0	0	0	0	603	903	0
310	6	0	0	0	0	0	0	200	300	0	0	0	0	0	0	0	200	903	0	0	0	0	0	0	0	603	903	0
310	7	0	0	0	0	0	0	200	300	0	0	0	0	0	0	0	200	903	0	0	0	0	0	0	0	603	903	0
310	8	0	0	0	0	0	0	200	300	0	0	0	0	0	0	0	200	903	0	0	0	0	0	0	0	603	903	0
310	9	0	0	0	0	0	0	200	300	0	0	0	0	0	0	0	200	903	0	0	0	0	0	0	0	603	903	0
311	0	0	0	0	0	0	0	200	300	0	0	0	0	0	0	0	200	903	0	0	0	0	0	0	0	603	903	0
311	1	0	0	0	0	0	0	200	300	0	0	0	0	0	0	0	200	903	0	0	0	0	0	0	0	603	903	0
311	2	0	0	0	0	0	0	200	300	0	0	0	0	0	0	0	200	903	0	0	0	0	0	0	0	603	903	0
311	3	0	0	0	0	0	0	200	300	0	0	0	0	0	0	0	200	903	0	0	0	0	0	0	0	603	903	0
311	4	0	0	0	0	0	0	200	300	0	0	0	0	0	0	0	200	903	0	0	0	0	0	0	0	603	903	0
311	5	0	0	0	0	0	0	200	300	0	0	0	0	0	0	0	200	903	0	0	0	0	0	0	0	603	903	0
311	6	0	0	0	0	0	0	200	300	0	0	0	0	0	0	0	200	903	0	0	0	0	0	0	0	603	903	0
311	7	0	0	0	0	0	0	200	300	0	0	0	0	0	0	0	200	903	0	0	0	0	0	0	0	603	903	0
311	8	0	0	0	0	0	0	200	300	0	0	0	0	0	0	0	200	903	0	0	0	0	0	0	0	603	903	0
311	9	0	0	0	0	0	0	200	300	0	0	0	0	0	0	0	200	903	0	0	0	0	0	0	0	603	903	0
312	0	0	0	0	0	0	0	200	300	0	0	0	0	0	0	0	200	903	0	0	0	0	0	0	0	603	903	0
312	1	0	0	0	0	0	0	200	300	0	0	0	0	0	0	0	200	903	0	0	0	0	0	0	0	603	903	0
312	2	0	0	0	0	0	0	200	300	0	0	0	0	0	0	0	200	903	0	0	0	0	0	0	0	603	903	0
312	3	0	0	0	0	0	0	200	300	0	0	0	0	0	0	0	200	903	0	0	0	0	0	0	0	603	903	0
312	4	0	0	0	0	0	0	200	300	0	0	0	0	0	0	0	200	903	0	0	0	0	0	0	0	603	903	0
312	5	0	0	0	0	0	0	200	300	0	0	0	0	0	0	0	200	903	0	0	0	0	0	0	0	603	903	0
312	6	0	0	0	0	0	0	200	300	0	0	0	0	0	0	0	200	903	0	0	0	0	0	0	0	603	903	0
312	7	0	0	0	0	0	0	200	300	0	0	0	0	0	0	0	200	903	0	0	0	0	0	0	0	603	903	0
312	8	0	0	0	0	0	0	200	300	0	0	0	0	0	0	0	200	903	0	0	0	0	0	0	0	603	903	0
312	9	0	0	0	0	0	0	200	300	0	0	0	0	0	0	0	200	903	0	0	0	0	0	0	0	603	903	0
313	0	0	0	0	0	0	0	200	300	0	0	0	0	0	0	0	200	903	0	0	0	0	0	0	0	603	903	0
313	1	0	0	0	0	0	0	200	300	0	0	0	0	0	0	0	200	903	0	0	0	0	0	0	0	603	903	0
313	2	0	0	0	0	0	0	200	300	0	0	0	0	0	0	0	200	903	0	0	0	0	0	0	0	603	903	0
313	3	0	0	0	0	0	0	200	300	0	0	0	0	0	0	0	200	903	0	0	0	0	0	0	0	603	903	0
313	4	0	0	0	0	0	0	200	300	0	0	0	0	0	0	0	200	903	0	0	0	0	0	0	0	603	903	0
313	5	0	0	0	0	0	0	200	300	0	0	0	0	0	0	0	200	903	0	0	0	0	0	0	0	603	903	0
313	6	0	0	0	0	0	0	200	300	0	0	0	0	0	0	0	200	903	0	0	0	0	0	0	0	603	903	0
313	7	0	0	0	0	0	0	200	300	0	0	0	0	0	0	0	200	903	0	0	0	0	0	0	0	603	903	0
313	8	0	0	0	0	0	0	200	300	0	0	0	0	0	0	0	200	903	0	0	0	0	0	0	0	603	903	0
313	9	0	0	0	0	0	0	200	300	0	0	0	0	0	0	0	200	903	0	0	0	0	0	0	0	603	903	0
314	0	0	0	0	0	0	0	200	300	0	0	0	0	0	0	0	200	903	0	0	0	0	0	0	0	603	903	0
314	1	0	0	0	0	0	0	200	300	0	0	0	0	0	0	0	200	903	0	0	0	0	0	0	0	603	903	0
314	2	0	0	0	0	0	0	200	300	0	0	0	0	0	0	0	200	903	0	0	0	0	0	0	0	603	903	0
314	3	0	0	0	0	0	0	200	300	0	0	0	0	0	0	0	200	903	0	0	0	0	0	0	0	603	903	0
314	4	0	0	0	0	0	0	200	300	0	0	0	0	0	0	0	200	903	0	0	0	0	0	0	0	603	903	0
314	5	0	0	0	0	0	0	200	300	0	0	0	0	0	0	0	200	903	0	0	0	0	0	0	0	603	903	0
314	6	0	0	0	0	0	0	200	300	0	0	0	0	0	0	0	200	903	0	0	0	0	0	0	0	603	903	0
314	7	0	0	0	0	0	0	200	300	0	0	0	0	0	0	0	200	903	0	0	0	0	0	0	0	603	903	0
314	8	0	0	0	0	0	0	200	300	0	0	0	0	0	0	0	200	903	0	0	0	0	0	0	0	603	903	0
314	9	0	0	0	0	0	0	200	300	0	0	0	0	0	0	0	200	903	0	0	0	0	0	0	0	603	903	0
315	0	0	0	0	0	0	0	200	300	0	0	0	0	0	0	0	200	903	0	0	0	0	0	0	0	603	903	0
315	1	0	0	0	0	0	0	200	300	0	0	0	0	0	0	0	200	903	0	0	0	0	0	0	0	603	903	0
315	2	0	0	0	0	0	0	200	300	0	0	0	0	0	0	0	200	903	0	0	0	0	0	0	0	603	903	0
315	3	0	0	0	0	0	0	200	300	0	0	0	0	0	0	0	200	903	0	0	0	0	0	0	0	603	903	0
315	4	0	0	0	0	0	0	200	300	0	0	0	0	0	0	0	200	903	0	0	0	0	0	0	0	603	903	0
315	5	0	0	0	0	0	0	200	300	0	0	0	0	0	0	0	200	903	0	0	0	0	0	0	0	603	903	0
315	6	0	0	0	0	0	0	200	300	0	0	0	0	0	0	0	200	903	0	0	0	0	0	0	0	603	903	0
315	7	0	0	0	0	0	0	200	300	0	0	0	0	0	0	0	200	903	0	0	0	0	0	0	0	603	903	0
315	8	0	0	0	0	0	0	200	300	0	0	0	0	0	0	0	200	903	0	0	0	0	0	0	0	603	903	0
315	9	0	0	0	0	0	0	200	300	0	0	0	0	0	0	0	200	903	0	0	0	0	0	0	0	603	903	0
316	0	0	0	0	0	0	0	200	300	0	0	0	0	0	0	0	200	903	0	0	0	0	0	0	0	603	903	0
316	1	0	0	0	0	0	0	200	300	0	0	0	0	0	0	0	200	903	0	0	0	0	0	0	0	603	903	0
316	2	0	0	0	0	0	0	200	300	0	0	0	0	0	0	0	200	903	0	0	0	0	0	0	0	603	903	0
316	3	0	0	0	0	0	0	200	300	0	0	0	0	0	0	0	200	903	0	0	0	0	0	0	0	603	903	0
316	4	0	0	0	0	0	0	200	300	0	0	0	0	0	0	0	200	903	0	0	0	0	0	0	0	603	903	0
316	5	0	0	0	0	0	0	200	300	0	0	0	0	0	0	0	200	903	0	0	0	0	0	0	0	603	903	0
316	6	0	0	0	0	0	0	200	300	0	0	0	0	0	0	0	200	903	0	0	0	0	0	0	0	603	903	0
316	7	0	0	0	0	0	0	200	300	0	0	0	0	0	0	0	200	903	0	0	0	0	0	0	0	603	903	0
316	8	0	0	0	0	0	0	200	300	0	0	0	0	0	0	0	200	903	0	0	0	0	0	0	0	603	903	0
316	9	0	0	0	0	0	0	200	300	0	0	0	0	0	0	0	200	903	0	0	0	0	0	0	0	603	903	0
317	0	0	0	0	0	0	0	200	300	0	0	0	0	0	0	0	200	903	0	0	0	0	0	0	0	603	903	0
317	1	0	0	0	0	0	0	200	300	0	0	0	0	0	0	0	200	903	0	0	0	0	0	0	0	603	903	0
317	2	0	0	0	0	0	0	200	300	0	0	0	0	0	0	0	200	903	0	0	0	0	0	0	0	603	903	0
317	3	0	0	0	0	0	0	200	300	0	0	0	0	0	0	0	200	903	0	0	0	0	0	0	0	603	903	0
317	4	0	0	0	0	0	0	200	300	0	0	0	0	0	0	0	200	903	0	0	0	0	0	0	0	603	903	0
317	5	0	0	0	0	0	0	200	300	0	0	0	0	0	0	0	200	903	0	0	0	0	0	0	0	603	903	0
317	6	0	0	0	0	0	0	200	300	0	0	0	0	0	0	0	200	903	0	0	0	0	0	0	0	603	903	0
317	7	0	0	0	0	0	0	200	300	0	0	0	0	0	0	0	200	903	0	0	0	0	0	0	0	603	903	0
317	8	0	0	0	0	0	0	200	300	0	0	0	0	0	0	0	200	903	0	0	0	0	0	0	0	603	903	0
317	9	0	0	0	0	0	0	200	300	0	0	0	0	0	0	0	200	903	0	0	0	0	0	0	0	603	903	0
318	0	0	0	0	0	0	0	200	300	0	0	0	0	0	0	0	200	903	0	0	0	0	0	0	0	603	903	0
318	1	0	0	0	0	0	0	200	300	0	0	0	0	0	0	0	200	903	0	0	0	0	0	0	0	603	903	0
318	2	0	0	0	0	0	0	200	300	0	0	0	0	0	0	0	200	903	0	0	0	0	0	0	0	603	903	0
318	3	0	0	0	0	0	0	200	300	0	0	0	0	0	0	0	200	903	0	0	0	0	0	0	0	603	903	0
318	4	0	0	0	0	0	0	200	300	0	0	0	0	0	0	0	200	903	0	0	0	0	0	0	0	603	903	0
318	5	0	0	0	0	0	0	200	300	0	0	0	0	0	0	0	200	903	0	0	0	0	0	0	0	603	903	0
318	6	0	0	0	0	0	0	200	300	0	0	0	0	0	0	0	200	903	0	0	0	0	0	0	0	603	903	0
318	7	0	0	0	0	0	0	200	300	0	0	0	0	0	0	0	200	903	0	0	0	0	0	0	0	603	903	0
318	8	0	0	0	0	0	0	200	300	0	0	0	0	0	0	0	200	903	0	0	0	0	0	0	0	603	903	0
318	9	0	0	0	0	0	0	200	300	0	0	0	0	0	0	0	200	903	0	0	0	0	0	0	0	603	903	0
319	0	0	0	0	0	0	0	200	300	0	0	0	0	0	0	0	200	903	0	0	0	0	0	0	0	603	903	0
319	1	0	0	0	0	0	0	200	300	0	0	0	0	0	0	0	200	903	0	0	0	0	0	0	0	603	903	0
319	2	0	0	0	0	0	0	200	300	0	0	0	0	0	0	0	200	903	0	0	0	0	0	0	0	603	903	0
319	3	0	0	0	0	0	0	200	300	0	0	0	0	0	0	0	200	903	0	0	0	0	0	0	0	603	903	0
319	4	0	0	0	0	0	0	200	300	0	0	0	0	0	0	0	200	903	0	0	0	0	0	0	0	603	903	0
319	5	0	0	0	0	0	0	200	300	0	0	0	0	0	0	0	200	903	0	0	0	0	0	0	0	603	903	0
319	6	0	0	0	0	0	0	200	300	0	0	0	0	0	0	0	200	903	0	0	0	0	0	0	0	603	903	0
319	7	0	0	0	0	0	0	200	300	0	0	0	0	0	0	0	200	903	0	0	0	0	0	0	0	603	903	0
319	8	0	0	0	0	0	0	200	300	0	0	0	0	0	0	0	200	903	0	0	0	0	0	0	0	603	903	0
319	9	0	0	0	0	0	0	200	300	0	0	0	0	0	0	0	200	903	0	0	0	0	0	0	0	603	903	0
320	0	0	0	0	0	0	0	200	300	0	0	0	0	0	0	0	200	903	0	0	0	0	0	0	0	603	903	0
320	1	0	0	0	0	0	0	200	300	0	0	0	0	0	0	0	200	903	0	0	0	0	0	0	0	603	903	0
320	2	0	0	0	0	0	0	200	300	0	0	0	0	0	0	0	200	903	0	0	0	0	0	0	0	603	903	0
320	3	0	0	0	0	0	0	200	300	0	0	0	0	0	0	0	200	903	0	0	0	0	0	0	0	603	903	0
320	4	0	0	0	0	0	0	200	300	0	0	0	0	0	0	0	200	903	0	0	0	0	0	0	0	603	903	0
320	5	0	0	0	0	0	0	200	300	0	0	0	0	0	0	0	200	903	0	0	0	0	0	0	0	603	903	0
320	6	0	0	0	0	0	0	200	300	0	0	0	0	0	0	0	200	903	0	0	0	0	0	0	0	603	903	0
320	7	0	0	0	0	0	0	200	300	0	0	0	0	0	0	0	200	903	0	0	0	0	0	0	0	603	903	0
320	8	0	0	0	0	0	0	200	300	0	0	0	0	0	0	0	200	903	0	0	0	0	0	0	0	603	903	0
320	9	0	0	0	0	0	0	200	300	0	0	0	0	0	0	0	200	903	0	0	0	0	0	0	0	603	903	0
321	0	0	0	0	0	0	0	200	300	0	0	0	0	0	0	0	200	903	0	0	0	0	0	0	0	603	903	0
321	1	0	0	0	0	0	0	200	300	0	0	0	0	0	0	0	200	903	0	0	0	0	0	0	0	603	903	0
321	2	0	0	0	0	0	0	200	300	0	0	0	0	0	0	0	200	903	0	0	0	0	0	0	0	603	903	0
321	3	0	0	0	0	0	0	200	300	0	0	0	0	0	0	0	200	903	0	0	0	0	0	0	0	603	903	0
321	4	0	0	0	0	0	0	200	300	0	0	0	0	0	0	0	200	903	0	0	0	0	0	0	0	603	903	0
321	5	0	0	0	0	0	0	200	300	0	0	0	0	0	0	0	200	903	0	0	0	0	0	0	0	603	903	0
321	6	0	0	0	0	0	0	200	300	0	0	0	0	0	0	0	200	903	0	0	0	0	0	0	0	603	903	0
321	7	0	0	0	0	0	0	200	300	0	0	0	0	0	0	0	200	903	0	0	0	0	0	0	0	603	903	0
321	8	0	0	0	0	0	0	200	300	0	0	0	0	0	0	0	200	903	0	0	0	0	0	0	0	603	903	0
321	9	0	0	0	0	0	0	200	300	0	0	0	0	0	0	0	200	903	0	0	0	0	0	0	0	603	903	0
322	0	0	0	0	0	0	0	200	300	0	0	0	0	0	0	0	200	903	0	0	0	0	0	0	0	603	903	0
322	1	0	0	0	0	0	0	200	300	0	0	0	0	0	0	0	200	903	0	0	0	0	0	0	0	603	903	0
322	2	0	0	0	0	0	0	200	300	0	0	0	0	0	0	0	200	903	0	0	0	0	0	0	0	603	903	0
322	3	0	0	0	0	0	0	200	300	0	0	0	0	0	0	0	200	903	0	0	0	0	0	0	0	603	903	0
322	4	0	0	0	0	0	0	200	300	0	0	0	0	0	0	0	200	903	0	0	0	0	0	0	0	603	903	0
322	5	0	0	0	0	0	0	200	300	0	0	0	0	0	0	0	200	903	0	0	0	0	0	0	0	603	903	0
322	6	0	0	0	0	0	0	200	300	0	0	0	0	0	0	0	200	903	0	0	0	0	0	0	0	603	903	0
322	7	0	0	0	0	0	0	200	300	0	0	0	0	0	0	0	200	903	0	0	0	0	0	0	0	603	903	0
322	8	0	0	0	0	0	0	200	300	0	0	0	0	0	0	0	200	903	0	0	0	0	0	0	0	603	903	0
322	9	0	0	0	0	0	0	200	300	0	0	0	0	0	0	0	200	903	0	0	0	0	0	0	0	603	903	0
323	0	0	0	0	0	0	0	200	300	0	0	0	0	0	0	0	200	903	0	0	0	0	0	0	0	603	903	0
323	1	0	0	0	0	0	0	200	300	0	0	0	0	0	0	0	200	903	0	0	0	0	0	0	0	603	903	0
323	2	0	0	0	0	0	0	200	300	0	0	0	0	0	0	0	200	903	0	0	0	0	0	0	0	603	903	0
323	3	0	0	0	0	0	0	200	300	0	0	0	0	0	0	0	200	903	0	0	0	0	0	0	0	603	903	0
323	4	0	0	0	0	0	0	200	300	0	0	0	0	0	0	0	200	903	0	0	0	0	0	0	0	603	903	0
323	5	0	0	0	0	0	0	200	300	0	0	0	0	0	0	0	200	903	0	0	0	0	0	0	0	603	903	0
323	6	0	0	0	0	0	0	200	300	0	0	0	0	0	0	0	200	903	0	0	0	0	0	0	0	603	903	0
323	7	0	0	0	0	0	0	200	300	0	0	0	0	0	0	0	200	903	0	0	0	0	0	0	0	603	903	0
323	8	0	0	0	0	0	0	200	300	0	0	0	0	0	0	0	200	903	0	0	0	0	0	0	0	603	903	0
323	9	0	0	0	0	0	0	200	300	0	0	0	0	0	0	0	200	903	0	0	0	0	0	0	0	603	903	0
324	0	0	0	0	0	0	0	200	300	0	0	0	0	0	0	0	200	903	0	0	0	0	0	0	0	603	903	0
324	1	0	0	0	0	0	0	200	300	0	0	0	0	0	0	0	200	903	0	0	0	0	0	0	0	603	903	0
324	2	0	0	0	0	0	0	200	300	0	0	0	0	0	0	0	200	903	0	0	0	0	0	0	0	603	903	0
324	3	0	0	0	0	0	0	200	300	0	0	0	0	0	0	0	200	903	0	0	0	0	0	0	0	603	903	0
324	4	0	0	0	0	0	0	200	300	0	0	0	0	0	0	0	200	903	0	0	0	0	0	0	0	603	903	0
324	5	0	0	0	0	0	0	200	300	0	0	0	0	0	0	0	200	903	0	0	0	0	0	0	0	603	903	0
324	6	0	0	0	0	0	0	200	300	0	0	0	0	0	0	0	200	903	0	0	0	0	0	0	0	603	903	0
324	7	0	0	0	0	0	0	200	300	0	0	0	0	0	0	0	200	903	0	0	0	0	0	0	0	603	903	0
324	8	0	0	0	0	0	0	200	300	0	0	0	0	0	0	0	200	903	0	0	0	0	0	0	0	603	903	0
324	9	0	0	0	0	0	0	200	300	0	0	0	0	0	0	0	200	903	0	0	0	0	0	0	0	603	903	0
325	0	0	0	0	0	0	0	200	300	0	0	0	0	0	0	0	200	903	0	0	0	0	0	0	0	603	903	0
325	1	0	0	0	0	0	0	200	300	0	0	0	0	0	0	0	200	903	0	0	0	0	0	0	0	603	903	0
325	2	0	0	0	0	0	0	200	300	0	0	0	0	0	0	0	200	903	0	0	0	0	0	0	0	603	903	0
325	3	0	0	0	0	0	0	200	300	0	0	0	0	0	0	0	200	903	0	0	0	0	0	0	0	603	903	0
325	4	0	0	0	0	0	0	200	300	0	0	0	0	0	0	0	200	903	0	0	0	0	0	0	0	603	903	0
325	5	0	0	0	0	0	0	200	300	0	0	0	0	0	0	0	200	903	0	0	0	0	0	0	0	603	903	0
325	6	0	0	0	0	0	0	200	300	0	0	0	0	0	0	0	200	903	0	0	0	0	0	0	0	603	903	0
325	7	0	0	0	0	0	0	200	300	0	0	0	0	0	0	0	200	903	0	0	0	0	0	0	0	603	903	0
325	8	0	0	0	0	0	0	200	300	0	0	0	0	0	0	0	200	903	0	0	0	0	0	0	0	603	903	0
325	9	0	0	0	0	0	0	200	300	0	0	0	0	0	0	0	200	903	0	0	0	0	0	0	0	603	903	0
326	0	0	0	0	0	0	0	200	300	0	0	0	0	0	0	0	200	903	0	0	0	0	0	0	0	603	903	0
326	1	0	0	0	0	0	0	200	300	0	0	0	0	0	0	0	200	903	0	0	0	0	0	0	0	603	903	0
326	2	0	0	0	0	0	0	200	300	0	0	0	0	0	0	0	200	903	0	0	0	0	0	0	0	603	903	0
326	3	0	0	0	0	0	0	200	300	0	0	0	0	0	0	0	200	903	0	0	0	0	0	0	0	603	903	0
326	4	0	0	0	0	0	0	200	300	0	0	0	0	0	0	0	200	903	0	0	0	0	0	0	0	603	903	0
326	5	0	0	0	0	0	0	200	300	0	0	0	0	0	0	0	200	903	0	0	0	0	0	0	0	603	903	0
326	6	0	0	0	0	0	0	200	300	0	0	0	0	0	0	0	200	903	0	0	0	0	0	0	0	603	903	0
326	7	0	0	0	0	0	0	200	300	0	0	0	0	0	0	0	200	903	0	0	0	0	0	0	0	603	903	0
326	8	0	0	0	0	0	0	200	300	0	0	0	0	0	0	0	200	903	0	0	0	0	0	0	0	603	903	0
326	9	0	0	0	0	0	0	200	300	0	0	0	0	0	0	0	200	903	0	0	0	0	0	0	0	603	903	0
327	0	0	0	0	0	0	0	200	300	0	0	0	0	0	0	0	200	903	0	0	0	0	0	0	0	603	903	0
327	1	0	0	0	0	0	0	200	300	0	0	0	0	0	0	0	200	903	0	0	0	0	0	0	0	603	903	0
327	2	0	0	0	0	0	0	200	300	0	0	0	0	0	0	0	200	903	0	0	0	0	0	0	0	603	903	0
327	3	0	0	0	0	0	0	200	300	0	0	0	0	0	0	0	200	903	0	0	0	0	0	0	0	603	903	0
327	4	0	0	0	0	0	0	200	300	0	0	0	0	0	0	0	200	903	0	0	0	0	0	0	0	603	903	0
327	5	0	0	0	0	0	0	200	300	0	0	0	0	0	0	0	200	903	0	0	0	0	0	0	0	603	903	0
327	6	0	0	0	0	0	0	200	300	0	0	0	0	0	0	0	200	903	0	0	0	0	0	0	0	603	903	0
327	7	0	0	0	0	0	0	200	300	0	0	0	0	0	0	0	200	903	0	0	0	0	0	0	0	603	903	0
327	8	0	0	0	0	0	0	200	300	0	0	0	0	0	0	0	200	903	0	0	0	0	0	0	0	603	903	0
327	9	0	0	0	0	0	0	200	300	0	0	0	0	0	0	0	200	903	0	0	0	0	0	0	0	603	903	0
328	0	0	0	0	0	0	0	200	300	0	0	0	0	0	0	0	200	903	0	0	0	0	0	0	0	603	903	0
328	1	0	0	0	0	0	0	200	300	0	0	0	0	0	0	0	200	903	0	0	0	0	0	0	0	603	903	0
328	2	0	0	0	0	0	0	200	300	0	0	0	0	0	0	0	200	903	0	0	0	0	0	0	0	603	903	0
328	3	0	0	0	0	0	0	200	300	0	0	0	0	0	0	0	200	903	0	0	0	0	0	0	0	603	903	0
328	4	0	0	0	0	0	0	200	300	0	0	0	0	0	0	0	200	903	0	0	0	0	0	0	0	603	903	0
328	5	0	0	0	0	0	0	200	300	0	0	0	0	0	0	0	200	903	0	0	0	0	0	0	0	603	903	0
328	6	0	0	0	0	0	0	200	300	0	0	0	0	0	0	0	200	903	0	0	0	0	0	0	0	603	903	0
328	7	0	0	0	0	0	0	200	300	0	0	0	0	0	0	0	200	903	0	0	0	0	0	0	0	603	903	0
328	8	0	0	0	0	0	0	200	300	0	0	0	0	0	0	0	200	903	0	0	0	0	0	0	0	603	903	0
328	9	0	0	0	0	0	0	200	300	0	0	0	0	0	0	0	200	903	0	0	0	0	0	0	0	603	903	0
329	0	0	0	0	0	0	0	200	300	0	0	0	0	0	0	0	200	903	0	0	0	0	0	0	0	603	903	0
329	1	0	0	0	0	0	0	200	300	0	0	0	0	0	0	0	200	903	0	0	0	0	0	0	0	603	903	0
329	2	0	0	0	0	0	0	200	300	0	0	0	0	0	0	0	200	903	0	0	0	0	0	0	0	603	903	0
329	3	0	0	0	0	0	0	200	300	0	0	0	0	0	0	0	200	903	0	0	0	0	0	0	0	603	903	0
329	4	0	0	0	0	0	0	200	300	0	0	0	0	0	0	0	200	903	0	0	0	0	0	0	0	603	903	0
329	5	0	0	0	0	0	0	200	300	0	0	0	0	0	0	0	200	903	0	0	0	0	0	0	0	603	903	0
329	6	0	0	0	0	0	0	200	300	0	0	0	0	0	0	0	200	903	0	0	0	0	0	0	0	603	903	0
329	7	0	0	0	0	0	0	200	300	0	0	0	0	0	0	0	200	903	0	0	0	0	0	0	0	603	903	0
329	8	0	0	0	0	0	0	200	300	0	0	0	0	0	0	0	200	903	0	0	0	0	0	0	0	603	903	0
329	9	0	0	0	0	0	0	200	300	0	0	0	0	0	0	0	200	903	0	0	0	0	0	0	0	603	903	0
330	0	0	0	0	0	0	0	200	300	0	0	0	0	0	0	0	200	903	0	0	0	0	0	0	0	603	903	0
330	1	0	0	0	0	0	0	200	300	0	0	0	0	0	0	0	200	903	0	0	0	0	0	0	0	603	903	0
330	2	0	0	0	0	0	0	200	300	0	0	0	0	0	0	0	200	903	0	0	0	0	0	0	0	603	903	0
330	3	0	0	0	0	0	0	200	300	0	0	0	0	0	0	0	200	903	0	0	0	0	0	0	0	603	903	0
330	4	0	0	0	0	0	0	200	300	0	0	0	0	0	0	0	200	903	0	0	0	0	0	0	0	603	903	0
330	5	0	0	0	0	0	0	200	300	0	0	0	0	0	0	0	200	903	0	0	0	0	0	0	0	603	903	0
330	6	0	0	0	0	0	0	200	300	0	0	0	0	0	0	0	200	903	0	0	0	0	0	0	0	603	903	0
330	7	0	0	0	0	0	0	200	300	0	0	0	0	0	0	0	200	903	0	0	0	0	0	0	0	603	903	0
330	8	0	0	0	0	0	0	200	300	0	0	0	0	0	0	0	200	903	0	0	0	0	0	0	0	603	903	0
330	9	0	0	0	0	0	0	200	300	0	0	0	0	0	0	0	200	903	0	0	0	0	0	0	0	603	903	0
331	0	0	0	0	0	0	0	200	300	0	0	0	0	0	0	0	200	903	0	0	0	0	0	0	0	603	903	0
331	1	0	0	0	0	0	0	200	300	0	0	0	0	0	0	0	200	903	0	0	0	0	0	0	0	603	903	0
331	2	0	0	0	0	0	0	200	300	0	0	0	0	0	0	0	200	903	0	0	0	0	0	0	0	603	903	0
331	3	0	0	0	0	0	0	200	300	0	0	0	0	0	0	0	200	903	0	0	0	0	0	0	0	603	903	0
331	4	0	0	0	0	0	0	200	300	0	0	0	0	0	0	0	200	903	0	0	0	0	0	0	0	603	903	0
331	5	0	0	0	0	0	0	200	300	0	0	0	0	0	0	0	200	903	0	0	0	0	0	0	0	603	903	0
331	6	0	0	0	0	0	0	200	300	0	0	0	0	0	0	0	200	903	0	0	0	0	0	0	0	603	903	0
331	7	0	0	0	0	0	0	200	300	0	0	0	0	0	0	0	200	903	0	0	0	0	0	0	0	603	903	0
331	8	0	0	0	0	0	0	200	300	0	0	0	0	0	0	0	200	903	0	0	0	0	0	0	0	603	903	0
331	9	0	0	0	0	0	0	200	300	0	0	0	0	0	0	0	200	903	0	0	0	0	0	0	0	603	903	0
332	0	0	0	0	0	0	0	200	300	0	0	0	0	0	0	0	200	903	0	0	0	0	0	0	0	603	903	0
332	1	0	0	0	0	0	0	200	300	0	0	0	0	0	0	0	200	903	0	0	0	0	0	0	0	603	903	0
332	2	0	0	0	0	0	0	200	300	0	0	0	0	0	0	0	200	903	0	0	0	0	0	0	0	603	903	0
332	3	0	0	0	0	0	0	200	300	0	0	0	0	0	0	0	200	903	0	0	0	0	0	0	0	603	903	0
332	4	0	0	0	0	0	0	200	300	0	0	0	0	0	0	0	200	903	0	0	0	0	0	0	0	603	903	0
332	5	0	0	0	0	0	0	200	300	0	0	0	0	0	0	0	200	903	0	0	0	0	0	0	0	603	903	0
332	6	0	0	0	0	0	0	200	300	0	0	0	0	0	0	0	200	903	0	0	0	0	0	0	0	603	903	0
332	7	0	0	0	0	0	0	200	300	0	0	0	0	0	0	0	200	903	0	0	0	0	0	0	0	603	903	0
332	8	0	0	0	0	0	0	200	300	0	0	0	0	0	0	0	200	903	0	0	0	0	0	0	0	603	903	0
332	9	0	0	0	0	0	0	200	300	0	0	0	0	0	0	0	200	903	0	0	0	0	0	0	0	603	903	0
333	0	0	0	0	0	0	0	200	300	0	0	0	0	0	0	0	200	903	0	0	0	0	0	0	0	603	903	0
333	1	0	0	0	0	0	0	200	300	0	0	0	0	0	0	0	200	903	0	0	0	0	0	0	0	603	903	0
333	2	0	0	0	0	0	0	200	300	0	0	0	0	0	0	0	200	903	0	0	0	0	0	0	0	603	903	0
333	3	0	0	0	0	0	0	200	300	0	0	0	0	0	0	0	200	903	0	0	0	0	0	0	0	603	903	0
333	4	0	0	0	0	0	0	200	300	0	0	0	0	0	0	0	200	903	0	0	0	0	0	0	0	603	903	0
333	5	0	0	0	0	0	0	200	300	0	0	0	0	0	0	0	200	903	0	0	0	0	0	0	0	603	903	0
333	6	0	0	0	0	0	0	200	300	0	0	0	0	0	0	0	200	903	0	0	0	0	0	0	0	603	903	0
333	7	0	0	0	0	0	0	200	300	0	0	0	0	0	0	0	200	903	0	0	0	0	0	0	0	603	903	0
333	8	0	0	0	0	0	0	200	300	0	0	0	0	0	0	0	200	903	0	0	0	0	0	0	0	603	903	0
333	9	0	0	0	0	0	0	200	300	0	0	0	0	0	0	0	200	903	0	0	0	0	0	0	0	603	903	0
334	0	0	0	0	0	0	0	200	300	0	0	0	0	0	0	0	200	903	0	0	0	0	0	0	0	603	903	0
334	1	0	0	0	0	0	0	200	300	0	0	0	0	0	0	0	200	903	0	0	0	0	0	0	0	603	903	0
334	2	0	0	0	0	0	0	200	300	0	0	0	0	0	0	0	200	903	0	0	0	0	0	0	0	603	903	0
334	3	0	0	0	0	0	0	200	300	0	0	0	0	0	0	0	200	903	0	0	0	0	0	0	0	603	903	0
334	4	0	0	0	0	0	0	200	300	0	0	0	0	0	0	0	200	903	0	0	0	0	0	0	0	603	903	0
334	5	0	0	0	0	0	0	200	300	0	0	0	0	0	0	0	200	903	0	0	0	0	0	0	0	603	903	0
334	6	0	0	0	0	0	0	200	300	0	0	0	0	0	0	0	200	903	0	0	0	0	0	0	0	603	903	0
334	7	0	0	0	0	0	0	200	300	0	0	0	0	0	0	0	200	903	0	0	0	0	0	0	0	603	903	0
334	8	0	0	0	0	0	0	200	300	0	0	0	0	0	0	0	200	903	0	0	0	0	0	0	0	603	903	0
334	9	0	0	0	0	0	0	200	300	0	0	0	0	0	0	0	200	903	0	0	0	0	0	0	0	603	903	0
335	0	0	0	0	0	0	0	200	300	0	0	0	0	0	0	0	200	903	0	0	0	0	0	0	0	603	903	0
335	1	0	0	0	0	0	0	200	300	0	0	0	0	0	0	0	200	903	0	0	0	0	0	0	0	603	903	0
335	2	0	0	0	0	0	0	200	300	0	0	0	0	0	0	0	200	903	0	0	0	0	0	0	0	603	903	0
335	3	0	0	0	0	0	0	200	300	0	0	0	0	0	0	0	200	903	0	0	0	0	0	0	0	603	903	0
335	4	0	0	0	0	0	0	200	300	0	0	0	0	0	0	0	200	903	0	0	0	0	0	0	0	603	903	0
335	5	0	0	0	0	0	0	200	300	0	0	0	0	0	0	0	200	903	0	0	0	0	0	0	0	603	903	0
335	6	0	0	0	0	0	0	200	300	0	0	0	0	0	0	0	200	903	0	0	0	0	0	0	0	603	903	0
335	7	0	0	0	0	0	0	200	300	0	0	0	0	0	0	0	200	903	0	0	0	0	0	0	0	603	903	0
335	8	0	0	0	0	0	0	200	300	0	0	0	0	0	0	0	200	903	0	0	0	0	0	0	0	603	903	0
335	9	0	0	0	0	0	0	200	300	0	0	0	0	0	0	0	200	903	0	0	0	0	0	0	0	603	903	0
336	0	0	0	0	0	0	0	200	300	0	0	0	0	0	0	0	200	903	0	0	0	0	0	0	0	603	903	0
336	1	0	0	0	0	0	0	200	300	0	0	0	0	0	0	0	200	903	0	0	0	0	0	0	0	603	903	0
336	2	0	0	0	0	0	0	200	300	0	0	0	0	0	0	0	200	903	0	0	0	0	0	0	0	603	903	0
336	3	0	0	0	0	0	0	200	300	0	0	0	0	0	0	0	200	903	0	0	0	0	0	0	0	603	903	0
336	4	0	0	0	0	0	0	200	300	0	0	0	0	0	0	0	200	903	0	0	0	0	0	0	0	603	903	0
336	5	0	0	0	0	0	0	200	300	0	0	0	0	0	0	0	200	903	0	0	0	0	0	0	0	603	903	0
336	6	0	0	0	0	0	0	200	300	0	0	0	0	0	0	0	200	903	0	0	0	0	0	0	0	603	903	0
336	7	0	0	0	0	0	0	200	300	0	0	0	0	0	0	0	200	903	0	0	0	0	0	0	0	603	903	0
336	8	0	0	0	0	0	0	200	300	0	0	0	0	0	0	0	200	903	0	0	0	0	0	0	0	603	903	0
336	9	0	0	0	0	0	0	200	300	0	0	0	0	0	0	0	200	903	0	0	0	0	0	0	0	603	903	0
337	0	0	0	0	0	0	0	200	300	0	0	0	0	0	0	0	200	903	0	0	0	0	0	0	0	603	903	0
337	1	0	0	0	0	0	0	200	300	0	0	0	0	0	0	0	200	903	0	0	0	0	0	0	0	603	903	0
337	2	0	0	0	0	0	0	200	300	0	0	0	0	0	0	0	200	903	0	0	0	0	0	0	0	603	903	0
337	3	0	0	0	0	0	0	200	300	0	0	0	0	0	0	0	200	903	0	0	0	0	0	0	0	603	903	0
337	4	0	0	0	0	0	0	200	300	0	0	0	0	0	0	0	200	903	0	0	0	0	0	0	0	603	903	0
337	5	0	0	0	0	0	0	200	300	0	0	0	0	0	0	0	200	903	0	0	0	0	0	0	0	603	903	0
337	6	0	0	0	0	0	0	200	300	0	0	0	0	0	0	0	200	903	0	0	0	0	0	0	0	603	903	0
337	7	0	0	0	0	0	0	200	300	0	0	0	0	0	0	0	200	903	0	0	0	0	0	0	0	603	903	0
337	8	0	0	0	0	0	0	200	300	0	0	0	0	0	0	0	200	903	0	0	0	0	0	0	0	603	903	0
337	9	0	0	0	0	0	0	200	300	0	0	0	0	0	0	0	200	903	0	0	0	0	0	0	0	603	903	0
338	0	0	0	0	0	0	0	200	300	0	0	0	0	0	0	0	200	903	0	0	0	0	0	0	0	603	903	0
338	1	0	0	0	0	0	0	200	300	0	0	0	0	0	0	0	200	903	0	0	0	0	0	0	0	603	903	0
338	2	0	0	0	0	0	0	200	300	0	0	0	0	0	0	0	200	903	0	0	0	0	0	0	0	603	903	0
338	3	0	0	0	0	0	0	200	300	0	0	0	0	0	0	0	200	903	0	0	0	0	0	0	0	603	903	0
338	4	0	0	0	0	0	0	200	300	0	0	0	0	0	0	0	200	903	0	0	0	0	0	0	0	603	903	0
338	5	0	0	0	0	0	0	200	300	0	0	0	0	0	0	0	200	903	0	0	0	0	0	0	0	603	903	0
338	6	0	0	0	0	0	0	200	300	0	0	0	0	0	0	0	200	903	0	0	0	0	0	0	0	603	903	0
338	7	0	0	0	0	0	0	200	300	0	0	0	0	0	0	0	200	903	0	0	0	0	0	0	0	603	903	0
338	8	0	0	0	0	0	0	200	300	0	0	0	0	0	0	0	200	903	0	0	0	0	0	0	0	603	903	0
338	9	0	0	0	0	0	0	200	300	0	0	0	0	0	0	0	200	903	0	0	0	0	0	0	0	603	903	0
339	0	0	0	0	0	0	0	200	300	0	0	0	0	0	0	0	200	903	0	0	0	0	0	0	0	603	903	0
339	1	0	0	0	0	0	0	200	300	0	0	0	0	0	0	0	200	903	0	0	0	0	0	0	0	603	903	0
339	2	0	0	0	0	0	0	200	300	0	0	0	0	0	0	0	200	903	0	0	0	0	0	0	0	603	903	0
339	3	0	0	0	0	0	0	200	300	0	0	0	0	0	0	0	200	903	0	0	0	0	0	0	0	603	903	0
339	4	0	0	0	0	0	0	200	300	0	0	0	0	0	0	0	200	903	0	0	0	0	0	0	0	603	903	0
339	5	0	0	0	0	0	0	200	300	0	0	0	0	0	0	0	200	903	0	0	0	0	0	0	0	603	903	0
339	6	0	0	0	0	0	0	200	300	0	0	0	0	0	0	0	200	903	0	0	0	0	0	0	0	603	903	0
339	7	0	0	0	0	0	0	200	300	0	0	0	0	0	0	0	200	903	0	0	0	0	0	0	0	603	903	0
339	8	0	0	0	0	0	0	200	300	0	0	0	0	0	0	0	200	903	0	0	0	0	0	0	0	603	903	0
339	9	0	0	0	0	0	0	200	300	0	0	0	0	0	0	0	200	903	0	0	0	0	0	0	0	603	903	0
340	0	0	0	0	0	0	0	200	300	0	0	0	0	0	0	0	200	903	0	0	0	0	0	0	0	603	903	0
340	1	0	0	0	0	0	0	200	300	0	0	0	0	0	0	0	200	903	0	0	0	0	0	0	0	603	903	0
340	2	0	0	0	0	0	0	200	300	0	0	0	0	0	0	0	200	903	0	0	0	0	0	0	0	603	903	0
340	3	0	0	0	0	0	0	200	300	0	0	0	0	0	0	0	200	903	0	0	0	0	0	0	0	603	903	0
340	4	0	0	0	0	0	0	200	300	0	0	0	0	0	0	0	200	903	0	0	0	0	0	0	0	603	903	0
340	5	0	0	0	0	0	0	200	300	0	0	0	0	0	0	0	200	903	0	0	0	0	0	0	0	603	903	0
340	6	0	0	0	0	0	0	200	300	0	0	0	0	0	0	0	200	903	0	0	0	0	0	0	0	603	903	0
340	7	0	0	0	0	0	0	200	300	0	0	0	0	0	0	0	200	903	0	0	0	0	0	0	0	603	903	0
340	8	0	0	0	0	0	0	200	300	0	0	0	0	0	0	0	200	903	0	0	0	0	0	0	0	603	903	0
340	9	0	0	0	0	0	0	200	300	0	0	0	0	0	0	0	200	903	0	0	0	0	0	0	0	603	903	0
341	0	0	0	0	0	0	0	200	300	0	0	0	0	0	0	0	200	903	0	0	0	0	0	0	0	603	903	0
341	1	0	0	0	0	0	0	200	300	0	0	0	0	0	0	0	200	903	0	0	0	0	0	0	0	603	903	0
341	2	0	0	0	0	0	0	200	300	0	0	0	0	0	0	0	200	903	0	0	0	0	0	0	0	603	903	0
341	3	0	0	0	0	0	0	200	300	0	0	0	0	0	0	0	200	903	0	0	0	0	0	0	0	603	903	0
341	4	0	0	0	0	0	0	200	300	0	0	0	0	0	0	0	200	903	0	0	0	0	0	0	0	603	903	0
341	5	0	0	0	0	0	0	200	300	0	0	0	0	0	0	0	200	903	0	0	0	0	0	0	0	603	903	0
341	6	0	0	0	0	0	0	200	300	0	0	0	0	0	0	0	200	903	0	0	0	0	0	0	0	603	903	0
341	7	0	0	0	0	0	0	200	300	0	0	0	0	0	0	0	200	903	0	0	0	0	0	0	0	603	903	0
341	8	0	0	0	0	0	0	200	300	0	0	0	0	0	0	0	200	903	0	0	0	0	0	0	0	603	903	0
341	9	0	0	0	0	0	0	200	300	0	0	0	0	0	0	0	200	903	0	0	0	0	0	0	0	603	903	0
342	0	0	0	0	0	0	0	200	300	0	0	0	0	0	0	0	200	903	0	0	0	0	0	0	0	603	903	0
342	1	0	0	0	0	0	0	200	300	0	0	0	0	0	0	0	200	903	0	0	0	0	0	0	0	603	903	0
342	2	0	0	0	0	0	0	200	300	0	0	0	0	0	0	0	200	903	0	0	0	0	0	0	0	603	903	0
342	3	0	0	0	0	0	0	200	300	0	0	0	0	0	0	0	200	903	0	0	0	0	0	0	0	603	903	0
342	4	0	0	0	0	0	0	200	300	0	0	0	0	0	0	0	200	903	0	0	0	0	0	0	0	603	903	0
342	5	0	0	0	0	0	0	200	300	0	0	0	0	0	0	0	200	903	0	0	0	0	0	0	0	603	903	0
342	6	0	0	0	0	0	0	200	300	0	0	0	0	0	0	0	200	903	0	0	0	0	0	0	0	603	903	0
342	7	0	0	0	0	0	0	200	300	0	0	0	0	0	0	0	200	903	0	0	0	0	0	0	0	603	903	0
342	8	0	0	0	0	0	0	200	300	0	0	0	0	0	0	0	200	903	0	0	0	0	0	0	0	603	903	0
342	9	0	0	0	0	0	0	200	300	0	0	0	0	0	0	0	200	903	0	0	0	0	0	0	0	603	903	0
343	0	0	0	0	0	0	0	200	300	0	0	0	0	0	0	0	200	903	0	0	0	0	0	0	0	603	903	0
343	1	0	0	0	0	0	0	200	300	0	0	0	0	0	0	0	200	903	0	0	0	0	0	0	0	603	903	0
343	2	0	0	0	0	0	0	200	300	0	0	0	0	0	0	0	200	903	0	0	0	0	0	0	0	603	903	0
343	3	0	0	0	0	0	0	200	300	0	0	0	0	0	0	0	200	903	0	0	0	0	0	0	0	603	903	0
343	4	0	0	0	0	0	0	200	300	0	0	0	0	0	0	0	200	903	0	0	0	0	0	0	0	603	903	0
343	5	0	0	0	0	0	0	200	300	0	0	0	0	0	0	0	200	903	0	0	0	0	0	0	0	603	903	0
343	6	0	0	0	0	0	0	200	300	0	0	0	0	0	0	0	200	903	0	0	0	0	0	0	0	603	903	0
343	7	0	0	0	0	0	0	200	300	0	0	0	0	0	0	0	200	903	0	0	0	0	0	0	0	603	903	0
343	8	0	0	0	0	0	0	200	300	0	0	0	0	0	0	0	200	903	0	0	0	0	0	0	0	603	903	0
343	9	0	0	0	0	0	0	200	300	0	0	0	0	0	0	0	200	903	0	0	0	0	0	0	0	603	903	0
344	0	0	0	0	0	0	0	200	300	0	0	0	0	0	0	0	200	903	0	0	0	0	0	0	0	603	903	0
344	1	0	0	0	0	0	0	200	300	0	0	0	0	0	0	0	200	903	0	0	0	0	0	0	0	603	903	0
344	2	0	0	0	0	0	0	200	300	0	0	0	0	0	0	0	200	903	0	0	0	0	0	0	0	603	903	0
344	3	0	0	0	0	0	0	200	300	0	0	0	0	0	0	0	200	903	0	0	0	0	0	0	0	603	903	0
344	4	0	0	0	0	0	0	200	300	0	0	0	0	0	0	0	200	903	0	0	0	0	0	0	0	603	903	0
344	5	0	0	0	0	0	0	200	300	0	0	0	0	0	0	0	200	903	0	0	0	0	0	0	0	603	903	0
344	6	0	0	0	0	0	0	200	300	0	0	0	0	0	0	0	200	903	0	0	0	0	0	0	0	603	903	0
344	7	0	0	0	0	0	0	200	300	0	0	0	0	0	0	0	200	903	0	0	0	0	0	0	0	603	903	0
344	8	0	0	0	0	0	0	200	300	0	0	0	0	0	0	0	200	903	0	0	0	0	0	0	0	603	903	0
344	9	0	0	0	0	0	0	200	300	0	0	0	0	0	0	0	200	903	0	0	0	0	0	0	0	603	903	0
345	0	0	0	0	0	0	0	200	300	0	0	0	0	0	0	0	200	903	0	0	0	0	0	0	0	603	903	0
345	1	0	0	0	0	0	0	200	300	0	0	0	0	0	0	0	200	903	0	0	0	0	0	0	0	603	903	0
345	2	0	0	0	0	0	0	200	300	0	0	0	0	0	0	0	200	903	0	0	0	0	0	0	0	603	903	0
345	3	0	0	0	0	0	0	200	300	0	0	0	0	0	0	0	200	903	0	0	0	0	0	0	0	603	903	0
345	4	0	0	0	0	0	0	200	300	0	0	0	0	0	0	0	200	903	0	0	0	0	0	0	0	603	903	0
345	5	0	0	0	0	0	0	200	300	0	0	0	0	0	0	0	200	903	0	0	0	0	0	0	0	603	903	0
345	6	0	0	0	0	0	0	200	300	0	0	0	0	0	0	0	200	903	0	0	0	0	0	0	0	603	903	0
345	7	0	0	0	0	0	0	200	300	0	0	0	0	0	0	0	200	903	0	0	0	0	0	0	0	603	903	0
345	8	0	0	0	0	0	0	200	300	0	0	0	0	0	0	0	200	903	0	0	0	0	0	0	0	603	903	0
345	9	0	0	0	0	0	0	200	300	0	0	0	0	0	0	0	200	903	0	0	0	0	0	0	0	603	903	0
346	0	0	0	0	0	0	0	200	300	0	0	0	0	0	0	0	200	903	0	0	0	0	0	0	0	603	903	0
346	1	0	0	0	0	0	0	200	300	0	0	0	0	0	0	0	200	903	0	0	0	0	0	0	0	603	903	0
346	2	0	0	0	0	0	0	200	300	0	0	0	0	0	0	0	200	903	0	0	0	0	0	0	0	603	903	0
346	3	0	0	0	0	0	0	200	300	0	0	0	0	0	0	0	200	903	0	0	0	0	0	0	0	603	903	0
346	4	0	0	0	0	0	0	200	300	0	0	0	0	0	0	0	200	903	0	0	0	0	0	0	0	603	903	0
346	5	0	0	0	0	0	0	200	300	0	0	0	0	0	0	0	200	903	0	0	0	0	0	0	0	603	903	0
346	6	0	0	0	0	0	0	200	300	0	0	0	0	0	0	0	200	903	0	0	0	0	0	0	0	603	903	0
346	7	0	0	0	0	0	0	200	300	0	0	0	0	0	0	0	200	903	0	0	0	0	0	0	0	603	903	0
346	8	0	0	0	0	0	0	200	300	0	0	0	0	0	0	0	200	903	0	0	0	0	0	0	0	603	903	0
346	9	0	0	0	0	0	0	200	300	0	0	0	0	0	0	0	200	903	0	0	0	0	0	0	0	603	903	0
347	0	0	0	0	0	0	0	200	300	0	0	0	0	0	0	0	200	903	0	0	0	0	0	0	0	603	903	0
347	1	0	0	0	0	0	0	200	300	0	0	0	0	0	0	0	200	903	0	0	0	0	0	0	0	603	903	0
347	2	0	0	0	0	0	0	200	300	0	0	0	0	0	0	0	200	903	0	0	0	0	0	0	0	603	903	0
347	3	0	0	0	0	0	0	200	300	0	0	0	0	0	0	0	200	903	0	0	0	0	0	0	0	603	903	0
347	4	0	0	0	0	0	0	200	300	0	0	0	0	0	0	0	200	903	0	0	0	0	0	0	0	603	903	0
347	5	0	0	0	0	0	0	200	300	0	0	0	0	0	0	0	200	903	0	0	0	0	0	0	0	603	903	0
347	6	0	0	0	0	0	0	200	300	0	0	0	0	0	0	0	200	903	0	0	0	0	0	0	0	603	903	0
347	7	0	0	0	0	0	0	200	300	0	0	0	0	0	0	0	200	903	0	0	0	0	0	0	0	603	903	0
347	8	0	0	0	0	0	0	200	300	0	0	0	0	0	0	0	200	903	0	0	0	0	0	0	0	603	903	0
347	9	0	0	0	0	0	0	200	300	0	0	0	0	0	0	0	200	903	0	0	0	0	0	0	0	603	903	0
348	0	0	0	0	0	0	0	200	300	0	0	0	0	0	0	0	200	903	0	0	0	0	0	0	0	603	903	0
348	1	0	0	0	0	0	0	200	300	0	0	0	0	0	0	0	200	903	0	0	0	0	0	0	0	603	903	0
348	2	0	0	0	0	0	0	200	300	0	0	0	0	0	0	0	200	903	0	0	0	0	0	0	0	603	903	0
348	3	0	0	0	0	0	0	200	300	0	0	0	0	0	0	0	200	903	0	0	0	0	0	0	0	603	903	0
348	4	0	0	0	0	0	0	200	300	0	0	0	0	0	0	0	200	903	0	0	0	0	0	0	0	603	903	0
348	5	0	0	0	0	0	0	200	300	0	0	0	0	0	0	0	200	903	0	0	0	0	0	0	0	603	903	0
348	6	0	0	0	0	0	0	200	300	0	0	0	0	0	0	0	200	903	0	0	0	0	0	0	0	603	903	0
348	7	0	0	0	0	0	0	200	300	0	0	0	0	0	0	0	200	903	0	0	0	0	0	0	0	603	903	0
348	8	0	0	0	0	0	0	200	300	0	0	0	0	0	0	0	200	903	0	0	0	0	0	0	0	603	903	0
348	9	0	0	0	0	0	0	200	300	0	0	0	0	0	0	0	200	903	0	0	0	0	0	0	0	603	903	0
349	0	0	0	0	0	0	0	200	300	0	0	0	0	0	0	0	200	903	0	0	0	0	0	0	0	603	903	0
349	1	0	0	0	0	0	0	200	300	0	0	0	0	0	0	0	200	903	0	0	0	0	0	0	0	603	903	0
349	2	0	0	0	0	0	0	200	300	0	0	0	0	0	0	0	200	903	0	0	0	0	0	0	0	603	903	0
349	3	0	0	0	0	0	0	200	300	0	0	0	0	0	0	0	200	903	0	0	0	0	0	0	0	603	903	0
349	4	0	0	0	0	0	0	200	300	0	0	0	0	0	0	0	200	903	0	0	0	0	0	0	0	603	903	0
349	5	0	0	0	0	0	0	200	300	0	0	0	0	0	0	0	200	903	0	0	0	0	0	0	0	603	903	0
349	6	0	0	0	0	0	0	200	300	0	0	0	0	0	0	0	200	903	0	0	0	0	0	0	0	603	903	0
349	7	0	0	0	0	0	0	200	300	0	0	0	0	0	0	0	200	903	0	0	0	0	0	0	0	603	903	0
349	8	0	0	0	0	0	0	200	300	0	0	0	0	0	0	0	200	903	0	0	0	0	0	0	0	603	903	0
349	9	0	0	0	0	0	0	200	300	0	0	0	0	0	0	0	200	903	0	0	0	0	0	0	0	603	903	0
350	0	0	0	0	0	0	0	200	300	0	0	0	0	0	0	0	200	903	0	0	0	0	0	0	0	603	903	0
350	1	0	0	0	0	0	0	200	300	0	0	0	0	0	0	0	200	903	0	0	0	0	0	0	0	603	903	0
350	2	0	0	0	0	0	0	200	300	0	0	0	0	0	0	0	200	903	0	0	0	0	0	0	0	603	903	0
350	3	0	0	0	0	0	0	200	300	0	0	0	0	0	0	0	200	903	0	0	0	0	0	0	0	603	903	0
350	4	0	0	0	0	0	0	200	300	0	0	0	0	0	0	0	200	903	0	0	0	0	0	0	0	603	903	0
350	5	0	0	0	0	0	0	200	300	0	0	0	0	0	0	0	200	903	0	0	0	0	0	0	0	603	903	0
350	6	0	0	0	0	0	0	200	300	0	0	0	0	0	0	0	200	903	0	0	0	0	0	0	0	603	903	0
350	7	0	0	0	0	0	0	200	300	0	0	0	0	0	0	0	200	903	0	0	0	0	0	0	0	603	903	0
350	8	0	0	0	0	0	0	200	300	0	0	0	0	0	0	0	200	903	0	0	0	0	0	0	0	603	903	0
350	9	0	0	0	0	0	0	200	300	0	0	0	0	0	0	0	200	903	0	0	0	0	0	0	0	603	903	0
351	0	0	0	0	0	0	0	200	300	0	0	0	0	0	0	0	200	903	0	0	0	0	0	0	0	603	903	0
351	1	0	0	0	0	0	0	200	300	0	0	0	0	0	0	0	200	903	0	0	0	0	0	0	0	603	903	0
351	2	0	0	0	0	0	0	200	300	0	0	0	0	0	0	0	200	903	0	0	0	0	0	0	0	603	903	0
351	3	0	0	0	0	0	0	200	300	0	0	0	0	0	0	0	200	903	0	0	0	0	0	0	0	603	903	0
351	4	0	0	0	0	0	0	200	300	0	0	0	0	0	0	0	200	903	0	0	0	0	0	0	0	603	903	0
351	5	0	0	0	0	0	0	200	300	0	0	0	0	0	0	0	200	903	0	0	0	0	0	0	0	603	903	0
351	6	0	0	0	0	0	0	200	300	0	0	0	0	0	0	0	200	903	0	0	0	0	0	0	0	603	903	0
351	7	0	0	0	0	0	0	200	300	0	0	0	0	0	0	0	200	903	0	0	0	0	0	0	0	603	903	0
351	8	0	0	0	0	0	0	200	300	0	0	0	0	0	0	0	200	903	0	0	0	0	0	0	0	603	903	0
351	9	0	0	0	0	0	0	200	300	0	0	0	0	0	0	0	200	903	0	0	0	0	0	0	0	603	903	0
352	0	0	0	0	0	0	0	200	300	0	0	0	0	0	0	0	200	903	0	0	0	0	0	0	0	603	903	0
352	1	0	0	0	0	0	0	200	300	0	0	0	0	0	0	0	200	903	0	0	0	0	0	0	0	603	903	0
352	2	0	0	0	0	0	0	200	300	0	0	0	0	0	0	0	200	903	0	0	0	0	0	0	0	603	903	0
352	3	0	0	0	0	0	0	200	300	0	0	0	0	0	0	0	200	903	0	0	0	0	0	0	0	603	903	0
352	4	0	0	0	0	0	0	200	300	0	0	0	0	0	0	0	200	903	0	0	0	0	0	0	0	603	903	0
352	5	0	0	0	0	0	0	200	300	0	0	0	0	0	0	0	200	903	0	0	0	0	0	0	0	603	903	0
352	6	0	0	0	0	0	0	200	300	0	0	0	0	0	0	0	200	903	0	0	0	0	0	0	0	603	903	0
352	7	0	0	0	0	0	0	200	300	0	0	0	0	0	0	0	200	903	0	0	0	0	0	0	0	603	903	0
352	8	0	0	0	0	0	0	200	300	0	0	0	0	0	0	0	200	903	0	0	0	0	0	0	0	603	903	0
352	9	0	0	0	0	0	0	200	300	0	0	0	0	0	0	0	200	903	0	0	0	0	0	0	0	603	903	0
353	0	0	0	0	0	0	0	200	300	0	0	0	0	0	0	0	200	903	0	0	0	0	0	0	0	603	903	0
353	1	0	0	0	0	0	0	200	300	0	0	0	0	0	0	0	200	903	0	0	0	0	0	0	0	603	903	0
353	2	0	0	0	0	0	0	200	300	0	0	0	0	0	0	0	200	903	0	0	0	0	0	0	0	603	903	0
353	3	0	0	0	0	0	0	200	300	0	0	0	0	0	0	0	200	903	0	0	0	0	0	0	0	603	903	0
353	4	0	0	0	0	0	0	200	300	0	0	0	0	0	0	0	200	903	0	0	0	0	0	0	0	603	903	0
353	5	0	0	0	0	0	0	200	300	0	0	0	0	0	0	0	200	903	0	0	0	0	0	0	0	603	903	0
353	6	0	0	0	0	0	0	200	300	0	0	0	0	0	0	0	200	903	0	0	0	0	0	0	0	603	903	0
353	7	0	0	0	0	0	0	200	300	0	0	0	0	0	0	0	200	903	0	0	0	0	0	0	0	603	903	0
353	8	0	0	0	0	0	0	200	300	0	0	0	0	0	0	0	200	903	0	0	0	0	0	0	0	603	903	0
353	9	0	0	0	0	0	0	200	300	0	0	0	0	0	0	0	200	903	0	0	0	0	0	0	0	603	903	0
354	0	0	0	0	0	0	0	200	300	0	0	0	0	0	0	0	200	903	0	0	0	0	0	0	0	603	903	0
354	1	0	0	0	0	0	0	200	300	0	0	0	0	0	0	0	200	903	0	0	0	0	0	0	0	603	903	0
354	2	0	0	0	0	0	0	200	300	0	0	0	0	0	0	0	200	903	0	0	0	0	0	0	0	603	903	0
354	3	0	0	0	0	0	0	200	300	0	0	0	0	0	0	0	200	903	0	0	0	0	0	0	0	603	903	0
354	4	0	0	0	0	0	0	200	300	0	0	0	0	0	0	0	200	903	0	0	0	0	0	0	0	603	903	0
354	5	0	0	0	0	0	0	200	300	0	0	0	0	0	0	0	200	903	0	0	0	0	0	0	0	603	903	0
354	6	0	0	0	0	0	0	200	300	0	0	0	0	0	0	0	200	903	0	0	0	0	0	0	0	603	903	0
354	7	0	0	0	0	0	0	200	300	0	0	0	0	0	0	0	200	903	0	0	0	0	0	0	0	603	903	0
354	8	0	0	0	0	0	0	200	300	0	0	0	0	0	0	0	200	903	0	0	0	0	0	0	0	603	903	0
354	9	0	0	0	0	0	0	200	300	0	0	0	0	0	0	0	200	903	0	0	0	0	0	0	0	603	903	0
355	0	0	0	0	0	0	0	200	300	0	0	0	0	0	0	0	200	903	0	0	0	0	0	0	0	603	903	0
355	1	0	0	0	0	0	0	200	300	0	0	0	0	0	0	0	200	903	0	0	0	0	0	0	0	603	903	0
355	2	0	0	0	0	0	0	200	300	0	0	0	0	0	0	0	200	903	0	0	0	0	0	0	0	603	903	0
355	3	0	0	0	0	0	0	200	300	0	0	0	0	0	0	0	200	903	0	0	0	0	0	0	0	603	903	0
355	4	0	0	0	0	0	0	200	300	0	0	0	0	0	0	0	200	903	0	0	0	0	0	0	0	603	903	0
355	5	0	0	0	0	0	0	200	300	0	0	0	0	0	0	0	200	903	0	0	0	0	0	0	0	603	903	0
355	6	0	0	0	0	0	0	200	300	0	0	0	0	0	0	0	200	903	0	0	0	0	0	0	0	603	903	0
355	7	0	0	0	0	0	0	200	300	0	0	0	0	0	0	0	200	903	0	0	0	0	0	0	0	603	903	0
355	8	0	0	0	0	0	0	200	300	0	0	0	0	0	0	0	200	903	0	0	0	0	0	0	0	603	903	0
355	9	0	0	0	0	0	0	200	300	0	0	0	0	0	0	0	200	903	0	0	0	0	0	0	0	603	903	0
356	0	0	0	0	0	0	0	200	300	0	0	0	0	0	0	0	200	903	0	0	0	0	0	0	0	603	903	0
356	1	0	0	0	0	0	0	200	300	0	0	0	0	0	0	0	200	903	0	0	0	0	0	0	0	603	903	0
356	2	0	0	0	0	0	0	200	300	0	0	0	0	0	0	0	200	903	0	0	0	0	0	0	0	603	903	0
356	3	0	0	0	0	0	0	200	300	0	0	0	0	0	0	0	200	903	0	0	0	0	0	0	0	603	903	0
356	4	0	0	0	0	0	0	200	300	0	0	0	0	0	0	0	200	903	0	0	0	0	0	0	0	603	903	0
356	5	0	0	0	0	0	0	200	300	0	0	0	0	0	0	0	200	903	0	0	0	0	0	0	0	603	903	0
356	6	0	0	0	0	0	0	200	300	0	0	0	0	0	0	0	200	903	0	0	0	0	0	0	0	603	903	0
356	7	0	0	0	0	0	0	200	300	0	0	0	0	0	0	0	200	903	0	0	0	0	0	0	0	603	903	0
356	8	0	0	0	0	0	0	200	300	0	0	0	0	0	0	0	200	903	0	0	0	0	0	0	0	603	903	0
356	9	0	0	0	0	0	0	200	300	0	0	0	0	0	0	0	200	903	0	0	0	0	0	0	0	603	903	0
357	0	0	0	0	0	0	0	200	300	0	0	0	0	0	0	0	200	903	0	0	0	0	0	0	0	603	903	0
357	1	0	0	0	0	0	0	200	300	0	0	0	0	0	0	0	200	903	0	0	0	0	0	0	0	603	903	0
357	2	0	0	0	0	0	0	200	300	0	0	0	0	0	0	0	200	903	0	0	0	0	0	0	0	603	903	0
357	3	0	0	0	0	0	0	200	300	0	0	0	0	0	0	0	200	903	0	0	0	0	0	0	0	603	903	0
357	4	0	0	0	0	0	0	200	300	0	0	0	0	0	0	0	200	903	0	0	0	0	0	0	0	603	903	0
357	5	0	0	0	0	0	0	200	300	0	0	0	0	0	0	0	200	903	0	0	0	0	0	0	0	603	903	0
357	6	0	0	0	0	0	0	200	300	0	0	0	0	0	0	0	200	903	0	0	0	0	0	0	0	603	903	0
357	7	0	0	0	0	0	0	200	300	0	0	0	0	0	0	0	200	903	0	0	0	0	0	0	0	603	903	0
357	8	0	0	0	0	0	0	200	300	0	0	0	0	0	0	0	200	903	0	0	0	0	0	0	0	603	903	0
357	9	0	0	0	0	0	0	200	300	0	0	0	0	0	0	0	200	903	0	0	0	0	0	0	0	603	903	0
358	0	0	0	0	0	0	0	200	300	0	0	0	0	0	0	0	200	903	0	0	0	0	0	0	0	603	903	0
358	1	0	0	0	0	0	0	200	300	0	0	0	0	0	0	0	200	903	0	0	0	0	0	0	0	603	903	0
358	2	0	0	0	0	0	0	200	300	0	0	0	0	0	0	0	200	903	0	0	0	0	0	0	0	603	903	0
358	3	0	0	0	0	0	0	200	300	0	0	0	0	0	0	0	200	903	0	0	0	0	0	0	0	603	903	0
358	4	0	0	0	0	0	0	200	300	0	0	0	0	0	0	0	200	903	0	0	0	0	0	0	0	603	903	0
358	5	0	0	0	0	0	0	200	300	0	0	0	0	0	0	0	200	903	0	0	0	0	0	0	0	603	903	0
358	6	0	0	0	0	0	0	200	300	0	0	0	0	0	0	0	200	903	0	0	0	0	0	0	0	603	903	0
358	7	0	0	0	0	0	0	200	300	0	0	0	0	0	0	0	200	903	0	0	0	0	0	0	0	603	903	0
358	8	0	0	0	0	0	0	200	300	0	0	0	0	0	0	0	200	903	0	0	0	0	0	0	0	603	903	0
358	9	0	0	0	0	0	0	200	300	0	0	0	0	0	0	0	200	903	0	0	0	0	0	0	0	603	903	0
359	0	0	0	0	0	0	0	200	300	0	0	0	0	0	0	0	200	903	0	0	0	0	0	0	0	603	903	0
359	1	0	0	0	0	0	0	200	300	0	0	0	0	0	0	0	200	903	0	0	0	0	0	0	0	603	903	0
359	2	0	0	0	0	0	0	200	300	0	0	0	0	0	0	0	200	903	0	0	0	0	0	0	0	603	903	0
359	3	0	0	0	0	0	0	200	300	0	0	0	0	0	0	0	200	903	0	0	0	0	0	0	0	603	903	0
359	4	0	0	0	0	0	0	200	300	0	0	0	0	0	0	0	200	903	0	0	0	0	0	0	0	603	903	0
359	5	0	0	0	0	0	0	200	300	0	0	0	0	0	0	0	200	903	0	0	0	0	0	0	0	603	903	0
359	6	0	0	0	0	0	0	200	300	0	0	0	0	0	0	0	200	903	0	0	0	0	0	0	0	603	903	0
359	7	0	0	0	0	0	0	200	300	0	0	0	0	0	0	0	200	903	0	0	0	0	0	0	0	603	903	0
359	8	0	0	0	0	0	0	200	300	0	0	0	0	0	0	0	200	903	0	0	0	0	0	0	0	603	903	0
359	9	0	0	0	0	0	0	200	300	0	0	0	0	0	0	0	200	903	0	0	0	0	0	0	0	603	903	0
360	0	0	0	0	0	0	0	200	300	0	0	0	0	0	0	0	200	903	0	0	0	0	0	0	0	603	903	0
360	1	0	0	0	0	0	0	200	300	0	0	0	0	0	0	0	200	903	0	0	0	0	0	0	0	603	903	0
360	2	0	0	0	0	0	0	200	300	0	0	0	0	0	0	0	200	903	0	0	0	0	0	0	0	603	903	0
360	3	0	0	0	0	0	0	200	300	0	0	0	0	0	0	0	200	903	0	0	0	0	0	0	0	603	903	0
360	4	0	0	0	0	0	0	200	300	0	0	0	0	0	0	0	200	903	0	0	0	0	0	0	0	603	903	0
360	5	0	0	0	0	0	0	200	300	0	0	0	0	0	0	0	200	903	0	0	0	0	0	0	0	603	903	0
360	6	0	0	0	0	0	0	200	300	0	0	0	0	0	0	0	200	903	0	0	0	0	0	0	0	603	903	0
360	7	0	0	0	0	0	0	200	300	0	0	0	0	0	0	0	200	903	0	0	0	0	0	0	0	603	903	0
360	8	0	0	0	0	0	0	200	300	0	0	0	0	0	0	0	200	903	0	0	0	0	0	0	0	603	903	0
360	9	0	0	0	0	0	0	200	300	0	0	0	0	0	0	0	200	903	0	0	0	0	0	0	0	603	903	0
361	0	0	0	0	0	0	0	200	300	0	0	0	0	0	0	0	200	903	0	0	0	0	0	0	0	603	903	0
361	1	0	0	0	0	0	0	200	300	0	0	0	0	0	0	0	200	903	0	0	0	0	0	0	0	603	903	0
361	2	0	0	0	0	0	0	200	300	0	0	0	0	0	0	0	200	903	0	0	0	0	0	0	0	603	903	0
361	3	0	0	0	0	0	0	200	300	0	0	0	0	0	0	0	200	903	0	0	0	0	0	0	0	603	903	0
361	4	0	0	0	0	0	0	200	300	0	0	0	0	0	0	0	200	903	0	0	0	0	0	0	0	603	903	0
361	5	0	0	0	0	0	0	200	300	0	0	0	0	0	0	0	200	903	0	0	0	0	0	0	0	603	903	0
361	6	0	0	0	0	0	0	200	300	0	0	0	0	0	0	0	200	903	0	0	0	0	0	0	0	603	903	0
361	7	0	0	0	0	0	0	200	300	0	0	0	0	0	0	0	200	903	0	0	0	0	0	0	0	603	903	0
361	8	0	0	0	0	0	0	200	300	0	0	0	0	0	0	0	200	903	0	0	0	0	0	0	0	603	903	0
361	9	0	0	0	0	0	0	200	300	0	0	0	0	0	0	0	200	903	0	0	0	0	0	0	0	603	903	0
362	0	0	0	0	0	0	0	200	300	0	0	0	0	0	0	0	200	903	0	0	0	0	0	0	0	603	903	0
362	1	0	0	0	0	0	0	200	300	0	0	0	0	0	0	0	200	903	0	0	0	0	0	0	0	603	903	0
362	2	0	0	0	0	0	0	200	300	0	0	0	0	0	0	0	200	903	0	0	0	0	0	0	0	603	903	0
362	3	0	0	0	0	0	0	200	300	0	0	0	0	0	0	0	200	903	0	0	0	0	0	0	0	603	903	0
362	4	0	0	0	0	0	0	200	300	0	0	0	0	0	0	0	200	903	0	0	0	0	0	0	0	603	903	0
362	5	0	0	0	0	0	0	200	300	0	0	0	0	0	0	0	200	903	0	0	0	0	0	0	0	603	903	0
362	6	0	0	0	0	0	0	200	300	0	0	0	0	0	0	0	200	903	0	0	0	0	0	0	0	603	903	0
362	7	0	0	0	0	0	0	200	300	0	0	0	0	0	0	0	200	903	0	0	0	0	0	0	0	603	903	0
362	8	0	0	0	0	0	0	200	300	0	0	0	0	0	0	0	200	903	0	0	0	0	0	0	0	603	903	0
362	9	0	0	0	0	0	0	200	300	0	0	0	0	0	0	0	200	903	0	0	0	0	0	0	0	603	903	0
363	0	0	0	0	0	0	0	200	300	0	0	0	0	0	0	0	200	903	0	0	0	0	0	0	0	603	903	0
363	1	0	0	0	0	0	0	200	300	0	0	0	0	0	0	0	200	903	0	0	0	0	0	0	0	603	903	0
363	2	0	0	0	0	0	0	200	300	0	0	0	0	0	0	0	200	903	0	0	0	0	0	0	0	603	903	0
363	3	0	0	0	0	0	0	200	300	0	0	0	0	0	0	0	200	903	0	0	0	0	0	0	0	603	903	0
363	4	0	0	0	0	0	0	200	300	0	0	0	0	0	0	0	200	903	0	0	0	0	0	0	0	603	903	0
363	5	0	0	0	0	0	0	200	300	0	0	0	0	0	0	0	200	903	0	0	0	0	0	0	0	603	903	0
363	6	0	0	0	0	0	0	200	300	0	0	0	0	0	0	0	200	903	0	0	0	0	0	0	0	603	903	0
363	7	0	0	0	0	0	0	200	300	0	0	0	0	0	0	0	200	903	0	0	0	0	0	0	0	603	903	0
363	8	0	0	0	0	0	0	200	300	0	0	0	0	0	0	0	200	903	0	0	0	0	0	0	0	603	903	0
363	9	0	0	0	0	0	0	200	300	0	0	0	0	0	0	0	200	903	0	0	0	0	0	0	0	603	903	0
364	0	0	0	0	0	0	0	200	300	0	0	0	0	0	0	0	200	903	0	0	0	0	0	0	0	603	903	0
364	1	0	0	0	0	0	0	200	300	0	0	0	0	0	0	0	200	903	0	0	0	0	0	0	0	603	903	0
364	2	0	0	0	0	0	0	200	300	0	0	0	0	0	0	0	200	903	0	0	0	0	0	0	0	603	903	0
364	3	0	0	0	0	0	0	200	300	0	0	0	0	0	0	0	200	903	0	0	0	0	0	0	0	603	903	0
364	4	0	0	0	0	0	0	200	300	0	0	0	0	0	0	0	200	903	0	0	0	0	0	0	0	603	903	0
364	5	0	0	0	0	0	0	200	300	0	0	0	0	0	0	0	200	903	0	0	0	0	0	0	0	603	903	0
364	6	0	0	0	0	0	0	200	300	0	0	0	0	0	0	0	200	903	0	0	0	0	0	0	0	603	903	0
364	7	0	0	0	0	0	0	200	300	0	0	0	0	0	0	0	200	903	0	0	0	0	0	0	0	603	903	0
364	8	0	0	0	0	0	0	200	300	0	0	0	0	0	0	0	200	903	0	0	0	0	0	0	0	603	903	0
364	9	0	0	0	0	0	0	200	300	0	0	0	0	0	0	0	200	903	0	0	0	0	0	0	0	603	903	0
365	0	0	0	0	0	0	0	200	300	0	0	0	0	0	0	0	200	903	0	0	0	0	0	0	0	603	903	0
365	1	0	0	0	0	0	0	200	300	0	0	0	0	0	0	0	200	903	0	0	0	0	0	0	0	603	903	0
365	2	0	0	0	0	0	0	200	300	0	0	0	0	0	0	0	200	903	0	0	0	0	0	0	0	603	903	0
365	3	0	0	0	0	0	0	200	300	0	0	0	0	0	0	0	200	903	0	0	0	0	0	0	0	603	903	0
365	4	0	0	0	0	0	0	200	300	0	0	0	0	0	0	0	200	903	0	0	0	0	0	0	0	603	903	0
365	5	0	0	0	0	0	0	200	300	0	0	0	0	0	0	0	200	903	0	0	0	0	0	0	0	603	903	0
365	6	0	0	0	0	0	0	200	300	0	0	0	0	0	0	0	200	903	0	0	0	0	0	0	0	603	903	0
365	7	0	0	0	0	0	0	200	300	0	0	0	0	0	0	0	200	903	0	0	0	0	0	0	0	603	903	0
365	8	0	0	0	0	0	0	200	300	0	0	0	0	0	0	0	200	903	0	0	0	0	0	0	0	603	903	0
365	9	0	0	0	0	0	0	200	300	0	0	0	0	0	0	0	200	903	0	0	0	0	0	0	0	603	903	0
366	0	0	0	0	0	0	0	200	300	0	0	0	0	0	0	0	200	903	0	0	0	0	0	0	0	603	903	0
366	1	0	0	0	0	0	0	200	300	0	0	0	0	0	0	0	200	903	0	0	0	0	0	0	0	603	903	0
366	2	0	0	0	0	0	0	200	300	0	0	0	0	0	0	0	200	903	0	0	0	0	0	0	0	603	903	0
366	3	0	0	0	0	0	0	200	300	0	0	0	0	0	0	0	200	903	0	0	0	0	0	0	0	603	903	0
366	4	0	0	0	0	0	0	200	300	0	0	0	0	0	0	0	200	903	0	0	0	0	0	0	0	603	903	0
366	5	0	0	0	0	0	0	200	300	0	0	0	0	0	0	0	200	903	0	0	0	0	0	0	0	603	903	0
366	6	0	0	0	0	0	0	200	300	0	0	0	0	0	0	0	200	903	0	0	0	0	0	0	0	603	903	0
366	7	0	0	0	0	0	0	200	300	0	0	0	0	0	0	0	200	903	0	0	0	0	0	0	0	603	903	0
366	8	0	0	0	0	0	0	200	300	0	0	0	0	0	0	0	200	903	0	0	0	0	0	0	0	603	903	0
366	9	0	0	0	0	0	0	200	300	0	0	0	0	0	0	0	200	903	0	0	0	0	0	0	0	603	903	0
367	0	0	0	0	0	0	0	200	300	0	0	0	0	0	0	0	200	903	0	0	0	0	0	0	0	603	903	0
367	1	0	0	0	0	0	0	200	300	0	0	0	0	0	0	0	200	903	0	0	0	0	0	0	0	603	903	0
367	2	0	0	0	0	0	0	200	300	0	0	0	0	0	0	0	200	903	0	0	0	0	0	0	0	603	903	0
367	3	0	0	0	0	0	0	200	300	0	0	0	0	0	0	0	200	903	0	0	0	0	0	0	0	603	903	0
367	4	0	0	0	0	0	0	200	300	0	0	0	0	0	0	0	200	903	0	0	0	0	0	0	0	603	903	0
367	5	0	0	0	0	0	0	200	300	0	0	0	0	0	0	0	200	903	0	0	0	0	0	0	0	603	903	0
367	6	0	0	0	0	0	0	200	300	0	0	0	0	0	0	0	200	903	0	0	0	0	0	0	0	603	903	0
367	7	0	0	0	0	0	0	200	300	0	0	0	0	0	0	0	200	903	0	0	0	0	0	0	0	603	903	0
367	8	0	0	0	0	0	0	200	300	0	0	0	0	0	0	0	200	903	0	0	0	0	0	0	0	603	903	0
367	9	0	0	0	0	0	0	200	300	0	0	0	0	0	0	0	200	903	0	0	0	0	0	0	0	603	903	0
368	0	0	0	0	0	0	0	200	300	0	0	0	0	0	0	0	200	903	0	0	0	0	0	0	0	603	903	0
368	1	0	0	0	0	0	0	200	300	0	0	0	0	0	0	0	200	903	0	0	0	0	0	0	0	603	903	0
368	2	0	0	0	0	0	0	200	300	0	0	0	0	0	0	0	200	903	0	0	0	0	0	0	0	603	903	0
368	3	0	0	0	0	0	0	200	300	0	0	0	0	0	0	0	200	903	0	0	0	0	0	0	0	603	903	0
368	4	0	0	0	0	0	0	200	300	0	0	0	0	0	0	0	200	903	0	0	0	0	0	0	0	603	903	0
368	5	0	0	0	0	0	0	200	300	0	0	0	0	0	0	0	200	903	0	0	0	0	0	0	0	603	903	0
368	6	0	0	0	0	0	0	200	300	0	0	0	0	0	0	0	200	903	0	0	0	0	0	0	0	603	903	0
368	7	0	0	0	0	0	0	200	300	0	0	0	0	0	0	0	200	903	0	0	0	0	0	0	0	603	903	0
368	8	0	0	0	0	0	0	200	300	0	0	0	0	0	0	0	200	903	0	0	0	0	0	0	0	603	903	0
368	9	0	0	0	0	0	0	200	300	0	0	0	0	0	0	0	200	903	0	0	0	0	0	0	0	603	903	0
369	0	0	0	0	0	0	0	200	300	0	0	0	0	0	0	0	200	903	0	0	0	0	0	0	0	603	903	0
369	1	0	0	0	0	0	0	200	300	0	0	0	0	0	0	0	200	903	0	0	0	0	0	0	0	603	903	0
369	2	0	0	0	0	0	0	200	300	0	0	0	0	0	0	0	200	903	0	0	0	0	0	0	0	603	903	0
369	3	0	0	0	0	0	0	200	300	0	0	0	0	0	0	0	200	903	0	0	0	0	0	0	0	603	903	0
369	4	0	0	0	0	0	0	200	300	0	0	0	0	0	0	0	200	903	0	0	0	0	0	0	0	603	903	0
369	5	0	0	0	0	0	0	200	300	0	0	0	0	0	0	0	200	903	0	0	0	0	0	0	0	603	903	0
369	6	0	0	0	0	0	0	200	300	0	0	0	0	0	0	0	200	903	0	0	0	0	0	0	0	603	903	0
369	7	0	0	0	0	0	0	200	300	0	0	0	0	0	0	0	200	903	0	0	0	0	0	0	0	603	903	0
369	8	0	0	0	0	0	0	200	300	0	0	0	0	0	0	0	200	903	0	0	0	0	0	0	0	603	903	0
369	9	0	0	0	0	0	0	200	300	0	0	0	0	0	0	0	200	903	0	0	0	0	0	0	0	603	903	0
370	0	0	0	0	0	0	0	200	300	0	0	0	0	0	0	0	200	903	0	0	0	0	0	0	0	603	903	0
370	1	0	0	0	0	0	0	200	300	0	0	0	0	0	0	0	200	903	0	0	0	0	0	0	0	603	903	0
370	2	0	0	0	0	0	0	200	300	0	0	0	0	0	0	0	200	903	0	0	0	0	0	0	0	603	903	0
370	3	0	0	0	0	0	0	200	300	0	0	0	0	0	0	0	200	903	0	0	0	0	0	0	0	603	903	0
370	4	0	0	0	0	0	0	200	300	0	0	0	0	0	0	0	200	903	0	0	0	0	0	0	0	603	903	0
370	5	0	0	0	0	0	0	200	300	0	0	0	0	0	0	0	200	903	0	0	0	0	0	0	0	603	903	0
370	6	0	0	0	0	0	0	200	300	0	0	0	0	0	0	0	200	903	0	0	0	0	0	0	0	603	903	0
370	7	0	0	0	0	0	0	200	300	0	0	0	0	0	0	0	200	903	0	0	0	0	0	0	0	603	903	0
370	8	0	0	0	0	0	0	200	300	0	0	0	0	0	0	0	200	903	0	0	0	0	0	0	0	603	903	0
370	9	0	0	0	0	0	0	200	300	0	0	0	0	0	0	0	200	903	0	0	0	0	0	0	0	603	903	0
371	0	0	0	0	0	0	0	200	300	0	0	0	0	0	0	0	200	903	0	0	0	0	0	0	0	603	903	0
371	1	0	0	0	0	0	0	200	300	0	0	0	0	0	0	0	200	903	0	0	0	0	0	0	0	603	903	0
371	2	0	0	0	0	0	0	200	300	0	0	0	0	0	0	0	200	903	0	0	0	0	0	0	0	603	903	0
371	3	0	0	0	0	0	0	200	300	0	0	0	0	0	0	0	200	903	0	0	0	0	0	0	0	603	903	0
371	4	0	0	0	0	0	0	200	300	0	0	0	0	0	0	0	200	903	0	0	0	0	0	0	0	603	903	0
371	5	0	0	0	0	0	0	200	300	0	0	0	0	0	0	0	200	903	0	0	0	0	0	0	0	603	903	0
371	6	0	0	0	0	0	0	200	300	0	0	0	0	0	0	0	200	903	0	0	0	0	0	0	0	603	903	0
371	7	0	0	0	0	0	0	200	300	0	0	0	0	0	0	0	200	903	0	0	0	0	0	0	0	603	903	0
371	8	0	0	0	0	0	0	200	300	0	0	0	0	0	0	0	200	903	0	0	0	0	0	0	0	603	903	0
371	9	0	0	0	0	0	0	200	300	0	0	0	0	0	0	0	200	903	0	0	0	0	0	0	0	603	903	0
372	0	0	0	0	0	0	0	200	300	0	0	0	0	0	0	0	200	903	0	0	0	0	0	0	0	603	903	0
372	1	0	0	0	0	0	0	200	300	0	0	0	0	0	0	0	200	903	0	0	0	0	0	0	0	603	903	0
372	2	0	0	0	0	0	0	200	300	0	0	0	0	0	0	0	200	903	0	0	0	0	0	0	0	603	903	0
372	3	0	0	0	0	0	0	200	300	0	0	0	0	0	0	0	200	903	0	0	0	0	0	0	0	603	903	0
372	4	0	0	0	0	0	0	200	300	0	0	0	0	0	0	0	200	903	0	0	0	0	0	0	0	603	903	0
372	5	0	0	0	0	0	0	200	300	0	0	0	0	0	0	0	200	903	0	0	0	0	0	0	0	603	903	0
372	6	0	0	0	0	0	0	200	300	0	0	0	0	0	0	0	200	903	0	0	0	0	0	0	0	603	903	0
372	7	0	0	0	0	0	0	200	300	0	0	0	0	0	0	0	200	903	0	0	0	0	0	0	0	603	903	0
372	8	0	0	0	0	0	0	200	300	0	0	0	0	0	0	0	200	903	0	0	0	0	0	0	0	603	903	0
372	9	0	0	0	0	0	0	200	300	0	0	0	0	0	0	0	200	903	0	0	0	0	0	0	0	603	903	0
373	0	0	0	0	0	0	0	200	300	0	0	0	0	0	0	0	200	903	0	0	0	0	0	0	0	603	903	0
373	1	0	0	0	0	0	0	200	300	0	0	0	0	0	0	0	200	903	0	0	0	0	0	0	0	603	903	0
373	2	0	0	0	0	0	0	200	300	0	0	0	0	0	0	0	200	903	0	0	0	0	0	0	0	603	903	0
373	3	0	0	0	0	0	0	200	300	0	0	0	0	0	0	0	200	903	0	0	0	0	0	0	0	603	903	0
373	4	0	0	0	0	0	0	200	300	0	0	0	0	0	0	0	200	903	0	0	0	0	0	0	0	603	903	0
373	5	0	0	0	0	0	0	200	300	0	0	0	0	0	0	0	200	903	0	0	0	0	0	0	0	603	903	0
373	6	0	0	0	0	0	0	200	300	0	0	0	0	0	0	0	200	903	0	0	0	0	0	0	0	603	903	0
373	7	0	0	0	0	0	0	200	300	0	0	0	0	0	0	0	200	903	0	0	0	0	0	0	0	603	903	0
373	8	0	0	0	0	0	0	200	300	0	0	0	0	0	0	0	200	903	0	0	0	0	0	0	0	603	903	0
373	9	0	0	0	0	0	0	200	300	0	0	0	0	0	0	0	200	903	0	0	0	0	0	0	0	603	903	0
374	0	0	0	0	0	0	0	200	300	0	0	0	0	0	0	0	200	903	0	0	0	0	0	0	0	603	903	0
374	1	0	0	0	0	0	0	200	300	0	0	0	0	0	0	0	200	903	0	0	0	0	0	0	0	603	903	0
374	2	0	0	0	0	0	0	200	300	0	0	0	0	0	0	0	200	903	0	0	0	0	0	0	0	603	903	0
374	3	0	0	0	0	0	0	200	300	0	0	0	0	0	0	0	200	903	0	0	0	0	0	0	0	603	903	0
374	4	0	0	0	0	0	0	200	300	0	0	0	0	0	0	0	200	903	0	0	0	0	0	0	0	603	903	0
374	5	0	0	0	0	0	0	200	300	0	0	0	0	0	0	0	200	903	0	0	0	0	0	0	0	603	903	0
374	6	0	0	0	0	0	0	200	300	0	0	0	0	0	0	0	200	903	0	0	0	0	0	0	0	603	903	0
374	7	0	0	0	0	0	0	200	300	0	0	0	0	0	0	0	200	903	0	0	0	0	0	0	0	603	903	0
374	8	0	0	0	0	0	0	200	300	0	0	0	0	0	0	0	200	903	0	0	0	0	0	0	0	603	903	0
374	9	0	0	0	0	0	0	200	300	0	0	0	0	0	0	0	200	903	0	0	0	0	0	0	0	603	903	0
375	0	0	0	0	0	0	0	200	300	0	0	0	0	0	0	0	200	903	0	0	0	0	0	0	0	603	903	0
375	1	0	0	0	0	0	0	200	300	0	0	0	0	0	0	0	200	903	0	0	0	0	0	0	0	603	903	0
375	2	0	0	0	0	0	0	200	300	0	0	0	0	0	0	0	200	903	0	0	0	0	0	0	0	603	903	0
375	3	0	0	0	0	0	0	200	300	0	0	0	0	0	0	0	200	903	0	0	0	0	0	0	0	603	903	0
375	4	0	0	0	0	0	0	200	300	0	0	0	0	0	0	0	200	903	0	0	0	0	0	0	0	603	903	0
375	5	0	0	0	0	0	0	200	300	0	0	0	0	0	0	0	200	903	0	0	0	0	0	0	0	603	903	0
375	6	0	0	0	0	0	0	200	300	0	0	0	0	0	0	0	200	903	0	0	0	0	0	0	0	603	903	0
375	7	0	0	0	0	0	0	200	300	0	0	0	0	0	0	0	200	903	0	0	0	0	0	0	0	603	903	0
375	8	0	0	0	0	0	0	200	300	0	0	0	0	0	0	0	200	903	0	0	0	0	0	0	0	603	903	0
375	9	0	0	0	0	0	0	200	300	0	0	0	0	0	0	0	200	903	0	0	0	0	0	0	0	603	903	0
376	0	0	0	0	0	0	0	200	300	0	0	0	0	0	0	0	200	903	0	0	0	0	0	0	0	603	903	0
376	1	0	0	0	0	0	0	200	300	0	0	0	0	0	0	0	200	903	0	0	0	0	0	0	0	603	903	0
376	2	0	0	0	0	0	0	200	300	0	0	0	0	0	0	0	200	903	0	0	0	0	0	0	0	603	903	0
376	3	0	0	0	0	0	0	200	300	0	0	0	0	0	0	0	200	903	0	0	0	0	0	0	0	603	903	0
376	4	0	0	0	0	0	0	200	300	0	0	0	0	0	0	0	200	903	0	0	0	0	0	0	0	603	903	0
376	5	0	0	0	0	0	0	200	300	0	0	0	0	0	0	0	200	903	0	0	0	0	0	0	0	603	903	0
376	6	0	0	0	0	0	0	200	300	0	0	0	0	0	0	0	200	903	0	0	0	0	0	0	0	603	903	0
376	7	0	0	0	0	0	0	200	300	0	0	0	0	0	0	0	200	903	0	0	0	0	0	0	0	603	903	0
376	8	0	0	0	0	0	0	200	300	0	0	0	0	0	0	0	200	903	0	0	0	0	0	0	0	603	903	0
376	9	0	0	0	0	0	0	200	300	0	0	0	0	0	0	0	200	903	0	0	0	0	0	0	0	603	903	0
377	0	0	0	0	0	0	0	200	300	0	0	0	0	0	0	0	200	903	0	0	0	0	0	0	0	603	903	0
377	1	0	0	0	0	0	0	200	300	0	0	0	0	0	0	0	200	903	0	0	0	0	0	0	0	603	903	0
377	2	0	0	0	0	0	0	200	300	0	0	0	0	0	0	0	200	903	0	0	0	0	0	0	0	603	903	0
377	3	0	0	0	0	0	0	200	300	0	0	0	0	0	0	0	200	903	0	0	0	0	0	0	0	603	903	0
377	4	0	0	0	0	0	0	200	300	0	0	0	0	0	0	0	200	903	0	0	0	0	0	0	0	603	903	0
377	5	0	0	0	0	0	0	200	300	0	0	0	0	0	0	0	200	903	0	0	0	0	0	0	0	603	903	0
377	6	0	0	0	0	0	0	200	300	0	0	0	0	0	0	0	200	903	0	0	0	0	0	0	0	603	903	0
377	7	0	0	0	0	0	0	200	300	0	0	0	0	0	0	0	200	903	0	0	0	0	0	0	0	603	903	0
377	8	0	0	0	0	0	0	200	300	0	0	0	0	0	0	0	200	903	0	0	0	0	0	0	0	603	903	0
377	9	0	0	0	0	0	0	200	300	0	0	0	0	0	0	0	200	903	0	0	0	0	0	0	0	603	903	0
378	0	0	0	0	0	0	0	200	300	0	0	0	0	0	0	0	200	903	0	0	0	0	0	0	0	603	903	0
378	1	0	0	0	0	0	0	200	300	0	0	0	0	0	0	0	200	903	0	0	0	0	0	0	0	603	903	0
378	2	0	0	0	0	0	0	200	300	0	0	0	0	0	0	0	200	903	0	0	0	0	0	0	0	603	903	0
378	3	0	0	0	0	0	0	200	300	0	0	0	0	0	0	0	200	903	0	0	0	0	0	0	0	603	903	0
378	4	0	0	0	0	0	0	200	300	0	0	0	0	0	0	0	200	903	0	0	0	0	0	0	0	603	903	0
378	5	0	0	0	0	0	0	200	300	0	0	0	0	0	0	0	200	903	0	0	0	0	0	0	0	603	903	0
378	6	0	0	0	0	0	0	200	300	0	0	0	0	0	0	0	200	903	0	0	0	0	0	0	0	603	903	0
378	7	0	0	0	0	0	0	200	300	0	0	0	0	0	0	0	200	903	0	0	0	0	0	0	0	603	903	0
378	8	0	0	0	0	0	0	200	300	0	0	0	0	0	0	0	200	903	0	0	0	0	0	0	0	603	903	0
378	9	0	0	0	0	0	0	200	300	0	0	0	0	0	0	0	200	903	0	0	0	0	0	0	0	603	903	0
379	0	0	0	0	0	0	0	200	300	0	0	0	0	0	0	0	200	903	0	0	0	0	0	0	0	603	903	0
379	1	0	0	0	0	0	0	200	300	0	0	0	0	0	0	0	200	903	0	0	0	0	0	0	0	603	903	0
379	2	0	0	0	0	0	0	200	300	0	0	0	0	0	0	0	200	903	0	0	0	0	0	0	0	603	903	0
379	3	0	0	0	0	0	0	200	300	0	0	0	0	0	0	0	200	903	0	0	0	0	0	0	0	603	903	0
379	4	0	0	0	0	0	0	200	300	0	0	0	0	0	0	0	200	903	0	0	0	0	0	0	0	603	903	0
379	5	0	0	0	0	0	0	200	300	0	0	0	0	0	0	0	200	903	0	0	0	0	0	0	0	603	903	0
379	6	0	0	0	0	0	0	200	300	0	0	0	0	0	0	0	200	903	0	0	0	0	0	0	0	603	903	0
379	7	0	0	0	0	0	0	200	300	0	0	0	0	0	0	0	200	903	0	0	0	0	0	0	0	603	903	0
379	8	0	0	0	0	0	0	200	300	0	0	0	0	0	0	0	200	903	0	0	0	0	0	0	0	603	903	0
379	9	0	0	0	0	0	0	200	300	0	0	0	0	0	0	0	200	903	0	0	0	0	0	0	0	603	903	0
380	0	0	0	0	0	0	0	200	300	0	0	0	0	0	0	0	200	903	0	0	0	0	0	0	0	603	903	0
380	1	0	0	0	0	0	0	200	300	0	0	0	0	0	0	0	200	903	0	0	0	0	0	0	0	603	903	0
380	2	0	0	0	0	0	0	200	300	0	0	0	0	0	0	0	200	903	0	0	0	0	0	0	0	603	903	0
380	3	0	0	0	0	0	0	200	300	0	0	0	0	0	0	0	200	903	0	0	0	0	0	0	0	603	903	0
380	4	0	0	0	0	0	0	200	300	0	0	0	0	0	0	0	200	903	0	0	0	0	0	0	0	603	903	0
380	5	0	0	0	0	0	0	200	300	0	0	0	0	0	0	0	200	903	0	0	0	0	0	0	0	603	903	0
380	6	0	0	0	0	0	0	200	300	0	0	0	0	0	0	0	200	903	0	0	0	0	0	0	0	603	903	0
380	7	0	0	0	0	0	0	200	300	0	0	0	0	0	0	0	200	903	0	0	0	0	0	0	0	603	903	0
380	8	0	0	0	0	0	0	200	300	0	0	0	0	0	0	0	200	903	0	0	0	0	0	0	0	603	903	0
380	9	0	0	0	0	0	0	200	300	0	0	0	0	0	0	0	200	903	0	0	0	0	0	0	0	603	903	0
381	0	0	0	0	0	0	0	200	300	0	0	0	0	0	0	0	200	903	0	0	0	0	0	0	0	603	903	0
381	1	0	0	0	0	0	0	200	300	0	0	0	0	0	0	0	200	903	0	0	0	0	0	0	0	603	903	0
381	2	0	0	0	0	0	0	200	300	0	0	0	0	0	0	0	200	903	0	0	0	0	0	0	0	603	903	0
381	3	0	0	0	0	0	0	200	300	0	0	0	0	0	0	0	200	903	0	0	0	0	0	0	0	603	903	0
381	4	0	0	0	0	0	0	200	300	0	0	0	0	0	0	0	200	903	0	0	0	0	0	0	0	603	903	0
381	5	0	0	0	0	0	0	200	300	0	0	0	0	0	0	0	200	903	0	0	0	0	0	0	0	603	903	0
381	6	0	0	0	0	0	0	200	300	0	0	0	0	0	0	0	200	903	0	0	0	0	0	0	0	603	903	0
381	7	0	0	0	0	0	0	200	300	0	0	0	0	0	0	0	200	903	0	0	0	0	0	0	0	603	903	0
381	8	0	0	0	0	0	0	200	300	0	0	0	0	0	0	0	200	903	0	0	0	0	0	0	0	603	903	0
381	9	0	0	0	0	0	0	200	300	0	0	0	0	0	0	0	200	903	0	0	0	0	0	0	0	603	903	0
382	0	0	0	0	0	0	0	200	300	0	0	0	0	0	0	0	200	903	0	0	0	0	0	0	0	603	903	0
382	1	0	0	0	0	0	0	200	300	0	0	0	0	0	0	0	200	903	0	0	0	0	0	0	0	603	903	0
382	2	0	0	0	0	0	0	200	300	0	0	0	0	0	0	0	200	903	0	0	0	0	0	0	0	603	903	0
382	3	0	0	0	0	0	0	200	300	0	0	0	0	0	0	0	200	903	0	0	0	0	0	0	0	603	903	0
382	4	0	0	0	0	0	0	200	300	0	0	0	0	0	0	0	200	903	0	0	0	0	0	0	0	603	903	0
382	5	0	0	0	0	0	0	200	300	0	0	0	0	0	0	0	200	903	0	0	0	0	0	0	0	603	903	0
382	6	0	0	0	0	0	0	200	300	0	0	0	0	0	0	0	200	903	0	0	0	0	0	0	0	603	903	0
382	7	0	0	0	0	0	0	200	300	0	0	0	0	0	0	0	200	903	0	0	0	0	0	0	0	603	903	0
382	8	0	0	0	0	0	0	200	300	0	0	0	0	0	0	0	200	903	0	0	0	0	0	0	0	603	903	0
382	9	0	0	0	0	0	0	200	300	0	0	0	0	0	0	0	200	903	0	0	0	0	0	0	0	603	903	0
383	0	0	0	0	0	0	0	200	300	0	0	0	0	0	0	0	200	903	0	0	0	0	0	0	0	603	903	0
383	1	0	0	0	0	0	0	200	300	0	0	0	0	0	0	0	200	903	0	0	0	0	0	0	0	603	903	0
383	2	0	0	0	0	0	0	200	300	0	0	0	0	0	0	0	200	903	0	0	0	0	0	0	0	603	903	0
383	3	0	0	0	0	0	0	200	300	0	0	0	0	0	0	0	200	903	0	0	0	0	0	0	0	603	903	0
383	4	0	0	0	0	0	0	200	300	0	0	0	0	0	0	0	200	903	0	0	0	0	0	0	0	603	903	0
383	5	0	0	0	0	0	0	200	300	0	0	0	0	0	0	0	200	903	0	0	0	0	0	0	0	603	903	0
383	6	0	0	0	0	0	0	200	300	0	0	0	0	0	0	0	200	903	0	0	0	0	0	0	0	603	903	0
383	7	0	0	0	0	0	0	200	300	0	0	0	0	0	0	0	200	903	0	0	0	0	0	0	0	603	903	0
383	8	0	0	0	0	0	0	200	300	0	0	0	0	0	0	0	200	903	0	0	0	0	0	0	0	603	903	0
383	9	0	0	0	0	0	0	200	300	0	0	0	0	0	0	0	200	903	0	0	0	0	0	0	0	603	903	0
384	0	0	0	0	0	0	0	200	300	0	0	0	0	0	0	0	200	903	0	0	0	0	0	0	0	603	903	0
384	1	0	0	0	0	0	0	200	300	0	0	0	0	0	0	0	200	903	0	0	0	0	0	0	0	603	903	0
384	2	0	0	0	0	0	0	200	300	0	0	0	0	0	0	0	200	903	0	0	0	0	0	0	0	603	903	0
384	3	0	0	0	0	0	0	200	300	0	0	0	0	0	0	0	200	903	0	0	0	0	0	0	0	603	903	0
384	4	0	0	0	0	0	0	200	300	0	0	0	0	0	0	0	200	903	0	0	0	0	0	0	0	603	903	0
384	5	0	0	0	0	0	0	200	300	0	0	0	0	0	0	0	200	903	0	0	0	0	0	0	0	603	903	0
384	6	0	0	0	0	0	0	200	300	0	0	0	0	0	0	0	200	903	0	0	0	0	0	0	0	603	903	0
384	7	0	0	0	0	0	0	200	300	0	0	0	0	0	0	0	200	903	0	0	0	0	0	0	0	603	903	0
384	8	0	0	0	0	0	0	200	300	0	0	0	0	0	0	0	200	903	0	0	0	0	0	0	0	603	903	0
384	9	0	0	0	0	0	0	200	300	0	0	0	0	0	0	0	200	903	0	0	0	0	0	0	0	603	903	0
385	0	0	0	0	0	0	0	200	300	0	0	0	0	0	0	0	200	903	0	0	0	0	0	0	0	603	903	0
385	1	0	0	0	0	0	0	200	300	0	0	0	0	0	0	0	200	903	0	0	0	0	0	0	0	603	903	0
385	2	0	0	0	0	0	0	200	300	0	0	0	0	0	0	0	200	903	0	0	0	0	0	0	0	603	903	0
385	3	0	0	0	0	0	0	200	300	0	0	0	0	0	0	0	200	903	0	0	0	0	0	0	0	603	903	0
385	4	0	0	0	0	0	0	200	300	0	0	0	0	0	0	0	200	903	0	0	0	0	0	0	0	603	903	0
385	5	0	0	0	0	0	0	200	300	0	0	0	0	0	0	0	200	903	0	0	0	0	0	0	0	603	903	0
385	6	0	0	0	0	0	0	200	300	0	0	0	0	0	0	0	200	903	0	0	0	0	0	0	0	603	903	0
385	7	0	0	0	0	0	0	200	300	0	0	0	0	0	0	0	200	903	0	0	0	0	0	0	0	603	903	0
385	8	0	0	0	0	0	0	200	300	0	0	0	0	0	0	0	200	903	0	0	0	0	0	0	0	603	903	0
385	9	0	0	0	0	0	0	200	300	0	0	0	0	0	0	0	200	903	0	0	0	0	0	0	0	603	903	0
386	0	0	0	0	0	0	0	200	300	0	0	0	0	0	0	0	200	903	0	0	0	0	0	0	0	603	903	0
386	1	0	0	0	0	0	0	200	300	0	0	0	0	0	0	0	200	903	0	0	0	0	0	0	0	603	903	0
386	2	0	0	0	0	0	0	200	300	0	0	0	0	0	0	0	200	903	0	0	0	0	0	0	0	603	903	0
386	3	0	0	0	0	0	0	200	300	0	0	0	0	0	0	0	200	903	0	0	0	0	0	0	0	603	903	0
386	4	0	0	0	0	0	0	200	300	0	0	0	0	0	0	0	200	903	0	0	0	0	0	0	0	603	903	0
386	5	0	0	0	0	0	0	200	300	0	0	0	0	0	0	0	200	903	0	0	0	0	0	0	0	603	903	0
386	6	0	0	0	0	0	0	200	300	0	0	0	0	0	0	0	200	903	0	0	0	0	0	0	0	603	903	0
386	7	0	0	0	0	0	0	200	300	0	0	0	0	0	0	0	200	903	0	0	0	0	0	0	0	603	903	0
386	8	0	0	0	0	0	0	200	300	0	0	0	0	0	0	0	200	903	0	0	0	0	0	0	0	603	903	0
386	9	0	0	0	0	0	0	200	300	0	0	0	0	0	0	0	200	903	0	0	0	0	0	0	0	603	903	0
387	0	0	0	0	0	0	0	200	300	0	0	0	0	0	0	0	200	903	0	0	0	0	0	0	0	603	903	0
387	1	0	0	0	0	0	0	200	300	0	0	0	0	0	0	0	200	903	0	0	0	0	0	0	0	603	903	0
387	2	0	0	0	0	0	0	200	300	0	0	0	0	0	0	0	200	903	0	0	0	0	0	0	0	603	903	0
387	3	0	0	0	0	0	0	200	300	0	0	0	0	0	0	0	200	903	0	0	0	0	0	0	0	603	903	0
387	4	0	0	0	0	0	0	200	300	0	0	0	0	0	0	0	200	903	0	0	0	0	0	0	0	603	903	0
387	5	0	0	0	0	0	0	200	300	0	0	0	0	0	0	0	200	903	0	0	0	0	0	0	0	603	903	0
387	6	0	0	0	0	0	0	200	300	0	0	0	0	0	0	0	200	903	0	0	0	0	0	0	0	603	903	0
387	7	0	0	0	0	0	0	200	300	0	0	0	0	0	0	0	200	903	0	0	0	0	0	0	0	603	903	0
387	8	0	0	0	0	0	0	200	300	0	0	0	0	0	0	0	200	903	0	0	0	0	0	0	0	603	903	0
387	9	0	0	0	0	0	0	200	300	0	0	0	0	0	0	0	200	903	0	0	0	0	0	0	0	603	903	0
388	0	0	0	0	0	0	0	200	300	0	0	0	0	0	0	0	200	903	0	0	0	0	0	0	0	603	903	0
388	1	0	0	0	0	0	0	200	300	0	0	0	0	0	0	0	200	903	0	0	0	0	0	0	0	603	903	0
388	2	0	0	0	0	0	0	200	300	0	0	0	0	0	0	0	200	903	0	0	0	0	0	0	0	603	903	0
388	3	0	0	0	0	0	0	200	300	0	0	0	0	0	0	0	200	903	0	0	0	0	0	0	0	603	903	0
388	4	0	0	0	0	0	0	200	300	0	0	0	0	0	0	0	200	903	0	0	0	0	0	0	0	603	903	0
388	5	0	0	0	0	0	0	200	300	0	0	0	0	0	0	0	200	903	0	0	0	0	0	0	0	603	903	0
388	6	0	0	0	0	0	0	200	300	0	0	0	0	0	0	0	200	903	0	0	0	0	0	0	0	603	903	0
388	7	0	0	0	0	0	0	200	300	0	0	0	0	0	0	0	200	903	0	0	0	0	0	0	0	603	903	0
388	8	0	0	0	0	0	0	200	300	0	0	0	0	0	0	0	200	903	0	0	0	0	0	0	0	603	903	0
388	9	0	0	0	0	0	0	200	300	0	0	0	0	0	0	0	200	903	0	0	0	0	0	0	0	603	903	0
389	0	0	0	0	0	0	0	200	300	0	0	0	0	0	0	0	200	903	0	0	0	0	0	0	0	603	903	0
389	1	0	0	0	0	0	0	200	300	0	0	0	0	0	0	0	200	903	0	0	0	0	0	0	0	603	903	0
389	2	0	0	0	0	0	0	200	300	0	0	0	0	0	0	0	200	903	0	0	0	0	0	0	0	603	903	0
389	3	0	0	0	0	0	0	200	300	0	0	0	0	0	0	0	200	903	0	0	0	0	0	0	0	603	903	0
389	4	0	0	0	0	0	0	200	300	0	0	0	0	0	0	0	200	903	0	0	0	0	0	0	0	603	903	0
389	5	0	0	0	0	0	0	200	300	0	0	0	0	0	0	0	200	903	0	0	0	0	0	0	0	603	903	0
389	6	0	0	0	0	0	0	200	300	0	0	0	0	0	0	0	200	903	0	0	0	0	0	0	0	603	903	0
389	7	0	0	0	0	0	0	200	300	0	0	0	0	0	0	0	200	903	0	0	0	0	0	0	0	603	903	0
389	8	0	0	0	0	0	0	200	300	0	0	0	0	0	0	0	200	903	0	0	0	0	0	0	0	603	903	0
389	9	0	0	0	0	0	0	200	300	0	0	0	0	0	0	0	200	903	0	0	0	0	0	0	0	603	903	0
390	0	0	0	0	0	0	0	200	300	0	0	0	0	0	0	0	200	903	0	0	0	0	0	0	0	603	903	0
390	1	0	0	0	0	0	0	200	300	0	0	0	0	0	0	0	200	903	0	0	0	0	0	0	0	603	903	0
390	2	0	0	0	0	0	0	200	300	0	0	0	0	0	0	0	200	903	0	0	0	0	0	0	0	603	903	0
390	3	0	0	0	0	0	0	200	300	0	0	0	0	0	0	0	200	903	0	0	0	0	0	0	0	603	903	0
390	4	0	0	0	0	0	0	200	300	0	0	0	0	0	0	0	200	903	0	0	0	0	0	0	0	603	903	0
390	5	0	0	0	0	0	0	200	300	0	0	0	0	0	0	0	200	903	0	0	0	0	0	0	0	603	903	0
390	6	0	0	0	0	0	0	200	300	0	0	0	0	0	0	0	200	903	0	0	0	0	0	0	0	603	903	0
390	7	0	0	0	0	0	0	200	300	0	0	0	0	0	0	0	200	903	0	0	0	0	0	0	0	603	903	0
390	8	0	0	0	0	0	0	200	300	0	0	0	0	0	0	0	200	903	0	0	0	0	0	0	0	603	903	0
390	9	0	0	0	0	0	0	200	300	0	0	0	0	0	0	0	200	903	0	0	0	0	0	0	0	603	903	0
391	0	0	0	0	0	0	0	200	300	0	0	0	0	0	0	0	200	903	0	0	0	0	0	0	0	603	903	0
391	1	0	0	0	0	0	0	200	300	0	0	0	0	0	0	0	200	903	0	0	0	0	0	0	0	603	903	0
391	2	0	0	0	0	0	0	200	300	0	0	0	0	0	0	0	200	903	0	0	0	0	0	0	0	603	903	0
391	3	0	0	0	0	0	0	200	300	0	0	0	0	0	0	0	200	903	0	0	0	0	0	0	0	603	903	0
391	4	0	0	0	0	0	0	200	300	0	0	0	0	0	0	0	200	903	0	0	0	0	0	0	0	603	903	0
391	5	0	0	0	0	0	0	200	300	0	0	0	0	0	0	0	200	903	0	0	0	0	0	0	0	603	903	0
391	6	0	0	0	0	0	0	200	300	0	0	0	0	0	0	0	200	903	0	0	0	0	0	0	0	603	903	0
391	7	0	0	0	0	0	0	200	300	0	0	0	0	0	0	0	200	903	0	0	0	0	0	0	0	603	903	0
391	8	0	0	0	0	0	0	200	300	0	0	0	0	0	0	0	200	903	0	0	0	0	0	0	0	603	903	0
391	9	0	0	0	0	0	0	200	300	0	0	0	0	0	0	0	200	903	0	0	0	0	0	0	0	603	903	0
392	0	0	0	0	0	0	0	200	300	0	0	0	0	0	0	0	200	903	0	0	0	0	0	0	0	603	903	0
392	1	0	0	0	0	0	0	200	300	0	0	0	0	0	0	0	200	903	0	0	0	0	0	0	0	603	903	0
392	2	0	0	0	0	0	0	200	300	0	0	0	0	0	0	0	200	903	0	0	0	0	0	0	0	603	903	0
392	3	0	0	0	0	0	0	200	300	0	0	0	0	0	0	0	200	903	0	0	0	0	0	0	0	603	903	0
392	4	0	0	0	0	0	0	200	300	0	0	0	0	0	0	0	200	903	0	0	0	0	0	0	0	603	903	0
392	5	0	0	0	0	0	0	200	300	0	0	0	0	0	0	0	200	903	0	0	0	0	0	0	0	603	903	0
392	6	0	0	0	0	0	0	200	300	0	0	0	0	0	0	0	200	903	0	0	0	0	0	0	0	603	903	0
392	7	0	0	0	0	0	0	200	300	0	0	0	0	0	0	0	200	903	0	0	0	0	0	0	0	603	903	0
392	8	0	0	0	0	0	0	200	300	0	0	0	0	0	0	0	200	903	0	0	0	0	0	0	0	603	903	0
392	9	0	0	0	0	0	0	200	300	0	0	0	0	0	0	0	200	903	0	0	0	0	0	0	0	603	903	0
393	0	0	0	0	0	0	0	200	300	0	0	0	0	0	0	0	200	903	0	0	0	0	0	0	0	603	903	0
393	1	0	0	0	0	0	0	200	300	0	0	0	0	0	0	0	200	903	0	0	0	0	0	0	0	603	903	0
393	2	0	0	0	0	0	0	200	300	0	0	0	0	0	0	0	200	903	0	0	0	0	0	0	0	603	903	0
393	3	0	0	0	0	0	0	200	300	0	0	0	0	0	0	0	200	903	0	0	0	0	0	0	0	603	903	0
393	4	0	0	0	0	0	0	200	300	0	0	0	0	0	0	0	200	903	0	0	0	0	0	0	0	603	903	0
393	5	0	0	0	0	0	0	200	300	0	0	0	0	0	0	0	200	903	0	0	0	0	0	0	0	603	903	0
393	6	0	0	0	0	0	0	200	300	0	0	0	0	0	0	0	200	903	0	0	0	0	0	0	0	603	903	0
393	7	0	0	0	0	0	0	200	300	0	0	0	0	0	0	0	200	903	0	0	0	0	0	0	0	603	903	0
393	8	0	0	0	0	0	0	200	300	0	0	0	0	0	0	0	200	903	0	0	0	0	0	0	0	603	903	0
393	9	0	0	0	0	0	0	200	300	0	0	0	0	0	0	0	200	903	0	0	0	0	0	0	0	603	903	0
394	0	0	0	0	0	0	0	200	300	0	0	0	0	0	0	0	200	903	0	0	0	0	0	0	0	603	903	0
394	1	0	0	0	0	0	0	200	300	0	0	0	0	0	0	0	200	903	0	0	0	0	0	0	0	603	903	0
394	2	0	0	0	0	0	0	200	300	0	0	0	0	0	0	0	200	903	0	0	0	0	0	0	0	603	903	0
394	3	0	0	0	0	0	0	200	300	0	0	0	0	0	0	0	200	903	0	0	0	0	0	0	0	603	903	0
394	4	0	0	0	0	0	0	200	300	0	0	0	0	0	0	0	200	903	0	0	0	0	0	0	0	603	903	0
394	5	0	0	0	0	0	0	200	300	0	0	0	0	0	0	0	200	903	0	0	0	0	0	0	0	603	903	0
394	6	0	0	0	0	0	0	200	300	0	0	0	0	0	0	0	200	903	0	0	0	0	0	0	0	603	903	0
394	7	0	0	0	0	0	0	200	300	0	0	0	0	0	0	0	200	903	0	0	0	0	0	0	0	603	903	0
394	8	0	0	0	0	0	0	200	300	0	0	0	0	0	0	0	200	903	0	0	0	0	0	0	0	603	903	0
394	9	0	0	0	0	0	0	200	300	0	0	0	0	0	0	0	200	903	0	0	0	0	0	0	0	603	903	0
395	0	0	0	0	0	0	0	200	300	0	0	0	0	0	0	0	200	903	0	0	0	0	0	0	0	603	903	0
395	1	0	0	0	0	0	0	200	300	0	0	0	0	0	0	0	200	903	0	0	0	0	0	0	0	603	903	0
395	2	0	0	0	0	0	0	200	300	0	0	0	0	0	0	0	200	903	0	0	0	0	0	0	0	603	903	0
395	3	0	0	0	0	0	0	200	300	0	0	0	0	0	0	0	200	903	0	0	0	0	0	0	0	603	903	0
395	4	0	0	0	0	0	0	200	300	0	0	0	0	0	0	0	200	903	0	0	0	0	0	0	0	603	903	0
395	5	0	0	0	0	0	0	200	300	0	0	0	0	0	0	0	200	903	0	0	0	0	0	0	0	603	903	0
395	6	0	0	0	0	0	0	200	300	0	0	0	0	0	0	0	200	903	0	0	0	0	0	0	0	603	903	0
395	7	0	0	0	0	0	0	200	300	0	0	0	0	0	0	0	200	903	0	0	0	0	0	0	0	603	903	0
395	8	0	0	0	0	0	0	200	300	0	0	0	0	0	0	0	200	903	0	0	0	0	0	0	0	603	903	0
395	9	0	0	0	0	0	0	200	300	0	0	0	0	0	0	0	200	903	0	0	0	0	0	0	0	603	903	0
396	0	0	0	0	0	0	0	200	300	0	0	0	0	0	0	0	200	903	0	0	0	0	0	0	0	603	903	0
396	1	0	0	0	0	0	0	200	300	0	0	0	0	0	0	0	200	903	0	0	0	0	0	0	0	603	903	0
396	2	0	0	0	0	0	0	200	300	0	0	0	0	0	0	0	200	903	0	0	0	0	0	0	0	603	903	0
396	3	0	0	0	0	0	0	200	300	0	0	0	0	0	0	0	200	903	0	0	0	0	0	0	0	603	903	0
396	4	0	0	0	0	0	0	200	300	0	0	0	0	0	0	0	200	903	0	0	0	0	0	0	0	603	903	0
396	5	0	0	0	0	0	0	200	300	0	0	0	0	0	0	0	200	903	0	0	0	0	0	0	0	603	903	0
396	6	0	0	0	0	0	0	200	300	0	0	0	0	0	0	0	200	903	0	0	0	0	0	0	0	603	903	0
396	7	0	0	0	0	0	0	200	300	0	0	0	0	0	0	0	200	903	0	0	0	0	0	0	0	603	903	0
396	8	0	0	0	0	0	0	200	300	0	0	0	0	0	0	0	200	903	0	0	0	0	0	0	0	603	903	0
396	9	0	0	0	0	0	0	200	300	0	0	0	0	0	0	0	200	903	0	0	0	0	0	0	0	603	903	0
397	0	0	0	0	0	0	0	200	300	0	0	0	0	0	0	0	200	903	0	0	0	0	0	0	0	603	903	0
397	1	0	0	0	0	0	0	200	300	0	0	0	0	0	0	0	200	903	0	0	0	0	0	0	0	603	903	0
397	2	0	0	0	0	0	0	200	300	0	0	0	0	0	0	0	200	903	0	0	0	0	0	0	0	603	903	0
397	3	0	0	0	0	0	0	200	300	0	0	0	0	0	0	0	200	903	0	0	0	0	0	0	0	603	903	0
397	4	0	0	0	0	0	0	200	300	0	0	0	0	0	0	0	200	903	0	0	0	0	0	0	0	603	903	0
397	5	0	0	0	0	0	0	200	300	0	0	0	0	0	0	0	200	903	0	0	0	0	0	0	0	603	903	0
397	6	0	0	0	0	0	0	200	300	0	0	0	0	0	0	0	200	903	0	0	0	0	0	0	0	603	903	0
397	7	0	0	0	0	0	0	200	300	0	0	0	0	0	0	0	200	903	0	0	0	0	0	0	0	603	903	0
397	8	0	0	0	0	0	0	200	300	0	0	0	0	0	0	0	200	903	0	0	0	0	0	0	0	603	903	0
397	9	0	0	0	0	0	0	200	300	0	0	0	0	0	0	0	200	903	0	0	0	0	0	0	0	603	903	0
398	0	0	0	0	0	0	0	200	300	0	0	0	0	0	0	0	200	903	0	0	0	0	0	0	0	603	903	0
398	1	0	0	0	0	0	0	200	300	0	0	0	0	0	0	0	200	903	0	0	0	0	0	0	0	603	903	0
398	2	0	0	0	0	0	0	200	300	0	0	0	0	0	0	0	200	903	0	0	0	0	0	0	0	603	903	0
398	3	0	0	0	0	0	0	200	300	0	0	0	0	0	0	0	200	903	0	0	0	0	0	0	0	603	903	0
398	4	0	0	0	0	0	0	200	300	0	0	0	0	0	0	0	200	903	0	0	0	0	0	0	0	603	903	0
398	5	0	0	0	0	0	0	200	300	0	0	0	0	0	0	0	200	903	0	0	0	0	0	0	0	603	903	0
398	6	0	0	0	0	0	0	200	300	0	0	0	0	0	0	0	200	903	0	0	0	0	0	0	0	603	903	0
398	7	0	0	0	0	0	0	200	300	0	0	0	0	0	0	0	200	903	0	0	0	0	0	0	0	603	903	0
398	8	0	0	0	0	0	0	200	300	0	0	0	0	0	0	0	200	903	0	0	0	0	0	0	0	603	903	0
398	9	0	0	0	0	0	0	200	300	0	0	0	0	0	0	0	200	903	0	0	0	0	0	0	0	603	903	0
399	0	0	0	0	0	0	0	200	300	0	0	0	0	0	0	0	200	903	0	0	0	0	0	0	0	603	903	0
399	1	0	0	0	0	0	0	200	300	0	0	0	0	0	0	0	200	903	0	0	0	0	0	0	0	603	903	0
399	2	0	0	0	0	0	0	200	300	0	0	0	0	0	0	0	200	903	0	0	0	0	0	0	0	603	903	0
399	3	0	0	0	0	0	0	200	300	0	0	0	0	0	0	0	200	903	0	0	0	0	0	0	0	603	903	0
399	4	0	0	0	0	0	0	200	300	0	0	0	0	0	0	0	200	903	0	0	0	0	0	0	0	603	903	0
399	5	0	0	0	0	0	0	200	300	0	0	0	0	0	0	0	200	903	0	0	0	0	0	0	0	603	903	0
399	6	0	0	0	0	0	0	200	300	0	0	0	0	0	0	0	200	903	0	0	0	0	0	0	0	603	903	0
399	7	0	0	0	0	0	0	200	300	0	0	0	0	0	0	0	200	903	0	0	0	0	0	0	0	603	903	0
399	8	0	0	0	0	0	0	200	300	0	0	0	0	0	0	0	200	903	0	0	0	0	0	0	0	603	903	0
399	9	0	0	0	0	0	0	200	300	0	0	0	0	0	0	0	200	903	0	0	0	0	0	0	0	603	903	0
400	0	0	0	0	0	0	0	200	300	0	0	0	0	0	0	0	200	903	0	0	0	0	0	0	0	603	903	0
400	1	0	0	0	0	0	0	200	300	0	0	0	0	0	0	0	200	903	0	0	0	0	0	0	0	603	903	0
400	2	0	0	0	0	0	0	200	300	0	0	0	0	0	0	0	200	903	0	0	0	0	0	0	0	603	903	0
400	3	0	0	0	0	0	0	200	300	0	0	0	0	0	0	0	200	903	0	0	0	0	0	0	0	603	903	0
400	4	0	0	0	0	0	0	200	300	0	0	0	0	0	0	0	200	903	0	0	0	0	0	0	0	603	903	0
400	5	0	0	0	0	0	0	200	300	0	0	0	0	0	0	0	200	903	0	0	0	0	0	0	0	603	903	0
400	6	0	0	0	0	0	0	200	300	0	0	0	0	0	0	0	200	903	0	0	0	0	0	0	0	603	903	0
400	7	0	0	0	0	0	0	200	300	0	0	0	0	0	0	0	200	903	0	0	0	0	0	0	0	603	903	0
400	8	0	0	0	0	0	0	200	300	0	0	0	0	0	0	0	200	903	0	0	0	0	0	0	0	603	903	0
400	9	0	0	0	0	0	0	200	300	0	0	0	0	0	0	0	200	903	0	0	0	0	0	0	0	603	903	0
401	0	0	0	0	0	0	0	200	300	0	0	0	0	0	0	0	200	903	0	0	0	0	0	0	0	603	903	0
401	1	0	0	0	0	0	0	200	300	0	0	0	0	0	0	0	200	903	0	0	0	0	0	0	0	603	903	0
401	2	0	0	0	0	0	0	200	300	0	0	0	0	0	0	0	200	903	0	0	0	0	0	0	0	603	903	0
401	3	0	0	0	0	0	0	200	300	0	0	0	0	0	0	0	200	903	0	0	0	0	0	0	0	603	903	0
401	4	0	0	0	0	0	0	200	300	0	0	0	0	0	0	0	200	903	0	0	0	0	0	0	0	603	903	0
401	5	0	0	0	0	0	0	200	300	0	0	0	0	0	0	0	200	903	0	0	0	0	0	0	0	603	903	0
401	6	0	0	0	0	0	0	200	300	0	0	0	0	0	0	0	200	903	0	0	0	0	0	0	0	603	903	0
401	7	0	0	0	0	0	0	200	300	0	0	0	0	0	0	0	200	903	0	0	0	0	0	0	0	603	903	0
401	8	0	0	0	0	0	0	200	300	0	0	0	0	0	0	0	200	903	0	0	0	0	0	0	0	603	903	0
401	9	0	0	0	0	0	0	200	300	0	0	0	0	0	0	0	200	903	0	0	0	0	0	0	0	603	903	0
402	0	0	0	0	0	0	0	200	300	0	0	0	0	0	0	0	200	903	0	0	0	0	0	0	0	603	903	0
402	1	0	0	0	0	0	0	200	300	0	0	0	0	0	0	0	200	903	0	0	0	0	0	0	0	603	903	0
402	2	0	0	0	0	0	0	200	300	0	0	0	0	0	0	0	200	903	0	0	0	0	0	0	0	603	903	0
402	3	0	0	0	0	0	0	200	300	0	0	0	0	0	0	0	200	903	0	0	0	0	0	0	0	603	903	0
402	4	0	0	0	0	0	0	200	300	0	0	0	0	0	0	0	200	903	0	0	0	0	0	0	0	603	903	0
402	5	0	0	0	0	0	0	200	300	0	0	0	0	0	0	0	200	903	0	0	0	0	0	0	0	603	903	0
402	6	0	0	0	0	0	0	200	300	0	0	0	0	0	0	0	200	903	0	0	0	0	0	0	0	603	903	0
402	7	0	0	0	0	0	0	200	300	0	0	0	0	0	0	0	200	903	0	0	0	0	0	0	0	603	903	0
402	8	0	0	0	0	0	0	200	300	0	0	0	0	0	0	0	200	903	0	0	0	0	0	0	0	603	903	0
402	9	0	0	0	0	0	0	200	300	0	0	0	0	0	0	0	200	903	0	0	0	0	0	0	0	603	903	0
403	0	0	0	0	0	0	0	200	300	0	0	0	0	0	0	0	200	903	0	0	0	0	0	0	0	603	903	0
403	1	0	0	0	0	0	0	200	300	0	0	0	0	0	0	0	200	903	0	0	0	0	0	0	0	603	903	0
403	2	0	0	0	0	0	0	200	300	0	0	0	0	0	0	0	200	903	0	0	0	0	0	0	0	603	903	0
403	3	0	0	0	0	0	0	200	300	0	0	0	0	0	0	0	200	903	0	0	0	0	0	0	0	603	903	0
403	4	0	0	0	0	0	0	200	300	0	0	0	0	0	0	0	200	903	0	0	0	0	0	0	0	603	903	0
403	5	0	0	0	0	0	0	200	300	0	0	0	0	0	0	0	200	903	0	0	0	0	0	0	0	603	903	0
403	6	0	0	0	0	0	0	200	300	0	0	0	0	0	0	0	200	903	0	0	0	0	0	0	0	603	903	0
403	7	0	0	0	0	0	0	200	300	0	0	0	0	0	0	0	200	903	0	0	0	0	0	0	0	603	903	0
403	8	0	0	0	0	0	0	200	300	0	0	0	0	0	0	0	200	903	0	0	0	0	0	0	0	603	903	0
403	9	0	0	0	0	0	0	200	300	0	0	0	0	0	0	0	200	903	0	0	0	0	0	0	0	603	903	0
404	0	0	0	0	0	0	0	200	300	0	0	0	0	0	0	0	200	903	0	0	0	0	0	0	0	603	903	0
404	1	0	0	0	0	0	0	200	300	0	0	0	0	0	0	0	200	903	0	0	0	0	0	0	0	603	903	0
404	2	0	0	0	0	0	0	200	300	0	0	0	0	0	0	0	200	903	0	0	0	0	0	0	0	603	903	0
404	3	0	0	0	0	0	0	200	300	0	0	0	0	0	0	0	200	903	0	0	0	0	0	0	0	603	903	0
404	4	0	0	0	0	0	0	200	300	0	0	0	0	0	0	0	200	903	0	0	0	0	0	0	0	603	903	0
404	5	0	0	0	0	0	0	200	300	0	0	0	0	0	0	0	200	903	0	0	0	0	0	0	0	603	903	0
404	6	0	0	0	0	0	0	200	300	0	0	0	0	0	0	0	200	903	0	0	0	0	0	0	0	603	903	0
404	7	0	0	0	0	0	0	200	300	0	0	0	0	0	0	0	200	903	0	0	0	0	0	0	0	603	903	0
404	8	0	0	0	0	0	0	200	300	0	0	0	0	0	0	0	200	903	0	0	0	0	0	0	0	603	903	0
404	9	0	0	0	0	0	0	200	300	0	0	0	0	0	0	0	200	903	0	0	0	0	0	0	0	603	903	0
405	0	0	0	0	0	0	0	200	300	0	0	0	0	0	0	0	200	903	0	0	0	0	0	0	0	603	903	0
405	1	0	0	0	0	0	0	200	300	0	0	0	0	0	0	0	200	903	0	0	0	0	0	0	0	603	903	0
405	2	0	0	0	0	0	0	200	300	0	0	0	0	0	0	0	200	903	0	0	0	0	0	0	0	603	903	0
405	3	0	0	0	0	0	0	200	300	0	0	0	0	0	0	0	200	903	0	0	0	0	0	0	0	603	903	0
405	4	0	0	0	0	0	0	200	300	0	0	0	0	0	0	0	200	903	0	0	0	0	0	0	0	603	903	0
405	5	0	0	0	0	0	0	200	300	0	0	0	0	0	0	0	200	903	0	0	0	0	0	0	0	603	903	0
405	6	0	0	0	0	0	0	200	300	0	0	0	0	0	0	0	200	903	0	0	0	0	0	0	0	603	903	0
405	7	0	0	0	0	0	0	200	300	0	0	0	0	0	0	0	200	903	0	0	0	0	0	0	0	603	903	0
405	8	0	0	0	0	0	0	200	300	0	0	0	0	0	0	0	200	903	0	0	0	0	0	0	0	603	903	0
405	9	0	0	0	0	0	0	200	300	0	0	0	0	0	0	0	200	903	0	0	0	0	0	0	0	603	903	0
406	0	0	0	0	0	0	0	200	300	0	0	0	0	0	0	0	200	903	0	0	0	0	0	0	0	603	903	0
406	1	0	0	0	0	0	0	200	300	0	0	0	0	0	0	0	200	903	0	0	0	0	0	0	0	603	903	0
406	2	0	0	0	0	0	0	200	300	0	0	0	0	0	0	0	200	903	0	0	0	0	0	0	0	603	903	0
406	3	0	0	0	0	0	0	200	300	0	0	0	0	0	0	0	200	903	0	0	0	0	0	0	0	603	903	0
406	4	0	0	0	0	0	0	200	300	0	0	0	0	0	0	0	200	903	0	0	0	0	0	0	0	603	903	0
406	5	0	0	0	0	0	0	200	300	0	0	0	0	0	0	0	200	903	0	0	0	0	0	0	0	603	903	0
406	6	0	0	0	0	0	0	200	300	0	0	0	0	0	0	0	200	903	0	0	0	0	0	0	0	603	903	0
406	7	0	0	0	0	0	0	200	300	0	0	0	0	0	0	0	200	903	0	0	0	0	0	0	0	603	903	0
406	8	0	0	0	0	0	0	200	300	0	0	0	0	0	0	0	200	903	0	0	0	0	0	0	0	603	903	0
406	9	0	0	0	0	0	0	200	300	0	0	0	0	0	0	0	200	903	0	0	0	0	0	0	0	603	903	0
407	0	0	0	0	0	0	0	200	300	0	0	0	0	0	0	0	200	903	0	0	0	0	0	0	0	603	903	0
407	1	0	0	0	0	0	0	200	300	0	0	0	0	0	0	0	200	903	0	0	0	0	0	0	0	603	903	0
407	2	0	0	0	0	0	0	200	300	0	0	0	0	0	0	0	200	903	0	0	0	0	0	0	0	603	903	0
407	3	0	0	0	0	0	0	200	300	0	0	0	0	0	0	0	200	903	0	0	0	0	0	0	0	603	903	0
407	4	0	0	0	0	0	0	200	300	0	0	0	0	0	0	0	200	903	0	0	0	0	0	0	0	603	903	0
407	5	0	0	0	0	0	0	200	300	0	0	0	0	0	0	0	200	903	0	0	0	0	0	0	0	603	903	0
407	6	0	0	0	0	0	0	200	300	0	0	0	0	0	0	0	200	903	0	0	0	0	0	0	0	603	903	0
407	7	0	0	0	0	0	0	200	300	0	0	0	0	0	0	0	200	903	0	0	0	0	0	0	0	603	903	0
407	8	0	0	0	0	0	0	200	300	0	0	0	0	0	0	0	200	903	0	0	0	0	0	0	0	603	903	0
407	9	0	0	0	0	0	0	200	300	0	0	0	0	0	0	0	200	903	0	0	0	0	0	0	0	603	903	0
408	0	0	0	0	0	0	0	200	300	0	0	0	0	0	0	0	200	903	0	0	0	0	0	0	0	603	903	0
408	1	0	0	0	0	0	0	200	300	0	0	0	0	0	0	0	200	903	0	0	0	0	0	0	0	603	903	0
408	2	0	0	0	0	0	0	200	300	0	0	0	0	0	0	0	200	903	0	0	0	0	0	0	0	603	903	0
408	3	0	0	0	0	0	0	200	300	0	0	0	0	0	0	0	200	903	0	0	0	0	0	0	0	603	903	0
408	4	0	0	0	0	0	0	200	300	0	0	0	0	0	0	0	200	903	0	0	0	0	0	0	0	603	903	0
408	5	0	0	0	0	0	0	200	300	0	0	0	0	0	0	0	200	903	0	0	0	0	0	0	0	603	903	0
408	6	0	0	0	0	0	0	200	300	0	0	0	0	0	0	0	200	903	0	0	0	0	0	0	0	603	903	0
408	7	0	0	0	0	0	0	200	300	0	0	0	0	0	0	0	200	903	0	0	0	0	0	0	0	603	903	0
408	8	0	0	0	0	0	0	200	300	0	0	0	0	0	0	0	200	903	0	0	0	0	0	0	0	603	903	0
408	9	0	0	0	0	0	0	200	300	0	0	0	0	0	0	0	200	903	0	0	0	0	0	0	0	603	903	0
409	0	0	0	0	0	0	0	200	300	0	0	0	0	0	0	0	200	903	0	0	0	0	0	0	0	603	903	0
409	1	0	0	0	0	0	0	200	300	0	0	0	0	0	0	0	200	903	0	0	0	0	0	0	0	603	903	0
409	2	0	0	0	0	0	0	200	300	0	0	0	0	0	0	0	200	903	0	0	0	0	0	0	0	603	903	0
409	3	0	0	0	0	0	0	200	300	0	0	0	0	0	0	0	200	903	0	0	0	0	0	0	0	603	903	0
409	4	0	0	0	0	0	0	200	300	0	0	0	0	0	0	0	200	903	0	0	0	0	0	0	0	603	903	0
409	5	0	0	0	0	0	0	200	300	0	0	0	0	0	0	0	200	903	0	0	0	0	0	0	0	603	903	0
409	6	0	0	0	0	0	0	200	300	0	0	0	0	0	0	0	200	903	0	0	0	0	0	0	0	603	903	0
409	7	0	0	0	0	0	0	200	300	0	0	0	0	0	0	0	200	903	0	0	0	0	0	0	0	603	903	0
409	8	0	0	0	0	0	0	200	300	0	0	0	0	0	0	0	200	903	0	0	0	0	0	0	0	603	903	0
409	9	0	0	0	0	0	0	200	300	0	0	0	0	0	0	0	200	903	0	0	0	0	0	0	0	603	903	0
410	0	0	0	0	0	0	0	200	300	0	0	0	0	0	0	0	200	903	0	0	0	0	0	0	0	603	903	0
410	1	0	0	0	0	0	0	200	300	0	0	0	0	0	0	0	200	903	0	0	0	0	0	0	0	603	903	0
410	2	0	0	0	0	0	0	200	300	0	0	0	0	0	0	0	200	903	0	0	0	0	0	0	0	603	903	0
410	3	0	0	0	0	0	0	200	300	0	0	0	0	0	0	0	200	903	0	0	0	0	0	0	0	603	903	0
410	4	0	0	0	0	0	0	200	300	0	0	0	0	0	0	0	200	903	0	0	0	0	0	0	0	603	903	0
410	5	0	0	0	0	0	0	200	300	0	0	0	0	0	0	0	200	903	0	0	0	0	0	0	0	603	903	0
410	6	0	0	0	0	0	0	200	300	0	0	0	0	0	0	0	200	903	0	0	0	0	0	0	0	603	903	0
410	7	0	0	0	0	0	0	200	300	0	0	0	0	0	0	0	200	903	0	0	0	0	0	0	0	603	903	0
410	8	0	0	0	0	0	0	200	300	0	0	0	0	0	0	0	200	903	0	0	0	0	0	0	0	603	903	0
410	9	0	0	0	0	0	0	200	300	0	0	0	0	0	0	0	200	903	0	0	0	0	0	0	0	603	903	0
411	0	0	0	0	0	0	0	200	300	0	0	0	0	0	0	0	200	903	0	0	0	0	0	0	0	603	903	0
411	1	0	0	0	0	0	0	200	300	0	0	0	0	0	0	0	200	903	0	0	0	0	0	0	0	603	903	0
411	2	0	0	0	0	0	0	200	300	0	0	0	0	0	0	0	200	903	0	0	0	0	0	0	0	603	903	0
411	3	0	0	0	0	0	0	200	300	0	0	0	0	0	0	0	200	903	0	0	0	0	0	0	0	603	903	0
411	4	0	0	0	0	0	0	200	300	0	0	0	0	0	0	0	200	903	0	0	0	0	0	0	0	603	903	0
411	5	0	0	0	0	0	0	200	300	0	0	0	0	0	0	0	200	903	0	0	0	0	0	0	0	603	903	0
411	6	0	0	0	0	0	0	200	300	0	0	0	0	0	0	0	200	903	0	0	0	0	0	0	0	603	903	0
411	7	0	0	0	0	0	0	200	300	0	0	0	0	0	0	0	200	903	0	0	0	0	0	0	0	603	903	0
411	8	0	0	0	0	0	0	200	300	0	0	0	0	0	0	0	200	903	0	0	0	0	0	0	0	603	903	0
411	9	0	0	0	0	0	0	200	300	0	0	0	0	0	0	0	200	903	0	0	0	0	0	0	0	603	903	0
412	0	0	0	0	0	0	0	200	300	0	0	0	0	0	0	0	200	903	0	0	0	0	0	0	0	603	903	0
412	1	0	0	0	0	0	0	200	300	0	0	0	0	0	0	0	200	903	0	0	0	0	0	0	0	603	903	0
412	2	0	0	0	0	0	0	200	300	0	0	0	0	0	0	0	200	903	0	0	0	0	0	0	0	603	903	0
412	3	0	0	0	0	0	0	200	300	0	0	0	0	0	0	0	200	903	0	0	0	0	0	0	0	603	903	0
412	4	0	0	0	0	0	0	200	300	0	0	0	0	0	0	0	200	903	0	0	0	0	0	0	0	603	903	0
412	5	0	0	0	0	0	0	200	300	0	0	0	0	0	0	0	200	903	0	0	0	0	0	0	0	603	903	0
412	6	0	0	0	0	0	0	200	300	0	0	0	0	0	0	0	200	903	0	0	0	0	0	0	0	603	903	0
412	7	0	0	0	0	0	0	200	300	0	0	0	0	0	0	0	200	903	0	0	0	0	0	0	0	603	903	0
412	8	0	0	0	0	0	0	200	300	0	0	0	0	0	0	0	200	903	0	0	0	0	0	0	0	603	903	0
412	9	0	0	0	0	0	0	200	300	0	0	0	0	0	0	0	200	903	0	0	0	0	0	0	0	603	903	0
413	0	0	0	0	0	0	0	200	300	0	0	0	0	0	0	0	200	903	0	0	0	0	0	0	0	603	903	0
413	1	0	0	0	0	0	0	200	300	0	0	0	0	0	0	0	200	903	0	0	0	0	0	0	0	603	903	0
413	2	0	0	0	0	0	0	200	300	0	0	0	0	0	0	0	200	903	0	0	0	0	0	0	0	603	903	0
413	3	0	0	0	0	0	0	200	300	0	0	0	0	0	0	0	200	903	0	0	0	0	0	0	0	603	903	0
413	4	0	0	0	0	0	0	200	300	0	0	0	0	0	0	0	200	903	0	0	0	0	0	0	0	603	903	0
413	5	0	0	0	0	0	0	200	300	0	0	0	0	0	0	0	200	903	0	0	0	0	0	0	0	603	903	0
413	6	0	0	0	0	0	0	200	300	0	0	0	0	0	0	0	200	903	0	0	0	0	0	0	0	603	903	0
413	7	0	0	0	0	0	0	200	300	0	0	0	0	0	0	0	200	903	0	0	0	0	0	0	0	603	903	0
413	8	0	0	0	0	0	0	200	300	0	0	0	0	0	0	0	200	903	0	0	0	0	0	0	0	603	903	0
413	9	0	0	0	0	0	0	200	300	0	0	0	0	0	0	0	200	903	0	0	0	0	0	0	0	603	903	0
414	0	0	0	0	0	0	0	200	300	0	0	0	0	0	0	0	200	903	0	0	0	0	0	0	0	603	903	0
414	1	0	0	0	0	0	0	200	300	0	0	0	0	0	0	0	200	903	0	0	0	0	0	0	0	603	903	0
414	2	0	0	0	0	0	0	200	300	0	0	0	0	0	0	0	200	903	0	0	0	0	0	0	0	603	903	0
414	3	0	0	0	0	0	0	200	300	0	0	0	0	0	0	0	200	903	0	0	0	0	0	0	0	603	903	0
414	4	0	0	0	0	0	0	200	300	0	0	0	0	0	0	0	200	903	0	0	0	0	0	0	0	603	903	0
414	5	0	0	0	0	0	0	200	300	0	0	0	0	0	0	0	200	903	0	0	0	0	0	0	0	603	903	0
414	6	0	0	0	0	0	0	200	300	0	0	0	0	0	0	0	200	903	0	0	0	0	0	0	0	603	903	0
414	7	0	0	0	0	0	0	200	300	0	0	0	0	0	0	0	200	903	0	0	0	0	0	0	0	603	903	0
414	8	0	0	0	0	0	0	200	300	0	0	0	0	0	0	0	200	903	0	0	0	0	0	0	0	603	903	0
414	9	0	0	0	0	0	0	200	300	0	0	0	0	0	0	0	200	903	0	0	0	0	0	0	0	603	903	0
415	0	0	0	0	0	0	0	200	300	0	0	0	0	0	0	0	200	903	0	0	0	0	0	0	0	603	903	0
415	1	0	0	0	0	0	0	200	300	0	0	0	0	0	0	0	200	903	0	0	0	0	0	0	0	603	903	0
415	2	0	0	0	0	0	0	200	300	0	0	0	0	0	0	0	200	903	0	0	0	0	0	0	0	603	903	0
415	3	0	0	0	0	0	0	200	300	0	0	0	0	0	0	0	200	903	0	0	0	0	0	0	0	603	903	0
415	4	0	0	0	0	0	0	200	300	0	0	0	0	0	0	0	200	903	0	0	0	0	0	0	0	603	903	0
415	5	0	0	0	0	0	0	200	300	0	0	0	0	0	0	0	200	903	0	0	0	0	0	0	0	603	903	0
415	6	0	0	0	0	0	0	200	300	0	0	0	0	0	0	0	200	903	0	0	0	0	0	0	0	603	903	0
415	7	0	0	0	0	0	0	200	300	0	0	0	0	0	0	0	200	903	0	0	0	0	0	0	0	603	903	0
415	8	0	0	0	0	0	0	200	300	0	0	0	0	0	0	0	200	903	0	0	0	0	0	0	0	603	903	0
415	9	0	0	0	0	0	0	200	300	0	0	0	0	0	0	0	200	903	0	0	0	0	0	0	0	603	903	0
416	0	0	0	0	0	0	0	200	300	0	0	0	0	0	0	0	200	903	0	0	0	0	0	0	0	603	903	0
416	1	0	0	0	0	0	0	200	300	0	0	0	0	0	0	0	200	903	0	0	0	0	0	0	0	603	903	0
416	2	0	0	0	0	0	0	200	300	0	0	0	0	0	0	0	200	903	0	0	0	0	0	0	0	603	903	0
416	3	0	0	0	0	0	0	200	300	0	0	0	0	0	0	0	200	903	0	0	0	0	0	0	0	603	903	0
416	4	0	0	0	0	0	0	200	300	0	0	0	0	0	0	0	200	903	0	0	0	0	0	0	0	603	903	0
416	5	0	0	0	0	0	0	200	300	0	0	0	0	0	0	0	200	903	0	0	0	0	0	0	0	603	903	0
416	6	0	0	0	0	0	0	200	300	0	0	0	0	0	0	0	200	903	0	0	0	0	0	0	0	603	903	0
416	7	0	0	0	0	0	0	200	300	0	0	0	0	0	0	0	200	903	0	0	0	0	0	0	0	603	903	0
416	8	0	0	0	0	0	0	200	300	0	0	0	0	0	0	0	200	903	0	0	0	0	0	0	0	603	903	0
416	9	0	0	0	0	0	0	200	300	0	0	0	0	0	0	0	200	903	0	0	0	0	0	0	0	603	903	0
417	0	0	0	0	0	0	0	200	300	0	0	0	0	0	0	0	200	903	0	0	0	0	0	0	0	603	903	0
417	1	0	0	0	0	0	0	200	300	0	0	0	0	0	0	0	200	903	0	0	0	0	0	0	0	603	903	0
417	2	0	0	0	0	0	0	200	300	0	0	0	0	0	0	0	200	903	0	0	0	0	0	0	0	603	903	0
417	3	0	0	0	0	0	0	200	300	0	0	0	0	0	0	0	200	903	0	0	0	0	0	0	0	603	903	0
417	4	0	0	0	0	0	0	200	300	0	0	0	0	0	0	0	200	903	0	0	0	0	0	0	0	603	903	0
417	5	0	0	0	0	0	0	200	300	0	0	0	0	0	0	0	200	903	0	0	0	0	0	0	0	603	903	0
417	6	0	0	0	0	0	0	200	300	0	0	0	0	0	0	0	200	903	0	0	0	0	0	0	0	603	903	0
417	7	0	0	0	0	0	0	200	300	0	0	0	0	0	0	0	200	903	0	0	0	0	0	0	0	603	903	0
417	8	0	0	0	0	0	0	200	300	0	0	0	0	0	0	0	200	903	0	0	0	0	0	0	0	603	903	0
417	9	0	0	0	0	0	0	200	300	0	0	0	0	0	0	0	200	903	0	0	0	0	0	0	0	603	903	0
418	0	0	0	0	0	0	0	200	300	0	0	0	0	0	0	0	200	903	0	0	0	0	0	0	0	603	903	0
418	1	0	0	0	0	0	0	200	300	0	0	0	0	0	0	0	200	903	0	0	0	0	0	0	0	603	903	0
418	2	0	0	0	0	0	0	200	300	0	0	0	0	0	0	0	200	903	0	0	0	0	0	0	0	603	903	0
418	3	0	0	0	0	0	0	200	300	0	0	0	0	0	0	0	200	903	0	0	0	0	0	0	0	603	903	0
418	4	0	0	0	0	0	0	200	300	0	0	0	0	0	0	0	200	903	0	0	0	0	0	0	0	603	903	0
418	5	0	0	0	0	0	0	200	300	0	0	0	0	0	0	0	200	903	0	0	0	0	0	0	0	603	903	0
418	6	0	0	0	0	0	0	200	300	0	0	0	0	0	0	0	200	903	0	0	0	0	0	0	0	603	903	0
418	7	0	0	0	0	0	0	200	300	0	0	0	0	0	0	0	200	903	0	0	0	0	0	0	0	603	903	0
418	8	0	0	0	0	0	0	200	300	0	0	0	0	0	0	0	200	903	0	0	0	0	0	0	0	603	903	0
418	9	0	0	0	0	0	0	200	300	0	0	0	0	0	0	0	200	903	0	0	0	0	0	0	0	603	903	0
419	0	0	0	0	0	0	0	200	300	0	0	0	0	0	0	0	200	903	0	0	0	0	0	0	0	603	903	0
419	1	0	0	0	0	0	0	200	300	0	0	0	0	0	0	0	200	903	0	0	0	0	0	0	0	603	903	0
419	2	0	0	0	0	0	0	200	300	0	0	0	0	0	0	0	200	903	0	0	0	0	0	0	0	603	903	0
419	3	0	0	0	0	0	0	200	300	0	0	0	0	0	0	0	200	903	0	0	0	0	0	0	0	603	903	0
419	4	0	0	0	0	0	0	200	300	0	0	0	0	0	0	0	200	903	0	0	0	0	0	0	0	603	903	0
419	5	0	0	0	0	0	0	200	300	0	0	0	0	0	0	0	200	903	0	0	0	0	0	0	0	603	903	0
419	6	0	0	0	0	0	0	200	300	0	0	0	0	0	0	0	200	903	0	0	0	0	0	0	0	603	903	0
419	7	0	0	0	0	0	0	200	300	0	0	0	0	0	0	0	200	903	0	0	0	0	0	0	0	603	903	0
419	8	0	0	0	0	0	0	200	300	0	0	0	0	0	0	0	200	903	0	0	0	0	0	0	0	603	903	0
419	9	0	0	0	0	0	0	200	300	0	0	0	0	0	0	0	200	903	0	0	0	0	0	0	0	603	903	0
420	0	0	0	0	0	0	0	200	300	0	0	0	0	0	0	0	200	903	0	0	0	0	0	0	0	603	903	0
420	1	0	0	0	0	0	0	200	300	0	0	0	0	0	0	0	200	903	0	0	0	0	0	0	0	603	903	0
420	2	0	0	0	0	0	0	200	300	0	0	0	0	0	0	0	200	903	0	0	0	0	0	0	0	603	903	0
420	3	0	0	0	0	0	0	200	300	0	0	0	0	0	0	0	200	903	0	0	0	0	0	0	0	603	903	0
420	4	0	0	0	0	0	0	200	300	0	0	0	0	0	0	0	200	903	0	0	0	0	0	0	0	603	903	0
420	5	0	0	0	0	0	0	200	300	0	0	0	0	0	0	0	200	903	0	0	0	0	0	0	0	603	903	0
420	6	0	0	0	0	0	0	200	300	0	0	0	0	0	0	0	200	903	0	0	0	0	0	0	0	603	903	0
420	7	0	0	0	0	0	0	200	300	0	0	0	0	0	0	0	200	903	0	0	0	0	0	0	0	603	903	0
420	8	0	0	0	0	0	0	200	300	0	0	0	0	0	0	0	200	903	0	0	0	0	0	0	0	603	903	0
420	9	0	0	0	0	0	0	200	300	0	0	0	0	0	0	0	200	903	0	0	0	0	0	0	0	603	903	0
421	0	0	0	0	0	0	0	200	300	0	0	0	0	0	0	0	200	903	0	0	0	0	0	0	0	603	903	0
421	1	0	0	0	0	0	0	200	300	0	0	0	0	0	0	0	200	903	0	0	0	0	0	0	0	603	903	0
421	2	0	0	0	0	0	0	200	300	0	0	0	0	0	0	0	200	903	0	0	0	0	0	0	0	603	903	0
421	3	0	0	0	0	0	0	200	300	0	0	0	0	0	0	0	200	903	0	0	0	0	0	0	0	603	903	0
421	4	0	0	0	0	0	0	200	300	0	0	0	0	0	0	0	200	903	0	0	0	0	0	0	0	603	903	0
421	5	0	0	0	0	0	0	200	300	0	0	0	0	0	0	0	200	903	0	0	0	0	0	0	0	603	903	0
421	6	0	0	0	0	0	0	200	300	0	0	0	0	0	0	0	200	903	0	0	0	0	0	0	0	603	903	0
421	7	0	0	0	0	0	0	200	300	0	0	0	0	0	0	0	200	903	0	0	0	0	0	0	0	603	903	0
421	8	0	0	0	0	0	0	200	300	0	0	0	0	0	0	0	200	903	0	0	0	0	0	0	0	603	903	0
421	9	0	0	0	0	0	0	200	300	0	0	0	0	0	0	0	200	903	0	0	0	0	0	0	0	603	903	0
422	0	0	0	0	0	0	0	200	300	0	0	0	0	0	0	0	200	903	0	0	0	0	0	0	0	603	903	0
422	1	0	0	0	0	0	0	200	300	0	0	0	0	0	0	0	200	903	0	0	0	0	0	0	0	603	903	0
422	2	0	0	0	0	0	0	200	300	0	0	0	0	0	0	0	200	903	0	0	0	0	0	0	0	603	903	0
422	3	0	0	0	0	0	0	200	300	0	0	0	0	0	0	0	200	903	0	0	0	0	0	0	0	603	903	0
422	4	0	0	0	0	0	0	200	300	0	0	0	0	0	0	0	200	903	0	0	0	0	0	0	0	603	903	0
422	5	0	0	0	0	0	0	200	300	0	0	0	0	0	0	0	200	903	0	0	0	0	0	0	0	603	903	0
422	6	0	0	0	0	0	0	200	300	0	0	0	0	0	0	0	200	903	0	0	0	0	0	0	0	603	903	0
422	7	0	0	0	0	0	0	200	300	0	0	0	0	0	0	0	200	903	0	0	0	0	0	0	0	603	903	0
422	8	0	0	0	0	0	0	200	300	0	0	0	0	0	0	0	200	903	0	0	0	0	0	0	0	603	903	0
422	9	0	0	0	0	0	0	200	300	0	0	0	0	0	0	0	200	903	0	0	0	0	0	0	0	603	903	0
423	0	0	0	0	0	0	0	200	300	0	0	0	0	0	0	0	200	903	0	0	0	0	0	0	0	603	903	0
423	1	0	0	0	0	0	0	200	300	0	0	0	0	0	0	0	200	903	0	0	0	0	0	0	0	603	903	0
423	2	0	0	0	0	0	0	200	300	0	0	0	0	0	0	0	200	903	0	0	0	0	0	0	0	603	903	0
423	3	0	0	0	0	0	0	200	300	0	0	0	0	0	0	0	200	903	0	0	0	0	0	0	0	603	903	0
423	4	0	0	0	0	0	0	200	300	0	0	0	0	0	0	0	200	903	0	0	0	0	0	0	0	603	903	0
423	5	0	0	0	0	0	0	200	300	0	0	0	0	0	0	0	200	903	0	0	0	0	0	0	0	603	903	0
423	6	0	0	0	0	0	0	200	300	0	0	0	0	0	0	0	200	903	0	0	0	0	0	0	0	603	903	0
423	7	0	0	0	0	0	0	200	300	0	0	0	0	0	0	0	200	903	0	0	0	0	0	0	0	603	903	0
423	8	0	0	0	0	0	0	200	300	0	0	0	0	0	0	0	200	903	0	0	0	0	0	0	0	603	903	0
423	9	0	0	0	0	0	0	200	300	0	0	0	0	0	0	0	200	903	0	0	0	0	0	0	0	603	903	0
424	0	0	0	0	0	0	0	200	300	0	0	0	0	0	0	0	200	903	0	0	0	0	0	0	0	603	903	0
424	1	0	0	0	0	0	0	200	300	0	0	0	0	0	0	0	200	903	0	0	0	0	0	0	0	603	903	0
424	2	0	0	0	0	0	0	200	300	0	0	0	0	0	0	0	200	903	0	0	0	0	0	0	0	603	903	0
424	3	0	0	0	0	0	0	200	300	0	0	0	0	0	0	0	200	903	0	0	0	0	0	0	0	603	903	0
424	4	0	0	0	0	0	0	200	300	0	0	0	0	0	0	0	200	903	0	0	0	0	0	0	0	603	903	0
424	5	0	0	0	0	0	0	200	300	0	0	0	0	0	0	0	200	903	0	0	0	0	0	0	0	603	903	0
424	6	0	0	0	0	0	0	200	300	0	0	0	0	0	0	0	200	903	0	0	0	0	0	0	0	603	903	0
424	7	0	0	0	0	0	0	200	300	0	0	0	0	0	0	0	200	903	0	0	0	0	0	0	0	603	903	0
424	8	0	0	0	0	0	0	200	300	0	0	0	0	0	0	0	200	903	0	0	0	0	0	0	0	603	903	0
424	9	0	0	0	0	0	0	200	300	0	0	0	0	0	0	0	200	903	0	0	0	0	0	0	0	603	903	0
425	0	0	0	0	0	0	0	200	300	0	0	0	0	0	0	0	200	903	0	0	0	0	0	0	0	603	903	0
425	1	0	0	0	0	0	0	200	300	0	0	0	0	0	0	0	200	903	0	0	0	0	0	0	0	603	903	0
425	2	0	0	0	0	0	0	200	300	0	0	0	0	0	0	0	200	903	0	0	0	0	0	0	0	603	903	0
425	3	0	0	0	0	0	0	200	300	0	0	0	0	0	0	0	200	903	0	0	0	0	0	0	0	603	903	0
425	4	0	0	0	0	0	0	200	300	0	0	0	0	0	0	0	200	903	0	0	0	0	0	0	0	603	903	0
425	5	0	0	0	0	0	0	200	300	0	0	0	0	0	0	0	200	903	0	0	0	0	0	0	0	603	903	0
425	6	0	0	0	0	0	0	200	300	0	0	0	0	0	0	0	200	903	0	0	0	0	0	0	0	603	903	0
425	7	0	0	0	0	0	0	200	300	0	0	0	0	0	0	0	200	903	0	0	0	0	0	0	0	603	903	0
425	8	0	0	0	0	0	0	200	300	0	0	0	0	0	0	0	200	903	0	0	0	0	0	0	0	603	903	0
425	9	0	0	0	0	0	0	200	300	0	0	0	0	0	0	0	200	903	0	0	0	0	0	0	0	603	903	0
426	0	0	0	0	0	0	0	200	300	0	0	0	0	0	0	0	200	903	0	0	0	0	0	0	0	603	903	0
426	1	0	0	0	0	0	0	200	300	0	0	0	0	0	0	0	200	903	0	0	0	0	0	0	0	603	903	0
426	2	0	0	0	0	0	0	200	300	0	0	0	0	0	0	0	200	903	0	0	0	0	0	0	0	603	903	0
426	3	0	0	0	0	0	0	200	300	0	0	0	0	0	0	0	200	903	0	0	0	0	0	0	0	603	903	0
426	4	0	0	0	0	0	0	200	300	0	0	0	0	0	0	0	200	903	0	0	0	0	0	0	0	603	903	0
426	5	0	0	0	0	0	0	200	300	0	0	0	0	0	0	0	200	903	0	0	0	0	0	0	0	603	903	0
426	6	0	0	0	0	0	0	200	300	0	0	0	0	0	0	0	200	903	0	0	0	0	0	0	0	603	903	0
426	7	0	0	0	0	0	0	200	300	0	0	0	0	0	0	0	200	903	0	0	0	0	0	0	0	603	903	0
426	8	0	0	0	0	0	0	200	300	0	0	0	0	0	0	0	200	903	0	0	0	0	0	0	0	603	903	0
426	9	0	0	0	0	0	0	200	300	0	0	0	0	0	0	0	200	903	0	0	0	0	0	0	0	603	903	0
427	0	0	0	0	0	0	0	200	300	0	0	0	0	0	0	0	200	903	0	0	0	0	0	0	0	603	903	0
427	1	0	0	0	0	0	0	200	300	0	0	0	0	0	0	0	200	903	0	0	0	0	0	0	0	603	903	0
427	2	0	0	0	0	0	0	200	300	0	0	0	0	0	0	0	200	903	0	0	0	0	0	0	0	603	903	0
427	3	0	0	0	0	0	0	200	300	0	0	0	0	0	0	0	200	903	0	0	0	0	0	0	0	603	903	0
427	4	0	0	0	0	0	0	200	300	0	0	0	0	0	0	0	200	903	0	0	0	0	0	0	0	603	903	0
427	5	0	0	0	0	0	0	200	300	0	0	0	0	0	0	0	200	903	0	0	0	0	0	0	0	603	903	0
427	6	0	0	0	0	0	0	200	300	0	0	0	0	0	0	0	200	903	0	0	0	0	0	0	0	603	903	0
427	7	0	0	0	0	0	0	200	300	0	0	0	0	0	0	0	200	903	0	0	0	0	0	0	0	603	903	0
427	8	0	0	0	0	0	0	200	300	0	0	0	0	0	0	0	200	903	0	0	0	0	0	0	0	603	903	0
427	9	0	0	0	0	0	0	200	300	0	0	0	0	0	0	0	200	903	0	0	0	0	0	0	0	603	903	0
428	0	0	0	0	0	0	0	200	300	0	0	0	0	0	0	0	200	903	0	0	0	0	0	0	0	603	903	0
428	1	0	0	0	0	0	0	200	300	0	0	0	0	0	0	0	200	903	0	0	0	0	0	0	0	603	903	0
428	2	0	0	0	0	0	0	200	300	0	0	0	0	0	0	0	200	903	0	0	0	0	0	0	0	603	903	0
428	3	0	0	0	0	0	0	200	300	0	0	0	0	0	0	0	200	903	0	0	0	0	0	0	0	603	903	0
428	4	0	0	0	0	0	0	200	300	0	0	0	0	0	0	0	200	903	0	0	0	0	0	0	0	603	903	0
428	5	0	0	0	0	0	0	200	300	0	0	0	0	0	0	0	200	903	0	0	0	0	0	0	0	603	903	0
428	6	0	0	0	0	0	0	200	300	0	0	0	0	0	0	0	200	903	0	0	0	0	0	0	0	603	903	0
428	7	0	0	0	0	0	0	200	300	0	0	0	0	0	0	0	200	903	0	0	0	0	0	0	0	603	903	0
428	8	0	0	0	0	0	0	200	300	0	0	0	0	0	0	0	200	903	0	0	0	0	0	0	0	603	903	0
428	9	0	0	0	0	0	0	200	300	0	0	0	0	0	0	0	200	903	0	0	0	0	0	0	0	603	903	0
429	0	0	0	0	0	0	0	200	300	0	0	0	0	0	0	0	200	903	0	0	0	0	0	0	0	603	903	0
429	1	0	0	0	0	0	0	200	300	0	0	0	0	0	0	0	200	903	0	0	0	0	0	0	0	603	903	0
429	2	0	0	0	0	0	0	200	300	0	0	0	0	0	0	0	200	903	0	0	0	0	0	0	0	603	903	0
429	3	0	0	0	0	0	0	200	300	0	0	0	0	0	0	0	200	903	0	0	0	0	0	0	0	603	903	0
429	4	0	0	0	0	0	0	200	300	0	0	0	0	0	0	0	200	903	0	0	0	0	0	0	0	603	903	0
429	5	0	0	0	0	0	0	200	300	0	0	0	0	0	0	0	200	903	0	0	0	0	0	0	0	603	903	0
429	6	0	0	0	0	0	0	200	300	0	0	0	0	0	0	0	200	903	0	0	0	0	0	0	0	603	903	0
429	7	0	0	0	0	0	0	200	300	0	0	0	0	0	0	0	200	903	0	0	0	0	0	0	0	603	903	0
429	8	0	0	0	0	0	0	200	300	0	0	0	0	0	0	0	200	903	0	0	0	0	0	0	0	603	903	0
429	9	0	0	0	0	0	0	200	300	0	0	0	0	0	0	0	200	903	0	0	0	0	0	0	0	603	903	0
430	0	0	0	0	0	0	0	200	300	0	0	0	0	0	0	0	200	903	0	0	0	0	0	0	0	603	903	0
430	1	0	0	0	0	0	0	200	300	0	0	0	0	0	0	0	200	903	0	0	0	0	0	0	0	603	903	0
430	2	0	0	0	0	0	0	200	300	0	0	0	0	0	0	0	200	903	0	0	0	0	0	0	0	603	903	0
430	3	0	0	0	0	0	0	200	300	0	0	0	0	0	0	0	200	903	0	0	0	0	0	0	0	603	903	0
430	4	0	0	0	0	0	0	200	300	0	0	0	0	0	0	0	200	903	0	0	0	0	0	0	0	603	903	0
430	5	0	0	0	0	0	0	200	300	0	0	0	0	0	0	0	200	903	0	0	0	0	0	0	0	603	903	0
430	6	0	0	0	0	0	0	200	300	0	0	0	0	0	0	0	200	903	0	0	0	0	0	0	0	603	903	0
430	7	0	0	0	0	0	0	200	300	0	0	0	0	0	0	0	200	903	0	0	0	0	0	0	0	603	903	0
430	8	0	0	0	0	0	0	200	300	0	0	0	0	0	0	0	200	903	0	0	0	0	0	0	0	603	903	0
430	9	0	0	0	0	0	0	200	300	0	0	0	0	0	0	0	200	903	0	0	0	0	0	0	0	603	903	0
431	0	0	0	0	0	0	0	200	300	0	0	0	0	0	0	0	200	903	0	0	0	0	0	0	0	603	903	0
431	1	0	0	0	0	0	0	200	300	0	0	0	0	0	0	0	200	903	0	0	0	0	0	0	0	603	903	0
431	2	0	0	0	0	0	0	200	300	0	0	0	0	0	0	0	200	903	0	0	0	0	0	0	0	603	903	0
431	3	0	0	0	0	0	0	200	300	0	0	0	0	0	0	0	200	903	0	0	0	0	0	0	0	603	903	0
431	4	0	0	0	0	0	0	200	300	0	0	0	0	0	0	0	200	903	0	0	0	0	0	0	0	603	903	0
431	5	0	0	0	0	0	0	200	300	0	0	0	0	0	0	0	200	903	0	0	0	0	0	0	0	603	903	0
431	6	0	0	0	0	0	0	200	300	0	0	0	0	0	0	0	200	903	0	0	0	0	0	0	0	603	903	0
431	7	0	0	0	0	0	0	200	300	0	0	0	0	0	0	0	200	903	0	0	0	0	0	0	0	603	903	0
431	8	0	0	0	0	0	0	200	300	0	0	0	0	0	0	0	200	903	0	0	0	0	0	0	0	603	903	0
431	9	0	0	0	0	0	0	200	300	0	0	0	0	0	0	0	200	903	0	0	0	0	0	0	0	603	903	0
432	0	0	0	0	0	0	0	200	300	0	0	0	0	0	0	0	200	903	0	0	0	0	0	0	0	603	903	0
432	1	0	0	0	0	0	0	200	300	0	0	0	0	0	0	0	200	903	0	0	0	0	0	0	0	603	903	0
432	2	0	0	0	0	0	0	200	300	0	0	0	0	0	0	0	200	903	0	0	0	0	0	0	0	603	903	0
432	3	0	0	0	0	0	0	200	300	0	0	0	0	0	0	0	200	903	0	0	0	0	0	0	0	603	903	0
432	4	0	0	0	0	0	0	200	300	0	0	0	0	0	0	0	200	903	0	0	0	0	0	0	0	603	903	0
432	5	0	0	0	0	0	0	200	300	0	0	0	0	0	0	0	200	903	0	0	0	0	0	0	0	603	903	0
432	6	0	0	0	0	0	0	200	300	0	0	0	0	0	0	0	200	903	0	0	0	0	0	0	0	603	903	0
432	7	0	0	0	0	0	0	200	300	0	0	0	0	0	0	0	200	903	0	0	0	0	0	0	0	603	903	0
432	8	0	0	0	0	0	0	200	300	0	0	0	0	0	0	0	200	903	0	0	0	0	0	0	0	603	903	0
432	9	0	0	0	0	0	0	200	300	0	0	0	0	0	0	0	200	903	0	0	0	0	0	0	0	603	903	0
433	0	0	0	0	0	0	0	200	300	0	0	0	0	0	0	0	200	903	0	0	0	0	0	0	0	603	903	0
433	1	0	0	0	0	0	0	200	300	0	0	0	0	0	0	0	200	903	0	0	0	0	0	0	0	603	903	0
433	2	0	0	0	0	0	0	200	300	0	0	0	0	0	0	0	200	903	0	0	0	0	0	0	0	603	903	0
433	3	0	0	0	0	0	0	200	300	0	0	0	0	0	0	0	200	903	0	0	0	0	0	0	0	603	903	0
433	4	0	0	0	0	0	0	200	300	0	0	0	0	0	0	0	200	903	0	0	0	0	0	0	0	603	903	0
433	5	0	0	0	0	0	0	200	300	0	0	0	0	0	0	0	200	903	0	0	0	0	0	0	0	603	903	0
433	6	0	0	0	0	0	0	200	300	0	0	0	0	0	0	0	200	903	0	0	0	0	0	0	0	603	903	0
433	7	0	0	0	0	0	0	200	300	0	0	0	0	0	0	0	200	903	0	0	0	0	0	0	0	603	903	0
433	8	0	0	0	0	0	0	200	300	0	0	0	0	0	0	0	200	903	0	0	0	0	0	0	0	603	903	0
433	9	0	0	0	0	0	0	200	300	0	0	0	0	0	0	0	200	903	0	0	0	0	0	0	0	603	903	0
434	0	0	0	0	0	0	0	200	300	0	0	0	0	0	0	0	200	903	0	0	0	0	0	0	0	603	903	0
434	1	0	0	0	0	0	0	200	300	0	0	0	0	0	0	0	200	903	0	0	0	0	0	0	0	603	903	0
434	2	0	0	0	0	0	0	200	300	0	0	0	0	0	0	0	200	903	0	0	0	0	0	0	0	603	903	0
434	3	0	0	0	0	0	0	200	300	0	0	0	0	0	0	0	200	903	0	0	0	0	0	0	0	603	903	0
434	4	0	0	0	0	0	0	200	300	0	0	0	0	0	0	0	200	903	0	0	0	0	0	0	0	603	903	0
434	5	0	0	0	0	0	0	200	300	0	0	0	0	0	0	0	200	903	0	0	0	0	0	0	0	603	903	0
434	6	0	0	0	0	0	0	200	300	0	0	0	0	0	0	0	200	903	0	0	0	0	0	0	0	603	903	0
434	7	0	0	0	0	0	0	200	300	0	0	0	0	0	0	0	200	903	0	0	0	0	0	0	0	603	903	0
434	8	0	0	0	0	0	0	200	300	0	0	0	0	0	0	0	200	903	0	0	0	0	0	0	0	603	903	0
434	9	0	0	0	0	0	0	200	300	0	0	0	0	0	0	0	200	903	0	0	0	0	0	0	0	603	903	0
435	0	0	0	0	0	0	0	200	300	0	0	0	0	0	0	0	200	903	0	0	0	0	0	0	0	603	903	0
435	1	0	0	0	0	0	0	200	300	0	0	0	0	0	0	0	200	903	0	0	0	0	0	0	0	603	903	0
435	2	0	0	0	0	0	0	200	300	0	0	0	0	0	0	0	200	903	0	0	0	0	0	0	0	603	903	0
435	3	0	0	0	0	0	0	200	300	0	0	0	0	0	0	0	200	903	0	0	0	0	0	0	0	603	903	0
435	4	0	0	0	0	0	0	200	300	0	0	0	0	0	0	0	200	903	0	0	0	0	0	0	0	603	903	0
435	5	0	0	0	0	0	0	200	300	0	0	0	0	0	0	0	200	903	0	0	0	0	0	0	0	603	903	0
435	6	0	0	0	0	0	0	200	300	0	0	0	0	0	0	0	200	903	0	0	0	0	0	0	0	603	903	0
435	7	0	0	0	0	0	0	200	300	0	0	0	0	0	0	0	200	903	0	0	0	0	0	0	0	603	903	0
435	8	0	0	0	0	0	0	200	300	0	0	0	0	0	0	0	200	903	0	0	0	0	0	0	0	603	903	0
435	9	0	0	0	0	0	0	200	300	0	0	0	0	0	0	0	200	903	0	0	0	0	0	0	0	603	903	0
436	0	0	0	0	0	0	0	200	300	0	0	0	0	0	0	0	200	903	0	0	0	0	0	0	0	603	903	0
436	1	0	0	0	0	0	0	200	300	0	0	0	0	0	0	0	200	903	0	0	0	0	0	0	0	603	903	0
436	2	0	0	0	0	0	0	200	300	0	0	0	0	0	0	0	200	903	0	0	0	0	0	0	0	603	903	0
436	3	0	0	0	0	0	0	200	300	0	0	0	0	0	0	0	200	903	0	0	0	0	0	0	0	603	903	0
436	4	0	0	0	0	0	0	200	300	0	0	0	0	0	0	0	200	903	0	0	0	0	0	0	0	603	903	0
436	5	0	0	0	0	0	0	200	300	0	0	0	0	0	0	0	200	903	0	0	0	0	0	0	0	603	903	0
436	6	0	0	0	0	0	0	200	300	0	0	0	0	0	0	0	200	903	0	0	0	0	0	0	0	603	903	0
436	7	0	0	0	0	0	0	200	300	0	0	0	0	0	0	0	200	903	0	0	0	0	0	0	0	603	903	0
436	8	0	0	0	0	0	0	200	300	0	0	0	0	0	0	0	200	903	0	0	0	0	0	0	0	603	903	0
436	9	0	0	0	0	0	0	200	300	0	0	0	0	0	0	0	200	903	0	0	0	0	0	0	0	603	903	0
437	0	0	0	0	0	0	0	200	300	0	0	0	0	0	0	0	200	903	0	0	0	0	0	0	0	603	903	0
437	1	0	0	0	0	0	0	200	300	0	0	0	0	0	0	0	200	903	0	0	0	0	0	0	0	603	903	0
437	2	0	0	0	0	0	0	200	300	0	0	0	0	0	0	0	200	903	0	0	0	0	0	0	0	603	903	0
437	3	0	0	0	0	0	0	200	300	0	0	0	0	0	0	0	200	903	0	0	0	0	0	0	0	603	903	0
437	4	0	0	0	0	0	0	200	300	0	0	0	0	0	0	0	200	903	0	0	0	0	0	0	0	603	903	0
437	5	0	0	0	0	0	0	200	300	0	0	0	0	0	0	0	200	903	0	0	0	0	0	0	0	603	903	0
437	6	0	0	0	0	0	0	200	300	0	0	0	0	0	0	0	200	903	0	0	0	0	0	0	0	603	903	0
437	7	0	0	0	0	0	0	200	300	0	0	0	0	0	0	0	200	903	0	0	0	0	0	0	0	603	903	0
437	8	0	0	0	0	0	0	200	300	0	0	0	0	0	0	0	200	903	0	0	0	0	0	0	0	603	903	0
437	9	0	0	0	0	0	0	200	300	0	0	0	0	0	0	0	200	903	0	0	0	0	0	0	0	603	903	0
438	0	0	0	0	0	0	0	200	300	0	0	0	0	0	0	0	200	903	0	0	0	0	0	0	0	603	903	0
438	1	0	0	0	0	0	0	200	300	0	0	0	0	0	0	0	200	903	0	0	0	0	0	0	0	603	903	0
438	2	0	0	0	0	0	0	200	300	0	0	0	0	0	0	0	200	903	0	0	0	0	0	0	0	603	903	0
438	3	0	0	0	0	0	0	200	300	0	0	0	0	0	0	0	200	903	0	0	0	0	0	0	0	603	903	0
438	4	0	0	0	0	0	0	200	300	0	0	0	0	0	0	0	200	903	0	0	0	0	0	0	0	603	903	0
438	5	0	0	0	0	0	0	200	300	0	0	0	0	0	0	0	200	903	0	0	0	0	0	0	0	603	903	0
438	6	0	0	0	0	0	0	200	300	0	0	0	0	0	0	0	200	903	0	0	0	0	0	0	0	603	903	0
438	7	0	0	0	0	0	0	200	300	0	0	0	0	0	0	0	200	903	0	0	0	0	0	0	0	603	903	0
438	8	0	0	0	0	0	0	200	300	0	0	0	0	0	0	0	200	903	0	0	0	0	0	0	0	603	903	0
438	9	0	0	0	0	0	0	200	300	0	0	0	0	0	0	0	200	903	0	0	0	0	0	0	0	603	903	0
439	0	0	0	0	0	0	0	200	300	0	0	0	0	0	0	0	200	903	0	0	0	0	0	0	0	603	903	0
439	1	0	0	0	0	0	0	200	300	0	0	0	0	0	0	0	200	903	0	0	0	0	0	0	0	603	903	0
439	2	0	0	0	0	0	0	200	300	0	0	0	0	0	0	0	200	903	0	0	0	0	0	0	0	603	903	0
439	3	0	0	0	0	0	0	200	300	0	0	0	0	0	0	0	200	903	0	0	0	0	0	0	0	603	903	0
439	4	0	0	0	0	0	0	200	300	0	0	0	0	0	0	0	200	903	0	0	0	0	0	0	0	603	903	0
439	5	0	0	0	0	0	0	200	300	0	0	0	0	0	0	0	200	903	0	0	0	0	0	0	0	603	903	0
439	6	0	0	0	0	0	0	200	300	0	0	0	0	0	0	0	200	903	0	0	0	0	0	0	0	603	903	0
439	7	0	0	0	0	0	0	200	300	0	0	0	0	0	0	0	200	903	0	0	0	0	0	0	0	603	903	0
439	8	0	0	0	0	0	0	200	300	0	0	0	0	0	0	0	200	903	0	0	0	0	0	0	0	603	903	0
439	9	0	0	0	0	0	0	200	300	0	0	0	0	0	0	0	200	903	0	0	0	0	0	0	0	603	903	0
440	0	0	0	0	0	0	0	200	300	0	0	0	0	0	0	0	200	903	0	0	0	0	0	0	0	603	903	0
440	1	0	0	0	0	0	0	200	300	0	0	0	0	0	0	0	200	903	0	0	0	0	0	0	0	603	903	0
440	2	0	0	0	0	0	0	200	300	0	0	0	0	0	0	0	200	903	0	0	0	0	0	0	0	603	903	0
440	3	0	0	0	0	0	0	200	300	0	0	0	0	0	0	0	200	903	0	0	0	0	0	0	0	603	903	0
440	4	0	0	0	0	0	0	200	300	0	0	0	0	0	0	0	200	903	0	0	0	0	0	0	0	603	903	0
440	5	0	0	0	0	0	0	200	300	0	0	0	0	0	0	0	200	903	0	0	0	0	0	0	0	603	903	0
440	6	0	0	0	0	0	0	200	300	0	0	0	0	0	0	0	200	903	0	0	0	0	0	0	0	603	903	0
440	7	0	0	0	0	0	0	200	300	0	0	0	0	0	0	0	200	903	0	0	0	0	0	0	0	603	903	0
440	8	0	0	0	0	0	0	200	300	0	0	0	0	0	0	0	200	903	0	0	0	0	0	0	0	603	903	0
440	9	0	0	0	0	0	0	200	300	0	0	0	0	0	0	0	200	903	0	0	0	0	0	0	0	603	903	0
441	0	0	0	0	0	0	0	200	300	0	0	0	0	0	0	0	200	903	0	0	0	0	0	0	0	603	903	0
441	1	0	0	0	0	0	0	200	300	0	0	0	0	0	0	0	200	903	0	0	0	0	0	0	0	603	903	0
441	2	0	0	0	0	0	0	200	300	0	0	0	0	0	0	0	200	903	0	0	0	0	0	0	0	603	903	0
441	3	0	0	0	0	0	0	200	300	0	0	0	0	0	0	0	200	903	0	0	0	0	0	0	0	603	903	0
441	4	0	0	0	0	0	0	200	300	0	0	0	0	0	0	0	200	903	0	0	0	0	0	0	0	603	903	0
441	5	0	0	0	0	0	0	200	300	0	0	0	0	0	0	0	200	903	0	0	0	0	0	0	0	603	903	0
441	6	0	0	0	0	0	0	200	300	0	0	0	0	0	0	0	200	903	0	0	0	0	0	0	0	603	903	0
441	7	0	0	0	0	0	0	200	300	0	0	0	0	0	0	0	200	903	0	0	0	0	0	0	0	603	903	0
441	8	0	0	0	0	0	0	200	300	0	0	0	0	0	0	0	200	903	0	0	0	0	0	0	0	603	903	0
441	9	0	0	0	0	0	0	200	300	0	0	0	0	0	0	0	200	903	0	0	0	0	0	0	0	603	903	0
442	0	0	0	0	0	0	0	200	300	0	0	0	0	0	0	0	200	903	0	0	0	0	0	0	0	603	903	0
442	1	0	0	0	0	0	0	200	300	0	0	0	0	0	0	0	200	903	0	0	0	0	0	0	0	603	903	0
442	2	0	0	0	0	0	0	200	300	0	0	0	0	0	0	0	200	903	0	0	0	0	0	0	0	603	903	0
442	3	0	0	0	0	0	0	200	300	0	0	0	0	0	0	0	200	903	0	0	0	0	0	0	0	603	903	0
442	4	0	0	0	0	0	0	200	300	0	0	0	0	0	0	0	200	903	0	0	0	0	0	0	0	603	903	0
442	5	0	0	0	0	0	0	200	300	0	0	0	0	0	0	0	200	903	0	0	0	0	0	0	0	603	903	0
442	6	0	0	0	0	0	0	200	300	0	0	0	0	0	0	0	200	903	0	0	0	0	0	0	0	603	903	0
442	7	0	0	0	0	0	0	200	300	0	0	0	0	0	0	0	200	903	0	0	0	0	0	0	0	603	903	0
442	8	0	0	0	0	0	0	200	300	0	0	0	0	0	0	0	200	903	0	0	0	0	0	0	0	603	903	0
442	9	0	0	0	0	0	0	200	300	0	0	0	0	0	0	0	200	903	0	0	0	0	0	0	0	603	903	0
443	0	0	0	0	0	0	0	200	300	0	0	0	0	0	0	0	200	903	0	0	0	0	0	0	0	603	903	0
443	1	0	0	0	0	0	0	200	300	0	0	0	0	0	0	0	200	903	0	0	0	0	0	0	0	603	903	0
443	2	0	0	0	0	0	0	200	300	0	0	0	0	0	0	0	200	903	0	0	0	0	0	0	0	603	903	0
443	3	0	0	0	0	0	0	200	300	0	0	0	0	0	0	0	200	903	0	0	0	0	0	0	0	603	903	0
443	4	0	0	0	0	0	0	200	300	0	0	0	0	0	0	0	200	903	0	0	0	0	0	0	0	603	903	0
443	5	0	0	0	0	0	0	200	300	0	0	0	0	0	0	0	200	903	0	0	0	0	0	0	0	603	903	0
443	6	0	0	0	0	0	0	200	300	0	0	0	0	0	0	0	200	903	0	0	0	0	0	0	0	603	903	0
443	7	0	0	0	0	0	0	200	300	0	0	0	0	0	0	0	200	903	0	0	0	0	0	0	0	603	903	0
443	8	0	0	0	0	0	0	200	300	0	0	0	0	0	0	0	200	903	0	0	0	0	0	0	0	603	903	0
443	9	0	0	0	0	0	0	200	300	0	0	0	0	0	0	0	200	903	0	0	0	0	0	0	0	603	903	0
444	0	0	0	0	0	0	0	200	300	0	0	0	0	0	0	0	200	903	0	0	0	0	0	0	0	603	903	0
444	1	0	0	0	0	0	0	200	300	0	0	0	0	0	0	0	200	903	0	0	0	0	0	0	0	603	903	0
444	2	0	0	0	0	0	0	200	300	0	0	0	0	0	0	0	200	903	0	0	0	0	0	0	0	603	903	0
444	3	0	0	0	0	0	0	200	300	0	0	0	0	0	0	0	200	903	0	0	0	0	0	0	0	603	903	0
444	4	0	0	0	0	0	0	200	300	0	0	0	0	0	0	0	200	903	0	0	0	0	0	0	0	603	903	0
444	5	0	0	0	0	0	0	200	300	0	0	0	0	0	0	0	200	903	0	0	0	0	0	0	0	603	903	0
444	6	0	0	0	0	0	0	200	300	0	0	0	0	0	0	0	200	903	0	0	0	0	0	0	0	603	903	0
444	7	0	0	0	0	0	0	200	300	0	0	0	0	0	0	0	200	903	0	0	0	0	0	0	0	603	903	0
444	8	0	0	0	0	0	0	200	300	0	0	0	0	0	0	0	200	903	0	0	0	0	0	0	0	603	903	0
444	9	0	0	0	0	0	0	200	300	0	0	0	0	0	0	0	200	903	0	0	0	0	0	0	0	603	903	0
445	0	0	0	0	0	0	0	200	300	0	0	0	0	0	0	0	200	903	0	0	0	0	0	0	0	603	903	0
445	1	0	0	0	0	0	0	200	300	0	0	0	0	0	0	0	200	903	0	0	0	0	0	0	0	603	903	0
445	2	0	0	0	0	0	0	200	300	0	0	0	0	0	0	0	200	903	0	0	0	0	0	0	0	603	903	0
445	3	0	0	0	0	0	0	200	300	0	0	0	0	0	0	0	200	903	0	0	0	0	0	0	0	603	903	0
445	4	0	0	0	0	0	0	200	300	0	0	0	0	0	0	0	200	903	0	0	0	0	0	0	0	603	903	0
445	5	0	0	0	0	0	0	200	300	0	0	0	0	0	0	0	200	903	0	0	0	0	0	0	0	603	903	0
445	6	0	0	0	0	0	0	200	300	0	0	0	0	0	0	0	200	903	0	0	0	0	0	0	0	603	903	0
445	7	0	0	0	0	0	0	200	300	0	0	0	0	0	0	0	200	903	0	0	0	0	0	0	0	603	903	0
445	8	0	0	0	0	0	0	200	300	0	0	0	0	0	0	0	200	903	0	0	0	0	0	0	0	603	903	0
445	9	0	0	0	0	0	0	200	300	0	0	0	0	0	0	0	200	903	0	0	0	0	0	0	0	603	903	0
446	0	0	0	0	0	0	0	200	300	0	0	0	0	0	0	0	200	903	0	0	0	0	0	0	0	603	903	0
446	1	0	0	0	0	0	0	200	300	0	0	0	0	0	0	0	200	903	0	0	0	0	0	0	0	603	903	0
446	2	0	0	0	0	0	0	200	300	0	0	0	0	0	0	0	200	903	0	0	0	0	0	0	0	603	903	0
446	3	0	0	0	0	0	0	200	300	0	0	0	0	0	0	0	200	903	0	0	0	0	0	0	0	603	903	0
446	4	0	0	0	0	0	0	200	300	0	0	0	0	0	0	0	200	903	0	0	0	0	0	0	0	603	903	0
446	5	0	0	0	0	0	0	200	300	0	0	0	0	0	0	0	200	903	0	0	0	0	0	0	0	603	903	0
446	6	0	0	0	0	0	0	200	300	0	0	0	0	0	0	0	200	903	0	0	0	0	0	0	0	603	903	0
446	7	0	0	0	0	0	0	200	300	0	0	0	0	0	0	0	200	903	0	0	0	0	0	0	0	603	903	0
446	8	0	0	0	0	0	0	200	300	0	0	0	0	0	0	0	200	903	0	0	0	0	0	0	0	603	903	0
446	9	0	0	0	0	0	0	200	300	0	0	0	0	0	0	0	200	903	0	0	0	0	0	0	0	603	903	0
447	0	0	0	0	0	0	0	200	300	0	0	0	0	0	0	0	200	903	0	0	0	0	0	0	0	603	903	0
447	1	0	0	0	0	0	0	200	300	0	0	0	0	0	0	0	200	903	0	0	0	0	0	0	0	603	903	0
447	2	0	0	0	0	0	0	200	300	0	0	0	0	0	0	0	200	903	0	0	0	0	0	0	0	603	903	0
447	3	0	0	0	0	0	0	200	300	0	0	0	0	0	0	0	200	903	0	0	0	0	0	0	0	603	903	0
447	4	0	0	0	0	0	0	200	300	0	0	0	0	0	0	0	200	903	0	0	0	0	0	0	0	603	903	0
447	5	0	0	0	0	0	0	200	300	0	0	0	0	0	0	0	200	903	0	0	0	0	0	0	0	603	903	0
447	6	0	0	0	0	0	0	200	300	0	0	0	0	0	0	0	200	903	0	0	0	0	0	0	0	603	903	0
447	7	0	0	0	0	0	0	200	300	0	0	0	0	0	0	0	200	903	0	0	0	0	0	0	0	603	903	0
447	8	0	0	0	0	0	0	200	300	0	0	0	0	0	0	0	200	903	0	0	0	0	0	0	0	603	903	0
447	9	0	0	0	0	0	0	200	300	0	0	0	0	0	0	0	200	903	0	0	0	0	0	0	0	603	903	0
448	0	0	0	0	0	0	0	200	300	0	0	0	0	0	0	0	200	903	0	0	0	0	0	0	0	603	903	0
448	1	0	0	0	0	0	0	200	300	0	0	0	0	0	0	0	200	903	0	0	0	0	0	0	0	603	903	0
448	2	0	0	0	0	0	0	200	300	0	0	0	0	0	0	0	200	903	0	0	0	0	0	0	0	603	903	0
448	3	0	0	0	0	0	0	200	300	0	0	0	0	0	0	0	200	903	0	0	0	0	0	0	0	603	903	0
448	4	0	0	0	0	0	0	200	300	0	0	0	0	0	0	0	200	903	0	0	0	0	0	0	0	603	903	0
448	5	0	0	0	0	0	0	200	300	0	0	0	0	0	0	0	200	903	0	0	0	0	0	0	0	603	903	0
448	6	0	0	0	0	0	0	200	300	0	0	0	0	0	0	0	200	903	0	0	0	0	0	0	0	603	903	0
448	7	0	0	0	0	0	0	200	300	0	0	0	0	0	0	0	200	903	0	0	0	0	0	0	0	603	903	0
448	8	0	0	0	0	0	0	200	300	0	0	0	0	0	0	0	200	903	0	0	0	0	0	0	0	603	903	0
448	9	0	0	0	0	0	0	200	300	0	0	0	0	0	0	0	200	903	0	0	0	0	0	0	0	603	903	0
449	0	0	0	0	0	0	0	200	300	0	0	0	0	0	0	0	200	903	0	0	0	0	0	0	0	603	903	0
449	1	0	0	0	0	0	0	200	300	0	0	0	0	0	0	0	200	903	0	0	0	0	0	0	0	603	903	0
449	2	0	0	0	0	0	0	200	300	0	0	0	0	0	0	0	200	903	0	0	0	0	0	0	0	603	903	0
449	3	0	0	0	0	0	0	200	300	0	0	0	0	0	0	0	200	903	0	0	0	0	0	0	0	603	903	0
449	4	0	0	0	0	0	0	200	300	0	0	0	0	0	0	0	200	903	0	0	0	0	0	0	0	603	903	0
449	5	0	0	0	0	0	0	200	300	0	0	0	0	0	0	0	200	903	0	0	0	0	0	0	0	603	903	0
449	6	0	0	0	0	0	0	200	300	0	0	0	0	0	0	0	200	903	0	0	0	0	0	0	0	603	903	0
449	7	0	0	0	0	0	0	200	300	0	0	0	0	0	0	0	200	903	0	0	0	0	0	0	0	603	903	0
449	8	0	0	0	0	0	0	200	300	0	0	0	0	0	0	0	200	903	0	0	0	0	0	0	0	603	903	0
449	9	0	0	0	0	0	0	200	300	0	0	0	0	0	0	0	200	903	0	0	0	0	0	0	0	603	903	0
450	0	0	0	0	0	0	0	200	300	0	0	0	0	0	0	0	200	903	0	0	0	0	0	0	0	603	903	0
450	1	0	0	0	0	0	0	200	300	0	0	0	0	0	0	0	200	903	0	0	0	0	0	0	0	603	903	0
450	2	0	0	0	0	0	0	200	300	0	0	0	0	0	0	0	200	903	0	0	0	0	0	0	0	603	903	0
450	3	0	0	0	0	0	0	200	300	0	0	0	0	0	0	0	200	903	0	0	0	0	0	0	0	603	903	0
450	4	0	0	0	0	0	0	200	300	0	0	0	0	0	0	0	200	903	0	0	0	0	0	0	0	603	903	0
450	5	0	0	0	0	0	0	200	300	0	0	0	0	0	0	0	200	903	0	0	0	0	0	0	0	603	903	0
450	6	0	0	0	0	0	0	200	300	0	0	0	0	0	0	0	200	903	0	0	0	0	0	0	0	603	903	0
450	7	0	0	0	0	0	0	200	300	0	0	0	0	0	0	0	200	903	0	0	0	0	0	0	0	603	903	0
450	8	0	0	0	0	0	0	200	300	0	0	0	0	0	0	0	200	903	0	0	0	0	0	0	0	603	903	0
450	9	0	0	0	0	0	0	200	300	0	0	0	0	0	0	0	200	903	0	0	0	0	0	0	0	603	903	0
451	0	0	0	0	0	0	0	200	300	0	0	0	0	0	0	0	200	903	0	0	0	0	0	0	0	603	903	0
451	1	0	0	0	0	0	0	200	300	0	0	0	0	0	0	0	200	903	0	0	0	0	0	0	0	603	903	0
451	2	0	0	0	0	0	0	200	300	0	0	0	0	0	0	0	200	903	0	0	0	0	0	0	0	603	903	0
451	3	0	0	0	0	0	0	200	300	0	0	0	0	0	0	0	200	903	0	0	0	0	0	0	0	603	903	0
451	4	0	0	0	0	0	0	200	300	0	0	0	0	0	0	0	200	903	0	0	0	0	0	0	0	603	903	0
451	5	0	0	0	0	0	0	200	300	0	0	0	0	0	0	0	200	903	0	0	0	0	0	0	0	603	903	0
451	6	0	0	0	0	0	0	200	300	0	0	0	0	0	0	0	200	903	0	0	0	0	0	0	0	603	903	0
451	7	0	0	0	0	0	0	200	300	0	0	0	0	0	0	0	200	903	0	0	0	0	0	0	0	603	903	0
451	8	0	0	0	0	0	0	200	300	0	0	0	0	0	0	0	200	903	0	0	0	0	0	0	0	603	903	0
451	9	0	0	0	0	0	0	200	300	0	0	0	0	0	0	0	200	903	0	0	0	0	0	0	0	603	903	0
452	0	0	0	0	0	0	0	200	300	0	0	0	0	0	0	0	200	903	0	0	0	0	0	0	0	603	903	0
452	1	0	0	0	0	0	0	200	300	0	0	0	0	0	0	0	200	903	0	0	0	0	0	0	0	603	903	0
452	2	0	0	0	0	0	0	200	300	0	0	0	0	0	0	0	200	903	0	0	0	0	0	0	0	603	903	0
452	3	0	0	0	0	0	0	200	300	0	0	0	0	0	0	0	200	903	0	0	0	0	0	0	0	603	903	0
452	4	0	0	0	0	0	0	200	300	0	0	0	0	0	0	0	200	903	0	0	0	0	0	0	0	603	903	0
452	5	0	0	0	0	0	0	200	300	0	0	0	0	0	0	0	200	903	0	0	0	0	0	0	0	603	903	0
452	6	0	0	0	0	0	0	200	300	0	0	0	0	0	0	0	200	903	0	0	0	0	0	0	0	603	903	0
452	7	0	0	0	0	0	0	200	300	0	0	0	0	0	0	0	200	903	0	0	0	0	0	0	0	603	903	0
452	8	0	0	0	0	0	0	200	300	0	0	0	0	0	0	0	200	903	0	0	0	0	0	0	0	603	903	0
452	9	0	0	0	0	0	0	200	300	0	0	0	0	0	0	0	200	903	0	0	0	0	0	0	0	603	903	0
453	0	0	0	0	0	0	0	200	300	0	0	0	0	0	0	0	200	903	0	0	0	0	0	0	0	603	903	0
453	1	0	0	0	0	0	0	200	300	0	0	0	0	0	0	0	200	903	0	0	0	0	0	0	0	603	903	0
453	2	0	0	0	0	0	0	200	300	0	0	0	0	0	0	0	200	903	0	0	0	0	0	0	0	603	903	0
453	3	0	0	0	0	0	0	200	300	0	0	0	0	0	0	0	200	903	0	0	0	0	0	0	0	603	903	0
453	4	0	0	0	0	0	0	200	300	0	0	0	0	0	0	0	200	903	0	0	0	0	0	0	0	603	903	0
453	5	0	0	0	0	0	0	200	300	0	0	0	0	0	0	0	200	903	0	0	0	0	0	0	0	603	903	0
453	6	0	0	0	0	0	0	200	300	0	0	0	0	0	0	0	200	903	0	0	0	0	0	0	0	603	903	0
453	7	0	0	0	0	0	0	200	300	0	0	0	0	0	0	0	200	903	0	0	0	0	0	0	0	603	903	0
453	8	0	0	0	0	0	0	200	300	0	0	0	0	0	0	0	200	903	0	0	0	0	0	0	0	603	903	0
453	9	0	0	0	0	0	0	200	300	0	0	0	0	0	0	0	200	903	0	0	0	0	0	0	0	603	903	0
454	0	0	0	0	0	0	0	200	300	0	0	0	0	0	0	0	200	903	0	0	0	0	0	0	0	603	903	0
454	1	0	0	0	0	0	0	200	300	0	0	0	0	0	0	0	200	903	0	0	0	0	0	0	0	603	903	0
454	2	0	0	0	0	0	0	200	300	0	0	0	0	0	0	0	200	903	0	0	0	0	0	0	0	603	903	0
454	3	0	0	0	0	0	0	200	300	0	0	0	0	0	0	0	200	903	0	0	0	0	0	0	0	603	903	0
454	4	0	0	0	0	0	0	200	300	0	0	0	0	0	0	0	200	903	0	0	0	0	0	0	0	603	903	0
454	5	0	0	0	0	0	0	200	300	0	0	0	0	0	0	0	200	903	0	0	0	0	0	0	0	603	903	0
454	6	0	0	0	0	0	0	200	300	0	0	0	0	0	0	0	200	903	0	0	0	0	0	0	0	603	903	0
454	7	0	0	0	0	0	0	200	300	0	0	0	0	0	0	0	200	903	0	0	0	0	0	0	0	603	903	0
454	8	0	0	0	0	0	0	200	300	0	0	0	0	0	0	0	200	903	0	0	0	0	0	0	0	603	903	0
454	9	0	0	0	0	0	0	200	300	0	0	0	0	0	0	0	200	903	0	0	0	0	0	0	0	603	903	0
455	0	0	0	0	0	0	0	200	300	0	0	0	0	0	0	0	200	903	0	0	0	0	0	0	0	603	903	0
455	1	0	0	0	0	0	0	200	300	0	0	0	0	0	0	0	200	903	0	0	0	0	0	0	0	603	903	0
455	2	0	0	0	0	0	0	200	300	0	0	0	0	0	0	0	200	903	0	0	0	0	0	0	0	603	903	0
455	3	0	0	0	0	0	0	200	300	0	0	0	0	0	0	0	200	903	0	0	0	0	0	0	0	603	903	0
455	4	0	0	0	0	0	0	200	300	0	0	0	0	0	0	0	200	903	0	0	0	0	0	0	0	603	903	0
455	5	0	0	0	0	0	0	200	300	0	0	0	0	0	0	0	200	903	0	0	0	0	0	0	0	603	903	0
455	6	0	0	0	0	0	0	200	300	0	0	0	0	0	0	0	200	903	0	0	0	0	0	0	0	603	903	0
455	7	0	0	0	0	0	0	200	300	0	0	0	0	0	0	0	200	903	0	0	0	0	0	0	0	603	903	0
455	8	0	0	0	0	0	0	200	300	0	0	0	0	0	0	0	200	903	0	0	0	0	0	0	0	603	903	0
455	9	0	0	0	0	0	0	200	300	0	0	0	0	0	0	0	200	903	0	0	0	0	0	0	0	603	903	0
456	0	0	0	0	0	0	0	200	300	0	0	0	0	0	0	0	200	903	0	0	0	0	0	0	0	603	903	0
456	1	0	0	0	0	0	0	200	300	0	0	0	0	0	0	0	200	903	0	0	0	0	0	0	0	603	903	0
456	2	0	0	0	0	0	0	200	300	0	0	0	0	0	0	0	200	903	0	0	0	0	0	0	0	603	903	0
456	3	0	0	0	0	0	0	200	300	0	0	0	0	0	0	0	200	903	0	0	0	0	0	0	0	603	903	0
456	4	0	0	0	0	0	0	200	300	0	0	0	0	0	0	0	200	903	0	0	0	0	0	0	0	603	903	0
456	5	0	0	0	0	0	0	200	300	0	0	0	0	0	0	0	200	903	0	0	0	0	0	0	0	603	903	0
456	6	0	0	0	0	0	0	200	300	0	0	0	0	0	0	0	200	903	0	0	0	0	0	0	0	603	903	0
456	7	0	0	0	0	0	0	200	300	0	0	0	0	0	0	0	200	903	0	0	0	0	0	0	0	603	903	0
456	8	0	0	0	0	0	0	200	300	0	0	0	0	0	0	0	200	903	0	0	0	0	0	0	0	603	903	0
456	9	0	0	0	0	0	0	200	300	0	0	0	0	0	0	0	200	903	0	0	0	0	0	0	0	603	903	0
457	0	0	0	0	0	0	0	200	300	0	0	0	0	0	0	0	200	903	0	0	0	0	0	0	0	603	903	0
457	1	0	0	0	0	0	0	200	300	0	0	0	0	0	0	0	200	903	0	0	0	0	0	0	0	603	903	0
457	2	0	0	0	0	0	0	200	300	0	0	0	0	0	0	0	200	903	0	0	0	0	0	0	0	603	903	0
457	3	0	0	0	0	0	0	200	300	0	0	0	0	0	0	0	200	903	0	0	0	0	0	0	0	603	903	0
457	4	0	0	0	0	0	0	200	300	0	0	0	0	0	0	0	200	903	0	0	0	0	0	0	0	603	903	0
457	5	0	0	0	0	0	0	200	300	0	0	0	0	0	0	0	200	903	0	0	0	0	0	0	0	603	903	0
457	6	0	0	0	0	0	0	200	300	0	0	0	0	0	0	0	200	903	0	0	0	0	0	0	0	603	903	0
457	7	0	0	0	0	0	0	200	300	0	0	0	0	0	0	0	200	903	0	0	0	0	0	0	0	603	903	0
457	8	0	0	0	0	0	0	200	300	0	0	0	0	0	0	0	200	903	0	0	0	0	0	0	0	603	903	0
457	9	0	0	0	0	0	0	200	300	0	0	0	0	0	0	0	200	903	0	0	0	0	0	0	0	603	903	0
458	0	0	0	0	0	0	0	200	300	0	0	0	0	0	0	0	200	903	0	0	0	0	0	0	0	603	903	0
458	1	0	0	0	0	0	0	200	300	0	0	0	0	0	0	0	200	903	0	0	0	0	0	0	0	603	903	0
458	2	0	0	0	0	0	0	200	300	0	0	0	0	0	0	0	200	903	0	0	0	0	0	0	0	603	903	0
458	3	0	0	0	0	0	0	200	300	0	0	0	0	0	0	0	200	903	0	0	0	0	0	0	0	603	903	0
458	4	0	0	0	0	0	0	200	300	0	0	0	0	0	0	0	200	903	0	0	0	0	0	0	0	603	903	0
458	5	0	0	0	0	0	0	200	300	0	0	0	0	0	0	0	200	903	0	0	0	0	0	0	0	603	903	0
458	6	0	0	0	0	0	0	200	300	0	0	0	0	0	0	0	200	903	0	0	0	0	0	0	0	603	903	0
458	7	0	0	0	0	0	0	200	300	0	0	0	0	0	0	0	200	903	0	0	0	0	0	0	0	603	903	0
458	8	0	0	0	0	0	0	200	300	0	0	0	0	0	0	0	200	903	0	0	0	0	0	0	0	603	903	0
458	9	0	0	0	0	0	0	200	300	0	0	0	0	0	0	0	200	903	0	0	0	0	0	0	0	603	903	0
459	0	0	0	0	0	0	0	200	300	0	0	0	0	0	0	0	200	903	0	0	0	0	0	0	0	603	903	0
459	1	0	0	0	0	0	0	200	300	0	0	0	0	0	0	0	200	903	0	0	0	0	0	0	0	603	903	0
459	2	0	0	0	0	0	0	200	300	0	0	0	0	0	0	0	200	903	0	0	0	0	0	0	0	603	903	0
459	3	0	0	0	0	0	0	200	300	0	0	0	0	0	0	0	200	903	0	0	0	0	0	0	0	603	903	0
459	4	0	0	0	0	0	0	200	300	0	0	0	0	0	0	0	200	903	0	0	0	0	0	0	0	603	903	0
459	5	0	0	0	0	0	0	200	300	0	0	0	0	0	0	0	200	903	0	0	0	0	0	0	0	603	903	0
459	6	0	0	0	0	0	0	200	300	0	0	0	0	0	0	0	200	903	0	0	0	0	0	0	0	603	903	0
459	7	0	0	0	0	0	0	200	300	0	0	0	0	0	0	0	200	903	0	0	0	0	0	0	0	603	903	0
459	8	0	0	0	0	0	0	200	300	0	0	0	0	0	0	0	200	903	0	0	0	0	0	0	0	603	903	0
459	9	0	0	0	0	0	0	200	300	0	0	0	0	0	0	0	200	903	0	0	0	0	0	0	0	603	903	0
460	0	0	0	0	0	0	0	200	300	0	0	0	0	0	0	0	200	903	0	0	0	0	0	0	0	603	903	0
460	1	0	0	0	0	0	0	200	300	0	0	0	0	0	0	0	200	903	0	0	0	0	0	0	0	603	903	0
460	2	0	0	0	0	0	0	200	300	0	0	0	0	0	0	0	200	903	0	0	0	0	0	0	0	603	903	0
460	3	0	0	0	0	0	0	200	300	0	0	0	0	0	0	0	200	903	0	0	0	0	0	0	0	603	903	0
460	4	0	0	0	0	0	0	200	300	0	0	0	0	0	0	0	200	903	0	0	0	0	0	0	0	603	903	0
460	5	0	0	0	0	0	0	200	300	0	0	0	0	0	0	0	200	903	0	0	0	0	0	0	0	603	903	0
460	6	0	0	0	0	0	0	200	300	0	0	0	0	0	0	0	200	903	0	0	0	0	0	0	0	603	903	0
460	7	0	0	0	0	0	0	200	300	0	0	0	0	0	0	0	200	903	0	0	0	0	0	0	0	603	903	0
460	8	0	0	0	0	0	0	200	300	0	0	0	0	0	0	0	200	903	0	0	0	0	0	0	0	603	903	0
460	9	0	0	0	0	0	0	200	300	0	0	0	0	0	0	0	200	903	0	0	0	0	0	0	0	603	903	0
461	0	0	0	0	0	0	0	200	300	0	0	0	0	0	0	0	200	903	0	0	0	0	0	0	0	603	903	0
461	1	0	0	0	0	0	0	200	300	0	0	0	0	0	0	0	200	903	0	0	0	0	0	0	0	603	903	0
461	2	0	0	0	0	0	0	200	300	0	0	0	0	0	0	0	200	903	0	0	0	0	0	0	0	603	903	0
461	3	0	0	0	0	0	0	200	300	0	0	0	0	0	0	0	200	903	0	0	0	0	0	0	0	603	903	0
461	4	0	0	0	0	0	0	200	300	0	0	0	0	0	0	0	200	903	0	0	0	0	0	0	0	603	903	0
461	5	0	0	0	0	0	0	200	300	0	0	0	0	0	0	0	200	903	0	0	0	0	0	0	0	603	903	0
461	6	0	0	0	0	0	0	200	300	0	0	0	0	0	0	0	200	903	0	0	0	0	0	0	0	603	903	0
461	7	0	0	0	0	0	0	200	300	0	0	0	0	0	0	0	200	903	0	0	0	0	0	0	0	603	903	0
461	8	0	0	0	0	0	0	200	300	0	0	0	0	0	0	0	200	903	0	0	0	0	0	0	0	603	903	0
461	9	0	0	0	0	0	0	200	300	0	0	0	0	0	0	0	200	903	0	0	0	0	0	0	0	603	903	0
462	0	0	0	0	0	0	0	200	300	0	0	0	0	0	0	0	200	903	0	0	0	0	0	0	0	603	903	0
462	1	0	0	0	0	0	0	200	300	0	0	0	0	0	0	0	200	903	0	0	0	0	0	0	0	603	903	0
462	2	0	0	0	0	0	0	200	300	0	0	0	0	0	0	0	200	903	0	0	0	0	0	0	0	603	903	0
462	3	0	0	0	0	0	0	200	300	0	0	0	0	0	0	0	200	903	0	0	0	0	0	0	0	603	903	0
462	4	0	0	0	0	0	0	200	300	0	0	0	0	0	0	0	200	903	0	0	0	0	0	0	0	603	903	0
462	5	0	0	0	0	0	0	200	300	0	0	0	0	0	0	0	200	903	0	0	0	0	0	0	0	603	903	0
462	6	0	0	0	0	0	0	200	300	0	0	0	0	0	0	0	200	903	0	0	0	0	0	0	0	603	903	0
462	7	0	0	0	0	0	0	200	300	0	0	0	0	0	0	0	200	903	0	0	0	0	0	0	0	603	903	0
462	8	0	0	0	0	0	0	200	300	0	0	0	0	0	0	0	200	903	0	0	0	0	0	0	0	603	903	0
462	9	0	0	0	0	0	0	200	300	0	0	0	0	0	0	0	200	903	0	0	0	0	0	0	0	603	903	0
463	0	0	0	0	0	0	0	200	300	0	0	0	0	0	0	0	200	903	0	0	0	0	0	0	0	603	903	0
463	1	0	0	0	0	0	0	200	300	0	0	0	0	0	0	0	200	903	0	0	0	0	0	0	0	603	903	0
463	2	0	0	0	0	0	0	200	300	0	0	0	0	0	0	0	200	903	0	0	0	0	0	0	0	603	903	0
463	3	0	0	0	0	0	0	200	300	0	0	0	0	0	0	0	200	903	0	0	0	0	0	0	0	603	903	0
463	4	0	0	0	0	0	0	200	300	0	0	0	0	0	0	0	200	903	0	0	0	0	0	0	0	603	903	0
463	5	0	0	0	0	0	0	200	300	0	0	0	0	0	0	0	200	903	0	0	0	0	0	0	0	603	903	0
463	6	0	0	0	0	0	0	200	300	0	0	0	0	0	0	0	200	903	0	0	0	0	0	0	0	603	903	0
463	7	0	0	0	0	0	0	200	300	0	0	0	0	0	0	0	200	903	0	0	0	0	0	0	0	603	903	0
463	8	0	0	0	0	0	0	200	300	0	0	0	0	0	0	0	200	903	0	0	0	0	0	0	0	603	903	0
463	9	0	0	0	0	0	0	200	300	0	0	0	0	0	0	0	200	903	0	0	0	0	0	0	0	603	903	0
464	0	0	0	0	0	0	0	200	300	0	0	0	0	0	0	0	200	903	0	0	0	0	0	0	0	603	903	0
464	1	0	0	0	0	0	0	200	300	0	0	0	0	0	0	0	200	903	0	0	0	0	0	0	0	603	903	0
464	2	0	0	0	0	0	0	200	300	0	0	0	0	0	0	0	200	903	0	0	0	0	0	0	0	603	903	0
464	3	0	0	0	0	0	0	200	300	0	0	0	0	0	0	0	200	903	0	0	0	0	0	0	0	603	903	0
464	4	0	0	0	0	0	0	200	300	0	0	0	0	0	0	0	200	903	0	0	0	0	0	0	0	603	903	0
464	5	0	0	0	0	0	0	200	300	0	0	0	0	0	0	0	200	903	0	0	0	0	0	0	0	603	903	0
464	6	0	0	0	0	0	0	200	300	0	0	0	0	0	0	0	200	903	0	0	0	0	0	0	0	603	903	0
464	7	0	0	0	0	0	0	200	300	0	0	0	0	0	0	0	200	903	0	0	0	0	0	0	0	603	903	0
464	8	0	0	0	0	0	0	200	300	0	0	0	0	0	0	0	200	903	0	0	0	0	0	0	0	603	903	0
464	9	0	0	0	0	0	0	200	300	0	0	0	0	0	0	0	200	903	0	0	0	0	0	0	0	603	903	0
465	0	0	0	0	0	0	0	200	300	0	0	0	0	0	0	0	200	903	0	0	0	0	0	0	0	603	903	0
465	1	0	0	0	0	0	0	200	300	0	0	0	0	0	0	0	200	903	0	0	0	0	0	0	0	603	903	0
465	2	0	0	0	0	0	0	200	300	0	0	0	0	0	0	0	200	903	0	0	0	0	0	0	0	603	903	0
465	3	0	0	0	0	0	0	200	300	0	0	0	0	0	0	0	200	903	0	0	0	0	0	0	0	603	903	0
465	4	0	0	0	0	0	0	200	300	0	0	0	0	0	0	0	200	903	0	0	0	0	0	0	0	603	903	0
465	5	0	0	0	0	0	0	200	300	0	0	0	0	0	0	0	200	903	0	0	0	0	0	0	0	603	903	0
465	6	0	0	0	0	0	0	200	300	0	0	0	0	0	0	0	200	903	0	0	0	0	0	0	0	603	903	0
465	7	0	0	0	0	0	0	200	300	0	0	0	0	0	0	0	200	903	0	0	0	0	0	0	0	603	903	0
465	8	0	0	0	0	0	0	200	300	0	0	0	0	0	0	0	200	903	0	0	0	0	0	0	0	603	903	0
465	9	0	0	0	0	0	0	200	300	0	0	0	0	0	0	0	200	903	0	0	0	0	0	0	0	603	903	0
466	0	0	0	0	0	0	0	200	300	0	0	0	0	0	0	0	200	903	0	0	0	0	0	0	0	603	903	0
466	1	0	0	0	0	0	0	200	300	0	0	0	0	0	0	0	200	903	0	0	0	0	0	0	0	603	903	0
466	2	0	0	0	0	0	0	200	300	0	0	0	0	0	0	0	200	903	0	0	0	0	0	0	0	603	903	0
466	3	0	0	0	0	0	0	200	300	0	0	0	0	0	0	0	200	903	0	0	0	0	0	0	0	603	903	0
466	4	0	0	0	0	0	0	200	300	0	0	0	0	0	0	0	200	903	0	0	0	0	0	0	0	603	903	0
466	5	0	0	0	0	0	0	200	300	0	0	0	0	0	0	0	200	903	0	0	0	0	0	0	0	603	903	0
466	6	0	0	0	0	0	0	200	300	0	0	0	0	0	0	0	200	903	0	0	0	0	0	0	0	603	903	0
466	7	0	0	0	0	0	0	200	300	0	0	0	0	0	0	0	200	903	0	0	0	0	0	0	0	603	903	0
466	8	0	0	0	0	0	0	200	300	0	0	0	0	0	0	0	200	903	0	0	0	0	0	0	0	603	903	0
466	9	0	0	0	0	0	0	200	300	0	0	0	0	0	0	0	200	903	0	0	0	0	0	0	0	603	903	0
467	0	0	0	0	0	0	0	200	300	0	0	0	0	0	0	0	200	903	0	0	0	0	0	0	0	603	903	0
467	1	0	0	0	0	0	0	200	300	0	0	0	0	0	0	0	200	903	0	0	0	0	0	0	0	603	903	0
467	2	0	0	0	0	0	0	200	300	0	0	0	0	0	0	0	200	903	0	0	0	0	0	0	0	603	903	0
467	3	0	0	0	0	0	0	200	300	0	0	0	0	0	0	0	200	903	0	0	0	0	0	0	0	603	903	0
467	4	0	0	0	0	0	0	200	300	0	0	0	0	0	0	0	200	903	0	0	0	0	0	0	0	603	903	0
467	5	0	0	0	0	0	0	200	300	0	0	0	0	0	0	0	200	903	0	0	0	0	0	0	0	603	903	0
467	6	0	0	0	0	0	0	200	300	0	0	0	0	0	0	0	200	903	0	0	0	0	0	0	0	603	903	0
467	7	0	0	0	0	0	0	200	300	0	0	0	0	0	0	0	200	903	0	0	0	0	0	0	0	603	903	0
467	8	0	0	0	0	0	0	200	300	0	0	0	0	0	0	0	200	903	0	0	0	0	0	0	0	603	903	0
467	9	0	0	0	0	0	0	200	300	0	0	0	0	0	0	0	200	903	0	0	0	0	0	0	0	603	903	0
468	0	0	0	0	0	0	0	200	300	0	0	0	0	0	0	0	200	903	0	0	0	0	0	0	0	603	903	0
468	1	0	0	0	0	0	0	200	300	0	0	0	0	0	0	0	200	903	0	0	0	0	0	0	0	603	903	0
468	2	0	0	0	0	0	0	200	300	0	0	0	0	0	0	0	200	903	0	0	0	0	0	0	0	603	903	0
468	3	0	0	0	0	0	0	200	300	0	0	0	0	0	0	0	200	903	0	0	0	0	0	0	0	603	903	0
468	4	0	0	0	0	0	0	200	300	0	0	0	0	0	0	0	200	903	0	0	0	0	0	0	0	603	903	0
468	5	0	0	0	0	0	0	200	300	0	0	0	0	0	0	0	200	903	0	0	0	0	0	0	0	603	903	0
468	6	0	0	0	0	0	0	200	300	0	0	0	0	0	0	0	200	903	0	0	0	0	0	0	0	603	903	0
468	7	0	0	0	0	0	0	200	300	0	0	0	0	0	0	0	200	903	0	0	0	0	0	0	0	603	903	0
468	8	0	0	0	0	0	0	200	300	0	0	0	0	0	0	0	200	903	0	0	0	0	0	0	0	603	903	0
468	9	0	0	0	0	0	0	200	300	0	0	0	0	0	0	0	200	903	0	0	0	0	0	0	0	603	903	0
469	0	0	0	0	0	0	0	200	300	0	0	0	0	0	0	0	200	903	0	0	0	0	0	0	0	603	903	0
469	1	0	0	0	0	0	0	200	300	0	0	0	0	0	0	0	200	903	0	0	0	0	0	0	0	603	903	0
469	2	0	0	0	0	0	0	200	300	0	0	0	0	0	0	0	200	903	0	0	0	0	0	0	0	603	903	0
469	3	0	0	0	0	0	0	200	300	0	0	0	0	0	0	0	200	903	0	0	0	0	0	0	0	603	903	0
469	4	0	0	0	0	0	0	200	300	0	0	0	0	0	0	0	200	903	0	0	0	0	0	0	0	603	903	0
469	5	0	0	0	0	0	0	200	300	0	0	0	0	0	0	0	200	903	0	0	0	0	0	0	0	603	903	0
469	6	0	0	0	0	0	0	200	300	0	0	0	0	0	0	0	200	903	0	0	0	0	0	0	0	603	903	0
469	7	0	0	0	0	0	0	200	300	0	0	0	0	0	0	0	200	903	0	0	0	0	0	0	0	603	903	0
469	8	0	0	0	0	0	0	200	300	0	0	0	0	0	0	0	200	903	0	0	0	0	0	0	0	603	903	0
469	9	0	0	0	0	0	0	200	300	0	0	0	0	0	0	0	200	903	0	0	0	0	0	0	0	603	903	0
470	0	0	0	0	0	0	0	200	300	0	0	0	0	0	0	0	200	903	0	0	0	0	0	0	0	603	903	0
470	1	0	0	0	0	0	0	200	300	0	0	0	0	0	0	0	200	903	0	0	0	0	0	0	0	603	903	0
470	2	0	0	0	0	0	0	200	300	0	0	0	0	0	0	0	200	903	0	0	0	0	0	0	0	603	903	0
470	3	0	0	0	0	0	0	200	300	0	0	0	0	0	0	0	200	903	0	0	0	0	0	0	0	603	903	0
470	4	0	0	0	0	0	0	200	300	0	0	0	0	0	0	0	200	903	0	0	0	0	0	0	0	603	903	0
470	5	0	0	0	0	0	0	200	300	0	0	0	0	0	0	0	200	903	0	0	0	0	0	0	0	603	903	0
470	6	0	0	0	0	0	0	200	300	0	0	0	0	0	0	0	200	903	0	0	0	0	0	0	0	603	903	0
470	7	0	0	0	0	0	0	200	300	0	0	0	0	0	0	0	200	903	0	0	0	0	0	0	0	603	903	0
470	8	0	0	0	0	0	0	200	300	0	0	0	0	0	0	0	200	903	0	0	0	0	0	0	0	603	903	0
470	9	0	0	0	0	0	0	200	300	0	0	0	0	0	0	0	200	903	0	0	0	0	0	0	0	603	903	0
471	0	0	0	0	0	0	0	200	300	0	0	0	0	0	0	0	200	903	0	0	0	0	0	0	0	603	903	0
471	1	0	0	0	0	0	0	200	300	0	0	0	0	0	0	0	200	903	0	0	0	0	0	0	0	603	903	0
471	2	0	0	0	0	0	0	200	300	0	0	0	0	0	0	0	200	903	0	0	0	0	0	0	0	603	903	0
471	3	0	0	0	0	0	0	200	300	0	0	0	0	0	0	0	200	903	0	0	0	0	0	0	0	603	903	0
471	4	0	0	0	0	0	0	200	300	0	0	0	0	0	0	0	200	903	0	0	0	0	0	0	0	603	903	0
471	5	0	0	0	0	0	0	200	300	0	0	0	0	0	0	0	200	903	0	0	0	0	0	0	0	603	903	0
471	6	0	0	0	0	0	0	200	300	0	0	0	0	0	0	0	200	903	0	0	0	0	0	0	0	603	903	0
471	7	0	0	0	0	0	0	200	300	0	0	0	0	0	0	0	200	903	0	0	0	0	0	0	0	603	903	0
471	8	0	0	0	0	0	0	200	300	0	0	0	0	0	0	0	200	903	0	0	0	0	0	0	0	603	903	0
471	9	0	0	0	0	0	0	200	300	0	0	0	0	0	0	0	200	903	0	0	0	0	0	0	0	603	903	0
472	0	0	0	0	0	0	0	200	300	0	0	0	0	0	0	0	200	903	0	0	0	0	0	0	0	603	903	0
472	1	0	0	0	0	0	0	200	300	0	0	0	0	0	0	0	200	903	0	0	0	0	0	0	0	603	903	0
472	2	0	0	0	0	0	0	200	300	0	0	0	0	0	0	0	200	903	0	0	0	0	0	0	0	603	903	0
472	3	0	0	0	0	0	0	200	300	0	0	0	0	0	0	0	200	903	0	0	0	0	0	0	0	603	903	0
472	4	0	0	0	0	0	0	200	300	0	0	0	0	0	0	0	200	903	0	0	0	0	0	0	0	603	903	0
472	5	0	0	0	0	0	0	200	300	0	0	0	0	0	0	0	200	903	0	0	0	0	0	0	0	603	903	0
472	6	0	0	0	0	0	0	200	300	0	0	0	0	0	0	0	200	903	0	0	0	0	0	0	0	603	903	0
472	7	0	0	0	0	0	0	200	300	0	0	0	0	0	0	0	200	903	0	0	0	0	0	0	0	603	903	0
472	8	0	0	0	0	0	0	200	300	0	0	0	0	0	0	0	200	903	0	0	0	0	0	0	0	603	903	0
472	9	0	0	0	0	0	0	200	300	0	0	0	0	0	0	0	200	903	0	0	0	0	0	0	0	603	903	0
473	0	0	0	0	0	0	0	200	300	0	0	0	0	0	0	0	200	903	0	0	0	0	0	0	0	603	903	0
473	1	0	0	0	0	0	0	200	300	0	0	0	0	0	0	0	200	903	0	0	0	0	0	0	0	603	903	0
473	2	0	0	0	0	0	0	200	300	0	0	0	0	0	0	0	200	903	0	0	0	0	0	0	0	603	903	0
473	3	0	0	0	0	0	0	200	300	0	0	0	0	0	0	0	200	903	0	0	0	0	0	0	0	603	903	0
473	4	0	0	0	0	0	0	200	300	0	0	0	0	0	0	0	200	903	0	0	0	0	0	0	0	603	903	0
473	5	0	0	0	0	0	0	200	300	0	0	0	0	0	0	0	200	903	0	0	0	0	0	0	0	603	903	0
473	6	0	0	0	0	0	0	200	300	0	0	0	0	0	0	0	200	903	0	0	0	0	0	0	0	603	903	0
473	7	0	0	0	0	0	0	200	300	0	0	0	0	0	0	0	200	903	0	0	0	0	0	0	0	603	903	0
473	8	0	0	0	0	0	0	200	300	0	0	0	0	0	0	0	200	903	0	0	0	0	0	0	0	603	903	0
473	9	0	0	0	0	0	0	200	300	0	0	0	0	0	0	0	200	903	0	0	0	0	0	0	0	603	903	0
474	0	0	0	0	0	0	0	200	300	0	0	0	0	0	0	0	200	903	0	0	0	0	0	0	0	603	903	0
474	1	0	0	0	0	0	0	200	300	0	0	0	0	0	0	0	200	903	0	0	0	0	0	0	0	603	903	0
474	2	0	0	0	0	0	0	200	300	0	0	0	0	0	0	0	200	903	0	0	0	0	0	0	0	603	903	0
474	3	0	0	0	0	0	0	200	300	0	0	0	0	0	0	0	200	903	0	0	0	0	0	0	0	603	903	0
474	4	0	0	0	0	0	0	200	300	0	0	0	0	0	0	0	200	903	0	0	0	0	0	0	0	603	903	0
474	5	0	0	0	0	0	0	200	300	0	0	0	0	0	0	0	200	903	0	0	0	0	0	0	0	603	903	0
474	6	0	0	0	0	0	0	200	300	0	0	0	0	0	0	0	200	903	0	0	0	0	0	0	0	603	903	0
474	7	0	0	0	0	0	0	200	300	0	0	0	0	0	0	0	200	903	0	0	0	0	0	0	0	603	903	0
474	8	0	0	0	0	0	0	200	300	0	0	0	0	0	0	0	200	903	0	0	0	0	0	0	0	603	903	0
474	9	0	0	0	0	0	0	200	300	0	0	0	0	0	0	0	200	903	0	0	0	0	0	0	0	603	903	0
475	0	0	0	0	0	0	0	200	300	0	0	0	0	0	0	0	200	903	0	0	0	0	0	0	0	603	903	0
475	1	0	0	0	0	0	0	200	300	0	0	0	0	0	0	0	200	903	0	0	0	0	0	0	0	603	903	0
475	2	0	0	0	0	0	0	200	300	0	0	0	0	0	0	0	200	903	0	0	0	0	0	0	0	603	903	0
475	3	0	0	0	0	0	0	200	300	0	0	0	0	0	0	0	200	903	0	0	0	0	0	0	0	603	903	0
475	4	0	0	0	0	0	0	200	300	0	0	0	0	0	0	0	200	903	0	0	0	0	0	0	0	603	903	0
475	5	0	0	0	0	0	0	200	300	0	0	0	0	0	0	0	200	903	0	0	0	0	0	0	0	603	903	0
475	6	0	0	0	0	0	0	200	300	0	0	0	0	0	0	0	200	903	0	0	0	0	0	0	0	603	903	0
475	7	0	0	0	0	0	0	200	300	0	0	0	0	0	0	0	200	903	0	0	0	0	0	0	0	603	903	0
475	8	0	0	0	0	0	0	200	300	0	0	0	0	0	0	0	200	903	0	0	0	0	0	0	0	603	903	0
475	9	0	0	0	0	0	0	200	300	0	0	0	0	0	0	0	200	903	0	0	0	0	0	0	0	603	903	0
476	0	0	0	0	0	0	0	200	300	0	0	0	0	0	0	0	200	903	0	0	0	0	0	0	0	603	903	0
476	1	0	0	0	0	0	0	200	300	0	0	0	0	0	0	0	200	903	0	0	0	0	0	0	0	603	903	0
476	2	0	0	0	0	0	0	200	300	0	0	0	0	0	0	0	200	903	0	0	0	0	0	0	0	603	903	0
476	3	0	0	0	0	0	0	200	300	0	0	0	0	0	0	0	200	903	0	0	0	0	0	0	0	603	903	0
476	4	0	0	0	0	0	0	200	300	0	0	0	0	0	0	0	200	903	0	0	0	0	0	0	0	603	903	0
476	5	0	0	0	0	0	0	200	300	0	0	0	0	0	0	0	200	903	0	0	0	0	0	0	0	603	903	0
476	6	0	0	0	0	0	0	200	300	0	0	0	0	0	0	0	200	903	0	0	0	0	0	0	0	603	903	0
476	7	0	0	0	0	0	0	200	300	0	0	0	0	0	0	0	200	903	0	0	0	0	0	0	0	603	903	0
476	8	0	0	0	0	0	0	200	300	0	0	0	0	0	0	0	200	903	0	0	0	0	0	0	0	603	903	0
476	9	0	0	0	0	0	0	200	300	0	0	0	0	0	0	0	200	903	0	0	0	0	0	0	0	603	903	0
477	0	0	0	0	0	0	0	200	300	0	0	0	0	0	0	0	200	903	0	0	0	0	0	0	0	603	903	0
477	1	0	0	0	0	0	0	200	300	0	0	0	0	0	0	0	200	903	0	0	0	0	0	0	0	603	903	0
477	2	0	0	0	0	0	0	200	300	0	0	0	0	0	0	0	200	903	0	0	0	0	0	0	0	603	903	0
477	3	0	0	0	0	0	0	200	300	0	0	0	0	0	0	0	200	903	0	0	0	0	0	0	0	603	903	0
477	4	0	0	0	0	0	0	200	300	0	0	0	0	0	0	0	200	903	0	0	0	0	0	0	0	603	903	0
477	5	0	0	0	0	0	0	200	300	0	0	0	0	0	0	0	200	903	0	0	0	0	0	0	0	603	903	0
477	6	0	0	0	0	0	0	200	300	0	0	0	0	0	0	0	200	903	0	0	0	0	0	0	0	603	903	0
477	7	0	0	0	0	0	0	200	300	0	0	0	0	0	0	0	200	903	0	0	0	0	0	0	0	603	903	0
477	8	0	0	0	0	0	0	200	300	0	0	0	0	0	0	0	200	903	0	0	0	0	0	0	0	603	903	0
477	9	0	0	0	0	0	0	200	300	0	0	0	0	0	0	0	200	903	0	0	0	0	0	0	0	603	903	0
478	0	0	0	0	0	0	0	200	300	0	0	0	0	0	0	0	200	903	0	0	0	0	0	0	0	603	903	0
478	1	0	0	0	0	0	0	200	300	0	0	0	0	0	0	0	200	903	0	0	0	0	0	0	0	603	903	0
478	2	0	0	0	0	0	0	200	300	0	0	0	0	0	0	0	200	903	0	0	0	0	0	0	0	603	903	0
478	3	0	0	0	0	0	0	200	300	0	0	0	0	0	0	0	200	903	0	0	0	0	0	0	0	603	903	0
478	4	0	0	0	0	0	0	200	300	0	0	0	0	0	0	0	200	903	0	0	0	0	0	0	0	603	903	0
478	5	0	0	0	0	0	0	200	300	0	0	0	0	0	0	0	200	903	0	0	0	0	0	0	0	603	903	0
478	6	0	0	0	0	0	0	200	300	0	0	0	0	0	0	0	200	903	0	0	0	0	0	0	0	603	903	0
478	7	0	0	0	0	0	0	200	300	0	0	0	0	0	0	0	200	903	0	0	0	0	0	0	0	603	903	0
478	8	0	0	0	0	0	0	200	300	0	0	0	0	0	0	0	200	903	0	0	0	0	0	0	0	603	903	0
478	9	0	0	0	0	0	0	200	300	0	0	0	0	0	0	0	200	903	0	0	0	0	0	0	0	603	903	0
479	0	0	0	0	0	0	0	200	300	0	0	0	0	0	0	0	200	903	0	0	0	0	0	0	0	603	903	0
479	1	0	0	0	0	0	0	200	300	0	0	0	0	0	0	0	200	903	0	0	0	0	0	0	0	603	903	0
479	2	0	0	0	0	0	0	200	300	0	0	0	0	0	0	0	200	903	0	0	0	0	0	0	0	603	903	0
479	3	0	0	0	0	0	0	200	300	0	0	0	0	0	0	0	200	903	0	0	0	0	0	0	0	603	903	0
479	4	0	0	0	0	0	0	200	300	0	0	0	0	0	0	0	200	903	0	0	0	0	0	0	0	603	903	0
479	5	0	0	0	0	0	0	200	300	0	0	0	0	0	0	0	200	903	0	0	0	0	0	0	0	603	903	0
479	6	0	0	0	0	0	0	200	300	0	0	0	0	0	0	0	200	903	0	0	0	0	0	0	0	603	903	0
479	7	0	0	0	0	0	0	200	300	0	0	0	0	0	0	0	200	903	0	0	0	0	0	0	0	603	903	0
479	8	0	0	0	0	0	0	200	300	0	0	0	0	0	0	0	200	903	0	0	0	0	0	0	0	603	903	0
479	9	0	0	0	0	0	0	200	300	0	0	0	0	0	0	0	200	903	0	0	0	0	0	0	0	603	903	0
480	0	0	0	0	0	0	0	200	300	0	0	0	0	0	0	0	200	903	0	0	0	0	0	0	0	603	903	0
480	1	0	0	0	0	0	0	200	300	0	0	0	0	0	0	0	200	903	0	0	0	0	0	0	0	603	903	0
480	2	0	0	0	0	0	0	200	300	0	0	0	0	0	0	0	200	903	0	0	0	0	0	0	0	603	903	0
480	3	0	0	0	0	0	0	200	300	0	0	0	0	0	0	0	200	903	0	0	0	0	0	0	0	603	903	0
480	4	0	0	0	0	0	0	200	300	0	0	0	0	0	0	0	200	903	0	0	0	0	0	0	0	603	903	0
480	5	0	0	0	0	0	0	200	300	0	0	0	0	0	0	0	200	903	0	0	0	0	0	0	0	603	903	0
480	6	0	0	0	0	0	0	200	300	0	0	0	0	0	0	0	200	903	0	0	0	0	0	0	0	603	903	0
480	7	0	0	0	0	0	0	200	300	0	0	0	0	0	0	0	200	903	0	0	0	0	0	0	0	603	903	0
480	8	0	0	0	0	0	0	200	300	0	0	0	0	0	0	0	200	903	0	0	0	0	0	0	0	603	903	0
480	9	0	0	0	0	0	0	200	300	0	0	0	0	0	0	0	200	903	0	0	0	0	0	0	0	603	903	0
481	0	0	0	0	0	0	0	200	300	0	0	0	0	0	0	0	200	903	0	0	0	0	0	0	0	603	903	0
481	1	0	0	0	0	0	0	200	300	0	0	0	0	0	0	0	200	903	0	0	0	0	0	0	0	603	903	0
481	2	0	0	0	0	0	0	200	300	0	0	0	0	0	0	0	200	903	0	0	0	0	0	0	0	603	903	0
481	3	0	0	0	0	0	0	200	300	0	0	0	0	0	0	0	200	903	0	0	0	0	0	0	0	603	903	0
481	4	0	0	0	0	0	0	200	300	0	0	0	0	0	0	0	200	903	0	0	0	0	0	0	0	603	903	0
481	5	0	0	0	0	0	0	200	300	0	0	0	0	0	0	0	200	903	0	0	0	0	0	0	0	603	903	0
481	6	0	0	0	0	0	0	200	300	0	0	0	0	0	0	0	200	903	0	0	0	0	0	0	0	603	903	0
481	7	0	0	0	0	0	0	200	300	0	0	0	0	0	0	0	200	903	0	0	0	0	0	0	0	603	903	0
481	8	0	0	0	0	0	0	200	300	0	0	0	0	0	0	0	200	903	0	0	0	0	0	0	0	603	903	0
481	9	0	0	0	0	0	0	200	300	0	0	0	0	0	0	0	200	903	0	0	0	0	0	0	0	603	903	0
482	0	0	0	0	0	0	0	200	300	0	0	0	0	0	0	0	200	903	0	0	0	0	0	0	0	603	903	0
482	1	0	0	0	0	0	0	200	300	0	0	0	0	0	0	0	200	903	0	0	0	0	0	0	0	603	903	0
482	2	0	0	0	0	0	0	200	300	0	0	0	0	0	0	0	200	903	0	0	0	0	0	0	0	603	903	0
482	3	0	0	0	0	0	0	200	300	0	0	0	0	0	0	0	200	903	0	0	0	0	0	0	0	603	903	0
482	4	0	0	0	0	0	0	200	300	0	0	0	0	0	0	0	200	903	0	0	0	0	0	0	0	603	903	0
482	5	0	0	0	0	0	0	200	300	0	0	0	0	0	0	0	200	903	0	0	0	0	0	0	0	603	903	0
482	6	0	0	0	0	0	0	200	300	0	0	0	0	0	0	0	200	903	0	0	0	0	0	0	0	603	903	0
482	7	0	0	0	0	0	0	200	300	0	0	0	0	0	0	0	200	903	0	0	0	0	0	0	0	603	903	0
482	8	0	0	0	0	0	0	200	300	0	0	0	0	0	0	0	200	903	0	0	0	0	0	0	0	603	903	0
482	9	0	0	0	0	0	0	200	300	0	0	0	0	0	0	0	200	903	0	0	0	0	0	0	0	603	903	0
483	0	0	0	0	0	0	0	200	300	0	0	0	0	0	0	0	200	903	0	0	0	0	0	0	0	603	903	0
483	1	0	0	0	0	0	0	200	300	0	0	0	0	0	0	0	200	903	0	0	0	0	0	0	0	603	903	0
483	2	0	0	0	0	0	0	200	300	0	0	0	0	0	0	0	200	903	0	0	0	0	0	0	0	603	903	0
483	3	0	0	0	0	0	0	200	300	0	0	0	0	0	0	0	200	903	0	0	0	0	0	0	0	603	903	0
483	4	0	0	0	0	0	0	200	300	0	0	0	0	0	0	0	200	903	0	0	0	0	0	0	0	603	903	0
483	5	0	0	0	0	0	0	200	300	0	0	0	0	0	0	0	200	903	0	0	0	0	0	0	0	603	903	0
483	6	0	0	0	0	0	0	200	300	0	0	0	0	0	0	0	200	903	0	0	0	0	0	0	0	603	903	0
483	7	0	0	0	0	0	0	200	300	0	0	0	0	0	0	0	200	903	0	0	0	0	0	0	0	603	903	0
483	8	0	0	0	0	0	0	200	300	0	0	0	0	0	0	0	200	903	0	0	0	0	0	0	0	603	903	0
483	9	0	0	0	0	0	0	200	300	0	0	0	0	0	0	0	200	903	0	0	0	0	0	0	0	603	903	0
484	0	0	0	0	0	0	0	200	300	0	0	0	0	0	0	0	200	903	0	0	0	0	0	0	0	603	903	0
484	1	0	0	0	0	0	0	200	300	0	0	0	0	0	0	0	200	903	0	0	0	0	0	0	0	603	903	0
484	2	0	0	0	0	0	0	200	300	0	0	0	0	0	0	0	200	903	0	0	0	0	0	0	0	603	903	0
484	3	0	0	0	0	0	0	200	300	0	0	0	0	0	0	0	200	903	0	0	0	0	0	0	0	603	903	0
484	4	0	0	0	0	0	0	200	300	0	0	0	0	0	0	0	200	903	0	0	0	0	0	0	0	603	903	0
484	5	0	0	0	0	0	0	200	300	0	0	0	0	0	0	0	200	903	0	0	0	0	0	0	0	603	903	0
484	6	0	0	0	0	0	0	200	300	0	0	0	0	0	0	0	200	903	0	0	0	0	0	0	0	603	903	0
484	7	0	0	0	0	0	0	200	300	0	0	0	0	0	0	0	200	903	0	0	0	0	0	0	0	603	903	0
484	8	0	0	0	0	0	0	200	300	0	0	0	0	0	0	0	200	903	0	0	0	0	0	0	0	603	903	0
484	9	0	0	0	0	0	0	200	300	0	0	0	0	0	0	0	200	903	0	0	0	0	0	0	0	603	903	0
485	0	0	0	0	0	0	0	200	300	0	0	0	0	0	0	0	200	903	0	0	0	0	0	0	0	603	903	0
485	1	0	0	0	0	0	0	200	300	0	0	0	0	0	0	0	200	903	0	0	0	0	0	0	0	603	903	0
485	2	0	0	0	0	0	0	200	300	0	0	0	0	0	0	0	200	903	0	0	0	0	0	0	0	603	903	0
485	3	0	0	0	0	0	0	200	300	0	0	0	0	0	0	0	200	903	0	0	0	0	0	0	0	603	903	0
485	4	0	0	0	0	0	0	200	300	0	0	0	0	0	0	0	200	903	0	0	0	0	0	0	0	603	903	0
485	5	0	0	0	0	0	0	200	300	0	0	0	0	0	0	0	200	903	0	0	0	0	0	0	0	603	903	0
485	6	0	0	0	0	0	0	200	300	0	0	0	0	0	0	0	200	903	0	0	0	0	0	0	0	603	903	0
485	7	0	0	0	0	0	0	200	300	0	0	0	0	0	0	0	200	903	0	0	0	0	0	0	0	603	903	0
485	8	0	0	0	0	0	0	200	300	0	0	0	0	0	0	0	200	903	0	0	0	0	0	0	0	603	903	0
485	9	0	0	0	0	0	0	200	300	0	0	0	0	0	0	0	200	903	0	0	0	0	0	0	0	603	903	0
486	0	0	0	0	0	0	0	200	300	0	0	0	0	0	0	0	200	903	0	0	0	0	0	0	0	603	903	0
486	1	0	0	0	0	0	0	200	300	0	0	0	0	0	0	0	200	903	0	0	0	0	0	0	0	603	903	0
486	2	0	0	0	0	0	0	200	300	0	0	0	0	0	0	0	200	903	0	0	0	0	0	0	0	603	903	0
486	3	0	0	0	0	0	0	200	300	0	0	0	0	0	0	0	200	903	0	0	0	0	0	0	0	603	903	0
486	4	0	0	0	0	0	0	200	300	0	0	0	0	0	0	0	200	903	0	0	0	0	0	0	0	603	903	0
486	5	0	0	0	0	0	0	200	300	0	0	0	0	0	0	0	200	903	0	0	0	0	0	0	0	603	903	0
486	6	0	0	0	0	0	0	200	300	0	0	0	0	0	0	0	200	903	0	0	0	0	0	0	0	603	903	0
486	7	0	0	0	0	0	0	200	300	0	0	0	0	0	0	0	200	903	0	0	0	0	0	0	0	603	903	0
486	8	0	0	0	0	0	0	200	300	0	0	0	0	0	0	0	200	903	0	0	0	0	0	0	0	603	903	0
486	9	0	0	0	0	0	0	200	300	0	0	0	0	0	0	0	200	903	0	0	0	0	0	0	0	603	903	0
487	0	0	0	0	0	0	0	200	300	0	0	0	0	0	0	0	200	903	0	0	0	0	0	0	0	603	903	0
487	1	0	0	0	0	0	0	200	300	0	0	0	0	0	0	0	200	903	0	0	0	0	0	0	0	603	903	0
487	2	0	0	0	0	0	0	200	300	0	0	0	0	0	0	0	200	903	0	0	0	0	0	0	0	603	903	0
487	3	0	0	0	0	0	0	200	300	0	0	0	0	0	0	0	200	903	0	0	0	0	0	0	0	603	903	0
487	4	0	0	0	0	0	0	200	300	0	0	0	0	0	0	0	200	903	0	0	0	0	0	0	0	603	903	0
487	5	0	0	0	0	0	0	200	300	0	0	0	0	0	0	0	200	903	0	0	0	0	0	0	0	603	903	0
487	6	0	0	0	0	0	0	200	300	0	0	0	0	0	0	0	200	903	0	0	0	0	0	0	0	603	903	0
487	7	0	0	0	0	0	0	200	300	0	0	0	0	0	0	0	200	903	0	0	0	0	0	0	0	603	903	0
487	8	0	0	0	0	0	0	200	300	0	0	0	0	0	0	0	200	903	0	0	0	0	0	0	0	603	903	0
487	9	0	0	0	0	0	0	200	300	0	0	0	0	0	0	0	200	903	0	0	0	0	0	0	0	603	903	0
488	0	0	0	0	0	0	0	200	300	0	0	0	0	0	0	0	200	903	0	0	0	0	0	0	0	603	903	0
488	1	0	0	0	0	0	0	200	300	0	0	0	0	0	0	0	200	903	0	0	0	0	0	0	0	603	903	0
488	2	0	0	0	0	0	0	200	300	0	0	0	0	0	0	0	200	903	0	0	0	0	0	0	0	603	903	0
488	3	0	0	0	0	0	0	200	300	0	0	0	0	0	0	0	200	903	0	0	0	0	0	0	0	603	903	0
488	4	0	0	0	0	0	0	200	300	0	0	0	0	0	0	0	200	903	0	0	0	0	0	0	0	603	903	0
488	5	0	0	0	0	0	0	200	300	0	0	0	0	0	0	0	200	903	0	0	0	0	0	0	0	603	903	0
488	6	0	0	0	0	0	0	200	300	0	0	0	0	0	0	0	200	903	0	0	0	0	0	0	0	603	903	0
488	7	0	0	0	0	0	0	200	300	0	0	0	0	0	0	0	200	903	0	0	0	0	0	0	0	603	903	0
488	8	0	0	0	0	0	0	200	300	0	0	0	0	0	0	0	200	903	0	0	0	0	0	0	0	603	903	0
488	9	0	0	0	0	0	0	200	300	0	0	0	0	0	0	0	200	903	0	0	0	0	0	0	0	603	903	0
489	0	0	0	0	0	0	0	200	300	0	0	0	0	0	0	0	200	903	0	0	0	0	0	0	0	603	903	0
489	1	0	0	0	0	0	0	200	300	0	0	0	0	0	0	0	200	903	0	0	0	0	0	0	0	603	903	0
489	2	0	0	0	0	0	0	200	300	0	0	0	0	0	0	0	200	903	0	0	0	0	0	0	0	603	903	0
489	3	0	0	0	0	0	0	200	300	0	0	0	0	0	0	0	200	903	0	0	0	0	0	0	0	603	903	0
489	4	0	0	0	0	0	0	200	300	0	0	0	0	0	0	0	200	903	0	0	0	0	0	0	0	603	903	0
489	5	0	0	0	0	0	0	200	300	0	0	0	0	0	0	0	200	903	0	0	0	0	0	0	0	603	903	0
489	6	0	0	0	0	0	0	200	300	0	0	0	0	0	0	0	200	903	0	0	0	0	0	0	0	603	903	0
489	7	0	0	0	0	0	0	200	300	0	0	0	0	0	0	0	200	903	0	0	0	0	0	0	0	603	903	0
489	8	0	0	0	0	0	0	200	300	0	0	0	0	0	0	0	200	903	0	0	0	0	0	0	0	603	903	0
489	9	0	0	0	0	0	0	200	300	0	0	0	0	0	0	0	200	903	0	0	0	0	0	0	0	603	903	0
490	0	0	0	0	0	0	0	200	300	0	0	0	0	0	0	0	200	903	0	0	0	0	0	0	0	603	903	0
490	1	0	0	0	0	0	0	200	300	0	0	0	0	0	0	0	200	903	0	0	0	0	0	0	0	603	903	0
490	2	0	0	0	0	0	0	200	300	0	0	0	0	0	0	0	200	903	0	0	0	0	0	0	0	603	903	0
490	3	0	0	0	0	0	0	200	300	0	0	0	0	0	0	0	200	903	0	0	0	0	0	0	0	603	903	0
490	4	0	0	0	0	0	0	200	300	0	0	0	0	0	0	0	200	903	0	0	0	0	0	0	0	603	903	0
490	5	0	0	0	0	0	0	200	300	0	0	0	0	0	0	0	200	903	0	0	0	0	0	0	0	603	903	0
490	6	0	0	0	0	0	0	200	300	0	0	0	0	0	0	0	200	903	0	0	0	0	0	0	0	603	903	0
490	7	0	0	0	0	0	0	200	300	0	0	0	0	0	0	0	200	903	0	0	0	0	0	0	0	603	903	0
490	8	0	0	0	0	0	0	200	300	0	0	0	0	0	0	0	200	903	0	0	0	0	0	0	0	603	903	0
490	9	0	0	0	0	0	0	200	300	0	0	0	0	0	0	0	200	903	0	0	0	0	0	0	0	603	903	0
491	0	0	0	0	0	0	0	200	300	0	0	0	0	0	0	0	200	903	0	0	0	0	0	0	0	603	903	0
491	1	0	0	0	0	0	0	200	300	0	0	0	0	0	0	0	200	903	0	0	0	0	0	0	0	603	903	0
491	2	0	0	0	0	0	0	200	300	0	0	0	0	0	0	0	200	903	0	0	0	0	0	0	0	603	903	0
491	3	0	0	0	0	0	0	200	300	0	0	0	0	0	0	0	200	903	0	0	0	0	0	0	0	603	903	0
491	4	0	0	0	0	0	0	200	300	0	0	0	0	0	0	0	200	903	0	0	0	0	0	0	0	603	903	0
491	5	0	0	0	0	0	0	200	300	0	0	0	0	0	0	0	200	903	0	0	0	0	0	0	0	603	903	0
491	6	0	0	0	0	0	0	200	300	0	0	0	0	0	0	0	200	903	0	0	0	0	0	0	0	603	903	0
491	7	0	0	0	0	0	0	200	300	0	0	0	0	0	0	0	200	903	0	0	0	0	0	0	0	603	903	0
491	8	0	0	0	0	0	0	200	300	0	0	0	0	0	0	0	200	903	0	0	0	0	0	0	0	603	903	0
491	9	0	0	0	0	0	0	200	300	0	0	0	0	0	0	0	200	903	0	0	0	0	0	0	0	603	903	0
492	0	0	0	0	0	0	0	200	300	0	0	0	0	0	0	0	200	903	0	0	0	0	0	0	0	603	903	0
492	1	0	0	0	0	0	0	200	300	0	0	0	0	0	0	0	200	903	0	0	0	0	0	0	0	603	903	0
492	2	0	0	0	0	0	0	200	300	0	0	0	0	0	0	0	200	903	0	0	0	0	0	0	0	603	903	0
492	3	0	0	0	0	0	0	200	300	0	0	0	0	0	0	0	200	903	0	0	0	0	0	0	0	603	903	0
492	4	0	0	0	0	0	0	200	300	0	0	0	0	0	0	0	200	903	0	0	0	0	0	0	0	603	903	0
492	5	0	0	0	0	0	0	200	300	0	0	0	0	0	0	0	200	903	0	0	0	0	0	0	0	603	903	0
492	6	0	0	0	0	0	0	200	300	0	0	0	0	0	0	0	200	903	0	0	0	0	0	0	0	603	903	0
492	7	0	0	0	0	0	0	200	300	0	0	0	0	0	0	0	200	903	0	0	0	0	0	0	0	603	903	0
492	8	0	0	0	0	0	0	200	300	0	0	0	0	0	0	0	200	903	0	0	0	0	0	0	0	603	903	0
492	9	0	0	0	0	0	0	200	300	0	0	0	0	0	0	0	200	903	0	0	0	0	0	0	0	603	903	0
493	0	0	0	0	0	0	0	200	300	0	0	0	0	0	0	0	200	903	0	0	0	0	0	0	0	603	903	0
493	1	0	0	0	0	0	0	200	300	0	0	0	0	0	0	0	200	903	0	0	0	0	0	0	0	603	903	0
493	2	0	0	0	0	0	0	200	300	0	0	0	0	0	0	0	200	903	0	0	0	0	0	0	0	603	903	0
493	3	0	0	0	0	0	0	200	300	0	0	0	0	0	0	0	200	903	0	0	0	0	0	0	0	603	903	0
493	4	0	0	0	0	0	0	200	300	0	0	0	0	0	0	0	200	903	0	0	0	0	0	0	0	603	903	0
493	5	0	0	0	0	0	0	200	300	0	0	0	0	0	0	0	200	903	0	0	0	0	0	0	0	603	903	0
493	6	0	0	0	0	0	0	200	300	0	0	0	0	0	0	0	200	903	0	0	0	0	0	0	0	603	903	0
493	7	0	0	0	0	0	0	200	300	0	0	0	0	0	0	0	200	903	0	0	0	0	0	0	0	603	903	0
493	8	0	0	0	0	0	0	200	300	0	0	0	0	0	0	0	200	903	0	0	0	0	0	0	0	603	903	0
493	9	0	0	0	0	0	0	200	300	0	0	0	0	0	0	0	200	903	0	0	0	0	0	0	0	603	903	0
494	0	0	0	0	0	0	0	200	300	0	0	0	0	0	0	0	200	903	0	0	0	0	0	0	0	603	903	0
494	1	0	0	0	0	0	0	200	300	0	0	0	0	0	0	0	200	903	0	0	0	0	0	0	0	603	903	0
494	2	0	0	0	0	0	0	200	300	0	0	0	0	0	0	0	200	903	0	0	0	0	0	0	0	603	903	0
494	3	0	0	0	0	0	0	200	300	0	0	0	0	0	0	0	200	903	0	0	0	0	0	0	0	603	903	0
494	4	0	0	0	0	0	0	200	300	0	0	0	0	0	0	0	200	903	0	0	0	0	0	0	0	603	903	0
494	5	0	0	0	0	0	0	200	300	0	0	0	0	0	0	0	200	903	0	0	0	0	0	0	0	603	903	0
494	6	0	0	0	0	0	0	200	300	0	0	0	0	0	0	0	200	903	0	0	0	0	0	0	0	603	903	0
494	7	0	0	0	0	0	0	200	300	0	0	0	0	0	0	0	200	903	0	0	0	0	0	0	0	603	903	0
494	8	0	0	0	0	0	0	200	300	0	0	0	0	0	0	0	200	903	0	0	0	0	0	0	0	603	903	0
494	9	0	0	0	0	0	0	200	300	0	0	0	0	0	0	0	200	903	0	0	0	0	0	0	0	603	903	0
495	0	0	0	0	0	0	0	200	300	0	0	0	0	0	0	0	200	903	0	0	0	0	0	0	0	603	903	0
495	1	0	0	0	0	0	0	200	300	0	0	0	0	0	0	0	200	903	0	0	0	0	0	0	0	603	903	0
495	2	0	0	0	0	0	0	200	300	0	0	0	0	0	0	0	200	903	0	0	0	0	0	0	0	603	903	0
495	3	0	0	0	0	0	0	200	300	0	0	0	0	0	0	0	200	903	0	0	0	0	0	0	0	603	903	0
495	4	0	0	0	0	0	0	200	300	0	0	0	0	0	0	0	200	903	0	0	0	0	0	0	0	603	903	0
495	5	0	0	0	0	0	0	200	300	0	0	0	0	0	0	0	200	903	0	0	0	0	0	0	0	603	903	0
495	6	0	0	0	0	0	0	200	300	0	0	0	0	0	0	0	200	903	0	0	0	0	0	0	0	603	903	0
495	7	0	0	0	0	0	0	200	300	0	0	0	0	0	0	0	200	903	0	0	0	0	0	0	0	603	903	0
495	8	0	0	0	0	0	0	200	300	0	0	0	0	0	0	0	200	903	0	0	0	0	0	0	0	603	903	0
495	9	0	0	0	0	0	0	200	300	0	0	0	0	0	0	0	200	903	0	0	0	0	0	0	0	603	903	0
496	0	0	0	0	0	0	0	200	300	0	0	0	0	0	0	0	200	903	0	0	0	0	0	0	0	603	903	0
496	1	0	0	0	0	0	0	200	300	0	0	0	0	0	0	0	200	903	0	0	0	0	0	0	0	603	903	0
496	2	0	0	0	0	0	0	200	300	0	0	0	0	0	0	0	200	903	0	0	0	0	0	0	0	603	903	0
496	3	0	0	0	0	0	0	200	300	0	0	0	0	0	0	0	200	903	0	0	0	0	0	0	0	603	903	0
496	4	0	0	0	0	0	0	200	300	0	0	0	0	0	0	0	200	903	0	0	0	0	0	0	0	603	903	0
496	5	0	0	0	0	0	0	200	300	0	0	0	0	0	0	0	200	903	0	0	0	0	0	0	0	603	903	0
496	6	0	0	0	0	0	0	200	300	0	0	0	0	0	0	0	200	903	0	0	0	0	0	0	0	603	903	0
496	7	0	0	0	0	0	0	200	300	0	0	0	0	0	0	0	200	903	0	0	0	0	0	0	0	603	903	0
496	8	0	0	0	0	0	0	200	300	0	0	0	0	0	0	0	200	903	0	0	0	0	0	0	0	603	903	0
496	9	0	0	0	0	0	0	200	300	0	0	0	0	0	0	0	200	903	0	0	0	0	0	0	0	603	903	0
497	0	0	0	0	0	0	0	200	300	0	0	0	0	0	0	0	200	903	0	0	0	0	0	0	0	603	903	0
497	1	0	0	0	0	0	0	200	300	0	0	0	0	0	0	0	200	903	0	0	0	0	0	0	0	603	903	0
497	2	0	0	0	0	0	0	200	300	0	0	0	0	0	0	0	200	903	0	0	0	0	0	0	0	603	903	0
497	3	0	0	0	0	0	0	200	300	0	0	0	0	0	0	0	200	903	0	0	0	0	0	0	0	603	903	0
497	4	0	0	0	0	0	0	200	300	0	0	0	0	0	0	0	200	903	0	0	0	0	0	0	0	603	903	0
497	5	0	0	0	0	0	0	200	300	0	0	0	0	0	0	0	200	903	0	0	0	0	0	0	0	603	903	0
497	6	0	0	0	0	0	0	200	300	0	0	0	0	0	0	0	200	903	0	0	0	0	0	0	0	603	903	0
497	7	0	0	0	0	0	0	200	300	0	0	0	0	0	0	0	200	903	0	0	0	0	0	0	0	603	903	0
497	8	0	0	0	0	0	0	200	300	0	0	0	0	0	0	0	200	903	0	0	0	0	0	0	0	603	903	0
497	9	0	0	0	0	0	0	200	300	0	0	0	0	0	0	0	200	903	0	0	0	0	0	0	0	603	903	0
498	0	0	0	0	0	0	0	200	300	0	0	0	0	0	0	0	200	903	0	0	0	0	0	0	0	603	903	0
498	1	0	0	0	0	0	0	200	300	0	0	0	0	0	0	0	200	903	0	0	0	0	0	0	0	603	903	0
498	2	0	0	0	0	0	0	200	300	0	0	0	0	0	0	0	200	903	0	0	0	0	0	0	0	603	903	0
498	3	0	0	0	0	0	0	200	300	0	0	0	0	0	0	0	200	903	0	0	0	0	0	0	0	603	903	0
498	4	0	0	0	0	0	0	200	300	0	0	0	0	0	0	0	200	903	0	0	0	0	0	0	0	603	903	0
498	5	0	0	0	0	0	0	200	300	0	0	0	0	0	0	0	200	903	0	0	0	0	0	0	0	603	903	0
498	6	0	0	0	0	0	0	200	300	0	0	0	0	0	0	0	200	903	0	0	0	0	0	0	0	603	903	0
498	7	0	0	0	0	0	0	200	300	0	0	0	0	0	0	0	200	903	0	0	0	0	0	0	0	603	903	0
498	8	0	0	0	0	0	0	200	300	0	0	0	0	0	0	0	200	903	0	0	0	0	0	0	0	603	903	0
498	9	0	0	0	0	0	0	200	300	0	0	0	0	0	0	0	200	903	0	0	0	0	0	0	0	603	903	0
499	0	0	0	0	0	0	0	200	300	0	0	0	0	0	0	0	200	903	0	0	0	0	0	0	0	603	903	0
499	1	0	0	0	0	0	0	200	300	0	0	0	0	0	0	0	200	903	0	0	0	0	0	0	0	603	903	0
499	2	0	0	0	0	0	0	200	300	0	0	0	0	0	0	0	200	903	0	0	0	0	0	0	0	603	903	0
499	3	0	0	0	0	0	0	200	300	0	0	0	0	0	0	0	200	903	0	0	0	0	0	0	0	603	903	0
499	4	0	0	0	0	0	0	200	300	0	0	0	0	0	0	0	200	903	0	0	0	0	0	0	0	603	903	0
499	5	0	0	0	0	0	0	200	300	0	0	0	0	0	0	0	200	903	0	0	0	0	0	0	0	603	903	0
499	6	0	0	0	0	0	0	200	300	0	0	0	0	0	0	0	200	903	0	0	0	0	0	0	0	603	903	0
499	7	0	0	0	0	0	0	200	300	0	0	0	0	0	0	0	200	903	0	0	0	0	0	0	0	603	903	0
499	8	0	0	0	0	0	0	200	300	0	0	0	0	0	0	0	200	903	0	0	0	0	0	0	0	603	903	0
499	9	0	0	0	0	0	0	200	300	0	0	0	0	0	0	0	200	903	0	0	0	0	0	0	0	603	903	0
500	0	0	0	0	0	0	0	200	300	0	0	0	0	0	0	0	200	903	0	0	0	0	0	0	0	603	903	0
500	1	0	0	0	0	0	0	200	300	0	0	0	0	0	0	0	200	903	0	0	0	0	0	0	0	603	903	0
500	2	0	0	0	0	0	0	200	300	0	0	0	0	0	0	0	200	903	0	0	0	0	0	0	0	603	903	0
500	3	0	0	0	0	0	0	200	300	0	0	0	0	0	0	0	200	903	0	0	0	0	0	0	0	603	903	0
500	4	0	0	0	0	0	0	200	300	0	0	0	0	0	0	0	200	903	0	0	0	0	0	0	0	603	903	0
500	5	0	0	0	0	0	0	200	300	0	0	0	0	0	0	0	200	903	0	0	0	0	0	0	0	603	903	0
500	6	0	0	0	0	0	0	200	300	0	0	0	0	0	0	0	200	903	0	0	0	0	0	0	0	603	903	0
500	7	0	0	0	0	0	0	200	300	0	0	0	0	0	0	0	200	903	0	0	0	0	0	0	0	603	903	0
500	8	0	0	0	0	0	0	200	300	0	0	0	0	0	0	0	200	903	0	0	0	0	0	0	0	603	903	0
500	9	0	0	0	0	0	0	200	300	0	0	0	0	0	0	0	200	903	0	0	0	0	0	0	0	603	903	0
501	0	0	0	0	0	0	0	200	300	0	0	0	0	0	0	0	200	903	0	0	0	0	0	0	0	603	903	0
501	1	0	0	0	0	0	0	200	300	0	0	0	0	0	0	0	200	903	0	0	0	0	0	0	0	603	903	0
501	2	0	0	0	0	0	0	200	300	0	0	0	0	0	0	0	200	903	0	0	0	0	0	0	0	603	903	0
501	3	0	0	0	0	0	0	200	300	0	0	0	0	0	0	0	200	903	0	0	0	0	0	0	0	603	903	0
501	4	0	0	0	0	0	0	200	300	0	0	0	0	0	0	0	200	903	0	0	0	0	0	0	0	603	903	0
501	5	0	0	0	0	0	0	200	300	0	0	0	0	0	0	0	200	903	0	0	0	0	0	0	0	603	903	0
501	6	0	0	0	0	0	0	200	300	0	0	0	0	0	0	0	200	903	0	0	0	0	0	0	0	603	903	0
501	7	0	0	0	0	0	0	200	300	0	0	0	0	0	0	0	200	903	0	0	0	0	0	0	0	603	903	0
501	8	0	0	0	0	0	0	200	300	0	0	0	0	0	0	0	200	903	0	0	0	0	0	0	0	603	903	0
501	9	0	0	0	0	0	0	200	300	0	0	0	0	0	0	0	200	903	0	0	0	0	0	0	0	603	903	0
502	0	0	0	0	0	0	0	200	300	0	0	0	0	0	0	0	200	903	0	0	0	0	0	0	0	603	903	0
502	1	0	0	0	0	0	0	200	300	0	0	0	0	0	0	0	200	903	0	0	0	0	0	0	0	603	903	0
502	2	0	0	0	0	0	0	200	300	0	0	0	0	0	0	0	200	903	0	0	0	0	0	0	0	603	903	0
502	3	0	0	0	0	0	0	200	300	0	0	0	0	0	0	0	200	903	0	0	0	0	0	0	0	603	903	0
502	4	0	0	0	0	0	0	200	300	0	0	0	0	0	0	0	200	903	0	0	0	0	0	0	0	603	903	0
502	5	0	0	0	0	0	0	200	300	0	0	0	0	0	0	0	200	903	0	0	0	0	0	0	0	603	903	0
502	6	0	0	0	0	0	0	200	300	0	0	0	0	0	0	0	200	903	0	0	0	0	0	0	0	603	903	0
502	7	0	0	0	0	0	0	200	300	0	0	0	0	0	0	0	200	903	0	0	0	0	0	0	0	603	903	0
502	8	0	0	0	0	0	0	200	300	0	0	0	0	0	0	0	200	903	0	0	0	0	0	0	0	603	903	0
502	9	0	0	0	0	0	0	200	300	0	0	0	0	0	0	0	200	903	0	0	0	0	0	0	0	603	903	0
503	0	0	0	0	0	0	0	200	300	0	0	0	0	0	0	0	200	903	0	0	0	0	0	0	0	603	903	0
503	1	0	0	0	0	0	0	200	300	0	0	0	0	0	0	0	200	903	0	0	0	0	0	0	0	603	903	0
503	2	0	0	0	0	0	0	200	300	0	0	0	0	0	0	0	200	903	0	0	0	0	0	0	0	603	903	0
503	3	0	0	0	0	0	0	200	300	0	0	0	0	0	0	0	200	903	0	0	0	0	0	0	0	603	903	0
503	4	0	0	0	0	0	0	200	300	0	0	0	0	0	0	0	200	903	0	0	0	0	0	0	0	603	903	0
503	5	0	0	0	0	0	0	200	300	0	0	0	0	0	0	0	200	903	0	0	0	0	0	0	0	603	903	0
503	6	0	0	0	0	0	0	200	300	0	0	0	0	0	0	0	200	903	0	0	0	0	0	0	0	603	903	0
503	7	0	0	0	0	0	0	200	300	0	0	0	0	0	0	0	200	903	0	0	0	0	0	0	0	603	903	0
503	8	0	0	0	0	0	0	200	300	0	0	0	0	0	0	0	200	903	0	0	0	0	0	0	0	603	903	0
503	9	0	0	0	0	0	0	200	300	0	0	0	0	0	0	0	200	903	0	0	0	0	0	0	0	603	903	0
504	0	0	0	0	0	0	0	200	300	0	0	0	0	0	0	0	200	903	0	0	0	0	0	0	0	603	903	0
504	1	0	0	0	0	0	0	200	300	0	0	0	0	0	0	0	200	903	0	0	0	0	0	0	0	603	903	0
504	2	0	0	0	0	0	0	200	300	0	0	0	0	0	0	0	200	903	0	0	0	0	0	0	0	603	903	0
504	3	0	0	0	0	0	0	200	300	0	0	0	0	0	0	0	200	903	0	0	0	0	0	0	0	603	903	0
504	4	0	0	0	0	0	0	200	300	0	0	0	0	0	0	0	200	903	0	0	0	0	0	0	0	603	903	0
504	5	0	0	0	0	0	0	200	300	0	0	0	0	0	0	0	200	903	0	0	0	0	0	0	0	603	903	0
504	6	0	0	0	0	0	0	200	300	0	0	0	0	0	0	0	200	903	0	0	0	0	0	0	0	603	903	0
504	7	0	0	0	0	0	0	200	300	0	0	0	0	0	0	0	200	903	0	0	0	0	0	0	0	603	903	0
504	8	0	0	0	0	0	0	200	300	0	0	0	0	0	0	0	200	903	0	0	0	0	0	0	0	603	903	0
504	9	0	0	0	0	0	0	200	300	0	0	0	0	0	0	0	200	903	0	0	0	0	0	0	0	603	903	0
505	0	0	0	0	0	0	0	200	300	0	0	0	0	0	0	0	200	903	0	0	0	0	0	0	0	603	903	0
505	1	0	0	0	0	0	0	200	300	0	0	0	0	0	0	0	200	903	0	0	0	0	0	0	0	603	903	0
505	2	0	0	0	0	0	0	200	300	0	0	0	0	0	0	0	200	903	0	0	0	0	0	0	0	603	903	0
505	3	0	0	0	0	0	0	200	300	0	0	0	0	0	0	0	200	903	0	0	0	0	0	0	0	603	903	0
505	4	0	0	0	0	0	0	200	300	0	0	0	0	0	0	0	200	903	0	0	0	0	0	0	0	603	903	0
505	5	0	0	0	0	0	0	200	300	0	0	0	0	0	0	0	200	903	0	0	0	0	0	0	0	603	903	0
505	6	0	0	0	0	0	0	200	300	0	0	0	0	0	0	0	200	903	0	0	0	0	0	0	0	603	903	0
505	7	0	0	0	0	0	0	200	300	0	0	0	0	0	0	0	200	903	0	0	0	0	0	0	0	603	903	0
505	8	0	0	0	0	0	0	200	300	0	0	0	0	0	0	0	200	903	0	0	0	0	0	0	0	603	903	0
505	9	0	0	0	0	0	0	200	300	0	0	0	0	0	0	0	200	903	0	0	0	0	0	0	0	603	903	0
506	0	0	0	0	0	0	0	200	300	0	0	0	0	0	0	0	200	903	0	0	0	0	0	0	0	603	903	0
506	1	0	0	0	0	0	0	200	300	0	0	0	0	0	0	0	200	903	0	0	0	0	0	0	0	603	903	0
506	2	0	0	0	0	0	0	200	300	0	0	0	0	0	0	0	200	903	0	0	0	0	0	0	0	603	903	0
506	3	0	0	0	0	0	0	200	300	0	0	0	0	0	0	0	200	903	0	0	0	0	0	0	0	603	903	0
506	4	0	0	0	0	0	0	200	300	0	0	0	0	0	0	0	200	903	0	0	0	0	0	0	0	603	903	0
506	5	0	0	0	0	0	0	200	300	0	0	0	0	0	0	0	200	903	0	0	0	0	0	0	0	603	903	0
506	6	0	0	0	0	0	0	200	300	0	0	0	0	0	0	0	200	903	0	0	0	0	0	0	0	603	903	0
506	7	0	0	0	0	0	0	200	300	0	0	0	0	0	0	0	200	903	0	0	0	0	0	0	0	603	903	0
506	8	0	0	0	0	0	0	200	300	0	0	0	0	0	0	0	200	903	0	0	0	0	0	0	0	603	903	0
506	9	0	0	0	0	0	0	200	300	0	0	0	0	0	0	0	200	903	0	0	0	0	0	0	0	603	903	0
507	0	0	0	0	0	0	0	200	300	0	0	0	0	0	0	0	200	903	0	0	0	0	0	0	0	603	903	0
507	1	0	0	0	0	0	0	200	300	0	0	0	0	0	0	0	200	903	0	0	0	0	0	0	0	603	903	0
507	2	0	0	0	0	0	0	200	300	0	0	0	0	0	0	0	200	903	0	0	0	0	0	0	0	603	903	0
507	3	0	0	0	0	0	0	200	300	0	0	0	0	0	0	0	200	903	0	0	0	0	0	0	0	603	903	0
507	4	0	0	0	0	0	0	200	300	0	0	0	0	0	0	0	200	903	0	0	0	0	0	0	0	603	903	0
507	5	0	0	0	0	0	0	200	300	0	0	0	0	0	0	0	200	903	0	0	0	0	0	0	0	603	903	0
507	6	0	0	0	0	0	0	200	300	0	0	0	0	0	0	0	200	903	0	0	0	0	0	0	0	603	903	0
507	7	0	0	0	0	0	0	200	300	0	0	0	0	0	0	0	200	903	0	0	0	0	0	0	0	603	903	0
507	8	0	0	0	0	0	0	200	300	0	0	0	0	0	0	0	200	903	0	0	0	0	0	0	0	603	903	0
507	9	0	0	0	0	0	0	200	300	0	0	0	0	0	0	0	200	903	0	0	0	0	0	0	0	603	903	0
508	0	0	0	0	0	0	0	200	300	0	0	0	0	0	0	0	200	903	0	0	0	0	0	0	0	603	903	0
508	1	0	0	0	0	0	0	200	300	0	0	0	0	0	0	0	200	903	0	0	0	0	0	0	0	603	903	0
508	2	0	0	0	0	0	0	200	300	0	0	0	0	0	0	0	200	903	0	0	0	0	0	0	0	603	903	0
508	3	0	0	0	0	0	0	200	300	0	0	0	0	0	0	0	200	903	0	0	0	0	0	0	0	603	903	0
508	4	0	0	0	0	0	0	200	300	0	0	0	0	0	0	0	200	903	0	0	0	0	0	0	0	603	903	0
508	5	0	0	0	0	0	0	200	300	0	0	0	0	0	0	0	200	903	0	0	0	0	0	0	0	603	903	0
508	6	0	0	0	0	0	0	200	300	0	0	0	0	0	0	0	200	903	0	0	0	0	0	0	0	603	903	0
508	7	0	0	0	0	0	0	200	300	0	0	0	0	0	0	0	200	903	0	0	0	0	0	0	0	603	903	0
508	8	0	0	0	0	0	0	200	300	0	0	0	0	0	0	0	200	903	0	0	0	0	0	0	0	603	903	0
508	9	0	0	0	0	0	0	200	300	0	0	0	0	0	0	0	200	903	0	0	0	0	0	0	0	603	903	0
509	0	0	0	0	0	0	0	200	300	0	0	0	0	0	0	0	200	903	0	0	0	0	0	0	0	603	903	0
509	1	0	0	0	0	0	0	200	300	0	0	0	0	0	0	0	200	903	0	0	0	0	0	0	0	603	903	0
509	2	0	0	0	0	0	0	200	300	0	0	0	0	0	0	0	200	903	0	0	0	0	0	0	0	603	903	0
509	3	0	0	0	0	0	0	200	300	0	0	0	0	0	0	0	200	903	0	0	0	0	0	0	0	603	903	0
509	4	0	0	0	0	0	0	200	300	0	0	0	0	0	0	0	200	903	0	0	0	0	0	0	0	603	903	0
509	5	0	0	0	0	0	0	200	300	0	0	0	0	0	0	0	200	903	0	0	0	0	0	0	0	603	903	0
[truncated: 3,724 more rows]
