# Supplementary material for: The Effects of an Extemporaneous Speech Dual-task on Older Adult Gait Control
Source: Research Square preprint supplement (doi:10.21203/rs.3.rs-7674245/v1), 2025-11-18
Supplement: Supplementary file 31 [file DT2Walk07.xlsx]

## Sheet: Sheet1
Trajectories
		02:LFHD			02:RFHD			02:LBHD			02:RBHD			02:C7			02:T10			02:CLAV			02:STRN			02:RBAK			02:LSHO			02:LUPA			02:LELB			02:LFRM			02:LWRA			02:LWRB			02:LFIN
Frame	Sub Frame	X	Y	Z	X	Y	Z	X	Y	Z	X	Y	Z	X	Y	Z	X	Y	Z	X	Y	Z	X	Y	Z	X	Y	Z	X	Y	Z	X	Y	Z	X	Y	Z	X	Y	Z	X	Y	Z	X	Y	Z	X	Y	Z
		mm	mm	mm	mm	mm	mm	mm	mm	mm	mm	mm	mm	mm	mm	mm	mm	mm	mm	mm	mm	mm	mm	mm	mm	mm	mm	mm	mm	mm	mm	mm	mm	mm	mm	mm	mm	mm	mm	mm	mm	mm	mm	mm	mm	mm	mm	mm	mm
334	0	341.675	2506.16	1582.23	242.932	2486.94	1579.11	322.228	2676.67	1602.37	210.536	2664.38	1599.61	268.046	2725.2	1429.86	280.723	2790.55	1215.14	276.289	2596.99	1357.01	267.028	2539.11	1226.8	187.671	2795.2	1267.23	443.915	2674.05	1379.79	484.998	2704.7	1149.23	480.507	2719.8	1082.49	503.513	2642.33	986.189	480.454	2620.84	884.164	521.32	2677.1	868.287	530.557	2628.46	783.004
335	0	341.82	2496.81	1579.83	243.057	2477.91	1576.87	323.005	2667.36	1600.44	211.179	2655.42	1597.71	268.924	2716.31	1428.11	281.268	2782.14	1214.12	276.692	2588.2	1354.94	267.131	2530.53	1224.96	188.308	2786.82	1266.09	444.538	2664.81	1377.81	484.901	2697.39	1147.49	480.153	2713.03	1080.93	503.45	2637.14	983.592	480.19	2617.23	881.392	520.805	2673.76	866.427	529.847	2626.59	780.421
336	0	342.066	2487.47	1577.52	243.281	2468.89	1574.68	323.88	2658.06	1598.54	211.926	2646.47	1595.85	269.88	2707.41	1426.36	281.925	2773.6	1212.98	277.194	2579.35	1352.93	267.33	2521.85	1223.16	189.05	2778.34	1264.85	445.251	2655.54	1375.82	484.937	2689.89	1145.72	479.94	2706.05	1079.33	503.49	2631.65	981.025	480.041	2613.27	878.656	520.447	2670.04	864.559	529.232	2624.35	777.84
337	0	342.413	2478.15	1575.28	243.605	2459.89	1572.56	324.851	2648.77	1596.69	212.778	2637.53	1594.03	270.914	2698.49	1424.6	282.694	2764.92	1211.71	277.795	2570.45	1350.99	267.626	2513.08	1221.41	189.898	2769.77	1263.52	446.055	2646.26	1373.83	485.107	2682.19	1143.91	479.868	2698.85	1077.69	503.633	2625.87	978.489	480.007	2608.96	875.957	520.247	2665.95	862.683	528.71	2621.74	775.261
338	0	342.861	2468.83	1573.13	244.029	2450.89	1570.51	325.919	2639.5	1594.88	213.734	2628.61	1592.25	272.027	2689.55	1422.84	283.573	2756.11	1210.32	278.496	2561.48	1349.12	268.019	2504.22	1219.7	190.85	2761.11	1262.11	446.951	2636.95	1371.83	485.408	2674.28	1142.06	479.938	2691.43	1076.01	503.879	2619.8	975.983	480.089	2604.31	873.297	520.203	2661.48	860.801	528.283	2618.76	772.687
339	0	343.409	2459.52	1571.05	244.551	2441.91	1568.53	327.083	2630.23	1593.12	214.794	2619.7	1590.52	273.216	2680.59	1421.08	284.562	2747.17	1208.81	279.295	2552.46	1347.32	268.509	2495.27	1218.05	191.905	2752.36	1260.61	447.936	2627.63	1369.83	485.842	2666.19	1140.19	480.147	2683.8	1074.31	504.227	2613.43	973.511	480.286	2599.3	870.677	520.317	2656.64	858.914	527.953	2615.4	770.119
340	0	344.058	2450.23	1569.06	245.172	2432.94	1566.62	328.343	2620.98	1591.41	215.958	2610.81	1588.83	274.481	2671.6	1419.32	285.654	2738.1	1207.19	280.193	2543.39	1345.58	269.098	2486.22	1216.45	193.059	2743.51	1259.03	449.012	2618.29	1367.83	486.405	2657.89	1138.29	480.495	2675.95	1072.57	504.677	2606.78	971.076	480.598	2593.95	868.1	520.586	2651.41	857.025	527.722	2611.66	767.56
341	0	344.806	2440.94	1567.16	245.89	2423.98	1564.78	329.699	2611.74	1589.75	217.225	2601.92	1587.2	275.82	2662.6	1417.57	286.844	2728.89	1205.46	281.189	2534.26	1343.93	269.787	2477.08	1214.91	194.309	2734.56	1257.37	450.176	2608.94	1365.83	487.095	2649.41	1136.37	480.977	2667.89	1070.8	505.229	2599.83	968.682	481.025	2588.24	865.572	521.01	2645.8	855.139	527.594	2607.53	765.018
342	0	345.651	2431.66	1565.35	246.704	2415.02	1563.03	331.148	2602.5	1588.15	218.593	2593.05	1585.62	277.229	2653.57	1415.83	288.124	2719.55	1203.64	282.282	2525.07	1342.35	270.578	2467.85	1213.44	195.649	2725.52	1255.65	451.426	2599.58	1363.85	487.908	2640.74	1134.44	481.591	2659.62	1069.02	505.884	2592.59	966.337	481.567	2582.18	863.099	521.586	2639.81	853.262	527.573	2603	762.5
343	0	346.593	2422.38	1563.64	247.612	2406.08	1561.37	332.689	2593.28	1586.61	220.06	2584.19	1584.1	278.706	2644.53	1414.12	289.482	2710.07	1201.73	283.471	2515.83	1340.86	271.474	2458.51	1212.06	197.071	2716.37	1253.88	452.76	2590.21	1361.89	488.839	2631.9	1132.5	482.331	2651.15	1067.23	506.639	2585.07	964.052	482.224	2575.75	860.692	522.311	2633.43	851.402	527.665	2598.06	760.02
344	0	347.628	2413.12	1562.05	248.612	2397.15	1559.81	334.319	2584.06	1585.15	221.624	2575.34	1582.66	280.245	2635.45	1412.44	290.904	2700.45	1199.75	284.753	2506.53	1339.47	272.475	2449.08	1210.76	198.564	2707.11	1252.08	454.175	2580.85	1359.97	489.882	2622.89	1130.58	483.191	2642.48	1065.44	507.493	2577.26	961.838	482.994	2568.96	858.363	523.178	2626.67	849.571	527.878	2592.7	757.59
345	0	348.753	2403.85	1560.59	249.699	2388.21	1558.37	336.035	2574.85	1583.77	223.282	2566.5	1581.31	281.841	2626.36	1410.81	292.374	2690.7	1197.73	286.126	2497.18	1338.18	273.585	2439.55	1209.58	200.118	2697.75	1250.26	455.666	2571.49	1358.1	491.027	2613.73	1128.68	484.161	2633.61	1063.67	508.447	2569.17	959.71	483.877	2561.8	856.126	524.182	2619.51	847.781	528.22	2586.9	755.231
346	0	349.964	2394.6	1559.26	250.871	2379.28	1557.06	337.833	2565.64	1582.49	225.028	2557.66	1580.05	283.488	2617.24	1409.24	293.876	2680.81	1195.69	287.585	2487.78	1337.02	274.802	2429.92	1208.52	201.721	2688.28	1248.44	457.228	2562.15	1356.3	492.267	2604.42	1126.83	485.235	2624.57	1061.93	509.497	2560.8	957.686	484.871	2554.26	854	525.313	2611.97	846.049	528.698	2580.65	752.963
347	0	351.257	2385.34	1558.08	252.122	2370.35	1555.88	339.707	2556.44	1581.32	226.858	2548.82	1578.91	285.177	2608.09	1407.76	295.392	2670.78	1193.66	289.125	2478.34	1335.99	276.128	2420.19	1207.61	203.357	2678.7	1246.66	458.854	2552.83	1354.59	493.592	2594.99	1125.05	486.401	2615.34	1060.25	510.641	2552.15	955.785	485.973	2546.34	852.005	526.56	2604.03	844.391	529.321	2573.92	750.81
348	0	352.625	2376.08	1557.07	253.446	2361.42	1554.87	341.651	2547.24	1580.27	228.765	2539.99	1577.89	286.902	2598.91	1406.37	296.904	2660.62	1191.68	290.74	2468.84	1335.1	277.558	2410.37	1206.87	205.014	2669	1244.94	460.537	2543.52	1353	494.99	2585.45	1123.36	487.648	2605.96	1058.65	511.877	2543.25	954.027	487.18	2538.05	850.161	527.913	2595.71	842.826	530.097	2566.7	748.799
349	0	354.063	2366.81	1556.23	254.837	2352.47	1554.04	343.658	2538.03	1579.36	230.742	2531.15	1577.01	288.655	2589.71	1405.11	298.397	2650.33	1189.76	292.422	2459.3	1334.37	279.089	2400.46	1206.31	206.679	2659.2	1243.3	462.268	2534.25	1351.53	496.45	2575.82	1121.78	488.967	2596.42	1057.14	513.2	2534.08	952.435	488.489	2529.37	848.492	529.357	2587	841.375	531.033	2558.98	746.959
350	0	355.564	2357.55	1555.58	256.288	2343.52	1553.39	345.72	2528.83	1578.6	232.781	2522.31	1576.3	290.425	2580.47	1403.99	299.858	2639.92	1187.97	294.161	2449.73	1333.81	280.713	2390.45	1205.94	208.337	2649.29	1241.79	464.039	2524.99	1350.23	497.961	2566.1	1120.35	490.347	2586.74	1055.76	514.607	2524.67	951.031	489.894	2520.3	847.02	530.88	2577.91	840.061	532.135	2550.73	745.319
351	0	357.118	2348.27	1555.12	257.79	2334.55	1552.95	347.826	2519.62	1578	234.87	2513.45	1575.75	292.206	2571.21	1403.02	301.275	2629.39	1186.31	295.948	2440.11	1333.44	282.422	2380.38	1205.79	209.978	2639.28	1240.42	465.838	2515.76	1349.11	499.512	2556.32	1119.09	491.778	2576.92	1054.53	516.093	2515.02	949.837	491.39	2510.86	845.77	532.466	2568.45	838.903	533.406	2541.95	743.91
352	0	358.719	2338.99	1554.88	259.335	2325.57	1552.71	349.966	2510.4	1577.56	237.001	2504.59	1575.39	293.988	2561.91	1402.23	302.642	2618.75	1184.85	297.772	2430.47	1333.25	284.204	2370.23	1205.85	211.591	2629.18	1239.23	467.656	2506.54	1348.19	501.094	2546.48	1118.02	493.25	2566.99	1053.47	517.651	2505.14	948.873	492.971	2501.03	844.762	534.102	2558.62	837.924	534.848	2532.62	742.759
353	0	360.356	2329.7	1554.84	260.914	2316.56	1552.7	352.129	2501.17	1577.31	239.16	2495.71	1575.23	295.763	2552.57	1401.63	303.956	2608.02	1183.6	299.618	2420.8	1333.25	286.046	2360.02	1206.14	213.17	2619	1238.24	469.483	2497.33	1347.48	502.696	2536.59	1117.17	494.755	2556.95	1052.61	519.277	2495.04	948.158	494.629	2490.83	844.017	535.774	2548.43	837.143	536.459	2522.73	741.893
354	0	362.018	2320.4	1555	262.516	2307.53	1552.9	354.302	2491.93	1577.23	241.334	2486.81	1575.26	297.523	2543.21	1401.22	305.219	2597.22	1182.59	301.475	2411.11	1333.46	287.933	2349.77	1206.65	214.709	2608.75	1237.46	471.306	2488.11	1347.02	504.311	2526.66	1116.55	496.289	2546.81	1051.95	520.963	2484.72	947.707	496.356	2480.27	843.553	537.472	2537.89	836.576	538.233	2512.3	741.334
355	0	363.696	2311.09	1555.38	264.132	2298.48	1553.33	356.471	2482.69	1577.35	243.51	2477.89	1575.5	299.262	2533.81	1401.03	306.437	2586.35	1181.86	303.329	2401.41	1333.86	289.847	2339.5	1207.37	216.208	2598.46	1236.92	473.117	2478.88	1346.8	505.933	2516.7	1116.19	497.845	2536.58	1051.53	522.701	2474.2	947.533	498.145	2469.35	843.383	539.183	2527.02	836.237	540.163	2501.3	741.102
356	0	365.377	2301.78	1555.95	265.749	2289.4	1553.97	358.622	2473.43	1577.64	245.672	2468.94	1575.94	300.975	2524.39	1401.04	307.619	2575.46	1181.4	305.166	2391.7	1334.45	291.771	2329.21	1208.29	217.669	2588.15	1236.62	474.905	2469.63	1346.84	507.558	2506.71	1116.08	499.422	2526.26	1051.34	524.486	2463.49	947.642	499.986	2458.08	843.516	540.899	2515.81	836.136	542.237	2489.76	741.208
357	0	367.05	2292.46	1556.7	267.356	2280.29	1554.82	360.742	2464.16	1578.12	247.806	2459.98	1576.57	302.656	2514.93	1401.27	308.778	2564.55	1181.23	306.972	2381.99	1335.22	293.686	2318.92	1209.4	219.097	2577.82	1236.56	476.662	2460.33	1347.14	509.185	2496.68	1116.24	501.02	2515.86	1051.4	526.308	2452.59	948.039	501.87	2446.48	843.959	542.614	2504.29	836.279	544.439	2477.68	741.658
358	0	368.702	2283.13	1557.63	268.944	2271.16	1555.84	362.816	2454.88	1578.78	249.896	2450.98	1577.4	304.302	2505.46	1401.7	309.933	2553.65	1181.36	308.735	2372.28	1336.17	295.572	2308.65	1210.68	220.503	2567.52	1236.75	478.379	2450.98	1347.69	510.814	2486.61	1116.66	502.641	2505.39	1051.7	528.162	2441.5	948.72	503.789	2434.57	844.71	544.324	2492.47	836.665	546.754	2465.08	742.452
359	0	370.321	2273.8	1558.71	270.499	2262.01	1557.04	364.829	2445.59	1579.6	251.927	2441.96	1578.41	305.912	2495.97	1402.34	311.103	2542.8	1181.76	310.441	2362.59	1337.27	297.41	2298.42	1212.09	221.899	2557.27	1237.17	480.049	2441.57	1348.49	512.446	2476.49	1117.35	504.289	2494.84	1052.25	530.039	2430.25	949.68	505.733	2422.36	845.763	546.026	2480.36	837.291	549.159	2451.98	743.583
360	0	371.895	2264.46	1559.91	272.01	2252.83	1558.37	366.769	2436.29	1580.58	253.885	2432.91	1579.58	307.485	2486.47	1403.15	312.309	2532.01	1182.43	312.08	2352.93	1338.5	299.18	2288.24	1213.62	223.3	2547.09	1237.8	481.667	2432.07	1349.53	514.085	2466.32	1118.28	505.969	2484.22	1053.03	531.934	2418.82	950.905	507.693	2409.87	847.107	547.72	2467.96	838.148	551.635	2438.41	745.036
361	0	373.41	2255.13	1561.23	273.466	2243.64	1559.82	368.622	2426.98	1581.69	255.756	2423.83	1580.9	309.02	2476.97	1404.14	313.573	2521.32	1183.35	313.641	2343.29	1339.86	300.864	2278.14	1215.24	224.724	2537	1238.63	483.227	2422.48	1350.78	515.736	2456.07	1119.44	507.687	2473.51	1054.03	533.839	2407.22	952.382	509.661	2397.11	848.727	549.409	2455.3	839.224	554.159	2424.39	746.791
362	0	374.855	2245.8	1562.62	274.856	2234.43	1561.35	370.378	2417.66	1582.94	257.528	2414.73	1582.35	310.519	2467.48	1405.28	314.915	2510.76	1184.48	315.116	2333.7	1341.31	302.446	2268.11	1216.91	226.188	2527.04	1239.64	484.727	2412.8	1352.23	517.404	2445.74	1120.82	509.451	2462.72	1055.24	535.747	2395.46	954.09	511.627	2384.11	850.602	551.095	2442.38	840.502	556.707	2409.95	748.823
363	0	376.219	2236.47	1564.08	276.169	2225.21	1562.94	372.027	2408.34	1584.3	259.191	2405.6	1583.9	311.982	2458	1406.55	316.355	2500.34	1185.79	316.498	2324.15	1342.84	303.914	2258.2	1218.61	227.707	2517.22	1240.79	486.163	2403.03	1353.85	519.094	2435.3	1122.39	511.267	2451.83	1056.62	537.652	2383.54	956.008	513.583	2370.89	852.709	552.785	2429.22	841.964	559.257	2395.14	751.102
364	0	377.489	2227.14	1565.57	277.396	2215.99	1564.55	373.561	2399	1585.76	260.736	2396.45	1585.54	313.411	2448.54	1407.93	317.904	2490.09	1187.27	317.784	2314.65	1344.43	305.255	2248.39	1220.32	229.296	2507.56	1242.07	487.534	2393.16	1355.62	520.813	2424.75	1124.11	513.141	2440.84	1058.17	539.548	2371.45	958.111	515.522	2357.47	855.022	554.485	2415.82	843.591	561.787	2379.98	753.596
365	0	378.657	2217.82	1567.07	278.527	2206.76	1566.15	374.975	2389.66	1587.29	262.158	2387.28	1587.25	314.808	2439.12	1409.41	319.571	2480.02	1188.87	318.969	2305.22	1346.04	306.464	2238.72	1222.01	230.962	2498.08	1243.45	488.839	2383.2	1357.52	522.563	2414.07	1125.98	515.079	2429.75	1059.85	541.426	2359.2	960.374	517.435	2343.86	857.513	556.199	2402.21	845.363	564.276	2364.52	756.272
366	0	379.714	2208.5	1568.56	279.555	2197.54	1567.72	376.264	2380.31	1588.89	263.452	2378.09	1588.99	316.172	2429.74	1410.95	321.358	2470.15	1190.56	320.055	2295.86	1347.68	307.538	2229.19	1223.66	232.712	2488.79	1244.91	490.079	2373.17	1359.51	524.347	2403.24	1127.95	517.084	2418.53	1061.64	543.281	2346.79	962.774	519.315	2330.08	860.156	557.936	2388.37	847.261	566.706	2348.79	759.097
367	0	380.652	2199.18	1570.01	280.473	2188.32	1569.23	377.427	2370.95	1590.54	264.617	2368.9	1590.76	317.505	2420.41	1412.55	323.26	2460.49	1192.31	321.042	2286.58	1349.31	308.478	2219.8	1225.26	234.544	2479.69	1246.41	491.252	2363.08	1361.57	526.167	2392.25	1130	519.156	2407.18	1063.51	545.103	2334.23	965.285	521.152	2316.17	862.921	559.701	2374.34	849.267	569.062	2332.84	762.039
368	0	381.466	2189.87	1571.42	281.278	2179.12	1570.67	378.464	2361.59	1592.21	265.654	2359.69	1592.53	318.807	2411.14	1414.18	325.267	2451.04	1194.1	321.933	2277.37	1350.92	309.289	2210.57	1226.79	236.455	2470.78	1247.95	492.361	2352.95	1363.68	528.02	2381.1	1132.11	521.295	2395.7	1065.45	546.886	2321.5	967.885	522.94	2302.12	865.784	561.497	2360.11	851.365	571.328	2316.7	765.07
369	0	382.152	2180.56	1572.77	281.965	2169.94	1572.01	379.378	2352.22	1593.9	266.564	2350.49	1594.28	320.076	2401.93	1415.83	327.362	2441.8	1195.9	322.734	2268.26	1352.49	309.98	2201.49	1228.24	238.433	2462.06	1249.49	493.407	2342.8	1365.81	529.902	2369.79	1134.26	523.497	2384.08	1067.43	548.622	2308.61	970.554	524.671	2287.95	868.72	563.328	2345.69	853.542	573.495	2300.41	768.165
370	0	382.708	2171.26	1574.04	282.532	2160.79	1573.24	380.173	2342.85	1595.59	267.353	2341.29	1595.99	321.314	2392.79	1417.47	329.526	2432.76	1197.7	323.45	2259.23	1354.02	310.563	2192.58	1229.62	240.467	2453.53	1251.04	494.392	2332.65	1367.94	531.807	2358.31	1136.42	525.756	2372.31	1069.43	550.301	2295.58	973.272	526.337	2273.7	871.706	565.195	2331.1	855.786	575.554	2283.99	771.301
371	0	383.133	2161.95	1575.23	282.981	2151.66	1574.34	380.853	2333.48	1597.27	268.026	2332.1	1597.66	322.517	2383.73	1419.1	331.735	2423.92	1199.47	324.088	2250.29	1355.49	311.05	2183.81	1230.91	242.54	2445.17	1252.56	495.317	2322.52	1370.05	533.728	2346.67	1138.58	528.062	2360.41	1071.44	551.916	2282.4	976.023	527.929	2259.36	874.724	567.094	2316.35	858.088	577.499	2267.49	774.462
372	0	383.431	2152.65	1576.33	283.311	2142.57	1575.32	381.427	2324.11	1598.92	268.59	2322.92	1599.26	323.685	2374.74	1420.7	333.967	2415.26	1201.21	324.656	2241.44	1356.89	311.457	2175.19	1232.11	244.634	2436.96	1254.06	496.185	2312.43	1372.14	535.655	2334.89	1140.72	530.404	2348.38	1073.43	553.459	2269.08	978.792	529.441	2244.95	877.756	569.022	2301.44	860.439	579.325	2250.93	777.633
373	0	383.604	2143.36	1577.33	283.526	2133.52	1576.17	381.901	2314.74	1600.53	269.054	2313.77	1600.78	324.816	2365.82	1422.25	336.197	2406.77	1202.9	325.162	2232.69	1358.22	311.798	2166.71	1233.23	246.732	2428.9	1255.51	496.999	2302.41	1374.17	537.577	2323	1142.82	532.77	2336.22	1075.4	554.923	2255.64	981.565	530.864	2230.49	880.788	570.971	2286.39	862.833	581.03	2234.32	780.804
374	0	383.659	2134.08	1578.24	283.631	2124.51	1576.89	382.283	2305.38	1602.08	269.427	2304.64	1602.22	325.907	2356.99	1423.76	338.403	2398.43	1204.52	325.613	2224.02	1359.46	312.089	2158.36	1234.27	248.815	2420.96	1256.91	497.761	2292.47	1376.15	539.481	2311	1144.88	535.144	2323.96	1077.33	556.302	2242.1	984.332	532.193	2216	883.808	572.931	2271.22	865.262	582.613	2217.71	783.967
375	0	383.602	2124.82	1579.04	283.63	2115.55	1577.48	382.582	2296.03	1603.57	269.717	2295.56	1603.56	326.956	2348.22	1425.2	340.566	2390.21	1206.08	326.017	2215.44	1360.62	312.343	2150.12	1235.21	250.868	2413.12	1258.25	498.472	2282.63	1378.05	541.356	2298.93	1146.89	537.51	2311.6	1079.22	557.591	2228.46	987.082	533.421	2201.48	886.804	574.887	2255.93	867.72	584.072	2201.1	787.118
376	0	383.442	2115.57	1579.75	283.53	2106.64	1577.95	382.807	2286.7	1604.98	269.934	2286.51	1604.79	327.962	2339.53	1426.56	342.668	2382.11	1207.56	326.382	2206.94	1361.69	312.572	2141.99	1236.07	252.875	2405.38	1259.53	499.135	2272.89	1379.87	543.19	2286.81	1148.83	539.852	2299.17	1081.05	558.785	2214.76	989.805	534.543	2186.95	889.769	576.826	2240.55	870.2	585.407	2184.51	790.253
377	0	383.188	2106.34	1580.36	283.339	2097.78	1578.3	382.965	2277.39	1606.3	270.086	2277.5	1605.91	328.922	2330.91	1427.85	344.695	2374.09	1208.96	326.713	2198.52	1362.66	312.787	2133.96	1236.84	254.822	2397.7	1260.73	499.752	2263.26	1381.6	544.971	2274.69	1150.69	542.154	2286.68	1082.81	559.882	2201	992.493	535.555	2172.43	892.694	578.728	2225.1	872.692	586.62	2167.96	793.371
378	0	382.852	2097.14	1580.87	283.065	2088.96	1578.53	383.064	2268.12	1607.53	270.181	2268.55	1606.91	329.833	2322.35	1429.05	346.637	2366.15	1210.27	327.015	2190.17	1363.52	312.995	2126	1237.51	256.698	2390.08	1261.86	500.323	2253.74	1383.22	546.688	2262.58	1152.48	544.397	2274.17	1084.5	560.88	2187.23	995.136	536.453	2157.92	895.574	580.577	2209.6	875.187	587.709	2151.46	796.468
379	0	382.446	2087.98	1581.29	282.717	2080.2	1578.65	383.112	2258.87	1608.66	270.228	2259.65	1607.79	330.694	2313.85	1430.15	348.484	2358.27	1211.49	327.293	2181.88	1364.29	313.201	2118.12	1238.09	258.491	2382.5	1262.9	500.849	2244.35	1384.73	548.329	2250.52	1154.17	546.567	2261.66	1086.1	561.778	2173.46	997.725	537.235	2143.45	898.402	582.351	2194.07	877.673	588.676	2135.03	799.543
380	0	381.98	2078.85	1581.61	282.305	2071.48	1578.68	383.116	2249.66	1609.67	270.233	2250.8	1608.55	331.502	2305.4	1431.15	350.232	2350.43	1212.62	327.55	2173.66	1364.95	313.41	2110.3	1238.56	260.194	2374.94	1263.86	501.331	2235.06	1386.12	549.887	2238.54	1155.77	548.648	2249.17	1087.62	562.576	2159.71	1000.25	537.901	2129.02	901.172	584.033	2178.54	880.139	589.519	2118.66	802.593
381	0	381.467	2069.76	1581.83	281.839	2062.81	1578.6	383.08	2240.5	1610.58	270.202	2242.01	1609.18	332.254	2297	1432.05	351.874	2342.62	1213.64	327.786	2165.48	1365.51	313.621	2102.54	1238.93	261.797	2367.4	1264.73	501.768	2225.89	1387.38	551.352	2226.66	1157.26	550.626	2236.73	1089.04	563.275	2146.02	1002.71	538.45	2114.65	903.88	585.602	2163.04	882.57	590.239	2102.38	805.614
382	0	380.919	2060.73	1581.96	281.329	2054.18	1578.43	383.012	2231.38	1611.36	270.141	2233.28	1609.68	332.947	2288.64	1432.83	353.408	2334.85	1214.55	328.004	2157.35	1365.96	313.832	2094.82	1239.18	263.294	2359.86	1265.5	502.159	2216.83	1388.51	552.717	2214.91	1158.64	552.487	2224.35	1090.35	563.875	2132.4	1005.08	538.883	2100.35	906.519	587.04	2147.6	884.951	590.834	2086.19	808.602
383	0	380.347	2051.74	1581.99	280.785	2045.6	1578.18	382.915	2222.31	1612.03	270.054	2224.59	1610.07	333.58	2280.32	1433.51	354.83	2327.09	1215.36	328.203	2149.26	1366.29	314.041	2087.14	1239.32	264.677	2352.32	1266.18	502.504	2207.87	1389.5	553.975	2203.3	1159.89	554.22	2212.06	1091.55	564.378	2118.88	1007.37	539.202	2086.14	909.086	588.334	2132.24	887.269	591.304	2070.11	811.55
384	0	379.762	2042.8	1581.93	280.219	2037.05	1577.83	382.792	2213.29	1612.57	269.944	2215.95	1610.33	334.149	2272.04	1434.07	356.136	2319.35	1216.06	328.382	2141.21	1366.53	314.243	2079.48	1239.35	265.941	2344.77	1266.76	502.799	2199	1390.35	555.121	2191.84	1161.03	555.815	2199.87	1092.64	564.785	2105.49	1009.56	539.408	2072.03	911.574	589.468	2117	889.509	591.648	2054.15	814.452
385	0	379.172	2033.92	1581.76	279.637	2028.53	1577.4	382.648	2204.31	1612.99	269.815	2207.36	1610.48	334.652	2263.79	1434.52	357.322	2311.62	1216.64	328.538	2133.18	1366.65	314.43	2071.85	1239.27	267.08	2337.2	1267.24	503.045	2190.23	1391.04	556.149	2180.54	1162.03	557.262	2187.8	1093.61	565.096	2092.23	1011.65	539.503	2058.03	913.979	590.432	2101.89	891.658	591.864	2038.32	817.299
386	0	378.586	2025.09	1581.49	279.049	2020.04	1576.88	382.484	2195.39	1613.29	269.668	2198.81	1610.52	335.087	2255.56	1434.85	358.386	2303.91	1217.11	328.67	2125.18	1366.67	314.596	2064.23	1239.07	268.089	2329.61	1267.62	503.239	2181.55	1391.6	557.055	2169.42	1162.9	558.555	2175.86	1094.45	565.312	2079.12	1013.63	539.49	2044.16	916.296	591.218	2086.95	893.704	591.952	2022.63	820.082
387	0	378.01	2016.31	1581.12	278.462	2011.57	1576.28	382.303	2186.51	1613.48	269.505	2190.28	1610.46	335.45	2247.36	1435.07	359.323	2296.21	1217.47	328.774	2117.2	1366.59	314.734	2056.62	1238.77	268.963	2322	1267.9	503.38	2172.96	1392	557.837	2158.47	1163.64	559.689	2164.06	1095.17	565.433	2066.19	1015.49	539.37	2030.42	918.52	591.82	2072.19	895.637	591.91	2007.1	822.793
388	0	377.449	2007.59	1580.64	277.881	2003.12	1575.59	382.105	2177.68	1613.55	269.326	2181.79	1610.3	335.741	2239.18	1435.18	360.127	2288.52	1217.71	328.847	2109.23	1366.41	314.835	2049.01	1238.36	269.7	2314.37	1268.09	503.465	2164.44	1392.26	558.49	2147.69	1164.24	560.658	2152.4	1095.77	565.458	2053.43	1017.23	539.146	2016.82	920.647	592.237	2057.63	897.449	591.737	1991.74	825.421
389	0	376.905	1998.9	1580.06	277.309	1994.69	1574.82	381.89	2168.88	1613.51	269.131	2173.31	1610.05	335.955	2231.03	1435.17	360.796	2280.85	1217.85	328.886	2101.28	1366.13	314.894	2041.39	1237.87	270.296	2306.71	1268.18	503.493	2155.99	1392.37	559.013	2137.07	1164.7	561.461	2140.89	1096.24	565.386	2040.85	1018.85	538.819	2003.38	922.672	592.468	2043.3	899.132	591.433	1976.57	827.956
390	0	376.379	1990.27	1579.37	276.748	1986.26	1573.97	381.66	2160.12	1613.37	268.92	2164.85	1609.72	336.093	2222.89	1435.06	361.325	2273.19	1217.88	328.885	2093.33	1365.76	314.904	2033.75	1237.28	270.749	2299.01	1268.17	503.463	2147.62	1392.35	559.405	2126.61	1165.04	562.096	2129.53	1096.59	565.216	2028.46	1020.35	538.39	1990.1	924.59	592.516	2029.19	900.683	590.997	1961.61	830.388
391	0	375.872	1981.67	1578.57	276.199	1977.85	1573.03	381.412	2151.39	1613.14	268.692	2156.39	1609.32	336.152	2214.76	1434.85	361.712	2265.53	1217.8	328.842	2085.39	1365.31	314.859	2026.09	1236.62	271.061	2291.29	1268.08	503.372	2139.32	1392.19	559.664	2116.3	1165.24	562.562	2118.31	1096.82	564.945	2016.26	1021.72	537.859	1976.99	926.397	592.384	2015.33	902.099	590.428	1946.85	832.708
392	0	375.379	1973.1	1577.67	275.661	1969.44	1572	381.146	2142.68	1612.81	268.443	2147.93	1608.85	336.13	2206.65	1434.54	361.954	2257.89	1217.62	328.752	2077.44	1364.76	314.755	2018.41	1235.89	271.23	2283.54	1267.9	503.219	2131.07	1391.91	559.79	2106.14	1165.32	562.862	2107.24	1096.93	564.574	2004.25	1022.96	537.226	1964.06	928.09	592.078	2001.71	903.38	589.728	1932.33	834.907
393	0	374.898	1964.56	1576.67	275.129	1961.03	1570.9	380.859	2134	1612.4	268.173	2139.47	1608.32	336.026	2198.54	1434.14	362.05	2250.24	1217.34	328.611	2069.49	1364.14	314.587	2010.69	1235.1	271.26	2275.75	1267.63	503.003	2122.88	1391.51	559.785	2096.1	1165.29	562.997	2096.32	1096.94	564.098	1992.42	1024.07	536.492	1951.31	929.664	591.606	1988.34	904.527	588.896	1918.06	836.974
394	0	374.423	1956.04	1575.57	274.599	1952.62	1569.72	380.549	2125.33	1611.91	267.876	2131	1607.74	335.84	2190.44	1433.65	362.002	2242.59	1216.96	328.416	2061.53	1363.45	314.355	2002.94	1234.26	271.155	2267.92	1267.28	502.722	2114.74	1391	559.649	2086.19	1165.14	562.971	2085.52	1096.84	563.518	1980.78	1025.07	535.657	1938.75	931.115	590.975	1975.23	905.542	587.933	1904.04	838.903
395	0	373.946	1947.54	1574.38	274.066	1944.2	1568.47	380.212	2116.67	1611.35	267.551	2122.52	1607.11	335.57	2182.35	1433.07	361.811	2234.93	1216.5	328.162	2053.56	1362.68	314.056	1995.15	1233.37	270.919	2260.06	1266.84	502.374	2106.64	1390.4	559.385	2076.39	1164.89	562.789	2074.86	1096.64	562.832	1969.31	1025.93	534.721	1926.38	932.439	590.197	1962.36	906.428	586.842	1890.28	840.684
396	0	373.461	1939.05	1573.1	273.522	1935.78	1567.14	379.844	2108.01	1610.72	267.193	2114.02	1606.43	335.216	2174.24	1432.41	361.481	2227.25	1215.94	327.845	2045.56	1361.85	313.688	1987.31	1232.45	270.559	2252.15	1266.33	501.958	2098.57	1389.7	558.997	2066.68	1164.55	562.455	2064.32	1096.36	562.04	1958.02	1026.67	533.686	1914.2	933.631	589.281	1949.74	907.187	585.625	1876.8	842.31
397	0	372.958	1930.57	1571.73	272.96	1927.36	1565.75	379.441	2099.36	1610.02	266.796	2105.5	1605.71	334.777	2166.13	1431.67	361.018	2219.54	1215.3	327.462	2037.54	1360.95	313.253	1979.43	1231.49	270.081	2244.21	1265.75	501.473	2090.53	1388.92	558.488	2057.07	1164.11	561.977	2053.89	1095.98	561.142	1946.89	1027.29	532.552	1902.23	934.686	588.238	1937.36	907.824	584.286	1863.6	843.774
398	0	372.429	1922.1	1570.3	272.371	1918.92	1564.3	378.997	2090.71	1609.27	266.356	2096.96	1604.96	334.253	2158	1430.85	360.428	2211.8	1214.58	327.01	2029.49	1360	312.748	1971.49	1230.49	269.492	2236.21	1265.08	500.916	2082.5	1388.07	557.863	2047.53	1163.58	561.362	2043.57	1095.52	560.14	1935.92	1027.78	531.322	1890.45	935.6	587.081	1925.21	908.34	582.828	1850.69	845.069
399	0	371.865	1913.62	1568.8	271.747	1910.47	1562.8	378.508	2082.05	1608.47	265.868	2088.4	1604.17	333.644	2149.85	1429.97	359.719	2204.02	1213.79	326.485	2021.4	1358.99	312.174	1963.5	1229.48	268.801	2228.17	1264.35	500.287	2074.47	1387.15	557.127	2038.06	1162.98	560.618	2033.36	1094.99	559.036	1925.1	1028.15	530	1878.88	936.367	585.819	1913.29	908.737	581.257	1838.06	846.188
400	0	371.256	1905.14	1567.25	271.08	1902.02	1561.26	377.968	2073.39	1607.62	265.327	2079.82	1603.35	332.949	2141.68	1429.02	358.901	2196.19	1212.91	325.884	2013.27	1357.93	311.531	1955.46	1228.43	268.014	2220.06	1263.54	499.584	2066.44	1386.16	556.287	2028.66	1162.31	559.754	2023.24	1094.37	557.836	1914.43	1028.39	528.59	1867.51	936.981	584.467	1901.59	909.014	579.579	1825.72	847.124
401	0	370.594	1896.64	1565.65	270.36	1893.54	1559.68	377.372	2064.72	1606.72	264.725	2071.22	1602.49	332.169	2133.47	1428	357.982	2188.3	1211.97	325.204	2005.09	1356.83	310.817	1947.34	1227.37	267.139	2211.9	1262.65	498.806	2058.38	1385.13	555.349	2019.3	1161.56	558.779	2013.22	1093.69	556.542	1903.89	1028.5	527.099	1856.34	937.437	583.036	1890.11	909.173	577.803	1813.66	847.87
402	0	369.87	1888.14	1564.01	269.579	1885.06	1558.07	376.713	2056.04	1605.77	264.059	2062.6	1601.6	331.303	2125.23	1426.92	356.971	2180.35	1210.95	324.442	1996.84	1355.68	310.033	1939.16	1226.28	266.182	2203.67	1261.69	497.952	2050.3	1384.04	554.319	2009.99	1160.74	557.704	2003.27	1092.94	555.162	1893.49	1028.49	525.534	1845.37	937.73	581.54	1878.83	909.209	575.936	1801.89	848.421
403	0	369.075	1879.61	1562.35	268.731	1876.55	1556.44	375.987	2047.34	1604.79	263.322	2053.96	1600.67	330.352	2116.93	1425.78	355.878	2172.31	1209.87	323.597	1988.54	1354.49	309.176	1930.9	1225.18	265.149	2195.37	1260.65	497.02	2042.17	1382.91	553.204	2000.71	1159.86	556.538	1993.41	1092.11	553.702	1883.21	1028.34	523.904	1834.61	937.855	579.99	1867.75	909.122	573.989	1790.39	848.77
404	0	368.203	1871.07	1560.68	267.808	1868.03	1554.8	375.188	2038.64	1603.76	262.51	2045.3	1599.71	329.316	2108.59	1424.57	354.709	2164.18	1208.71	322.665	1980.17	1353.27	308.247	1922.56	1224.05	264.046	2186.98	1259.53	496.01	2033.99	1381.73	552.009	1991.45	1158.92	555.29	1983.62	1091.23	552.17	1873.05	1028.06	522.217	1824.04	937.806	578.398	1856.87	908.908	571.974	1779.17	848.911
405	0	367.247	1862.5	1559.01	266.806	1859.49	1553.17	374.312	2029.92	1602.7	261.619	2036.63	1598.72	328.194	2100.19	1423.32	353.473	2155.95	1207.49	321.645	1971.71	1352.01	307.243	1914.13	1222.92	262.875	2178.51	1258.34	494.922	2025.75	1380.51	550.742	1982.22	1157.92	553.97	1973.9	1090.27	550.576	1863.01	1027.65	520.486	1813.67	937.582	576.777	1846.19	908.563	569.903	1768.22	848.84
406	0	366.201	1853.9	1557.34	265.719	1850.92	1551.54	373.354	2021.18	1601.61	260.644	2027.93	1597.69	326.986	2091.73	1422.01	352.172	2147.61	1206.2	320.537	1963.18	1350.74	306.163	1905.59	1221.77	261.639	2169.93	1257.06	493.753	2017.45	1379.25	549.406	1973	1156.86	552.586	1964.24	1089.25	548.928	1853.08	1027.1	518.72	1803.49	937.179	575.139	1835.69	908.086	567.791	1757.53	848.554
407	0	365.063	1845.27	1555.69	264.545	1842.33	1549.93	372.311	2012.43	1600.5	259.582	2019.22	1596.64	325.692	2083.2	1420.65	350.811	2139.15	1204.85	319.338	1954.55	1349.44	305.007	1896.96	1220.61	260.339	2161.26	1255.7	492.505	2009.06	1377.96	548.008	1963.78	1155.74	551.145	1954.65	1088.18	547.236	1843.26	1026.42	516.933	1793.5	936.598	573.495	1825.38	907.473	565.652	1747.1	848.05
408	0	363.829	1836.6	1554.07	263.282	1833.71	1548.35	371.179	2003.66	1599.36	258.431	2010.48	1595.56	324.311	2074.59	1419.26	349.391	2130.55	1203.42	318.049	1945.83	1348.14	303.775	1888.2	1219.45	258.976	2152.47	1254.26	491.175	2000.6	1376.64	546.549	1954.58	1154.58	549.653	1945.13	1087.04	545.51	1833.55	1025.61	515.135	1783.69	935.839	571.854	1815.26	906.724	563.503	1736.94	847.328
409	0	362.499	1827.9	1552.5	261.93	1825.06	1546.81	369.958	1994.87	1598.2	257.188	2001.72	1594.47	322.844	2065.92	1417.82	347.91	2121.8	1201.94	316.671	1937.01	1346.83	302.466	1879.33	1218.3	257.547	2143.56	1252.75	489.765	1992.06	1375.29	545.034	1945.37	1153.37	548.115	1935.66	1085.85	543.758	1823.95	1024.67	513.339	1774.07	934.906	570.226	1805.33	905.841	561.362	1727.03	846.391
410	0	361.071	1819.16	1550.98	260.488	1816.38	1545.33	368.644	1986.05	1597.04	255.854	1992.95	1593.36	321.29	2057.16	1416.36	346.366	2112.89	1200.39	315.205	1928.09	1345.53	301.081	1870.33	1217.16	256.051	2134.52	1251.16	488.274	1983.43	1373.92	543.464	1936.16	1152.12	546.535	1926.26	1084.61	541.991	1814.46	1023.6	511.556	1764.63	933.806	568.621	1795.6	904.825	559.244	1717.38	845.244
411	0	359.549	1810.37	1549.52	258.96	1807.66	1543.9	367.238	1977.22	1595.89	254.427	1984.14	1592.25	319.65	2048.32	1414.89	344.755	2103.81	1198.79	313.653	1919.06	1344.26	299.623	1861.2	1216.03	254.484	2125.35	1249.51	486.702	1974.72	1372.54	541.841	1926.96	1150.83	544.916	1916.93	1083.34	540.217	1805.08	1022.42	509.799	1755.36	932.546	567.046	1786.07	903.684	557.169	1707.98	843.894
412	0	357.936	1801.55	1548.13	257.348	1798.9	1542.55	365.741	1968.36	1594.75	252.909	1975.31	1591.14	317.923	2039.4	1413.41	343.07	2094.55	1197.14	312.018	1909.93	1343.01	298.093	1851.94	1214.95	252.84	2116.04	1247.81	485.052	1965.92	1371.16	540.167	1917.76	1149.53	543.257	1907.66	1082.03	538.445	1795.81	1021.14	508.076	1746.28	931.139	565.506	1776.74	902.424	555.154	1698.85	842.355
413	0	356.236	1792.67	1546.84	255.656	1790.1	1541.27	364.154	1959.47	1593.63	251.301	1966.45	1590.06	316.112	2030.4	1411.94	341.304	2085.11	1195.46	310.303	1900.69	1341.82	296.495	1842.53	1213.91	251.117	2106.59	1246.06	483.324	1957.05	1369.79	538.441	1908.57	1148.21	541.561	1898.47	1080.7	536.682	1786.67	1019.76	506.398	1737.37	929.597	564.009	1767.62	901.059	553.216	1689.97	840.64
414	0	354.455	1783.75	1545.64	253.892	1781.26	1540.1	362.479	1950.55	1592.55	249.605	1957.55	1589.01	314.217	2021.31	1410.49	339.451	2075.49	1193.75	308.515	1891.35	1340.68	294.833	1832.99	1212.92	249.308	2097	1244.29	481.521	1948.09	1368.45	536.663	1899.4	1146.89	539.825	1889.36	1079.36	534.935	1777.66	1018.31	504.773	1728.65	927.938	562.556	1758.73	899.601	551.372	1681.37	838.771
415	0	352.6	1774.79	1544.55	252.06	1772.37	1539.03	360.719	1941.61	1591.53	247.825	1948.62	1588.01	312.241	2012.14	1409.09	337.504	2065.67	1192.05	306.657	1881.91	1339.62	293.113	1823.31	1212.02	247.411	2087.26	1242.52	479.648	1939.06	1367.14	534.836	1890.26	1145.59	538.05	1880.34	1078.03	533.212	1768.78	1016.79	503.208	1720.1	926.181	561.151	1750.06	898.068	549.637	1673.03	836.768
416	0	350.679	1765.78	1543.59	250.169	1763.43	1538.08	358.878	1932.63	1590.57	245.964	1939.65	1587.08	310.187	2002.89	1407.75	335.456	2055.67	1190.36	304.737	1872.37	1338.66	291.341	1813.49	1211.2	245.422	2077.39	1240.77	477.708	1929.97	1365.89	532.958	1881.17	1144.31	536.232	1871.43	1076.73	531.516	1760.06	1015.22	501.708	1711.75	924.347	559.794	1741.65	896.48	548.025	1664.98	834.659
417	0	348.701	1756.72	1542.76	248.226	1754.43	1537.26	356.961	1923.62	1589.7	244.028	1930.64	1586.22	308.06	1993.57	1406.49	333.306	2045.5	1188.73	302.762	1862.74	1337.8	289.524	1803.55	1210.48	243.338	2067.38	1239.06	475.708	1920.81	1364.72	531.032	1872.13	1143.09	534.372	1862.62	1075.47	529.853	1751.48	1013.64	500.277	1703.6	922.46	558.484	1733.49	894.857	546.549	1657.21	832.474
418	0	346.675	1747.62	1542.08	246.239	1745.39	1536.59	354.973	1914.58	1588.93	242.023	1921.59	1585.47	305.866	1984.17	1405.33	331.053	2035.16	1187.17	300.739	1853.03	1337.07	287.667	1793.5	1209.89	241.162	2057.25	1237.43	473.653	1911.59	1363.65	529.058	1863.16	1141.93	532.467	1853.94	1074.27	528.227	1743.08	1012.05	498.918	1695.64	920.546	557.219	1725.59	893.223	545.218	1649.73	830.243
419	0	344.61	1738.48	1541.56	244.217	1736.29	1536.07	352.922	1905.51	1588.28	239.955	1912.49	1584.83	303.611	1974.71	1404.3	328.699	2024.67	1185.72	298.677	1843.24	1336.47	285.779	1783.35	1209.42	238.894	2047.01	1235.91	471.55	1902.33	1362.7	527.04	1854.29	1140.86	530.516	1845.4	1073.16	526.641	1734.86	1010.48	497.631	1687.9	918.63	555.995	1717.98	891.601	544.038	1642.57	828.001
420	0	342.516	1729.29	1541.21	242.169	1727.14	1535.72	350.813	1896.4	1587.75	237.831	1903.34	1584.31	301.303	1965.18	1403.41	326.251	2014.07	1184.42	296.584	1833.4	1336.03	283.867	1773.11	1209.11	236.54	2036.68	1234.52	469.409	1893.02	1361.88	524.981	1845.52	1139.89	528.519	1837	1072.15	525.098	1726.83	1008.96	496.416	1680.38	916.739	554.805	1710.67	890.017	543.014	1635.71	825.782
421	0	340.402	1720.07	1541.03	240.103	1717.93	1535.55	348.654	1887.27	1587.36	235.66	1894.15	1583.94	298.95	1955.6	1402.68	323.72	2003.37	1183.3	294.47	1823.5	1335.75	281.939	1762.8	1208.94	234.107	2026.26	1233.31	467.236	1883.67	1361.23	522.885	1836.87	1139.05	526.477	1828.77	1071.26	523.599	1719	1007.5	495.27	1673.08	914.899	553.644	1703.67	888.494	542.144	1629.19	823.618
422	0	338.278	1710.82	1541.04	238.028	1708.67	1535.56	346.453	1878.1	1587.13	233.449	1884.92	1583.72	296.561	1945.98	1402.13	321.119	1992.62	1182.4	292.343	1813.57	1335.64	280.003	1752.45	1208.95	231.604	2015.79	1232.29	465.041	1874.3	1360.75	520.757	1828.36	1138.36	524.393	1820.71	1070.52	522.147	1711.4	1006.12	494.192	1666.03	913.137	552.505	1696.98	887.057	541.425	1622.99	821.543
423	0	336.153	1701.53	1541.23	235.952	1699.37	1535.76	344.219	1868.92	1587.05	231.208	1875.65	1583.65	294.146	1936.32	1401.78	318.466	1981.84	1181.74	290.214	1803.61	1335.71	278.067	1742.08	1209.12	229.043	2005.28	1231.49	462.833	1864.9	1360.47	518.605	1820.01	1137.83	522.269	1812.84	1069.94	520.741	1704.02	1004.86	493.177	1659.21	911.475	551.381	1690.62	885.727	540.849	1617.14	819.585
424	0	334.035	1692.22	1541.62	233.884	1690.02	1536.15	341.961	1859.71	1587.14	228.946	1866.34	1583.76	291.713	1926.64	1401.63	315.778	1971.07	1181.34	288.09	1793.65	1335.97	276.139	1731.72	1209.47	226.433	1994.76	1230.94	460.619	1855.49	1360.39	516.436	1811.82	1137.48	520.111	1805.17	1069.53	519.384	1696.87	1003.71	492.223	1652.66	909.937	550.267	1684.6	884.524	540.404	1611.63	817.77
425	0	331.934	1682.89	1542.19	231.832	1680.64	1536.73	339.687	1850.49	1587.39	226.672	1857.01	1584.03	289.274	1916.95	1401.69	313.076	1960.36	1181.23	285.982	1783.69	1336.4	274.229	1721.37	1209.99	223.789	1984.25	1230.66	458.41	1846.08	1360.54	514.258	1803.8	1137.33	517.926	1797.7	1069.32	518.075	1689.97	1002.71	491.324	1646.35	908.539	549.158	1678.9	883.466	540.075	1606.46	816.117
426	0	329.858	1673.56	1542.94	229.803	1671.23	1537.49	337.407	1841.27	1587.81	224.395	1847.65	1584.47	286.835	1907.27	1401.96	310.379	1949.74	1181.41	283.898	1773.76	1337.02	272.344	1711.08	1210.67	221.121	1973.77	1230.64	456.212	1836.69	1360.9	512.081	1795.98	1137.37	515.723	1790.45	1069.3	516.816	1683.31	1001.86	490.477	1640.31	907.298	548.051	1673.54	882.567	539.845	1601.64	814.643
427	0	327.814	1664.23	1543.86	227.805	1661.8	1538.42	335.129	1832.04	1588.4	222.124	1838.28	1585.07	284.407	1897.6	1402.44	307.705	1939.25	1181.89	281.846	1763.87	1337.8	270.494	1700.86	1211.52	218.44	1963.36	1230.9	454.033	1827.33	1361.48	509.914	1788.34	1137.61	513.51	1783.41	1069.49	515.608	1676.91	1001.17	489.681	1634.52	906.225	546.945	1668.5	881.836	539.693	1597.15	813.354
428	0	325.81	1654.91	1544.95	225.846	1652.36	1539.51	332.862	1822.83	1589.14	219.867	1828.92	1585.83	281.995	1887.96	1403.13	305.068	1928.92	1182.64	279.833	1754.03	1338.76	268.687	1690.74	1212.53	215.754	1953.02	1231.43	451.88	1818.02	1362.27	507.768	1780.9	1138.06	511.299	1776.58	1069.87	514.452	1670.75	1000.64	488.932	1628.99	905.328	545.843	1663.77	881.281	539.597	1593	812.253
429	0	323.854	1645.62	1546.18	223.933	1642.93	1540.75	330.616	1813.64	1590.03	217.634	1819.56	1586.74	279.606	1878.38	1404.01	302.48	1918.78	1183.67	277.866	1744.27	1339.86	266.933	1680.73	1213.67	213.07	1942.79	1232.22	449.759	1808.78	1363.26	505.652	1773.66	1138.7	509.101	1769.98	1070.45	513.348	1664.83	1000.29	488.231	1623.71	904.61	544.747	1659.33	880.904	539.536	1589.15	811.336
430	0	321.953	1636.37	1547.54	222.074	1633.53	1542.12	328.396	1804.49	1591.05	215.432	1810.22	1587.79	277.245	1868.85	1405.07	299.947	1908.86	1184.93	275.95	1734.59	1341.11	265.237	1670.85	1214.94	210.39	1932.67	1233.25	447.674	1799.63	1364.44	503.576	1766.61	1139.53	506.927	1763.58	1071.21	512.298	1659.15	1000.1	487.575	1618.67	904.071	543.664	1655.17	880.704	539.49	1585.6	810.596
431	0	320.114	1627.18	1549.01	220.273	1624.15	1543.59	326.212	1795.39	1592.2	213.267	1800.92	1588.96	274.916	1859.41	1406.29	297.47	1899.17	1186.4	274.09	1725.01	1342.48	263.608	1661.12	1216.32	207.718	1922.69	1234.5	445.629	1790.58	1365.77	501.548	1759.75	1140.53	504.788	1757.4	1072.14	511.303	1653.7	1000.07	486.967	1613.85	903.708	542.6	1651.26	880.675	539.439	1582.32	810.018
432	0	318.341	1618.05	1550.58	218.539	1614.83	1545.16	324.068	1786.34	1593.46	211.146	1791.66	1590.24	272.621	1850.06	1407.66	295.048	1889.72	1188.05	272.288	1715.54	1343.96	262.049	1651.55	1217.79	205.054	1912.86	1235.94	443.628	1781.67	1367.25	499.577	1753.09	1141.68	502.695	1751.42	1073.23	510.365	1648.47	1000.19	486.406	1609.26	903.512	541.564	1647.57	880.811	539.367	1579.29	809.589
433	0	316.641	1609	1552.21	216.876	1605.56	1546.8	321.972	1777.37	1594.8	209.073	1782.47	1591.61	270.363	1840.82	1409.14	292.675	1880.53	1189.84	270.547	1706.2	1345.52	260.564	1642.15	1219.33	202.399	1903.19	1237.56	441.673	1772.91	1368.84	497.667	1746.62	1142.97	500.656	1745.64	1074.46	509.483	1643.45	1000.46	485.894	1604.86	903.473	540.563	1644.08	881.101	539.263	1576.49	809.291
434	0	315.018	1600.05	1553.9	215.289	1596.38	1548.49	319.928	1768.48	1596.22	207.054	1773.35	1593.06	268.143	1831.7	1410.73	290.344	1871.59	1191.73	268.868	1696.99	1347.16	259.154	1632.93	1220.92	199.753	1893.69	1239.3	439.765	1764.31	1370.51	495.823	1740.34	1144.38	498.679	1740.04	1075.8	508.658	1638.63	1000.86	485.432	1600.64	903.581	539.607	1640.77	881.533	539.118	1573.88	809.109
435	0	313.475	1591.21	1555.62	213.781	1587.28	1550.22	317.939	1759.68	1597.7	205.091	1764.31	1594.57	265.963	1822.7	1412.39	288.049	1862.9	1193.7	267.249	1687.92	1348.85	257.817	1623.89	1222.56	197.117	1884.35	1241.16	437.905	1755.89	1372.25	494.05	1734.23	1145.88	496.77	1734.62	1077.25	507.889	1633.99	1001.38	485.022	1596.6	903.82	538.7	1637.61	882.093	538.93	1571.45	809.026
436	0	312.015	1582.48	1557.35	212.356	1578.28	1551.96	316.008	1750.99	1599.22	203.187	1755.37	1596.12	263.823	1813.84	1414.1	285.783	1854.45	1195.71	265.69	1678.99	1350.57	256.549	1615.04	1224.21	194.495	1875.2	1243.1	436.093	1747.64	1374.03	492.346	1728.29	1147.45	494.932	1729.37	1078.77	507.175	1629.52	1002	484.663	1592.71	904.175	537.848	1634.58	882.765	538.698	1569.17	809.029
437	0	310.637	1573.89	1559.08	211.013	1569.39	1553.7	314.138	1742.42	1600.76	201.342	1746.53	1597.7	261.725	1805.12	1415.85	283.54	1846.23	1197.73	264.189	1670.21	1352.31	255.344	1606.37	1225.88	191.89	1866.22	1245.09	434.328	1739.59	1375.83	490.711	1722.53	1149.07	493.166	1724.27	1080.34	506.513	1625.21	1002.7	484.355	1588.96	904.63	537.054	1631.67	883.533	538.429	1567.02	809.105
438	0	309.342	1565.42	1560.79	209.753	1560.62	1555.42	312.328	1733.97	1602.31	199.557	1737.8	1599.29	259.669	1796.54	1417.61	281.317	1838.22	1199.74	262.741	1661.58	1354.06	254.197	1597.89	1227.53	189.309	1857.41	1247.11	432.61	1731.71	1377.62	489.141	1716.92	1150.72	491.473	1719.33	1081.96	505.903	1621.05	1003.47	484.098	1585.34	905.167	536.318	1628.85	884.38	538.13	1564.97	809.243
439	0	308.126	1557.1	1562.46	208.574	1551.98	1557.11	310.579	1725.65	1603.85	197.832	1729.19	1600.88	257.658	1788.11	1419.36	279.113	1830.42	1201.72	261.344	1653.1	1355.79	253.097	1589.59	1229.17	186.757	1848.78	1249.14	430.936	1724.02	1379.38	487.634	1711.47	1152.39	489.849	1714.52	1083.59	505.341	1617.02	1004.3	483.89	1581.84	905.769	535.641	1626.11	885.29	537.815	1563	809.433
440	0	306.987	1548.93	1564.1	207.473	1543.47	1558.76	308.891	1717.46	1605.37	196.166	1720.7	1602.45	255.691	1779.82	1421.08	276.93	1822.81	1203.65	259.994	1644.77	1357.49	252.036	1581.46	1230.78	184.242	1840.31	1251.15	429.306	1716.5	1381.1	486.181	1706.16	1154.04	488.291	1709.84	1085.22	504.824	1613.11	1005.16	483.731	1578.43	906.417	535.018	1623.44	886.243	537.495	1561.1	809.667
441	0	305.921	1540.89	1565.67	206.445	1535.09	1560.36	307.261	1709.4	1606.85	194.558	1712.33	1603.97	253.772	1771.68	1422.77	274.771	1815.36	1205.52	258.687	1636.58	1359.15	251.005	1573.49	1232.34	181.77	1832	1253.12	427.718	1709.14	1382.76	484.779	1700.99	1155.66	486.794	1705.27	1086.84	504.348	1609.32	1006.03	483.617	1575.12	907.092	534.445	1620.83	887.222	537.185	1559.25	809.937
442	0	304.921	1533	1567.18	205.486	1526.84	1561.89	305.69	1701.48	1608.27	193.004	1704.1	1605.45	251.901	1763.67	1424.39	272.638	1808.08	1207.32	257.419	1628.53	1360.75	249.997	1565.66	1233.86	179.349	1823.84	1255.03	426.17	1701.93	1384.35	483.419	1695.94	1157.25	485.351	1700.81	1088.42	503.91	1605.62	1006.91	483.547	1571.88	907.778	533.917	1618.28	888.209	536.9	1557.44	810.235
443	0	303.982	1525.25	1568.61	204.588	1518.73	1563.34	304.173	1693.69	1609.64	191.504	1695.99	1606.87	250.08	1755.8	1425.95	270.539	1800.95	1209.03	256.188	1620.61	1362.29	249.003	1557.96	1235.31	176.986	1815.83	1256.88	424.661	1694.85	1385.85	482.095	1691.01	1158.77	483.955	1696.44	1089.96	503.507	1602.02	1007.77	483.518	1568.72	908.455	533.426	1615.78	889.187	536.654	1555.65	810.553
444	0	303.096	1517.62	1569.95	203.744	1510.75	1564.7	302.711	1686.02	1610.92	190.056	1688	1608.21	248.311	1748.05	1427.41	268.477	1793.95	1210.65	254.991	1612.82	1363.74	248.019	1550.39	1236.7	174.687	1807.95	1258.64	423.192	1687.9	1387.26	480.801	1686.17	1160.22	482.599	1692.15	1091.43	503.137	1598.48	1008.6	483.528	1565.62	909.107	532.967	1613.32	890.137	536.459	1553.88	810.88
445	0	302.258	1510.12	1571.2	202.948	1502.9	1565.98	301.299	1678.48	1612.12	188.656	1680.14	1609.46	246.596	1740.42	1428.79	266.456	1787.06	1212.17	253.825	1605.14	1365.11	247.04	1542.91	1238.01	172.456	1800.19	1260.29	421.762	1681.04	1388.57	479.532	1681.41	1161.59	481.277	1687.92	1092.84	502.795	1595.02	1009.39	483.573	1562.57	909.718	532.53	1610.9	891.043	536.325	1552.13	811.206
446	0	301.46	1502.74	1572.36	202.192	1495.17	1567.15	299.937	1671.05	1613.22	187.304	1672.39	1610.61	244.936	1732.89	1430.05	264.482	1780.29	1213.57	252.69	1597.57	1366.38	246.066	1535.52	1239.23	170.298	1792.54	1261.84	420.373	1674.27	1389.77	478.283	1676.72	1162.87	479.982	1683.74	1094.16	502.479	1591.6	1010.11	483.65	1559.57	910.27	532.109	1608.52	891.89	536.261	1550.37	811.521
447	0	300.695	1495.46	1573.41	201.468	1487.55	1568.22	298.622	1663.72	1614.22	185.997	1664.76	1611.65	243.334	1725.47	1431.2	262.557	1773.62	1214.86	251.584	1590.09	1367.55	245.095	1528.22	1240.35	168.218	1784.99	1263.27	419.025	1667.56	1390.85	477.05	1672.08	1164.04	478.711	1679.59	1095.38	502.187	1588.22	1010.76	483.755	1556.6	910.751	531.695	1606.16	892.663	536.271	1548.62	811.812
448	0	299.957	1488.27	1574.36	200.77	1480.04	1569.18	297.353	1656.48	1615.11	184.734	1657.22	1612.57	241.791	1718.13	1432.23	260.687	1767.03	1216.02	250.509	1582.7	1368.6	244.13	1520.98	1241.37	166.219	1777.54	1264.57	417.719	1660.91	1391.81	475.832	1667.47	1165.1	477.458	1675.45	1096.5	501.915	1584.87	1011.33	483.885	1553.65	911.147	531.283	1603.83	893.348	536.357	1546.87	812.067
449	0	299.242	1481.16	1575.19	200.093	1472.62	1570.02	296.128	1649.33	1615.87	183.514	1649.78	1613.37	240.309	1710.86	1433.14	258.874	1760.51	1217.06	249.464	1575.39	1369.53	243.173	1513.81	1242.26	164.305	1770.17	1265.74	416.46	1654.29	1392.65	474.629	1662.88	1166.05	476.221	1671.3	1097.52	501.66	1581.53	1011.79	484.036	1550.72	911.446	530.866	1601.52	893.936	536.518	1545.12	812.273
450	0	298.544	1474.11	1575.91	199.429	1465.28	1570.75	294.947	1642.25	1616.52	182.336	1642.43	1614.04	238.89	1703.67	1433.92	257.125	1754.05	1217.96	248.45	1568.14	1370.33	242.229	1506.69	1243.03	162.478	1762.87	1266.77	415.248	1647.7	1393.36	473.44	1658.27	1166.87	475	1667.13	1098.42	501.421	1578.18	1012.16	484.203	1547.79	911.64	530.44	1599.22	894.417	536.749	1543.36	812.417
451	0	297.86	1467.11	1576.52	198.775	1458.02	1571.36	293.809	1635.23	1617.04	181.2	1635.15	1614.58	237.537	1696.52	1434.56	255.443	1747.63	1218.73	247.471	1560.94	1371.01	241.303	1499.63	1243.67	160.744	1755.63	1267.65	414.087	1641.11	1393.95	472.268	1653.64	1167.57	473.795	1662.92	1099.21	501.194	1574.82	1012.42	484.381	1544.85	911.721	530	1596.91	894.786	537.043	1541.59	812.489
452	0	297.187	1460.16	1577.01	198.128	1450.81	1571.84	292.715	1628.25	1617.43	180.105	1627.93	1614.98	236.251	1689.42	1435.08	253.836	1741.24	1219.37	246.526	1553.8	1371.56	240.401	1492.62	1244.16	159.104	1748.45	1268.39	412.98	1634.52	1394.41	471.117	1648.96	1168.14	472.607	1658.65	1099.88	500.976	1571.42	1012.56	484.565	1541.91	911.684	529.545	1594.59	895.039	537.388	1539.81	812.478
453	0	296.523	1453.22	1577.39	197.484	1443.66	1572.2	291.665	1621.31	1617.7	179.053	1620.76	1615.24	235.034	1682.36	1435.47	252.309	1734.86	1219.88	245.621	1546.69	1371.98	239.528	1485.65	1244.51	157.561	1741.32	1268.98	411.929	1627.91	1394.76	469.99	1644.21	1168.59	471.44	1654.3	1100.43	500.766	1567.97	1012.58	484.749	1538.93	911.526	529.073	1592.24	895.174	537.775	1538.01	812.376
454	0	295.868	1446.3	1577.65	196.844	1436.53	1572.44	290.659	1614.38	1617.84	178.044	1613.63	1615.37	233.888	1675.31	1435.73	250.871	1728.48	1220.26	244.756	1539.61	1372.27	238.691	1478.72	1244.71	156.12	1734.22	1269.44	410.938	1621.27	1394.99	468.894	1639.38	1168.92	470.298	1649.86	1100.87	500.56	1564.45	1012.49	484.93	1535.92	911.247	528.585	1589.85	895.194	538.187	1536.19	812.176
455	0	295.222	1439.38	1577.8	196.207	1429.43	1572.56	289.7	1607.47	1617.86	177.08	1606.53	1615.36	232.816	1668.29	1435.88	249.53	1722.08	1220.52	243.935	1532.54	1372.43	237.895	1471.82	1244.77	154.783	1727.16	1269.75	410.009	1614.59	1395.1	467.833	1634.45	1169.13	469.186	1645.3	1101.19	500.358	1560.86	1012.29	485.101	1532.86	910.849	528.083	1587.39	895.103	538.611	1534.35	811.873
456	0	294.585	1432.44	1577.84	195.574	1422.34	1572.57	288.788	1600.54	1617.76	176.161	1599.44	1615.23	231.819	1661.26	1435.91	248.293	1715.65	1220.67	243.16	1525.49	1372.46	237.146	1464.95	1244.67	153.553	1720.12	1269.94	409.145	1607.87	1395.11	466.815	1629.4	1169.23	468.109	1640.63	1101.41	500.158	1557.17	1011.98	485.257	1529.74	910.334	527.57	1584.87	894.906	539.03	1532.46	811.466
457	0	293.96	1425.48	1577.77	194.948	1415.25	1572.46	287.926	1593.6	1617.55	175.291	1592.36	1614.97	230.9	1654.24	1435.83	247.169	1709.19	1220.7	242.436	1518.45	1372.38	236.448	1458.11	1244.44	152.432	1713.1	1270.01	408.349	1601.09	1395.02	465.847	1624.22	1169.22	467.075	1635.82	1101.53	499.958	1553.36	1011.56	485.395	1526.55	909.709	527.051	1582.24	894.611	539.431	1530.53	810.953
458	0	293.349	1418.49	1577.6	194.331	1408.15	1572.23	287.117	1586.64	1617.23	174.471	1585.27	1614.6	230.061	1647.2	1435.65	246.165	1702.67	1220.64	241.764	1511.4	1372.18	235.806	1451.28	1244.08	151.422	1706.1	1269.96	407.623	1594.25	1394.84	464.933	1618.9	1169.12	466.088	1630.87	1101.54	499.758	1549.43	1011.04	485.509	1523.28	908.98	526.531	1579.51	894.228	539.798	1528.54	810.338
459	0	292.755	1411.45	1577.33	193.726	1401.03	1571.9	286.363	1579.63	1616.82	173.703	1578.17	1614.11	229.303	1640.15	1435.38	245.288	1696.08	1220.49	241.148	1504.34	1371.87	235.224	1444.45	1243.59	150.525	1699.1	1269.81	406.968	1587.35	1394.57	464.083	1613.43	1168.92	465.157	1625.77	1101.47	499.559	1545.36	1010.43	485.599	1519.91	908.155	526.015	1576.64	893.765	540.119	1526.47	809.623
460	0	292.183	1404.36	1576.96	193.14	1393.87	1571.47	285.667	1572.58	1616.32	172.992	1571.04	1613.53	228.629	1633.07	1435.02	244.543	1689.44	1220.27	240.59	1497.27	1371.46	234.702	1437.62	1243	149.743	1692.1	1269.56	406.388	1580.38	1394.23	463.3	1607.81	1168.65	464.286	1620.51	1101.32	499.361	1541.15	1009.74	485.662	1516.43	907.245	525.511	1573.63	893.234	540.382	1524.3	808.815
461	0	291.637	1397.21	1576.51	192.576	1386.68	1570.95	285.032	1565.48	1615.73	172.339	1563.87	1612.85	228.04	1625.96	1434.59	243.932	1682.72	1219.97	240.092	1490.18	1370.96	234.244	1430.77	1242.31	149.075	1685.09	1269.23	405.882	1573.34	1393.81	462.59	1602.02	1168.29	463.482	1615.1	1101.08	499.166	1536.77	1008.96	485.697	1512.83	906.258	525.026	1570.45	892.643	540.579	1522.03	807.919
462	0	291.122	1390	1575.97	192.041	1379.45	1570.33	284.461	1558.31	1615.07	171.747	1556.66	1612.09	227.537	1618.82	1434.09	243.457	1675.92	1219.62	239.657	1483.07	1370.36	233.851	1423.9	1241.53	148.521	1678.08	1268.82	405.453	1566.24	1393.33	461.959	1596.08	1167.87	462.749	1609.52	1100.78	498.975	1532.23	1008.13	485.706	1509.1	905.204	524.566	1567.08	892.002	540.702	1519.62	806.943
463	0	290.643	1382.73	1575.35	191.54	1372.16	1569.63	283.958	1551.08	1614.34	171.221	1549.4	1611.25	227.122	1611.64	1433.52	243.117	1669.06	1219.21	239.287	1475.93	1369.69	233.522	1416.99	1240.69	148.08	1671.05	1268.35	405.101	1559.06	1392.79	461.409	1589.97	1167.39	462.091	1603.79	1100.41	498.793	1527.51	1007.22	485.691	1505.22	904.093	524.139	1563.52	891.319	540.749	1517.06	805.896
464	0	290.205	1375.38	1574.66	191.081	1364.83	1568.86	283.525	1543.78	1613.55	170.763	1542.08	1610.34	226.795	1604.42	1432.9	242.908	1662.12	1218.77	238.982	1468.76	1368.95	233.257	1410.03	1239.79	147.751	1663.99	1267.82	404.826	1551.81	1392.19	460.943	1583.71	1166.84	461.512	1597.9	1099.97	498.622	1522.6	1006.27	485.654	1501.17	902.934	523.75	1559.75	890.6	540.719	1514.32	804.785
465	0	289.816	1367.96	1573.9	190.668	1357.43	1568.02	283.167	1536.41	1612.71	170.377	1534.71	1609.38	226.557	1597.15	1432.22	242.823	1655.1	1218.28	238.746	1461.56	1368.13	233.057	1403.02	1238.85	147.53	1656.91	1267.24	404.628	1544.49	1391.54	460.562	1577.29	1166.25	461.015	1591.86	1099.48	498.466	1517.52	1005.27	485.601	1496.96	901.736	523.405	1555.76	889.85	540.614	1511.39	803.618
466	0	289.48	1360.47	1573.08	190.31	1349.97	1567.11	282.886	1528.96	1611.81	170.066	1527.27	1608.36	226.407	1589.83	1431.5	242.853	1648.01	1217.76	238.578	1454.31	1367.26	232.919	1395.95	1237.87	147.413	1649.8	1266.61	404.508	1537.1	1390.84	460.266	1570.73	1165.6	460.6	1585.67	1098.93	498.331	1512.24	1004.22	485.538	1492.56	900.504	523.109	1551.53	889.072	540.438	1508.25	802.402
467	0	289.204	1352.91	1572.2	190.013	1342.46	1566.15	282.685	1521.44	1610.87	169.835	1519.77	1607.29	226.347	1582.46	1430.73	242.988	1640.85	1217.21	238.481	1447.02	1366.33	232.843	1388.8	1236.87	147.397	1642.65	1265.94	404.464	1529.64	1390.08	460.056	1564.04	1164.91	460.268	1579.33	1098.32	498.222	1506.78	1003.14	485.471	1487.96	899.245	522.866	1547.06	888.265	540.201	1504.86	801.143
468	0	288.992	1345.27	1571.27	189.783	1334.88	1565.14	282.567	1513.84	1609.89	169.685	1512.21	1606.18	226.374	1575.03	1429.92	243.215	1633.61	1216.61	238.453	1439.68	1365.34	232.826	1381.58	1235.85	147.476	1635.45	1265.24	404.497	1522.12	1389.28	459.928	1557.22	1164.16	460.019	1572.87	1097.65	498.143	1501.14	1002.01	485.408	1483.15	897.962	522.678	1542.35	887.429	539.911	1501.23	799.845
469	0	288.852	1337.56	1570.29	189.626	1327.24	1564.09	282.535	1506.17	1608.86	169.62	1504.58	1605.03	226.488	1567.54	1429.06	243.521	1626.29	1215.97	238.496	1432.29	1364.31	232.868	1374.27	1234.81	147.646	1628.2	1264.49	404.604	1514.53	1388.42	459.882	1550.28	1163.36	459.851	1566.27	1096.92	498.101	1495.3	1000.85	485.357	1478.12	896.659	522.548	1537.38	886.56	539.582	1497.31	798.513
470	0	288.787	1329.79	1569.27	189.549	1319.53	1563	282.591	1498.43	1607.79	169.644	1496.88	1603.85	226.688	1559.99	1428.16	243.896	1618.89	1215.29	238.61	1424.84	1363.23	232.966	1366.87	1233.76	147.902	1620.89	1263.7	404.785	1506.87	1387.51	459.914	1543.24	1162.51	459.763	1559.56	1096.13	498.1	1489.29	999.66	485.325	1472.87	895.336	522.477	1532.16	885.653	539.226	1493.11	797.147
471	0	288.802	1321.94	1568.2	189.556	1311.77	1561.88	282.737	1490.61	1606.69	169.758	1489.12	1602.64	226.972	1552.37	1427.21	244.327	1611.41	1214.54	238.794	1417.33	1362.1	233.118	1359.37	1232.7	148.238	1613.52	1262.88	405.039	1499.15	1386.54	460.021	1536.1	1161.6	459.752	1552.72	1095.28	498.146	1483.09	998.429	485.321	1467.38	893.994	522.463	1526.68	884.701	538.86	1488.59	795.75
472	0	288.902	1314.04	1567.11	189.651	1303.94	1560.73	282.974	1482.73	1605.55	169.964	1481.29	1601.4	227.339	1544.68	1426.22	244.805	1603.84	1213.74	239.049	1409.75	1360.93	233.324	1351.78	1231.62	148.649	1606.08	1262.01	405.365	1491.37	1385.51	460.199	1528.87	1160.63	459.815	1545.78	1094.35	498.243	1476.71	997.161	485.352	1461.65	892.631	522.507	1520.95	883.699	538.498	1483.76	794.321
473	0	289.09	1306.07	1565.97	189.839	1296.06	1559.56	283.303	1474.79	1604.37	170.263	1473.4	1600.14	227.787	1536.92	1425.18	245.324	1596.18	1212.87	239.375	1402.1	1359.73	233.582	1344.08	1230.53	149.133	1598.57	1261.09	405.761	1483.52	1384.42	460.445	1521.55	1159.6	459.949	1538.73	1093.36	498.393	1470.16	995.854	485.424	1455.68	891.246	522.605	1514.96	882.64	538.158	1478.6	792.861
474	0	289.368	1298.04	1564.81	190.123	1288.12	1558.38	283.725	1466.78	1603.16	170.658	1465.46	1598.85	228.313	1529.08	1424.09	245.878	1588.43	1211.93	239.77	1394.38	1358.49	233.891	1336.28	1229.43	149.685	1590.97	1260.12	406.228	1475.6	1383.25	460.755	1514.15	1158.5	460.151	1531.56	1092.28	498.6	1463.43	994.506	485.543	1449.45	889.837	522.755	1508.72	881.516	537.854	1473.11	791.369
475	0	289.738	1289.95	1563.63	190.503	1280.12	1557.18	284.241	1458.72	1601.92	171.147	1457.45	1597.55	228.917	1521.17	1422.96	246.463	1580.59	1210.9	240.235	1386.57	1357.22	234.251	1328.36	1228.31	150.302	1583.29	1259.1	406.765	1467.61	1382.03	461.125	1506.67	1157.34	460.416	1524.3	1091.13	498.865	1456.54	993.118	485.713	1442.98	888.403	522.954	1502.24	880.323	537.601	1467.27	789.846
476	0	290.202	1281.8	1562.42	190.982	1272.07	1555.98	284.849	1450.59	1600.65	171.732	1449.38	1596.24	229.597	1513.19	1421.78	247.079	1572.65	1209.8	240.769	1378.67	1355.92	234.663	1320.34	1227.17	150.982	1575.52	1258.03	407.37	1459.55	1380.73	461.552	1499.1	1156.1	460.74	1516.92	1089.91	499.188	1449.47	991.688	485.937	1436.25	886.941	523.196	1495.52	879.058	537.413	1461.08	788.292
477	0	290.76	1273.6	1561.21	191.557	1263.96	1554.77	285.549	1442.41	1599.37	172.411	1441.26	1594.91	230.35	1505.12	1420.56	247.724	1564.6	1208.61	241.373	1370.68	1354.6	235.126	1312.21	1226.02	151.723	1567.64	1256.89	408.044	1451.42	1379.38	462.032	1491.45	1154.8	461.121	1509.43	1088.61	499.568	1442.23	990.219	486.215	1429.26	885.453	523.478	1488.55	877.717	537.3	1454.55	786.71
478	0	291.41	1265.34	1559.99	192.23	1255.8	1553.57	286.34	1434.17	1598.07	173.183	1433.08	1593.59	231.175	1496.96	1419.3	248.4	1556.45	1207.34	242.046	1362.59	1353.28	235.642	1303.96	1224.86	152.523	1559.66	1255.7	408.786	1443.21	1377.97	462.564	1483.7	1153.43	461.553	1501.82	1087.25	500.004	1434.82	988.713	486.548	1422.03	883.94	523.793	1481.36	876.303	537.272	1447.67	785.103
479	0	292.151	1257.03	1558.77	192.996	1247.58	1552.38	287.22	1425.88	1596.77	174.045	1424.84	1592.27	232.069	1488.72	1418.01	249.109	1548.18	1205.99	242.787	1354.4	1351.95	236.213	1295.61	1223.69	153.381	1551.57	1254.46	409.597	1434.92	1376.51	463.144	1475.86	1152	462.034	1494.08	1085.82	500.492	1427.24	987.176	486.934	1414.55	882.406	524.138	1473.93	874.82	537.335	1440.45	783.476
480	0	292.98	1248.66	1557.57	193.853	1239.3	1551.2	288.186	1417.53	1595.48	174.997	1416.55	1590.97	233.031	1480.4	1416.69	249.854	1539.8	1204.57	243.598	1346.11	1350.63	236.84	1287.13	1222.53	154.295	1543.36	1253.17	410.475	1426.54	1375.01	463.77	1467.9	1150.53	462.559	1486.22	1084.33	501.03	1419.48	985.613	487.37	1406.82	880.856	524.507	1466.28	873.274	537.492	1432.9	781.838
481	0	293.895	1240.23	1556.39	194.797	1230.97	1550.07	289.236	1409.12	1594.2	176.034	1408.2	1589.7	234.059	1471.98	1415.36	250.638	1531.29	1203.09	244.476	1337.7	1349.34	237.524	1278.55	1221.38	155.264	1535.02	1251.84	411.421	1418.09	1373.49	464.44	1459.83	1149.01	463.126	1478.22	1082.8	501.612	1411.55	984.036	487.853	1398.85	879.298	524.897	1458.4	871.676	537.745	1425.02	780.197
482	0	294.892	1231.75	1555.25	195.822	1222.58	1548.97	290.367	1400.66	1592.96	177.154	1399.79	1588.47	235.15	1463.47	1414.03	251.463	1522.65	1201.55	245.422	1329.18	1348.08	238.267	1269.84	1220.26	156.286	1526.54	1250.48	412.434	1409.54	1371.96	465.152	1451.63	1147.47	463.731	1470.08	1081.25	502.234	1403.44	982.454	488.377	1390.64	877.742	525.302	1450.3	870.039	538.092	1416.81	778.566
483	0	295.965	1223.2	1554.17	196.923	1214.13	1547.92	291.573	1392.13	1591.77	178.353	1391.33	1587.29	236.302	1454.87	1412.71	252.33	1513.86	1199.99	246.434	1320.55	1346.88	239.072	1261.02	1219.18	157.358	1517.93	1249.11	413.512	1400.91	1370.43	465.905	1443.3	1145.92	464.37	1461.78	1079.68	502.891	1395.14	980.881	488.939	1382.19	876.201	525.72	1441.99	868.379	538.529	1408.3	776.957
484	0	297.11	1214.59	1553.15	198.094	1205.62	1546.95	292.853	1383.55	1590.64	179.626	1382.8	1586.18	237.511	1446.18	1411.42	253.24	1504.93	1198.41	247.512	1311.8	1345.75	239.938	1252.08	1218.17	158.477	1509.17	1247.74	414.653	1392.18	1368.93	466.696	1434.82	1144.37	465.042	1453.32	1078.12	503.578	1386.66	979.333	489.532	1373.51	874.689	526.147	1433.46	866.714	539.048	1399.49	775.385
485	0	298.322	1205.92	1552.22	199.329	1197.04	1546.06	294.2	1374.9	1589.6	180.968	1374.22	1585.15	238.775	1437.39	1410.18	254.191	1495.84	1196.83	248.652	1302.93	1344.71	240.868	1243.02	1217.23	159.637	1500.26	1246.39	415.856	1383.36	1367.47	467.523	1426.19	1142.85	465.742	1444.7	1076.59	504.29	1377.99	977.828	490.15	1364.61	873.223	526.582	1424.71	865.066	539.64	1390.39	773.868
486	0	299.594	1197.17	1551.39	200.621	1188.4	1545.27	295.61	1366.18	1588.65	182.375	1365.57	1584.23	240.089	1428.5	1409	255.181	1486.59	1195.29	249.854	1293.95	1343.78	241.861	1233.84	1216.39	160.835	1491.19	1245.09	417.116	1374.45	1366.08	468.384	1417.39	1141.38	466.47	1435.91	1075.09	505.023	1369.12	976.382	490.789	1355.48	871.82	527.021	1415.74	863.457	540.296	1381.02	772.422
487	0	300.921	1188.36	1550.68	201.963	1179.69	1544.59	297.077	1357.4	1587.81	183.841	1356.86	1583.41	241.449	1419.52	1407.91	256.207	1477.17	1193.81	251.112	1284.86	1342.96	242.918	1224.54	1215.66	162.065	1481.98	1243.85	418.429	1365.44	1364.78	469.276	1408.44	1139.98	467.221	1426.93	1073.67	505.774	1360.07	975.018	491.443	1346.13	870.501	527.463	1406.56	861.91	541.003	1371.39	771.067
488	0	302.297	1179.48	1550.11	203.35	1170.92	1544.04	298.595	1348.55	1587.11	185.36	1348.09	1582.73	242.85	1410.45	1406.91	257.265	1467.57	1192.41	252.424	1275.65	1342.28	244.036	1215.12	1215.08	163.319	1472.61	1242.71	419.791	1356.35	1363.59	470.196	1399.32	1138.67	467.994	1417.79	1072.34	506.537	1350.81	973.753	492.108	1336.56	869.285	527.909	1397.16	860.449	541.749	1361.51	769.821
489	0	303.714	1170.52	1549.68	204.773	1162.07	1543.63	300.158	1339.64	1586.55	186.925	1339.26	1582.19	244.288	1401.28	1406.05	258.349	1457.81	1191.14	253.785	1266.34	1341.75	245.215	1205.58	1214.64	164.593	1463.09	1241.69	421.197	1347.16	1362.53	471.142	1390.03	1137.48	468.788	1408.46	1071.12	507.311	1341.37	972.609	492.778	1326.78	868.192	528.357	1387.54	859.099	542.521	1351.4	768.702
490	0	305.167	1161.5	1549.41	206.228	1153.16	1543.38	301.759	1330.65	1586.14	188.53	1330.36	1581.8	245.758	1392.02	1405.32	259.456	1447.88	1190.01	255.189	1256.93	1341.39	246.452	1195.92	1214.38	165.879	1453.44	1240.81	422.64	1337.89	1361.62	472.111	1380.58	1136.42	469.6	1398.95	1070.03	508.092	1331.72	971.605	493.452	1316.79	867.242	528.808	1377.71	857.883	543.306	1341.06	767.731
491	0	306.649	1152.4	1549.31	207.707	1144.17	1543.3	303.391	1321.59	1585.9	190.167	1321.39	1581.57	247.254	1382.68	1404.75	260.579	1437.78	1189.05	256.631	1247.42	1341.19	247.741	1186.15	1214.29	167.174	1443.66	1240.09	424.114	1328.54	1360.88	473.099	1370.96	1135.52	470.429	1389.27	1069.08	508.877	1321.89	970.759	494.124	1306.59	866.454	529.263	1367.65	856.822	544.092	1330.52	766.923
492	0	308.154	1143.23	1549.39	209.204	1135.12	1543.39	305.046	1312.47	1585.84	191.828	1312.36	1581.52	248.771	1373.26	1404.34	261.713	1427.54	1188.28	258.102	1237.84	1341.18	249.078	1176.29	1214.4	168.471	1433.76	1239.56	425.613	1319.11	1360.32	474.105	1361.19	1134.78	471.274	1379.42	1068.31	509.666	1311.86	970.087	494.794	1296.2	865.846	529.724	1357.38	855.935	544.867	1319.76	766.293
493	0	309.674	1134	1549.64	210.712	1126	1543.65	306.718	1303.29	1585.95	193.506	1303.27	1581.65	250.304	1363.77	1404.12	262.856	1417.16	1187.73	259.596	1228.18	1341.34	250.456	1166.33	1214.7	169.769	1423.76	1239.23	427.129	1309.6	1359.95	475.125	1351.28	1134.23	472.136	1369.41	1067.72	510.456	1301.65	969.603	495.457	1285.61	865.431	530.192	1346.9	855.24	545.621	1308.81	765.856
494	0	311.203	1124.71	1550.08	212.226	1116.81	1544.1	308.396	1294.04	1586.23	195.192	1294.12	1581.95	251.849	1354.21	1404.08	264.005	1406.66	1187.41	261.105	1218.46	1341.68	251.865	1156.29	1215.19	171.066	1413.69	1239.11	428.656	1300.02	1359.79	476.159	1341.23	1133.88	473.014	1359.25	1067.32	511.248	1291.26	969.319	496.114	1274.82	865.222	530.671	1336.19	854.747	546.346	1297.67	765.621
495	0	312.735	1115.36	1550.69	213.738	1107.56	1544.72	310.074	1284.74	1586.7	196.878	1284.91	1582.43	253.402	1344.59	1404.23	265.16	1396.07	1187.32	262.62	1208.7	1342.2	253.297	1146.19	1215.87	172.364	1403.56	1239.2	430.188	1290.37	1359.84	477.206	1331.05	1133.73	473.912	1348.95	1067.11	512.041	1280.69	969.241	496.762	1263.85	865.228	531.162	1325.28	854.465	547.035	1286.33	765.595
496	0	314.262	1105.95	1551.47	215.242	1098.26	1545.5	311.743	1275.39	1587.33	198.555	1275.65	1583.07	254.96	1334.92	1404.56	266.326	1385.4	1187.47	264.132	1198.89	1342.88	254.74	1136.05	1216.73	173.666	1393.39	1239.51	431.718	1280.66	1360.09	478.266	1320.76	1133.78	474.831	1338.53	1067.11	512.836	1269.96	969.372	497.402	1252.7	865.452	531.671	1314.15	854.398	547.682	1274.81	765.78
497	0	315.777	1096.51	1552.4	216.731	1088.91	1546.45	313.395	1265.99	1588.13	200.216	1266.34	1583.88	256.519	1325.22	1405.08	267.505	1374.68	1187.85	265.632	1189.06	1343.72	256.18	1125.87	1217.75	174.976	1383.21	1240.04	433.241	1270.89	1360.54	479.341	1310.38	1134.04	475.776	1327.99	1067.3	513.632	1259.08	969.714	498.032	1241.38	865.897	532.202	1302.82	854.546	548.285	1263.09	766.175
498	0	317.273	1087.02	1553.48	218.199	1079.51	1547.54	315.022	1256.55	1589.07	201.851	1256.99	1584.84	258.078	1315.49	1405.78	268.706	1363.94	1188.46	267.111	1179.22	1344.7	257.604	1115.69	1218.91	176.302	1373.05	1240.76	434.751	1261.05	1361.19	480.433	1299.91	1134.49	476.75	1317.35	1067.69	514.433	1248.05	970.261	498.654	1229.89	866.558	532.758	1291.29	854.902	548.842	1251.18	766.776
499	0	318.742	1077.51	1554.69	219.638	1070.08	1548.75	316.616	1247.07	1590.16	203.453	1247.6	1585.94	259.634	1305.74	1406.64	269.936	1353.2	1189.28	268.56	1169.38	1345.82	258.998	1105.52	1220.19	177.652	1362.94	1241.68	436.243	1251.16	1362.02	481.545	1289.38	1135.14	477.759	1306.64	1068.26	515.24	1236.88	971.006	499.268	1218.25	867.427	533.346	1279.57	855.458	549.354	1239.08	767.572
500	0	320.178	1067.97	1556	221.041	1060.61	1550.07	318.17	1237.57	1591.36	205.015	1238.19	1587.15	261.186	1295.99	1407.66	271.203	1342.51	1190.29	269.97	1159.55	1347.03	260.345	1095.39	1221.57	179.034	1352.89	1242.77	437.712	1241.21	1363.01	482.681	1278.78	1135.95	478.808	1295.85	1069	516.053	1225.59	971.936	499.875	1206.47	868.495	533.971	1267.67	856.2	549.826	1226.78	768.553
501	0	321.573	1058.42	1557.4	222.4	1051.13	1551.48	319.678	1228.05	1592.67	206.53	1228.75	1588.46	262.732	1286.25	1408.8	272.515	1331.88	1191.47	271.334	1149.75	1348.34	261.634	1085.3	1223.02	180.456	1342.93	1244.01	439.154	1231.21	1364.15	483.845	1268.14	1136.93	479.903	1285.01	1069.89	516.874	1214.19	973.038	500.476	1194.55	869.745	534.636	1255.6	857.111	550.26	1214.28	769.703
502	0	322.92	1048.86	1558.87	223.71	1041.63	1552.95	321.133	1218.51	1594.06	207.991	1219.29	1589.86	264.27	1276.52	1410.07	273.879	1321.35	1192.79	272.644	1139.99	1349.72	262.85	1075.3	1224.51	181.924	1333.09	1245.37	440.565	1221.16	1365.41	485.041	1257.45	1138.04	481.05	1274.12	1070.92	517.704	1202.68	974.295	501.073	1182.5	871.161	535.348	1243.36	858.173	550.664	1201.59	771.005
503	0	324.211	1039.3	1560.37	224.963	1032.12	1554.45	322.531	1208.96	1595.52	209.394	1209.82	1591.32	265.797	1266.83	1411.43	275.299	1310.94	1194.22	273.893	1130.27	1351.14	263.981	1065.38	1226.01	183.445	1323.39	1246.85	441.941	1211.07	1366.77	486.272	1246.73	1139.27	482.254	1263.19	1072.06	518.542	1191.08	975.687	501.667	1170.34	872.724	536.109	1230.97	859.367	551.045	1188.7	772.441
504	0	325.441	1029.74	1561.9	226.153	1022.62	1555.97	323.866	1199.41	1597.03	210.734	1200.35	1592.82	267.313	1257.18	1412.87	276.779	1300.69	1195.75	275.077	1120.62	1352.59	265.02	1055.58	1227.51	185.02	1313.83	1248.4	443.277	1200.94	1368.22	487.54	1235.97	1140.59	483.517	1252.24	1073.3	519.389	1179.4	977.196	502.257	1158.08	874.414	536.923	1218.45	860.674	551.413	1175.62	773.994
505	0	326.602	1020.19	1563.42	227.274	1013.12	1557.48	325.135	1189.86	1598.57	212.008	1190.89	1594.36	268.813	1247.57	1414.37	278.32	1290.61	1197.34	276.191	1111.04	1354.05	265.958	1045.91	1228.97	186.65	1304.44	1250.01	444.57	1190.79	1369.72	488.847	1225.18	1142	484.843	1241.25	1074.62	520.242	1167.65	978.803	502.845	1145.73	876.21	537.792	1205.81	862.074	551.776	1162.36	775.647
506	0	327.69	1010.66	1564.92	228.32	1003.65	1558.96	326.336	1180.31	1600.12	213.211	1181.43	1595.89	270.294	1238.03	1415.92	279.918	1280.72	1198.98	277.231	1101.54	1355.5	266.793	1036.37	1230.38	188.331	1295.22	1251.66	445.817	1180.63	1371.27	490.192	1214.36	1143.46	486.232	1230.25	1075.99	521.098	1155.83	980.488	503.43	1133.31	878.093	538.718	1193.05	863.552	552.144	1148.93	777.385
507	0	328.7	1001.15	1566.38	229.287	994.19	1560.39	327.465	1170.77	1601.67	214.342	1171.99	1597.43	271.751	1228.56	1417.49	281.571	1271.05	1200.64	278.197	1092.13	1356.93	267.524	1026.99	1231.73	190.06	1286.17	1253.33	447.015	1170.46	1372.84	491.572	1203.52	1144.95	487.681	1219.23	1077.41	521.955	1143.95	982.235	504.012	1120.82	880.042	539.701	1180.2	865.091	552.528	1135.34	779.195
508	0	329.627	991.661	1567.77	230.17	984.764	1561.75	328.521	1161.24	1603.21	215.4	1162.57	1598.94	273.181	1219.16	1419.07	283.27	1261.59	1202.3	279.087	1082.81	1358.31	268.151	1017.76	1233	191.826	1277.31	1255.01	448.161	1160.31	1374.42	492.984	1192.65	1146.47	489.188	1208.19	1078.84	522.808	1132.02	984.028	504.589	1108.29	882.042	540.738	1167.27	866.679	552.935	1121.61	781.066
509	0	330.469	982.199	1569.09	230.968	975.373	1563.02	329.502	1151.73	1604.72	216.383	1153.18	1600.41	274.578	1209.85	1420.65	285.006	1252.35	1203.96	279.903	1073.6	1359.65	268.681	1008.68	1234.19	193.621	1268.63	1256.66	449.252	1150.19	1375.99	494.422	1181.75	1147.99	490.745	1197.15	1080.28	523.651	1120.06	985.853	505.161	1095.71	884.077	541.828	1154.26	868.306	553.374	1107.75	782.99
510	0	331.223	972.768	1570.31	231.677	966.022	1564.2	330.409	1142.23	1606.19	217.291	1143.81	1601.84	275.937	1200.63	1422.2	286.768	1243.33	1205.59	280.645	1064.48	1360.93	269.121	999.772	1235.29	195.43	1260.12	1258.3	450.286	1140.12	1377.54	495.877	1170.83	1149.51	492.346	1186.09	1081.72	524.481	1108.05	987.696	505.724	1083.11	886.132	542.964	1141.2	869.963	553.85	1093.78	784.96
511	0	331.889	963.37	1571.44	232.298	956.717	1565.26	331.241	1132.76	1607.61	218.124	1134.49	1603.21	277.252	1191.49	1423.73	288.543	1234.52	1207.2	281.317	1055.47	1362.13	269.479	991.017	1236.3	197.243	1251.77	1259.89	451.262	1130.1	1379.07	497.341	1159.9	1151.01	493.98	1175.02	1083.15	525.291	1096.02	989.549	506.276	1070.49	888.197	544.141	1128.09	871.643	554.367	1079.72	786.971
512	0	332.465	954.008	1572.46	232.829	947.462	1566.21	331.999	1123.32	1608.97	218.882	1125.2	1604.51	278.519	1182.46	1425.22	290.318	1225.91	1208.76	281.922	1046.57	1363.27	269.766	982.413	1237.23	199.044	1243.58	1261.44	452.177	1120.16	1380.56	498.803	1148.97	1152.48	495.636	1163.95	1084.54	526.077	1083.98	991.401	506.815	1057.86	890.261	545.352	1114.94	873.34	554.928	1065.6	789.021
513	0	332.953	944.685	1573.37	233.271	938.26	1567.04	332.682	1113.9	1610.26	219.567	1115.96	1605.74	279.733	1173.51	1426.65	292.08	1217.49	1210.27	282.463	1037.78	1364.32	269.992	973.952	1238.07	200.82	1235.52	1262.94	453.031	1110.31	1382	500.253	1138.04	1153.91	497.303	1152.89	1085.91	526.834	1071.92	993.244	507.337	1045.24	892.315	546.585	1101.77	875.049	555.531	1051.44	791.104
514	0	333.353	935.405	1574.17	233.627	929.117	1567.74	333.292	1104.52	1611.48	220.179	1106.76	1606.89	280.889	1164.66	1428.02	293.816	1209.24	1211.74	282.945	1029.09	1365.29	270.171	965.625	1238.82	202.56	1227.6	1264.37	453.824	1100.57	1383.4	501.682	1127.14	1155.3	498.968	1141.84	1087.23	527.557	1059.87	995.072	507.838	1032.62	894.353	547.831	1088.58	876.765	556.174	1037.25	793.218
515	0	333.668	926.171	1574.85	233.898	920.034	1568.32	333.829	1095.18	1612.62	220.719	1097.62	1607.96	281.983	1155.91	1429.32	295.514	1201.14	1213.14	283.372	1020.51	1366.17	270.312	957.423	1239.49	204.25	1219.79	1265.74	454.557	1090.93	1384.75	503.078	1116.27	1156.64	500.619	1130.81	1088.5	528.243	1047.83	996.878	508.316	1020.03	896.369	549.079	1075.39	878.483	556.85	1023.05	795.357
516	0	333.9	916.985	1575.41	234.087	911.014	1568.78	334.295	1085.87	1613.68	221.188	1088.53	1608.93	283.011	1147.24	1430.55	297.162	1193.16	1214.48	283.749	1012.02	1366.96	270.426	949.334	1240.08	205.88	1212.07	1267.03	455.228	1081.41	1386.03	504.434	1105.45	1157.92	502.243	1119.81	1089.72	528.889	1035.82	998.655	508.766	1007.47	898.356	550.316	1062.19	880.195	557.552	1008.88	797.517
517	0	334.052	907.849	1575.87	234.199	902.059	1569.12	334.692	1076.62	1614.65	221.588	1079.5	1609.8	283.971	1138.65	1431.7	298.75	1185.3	1215.75	284.079	1003.62	1367.66	270.523	941.35	1240.58	207.44	1204.43	1268.23	455.84	1072.01	1387.25	505.741	1094.7	1159.14	503.83	1108.85	1090.87	529.494	1023.85	1000.4	509.185	994.945	900.31	551.53	1049.02	881.895	558.269	994.731	799.691
518	0	334.128	898.767	1576.22	234.237	893.169	1569.35	335.02	1067.42	1615.53	221.92	1070.53	1610.58	284.86	1130.14	1432.76	300.27	1177.53	1216.94	284.368	995.307	1368.26	270.611	933.46	1240.99	208.923	1196.87	1269.36	456.392	1062.74	1388.39	506.992	1084.02	1160.29	505.369	1097.94	1091.96	530.054	1011.92	1002.1	509.569	982.466	902.224	552.709	1035.87	883.574	558.99	980.634	801.869
519	0	334.132	889.74	1576.48	234.205	884.344	1569.47	335.281	1058.26	1616.31	222.185	1061.61	1611.25	285.676	1121.71	1433.72	301.713	1169.84	1218.05	284.619	987.072	1368.76	270.695	925.655	1241.31	210.32	1189.35	1270.39	456.887	1053.59	1389.46	508.183	1073.44	1161.36	506.851	1087.09	1092.98	530.57	1000.06	1003.75	509.914	970.043	904.093	553.839	1022.75	885.222	559.702	966.601	804.043
520	0	334.069	880.768	1576.64	234.109	875.583	1569.48	335.476	1049.17	1617	222.385	1052.76	1611.81	286.416	1113.34	1434.59	303.071	1162.21	1219.08	284.835	978.907	1369.16	270.782	917.927	1241.54	211.626	1181.87	1271.33	457.325	1044.56	1390.44	509.307	1062.97	1162.36	508.269	1076.31	1093.91	531.039	988.269	1005.35	510.218	957.684	905.913	554.911	1009.69	886.832	560.39	952.645	806.201
521	0	333.942	871.853	1576.71	233.954	866.883	1569.41	335.609	1040.13	1617.59	222.522	1043.97	1612.26	287.08	1105.02	1435.36	304.339	1154.63	1220.01	285.019	970.803	1369.46	270.875	910.266	1241.67	212.834	1174.42	1272.18	457.706	1035.65	1391.33	510.362	1052.6	1163.27	509.615	1065.6	1094.76	531.46	976.565	1006.88	510.477	945.397	907.677	555.912	996.694	888.391	561.04	938.779	808.332
522	0	333.758	862.995	1576.7	233.745	858.243	1569.24	335.679	1031.16	1618.08	222.597	1035.23	1612.61	287.665	1096.76	1436.03	305.511	1147.08	1220.84	285.173	962.752	1369.67	270.974	902.665	1241.69	213.939	1166.98	1272.93	458.033	1026.85	1392.13	511.344	1042.37	1164.09	510.885	1054.99	1095.53	531.834	964.958	1008.35	510.686	933.193	909.379	556.835	983.773	889.889	561.638	925.017	810.423
523	0	333.52	854.192	1576.61	233.486	849.658	1568.99	335.69	1022.24	1618.46	222.612	1026.55	1612.84	288.171	1088.54	1436.6	306.58	1139.56	1221.58	285.298	954.746	1369.77	271.081	895.114	1241.61	214.938	1159.54	1273.58	458.304	1018.17	1392.82	512.253	1032.25	1164.82	512.073	1044.47	1096.19	532.159	953.457	1009.74	510.844	921.081	911.016	557.67	970.943	891.318	562.17	911.368	812.462
524	0	333.233	845.443	1576.45	233.184	841.123	1568.67	335.643	1013.38	1618.74	222.569	1017.93	1612.96	288.596	1080.35	1437.06	307.542	1132.06	1222.21	285.395	946.775	1369.77	271.194	887.605	1241.43	215.825	1152.1	1274.13	458.52	1009.58	1393.41	513.085	1022.27	1165.45	513.177	1034.05	1096.77	532.432	942.072	1011.06	510.948	909.068	912.581	558.411	958.216	892.668	562.624	897.845	814.438
525	0	332.903	836.747	1576.23	232.843	832.633	1568.28	335.541	1004.58	1618.93	222.471	1009.35	1612.98	288.941	1072.2	1437.42	308.393	1124.57	1222.73	285.465	938.833	1369.67	271.31	880.128	1241.14	216.598	1144.65	1274.59	458.682	1001.09	1393.89	513.84	1012.42	1165.98	514.195	1023.74	1097.24	532.654	930.811	1012.28	510.993	897.166	914.07	559.053	945.607	893.932	562.99	884.457	816.341
526	0	332.534	828.099	1575.94	232.467	824.181	1567.82	335.385	995.843	1619.01	222.318	1000.82	1612.89	289.204	1064.06	1437.68	309.127	1117.09	1223.15	285.506	930.911	1369.48	271.426	872.674	1240.75	217.254	1137.17	1274.95	458.789	992.685	1394.26	514.516	1002.7	1166.42	515.122	1013.54	1097.62	532.823	919.68	1013.42	510.979	885.38	915.479	559.591	933.128	895.102	563.258	871.215	818.16
527	0	332.131	819.496	1575.59	232.062	815.762	1567.3	335.178	987.154	1618.99	222.114	992.325	1612.7	289.384	1055.94	1437.84	309.744	1109.61	1223.46	285.518	923.002	1369.19	271.537	865.232	1240.26	217.79	1129.67	1275.22	458.84	984.362	1394.53	515.113	993.11	1166.75	515.959	1003.45	1097.89	532.936	908.686	1014.47	510.903	873.721	916.805	560.023	920.79	896.175	563.42	858.129	819.888
528	0	331.697	810.936	1575.18	231.63	807.368	1566.72	334.922	978.517	1618.88	221.86	983.863	1612.41	289.482	1047.83	1437.9	310.24	1102.13	1223.67	285.499	915.099	1368.82	271.637	857.792	1239.67	218.205	1122.14	1275.39	458.836	976.113	1394.68	515.628	983.642	1166.98	516.702	993.484	1098.07	532.993	897.833	1015.42	510.763	862.195	918.043	560.347	908.604	897.147	563.472	845.208	821.517
529	0	331.238	802.413	1574.72	231.176	798.993	1566.09	334.618	969.926	1618.66	221.558	975.43	1612.03	289.496	1039.72	1437.87	310.616	1094.64	1223.78	285.446	907.197	1368.35	271.721	850.346	1239	218.499	1114.58	1275.48	458.774	967.929	1394.72	516.061	974.295	1167.12	517.352	983.633	1098.16	532.991	887.124	1016.27	510.559	850.808	919.192	560.564	896.579	898.015	563.41	832.463	823.042
530	0	330.756	793.923	1574.2	230.703	790.631	1565.42	334.268	961.378	1618.36	221.21	967.018	1611.55	289.427	1031.62	1437.75	310.87	1087.14	1223.8	285.359	899.29	1367.81	271.783	842.883	1238.25	218.672	1106.97	1275.48	458.655	959.802	1394.66	516.41	965.064	1167.16	517.906	973.9	1098.15	532.929	876.56	1017.03	510.288	839.566	920.248	560.674	884.722	898.778	563.232	819.901	824.456
531	0	330.255	785.463	1573.63	230.212	782.275	1564.69	333.874	952.869	1617.96	220.817	958.622	1610.99	289.275	1023.51	1437.53	311.004	1079.62	1223.73	285.233	891.371	1367.19	271.816	835.395	1237.42	218.724	1099.32	1275.39	458.477	951.725	1394.5	516.676	955.942	1167.1	518.364	964.284	1098.04	532.805	866.144	1017.68	509.951	828.473	921.208	560.677	873.041	899.435	562.94	807.532	825.756
532	0	329.737	777.026	1573.01	229.706	773.92	1563.92	333.436	944.394	1617.48	220.38	950.237	1610.35	289.039	1015.38	1437.23	311.019	1072.08	1223.57	285.066	883.436	1366.5	271.816	827.876	1236.53	218.657	1091.63	1275.23	458.239	943.689	1394.24	516.855	946.923	1166.95	518.725	954.782	1097.85	532.618	855.873	1018.24	509.547	817.534	922.071	560.577	861.541	899.986	562.535	795.364	826.937
533	0	329.204	768.611	1572.34	229.185	765.561	1563.12	332.956	935.95	1616.91	219.9	941.858	1609.63	288.72	1007.25	1436.85	310.917	1064.52	1223.33	284.855	875.48	1365.73	271.775	820.317	1235.58	218.474	1083.89	1274.99	457.941	935.687	1393.88	516.948	938.001	1166.71	518.987	945.392	1097.58	532.366	845.747	1018.69	509.077	806.752	922.832	560.376	850.224	900.432	562.021	783.404	827.996
534	0	328.656	760.212	1571.62	228.65	757.194	1562.27	332.434	927.532	1616.25	219.378	933.481	1608.84	288.32	999.095	1436.38	310.7	1056.92	1223.02	284.597	867.498	1364.9	271.691	812.713	1234.57	218.176	1076.09	1274.68	457.58	927.71	1393.44	516.953	929.166	1166.39	519.15	936.11	1097.22	532.048	835.763	1019.03	508.541	796.128	923.488	560.078	839.095	900.773	561.402	771.658	828.929
535	0	328.094	751.825	1570.85	228.101	748.815	1561.39	331.869	919.136	1615.52	218.813	925.102	1607.98	287.838	990.92	1435.83	310.373	1049.29	1222.63	284.29	859.486	1364	271.558	805.058	1233.52	217.769	1068.24	1274.29	457.157	919.75	1392.91	516.871	920.413	1165.99	519.214	926.929	1096.78	531.664	825.917	1019.27	507.941	785.662	924.036	559.687	828.154	901.009	560.684	760.131	829.732
536	0	327.518	743.449	1570.03	227.537	740.422	1560.47	331.262	910.759	1614.71	218.206	916.719	1607.06	287.277	982.721	1435.21	309.939	1041.61	1222.17	283.93	851.439	1363.05	271.373	797.347	1232.43	217.256	1060.33	1273.82	456.67	911.798	1392.3	516.7	911.731	1165.5	519.178	917.845	1096.27	531.212	816.204	1019.4	507.279	775.356	924.47	559.208	817.402	901.14	559.874	748.827	830.401
537	0	326.925	735.078	1569.17	226.954	732.013	1559.52	330.611	902.398	1613.82	217.554	908.328	1606.07	286.637	974.494	1434.5	309.403	1033.89	1221.64	283.514	843.354	1362.04	271.133	789.576	1231.29	216.642	1052.35	1273.28	456.12	903.846	1391.61	516.44	903.112	1164.94	519.044	908.849	1095.68	530.693	806.619	1019.42	506.555	765.207	924.785	558.645	806.837	901.165	558.978	737.749	830.931
538	0	326.314	726.712	1568.26	226.353	723.586	1558.54	329.915	894.049	1612.85	216.858	899.927	1605.01	285.92	966.236	1433.72	308.77	1026.12	1221.04	283.041	835.226	1360.97	270.835	781.738	1230.12	215.933	1044.31	1272.66	455.506	895.884	1390.85	516.093	894.548	1164.3	518.811	899.935	1095.01	530.107	797.155	1019.33	505.775	755.214	924.976	558.005	796.458	901.082	558.004	726.899	831.317
539	0	325.681	718.346	1567.3	225.728	715.14	1557.53	329.173	885.709	1611.81	216.115	891.515	1603.9	285.129	957.946	1432.85	308.046	1018.28	1220.37	282.508	827.05	1359.85	270.477	773.83	1228.92	215.134	1036.2	1271.97	454.827	887.904	1390.02	515.658	886.028	1163.59	518.481	891.095	1094.28	529.455	787.807	1019.12	504.939	745.374	925.035	557.294	786.262	900.888	556.961	716.276	831.551
540	0	325.023	709.98	1566.31	225.077	706.674	1556.48	328.383	877.376	1610.7	215.325	883.091	1602.73	284.265	949.619	1431.91	307.236	1010.38	1219.62	281.913	818.823	1358.68	270.058	765.848	1227.68	214.251	1028.02	1271.19	454.084	879.897	1389.11	515.138	877.544	1162.8	518.056	882.319	1093.47	528.739	778.566	1018.79	504.053	735.684	924.956	556.518	776.246	900.58	555.857	705.879	831.629
541	0	324.335	701.608	1565.27	224.395	698.188	1555.41	327.544	869.046	1609.52	214.484	874.654	1601.5	283.332	941.254	1430.89	306.346	1002.4	1218.8	281.253	810.541	1357.46	269.574	757.786	1226.4	213.29	1019.76	1270.32	453.278	871.853	1388.13	514.534	869.087	1161.94	517.539	873.598	1092.58	527.96	769.426	1018.34	503.12	726.14	924.732	555.684	766.407	900.154	554.7	695.706	831.542
542	0	323.614	693.231	1564.19	223.678	689.682	1554.3	326.652	860.716	1608.27	213.592	866.202	1600.21	282.332	932.847	1429.79	305.381	994.338	1217.89	280.527	802.199	1356.18	269.024	749.639	1225.09	212.258	1011.43	1269.36	452.408	863.763	1387.09	513.849	860.647	1161.01	516.93	864.922	1091.63	527.122	760.377	1017.76	502.144	716.737	924.356	554.797	756.74	899.605	553.499	685.753	831.284
543	0	322.853	684.844	1563.07	222.922	681.155	1553.17	325.708	852.383	1606.96	212.645	857.734	1598.87	281.268	924.397	1428.61	304.347	986.192	1216.9	279.733	793.794	1354.86	268.406	741.405	1223.74	211.161	1003.02	1268.31	451.476	855.62	1385.97	513.083	852.215	1159.99	516.234	856.28	1090.6	526.227	751.413	1017.04	501.13	707.47	923.821	553.865	747.241	898.929	552.264	676.019	830.847
544	0	322.05	676.444	1561.91	222.122	672.607	1552.02	324.707	844.045	1605.59	211.642	849.251	1597.47	280.142	915.901	1427.34	303.25	977.952	1215.82	278.87	785.32	1353.5	267.718	733.078	1222.36	210.004	994.518	1267.16	450.481	847.414	1384.79	512.241	843.781	1158.9	515.452	847.663	1089.49	525.278	742.526	1016.19	500.082	698.335	923.122	552.892	737.905	898.121	551.002	666.497	830.225
545	0	321.198	668.03	1560.73	221.273	664.037	1550.83	323.65	835.697	1604.16	210.583	840.751	1596.02	278.958	907.356	1426	302.094	969.613	1214.64	277.935	776.776	1352.1	266.958	724.654	1220.95	208.793	985.933	1265.91	449.426	839.137	1383.53	511.324	835.336	1157.74	514.588	839.058	1088.31	524.279	733.706	1015.21	499.006	689.327	922.255	551.885	728.729	897.177	549.722	657.184	829.413
546	0	320.293	659.596	1559.52	220.371	655.445	1549.63	322.535	827.335	1602.67	209.464	832.232	1594.52	277.717	898.759	1424.58	300.885	961.169	1213.37	276.93	768.156	1350.66	266.123	716.129	1219.51	207.533	977.258	1264.55	448.311	830.782	1382.22	510.335	826.868	1156.5	513.643	830.456	1087.06	523.233	724.946	1014.09	497.906	680.439	921.216	550.849	719.708	896.096	548.433	648.077	828.406
547	0	319.33	651.14	1558.29	219.411	646.83	1548.41	321.361	818.957	1601.15	208.285	823.694	1592.98	276.425	890.109	1423.09	299.627	952.615	1212	275.852	759.457	1349.2	265.21	707.498	1218.04	206.229	968.49	1263.09	447.137	822.342	1380.84	509.275	818.368	1155.19	512.62	821.844	1085.75	522.142	716.238	1012.84	496.786	671.668	920.004	549.789	710.839	894.876	547.144	639.171	827.202
548	0	318.307	642.657	1557.04	218.39	638.19	1547.18	320.127	810.558	1599.59	207.046	815.135	1591.41	275.082	881.401	1421.53	298.326	943.947	1210.54	274.701	750.675	1347.71	264.218	698.756	1216.55	204.886	959.625	1261.54	445.907	813.811	1379.4	508.145	809.825	1153.82	511.519	813.213	1084.36	521.01	707.574	1011.45	495.651	663.009	918.621	548.708	702.118	893.52	545.862	630.465	825.801
549	0	317.219	634.143	1555.79	217.304	629.523	1545.95	318.833	802.134	1598.01	205.747	806.554	1589.81	273.694	872.634	1419.92	296.984	935.158	1208.98	273.479	741.808	1346.22	263.144	689.899	1215.05	203.509	950.66	1259.88	444.622	805.181	1377.92	506.947	801.228	1152.38	510.344	804.553	1082.93	519.839	698.948	1009.94	494.504	654.457	917.07	547.611	693.543	892.031	544.596	621.955	824.205
550	0	316.064	625.594	1554.55	216.151	620.829	1544.72	317.481	793.68	1596.41	204.388	797.947	1588.19	272.263	863.805	1418.26	295.605	926.244	1207.34	272.186	732.852	1344.72	261.986	680.922	1213.56	202.1	941.591	1258.13	443.285	796.448	1376.39	505.682	792.567	1150.89	509.093	795.853	1081.44	518.63	690.353	1008.32	493.35	646.01	915.357	546.499	685.11	890.416	543.351	613.641	822.42
551	0	314.84	617.006	1553.33	214.929	612.105	1543.51	316.072	785.193	1594.82	202.971	789.314	1586.58	270.792	854.912	1416.56	294.192	917.199	1205.61	270.823	723.805	1343.25	260.744	671.82	1212.08	200.664	932.415	1256.31	441.898	787.607	1374.84	504.349	783.833	1149.35	507.769	787.105	1079.91	517.387	681.784	1006.59	492.191	637.663	913.494	545.374	676.818	888.684	542.136	605.522	820.455
552	0	313.546	608.374	1552.14	213.636	603.349	1542.32	314.608	776.667	1593.24	201.498	780.652	1584.97	269.286	845.951	1414.84	292.747	908.019	1203.82	269.394	714.664	1341.8	259.416	662.591	1210.63	199.203	923.128	1254.41	440.464	778.655	1373.26	502.949	775.018	1147.79	506.37	778.303	1078.36	516.109	673.235	1004.76	491.029	629.415	911.492	544.238	668.664	886.85	540.955	597.599	818.322
553	0	312.182	599.693	1551	212.272	594.558	1541.18	313.092	768.098	1591.69	199.972	771.958	1583.39	267.747	836.922	1413.12	291.273	898.698	1201.97	267.9	705.43	1340.39	258.003	653.229	1209.23	197.723	913.73	1252.47	438.986	769.588	1371.69	501.482	766.112	1146.21	504.897	769.44	1076.8	514.8	664.703	1002.87	489.867	621.264	909.369	543.091	660.648	884.929	539.814	589.872	816.039
554	0	310.749	590.96	1549.93	210.839	585.73	1540.1	311.526	759.482	1590.2	198.396	763.231	1581.86	266.18	827.822	1411.41	289.772	889.233	1200.09	266.347	696.101	1339.05	256.507	643.734	1207.9	196.225	904.218	1250.49	437.469	760.404	1370.14	499.949	757.112	1144.63	503.35	760.512	1075.24	513.458	656.185	1000.91	488.706	613.207	907.144	541.932	652.768	882.943	538.716	582.345	813.628
555	0	309.249	582.171	1548.95	209.338	576.862	1539.1	309.915	750.816	1588.76	196.774	754.466	1580.38	264.588	818.651	1409.74	288.246	879.62	1198.19	264.739	686.678	1337.79	254.931	634.103	1206.66	194.712	894.592	1248.5	435.916	751.104	1368.62	498.349	748.014	1143.07	501.73	751.519	1073.71	512.086	647.68	998.926	487.545	605.244	904.842	540.76	645.023	880.914	537.663	575.017	811.113
556	0	307.685	573.324	1548.06	207.772	567.951	1538.19	308.264	742.096	1587.42	195.111	745.662	1578.99	262.976	809.407	1408.13	286.699	869.856	1196.3	263.081	677.162	1336.64	253.279	624.338	1205.53	193.187	884.853	1246.53	434.332	741.688	1367.17	496.685	738.816	1141.56	500.037	742.459	1072.24	510.684	639.187	996.931	486.386	597.375	902.49	539.572	637.412	878.869	536.656	567.892	808.524
557	0	306.062	564.416	1547.3	206.147	558.994	1537.4	306.578	733.319	1586.18	193.413	736.816	1577.69	261.348	800.09	1406.6	285.131	859.943	1194.46	261.38	667.556	1335.6	251.556	614.441	1204.53	191.652	875.004	1244.6	432.721	732.158	1365.8	494.957	729.521	1140.11	498.273	733.336	1070.83	509.253	630.708	994.955	485.226	589.6	900.116	538.368	629.933	876.839	535.694	560.971	805.894
558	0	304.386	555.445	1546.67	204.467	549.99	1536.73	304.861	724.484	1585.06	191.685	727.926	1576.51	259.706	790.703	1405.18	283.546	849.881	1192.69	259.642	657.865	1334.7	249.77	604.417	1203.69	190.11	865.05	1242.76	431.09	722.52	1364.54	493.169	720.133	1138.76	496.438	724.155	1069.53	507.795	622.245	993.025	484.064	581.917	897.754	537.143	622.584	874.855	534.774	554.253	803.26
559	0	302.663	546.411	1546.2	202.741	540.935	1536.22	303.121	715.589	1584.08	189.933	718.989	1575.46	258.057	781.246	1403.89	281.946	839.678	1191.02	257.877	648.093	1333.96	247.93	594.272	1203.01	188.562	854.997	1241.03	429.443	712.78	1363.41	491.323	710.66	1137.53	494.537	714.925	1068.34	506.311	613.801	991.172	482.898	574.326	895.438	535.896	615.362	872.951	533.891	547.739	800.66
560	0	300.902	537.315	1545.91	200.975	531.828	1535.88	301.363	706.635	1583.26	188.163	710.005	1574.56	256.402	771.722	1402.75	280.335	829.342	1189.51	256.093	638.248	1333.38	246.047	584.017	1202.53	187.01	844.855	1239.44	427.786	702.947	1362.44	489.426	701.113	1136.43	492.573	705.654	1067.31	504.804	605.381	989.424	481.726	566.827	893.201	534.624	608.263	871.159	533.039	541.424	798.133
561	0	299.111	528.159	1545.8	199.181	522.668	1535.72	299.593	697.623	1582.6	186.382	700.972	1573.83	254.747	762.136	1401.79	278.714	818.885	1188.17	254.298	628.338	1333	244.132	573.663	1202.26	185.453	834.635	1238.04	426.125	693.031	1361.66	487.483	691.507	1135.51	490.552	696.357	1066.44	503.276	596.99	987.81	480.547	559.418	891.079	533.325	601.283	869.514	532.207	535.304	795.719
562	0	297.302	518.945	1545.89	197.368	513.456	1535.76	297.818	688.555	1582.12	184.597	691.891	1573.27	253.094	752.493	1401.03	277.086	808.326	1187.04	252.501	618.372	1332.81	242.198	563.226	1202.21	183.892	824.349	1236.84	424.465	683.045	1361.07	485.502	681.858	1134.78	488.48	687.049	1065.77	501.73	588.636	986.359	479.359	552.096	889.106	531.997	594.414	868.046	531.387	529.371	793.455
563	0	295.483	509.677	1546.19	195.548	504.191	1536	296.044	679.435	1581.83	182.813	682.761	1572.9	251.448	742.799	1400.48	275.455	797.685	1186.16	250.713	608.361	1332.82	240.259	552.723	1202.39	182.327	814.011	1235.88	422.814	673.005	1360.7	483.492	672.187	1134.25	486.365	677.746	1065.3	500.171	580.325	985.095	478.16	544.858	887.314	530.641	587.648	866.786	530.568	523.613	791.378
564	0	293.668	500.362	1546.7	193.732	494.876	1536.46	294.278	670.268	1581.73	181.037	673.585	1572.71	249.81	733.062	1400.15	273.822	786.987	1185.54	248.942	598.317	1333.04	238.329	542.172	1202.8	180.757	803.637	1235.18	421.175	662.928	1360.57	481.461	662.516	1133.96	484.218	668.468	1065.07	498.604	572.065	984.04	476.95	537.698	885.732	529.256	580.977	865.758	529.735	518.014	789.518
565	0	291.867	491.007	1547.44	191.932	485.513	1537.13	292.525	661.062	1581.82	179.276	664.366	1572.71	248.184	723.292	1400.06	272.189	776.259	1185.22	247.199	588.253	1333.46	236.424	531.595	1203.43	179.178	793.244	1234.76	419.555	652.833	1360.67	479.423	652.869	1133.89	482.047	659.234	1065.06	497.034	563.862	983.211	475.73	530.61	884.384	527.845	574.387	864.981	528.878	512.556	787.904
566	0	290.092	481.62	1548.39	190.161	476.109	1538.02	290.792	651.824	1582.1	177.534	655.107	1572.9	246.571	713.497	1400.21	270.556	765.533	1185.19	245.492	578.181	1334.1	234.558	521.015	1204.29	177.588	782.847	1234.63	417.958	642.741	1361.01	477.387	643.272	1134.07	479.867	650.066	1065.29	495.468	555.726	982.622	474.5	523.587	883.293	526.411	567.867	864.47	527.982	507.215	786.554
567	0	288.354	472.21	1549.55	188.43	466.668	1539.11	289.083	642.563	1582.56	175.818	645.814	1573.27	244.974	703.691	1400.59	268.922	754.839	1185.47	243.83	568.117	1334.92	232.748	510.455	1205.36	175.982	772.464	1234.79	416.388	632.675	1361.59	475.368	633.75	1134.48	477.689	640.984	1065.76	493.915	547.664	982.281	473.264	516.619	882.471	524.959	561.403	864.233	527.037	501.966	785.482
568	0	286.667	462.788	1550.91	186.75	457.198	1540.41	287.404	633.29	1583.19	174.132	636.493	1573.81	243.393	693.883	1401.2	267.285	744.211	1186.04	242.22	558.074	1335.93	231.005	499.941	1206.61	174.354	762.109	1235.24	414.85	622.658	1362.39	473.376	624.33	1135.13	475.527	632.008	1066.46	492.38	539.682	982.189	472.026	509.696	881.93	523.495	554.978	864.269	526.033	496.777	784.695
569	0	285.039	453.366	1552.46	185.134	447.707	1541.9	285.759	624.015	1583.98	172.482	627.151	1574.5	241.829	684.086	1402.03	265.641	733.681	1186.89	240.671	548.066	1337.11	229.345	489.496	1208.04	172.697	751.799	1235.96	413.346	612.714	1363.41	471.424	615.037	1136	473.394	623.159	1067.37	490.873	531.789	982.344	470.789	502.808	881.67	522.026	548.579	864.571	524.961	491.618	784.191
570	0	283.481	443.956	1554.19	183.591	438.204	1543.56	284.152	614.751	1584.91	170.87	617.796	1575.33	240.281	674.314	1403.06	263.984	723.278	1188.01	239.188	538.107	1338.44	227.779	479.143	1209.61	171.006	741.547	1236.95	411.879	602.869	1364.62	469.522	605.896	1137.08	471.302	614.455	1068.48	489.402	523.99	982.738	469.56	495.943	881.69	520.559	542.191	865.127	523.817	486.456	783.965
571	0	282.004	434.57	1556.07	182.131	428.699	1545.38	282.587	605.508	1585.96	169.301	608.436	1576.28	238.75	664.577	1404.28	262.308	713.031	1189.35	237.776	528.212	1339.91	226.317	468.904	1211.3	169.273	731.366	1238.17	410.451	593.146	1366	467.681	596.927	1138.33	469.263	605.913	1069.76	487.975	516.291	983.356	468.344	489.091	881.981	519.102	535.8	865.916	522.599	481.255	784.003
572	0	280.615	425.22	1558.1	180.762	419.201	1547.34	281.066	596.299	1587.12	167.778	599.079	1577.33	237.233	654.889	1405.66	260.607	702.962	1190.9	236.439	518.391	1341.48	224.967	458.799	1213.07	167.493	721.268	1239.6	409.063	583.568	1367.52	465.908	588.151	1139.74	467.288	597.548	1071.2	486.597	508.698	984.182	467.148	482.243	882.53	517.661	529.394	866.916	521.309	475.984	784.289
573	0	279.321	415.92	1560.23	179.491	409.721	1549.41	279.591	587.135	1588.36	166.302	589.734	1578.46	235.732	645.261	1407.18	258.873	693.092	1192.62	235.179	508.657	1343.14	223.735	448.845	1214.9	165.662	711.263	1241.21	407.716	574.152	1369.15	464.209	579.585	1141.28	465.385	589.373	1072.75	485.275	501.215	985.195	465.977	475.39	883.317	516.243	522.963	868.098	519.954	470.611	784.804
574	0	278.13	406.68	1562.46	178.326	400.268	1551.57	278.163	578.026	1589.66	164.874	580.407	1579.65	234.243	635.702	1408.82	257.101	683.434	1194.46	233.999	499.021	1344.86	222.624	439.056	1216.75	163.779	701.359	1242.97	406.41	564.918	1370.86	462.588	571.242	1142.93	463.56	581.398	1074.4	484.013	493.847	986.372	464.838	468.526	884.323	514.852	516.502	869.433	518.544	465.109	785.525
575	0	277.044	397.511	1564.76	177.269	390.851	1553.8	276.784	568.984	1591	163.497	571.108	1580.88	232.769	626.223	1410.54	255.29	673.995	1196.39	232.898	489.491	1346.63	221.634	429.441	1218.61	161.843	691.565	1244.85	405.144	555.876	1372.63	461.046	563.132	1144.64	461.817	573.632	1076.11	482.813	486.596	987.688	463.735	461.647	885.522	513.491	510.005	870.89	517.091	459.455	786.431
576	0	276.069	388.423	1567.1	176.326	381.478	1556.08	275.453	560.016	1592.37	162.169	561.842	1582.13	231.307	616.832	1412.33	253.437	664.778	1198.39	231.874	480.074	1348.41	220.763	420.005	1220.46	159.859	681.884	1246.82	403.919	547.037	1374.43	459.58	555.263	1146.4	460.156	566.08	1077.86	481.678	479.466	989.117	462.671	454.751	886.889	512.161	503.473	872.438	515.611	453.63	787.5
577	0	275.204	379.424	1569.46	175.496	372.158	1558.39	274.169	551.129	1593.73	160.891	552.617	1583.37	229.858	607.534	1414.16	251.547	655.78	1200.41	230.925	470.778	1350.19	220.006	410.749	1222.26	157.834	672.321	1248.85	402.733	538.404	1376.23	458.188	547.637	1148.17	458.577	558.746	1079.63	480.605	472.459	990.634	461.651	447.838	888.397	510.861	496.907	874.046	514.122	447.623	788.712
578	0	274.451	370.521	1571.82	174.78	362.897	1560.7	272.931	542.329	1595.08	159.662	543.436	1584.6	228.424	598.336	1416	249.623	646.992	1202.43	230.047	461.607	1351.95	219.353	401.67	1224	155.776	662.879	1250.92	401.584	529.977	1378	456.863	540.253	1149.94	457.075	551.629	1081.38	479.594	465.576	992.211	460.675	440.911	890.018	509.588	490.313	875.686	512.644	441.426	790.045
579	0	273.808	361.718	1574.16	174.177	353.7	1562.98	271.739	533.621	1596.39	158.481	534.306	1585.8	227.005	589.24	1417.84	247.673	638.403	1204.42	229.235	452.562	1353.67	218.797	392.76	1225.67	153.695	653.557	1252.98	400.471	521.753	1379.73	455.598	533.107	1151.67	455.643	544.728	1083.09	478.641	458.816	993.826	459.743	433.972	891.726	508.34	483.696	877.331	511.194	435.04	791.48
580	0	273.271	353.018	1576.45	173.683	344.572	1565.23	270.59	525.006	1597.66	157.346	525.228	1586.94	225.602	580.248	1419.65	245.706	629.997	1206.36	228.485	443.647	1355.33	218.324	384.008	1227.26	151.604	644.355	1255.03	399.391	513.724	1381.39	454.384	526.192	1153.36	454.275	538.035	1084.76	477.741	452.178	995.452	458.857	427.028	893.493	507.11	477.065	878.956	509.792	428.47	792.999
581	0	272.836	344.422	1578.68	173.295	335.516	1567.43	269.484	516.485	1598.86	156.256	516.207	1588.03	224.219	571.362	1421.41	243.733	621.759	1208.24	227.791	434.86	1356.92	217.924	375.402	1228.76	149.514	635.27	1257.04	398.342	505.879	1382.97	453.211	519.497	1154.97	452.959	531.543	1086.35	476.89	445.661	997.068	458.014	420.084	895.293	505.892	470.431	880.538	508.455	421.726	794.583
582	0	272.497	335.93	1580.83	173.005	326.534	1569.54	268.417	508.057	1599.99	155.21	507.243	1589.04	222.858	562.58	1423.11	241.762	613.67	1210.03	227.147	426.2	1358.43	217.583	366.927	1230.17	147.438	626.299	1258.98	397.322	498.206	1384.46	452.069	513.008	1156.51	451.685	525.24	1087.86	476.081	439.26	998.653	457.212	413.146	897.101	504.681	463.803	882.058	507.195	414.825	796.213
583	0	272.247	327.539	1582.88	172.807	317.627	1571.57	267.39	499.718	1601.05	154.206	498.338	1589.98	221.519	553.899	1424.74	239.805	605.71	1211.72	226.547	417.664	1359.84	217.29	358.568	1231.48	145.388	617.439	1260.84	396.329	490.688	1385.84	450.949	506.708	1157.94	450.443	519.11	1089.27	475.309	432.97	1000.19	456.449	406.223	898.892	503.469	457.191	883.498	506.026	407.788	797.871
584	0	272.078	319.244	1584.81	172.693	308.795	1573.49	266.399	491.464	1602.01	153.242	489.492	1590.82	220.207	545.317	1426.27	237.87	597.86	1213.3	225.985	409.248	1361.15	217.032	350.314	1232.69	143.373	608.683	1262.61	395.361	483.311	1387.1	449.842	500.577	1159.27	449.223	513.136	1090.57	474.567	426.785	1001.65	455.721	399.319	900.643	502.251	450.604	884.84	504.953	400.637	799.538
585	0	271.981	311.042	1586.62	172.654	300.038	1575.29	265.445	483.291	1602.87	152.318	480.704	1591.58	218.924	536.828	1427.7	235.966	590.104	1214.76	225.456	400.945	1362.36	216.8	342.152	1233.79	141.404	600.026	1264.26	394.417	476.055	1388.24	448.741	494.594	1160.48	448.014	507.298	1091.75	473.848	420.695	1003.02	455.025	392.442	902.332	501.022	444.052	886.072	503.983	393.399	801.192
586	0	271.947	302.923	1588.3	172.68	291.352	1576.96	264.525	475.19	1603.63	151.433	471.973	1592.23	217.672	528.427	1429.03	234.099	582.423	1216.1	224.955	392.751	1363.44	216.585	334.072	1234.77	139.489	591.464	1265.8	393.496	468.904	1389.25	447.638	488.736	1161.56	446.81	501.575	1092.81	473.148	414.692	1004.3	454.357	385.597	903.939	499.777	437.541	887.182	503.116	386.1	802.812
587	0	271.967	294.879	1589.83	172.762	282.735	1578.49	263.639	467.153	1604.29	150.585	463.298	1592.79	216.453	520.107	1430.24	232.276	574.803	1217.3	224.478	384.656	1364.41	216.381	326.068	1235.64	137.635	582.991	1267.2	392.596	461.839	1390.13	446.529	482.978	1162.51	445.604	495.942	1093.75	472.459	408.764	1005.46	453.712	378.79	905.445	498.513	431.078	888.158	502.347	378.77	804.379
588	0	272.031	286.902	1591.21	172.89	274.182	1579.87	262.788	459.173	1604.84	149.774	454.675	1593.24	215.27	511.861	1431.33	230.503	567.231	1218.37	224.023	376.654	1365.25	216.181	318.134	1236.39	135.848	574.601	1268.47	391.719	454.843	1390.88	445.411	477.295	1163.33	444.391	490.377	1094.55	471.778	402.9	1006.49	453.087	372.025	906.832	497.23	424.665	888.994	501.672	371.437	805.87
589	0	272.13	278.981	1592.43	173.053	265.69	1581.1	261.97	451.239	1605.28	149	446.101	1593.59	214.127	503.682	1432.29	228.785	559.694	1219.31	223.586	368.736	1365.97	215.984	310.266	1237.01	134.134	566.29	1269.59	390.866	447.898	1391.49	444.284	471.661	1164.01	443.17	484.855	1095.22	471.099	397.087	1007.39	452.476	365.306	908.085	495.928	418.307	889.684	501.081	364.126	807.265
590	0	272.254	271.104	1593.5	173.242	257.252	1582.18	261.186	443.342	1605.6	148.263	437.572	1593.83	213.024	495.56	1433.14	227.128	552.184	1220.12	223.166	360.893	1366.56	215.786	302.462	1237.5	132.498	558.052	1270.58	390.036	440.988	1391.97	443.15	466.051	1164.56	441.941	479.352	1095.75	470.419	391.31	1008.15	451.876	358.635	909.191	494.61	412.004	890.224	500.561	356.864	808.542
591	0	272.397	263.262	1594.4	173.448	248.863	1583.09	260.436	435.472	1605.82	147.562	429.085	1593.97	211.966	487.488	1433.85	225.537	544.693	1220.8	222.763	353.115	1367.02	215.589	294.717	1237.86	130.946	549.883	1271.42	389.233	434.098	1392.32	442.01	460.44	1164.97	440.705	473.844	1096.16	469.736	385.556	1008.76	451.282	352.014	910.138	493.279	405.755	890.613	500.099	349.672	809.683
592	0	272.549	255.443	1595.15	173.664	240.516	1583.85	259.722	427.62	1605.93	146.899	420.634	1594	210.955	479.457	1434.45	224.019	537.213	1221.35	222.376	345.394	1367.35	215.393	287.03	1238.09	129.48	541.779	1272.12	388.459	427.213	1392.55	440.87	454.804	1165.25	439.467	468.31	1096.44	469.046	379.811	1009.22	450.691	345.446	910.916	491.941	399.56	890.85	499.68	342.572	810.669
593	0	272.706	247.636	1595.74	173.881	232.204	1584.45	259.045	419.774	1605.94	146.273	412.215	1593.94	209.994	471.458	1434.92	222.579	529.74	1221.78	222.006	337.72	1367.56	215.202	279.395	1238.19	128.106	533.733	1272.68	387.716	420.321	1392.65	439.737	449.122	1165.4	438.232	462.729	1096.59	468.35	374.063	1009.52	450.098	338.931	911.519	490.604	393.415	890.94	499.287	335.58	811.486
594	0	272.86	239.83	1596.17	174.095	223.92	1584.89	258.405	411.927	1605.84	145.686	403.823	1593.77	209.085	463.484	1435.27	221.224	522.266	1222.09	221.655	330.082	1367.65	215.02	271.807	1238.15	126.828	525.742	1273.11	387.009	413.409	1392.65	438.618	443.373	1165.44	437.007	457.083	1096.63	467.647	368.297	1009.68	449.5	332.47	911.94	489.276	387.318	890.884	498.906	328.711	812.118
595	0	273.009	232.016	1596.46	174.3	215.658	1585.18	257.804	404.069	1605.65	145.137	395.453	1593.52	208.231	455.527	1435.51	219.958	514.788	1222.29	221.325	322.471	1367.62	214.85	264.257	1237.99	125.648	517.799	1273.42	386.34	406.466	1392.53	437.52	437.54	1165.35	435.8	451.355	1096.55	466.94	362.502	1009.68	448.897	326.063	912.177	487.966	381.266	890.69	498.522	321.975	812.556
596	0	273.148	224.183	1596.6	174.493	207.41	1585.32	257.244	396.193	1605.36	144.629	387.099	1593.16	207.436	447.578	1435.64	218.788	507.299	1222.39	221.019	314.877	1367.47	214.698	256.736	1237.7	124.571	509.899	1273.6	385.714	399.484	1392.32	436.454	431.607	1165.16	434.619	445.533	1096.37	466.229	356.669	1009.54	448.286	319.711	912.229	486.684	375.255	890.363	498.121	315.38	812.79
597	0	273.277	216.325	1596.61	174.673	199.171	1585.32	256.726	388.292	1604.99	144.161	378.756	1592.73	206.703	439.63	1435.66	217.717	499.793	1222.39	220.739	307.291	1367.21	214.568	249.234	1237.31	123.598	502.035	1273.66	385.134	392.453	1392.01	435.428	425.562	1164.87	433.474	439.603	1096.1	465.52	350.788	1009.25	447.668	313.414	912.096	485.442	369.281	889.91	497.693	308.932	812.815
598	0	273.395	208.433	1596.49	174.838	190.932	1585.19	256.252	380.359	1604.53	143.737	370.421	1592.21	206.034	431.676	1435.58	216.749	492.263	1222.29	220.489	299.703	1366.85	214.467	241.738	1236.8	122.732	494.199	1273.62	384.606	385.366	1391.61	434.452	419.394	1164.49	432.372	433.558	1095.73	464.815	344.851	1008.83	447.045	307.171	911.78	484.248	363.344	889.341	497.228	302.635	812.628
599	0	273.502	200.502	1596.25	174.989	182.69	1584.93	255.825	372.39	1604	143.357	362.087	1591.61	205.432	423.709	1435.4	215.887	484.703	1222.1	220.273	292.103	1366.38	214.398	234.237	1236.2	121.973	486.384	1273.48	384.133	378.215	1391.14	433.535	413.095	1164.02	431.324	427.391	1095.28	464.121	338.853	1008.27	446.42	300.982	911.286	483.113	357.439	888.662	496.721	296.489	812.229
600	0	273.601	192.528	1595.89	175.129	174.438	1584.55	255.447	364.38	1603.39	143.022	353.751	1590.94	204.902	415.725	1435.13	215.132	477.106	1221.83	220.094	284.481	1365.82	214.365	226.718	1235.51	121.323	478.582	1273.24	383.72	370.993	1390.59	432.684	406.662	1163.47	430.337	421.096	1094.75	463.444	332.79	1007.59	445.795	294.845	910.619	482.047	351.566	887.884	496.17	290.495	811.62
601	0	273.696	184.506	1595.42	175.261	166.171	1584.06	255.119	356.327	1602.72	142.736	345.41	1590.2	204.446	407.716	1434.78	214.488	469.465	1221.48	219.956	276.829	1365.16	214.373	219.169	1234.75	120.782	470.782	1272.92	383.371	363.695	1389.98	431.908	400.09	1162.85	429.419	414.67	1094.15	462.79	326.66	1006.78	445.178	288.76	909.783	481.056	345.724	887.012	495.574	284.651	810.807
602	0	273.789	176.433	1594.86	175.39	157.887	1583.47	254.845	348.227	1601.98	142.501	337.059	1589.4	204.067	399.678	1434.34	213.954	461.773	1221.06	219.863	269.138	1364.43	214.423	211.58	1233.91	120.349	462.977	1272.51	383.09	356.314	1389.3	431.213	393.38	1162.17	428.578	408.113	1093.5	462.167	320.46	1005.86	444.573	282.726	908.787	480.148	339.913	886.056	494.937	278.955	809.796
603	0	273.887	168.309	1594.2	175.52	149.581	1582.78	254.629	340.08	1601.18	142.319	328.696	1588.54	203.77	391.608	1433.82	213.533	454.025	1220.56	219.82	261.4	1363.61	214.52	203.94	1233.02	120.023	455.157	1272.03	382.881	348.845	1388.56	430.605	386.531	1161.42	427.82	401.423	1092.78	461.583	314.192	1004.83	443.99	276.741	907.638	479.329	334.132	885.021	494.266	273.404	808.598
604	0	273.994	160.133	1593.44	175.658	141.251	1581.99	254.471	331.884	1600.34	142.193	320.319	1587.62	203.557	383.499	1433.22	213.224	446.217	1220	219.829	253.607	1362.72	214.663	196.241	1232.07	119.803	447.313	1271.47	382.749	341.282	1387.76	430.087	379.546	1160.62	427.149	394.603	1092.01	461.046	307.856	1003.69	443.436	270.802	906.343	478.602	328.382	883.914	493.57	267.993	807.221
605	0	274.117	151.905	1592.61	175.809	132.896	1581.12	254.378	323.641	1599.44	142.127	311.926	1586.66	203.432	375.351	1432.54	213.028	438.344	1219.38	219.895	245.753	1361.75	214.855	188.475	1231.08	119.688	439.436	1270.85	382.696	333.622	1386.91	429.665	372.427	1159.76	426.57	387.654	1091.18	460.564	301.453	1002.46	442.92	264.907	904.91	477.973	322.662	882.74	492.861	262.719	805.677
606	0	274.262	143.626	1591.69	175.98	124.514	1580.17	254.351	315.351	1598.49	142.124	303.516	1585.64	203.4	367.159	1431.79	212.944	430.404	1218.69	220.02	237.83	1360.73	215.095	180.634	1230.04	119.675	431.519	1270.16	382.726	325.858	1386	429.339	365.178	1158.86	426.088	380.578	1090.31	460.145	294.986	1001.12	442.454	259.052	903.347	477.443	316.972	881.502	492.151	257.576	803.978
607	0	274.435	135.298	1590.7	176.178	116.106	1579.15	254.396	307.015	1597.5	142.19	295.09	1584.59	203.462	358.922	1430.96	212.971	422.396	1217.94	220.21	229.834	1359.64	215.384	172.712	1228.96	119.764	423.552	1269.4	382.843	317.989	1385.03	429.113	357.801	1157.89	425.703	373.378	1089.39	459.798	288.455	999.694	442.046	253.234	901.66	477.014	311.31	880.204	491.456	252.557	802.136
608	0	274.643	126.922	1589.64	176.409	107.672	1578.06	254.517	298.635	1596.47	142.327	286.648	1583.48	203.624	350.639	1430.05	213.11	414.32	1217.13	220.466	221.759	1358.49	215.723	164.705	1227.85	119.954	415.529	1268.57	383.049	310.01	1384.01	428.988	350.299	1156.87	425.419	366.055	1088.41	459.529	281.863	998.176	441.705	247.446	899.858	476.687	305.674	878.848	490.793	247.655	800.164
609	0	274.892	118.5	1588.52	176.679	99.2126	1576.9	254.718	290.213	1595.4	142.542	278.19	1582.34	203.888	342.307	1429.07	213.358	406.174	1216.26	220.793	213.602	1357.3	216.11	156.606	1226.7	120.243	407.443	1267.68	383.347	301.919	1382.92	428.963	342.676	1155.8	425.236	358.613	1087.39	459.346	275.211	996.569	441.443	241.683	897.947	476.464	300.059	877.435	490.178	242.861	798.074
610	0	275.188	110.035	1587.33	176.994	90.7305	1575.68	255.003	281.751	1594.28	142.838	269.718	1581.16	204.258	333.927	1428.01	213.714	397.96	1215.31	221.194	205.359	1356.05	216.545	148.412	1225.52	120.632	399.288	1266.71	383.741	293.716	1381.76	429.04	334.934	1154.66	425.154	351.051	1086.31	459.256	268.498	994.877	441.266	235.938	895.932	476.344	294.461	875.967	489.626	238.165	795.879
611	0	275.536	101.529	1586.09	177.358	82.2272	1574.41	255.379	273.251	1593.13	143.22	261.234	1579.94	204.737	325.497	1426.87	214.177	389.676	1214.29	221.672	197.028	1354.76	217.03	140.117	1224.31	121.122	391.058	1265.67	384.232	285.398	1380.54	429.218	327.074	1153.45	425.175	343.371	1085.17	459.263	261.724	993.1	441.181	230.203	893.82	476.328	288.872	874.444	489.155	233.555	793.588
612	0	275.941	92.9846	1584.8	177.777	73.705	1573.1	255.848	264.717	1591.94	143.693	252.74	1578.69	205.327	317.019	1425.66	214.747	381.321	1213.19	222.229	188.608	1353.44	217.564	131.72	1223.07	121.712	382.75	1264.55	384.824	276.966	1379.24	429.498	319.097	1152.18	425.298	335.574	1083.97	459.372	254.887	991.243	441.196	224.468	891.616	476.414	283.284	872.868	488.779	229.017	791.215
613	0	276.408	84.4034	1583.47	178.254	65.1661	1571.74	256.416	256.149	1590.72	144.262	244.237	1577.4	206.032	308.493	1424.38	215.424	372.893	1212.01	222.869	180.096	1352.08	218.149	123.216	1221.81	122.406	374.358	1263.35	385.517	268.421	1377.87	429.878	311.004	1150.83	425.522	327.659	1082.7	459.586	247.982	989.307	441.314	218.724	889.328	476.603	277.686	871.239	488.511	224.535	788.771
614	0	276.94	75.7875	1582.11	178.792	56.6127	1570.35	257.085	247.55	1589.47	144.93	235.728	1576.09	206.853	299.918	1423.03	216.207	364.389	1210.75	223.595	171.493	1350.69	218.786	114.602	1220.53	123.204	365.879	1262.07	386.314	259.766	1376.43	430.358	302.793	1149.42	425.847	319.624	1081.38	459.907	241.006	987.298	441.538	212.957	886.962	476.894	272.067	869.561	488.363	220.092	786.266
615	0	277.541	67.1385	1580.73	179.393	48.0471	1568.94	257.86	238.922	1588.2	145.7	227.214	1574.75	207.792	291.296	1421.61	217.099	355.802	1209.39	224.408	162.799	1349.29	219.477	105.877	1219.24	124.11	357.309	1260.71	387.216	251.004	1374.92	430.939	294.464	1147.92	426.272	311.469	1079.98	460.336	233.953	985.221	441.869	207.157	884.526	477.284	266.413	867.836	488.345	215.669	783.714
616	0	278.212	58.458	1579.33	180.06	39.471	1567.52	258.742	230.266	1586.91	146.575	218.696	1573.39	208.849	282.626	1420.13	218.098	347.126	1207.95	225.311	154.015	1347.89	220.225	97.038	1217.94	125.123	348.644	1259.27	388.224	242.138	1373.34	431.618	286.016	1146.36	426.795	303.191	1078.53	460.873	226.815	983.084	442.308	201.308	882.029	477.774	260.707	866.07	488.463	211.243	781.127
617	0	278.956	49.7471	1577.94	180.795	30.8859	1566.09	259.734	221.584	1585.61	147.557	210.176	1572.01	210.023	273.909	1418.6	219.206	338.352	1206.41	226.305	145.141	1346.48	221.033	88.0844	1216.65	126.246	339.882	1257.75	389.338	233.174	1371.7	432.395	277.446	1144.72	427.414	294.791	1077.01	461.517	219.585	980.895	442.854	195.395	879.482	478.361	254.934	864.271	488.723	206.791	778.518
618	0	279.774	41.0068	1576.56	181.597	22.2925	1564.67	260.834	212.876	1584.32	148.646	201.653	1570.64	211.315	265.146	1417.04	220.421	329.47	1204.78	227.391	136.179	1345.09	221.903	79.0147	1215.38	127.478	331.018	1256.16	390.557	224.116	1370	433.269	268.754	1143.03	428.128	286.264	1075.44	462.265	212.252	978.666	443.503	189.401	876.898	479.044	249.074	862.445	489.127	202.287	775.901
619	0	280.667	32.2376	1575.22	182.467	13.6912	1563.28	262.043	204.144	1583.04	149.843	193.127	1569.28	212.721	256.335	1415.44	221.743	320.469	1203.08	228.568	127.132	1343.73	222.839	69.8284	1214.14	128.818	322.049	1254.5	391.88	214.97	1368.26	434.237	259.94	1141.27	428.932	277.611	1073.82	463.114	204.809	976.41	444.254	183.308	874.292	479.82	243.107	860.605	489.675	197.704	773.293
620	0	281.634	23.44	1573.93	183.405	5.08151	1561.93	263.359	195.386	1581.79	151.145	184.597	1567.93	214.237	247.476	1413.83	223.166	311.337	1201.31	229.836	118.002	1342.42	223.842	60.5253	1212.95	130.263	312.973	1252.8	393.303	205.743	1366.48	435.296	251.002	1139.48	429.825	268.831	1072.17	464.06	197.243	974.143	445.101	177.095	871.681	480.688	237.013	858.763	490.365	193.012	770.711
621	0	282.676	14.6143	1572.71	184.411	-3.53758	1560.64	264.78	186.604	1580.59	152.551	176.062	1566.63	215.86	238.568	1412.22	224.684	302.064	1199.48	231.192	108.792	1341.16	224.915	51.1055	1211.82	131.807	303.786	1251.06	394.822	196.441	1364.69	436.442	241.943	1137.66	430.802	259.922	1070.49	465.098	189.546	971.882	446.04	170.743	869.084	481.643	230.771	856.934	491.192	188.181	768.171
622	0	283.791	5.76023	1571.58	185.485	-12.1679	1559.43	266.3	177.797	1579.44	154.057	167.518	1565.37	217.582	229.611	1410.64	226.29	292.637	1197.61	232.633	99.5038	1339.98	226.058	41.5699	1210.78	133.445	294.486	1249.31	396.433	187.07	1362.9	437.672	232.763	1135.83	431.857	250.886	1068.81	466.224	181.707	969.649	447.066	164.23	866.523	482.682	224.358	855.132	492.149	183.181	765.694
623	0	284.977	-3.12235	1570.55	186.625	-20.812	1558.31	267.917	168.964	1578.37	155.658	158.962	1564.19	219.396	220.603	1409.1	227.972	283.048	1195.73	234.154	90.1422	1338.89	227.27	31.9203	1209.84	135.166	285.072	1247.56	398.127	177.636	1361.13	438.978	223.465	1134.01	432.985	241.724	1067.14	467.43	173.715	967.463	448.175	157.533	864.022	483.799	217.754	853.377	493.228	177.978	763.301
624	0	286.234	-12.0339	1569.66	187.83	-29.473	1557.32	269.622	160.104	1577.39	157.349	150.392	1563.09	221.293	211.543	1407.62	229.716	273.29	1193.86	235.75	80.7108	1337.9	228.55	22.1591	1209.03	136.959	275.544	1245.86	399.898	168.145	1359.41	440.353	214.053	1132.22	434.179	232.436	1065.5	468.711	165.563	965.349	449.359	150.631	861.606	484.988	210.936	851.687	494.42	172.541	761.013
625	0	287.558	-20.975	1568.91	189.099	-38.1544	1556.47	271.41	151.216	1576.53	159.123	141.802	1562.1	223.263	202.428	1406.23	231.509	263.359	1192.03	237.413	71.2139	1337.05	229.894	12.2903	1208.35	138.813	265.903	1244.21	401.734	158.603	1357.75	441.79	204.532	1130.49	435.433	223.026	1063.91	470.059	157.242	963.33	450.614	143.502	859.301	486.244	203.884	850.082	495.714	166.836	758.852
626	0	288.947	-29.9464	1568.32	190.43	-46.8603	1555.77	273.273	142.299	1575.78	160.973	133.188	1561.23	225.294	193.259	1404.95	233.332	253.253	1190.28	239.133	61.6565	1336.33	231.297	2.31935	1207.84	140.711	256.151	1242.66	403.627	149.013	1356.18	443.28	194.907	1128.84	436.739	213.496	1062.39	471.467	148.743	961.432	451.932	136.125	857.135	487.558	196.578	848.581	497.099	160.832	756.843
627	0	290.396	-38.9485	1567.91	191.82	-55.5949	1555.25	275.202	133.351	1575.18	162.889	124.546	1560.51	227.374	184.034	1403.8	235.168	242.975	1188.63	240.902	52.0436	1335.77	232.751	-7.74668	1207.5	142.639	246.294	1241.23	405.563	139.38	1354.72	444.812	185.184	1127.3	438.088	203.85	1060.98	472.928	140.06	959.679	453.308	128.481	855.133	488.922	189	847.206	498.565	154.498	755.009
628	0	291.902	-47.9821	1567.69	193.265	-64.3623	1554.93	277.189	124.373	1574.72	164.863	115.871	1559.93	229.491	174.752	1402.8	236.999	232.531	1187.11	242.707	42.3812	1335.38	234.249	-17.8986	1207.34	144.58	236.338	1239.96	407.531	129.708	1353.4	446.377	175.371	1125.89	439.474	194.093	1059.69	474.432	131.187	958.095	454.735	120.55	853.322	490.327	181.134	845.976	500.098	147.803	753.373
629	0	293.46	-57.0475	1567.67	194.762	-73.1664	1554.82	279.222	115.361	1574.43	166.886	107.158	1559.53	231.629	165.415	1401.96	238.806	221.935	1185.77	244.537	32.6755	1335.16	235.78	-28.1251	1207.38	146.518	226.294	1238.86	409.517	119.999	1352.24	447.963	165.474	1124.64	440.888	184.231	1058.55	475.971	122.12	956.703	456.205	112.318	851.727	491.766	172.964	844.909	501.687	140.72	751.957
630	0	295.062	-66.1448	1567.85	196.306	-82.0107	1554.92	281.293	106.317	1574.31	168.945	98.4041	1559.31	233.777	156.023	1401.32	240.575	211.201	1184.63	246.379	22.9335	1335.12	237.332	-38.413	1207.62	148.439	216.174	1237.97	411.507	110.256	1351.26	449.56	155.501	1123.57	442.323	174.267	1057.57	477.538	112.854	955.524	457.711	103.77	850.37	493.228	164.478	844.023	503.322	133.222	750.781
631	0	296.704	-75.274	1568.24	197.89	-90.898	1555.25	283.39	97.2385	1574.35	171.03	89.6062	1559.28	235.919	146.579	1400.87	242.292	200.35	1183.72	248.218	13.1626	1335.27	238.893	-48.7471	1208.05	150.329	205.992	1237.31	413.489	100.478	1350.48	451.159	145.46	1122.7	443.771	164.209	1056.78	479.123	103.388	954.575	459.246	94.8944	849.269	494.704	155.665	843.33	504.991	125.286	749.861
632	0	298.375	-84.4343	1568.83	199.508	-99.8303	1555.8	285.501	88.1265	1574.57	173.13	80.7619	1559.44	238.044	137.086	1400.64	243.946	189.408	1183.05	250.04	3.37062	1335.61	240.45	-59.1105	1208.68	152.177	195.768	1236.89	415.449	90.6676	1349.92	452.751	135.358	1122.05	445.226	154.063	1056.19	480.718	93.7189	953.871	460.801	85.6834	848.441	496.185	146.518	842.841	506.684	116.891	749.213
633	0	300.068	-93.6249	1569.61	201.151	-108.808	1556.58	287.615	78.9813	1574.96	175.232	71.87	1559.79	240.139	127.549	1400.61	245.532	178.402	1182.64	251.833	-6.43399	1336.13	241.988	-69.4851	1209.49	153.977	185.521	1236.72	417.376	80.8232	1349.58	454.327	125.202	1121.62	446.684	143.835	1055.81	482.315	83.8467	953.422	462.369	76.1312	847.897	497.664	137.03	842.564	508.39	108.02	748.845
634	0	301.773	-102.844	1570.57	202.809	-117.832	1557.56	289.721	69.8038	1575.51	177.324	62.9306	1560.34	242.194	117.974	1400.8	247.049	167.366	1182.5	253.582	-16.2425	1336.82	243.492	-79.8519	1210.47	155.725	175.273	1236.81	419.259	70.9445	1349.47	455.884	114.996	1121.43	448.142	133.53	1055.65	483.906	73.7715	953.233	463.942	66.2356	847.643	499.132	127.199	842.5	510.1	98.6592	748.762
635	0	303.478	-112.091	1571.7	204.47	-126.9	1558.75	291.806	60.5955	1576.22	179.393	53.9448	1561.07	244.199	108.368	1401.2	248.501	156.334	1182.63	255.275	-26.0461	1337.68	244.947	-90.1918	1211.61	157.421	165.051	1237.14	421.089	61.0303	1349.6	457.415	104.745	1121.48	449.596	123.153	1055.71	485.484	63.4941	953.306	465.512	55.9974	847.68	500.584	117.023	842.65	511.805	88.8002	748.963
636	0	305.172	-121.363	1572.98	206.124	-136.009	1560.11	293.859	51.3584	1577.08	181.429	44.9149	1561.98	246.147	98.7404	1401.79	249.899	145.342	1183.01	256.899	-35.8357	1338.7	246.34	-100.485	1212.87	159.07	154.877	1237.72	422.856	51.0794	1349.95	458.92	94.4515	1121.77	451.047	112.709	1055.98	487.041	53.0161	953.637	467.07	45.4205	848.005	502.015	106.506	843.006	513.494	78.4378	749.444
637	0	306.841	-130.657	1574.39	207.757	-145.156	1561.64	295.866	42.0949	1578.07	183.418	35.8443	1563.05	248.032	89.0985	1402.58	251.255	134.427	1183.65	258.445	-45.6023	1339.84	247.657	-110.713	1214.25	160.68	144.779	1238.52	424.556	41.091	1350.53	460.398	84.1142	1122.28	452.497	102.199	1056.47	488.571	42.3394	954.218	468.608	34.5121	848.61	503.421	95.6501	843.56	515.16	67.5718	750.192
638	0	308.472	-139.971	1575.9	209.355	-154.336	1563.29	297.818	32.808	1579.19	185.349	26.7376	1564.28	249.85	79.4524	1403.55	252.587	123.624	1184.5	259.904	-55.3372	1341.11	248.885	-120.858	1215.71	162.261	134.78	1239.52	426.183	31.065	1351.32	461.851	73.731	1123	453.947	91.6258	1057.15	490.069	31.4663	955.037	470.119	23.2818	849.481	504.801	84.4617	844.299	516.794	56.2066	751.194
639	0	310.053	-149.301	1577.49	210.904	-163.544	1565.06	299.702	23.5007	1580.41	187.21	17.5999	1565.63	251.598	69.8116	1404.67	253.914	112.966	1185.56	261.269	-65.032	1342.47	250.014	-130.902	1217.23	163.827	124.904	1240.71	427.735	21.0022	1352.3	463.283	63.2976	1123.92	455.401	80.9887	1058.01	491.527	20.3992	956.078	471.595	11.7418	850.602	506.154	72.9482	845.208	518.387	44.3515	752.431
640	0	311.568	-158.645	1579.14	212.389	-172.772	1566.9	301.508	14.1767	1581.72	188.992	8.43737	1567.1	253.274	60.1859	1405.94	255.258	102.483	1186.8	262.535	-74.679	1343.91	251.038	-140.83	1218.79	165.39	115.17	1242.05	429.209	10.9052	1353.46	464.697	52.8075	1125.02	456.866	70.2863	1059.04	492.943	9.14077	957.322	473.027	-0.093687	851.953	507.481	61.1184	846.27	519.932	32.0199	753.88
641	0	313.006	-168	1580.82	213.799	-182.014	1568.78	303.227	4.8396	1583.11	190.685	-0.743459	1568.65	254.878	50.5846	1407.32	256.635	92.1995	1188.19	263.699	-84.2708	1345.41	251.951	-150.63	1220.36	166.963	105.596	1243.51	430.606	0.777887	1354.78	466.1	42.2529	1126.28	458.345	59.5158	1060.22	494.309	-2.30644	958.749	474.41	-12.2086	853.51	508.787	48.9819	847.468	521.421	19.2296	755.517
642	0	314.352	-177.361	1582.51	215.118	-191.263	1570.68	304.849	-4.50685	1584.55	192.281	-9.93572	1570.28	256.412	41.0166	1408.8	258.063	82.1349	1189.7	264.761	-93.8011	1346.95	252.754	-160.289	1221.92	168.556	96.1936	1245.08	431.926	-9.37355	1356.23	467.497	31.6255	1127.67	459.846	48.6737	1061.52	495.623	-13.9397	960.336	475.736	-24.5859	855.251	510.075	36.5491	848.782	522.848	6.00226	757.319
643	0	315.597	-186.725	1584.19	216.336	-200.511	1572.58	306.366	-13.8588	1586.04	193.772	-19.1324	1571.96	257.875	31.4899	1410.36	259.552	72.3013	1191.31	265.722	-103.264	1348.5	253.448	-169.802	1223.45	170.179	86.9719	1246.72	433.171	-19.5412	1357.8	468.894	20.9167	1129.17	461.373	37.7557	1062.92	496.88	-25.7559	962.063	476.998	-37.2075	857.15	511.35	23.8307	850.197	524.206	-7.63757	759.261
644	0	316.729	-196.09	1585.84	217.442	-209.753	1574.43	307.773	-23.2122	1587.56	195.153	-28.3266	1573.66	259.271	22.0118	1411.97	261.109	62.7042	1192.99	266.586	-112.656	1350.05	254.039	-179.162	1224.93	171.834	77.9337	1248.41	434.341	-29.7153	1359.46	470.296	10.1189	1130.75	462.931	26.7575	1064.4	498.077	-37.7518	963.906	478.191	-50.0548	859.183	512.619	10.8376	851.697	525.49	-21.6626	761.321
645	0	317.739	-205.451	1587.45	218.427	-218.979	1576.22	309.064	-32.5634	1589.09	196.419	-37.5115	1575.37	260.6	12.5885	1413.62	262.735	53.3421	1194.72	267.356	-121.972	1351.59	254.537	-188.368	1226.35	173.523	69.0778	1250.13	435.441	-39.8849	1361.19	471.706	-0.773749	1132.4	464.525	15.675	1065.95	499.211	-49.9234	965.845	479.308	-63.1094	861.327	513.886	-2.41908	853.268	526.695	-36.0435	763.477
646	0	318.622	-214.805	1588.98	219.284	-228.185	1577.93	310.236	-41.9085	1590.62	197.567	-46.6807	1577.06	261.864	3.22521	1415.28	264.425	44.2072	1196.48	268.04	-131.21	1353.09	254.951	-197.424	1227.7	175.243	60.3983	1251.85	436.473	-50.0381	1362.97	473.128	-11.7648	1134.09	466.155	4.50494	1067.53	500.277	-62.2657	967.859	480.344	-76.3526	863.56	515.158	-15.928	854.897	527.819	-50.7498	765.709
647	0	319.373	-224.149	1590.45	220.01	-237.365	1579.53	311.286	-51.2438	1592.14	198.595	-55.8282	1578.73	263.065	-6.07418	1416.94	266.169	35.2863	1198.24	268.644	-140.369	1354.54	255.296	-206.333	1228.98	176.989	51.8858	1253.56	437.438	-60.1627	1364.77	474.562	-22.8546	1135.8	467.824	-6.75465	1069.14	501.275	-74.7723	969.931	481.295	-89.7663	865.859	516.439	-29.6775	856.575	528.857	-65.7502	768.002
648	0	319.987	-233.48	1591.82	220.601	-246.512	1581.01	312.214	-60.5659	1593.64	199.505	-64.9488	1580.35	264.205	-15.3068	1418.57	267.955	26.5618	1199.99	269.176	-149.448	1355.94	255.584	-215.104	1230.16	178.751	43.5277	1255.25	438.341	-70.2471	1366.58	476.008	-34.0406	1137.52	469.531	-18.1043	1070.75	502.203	-87.4357	972.044	482.158	-103.333	868.207	517.731	-43.655	858.292	529.808	-81.0133	770.339
649	0	320.465	-242.794	1593.09	221.056	-255.622	1582.36	313.02	-69.8715	1595.11	200.296	-74.0376	1581.9	265.285	-24.471	1420.16	269.767	18.0129	1201.72	269.644	-158.447	1357.25	255.83	-223.744	1231.25	180.52	35.3091	1256.89	439.183	-80.2806	1368.39	477.464	-45.3165	1139.22	471.272	-29.5429	1072.35	503.059	-100.246	974.181	482.929	-117.035	870.585	519.036	-57.8472	860.04	530.669	-96.5077	772.709
650	0	320.808	-252.088	1594.25	221.378	-264.692	1583.56	313.708	-79.1577	1596.52	200.971	-83.0907	1583.37	266.307	-33.5663	1421.7	271.59	9.61706	1203.41	270.055	-167.37	1358.49	256.044	-232.264	1232.25	182.284	27.2138	1258.47	439.968	-90.2538	1370.17	478.927	-56.6732	1140.9	473.043	-41.0672	1073.92	503.844	-113.193	976.328	483.607	-130.857	872.979	520.35	-72.2395	861.812	531.439	-112.203	775.099
651	0	321.017	-261.36	1595.3	221.569	-273.718	1584.61	314.28	-88.422	1597.89	201.535	-92.1049	1584.76	267.272	-42.593	1423.17	273.406	1.35139	1205.04	270.417	-176.216	1359.63	256.24	-240.675	1233.14	184.032	19.2245	1259.99	440.696	-100.159	1371.9	480.39	-68.099	1142.54	474.838	-52.6724	1075.46	504.556	-126.262	978.473	484.192	-144.782	875.374	521.67	-86.816	863.599	532.118	-128.069	777.499
652	0	321.097	-270.607	1596.23	221.633	-282.699	1585.5	314.741	-97.6623	1599.18	201.992	-101.078	1586.04	268.181	-51.5525	1424.56	275.203	-6.80646	1206.6	270.737	-184.991	1360.66	256.426	-248.985	1233.92	185.752	11.3243	1261.42	441.371	-109.991	1373.58	481.85	-79.5802	1144.12	476.647	-64.3519	1076.95	505.199	-139.44	980.604	484.682	-158.796	877.759	522.987	-101.559	865.394	532.703	-144.079	779.9
653	0	321.054	-279.829	1597.03	221.577	-291.633	1586.22	315.096	-106.877	1600.4	202.348	-110.008	1587.21	269.033	-60.447	1425.85	276.966	-14.8771	1208.09	271.02	-193.697	1361.59	256.609	-257.206	1234.58	187.433	3.49661	1262.76	441.993	-119.746	1375.19	483.298	-91.1019	1145.64	478.462	-76.0975	1078.38	505.771	-152.709	982.71	485.079	-172.884	880.122	524.293	-116.449	867.189	533.193	-160.205	782.294
654	0	320.895	-289.023	1597.7	221.409	-300.52	1586.78	315.353	-116.066	1601.53	202.609	-118.894	1588.25	269.831	-69.2793	1427.04	278.684	-22.8785	1209.49	271.271	-202.338	1362.4	256.795	-265.345	1235.12	189.065	-4.2742	1264	442.564	-129.423	1376.71	484.726	-102.649	1147.08	480.27	-87.9	1079.73	506.276	-166.053	984.78	485.385	-187.034	882.456	525.573	-131.467	868.974	533.586	-176.422	784.673
655	0	320.628	-298.189	1598.23	221.135	-309.362	1587.17	315.517	-125.228	1602.57	202.783	-127.738	1589.17	270.573	-78.0526	1428.12	280.348	-30.826	1210.79	271.494	-210.92	1363.09	256.986	-273.411	1235.54	190.638	-12.0023	1265.13	443.084	-139.02	1378.14	486.126	-114.206	1148.44	482.06	-99.7495	1081	506.713	-179.454	986.806	485.601	-201.232	884.751	526.814	-146.589	870.741	533.882	-192.709	787.03
656	0	320.261	-307.328	1598.63	220.765	-318.16	1587.4	315.596	-134.363	1603.51	202.876	-136.541	1589.96	271.26	-86.7703	1429.07	281.95	-38.7311	1211.99	271.693	-219.445	1363.65	257.183	-281.413	1235.82	192.143	-19.7005	1266.14	443.553	-148.538	1379.46	487.49	-125.759	1149.7	483.817	-111.636	1082.18	507.085	-192.893	988.78	485.728	-215.467	887.002	528	-161.795	872.481	534.076	-209.043	789.358
657	0	319.803	-316.44	1598.9	220.308	-326.919	1587.46	315.598	-143.474	1604.34	202.896	-145.305	1590.61	271.89	-95.4361	1429.9	283.484	-46.6027	1213.08	271.868	-227.919	1364.08	257.387	-289.358	1235.96	193.574	-27.3799	1267.03	443.972	-157.979	1380.67	488.807	-137.295	1150.87	485.528	-123.548	1083.26	507.39	-206.353	990.693	485.768	-229.727	889.202	529.114	-177.062	874.183	534.167	-225.405	791.652
658	0	319.264	-325.526	1599.02	219.773	-335.64	1587.36	315.528	-152.562	1605.06	202.85	-154.034	1591.12	272.464	-104.053	1430.61	284.944	-54.4463	1214.05	272.023	-236.346	1364.39	257.593	-297.254	1235.97	194.921	-35.0499	1267.79	444.339	-167.343	1381.75	490.068	-148.803	1151.93	487.177	-135.476	1084.23	507.628	-219.818	992.541	485.721	-244.001	891.346	530.137	-192.368	875.84	534.151	-241.778	793.904
659	0	318.654	-334.589	1599.01	219.17	-344.33	1587.1	315.395	-161.63	1605.66	202.744	-162.732	1591.49	272.979	-112.626	1431.18	286.326	-62.2649	1214.9	272.156	-244.73	1364.56	257.8	-305.109	1235.84	196.179	-42.7187	1268.42	444.654	-176.633	1382.71	491.262	-160.272	1152.88	488.75	-147.411	1085.1	507.796	-233.27	994.317	485.586	-258.279	893.432	531.054	-207.692	877.443	534.024	-258.145	796.112
660	0	317.982	-343.631	1598.86	218.509	-352.994	1586.68	315.205	-170.68	1606.15	202.584	-171.406	1591.73	273.435	-121.157	1431.62	287.625	-70.0597	1215.63	272.268	-253.075	1364.61	258.002	-312.93	1235.58	197.341	-50.3927	1268.93	444.916	-185.849	1383.53	492.38	-171.697	1153.72	490.232	-159.344	1085.85	507.891	-246.696	996.018	485.36	-272.551	895.455	531.847	-223.013	878.985	533.779	-274.491	798.27
661	0	317.258	-352.656	1598.58	217.798	-361.638	1586.12	314.964	-179.717	1606.52	202.377	-180.06	1591.83	273.83	-129.649	1431.93	288.835	-77.8304	1216.23	272.358	-261.384	1364.53	258.195	-320.726	1235.18	198.402	-58.0778	1269.31	445.124	-194.992	1384.21	493.411	-183.071	1154.45	491.609	-171.267	1086.48	507.907	-260.083	997.64	485.041	-286.808	897.414	532.501	-238.313	880.461	533.413	-290.803	800.376
662	0	316.49	-361.666	1598.15	217.047	-370.269	1585.41	314.676	-188.746	1606.77	202.126	-188.703	1591.81	274.162	-138.105	1432.12	289.952	-85.5759	1216.71	272.424	-269.661	1364.33	258.373	-328.505	1234.67	199.356	-65.7784	1269.56	445.277	-204.06	1384.76	494.345	-194.39	1155.06	492.866	-183.175	1086.99	507.837	-273.421	999.18	484.623	-301.039	899.307	533.001	-253.576	881.865	532.918	-307.066	802.428
663	0	315.687	-370.666	1597.6	216.264	-378.893	1584.56	314.347	-197.77	1606.91	201.836	-197.341	1591.67	274.43	-146.528	1432.18	290.969	-93.2952	1217.06	272.465	-277.909	1364.01	258.53	-336.274	1234.04	200.198	-73.4987	1269.69	445.372	-213.055	1385.17	495.172	-205.653	1155.55	493.99	-195.062	1087.39	507.674	-286.698	1000.64	484.099	-315.236	901.134	533.334	-268.786	883.197	532.287	-323.269	804.424
664	0	314.856	-379.661	1596.91	215.455	-387.518	1583.58	313.98	-206.796	1606.95	201.51	-205.982	1591.42	274.631	-154.921	1432.13	291.883	-100.988	1217.29	272.477	-286.131	1363.58	258.661	-344.04	1233.31	200.924	-81.2422	1269.71	445.409	-221.975	1385.45	495.882	-216.857	1155.93	494.97	-206.923	1087.68	507.407	-299.908	1002.01	483.462	-329.39	902.895	533.488	-283.929	884.454	531.514	-339.399	806.363
665	0	314.005	-388.654	1596.09	214.629	-396.15	1582.47	313.578	-215.828	1606.88	201.15	-214.634	1591.07	274.765	-163.286	1431.97	292.686	-108.653	1217.41	272.458	-294.329	1363.06	258.76	-351.811	1232.49	201.531	-89.0123	1269.62	445.385	-230.819	1385.59	496.465	-228.004	1156.2	495.793	-218.756	1087.85	507.028	-313.045	1003.31	482.702	-343.49	904.59	533.453	-298.993	885.638	530.59	-355.444	808.247
666	0	313.138	-397.65	1595.14	213.789	-404.796	1581.23	313.142	-224.873	1606.71	200.759	-223.305	1590.62	274.828	-171.627	1431.7	293.373	-116.295	1217.41	272.405	-302.508	1362.44	258.821	-359.594	1231.61	202.017	-96.8122	1269.42	445.3	-239.587	1385.62	496.913	-239.093	1156.37	496.45	-230.557	1087.93	506.526	-326.103	1004.52	481.813	-357.529	906.219	533.221	-313.967	886.749	529.509	-371.394	810.074
667	0	312.262	-406.654	1594.08	212.942	-413.463	1579.88	312.674	-233.935	1606.45	200.335	-232.002	1590.09	274.82	-179.947	1431.34	293.941	-123.915	1217.31	272.315	-310.671	1361.73	258.841	-367.394	1230.66	202.379	-104.645	1269.12	445.153	-248.278	1385.53	497.218	-250.126	1156.43	496.933	-242.325	1087.9	505.89	-339.078	1005.66	480.783	-371.498	907.783	532.785	-328.843	887.79	528.262	-387.236	811.847
668	0	311.378	-415.67	1592.9	212.089	-422.158	1578.42	312.175	-243.02	1606.11	199.88	-240.734	1589.49	274.738	-188.249	1430.89	294.384	-131.521	1217.1	272.185	-318.821	1360.95	258.815	-375.218	1229.67	202.618	-112.514	1268.74	444.941	-256.893	1385.32	497.374	-261.104	1156.39	497.234	-254.056	1087.78	505.112	-351.968	1006.72	479.604	-385.386	909.284	532.14	-343.61	888.764	526.843	-402.96	813.566
669	0	310.491	-424.703	1591.6	211.233	-430.886	1576.86	311.642	-252.133	1605.69	199.392	-249.506	1588.81	274.582	-196.539	1430.36	294.699	-139.12	1216.8	272.011	-326.963	1360.1	258.739	-383.071	1228.64	202.733	-120.423	1268.26	444.666	-265.435	1385.02	497.376	-272.026	1156.27	497.349	-265.75	1087.57	504.184	-364.769	1007.7	478.268	-399.186	910.721	531.283	-358.263	889.674	525.245	-418.555	815.231
670	0	309.6	-433.758	1590.19	210.375	-439.652	1575.19	311.076	-261.279	1605.2	198.869	-258.325	1588.08	274.349	-204.82	1429.76	294.886	-146.722	1216.4	271.791	-335.102	1359.19	258.611	-390.958	1227.59	202.728	-128.376	1267.71	444.325	-273.908	1384.62	497.219	-282.892	1156.05	497.275	-277.402	1087.28	503.099	-377.481	1008.61	476.769	-412.889	912.096	530.212	-372.795	890.522	523.462	-434.009	816.843
671	0	308.705	-442.839	1588.68	209.514	-448.462	1573.44	310.474	-270.462	1604.63	198.311	-267.198	1587.29	274.04	-213.098	1429.09	294.943	-154.34	1215.92	271.522	-343.243	1358.22	258.43	-398.884	1226.52	202.605	-136.375	1267.08	443.92	-282.316	1384.13	496.903	-293.702	1155.75	497.011	-289.011	1086.92	501.852	-390.1	1009.45	475.101	-426.488	913.408	528.926	-387.199	891.312	521.49	-449.312	818.401
672	0	307.805	-451.949	1587.07	208.648	-457.32	1571.59	309.835	-279.688	1604	197.714	-276.128	1586.45	273.654	-221.379	1428.35	294.874	-161.987	1215.35	271.201	-351.393	1357.21	258.193	-406.855	1225.45	202.369	-144.425	1266.38	443.45	-290.668	1383.56	496.428	-304.455	1155.37	496.558	-300.575	1086.49	500.44	-402.627	1010.22	473.26	-439.975	914.656	527.427	-401.47	892.044	519.323	-464.456	819.904
673	0	306.898	-461.095	1585.37	207.775	-466.23	1569.67	309.154	-288.959	1603.31	197.075	-285.122	1585.56	273.19	-229.671	1427.55	294.68	-169.678	1214.7	270.825	-359.557	1356.15	257.902	-414.874	1224.37	202.025	-152.53	1265.61	442.917	-298.972	1382.91	495.796	-315.15	1154.92	495.92	-312.09	1086	498.862	-415.059	1010.92	471.244	-453.344	915.839	525.718	-415.605	892.719	516.962	-479.43	821.35
674	0	305.979	-470.278	1583.57	206.889	-475.194	1567.66	308.429	-298.279	1602.55	196.391	-294.181	1584.62	272.65	-237.979	1426.69	294.369	-177.428	1213.98	270.394	-367.743	1355.05	257.554	-422.948	1223.29	201.581	-160.693	1264.77	442.319	-307.24	1382.2	495.013	-325.786	1154.39	495.102	-323.553	1085.44	497.121	-427.395	1011.54	469.053	-466.589	916.955	523.805	-429.599	893.336	514.403	-494.228	822.737
675	0	305.044	-479.504	1581.68	205.988	-484.218	1565.58	307.658	-307.651	1601.73	195.658	-303.309	1583.64	272.033	-246.312	1425.77	293.946	-185.253	1213.17	269.903	-375.959	1353.9	257.152	-431.08	1222.2	201.042	-168.919	1263.86	441.659	-315.483	1381.41	494.084	-336.361	1153.78	494.113	-334.961	1084.82	495.221	-439.635	1012.09	466.69	-479.704	918	521.693	-443.449	893.893	511.651	-508.844	824.058
676	0	304.089	-488.776	1579.71	205.064	-493.301	1563.43	306.835	-317.078	1600.85	194.873	-312.509	1582.61	271.341	-254.677	1424.8	293.421	-193.167	1212.29	269.351	-384.213	1352.72	256.693	-439.276	1221.1	200.417	-177.211	1262.88	440.936	-323.717	1380.57	493.016	-346.875	1153.11	492.96	-346.312	1084.15	493.167	-451.778	1012.57	464.16	-492.686	918.969	519.391	-457.152	894.384	508.706	-523.272	825.31
677	0	303.106	-498.097	1577.67	204.112	-502.448	1561.22	305.959	-326.561	1599.91	194.031	-321.781	1581.53	270.575	-263.083	1423.77	292.802	-201.185	1211.34	268.737	-392.513	1351.5	256.179	-447.542	1219.98	199.713	-185.574	1261.82	440.153	-331.955	1379.66	491.82	-357.33	1152.36	491.655	-357.604	1083.41	490.968	-463.824	1012.96	461.469	-505.532	919.858	516.909	-470.707	894.806	505.577	-537.509	826.485
678	0	302.09	-507.471	1575.55	203.126	-511.659	1558.94	305.025	-336.103	1598.9	193.131	-331.127	1580.4	269.736	-271.537	1422.69	292.097	-209.317	1210.3	268.058	-400.868	1350.24	255.607	-455.883	1218.86	198.939	-194.013	1260.69	439.308	-340.213	1378.69	490.506	-367.726	1151.55	490.21	-368.835	1082.61	488.633	-475.773	1013.26	458.627	-518.239	920.659	514.259	-484.112	895.151	502.272	-551.553	827.577
679	0	301.035	-516.899	1573.37	202.1	-520.937	1556.61	304.03	-345.703	1597.82	192.168	-340.547	1579.21	268.825	-280.048	1421.54	291.318	-217.575	1209.19	267.313	-409.288	1348.95	254.976	-464.306	1217.71	198.1	-202.533	1259.48	438.403	-348.507	1377.65	489.084	-378.068	1150.65	488.639	-380.004	1081.76	486.175	-487.625	1013.47	455.646	-530.806	921.366	511.455	-497.367	895.413	498.802	-565.405	828.575
680	0	299.935	-526.386	1571.12	201.027	-530.282	1554.22	302.972	-355.363	1596.68	191.139	-350.041	1577.97	267.845	-288.623	1420.34	290.471	-225.967	1208	266.498	-417.781	1347.62	254.284	-472.817	1216.53	197.204	-211.138	1258.18	437.438	-356.852	1376.56	487.566	-388.36	1149.69	486.953	-391.112	1080.83	483.605	-499.382	1013.59	452.539	-543.232	921.971	508.513	-510.472	895.582	495.182	-579.063	829.472
681	0	298.785	-535.931	1568.83	199.903	-539.695	1551.8	301.848	-365.082	1595.48	190.042	-359.608	1576.68	266.797	-297.27	1419.08	289.563	-234.501	1206.73	265.612	-426.356	1346.25	253.528	-481.424	1215.32	196.256	-219.836	1256.81	436.413	-365.263	1375.4	485.962	-398.609	1148.64	485.168	-402.16	1079.84	480.938	-511.046	1013.6	449.32	-555.518	922.465	505.449	-523.427	895.651	491.428	-592.531	830.258
682	0	297.579	-545.538	1566.49	198.722	-549.178	1549.33	300.655	-374.86	1594.21	188.874	-369.247	1575.33	265.682	-305.997	1417.76	288.602	-243.181	1205.37	264.654	-435.022	1344.84	252.705	-490.136	1214.09	195.261	-228.633	1255.34	435.328	-373.754	1374.18	484.284	-408.822	1147.53	483.297	-413.15	1078.78	478.188	-522.618	1013.5	446.009	-567.665	922.839	502.281	-536.233	895.613	487.561	-605.81	830.922
683	0	296.314	-555.206	1564.13	197.482	-558.73	1546.85	299.391	-384.695	1592.88	187.634	-378.958	1573.92	264.501	-314.81	1416.39	287.59	-252.012	1203.92	263.62	-443.788	1343.41	251.809	-498.961	1212.82	194.222	-237.536	1253.78	434.181	-382.338	1372.91	482.54	-419.009	1146.33	481.354	-424.086	1077.66	475.369	-534.101	1013.29	442.622	-579.674	923.087	499.031	-548.89	895.459	483.602	-618.902	831.455
684	0	294.986	-564.936	1561.74	196.178	-568.352	1544.35	298.056	-394.587	1591.5	186.319	-388.738	1572.46	263.255	-323.716	1414.96	286.529	-260.996	1202.39	262.51	-452.66	1341.94	250.838	-507.909	1211.53	193.14	-246.552	1252.13	432.973	-391.026	1371.57	480.742	-429.18	1145.06	479.351	-434.972	1076.46	472.497	-545.498	1012.96	439.179	-591.547	923.2	495.719	-561.4	895.185	479.578	-631.809	831.847
685	0	293.594	-574.727	1559.36	194.81	-578.044	1541.85	296.649	-404.532	1590.07	184.93	-398.586	1570.96	261.944	-332.721	1413.49	285.421	-270.136	1200.78	261.321	-461.648	1340.46	249.787	-516.989	1210.21	192.018	-255.689	1250.4	431.702	-399.83	1370.17	478.895	-439.347	1143.73	477.3	-445.813	1075.2	469.587	-556.814	1012.51	435.703	-603.286	923.173	492.367	-573.761	894.787	475.515	-644.533	832.09
686	0	292.136	-584.579	1556.99	193.375	-587.806	1539.37	295.17	-414.529	1588.59	183.466	-408.499	1569.41	260.571	-341.829	1411.97	284.265	-279.433	1199.08	260.053	-470.755	1338.96	248.651	-526.211	1208.87	190.854	-264.953	1248.58	430.369	-408.758	1368.73	477.006	-449.521	1142.32	475.21	-456.616	1073.87	466.654	-568.05	1011.94	432.213	-614.894	923	488.999	-585.974	894.261	471.443	-657.073	832.175
687	0	290.614	-594.491	1554.64	191.876	-597.637	1536.93	293.619	-424.574	1587.09	181.927	-418.476	1567.84	259.135	-351.045	1410.42	283.057	-288.89	1197.3	258.704	-479.989	1337.46	247.427	-535.583	1207.53	189.649	-274.353	1246.68	428.972	-417.817	1367.24	475.082	-459.714	1140.87	473.092	-467.384	1072.49	463.712	-579.21	1011.26	428.732	-626.371	922.678	485.637	-598.035	893.609	467.39	-669.427	832.099
688	0	289.027	-604.46	1552.36	190.313	-607.538	1534.54	291.998	-434.665	1585.57	180.316	-428.513	1566.26	257.637	-360.372	1408.86	281.795	-298.508	1195.46	257.275	-489.353	1335.96	246.113	-545.113	1206.2	188.402	-283.893	1244.72	427.511	-427.013	1365.72	473.126	-469.935	1139.37	470.953	-478.126	1071.07	460.777	-590.297	1010.46	425.283	-637.72	922.208	482.305	-609.943	892.834	463.39	-681.594	831.856
689	0	287.378	-614.485	1550.14	188.688	-617.506	1532.23	290.309	-444.799	1584.05	178.634	-438.609	1564.67	256.079	-369.812	1407.28	280.475	-308.289	1193.56	255.767	-498.85	1334.48	244.706	-554.805	1204.88	187.11	-293.578	1242.7	425.988	-436.349	1364.19	471.141	-480.195	1137.84	468.798	-488.844	1069.61	457.861	-601.313	1009.56	421.886	-648.94	921.589	479.026	-621.693	891.941	459.472	-693.569	831.446
690	0	285.671	-624.564	1548.02	187.004	-627.542	1530.02	288.555	-454.972	1582.55	176.884	-448.76	1563.09	254.462	-379.368	1405.72	279.094	-318.235	1191.62	254.181	-508.48	1333.04	243.207	-564.664	1203.6	185.772	-303.412	1240.65	424.402	-445.827	1362.65	469.129	-490.502	1136.3	466.634	-499.545	1068.14	454.98	-612.258	1008.56	418.563	-660.032	920.828	475.822	-633.279	890.938	455.669	-705.343	830.869
691	0	283.909	-634.693	1546.02	185.266	-637.644	1527.94	286.74	-465.18	1581.07	175.07	-458.964	1561.55	252.788	-389.04	1404.18	277.646	-328.345	1189.66	252.52	-518.244	1331.65	241.616	-574.691	1202.37	184.387	-313.394	1238.58	422.758	-455.447	1361.13	467.093	-500.861	1134.76	464.464	-510.231	1066.66	452.144	-623.133	1007.48	415.335	-670.992	919.932	472.713	-644.692	889.838	452.011	-716.909	830.131
692	0	282.098	-644.871	1544.16	183.478	-647.81	1526.01	284.868	-475.422	1579.65	173.197	-469.218	1560.07	251.061	-398.826	1402.69	276.131	-338.62	1187.71	250.788	-528.139	1330.32	239.937	-584.884	1201.22	182.955	-323.524	1236.53	421.057	-465.21	1359.65	465.033	-511.276	1133.25	462.291	-520.904	1065.2	449.368	-633.936	1006.33	412.22	-681.819	918.911	469.721	-655.924	888.655	448.526	-728.255	829.238
693	0	280.242	-655.094	1542.47	181.645	-658.038	1524.25	282.944	-485.693	1578.31	171.269	-479.518	1558.66	249.283	-408.725	1401.27	274.548	-349.058	1185.79	248.99	-538.162	1329.08	238.175	-595.237	1200.16	181.476	-333.795	1234.52	419.305	-475.111	1358.23	462.952	-521.748	1131.78	460.118	-531.565	1063.79	446.662	-644.666	1005.13	409.237	-692.507	917.779	466.861	-666.964	887.408	445.24	-739.367	828.203
694	0	278.348	-665.36	1540.96	179.773	-668.325	1522.68	280.974	-495.99	1577.06	169.292	-489.86	1557.34	247.461	-418.733	1399.95	272.898	-359.654	1183.94	247.133	-548.305	1327.95	236.334	-605.743	1199.2	179.951	-344.201	1232.59	417.505	-485.146	1356.89	460.852	-532.274	1130.39	457.947	-542.211	1062.45	444.036	-655.316	1003.9	406.402	-703.051	916.553	464.15	-677.801	886.115	442.176	-750.23	827.039
695	0	276.422	-675.664	1539.66	177.868	-678.667	1521.33	278.965	-506.31	1575.92	167.275	-500.24	1556.14	245.599	-428.845	1398.74	271.183	-370.401	1182.19	245.224	-558.561	1326.93	234.424	-616.389	1198.37	178.381	-354.731	1230.76	415.666	-495.309	1355.67	458.736	-542.849	1129.1	455.78	-552.839	1061.19	441.502	-665.883	1002.66	403.728	-713.444	915.251	461.601	-688.422	884.799	439.355	-760.829	825.763
696	0	274.47	-686.002	1538.57	175.936	-689.059	1520.2	276.923	-516.65	1574.92	165.223	-510.653	1555.08	243.705	-439.054	1397.67	269.41	-381.29	1180.59	243.271	-568.919	1326.06	232.454	-627.161	1197.69	176.772	-365.371	1229.08	413.792	-505.593	1354.59	456.606	-553.467	1127.94	453.62	-563.442	1060.06	439.067	-676.357	1001.44	401.227	-723.677	913.895	459.225	-698.814	883.486	436.791	-771.146	824.396
697	0	272.5	-696.371	1537.73	173.983	-699.495	1519.33	274.857	-527.005	1574.08	163.145	-521.094	1554.17	241.785	-449.35	1396.76	267.586	-392.305	1179.17	241.283	-579.367	1325.34	230.434	-638.04	1197.17	175.126	-376.103	1227.58	411.893	-515.988	1353.66	454.469	-564.116	1126.93	451.471	-574.013	1059.07	436.741	-686.731	1000.25	398.908	-733.74	912.508	457.03	-708.965	882.199	434.495	-781.162	822.959
698	0	270.519	-706.765	1537.12	172.017	-709.97	1518.7	272.775	-537.371	1573.4	161.049	-531.557	1553.44	239.849	-459.724	1396.03	265.722	-403.429	1177.97	239.272	-589.889	1324.79	228.376	-649.005	1196.83	173.45	-386.91	1226.29	409.976	-526.482	1352.92	452.33	-574.785	1126.09	449.335	-584.542	1058.24	434.53	-696.995	999.114	396.78	-743.624	911.115	455.022	-718.861	880.965	432.474	-790.863	821.476
699	0	268.534	-717.177	1536.77	170.043	-720.474	1518.34	270.686	-547.743	1572.91	158.946	-542.035	1552.89	237.904	-470.163	1395.5	263.828	-414.638	1177.02	237.247	-600.47	1324.43	226.293	-660.033	1196.66	171.749	-397.768	1225.25	408.05	-537.059	1352.39	450.196	-585.458	1125.44	447.219	-595.014	1057.6	432.442	-707.137	998.064	394.845	-753.318	909.74	453.205	-728.493	879.809	430.73	-800.232	819.973
700	0	266.552	-727.601	1536.68	168.07	-730.997	1518.24	268.598	-558.117	1572.61	156.844	-552.519	1552.55	235.96	-480.651	1395.18	261.917	-425.907	1176.35	235.22	-611.091	1324.25	224.198	-671.096	1196.69	170.029	-408.656	1224.47	406.123	-547.703	1352.08	448.076	-596.118	1125.01	445.127	-605.417	1057.17	430.48	-717.145	997.116	393.107	-762.814	908.408	451.579	-737.851	878.755	429.259	-809.259	818.475
701	0	264.581	-738.029	1536.83	166.105	-741.53	1518.39	266.521	-568.486	1572.52	154.752	-563.002	1552.4	234.024	-491.174	1395.09	260.002	-437.205	1175.97	233.201	-621.733	1324.26	222.106	-682.167	1196.91	168.296	-419.549	1223.98	404.204	-558.393	1352	445.978	-606.746	1124.8	443.066	-615.734	1056.95	428.651	-727.006	996.287	391.565	-772.101	907.142	450.143	-746.928	877.823	428.056	-817.933	817.007
702	0	262.628	-748.452	1537.22	164.155	-752.061	1518.8	264.464	-578.844	1572.63	152.682	-573.473	1552.47	232.104	-501.713	1395.22	258.092	-448.499	1175.91	231.2	-632.377	1324.48	220.029	-693.218	1197.33	166.552	-430.424	1223.8	402.301	-569.106	1352.15	443.913	-617.323	1124.83	441.045	-625.948	1056.95	426.958	-736.708	995.594	390.22	-781.171	905.964	448.895	-755.721	877.033	427.111	-826.252	815.592
703	0	260.701	-758.859	1537.85	162.227	-762.575	1519.43	262.437	-589.182	1572.95	150.641	-583.922	1552.75	230.209	-512.251	1395.58	256.198	-459.755	1176.15	229.23	-643.002	1324.89	217.982	-704.221	1197.93	164.803	-441.258	1223.92	400.42	-579.816	1352.54	441.89	-627.825	1125.1	439.07	-636.039	1057.19	425.404	-746.238	995.048	389.066	-790.018	904.893	447.829	-764.227	876.4	426.411	-834.215	814.254
704	0	258.808	-769.241	1538.69	160.329	-773.061	1520.28	260.45	-599.492	1573.47	148.641	-594.339	1553.24	228.343	-522.767	1396.16	254.324	-470.937	1176.71	227.297	-653.588	1325.49	215.977	-715.147	1198.71	163.049	-452.027	1224.34	398.57	-590.496	1353.16	439.919	-638.229	1125.6	437.151	-645.989	1057.64	423.989	-755.583	994.656	388.099	-798.637	903.944	446.939	-772.448	875.933	425.941	-841.831	813.012
705	0	256.955	-779.585	1539.72	158.47	-783.503	1521.33	258.51	-609.766	1574.19	146.69	-604.712	1553.93	226.511	-533.243	1396.96	252.475	-482.011	1177.55	225.411	-664.115	1326.28	214.027	-725.97	1199.67	161.289	-462.711	1225.05	396.755	-601.118	1354	438.01	-648.512	1126.31	435.295	-655.776	1058.31	422.717	-764.731	994.423	387.313	-807.026	903.131	446.218	-780.388	875.638	425.686	-849.109	811.883
706	0	255.151	-789.88	1540.92	156.655	-793.888	1522.55	256.626	-619.993	1575.09	144.796	-615.03	1554.81	224.718	-543.659	1397.96	250.649	-492.943	1178.65	223.58	-674.564	1327.23	212.143	-736.668	1200.78	159.523	-473.292	1226.03	394.981	-611.651	1355.04	436.171	-658.646	1127.24	433.512	-665.382	1059.18	421.586	-773.671	994.348	386.702	-815.184	902.462	445.656	-788.055	875.517	425.63	-856.069	810.883
707	0	253.402	-800.113	1542.28	154.894	-804.202	1523.92	254.806	-630.164	1576.17	142.967	-625.283	1555.87	222.964	-553.999	1399.15	248.844	-503.705	1179.99	221.807	-684.918	1328.35	210.332	-747.219	1202.04	157.748	-483.753	1227.27	393.253	-622.068	1356.26	434.412	-668.607	1128.35	431.809	-674.786	1060.23	420.596	-782.392	994.427	386.257	-823.112	901.944	445.243	-795.457	875.565	425.755	-862.732	810.023
708	0	251.715	-810.272	1543.75	153.193	-814.433	1525.42	253.057	-640.269	1577.4	141.209	-635.46	1557.1	221.252	-564.246	1400.5	247.054	-514.274	1181.53	220.097	-695.163	1329.61	208.602	-757.607	1203.41	155.96	-494.081	1228.72	391.572	-632.342	1357.63	432.739	-678.366	1129.62	430.193	-683.968	1061.43	419.746	-790.885	994.654	385.969	-830.813	901.578	444.97	-802.605	875.774	426.044	-869.123	809.311
709	0	250.096	-820.346	1545.32	151.558	-824.568	1527.01	251.383	-650.298	1578.77	139.528	-645.551	1558.48	219.581	-574.385	1402	245.273	-524.63	1183.23	218.453	-705.284	1331	206.957	-767.817	1204.89	154.158	-504.265	1230.37	389.943	-642.452	1359.13	431.158	-687.899	1131.02	428.67	-692.911	1062.77	419.032	-799.141	995.018	385.831	-838.291	901.362	444.824	-809.509	876.135	426.482	-875.27	808.754
710	0	248.551	-830.324	1546.96	149.996	-834.598	1528.69	249.789	-660.241	1580.27	137.926	-655.547	1560	217.95	-584.404	1403.63	243.495	-534.761	1185.06	216.875	-715.272	1332.49	205.396	-777.843	1206.46	152.339	-514.298	1232.18	388.364	-652.378	1360.72	429.674	-697.18	1132.53	427.246	-701.597	1064.21	418.453	-807.153	995.506	385.831	-845.553	901.292	444.795	-816.183	876.632	427.052	-881.202	808.354
711	0	247.085	-840.195	1548.65	148.511	-844.514	1530.42	248.278	-670.088	1581.86	136.407	-665.442	1561.64	216.357	-594.293	1405.35	241.714	-544.663	1186.98	215.362	-725.119	1334.07	203.919	-787.678	1208.1	150.505	-524.174	1234.11	386.837	-662.106	1362.39	428.29	-706.186	1134.11	425.923	-710.012	1065.72	418.004	-814.917	996.105	385.962	-852.603	901.362	444.872	-822.638	877.25	427.739	-886.949	808.111
712	0	245.701	-849.951	1550.37	147.109	-854.31	1532.19	246.85	-679.832	1583.52	134.971	-675.228	1563.37	214.801	-604.046	1407.15	239.928	-554.337	1188.96	213.911	-734.818	1335.72	202.52	-797.324	1209.78	148.656	-533.891	1236.13	385.361	-671.628	1364.1	427.007	-714.896	1135.74	424.704	-718.143	1067.29	417.681	-822.428	996.798	386.212	-859.45	901.562	445.041	-828.885	877.972	428.528	-892.536	808.022
713	0	244.402	-859.584	1552.1	145.79	-863.98	1533.98	245.506	-689.465	1585.25	133.618	-684.901	1565.18	213.278	-613.658	1409	238.135	-563.789	1190.96	212.518	-744.366	1337.43	201.194	-806.783	1211.49	146.796	-543.449	1238.22	383.932	-680.939	1365.84	425.826	-723.293	1137.39	423.59	-725.981	1068.89	417.479	-829.684	997.57	386.572	-866.1	901.881	445.293	-834.936	878.779	429.403	-897.989	808.081
714	0	243.189	-869.089	1553.81	144.557	-873.521	1535.78	244.245	-698.981	1587.01	132.345	-694.458	1567.05	211.786	-623.128	1410.89	236.336	-573.03	1192.96	211.18	-753.763	1339.16	199.932	-816.063	1213.22	144.93	-552.852	1240.34	382.548	-690.041	1367.57	424.745	-731.364	1139.04	422.58	-733.519	1070.49	417.393	-836.685	998.403	387.033	-872.56	902.306	445.615	-840.801	879.654	430.35	-903.327	808.28
715	0	242.062	-878.461	1555.5	143.411	-882.934	1537.56	243.062	-708.375	1588.78	131.149	-703.896	1568.96	210.322	-632.455	1412.78	234.535	-582.075	1194.94	209.891	-763.011	1340.91	198.724	-825.174	1214.95	143.065	-562.105	1242.46	381.206	-698.94	1369.28	423.759	-739.102	1140.66	421.67	-740.756	1072.08	417.417	-843.433	999.281	387.584	-878.838	902.822	445.998	-846.487	880.576	431.356	-908.568	808.606
716	0	241.02	-887.699	1557.16	142.349	-892.217	1539.33	241.953	-717.644	1590.55	130.025	-713.214	1570.88	208.883	-641.643	1414.66	232.737	-590.943	1196.87	208.645	-772.113	1342.65	197.561	-834.128	1216.67	141.206	-571.215	1244.55	379.902	-707.643	1370.95	422.865	-746.504	1142.25	420.855	-747.694	1073.64	417.546	-849.931	1000.19	388.218	-884.94	903.415	446.431	-852.001	881.529	432.407	-913.722	809.045
717	0	240.059	-896.802	1558.76	141.369	-901.374	1541.06	240.915	-726.784	1592.3	128.969	-722.413	1572.8	207.466	-650.696	1416.51	230.947	-599.651	1198.74	207.437	-781.073	1344.38	196.435	-842.939	1218.36	139.361	-580.19	1246.61	378.631	-716.162	1372.57	422.055	-753.576	1143.78	420.13	-754.338	1075.15	417.77	-856.186	1001.11	388.925	-890.873	904.067	446.905	-857.351	882.493	433.492	-918.797	809.578
718	0	239.177	-905.771	1560.3	140.467	-910.409	1542.75	239.939	-735.796	1594	127.973	-731.495	1574.71	206.069	-659.62	1418.32	229.172	-608.22	1200.53	206.262	-789.9	1346.06	195.338	-851.623	1220.01	137.536	-589.039	1248.59	377.389	-724.512	1374.13	421.321	-760.328	1145.24	419.486	-760.7	1076.6	418.085	-862.207	1002.02	389.696	-896.643	904.761	447.411	-862.54	883.452	434.6	-923.793	810.185
719	0	238.368	-914.608	1561.77	139.639	-919.325	1544.4	239.019	-744.681	1595.65	127.031	-740.463	1576.57	204.69	-668.421	1420.06	227.418	-616.668	1202.24	205.116	-798.6	1347.7	194.264	-860.192	1221.61	135.736	-597.775	1250.5	376.174	-732.708	1375.61	420.655	-766.777	1146.63	418.914	-766.795	1077.98	418.481	-868.003	1002.92	390.525	-902.256	905.479	447.942	-867.573	884.39	435.724	-928.708	810.844
720	0	237.626	-923.319	1563.17	138.878	-928.129	1545.98	238.149	-753.441	1597.22	126.135	-749.32	1578.38	203.327	-677.11	1421.72	225.689	-625.012	1203.85	203.996	-807.182	1349.27	193.21	-868.661	1223.14	133.966	-606.405	1252.31	374.982	-740.766	1377.02	420.046	-772.945	1147.93	418.405	-772.641	1079.29	418.95	-873.588	1003.78	391.403	-907.718	906.202	448.49	-872.451	885.29	436.857	-933.535	811.53
721	0	236.946	-931.909	1564.48	138.179	-936.828	1547.5	237.32	-762.08	1598.7	125.278	-758.072	1580.11	201.979	-685.693	1423.29	223.99	-633.269	1205.37	202.898	-815.657	1350.77	192.174	-877.041	1224.59	132.229	-614.942	1254	373.812	-748.703	1378.34	419.485	-778.86	1149.16	417.946	-778.262	1080.52	419.483	-878.977	1004.6	392.324	-913.035	906.91	449.048	-877.179	886.138	437.993	-938.266	812.219
722	0	236.32	-940.385	1565.72	137.534	-945.428	1548.94	236.525	-770.602	1600.09	124.454	-766.724	1581.76	200.646	-694.181	1424.77	222.327	-641.455	1206.77	201.822	-824.033	1352.18	191.156	-885.342	1225.96	130.531	-623.395	1255.58	372.662	-756.536	1379.56	418.96	-784.554	1150.29	417.527	-783.684	1081.67	420.07	-884.185	1005.36	393.28	-918.212	907.585	449.612	-881.759	886.921	439.13	-942.889	812.885
723	0	235.742	-948.756	1566.86	136.937	-953.939	1550.3	235.757	-779.014	1601.36	123.655	-775.283	1583.3	199.329	-702.583	1426.13	220.702	-649.58	1208.06	200.766	-832.321	1353.49	190.158	-893.574	1227.22	128.875	-631.772	1257.03	371.533	-764.282	1380.7	418.463	-790.063	1151.33	417.138	-788.935	1082.73	420.701	-889.231	1006.04	394.264	-923.255	908.208	450.176	-886.193	887.627	440.265	-947.391	813.503
724	0	235.204	-957.029	1567.91	136.38	-962.367	1551.58	235.01	-787.324	1602.52	122.875	-783.755	1584.72	198.03	-710.909	1427.38	219.119	-657.657	1209.23	199.73	-840.532	1354.69	189.184	-901.742	1228.38	127.264	-640.081	1258.35	370.425	-771.957	1381.74	417.984	-795.424	1152.29	416.77	-794.047	1083.7	421.365	-894.133	1006.65	395.271	-928.17	908.76	450.737	-890.486	888.244	441.397	-951.76	814.047
725	0	234.7	-965.214	1568.87	135.857	-970.721	1552.76	234.277	-795.539	1603.55	122.109	-792.149	1586.02	196.75	-719.168	1428.5	217.583	-665.695	1210.28	198.717	-848.675	1355.78	188.237	-909.854	1229.42	125.704	-648.33	1259.53	369.341	-779.578	1382.68	417.515	-800.676	1153.15	416.412	-799.051	1084.59	422.053	-898.912	1007.16	396.293	-932.961	909.225	451.292	-894.641	888.765	442.526	-955.983	814.496
726	0	234.223	-973.322	1569.73	135.361	-979.009	1553.84	233.554	-803.668	1604.46	121.352	-800.47	1587.19	195.495	-727.369	1429.5	216.099	-673.7	1211.21	197.727	-856.76	1356.75	187.322	-917.913	1230.33	124.201	-656.523	1260.57	368.282	-787.161	1383.52	417.051	-805.858	1153.92	416.059	-803.98	1085.38	422.755	-903.588	1007.56	397.325	-937.635	909.586	451.838	-898.665	889.18	443.652	-960.05	814.828
727	0	233.767	-981.362	1570.5	134.888	-987.24	1554.82	232.838	-811.721	1605.23	120.602	-808.728	1588.21	194.267	-735.521	1430.37	214.673	-681.679	1212.02	196.763	-864.796	1357.59	186.444	-925.925	1231.1	122.76	-664.665	1261.48	367.253	-794.719	1384.26	416.586	-811.009	1154.6	415.706	-808.865	1086.09	423.46	-908.181	1007.86	398.359	-942.196	909.828	452.376	-902.564	889.485	444.774	-963.951	815.025
728	0	233.329	-989.345	1571.16	134.432	-995.421	1555.69	232.125	-819.708	1605.87	119.856	-816.931	1589.08	193.072	-743.632	1431.11	213.312	-689.637	1212.7	195.828	-872.792	1358.3	185.607	-933.895	1231.74	121.388	-672.76	1262.24	366.257	-802.268	1384.9	416.119	-816.164	1155.19	415.348	-813.739	1086.71	424.161	-912.713	1008.04	399.391	-946.652	909.939	452.905	-906.347	889.675	445.893	-967.681	815.074
729	0	232.903	-997.28	1571.72	133.99	-1003.56	1556.44	231.414	-827.639	1606.37	119.112	-825.085	1589.8	191.916	-751.71	1431.71	212.024	-697.577	1213.27	194.926	-880.757	1358.88	184.815	-941.827	1232.25	120.092	-680.81	1262.86	365.298	-809.821	1385.45	415.649	-821.357	1155.7	414.985	-818.63	1087.25	424.849	-917.202	1008.1	400.415	-951.009	909.908	453.424	-910.022	889.747	447.008	-971.236	814.961
730	0	232.486	-1005.18	1572.18	133.558	-1011.67	1557.08	230.705	-835.525	1606.73	118.373	-833.2	1590.37	190.806	-759.762	1432.19	210.819	-705.502	1213.71	194.06	-888.697	1359.32	184.072	-949.729	1232.61	118.881	-688.818	1263.36	364.381	-817.39	1385.89	415.177	-826.62	1156.11	414.617	-823.567	1087.7	425.52	-921.669	1008.03	401.427	-955.274	909.726	453.936	-913.6	889.701	448.118	-974.616	814.679
731	0	232.078	-1013.05	1572.53	133.135	-1019.74	1557.59	230	-843.375	1606.96	117.638	-841.282	1590.78	189.748	-767.794	1432.54	209.703	-713.414	1214.05	193.234	-896.62	1359.63	183.379	-957.605	1232.83	117.76	-696.786	1263.72	363.512	-824.985	1386.23	414.706	-831.979	1156.43	414.246	-828.574	1088.07	426.167	-926.132	1007.83	402.423	-959.454	909.386	454.442	-917.094	889.536	449.222	-977.823	814.222
732	0	231.677	-1020.91	1572.78	132.721	-1027.8	1557.98	229.299	-851.2	1607.06	116.912	-849.338	1591.04	188.748	-775.812	1432.76	208.688	-721.314	1214.27	192.454	-904.532	1359.8	182.74	-965.462	1232.92	116.737	-704.716	1263.95	362.694	-832.616	1386.47	414.24	-837.457	1156.66	413.875	-833.673	1088.35	426.789	-930.607	1007.5	403.401	-963.56	908.887	454.944	-920.515	889.254	450.319	-980.864	813.59
733	0	231.283	-1028.75	1572.92	132.315	-1035.84	1558.24	228.608	-859.008	1607.03	116.199	-857.375	1591.14	187.815	-783.823	1432.85	207.78	-729.202	1214.38	191.723	-912.44	1359.83	182.157	-973.306	1232.88	115.818	-712.613	1264.07	361.934	-840.292	1386.62	413.786	-843.072	1156.8	413.508	-838.882	1088.55	427.385	-935.112	1007.04	404.357	-967.602	908.225	455.444	-923.88	888.858	451.408	-983.75	812.784
734	0	230.898	-1036.59	1572.96	131.92	-1043.88	1558.38	227.931	-866.809	1606.88	115.502	-865.4	1591.1	186.954	-791.83	1432.83	206.986	-737.08	1214.38	191.045	-920.348	1359.74	181.63	-981.145	1232.71	115.008	-720.48	1264.07	361.235	-848.018	1386.66	413.348	-848.841	1156.85	413.152	-844.218	1088.66	427.953	-939.661	1006.45	405.293	-971.591	907.403	455.946	-927.202	888.353	452.487	-986.492	811.808
735	0	230.524	-1044.44	1572.89	131.539	-1051.91	1558.39	227.274	-874.61	1606.6	114.829	-873.417	1590.91	186.172	-799.838	1432.69	206.312	-744.95	1214.29	190.426	-928.262	1359.51	181.161	-988.983	1232.43	114.31	-728.321	1263.96	360.604	-855.799	1386.6	412.935	-854.772	1156.81	412.811	-849.69	1088.69	428.498	-944.266	1005.73	406.208	-975.539	906.424	456.452	-930.499	887.742	453.557	-989.108	810.67
736	0	230.167	-1052.31	1572.72	131.175	-1059.94	1558.27	226.643	-882.419	1606.21	114.185	-881.431	1590.58	185.475	-807.851	1432.43	205.762	-752.811	1214.1	189.869	-936.186	1359.16	180.751	-996.827	1232.03	113.728	-736.141	1263.75	360.043	-863.639	1386.45	412.554	-860.871	1156.68	412.493	-855.307	1088.64	429.02	-948.941	1004.89	407.102	-979.462	905.294	456.965	-933.787	887.031	454.617	-991.62	809.379
737	0	229.829	-1060.18	1572.45	130.833	-1067.97	1558.03	226.045	-890.24	1605.71	113.579	-889.447	1590.11	184.87	-815.873	1432.07	205.339	-760.667	1213.82	189.379	-944.124	1358.69	180.403	-1004.68	1231.53	113.261	-743.948	1263.43	359.559	-871.539	1386.19	412.211	-867.141	1156.45	412.202	-861.075	1088.49	429.526	-953.696	1003.92	407.98	-983.374	904.019	457.489	-937.085	886.225	455.669	-994.049	807.947
738	0	229.517	-1068.08	1572.08	130.519	-1076.01	1557.66	225.488	-898.08	1605.09	113.018	-897.467	1589.51	184.36	-823.907	1431.59	205.04	-768.52	1213.45	188.961	-952.081	1358.11	180.116	-1012.55	1230.93	112.911	-751.749	1263.01	359.154	-879.501	1385.83	411.914	-873.581	1156.12	411.947	-866.995	1088.26	430.02	-958.54	1002.84	408.842	-987.293	902.608	458.026	-940.412	885.33	456.712	-996.424	806.387
739	0	229.236	-1076	1571.61	130.239	-1084.06	1557.19	224.98	-905.941	1604.38	112.51	-905.494	1588.79	183.952	-831.956	1431.02	204.866	-776.375	1212.99	188.619	-960.06	1357.41	179.893	-1020.45	1230.23	112.677	-759.55	1262.5	358.835	-887.523	1385.36	411.67	-880.184	1155.7	411.731	-873.064	1087.94	430.509	-963.481	1001.64	409.693	-991.236	901.071	458.58	-943.788	884.352	457.749	-998.774	804.712
740	0	228.994	-1083.95	1571.04	129.999	-1092.12	1556.6	224.53	-913.826	1603.57	112.062	-913.53	1587.95	183.648	-840.022	1430.33	204.813	-784.237	1212.44	188.358	-968.065	1356.61	179.736	-1028.37	1229.45	112.554	-767.362	1261.89	358.604	-895.604	1384.79	411.486	-886.943	1155.18	411.563	-879.281	1087.52	430.998	-968.528	1000.34	410.537	-995.222	899.417	459.154	-947.234	883.294	458.782	-1001.13	802.937
741	0	228.797	-1091.92	1570.39	129.806	-1100.2	1555.9	224.145	-921.736	1602.66	111.684	-921.575	1587.01	183.453	-848.108	1429.55	204.875	-792.114	1211.8	188.181	-976.101	1355.71	179.647	-1036.32	1228.59	112.542	-775.192	1261.19	358.465	-903.741	1384.12	411.366	-893.849	1154.56	411.445	-885.64	1087	431.495	-973.687	998.931	411.377	-999.27	897.659	459.75	-950.77	882.163	459.814	-1003.53	801.074
742	0	228.652	-1099.92	1569.65	129.667	-1108.28	1555.1	223.834	-929.673	1601.67	111.382	-929.63	1585.96	183.369	-856.216	1428.67	205.049	-800.013	1211.07	188.093	-984.169	1354.72	179.628	-1044.31	1227.65	112.637	-783.049	1260.4	358.423	-911.933	1383.33	411.315	-900.89	1153.83	411.385	-892.134	1086.39	432.005	-978.963	997.427	412.218	-1003.4	895.805	460.37	-954.418	880.96	460.846	-1006.01	799.138
743	0	228.567	-1107.94	1568.83	129.59	-1116.38	1554.22	223.604	-937.636	1600.6	111.164	-937.695	1584.81	183.399	-864.349	1427.69	205.327	-807.943	1210.25	188.097	-992.275	1353.65	179.682	-1052.34	1226.65	112.835	-790.943	1259.52	358.48	-920.175	1382.45	411.339	-908.052	1152.99	411.385	-898.756	1085.67	432.536	-984.362	995.832	413.064	-1007.63	893.867	461.016	-958.198	879.688	461.881	-1008.6	797.14
744	0	228.548	-1115.98	1567.94	129.582	-1124.49	1553.25	223.463	-945.623	1599.46	111.038	-945.769	1583.59	183.544	-872.506	1426.62	205.704	-815.915	1209.34	188.197	-1000.42	1352.49	179.811	-1060.43	1225.58	113.133	-798.884	1258.54	358.639	-928.465	1381.45	411.44	-915.323	1152.05	411.449	-905.497	1084.84	433.094	-989.89	994.15	413.919	-1011.99	891.856	461.689	-962.132	878.35	462.92	-1011.35	795.092
745	0	228.603	-1124.05	1566.98	129.649	-1132.6	1552.2	223.418	-953.633	1598.25	111.009	-953.85	1582.28	183.805	-880.692	1425.46	206.175	-823.94	1208.33	188.396	-1008.61	1351.28	180.017	-1068.56	1224.45	113.527	-806.879	1257.46	358.903	-936.799	1380.34	411.62	-922.691	1151	411.582	-912.35	1083.91	433.683	-995.552	992.389	414.785	-1016.49	889.78	462.391	-966.24	876.946	463.964	-1014.29	793.001
746	0	228.738	-1132.14	1565.97	129.797	-1140.73	1551.1	223.475	-961.663	1596.99	111.084	-961.938	1580.91	184.183	-888.906	1424.21	206.732	-832.027	1207.22	188.696	-1016.85	1350	180.304	-1076.76	1223.27	114.015	-814.939	1256.3	359.275	-945.174	1379.13	411.883	-930.144	1149.84	411.785	-919.308	1082.87	434.31	-1001.35	990.553	415.667	-1021.15	887.65	463.122	-970.541	875.477	465.014	-1017.45	790.878
747	0	228.959	-1140.24	1564.91	130.033	-1148.86	1549.94	223.641	-969.711	1595.67	111.267	-970.029	1579.48	184.676	-897.152	1422.88	207.372	-840.19	1206	189.1	-1025.14	1348.67	180.672	-1085.03	1222.06	114.594	-823.071	1255.03	359.755	-953.586	1377.82	412.229	-937.672	1148.57	412.06	-926.366	1081.72	434.978	-1007.3	988.651	416.565	-1026	885.476	463.88	-975.053	873.944	466.071	-1020.87	788.727
748	0	229.271	-1148.36	1563.81	130.362	-1157.01	1548.74	223.919	-977.775	1594.32	111.564	-978.124	1578.01	185.285	-905.43	1421.48	208.088	-848.44	1204.69	189.61	-1033.48	1347.31	181.125	-1093.38	1220.8	115.261	-831.284	1253.68	360.344	-962.034	1376.41	412.658	-945.268	1147.2	412.409	-933.52	1080.46	435.691	-1013.39	986.688	417.483	-1031.05	883.266	464.664	-979.792	872.347	467.132	-1024.57	786.556
749	0	229.679	-1156.49	1562.69	130.788	-1165.15	1547.52	224.314	-985.851	1592.94	111.978	-986.22	1576.51	186.007	-913.743	1420	208.877	-856.788	1203.27	190.225	-1041.88	1345.93	181.663	-1101.8	1219.53	116.012	-839.585	1252.23	361.044	-970.514	1374.9	413.171	-952.925	1145.73	412.832	-940.767	1079.1	436.452	-1019.64	984.674	418.422	-1036.32	881.03	465.473	-984.774	870.69	468.196	-1028.59	784.368
750	0	230.187	-1164.63	1561.57	131.314	-1173.3	1546.29	224.831	-993.936	1591.54	112.512	-994.315	1574.99	186.84	-922.093	1418.47	209.734	-865.244	1201.74	190.947	-1050.34	1344.53	182.289	-1110.32	1218.25	116.846	-847.983	1250.7	361.852	-979.025	1373.31	413.767	-960.642	1144.16	413.328	-948.108	1077.65	437.261	-1026.05	982.618	419.381	-1041.82	878.779	466.304	-990.011	868.973	469.262	-1032.95	782.17
751	0	230.799	-1172.78	1560.46	131.944	-1181.45	1545.07	225.47	-1002.03	1590.13	113.168	-1002.41	1573.46	187.78	-930.481	1416.88	210.652	-873.82	1200.13	191.774	-1058.86	1343.14	183.003	-1118.93	1216.97	117.76	-856.485	1249.09	362.769	-987.567	1371.65	414.443	-968.418	1142.52	413.895	-955.544	1076.1	438.121	-1032.62	980.53	420.361	-1047.58	876.522	467.154	-995.514	867.202	470.326	-1037.67	779.967
752	0	231.515	-1180.93	1559.37	132.678	-1189.6	1543.88	226.235	-1010.12	1588.73	113.948	-1010.49	1571.94	188.824	-938.912	1415.26	211.628	-882.523	1198.42	192.704	-1067.45	1341.77	183.806	-1127.65	1215.72	118.748	-865.098	1247.41	363.791	-996.137	1369.92	415.197	-976.256	1140.8	414.531	-963.08	1074.48	439.029	-1039.37	978.423	421.361	-1053.59	874.272	468.018	-1001.29	865.383	471.387	-1042.75	777.764
753	0	232.338	-1189.09	1558.33	133.519	-1197.75	1542.74	227.127	-1018.22	1587.36	114.852	-1018.58	1570.46	189.967	-947.387	1413.62	212.655	-891.363	1196.65	193.737	-1076.12	1340.43	184.698	-1136.47	1214.51	119.807	-873.828	1245.68	364.916	-1004.74	1368.14	416.026	-984.163	1139.02	415.232	-970.722	1072.79	439.985	-1046.3	976.309	422.379	-1059.88	872.041	468.891	-1007.36	863.525	472.44	-1048.21	775.57
754	0	233.268	-1197.25	1557.35	134.465	-1205.9	1541.67	228.145	-1026.32	1586.02	115.88	-1026.65	1569.01	191.203	-955.91	1411.97	213.727	-900.347	1194.81	194.866	-1084.85	1339.15	185.677	-1145.41	1213.36	120.931	-882.679	1243.91	366.137	-1013.37	1366.34	416.923	-992.144	1137.2	415.993	-978.477	1071.06	440.985	-1053.42	974.205	423.412	-1066.45	869.844	469.769	-1013.71	861.64	473.482	-1054.06	773.394
755	0	234.303	-1205.41	1556.47	135.515	-1214.05	1540.7	229.289	-1034.41	1584.73	117.031	-1034.72	1567.63	192.525	-964.484	1410.34	214.839	-909.479	1192.92	196.089	-1093.66	1337.95	186.743	-1154.47	1212.28	122.115	-891.658	1242.12	367.451	-1022.03	1364.52	417.886	-1000.21	1135.36	416.809	-986.356	1069.3	442.026	-1060.74	972.128	424.459	-1073.3	867.695	470.646	-1020.36	859.741	474.509	-1060.3	771.248
756	0	235.443	-1213.57	1555.7	136.668	-1222.19	1539.85	230.557	-1042.5	1583.51	118.303	-1042.77	1566.33	193.926	-973.112	1408.74	215.982	-918.764	1191.02	197.399	-1102.55	1336.83	187.892	-1163.65	1211.31	123.352	-900.766	1240.32	368.85	-1030.72	1362.72	418.905	-1008.37	1133.52	417.673	-994.367	1067.52	443.102	-1068.26	970.096	425.514	-1080.46	865.612	471.517	-1027.3	857.845	475.518	-1066.92	769.145
757	0	236.684	-1221.73	1555.06	137.92	-1230.33	1539.15	231.946	-1050.59	1582.37	119.693	-1050.82	1565.12	195.399	-981.798	1407.19	217.15	-928.204	1189.13	198.79	-1111.52	1335.82	189.12	-1172.97	1210.46	124.634	-910.005	1238.56	370.327	-1039.46	1360.96	419.976	-1016.64	1131.7	418.58	-1002.52	1065.77	444.208	-1075.99	968.129	426.574	-1087.91	863.614	472.376	-1034.54	855.973	476.505	-1073.93	767.103
758	0	238.022	-1229.89	1554.57	139.268	-1238.47	1538.62	233.454	-1058.67	1581.32	121.197	-1058.85	1564.04	196.935	-990.545	1405.71	218.336	-937.798	1187.27	200.253	-1120.57	1334.94	190.422	-1182.4	1209.76	125.953	-919.376	1236.85	371.873	-1048.24	1359.25	421.09	-1025.03	1129.93	419.521	-1010.83	1064.05	445.339	-1083.94	966.249	427.635	-1095.66	861.719	473.217	-1042.09	854.145	477.467	-1081.31	765.141
759	0	239.453	-1238.05	1554.27	140.706	-1246.61	1538.3	235.076	-1066.74	1580.38	122.812	-1066.87	1563.08	198.525	-999.356	1404.34	219.534	-947.546	1185.47	201.779	-1129.7	1334.2	191.791	-1191.97	1209.21	127.302	-928.877	1235.21	373.478	-1057.06	1357.64	422.239	-1033.55	1128.24	420.49	-1019.31	1062.4	446.486	-1092.11	964.479	428.693	-1103.73	859.95	474.035	-1049.93	852.387	478.4	-1089.05	763.28
760	0	240.971	-1246.2	1554.16	142.229	-1254.74	1538.2	236.806	-1074.8	1579.56	124.531	-1074.89	1562.28	200.16	-1008.23	1403.07	220.737	-957.441	1183.78	203.359	-1138.91	1333.61	193.217	-1201.66	1208.84	128.673	-938.504	1233.69	375.133	-1065.94	1356.14	423.415	-1042.22	1126.65	421.481	-1027.96	1060.84	447.644	-1100.52	962.84	429.742	-1112.09	858.325	474.826	-1058.08	850.722	479.303	-1097.16	761.543
761	0	242.569	-1254.35	1554.26	143.829	-1262.86	1538.35	238.64	-1082.86	1578.87	126.349	-1082.88	1561.64	201.831	-1017.18	1401.95	221.939	-967.479	1182.21	204.983	-1148.2	1333.2	194.693	-1211.46	1208.65	130.059	-948.249	1232.3	376.826	-1074.89	1354.78	424.612	-1051.04	1125.18	422.486	-1036.8	1059.41	448.805	-1109.17	961.356	430.778	-1120.77	856.868	475.585	-1066.53	849.176	480.172	-1105.62	759.953
762	0	244.239	-1262.49	1554.58	145.499	-1270.98	1538.76	240.568	-1090.91	1578.32	128.258	-1090.87	1561.17	203.529	-1026.2	1400.98	223.138	-977.648	1180.81	206.637	-1157.56	1332.96	196.206	-1221.37	1208.66	131.453	-958.104	1231.07	378.547	-1083.91	1353.59	425.82	-1060.02	1123.88	423.5	-1045.83	1058.12	449.963	-1118.05	960.048	431.798	-1129.75	855.598	476.309	-1075.27	847.774	481.006	-1114.43	758.536
763	0	245.973	-1270.63	1555.15	147.23	-1279.09	1539.45	242.585	-1098.96	1577.92	130.251	-1098.84	1560.89	205.244	-1035.28	1400.18	224.33	-987.937	1179.59	208.312	-1166.99	1332.91	197.746	-1231.38	1208.87	132.849	-968.056	1230.03	380.284	-1093	1352.58	427.035	-1069.17	1122.75	424.52	-1055.06	1057	451.112	-1127.19	958.937	432.797	-1139.05	854.535	476.996	-1084.32	846.54	481.804	-1123.58	757.315
764	0	247.762	-1278.77	1555.95	149.012	-1287.19	1540.43	244.68	-1107	1577.67	132.319	-1106.81	1560.8	206.969	-1044.44	1399.56	225.514	-998.329	1178.6	209.996	-1176.49	1333.05	199.301	-1241.46	1209.28	134.243	-978.092	1229.2	382.027	-1102.18	1351.79	428.25	-1078.49	1121.82	425.542	-1064.49	1056.07	452.247	-1136.58	958.04	433.772	-1148.65	853.696	477.646	-1093.68	845.494	482.565	-1133.08	756.31
765	0	249.595	-1286.91	1556.99	150.835	-1295.29	1541.69	246.846	-1115.04	1577.57	134.452	-1114.76	1560.91	208.695	-1053.66	1399.14	226.692	-1008.81	1177.85	211.675	-1186.05	1333.38	200.857	-1251.62	1209.88	135.631	-988.193	1228.59	383.765	-1111.46	1351.22	429.462	-1087.99	1121.1	426.563	-1074.12	1055.35	453.364	-1146.22	957.374	434.721	-1158.56	853.097	478.258	-1103.33	844.656	483.29	-1142.91	755.543
766	0	251.461	-1295.06	1558.26	152.689	-1303.37	1543.24	249.07	-1123.09	1577.62	136.64	-1122.71	1561.22	210.415	-1062.94	1398.91	227.866	-1019.35	1177.36	213.339	-1195.66	1333.89	202.402	-1261.81	1210.66	137.013	-998.341	1228.22	385.488	-1120.83	1350.88	430.667	-1097.67	1120.63	427.586	-1083.95	1054.86	454.457	-1156.12	956.95	435.642	-1168.77	852.75	478.834	-1113.3	844.04	483.98	-1153.09	755.028
767	0	253.351	-1303.2	1559.75	154.561	-1311.46	1545.06	251.342	-1131.13	1577.82	138.872	-1130.65	1561.71	212.124	-1072.29	1398.89	229.04	-1029.93	1177.13	214.975	-1205.32	1334.58	203.923	-1272.04	1211.61	138.39	-1008.51	1228.1	387.186	-1130.3	1350.79	431.864	-1107.53	1120.39	428.609	-1093.99	1054.6	455.526	-1166.28	956.778	436.535	-1179.3	852.664	479.379	-1123.57	843.656	484.636	-1163.62	754.777
768	0	255.251	-1311.36	1561.44	156.44	-1319.53	1547.13	253.65	-1139.19	1578.16	141.138	-1138.59	1562.4	213.815	-1081.68	1399.07	230.22	-1040.53	1177.17	216.575	-1215	1335.44	205.408	-1282.27	1212.72	139.763	-1018.68	1228.22	388.851	-1139.89	1350.94	433.055	-1117.57	1120.4	429.638	-1104.22	1054.57	456.569	-1176.69	956.861	437.399	-1190.13	852.845	479.896	-1134.16	843.509	485.262	-1174.5	754.798
769	0	257.15	-1319.53	1563.32	158.314	-1327.6	1549.43	255.982	-1147.27	1578.63	143.424	-1146.53	1563.26	215.485	-1091.11	1399.45	231.415	-1051.12	1177.47	218.128	-1224.7	1336.46	206.844	-1292.49	1213.95	141.137	-1028.83	1228.58	390.477	-1149.57	1351.33	434.239	-1127.77	1120.65	430.676	-1114.64	1054.78	457.583	-1187.36	957.201	438.234	-1201.27	853.292	480.393	-1145.07	843.6	485.862	-1185.76	755.093
770	0	259.037	-1327.71	1565.35	160.171	-1335.68	1551.93	258.324	-1155.36	1579.23	145.718	-1154.48	1564.28	217.13	-1100.57	1400.01	232.632	-1061.66	1178.03	219.626	-1234.4	1337.61	208.221	-1302.66	1215.28	142.519	-1038.93	1229.18	392.057	-1159.36	1351.96	435.421	-1138.15	1121.14	431.729	-1125.24	1055.21	458.57	-1198.28	957.794	439.04	-1212.72	854.004	480.877	-1156.3	843.926	486.439	-1197.4	755.661
771	0	260.9	-1335.91	1567.51	162	-1343.75	1554.59	260.664	-1163.47	1579.95	148.007	-1162.43	1565.46	218.749	-1110.05	1400.75	233.88	-1072.14	1178.83	221.061	-1244.1	1338.88	209.528	-1312.78	1216.7	143.915	-1048.95	1229.98	393.585	-1169.24	1352.8	436.603	-1148.68	1121.85	432.802	-1136.01	1055.86	459.529	-1209.45	958.633	439.819	-1224.46	854.973	481.358	-1167.86	844.479	486.998	-1209.43	756.495
772	0	262.728	-1344.13	1569.76	163.79	-1351.83	1557.38	262.986	-1171.61	1580.77	150.278	-1170.4	1566.76	220.339	-1119.54	1401.65	235.171	-1082.52	1179.84	222.429	-1253.77	1340.25	210.758	-1322.81	1218.16	145.332	-1058.88	1230.98	395.059	-1179.21	1353.84	437.791	-1159.36	1122.78	433.903	-1146.95	1056.71	460.461	-1220.86	959.707	440.571	-1236.51	856.19	481.844	-1179.76	845.248	487.544	-1221.87	757.586
773	0	264.511	-1352.37	1572.08	165.532	-1359.91	1560.24	265.278	-1179.78	1581.67	152.519	-1178.38	1568.17	221.9	-1129.02	1402.69	236.511	-1092.78	1181.05	223.725	-1263.41	1341.7	211.903	-1332.74	1219.65	146.778	-1068.68	1232.16	396.476	-1189.26	1355.07	438.989	-1170.18	1123.9	435.038	-1158.04	1057.74	461.365	-1232.52	961.004	441.295	-1248.86	857.643	482.347	-1192	846.219	488.081	-1234.72	758.923
774	0	266.239	-1360.65	1574.42	167.215	-1368.01	1563.15	267.526	-1187.98	1582.66	154.715	-1186.38	1569.68	223.431	-1138.48	1403.85	237.908	-1102.89	1182.41	224.947	-1272.99	1343.21	212.96	-1342.54	1221.14	148.259	-1078.34	1233.47	397.833	-1199.37	1356.45	440.202	-1181.14	1125.19	436.214	-1169.27	1058.93	462.241	-1244.41	962.509	441.991	-1261.49	859.318	482.875	-1204.59	847.379	488.615	-1248	760.493
775	0	267.904	-1368.95	1576.75	168.833	-1376.12	1566.06	269.716	-1196.21	1583.71	156.855	-1194.4	1571.25	224.932	-1147.9	1405.13	239.367	-1112.84	1183.91	226.096	-1282.5	1344.76	213.928	-1352.2	1222.61	149.779	-1087.84	1234.91	399.131	-1209.52	1357.97	441.432	-1192.23	1126.62	437.436	-1180.63	1060.25	463.089	-1256.52	964.207	442.657	-1274.41	861.198	483.438	-1217.51	848.712	489.149	-1261.71	762.282
776	0	269.499	-1377.28	1579.05	170.379	-1384.26	1568.92	271.837	-1204.49	1584.81	158.926	-1202.45	1572.88	226.402	-1157.27	1406.49	240.89	-1122.59	1185.51	227.171	-1291.93	1346.33	214.806	-1361.7	1224.04	151.34	-1097.17	1236.44	400.369	-1219.69	1359.59	442.685	-1203.42	1128.18	438.709	-1192.11	1061.68	463.906	-1268.84	966.08	443.29	-1287.59	863.27	484.043	-1230.79	850.205	489.685	-1275.85	764.28
777	0	271.019	-1385.64	1581.28	171.849	-1392.41	1571.71	273.876	-1212.79	1585.96	160.919	-1210.52	1574.54	227.841	-1166.58	1407.92	242.474	-1132.15	1187.19	228.177	-1301.27	1347.89	215.599	-1371.04	1225.42	152.94	-1106.32	1238.04	401.549	-1229.86	1361.3	443.962	-1214.72	1129.83	440.036	-1203.69	1063.21	464.691	-1281.36	968.113	443.887	-1301.04	865.517	484.698	-1244.4	851.845	490.225	-1290.43	766.475
778	0	272.459	-1394.03	1583.42	173.24	-1400.59	1574.37	275.824	-1221.13	1587.13	162.823	-1218.63	1576.22	229.249	-1175.81	1409.39	244.116	-1141.5	1188.92	229.117	-1310.5	1349.44	216.314	-1380.19	1226.73	154.578	-1115.28	1239.69	402.672	-1240	1363.06	445.265	-1226.11	1131.57	441.421	-1215.35	1064.81	465.441	-1294.07	970.292	444.443	-1314.72	867.927	485.405	-1258.35	853.623	490.765	-1305.43	768.86
779	0	273.816	-1402.44	1585.46	174.549	-1408.8	1576.9	277.672	-1229.5	1588.33	164.631	-1226.77	1577.9	230.625	-1184.94	1410.9	245.805	-1150.62	1190.68	229.996	-1319.62	1350.96	216.959	-1389.16	1227.96	156.246	-1124.04	1241.36	403.74	-1250.08	1364.86	446.593	-1237.56	1133.36	442.863	-1227.1	1066.45	466.152	-1306.95	972.602	444.953	-1328.63	870.488	486.167	-1272.62	855.53	491.304	-1320.83	771.429
780	0	275.09	-1410.87	1587.36	175.778	-1417.03	1579.25	279.413	-1237.9	1589.55	166.335	-1234.93	1579.56	231.967	-1193.98	1412.43	247.531	-1159.53	1192.44	230.822	-1328.61	1352.44	217.545	-1397.94	1229.12	157.936	-1132.61	1243.04	404.755	-1260.08	1366.68	447.947	-1249.07	1135.19	444.362	-1238.9	1068.12	466.82	-1319.98	975.031	445.411	-1342.73	873.189	486.981	-1287.21	857.562	491.835	-1336.64	774.182
781	0	276.281	-1419.32	1589.12	176.926	-1425.28	1581.42	281.041	-1246.31	1590.78	167.931	-1243.12	1581.19	233.274	-1202.91	1413.95	249.279	-1168.21	1194.18	231.601	-1337.46	1353.86	218.085	-1406.54	1230.2	159.638	-1141	1244.71	405.722	-1269.98	1368.5	449.323	-1260.62	1137.05	445.915	-1250.74	1069.82	467.443	-1333.14	977.57	445.81	-1357.02	876.025	487.844	-1302.09	859.717	492.35	-1352.81	777.119
782	0	277.389	-1427.78	1590.74	177.997	-1433.55	1583.38	282.554	-1254.74	1592	169.416	-1251.33	1582.78	234.544	-1211.72	1415.46	251.035	-1176.68	1195.9	232.341	-1346.18	1355.23	218.591	-1414.96	1231.21	161.339	-1149.2	1246.35	406.644	-1279.73	1370.3	450.721	-1272.17	1138.92	447.52	-1262.6	1071.52	468.018	-1346.41	980.21	446.145	-1371.45	878.988	488.748	-1317.24	861.993	492.837	-1369.32	780.245
783	0	278.418	-1436.23	1592.2	178.993	-1441.84	1585.14	283.95	-1263.17	1593.22	170.789	-1259.55	1584.33	235.776	-1220.41	1416.95	252.783	-1184.95	1197.57	233.05	-1354.77	1356.53	219.077	-1423.2	1232.15	163.028	-1157.23	1247.96	407.523	-1289.34	1372.07	452.135	-1283.71	1140.78	449.172	-1274.46	1073.21	468.541	-1359.77	982.943	446.409	-1386.02	882.077	489.682	-1332.64	864.393	493.284	-1386.14	783.566
784	0	279.371	-1444.67	1593.5	179.918	-1450.13	1586.69	285.229	-1271.6	1594.43	172.05	-1267.79	1585.81	236.968	-1228.97	1418.4	254.507	-1193.03	1199.18	233.735	-1363.21	1357.76	219.555	-1431.29	1233.03	164.693	-1165.11	1249.52	408.364	-1298.77	1373.79	453.563	-1295.21	1142.63	450.864	-1286.29	1074.88	469.011	-1373.17	985.764	446.598	-1400.68	885.29	490.633	-1348.26	866.918	493.677	-1403.23	787.09
785	0	280.252	-1453.1	1594.66	180.777	-1458.41	1588.03	286.394	-1280.01	1595.61	173.202	-1276.03	1587.22	238.117	-1237.4	1419.8	256.193	-1200.92	1200.73	234.402	-1371.51	1358.92	220.039	-1439.23	1233.86	166.319	-1172.84	1251.03	409.171	-1308	1375.46	455	-1306.63	1144.46	452.59	-1298.08	1076.54	469.428	-1386.6	988.666	446.708	-1415.4	888.627	491.587	-1364.06	869.57	494.002	-1420.55	790.826
786	0	281.065	-1461.49	1595.66	181.574	-1466.69	1589.17	287.447	-1288.4	1596.77	174.247	-1284.26	1588.56	239.221	-1245.71	1421.15	257.829	-1208.65	1202.22	235.06	-1379.67	1360	220.539	-1447.03	1234.63	167.896	-1180.45	1252.48	409.946	-1317.04	1377.08	456.441	-1317.96	1146.26	454.341	-1309.8	1078.17	469.793	-1400.02	991.644	446.733	-1430.17	892.086	492.525	-1380	872.352	494.243	-1438.06	794.781
787	0	281.817	-1469.85	1596.53	182.314	-1474.95	1590.12	288.394	-1296.76	1597.9	175.192	-1292.48	1589.82	240.279	-1253.88	1422.43	259.402	-1216.23	1203.62	235.713	-1387.7	1361.01	221.064	-1454.7	1235.35	169.413	-1187.94	1253.85	410.693	-1325.87	1378.62	457.883	-1329.15	1148.03	456.109	-1321.42	1079.76	470.107	-1413.41	994.691	446.673	-1444.93	895.669	493.431	-1396.06	875.264	494.386	-1455.72	798.962
788	0	282.512	-1478.16	1597.27	183.003	-1483.18	1590.9	289.241	-1305.08	1598.99	176.04	-1300.67	1591	241.289	-1261.93	1423.64	260.904	-1223.68	1204.94	236.365	-1395.61	1361.94	221.622	-1462.26	1236.02	170.859	-1195.34	1255.16	411.414	-1334.49	1380.09	459.319	-1340.19	1149.75	457.885	-1332.93	1081.31	470.372	-1426.72	997.803	446.525	-1459.68	899.375	494.285	-1412.18	878.304	494.417	-1473.47	803.375
789	0	283.157	-1486.42	1597.88	183.646	-1491.38	1591.5	289.994	-1313.34	1600.03	176.798	-1308.83	1592.08	242.249	-1269.87	1424.77	262.327	-1231.01	1206.17	237.021	-1403.4	1362.78	222.219	-1469.71	1236.65	172.226	-1202.65	1256.38	412.113	-1342.89	1381.47	460.747	-1351.03	1151.42	459.658	-1344.3	1082.82	470.592	-1439.94	1000.97	446.289	-1474.37	903.201	495.07	-1428.32	881.468	494.325	-1491.27	808.019
790	0	283.757	-1494.6	1598.38	184.25	-1499.53	1591.96	290.659	-1321.54	1601.01	177.473	-1316.95	1593.07	243.156	-1277.69	1425.83	263.664	-1238.24	1207.31	237.684	-1411.07	1363.55	222.858	-1477.08	1237.22	173.506	-1209.9	1257.52	412.79	-1351.08	1382.77	462.16	-1361.67	1153.02	461.419	-1355.52	1084.27	470.768	-1453.03	1004.18	445.966	-1488.97	907.144	495.769	-1444.45	884.751	494.101	-1509.07	812.894
791	0	284.32	-1502.72	1598.77	184.819	-1507.62	1592.28	291.244	-1329.67	1601.94	178.071	-1325.03	1593.96	244.01	-1285.41	1426.79	264.91	-1245.38	1208.36	238.353	-1418.65	1364.23	223.542	-1484.36	1237.73	174.691	-1217.1	1258.57	413.446	-1359.08	1383.97	463.553	-1372.08	1154.56	463.157	-1366.56	1085.67	470.905	-1465.95	1007.43	445.557	-1503.45	911.196	496.367	-1460.51	888.143	493.737	-1526.82	817.991
792	0	284.851	-1510.76	1599.07	185.361	-1515.66	1592.48	291.755	-1337.73	1602.79	178.597	-1333.05	1594.76	244.807	-1293.04	1427.66	266.06	-1252.45	1209.31	239.031	-1426.13	1364.82	224.271	-1491.56	1238.18	175.776	-1224.26	1259.52	414.083	-1366.87	1385.07	464.922	-1382.24	1156.02	464.861	-1377.41	1087	471.004	-1478.7	1010.71	445.065	-1517.8	915.348	496.849	-1476.47	891.634	493.229	-1544.47	823.299
793	0	285.357	-1518.72	1599.28	185.879	-1523.64	1592.57	292.199	-1345.72	1603.57	179.06	-1341.03	1595.45	245.547	-1300.57	1428.43	267.111	-1259.44	1210.16	239.717	-1433.53	1365.33	225.042	-1498.7	1238.57	176.756	-1231.4	1260.38	414.699	-1374.49	1386.07	466.26	-1392.15	1157.39	466.521	-1388.06	1088.26	471.069	-1491.24	1014	444.493	-1531.97	919.59	497.205	-1492.28	895.209	492.575	-1561.97	828.802
794	0	285.842	-1526.6	1599.41	186.38	-1531.56	1592.56	292.583	-1353.62	1604.27	179.463	-1348.94	1596.03	246.227	-1308.03	1429.11	268.059	-1266.39	1210.91	240.408	-1440.86	1365.76	225.853	-1505.79	1238.88	177.627	-1238.51	1261.14	415.293	-1381.93	1386.96	467.561	-1401.79	1158.67	468.127	-1398.51	1089.45	471.1	-1503.56	1017.28	443.843	-1545.95	923.905	497.426	-1507.91	898.853	491.776	-1579.28	834.475
795	0	286.314	-1534.39	1599.47	186.87	-1539.41	1592.47	292.911	-1361.44	1604.88	179.811	-1356.8	1596.52	246.846	-1315.42	1429.69	268.903	-1273.28	1211.55	241.103	-1448.12	1366.09	226.7	-1512.82	1239.12	178.384	-1245.63	1261.8	415.865	-1389.21	1387.75	468.819	-1411.18	1159.85	469.67	-1408.75	1090.55	471.099	-1515.64	1020.55	443.121	-1559.71	928.276	497.508	-1523.31	902.548	490.836	-1596.35	840.294
796	0	286.776	-1542.1	1599.45	187.353	-1547.2	1592.29	293.188	-1369.18	1605.41	180.11	-1364.61	1596.9	247.401	-1322.74	1430.16	269.641	-1280.12	1212.09	241.799	-1455.33	1366.34	227.576	-1519.81	1239.27	179.026	-1252.74	1262.35	416.41	-1396.34	1388.42	470.026	-1420.32	1160.92	471.139	-1418.78	1091.56	471.064	-1527.47	1023.79	442.33	-1573.24	932.682	497.446	-1538.47	906.275	489.76	-1613.13	846.224
797	0	287.234	-1549.73	1599.36	187.833	-1554.93	1592.04	293.418	-1376.83	1605.84	180.363	-1372.36	1597.17	247.891	-1330.01	1430.52	270.27	-1286.93	1212.51	242.491	-1462.49	1366.51	228.475	-1526.77	1239.33	179.55	-1259.86	1262.79	416.927	-1403.33	1388.97	471.175	-1429.21	1161.89	472.527	-1428.6	1092.49	470.995	-1539.03	1026.98	441.473	-1586.5	937.101	497.243	-1553.34	910.012	488.555	-1629.59	852.23
798	0	287.69	-1557.28	1599.21	188.315	-1562.6	1591.72	293.605	-1384.41	1606.18	180.573	-1380.07	1597.35	248.313	-1337.24	1430.79	270.79	-1293.7	1212.83	243.175	-1469.62	1366.58	229.391	-1533.7	1239.31	179.955	-1266.99	1263.13	417.412	-1410.2	1389.41	472.258	-1437.87	1162.74	473.825	-1438.22	1093.31	470.889	-1550.33	1030.1	440.555	-1599.49	941.509	496.899	-1567.89	913.738	487.23	-1645.68	858.274
799	0	288.149	-1564.75	1598.99	188.8	-1570.22	1591.34	293.752	-1391.92	1606.42	180.742	-1387.73	1597.42	248.666	-1344.42	1430.95	271.199	-1300.44	1213.04	243.847	-1476.72	1366.57	230.314	-1540.61	1239.2	180.24	-1274.14	1263.36	417.86	-1416.97	1389.74	473.268	-1446.33	1163.47	475.027	-1447.64	1094.04	470.742	-1561.37	1033.15	439.58	-1612.19	945.878	496.421	-1582.13	917.432	485.795	-1661.38	864.314
800	0	288.611	-1572.15	1598.7	189.292	-1577.8	1590.9	293.86	-1399.36	1606.57	180.872	-1395.35	1597.4	248.95	-1351.57	1431.01	271.498	-1307.15	1213.13	244.501	-1483.8	1366.47	231.238	-1547.52	1239.01	180.406	-1281.31	1263.47	418.269	-1423.63	1389.95	474.198	-1454.59	1164.09	476.127	-1456.89	1094.68	470.553	-1572.13	1036.1	438.552	-1624.59	950.183	495.817	-1596.01	921.071	484.26	-1676.66	870.307
801	0	289.079	-1579.49	1598.35	189.791	-1585.35	1590.4	293.931	-1406.73	1606.62	180.965	-1402.94	1597.29	249.161	-1358.7	1430.97	271.686	-1313.83	1213.13	245.133	-1490.86	1366.3	232.155	-1554.42	1238.73	180.454	-1288.51	1263.48	418.633	-1430.21	1390.05	475.041	-1462.69	1164.6	477.12	-1465.96	1095.21	470.316	-1582.64	1038.94	437.473	-1636.69	954.397	495.094	-1609.54	924.635	482.636	-1691.5	876.211
802	0	289.55	-1586.78	1597.94	190.298	-1592.86	1589.84	293.967	-1414.05	1606.58	181.021	-1410.5	1597.09	249.3	-1365.81	1430.84	271.764	-1320.5	1213.01	245.737	-1497.92	1366.04	233.058	-1561.33	1238.36	180.387	-1295.72	1263.39	418.949	-1436.72	1390.05	475.793	-1470.63	1164.99	478.003	-1474.86	1095.65	470.029	-1592.89	1041.65	436.348	-1648.47	958.494	494.264	-1622.69	928.102	480.935	-1705.88	881.983
803	0	290.025	-1594.02	1597.47	190.81	-1600.35	1589.23	293.967	-1421.32	1606.45	181.041	-1418.04	1596.81	249.367	-1372.91	1430.62	271.733	-1327.16	1212.8	246.308	-1504.97	1365.7	233.937	-1568.25	1237.92	180.206	-1302.97	1263.2	419.213	-1443.17	1389.94	476.447	-1478.45	1165.27	478.774	-1483.62	1095.99	469.687	-1602.89	1044.24	435.18	-1659.93	962.448	493.337	-1635.48	931.453	479.168	-1719.79	887.583
804	0	290.5	-1601.22	1596.94	191.325	-1607.83	1588.57	293.931	-1428.56	1606.24	181.024	-1425.57	1596.44	249.36	-1380	1430.3	271.595	-1333.8	1212.49	246.842	-1512.03	1365.29	234.788	-1575.18	1237.41	179.918	-1310.24	1262.91	419.422	-1449.57	1389.74	477.001	-1486.17	1165.45	479.431	-1492.24	1096.24	469.288	-1612.65	1046.67	433.974	-1671.08	966.235	492.325	-1647.9	934.669	477.345	-1733.22	892.974
805	0	290.973	-1608.39	1596.36	191.841	-1615.29	1587.86	293.859	-1435.76	1605.95	180.97	-1433.09	1596.01	249.281	-1387.09	1429.91	271.354	-1340.45	1212.09	247.333	-1519.09	1364.81	235.602	-1582.14	1236.83	179.527	-1317.55	1262.53	419.574	-1455.93	1389.45	477.453	-1493.79	1165.53	479.976	-1500.74	1096.39	468.83	-1622.19	1048.95	432.733	-1681.92	969.836	491.24	-1659.95	937.732	475.478	-1746.19	898.121
806	0	291.44	-1615.53	1595.72	192.352	-1622.75	1587.1	293.75	-1442.93	1605.58	180.88	-1440.61	1595.51	249.131	-1394.18	1429.44	271.013	-1347.11	1211.6	247.777	-1526.18	1364.27	236.373	-1589.12	1236.2	179.04	-1324.88	1262.06	419.664	-1462.28	1389.08	477.802	-1501.34	1165.52	480.409	-1509.12	1096.47	468.311	-1631.51	1051.06	431.46	-1692.45	973.229	490.092	-1671.63	940.628	473.577	-1758.69	902.995
807	0	291.894	-1622.66	1595.03	192.854	-1630.22	1586.3	293.604	-1450.09	1605.15	180.75	-1448.14	1594.94	248.911	-1401.29	1428.9	270.579	-1353.78	1211.04	248.171	-1533.27	1363.67	237.096	-1596.13	1235.51	178.464	-1332.25	1261.51	419.693	-1468.62	1388.63	478.048	-1508.83	1165.42	480.733	-1517.4	1096.46	467.731	-1640.63	1053	430.161	-1702.68	976.399	488.894	-1682.96	943.342	471.652	-1770.73	907.569
808	0	292.331	-1629.78	1594.29	193.34	-1637.69	1585.45	293.419	-1457.24	1604.64	180.581	-1455.67	1594.32	248.624	-1408.4	1428.29	270.058	-1360.49	1210.41	248.51	-1540.39	1363.02	237.764	-1603.18	1234.77	177.809	-1339.65	1260.9	419.659	-1474.96	1388.11	478.194	-1516.28	1165.24	480.951	-1525.58	1096.37	467.091	-1649.56	1054.77	428.839	-1712.63	979.332	487.655	-1693.95	945.863	469.713	-1782.33	911.822
809	0	292.744	-1636.9	1593.51	193.805	-1645.17	1584.57	293.192	-1464.38	1604.09	180.372	-1463.21	1593.65	248.271	-1415.54	1427.63	269.458	-1367.22	1209.71	248.791	-1547.54	1362.31	238.372	-1610.27	1234	177.082	-1347.09	1260.21	419.56	-1481.32	1387.53	478.242	-1523.7	1164.98	481.067	-1533.68	1096.22	466.393	-1658.32	1056.35	427.5	-1722.3	982.017	486.385	-1704.6	948.181	467.768	-1793.5	915.738
810	0	293.128	-1644.03	1592.7	194.242	-1652.66	1583.66	292.924	-1471.53	1603.47	180.119	-1470.77	1592.93	247.856	-1422.7	1426.9	268.787	-1374.01	1208.95	249.012	-1554.72	1361.57	238.915	-1617.41	1233.2	176.294	-1354.57	1259.47	419.398	-1487.7	1386.89	478.196	-1531.08	1164.65	481.085	-1541.7	1095.99	465.639	-1666.91	1057.76	426.146	-1731.7	984.445	485.093	-1714.93	950.287	465.825	-1804.28	919.304
811	0	293.476	-1651.16	1591.86	194.643	-1660.17	1582.71	292.612	-1478.68	1602.81	179.823	-1478.34	1592.17	247.381	-1429.88	1426.13	268.054	-1380.85	1208.15	249.17	-1561.93	1360.78	239.388	-1624.59	1232.38	175.452	-1362.09	1258.68	419.171	-1494.13	1386.2	478.059	-1538.45	1164.26	481.009	-1549.65	1095.69	464.832	-1675.35	1058.98	424.783	-1740.85	986.611	483.788	-1724.96	952.176	463.893	-1814.67	922.511
812	0	293.782	-1658.3	1590.98	195.004	-1667.69	1581.75	292.255	-1485.84	1602.11	179.482	-1485.93	1591.37	246.849	-1437.1	1425.32	267.268	-1387.75	1207.3	249.263	-1569.18	1359.96	239.787	-1631.82	1231.54	174.567	-1369.65	1257.84	418.882	-1500.61	1385.47	477.837	-1545.8	1163.8	480.843	-1557.54	1095.34	463.977	-1683.64	1060.01	423.415	-1749.77	988.51	482.475	-1734.7	953.843	461.978	-1824.7	925.355
813	0	294.041	-1665.46	1590.09	195.317	-1675.23	1580.76	291.85	-1493.02	1601.37	179.094	-1493.53	1590.54	246.263	-1444.35	1424.46	266.437	-1394.72	1206.42	249.29	-1576.47	1359.11	240.108	-1639.12	1230.69	173.647	-1377.25	1256.95	418.53	-1507.14	1384.7	477.535	-1553.13	1163.28	480.592	-1565.37	1094.92	463.077	-1691.81	1060.86	422.046	-1758.45	990.141	481.162	-1744.17	955.284	460.088	-1834.4	927.834
814	0	294.249	-1672.64	1589.18	195.578	-1682.8	1579.76	291.397	-1500.22	1600.59	178.658	-1501.16	1589.68	245.627	-1451.64	1423.57	265.571	-1401.76	1205.5	249.248	-1583.8	1358.24	240.349	-1646.47	1229.84	172.699	-1384.9	1256.03	418.116	-1513.75	1383.89	477.157	-1560.46	1162.71	480.259	-1573.16	1094.45	462.137	-1699.85	1061.53	420.68	-1766.93	991.502	479.855	-1753.37	956.498	458.227	-1843.78	929.948
815	0	294.399	-1679.85	1588.25	195.782	-1690.37	1578.74	290.895	-1507.43	1599.78	178.172	-1508.81	1588.78	244.941	-1458.97	1422.64	264.675	-1408.89	1204.55	249.138	-1591.18	1357.34	240.506	-1653.88	1228.98	171.73	-1392.59	1255.08	417.643	-1520.44	1383.05	476.706	-1567.78	1162.08	479.848	-1580.9	1093.92	461.16	-1707.79	1062.02	419.321	-1775.2	992.593	478.557	-1762.32	957.484	456.401	-1852.87	931.7
816	0	294.489	-1687.07	1587.31	195.924	-1697.97	1577.72	290.342	-1514.67	1598.94	177.637	-1516.48	1587.86	244.209	-1466.34	1421.68	263.756	-1416.1	1203.57	248.957	-1598.6	1356.42	240.577	-1661.36	1228.12	170.746	-1400.34	1254.09	417.109	-1527.21	1382.18	476.188	-1575.09	1161.4	479.362	-1588.6	1093.34	460.15	-1715.62	1062.32	417.97	-1783.29	993.416	477.273	-1771.04	958.241	454.614	-1861.69	933.092
817	0	294.516	-1694.32	1586.36	196.001	-1705.59	1576.68	289.738	-1521.93	1598.06	177.05	-1524.16	1586.91	243.432	-1473.75	1420.68	262.82	-1423.41	1202.57	248.707	-1606.06	1355.48	240.561	-1668.9	1227.26	169.75	-1408.12	1253.08	416.517	-1534.07	1381.28	475.604	-1582.39	1160.66	478.803	-1596.26	1092.7	459.11	-1723.35	1062.44	416.632	-1791.18	993.972	476.005	-1779.53	958.769	452.869	-1870.24	934.128
818	0	294.478	-1701.6	1585.4	196.011	-1713.22	1575.64	289.081	-1529.22	1597.17	176.412	-1531.87	1585.93	242.611	-1481.2	1419.66	261.87	-1430.81	1201.55	248.386	-1613.58	1354.52	240.457	-1676.52	1226.41	168.746	-1415.96	1252.04	415.867	-1541.02	1380.35	474.957	-1589.69	1159.87	478.173	-1603.88	1092.02	458.042	-1730.99	1062.38	415.307	-1798.91	994.261	474.756	-1787.79	959.069	451.169	-1878.55	934.812
819	0	294.373	-1708.9	1584.44	195.952	-1720.87	1574.6	288.373	-1536.53	1596.24	175.722	-1539.6	1584.93	241.747	-1488.71	1418.61	260.909	-1438.3	1200.5	247.994	-1621.14	1353.54	240.264	-1684.2	1225.56	167.737	-1423.84	1250.97	415.16	-1548.07	1379.4	474.248	-1596.99	1159.03	477.473	-1611.48	1091.28	456.949	-1738.54	1062.14	413.997	-1806.46	994.286	473.529	-1795.85	959.142	449.515	-1886.61	935.146
820	0	294.2	-1716.23	1583.47	195.823	-1728.54	1573.55	287.611	-1543.87	1595.29	174.979	-1547.34	1583.9	240.84	-1496.25	1417.53	259.939	-1445.88	1199.42	247.531	-1628.75	1352.55	239.981	-1691.95	1224.71	166.724	-1431.78	1249.88	414.395	-1555.22	1378.43	473.48	-1604.29	1158.14	476.704	-1619.04	1090.49	455.832	-1746	1061.72	412.703	-1813.84	994.046	472.322	-1803.69	958.988	447.91	-1894.44	935.133
821	0	293.959	-1723.58	1582.49	195.623	-1736.23	1572.5	286.797	-1551.23	1594.31	174.184	-1555.11	1582.85	239.892	-1503.84	1416.42	258.96	-1453.57	1198.33	246.996	-1636.41	1351.54	239.608	-1699.78	1223.88	165.708	-1439.76	1248.76	413.573	-1562.46	1377.43	472.651	-1611.58	1157.2	475.866	-1626.58	1089.64	454.691	-1753.37	1061.12	411.426	-1821.06	993.543	471.138	-1811.32	958.607	446.354	-1902.05	934.773
822	0	293.649	-1730.96	1581.51	195.351	-1743.94	1571.44	285.93	-1558.62	1593.31	173.337	-1562.89	1581.77	238.902	-1511.48	1415.28	257.974	-1461.34	1197.21	246.391	-1644.12	1350.51	239.145	-1707.67	1223.05	164.689	-1447.79	1247.62	412.695	-1569.8	1376.41	471.763	-1618.87	1156.21	474.96	-1634.08	1088.75	453.527	-1760.66	1060.35	410.166	-1828.11	992.776	469.977	-1818.75	957.999	444.846	-1909.42	934.07
823	0	293.27	-1738.37	1580.52	195.009	-1751.66	1570.38	285.011	-1566.03	1592.29	172.437	-1570.7	1580.67	237.87	-1519.17	1414.11	256.981	-1469.22	1196.07	245.714	-1651.87	1349.47	238.593	-1715.63	1222.22	163.668	-1455.88	1246.45	411.76	-1577.25	1375.37	470.815	-1626.16	1155.17	473.985	-1641.56	1087.8	452.34	-1767.86	1059.39	408.923	-1835	991.746	468.838	-1825.97	957.165	443.388	-1916.57	933.021
[truncated: 69 more columns]

## Sheet: Sheet2
Devices
		025370 - Force			025370 - Moment			025370 - CoP			027571 - Force			027571 - Moment			027571 - CoP			037720 - Force			037720 - Moment			037720 - CoP
Frame	Sub Frame	Fx	Fy	Fz	Mx	My	Mz	Cx	Cy	Cz	Fx	Fy	Fz	Mx	My	Mz	Cx	Cy	Cz	Fx	Fy	Fz	Mx	My	Mz	Cx	Cy	Cz
		N	N	N	N.mm	N.mm	N.mm	mm	mm	mm	N	N	N	N.mm	N.mm	N.mm	mm	mm	mm	N	N	N	N.mm	N.mm	N.mm	mm	mm	mm
334	0	0	0	0	0	0	0	200	300	0	0	0	0	0	0	0	200	903	0	0	0	0	0	0	0	603	903	0
334	1	0	0	0	0	0	0	200	300	0	0	0	0	0	0	0	200	903	0	0	0	0	0	0	0	603	903	0
334	2	0	0	0	0	0	0	200	300	0	0	0	0	0	0	0	200	903	0	0	0	0	0	0	0	603	903	0
334	3	0	0	0	0	0	0	200	300	0	0	0	0	0	0	0	200	903	0	0	0	0	0	0	0	603	903	0
334	4	0	0	0	0	0	0	200	300	0	0	0	0	0	0	0	200	903	0	0	0	0	0	0	0	603	903	0
334	5	0	0	0	0	0	0	200	300	0	0	0	0	0	0	0	200	903	0	0	0	0	0	0	0	603	903	0
334	6	0	0	0	0	0	0	200	300	0	0	0	0	0	0	0	200	903	0	0	0	0	0	0	0	603	903	0
334	7	0	0	0	0	0	0	200	300	0	0	0	0	0	0	0	200	903	0	0	0	0	0	0	0	603	903	0
334	8	0	0	0	0	0	0	200	300	0	0	0	0	0	0	0	200	903	0	0	0	0	0	0	0	603	903	0
334	9	0	0	0	0	0	0	200	300	0	0	0	0	0	0	0	200	903	0	0	0	0	0	0	0	603	903	0
335	0	0	0	0	0	0	0	200	300	0	0	0	0	0	0	0	200	903	0	0	0	0	0	0	0	603	903	0
335	1	0	0	0	0	0	0	200	300	0	0	0	0	0	0	0	200	903	0	0	0	0	0	0	0	603	903	0
335	2	0	0	0	0	0	0	200	300	0	0	0	0	0	0	0	200	903	0	0	0	0	0	0	0	603	903	0
335	3	0	0	0	0	0	0	200	300	0	0	0	0	0	0	0	200	903	0	0	0	0	0	0	0	603	903	0
335	4	0	0	0	0	0	0	200	300	0	0	0	0	0	0	0	200	903	0	0	0	0	0	0	0	603	903	0
335	5	0	0	0	0	0	0	200	300	0	0	0	0	0	0	0	200	903	0	0	0	0	0	0	0	603	903	0
335	6	0	0	0	0	0	0	200	300	0	0	0	0	0	0	0	200	903	0	0	0	0	0	0	0	603	903	0
335	7	0	0	0	0	0	0	200	300	0	0	0	0	0	0	0	200	903	0	0	0	0	0	0	0	603	903	0
335	8	0	0	0	0	0	0	200	300	0	0	0	0	0	0	0	200	903	0	0	0	0	0	0	0	603	903	0
335	9	0	0	0	0	0	0	200	300	0	0	0	0	0	0	0	200	903	0	0	0	0	0	0	0	603	903	0
336	0	0	0	0	0	0	0	200	300	0	0	0	0	0	0	0	200	903	0	0	0	0	0	0	0	603	903	0
336	1	0	0	0	0	0	0	200	300	0	0	0	0	0	0	0	200	903	0	0	0	0	0	0	0	603	903	0
336	2	0	0	0	0	0	0	200	300	0	0	0	0	0	0	0	200	903	0	0	0	0	0	0	0	603	903	0
336	3	0	0	0	0	0	0	200	300	0	0	0	0	0	0	0	200	903	0	0	0	0	0	0	0	603	903	0
336	4	0	0	0	0	0	0	200	300	0	0	0	0	0	0	0	200	903	0	0	0	0	0	0	0	603	903	0
336	5	0	0	0	0	0	0	200	300	0	0	0	0	0	0	0	200	903	0	0	0	0	0	0	0	603	903	0
336	6	0	0	0	0	0	0	200	300	0	0	0	0	0	0	0	200	903	0	0	0	0	0	0	0	603	903	0
336	7	0	0	0	0	0	0	200	300	0	0	0	0	0	0	0	200	903	0	0	0	0	0	0	0	603	903	0
336	8	0	0	0	0	0	0	200	300	0	0	0	0	0	0	0	200	903	0	0	0	0	0	0	0	603	903	0
336	9	0	0	0	0	0	0	200	300	0	0	0	0	0	0	0	200	903	0	0	0	0	0	0	0	603	903	0
337	0	0	0	0	0	0	0	200	300	0	0	0	0	0	0	0	200	903	0	0	0	0	0	0	0	603	903	0
337	1	0	0	0	0	0	0	200	300	0	0	0	0	0	0	0	200	903	0	0	0	0	0	0	0	603	903	0
337	2	0	0	0	0	0	0	200	300	0	0	0	0	0	0	0	200	903	0	0	0	0	0	0	0	603	903	0
337	3	0	0	0	0	0	0	200	300	0	0	0	0	0	0	0	200	903	0	0	0	0	0	0	0	603	903	0
337	4	0	0	0	0	0	0	200	300	0	0	0	0	0	0	0	200	903	0	0	0	0	0	0	0	603	903	0
337	5	0	0	0	0	0	0	200	300	0	0	0	0	0	0	0	200	903	0	0	0	0	0	0	0	603	903	0
337	6	0	0	0	0	0	0	200	300	0	0	0	0	0	0	0	200	903	0	0	0	0	0	0	0	603	903	0
337	7	0	0	0	0	0	0	200	300	0	0	0	0	0	0	0	200	903	0	0	0	0	0	0	0	603	903	0
337	8	0	0	0	0	0	0	200	300	0	0	0	0	0	0	0	200	903	0	0	0	0	0	0	0	603	903	0
337	9	0	0	0	0	0	0	200	300	0	0	0	0	0	0	0	200	903	0	0	0	0	0	0	0	603	903	0
338	0	0	0	0	0	0	0	200	300	0	0	0	0	0	0	0	200	903	0	0	0	0	0	0	0	603	903	0
338	1	0	0	0	0	0	0	200	300	0	0	0	0	0	0	0	200	903	0	0	0	0	0	0	0	603	903	0
338	2	0	0	0	0	0	0	200	300	0	0	0	0	0	0	0	200	903	0	0	0	0	0	0	0	603	903	0
338	3	0	0	0	0	0	0	200	300	0	0	0	0	0	0	0	200	903	0	0	0	0	0	0	0	603	903	0
338	4	0	0	0	0	0	0	200	300	0	0	0	0	0	0	0	200	903	0	0	0	0	0	0	0	603	903	0
338	5	0	0	0	0	0	0	200	300	0	0	0	0	0	0	0	200	903	0	0	0	0	0	0	0	603	903	0
338	6	0	0	0	0	0	0	200	300	0	0	0	0	0	0	0	200	903	0	0	0	0	0	0	0	603	903	0
338	7	0	0	0	0	0	0	200	300	0	0	0	0	0	0	0	200	903	0	0	0	0	0	0	0	603	903	0
338	8	0	0	0	0	0	0	200	300	0	0	0	0	0	0	0	200	903	0	0	0	0	0	0	0	603	903	0
338	9	0	0	0	0	0	0	200	300	0	0	0	0	0	0	0	200	903	0	0	0	0	0	0	0	603	903	0
339	0	0	0	0	0	0	0	200	300	0	0	0	0	0	0	0	200	903	0	0	0	0	0	0	0	603	903	0
339	1	0	0	0	0	0	0	200	300	0	0	0	0	0	0	0	200	903	0	0	0	0	0	0	0	603	903	0
339	2	0	0	0	0	0	0	200	300	0	0	0	0	0	0	0	200	903	0	0	0	0	0	0	0	603	903	0
339	3	0	0	0	0	0	0	200	300	0	0	0	0	0	0	0	200	903	0	0	0	0	0	0	0	603	903	0
339	4	0	0	0	0	0	0	200	300	0	0	0	0	0	0	0	200	903	0	0	0	0	0	0	0	603	903	0
339	5	0	0	0	0	0	0	200	300	0	0	0	0	0	0	0	200	903	0	0	0	0	0	0	0	603	903	0
339	6	0	0	0	0	0	0	200	300	0	0	0	0	0	0	0	200	903	0	0	0	0	0	0	0	603	903	0
339	7	0	0	0	0	0	0	200	300	0	0	0	0	0	0	0	200	903	0	0	0	0	0	0	0	603	903	0
339	8	0	0	0	0	0	0	200	300	0	0	0	0	0	0	0	200	903	0	0	0	0	0	0	0	603	903	0
339	9	0	0	0	0	0	0	200	300	0	0	0	0	0	0	0	200	903	0	0	0	0	0	0	0	603	903	0
340	0	0	0	0	0	0	0	200	300	0	0	0	0	0	0	0	200	903	0	0	0	0	0	0	0	603	903	0
340	1	0	0	0	0	0	0	200	300	0	0	0	0	0	0	0	200	903	0	0	0	0	0	0	0	603	903	0
340	2	0	0	0	0	0	0	200	300	0	0	0	0	0	0	0	200	903	0	0	0	0	0	0	0	603	903	0
340	3	0	0	0	0	0	0	200	300	0	0	0	0	0	0	0	200	903	0	0	0	0	0	0	0	603	903	0
340	4	0	0	0	0	0	0	200	300	0	0	0	0	0	0	0	200	903	0	0	0	0	0	0	0	603	903	0
340	5	0	0	0	0	0	0	200	300	0	0	0	0	0	0	0	200	903	0	0	0	0	0	0	0	603	903	0
340	6	0	0	0	0	0	0	200	300	0	0	0	0	0	0	0	200	903	0	0	0	0	0	0	0	603	903	0
340	7	0	0	0	0	0	0	200	300	0	0	0	0	0	0	0	200	903	0	0	0	0	0	0	0	603	903	0
340	8	0	0	0	0	0	0	200	300	0	0	0	0	0	0	0	200	903	0	0	0	0	0	0	0	603	903	0
340	9	0	0	0	0	0	0	200	300	0	0	0	0	0	0	0	200	903	0	0	0	0	0	0	0	603	903	0
341	0	0	0	0	0	0	0	200	300	0	0	0	0	0	0	0	200	903	0	0	0	0	0	0	0	603	903	0
341	1	0	0	0	0	0	0	200	300	0	0	0	0	0	0	0	200	903	0	0	0	0	0	0	0	603	903	0
341	2	0	0	0	0	0	0	200	300	0	0	0	0	0	0	0	200	903	0	0	0	0	0	0	0	603	903	0
341	3	0	0	0	0	0	0	200	300	0	0	0	0	0	0	0	200	903	0	0	0	0	0	0	0	603	903	0
341	4	0	0	0	0	0	0	200	300	0	0	0	0	0	0	0	200	903	0	0	0	0	0	0	0	603	903	0
341	5	0	0	0	0	0	0	200	300	0	0	0	0	0	0	0	200	903	0	0	0	0	0	0	0	603	903	0
341	6	0	0	0	0	0	0	200	300	0	0	0	0	0	0	0	200	903	0	0	0	0	0	0	0	603	903	0
341	7	0	0	0	0	0	0	200	300	0	0	0	0	0	0	0	200	903	0	0	0	0	0	0	0	603	903	0
341	8	0	0	0	0	0	0	200	300	0	0	0	0	0	0	0	200	903	0	0	0	0	0	0	0	603	903	0
341	9	0	0	0	0	0	0	200	300	0	0	0	0	0	0	0	200	903	0	0	0	0	0	0	0	603	903	0
342	0	0	0	0	0	0	0	200	300	0	0	0	0	0	0	0	200	903	0	0	0	0	0	0	0	603	903	0
342	1	0	0	0	0	0	0	200	300	0	0	0	0	0	0	0	200	903	0	0	0	0	0	0	0	603	903	0
342	2	0	0	0	0	0	0	200	300	0	0	0	0	0	0	0	200	903	0	0	0	0	0	0	0	603	903	0
342	3	0	0	0	0	0	0	200	300	0	0	0	0	0	0	0	200	903	0	0	0	0	0	0	0	603	903	0
342	4	0	0	0	0	0	0	200	300	0	0	0	0	0	0	0	200	903	0	0	0	0	0	0	0	603	903	0
342	5	0	0	0	0	0	0	200	300	0	0	0	0	0	0	0	200	903	0	0	0	0	0	0	0	603	903	0
342	6	0	0	0	0	0	0	200	300	0	0	0	0	0	0	0	200	903	0	0	0	0	0	0	0	603	903	0
342	7	0	0	0	0	0	0	200	300	0	0	0	0	0	0	0	200	903	0	0	0	0	0	0	0	603	903	0
342	8	0	0	0	0	0	0	200	300	0	0	0	0	0	0	0	200	903	0	0	0	0	0	0	0	603	903	0
342	9	0	0	0	0	0	0	200	300	0	0	0	0	0	0	0	200	903	0	0	0	0	0	0	0	603	903	0
343	0	0	0	0	0	0	0	200	300	0	0	0	0	0	0	0	200	903	0	0	0	0	0	0	0	603	903	0
343	1	0	0	0	0	0	0	200	300	0	0	0	0	0	0	0	200	903	0	0	0	0	0	0	0	603	903	0
343	2	0	0	0	0	0	0	200	300	0	0	0	0	0	0	0	200	903	0	0	0	0	0	0	0	603	903	0
343	3	0	0	0	0	0	0	200	300	0	0	0	0	0	0	0	200	903	0	0	0	0	0	0	0	603	903	0
343	4	0	0	0	0	0	0	200	300	0	0	0	0	0	0	0	200	903	0	0	0	0	0	0	0	603	903	0
343	5	0	0	0	0	0	0	200	300	0	0	0	0	0	0	0	200	903	0	0	0	0	0	0	0	603	903	0
343	6	0	0	0	0	0	0	200	300	0	0	0	0	0	0	0	200	903	0	0	0	0	0	0	0	603	903	0
343	7	0	0	0	0	0	0	200	300	0	0	0	0	0	0	0	200	903	0	0	0	0	0	0	0	603	903	0
343	8	0	0	0	0	0	0	200	300	0	0	0	0	0	0	0	200	903	0	0	0	0	0	0	0	603	903	0
343	9	0	0	0	0	0	0	200	300	0	0	0	0	0	0	0	200	903	0	0	0	0	0	0	0	603	903	0
344	0	0	0	0	0	0	0	200	300	0	0	0	0	0	0	0	200	903	0	0	0	0	0	0	0	603	903	0
344	1	0	0	0	0	0	0	200	300	0	0	0	0	0	0	0	200	903	0	0	0	0	0	0	0	603	903	0
344	2	0	0	0	0	0	0	200	300	0	0	0	0	0	0	0	200	903	0	0	0	0	0	0	0	603	903	0
344	3	0	0	0	0	0	0	200	300	0	0	0	0	0	0	0	200	903	0	0	0	0	0	0	0	603	903	0
344	4	0	0	0	0	0	0	200	300	0	0	0	0	0	0	0	200	903	0	0	0	0	0	0	0	603	903	0
344	5	0	0	0	0	0	0	200	300	0	0	0	0	0	0	0	200	903	0	0	0	0	0	0	0	603	903	0
344	6	0	0	0	0	0	0	200	300	0	0	0	0	0	0	0	200	903	0	0	0	0	0	0	0	603	903	0
344	7	0	0	0	0	0	0	200	300	0	0	0	0	0	0	0	200	903	0	0	0	0	0	0	0	603	903	0
344	8	0	0	0	0	0	0	200	300	0	0	0	0	0	0	0	200	903	0	0	0	0	0	0	0	603	903	0
344	9	0	0	0	0	0	0	200	300	0	0	0	0	0	0	0	200	903	0	0	0	0	0	0	0	603	903	0
345	0	0	0	0	0	0	0	200	300	0	0	0	0	0	0	0	200	903	0	0	0	0	0	0	0	603	903	0
345	1	0	0	0	0	0	0	200	300	0	0	0	0	0	0	0	200	903	0	0	0	0	0	0	0	603	903	0
345	2	0	0	0	0	0	0	200	300	0	0	0	0	0	0	0	200	903	0	0	0	0	0	0	0	603	903	0
345	3	0	0	0	0	0	0	200	300	0	0	0	0	0	0	0	200	903	0	0	0	0	0	0	0	603	903	0
345	4	0	0	0	0	0	0	200	300	0	0	0	0	0	0	0	200	903	0	0	0	0	0	0	0	603	903	0
345	5	0	0	0	0	0	0	200	300	0	0	0	0	0	0	0	200	903	0	0	0	0	0	0	0	603	903	0
345	6	0	0	0	0	0	0	200	300	0	0	0	0	0	0	0	200	903	0	0	0	0	0	0	0	603	903	0
345	7	0	0	0	0	0	0	200	300	0	0	0	0	0	0	0	200	903	0	0	0	0	0	0	0	603	903	0
345	8	0	0	0	0	0	0	200	300	0	0	0	0	0	0	0	200	903	0	0	0	0	0	0	0	603	903	0
345	9	0	0	0	0	0	0	200	300	0	0	0	0	0	0	0	200	903	0	0	0	0	0	0	0	603	903	0
346	0	0	0	0	0	0	0	200	300	0	0	0	0	0	0	0	200	903	0	0	0	0	0	0	0	603	903	0
346	1	0	0	0	0	0	0	200	300	0	0	0	0	0	0	0	200	903	0	0	0	0	0	0	0	603	903	0
346	2	0	0	0	0	0	0	200	300	0	0	0	0	0	0	0	200	903	0	0	0	0	0	0	0	603	903	0
346	3	0	0	0	0	0	0	200	300	0	0	0	0	0	0	0	200	903	0	0	0	0	0	0	0	603	903	0
346	4	0	0	0	0	0	0	200	300	0	0	0	0	0	0	0	200	903	0	0	0	0	0	0	0	603	903	0
346	5	0	0	0	0	0	0	200	300	0	0	0	0	0	0	0	200	903	0	0	0	0	0	0	0	603	903	0
346	6	0	0	0	0	0	0	200	300	0	0	0	0	0	0	0	200	903	0	0	0	0	0	0	0	603	903	0
346	7	0	0	0	0	0	0	200	300	0	0	0	0	0	0	0	200	903	0	0	0	0	0	0	0	603	903	0
346	8	0	0	0	0	0	0	200	300	0	0	0	0	0	0	0	200	903	0	0	0	0	0	0	0	603	903	0
346	9	0	0	0	0	0	0	200	300	0	0	0	0	0	0	0	200	903	0	0	0	0	0	0	0	603	903	0
347	0	0	0	0	0	0	0	200	300	0	0	0	0	0	0	0	200	903	0	0	0	0	0	0	0	603	903	0
347	1	0	0	0	0	0	0	200	300	0	0	0	0	0	0	0	200	903	0	0	0	0	0	0	0	603	903	0
347	2	0	0	0	0	0	0	200	300	0	0	0	0	0	0	0	200	903	0	0	0	0	0	0	0	603	903	0
347	3	0	0	0	0	0	0	200	300	0	0	0	0	0	0	0	200	903	0	0	0	0	0	0	0	603	903	0
347	4	0	0	0	0	0	0	200	300	0	0	0	0	0	0	0	200	903	0	0	0	0	0	0	0	603	903	0
347	5	0	0	0	0	0	0	200	300	0	0	0	0	0	0	0	200	903	0	0	0	0	0	0	0	603	903	0
347	6	0	0	0	0	0	0	200	300	0	0	0	0	0	0	0	200	903	0	0	0	0	0	0	0	603	903	0
347	7	0	0	0	0	0	0	200	300	0	0	0	0	0	0	0	200	903	0	0	0	0	0	0	0	603	903	0
347	8	0	0	0	0	0	0	200	300	0	0	0	0	0	0	0	200	903	0	0	0	0	0	0	0	603	903	0
347	9	0	0	0	0	0	0	200	300	0	0	0	0	0	0	0	200	903	0	0	0	0	0	0	0	603	903	0
348	0	0	0	0	0	0	0	200	300	0	0	0	0	0	0	0	200	903	0	0	0	0	0	0	0	603	903	0
348	1	0	0	0	0	0	0	200	300	0	0	0	0	0	0	0	200	903	0	0	0	0	0	0	0	603	903	0
348	2	0	0	0	0	0	0	200	300	0	0	0	0	0	0	0	200	903	0	0	0	0	0	0	0	603	903	0
348	3	0	0	0	0	0	0	200	300	0	0	0	0	0	0	0	200	903	0	0	0	0	0	0	0	603	903	0
348	4	0	0	0	0	0	0	200	300	0	0	0	0	0	0	0	200	903	0	0	0	0	0	0	0	603	903	0
348	5	0	0	0	0	0	0	200	300	0	0	0	0	0	0	0	200	903	0	0	0	0	0	0	0	603	903	0
348	6	0	0	0	0	0	0	200	300	0	0	0	0	0	0	0	200	903	0	0	0	0	0	0	0	603	903	0
348	7	0	0	0	0	0	0	200	300	0	0	0	0	0	0	0	200	903	0	0	0	0	0	0	0	603	903	0
348	8	0	0	0	0	0	0	200	300	0	0	0	0	0	0	0	200	903	0	0	0	0	0	0	0	603	903	0
348	9	0	0	0	0	0	0	200	300	0	0	0	0	0	0	0	200	903	0	0	0	0	0	0	0	603	903	0
349	0	0	0	0	0	0	0	200	300	0	0	0	0	0	0	0	200	903	0	0	0	0	0	0	0	603	903	0
349	1	0	0	0	0	0	0	200	300	0	0	0	0	0	0	0	200	903	0	0	0	0	0	0	0	603	903	0
349	2	0	0	0	0	0	0	200	300	0	0	0	0	0	0	0	200	903	0	0	0	0	0	0	0	603	903	0
349	3	0	0	0	0	0	0	200	300	0	0	0	0	0	0	0	200	903	0	0	0	0	0	0	0	603	903	0
349	4	0	0	0	0	0	0	200	300	0	0	0	0	0	0	0	200	903	0	0	0	0	0	0	0	603	903	0
349	5	0	0	0	0	0	0	200	300	0	0	0	0	0	0	0	200	903	0	0	0	0	0	0	0	603	903	0
349	6	0	0	0	0	0	0	200	300	0	0	0	0	0	0	0	200	903	0	0	0	0	0	0	0	603	903	0
349	7	0	0	0	0	0	0	200	300	0	0	0	0	0	0	0	200	903	0	0	0	0	0	0	0	603	903	0
349	8	0	0	0	0	0	0	200	300	0	0	0	0	0	0	0	200	903	0	0	0	0	0	0	0	603	903	0
349	9	0	0	0	0	0	0	200	300	0	0	0	0	0	0	0	200	903	0	0	0	0	0	0	0	603	903	0
350	0	0	0	0	0	0	0	200	300	0	0	0	0	0	0	0	200	903	0	0	0	0	0	0	0	603	903	0
350	1	0	0	0	0	0	0	200	300	0	0	0	0	0	0	0	200	903	0	0	0	0	0	0	0	603	903	0
350	2	0	0	0	0	0	0	200	300	0	0	0	0	0	0	0	200	903	0	0	0	0	0	0	0	603	903	0
350	3	0	0	0	0	0	0	200	300	0	0	0	0	0	0	0	200	903	0	0	0	0	0	0	0	603	903	0
350	4	0	0	0	0	0	0	200	300	0	0	0	0	0	0	0	200	903	0	0	0	0	0	0	0	603	903	0
350	5	0	0	0	0	0	0	200	300	0	0	0	0	0	0	0	200	903	0	0	0	0	0	0	0	603	903	0
350	6	0	0	0	0	0	0	200	300	0	0	0	0	0	0	0	200	903	0	0	0	0	0	0	0	603	903	0
350	7	0	0	0	0	0	0	200	300	0	0	0	0	0	0	0	200	903	0	0	0	0	0	0	0	603	903	0
350	8	0	0	0	0	0	0	200	300	0	0	0	0	0	0	0	200	903	0	0	0	0	0	0	0	603	903	0
350	9	0	0	0	0	0	0	200	300	0	0	0	0	0	0	0	200	903	0	0	0	0	0	0	0	603	903	0
351	0	0	0	0	0	0	0	200	300	0	0	0	0	0	0	0	200	903	0	0	0	0	0	0	0	603	903	0
351	1	0	0	0	0	0	0	200	300	0	0	0	0	0	0	0	200	903	0	0	0	0	0	0	0	603	903	0
351	2	0	0	0	0	0	0	200	300	0	0	0	0	0	0	0	200	903	0	0	0	0	0	0	0	603	903	0
351	3	0	0	0	0	0	0	200	300	0	0	0	0	0	0	0	200	903	0	0	0	0	0	0	0	603	903	0
351	4	0	0	0	0	0	0	200	300	0	0	0	0	0	0	0	200	903	0	0	0	0	0	0	0	603	903	0
351	5	0	0	0	0	0	0	200	300	0	0	0	0	0	0	0	200	903	0	0	0	0	0	0	0	603	903	0
351	6	0	0	0	0	0	0	200	300	0	0	0	0	0	0	0	200	903	0	0	0	0	0	0	0	603	903	0
351	7	0	0	0	0	0	0	200	300	0	0	0	0	0	0	0	200	903	0	0	0	0	0	0	0	603	903	0
351	8	0	0	0	0	0	0	200	300	0	0	0	0	0	0	0	200	903	0	0	0	0	0	0	0	603	903	0
351	9	0	0	0	0	0	0	200	300	0	0	0	0	0	0	0	200	903	0	0	0	0	0	0	0	603	903	0
352	0	0	0	0	0	0	0	200	300	0	0	0	0	0	0	0	200	903	0	0	0	0	0	0	0	603	903	0
352	1	0	0	0	0	0	0	200	300	0	0	0	0	0	0	0	200	903	0	0	0	0	0	0	0	603	903	0
352	2	0	0	0	0	0	0	200	300	0	0	0	0	0	0	0	200	903	0	0	0	0	0	0	0	603	903	0
352	3	0	0	0	0	0	0	200	300	0	0	0	0	0	0	0	200	903	0	0	0	0	0	0	0	603	903	0
352	4	0	0	0	0	0	0	200	300	0	0	0	0	0	0	0	200	903	0	0	0	0	0	0	0	603	903	0
352	5	0	0	0	0	0	0	200	300	0	0	0	0	0	0	0	200	903	0	0	0	0	0	0	0	603	903	0
352	6	0	0	0	0	0	0	200	300	0	0	0	0	0	0	0	200	903	0	0	0	0	0	0	0	603	903	0
352	7	0	0	0	0	0	0	200	300	0	0	0	0	0	0	0	200	903	0	0	0	0	0	0	0	603	903	0
352	8	0	0	0	0	0	0	200	300	0	0	0	0	0	0	0	200	903	0	0	0	0	0	0	0	603	903	0
352	9	0	0	0	0	0	0	200	300	0	0	0	0	0	0	0	200	903	0	0	0	0	0	0	0	603	903	0
353	0	0	0	0	0	0	0	200	300	0	0	0	0	0	0	0	200	903	0	0	0	0	0	0	0	603	903	0
353	1	0	0	0	0	0	0	200	300	0	0	0	0	0	0	0	200	903	0	0	0	0	0	0	0	603	903	0
353	2	0	0	0	0	0	0	200	300	0	0	0	0	0	0	0	200	903	0	0	0	0	0	0	0	603	903	0
353	3	0	0	0	0	0	0	200	300	0	0	0	0	0	0	0	200	903	0	0	0	0	0	0	0	603	903	0
353	4	0	0	0	0	0	0	200	300	0	0	0	0	0	0	0	200	903	0	0	0	0	0	0	0	603	903	0
353	5	0	0	0	0	0	0	200	300	0	0	0	0	0	0	0	200	903	0	0	0	0	0	0	0	603	903	0
353	6	0	0	0	0	0	0	200	300	0	0	0	0	0	0	0	200	903	0	0	0	0	0	0	0	603	903	0
353	7	0	0	0	0	0	0	200	300	0	0	0	0	0	0	0	200	903	0	0	0	0	0	0	0	603	903	0
353	8	0	0	0	0	0	0	200	300	0	0	0	0	0	0	0	200	903	0	0	0	0	0	0	0	603	903	0
353	9	0	0	0	0	0	0	200	300	0	0	0	0	0	0	0	200	903	0	0	0	0	0	0	0	603	903	0
354	0	0	0	0	0	0	0	200	300	0	0	0	0	0	0	0	200	903	0	0	0	0	0	0	0	603	903	0
354	1	0	0	0	0	0	0	200	300	0	0	0	0	0	0	0	200	903	0	0	0	0	0	0	0	603	903	0
354	2	0	0	0	0	0	0	200	300	0	0	0	0	0	0	0	200	903	0	0	0	0	0	0	0	603	903	0
354	3	0	0	0	0	0	0	200	300	0	0	0	0	0	0	0	200	903	0	0	0	0	0	0	0	603	903	0
354	4	0	0	0	0	0	0	200	300	0	0	0	0	0	0	0	200	903	0	0	0	0	0	0	0	603	903	0
354	5	0	0	0	0	0	0	200	300	0	0	0	0	0	0	0	200	903	0	0	0	0	0	0	0	603	903	0
354	6	0	0	0	0	0	0	200	300	0	0	0	0	0	0	0	200	903	0	0	0	0	0	0	0	603	903	0
354	7	0	0	0	0	0	0	200	300	0	0	0	0	0	0	0	200	903	0	0	0	0	0	0	0	603	903	0
354	8	0	0	0	0	0	0	200	300	0	0	0	0	0	0	0	200	903	0	0	0	0	0	0	0	603	903	0
354	9	0	0	0	0	0	0	200	300	0	0	0	0	0	0	0	200	903	0	0	0	0	0	0	0	603	903	0
355	0	0	0	0	0	0	0	200	300	0	0	0	0	0	0	0	200	903	0	0	0	0	0	0	0	603	903	0
355	1	0	0	0	0	0	0	200	300	0	0	0	0	0	0	0	200	903	0	0	0	0	0	0	0	603	903	0
355	2	0	0	0	0	0	0	200	300	0	0	0	0	0	0	0	200	903	0	0	0	0	0	0	0	603	903	0
355	3	0	0	0	0	0	0	200	300	0	0	0	0	0	0	0	200	903	0	0	0	0	0	0	0	603	903	0
355	4	0	0	0	0	0	0	200	300	0	0	0	0	0	0	0	200	903	0	0	0	0	0	0	0	603	903	0
355	5	0	0	0	0	0	0	200	300	0	0	0	0	0	0	0	200	903	0	0	0	0	0	0	0	603	903	0
355	6	0	0	0	0	0	0	200	300	0	0	0	0	0	0	0	200	903	0	0	0	0	0	0	0	603	903	0
355	7	0	0	0	0	0	0	200	300	0	0	0	0	0	0	0	200	903	0	0	0	0	0	0	0	603	903	0
355	8	0	0	0	0	0	0	200	300	0	0	0	0	0	0	0	200	903	0	0	0	0	0	0	0	603	903	0
355	9	0	0	0	0	0	0	200	300	0	0	0	0	0	0	0	200	903	0	0	0	0	0	0	0	603	903	0
356	0	0	0	0	0	0	0	200	300	0	0	0	0	0	0	0	200	903	0	0	0	0	0	0	0	603	903	0
356	1	0	0	0	0	0	0	200	300	0	0	0	0	0	0	0	200	903	0	0	0	0	0	0	0	603	903	0
356	2	0	0	0	0	0	0	200	300	0	0	0	0	0	0	0	200	903	0	0	0	0	0	0	0	603	903	0
356	3	0	0	0	0	0	0	200	300	0	0	0	0	0	0	0	200	903	0	0	0	0	0	0	0	603	903	0
356	4	0	0	0	0	0	0	200	300	0	0	0	0	0	0	0	200	903	0	0	0	0	0	0	0	603	903	0
356	5	0	0	0	0	0	0	200	300	0	0	0	0	0	0	0	200	903	0	0	0	0	0	0	0	603	903	0
356	6	0	0	0	0	0	0	200	300	0	0	0	0	0	0	0	200	903	0	0	0	0	0	0	0	603	903	0
356	7	0	0	0	0	0	0	200	300	0	0	0	0	0	0	0	200	903	0	0	0	0	0	0	0	603	903	0
356	8	0	0	0	0	0	0	200	300	0	0	0	0	0	0	0	200	903	0	0	0	0	0	0	0	603	903	0
356	9	0	0	0	0	0	0	200	300	0	0	0	0	0	0	0	200	903	0	0	0	0	0	0	0	603	903	0
357	0	0	0	0	0	0	0	200	300	0	0	0	0	0	0	0	200	903	0	0	0	0	0	0	0	603	903	0
357	1	0	0	0	0	0	0	200	300	0	0	0	0	0	0	0	200	903	0	0	0	0	0	0	0	603	903	0
357	2	0	0	0	0	0	0	200	300	0	0	0	0	0	0	0	200	903	0	0	0	0	0	0	0	603	903	0
357	3	0	0	0	0	0	0	200	300	0	0	0	0	0	0	0	200	903	0	0	0	0	0	0	0	603	903	0
357	4	0	0	0	0	0	0	200	300	0	0	0	0	0	0	0	200	903	0	0	0	0	0	0	0	603	903	0
357	5	0	0	0	0	0	0	200	300	0	0	0	0	0	0	0	200	903	0	0	0	0	0	0	0	603	903	0
357	6	0	0	0	0	0	0	200	300	0	0	0	0	0	0	0	200	903	0	0	0	0	0	0	0	603	903	0
357	7	0	0	0	0	0	0	200	300	0	0	0	0	0	0	0	200	903	0	0	0	0	0	0	0	603	903	0
357	8	0	0	0	0	0	0	200	300	0	0	0	0	0	0	0	200	903	0	0	0	0	0	0	0	603	903	0
357	9	0	0	0	0	0	0	200	300	0	0	0	0	0	0	0	200	903	0	0	0	0	0	0	0	603	903	0
358	0	0	0	0	0	0	0	200	300	0	0	0	0	0	0	0	200	903	0	0	0	0	0	0	0	603	903	0
358	1	0	0	0	0	0	0	200	300	0	0	0	0	0	0	0	200	903	0	0	0	0	0	0	0	603	903	0
358	2	0	0	0	0	0	0	200	300	0	0	0	0	0	0	0	200	903	0	0	0	0	0	0	0	603	903	0
358	3	0	0	0	0	0	0	200	300	0	0	0	0	0	0	0	200	903	0	0	0	0	0	0	0	603	903	0
358	4	0	0	0	0	0	0	200	300	0	0	0	0	0	0	0	200	903	0	0	0	0	0	0	0	603	903	0
358	5	0	0	0	0	0	0	200	300	0	0	0	0	0	0	0	200	903	0	0	0	0	0	0	0	603	903	0
358	6	0	0	0	0	0	0	200	300	0	0	0	0	0	0	0	200	903	0	0	0	0	0	0	0	603	903	0
358	7	0	0	0	0	0	0	200	300	0	0	0	0	0	0	0	200	903	0	0	0	0	0	0	0	603	903	0
358	8	0	0	0	0	0	0	200	300	0	0	0	0	0	0	0	200	903	0	0	0	0	0	0	0	603	903	0
358	9	0	0	0	0	0	0	200	300	0	0	0	0	0	0	0	200	903	0	0	0	0	0	0	0	603	903	0
359	0	0	0	0	0	0	0	200	300	0	0	0	0	0	0	0	200	903	0	0	0	0	0	0	0	603	903	0
359	1	0	0	0	0	0	0	200	300	0	0	0	0	0	0	0	200	903	0	0	0	0	0	0	0	603	903	0
359	2	0	0	0	0	0	0	200	300	0	0	0	0	0	0	0	200	903	0	0	0	0	0	0	0	603	903	0
359	3	0	0	0	0	0	0	200	300	0	0	0	0	0	0	0	200	903	0	0	0	0	0	0	0	603	903	0
359	4	0	0	0	0	0	0	200	300	0	0	0	0	0	0	0	200	903	0	0	0	0	0	0	0	603	903	0
359	5	0	0	0	0	0	0	200	300	0	0	0	0	0	0	0	200	903	0	0	0	0	0	0	0	603	903	0
359	6	0	0	0	0	0	0	200	300	0	0	0	0	0	0	0	200	903	0	0	0	0	0	0	0	603	903	0
359	7	0	0	0	0	0	0	200	300	0	0	0	0	0	0	0	200	903	0	0	0	0	0	0	0	603	903	0
359	8	0	0	0	0	0	0	200	300	0	0	0	0	0	0	0	200	903	0	0	0	0	0	0	0	603	903	0
359	9	0	0	0	0	0	0	200	300	0	0	0	0	0	0	0	200	903	0	0	0	0	0	0	0	603	903	0
360	0	0	0	0	0	0	0	200	300	0	0	0	0	0	0	0	200	903	0	0	0	0	0	0	0	603	903	0
360	1	0	0	0	0	0	0	200	300	0	0	0	0	0	0	0	200	903	0	0	0	0	0	0	0	603	903	0
360	2	0	0	0	0	0	0	200	300	0	0	0	0	0	0	0	200	903	0	0	0	0	0	0	0	603	903	0
360	3	0	0	0	0	0	0	200	300	0	0	0	0	0	0	0	200	903	0	0	0	0	0	0	0	603	903	0
360	4	0	0	0	0	0	0	200	300	0	0	0	0	0	0	0	200	903	0	0	0	0	0	0	0	603	903	0
360	5	0	0	0	0	0	0	200	300	0	0	0	0	0	0	0	200	903	0	0	0	0	0	0	0	603	903	0
360	6	0	0	0	0	0	0	200	300	0	0	0	0	0	0	0	200	903	0	0	0	0	0	0	0	603	903	0
360	7	0	0	0	0	0	0	200	300	0	0	0	0	0	0	0	200	903	0	0	0	0	0	0	0	603	903	0
360	8	0	0	0	0	0	0	200	300	0	0	0	0	0	0	0	200	903	0	0	0	0	0	0	0	603	903	0
360	9	0	0	0	0	0	0	200	300	0	0	0	0	0	0	0	200	903	0	0	0	0	0	0	0	603	903	0
361	0	0	0	0	0	0	0	200	300	0	0	0	0	0	0	0	200	903	0	0	0	0	0	0	0	603	903	0
361	1	0	0	0	0	0	0	200	300	0	0	0	0	0	0	0	200	903	0	0	0	0	0	0	0	603	903	0
361	2	0	0	0	0	0	0	200	300	0	0	0	0	0	0	0	200	903	0	0	0	0	0	0	0	603	903	0
361	3	0	0	0	0	0	0	200	300	0	0	0	0	0	0	0	200	903	0	0	0	0	0	0	0	603	903	0
361	4	0	0	0	0	0	0	200	300	0	0	0	0	0	0	0	200	903	0	0	0	0	0	0	0	603	903	0
361	5	0	0	0	0	0	0	200	300	0	0	0	0	0	0	0	200	903	0	0	0	0	0	0	0	603	903	0
361	6	0	0	0	0	0	0	200	300	0	0	0	0	0	0	0	200	903	0	0	0	0	0	0	0	603	903	0
361	7	0	0	0	0	0	0	200	300	0	0	0	0	0	0	0	200	903	0	0	0	0	0	0	0	603	903	0
361	8	0	0	0	0	0	0	200	300	0	0	0	0	0	0	0	200	903	0	0	0	0	0	0	0	603	903	0
361	9	0	0	0	0	0	0	200	300	0	0	0	0	0	0	0	200	903	0	0	0	0	0	0	0	603	903	0
362	0	0	0	0	0	0	0	200	300	0	0	0	0	0	0	0	200	903	0	0	0	0	0	0	0	603	903	0
362	1	0	0	0	0	0	0	200	300	0	0	0	0	0	0	0	200	903	0	0	0	0	0	0	0	603	903	0
362	2	0	0	0	0	0	0	200	300	0	0	0	0	0	0	0	200	903	0	0	0	0	0	0	0	603	903	0
362	3	0	0	0	0	0	0	200	300	0	0	0	0	0	0	0	200	903	0	0	0	0	0	0	0	603	903	0
362	4	0	0	0	0	0	0	200	300	0	0	0	0	0	0	0	200	903	0	0	0	0	0	0	0	603	903	0
362	5	0	0	0	0	0	0	200	300	0	0	0	0	0	0	0	200	903	0	0	0	0	0	0	0	603	903	0
362	6	0	0	0	0	0	0	200	300	0	0	0	0	0	0	0	200	903	0	0	0	0	0	0	0	603	903	0
362	7	0	0	0	0	0	0	200	300	0	0	0	0	0	0	0	200	903	0	0	0	0	0	0	0	603	903	0
362	8	0	0	0	0	0	0	200	300	0	0	0	0	0	0	0	200	903	0	0	0	0	0	0	0	603	903	0
362	9	0	0	0	0	0	0	200	300	0	0	0	0	0	0	0	200	903	0	0	0	0	0	0	0	603	903	0
363	0	0	0	0	0	0	0	200	300	0	0	0	0	0	0	0	200	903	0	0	0	0	0	0	0	603	903	0
363	1	0	0	0	0	0	0	200	300	0	0	0	0	0	0	0	200	903	0	0	0	0	0	0	0	603	903	0
363	2	0	0	0	0	0	0	200	300	0	0	0	0	0	0	0	200	903	0	0	0	0	0	0	0	603	903	0
363	3	0	0	0	0	0	0	200	300	0	0	0	0	0	0	0	200	903	0	0	0	0	0	0	0	603	903	0
363	4	0	0	0	0	0	0	200	300	0	0	0	0	0	0	0	200	903	0	0	0	0	0	0	0	603	903	0
363	5	0	0	0	0	0	0	200	300	0	0	0	0	0	0	0	200	903	0	0	0	0	0	0	0	603	903	0
363	6	0	0	0	0	0	0	200	300	0	0	0	0	0	0	0	200	903	0	0	0	0	0	0	0	603	903	0
363	7	0	0	0	0	0	0	200	300	0	0	0	0	0	0	0	200	903	0	0	0	0	0	0	0	603	903	0
363	8	0	0	0	0	0	0	200	300	0	0	0	0	0	0	0	200	903	0	0	0	0	0	0	0	603	903	0
363	9	0	0	0	0	0	0	200	300	0	0	0	0	0	0	0	200	903	0	0	0	0	0	0	0	603	903	0
364	0	0	0	0	0	0	0	200	300	0	0	0	0	0	0	0	200	903	0	0	0	0	0	0	0	603	903	0
364	1	0	0	0	0	0	0	200	300	0	0	0	0	0	0	0	200	903	0	0	0	0	0	0	0	603	903	0
364	2	0	0	0	0	0	0	200	300	0	0	0	0	0	0	0	200	903	0	0	0	0	0	0	0	603	903	0
364	3	0	0	0	0	0	0	200	300	0	0	0	0	0	0	0	200	903	0	0	0	0	0	0	0	603	903	0
364	4	0	0	0	0	0	0	200	300	0	0	0	0	0	0	0	200	903	0	0	0	0	0	0	0	603	903	0
364	5	0	0	0	0	0	0	200	300	0	0	0	0	0	0	0	200	903	0	0	0	0	0	0	0	603	903	0
364	6	0	0	0	0	0	0	200	300	0	0	0	0	0	0	0	200	903	0	0	0	0	0	0	0	603	903	0
364	7	0	0	0	0	0	0	200	300	0	0	0	0	0	0	0	200	903	0	0	0	0	0	0	0	603	903	0
364	8	0	0	0	0	0	0	200	300	0	0	0	0	0	0	0	200	903	0	0	0	0	0	0	0	603	903	0
364	9	0	0	0	0	0	0	200	300	0	0	0	0	0	0	0	200	903	0	0	0	0	0	0	0	603	903	0
365	0	0	0	0	0	0	0	200	300	0	0	0	0	0	0	0	200	903	0	0	0	0	0	0	0	603	903	0
365	1	0	0	0	0	0	0	200	300	0	0	0	0	0	0	0	200	903	0	0	0	0	0	0	0	603	903	0
365	2	0	0	0	0	0	0	200	300	0	0	0	0	0	0	0	200	903	0	0	0	0	0	0	0	603	903	0
365	3	0	0	0	0	0	0	200	300	0	0	0	0	0	0	0	200	903	0	0	0	0	0	0	0	603	903	0
365	4	0	0	0	0	0	0	200	300	0	0	0	0	0	0	0	200	903	0	0	0	0	0	0	0	603	903	0
365	5	0	0	0	0	0	0	200	300	0	0	0	0	0	0	0	200	903	0	0	0	0	0	0	0	603	903	0
365	6	0	0	0	0	0	0	200	300	0	0	0	0	0	0	0	200	903	0	0	0	0	0	0	0	603	903	0
365	7	0	0	0	0	0	0	200	300	0	0	0	0	0	0	0	200	903	0	0	0	0	0	0	0	603	903	0
365	8	0	0	0	0	0	0	200	300	0	0	0	0	0	0	0	200	903	0	0	0	0	0	0	0	603	903	0
365	9	0	0	0	0	0	0	200	300	0	0	0	0	0	0	0	200	903	0	0	0	0	0	0	0	603	903	0
366	0	0	0	0	0	0	0	200	300	0	0	0	0	0	0	0	200	903	0	0	0	0	0	0	0	603	903	0
366	1	0	0	0	0	0	0	200	300	0	0	0	0	0	0	0	200	903	0	0	0	0	0	0	0	603	903	0
366	2	0	0	0	0	0	0	200	300	0	0	0	0	0	0	0	200	903	0	0	0	0	0	0	0	603	903	0
366	3	0	0	0	0	0	0	200	300	0	0	0	0	0	0	0	200	903	0	0	0	0	0	0	0	603	903	0
366	4	0	0	0	0	0	0	200	300	0	0	0	0	0	0	0	200	903	0	0	0	0	0	0	0	603	903	0
366	5	0	0	0	0	0	0	200	300	0	0	0	0	0	0	0	200	903	0	0	0	0	0	0	0	603	903	0
366	6	0	0	0	0	0	0	200	300	0	0	0	0	0	0	0	200	903	0	0	0	0	0	0	0	603	903	0
366	7	0	0	0	0	0	0	200	300	0	0	0	0	0	0	0	200	903	0	0	0	0	0	0	0	603	903	0
366	8	0	0	0	0	0	0	200	300	0	0	0	0	0	0	0	200	903	0	0	0	0	0	0	0	603	903	0
366	9	0	0	0	0	0	0	200	300	0	0	0	0	0	0	0	200	903	0	0	0	0	0	0	0	603	903	0
367	0	0	0	0	0	0	0	200	300	0	0	0	0	0	0	0	200	903	0	0	0	0	0	0	0	603	903	0
367	1	0	0	0	0	0	0	200	300	0	0	0	0	0	0	0	200	903	0	0	0	0	0	0	0	603	903	0
367	2	0	0	0	0	0	0	200	300	0	0	0	0	0	0	0	200	903	0	0	0	0	0	0	0	603	903	0
367	3	0	0	0	0	0	0	200	300	0	0	0	0	0	0	0	200	903	0	0	0	0	0	0	0	603	903	0
367	4	0	0	0	0	0	0	200	300	0	0	0	0	0	0	0	200	903	0	0	0	0	0	0	0	603	903	0
367	5	0	0	0	0	0	0	200	300	0	0	0	0	0	0	0	200	903	0	0	0	0	0	0	0	603	903	0
367	6	0	0	0	0	0	0	200	300	0	0	0	0	0	0	0	200	903	0	0	0	0	0	0	0	603	903	0
367	7	0	0	0	0	0	0	200	300	0	0	0	0	0	0	0	200	903	0	0	0	0	0	0	0	603	903	0
367	8	0	0	0	0	0	0	200	300	0	0	0	0	0	0	0	200	903	0	0	0	0	0	0	0	603	903	0
367	9	0	0	0	0	0	0	200	300	0	0	0	0	0	0	0	200	903	0	0	0	0	0	0	0	603	903	0
368	0	0	0	0	0	0	0	200	300	0	0	0	0	0	0	0	200	903	0	0	0	0	0	0	0	603	903	0
368	1	0	0	0	0	0	0	200	300	0	0	0	0	0	0	0	200	903	0	0	0	0	0	0	0	603	903	0
368	2	0	0	0	0	0	0	200	300	0	0	0	0	0	0	0	200	903	0	0	0	0	0	0	0	603	903	0
368	3	0	0	0	0	0	0	200	300	0	0	0	0	0	0	0	200	903	0	0	0	0	0	0	0	603	903	0
368	4	0	0	0	0	0	0	200	300	0	0	0	0	0	0	0	200	903	0	0	0	0	0	0	0	603	903	0
368	5	0	0	0	0	0	0	200	300	0	0	0	0	0	0	0	200	903	0	0	0	0	0	0	0	603	903	0
368	6	0	0	0	0	0	0	200	300	0	0	0	0	0	0	0	200	903	0	0	0	0	0	0	0	603	903	0
368	7	0	0	0	0	0	0	200	300	0	0	0	0	0	0	0	200	903	0	0	0	0	0	0	0	603	903	0
368	8	0	0	0	0	0	0	200	300	0	0	0	0	0	0	0	200	903	0	0	0	0	0	0	0	603	903	0
368	9	0	0	0	0	0	0	200	300	0	0	0	0	0	0	0	200	903	0	0	0	0	0	0	0	603	903	0
369	0	0	0	0	0	0	0	200	300	0	0	0	0	0	0	0	200	903	0	0	0	0	0	0	0	603	903	0
369	1	0	0	0	0	0	0	200	300	0	0	0	0	0	0	0	200	903	0	0	0	0	0	0	0	603	903	0
369	2	0	0	0	0	0	0	200	300	0	0	0	0	0	0	0	200	903	0	0	0	0	0	0	0	603	903	0
369	3	0	0	0	0	0	0	200	300	0	0	0	0	0	0	0	200	903	0	0	0	0	0	0	0	603	903	0
369	4	0	0	0	0	0	0	200	300	0	0	0	0	0	0	0	200	903	0	0	0	0	0	0	0	603	903	0
369	5	0	0	0	0	0	0	200	300	0	0	0	0	0	0	0	200	903	0	0	0	0	0	0	0	603	903	0
369	6	0	0	0	0	0	0	200	300	0	0	0	0	0	0	0	200	903	0	0	0	0	0	0	0	603	903	0
369	7	0	0	0	0	0	0	200	300	0	0	0	0	0	0	0	200	903	0	0	0	0	0	0	0	603	903	0
369	8	0	0	0	0	0	0	200	300	0	0	0	0	0	0	0	200	903	0	0	0	0	0	0	0	603	903	0
369	9	0	0	0	0	0	0	200	300	0	0	0	0	0	0	0	200	903	0	0	0	0	0	0	0	603	903	0
370	0	0	0	0	0	0	0	200	300	0	0	0	0	0	0	0	200	903	0	0	0	0	0	0	0	603	903	0
370	1	0	0	0	0	0	0	200	300	0	0	0	0	0	0	0	200	903	0	0	0	0	0	0	0	603	903	0
370	2	0	0	0	0	0	0	200	300	0	0	0	0	0	0	0	200	903	0	0	0	0	0	0	0	603	903	0
370	3	0	0	0	0	0	0	200	300	0	0	0	0	0	0	0	200	903	0	0	0	0	0	0	0	603	903	0
370	4	0	0	0	0	0	0	200	300	0	0	0	0	0	0	0	200	903	0	0	0	0	0	0	0	603	903	0
370	5	0	0	0	0	0	0	200	300	0	0	0	0	0	0	0	200	903	0	0	0	0	0	0	0	603	903	0
370	6	0	0	0	0	0	0	200	300	0	0	0	0	0	0	0	200	903	0	0	0	0	0	0	0	603	903	0
370	7	0	0	0	0	0	0	200	300	0	0	0	0	0	0	0	200	903	0	0	0	0	0	0	0	603	903	0
370	8	0	0	0	0	0	0	200	300	0	0	0	0	0	0	0	200	903	0	0	0	0	0	0	0	603	903	0
370	9	0	0	0	0	0	0	200	300	0	0	0	0	0	0	0	200	903	0	0	0	0	0	0	0	603	903	0
371	0	0	0	0	0	0	0	200	300	0	0	0	0	0	0	0	200	903	0	0	0	0	0	0	0	603	903	0
371	1	0	0	0	0	0	0	200	300	0	0	0	0	0	0	0	200	903	0	0	0	0	0	0	0	603	903	0
371	2	0	0	0	0	0	0	200	300	0	0	0	0	0	0	0	200	903	0	0	0	0	0	0	0	603	903	0
371	3	0	0	0	0	0	0	200	300	0	0	0	0	0	0	0	200	903	0	0	0	0	0	0	0	603	903	0
371	4	0	0	0	0	0	0	200	300	0	0	0	0	0	0	0	200	903	0	0	0	0	0	0	0	603	903	0
371	5	0	0	0	0	0	0	200	300	0	0	0	0	0	0	0	200	903	0	0	0	0	0	0	0	603	903	0
371	6	0	0	0	0	0	0	200	300	0	0	0	0	0	0	0	200	903	0	0	0	0	0	0	0	603	903	0
371	7	0	0	0	0	0	0	200	300	0	0	0	0	0	0	0	200	903	0	0	0	0	0	0	0	603	903	0
371	8	0	0	0	0	0	0	200	300	0	0	0	0	0	0	0	200	903	0	0	0	0	0	0	0	603	903	0
371	9	0	0	0	0	0	0	200	300	0	0	0	0	0	0	0	200	903	0	0	0	0	0	0	0	603	903	0
372	0	0	0	0	0	0	0	200	300	0	0	0	0	0	0	0	200	903	0	0	0	0	0	0	0	603	903	0
372	1	0	0	0	0	0	0	200	300	0	0	0	0	0	0	0	200	903	0	0	0	0	0	0	0	603	903	0
372	2	0	0	0	0	0	0	200	300	0	0	0	0	0	0	0	200	903	0	0	0	0	0	0	0	603	903	0
372	3	0	0	0	0	0	0	200	300	0	0	0	0	0	0	0	200	903	0	0	0	0	0	0	0	603	903	0
372	4	0	0	0	0	0	0	200	300	0	0	0	0	0	0	0	200	903	0	0	0	0	0	0	0	603	903	0
372	5	0	0	0	0	0	0	200	300	0	0	0	0	0	0	0	200	903	0	0	0	0	0	0	0	603	903	0
372	6	0	0	0	0	0	0	200	300	0	0	0	0	0	0	0	200	903	0	0	0	0	0	0	0	603	903	0
372	7	0	0	0	0	0	0	200	300	0	0	0	0	0	0	0	200	903	0	0	0	0	0	0	0	603	903	0
372	8	0	0	0	0	0	0	200	300	0	0	0	0	0	0	0	200	903	0	0	0	0	0	0	0	603	903	0
372	9	0	0	0	0	0	0	200	300	0	0	0	0	0	0	0	200	903	0	0	0	0	0	0	0	603	903	0
373	0	0	0	0	0	0	0	200	300	0	0	0	0	0	0	0	200	903	0	0	0	0	0	0	0	603	903	0
373	1	0	0	0	0	0	0	200	300	0	0	0	0	0	0	0	200	903	0	0	0	0	0	0	0	603	903	0
373	2	0	0	0	0	0	0	200	300	0	0	0	0	0	0	0	200	903	0	0	0	0	0	0	0	603	903	0
373	3	0	0	0	0	0	0	200	300	0	0	0	0	0	0	0	200	903	0	0	0	0	0	0	0	603	903	0
373	4	0	0	0	0	0	0	200	300	0	0	0	0	0	0	0	200	903	0	0	0	0	0	0	0	603	903	0
373	5	0	0	0	0	0	0	200	300	0	0	0	0	0	0	0	200	903	0	0	0	0	0	0	0	603	903	0
373	6	0	0	0	0	0	0	200	300	0	0	0	0	0	0	0	200	903	0	0	0	0	0	0	0	603	903	0
373	7	0	0	0	0	0	0	200	300	0	0	0	0	0	0	0	200	903	0	0	0	0	0	0	0	603	903	0
373	8	0	0	0	0	0	0	200	300	0	0	0	0	0	0	0	200	903	0	0	0	0	0	0	0	603	903	0
373	9	0	0	0	0	0	0	200	300	0	0	0	0	0	0	0	200	903	0	0	0	0	0	0	0	603	903	0
374	0	0	0	0	0	0	0	200	300	0	0	0	0	0	0	0	200	903	0	0	0	0	0	0	0	603	903	0
374	1	0	0	0	0	0	0	200	300	0	0	0	0	0	0	0	200	903	0	0	0	0	0	0	0	603	903	0
374	2	0	0	0	0	0	0	200	300	0	0	0	0	0	0	0	200	903	0	0	0	0	0	0	0	603	903	0
374	3	0	0	0	0	0	0	200	300	0	0	0	0	0	0	0	200	903	0	0	0	0	0	0	0	603	903	0
374	4	0	0	0	0	0	0	200	300	0	0	0	0	0	0	0	200	903	0	0	0	0	0	0	0	603	903	0
374	5	0	0	0	0	0	0	200	300	0	0	0	0	0	0	0	200	903	0	0	0	0	0	0	0	603	903	0
374	6	0	0	0	0	0	0	200	300	0	0	0	0	0	0	0	200	903	0	0	0	0	0	0	0	603	903	0
374	7	0	0	0	0	0	0	200	300	0	0	0	0	0	0	0	200	903	0	0	0	0	0	0	0	603	903	0
374	8	0	0	0	0	0	0	200	300	0	0	0	0	0	0	0	200	903	0	0	0	0	0	0	0	603	903	0
374	9	0	0	0	0	0	0	200	300	0	0	0	0	0	0	0	200	903	0	0	0	0	0	0	0	603	903	0
375	0	0	0	0	0	0	0	200	300	0	0	0	0	0	0	0	200	903	0	0	0	0	0	0	0	603	903	0
375	1	0	0	0	0	0	0	200	300	0	0	0	0	0	0	0	200	903	0	0	0	0	0	0	0	603	903	0
375	2	0	0	0	0	0	0	200	300	0	0	0	0	0	0	0	200	903	0	0	0	0	0	0	0	603	903	0
375	3	0	0	0	0	0	0	200	300	0	0	0	0	0	0	0	200	903	0	0	0	0	0	0	0	603	903	0
375	4	0	0	0	0	0	0	200	300	0	0	0	0	0	0	0	200	903	0	0	0	0	0	0	0	603	903	0
375	5	0	0	0	0	0	0	200	300	0	0	0	0	0	0	0	200	903	0	0	0	0	0	0	0	603	903	0
375	6	0	0	0	0	0	0	200	300	0	0	0	0	0	0	0	200	903	0	0	0	0	0	0	0	603	903	0
375	7	0	0	0	0	0	0	200	300	0	0	0	0	0	0	0	200	903	0	0	0	0	0	0	0	603	903	0
375	8	0	0	0	0	0	0	200	300	0	0	0	0	0	0	0	200	903	0	0	0	0	0	0	0	603	903	0
375	9	0	0	0	0	0	0	200	300	0	0	0	0	0	0	0	200	903	0	0	0	0	0	0	0	603	903	0
376	0	0	0	0	0	0	0	200	300	0	0	0	0	0	0	0	200	903	0	0	0	0	0	0	0	603	903	0
376	1	0	0	0	0	0	0	200	300	0	0	0	0	0	0	0	200	903	0	0	0	0	0	0	0	603	903	0
376	2	0	0	0	0	0	0	200	300	0	0	0	0	0	0	0	200	903	0	0	0	0	0	0	0	603	903	0
376	3	0	0	0	0	0	0	200	300	0	0	0	0	0	0	0	200	903	0	0	0	0	0	0	0	603	903	0
376	4	0	0	0	0	0	0	200	300	0	0	0	0	0	0	0	200	903	0	0	0	0	0	0	0	603	903	0
376	5	0	0	0	0	0	0	200	300	0	0	0	0	0	0	0	200	903	0	0	0	0	0	0	0	603	903	0
376	6	0	0	0	0	0	0	200	300	0	0	0	0	0	0	0	200	903	0	0	0	0	0	0	0	603	903	0
376	7	0	0	0	0	0	0	200	300	0	0	0	0	0	0	0	200	903	0	0	0	0	0	0	0	603	903	0
376	8	0	0	0	0	0	0	200	300	0	0	0	0	0	0	0	200	903	0	0	0	0	0	0	0	603	903	0
376	9	0	0	0	0	0	0	200	300	0	0	0	0	0	0	0	200	903	0	0	0	0	0	0	0	603	903	0
377	0	0	0	0	0	0	0	200	300	0	0	0	0	0	0	0	200	903	0	0	0	0	0	0	0	603	903	0
377	1	0	0	0	0	0	0	200	300	0	0	0	0	0	0	0	200	903	0	0	0	0	0	0	0	603	903	0
377	2	0	0	0	0	0	0	200	300	0	0	0	0	0	0	0	200	903	0	0	0	0	0	0	0	603	903	0
377	3	0	0	0	0	0	0	200	300	0	0	0	0	0	0	0	200	903	0	0	0	0	0	0	0	603	903	0
377	4	0	0	0	0	0	0	200	300	0	0	0	0	0	0	0	200	903	0	0	0	0	0	0	0	603	903	0
377	5	0	0	0	0	0	0	200	300	0	0	0	0	0	0	0	200	903	0	0	0	0	0	0	0	603	903	0
377	6	0	0	0	0	0	0	200	300	0	0	0	0	0	0	0	200	903	0	0	0	0	0	0	0	603	903	0
377	7	0	0	0	0	0	0	200	300	0	0	0	0	0	0	0	200	903	0	0	0	0	0	0	0	603	903	0
377	8	0	0	0	0	0	0	200	300	0	0	0	0	0	0	0	200	903	0	0	0	0	0	0	0	603	903	0
377	9	0	0	0	0	0	0	200	300	0	0	0	0	0	0	0	200	903	0	0	0	0	0	0	0	603	903	0
378	0	0	0	0	0	0	0	200	300	0	0	0	0	0	0	0	200	903	0	0	0	0	0	0	0	603	903	0
378	1	0	0	0	0	0	0	200	300	0	0	0	0	0	0	0	200	903	0	0	0	0	0	0	0	603	903	0
378	2	0	0	0	0	0	0	200	300	0	0	0	0	0	0	0	200	903	0	0	0	0	0	0	0	603	903	0
378	3	0	0	0	0	0	0	200	300	0	0	0	0	0	0	0	200	903	0	0	0	0	0	0	0	603	903	0
378	4	0	0	0	0	0	0	200	300	0	0	0	0	0	0	0	200	903	0	0	0	0	0	0	0	603	903	0
378	5	0	0	0	0	0	0	200	300	0	0	0	0	0	0	0	200	903	0	0	0	0	0	0	0	603	903	0
378	6	0	0	0	0	0	0	200	300	0	0	0	0	0	0	0	200	903	0	0	0	0	0	0	0	603	903	0
378	7	0	0	0	0	0	0	200	300	0	0	0	0	0	0	0	200	903	0	0	0	0	0	0	0	603	903	0
378	8	0	0	0	0	0	0	200	300	0	0	0	0	0	0	0	200	903	0	0	0	0	0	0	0	603	903	0
378	9	0	0	0	0	0	0	200	300	0	0	0	0	0	0	0	200	903	0	0	0	0	0	0	0	603	903	0
379	0	0	0	0	0	0	0	200	300	0	0	0	0	0	0	0	200	903	0	0	0	0	0	0	0	603	903	0
379	1	0	0	0	0	0	0	200	300	0	0	0	0	0	0	0	200	903	0	0	0	0	0	0	0	603	903	0
379	2	0	0	0	0	0	0	200	300	0	0	0	0	0	0	0	200	903	0	0	0	0	0	0	0	603	903	0
379	3	0	0	0	0	0	0	200	300	0	0	0	0	0	0	0	200	903	0	0	0	0	0	0	0	603	903	0
379	4	0	0	0	0	0	0	200	300	0	0	0	0	0	0	0	200	903	0	0	0	0	0	0	0	603	903	0
379	5	0	0	0	0	0	0	200	300	0	0	0	0	0	0	0	200	903	0	0	0	0	0	0	0	603	903	0
379	6	0	0	0	0	0	0	200	300	0	0	0	0	0	0	0	200	903	0	0	0	0	0	0	0	603	903	0
379	7	0	0	0	0	0	0	200	300	0	0	0	0	0	0	0	200	903	0	0	0	0	0	0	0	603	903	0
379	8	0	0	0	0	0	0	200	300	0	0	0	0	0	0	0	200	903	0	0	0	0	0	0	0	603	903	0
379	9	0	0	0	0	0	0	200	300	0	0	0	0	0	0	0	200	903	0	0	0	0	0	0	0	603	903	0
380	0	0	0	0	0	0	0	200	300	0	0	0	0	0	0	0	200	903	0	0	0	0	0	0	0	603	903	0
380	1	0	0	0	0	0	0	200	300	0	0	0	0	0	0	0	200	903	0	0	0	0	0	0	0	603	903	0
380	2	0	0	0	0	0	0	200	300	0	0	0	0	0	0	0	200	903	0	0	0	0	0	0	0	603	903	0
380	3	0	0	0	0	0	0	200	300	0	0	0	0	0	0	0	200	903	0	0	0	0	0	0	0	603	903	0
380	4	0	0	0	0	0	0	200	300	0	0	0	0	0	0	0	200	903	0	0	0	0	0	0	0	603	903	0
380	5	0	0	0	0	0	0	200	300	0	0	0	0	0	0	0	200	903	0	0	0	0	0	0	0	603	903	0
380	6	0	0	0	0	0	0	200	300	0	0	0	0	0	0	0	200	903	0	0	0	0	0	0	0	603	903	0
380	7	0	0	0	0	0	0	200	300	0	0	0	0	0	0	0	200	903	0	0	0	0	0	0	0	603	903	0
380	8	0	0	0	0	0	0	200	300	0	0	0	0	0	0	0	200	903	0	0	0	0	0	0	0	603	903	0
380	9	0	0	0	0	0	0	200	300	0	0	0	0	0	0	0	200	903	0	0	0	0	0	0	0	603	903	0
381	0	0	0	0	0	0	0	200	300	0	0	0	0	0	0	0	200	903	0	0	0	0	0	0	0	603	903	0
381	1	0	0	0	0	0	0	200	300	0	0	0	0	0	0	0	200	903	0	0	0	0	0	0	0	603	903	0
381	2	0	0	0	0	0	0	200	300	0	0	0	0	0	0	0	200	903	0	0	0	0	0	0	0	603	903	0
381	3	0	0	0	0	0	0	200	300	0	0	0	0	0	0	0	200	903	0	0	0	0	0	0	0	603	903	0
381	4	0	0	0	0	0	0	200	300	0	0	0	0	0	0	0	200	903	0	0	0	0	0	0	0	603	903	0
381	5	0	0	0	0	0	0	200	300	0	0	0	0	0	0	0	200	903	0	0	0	0	0	0	0	603	903	0
381	6	0	0	0	0	0	0	200	300	0	0	0	0	0	0	0	200	903	0	0	0	0	0	0	0	603	903	0
381	7	0	0	0	0	0	0	200	300	0	0	0	0	0	0	0	200	903	0	0	0	0	0	0	0	603	903	0
381	8	0	0	0	0	0	0	200	300	0	0	0	0	0	0	0	200	903	0	0	0	0	0	0	0	603	903	0
381	9	0	0	0	0	0	0	200	300	0	0	0	0	0	0	0	200	903	0	0	0	0	0	0	0	603	903	0
382	0	0	0	0	0	0	0	200	300	0	0	0	0	0	0	0	200	903	0	0	0	0	0	0	0	603	903	0
382	1	0	0	0	0	0	0	200	300	0	0	0	0	0	0	0	200	903	0	0	0	0	0	0	0	603	903	0
382	2	0	0	0	0	0	0	200	300	0	0	0	0	0	0	0	200	903	0	0	0	0	0	0	0	603	903	0
382	3	0	0	0	0	0	0	200	300	0	0	0	0	0	0	0	200	903	0	0	0	0	0	0	0	603	903	0
382	4	0	0	0	0	0	0	200	300	0	0	0	0	0	0	0	200	903	0	0	0	0	0	0	0	603	903	0
382	5	0	0	0	0	0	0	200	300	0	0	0	0	0	0	0	200	903	0	0	0	0	0	0	0	603	903	0
382	6	0	0	0	0	0	0	200	300	0	0	0	0	0	0	0	200	903	0	0	0	0	0	0	0	603	903	0
382	7	0	0	0	0	0	0	200	300	0	0	0	0	0	0	0	200	903	0	0	0	0	0	0	0	603	903	0
382	8	0	0	0	0	0	0	200	300	0	0	0	0	0	0	0	200	903	0	0	0	0	0	0	0	603	903	0
382	9	0	0	0	0	0	0	200	300	0	0	0	0	0	0	0	200	903	0	0	0	0	0	0	0	603	903	0
383	0	0	0	0	0	0	0	200	300	0	0	0	0	0	0	0	200	903	0	0	0	0	0	0	0	603	903	0
383	1	0	0	0	0	0	0	200	300	0	0	0	0	0	0	0	200	903	0	0	0	0	0	0	0	603	903	0
383	2	0	0	0	0	0	0	200	300	0	0	0	0	0	0	0	200	903	0	0	0	0	0	0	0	603	903	0
383	3	0	0	0	0	0	0	200	300	0	0	0	0	0	0	0	200	903	0	0	0	0	0	0	0	603	903	0
383	4	0	0	0	0	0	0	200	300	0	0	0	0	0	0	0	200	903	0	0	0	0	0	0	0	603	903	0
383	5	0	0	0	0	0	0	200	300	0	0	0	0	0	0	0	200	903	0	0	0	0	0	0	0	603	903	0
383	6	0	0	0	0	0	0	200	300	0	0	0	0	0	0	0	200	903	0	0	0	0	0	0	0	603	903	0
383	7	0	0	0	0	0	0	200	300	0	0	0	0	0	0	0	200	903	0	0	0	0	0	0	0	603	903	0
383	8	0	0	0	0	0	0	200	300	0	0	0	0	0	0	0	200	903	0	0	0	0	0	0	0	603	903	0
383	9	0	0	0	0	0	0	200	300	0	0	0	0	0	0	0	200	903	0	0	0	0	0	0	0	603	903	0
384	0	0	0	0	0	0	0	200	300	0	0	0	0	0	0	0	200	903	0	0	0	0	0	0	0	603	903	0
384	1	0	0	0	0	0	0	200	300	0	0	0	0	0	0	0	200	903	0	0	0	0	0	0	0	603	903	0
384	2	0	0	0	0	0	0	200	300	0	0	0	0	0	0	0	200	903	0	0	0	0	0	0	0	603	903	0
384	3	0	0	0	0	0	0	200	300	0	0	0	0	0	0	0	200	903	0	0	0	0	0	0	0	603	903	0
384	4	0	0	0	0	0	0	200	300	0	0	0	0	0	0	0	200	903	0	0	0	0	0	0	0	603	903	0
384	5	0	0	0	0	0	0	200	300	0	0	0	0	0	0	0	200	903	0	0	0	0	0	0	0	603	903	0
384	6	0	0	0	0	0	0	200	300	0	0	0	0	0	0	0	200	903	0	0	0	0	0	0	0	603	903	0
384	7	0	0	0	0	0	0	200	300	0	0	0	0	0	0	0	200	903	0	0	0	0	0	0	0	603	903	0
384	8	0	0	0	0	0	0	200	300	0	0	0	0	0	0	0	200	903	0	0	0	0	0	0	0	603	903	0
384	9	0	0	0	0	0	0	200	300	0	0	0	0	0	0	0	200	903	0	0	0	0	0	0	0	603	903	0
385	0	0	0	0	0	0	0	200	300	0	0	0	0	0	0	0	200	903	0	0	0	0	0	0	0	603	903	0
385	1	0	0	0	0	0	0	200	300	0	0	0	0	0	0	0	200	903	0	0	0	0	0	0	0	603	903	0
385	2	0	0	0	0	0	0	200	300	0	0	0	0	0	0	0	200	903	0	0	0	0	0	0	0	603	903	0
385	3	0	0	0	0	0	0	200	300	0	0	0	0	0	0	0	200	903	0	0	0	0	0	0	0	603	903	0
385	4	0	0	0	0	0	0	200	300	0	0	0	0	0	0	0	200	903	0	0	0	0	0	0	0	603	903	0
385	5	0	0	0	0	0	0	200	300	0	0	0	0	0	0	0	200	903	0	0	0	0	0	0	0	603	903	0
385	6	0	0	0	0	0	0	200	300	0	0	0	0	0	0	0	200	903	0	0	0	0	0	0	0	603	903	0
385	7	0	0	0	0	0	0	200	300	0	0	0	0	0	0	0	200	903	0	0	0	0	0	0	0	603	903	0
385	8	0	0	0	0	0	0	200	300	0	0	0	0	0	0	0	200	903	0	0	0	0	0	0	0	603	903	0
385	9	0	0	0	0	0	0	200	300	0	0	0	0	0	0	0	200	903	0	0	0	0	0	0	0	603	903	0
386	0	0	0	0	0	0	0	200	300	0	0	0	0	0	0	0	200	903	0	0	0	0	0	0	0	603	903	0
386	1	0	0	0	0	0	0	200	300	0	0	0	0	0	0	0	200	903	0	0	0	0	0	0	0	603	903	0
386	2	0	0	0	0	0	0	200	300	0	0	0	0	0	0	0	200	903	0	0	0	0	0	0	0	603	903	0
386	3	0	0	0	0	0	0	200	300	0	0	0	0	0	0	0	200	903	0	0	0	0	0	0	0	603	903	0
386	4	0	0	0	0	0	0	200	300	0	0	0	0	0	0	0	200	903	0	0	0	0	0	0	0	603	903	0
386	5	0	0	0	0	0	0	200	300	0	0	0	0	0	0	0	200	903	0	0	0	0	0	0	0	603	903	0
386	6	0	0	0	0	0	0	200	300	0	0	0	0	0	0	0	200	903	0	0	0	0	0	0	0	603	903	0
386	7	0	0	0	0	0	0	200	300	0	0	0	0	0	0	0	200	903	0	0	0	0	0	0	0	603	903	0
386	8	0	0	0	0	0	0	200	300	0	0	0	0	0	0	0	200	903	0	0	0	0	0	0	0	603	903	0
386	9	0	0	0	0	0	0	200	300	0	0	0	0	0	0	0	200	903	0	0	0	0	0	0	0	603	903	0
387	0	0	0	0	0	0	0	200	300	0	0	0	0	0	0	0	200	903	0	0	0	0	0	0	0	603	903	0
387	1	0	0	0	0	0	0	200	300	0	0	0	0	0	0	0	200	903	0	0	0	0	0	0	0	603	903	0
387	2	0	0	0	0	0	0	200	300	0	0	0	0	0	0	0	200	903	0	0	0	0	0	0	0	603	903	0
387	3	0	0	0	0	0	0	200	300	0	0	0	0	0	0	0	200	903	0	0	0	0	0	0	0	603	903	0
387	4	0	0	0	0	0	0	200	300	0	0	0	0	0	0	0	200	903	0	0	0	0	0	0	0	603	903	0
387	5	0	0	0	0	0	0	200	300	0	0	0	0	0	0	0	200	903	0	0	0	0	0	0	0	603	903	0
387	6	0	0	0	0	0	0	200	300	0	0	0	0	0	0	0	200	903	0	0	0	0	0	0	0	603	903	0
387	7	0	0	0	0	0	0	200	300	0	0	0	0	0	0	0	200	903	0	0	0	0	0	0	0	603	903	0
387	8	0	0	0	0	0	0	200	300	0	0	0	0	0	0	0	200	903	0	0	0	0	0	0	0	603	903	0
387	9	0	0	0	0	0	0	200	300	0	0	0	0	0	0	0	200	903	0	0	0	0	0	0	0	603	903	0
388	0	0	0	0	0	0	0	200	300	0	0	0	0	0	0	0	200	903	0	0	0	0	0	0	0	603	903	0
388	1	0	0	0	0	0	0	200	300	0	0	0	0	0	0	0	200	903	0	0	0	0	0	0	0	603	903	0
388	2	0	0	0	0	0	0	200	300	0	0	0	0	0	0	0	200	903	0	0	0	0	0	0	0	603	903	0
388	3	0	0	0	0	0	0	200	300	0	0	0	0	0	0	0	200	903	0	0	0	0	0	0	0	603	903	0
388	4	0	0	0	0	0	0	200	300	0	0	0	0	0	0	0	200	903	0	0	0	0	0	0	0	603	903	0
388	5	0	0	0	0	0	0	200	300	0	0	0	0	0	0	0	200	903	0	0	0	0	0	0	0	603	903	0
388	6	0	0	0	0	0	0	200	300	0	0	0	0	0	0	0	200	903	0	0	0	0	0	0	0	603	903	0
388	7	0	0	0	0	0	0	200	300	0	0	0	0	0	0	0	200	903	0	0	0	0	0	0	0	603	903	0
388	8	0	0	0	0	0	0	200	300	0	0	0	0	0	0	0	200	903	0	0	0	0	0	0	0	603	903	0
388	9	0	0	0	0	0	0	200	300	0	0	0	0	0	0	0	200	903	0	0	0	0	0	0	0	603	903	0
389	0	0	0	0	0	0	0	200	300	0	0	0	0	0	0	0	200	903	0	0	0	0	0	0	0	603	903	0
389	1	0	0	0	0	0	0	200	300	0	0	0	0	0	0	0	200	903	0	0	0	0	0	0	0	603	903	0
389	2	0	0	0	0	0	0	200	300	0	0	0	0	0	0	0	200	903	0	0	0	0	0	0	0	603	903	0
389	3	0	0	0	0	0	0	200	300	0	0	0	0	0	0	0	200	903	0	0	0	0	0	0	0	603	903	0
389	4	0	0	0	0	0	0	200	300	0	0	0	0	0	0	0	200	903	0	0	0	0	0	0	0	603	903	0
389	5	0	0	0	0	0	0	200	300	0	0	0	0	0	0	0	200	903	0	0	0	0	0	0	0	603	903	0
389	6	0	0	0	0	0	0	200	300	0	0	0	0	0	0	0	200	903	0	0	0	0	0	0	0	603	903	0
389	7	0	0	0	0	0	0	200	300	0	0	0	0	0	0	0	200	903	0	0	0	0	0	0	0	603	903	0
389	8	0	0	0	0	0	0	200	300	0	0	0	0	0	0	0	200	903	0	0	0	0	0	0	0	603	903	0
389	9	0	0	0	0	0	0	200	300	0	0	0	0	0	0	0	200	903	0	0	0	0	0	0	0	603	903	0
390	0	0	0	0	0	0	0	200	300	0	0	0	0	0	0	0	200	903	0	0	0	0	0	0	0	603	903	0
390	1	0	0	0	0	0	0	200	300	0	0	0	0	0	0	0	200	903	0	0	0	0	0	0	0	603	903	0
390	2	0	0	0	0	0	0	200	300	0	0	0	0	0	0	0	200	903	0	0	0	0	0	0	0	603	903	0
390	3	0	0	0	0	0	0	200	300	0	0	0	0	0	0	0	200	903	0	0	0	0	0	0	0	603	903	0
390	4	0	0	0	0	0	0	200	300	0	0	0	0	0	0	0	200	903	0	0	0	0	0	0	0	603	903	0
390	5	0	0	0	0	0	0	200	300	0	0	0	0	0	0	0	200	903	0	0	0	0	0	0	0	603	903	0
390	6	0	0	0	0	0	0	200	300	0	0	0	0	0	0	0	200	903	0	0	0	0	0	0	0	603	903	0
390	7	0	0	0	0	0	0	200	300	0	0	0	0	0	0	0	200	903	0	0	0	0	0	0	0	603	903	0
390	8	0	0	0	0	0	0	200	300	0	0	0	0	0	0	0	200	903	0	0	0	0	0	0	0	603	903	0
390	9	0	0	0	0	0	0	200	300	0	0	0	0	0	0	0	200	903	0	0	0	0	0	0	0	603	903	0
391	0	0	0	0	0	0	0	200	300	0	0	0	0	0	0	0	200	903	0	0	0	0	0	0	0	603	903	0
391	1	0	0	0	0	0	0	200	300	0	0	0	0	0	0	0	200	903	0	0	0	0	0	0	0	603	903	0
391	2	0	0	0	0	0	0	200	300	0	0	0	0	0	0	0	200	903	0	0	0	0	0	0	0	603	903	0
391	3	0	0	0	0	0	0	200	300	0	0	0	0	0	0	0	200	903	0	0	0	0	0	0	0	603	903	0
391	4	0	0	0	0	0	0	200	300	0	0	0	0	0	0	0	200	903	0	0	0	0	0	0	0	603	903	0
391	5	0	0	0	0	0	0	200	300	0	0	0	0	0	0	0	200	903	0	0	0	0	0	0	0	603	903	0
391	6	0	0	0	0	0	0	200	300	0	0	0	0	0	0	0	200	903	0	0	0	0	0	0	0	603	903	0
391	7	0	0	0	0	0	0	200	300	0	0	0	0	0	0	0	200	903	0	0	0	0	0	0	0	603	903	0
391	8	0	0	0	0	0	0	200	300	0	0	0	0	0	0	0	200	903	0	0	0	0	0	0	0	603	903	0
391	9	0	0	0	0	0	0	200	300	0	0	0	0	0	0	0	200	903	0	0	0	0	0	0	0	603	903	0
392	0	0	0	0	0	0	0	200	300	0	0	0	0	0	0	0	200	903	0	0	0	0	0	0	0	603	903	0
392	1	0	0	0	0	0	0	200	300	0	0	0	0	0	0	0	200	903	0	0	0	0	0	0	0	603	903	0
392	2	0	0	0	0	0	0	200	300	0	0	0	0	0	0	0	200	903	0	0	0	0	0	0	0	603	903	0
392	3	0	0	0	0	0	0	200	300	0	0	0	0	0	0	0	200	903	0	0	0	0	0	0	0	603	903	0
392	4	0	0	0	0	0	0	200	300	0	0	0	0	0	0	0	200	903	0	0	0	0	0	0	0	603	903	0
392	5	0	0	0	0	0	0	200	300	0	0	0	0	0	0	0	200	903	0	0	0	0	0	0	0	603	903	0
392	6	0	0	0	0	0	0	200	300	0	0	0	0	0	0	0	200	903	0	0	0	0	0	0	0	603	903	0
392	7	0	0	0	0	0	0	200	300	0	0	0	0	0	0	0	200	903	0	0	0	0	0	0	0	603	903	0
392	8	0	0	0	0	0	0	200	300	0	0	0	0	0	0	0	200	903	0	0	0	0	0	0	0	603	903	0
392	9	0	0	0	0	0	0	200	300	0	0	0	0	0	0	0	200	903	0	0	0	0	0	0	0	603	903	0
393	0	0	0	0	0	0	0	200	300	0	0	0	0	0	0	0	200	903	0	0	0	0	0	0	0	603	903	0
393	1	0	0	0	0	0	0	200	300	0	0	0	0	0	0	0	200	903	0	0	0	0	0	0	0	603	903	0
393	2	0	0	0	0	0	0	200	300	0	0	0	0	0	0	0	200	903	0	0	0	0	0	0	0	603	903	0
393	3	0	0	0	0	0	0	200	300	0	0	0	0	0	0	0	200	903	0	0	0	0	0	0	0	603	903	0
393	4	0	0	0	0	0	0	200	300	0	0	0	0	0	0	0	200	903	0	0	0	0	0	0	0	603	903	0
393	5	0	0	0	0	0	0	200	300	0	0	0	0	0	0	0	200	903	0	0	0	0	0	0	0	603	903	0
393	6	0	0	0	0	0	0	200	300	0	0	0	0	0	0	0	200	903	0	0	0	0	0	0	0	603	903	0
393	7	0	0	0	0	0	0	200	300	0	0	0	0	0	0	0	200	903	0	0	0	0	0	0	0	603	903	0
393	8	0	0	0	0	0	0	200	300	0	0	0	0	0	0	0	200	903	0	0	0	0	0	0	0	603	903	0
393	9	0	0	0	0	0	0	200	300	0	0	0	0	0	0	0	200	903	0	0	0	0	0	0	0	603	903	0
394	0	0	0	0	0	0	0	200	300	0	0	0	0	0	0	0	200	903	0	0	0	0	0	0	0	603	903	0
394	1	0	0	0	0	0	0	200	300	0	0	0	0	0	0	0	200	903	0	0	0	0	0	0	0	603	903	0
394	2	0	0	0	0	0	0	200	300	0	0	0	0	0	0	0	200	903	0	0	0	0	0	0	0	603	903	0
394	3	0	0	0	0	0	0	200	300	0	0	0	0	0	0	0	200	903	0	0	0	0	0	0	0	603	903	0
394	4	0	0	0	0	0	0	200	300	0	0	0	0	0	0	0	200	903	0	0	0	0	0	0	0	603	903	0
394	5	0	0	0	0	0	0	200	300	0	0	0	0	0	0	0	200	903	0	0	0	0	0	0	0	603	903	0
394	6	0	0	0	0	0	0	200	300	0	0	0	0	0	0	0	200	903	0	0	0	0	0	0	0	603	903	0
394	7	0	0	0	0	0	0	200	300	0	0	0	0	0	0	0	200	903	0	0	0	0	0	0	0	603	903	0
394	8	0	0	0	0	0	0	200	300	0	0	0	0	0	0	0	200	903	0	0	0	0	0	0	0	603	903	0
394	9	0	0	0	0	0	0	200	300	0	0	0	0	0	0	0	200	903	0	0	0	0	0	0	0	603	903	0
395	0	0	0	0	0	0	0	200	300	0	0	0	0	0	0	0	200	903	0	0	0	0	0	0	0	603	903	0
395	1	0	0	0	0	0	0	200	300	0	0	0	0	0	0	0	200	903	0	0	0	0	0	0	0	603	903	0
395	2	0	0	0	0	0	0	200	300	0	0	0	0	0	0	0	200	903	0	0	0	0	0	0	0	603	903	0
395	3	0	0	0	0	0	0	200	300	0	0	0	0	0	0	0	200	903	0	0	0	0	0	0	0	603	903	0
395	4	0	0	0	0	0	0	200	300	0	0	0	0	0	0	0	200	903	0	0	0	0	0	0	0	603	903	0
395	5	0	0	0	0	0	0	200	300	0	0	0	0	0	0	0	200	903	0	0	0	0	0	0	0	603	903	0
395	6	0	0	0	0	0	0	200	300	0	0	0	0	0	0	0	200	903	0	0	0	0	0	0	0	603	903	0
395	7	0	0	0	0	0	0	200	300	0	0	0	0	0	0	0	200	903	0	0	0	0	0	0	0	603	903	0
395	8	0	0	0	0	0	0	200	300	0	0	0	0	0	0	0	200	903	0	0	0	0	0	0	0	603	903	0
395	9	0	0	0	0	0	0	200	300	0	0	0	0	0	0	0	200	903	0	0	0	0	0	0	0	603	903	0
396	0	0	0	0	0	0	0	200	300	0	0	0	0	0	0	0	200	903	0	0	0	0	0	0	0	603	903	0
396	1	0	0	0	0	0	0	200	300	0	0	0	0	0	0	0	200	903	0	0	0	0	0	0	0	603	903	0
396	2	0	0	0	0	0	0	200	300	0	0	0	0	0	0	0	200	903	0	0	0	0	0	0	0	603	903	0
396	3	0	0	0	0	0	0	200	300	0	0	0	0	0	0	0	200	903	0	0	0	0	0	0	0	603	903	0
396	4	0	0	0	0	0	0	200	300	0	0	0	0	0	0	0	200	903	0	0	0	0	0	0	0	603	903	0
396	5	0	0	0	0	0	0	200	300	0	0	0	0	0	0	0	200	903	0	0	0	0	0	0	0	603	903	0
396	6	0	0	0	0	0	0	200	300	0	0	0	0	0	0	0	200	903	0	0	0	0	0	0	0	603	903	0
396	7	0	0	0	0	0	0	200	300	0	0	0	0	0	0	0	200	903	0	0	0	0	0	0	0	603	903	0
396	8	0	0	0	0	0	0	200	300	0	0	0	0	0	0	0	200	903	0	0	0	0	0	0	0	603	903	0
396	9	0	0	0	0	0	0	200	300	0	0	0	0	0	0	0	200	903	0	0	0	0	0	0	0	603	903	0
397	0	0	0	0	0	0	0	200	300	0	0	0	0	0	0	0	200	903	0	0	0	0	0	0	0	603	903	0
397	1	0	0	0	0	0	0	200	300	0	0	0	0	0	0	0	200	903	0	0	0	0	0	0	0	603	903	0
397	2	0	0	0	0	0	0	200	300	0	0	0	0	0	0	0	200	903	0	0	0	0	0	0	0	603	903	0
397	3	0	0	0	0	0	0	200	300	0	0	0	0	0	0	0	200	903	0	0	0	0	0	0	0	603	903	0
397	4	0	0	0	0	0	0	200	300	0	0	0	0	0	0	0	200	903	0	0	0	0	0	0	0	603	903	0
397	5	0	0	0	0	0	0	200	300	0	0	0	0	0	0	0	200	903	0	0	0	0	0	0	0	603	903	0
397	6	0	0	0	0	0	0	200	300	0	0	0	0	0	0	0	200	903	0	0	0	0	0	0	0	603	903	0
397	7	0	0	0	0	0	0	200	300	0	0	0	0	0	0	0	200	903	0	0	0	0	0	0	0	603	903	0
397	8	0	0	0	0	0	0	200	300	0	0	0	0	0	0	0	200	903	0	0	0	0	0	0	0	603	903	0
397	9	0	0	0	0	0	0	200	300	0	0	0	0	0	0	0	200	903	0	0	0	0	0	0	0	603	903	0
398	0	0	0	0	0	0	0	200	300	0	0	0	0	0	0	0	200	903	0	0	0	0	0	0	0	603	903	0
398	1	0	0	0	0	0	0	200	300	0	0	0	0	0	0	0	200	903	0	0	0	0	0	0	0	603	903	0
398	2	0	0	0	0	0	0	200	300	0	0	0	0	0	0	0	200	903	0	0	0	0	0	0	0	603	903	0
398	3	0	0	0	0	0	0	200	300	0	0	0	0	0	0	0	200	903	0	0	0	0	0	0	0	603	903	0
398	4	0	0	0	0	0	0	200	300	0	0	0	0	0	0	0	200	903	0	0	0	0	0	0	0	603	903	0
398	5	0	0	0	0	0	0	200	300	0	0	0	0	0	0	0	200	903	0	0	0	0	0	0	0	603	903	0
398	6	0	0	0	0	0	0	200	300	0	0	0	0	0	0	0	200	903	0	0	0	0	0	0	0	603	903	0
398	7	0	0	0	0	0	0	200	300	0	0	0	0	0	0	0	200	903	0	0	0	0	0	0	0	603	903	0
398	8	0	0	0	0	0	0	200	300	0	0	0	0	0	0	0	200	903	0	0	0	0	0	0	0	603	903	0
398	9	0	0	0	0	0	0	200	300	0	0	0	0	0	0	0	200	903	0	0	0	0	0	0	0	603	903	0
399	0	0	0	0	0	0	0	200	300	0	0	0	0	0	0	0	200	903	0	0	0	0	0	0	0	603	903	0
399	1	0	0	0	0	0	0	200	300	0	0	0	0	0	0	0	200	903	0	0	0	0	0	0	0	603	903	0
399	2	0	0	0	0	0	0	200	300	0	0	0	0	0	0	0	200	903	0	0	0	0	0	0	0	603	903	0
399	3	0	0	0	0	0	0	200	300	0	0	0	0	0	0	0	200	903	0	0	0	0	0	0	0	603	903	0
399	4	0	0	0	0	0	0	200	300	0	0	0	0	0	0	0	200	903	0	0	0	0	0	0	0	603	903	0
399	5	0	0	0	0	0	0	200	300	0	0	0	0	0	0	0	200	903	0	0	0	0	0	0	0	603	903	0
399	6	0	0	0	0	0	0	200	300	0	0	0	0	0	0	0	200	903	0	0	0	0	0	0	0	603	903	0
399	7	0	0	0	0	0	0	200	300	0	0	0	0	0	0	0	200	903	0	0	0	0	0	0	0	603	903	0
399	8	0	0	0	0	0	0	200	300	0	0	0	0	0	0	0	200	903	0	0	0	0	0	0	0	603	903	0
399	9	0	0	0	0	0	0	200	300	0	0	0	0	0	0	0	200	903	0	0	0	0	0	0	0	603	903	0
400	0	0	0	0	0	0	0	200	300	0	0	0	0	0	0	0	200	903	0	0	0	0	0	0	0	603	903	0
400	1	0	0	0	0	0	0	200	300	0	0	0	0	0	0	0	200	903	0	0	0	0	0	0	0	603	903	0
400	2	0	0	0	0	0	0	200	300	0	0	0	0	0	0	0	200	903	0	0	0	0	0	0	0	603	903	0
400	3	0	0	0	0	0	0	200	300	0	0	0	0	0	0	0	200	903	0	0	0	0	0	0	0	603	903	0
400	4	0	0	0	0	0	0	200	300	0	0	0	0	0	0	0	200	903	0	0	0	0	0	0	0	603	903	0
400	5	0	0	0	0	0	0	200	300	0	0	0	0	0	0	0	200	903	0	0	0	0	0	0	0	603	903	0
400	6	0	0	0	0	0	0	200	300	0	0	0	0	0	0	0	200	903	0	0	0	0	0	0	0	603	903	0
400	7	0	0	0	0	0	0	200	300	0	0	0	0	0	0	0	200	903	0	0	0	0	0	0	0	603	903	0
400	8	0	0	0	0	0	0	200	300	0	0	0	0	0	0	0	200	903	0	0	0	0	0	0	0	603	903	0
400	9	0	0	0	0	0	0	200	300	0	0	0	0	0	0	0	200	903	0	0	0	0	0	0	0	603	903	0
401	0	0	0	0	0	0	0	200	300	0	0	0	0	0	0	0	200	903	0	0	0	0	0	0	0	603	903	0
401	1	0	0	0	0	0	0	200	300	0	0	0	0	0	0	0	200	903	0	0	0	0	0	0	0	603	903	0
401	2	0	0	0	0	0	0	200	300	0	0	0	0	0	0	0	200	903	0	0	0	0	0	0	0	603	903	0
401	3	0	0	0	0	0	0	200	300	0	0	0	0	0	0	0	200	903	0	0	0	0	0	0	0	603	903	0
401	4	0	0	0	0	0	0	200	300	0	0	0	0	0	0	0	200	903	0	0	0	0	0	0	0	603	903	0
401	5	0	0	0	0	0	0	200	300	0	0	0	0	0	0	0	200	903	0	0	0	0	0	0	0	603	903	0
401	6	0	0	0	0	0	0	200	300	0	0	0	0	0	0	0	200	903	0	0	0	0	0	0	0	603	903	0
401	7	0	0	0	0	0	0	200	300	0	0	0	0	0	0	0	200	903	0	0	0	0	0	0	0	603	903	0
401	8	0	0	0	0	0	0	200	300	0	0	0	0	0	0	0	200	903	0	0	0	0	0	0	0	603	903	0
401	9	0	0	0	0	0	0	200	300	0	0	0	0	0	0	0	200	903	0	0	0	0	0	0	0	603	903	0
402	0	0	0	0	0	0	0	200	300	0	0	0	0	0	0	0	200	903	0	0	0	0	0	0	0	603	903	0
402	1	0	0	0	0	0	0	200	300	0	0	0	0	0	0	0	200	903	0	0	0	0	0	0	0	603	903	0
402	2	0	0	0	0	0	0	200	300	0	0	0	0	0	0	0	200	903	0	0	0	0	0	0	0	603	903	0
402	3	0	0	0	0	0	0	200	300	0	0	0	0	0	0	0	200	903	0	0	0	0	0	0	0	603	903	0
402	4	0	0	0	0	0	0	200	300	0	0	0	0	0	0	0	200	903	0	0	0	0	0	0	0	603	903	0
402	5	0	0	0	0	0	0	200	300	0	0	0	0	0	0	0	200	903	0	0	0	0	0	0	0	603	903	0
402	6	0	0	0	0	0	0	200	300	0	0	0	0	0	0	0	200	903	0	0	0	0	0	0	0	603	903	0
402	7	0	0	0	0	0	0	200	300	0	0	0	0	0	0	0	200	903	0	0	0	0	0	0	0	603	903	0
402	8	0	0	0	0	0	0	200	300	0	0	0	0	0	0	0	200	903	0	0	0	0	0	0	0	603	903	0
402	9	0	0	0	0	0	0	200	300	0	0	0	0	0	0	0	200	903	0	0	0	0	0	0	0	603	903	0
403	0	0	0	0	0	0	0	200	300	0	0	0	0	0	0	0	200	903	0	0	0	0	0	0	0	603	903	0
403	1	0	0	0	0	0	0	200	300	0	0	0	0	0	0	0	200	903	0	0	0	0	0	0	0	603	903	0
403	2	0	0	0	0	0	0	200	300	0	0	0	0	0	0	0	200	903	0	0	0	0	0	0	0	603	903	0
403	3	0	0	0	0	0	0	200	300	0	0	0	0	0	0	0	200	903	0	0	0	0	0	0	0	603	903	0
403	4	0	0	0	0	0	0	200	300	0	0	0	0	0	0	0	200	903	0	0	0	0	0	0	0	603	903	0
403	5	0	0	0	0	0	0	200	300	0	0	0	0	0	0	0	200	903	0	0	0	0	0	0	0	603	903	0
403	6	0	0	0	0	0	0	200	300	0	0	0	0	0	0	0	200	903	0	0	0	0	0	0	0	603	903	0
403	7	0	0	0	0	0	0	200	300	0	0	0	0	0	0	0	200	903	0	0	0	0	0	0	0	603	903	0
403	8	0	0	0	0	0	0	200	300	0	0	0	0	0	0	0	200	903	0	0	0	0	0	0	0	603	903	0
403	9	0	0	0	0	0	0	200	300	0	0	0	0	0	0	0	200	903	0	0	0	0	0	0	0	603	903	0
404	0	0	0	0	0	0	0	200	300	0	0	0	0	0	0	0	200	903	0	0	0	0	0	0	0	603	903	0
404	1	0	0	0	0	0	0	200	300	0	0	0	0	0	0	0	200	903	0	0	0	0	0	0	0	603	903	0
404	2	0	0	0	0	0	0	200	300	0	0	0	0	0	0	0	200	903	0	0	0	0	0	0	0	603	903	0
404	3	0	0	0	0	0	0	200	300	0	0	0	0	0	0	0	200	903	0	0	0	0	0	0	0	603	903	0
404	4	0	0	0	0	0	0	200	300	0	0	0	0	0	0	0	200	903	0	0	0	0	0	0	0	603	903	0
404	5	0	0	0	0	0	0	200	300	0	0	0	0	0	0	0	200	903	0	0	0	0	0	0	0	603	903	0
404	6	0	0	0	0	0	0	200	300	0	0	0	0	0	0	0	200	903	0	0	0	0	0	0	0	603	903	0
404	7	0	0	0	0	0	0	200	300	0	0	0	0	0	0	0	200	903	0	0	0	0	0	0	0	603	903	0
404	8	0	0	0	0	0	0	200	300	0	0	0	0	0	0	0	200	903	0	0	0	0	0	0	0	603	903	0
404	9	0	0	0	0	0	0	200	300	0	0	0	0	0	0	0	200	903	0	0	0	0	0	0	0	603	903	0
405	0	0	0	0	0	0	0	200	300	0	0	0	0	0	0	0	200	903	0	0	0	0	0	0	0	603	903	0
405	1	0	0	0	0	0	0	200	300	0	0	0	0	0	0	0	200	903	0	0	0	0	0	0	0	603	903	0
405	2	0	0	0	0	0	0	200	300	0	0	0	0	0	0	0	200	903	0	0	0	0	0	0	0	603	903	0
405	3	0	0	0	0	0	0	200	300	0	0	0	0	0	0	0	200	903	0	0	0	0	0	0	0	603	903	0
405	4	0	0	0	0	0	0	200	300	0	0	0	0	0	0	0	200	903	0	0	0	0	0	0	0	603	903	0
405	5	0	0	0	0	0	0	200	300	0	0	0	0	0	0	0	200	903	0	0	0	0	0	0	0	603	903	0
405	6	0	0	0	0	0	0	200	300	0	0	0	0	0	0	0	200	903	0	0	0	0	0	0	0	603	903	0
405	7	0	0	0	0	0	0	200	300	0	0	0	0	0	0	0	200	903	0	0	0	0	0	0	0	603	903	0
405	8	0	0	0	0	0	0	200	300	0	0	0	0	0	0	0	200	903	0	0	0	0	0	0	0	603	903	0
405	9	0	0	0	0	0	0	200	300	0	0	0	0	0	0	0	200	903	0	0	0	0	0	0	0	603	903	0
406	0	0	0	0	0	0	0	200	300	0	0	0	0	0	0	0	200	903	0	0	0	0	0	0	0	603	903	0
406	1	0	0	0	0	0	0	200	300	0	0	0	0	0	0	0	200	903	0	0	0	0	0	0	0	603	903	0
406	2	0	0	0	0	0	0	200	300	0	0	0	0	0	0	0	200	903	0	0	0	0	0	0	0	603	903	0
406	3	0	0	0	0	0	0	200	300	0	0	0	0	0	0	0	200	903	0	0	0	0	0	0	0	603	903	0
406	4	0	0	0	0	0	0	200	300	0	0	0	0	0	0	0	200	903	0	0	0	0	0	0	0	603	903	0
406	5	0	0	0	0	0	0	200	300	0	0	0	0	0	0	0	200	903	0	0	0	0	0	0	0	603	903	0
406	6	0	0	0	0	0	0	200	300	0	0	0	0	0	0	0	200	903	0	0	0	0	0	0	0	603	903	0
406	7	0	0	0	0	0	0	200	300	0	0	0	0	0	0	0	200	903	0	0	0	0	0	0	0	603	903	0
406	8	0	0	0	0	0	0	200	300	0	0	0	0	0	0	0	200	903	0	0	0	0	0	0	0	603	903	0
406	9	0	0	0	0	0	0	200	300	0	0	0	0	0	0	0	200	903	0	0	0	0	0	0	0	603	903	0
407	0	0	0	0	0	0	0	200	300	0	0	0	0	0	0	0	200	903	0	0	0	0	0	0	0	603	903	0
407	1	0	0	0	0	0	0	200	300	0	0	0	0	0	0	0	200	903	0	0	0	0	0	0	0	603	903	0
407	2	0	0	0	0	0	0	200	300	0	0	0	0	0	0	0	200	903	0	0	0	0	0	0	0	603	903	0
407	3	0	0	0	0	0	0	200	300	0	0	0	0	0	0	0	200	903	0	0	0	0	0	0	0	603	903	0
407	4	0	0	0	0	0	0	200	300	0	0	0	0	0	0	0	200	903	0	0	0	0	0	0	0	603	903	0
407	5	0	0	0	0	0	0	200	300	0	0	0	0	0	0	0	200	903	0	0	0	0	0	0	0	603	903	0
407	6	0	0	0	0	0	0	200	300	0	0	0	0	0	0	0	200	903	0	0	0	0	0	0	0	603	903	0
407	7	0	0	0	0	0	0	200	300	0	0	0	0	0	0	0	200	903	0	0	0	0	0	0	0	603	903	0
407	8	0	0	0	0	0	0	200	300	0	0	0	0	0	0	0	200	903	0	0	0	0	0	0	0	603	903	0
407	9	0	0	0	0	0	0	200	300	0	0	0	0	0	0	0	200	903	0	0	0	0	0	0	0	603	903	0
408	0	0	0	0	0	0	0	200	300	0	0	0	0	0	0	0	200	903	0	0	0	0	0	0	0	603	903	0
408	1	0	0	0	0	0	0	200	300	0	0	0	0	0	0	0	200	903	0	0	0	0	0	0	0	603	903	0
408	2	0	0	0	0	0	0	200	300	0	0	0	0	0	0	0	200	903	0	0	0	0	0	0	0	603	903	0
408	3	0	0	0	0	0	0	200	300	0	0	0	0	0	0	0	200	903	0	0	0	0	0	0	0	603	903	0
408	4	0	0	0	0	0	0	200	300	0	0	0	0	0	0	0	200	903	0	0	0	0	0	0	0	603	903	0
408	5	0	0	0	0	0	0	200	300	0	0	0	0	0	0	0	200	903	0	0	0	0	0	0	0	603	903	0
408	6	0	0	0	0	0	0	200	300	0	0	0	0	0	0	0	200	903	0	0	0	0	0	0	0	603	903	0
408	7	0	0	0	0	0	0	200	300	0	0	0	0	0	0	0	200	903	0	0	0	0	0	0	0	603	903	0
408	8	0	0	0	0	0	0	200	300	0	0	0	0	0	0	0	200	903	0	0	0	0	0	0	0	603	903	0
408	9	0	0	0	0	0	0	200	300	0	0	0	0	0	0	0	200	903	0	0	0	0	0	0	0	603	903	0
409	0	0	0	0	0	0	0	200	300	0	0	0	0	0	0	0	200	903	0	0	0	0	0	0	0	603	903	0
409	1	0	0	0	0	0	0	200	300	0	0	0	0	0	0	0	200	903	0	0	0	0	0	0	0	603	903	0
409	2	0	0	0	0	0	0	200	300	0	0	0	0	0	0	0	200	903	0	0	0	0	0	0	0	603	903	0
409	3	0	0	0	0	0	0	200	300	0	0	0	0	0	0	0	200	903	0	0	0	0	0	0	0	603	903	0
409	4	0	0	0	0	0	0	200	300	0	0	0	0	0	0	0	200	903	0	0	0	0	0	0	0	603	903	0
409	5	0	0	0	0	0	0	200	300	0	0	0	0	0	0	0	200	903	0	0	0	0	0	0	0	603	903	0
409	6	0	0	0	0	0	0	200	300	0	0	0	0	0	0	0	200	903	0	0	0	0	0	0	0	603	903	0
409	7	0	0	0	0	0	0	200	300	0	0	0	0	0	0	0	200	903	0	0	0	0	0	0	0	603	903	0
409	8	0	0	0	0	0	0	200	300	0	0	0	0	0	0	0	200	903	0	0	0	0	0	0	0	603	903	0
409	9	0	0	0	0	0	0	200	300	0	0	0	0	0	0	0	200	903	0	0	0	0	0	0	0	603	903	0
410	0	0	0	0	0	0	0	200	300	0	0	0	0	0	0	0	200	903	0	0	0	0	0	0	0	603	903	0
410	1	0	0	0	0	0	0	200	300	0	0	0	0	0	0	0	200	903	0	0	0	0	0	0	0	603	903	0
410	2	0	0	0	0	0	0	200	300	0	0	0	0	0	0	0	200	903	0	0	0	0	0	0	0	603	903	0
410	3	0	0	0	0	0	0	200	300	0	0	0	0	0	0	0	200	903	0	0	0	0	0	0	0	603	903	0
410	4	0	0	0	0	0	0	200	300	0	0	0	0	0	0	0	200	903	0	0	0	0	0	0	0	603	903	0
410	5	0	0	0	0	0	0	200	300	0	0	0	0	0	0	0	200	903	0	0	0	0	0	0	0	603	903	0
410	6	0	0	0	0	0	0	200	300	0	0	0	0	0	0	0	200	903	0	0	0	0	0	0	0	603	903	0
410	7	0	0	0	0	0	0	200	300	0	0	0	0	0	0	0	200	903	0	0	0	0	0	0	0	603	903	0
410	8	0	0	0	0	0	0	200	300	0	0	0	0	0	0	0	200	903	0	0	0	0	0	0	0	603	903	0
410	9	0	0	0	0	0	0	200	300	0	0	0	0	0	0	0	200	903	0	0	0	0	0	0	0	603	903	0
411	0	0	0	0	0	0	0	200	300	0	0	0	0	0	0	0	200	903	0	0	0	0	0	0	0	603	903	0
411	1	0	0	0	0	0	0	200	300	0	0	0	0	0	0	0	200	903	0	0	0	0	0	0	0	603	903	0
411	2	0	0	0	0	0	0	200	300	0	0	0	0	0	0	0	200	903	0	0	0	0	0	0	0	603	903	0
411	3	0	0	0	0	0	0	200	300	0	0	0	0	0	0	0	200	903	0	0	0	0	0	0	0	603	903	0
411	4	0	0	0	0	0	0	200	300	0	0	0	0	0	0	0	200	903	0	0	0	0	0	0	0	603	903	0
411	5	0	0	0	0	0	0	200	300	0	0	0	0	0	0	0	200	903	0	0	0	0	0	0	0	603	903	0
411	6	0	0	0	0	0	0	200	300	0	0	0	0	0	0	0	200	903	0	0	0	0	0	0	0	603	903	0
411	7	0	0	0	0	0	0	200	300	0	0	0	0	0	0	0	200	903	0	0	0	0	0	0	0	603	903	0
411	8	0	0	0	0	0	0	200	300	0	0	0	0	0	0	0	200	903	0	0	0	0	0	0	0	603	903	0
411	9	0	0	0	0	0	0	200	300	0	0	0	0	0	0	0	200	903	0	0	0	0	0	0	0	603	903	0
412	0	0	0	0	0	0	0	200	300	0	0	0	0	0	0	0	200	903	0	0	0	0	0	0	0	603	903	0
412	1	0	0	0	0	0	0	200	300	0	0	0	0	0	0	0	200	903	0	0	0	0	0	0	0	603	903	0
412	2	0	0	0	0	0	0	200	300	0	0	0	0	0	0	0	200	903	0	0	0	0	0	0	0	603	903	0
412	3	0	0	0	0	0	0	200	300	0	0	0	0	0	0	0	200	903	0	0	0	0	0	0	0	603	903	0
412	4	0	0	0	0	0	0	200	300	0	0	0	0	0	0	0	200	903	0	0	0	0	0	0	0	603	903	0
412	5	0	0	0	0	0	0	200	300	0	0	0	0	0	0	0	200	903	0	0	0	0	0	0	0	603	903	0
412	6	0	0	0	0	0	0	200	300	0	0	0	0	0	0	0	200	903	0	0	0	0	0	0	0	603	903	0
412	7	0	0	0	0	0	0	200	300	0	0	0	0	0	0	0	200	903	0	0	0	0	0	0	0	603	903	0
412	8	0	0	0	0	0	0	200	300	0	0	0	0	0	0	0	200	903	0	0	0	0	0	0	0	603	903	0
412	9	0	0	0	0	0	0	200	300	0	0	0	0	0	0	0	200	903	0	0	0	0	0	0	0	603	903	0
413	0	0	0	0	0	0	0	200	300	0	0	0	0	0	0	0	200	903	0	0	0	0	0	0	0	603	903	0
413	1	0	0	0	0	0	0	200	300	0	0	0	0	0	0	0	200	903	0	0	0	0	0	0	0	603	903	0
413	2	0	0	0	0	0	0	200	300	0	0	0	0	0	0	0	200	903	0	0	0	0	0	0	0	603	903	0
413	3	0	0	0	0	0	0	200	300	0	0	0	0	0	0	0	200	903	0	0	0	0	0	0	0	603	903	0
413	4	0	0	0	0	0	0	200	300	0	0	0	0	0	0	0	200	903	0	0	0	0	0	0	0	603	903	0
413	5	0	0	0	0	0	0	200	300	0	0	0	0	0	0	0	200	903	0	0	0	0	0	0	0	603	903	0
413	6	0	0	0	0	0	0	200	300	0	0	0	0	0	0	0	200	903	0	0	0	0	0	0	0	603	903	0
413	7	0	0	0	0	0	0	200	300	0	0	0	0	0	0	0	200	903	0	0	0	0	0	0	0	603	903	0
413	8	0	0	0	0	0	0	200	300	0	0	0	0	0	0	0	200	903	0	0	0	0	0	0	0	603	903	0
413	9	0	0	0	0	0	0	200	300	0	0	0	0	0	0	0	200	903	0	0	0	0	0	0	0	603	903	0
414	0	0	0	0	0	0	0	200	300	0	0	0	0	0	0	0	200	903	0	0	0	0	0	0	0	603	903	0
414	1	0	0	0	0	0	0	200	300	0	0	0	0	0	0	0	200	903	0	0	0	0	0	0	0	603	903	0
414	2	0	0	0	0	0	0	200	300	0	0	0	0	0	0	0	200	903	0	0	0	0	0	0	0	603	903	0
414	3	0	0	0	0	0	0	200	300	0	0	0	0	0	0	0	200	903	0	0	0	0	0	0	0	603	903	0
414	4	0	0	0	0	0	0	200	300	0	0	0	0	0	0	0	200	903	0	0	0	0	0	0	0	603	903	0
414	5	0	0	0	0	0	0	200	300	0	0	0	0	0	0	0	200	903	0	0	0	0	0	0	0	603	903	0
414	6	0	0	0	0	0	0	200	300	0	0	0	0	0	0	0	200	903	0	0	0	0	0	0	0	603	903	0
414	7	0	0	0	0	0	0	200	300	0	0	0	0	0	0	0	200	903	0	0	0	0	0	0	0	603	903	0
414	8	0	0	0	0	0	0	200	300	0	0	0	0	0	0	0	200	903	0	0	0	0	0	0	0	603	903	0
414	9	0	0	0	0	0	0	200	300	0	0	0	0	0	0	0	200	903	0	0	0	0	0	0	0	603	903	0
415	0	0	0	0	0	0	0	200	300	0	0	0	0	0	0	0	200	903	0	0	0	0	0	0	0	603	903	0
415	1	0	0	0	0	0	0	200	300	0	0	0	0	0	0	0	200	903	0	0	0	0	0	0	0	603	903	0
415	2	0	0	0	0	0	0	200	300	0	0	0	0	0	0	0	200	903	0	0	0	0	0	0	0	603	903	0
415	3	0	0	0	0	0	0	200	300	0	0	0	0	0	0	0	200	903	0	0	0	0	0	0	0	603	903	0
415	4	0	0	0	0	0	0	200	300	0	0	0	0	0	0	0	200	903	0	0	0	0	0	0	0	603	903	0
415	5	0	0	0	0	0	0	200	300	0	0	0	0	0	0	0	200	903	0	0	0	0	0	0	0	603	903	0
415	6	0	0	0	0	0	0	200	300	0	0	0	0	0	0	0	200	903	0	0	0	0	0	0	0	603	903	0
415	7	0	0	0	0	0	0	200	300	0	0	0	0	0	0	0	200	903	0	0	0	0	0	0	0	603	903	0
415	8	0	0	0	0	0	0	200	300	0	0	0	0	0	0	0	200	903	0	0	0	0	0	0	0	603	903	0
415	9	0	0	0	0	0	0	200	300	0	0	0	0	0	0	0	200	903	0	0	0	0	0	0	0	603	903	0
416	0	0	0	0	0	0	0	200	300	0	0	0	0	0	0	0	200	903	0	0	0	0	0	0	0	603	903	0
416	1	0	0	0	0	0	0	200	300	0	0	0	0	0	0	0	200	903	0	0	0	0	0	0	0	603	903	0
416	2	0	0	0	0	0	0	200	300	0	0	0	0	0	0	0	200	903	0	0	0	0	0	0	0	603	903	0
416	3	0	0	0	0	0	0	200	300	0	0	0	0	0	0	0	200	903	0	0	0	0	0	0	0	603	903	0
416	4	0	0	0	0	0	0	200	300	0	0	0	0	0	0	0	200	903	0	0	0	0	0	0	0	603	903	0
416	5	0	0	0	0	0	0	200	300	0	0	0	0	0	0	0	200	903	0	0	0	0	0	0	0	603	903	0
416	6	0	0	0	0	0	0	200	300	0	0	0	0	0	0	0	200	903	0	0	0	0	0	0	0	603	903	0
416	7	0	0	0	0	0	0	200	300	0	0	0	0	0	0	0	200	903	0	0	0	0	0	0	0	603	903	0
416	8	0	0	0	0	0	0	200	300	0	0	0	0	0	0	0	200	903	0	0	0	0	0	0	0	603	903	0
416	9	0	0	0	0	0	0	200	300	0	0	0	0	0	0	0	200	903	0	0	0	0	0	0	0	603	903	0
417	0	0	0	0	0	0	0	200	300	0	0	0	0	0	0	0	200	903	0	0	0	0	0	0	0	603	903	0
417	1	0	0	0	0	0	0	200	300	0	0	0	0	0	0	0	200	903	0	0	0	0	0	0	0	603	903	0
417	2	0	0	0	0	0	0	200	300	0	0	0	0	0	0	0	200	903	0	0	0	0	0	0	0	603	903	0
417	3	0	0	0	0	0	0	200	300	0	0	0	0	0	0	0	200	903	0	0	0	0	0	0	0	603	903	0
417	4	0	0	0	0	0	0	200	300	0	0	0	0	0	0	0	200	903	0	0	0	0	0	0	0	603	903	0
417	5	0	0	0	0	0	0	200	300	0	0	0	0	0	0	0	200	903	0	0	0	0	0	0	0	603	903	0
417	6	0	0	0	0	0	0	200	300	0	0	0	0	0	0	0	200	903	0	0	0	0	0	0	0	603	903	0
417	7	0	0	0	0	0	0	200	300	0	0	0	0	0	0	0	200	903	0	0	0	0	0	0	0	603	903	0
417	8	0	0	0	0	0	0	200	300	0	0	0	0	0	0	0	200	903	0	0	0	0	0	0	0	603	903	0
417	9	0	0	0	0	0	0	200	300	0	0	0	0	0	0	0	200	903	0	0	0	0	0	0	0	603	903	0
418	0	0	0	0	0	0	0	200	300	0	0	0	0	0	0	0	200	903	0	0	0	0	0	0	0	603	903	0
418	1	0	0	0	0	0	0	200	300	0	0	0	0	0	0	0	200	903	0	0	0	0	0	0	0	603	903	0
418	2	0	0	0	0	0	0	200	300	0	0	0	0	0	0	0	200	903	0	0	0	0	0	0	0	603	903	0
418	3	0	0	0	0	0	0	200	300	0	0	0	0	0	0	0	200	903	0	0	0	0	0	0	0	603	903	0
418	4	0	0	0	0	0	0	200	300	0	0	0	0	0	0	0	200	903	0	0	0	0	0	0	0	603	903	0
418	5	0	0	0	0	0	0	200	300	0	0	0	0	0	0	0	200	903	0	0	0	0	0	0	0	603	903	0
418	6	0	0	0	0	0	0	200	300	0	0	0	0	0	0	0	200	903	0	0	0	0	0	0	0	603	903	0
418	7	0	0	0	0	0	0	200	300	0	0	0	0	0	0	0	200	903	0	0	0	0	0	0	0	603	903	0
418	8	0	0	0	0	0	0	200	300	0	0	0	0	0	0	0	200	903	0	0	0	0	0	0	0	603	903	0
418	9	0	0	0	0	0	0	200	300	0	0	0	0	0	0	0	200	903	0	0	0	0	0	0	0	603	903	0
419	0	0	0	0	0	0	0	200	300	0	0	0	0	0	0	0	200	903	0	0	0	0	0	0	0	603	903	0
419	1	0	0	0	0	0	0	200	300	0	0	0	0	0	0	0	200	903	0	0	0	0	0	0	0	603	903	0
419	2	0	0	0	0	0	0	200	300	0	0	0	0	0	0	0	200	903	0	0	0	0	0	0	0	603	903	0
419	3	0	0	0	0	0	0	200	300	0	0	0	0	0	0	0	200	903	0	0	0	0	0	0	0	603	903	0
419	4	0	0	0	0	0	0	200	300	0	0	0	0	0	0	0	200	903	0	0	0	0	0	0	0	603	903	0
419	5	0	0	0	0	0	0	200	300	0	0	0	0	0	0	0	200	903	0	0	0	0	0	0	0	603	903	0
419	6	0	0	0	0	0	0	200	300	0	0	0	0	0	0	0	200	903	0	0	0	0	0	0	0	603	903	0
419	7	0	0	0	0	0	0	200	300	0	0	0	0	0	0	0	200	903	0	0	0	0	0	0	0	603	903	0
419	8	0	0	0	0	0	0	200	300	0	0	0	0	0	0	0	200	903	0	0	0	0	0	0	0	603	903	0
419	9	0	0	0	0	0	0	200	300	0	0	0	0	0	0	0	200	903	0	0	0	0	0	0	0	603	903	0
420	0	0	0	0	0	0	0	200	300	0	0	0	0	0	0	0	200	903	0	0	0	0	0	0	0	603	903	0
420	1	0	0	0	0	0	0	200	300	0	0	0	0	0	0	0	200	903	0	0	0	0	0	0	0	603	903	0
420	2	0	0	0	0	0	0	200	300	0	0	0	0	0	0	0	200	903	0	0	0	0	0	0	0	603	903	0
420	3	0	0	0	0	0	0	200	300	0	0	0	0	0	0	0	200	903	0	0	0	0	0	0	0	603	903	0
420	4	0	0	0	0	0	0	200	300	0	0	0	0	0	0	0	200	903	0	0	0	0	0	0	0	603	903	0
420	5	0	0	0	0	0	0	200	300	0	0	0	0	0	0	0	200	903	0	0	0	0	0	0	0	603	903	0
420	6	0	0	0	0	0	0	200	300	0	0	0	0	0	0	0	200	903	0	0	0	0	0	0	0	603	903	0
420	7	0	0	0	0	0	0	200	300	0	0	0	0	0	0	0	200	903	0	0	0	0	0	0	0	603	903	0
420	8	0	0	0	0	0	0	200	300	0	0	0	0	0	0	0	200	903	0	0	0	0	0	0	0	603	903	0
420	9	0	0	0	0	0	0	200	300	0	0	0	0	0	0	0	200	903	0	0	0	0	0	0	0	603	903	0
421	0	0	0	0	0	0	0	200	300	0	0	0	0	0	0	0	200	903	0	0	0	0	0	0	0	603	903	0
421	1	0	0	0	0	0	0	200	300	0	0	0	0	0	0	0	200	903	0	0	0	0	0	0	0	603	903	0
421	2	0	0	0	0	0	0	200	300	0	0	0	0	0	0	0	200	903	0	0	0	0	0	0	0	603	903	0
421	3	0	0	0	0	0	0	200	300	0	0	0	0	0	0	0	200	903	0	0	0	0	0	0	0	603	903	0
421	4	0	0	0	0	0	0	200	300	0	0	0	0	0	0	0	200	903	0	0	0	0	0	0	0	603	903	0
421	5	0	0	0	0	0	0	200	300	0	0	0	0	0	0	0	200	903	0	0	0	0	0	0	0	603	903	0
421	6	0	0	0	0	0	0	200	300	0	0	0	0	0	0	0	200	903	0	0	0	0	0	0	0	603	903	0
421	7	0	0	0	0	0	0	200	300	0	0	0	0	0	0	0	200	903	0	0	0	0	0	0	0	603	903	0
421	8	0	0	0	0	0	0	200	300	0	0	0	0	0	0	0	200	903	0	0	0	0	0	0	0	603	903	0
421	9	0	0	0	0	0	0	200	300	0	0	0	0	0	0	0	200	903	0	0	0	0	0	0	0	603	903	0
422	0	0	0	0	0	0	0	200	300	0	0	0	0	0	0	0	200	903	0	0	0	0	0	0	0	603	903	0
422	1	0	0	0	0	0	0	200	300	0	0	0	0	0	0	0	200	903	0	0	0	0	0	0	0	603	903	0
422	2	0	0	0	0	0	0	200	300	0	0	0	0	0	0	0	200	903	0	0	0	0	0	0	0	603	903	0
422	3	0	0	0	0	0	0	200	300	0	0	0	0	0	0	0	200	903	0	0	0	0	0	0	0	603	903	0
422	4	0	0	0	0	0	0	200	300	0	0	0	0	0	0	0	200	903	0	0	0	0	0	0	0	603	903	0
422	5	0	0	0	0	0	0	200	300	0	0	0	0	0	0	0	200	903	0	0	0	0	0	0	0	603	903	0
422	6	0	0	0	0	0	0	200	300	0	0	0	0	0	0	0	200	903	0	0	0	0	0	0	0	603	903	0
422	7	0	0	0	0	0	0	200	300	0	0	0	0	0	0	0	200	903	0	0	0	0	0	0	0	603	903	0
422	8	0	0	0	0	0	0	200	300	0	0	0	0	0	0	0	200	903	0	0	0	0	0	0	0	603	903	0
422	9	0	0	0	0	0	0	200	300	0	0	0	0	0	0	0	200	903	0	0	0	0	0	0	0	603	903	0
423	0	0	0	0	0	0	0	200	300	0	0	0	0	0	0	0	200	903	0	0	0	0	0	0	0	603	903	0
423	1	0	0	0	0	0	0	200	300	0	0	0	0	0	0	0	200	903	0	0	0	0	0	0	0	603	903	0
423	2	0	0	0	0	0	0	200	300	0	0	0	0	0	0	0	200	903	0	0	0	0	0	0	0	603	903	0
423	3	0	0	0	0	0	0	200	300	0	0	0	0	0	0	0	200	903	0	0	0	0	0	0	0	603	903	0
423	4	0	0	0	0	0	0	200	300	0	0	0	0	0	0	0	200	903	0	0	0	0	0	0	0	603	903	0
423	5	0	0	0	0	0	0	200	300	0	0	0	0	0	0	0	200	903	0	0	0	0	0	0	0	603	903	0
423	6	0	0	0	0	0	0	200	300	0	0	0	0	0	0	0	200	903	0	0	0	0	0	0	0	603	903	0
423	7	0	0	0	0	0	0	200	300	0	0	0	0	0	0	0	200	903	0	0	0	0	0	0	0	603	903	0
423	8	0	0	0	0	0	0	200	300	0	0	0	0	0	0	0	200	903	0	0	0	0	0	0	0	603	903	0
423	9	0	0	0	0	0	0	200	300	0	0	0	0	0	0	0	200	903	0	0	0	0	0	0	0	603	903	0
424	0	0	0	0	0	0	0	200	300	0	0	0	0	0	0	0	200	903	0	0	0	0	0	0	0	603	903	0
424	1	0	0	0	0	0	0	200	300	0	0	0	0	0	0	0	200	903	0	0	0	0	0	0	0	603	903	0
424	2	0	0	0	0	0	0	200	300	0	0	0	0	0	0	0	200	903	0	0	0	0	0	0	0	603	903	0
424	3	0	0	0	0	0	0	200	300	0	0	0	0	0	0	0	200	903	0	0	0	0	0	0	0	603	903	0
424	4	0	0	0	0	0	0	200	300	0	0	0	0	0	0	0	200	903	0	0	0	0	0	0	0	603	903	0
424	5	0	0	0	0	0	0	200	300	0	0	0	0	0	0	0	200	903	0	0	0	0	0	0	0	603	903	0
424	6	0	0	0	0	0	0	200	300	0	0	0	0	0	0	0	200	903	0	0	0	0	0	0	0	603	903	0
424	7	0	0	0	0	0	0	200	300	0	0	0	0	0	0	0	200	903	0	0	0	0	0	0	0	603	903	0
424	8	0	0	0	0	0	0	200	300	0	0	0	0	0	0	0	200	903	0	0	0	0	0	0	0	603	903	0
424	9	0	0	0	0	0	0	200	300	0	0	0	0	0	0	0	200	903	0	0	0	0	0	0	0	603	903	0
425	0	0	0	0	0	0	0	200	300	0	0	0	0	0	0	0	200	903	0	0	0	0	0	0	0	603	903	0
425	1	0	0	0	0	0	0	200	300	0	0	0	0	0	0	0	200	903	0	0	0	0	0	0	0	603	903	0
425	2	0	0	0	0	0	0	200	300	0	0	0	0	0	0	0	200	903	0	0	0	0	0	0	0	603	903	0
425	3	0	0	0	0	0	0	200	300	0	0	0	0	0	0	0	200	903	0	0	0	0	0	0	0	603	903	0
425	4	0	0	0	0	0	0	200	300	0	0	0	0	0	0	0	200	903	0	0	0	0	0	0	0	603	903	0
425	5	0	0	0	0	0	0	200	300	0	0	0	0	0	0	0	200	903	0	0	0	0	0	0	0	603	903	0
425	6	0	0	0	0	0	0	200	300	0	0	0	0	0	0	0	200	903	0	0	0	0	0	0	0	603	903	0
425	7	0	0	0	0	0	0	200	300	0	0	0	0	0	0	0	200	903	0	0	0	0	0	0	0	603	903	0
425	8	0	0	0	0	0	0	200	300	0	0	0	0	0	0	0	200	903	0	0	0	0	0	0	0	603	903	0
425	9	0	0	0	0	0	0	200	300	0	0	0	0	0	0	0	200	903	0	0	0	0	0	0	0	603	903	0
426	0	0	0	0	0	0	0	200	300	0	0	0	0	0	0	0	200	903	0	0	0	0	0	0	0	603	903	0
426	1	0	0	0	0	0	0	200	300	0	0	0	0	0	0	0	200	903	0	0	0	0	0	0	0	603	903	0
426	2	0	0	0	0	0	0	200	300	0	0	0	0	0	0	0	200	903	0	0	0	0	0	0	0	603	903	0
426	3	0	0	0	0	0	0	200	300	0	0	0	0	0	0	0	200	903	0	0	0	0	0	0	0	603	903	0
426	4	0	0	0	0	0	0	200	300	0	0	0	0	0	0	0	200	903	0	0	0	0	0	0	0	603	903	0
426	5	0	0	0	0	0	0	200	300	0	0	0	0	0	0	0	200	903	0	0	0	0	0	0	0	603	903	0
426	6	0	0	0	0	0	0	200	300	0	0	0	0	0	0	0	200	903	0	0	0	0	0	0	0	603	903	0
426	7	0	0	0	0	0	0	200	300	0	0	0	0	0	0	0	200	903	0	0	0	0	0	0	0	603	903	0
426	8	0	0	0	0	0	0	200	300	0	0	0	0	0	0	0	200	903	0	0	0	0	0	0	0	603	903	0
426	9	0	0	0	0	0	0	200	300	0	0	0	0	0	0	0	200	903	0	0	0	0	0	0	0	603	903	0
427	0	0	0	0	0	0	0	200	300	0	0	0	0	0	0	0	200	903	0	0	0	0	0	0	0	603	903	0
427	1	0	0	0	0	0	0	200	300	0	0	0	0	0	0	0	200	903	0	0	0	0	0	0	0	603	903	0
427	2	0	0	0	0	0	0	200	300	0	0	0	0	0	0	0	200	903	0	0	0	0	0	0	0	603	903	0
427	3	0	0	0	0	0	0	200	300	0	0	0	0	0	0	0	200	903	0	0	0	0	0	0	0	603	903	0
427	4	0	0	0	0	0	0	200	300	0	0	0	0	0	0	0	200	903	0	0	0	0	0	0	0	603	903	0
427	5	0	0	0	0	0	0	200	300	0	0	0	0	0	0	0	200	903	0	0	0	0	0	0	0	603	903	0
427	6	0	0	0	0	0	0	200	300	0	0	0	0	0	0	0	200	903	0	0	0	0	0	0	0	603	903	0
427	7	0	0	0	0	0	0	200	300	0	0	0	0	0	0	0	200	903	0	0	0	0	0	0	0	603	903	0
427	8	0	0	0	0	0	0	200	300	0	0	0	0	0	0	0	200	903	0	0	0	0	0	0	0	603	903	0
427	9	0	0	0	0	0	0	200	300	0	0	0	0	0	0	0	200	903	0	0	0	0	0	0	0	603	903	0
428	0	0	0	0	0	0	0	200	300	0	0	0	0	0	0	0	200	903	0	0	0	0	0	0	0	603	903	0
428	1	0	0	0	0	0	0	200	300	0	0	0	0	0	0	0	200	903	0	0	0	0	0	0	0	603	903	0
428	2	0	0	0	0	0	0	200	300	0	0	0	0	0	0	0	200	903	0	0	0	0	0	0	0	603	903	0
428	3	0	0	0	0	0	0	200	300	0	0	0	0	0	0	0	200	903	0	0	0	0	0	0	0	603	903	0
428	4	0	0	0	0	0	0	200	300	0	0	0	0	0	0	0	200	903	0	0	0	0	0	0	0	603	903	0
428	5	0	0	0	0	0	0	200	300	0	0	0	0	0	0	0	200	903	0	0	0	0	0	0	0	603	903	0
428	6	0	0	0	0	0	0	200	300	0	0	0	0	0	0	0	200	903	0	0	0	0	0	0	0	603	903	0
428	7	0	0	0	0	0	0	200	300	0	0	0	0	0	0	0	200	903	0	0	0	0	0	0	0	603	903	0
428	8	0	0	0	0	0	0	200	300	0	0	0	0	0	0	0	200	903	0	0	0	0	0	0	0	603	903	0
428	9	0	0	0	0	0	0	200	300	0	0	0	0	0	0	0	200	903	0	0	0	0	0	0	0	603	903	0
429	0	0	0	0	0	0	0	200	300	0	0	0	0	0	0	0	200	903	0	0	0	0	0	0	0	603	903	0
429	1	0	0	0	0	0	0	200	300	0	0	0	0	0	0	0	200	903	0	0	0	0	0	0	0	603	903	0
429	2	0	0	0	0	0	0	200	300	0	0	0	0	0	0	0	200	903	0	0	0	0	0	0	0	603	903	0
429	3	0	0	0	0	0	0	200	300	0	0	0	0	0	0	0	200	903	0	0	0	0	0	0	0	603	903	0
429	4	0	0	0	0	0	0	200	300	0	0	0	0	0	0	0	200	903	0	0	0	0	0	0	0	603	903	0
429	5	0	0	0	0	0	0	200	300	0	0	0	0	0	0	0	200	903	0	0	0	0	0	0	0	603	903	0
429	6	0	0	0	0	0	0	200	300	0	0	0	0	0	0	0	200	903	0	0	0	0	0	0	0	603	903	0
429	7	0	0	0	0	0	0	200	300	0	0	0	0	0	0	0	200	903	0	0	0	0	0	0	0	603	903	0
429	8	0	0	0	0	0	0	200	300	0	0	0	0	0	0	0	200	903	0	0	0	0	0	0	0	603	903	0
429	9	0	0	0	0	0	0	200	300	0	0	0	0	0	0	0	200	903	0	0	0	0	0	0	0	603	903	0
430	0	0	0	0	0	0	0	200	300	0	0	0	0	0	0	0	200	903	0	0	0	0	0	0	0	603	903	0
430	1	0	0	0	0	0	0	200	300	0	0	0	0	0	0	0	200	903	0	0	0	0	0	0	0	603	903	0
430	2	0	0	0	0	0	0	200	300	0	0	0	0	0	0	0	200	903	0	0	0	0	0	0	0	603	903	0
430	3	0	0	0	0	0	0	200	300	0	0	0	0	0	0	0	200	903	0	0	0	0	0	0	0	603	903	0
430	4	0	0	0	0	0	0	200	300	0	0	0	0	0	0	0	200	903	0	0	0	0	0	0	0	603	903	0
430	5	0	0	0	0	0	0	200	300	0	0	0	0	0	0	0	200	903	0	0	0	0	0	0	0	603	903	0
430	6	0	0	0	0	0	0	200	300	0	0	0	0	0	0	0	200	903	0	0	0	0	0	0	0	603	903	0
430	7	0	0	0	0	0	0	200	300	0	0	0	0	0	0	0	200	903	0	0	0	0	0	0	0	603	903	0
430	8	0	0	0	0	0	0	200	300	0	0	0	0	0	0	0	200	903	0	0	0	0	0	0	0	603	903	0
430	9	0	0	0	0	0	0	200	300	0	0	0	0	0	0	0	200	903	0	0	0	0	0	0	0	603	903	0
431	0	0	0	0	0	0	0	200	300	0	0	0	0	0	0	0	200	903	0	0	0	0	0	0	0	603	903	0
431	1	0	0	0	0	0	0	200	300	0	0	0	0	0	0	0	200	903	0	0	0	0	0	0	0	603	903	0
431	2	0	0	0	0	0	0	200	300	0	0	0	0	0	0	0	200	903	0	0	0	0	0	0	0	603	903	0
431	3	0	0	0	0	0	0	200	300	0	0	0	0	0	0	0	200	903	0	0	0	0	0	0	0	603	903	0
431	4	0	0	0	0	0	0	200	300	0	0	0	0	0	0	0	200	903	0	0	0	0	0	0	0	603	903	0
431	5	0	0	0	0	0	0	200	300	0	0	0	0	0	0	0	200	903	0	0	0	0	0	0	0	603	903	0
431	6	0	0	0	0	0	0	200	300	0	0	0	0	0	0	0	200	903	0	0	0	0	0	0	0	603	903	0
431	7	0	0	0	0	0	0	200	300	0	0	0	0	0	0	0	200	903	0	0	0	0	0	0	0	603	903	0
431	8	0	0	0	0	0	0	200	300	0	0	0	0	0	0	0	200	903	0	0	0	0	0	0	0	603	903	0
431	9	0	0	0	0	0	0	200	300	0	0	0	0	0	0	0	200	903	0	0	0	0	0	0	0	603	903	0
432	0	0	0	0	0	0	0	200	300	0	0	0	0	0	0	0	200	903	0	0	0	0	0	0	0	603	903	0
432	1	0	0	0	0	0	0	200	300	0	0	0	0	0	0	0	200	903	0	0	0	0	0	0	0	603	903	0
432	2	0	0	0	0	0	0	200	300	0	0	0	0	0	0	0	200	903	0	0	0	0	0	0	0	603	903	0
432	3	0	0	0	0	0	0	200	300	0	0	0	0	0	0	0	200	903	0	0	0	0	0	0	0	603	903	0
432	4	0	0	0	0	0	0	200	300	0	0	0	0	0	0	0	200	903	0	0	0	0	0	0	0	603	903	0
432	5	0	0	0	0	0	0	200	300	0	0	0	0	0	0	0	200	903	0	0	0	0	0	0	0	603	903	0
432	6	0	0	0	0	0	0	200	300	0	0	0	0	0	0	0	200	903	0	0	0	0	0	0	0	603	903	0
432	7	0	0	0	0	0	0	200	300	0	0	0	0	0	0	0	200	903	0	0	0	0	0	0	0	603	903	0
432	8	0	0	0	0	0	0	200	300	0	0	0	0	0	0	0	200	903	0	0	0	0	0	0	0	603	903	0
432	9	0	0	0	0	0	0	200	300	0	0	0	0	0	0	0	200	903	0	0	0	0	0	0	0	603	903	0
433	0	0	0	0	0	0	0	200	300	0	0	0	0	0	0	0	200	903	0	0	0	0	0	0	0	603	903	0
433	1	0	0	0	0	0	0	200	300	0	0	0	0	0	0	0	200	903	0	0	0	0	0	0	0	603	903	0
433	2	0	0	0	0	0	0	200	300	0	0	0	0	0	0	0	200	903	0	0	0	0	0	0	0	603	903	0
433	3	0	0	0	0	0	0	200	300	0	0	0	0	0	0	0	200	903	0	0	0	0	0	0	0	603	903	0
433	4	0	0	0	0	0	0	200	300	0	0	0	0	0	0	0	200	903	0	0	0	0	0	0	0	603	903	0
433	5	0	0	0	0	0	0	200	300	0	0	0	0	0	0	0	200	903	0	0	0	0	0	0	0	603	903	0
433	6	0	0	0	0	0	0	200	300	0	0	0	0	0	0	0	200	903	0	0	0	0	0	0	0	603	903	0
433	7	0	0	0	0	0	0	200	300	0	0	0	0	0	0	0	200	903	0	0	0	0	0	0	0	603	903	0
433	8	0	0	0	0	0	0	200	300	0	0	0	0	0	0	0	200	903	0	0	0	0	0	0	0	603	903	0
433	9	0	0	0	0	0	0	200	300	0	0	0	0	0	0	0	200	903	0	0	0	0	0	0	0	603	903	0
434	0	0	0	0	0	0	0	200	300	0	0	0	0	0	0	0	200	903	0	0	0	0	0	0	0	603	903	0
434	1	0	0	0	0	0	0	200	300	0	0	0	0	0	0	0	200	903	0	0	0	0	0	0	0	603	903	0
434	2	0	0	0	0	0	0	200	300	0	0	0	0	0	0	0	200	903	0	0	0	0	0	0	0	603	903	0
434	3	0	0	0	0	0	0	200	300	0	0	0	0	0	0	0	200	903	0	0	0	0	0	0	0	603	903	0
434	4	0	0	0	0	0	0	200	300	0	0	0	0	0	0	0	200	903	0	0	0	0	0	0	0	603	903	0
434	5	0	0	0	0	0	0	200	300	0	0	0	0	0	0	0	200	903	0	0	0	0	0	0	0	603	903	0
434	6	0	0	0	0	0	0	200	300	0	0	0	0	0	0	0	200	903	0	0	0	0	0	0	0	603	903	0
434	7	0	0	0	0	0	0	200	300	0	0	0	0	0	0	0	200	903	0	0	0	0	0	0	0	603	903	0
434	8	0	0	0	0	0	0	200	300	0	0	0	0	0	0	0	200	903	0	0	0	0	0	0	0	603	903	0
434	9	0	0	0	0	0	0	200	300	0	0	0	0	0	0	0	200	903	0	0	0	0	0	0	0	603	903	0
435	0	0	0	0	0	0	0	200	300	0	0	0	0	0	0	0	200	903	0	0	0	0	0	0	0	603	903	0
435	1	0	0	0	0	0	0	200	300	0	0	0	0	0	0	0	200	903	0	0	0	0	0	0	0	603	903	0
435	2	0	0	0	0	0	0	200	300	0	0	0	0	0	0	0	200	903	0	0	0	0	0	0	0	603	903	0
435	3	0	0	0	0	0	0	200	300	0	0	0	0	0	0	0	200	903	0	0	0	0	0	0	0	603	903	0
435	4	0	0	0	0	0	0	200	300	0	0	0	0	0	0	0	200	903	0	0	0	0	0	0	0	603	903	0
435	5	0	0	0	0	0	0	200	300	0	0	0	0	0	0	0	200	903	0	0	0	0	0	0	0	603	903	0
435	6	0	0	0	0	0	0	200	300	0	0	0	0	0	0	0	200	903	0	0	0	0	0	0	0	603	903	0
435	7	0	0	0	0	0	0	200	300	0	0	0	0	0	0	0	200	903	0	0	0	0	0	0	0	603	903	0
435	8	0	0	0	0	0	0	200	300	0	0	0	0	0	0	0	200	903	0	0	0	0	0	0	0	603	903	0
435	9	0	0	0	0	0	0	200	300	0	0	0	0	0	0	0	200	903	0	0	0	0	0	0	0	603	903	0
436	0	0	0	0	0	0	0	200	300	0	0	0	0	0	0	0	200	903	0	0	0	0	0	0	0	603	903	0
436	1	0	0	0	0	0	0	200	300	0	0	0	0	0	0	0	200	903	0	0	0	0	0	0	0	603	903	0
436	2	0	0	0	0	0	0	200	300	0	0	0	0	0	0	0	200	903	0	0	0	0	0	0	0	603	903	0
436	3	0	0	0	0	0	0	200	300	0	0	0	0	0	0	0	200	903	0	0	0	0	0	0	0	603	903	0
436	4	0	0	0	0	0	0	200	300	0	0	0	0	0	0	0	200	903	0	0	0	0	0	0	0	603	903	0
436	5	0	0	0	0	0	0	200	300	0	0	0	0	0	0	0	200	903	0	0	0	0	0	0	0	603	903	0
436	6	0	0	0	0	0	0	200	300	0	0	0	0	0	0	0	200	903	0	0	0	0	0	0	0	603	903	0
436	7	0	0	0	0	0	0	200	300	0	0	0	0	0	0	0	200	903	0	0	0	0	0	0	0	603	903	0
436	8	0	0	0	0	0	0	200	300	0	0	0	0	0	0	0	200	903	0	0	0	0	0	0	0	603	903	0
436	9	0	0	0	0	0	0	200	300	0	0	0	0	0	0	0	200	903	0	0	0	0	0	0	0	603	903	0
437	0	0	0	0	0	0	0	200	300	0	0	0	0	0	0	0	200	903	0	0	0	0	0	0	0	603	903	0
437	1	0	0	0	0	0	0	200	300	0	0	0	0	0	0	0	200	903	0	0	0	0	0	0	0	603	903	0
437	2	0	0	0	0	0	0	200	300	0	0	0	0	0	0	0	200	903	0	0	0	0	0	0	0	603	903	0
437	3	0	0	0	0	0	0	200	300	0	0	0	0	0	0	0	200	903	0	0	0	0	0	0	0	603	903	0
437	4	0	0	0	0	0	0	200	300	0	0	0	0	0	0	0	200	903	0	0	0	0	0	0	0	603	903	0
437	5	0	0	0	0	0	0	200	300	0	0	0	0	0	0	0	200	903	0	0	0	0	0	0	0	603	903	0
437	6	0	0	0	0	0	0	200	300	0	0	0	0	0	0	0	200	903	0	0	0	0	0	0	0	603	903	0
437	7	0	0	0	0	0	0	200	300	0	0	0	0	0	0	0	200	903	0	0	0	0	0	0	0	603	903	0
437	8	0	0	0	0	0	0	200	300	0	0	0	0	0	0	0	200	903	0	0	0	0	0	0	0	603	903	0
437	9	0	0	0	0	0	0	200	300	0	0	0	0	0	0	0	200	903	0	0	0	0	0	0	0	603	903	0
438	0	0	0	0	0	0	0	200	300	0	0	0	0	0	0	0	200	903	0	0	0	0	0	0	0	603	903	0
438	1	0	0	0	0	0	0	200	300	0	0	0	0	0	0	0	200	903	0	0	0	0	0	0	0	603	903	0
438	2	0	0	0	0	0	0	200	300	0	0	0	0	0	0	0	200	903	0	0	0	0	0	0	0	603	903	0
438	3	0	0	0	0	0	0	200	300	0	0	0	0	0	0	0	200	903	0	0	0	0	0	0	0	603	903	0
438	4	0	0	0	0	0	0	200	300	0	0	0	0	0	0	0	200	903	0	0	0	0	0	0	0	603	903	0
438	5	0	0	0	0	0	0	200	300	0	0	0	0	0	0	0	200	903	0	0	0	0	0	0	0	603	903	0
438	6	0	0	0	0	0	0	200	300	0	0	0	0	0	0	0	200	903	0	0	0	0	0	0	0	603	903	0
438	7	0	0	0	0	0	0	200	300	0	0	0	0	0	0	0	200	903	0	0	0	0	0	0	0	603	903	0
438	8	0	0	0	0	0	0	200	300	0	0	0	0	0	0	0	200	903	0	0	0	0	0	0	0	603	903	0
438	9	0	0	0	0	0	0	200	300	0	0	0	0	0	0	0	200	903	0	0	0	0	0	0	0	603	903	0
439	0	0	0	0	0	0	0	200	300	0	0	0	0	0	0	0	200	903	0	0	0	0	0	0	0	603	903	0
439	1	0	0	0	0	0	0	200	300	0	0	0	0	0	0	0	200	903	0	0	0	0	0	0	0	603	903	0
439	2	0	0	0	0	0	0	200	300	0	0	0	0	0	0	0	200	903	0	0	0	0	0	0	0	603	903	0
439	3	0	0	0	0	0	0	200	300	0	0	0	0	0	0	0	200	903	0	0	0	0	0	0	0	603	903	0
439	4	0	0	0	0	0	0	200	300	0	0	0	0	0	0	0	200	903	0	0	0	0	0	0	0	603	903	0
439	5	0	0	0	0	0	0	200	300	0	0	0	0	0	0	0	200	903	0	0	0	0	0	0	0	603	903	0
439	6	0	0	0	0	0	0	200	300	0	0	0	0	0	0	0	200	903	0	0	0	0	0	0	0	603	903	0
439	7	0	0	0	0	0	0	200	300	0	0	0	0	0	0	0	200	903	0	0	0	0	0	0	0	603	903	0
439	8	0	0	0	0	0	0	200	300	0	0	0	0	0	0	0	200	903	0	0	0	0	0	0	0	603	903	0
439	9	0	0	0	0	0	0	200	300	0	0	0	0	0	0	0	200	903	0	0	0	0	0	0	0	603	903	0
440	0	0	0	0	0	0	0	200	300	0	0	0	0	0	0	0	200	903	0	0	0	0	0	0	0	603	903	0
440	1	0	0	0	0	0	0	200	300	0	0	0	0	0	0	0	200	903	0	0	0	0	0	0	0	603	903	0
440	2	0	0	0	0	0	0	200	300	0	0	0	0	0	0	0	200	903	0	0	0	0	0	0	0	603	903	0
440	3	0	0	0	0	0	0	200	300	0	0	0	0	0	0	0	200	903	0	0	0	0	0	0	0	603	903	0
440	4	0	0	0	0	0	0	200	300	0	0	0	0	0	0	0	200	903	0	0	0	0	0	0	0	603	903	0
440	5	0	0	0	0	0	0	200	300	0	0	0	0	0	0	0	200	903	0	0	0	0	0	0	0	603	903	0
440	6	0	0	0	0	0	0	200	300	0	0	0	0	0	0	0	200	903	0	0	0	0	0	0	0	603	903	0
440	7	0	0	0	0	0	0	200	300	0	0	0	0	0	0	0	200	903	0	0	0	0	0	0	0	603	903	0
440	8	0	0	0	0	0	0	200	300	0	0	0	0	0	0	0	200	903	0	0	0	0	0	0	0	603	903	0
440	9	0	0	0	0	0	0	200	300	0	0	0	0	0	0	0	200	903	0	0	0	0	0	0	0	603	903	0
441	0	0	0	0	0	0	0	200	300	0	0	0	0	0	0	0	200	903	0	0	0	0	0	0	0	603	903	0
441	1	0	0	0	0	0	0	200	300	0	0	0	0	0	0	0	200	903	0	0	0	0	0	0	0	603	903	0
441	2	0	0	0	0	0	0	200	300	0	0	0	0	0	0	0	200	903	0	0	0	0	0	0	0	603	903	0
441	3	0	0	0	0	0	0	200	300	0	0	0	0	0	0	0	200	903	0	0	0	0	0	0	0	603	903	0
441	4	0	0	0	0	0	0	200	300	0	0	0	0	0	0	0	200	903	0	0	0	0	0	0	0	603	903	0
441	5	0	0	0	0	0	0	200	300	0	0	0	0	0	0	0	200	903	0	0	0	0	0	0	0	603	903	0
441	6	0	0	0	0	0	0	200	300	0	0	0	0	0	0	0	200	903	0	0	0	0	0	0	0	603	903	0
441	7	0	0	0	0	0	0	200	300	0	0	0	0	0	0	0	200	903	0	0	0	0	0	0	0	603	903	0
441	8	0	0	0	0	0	0	200	300	0	0	0	0	0	0	0	200	903	0	0	0	0	0	0	0	603	903	0
441	9	0	0	0	0	0	0	200	300	0	0	0	0	0	0	0	200	903	0	0	0	0	0	0	0	603	903	0
442	0	0	0	0	0	0	0	200	300	0	0	0	0	0	0	0	200	903	0	0	0	0	0	0	0	603	903	0
442	1	0	0	0	0	0	0	200	300	0	0	0	0	0	0	0	200	903	0	0	0	0	0	0	0	603	903	0
442	2	0	0	0	0	0	0	200	300	0	0	0	0	0	0	0	200	903	0	0	0	0	0	0	0	603	903	0
442	3	0	0	0	0	0	0	200	300	0	0	0	0	0	0	0	200	903	0	0	0	0	0	0	0	603	903	0
442	4	0	0	0	0	0	0	200	300	0	0	0	0	0	0	0	200	903	0	0	0	0	0	0	0	603	903	0
442	5	0	0	0	0	0	0	200	300	0	0	0	0	0	0	0	200	903	0	0	0	0	0	0	0	603	903	0
442	6	0	0	0	0	0	0	200	300	0	0	0	0	0	0	0	200	903	0	0	0	0	0	0	0	603	903	0
442	7	0	0	0	0	0	0	200	300	0	0	0	0	0	0	0	200	903	0	0	0	0	0	0	0	603	903	0
442	8	0	0	0	0	0	0	200	300	0	0	0	0	0	0	0	200	903	0	0	0	0	0	0	0	603	903	0
442	9	0	0	0	0	0	0	200	300	0	0	0	0	0	0	0	200	903	0	0	0	0	0	0	0	603	903	0
443	0	0	0	0	0	0	0	200	300	0	0	0	0	0	0	0	200	903	0	0	0	0	0	0	0	603	903	0
443	1	0	0	0	0	0	0	200	300	0	0	0	0	0	0	0	200	903	0	0	0	0	0	0	0	603	903	0
443	2	0	0	0	0	0	0	200	300	0	0	0	0	0	0	0	200	903	0	0	0	0	0	0	0	603	903	0
443	3	0	0	0	0	0	0	200	300	0	0	0	0	0	0	0	200	903	0	0	0	0	0	0	0	603	903	0
443	4	0	0	0	0	0	0	200	300	0	0	0	0	0	0	0	200	903	0	0	0	0	0	0	0	603	903	0
443	5	0	0	0	0	0	0	200	300	0	0	0	0	0	0	0	200	903	0	0	0	0	0	0	0	603	903	0
443	6	0	0	0	0	0	0	200	300	0	0	0	0	0	0	0	200	903	0	0	0	0	0	0	0	603	903	0
443	7	0	0	0	0	0	0	200	300	0	0	0	0	0	0	0	200	903	0	0	0	0	0	0	0	603	903	0
443	8	0	0	0	0	0	0	200	300	0	0	0	0	0	0	0	200	903	0	0	0	0	0	0	0	603	903	0
443	9	0	0	0	0	0	0	200	300	0	0	0	0	0	0	0	200	903	0	0	0	0	0	0	0	603	903	0
444	0	0	0	0	0	0	0	200	300	0	0	0	0	0	0	0	200	903	0	0	0	0	0	0	0	603	903	0
444	1	0	0	0	0	0	0	200	300	0	0	0	0	0	0	0	200	903	0	0	0	0	0	0	0	603	903	0
444	2	0	0	0	0	0	0	200	300	0	0	0	0	0	0	0	200	903	0	0	0	0	0	0	0	603	903	0
444	3	0	0	0	0	0	0	200	300	0	0	0	0	0	0	0	200	903	0	0	0	0	0	0	0	603	903	0
444	4	0	0	0	0	0	0	200	300	0	0	0	0	0	0	0	200	903	0	0	0	0	0	0	0	603	903	0
444	5	0	0	0	0	0	0	200	300	0	0	0	0	0	0	0	200	903	0	0	0	0	0	0	0	603	903	0
444	6	0	0	0	0	0	0	200	300	0	0	0	0	0	0	0	200	903	0	0	0	0	0	0	0	603	903	0
444	7	0	0	0	0	0	0	200	300	0	0	0	0	0	0	0	200	903	0	0	0	0	0	0	0	603	903	0
444	8	0	0	0	0	0	0	200	300	0	0	0	0	0	0	0	200	903	0	0	0	0	0	0	0	603	903	0
444	9	0	0	0	0	0	0	200	300	0	0	0	0	0	0	0	200	903	0	0	0	0	0	0	0	603	903	0
445	0	0	0	0	0	0	0	200	300	0	0	0	0	0	0	0	200	903	0	0	0	0	0	0	0	603	903	0
445	1	0	0	0	0	0	0	200	300	0	0	0	0	0	0	0	200	903	0	0	0	0	0	0	0	603	903	0
445	2	0	0	0	0	0	0	200	300	0	0	0	0	0	0	0	200	903	0	0	0	0	0	0	0	603	903	0
445	3	0	0	0	0	0	0	200	300	0	0	0	0	0	0	0	200	903	0	0	0	0	0	0	0	603	903	0
445	4	0	0	0	0	0	0	200	300	0	0	0	0	0	0	0	200	903	0	0	0	0	0	0	0	603	903	0
445	5	0	0	0	0	0	0	200	300	0	0	0	0	0	0	0	200	903	0	0	0	0	0	0	0	603	903	0
445	6	0	0	0	0	0	0	200	300	0	0	0	0	0	0	0	200	903	0	0	0	0	0	0	0	603	903	0
445	7	0	0	0	0	0	0	200	300	0	0	0	0	0	0	0	200	903	0	0	0	0	0	0	0	603	903	0
445	8	0	0	0	0	0	0	200	300	0	0	0	0	0	0	0	200	903	0	0	0	0	0	0	0	603	903	0
445	9	0	0	0	0	0	0	200	300	0	0	0	0	0	0	0	200	903	0	0	0	0	0	0	0	603	903	0
446	0	0	0	0	0	0	0	200	300	0	0	0	0	0	0	0	200	903	0	0	0	0	0	0	0	603	903	0
446	1	0	0	0	0	0	0	200	300	0	0	0	0	0	0	0	200	903	0	0	0	0	0	0	0	603	903	0
446	2	0	0	0	0	0	0	200	300	0	0	0	0	0	0	0	200	903	0	0	0	0	0	0	0	603	903	0
446	3	0	0	0	0	0	0	200	300	0	0	0	0	0	0	0	200	903	0	0	0	0	0	0	0	603	903	0
446	4	0	0	0	0	0	0	200	300	0	0	0	0	0	0	0	200	903	0	0	0	0	0	0	0	603	903	0
446	5	0	0	0	0	0	0	200	300	0	0	0	0	0	0	0	200	903	0	0	0	0	0	0	0	603	903	0
446	6	0	0	0	0	0	0	200	300	0	0	0	0	0	0	0	200	903	0	0	0	0	0	0	0	603	903	0
446	7	0	0	0	0	0	0	200	300	0	0	0	0	0	0	0	200	903	0	0	0	0	0	0	0	603	903	0
446	8	0	0	0	0	0	0	200	300	0	0	0	0	0	0	0	200	903	0	0	0	0	0	0	0	603	903	0
446	9	0	0	0	0	0	0	200	300	0	0	0	0	0	0	0	200	903	0	0	0	0	0	0	0	603	903	0
447	0	0	0	0	0	0	0	200	300	0	0	0	0	0	0	0	200	903	0	0	0	0	0	0	0	603	903	0
447	1	0	0	0	0	0	0	200	300	0	0	0	0	0	0	0	200	903	0	0	0	0	0	0	0	603	903	0
447	2	0	0	0	0	0	0	200	300	0	0	0	0	0	0	0	200	903	0	0	0	0	0	0	0	603	903	0
447	3	0	0	0	0	0	0	200	300	0	0	0	0	0	0	0	200	903	0	0	0	0	0	0	0	603	903	0
447	4	0	0	0	0	0	0	200	300	0	0	0	0	0	0	0	200	903	0	0	0	0	0	0	0	603	903	0
447	5	0	0	0	0	0	0	200	300	0	0	0	0	0	0	0	200	903	0	0	0	0	0	0	0	603	903	0
447	6	0	0	0	0	0	0	200	300	0	0	0	0	0	0	0	200	903	0	0	0	0	0	0	0	603	903	0
447	7	0	0	0	0	0	0	200	300	0	0	0	0	0	0	0	200	903	0	0	0	0	0	0	0	603	903	0
447	8	0	0	0	0	0	0	200	300	0	0	0	0	0	0	0	200	903	0	0	0	0	0	0	0	603	903	0
447	9	0	0	0	0	0	0	200	300	0	0	0	0	0	0	0	200	903	0	0	0	0	0	0	0	603	903	0
448	0	0	0	0	0	0	0	200	300	0	0	0	0	0	0	0	200	903	0	0	0	0	0	0	0	603	903	0
448	1	0	0	0	0	0	0	200	300	0	0	0	0	0	0	0	200	903	0	0	0	0	0	0	0	603	903	0
448	2	0	0	0	0	0	0	200	300	0	0	0	0	0	0	0	200	903	0	0	0	0	0	0	0	603	903	0
448	3	0	0	0	0	0	0	200	300	0	0	0	0	0	0	0	200	903	0	0	0	0	0	0	0	603	903	0
448	4	0	0	0	0	0	0	200	300	0	0	0	0	0	0	0	200	903	0	0	0	0	0	0	0	603	903	0
448	5	0	0	0	0	0	0	200	300	0	0	0	0	0	0	0	200	903	0	0	0	0	0	0	0	603	903	0
448	6	0	0	0	0	0	0	200	300	0	0	0	0	0	0	0	200	903	0	0	0	0	0	0	0	603	903	0
448	7	0	0	0	0	0	0	200	300	0	0	0	0	0	0	0	200	903	0	0	0	0	0	0	0	603	903	0
448	8	0	0	0	0	0	0	200	300	0	0	0	0	0	0	0	200	903	0	0	0	0	0	0	0	603	903	0
448	9	0	0	0	0	0	0	200	300	0	0	0	0	0	0	0	200	903	0	0	0	0	0	0	0	603	903	0
449	0	0	0	0	0	0	0	200	300	0	0	0	0	0	0	0	200	903	0	0	0	0	0	0	0	603	903	0
449	1	0	0	0	0	0	0	200	300	0	0	0	0	0	0	0	200	903	0	0	0	0	0	0	0	603	903	0
449	2	0	0	0	0	0	0	200	300	0	0	0	0	0	0	0	200	903	0	0	0	0	0	0	0	603	903	0
449	3	0	0	0	0	0	0	200	300	0	0	0	0	0	0	0	200	903	0	0	0	0	0	0	0	603	903	0
449	4	0	0	0	0	0	0	200	300	0	0	0	0	0	0	0	200	903	0	0	0	0	0	0	0	603	903	0
449	5	0	0	0	0	0	0	200	300	0	0	0	0	0	0	0	200	903	0	0	0	0	0	0	0	603	903	0
449	6	0	0	0	0	0	0	200	300	0	0	0	0	0	0	0	200	903	0	0	0	0	0	0	0	603	903	0
449	7	0	0	0	0	0	0	200	300	0	0	0	0	0	0	0	200	903	0	0	0	0	0	0	0	603	903	0
449	8	0	0	0	0	0	0	200	300	0	0	0	0	0	0	0	200	903	0	0	0	0	0	0	0	603	903	0
449	9	0	0	0	0	0	0	200	300	0	0	0	0	0	0	0	200	903	0	0	0	0	0	0	0	603	903	0
450	0	0	0	0	0	0	0	200	300	0	0	0	0	0	0	0	200	903	0	0	0	0	0	0	0	603	903	0
450	1	0	0	0	0	0	0	200	300	0	0	0	0	0	0	0	200	903	0	0	0	0	0	0	0	603	903	0
450	2	0	0	0	0	0	0	200	300	0	0	0	0	0	0	0	200	903	0	0	0	0	0	0	0	603	903	0
450	3	0	0	0	0	0	0	200	300	0	0	0	0	0	0	0	200	903	0	0	0	0	0	0	0	603	903	0
450	4	0	0	0	0	0	0	200	300	0	0	0	0	0	0	0	200	903	0	0	0	0	0	0	0	603	903	0
450	5	0	0	0	0	0	0	200	300	0	0	0	0	0	0	0	200	903	0	0	0	0	0	0	0	603	903	0
450	6	0	0	0	0	0	0	200	300	0	0	0	0	0	0	0	200	903	0	0	0	0	0	0	0	603	903	0
450	7	0	0	0	0	0	0	200	300	0	0	0	0	0	0	0	200	903	0	0	0	0	0	0	0	603	903	0
450	8	0	0	0	0	0	0	200	300	0	0	0	0	0	0	0	200	903	0	0	0	0	0	0	0	603	903	0
450	9	0	0	0	0	0	0	200	300	0	0	0	0	0	0	0	200	903	0	0	0	0	0	0	0	603	903	0
451	0	0	0	0	0	0	0	200	300	0	0	0	0	0	0	0	200	903	0	0	0	0	0	0	0	603	903	0
451	1	0	0	0	0	0	0	200	300	0	0	0	0	0	0	0	200	903	0	0	0	0	0	0	0	603	903	0
451	2	0	0	0	0	0	0	200	300	0	0	0	0	0	0	0	200	903	0	0	0	0	0	0	0	603	903	0
451	3	0	0	0	0	0	0	200	300	0	0	0	0	0	0	0	200	903	0	0	0	0	0	0	0	603	903	0
451	4	0	0	0	0	0	0	200	300	0	0	0	0	0	0	0	200	903	0	0	0	0	0	0	0	603	903	0
451	5	0	0	0	0	0	0	200	300	0	0	0	0	0	0	0	200	903	0	0	0	0	0	0	0	603	903	0
451	6	0	0	0	0	0	0	200	300	0	0	0	0	0	0	0	200	903	0	0	0	0	0	0	0	603	903	0
451	7	0	0	0	0	0	0	200	300	0	0	0	0	0	0	0	200	903	0	0	0	0	0	0	0	603	903	0
451	8	0	0	0	0	0	0	200	300	0	0	0	0	0	0	0	200	903	0	0	0	0	0	0	0	603	903	0
451	9	0	0	0	0	0	0	200	300	0	0	0	0	0	0	0	200	903	0	0	0	0	0	0	0	603	903	0
452	0	0	0	0	0	0	0	200	300	0	0	0	0	0	0	0	200	903	0	0	0	0	0	0	0	603	903	0
452	1	0	0	0	0	0	0	200	300	0	0	0	0	0	0	0	200	903	0	0	0	0	0	0	0	603	903	0
452	2	0	0	0	0	0	0	200	300	0	0	0	0	0	0	0	200	903	0	0	0	0	0	0	0	603	903	0
452	3	0	0	0	0	0	0	200	300	0	0	0	0	0	0	0	200	903	0	0	0	0	0	0	0	603	903	0
452	4	0	0	0	0	0	0	200	300	0	0	0	0	0	0	0	200	903	0	0	0	0	0	0	0	603	903	0
452	5	0	0	0	0	0	0	200	300	0	0	0	0	0	0	0	200	903	0	0	0	0	0	0	0	603	903	0
452	6	0	0	0	0	0	0	200	300	0	0	0	0	0	0	0	200	903	0	0	0	0	0	0	0	603	903	0
452	7	0	0	0	0	0	0	200	300	0	0	0	0	0	0	0	200	903	0	0	0	0	0	0	0	603	903	0
452	8	0	0	0	0	0	0	200	300	0	0	0	0	0	0	0	200	903	0	0	0	0	0	0	0	603	903	0
452	9	0	0	0	0	0	0	200	300	0	0	0	0	0	0	0	200	903	0	0	0	0	0	0	0	603	903	0
453	0	0	0	0	0	0	0	200	300	0	0	0	0	0	0	0	200	903	0	0	0	0	0	0	0	603	903	0
453	1	0	0	0	0	0	0	200	300	0	0	0	0	0	0	0	200	903	0	0	0	0	0	0	0	603	903	0
453	2	0	0	0	0	0	0	200	300	0	0	0	0	0	0	0	200	903	0	0	0	0	0	0	0	603	903	0
453	3	0	0	0	0	0	0	200	300	0	0	0	0	0	0	0	200	903	0	0	0	0	0	0	0	603	903	0
453	4	0	0	0	0	0	0	200	300	0	0	0	0	0	0	0	200	903	0	0	0	0	0	0	0	603	903	0
453	5	0	0	0	0	0	0	200	300	0	0	0	0	0	0	0	200	903	0	0	0	0	0	0	0	603	903	0
453	6	0	0	0	0	0	0	200	300	0	0	0	0	0	0	0	200	903	0	0	0	0	0	0	0	603	903	0
453	7	0	0	0	0	0	0	200	300	0	0	0	0	0	0	0	200	903	0	0	0	0	0	0	0	603	903	0
453	8	0	0	0	0	0	0	200	300	0	0	0	0	0	0	0	200	903	0	0	0	0	0	0	0	603	903	0
453	9	0	0	0	0	0	0	200	300	0	0	0	0	0	0	0	200	903	0	0	0	0	0	0	0	603	903	0
454	0	0	0	0	0	0	0	200	300	0	0	0	0	0	0	0	200	903	0	0	0	0	0	0	0	603	903	0
454	1	0	0	0	0	0	0	200	300	0	0	0	0	0	0	0	200	903	0	0	0	0	0	0	0	603	903	0
454	2	0	0	0	0	0	0	200	300	0	0	0	0	0	0	0	200	903	0	0	0	0	0	0	0	603	903	0
454	3	0	0	0	0	0	0	200	300	0	0	0	0	0	0	0	200	903	0	0	0	0	0	0	0	603	903	0
454	4	0	0	0	0	0	0	200	300	0	0	0	0	0	0	0	200	903	0	0	0	0	0	0	0	603	903	0
454	5	0	0	0	0	0	0	200	300	0	0	0	0	0	0	0	200	903	0	0	0	0	0	0	0	603	903	0
454	6	0	0	0	0	0	0	200	300	0	0	0	0	0	0	0	200	903	0	0	0	0	0	0	0	603	903	0
454	7	0	0	0	0	0	0	200	300	0	0	0	0	0	0	0	200	903	0	0	0	0	0	0	0	603	903	0
454	8	0	0	0	0	0	0	200	300	0	0	0	0	0	0	0	200	903	0	0	0	0	0	0	0	603	903	0
454	9	0	0	0	0	0	0	200	300	0	0	0	0	0	0	0	200	903	0	0	0	0	0	0	0	603	903	0
455	0	0	0	0	0	0	0	200	300	0	0	0	0	0	0	0	200	903	0	0	0	0	0	0	0	603	903	0
455	1	0	0	0	0	0	0	200	300	0	0	0	0	0	0	0	200	903	0	0	0	0	0	0	0	603	903	0
455	2	0	0	0	0	0	0	200	300	0	0	0	0	0	0	0	200	903	0	0	0	0	0	0	0	603	903	0
455	3	0	0	0	0	0	0	200	300	0	0	0	0	0	0	0	200	903	0	0	0	0	0	0	0	603	903	0
455	4	0	0	0	0	0	0	200	300	0	0	0	0	0	0	0	200	903	0	0	0	0	0	0	0	603	903	0
455	5	0	0	0	0	0	0	200	300	0	0	0	0	0	0	0	200	903	0	0	0	0	0	0	0	603	903	0
455	6	0	0	0	0	0	0	200	300	0	0	0	0	0	0	0	200	903	0	0	0	0	0	0	0	603	903	0
455	7	0	0	0	0	0	0	200	300	0	0	0	0	0	0	0	200	903	0	0	0	0	0	0	0	603	903	0
455	8	0	0	0	0	0	0	200	300	0	0	0	0	0	0	0	200	903	0	0	0	0	0	0	0	603	903	0
455	9	0	0	0	0	0	0	200	300	0	0	0	0	0	0	0	200	903	0	0	0	0	0	0	0	603	903	0
456	0	0	0	0	0	0	0	200	300	0	0	0	0	0	0	0	200	903	0	0	0	0	0	0	0	603	903	0
456	1	0	0	0	0	0	0	200	300	0	0	0	0	0	0	0	200	903	0	0	0	0	0	0	0	603	903	0
456	2	0	0	0	0	0	0	200	300	0	0	0	0	0	0	0	200	903	0	0	0	0	0	0	0	603	903	0
456	3	0	0	0	0	0	0	200	300	0	0	0	0	0	0	0	200	903	0	0	0	0	0	0	0	603	903	0
456	4	0	0	0	0	0	0	200	300	0	0	0	0	0	0	0	200	903	0	0	0	0	0	0	0	603	903	0
456	5	0	0	0	0	0	0	200	300	0	0	0	0	0	0	0	200	903	0	0	0	0	0	0	0	603	903	0
456	6	0	0	0	0	0	0	200	300	0	0	0	0	0	0	0	200	903	0	0	0	0	0	0	0	603	903	0
456	7	0	0	0	0	0	0	200	300	0	0	0	0	0	0	0	200	903	0	0	0	0	0	0	0	603	903	0
456	8	0	0	0	0	0	0	200	300	0	0	0	0	0	0	0	200	903	0	0	0	0	0	0	0	603	903	0
456	9	0	0	0	0	0	0	200	300	0	0	0	0	0	0	0	200	903	0	0	0	0	0	0	0	603	903	0
457	0	0	0	0	0	0	0	200	300	0	0	0	0	0	0	0	200	903	0	0	0	0	0	0	0	603	903	0
457	1	0	0	0	0	0	0	200	300	0	0	0	0	0	0	0	200	903	0	0	0	0	0	0	0	603	903	0
457	2	0	0	0	0	0	0	200	300	0	0	0	0	0	0	0	200	903	0	0	0	0	0	0	0	603	903	0
457	3	0	0	0	0	0	0	200	300	0	0	0	0	0	0	0	200	903	0	0	0	0	0	0	0	603	903	0
457	4	0	0	0	0	0	0	200	300	0	0	0	0	0	0	0	200	903	0	0	0	0	0	0	0	603	903	0
457	5	0	0	0	0	0	0	200	300	0	0	0	0	0	0	0	200	903	0	0	0	0	0	0	0	603	903	0
457	6	0	0	0	0	0	0	200	300	0	0	0	0	0	0	0	200	903	0	0	0	0	0	0	0	603	903	0
457	7	0	0	0	0	0	0	200	300	0	0	0	0	0	0	0	200	903	0	0	0	0	0	0	0	603	903	0
457	8	0	0	0	0	0	0	200	300	0	0	0	0	0	0	0	200	903	0	0	0	0	0	0	0	603	903	0
457	9	0	0	0	0	0	0	200	300	0	0	0	0	0	0	0	200	903	0	0	0	0	0	0	0	603	903	0
458	0	0	0	0	0	0	0	200	300	0	0	0	0	0	0	0	200	903	0	0	0	0	0	0	0	603	903	0
458	1	0	0	0	0	0	0	200	300	0	0	0	0	0	0	0	200	903	0	0	0	0	0	0	0	603	903	0
458	2	0	0	0	0	0	0	200	300	0	0	0	0	0	0	0	200	903	0	0	0	0	0	0	0	603	903	0
458	3	0	0	0	0	0	0	200	300	0	0	0	0	0	0	0	200	903	0	0	0	0	0	0	0	603	903	0
458	4	0	0	0	0	0	0	200	300	0	0	0	0	0	0	0	200	903	0	0	0	0	0	0	0	603	903	0
458	5	0	0	0	0	0	0	200	300	0	0	0	0	0	0	0	200	903	0	0	0	0	0	0	0	603	903	0
458	6	0	0	0	0	0	0	200	300	0	0	0	0	0	0	0	200	903	0	0	0	0	0	0	0	603	903	0
458	7	0	0	0	0	0	0	200	300	0	0	0	0	0	0	0	200	903	0	0	0	0	0	0	0	603	903	0
458	8	0	0	0	0	0	0	200	300	0	0	0	0	0	0	0	200	903	0	0	0	0	0	0	0	603	903	0
458	9	0	0	0	0	0	0	200	300	0	0	0	0	0	0	0	200	903	0	0	0	0	0	0	0	603	903	0
459	0	0	0	0	0	0	0	200	300	0	0	0	0	0	0	0	200	903	0	0	0	0	0	0	0	603	903	0
459	1	0	0	0	0	0	0	200	300	0	0	0	0	0	0	0	200	903	0	0	0	0	0	0	0	603	903	0
459	2	0	0	0	0	0	0	200	300	0	0	0	0	0	0	0	200	903	0	0	0	0	0	0	0	603	903	0
459	3	0	0	0	0	0	0	200	300	0	0	0	0	0	0	0	200	903	0	0	0	0	0	0	0	603	903	0
459	4	0	0	0	0	0	0	200	300	0	0	0	0	0	0	0	200	903	0	0	0	0	0	0	0	603	903	0
459	5	0	0	0	0	0	0	200	300	0	0	0	0	0	0	0	200	903	0	0	0	0	0	0	0	603	903	0
459	6	0	0	0	0	0	0	200	300	0	0	0	0	0	0	0	200	903	0	0	0	0	0	0	0	603	903	0
459	7	0	0	0	0	0	0	200	300	0	0	0	0	0	0	0	200	903	0	0	0	0	0	0	0	603	903	0
459	8	0	0	0	0	0	0	200	300	0	0	0	0	0	0	0	200	903	0	0	0	0	0	0	0	603	903	0
459	9	0	0	0	0	0	0	200	300	0	0	0	0	0	0	0	200	903	0	0	0	0	0	0	0	603	903	0
460	0	0	0	0	0	0	0	200	300	0	0	0	0	0	0	0	200	903	0	0	0	0	0	0	0	603	903	0
460	1	0	0	0	0	0	0	200	300	0	0	0	0	0	0	0	200	903	0	0	0	0	0	0	0	603	903	0
460	2	0	0	0	0	0	0	200	300	0	0	0	0	0	0	0	200	903	0	0	0	0	0	0	0	603	903	0
460	3	0	0	0	0	0	0	200	300	0	0	0	0	0	0	0	200	903	0	0	0	0	0	0	0	603	903	0
460	4	0	0	0	0	0	0	200	300	0	0	0	0	0	0	0	200	903	0	0	0	0	0	0	0	603	903	0
460	5	0	0	0	0	0	0	200	300	0	0	0	0	0	0	0	200	903	0	0	0	0	0	0	0	603	903	0
460	6	0	0	0	0	0	0	200	300	0	0	0	0	0	0	0	200	903	0	0	0	0	0	0	0	603	903	0
460	7	0	0	0	0	0	0	200	300	0	0	0	0	0	0	0	200	903	0	0	0	0	0	0	0	603	903	0
460	8	0	0	0	0	0	0	200	300	0	0	0	0	0	0	0	200	903	0	0	0	0	0	0	0	603	903	0
460	9	0	0	0	0	0	0	200	300	0	0	0	0	0	0	0	200	903	0	0	0	0	0	0	0	603	903	0
461	0	0	0	0	0	0	0	200	300	0	0	0	0	0	0	0	200	903	0	0	0	0	0	0	0	603	903	0
461	1	0	0	0	0	0	0	200	300	0	0	0	0	0	0	0	200	903	0	0	0	0	0	0	0	603	903	0
461	2	0	0	0	0	0	0	200	300	0	0	0	0	0	0	0	200	903	0	0	0	0	0	0	0	603	903	0
461	3	0	0	0	0	0	0	200	300	0	0	0	0	0	0	0	200	903	0	0	0	0	0	0	0	603	903	0
461	4	0	0	0	0	0	0	200	300	0	0	0	0	0	0	0	200	903	0	0	0	0	0	0	0	603	903	0
461	5	0	0	0	0	0	0	200	300	0	0	0	0	0	0	0	200	903	0	0	0	0	0	0	0	603	903	0
461	6	0	0	0	0	0	0	200	300	0	0	0	0	0	0	0	200	903	0	0	0	0	0	0	0	603	903	0
461	7	0	0	0	0	0	0	200	300	0	0	0	0	0	0	0	200	903	0	0	0	0	0	0	0	603	903	0
461	8	0	0	0	0	0	0	200	300	0	0	0	0	0	0	0	200	903	0	0	0	0	0	0	0	603	903	0
461	9	0	0	0	0	0	0	200	300	0	0	0	0	0	0	0	200	903	0	0	0	0	0	0	0	603	903	0
462	0	0	0	0	0	0	0	200	300	0	0	0	0	0	0	0	200	903	0	0	0	0	0	0	0	603	903	0
462	1	0	0	0	0	0	0	200	300	0	0	0	0	0	0	0	200	903	0	0	0	0	0	0	0	603	903	0
462	2	0	0	0	0	0	0	200	300	0	0	0	0	0	0	0	200	903	0	0	0	0	0	0	0	603	903	0
462	3	0	0	0	0	0	0	200	300	0	0	0	0	0	0	0	200	903	0	0	0	0	0	0	0	603	903	0
462	4	0	0	0	0	0	0	200	300	0	0	0	0	0	0	0	200	903	0	0	0	0	0	0	0	603	903	0
462	5	0	0	0	0	0	0	200	300	0	0	0	0	0	0	0	200	903	0	0	0	0	0	0	0	603	903	0
462	6	0	0	0	0	0	0	200	300	0	0	0	0	0	0	0	200	903	0	0	0	0	0	0	0	603	903	0
462	7	0	0	0	0	0	0	200	300	0	0	0	0	0	0	0	200	903	0	0	0	0	0	0	0	603	903	0
462	8	0	0	0	0	0	0	200	300	0	0	0	0	0	0	0	200	903	0	0	0	0	0	0	0	603	903	0
462	9	0	0	0	0	0	0	200	300	0	0	0	0	0	0	0	200	903	0	0	0	0	0	0	0	603	903	0
463	0	0	0	0	0	0	0	200	300	0	0	0	0	0	0	0	200	903	0	0	0	0	0	0	0	603	903	0
463	1	0	0	0	0	0	0	200	300	0	0	0	0	0	0	0	200	903	0	0	0	0	0	0	0	603	903	0
463	2	0	0	0	0	0	0	200	300	0	0	0	0	0	0	0	200	903	0	0	0	0	0	0	0	603	903	0
463	3	0	0	0	0	0	0	200	300	0	0	0	0	0	0	0	200	903	0	0	0	0	0	0	0	603	903	0
463	4	0	0	0	0	0	0	200	300	0	0	0	0	0	0	0	200	903	0	0	0	0	0	0	0	603	903	0
463	5	0	0	0	0	0	0	200	300	0	0	0	0	0	0	0	200	903	0	0	0	0	0	0	0	603	903	0
463	6	0	0	0	0	0	0	200	300	0	0	0	0	0	0	0	200	903	0	0	0	0	0	0	0	603	903	0
463	7	0	0	0	0	0	0	200	300	0	0	0	0	0	0	0	200	903	0	0	0	0	0	0	0	603	903	0
463	8	0	0	0	0	0	0	200	300	0	0	0	0	0	0	0	200	903	0	0	0	0	0	0	0	603	903	0
463	9	0	0	0	0	0	0	200	300	0	0	0	0	0	0	0	200	903	0	0	0	0	0	0	0	603	903	0
464	0	0	0	0	0	0	0	200	300	0	0	0	0	0	0	0	200	903	0	0	0	0	0	0	0	603	903	0
464	1	0	0	0	0	0	0	200	300	0	0	0	0	0	0	0	200	903	0	0	0	0	0	0	0	603	903	0
464	2	0	0	0	0	0	0	200	300	0	0	0	0	0	0	0	200	903	0	0	0	0	0	0	0	603	903	0
464	3	0	0	0	0	0	0	200	300	0	0	0	0	0	0	0	200	903	0	0	0	0	0	0	0	603	903	0
464	4	0	0	0	0	0	0	200	300	0	0	0	0	0	0	0	200	903	0	0	0	0	0	0	0	603	903	0
464	5	0	0	0	0	0	0	200	300	0	0	0	0	0	0	0	200	903	0	0	0	0	0	0	0	603	903	0
464	6	0	0	0	0	0	0	200	300	0	0	0	0	0	0	0	200	903	0	0	0	0	0	0	0	603	903	0
464	7	0	0	0	0	0	0	200	300	0	0	0	0	0	0	0	200	903	0	0	0	0	0	0	0	603	903	0
464	8	0	0	0	0	0	0	200	300	0	0	0	0	0	0	0	200	903	0	0	0	0	0	0	0	603	903	0
464	9	0	0	0	0	0	0	200	300	0	0	0	0	0	0	0	200	903	0	0	0	0	0	0	0	603	903	0
465	0	0	0	0	0	0	0	200	300	0	0	0	0	0	0	0	200	903	0	0	0	0	0	0	0	603	903	0
465	1	0	0	0	0	0	0	200	300	0	0	0	0	0	0	0	200	903	0	0	0	0	0	0	0	603	903	0
465	2	0	0	0	0	0	0	200	300	0	0	0	0	0	0	0	200	903	0	0	0	0	0	0	0	603	903	0
465	3	0	0	0	0	0	0	200	300	0	0	0	0	0	0	0	200	903	0	0	0	0	0	0	0	603	903	0
465	4	0	0	0	0	0	0	200	300	0	0	0	0	0	0	0	200	903	0	0	0	0	0	0	0	603	903	0
465	5	0	0	0	0	0	0	200	300	0	0	0	0	0	0	0	200	903	0	0	0	0	0	0	0	603	903	0
465	6	0	0	0	0	0	0	200	300	0	0	0	0	0	0	0	200	903	0	0	0	0	0	0	0	603	903	0
465	7	0	0	0	0	0	0	200	300	0	0	0	0	0	0	0	200	903	0	0	0	0	0	0	0	603	903	0
465	8	0	0	0	0	0	0	200	300	0	0	0	0	0	0	0	200	903	0	0	0	0	0	0	0	603	903	0
465	9	0	0	0	0	0	0	200	300	0	0	0	0	0	0	0	200	903	0	0	0	0	0	0	0	603	903	0
466	0	0	0	0	0	0	0	200	300	0	0	0	0	0	0	0	200	903	0	0	0	0	0	0	0	603	903	0
466	1	0	0	0	0	0	0	200	300	0	0	0	0	0	0	0	200	903	0	0	0	0	0	0	0	603	903	0
466	2	0	0	0	0	0	0	200	300	0	0	0	0	0	0	0	200	903	0	0	0	0	0	0	0	603	903	0
466	3	0	0	0	0	0	0	200	300	0	0	0	0	0	0	0	200	903	0	0	0	0	0	0	0	603	903	0
466	4	0	0	0	0	0	0	200	300	0	0	0	0	0	0	0	200	903	0	0	0	0	0	0	0	603	903	0
466	5	0	0	0	0	0	0	200	300	0	0	0	0	0	0	0	200	903	0	0	0	0	0	0	0	603	903	0
466	6	0	0	0	0	0	0	200	300	0	0	0	0	0	0	0	200	903	0	0	0	0	0	0	0	603	903	0
466	7	0	0	0	0	0	0	200	300	0	0	0	0	0	0	0	200	903	0	0	0	0	0	0	0	603	903	0
466	8	0	0	0	0	0	0	200	300	0	0	0	0	0	0	0	200	903	0	0	0	0	0	0	0	603	903	0
466	9	0	0	0	0	0	0	200	300	0	0	0	0	0	0	0	200	903	0	0	0	0	0	0	0	603	903	0
467	0	0	0	0	0	0	0	200	300	0	0	0	0	0	0	0	200	903	0	0	0	0	0	0	0	603	903	0
467	1	0	0	0	0	0	0	200	300	0	0	0	0	0	0	0	200	903	0	0	0	0	0	0	0	603	903	0
467	2	0	0	0	0	0	0	200	300	0	0	0	0	0	0	0	200	903	0	0	0	0	0	0	0	603	903	0
467	3	0	0	0	0	0	0	200	300	0	0	0	0	0	0	0	200	903	0	0	0	0	0	0	0	603	903	0
467	4	0	0	0	0	0	0	200	300	0	0	0	0	0	0	0	200	903	0	0	0	0	0	0	0	603	903	0
467	5	0	0	0	0	0	0	200	300	0	0	0	0	0	0	0	200	903	0	0	0	0	0	0	0	603	903	0
467	6	0	0	0	0	0	0	200	300	0	0	0	0	0	0	0	200	903	0	0	0	0	0	0	0	603	903	0
467	7	0	0	0	0	0	0	200	300	0	0	0	0	0	0	0	200	903	0	0	0	0	0	0	0	603	903	0
467	8	0	0	0	0	0	0	200	300	0	0	0	0	0	0	0	200	903	0	0	0	0	0	0	0	603	903	0
467	9	0	0	0	0	0	0	200	300	0	0	0	0	0	0	0	200	903	0	0	0	0	0	0	0	603	903	0
468	0	0	0	0	0	0	0	200	300	0	0	0	0	0	0	0	200	903	0	0	0	0	0	0	0	603	903	0
468	1	0	0	0	0	0	0	200	300	0	0	0	0	0	0	0	200	903	0	0	0	0	0	0	0	603	903	0
468	2	0	0	0	0	0	0	200	300	0	0	0	0	0	0	0	200	903	0	0	0	0	0	0	0	603	903	0
468	3	0	0	0	0	0	0	200	300	0	0	0	0	0	0	0	200	903	0	0	0	0	0	0	0	603	903	0
468	4	0	0	0	0	0	0	200	300	0	0	0	0	0	0	0	200	903	0	0	0	0	0	0	0	603	903	0
468	5	0	0	0	0	0	0	200	300	0	0	0	0	0	0	0	200	903	0	0	0	0	0	0	0	603	903	0
468	6	0	0	0	0	0	0	200	300	0	0	0	0	0	0	0	200	903	0	0	0	0	0	0	0	603	903	0
468	7	0	0	0	0	0	0	200	300	0	0	0	0	0	0	0	200	903	0	0	0	0	0	0	0	603	903	0
468	8	0	0	0	0	0	0	200	300	0	0	0	0	0	0	0	200	903	0	0	0	0	0	0	0	603	903	0
468	9	0	0	0	0	0	0	200	300	0	0	0	0	0	0	0	200	903	0	0	0	0	0	0	0	603	903	0
469	0	0	0	0	0	0	0	200	300	0	0	0	0	0	0	0	200	903	0	0	0	0	0	0	0	603	903	0
469	1	0	0	0	0	0	0	200	300	0	0	0	0	0	0	0	200	903	0	0	0	0	0	0	0	603	903	0
469	2	0	0	0	0	0	0	200	300	0	0	0	0	0	0	0	200	903	0	0	0	0	0	0	0	603	903	0
469	3	0	0	0	0	0	0	200	300	0	0	0	0	0	0	0	200	903	0	0	0	0	0	0	0	603	903	0
469	4	0	0	0	0	0	0	200	300	0	0	0	0	0	0	0	200	903	0	0	0	0	0	0	0	603	903	0
469	5	0	0	0	0	0	0	200	300	0	0	0	0	0	0	0	200	903	0	0	0	0	0	0	0	603	903	0
469	6	0	0	0	0	0	0	200	300	0	0	0	0	0	0	0	200	903	0	0	0	0	0	0	0	603	903	0
469	7	0	0	0	0	0	0	200	300	0	0	0	0	0	0	0	200	903	0	0	0	0	0	0	0	603	903	0
469	8	0	0	0	0	0	0	200	300	0	0	0	0	0	0	0	200	903	0	0	0	0	0	0	0	603	903	0
469	9	0	0	0	0	0	0	200	300	0	0	0	0	0	0	0	200	903	0	0	0	0	0	0	0	603	903	0
470	0	0	0	0	0	0	0	200	300	0	0	0	0	0	0	0	200	903	0	0	0	0	0	0	0	603	903	0
470	1	0	0	0	0	0	0	200	300	0	0	0	0	0	0	0	200	903	0	0	0	0	0	0	0	603	903	0
470	2	0	0	0	0	0	0	200	300	0	0	0	0	0	0	0	200	903	0	0	0	0	0	0	0	603	903	0
470	3	0	0	0	0	0	0	200	300	0	0	0	0	0	0	0	200	903	0	0	0	0	0	0	0	603	903	0
470	4	0	0	0	0	0	0	200	300	0	0	0	0	0	0	0	200	903	0	0	0	0	0	0	0	603	903	0
470	5	0	0	0	0	0	0	200	300	0	0	0	0	0	0	0	200	903	0	0	0	0	0	0	0	603	903	0
470	6	0	0	0	0	0	0	200	300	0	0	0	0	0	0	0	200	903	0	0	0	0	0	0	0	603	903	0
470	7	0	0	0	0	0	0	200	300	0	0	0	0	0	0	0	200	903	0	0	0	0	0	0	0	603	903	0
470	8	0	0	0	0	0	0	200	300	0	0	0	0	0	0	0	200	903	0	0	0	0	0	0	0	603	903	0
470	9	0	0	0	0	0	0	200	300	0	0	0	0	0	0	0	200	903	0	0	0	0	0	0	0	603	903	0
471	0	0	0	0	0	0	0	200	300	0	0	0	0	0	0	0	200	903	0	0	0	0	0	0	0	603	903	0
471	1	0	0	0	0	0	0	200	300	0	0	0	0	0	0	0	200	903	0	0	0	0	0	0	0	603	903	0
471	2	0	0	0	0	0	0	200	300	0	0	0	0	0	0	0	200	903	0	0	0	0	0	0	0	603	903	0
471	3	0	0	0	0	0	0	200	300	0	0	0	0	0	0	0	200	903	0	0	0	0	0	0	0	603	903	0
471	4	0	0	0	0	0	0	200	300	0	0	0	0	0	0	0	200	903	0	0	0	0	0	0	0	603	903	0
471	5	0	0	0	0	0	0	200	300	0	0	0	0	0	0	0	200	903	0	0	0	0	0	0	0	603	903	0
471	6	0	0	0	0	0	0	200	300	0	0	0	0	0	0	0	200	903	0	0	0	0	0	0	0	603	903	0
471	7	0	0	0	0	0	0	200	300	0	0	0	0	0	0	0	200	903	0	0	0	0	0	0	0	603	903	0
471	8	0	0	0	0	0	0	200	300	0	0	0	0	0	0	0	200	903	0	0	0	0	0	0	0	603	903	0
471	9	0	0	0	0	0	0	200	300	0	0	0	0	0	0	0	200	903	0	0	0	0	0	0	0	603	903	0
472	0	0	0	0	0	0	0	200	300	0	0	0	0	0	0	0	200	903	0	0	0	0	0	0	0	603	903	0
472	1	0	0	0	0	0	0	200	300	0	0	0	0	0	0	0	200	903	0	0	0	0	0	0	0	603	903	0
472	2	0	0	0	0	0	0	200	300	0	0	0	0	0	0	0	200	903	0	0	0	0	0	0	0	603	903	0
472	3	0	0	0	0	0	0	200	300	0	0	0	0	0	0	0	200	903	0	0	0	0	0	0	0	603	903	0
472	4	0	0	0	0	0	0	200	300	0	0	0	0	0	0	0	200	903	0	0	0	0	0	0	0	603	903	0
472	5	0	0	0	0	0	0	200	300	0	0	0	0	0	0	0	200	903	0	0	0	0	0	0	0	603	903	0
472	6	0	0	0	0	0	0	200	300	0	0	0	0	0	0	0	200	903	0	0	0	0	0	0	0	603	903	0
472	7	0	0	0	0	0	0	200	300	0	0	0	0	0	0	0	200	903	0	0	0	0	0	0	0	603	903	0
472	8	0	0	0	0	0	0	200	300	0	0	0	0	0	0	0	200	903	0	0	0	0	0	0	0	603	903	0
472	9	0	0	0	0	0	0	200	300	0	0	0	0	0	0	0	200	903	0	0	0	0	0	0	0	603	903	0
473	0	0	0	0	0	0	0	200	300	0	0	0	0	0	0	0	200	903	0	0	0	0	0	0	0	603	903	0
473	1	0	0	0	0	0	0	200	300	0	0	0	0	0	0	0	200	903	0	0	0	0	0	0	0	603	903	0
473	2	0	0	0	0	0	0	200	300	0	0	0	0	0	0	0	200	903	0	0	0	0	0	0	0	603	903	0
473	3	0	0	0	0	0	0	200	300	0	0	0	0	0	0	0	200	903	0	0	0	0	0	0	0	603	903	0
473	4	0	0	0	0	0	0	200	300	0	0	0	0	0	0	0	200	903	0	0	0	0	0	0	0	603	903	0
473	5	0	0	0	0	0	0	200	300	0	0	0	0	0	0	0	200	903	0	0	0	0	0	0	0	603	903	0
473	6	0	0	0	0	0	0	200	300	0	0	0	0	0	0	0	200	903	0	0	0	0	0	0	0	603	903	0
473	7	0	0	0	0	0	0	200	300	0	0	0	0	0	0	0	200	903	0	0	0	0	0	0	0	603	903	0
473	8	0	0	0	0	0	0	200	300	0	0	0	0	0	0	0	200	903	0	0	0	0	0	0	0	603	903	0
473	9	0	0	0	0	0	0	200	300	0	0	0	0	0	0	0	200	903	0	0	0	0	0	0	0	603	903	0
474	0	0	0	0	0	0	0	200	300	0	0	0	0	0	0	0	200	903	0	0	0	0	0	0	0	603	903	0
474	1	0	0	0	0	0	0	200	300	0	0	0	0	0	0	0	200	903	0	0	0	0	0	0	0	603	903	0
474	2	0	0	0	0	0	0	200	300	0	0	0	0	0	0	0	200	903	0	0	0	0	0	0	0	603	903	0
474	3	0	0	0	0	0	0	200	300	0	0	0	0	0	0	0	200	903	0	0	0	0	0	0	0	603	903	0
474	4	0	0	0	0	0	0	200	300	0	0	0	0	0	0	0	200	903	0	0	0	0	0	0	0	603	903	0
474	5	0	0	0	0	0	0	200	300	0	0	0	0	0	0	0	200	903	0	0	0	0	0	0	0	603	903	0
474	6	0	0	0	0	0	0	200	300	0	0	0	0	0	0	0	200	903	0	0	0	0	0	0	0	603	903	0
474	7	0	0	0	0	0	0	200	300	0	0	0	0	0	0	0	200	903	0	0	0	0	0	0	0	603	903	0
474	8	0	0	0	0	0	0	200	300	0	0	0	0	0	0	0	200	903	0	0	0	0	0	0	0	603	903	0
474	9	0	0	0	0	0	0	200	300	0	0	0	0	0	0	0	200	903	0	0	0	0	0	0	0	603	903	0
475	0	0	0	0	0	0	0	200	300	0	0	0	0	0	0	0	200	903	0	0	0	0	0	0	0	603	903	0
475	1	0	0	0	0	0	0	200	300	0	0	0	0	0	0	0	200	903	0	0	0	0	0	0	0	603	903	0
475	2	0	0	0	0	0	0	200	300	0	0	0	0	0	0	0	200	903	0	0	0	0	0	0	0	603	903	0
475	3	0	0	0	0	0	0	200	300	0	0	0	0	0	0	0	200	903	0	0	0	0	0	0	0	603	903	0
475	4	0	0	0	0	0	0	200	300	0	0	0	0	0	0	0	200	903	0	0	0	0	0	0	0	603	903	0
475	5	0	0	0	0	0	0	200	300	0	0	0	0	0	0	0	200	903	0	0	0	0	0	0	0	603	903	0
475	6	0	0	0	0	0	0	200	300	0	0	0	0	0	0	0	200	903	0	0	0	0	0	0	0	603	903	0
475	7	0	0	0	0	0	0	200	300	0	0	0	0	0	0	0	200	903	0	0	0	0	0	0	0	603	903	0
475	8	0	0	0	0	0	0	200	300	0	0	0	0	0	0	0	200	903	0	0	0	0	0	0	0	603	903	0
475	9	0	0	0	0	0	0	200	300	0	0	0	0	0	0	0	200	903	0	0	0	0	0	0	0	603	903	0
476	0	0	0	0	0	0	0	200	300	0	0	0	0	0	0	0	200	903	0	0	0	0	0	0	0	603	903	0
476	1	0	0	0	0	0	0	200	300	0	0	0	0	0	0	0	200	903	0	0	0	0	0	0	0	603	903	0
476	2	0	0	0	0	0	0	200	300	0	0	0	0	0	0	0	200	903	0	0	0	0	0	0	0	603	903	0
476	3	0	0	0	0	0	0	200	300	0	0	0	0	0	0	0	200	903	0	0	0	0	0	0	0	603	903	0
476	4	0	0	0	0	0	0	200	300	0	0	0	0	0	0	0	200	903	0	0	0	0	0	0	0	603	903	0
476	5	0	0	0	0	0	0	200	300	0	0	0	0	0	0	0	200	903	0	0	0	0	0	0	0	603	903	0
476	6	0	0	0	0	0	0	200	300	0	0	0	0	0	0	0	200	903	0	0	0	0	0	0	0	603	903	0
476	7	0	0	0	0	0	0	200	300	0	0	0	0	0	0	0	200	903	0	0	0	0	0	0	0	603	903	0
476	8	0	0	0	0	0	0	200	300	0	0	0	0	0	0	0	200	903	0	0	0	0	0	0	0	603	903	0
476	9	0	0	0	0	0	0	200	300	0	0	0	0	0	0	0	200	903	0	0	0	0	0	0	0	603	903	0
477	0	0	0	0	0	0	0	200	300	0	0	0	0	0	0	0	200	903	0	0	0	0	0	0	0	603	903	0
477	1	0	0	0	0	0	0	200	300	0	0	0	0	0	0	0	200	903	0	0	0	0	0	0	0	603	903	0
477	2	0	0	0	0	0	0	200	300	0	0	0	0	0	0	0	200	903	0	0	0	0	0	0	0	603	903	0
477	3	0	0	0	0	0	0	200	300	0	0	0	0	0	0	0	200	903	0	0	0	0	0	0	0	603	903	0
477	4	0	0	0	0	0	0	200	300	0	0	0	0	0	0	0	200	903	0	0	0	0	0	0	0	603	903	0
477	5	0	0	0	0	0	0	200	300	0	0	0	0	0	0	0	200	903	0	0	0	0	0	0	0	603	903	0
477	6	0	0	0	0	0	0	200	300	0	0	0	0	0	0	0	200	903	0	0	0	0	0	0	0	603	903	0
477	7	0	0	0	0	0	0	200	300	0	0	0	0	0	0	0	200	903	0	0	0	0	0	0	0	603	903	0
477	8	0	0	0	0	0	0	200	300	0	0	0	0	0	0	0	200	903	0	0	0	0	0	0	0	603	903	0
477	9	0	0	0	0	0	0	200	300	0	0	0	0	0	0	0	200	903	0	0	0	0	0	0	0	603	903	0
478	0	0	0	0	0	0	0	200	300	0	0	0	0	0	0	0	200	903	0	0	0	0	0	0	0	603	903	0
478	1	0	0	0	0	0	0	200	300	0	0	0	0	0	0	0	200	903	0	0	0	0	0	0	0	603	903	0
478	2	0	0	0	0	0	0	200	300	0	0	0	0	0	0	0	200	903	0	0	0	0	0	0	0	603	903	0
478	3	0	0	0	0	0	0	200	300	0	0	0	0	0	0	0	200	903	0	0	0	0	0	0	0	603	903	0
478	4	0	0	0	0	0	0	200	300	0	0	0	0	0	0	0	200	903	0	0	0	0	0	0	0	603	903	0
478	5	0	0	0	0	0	0	200	300	0	0	0	0	0	0	0	200	903	0	0	0	0	0	0	0	603	903	0
478	6	0	0	0	0	0	0	200	300	0	0	0	0	0	0	0	200	903	0	0	0	0	0	0	0	603	903	0
478	7	0	0	0	0	0	0	200	300	0	0	0	0	0	0	0	200	903	0	0	0	0	0	0	0	603	903	0
478	8	0	0	0	0	0	0	200	300	0	0	0	0	0	0	0	200	903	0	0	0	0	0	0	0	603	903	0
478	9	0	0	0	0	0	0	200	300	0	0	0	0	0	0	0	200	903	0	0	0	0	0	0	0	603	903	0
479	0	0	0	0	0	0	0	200	300	0	0	0	0	0	0	0	200	903	0	0	0	0	0	0	0	603	903	0
479	1	0	0	0	0	0	0	200	300	0	0	0	0	0	0	0	200	903	0	0	0	0	0	0	0	603	903	0
479	2	0	0	0	0	0	0	200	300	0	0	0	0	0	0	0	200	903	0	0	0	0	0	0	0	603	903	0
479	3	0	0	0	0	0	0	200	300	0	0	0	0	0	0	0	200	903	0	0	0	0	0	0	0	603	903	0
479	4	0	0	0	0	0	0	200	300	0	0	0	0	0	0	0	200	903	0	0	0	0	0	0	0	603	903	0
479	5	0	0	0	0	0	0	200	300	0	0	0	0	0	0	0	200	903	0	0	0	0	0	0	0	603	903	0
479	6	0	0	0	0	0	0	200	300	0	0	0	0	0	0	0	200	903	0	0	0	0	0	0	0	603	903	0
479	7	0	0	0	0	0	0	200	300	0	0	0	0	0	0	0	200	903	0	0	0	0	0	0	0	603	903	0
479	8	0	0	0	0	0	0	200	300	0	0	0	0	0	0	0	200	903	0	0	0	0	0	0	0	603	903	0
479	9	0	0	0	0	0	0	200	300	0	0	0	0	0	0	0	200	903	0	0	0	0	0	0	0	603	903	0
480	0	0	0	0	0	0	0	200	300	0	0	0	0	0	0	0	200	903	0	0	0	0	0	0	0	603	903	0
480	1	0	0	0	0	0	0	200	300	0	0	0	0	0	0	0	200	903	0	0	0	0	0	0	0	603	903	0
480	2	0	0	0	0	0	0	200	300	0	0	0	0	0	0	0	200	903	0	0	0	0	0	0	0	603	903	0
480	3	0	0	0	0	0	0	200	300	0	0	0	0	0	0	0	200	903	0	0	0	0	0	0	0	603	903	0
480	4	0	0	0	0	0	0	200	300	0	0	0	0	0	0	0	200	903	0	0	0	0	0	0	0	603	903	0
480	5	0	0	0	0	0	0	200	300	0	0	0	0	0	0	0	200	903	0	0	0	0	0	0	0	603	903	0
480	6	0	0	0	0	0	0	200	300	0	0	0	0	0	0	0	200	903	0	0	0	0	0	0	0	603	903	0
480	7	0	0	0	0	0	0	200	300	0	0	0	0	0	0	0	200	903	0	0	0	0	0	0	0	603	903	0
480	8	0	0	0	0	0	0	200	300	0	0	0	0	0	0	0	200	903	0	0	0	0	0	0	0	603	903	0
480	9	0	0	0	0	0	0	200	300	0	0	0	0	0	0	0	200	903	0	0	0	0	0	0	0	603	903	0
481	0	0	0	0	0	0	0	200	300	0	0	0	0	0	0	0	200	903	0	0	0	0	0	0	0	603	903	0
481	1	0	0	0	0	0	0	200	300	0	0	0	0	0	0	0	200	903	0	0	0	0	0	0	0	603	903	0
481	2	0	0	0	0	0	0	200	300	0	0	0	0	0	0	0	200	903	0	0	0	0	0	0	0	603	903	0
481	3	0	0	0	0	0	0	200	300	0	0	0	0	0	0	0	200	903	0	0	0	0	0	0	0	603	903	0
481	4	0	0	0	0	0	0	200	300	0	0	0	0	0	0	0	200	903	0	0	0	0	0	0	0	603	903	0
481	5	0	0	0	0	0	0	200	300	0	0	0	0	0	0	0	200	903	0	0	0	0	0	0	0	603	903	0
481	6	0	0	0	0	0	0	200	300	0	0	0	0	0	0	0	200	903	0	0	0	0	0	0	0	603	903	0
481	7	0	0	0	0	0	0	200	300	0	0	0	0	0	0	0	200	903	0	0	0	0	0	0	0	603	903	0
481	8	0	0	0	0	0	0	200	300	0	0	0	0	0	0	0	200	903	0	0	0	0	0	0	0	603	903	0
481	9	0	0	0	0	0	0	200	300	0	0	0	0	0	0	0	200	903	0	0	0	0	0	0	0	603	903	0
482	0	0	0	0	0	0	0	200	300	0	0	0	0	0	0	0	200	903	0	0	0	0	0	0	0	603	903	0
482	1	0	0	0	0	0	0	200	300	0	0	0	0	0	0	0	200	903	0	0	0	0	0	0	0	603	903	0
482	2	0	0	0	0	0	0	200	300	0	0	0	0	0	0	0	200	903	0	0	0	0	0	0	0	603	903	0
482	3	0	0	0	0	0	0	200	300	0	0	0	0	0	0	0	200	903	0	0	0	0	0	0	0	603	903	0
482	4	0	0	0	0	0	0	200	300	0	0	0	0	0	0	0	200	903	0	0	0	0	0	0	0	603	903	0
482	5	0	0	0	0	0	0	200	300	0	0	0	0	0	0	0	200	903	0	0	0	0	0	0	0	603	903	0
482	6	0	0	0	0	0	0	200	300	0	0	0	0	0	0	0	200	903	0	0	0	0	0	0	0	603	903	0
482	7	0	0	0	0	0	0	200	300	0	0	0	0	0	0	0	200	903	0	0	0	0	0	0	0	603	903	0
482	8	0	0	0	0	0	0	200	300	0	0	0	0	0	0	0	200	903	0	0	0	0	0	0	0	603	903	0
482	9	0	0	0	0	0	0	200	300	0	0	0	0	0	0	0	200	903	0	0	0	0	0	0	0	603	903	0
483	0	0	0	0	0	0	0	200	300	0	0	0	0	0	0	0	200	903	0	0	0	0	0	0	0	603	903	0
483	1	0	0	0	0	0	0	200	300	0	0	0	0	0	0	0	200	903	0	0	0	0	0	0	0	603	903	0
483	2	0	0	0	0	0	0	200	300	0	0	0	0	0	0	0	200	903	0	0	0	0	0	0	0	603	903	0
483	3	0	0	0	0	0	0	200	300	0	0	0	0	0	0	0	200	903	0	0	0	0	0	0	0	603	903	0
483	4	0	0	0	0	0	0	200	300	0	0	0	0	0	0	0	200	903	0	0	0	0	0	0	0	603	903	0
483	5	0	0	0	0	0	0	200	300	0	0	0	0	0	0	0	200	903	0	0	0	0	0	0	0	603	903	0
483	6	0	0	0	0	0	0	200	300	0	0	0	0	0	0	0	200	903	0	0	0	0	0	0	0	603	903	0
483	7	0	0	0	0	0	0	200	300	0	0	0	0	0	0	0	200	903	0	0	0	0	0	0	0	603	903	0
483	8	0	0	0	0	0	0	200	300	0	0	0	0	0	0	0	200	903	0	0	0	0	0	0	0	603	903	0
483	9	0	0	0	0	0	0	200	300	0	0	0	0	0	0	0	200	903	0	0	0	0	0	0	0	603	903	0
484	0	0	0	0	0	0	0	200	300	0	0	0	0	0	0	0	200	903	0	0	0	0	0	0	0	603	903	0
484	1	0	0	0	0	0	0	200	300	0	0	0	0	0	0	0	200	903	0	0	0	0	0	0	0	603	903	0
484	2	0	0	0	0	0	0	200	300	0	0	0	0	0	0	0	200	903	0	0	0	0	0	0	0	603	903	0
484	3	0	0	0	0	0	0	200	300	0	0	0	0	0	0	0	200	903	0	0	0	0	0	0	0	603	903	0
484	4	0	0	0	0	0	0	200	300	0	0	0	0	0	0	0	200	903	0	0	0	0	0	0	0	603	903	0
484	5	0	0	0	0	0	0	200	300	0	0	0	0	0	0	0	200	903	0	0	0	0	0	0	0	603	903	0
484	6	0	0	0	0	0	0	200	300	0	0	0	0	0	0	0	200	903	0	0	0	0	0	0	0	603	903	0
484	7	0	0	0	0	0	0	200	300	0	0	0	0	0	0	0	200	903	0	0	0	0	0	0	0	603	903	0
484	8	0	0	0	0	0	0	200	300	0	0	0	0	0	0	0	200	903	0	0	0	0	0	0	0	603	903	0
484	9	0	0	0	0	0	0	200	300	0	0	0	0	0	0	0	200	903	0	0	0	0	0	0	0	603	903	0
485	0	0	0	0	0	0	0	200	300	0	0	0	0	0	0	0	200	903	0	0	0	0	0	0	0	603	903	0
485	1	0	0	0	0	0	0	200	300	0	0	0	0	0	0	0	200	903	0	0	0	0	0	0	0	603	903	0
485	2	0	0	0	0	0	0	200	300	0	0	0	0	0	0	0	200	903	0	0	0	0	0	0	0	603	903	0
485	3	0	0	0	0	0	0	200	300	0	0	0	0	0	0	0	200	903	0	0	0	0	0	0	0	603	903	0
485	4	0	0	0	0	0	0	200	300	0	0	0	0	0	0	0	200	903	0	0	0	0	0	0	0	603	903	0
485	5	0	0	0	0	0	0	200	300	0	0	0	0	0	0	0	200	903	0	0	0	0	0	0	0	603	903	0
485	6	0	0	0	0	0	0	200	300	0	0	0	0	0	0	0	200	903	0	0	0	0	0	0	0	603	903	0
485	7	0	0	0	0	0	0	200	300	0	0	0	0	0	0	0	200	903	0	0	0	0	0	0	0	603	903	0
485	8	0	0	0	0	0	0	200	300	0	0	0	0	0	0	0	200	903	0	0	0	0	0	0	0	603	903	0
485	9	0	0	0	0	0	0	200	300	0	0	0	0	0	0	0	200	903	0	0	0	0	0	0	0	603	903	0
486	0	0	0	0	0	0	0	200	300	0	0	0	0	0	0	0	200	903	0	0	0	0	0	0	0	603	903	0
486	1	0	0	0	0	0	0	200	300	0	0	0	0	0	0	0	200	903	0	0	0	0	0	0	0	603	903	0
486	2	0	0	0	0	0	0	200	300	0	0	0	0	0	0	0	200	903	0	0	0	0	0	0	0	603	903	0
486	3	0	0	0	0	0	0	200	300	0	0	0	0	0	0	0	200	903	0	0	0	0	0	0	0	603	903	0
486	4	0	0	0	0	0	0	200	300	0	0	0	0	0	0	0	200	903	0	0	0	0	0	0	0	603	903	0
486	5	0	0	0	0	0	0	200	300	0	0	0	0	0	0	0	200	903	0	0	0	0	0	0	0	603	903	0
486	6	0	0	0	0	0	0	200	300	0	0	0	0	0	0	0	200	903	0	0	0	0	0	0	0	603	903	0
486	7	0	0	0	0	0	0	200	300	0	0	0	0	0	0	0	200	903	0	0	0	0	0	0	0	603	903	0
486	8	0	0	0	0	0	0	200	300	0	0	0	0	0	0	0	200	903	0	0	0	0	0	0	0	603	903	0
486	9	0	0	0	0	0	0	200	300	0	0	0	0	0	0	0	200	903	0	0	0	0	0	0	0	603	903	0
487	0	0	0	0	0	0	0	200	300	0	0	0	0	0	0	0	200	903	0	0	0	0	0	0	0	603	903	0
487	1	0	0	0	0	0	0	200	300	0	0	0	0	0	0	0	200	903	0	0	0	0	0	0	0	603	903	0
487	2	0	0	0	0	0	0	200	300	0	0	0	0	0	0	0	200	903	0	0	0	0	0	0	0	603	903	0
487	3	0	0	0	0	0	0	200	300	0	0	0	0	0	0	0	200	903	0	0	0	0	0	0	0	603	903	0
487	4	0	0	0	0	0	0	200	300	0	4.85687	9.36905	-15.9889	-3867.1	2224.38	206.222	339.121	1144.86	0	0	0	0	0	0	0	603	903	0
487	5	0	0	0	0	0	0	200	300	0	2.72064	10.7423	-15.9889	-4324.86	3139.91	572.433	396.381	1173.49	0	0	0	0	0	0	0	603	903	0
487	6	0	0	0	0	0	0	200	300	0	4.39911	12.726	-20.2613	-5240.39	2773.7	984.421	336.896	1161.64	0	0	0	0	0	0	0	603	903	0
487	7	0	0	0	0	0	0	200	300	0	3.94135	15.32	-22.3975	-5240.39	3200.94	1487.96	342.915	1136.97	0	0	0	0	0	0	0	603	903	0
487	8	0	0	0	0	0	0	200	300	0	3.48358	16.6933	-24.2286	-6155.92	3445.08	1579.51	342.191	1157.08	0	0	0	0	0	0	0	603	903	0
487	9	0	0	0	0	0	0	200	300	0	1.49994	16.0829	-26.67	-5881.26	3811.29	1442.18	342.906	1123.52	0	0	0	0	0	0	0	603	903	0
488	0	0	0	0	0	0	0	200	300	0	3.94135	17.7614	-31.2476	-6796.79	4177.5	1579.51	333.69	1120.51	0	0	0	0	0	0	0	603	903	0
488	1	0	0	0	0	0	0	200	300	0	6.38275	17.914	-32.1632	-6796.79	4299.58	1487.96	333.68	1114.32	0	0	0	0	0	0	0	603	903	0
488	2	0	0	0	0	0	0	200	300	0	7.45087	19.1347	-37.6563	-7712.31	4604.75	1304.85	322.284	1107.81	0	0	0	0	0	0	0	603	903	0
488	3	0	0	0	0	0	0	200	300	0	6.53534	19.4399	-39.7926	-8810.95	5154.07	1579.51	329.523	1124.42	0	0	0	0	0	0	0	603	903	0
488	4	0	0	0	0	0	0	200	300	0	7.29828	20.3554	-44.065	-8810.95	5642.35	1304.85	328.046	1102.95	0	0	0	0	0	0	0	603	903	0
488	5	0	0	0	0	0	0	200	300	0	8.97675	20.6606	-47.422	-9818.03	5581.31	1030.2	317.695	1110.04	0	0	0	0	0	0	0	603	903	0
488	6	0	0	0	0	0	0	200	300	0	8.82416	20.6606	-52.61	-10916.7	6008.56	1121.75	314.21	1110.5	0	0	0	0	0	0	0	603	903	0
488	7	0	0	0	0	0	0	200	300	0	7.45087	20.0502	-55.9669	-11191.3	6557.88	1075.97	317.174	1102.96	0	0	0	0	0	0	0	603	903	0
488	8	0	0	0	0	0	0	200	300	0	7.45087	18.6769	-57.7979	-11099.8	7046.16	1030.2	321.91	1095.04	0	0	0	0	0	0	0	603	903	0
488	9	0	0	0	0	0	0	200	300	0	8.82416	19.4399	-60.2393	-12015.3	6863.05	984.421	313.93	1102.46	0	0	0	0	0	0	0	603	903	0
489	0	0	0	0	0	0	0	200	300	0	8.82416	18.2192	-64.5118	-12381.5	7412.37	938.644	314.899	1094.93	0	0	0	0	0	0	0	603	903	0
489	1	0	0	0	0	0	0	200	300	0	7.75604	17.151	-66.0377	-13113.9	7900.65	847.092	319.639	1101.58	0	0	0	0	0	0	0	603	903	0
489	2	0	0	0	0	0	0	200	300	0	7.75604	16.3881	-71.2257	-13297	8449.97	663.986	318.637	1089.69	0	0	0	0	0	0	0	603	903	0
489	3	0	0	0	0	0	0	200	300	0	10.1974	14.7096	-72.4464	-13937.9	8327.9	572.433	314.953	1095.39	0	0	0	0	0	0	0	603	903	0
489	4	0	0	0	0	0	0	200	300	0	8.97675	13.6415	-74.8878	-14487.2	8572.04	663.986	314.465	1096.45	0	0	0	0	0	0	0	603	903	0
489	5	0	0	0	0	0	0	200	300	0	10.1974	12.5734	-77.3292	-15036.5	8755.15	251.999	313.219	1097.45	0	0	0	0	0	0	0	603	903	0
489	6	0	0	0	0	0	0	200	300	0	9.43451	11.5053	-78.2447	-15219.6	9304.46	114.67	318.915	1097.51	0	0	0	0	0	0	0	603	903	0
489	7	0	0	0	0	0	0	200	300	0	10.6552	10.8949	-82.212	-15677.4	9487.57	-22.6596	315.404	1093.69	0	0	0	0	0	0	0	603	903	0
489	8	0	0	0	0	0	0	200	300	0	10.9604	9.06388	-80.9913	-16043.6	9426.53	-251.541	316.389	1101.09	0	0	0	0	0	0	0	603	903	0
489	9	0	0	0	0	0	0	200	300	0	11.113	7.38541	-86.7896	-16592.9	9609.64	-68.436	310.723	1094.19	0	0	0	0	0	0	0	603	903	0
490	0	0	0	0	0	0	0	200	300	0	10.5026	6.92765	-88.0103	-16592.9	10036.9	-251.541	314.042	1091.53	0	0	0	0	0	0	0	603	903	0
490	1	0	0	0	0	0	0	200	300	0	12.944	6.16471	-87.4	-16867.6	10220	-114.212	316.934	1095.99	0	0	0	0	0	0	0	603	903	0
490	2	0	0	0	0	0	0	200	300	0	9.28192	5.24918	-90.4517	-17416.9	9853.78	-343.094	308.94	1095.55	0	0	0	0	0	0	0	603	903	0
490	3	0	0	0	0	0	0	200	300	0	9.43451	4.63883	-95.9449	-17783.1	9914.82	-22.6596	303.339	1088.35	0	0	0	0	0	0	0	603	903	0
490	4	0	0	0	0	0	0	200	300	0	10.9604	3.41813	-94.419	-18057.8	10525.2	-297.318	311.473	1094.25	0	0	0	0	0	0	0	603	903	0
490	5	0	0	0	0	0	0	200	300	0	12.0285	2.5026	-99.607	-18057.8	10830.3	-297.318	308.731	1084.29	0	0	0	0	0	0	0	603	903	0
490	6	0	0	0	0	0	0	200	300	0	8.67157	2.19742	-100.828	-18973.3	10586.2	-297.318	304.993	1091.18	0	0	0	0	0	0	0	603	903	0
490	7	0	0	0	0	0	0	200	300	0	7.14569	1.2819	-99.607	-19064.9	10586.2	160.446	306.28	1094.4	0	0	0	0	0	0	0	603	903	0
490	8	0	0	0	0	0	0	200	300	0	6.68793	0.671544	-104.795	-19248	11013.4	-251.541	305.095	1086.67	0	0	0	0	0	0	0	603	903	0
490	9	0	0	0	0	0	0	200	300	0	6.38275	-0.854335	-109.067	-19522.6	11196.6	-343.094	302.657	1082	0	0	0	0	0	0	0	603	903	0
491	0	0	0	0	0	0	0	200	300	0	4.70429	-2.38021	-109.373	-20346.6	11440.7	343.551	304.603	1089.03	0	0	0	0	0	0	0	603	903	0
491	1	0	0	0	0	0	0	200	300	0	2.87323	-2.22763	-114.866	-20895.9	11501.7	-22.6596	300.132	1084.92	0	0	0	0	0	0	0	603	903	0
491	2	0	0	0	0	0	0	200	300	0	2.72064	-3.14315	-115.171	-20712.8	11562.8	160.446	300.397	1082.84	0	0	0	0	0	0	0	603	903	0
491	3	0	0	0	0	0	0	200	300	0	2.11029	-3.44833	-118.223	-21628.3	11440.7	435.104	296.772	1085.95	0	0	0	0	0	0	0	603	903	0
491	4	0	0	0	0	0	0	200	300	0	-0.178527	-5.1268	-121.274	-22177.6	12051	526.657	299.37	1085.87	0	0	0	0	0	0	0	603	903	0
491	5	0	0	0	0	0	0	200	300	0	0.431824	-5.27938	-122.8	-22635.4	12356.2	297.775	300.62	1087.33	0	0	0	0	0	0	0	603	903	0
491	6	0	0	0	0	0	0	200	300	0	-0.636291	-7.26303	-128.294	-22910.1	12356.2	480.881	296.312	1081.58	0	0	0	0	0	0	0	603	903	0
491	7	0	0	0	0	0	0	200	300	0	-1.55182	-8.48373	-131.04	-23642.5	12478.3	709.762	295.225	1083.42	0	0	0	0	0	0	0	603	903	0
491	8	0	0	0	0	0	0	200	300	0	-2.77252	-9.70443	-134.702	-24191.8	13149.7	389.328	297.62	1082.59	0	0	0	0	0	0	0	603	903	0
491	9	0	0	0	0	0	0	200	300	0	-4.45099	-10.0096	-136.838	-24924.2	13210.7	572.433	296.542	1085.14	0	0	0	0	0	0	0	603	903	0
492	0	0	0	0	0	0	0	200	300	0	-5.5191	-11.0777	-138.364	-24741.1	13210.7	480.881	295.478	1081.81	0	0	0	0	0	0	0	603	903	0
492	1	0	0	0	0	0	0	200	300	0	-4.75616	-11.5355	-143.858	-25290.4	13515.9	297.775	293.953	1078.8	0	0	0	0	0	0	0	603	903	0
492	2	0	0	0	0	0	0	200	300	0	-5.21393	-12.7562	-148.74	-26022.9	14187.3	297.775	295.383	1077.96	0	0	0	0	0	0	0	603	903	0
492	3	0	0	0	0	0	0	200	300	0	-6.58722	-14.5872	-148.13	-26663.7	14065.2	297.775	294.952	1083	0	0	0	0	0	0	0	603	903	0
492	4	0	0	0	0	0	0	200	300	0	-7.96051	-15.1976	-156.065	-27213.1	14065.2	68.8931	290.124	1077.37	0	0	0	0	0	0	0	603	903	0
492	5	0	0	0	0	0	0	200	300	0	-7.35016	-15.5028	-157.59	-27487.7	14187.3	114.67	290.026	1077.43	0	0	0	0	0	0	0	603	903	0
492	6	0	0	0	0	0	0	200	300	0	-8.26569	-17.4864	-163.694	-28403.2	15041.8	68.8931	291.89	1076.51	0	0	0	0	0	0	0	603	903	0
492	7	0	0	0	0	0	0	200	300	0	-10.8597	-17.7916	-167.661	-28586.3	15835.2	251.999	294.448	1073.5	0	0	0	0	0	0	0	603	903	0
492	8	0	0	0	0	0	0	200	300	0	-11.1649	-18.7071	-172.239	-29227.2	15774.2	-343.094	291.583	1072.69	0	0	0	0	0	0	0	603	903	0
492	9	0	0	0	0	0	0	200	300	0	-10.4019	-20.3856	-177.122	-29318.8	15957.3	-205.765	290.092	1068.53	0	0	0	0	0	0	0	603	903	0
493	0	0	0	0	0	0	0	200	300	0	-11.0123	-20.6908	-181.699	-30509	16445.6	-434.647	290.51	1070.91	0	0	0	0	0	0	0	603	903	0
493	1	0	0	0	0	0	0	200	300	0	-13.4537	-22.6744	-185.056	-30509	17361.1	-480.423	293.815	1067.86	0	0	0	0	0	0	0	603	903	0
493	2	0	0	0	0	0	0	200	300	0	-13.6063	-23.4373	-189.024	-31241.4	17483.2	-571.976	292.492	1068.28	0	0	0	0	0	0	0	603	903	0
493	3	0	0	0	0	0	0	200	300	0	-12.5381	-23.7425	-194.822	-32065.3	18032.5	-571.976	292.559	1067.59	0	0	0	0	0	0	0	603	903	0
493	4	0	0	0	0	0	0	200	300	0	-13.9114	-24.5055	-198.179	-33164	18093.5	-617.753	291.299	1070.34	0	0	0	0	0	0	0	603	903	0
493	5	0	0	0	0	0	0	200	300	0	-13.9114	-25.7262	-203.672	-33530.2	18459.7	-709.306	290.635	1067.63	0	0	0	0	0	0	0	603	903	0
493	6	0	0	0	0	0	0	200	300	0	-14.064	-26.1839	-207.639	-33896.4	19131.1	-663.529	292.136	1066.25	0	0	0	0	0	0	0	603	903	0
493	7	0	0	0	0	0	0	200	300	0	-14.5218	-28.015	-209.165	-34171.1	19375.3	-663.529	292.631	1066.37	0	0	0	0	0	0	0	603	903	0
493	8	0	0	0	0	0	0	200	300	0	-14.6744	-29.0831	-216.489	-34995	19558.4	-709.306	290.343	1064.65	0	0	0	0	0	0	0	603	903	0
493	9	0	0	0	0	0	0	200	300	0	-16.0477	-29.3883	-220.762	-36002.1	19924.6	-709.306	290.254	1066.08	0	0	0	0	0	0	0	603	903	0
494	0	0	0	0	0	0	0	200	300	0	-14.9796	-30.1512	-225.645	-36002.1	20840.1	-755.082	292.358	1062.55	0	0	0	0	0	0	0	603	903	0
494	1	0	0	0	0	0	0	200	300	0	-14.6744	-30.7616	-229.917	-36643	20962.2	-1075.52	291.173	1062.37	0	0	0	0	0	0	0	603	903	0
494	2	0	0	0	0	0	0	200	300	0	-15.2847	-31.8297	-236.021	-37558.5	21633.6	-892.411	291.66	1062.13	0	0	0	0	0	0	0	603	903	0
494	3	0	0	0	0	0	0	200	300	0	-15.7425	-33.3556	-239.683	-38565.6	21755.6	-1212.85	290.768	1063.9	0	0	0	0	0	0	0	603	903	0
494	4	0	0	0	0	0	0	200	300	0	-15.2847	-34.4237	-245.176	-37924.7	22243.9	-1350.18	290.726	1057.68	0	0	0	0	0	0	0	603	903	0
494	5	0	0	0	0	0	0	200	300	0	-14.9796	-34.8814	-248.838	-38657.1	22732.2	-1304.4	291.353	1058.35	0	0	0	0	0	0	0	603	903	0
494	6	0	0	0	0	0	0	200	300	0	-14.6744	-36.1021	-254.636	-39572.7	23464.6	-1441.73	292.15	1058.41	0	0	0	0	0	0	0	603	903	0
494	7	0	0	0	0	0	0	200	300	0	-15.7425	-36.4073	-258.604	-40213.5	23525.7	-1670.61	290.972	1058.5	0	0	0	0	0	0	0	603	903	0
494	8	0	0	0	0	0	0	200	300	0	-15.8951	-38.2384	-263.181	-39847.3	24075	-1716.39	291.477	1054.41	0	0	0	0	0	0	0	603	903	0
494	9	0	0	0	0	0	0	200	300	0	-13.9114	-39.1539	-268.674	-40671.3	24624.3	-1945.27	291.651	1054.38	0	0	0	0	0	0	0	603	903	0
495	0	0	0	0	0	0	0	200	300	0	-13.9114	-40.0694	-273.557	-41769.9	25906	-1899.49	294.701	1055.69	0	0	0	0	0	0	0	603	903	0
495	1	0	0	0	0	0	0	200	300	0	-14.064	-40.8324	-277.525	-41953	26272.2	-1899.49	294.666	1054.17	0	0	0	0	0	0	0	603	903	0
495	2	0	0	0	0	0	0	200	300	0	-12.5381	-41.7479	-285.154	-42227.7	26272.2	-1991.04	292.134	1051.09	0	0	0	0	0	0	0	603	903	0
495	3	0	0	0	0	0	0	200	300	0	-10.8597	-42.9686	-290.647	-42868.6	27126.7	-2265.7	293.332	1050.49	0	0	0	0	0	0	0	603	903	0
495	4	0	0	0	0	0	0	200	300	0	-10.2493	-45.5626	-295.53	-43784.1	28042.3	-2540.36	294.888	1051.15	0	0	0	0	0	0	0	603	903	0
495	5	0	0	0	0	0	0	200	300	0	-10.0967	-46.6307	-300.718	-44425	28591.6	-2448.81	295.078	1050.73	0	0	0	0	0	0	0	603	903	0
495	6	0	0	0	0	0	0	200	300	0	-8.87604	-47.0885	-306.211	-44425	29324	-2952.35	295.764	1048.08	0	0	0	0	0	0	0	603	903	0
495	7	0	0	0	0	0	0	200	300	0	-6.89239	-48.7669	-311.094	-44333.4	29385	-3135.45	294.457	1045.51	0	0	0	0	0	0	0	603	903	0
495	8	0	0	0	0	0	0	200	300	0	-5.67169	-49.9876	-315.061	-45798.3	29934.4	-3272.78	295.011	1048.36	0	0	0	0	0	0	0	603	903	0
495	9	0	0	0	0	0	0	200	300	0	-5.82428	-51.9713	-322.996	-45981.4	31033	-3638.99	296.079	1045.36	0	0	0	0	0	0	0	603	903	0
496	0	0	0	0	0	0	0	200	300	0	-3.99322	-53.9549	-326.658	-45981.4	31338.2	-3822.1	295.936	1043.76	0	0	0	0	0	0	0	603	903	0
496	1	0	0	0	0	0	0	200	300	0	-2.92511	-55.1756	-329.71	-45981.4	31399.2	-3959.43	295.233	1042.46	0	0	0	0	0	0	0	603	903	0
496	2	0	0	0	0	0	0	200	300	0	-1.55182	-57.4644	-332.761	-46896.9	31582.3	-4462.97	294.91	1043.93	0	0	0	0	0	0	0	603	903	0
496	3	0	0	0	0	0	0	200	300	0	-0.178527	-58.38	-337.644	-47080	32314.7	-4554.52	295.706	1042.44	0	0	0	0	0	0	0	603	903	0
496	4	0	0	0	0	0	0	200	300	0	-1.09405	-59.4481	-341.001	-46622.2	33047.1	-4691.85	296.912	1039.72	0	0	0	0	0	0	0	603	903	0
496	5	0	0	0	0	0	0	200	300	0	-1.39923	-60.3636	-345.579	-46530.7	33291.3	-5149.61	296.335	1037.65	0	0	0	0	0	0	0	603	903	0
496	6	0	0	0	0	0	0	200	300	0	0.431824	-62.9576	-348.02	-47263.1	33535.4	-5195.39	296.361	1038.81	0	0	0	0	0	0	0	603	903	0
496	7	0	0	0	0	0	0	200	300	0	-0.331115	-64.7887	-351.072	-47995.5	33962.7	-5515.82	296.74	1039.71	0	0	0	0	0	0	0	603	903	0
496	8	0	0	0	0	0	0	200	300	0	-0.0259395	-65.5516	-352.293	-47537.8	34634	-5607.38	298.31	1037.94	0	0	0	0	0	0	0	603	903	0
496	9	0	0	0	0	0	0	200	300	0	1.19476	-64.7887	-355.955	-47629.3	35183.4	-5744.71	298.842	1036.81	0	0	0	0	0	0	0	603	903	0
497	0	0	0	0	0	0	0	200	300	0	1.49994	-65.2464	-359.617	-48544.8	35183.4	-5973.59	297.836	1037.99	0	0	0	0	0	0	0	603	903	0
497	1	0	0	0	0	0	0	200	300	0	1.04218	-66.3145	-359.922	-47904	34512	-5698.93	295.887	1036.1	0	0	0	0	0	0	0	603	903	0
497	2	0	0	0	0	0	0	200	300	0	1.19476	-67.5352	-363.889	-47995.5	35366.5	-5882.03	297.19	1034.9	0	0	0	0	0	0	0	603	903	0
497	3	0	0	0	0	0	0	200	300	0	2.41547	-68.2982	-364.5	-47995.5	36221	-6294.02	299.372	1034.68	0	0	0	0	0	0	0	603	903	0
497	4	0	0	0	0	0	0	200	300	0	2.56805	-67.3827	-366.331	-47812.4	36404.1	-6156.69	299.375	1033.52	0	0	0	0	0	0	0	603	903	0
497	5	0	0	0	0	0	0	200	300	0	1.65253	-67.5352	-368.467	-48453.3	36098.9	-6202.47	297.971	1034.5	0	0	0	0	0	0	0	603	903	0
497	6	0	0	0	0	0	0	200	300	0	1.9577	-67.2301	-371.824	-48544.8	36343	-5927.81	297.743	1033.56	0	0	0	0	0	0	0	603	903	0
497	7	0	0	0	0	0	0	200	300	0	3.33099	-67.5352	-372.434	-48911.1	37075.5	-6156.69	299.549	1034.33	0	0	0	0	0	0	0	603	903	0
497	8	0	0	0	0	0	0	200	300	0	2.72064	-66.4671	-373.655	-48453.3	36831.3	-6202.47	298.57	1032.67	0	0	0	0	0	0	0	603	903	0
497	9	0	0	0	0	0	0	200	300	0	2.87323	-67.2301	-374.265	-49002.6	37075.5	-6019.36	299.062	1033.93	0	0	0	0	0	0	0	603	903	0
498	0	0	0	0	0	0	0	200	300	0	3.63617	-66.6197	-376.096	-49185.7	37075.5	-6202.47	298.58	1033.78	0	0	0	0	0	0	0	603	903	0
498	1	0	0	0	0	0	0	200	300	0	5.00946	-64.9412	-375.181	-48453.3	37136.5	-6294.02	298.983	1032.15	0	0	0	0	0	0	0	603	903	0
498	2	0	0	0	0	0	0	200	300	0	5.92499	-66.3145	-378.538	-48453.3	37380.6	-6248.25	298.75	1031	0	0	0	0	0	0	0	603	903	0
498	3	0	0	0	0	0	0	200	300	0	4.09393	-66.6197	-381.284	-48911.1	37929.9	-6385.57	299.479	1031.28	0	0	0	0	0	0	0	603	903	0
498	4	0	0	0	0	0	0	200	300	0	5.16205	-66.7723	-380.064	-48819.5	37441.7	-6751.79	298.514	1031.45	0	0	0	0	0	0	0	603	903	0
498	5	0	0	0	0	0	0	200	300	0	5.92499	-66.6197	-380.674	-47629.3	37807.9	-6568.68	299.318	1028.12	0	0	0	0	0	0	0	603	903	0
498	6	0	0	0	0	0	0	200	300	0	5.31464	-66.7723	-381.589	-48270.2	38662.4	-6522.9	301.319	1029.5	0	0	0	0	0	0	0	603	903	0
498	7	0	0	0	0	0	0	200	300	0	4.09393	-66.6197	-384.031	-48270.2	38601.3	-6706.01	300.516	1028.69	0	0	0	0	0	0	0	603	903	0
498	8	0	0	0	0	0	0	200	300	0	5.16205	-67.3827	-384.946	-48270.2	38662.4	-6980.67	300.436	1028.39	0	0	0	0	0	0	0	603	903	0
498	9	0	0	0	0	0	0	200	300	0	6.38275	-68.9085	-384.946	-48270.2	38418.2	-6843.34	299.802	1028.39	0	0	0	0	0	0	0	603	903	0
499	0	0	0	0	0	0	0	200	300	0	6.84052	-68.6034	-383.726	-47812.4	38723.4	-6934.89	300.914	1027.6	0	0	0	0	0	0	0	603	903	0
499	1	0	0	0	0	0	0	200	300	0	6.68793	-69.2137	-385.252	-47537.8	39150.6	-6889.11	301.624	1026.39	0	0	0	0	0	0	0	603	903	0
499	2	0	0	0	0	0	0	200	300	0	8.21381	-69.2137	-385.252	-48270.2	39272.7	-7118	301.94	1028.3	0	0	0	0	0	0	0	603	903	0
499	3	0	0	0	0	0	0	200	300	0	9.89227	-69.9766	-386.777	-47354.7	39028.6	-7209.55	300.907	1025.43	0	0	0	0	0	0	0	603	903	0
499	4	0	0	0	0	0	0	200	300	0	10.8078	-70.8922	-385.557	-47812.4	39272.7	-7346.88	301.86	1027.01	0	0	0	0	0	0	0	603	903	0
499	5	0	0	0	0	0	0	200	300	0	10.5026	-70.8922	-388.914	-47904	39822	-7346.88	302.393	1026.17	0	0	0	0	0	0	0	603	903	0
499	6	0	0	0	0	0	0	200	300	0	12.0285	-71.3499	-387.998	-47446.2	40127.2	-7529.99	303.421	1025.28	0	0	0	0	0	0	0	603	903	0
499	7	0	0	0	0	0	0	200	300	0	13.4018	-70.8922	-387.083	-46896.9	40310.3	-7804.65	304.139	1024.15	0	0	0	0	0	0	0	603	903	0
499	8	0	0	0	0	0	0	200	300	0	14.1647	-71.1973	-390.134	-46439.1	40249.3	-7804.65	303.168	1022.03	0	0	0	0	0	0	0	603	903	0
499	9	0	0	0	0	0	0	200	300	0	15.0803	-71.8077	-391.66	-47537.8	40127.2	-7941.97	302.454	1024.38	0	0	0	0	0	0	0	603	903	0
500	0	0	0	0	0	0	0	200	300	0	17.3691	-73.6388	-392.576	-47354.7	40981.7	-8399.73	304.392	1023.63	0	0	0	0	0	0	0	603	903	0
500	1	0	0	0	0	0	0	200	300	0	17.5217	-72.5706	-395.017	-46713.8	40798.6	-8537.06	303.283	1021.26	0	0	0	0	0	0	0	603	903	0
500	2	0	0	0	0	0	0	200	300	0	19.3527	-74.2491	-395.017	-46622.2	40737.6	-8720.17	303.129	1021.03	0	0	0	0	0	0	0	603	903	0
500	3	0	0	0	0	0	0	200	300	0	19.0475	-75.1646	-393.796	-46988.5	41103.8	-8949.05	304.378	1022.32	0	0	0	0	0	0	0	603	903	0
500	4	0	0	0	0	0	0	200	300	0	19.5053	-74.4017	-396.238	-46256	41531	-8720.17	304.813	1019.74	0	0	0	0	0	0	0	603	903	0
500	5	0	0	0	0	0	0	200	300	0	19.3527	-74.5543	-396.848	-46256	41897.2	-9086.38	305.575	1019.56	0	0	0	0	0	0	0	603	903	0
500	6	0	0	0	0	0	0	200	300	0	20.5734	-75.3172	-398.374	-46256	42080.3	-9452.59	305.63	1019.11	0	0	0	0	0	0	0	603	903	0
500	7	0	0	0	0	0	0	200	300	0	21.489	-76.5379	-399.29	-46347.6	42019.3	-9452.59	305.235	1019.08	0	0	0	0	0	0	0	603	903	0
500	8	0	0	0	0	0	0	200	300	0	21.1838	-76.6905	-399.9	-46439.1	42141.4	-9681.47	305.38	1019.13	0	0	0	0	0	0	0	603	903	0
500	9	0	0	0	0	0	0	200	300	0	21.6415	-76.8431	-400.51	-46256	43117.9	-9589.92	307.657	1018.49	0	0	0	0	0	0	0	603	903	0
501	0	0	0	0	0	0	0	200	300	0	23.9304	-76.9957	-401.426	-45798.3	43056.9	-9818.8	307.26	1017.09	0	0	0	0	0	0	0	603	903	0
501	1	0	0	0	0	0	0	200	300	0	23.7778	-77.1483	-404.783	-46164.5	42751.7	-9635.7	305.616	1017.05	0	0	0	0	0	0	0	603	903	0
501	2	0	0	0	0	0	0	200	300	0	23.1674	-77.4535	-405.393	-46164.5	43117.9	-9910.35	306.361	1016.88	0	0	0	0	0	0	0	603	903	0
501	3	0	0	0	0	0	0	200	300	0	24.2355	-78.5216	-406.309	-46072.9	43117.9	-9818.8	306.121	1016.39	0	0	0	0	0	0	0	603	903	0
501	4	0	0	0	0	0	0	200	300	0	25.7614	-78.5216	-406.919	-45523.6	43362.1	-9956.13	306.562	1014.87	0	0	0	0	0	0	0	603	903	0
501	5	0	0	0	0	0	0	200	300	0	25.914	-78.369	-408.75	-46439.1	43972.4	-9864.58	307.578	1016.61	0	0	0	0	0	0	0	603	903	0
501	6	0	0	0	0	0	0	200	300	0	25.1511	-78.369	-409.971	-45981.4	43911.4	-10322.3	307.109	1015.16	0	0	0	0	0	0	0	603	903	0
501	7	0	0	0	0	0	0	200	300	0	25.7614	-77.3009	-410.276	-45889.8	44094.5	-10322.3	307.475	1014.85	0	0	0	0	0	0	0	603	903	0
501	8	0	0	0	0	0	0	200	300	0	27.5925	-78.369	-414.243	-44882.7	44521.7	-10230.8	307.477	1011.35	0	0	0	0	0	0	0	603	903	0
501	9	0	0	0	0	0	0	200	300	0	27.2873	-79.2845	-415.769	-45706.7	44826.9	-10597	307.817	1012.93	0	0	0	0	0	0	0	603	903	0
502	0	0	0	0	0	0	0	200	300	0	26.8295	-80.2	-416.379	-46622.2	44704.8	-10688.6	307.366	1014.97	0	0	0	0	0	0	0	603	903	0
502	1	0	0	0	0	0	0	200	300	0	28.508	-79.7423	-417.295	-46256	44643.8	-10642.8	306.984	1013.85	0	0	0	0	0	0	0	603	903	0
502	2	0	0	0	0	0	0	200	300	0	27.5925	-79.4371	-417.905	-45981.4	45681.4	-10642.8	309.31	1013.03	0	0	0	0	0	0	0	603	903	0
502	3	0	0	0	0	0	0	200	300	0	28.6606	-79.2845	-420.652	-46164.5	45803.5	-10963.2	308.887	1012.75	0	0	0	0	0	0	0	603	903	0
502	4	0	0	0	0	0	0	200	300	0	27.8976	-79.4371	-422.178	-46530.7	45742.4	-10825.9	308.349	1013.22	0	0	0	0	0	0	0	603	903	0
502	5	0	0	0	0	0	0	200	300	0	27.8976	-80.2	-424.314	-46713.8	45803.5	-10963.2	307.947	1013.09	0	0	0	0	0	0	0	603	903	0
502	6	0	0	0	0	0	0	200	300	0	27.7451	-79.5897	-425.84	-46347.6	46780	-10780.1	309.854	1011.84	0	0	0	0	0	0	0	603	903	0
502	7	0	0	0	0	0	0	200	300	0	29.1183	-80.2	-426.755	-45340.5	46230.7	-10917.4	308.331	1009.24	0	0	0	0	0	0	0	603	903	0
502	8	0	0	0	0	0	0	200	300	0	29.2709	-80.0474	-428.587	-45615.2	47146.3	-10871.7	310.004	1009.43	0	0	0	0	0	0	0	603	903	0
502	9	0	0	0	0	0	0	200	300	0	28.6606	-79.7423	-429.807	-46805.4	46596.9	-10505.4	308.414	1011.9	0	0	0	0	0	0	0	603	903	0
503	0	0	0	0	0	0	0	200	300	0	28.9658	-79.5897	-431.943	-47171.6	47207.3	-10917.4	309.29	1012.21	0	0	0	0	0	0	0	603	903	0
503	1	0	0	0	0	0	0	200	300	0	30.6442	-79.4371	-434.995	-47080	47634.5	-10825.9	309.506	1011.23	0	0	0	0	0	0	0	603	903	0
503	2	0	0	0	0	0	0	200	300	0	30.3391	-80.3526	-436.521	-47080	47756.6	-10459.7	309.403	1010.85	0	0	0	0	0	0	0	603	903	0
503	3	0	0	0	0	0	0	200	300	0	32.7805	-79.7423	-437.437	-47537.8	47878.7	-10917.4	309.453	1011.67	0	0	0	0	0	0	0	603	903	0
503	4	0	0	0	0	0	0	200	300	0	30.9494	-78.9793	-439.878	-47446.2	47817.6	-10963.2	308.707	1010.86	0	0	0	0	0	0	0	603	903	0
503	5	0	0	0	0	0	0	200	300	0	30.9494	-78.5216	-440.183	-46988.5	48000.7	-10917.4	309.047	1009.75	0	0	0	0	0	0	0	603	903	0
503	6	0	0	0	0	0	0	200	300	0	30.0339	-78.2164	-443.845	-47263.1	48367	-11009	308.973	1009.49	0	0	0	0	0	0	0	603	903	0
503	7	0	0	0	0	0	0	200	300	0	30.4916	-77.4535	-445.982	-47720.9	49038.3	-11146.3	309.956	1010	0	0	0	0	0	0	0	603	903	0
503	8	0	0	0	0	0	0	200	300	0	30.0339	-78.369	-447.202	-47629.3	48428	-10871.7	308.291	1009.51	0	0	0	0	0	0	0	603	903	0
503	9	0	0	0	0	0	0	200	300	0	30.0339	-77.9112	-448.728	-47446.2	48977.3	-10871.7	309.147	1008.73	0	0	0	0	0	0	0	603	903	0
504	0	0	0	0	0	0	0	200	300	0	30.4916	-77.3009	-450.254	-46896.9	49465.6	-11009	309.862	1007.16	0	0	0	0	0	0	0	603	903	0
504	1	0	0	0	0	0	0	200	300	0	30.1865	-76.8431	-450.864	-47354.7	49648.7	-10734.3	310.119	1008.03	0	0	0	0	0	0	0	603	903	0
504	2	0	0	0	0	0	0	200	300	0	29.2709	-76.5379	-453.001	-48361.7	49526.6	-10734.3	309.33	1009.76	0	0	0	0	0	0	0	603	903	0
504	3	0	0	0	0	0	0	200	300	0	28.2028	-75.4698	-454.526	-48361.7	49892.8	-10688.6	309.769	1009.4	0	0	0	0	0	0	0	603	903	0
504	4	0	0	0	0	0	0	200	300	0	30.0339	-76.0802	-456.358	-48087.1	49892.8	-10459.7	309.328	1008.37	0	0	0	0	0	0	0	603	903	0
504	5	0	0	0	0	0	0	200	300	0	29.1183	-76.0802	-457.883	-48270.2	50686.3	-10597	310.697	1008.42	0	0	0	0	0	0	0	603	903	0
504	6	0	0	0	0	0	0	200	300	0	28.3554	-75.4698	-459.104	-49185.7	50686.3	-10551.2	310.403	1010.13	0	0	0	0	0	0	0	603	903	0
504	7	0	0	0	0	0	0	200	300	0	28.6606	-74.7069	-461.546	-48819.5	50686.3	-10459.7	309.819	1008.77	0	0	0	0	0	0	0	603	903	0
504	8	0	0	0	0	0	0	200	300	0	29.2709	-73.181	-463.682	-49002.6	50747.3	-10413.9	309.444	1008.68	0	0	0	0	0	0	0	603	903	0
504	9	0	0	0	0	0	0	200	300	0	29.7287	-74.0965	-464.597	-48819.5	51235.6	-10322.3	310.28	1008.08	0	0	0	0	0	0	0	603	903	0
505	0	0	0	0	0	0	0	200	300	0	29.2709	-73.9439	-467.039	-49551.9	51601.8	-10459.7	310.487	1009.1	0	0	0	0	0	0	0	603	903	0
505	1	0	0	0	0	0	0	200	300	0	28.508	-73.3336	-467.649	-49368.8	50991.5	-9956.13	309.038	1008.57	0	0	0	0	0	0	0	603	903	0
505	2	0	0	0	0	0	0	200	300	0	28.2028	-73.181	-469.48	-49368.8	51235.6	-10093.5	309.133	1008.16	0	0	0	0	0	0	0	603	903	0
505	3	0	0	0	0	0	0	200	300	0	28.508	-71.9603	-471.006	-49460.4	51968	-10185	310.334	1008.01	0	0	0	0	0	0	0	603	903	0
505	4	0	0	0	0	0	0	200	300	0	28.0502	-71.0448	-474.363	-49918.1	52212.2	-10276.6	310.068	1008.23	0	0	0	0	0	0	0	603	903	0
505	5	0	0	0	0	0	0	200	300	0	27.4399	-71.3499	-475.584	-50101.2	51662.9	-10093.5	308.63	1008.35	0	0	0	0	0	0	0	603	903	0
505	6	0	0	0	0	0	0	200	300	0	27.1347	-71.5025	-478.025	-49643.5	52212.2	-10001.9	309.225	1006.85	0	0	0	0	0	0	0	603	903	0
505	7	0	0	0	0	0	0	200	300	0	26.6769	-70.2818	-477.109	-49460.4	52639.4	-10093.5	310.33	1006.67	0	0	0	0	0	0	0	603	903	0
505	8	0	0	0	0	0	0	200	300	0	27.2873	-70.7396	-480.466	-50284.4	52578.4	-9864.58	309.432	1007.66	0	0	0	0	0	0	0	603	903	0
505	9	0	0	0	0	0	0	200	300	0	26.0666	-69.3663	-481.992	-50650.6	53616	-10047.7	311.238	1008.09	0	0	0	0	0	0	0	603	903	0
506	0	0	0	0	0	0	0	200	300	0	25.7614	-69.2137	-483.823	-50192.8	53249.8	-9681.47	310.06	1006.74	0	0	0	0	0	0	0	603	903	0
506	1	0	0	0	0	0	0	200	300	0	26.5244	-68.7559	-485.654	-50375.9	53127.7	-10047.7	309.394	1006.73	0	0	0	0	0	0	0	603	903	0
506	2	0	0	0	0	0	0	200	300	0	26.5244	-69.5189	-488.096	-51291.4	53921.2	-9773.03	310.473	1008.08	0	0	0	0	0	0	0	603	903	0
506	3	0	0	0	0	0	0	200	300	0	25.3036	-68.7559	-489.011	-51383	54043.2	-9864.58	310.515	1008.08	0	0	0	0	0	0	0	603	903	0
506	4	0	0	0	0	0	0	200	300	0	24.8459	-68.7559	-490.537	-51016.8	53738.1	-9818.8	309.549	1007	0	0	0	0	0	0	0	603	903	0
506	5	0	0	0	0	0	0	200	300	0	25.914	-67.6878	-491.148	-51199.9	53982.2	-9910.35	309.91	1007.25	0	0	0	0	0	0	0	603	903	0
506	6	0	0	0	0	0	0	200	300	0	25.4562	-67.8404	-494.504	-51749.2	54409.4	-9727.25	310.028	1007.65	0	0	0	0	0	0	0	603	903	0
506	7	0	0	0	0	0	0	200	300	0	24.5407	-66.6197	-496.336	-51566.1	54714.6	-9544.14	310.237	1006.89	0	0	0	0	0	0	0	603	903	0
506	8	0	0	0	0	0	0	200	300	0	24.5407	-67.5352	-499.082	-51566.1	54348.4	-9773.03	308.897	1006.32	0	0	0	0	0	0	0	603	903	0
506	9	0	0	0	0	0	0	200	300	0	25.4562	-67.6878	-499.082	-51932.3	54653.6	-9132.16	309.508	1007.06	0	0	0	0	0	0	0	603	903	0
507	0	0	0	0	0	0	0	200	300	0	25.3036	-66.4671	-499.692	-52298.5	55325	-9864.58	310.718	1007.66	0	0	0	0	0	0	0	603	903	0
507	1	0	0	0	0	0	0	200	300	0	23.7778	-65.5516	-502.744	-52573.2	55386	-9361.04	310.167	1007.57	0	0	0	0	0	0	0	603	903	0
507	2	0	0	0	0	0	0	200	300	0	24.5407	-65.7042	-504.575	-52298.5	55202.9	-9681.47	309.405	1006.65	0	0	0	0	0	0	0	603	903	0
507	3	0	0	0	0	0	0	200	300	0	24.2355	-65.8568	-506.712	-51932.3	55325	-9452.59	309.184	1005.49	0	0	0	0	0	0	0	603	903	0
507	4	0	0	0	0	0	0	200	300	0	24.2355	-64.7887	-508.848	-52847.8	55691.2	-9315.26	309.446	1006.86	0	0	0	0	0	0	0	603	903	0
507	5	0	0	0	0	0	0	200	300	0	23.0148	-65.0938	-508.848	-52847.8	55691.2	-9361.04	309.446	1006.86	0	0	0	0	0	0	0	603	903	0
507	6	0	0	0	0	0	0	200	300	0	23.4726	-65.0938	-509.153	-52481.6	56118.4	-9452.59	310.219	1006.08	0	0	0	0	0	0	0	603	903	0
507	7	0	0	0	0	0	0	200	300	0	23.32	-63.4154	-511.9	-52206.9	55386	-9223.71	308.197	1004.99	0	0	0	0	0	0	0	603	903	0
507	8	0	0	0	0	0	0	200	300	0	23.4726	-62.9576	-514.646	-53030.9	56240.5	-9177.93	309.28	1006.04	0	0	0	0	0	0	0	603	903	0
507	9	0	0	0	0	0	0	200	300	0	22.4045	-63.568	-514.646	-53397.1	56789.8	-9315.26	310.347	1006.76	0	0	0	0	0	0	0	603	903	0
508	0	0	0	0	0	0	0	200	300	0	22.4045	-63.568	-516.477	-52481.6	56911.9	-9223.71	310.192	1004.61	0	0	0	0	0	0	0	603	903	0
508	1	0	0	0	0	0	0	200	300	0	22.7097	-63.2628	-518.613	-53214	56789.8	-9498.37	309.503	1005.61	0	0	0	0	0	0	0	603	903	0
508	2	0	0	0	0	0	0	200	300	0	22.8622	-62.1947	-516.477	-53763.4	57217.1	-9223.71	310.783	1007.1	0	0	0	0	0	0	0	603	903	0
508	3	0	0	0	0	0	0	200	300	0	22.0993	-61.7369	-520.75	-53946.5	57644.3	-9177.93	310.695	1006.59	0	0	0	0	0	0	0	603	903	0
508	4	0	0	0	0	0	0	200	300	0	21.6415	-61.2791	-522.886	-53671.8	57644.3	-8811.72	310.243	1005.65	0	0	0	0	0	0	0	603	903	0
508	5	0	0	0	0	0	0	200	300	0	22.5571	-61.8895	-525.022	-54038	57461.2	-9132.16	309.445	1005.93	0	0	0	0	0	0	0	603	903	0
508	6	0	0	0	0	0	0	200	300	0	22.8622	-61.4317	-525.327	-53854.9	57827.4	-8949.05	310.079	1005.52	0	0	0	0	0	0	0	603	903	0
508	7	0	0	0	0	0	0	200	300	0	21.6415	-60.8214	-525.632	-54404.2	58071.5	-8811.72	310.479	1006.5	0	0	0	0	0	0	0	603	903	0
508	8	0	0	0	0	0	0	200	300	0	21.6415	-59.7533	-528.379	-54129.6	58254.7	-8537.06	310.252	1005.44	0	0	0	0	0	0	0	603	903	0
508	9	0	0	0	0	0	0	200	300	0	22.7097	-59.7533	-530.515	-54129.6	57827.4	-8811.72	309.002	1005.03	0	0	0	0	0	0	0	603	903	0
509	0	0	0	0	0	0	0	200	300	0	22.4045	-59.7533	-527.158	-54495.8	57827.4	-8537.06	309.697	1006.38	0	0	0	0	0	0	0	603	903	0
509	1	0	0	0	0	0	0	200	300	0	22.5571	-59.2955	-531.736	-54404.2	58315.7	-8674.39	309.67	1005.31	0	0	0	0	0	0	0	603	903	0
509	2	0	0	0	0	0	0	200	300	0	21.9467	-58.5326	-531.736	-54221.1	58559.8	-8765.95	310.13	1004.97	0	0	0	0	0	0	0	603	903	0
509	3	0	0	0	0	0	0	200	300	0	22.0993	-57.4644	-530.515	-54312.7	58926	-8811.72	311.073	1005.38	0	0	0	0	0	0	0	603	903	0
509	4	0	0	0	0	0	0	200	300	0	21.0312	-57.1593	-534.177	-54495.8	58437.8	-8674.39	309.398	1005.02	0	0	0	0	0	0	0	603	903	0
509	5	0	0	0	0	0	0	200	300	0	22.4045	-57.0067	-536.619	-54678.9	58865	-8811.72	309.696	1004.9	0	0	0	0	0	0	0	603	903	0
509	6	0	0	0	0	0	0	200	300	0	21.489	-57.3119	-537.534	-54495.8	59292.2	-8857.5	310.304	1004.38	0	0	0	0	0	0	0	603	903	0
509	7	0	0	0	0	0	0	200	300	0	23.0148	-57.0067	-539.67	-54312.7	59353.3	-8491.29	309.981	1003.64	0	0	0	0	0	0	0	603	903	0
509	8	0	0	0	0	0	0	200	300	0	20.5734	-55.9386	-538.45	-55136.6	58987.1	-8353.96	309.55	1005.4	0	0	0	0	0	0	0	603	903	0
509	9	0	0	0	0	0	0	200	300	0	22.2519	-55.023	-539.976	-55045.1	59475.4	-8308.18	310.145	1004.94	0	0	0	0	0	0	0	603	903	0
510	0	0	0	0	0	0	0	200	300	0	24.0829	-55.6334	-541.196	-54678.9	59780.5	-8491.29	310.46	1004.03	0	0	0	0	0	0	0	603	903	0
510	1	0	0	0	0	0	0	200	300	0	23.1674	-55.6334	-540.586	-54587.3	59780.5	-8491.29	310.585	1003.98	0	0	0	0	0	0	0	603	903	0
510	2	0	0	0	0	0	0	200	300	0	21.489	-55.6334	-541.807	-55777.5	60085.7	-8308.18	310.899	1005.95	0	0	0	0	0	0	0	603	903	0
510	3	0	0	0	0	0	0	200	300	0	20.2682	-54.8704	-542.417	-55319.7	59719.5	-8674.39	310.099	1004.99	0	0	0	0	0	0	0	603	903	0
510	4	0	0	0	0	0	0	200	300	0	22.4045	-54.2601	-542.112	-55045.1	59719.5	-8491.29	310.161	1004.54	0	0	0	0	0	0	0	603	903	0
510	5	0	0	0	0	0	0	200	300	0	21.9467	-53.8023	-544.858	-55136.6	60268.8	-8170.85	310.614	1004.19	0	0	0	0	0	0	0	603	903	0
510	6	0	0	0	0	0	0	200	300	0	21.0312	-53.192	-545.774	-54312.7	60574	-8308.18	310.987	1002.51	0	0	0	0	0	0	0	603	903	0
510	7	0	0	0	0	0	0	200	300	0	20.5734	-53.192	-546.079	-54587.3	60085.7	-8079.3	310.031	1002.96	0	0	0	0	0	0	0	603	903	0
510	8	0	0	0	0	0	0	200	300	0	22.2519	-53.192	-545.774	-54404.2	59963.6	-8079.3	309.869	1002.68	0	0	0	0	0	0	0	603	903	0
510	9	0	0	0	0	0	0	200	300	0	21.9467	-52.429	-546.079	-55411.3	60574	-8308.18	310.925	1004.47	0	0	0	0	0	0	0	603	903	0
511	0	0	0	0	0	0	0	200	300	0	21.0312	-51.5135	-546.995	-54953.5	60940.2	-8353.96	311.409	1003.46	0	0	0	0	0	0	0	603	903	0
511	1	0	0	0	0	0	0	200	300	0	21.1838	-51.3609	-548.215	-54953.5	60085.7	-8079.3	309.602	1003.24	0	0	0	0	0	0	0	603	903	0
511	2	0	0	0	0	0	0	200	300	0	22.4045	-51.3609	-549.131	-53854.9	60390.9	-8216.63	309.975	1001.07	0	0	0	0	0	0	0	603	903	0
511	3	0	0	0	0	0	0	200	300	0	21.6415	-51.0558	-548.826	-55319.7	60574	-8491.29	310.37	1003.8	0	0	0	0	0	0	0	603	903	0
511	4	0	0	0	0	0	0	200	300	0	21.6415	-50.7506	-546.69	-54404.2	60757.1	-8079.3	311.136	1002.52	0	0	0	0	0	0	0	603	903	0
511	5	0	0	0	0	0	0	200	300	0	22.0993	-50.7506	-548.215	-54770.4	60757.1	-7392.66	310.827	1002.91	0	0	0	0	0	0	0	603	903	0
511	6	0	0	0	0	0	0	200	300	0	21.9467	-49.6825	-549.436	-53763.4	60940.2	-8216.63	310.914	1000.85	0	0	0	0	0	0	0	603	903	0
511	7	0	0	0	0	0	0	200	300	0	22.4045	-49.5299	-548.826	-54953.5	60574	-8308.18	310.37	1003.13	0	0	0	0	0	0	0	603	903	0
511	8	0	0	0	0	0	0	200	300	0	21.489	-49.5299	-550.657	-55045.1	61428.5	-7987.75	311.555	1002.96	0	0	0	0	0	0	0	603	903	0
511	9	0	0	0	0	0	0	200	300	0	21.7941	-49.2247	-550.962	-54862	61245.4	-8125.08	311.161	1002.57	0	0	0	0	0	0	0	603	903	0
512	0	0	0	0	0	0	0	200	300	0	22.4045	-49.5299	-553.098	-54495.8	61001.2	-8308.18	310.29	1001.53	0	0	0	0	0	0	0	603	903	0
512	1	0	0	0	0	0	0	200	300	0	23.7778	-48.7669	-550.046	-55045.1	60879.2	-8262.41	310.68	1003.07	0	0	0	0	0	0	0	603	903	0
512	2	0	0	0	0	0	0	200	300	0	22.2519	-48.1566	-550.962	-54953.5	61672.6	-7896.2	311.936	1002.74	0	0	0	0	0	0	0	603	903	0
512	3	0	0	0	0	0	0	200	300	0	22.2519	-47.3936	-551.572	-54587.3	61733.7	-8216.63	311.923	1001.97	0	0	0	0	0	0	0	603	903	0
512	4	0	0	0	0	0	0	200	300	0	22.8622	-48.3092	-550.657	-54038	61184.3	-8216.63	311.112	1001.13	0	0	0	0	0	0	0	603	903	0
512	5	0	0	0	0	0	0	200	300	0	23.4726	-47.8514	-551.878	-54587.3	60940.2	-7896.2	310.423	1001.91	0	0	0	0	0	0	0	603	903	0
512	6	0	0	0	0	0	0	200	300	0	22.4045	-48.004	-551.267	-54404.2	61062.3	-8033.52	310.767	1001.69	0	0	0	0	0	0	0	603	903	0
512	7	0	0	0	0	0	0	200	300	0	22.7097	-46.9359	-551.878	-54221.1	61428.5	-7987.75	311.308	1001.25	0	0	0	0	0	0	0	603	903	0
512	8	0	0	0	0	0	0	200	300	0	23.9304	-46.3255	-551.267	-53763.4	61428.5	-7941.97	311.431	1000.53	0	0	0	0	0	0	0	603	903	0
512	9	0	0	0	0	0	0	200	300	0	23.1674	-46.4781	-553.098	-54129.6	61245.4	-7941.97	310.732	1000.87	0	0	0	0	0	0	0	603	903	0
513	0	0	0	0	0	0	0	200	300	0	23.32	-46.4781	-551.572	-53397.1	61367.4	-8125.08	311.259	999.809	0	0	0	0	0	0	0	603	903	0
513	1	0	0	0	0	0	0	200	300	0	23.32	-46.1729	-549.741	-53763.4	61733.7	-7941.97	312.296	1000.8	0	0	0	0	0	0	0	603	903	0
513	2	0	0	0	0	0	0	200	300	0	24.0829	-46.4781	-549.436	-52481.6	61794.7	-7941.97	312.469	998.519	0	0	0	0	0	0	0	603	903	0
513	3	0	0	0	0	0	0	200	300	0	23.6252	-45.1048	-549.131	-53580.3	61733.7	-7850.42	312.421	1000.57	0	0	0	0	0	0	0	603	903	0
513	4	0	0	0	0	0	0	200	300	0	23.6252	-44.7996	-550.352	-53580.3	61489.5	-7804.65	311.728	1000.36	0	0	0	0	0	0	0	603	903	0
513	5	0	0	0	0	0	0	200	300	0	23.0148	-44.4945	-546.995	-53488.7	61855.7	-7850.42	313.083	1000.79	0	0	0	0	0	0	0	603	903	0
513	6	0	0	0	0	0	0	200	300	0	23.6252	-44.3419	-549.436	-53305.6	62099.9	-7941.97	313.025	1000.02	0	0	0	0	0	0	0	603	903	0
513	7	0	0	0	0	0	0	200	300	0	25.1511	-44.6471	-549.131	-52939.4	61733.7	-7941.97	312.421	999.406	0	0	0	0	0	0	0	603	903	0
513	8	0	0	0	0	0	0	200	300	0	24.9985	-43.5789	-549.131	-53580.3	61367.4	-7529.99	311.754	1000.57	0	0	0	0	0	0	0	603	903	0
513	9	0	0	0	0	0	0	200	300	0	25.3036	-43.8841	-547.605	-53122.5	61733.7	-7621.54	312.734	1000.01	0	0	0	0	0	0	0	603	903	0
514	0	0	0	0	0	0	0	200	300	0	23.4726	-43.1212	-548.521	-52847.8	61855.7	-7758.87	312.768	999.346	0	0	0	0	0	0	0	603	903	0
514	1	0	0	0	0	0	0	200	300	0	25.4562	-42.5108	-547.91	-52664.7	61489.5	-7896.2	312.226	999.119	0	0	0	0	0	0	0	603	903	0
514	2	0	0	0	0	0	0	200	300	0	24.2355	-42.2057	-547.3	-52847.8	61306.4	-7392.66	312.016	999.561	0	0	0	0	0	0	0	603	903	0
514	3	0	0	0	0	0	0	200	300	0	23.4726	-42.6634	-545.469	-52939.4	61611.6	-7667.32	312.952	1000.05	0	0	0	0	0	0	0	603	903	0
514	4	0	0	0	0	0	0	200	300	0	23.32	-41.4427	-545.469	-51840.7	61428.5	-7484.21	312.616	998.039	0	0	0	0	0	0	0	603	903	0
514	5	0	0	0	0	0	0	200	300	0	24.2355	-41.1375	-544.858	-51657.6	60513	-7575.76	311.062	997.809	0	0	0	0	0	0	0	603	903	0
514	6	0	0	0	0	0	0	200	300	0	24.0829	-40.222	-544.248	-51566.1	60513	-7072.22	311.186	997.747	0	0	0	0	0	0	0	603	903	0
514	7	0	0	0	0	0	0	200	300	0	23.1674	-40.985	-542.722	-51199.9	60879.2	-7713.09	312.174	997.339	0	0	0	0	0	0	0	603	903	0
514	8	0	0	0	0	0	0	200	300	0	23.7778	-40.6798	-542.112	-50101.2	61306.4	-7438.43	313.088	995.419	0	0	0	0	0	0	0	603	903	0
514	9	0	0	0	0	0	0	200	300	0	24.3881	-39.3065	-538.145	-50925.2	61550.6	-7575.76	314.375	997.631	0	0	0	0	0	0	0	603	903	0
515	0	0	0	0	0	0	0	200	300	0	23.7778	-39.3065	-539.365	-50833.7	61184.3	-7575.76	313.438	997.247	0	0	0	0	0	0	0	603	903	0
515	1	0	0	0	0	0	0	200	300	0	23.4726	-39.3065	-540.281	-49826.6	60818.1	-7529.99	312.568	995.224	0	0	0	0	0	0	0	603	903	0
515	2	0	0	0	0	0	0	200	300	0	23.4726	-39.1539	-539.365	-50375.9	61306.4	-7438.43	313.664	996.399	0	0	0	0	0	0	0	603	903	0
515	3	0	0	0	0	0	0	200	300	0	23.7778	-39.6117	-537.534	-49918.1	61123.3	-7118	313.711	995.865	0	0	0	0	0	0	0	603	903	0
515	4	0	0	0	0	0	0	200	300	0	23.6252	-38.391	-536.619	-50009.7	60574	-7529.99	312.881	996.194	0	0	0	0	0	0	0	603	903	0
515	5	0	0	0	0	0	0	200	300	0	23.7778	-37.9332	-536.008	-50650.6	60513	-7209.55	312.896	997.496	0	0	0	0	0	0	0	603	903	0
515	6	0	0	0	0	0	0	200	300	0	23.1674	-37.7806	-535.398	-50467.5	60757.1	-6889.11	313.48	997.262	0	0	0	0	0	0	0	603	903	0
515	7	0	0	0	0	0	0	200	300	0	24.2355	-36.8651	-534.482	-49826.6	60818.1	-7026.44	313.789	996.224	0	0	0	0	0	0	0	603	903	0
515	8	0	0	0	0	0	0	200	300	0	23.1674	-37.0177	-533.872	-49277.3	60207.8	-6980.67	312.776	995.302	0	0	0	0	0	0	0	603	903	0
515	9	0	0	0	0	0	0	200	300	0	23.32	-36.8651	-532.041	-49735	59841.6	-6614.46	312.475	996.48	0	0	0	0	0	0	0	603	903	0
516	0	0	0	0	0	0	0	200	300	0	24.8459	-36.1021	-530.515	-49551.9	59841.6	-6706.01	312.799	996.404	0	0	0	0	0	0	0	603	903	0
516	1	0	0	0	0	0	0	200	300	0	22.4045	-35.4918	-530.515	-49002.6	60024.7	-6797.56	313.144	995.368	0	0	0	0	0	0	0	603	903	0
516	2	0	0	0	0	0	0	200	300	0	23.1674	-35.3392	-529.294	-48636.4	59902.6	-6660.23	313.174	994.889	0	0	0	0	0	0	0	603	903	0
516	3	0	0	0	0	0	0	200	300	0	23.4726	-35.3392	-529.6	-48544.8	59597.4	-6706.01	312.533	994.663	0	0	0	0	0	0	0	603	903	0
516	4	0	0	0	0	0	0	200	300	0	22.0993	-34.5763	-528.074	-48819.5	59414.3	-6843.34	312.511	995.448	0	0	0	0	0	0	0	603	903	0
516	5	0	0	0	0	0	0	200	300	0	22.0993	-34.2711	-526.548	-47812.4	59109.1	-6614.46	312.258	993.804	0	0	0	0	0	0	0	603	903	0
516	6	0	0	0	0	0	0	200	300	0	22.4045	-33.5081	-524.107	-47904	59597.4	-6797.56	313.712	994.401	0	0	0	0	0	0	0	603	903	0
516	7	0	0	0	0	0	0	200	300	0	21.6415	-32.1349	-522.275	-47995.5	59353.3	-6522.9	313.644	994.897	0	0	0	0	0	0	0	603	903	0
516	8	0	0	0	0	0	0	200	300	0	23.6252	-32.44	-523.191	-47904	59536.4	-6522.9	313.795	994.561	0	0	0	0	0	0	0	603	903	0
516	9	0	0	0	0	0	0	200	300	0	21.7941	-32.8978	-521.665	-47171.6	59475.4	-6522.9	314.011	993.425	0	0	0	0	0	0	0	603	903	0
517	0	0	0	0	0	0	0	200	300	0	21.489	-32.44	-518.919	-47080	59353.3	-6339.8	314.379	993.727	0	0	0	0	0	0	0	603	903	0
517	1	0	0	0	0	0	0	200	300	0	21.1838	-32.1349	-517.698	-47263.1	58804	-6202.47	313.587	994.295	0	0	0	0	0	0	0	603	903	0
517	2	0	0	0	0	0	0	200	300	0	21.6415	-31.2193	-517.087	-47263.1	58926	-6065.14	313.958	994.403	0	0	0	0	0	0	0	603	903	0
517	3	0	0	0	0	0	0	200	300	0	21.3364	-31.6771	-517.698	-46439.1	59048.1	-6065.14	314.059	992.703	0	0	0	0	0	0	0	603	903	0
517	4	0	0	0	0	0	0	200	300	0	21.0312	-30.9142	-513.731	-46347.6	59048.1	-5561.6	314.94	993.218	0	0	0	0	0	0	0	603	903	0
517	5	0	0	0	0	0	0	200	300	0	20.8786	-30.7616	-515.256	-46896.9	58437.8	-5836.26	313.415	994.017	0	0	0	0	0	0	0	603	903	0
517	6	0	0	0	0	0	0	200	300	0	22.5571	-30.3038	-513.425	-46164.5	58681.9	-5744.71	314.295	992.915	0	0	0	0	0	0	0	603	903	0
517	7	0	0	0	0	0	0	200	300	0	22.5571	-29.2357	-510.679	-45981.4	58559.8	-5607.38	314.671	993.04	0	0	0	0	0	0	0	603	903	0
517	8	0	0	0	0	0	0	200	300	0	22.0993	-29.3883	-512.205	-45340.5	58559.8	-5744.71	314.329	991.52	0	0	0	0	0	0	0	603	903	0
517	9	0	0	0	0	0	0	200	300	0	21.489	-28.7779	-511.289	-46256	57827.4	-5836.26	313.101	993.469	0	0	0	0	0	0	0	603	903	0
518	0	0	0	0	0	0	0	200	300	0	21.0312	-28.4727	-511.594	-45615.2	57949.5	-5744.71	313.272	992.163	0	0	0	0	0	0	0	603	903	0
518	1	0	0	0	0	0	0	200	300	0	19.6579	-28.015	-509.458	-44699.6	58071.5	-5653.15	313.987	990.74	0	0	0	0	0	0	0	603	903	0
518	2	0	0	0	0	0	0	200	300	0	20.4208	-27.4046	-507.322	-44150.3	58132.6	-5698.93	314.587	990.026	0	0	0	0	0	0	0	603	903	0
518	3	0	0	0	0	0	0	200	300	0	20.1157	-27.0995	-505.796	-45065.8	57583.3	-5653.15	313.847	992.099	0	0	0	0	0	0	0	603	903	0
518	4	0	0	0	0	0	0	200	300	0	18.4372	-26.4891	-505.491	-44516.5	56911.9	-5561.6	312.587	991.066	0	0	0	0	0	0	0	603	903	0
518	5	0	0	0	0	0	0	200	300	0	18.5898	-26.0313	-504.88	-44058.7	57705.3	-5378.49	314.295	990.266	0	0	0	0	0	0	0	603	903	0
518	6	0	0	0	0	0	0	200	300	0	19.6579	-26.6417	-504.575	-44058.7	56972.9	-5424.27	312.913	990.319	0	0	0	0	0	0	0	603	903	0
518	7	0	0	0	0	0	0	200	300	0	19.6579	-25.5736	-501.218	-44058.7	57766.4	-5286.94	315.252	990.903	0	0	0	0	0	0	0	603	903	0
518	8	0	0	0	0	0	0	200	300	0	18.4372	-24.9632	-500.608	-43692.5	57461.2	-5149.61	314.783	990.279	0	0	0	0	0	0	0	603	903	0
518	9	0	0	0	0	0	0	200	300	0	18.4372	-24.0477	-501.524	-43875.6	57156	-5332.72	313.965	990.485	0	0	0	0	0	0	0	603	903	0
519	0	0	0	0	0	0	0	200	300	0	19.8105	-24.8106	-500.913	-42502.4	57400.2	-5241.17	314.591	987.85	0	0	0	0	0	0	0	603	903	0
519	1	0	0	0	0	0	0	200	300	0	18.7424	-24.5055	-497.556	-42960.1	57217.1	-5058.06	314.996	989.342	0	0	0	0	0	0	0	603	903	0
519	2	0	0	0	0	0	0	200	300	0	18.132	-24.3529	-498.167	-43143.2	56789.8	-5103.84	313.998	989.604	0	0	0	0	0	0	0	603	903	0
519	3	0	0	0	0	0	0	200	300	0	18.4372	-23.8951	-497.861	-42593.9	56911.9	-5012.28	314.313	988.554	0	0	0	0	0	0	0	603	903	0
519	4	0	0	0	0	0	0	200	300	0	19.3527	-23.1322	-496.336	-42044.6	56850.8	-5195.39	314.541	987.71	0	0	0	0	0	0	0	603	903	0
519	5	0	0	0	0	0	0	200	300	0	19.0475	-23.1322	-495.725	-43326.3	56911.9	-4371.41	314.805	990.4	0	0	0	0	0	0	0	603	903	0
519	6	0	0	0	0	0	0	200	300	0	18.7424	-22.3692	-495.115	-42044.6	56362.6	-4874.95	313.837	987.919	0	0	0	0	0	0	0	603	903	0
519	7	0	0	0	0	0	0	200	300	0	17.9794	-22.3692	-494.504	-42319.3	56484.6	-5103.84	314.225	988.579	0	0	0	0	0	0	0	603	903	0
519	8	0	0	0	0	0	0	200	300	0	19.2001	-20.9959	-491.453	-41312.2	56301.5	-4966.51	314.561	987.061	0	0	0	0	0	0	0	603	903	0
519	9	0	0	0	0	0	0	200	300	0	19.2001	-21.9115	-491.758	-42136.1	56667.7	-4691.85	315.235	988.685	0	0	0	0	0	0	0	603	903	0
520	0	0	0	0	0	0	0	200	300	0	17.8268	-20.6908	-490.232	-40671.3	56850.8	-4737.63	315.967	985.963	0	0	0	0	0	0	0	603	903	0
520	1	0	0	0	0	0	0	200	300	0	17.3691	-20.5382	-492.368	-41129.1	55691.2	-4691.85	313.109	986.533	0	0	0	0	0	0	0	603	903	0
520	2	0	0	0	0	0	0	200	300	0	19.2001	-20.233	-490.842	-40488.2	56057.4	-4646.07	314.207	985.487	0	0	0	0	0	0	0	603	903	0
520	3	0	0	0	0	0	0	200	300	0	18.2846	-20.233	-489.622	-41129.1	56545.7	-4829.18	315.489	987.002	0	0	0	0	0	0	0	603	903	0
520	4	0	0	0	0	0	0	200	300	0	17.9794	-19.9278	-486.875	-40579.7	56362.6	-4508.74	315.764	986.347	0	0	0	0	0	0	0	603	903	0
520	5	0	0	0	0	0	0	200	300	0	17.2165	-20.3856	-485.96	-40488.2	55935.3	-4600.3	315.103	986.316	0	0	0	0	0	0	0	603	903	0
520	6	0	0	0	0	0	0	200	300	0	18.4372	-18.8597	-486.57	-40122	56118.4	-4508.74	315.335	985.459	0	0	0	0	0	0	0	603	903	0
520	7	0	0	0	0	0	0	200	300	0	19.2001	-19.3175	-485.654	-40762.8	56240.5	-4554.52	315.804	986.934	0	0	0	0	0	0	0	603	903	0
520	8	0	0	0	0	0	0	200	300	0	17.5217	-19.1649	-484.434	-40762.8	55752.2	-4371.41	315.087	987.145	0	0	0	0	0	0	0	603	903	0
520	9	0	0	0	0	0	0	200	300	0	16.9113	-19.1649	-485.654	-41037.5	56301.5	-4508.74	315.929	987.499	0	0	0	0	0	0	0	603	903	0
521	0	0	0	0	0	0	0	200	300	0	19.0475	-18.5545	-484.129	-39389.6	55752.2	-4417.19	315.16	984.362	0	0	0	0	0	0	0	603	903	0
521	1	0	0	0	0	0	0	200	300	0	19.2001	-17.4864	-483.213	-39755.8	55691.2	-4188.31	315.252	985.274	0	0	0	0	0	0	0	603	903	0
521	2	0	0	0	0	0	0	200	300	0	18.4372	-17.7916	-484.739	-39755.8	56057.4	-4188.31	315.645	985.015	0	0	0	0	0	0	0	603	903	0
521	3	0	0	0	0	0	0	200	300	0	19.6579	-17.639	-484.129	-39847.3	56057.4	-4279.86	315.79	985.307	0	0	0	0	0	0	0	603	903	0
521	4	0	0	0	0	0	0	200	300	0	19.2001	-17.9442	-482.603	-39023.4	55691.2	-4417.19	315.398	983.86	0	0	0	0	0	0	0	603	903	0
521	5	0	0	0	0	0	0	200	300	0	21.0312	-17.0287	-483.518	-38931.8	55569.1	-3822.1	314.927	983.518	0	0	0	0	0	0	0	603	903	0
521	6	0	0	0	0	0	0	200	300	0	18.4372	-17.7916	-483.213	-39023.4	56118.4	-4142.53	316.136	983.758	0	0	0	0	0	0	0	603	903	0
521	7	0	0	0	0	0	0	200	300	0	20.4208	-16.5709	-479.856	-39023.4	56118.4	-4279.86	316.948	984.323	0	0	0	0	0	0	0	603	903	0
521	8	0	0	0	0	0	0	200	300	0	18.7424	-17.7916	-481.382	-38199.4	55630.1	-4050.98	315.563	982.354	0	0	0	0	0	0	0	603	903	0
521	9	0	0	0	0	0	0	200	300	0	18.7424	-16.2657	-481.992	-38290.9	54836.7	-3913.65	313.771	982.443	0	0	0	0	0	0	0	603	903	0
522	0	0	0	0	0	0	0	200	300	0	18.7424	-16.7235	-481.992	-38748.7	55874.3	-4234.09	315.924	983.393	0	0	0	0	0	0	0	603	903	0
522	1	0	0	0	0	0	0	200	300	0	17.5217	-16.2657	-479.246	-38382.5	55996.4	-4096.76	316.843	983.089	0	0	0	0	0	0	0	603	903	0
522	2	0	0	0	0	0	0	200	300	0	17.6743	-16.5709	-480.161	-37558.5	55935.3	-4325.64	316.493	981.221	0	0	0	0	0	0	0	603	903	0
522	3	0	0	0	0	0	0	200	300	0	19.3527	-15.5028	-479.551	-37650.1	55874.3	-4050.98	316.514	981.511	0	0	0	0	0	0	0	603	903	0
522	4	0	0	0	0	0	0	200	300	0	19.5053	-15.6554	-479.856	-38016.3	55691.2	-4005.2	316.058	982.224	0	0	0	0	0	0	0	603	903	0
522	5	0	0	0	0	0	0	200	300	0	18.132	-15.3502	-478.025	-38290.9	55813.2	-4050.98	316.758	983.102	0	0	0	0	0	0	0	603	903	0
522	6	0	0	0	0	0	0	200	300	0	18.4372	-15.3502	-479.551	-37924.7	56118.4	-4188.31	317.023	982.084	0	0	0	0	0	0	0	603	903	0
522	7	0	0	0	0	0	0	200	300	0	19.6579	-15.8079	-478.025	-36643	55752.2	-3776.32	316.63	979.655	0	0	0	0	0	0	0	603	903	0
522	8	0	0	0	0	0	0	200	300	0	19.8105	-15.045	-476.804	-37375.4	55019.8	-4142.53	315.393	981.387	0	0	0	0	0	0	0	603	903	0
522	9	0	0	0	0	0	0	200	300	0	18.5898	-15.045	-478.635	-37100.7	55569.1	-3776.32	316.099	980.514	0	0	0	0	0	0	0	603	903	0
523	0	0	0	0	0	0	0	200	300	0	18.895	-14.7398	-478.025	-37283.8	56057.4	-4005.2	317.269	980.996	0	0	0	0	0	0	0	603	903	0
523	1	0	0	0	0	0	0	200	300	0	19.2001	-15.045	-476.499	-36643	55935.3	-3959.43	317.388	979.9	0	0	0	0	0	0	0	603	903	0
523	2	0	0	0	0	0	0	200	300	0	20.4208	-13.9769	-478.33	-36551.4	55325	-3867.87	315.663	979.415	0	0	0	0	0	0	0	603	903	0
523	3	0	0	0	0	0	0	200	300	0	18.7424	-14.7398	-477.415	-36734.5	55569.1	-3776.32	316.396	979.945	0	0	0	0	0	0	0	603	903	0
523	4	0	0	0	0	0	0	200	300	0	19.2001	-13.9769	-476.499	-36551.4	55935.3	-3867.87	317.388	979.708	0	0	0	0	0	0	0	603	903	0
523	5	0	0	0	0	0	0	200	300	0	19.3527	-14.2821	-475.584	-35635.9	55569.1	-3822.1	316.844	977.931	0	0	0	0	0	0	0	603	903	0
523	6	0	0	0	0	0	0	200	300	0	19.0475	-13.8243	-477.72	-35635.9	55447	-3867.87	316.066	977.596	0	0	0	0	0	0	0	603	903	0
523	7	0	0	0	0	0	0	200	300	0	18.7424	-13.9769	-475.584	-36002.1	54897.7	-4050.98	315.432	978.701	0	0	0	0	0	0	0	603	903	0
523	8	0	0	0	0	0	0	200	300	0	18.4372	-14.5872	-474.973	-35361.2	55569.1	-3684.77	316.994	977.449	0	0	0	0	0	0	0	603	903	0
523	9	0	0	0	0	0	0	200	300	0	17.9794	-13.6717	-473.447	-35269.7	55996.4	-3867.87	318.274	977.496	0	0	0	0	0	0	0	603	903	0
524	0	0	0	0	0	0	0	200	300	0	19.5053	-13.214	-474.973	-34262.6	56057.4	-3867.87	318.022	975.136	0	0	0	0	0	0	0	603	903	0
524	1	0	0	0	0	0	0	200	300	0	19.5053	-13.8243	-473.753	-33896.4	55325	-3959.43	316.78	974.549	0	0	0	0	0	0	0	603	903	0
524	2	0	0	0	0	0	0	200	300	0	18.5898	-12.9088	-475.278	-34445.7	55813.2	-3501.66	317.433	975.475	0	0	0	0	0	0	0	603	903	0
524	3	0	0	0	0	0	0	200	300	0	19.0475	-13.214	-475.278	-34903.5	55935.3	-3822.1	317.69	976.438	0	0	0	0	0	0	0	603	903	0
524	4	0	0	0	0	0	0	200	300	0	19.5053	-13.9769	-474.668	-34537.3	56118.4	-3730.55	318.227	975.761	0	0	0	0	0	0	0	603	903	0
524	5	0	0	0	0	0	0	200	300	0	20.2682	-13.214	-473.753	-34720.4	55386	-3822.1	316.909	976.288	0	0	0	0	0	0	0	603	903	0
524	6	0	0	0	0	0	0	200	300	0	19.0475	-12.9088	-475.278	-34811.9	55080.8	-3272.78	315.892	976.245	0	0	0	0	0	0	0	603	903	0
524	7	0	0	0	0	0	0	200	300	0	19.3527	-13.3665	-474.363	-34171.1	56362.6	-3547.44	318.817	975.036	0	0	0	0	0	0	0	603	903	0
524	8	0	0	0	0	0	0	200	300	0	19.8105	-12.7562	-475.889	-33530.2	55813.2	-3684.77	317.282	973.458	0	0	0	0	0	0	0	603	903	0
524	9	0	0	0	0	0	0	200	300	0	20.8786	-13.214	-474.973	-34354.2	55874.3	-2998.12	317.637	975.329	0	0	0	0	0	0	0	603	903	0
525	0	0	0	0	0	0	0	200	300	0	19.3527	-13.6717	-477.415	-33896.4	55630.1	-3455.89	316.524	974	0	0	0	0	0	0	0	603	903	0
525	1	0	0	0	0	0	0	200	300	0	19.2001	-12.451	-475.278	-33621.7	55630.1	-3547.44	317.048	973.741	0	0	0	0	0	0	0	603	903	0
525	2	0	0	0	0	0	0	200	300	0	20.4208	-12.451	-474.668	-33621.7	55996.4	-3501.66	317.97	973.832	0	0	0	0	0	0	0	603	903	0
525	3	0	0	0	0	0	0	200	300	0	20.726	-12.6036	-476.499	-33347.1	56179.5	-3455.89	317.9	972.984	0	0	0	0	0	0	0	603	903	0
525	4	0	0	0	0	0	0	200	300	0	19.0475	-11.9933	-475.584	-32889.3	55630.1	-3684.77	316.972	972.156	0	0	0	0	0	0	0	603	903	0
525	5	0	0	0	0	0	0	200	300	0	19.3527	-12.7562	-475.278	-31424.5	55752.2	-3410.11	317.304	969.118	0	0	0	0	0	0	0	603	903	0
525	6	0	0	0	0	0	0	200	300	0	20.4208	-12.1458	-473.753	-32065.3	56240.5	-3547.44	318.713	970.684	0	0	0	0	0	0	0	603	903	0
525	7	0	0	0	0	0	0	200	300	0	19.8105	-12.9088	-474.058	-32523.1	56118.4	-3318.56	318.379	971.606	0	0	0	0	0	0	0	603	903	0
525	8	0	0	0	0	0	0	200	300	0	19.8105	-11.8407	-474.668	-31973.8	56484.6	-3547.44	318.998	970.36	0	0	0	0	0	0	0	603	903	0
525	9	0	0	0	0	0	0	200	300	0	19.6579	-11.8407	-476.194	-32614.7	55813.2	-3364.33	317.207	971.49	0	0	0	0	0	0	0	603	903	0
526	0	0	0	0	0	0	0	200	300	0	20.1157	-12.1458	-476.804	-32980.9	55813.2	-3318.56	317.057	972.171	0	0	0	0	0	0	0	603	903	0
526	1	0	0	0	0	0	0	200	300	0	20.726	-12.451	-475.889	-32340	56240.5	-3181.23	318.18	970.957	0	0	0	0	0	0	0	603	903	0
526	2	0	0	0	0	0	0	200	300	0	20.2682	-11.6881	-474.973	-32797.8	56179.5	-3181.23	318.279	972.052	0	0	0	0	0	0	0	603	903	0
526	3	0	0	0	0	0	0	200	300	0	19.8105	-11.9933	-475.584	-32248.4	55813.2	-2998.12	317.357	970.808	0	0	0	0	0	0	0	603	903	0
526	4	0	0	0	0	0	0	200	300	0	21.1838	-11.9933	-476.499	-31241.4	56118.4	-2998.12	317.772	968.564	0	0	0	0	0	0	0	603	903	0
526	5	0	0	0	0	0	0	200	300	0	22.5571	-11.3829	-476.804	-31790.7	56301.5	-2998.12	318.081	969.674	0	0	0	0	0	0	0	603	903	0
526	6	0	0	0	0	0	0	200	300	0	20.2682	-11.5355	-476.194	-31882.2	56179.5	-2815.02	317.976	969.952	0	0	0	0	0	0	0	603	903	0
526	7	0	0	0	0	0	0	200	300	0	19.8105	-11.8407	-475.584	-32065.3	55752.2	-2906.57	317.229	970.423	0	0	0	0	0	0	0	603	903	0
526	8	0	0	0	0	0	0	200	300	0	19.9631	-10.9251	-474.058	-31332.9	55996.4	-2860.79	318.121	969.095	0	0	0	0	0	0	0	603	903	0
526	9	0	0	0	0	0	0	200	300	0	21.3364	-11.2303	-474.973	-31332.9	56057.4	-3089.68	318.022	968.968	0	0	0	0	0	0	0	603	903	0
527	0	0	0	0	0	0	0	200	300	0	20.5734	-10.62	-477.109	-31699.1	55447	-2952.35	316.215	969.44	0	0	0	0	0	0	0	603	903	0
527	1	0	0	0	0	0	0	200	300	0	19.5053	-10.7725	-478.635	-31699.1	55935.3	-3135.45	316.864	969.228	0	0	0	0	0	0	0	603	903	0
527	2	0	0	0	0	0	0	200	300	0	19.8105	-12.1458	-478.025	-30600.5	55691.2	-2723.47	316.503	967.014	0	0	0	0	0	0	0	603	903	0
527	3	0	0	0	0	0	0	200	300	0	20.726	-11.0777	-477.109	-30966.7	55874.3	-2952.35	317.11	967.905	0	0	0	0	0	0	0	603	903	0
527	4	0	0	0	0	0	0	200	300	0	20.4208	-10.4674	-477.72	-31058.3	56484.6	-2860.79	318.238	968.014	0	0	0	0	0	0	0	603	903	0
527	5	0	0	0	0	0	0	200	300	0	19.6579	-10.3148	-477.72	-30966.7	56179.5	-2815.02	317.599	967.822	0	0	0	0	0	0	0	603	903	0
527	6	0	0	0	0	0	0	200	300	0	18.895	-10.3148	-478.941	-30600.5	56118.4	-2815.02	317.172	966.892	0	0	0	0	0	0	0	603	903	0
527	7	0	0	0	0	0	0	200	300	0	20.4208	-10.4674	-478.635	-30692.1	55874.3	-2586.14	316.737	967.124	0	0	0	0	0	0	0	603	903	0
527	8	0	0	0	0	0	0	200	300	0	19.6579	-10.62	-478.025	-30875.2	56301.5	-2631.91	317.779	967.589	0	0	0	0	0	0	0	603	903	0
527	9	0	0	0	0	0	0	200	300	0	19.8105	-10.7725	-480.161	-31058.3	56545.7	-2448.81	317.764	967.683	0	0	0	0	0	0	0	603	903	0
528	0	0	0	0	0	0	0	200	300	0	19.2001	-10.4674	-480.466	-30966.7	56118.4	-2357.25	316.8	967.451	0	0	0	0	0	0	0	603	903	0
528	1	0	0	0	0	0	0	200	300	0	20.1157	-9.85702	-481.077	-29776.5	56179.5	-2357.25	316.779	964.896	0	0	0	0	0	0	0	603	903	0
528	2	0	0	0	0	0	0	200	300	0	19.9631	-11.0777	-481.077	-31424.5	56545.7	-2357.25	317.54	968.321	0	0	0	0	0	0	0	603	903	0
528	3	0	0	0	0	0	0	200	300	0	19.9631	-10.0096	-483.823	-29593.4	56301.5	-1945.27	316.368	964.166	0	0	0	0	0	0	0	603	903	0
528	4	0	0	0	0	0	0	200	300	0	19.3527	-9.39926	-482.603	-30783.6	56667.7	-2265.7	317.421	966.787	0	0	0	0	0	0	0	603	903	0
528	5	0	0	0	0	0	0	200	300	0	19.3527	-8.78891	-481.382	-30142.7	56057.4	-2174.15	316.451	965.617	0	0	0	0	0	0	0	603	903	0
528	6	0	0	0	0	0	0	200	300	0	19.6579	-8.94149	-485.044	-30051.2	55996.4	-2403.03	315.446	964.956	0	0	0	0	0	0	0	603	903	0
528	7	0	0	0	0	0	0	200	300	0	18.4372	-8.94149	-486.57	-30417.4	56606.7	-2082.6	316.338	965.514	0	0	0	0	0	0	0	603	903	0
528	8	0	0	0	0	0	0	200	300	0	19.8105	-9.39926	-486.875	-30600.5	56484.6	-2219.93	316.015	965.851	0	0	0	0	0	0	0	603	903	0
528	9	0	0	0	0	0	0	200	300	0	18.2846	-10.4674	-487.18	-29959.6	56606.7	-1991.04	316.193	964.496	0	0	0	0	0	0	0	603	903	0
529	0	0	0	0	0	0	0	200	300	0	18.4372	-9.09408	-488.096	-30051.2	56545.7	-2036.82	315.85	964.568	0	0	0	0	0	0	0	603	903	0
529	1	0	0	0	0	0	0	200	300	0	18.2846	-8.33114	-489.316	-30509	57278.1	-2036.82	317.057	965.35	0	0	0	0	0	0	0	603	903	0
529	2	0	0	0	0	0	0	200	300	0	17.6743	-8.48373	-491.453	-30600.5	56972.9	-1991.04	315.928	965.266	0	0	0	0	0	0	0	603	903	0
529	3	0	0	0	0	0	0	200	300	0	17.2165	-8.78891	-491.758	-30051.2	57033.9	-1670.61	315.98	964.11	0	0	0	0	0	0	0	603	903	0
529	4	0	0	0	0	0	0	200	300	0	17.9794	-8.78891	-492.673	-30325.8	56911.9	-1762.16	315.516	964.554	0	0	0	0	0	0	0	603	903	0
529	5	0	0	0	0	0	0	200	300	0	17.3691	-8.48373	-493.589	-30875.2	57766.4	-1579.06	317.033	965.552	0	0	0	0	0	0	0	603	903	0
529	6	0	0	0	0	0	0	200	300	0	17.3691	-8.17855	-494.504	-30417.4	57278.1	-1624.83	315.829	964.511	0	0	0	0	0	0	0	603	903	0
529	7	0	0	0	0	0	0	200	300	0	16.301	-7.87338	-496.03	-29868.1	57766.4	-1212.85	316.457	963.214	0	0	0	0	0	0	0	603	903	0
529	8	0	0	0	0	0	0	200	300	0	17.6743	-7.11044	-497.861	-29868.1	57400.2	-1258.62	315.293	962.993	0	0	0	0	0	0	0	603	903	0
529	9	0	0	0	0	0	0	200	300	0	17.3691	-6.50009	-492.063	-30417.4	57339.1	-1167.07	316.528	964.816	0	0	0	0	0	0	0	603	903	0
530	0	0	0	0	0	0	0	200	300	0	16.9113	-6.65268	-499.082	-30692.1	57888.4	-1121.29	315.99	964.497	0	0	0	0	0	0	0	603	903	0
530	1	0	0	0	0	0	0	200	300	0	17.5217	-6.19491	-498.472	-30600.5	57888.4	-1350.18	316.132	964.389	0	0	0	0	0	0	0	603	903	0
530	2	0	0	0	0	0	0	200	300	0	15.8432	-5.1268	-498.777	-30051.2	57583.3	-846.635	315.449	963.25	0	0	0	0	0	0	0	603	903	0
530	3	0	0	0	0	0	0	200	300	0	16.7587	-5.43197	-500.608	-30234.3	57461.2	-1167.07	314.783	963.395	0	0	0	0	0	0	0	603	903	0
530	4	0	0	0	0	0	0	200	300	0	15.9958	-4.82162	-502.439	-30692.1	58254.7	-1121.29	315.944	964.086	0	0	0	0	0	0	0	603	903	0
530	5	0	0	0	0	0	0	200	300	0	15.3854	-5.43197	-502.134	-30692.1	58132.6	-1075.52	315.771	964.123	0	0	0	0	0	0	0	603	903	0
530	6	0	0	0	0	0	0	200	300	0	15.2328	-5.43197	-504.575	-30234.3	58010.5	-846.635	314.969	962.92	0	0	0	0	0	0	0	603	903	0
530	7	0	0	0	0	0	0	200	300	0	15.3854	-4.82162	-503.66	-29501.9	58193.6	-983.964	315.542	961.575	0	0	0	0	0	0	0	603	903	0
530	8	0	0	0	0	0	0	200	300	0	15.3854	-4.51644	-505.491	-29868.1	58376.7	-892.411	315.485	962.087	0	0	0	0	0	0	0	603	903	0
530	9	0	0	0	0	0	0	200	300	0	14.0121	-3.29574	-506.101	-30509	58315.7	-892.411	315.225	963.282	0	0	0	0	0	0	0	603	903	0
531	0	0	0	0	0	0	0	200	300	0	15.9958	-3.75351	-508.543	-30783.6	58742.9	-388.871	315.512	963.533	0	0	0	0	0	0	0	603	903	0
531	1	0	0	0	0	0	0	200	300	0	15.538	-2.07504	-506.406	-30234.3	58559.8	-571.976	315.638	962.704	0	0	0	0	0	0	0	603	903	0
531	2	0	0	0	0	0	0	200	300	0	14.7751	-2.99057	-508.848	-30142.7	58620.9	-617.753	315.203	962.237	0	0	0	0	0	0	0	603	903	0
531	3	0	0	0	0	0	0	200	300	0	15.3854	-2.5328	-510.068	-30875.2	59170.2	-526.2	316.004	963.531	0	0	0	0	0	0	0	603	903	0
531	4	0	0	0	0	0	0	200	300	0	14.9277	-1.61727	-507.322	-30783.6	59231.2	-159.989	316.753	963.679	0	0	0	0	0	0	0	603	903	0
531	5	0	0	0	0	0	0	200	300	0	14.4699	-1.3121	-511.594	-30051.2	58865	-343.094	315.062	961.74	0	0	0	0	0	0	0	603	903	0
531	6	0	0	0	0	0	0	200	300	0	15.6906	-1.46469	-513.425	-30417.4	58926	-297.318	314.77	962.244	0	0	0	0	0	0	0	603	903	0
531	7	0	0	0	0	0	0	200	300	0	16.4536	-2.68539	-510.984	-30509	59353.3	-22.6596	316.155	962.706	0	0	0	0	0	0	0	603	903	0
531	8	0	0	0	0	0	0	200	300	0	14.7751	-1.00692	-514.341	-30875.2	59597.4	-297.318	315.871	963.029	0	0	0	0	0	0	0	603	903	0
531	9	0	0	0	0	0	0	200	300	0	14.4699	-0.396572	-515.562	-30417.4	58865	-159.989	314.177	961.999	0	0	0	0	0	0	0	603	903	0
532	0	0	0	0	0	0	0	200	300	0	15.9958	-0.243984	-514.951	-29501.9	59048.1	-114.212	314.667	960.291	0	0	0	0	0	0	0	603	903	0
532	1	0	0	0	0	0	0	200	300	0	15.538	0.671544	-516.782	-30142.7	59597.4	114.67	315.324	961.328	0	0	0	0	0	0	0	603	903	0
532	2	0	0	0	0	0	0	200	300	0	14.3173	0.976719	-517.698	-30234.3	59780.5	-343.094	315.474	961.401	0	0	0	0	0	0	0	603	903	0
532	3	0	0	0	0	0	0	200	300	0	14.4699	1.12931	-519.529	-29685	59963.6	68.8931	315.419	960.138	0	0	0	0	0	0	0	603	903	0
532	4	0	0	0	0	0	0	200	300	0	15.9958	0.976719	-519.529	-29685	59780.5	-159.989	315.067	960.138	0	0	0	0	0	0	0	603	903	0
532	5	0	0	0	0	0	0	200	300	0	15.2328	0.366368	-519.834	-29685	60085.7	-114.212	315.586	960.105	0	0	0	0	0	0	0	603	903	0
532	6	0	0	0	0	0	0	200	300	0	15.0803	1.2819	-520.444	-29593.4	60451.9	23.1167	316.154	959.862	0	0	0	0	0	0	0	603	903	0
532	7	0	0	0	0	0	0	200	300	0	14.4699	2.19742	-521.055	-29959.6	60757.1	206.222	316.604	960.498	0	0	0	0	0	0	0	603	903	0
532	8	0	0	0	0	0	0	200	300	0	15.9958	1.2819	-520.139	-29227.2	60146.7	206.222	315.636	959.191	0	0	0	0	0	0	0	603	903	0
532	9	0	0	0	0	0	0	200	300	0	16.1484	2.96036	-523.496	-30509	60329.8	206.222	315.244	961.279	0	0	0	0	0	0	0	603	903	0
533	0	0	0	0	0	0	0	200	300	0	15.2328	2.65519	-524.107	-29776.5	60451.9	206.222	315.343	959.814	0	0	0	0	0	0	0	603	903	0
533	1	0	0	0	0	0	0	200	300	0	15.2328	2.35001	-523.496	-29959.6	60879.2	206.222	316.293	960.23	0	0	0	0	0	0	0	603	903	0
533	2	0	0	0	0	0	0	200	300	0	16.301	3.57071	-524.412	-29410.3	61123.3	526.657	316.556	959.083	0	0	0	0	0	0	0	603	903	0
533	3	0	0	0	0	0	0	200	300	0	17.3691	2.80777	-523.801	-29593.4	60696.1	801.315	315.876	959.497	0	0	0	0	0	0	0	603	903	0
533	4	0	0	0	0	0	0	200	300	0	16.1484	4.33365	-525.327	-29501.9	60757.1	572.433	315.656	959.159	0	0	0	0	0	0	0	603	903	0
533	5	0	0	0	0	0	0	200	300	0	16.1484	4.48624	-525.632	-30325.8	61184.3	480.881	316.401	960.694	0	0	0	0	0	0	0	603	903	0
[truncated: 2,904 more rows]
