# Supplementary material for: The Effects of an Extemporaneous Speech Dual-task on Older Adult Gait Control
Source: Research Square preprint supplement (doi:10.21203/rs.3.rs-7674245/v1), 2025-11-18
Supplement: Supplementary file 33 [file DT3Walk02.xlsx]

## Sheet: Sheet1
Trajectories
		03:LFHD			03:RFHD			03:LBHD			03:RBHD			03:C7			03:T10			03:CLAV			03:STRN			03:RBAK			03:LSHO			03:LUPA			03:LELB			03:LFRM			03:LWRA			03:LWRB			03:LFIN
Frame	Sub Frame	X	Y	Z	X	Y	Z	X	Y	Z	X	Y	Z	X	Y	Z	X	Y	Z	X	Y	Z	X	Y	Z	X	Y	Z	X	Y	Z	X	Y	Z	X	Y	Z	X	Y	Z	X	Y	Z	X	Y	Z	X	Y	Z
		mm	mm	mm	mm	mm	mm	mm	mm	mm	mm	mm	mm	mm	mm	mm	mm	mm	mm	mm	mm	mm	mm	mm	mm	mm	mm	mm	mm	mm	mm	mm	mm	mm	mm	mm	mm	mm	mm	mm	mm	mm	mm	mm	mm	mm	mm	mm	mm
513	0	146.62	-1785.31	1609.64	249.73	-1791.51	1608.06	117.592	-1939.33	1635.83	253.569	-1957.47	1637.22	198.197	-2027.37	1487.4	187.496	-2134.25	1264.74	189.668	-1891.92	1384.85	182.753	-1868.24	1199.95	243.028	-2136.93	1338.16	-0.440633	-2011.91	1441.12	-63.5918	-1991.83	1235	-89.4404	-1976.18	1117.9	-85.0989	-1834.84	1012.8	-34.9549	-1756.24	966.345	-89.6791	-1786.66	921.33	-81.7464	-1689.41	883.821
514	0	149.419	-1772.52	1609.55	252.515	-1778.61	1607.41	120.647	-1926.69	1635.37	256.645	-1944.66	1636.03	200.533	-2014.29	1486.72	190.096	-2120.83	1264.17	191.571	-1878.49	1384.14	184.272	-1854.34	1199.3	245.427	-2123.84	1337.44	1.62128	-1998.72	1440.98	-61.6241	-1978.65	1234.96	-87.6333	-1963.17	1117.86	-83.0855	-1822.29	1011.78	-32.8151	-1744.23	964.298	-88.0243	-1774.58	919.98	-79.8117	-1677.47	881.801
515	0	152.022	-1759.79	1609.6	255.101	-1765.79	1606.96	123.468	-1914.07	1635.16	259.483	-1931.9	1635.15	202.715	-2001.34	1486.29	192.561	-2107.58	1263.85	193.328	-1865.22	1383.72	185.703	-1840.66	1198.92	247.717	-2110.85	1336.98	3.55179	-1985.72	1441.02	-59.788	-1965.76	1235.11	-85.9327	-1950.53	1118	-81.1926	-1810.26	1010.81	-30.7935	-1732.82	962.241	-86.4949	-1763.13	918.655	-77.9592	-1666.24	879.669
516	0	154.429	-1747.11	1609.81	257.488	-1753.03	1606.71	126.055	-1901.48	1635.2	262.083	-1919.2	1634.58	204.742	-1988.51	1486.13	194.89	-2094.51	1263.78	194.94	-1852.1	1383.58	187.045	-1827.21	1198.8	249.898	-2097.96	1336.79	5.35114	-1972.9	1441.26	-58.0834	-1953.18	1235.45	-84.3383	-1938.27	1118.3	-79.4202	-1798.75	1009.9	-28.8904	-1722.02	960.172	-85.0908	-1752.31	917.355	-76.1895	-1655.73	877.425
517	0	156.638	-1734.47	1610.16	259.675	-1740.35	1606.66	128.409	-1888.92	1635.48	264.444	-1906.55	1634.33	206.617	-1975.82	1486.24	197.085	-2081.62	1263.96	196.406	-1839.14	1383.72	188.299	-1813.99	1198.94	251.97	-2085.17	1336.86	7.02002	-1960.27	1441.7	-56.5096	-1940.88	1235.98	-82.8495	-1926.38	1118.77	-77.7682	-1787.76	1009.04	-27.1062	-1711.82	958.094	-83.8122	-1742.11	916.08	-74.5035	-1645.93	875.071
518	0	158.647	-1721.9	1610.67	261.661	-1727.74	1606.81	130.529	-1876.39	1636.01	266.567	-1893.97	1634.38	208.339	-1963.26	1486.6	199.148	-2068.9	1264.39	197.729	-1826.34	1384.14	189.465	-1800.98	1199.35	253.935	-2072.49	1337.19	8.55984	-1947.83	1442.32	-55.0652	-1928.89	1236.69	-81.4646	-1914.86	1119.4	-76.2369	-1777.29	1008.23	-25.4424	-1702.23	956.009	-82.6592	-1732.53	914.833	-72.9034	-1636.85	872.611
519	0	160.454	-1709.37	1611.34	263.443	-1715.21	1607.17	132.416	-1863.89	1636.79	268.455	-1881.43	1634.74	209.913	-1950.82	1487.22	201.079	-2056.35	1265.06	198.909	-1813.68	1384.83	190.541	-1788.19	1200.03	255.794	-2059.9	1337.78	9.97301	-1935.58	1443.14	-53.7478	-1917.18	1237.6	-80.1808	-1903.72	1120.21	-74.826	-1767.33	1007.48	-23.9007	-1693.22	953.922	-81.632	-1723.58	913.616	-71.393	-1628.48	870.05
520	0	162.054	-1696.91	1612.16	265.019	-1702.74	1607.75	134.072	-1851.44	1637.8	270.11	-1868.96	1635.41	211.341	-1938.51	1488.1	202.885	-2043.96	1265.96	199.952	-1801.18	1385.81	191.529	-1775.6	1200.97	257.551	-2047.41	1338.62	11.2632	-1923.51	1444.14	-52.5534	-1905.77	1238.69	-78.9936	-1892.95	1121.18	-73.5356	-1757.89	1006.79	-22.4842	-1684.81	951.837	-80.7306	-1715.26	912.432	-69.978	-1620.83	867.395
521	0	163.443	-1684.51	1613.14	266.384	-1690.35	1608.54	135.501	-1839.03	1639.04	271.537	-1856.55	1636.38	212.63	-1926.31	1489.21	204.572	-2031.73	1267.1	200.861	-1788.81	1387.06	192.429	-1763.18	1202.18	259.21	-2035	1339.7	12.4353	-1911.62	1445.33	-51.4765	-1894.65	1239.95	-77.897	-1882.54	1122.32	-72.3651	-1748.96	1006.15	-21.1965	-1676.99	949.761	-79.955	-1707.55	911.286	-68.6664	-1613.88	864.659
522	0	164.617	-1672.18	1614.3	267.538	-1678.02	1609.55	136.707	-1826.68	1640.51	272.742	-1844.2	1637.65	213.786	-1914.22	1490.56	206.148	-2019.62	1268.44	201.643	-1776.57	1388.58	193.242	-1750.92	1203.66	260.777	-2022.68	1341.02	13.4957	-1899.9	1446.68	-50.5094	-1883.82	1241.4	-76.8828	-1872.51	1123.61	-71.314	-1740.54	1005.58	-20.042	-1669.74	947.703	-79.3046	-1700.46	910.183	-67.4683	-1607.65	861.853
523	0	165.573	-1659.94	1615.62	268.479	-1665.77	1610.79	137.7	-1814.4	1642.17	273.735	-1831.91	1639.19	214.817	-1902.23	1492.13	207.622	-2007.64	1269.99	202.306	-1764.45	1390.35	193.975	-1738.8	1205.39	262.258	-2010.42	1342.54	14.4521	-1888.33	1448.2	-49.6429	-1873.26	1243	-75.9418	-1862.83	1125.05	-70.381	-1732.62	1005.06	-19.0257	-1663.05	945.668	-78.7785	-1693.97	909.128	-66.3959	-1602.11	858.993
524	0	166.312	-1647.77	1617.12	269.208	-1653.58	1612.26	138.488	-1802.2	1644.02	274.527	-1819.68	1640.98	215.733	-1890.32	1493.89	209.005	-1995.76	1271.72	202.86	-1752.42	1392.36	194.632	-1726.78	1207.37	263.66	-1998.21	1344.27	15.3129	-1876.91	1449.87	-48.866	-1862.98	1244.76	-75.0629	-1853.52	1126.64	-69.5643	-1725.2	1004.6	-18.1524	-1656.91	943.665	-78.3743	-1688.09	908.125	-65.4629	-1597.26	856.094
525	0	166.834	-1635.7	1618.79	269.729	-1641.47	1613.94	139.085	-1790.1	1646.03	275.133	-1807.52	1643.01	216.543	-1878.48	1495.83	210.307	-1983.96	1273.6	203.314	-1740.47	1394.57	195.222	-1714.84	1209.56	264.992	-1986.06	1346.16	16.0872	-1865.62	1451.66	-48.1666	-1852.97	1246.66	-74.2346	-1844.56	1128.35	-68.8613	-1718.26	1004.19	-17.4264	-1651.3	941.699	-78.0891	-1682.79	907.175	-64.6836	-1593.09	853.174
526	0	167.149	-1623.73	1620.62	270.049	-1629.42	1615.85	139.506	-1778.09	1648.16	275.569	-1795.43	1645.23	217.257	-1866.69	1497.91	211.536	-1972.23	1275.62	203.681	-1728.59	1396.96	195.756	-1702.96	1211.94	266.259	-1973.93	1348.2	16.7843	-1854.42	1453.56	-47.5317	-1843.21	1248.68	-73.4446	-1835.93	1130.18	-68.2685	-1711.79	1003.84	-16.8511	-1646.2	939.773	-77.9179	-1678.06	906.281	-64.0719	-1589.58	850.248
527	0	167.266	-1611.85	1622.61	270.181	-1617.43	1617.94	139.769	-1766.2	1650.38	275.852	-1783.41	1647.6	217.885	-1854.92	1500.1	212.699	-1960.53	1277.75	203.972	-1716.74	1399.49	196.245	-1691.1	1214.47	267.468	-1961.82	1350.36	17.413	-1843.29	1455.53	-46.9483	-1833.69	1250.79	-72.681	-1827.64	1132.11	-67.7817	-1705.77	1003.52	-16.4282	-1641.58	937.887	-77.8546	-1673.88	905.44	-63.6404	-1586.71	847.331
528	0	167.201	-1600.06	1624.73	270.14	-1605.49	1620.21	139.892	-1754.41	1652.64	276.003	-1771.45	1650.07	218.438	-1843.17	1502.37	213.801	-1948.85	1279.95	204.2	-1704.92	1402.11	196.7	-1679.26	1217.1	268.625	-1949.71	1352.6	17.9817	-1832.21	1457.55	-46.4037	-1824.39	1252.97	-71.9319	-1819.66	1134.1	-67.3955	-1700.19	1003.23	-16.1577	-1637.42	936.038	-77.8908	-1670.23	904.646	-63.3993	-1584.45	844.435
529	0	166.973	-1588.36	1626.95	269.944	-1593.62	1622.62	139.895	-1742.73	1654.92	276.04	-1759.56	1652.61	218.924	-1831.42	1504.67	214.844	-1937.18	1282.19	204.375	-1693.1	1404.77	197.133	-1667.42	1219.78	269.733	-1937.6	1354.87	18.4977	-1821.14	1459.59	-45.8863	-1815.29	1255.19	-71.1868	-1811.97	1136.15	-67.1037	-1695.02	1002.96	-16.037	-1633.68	934.222	-78.0167	-1667.08	903.892	-63.3551	-1582.77	841.565
530	0	166.606	-1576.75	1629.24	269.616	-1581.78	1625.12	139.8	-1731.15	1657.16	275.984	-1747.72	1655.14	219.352	-1819.64	1506.96	215.829	-1925.51	1284.43	204.51	-1681.26	1407.43	197.554	-1655.57	1222.46	270.795	-1925.48	1357.16	18.9676	-1810.07	1461.61	-45.3859	-1806.37	1257.42	-70.4361	-1804.55	1138.22	-66.8991	-1690.24	1002.7	-16.0615	-1630.35	932.427	-78.2209	-1664.41	903.164	-63.5102	-1581.63	838.728
531	0	166.125	-1565.19	1631.56	269.18	-1569.98	1627.68	139.628	-1719.65	1659.31	275.855	-1735.94	1657.63	219.729	-1807.82	1509.2	216.757	-1913.81	1286.64	204.614	-1669.38	1410.03	197.971	-1643.69	1225.07	271.812	-1913.32	1359.4	19.3967	-1798.95	1463.56	-44.8941	-1797.61	1259.63	-69.6718	-1797.38	1140.28	-66.7738	-1685.81	1002.41	-16.2237	-1627.37	930.642	-78.4905	-1662.17	902.45	-63.8619	-1580.99	835.921
532	0	165.557	-1553.69	1633.88	268.663	-1558.21	1630.24	139.397	-1708.22	1661.34	275.672	-1724.19	1660	220.062	-1795.95	1511.34	217.625	-1902.09	1288.77	204.697	-1657.46	1412.5	198.391	-1631.79	1227.56	272.783	-1901.14	1361.57	19.7889	-1787.78	1465.42	-44.4043	-1788.99	1261.79	-68.8874	-1790.42	1142.31	-66.7193	-1681.71	1002.1	-16.514	-1624.72	928.853	-78.8122	-1660.34	901.733	-64.4023	-1580.81	833.141
533	0	164.929	-1542.22	1636.13	268.088	-1546.45	1632.75	139.128	-1696.84	1663.21	275.451	-1712.47	1662.22	220.357	-1784.02	1513.36	218.433	-1890.33	1290.79	204.765	-1645.48	1414.82	198.816	-1619.86	1229.87	273.704	-1888.92	1363.63	20.1471	-1776.53	1467.14	-43.9124	-1780.46	1263.86	-68.0784	-1783.64	1144.28	-66.7263	-1677.9	1001.74	-16.9206	-1622.37	927.044	-79.172	-1658.87	900.997	-65.1184	-1581.04	830.38
534	0	164.268	-1530.75	1638.27	267.483	-1534.68	1635.15	138.835	-1685.49	1664.87	275.207	-1700.77	1664.24	220.616	-1772.01	1515.2	219.177	-1878.52	1292.68	204.825	-1633.44	1416.92	199.248	-1607.89	1231.96	274.572	-1876.66	1365.54	20.4728	-1765.18	1468.69	-43.416	-1772	1265.82	-67.242	-1777	1146.16	-66.7857	-1674.35	1001.31	-17.4297	-1620.26	925.199	-79.5565	-1657.72	900.228	-65.9924	-1581.64	827.63
535	0	163.598	-1519.27	1640.26	266.869	-1522.9	1637.4	138.533	-1674.13	1666.3	274.954	-1689.06	1666.01	220.843	-1759.91	1516.83	219.854	-1866.68	1294.38	204.879	-1621.33	1418.77	199.684	-1595.9	1233.77	275.382	-1864.36	1367.27	20.7661	-1753.73	1470.04	-42.9149	-1763.59	1267.63	-66.3769	-1770.47	1147.92	-66.8879	-1671.01	1000.8	-18.0262	-1618.38	923.305	-79.9528	-1656.85	899.41	-67.0023	-1582.55	824.882
536	0	162.942	-1507.74	1642.05	266.267	-1511.09	1639.43	138.233	-1662.73	1667.46	274.7	-1677.32	1667.5	221.039	-1747.73	1518.23	220.462	-1854.78	1295.88	204.93	-1609.14	1420.33	200.12	-1583.87	1235.28	276.127	-1852.02	1368.78	21.026	-1742.15	1471.16	-42.4106	-1755.19	1269.28	-65.4839	-1764	1149.55	-67.0236	-1667.84	1000.2	-18.6937	-1616.69	921.349	-80.3493	-1656.22	898.535	-68.123	-1583.74	822.127
537	0	162.316	-1496.15	1643.59	265.694	-1499.22	1641.19	137.942	-1651.28	1668.35	274.451	-1665.55	1668.68	221.203	-1735.46	1519.37	220.996	-1842.84	1297.15	204.976	-1596.88	1421.58	200.549	-1571.82	1236.45	276.801	-1839.63	1370.07	21.2504	-1730.45	1472.03	-41.9062	-1746.76	1270.75	-64.565	-1757.56	1151.03	-67.1838	-1664.81	999.497	-19.4155	-1615.14	919.321	-80.7361	-1655.77	897.595	-69.3272	-1585.15	819.359
538	0	161.736	-1484.47	1644.84	265.161	-1487.29	1642.66	137.664	-1639.73	1668.95	274.211	-1653.71	1669.54	221.334	-1723.1	1520.23	221.452	-1830.84	1298.17	205.014	-1584.54	1422.49	200.96	-1559.74	1237.26	277.397	-1827.2	1371.1	21.436	-1718.62	1472.63	-41.4058	-1738.29	1272.02	-63.6239	-1751.1	1152.34	-67.3603	-1661.88	998.692	-20.1748	-1613.71	917.217	-81.1053	-1655.47	896.589	-70.5861	-1586.75	816.574
539	0	161.209	-1472.67	1645.79	264.677	-1475.28	1643.8	137.401	-1628.07	1669.24	273.98	-1641.79	1670.06	221.427	-1710.64	1520.81	221.828	-1818.78	1298.93	205.04	-1572.13	1423.06	201.345	-1547.63	1237.71	277.907	-1814.73	1371.86	21.5786	-1706.66	1472.95	-40.9148	-1729.74	1273.08	-62.6654	-1744.6	1153.48	-67.5455	-1659	997.781	-20.9554	-1612.37	915.033	-81.4511	-1655.27	895.519	-71.8713	-1588.48	813.774
540	0	160.739	-1460.75	1646.4	264.243	-1463.17	1644.58	137.149	-1616.27	1669.24	273.754	-1629.78	1670.24	221.479	-1698.09	1521.09	222.118	-1806.67	1299.42	205.046	-1559.64	1423.28	201.692	-1535.5	1237.79	278.326	-1802.21	1372.35	21.6732	-1694.57	1473	-40.4394	-1721.09	1273.92	-61.6953	-1738.01	1154.43	-67.7331	-1656.13	996.769	-21.7419	-1611.08	912.772	-81.7701	-1655.11	894.392	-73.1555	-1590.32	810.962
541	0	160.324	-1448.68	1646.67	263.859	-1450.96	1644.98	136.901	-1604.31	1668.94	273.526	-1617.66	1670.08	221.483	-1685.45	1521.08	222.32	-1794.49	1299.64	205.024	-1547.09	1423.16	201.988	-1523.33	1237.51	278.647	-1789.64	1372.57	21.714	-1682.36	1472.76	-39.9862	-1712.3	1274.55	-60.7206	-1731.31	1155.21	-67.918	-1653.24	995.661	-22.5206	-1609.81	910.44	-82.0607	-1654.96	893.218	-74.4135	-1592.23	808.148
542	0	159.957	-1436.44	1646.58	263.516	-1438.62	1645.01	136.649	-1592.18	1668.36	273.289	-1605.41	1669.6	221.432	-1672.71	1520.78	222.431	-1782.25	1299.58	204.964	-1534.45	1422.7	202.221	-1511.13	1236.89	278.864	-1777.01	1372.51	21.6945	-1670.02	1472.25	-39.5624	-1703.37	1274.96	-59.7488	-1724.45	1155.8	-68.0965	-1650.3	994.466	-23.2796	-1608.53	908.047	-82.3235	-1654.78	892.012	-75.6234	-1594.15	805.345
543	0	159.627	-1424.04	1646.14	263.203	-1426.15	1644.66	136.382	-1579.87	1667.51	273.03	-1593.03	1668.82	221.318	-1659.89	1520.2	222.446	-1769.93	1299.26	204.855	-1521.75	1421.93	202.38	-1498.88	1235.95	278.973	-1764.34	1372.18	21.6078	-1657.57	1471.48	-39.1755	-1694.27	1275.15	-58.7882	-1717.42	1156.22	-68.2667	-1647.25	993.196	-24.0091	-1607.22	905.604	-82.5607	-1654.51	890.789	-76.7669	-1596.06	802.568
544	0	159.317	-1411.47	1645.35	262.906	-1413.55	1643.94	136.085	-1567.36	1666.4	272.737	-1580.51	1667.74	221.132	-1646.98	1519.36	222.365	-1757.54	1298.67	204.685	-1508.97	1420.86	202.453	-1486.58	1234.71	278.97	-1751.59	1371.6	21.4466	-1645.01	1470.46	-38.8329	-1684.98	1275.14	-57.8474	-1710.2	1156.48	-68.4279	-1644.07	991.863	-24.7019	-1605.83	903.126	-82.7757	-1654.11	889.566	-77.8302	-1597.92	799.836
545	0	159.009	-1398.72	1644.25	262.606	-1400.82	1642.88	135.743	-1554.66	1665.07	272.395	-1567.85	1666.41	220.865	-1633.99	1518.27	222.186	-1745.06	1297.84	204.441	-1496.12	1419.53	202.428	-1474.22	1233.22	278.852	-1738.78	1370.77	21.2032	-1632.34	1469.2	-38.542	-1675.5	1274.92	-56.9355	-1702.75	1156.57	-68.5814	-1640.73	990.48	-25.3536	-1604.35	900.629	-82.9734	-1653.56	888.36	-78.8036	-1599.68	797.168
546	0	158.682	-1385.8	1642.84	262.282	-1387.93	1641.5	135.34	-1541.76	1663.53	271.988	-1555.03	1664.85	220.507	-1620.91	1516.96	221.908	-1732.49	1296.78	204.11	-1483.19	1417.97	202.296	-1461.78	1231.49	278.616	-1725.9	1369.72	20.8703	-1619.57	1467.74	-38.3101	-1665.81	1274.52	-56.0621	-1695.08	1156.5	-68.7299	-1637.19	989.061	-25.9626	-1602.74	898.129	-83.1595	-1652.79	887.186	-79.682	-1601.31	794.582
547	0	158.312	-1372.71	1641.16	261.913	-1374.91	1639.83	134.858	-1528.68	1661.81	271.502	-1542.07	1663.08	220.049	-1607.74	1515.44	221.532	-1719.82	1295.51	203.679	-1470.17	1416.19	202.048	-1449.25	1229.57	278.263	-1712.93	1368.46	20.4404	-1606.71	1466.08	-38.1445	-1655.91	1273.93	-55.2367	-1687.15	1156.3	-68.8776	-1633.43	987.617	-26.53	-1600.96	895.641	-83.3402	-1651.79	886.058	-80.4644	-1602.77	792.096
548	0	157.877	-1359.46	1639.23	261.475	-1361.75	1637.91	134.282	-1515.43	1659.94	270.921	-1528.96	1661.15	219.482	-1594.49	1513.75	221.057	-1707.04	1294.05	203.138	-1457.08	1414.25	201.677	-1436.62	1227.49	277.791	-1699.88	1367.02	19.9066	-1593.76	1464.26	-38.0522	-1645.8	1273.18	-54.4692	-1678.96	1155.96	-69.0301	-1629.41	986.16	-27.06	-1598.98	893.181	-83.5226	-1650.5	884.987	-81.1538	-1604.02	789.724
549	0	157.353	-1346.06	1637.1	260.947	-1348.45	1635.77	133.595	-1502	1657.93	270.231	-1515.71	1659.09	218.798	-1581.16	1511.91	220.484	-1694.15	1292.43	202.475	-1443.9	1412.16	201.177	-1423.88	1225.29	277.201	-1686.73	1365.43	19.2625	-1580.73	1462.29	-38.0398	-1635.47	1272.28	-53.7695	-1670.5	1155.49	-69.1944	-1625.11	984.7	-27.5591	-1596.78	890.763	-83.7139	-1648.9	883.981	-81.7565	-1605.02	787.48
550	0	156.718	-1332.51	1634.8	260.308	-1335.02	1633.46	132.782	-1488.42	1655.82	269.417	-1502.33	1656.92	217.989	-1567.74	1509.95	219.817	-1681.15	1290.66	201.681	-1430.63	1409.97	200.543	-1411.01	1223	276.495	-1673.49	1363.71	18.5024	-1567.63	1460.19	-38.1137	-1624.92	1271.23	-53.1475	-1661.76	1154.91	-69.3784	-1620.5	983.244	-28.0363	-1594.3	888.398	-83.9216	-1646.95	883.045	-82.2817	-1605.72	785.374
551	0	155.953	-1318.84	1632.36	259.54	-1321.46	1631.01	131.832	-1474.7	1653.63	268.47	-1488.82	1654.68	217.05	-1554.24	1507.89	219.056	-1668.02	1288.78	200.749	-1417.27	1407.7	199.771	-1398.02	1220.65	275.673	-1660.14	1361.88	17.6215	-1554.45	1457.99	-38.2799	-1614.15	1270.06	-52.6128	-1652.72	1154.21	-69.5911	-1615.55	981.8	-28.5021	-1591.52	886.097	-84.1535	-1644.62	882.181	-82.7411	-1606.07	783.411
552	0	155.042	-1305.04	1629.83	258.626	-1307.79	1628.47	130.733	-1460.85	1651.39	267.378	-1475.18	1652.4	215.978	-1540.66	1505.77	218.203	-1654.78	1286.81	199.673	-1403.82	1405.39	198.861	-1384.89	1218.27	274.738	-1646.69	1359.98	16.6166	-1541.21	1455.72	-38.5438	-1603.17	1268.77	-52.1748	-1643.4	1153.42	-69.8416	-1610.24	980.371	-28.9683	-1588.39	883.869	-84.4175	-1641.86	881.388	-83.1479	-1606.04	781.595
553	0	153.973	-1291.14	1627.25	257.556	-1294	1625.88	129.479	-1446.88	1649.12	266.137	-1461.44	1650.11	214.77	-1527	1503.61	217.261	-1641.41	1284.79	198.452	-1390.27	1403.06	197.812	-1371.62	1215.9	273.693	-1633.14	1358.04	15.486	-1527.9	1453.39	-38.9104	-1591.97	1267.38	-51.8425	-1633.77	1152.54	-70.1398	-1604.54	978.963	-29.4475	-1584.88	881.72	-84.7217	-1638.65	880.661	-83.5165	-1605.57	779.924
554	0	152.738	-1277.15	1624.64	256.321	-1280.11	1623.27	128.066	-1432.82	1646.85	264.742	-1447.59	1647.84	213.428	-1513.26	1501.45	216.233	-1627.93	1282.73	197.084	-1376.64	1400.74	196.628	-1358.21	1213.56	272.542	-1619.5	1356.08	14.23	-1514.54	1451.03	-39.3841	-1580.55	1265.91	-51.6245	-1623.83	1151.58	-70.4952	-1598.43	977.578	-29.9523	-1580.94	879.658	-85.0744	-1634.96	879.996	-83.8621	-1604.62	778.396
555	0	151.333	-1263.07	1622.04	254.92	-1266.13	1620.69	126.493	-1418.67	1644.6	263.194	-1433.65	1645.62	211.954	-1499.45	1499.3	215.12	-1614.33	1280.67	195.576	-1362.92	1398.46	195.313	-1344.67	1211.27	271.288	-1605.76	1354.13	12.8512	-1501.12	1448.66	-39.9684	-1568.93	1264.37	-51.5287	-1613.59	1150.54	-70.9171	-1591.88	976.219	-30.4953	-1576.53	877.684	-85.484	-1630.74	879.384	-84.1995	-1603.13	777.004
556	0	149.761	-1248.93	1619.49	253.353	-1252.07	1618.17	124.766	-1404.45	1642.39	261.495	-1419.63	1643.46	210.356	-1485.57	1497.19	213.926	-1600.64	1278.64	193.933	-1349.12	1396.25	193.872	-1330.99	1209.07	269.936	-1591.94	1352.22	11.3544	-1487.64	1446.3	-40.6662	-1557.09	1262.77	-51.5626	-1603.03	1149.44	-71.4141	-1584.87	974.887	-31.0882	-1571.61	875.803	-85.9595	-1625.96	878.818	-84.5438	-1601.06	775.74
557	0	148.03	-1234.73	1617	251.629	-1237.94	1615.74	122.89	-1390.17	1640.25	259.655	-1405.53	1641.4	208.642	-1471.64	1495.16	212.654	-1586.85	1276.66	192.167	-1335.25	1394.13	192.314	-1317.2	1206.97	268.493	-1578.04	1350.38	9.74674	-1474.12	1443.99	-41.4792	-1545.04	1261.15	-51.7325	-1592.14	1148.29	-71.9941	-1577.37	973.587	-31.7418	-1566.13	874.018	-86.51	-1620.6	878.289	-84.9091	-1598.35	774.593
558	0	146.153	-1220.49	1614.62	249.76	-1223.76	1613.41	120.88	-1375.85	1638.2	257.684	-1391.38	1639.46	206.824	-1457.66	1493.23	211.307	-1572.99	1274.77	190.291	-1321.33	1392.12	190.652	-1303.3	1205	266.965	-1564.09	1348.63	8.03788	-1460.55	1441.75	-42.4085	-1532.78	1259.51	-52.044	-1580.94	1147.1	-72.6641	-1569.36	972.32	-32.4655	-1560.06	872.329	-87.1449	-1614.6	877.787	-85.3093	-1594.94	773.552
559	0	144.147	-1206.22	1612.35	247.763	-1209.54	1611.23	118.75	-1361.5	1636.26	255.596	-1377.19	1637.67	204.916	-1443.65	1491.42	209.89	-1559.06	1272.98	188.324	-1307.36	1390.25	188.897	-1289.31	1203.17	265.361	-1550.09	1347	6.23993	-1446.95	1439.6	-43.4537	-1520.31	1257.87	-52.5017	-1569.41	1145.9	-73.4298	-1560.81	971.092	-33.267	-1553.36	870.739	-87.8733	-1607.93	877.305	-85.7572	-1590.79	772.604
560	0	142.034	-1191.93	1610.23	245.66	-1195.29	1609.21	116.521	-1347.13	1634.45	253.412	-1362.96	1636.03	202.936	-1429.63	1489.76	208.409	-1545.09	1271.33	186.285	-1293.36	1388.54	187.066	-1275.24	1201.51	263.689	-1536.07	1345.5	4.3674	-1433.31	1437.58	-44.6131	-1507.63	1256.27	-53.1091	-1557.56	1144.68	-74.2953	-1551.71	969.906	-34.1525	-1545.99	869.248	-88.7046	-1600.56	876.834	-86.2653	-1585.83	771.736
561	0	139.839	-1177.65	1608.26	243.474	-1181.03	1607.37	114.215	-1332.77	1632.79	251.151	-1348.72	1634.58	200.903	-1415.61	1488.25	206.87	-1531.1	1269.83	184.197	-1279.36	1386.99	185.175	-1261.12	1200.03	261.96	-1522.05	1344.15	2.43696	-1419.65	1435.7	-45.8835	-1494.74	1254.71	-53.8685	-1545.39	1143.48	-75.2637	-1542.03	968.769	-35.1267	-1537.92	867.859	-89.6471	-1592.46	876.367	-86.8451	-1580.01	770.933
562	0	137.59	-1163.38	1606.47	241.234	-1166.78	1605.72	111.859	-1318.42	1631.31	248.84	-1334.49	1633.32	198.838	-1401.62	1486.94	205.281	-1517.1	1268.5	182.086	-1265.36	1385.64	183.244	-1246.98	1198.75	260.185	-1508.06	1342.98	0.467176	-1405.97	1433.99	-47.2604	-1481.66	1253.23	-54.7811	-1532.89	1142.3	-76.3364	-1531.75	967.687	-36.1922	-1529.11	866.573	-90.7086	-1583.59	875.899	-87.5081	-1573.28	770.182
563	0	135.317	-1149.14	1604.87	238.968	-1152.56	1604.27	109.481	-1304.1	1630.01	246.505	-1320.28	1632.27	196.764	-1387.66	1485.82	203.65	-1503.12	1267.37	179.975	-1251.41	1384.5	181.291	-1232.84	1197.69	258.378	-1494.1	1341.99	-1.52194	-1392.29	1432.49	-48.7371	-1468.37	1251.84	-55.8466	-1520.08	1141.17	-77.513	-1520.86	966.667	-37.3502	-1519.53	865.391	-91.8956	-1573.93	875.425	-88.2649	-1565.58	769.47
564	0	133.051	-1134.96	1603.46	236.707	-1138.4	1603.04	107.11	-1289.84	1628.92	244.174	-1306.1	1631.46	194.704	-1373.78	1484.92	201.989	-1489.18	1266.45	177.892	-1237.5	1383.57	179.338	-1218.73	1196.84	256.551	-1480.22	1341.2	-3.50947	-1378.63	1431.21	-50.3056	-1454.89	1250.56	-57.0635	-1506.95	1140.1	-78.7921	-1509.35	965.718	-38.6001	-1509.17	864.317	-93.2126	-1563.44	874.943	-89.126	-1556.86	768.786
565	0	130.823	-1120.85	1602.27	234.481	-1124.29	1602.04	104.778	-1275.64	1628.04	241.878	-1291.98	1630.88	192.683	-1359.98	1484.25	200.307	-1475.3	1265.75	175.861	-1223.68	1382.88	177.405	-1204.67	1196.24	254.72	-1466.42	1340.63	-5.4743	-1364.99	1430.17	-51.9562	-1441.23	1249.42	-58.429	-1493.52	1139.12	-80.1702	-1497.19	964.849	-39.9397	-1497.99	863.354	-94.6625	-1552.11	874.452	-90.1014	-1547.08	768.122
566	0	128.663	-1106.82	1601.3	232.32	-1110.28	1601.26	102.515	-1261.52	1627.41	239.647	-1277.93	1630.55	190.724	-1346.29	1483.82	198.617	-1461.49	1265.28	173.906	-1209.96	1382.43	175.512	-1190.72	1195.87	252.898	-1452.74	1340.28	-7.39587	-1351.4	1429.4	-53.6776	-1427.39	1248.44	-59.9387	-1479.79	1138.23	-81.6427	-1484.4	964.07	-41.3648	-1486	862.508	-96.2451	-1539.91	873.954	-91.2004	-1536.21	767.473
567	0	126.598	-1092.9	1600.55	230.251	-1096.36	1600.72	100.35	-1247.51	1627.02	237.509	-1263.96	1630.47	188.846	-1332.73	1483.64	196.93	-1447.79	1265.06	172.049	-1196.35	1382.23	173.679	-1176.88	1195.74	251.1	-1439.2	1340.16	-9.25485	-1337.86	1428.92	-55.4574	-1413.39	1247.64	-61.5866	-1465.78	1137.47	-83.2032	-1470.96	963.393	-42.87	-1473.18	861.787	-97.958	-1526.85	873.455	-92.4312	-1524.2	766.84
568	0	124.656	-1079.09	1600.04	228.3	-1082.56	1600.42	98.3121	-1233.61	1626.89	235.493	-1250.1	1630.66	187.071	-1319.31	1483.72	195.257	-1434.19	1265.1	170.31	-1182.89	1382.29	171.925	-1163.2	1195.87	249.337	-1425.81	1340.27	-11.0337	-1324.4	1428.75	-57.2823	-1399.25	1247.02	-63.3654	-1451.5	1136.83	-84.844	-1456.89	962.831	-44.4482	-1459.52	861.199	-99.7952	-1512.92	872.964	-93.8004	-1511.03	766.229
569	0	122.858	-1065.42	1599.77	226.488	-1068.89	1600.35	96.4257	-1219.83	1627.03	233.624	-1236.35	1631.13	185.412	-1306.06	1484.06	193.609	-1420.73	1265.39	168.704	-1169.58	1382.62	170.267	-1149.69	1196.25	247.62	-1412.58	1340.62	-12.7173	-1311.03	1428.89	-59.1386	-1384.97	1246.62	-65.2663	-1436.95	1136.35	-86.5562	-1442.17	962.397	-46.091	-1445.04	860.756	-101.748	-1498.12	872.491	-95.3125	-1496.69	765.65
570	0	121.224	-1051.89	1599.74	224.836	-1055.36	1600.51	94.7126	-1206.19	1627.46	231.923	-1222.71	1631.86	183.882	-1292.97	1484.67	191.993	-1407.41	1265.93	167.246	-1156.44	1383.21	168.722	-1136.38	1196.89	245.957	-1399.54	1341.21	-14.2933	-1297.75	1429.35	-61.0122	-1370.57	1246.43	-67.2791	-1422.17	1136.03	-88.3297	-1426.84	962.106	-47.7886	-1429.74	860.471	-103.803	-1482.46	872.052	-96.9692	-1481.16	765.121
571	0	119.768	-1038.51	1599.95	223.357	-1041.98	1600.9	93.1901	-1192.7	1628.17	230.409	-1209.2	1632.87	182.49	-1280.07	1485.54	190.417	-1394.25	1266.73	165.943	-1143.47	1384.07	167.302	-1123.26	1197.79	244.354	-1386.69	1342.04	-15.7525	-1284.59	1430.13	-62.8895	-1356.07	1246.48	-69.3927	-1407.15	1135.89	-90.1538	-1410.91	961.972	-49.5305	-1413.63	860.36	-105.947	-1465.96	871.665	-98.7686	-1464.46	764.666
572	0	118.502	-1025.28	1600.41	222.062	-1028.76	1601.51	91.8705	-1179.35	1629.18	229.093	-1195.83	1634.14	181.238	-1267.36	1486.66	188.884	-1381.24	1267.77	164.801	-1130.69	1385.2	166.021	-1110.35	1198.96	242.814	-1374.03	1343.09	-17.0893	-1271.53	1431.24	-64.7576	-1341.48	1246.77	-71.5948	-1391.93	1135.94	-92.0172	-1394.39	962.009	-51.3053	-1396.73	860.44	-108.16	-1448.65	871.349	-100.705	-1446.58	764.312
573	0	117.432	-1012.22	1601.11	220.958	-1015.69	1602.33	90.7606	-1166.15	1630.48	227.983	-1182.6	1635.69	180.126	-1254.83	1488.04	187.398	-1368.39	1269.05	163.821	-1118.09	1386.59	164.886	-1097.64	1200.38	241.336	-1361.57	1344.35	-18.3014	-1258.59	1432.67	-66.6048	-1326.83	1247.31	-73.8725	-1376.51	1136.19	-93.9085	-1377.32	962.23	-53.1013	-1379.08	860.727	-110.424	-1430.56	871.127	-102.768	-1427.56	764.091
574	0	116.56	-999.314	1602.05	220.047	-1002.78	1603.36	89.8617	-1153.11	1632.07	227.08	-1169.5	1637.48	179.149	-1242.49	1489.64	185.959	-1355.71	1270.54	163.003	-1105.66	1388.24	163.902	-1085.11	1202.06	239.92	-1349.28	1345.82	-19.3898	-1245.77	1434.4	-68.4208	-1312.12	1248.09	-76.2128	-1360.91	1136.64	-95.8165	-1359.72	962.648	-54.9066	-1360.71	861.239	-112.717	-1411.72	871.018	-104.942	-1407.44	764.039
575	0	115.881	-986.565	1603.22	219.325	-990.031	1604.59	89.1692	-1140.21	1633.93	226.38	-1156.55	1639.51	178.301	-1230.33	1491.47	184.569	-1343.18	1272.24	162.338	-1093.4	1390.12	163.07	-1072.76	1203.99	238.563	-1337.17	1347.48	-20.3586	-1233.05	1436.41	-70.1973	-1297.36	1249.11	-78.6021	-1345.16	1137.29	-97.7304	-1341.62	963.273	-56.7098	-1341.64	861.991	-115.017	-1392.17	871.045	-107.209	-1386.26	764.19
576	0	115.389	-973.97	1604.6	218.787	-977.439	1605.99	88.6734	-1127.46	1636.06	225.873	-1143.74	1641.75	177.57	-1218.33	1493.48	183.228	-1330.79	1274.11	161.82	-1081.3	1392.23	162.386	-1060.54	1206.15	237.261	-1325.23	1349.29	-21.2146	-1220.43	1438.67	-71.9276	-1282.58	1250.35	-81.0273	-1329.26	1138.14	-99.64	-1323.06	964.109	-58.4999	-1321.91	862.998	-117.303	-1371.96	871.225	-109.545	-1364.08	764.577
577	0	115.072	-961.521	1606.2	218.422	-965	1607.57	88.3595	-1114.84	1638.41	225.546	-1131.08	1644.18	176.944	-1206.48	1495.66	181.936	-1318.52	1276.12	161.435	-1069.34	1394.53	161.842	-1048.45	1208.52	236.012	-1313.42	1351.25	-21.9662	-1207.9	1441.15	-73.6072	-1267.78	1251.81	-83.4757	-1313.24	1139.18	-101.536	-1304.08	965.161	-60.2667	-1301.57	864.269	-119.555	-1351.14	871.575	-111.922	-1340.97	765.23
578	0	114.915	-949.209	1607.97	218.217	-952.705	1609.29	88.209	-1102.36	1640.96	225.38	-1118.55	1646.76	176.411	-1194.77	1497.98	180.695	-1306.38	1278.26	161.17	-1057.5	1396.99	161.428	-1036.45	1211.06	234.813	-1301.74	1353.32	-22.6234	-1195.44	1443.82	-75.2333	-1252.96	1253.46	-85.9349	-1297.12	1140.38	-103.41	-1284.7	966.425	-62.001	-1280.66	865.81	-121.753	-1329.76	872.104	-114.31	-1317.01	766.171
579	0	114.899	-937.024	1609.91	218.153	-940.548	1611.13	88.1997	-1090.01	1643.67	225.352	-1106.16	1649.45	175.956	-1183.17	1500.39	179.508	-1294.32	1280.48	161.008	-1045.77	1399.57	161.128	-1024.52	1213.75	233.663	-1290.17	1355.46	-23.1965	-1183.05	1446.62	-76.8048	-1238.14	1255.26	-88.3932	-1280.9	1141.74	-105.255	-1264.98	967.894	-63.6945	-1259.23	867.623	-123.879	-1307.85	872.819	-116.677	-1292.27	767.417
580	0	115.005	-924.954	1611.97	218.213	-928.515	1613.07	88.3075	-1077.77	1646.49	225.441	-1093.91	1652.22	175.566	-1171.65	1502.86	178.376	-1282.35	1282.75	160.934	-1034.12	1402.23	160.927	-1012.65	1216.52	232.56	-1278.67	1357.66	-23.6963	-1170.71	1449.52	-78.3221	-1223.33	1257.19	-90.8396	-1264.6	1143.22	-107.064	-1244.95	969.556	-65.3397	-1237.32	869.703	-125.919	-1285.49	873.72	-118.992	-1266.84	768.978
581	0	115.21	-912.986	1614.13	218.376	-916.596	1615.08	88.5074	-1065.63	1649.38	225.619	-1081.77	1655	175.228	-1160.21	1505.35	177.305	-1270.43	1285.03	160.93	-1022.54	1404.92	160.806	-1000.82	1219.35	231.505	-1267.23	1359.87	-24.1332	-1158.41	1452.46	-79.7866	-1208.52	1259.2	-93.2635	-1248.25	1144.78	-108.831	-1224.65	971.396	-66.9298	-1214.98	872.041	-127.861	-1262.7	874.802	-121.222	-1240.82	770.853
582	0	115.494	-901.104	1616.35	218.622	-904.776	1617.12	88.774	-1053.59	1652.27	225.863	-1069.75	1657.77	174.93	-1148.8	1507.82	176.299	-1258.55	1287.29	160.979	-1011	1407.59	160.75	-988.998	1222.16	230.5	-1255.84	1362.06	-24.5173	-1146.14	1455.39	-81.2	-1193.72	1261.25	-95.6548	-1231.85	1146.4	-110.55	-1204.11	973.39	-68.4584	-1192.25	874.623	-129.692	-1239.54	876.056	-123.337	-1214.28	773.036
583	0	115.836	-889.294	1618.58	218.931	-893.04	1619.17	89.0827	-1041.63	1655.12	226.148	-1057.83	1660.46	174.662	-1137.42	1510.22	175.363	-1246.7	1289.48	161.066	-999.481	1410.2	160.739	-977.189	1224.92	229.545	-1244.45	1364.2	-24.8574	-1133.9	1458.25	-82.5642	-1178.94	1263.3	-98.0035	-1215.42	1148.02	-112.216	-1183.37	975.517	-69.9196	-1169.18	877.43	-131.404	-1216.06	877.466	-125.312	-1187.32	775.514
584	0	116.215	-877.538	1620.78	219.283	-881.37	1621.17	89.4106	-1029.73	1657.86	226.451	-1046	1663.03	174.414	-1126.04	1512.52	174.501	-1234.86	1291.57	161.177	-987.97	1412.69	160.76	-965.379	1227.56	228.645	-1233.07	1366.25	-25.1615	-1121.67	1461	-83.8803	-1164.19	1265.3	-100.3	-1198.97	1149.6	-113.824	-1162.47	977.748	-71.3073	-1145.83	880.439	-132.989	-1192.31	879.016	-127.124	-1160.02	778.269
585	0	116.613	-865.82	1622.91	219.659	-869.751	1623.1	89.7371	-1017.89	1660.46	226.751	-1034.25	1665.43	174.18	-1114.64	1514.67	173.718	-1223.02	1293.53	161.299	-976.447	1415.02	160.799	-953.562	1230.03	227.802	-1221.67	1368.18	-25.436	-1109.45	1463.58	-85.1483	-1149.47	1267.2	-102.535	-1182.52	1151.11	-115.367	-1141.43	980.054	-72.6154	-1122.24	883.625	-134.443	-1168.31	880.685	-128.754	-1132.46	781.278
586	0	117.015	-854.121	1624.92	220.045	-858.165	1624.92	90.0443	-1006.07	1662.86	227.03	-1022.55	1667.64	173.955	-1103.2	1516.65	173.016	-1211.17	1295.33	161.424	-964.898	1417.14	160.844	-941.734	1232.29	227.019	-1210.24	1369.96	-25.6856	-1097.24	1465.96	-86.367	-1134.78	1268.97	-104.698	-1166.06	1152.49	-116.84	-1120.3	982.406	-73.8373	-1098.45	886.961	-135.76	-1144.13	882.451	-130.189	-1104.7	784.514
587	0	117.407	-842.426	1626.77	220.426	-846.595	1626.58	90.3178	-994.278	1665.02	227.274	-1010.89	1669.6	173.736	-1091.71	1518.41	172.4	-1199.32	1296.93	161.542	-953.311	1419.03	160.887	-929.893	1234.29	226.3	-1198.76	1371.56	-25.9131	-1085.03	1468.09	-87.5332	-1120.12	1270.56	-106.778	-1149.62	1153.72	-118.235	-1099.1	984.773	-74.9663	-1074.51	890.418	-136.936	-1119.8	884.292	-131.421	-1076.83	787.952
588	0	117.779	-830.718	1628.41	220.791	-835.024	1628.05	90.5467	-982.48	1666.9	227.473	-999.255	1671.29	173.523	-1080.16	1519.93	171.87	-1187.45	1298.32	161.65	-941.676	1420.64	160.923	-918.038	1236	225.65	-1187.22	1372.95	-26.1196	-1072.82	1469.94	-88.6419	-1105.51	1271.93	-108.766	-1133.19	1154.75	-119.544	-1077.86	987.128	-75.9951	-1050.47	893.965	-137.97	-1095.36	886.184	-132.447	-1048.89	791.564
589	0	118.124	-818.981	1629.81	221.133	-823.435	1629.3	90.7241	-970.665	1668.47	227.62	-987.62	1672.68	173.316	-1068.54	1521.19	171.429	-1175.56	1299.46	161.746	-929.985	1421.95	160.949	-906.168	1237.39	225.072	-1175.62	1374.12	-26.304	-1060.6	1471.49	-89.6863	-1090.95	1273.05	-110.65	-1116.78	1155.55	-120.758	-1056.61	989.443	-76.9162	-1026.38	897.575	-138.858	-1070.86	888.107	-133.265	-1020.95	795.322
590	0	118.439	-807.201	1630.94	221.446	-811.813	1630.3	90.8469	-958.816	1669.71	227.712	-975.967	1673.77	173.121	-1056.84	1522.17	171.079	-1163.66	1300.36	161.829	-918.231	1422.95	160.965	-894.282	1238.44	224.571	-1163.94	1375.05	-26.4636	-1048.38	1472.7	-90.6579	-1076.43	1273.9	-112.417	-1100.39	1156.1	-121.869	-1035.38	991.693	-77.7225	-1002.27	901.218	-139.599	-1046.33	890.041	-133.882	-993.071	799.201
591	0	118.721	-795.366	1631.78	221.729	-800.143	1631.02	90.9162	-946.918	1670.6	227.751	-964.28	1674.53	172.941	-1045.05	1522.87	170.821	-1151.74	1300.99	161.904	-906.41	1423.62	160.972	-882.381	1239.13	224.152	-1152.19	1375.73	-26.5942	-1036.14	1473.58	-91.5464	-1061.96	1274.46	-114.056	-1084.03	1156.39	-122.866	-1014.18	993.857	-78.4069	-978.199	904.868	-140.191	-1021.82	891.969	-134.305	-965.293	803.177
592	0	118.973	-783.463	1632.29	221.983	-788.412	1631.45	90.9365	-934.957	1671.13	227.742	-952.539	1674.97	172.784	-1033.18	1523.27	170.656	-1139.81	1301.35	161.975	-894.52	1423.95	160.975	-870.462	1239.47	223.822	-1140.35	1376.14	-26.6898	-1023.9	1474.11	-92.3403	-1047.53	1274.71	-115.552	-1067.68	1156.39	-123.74	-993.049	995.917	-78.963	-954.201	908.498	-140.633	-997.359	893.875	-134.543	-937.669	807.225
593	0	119.199	-771.484	1632.47	222.211	-776.609	1631.58	90.9164	-922.924	1671.31	227.694	-940.731	1675.09	172.66	-1021.22	1523.37	170.588	-1127.85	1301.45	162.048	-882.557	1423.95	160.979	-858.521	1239.46	223.584	-1128.44	1376.29	-26.7432	-1011.63	1474.31	-93.0272	-1033.15	1274.65	-116.895	-1051.35	1156.11	-124.481	-972.004	997.857	-79.3854	-930.321	912.086	-140.925	-972.996	895.745	-134.608	-910.247	811.324
594	0	119.406	-759.421	1632.31	222.42	-764.723	1631.4	90.8674	-910.807	1671.14	227.619	-928.841	1674.89	172.579	-1009.17	1523.18	170.616	-1115.86	1301.27	162.134	-870.521	1423.63	160.992	-846.556	1239.11	223.444	-1116.43	1376.17	-26.7464	-999.341	1474.16	-93.5941	-1018.8	1274.28	-118.069	-1035.04	1155.55	-125.08	-951.07	999.667	-79.6692	-906.599	915.612	-141.064	-948.768	897.569	-134.512	-883.073	815.453
595	0	119.604	-747.27	1631.82	222.617	-752.745	1630.91	90.8041	-898.601	1670.64	227.533	-916.858	1674.39	172.551	-997.031	1522.7	170.742	-1103.85	1300.83	162.243	-858.41	1423	161.022	-834.558	1238.44	223.406	-1104.34	1375.79	-26.6902	-987.027	1473.7	-94.0282	-1004.48	1273.6	-119.064	-1018.76	1154.72	-125.529	-930.269	1001.34	-79.811	-883.073	919.058	-141.051	-924.715	899.339	-134.269	-856.193	819.59
596	0	119.805	-735.026	1631.01	222.815	-740.671	1630.13	90.7436	-886.301	1669.81	227.452	-904.774	1673.61	172.589	-984.808	1521.95	170.968	-1091.81	1300.14	162.386	-846.222	1422.08	161.078	-822.521	1237.46	223.475	-1092.15	1375.15	-26.5653	-974.681	1472.94	-94.3175	-990.18	1272.65	-119.866	-1002.5	1153.63	-125.818	-909.626	1002.87	-79.808	-859.782	922.407	-140.885	-900.876	901.048	-133.891	-829.654	823.715
597	0	120.02	-722.688	1629.9	223.025	-728.494	1629.06	90.705	-873.905	1668.69	227.395	-892.582	1672.56	172.705	-972.499	1520.95	171.292	-1079.71	1299.2	162.576	-833.956	1420.88	161.171	-810.434	1236.21	223.654	-1079.88	1374.26	-26.3621	-962.295	1471.91	-94.4508	-975.902	1271.42	-120.466	-986.264	1152.3	-125.943	-889.164	1004.25	-79.6586	-836.762	925.647	-140.563	-877.291	902.69	-133.387	-803.499	827.81
598	0	120.266	-710.257	1628.5	223.262	-716.211	1627.73	90.7086	-861.414	1667.31	227.383	-880.279	1671.27	172.91	-960.106	1519.7	171.715	-1067.57	1298.04	162.825	-821.611	1419.45	161.309	-798.286	1234.71	223.944	-1067.52	1373.14	-26.0713	-949.862	1470.63	-94.419	-961.635	1269.95	-120.855	-970.067	1150.75	-125.897	-868.908	1005.49	-79.3619	-814.048	928.769	-140.086	-853.998	904.262	-132.77	-777.775	831.854
599	0	120.556	-697.733	1626.86	223.541	-703.822	1626.17	90.7756	-848.831	1665.69	227.436	-867.863	1669.76	173.216	-947.628	1518.25	172.233	-1055.36	1296.67	163.148	-809.183	1417.79	161.504	-786.065	1233.01	224.346	-1055.06	1371.8	-25.6844	-937.372	1469.13	-94.2149	-947.375	1268.26	-121.026	-953.915	1149.02	-125.677	-848.884	1006.59	-78.918	-791.672	931.762	-139.453	-831.036	905.761	-132.046	-752.522	835.83
600	0	120.907	-685.12	1625	223.877	-691.325	1624.4	90.9272	-836.16	1663.86	227.575	-855.336	1668.07	173.633	-935.065	1516.59	172.844	-1043.08	1295.11	163.557	-796.67	1415.95	161.765	-773.758	1231.12	224.86	-1042.51	1370.26	-25.1935	-924.814	1467.45	-93.8336	-933.115	1266.39	-120.976	-937.822	1147.13	-125.28	-829.115	1007.56	-78.3274	-769.669	934.622	-138.662	-808.442	907.184	-131.223	-727.785	839.718
601	0	121.333	-672.421	1622.97	224.286	-678.723	1622.46	91.184	-823.406	1661.87	227.821	-842.702	1666.21	174.172	-922.418	1514.77	173.544	-1030.7	1293.37	164.064	-784.069	1413.95	162.101	-761.351	1229.08	225.483	-1029.87	1368.53	-24.5922	-912.179	1465.62	-93.2731	-918.853	1264.37	-120.702	-921.802	1145.12	-124.706	-809.629	1008.39	-77.5913	-748.067	937.341	-137.713	-786.254	908.53	-130.303	-703.602	843.502
602	0	121.85	-659.639	1620.81	224.786	-666.017	1620.39	91.5654	-810.578	1659.74	228.192	-829.965	1664.22	174.839	-909.684	1512.81	174.327	-1018.23	1291.49	164.679	-771.374	1411.83	162.52	-748.833	1226.93	226.213	-1017.13	1366.64	-23.8755	-899.454	1463.68	-92.5339	-904.589	1262.23	-120.206	-905.872	1143.02	-123.956	-790.449	1009.11	-76.7111	-726.897	939.916	-136.607	-764.507	909.796	-129.288	-680.011	847.163
603	0	122.473	-646.78	1618.55	225.39	-653.211	1618.22	92.0889	-797.681	1657.51	228.705	-817.131	1662.12	175.641	-896.863	1510.73	175.187	-1005.64	1289.49	165.411	-758.584	1409.61	163.03	-736.19	1224.7	227.044	-1004.3	1364.6	-23.04	-886.629	1461.66	-91.6197	-890.322	1260.02	-119.493	-890.052	1140.86	-123.031	-771.602	1009.7	-75.6887	-706.187	942.341	-135.346	-743.236	910.979	-128.177	-657.046	850.684
604	0	123.215	-633.849	1616.25	226.113	-640.309	1615.99	92.7696	-784.724	1655.22	229.374	-804.208	1659.94	176.58	-883.952	1508.56	176.117	-992.932	1287.38	166.266	-745.694	1407.33	163.635	-723.413	1222.42	227.971	-991.367	1362.45	-22.0844	-873.695	1459.59	-90.5371	-876.055	1257.75	-118.571	-874.361	1138.67	-121.937	-753.111	1010.19	-74.5264	-685.963	944.612	-133.931	-722.472	912.076	-126.969	-634.739	854.047
605	0	124.085	-620.849	1613.93	226.966	-627.316	1613.73	93.6192	-771.714	1652.89	230.211	-791.205	1657.7	177.659	-870.952	1506.33	177.108	-980.091	1285.19	167.248	-732.701	1405.01	164.338	-710.494	1220.11	228.989	-978.344	1360.2	-21.0091	-860.644	1457.5	-89.2955	-861.793	1255.48	-117.452	-858.819	1136.48	-120.679	-734.998	1010.57	-73.2269	-666.25	946.72	-132.368	-702.246	913.082	-125.658	-613.115	857.233
606	0	125.094	-607.787	1611.64	227.959	-614.239	1611.48	94.646	-758.658	1650.57	231.221	-778.129	1655.43	178.874	-857.862	1504.07	178.155	-967.112	1282.96	168.356	-719.606	1402.68	165.14	-697.426	1217.81	230.091	-965.226	1357.87	-19.8172	-847.472	1455.43	-87.907	-847.542	1253.23	-116.148	-843.447	1134.33	-119.264	-717.284	1010.86	-71.7934	-647.068	948.66	-130.661	-682.583	913.992	-124.239	-592.198	860.224
607	0	126.247	-594.666	1609.42	229.099	-601.084	1609.27	95.8541	-745.561	1648.28	232.407	-764.989	1653.14	180.222	-844.684	1501.79	179.251	-953.991	1280.7	169.587	-706.407	1400.36	166.04	-684.207	1215.53	231.27	-952.018	1355.51	-18.5137	-834.177	1453.39	-86.3861	-833.309	1251.03	-114.677	-828.262	1132.24	-117.702	-699.987	1011.05	-70.2299	-628.439	950.423	-128.819	-663.507	914.799	-122.706	-572.006	862.999
608	0	127.546	-581.492	1607.28	230.387	-587.857	1607.12	97.2429	-732.429	1646.04	233.768	-751.795	1650.86	181.693	-831.421	1499.54	180.389	-940.73	1278.43	170.934	-693.109	1398.08	167.03	-670.836	1213.31	232.52	-938.723	1353.12	-17.1062	-820.765	1451.42	-84.7494	-819.105	1248.9	-113.057	-813.28	1130.23	-116.002	-683.122	1011.15	-68.5413	-610.379	951.997	-126.851	-645.037	915.494	-121.054	-552.552	865.536
609	0	128.989	-568.27	1605.27	231.824	-574.568	1605.05	98.8072	-719.266	1643.89	235.297	-738.555	1648.62	183.279	-818.078	1497.32	181.565	-927.333	1276.2	172.385	-679.716	1395.87	168.105	-657.317	1211.17	233.834	-925.347	1350.74	-15.6048	-807.242	1449.53	-83.0153	-804.938	1246.88	-111.308	-798.517	1128.31	-114.176	-666.703	1011.16	-66.7334	-592.902	953.37	-124.768	-627.191	916.068	-119.277	-533.846	867.811
610	0	130.572	-555.004	1603.39	233.404	-561.226	1603.09	100.537	-706.076	1641.84	236.984	-725.277	1646.41	184.963	-804.662	1495.16	182.775	-913.808	1274.01	173.925	-666.236	1393.74	169.254	-643.657	1209.12	235.205	-911.899	1348.4	-14.0218	-793.621	1447.73	-81.2036	-790.823	1244.98	-109.451	-783.983	1126.52	-112.237	-650.74	1011.08	-64.8132	-576.021	954.53	-122.584	-609.98	916.51	-117.373	-515.893	869.8
611	0	132.286	-541.699	1601.67	235.117	-547.839	1601.24	102.417	-692.861	1639.93	238.811	-711.971	1644.28	186.731	-791.184	1493.09	184.015	-900.167	1271.9	175.536	-652.681	1391.72	170.464	-629.867	1207.18	236.626	-898.389	1346.12	-12.3721	-779.921	1446.06	-79.3347	-776.769	1243.21	-107.508	-769.688	1124.86	-110.199	-635.241	1010.9	-62.7892	-559.743	955.463	-120.313	-593.413	916.81	-115.339	-498.698	871.477
612	0	134.118	-528.361	1600.11	236.95	-534.417	1599.53	104.427	-679.623	1638.16	240.759	-698.643	1642.23	188.561	-777.656	1491.14	185.282	-886.428	1269.89	177.199	-639.064	1389.83	171.721	-615.964	1205.38	238.089	-884.829	1343.92	-10.6725	-766.16	1444.51	-77.4297	-762.793	1241.6	-105.5	-755.638	1123.35	-108.077	-620.21	1010.64	-60.671	-544.076	956.155	-117.973	-577.497	916.957	-113.18	-482.259	872.818
613	0	136.05	-514.995	1598.72	238.887	-520.973	1597.95	106.544	-666.365	1636.56	242.806	-685.302	1640.29	190.433	-764.09	1489.31	186.572	-872.612	1267.99	178.89	-625.402	1388.07	173.013	-601.967	1203.73	239.585	-871.233	1341.85	-8.94215	-752.363	1443.1	-75.5094	-748.907	1240.16	-103.449	-741.839	1121.98	-105.887	-605.652	1010.28	-58.4698	-529.023	956.593	-115.58	-562.236	916.941	-110.899	-466.576	873.799
614	0	138.064	-501.607	1597.51	240.906	-507.515	1596.51	108.739	-653.085	1635.13	244.923	-671.954	1638.47	192.322	-750.504	1487.63	187.882	-858.743	1266.24	180.587	-611.714	1386.48	174.323	-587.904	1202.23	241.105	-857.619	1339.93	-7.20159	-738.554	1441.85	-73.5937	-735.128	1238.88	-101.374	-728.292	1120.78	-103.644	-591.567	1009.82	-56.1982	-514.588	956.766	-113.154	-547.631	916.753	-108.506	-451.646	874.399
615	0	140.138	-488.203	1596.48	242.985	-494.057	1595.22	110.981	-639.787	1633.9	247.081	-658.608	1636.79	194.205	-736.913	1486.12	189.204	-844.849	1264.66	182.265	-598.02	1385.05	175.638	-573.804	1200.91	242.638	-844.004	1338.17	-5.47254	-724.76	1440.75	-71.7018	-721.47	1237.79	-99.2933	-714.999	1119.74	-101.366	-577.957	1009.27	-53.8701	-500.77	956.663	-110.712	-533.684	916.385	-106.016	-437.468	874.6
616	0	142.246	-474.789	1595.63	245.098	-480.608	1594.08	113.236	-626.47	1632.87	249.25	-645.27	1635.27	196.056	-723.336	1484.81	190.533	-830.959	1263.27	183.902	-584.342	1383.82	176.944	-559.701	1199.77	244.171	-830.408	1336.62	-3.7771	-711.004	1439.81	-69.8511	-707.951	1236.88	-97.2248	-701.962	1118.87	-99.0704	-564.821	1008.61	-51.5009	-487.571	956.279	-108.276	-520.393	915.832	-103.445	-424.04	874.387
617	0	144.363	-461.37	1594.95	247.219	-467.181	1593.1	115.471	-613.136	1632.04	251.396	-631.945	1633.94	197.85	-709.792	1483.7	191.858	-817.104	1262.09	185.477	-570.703	1382.78	178.229	-545.633	1198.83	245.691	-816.848	1335.29	-2.13695	-697.312	1439.05	-68.0574	-694.587	1236.16	-95.1832	-689.179	1118.17	-96.7734	-552.159	1007.85	-49.107	-474.988	955.609	-105.862	-507.757	915.093	-100.814	-411.361	873.753
618	0	146.461	-447.954	1594.44	249.321	-453.787	1592.26	117.649	-599.785	1631.43	253.488	-618.64	1632.8	199.563	-696.299	1482.81	193.172	-803.315	1261.14	186.969	-557.125	1381.95	179.481	-531.636	1198.08	247.185	-803.345	1334.21	-0.572477	-683.708	1438.47	-66.3343	-681.394	1235.63	-93.1813	-676.651	1117.64	-94.4923	-539.972	1007	-46.706	-463.02	954.655	-103.49	-495.776	914.167	-98.1467	-399.433	872.694
619	0	148.514	-434.547	1594.08	251.374	-440.435	1591.59	119.736	-586.42	1631.04	255.495	-605.358	1631.89	201.174	-682.876	1482.16	194.465	-789.62	1260.44	188.362	-543.631	1381.35	180.689	-517.749	1197.54	248.641	-789.916	1333.4	0.898183	-670.213	1438.07	-64.6934	-668.387	1235.3	-91.2301	-664.377	1117.28	-92.2436	-528.256	1006.05	-44.3161	-451.665	953.422	-101.176	-484.449	913.06	-95.4701	-388.256	871.214
620	0	150.493	-421.157	1593.88	253.351	-427.136	1591.07	121.701	-573.044	1630.88	257.385	-592.106	1631.22	202.665	-669.54	1481.77	195.728	-776.045	1260	189.641	-530.239	1380.97	181.841	-504.003	1197.22	250.047	-776.577	1332.87	2.25989	-656.849	1437.86	-63.1437	-655.58	1235.16	-89.3381	-652.357	1117.09	-90.0432	-517.014	1005.01	-41.9561	-440.921	951.919	-98.9375	-473.774	911.782	-92.8118	-377.834	869.323
621	0	152.371	-407.792	1593.83	255.225	-413.897	1590.71	123.513	-559.661	1630.95	259.133	-578.885	1630.81	204.022	-656.308	1481.64	196.956	-762.612	1259.84	190.796	-516.968	1380.84	182.926	-490.429	1197.14	251.393	-763.341	1332.63	3.50114	-643.635	1437.85	-61.6918	-642.988	1235.21	-87.5116	-640.591	1117.08	-87.9061	-506.243	1003.89	-39.6451	-430.785	950.16	-96.7889	-463.75	910.344	-90.2003	-368.171	867.04
622	0	154.124	-394.46	1593.93	256.97	-400.726	1590.52	125.148	-546.28	1631.26	260.714	-565.701	1630.67	205.235	-643.194	1481.78	198.142	-749.336	1259.95	191.818	-503.832	1380.97	183.933	-477.046	1197.3	252.673	-750.218	1332.7	4.61451	-630.59	1438.04	-60.3415	-630.622	1235.47	-85.7549	-629.078	1117.25	-85.8464	-495.943	1002.71	-37.4025	-421.254	948.165	-94.7446	-454.376	908.765	-87.6643	-359.269	864.39
623	0	155.725	-381.172	1594.18	258.563	-387.628	1590.5	126.586	-532.908	1631.8	262.111	-552.557	1630.82	206.3	-630.207	1482.19	199.288	-736.229	1260.35	192.702	-490.842	1381.37	184.852	-463.867	1197.71	253.883	-737.214	1333.07	5.59678	-617.729	1438.44	-59.094	-618.49	1235.92	-84.0701	-617.819	1117.59	-83.877	-486.113	1001.48	-35.2473	-412.323	945.958	-92.8178	-445.65	907.067	-85.2317	-351.133	861.404
624	0	157.154	-367.936	1594.57	259.981	-374.606	1590.66	127.812	-519.557	1632.58	263.31	-539.456	1631.27	207.216	-617.356	1482.89	200.394	-723.294	1261.03	193.445	-478.004	1382.03	185.672	-450.896	1198.4	255.024	-724.331	1333.74	6.44884	-605.066	1439.04	-57.9478	-606.603	1236.57	-82.4571	-606.815	1118.12	-82.0096	-476.752	1000.21	-33.1983	-403.987	943.567	-91.0208	-437.569	905.277	-82.9292	-343.765	858.122
625	0	158.392	-354.763	1595.13	261.207	-361.663	1591.02	128.817	-506.243	1633.6	264.302	-526.401	1632.03	207.989	-604.642	1483.85	201.465	-710.531	1261.98	194.049	-465.318	1382.98	186.385	-438.127	1199.36	256.098	-711.567	1334.71	7.17544	-592.609	1439.85	-56.8986	-594.965	1237.43	-80.914	-596.066	1118.83	-80.2546	-467.857	998.925	-31.2737	-396.238	941.024	-89.3643	-430.128	903.423	-80.7819	-337.162	854.589
626	0	159.422	-341.665	1595.84	262.227	-348.8	1591.58	129.598	-492.981	1634.84	265.084	-513.396	1633.09	208.626	-592.065	1485.08	202.506	-697.929	1263.19	194.517	-452.782	1384.2	186.986	-425.548	1200.6	257.111	-698.916	1335.95	7.78461	-580.364	1440.86	-55.9399	-583.581	1238.47	-79.4375	-585.573	1119.73	-78.6209	-459.427	997.645	-29.4905	-389.068	938.363	-87.8579	-423.319	901.539	-78.8127	-331.323	850.853
627	0	160.235	-328.652	1596.73	263.029	-336.017	1592.35	130.157	-479.788	1636.31	265.66	-500.447	1634.45	209.139	-579.617	1486.56	203.525	-685.477	1264.64	194.855	-440.387	1385.69	187.47	-413.138	1202.13	258.072	-686.369	1337.46	8.28714	-568.329	1442.06	-55.063	-572.455	1239.71	-78.0228	-575.339	1120.8	-77.1161	-451.456	996.39	-27.8646	-382.464	935.62	-86.5096	-417.135	899.655	-77.0425	-326.238	846.969
628	0	160.823	-315.734	1597.79	263.608	-323.313	1593.34	130.503	-466.682	1637.98	266.035	-487.557	1636.09	209.543	-567.288	1488.28	204.529	-673.157	1266.31	195.07	-428.12	1387.43	187.839	-400.874	1203.92	258.989	-673.913	1339.21	8.69579	-556.497	1443.46	-54.2577	-561.586	1241.13	-76.6642	-565.365	1122.05	-75.7462	-443.939	995.179	-26.4104	-376.411	932.832	-85.3256	-411.561	897.806	-75.4902	-321.896	842.992
629	0	161.184	-302.919	1599.03	263.963	-310.685	1594.56	130.648	-453.681	1639.84	266.222	-474.733	1637.98	209.854	-555.065	1490.2	205.525	-660.948	1268.18	195.172	-415.963	1389.42	188.097	-388.729	1205.95	259.874	-661.533	1341.17	9.02463	-544.857	1445.02	-53.5127	-550.973	1242.71	-75.3557	-555.655	1123.47	-74.5157	-436.868	994.031	-25.1401	-370.892	930.032	-84.3096	-406.582	896.02	-74.172	-318.277	838.977
630	0	161.32	-290.214	1600.46	264.098	-298.13	1595.99	130.609	-440.8	1641.85	266.234	-461.978	1640.1	210.087	-542.93	1492.29	206.518	-648.829	1270.21	195.174	-403.899	1391.61	188.251	-376.678	1208.21	260.735	-649.213	1343.31	9.28831	-533.39	1446.73	-52.816	-540.611	1244.45	-74.091	-546.21	1125.05	-73.4278	-430.234	992.96	-24.0637	-365.885	927.255	-83.4635	-402.179	894.327	-73.1015	-315.358	834.98
631	0	161.24	-277.625	1602.05	264.021	-285.646	1597.63	130.402	-428.052	1643.99	266.088	-449.298	1642.41	210.259	-530.863	1494.53	207.512	-636.777	1272.37	195.088	-391.905	1393.97	188.312	-364.695	1210.64	261.584	-636.936	1345.6	9.50154	-522.073	1448.56	-52.1558	-530.495	1246.33	-72.8642	-537.03	1126.77	-72.4839	-424.024	991.979	-23.1888	-361.363	924.529	-82.7859	-398.326	892.748	-72.2894	-313.108	831.049
632	0	160.955	-265.151	1603.81	263.744	-273.225	1599.47	130.051	-415.447	1646.22	265.803	-436.696	1644.86	210.386	-518.845	1496.87	208.51	-624.772	1274.63	194.927	-379.96	1396.46	188.295	-352.757	1213.22	262.427	-624.684	1347.99	9.67844	-510.882	1450.49	-51.5209	-520.613	1248.3	-71.6699	-528.116	1128.6	-71.6842	-418.224	991.096	-22.5201	-357.298	921.88	-82.2734	-394.998	891.301	-71.7427	-311.49	827.231
633	0	160.478	-252.793	1605.71	263.283	-260.864	1601.48	129.575	-402.99	1648.5	265.398	-424.173	1647.4	210.482	-506.854	1499.28	209.51	-612.793	1276.95	194.705	-368.041	1399.04	188.214	-340.843	1215.87	263.271	-612.44	1350.44	9.83208	-499.787	1452.46	-50.9011	-510.955	1250.36	-70.5036	-519.463	1130.54	-71.0272	-412.815	990.314	-22.0596	-353.658	919.326	-81.9194	-392.161	889.996	-71.4645	-310.461	823.562
634	0	159.829	-240.544	1607.72	262.654	-248.554	1603.64	128.996	-390.682	1650.78	264.891	-411.729	1649.98	210.559	-494.87	1501.69	210.511	-600.824	1279.28	194.435	-356.13	1401.64	188.085	-328.935	1218.55	264.12	-600.19	1352.91	9.97407	-488.762	1454.46	-50.2876	-501.504	1252.46	-69.3615	-511.068	1132.54	-70.5103	-407.777	989.633	-21.8064	-350.407	916.88	-81.715	-389.78	888.837	-71.4539	-309.973	820.07
635	0	159.027	-228.398	1609.82	261.878	-236.288	1605.9	128.336	-378.519	1653.03	264.303	-399.36	1652.55	210.628	-482.872	1504.08	211.508	-588.852	1281.59	194.129	-344.205	1404.22	187.925	-317.017	1221.19	264.977	-587.919	1355.36	10.1142	-477.778	1456.42	-49.6734	-492.241	1254.58	-68.2409	-502.919	1134.59	-70.1291	-403.085	989.046	-21.7569	-347.506	914.551	-81.6491	-387.818	887.824	-71.7051	-309.973	816.776
636	0	158.092	-216.344	1611.96	260.973	-224.056	1608.23	127.614	-366.492	1655.19	263.652	-387.062	1655.05	210.698	-470.845	1506.38	212.495	-576.866	1283.84	193.798	-332.252	1406.72	187.749	-305.076	1223.75	265.839	-575.616	1357.73	10.2603	-466.807	1458.32	-49.0529	-483.148	1256.69	-67.1397	-495.006	1136.65	-69.8782	-398.713	988.547	-21.9048	-344.917	912.34	-81.7087	-386.231	886.949	-72.208	-310.407	813.689
637	0	157.045	-204.366	1614.1	259.961	-211.848	1610.57	126.848	-354.588	1657.21	262.955	-374.824	1657.44	210.774	-458.771	1508.57	213.466	-564.859	1285.98	193.452	-320.255	1409.09	187.569	-293.101	1226.15	266.705	-563.27	1359.99	10.418	-455.826	1460.11	-48.4226	-474.2	1258.74	-66.0568	-487.311	1138.7	-69.7508	-394.63	988.122	-22.2411	-342.597	910.245	-81.8795	-384.977	886.2	-72.948	-311.217	810.814
638	0	155.906	-192.45	1616.21	258.86	-199.652	1612.89	126.054	-342.789	1659.07	262.226	-362.636	1659.65	210.86	-446.638	1510.59	214.411	-552.826	1287.98	193.098	-308.202	1411.27	187.397	-281.086	1228.35	267.57	-550.875	1362.1	10.5907	-444.811	1461.75	-47.7803	-465.374	1260.71	-64.992	-479.813	1140.69	-69.7388	-390.803	987.758	-22.7546	-340.507	908.259	-82.1467	-384.008	885.563	-73.9062	-312.345	808.144
639	0	154.696	-180.577	1618.22	257.689	-187.456	1615.12	125.246	-331.076	1660.7	261.48	-350.483	1661.65	210.956	-434.433	1512.41	215.319	-540.763	1289.81	192.742	-296.086	1413.23	187.241	-269.025	1230.3	268.425	-538.424	1364.02	10.7793	-433.744	1463.21	-47.1254	-456.644	1262.56	-63.9452	-472.488	1142.61	-69.8334	-387.2	987.441	-23.4321	-338.604	906.372	-82.4951	-383.279	885.022	-75.0603	-313.735	805.671
640	0	153.432	-168.728	1620.09	256.464	-175.246	1617.23	124.434	-319.424	1662.09	260.727	-338.35	1663.4	211.061	-422.149	1513.99	216.181	-528.67	1291.43	192.385	-283.899	1414.92	187.104	-256.916	1231.96	269.262	-525.913	1365.72	10.9824	-422.608	1464.44	-46.4589	-447.984	1264.28	-62.9172	-465.31	1144.43	-70.0247	-383.782	987.155	-24.2588	-336.849	904.572	-82.9099	-382.741	884.562	-76.3853	-315.33	803.38
641	0	152.13	-156.882	1621.78	255.2	-163.009	1619.16	123.627	-307.807	1663.2	259.975	-326.219	1664.86	211.17	-409.777	1515.31	216.985	-516.545	1292.81	192.028	-271.636	1416.31	186.989	-244.758	1233.3	270.07	-513.34	1367.17	11.196	-411.386	1465.43	-45.7828	-439.367	1265.84	-61.9092	-458.249	1146.13	-70.3026	-380.513	986.885	-25.2185	-335.205	902.846	-83.3772	-382.348	884.166	-77.8541	-317.077	801.255
642	0	150.803	-145.02	1623.25	253.911	-150.731	1620.86	122.83	-296.2	1664.01	259.231	-314.072	1666	211.277	-397.314	1516.34	217.719	-504.386	1293.94	191.669	-259.295	1417.36	186.894	-232.553	1234.28	270.836	-500.703	1368.34	11.4138	-400.068	1466.15	-45.1009	-430.766	1267.21	-60.9226	-451.271	1147.69	-70.6563	-377.355	986.617	-26.2943	-333.634	901.178	-83.8843	-382.05	883.82	-79.4386	-318.925	799.279
643	0	149.464	-133.119	1624.46	252.606	-138.398	1622.3	122.048	-284.576	1664.51	258.498	-301.89	1666.81	211.373	-384.754	1517.06	218.372	-492.19	1294.8	191.305	-246.873	1418.07	186.812	-220.301	1234.88	271.548	-488	1369.23	11.6274	-388.641	1466.58	-44.418	-422.155	1268.4	-59.9593	-444.345	1149.09	-71.0753	-374.269	986.338	-27.4689	-332.103	899.557	-84.4197	-381.804	883.515	-81.111	-320.825	797.435
644	0	148.121	-121.161	1625.39	251.294	-125.998	1623.45	121.28	-272.906	1664.68	257.776	-289.653	1667.27	211.448	-372.097	1517.47	218.931	-479.955	1295.37	190.93	-234.37	1418.41	186.738	-208.005	1235.11	272.191	-475.233	1369.82	11.8262	-377.097	1466.72	-43.7402	-413.507	1269.37	-59.0216	-437.436	1150.33	-71.5493	-371.217	986.038	-28.7252	-330.58	897.968	-84.9735	-381.564	883.24	-82.8439	-322.732	795.71
645	0	146.781	-109.125	1626	249.981	-113.519	1624.27	120.525	-261.165	1664.52	257.064	-277.343	1667.37	211.49	-359.34	1517.56	219.387	-467.674	1295.65	190.536	-221.784	1418.38	186.661	-195.665	1234.96	272.753	-462.402	1370.1	11.9983	-365.428	1466.56	-43.0748	-404.796	1270.14	-58.1123	-430.509	1151.4	-72.0687	-368.162	985.707	-30.0464	-329.035	896.4	-85.5373	-381.286	882.99	-84.612	-324.605	794.09
646	0	145.448	-96.995	1626.28	248.671	-100.948	1624.75	119.779	-249.328	1664.03	256.358	-264.944	1667.12	211.486	-346.483	1517.33	219.728	-455.341	1295.63	190.115	-209.116	1417.98	186.57	-183.282	1234.42	273.218	-449.506	1370.08	12.1306	-353.627	1466.1	-42.4302	-395.999	1270.68	-57.2347	-423.53	1152.28	-72.6247	-365.066	985.339	-31.4167	-327.44	894.842	-86.1046	-380.931	882.761	-86.3919	-326.404	792.566
647	0	144.126	-84.7538	1626.23	247.368	-88.2764	1624.88	119.035	-237.372	1663.23	255.651	-252.44	1666.53	211.421	-333.528	1516.78	219.945	-442.947	1295.31	189.658	-196.364	1417.23	186.455	-170.854	1233.52	273.573	-436.546	1369.75	12.209	-341.688	1465.35	-41.8159	-387.092	1271.01	-56.3926	-416.464	1152.99	-73.2099	-361.891	984.927	-32.8213	-325.767	893.289	-86.6703	-380.457	882.551	-88.1631	-328.093	791.131
648	0	142.815	-72.3872	1625.82	246.071	-75.4958	1624.64	118.286	-225.277	1662.13	254.934	-239.816	1665.61	211.283	-320.475	1515.94	220.031	-430.483	1294.71	189.156	-183.529	1416.14	186.302	-158.38	1232.28	273.807	-423.522	1369.14	12.2192	-329.607	1464.32	-41.2423	-378.053	1271.13	-55.5909	-409.278	1153.52	-73.8181	-358.603	984.467	-34.2471	-323.989	891.732	-87.2309	-379.827	882.36	-89.9074	-329.639	789.779
649	0	141.514	-59.8828	1625.08	244.779	-62.5991	1624.05	117.522	-213.024	1660.74	254.199	-227.063	1664.38	211.056	-307.326	1514.81	219.978	-417.938	1293.83	188.597	-170.609	1414.73	186.099	-145.854	1230.71	273.908	-410.433	1368.26	12.1466	-317.382	1463.02	-40.7205	-368.86	1271.04	-54.8351	-401.938	1153.87	-74.4448	-355.166	983.957	-35.6825	-322.079	890.17	-87.7848	-379.004	882.187	-91.6095	-331.011	788.506
650	0	140.22	-47.2303	1624.01	243.49	-49.5814	1623.1	116.732	-200.598	1659.1	253.435	-214.17	1662.87	210.728	-294.085	1513.42	219.782	-405.304	1292.69	187.973	-157.606	1413.02	185.835	-133.27	1228.85	273.865	-397.281	1367.12	11.9775	-305.01	1461.47	-40.2624	-359.493	1270.75	-54.1318	-394.413	1154.05	-75.0871	-351.544	983.394	-37.1179	-320.009	888.599	-88.3319	-377.953	882.032	-93.257	-332.177	787.309
651	0	138.929	-34.4218	1622.62	242.202	-36.4395	1621.83	115.904	-187.988	1657.23	252.63	-201.133	1661.1	210.284	-280.755	1511.79	219.437	-392.571	1291.31	187.273	-144.517	1411.06	185.499	-120.623	1226.73	273.668	-384.062	1365.74	11.6985	-292.492	1459.69	-39.8802	-349.933	1270.26	-53.4887	-386.67	1154.06	-75.7438	-347.701	982.777	-38.5455	-317.752	887.02	-88.8737	-376.638	881.895	-94.8396	-333.109	786.183
652	0	137.638	-21.4517	1620.93	240.908	-23.172	1620.23	115.026	-175.184	1655.16	251.772	-187.947	1659.11	209.713	-267.339	1509.95	218.943	-379.732	1289.7	186.488	-131.344	1408.87	185.079	-107.902	1224.4	273.31	-370.778	1364.16	11.2976	-279.829	1457.7	-39.5868	-340.163	1269.59	-52.9145	-378.68	1153.9	-76.4153	-343.604	982.106	-39.9593	-315.276	885.432	-89.4135	-375.024	881.775	-96.3501	-333.774	785.126
653	0	136.339	-8.31698	1618.97	239.604	-9.77955	1618.36	114.086	-162.18	1652.92	250.85	-174.612	1656.94	209.005	-253.842	1507.93	218.297	-366.779	1287.9	185.609	-118.087	1406.49	184.566	-95.1006	1221.88	272.784	-357.428	1362.39	10.7637	-267.024	1455.53	-39.3948	-330.165	1268.74	-52.4189	-370.416	1153.59	-77.1037	-339.216	981.379	-41.3551	-312.551	883.838	-89.9561	-373.075	881.67	-97.7836	-334.141	784.133
654	0	135.028	4.98305	1616.77	238.285	3.73549	1616.23	113.071	-148.976	1650.54	249.852	-161.13	1654.62	208.149	-240.268	1505.76	217.501	-353.707	1285.94	184.63	-104.745	1403.96	183.951	-82.2081	1219.22	272.085	-344.012	1360.47	10.0877	-254.08	1453.21	-39.3168	-319.924	1267.72	-52.0123	-361.851	1153.12	-77.8126	-334.503	980.598	-42.7301	-309.543	882.24	-90.5078	-370.755	881.577	-99.1376	-334.177	783.202
655	0	133.699	18.4465	1614.37	236.945	17.3687	1613.88	111.971	-135.572	1648.07	248.768	-147.507	1652.2	207.139	-226.623	1503.48	216.554	-340.515	1283.83	183.544	-91.3208	1401.32	183.228	-69.2161	1216.46	271.211	-330.53	1358.43	9.26196	-241	1450.75	-39.3648	-309.425	1266.55	-51.7059	-352.961	1152.51	-78.5466	-329.43	979.762	-44.0832	-306.214	880.641	-91.0761	-368.025	881.492	-100.411	-333.842	782.328
656	0	132.345	32.0689	1611.8	235.579	31.1138	1611.36	110.776	-121.973	1645.53	247.589	-133.751	1649.71	205.971	-212.912	1501.11	215.461	-327.202	1281.62	182.347	-77.8158	1398.62	182.391	-56.117	1213.65	270.16	-316.983	1356.3	8.28109	-227.791	1448.2	-39.55	-298.658	1265.24	-51.511	-343.726	1151.77	-79.3115	-323.96	978.873	-45.4142	-302.528	879.045	-91.6702	-364.845	881.409	-101.606	-333.097	781.505
657	0	130.962	45.8432	1609.11	234.182	44.9627	1608.71	109.477	-108.188	1642.97	246.307	-119.872	1647.19	204.641	-199.141	1498.7	214.225	-313.77	1279.34	181.038	-64.233	1395.89	181.435	-42.9042	1210.82	268.933	-303.376	1354.11	7.14204	-214.457	1445.57	-39.8826	-287.611	1263.8	-51.4389	-334.127	1150.89	-80.1139	-318.059	977.932	-46.7243	-298.444	877.455	-92.3001	-361.176	881.321	-102.725	-331.898	780.727
658	0	129.545	59.7597	1606.33	232.749	58.9053	1605.97	108.069	-94.2268	1640.4	244.915	-105.883	1644.68	203.152	-185.316	1496.27	212.85	-300.224	1277.02	179.616	-50.5765	1393.18	180.359	-29.5735	1208.02	267.535	-289.711	1351.9	5.84436	-201.004	1442.89	-40.371	-276.275	1262.26	-51.5006	-324.149	1149.9	-80.9605	-311.691	976.941	-48.0154	-293.919	875.877	-92.9769	-356.973	881.223	-103.771	-330.195	779.988
659	0	128.091	73.8061	1603.51	231.279	72.9299	1603.19	106.548	-80.1055	1637.88	243.41	-91.799	1642.22	201.508	-171.444	1493.87	211.344	-286.571	1274.7	178.085	-36.8519	1390.51	179.163	-16.1231	1205.28	265.971	-275.995	1349.7	4.39057	-187.439	1440.21	-41.0222	-264.645	1260.61	-51.7065	-313.78	1148.8	-81.8586	-304.824	975.904	-49.2902	-288.909	874.314	-93.7121	-352.194	881.107	-104.751	-327.938	779.278
660	0	126.598	87.9677	1600.71	229.77	87.0231	1600.42	104.912	-65.8415	1635.42	241.792	-77.6379	1639.83	199.717	-157.533	1491.53	209.714	-272.821	1272.42	176.451	-23.0668	1387.94	177.848	-2.55439	1202.64	264.251	-262.237	1347.54	2.78634	-173.769	1437.55	-41.8411	-252.715	1258.9	-52.066	-303.012	1147.61	-82.8152	-297.424	974.825	-50.5519	-283.369	872.772	-94.5178	-346.794	880.964	-105.673	-325.069	778.59
661	0	125.066	102.227	1597.95	228.222	101.17	1597.71	103.165	-51.4557	1633.06	240.061	-63.4176	1637.56	197.79	-143.594	1489.28	207.97	-258.987	1270.2	174.723	-9.2309	1385.5	176.421	11.1275	1200.13	262.388	-248.447	1345.47	1.04073	-160.001	1434.95	-42.8305	-240.484	1257.14	-52.5874	-291.838	1146.34	-83.8367	-289.458	973.709	-51.8042	-277.251	871.256	-95.4061	-340.73	880.787	-106.544	-321.531	777.914
662	0	123.494	116.564	1595.28	226.637	115.354	1595.09	101.311	-36.9714	1630.82	238.223	-49.1573	1635.42	195.745	-129.637	1487.16	206.125	-245.085	1268.09	172.915	4.64371	1383.2	174.889	24.9129	1197.8	260.396	-234.638	1343.51	-0.83366	-146.146	1432.43	-43.9907	-227.952	1255.34	-53.2775	-280.256	1145.02	-84.929	-280.896	972.563	-53.0511	-270.511	869.771	-96.3886	-333.957	880.568	-107.375	-317.262	777.242
663	0	121.888	130.956	1592.73	225.018	129.557	1592.61	99.3602	-22.4144	1628.73	236.287	-34.8769	1633.46	193.601	-115.676	1485.19	204.191	-231.131	1266.11	171.044	18.5423	1381.1	173.263	38.7876	1195.65	258.293	-220.825	1341.68	-2.82074	-132.215	1430.04	-45.3195	-215.121	1253.55	-54.1417	-268.265	1143.65	-86.0968	-271.71	971.396	-54.2968	-263.103	868.323	-97.4765	-326.432	880.299	-108.177	-312.197	776.563
664	0	120.251	145.38	1590.35	223.373	143.762	1590.3	97.3249	-7.81215	1626.82	234.264	-20.5965	1631.68	191.381	-101.727	1483.41	202.186	-217.147	1264.31	169.128	32.4474	1379.2	171.555	52.732	1193.73	256.1	-207.026	1340.03	-4.90104	-118.221	1427.81	-46.8122	-201.996	1251.78	-55.1836	-255.87	1142.27	-87.3434	-261.874	970.218	-55.5455	-254.982	866.919	-98.68	-318.115	879.974	-108.962	-306.274	775.868
665	0	118.591	159.81	1588.16	221.709	157.949	1588.21	95.222	6.80617	1625.09	232.171	-6.33608	1630.13	189.111	-87.8072	1481.85	200.126	-203.153	1262.7	167.189	46.3391	1377.54	169.783	66.7215	1192.06	253.842	-193.261	1338.58	-7.05205	-104.182	1425.77	-48.4615	-188.585	1250.06	-56.4047	-243.076	1140.89	-88.6709	-251.364	969.038	-56.8011	-246.107	865.564	-100.008	-308.967	879.586	-109.743	-299.426	775.145
666	0	116.917	174.218	1586.18	220.035	172.097	1586.35	93.0716	21.4107	1623.57	230.028	7.88463	1628.81	186.822	-73.9361	1480.52	198.031	-189.174	1261.33	165.252	60.1952	1376.14	167.963	80.7264	1190.66	251.542	-179.551	1337.35	-9.24873	-90.117	1423.97	-50.2572	-174.901	1248.42	-57.8045	-229.892	1139.54	-90.0794	-240.161	967.87	-58.0674	-236.44	864.266	-101.467	-298.953	879.131	-110.536	-291.591	774.386
667	0	115.242	188.577	1584.43	218.365	186.189	1584.75	90.8972	35.9712	1622.28	227.856	22.0467	1627.75	184.543	-60.1351	1479.44	195.921	-175.235	1260.2	163.34	73.9917	1375	166.116	94.7127	1189.53	249.227	-165.92	1336.37	-11.4642	-76.0481	1422.42	-52.1868	-160.956	1246.89	-59.3804	-216.33	1138.24	-91.5672	-228.25	966.726	-59.3475	-225.946	863.034	-103.062	-288.041	878.607	-111.353	-282.705	773.581
668	0	113.579	202.858	1582.94	216.711	200.203	1583.42	88.7252	50.4582	1621.24	225.682	36.1319	1626.96	182.305	-46.4269	1478.65	193.816	-161.361	1259.34	161.478	87.7036	1374.15	164.262	108.643	1188.71	246.923	-152.39	1335.64	-13.6704	-62.0007	1421.17	-54.2355	-146.77	1245.49	-61.1273	-202.406	1137.01	-93.1308	-215.62	965.621	-60.6435	-214.596	861.875	-104.794	-276.208	878.013	-112.211	-272.711	772.726
669	0	111.944	217.036	1581.7	215.091	214.12	1582.38	86.5837	64.843	1620.44	223.534	50.1232	1626.46	180.139	-32.8347	1478.14	191.736	-147.578	1258.77	159.689	101.306	1373.6	162.422	122.478	1188.18	244.657	-138.985	1335.18	-15.8395	-48.0017	1420.23	-56.386	-132.363	1244.25	-63.0376	-188.137	1135.88	-94.7646	-202.265	964.572	-61.9569	-202.367	860.802	-106.662	-263.432	877.352	-113.123	-261.555	771.817
670	0	110.354	231.083	1580.73	213.52	227.922	1581.63	84.5024	79.099	1619.92	221.443	64.0049	1626.25	178.074	-19.3819	1477.94	189.701	-133.911	1258.5	157.997	114.773	1373.35	160.618	136.181	1187.97	242.451	-125.727	1335.01	-17.9444	-34.0794	1419.64	-58.6193	-117.759	1243.2	-65.1012	-173.544	1134.87	-96.4611	-188.186	963.594	-63.2873	-189.241	859.826	-108.661	-249.701	876.631	-114.106	-249.189	770.858
671	0	108.828	244.976	1580.04	212.017	241.591	1581.17	82.5108	93.2022	1619.67	219.436	77.7621	1626.34	176.135	-6.09088	1478.04	187.725	-120.381	1258.53	156.42	128.082	1373.41	158.872	149.715	1188.07	240.327	-112.636	1335.12	-19.9599	-20.2619	1419.42	-60.915	-102.987	1242.35	-67.3054	-158.649	1134.01	-98.2111	-173.39	962.708	-64.6329	-175.208	858.962	-110.779	-235.012	875.859	-115.17	-235.572	769.858
672	0	107.387	258.694	1579.63	210.6	255.11	1581.01	80.6378	107.132	1619.72	217.545	91.3815	1626.74	174.344	7.01769	1478.46	185.824	-107.009	1258.87	154.975	141.214	1373.78	157.204	163.05	1188.49	238.302	-99.7301	1335.52	-21.8637	-6.5763	1419.57	-63.2515	-88.0753	1241.74	-69.6353	-143.477	1133.3	-100.004	-157.888	961.932	-65.9901	-160.267	858.227	-113.004	-219.368	875.052	-116.329	-220.675	768.832
673	0	106.049	272.22	1579.49	209.288	268.465	1581.14	78.91	120.869	1620.07	215.796	104.851	1627.44	172.717	19.9259	1479.19	184.007	-93.8124	1259.51	153.675	154.15	1374.47	155.632	176.162	1189.23	236.389	-87.0231	1336.2	-23.6373	6.95305	1420.11	-65.6067	-73.055	1241.38	-72.0739	-128.054	1132.78	-101.826	-141.699	961.288	-67.3538	-144.422	857.64	-115.316	-202.781	874.228	-117.59	-204.477	767.805
674	0	104.833	285.539	1579.64	208.099	281.643	1581.55	77.3508	134.402	1620.73	214.212	118.159	1628.46	171.267	32.6194	1480.22	182.282	-80.8037	1260.45	152.529	166.878	1375.48	154.175	189.037	1190.29	234.597	-74.5248	1337.16	-25.2661	20.3055	1421.05	-67.9587	-57.958	1241.29	-74.6025	-112.408	1132.45	-103.666	-124.848	960.796	-68.7174	-127.686	857.223	-117.694	-185.272	873.41	-118.958	-186.97	766.807
675	0	103.757	298.64	1580.07	207.049	294.631	1582.24	75.9796	147.719	1621.71	212.814	131.295	1629.77	169.998	45.0884	1481.55	180.651	-67.9921	1261.68	151.542	179.392	1376.8	152.846	201.669	1191.66	232.93	-62.2399	1338.38	-26.7405	33.4651	1422.37	-70.2862	-42.8154	1241.47	-77.2012	-96.566	1132.33	-105.51	-107.366	960.478	-70.0732	-110.08	856.998	-120.111	-166.872	872.627	-120.434	-168.161	765.877
676	0	102.835	311.518	1580.79	206.15	307.42	1583.19	74.8105	160.815	1623	211.617	144.251	1631.38	168.911	57.3279	1483.17	179.116	-55.3823	1263.18	150.714	191.687	1378.43	151.656	214.06	1193.35	231.388	-50.1684	1339.85	-28.0556	46.4217	1424.08	-72.5695	-27.6571	1241.93	-79.8491	-80.5561	1132.43	-107.344	-89.2882	960.355	-71.4128	-91.6294	856.993	-122.54	-147.617	871.908	-122.014	-148.069	765.059
677	0	102.078	324.169	1581.79	205.413	320.003	1584.4	73.8519	173.685	1624.6	210.629	157.017	1633.27	168.002	69.3386	1485.05	177.675	-42.9747	1264.93	150.042	203.769	1380.35	150.611	226.221	1195.33	229.967	-38.3048	1341.55	-29.211	59.171	1426.14	-74.7906	-12.5107	1242.68	-82.5254	-64.4049	1132.76	-109.155	-70.6541	960.447	-72.7276	-72.3686	857.232	-124.95	-127.553	871.286	-123.689	-126.729	764.404
678	0	101.495	336.594	1583.06	204.844	332.376	1585.85	73.1064	186.33	1626.51	209.854	169.586	1635.42	167.26	81.1262	1487.17	176.325	-30.7651	1266.91	149.518	215.644	1382.55	149.713	238.169	1197.6	228.663	-26.6392	1343.46	-30.2107	71.7145	1428.54	-76.934	2.59903	1243.71	-85.2096	-48.1389	1133.32	-110.931	-51.5071	960.77	-74.009	-52.3357	857.74	-127.314	-106.729	870.792	-125.445	-104.19	763.963
679	0	101.086	348.797	1584.6	204.446	344.536	1587.53	72.5705	198.752	1628.7	209.289	181.954	1637.8	166.671	92.7018	1489.51	175.061	-18.7454	1269.08	149.13	227.327	1385	148.959	249.926	1200.14	227.468	-15.1573	1345.55	-31.0624	84.0592	1431.25	-78.9874	17.6511	1245.01	-87.8823	-31.7829	1134.11	-112.662	-31.8934	961.34	-75.2493	-31.5742	858.543	-129.6	-85.2007	870.46	-127.262	-80.5178	763.79
680	0	100.849	360.784	1586.4	204.214	356.484	1589.41	72.2349	210.957	1631.16	208.924	194.115	1640.39	166.221	104.081	1492.03	173.88	-6.90349	1271.43	148.864	238.833	1387.67	148.341	261.517	1202.9	226.374	-3.84115	1347.79	-31.7766	96.217	1434.23	-80.9413	32.6284	1246.57	-90.5253	-15.3605	1135.11	-114.338	-11.8605	962.167	-76.4417	-10.1316	859.662	-131.784	-63.027	870.317	-129.117	-55.7886	763.932
681	0	100.778	372.564	1588.43	204.141	368.223	1591.48	72.0853	222.951	1633.86	208.746	206.07	1643.14	165.892	115.283	1494.7	172.779	4.77628	1273.91	148.704	250.183	1390.54	147.848	272.967	1205.87	225.374	7.32969	1350.15	-32.3662	108.203	1437.43	-82.7895	47.5175	1248.35	-93.1227	1.10607	1136.31	-115.952	8.54287	963.256	-77.5809	11.9412	861.114	-133.841	-40.2686	870.389	-130.981	-30.092	764.433
682	0	100.859	384.15	1590.69	204.215	379.761	1593.72	72.1028	234.742	1636.75	208.737	217.818	1646.03	165.664	126.331	1497.48	171.755	16.3123	1276.48	148.633	261.399	1393.55	147.464	284.303	1208.99	224.46	18.3776	1352.61	-32.8449	120.036	1440.79	-84.5291	62.3093	1250.33	-95.6603	17.5967	1137.7	-117.498	29.268	964.607	-78.6627	34.5905	862.912	-135.75	-16.9872	870.695	-132.824	-3.52741	765.33
683	0	101.077	395.555	1593.13	204.42	391.106	1596.09	72.2652	246.343	1639.79	208.873	229.363	1649.01	165.519	137.249	1500.33	170.808	27.725	1279.12	148.632	272.504	1396.67	147.174	295.549	1212.21	223.626	29.3259	1355.11	-33.2272	131.734	1444.28	-86.1596	76.9978	1252.47	-98.1262	34.0929	1139.23	-118.97	50.267	966.216	-79.684	57.76	865.064	-137.495	6.75545	871.25	-134.613	23.7983	766.648
684	0	101.413	406.794	1595.73	204.736	402.272	1598.57	72.5477	257.765	1642.95	209.132	240.713	1652.03	165.44	148.063	1503.2	169.936	39.0357	1281.78	148.684	283.524	1399.84	146.958	306.728	1215.49	222.865	40.1981	1357.63	-33.5271	143.318	1447.82	-87.6831	91.5807	1254.74	-100.511	50.5787	1140.88	-120.367	71.4931	968.071	-80.6427	81.3914	867.57	-139.062	30.8986	872.061	-136.315	51.7736	768.404
685	0	101.844	417.885	1598.45	205.143	413.272	1601.12	72.9243	269.021	1646.16	209.486	251.877	1655.05	165.409	158.799	1506.06	169.141	50.2661	1284.42	148.773	294.481	1403.02	146.801	317.86	1218.77	222.174	51.0169	1360.14	-33.7576	154.807	1451.37	-89.1031	106.058	1257.08	-102.806	67.04	1142.62	-121.685	92.9018	970.156	-81.537	105.425	870.427	-140.443	55.3832	873.13	-137.896	80.2848	770.605
686	0	102.348	428.846	1601.25	205.618	424.125	1603.7	73.3688	280.127	1649.37	209.909	262.867	1658.02	165.413	169.484	1508.85	168.424	61.4367	1287.01	148.883	305.397	1406.15	146.685	328.964	1221.99	221.55	61.8039	1362.59	-33.9305	166.22	1454.86	-90.4243	120.433	1259.45	-105.005	83.4655	1144.4	-122.923	114.451	972.451	-82.3648	129.799	873.622	-141.633	80.1525	874.452	-139.329	109.219	773.247
687	0	102.903	439.697	1604.09	206.139	434.85	1606.29	73.8559	291.1	1652.53	210.376	273.7	1660.9	165.441	180.14	1511.54	167.788	72.5668	1289.49	149.003	316.294	1409.18	146.595	340.053	1225.1	220.991	72.5793	1364.96	-34.0554	177.575	1458.23	-91.6514	134.709	1261.81	-107.104	99.8467	1146.18	-124.077	136.1	974.933	-83.1239	154.451	877.14	-142.628	105.152	876.019	-140.584	138.466	776.318
688	0	103.487	450.458	1606.91	206.686	445.469	1608.85	74.362	301.956	1655.58	210.863	284.394	1663.64	165.481	190.791	1514.09	167.234	83.6733	1291.84	149.123	327.188	1412.07	146.52	351.141	1228.05	220.494	83.3611	1367.2	-34.14	188.887	1461.44	-92.7887	148.893	1264.1	-109.097	116.178	1147.92	-125.147	157.813	977.575	-83.8108	179.32	880.959	-143.431	130.331	877.818	-141.64	167.921	779.799
689	0	104.079	461.15	1609.69	207.238	456.002	1611.33	74.8659	312.716	1658.48	211.347	294.968	1666.2	165.529	201.456	1516.47	166.765	94.7712	1294.03	149.237	338.098	1414.77	146.452	362.237	1230.79	220.061	94.1653	1369.29	-34.1898	200.17	1464.44	-93.8393	162.992	1266.28	-110.98	132.456	1149.58	-126.129	179.557	980.347	-84.4213	204.341	885.054	-144.044	155.639	879.832	-142.48	197.487	783.662
690	0	104.663	471.793	1612.36	207.781	466.472	1613.71	75.3501	323.397	1661.18	211.811	305.445	1668.55	165.581	212.154	1518.63	166.382	105.873	1296.02	149.34	349.034	1417.23	146.383	373.35	1233.28	219.692	105.006	1371.21	-34.208	211.438	1467.18	-94.805	177.013	1268.31	-112.75	148.68	1151.12	-127.02	201.299	983.222	-84.9495	229.454	889.396	-144.473	181.03	882.043	-143.089	227.074	787.879
691	0	105.225	482.406	1614.9	208.3	476.902	1615.95	75.8004	334.021	1663.64	212.241	315.848	1670.66	165.635	222.898	1520.55	166.087	116.988	1297.8	149.433	360.01	1419.44	146.313	384.486	1235.49	219.387	115.894	1372.92	-34.1957	222.701	1469.64	-95.6858	190.964	1270.15	-114.401	164.854	1152.5	-127.813	223.012	986.169	-85.3886	254.598	893.953	-144.725	206.46	884.43	-143.461	256.599	792.416
692	0	105.755	493.01	1617.26	208.787	487.314	1618.02	76.2072	344.607	1665.81	212.625	326.201	1672.5	165.694	233.702	1522.22	165.88	128.125	1299.32	149.517	371.033	1421.35	146.24	395.649	1237.39	219.149	126.84	1374.41	-34.1518	233.969	1471.78	-96.4797	204.856	1271.77	-115.929	180.98	1153.7	-128.505	244.671	989.16	-85.7306	279.712	898.69	-144.807	231.885	886.973	-143.595	285.991	797.237
693	0	106.247	503.622	1619.4	209.237	497.728	1619.89	76.565	355.175	1667.69	212.959	336.527	1674.05	165.762	244.574	1523.61	165.761	139.291	1300.59	149.597	382.109	1422.94	146.168	406.843	1238.97	218.98	137.852	1375.65	-34.0737	245.25	1473.59	-97.183	218.697	1273.13	-117.328	197.065	1154.7	-129.089	266.253	992.167	-85.9667	304.741	903.573	-144.729	257.267	889.65	-143.492	315.184	802.307
694	0	106.701	514.259	1621.3	209.649	508.165	1621.54	76.8729	365.744	1669.23	213.24	346.849	1675.3	165.845	255.522	1524.71	165.731	150.492	1301.59	149.68	393.245	1424.22	146.103	418.071	1240.2	218.883	148.936	1376.64	-33.9571	256.553	1475.05	-97.7903	232.498	1274.23	-118.592	213.115	1155.46	-129.557	287.735	995.167	-86.0879	329.631	908.564	-144.499	282.563	892.44	-143.16	344.12	807.59
695	0	107.118	524.935	1622.93	210.027	518.641	1622.95	77.1341	376.333	1670.44	213.472	357.19	1676.25	165.951	266.552	1525.52	165.791	161.732	1302.31	149.773	404.443	1425.15	146.052	429.336	1241.1	218.861	160.098	1377.36	-33.7962	267.883	1476.16	-98.2948	246.269	1275.03	-119.715	229.138	1155.98	-129.904	309.099	998.136	-86.0851	354.331	913.628	-144.127	307.736	895.321	-142.61	372.75	813.05
696	0	107.506	535.664	1624.27	210.379	529.173	1624.1	77.356	386.959	1671.3	213.662	367.569	1676.89	166.09	277.666	1526.02	165.94	173.016	1302.74	149.888	415.707	1425.76	146.022	440.643	1241.65	218.918	171.341	1377.81	-33.5843	279.247	1476.92	-98.6889	260.021	1275.54	-120.691	245.14	1156.25	-130.122	330.325	1001.05	-85.9504	378.793	918.725	-143.621	332.748	898.274	-141.856	401.029	818.653
697	0	107.873	546.456	1625.31	210.713	539.774	1624.99	77.55	397.636	1671.81	213.821	378.005	1677.22	166.271	288.867	1526.23	166.179	184.349	1302.88	150.035	427.037	1426.03	146.025	451.996	1241.87	219.057	182.668	1377.98	-33.3143	290.652	1477.34	-98.9642	273.765	1275.76	-121.511	261.125	1156.27	-130.204	351.395	1003.9	-85.6769	402.977	923.822	-142.99	357.562	901.276	-140.914	428.915	824.361
698	0	108.233	557.322	1626.04	211.043	550.457	1625.6	77.7305	408.377	1671.99	213.965	388.513	1677.25	166.507	300.156	1526.15	166.508	195.735	1302.74	150.225	438.436	1425.98	146.07	463.4	1241.77	219.281	194.081	1377.87	-32.9781	302.103	1477.44	-99.1126	287.511	1275.68	-122.171	277.098	1156.04	-130.146	372.29	1006.66	-85.2598	426.841	928.882	-142.243	382.141	904.309	-139.803	456.373	830.141
699	0	108.601	568.268	1626.45	211.385	561.229	1625.94	77.9148	419.194	1671.83	214.111	399.107	1676.99	166.808	311.531	1525.78	166.925	207.181	1302.32	150.471	449.906	1425.63	146.169	474.861	1241.37	219.595	205.581	1377.49	-32.5681	313.606	1477.22	-99.1259	301.268	1275.31	-122.662	293.058	1155.57	-129.943	392.993	1009.31	-84.6959	450.352	933.871	-141.385	406.449	907.352	-138.539	483.367	835.956
700	0	108.992	579.299	1626.57	211.753	572.1	1626	78.1226	430.094	1671.37	214.28	409.798	1676.45	167.186	322.994	1525.13	167.432	218.69	1301.63	150.785	461.448	1424.99	146.331	486.386	1240.68	219.999	217.169	1376.84	-32.0763	325.167	1476.71	-98.9971	315.046	1274.67	-122.981	309.004	1154.87	-129.592	413.483	1011.85	-83.9845	473.479	938.759	-140.424	430.452	910.386	-137.142	509.867	841.772
701	0	109.425	590.419	1626.39	212.167	583.073	1625.8	78.3751	441.084	1670.61	214.493	420.594	1675.66	167.651	334.543	1524.23	168.025	230.27	1300.69	151.178	473.064	1424.07	146.567	497.981	1239.73	220.498	228.845	1375.93	-31.4956	336.795	1475.93	-98.7202	328.85	1273.77	-123.121	324.93	1153.95	-129.091	433.741	1014.26	-83.1272	496.195	943.516	-139.365	454.113	913.39	-135.631	535.841	847.554
702	0	109.917	601.632	1625.93	212.644	594.153	1625.34	78.6944	452.169	1669.58	214.773	431.503	1674.62	168.214	346.176	1523.08	168.704	241.927	1299.5	151.663	484.755	1422.91	146.888	509.656	1238.54	221.092	240.609	1374.77	-30.8193	348.497	1474.91	-98.2908	342.686	1272.64	-123.08	340.827	1152.84	-128.44	453.745	1016.54	-82.1272	518.475	948.115	-138.212	477.398	916.344	-134.022	561.261	853.266
703	0	110.487	612.938	1625.21	213.201	605.344	1624.64	79.1029	463.35	1668.31	215.144	442.528	1673.36	168.884	357.894	1521.7	169.465	253.666	1298.08	152.25	496.525	1421.52	147.303	521.416	1237.13	221.782	252.461	1373.37	-30.0416	360.281	1473.67	-97.7063	356.556	1271.29	-122.856	356.682	1151.56	-127.64	473.474	1018.67	-80.9901	540.299	952.532	-136.967	500.273	919.228	-132.333	586.098	858.876
704	0	111.152	624.338	1624.25	213.856	616.645	1623.72	79.6225	474.629	1666.82	215.628	453.673	1671.89	169.67	369.696	1520.12	170.305	265.494	1296.45	152.95	508.375	1419.93	147.821	533.27	1235.53	222.567	264.399	1371.75	-29.1575	372.158	1472.23	-96.9658	370.461	1269.76	-122.449	372.48	1150.12	-126.695	492.905	1020.64	-79.7227	561.648	956.745	-135.633	522.706	922.022	-130.579	610.326	864.348
705	0	111.928	635.832	1623.08	214.624	628.059	1622.6	80.2739	486.006	1665.15	216.248	464.939	1670.25	170.578	381.581	1518.35	171.22	277.416	1294.62	153.772	520.308	1418.16	148.45	545.223	1233.76	223.447	276.424	1369.93	-28.163	384.135	1470.63	-96.0707	384.397	1268.07	-121.861	388.203	1148.55	-125.609	512.016	1022.46	-78.3332	582.505	960.733	-134.212	544.663	924.704	-128.771	633.919	869.648
706	0	112.83	647.42	1621.74	215.522	639.587	1621.29	81.076	497.48	1663.31	217.022	476.328	1668.44	171.614	393.551	1516.42	172.203	289.438	1292.64	154.724	532.327	1416.24	149.196	557.282	1231.84	224.419	288.533	1367.93	-27.0552	396.223	1468.88	-95.0242	398.361	1266.25	-121.098	403.831	1146.88	-124.387	530.782	1024.1	-76.8304	602.855	964.478	-132.705	566.113	927.254	-126.922	656.855	874.742
707	0	113.871	659.104	1620.24	216.561	651.228	1619.83	82.0452	509.049	1661.35	217.968	487.838	1666.5	172.784	405.606	1514.36	173.251	301.565	1290.51	155.811	544.434	1414.2	150.065	569.452	1229.8	225.48	300.727	1365.77	-25.8321	408.43	1467.03	-93.8315	412.343	1264.33	-120.165	419.342	1145.12	-123.037	549.182	1025.58	-75.2239	622.683	967.963	-131.112	587.026	929.65	-125.038	679.111	879.596
708	0	115.063	670.882	1618.63	217.752	662.982	1618.24	83.1953	520.713	1659.3	219.102	499.47	1664.45	174.088	417.747	1512.18	174.359	313.799	1288.26	157.039	556.631	1412.05	151.059	581.735	1227.66	226.628	313.004	1363.47	-24.4932	420.763	1465.1	-92.4999	426.335	1262.35	-119.072	434.714	1143.32	-121.566	567.194	1026.88	-73.5229	641.977	971.17	-129.437	607.375	931.873	-123.126	700.666	884.179
709	0	116.414	682.755	1616.93	219.105	674.851	1616.55	84.5364	532.471	1657.17	220.434	511.222	1662.32	175.53	429.975	1509.91	175.521	326.143	1285.92	158.408	568.92	1409.82	152.18	594.136	1225.46	227.859	325.362	1361.06	-23.0386	433.226	1463.12	-91.038	440.324	1260.32	-117.83	449.925	1141.48	-119.983	584.797	1027.99	-71.7369	660.724	974.088	-127.683	627.131	933.905	-121.19	721.503	888.458
710	0	117.93	694.725	1615.18	220.624	686.832	1614.79	86.075	544.323	1655.02	221.971	523.093	1660.12	177.108	442.29	1507.6	176.736	338.599	1283.53	159.92	581.301	1407.56	153.427	606.657	1223.21	229.171	337.8	1358.57	-21.4699	445.821	1461.11	-89.4558	454.298	1258.29	-116.451	464.952	1139.65	-118.298	601.971	1028.93	-69.8748	678.911	976.702	-125.854	646.272	935.729	-119.232	741.603	892.404
711	0	119.614	706.792	1613.42	222.312	698.927	1612.99	87.8138	556.268	1652.86	223.716	535.082	1657.89	178.82	454.692	1505.25	178.002	351.166	1281.11	161.571	593.774	1405.28	154.795	619.297	1220.95	230.561	350.317	1356.04	-19.7898	458.546	1459.11	-87.7647	468.241	1256.29	-114.949	479.776	1137.84	-116.52	618.698	1029.69	-67.9448	696.527	979.002	-123.955	664.773	937.33	-117.251	760.952	895.986
712	0	121.465	718.957	1611.67	224.17	711.135	1611.17	89.7512	568.308	1650.74	225.667	547.187	1655.66	180.662	467.181	1502.92	179.319	363.842	1278.69	163.355	606.338	1403.01	156.28	632.058	1218.71	232.029	362.91	1353.49	-18.0021	471.398	1457.14	-85.9763	482.136	1254.34	-113.338	494.376	1136.09	-114.66	634.962	1030.26	-65.955	713.56	980.976	-121.994	682.614	938.697	-115.246	779.537	899.179
713	0	123.482	731.22	1609.97	226.192	723.452	1609.38	91.8812	580.444	1648.68	227.817	559.405	1653.46	182.628	479.753	1500.62	180.688	376.624	1276.32	165.265	618.99	1400.79	157.871	644.937	1216.53	233.572	375.577	1350.96	-16.1122	484.366	1455.24	-84.103	495.967	1252.48	-111.633	508.735	1134.42	-112.728	650.748	1030.66	-63.9128	729.999	982.618	-119.978	699.779	939.818	-113.215	797.345	901.954
714	0	125.656	743.58	1608.34	228.373	735.876	1607.63	94.1939	592.674	1646.71	230.157	571.732	1651.31	184.711	492.406	1498.4	182.114	389.506	1274.02	167.287	631.725	1398.65	159.56	657.932	1214.42	235.19	388.313	1348.49	-14.1269	497.438	1453.43	-82.1572	509.715	1250.73	-109.848	522.838	1132.86	-110.735	666.045	1030.89	-61.8252	745.834	983.919	-117.918	716.251	940.687	-111.155	814.365	904.289
715	0	127.978	756.037	1606.82	230.701	748.403	1605.96	96.6753	605	1644.87	232.669	584.166	1649.25	186.899	505.135	1496.28	183.6	402.48	1271.83	169.409	644.539	1396.62	161.333	671.035	1212.44	236.884	401.114	1346.1	-12.0547	510.598	1451.74	-80.1513	523.363	1249.13	-107.997	536.671	1131.43	-108.692	680.841	1030.94	-59.699	761.054	984.876	-115.825	732.016	941.299	-109.065	830.588	906.163
716	0	130.436	768.586	1605.43	233.163	761.026	1604.38	99.3073	617.419	1643.18	235.336	596.698	1647.31	189.181	517.934	1494.3	185.152	415.537	1269.77	171.611	657.421	1394.73	163.175	684.238	1210.6	238.653	413.972	1343.85	-9.90593	523.828	1450.2	-78.0974	536.889	1247.69	-106.095	550.222	1130.16	-106.609	695.126	1030.84	-57.5413	775.649	985.485	-113.71	747.065	941.655	-106.943	846.003	907.559
717	0	133.013	781.224	1604.19	235.742	773.737	1602.94	102.069	629.929	1641.67	238.133	609.323	1645.51	191.541	530.795	1492.49	186.774	428.662	1267.89	173.876	670.364	1393	165.073	697.526	1208.95	240.497	426.88	1341.76	-7.69279	537.104	1448.84	-76.0072	550.277	1246.45	-104.154	563.481	1129.06	-104.497	708.894	1030.59	-55.3592	789.612	985.747	-111.587	761.387	941.757	-104.792	860.604	908.464
718	0	135.693	793.943	1603.13	238.421	786.526	1601.64	104.935	642.525	1640.36	241.034	622.03	1643.88	193.965	543.708	1490.87	188.47	441.841	1266.22	176.181	683.353	1391.47	167.011	710.883	1207.49	242.412	439.827	1339.87	-5.42918	550.405	1447.66	-73.892	563.506	1245.42	-102.184	576.439	1128.16	-102.367	722.138	1030.19	-53.1605	802.933	985.664	-109.47	774.976	941.609	-102.614	874.382	908.868
719	0	138.455	806.735	1602.25	241.177	799.38	1600.5	107.878	655.202	1639.27	244.011	634.809	1642.44	196.432	556.662	1489.47	190.24	455.055	1264.77	178.504	696.376	1390.15	168.973	724.286	1206.26	244.397	452.801	1338.21	-3.13051	563.706	1446.7	-71.7627	576.557	1244.62	-100.198	589.089	1127.47	-100.23	734.851	1029.66	-50.9536	815.606	985.24	-107.37	787.827	941.221	-100.415	887.33	908.769
720	0	141.276	819.589	1601.58	243.988	812.284	1599.55	110.869	667.95	1638.43	247.031	647.645	1641.22	198.924	569.644	1488.31	192.084	468.285	1263.58	180.823	709.417	1389.07	170.945	737.707	1205.27	246.445	465.79	1336.81	-0.813321	576.983	1445.97	-69.6298	589.412	1244.07	-98.2031	601.424	1127.01	-98.097	747.03	1029.01	-48.7477	827.625	984.484	-105.303	799.937	940.603	-98.2022	899.443	908.168
721	0	144.132	832.492	1601.11	246.829	825.222	1598.79	113.878	680.759	1637.83	250.063	660.523	1640.23	201.42	582.639	1487.42	193.997	481.507	1262.66	183.116	722.457	1388.23	172.914	751.118	1204.53	248.55	478.777	1335.7	1.50523	590.212	1445.48	-67.5035	602.056	1243.76	-96.2092	613.439	1126.78	-95.9789	758.671	1028.25	-46.553	838.983	983.407	-103.281	811.305	939.768	-95.9872	910.717	907.072
722	0	146.999	845.43	1600.86	249.676	838.177	1598.23	116.872	693.617	1637.49	253.074	673.428	1639.48	203.9	595.63	1486.8	195.974	494.7	1262.03	185.362	735.48	1387.64	174.866	764.487	1204.05	250.703	491.749	1334.88	3.80792	603.369	1445.24	-65.3934	614.472	1243.71	-94.2231	625.13	1126.79	-93.8866	769.772	1027.39	-44.3806	849.679	982.021	-101.315	821.932	938.73	-93.7822	921.148	905.493
723	0	149.85	858.386	1600.83	252.502	851.128	1597.89	119.82	706.51	1637.42	256.032	686.34	1639	206.343	608.602	1486.46	198.003	507.841	1261.71	187.543	748.465	1387.32	176.789	777.782	1203.83	252.893	504.69	1334.39	6.07815	616.43	1445.24	-63.3085	626.646	1243.92	-92.2511	636.491	1127.04	-91.8308	780.329	1026.45	-42.2424	859.708	980.344	-99.4185	831.821	937.508	-91.602	930.736	903.452
724	0	152.659	871.343	1601.01	255.281	864.058	1597.77	122.691	719.422	1637.61	258.907	699.243	1638.78	208.732	621.536	1486.42	200.076	520.908	1261.69	189.642	761.394	1387.27	178.673	790.973	1203.87	255.109	517.585	1334.21	8.30049	629.374	1445.5	-61.257	638.567	1244.39	-90.2981	647.522	1127.52	-89.822	790.344	1025.42	-40.1512	869.071	978.393	-97.6009	840.976	936.118	-89.4628	939.48	900.971
725	0	155.398	884.281	1601.41	257.988	876.948	1597.87	125.458	732.333	1638.06	261.668	712.118	1638.83	211.049	634.415	1486.67	202.179	533.881	1261.98	191.647	774.25	1387.49	180.505	804.034	1204.17	257.34	530.42	1334.37	10.4612	642.18	1446	-59.2463	650.225	1245.1	-88.3675	658.22	1128.22	-87.87	799.814	1024.34	-38.1205	877.77	976.191	-95.8721	849.403	934.581	-87.3824	947.384	898.082
726	0	158.042	897.183	1602.02	260.598	889.78	1598.19	128.094	745.226	1638.76	264.292	724.948	1639.16	213.281	647.223	1487.21	204.301	546.743	1262.56	193.548	787.017	1387.98	182.278	816.946	1204.74	259.572	543.183	1334.85	12.5489	654.829	1446.73	-57.2822	661.613	1246.05	-86.4613	668.585	1129.14	-85.984	808.743	1023.2	-36.1641	885.807	973.762	-94.241	857.109	932.92	-85.3796	954.453	894.82
727	0	160.565	910.028	1602.83	263.086	902.538	1598.75	130.577	758.08	1639.72	266.758	737.715	1639.77	215.416	659.945	1488.03	206.431	559.482	1263.44	195.337	799.683	1388.74	183.982	829.695	1205.56	261.796	555.864	1335.64	14.5543	667.305	1447.68	-55.369	672.726	1247.22	-84.5798	678.619	1130.26	-84.1722	817.132	1022.03	-34.2961	893.189	971.131	-92.715	864.103	931.155	-83.4738	960.692	891.225
728	0	162.945	922.799	1603.84	265.433	915.21	1599.54	132.89	770.874	1640.91	269.048	750.407	1640.66	217.448	672.571	1489.12	208.559	572.086	1264.58	197.012	812.236	1389.76	185.611	842.275	1206.64	263.999	568.457	1336.72	16.4711	679.598	1448.85	-53.5092	683.562	1248.61	-82.7212	688.323	1131.57	-82.4417	824.987	1020.83	-32.5303	899.924	968.327	-91.3002	870.394	929.311	-81.685	966.109	887.34
729	0	165.161	935.477	1605.05	267.62	927.783	1600.56	135.019	783.588	1642.32	271.151	763.008	1641.81	219.37	685.092	1490.46	210.676	584.553	1265.98	198.57	824.671	1391.04	187.159	854.686	1207.95	266.172	580.956	1338.09	18.2955	691.698	1450.21	-51.7034	694.122	1250.19	-80.8822	697.703	1133.05	-80.7982	832.313	1019.62	-30.88	906.023	965.379	-90.0012	875.996	927.412	-80.0331	970.715	883.208
730	0	167.197	948.047	1606.45	269.632	940.249	1601.82	136.957	796.201	1643.94	273.06	775.507	1643.21	221.18	697.504	1492.04	212.774	596.88	1267.61	200.015	836.987	1392.57	188.623	866.935	1209.51	268.308	593.363	1339.72	20.0261	703.606	1451.74	-49.95	704.409	1251.94	-79.0576	706.765	1134.69	-79.2463	839.119	1018.42	-29.3575	911.5	962.318	-88.8213	880.919	925.481	-78.5377	974.519	878.879
731	0	169.039	960.496	1608.05	271.457	952.601	1603.31	138.7	808.696	1645.74	274.774	787.895	1644.86	222.88	709.806	1493.83	214.848	609.07	1269.43	201.35	849.184	1394.32	190.004	879.033	1211.28	270.399	605.677	1341.57	21.664	715.324	1453.43	-48.2456	714.43	1253.85	-77.2411	715.517	1136.46	-77.7887	845.415	1017.24	-27.9738	916.373	959.175	-87.762	885.179	923.543	-77.2176	977.534	874.399
732	0	170.679	972.812	1609.82	273.089	964.838	1605.02	140.25	821.055	1647.71	276.298	800.164	1646.72	224.471	722.001	1495.8	216.891	621.132	1271.44	202.58	861.27	1396.28	191.305	890.994	1213.25	272.441	617.906	1343.62	23.2121	726.861	1455.25	-46.5851	724.193	1255.9	-75.4256	723.97	1138.36	-76.4268	851.214	1016.08	-26.7379	920.66	955.98	-86.823	888.793	921.62	-76.0901	979.775	869.818
733	0	172.115	984.987	1611.77	274.527	976.957	1606.95	141.615	833.267	1649.8	277.639	812.31	1648.77	225.959	734.096	1497.93	218.896	633.072	1273.58	203.713	873.252	1398.42	192.529	902.836	1215.39	274.43	630.054	1345.83	24.6751	738.232	1457.18	-44.9624	733.714	1258.05	-73.6032	732.135	1140.36	-75.1607	856.532	1014.97	-25.6567	924.386	952.763	-86.0024	891.779	919.735	-75.17	981.26	865.186
734	0	173.349	997.019	1613.88	275.773	988.96	1609.07	142.805	845.322	1652	278.809	824.331	1650.97	227.351	746.101	1500.17	220.86	644.904	1275.84	204.757	885.143	1400.71	193.684	914.575	1217.67	276.364	642.132	1348.17	26.0588	749.456	1459.18	-43.3705	743.005	1260.29	-71.7667	740.026	1142.45	-73.9887	861.388	1013.92	-24.7347	927.576	949.553	-85.296	894.16	917.908	-74.4687	982.011	860.548
735	0	174.389	1008.91	1616.12	276.835	1000.85	1611.37	143.834	857.216	1654.27	279.825	836.226	1653.29	228.653	758.026	1502.49	222.775	656.64	1278.17	205.72	896.955	1403.1	194.779	926.229	1220.06	278.242	654.149	1350.6	27.3699	760.554	1461.24	-41.802	752.087	1262.59	-69.9092	747.662	1144.6	-72.9081	865.801	1012.92	-23.9736	930.26	946.375	-84.6979	895.962	916.155	-73.9937	982.053	855.95
736	0	175.247	1020.65	1618.48	277.725	1012.64	1613.81	144.719	868.949	1656.57	280.705	848.001	1655.67	229.875	769.885	1504.86	224.636	668.291	1280.54	206.611	908.703	1405.56	195.822	937.813	1222.5	280.062	666.115	1353.08	28.6155	771.55	1463.31	-40.2503	760.978	1264.93	-68.0249	755.059	1146.79	-71.9148	869.798	1011.99	-23.3722	932.469	943.249	-84.2001	897.216	914.491	-73.7472	981.42	851.432
737	0	175.941	1032.27	1620.93	278.459	1024.34	1616.36	145.481	880.527	1658.86	281.469	859.662	1658.08	231.026	781.691	1507.23	226.437	679.87	1282.92	207.44	920.401	1408.04	196.823	949.341	1224.96	281.826	678.041	1355.56	29.8024	782.469	1465.37	-38.7093	769.702	1267.27	-66.1098	762.239	1149	-71.0034	873.404	1011.12	-22.9265	934.239	940.193	-83.7925	897.956	912.927	-73.7261	980.148	847.029
738	0	176.491	1043.77	1623.42	279.056	1035.95	1618.98	146.138	891.962	1661.11	282.136	871.22	1660.47	232.112	793.459	1509.56	228.172	691.388	1285.27	208.215	932.064	1410.5	197.79	960.827	1227.39	283.532	689.935	1358	30.9374	793.334	1467.39	-37.174	778.282	1269.59	-64.1615	769.225	1151.21	-70.168	876.651	1010.32	-22.6297	935.606	937.221	-83.4636	898.221	911.469	-73.9214	978.284	842.772
739	0	176.919	1055.17	1625.92	279.537	1047.49	1621.61	146.713	903.27	1663.27	282.729	882.689	1662.79	233.143	805.202	1511.82	229.836	702.854	1287.55	208.943	943.704	1412.88	198.73	972.281	1229.73	285.179	701.805	1360.37	32.0262	804.171	1469.32	-35.6411	786.742	1271.86	-62.1797	776.042	1153.39	-69.4014	879.572	1009.57	-22.472	936.61	934.342	-83.2005	898.055	910.12	-74.3187	975.876	838.686
740	0	177.251	1066.48	1628.38	279.926	1058.98	1624.2	147.226	914.473	1665.31	283.266	894.086	1664.99	234.125	816.933	1513.96	231.422	714.276	1289.74	209.633	955.333	1415.14	199.65	983.712	1231.93	286.766	713.66	1362.63	33.0737	815.001	1471.15	-34.1087	795.108	1274.04	-60.166	782.717	1155.51	-68.6962	882.203	1008.88	-22.4414	937.292	931.56	-82.9897	897.506	908.883	-74.8979	972.983	834.791
741	0	177.512	1077.73	1630.76	280.246	1070.44	1626.71	147.694	925.594	1667.2	283.766	905.428	1667.03	235.063	828.665	1515.95	232.925	725.661	1291.79	210.291	966.961	1417.23	200.555	995.127	1233.95	288.289	725.503	1364.75	34.0837	825.843	1472.82	-32.5767	803.404	1276.12	-58.124	789.277	1157.57	-68.0444	884.584	1008.24	-22.5239	937.694	928.876	-82.8168	896.625	907.755	-75.6347	969.664	831.103
742	0	177.726	1088.95	1633	280.518	1081.87	1629.08	148.136	936.664	1668.89	284.243	916.737	1668.87	235.963	840.407	1517.76	234.341	737.014	1293.68	210.921	978.594	1419.12	201.447	1006.53	1235.76	289.745	737.339	1366.69	35.0586	836.715	1474.32	-31.0465	811.656	1278.06	-56.0594	795.752	1159.52	-67.4379	886.755	1007.64	-22.7037	937.859	926.29	-82.6678	895.467	906.735	-76.5005	965.985	827.631
743	0	177.916	1100.15	1635.06	280.764	1093.3	1631.26	148.565	947.711	1670.37	284.711	928.035	1670.48	236.826	852.168	1519.36	235.664	748.34	1295.39	211.528	990.24	1420.76	202.327	1017.92	1237.3	291.129	749.17	1368.42	35.9994	847.63	1475.62	-29.5209	819.887	1279.84	-53.9791	802.173	1161.37	-66.8684	888.758	1007.06	-22.9642	937.832	923.799	-82.5287	894.089	905.818	-77.4642	962.013	824.382
744	0	178.1	1111.37	1636.9	281	1104.74	1633.21	148.992	958.765	1671.62	285.177	939.343	1671.83	237.654	863.956	1520.72	236.89	759.644	1296.89	212.113	1001.9	1422.13	203.194	1029.31	1238.55	292.437	761	1369.93	36.906	858.6	1476.7	-28.004	828.12	1281.45	-51.8917	808.57	1163.07	-66.328	890.636	1006.49	-23.2879	937.656	921.397	-82.3867	892.549	905	-78.4929	957.817	821.357
745	0	178.295	1122.63	1638.47	281.243	1116.22	1634.87	149.425	969.858	1672.6	285.649	950.683	1672.9	238.447	875.777	1521.83	238.016	770.932	1298.16	212.68	1013.59	1423.21	204.047	1040.69	1239.5	293.663	772.829	1371.2	37.7768	869.636	1477.54	-26.501	836.378	1282.87	-49.8066	814.971	1164.64	-65.8088	892.435	1005.94	-23.6575	937.376	919.081	-82.2298	890.908	904.278	-79.5533	953.465	818.557
746	0	178.514	1133.95	1639.75	281.5	1127.74	1636.22	149.866	981.016	1673.32	286.126	962.074	1673.68	239.202	887.635	1522.68	239.039	782.209	1299.19	213.226	1025.29	1423.97	204.883	1052.07	1240.12	294.801	784.659	1372.21	38.6091	880.744	1478.13	-25.018	844.682	1284.08	-47.7338	821.408	1166.04	-65.3037	894.197	1005.39	-24.0558	937.038	916.846	-82.0475	889.226	903.649	-80.6128	949.026	815.978
747	0	178.762	1145.35	1640.7	281.78	1139.32	1637.22	150.315	992.266	1673.77	286.608	973.536	1674.15	239.914	899.534	1523.26	239.957	793.483	1299.97	213.75	1037.02	1424.41	205.697	1063.44	1240.41	295.845	796.491	1372.96	39.399	891.931	1478.46	-23.5614	853.052	1285.08	-45.6835	827.907	1167.28	-64.8062	895.965	1004.83	-24.4662	936.686	914.689	-81.831	887.561	903.111	-81.6408	944.566	813.616
748	0	179.042	1156.85	1641.31	282.083	1150.97	1637.87	150.768	1003.63	1673.93	287.089	985.085	1674.33	240.58	911.475	1523.56	240.767	804.762	1300.5	214.251	1048.78	1424.53	206.486	1074.82	1240.36	296.789	808.33	1373.44	40.1416	903.202	1478.53	-22.1382	861.506	1285.87	-43.6657	834.495	1168.35	-64.3109	897.784	1004.26	-24.8735	936.366	912.609	-81.5731	885.973	902.663	-82.6092	940.149	811.468
749	0	179.351	1168.47	1641.56	282.407	1162.71	1638.15	151.216	1015.12	1673.83	287.56	996.732	1674.21	241.19	923.461	1523.59	241.47	816.058	1300.76	214.723	1060.57	1424.34	207.245	1086.2	1240	297.627	820.177	1373.66	40.8311	914.561	1478.34	-20.7556	870.061	1286.43	-41.6902	841.195	1169.25	-63.8131	899.692	1003.69	-25.2638	936.123	910.606	-81.2684	884.517	902.304	-83.4934	935.839	809.528
750	0	179.683	1180.2	1641.47	282.744	1174.53	1638.06	151.65	1026.75	1673.45	288.011	1008.49	1673.81	241.739	935.494	1523.35	242.064	827.382	1300.77	215.163	1072.39	1423.84	207.968	1097.59	1239.34	298.355	832.038	1373.62	41.4611	926.012	1477.89	-19.421	878.732	1286.79	-39.7657	848.028	1169.98	-63.3098	901.732	1003.11	-25.6253	936.001	908.683	-80.9134	883.247	902.035	-84.2727	931.696	807.794
751	0	180.026	1192.06	1641.02	283.085	1186.45	1637.62	152.056	1038.53	1672.83	288.429	1020.36	1673.14	242.217	947.574	1522.85	242.551	838.747	1300.52	215.563	1084.25	1423.05	208.654	1109.01	1238.39	298.967	843.919	1373.33	42.0244	937.558	1477.2	-18.1414	887.533	1286.94	-37.9004	855.016	1170.56	-62.7985	903.941	1002.53	-25.9482	936.044	906.843	-80.5064	882.216	901.856	-84.9305	927.778	806.258
752	0	180.366	1204.05	1640.24	283.414	1198.46	1636.83	152.419	1050.46	1671.96	288.797	1032.35	1672.22	242.614	959.703	1522.12	242.931	850.17	1300.03	215.918	1096.14	1421.99	209.296	1120.46	1237.17	299.461	855.827	1372.8	42.5137	949.202	1476.28	-16.9242	896.476	1286.89	-36.1014	862.174	1170.97	-62.2787	906.355	1001.94	-26.2251	936.295	905.089	-80.0477	881.471	901.767	-85.4546	924.141	804.917
753	0	180.686	1216.17	1639.15	283.716	1210.57	1635.74	152.723	1062.54	1670.87	289.102	1044.45	1671.09	242.921	971.884	1521.16	243.206	861.663	1299.31	216.219	1108.09	1420.7	209.893	1131.95	1235.73	299.833	867.771	1372.06	42.9213	960.947	1475.14	-15.776	905.572	1286.66	-34.3751	869.519	1171.23	-61.7506	909.01	1001.36	-26.4512	936.797	903.425	-79.5391	881.059	901.764	-85.8371	920.839	803.763
754	0	180.967	1228.41	1637.78	283.973	1222.78	1634.37	152.95	1074.77	1669.57	289.325	1056.67	1669.75	243.128	984.119	1519.99	243.378	873.244	1298.38	216.46	1120.09	1419.18	210.442	1143.5	1234.08	300.081	879.76	1371.11	43.2394	972.798	1473.79	-14.7034	914.831	1286.26	-32.7271	877.066	1171.35	-61.2161	911.94	1000.77	-26.6237	937.59	901.853	-78.984	881.022	901.843	-86.0743	917.921	802.786
755	0	181.188	1240.77	1636.17	284.167	1235.08	1632.75	153.084	1087.14	1668.09	289.451	1069	1668.25	243.225	996.412	1518.64	243.447	884.928	1297.24	216.633	1132.15	1417.49	210.939	1155.13	1232.26	300.204	891.805	1369.98	43.4605	984.757	1472.25	-13.7124	924.261	1285.69	-31.1628	884.828	1171.34	-60.6782	915.176	1000.19	-26.7424	938.715	900.374	-78.3874	881.399	901.998	-86.1668	915.439	801.977
756	0	181.332	1253.24	1634.34	284.278	1247.47	1630.93	153.109	1099.63	1666.45	289.464	1081.44	1666.6	243.202	1008.77	1517.13	243.418	896.728	1295.93	216.729	1144.28	1415.63	211.384	1166.85	1230.3	300.201	903.916	1368.69	43.5773	996.828	1470.54	-12.8086	933.872	1284.97	-29.6868	892.818	1171.2	-60.1414	918.749	999.612	-26.809	940.211	898.988	-77.7552	882.227	902.218	-86.1191	913.438	801.322
757	0	181.378	1265.82	1632.34	284.29	1259.95	1628.96	153.01	1112.24	1664.67	289.35	1093.97	1664.83	243.052	1021.19	1515.48	243.291	908.656	1294.46	216.741	1156.49	1413.66	211.772	1178.68	1228.23	300.072	916.104	1367.26	43.583	1009.02	1468.67	-11.9971	943.672	1284.12	-28.3037	901.049	1170.93	-59.6109	922.69	999.03	-26.8271	942.115	897.69	-77.0942	883.541	902.49	-85.9388	911.964	800.803
758	0	181.311	1278.49	1630.22	284.186	1272.51	1626.87	152.774	1124.95	1662.78	289.096	1106.59	1662.97	242.766	1033.69	1513.72	243.069	920.725	1292.84	216.662	1168.8	1411.58	212.103	1190.64	1226.08	299.817	928.379	1365.72	43.4715	1021.32	1466.67	-11.2828	953.669	1283.14	-27.0184	909.535	1170.55	-59.0931	927.026	998.442	-26.8019	944.464	896.475	-76.4125	885.372	902.799	-85.6368	911.06	800.404
759	0	181.117	1291.25	1628.01	283.952	1285.15	1624.71	152.391	1137.76	1660.79	288.693	1119.29	1661.04	242.34	1046.27	1511.87	242.754	932.943	1291.12	216.487	1181.21	1409.44	212.374	1202.73	1223.87	299.438	940.751	1364.09	43.2377	1033.75	1464.54	-10.6701	963.873	1282.05	-25.8357	918.288	1170.05	-58.5949	931.787	997.84	-26.7395	947.293	895.334	-75.7186	887.751	903.126	-85.2263	910.766	800.1
760	0	180.782	1304.1	1625.76	283.578	1297.87	1622.52	151.853	1150.65	1658.74	288.133	1132.07	1659.08	241.768	1058.95	1509.95	242.348	945.315	1289.31	216.21	1193.72	1407.26	212.582	1214.98	1221.64	298.936	953.226	1362.39	42.8776	1046.31	1462.32	-10.1633	974.292	1280.85	-24.7608	927.325	1169.45	-58.1238	937.001	997.215	-26.6471	950.638	894.254	-75.022	890.707	903.451	-84.7226	911.125	799.869
761	0	180.3	1317.03	1623.51	283.055	1310.67	1620.35	151.154	1163.63	1656.64	287.411	1144.92	1657.1	241.05	1071.71	1507.99	241.853	957.846	1287.44	215.828	1206.36	1405.06	212.725	1227.39	1219.41	298.314	965.813	1360.66	42.3886	1059	1460.01	-9.76664	984.937	1279.55	-23.7992	936.66	1168.73	-57.6873	942.696	996.559	-26.5321	954.531	893.223	-74.3325	894.269	903.751	-84.1419	912.174	799.684
762	0	179.665	1330.03	1621.28	282.38	1323.55	1618.22	150.294	1176.67	1654.52	286.526	1157.83	1655.13	240.186	1084.59	1506.02	241.27	970.537	1285.54	215.34	1219.12	1402.88	212.8	1239.98	1217.2	297.574	978.516	1358.92	41.7699	1071.83	1457.64	-9.48406	995.821	1278.17	-22.9566	946.311	1167.91	-57.2928	948.9	995.859	-26.4021	959.007	892.224	-73.6609	898.463	904.004	-83.5014	913.951	799.519
763	0	178.876	1343.12	1619.12	281.553	1336.51	1616.18	149.274	1189.79	1652.4	285.48	1170.81	1653.18	239.179	1097.57	1504.07	240.602	983.385	1283.64	214.746	1232.01	1400.73	212.805	1252.73	1215.03	296.721	991.336	1357.2	41.0224	1084.79	1455.22	-9.31943	1006.96	1276.7	-22.2389	956.295	1166.99	-56.9475	955.642	995.105	-26.2644	964.098	891.24	-73.0182	903.32	904.187	-82.8184	916.496	799.346
764	0	177.936	1356.28	1617.05	280.575	1349.54	1614.23	148.1	1202.98	1650.3	284.279	1183.86	1651.29	238.036	1110.66	1502.14	239.85	996.386	1281.76	214.051	1245.04	1398.64	212.739	1265.67	1212.94	295.76	1004.27	1355.53	40.1493	1097.89	1452.79	-9.2764	1018.35	1275.17	-21.6523	966.629	1165.97	-56.658	962.95	994.287	-26.1256	969.839	890.254	-72.416	908.867	904.277	-82.1098	919.845	799.138
765	0	176.852	1369.52	1615.09	279.454	1362.65	1612.41	146.779	1216.23	1648.25	282.931	1196.98	1649.46	236.765	1123.87	1500.28	239.018	1009.53	1279.93	213.259	1258.2	1396.63	212.601	1278.78	1210.92	294.696	1017.32	1353.91	39.156	1111.12	1450.37	-9.35825	1030.03	1273.57	-21.2024	977.332	1164.85	-56.4302	970.852	993.396	-25.9922	976.263	889.249	-71.8662	915.135	904.256	-81.3916	924.036	798.87
766	0	175.634	1382.83	1613.25	278.201	1375.84	1610.74	145.325	1229.55	1646.26	281.45	1210.16	1647.73	235.38	1137.19	1498.5	238.11	1022.81	1278.18	212.381	1271.48	1394.71	212.391	1292.06	1209.02	293.538	1030.47	1352.39	38.0504	1124.5	1447.98	-9.56777	1042	1271.93	-20.8949	988.419	1163.65	-56.2693	979.375	992.425	-25.8698	983.403	888.21	-71.3809	922.155	904.104	-80.6789	929.107	798.519
767	0	174.295	1396.23	1611.55	276.829	1389.11	1609.21	143.752	1242.94	1644.35	279.85	1223.41	1646.1	233.894	1150.62	1496.82	237.13	1036.21	1276.53	211.426	1284.88	1392.9	212.114	1305.49	1207.23	292.295	1043.72	1350.98	36.8427	1138	1445.66	-9.90702	1054.26	1270.25	-20.7347	999.907	1162.36	-56.1796	988.548	991.368	-25.7634	991.291	887.122	-70.9726	929.957	903.805	-79.9851	935.096	798.061
768	0	172.853	1409.69	1609.98	275.355	1402.46	1607.85	142.079	1256.39	1642.53	278.149	1236.73	1644.6	232.327	1164.14	1495.27	236.085	1049.72	1275.01	210.411	1298.39	1391.22	211.772	1319.07	1205.58	290.978	1057.05	1349.7	35.5458	1151.64	1443.41	-10.3771	1066.84	1268.55	-20.726	1011.81	1161	-56.1648	998.394	990.224	-25.6778	999.96	885.973	-70.6537	938.574	903.346	-79.3224	942.042	797.476
769	0	171.328	1423.23	1608.56	273.799	1415.89	1606.64	140.326	1269.91	1640.83	276.368	1250.12	1643.24	230.698	1177.73	1493.85	234.981	1063.31	1273.63	209.35	1311.98	1389.68	211.373	1332.76	1204.08	289.598	1070.45	1348.57	34.1748	1165.39	1441.28	-10.9778	1079.74	1266.84	-20.8722	1024.13	1159.59	-56.2273	1008.94	988.992	-25.6171	1009.44	884.755	-70.4362	948.035	902.719	-78.7015	949.982	796.745
770	0	169.74	1436.83	1607.28	272.182	1429.38	1605.6	138.516	1283.48	1639.26	274.53	1263.58	1642.03	229.03	1191.4	1492.59	233.828	1076.96	1272.41	208.262	1325.65	1388.3	210.925	1346.55	1202.75	288.17	1083.89	1347.59	32.7473	1179.25	1439.3	-11.7073	1092.97	1265.14	-21.1752	1036.88	1158.13	-56.3688	1020.2	987.676	-25.585	1019.75	883.465	-70.3317	958.372	901.915	-78.1319	958.954	795.853
771	0	168.115	1450.48	1606.14	270.528	1442.93	1604.71	136.674	1297.11	1637.83	272.659	1277.09	1640.98	227.346	1205.1	1491.51	232.638	1090.66	1271.37	207.167	1339.35	1387.09	210.436	1360.41	1201.59	286.71	1097.35	1346.79	31.2825	1193.19	1437.48	-12.5619	1106.51	1263.47	-21.6358	1050.06	1156.64	-56.5899	1032.19	986.282	-25.5846	1030.93	882.1	-70.3507	969.611	900.932	-77.6224	968.993	794.789
772	0	166.477	1464.17	1605.13	268.863	1456.52	1603.98	134.825	1310.78	1636.55	270.781	1290.65	1640.12	225.671	1218.82	1490.61	231.421	1104.37	1270.52	206.084	1353.08	1386.06	209.916	1374.31	1200.62	285.235	1110.81	1346.18	29.8015	1207.2	1435.85	-13.5358	1120.37	1261.84	-22.2534	1063.66	1155.13	-56.8904	1044.93	984.82	-25.6185	1042.99	880.666	-70.5018	981.777	899.772	-77.1812	980.134	793.545
773	0	164.851	1477.88	1604.25	267.21	1470.14	1603.39	132.996	1324.48	1635.43	268.923	1304.25	1639.44	224.032	1232.53	1489.9	230.193	1118.07	1269.87	205.034	1366.79	1385.21	209.376	1388.2	1199.83	283.762	1124.25	1345.75	28.3262	1221.26	1434.44	-14.6209	1134.53	1260.28	-23.0252	1077.68	1153.63	-57.2685	1058.42	983.304	-25.6885	1055.95	879.172	-70.7916	994.887	898.44	-76.8167	992.407	792.12
774	0	163.262	1491.6	1603.49	265.596	1483.78	1602.95	131.215	1338.2	1634.49	267.112	1317.88	1638.96	222.453	1246.2	1489.4	228.969	1131.73	1269.43	204.036	1380.46	1384.55	208.824	1402.06	1199.24	282.31	1137.64	1345.51	26.879	1235.33	1433.28	-15.8067	1148.97	1258.81	-23.9472	1092.09	1152.14	-57.7217	1072.66	981.752	-25.7959	1069.81	877.63	-71.2241	1008.96	896.946	-76.5368	1005.84	790.518
775	0	161.737	1505.3	1602.85	264.045	1497.41	1602.65	129.509	1351.91	1633.73	265.375	1331.51	1638.67	220.959	1259.81	1489.11	227.765	1145.33	1269.21	203.106	1394.07	1384.09	208.27	1415.83	1198.84	280.9	1150.95	1345.47	25.4822	1249.39	1432.37	-17.0803	1163.68	1257.44	-25.0131	1106.88	1150.71	-58.2459	1087.65	980.182	-25.9413	1084.57	876.06	-71.7999	1023.99	895.306	-76.3499	1020.46	788.753
776	0	160.298	1518.95	1602.34	262.581	1511.02	1602.48	127.903	1365.59	1633.16	263.74	1345.13	1638.6	219.573	1273.32	1489.04	226.597	1158.85	1269.2	202.262	1407.57	1383.84	207.722	1429.49	1198.65	279.549	1164.16	1345.63	24.1569	1263.4	1431.74	-18.4271	1178.62	1256.2	-26.2149	1122.02	1149.33	-58.836	1103.37	978.621	-26.1248	1100.24	874.488	-72.5156	1039.99	893.54	-76.2638	1036.28	786.844
777	0	158.966	1532.55	1601.95	261.225	1524.57	1602.45	126.423	1379.22	1632.81	262.23	1358.73	1638.72	218.316	1286.71	1489.18	225.482	1172.25	1269.41	201.514	1420.95	1383.8	207.186	1442.99	1198.64	278.276	1177.25	1345.98	22.9226	1277.33	1431.41	-19.8305	1193.75	1255.11	-27.5425	1137.48	1148.04	-59.4852	1119.81	977.094	-26.3455	1116.81	872.943	-73.3638	1056.95	891.675	-76.2861	1053.31	784.821
778	0	157.763	1546.05	1601.7	259.999	1538.06	1602.54	125.092	1392.79	1632.67	260.871	1372.27	1639.06	217.203	1299.96	1489.55	224.433	1185.54	1269.83	200.873	1434.17	1383.98	206.668	1456.31	1198.84	277.094	1190.2	1346.53	21.7961	1291.15	1431.38	-21.2725	1209.04	1254.19	-28.984	1153.22	1146.86	-60.1858	1136.93	975.631	-26.6016	1134.24	871.459	-74.3326	1074.85	889.743	-76.423	1071.58	782.725
779	0	156.706	1559.45	1601.58	258.921	1551.46	1602.77	123.93	1406.26	1632.75	259.684	1385.73	1639.61	216.248	1313.04	1490.14	223.461	1198.68	1270.47	200.345	1447.23	1384.37	206.173	1469.42	1199.24	276.017	1202.99	1347.27	20.7913	1304.83	1431.67	-22.7346	1224.45	1253.46	-30.5261	1169.21	1145.8	-60.9289	1154.71	974.266	-26.89	1152.53	870.078	-75.4057	1093.66	887.78	-76.679	1091.06	780.605
780	0	155.809	1572.71	1601.61	258.004	1564.75	1603.13	122.954	1419.61	1633.08	258.684	1399.1	1640.37	215.46	1325.94	1490.94	222.575	1211.67	1271.31	199.933	1460.1	1384.99	205.704	1482.3	1199.83	275.052	1215.62	1348.19	19.9182	1318.33	1432.28	-24.198	1239.92	1252.94	-32.1536	1185.39	1144.9	-61.7049	1173.11	973.033	-27.2065	1171.64	868.843	-76.5624	1113.35	885.829	-77.0562	1111.76	778.521
781	0	155.084	1585.82	1601.81	257.262	1577.9	1603.62	122.177	1432.82	1633.66	257.886	1412.35	1641.33	214.841	1338.65	1491.95	221.78	1224.5	1272.35	199.637	1472.77	1385.83	205.266	1494.95	1200.64	274.204	1228.07	1349.27	19.1826	1331.65	1433.2	-25.6444	1255.42	1252.65	-33.8505	1201.73	1144.17	-62.5034	1192.08	971.967	-27.5455	1191.53	867.802	-77.7787	1133.88	883.937	-77.5531	1133.65	776.542
782	0	154.539	1598.77	1602.18	256.703	1590.9	1604.26	121.607	1445.88	1634.48	257.298	1425.47	1642.48	214.39	1351.14	1493.16	221.077	1237.16	1273.57	199.454	1485.25	1386.9	204.86	1507.35	1201.65	273.473	1240.35	1350.52	18.5866	1344.77	1434.43	-27.0568	1270.89	1252.6	-35.6002	1218.18	1143.63	-63.3142	1211.58	971.104	-27.9006	1212.15	867.002	-79.0275	1155.19	882.152	-78.1636	1156.7	774.742
783	0	154.179	1611.53	1602.74	256.332	1603.74	1605.04	121.247	1458.77	1635.56	256.923	1438.42	1643.83	214.1	1363.43	1494.55	220.464	1249.66	1274.96	199.378	1497.52	1388.19	204.489	1519.53	1202.86	272.853	1252.45	1351.91	18.1281	1357.66	1435.96	-28.4199	1286.3	1252.8	-37.386	1234.7	1143.29	-64.1269	1231.54	970.478	-28.2646	1233.47	866.492	-80.2799	1177.23	880.524	-78.8772	1180.86	773.197
784	0	154.002	1624.1	1603.51	256.148	1616.4	1605.97	121.096	1471.47	1636.89	256.757	1451.19	1645.34	213.962	1375.51	1496.12	219.936	1262	1276.49	199.401	1509.6	1389.69	204.153	1531.49	1204.27	272.34	1264.38	1353.42	17.8014	1370.35	1437.77	-29.7209	1301.61	1253.25	-39.1918	1251.25	1143.16	-64.9319	1251.92	970.12	-28.6305	1255.43	866.321	-81.5067	1199.93	879.102	-79.6781	1206.09	771.985
785	0	154.005	1636.47	1604.49	256.148	1628.86	1607.05	121.144	1483.97	1638.46	256.793	1463.78	1647.01	213.962	1387.39	1497.84	219.486	1274.19	1278.16	199.512	1521.49	1391.39	203.852	1543.26	1205.88	271.923	1276.15	1355.04	17.598	1382.82	1439.83	-30.9496	1316.79	1253.95	-41.0023	1267.79	1143.25	-65.7206	1272.65	970.055	-28.9912	1277.98	866.53	-82.6788	1223.23	877.929	-80.5455	1232.3	771.179
786	0	154.178	1648.65	1605.69	256.323	1641.13	1608.28	121.38	1496.28	1640.26	257.016	1476.16	1648.81	214.082	1399.09	1499.68	219.11	1286.23	1279.93	199.699	1533.22	1393.28	203.583	1554.87	1207.66	271.593	1287.78	1356.74	17.5068	1395.09	1442.1	-32.0989	1331.8	1254.88	-42.8036	1284.28	1143.56	-66.4852	1293.69	970.306	-29.3401	1301.06	867.161	-83.769	1247.04	877.048	-81.4545	1259.4	770.845
787	0	154.508	1660.63	1607.1	256.658	1653.2	1609.66	121.787	1508.38	1642.25	257.408	1488.33	1650.73	214.306	1410.62	1501.63	218.799	1298.14	1281.78	199.952	1544.8	1395.32	203.346	1566.34	1209.6	271.339	1299.29	1358.51	17.5152	1407.17	1444.55	-33.1644	1346.64	1256.04	-44.5835	1300.71	1144.06	-67.2194	1314.97	970.886	-29.6709	1324.61	868.243	-84.7526	1271.31	876.492	-82.3766	1287.31	771.04
788	0	154.978	1672.42	1608.72	257.137	1665.07	1611.17	122.341	1520.28	1644.41	257.947	1500.29	1652.72	214.614	1421.99	1503.65	218.55	1309.92	1283.69	200.255	1556.25	1397.48	203.137	1577.7	1211.66	271.153	1310.69	1360.31	17.6095	1419.09	1447.15	-34.1447	1361.28	1257.39	-46.3312	1317.05	1144.76	-67.9181	1336.43	971.803	-29.9776	1348.57	869.802	-85.6086	1295.95	876.286	-83.281	1315.9	771.811
789	0	155.566	1684.03	1610.52	257.737	1676.75	1612.81	123.019	1531.99	1646.7	258.607	1512.04	1654.77	214.988	1433.24	1505.72	218.359	1321.59	1285.63	200.598	1567.6	1399.75	202.953	1588.98	1213.83	271.025	1322.01	1362.14	17.7761	1430.86	1449.83	-35.0406	1375.73	1258.91	-48.038	1333.29	1145.63	-68.5773	1358.04	973.058	-30.255	1372.89	871.853	-86.3198	1320.91	876.45	-84.136	1345.08	773.188
790	0	156.251	1695.47	1612.48	258.436	1688.25	1614.56	123.793	1543.52	1649.07	259.363	1523.59	1656.83	215.412	1444.39	1507.79	218.224	1333.18	1287.57	200.968	1578.87	1402.06	202.792	1600.2	1216.05	270.948	1333.25	1363.95	18.0012	1442.5	1452.56	-35.8552	1389.99	1260.55	-49.6964	1349.41	1146.63	-69.1938	1379.74	974.642	-30.4983	1397.5	874.401	-86.8735	1346.11	876.993	-84.9103	1374.7	775.188
791	0	157.006	1706.77	1614.57	259.209	1699.59	1616.38	124.636	1554.88	1651.49	260.185	1534.95	1658.88	215.868	1455.45	1509.85	218.143	1344.68	1289.47	201.355	1590.07	1404.39	202.653	1611.39	1218.29	270.917	1344.45	1365.73	18.2724	1454.03	1455.27	-36.593	1404.07	1262.27	-51.3003	1365.41	1147.73	-69.7652	1401.48	976.54	-30.7029	1422.35	877.441	-87.2612	1371.48	877.914	-85.5743	1404.66	777.812
792	0	157.808	1717.93	1616.75	260.028	1710.78	1618.26	125.52	1566.1	1653.91	261.048	1546.15	1660.89	216.344	1466.46	1511.85	218.118	1356.13	1291.32	201.749	1601.24	1406.7	202.535	1622.55	1220.51	270.928	1355.61	1367.45	18.5784	1465.48	1457.94	-37.2592	1417.99	1264.03	-52.845	1381.29	1148.9	-70.2892	1423.23	978.732	-30.8643	1447.36	880.959	-87.4789	1396.98	879.208	-86.1014	1434.83	781.045
793	0	158.632	1728.99	1618.97	260.871	1721.86	1620.14	126.419	1577.19	1656.27	261.926	1557.21	1662.82	216.826	1477.43	1513.76	218.148	1367.53	1293.07	202.143	1612.38	1408.93	202.438	1633.72	1222.67	270.977	1366.76	1369.08	18.9096	1476.86	1460.5	-37.8597	1431.76	1265.78	-54.3261	1397.06	1150.09	-70.7636	1444.95	981.19	-30.9781	1472.49	884.93	-87.5263	1422.55	880.859	-86.4685	1465.1	784.861
794	0	159.455	1739.97	1621.17	261.713	1732.83	1622.01	127.308	1588.18	1658.54	262.794	1568.15	1664.65	217.305	1488.38	1515.56	218.235	1378.91	1294.7	202.53	1623.52	1411.05	202.362	1644.91	1224.72	271.063	1377.91	1370.61	19.2583	1488.2	1462.92	-38.3999	1445.4	1267.48	-55.7399	1412.73	1151.26	-71.1858	1466.62	983.882	-31.0392	1497.67	889.323	-87.4067	1448.14	882.848	-86.6571	1495.35	789.222
795	0	160.258	1750.89	1623.32	262.533	1743.73	1623.81	128.167	1599.09	1660.67	263.634	1579	1666.33	217.775	1499.34	1517.21	218.38	1390.27	1296.19	202.908	1634.66	1413.03	202.311	1656.11	1226.62	271.183	1389.08	1372	19.6188	1499.5	1465.16	-38.8845	1458.94	1269.09	-57.0827	1428.32	1152.38	-71.5524	1488.21	986.773	-31.0422	1522.85	894.097	-87.1262	1473.71	885.15	-86.6535	1525.49	794.082
796	0	161.023	1761.77	1625.35	263.314	1754.58	1625.52	128.977	1609.97	1662.61	264.429	1589.79	1667.86	218.23	1510.31	1518.69	218.583	1401.64	1297.51	203.275	1645.83	1414.82	202.286	1667.35	1228.35	271.338	1400.26	1373.25	19.9876	1510.79	1467.17	-39.3174	1472.41	1270.55	-58.3506	1443.84	1153.4	-71.8595	1509.69	989.827	-30.9813	1547.96	899.204	-86.6934	1499.21	887.736	-86.4488	1555.43	799.386
797	0	161.737	1772.64	1627.23	264.042	1765.42	1627.08	129.727	1620.82	1664.34	265.168	1600.57	1669.21	218.67	1521.31	1519.98	218.845	1413.01	1298.64	203.63	1657.03	1416.4	202.289	1678.63	1229.88	271.528	1411.48	1374.33	20.3636	1522.07	1468.94	-39.7007	1485.83	1271.85	-59.5397	1459.3	1154.3	-72.1021	1531.06	993.006	-30.8498	1572.95	904.591	-86.119	1524.61	890.575	-86.0391	1585.08	805.077
798	0	162.39	1783.52	1628.9	264.708	1776.25	1628.47	130.408	1631.67	1665.83	265.843	1611.34	1670.36	219.095	1532.36	1521.06	219.165	1424.41	1299.57	203.976	1668.26	1417.75	202.325	1689.94	1231.17	271.755	1422.74	1375.22	20.7474	1533.36	1470.45	-40.0351	1499.21	1272.94	-60.645	1474.73	1155.04	-72.2745	1552.28	996.272	-30.6408	1597.76	910.202	-85.4148	1549.87	893.632	-85.4254	1614.39	811.093
799	0	162.976	1794.43	1630.34	265.304	1787.12	1629.66	131.016	1642.55	1667.05	266.452	1622.15	1671.29	219.507	1543.45	1521.91	219.543	1435.85	1300.28	204.318	1679.53	1418.85	202.396	1701.3	1232.21	272.02	1434.06	1375.91	21.142	1544.67	1471.67	-40.3196	1512.59	1273.8	-61.6616	1490.15	1155.6	-72.3701	1573.36	999.586	-30.3473	1622.34	915.979	-84.5935	1574.97	896.875	-84.613	1643.29	817.371
800	0	163.494	1805.38	1631.5	265.831	1798.03	1630.62	131.552	1653.49	1667.99	266.995	1633.01	1672	219.913	1554.6	1522.53	219.979	1447.32	1300.76	204.661	1690.85	1419.68	202.507	1712.7	1232.99	272.328	1445.42	1376.39	21.5521	1555.99	1472.6	-40.5516	1525.97	1274.42	-62.5834	1505.56	1155.96	-72.3824	1594.27	1002.91	-29.9624	1646.64	921.86	-83.6682	1599.86	900.266	-83.6112	1671.74	823.847
801	0	163.946	1816.41	1632.37	266.291	1809.01	1631.33	132.023	1664.49	1668.63	267.48	1643.95	1672.49	220.32	1565.81	1522.9	220.473	1458.85	1301	205.014	1702.22	1420.24	202.662	1724.14	1233.51	272.681	1456.85	1376.66	21.9838	1567.35	1473.24	-40.7269	1539.37	1274.78	-63.4041	1520.98	1156.11	-72.3045	1615	1006.22	-29.4797	1670.61	927.786	-82.6517	1624.52	903.77	-82.4332	1699.69	830.462
802	0	164.338	1827.5	1632.92	266.69	1820.07	1631.79	132.437	1675.56	1668.98	267.916	1655	1672.74	220.738	1577.1	1523.03	221.024	1470.43	1301.01	205.384	1713.64	1420.53	202.866	1735.64	1233.75	273.086	1468.34	1376.71	22.4447	1578.76	1473.59	-40.8402	1552.82	1274.88	-64.117	1536.42	1156.05	-72.1299	1635.54	1009.47	-28.8934	1694.22	933.699	-81.5564	1648.91	907.352	-81.0946	1727.1	837.156
803	0	164.679	1838.68	1633.16	267.038	1831.24	1631.98	132.808	1686.73	1669.04	268.317	1666.15	1672.76	221.177	1588.45	1522.92	221.633	1482.08	1300.78	205.781	1725.12	1420.55	203.123	1747.18	1233.73	273.545	1479.91	1376.53	22.9431	1590.2	1473.65	-40.8847	1566.3	1274.71	-64.7152	1551.89	1155.77	-71.8527	1655.88	1012.64	-28.1989	1717.43	939.543	-80.3934	1673	910.977	-79.6132	1753.96	843.871
804	0	164.981	1849.96	1633.09	267.349	1842.51	1631.9	133.153	1697.99	1668.81	268.698	1677.42	1672.55	221.649	1599.88	1522.56	222.301	1493.79	1300.33	206.217	1736.67	1420.31	203.438	1758.78	1233.46	274.065	1491.54	1376.13	23.4881	1601.71	1473.44	-40.8533	1579.83	1274.29	-65.1914	1567.38	1155.28	-71.4678	1676	1015.7	-27.3926	1740.2	945.264	-79.1728	1696.76	914.609	-78.0083	1780.23	850.556
805	0	165.259	1861.32	1632.71	267.638	1853.89	1631.57	133.491	1709.36	1668.31	269.079	1688.83	1672.12	222.166	1611.38	1521.98	223.029	1505.57	1299.65	206.702	1748.27	1419.81	203.817	1770.43	1232.93	274.65	1503.24	1375.51	24.0888	1613.28	1472.97	-40.738	1593.42	1273.63	-65.5392	1582.89	1154.58	-70.9711	1695.87	1018.62	-26.4724	1762.5	950.815	-77.9027	1720.16	918.215	-76.2996	1805.89	857.157
806	0	165.531	1872.78	1632.05	267.922	1865.39	1630.98	133.844	1720.82	1667.54	269.479	1700.36	1671.48	222.743	1622.97	1521.17	223.817	1517.42	1298.75	207.247	1759.95	1419.07	204.265	1782.15	1232.18	275.304	1515.02	1374.68	24.7543	1624.92	1472.27	-40.5308	1607.05	1272.74	-65.7521	1598.42	1153.7	-70.3599	1715.5	1021.39	-25.4373	1784.33	956.151	-76.5898	1743.15	921.758	-74.5065	1830.92	863.624
807	0	165.815	1884.34	1631.11	268.221	1877.02	1630.17	134.234	1732.37	1666.54	269.92	1712.03	1670.64	223.391	1634.64	1520.16	224.665	1529.35	1297.66	207.864	1771.7	1418.11	204.789	1793.95	1231.21	276.031	1526.88	1373.64	25.4934	1636.64	1471.34	-40.2239	1620.73	1271.63	-65.8246	1613.94	1152.64	-69.6326	1734.85	1023.98	-24.2876	1805.64	961.233	-75.2391	1765.71	925.205	-72.6475	1855.29	869.908
808	0	166.131	1896	1629.93	268.556	1888.76	1629.14	134.685	1744.03	1665.31	270.423	1723.82	1669.61	224.123	1646.4	1518.95	225.573	1541.35	1296.37	208.562	1783.53	1416.95	205.395	1805.81	1230.04	276.833	1538.81	1372.41	26.3137	1648.45	1470.23	-39.8101	1634.45	1270.34	-65.7524	1629.45	1151.43	-68.789	1753.9	1026.38	-23.0252	1826.44	966.025	-73.8538	1787.81	928.521	-70.7395	1879	875.96
809	0	166.499	1907.74	1628.54	268.945	1900.63	1627.91	135.22	1755.77	1663.89	271.011	1735.73	1668.4	224.95	1658.24	1517.56	226.54	1553.43	1294.92	209.354	1795.44	1415.6	206.09	1817.77	1228.69	277.711	1550.81	1371	27.222	1660.36	1468.94	-39.2829	1648.21	1268.88	-65.5321	1644.92	1150.08	-67.8303	1772.64	1028.56	-21.653	1846.71	970.496	-72.4356	1809.39	931.672	-68.7975	1902.01	881.732
810	0	166.942	1919.57	1626.96	269.412	1912.61	1626.52	135.861	1767.59	1662.3	271.703	1747.75	1667.04	225.881	1670.18	1516.01	227.562	1565.58	1293.31	210.248	1807.43	1414.08	206.88	1829.81	1227.19	278.663	1562.89	1369.42	28.2238	1672.37	1467.5	-38.6371	1661.98	1267.28	-65.1618	1660.33	1148.62	-66.7587	1791.04	1030.52	-20.1754	1866.44	974.62	-70.9848	1830.45	934.625	-66.834	1924.32	887.179
811	0	167.478	1931.49	1625.23	269.975	1924.7	1624.97	136.628	1779.5	1660.57	272.518	1759.89	1665.53	226.925	1682.2	1514.33	228.634	1577.81	1291.57	211.253	1819.51	1412.43	207.771	1841.94	1225.55	279.688	1575.05	1367.69	29.3227	1684.5	1465.95	-37.8687	1675.78	1265.57	-64.6412	1675.66	1147.06	-65.5778	1809.08	1032.23	-18.5982	1885.63	978.374	-69.501	1850.94	937.348	-64.8589	1945.9	892.258
812	0	168.129	1943.49	1623.39	270.652	1936.89	1623.31	137.539	1791.48	1658.72	273.475	1772.12	1663.9	228.086	1694.32	1512.52	229.752	1590.1	1289.71	212.374	1831.67	1410.65	208.768	1854.17	1223.8	280.783	1587.27	1365.82	30.5209	1696.75	1464.29	-36.9755	1689.57	1263.77	-63.9714	1690.88	1145.44	-64.2919	1826.75	1033.7	-16.9283	1904.27	981.735	-67.9829	1870.83	939.811	-62.8793	1966.75	896.925
813	0	168.911	1955.56	1621.45	271.462	1949.18	1621.55	138.61	1803.53	1656.79	274.586	1784.43	1662.17	229.369	1706.52	1510.61	230.909	1602.47	1287.75	213.616	1843.93	1408.77	209.875	1866.51	1221.95	281.943	1599.56	1363.84	31.8186	1709.12	1462.57	-35.9571	1703.35	1261.91	-63.1552	1705.97	1143.76	-62.9063	1844.01	1034.91	-15.1734	1922.35	984.685	-66.4289	1890.1	941.985	-60.8998	1986.84	901.143
814	0	169.841	1967.71	1619.47	272.418	1961.56	1619.71	139.851	1815.65	1654.8	275.864	1796.83	1660.35	230.774	1718.81	1508.63	232.097	1614.9	1285.72	214.981	1856.27	1406.82	211.093	1878.95	1220.04	283.163	1611.92	1361.75	33.2141	1721.62	1460.79	-34.8148	1717.12	1260.02	-62.197	1720.9	1142.06	-61.4272	1860.85	1035.85	-13.3418	1939.88	987.21	-64.8375	1908.73	943.844	-58.9224	2006.17	904.875
815	0	170.93	1979.93	1617.45	273.53	1974.01	1617.82	141.269	1827.84	1652.78	277.315	1809.3	1658.47	232.299	1731.18	1506.59	233.309	1627.39	1283.63	216.469	1868.69	1404.82	212.422	1891.49	1218.09	284.437	1624.34	1359.59	34.7037	1734.24	1458.99	-33.5521	1730.84	1258.12	-61.1023	1735.65	1140.36	-59.8613	1877.26	1036.52	-11.4423	1956.85	989.293	-63.2078	1926.7	945.367	-56.9474	2024.73	908.087
816	0	172.189	1992.22	1615.45	274.808	1986.52	1615.91	142.867	1840.08	1650.77	278.942	1821.83	1656.55	233.938	1743.63	1504.53	234.538	1639.95	1281.51	218.074	1881.19	1402.81	213.858	1904.14	1216.13	285.762	1636.81	1357.37	36.2819	1746.97	1457.19	-32.1743	1744.53	1256.23	-59.8782	1750.2	1138.66	-58.2158	1893.21	1036.9	-9.4836	1973.26	990.925	-61.5396	1943.99	946.532	-54.973	2042.52	910.75
817	0	173.622	2004.57	1613.48	276.253	1999.1	1613.99	144.643	1852.38	1648.78	280.745	1834.41	1654.61	235.685	1756.14	1502.45	235.778	1652.56	1279.37	219.79	1893.77	1400.79	215.393	1916.9	1214.17	287.131	1649.34	1355.11	37.9411	1759.8	1455.41	-30.6885	1758.15	1254.38	-58.5323	1764.52	1137	-56.4983	1908.71	1037.01	-7.47469	1989.11	992.094	-59.8339	1960.59	947.323	-52.9971	2059.53	912.836
818	0	175.228	2016.97	1611.57	277.866	2011.72	1612.09	146.59	1864.73	1646.85	282.716	1847.03	1652.67	237.528	1768.71	1500.39	237.025	1665.22	1277.24	221.606	1906.42	1398.81	217.017	1929.76	1212.26	288.541	1661.93	1352.84	39.6718	1772.73	1453.66	-29.1036	1771.71	1252.59	-57.0736	1778.61	1135.38	-54.717	1923.73	1036.84	-5.4245	2004.39	992.794	-58.0933	1976.5	947.729	-51.0172	2075.76	914.323
819	0	177.003	2029.42	1609.75	279.641	2024.37	1610.24	148.697	1877.12	1645	284.845	1859.67	1650.76	239.455	1781.33	1498.37	238.278	1677.93	1275.14	223.507	1919.12	1396.88	218.716	1942.72	1210.4	289.987	1674.55	1350.59	41.4628	1785.73	1451.97	-27.4302	1785.18	1250.87	-55.5113	1792.44	1133.82	-52.8803	1938.27	1036.39	-3.34221	2019.1	993.017	-56.3224	1991.7	947.74	-49.0317	2091.21	915.193
820	0	178.937	2041.92	1608.04	281.567	2037.04	1608.45	150.946	1889.56	1643.25	287.115	1872.34	1648.9	241.449	1793.99	1496.41	239.535	1690.67	1273.09	225.476	1931.87	1395.02	220.473	1955.77	1208.63	291.467	1687.22	1348.37	43.3011	1798.78	1450.36	-25.68	1798.56	1249.24	-53.8554	1806.02	1132.34	-50.9972	1952.32	1035.66	-1.23737	2033.25	992.762	-54.5273	2006.2	947.353	-47.0402	2105.88	915.431
821	0	181.015	2054.45	1606.46	283.63	2049.72	1606.74	153.318	1902.02	1641.64	289.506	1885.01	1647.11	243.493	1806.68	1494.53	240.8	1703.46	1271.12	227.491	1944.66	1393.27	222.267	1968.9	1206.97	292.976	1699.91	1346.21	45.1718	1811.85	1448.83	-23.8662	1811.82	1247.73	-52.1159	1819.33	1130.93	-49.0768	1965.89	1034.66	0.879942	2046.82	992.027	-52.7161	2019.99	946.569	-45.0444	2119.78	915.029
822	0	183.218	2067	1605.04	285.81	2062.4	1605.14	155.788	1914.51	1640.17	291.994	1897.67	1645.4	245.565	1819.38	1492.77	242.076	1716.27	1269.24	229.53	1957.48	1391.64	224.077	1982.1	1205.44	294.511	1712.63	1344.15	47.0588	1824.94	1447.41	-22.0025	1824.96	1246.32	-50.3034	1832.36	1129.62	-47.1287	1978.96	1033.4	2.99911	2059.81	990.814	-50.8986	2033.07	945.393	-43.0484	2132.91	913.984
823	0	185.522	2079.58	1603.79	288.085	2075.07	1603.66	158.329	1927.02	1638.87	294.551	1910.32	1643.81	247.644	1832.08	1491.13	243.369	1729.1	1267.49	231.568	1970.31	1390.16	225.881	1995.35	1204.05	296.07	1725.36	1342.21	48.9443	1838.01	1446.11	-20.1035	1837.97	1245.05	-48.4283	1845.13	1128.42	-45.1628	1991.54	1031.89	5.10891	2072.23	989.129	-49.0856	2045.46	943.833	-41.059	2145.26	912.299
824	0	187.9	2092.16	1602.72	290.429	2087.71	1602.33	160.909	1939.54	1637.75	297.144	1922.95	1642.35	249.707	1844.76	1489.64	244.682	1741.94	1265.89	233.579	1983.13	1388.83	227.658	2008.62	1202.82	297.647	1738.08	1340.42	50.8096	1851.03	1444.94	-18.1842	1850.82	1243.91	-46.5013	1857.63	1127.32	-43.1895	2003.63	1030.13	7.19759	2084.06	986.981	-47.2888	2057.14	941.904	-39.0857	2156.83	909.983
825	0	190.325	2104.75	1601.84	292.814	2100.33	1601.14	163.498	1952.07	1636.83	299.743	1935.54	1641.03	251.731	1857.43	1488.33	246.019	1754.77	1264.45	235.539	1995.93	1387.67	229.387	2021.89	1201.76	299.237	1750.8	1338.81	52.6355	1864	1443.91	-16.2598	1863.52	1242.91	-44.533	1869.85	1126.33	-41.2192	2015.22	1028.15	9.25292	2095.3	984.385	-45.5202	2068.12	939.624	-37.1405	2167.63	907.051
826	0	192.764	2117.33	1601.16	295.211	2112.9	1600.11	166.059	1964.6	1636.11	302.31	1948.09	1639.88	253.692	1870.05	1487.21	247.382	1767.57	1263.21	237.424	2008.7	1386.71	231.05	2035.13	1200.88	300.835	1763.49	1337.4	54.4029	1876.88	1443.04	-14.3452	1876.05	1242.07	-42.5339	1881.81	1125.46	-39.2627	2026.33	1025.96	11.2623	2105.95	981.358	-43.7916	2078.41	937.015	-35.2374	2177.64	903.526
827	0	195.186	2129.9	1600.66	297.589	2125.43	1599.25	168.558	1977.12	1635.6	304.812	1960.6	1638.9	255.569	1882.63	1486.3	248.771	1780.34	1262.19	239.211	2021.41	1385.94	232.629	2048.29	1200.19	302.432	1776.14	1336.22	56.0936	1889.65	1442.33	-12.455	1888.4	1241.37	-40.5145	1893.51	1124.71	-37.3311	2036.94	1023.58	13.213	2115.99	977.927	-42.1148	2088	934.105	-33.3918	2186.86	899.44
828	0	197.558	2142.45	1600.35	299.916	2137.91	1598.56	170.96	1989.64	1635.31	307.212	1973.05	1638.13	257.341	1895.14	1485.62	250.183	1793.04	1261.4	240.879	2034.05	1385.39	234.112	2061.35	1199.69	304.021	1788.73	1335.3	57.691	1902.3	1441.79	-10.6031	1900.56	1240.83	-38.4848	1904.95	1124.09	-35.4353	2047.06	1021.03	15.0921	2125.43	974.119	-40.5008	2096.89	930.925	-31.6197	2195.29	894.831
829	0	199.847	2154.98	1600.22	302.162	2150.33	1598.04	173.231	2002.15	1635.24	309.477	1985.45	1637.56	258.992	1907.57	1485.19	251.612	1805.67	1260.87	242.414	2046.6	1385.06	235.487	2074.26	1199.4	305.595	1801.26	1334.64	59.1813	1914.81	1441.43	-8.80224	1912.52	1240.45	-36.4544	1916.14	1123.6	-33.5863	2056.69	1018.35	16.8869	2134.26	969.97	-38.9596	2105.1	927.511	-29.9372	2202.92	889.745
830	0	202.022	2167.47	1600.25	304.294	2162.68	1597.69	175.338	2014.65	1635.39	311.576	1997.8	1637.23	260.508	1919.91	1485	253.052	1818.2	1260.59	243.801	2059.04	1384.96	236.743	2087.02	1199.32	307.146	1813.71	1334.26	60.5539	1927.15	1441.26	-7.0636	1924.29	1240.23	-34.4319	1927.07	1123.25	-31.7948	2065.83	1015.54	18.585	2142.48	965.522	-37.5009	2112.62	923.905	-28.3593	2209.73	884.236
831	0	204.051	2179.93	1600.43	306.283	2174.97	1597.51	177.254	2027.13	1635.76	313.48	2010.09	1637.14	261.879	1932.13	1485.08	254.498	1830.62	1260.59	245.032	2071.36	1385.1	237.875	2099.58	1199.46	308.669	1826.07	1334.17	61.802	1939.32	1441.29	-5.39655	1935.85	1240.17	-32.4248	1937.76	1123.03	-30.0712	2074.47	1012.65	20.1741	2150.08	960.819	-36.133	2119.45	920.151	-26.9	2215.72	878.365
832	0	205.904	2192.33	1600.74	308.1	2187.19	1597.5	178.954	2039.59	1636.35	315.166	2022.33	1637.31	263.101	1944.24	1485.41	255.941	1842.92	1260.85	246.101	2083.54	1385.5	238.876	2111.95	1199.84	310.157	1838.34	1334.37	62.9226	1951.3	1441.5	-3.80821	1947.2	1240.29	-30.4392	1948.19	1122.96	-28.4253	2082.63	1009.72	21.6429	2157.06	955.912	-34.8641	2125.6	916.298	-25.572	2220.89	872.198
833	0	207.553	2204.68	1601.19	309.718	2199.34	1597.66	180.418	2052.03	1637.14	316.614	2034.52	1637.74	264.173	1956.22	1486.01	257.377	1855.09	1261.38	247.007	2095.57	1386.15	239.745	2124.11	1200.46	311.607	1850.5	1334.86	63.9169	1963.07	1441.91	-2.30322	1958.34	1240.57	-28.48	1958.37	1123.04	-26.8662	2090.29	1006.76	22.9804	2163.43	950.854	-33.7011	2131.08	912.397	-24.386	2225.24	865.807
834	0	208.974	2216.96	1601.75	311.114	2211.42	1597.99	181.633	2064.42	1638.15	317.814	2046.66	1638.46	265.1	1968.06	1486.86	258.802	1867.11	1262.16	247.753	2107.45	1387.05	240.48	2136.08	1201.34	313.018	1862.57	1335.62	64.7894	1974.62	1442.52	-0.883561	1969.26	1241.02	-26.5501	1968.3	1123.27	-25.4021	2097.47	1003.83	24.1773	2169.19	945.704	-32.6506	2135.91	908.502	-23.3517	2228.76	859.267
835	0	210.146	2229.17	1602.42	312.267	2223.43	1598.5	182.591	2076.75	1639.34	318.759	2058.74	1639.46	265.887	1979.76	1487.96	260.213	1879	1263.19	248.343	2119.18	1388.21	241.085	2147.85	1202.47	314.388	1874.53	1336.65	65.548	1985.95	1443.31	0.451472	1979.95	1241.63	-24.6514	1977.98	1123.65	-24.04	2104.16	1000.95	25.2254	2174.34	940.519	-31.7181	2140.08	904.667	-22.4773	2231.47	852.656
836	0	211.054	2241.27	1603.21	313.164	2235.35	1599.2	183.292	2089.02	1640.72	319.45	2070.77	1640.72	266.546	1991.33	1489.28	261.61	1890.74	1264.43	248.787	2130.76	1389.62	241.563	2159.46	1203.86	315.717	1886.4	1337.92	66.2026	1997.05	1444.27	1.70512	1990.41	1242.41	-22.7842	1987.39	1124.19	-22.7855	2110.37	998.164	26.1183	2178.91	935.36	-30.9077	2143.63	900.946	-21.7698	2233.37	846.056
837	0	211.687	2253.27	1604.12	313.794	2247.21	1600.08	183.741	2101.18	1642.26	319.894	2082.74	1642.25	267.089	2002.77	1490.82	262.991	1902.37	1265.88	249.095	2142.2	1391.26	241.922	2170.92	1205.49	317.007	1898.17	1339.41	66.7649	2007.94	1445.4	2.88289	2000.63	1243.35	-20.948	1996.54	1124.89	-21.6429	2116.11	995.504	26.852	2182.9	930.284	-30.2224	2146.58	897.391	-21.2352	2234.5	839.544
838	0	212.041	2265.15	1605.14	314.154	2258.98	1601.16	183.949	2113.24	1643.95	320.103	2094.64	1644.03	267.529	2014.08	1492.53	264.357	1913.87	1267.5	249.278	2153.51	1393.12	242.173	2182.26	1207.35	318.257	1909.87	1341.08	67.2476	2018.61	1446.67	3.99213	2010.6	1244.43	-19.1416	2005.42	1125.74	-20.6147	2121.39	993.001	27.4246	2186.33	925.349	-29.6629	2148.95	894.05	-20.878	2234.88	833.198
839	0	212.119	2276.9	1606.3	314.249	2270.67	1602.43	183.933	2125.16	1645.75	320.096	2106.47	1646.02	267.882	2025.3	1494.41	265.705	1925.27	1269.26	249.35	2164.72	1395.17	242.327	2193.51	1209.42	319.469	1921.5	1342.92	67.6636	2029.1	1448.07	5.04149	2020.32	1245.65	-17.364	2014.02	1126.74	-19.7018	2126.23	990.681	27.8369	2189.24	920.605	-29.2279	2150.77	890.964	-20.7014	2234.55	827.089
840	0	211.93	2288.51	1607.58	314.085	2282.29	1603.89	183.714	2136.93	1647.65	319.895	2118.22	1648.18	268.161	2036.42	1496.4	267.032	1936.59	1271.13	249.324	2175.83	1397.37	242.398	2204.68	1211.65	320.643	1933.08	1344.88	68.0256	2039.42	1449.57	6.04036	2029.79	1246.98	-15.6139	2022.33	1127.87	-18.9036	2130.63	988.566	28.0921	2191.64	916.098	-28.9137	2152.08	888.168	-20.7062	2233.55	821.28
841	0	211.489	2299.97	1608.98	313.68	2293.82	1605.53	183.317	2148.55	1649.61	319.524	2129.89	1650.49	268.381	2047.47	1498.48	268.333	1947.83	1273.09	249.212	2186.87	1399.68	242.398	2215.8	1214.01	321.782	1944.61	1346.93	68.3455	2049.6	1451.14	6.9982	2038.99	1248.42	-13.891	2030.36	1129.14	-18.2177	2134.63	986.673	28.196	2193.59	911.866	-28.7136	2152.92	885.687	-20.8908	2231.94	815.827
842	0	210.817	2311.29	1610.51	313.052	2305.28	1607.33	182.767	2159.99	1651.6	319.01	2141.47	1652.89	268.553	2058.48	1500.61	269.6	1959	1275.09	249.027	2197.86	1402.06	242.34	2226.89	1216.45	322.883	1956.12	1349.03	68.6338	2059.66	1452.75	7.92404	2047.94	1249.93	-12.1955	2038.1	1130.51	-17.6404	2138.24	985.012	28.1562	2195.1	907.938	-28.6188	2153.33	883.54	-21.2508	2229.78	810.772
843	0	209.939	2322.46	1612.14	312.227	2316.67	1609.28	182.091	2171.26	1653.59	318.38	2152.97	1655.34	268.688	2069.45	1502.75	270.825	1970.14	1277.1	248.781	2208.82	1404.47	242.236	2237.96	1218.92	323.947	1967.61	1351.15	68.8997	2069.65	1454.37	8.82593	2056.64	1251.51	-10.5289	2045.56	1131.98	-17.1666	2141.5	983.585	27.9823	2196.23	904.334	-28.618	2153.35	881.732	-21.778	2227.13	806.148
844	0	208.884	2333.5	1613.86	311.23	2327.99	1611.33	181.317	2182.35	1655.53	317.662	2164.37	1657.78	268.795	2080.42	1504.85	271.998	1981.23	1279.09	248.482	2219.77	1406.84	242.097	2249.03	1221.36	324.972	1979.1	1353.24	69.1501	2079.58	1455.97	9.71063	2065.1	1253.12	-8.89362	2052.75	1133.53	-16.7901	2144.43	982.391	27.6855	2197.02	901.065	-28.698	2153.04	880.262	-22.4605	2224.08	801.974
845	0	207.681	2344.41	1615.64	310.091	2339.25	1613.46	180.472	2193.29	1657.4	316.882	2175.68	1660.17	268.882	2091.4	1506.89	273.111	1992.3	1281.03	248.139	2230.73	1409.14	241.931	2260.11	1223.72	325.956	1990.59	1355.26	69.3906	2089.48	1457.51	10.5833	2073.33	1254.74	-7.29315	2059.67	1135.13	-16.5038	2147.07	981.422	27.2785	2197.52	898.133	-28.8441	2152.44	879.119	-23.2828	2220.68	798.259
846	0	206.363	2355.22	1617.45	308.84	2350.46	1615.62	179.577	2204.09	1659.17	316.064	2186.92	1662.46	268.953	2102.41	1508.83	274.153	2003.35	1282.88	247.759	2241.7	1411.32	241.744	2271.2	1225.96	326.896	2002.1	1357.2	69.6242	2099.38	1458.96	11.4473	2081.35	1256.35	-5.732	2066.35	1136.76	-16.2997	2149.45	980.666	26.775	2197.78	895.531	-29.0409	2151.62	878.285	-24.2253	2217.03	794.999
847	0	204.959	2365.94	1619.26	307.506	2361.63	1617.77	178.656	2214.77	1660.79	315.228	2198.09	1664.6	269.01	2113.46	1510.62	275.118	2014.39	1284.61	247.346	2252.7	1413.33	241.541	2282.32	1228.01	327.789	2013.63	1359	69.8525	2109.3	1460.29	12.3043	2089.19	1257.93	-4.21532	2072.81	1138.41	-16.1693	2151.61	980.105	26.1897	2197.86	893.246	-29.2727	2150.61	877.736	-25.2653	2213.2	792.181
848	0	203.5	2376.6	1621.02	306.115	2372.77	1619.86	177.726	2225.35	1662.25	314.391	2209.2	1666.56	269.056	2124.56	1512.24	275.997	2025.42	1286.2	246.904	2263.75	1415.13	241.321	2293.45	1229.86	328.628	2025.19	1360.65	70.0748	2119.27	1461.48	13.1541	2096.87	1259.45	-2.74877	2079.07	1140.04	-16.1038	2153.6	979.72	25.5376	2197.79	891.261	-29.5242	2149.47	877.445	-26.3777	2209.27	789.783
849	0	202.012	2387.23	1622.7	304.694	2383.91	1621.85	176.801	2235.86	1663.51	313.566	2220.28	1668.3	269.088	2135.73	1513.67	276.786	2036.45	1287.62	246.434	2274.84	1416.7	241.086	2304.62	1231.45	329.409	2036.78	1362.11	70.2888	2129.28	1462.5	13.9951	2104.41	1260.91	-1.33814	2085.16	1141.65	-16.0942	2155.45	979.491	24.834	2197.64	889.553	-29.7816	2148.27	877.382	-27.5357	2205.31	787.778
850	0	200.517	2397.85	1624.24	303.263	2395.06	1623.69	175.893	2246.35	1664.56	312.764	2231.34	1669.8	269.103	2146.97	1514.88	277.478	2047.48	1288.85	245.935	2285.99	1418.01	240.832	2315.81	1232.77	330.123	2048.4	1363.37	70.4903	2139.37	1463.32	14.824	2111.85	1262.28	0.010919	2091.12	1143.22	-16.1318	2157.21	979.396	24.0939	2197.46	888.098	-30.0323	2147.04	877.515	-28.7122	2201.39	786.133
851	0	199.036	2408.49	1625.61	301.84	2406.23	1625.34	175.009	2256.83	1665.38	311.989	2242.42	1671.03	269.096	2158.29	1515.85	278.069	2058.52	1289.87	245.407	2297.19	1419.03	240.555	2327.04	1233.79	330.765	2060.06	1364.41	70.6737	2149.54	1463.94	15.6365	2119.23	1263.55	1.2932	2096.97	1144.73	-16.2083	2158.92	979.413	23.3317	2197.28	886.871	-30.2659	2145.85	877.815	-29.8806	2197.58	784.815
852	0	197.582	2419.18	1626.78	300.438	2417.45	1626.75	174.153	2267.36	1665.95	311.242	2253.51	1671.97	269.061	2169.69	1516.58	278.556	2069.57	1290.67	244.846	2308.46	1419.75	240.249	2338.29	1234.5	331.324	2071.76	1365.21	70.8319	2159.79	1464.35	16.4269	2126.57	1264.71	2.50413	2102.76	1146.16	-16.3159	2160.63	979.524	22.561	2197.17	885.846	-30.474	2144.74	878.255	-31.0164	2193.94	783.79
853	0	196.165	2429.95	1627.7	299.067	2428.72	1627.89	173.326	2277.95	1666.28	310.52	2264.67	1672.62	268.989	2181.17	1517.04	278.935	2080.66	1291.23	244.249	2319.78	1420.17	239.906	2349.57	1234.9	331.793	2083.49	1365.77	70.9568	2170.14	1464.53	17.1887	2133.91	1265.77	3.6399	2108.51	1147.52	-16.4478	2162.38	979.708	21.7939	2197.16	884.998	-30.6509	2143.76	878.808	-32.0975	2190.51	783.024
854	0	194.792	2440.81	1628.35	297.731	2440.07	1628.73	172.524	2288.64	1666.36	309.817	2275.89	1672.97	268.874	2192.75	1517.25	279.203	2091.78	1291.56	243.611	2331.18	1420.28	239.519	2360.88	1234.99	332.163	2095.27	1366.09	71.0393	2180.6	1464.49	17.9145	2141.28	1266.71	4.6975	2114.27	1148.8	-16.5982	2164.2	979.949	21.041	2197.28	884.306	-30.7927	2142.96	879.453	-33.1051	2187.35	782.486
855	0	193.462	2451.8	1628.72	296.431	2451.51	1629.25	171.741	2299.45	1666.2	309.125	2287.22	1673.02	268.704	2204.41	1517.21	279.358	2102.94	1291.65	242.927	2342.64	1420.1	239.079	2372.22	1234.78	332.425	2107.09	1366.16	71.0698	2191.17	1464.23	18.5964	2148.71	1267.53	5.67476	2120.05	1149.98	-16.7625	2166.15	980.232	20.3111	2197.59	883.746	-30.8978	2142.37	880.169	-34.0247	2184.49	782.148
856	0	192.171	2462.92	1628.78	295.162	2463.06	1629.44	170.97	2310.41	1665.79	308.433	2298.65	1672.79	268.471	2216.17	1516.9	279.397	2114.17	1291.5	242.19	2354.17	1419.62	238.578	2383.6	1234.27	332.572	2118.96	1365.98	71.0386	2201.86	1463.75	19.2262	2156.23	1268.23	6.57009	2125.91	1151.08	-16.9372	2168.25	980.543	19.6107	2198.11	883.299	-30.9667	2142.03	880.941	-34.8458	2181.99	781.984
857	0	190.914	2474.19	1628.54	293.919	2474.72	1629.3	170.2	2321.53	1665.14	307.727	2310.22	1672.27	268.165	2228.01	1516.36	279.318	2125.48	1291.11	241.396	2365.78	1418.86	238.007	2395.01	1233.48	332.596	2130.88	1365.57	70.9357	2212.67	1463.07	19.7955	2163.87	1268.81	7.38238	2131.85	1152.08	-17.1201	2170.54	980.871	18.9438	2198.88	882.947	-31.0015	2141.99	881.753	-35.5626	2179.86	781.968
858	0	189.679	2485.62	1628	292.692	2486.5	1628.82	169.419	2332.83	1664.27	306.994	2321.94	1671.48	267.777	2239.96	1515.57	279.12	2136.87	1290.5	240.537	2377.46	1417.84	237.357	2406.47	1232.42	332.491	2142.85	1364.94	70.7517	2223.61	1462.19	20.2961	2171.65	1269.28	8.11072	2137.93	1152.99	-17.3108	2173.05	981.204	18.312	2199.92	882.672	-31.0058	2142.27	882.591	-36.1738	2178.13	782.08
859	0	188.454	2497.22	1627.15	291.468	2498.42	1628.02	168.613	2344.32	1663.18	306.221	2333.81	1670.44	267.299	2251.99	1514.57	278.801	2148.36	1289.67	239.606	2389.23	1416.58	236.622	2417.98	1231.12	332.253	2154.87	1364.1	70.4775	2234.68	1461.12	20.7199	2179.6	1269.63	8.75414	2144.17	1153.81	-17.51	2175.81	981.533	17.7136	2201.26	882.458	-30.9847	2142.9	883.443	-36.6822	2176.83	782.296
860	0	187.225	2508.99	1626.03	290.234	2510.47	1626.91	167.769	2356	1661.9	305.394	2345.83	1669.16	266.72	2264.13	1513.37	278.361	2159.97	1288.64	238.596	2401.08	1415.09	235.794	2429.53	1229.59	331.878	2166.96	1363.06	70.1045	2245.88	1459.89	21.0592	2187.73	1269.86	9.31135	2150.59	1154.53	-17.7199	2178.86	981.846	17.1445	2202.93	882.287	-30.9444	2143.91	884.297	-37.095	2175.97	782.596
861	0	185.976	2520.93	1624.64	288.975	2522.66	1625.52	166.872	2367.88	1660.45	304.498	2358.03	1667.67	266.035	2276.36	1511.99	277.799	2171.7	1287.43	237.5	2413.03	1413.41	234.865	2441.15	1227.86	331.364	2179.12	1361.85	69.6247	2257.22	1458.5	21.3066	2196.06	1269.98	9.78057	2157.22	1155.15	-17.9445	2182.23	982.135	16.5978	2204.96	882.145	-30.8926	2145.33	885.14	-37.4227	2175.58	782.958
862	0	184.69	2533.04	1623.01	287.676	2534.99	1623.86	165.906	2379.94	1658.83	303.522	2370.38	1665.99	265.235	2288.7	1510.44	277.114	2183.55	1286.05	236.311	2425.06	1411.55	233.829	2452.84	1225.95	330.71	2191.35	1360.49	69.0309	2268.69	1456.97	21.455	2204.61	1269.98	10.1594	2164.09	1155.68	-18.189	2185.92	982.39	16.0645	2207.35	882.015	-30.838	2147.17	885.961	-37.6791	2175.66	783.36
863	0	183.355	2545.32	1621.17	286.324	2547.47	1621.98	164.859	2392.18	1657.07	302.451	2382.9	1664.15	264.316	2301.13	1508.76	276.308	2195.55	1284.54	235.022	2437.19	1409.54	232.682	2464.6	1223.89	329.917	2203.65	1358.99	68.3165	2280.3	1455.32	21.4978	2213.4	1269.87	10.4446	2171.23	1156.09	-18.4597	2189.98	982.6	15.5343	2210.14	881.883	-30.7903	2149.46	886.748	-37.8805	2176.23	783.781
864	0	181.955	2557.75	1619.16	284.905	2560.07	1619.9	163.716	2404.61	1655.19	301.275	2395.57	1662.17	263.27	2313.66	1506.96	275.379	2207.68	1282.9	233.628	2449.42	1407.4	231.418	2476.45	1221.71	328.986	2216.03	1357.39	67.4759	2292.04	1453.56	21.4281	2222.44	1269.64	10.6322	2178.65	1156.4	-18.7642	2194.42	982.757	14.9959	2213.35	881.733	-30.7603	2152.2	887.488	-38.0452	2177.3	784.196
865	0	180.478	2570.34	1616.99	283.408	2572.81	1617.67	162.465	2417.21	1653.21	299.984	2408.38	1660.07	262.095	2326.29	1505.07	274.33	2219.94	1281.17	232.124	2461.74	1405.17	230.036	2488.39	1219.43	327.918	2228.49	1355.71	66.5045	2303.91	1451.71	21.2398	2231.73	1269.28	10.7176	2186.38	1156.59	-19.1108	2199.27	982.85	14.4377	2216.99	881.552	-30.7597	2155.43	888.168	-38.1928	2178.88	784.586
866	0	178.915	2583.08	1614.71	281.825	2585.67	1615.31	161.094	2429.97	1651.17	298.566	2421.33	1657.9	260.786	2339.02	1503.12	273.161	2232.34	1279.38	230.508	2474.16	1402.88	228.534	2500.42	1217.09	326.716	2241.04	1353.97	65.3986	2315.89	1449.79	20.9265	2241.3	1268.82	10.6953	2194.45	1156.67	-19.5086	2204.55	982.873	13.8485	2221.1	881.326	-30.8007	2159.16	888.778	-38.3431	2180.98	784.929
867	0	177.259	2595.96	1612.35	280.148	2598.65	1612.86	159.596	2442.88	1649.08	297.015	2434.4	1655.68	259.342	2351.84	1501.14	271.875	2244.86	1277.54	228.78	2486.68	1400.55	226.911	2512.55	1214.71	325.385	2253.66	1352.21	64.1555	2328	1447.82	20.4822	2251.14	1268.23	10.5595	2202.87	1156.61	-19.9666	2210.28	982.816	13.217	2225.68	881.046	-30.8962	2163.4	889.305	-38.5155	2183.63	785.209
868	0	175.505	2608.96	1609.94	278.375	2611.74	1610.36	157.962	2455.94	1646.97	295.324	2447.58	1653.44	257.763	2364.74	1499.15	270.472	2257.51	1275.7	226.94	2499.29	1398.22	225.172	2524.8	1212.33	323.927	2266.35	1350.44	62.7743	2340.22	1445.82	19.9011	2261.26	1267.53	10.3036	2211.66	1156.43	-20.4945	2216.47	982.674	12.5329	2230.75	880.699	-31.0593	2168.18	889.74	-38.7287	2186.83	785.411
869	0	173.653	2622.08	1607.51	276.503	2624.92	1607.86	156.189	2469.13	1644.86	293.488	2460.86	1651.22	256.05	2377.72	1497.18	268.957	2270.26	1273.87	224.992	2511.99	1395.91	223.32	2537.15	1209.98	322.347	2279.12	1348.71	61.255	2352.54	1443.82	19.1776	2271.68	1266.72	9.92113	2220.83	1156.12	-21.1014	2223.16	982.442	11.7868	2236.35	880.281	-31.3034	2173.51	890.073	-38.9994	2190.6	785.523
870	0	171.705	2635.3	1605.1	274.536	2638.19	1605.37	154.275	2482.43	1642.79	291.505	2474.22	1649.04	254.206	2390.77	1495.26	267.333	2283.1	1272.09	222.942	2524.77	1393.67	221.363	2549.62	1207.7	320.651	2291.94	1347.03	59.5997	2364.96	1441.83	18.3064	2282.39	1265.8	9.40507	2230.41	1155.69	-21.7963	2230.36	982.117	10.9703	2242.49	879.783	-31.6422	2179.42	890.297	-39.3428	2194.97	785.538
871	0	169.664	2648.62	1602.74	272.478	2651.52	1602.94	152.222	2495.84	1640.77	289.377	2487.64	1646.94	252.237	2403.87	1493.42	265.604	2296.03	1270.39	220.802	2537.63	1391.51	219.311	2562.19	1205.51	318.846	2304.82	1345.44	57.8123	2377.47	1439.88	17.2831	2293.39	1264.79	8.74857	2240.39	1155.13	-22.5876	2238.09	981.699	10.0757	2249.19	879.205	-32.0889	2185.92	890.408	-39.7721	2199.97	785.45
872	0	167.538	2662.02	1600.44	270.336	2664.91	1600.59	150.035	2509.35	1638.84	287.11	2501.11	1644.95	250.151	2417.02	1491.68	263.776	2309.02	1268.78	218.582	2550.56	1389.46	217.178	2574.87	1203.44	316.938	2317.74	1343.94	55.8988	2390.07	1437.99	16.1035	2304.69	1263.71	7.94498	2250.78	1154.45	-23.4832	2246.38	981.188	9.09683	2256.49	878.545	-32.657	2193.04	890.4	-40.2984	2205.61	785.256
873	0	165.337	2675.47	1598.24	268.119	2678.34	1598.36	147.723	2522.92	1637	284.712	2514.61	1643.08	247.957	2430.2	1490.06	261.855	2322.06	1267.29	216.299	2563.55	1387.56	214.978	2587.66	1201.53	314.937	2330.68	1342.58	53.8676	2402.75	1436.19	14.7647	2316.3	1262.55	6.98808	2261.6	1153.67	-24.4901	2255.23	980.587	8.02843	2264.39	877.807	-33.3593	2200.8	890.271	-40.9307	2211.95	784.953
874	0	163.072	2688.97	1596.16	265.839	2691.79	1596.27	145.298	2536.55	1635.29	282.196	2528.13	1641.37	245.67	2443.4	1488.6	259.849	2335.12	1265.94	213.97	2576.58	1385.82	212.729	2600.53	1199.79	312.851	2343.64	1341.36	51.7296	2415.5	1434.5	13.2649	2328.19	1261.35	5.87229	2272.84	1152.8	-25.6143	2264.67	979.901	6.86639	2272.93	876.995	-34.2084	2209.23	890.022	-41.6764	2219	784.542
875	0	160.757	2702.49	1594.21	263.508	2705.25	1594.33	142.777	2550.21	1633.71	279.58	2541.65	1639.84	243.304	2456.59	1487.29	257.769	2348.19	1264.76	211.614	2589.64	1384.28	210.449	2613.48	1198.25	310.693	2356.59	1340.3	49.4981	2428.32	1432.95	11.604	2340.38	1260.12	4.59295	2284.49	1151.85	-26.8611	2274.71	979.137	5.60776	2282.12	876.118	-35.2162	2218.35	889.653	-42.5413	2226.8	784.025
876	0	158.406	2716.02	1592.41	261.141	2718.7	1592.57	140.18	2563.89	1632.29	276.885	2555.14	1638.5	240.879	2469.75	1486.17	255.625	2361.24	1263.75	209.251	2602.71	1382.93	208.159	2626.49	1196.92	308.476	2369.51	1339.42	47.1888	2441.19	1431.56	9.78354	2352.85	1258.88	3.14654	2296.55	1150.84	-28.2342	2285.37	978.305	4.25063	2291.99	875.185	-36.3938	2228.19	889.166	-43.5303	2235.41	783.404
877	0	156.035	2729.53	1590.78	258.753	2732.11	1591.01	137.528	2577.56	1631.04	274.135	2568.6	1637.37	238.415	2482.88	1485.25	253.431	2374.25	1262.94	206.901	2615.78	1381.8	205.875	2639.52	1195.82	306.215	2382.39	1338.73	44.8196	2454.1	1430.35	7.80751	2365.59	1257.65	1.5309	2309.02	1149.79	-29.7364	2296.65	977.413	2.79415	2302.56	874.207	-37.7511	2238.76	888.568	-44.6473	2244.85	782.681
878	0	153.66	2742.99	1589.33	256.361	2745.48	1589.65	134.848	2591.19	1629.96	271.356	2582.01	1636.46	235.935	2495.94	1484.54	251.201	2387.19	1262.33	204.584	2628.81	1380.89	203.616	2652.56	1194.95	303.925	2395.2	1338.24	42.4107	2467.04	1429.33	5.68216	2378.59	1256.46	-0.254502	2321.87	1148.71	-31.3683	2308.57	976.476	1.23855	2313.85	873.199	-39.2966	2250.09	887.862	-45.896	2255.17	781.86
879	0	151.298	2756.39	1588.06	253.98	2758.79	1588.49	132.166	2604.76	1629.06	268.576	2595.36	1635.77	233.462	2508.93	1484.04	248.95	2400.05	1261.94	202.319	2641.8	1380.2	201.398	2665.56	1194.31	301.625	2407.93	1337.96	39.9834	2479.99	1428.54	3.41639	2391.84	1255.32	-2.20842	2335.09	1147.64	-33.1293	2321.12	975.506	-0.414853	2325.86	872.175	-41.0364	2262.2	887.057	-47.2799	2266.4	780.947
880	0	148.967	2769.71	1586.98	251.627	2772.02	1587.55	129.511	2618.24	1628.36	265.823	2608.62	1635.31	231.02	2521.82	1483.77	246.695	2412.81	1261.77	200.122	2654.71	1379.75	199.234	2678.48	1193.91	299.332	2420.55	1337.88	37.56	2492.92	1427.98	1.0217	2405.31	1254.27	-4.32761	2348.66	1146.58	-35.0168	2334.31	974.52	-2.16357	2338.61	871.151	-42.9741	2275.1	886.161	-48.8026	2278.59	779.948
881	0	146.683	2782.92	1586.1	249.321	2785.15	1586.82	126.91	2631.63	1627.86	263.128	2621.8	1635.08	228.634	2534.6	1483.71	244.452	2425.44	1261.82	198.009	2667.53	1379.52	197.135	2691.31	1193.73	297.063	2433.05	1338.02	35.163	2505.83	1427.66	-1.48783	2418.99	1253.3	-6.60663	2362.55	1145.55	-37.026	2348.13	973.535	-4.00392	2352.11	870.145	-45.1099	2288.8	885.187	-50.4678	2291.76	778.872
882	0	144.463	2796	1585.4	247.078	2798.17	1586.3	124.392	2644.89	1627.55	260.519	2634.87	1635.07	226.325	2547.24	1483.89	242.234	2437.93	1262.1	195.993	2680.22	1379.51	195.111	2703.99	1193.78	294.835	2445.41	1338.36	32.814	2518.68	1427.61	-4.09574	2432.83	1252.46	-9.0377	2376.73	1144.59	-39.1506	2362.56	972.569	-5.93093	2366.36	869.176	-47.4397	2303.3	884.149	-52.279	2305.94	777.732
883	0	142.325	2808.94	1584.9	244.914	2811.08	1585.98	121.982	2658.01	1627.45	258.024	2647.84	1635.29	224.114	2559.74	1484.28	240.055	2450.28	1262.6	194.085	2692.77	1379.72	193.171	2716.5	1194.04	292.662	2457.62	1338.91	30.5334	2531.46	1427.82	-6.78348	2446.83	1251.75	-11.6107	2391.17	1143.7	-41.3823	2377.6	971.641	-7.93832	2381.35	868.266	-49.9554	2318.6	883.062	-54.2396	2321.15	776.546
884	0	140.284	2821.72	1584.59	242.846	2823.86	1585.86	119.703	2670.97	1627.56	255.668	2660.69	1635.72	222.018	2572.07	1484.89	237.925	2462.47	1263.31	192.293	2705.16	1380.15	191.32	2728.82	1194.52	290.556	2469.65	1339.65	28.3389	2544.14	1428.29	-9.53085	2460.94	1251.19	-14.3133	2405.84	1142.9	-43.7109	2393.23	970.773	-10.0186	2397.08	867.437	-52.6438	2334.69	881.947	-56.3517	2337.4	775.338
885	0	138.356	2834.33	1584.46	240.89	2836.49	1585.93	117.577	2683.77	1627.87	253.472	2673.4	1636.37	220.05	2584.24	1485.71	235.853	2474.5	1264.23	190.625	2717.38	1380.79	189.567	2740.92	1195.21	288.524	2481.51	1340.58	26.2455	2556.71	1429.04	-12.3166	2475.13	1250.8	-17.1311	2420.7	1142.21	-46.125	2409.41	969.986	-12.1633	2413.53	866.714	-55.4873	2351.55	880.827	-58.6163	2354.7	774.139
886	0	136.555	2846.77	1584.52	239.061	2848.98	1586.18	115.618	2696.39	1628.4	251.456	2685.99	1637.22	218.218	2596.22	1486.72	233.843	2486.37	1265.34	189.083	2729.41	1381.62	187.915	2752.8	1196.1	286.573	2493.19	1341.69	24.2645	2569.15	1430.04	-15.1191	2489.38	1250.58	-20.048	2435.72	1141.65	-48.6119	2426.11	969.303	-14.3633	2430.67	866.123	-58.4643	2369.15	879.726	-61.0317	2373.04	772.984
887	0	134.896	2859.02	1584.77	237.371	2861.3	1586.61	113.839	2708.82	1629.13	249.631	2698.43	1638.26	216.529	2608.02	1487.92	231.898	2498.09	1266.63	187.67	2741.25	1382.66	186.37	2764.47	1197.19	284.703	2504.68	1342.95	22.4034	2581.45	1431.3	-17.9171	2503.65	1250.56	-23.0468	2450.87	1141.22	-51.1581	2443.3	968.746	-16.6092	2448.5	865.691	-61.5495	2387.48	878.673	-63.5938	2392.39	771.913
888	0	133.388	2871.09	1585.2	235.832	2873.46	1587.2	112.248	2721.08	1630.07	248.007	2710.72	1639.49	214.982	2619.64	1489.3	230.02	2509.64	1268.08	186.385	2752.9	1383.88	184.936	2775.92	1198.47	282.914	2515.99	1344.37	20.6661	2593.6	1432.79	-20.6902	2517.91	1250.72	-26.1093	2466.12	1140.95	-53.7497	2460.94	968.339	-18.8917	2466.96	865.447	-64.7152	2406.47	877.698	-66.2948	2412.73	770.972
889	0	132.042	2882.97	1585.81	234.454	2885.46	1587.95	110.845	2733.15	1631.21	246.585	2722.85	1640.88	213.574	2631.08	1490.83	228.208	2521.05	1269.67	185.224	2764.35	1385.28	183.617	2787.18	1199.93	281.203	2527.13	1345.92	19.0526	2605.6	1434.51	-23.4199	2532.15	1251.09	-29.2173	2481.43	1140.84	-56.373	2479	968.102	-21.2018	2486.04	865.418	-67.9321	2426.11	876.83	-69.1236	2434.02	770.208
890	0	130.864	2894.67	1586.61	233.243	2897.27	1588.86	109.631	2745.04	1632.54	245.364	2734.82	1642.42	212.299	2642.33	1492.5	226.464	2532.31	1271.4	184.182	2775.62	1386.83	182.412	2798.26	1201.56	279.567	2538.09	1347.58	17.56	2617.46	1436.42	-26.0899	2546.33	1251.65	-32.3525	2496.77	1140.89	-59.0147	2497.42	968.057	-23.5313	2505.69	865.634	-71.1706	2446.33	876.101	-72.0654	2456.21	769.67
891	0	129.859	2906.19	1587.58	232.205	2908.91	1589.92	108.6	2756.75	1634.06	244.339	2746.62	1644.1	211.148	2653.42	1494.3	224.785	2543.43	1273.23	183.252	2786.72	1388.54	181.322	2809.18	1203.35	277.998	2548.9	1349.34	16.1829	2629.17	1438.51	-28.6862	2560.43	1252.4	-35.4975	2512.12	1141.12	-61.6622	2516.17	968.221	-25.8728	2525.87	866.122	-74.4017	2467.09	875.54	-75.1024	2479.23	769.404
892	0	129.027	2917.53	1588.74	231.341	2920.36	1591.12	107.743	2768.29	1635.75	243.502	2758.24	1645.9	210.111	2664.35	1496.2	223.172	2554.43	1275.16	182.425	2797.64	1390.38	180.344	2819.97	1205.28	276.494	2559.56	1351.18	14.9137	2640.76	1440.76	-31.1979	2574.45	1253.35	-38.6358	2527.45	1141.52	-64.3042	2535.2	968.611	-28.2195	2546.56	866.908	-77.5979	2488.34	875.174	-78.2138	2503.03	769.456
893	0	128.369	2928.71	1590.07	230.652	2931.63	1592.47	107.051	2779.65	1637.59	242.84	2769.68	1647.79	209.174	2675.14	1498.18	221.625	2565.3	1277.15	181.692	2808.42	1392.32	179.475	2830.65	1207.33	275.048	2570.09	1353.09	13.744	2652.23	1443.13	-33.6167	2588.36	1254.47	-41.7524	2542.74	1142.09	-66.9306	2554.48	969.241	-30.5658	2567.69	868.016	-80.7341	2510.03	875.028	-81.3773	2527.53	769.867
894	0	127.881	2939.73	1591.56	230.135	2942.72	1593.94	106.511	2790.85	1639.56	242.341	2780.94	1649.76	208.327	2685.78	1500.23	220.144	2576.05	1279.2	181.046	2819.06	1394.36	178.709	2841.24	1209.48	273.657	2580.5	1355.05	12.6651	2663.59	1445.59	-35.9366	2602.15	1255.77	-44.8339	2557.97	1142.83	-69.5327	2573.97	970.123	-32.9068	2589.25	869.468	-83.788	2532.12	875.125	-84.5691	2552.67	770.672
895	0	127.56	2950.59	1593.22	229.787	2953.63	1595.54	106.111	2801.89	1641.66	241.991	2792.01	1651.78	207.558	2696.3	1502.32	218.729	2586.69	1281.28	180.477	2829.57	1396.47	178.042	2851.75	1211.7	272.316	2590.8	1357.04	11.6682	2674.86	1448.13	-38.1541	2615.81	1257.23	-47.8691	2573.13	1143.73	-72.1034	2593.64	971.265	-35.2386	2611.18	871.283	-86.7403	2554.55	875.482	-87.7657	2578.37	771.901
896	0	127.399	2961.31	1595.03	229.602	2964.35	1597.25	105.839	2812.77	1643.85	241.776	2802.89	1653.85	206.856	2706.71	1504.44	217.382	2597.23	1283.38	179.979	2839.97	1398.62	177.469	2862.21	1213.97	271.023	2601.01	1359.05	10.7455	2686.05	1450.72	-40.2674	2629.35	1258.83	-50.8484	2588.19	1144.79	-74.6372	2613.45	972.673	-37.5578	2633.46	873.475	-89.5751	2577.31	876.112	-90.9447	2604.58	773.577
897	0	127.392	2971.89	1596.99	229.577	2974.9	1599.08	105.683	2823.49	1646.12	241.684	2813.59	1655.94	206.213	2717.02	1506.57	216.101	2607.67	1285.49	179.546	2850.27	1400.81	176.984	2872.61	1216.27	269.774	2611.14	1361.07	9.89031	2697.16	1453.33	-42.276	2642.74	1260.57	-53.7646	2603.16	1145.99	-77.1295	2633.39	974.351	-39.8617	2656.07	876.058	-92.2798	2600.34	877.026	-94.0855	2631.24	775.714
898	0	127.534	2982.33	1599.08	229.705	2985.27	1601.02	105.635	2834.07	1648.46	241.702	2824.1	1658.03	205.622	2727.22	1508.7	214.889	2618.02	1287.59	179.173	2860.49	1403.02	176.584	2882.99	1218.59	268.569	2621.18	1363.09	9.09707	2708.22	1455.94	-44.1801	2655.99	1262.43	-56.6121	2618.01	1147.34	-79.5774	2653.43	976.301	-42.1478	2678.96	879.038	-94.8443	2623.63	878.229	-97.1704	2658.29	778.325
899	0	127.82	2992.64	1601.29	229.981	2995.46	1603.05	105.685	2844.5	1650.84	241.82	2834.42	1660.13	205.076	2737.34	1510.82	213.744	2628.27	1289.68	178.859	2870.62	1405.24	176.266	2893.34	1220.9	267.407	2631.16	1365.1	8.3616	2719.21	1458.55	-45.9806	2669.1	1264.41	-59.3873	2632.75	1148.82	-81.9785	2673.56	978.523	-44.4146	2702.14	882.422	-97.2617	2647.15	879.726	-100.185	2685.71	781.415
900	0	128.245	3002.82	1603.63	230.403	3005.49	1605.19	105.827	2854.78	1653.27	242.032	2844.55	1662.21	204.573	2747.37	1512.92	212.666	2638.43	1291.75	178.599	2880.69	1407.46	176.026	2903.67	1223.2	266.286	2641.08	1367.1	7.68097	2730.16	1461.14	-47.6783	2682.06	1266.5	-62.0876	2647.36	1150.42	-84.3313	2693.76	981.016	-46.6606	2725.57	886.213	-99.5269	2670.89	881.519	-103.118	2713.46	784.987
901	0	128.807	3012.89	1606.09	230.968	3015.34	1607.41	106.058	2864.93	1655.73	242.332	2854.5	1664.28	204.108	2757.31	1515	211.656	2648.51	1293.79	178.395	2890.68	1409.67	175.865	2913.98	1225.48	265.206	2650.93	1369.08	7.05328	2741.06	1463.69	-49.274	2694.88	1268.69	-64.7117	2661.85	1152.15	-86.635	2714.03	983.781	-48.885	2749.25	890.413	-101.637	2694.84	883.607	-105.963	2741.52	789.043
902	0	129.504	3022.82	1608.66	231.673	3025.02	1609.72	106.375	2874.93	1658.21	242.716	2864.27	1666.33	203.682	2767.17	1517.05	210.715	2658.5	1295.81	178.244	2900.62	1411.87	175.779	2924.28	1227.73	264.167	2660.72	1371.04	6.47748	2751.91	1466.22	-50.7684	2707.55	1270.98	-67.2589	2676.21	1154	-88.8891	2734.37	986.817	-51.0873	2773.19	895.021	-103.59	2718.99	885.991	-108.713	2769.88	793.583
903	0	130.334	3032.64	1611.34	232.519	3034.54	1612.12	106.776	2884.79	1660.72	243.183	2873.85	1668.35	203.293	2776.96	1519.08	209.841	2668.4	1297.8	178.147	2910.49	1414.06	175.77	2934.56	1229.95	263.168	2670.46	1372.98	5.95306	2762.71	1468.71	-52.1616	2720.06	1273.36	-69.7288	2690.45	1155.97	-91.0933	2754.77	990.123	-53.2671	2797.36	900.039	-105.385	2743.34	888.672	-111.368	2798.54	798.607
904	0	131.299	3042.34	1614.14	233.503	3043.89	1614.61	107.26	2894.5	1663.26	243.733	2883.25	1670.36	202.942	2786.66	1521.07	209.034	2678.22	1299.76	178.104	2920.3	1416.23	175.836	2944.83	1232.13	262.211	2680.13	1374.89	5.47986	2773.47	1471.16	-53.4538	2732.44	1275.84	-72.1215	2704.56	1158.06	-93.2475	2775.23	993.699	-55.4243	2821.78	905.467	-107.022	2767.89	891.648	-113.927	2827.48	804.115
[truncated: 69 more columns]

## Sheet: Sheet2
Devices
		025370 - Force			025370 - Moment			025370 - CoP			027571 - Force			027571 - Moment			027571 - CoP			037720 - Force			037720 - Moment			037720 - CoP
Frame	Sub Frame	Fx	Fy	Fz	Mx	My	Mz	Cx	Cy	Cz	Fx	Fy	Fz	Mx	My	Mz	Cx	Cy	Cz	Fx	Fy	Fz	Mx	My	Mz	Cx	Cy	Cz
		N	N	N	N.mm	N.mm	N.mm	mm	mm	mm	N	N	N	N.mm	N.mm	N.mm	mm	mm	mm	N	N	N	N.mm	N.mm	N.mm	mm	mm	mm
513	0	0	0	0	0	0	0	200	300	0	0	0	0	0	0	0	200	903	0	0	0	0	0	0	0	603	903	0
513	1	0	0	0	0	0	0	200	300	0	0	0	0	0	0	0	200	903	0	0	0	0	0	0	0	603	903	0
513	2	0	0	0	0	0	0	200	300	0	0	0	0	0	0	0	200	903	0	0	0	0	0	0	0	603	903	0
513	3	0	0	0	0	0	0	200	300	0	0	0	0	0	0	0	200	903	0	0	0	0	0	0	0	603	903	0
513	4	0	0	0	0	0	0	200	300	0	0	0	0	0	0	0	200	903	0	0	0	0	0	0	0	603	903	0
513	5	0	0	0	0	0	0	200	300	0	0	0	0	0	0	0	200	903	0	0	0	0	0	0	0	603	903	0
513	6	0	0	0	0	0	0	200	300	0	0	0	0	0	0	0	200	903	0	0	0	0	0	0	0	603	903	0
513	7	0	0	0	0	0	0	200	300	0	0	0	0	0	0	0	200	903	0	0	0	0	0	0	0	603	903	0
513	8	0	0	0	0	0	0	200	300	0	0	0	0	0	0	0	200	903	0	0	0	0	0	0	0	603	903	0
513	9	0	0	0	0	0	0	200	300	0	0	0	0	0	0	0	200	903	0	0	0	0	0	0	0	603	903	0
514	0	0	0	0	0	0	0	200	300	0	0	0	0	0	0	0	200	903	0	0	0	0	0	0	0	603	903	0
514	1	0	0	0	0	0	0	200	300	0	0	0	0	0	0	0	200	903	0	0	0	0	0	0	0	603	903	0
514	2	0	0	0	0	0	0	200	300	0	0	0	0	0	0	0	200	903	0	0	0	0	0	0	0	603	903	0
514	3	0	0	0	0	0	0	200	300	0	0	0	0	0	0	0	200	903	0	0	0	0	0	0	0	603	903	0
514	4	0	0	0	0	0	0	200	300	0	0	0	0	0	0	0	200	903	0	0	0	0	0	0	0	603	903	0
514	5	0	0	0	0	0	0	200	300	0	0	0	0	0	0	0	200	903	0	0	0	0	0	0	0	603	903	0
514	6	0	0	0	0	0	0	200	300	0	0	0	0	0	0	0	200	903	0	0	0	0	0	0	0	603	903	0
514	7	0	0	0	0	0	0	200	300	0	0	0	0	0	0	0	200	903	0	0	0	0	0	0	0	603	903	0
514	8	0	0	0	0	0	0	200	300	0	0	0	0	0	0	0	200	903	0	0	0	0	0	0	0	603	903	0
514	9	0	0	0	0	0	0	200	300	0	0	0	0	0	0	0	200	903	0	0	0	0	0	0	0	603	903	0
515	0	0	0	0	0	0	0	200	300	0	0	0	0	0	0	0	200	903	0	0	0	0	0	0	0	603	903	0
515	1	0	0	0	0	0	0	200	300	0	0	0	0	0	0	0	200	903	0	0	0	0	0	0	0	603	903	0
515	2	0	0	0	0	0	0	200	300	0	0	0	0	0	0	0	200	903	0	0	0	0	0	0	0	603	903	0
515	3	0	0	0	0	0	0	200	300	0	0	0	0	0	0	0	200	903	0	0	0	0	0	0	0	603	903	0
515	4	0	0	0	0	0	0	200	300	0	0	0	0	0	0	0	200	903	0	0	0	0	0	0	0	603	903	0
515	5	0	0	0	0	0	0	200	300	0	0	0	0	0	0	0	200	903	0	0	0	0	0	0	0	603	903	0
515	6	0	0	0	0	0	0	200	300	0	0	0	0	0	0	0	200	903	0	0	0	0	0	0	0	603	903	0
515	7	0	0	0	0	0	0	200	300	0	0	0	0	0	0	0	200	903	0	0	0	0	0	0	0	603	903	0
515	8	0	0	0	0	0	0	200	300	0	0	0	0	0	0	0	200	903	0	0	0	0	0	0	0	603	903	0
515	9	0	0	0	0	0	0	200	300	0	0	0	0	0	0	0	200	903	0	0	0	0	0	0	0	603	903	0
516	0	0	0	0	0	0	0	200	300	0	0	0	0	0	0	0	200	903	0	0	0	0	0	0	0	603	903	0
516	1	0	0	0	0	0	0	200	300	0	0	0	0	0	0	0	200	903	0	0	0	0	0	0	0	603	903	0
516	2	0	0	0	0	0	0	200	300	0	0	0	0	0	0	0	200	903	0	0	0	0	0	0	0	603	903	0
516	3	0	0	0	0	0	0	200	300	0	0	0	0	0	0	0	200	903	0	0	0	0	0	0	0	603	903	0
516	4	0	0	0	0	0	0	200	300	0	0	0	0	0	0	0	200	903	0	0	0	0	0	0	0	603	903	0
516	5	0	0	0	0	0	0	200	300	0	0	0	0	0	0	0	200	903	0	0	0	0	0	0	0	603	903	0
516	6	0	0	0	0	0	0	200	300	0	0	0	0	0	0	0	200	903	0	0	0	0	0	0	0	603	903	0
516	7	0	0	0	0	0	0	200	300	0	0	0	0	0	0	0	200	903	0	0	0	0	0	0	0	603	903	0
516	8	0	0	0	0	0	0	200	300	0	0	0	0	0	0	0	200	903	0	0	0	0	0	0	0	603	903	0
516	9	0	0	0	0	0	0	200	300	0	0	0	0	0	0	0	200	903	0	0	0	0	0	0	0	603	903	0
517	0	0	0	0	0	0	0	200	300	0	0	0	0	0	0	0	200	903	0	0	0	0	0	0	0	603	903	0
517	1	0	0	0	0	0	0	200	300	0	0	0	0	0	0	0	200	903	0	0	0	0	0	0	0	603	903	0
517	2	0	0	0	0	0	0	200	300	0	0	0	0	0	0	0	200	903	0	0	0	0	0	0	0	603	903	0
517	3	0	0	0	0	0	0	200	300	0	0	0	0	0	0	0	200	903	0	0	0	0	0	0	0	603	903	0
517	4	0	0	0	0	0	0	200	300	0	0	0	0	0	0	0	200	903	0	0	0	0	0	0	0	603	903	0
517	5	0	0	0	0	0	0	200	300	0	0	0	0	0	0	0	200	903	0	0	0	0	0	0	0	603	903	0
517	6	0	0	0	0	0	0	200	300	0	0	0	0	0	0	0	200	903	0	0	0	0	0	0	0	603	903	0
517	7	0	0	0	0	0	0	200	300	0	0	0	0	0	0	0	200	903	0	0	0	0	0	0	0	603	903	0
517	8	0	0	0	0	0	0	200	300	0	0	0	0	0	0	0	200	903	0	0	0	0	0	0	0	603	903	0
517	9	0	0	0	0	0	0	200	300	0	0	0	0	0	0	0	200	903	0	0	0	0	0	0	0	603	903	0
518	0	0	0	0	0	0	0	200	300	0	0	0	0	0	0	0	200	903	0	0	0	0	0	0	0	603	903	0
518	1	0	0	0	0	0	0	200	300	0	0	0	0	0	0	0	200	903	0	0	0	0	0	0	0	603	903	0
518	2	0	0	0	0	0	0	200	300	0	0	0	0	0	0	0	200	903	0	0	0	0	0	0	0	603	903	0
518	3	0	0	0	0	0	0	200	300	0	0	0	0	0	0	0	200	903	0	0	0	0	0	0	0	603	903	0
518	4	0	0	0	0	0	0	200	300	0	0	0	0	0	0	0	200	903	0	0	0	0	0	0	0	603	903	0
518	5	0	0	0	0	0	0	200	300	0	0	0	0	0	0	0	200	903	0	0	0	0	0	0	0	603	903	0
518	6	0	0	0	0	0	0	200	300	0	0	0	0	0	0	0	200	903	0	0	0	0	0	0	0	603	903	0
518	7	0	0	0	0	0	0	200	300	0	0	0	0	0	0	0	200	903	0	0	0	0	0	0	0	603	903	0
518	8	0	0	0	0	0	0	200	300	0	0	0	0	0	0	0	200	903	0	0	0	0	0	0	0	603	903	0
518	9	0	0	0	0	0	0	200	300	0	0	0	0	0	0	0	200	903	0	0	0	0	0	0	0	603	903	0
519	0	0	0	0	0	0	0	200	300	0	0	0	0	0	0	0	200	903	0	0	0	0	0	0	0	603	903	0
519	1	0	0	0	0	0	0	200	300	0	0	0	0	0	0	0	200	903	0	0	0	0	0	0	0	603	903	0
519	2	0	0	0	0	0	0	200	300	0	0	0	0	0	0	0	200	903	0	0	0	0	0	0	0	603	903	0
519	3	0	0	0	0	0	0	200	300	0	0	0	0	0	0	0	200	903	0	0	0	0	0	0	0	603	903	0
519	4	0	0	0	0	0	0	200	300	0	0	0	0	0	0	0	200	903	0	0	0	0	0	0	0	603	903	0
519	5	0	0	0	0	0	0	200	300	0	0	0	0	0	0	0	200	903	0	0	0	0	0	0	0	603	903	0
519	6	0	0	0	0	0	0	200	300	0	0	0	0	0	0	0	200	903	0	0	0	0	0	0	0	603	903	0
519	7	0	0	0	0	0	0	200	300	0	0	0	0	0	0	0	200	903	0	0	0	0	0	0	0	603	903	0
519	8	0	0	0	0	0	0	200	300	0	0	0	0	0	0	0	200	903	0	0	0	0	0	0	0	603	903	0
519	9	0	0	0	0	0	0	200	300	0	0	0	0	0	0	0	200	903	0	0	0	0	0	0	0	603	903	0
520	0	0	0	0	0	0	0	200	300	0	0	0	0	0	0	0	200	903	0	0	0	0	0	0	0	603	903	0
520	1	0	0	0	0	0	0	200	300	0	0	0	0	0	0	0	200	903	0	0	0	0	0	0	0	603	903	0
520	2	0	0	0	0	0	0	200	300	0	0	0	0	0	0	0	200	903	0	0	0	0	0	0	0	603	903	0
520	3	0	0	0	0	0	0	200	300	0	0	0	0	0	0	0	200	903	0	0	0	0	0	0	0	603	903	0
520	4	0	0	0	0	0	0	200	300	0	0	0	0	0	0	0	200	903	0	0	0	0	0	0	0	603	903	0
520	5	0	0	0	0	0	0	200	300	0	0	0	0	0	0	0	200	903	0	0	0	0	0	0	0	603	903	0
520	6	0	0	0	0	0	0	200	300	0	0	0	0	0	0	0	200	903	0	0	0	0	0	0	0	603	903	0
520	7	0	0	0	0	0	0	200	300	0	0	0	0	0	0	0	200	903	0	0	0	0	0	0	0	603	903	0
520	8	0	0	0	0	0	0	200	300	0	0	0	0	0	0	0	200	903	0	0	0	0	0	0	0	603	903	0
520	9	0	0	0	0	0	0	200	300	0	0	0	0	0	0	0	200	903	0	0	0	0	0	0	0	603	903	0
521	0	0	0	0	0	0	0	200	300	0	0	0	0	0	0	0	200	903	0	0	0	0	0	0	0	603	903	0
521	1	0	0	0	0	0	0	200	300	0	0	0	0	0	0	0	200	903	0	0	0	0	0	0	0	603	903	0
521	2	0	0	0	0	0	0	200	300	0	0	0	0	0	0	0	200	903	0	0	0	0	0	0	0	603	903	0
521	3	0	0	0	0	0	0	200	300	0	0	0	0	0	0	0	200	903	0	0	0	0	0	0	0	603	903	0
521	4	0	0	0	0	0	0	200	300	0	0	0	0	0	0	0	200	903	0	0	0	0	0	0	0	603	903	0
521	5	0	0	0	0	0	0	200	300	0	0	0	0	0	0	0	200	903	0	0	0	0	0	0	0	603	903	0
521	6	0	0	0	0	0	0	200	300	0	0	0	0	0	0	0	200	903	0	0	0	0	0	0	0	603	903	0
521	7	0	0	0	0	0	0	200	300	0	0	0	0	0	0	0	200	903	0	0	0	0	0	0	0	603	903	0
521	8	0	0	0	0	0	0	200	300	0	0	0	0	0	0	0	200	903	0	0	0	0	0	0	0	603	903	0
521	9	0	0	0	0	0	0	200	300	0	0	0	0	0	0	0	200	903	0	0	0	0	0	0	0	603	903	0
522	0	0	0	0	0	0	0	200	300	0	0	0	0	0	0	0	200	903	0	0	0	0	0	0	0	603	903	0
522	1	0	0	0	0	0	0	200	300	0	0	0	0	0	0	0	200	903	0	0	0	0	0	0	0	603	903	0
522	2	0	0	0	0	0	0	200	300	0	0	0	0	0	0	0	200	903	0	0	0	0	0	0	0	603	903	0
522	3	0	0	0	0	0	0	200	300	0	0	0	0	0	0	0	200	903	0	0	0	0	0	0	0	603	903	0
522	4	0	0	0	0	0	0	200	300	0	0	0	0	0	0	0	200	903	0	0	0	0	0	0	0	603	903	0
522	5	0	0	0	0	0	0	200	300	0	0	0	0	0	0	0	200	903	0	0	0	0	0	0	0	603	903	0
522	6	0	0	0	0	0	0	200	300	0	0	0	0	0	0	0	200	903	0	0	0	0	0	0	0	603	903	0
522	7	0	0	0	0	0	0	200	300	0	0	0	0	0	0	0	200	903	0	0	0	0	0	0	0	603	903	0
522	8	0	0	0	0	0	0	200	300	0	0	0	0	0	0	0	200	903	0	0	0	0	0	0	0	603	903	0
522	9	0	0	0	0	0	0	200	300	0	0	0	0	0	0	0	200	903	0	0	0	0	0	0	0	603	903	0
523	0	0	0	0	0	0	0	200	300	0	0	0	0	0	0	0	200	903	0	0	0	0	0	0	0	603	903	0
523	1	0	0	0	0	0	0	200	300	0	0	0	0	0	0	0	200	903	0	0	0	0	0	0	0	603	903	0
523	2	0	0	0	0	0	0	200	300	0	0	0	0	0	0	0	200	903	0	0	0	0	0	0	0	603	903	0
523	3	0	0	0	0	0	0	200	300	0	0	0	0	0	0	0	200	903	0	0	0	0	0	0	0	603	903	0
523	4	0	0	0	0	0	0	200	300	0	0	0	0	0	0	0	200	903	0	0	0	0	0	0	0	603	903	0
523	5	0	0	0	0	0	0	200	300	0	0	0	0	0	0	0	200	903	0	0	0	0	0	0	0	603	903	0
523	6	0	0	0	0	0	0	200	300	0	0	0	0	0	0	0	200	903	0	0	0	0	0	0	0	603	903	0
523	7	0	0	0	0	0	0	200	300	0	0	0	0	0	0	0	200	903	0	0	0	0	0	0	0	603	903	0
523	8	0	0	0	0	0	0	200	300	0	0	0	0	0	0	0	200	903	0	0	0	0	0	0	0	603	903	0
523	9	0	0	0	0	0	0	200	300	0	0	0	0	0	0	0	200	903	0	0	0	0	0	0	0	603	903	0
524	0	0	0	0	0	0	0	200	300	0	0	0	0	0	0	0	200	903	0	0	0	0	0	0	0	603	903	0
524	1	0	0	0	0	0	0	200	300	0	0	0	0	0	0	0	200	903	0	0	0	0	0	0	0	603	903	0
524	2	0	0	0	0	0	0	200	300	0	0	0	0	0	0	0	200	903	0	0	0	0	0	0	0	603	903	0
524	3	0	0	0	0	0	0	200	300	0	0	0	0	0	0	0	200	903	0	0	0	0	0	0	0	603	903	0
524	4	0	0	0	0	0	0	200	300	0	0	0	0	0	0	0	200	903	0	0	0	0	0	0	0	603	903	0
524	5	0	0	0	0	0	0	200	300	0	0	0	0	0	0	0	200	903	0	0	0	0	0	0	0	603	903	0
524	6	0	0	0	0	0	0	200	300	0	0	0	0	0	0	0	200	903	0	0	0	0	0	0	0	603	903	0
524	7	0	0	0	0	0	0	200	300	0	0	0	0	0	0	0	200	903	0	0	0	0	0	0	0	603	903	0
524	8	0	0	0	0	0	0	200	300	0	0	0	0	0	0	0	200	903	0	0	0	0	0	0	0	603	903	0
524	9	0	0	0	0	0	0	200	300	0	0	0	0	0	0	0	200	903	0	0	0	0	0	0	0	603	903	0
525	0	0	0	0	0	0	0	200	300	0	0	0	0	0	0	0	200	903	0	0	0	0	0	0	0	603	903	0
525	1	0	0	0	0	0	0	200	300	0	0	0	0	0	0	0	200	903	0	0	0	0	0	0	0	603	903	0
525	2	0	0	0	0	0	0	200	300	0	0	0	0	0	0	0	200	903	0	0	0	0	0	0	0	603	903	0
525	3	0	0	0	0	0	0	200	300	0	0	0	0	0	0	0	200	903	0	0	0	0	0	0	0	603	903	0
525	4	0	0	0	0	0	0	200	300	0	0	0	0	0	0	0	200	903	0	0	0	0	0	0	0	603	903	0
525	5	0	0	0	0	0	0	200	300	0	0	0	0	0	0	0	200	903	0	0	0	0	0	0	0	603	903	0
525	6	0	0	0	0	0	0	200	300	0	0	0	0	0	0	0	200	903	0	0	0	0	0	0	0	603	903	0
525	7	0	0	0	0	0	0	200	300	0	0	0	0	0	0	0	200	903	0	0	0	0	0	0	0	603	903	0
525	8	0	0	0	0	0	0	200	300	0	0	0	0	0	0	0	200	903	0	0	0	0	0	0	0	603	903	0
525	9	0	0	0	0	0	0	200	300	0	0	0	0	0	0	0	200	903	0	0	0	0	0	0	0	603	903	0
526	0	0	0	0	0	0	0	200	300	0	0	0	0	0	0	0	200	903	0	0	0	0	0	0	0	603	903	0
526	1	0	0	0	0	0	0	200	300	0	0	0	0	0	0	0	200	903	0	0	0	0	0	0	0	603	903	0
526	2	0	0	0	0	0	0	200	300	0	0	0	0	0	0	0	200	903	0	0	0	0	0	0	0	603	903	0
526	3	0	0	0	0	0	0	200	300	0	0	0	0	0	0	0	200	903	0	0	0	0	0	0	0	603	903	0
526	4	0	0	0	0	0	0	200	300	0	0	0	0	0	0	0	200	903	0	0	0	0	0	0	0	603	903	0
526	5	0	0	0	0	0	0	200	300	0	0	0	0	0	0	0	200	903	0	0	0	0	0	0	0	603	903	0
526	6	0	0	0	0	0	0	200	300	0	0	0	0	0	0	0	200	903	0	0	0	0	0	0	0	603	903	0
526	7	0	0	0	0	0	0	200	300	0	0	0	0	0	0	0	200	903	0	0	0	0	0	0	0	603	903	0
526	8	0	0	0	0	0	0	200	300	0	0	0	0	0	0	0	200	903	0	0	0	0	0	0	0	603	903	0
526	9	0	0	0	0	0	0	200	300	0	0	0	0	0	0	0	200	903	0	0	0	0	0	0	0	603	903	0
527	0	0	0	0	0	0	0	200	300	0	0	0	0	0	0	0	200	903	0	0	0	0	0	0	0	603	903	0
527	1	0	0	0	0	0	0	200	300	0	0	0	0	0	0	0	200	903	0	0	0	0	0	0	0	603	903	0
527	2	0	0	0	0	0	0	200	300	0	0	0	0	0	0	0	200	903	0	0	0	0	0	0	0	603	903	0
527	3	0	0	0	0	0	0	200	300	0	0	0	0	0	0	0	200	903	0	0	0	0	0	0	0	603	903	0
527	4	0	0	0	0	0	0	200	300	0	0	0	0	0	0	0	200	903	0	0	0	0	0	0	0	603	903	0
527	5	0	0	0	0	0	0	200	300	0	0	0	0	0	0	0	200	903	0	0	0	0	0	0	0	603	903	0
527	6	0	0	0	0	0	0	200	300	0	0	0	0	0	0	0	200	903	0	0	0	0	0	0	0	603	903	0
527	7	0	0	0	0	0	0	200	300	0	0	0	0	0	0	0	200	903	0	0	0	0	0	0	0	603	903	0
527	8	0	0	0	0	0	0	200	300	0	0	0	0	0	0	0	200	903	0	0	0	0	0	0	0	603	903	0
527	9	0	0	0	0	0	0	200	300	0	0	0	0	0	0	0	200	903	0	0	0	0	0	0	0	603	903	0
528	0	0	0	0	0	0	0	200	300	0	0	0	0	0	0	0	200	903	0	0	0	0	0	0	0	603	903	0
528	1	0	0	0	0	0	0	200	300	0	0	0	0	0	0	0	200	903	0	0	0	0	0	0	0	603	903	0
528	2	0	0	0	0	0	0	200	300	0	0	0	0	0	0	0	200	903	0	0	0	0	0	0	0	603	903	0
528	3	0	0	0	0	0	0	200	300	0	0	0	0	0	0	0	200	903	0	0	0	0	0	0	0	603	903	0
528	4	0	0	0	0	0	0	200	300	0	0	0	0	0	0	0	200	903	0	0	0	0	0	0	0	603	903	0
528	5	0	0	0	0	0	0	200	300	0	0	0	0	0	0	0	200	903	0	0	0	0	0	0	0	603	903	0
528	6	0	0	0	0	0	0	200	300	0	0	0	0	0	0	0	200	903	0	0	0	0	0	0	0	603	903	0
528	7	0	0	0	0	0	0	200	300	0	0	0	0	0	0	0	200	903	0	0	0	0	0	0	0	603	903	0
528	8	0	0	0	0	0	0	200	300	0	0	0	0	0	0	0	200	903	0	0	0	0	0	0	0	603	903	0
528	9	0	0	0	0	0	0	200	300	0	0	0	0	0	0	0	200	903	0	0	0	0	0	0	0	603	903	0
529	0	0	0	0	0	0	0	200	300	0	0	0	0	0	0	0	200	903	0	0	0	0	0	0	0	603	903	0
529	1	0	0	0	0	0	0	200	300	0	0	0	0	0	0	0	200	903	0	0	0	0	0	0	0	603	903	0
529	2	0	0	0	0	0	0	200	300	0	0	0	0	0	0	0	200	903	0	0	0	0	0	0	0	603	903	0
529	3	0	0	0	0	0	0	200	300	0	0	0	0	0	0	0	200	903	0	0	0	0	0	0	0	603	903	0
529	4	0	0	0	0	0	0	200	300	0	0	0	0	0	0	0	200	903	0	0	0	0	0	0	0	603	903	0
529	5	0	0	0	0	0	0	200	300	0	0	0	0	0	0	0	200	903	0	0	0	0	0	0	0	603	903	0
529	6	0	0	0	0	0	0	200	300	0	0	0	0	0	0	0	200	903	0	0	0	0	0	0	0	603	903	0
529	7	0	0	0	0	0	0	200	300	0	0	0	0	0	0	0	200	903	0	0	0	0	0	0	0	603	903	0
529	8	0	0	0	0	0	0	200	300	0	0	0	0	0	0	0	200	903	0	0	0	0	0	0	0	603	903	0
529	9	0	0	0	0	0	0	200	300	0	0	0	0	0	0	0	200	903	0	0	0	0	0	0	0	603	903	0
530	0	0	0	0	0	0	0	200	300	0	0	0	0	0	0	0	200	903	0	0	0	0	0	0	0	603	903	0
530	1	0	0	0	0	0	0	200	300	0	0	0	0	0	0	0	200	903	0	0	0	0	0	0	0	603	903	0
530	2	0	0	0	0	0	0	200	300	0	0	0	0	0	0	0	200	903	0	0	0	0	0	0	0	603	903	0
530	3	0	0	0	0	0	0	200	300	0	0	0	0	0	0	0	200	903	0	0	0	0	0	0	0	603	903	0
530	4	0	0	0	0	0	0	200	300	0	0	0	0	0	0	0	200	903	0	0	0	0	0	0	0	603	903	0
530	5	0	0	0	0	0	0	200	300	0	0	0	0	0	0	0	200	903	0	0	0	0	0	0	0	603	903	0
530	6	0	0	0	0	0	0	200	300	0	0	0	0	0	0	0	200	903	0	0	0	0	0	0	0	603	903	0
530	7	0	0	0	0	0	0	200	300	0	0	0	0	0	0	0	200	903	0	0	0	0	0	0	0	603	903	0
530	8	0	0	0	0	0	0	200	300	0	0	0	0	0	0	0	200	903	0	0	0	0	0	0	0	603	903	0
530	9	0	0	0	0	0	0	200	300	0	0	0	0	0	0	0	200	903	0	0	0	0	0	0	0	603	903	0
531	0	0	0	0	0	0	0	200	300	0	0	0	0	0	0	0	200	903	0	0	0	0	0	0	0	603	903	0
531	1	0	0	0	0	0	0	200	300	0	0	0	0	0	0	0	200	903	0	0	0	0	0	0	0	603	903	0
531	2	0	0	0	0	0	0	200	300	0	0	0	0	0	0	0	200	903	0	0	0	0	0	0	0	603	903	0
531	3	0	0	0	0	0	0	200	300	0	0	0	0	0	0	0	200	903	0	0	0	0	0	0	0	603	903	0
531	4	0	0	0	0	0	0	200	300	0	0	0	0	0	0	0	200	903	0	0	0	0	0	0	0	603	903	0
531	5	0	0	0	0	0	0	200	300	0	0	0	0	0	0	0	200	903	0	0	0	0	0	0	0	603	903	0
531	6	0	0	0	0	0	0	200	300	0	0	0	0	0	0	0	200	903	0	0	0	0	0	0	0	603	903	0
531	7	0	0	0	0	0	0	200	300	0	0	0	0	0	0	0	200	903	0	0	0	0	0	0	0	603	903	0
531	8	0	0	0	0	0	0	200	300	0	0	0	0	0	0	0	200	903	0	0	0	0	0	0	0	603	903	0
531	9	0	0	0	0	0	0	200	300	0	0	0	0	0	0	0	200	903	0	0	0	0	0	0	0	603	903	0
532	0	0	0	0	0	0	0	200	300	0	0	0	0	0	0	0	200	903	0	0	0	0	0	0	0	603	903	0
532	1	0	0	0	0	0	0	200	300	0	0	0	0	0	0	0	200	903	0	0	0	0	0	0	0	603	903	0
532	2	0	0	0	0	0	0	200	300	0	0	0	0	0	0	0	200	903	0	0	0	0	0	0	0	603	903	0
532	3	0	0	0	0	0	0	200	300	0	0	0	0	0	0	0	200	903	0	0	0	0	0	0	0	603	903	0
532	4	0	0	0	0	0	0	200	300	0	0	0	0	0	0	0	200	903	0	0	0	0	0	0	0	603	903	0
532	5	0	0	0	0	0	0	200	300	0	0	0	0	0	0	0	200	903	0	0	0	0	0	0	0	603	903	0
532	6	0	0	0	0	0	0	200	300	0	0	0	0	0	0	0	200	903	0	0	0	0	0	0	0	603	903	0
532	7	0	0	0	0	0	0	200	300	0	0	0	0	0	0	0	200	903	0	0	0	0	0	0	0	603	903	0
532	8	0	0	0	0	0	0	200	300	0	0	0	0	0	0	0	200	903	0	0	0	0	0	0	0	603	903	0
532	9	0	0	0	0	0	0	200	300	0	0	0	0	0	0	0	200	903	0	0	0	0	0	0	0	603	903	0
533	0	0	0	0	0	0	0	200	300	0	0	0	0	0	0	0	200	903	0	0	0	0	0	0	0	603	903	0
533	1	0	0	0	0	0	0	200	300	0	0	0	0	0	0	0	200	903	0	0	0	0	0	0	0	603	903	0
533	2	0	0	0	0	0	0	200	300	0	0	0	0	0	0	0	200	903	0	0	0	0	0	0	0	603	903	0
533	3	0	0	0	0	0	0	200	300	0	0	0	0	0	0	0	200	903	0	0	0	0	0	0	0	603	903	0
533	4	0	0	0	0	0	0	200	300	0	0	0	0	0	0	0	200	903	0	0	0	0	0	0	0	603	903	0
533	5	0	0	0	0	0	0	200	300	0	0	0	0	0	0	0	200	903	0	0	0	0	0	0	0	603	903	0
533	6	0	0	0	0	0	0	200	300	0	0	0	0	0	0	0	200	903	0	0	0	0	0	0	0	603	903	0
533	7	0	0	0	0	0	0	200	300	0	0	0	0	0	0	0	200	903	0	0	0	0	0	0	0	603	903	0
533	8	0	0	0	0	0	0	200	300	0	0	0	0	0	0	0	200	903	0	0	0	0	0	0	0	603	903	0
533	9	0	0	0	0	0	0	200	300	0	0	0	0	0	0	0	200	903	0	0	0	0	0	0	0	603	903	0
534	0	0	0	0	0	0	0	200	300	0	0	0	0	0	0	0	200	903	0	0	0	0	0	0	0	603	903	0
534	1	0	0	0	0	0	0	200	300	0	0	0	0	0	0	0	200	903	0	0	0	0	0	0	0	603	903	0
534	2	0	0	0	0	0	0	200	300	0	0	0	0	0	0	0	200	903	0	0	0	0	0	0	0	603	903	0
534	3	0	0	0	0	0	0	200	300	0	0	0	0	0	0	0	200	903	0	0	0	0	0	0	0	603	903	0
534	4	0	0	0	0	0	0	200	300	0	0	0	0	0	0	0	200	903	0	0	0	0	0	0	0	603	903	0
534	5	0	0	0	0	0	0	200	300	0	0	0	0	0	0	0	200	903	0	0	0	0	0	0	0	603	903	0
534	6	0	0	0	0	0	0	200	300	0	0	0	0	0	0	0	200	903	0	0	0	0	0	0	0	603	903	0
534	7	0	0	0	0	0	0	200	300	0	0	0	0	0	0	0	200	903	0	0	0	0	0	0	0	603	903	0
534	8	0	0	0	0	0	0	200	300	0	0	0	0	0	0	0	200	903	0	0	0	0	0	0	0	603	903	0
534	9	0	0	0	0	0	0	200	300	0	0	0	0	0	0	0	200	903	0	0	0	0	0	0	0	603	903	0
535	0	0	0	0	0	0	0	200	300	0	0	0	0	0	0	0	200	903	0	0	0	0	0	0	0	603	903	0
535	1	0	0	0	0	0	0	200	300	0	0	0	0	0	0	0	200	903	0	0	0	0	0	0	0	603	903	0
535	2	0	0	0	0	0	0	200	300	0	0	0	0	0	0	0	200	903	0	0	0	0	0	0	0	603	903	0
535	3	0	0	0	0	0	0	200	300	0	0	0	0	0	0	0	200	903	0	0	0	0	0	0	0	603	903	0
535	4	0	0	0	0	0	0	200	300	0	0	0	0	0	0	0	200	903	0	0	0	0	0	0	0	603	903	0
535	5	0	0	0	0	0	0	200	300	0	0	0	0	0	0	0	200	903	0	0	0	0	0	0	0	603	903	0
535	6	0	0	0	0	0	0	200	300	0	0	0	0	0	0	0	200	903	0	0	0	0	0	0	0	603	903	0
535	7	0	0	0	0	0	0	200	300	0	0	0	0	0	0	0	200	903	0	0	0	0	0	0	0	603	903	0
535	8	0	0	0	0	0	0	200	300	0	0	0	0	0	0	0	200	903	0	0	0	0	0	0	0	603	903	0
535	9	0	0	0	0	0	0	200	300	0	0	0	0	0	0	0	200	903	0	0	0	0	0	0	0	603	903	0
536	0	0	0	0	0	0	0	200	300	0	0	0	0	0	0	0	200	903	0	0	0	0	0	0	0	603	903	0
536	1	0	0	0	0	0	0	200	300	0	0	0	0	0	0	0	200	903	0	0	0	0	0	0	0	603	903	0
536	2	0	0	0	0	0	0	200	300	0	0	0	0	0	0	0	200	903	0	0	0	0	0	0	0	603	903	0
536	3	0	0	0	0	0	0	200	300	0	0	0	0	0	0	0	200	903	0	0	0	0	0	0	0	603	903	0
536	4	0	0	0	0	0	0	200	300	0	0	0	0	0	0	0	200	903	0	0	0	0	0	0	0	603	903	0
536	5	0	0	0	0	0	0	200	300	0	0	0	0	0	0	0	200	903	0	0	0	0	0	0	0	603	903	0
536	6	0	0	0	0	0	0	200	300	0	0	0	0	0	0	0	200	903	0	0	0	0	0	0	0	603	903	0
536	7	0	0	0	0	0	0	200	300	0	0	0	0	0	0	0	200	903	0	0	0	0	0	0	0	603	903	0
536	8	0	0	0	0	0	0	200	300	0	0	0	0	0	0	0	200	903	0	0	0	0	0	0	0	603	903	0
536	9	0	0	0	0	0	0	200	300	0	0	0	0	0	0	0	200	903	0	0	0	0	0	0	0	603	903	0
537	0	0	0	0	0	0	0	200	300	0	0	0	0	0	0	0	200	903	0	0	0	0	0	0	0	603	903	0
537	1	0	0	0	0	0	0	200	300	0	0	0	0	0	0	0	200	903	0	0	0	0	0	0	0	603	903	0
537	2	0	0	0	0	0	0	200	300	0	0	0	0	0	0	0	200	903	0	0	0	0	0	0	0	603	903	0
537	3	0	0	0	0	0	0	200	300	0	0	0	0	0	0	0	200	903	0	0	0	0	0	0	0	603	903	0
537	4	0	0	0	0	0	0	200	300	0	0	0	0	0	0	0	200	903	0	0	0	0	0	0	0	603	903	0
537	5	0	0	0	0	0	0	200	300	0	0	0	0	0	0	0	200	903	0	0	0	0	0	0	0	603	903	0
537	6	0	0	0	0	0	0	200	300	0	0	0	0	0	0	0	200	903	0	0	0	0	0	0	0	603	903	0
537	7	0	0	0	0	0	0	200	300	0	0	0	0	0	0	0	200	903	0	0	0	0	0	0	0	603	903	0
537	8	0	0	0	0	0	0	200	300	0	0	0	0	0	0	0	200	903	0	0	0	0	0	0	0	603	903	0
537	9	0	0	0	0	0	0	200	300	0	0	0	0	0	0	0	200	903	0	0	0	0	0	0	0	603	903	0
538	0	0	0	0	0	0	0	200	300	0	0	0	0	0	0	0	200	903	0	0	0	0	0	0	0	603	903	0
538	1	0	0	0	0	0	0	200	300	0	0	0	0	0	0	0	200	903	0	0	0	0	0	0	0	603	903	0
538	2	0	0	0	0	0	0	200	300	0	0	0	0	0	0	0	200	903	0	0	0	0	0	0	0	603	903	0
538	3	0	0	0	0	0	0	200	300	0	0	0	0	0	0	0	200	903	0	0	0	0	0	0	0	603	903	0
538	4	0	0	0	0	0	0	200	300	0	0	0	0	0	0	0	200	903	0	0	0	0	0	0	0	603	903	0
538	5	0	0	0	0	0	0	200	300	0	0	0	0	0	0	0	200	903	0	0	0	0	0	0	0	603	903	0
538	6	0	0	0	0	0	0	200	300	0	0	0	0	0	0	0	200	903	0	0	0	0	0	0	0	603	903	0
538	7	0	0	0	0	0	0	200	300	0	0	0	0	0	0	0	200	903	0	0	0	0	0	0	0	603	903	0
538	8	0	0	0	0	0	0	200	300	0	0	0	0	0	0	0	200	903	0	0	0	0	0	0	0	603	903	0
538	9	0	0	0	0	0	0	200	300	0	0	0	0	0	0	0	200	903	0	0	0	0	0	0	0	603	903	0
539	0	0	0	0	0	0	0	200	300	0	0	0	0	0	0	0	200	903	0	0	0	0	0	0	0	603	903	0
539	1	0	0	0	0	0	0	200	300	0	0	0	0	0	0	0	200	903	0	0	0	0	0	0	0	603	903	0
539	2	0	0	0	0	0	0	200	300	0	0	0	0	0	0	0	200	903	0	0	0	0	0	0	0	603	903	0
539	3	0	0	0	0	0	0	200	300	0	0	0	0	0	0	0	200	903	0	0	0	0	0	0	0	603	903	0
539	4	0	0	0	0	0	0	200	300	0	0	0	0	0	0	0	200	903	0	0	0	0	0	0	0	603	903	0
539	5	0	0	0	0	0	0	200	300	0	0	0	0	0	0	0	200	903	0	0	0	0	0	0	0	603	903	0
539	6	0	0	0	0	0	0	200	300	0	0	0	0	0	0	0	200	903	0	0	0	0	0	0	0	603	903	0
539	7	0	0	0	0	0	0	200	300	0	0	0	0	0	0	0	200	903	0	0	0	0	0	0	0	603	903	0
539	8	0	0	0	0	0	0	200	300	0	0	0	0	0	0	0	200	903	0	0	0	0	0	0	0	603	903	0
539	9	0	0	0	0	0	0	200	300	0	0	0	0	0	0	0	200	903	0	0	0	0	0	0	0	603	903	0
540	0	0	0	0	0	0	0	200	300	0	0	0	0	0	0	0	200	903	0	0	0	0	0	0	0	603	903	0
540	1	0	0	0	0	0	0	200	300	0	0	0	0	0	0	0	200	903	0	0	0	0	0	0	0	603	903	0
540	2	0	0	0	0	0	0	200	300	0	0	0	0	0	0	0	200	903	0	0	0	0	0	0	0	603	903	0
540	3	0	0	0	0	0	0	200	300	0	0	0	0	0	0	0	200	903	0	0	0	0	0	0	0	603	903	0
540	4	0	0	0	0	0	0	200	300	0	0	0	0	0	0	0	200	903	0	0	0	0	0	0	0	603	903	0
540	5	0	0	0	0	0	0	200	300	0	0	0	0	0	0	0	200	903	0	0	0	0	0	0	0	603	903	0
540	6	0	0	0	0	0	0	200	300	0	0	0	0	0	0	0	200	903	0	0	0	0	0	0	0	603	903	0
540	7	0	0	0	0	0	0	200	300	0	0	0	0	0	0	0	200	903	0	0	0	0	0	0	0	603	903	0
540	8	0	0	0	0	0	0	200	300	0	0	0	0	0	0	0	200	903	0	0	0	0	0	0	0	603	903	0
540	9	0	0	0	0	0	0	200	300	0	0	0	0	0	0	0	200	903	0	0	0	0	0	0	0	603	903	0
541	0	0	0	0	0	0	0	200	300	0	0	0	0	0	0	0	200	903	0	0	0	0	0	0	0	603	903	0
541	1	0	0	0	0	0	0	200	300	0	0	0	0	0	0	0	200	903	0	0	0	0	0	0	0	603	903	0
541	2	0	0	0	0	0	0	200	300	0	0	0	0	0	0	0	200	903	0	0	0	0	0	0	0	603	903	0
541	3	0	0	0	0	0	0	200	300	0	0	0	0	0	0	0	200	903	0	0	0	0	0	0	0	603	903	0
541	4	0	0	0	0	0	0	200	300	0	0	0	0	0	0	0	200	903	0	0	0	0	0	0	0	603	903	0
541	5	0	0	0	0	0	0	200	300	0	0	0	0	0	0	0	200	903	0	0	0	0	0	0	0	603	903	0
541	6	0	0	0	0	0	0	200	300	0	0	0	0	0	0	0	200	903	0	0	0	0	0	0	0	603	903	0
541	7	0	0	0	0	0	0	200	300	0	0	0	0	0	0	0	200	903	0	0	0	0	0	0	0	603	903	0
541	8	0	0	0	0	0	0	200	300	0	0	0	0	0	0	0	200	903	0	0	0	0	0	0	0	603	903	0
541	9	0	0	0	0	0	0	200	300	0	0	0	0	0	0	0	200	903	0	0	0	0	0	0	0	603	903	0
542	0	0	0	0	0	0	0	200	300	0	0	0	0	0	0	0	200	903	0	0	0	0	0	0	0	603	903	0
542	1	0	0	0	0	0	0	200	300	0	0	0	0	0	0	0	200	903	0	0	0	0	0	0	0	603	903	0
542	2	0	0	0	0	0	0	200	300	0	0	0	0	0	0	0	200	903	0	0	0	0	0	0	0	603	903	0
542	3	0	0	0	0	0	0	200	300	0	0	0	0	0	0	0	200	903	0	0	0	0	0	0	0	603	903	0
542	4	0	0	0	0	0	0	200	300	0	0	0	0	0	0	0	200	903	0	0	0	0	0	0	0	603	903	0
542	5	0	0	0	0	0	0	200	300	0	0	0	0	0	0	0	200	903	0	0	0	0	0	0	0	603	903	0
542	6	0	0	0	0	0	0	200	300	0	0	0	0	0	0	0	200	903	0	0	0	0	0	0	0	603	903	0
542	7	0	0	0	0	0	0	200	300	0	0	0	0	0	0	0	200	903	0	0	0	0	0	0	0	603	903	0
542	8	0	0	0	0	0	0	200	300	0	0	0	0	0	0	0	200	903	0	0	0	0	0	0	0	603	903	0
542	9	0	0	0	0	0	0	200	300	0	0	0	0	0	0	0	200	903	0	0	0	0	0	0	0	603	903	0
543	0	0	0	0	0	0	0	200	300	0	0	0	0	0	0	0	200	903	0	0	0	0	0	0	0	603	903	0
543	1	0	0	0	0	0	0	200	300	0	0	0	0	0	0	0	200	903	0	0	0	0	0	0	0	603	903	0
543	2	0	0	0	0	0	0	200	300	0	0	0	0	0	0	0	200	903	0	0	0	0	0	0	0	603	903	0
543	3	0	0	0	0	0	0	200	300	0	0	0	0	0	0	0	200	903	0	0	0	0	0	0	0	603	903	0
543	4	0	0	0	0	0	0	200	300	0	0	0	0	0	0	0	200	903	0	0	0	0	0	0	0	603	903	0
543	5	0	0	0	0	0	0	200	300	0	0	0	0	0	0	0	200	903	0	0	0	0	0	0	0	603	903	0
543	6	0	0	0	0	0	0	200	300	0	0	0	0	0	0	0	200	903	0	0	0	0	0	0	0	603	903	0
543	7	0	0	0	0	0	0	200	300	0	0	0	0	0	0	0	200	903	0	0	0	0	0	0	0	603	903	0
543	8	0	0	0	0	0	0	200	300	0	0	0	0	0	0	0	200	903	0	0	0	0	0	0	0	603	903	0
543	9	0	0	0	0	0	0	200	300	0	0	0	0	0	0	0	200	903	0	0	0	0	0	0	0	603	903	0
544	0	0	0	0	0	0	0	200	300	0	0	0	0	0	0	0	200	903	0	0	0	0	0	0	0	603	903	0
544	1	0	0	0	0	0	0	200	300	0	0	0	0	0	0	0	200	903	0	0	0	0	0	0	0	603	903	0
544	2	0	0	0	0	0	0	200	300	0	0	0	0	0	0	0	200	903	0	0	0	0	0	0	0	603	903	0
544	3	0	0	0	0	0	0	200	300	0	0	0	0	0	0	0	200	903	0	0	0	0	0	0	0	603	903	0
544	4	0	0	0	0	0	0	200	300	0	0	0	0	0	0	0	200	903	0	0	0	0	0	0	0	603	903	0
544	5	0	0	0	0	0	0	200	300	0	0	0	0	0	0	0	200	903	0	0	0	0	0	0	0	603	903	0
544	6	0	0	0	0	0	0	200	300	0	0	0	0	0	0	0	200	903	0	0	0	0	0	0	0	603	903	0
544	7	0	0	0	0	0	0	200	300	0	0	0	0	0	0	0	200	903	0	0	0	0	0	0	0	603	903	0
544	8	0	0	0	0	0	0	200	300	0	0	0	0	0	0	0	200	903	0	0	0	0	0	0	0	603	903	0
544	9	0	0	0	0	0	0	200	300	0	0	0	0	0	0	0	200	903	0	0	0	0	0	0	0	603	903	0
545	0	0	0	0	0	0	0	200	300	0	0	0	0	0	0	0	200	903	0	0	0	0	0	0	0	603	903	0
545	1	0	0	0	0	0	0	200	300	0	0	0	0	0	0	0	200	903	0	0	0	0	0	0	0	603	903	0
545	2	0	0	0	0	0	0	200	300	0	0	0	0	0	0	0	200	903	0	0	0	0	0	0	0	603	903	0
545	3	0	0	0	0	0	0	200	300	0	0	0	0	0	0	0	200	903	0	0	0	0	0	0	0	603	903	0
545	4	0	0	0	0	0	0	200	300	0	0	0	0	0	0	0	200	903	0	0	0	0	0	0	0	603	903	0
545	5	0	0	0	0	0	0	200	300	0	0	0	0	0	0	0	200	903	0	0	0	0	0	0	0	603	903	0
545	6	0	0	0	0	0	0	200	300	0	0	0	0	0	0	0	200	903	0	0	0	0	0	0	0	603	903	0
545	7	0	0	0	0	0	0	200	300	0	0	0	0	0	0	0	200	903	0	0	0	0	0	0	0	603	903	0
545	8	0	0	0	0	0	0	200	300	0	0	0	0	0	0	0	200	903	0	0	0	0	0	0	0	603	903	0
545	9	0	0	0	0	0	0	200	300	0	0	0	0	0	0	0	200	903	0	0	0	0	0	0	0	603	903	0
546	0	0	0	0	0	0	0	200	300	0	0	0	0	0	0	0	200	903	0	0	0	0	0	0	0	603	903	0
546	1	0	0	0	0	0	0	200	300	0	0	0	0	0	0	0	200	903	0	0	0	0	0	0	0	603	903	0
546	2	0	0	0	0	0	0	200	300	0	0	0	0	0	0	0	200	903	0	0	0	0	0	0	0	603	903	0
546	3	0	0	0	0	0	0	200	300	0	0	0	0	0	0	0	200	903	0	0	0	0	0	0	0	603	903	0
546	4	0	0	0	0	0	0	200	300	0	0	0	0	0	0	0	200	903	0	0	0	0	0	0	0	603	903	0
546	5	0	0	0	0	0	0	200	300	0	0	0	0	0	0	0	200	903	0	0	0	0	0	0	0	603	903	0
546	6	0	0	0	0	0	0	200	300	0	0	0	0	0	0	0	200	903	0	0	0	0	0	0	0	603	903	0
546	7	0	0	0	0	0	0	200	300	0	0	0	0	0	0	0	200	903	0	0	0	0	0	0	0	603	903	0
546	8	0	0	0	0	0	0	200	300	0	0	0	0	0	0	0	200	903	0	0	0	0	0	0	0	603	903	0
546	9	0	0	0	0	0	0	200	300	0	0	0	0	0	0	0	200	903	0	0	0	0	0	0	0	603	903	0
547	0	0	0	0	0	0	0	200	300	0	0	0	0	0	0	0	200	903	0	0	0	0	0	0	0	603	903	0
547	1	0	0	0	0	0	0	200	300	0	0	0	0	0	0	0	200	903	0	0	0	0	0	0	0	603	903	0
547	2	0	0	0	0	0	0	200	300	0	0	0	0	0	0	0	200	903	0	0	0	0	0	0	0	603	903	0
547	3	0	0	0	0	0	0	200	300	0	0	0	0	0	0	0	200	903	0	0	0	0	0	0	0	603	903	0
547	4	0	0	0	0	0	0	200	300	0	0	0	0	0	0	0	200	903	0	0	0	0	0	0	0	603	903	0
547	5	0	0	0	0	0	0	200	300	0	0	0	0	0	0	0	200	903	0	0	0	0	0	0	0	603	903	0
547	6	0	0	0	0	0	0	200	300	0	0	0	0	0	0	0	200	903	0	0	0	0	0	0	0	603	903	0
547	7	0	0	0	0	0	0	200	300	0	0	0	0	0	0	0	200	903	0	0	0	0	0	0	0	603	903	0
547	8	0	0	0	0	0	0	200	300	0	0	0	0	0	0	0	200	903	0	0	0	0	0	0	0	603	903	0
547	9	0	0	0	0	0	0	200	300	0	0	0	0	0	0	0	200	903	0	0	0	0	0	0	0	603	903	0
548	0	0	0	0	0	0	0	200	300	0	0	0	0	0	0	0	200	903	0	0	0	0	0	0	0	603	903	0
548	1	0	0	0	0	0	0	200	300	0	0	0	0	0	0	0	200	903	0	0	0	0	0	0	0	603	903	0
548	2	0	0	0	0	0	0	200	300	0	0	0	0	0	0	0	200	903	0	0	0	0	0	0	0	603	903	0
548	3	0	0	0	0	0	0	200	300	0	0	0	0	0	0	0	200	903	0	0	0	0	0	0	0	603	903	0
548	4	0	0	0	0	0	0	200	300	0	0	0	0	0	0	0	200	903	0	0	0	0	0	0	0	603	903	0
548	5	0	0	0	0	0	0	200	300	0	0	0	0	0	0	0	200	903	0	0	0	0	0	0	0	603	903	0
548	6	0	0	0	0	0	0	200	300	0	0	0	0	0	0	0	200	903	0	0	0	0	0	0	0	603	903	0
548	7	0	0	0	0	0	0	200	300	0	0	0	0	0	0	0	200	903	0	0	0	0	0	0	0	603	903	0
548	8	0	0	0	0	0	0	200	300	0	0	0	0	0	0	0	200	903	0	0	0	0	0	0	0	603	903	0
548	9	0	0	0	0	0	0	200	300	0	0	0	0	0	0	0	200	903	0	0	0	0	0	0	0	603	903	0
549	0	0	0	0	0	0	0	200	300	0	0	0	0	0	0	0	200	903	0	0	0	0	0	0	0	603	903	0
549	1	0	0	0	0	0	0	200	300	0	0	0	0	0	0	0	200	903	0	0	0	0	0	0	0	603	903	0
549	2	0	0	0	0	0	0	200	300	0	0	0	0	0	0	0	200	903	0	0	0	0	0	0	0	603	903	0
549	3	0	0	0	0	0	0	200	300	0	0	0	0	0	0	0	200	903	0	0	0	0	0	0	0	603	903	0
549	4	0	0	0	0	0	0	200	300	0	0	0	0	0	0	0	200	903	0	0	0	0	0	0	0	603	903	0
549	5	0	0	0	0	0	0	200	300	0	0	0	0	0	0	0	200	903	0	0	0	0	0	0	0	603	903	0
549	6	0	0	0	0	0	0	200	300	0	0	0	0	0	0	0	200	903	0	0	0	0	0	0	0	603	903	0
549	7	0	0	0	0	0	0	200	300	0	0	0	0	0	0	0	200	903	0	0	0	0	0	0	0	603	903	0
549	8	0	0	0	0	0	0	200	300	0	0	0	0	0	0	0	200	903	0	0	0	0	0	0	0	603	903	0
549	9	0	0	0	0	0	0	200	300	0	0	0	0	0	0	0	200	903	0	0	0	0	0	0	0	603	903	0
550	0	0	0	0	0	0	0	200	300	0	0	0	0	0	0	0	200	903	0	0	0	0	0	0	0	603	903	0
550	1	0	0	0	0	0	0	200	300	0	0	0	0	0	0	0	200	903	0	0	0	0	0	0	0	603	903	0
550	2	0	0	0	0	0	0	200	300	0	0	0	0	0	0	0	200	903	0	0	0	0	0	0	0	603	903	0
550	3	0	0	0	0	0	0	200	300	0	0	0	0	0	0	0	200	903	0	0	0	0	0	0	0	603	903	0
550	4	0	0	0	0	0	0	200	300	0	0	0	0	0	0	0	200	903	0	0	0	0	0	0	0	603	903	0
550	5	0	0	0	0	0	0	200	300	0	0	0	0	0	0	0	200	903	0	0	0	0	0	0	0	603	903	0
550	6	0	0	0	0	0	0	200	300	0	0	0	0	0	0	0	200	903	0	0	0	0	0	0	0	603	903	0
550	7	0	0	0	0	0	0	200	300	0	0	0	0	0	0	0	200	903	0	0	0	0	0	0	0	603	903	0
550	8	0	0	0	0	0	0	200	300	0	0	0	0	0	0	0	200	903	0	0	0	0	0	0	0	603	903	0
550	9	0	0	0	0	0	0	200	300	0	0	0	0	0	0	0	200	903	0	0	0	0	0	0	0	603	903	0
551	0	0	0	0	0	0	0	200	300	0	0	0	0	0	0	0	200	903	0	0	0	0	0	0	0	603	903	0
551	1	0	0	0	0	0	0	200	300	0	0	0	0	0	0	0	200	903	0	0	0	0	0	0	0	603	903	0
551	2	0	0	0	0	0	0	200	300	0	0	0	0	0	0	0	200	903	0	0	0	0	0	0	0	603	903	0
551	3	0	0	0	0	0	0	200	300	0	0	0	0	0	0	0	200	903	0	0	0	0	0	0	0	603	903	0
551	4	0	0	0	0	0	0	200	300	0	0	0	0	0	0	0	200	903	0	0	0	0	0	0	0	603	903	0
551	5	0	0	0	0	0	0	200	300	0	0	0	0	0	0	0	200	903	0	0	0	0	0	0	0	603	903	0
551	6	0	0	0	0	0	0	200	300	0	0	0	0	0	0	0	200	903	0	0	0	0	0	0	0	603	903	0
551	7	0	0	0	0	0	0	200	300	0	0	0	0	0	0	0	200	903	0	0	0	0	0	0	0	603	903	0
551	8	0	0	0	0	0	0	200	300	0	0	0	0	0	0	0	200	903	0	0	0	0	0	0	0	603	903	0
551	9	0	0	0	0	0	0	200	300	0	0	0	0	0	0	0	200	903	0	0	0	0	0	0	0	603	903	0
552	0	0	0	0	0	0	0	200	300	0	0	0	0	0	0	0	200	903	0	0	0	0	0	0	0	603	903	0
552	1	0	0	0	0	0	0	200	300	0	0	0	0	0	0	0	200	903	0	0	0	0	0	0	0	603	903	0
552	2	0	0	0	0	0	0	200	300	0	0	0	0	0	0	0	200	903	0	0	0	0	0	0	0	603	903	0
552	3	0	0	0	0	0	0	200	300	0	0	0	0	0	0	0	200	903	0	0	0	0	0	0	0	603	903	0
552	4	0	0	0	0	0	0	200	300	0	0	0	0	0	0	0	200	903	0	0	0	0	0	0	0	603	903	0
552	5	0	0	0	0	0	0	200	300	0	0	0	0	0	0	0	200	903	0	0	0	0	0	0	0	603	903	0
552	6	0	0	0	0	0	0	200	300	0	0	0	0	0	0	0	200	903	0	0	0	0	0	0	0	603	903	0
552	7	0	0	0	0	0	0	200	300	0	0	0	0	0	0	0	200	903	0	0	0	0	0	0	0	603	903	0
552	8	0	0	0	0	0	0	200	300	0	0	0	0	0	0	0	200	903	0	0	0	0	0	0	0	603	903	0
552	9	0	0	0	0	0	0	200	300	0	0	0	0	0	0	0	200	903	0	0	0	0	0	0	0	603	903	0
553	0	0	0	0	0	0	0	200	300	0	0	0	0	0	0	0	200	903	0	0	0	0	0	0	0	603	903	0
553	1	0	0	0	0	0	0	200	300	0	0	0	0	0	0	0	200	903	0	0	0	0	0	0	0	603	903	0
553	2	0	0	0	0	0	0	200	300	0	0	0	0	0	0	0	200	903	0	0	0	0	0	0	0	603	903	0
553	3	0	0	0	0	0	0	200	300	0	0	0	0	0	0	0	200	903	0	0	0	0	0	0	0	603	903	0
553	4	0	0	0	0	0	0	200	300	0	0	0	0	0	0	0	200	903	0	0	0	0	0	0	0	603	903	0
553	5	0	0	0	0	0	0	200	300	0	0	0	0	0	0	0	200	903	0	0	0	0	0	0	0	603	903	0
553	6	0	0	0	0	0	0	200	300	0	0	0	0	0	0	0	200	903	0	0	0	0	0	0	0	603	903	0
553	7	0	0	0	0	0	0	200	300	0	0	0	0	0	0	0	200	903	0	0	0	0	0	0	0	603	903	0
553	8	0	0	0	0	0	0	200	300	0	0	0	0	0	0	0	200	903	0	0	0	0	0	0	0	603	903	0
553	9	0	0	0	0	0	0	200	300	0	0	0	0	0	0	0	200	903	0	0	0	0	0	0	0	603	903	0
554	0	0	0	0	0	0	0	200	300	0	0	0	0	0	0	0	200	903	0	0	0	0	0	0	0	603	903	0
554	1	0	0	0	0	0	0	200	300	0	0	0	0	0	0	0	200	903	0	0	0	0	0	0	0	603	903	0
554	2	0	0	0	0	0	0	200	300	0	0	0	0	0	0	0	200	903	0	0	0	0	0	0	0	603	903	0
554	3	0	0	0	0	0	0	200	300	0	0	0	0	0	0	0	200	903	0	0	0	0	0	0	0	603	903	0
554	4	0	0	0	0	0	0	200	300	0	0	0	0	0	0	0	200	903	0	0	0	0	0	0	0	603	903	0
554	5	0	0	0	0	0	0	200	300	0	0	0	0	0	0	0	200	903	0	0	0	0	0	0	0	603	903	0
554	6	0	0	0	0	0	0	200	300	0	0	0	0	0	0	0	200	903	0	0	0	0	0	0	0	603	903	0
554	7	0	0	0	0	0	0	200	300	0	0	0	0	0	0	0	200	903	0	0	0	0	0	0	0	603	903	0
554	8	0	0	0	0	0	0	200	300	0	0	0	0	0	0	0	200	903	0	0	0	0	0	0	0	603	903	0
554	9	0	0	0	0	0	0	200	300	0	0	0	0	0	0	0	200	903	0	0	0	0	0	0	0	603	903	0
555	0	0	0	0	0	0	0	200	300	0	0	0	0	0	0	0	200	903	0	0	0	0	0	0	0	603	903	0
555	1	0	0	0	0	0	0	200	300	0	0	0	0	0	0	0	200	903	0	0	0	0	0	0	0	603	903	0
555	2	0	0	0	0	0	0	200	300	0	0	0	0	0	0	0	200	903	0	0	0	0	0	0	0	603	903	0
555	3	0	0	0	0	0	0	200	300	0	0	0	0	0	0	0	200	903	0	0	0	0	0	0	0	603	903	0
555	4	0	0	0	0	0	0	200	300	0	0	0	0	0	0	0	200	903	0	0	0	0	0	0	0	603	903	0
555	5	0	0	0	0	0	0	200	300	0	0	0	0	0	0	0	200	903	0	0	0	0	0	0	0	603	903	0
555	6	0	0	0	0	0	0	200	300	0	0	0	0	0	0	0	200	903	0	0	0	0	0	0	0	603	903	0
555	7	0	0	0	0	0	0	200	300	0	0	0	0	0	0	0	200	903	0	0	0	0	0	0	0	603	903	0
555	8	0	0	0	0	0	0	200	300	0	0	0	0	0	0	0	200	903	0	0	0	0	0	0	0	603	903	0
555	9	0	0	0	0	0	0	200	300	0	0	0	0	0	0	0	200	903	0	0	0	0	0	0	0	603	903	0
556	0	0	0	0	0	0	0	200	300	0	0	0	0	0	0	0	200	903	0	0	0	0	0	0	0	603	903	0
556	1	0	0	0	0	0	0	200	300	0	0	0	0	0	0	0	200	903	0	0	0	0	0	0	0	603	903	0
556	2	0	0	0	0	0	0	200	300	0	0	0	0	0	0	0	200	903	0	0	0	0	0	0	0	603	903	0
556	3	0	0	0	0	0	0	200	300	0	0	0	0	0	0	0	200	903	0	0	0	0	0	0	0	603	903	0
556	4	0	0	0	0	0	0	200	300	0	0	0	0	0	0	0	200	903	0	0	0	0	0	0	0	603	903	0
556	5	0	0	0	0	0	0	200	300	0	0	0	0	0	0	0	200	903	0	0	0	0	0	0	0	603	903	0
556	6	0	0	0	0	0	0	200	300	0	0	0	0	0	0	0	200	903	0	0	0	0	0	0	0	603	903	0
556	7	0	0	0	0	0	0	200	300	0	0	0	0	0	0	0	200	903	0	0	0	0	0	0	0	603	903	0
556	8	0	0	0	0	0	0	200	300	0	0	0	0	0	0	0	200	903	0	0	0	0	0	0	0	603	903	0
556	9	0	0	0	0	0	0	200	300	0	0	0	0	0	0	0	200	903	0	0	0	0	0	0	0	603	903	0
557	0	0	0	0	0	0	0	200	300	0	0	0	0	0	0	0	200	903	0	0	0	0	0	0	0	603	903	0
557	1	0	0	0	0	0	0	200	300	0	0	0	0	0	0	0	200	903	0	0	0	0	0	0	0	603	903	0
557	2	0	0	0	0	0	0	200	300	0	0	0	0	0	0	0	200	903	0	0	0	0	0	0	0	603	903	0
557	3	0	0	0	0	0	0	200	300	0	0	0	0	0	0	0	200	903	0	0	0	0	0	0	0	603	903	0
557	4	0	0	0	0	0	0	200	300	0	0	0	0	0	0	0	200	903	0	0	0	0	0	0	0	603	903	0
557	5	0	0	0	0	0	0	200	300	0	0	0	0	0	0	0	200	903	0	0	0	0	0	0	0	603	903	0
557	6	0	0	0	0	0	0	200	300	0	0	0	0	0	0	0	200	903	0	0	0	0	0	0	0	603	903	0
557	7	0	0	0	0	0	0	200	300	0	0	0	0	0	0	0	200	903	0	0	0	0	0	0	0	603	903	0
557	8	0	0	0	0	0	0	200	300	0	0	0	0	0	0	0	200	903	0	0	0	0	0	0	0	603	903	0
557	9	0	0	0	0	0	0	200	300	0	0	0	0	0	0	0	200	903	0	0	0	0	0	0	0	603	903	0
558	0	0	0	0	0	0	0	200	300	0	0	0	0	0	0	0	200	903	0	0	0	0	0	0	0	603	903	0
558	1	0	0	0	0	0	0	200	300	0	0	0	0	0	0	0	200	903	0	0	0	0	0	0	0	603	903	0
558	2	0	0	0	0	0	0	200	300	0	0	0	0	0	0	0	200	903	0	0	0	0	0	0	0	603	903	0
558	3	0	0	0	0	0	0	200	300	0	0	0	0	0	0	0	200	903	0	0	0	0	0	0	0	603	903	0
558	4	0	0	0	0	0	0	200	300	0	0	0	0	0	0	0	200	903	0	0	0	0	0	0	0	603	903	0
558	5	0	0	0	0	0	0	200	300	0	0	0	0	0	0	0	200	903	0	0	0	0	0	0	0	603	903	0
558	6	0	0	0	0	0	0	200	300	0	0	0	0	0	0	0	200	903	0	0	0	0	0	0	0	603	903	0
558	7	0	0	0	0	0	0	200	300	0	0	0	0	0	0	0	200	903	0	0	0	0	0	0	0	603	903	0
558	8	0	0	0	0	0	0	200	300	0	0	0	0	0	0	0	200	903	0	0	0	0	0	0	0	603	903	0
558	9	0	0	0	0	0	0	200	300	0	0	0	0	0	0	0	200	903	0	0	0	0	0	0	0	603	903	0
559	0	0	0	0	0	0	0	200	300	0	0	0	0	0	0	0	200	903	0	0	0	0	0	0	0	603	903	0
559	1	0	0	0	0	0	0	200	300	0	0	0	0	0	0	0	200	903	0	0	0	0	0	0	0	603	903	0
559	2	0	0	0	0	0	0	200	300	0	0	0	0	0	0	0	200	903	0	0	0	0	0	0	0	603	903	0
559	3	0	0	0	0	0	0	200	300	0	0	0	0	0	0	0	200	903	0	0	0	0	0	0	0	603	903	0
559	4	0	0	0	0	0	0	200	300	0	0	0	0	0	0	0	200	903	0	0	0	0	0	0	0	603	903	0
559	5	0	0	0	0	0	0	200	300	0	0	0	0	0	0	0	200	903	0	0	0	0	0	0	0	603	903	0
559	6	0	0	0	0	0	0	200	300	0	0	0	0	0	0	0	200	903	0	0	0	0	0	0	0	603	903	0
559	7	0	0	0	0	0	0	200	300	0	0	0	0	0	0	0	200	903	0	0	0	0	0	0	0	603	903	0
559	8	0	0	0	0	0	0	200	300	0	0	0	0	0	0	0	200	903	0	0	0	0	0	0	0	603	903	0
559	9	0	0	0	0	0	0	200	300	0	0	0	0	0	0	0	200	903	0	0	0	0	0	0	0	603	903	0
560	0	0	0	0	0	0	0	200	300	0	0	0	0	0	0	0	200	903	0	0	0	0	0	0	0	603	903	0
560	1	0	0	0	0	0	0	200	300	0	0	0	0	0	0	0	200	903	0	0	0	0	0	0	0	603	903	0
560	2	0	0	0	0	0	0	200	300	0	0	0	0	0	0	0	200	903	0	0	0	0	0	0	0	603	903	0
560	3	0	0	0	0	0	0	200	300	0	0	0	0	0	0	0	200	903	0	0	0	0	0	0	0	603	903	0
560	4	0	0	0	0	0	0	200	300	0	0	0	0	0	0	0	200	903	0	0	0	0	0	0	0	603	903	0
560	5	0	0	0	0	0	0	200	300	0	0	0	0	0	0	0	200	903	0	0	0	0	0	0	0	603	903	0
560	6	0	0	0	0	0	0	200	300	0	0	0	0	0	0	0	200	903	0	0	0	0	0	0	0	603	903	0
560	7	0	0	0	0	0	0	200	300	0	0	0	0	0	0	0	200	903	0	0	0	0	0	0	0	603	903	0
560	8	0	0	0	0	0	0	200	300	0	0	0	0	0	0	0	200	903	0	0	0	0	0	0	0	603	903	0
560	9	0	0	0	0	0	0	200	300	0	0	0	0	0	0	0	200	903	0	0	0	0	0	0	0	603	903	0
561	0	0	0	0	0	0	0	200	300	0	0	0	0	0	0	0	200	903	0	0	0	0	0	0	0	603	903	0
561	1	0	0	0	0	0	0	200	300	0	0	0	0	0	0	0	200	903	0	0	0	0	0	0	0	603	903	0
561	2	0	0	0	0	0	0	200	300	0	0	0	0	0	0	0	200	903	0	0	0	0	0	0	0	603	903	0
561	3	0	0	0	0	0	0	200	300	0	0	0	0	0	0	0	200	903	0	0	0	0	0	0	0	603	903	0
561	4	0	0	0	0	0	0	200	300	0	0	0	0	0	0	0	200	903	0	0	0	0	0	0	0	603	903	0
561	5	0	0	0	0	0	0	200	300	0	0	0	0	0	0	0	200	903	0	0	0	0	0	0	0	603	903	0
561	6	0	0	0	0	0	0	200	300	0	0	0	0	0	0	0	200	903	0	0	0	0	0	0	0	603	903	0
561	7	0	0	0	0	0	0	200	300	0	0	0	0	0	0	0	200	903	0	0	0	0	0	0	0	603	903	0
561	8	0	0	0	0	0	0	200	300	0	0	0	0	0	0	0	200	903	0	0	0	0	0	0	0	603	903	0
561	9	0	0	0	0	0	0	200	300	0	0	0	0	0	0	0	200	903	0	0	0	0	0	0	0	603	903	0
562	0	0	0	0	0	0	0	200	300	0	0	0	0	0	0	0	200	903	0	0	0	0	0	0	0	603	903	0
562	1	0	0	0	0	0	0	200	300	0	0	0	0	0	0	0	200	903	0	0	0	0	0	0	0	603	903	0
562	2	0	0	0	0	0	0	200	300	0	0	0	0	0	0	0	200	903	0	0	0	0	0	0	0	603	903	0
562	3	0	0	0	0	0	0	200	300	0	0	0	0	0	0	0	200	903	0	0	0	0	0	0	0	603	903	0
562	4	0	0	0	0	0	0	200	300	0	0	0	0	0	0	0	200	903	0	0	0	0	0	0	0	603	903	0
562	5	0	0	0	0	0	0	200	300	0	0	0	0	0	0	0	200	903	0	0	0	0	0	0	0	603	903	0
562	6	0	0	0	0	0	0	200	300	0	0	0	0	0	0	0	200	903	0	0	0	0	0	0	0	603	903	0
562	7	0	0	0	0	0	0	200	300	0	0	0	0	0	0	0	200	903	0	0	0	0	0	0	0	603	903	0
562	8	0	0	0	0	0	0	200	300	0	0	0	0	0	0	0	200	903	0	0	0	0	0	0	0	603	903	0
562	9	0	0	0	0	0	0	200	300	0	0	0	0	0	0	0	200	903	0	0	0	0	0	0	0	603	903	0
563	0	0	0	0	0	0	0	200	300	0	0	0	0	0	0	0	200	903	0	0	0	0	0	0	0	603	903	0
563	1	0	0	0	0	0	0	200	300	0	0	0	0	0	0	0	200	903	0	0	0	0	0	0	0	603	903	0
563	2	0	0	0	0	0	0	200	300	0	0	0	0	0	0	0	200	903	0	0	0	0	0	0	0	603	903	0
563	3	0	0	0	0	0	0	200	300	0	0	0	0	0	0	0	200	903	0	0	0	0	0	0	0	603	903	0
563	4	0	0	0	0	0	0	200	300	0	0	0	0	0	0	0	200	903	0	0	0	0	0	0	0	603	903	0
563	5	0	0	0	0	0	0	200	300	0	0	0	0	0	0	0	200	903	0	0	0	0	0	0	0	603	903	0
563	6	0	0	0	0	0	0	200	300	0	0	0	0	0	0	0	200	903	0	0	0	0	0	0	0	603	903	0
563	7	0	0	0	0	0	0	200	300	0	0	0	0	0	0	0	200	903	0	0	0	0	0	0	0	603	903	0
563	8	0	0	0	0	0	0	200	300	0	0	0	0	0	0	0	200	903	0	0	0	0	0	0	0	603	903	0
563	9	0	0	0	0	0	0	200	300	0	0	0	0	0	0	0	200	903	0	0	0	0	0	0	0	603	903	0
564	0	0	0	0	0	0	0	200	300	0	0	0	0	0	0	0	200	903	0	0	0	0	0	0	0	603	903	0
564	1	0	0	0	0	0	0	200	300	0	0	0	0	0	0	0	200	903	0	0	0	0	0	0	0	603	903	0
564	2	0	0	0	0	0	0	200	300	0	0	0	0	0	0	0	200	903	0	0	0	0	0	0	0	603	903	0
564	3	0	0	0	0	0	0	200	300	0	0	0	0	0	0	0	200	903	0	0	0	0	0	0	0	603	903	0
564	4	0	0	0	0	0	0	200	300	0	0	0	0	0	0	0	200	903	0	0	0	0	0	0	0	603	903	0
564	5	0	0	0	0	0	0	200	300	0	0	0	0	0	0	0	200	903	0	0	0	0	0	0	0	603	903	0
564	6	0	0	0	0	0	0	200	300	0	0	0	0	0	0	0	200	903	0	0	0	0	0	0	0	603	903	0
564	7	0	0	0	0	0	0	200	300	0	0	0	0	0	0	0	200	903	0	0	0	0	0	0	0	603	903	0
564	8	0	0	0	0	0	0	200	300	0	0	0	0	0	0	0	200	903	0	0	0	0	0	0	0	603	903	0
564	9	0	0	0	0	0	0	200	300	0	0	0	0	0	0	0	200	903	0	0	0	0	0	0	0	603	903	0
565	0	0	0	0	0	0	0	200	300	0	0	0	0	0	0	0	200	903	0	0	0	0	0	0	0	603	903	0
565	1	0	0	0	0	0	0	200	300	0	0	0	0	0	0	0	200	903	0	0	0	0	0	0	0	603	903	0
565	2	0	0	0	0	0	0	200	300	0	0	0	0	0	0	0	200	903	0	0	0	0	0	0	0	603	903	0
565	3	0	0	0	0	0	0	200	300	0	0	0	0	0	0	0	200	903	0	0	0	0	0	0	0	603	903	0
565	4	0	0	0	0	0	0	200	300	0	0	0	0	0	0	0	200	903	0	0	0	0	0	0	0	603	903	0
565	5	0	0	0	0	0	0	200	300	0	0	0	0	0	0	0	200	903	0	0	0	0	0	0	0	603	903	0
565	6	0	0	0	0	0	0	200	300	0	0	0	0	0	0	0	200	903	0	0	0	0	0	0	0	603	903	0
565	7	0	0	0	0	0	0	200	300	0	0	0	0	0	0	0	200	903	0	0	0	0	0	0	0	603	903	0
565	8	0	0	0	0	0	0	200	300	0	0	0	0	0	0	0	200	903	0	0	0	0	0	0	0	603	903	0
565	9	0	0	0	0	0	0	200	300	0	0	0	0	0	0	0	200	903	0	0	0	0	0	0	0	603	903	0
566	0	0	0	0	0	0	0	200	300	0	0	0	0	0	0	0	200	903	0	0	0	0	0	0	0	603	903	0
566	1	0	0	0	0	0	0	200	300	0	0	0	0	0	0	0	200	903	0	0	0	0	0	0	0	603	903	0
566	2	0	0	0	0	0	0	200	300	0	0	0	0	0	0	0	200	903	0	0	0	0	0	0	0	603	903	0
566	3	0	0	0	0	0	0	200	300	0	0	0	0	0	0	0	200	903	0	0	0	0	0	0	0	603	903	0
566	4	0	0	0	0	0	0	200	300	0	0	0	0	0	0	0	200	903	0	0	0	0	0	0	0	603	903	0
566	5	0	0	0	0	0	0	200	300	0	0	0	0	0	0	0	200	903	0	0	0	0	0	0	0	603	903	0
566	6	0	0	0	0	0	0	200	300	0	0	0	0	0	0	0	200	903	0	0	0	0	0	0	0	603	903	0
566	7	0	0	0	0	0	0	200	300	0	0	0	0	0	0	0	200	903	0	0	0	0	0	0	0	603	903	0
566	8	0	0	0	0	0	0	200	300	0	0	0	0	0	0	0	200	903	0	0	0	0	0	0	0	603	903	0
566	9	0	0	0	0	0	0	200	300	0	0	0	0	0	0	0	200	903	0	0	0	0	0	0	0	603	903	0
567	0	0	0	0	0	0	0	200	300	0	0	0	0	0	0	0	200	903	0	0	0	0	0	0	0	603	903	0
567	1	0	0	0	0	0	0	200	300	0	0	0	0	0	0	0	200	903	0	0	0	0	0	0	0	603	903	0
567	2	0	0	0	0	0	0	200	300	0	0	0	0	0	0	0	200	903	0	0	0	0	0	0	0	603	903	0
567	3	0	0	0	0	0	0	200	300	0	0	0	0	0	0	0	200	903	0	0	0	0	0	0	0	603	903	0
567	4	0	0	0	0	0	0	200	300	0	0	0	0	0	0	0	200	903	0	0	0	0	0	0	0	603	903	0
567	5	0	0	0	0	0	0	200	300	0	0	0	0	0	0	0	200	903	0	0	0	0	0	0	0	603	903	0
567	6	0	0	0	0	0	0	200	300	0	0	0	0	0	0	0	200	903	0	0	0	0	0	0	0	603	903	0
567	7	0	0	0	0	0	0	200	300	0	0	0	0	0	0	0	200	903	0	0	0	0	0	0	0	603	903	0
567	8	0	0	0	0	0	0	200	300	0	0	0	0	0	0	0	200	903	0	0	0	0	0	0	0	603	903	0
567	9	0	0	0	0	0	0	200	300	0	0	0	0	0	0	0	200	903	0	0	0	0	0	0	0	603	903	0
568	0	0	0	0	0	0	0	200	300	0	0	0	0	0	0	0	200	903	0	0	0	0	0	0	0	603	903	0
568	1	0	0	0	0	0	0	200	300	0	0	0	0	0	0	0	200	903	0	0	0	0	0	0	0	603	903	0
568	2	0	0	0	0	0	0	200	300	0	0	0	0	0	0	0	200	903	0	0	0	0	0	0	0	603	903	0
568	3	0	0	0	0	0	0	200	300	0	0	0	0	0	0	0	200	903	0	0	0	0	0	0	0	603	903	0
568	4	0	0	0	0	0	0	200	300	0	0	0	0	0	0	0	200	903	0	0	0	0	0	0	0	603	903	0
568	5	0	0	0	0	0	0	200	300	0	0	0	0	0	0	0	200	903	0	0	0	0	0	0	0	603	903	0
568	6	0	0	0	0	0	0	200	300	0	0	0	0	0	0	0	200	903	0	0	0	0	0	0	0	603	903	0
568	7	0	0	0	0	0	0	200	300	0	0	0	0	0	0	0	200	903	0	0	0	0	0	0	0	603	903	0
568	8	0	0	0	0	0	0	200	300	0	0	0	0	0	0	0	200	903	0	0	0	0	0	0	0	603	903	0
568	9	0	0	0	0	0	0	200	300	0	0	0	0	0	0	0	200	903	0	0	0	0	0	0	0	603	903	0
569	0	0	0	0	0	0	0	200	300	0	0	0	0	0	0	0	200	903	0	0	0	0	0	0	0	603	903	0
569	1	0	0	0	0	0	0	200	300	0	0	0	0	0	0	0	200	903	0	0	0	0	0	0	0	603	903	0
569	2	0	0	0	0	0	0	200	300	0	0	0	0	0	0	0	200	903	0	0	0	0	0	0	0	603	903	0
569	3	0	0	0	0	0	0	200	300	0	0	0	0	0	0	0	200	903	0	0	0	0	0	0	0	603	903	0
569	4	0	0	0	0	0	0	200	300	0	0	0	0	0	0	0	200	903	0	0	0	0	0	0	0	603	903	0
569	5	0	0	0	0	0	0	200	300	0	0	0	0	0	0	0	200	903	0	0	0	0	0	0	0	603	903	0
569	6	0	0	0	0	0	0	200	300	0	0	0	0	0	0	0	200	903	0	0	0	0	0	0	0	603	903	0
569	7	0	0	0	0	0	0	200	300	0	0	0	0	0	0	0	200	903	0	0	0	0	0	0	0	603	903	0
569	8	0	0	0	0	0	0	200	300	0	0	0	0	0	0	0	200	903	0	0	0	0	0	0	0	603	903	0
569	9	0	0	0	0	0	0	200	300	0	0	0	0	0	0	0	200	903	0	0	0	0	0	0	0	603	903	0
570	0	0	0	0	0	0	0	200	300	0	0	0	0	0	0	0	200	903	0	0	0	0	0	0	0	603	903	0
570	1	0	0	0	0	0	0	200	300	0	0	0	0	0	0	0	200	903	0	0	0	0	0	0	0	603	903	0
570	2	0	0	0	0	0	0	200	300	0	0	0	0	0	0	0	200	903	0	0	0	0	0	0	0	603	903	0
570	3	0	0	0	0	0	0	200	300	0	0	0	0	0	0	0	200	903	0	0	0	0	0	0	0	603	903	0
570	4	0	0	0	0	0	0	200	300	0	0	0	0	0	0	0	200	903	0	0	0	0	0	0	0	603	903	0
570	5	0	0	0	0	0	0	200	300	0	0	0	0	0	0	0	200	903	0	0	0	0	0	0	0	603	903	0
570	6	0	0	0	0	0	0	200	300	0	0	0	0	0	0	0	200	903	0	0	0	0	0	0	0	603	903	0
570	7	0	0	0	0	0	0	200	300	0	0	0	0	0	0	0	200	903	0	0	0	0	0	0	0	603	903	0
570	8	0	0	0	0	0	0	200	300	0	0	0	0	0	0	0	200	903	0	0	0	0	0	0	0	603	903	0
570	9	0	0	0	0	0	0	200	300	0	0	0	0	0	0	0	200	903	0	0	0	0	0	0	0	603	903	0
571	0	0	0	0	0	0	0	200	300	0	0	0	0	0	0	0	200	903	0	0	0	0	0	0	0	603	903	0
571	1	0	0	0	0	0	0	200	300	0	0	0	0	0	0	0	200	903	0	0	0	0	0	0	0	603	903	0
571	2	0	0	0	0	0	0	200	300	0	0	0	0	0	0	0	200	903	0	0	0	0	0	0	0	603	903	0
571	3	0	0	0	0	0	0	200	300	0	0	0	0	0	0	0	200	903	0	0	0	0	0	0	0	603	903	0
571	4	0	0	0	0	0	0	200	300	0	0	0	0	0	0	0	200	903	0	0	0	0	0	0	0	603	903	0
571	5	0	0	0	0	0	0	200	300	0	0	0	0	0	0	0	200	903	0	0	0	0	0	0	0	603	903	0
571	6	0	0	0	0	0	0	200	300	0	0	0	0	0	0	0	200	903	0	0	0	0	0	0	0	603	903	0
571	7	0	0	0	0	0	0	200	300	0	0	0	0	0	0	0	200	903	0	0	0	0	0	0	0	603	903	0
571	8	0	0	0	0	0	0	200	300	0	0	0	0	0	0	0	200	903	0	0	0	0	0	0	0	603	903	0
571	9	0	0	0	0	0	0	200	300	0	0	0	0	0	0	0	200	903	0	0	0	0	0	0	0	603	903	0
572	0	0	0	0	0	0	0	200	300	0	0	0	0	0	0	0	200	903	0	0	0	0	0	0	0	603	903	0
572	1	0	0	0	0	0	0	200	300	0	0	0	0	0	0	0	200	903	0	0	0	0	0	0	0	603	903	0
572	2	0	0	0	0	0	0	200	300	0	0	0	0	0	0	0	200	903	0	0	0	0	0	0	0	603	903	0
572	3	0	0	0	0	0	0	200	300	0	0	0	0	0	0	0	200	903	0	0	0	0	0	0	0	603	903	0
572	4	0	0	0	0	0	0	200	300	0	0	0	0	0	0	0	200	903	0	0	0	0	0	0	0	603	903	0
572	5	0	0	0	0	0	0	200	300	0	0	0	0	0	0	0	200	903	0	0	0	0	0	0	0	603	903	0
572	6	0	0	0	0	0	0	200	300	0	0	0	0	0	0	0	200	903	0	0	0	0	0	0	0	603	903	0
572	7	0	0	0	0	0	0	200	300	0	0	0	0	0	0	0	200	903	0	0	0	0	0	0	0	603	903	0
572	8	0	0	0	0	0	0	200	300	0	0	0	0	0	0	0	200	903	0	0	0	0	0	0	0	603	903	0
572	9	0	0	0	0	0	0	200	300	0	0	0	0	0	0	0	200	903	0	0	0	0	0	0	0	603	903	0
573	0	0	0	0	0	0	0	200	300	0	0	0	0	0	0	0	200	903	0	0	0	0	0	0	0	603	903	0
573	1	0	0	0	0	0	0	200	300	0	0	0	0	0	0	0	200	903	0	0	0	0	0	0	0	603	903	0
573	2	0	0	0	0	0	0	200	300	0	0	0	0	0	0	0	200	903	0	0	0	0	0	0	0	603	903	0
573	3	0	0	0	0	0	0	200	300	0	0	0	0	0	0	0	200	903	0	0	0	0	0	0	0	603	903	0
573	4	0	0	0	0	0	0	200	300	0	0	0	0	0	0	0	200	903	0	0	0	0	0	0	0	603	903	0
573	5	0	0	0	0	0	0	200	300	0	0	0	0	0	0	0	200	903	0	0	0	0	0	0	0	603	903	0
573	6	0	0	0	0	0	0	200	300	0	0	0	0	0	0	0	200	903	0	0	0	0	0	0	0	603	903	0
573	7	0	0	0	0	0	0	200	300	0	0	0	0	0	0	0	200	903	0	0	0	0	0	0	0	603	903	0
573	8	0	0	0	0	0	0	200	300	0	0	0	0	0	0	0	200	903	0	0	0	0	0	0	0	603	903	0
573	9	0	0	0	0	0	0	200	300	0	0	0	0	0	0	0	200	903	0	0	0	0	0	0	0	603	903	0
574	0	0	0	0	0	0	0	200	300	0	0	0	0	0	0	0	200	903	0	0	0	0	0	0	0	603	903	0
574	1	0	0	0	0	0	0	200	300	0	0	0	0	0	0	0	200	903	0	0	0	0	0	0	0	603	903	0
574	2	0	0	0	0	0	0	200	300	0	0	0	0	0	0	0	200	903	0	0	0	0	0	0	0	603	903	0
574	3	0	0	0	0	0	0	200	300	0	0	0	0	0	0	0	200	903	0	0	0	0	0	0	0	603	903	0
574	4	0	0	0	0	0	0	200	300	0	0	0	0	0	0	0	200	903	0	0	0	0	0	0	0	603	903	0
574	5	0	0	0	0	0	0	200	300	0	0	0	0	0	0	0	200	903	0	0	0	0	0	0	0	603	903	0
574	6	0	0	0	0	0	0	200	300	0	0	0	0	0	0	0	200	903	0	0	0	0	0	0	0	603	903	0
574	7	0	0	0	0	0	0	200	300	0	0	0	0	0	0	0	200	903	0	0	0	0	0	0	0	603	903	0
574	8	0	0	0	0	0	0	200	300	0	0	0	0	0	0	0	200	903	0	0	0	0	0	0	0	603	903	0
574	9	0	0	0	0	0	0	200	300	0	0	0	0	0	0	0	200	903	0	0	0	0	0	0	0	603	903	0
575	0	0	0	0	0	0	0	200	300	0	0	0	0	0	0	0	200	903	0	0	0	0	0	0	0	603	903	0
575	1	0	0	0	0	0	0	200	300	0	0	0	0	0	0	0	200	903	0	0	0	0	0	0	0	603	903	0
575	2	0	0	0	0	0	0	200	300	0	0	0	0	0	0	0	200	903	0	0	0	0	0	0	0	603	903	0
575	3	0	0	0	0	0	0	200	300	0	0	0	0	0	0	0	200	903	0	0	0	0	0	0	0	603	903	0
575	4	0	0	0	0	0	0	200	300	0	0	0	0	0	0	0	200	903	0	0	0	0	0	0	0	603	903	0
575	5	0	0	0	0	0	0	200	300	0	0	0	0	0	0	0	200	903	0	0	0	0	0	0	0	603	903	0
575	6	0	0	0	0	0	0	200	300	0	0	0	0	0	0	0	200	903	0	0	0	0	0	0	0	603	903	0
575	7	0	0	0	0	0	0	200	300	0	0	0	0	0	0	0	200	903	0	0	0	0	0	0	0	603	903	0
575	8	0	0	0	0	0	0	200	300	0	0	0	0	0	0	0	200	903	0	0	0	0	0	0	0	603	903	0
575	9	0	0	0	0	0	0	200	300	0	0	0	0	0	0	0	200	903	0	0	0	0	0	0	0	603	903	0
576	0	0	0	0	0	0	0	200	300	0	0	0	0	0	0	0	200	903	0	0	0	0	0	0	0	603	903	0
576	1	0	0	0	0	0	0	200	300	0	0	0	0	0	0	0	200	903	0	0	0	0	0	0	0	603	903	0
576	2	0	0	0	0	0	0	200	300	0	0	0	0	0	0	0	200	903	0	0	0	0	0	0	0	603	903	0
576	3	0	0	0	0	0	0	200	300	0	0	0	0	0	0	0	200	903	0	0	0	0	0	0	0	603	903	0
576	4	0	0	0	0	0	0	200	300	0	0	0	0	0	0	0	200	903	0	0	0	0	0	0	0	603	903	0
576	5	0	0	0	0	0	0	200	300	0	0	0	0	0	0	0	200	903	0	0	0	0	0	0	0	603	903	0
576	6	0	0	0	0	0	0	200	300	0	0	0	0	0	0	0	200	903	0	0	0	0	0	0	0	603	903	0
576	7	0	0	0	0	0	0	200	300	0	0	0	0	0	0	0	200	903	0	0	0	0	0	0	0	603	903	0
576	8	0	0	0	0	0	0	200	300	0	0	0	0	0	0	0	200	903	0	0	0	0	0	0	0	603	903	0
576	9	0	0	0	0	0	0	200	300	0	0	0	0	0	0	0	200	903	0	0	0	0	0	0	0	603	903	0
577	0	0	0	0	0	0	0	200	300	0	0	0	0	0	0	0	200	903	0	0	0	0	0	0	0	603	903	0
577	1	0	0	0	0	0	0	200	300	0	0	0	0	0	0	0	200	903	0	0	0	0	0	0	0	603	903	0
577	2	0	0	0	0	0	0	200	300	0	0	0	0	0	0	0	200	903	0	0	0	0	0	0	0	603	903	0
577	3	0	0	0	0	0	0	200	300	0	0	0	0	0	0	0	200	903	0	0	0	0	0	0	0	603	903	0
577	4	0	0	0	0	0	0	200	300	0	0	0	0	0	0	0	200	903	0	0	0	0	0	0	0	603	903	0
577	5	0	0	0	0	0	0	200	300	0	0	0	0	0	0	0	200	903	0	0	0	0	0	0	0	603	903	0
577	6	0	0	0	0	0	0	200	300	0	0	0	0	0	0	0	200	903	0	0	0	0	0	0	0	603	903	0
577	7	0	0	0	0	0	0	200	300	0	0	0	0	0	0	0	200	903	0	0	0	0	0	0	0	603	903	0
577	8	0	0	0	0	0	0	200	300	0	0	0	0	0	0	0	200	903	0	0	0	0	0	0	0	603	903	0
577	9	0	0	0	0	0	0	200	300	0	0	0	0	0	0	0	200	903	0	0	0	0	0	0	0	603	903	0
578	0	0	0	0	0	0	0	200	300	0	0	0	0	0	0	0	200	903	0	0	0	0	0	0	0	603	903	0
578	1	0	0	0	0	0	0	200	300	0	0	0	0	0	0	0	200	903	0	0	0	0	0	0	0	603	903	0
578	2	0	0	0	0	0	0	200	300	0	0	0	0	0	0	0	200	903	0	0	0	0	0	0	0	603	903	0
578	3	0	0	0	0	0	0	200	300	0	0	0	0	0	0	0	200	903	0	0	0	0	0	0	0	603	903	0
578	4	0	0	0	0	0	0	200	300	0	0	0	0	0	0	0	200	903	0	0	0	0	0	0	0	603	903	0
578	5	0	0	0	0	0	0	200	300	0	0	0	0	0	0	0	200	903	0	0	0	0	0	0	0	603	903	0
578	6	0	0	0	0	0	0	200	300	0	0	0	0	0	0	0	200	903	0	0	0	0	0	0	0	603	903	0
578	7	0	0	0	0	0	0	200	300	0	0	0	0	0	0	0	200	903	0	0	0	0	0	0	0	603	903	0
578	8	0	0	0	0	0	0	200	300	0	0	0	0	0	0	0	200	903	0	0	0	0	0	0	0	603	903	0
578	9	0	0	0	0	0	0	200	300	0	0	0	0	0	0	0	200	903	0	0	0	0	0	0	0	603	903	0
579	0	0	0	0	0	0	0	200	300	0	0	0	0	0	0	0	200	903	0	0	0	0	0	0	0	603	903	0
579	1	0	0	0	0	0	0	200	300	0	0	0	0	0	0	0	200	903	0	0	0	0	0	0	0	603	903	0
579	2	0	0	0	0	0	0	200	300	0	0	0	0	0	0	0	200	903	0	0	0	0	0	0	0	603	903	0
579	3	0	0	0	0	0	0	200	300	0	0	0	0	0	0	0	200	903	0	0	0	0	0	0	0	603	903	0
579	4	0	0	0	0	0	0	200	300	0	0	0	0	0	0	0	200	903	0	0	0	0	0	0	0	603	903	0
579	5	0	0	0	0	0	0	200	300	0	0	0	0	0	0	0	200	903	0	0	0	0	0	0	0	603	903	0
579	6	0	0	0	0	0	0	200	300	0	0	0	0	0	0	0	200	903	0	0	0	0	0	0	0	603	903	0
579	7	0	0	0	0	0	0	200	300	0	0	0	0	0	0	0	200	903	0	0	0	0	0	0	0	603	903	0
579	8	0	0	0	0	0	0	200	300	0	0	0	0	0	0	0	200	903	0	0	0	0	0	0	0	603	903	0
579	9	0	0	0	0	0	0	200	300	0	0	0	0	0	0	0	200	903	0	0	0	0	0	0	0	603	903	0
580	0	0	0	0	0	0	0	200	300	0	0	0	0	0	0	0	200	903	0	0	0	0	0	0	0	603	903	0
580	1	0	0	0	0	0	0	200	300	0	0	0	0	0	0	0	200	903	0	0	0	0	0	0	0	603	903	0
580	2	0	0	0	0	0	0	200	300	0	0	0	0	0	0	0	200	903	0	0	0	0	0	0	0	603	903	0
580	3	0	0	0	0	0	0	200	300	0	0	0	0	0	0	0	200	903	0	0	0	0	0	0	0	603	903	0
580	4	0	0	0	0	0	0	200	300	0	0	0	0	0	0	0	200	903	0	0	0	0	0	0	0	603	903	0
580	5	0	0	0	0	0	0	200	300	0	0	0	0	0	0	0	200	903	0	0	0	0	0	0	0	603	903	0
580	6	0	0	0	0	0	0	200	300	0	0	0	0	0	0	0	200	903	0	0	0	0	0	0	0	603	903	0
580	7	0	0	0	0	0	0	200	300	0	0	0	0	0	0	0	200	903	0	0	0	0	0	0	0	603	903	0
580	8	0	0	0	0	0	0	200	300	0	0	0	0	0	0	0	200	903	0	0	0	0	0	0	0	603	903	0
580	9	0	0	0	0	0	0	200	300	0	0	0	0	0	0	0	200	903	0	0	0	0	0	0	0	603	903	0
581	0	0	0	0	0	0	0	200	300	0	0	0	0	0	0	0	200	903	0	0	0	0	0	0	0	603	903	0
581	1	0	0	0	0	0	0	200	300	0	0	0	0	0	0	0	200	903	0	0	0	0	0	0	0	603	903	0
581	2	0	0	0	0	0	0	200	300	0	0	0	0	0	0	0	200	903	0	0	0	0	0	0	0	603	903	0
581	3	0	0	0	0	0	0	200	300	0	0	0	0	0	0	0	200	903	0	0	0	0	0	0	0	603	903	0
581	4	0	0	0	0	0	0	200	300	0	0	0	0	0	0	0	200	903	0	0	0	0	0	0	0	603	903	0
581	5	0	0	0	0	0	0	200	300	0	0	0	0	0	0	0	200	903	0	0	0	0	0	0	0	603	903	0
581	6	0	0	0	0	0	0	200	300	0	0	0	0	0	0	0	200	903	0	0	0	0	0	0	0	603	903	0
581	7	0	0	0	0	0	0	200	300	0	0	0	0	0	0	0	200	903	0	0	0	0	0	0	0	603	903	0
581	8	0	0	0	0	0	0	200	300	0	0	0	0	0	0	0	200	903	0	0	0	0	0	0	0	603	903	0
581	9	0	0	0	0	0	0	200	300	0	0	0	0	0	0	0	200	903	0	0	0	0	0	0	0	603	903	0
582	0	0	0	0	0	0	0	200	300	0	0	0	0	0	0	0	200	903	0	0	0	0	0	0	0	603	903	0
582	1	0	0	0	0	0	0	200	300	0	0	0	0	0	0	0	200	903	0	0	0	0	0	0	0	603	903	0
582	2	0	0	0	0	0	0	200	300	0	0	0	0	0	0	0	200	903	0	0	0	0	0	0	0	603	903	0
582	3	0	0	0	0	0	0	200	300	0	0	0	0	0	0	0	200	903	0	0	0	0	0	0	0	603	903	0
582	4	0	0	0	0	0	0	200	300	0	0	0	0	0	0	0	200	903	0	0	0	0	0	0	0	603	903	0
582	5	0	0	0	0	0	0	200	300	0	0	0	0	0	0	0	200	903	0	0	0	0	0	0	0	603	903	0
582	6	0	0	0	0	0	0	200	300	0	0	0	0	0	0	0	200	903	0	0	0	0	0	0	0	603	903	0
582	7	0	0	0	0	0	0	200	300	0	0	0	0	0	0	0	200	903	0	0	0	0	0	0	0	603	903	0
582	8	0	0	0	0	0	0	200	300	0	0	0	0	0	0	0	200	903	0	0	0	0	0	0	0	603	903	0
582	9	0	0	0	0	0	0	200	300	0	0	0	0	0	0	0	200	903	0	0	0	0	0	0	0	603	903	0
583	0	0	0	0	0	0	0	200	300	0	0	0	0	0	0	0	200	903	0	0	0	0	0	0	0	603	903	0
583	1	0	0	0	0	0	0	200	300	0	0	0	0	0	0	0	200	903	0	0	0	0	0	0	0	603	903	0
583	2	0	0	0	0	0	0	200	300	0	0	0	0	0	0	0	200	903	0	0	0	0	0	0	0	603	903	0
583	3	0	0	0	0	0	0	200	300	0	0	0	0	0	0	0	200	903	0	0	0	0	0	0	0	603	903	0
583	4	0	0	0	0	0	0	200	300	0	0	0	0	0	0	0	200	903	0	0	0	0	0	0	0	603	903	0
583	5	0	0	0	0	0	0	200	300	0	0	0	0	0	0	0	200	903	0	0	0	0	0	0	0	603	903	0
583	6	0	0	0	0	0	0	200	300	0	0	0	0	0	0	0	200	903	0	0	0	0	0	0	0	603	903	0
583	7	0	0	0	0	0	0	200	300	0	0	0	0	0	0	0	200	903	0	0	0	0	0	0	0	603	903	0
583	8	0	0	0	0	0	0	200	300	0	0	0	0	0	0	0	200	903	0	0	0	0	0	0	0	603	903	0
583	9	0	0	0	0	0	0	200	300	0	0	0	0	0	0	0	200	903	0	0	0	0	0	0	0	603	903	0
584	0	0	0	0	0	0	0	200	300	0	0	0	0	0	0	0	200	903	0	0	0	0	0	0	0	603	903	0
584	1	0	0	0	0	0	0	200	300	0	0	0	0	0	0	0	200	903	0	0	0	0	0	0	0	603	903	0
584	2	0	0	0	0	0	0	200	300	0	0	0	0	0	0	0	200	903	0	0	0	0	0	0	0	603	903	0
584	3	0	0	0	0	0	0	200	300	0	0	0	0	0	0	0	200	903	0	0	0	0	0	0	0	603	903	0
584	4	0	0	0	0	0	0	200	300	0	0	0	0	0	0	0	200	903	0	0	0	0	0	0	0	603	903	0
584	5	0	0	0	0	0	0	200	300	0	0	0	0	0	0	0	200	903	0	0	0	0	0	0	0	603	903	0
584	6	0	0	0	0	0	0	200	300	0	0	0	0	0	0	0	200	903	0	0	0	0	0	0	0	603	903	0
584	7	0	0	0	0	0	0	200	300	0	0	0	0	0	0	0	200	903	0	0	0	0	0	0	0	603	903	0
584	8	0	0	0	0	0	0	200	300	0	0	0	0	0	0	0	200	903	0	0	0	0	0	0	0	603	903	0
584	9	0	0	0	0	0	0	200	300	0	0	0	0	0	0	0	200	903	0	0	0	0	0	0	0	603	903	0
585	0	0	0	0	0	0	0	200	300	0	0	0	0	0	0	0	200	903	0	0	0	0	0	0	0	603	903	0
585	1	0	0	0	0	0	0	200	300	0	0	0	0	0	0	0	200	903	0	0	0	0	0	0	0	603	903	0
585	2	0	0	0	0	0	0	200	300	0	0	0	0	0	0	0	200	903	0	0	0	0	0	0	0	603	903	0
585	3	0	0	0	0	0	0	200	300	0	0	0	0	0	0	0	200	903	0	0	0	0	0	0	0	603	903	0
585	4	0	0	0	0	0	0	200	300	0	0	0	0	0	0	0	200	903	0	0	0	0	0	0	0	603	903	0
585	5	0	0	0	0	0	0	200	300	0	0	0	0	0	0	0	200	903	0	0	0	0	0	0	0	603	903	0
585	6	0	0	0	0	0	0	200	300	0	0	0	0	0	0	0	200	903	0	0	0	0	0	0	0	603	903	0
585	7	0	0	0	0	0	0	200	300	0	0	0	0	0	0	0	200	903	0	0	0	0	0	0	0	603	903	0
585	8	0	0	0	0	0	0	200	300	0	0	0	0	0	0	0	200	903	0	0	0	0	0	0	0	603	903	0
585	9	0	0	0	0	0	0	200	300	0	0	0	0	0	0	0	200	903	0	0	0	0	0	0	0	603	903	0
586	0	0	0	0	0	0	0	200	300	0	0	0	0	0	0	0	200	903	0	0	0	0	0	0	0	603	903	0
586	1	0	0	0	0	0	0	200	300	0	0	0	0	0	0	0	200	903	0	0	0	0	0	0	0	603	903	0
586	2	0	0	0	0	0	0	200	300	0	0	0	0	0	0	0	200	903	0	0	0	0	0	0	0	603	903	0
586	3	0	0	0	0	0	0	200	300	0	0	0	0	0	0	0	200	903	0	0	0	0	0	0	0	603	903	0
586	4	0	0	0	0	0	0	200	300	0	0	0	0	0	0	0	200	903	0	0	0	0	0	0	0	603	903	0
586	5	0	0	0	0	0	0	200	300	0	0	0	0	0	0	0	200	903	0	0	0	0	0	0	0	603	903	0
586	6	0	0	0	0	0	0	200	300	0	0	0	0	0	0	0	200	903	0	0	0	0	0	0	0	603	903	0
586	7	0	0	0	0	0	0	200	300	0	0	0	0	0	0	0	200	903	0	0	0	0	0	0	0	603	903	0
586	8	0	0	0	0	0	0	200	300	0	0	0	0	0	0	0	200	903	0	0	0	0	0	0	0	603	903	0
586	9	0	0	0	0	0	0	200	300	0	0	0	0	0	0	0	200	903	0	0	0	0	0	0	0	603	903	0
587	0	0	0	0	0	0	0	200	300	0	0	0	0	0	0	0	200	903	0	0	0	0	0	0	0	603	903	0
587	1	0	0	0	0	0	0	200	300	0	0	0	0	0	0	0	200	903	0	0	0	0	0	0	0	603	903	0
587	2	0	0	0	0	0	0	200	300	0	0	0	0	0	0	0	200	903	0	0	0	0	0	0	0	603	903	0
587	3	0	0	0	0	0	0	200	300	0	0	0	0	0	0	0	200	903	0	0	0	0	0	0	0	603	903	0
587	4	0	0	0	0	0	0	200	300	0	0	0	0	0	0	0	200	903	0	0	0	0	0	0	0	603	903	0
587	5	0	0	0	0	0	0	200	300	0	0	0	0	0	0	0	200	903	0	0	0	0	0	0	0	603	903	0
587	6	0	0	0	0	0	0	200	300	0	0	0	0	0	0	0	200	903	0	0	0	0	0	0	0	603	903	0
587	7	0	0	0	0	0	0	200	300	0	0	0	0	0	0	0	200	903	0	0	0	0	0	0	0	603	903	0
587	8	0	0	0	0	0	0	200	300	0	0	0	0	0	0	0	200	903	0	0	0	0	0	0	0	603	903	0
587	9	0	0	0	0	0	0	200	300	0	0	0	0	0	0	0	200	903	0	0	0	0	0	0	0	603	903	0
588	0	0	0	0	0	0	0	200	300	0	0	0	0	0	0	0	200	903	0	0	0	0	0	0	0	603	903	0
588	1	0	0	0	0	0	0	200	300	0	0	0	0	0	0	0	200	903	0	0	0	0	0	0	0	603	903	0
588	2	0	0	0	0	0	0	200	300	0	0	0	0	0	0	0	200	903	0	0	0	0	0	0	0	603	903	0
588	3	0	0	0	0	0	0	200	300	0	0	0	0	0	0	0	200	903	0	0	0	0	0	0	0	603	903	0
588	4	0	0	0	0	0	0	200	300	0	0	0	0	0	0	0	200	903	0	0	0	0	0	0	0	603	903	0
588	5	0	0	0	0	0	0	200	300	0	0	0	0	0	0	0	200	903	0	0	0	0	0	0	0	603	903	0
588	6	0	0	0	0	0	0	200	300	0	0	0	0	0	0	0	200	903	0	0	0	0	0	0	0	603	903	0
588	7	0	0	0	0	0	0	200	300	0	0	0	0	0	0	0	200	903	0	0	0	0	0	0	0	603	903	0
588	8	0	0	0	0	0	0	200	300	0	0	0	0	0	0	0	200	903	0	0	0	0	0	0	0	603	903	0
588	9	0	0	0	0	0	0	200	300	0	0	0	0	0	0	0	200	903	0	0	0	0	0	0	0	603	903	0
589	0	0	0	0	0	0	0	200	300	0	0	0	0	0	0	0	200	903	0	0	0	0	0	0	0	603	903	0
589	1	0	0	0	0	0	0	200	300	0	0	0	0	0	0	0	200	903	0	0	0	0	0	0	0	603	903	0
589	2	0	0	0	0	0	0	200	300	0	0	0	0	0	0	0	200	903	0	0	0	0	0	0	0	603	903	0
589	3	0	0	0	0	0	0	200	300	0	0	0	0	0	0	0	200	903	0	0	0	0	0	0	0	603	903	0
589	4	0	0	0	0	0	0	200	300	0	0	0	0	0	0	0	200	903	0	0	0	0	0	0	0	603	903	0
589	5	0	0	0	0	0	0	200	300	0	0	0	0	0	0	0	200	903	0	0	0	0	0	0	0	603	903	0
589	6	0	0	0	0	0	0	200	300	0	0	0	0	0	0	0	200	903	0	0	0	0	0	0	0	603	903	0
589	7	0	0	0	0	0	0	200	300	0	0	0	0	0	0	0	200	903	0	0	0	0	0	0	0	603	903	0
589	8	0	0	0	0	0	0	200	300	0	0	0	0	0	0	0	200	903	0	0	0	0	0	0	0	603	903	0
589	9	0	0	0	0	0	0	200	300	0	0	0	0	0	0	0	200	903	0	0	0	0	0	0	0	603	903	0
590	0	0	0	0	0	0	0	200	300	0	0	0	0	0	0	0	200	903	0	0	0	0	0	0	0	603	903	0
590	1	0	0	0	0	0	0	200	300	0	0	0	0	0	0	0	200	903	0	0	0	0	0	0	0	603	903	0
590	2	0	0	0	0	0	0	200	300	0	0	0	0	0	0	0	200	903	0	0	0	0	0	0	0	603	903	0
590	3	0	0	0	0	0	0	200	300	0	0	0	0	0	0	0	200	903	0	0	0	0	0	0	0	603	903	0
590	4	0	0	0	0	0	0	200	300	0	0	0	0	0	0	0	200	903	0	0	0	0	0	0	0	603	903	0
590	5	0	0	0	0	0	0	200	300	0	0	0	0	0	0	0	200	903	0	0	0	0	0	0	0	603	903	0
590	6	0	0	0	0	0	0	200	300	0	0	0	0	0	0	0	200	903	0	0	0	0	0	0	0	603	903	0
590	7	0	0	0	0	0	0	200	300	0	0	0	0	0	0	0	200	903	0	0	0	0	0	0	0	603	903	0
590	8	0	0	0	0	0	0	200	300	0	0	0	0	0	0	0	200	903	0	0	0	0	0	0	0	603	903	0
590	9	0	0	0	0	0	0	200	300	0	0	0	0	0	0	0	200	903	0	0	0	0	0	0	0	603	903	0
591	0	0	0	0	0	0	0	200	300	0	0	0	0	0	0	0	200	903	0	0	0	0	0	0	0	603	903	0
591	1	0	0	0	0	0	0	200	300	0	0	0	0	0	0	0	200	903	0	0	0	0	0	0	0	603	903	0
591	2	0	0	0	0	0	0	200	300	0	0	0	0	0	0	0	200	903	0	0	0	0	0	0	0	603	903	0
591	3	0	0	0	0	0	0	200	300	0	0	0	0	0	0	0	200	903	0	0	0	0	0	0	0	603	903	0
591	4	0	0	0	0	0	0	200	300	0	0	0	0	0	0	0	200	903	0	0	0	0	0	0	0	603	903	0
591	5	0	0	0	0	0	0	200	300	0	0	0	0	0	0	0	200	903	0	0	0	0	0	0	0	603	903	0
591	6	0	0	0	0	0	0	200	300	0	0	0	0	0	0	0	200	903	0	0	0	0	0	0	0	603	903	0
591	7	0	0	0	0	0	0	200	300	0	0	0	0	0	0	0	200	903	0	0	0	0	0	0	0	603	903	0
591	8	0	0	0	0	0	0	200	300	0	0	0	0	0	0	0	200	903	0	0	0	0	0	0	0	603	903	0
591	9	0	0	0	0	0	0	200	300	0	0	0	0	0	0	0	200	903	0	0	0	0	0	0	0	603	903	0
592	0	0	0	0	0	0	0	200	300	0	0	0	0	0	0	0	200	903	0	0	0	0	0	0	0	603	903	0
592	1	0	0	0	0	0	0	200	300	0	0	0	0	0	0	0	200	903	0	0	0	0	0	0	0	603	903	0
592	2	0	0	0	0	0	0	200	300	0	0	0	0	0	0	0	200	903	0	0	0	0	0	0	0	603	903	0
592	3	0	0	0	0	0	0	200	300	0	0	0	0	0	0	0	200	903	0	0	0	0	0	0	0	603	903	0
592	4	0	0	0	0	0	0	200	300	0	0	0	0	0	0	0	200	903	0	0	0	0	0	0	0	603	903	0
592	5	0	0	0	0	0	0	200	300	0	0	0	0	0	0	0	200	903	0	0	0	0	0	0	0	603	903	0
592	6	0	0	0	0	0	0	200	300	0	0	0	0	0	0	0	200	903	0	0	0	0	0	0	0	603	903	0
592	7	0	0	0	0	0	0	200	300	0	0	0	0	0	0	0	200	903	0	0	0	0	0	0	0	603	903	0
592	8	0	0	0	0	0	0	200	300	0	0	0	0	0	0	0	200	903	0	0	0	0	0	0	0	603	903	0
592	9	0	0	0	0	0	0	200	300	0	0	0	0	0	0	0	200	903	0	0	0	0	0	0	0	603	903	0
593	0	0	0	0	0	0	0	200	300	0	0	0	0	0	0	0	200	903	0	0	0	0	0	0	0	603	903	0
593	1	0	0	0	0	0	0	200	300	0	0	0	0	0	0	0	200	903	0	0	0	0	0	0	0	603	903	0
593	2	0	0	0	0	0	0	200	300	0	0	0	0	0	0	0	200	903	0	0	0	0	0	0	0	603	903	0
593	3	0	0	0	0	0	0	200	300	0	0	0	0	0	0	0	200	903	0	0	0	0	0	0	0	603	903	0
593	4	0	0	0	0	0	0	200	300	0	0	0	0	0	0	0	200	903	0	0	0	0	0	0	0	603	903	0
593	5	0	0	0	0	0	0	200	300	0	0	0	0	0	0	0	200	903	0	0	0	0	0	0	0	603	903	0
593	6	0	0	0	0	0	0	200	300	0	0	0	0	0	0	0	200	903	0	0	0	0	0	0	0	603	903	0
593	7	0	0	0	0	0	0	200	300	0	0	0	0	0	0	0	200	903	0	0	0	0	0	0	0	603	903	0
593	8	0	0	0	0	0	0	200	300	0	0	0	0	0	0	0	200	903	0	0	0	0	0	0	0	603	903	0
593	9	0	0	0	0	0	0	200	300	0	0	0	0	0	0	0	200	903	0	0	0	0	0	0	0	603	903	0
594	0	0	0	0	0	0	0	200	300	0	0	0	0	0	0	0	200	903	0	0	0	0	0	0	0	603	903	0
594	1	0	0	0	0	0	0	200	300	0	0	0	0	0	0	0	200	903	0	0	0	0	0	0	0	603	903	0
594	2	0	0	0	0	0	0	200	300	0	0	0	0	0	0	0	200	903	0	0	0	0	0	0	0	603	903	0
594	3	0	0	0	0	0	0	200	300	0	0	0	0	0	0	0	200	903	0	0	0	0	0	0	0	603	903	0
594	4	0	0	0	0	0	0	200	300	0	0	0	0	0	0	0	200	903	0	0	0	0	0	0	0	603	903	0
594	5	0	0	0	0	0	0	200	300	0	0	0	0	0	0	0	200	903	0	0	0	0	0	0	0	603	903	0
594	6	0	0	0	0	0	0	200	300	0	0	0	0	0	0	0	200	903	0	0	0	0	0	0	0	603	903	0
594	7	0	0	0	0	0	0	200	300	0	0	0	0	0	0	0	200	903	0	0	0	0	0	0	0	603	903	0
594	8	0	0	0	0	0	0	200	300	0	0	0	0	0	0	0	200	903	0	0	0	0	0	0	0	603	903	0
594	9	0	0	0	0	0	0	200	300	0	0	0	0	0	0	0	200	903	0	0	0	0	0	0	0	603	903	0
595	0	0	0	0	0	0	0	200	300	0	0	0	0	0	0	0	200	903	0	0	0	0	0	0	0	603	903	0
595	1	0	0	0	0	0	0	200	300	0	0	0	0	0	0	0	200	903	0	0	0	0	0	0	0	603	903	0
595	2	0	0	0	0	0	0	200	300	0	0	0	0	0	0	0	200	903	0	0	0	0	0	0	0	603	903	0
595	3	0	0	0	0	0	0	200	300	0	0	0	0	0	0	0	200	903	0	0	0	0	0	0	0	603	903	0
595	4	0	0	0	0	0	0	200	300	0	0	0	0	0	0	0	200	903	0	0	0	0	0	0	0	603	903	0
595	5	0	0	0	0	0	0	200	300	0	0	0	0	0	0	0	200	903	0	0	0	0	0	0	0	603	903	0
595	6	0	0	0	0	0	0	200	300	0	0	0	0	0	0	0	200	903	0	0	0	0	0	0	0	603	903	0
595	7	0	0	0	0	0	0	200	300	0	0	0	0	0	0	0	200	903	0	0	0	0	0	0	0	603	903	0
595	8	0	0	0	0	0	0	200	300	0	0	0	0	0	0	0	200	903	0	0	0	0	0	0	0	603	903	0
595	9	0	0	0	0	0	0	200	300	0	0	0	0	0	0	0	200	903	0	0	0	0	0	0	0	603	903	0
596	0	0	0	0	0	0	0	200	300	0	0	0	0	0	0	0	200	903	0	0	0	0	0	0	0	603	903	0
596	1	0	0	0	0	0	0	200	300	0	0	0	0	0	0	0	200	903	0	0	0	0	0	0	0	603	903	0
596	2	0	0	0	0	0	0	200	300	0	0	0	0	0	0	0	200	903	0	0	0	0	0	0	0	603	903	0
596	3	0	0	0	0	0	0	200	300	0	0	0	0	0	0	0	200	903	0	0	0	0	0	0	0	603	903	0
596	4	0	0	0	0	0	0	200	300	0	0	0	0	0	0	0	200	903	0	0	0	0	0	0	0	603	903	0
596	5	0	0	0	0	0	0	200	300	0	0	0	0	0	0	0	200	903	0	0	0	0	0	0	0	603	903	0
596	6	0	0	0	0	0	0	200	300	0	0	0	0	0	0	0	200	903	0	0	0	0	0	0	0	603	903	0
596	7	0	0	0	0	0	0	200	300	0	0	0	0	0	0	0	200	903	0	0	0	0	0	0	0	603	903	0
596	8	0	0	0	0	0	0	200	300	0	0	0	0	0	0	0	200	903	0	0	0	0	0	0	0	603	903	0
596	9	0	0	0	0	0	0	200	300	0	0	0	0	0	0	0	200	903	0	0	0	0	0	0	0	603	903	0
597	0	0	0	0	0	0	0	200	300	0	0	0	0	0	0	0	200	903	0	0	0	0	0	0	0	603	903	0
597	1	0	0	0	0	0	0	200	300	0	0	0	0	0	0	0	200	903	0	0	0	0	0	0	0	603	903	0
597	2	0	0	0	0	0	0	200	300	0	0	0	0	0	0	0	200	903	0	0	0	0	0	0	0	603	903	0
597	3	0	0	0	0	0	0	200	300	0	0	0	0	0	0	0	200	903	0	0	0	0	0	0	0	603	903	0
597	4	0	0	0	0	0	0	200	300	0	0	0	0	0	0	0	200	903	0	0	0	0	0	0	0	603	903	0
597	5	0	0	0	0	0	0	200	300	0	0	0	0	0	0	0	200	903	0	0	0	0	0	0	0	603	903	0
597	6	0	0	0	0	0	0	200	300	0	0	0	0	0	0	0	200	903	0	0	0	0	0	0	0	603	903	0
597	7	0	0	0	0	0	0	200	300	0	0	0	0	0	0	0	200	903	0	0	0	0	0	0	0	603	903	0
597	8	0	0	0	0	0	0	200	300	0	0	0	0	0	0	0	200	903	0	0	0	0	0	0	0	603	903	0
597	9	0	0	0	0	0	0	200	300	0	0	0	0	0	0	0	200	903	0	0	0	0	0	0	0	603	903	0
598	0	0	0	0	0	0	0	200	300	0	0	0	0	0	0	0	200	903	0	0	0	0	0	0	0	603	903	0
598	1	0	0	0	0	0	0	200	300	0	0	0	0	0	0	0	200	903	0	0	0	0	0	0	0	603	903	0
598	2	0	0	0	0	0	0	200	300	0	0	0	0	0	0	0	200	903	0	0	0	0	0	0	0	603	903	0
598	3	0	0	0	0	0	0	200	300	0	0	0	0	0	0	0	200	903	0	0	0	0	0	0	0	603	903	0
598	4	0	0	0	0	0	0	200	300	0	0	0	0	0	0	0	200	903	0	0	0	0	0	0	0	603	903	0
598	5	0	0	0	0	0	0	200	300	0	0	0	0	0	0	0	200	903	0	0	0	0	0	0	0	603	903	0
598	6	0	0	0	0	0	0	200	300	0	0	0	0	0	0	0	200	903	0	0	0	0	0	0	0	603	903	0
598	7	0	0	0	0	0	0	200	300	0	0	0	0	0	0	0	200	903	0	0	0	0	0	0	0	603	903	0
598	8	0	0	0	0	0	0	200	300	0	0	0	0	0	0	0	200	903	0	0	0	0	0	0	0	603	903	0
598	9	0	0	0	0	0	0	200	300	0	0	0	0	0	0	0	200	903	0	0	0	0	0	0	0	603	903	0
599	0	0	0	0	0	0	0	200	300	0	0	0	0	0	0	0	200	903	0	0	0	0	0	0	0	603	903	0
599	1	0	0	0	0	0	0	200	300	0	0	0	0	0	0	0	200	903	0	0	0	0	0	0	0	603	903	0
599	2	0	0	0	0	0	0	200	300	0	0	0	0	0	0	0	200	903	0	0	0	0	0	0	0	603	903	0
599	3	0	0	0	0	0	0	200	300	0	0	0	0	0	0	0	200	903	0	0	0	0	0	0	0	603	903	0
599	4	0	0	0	0	0	0	200	300	0	0	0	0	0	0	0	200	903	0	0	0	0	0	0	0	603	903	0
599	5	0	0	0	0	0	0	200	300	0	0	0	0	0	0	0	200	903	0	0	0	0	0	0	0	603	903	0
599	6	0	0	0	0	0	0	200	300	0	0	0	0	0	0	0	200	903	0	0	0	0	0	0	0	603	903	0
599	7	0	0	0	0	0	0	200	300	0	0	0	0	0	0	0	200	903	0	0	0	0	0	0	0	603	903	0
599	8	0	0	0	0	0	0	200	300	0	0	0	0	0	0	0	200	903	0	0	0	0	0	0	0	603	903	0
599	9	0	0	0	0	0	0	200	300	0	0	0	0	0	0	0	200	903	0	0	0	0	0	0	0	603	903	0
600	0	0	0	0	0	0	0	200	300	0	0	0	0	0	0	0	200	903	0	0	0	0	0	0	0	603	903	0
600	1	0	0	0	0	0	0	200	300	0	0	0	0	0	0	0	200	903	0	0	0	0	0	0	0	603	903	0
600	2	0	0	0	0	0	0	200	300	0	0	0	0	0	0	0	200	903	0	0	0	0	0	0	0	603	903	0
600	3	0	0	0	0	0	0	200	300	0	0	0	0	0	0	0	200	903	0	0	0	0	0	0	0	603	903	0
600	4	0	0	0	0	0	0	200	300	0	0	0	0	0	0	0	200	903	0	0	0	0	0	0	0	603	903	0
600	5	0	0	0	0	0	0	200	300	0	0	0	0	0	0	0	200	903	0	0	0	0	0	0	0	603	903	0
600	6	0	0	0	0	0	0	200	300	0	0	0	0	0	0	0	200	903	0	0	0	0	0	0	0	603	903	0
600	7	0	0	0	0	0	0	200	300	0	0	0	0	0	0	0	200	903	0	0	0	0	0	0	0	603	903	0
600	8	0	0	0	0	0	0	200	300	0	0	0	0	0	0	0	200	903	0	0	0	0	0	0	0	603	903	0
600	9	0	0	0	0	0	0	200	300	0	0	0	0	0	0	0	200	903	0	0	0	0	0	0	0	603	903	0
601	0	0	0	0	0	0	0	200	300	0	0	0	0	0	0	0	200	903	0	0	0	0	0	0	0	603	903	0
601	1	0	0	0	0	0	0	200	300	0	0	0	0	0	0	0	200	903	0	0	0	0	0	0	0	603	903	0
601	2	0	0	0	0	0	0	200	300	0	0	0	0	0	0	0	200	903	0	0	0	0	0	0	0	603	903	0
601	3	0	0	0	0	0	0	200	300	0	0	0	0	0	0	0	200	903	0	0	0	0	0	0	0	603	903	0
601	4	0	0	0	0	0	0	200	300	0	0	0	0	0	0	0	200	903	0	0	0	0	0	0	0	603	903	0
601	5	0	0	0	0	0	0	200	300	0	0	0	0	0	0	0	200	903	0	0	0	0	0	0	0	603	903	0
601	6	0	0	0	0	0	0	200	300	0	0	0	0	0	0	0	200	903	0	0	0	0	0	0	0	603	903	0
601	7	0	0	0	0	0	0	200	300	0	0	0	0	0	0	0	200	903	0	0	0	0	0	0	0	603	903	0
601	8	0	0	0	0	0	0	200	300	0	0	0	0	0	0	0	200	903	0	0	0	0	0	0	0	603	903	0
601	9	0	0	0	0	0	0	200	300	0	0	0	0	0	0	0	200	903	0	0	0	0	0	0	0	603	903	0
602	0	0	0	0	0	0	0	200	300	0	0	0	0	0	0	0	200	903	0	0	0	0	0	0	0	603	903	0
602	1	0	0	0	0	0	0	200	300	0	0	0	0	0	0	0	200	903	0	0	0	0	0	0	0	603	903	0
602	2	0	0	0	0	0	0	200	300	0	0	0	0	0	0	0	200	903	0	0	0	0	0	0	0	603	903	0
602	3	0	0	0	0	0	0	200	300	0	0	0	0	0	0	0	200	903	0	0	0	0	0	0	0	603	903	0
602	4	0	0	0	0	0	0	200	300	0	0	0	0	0	0	0	200	903	0	0	0	0	0	0	0	603	903	0
602	5	0	0	0	0	0	0	200	300	0	0	0	0	0	0	0	200	903	0	0	0	0	0	0	0	603	903	0
602	6	0	0	0	0	0	0	200	300	0	0	0	0	0	0	0	200	903	0	0	0	0	0	0	0	603	903	0
602	7	0	0	0	0	0	0	200	300	0	0	0	0	0	0	0	200	903	0	0	0	0	0	0	0	603	903	0
602	8	0	0	0	0	0	0	200	300	0	0	0	0	0	0	0	200	903	0	0	0	0	0	0	0	603	903	0
602	9	0	0	0	0	0	0	200	300	0	0	0	0	0	0	0	200	903	0	0	0	0	0	0	0	603	903	0
603	0	0	0	0	0	0	0	200	300	0	0	0	0	0	0	0	200	903	0	0	0	0	0	0	0	603	903	0
603	1	0	0	0	0	0	0	200	300	0	0	0	0	0	0	0	200	903	0	0	0	0	0	0	0	603	903	0
603	2	0	0	0	0	0	0	200	300	0	0	0	0	0	0	0	200	903	0	0	0	0	0	0	0	603	903	0
603	3	0	0	0	0	0	0	200	300	0	0	0	0	0	0	0	200	903	0	0	0	0	0	0	0	603	903	0
603	4	0	0	0	0	0	0	200	300	0	0	0	0	0	0	0	200	903	0	0	0	0	0	0	0	603	903	0
603	5	0	0	0	0	0	0	200	300	0	0	0	0	0	0	0	200	903	0	0	0	0	0	0	0	603	903	0
603	6	0	0	0	0	0	0	200	300	0	0	0	0	0	0	0	200	903	0	0	0	0	0	0	0	603	903	0
603	7	0	0	0	0	0	0	200	300	0	0	0	0	0	0	0	200	903	0	0	0	0	0	0	0	603	903	0
603	8	0	0	0	0	0	0	200	300	0	0	0	0	0	0	0	200	903	0	0	0	0	0	0	0	603	903	0
603	9	0	0	0	0	0	0	200	300	0	0	0	0	0	0	0	200	903	0	0	0	0	0	0	0	603	903	0
604	0	0	0	0	0	0	0	200	300	0	0	0	0	0	0	0	200	903	0	0	0	0	0	0	0	603	903	0
604	1	0	0	0	0	0	0	200	300	0	0	0	0	0	0	0	200	903	0	0	0	0	0	0	0	603	903	0
604	2	0	0	0	0	0	0	200	300	0	0	0	0	0	0	0	200	903	0	0	0	0	0	0	0	603	903	0
604	3	0	0	0	0	0	0	200	300	0	0	0	0	0	0	0	200	903	0	0	0	0	0	0	0	603	903	0
604	4	0	0	0	0	0	0	200	300	0	0	0	0	0	0	0	200	903	0	0	0	0	0	0	0	603	903	0
604	5	0	0	0	0	0	0	200	300	0	0	0	0	0	0	0	200	903	0	0	0	0	0	0	0	603	903	0
604	6	0	0	0	0	0	0	200	300	0	0	0	0	0	0	0	200	903	0	0	0	0	0	0	0	603	903	0
604	7	0	0	0	0	0	0	200	300	0	0	0	0	0	0	0	200	903	0	0	0	0	0	0	0	603	903	0
604	8	0	0	0	0	0	0	200	300	0	0	0	0	0	0	0	200	903	0	0	0	0	0	0	0	603	903	0
604	9	0	0	0	0	0	0	200	300	0	0	0	0	0	0	0	200	903	0	0	0	0	0	0	0	603	903	0
605	0	0	0	0	0	0	0	200	300	0	0	0	0	0	0	0	200	903	0	0	0	0	0	0	0	603	903	0
605	1	0	0	0	0	0	0	200	300	0	0	0	0	0	0	0	200	903	0	0	0	0	0	0	0	603	903	0
605	2	0	0	0	0	0	0	200	300	0	0	0	0	0	0	0	200	903	0	0	0	0	0	0	0	603	903	0
605	3	0	0	0	0	0	0	200	300	0	0	0	0	0	0	0	200	903	0	0	0	0	0	0	0	603	903	0
605	4	0	0	0	0	0	0	200	300	0	0	0	0	0	0	0	200	903	0	0	0	0	0	0	0	603	903	0
605	5	0	0	0	0	0	0	200	300	0	0	0	0	0	0	0	200	903	0	0	0	0	0	0	0	603	903	0
605	6	0	0	0	0	0	0	200	300	0	0	0	0	0	0	0	200	903	0	0	0	0	0	0	0	603	903	0
605	7	0	0	0	0	0	0	200	300	0	0	0	0	0	0	0	200	903	0	0	0	0	0	0	0	603	903	0
605	8	0	0	0	0	0	0	200	300	0	0	0	0	0	0	0	200	903	0	0	0	0	0	0	0	603	903	0
605	9	0	0	0	0	0	0	200	300	0	0	0	0	0	0	0	200	903	0	0	0	0	0	0	0	603	903	0
606	0	0	0	0	0	0	0	200	300	0	0	0	0	0	0	0	200	903	0	0	0	0	0	0	0	603	903	0
606	1	0	0	0	0	0	0	200	300	0	0	0	0	0	0	0	200	903	0	0	0	0	0	0	0	603	903	0
606	2	0	0	0	0	0	0	200	300	0	0	0	0	0	0	0	200	903	0	0	0	0	0	0	0	603	903	0
606	3	0	0	0	0	0	0	200	300	0	0	0	0	0	0	0	200	903	0	0	0	0	0	0	0	603	903	0
606	4	0	0	0	0	0	0	200	300	0	0	0	0	0	0	0	200	903	0	0	0	0	0	0	0	603	903	0
606	5	0	0	0	0	0	0	200	300	0	0	0	0	0	0	0	200	903	0	0	0	0	0	0	0	603	903	0
606	6	0	0	0	0	0	0	200	300	0	0	0	0	0	0	0	200	903	0	0	0	0	0	0	0	603	903	0
606	7	0	0	0	0	0	0	200	300	0	0	0	0	0	0	0	200	903	0	0	0	0	0	0	0	603	903	0
606	8	0	0	0	0	0	0	200	300	0	0	0	0	0	0	0	200	903	0	0	0	0	0	0	0	603	903	0
606	9	0	0	0	0	0	0	200	300	0	0	0	0	0	0	0	200	903	0	0	0	0	0	0	0	603	903	0
607	0	0	0	0	0	0	0	200	300	0	0	0	0	0	0	0	200	903	0	0	0	0	0	0	0	603	903	0
607	1	0	0	0	0	0	0	200	300	0	0	0	0	0	0	0	200	903	0	0	0	0	0	0	0	603	903	0
607	2	0	0	0	0	0	0	200	300	0	0	0	0	0	0	0	200	903	0	0	0	0	0	0	0	603	903	0
607	3	0	0	0	0	0	0	200	300	0	0	0	0	0	0	0	200	903	0	0	0	0	0	0	0	603	903	0
607	4	0	0	0	0	0	0	200	300	0	0	0	0	0	0	0	200	903	0	0	0	0	0	0	0	603	903	0
607	5	0	0	0	0	0	0	200	300	0	0	0	0	0	0	0	200	903	0	0	0	0	0	0	0	603	903	0
607	6	0	0	0	0	0	0	200	300	0	0	0	0	0	0	0	200	903	0	0	0	0	0	0	0	603	903	0
607	7	0	0	0	0	0	0	200	300	0	0	0	0	0	0	0	200	903	0	0	0	0	0	0	0	603	903	0
607	8	0	0	0	0	0	0	200	300	0	0	0	0	0	0	0	200	903	0	0	0	0	0	0	0	603	903	0
607	9	0	0	0	0	0	0	200	300	0	0	0	0	0	0	0	200	903	0	0	0	0	0	0	0	603	903	0
608	0	0	0	0	0	0	0	200	300	0	0	0	0	0	0	0	200	903	0	0	0	0	0	0	0	603	903	0
608	1	0	0	0	0	0	0	200	300	0	0	0	0	0	0	0	200	903	0	0	0	0	0	0	0	603	903	0
608	2	0	0	0	0	0	0	200	300	0	0	0	0	0	0	0	200	903	0	0	0	0	0	0	0	603	903	0
608	3	0	0	0	0	0	0	200	300	0	0	0	0	0	0	0	200	903	0	0	0	0	0	0	0	603	903	0
608	4	0	0	0	0	0	0	200	300	0	0	0	0	0	0	0	200	903	0	0	0	0	0	0	0	603	903	0
608	5	0	0	0	0	0	0	200	300	0	0	0	0	0	0	0	200	903	0	0	0	0	0	0	0	603	903	0
608	6	0	0	0	0	0	0	200	300	0	0	0	0	0	0	0	200	903	0	0	0	0	0	0	0	603	903	0
608	7	0	0	0	0	0	0	200	300	0	0	0	0	0	0	0	200	903	0	0	0	0	0	0	0	603	903	0
608	8	0	0	0	0	0	0	200	300	0	0	0	0	0	0	0	200	903	0	0	0	0	0	0	0	603	903	0
608	9	0	0	0	0	0	0	200	300	0	0	0	0	0	0	0	200	903	0	0	0	0	0	0	0	603	903	0
609	0	0	0	0	0	0	0	200	300	0	0	0	0	0	0	0	200	903	0	0	0	0	0	0	0	603	903	0
609	1	0	0	0	0	0	0	200	300	0	0	0	0	0	0	0	200	903	0	0	0	0	0	0	0	603	903	0
609	2	0	0	0	0	0	0	200	300	0	0	0	0	0	0	0	200	903	0	0	0	0	0	0	0	603	903	0
609	3	0	0	0	0	0	0	200	300	0	0	0	0	0	0	0	200	903	0	0	0	0	0	0	0	603	903	0
609	4	0	0	0	0	0	0	200	300	0	0	0	0	0	0	0	200	903	0	0	0	0	0	0	0	603	903	0
609	5	0	0	0	0	0	0	200	300	0	0	0	0	0	0	0	200	903	0	0	0	0	0	0	0	603	903	0
609	6	0	0	0	0	0	0	200	300	0	0	0	0	0	0	0	200	903	0	0	0	0	0	0	0	603	903	0
609	7	0	0	0	0	0	0	200	300	0	0	0	0	0	0	0	200	903	0	0	0	0	0	0	0	603	903	0
609	8	0	0	0	0	0	0	200	300	0	0	0	0	0	0	0	200	903	0	0	0	0	0	0	0	603	903	0
609	9	0	0	0	0	0	0	200	300	0	0	0	0	0	0	0	200	903	0	0	0	0	0	0	0	603	903	0
610	0	0	0	0	0	0	0	200	300	0	0	0	0	0	0	0	200	903	0	0	0	0	0	0	0	603	903	0
610	1	0	0	0	0	0	0	200	300	0	0	0	0	0	0	0	200	903	0	0	0	0	0	0	0	603	903	0
610	2	0	0	0	0	0	0	200	300	0	0	0	0	0	0	0	200	903	0	0	0	0	0	0	0	603	903	0
610	3	0	0	0	0	0	0	200	300	0	0	0	0	0	0	0	200	903	0	0	0	0	0	0	0	603	903	0
610	4	0	0	0	0	0	0	200	300	0	0	0	0	0	0	0	200	903	0	0	0	0	0	0	0	603	903	0
610	5	0	0	0	0	0	0	200	300	0	0	0	0	0	0	0	200	903	0	0	0	0	0	0	0	603	903	0
610	6	0	0	0	0	0	0	200	300	0	0	0	0	0	0	0	200	903	0	0	0	0	0	0	0	603	903	0
610	7	0	0	0	0	0	0	200	300	0	0	0	0	0	0	0	200	903	0	0	0	0	0	0	0	603	903	0
610	8	0	0	0	0	0	0	200	300	0	0	0	0	0	0	0	200	903	0	0	0	0	0	0	0	603	903	0
610	9	0	0	0	0	0	0	200	300	0	0	0	0	0	0	0	200	903	0	0	0	0	0	0	0	603	903	0
611	0	0	0	0	0	0	0	200	300	0	0	0	0	0	0	0	200	903	0	0	0	0	0	0	0	603	903	0
611	1	0	0	0	0	0	0	200	300	0	0	0	0	0	0	0	200	903	0	0	0	0	0	0	0	603	903	0
611	2	0	0	0	0	0	0	200	300	0	0	0	0	0	0	0	200	903	0	0	0	0	0	0	0	603	903	0
611	3	0	0	0	0	0	0	200	300	0	0	0	0	0	0	0	200	903	0	0	0	0	0	0	0	603	903	0
611	4	0	0	0	0	0	0	200	300	0	0	0	0	0	0	0	200	903	0	0	0	0	0	0	0	603	903	0
611	5	0	0	0	0	0	0	200	300	0	0	0	0	0	0	0	200	903	0	0	0	0	0	0	0	603	903	0
611	6	0	0	0	0	0	0	200	300	0	0	0	0	0	0	0	200	903	0	0	0	0	0	0	0	603	903	0
611	7	0	0	0	0	0	0	200	300	0	0	0	0	0	0	0	200	903	0	0	0	0	0	0	0	603	903	0
611	8	0	0	0	0	0	0	200	300	0	0	0	0	0	0	0	200	903	0	0	0	0	0	0	0	603	903	0
611	9	0	0	0	0	0	0	200	300	0	0	0	0	0	0	0	200	903	0	0	0	0	0	0	0	603	903	0
612	0	0	0	0	0	0	0	200	300	0	0	0	0	0	0	0	200	903	0	0	0	0	0	0	0	603	903	0
612	1	0	0	0	0	0	0	200	300	0	0	0	0	0	0	0	200	903	0	0	0	0	0	0	0	603	903	0
612	2	0	0	0	0	0	0	200	300	0	0	0	0	0	0	0	200	903	0	0	0	0	0	0	0	603	903	0
612	3	0	0	0	0	0	0	200	300	0	0	0	0	0	0	0	200	903	0	0	0	0	0	0	0	603	903	0
612	4	0	0	0	0	0	0	200	300	0	0	0	0	0	0	0	200	903	0	0	0	0	0	0	0	603	903	0
612	5	0	0	0	0	0	0	200	300	0	0	0	0	0	0	0	200	903	0	0	0	0	0	0	0	603	903	0
612	6	0	0	0	0	0	0	200	300	0	0	0	0	0	0	0	200	903	0	0	0	0	0	0	0	603	903	0
612	7	0	0	0	0	0	0	200	300	0	0	0	0	0	0	0	200	903	0	0	0	0	0	0	0	603	903	0
612	8	0	0	0	0	0	0	200	300	0	0	0	0	0	0	0	200	903	0	0	0	0	0	0	0	603	903	0
612	9	0	0	0	0	0	0	200	300	0	0	0	0	0	0	0	200	903	0	0	0	0	0	0	0	603	903	0
613	0	0	0	0	0	0	0	200	300	0	0	0	0	0	0	0	200	903	0	0	0	0	0	0	0	603	903	0
613	1	0	0	0	0	0	0	200	300	0	0	0	0	0	0	0	200	903	0	0	0	0	0	0	0	603	903	0
613	2	0	0	0	0	0	0	200	300	0	0	0	0	0	0	0	200	903	0	0	0	0	0	0	0	603	903	0
613	3	0	0	0	0	0	0	200	300	0	0	0	0	0	0	0	200	903	0	0	0	0	0	0	0	603	903	0
613	4	0	0	0	0	0	0	200	300	0	0	0	0	0	0	0	200	903	0	0	0	0	0	0	0	603	903	0
613	5	0	0	0	0	0	0	200	300	0	0	0	0	0	0	0	200	903	0	0	0	0	0	0	0	603	903	0
613	6	0	0	0	0	0	0	200	300	0	0	0	0	0	0	0	200	903	0	0	0	0	0	0	0	603	903	0
613	7	0	0	0	0	0	0	200	300	0	0	0	0	0	0	0	200	903	0	0	0	0	0	0	0	603	903	0
613	8	0	0	0	0	0	0	200	300	0	0	0	0	0	0	0	200	903	0	0	0	0	0	0	0	603	903	0
613	9	0	0	0	0	0	0	200	300	0	0	0	0	0	0	0	200	903	0	0	0	0	0	0	0	603	903	0
614	0	0	0	0	0	0	0	200	300	0	0	0	0	0	0	0	200	903	0	0	0	0	0	0	0	603	903	0
614	1	0	0	0	0	0	0	200	300	0	0	0	0	0	0	0	200	903	0	0	0	0	0	0	0	603	903	0
614	2	0	0	0	0	0	0	200	300	0	0	0	0	0	0	0	200	903	0	0	0	0	0	0	0	603	903	0
614	3	0	0	0	0	0	0	200	300	0	0	0	0	0	0	0	200	903	0	0	0	0	0	0	0	603	903	0
614	4	0	0	0	0	0	0	200	300	0	0	0	0	0	0	0	200	903	0	0	0	0	0	0	0	603	903	0
614	5	0	0	0	0	0	0	200	300	0	0	0	0	0	0	0	200	903	0	0	0	0	0	0	0	603	903	0
614	6	0	0	0	0	0	0	200	300	0	0	0	0	0	0	0	200	903	0	0	0	0	0	0	0	603	903	0
614	7	0	0	0	0	0	0	200	300	0	0	0	0	0	0	0	200	903	0	0	0	0	0	0	0	603	903	0
614	8	0	0	0	0	0	0	200	300	0	0	0	0	0	0	0	200	903	0	0	0	0	0	0	0	603	903	0
614	9	0	0	0	0	0	0	200	300	0	0	0	0	0	0	0	200	903	0	0	0	0	0	0	0	603	903	0
615	0	0	0	0	0	0	0	200	300	0	0	0	0	0	0	0	200	903	0	0	0	0	0	0	0	603	903	0
615	1	0	0	0	0	0	0	200	300	0	0	0	0	0	0	0	200	903	0	0	0	0	0	0	0	603	903	0
615	2	0	0	0	0	0	0	200	300	0	0	0	0	0	0	0	200	903	0	0	0	0	0	0	0	603	903	0
615	3	0	0	0	0	0	0	200	300	0	0	0	0	0	0	0	200	903	0	0	0	0	0	0	0	603	903	0
615	4	0	0	0	0	0	0	200	300	0	0	0	0	0	0	0	200	903	0	0	0	0	0	0	0	603	903	0
615	5	0	0	0	0	0	0	200	300	0	0	0	0	0	0	0	200	903	0	0	0	0	0	0	0	603	903	0
615	6	0	0	0	0	0	0	200	300	0	0	0	0	0	0	0	200	903	0	0	0	0	0	0	0	603	903	0
615	7	0	0	0	0	0	0	200	300	0	0	0	0	0	0	0	200	903	0	0	0	0	0	0	0	603	903	0
615	8	0	0	0	0	0	0	200	300	0	0	0	0	0	0	0	200	903	0	0	0	0	0	0	0	603	903	0
615	9	0	0	0	0	0	0	200	300	0	0	0	0	0	0	0	200	903	0	0	0	0	0	0	0	603	903	0
616	0	0	0	0	0	0	0	200	300	0	0	0	0	0	0	0	200	903	0	0	0	0	0	0	0	603	903	0
616	1	0	0	0	0	0	0	200	300	0	0	0	0	0	0	0	200	903	0	0	0	0	0	0	0	603	903	0
616	2	0	0	0	0	0	0	200	300	0	0	0	0	0	0	0	200	903	0	0	0	0	0	0	0	603	903	0
616	3	0	0	0	0	0	0	200	300	0	0	0	0	0	0	0	200	903	0	0	0	0	0	0	0	603	903	0
616	4	0	0	0	0	0	0	200	300	0	0	0	0	0	0	0	200	903	0	0	0	0	0	0	0	603	903	0
616	5	0	0	0	0	0	0	200	300	0	0	0	0	0	0	0	200	903	0	0	0	0	0	0	0	603	903	0
616	6	0	0	0	0	0	0	200	300	0	0	0	0	0	0	0	200	903	0	0	0	0	0	0	0	603	903	0
616	7	0	0	0	0	0	0	200	300	0	0	0	0	0	0	0	200	903	0	0	0	0	0	0	0	603	903	0
616	8	0	0	0	0	0	0	200	300	0	0	0	0	0	0	0	200	903	0	0	0	0	0	0	0	603	903	0
616	9	0	0	0	0	0	0	200	300	0	0	0	0	0	0	0	200	903	0	0	0	0	0	0	0	603	903	0
617	0	0	0	0	0	0	0	200	300	0	0	0	0	0	0	0	200	903	0	0	0	0	0	0	0	603	903	0
617	1	0	0	0	0	0	0	200	300	0	0	0	0	0	0	0	200	903	0	0	0	0	0	0	0	603	903	0
617	2	0	0	0	0	0	0	200	300	0	0	0	0	0	0	0	200	903	0	0	0	0	0	0	0	603	903	0
617	3	0	0	0	0	0	0	200	300	0	0	0	0	0	0	0	200	903	0	0	0	0	0	0	0	603	903	0
617	4	0	0	0	0	0	0	200	300	0	0	0	0	0	0	0	200	903	0	0	0	0	0	0	0	603	903	0
617	5	0	0	0	0	0	0	200	300	0	0	0	0	0	0	0	200	903	0	0	0	0	0	0	0	603	903	0
617	6	0	0	0	0	0	0	200	300	0	0	0	0	0	0	0	200	903	0	0	0	0	0	0	0	603	903	0
617	7	0	0	0	0	0	0	200	300	0	0	0	0	0	0	0	200	903	0	0	0	0	0	0	0	603	903	0
617	8	0	0	0	0	0	0	200	300	0	0	0	0	0	0	0	200	903	0	0	0	0	0	0	0	603	903	0
617	9	0	0	0	0	0	0	200	300	0	0	0	0	0	0	0	200	903	0	0	0	0	0	0	0	603	903	0
618	0	0	0	0	0	0	0	200	300	0	0	0	0	0	0	0	200	903	0	0	0	0	0	0	0	603	903	0
618	1	0	0	0	0	0	0	200	300	0	0	0	0	0	0	0	200	903	0	0	0	0	0	0	0	603	903	0
618	2	0	0	0	0	0	0	200	300	0	0	0	0	0	0	0	200	903	0	0	0	0	0	0	0	603	903	0
618	3	0	0	0	0	0	0	200	300	0	0	0	0	0	0	0	200	903	0	0	0	0	0	0	0	603	903	0
618	4	0	0	0	0	0	0	200	300	0	0	0	0	0	0	0	200	903	0	0	0	0	0	0	0	603	903	0
618	5	0	0	0	0	0	0	200	300	0	0	0	0	0	0	0	200	903	0	0	0	0	0	0	0	603	903	0
618	6	0	0	0	0	0	0	200	300	0	0	0	0	0	0	0	200	903	0	0	0	0	0	0	0	603	903	0
618	7	0	0	0	0	0	0	200	300	0	0	0	0	0	0	0	200	903	0	0	0	0	0	0	0	603	903	0
618	8	0	0	0	0	0	0	200	300	0	0	0	0	0	0	0	200	903	0	0	0	0	0	0	0	603	903	0
618	9	0	0	0	0	0	0	200	300	0	0	0	0	0	0	0	200	903	0	0	0	0	0	0	0	603	903	0
619	0	0	0	0	0	0	0	200	300	0	0	0	0	0	0	0	200	903	0	0	0	0	0	0	0	603	903	0
619	1	0	0	0	0	0	0	200	300	0	0	0	0	0	0	0	200	903	0	0	0	0	0	0	0	603	903	0
619	2	0	0	0	0	0	0	200	300	0	0	0	0	0	0	0	200	903	0	0	0	0	0	0	0	603	903	0
619	3	0	0	0	0	0	0	200	300	0	0	0	0	0	0	0	200	903	0	0	0	0	0	0	0	603	903	0
619	4	0	0	0	0	0	0	200	300	0	0	0	0	0	0	0	200	903	0	0	0	0	0	0	0	603	903	0
619	5	0	0	0	0	0	0	200	300	0	0	0	0	0	0	0	200	903	0	0	0	0	0	0	0	603	903	0
619	6	0	0	0	0	0	0	200	300	0	0	0	0	0	0	0	200	903	0	0	0	0	0	0	0	603	903	0
619	7	0	0	0	0	0	0	200	300	0	0	0	0	0	0	0	200	903	0	0	0	0	0	0	0	603	903	0
619	8	0	0	0	0	0	0	200	300	0	0	0	0	0	0	0	200	903	0	0	0	0	0	0	0	603	903	0
619	9	0	0	0	0	0	0	200	300	0	0	0	0	0	0	0	200	903	0	0	0	0	0	0	0	603	903	0
620	0	0	0	0	0	0	0	200	300	0	0	0	0	0	0	0	200	903	0	0	0	0	0	0	0	603	903	0
620	1	0	0	0	0	0	0	200	300	0	0	0	0	0	0	0	200	903	0	0	0	0	0	0	0	603	903	0
620	2	0	0	0	0	0	0	200	300	0	0	0	0	0	0	0	200	903	0	0	0	0	0	0	0	603	903	0
620	3	0	0	0	0	0	0	200	300	0	0	0	0	0	0	0	200	903	0	0	0	0	0	0	0	603	903	0
620	4	0	0	0	0	0	0	200	300	0	0	0	0	0	0	0	200	903	0	0	0	0	0	0	0	603	903	0
620	5	0	0	0	0	0	0	200	300	0	0	0	0	0	0	0	200	903	0	0	0	0	0	0	0	603	903	0
620	6	0	0	0	0	0	0	200	300	0	0	0	0	0	0	0	200	903	0	0	0	0	0	0	0	603	903	0
620	7	0	0	0	0	0	0	200	300	0	0	0	0	0	0	0	200	903	0	0	0	0	0	0	0	603	903	0
620	8	0	0	0	0	0	0	200	300	0	0	0	0	0	0	0	200	903	0	0	0	0	0	0	0	603	903	0
620	9	0	0	0	0	0	0	200	300	0	0	0	0	0	0	0	200	903	0	0	0	0	0	0	0	603	903	0
621	0	0	0	0	0	0	0	200	300	0	0	0	0	0	0	0	200	903	0	0	0	0	0	0	0	603	903	0
621	1	0	0	0	0	0	0	200	300	0	0	0	0	0	0	0	200	903	0	0	0	0	0	0	0	603	903	0
621	2	0	0	0	0	0	0	200	300	0	0	0	0	0	0	0	200	903	0	0	0	0	0	0	0	603	903	0
621	3	0	0	0	0	0	0	200	300	0	0	0	0	0	0	0	200	903	0	0	0	0	0	0	0	603	903	0
621	4	0	0	0	0	0	0	200	300	0	0	0	0	0	0	0	200	903	0	0	0	0	0	0	0	603	903	0
621	5	0	0	0	0	0	0	200	300	0	0	0	0	0	0	0	200	903	0	0	0	0	0	0	0	603	903	0
621	6	0	0	0	0	0	0	200	300	0	0	0	0	0	0	0	200	903	0	0	0	0	0	0	0	603	903	0
621	7	0	0	0	0	0	0	200	300	0	0	0	0	0	0	0	200	903	0	0	0	0	0	0	0	603	903	0
621	8	0	0	0	0	0	0	200	300	0	0	0	0	0	0	0	200	903	0	0	0	0	0	0	0	603	903	0
621	9	0	0	0	0	0	0	200	300	0	0	0	0	0	0	0	200	903	0	0	0	0	0	0	0	603	903	0
622	0	0	0	0	0	0	0	200	300	0	0	0	0	0	0	0	200	903	0	0	0	0	0	0	0	603	903	0
622	1	0	0	0	0	0	0	200	300	0	0	0	0	0	0	0	200	903	0	0	0	0	0	0	0	603	903	0
622	2	0	0	0	0	0	0	200	300	0	0	0	0	0	0	0	200	903	0	0	0	0	0	0	0	603	903	0
622	3	0	0	0	0	0	0	200	300	0	0	0	0	0	0	0	200	903	0	0	0	0	0	0	0	603	903	0
622	4	0	0	0	0	0	0	200	300	0	0	0	0	0	0	0	200	903	0	0	0	0	0	0	0	603	903	0
622	5	0	0	0	0	0	0	200	300	0	0	0	0	0	0	0	200	903	0	0	0	0	0	0	0	603	903	0
622	6	0	0	0	0	0	0	200	300	0	0	0	0	0	0	0	200	903	0	0	0	0	0	0	0	603	903	0
622	7	0	0	0	0	0	0	200	300	0	0	0	0	0	0	0	200	903	0	0	0	0	0	0	0	603	903	0
622	8	0	0	0	0	0	0	200	300	0	0	0	0	0	0	0	200	903	0	0	0	0	0	0	0	603	903	0
622	9	0	0	0	0	0	0	200	300	0	0	0	0	0	0	0	200	903	0	0	0	0	0	0	0	603	903	0
623	0	0	0	0	0	0	0	200	300	0	0	0	0	0	0	0	200	903	0	0	0	0	0	0	0	603	903	0
623	1	0	0	0	0	0	0	200	300	0	0	0	0	0	0	0	200	903	0	0	0	0	0	0	0	603	903	0
623	2	0	0	0	0	0	0	200	300	0	0	0	0	0	0	0	200	903	0	0	0	0	0	0	0	603	903	0
623	3	0	0	0	0	0	0	200	300	0	0	0	0	0	0	0	200	903	0	0	0	0	0	0	0	603	903	0
623	4	0	0	0	0	0	0	200	300	0	0	0	0	0	0	0	200	903	0	0	0	0	0	0	0	603	903	0
623	5	0	0	0	0	0	0	200	300	0	0	0	0	0	0	0	200	903	0	0	0	0	0	0	0	603	903	0
623	6	0	0	0	0	0	0	200	300	0	0	0	0	0	0	0	200	903	0	0	0	0	0	0	0	603	903	0
623	7	0	0	0	0	0	0	200	300	0	0	0	0	0	0	0	200	903	0	0	0	0	0	0	0	603	903	0
623	8	0	0	0	0	0	0	200	300	0	0	0	0	0	0	0	200	903	0	0	0	0	0	0	0	603	903	0
623	9	0	0	0	0	0	0	200	300	0	0	0	0	0	0	0	200	903	0	0	0	0	0	0	0	603	903	0
624	0	0	0	0	0	0	0	200	300	0	0	0	0	0	0	0	200	903	0	0	0	0	0	0	0	603	903	0
624	1	0	0	0	0	0	0	200	300	0	0	0	0	0	0	0	200	903	0	0	0	0	0	0	0	603	903	0
624	2	0	0	0	0	0	0	200	300	0	0	0	0	0	0	0	200	903	0	0	0	0	0	0	0	603	903	0
624	3	0	0	0	0	0	0	200	300	0	0	0	0	0	0	0	200	903	0	0	0	0	0	0	0	603	903	0
624	4	0	0	0	0	0	0	200	300	0	0	0	0	0	0	0	200	903	0	0	0	0	0	0	0	603	903	0
624	5	0	0	0	0	0	0	200	300	0	0	0	0	0	0	0	200	903	0	0	0	0	0	0	0	603	903	0
624	6	0	0	0	0	0	0	200	300	0	0	0	0	0	0	0	200	903	0	0	0	0	0	0	0	603	903	0
624	7	0	0	0	0	0	0	200	300	0	0	0	0	0	0	0	200	903	0	0	0	0	0	0	0	603	903	0
624	8	0	0	0	0	0	0	200	300	0	0	0	0	0	0	0	200	903	0	0	0	0	0	0	0	603	903	0
624	9	0	0	0	0	0	0	200	300	0	0	0	0	0	0	0	200	903	0	0	0	0	0	0	0	603	903	0
625	0	0	0	0	0	0	0	200	300	0	0	0	0	0	0	0	200	903	0	0	0	0	0	0	0	603	903	0
625	1	0	0	0	0	0	0	200	300	0	0	0	0	0	0	0	200	903	0	0	0	0	0	0	0	603	903	0
625	2	0	0	0	0	0	0	200	300	0	0	0	0	0	0	0	200	903	0	0	0	0	0	0	0	603	903	0
625	3	0	0	0	0	0	0	200	300	0	0	0	0	0	0	0	200	903	0	0	0	0	0	0	0	603	903	0
625	4	0	0	0	0	0	0	200	300	0	0	0	0	0	0	0	200	903	0	0	0	0	0	0	0	603	903	0
625	5	0	0	0	0	0	0	200	300	0	0	0	0	0	0	0	200	903	0	0	0	0	0	0	0	603	903	0
625	6	0	0	0	0	0	0	200	300	0	0	0	0	0	0	0	200	903	0	0	0	0	0	0	0	603	903	0
625	7	0	0	0	0	0	0	200	300	0	0	0	0	0	0	0	200	903	0	0	0	0	0	0	0	603	903	0
625	8	0	0	0	0	0	0	200	300	0	0	0	0	0	0	0	200	903	0	0	0	0	0	0	0	603	903	0
625	9	0	0	0	0	0	0	200	300	0	0	0	0	0	0	0	200	903	0	0	0	0	0	0	0	603	903	0
626	0	0	0	0	0	0	0	200	300	0	0	0	0	0	0	0	200	903	0	0	0	0	0	0	0	603	903	0
626	1	0	0	0	0	0	0	200	300	0	0	0	0	0	0	0	200	903	0	0	0	0	0	0	0	603	903	0
626	2	0	0	0	0	0	0	200	300	0	0	0	0	0	0	0	200	903	0	0	0	0	0	0	0	603	903	0
626	3	0	0	0	0	0	0	200	300	0	0	0	0	0	0	0	200	903	0	0	0	0	0	0	0	603	903	0
626	4	0	0	0	0	0	0	200	300	0	0	0	0	0	0	0	200	903	0	0	0	0	0	0	0	603	903	0
626	5	0	0	0	0	0	0	200	300	0	0	0	0	0	0	0	200	903	0	0	0	0	0	0	0	603	903	0
626	6	0	0	0	0	0	0	200	300	0	0	0	0	0	0	0	200	903	0	0	0	0	0	0	0	603	903	0
626	7	0	0	0	0	0	0	200	300	0	0	0	0	0	0	0	200	903	0	0	0	0	0	0	0	603	903	0
626	8	0	0	0	0	0	0	200	300	0	0	0	0	0	0	0	200	903	0	0	0	0	0	0	0	603	903	0
626	9	0	0	0	0	0	0	200	300	0	0	0	0	0	0	0	200	903	0	0	0	0	0	0	0	603	903	0
627	0	0	0	0	0	0	0	200	300	0	0	0	0	0	0	0	200	903	0	0	0	0	0	0	0	603	903	0
627	1	0	0	0	0	0	0	200	300	0	0	0	0	0	0	0	200	903	0	0	0	0	0	0	0	603	903	0
627	2	0	0	0	0	0	0	200	300	0	0	0	0	0	0	0	200	903	0	0	0	0	0	0	0	603	903	0
627	3	0	0	0	0	0	0	200	300	0	0	0	0	0	0	0	200	903	0	0	0	0	0	0	0	603	903	0
627	4	0	0	0	0	0	0	200	300	0	0	0	0	0	0	0	200	903	0	0	0	0	0	0	0	603	903	0
627	5	0	0	0	0	0	0	200	300	0	0	0	0	0	0	0	200	903	0	0	0	0	0	0	0	603	903	0
627	6	0	0	0	0	0	0	200	300	0	0	0	0	0	0	0	200	903	0	0	0	0	0	0	0	603	903	0
627	7	0	0	0	0	0	0	200	300	0	0	0	0	0	0	0	200	903	0	0	0	0	0	0	0	603	903	0
627	8	0	0	0	0	0	0	200	300	0	0	0	0	0	0	0	200	903	0	0	0	0	0	0	0	603	903	0
627	9	0	0	0	0	0	0	200	300	0	0	0	0	0	0	0	200	903	0	0	0	0	0	0	0	603	903	0
628	0	0	0	0	0	0	0	200	300	0	0	0	0	0	0	0	200	903	0	0	0	0	0	0	0	603	903	0
628	1	0	0	0	0	0	0	200	300	0	0	0	0	0	0	0	200	903	0	0	0	0	0	0	0	603	903	0
628	2	0	0	0	0	0	0	200	300	0	0	0	0	0	0	0	200	903	0	0	0	0	0	0	0	603	903	0
628	3	0	0	0	0	0	0	200	300	0	0	0	0	0	0	0	200	903	0	0	0	0	0	0	0	603	903	0
628	4	0	0	0	0	0	0	200	300	0	0	0	0	0	0	0	200	903	0	0	0	0	0	0	0	603	903	0
628	5	0	0	0	0	0	0	200	300	0	0	0	0	0	0	0	200	903	0	0	0	0	0	0	0	603	903	0
628	6	0	0	0	0	0	0	200	300	0	0	0	0	0	0	0	200	903	0	0	0	0	0	0	0	603	903	0
628	7	0	0	0	0	0	0	200	300	0	0	0	0	0	0	0	200	903	0	0	0	0	0	0	0	603	903	0
628	8	0	0	0	0	0	0	200	300	0	0	0	0	0	0	0	200	903	0	0	0	0	0	0	0	603	903	0
628	9	0	0	0	0	0	0	200	300	0	0	0	0	0	0	0	200	903	0	0	0	0	0	0	0	603	903	0
629	0	0	0	0	0	0	0	200	300	0	0	0	0	0	0	0	200	903	0	0	0	0	0	0	0	603	903	0
629	1	0	0	0	0	0	0	200	300	0	0	0	0	0	0	0	200	903	0	0	0	0	0	0	0	603	903	0
629	2	0	0	0	0	0	0	200	300	0	0	0	0	0	0	0	200	903	0	0	0	0	0	0	0	603	903	0
629	3	0	0	0	0	0	0	200	300	0	0	0	0	0	0	0	200	903	0	0	0	0	0	0	0	603	903	0
629	4	0	0	0	0	0	0	200	300	0	0	0	0	0	0	0	200	903	0	0	0	0	0	0	0	603	903	0
629	5	0	0	0	0	0	0	200	300	0	0	0	0	0	0	0	200	903	0	0	0	0	0	0	0	603	903	0
629	6	0	0	0	0	0	0	200	300	0	0	0	0	0	0	0	200	903	0	0	0	0	0	0	0	603	903	0
629	7	0	0	0	0	0	0	200	300	0	0	0	0	0	0	0	200	903	0	0	0	0	0	0	0	603	903	0
629	8	0	0	0	0	0	0	200	300	0	0	0	0	0	0	0	200	903	0	0	0	0	0	0	0	603	903	0
629	9	0	0	0	0	0	0	200	300	0	0	0	0	0	0	0	200	903	0	0	0	0	0	0	0	603	903	0
630	0	0	0	0	0	0	0	200	300	0	0	0	0	0	0	0	200	903	0	0	0	0	0	0	0	603	903	0
630	1	0	0	0	0	0	0	200	300	0	0	0	0	0	0	0	200	903	0	0	0	0	0	0	0	603	903	0
630	2	0	0	0	0	0	0	200	300	0	0	0	0	0	0	0	200	903	0	0	0	0	0	0	0	603	903	0
630	3	0	0	0	0	0	0	200	300	0	0	0	0	0	0	0	200	903	0	0	0	0	0	0	0	603	903	0
630	4	0	0	0	0	0	0	200	300	0	0	0	0	0	0	0	200	903	0	0	0	0	0	0	0	603	903	0
630	5	0	0	0	0	0	0	200	300	0	0	0	0	0	0	0	200	903	0	0	0	0	0	0	0	603	903	0
630	6	0	0	0	0	0	0	200	300	0	0	0	0	0	0	0	200	903	0	0	0	0	0	0	0	603	903	0
630	7	0	0	0	0	0	0	200	300	0	0	0	0	0	0	0	200	903	0	0	0	0	0	0	0	603	903	0
630	8	0	0	0	0	0	0	200	300	0	0	0	0	0	0	0	200	903	0	0	0	0	0	0	0	603	903	0
630	9	0	0	0	0	0	0	200	300	0	0	0	0	0	0	0	200	903	0	0	0	0	0	0	0	603	903	0
631	0	0	0	0	0	0	0	200	300	0	0	0	0	0	0	0	200	903	0	0	0	0	0	0	0	603	903	0
631	1	0	0	0	0	0	0	200	300	0	0	0	0	0	0	0	200	903	0	0	0	0	0	0	0	603	903	0
631	2	0	0	0	0	0	0	200	300	0	0	0	0	0	0	0	200	903	0	0	0	0	0	0	0	603	903	0
631	3	0	0	0	0	0	0	200	300	0	0	0	0	0	0	0	200	903	0	0	0	0	0	0	0	603	903	0
631	4	0	0	0	0	0	0	200	300	0	0	0	0	0	0	0	200	903	0	0	0	0	0	0	0	603	903	0
631	5	0	0	0	0	0	0	200	300	0	0	0	0	0	0	0	200	903	0	0	0	0	0	0	0	603	903	0
631	6	0	0	0	0	0	0	200	300	0	0	0	0	0	0	0	200	903	0	0	0	0	0	0	0	603	903	0
631	7	0	0	0	0	0	0	200	300	0	0	0	0	0	0	0	200	903	0	0	0	0	0	0	0	603	903	0
631	8	0	0	0	0	0	0	200	300	0	0	0	0	0	0	0	200	903	0	0	0	0	0	0	0	603	903	0
631	9	0	0	0	0	0	0	200	300	0	0	0	0	0	0	0	200	903	0	0	0	0	0	0	0	603	903	0
632	0	0	0	0	0	0	0	200	300	0	0	0	0	0	0	0	200	903	0	0	0	0	0	0	0	603	903	0
632	1	0	0	0	0	0	0	200	300	0	0	0	0	0	0	0	200	903	0	0	0	0	0	0	0	603	903	0
632	2	0	0	0	0	0	0	200	300	0	0	0	0	0	0	0	200	903	0	0	0	0	0	0	0	603	903	0
632	3	0	0	0	0	0	0	200	300	0	0	0	0	0	0	0	200	903	0	0	0	0	0	0	0	603	903	0
632	4	0	0	0	0	0	0	200	300	0	0	0	0	0	0	0	200	903	0	0	0	0	0	0	0	603	903	0
632	5	0	0	0	0	0	0	200	300	0	0	0	0	0	0	0	200	903	0	0	0	0	0	0	0	603	903	0
632	6	0	0	0	0	0	0	200	300	0	0	0	0	0	0	0	200	903	0	0	0	0	0	0	0	603	903	0
632	7	0	0	0	0	0	0	200	300	0	0	0	0	0	0	0	200	903	0	0	0	0	0	0	0	603	903	0
632	8	0	0	0	0	0	0	200	300	0	0	0	0	0	0	0	200	903	0	0	0	0	0	0	0	603	903	0
632	9	0	0	0	0	0	0	200	300	0	0	0	0	0	0	0	200	903	0	0	0	0	0	0	0	603	903	0
633	0	0	0	0	0	0	0	200	300	0	0	0	0	0	0	0	200	903	0	0	0	0	0	0	0	603	903	0
633	1	0	0	0	0	0	0	200	300	0	0	0	0	0	0	0	200	903	0	0	0	0	0	0	0	603	903	0
633	2	0	0	0	0	0	0	200	300	0	0	0	0	0	0	0	200	903	0	0	0	0	0	0	0	603	903	0
633	3	0	0	0	0	0	0	200	300	0	0	0	0	0	0	0	200	903	0	0	0	0	0	0	0	603	903	0
633	4	0	0	0	0	0	0	200	300	0	0	0	0	0	0	0	200	903	0	0	0	0	0	0	0	603	903	0
633	5	0	0	0	0	0	0	200	300	0	0	0	0	0	0	0	200	903	0	0	0	0	0	0	0	603	903	0
633	6	0	0	0	0	0	0	200	300	0	0	0	0	0	0	0	200	903	0	0	0	0	0	0	0	603	903	0
633	7	0	0	0	0	0	0	200	300	0	0	0	0	0	0	0	200	903	0	0	0	0	0	0	0	603	903	0
633	8	0	0	0	0	0	0	200	300	0	0	0	0	0	0	0	200	903	0	0	0	0	0	0	0	603	903	0
633	9	0	0	0	0	0	0	200	300	0	0	0	0	0	0	0	200	903	0	0	0	0	0	0	0	603	903	0
634	0	0	0	0	0	0	0	200	300	0	0	0	0	0	0	0	200	903	0	0	0	0	0	0	0	603	903	0
634	1	0	0	0	0	0	0	200	300	0	0	0	0	0	0	0	200	903	0	0	0	0	0	0	0	603	903	0
634	2	0	0	0	0	0	0	200	300	0	0	0	0	0	0	0	200	903	0	0	0	0	0	0	0	603	903	0
634	3	0	0	0	0	0	0	200	300	0	0	0	0	0	0	0	200	903	0	0	0	0	0	0	0	603	903	0
634	4	0	0	0	0	0	0	200	300	0	0	0	0	0	0	0	200	903	0	0	0	0	0	0	0	603	903	0
634	5	0	0	0	0	0	0	200	300	0	0	0	0	0	0	0	200	903	0	0	0	0	0	0	0	603	903	0
634	6	0	0	0	0	0	0	200	300	0	0	0	0	0	0	0	200	903	0	0	0	0	0	0	0	603	903	0
634	7	0	0	0	0	0	0	200	300	0	0	0	0	0	0	0	200	903	0	0	0	0	0	0	0	603	903	0
634	8	0	0	0	0	0	0	200	300	0	0	0	0	0	0	0	200	903	0	0	0	0	0	0	0	603	903	0
634	9	0	0	0	0	0	0	200	300	0	0	0	0	0	0	0	200	903	0	0	0	0	0	0	0	603	903	0
635	0	0	0	0	0	0	0	200	300	0	0	0	0	0	0	0	200	903	0	0	0	0	0	0	0	603	903	0
635	1	0	0	0	0	0	0	200	300	0	0	0	0	0	0	0	200	903	0	0	0	0	0	0	0	603	903	0
635	2	0	0	0	0	0	0	200	300	0	0	0	0	0	0	0	200	903	0	0	0	0	0	0	0	603	903	0
635	3	0	0	0	0	0	0	200	300	0	0	0	0	0	0	0	200	903	0	0	0	0	0	0	0	603	903	0
635	4	0	0	0	0	0	0	200	300	0	0	0	0	0	0	0	200	903	0	0	0	0	0	0	0	603	903	0
635	5	0	0	0	0	0	0	200	300	0	0	0	0	0	0	0	200	903	0	0	0	0	0	0	0	603	903	0
635	6	0	0	0	0	0	0	200	300	0	0	0	0	0	0	0	200	903	0	0	0	0	0	0	0	603	903	0
635	7	0	0	0	0	0	0	200	300	0	0	0	0	0	0	0	200	903	0	0	0	0	0	0	0	603	903	0
635	8	0	0	0	0	0	0	200	300	0	0	0	0	0	0	0	200	903	0	0	0	0	0	0	0	603	903	0
635	9	0	0	0	0	0	0	200	300	0	0	0	0	0	0	0	200	903	0	0	0	0	0	0	0	603	903	0
636	0	0	0	0	0	0	0	200	300	0	0	0	0	0	0	0	200	903	0	0	0	0	0	0	0	603	903	0
636	1	0	0	0	0	0	0	200	300	0	0	0	0	0	0	0	200	903	0	0	0	0	0	0	0	603	903	0
636	2	0	0	0	0	0	0	200	300	0	0	0	0	0	0	0	200	903	0	0	0	0	0	0	0	603	903	0
636	3	0	0	0	0	0	0	200	300	0	0	0	0	0	0	0	200	903	0	0	0	0	0	0	0	603	903	0
636	4	0	0	0	0	0	0	200	300	0	0	0	0	0	0	0	200	903	0	0	0	0	0	0	0	603	903	0
636	5	0	0	0	0	0	0	200	300	0	0	0	0	0	0	0	200	903	0	0	0	0	0	0	0	603	903	0
636	6	0	0	0	0	0	0	200	300	0	0	0	0	0	0	0	200	903	0	0	0	0	0	0	0	603	903	0
636	7	0	0	0	0	0	0	200	300	0	0	0	0	0	0	0	200	903	0	0	0	0	0	0	0	603	903	0
636	8	0	0	0	0	0	0	200	300	0	0	0	0	0	0	0	200	903	0	0	0	0	0	0	0	603	903	0
636	9	0	0	0	0	0	0	200	300	0	0	0	0	0	0	0	200	903	0	0	0	0	0	0	0	603	903	0
637	0	0	0	0	0	0	0	200	300	0	0	0	0	0	0	0	200	903	0	0	0	0	0	0	0	603	903	0
637	1	0	0	0	0	0	0	200	300	0	0	0	0	0	0	0	200	903	0	0	0	0	0	0	0	603	903	0
637	2	0	0	0	0	0	0	200	300	0	0	0	0	0	0	0	200	903	0	0	0	0	0	0	0	603	903	0
637	3	0	0	0	0	0	0	200	300	0	0	0	0	0	0	0	200	903	0	0	0	0	0	0	0	603	903	0
637	4	0	0	0	0	0	0	200	300	0	0	0	0	0	0	0	200	903	0	0	0	0	0	0	0	603	903	0
637	5	0	0	0	0	0	0	200	300	0	0	0	0	0	0	0	200	903	0	0	0	0	0	0	0	603	903	0
637	6	0	0	0	0	0	0	200	300	0	0	0	0	0	0	0	200	903	0	0	0	0	0	0	0	603	903	0
637	7	0	0	0	0	0	0	200	300	0	0	0	0	0	0	0	200	903	0	0	0	0	0	0	0	603	903	0
637	8	0	0	0	0	0	0	200	300	0	0	0	0	0	0	0	200	903	0	0	0	0	0	0	0	603	903	0
637	9	0	0	0	0	0	0	200	300	0	0	0	0	0	0	0	200	903	0	0	0	0	0	0	0	603	903	0
638	0	0	0	0	0	0	0	200	300	0	0	0	0	0	0	0	200	903	0	0	0	0	0	0	0	603	903	0
638	1	0	0	0	0	0	0	200	300	0	0	0	0	0	0	0	200	903	0	0	0	0	0	0	0	603	903	0
638	2	0	0	0	0	0	0	200	300	0	0	0	0	0	0	0	200	903	0	0	0	0	0	0	0	603	903	0
638	3	0	0	0	0	0	0	200	300	0	0	0	0	0	0	0	200	903	0	0	0	0	0	0	0	603	903	0
638	4	0	0	0	0	0	0	200	300	0	0	0	0	0	0	0	200	903	0	0	0	0	0	0	0	603	903	0
638	5	0	0	0	0	0	0	200	300	0	0	0	0	0	0	0	200	903	0	0	0	0	0	0	0	603	903	0
638	6	0	0	0	0	0	0	200	300	0	0	0	0	0	0	0	200	903	0	0	0	0	0	0	0	603	903	0
638	7	0	0	0	0	0	0	200	300	0	0	0	0	0	0	0	200	903	0	0	0	0	0	0	0	603	903	0
638	8	0	0	0	0	0	0	200	300	0	0	0	0	0	0	0	200	903	0	0	0	0	0	0	0	603	903	0
638	9	0	0	0	0	0	0	200	300	0	0	0	0	0	0	0	200	903	0	0	0	0	0	0	0	603	903	0
639	0	0	0	0	0	0	0	200	300	0	0	0	0	0	0	0	200	903	0	0	0	0	0	0	0	603	903	0
639	1	0	0	0	0	0	0	200	300	0	0	0	0	0	0	0	200	903	0	0	0	0	0	0	0	603	903	0
639	2	0	0	0	0	0	0	200	300	0	0	0	0	0	0	0	200	903	0	0	0	0	0	0	0	603	903	0
639	3	0	0	0	0	0	0	200	300	0	0	0	0	0	0	0	200	903	0	0	0	0	0	0	0	603	903	0
639	4	0	0	0	0	0	0	200	300	0	0	0	0	0	0	0	200	903	0	0	0	0	0	0	0	603	903	0
639	5	0	0	0	0	0	0	200	300	0	0	0	0	0	0	0	200	903	0	0	0	0	0	0	0	603	903	0
639	6	0	0	0	0	0	0	200	300	0	0	0	0	0	0	0	200	903	0	0	0	0	0	0	0	603	903	0
639	7	0	0	0	0	0	0	200	300	0	0	0	0	0	0	0	200	903	0	0	0	0	0	0	0	603	903	0
639	8	0	0	0	0	0	0	200	300	0	0	0	0	0	0	0	200	903	0	0	0	0	0	0	0	603	903	0
639	9	0	0	0	0	0	0	200	300	0	0	0	0	0	0	0	200	903	0	0	0	0	0	0	0	603	903	0
640	0	0	0	0	0	0	0	200	300	0	0	0	0	0	0	0	200	903	0	0	0	0	0	0	0	603	903	0
640	1	0	0	0	0	0	0	200	300	0	0	0	0	0	0	0	200	903	0	0	0	0	0	0	0	603	903	0
640	2	0	0	0	0	0	0	200	300	0	0	0	0	0	0	0	200	903	0	0	0	0	0	0	0	603	903	0
640	3	0	0	0	0	0	0	200	300	0	0	0	0	0	0	0	200	903	0	0	0	0	0	0	0	603	903	0
640	4	0	0	0	0	0	0	200	300	0	0	0	0	0	0	0	200	903	0	0	0	0	0	0	0	603	903	0
640	5	0	0	0	0	0	0	200	300	0	0	0	0	0	0	0	200	903	0	0	0	0	0	0	0	603	903	0
640	6	0	0	0	0	0	0	200	300	0	0	0	0	0	0	0	200	903	0	0	0	0	0	0	0	603	903	0
640	7	0	0	0	0	0	0	200	300	0	0	0	0	0	0	0	200	903	0	0	0	0	0	0	0	603	903	0
640	8	0	0	0	0	0	0	200	300	0	0	0	0	0	0	0	200	903	0	0	0	0	0	0	0	603	903	0
640	9	0	0	0	0	0	0	200	300	0	0	0	0	0	0	0	200	903	0	0	0	0	0	0	0	603	903	0
641	0	0	0	0	0	0	0	200	300	0	0	0	0	0	0	0	200	903	0	0	0	0	0	0	0	603	903	0
641	1	0	0	0	0	0	0	200	300	0	0	0	0	0	0	0	200	903	0	0	0	0	0	0	0	603	903	0
641	2	0	0	0	0	0	0	200	300	0	0	0	0	0	0	0	200	903	0	0	0	0	0	0	0	603	903	0
641	3	0	0	0	0	0	0	200	300	0	0	0	0	0	0	0	200	903	0	0	0	0	0	0	0	603	903	0
641	4	0	0	0	0	0	0	200	300	0	0	0	0	0	0	0	200	903	0	0	0	0	0	0	0	603	903	0
641	5	0	0	0	0	0	0	200	300	0	0	0	0	0	0	0	200	903	0	0	0	0	0	0	0	603	903	0
641	6	0	0	0	0	0	0	200	300	0	0	0	0	0	0	0	200	903	0	0	0	0	0	0	0	603	903	0
641	7	0	0	0	0	0	0	200	300	0	0	0	0	0	0	0	200	903	0	0	0	0	0	0	0	603	903	0
641	8	0	0	0	0	0	0	200	300	0	0	0	0	0	0	0	200	903	0	0	0	0	0	0	0	603	903	0
641	9	0	0	0	0	0	0	200	300	0	0	0	0	0	0	0	200	903	0	0	0	0	0	0	0	603	903	0
642	0	0	0	0	0	0	0	200	300	0	0	0	0	0	0	0	200	903	0	0	0	0	0	0	0	603	903	0
642	1	0	0	0	0	0	0	200	300	0	0	0	0	0	0	0	200	903	0	0	0	0	0	0	0	603	903	0
642	2	0	0	0	0	0	0	200	300	0	0	0	0	0	0	0	200	903	0	0	0	0	0	0	0	603	903	0
642	3	0	0	0	0	0	0	200	300	0	0	0	0	0	0	0	200	903	0	0	0	0	0	0	0	603	903	0
642	4	0	0	0	0	0	0	200	300	0	0	0	0	0	0	0	200	903	0	0	0	0	0	0	0	603	903	0
642	5	0	0	0	0	0	0	200	300	0	0	0	0	0	0	0	200	903	0	0	0	0	0	0	0	603	903	0
642	6	0	0	0	0	0	0	200	300	0	0	0	0	0	0	0	200	903	0	0	0	0	0	0	0	603	903	0
642	7	0	0	0	0	0	0	200	300	0	0	0	0	0	0	0	200	903	0	0	0	0	0	0	0	603	903	0
642	8	0	0	0	0	0	0	200	300	0	0	0	0	0	0	0	200	903	0	0	0	0	0	0	0	603	903	0
642	9	0	0	0	0	0	0	200	300	0	0	0	0	0	0	0	200	903	0	0	0	0	0	0	0	603	903	0
643	0	0	0	0	0	0	0	200	300	0	0	0	0	0	0	0	200	903	0	0	0	0	0	0	0	603	903	0
643	1	0	0	0	0	0	0	200	300	0	0	0	0	0	0	0	200	903	0	0	0	0	0	0	0	603	903	0
643	2	0	0	0	0	0	0	200	300	0	0	0	0	0	0	0	200	903	0	0	0	0	0	0	0	603	903	0
643	3	0	0	0	0	0	0	200	300	0	0	0	0	0	0	0	200	903	0	0	0	0	0	0	0	603	903	0
643	4	0	0	0	0	0	0	200	300	0	0	0	0	0	0	0	200	903	0	0	0	0	0	0	0	603	903	0
643	5	0	0	0	0	0	0	200	300	0	0	0	0	0	0	0	200	903	0	0	0	0	0	0	0	603	903	0
643	6	0	0	0	0	0	0	200	300	0	0	0	0	0	0	0	200	903	0	0	0	0	0	0	0	603	903	0
643	7	0	0	0	0	0	0	200	300	0	0	0	0	0	0	0	200	903	0	0	0	0	0	0	0	603	903	0
643	8	0	0	0	0	0	0	200	300	0	0	0	0	0	0	0	200	903	0	0	0	0	0	0	0	603	903	0
643	9	0	0	0	0	0	0	200	300	0	0	0	0	0	0	0	200	903	0	0	0	0	0	0	0	603	903	0
644	0	0	0	0	0	0	0	200	300	0	0	0	0	0	0	0	200	903	0	0	0	0	0	0	0	603	903	0
644	1	0	0	0	0	0	0	200	300	0	0	0	0	0	0	0	200	903	0	0	0	0	0	0	0	603	903	0
644	2	0	0	0	0	0	0	200	300	0	0	0	0	0	0	0	200	903	0	0	0	0	0	0	0	603	903	0
644	3	0	0	0	0	0	0	200	300	0	0	0	0	0	0	0	200	903	0	0	0	0	0	0	0	603	903	0
644	4	0	0	0	0	0	0	200	300	0	0	0	0	0	0	0	200	903	0	0	0	0	0	0	0	603	903	0
644	5	0	0	0	0	0	0	200	300	0	0	0	0	0	0	0	200	903	0	0	0	0	0	0	0	603	903	0
644	6	0	0	0	0	0	0	200	300	0	0	0	0	0	0	0	200	903	0	0	0	0	0	0	0	603	903	0
644	7	0	0	0	0	0	0	200	300	0	0	0	0	0	0	0	200	903	0	0	0	0	0	0	0	603	903	0
644	8	0	0	0	0	0	0	200	300	0	0	0	0	0	0	0	200	903	0	0	0	0	0	0	0	603	903	0
644	9	0	0	0	0	0	0	200	300	0	0	0	0	0	0	0	200	903	0	0	0	0	0	0	0	603	903	0
645	0	0	0	0	0	0	0	200	300	0	0	0	0	0	0	0	200	903	0	0	0	0	0	0	0	603	903	0
645	1	0	0	0	0	0	0	200	300	0	0	0	0	0	0	0	200	903	0	0	0	0	0	0	0	603	903	0
645	2	0	0	0	0	0	0	200	300	0	0	0	0	0	0	0	200	903	0	0	0	0	0	0	0	603	903	0
645	3	0	0	0	0	0	0	200	300	0	0	0	0	0	0	0	200	903	0	0	0	0	0	0	0	603	903	0
645	4	0	0	0	0	0	0	200	300	0	0	0	0	0	0	0	200	903	0	0	0	0	0	0	0	603	903	0
645	5	0	0	0	0	0	0	200	300	0	0	0	0	0	0	0	200	903	0	0	0	0	0	0	0	603	903	0
645	6	0	0	0	0	0	0	200	300	0	0	0	0	0	0	0	200	903	0	0	0	0	0	0	0	603	903	0
645	7	0	0	0	0	0	0	200	300	0	0	0	0	0	0	0	200	903	0	0	0	0	0	0	0	603	903	0
645	8	0	0	0	0	0	0	200	300	0	0	0	0	0	0	0	200	903	0	0	0	0	0	0	0	603	903	0
645	9	0	0	0	0	0	0	200	300	0	0	0	0	0	0	0	200	903	0	0	0	0	0	0	0	603	903	0
646	0	0	0	0	0	0	0	200	300	0	0	0	0	0	0	0	200	903	0	0	0	0	0	0	0	603	903	0
646	1	0	0	0	0	0	0	200	300	0	0	0	0	0	0	0	200	903	0	0	0	0	0	0	0	603	903	0
646	2	0	0	0	0	0	0	200	300	0	0	0	0	0	0	0	200	903	0	0	0	0	0	0	0	603	903	0
646	3	0	0	0	0	0	0	200	300	0	0	0	0	0	0	0	200	903	0	0	0	0	0	0	0	603	903	0
646	4	0	0	0	0	0	0	200	300	0	0	0	0	0	0	0	200	903	0	0	0	0	0	0	0	603	903	0
646	5	0	0	0	0	0	0	200	300	0	0	0	0	0	0	0	200	903	0	0	0	0	0	0	0	603	903	0
646	6	0	0	0	0	0	0	200	300	0	0	0	0	0	0	0	200	903	0	0	0	0	0	0	0	603	903	0
646	7	0	0	0	0	0	0	200	300	0	0	0	0	0	0	0	200	903	0	0	0	0	0	0	0	603	903	0
646	8	0	0	0	0	0	0	200	300	0	0	0	0	0	0	0	200	903	0	0	0	0	0	0	0	603	903	0
646	9	0	0	0	0	0	0	200	300	0	0	0	0	0	0	0	200	903	0	0	0	0	0	0	0	603	903	0
647	0	0	0	0	0	0	0	200	300	0	0	0	0	0	0	0	200	903	0	0	0	0	0	0	0	603	903	0
647	1	0	0	0	0	0	0	200	300	0	0	0	0	0	0	0	200	903	0	0	0	0	0	0	0	603	903	0
647	2	0	0	0	0	0	0	200	300	0	0	0	0	0	0	0	200	903	0	0	0	0	0	0	0	603	903	0
647	3	0	0	0	0	0	0	200	300	0	0	0	0	0	0	0	200	903	0	0	0	0	0	0	0	603	903	0
647	4	0	0	0	0	0	0	200	300	0	0	0	0	0	0	0	200	903	0	0	0	0	0	0	0	603	903	0
647	5	0	0	0	0	0	0	200	300	0	0	0	0	0	0	0	200	903	0	0	0	0	0	0	0	603	903	0
647	6	0	0	0	0	0	0	200	300	0	0	0	0	0	0	0	200	903	0	0	0	0	0	0	0	603	903	0
647	7	0	0	0	0	0	0	200	300	0	0	0	0	0	0	0	200	903	0	0	0	0	0	0	0	603	903	0
647	8	0	0	0	0	0	0	200	300	0	0	0	0	0	0	0	200	903	0	0	0	0	0	0	0	603	903	0
647	9	0	0	0	0	0	0	200	300	0	0	0	0	0	0	0	200	903	0	0	0	0	0	0	0	603	903	0
648	0	0	0	0	0	0	0	200	300	0	0	0	0	0	0	0	200	903	0	0	0	0	0	0	0	603	903	0
648	1	0	0	0	0	0	0	200	300	0	0	0	0	0	0	0	200	903	0	0	0	0	0	0	0	603	903	0
648	2	0	0	0	0	0	0	200	300	0	0	0	0	0	0	0	200	903	0	0	0	0	0	0	0	603	903	0
648	3	0	0	0	0	0	0	200	300	0	0	0	0	0	0	0	200	903	0	0	0	0	0	0	0	603	903	0
648	4	0	0	0	0	0	0	200	300	0	0	0	0	0	0	0	200	903	0	0	0	0	0	0	0	603	903	0
648	5	0	0	0	0	0	0	200	300	0	0	0	0	0	0	0	200	903	0	0	0	0	0	0	0	603	903	0
648	6	0	0	0	0	0	0	200	300	0	0	0	0	0	0	0	200	903	0	0	0	0	0	0	0	603	903	0
648	7	0	0	0	0	0	0	200	300	0	0	0	0	0	0	0	200	903	0	0	0	0	0	0	0	603	903	0
648	8	0	0	0	0	0	0	200	300	0	0	0	0	0	0	0	200	903	0	0	0	0	0	0	0	603	903	0
648	9	0	0	0	0	0	0	200	300	0	0	0	0	0	0	0	200	903	0	0	0	0	0	0	0	603	903	0
649	0	0	0	0	0	0	0	200	300	0	0	0	0	0	0	0	200	903	0	0	0	0	0	0	0	603	903	0
649	1	0	0	0	0	0	0	200	300	0	0	0	0	0	0	0	200	903	0	0	0	0	0	0	0	603	903	0
649	2	0	0	0	0	0	0	200	300	0	0	0	0	0	0	0	200	903	0	0	0	0	0	0	0	603	903	0
649	3	0	0	0	0	0	0	200	300	0	0	0	0	0	0	0	200	903	0	0	0	0	0	0	0	603	903	0
649	4	0	0	0	0	0	0	200	300	0	0	0	0	0	0	0	200	903	0	0	0	0	0	0	0	603	903	0
649	5	0	0	0	0	0	0	200	300	0	0	0	0	0	0	0	200	903	0	0	0	0	0	0	0	603	903	0
649	6	0	0	0	0	0	0	200	300	0	0	0	0	0	0	0	200	903	0	0	0	0	0	0	0	603	903	0
649	7	0	0	0	0	0	0	200	300	0	0	0	0	0	0	0	200	903	0	0	0	0	0	0	0	603	903	0
649	8	0	0	0	0	0	0	200	300	0	0	0	0	0	0	0	200	903	0	0	0	0	0	0	0	603	903	0
649	9	0	0	0	0	0	0	200	300	0	0	0	0	0	0	0	200	903	0	0	0	0	0	0	0	603	903	0
650	0	0	0	0	0	0	0	200	300	0	0	0	0	0	0	0	200	903	0	0	0	0	0	0	0	603	903	0
650	1	0	0	0	0	0	0	200	300	0	0	0	0	0	0	0	200	903	0	0	0	0	0	0	0	603	903	0
650	2	0	0	0	0	0	0	200	300	0	0	0	0	0	0	0	200	903	0	0	0	0	0	0	0	603	903	0
650	3	0	0	0	0	0	0	200	300	0	0	0	0	0	0	0	200	903	0	0	0	0	0	0	0	603	903	0
650	4	0	0	0	0	0	0	200	300	0	0	0	0	0	0	0	200	903	0	0	0	0	0	0	0	603	903	0
650	5	0	0	0	0	0	0	200	300	0	0	0	0	0	0	0	200	903	0	0	0	0	0	0	0	603	903	0
650	6	0	0	0	0	0	0	200	300	0	0	0	0	0	0	0	200	903	0	0	0	0	0	0	0	603	903	0
650	7	0	0	0	0	0	0	200	300	0	0	0	0	0	0	0	200	903	0	0	0	0	0	0	0	603	903	0
650	8	0	0	0	0	0	0	200	300	0	0	0	0	0	0	0	200	903	0	0	0	0	0	0	0	603	903	0
650	9	0	0	0	0	0	0	200	300	0	0	0	0	0	0	0	200	903	0	0	0	0	0	0	0	603	903	0
651	0	0	0	0	0	0	0	200	300	0	0	0	0	0	0	0	200	903	0	0	0	0	0	0	0	603	903	0
651	1	0	0	0	0	0	0	200	300	0	0	0	0	0	0	0	200	903	0	0	0	0	0	0	0	603	903	0
651	2	0	0	0	0	0	0	200	300	0	0	0	0	0	0	0	200	903	0	0	0	0	0	0	0	603	903	0
651	3	0	0	0	0	0	0	200	300	0	0	0	0	0	0	0	200	903	0	0	0	0	0	0	0	603	903	0
651	4	0	0	0	0	0	0	200	300	0	0	0	0	0	0	0	200	903	0	0	0	0	0	0	0	603	903	0
651	5	0	0	0	0	0	0	200	300	0	0	0	0	0	0	0	200	903	0	0	0	0	0	0	0	603	903	0
651	6	0	0	0	0	0	0	200	300	0	0	0	0	0	0	0	200	903	0	0	0	0	0	0	0	603	903	0
651	7	0	0	0	0	0	0	200	300	0	0	0	0	0	0	0	200	903	0	0	0	0	0	0	0	603	903	0
651	8	0	0	0	0	0	0	200	300	0	0	0	0	0	0	0	200	903	0	0	0	0	0	0	0	603	903	0
651	9	0	0	0	0	0	0	200	300	0	0	0	0	0	0	0	200	903	0	0	0	0	0	0	0	603	903	0
652	0	0	0	0	0	0	0	200	300	0	0	0	0	0	0	0	200	903	0	0	0	0	0	0	0	603	903	0
652	1	0	0	0	0	0	0	200	300	0	0	0	0	0	0	0	200	903	0	0	0	0	0	0	0	603	903	0
652	2	0	0	0	0	0	0	200	300	0	0	0	0	0	0	0	200	903	0	0	0	0	0	0	0	603	903	0
652	3	0	0	0	0	0	0	200	300	0	0	0	0	0	0	0	200	903	0	0	0	0	0	0	0	603	903	0
652	4	0	0	0	0	0	0	200	300	0	0	0	0	0	0	0	200	903	0	0	0	0	0	0	0	603	903	0
652	5	0	0	0	0	0	0	200	300	0	0	0	0	0	0	0	200	903	0	0	0	0	0	0	0	603	903	0
652	6	0	0	0	0	0	0	200	300	0	0	0	0	0	0	0	200	903	0	0	0	0	0	0	0	603	903	0
652	7	0	0	0	0	0	0	200	300	0	0	0	0	0	0	0	200	903	0	0	0	0	0	0	0	603	903	0
652	8	0	0	0	0	0	0	200	300	0	0	0	0	0	0	0	200	903	0	0	0	0	0	0	0	603	903	0
652	9	0	0	0	0	0	0	200	300	0	0	0	0	0	0	0	200	903	0	0	0	0	0	0	0	603	903	0
653	0	0	0	0	0	0	0	200	300	0	0	0	0	0	0	0	200	903	0	0	0	0	0	0	0	603	903	0
653	1	0	0	0	0	0	0	200	300	0	0	0	0	0	0	0	200	903	0	0	0	0	0	0	0	603	903	0
653	2	0	0	0	0	0	0	200	300	0	0	0	0	0	0	0	200	903	0	0	0	0	0	0	0	603	903	0
653	3	0	0	0	0	0	0	200	300	0	0	0	0	0	0	0	200	903	0	0	0	0	0	0	0	603	903	0
653	4	0	0	0	0	0	0	200	300	0	0	0	0	0	0	0	200	903	0	0	0	0	0	0	0	603	903	0
653	5	0	0	0	0	0	0	200	300	0	0	0	0	0	0	0	200	903	0	0	0	0	0	0	0	603	903	0
653	6	0	0	0	0	0	0	200	300	0	0	0	0	0	0	0	200	903	0	0	0	0	0	0	0	603	903	0
653	7	0	0	0	0	0	0	200	300	0	0	0	0	0	0	0	200	903	0	0	0	0	0	0	0	603	903	0
653	8	0	0	0	0	0	0	200	300	0	0	0	0	0	0	0	200	903	0	0	0	0	0	0	0	603	903	0
653	9	0	0	0	0	0	0	200	300	0	0	0	0	0	0	0	200	903	0	0	0	0	0	0	0	603	903	0
654	0	0	0	0	0	0	0	200	300	0	0	0	0	0	0	0	200	903	0	0	0	0	0	0	0	603	903	0
654	1	0	0	0	0	0	0	200	300	0	0	0	0	0	0	0	200	903	0	0	0	0	0	0	0	603	903	0
654	2	0	0	0	0	0	0	200	300	0	0	0	0	0	0	0	200	903	0	0	0	0	0	0	0	603	903	0
654	3	0	0	0	0	0	0	200	300	0	0	0	0	0	0	0	200	903	0	0	0	0	0	0	0	603	903	0
654	4	0	0	0	0	0	0	200	300	0	0	0	0	0	0	0	200	903	0	0	0	0	0	0	0	603	903	0
654	5	0	0	0	0	0	0	200	300	0	0	0	0	0	0	0	200	903	0	0	0	0	0	0	0	603	903	0
654	6	0	0	0	0	0	0	200	300	0	0	0	0	0	0	0	200	903	0	0	0	0	0	0	0	603	903	0
654	7	0	0	0	0	0	0	200	300	0	0	0	0	0	0	0	200	903	0	0	0	0	0	0	0	603	903	0
654	8	0	0	0	0	0	0	200	300	0	0	0	0	0	0	0	200	903	0	0	0	0	0	0	0	603	903	0
654	9	0	0	0	0	0	0	200	300	0	0	0	0	0	0	0	200	903	0	0	0	0	0	0	0	603	903	0
655	0	0	0	0	0	0	0	200	300	0	0	0	0	0	0	0	200	903	0	0	0	0	0	0	0	603	903	0
655	1	0	0	0	0	0	0	200	300	0	0	0	0	0	0	0	200	903	0	0	0	0	0	0	0	603	903	0
655	2	0	0	0	0	0	0	200	300	0	0	0	0	0	0	0	200	903	0	0	0	0	0	0	0	603	903	0
655	3	0	0	0	0	0	0	200	300	0	0	0	0	0	0	0	200	903	0	0	0	0	0	0	0	603	903	0
655	4	0	0	0	0	0	0	200	300	0	0	0	0	0	0	0	200	903	0	0	0	0	0	0	0	603	903	0
655	5	0	0	0	0	0	0	200	300	0	0	0	0	0	0	0	200	903	0	0	0	0	0	0	0	603	903	0
655	6	0	0	0	0	0	0	200	300	0	0	0	0	0	0	0	200	903	0	0	0	0	0	0	0	603	903	0
655	7	0	0	0	0	0	0	200	300	0	0	0	0	0	0	0	200	903	0	0	0	0	0	0	0	603	903	0
655	8	0	0	0	0	0	0	200	300	0	0	0	0	0	0	0	200	903	0	0	0	0	0	0	0	603	903	0
655	9	0	0	0	0	0	0	200	300	0	0	0	0	0	0	0	200	903	0	0	0	0	0	0	0	603	903	0
656	0	0	0	0	0	0	0	200	300	0	0	0	0	0	0	0	200	903	0	0	0	0	0	0	0	603	903	0
656	1	0	0	0	0	0	0	200	300	0	0	0	0	0	0	0	200	903	0	0	0	0	0	0	0	603	903	0
656	2	0	0	0	0	0	0	200	300	0	0	0	0	0	0	0	200	903	0	0	0	0	0	0	0	603	903	0
656	3	0	0	0	0	0	0	200	300	0	0	0	0	0	0	0	200	903	0	0	0	0	0	0	0	603	903	0
656	4	0	0	0	0	0	0	200	300	0	0	0	0	0	0	0	200	903	0	0	0	0	0	0	0	603	903	0
656	5	0	0	0	0	0	0	200	300	0	0	0	0	0	0	0	200	903	0	0	0	0	0	0	0	603	903	0
656	6	0	0	0	0	0	0	200	300	0	0	0	0	0	0	0	200	903	0	0	0	0	0	0	0	603	903	0
656	7	0	0	0	0	0	0	200	300	0	0	0	0	0	0	0	200	903	0	0	0	0	0	0	0	603	903	0
656	8	0	0	0	0	0	0	200	300	0	0	0	0	0	0	0	200	903	0	0	0	0	0	0	0	603	903	0
656	9	0	0	0	0	0	0	200	300	0	0	0	0	0	0	0	200	903	0	0	0	0	0	0	0	603	903	0
657	0	0	0	0	0	0	0	200	300	0	0	0	0	0	0	0	200	903	0	0	0	0	0	0	0	603	903	0
657	1	0	0	0	0	0	0	200	300	0	0	0	0	0	0	0	200	903	0	0	0	0	0	0	0	603	903	0
657	2	0	0	0	0	0	0	200	300	0	0	0	0	0	0	0	200	903	0	0	0	0	0	0	0	603	903	0
657	3	0	0	0	0	0	0	200	300	0	0	0	0	0	0	0	200	903	0	0	0	0	0	0	0	603	903	0
657	4	0	0	0	0	0	0	200	300	0	0	0	0	0	0	0	200	903	0	0	0	0	0	0	0	603	903	0
657	5	0	0	0	0	0	0	200	300	0	0	0	0	0	0	0	200	903	0	0	0	0	0	0	0	603	903	0
657	6	0	0	0	0	0	0	200	300	0	0	0	0	0	0	0	200	903	0	0	0	0	0	0	0	603	903	0
657	7	0	0	0	0	0	0	200	300	0	0	0	0	0	0	0	200	903	0	0	0	0	0	0	0	603	903	0
657	8	0	0	0	0	0	0	200	300	0	0	0	0	0	0	0	200	903	0	0	0	0	0	0	0	603	903	0
657	9	0	0	0	0	0	0	200	300	0	0	0	0	0	0	0	200	903	0	0	0	0	0	0	0	603	903	0
658	0	0	0	0	0	0	0	200	300	0	0	0	0	0	0	0	200	903	0	0	0	0	0	0	0	603	903	0
658	1	0	0	0	0	0	0	200	300	0	0	0	0	0	0	0	200	903	0	0	0	0	0	0	0	603	903	0
658	2	0	0	0	0	0	0	200	300	0	0	0	0	0	0	0	200	903	0	0	0	0	0	0	0	603	903	0
658	3	0	0	0	0	0	0	200	300	0	0	0	0	0	0	0	200	903	0	0	0	0	0	0	0	603	903	0
658	4	0	0	0	0	0	0	200	300	0	0	0	0	0	0	0	200	903	0	0	0	0	0	0	0	603	903	0
658	5	0	0	0	0	0	0	200	300	0	0	0	0	0	0	0	200	903	0	0	0	0	0	0	0	603	903	0
658	6	0	0	0	0	0	0	200	300	0	0	0	0	0	0	0	200	903	0	0	0	0	0	0	0	603	903	0
658	7	0	0	0	0	0	0	200	300	0	0	0	0	0	0	0	200	903	0	0	0	0	0	0	0	603	903	0
658	8	0	0	0	0	0	0	200	300	0	0	0	0	0	0	0	200	903	0	0	0	0	0	0	0	603	903	0
658	9	0	0	0	0	0	0	200	300	0	0	0	0	0	0	0	200	903	0	0	0	0	0	0	0	603	903	0
659	0	0	0	0	0	0	0	200	300	0	0	0	0	0	0	0	200	903	0	0	0	0	0	0	0	603	903	0
659	1	0	0	0	0	0	0	200	300	0	0	0	0	0	0	0	200	903	0	0	0	0	0	0	0	603	903	0
659	2	0	0	0	0	0	0	200	300	0	0	0	0	0	0	0	200	903	0	0	0	0	0	0	0	603	903	0
659	3	0	0	0	0	0	0	200	300	0	0	0	0	0	0	0	200	903	0	0	0	0	0	0	0	603	903	0
659	4	0	0	0	0	0	0	200	300	0	0	0	0	0	0	0	200	903	0	0	0	0	0	0	0	603	903	0
659	5	0	0	0	0	0	0	200	300	0	0	0	0	0	0	0	200	903	0	0	0	0	0	0	0	603	903	0
659	6	0	0	0	0	0	0	200	300	0	0	0	0	0	0	0	200	903	0	0	0	0	0	0	0	603	903	0
659	7	0	0	0	0	0	0	200	300	0	0	0	0	0	0	0	200	903	0	0	0	0	0	0	0	603	903	0
659	8	0	0	0	0	0	0	200	300	0	0	0	0	0	0	0	200	903	0	0	0	0	0	0	0	603	903	0
659	9	0	0	0	0	0	0	200	300	0	0	0	0	0	0	0	200	903	0	0	0	0	0	0	0	603	903	0
660	0	0	0	0	0	0	0	200	300	0	0	0	0	0	0	0	200	903	0	0	0	0	0	0	0	603	903	0
660	1	0	0	0	0	0	0	200	300	0	0	0	0	0	0	0	200	903	0	0	0	0	0	0	0	603	903	0
660	2	0	0	0	0	0	0	200	300	0	0	0	0	0	0	0	200	903	0	0	0	0	0	0	0	603	903	0
660	3	0	0	0	0	0	0	200	300	0	0	0	0	0	0	0	200	903	0	0	0	0	0	0	0	603	903	0
660	4	0	0	0	0	0	0	200	300	0	0	0	0	0	0	0	200	903	0	0	0	0	0	0	0	603	903	0
660	5	0	0	0	0	0	0	200	300	0	0	0	0	0	0	0	200	903	0	0	0	0	0	0	0	603	903	0
660	6	0	0	0	0	0	0	200	300	0	0	0	0	0	0	0	200	903	0	0	0	0	0	0	0	603	903	0
660	7	0	0	0	0	0	0	200	300	0	0	0	0	0	0	0	200	903	0	0	0	0	0	0	0	603	903	0
660	8	0	0	0	0	0	0	200	300	0	0	0	0	0	0	0	200	903	0	0	0	0	0	0	0	603	903	0
660	9	0	0	0	0	0	0	200	300	0	0	0	0	0	0	0	200	903	0	0	0	0	0	0	0	603	903	0
661	0	0	0	0	0	0	0	200	300	0	0	0	0	0	0	0	200	903	0	0	0	0	0	0	0	603	903	0
661	1	0	0	0	0	0	0	200	300	0	0	0	0	0	0	0	200	903	0	0	0	0	0	0	0	603	903	0
661	2	0	0	0	0	0	0	200	300	0	0	0	0	0	0	0	200	903	0	0	0	0	0	0	0	603	903	0
661	3	0	0	0	0	0	0	200	300	0	0	0	0	0	0	0	200	903	0	0	0	0	0	0	0	603	903	0
661	4	0	0	0	0	0	0	200	300	0	0	0	0	0	0	0	200	903	0	0	0	0	0	0	0	603	903	0
661	5	0	0	0	0	0	0	200	300	0	0	0	0	0	0	0	200	903	0	0	0	0	0	0	0	603	903	0
661	6	0	0	0	0	0	0	200	300	0	0	0	0	0	0	0	200	903	0	0	0	0	0	0	0	603	903	0
661	7	0	0	0	0	0	0	200	300	0	0	0	0	0	0	0	200	903	0	0	0	0	0	0	0	603	903	0
661	8	0	0	0	0	0	0	200	300	0	0	0	0	0	0	0	200	903	0	0	0	0	0	0	0	603	903	0
661	9	0	0	0	0	0	0	200	300	0	0	0	0	0	0	0	200	903	0	0	0	0	0	0	0	603	903	0
662	0	0	0	0	0	0	0	200	300	0	0	0	0	0	0	0	200	903	0	0	0	0	0	0	0	603	903	0
662	1	0	0	0	0	0	0	200	300	0	0	0	0	0	0	0	200	903	0	0	0	0	0	0	0	603	903	0
662	2	0	0	0	0	0	0	200	300	0	0	0	0	0	0	0	200	903	0	0	0	0	0	0	0	603	903	0
662	3	0	0	0	0	0	0	200	300	0	0	0	0	0	0	0	200	903	0	0	0	0	0	0	0	603	903	0
662	4	0	0	0	0	0	0	200	300	0	0	0	0	0	0	0	200	903	0	0	0	0	0	0	0	603	903	0
662	5	0	0	0	0	0	0	200	300	0	0	0	0	0	0	0	200	903	0	0	0	0	0	0	0	603	903	0
662	6	0	0	0	0	0	0	200	300	0	0	0	0	0	0	0	200	903	0	0	0	0	0	0	0	603	903	0
662	7	0	0	0	0	0	0	200	300	0	0	0	0	0	0	0	200	903	0	0	0	0	0	0	0	603	903	0
662	8	0	0	0	0	0	0	200	300	0	0	0	0	0	0	0	200	903	0	0	0	0	0	0	0	603	903	0
662	9	0	0	0	0	0	0	200	300	0	0	0	0	0	0	0	200	903	0	0	0	0	0	0	0	603	903	0
663	0	0	0	0	0	0	0	200	300	0	0	0	0	0	0	0	200	903	0	0	0	0	0	0	0	603	903	0
663	1	0	0	0	0	0	0	200	300	0	0	0	0	0	0	0	200	903	0	0	0	0	0	0	0	603	903	0
663	2	0	0	0	0	0	0	200	300	0	0	0	0	0	0	0	200	903	0	0	0	0	0	0	0	603	903	0
663	3	0	0	0	0	0	0	200	300	0	0	0	0	0	0	0	200	903	0	0	0	0	0	0	0	603	903	0
663	4	0	0	0	0	0	0	200	300	0	0	0	0	0	0	0	200	903	0	0	0	0	0	0	0	603	903	0
663	5	0	0	0	0	0	0	200	300	0	0	0	0	0	0	0	200	903	0	0	0	0	0	0	0	603	903	0
663	6	0	0	0	0	0	0	200	300	0	0	0	0	0	0	0	200	903	0	0	0	0	0	0	0	603	903	0
663	7	0	0	0	0	0	0	200	300	0	0	0	0	0	0	0	200	903	0	0	0	0	0	0	0	603	903	0
663	8	0	0	0	0	0	0	200	300	0	0	0	0	0	0	0	200	903	0	0	0	0	0	0	0	603	903	0
663	9	0	0	0	0	0	0	200	300	0	0	0	0	0	0	0	200	903	0	0	0	0	0	0	0	603	903	0
664	0	0	0	0	0	0	0	200	300	0	0	0	0	0	0	0	200	903	0	0	0	0	0	0	0	603	903	0
664	1	0	0	0	0	0	0	200	300	0	0	0	0	0	0	0	200	903	0	0	0	0	0	0	0	603	903	0
664	2	0	0	0	0	0	0	200	300	0	0	0	0	0	0	0	200	903	0	0	0	0	0	0	0	603	903	0
664	3	3.32672	-0.507778	-14.3793	1899.9	-1693.48	387.818	82.2276	167.872	0	0	0	0	0	0	0	200	903	0	0	0	0	0	0	0	603	903	0
664	4	10.1932	-1.27072	-33.9105	4554.94	-3890.75	1166.02	85.2643	165.678	0	0	0	0	0	0	0	200	903	0	0	0	0	0	0	0	603	903	0
664	5	4.24225	-10.8838	-44.8969	3090.09	-3829.71	2081.54	114.7	231.174	0	0	0	0	0	0	0	200	903	0	0	0	0	0	0	0	603	903	0
664	6	-6.89667	-18.9709	-36.3519	3730.96	-3463.5	2493.53	104.723	197.366	0	0	0	0	0	0	0	200	903	0	0	0	0	0	0	0	603	903	0
664	7	-3.38715	-20.4968	-28.7225	3730.96	-3646.61	2356.2	73.0402	170.103	0	0	0	0	0	0	0	200	903	0	0	0	0	0	0	0	603	903	0
664	8	0.580137	-21.2597	-36.9623	4646.49	-4073.85	2768.19	89.7835	174.291	0	0	0	0	0	0	0	200	903	0	0	0	0	0	0	0	603	903	0
664	9	-2.16645	-25.0744	-56.7987	6843.75	-5477.66	3409.06	103.56	179.509	0	0	0	0	0	0	0	200	903	0	0	0	0	0	0	0	603	903	0
665	0	-8.42255	-35.9082	-66.8695	6477.54	-6393.19	3775.27	104.393	203.132	0	0	0	0	0	0	0	200	903	0	0	0	0	0	0	0	603	903	0
665	1	-11.0165	-39.1125	-63.8177	6752.2	-7491.82	4004.15	82.606	194.196	0	0	0	0	0	0	0	200	903	0	0	0	0	0	0	0	603	903	0
665	2	-5.82855	-34.0771	-65.6488	7759.28	-7797	4233.03	81.2317	181.806	0	0	0	0	0	0	0	200	903	0	0	0	0	0	0	0	603	903	0
665	3	-6.89667	-39.2651	-75.4144	8400.15	-8285.28	3958.38	90.1367	188.614	0	0	0	0	0	0	0	200	903	0	0	0	0	0	0	0	603	903	0
665	4	-5.06562	-44.4531	-90.6732	9773.44	-9383.91	4278.81	96.5085	192.212	0	0	0	0	0	0	0	200	903	0	0	0	0	0	0	0	603	903	0
665	5	-8.88031	-39.7229	-95.556	10780.5	-10299.4	4233.03	92.2157	187.181	0	0	0	0	0	0	0	200	903	0	0	0	0	0	0	0	603	903	0
665	6	-13.0002	-33.3142	-99.8285	11421.4	-11337	4004.15	86.4348	185.59	0	0	0	0	0	0	0	200	903	0	0	0	0	0	0	0	603	903	0
665	7	-11.4743	-39.2651	-108.373	12520	-12496.7	3866.82	84.6884	184.473	0	0	0	0	0	0	0	200	903	0	0	0	0	0	0	0	603	903	0
665	8	-7.96479	-43.8427	-122.411	13435.6	-12496.7	4416.14	97.9123	190.243	0	0	0	0	0	0	0	200	903	0	0	0	0	0	0	0	603	903	0
665	9	-5.98114	-39.8755	-131.872	14625.7	-13168.1	4233.03	100.145	189.091	0	0	0	0	0	0	0	200	903	0	0	0	0	0	0	0	603	903	0
666	0	-4.76044	-38.197	-137.67	15358.2	-14510.9	4187.26	94.5969	188.442	0	0	0	0	0	0	0	200	903	0	0	0	0	0	0	0	603	903	0
666	1	-9.49066	-41.2487	-148.351	16456.8	-15792.6	4507.69	93.546	189.069	0	0	0	0	0	0	0	200	903	0	0	0	0	0	0	0	603	903	0
666	2	-11.1691	-41.8591	-160.253	17647	-17013.3	4645.02	93.8349	189.881	0	0	0	0	0	0	0	200	903	0	0	0	0	0	0	0	603	903	0
666	3	-3.53974	-40.1806	-172.155	18654.1	-17501.6	5011.23	98.3383	191.644	0	0	0	0	0	0	0	200	903	0	0	0	0	0	0	0	603	903	0
666	4	1.0379	-38.9599	-179.479	20027.4	-18356.1	4919.68	97.726	188.414	0	0	0	0	0	0	0	200	903	0	0	0	0	0	0	0	603	903	0
666	5	-1.40351	-40.028	-186.804	20851.3	-19271.6	4828.12	96.8349	188.378	0	0	0	0	0	0	0	200	903	0	0	0	0	0	0	0	603	903	0
666	6	-3.69232	-35.603	-199.316	21217.5	-20553.3	4690.8	96.8805	193.548	0	0	0	0	0	0	0	200	903	0	0	0	0	0	0	0	603	903	0
666	7	-1.40351	-28.2788	-209.081	22133.1	-21590.9	4095.7	96.7343	194.141	0	0	0	0	0	0	0	200	903	0	0	0	0	0	0	0	603	903	0
666	8	0.732725	-25.5322	-216.406	22957	-21713	3866.82	99.6652	193.917	0	0	0	0	0	0	0	200	903	0	0	0	0	0	0	0	603	903	0
666	9	3.02154	-25.227	-224.34	23964.1	-22811.6	3180.18	98.3167	193.18	0	0	0	0	0	0	0	200	903	0	0	0	0	0	0	0	603	903	0
667	0	4.8526	-20.9546	-234.716	25337.4	-23361	2905.52	100.471	192.051	0	0	0	0	0	0	0	200	903	0	0	0	0	0	0	0	603	903	0
667	1	2.71637	-15.3088	-242.04	25337.4	-24215.5	2813.97	99.9529	195.317	0	0	0	0	0	0	0	200	903	0	0	0	0	0	0	0	603	903	0
667	2	2.86896	-12.257	-248.449	25703.6	-24764.8	1944.21	100.323	196.544	0	0	0	0	0	0	0	200	903	0	0	0	0	0	0	0	603	903	0
667	3	4.24225	-11.6467	-251.806	26436	-25680.3	1532.23	98.0156	195.014	0	0	0	0	0	0	0	200	903	0	0	0	0	0	0	0	603	903	0
667	4	7.294	-6.76388	-262.182	26527.6	-26412.7	1394.9	99.2581	198.82	0	0	0	0	0	0	0	200	903	0	0	0	0	0	0	0	603	903	0
667	5	8.51471	-0.202602	-269.506	26802.3	-25924.4	845.581	103.808	200.551	0	0	0	0	0	0	0	200	903	0	0	0	0	0	0	0	603	903	0
667	6	7.59918	2.2388	-272.558	26710.7	-27267.2	342.041	99.9581	202	0	0	0	0	0	0	0	200	903	0	0	0	0	0	0	0	603	903	0
667	7	6.83624	7.42679	-276.83	27626.2	-27633.4	-390.381	100.179	200.205	0	0	0	0	0	0	0	200	903	0	0	0	0	0	0	0	603	903	0
667	8	7.294	13.9881	-283.544	27900.9	-27938.6	-344.605	101.467	201.6	0	0	0	0	0	0	0	200	903	0	0	0	0	0	0	0	603	903	0
667	9	11.5665	17.345	-290.563	27992.4	-28548.9	-1626.34	101.746	203.661	0	0	0	0	0	0	0	200	903	0	0	0	0	0	0	0	603	903	0
668	0	10.0406	19.7864	-297.888	28084	-29098.3	-1992.55	102.318	205.723	0	0	0	0	0	0	0	200	903	0	0	0	0	0	0	0	603	903	0
668	1	9.27765	25.127	-299.719	27992.4	-29769.7	-2358.76	100.675	206.604	0	0	0	0	0	0	0	200	903	0	0	0	0	0	0	0	603	903	0
668	2	9.888	30.315	-306.738	28175.5	-29891.7	-2999.64	102.55	208.144	0	0	0	0	0	0	0	200	903	0	0	0	0	0	0	0	603	903	0
668	3	9.73541	35.1978	-316.503	28724.9	-31295.5	-3686.28	101.121	209.243	0	0	0	0	0	0	0	200	903	0	0	0	0	0	0	0	603	903	0
668	4	9.43023	37.7918	-324.133	29182.6	-32028	-4052.49	101.189	209.967	0	0	0	0	0	0	0	200	903	0	0	0	0	0	0	0	603	903	0
668	5	11.7191	41.6065	-329.626	30006.6	-32211.1	-4464.48	102.28	208.968	0	0	0	0	0	0	0	200	903	0	0	0	0	0	0	0	603	903	0
668	6	13.8553	46.4893	-336.34	30464.4	-33431.8	-5059.57	100.601	209.424	0	0	0	0	0	0	0	200	903	0	0	0	0	0	0	0	603	903	0
668	7	11.8716	48.7781	-348.547	31013.7	-34225.2	-5380.01	101.806	211.02	0	0	0	0	0	0	0	200	903	0	0	0	0	0	0	0	603	903	0
668	8	10.0406	51.8299	-364.416	31196.8	-35751.1	-6203.98	101.895	214.392	0	0	0	0	0	0	0	200	903	0	0	0	0	0	0	0	603	903	0
668	9	10.0406	53.6609	-376.013	31654.6	-36971.8	-6524.42	101.674	215.815	0	0	0	0	0	0	0	200	903	0	0	0	0	0	0	0	603	903	0
669	0	10.1932	57.0179	-388.22	32203.9	-38924.9	-6753.3	99.7348	217.047	0	0	0	0	0	0	0	200	903	0	0	0	0	0	0	0	603	903	0
669	1	10.6509	59.3067	-401.953	33485.6	-40328.7	-6936.4	99.6679	216.693	0	0	0	0	0	0	0	200	903	0	0	0	0	0	0	0	603	903	0
669	2	9.12506	57.6282	-416.296	33943.4	-41305.3	-7623.05	100.779	218.463	0	0	0	0	0	0	0	200	903	0	0	0	0	0	0	0	603	903	0
669	3	8.51471	62.6636	-430.334	35316.6	-43014.3	-7851.93	100.044	217.932	0	0	0	0	0	0	0	200	903	0	0	0	0	0	0	0	603	903	0
669	4	7.59918	65.2576	-443.456	36323.7	-44051.9	-8126.59	100.662	218.09	0	0	0	0	0	0	0	200	903	0	0	0	0	0	0	0	603	903	0
669	5	6.37848	64.7998	-455.358	36598.4	-46005	-8675.9	98.9697	219.627	0	0	0	0	0	0	0	200	903	0	0	0	0	0	0	0	603	903	0
669	6	7.14142	65.5628	-470.617	37330.8	-47225.7	-8447.02	99.6515	220.677	0	0	0	0	0	0	0	200	903	0	0	0	0	0	0	0	603	903	0
669	7	8.20953	68.462	-486.181	37330.8	-49300.9	-8721.68	98.5956	223.216	0	0	0	0	0	0	0	200	903	0	0	0	0	0	0	0	603	903	0
669	8	6.68365	70.5982	-495.641	38704.1	-50460.6	-9271	98.1914	221.911	0	0	0	0	0	0	0	200	903	0	0	0	0	0	0	0	603	903	0
669	9	4.70001	71.2085	-510.29	38612.5	-51986.4	-9087.89	98.1237	224.332	0	0	0	0	0	0	0	200	903	0	0	0	0	0	0	0	603	903	0
670	0	4.08966	72.7344	-519.14	38795.7	-53268.2	-9133.67	97.3915	225.269	0	0	0	0	0	0	0	200	903	0	0	0	0	0	0	0	603	903	0
670	1	4.70001	74.1077	-532.263	39711.2	-54244.8	-9545.65	98.0865	225.392	0	0	0	0	0	0	0	200	903	0	0	0	0	0	0	0	603	903	0
670	2	5.15777	75.0232	-543.859	39894.3	-55099.2	-9957.64	98.6884	226.646	0	0	0	0	0	0	0	200	903	0	0	0	0	0	0	0	603	903	0
670	3	2.86896	75.0232	-549.047	40352.1	-56258.9	-9682.98	97.5336	226.505	0	0	0	0	0	0	0	200	903	0	0	0	0	0	0	0	603	903	0
670	4	0.427549	78.5328	-561.559	39528.1	-57906.9	-9911.87	96.882	229.61	0	0	0	0	0	0	0	200	903	0	0	0	0	0	0	0	603	903	0
670	5	-0.182803	81.7371	-568.273	39619.6	-58761.4	-9911.87	96.5967	230.281	0	0	0	0	0	0	0	200	903	0	0	0	0	0	0	0	603	903	0
670	6	-0.945742	83.263	-575.903	39894.3	-58639.3	-10232.3	98.1785	230.727	0	0	0	0	0	0	0	200	903	0	0	0	0	0	0	0	603	903	0
670	7	-2.47162	84.0259	-582.617	40535.2	-60287.2	-10278.1	96.5233	230.426	0	0	0	0	0	0	0	200	903	0	0	0	0	0	0	0	603	903	0
670	8	-4.15009	85.7044	-588.11	40535.2	-60775.5	-10827.4	96.6595	231.076	0	0	0	0	0	0	0	200	903	0	0	0	0	0	0	0	603	903	0
670	9	-6.89667	87.8406	-591.467	40169	-61263.8	-10873.2	96.4205	232.086	0	0	0	0	0	0	0	200	903	0	0	0	0	0	0	0	603	903	0
671	0	-8.57514	87.2303	-595.129	40352.1	-62118.3	-11056.3	95.6221	232.196	0	0	0	0	0	0	0	200	903	0	0	0	0	0	0	0	603	903	0
671	1	-9.18549	89.2139	-598.791	39436.5	-62057.3	-11559.8	96.3624	234.14	0	0	0	0	0	0	0	200	903	0	0	0	0	0	0	0	603	903	0
671	2	-11.1691	92.7234	-604.284	39802.7	-62972.8	-11514	95.7894	234.132	0	0	0	0	0	0	0	200	903	0	0	0	0	0	0	0	603	903	0
671	3	-13.3054	93.639	-609.167	39161.9	-63522.1	-11559.8	95.723	235.712	0	0	0	0	0	0	0	200	903	0	0	0	0	0	0	0	603	903	0
671	4	-13.6105	94.8597	-608.557	38612.5	-64071.4	-12154.9	94.7158	236.551	0	0	0	0	0	0	0	200	903	0	0	0	0	0	0	0	603	903	0
671	5	-16.2045	95.1648	-617.407	39802.7	-65536.3	-12246.5	93.8523	235.532	0	0	0	0	0	0	0	200	903	0	0	0	0	0	0	0	603	903	0
671	6	-14.6787	92.7234	-633.276	38887.2	-67489.4	-11742.9	93.4281	238.594	0	0	0	0	0	0	0	200	903	0	0	0	0	0	0	0	603	903	0
671	7	-25.8176	93.7915	-643.652	38154.8	-68649	-11788.7	93.3444	240.721	0	0	0	0	0	0	0	200	903	0	0	0	0	0	0	0	603	903	0
671	8	-38.7875	102.794	-650.366	37513.9	-70175	-13070.4	92.0992	242.319	0	0	0	0	0	0	0	200	903	0	0	0	0	0	0	0	603	903	0
671	9	-37.5668	108.745	-650.671	36964.6	-70846.3	-13848.6	91.118	243.19	0	0	0	0	0	0	0	200	903	0	0	0	0	0	0	0	603	903	0
672	0	-37.872	107.372	-659.216	36506.8	-71578.7	-13528.2	91.4183	244.621	0	0	0	0	0	0	0	200	903	0	0	0	0	0	0	0	603	903	0
672	1	-47.1799	108.898	-672.033	36964.6	-72982.6	-14672.6	91.4003	244.996	0	0	0	0	0	0	0	200	903	0	0	0	0	0	0	0	603	903	0
672	2	-48.0954	117.9	-675.695	36232.2	-73348.8	-15725.5	91.4469	246.378	0	0	0	0	0	0	0	200	903	0	0	0	0	0	0	0	603	903	0
672	3	-42.6022	124.462	-677.221	35866	-74630.5	-16229	89.7989	247.039	0	0	0	0	0	0	0	200	903	0	0	0	0	0	0	0	603	903	0
672	4	-49.4687	127.666	-682.104	35682.9	-74752.6	-16595.2	90.4088	247.687	0	0	0	0	0	0	0	200	903	0	0	0	0	0	0	0	603	903	0
672	5	-46.4169	129.345	-692.48	36140.6	-75546.1	-17465	90.905	247.81	0	0	0	0	0	0	0	200	903	0	0	0	0	0	0	0	603	903	0
672	6	-39.2453	134.227	-699.194	34584.2	-76034.3	-17739.6	91.2543	250.537	0	0	0	0	0	0	0	200	903	0	0	0	0	0	0	0	603	903	0
672	7	-42.9074	138.805	-702.551	34950.4	-76278.5	-17785.4	91.4264	250.252	0	0	0	0	0	0	0	200	903	0	0	0	0	0	0	0	603	903	0
672	8	-45.654	138.5	-705.908	34126.5	-77682.2	-18334.7	89.9541	251.656	0	0	0	0	0	0	0	200	903	0	0	0	0	0	0	0	603	903	0
672	9	-41.0764	138.195	-711.096	33394	-78048.5	-17922.7	90.242	253.039	0	0	0	0	0	0	0	200	903	0	0	0	0	0	0	0	603	903	0
673	0	-38.7875	141.704	-712.621	33943.4	-77499.2	-18197.4	91.2478	252.368	0	0	0	0	0	0	0	200	903	0	0	0	0	0	0	0	603	903	0
673	1	-37.7194	140.483	-718.725	34401.1	-78475.8	-18151.6	90.8126	252.136	0	0	0	0	0	0	0	200	903	0	0	0	0	0	0	0	603	903	0
673	2	-38.1772	136.669	-723.913	33302.5	-78903	-18426.3	91.0049	253.997	0	0	0	0	0	0	0	200	903	0	0	0	0	0	0	0	603	903	0
673	3	-39.7031	138.958	-722.692	33119.4	-78903	-18884	90.8208	254.172	0	0	0	0	0	0	0	200	903	0	0	0	0	0	0	0	603	903	0
673	4	-38.635	140.331	-724.523	32753.2	-79269.2	-18884	90.5913	254.793	0	0	0	0	0	0	0	200	903	0	0	0	0	0	0	0	603	903	0
673	5	-34.5151	136.364	-730.932	32936.3	-79513.3	-18746.7	91.2166	254.939	0	0	0	0	0	0	0	200	903	0	0	0	0	0	0	0	603	903	0
673	6	-36.041	135.295	-728.491	32203.9	-79574.4	-18472	90.7682	255.794	0	0	0	0	0	0	0	200	903	0	0	0	0	0	0	0	603	903	0
673	7	-38.3298	137.432	-737.036	32295.4	-80184.7	-18746.7	91.2064	256.182	0	0	0	0	0	0	0	200	903	0	0	0	0	0	0	0	603	903	0
673	8	-37.1091	136.974	-736.425	31471.4	-80917.2	-18609.4	90.1217	257.265	0	0	0	0	0	0	0	200	903	0	0	0	0	0	0	0	603	903	0
673	9	-38.635	135.295	-738.561	31379.9	-81161.3	-18426.3	90.1089	257.512	0	0	0	0	0	0	0	200	903	0	0	0	0	0	0	0	603	903	0
674	0	-39.5505	136.669	-743.749	31288.3	-80978.1	-18517.8	91.1217	257.932	0	0	0	0	0	0	0	200	903	0	0	0	0	0	0	0	603	903	0
674	1	-37.7194	138.5	-746.496	30739	-81954.7	-18746.7	90.2141	258.822	0	0	0	0	0	0	0	200	903	0	0	0	0	0	0	0	603	903	0
674	2	-38.3298	139.11	-745.275	30189.7	-82259.9	-18884	89.6248	259.492	0	0	0	0	0	0	0	200	903	0	0	0	0	0	0	0	603	903	0
674	3	-44.2807	140.941	-748.632	30281.3	-82198.9	-18975.6	90.2013	259.551	0	0	0	0	0	0	0	200	903	0	0	0	0	0	0	0	603	903	0
674	4	-42.9074	140.789	-751.379	29365.7	-82626.1	-19296	90.034	260.918	0	0	0	0	0	0	0	200	903	0	0	0	0	0	0	0	603	903	0
674	5	-43.06	144.756	-756.872	30189.7	-82931.3	-18334.7	90.4289	260.113	0	0	0	0	0	0	0	200	903	0	0	0	0	0	0	0	603	903	0
674	6	-46.4169	143.993	-758.093	30372.8	-83419.6	-19296	89.9613	259.935	0	0	0	0	0	0	0	200	903	0	0	0	0	0	0	0	603	903	0
674	7	-46.8747	143.688	-761.45	29548.8	-83907.8	-19524.9	89.8051	261.194	0	0	0	0	0	0	0	200	903	0	0	0	0	0	0	0	603	903	0
674	8	-49.7739	146.587	-763.586	29457.3	-84823.4	-19158.7	88.9144	261.422	0	0	0	0	0	0	0	200	903	0	0	0	0	0	0	0	603	903	0
674	9	-50.5368	147.655	-766.943	28358.7	-85372.7	-19433.3	88.6844	263.024	0	0	0	0	0	0	0	200	903	0	0	0	0	0	0	0	603	903	0
675	0	-51.1472	147.655	-773.351	29091.1	-85372.7	-19891.1	89.6069	262.383	0	0	0	0	0	0	0	200	903	0	0	0	0	0	0	0	603	903	0
675	1	-52.9782	148.265	-776.403	28267.1	-85861	-19799.6	89.4119	263.592	0	0	0	0	0	0	0	200	903	0	0	0	0	0	0	0	603	903	0
675	2	-53.2834	149.944	-777.624	28358.7	-86593.4	-19616.5	88.6436	263.532	0	0	0	0	0	0	0	200	903	0	0	0	0	0	0	0	603	903	0
675	3	-53.8937	150.402	-781.896	28358.7	-86654.5	-19936.9	89.174	263.731	0	0	0	0	0	0	0	200	903	0	0	0	0	0	0	0	603	903	0
675	4	-55.267	148.571	-783.727	28450.2	-87509	-20074.2	88.3426	263.699	0	0	0	0	0	0	0	200	903	0	0	0	0	0	0	0	603	903	0
675	5	-55.7248	150.859	-789.526	28267.1	-88058.2	-19936.9	88.4669	264.197	0	0	0	0	0	0	0	200	903	0	0	0	0	0	0	0	603	903	0
675	6	-56.9455	150.707	-794.714	27809.3	-88180.3	-19708	89.0414	265.007	0	0	0	0	0	0	0	200	903	0	0	0	0	0	0	0	603	903	0
675	7	-56.7929	151.012	-796.85	27443.1	-88668.6	-20577.8	88.7261	265.561	0	0	0	0	0	0	0	200	903	0	0	0	0	0	0	0	603	903	0
675	8	-57.0981	151.47	-799.902	27351.6	-89523.1	-20577.8	88.0824	265.806	0	0	0	0	0	0	0	200	903	0	0	0	0	0	0	0	603	903	0
675	9	-56.03	153.606	-806.31	27351.6	-89950.4	-20440.4	88.442	266.078	0	0	0	0	0	0	0	200	903	0	0	0	0	0	0	0	603	903	0
676	0	-56.4877	151.775	-810.278	27168.5	-90194.5	-20532	88.6869	266.47	0	0	0	0	0	0	0	200	903	0	0	0	0	0	0	0	603	903	0
676	1	-56.7929	152.996	-812.109	27534.7	-90560.7	-20257.3	88.487	266.095	0	0	0	0	0	0	0	200	903	0	0	0	0	0	0	0	603	903	0
676	2	-55.4196	152.385	-814.855	28084	-91110	-20440.4	88.1888	265.535	0	0	0	0	0	0	0	200	903	0	0	0	0	0	0	0	603	903	0
676	3	-52.9782	153.606	-820.349	27351.6	-91171.1	-20669.3	88.863	266.659	0	0	0	0	0	0	0	200	903	0	0	0	0	0	0	0	603	903	0
676	4	-55.267	153.301	-819.433	27168.5	-91476.2	-20669.3	88.3665	266.845	0	0	0	0	0	0	0	200	903	0	0	0	0	0	0	0	603	903	0
676	5	-56.03	151.317	-825.231	26893.8	-92391.8	-20760.9	88.0414	267.411	0	0	0	0	0	0	0	200	903	0	0	0	0	0	0	0	603	903	0
676	6	-54.5041	154.064	-831.335	26619.2	-92513.8	-20806.7	88.7165	267.98	0	0	0	0	0	0	0	200	903	0	0	0	0	0	0	0	603	903	0
676	7	-53.2834	152.996	-834.997	26802.3	-92880	-20486.2	88.766	267.901	0	0	0	0	0	0	0	200	903	0	0	0	0	0	0	0	603	903	0
676	8	-53.436	154.064	-839.575	26985.4	-93490.4	-20760.9	88.6455	267.858	0	0	0	0	0	0	0	200	903	0	0	0	0	0	0	0	603	903	0
676	9	-54.1989	153.301	-844.457	27168.5	-93551.4	-20806.7	89.2172	267.827	0	0	0	0	0	0	0	200	903	0	0	0	0	0	0	0	603	903	0
677	0	-54.1989	153.911	-845.373	26802.3	-93856.6	-20028.4	88.9761	268.295	0	0	0	0	0	0	0	200	903	0	0	0	0	0	0	0	603	903	0
677	1	-51.7575	153.606	-848.425	25795.2	-94161.7	-20211.5	89.0158	269.596	0	0	0	0	0	0	0	200	903	0	0	0	0	0	0	0	603	903	0
677	2	-52.3679	152.843	-853.307	26619.2	-94833.2	-20715.1	88.864	268.805	0	0	0	0	0	0	0	200	903	0	0	0	0	0	0	0	603	903	0
677	3	-52.5205	153.606	-852.697	26985.4	-94894.2	-20394.7	88.7129	268.353	0	0	0	0	0	0	0	200	903	0	0	0	0	0	0	0	603	903	0
677	4	-53.7412	153.148	-860.632	26436	-95260.4	-20211.5	89.3134	269.283	0	0	0	0	0	0	0	200	903	0	0	0	0	0	0	0	603	903	0
677	5	-52.8256	152.385	-860.937	26344.5	-95809.7	-20715.1	88.7146	269.4	0	0	0	0	0	0	0	200	903	0	0	0	0	0	0	0	603	903	0
677	6	-51.9101	151.317	-862.768	26619.2	-95504.5	-20211.5	89.3045	269.147	0	0	0	0	0	0	0	200	903	0	0	0	0	0	0	0	603	903	0
677	7	-50.9946	150.402	-865.82	26344.5	-95870.7	-20028.4	89.2717	269.573	0	0	0	0	0	0	0	200	903	0	0	0	0	0	0	0	603	903	0
677	8	-52.2153	149.944	-869.787	26527.6	-96359	-20211.5	89.2154	269.501	0	0	0	0	0	0	0	200	903	0	0	0	0	0	0	0	603	903	0
677	9	-51.6049	148.876	-868.261	25978.3	-96481.1	-20120	88.8801	270.08	0	0	0	0	0	0	0	200	903	0	0	0	0	0	0	0	603	903	0
678	0	-51.1472	148.418	-865.209	26069.8	-96236.9	-19524.9	88.7703	269.869	0	0	0	0	0	0	0	200	903	0	0	0	0	0	0	0	603	903	0
678	1	-50.6894	148.571	-871.313	25978.3	-96114.9	-19524.9	89.6896	270.185	0	0	0	0	0	0	0	200	903	0	0	0	0	0	0	0	603	903	0
678	2	-50.6894	146.129	-874.365	25612.1	-96481.1	-19250.2	89.6558	270.708	0	0	0	0	0	0	0	200	903	0	0	0	0	0	0	0	603	903	0
678	3	-51.6049	145.977	-875.28	26344.5	-96603.1	-19296	89.6318	269.902	0	0	0	0	0	0	0	200	903	0	0	0	0	0	0	0	603	903	0
678	4	-50.079	145.061	-874.67	25795.2	-96725.2	-19067.1	89.4152	270.509	0	0	0	0	0	0	0	200	903	0	0	0	0	0	0	0	603	903	0
678	5	-50.842	144.146	-872.228	26344.5	-97152.5	-19296	88.6158	269.796	0	0	0	0	0	0	0	200	903	0	0	0	0	0	0	0	603	903	0
678	6	-49.1635	143.383	-875.585	26527.6	-97274.6	-19433.3	88.9034	269.703	0	0	0	0	0	0	0	200	903	0	0	0	0	0	0	0	603	903	0
678	7	-49.9265	143.077	-878.332	25520.5	-96786.3	-19067.1	89.8067	270.944	0	0	0	0	0	0	0	200	903	0	0	0	0	0	0	0	603	903	0
678	8	-49.9265	142.62	-878.637	25337.4	-97091.4	-19021.4	89.4977	271.163	0	0	0	0	0	0	0	200	903	0	0	0	0	0	0	0	603	903	0
678	9	-50.5368	140.026	-876.196	25337.4	-97335.6	-19158.7	88.9112	271.082	0	0	0	0	0	0	0	200	903	0	0	0	0	0	0	0	603	903	0
679	0	-48.7058	141.246	-876.806	25703.6	-96969.4	-18792.5	89.4062	270.685	0	0	0	0	0	0	0	200	903	0	0	0	0	0	0	0	603	903	0
679	1	-49.1635	138.958	-876.806	25886.7	-97213.5	-18014.3	89.1277	270.476	0	0	0	0	0	0	0	200	903	0	0	0	0	0	0	0	603	903	0
679	2	-49.6213	139.263	-877.416	25612.1	-97152.5	-18884	89.2743	270.81	0	0	0	0	0	0	0	200	903	0	0	0	0	0	0	0	603	903	0
679	3	-48.4006	137.889	-874.059	26069.8	-96725.2	-18472	89.3379	270.174	0	0	0	0	0	0	0	200	903	0	0	0	0	0	0	0	603	903	0
679	4	-49.4687	137.584	-874.365	25337.4	-96725.2	-18563.6	89.3766	271.022	0	0	0	0	0	0	0	200	903	0	0	0	0	0	0	0	603	903	0
679	5	-48.248	137.279	-874.365	25154.3	-96542.2	-18105.8	89.5859	271.231	0	0	0	0	0	0	0	200	903	0	0	0	0	0	0	0	603	903	0
679	6	-47.9428	134.227	-873.449	24788.1	-96053.9	-18426.3	90.0292	271.62	0	0	0	0	0	0	0	200	903	0	0	0	0	0	0	0	603	903	0
679	7	-49.1635	135.448	-872.228	25612.1	-96053.9	-18288.9	89.8753	270.636	0	0	0	0	0	0	0	200	903	0	0	0	0	0	0	0	603	903	0
679	8	-49.4687	133.464	-868.261	25612.1	-96603.1	-17831.2	88.7395	270.502	0	0	0	0	0	0	0	200	903	0	0	0	0	0	0	0	603	903	0
679	9	-47.1799	132.854	-866.125	25429	-95687.7	-17877	89.5221	270.641	0	0	0	0	0	0	0	200	903	0	0	0	0	0	0	0	603	903	0
680	0	-47.4851	132.091	-868.566	24696.5	-95504.5	-17327.6	90.0435	271.566	0	0	0	0	0	0	0	200	903	0	0	0	0	0	0	0	603	903	0
680	1	-48.4006	131.023	-865.209	24513.4	-95687.7	-17648.1	89.4052	271.668	0	0	0	0	0	0	0	200	903	0	0	0	0	0	0	0	603	903	0
680	2	-46.4169	130.26	-861.852	24696.5	-95199.4	-17419.2	89.541	271.345	0	0	0	0	0	0	0	200	903	0	0	0	0	0	0	0	603	903	0
680	3	-48.0954	127.361	-856.664	24513.4	-94955.2	-17465	89.157	271.385	0	0	0	0	0	0	0	200	903	0	0	0	0	0	0	0	603	903	0
680	4	-45.5014	128.734	-857.275	24971.2	-94650	-17510.7	89.592	270.871	0	0	0	0	0	0	0	200	903	0	0	0	0	0	0	0	603	903	0
680	5	-47.1799	127.056	-852.392	25062.8	-94344.9	-16869.9	89.3175	270.597	0	0	0	0	0	0	0	200	903	0	0	0	0	0	0	0	603	903	0
680	6	-48.5532	125.53	-851.476	25062.8	-94222.8	-16961.4	89.3418	270.566	0	0	0	0	0	0	0	200	903	0	0	0	0	0	0	0	603	903	0
680	7	-47.7902	124.767	-846.594	24238.8	-93429.3	-16457.9	89.6409	271.369	0	0	0	0	0	0	0	200	903	0	0	0	0	0	0	0	603	903	0
680	8	-47.6376	124.614	-843.237	24147.2	-93124.2	-16412.1	89.5634	271.364	0	0	0	0	0	0	0	200	903	0	0	0	0	0	0	0	603	903	0
680	9	-47.1799	122.783	-842.932	24055.7	-92880	-16366.3	89.8131	271.462	0	0	0	0	0	0	0	200	903	0	0	0	0	0	0	0	603	903	0
681	0	-47.3325	120.342	-838.659	23964.1	-92391.8	-16595.2	89.8339	271.426	0	0	0	0	0	0	0	200	903	0	0	0	0	0	0	0	603	903	0
681	1	-48.0954	121.105	-832.556	24605	-92452.8	-16595.2	88.9531	270.446	0	0	0	0	0	0	0	200	903	0	0	0	0	0	0	0	603	903	0
681	2	-46.7221	118.969	-830.419	24513.4	-92086.5	-15954.4	89.1084	270.481	0	0	0	0	0	0	0	200	903	0	0	0	0	0	0	0	603	903	0
681	3	-46.1118	118.206	-827.062	23689.5	-90926.9	-16183.2	90.0604	271.357	0	0	0	0	0	0	0	200	903	0	0	0	0	0	0	0	603	903	0
681	4	-46.2643	116.68	-822.79	23506.4	-91232.1	-15954.4	89.1187	271.431	0	0	0	0	0	0	0	200	903	0	0	0	0	0	0	0	603	903	0
681	5	-47.7902	115.459	-819.433	23323.3	-90926.9	-15725.5	89.0368	271.537	0	0	0	0	0	0	0	200	903	0	0	0	0	0	0	0	603	903	0
681	6	-48.248	116.069	-814.245	23689.5	-89828.3	-15496.6	89.679	270.906	0	0	0	0	0	0	0	200	903	0	0	0	0	0	0	0	603	903	0
681	7	-47.6376	113.17	-809.973	22957	-89767.2	-15313.5	89.1725	271.657	0	0	0	0	0	0	0	200	903	0	0	0	0	0	0	0	603	903	0
681	8	-46.5695	112.255	-809.057	23323.3	-88668.6	-15359.3	90.405	271.172	0	0	0	0	0	0	0	200	903	0	0	0	0	0	0	0	603	903	0
681	9	-47.3325	110.576	-803.564	23231.7	-88729.7	-14901.5	89.5798	271.089	0	0	0	0	0	0	0	200	903	0	0	0	0	0	0	0	603	903	0
682	0	-47.1799	109.05	-798.681	23140.1	-88363.4	-14809.9	89.3633	271.027	0	0	0	0	0	0	0	200	903	0	0	0	0	0	0	0	603	903	0
682	1	-47.7902	107.83	-790.136	22773.9	-87997.2	-14672.6	88.6303	271.177	0	0	0	0	0	0	0	200	903	0	0	0	0	0	0	0	603	903	0
682	2	-47.3325	105.236	-789.221	22590.8	-87814.1	-14626.8	88.7332	271.376	0	0	0	0	0	0	0	200	903	0	0	0	0	0	0	0	603	903	0
682	3	-47.1799	105.541	-786.779	22316.2	-86837.5	-14306.4	89.6291	271.636	0	0	0	0	0	0	0	200	903	0	0	0	0	0	0	0	603	903	0
682	4	-48.7058	104.473	-781.591	21950	-86959.6	-14123.3	88.7403	271.916	0	0	0	0	0	0	0	200	903	0	0	0	0	0	0	0	603	903	0
682	5	-48.4006	103.557	-777.319	22682.4	-86410.3	-13619.8	88.8354	270.82	0	0	0	0	0	0	0	200	903	0	0	0	0	0	0	0	603	903	0
682	6	-47.4851	101.726	-773.657	21950	-85372.7	-14123.3	89.6504	271.628	0	0	0	0	0	0	0	200	903	0	0	0	0	0	0	0	603	903	0
682	7	-45.654	100.048	-769.384	22316.2	-85372.7	-12658.5	89.0376	270.995	0	0	0	0	0	0	0	200	903	0	0	0	0	0	0	0	603	903	0
682	8	-47.1799	98.9795	-763.891	21675.3	-84884.4	-13574	88.8789	271.625	0	0	0	0	0	0	0	200	903	0	0	0	0	0	0	0	603	903	0
682	9	-48.5532	97.7588	-761.144	21400.6	-84029.9	-13345.1	89.6006	271.884	0	0	0	0	0	0	0	200	903	0	0	0	0	0	0	0	603	903	0
683	0	-48.5532	96.8433	-756.262	21583.8	-83785.8	-13207.8	89.2106	271.46	0	0	0	0	0	0	0	200	903	0	0	0	0	0	0	0	603	903	0
683	1	-47.9428	93.9441	-751.684	21309.1	-82687.1	-12841.6	89.9975	271.652	0	0	0	0	0	0	0	200	903	0	0	0	0	0	0	0	603	903	0
683	2	-48.248	93.9441	-748.632	21858.4	-82870.3	-12795.8	89.3044	270.802	0	0	0	0	0	0	0	200	903	0	0	0	0	0	0	0	603	903	0
683	3	-48.248	91.8079	-744.055	21675.3	-82320.9	-12200.7	89.3617	270.869	0	0	0	0	0	0	0	200	903	0	0	0	0	0	0	0	603	903	0
683	4	-49.0109	90.8924	-738.867	20851.3	-82259.9	-12154.9	88.6674	271.779	0	0	0	0	0	0	0	200	903	0	0	0	0	0	0	0	603	903	0
683	5	-48.0954	89.0613	-734.594	20942.9	-81771.6	-12292.2	88.6846	271.491	0	0	0	0	0	0	0	200	903	0	0	0	0	0	0	0	603	903	0
683	6	-48.0954	87.9932	-730.627	21217.5	-81100.2	-12200.7	88.9991	270.96	0	0	0	0	0	0	0	200	903	0	0	0	0	0	0	0	603	903	0
683	7	-47.4851	86.9251	-729.101	20485.1	-80917.2	-11742.9	89.0179	271.904	0	0	0	0	0	0	0	200	903	0	0	0	0	0	0	0	603	903	0
683	8	-49.4687	84.3311	-722.997	20851.3	-80367.8	-11514	88.8408	271.16	0	0	0	0	0	0	0	200	903	0	0	0	0	0	0	0	603	903	0
683	9	-47.1799	84.1785	-718.42	20668.2	-79696.5	-11651.4	89.067	271.231	0	0	0	0	0	0	0	200	903	0	0	0	0	0	0	0	603	903	0
684	0	-49.0109	81.8897	-713.537	21217.5	-79513.3	-11376.7	88.5646	270.264	0	0	0	0	0	0	0	200	903	0	0	0	0	0	0	0	603	903	0
684	1	-48.4006	80.8216	-709.875	20393.6	-79208.2	-11056.3	88.4195	271.272	0	0	0	0	0	0	0	200	903	0	0	0	0	0	0	0	603	903	0
684	2	-48.5532	79.4483	-707.739	21034.4	-78292.6	-10461.2	89.3764	270.279	0	0	0	0	0	0	0	200	903	0	0	0	0	0	0	0	603	903	0
684	3	-49.7739	77.9224	-703.466	20027.4	-77743.3	-10369.6	89.4853	271.53	0	0	0	0	0	0	0	200	903	0	0	0	0	0	0	0	603	903	0
684	4	-49.7739	77.312	-698.278	20118.9	-76644.7	-10552.7	90.2376	271.188	0	0	0	0	0	0	0	200	903	0	0	0	0	0	0	0	603	903	0
684	5	-48.8583	74.4129	-694.311	20210.5	-77194	-10049.2	88.8193	270.891	0	0	0	0	0	0	0	200	903	0	0	0	0	0	0	0	603	903	0
684	6	-48.8583	74.1077	-691.259	20302	-76583.6	-10186.5	89.2114	270.63	0	0	0	0	0	0	0	200	903	0	0	0	0	0	0	0	603	903	0
684	7	-50.9946	72.5818	-686.987	19935.8	-76339.5	-9957.64	88.8778	270.981	0	0	0	0	0	0	0	200	903	0	0	0	0	0	0	0	603	903	0
684	8	-50.842	71.0559	-678.442	19935.8	-76278.5	-9774.54	87.5681	270.615	0	0	0	0	0	0	0	200	903	0	0	0	0	0	0	0	603	903	0
684	9	-50.2316	70.1404	-676.611	19844.2	-75057.8	-9545.65	89.068	270.671	0	0	0	0	0	0	0	200	903	0	0	0	0	0	0	0	603	903	0
685	0	-50.079	68.6145	-672.338	19294.9	-75301.9	-9362.55	88	271.302	0	0	0	0	0	0	0	200	903	0	0	0	0	0	0	0	603	903	0
685	1	-49.4687	67.8516	-670.507	18837.2	-74874.6	-9499.88	88.3314	271.906	0	0	0	0	0	0	0	200	903	0	0	0	0	0	0	0	603	903	0
685	2	-50.6894	65.4102	-667.455	19386.5	-73776	-8904.79	89.4668	270.955	0	0	0	0	0	0	0	200	903	0	0	0	0	0	0	0	603	903	0
685	3	-50.6894	65.7154	-659.826	19386.5	-73653.9	-8630.13	88.3737	270.619	0	0	0	0	0	0	0	200	903	0	0	0	0	0	0	0	603	903	0
685	4	-50.6894	63.5791	-657.69	19661.1	-72189.1	-8401.25	90.2384	270.106	0	0	0	0	0	0	0	200	903	0	0	0	0	0	0	0	603	903	0
685	5	-49.1635	62.8162	-654.028	19478	-72860.5	-8584.35	88.5972	270.218	0	0	0	0	0	0	0	200	903	0	0	0	0	0	0	0	603	903	0
685	6	-49.4687	61.2903	-647.314	19386.5	-72250.2	-8263.92	88.3847	270.051	0	0	0	0	0	0	0	200	903	0	0	0	0	0	0	0	603	903	0
685	7	-50.842	60.5274	-646.093	18654.1	-72189.1	-8401.25	88.2683	271.128	0	0	0	0	0	0	0	200	903	0	0	0	0	0	0	0	603	903	0
685	8	-51.1472	60.3748	-641.21	19111.8	-72311.2	-8309.69	87.2271	270.194	0	0	0	0	0	0	0	200	903	0	0	0	0	0	0	0	603	903	0
685	9	-50.079	58.5437	-636.938	18287.8	-71090.5	-7806.15	88.3871	271.288	0	0	0	0	0	0	0	200	903	0	0	0	0	0	0	0	603	903	0
686	0	-49.6213	57.1704	-635.412	18745.6	-71151.5	-7806.15	88.023	270.499	0	0	0	0	0	0	0	200	903	0	0	0	0	0	0	0	603	903	0
686	1	-50.3842	56.4075	-632.055	18654.1	-70358	-7577.27	88.6837	270.487	0	0	0	0	0	0	0	200	903	0	0	0	0	0	0	0	603	903	0
686	2	-49.3161	54.5765	-625.952	18470.9	-69686.7	-7394.17	88.6708	270.491	0	0	0	0	0	0	0	200	903	0	0	0	0	0	0	0	603	903	0
686	3	-50.2316	52.2876	-619.238	18287.8	-69869.8	-7302.61	87.1681	270.467	0	0	0	0	0	0	0	200	903	0	0	0	0	0	0	0	603	903	0
686	4	-49.3161	52.898	-619.543	17738.5	-69381.5	-7302.61	88.0118	271.368	0	0	0	0	0	0	0	200	903	0	0	0	0	0	0	0	603	903	0
686	5	-49.3161	50.7618	-616.491	17738.5	-68588.1	-7348.39	88.7445	271.227	0	0	0	0	0	0	0	200	903	0	0	0	0	0	0	0	603	903	0
686	6	-49.7739	51.2195	-613.439	17738.5	-68404.9	-6799.07	88.4895	271.083	0	0	0	0	0	0	0	200	903	0	0	0	0	0	0	0	603	903	0
686	7	-50.2316	50.4566	-607.031	17097.7	-68038.7	-6982.18	87.9156	271.834	0	0	0	0	0	0	0	200	903	0	0	0	0	0	0	0	603	903	0
686	8	-49.1635	49.9988	-604.284	17921.6	-67306.3	-6615.97	88.6182	270.342	0	0	0	0	0	0	0	200	903	0	0	0	0	0	0	0	603	903	0
686	9	-48.5532	47.4048	-602.758	17830.1	-66818	-6341.31	89.1463	270.419	0	0	0	0	0	0	0	200	903	0	0	0	0	0	0	0	603	903	0
687	0	-50.079	46.9471	-595.739	17372.3	-66940.1	-6341.31	87.6353	270.839	0	0	0	0	0	0	0	200	903	0	0	0	0	0	0	0	603	903	0
687	1	-50.079	45.7264	-593.908	17189.2	-66207.6	-5791.99	88.5221	271.057	0	0	0	0	0	0	0	200	903	0	0	0	0	0	0	0	603	903	0
687	2	-49.6213	44.2005	-588.72	16914.6	-66390.8	-6066.65	87.2286	271.269	0	0	0	0	0	0	0	200	903	0	0	0	0	0	0	0	603	903	0
687	3	-47.7902	44.5056	-587.805	17006.1	-65475.2	-5334.23	88.6106	271.068	0	0	0	0	0	0	0	200	903	0	0	0	0	0	0	0	603	903	0
687	4	-48.248	41.4539	-584.142	16823	-65353.1	-5929.32	88.1212	271.201	0	0	0	0	0	0	0	200	903	0	0	0	0	0	0	0	603	903	0
687	5	-49.0109	42.3694	-581.701	17189.2	-64986.9	-5746.22	88.2812	270.45	0	0	0	0	0	0	0	200	903	0	0	0	0	0	0	0	603	903	0
687	6	-48.8583	41.1487	-576.208	16914.6	-64803.8	-5196.9	87.5339	270.645	0	0	0	0	0	0	0	200	903	0	0	0	0	0	0	0	603	903	0
687	7	-48.248	40.0806	-573.766	16914.6	-64315.6	-5334.23	87.9064	270.52	0	0	0	0	0	0	0	200	903	0	0	0	0	0	0	0	603	903	0
687	8	-47.9428	39.0125	-572.241	16731.4	-63949.4	-5151.13	88.2474	270.762	0	0	0	0	0	0	0	200	903	0	0	0	0	0	0	0	603	903	0
687	9	-47.6376	38.097	-567.663	16182.1	-63766.3	-5151.13	87.6688	271.493	0	0	0	0	0	0	0	200	903	0	0	0	0	0	0	0	603	903	0
688	0	-46.1118	38.2495	-566.747	16365.2	-62728.7	-4784.91	89.3181	271.124	0	0	0	0	0	0	0	200	903	0	0	0	0	0	0	0	603	903	0
688	1	-47.9428	36.1133	-557.287	15815.9	-63155.9	-4693.36	86.6726	271.62	0	0	0	0	0	0	0	200	903	0	0	0	0	0	0	0	603	903	0
688	2	-46.2643	36.5711	-558.813	16273.7	-62850.7	-4556.03	87.5281	270.878	0	0	0	0	0	0	0	200	903	0	0	0	0	0	0	0	603	903	0
688	3	-45.9592	34.5874	-557.287	16639.9	-62057.3	-4464.48	88.644	270.141	0	0	0	0	0	0	0	200	903	0	0	0	0	0	0	0	603	903	0
688	4	-46.5695	34.4348	-553.32	15724.4	-62179.3	-4464.48	87.6249	271.582	0	0	0	0	0	0	0	200	903	0	0	0	0	0	0	0	603	903	0
688	5	-46.4169	33.3667	-550.573	15541.3	-61752.1	-4235.6	87.8403	271.773	0	0	0	0	0	0	0	200	903	0	0	0	0	0	0	0	603	903	0
688	6	-45.8066	31.9934	-548.437	15266.6	-61263.8	-4189.82	88.2938	272.163	0	0	0	0	0	0	0	200	903	0	0	0	0	0	0	0	603	903	0
688	7	-43.6704	32.146	-544.775	15358.2	-61263.8	-3869.39	87.5429	271.808	0	0	0	0	0	0	0	200	903	0	0	0	0	0	0	0	603	903	0
688	8	-45.0436	31.6883	-540.502	15083.5	-61019.7	-4006.71	87.1056	272.094	0	0	0	0	0	0	0	200	903	0	0	0	0	0	0	0	603	903	0
688	9	-45.9592	31.3831	-540.807	15449.7	-60531.4	-3640.5	88.0722	271.432	0	0	0	0	0	0	0	200	903	0	0	0	0	0	0	0	603	903	0
689	0	-45.654	29.7046	-535.925	15632.8	-60409.3	-3182.74	87.2802	270.83	0	0	0	0	0	0	0	200	903	0	0	0	0	0	0	0	603	903	0
689	1	-44.5859	28.9417	-533.788	15175.1	-59982.1	-3457.4	87.6295	271.571	0	0	0	0	0	0	0	200	903	0	0	0	0	0	0	0	603	903	0
689	2	-43.8229	27.5684	-533.483	15449.7	-59554.8	-3503.18	88.3661	271.04	0	0	0	0	0	0	0	200	903	0	0	0	0	0	0	0	603	903	0
689	3	-45.0436	27.1106	-530.432	14808.8	-59615.8	-3365.85	87.6088	272.082	0	0	0	0	0	0	0	200	903	0	0	0	0	0	0	0	603	903	0
689	4	-42.1445	27.5684	-529.211	14442.6	-59432.7	-3228.52	87.6955	272.709	0	0	0	0	0	0	0	200	903	0	0	0	0	0	0	0	603	903	0
689	5	-43.8229	25.7373	-524.023	14534.2	-58151	-3091.19	89.0297	272.264	0	0	0	0	0	0	0	200	903	0	0	0	0	0	0	0	603	903	0
689	6	-43.06	25.8899	-523.107	14900.4	-58822.4	-3136.96	87.552	271.516	0	0	0	0	0	0	0	200	903	0	0	0	0	0	0	0	603	903	0
689	7	-42.4496	22.2278	-521.887	14900.4	-58578.2	-2953.86	87.7568	271.449	0	0	0	0	0	0	0	200	903	0	0	0	0	0	0	0	603	903	0
689	8	-43.3652	24.364	-520.666	14442.6	-58028.9	-2862.31	88.5486	272.261	0	0	0	0	0	0	0	200	903	0	0	0	0	0	0	0	603	903	0
689	9	-43.06	24.0589	-517.004	14717.3	-57662.7	-2587.65	88.4675	271.534	0	0	0	0	0	0	0	200	903	0	0	0	0	0	0	0	603	903	0
690	0	-41.5341	22.6856	-513.342	13801.8	-57113.4	-2541.87	88.7419	273.114	0	0	0	0	0	0	0	200	903	0	0	0	0	0	0	0	603	903	0
690	1	-41.0764	22.8382	-514.257	13710.2	-57235.5	-2496.09	88.7026	273.34	0	0	0	0	0	0	0	200	903	0	0	0	0	0	0	0	603	903	0
690	2	-41.3815	20.8545	-510.29	13710.2	-57296.5	-2358.76	87.7177	273.133	0	0	0	0	0	0	0	200	903	0	0	0	0	0	0	0	603	903	0
690	3	-41.3815	21.7701	-509.374	13893.3	-57235.5	-2496.09	87.6357	272.725	0	0	0	0	0	0	0	200	903	0	0	0	0	0	0	0	603	903	0
690	4	-41.2289	20.5494	-507.849	14534.2	-57052.4	-2450.32	87.6587	271.381	0	0	0	0	0	0	0	200	903	0	0	0	0	0	0	0	603	903	0
690	5	-40.0082	20.0916	-505.407	13984.9	-56808.2	-2221.44	87.5991	272.329	0	0	0	0	0	0	0	200	903	0	0	0	0	0	0	0	603	903	0
690	6	-39.3979	19.4812	-505.407	14351.1	-56747.2	-2175.66	87.7198	271.605	0	0	0	0	0	0	0	200	903	0	0	0	0	0	0	0	603	903	0
690	7	-41.0764	19.0235	-502.966	13527.1	-56564.1	-1809.45	87.5389	273.105	0	0	0	0	0	0	0	200	903	0	0	0	0	0	0	0	603	903	0
690	8	-39.5505	19.0235	-500.829	13069.3	-56136.8	-1855.23	87.9123	273.905	0	0	0	0	0	0	0	200	903	0	0	0	0	0	0	0	603	903	0
690	9	-38.7875	17.1924	-498.388	13160.9	-55709.6	-1763.67	88.2204	273.593	0	0	0	0	0	0	0	200	903	0	0	0	0	0	0	0	603	903	0
691	0	-36.8039	18.2605	-499.304	13710.2	-55404.4	-1946.78	89.0366	272.541	0	0	0	0	0	0	0	200	903	0	0	0	0	0	0	0	603	903	0
691	1	-37.1091	17.4976	-495.947	13893.3	-55587.5	-1717.9	87.9163	271.986	0	0	0	0	0	0	0	200	903	0	0	0	0	0	0	0	603	903	0
691	2	-38.635	16.4295	-496.252	13344	-55343.4	-1809.45	88.4772	273.11	0	0	0	0	0	0	0	200	903	0	0	0	0	0	0	0	603	903	0
691	3	-38.1772	16.7347	-494.116	13344	-55404.4	-1580.57	87.8716	272.994	0	0	0	0	0	0	0	200	903	0	0	0	0	0	0	0	603	903	0
691	4	-36.8039	16.1243	-492.59	12794.7	-54733	-1672.12	88.8872	274.026	0	0	0	0	0	0	0	200	903	0	0	0	0	0	0	0	603	903	0
691	5	-36.041	15.9717	-491.369	13344	-54855.1	-1397.46	88.3627	272.843	0	0	0	0	0	0	0	200	903	0	0	0	0	0	0	0	603	903	0
691	6	-36.9565	13.6829	-490.148	12611.6	-55160.3	-1077.03	87.4621	274.27	0	0	0	0	0	0	0	200	903	0	0	0	0	0	0	0	603	903	0
691	7	-35.1254	14.751	-488.317	12977.8	-54916.1	-1489.01	87.54	273.423	0	0	0	0	0	0	0	200	903	0	0	0	0	0	0	0	603	903	0
691	8	-35.1254	13.3777	-485.876	13527.1	-54305.8	-1122.8	88.2312	272.159	0	0	0	0	0	0	0	200	903	0	0	0	0	0	0	0	603	903	0
691	9	-33.1418	12.6148	-486.486	12977.8	-54611	-1168.58	87.7441	273.323	0	0	0	0	0	0	0	200	903	0	0	0	0	0	0	0	603	903	0
692	0	-34.3625	13.3777	-486.181	12794.7	-54305.8	-802.368	88.3013	273.683	0	0	0	0	0	0	0	200	903	0	0	0	0	0	0	0	603	903	0
692	1	-35.278	12.157	-485.876	12245.4	-54122.7	-1077.03	88.608	274.797	0	0	0	0	0	0	0	200	903	0	0	0	0	0	0	0	603	903	0
692	2	-34.0573	12.4622	-483.74	12062.3	-54122.7	-802.368	88.1161	275.065	0	0	0	0	0	0	0	200	903	0	0	0	0	0	0	0	603	903	0
692	3	-32.9892	10.9363	-482.214	12153.8	-54000.6	-756.592	88.0152	274.796	0	0	0	0	0	0	0	200	903	0	0	0	0	0	0	0	603	903	0
692	4	-32.8366	11.2415	-482.824	12245.4	-53817.5	-710.816	88.536	274.638	0	0	0	0	0	0	0	200	903	0	0	0	0	0	0	0	603	903	0
692	5	-33.5996	10.4786	-483.74	12520	-53634.4	-756.592	89.1255	274.118	0	0	0	0	0	0	0	200	903	0	0	0	0	0	0	0	603	903	0
692	6	-31.7685	10.0208	-480.078	12336.9	-54122.7	-710.816	87.2626	274.302	0	0	0	0	0	0	0	200	903	0	0	0	0	0	0	0	603	903	0
692	7	-32.2263	9.71561	-478.552	12062.3	-53817.5	-573.486	87.5409	274.794	0	0	0	0	0	0	0	200	903	0	0	0	0	0	0	0	603	903	0
692	8	-31.3107	9.25785	-478.246	11329.8	-53451.3	-436.157	88.2348	276.31	0	0	0	0	0	0	0	200	903	0	0	0	0	0	0	0	603	903	0
692	9	-30.7004	9.41044	-479.772	12428.5	-53878.5	-344.605	87.6998	274.095	0	0	0	0	0	0	0	200	903	0	0	0	0	0	0	0	603	903	0
693	0	-32.3788	9.10526	-478.552	10963.6	-53878.5	-298.828	87.4133	277.09	0	0	0	0	0	0	0	200	903	0	0	0	0	0	0	0	603	903	0
693	1	-31.1581	7.2742	-477.636	11421.4	-53634.4	-344.605	87.7087	276.088	0	0	0	0	0	0	0	200	903	0	0	0	0	0	0	0	603	903	0
693	2	-30.2426	8.03714	-476.721	11604.5	-53390.3	-298.828	88.0051	275.658	0	0	0	0	0	0	0	200	903	0	0	0	0	0	0	0	603	903	0
693	3	-30.2426	7.2742	-478.246	11238.3	-53878.5	-24.1699	87.3415	276.501	0	0	0	0	0	0	0	200	903	0	0	0	0	0	0	0	603	903	0
693	4	-30.3952	6.51127	-478.857	11604.5	-53329.2	-69.9462	88.6322	275.766	0	0	0	0	0	0	0	200	903	0	0	0	0	0	0	0	603	903	0
693	5	-28.4116	5.44315	-475.5	11238.3	-53268.2	158.936	87.9743	276.365	0	0	0	0	0	0	0	200	903	0	0	0	0	0	0	0	603	903	0
693	6	-29.9374	6.20609	-471.838	10963.6	-53756.5	158.936	86.07	276.764	0	0	0	0	0	0	0	200	903	0	0	0	0	0	0	0	603	903	0
693	7	-29.4797	5.29056	-477.331	10689	-53451.3	-24.1699	88.0205	277.607	0	0	0	0	0	0	0	200	903	0	0	0	0	0	0	0	603	903	0
693	8	-29.1745	5.90091	-477.941	10689	-53268.2	21.6065	88.5466	277.635	0	0	0	0	0	0	0	200	903	0	0	0	0	0	0	0	603	903	0
693	9	-29.4797	4.37503	-477.636	10780.5	-53634.4	250.488	87.7087	277.429	0	0	0	0	0	0	0	200	903	0	0	0	0	0	0	0	603	903	0
694	0	-29.4797	5.44315	-475.5	10872.1	-53878.5	296.265	86.6907	277.135	0	0	0	0	0	0	0	200	903	0	0	0	0	0	0	0	603	903	0
694	1	-28.259	4.8328	-476.415	10780.5	-53268.2	479.37	88.1896	277.372	0	0	0	0	0	0	0	200	903	0	0	0	0	0	0	0	603	903	0
694	2	-27.9538	4.06986	-477.636	10414.3	-53573.4	387.818	87.8364	278.196	0	0	0	0	0	0	0	200	903	0	0	0	0	0	0	0	603	903	0
694	3	-28.5641	2.08622	-478.552	10505.9	-53634.4	342.041	87.9235	278.047	0	0	0	0	0	0	0	200	903	0	0	0	0	0	0	0	603	903	0
694	4	-27.6486	3.45951	-476.415	10139.7	-53512.3	754.029	87.6772	278.717	0	0	0	0	0	0	0	200	903	0	0	0	0	0	0	0	603	903	0
694	5	-27.496	3.45951	-476.11	10597.4	-53512.3	296.265	87.6052	277.742	0	0	0	0	0	0	0	200	903	0	0	0	0	0	0	0	603	903	0
694	6	-27.3434	3.30692	-481.298	10139.7	-53939.6	570.923	87.929	278.933	0	0	0	0	0	0	0	200	903	0	0	0	0	0	0	0	603	903	0
694	7	-27.496	2.69657	-478.857	10689	-53634.4	570.923	87.9949	277.678	0	0	0	0	0	0	0	200	903	0	0	0	0	0	0	0	603	903	0
694	8	-28.8693	2.54398	-479.467	10414.3	-53756.5	616.7	87.8829	278.279	0	0	0	0	0	0	0	200	903	0	0	0	0	0	0	0	603	903	0
694	9	-28.5641	1.93363	-477.026	10231.2	-54244.8	708.252	86.2855	278.552	0	0	0	0	0	0	0	200	903	0	0	0	0	0	0	0	603	903	0
695	0	-27.1909	1.17069	-477.941	10231.2	-54549.9	570.923	85.8648	278.593	0	0	0	0	0	0	0	200	903	0	0	0	0	0	0	0	603	903	0
695	1	-27.3434	1.0181	-480.383	9865	-53329.2	891.358	88.986	279.464	0	0	0	0	0	0	0	200	903	0	0	0	0	0	0	0	603	903	0
695	2	-27.9538	0.102574	-480.383	9498.79	-54366.8	891.358	86.826	280.227	0	0	0	0	0	0	0	200	903	0	0	0	0	0	0	0	603	903	0
695	3	-27.3434	0.560338	-479.162	10139.7	-54427.9	1028.69	86.4103	278.839	0	0	0	0	0	0	0	200	903	0	0	0	0	0	0	0	603	903	0
695	4	-28.5641	0.102574	-479.772	9407.23	-54183.7	799.805	87.0637	280.392	0	0	0	0	0	0	0	200	903	0	0	0	0	0	0	0	603	903	0
695	5	-26.8857	-0.0500139	-484.96	9590.34	-54672	1257.57	87.265	280.224	0	0	0	0	0	0	0	200	903	0	0	0	0	0	0	0	603	903	0
695	6	-27.6486	-0.507778	-482.519	9681.89	-54549.9	1074.46	86.9476	279.935	0	0	0	0	0	0	0	200	903	0	0	0	0	0	0	0	603	903	0
695	7	-28.259	-1.4233	-483.129	10963.6	-54549.9	1074.46	87.0904	277.307	0	0	0	0	0	0	0	200	903	0	0	0	0	0	0	0	603	903	0
695	8	-28.4116	-2.33883	-481.909	9681.89	-54611	1303.35	86.6777	279.909	0	0	0	0	0	0	0	200	903	0	0	0	0	0	0	0	603	903	0
695	9	-27.496	-2.33883	-482.824	9773.44	-55343.4	1120.24	85.3757	279.758	0	0	0	0	0	0	0	200	903	0	0	0	0	0	0	0	603	903	0
696	0	-27.1909	-2.64401	-485.266	9224.13	-54366.8	1257.57	87.9648	280.992	0	0	0	0	0	0	0	200	903	0	0	0	0	0	0	0	603	903	0
696	1	-27.8012	-2.03366	-484.35	9498.79	-54794.1	1211.79	86.8709	280.389	0	0	0	0	0	0	0	200	903	0	0	0	0	0	0	0	603	903	0
696	2	-26.8857	-2.03366	-485.266	9407.23	-55282.3	1486.45	86.0781	280.614	0	0	0	0	0	0	0	200	903	0	0	0	0	0	0	0	603	903	0
696	3	-28.5641	-2.7966	-484.96	8857.91	-55465.5	1532.23	85.6289	281.735	0	0	0	0	0	0	0	200	903	0	0	0	0	0	0	0	603	903	0
696	4	-27.9538	-2.64401	-485.571	9132.58	-54977.2	1303.35	86.7782	281.192	0	0	0	0	0	0	0	200	903	0	0	0	0	0	0	0	603	903	0
696	5	-27.9538	-4.16989	-488.928	9865	-55404.4	1623.78	86.6818	279.823	0	0	0	0	0	0	0	200	903	0	0	0	0	0	0	0	603	903	0
696	6	-29.0219	-4.62765	-488.622	9041.02	-55831.7	1532.23	85.7366	281.497	0	0	0	0	0	0	0	200	903	0	0	0	0	0	0	0	603	903	0
696	7	-28.8693	-4.78024	-489.233	8766.36	-55343.4	1669.56	86.8772	282.081	0	0	0	0	0	0	0	200	903	0	0	0	0	0	0	0	603	903	0
696	8	-28.4116	-5.39059	-489.233	8857.91	-55709.6	1669.56	86.1287	281.894	0	0	0	0	0	0	0	200	903	0	0	0	0	0	0	0	603	903	0
696	9	-27.0383	-5.08541	-491.979	9224.13	-56075.8	1715.33	86.02	281.251	0	0	0	0	0	0	0	200	903	0	0	0	0	0	0	0	603	903	0
697	0	-28.5641	-5.39059	-487.402	8766.36	-56564.1	1898.44	83.9477	282.014	0	0	0	0	0	0	0	200	903	0	0	0	0	0	0	0	603	903	0
697	1	-29.6323	-5.84835	-493.81	8125.49	-56075.8	1669.56	86.4427	283.545	0	0	0	0	0	0	0	200	903	0	0	0	0	0	0	0	603	903	0
697	2	-29.9374	-6.00094	-493.505	8857.91	-56319.9	2447.75	85.8777	282.051	0	0	0	0	0	0	0	200	903	0	0	0	0	0	0	0	603	903	0
697	3	-28.5641	-7.06906	-494.116	8491.7	-56686.2	2035.77	85.2775	282.814	0	0	0	0	0	0	0	200	903	0	0	0	0	0	0	0	603	903	0
697	4	-28.259	-9.51046	-496.862	8491.7	-56197.9	2127.32	86.8944	282.909	0	0	0	0	0	0	0	200	903	0	0	0	0	0	0	0	603	903	0
697	5	-28.7167	-8.28976	-498.083	7942.39	-57113.4	2310.42	85.3335	284.054	0	0	0	0	0	0	0	200	903	0	0	0	0	0	0	0	603	903	0
697	6	-27.9538	-7.37423	-498.083	8949.46	-57296.5	2493.53	84.9659	282.032	0	0	0	0	0	0	0	200	903	0	0	0	0	0	0	0	603	903	0
697	7	-29.7849	-8.44235	-498.693	8125.49	-56869.3	2356.2	85.9634	283.706	0	0	0	0	0	0	0	200	903	0	0	0	0	0	0	0	603	903	0
697	8	-28.1064	-8.28976	-500.219	8217.04	-56991.3	2356.2	86.0673	283.573	0	0	0	0	0	0	0	200	903	0	0	0	0	0	0	0	603	903	0
697	9	-28.4116	-8.74752	-502.661	8125.49	-57357.5	2585.08	85.8921	283.835	0	0	0	0	0	0	0	200	903	0	0	0	0	0	0	0	603	903	0
698	0	-29.7849	-9.81564	-503.576	7942.39	-57601.7	2539.31	85.6147	284.228	0	0	0	0	0	0	0	200	903	0	0	0	0	0	0	0	603	903	0
698	1	-29.9374	-9.66305	-502.05	8033.94	-57540.6	2859.74	85.3887	283.998	0	0	0	0	0	0	0	200	903	0	0	0	0	0	0	0	603	903	0
698	2	-29.9374	-11.1889	-504.186	7393.07	-58151	2539.31	84.6637	285.337	0	0	0	0	0	0	0	200	903	0	0	0	0	0	0	0	603	903	0
698	3	-27.1909	-10.5786	-506.323	7759.28	-58395.1	2722.41	84.6681	284.675	0	0	0	0	0	0	0	200	903	0	0	0	0	0	0	0	603	903	0
698	4	-29.3271	-10.5786	-505.407	7393.07	-58090	3042.85	85.063	285.372	0	0	0	0	0	0	0	200	903	0	0	0	0	0	0	0	603	903	0
698	5	-30.5478	-11.4941	-510.595	7393.07	-58395.1	2997.07	85.6332	285.521	0	0	0	0	0	0	0	200	903	0	0	0	0	0	0	0	603	903	0
698	6	-29.6323	-11.9519	-509.069	7484.62	-58700.3	3180.18	84.6909	285.297	0	0	0	0	0	0	0	200	903	0	0	0	0	0	0	0	603	903	0
698	7	-29.7849	-12.7148	-511.205	7667.73	-58578.2	3225.95	85.4115	285.001	0	0	0	0	0	0	0	200	903	0	0	0	0	0	0	0	603	903	0
698	8	-29.0219	-14.6985	-512.731	7301.52	-58761.4	3454.84	85.3954	285.76	0	0	0	0	0	0	0	200	903	0	0	0	0	0	0	0	603	903	0
698	9	-31.0056	-13.7829	-515.173	6660.65	-59188.6	3500.61	85.1092	287.071	0	0	0	0	0	0	0	200	903	0	0	0	0	0	0	0	603	903	0
699	0	-30.5478	-13.7829	-513.647	7484.62	-59249.6	3500.61	84.6491	285.428	0	0	0	0	0	0	0	200	903	0	0	0	0	0	0	0	603	903	0
699	1	-29.3271	-13.4777	-515.783	6660.65	-59188.6	3454.84	85.2452	287.086	0	0	0	0	0	0	0	200	903	0	0	0	0	0	0	0	603	903	0
699	2	-29.3271	-14.3933	-519.445	7026.86	-60043.1	3683.72	84.4092	286.472	0	0	0	0	0	0	0	200	903	0	0	0	0	0	0	0	603	903	0
699	3	-29.4797	-15.1562	-520.056	6569.1	-60165.2	3821.05	84.3101	287.368	0	0	0	0	0	0	0	200	903	0	0	0	0	0	0	0	603	903	0
699	4	-30.3952	-15.7666	-521.581	6752.2	-59615.8	3683.72	85.7018	287.054	0	0	0	0	0	0	0	200	903	0	0	0	0	0	0	0	603	903	0
699	5	-31.0056	-16.2243	-521.887	6569.1	-60531.4	3729.49	84.0143	287.413	0	0	0	0	0	0	0	200	903	0	0	0	0	0	0	0	603	903	0
699	6	-30.09	-16.8347	-524.023	6294.44	-60897.6	4004.15	83.7883	287.988	0	0	0	0	0	0	0	200	903	0	0	0	0	0	0	0	603	903	0
699	7	-30.7004	-16.8347	-526.464	5928.23	-60836.6	4324.58	84.4431	288.74	0	0	0	0	0	0	0	200	903	0	0	0	0	0	0	0	603	903	0
699	8	-31.4633	-16.8347	-528.6	6019.78	-60958.6	4187.26	84.6792	288.612	0	0	0	0	0	0	0	200	903	0	0	0	0	0	0	0	603	903	0
699	9	-30.5478	-17.445	-529.821	5653.57	-61446.9	4233.03	84.0233	289.329	0	0	0	0	0	0	0	200	903	0	0	0	0	0	0	0	603	903	0
700	0	-31.0056	-17.5976	-530.126	6202.89	-61446.9	4233.03	84.0901	288.299	0	0	0	0	0	0	0	200	903	0	0	0	0	0	0	0	603	903	0
700	1	-30.5478	-18.9709	-534.094	6019.78	-61691.1	4690.8	84.4939	288.729	0	0	0	0	0	0	0	200	903	0	0	0	0	0	0	0	603	903	0
700	2	-30.09	-20.1916	-535.62	5653.57	-61630	4690.8	84.9369	289.445	0	0	0	0	0	0	0	200	903	0	0	0	0	0	0	0	603	903	0
700	3	-31.7685	-18.9709	-537.451	5378.91	-61996.2	4645.02	84.6476	289.992	0	0	0	0	0	0	0	200	903	0	0	0	0	0	0	0	603	903	0
700	4	-31.7685	-19.2761	-536.84	5653.57	-62362.4	4645.02	83.8343	289.469	0	0	0	0	0	0	0	200	903	0	0	0	0	0	0	0	603	903	0
700	5	-29.6323	-19.4287	-538.976	5287.36	-62728.7	4645.02	83.6152	290.19	0	0	0	0	0	0	0	200	903	0	0	0	0	0	0	0	603	903	0
700	6	-31.6159	-19.8864	-542.333	5378.91	-63400	4828.12	83.0977	290.082	0	0	0	0	0	0	0	200	903	0	0	0	0	0	0	0	603	903	0
700	7	-31.6159	-19.8864	-544.164	5195.81	-63339	5102.79	83.6032	290.452	0	0	0	0	0	0	0	200	903	0	0	0	0	0	0	0	603	903	0
700	8	-29.9374	-21.2597	-544.164	5012.7	-63644.2	5148.56	83.0424	290.788	0	0	0	0	0	0	0	200	903	0	0	0	0	0	0	0	603	903	0
700	9	-32.0737	-21.7175	-544.47	4829.59	-64254.5	4965.45	81.987	291.13	0	0	0	0	0	0	0	200	903	0	0	0	0	0	0	0	603	903	0
701	0	-31.1581	-22.3278	-548.742	4463.38	-63644.2	5011.23	84.018	291.866	0	0	0	0	0	0	0	200	903	0	0	0	0	0	0	0	603	903	0
701	1	-31.6159	-21.4123	-552.404	4371.83	-63888.3	5194.34	84.345	292.086	0	0	0	0	0	0	0	200	903	0	0	0	0	0	0	0	603	903	0
701	2	-32.0737	-23.2434	-554.846	4280.28	-64620.7	5377.44	83.5339	292.286	0	0	0	0	0	0	0	200	903	0	0	0	0	0	0	0	603	903	0
701	3	-32.3788	-22.7856	-553.93	4188.73	-64437.6	5469	83.6719	292.438	0	0	0	0	0	0	0	200	903	0	0	0	0	0	0	0	603	903	0
701	4	-31.6159	-23.2434	-556.677	4738.04	-64864.9	5377.44	83.4784	291.489	0	0	0	0	0	0	0	200	903	0	0	0	0	0	0	0	603	903	0
701	5	-31.3107	-24.3115	-561.559	4005.62	-65414.2	5652.1	83.5133	292.867	0	0	0	0	0	0	0	200	903	0	0	0	0	0	0	0	603	903	0
701	6	-31.3107	-24.4641	-559.728	3639.41	-65536.3	5514.77	82.9141	293.498	0	0	0	0	0	0	0	200	903	0	0	0	0	0	0	0	603	903	0
701	7	-32.8366	-25.0744	-564.916	3730.96	-65414.2	5880.98	84.2055	293.396	0	0	0	0	0	0	0	200	903	0	0	0	0	0	0	0	603	903	0
701	8	-33.2944	-24.6167	-564.306	3273.2	-66268.7	5789.43	82.566	294.2	0	0	0	0	0	0	0	200	903	0	0	0	0	0	0	0	603	903	0
701	9	-32.0737	-25.227	-567.663	3639.41	-66268.7	6201.42	83.2605	293.589	0	0	0	0	0	0	0	200	903	0	0	0	0	0	0	0	603	903	0
702	0	-32.3788	-25.8374	-570.715	3090.09	-66451.8	6247.19	83.5639	294.586	0	0	0	0	0	0	0	200	903	0	0	0	0	0	0	0	603	903	0
702	1	-32.0737	-26.7529	-572.546	3090.09	-66757	6064.09	83.4032	294.603	0	0	0	0	0	0	0	200	903	0	0	0	0	0	0	0	603	903	0
702	2	-33.2944	-27.2107	-571.935	3090.09	-67062.1	6292.97	82.7453	294.597	0	0	0	0	0	0	0	200	903	0	0	0	0	0	0	0	603	903	0
702	3	-33.447	-27.9736	-573.156	2357.67	-67489.4	6384.52	82.2495	295.887	0	0	0	0	0	0	0	200	903	0	0	0	0	0	0	0	603	903	0
702	4	-32.3788	-27.6684	-576.513	1899.9	-67123.2	6292.97	83.5704	296.704	0	0	0	0	0	0	0	200	903	0	0	0	0	0	0	0	603	903	0
702	5	-32.3788	-30.2624	-580.175	1808.35	-68221.8	6567.63	82.4117	296.883	0	0	0	0	0	0	0	200	903	0	0	0	0	0	0	0	603	903	0
702	6	-33.1418	-28.4314	-580.786	2083.01	-68404.9	6704.96	82.22	296.413	0	0	0	0	0	0	0	200	903	0	0	0	0	0	0	0	603	903	0
702	7	-32.3788	-29.6521	-582.311	2357.67	-68527	6750.73	82.319	295.951	0	0	0	0	0	0	0	200	903	0	0	0	0	0	0	0	603	903	0
702	8	-33.9047	-29.4995	-582.311	1899.9	-69259.4	6842.29	81.0612	296.737	0	0	0	0	0	0	0	200	903	0	0	0	0	0	0	0	603	903	0
702	9	-32.5314	-30.8728	-586.584	801.271	-69015.3	6979.62	82.3438	298.634	0	0	0	0	0	0	0	200	903	0	0	0	0	0	0	0	603	903	0
703	0	-32.9892	-30.8728	-589.025	526.613	-69503.5	7254.27	82.0025	299.106	0	0	0	0	0	0	0	200	903	0	0	0	0	0	0	0	603	903	0
703	1	-33.7521	-30.7202	-591.467	160.402	-69320.5	7300.05	82.799	299.729	0	0	0	0	0	0	0	200	903	0	0	0	0	0	0	0	603	903	0
703	2	-34.5151	-32.3986	-590.551	251.955	-69869.8	7162.72	81.6872	299.573	0	0	0	0	0	0	0	200	903	0	0	0	0	0	0	0	603	903	0
703	3	-33.7521	-31.4831	-593.298	435.06	-69991.8	7254.27	82.0292	299.267	0	0	0	0	0	0	0	200	903	0	0	0	0	0	0	0	603	903	0
703	4	-32.3788	-33.3142	-597.57	526.613	-70297	7391.6	82.3619	299.119	0	0	0	0	0	0	0	200	903	0	0	0	0	0	0	0	603	903	0
703	5	-33.1418	-33.3142	-597.57	160.402	-71151.5	7391.6	80.9319	299.732	0	0	0	0	0	0	0	200	903	0	0	0	0	0	0	0	603	903	0
703	6	-34.8203	-34.0771	-601.843	-205.809	-71212.5	7528.93	81.6758	300.342	0	0	0	0	0	0	0	200	903	0	0	0	0	0	0	0	603	903	0
703	7	-35.1254	-34.9926	-600.927	-1121.34	-71090.5	7757.81	81.6987	301.866	0	0	0	0	0	0	0	200	903	0	0	0	0	0	0	0	603	903	0
703	8	-33.9047	-34.2297	-603.369	-1121.34	-71884	7803.59	80.8623	301.858	0	0	0	0	0	0	0	200	903	0	0	0	0	0	0	0	603	903	0
703	9	-34.3625	-36.3659	-605.81	-1670.65	-72006	7940.92	81.1409	302.758	0	0	0	0	0	0	0	200	903	0	0	0	0	0	0	0	603	903	0
704	0	-33.9047	-35.2978	-607.641	-1304.44	-72311.2	8169.8	80.9969	302.147	0	0	0	0	0	0	0	200	903	0	0	0	0	0	0	0	603	903	0
704	1	-33.9047	-36.6711	-608.251	-1121.34	-72677.4	8398.68	80.5143	301.844	0	0	0	0	0	0	0	200	903	0	0	0	0	0	0	0	603	903	0
704	2	-35.5832	-37.2815	-609.472	-2128.42	-73104.7	8352.91	80.0525	303.492	0	0	0	0	0	0	0	200	903	0	0	0	0	0	0	0	603	903	0
704	3	-34.8203	-37.8918	-610.388	-2219.97	-72616.4	8215.58	81.0324	303.637	0	0	0	0	0	0	0	200	903	0	0	0	0	0	0	0	603	903	0
704	4	-35.278	-38.3496	-615.27	-2769.29	-73104.7	8352.91	81.1829	304.501	0	0	0	0	0	0	0	200	903	0	0	0	0	0	0	0	603	903	0
704	5	-36.1935	-37.8918	-616.796	-3410.16	-73348.8	9039.55	81.081	305.529	0	0	0	0	0	0	0	200	903	0	0	0	0	0	0	0	603	903	0
704	6	-35.8884	-40.3332	-616.491	-3501.71	-73470.9	8673.34	80.8241	305.68	0	0	0	0	0	0	0	200	903	0	0	0	0	0	0	0	603	903	0
704	7	-37.1091	-38.9599	-618.017	-3318.6	-73898.1	8536.01	80.4271	305.37	0	0	0	0	0	0	0	200	903	0	0	0	0	0	0	0	603	903	0
704	8	-36.4987	-40.6384	-619.238	-3135.5	-74447.4	8993.77	79.7757	305.063	0	0	0	0	0	0	0	200	903	0	0	0	0	0	0	0	603	903	0
704	9	-36.8039	-40.4858	-622.595	-3959.47	-74752.6	8902.22	79.9338	306.36	0	0	0	0	0	0	0	200	903	0	0	0	0	0	0	0	603	903	0
705	0	-37.7194	-40.6384	-624.426	-4142.58	-74325.4	9039.55	80.97	306.634	0	0	0	0	0	0	0	200	903	0	0	0	0	0	0	0	603	903	0
705	1	-38.1772	-41.5539	-624.426	-5241.21	-75301.9	9039.55	79.4061	308.394	0	0	0	0	0	0	0	200	903	0	0	0	0	0	0	0	603	903	0
705	2	-37.7194	-41.5539	-625.341	-5149.66	-75362.9	9085.33	79.4851	308.235	0	0	0	0	0	0	0	200	903	0	0	0	0	0	0	0	603	903	0
705	3	-37.872	-42.0117	-627.783	-5790.53	-75485	9314.21	79.7594	309.224	0	0	0	0	0	0	0	200	903	0	0	0	0	0	0	0	603	903	0
705	4	-38.0246	-42.0117	-623.815	-5973.63	-75485	9222.66	78.9947	309.576	0	0	0	0	0	0	0	200	903	0	0	0	0	0	0	0	603	903	0
705	5	-39.8557	-42.7746	-630.529	-6248.29	-76095.3	9405.76	79.3151	309.91	0	0	0	0	0	0	0	200	903	0	0	0	0	0	0	0	603	903	0
705	6	-39.3979	-42.9272	-630.834	-6339.84	-76278.5	9680.42	79.0832	310.05	0	0	0	0	0	0	0	200	903	0	0	0	0	0	0	0	603	903	0
705	7	-39.0927	-43.2324	-632.665	-7346.92	-75973.3	9268.43	79.9156	311.613	0	0	0	0	0	0	0	200	903	0	0	0	0	0	0	0	603	903	0
705	8	-39.7031	-43.6902	-634.191	-7804.69	-77071.9	9588.87	78.4722	312.307	0	0	0	0	0	0	0	200	903	0	0	0	0	0	0	0	603	903	0
705	9	-40.0082	-43.0798	-635.107	-8445.55	-76644.7	10092.4	79.32	313.298	0	0	0	0	0	0	0	200	903	0	0	0	0	0	0	0	603	903	0
706	0	-40.9238	-44.1479	-635.107	-8628.66	-77071.9	9588.87	78.6473	313.586	0	0	0	0	0	0	0	200	903	0	0	0	0	0	0	0	603	903	0
706	1	-41.6867	-43.385	-635.412	-7896.24	-77560.2	9726.2	77.9372	312.427	0	0	0	0	0	0	0	200	903	0	0	0	0	0	0	0	603	903	0
706	2	-40.7712	-44.6057	-636.022	-9086.42	-77804.3	9863.53	77.6705	314.286	0	0	0	0	0	0	0	200	903	0	0	0	0	0	0	0	603	903	0
706	3	-40.6186	-44.4531	-639.074	-9544.19	-77743.3	9588.87	78.3501	314.934	0	0	0	0	0	0	0	200	903	0	0	0	0	0	0	0	603	903	0
706	4	-40.9238	-44.4531	-636.328	-10368.2	-77865.4	9955.08	77.6331	316.294	0	0	0	0	0	0	0	200	903	0	0	0	0	0	0	0	603	903	0
706	5	-42.1445	-44.6057	-640.295	-10551.3	-78109.5	9955.08	78.01	316.479	0	0	0	0	0	0	0	200	903	0	0	0	0	0	0	0	603	903	0
706	6	-43.3652	-44.1479	-639.99	-10917.5	-78048.5	10184	78.0473	317.059	0	0	0	0	0	0	0	200	903	0	0	0	0	0	0	0	603	903	0
706	7	-42.6022	-46.5893	-639.99	-11649.9	-78231.6	9771.97	77.7611	318.203	0	0	0	0	0	0	0	200	903	0	0	0	0	0	0	0	603	903	0
706	8	-42.6022	-44.7583	-642.431	-11741.5	-78597.8	9863.53	77.6556	318.277	0	0	0	0	0	0	0	200	903	0	0	0	0	0	0	0	603	903	0
706	9	-43.6704	-45.6738	-643.041	-12290.8	-78536.7	10184	77.8667	319.114	0	0	0	0	0	0	0	200	903	0	0	0	0	0	0	0	603	903	0
707	0	-41.8393	-45.8264	-643.041	-12657	-78903	10229.7	77.2972	319.683	0	0	0	0	0	0	0	200	903	0	0	0	0	0	0	0	603	903	0
707	1	-44.5859	-45.5212	-643.652	-13023.2	-79025	10367.1	77.2239	320.233	0	0	0	0	0	0	0	200	903	0	0	0	0	0	0	0	603	903	0
707	2	-43.6704	-45.8264	-643.652	-14213.4	-79574.4	10321.3	76.3704	322.082	0	0	0	0	0	0	0	200	903	0	0	0	0	0	0	0	603	903	0
707	3	-43.6704	-45.5212	-647.009	-14579.6	-79391.2	10458.6	77.2949	322.534	0	0	0	0	0	0	0	200	903	0	0	0	0	0	0	0	603	903	0
707	4	-45.0436	-46.7419	-647.009	-15037.4	-79574.4	10321.3	77.0119	323.241	0	0	0	0	0	0	0	200	903	0	0	0	0	0	0	0	603	903	0
707	5	-45.8066	-45.0634	-646.703	-15128.9	-79818.5	10367.1	76.5763	323.394	0	0	0	0	0	0	0	200	903	0	0	0	0	0	0	0	603	903	0
707	6	-44.7385	-46.5893	-647.619	-15312	-79635.4	10046.6	77.0336	323.644	0	0	0	0	0	0	0	200	903	0	0	0	0	0	0	0	603	903	0
707	7	-44.4333	-47.81	-647.924	-16319.1	-80123.7	10458.6	76.3379	325.187	0	0	0	0	0	0	0	200	903	0	0	0	0	0	0	0	603	903	0
707	8	-44.8911	-46.4367	-644.872	-17417.7	-80184.7	10641.7	75.658	327.01	0	0	0	0	0	0	0	200	903	0	0	0	0	0	0	0	603	903	0
707	9	-46.2643	-45.6738	-650.366	-17509.3	-80611.9	10641.7	76.0514	326.922	0	0	0	0	0	0	0	200	903	0	0	0	0	0	0	0	603	903	0
708	0	-46.1118	-46.5893	-649.145	-18607.9	-80306.8	10458.6	76.2883	328.665	0	0	0	0	0	0	0	200	903	0	0	0	0	0	0	0	603	903	0
708	1	-46.1118	-45.6738	-650.671	-18424.8	-80978.1	10504.4	75.5467	328.317	0	0	0	0	0	0	0	200	903	0	0	0	0	0	0	0	603	903	0
708	2	-45.5014	-46.5893	-651.586	-18791	-80978.1	10733.3	75.7215	328.839	0	0	0	0	0	0	0	200	903	0	0	0	0	0	0	0	603	903	0
708	3	-47.3325	-46.7419	-652.807	-19523.4	-80856.1	10641.7	76.1409	329.907	0	0	0	0	0	0	0	200	903	0	0	0	0	0	0	0	603	903	0
708	4	-45.5014	-46.2841	-650.976	-20988.3	-81100.2	10733.3	75.4175	332.241	0	0	0	0	0	0	0	200	903	0	0	0	0	0	0	0	603	903	0
708	5	-47.7902	-45.8264	-649.45	-21079.8	-80856.1	10687.5	75.5007	332.458	0	0	0	0	0	0	0	200	903	0	0	0	0	0	0	0	603	903	0
708	6	-47.0273	-45.979	-651.281	-21720.7	-81283.4	10824.8	75.1947	333.351	0	0	0	0	0	0	0	200	903	0	0	0	0	0	0	0	603	903	0
708	7	-47.0273	-45.6738	-654.028	-21812.3	-81222.3	11099.5	75.8122	333.351	0	0	0	0	0	0	0	200	903	0	0	0	0	0	0	0	603	903	0
708	8	-48.4006	-46.4367	-654.943	-22270	-81710.6	10962.2	75.2402	334.003	0	0	0	0	0	0	0	200	903	0	0	0	0	0	0	0	603	903	0
708	9	-49.0109	-46.2841	-653.417	-22910.9	-81893.7	11053.7	74.6686	335.063	0	0	0	0	0	0	0	200	903	0	0	0	0	0	0	0	603	903	0
709	0	-48.4006	-46.5893	-653.417	-23643.3	-82198.9	11007.9	74.2016	336.184	0	0	0	0	0	0	0	200	903	0	0	0	0	0	0	0	603	903	0
709	1	-47.4851	-46.5893	-654.333	-24650.4	-82198.9	10916.4	74.3776	337.673	0	0	0	0	0	0	0	200	903	0	0	0	0	0	0	0	603	903	0
709	2	-48.7058	-44.6057	-656.164	-25199.7	-82198.9	11191	74.7282	338.405	0	0	0	0	0	0	0	200	903	0	0	0	0	0	0	0	603	903	0
709	3	-49.9265	-46.8945	-655.859	-25840.6	-82259.9	10962.2	74.5768	339.4	0	0	0	0	0	0	0	200	903	0	0	0	0	0	0	0	603	903	0
709	4	-50.079	-44.7583	-654.638	-25474.4	-82443	10962.2	74.0632	338.914	0	0	0	0	0	0	0	200	903	0	0	0	0	0	0	0	603	903	0
709	5	-49.6213	-45.979	-654.943	-25749	-82992.4	11053.7	73.2831	339.315	0	0	0	0	0	0	0	200	903	0	0	0	0	0	0	0	603	903	0
709	6	-50.3842	-45.979	-656.774	-27122.3	-82565.1	11191	74.287	341.296	0	0	0	0	0	0	0	200	903	0	0	0	0	0	0	0	603	903	0
709	7	-50.9946	-45.3686	-656.774	-27854.7	-82626.1	11007.9	74.194	342.411	0	0	0	0	0	0	0	200	903	0	0	0	0	0	0	0	603	903	0
709	8	-50.3842	-44.6057	-654.028	-27305.4	-83236.5	10779.1	72.7325	341.75	0	0	0	0	0	0	0	200	903	0	0	0	0	0	0	0	603	903	0
709	9	-50.842	-44.4531	-656.774	-29136.5	-83175.4	10916.4	73.3577	344.363	0	0	0	0	0	0	0	200	903	0	0	0	0	0	0	0	603	903	0
710	0	-50.9946	-44.3005	-656.164	-29228	-83053.3	10733.3	73.4259	344.544	0	0	0	0	0	0	0	200	903	0	0	0	0	0	0	0	603	903	0
710	1	-49.9265	-44.9109	-658.911	-29777.4	-83419.6	11007.9	73.3978	345.192	0	0	0	0	0	0	0	200	903	0	0	0	0	0	0	0	603	903	0
710	2	-51.9101	-45.3686	-657.69	-30509.8	-83480.6	10824.8	73.0699	346.389	0	0	0	0	0	0	0	200	903	0	0	0	0	0	0	0	603	903	0
710	3	-51.7575	-46.1316	-656.469	-30509.8	-83480.6	11053.7	72.8339	346.476	0	0	0	0	0	0	0	200	903	0	0	0	0	0	0	0	603	903	0
710	4	-50.3842	-44.9109	-657.995	-32432.4	-83053.3	11145.3	73.7782	349.29	0	0	0	0	0	0	0	200	903	0	0	0	0	0	0	0	603	903	0
710	5	-50.079	-44.3005	-658.911	-32523.9	-83785.8	10779.1	72.842	349.36	0	0	0	0	0	0	0	200	903	0	0	0	0	0	0	0	603	903	0
710	6	-51.7575	-46.1316	-658.911	-33256.3	-83541.6	11374.2	73.2125	350.472	0	0	0	0	0	0	0	200	903	0	0	0	0	0	0	0	603	903	0
710	7	-52.9782	-43.9953	-658.911	-33622.6	-83785.8	11007.9	72.842	351.028	0	0	0	0	0	0	0	200	903	0	0	0	0	0	0	0	603	903	0
710	8	-52.8256	-43.5376	-656.774	-32707	-84213.1	11007.9	71.7778	349.799	0	0	0	0	0	0	0	200	903	0	0	0	0	0	0	0	603	903	0
710	9	-52.2153	-43.9953	-658.3	-34721.2	-83846.8	11053.7	72.6313	352.744	0	0	0	0	0	0	0	200	903	0	0	0	0	0	0	0	603	903	0
711	0	-53.1308	-43.8427	-660.436	-36002.9	-83602.7	11191	73.413	354.514	0	0	0	0	0	0	0	200	903	0	0	0	0	0	0	0	603	903	0
711	1	-53.8937	-45.3686	-661.352	-36369.1	-84518.2	11145.3	72.2039	354.992	0	0	0	0	0	0	0	200	903	0	0	0	0	0	0	0	603	903	0
711	2	-53.8937	-43.6902	-656.164	-37101.6	-84029.9	11053.7	71.9376	356.543	0	0	0	0	0	0	0	200	903	0	0	0	0	0	0	0	603	903	0
711	3	-54.5041	-42.3169	-657.385	-37010	-84213.1	11191	71.8968	356.299	0	0	0	0	0	0	0	200	903	0	0	0	0	0	0	0	603	903	0
711	4	-53.7412	-43.385	-658.911	-37559.3	-84152	11053.7	72.2862	357.002	0	0	0	0	0	0	0	200	903	0	0	0	0	0	0	0	603	903	0
711	5	-53.2834	-44.1479	-661.352	-38383.3	-84396.1	10687.5	72.3885	358.038	0	0	0	0	0	0	0	200	903	0	0	0	0	0	0	0	603	903	0
711	6	-55.267	-43.9953	-660.131	-38658	-84457.2	10779.1	72.06	358.561	0	0	0	0	0	0	0	200	903	0	0	0	0	0	0	0	603	903	0
711	7	-55.5722	-43.5376	-659.216	-40122.8	-85250.6	11145.3	70.6787	360.865	0	0	0	0	0	0	0	200	903	0	0	0	0	0	0	0	603	903	0
711	8	-54.0463	-42.7746	-658.605	-41038.3	-84579.3	11053.7	71.5782	362.311	0	0	0	0	0	0	0	200	903	0	0	0	0	0	0	0	603	903	0
711	9	-54.8093	-42.9272	-657.385	-41496.1	-84945.5	10916.4	70.7827	363.123	0	0	0	0	0	0	0	200	903	0	0	0	0	0	0	0	603	903	0
712	0	-54.0463	-43.5376	-661.352	-42320.1	-85128.5	10962.2	71.281	363.99	0	0	0	0	0	0	0	200	903	0	0	0	0	0	0	0	603	903	0
712	1	-55.5722	-42.622	-661.352	-42137	-85189.6	11145.3	71.1887	363.713	0	0	0	0	0	0	0	200	903	0	0	0	0	0	0	0	603	903	0
712	2	-56.1826	-43.385	-660.131	-42411.6	-85128.5	10824.8	71.043	364.247	0	0	0	0	0	0	0	200	903	0	0	0	0	0	0	0	603	903	0
712	3	-54.9619	-43.5376	-661.047	-43052.5	-85372.7	10824.8	70.8523	365.128	0	0	0	0	0	0	0	200	903	0	0	0	0	0	0	0	603	903	0
712	4	-54.3515	-42.9272	-661.352	-44151.1	-85555.8	10779.1	70.635	366.759	0	0	0	0	0	0	0	200	903	0	0	0	0	0	0	0	603	903	0
712	5	-56.1826	-43.0798	-662.878	-44975.1	-85372.7	11282.6	71.209	367.848	0	0	0	0	0	0	0	200	903	0	0	0	0	0	0	0	603	903	0
[truncated: 1,924 more rows]
