# Supplementary material for: The Effects of an Extemporaneous Speech Dual-task on Older Adult Gait Control
Source: Research Square preprint supplement (doi:10.21203/rs.3.rs-7674245/v1), 2025-11-18
Supplement: Supplementary file 35 [file DT3Walk03.xlsx]

## Sheet: Sheet1
Trajectories
		03:LFHD			03:RFHD			03:LBHD			03:RBHD			03:C7			03:T10			03:CLAV			03:STRN			03:RBAK			03:LSHO			03:LUPA			03:LELB			03:LFRM			03:LWRA			03:LWRB			03:LFIN
Frame	Sub Frame	X	Y	Z	X	Y	Z	X	Y	Z	X	Y	Z	X	Y	Z	X	Y	Z	X	Y	Z	X	Y	Z	X	Y	Z	X	Y	Z	X	Y	Z	X	Y	Z	X	Y	Z	X	Y	Z	X	Y	Z	X	Y	Z
		mm	mm	mm	mm	mm	mm	mm	mm	mm	mm	mm	mm	mm	mm	mm	mm	mm	mm	mm	mm	mm	mm	mm	mm	mm	mm	mm	mm	mm	mm	mm	mm	mm	mm	mm	mm	mm	mm	mm	mm	mm	mm	mm	mm	mm	mm	mm	mm
267	0	247.754	2625.59	1640.69	143.942	2628.95	1635.99	272.375	2780.28	1667.51	136.762	2795.3	1665.63	182.199	2864.32	1516.83	172.328	2971.29	1296.05	213.188	2729.33	1419.59	222.223	2704	1234.85	119.875	2967.06	1369.45	380.056	2884.51	1469.73	438.2	2925.58	1271.95	454.48	2951.82	1153.91	473.545	2889.65	989.531	434.91	2846.88	901.615	486.695	2902.73	886.745	489.826	2846.62	798.058
268	0	249.186	2615.19	1641.06	145.34	2618.11	1636.64	273.243	2770.1	1667.25	137.459	2784.59	1665.69	182.119	2853.23	1516.72	171.918	2960.85	1296.11	213.799	2718.46	1419.38	222.549	2693.36	1234.59	119.285	2955.82	1369.29	379.697	2874.62	1469.43	437.391	2918.92	1273.33	453.824	2946.91	1155.67	474.387	2887.12	990.414	436.908	2844.57	901.854	487.652	2901.62	887.7	492.012	2846.42	798.286
269	0	250.615	2604.61	1641.21	146.741	2607.12	1637.04	274.144	2759.73	1666.81	138.204	2773.73	1665.54	182.165	2842.01	1516.45	171.629	2950.28	1296.02	214.467	2707.48	1418.96	222.923	2682.63	1234.11	118.857	2944.47	1369.01	379.469	2864.52	1468.98	436.689	2911.97	1274.54	453.234	2941.7	1157.28	475.215	2884.34	991.177	438.836	2842.13	901.967	488.574	2900.29	888.579	494.095	2846.08	798.438
270	0	252.041	2593.86	1641.13	148.145	2595.99	1637.18	275.08	2749.17	1666.18	138.997	2762.71	1665.16	182.339	2830.66	1516.01	171.461	2939.59	1295.76	215.193	2696.36	1418.34	223.344	2671.81	1233.43	118.588	2933.03	1368.59	379.372	2854.22	1468.39	436.094	2904.74	1275.58	452.711	2936.17	1158.72	476.031	2881.31	991.819	440.693	2839.55	901.955	489.46	2898.76	889.382	496.077	2845.61	798.514
271	0	253.464	2582.93	1640.82	149.552	2584.71	1637.08	276.05	2738.41	1665.37	139.839	2751.53	1664.57	182.64	2819.17	1515.42	171.414	2928.77	1295.34	215.977	2685.13	1417.52	223.813	2660.91	1232.53	118.48	2921.48	1368.04	379.406	2843.71	1467.64	435.608	2897.24	1276.45	452.255	2930.33	1160	476.834	2878.04	992.339	442.481	2836.83	901.816	490.312	2897.02	890.109	497.958	2845	798.514
272	0	254.885	2571.82	1640.3	150.963	2573.29	1636.72	277.056	2727.46	1664.38	140.731	2740.2	1663.77	183.069	2807.56	1514.66	171.489	2917.81	1294.76	216.821	2673.77	1416.49	224.331	2649.91	1231.43	118.532	2909.83	1367.35	379.572	2833.01	1466.75	435.23	2889.45	1277.14	451.866	2924.18	1161.12	477.626	2874.52	992.739	444.199	2833.98	901.554	491.13	2895.07	890.759	499.737	2844.25	798.439
273	0	256.308	2560.53	1639.55	152.38	2561.72	1636.13	278.099	2716.32	1663.22	141.674	2728.71	1662.76	183.625	2795.82	1513.75	171.687	2906.73	1294.02	217.725	2662.28	1415.28	224.901	2638.83	1230.12	118.745	2898.08	1366.54	379.871	2822.1	1465.71	434.961	2881.37	1277.65	451.545	2917.72	1162.07	478.407	2870.75	993.019	445.849	2830.98	901.167	491.915	2892.9	891.334	501.418	2843.37	798.29
274	0	257.734	2549.07	1638.59	153.806	2550	1635.3	279.183	2704.99	1661.88	142.671	2717.07	1661.55	184.31	2783.94	1512.68	172.01	2895.52	1293.13	218.692	2650.68	1413.87	225.526	2627.65	1228.62	119.117	2886.22	1365.6	380.303	2810.99	1464.52	434.804	2873.02	1278	451.294	2910.94	1162.87	479.179	2866.72	993.179	447.433	2827.84	900.658	492.669	2890.52	891.833	503.001	2842.35	798.068
275	0	259.167	2537.43	1637.42	155.244	2538.14	1634.24	280.312	2693.47	1660.37	143.724	2705.27	1660.15	185.125	2771.94	1511.46	172.459	2884.17	1292.1	219.726	2638.94	1412.28	226.21	2616.37	1226.93	119.648	2874.27	1364.54	380.87	2799.68	1463.2	434.76	2864.37	1278.17	451.117	2903.84	1163.5	479.946	2862.44	993.22	448.953	2824.55	900.028	493.395	2887.92	892.256	504.488	2841.18	797.774
276	0	260.615	2525.62	1636.06	156.701	2526.13	1632.96	281.49	2681.76	1658.71	144.837	2693.32	1658.57	186.071	2759.82	1510.11	173.038	2872.7	1290.92	220.83	2627.08	1410.53	226.959	2605	1225.06	120.338	2862.22	1363.37	381.575	2788.18	1461.75	434.833	2855.44	1278.16	451.015	2896.42	1163.96	480.709	2857.89	993.142	450.412	2821.09	899.282	494.096	2885.08	892.604	505.882	2839.85	797.41
277	0	262.082	2513.64	1634.51	158.181	2513.98	1631.47	282.724	2669.86	1656.91	146.015	2681.22	1656.82	187.149	2747.57	1508.62	173.749	2861.09	1289.62	222.01	2615.1	1408.62	227.779	2593.51	1223.04	121.184	2850.07	1362.08	382.419	2776.49	1460.17	435.026	2846.21	1277.98	450.994	2888.66	1164.26	481.474	2853.06	992.948	451.813	2817.46	898.422	494.779	2882.01	892.879	507.185	2838.36	796.978
278	0	263.578	2501.48	1632.79	159.692	2501.68	1629.8	284.02	2657.79	1654.98	147.265	2668.97	1654.93	188.36	2735.19	1507.02	174.597	2849.35	1288.2	223.27	2602.99	1406.57	228.676	2581.92	1220.89	122.186	2837.82	1360.71	383.405	2764.61	1458.47	435.343	2836.7	1277.63	451.058	2880.57	1164.4	482.245	2847.95	992.639	453.162	2813.64	897.454	495.448	2878.68	893.079	508.401	2836.7	796.482
279	0	265.11	2489.17	1630.92	161.242	2489.25	1627.96	285.386	2645.54	1652.94	148.591	2656.57	1652.91	189.707	2722.7	1505.32	175.586	2837.48	1286.67	224.615	2590.76	1404.41	229.659	2570.2	1218.61	123.34	2825.47	1359.25	384.535	2752.56	1456.67	435.79	2826.88	1277.12	451.211	2872.13	1164.37	483.027	2842.54	992.218	454.464	2809.61	896.383	496.11	2875.08	893.207	509.534	2834.83	795.922
280	0	266.688	2476.7	1628.93	162.838	2476.69	1625.97	286.829	2633.12	1650.82	150.001	2644.04	1650.78	191.188	2710.1	1503.54	176.72	2825.48	1285.06	226.051	2578.4	1402.16	230.736	2558.36	1216.25	124.644	2813.03	1357.72	385.811	2740.33	1454.77	436.37	2816.77	1276.44	451.461	2863.35	1164.18	483.826	2836.82	991.687	455.723	2805.35	895.215	496.774	2871.19	893.264	510.589	2832.76	795.303
281	0	268.32	2464.07	1626.82	164.489	2463.99	1623.86	288.357	2620.53	1648.63	151.501	2631.36	1648.57	192.805	2697.38	1501.69	178.001	2813.35	1283.37	227.583	2565.94	1399.83	231.914	2546.39	1213.82	126.094	2800.5	1356.14	387.234	2727.94	1452.8	437.089	2806.36	1275.59	451.813	2854.21	1163.83	484.65	2830.76	991.049	456.946	2800.85	893.959	497.449	2866.98	893.251	511.571	2830.45	794.627
282	0	270.015	2451.3	1624.64	166.201	2451.17	1621.66	289.978	2607.78	1646.41	153.098	2618.56	1646.32	194.555	2684.57	1499.8	179.433	2801.09	1281.64	229.214	2553.36	1397.47	233.2	2534.29	1211.36	127.684	2787.88	1354.53	388.805	2715.39	1450.76	437.95	2795.65	1274.6	452.273	2844.7	1163.33	485.503	2824.36	990.309	458.138	2796.06	892.622	498.145	2862.44	893.168	512.486	2827.88	793.898
283	0	271.78	2438.39	1622.4	167.983	2438.24	1619.4	291.697	2594.89	1644.17	154.797	2605.63	1644.04	196.438	2671.66	1497.89	181.015	2788.72	1279.87	230.946	2540.67	1395.09	234.6	2522.05	1208.9	129.411	2775.18	1352.91	390.522	2702.71	1448.68	438.958	2784.64	1273.46	452.847	2834.84	1162.67	486.394	2817.59	989.473	459.307	2790.96	891.213	498.872	2857.54	893.019	513.342	2825	793.118
284	0	273.621	2425.34	1620.14	169.838	2425.19	1617.1	293.521	2581.85	1641.95	156.605	2592.58	1641.77	198.449	2658.67	1495.99	182.748	2776.24	1278.1	232.782	2527.89	1392.74	236.119	2509.68	1206.46	131.268	2762.4	1351.3	392.382	2689.9	1446.59	440.115	2773.33	1272.19	453.541	2824.6	1161.87	487.328	2810.43	988.546	460.458	2785.52	889.743	499.642	2852.24	892.803	514.146	2821.8	792.292
285	0	275.542	2412.18	1617.88	171.771	2412.05	1614.8	295.453	2568.68	1639.77	158.523	2579.44	1639.54	200.584	2645.6	1494.12	184.628	2763.64	1276.35	234.719	2515.01	1390.43	237.758	2497.18	1204.08	133.248	2749.56	1349.72	394.382	2676.97	1444.49	441.423	2761.73	1270.81	454.361	2814	1160.94	488.312	2802.86	987.536	461.599	2779.71	888.224	500.466	2846.51	892.525	514.907	2818.21	791.423
286	0	277.545	2398.91	1615.65	173.782	2398.82	1612.54	297.495	2555.39	1637.66	160.554	2566.2	1637.39	202.834	2632.47	1492.31	186.653	2750.95	1274.64	236.754	2502.06	1388.19	239.518	2484.54	1201.79	135.343	2736.65	1348.19	396.516	2663.93	1442.42	442.883	2749.85	1269.32	455.311	2803.04	1159.89	489.354	2794.86	986.453	462.736	2773.49	886.667	501.355	2840.32	892.185	515.635	2814.21	790.516
287	0	279.628	2385.54	1613.48	175.87	2385.51	1610.34	299.646	2541.99	1635.65	162.695	2552.88	1635.35	205.191	2619.29	1490.58	188.814	2738.17	1272.99	238.881	2489.04	1386.07	241.395	2471.79	1199.62	137.544	2723.7	1346.75	398.774	2650.81	1440.4	444.494	2737.68	1267.75	456.394	2791.7	1158.73	490.457	2786.41	985.307	463.875	2766.82	885.087	502.321	2833.64	891.787	516.34	2809.73	789.575
288	0	281.789	2372.1	1611.41	178.031	2372.15	1608.23	301.901	2528.5	1633.76	164.943	2539.49	1633.44	207.645	2606.08	1488.97	191.105	2725.31	1271.44	241.091	2475.97	1384.08	243.381	2458.92	1197.6	139.843	2710.72	1345.41	401.146	2637.61	1438.45	446.253	2725.25	1266.12	457.615	2780.02	1157.49	491.628	2777.48	984.11	465.023	2759.67	883.498	503.372	2826.42	891.334	517.032	2804.73	788.603
289	0	284.022	2358.59	1609.45	180.258	2358.74	1606.25	304.254	2514.94	1632.02	167.291	2526.06	1631.7	210.181	2592.85	1487.48	193.514	2712.39	1270	243.372	2462.85	1382.25	245.467	2445.95	1195.76	142.228	2697.71	1344.19	403.62	2624.35	1436.61	448.155	2712.56	1264.46	458.973	2767.98	1156.17	492.87	2768.06	982.876	466.185	2752	881.915	504.519	2818.64	890.83	517.722	2799.15	787.607
290	0	286.317	2345.03	1607.62	182.543	2345.3	1604.42	306.694	2501.32	1630.44	169.727	2512.6	1630.15	212.786	2579.62	1486.16	196.03	2699.42	1268.7	245.709	2449.72	1380.62	247.638	2432.91	1194.13	144.688	2684.7	1343.11	406.181	2611.05	1434.91	450.195	2699.63	1262.78	460.47	2755.6	1154.81	494.188	2758.14	981.619	467.367	2743.77	880.354	505.769	2810.25	890.278	518.422	2792.94	786.589
291	0	288.663	2331.46	1605.96	184.873	2331.86	1602.77	309.206	2487.68	1629.06	172.237	2499.14	1628.82	215.442	2566.41	1485.01	198.636	2686.42	1267.56	248.084	2436.58	1379.19	249.877	2419.8	1192.72	147.211	2671.71	1342.19	408.814	2597.71	1433.35	452.366	2686.47	1261.13	462.106	2742.89	1153.43	495.583	2747.68	980.354	468.572	2734.94	878.832	507.129	2801.22	889.682	519.143	2786.03	785.554
292	0	291.045	2317.89	1604.48	187.233	2318.43	1601.32	311.771	2474.03	1627.88	174.802	2485.68	1627.72	218.13	2553.24	1484.06	201.318	2673.4	1266.6	250.478	2423.46	1378	252.163	2406.65	1191.57	149.784	2658.75	1341.45	411.498	2584.35	1431.98	454.658	2673.09	1259.53	463.88	2729.87	1152.06	497.058	2736.69	979.099	469.805	2725.49	877.366	508.603	2791.53	889.047	519.897	2778.37	784.507
293	0	293.446	2304.35	1603.2	189.607	2305.04	1600.1	314.369	2460.39	1626.92	177.402	2472.26	1626.88	220.831	2540.13	1483.32	204.059	2660.38	1265.84	252.87	2410.38	1377.06	254.473	2393.48	1190.67	152.395	2645.85	1340.89	414.217	2570.99	1430.82	457.06	2659.51	1258	465.787	2716.56	1150.71	498.612	2725.14	977.87	471.068	2715.38	875.972	510.194	2781.14	888.379	520.693	2769.89	783.452
294	0	295.845	2290.87	1602.14	191.974	2291.7	1599.12	316.976	2446.81	1626.2	180.011	2458.9	1626.31	223.524	2527.1	1482.81	206.84	2647.38	1265.28	255.235	2397.35	1376.38	256.783	2380.33	1190.05	155.029	2633.02	1340.54	416.949	2557.64	1429.88	459.562	2645.75	1256.57	467.827	2702.96	1149.42	500.245	2713.04	976.684	472.364	2704.59	874.668	511.903	2770.03	887.681	521.545	2760.55	782.394
295	0	298.22	2277.46	1601.31	194.314	2278.45	1598.39	319.564	2433.3	1625.72	182.603	2445.62	1626.01	226.189	2514.16	1482.53	209.642	2634.42	1264.94	257.553	2384.39	1375.97	259.068	2367.22	1189.72	157.673	2620.28	1340.39	419.674	2544.31	1429.19	462.151	2631.82	1255.28	469.993	2689.1	1148.21	501.956	2700.36	975.558	473.693	2693.09	873.468	513.729	2758.17	886.962	522.461	2750.3	781.339
296	0	300.548	2264.17	1600.71	196.603	2265.3	1597.93	322.105	2419.89	1625.49	185.149	2432.44	1625.99	228.804	2501.34	1482.5	212.45	2621.52	1264.84	259.799	2371.53	1375.84	261.303	2354.17	1189.66	160.314	2607.66	1340.45	422.372	2531.01	1428.77	464.812	2617.76	1254.15	472.281	2675	1147.1	503.74	2687.12	974.509	475.055	2680.86	872.389	515.668	2745.56	886.227	523.451	2739.07	780.293
297	0	302.802	2250.99	1600.37	198.816	2252.28	1597.73	324.57	2406.6	1625.52	187.621	2419.38	1626.25	231.35	2488.66	1482.71	215.245	2608.7	1264.96	261.953	2358.77	1375.98	263.464	2341.22	1189.89	162.939	2595.17	1340.73	425.024	2517.77	1428.62	467.532	2603.56	1253.19	474.685	2660.68	1146.11	505.595	2673.31	973.552	476.448	2667.9	871.445	517.715	2732.18	885.484	524.524	2726.85	779.265
298	0	304.959	2237.97	1600.28	200.931	2239.39	1597.8	326.932	2393.47	1625.81	189.99	2406.46	1626.79	233.809	2476.12	1483.17	218.012	2595.96	1265.33	263.995	2346.15	1376.4	265.53	2328.39	1190.4	165.535	2582.81	1341.22	427.612	2504.58	1428.76	470.295	2589.25	1252.43	477.197	2646.14	1145.26	507.515	2658.94	972.704	477.872	2654.19	870.651	519.863	2718.02	884.742	525.688	2713.58	778.264
299	0	306.993	2225.12	1600.46	202.923	2226.66	1598.14	329.163	2380.49	1626.37	192.228	2393.69	1627.6	236.165	2463.75	1483.87	220.737	2583.33	1265.92	265.909	2333.66	1377.1	267.48	2315.7	1191.18	168.092	2570.62	1341.92	430.118	2491.47	1429.19	473.088	2574.86	1251.89	479.811	2631.42	1144.58	509.494	2644	971.978	479.321	2639.73	870.018	522.102	2703.08	884.011	526.947	2699.24	777.302
300	0	308.882	2212.44	1600.89	204.77	2214.11	1598.74	331.239	2367.7	1627.18	194.311	2381.09	1628.68	238.405	2451.55	1484.8	223.409	2570.83	1266.75	267.679	2321.32	1378.06	269.298	2303.17	1192.23	170.6	2558.59	1342.83	432.528	2478.44	1429.92	475.894	2560.38	1251.57	482.517	2616.53	1144.06	511.524	2628.53	971.388	480.792	2624.52	869.559	524.421	2687.37	883.301	528.306	2683.83	776.395
301	0	310.603	2199.95	1601.57	206.451	2201.73	1599.59	333.138	2355.1	1628.26	196.217	2368.66	1630	240.519	2439.52	1485.97	226.018	2558.45	1267.79	269.295	2309.14	1379.28	270.969	2290.8	1193.52	173.053	2546.74	1343.94	434.829	2465.5	1430.94	478.7	2545.85	1251.48	485.307	2601.47	1143.73	513.599	2612.51	970.945	482.28	2608.58	869.286	526.806	2670.9	882.623	529.766	2667.33	775.56
302	0	312.139	2187.65	1602.51	207.949	2189.53	1600.68	334.844	2342.68	1629.59	197.93	2356.41	1631.57	242.499	2427.68	1487.36	228.556	2546.22	1269.04	270.749	2297.12	1380.74	272.483	2278.62	1195.06	175.445	2535.07	1345.23	437.013	2452.65	1432.25	481.491	2531.28	1251.63	488.17	2586.28	1143.58	515.711	2595.99	970.659	483.78	2591.92	869.208	529.244	2653.69	881.991	531.325	2649.75	774.817
303	0	313.476	2175.54	1603.68	209.252	2177.52	1601.99	336.345	2330.46	1631.17	199.437	2344.35	1633.36	244.343	2416.03	1488.95	231.019	2534.13	1270.48	272.037	2285.26	1382.44	273.834	2266.61	1196.83	177.771	2523.57	1346.7	439.072	2439.91	1433.83	484.255	2516.67	1252.01	491.097	2570.95	1143.61	517.851	2578.96	970.539	485.286	2574.56	869.334	531.72	2635.75	881.418	532.98	2631.1	774.188
304	0	314.605	2163.61	1605.08	210.349	2165.7	1603.5	337.634	2318.43	1632.99	200.733	2332.46	1635.35	246.049	2404.55	1490.73	233.403	2522.19	1272.1	273.158	2273.57	1384.36	275.018	2254.77	1198.8	180.029	2512.25	1348.33	441.003	2427.27	1435.66	486.98	2502.05	1252.61	494.077	2555.51	1143.83	520.011	2561.46	970.592	486.793	2556.53	869.671	534.218	2617.11	880.918	534.723	2611.4	773.697
305	0	315.52	2151.87	1606.69	211.237	2154.06	1605.2	338.71	2306.58	1635.02	201.816	2320.75	1637.52	247.621	2393.25	1492.67	235.705	2510.39	1273.88	274.115	2262.04	1386.47	276.038	2243.09	1200.97	182.218	2501.09	1350.11	442.805	2414.74	1437.73	489.656	2487.42	1253.44	497.098	2539.95	1144.22	522.183	2543.5	970.821	488.295	2537.85	870.226	536.722	2597.8	880.503	536.544	2590.7	773.368
306	0	316.221	2140.29	1608.5	211.915	2142.59	1607.05	339.576	2294.9	1637.26	202.691	2309.21	1639.84	249.063	2382.12	1494.76	237.925	2498.74	1275.79	274.915	2250.65	1388.75	276.9	2231.57	1203.31	184.339	2490.09	1352	444.479	2402.31	1440	492.273	2472.79	1254.46	500.151	2524.3	1144.78	524.359	2525.12	971.228	489.787	2518.55	871.002	539.218	2577.85	880.186	538.431	2569.04	773.225
307	0	316.715	2128.88	1610.47	212.389	2131.3	1609.03	340.243	2283.37	1639.68	203.368	2297.83	1642.3	250.384	2371.14	1496.98	240.063	2487.22	1277.81	275.567	2239.41	1391.18	277.612	2220.17	1205.79	186.392	2479.24	1353.99	446.029	2389.98	1442.45	494.824	2458.17	1255.67	503.224	2508.56	1145.48	526.531	2506.34	971.812	491.266	2498.68	872	541.69	2557.3	879.979	540.368	2546.47	773.29
308	0	317.011	2117.6	1612.59	212.67	2120.15	1611.13	340.725	2271.98	1642.25	203.862	2286.61	1644.85	251.593	2360.29	1499.29	242.118	2475.83	1279.91	276.084	2228.29	1393.73	278.186	2208.9	1208.39	188.377	2468.52	1356.07	447.461	2377.74	1445.03	497.305	2443.56	1257.03	506.306	2492.73	1146.32	528.692	2487.18	972.571	492.727	2478.26	873.22	544.125	2536.19	879.893	542.336	2523.05	773.583
309	0	317.124	2106.45	1614.82	212.772	2109.16	1613.3	341.04	2260.72	1644.93	204.192	2275.53	1647.47	252.7	2349.57	1501.66	244.09	2464.56	1282.07	276.478	2217.29	1396.36	278.637	2197.73	1211.07	190.297	2457.91	1358.19	448.783	2365.59	1447.72	499.711	2428.96	1258.52	509.387	2476.82	1147.27	530.836	2467.69	973.497	494.167	2457.34	874.659	546.51	2514.56	879.933	544.316	2498.85	774.12
310	0	317.073	2095.42	1617.14	212.715	2098.29	1615.52	341.209	2249.58	1647.68	204.38	2264.58	1650.11	253.717	2338.95	1504.06	245.981	2453.39	1284.25	276.766	2206.38	1399.04	278.981	2186.64	1213.8	192.151	2447.4	1360.34	450.001	2353.53	1450.47	502.039	2414.39	1260.1	512.455	2460.85	1148.3	532.955	2447.88	974.581	495.584	2435.95	876.31	548.833	2492.44	880.107	546.287	2473.95	774.914
311	0	316.881	2084.48	1619.51	212.52	2087.54	1617.76	341.256	2238.53	1650.47	204.451	2253.76	1652.75	254.654	2328.42	1506.47	247.789	2442.3	1286.43	276.962	2195.55	1401.73	279.233	2175.63	1216.54	193.941	2436.97	1362.48	451.125	2341.53	1453.24	504.289	2399.84	1261.75	515.5	2444.81	1149.39	535.045	2427.79	975.812	496.975	2414.15	878.164	551.084	2469.89	880.417	548.23	2448.42	775.973
312	0	316.571	2073.62	1621.9	212.211	2076.89	1619.99	341.206	2227.56	1653.25	204.429	2243.03	1655.33	255.523	2317.95	1508.84	249.516	2431.29	1288.57	277.082	2184.79	1404.4	279.409	2164.67	1219.25	195.665	2426.6	1364.6	452.163	2329.6	1455.98	506.459	2385.31	1263.43	518.511	2428.71	1150.5	537.099	2407.45	977.176	498.337	2391.96	880.211	553.253	2446.94	880.863	550.123	2422.35	777.299
313	0	316.169	2062.83	1624.27	211.812	2066.32	1622.18	341.086	2216.66	1655.98	204.34	2232.4	1657.84	256.333	2307.52	1511.15	251.161	2420.34	1290.65	277.142	2174.08	1406.99	279.524	2153.75	1221.89	197.325	2416.27	1366.65	453.122	2317.72	1458.66	508.55	2370.8	1265.1	521.478	2412.56	1151.61	539.111	2386.89	978.658	499.667	2369.44	882.436	555.332	2423.64	881.443	551.948	2395.8	778.892
314	0	315.699	2052.09	1626.59	211.351	2055.82	1624.31	340.918	2205.81	1658.61	204.208	2221.85	1660.22	257.094	2297.12	1513.36	252.723	2409.44	1292.64	277.155	2163.39	1409.48	279.591	2142.87	1224.42	198.918	2405.97	1368.62	454.011	2305.89	1461.23	510.561	2356.31	1266.73	524.388	2396.36	1152.69	541.075	2366.15	980.239	500.962	2346.62	884.825	557.313	2400.04	882.152	553.687	2368.87	780.744
315	0	315.186	2041.39	1628.82	210.85	2045.38	1626.33	340.727	2195	1661.11	204.057	2211.37	1662.46	257.812	2286.72	1515.44	254.201	2398.56	1294.5	277.133	2152.73	1411.82	279.623	2132.01	1226.81	200.443	2395.68	1370.48	454.835	2294.1	1463.66	512.492	2341.85	1268.28	527.233	2380.12	1153.69	542.985	2345.24	981.901	502.22	2323.55	887.361	559.19	2376.18	882.983	555.324	2341.63	782.847
316	0	314.653	2030.71	1630.93	210.332	2034.98	1628.23	340.534	2184.23	1663.42	203.908	2200.93	1664.5	258.493	2276.32	1517.37	255.595	2387.7	1296.22	277.087	2142.07	1413.99	279.629	2121.16	1229.01	201.898	2385.38	1372.19	455.601	2282.34	1465.9	514.342	2327.41	1269.72	529.998	2363.84	1154.61	544.833	2324.21	983.626	503.434	2300.27	890.024	560.957	2352.09	883.929	556.846	2314.15	785.186
317	0	314.119	2020.04	1632.89	209.818	2024.6	1629.98	340.356	2173.47	1665.51	203.779	2190.53	1666.34	259.141	2265.89	1519.11	256.903	2376.85	1297.77	277.026	2131.4	1415.95	279.616	2110.31	1231	203.28	2375.06	1373.74	456.31	2270.6	1467.93	516.109	2312.99	1271.01	532.675	2347.53	1155.39	546.613	2303.08	985.393	504.6	2276.82	892.797	562.609	2327.83	884.979	558.244	2286.51	787.746
318	0	313.602	2009.38	1634.66	209.324	2014.23	1631.56	340.21	2162.72	1667.36	203.684	2180.16	1667.94	259.758	2255.42	1520.65	258.123	2366	1299.13	276.954	2120.71	1417.67	279.591	2099.46	1232.75	204.586	2364.7	1375.1	456.967	2258.88	1469.72	517.79	2298.6	1272.14	535.251	2331.19	1156.03	548.316	2281.87	987.184	505.712	2253.25	895.659	564.14	2303.44	886.122	559.51	2258.78	790.509
319	0	313.116	1998.7	1636.22	208.866	2003.86	1632.95	340.105	2151.97	1668.93	203.633	2169.78	1669.29	260.344	2244.9	1521.97	259.253	2355.13	1300.28	276.878	2109.99	1419.14	279.557	2088.6	1234.23	205.811	2354.3	1376.26	457.571	2247.17	1471.25	519.382	2284.23	1273.07	537.715	2314.82	1156.51	549.935	2260.63	988.981	506.762	2229.59	898.592	565.546	2278.96	887.347	560.64	2231.01	793.456
320	0	312.669	1987.99	1637.55	208.451	1993.47	1634.13	340.05	2141.2	1670.21	203.634	2159.4	1670.38	260.897	2234.31	1523.04	260.29	2344.23	1301.21	276.799	2099.23	1420.33	279.517	2077.71	1235.44	206.95	2343.84	1377.2	458.122	2235.47	1472.49	520.879	2269.87	1273.78	540.055	2298.43	1156.79	551.46	2239.36	990.767	507.744	2205.89	901.576	566.823	2254.43	888.642	561.63	2203.26	796.568
321	0	312.27	1977.26	1638.64	208.087	1983.05	1635.08	340.046	2130.41	1671.18	203.689	2149	1671.19	261.412	2223.67	1523.86	261.231	2333.31	1301.9	276.716	2088.42	1421.24	279.47	2066.8	1236.35	207.998	2333.31	1377.89	458.618	2223.78	1473.45	522.276	2255.54	1274.27	542.26	2282.02	1156.88	552.882	2218.1	992.525	508.649	2182.18	904.593	567.966	2229.89	889.996	562.48	2175.6	799.824
322	0	311.92	1966.48	1639.45	207.775	1972.6	1635.8	340.095	2119.59	1671.83	203.797	2138.56	1671.72	261.886	2212.94	1524.42	262.073	2322.35	1302.34	276.63	2077.57	1421.85	279.416	2055.86	1236.96	208.949	2322.71	1378.35	459.055	2212.08	1474.11	523.566	2241.22	1274.51	544.32	2265.59	1156.76	554.192	2196.88	994.242	509.466	2158.51	907.625	568.97	2205.38	891.397	563.19	2148.07	803.204
323	0	311.618	1955.66	1640	207.514	1962.09	1636.28	340.19	2108.73	1672.16	203.953	2128.08	1671.98	262.31	2202.14	1524.72	262.812	2311.35	1302.54	276.537	2066.65	1422.16	279.353	2044.88	1237.27	209.797	2312.02	1378.55	459.429	2200.38	1474.48	524.74	2226.92	1274.52	546.223	2249.15	1156.43	555.381	2175.72	995.906	510.187	2134.91	910.658	569.833	2180.94	892.834	563.761	2120.72	806.689
324	0	311.362	1944.79	1640.27	207.298	1951.52	1636.51	340.324	2097.82	1672.17	204.148	2117.55	1671.95	262.679	2191.25	1524.75	263.444	2300.29	1302.48	276.433	2055.68	1422.18	279.278	2033.85	1237.28	210.537	2301.25	1378.49	459.735	2188.67	1474.56	525.792	2212.63	1274.27	547.96	2232.7	1155.89	556.439	2154.64	997.507	510.803	2111.41	913.677	570.55	2156.61	894.298	564.196	2093.59	810.26
325	0	311.143	1933.85	1640.26	207.121	1940.89	1636.49	340.486	2086.86	1671.87	204.369	2106.95	1671.66	262.984	2180.28	1524.51	263.966	2289.18	1302.18	276.31	2044.63	1421.91	279.187	2022.77	1237.01	211.162	2290.38	1378.18	459.966	2176.95	1474.35	526.711	2198.36	1273.79	549.522	2216.25	1155.15	557.357	2133.67	999.037	511.304	2088.07	916.669	571.117	2132.43	895.778	564.496	2066.73	813.898
326	0	310.954	1922.86	1639.98	206.971	1930.18	1636.23	340.662	2075.85	1671.27	204.604	2096.27	1671.11	263.216	2169.22	1524.02	264.374	2278.01	1301.62	276.163	2033.52	1421.36	279.075	2011.62	1236.45	211.667	2279.42	1377.62	460.117	2165.21	1473.86	527.491	2184.1	1273.07	550.9	2199.81	1154.2	558.128	2112.83	1000.49	511.681	2064.92	919.624	571.529	2108.43	897.268	564.663	2040.18	817.587
327	0	310.78	1911.79	1639.43	206.836	1919.39	1635.74	340.835	2064.78	1670.39	204.834	2085.52	1670.31	263.366	2158.08	1523.27	264.667	2266.77	1300.83	275.983	2022.33	1420.54	278.937	2000.41	1235.64	212.047	2268.35	1376.81	460.181	2153.46	1473.13	528.123	2169.85	1272.12	552.088	2183.38	1153.08	558.743	2092.15	1001.86	511.927	2041.98	922.531	571.785	2084.65	898.758	564.698	2013.98	821.309
328	0	310.61	1900.67	1638.64	206.701	1908.52	1635.02	340.988	2053.65	1669.25	205.041	2074.67	1669.28	263.426	2146.85	1522.28	264.843	2255.46	1299.8	275.761	2011.07	1419.49	278.767	1989.12	1234.58	212.3	2257.18	1375.76	460.152	2141.67	1472.15	528.6	2155.61	1270.97	553.079	2166.99	1151.78	559.198	2071.67	1003.14	512.033	2019.3	925.383	571.879	2061.14	900.242	564.6	1988.17	825.05
329	0	310.428	1889.47	1637.62	206.551	1897.56	1634.08	341.101	2042.45	1667.88	205.204	2063.74	1668.04	263.387	2135.53	1521.07	264.901	2244.08	1298.56	275.486	1999.72	1418.2	278.559	1977.75	1233.29	212.423	2245.91	1374.48	460.024	2129.86	1470.95	528.917	2141.39	1269.64	553.87	2150.65	1150.33	559.486	2051.4	1004.35	511.996	1996.92	928.174	571.811	2037.92	901.714	564.371	1962.77	828.794
330	0	310.218	1878.21	1636.38	206.369	1886.5	1632.95	341.154	2031.2	1666.29	205.304	2052.72	1666.6	263.241	2124.14	1519.65	264.842	2232.61	1297.1	275.149	1988.29	1416.71	278.303	1966.3	1231.81	212.414	2234.53	1372.99	459.791	2118.01	1469.57	529.07	2127.18	1268.13	554.458	2134.38	1148.75	559.604	2031.37	1005.46	511.809	1974.86	930.896	571.576	2015.03	903.168	564.009	1937.83	832.528
331	0	309.964	1866.88	1634.95	206.138	1875.35	1631.63	341.128	2019.88	1664.53	205.32	2041.6	1664.99	262.981	2112.66	1518.03	264.668	2221.06	1295.46	274.74	1976.77	1415.04	277.995	1954.74	1230.14	212.273	2223.04	1371.31	459.45	2106.11	1468.01	529.055	2113.01	1266.48	554.842	2118.21	1147.06	559.549	2011.61	1006.5	511.471	1953.16	933.544	571.174	1992.51	904.598	563.514	1913.38	836.236
332	0	309.649	1855.48	1633.35	205.842	1864.11	1630.15	341.003	2008.5	1662.61	205.231	2030.39	1663.22	262.6	2101.1	1516.24	264.381	2209.42	1293.64	274.248	1965.17	1413.21	277.625	1943.08	1228.33	212.002	2211.45	1369.44	458.996	2094.17	1466.3	528.874	2098.86	1264.71	555.024	2102.14	1145.27	559.32	1992.15	1007.45	510.979	1931.85	936.115	570.604	1970.39	905.999	562.883	1889.45	839.906
333	0	309.259	1844.01	1631.61	205.465	1852.76	1628.53	340.761	1997.06	1660.56	205.019	2019.07	1661.33	262.094	2089.47	1514.3	263.986	2197.69	1291.66	273.664	1953.47	1411.26	277.186	1931.32	1226.39	211.603	2199.76	1367.41	458.427	2082.17	1464.48	528.526	2084.76	1262.85	555.005	2086.22	1143.43	558.919	1973.02	1008.33	510.332	1910.98	938.603	569.867	1948.71	907.365	562.117	1866.07	843.522
334	0	308.778	1832.48	1629.76	204.992	1841.31	1626.79	340.386	1985.56	1658.43	204.666	2007.66	1659.33	261.459	2077.76	1512.24	263.486	2185.86	1289.55	272.982	1941.68	1409.2	276.672	1919.44	1224.36	211.08	2187.97	1365.25	457.742	2070.11	1462.56	528.015	2070.7	1260.92	554.791	2070.46	1141.53	558.347	1954.25	1009.13	509.533	1890.56	941.003	568.964	1927.5	908.691	561.212	1843.28	847.07
335	0	308.195	1820.88	1627.83	204.41	1829.75	1624.96	339.864	1974	1656.23	204.159	1996.14	1657.25	260.692	2065.98	1510.07	262.887	2173.93	1287.33	272.194	1929.8	1407.08	276.077	1907.44	1222.25	210.438	2176.08	1362.98	456.941	2057.99	1460.58	527.347	2056.71	1258.95	554.387	2054.89	1139.62	557.608	1935.87	1009.87	508.585	1870.63	943.31	567.9	1906.79	909.972	560.17	1821.1	850.536
336	0	307.498	1809.21	1625.85	203.707	1818.09	1623.06	339.183	1962.39	1654	203.485	1984.53	1655.12	259.795	2054.13	1507.84	262.193	2161.91	1285.03	271.297	1917.82	1404.91	275.395	1895.32	1220.11	209.681	2164.09	1360.61	456.025	2045.81	1458.57	526.529	2042.79	1256.96	553.802	2039.54	1137.71	556.707	1917.89	1010.53	507.492	1851.21	945.52	566.679	1886.61	911.201	558.989	1799.57	853.903
337	0	306.681	1797.47	1623.85	202.876	1806.32	1621.12	338.336	1950.71	1651.77	202.636	1972.81	1652.96	258.769	2042.21	1505.55	261.41	2149.79	1282.67	270.29	1905.76	1402.72	274.626	1883.08	1217.95	208.815	2152.02	1358.18	454.998	2033.56	1456.54	525.568	2028.97	1254.99	553.045	2024.43	1135.82	555.651	1900.35	1011.14	506.259	1832.34	947.625	565.31	1867	912.373	557.672	1778.71	857.155
338	0	305.737	1785.66	1621.85	201.912	1794.45	1619.17	337.319	1938.98	1649.57	201.608	1961	1650.79	257.617	2030.22	1503.26	260.542	2137.58	1280.27	269.174	1893.6	1400.55	273.768	1870.71	1215.82	207.846	2139.86	1355.72	453.864	2021.26	1454.53	524.476	2015.24	1253.05	552.124	2009.59	1133.97	554.45	1883.27	1011.68	504.896	1814.03	949.618	563.803	1847.98	913.483	556.221	1758.54	860.274
339	0	304.667	1773.79	1619.89	200.814	1782.47	1617.22	336.131	1927.19	1647.44	200.402	1949.09	1648.65	256.346	2018.18	1500.97	259.594	2125.28	1277.87	267.955	1881.37	1398.43	272.823	1858.23	1213.73	206.779	2127.63	1353.26	452.63	2008.9	1452.57	523.263	2001.64	1251.18	551.052	1995.04	1132.19	553.111	1866.67	1012.16	503.411	1796.3	951.493	562.168	1829.58	914.525	554.643	1739.09	863.241
340	0	303.471	1761.85	1618	199.585	1770.39	1615.31	334.777	1915.35	1645.39	199.021	1937.08	1646.55	254.965	2006.07	1498.73	258.569	2112.89	1275.5	266.642	1869.05	1396.37	271.798	1845.63	1211.72	205.622	2115.33	1350.81	451.304	1996.49	1450.67	521.939	1988.17	1249.39	549.839	1980.8	1130.49	551.647	1850.57	1012.59	501.814	1779.19	953.239	560.419	1811.82	915.492	552.942	1720.38	866.037
341	0	302.156	1749.85	1616.2	198.231	1758.22	1613.46	333.266	1903.45	1643.46	197.477	1925	1644.53	253.483	1993.91	1496.57	257.47	2100.43	1273.19	265.245	1856.66	1394.41	270.7	1832.92	1209.81	204.38	2102.96	1348.43	449.895	1984.05	1448.86	520.518	1974.85	1247.7	548.498	1966.88	1128.89	550.07	1834.98	1012.97	500.117	1762.69	954.848	558.572	1794.72	916.379	551.13	1702.44	868.64
342	0	300.731	1737.78	1614.51	196.764	1745.96	1611.69	331.611	1891.5	1641.67	195.782	1912.83	1642.61	251.915	1981.71	1494.51	256.301	2087.91	1270.97	263.78	1844.22	1392.57	269.538	1820.12	1208.02	203.059	2090.54	1346.13	448.415	1971.58	1447.17	519.012	1961.7	1246.14	547.041	1953.31	1127.41	548.393	1819.92	1013.29	498.334	1746.83	956.309	556.643	1778.3	917.177	549.219	1685.26	871.027
343	0	299.209	1725.67	1612.97	195.198	1733.63	1610.02	329.83	1879.5	1640.05	193.957	1900.59	1640.8	250.274	1969.46	1492.58	255.064	2075.34	1268.87	262.264	1831.72	1390.88	268.326	1807.24	1206.39	201.667	2078.07	1343.96	446.875	1959.1	1445.61	517.433	1948.73	1244.72	545.481	1940.08	1126.05	546.63	1805.41	1013.56	496.478	1731.62	957.611	554.651	1762.57	917.881	547.22	1668.88	873.178
344	0	297.606	1713.5	1611.58	193.552	1721.23	1608.48	327.944	1867.46	1638.6	192.024	1888.28	1639.14	248.578	1957.19	1490.81	253.762	2062.74	1266.92	260.716	1819.19	1389.35	267.078	1794.3	1204.93	200.209	2065.58	1341.93	445.29	1946.63	1444.21	515.793	1935.95	1243.45	543.831	1927.22	1124.85	544.798	1791.44	1013.78	494.564	1717.06	958.744	552.612	1747.56	918.483	545.151	1653.3	875.068
345	0	295.94	1701.29	1610.36	191.846	1708.78	1607.07	325.979	1855.37	1637.36	190.011	1875.92	1637.65	246.845	1944.9	1489.23	252.396	2050.12	1265.14	259.156	1806.65	1388	265.809	1781.32	1203.65	198.693	2053.07	1340.08	443.675	1934.19	1442.97	514.105	1923.4	1242.35	542.105	1914.72	1123.79	542.91	1778.03	1013.94	492.609	1703.16	959.695	550.548	1733.27	918.975	543.03	1638.53	876.675
346	0	294.233	1689.04	1609.33	190.104	1696.29	1605.82	323.963	1843.25	1636.33	187.949	1863.53	1636.33	245.093	1932.59	1487.85	250.97	2037.5	1263.57	257.607	1794.1	1386.86	264.535	1768.33	1202.58	197.129	2040.55	1338.44	442.044	1921.78	1441.92	512.38	1911.06	1241.42	540.316	1902.59	1122.9	540.985	1765.18	1014.04	490.629	1689.92	960.455	548.476	1719.71	919.351	540.875	1624.57	877.979
347	0	292.51	1676.77	1608.5	188.35	1683.78	1604.74	321.926	1831.1	1635.52	185.869	1851.11	1635.22	243.342	1920.3	1486.7	249.489	2024.89	1262.23	256.09	1781.56	1385.92	263.27	1755.36	1201.72	195.524	2028.04	1337.03	440.413	1909.45	1441.06	510.63	1898.97	1240.67	538.478	1890.82	1122.19	539.038	1752.9	1014.08	488.642	1677.35	961.012	546.417	1706.88	919.603	538.706	1611.44	878.959
348	0	290.793	1664.48	1607.86	186.613	1671.28	1603.84	319.9	1818.92	1634.94	183.806	1838.68	1634.32	241.613	1908.01	1485.8	247.958	2012.33	1261.14	254.623	1769.06	1385.22	262.03	1742.43	1201.09	193.89	2015.56	1335.88	438.799	1897.19	1440.41	508.868	1887.13	1240.12	536.604	1879.42	1121.65	537.088	1741.17	1014.06	486.664	1665.44	961.359	544.388	1694.8	919.726	536.545	1599.13	879.598
349	0	289.111	1652.19	1607.42	184.917	1658.79	1603.13	317.918	1806.72	1634.6	181.795	1826.25	1633.65	239.924	1895.76	1485.16	246.384	1999.82	1260.31	253.227	1756.61	1384.75	260.828	1729.59	1200.69	192.237	2003.11	1335	437.216	1885.03	1439.97	507.105	1875.55	1239.76	534.708	1868.38	1121.29	535.15	1729.99	1013.97	484.713	1654.18	961.488	542.408	1683.44	919.715	534.413	1587.64	879.881
350	0	287.488	1639.91	1607.18	183.291	1646.32	1602.62	316.011	1794.52	1634.49	179.868	1813.83	1633.23	238.292	1883.55	1484.79	244.774	1987.39	1259.77	251.917	1744.23	1384.52	259.676	1716.85	1200.53	190.575	1990.71	1334.41	435.678	1872.98	1439.74	505.352	1864.24	1239.59	532.803	1857.69	1121.12	533.241	1719.38	1013.82	482.807	1643.58	961.393	540.493	1672.83	919.565	532.332	1576.96	879.799
351	0	285.951	1627.65	1607.14	181.759	1633.91	1602.31	314.211	1782.31	1634.63	178.057	1801.45	1633.07	236.734	1871.39	1484.7	243.139	1975.06	1259.53	250.708	1731.93	1384.54	258.586	1704.24	1200.6	188.914	1978.38	1334.13	434.198	1861.07	1439.72	503.621	1853.19	1239.61	530.902	1847.34	1121.14	531.378	1709.31	1013.6	480.962	1633.62	961.071	538.66	1662.95	919.275	530.324	1567.1	879.346
352	0	284.525	1615.43	1607.3	180.348	1621.56	1602.22	312.545	1770.12	1635	176.391	1789.11	1633.17	235.261	1859.31	1484.89	241.487	1962.82	1259.58	249.609	1719.74	1384.82	257.568	1691.78	1200.92	187.266	1966.11	1334.15	432.787	1849.3	1439.92	501.922	1842.42	1239.83	529.016	1837.33	1121.34	529.575	1699.78	1013.31	479.195	1624.3	960.522	536.921	1653.79	918.844	528.409	1558.05	878.52
353	0	283.234	1603.25	1607.66	179.079	1609.28	1602.36	311.037	1757.96	1635.61	174.892	1776.83	1633.55	233.885	1847.3	1485.36	239.83	1950.7	1259.92	248.629	1707.65	1385.35	256.629	1679.49	1201.49	185.638	1953.93	1334.47	431.453	1837.69	1440.33	500.265	1831.91	1240.25	527.156	1827.64	1121.73	527.847	1690.78	1012.95	477.521	1615.6	959.745	535.29	1645.35	918.273	526.607	1549.8	877.326
354	0	282.1	1591.13	1608.22	177.973	1597.08	1602.72	309.706	1745.83	1636.45	173.581	1764.62	1634.22	232.612	1835.37	1486.11	238.18	1938.7	1260.57	247.773	1695.68	1386.14	255.776	1667.36	1202.31	184.038	1941.82	1335.1	430.205	1826.24	1440.95	498.659	1821.68	1240.85	525.332	1818.26	1122.3	526.206	1682.31	1012.52	475.955	1607.53	958.746	533.777	1637.62	917.568	524.938	1542.35	875.772
355	0	281.141	1579.09	1608.96	177.046	1584.98	1603.33	308.568	1733.75	1637.52	172.471	1752.48	1635.17	231.447	1823.54	1487.12	236.546	1926.82	1261.49	247.041	1683.84	1387.18	255.012	1655.41	1203.38	182.473	1929.8	1336.02	429.045	1814.96	1441.77	497.109	1811.7	1241.64	523.551	1809.17	1123.05	524.663	1674.34	1012.03	474.51	1600.05	957.532	532.391	1630.58	916.732	523.419	1535.69	873.875
356	0	280.372	1567.13	1609.91	176.313	1572.97	1604.19	307.633	1721.74	1638.79	171.568	1740.43	1636.4	230.392	1811.8	1488.39	234.94	1915.07	1262.69	246.431	1672.12	1388.47	254.339	1643.62	1204.69	180.949	1917.86	1337.22	427.976	1803.85	1442.77	495.621	1801.98	1242.62	521.82	1800.37	1123.97	523.227	1666.88	1011.48	473.198	1593.17	956.112	531.139	1624.23	915.777	522.068	1529.8	871.653
357	0	279.804	1555.27	1611.05	175.781	1561.05	1605.29	306.904	1709.81	1640.27	170.874	1728.47	1637.91	229.445	1800.15	1489.91	233.372	1903.44	1264.13	245.939	1660.51	1390	253.755	1631.98	1206.23	179.469	1906	1338.69	426.998	1792.9	1443.96	494.199	1792.5	1243.77	520.143	1791.83	1125.06	521.906	1659.9	1010.87	472.03	1586.87	954.497	530.026	1618.55	914.711	520.896	1524.69	869.13
358	0	279.442	1543.52	1612.39	175.455	1549.24	1606.66	306.38	1697.98	1641.93	170.385	1716.61	1639.69	228.602	1788.59	1491.63	231.85	1891.92	1265.81	245.558	1649.02	1391.76	253.255	1620.49	1208.01	178.036	1894.21	1340.4	426.11	1782.11	1445.32	492.846	1783.23	1245.1	518.522	1783.55	1126.32	520.704	1653.39	1010.21	471.013	1581.13	952.703	529.055	1613.52	913.548	519.918	1520.34	866.334
359	0	279.287	1531.88	1613.91	175.333	1537.54	1608.27	306.055	1686.27	1643.76	170.092	1704.85	1641.7	227.858	1777.1	1493.56	230.383	1880.51	1267.69	245.277	1637.63	1393.72	252.832	1609.11	1209.98	176.651	1882.48	1342.31	425.306	1771.45	1446.83	491.561	1774.18	1246.58	516.96	1775.5	1127.73	519.624	1647.34	1009.5	470.155	1575.94	950.742	528.227	1609.12	912.3	519.141	1516.75	863.295
360	0	279.335	1520.37	1615.62	175.408	1525.93	1610.13	305.916	1674.68	1645.72	169.981	1693.19	1643.93	227.207	1765.7	1495.64	228.977	1869.19	1269.75	245.087	1626.32	1395.86	252.476	1597.83	1212.14	175.316	1870.81	1344.41	424.583	1760.92	1448.46	490.343	1765.31	1248.2	515.454	1767.68	1129.28	518.666	1641.73	1008.75	469.46	1571.28	948.633	527.541	1605.33	910.983	518.572	1513.89	860.043
361	0	279.574	1508.98	1617.49	175.67	1514.42	1612.21	305.949	1663.21	1647.79	170.034	1681.63	1646.35	226.639	1754.35	1497.86	227.639	1857.96	1271.95	244.976	1615.08	1398.16	252.177	1586.64	1214.44	174.03	1859.19	1346.65	423.934	1750.49	1450.2	489.19	1756.62	1249.94	514.005	1760.06	1130.96	517.831	1636.53	1007.96	468.931	1567.13	946.391	526.995	1602.14	909.611	518.214	1511.74	856.613
362	0	279.991	1497.71	1619.52	176.102	1502.99	1614.5	306.134	1651.89	1649.94	170.231	1670.17	1648.9	226.147	1743.05	1500.17	226.374	1846.8	1274.25	244.931	1603.9	1400.57	251.922	1575.51	1216.86	172.795	1847.6	1349	423.352	1740.13	1452.02	488.097	1748.06	1251.8	512.607	1752.63	1132.74	517.113	1631.73	1007.15	468.567	1563.47	944.033	526.582	1599.5	908.198	518.067	1510.3	853.037
363	0	280.567	1486.57	1621.67	176.686	1491.66	1616.96	306.449	1640.69	1652.14	170.55	1658.81	1651.56	225.722	1731.78	1502.54	225.187	1835.71	1276.63	244.939	1592.76	1403.05	251.7	1564.42	1219.35	171.61	1836.03	1351.42	422.831	1729.83	1453.89	487.06	1739.63	1253.73	511.258	1745.36	1134.62	516.508	1627.31	1006.31	468.366	1560.27	941.576	526.298	1597.4	906.758	518.126	1509.53	849.345
364	0	281.28	1475.53	1623.92	177.4	1480.39	1619.56	306.872	1629.62	1654.33	170.967	1647.54	1654.26	225.354	1720.53	1504.93	224.083	1824.67	1279.04	244.988	1581.63	1405.56	251.5	1553.36	1221.86	170.477	1824.48	1353.86	422.364	1719.56	1455.78	486.075	1731.3	1255.71	509.951	1738.25	1136.56	516.009	1623.23	1005.44	468.323	1557.51	939.036	526.133	1595.8	905.305	518.383	1509.4	845.57
365	0	282.106	1464.59	1626.23	178.219	1469.19	1622.25	307.379	1618.68	1656.49	171.459	1636.35	1656.96	225.036	1709.29	1507.29	223.066	1813.67	1281.45	245.067	1570.51	1408.06	251.311	1542.31	1224.35	169.396	1812.93	1356.29	421.945	1709.3	1457.66	485.136	1723.04	1257.72	508.683	1731.26	1138.53	515.609	1619.47	1004.54	468.431	1555.16	936.428	526.077	1594.66	903.85	518.826	1509.89	841.738
366	0	283.018	1453.73	1628.56	179.118	1458.04	1624.98	307.947	1607.83	1658.58	172.001	1625.22	1659.6	224.762	1698.05	1509.59	222.139	1802.71	1283.81	245.167	1559.38	1410.49	251.125	1531.26	1226.77	168.371	1801.38	1358.65	421.57	1699.01	1459.49	484.238	1714.83	1259.71	507.448	1724.39	1140.52	515.298	1616.01	1003.63	468.681	1553.18	933.765	526.121	1593.94	902.405	519.44	1510.93	837.877
367	0	283.991	1442.93	1630.87	180.072	1446.93	1627.71	308.553	1597.08	1660.56	172.574	1614.14	1662.14	224.525	1686.78	1511.78	221.306	1791.76	1286.1	245.278	1548.23	1412.81	250.935	1520.21	1229.06	167.405	1789.83	1360.92	421.234	1688.69	1461.23	483.38	1706.65	1261.67	506.242	1717.6	1142.5	515.066	1612.81	1002.69	469.061	1551.56	931.06	526.252	1593.61	900.979	520.207	1512.51	834.011
368	0	284.999	1432.17	1633.11	181.058	1435.84	1630.37	309.177	1586.38	1662.39	173.157	1603.09	1664.53	224.322	1675.48	1513.83	220.569	1780.83	1288.27	245.394	1537.04	1414.98	250.738	1509.13	1231.19	166.502	1778.27	1363.05	420.935	1678.3	1462.86	482.558	1698.47	1263.56	505.06	1710.88	1144.43	514.904	1609.85	1001.73	469.559	1550.24	928.327	526.458	1593.61	899.582	521.105	1514.55	830.164
369	0	286.018	1421.44	1635.24	182.053	1424.75	1632.91	309.803	1575.73	1664.04	173.733	1592.06	1666.72	224.15	1664.15	1515.71	219.93	1769.89	1290.3	245.511	1525.81	1416.96	250.533	1498.02	1233.11	165.668	1766.69	1365.01	420.672	1667.84	1464.34	481.772	1690.27	1265.36	503.901	1704.2	1146.29	514.802	1607.08	1000.74	470.161	1549.2	925.576	526.727	1593.91	898.224	522.112	1517.02	826.357
370	0	287.028	1410.7	1637.21	183.039	1413.65	1635.27	310.416	1565.08	1665.48	174.289	1581.02	1668.68	224.009	1652.76	1517.38	219.391	1758.94	1292.15	245.627	1514.53	1418.7	250.321	1486.89	1234.78	164.909	1755.09	1366.76	420.446	1657.28	1465.65	481.02	1682.04	1267.02	502.762	1697.55	1148.06	514.748	1604.48	999.735	470.851	1548.4	922.819	527.046	1594.46	896.911	523.204	1519.85	822.611
371	0	288.012	1399.93	1638.98	183.999	1402.51	1637.41	311.006	1554.42	1666.7	174.815	1569.95	1670.36	223.901	1641.32	1518.82	218.954	1747.98	1293.8	245.741	1503.19	1420.18	250.105	1475.73	1236.18	164.233	1743.47	1368.29	420.257	1646.63	1466.76	480.305	1673.76	1268.55	501.643	1690.89	1149.72	514.734	1602.01	998.706	471.612	1547.81	920.067	527.403	1595.19	895.653	524.355	1523	818.946
372	0	288.955	1389.1	1640.51	184.921	1391.33	1639.28	311.565	1543.72	1667.67	175.304	1558.83	1671.75	223.827	1629.82	1520.01	218.62	1736.98	1295.22	245.855	1491.8	1421.38	249.893	1464.54	1237.27	163.648	1731.84	1369.58	420.109	1635.86	1467.65	479.628	1665.41	1269.91	500.545	1684.22	1151.25	514.751	1599.64	997.658	472.43	1547.38	917.332	527.787	1596.08	894.457	525.542	1526.39	815.381
373	0	289.847	1378.2	1641.77	185.797	1380.08	1640.85	312.09	1532.95	1668.38	175.754	1547.64	1672.82	223.793	1618.25	1520.92	218.391	1725.95	1296.4	245.973	1480.34	1422.26	249.691	1453.31	1238.04	163.162	1720.18	1370.6	420.007	1624.97	1468.31	478.992	1656.98	1271.08	499.469	1677.51	1152.63	514.791	1597.34	996.595	473.287	1547.07	914.624	528.185	1597.06	893.33	526.741	1529.97	811.936
374	0	290.684	1367.21	1642.73	186.622	1368.76	1642.08	312.583	1522.08	1668.82	176.167	1536.37	1673.56	223.804	1606.61	1521.56	218.27	1714.86	1297.33	246.102	1468.82	1422.84	249.507	1442.05	1238.49	162.786	1708.5	1371.36	419.957	1613.96	1468.72	478.402	1648.45	1272.07	498.419	1670.75	1153.85	514.847	1595.06	995.52	474.169	1546.86	911.956	528.588	1598.09	892.28	527.928	1533.69	808.629
375	0	291.465	1356.1	1643.37	187.396	1357.34	1642.94	313.049	1511.09	1668.99	176.548	1525	1673.97	223.869	1594.9	1521.91	218.259	1703.72	1297.98	246.248	1457.24	1423.09	249.352	1430.75	1238.6	162.527	1696.8	1371.84	419.965	1602.82	1468.88	477.861	1639.82	1272.86	497.399	1663.91	1154.92	514.915	1592.78	994.439	475.061	1546.69	909.339	528.989	1599.11	891.313	529.085	1537.47	805.48
376	0	292.193	1344.86	1643.68	188.122	1345.81	1643.44	313.494	1499.97	1668.88	176.905	1513.52	1674.05	223.996	1583.12	1521.97	218.359	1692.51	1298.37	246.42	1445.59	1423.01	249.235	1419.42	1238.39	162.394	1685.07	1372.05	420.039	1591.55	1468.79	477.375	1631.08	1273.45	496.413	1656.98	1155.82	514.99	1590.46	993.356	475.953	1546.53	906.785	529.378	1600.09	890.436	530.193	1541.26	802.505
377	0	292.876	1333.47	1643.66	188.807	1334.18	1643.55	313.93	1488.7	1668.52	177.252	1501.91	1673.8	224.195	1571.26	1521.75	218.573	1681.23	1298.47	246.628	1433.87	1422.63	249.166	1408.04	1237.86	162.396	1673.31	1371.98	420.188	1580.15	1468.44	476.95	1622.22	1273.83	495.469	1649.95	1156.55	515.072	1588.08	992.279	476.833	1546.34	904.305	529.751	1600.97	889.653	531.24	1545	799.72
378	0	293.524	1321.94	1643.3	189.46	1322.42	1643.29	314.371	1477.27	1667.9	177.602	1490.18	1673.24	224.475	1559.32	1521.25	218.902	1669.86	1298.31	246.883	1422.09	1421.94	249.156	1396.61	1237.03	162.539	1661.51	1371.66	420.42	1568.62	1467.85	476.593	1613.24	1274.02	494.572	1642.81	1157.12	515.16	1585.6	991.211	477.692	1546.09	901.908	530.104	1601.71	888.969	532.214	1548.63	797.14
379	0	294.151	1310.25	1642.62	190.094	1310.55	1642.68	314.831	1465.66	1667.04	177.973	1478.31	1672.39	224.846	1547.31	1520.49	219.349	1658.4	1297.88	247.196	1410.24	1420.98	249.212	1385.12	1235.92	162.829	1649.68	1371.08	420.743	1556.96	1467.02	476.309	1604.14	1274.02	493.731	1635.54	1157.54	515.255	1582.98	990.16	478.527	1545.72	899.604	530.434	1602.26	888.384	533.108	1552.1	794.775
380	0	294.774	1298.4	1641.63	190.726	1298.55	1641.72	315.328	1453.89	1665.94	178.383	1466.32	1671.25	225.318	1535.22	1519.48	219.915	1646.84	1297.2	247.578	1398.31	1419.74	249.344	1373.57	1234.55	163.271	1637.8	1370.28	421.165	1545.18	1465.96	476.105	1594.89	1273.84	492.953	1628.13	1157.8	515.36	1580.2	989.128	479.331	1545.21	897.4	530.741	1602.59	887.899	533.919	1555.35	792.632
381	0	295.41	1286.4	1640.36	191.37	1286.43	1640.45	315.879	1441.95	1664.64	178.852	1454.2	1669.87	225.902	1523.05	1518.24	220.598	1635.16	1296.27	248.041	1386.31	1418.27	249.56	1361.95	1232.95	163.866	1625.86	1369.25	421.695	1533.29	1464.68	475.988	1585.52	1273.49	492.247	1620.57	1157.92	515.481	1577.23	988.12	480.106	1544.51	895.301	531.024	1602.65	887.511	534.643	1558.33	790.713
382	0	296.079	1274.25	1638.84	192.045	1274.2	1638.9	316.501	1429.85	1663.14	179.398	1441.96	1668.25	226.605	1510.8	1516.79	221.4	1623.37	1295.12	248.594	1374.24	1416.59	249.865	1350.24	1231.15	164.615	1613.86	1368.02	422.34	1521.27	1463.21	475.963	1576	1272.98	491.62	1612.85	1157.91	515.621	1574.04	987.136	480.85	1543.59	893.308	531.288	1602.4	887.215	535.285	1561	789.017
383	0	296.798	1261.96	1637.08	192.77	1261.86	1637.11	317.213	1417.59	1661.47	180.041	1429.61	1666.44	227.437	1498.47	1515.16	222.319	1611.45	1293.75	249.248	1362.08	1414.72	250.268	1338.44	1229.18	165.518	1601.8	1366.61	423.105	1509.14	1461.55	476.038	1566.34	1272.31	491.081	1604.96	1157.76	515.786	1570.6	986.177	481.568	1542.39	891.424	531.535	1601.8	887.004	535.849	1563.29	787.538
384	0	297.586	1249.54	1635.14	193.561	1249.42	1635.12	318.031	1405.18	1659.64	180.799	1417.15	1664.46	228.402	1486.07	1513.36	223.353	1599.41	1292.2	250.013	1349.84	1412.69	250.772	1326.53	1227.06	166.572	1589.65	1365.04	423.996	1496.91	1459.73	476.217	1556.53	1271.51	490.638	1596.88	1157.5	515.985	1566.88	985.242	482.262	1540.89	889.643	531.771	1600.83	886.867	536.343	1565.17	786.263
385	0	298.461	1236.99	1633.05	194.435	1236.89	1632.96	318.97	1392.64	1657.69	181.688	1404.6	1662.33	229.507	1473.58	1511.43	224.497	1587.22	1290.48	250.896	1337.52	1410.54	251.384	1314.5	1224.84	167.773	1577.42	1363.33	425.016	1484.58	1457.76	476.504	1546.57	1270.58	490.299	1588.61	1157.12	516.224	1562.85	984.327	482.939	1539.05	887.962	532.003	1599.43	886.793	536.776	1566.59	785.179
386	0	299.436	1224.34	1630.84	195.408	1224.28	1630.68	320.043	1379.97	1655.62	182.721	1391.96	1660.09	230.754	1461.01	1509.39	225.749	1574.9	1288.62	251.904	1325.1	1408.29	252.106	1302.35	1222.53	169.116	1565.1	1361.51	426.168	1472.15	1455.67	476.904	1536.44	1269.54	490.069	1580.13	1156.63	516.511	1558.47	983.429	483.605	1536.81	886.372	532.238	1597.58	886.767	537.16	1567.5	784.267
387	0	300.526	1211.57	1628.55	196.493	1211.58	1628.33	321.261	1367.2	1653.48	183.911	1379.26	1657.78	232.144	1448.35	1507.26	227.103	1562.44	1286.65	253.04	1312.59	1405.98	252.943	1290.07	1220.17	170.593	1552.69	1359.61	427.451	1459.63	1453.47	477.419	1526.15	1268.38	489.956	1571.42	1156.04	516.851	1553.73	982.542	484.266	1534.15	884.866	532.487	1595.24	886.775	537.509	1567.87	783.503
388	0	301.739	1198.72	1626.23	197.698	1198.82	1625.94	322.632	1354.32	1651.27	185.264	1366.48	1655.41	233.676	1435.62	1505.08	228.554	1549.84	1284.6	254.309	1299.99	1403.62	253.898	1277.64	1217.79	172.198	1540.17	1357.65	428.866	1447.03	1451.19	478.052	1515.69	1267.14	489.965	1562.46	1155.36	517.253	1548.59	981.66	484.932	1531.03	883.431	532.759	1592.38	886.799	537.837	1567.65	782.866
389	0	303.081	1185.78	1623.89	199.031	1186	1623.56	324.161	1341.35	1649.04	186.786	1353.65	1653.03	235.347	1422.8	1502.88	230.094	1537.11	1282.48	255.71	1287.29	1401.26	254.973	1265.07	1215.41	173.92	1527.56	1355.65	430.408	1434.34	1448.85	478.804	1505.04	1265.81	490.101	1553.25	1154.58	517.723	1543.02	980.777	485.609	1527.39	882.058	533.064	1588.96	886.823	538.157	1566.8	782.328
390	0	304.555	1172.76	1621.59	200.494	1173.12	1621.21	325.85	1328.29	1646.8	188.476	1340.77	1650.66	237.149	1409.91	1500.68	231.717	1524.24	1280.35	257.241	1274.5	1398.93	256.17	1252.36	1213.07	175.749	1514.84	1353.66	432.072	1421.57	1446.48	479.675	1494.21	1264.41	490.367	1543.76	1153.72	518.267	1536.98	979.887	486.306	1523.21	880.736	533.415	1584.95	886.832	538.484	1565.27	781.864
391	0	306.159	1159.67	1619.35	202.086	1160.19	1618.94	327.695	1315.16	1644.58	190.333	1327.85	1648.33	239.076	1396.93	1498.52	233.415	1511.25	1278.22	258.899	1261.62	1396.63	257.489	1239.51	1210.78	177.675	1502.03	1351.68	433.853	1408.74	1444.11	480.667	1483.17	1262.95	490.767	1533.98	1152.78	518.891	1530.46	978.986	487.029	1518.45	879.454	533.823	1580.33	886.81	538.833	1563.04	781.449
392	0	307.887	1146.52	1617.19	203.803	1147.2	1616.77	329.691	1301.96	1642.41	192.348	1314.88	1646.08	241.114	1383.88	1496.42	235.179	1498.14	1276.13	260.677	1248.65	1394.42	258.93	1226.53	1208.58	179.684	1489.12	1349.77	435.742	1395.84	1441.76	481.778	1471.92	1261.45	491.303	1523.89	1151.78	519.598	1523.41	978.07	487.787	1513.07	878.203	534.301	1575.04	886.744	539.215	1560.04	781.059
393	0	309.732	1133.3	1615.15	205.635	1134.18	1614.73	331.827	1288.69	1640.32	194.511	1301.87	1643.92	243.251	1370.77	1494.41	237.001	1484.94	1274.11	262.564	1235.6	1392.31	260.49	1213.42	1206.48	181.765	1476.14	1347.93	437.727	1382.87	1439.47	483.006	1460.46	1259.93	491.977	1513.47	1150.72	520.393	1515.81	977.138	488.586	1507.03	876.978	534.859	1569.07	886.621	539.644	1556.26	780.67
394	0	311.68	1120.03	1613.24	207.573	1121.11	1612.84	334.091	1275.37	1638.33	196.808	1288.83	1641.89	245.471	1357.59	1492.52	238.871	1471.64	1272.2	264.549	1222.48	1390.33	262.166	1200.2	1204.53	183.903	1463.08	1346.21	439.798	1369.86	1437.27	484.349	1448.76	1258.4	492.79	1502.71	1149.62	521.28	1507.64	976.188	489.433	1500.3	875.773	535.511	1562.37	886.433	540.13	1551.63	780.263
395	0	313.716	1106.7	1611.49	209.6	1108.01	1611.12	336.464	1261.99	1636.47	199.22	1275.76	1640.02	247.757	1344.38	1490.78	240.78	1458.28	1270.41	266.616	1209.31	1388.51	263.949	1186.9	1202.74	186.084	1449.96	1344.62	441.939	1356.79	1435.18	485.805	1436.84	1256.89	493.743	1491.61	1148.49	522.26	1498.86	975.223	490.334	1492.84	874.588	536.266	1554.92	886.169	540.683	1546.12	779.819
396	0	315.823	1093.34	1609.89	211.699	1094.88	1609.58	338.927	1248.57	1634.75	201.725	1262.66	1638.33	250.088	1331.13	1489.21	242.718	1444.87	1268.79	268.75	1196.09	1386.86	265.832	1173.52	1201.13	188.294	1436.81	1343.2	444.137	1343.69	1433.25	487.369	1424.67	1255.41	494.837	1480.15	1147.34	523.337	1489.45	974.247	491.295	1484.62	873.422	537.136	1546.69	885.827	541.312	1539.69	779.326
397	0	317.979	1079.94	1608.47	213.852	1081.73	1608.23	341.456	1235.12	1633.21	204.3	1249.54	1636.85	252.445	1317.86	1487.83	244.675	1431.43	1267.34	270.931	1182.85	1385.41	267.802	1160.1	1199.72	190.517	1423.63	1341.96	446.373	1330.57	1431.5	489.036	1412.27	1253.98	496.07	1468.33	1146.2	524.511	1479.4	973.267	492.32	1475.62	872.281	538.13	1537.65	885.402	542.025	1532.3	778.771
398	0	320.164	1066.52	1607.24	216.037	1068.57	1607.08	344.025	1221.64	1631.86	206.918	1236.4	1635.59	254.805	1304.6	1486.66	246.641	1417.98	1266.1	273.137	1169.61	1384.17	269.845	1146.67	1198.53	192.74	1410.46	1340.92	448.632	1317.43	1429.97	490.802	1399.64	1252.64	497.443	1456.14	1145.07	525.782	1468.68	972.291	493.413	1465.8	871.17	539.254	1527.77	884.895	542.826	1523.89	778.147
399	0	322.355	1053.1	1606.19	218.232	1055.41	1606.14	346.607	1208.15	1630.72	209.55	1223.26	1634.57	257.147	1291.36	1485.73	248.606	1404.56	1265.08	275.348	1156.39	1383.18	271.944	1133.25	1197.59	194.948	1397.31	1340.09	450.895	1304.29	1428.67	492.66	1386.76	1251.39	498.954	1443.59	1143.99	527.149	1457.29	971.329	494.575	1455.15	870.097	540.514	1517.03	884.307	543.723	1514.45	777.449
400	0	324.528	1039.69	1605.33	220.413	1042.27	1605.41	349.172	1194.67	1629.81	212.166	1210.13	1633.81	259.449	1278.18	1485.03	250.56	1391.17	1264.3	277.54	1143.2	1382.42	274.079	1119.87	1196.89	197.127	1384.22	1339.5	453.144	1291.17	1427.64	494.603	1373.67	1250.25	500.603	1430.69	1142.96	528.612	1445.2	970.392	495.808	1443.66	869.074	541.915	1505.42	883.643	544.719	1503.92	776.677
401	0	326.659	1026.32	1604.68	222.558	1029.15	1604.88	351.69	1181.22	1629.14	214.737	1197.02	1633.31	261.691	1265.06	1484.6	252.494	1377.86	1263.77	279.692	1130.09	1381.93	276.229	1106.57	1196.46	199.265	1371.19	1339.15	455.362	1278.08	1426.9	496.622	1360.36	1249.26	502.386	1417.44	1142.01	530.167	1432.43	969.493	497.11	1431.3	868.112	543.457	1492.92	882.909	545.818	1492.28	775.834
402	0	328.727	1013	1604.21	224.643	1016.09	1604.56	354.132	1167.82	1628.72	217.23	1183.94	1633.1	263.853	1252.04	1484.42	254.399	1364.63	1263.49	281.782	1117.06	1381.7	278.372	1093.38	1196.28	201.351	1358.26	1339.04	457.531	1265.03	1426.45	498.709	1346.85	1248.42	504.303	1403.86	1141.15	531.811	1418.97	968.645	498.48	1418.08	867.227	545.138	1479.52	882.114	547.02	1479.5	774.926
403	0	330.708	999.752	1603.96	226.646	1003.08	1604.45	356.468	1154.49	1628.57	219.617	1170.92	1633.16	265.919	1239.13	1484.5	256.269	1351.51	1263.47	283.789	1104.14	1381.74	280.484	1080.31	1196.38	203.375	1345.44	1339.18	459.638	1252.05	1426.32	500.854	1333.15	1247.76	506.349	1389.96	1140.39	533.54	1404.82	967.863	499.913	1404	866.434	546.953	1465.23	881.269	548.329	1465.55	773.965
404	0	332.581	986.605	1603.9	228.546	990.168	1604.54	358.672	1141.25	1628.67	221.869	1157.96	1633.5	267.873	1226.36	1484.85	258.097	1338.51	1263.71	285.694	1091.35	1382.06	282.542	1067.41	1196.74	205.33	1332.76	1339.55	461.666	1239.14	1426.5	503.046	1319.29	1247.28	508.521	1375.77	1139.76	535.347	1390	967.163	501.403	1389.07	865.751	548.895	1450.05	880.387	549.742	1450.44	772.968
405	0	334.327	973.579	1604.05	230.323	977.354	1604.84	360.718	1128.12	1629.05	223.961	1145.09	1634.12	269.705	1213.74	1485.45	259.879	1325.66	1264.2	287.482	1078.71	1382.64	284.523	1054.67	1197.37	207.212	1320.24	1340.17	463.605	1226.31	1427.01	505.274	1305.29	1246.99	510.814	1361.3	1139.25	537.225	1374.52	966.56	502.945	1373.3	865.195	550.953	1434	879.485	551.26	1434.14	771.956
406	0	335.929	960.693	1604.4	231.959	964.66	1605.34	362.586	1115.13	1629.7	225.872	1132.33	1635.01	271.407	1201.3	1486.31	261.613	1312.97	1264.94	289.138	1066.23	1383.49	286.404	1042.12	1198.26	209.017	1307.88	1341.01	465.445	1213.59	1427.82	507.527	1291.16	1246.91	513.221	1346.57	1138.89	539.167	1358.41	966.07	504.529	1356.7	864.786	553.113	1417.09	878.58	552.878	1416.66	770.957
407	0	337.372	947.964	1604.97	233.44	952.103	1606.03	364.259	1102.3	1630.61	227.584	1119.68	1636.15	272.973	1189.03	1487.41	263.298	1300.44	1265.92	290.652	1053.92	1384.59	288.167	1029.77	1199.4	210.746	1295.71	1342.08	467.178	1200.97	1428.95	509.794	1276.92	1247.04	515.736	1331.61	1138.68	541.163	1341.68	965.708	506.147	1339.32	864.543	555.358	1399.35	877.693	554.591	1398.03	770.002
408	0	338.645	935.408	1605.75	234.752	939.696	1606.91	365.723	1089.63	1631.8	229.085	1107.17	1637.54	274.403	1176.95	1488.74	264.932	1288.07	1267.12	292.016	1041.79	1385.94	289.793	1017.61	1200.78	212.4	1283.71	1343.34	468.801	1188.47	1430.36	512.063	1262.59	1247.37	518.348	1316.43	1138.62	543.205	1324.38	965.49	507.789	1321.18	864.485	557.672	1380.81	876.846	556.393	1378.26	769.127
409	0	339.738	923.033	1606.74	235.888	927.451	1607.99	366.974	1077.14	1633.24	230.368	1094.81	1639.15	275.698	1165.07	1490.29	266.517	1275.87	1268.53	293.227	1029.83	1387.53	291.272	1005.65	1202.39	213.982	1271.9	1344.8	470.31	1176.08	1432.05	514.324	1248.2	1247.91	521.049	1301.06	1138.71	545.28	1306.52	965.429	509.443	1302.31	864.632	560.034	1361.5	876.062	558.274	1357.39	768.371
410	0	340.649	910.848	1607.95	236.84	915.378	1609.24	368.008	1064.84	1634.93	231.433	1082.62	1640.98	276.864	1153.37	1492.02	268.053	1263.84	1270.13	294.286	1018.06	1389.34	292.594	993.862	1204.23	215.496	1260.27	1346.42	471.707	1163.81	1433.99	516.567	1233.74	1248.65	523.827	1285.51	1138.97	547.379	1288.15	965.539	511.101	1282.76	865.002	562.423	1341.48	875.365	560.221	1335.47	767.777
411	0	341.375	898.854	1609.36	237.608	903.481	1610.66	368.83	1052.72	1636.84	232.282	1070.59	1642.99	277.906	1141.87	1493.94	269.54	1251.97	1271.89	295.195	1006.45	1391.35	293.757	982.247	1206.26	216.946	1248.82	1348.19	472.993	1151.65	1436.16	518.782	1219.25	1249.57	526.668	1269.8	1139.38	549.49	1269.29	965.831	512.752	1262.57	865.611	564.819	1320.78	874.78	562.222	1312.56	767.386
412	0	341.922	887.051	1610.97	238.195	891.765	1612.25	369.448	1040.8	1638.97	232.926	1058.73	1645.16	278.836	1130.54	1496	270.98	1240.25	1273.8	295.96	995.012	1393.54	294.761	970.785	1208.46	218.336	1237.53	1350.09	474.172	1139.6	1438.53	520.961	1204.73	1250.68	529.559	1253.95	1139.93	551.602	1250	966.316	514.385	1241.8	866.475	567.202	1299.45	874.33	564.259	1288.73	767.24
413	0	342.296	875.434	1612.76	238.607	880.226	1613.98	369.877	1029.07	1641.29	233.379	1047.05	1647.46	279.662	1119.37	1498.18	272.372	1228.68	1275.84	296.593	983.719	1395.87	295.615	959.46	1210.83	219.669	1226.4	1352.1	475.248	1127.66	1441.07	523.097	1190.19	1251.94	532.484	1237.97	1140.62	553.704	1230.3	966.999	515.992	1220.48	867.605	569.551	1277.53	874.037	566.313	1264.04	767.377
414	0	342.511	863.993	1614.72	238.856	868.862	1615.83	370.135	1017.51	1643.75	233.659	1035.55	1649.87	280.396	1108.36	1500.46	273.714	1217.24	1277.96	297.104	972.561	1398.33	296.328	948.254	1213.31	220.95	1215.4	1354.18	476.229	1115.81	1443.74	525.183	1175.64	1253.34	535.429	1221.88	1141.44	555.785	1210.24	967.885	517.563	1198.66	869.009	571.849	1255.09	873.922	568.364	1238.59	767.831
415	0	342.58	852.718	1616.83	238.957	857.663	1617.8	370.244	1006.13	1646.34	233.789	1024.21	1652.34	281.051	1097.48	1502.81	275.004	1205.91	1280.16	297.506	961.522	1400.88	296.914	937.148	1215.88	222.178	1204.52	1356.31	477.122	1104.06	1446.51	527.215	1161.09	1254.86	538.378	1205.69	1142.37	557.836	1189.86	968.974	519.091	1176.41	870.692	574.077	1232.18	874	570.389	1212.46	768.63
416	0	342.524	841.595	1619.05	238.928	846.618	1619.85	370.226	994.896	1649.02	233.794	1013.04	1654.84	281.636	1086.71	1505.19	276.24	1194.69	1282.39	297.815	950.583	1403.48	297.388	926.125	1218.51	223.356	1193.74	1358.48	477.932	1092.38	1449.34	529.187	1146.54	1256.47	541.314	1189.41	1143.38	559.845	1169.2	970.263	520.567	1153.76	872.654	576.221	1208.83	874.285	572.367	1185.73	769.793
417	0	342.363	830.607	1621.36	238.791	835.714	1621.96	370.109	983.809	1651.73	233.698	1002.02	1657.34	282.164	1076.04	1507.58	277.418	1183.56	1284.63	298.044	939.727	1406.09	297.768	915.17	1221.16	224.483	1183.05	1360.64	478.667	1080.77	1452.18	531.096	1132.01	1258.14	544.221	1173.05	1144.47	561.804	1148.29	971.746	521.985	1130.78	874.889	578.267	1185.12	874.785	574.275	1158.5	771.334
418	0	342.121	819.736	1623.72	238.568	824.934	1624.1	369.918	972.846	1654.44	233.528	991.143	1659.8	282.644	1065.44	1509.93	278.534	1172.5	1286.85	298.207	928.937	1408.68	298.069	904.268	1223.78	225.557	1172.42	1362.78	479.335	1069.23	1455.01	532.939	1117.48	1259.85	547.085	1156.64	1145.6	563.704	1127.18	973.412	523.338	1107.5	877.389	580.204	1161.09	875.504	576.09	1130.87	773.256
419	0	341.821	808.963	1626.1	238.283	814.259	1626.24	369.679	961.991	1657.11	233.311	980.382	1662.18	283.084	1054.9	1512.22	279.584	1161.51	1289.01	298.319	918.195	1411.2	298.307	893.405	1226.34	226.579	1161.84	1364.86	479.94	1057.74	1457.77	534.713	1102.98	1261.55	549.889	1140.17	1146.76	565.537	1105.91	975.249	524.62	1083.99	880.14	582.02	1136.79	876.442	577.793	1102.92	775.556
420	0	341.484	798.268	1628.45	237.957	803.669	1628.34	369.416	951.223	1659.68	233.072	969.724	1664.46	283.491	1044.38	1514.42	280.564	1150.56	1291.09	298.391	907.485	1413.63	298.496	882.572	1228.79	227.544	1151.28	1366.85	480.487	1046.29	1460.44	536.414	1088.5	1263.23	552.621	1123.65	1147.9	567.293	1084.5	977.239	525.824	1060.29	883.126	583.708	1112.27	877.594	579.365	1074.73	778.223
421	0	341.133	787.631	1630.73	237.613	793.145	1630.37	369.153	940.523	1662.13	232.831	959.15	1666.6	283.872	1033.88	1516.49	281.47	1139.65	1293.05	298.433	896.792	1415.92	298.649	871.758	1231.11	228.452	1140.75	1368.75	480.981	1034.88	1462.97	538.041	1074.04	1264.85	555.266	1107.11	1149.01	568.966	1063	979.364	526.946	1036.44	886.325	585.26	1087.58	878.951	580.79	1046.41	781.238
422	0	340.786	777.031	1632.91	237.27	782.666	1632.31	368.908	929.871	1664.4	232.61	948.639	1668.57	284.229	1023.38	1518.42	282.298	1128.76	1294.88	298.455	886.103	1418.03	298.776	860.956	1233.25	229.3	1130.2	1370.51	481.423	1023.5	1465.32	539.59	1059.62	1266.37	557.812	1090.54	1150.07	570.547	1041.44	981.603	527.979	1012.5	889.714	586.671	1062.76	880.5	582.054	1018.01	784.577
423	0	340.458	766.45	1634.94	236.943	772.211	1634.12	368.698	919.248	1666.47	232.424	938.171	1670.35	284.564	1012.86	1520.16	283.046	1117.89	1296.54	298.463	875.406	1419.95	298.885	850.159	1235.19	230.084	1119.65	1372.11	481.815	1012.14	1467.48	541.057	1045.23	1267.78	560.247	1073.95	1151.03	572.029	1019.85	983.932	528.919	988.51	893.267	587.937	1037.88	882.226	583.146	989.612	788.21
424	0	340.163	755.869	1636.79	236.646	761.763	1635.77	368.535	908.634	1668.31	232.287	927.727	1671.91	284.879	1002.31	1521.71	283.711	1107.01	1298.01	298.462	864.69	1421.64	298.98	839.362	1236.9	230.801	1109.06	1373.54	482.155	1000.79	1469.4	542.438	1030.87	1269.05	562.562	1057.35	1151.89	573.404	998.269	986.33	529.758	964.51	896.957	589.053	1012.96	884.11	584.058	961.286	792.107
425	0	339.907	745.272	1638.44	236.386	751.304	1637.24	368.428	898.013	1669.88	232.206	917.288	1673.24	285.172	991.708	1523.04	284.291	1096.13	1299.28	298.454	853.945	1423.08	299.065	828.561	1238.35	231.447	1098.44	1374.78	482.442	989.447	1471.07	543.727	1016.56	1270.15	564.747	1040.75	1152.61	574.665	976.715	988.771	530.494	940.545	900.755	590.018	988.063	886.131	584.786	933.091	796.231
426	0	339.697	734.644	1639.86	236.17	740.818	1638.51	368.38	887.368	1671.17	232.185	906.838	1674.32	285.438	981.056	1524.14	284.784	1085.23	1300.33	298.44	843.164	1424.25	299.142	817.749	1239.52	232.017	1087.77	1375.81	482.673	978.106	1472.46	544.918	1002.27	1271.06	566.792	1024.15	1153.19	575.805	955.22	991.232	531.119	916.653	904.634	590.829	963.217	888.269	585.329	905.081	800.549
427	0	339.532	723.972	1641.02	235.998	730.292	1639.56	368.392	876.687	1672.17	232.225	896.359	1675.15	285.674	970.341	1524.99	285.187	1074.29	1301.14	298.417	832.339	1425.15	299.208	806.924	1240.42	232.508	1077.04	1376.61	482.842	966.76	1473.57	546.005	988.032	1271.77	568.69	1007.55	1153.6	576.817	933.81	993.69	531.63	892.875	908.563	591.487	938.469	890.502	585.686	877.306	805.023
428	0	339.41	713.247	1641.92	235.866	719.714	1640.38	368.457	865.959	1672.86	232.319	885.84	1675.73	285.873	959.555	1525.59	285.499	1063.32	1301.71	298.382	821.464	1425.77	299.262	796.08	1241.02	232.914	1066.24	1377.18	482.946	955.403	1474.38	546.982	973.825	1272.26	570.432	990.973	1153.84	577.696	912.51	996.124	532.022	869.247	912.515	591.992	913.856	892.807	585.862	849.811	809.619
429	0	339.323	702.46	1642.53	235.769	709.076	1640.96	368.568	855.175	1673.25	232.459	875.268	1676.04	286.026	948.693	1525.93	285.716	1052.31	1302.03	298.33	810.532	1426.1	299.299	785.211	1241.33	233.228	1055.37	1377.51	482.978	944.028	1474.89	547.84	959.653	1272.53	572.012	974.412	1153.9	578.436	891.346	998.513	532.29	845.804	916.462	592.344	889.416	895.162	585.862	822.637	814.303
430	0	339.262	691.607	1642.87	235.697	698.37	1641.29	368.711	844.328	1673.34	232.63	864.634	1676.1	286.124	937.749	1526	285.837	1041.24	1302.09	298.253	799.537	1426.14	299.315	774.31	1241.35	233.446	1044.42	1377.6	482.933	932.628	1475.09	548.573	945.515	1272.57	573.423	957.879	1153.77	579.033	870.341	1000.84	532.431	822.579	920.38	592.544	865.185	897.547	585.694	795.82	819.041
431	0	339.215	680.684	1642.94	235.638	687.59	1641.37	368.87	833.416	1673.13	232.817	853.931	1675.91	286.157	926.719	1525.82	285.858	1030.1	1301.9	298.142	788.474	1425.91	299.304	763.369	1241.09	233.561	1033.38	1377.43	482.803	921.198	1475.01	549.174	931.408	1272.38	574.658	941.384	1153.46	579.482	849.517	1003.08	532.442	799.604	924.243	592.595	841.199	899.939	585.366	769.395	823.802
432	0	339.167	669.689	1642.73	235.577	676.732	1641.22	369.025	822.435	1672.63	232.999	843.151	1675.46	286.115	915.6	1525.39	285.776	1018.9	1301.45	297.988	777.336	1425.41	299.259	752.38	1240.56	233.568	1022.25	1377.02	482.584	909.73	1474.64	549.634	917.331	1271.97	575.713	924.938	1152.96	579.783	828.898	1005.23	532.321	776.91	928.029	592.499	817.491	902.321	584.886	743.392	828.556
433	0	339.102	658.623	1642.26	235.499	665.793	1640.83	369.154	811.388	1671.87	233.153	832.29	1674.79	285.984	904.388	1524.7	285.589	1007.62	1300.77	297.78	766.119	1424.64	299.172	741.332	1239.76	233.461	1011.02	1376.36	482.269	898.218	1474.01	549.947	903.282	1271.34	576.583	908.552	1152.29	579.932	808.506	1007.28	532.067	754.523	931.719	592.258	794.095	904.672	584.266	717.841	833.274
434	0	339.002	647.487	1641.56	235.386	654.768	1640.22	369.233	800.275	1670.84	233.255	821.343	1673.88	285.755	893.08	1523.78	285.294	996.254	1299.84	297.509	754.815	1423.64	299.038	730.213	1238.72	233.236	999.691	1375.46	481.853	886.654	1473.12	550.109	889.261	1270.5	577.263	892.24	1151.45	579.93	788.363	1009.2	531.681	732.471	935.292	591.874	771.041	906.974	583.514	692.77	837.928
435	0	338.851	636.282	1640.63	235.22	643.657	1639.4	369.238	789.098	1669.59	233.278	810.308	1672.77	285.416	881.675	1522.63	284.89	984.798	1298.68	297.163	743.42	1422.41	298.848	719.013	1237.45	232.89	988.257	1374.33	481.332	875.031	1472.01	550.112	875.267	1269.47	577.753	876.015	1150.46	579.776	768.491	1011	531.165	710.78	938.734	591.352	748.361	909.211	582.643	668.203	842.494
436	0	338.629	625.011	1639.5	234.985	632.456	1638.39	369.142	777.859	1668.12	233.196	799.181	1671.45	284.956	870.169	1521.27	284.377	973.246	1297.32	296.731	731.927	1420.97	298.596	707.72	1235.96	232.419	976.716	1372.98	480.701	863.34	1470.7	549.955	861.301	1268.27	578.05	859.895	1149.33	579.473	748.912	1012.66	530.519	689.473	942.028	590.693	726.085	911.368	581.66	644.167	846.948
437	0	338.318	613.674	1638.19	234.662	621.163	1637.2	368.922	766.562	1666.46	232.985	787.958	1669.95	284.365	858.561	1519.71	283.755	961.595	1295.75	296.205	720.333	1419.35	298.276	696.323	1234.29	231.823	965.066	1371.43	479.958	851.574	1469.21	549.634	847.365	1266.9	578.156	843.894	1148.07	579.021	729.646	1014.18	529.748	668.573	945.162	589.901	704.242	913.428	580.577	620.684	851.267
438	0	337.902	602.272	1636.73	234.234	609.773	1635.85	368.553	755.206	1664.64	232.618	776.635	1668.28	283.637	846.849	1517.98	283.027	949.842	1294.01	295.575	708.632	1417.56	297.88	684.812	1232.46	231.102	953.307	1369.68	479.1	839.725	1467.57	549.15	833.46	1265.41	578.072	828.031	1146.71	578.425	710.715	1015.55	528.856	648.102	948.125	588.98	682.86	915.38	579.402	597.778	855.429
439	0	337.364	590.803	1635.14	233.685	598.284	1634.37	368.014	743.792	1662.69	232.075	765.21	1666.45	282.764	835.033	1516.09	282.197	937.987	1292.11	294.833	696.822	1415.62	297.405	673.179	1230.47	230.258	941.44	1367.76	478.126	827.786	1465.81	548.503	819.592	1263.8	577.802	812.323	1145.26	577.687	692.139	1016.79	527.846	628.081	950.906	587.935	661.965	917.211	578.144	575.469	859.415
440	0	336.69	579.266	1633.45	233	586.69	1632.76	367.286	732.317	1660.62	231.336	753.677	1664.5	281.742	823.11	1514.08	281.268	926.03	1290.08	293.975	684.9	1413.56	296.846	661.418	1228.36	229.293	929.464	1365.69	477.035	815.75	1463.97	547.696	805.765	1262.11	577.352	796.789	1143.75	576.813	673.937	1017.87	526.725	608.528	953.497	586.768	641.583	918.91	576.809	553.779	863.204
441	0	335.867	567.656	1631.68	232.169	574.988	1631.04	366.355	720.779	1658.47	230.386	742.032	1662.42	280.57	811.082	1511.95	280.248	913.972	1287.94	292.996	672.864	1411.4	296.199	649.524	1226.16	228.212	917.384	1363.5	475.829	803.612	1462.06	546.735	791.986	1260.35	576.73	781.445	1142.18	575.809	656.128	1018.81	525.498	589.464	955.891	585.487	621.737	920.468	575.403	532.727	866.779
442	0	334.886	555.968	1629.84	231.18	563.173	1629.25	365.208	709.173	1656.27	229.214	730.27	1660.25	279.247	798.95	1509.74	279.143	901.818	1285.72	291.895	660.715	1409.16	295.464	637.496	1223.87	227.019	905.202	1361.2	474.509	791.37	1460.12	545.626	778.262	1258.56	575.943	766.31	1140.6	574.679	638.73	1019.6	524.169	570.905	958.081	584.096	602.449	921.876	573.932	512.331	870.122
443	0	333.74	544.198	1627.98	230.027	551.241	1627.38	363.84	697.492	1654.04	227.815	718.387	1658.01	277.778	786.717	1507.48	277.96	889.572	1283.45	290.673	648.456	1406.88	294.639	625.333	1221.54	225.72	892.923	1358.83	473.08	779.022	1458.19	544.377	764.601	1256.76	575.002	751.4	1139.01	573.431	621.758	1020.26	522.745	552.868	960.062	582.602	583.738	923.129	572.398	492.607	873.216
444	0	332.424	532.337	1626.1	228.705	539.19	1625.46	362.251	685.73	1651.82	226.189	706.38	1655.73	276.168	774.386	1505.19	276.707	877.24	1281.15	289.333	636.09	1404.57	293.727	613.039	1219.19	224.321	880.553	1356.42	471.546	766.572	1456.27	543	751.014	1254.98	573.918	736.731	1137.43	572.072	605.228	1020.78	521.232	535.369	961.829	581.012	565.623	924.222	570.804	473.571	876.045
445	0	330.939	520.382	1624.23	227.216	527.019	1623.51	360.443	673.878	1649.64	224.341	694.246	1653.42	274.426	761.964	1502.9	275.388	864.831	1278.86	287.882	623.624	1402.28	292.73	600.619	1216.85	222.83	868.099	1354	469.914	754.025	1454.41	541.505	737.511	1253.24	572.704	722.317	1135.9	570.61	589.153	1021.16	519.634	518.423	963.377	579.334	548.12	925.152	569.152	455.236	878.594
446	0	329.287	508.326	1622.39	225.563	514.727	1621.55	358.428	661.93	1647.52	222.282	681.986	1651.11	272.563	749.459	1500.65	274.011	852.353	1276.61	286.329	611.065	1400.02	291.654	588.08	1214.55	221.251	855.57	1351.59	468.191	741.389	1452.63	539.906	724.105	1251.57	571.372	708.174	1134.42	569.053	573.547	1021.43	517.959	502.043	964.705	577.579	531.243	925.917	567.441	437.616	880.849
447	0	327.475	496.167	1620.6	223.753	502.319	1619.6	356.221	649.881	1645.49	220.029	669.602	1648.84	270.593	736.879	1498.45	272.579	839.815	1274.43	284.685	598.425	1397.82	290.505	575.431	1212.32	219.593	842.974	1349.24	466.389	728.679	1450.95	538.216	710.807	1249.99	569.935	694.312	1133.03	567.41	558.419	1021.57	516.213	486.242	965.809	575.755	515.003	926.519	565.674	420.722	882.797
448	0	325.514	483.905	1618.87	221.797	489.8	1617.66	353.842	637.726	1643.59	217.604	657.099	1646.64	268.533	724.238	1496.36	271.095	827.228	1272.34	282.965	585.715	1395.72	289.291	562.685	1210.2	217.863	830.324	1346.97	464.518	715.909	1449.39	536.451	697.632	1248.52	568.407	680.744	1131.73	565.691	543.779	1021.61	514.401	471.03	966.689	573.875	499.411	926.959	563.849	404.563	884.427
449	0	323.418	471.539	1617.23	219.71	477.181	1615.78	351.316	625.465	1641.83	215.034	644.486	1644.53	266.401	711.547	1494.38	269.563	814.602	1270.38	281.186	572.951	1393.74	288.02	549.854	1208.2	216.069	817.63	1344.82	462.593	703.098	1447.96	534.625	684.594	1247.18	566.801	667.481	1130.54	563.904	529.636	1021.54	512.532	456.417	967.343	571.949	484.474	927.24	561.967	389.148	885.73
450	0	321.206	459.078	1615.7	217.511	464.472	1613.96	348.672	613.099	1640.24	212.348	631.775	1642.54	264.217	698.822	1492.55	267.984	801.949	1268.57	279.363	560.149	1391.91	286.702	536.957	1206.37	214.219	804.906	1342.81	460.628	690.267	1446.7	532.755	671.708	1245.99	565.129	654.53	1129.48	562.06	515.997	1021.37	510.613	442.413	967.774	569.99	470.199	927.368	560.032	374.482	886.7
451	0	318.896	446.527	1614.28	215.22	451.691	1612.23	345.944	600.634	1638.85	209.582	618.982	1640.71	262.002	686.078	1490.89	266.361	789.28	1266.94	277.518	547.325	1390.25	285.345	524.012	1204.72	212.324	792.165	1340.98	458.64	677.438	1445.6	530.856	658.99	1244.96	563.404	641.902	1128.57	560.171	502.867	1021.12	508.652	429.023	967.982	568.012	456.591	927.348	558.044	360.571	887.332
452	0	316.514	433.9	1613.01	212.861	438.856	1610.62	343.166	588.079	1637.67	206.771	606.126	1639.05	259.779	673.33	1489.43	264.696	776.608	1265.5	275.668	534.5	1388.79	283.959	511.04	1203.29	210.394	779.423	1339.35	456.647	664.633	1444.69	528.942	646.456	1244.11	561.636	629.602	1127.8	558.246	490.25	1020.8	506.659	416.253	967.971	566.027	443.651	927.186	556.01	347.418	887.624
453	0	314.084	421.21	1611.89	210.459	425.986	1609.14	340.376	575.448	1636.71	203.953	593.227	1637.59	257.57	660.596	1488.18	262.993	763.945	1264.29	273.833	521.691	1387.56	282.554	498.066	1202.08	208.442	766.694	1337.95	454.666	651.877	1443.96	527.028	634.12	1243.45	559.836	617.638	1127.19	556.297	478.15	1020.4	504.644	404.106	967.745	564.048	431.382	926.889	553.935	335.023	887.576
454	0	311.634	408.476	1610.95	208.042	413.105	1607.83	337.61	562.755	1635.99	201.166	580.31	1636.36	255.397	647.892	1487.18	261.258	751.303	1263.31	272.032	508.918	1386.55	281.139	485.113	1201.11	206.479	753.992	1336.8	452.716	639.19	1443.44	525.128	621.999	1242.97	558.013	606.016	1126.75	554.337	466.569	1019.94	502.619	392.583	967.31	562.09	419.784	926.465	551.83	323.387	887.193
455	0	309.194	395.715	1610.19	205.638	400.235	1606.7	334.905	550.02	1635.51	198.447	567.398	1635.36	253.281	635.233	1486.42	259.498	738.693	1262.57	270.283	496.199	1385.8	279.723	472.207	1200.4	204.52	741.332	1335.92	450.813	626.594	1443.12	523.252	610.105	1242.7	556.176	594.738	1126.48	552.376	455.509	1019.43	500.596	381.686	966.672	560.165	408.856	925.922	549.706	312.508	886.481
456	0	306.791	382.948	1609.65	203.273	387.399	1605.78	332.298	537.262	1635.28	195.831	554.515	1634.63	251.242	622.635	1485.93	257.72	726.128	1262.1	268.6	483.551	1385.31	278.315	459.372	1199.96	202.577	728.726	1335.32	448.973	614.109	1443	521.411	598.451	1242.62	554.332	583.809	1126.37	550.427	444.969	1018.86	498.589	371.41	965.84	558.285	398.597	925.267	547.578	302.384	885.449
457	0	304.456	370.197	1609.32	200.978	374.617	1605.09	329.82	524.504	1635.31	193.351	541.685	1634.17	249.296	610.109	1485.71	255.935	713.616	1261.89	267	470.989	1385.09	276.925	446.627	1199.79	200.663	716.187	1335.01	447.211	601.752	1443.08	519.614	587.046	1242.74	552.486	573.228	1126.44	548.5	434.948	1018.26	496.611	361.752	964.823	556.463	389.003	924.509	545.463	293.01	884.109
458	0	302.218	357.482	1609.22	198.779	361.91	1604.64	327.501	511.767	1635.59	191.033	528.928	1633.99	247.457	597.669	1485.77	254.151	701.168	1261.95	265.493	458.525	1385.15	275.563	433.992	1199.89	198.79	703.724	1335	445.538	589.539	1443.37	517.867	575.899	1243.06	550.643	562.996	1126.67	546.609	425.444	1017.62	494.677	352.707	963.631	554.71	380.072	923.656	543.38	284.382	882.475
459	0	300.104	344.823	1609.36	196.702	349.292	1604.47	325.366	499.075	1636.12	188.902	516.262	1634.11	245.734	585.323	1486.1	252.377	688.79	1262.27	264.089	446.171	1385.49	274.24	421.48	1200.28	196.967	691.343	1335.29	443.963	577.482	1443.86	516.176	565.015	1243.57	548.806	553.108	1127.08	544.762	416.453	1016.95	492.802	344.265	962.276	553.035	371.798	922.717	541.352	276.497	880.564
460	0	298.141	332.24	1609.74	194.772	336.778	1604.57	323.434	486.447	1636.9	186.976	503.703	1634.53	244.136	573.077	1486.72	250.621	676.488	1262.86	262.796	433.933	1386.12	272.965	409.097	1200.94	195.203	679.05	1335.88	442.491	565.591	1444.55	514.542	554.396	1244.26	546.977	543.561	1127.64	542.972	407.97	1016.25	491.001	336.417	960.77	551.448	364.176	921.7	539.401	269.349	878.394
461	0	296.351	319.748	1610.38	193.011	324.376	1604.97	321.718	473.903	1637.93	185.266	491.26	1635.26	242.664	560.935	1487.6	248.889	664.266	1263.7	261.616	421.813	1387.02	271.748	396.847	1201.89	193.503	666.845	1336.75	441.126	553.871	1445.43	512.966	544.043	1245.15	545.156	534.346	1128.37	541.245	399.988	1015.54	489.29	329.153	959.126	549.955	357.2	920.616	537.551	262.935	875.986
462	0	294.754	307.364	1611.28	191.437	312.092	1605.68	320.228	461.462	1639.18	183.78	478.941	1636.29	241.318	548.899	1488.75	247.186	652.125	1264.79	260.552	409.812	1388.21	270.596	384.728	1203.11	191.87	654.728	1337.91	439.867	542.325	1446.5	511.446	533.951	1246.21	543.342	525.455	1129.26	539.592	392.501	1014.81	487.681	322.458	957.359	548.562	350.862	919.474	535.825	257.249	873.361
463	0	293.367	295.097	1612.42	190.065	299.929	1606.69	318.965	449.138	1640.66	182.518	466.749	1637.61	240.095	536.966	1490.14	245.513	640.064	1266.11	259.601	397.925	1389.66	269.517	372.732	1204.59	190.303	642.694	1339.32	438.71	530.95	1447.74	509.98	524.115	1247.44	541.535	516.876	1130.3	538.018	385.497	1014.08	486.187	316.318	955.484	547.275	345.152	918.284	534.245	252.288	870.543
464	0	292.199	282.959	1613.82	188.905	287.886	1608	317.926	436.944	1642.34	181.477	454.685	1639.22	238.989	525.131	1491.77	243.873	628.083	1267.64	258.76	386.145	1391.36	268.512	360.85	1206.33	188.801	630.736	1340.97	437.65	519.738	1449.14	508.561	514.527	1248.83	539.73	508.597	1131.49	536.53	378.966	1013.34	484.821	310.718	953.515	546.095	340.059	917.057	532.832	248.046	867.555
465	0	291.258	270.955	1615.45	187.963	275.96	1609.61	317.104	424.889	1644.21	180.646	442.746	1641.1	237.99	513.386	1493.6	242.267	616.178	1269.36	258.022	374.461	1393.3	267.583	349.069	1208.31	187.359	618.845	1342.84	436.678	508.679	1450.7	507.184	505.174	1250.37	537.927	500.602	1132.83	535.131	372.895	1012.6	483.592	305.639	951.468	545.023	335.569	915.803	531.602	244.512	864.424
466	0	290.541	259.088	1617.3	187.238	264.144	1611.5	316.483	412.98	1646.23	180.012	430.926	1643.21	237.089	501.721	1495.62	240.696	604.345	1271.25	257.379	362.861	1395.44	266.728	337.375	1210.49	185.972	607.01	1344.9	435.784	497.756	1452.38	505.843	496.043	1252.06	536.123	492.876	1134.3	533.825	367.268	1011.87	482.506	301.062	949.357	544.06	331.665	914.534	530.571	241.678	861.173
467	0	290.045	247.358	1619.36	186.726	252.433	1613.66	316.048	401.22	1648.38	179.558	419.22	1645.54	236.273	490.124	1497.78	239.16	592.581	1273.28	256.82	351.328	1397.76	265.94	325.755	1212.86	184.633	595.22	1347.11	434.959	486.951	1454.18	504.53	487.117	1253.86	534.315	485.401	1135.89	532.612	362.069	1011.15	481.569	296.967	947.194	543.203	328.328	913.258	529.745	239.528	857.828
468	0	289.758	235.763	1621.58	186.417	240.816	1616.04	315.777	389.609	1650.62	179.263	407.619	1648.03	235.532	478.582	1500.06	237.661	580.881	1275.42	256.336	339.848	1400.22	265.214	314.194	1215.36	183.337	583.463	1349.43	434.191	476.242	1456.07	503.239	478.379	1255.77	532.503	478.159	1137.6	531.492	357.277	1010.43	480.782	293.331	944.993	542.449	325.534	911.985	529.13	238.041	854.412
469	0	289.666	224.295	1623.95	186.295	229.284	1618.61	315.648	378.141	1652.92	179.106	396.112	1650.64	234.852	467.081	1502.42	236.202	569.244	1277.63	255.914	328.402	1402.77	264.539	302.679	1217.96	182.075	571.726	1351.83	433.471	465.605	1458.01	501.964	469.809	1257.77	530.684	471.13	1139.4	530.464	352.871	1009.72	480.145	290.13	942.762	541.791	323.257	910.723	528.723	237.193	850.948
470	0	289.747	212.945	1626.43	186.344	217.826	1621.34	315.636	366.81	1655.23	179.063	384.69	1653.33	234.223	455.604	1504.81	234.788	557.666	1279.89	255.542	316.976	1405.38	263.906	291.198	1220.6	180.845	559.999	1354.27	432.787	455.015	1459.98	500.699	461.385	1259.81	528.86	464.293	1141.27	529.524	348.827	1009.02	479.653	287.338	940.51	541.223	321.464	909.477	528.518	236.954	847.456
471	0	289.981	201.703	1628.97	186.542	206.43	1624.16	315.716	355.604	1657.51	179.109	373.339	1656.03	233.636	444.138	1507.19	233.424	546.146	1282.16	255.211	305.552	1407.98	263.303	279.739	1223.25	179.641	548.271	1356.71	432.133	444.447	1461.94	499.442	453.086	1261.89	527.032	457.627	1143.19	528.668	345.117	1008.31	479.301	284.927	938.242	540.738	320.123	908.252	528.503	237.285	843.956
472	0	290.341	190.552	1631.53	186.864	195.084	1627.04	315.864	344.51	1659.72	179.221	362.048	1658.69	233.081	432.669	1509.53	232.115	534.681	1284.4	254.91	294.118	1410.53	262.721	268.294	1225.83	178.464	536.534	1359.09	431.501	433.875	1463.85	498.189	444.888	1263.97	525.201	451.107	1145.14	527.891	341.714	1007.61	479.078	282.87	935.961	540.325	319.196	907.05	528.663	238.146	840.464
473	0	290.802	179.476	1634.07	187.285	183.774	1629.92	316.057	333.511	1661.81	179.377	350.801	1661.26	232.552	421.182	1511.77	230.869	523.27	1286.58	254.63	282.66	1412.98	262.149	256.853	1228.3	177.314	524.782	1361.39	430.887	423.277	1465.68	496.94	436.767	1266.01	523.371	444.709	1147.09	527.185	338.587	1006.89	478.973	281.136	933.669	539.974	318.643	905.872	528.979	239.488	836.993
474	0	291.337	168.455	1636.53	187.781	172.486	1632.73	316.274	322.586	1663.74	179.556	339.584	1663.68	232.045	409.665	1513.88	229.694	511.91	1288.65	254.362	271.168	1415.28	261.58	245.41	1230.6	176.194	513.01	1363.56	430.289	412.63	1467.39	495.696	428.699	1268	521.545	438.406	1149.01	526.542	335.701	1006.15	478.972	279.694	931.363	539.675	318.421	904.719	529.427	241.26	833.557
475	0	291.92	157.469	1638.88	188.326	161.206	1635.43	316.497	311.712	1665.48	179.74	328.383	1665.91	231.558	398.107	1515.81	228.596	500.596	1290.59	254.103	259.634	1417.39	261.006	233.96	1232.69	175.111	501.215	1365.56	429.706	401.916	1468.94	494.458	420.659	1269.88	519.728	432.171	1150.87	525.955	333.022	1005.39	479.06	278.51	929.044	539.416	318.485	903.588	529.985	243.408	830.166
476	0	292.527	146.496	1641.06	188.897	149.92	1637.96	316.711	300.868	1666.99	179.916	317.18	1667.89	231.091	386.499	1517.55	227.585	489.322	1292.36	253.846	248.05	1419.25	260.425	222.499	1234.52	174.073	489.394	1367.37	429.141	391.118	1470.3	493.228	412.622	1271.64	517.922	425.975	1152.64	525.415	330.515	1004.59	479.22	277.552	926.707	539.185	318.789	902.477	530.627	245.875	826.829
477	0	293.138	135.514	1643.03	189.474	138.613	1640.27	316.903	290.026	1668.25	180.073	305.961	1669.6	230.647	374.831	1519.04	226.668	478.081	1293.94	253.591	236.413	1420.84	259.833	211.024	1236.06	173.091	477.547	1368.96	428.596	380.22	1471.45	492.012	404.563	1273.25	516.135	419.788	1154.3	524.911	328.141	1003.75	479.436	276.785	924.351	538.972	319.287	901.385	531.328	248.605	823.552
478	0	293.733	124.5	1644.75	190.037	127.27	1642.31	317.068	279.163	1669.23	180.203	294.71	1670.99	230.228	363.099	1520.28	225.853	466.861	1295.3	253.338	224.718	1422.12	259.232	199.532	1237.27	172.175	465.672	1370.29	428.077	369.212	1472.35	490.815	396.457	1274.68	514.369	413.579	1155.82	524.437	325.862	1002.86	479.69	276.173	921.973	538.766	319.93	900.31	532.062	251.542	820.342
479	0	294.297	113.432	1646.2	190.573	115.878	1644.06	317.202	268.254	1669.91	180.304	283.41	1672.05	229.842	351.295	1521.24	225.147	455.651	1296.43	253.09	212.965	1423.08	258.625	188.02	1238.13	171.339	453.771	1371.37	427.591	358.085	1472.99	489.641	388.279	1275.91	512.63	407.319	1157.19	523.982	323.641	1001.92	479.967	275.68	919.572	538.558	320.672	899.252	532.805	254.63	817.207
480	0	294.822	102.29	1647.35	191.072	104.425	1645.47	317.303	257.274	1670.29	180.376	272.049	1672.76	229.496	339.417	1521.91	224.555	444.435	1297.29	252.85	201.153	1423.71	258.018	176.487	1238.64	170.594	441.842	1372.17	427.145	346.833	1473.35	488.499	380.005	1276.93	510.923	400.977	1158.39	523.54	321.437	1000.92	480.252	275.269	917.149	538.339	321.464	898.211	533.533	257.816	814.152
481	0	295.299	91.0563	1648.18	191.526	92.8986	1646.53	317.377	246.203	1670.37	180.424	260.614	1673.12	229.198	327.462	1522.28	224.083	433.197	1297.89	252.626	189.279	1423.98	257.418	164.927	1238.78	169.953	429.884	1372.68	426.749	335.45	1473.43	487.395	371.614	1277.72	509.253	394.524	1159.4	523.104	319.214	999.866	480.53	274.901	914.706	538.102	322.259	897.19	534.226	261.05	811.185
482	0	295.727	79.7139	1648.68	191.935	81.2888	1647.23	317.43	235.021	1670.15	180.454	249.092	1673.12	228.958	315.428	1522.36	223.736	421.919	1298.21	252.424	177.344	1423.91	256.835	153.337	1238.56	169.428	417.895	1372.91	426.411	323.934	1473.22	486.34	363.085	1278.28	507.624	387.933	1160.23	522.669	316.933	998.756	480.79	274.537	912.249	537.841	323.01	896.192	534.866	264.282	808.314
483	0	296.109	68.2498	1648.85	192.3	69.5871	1647.56	317.473	223.712	1669.63	180.478	237.475	1672.78	228.787	303.314	1522.14	223.515	410.581	1298.26	252.257	165.348	1423.51	256.279	141.71	1238	169.029	405.871	1372.86	426.142	312.284	1472.73	485.34	354.398	1278.61	506.042	381.178	1160.85	522.232	314.556	997.594	481.022	274.139	909.785	537.554	323.671	895.222	535.435	267.465	805.548
484	0	296.451	56.6535	1648.69	192.628	57.7868	1647.53	317.517	212.263	1668.84	180.507	225.754	1672.11	228.696	291.12	1521.63	223.422	399.165	1298.04	252.133	153.288	1422.79	255.764	130.04	1237.11	168.764	393.809	1372.53	425.952	300.5	1471.97	484.407	345.536	1278.7	504.512	374.236	1161.29	521.791	312.047	996.385	481.22	273.665	907.321	537.238	324.195	894.285	535.921	270.552	802.897
485	0	296.763	44.918	1648.22	192.93	45.8829	1647.15	317.577	200.665	1667.8	180.555	213.925	1671.13	228.695	278.844	1520.86	223.457	387.653	1297.54	252.066	141.163	1421.77	255.302	118.318	1235.93	168.641	381.701	1371.94	425.85	288.585	1470.95	483.549	336.486	1278.56	503.039	367.086	1161.52	521.345	309.371	995.134	481.377	273.076	904.868	536.893	324.539	893.386	536.313	273.5	800.37
486	0	297.06	33.0393	1647.45	193.217	33.8723	1646.44	317.67	188.912	1666.51	180.64	201.984	1669.87	228.795	266.486	1519.83	223.62	376.026	1296.79	252.068	128.969	1420.47	254.905	106.533	1234.47	168.664	369.542	1371.11	425.847	276.541	1469.68	482.775	327.236	1278.21	501.63	359.71	1161.58	520.896	306.493	993.849	481.492	272.33	902.437	536.521	324.656	892.533	536.603	276.263	797.974
487	0	297.357	21.0163	1646.42	193.508	21.7534	1645.43	317.812	177.001	1665.02	180.777	189.928	1668.35	229.006	254.047	1518.58	223.906	364.269	1295.8	252.151	116.705	1418.94	254.588	94.6745	1232.78	168.836	357.324	1370.05	425.95	264.371	1468.19	482.094	317.776	1277.65	500.29	352.091	1161.45	520.446	303.38	992.537	481.565	271.387	900.039	536.124	324.504	891.728	536.785	278.797	795.719
488	0	297.674	8.85066	1645.15	193.82	9.52611	1644.16	318.021	164.932	1663.35	180.984	177.758	1666.62	229.336	241.525	1517.12	224.313	352.369	1294.59	252.329	104.364	1417.19	254.361	82.7304	1230.88	169.158	345.038	1368.79	426.167	252.081	1466.49	481.515	308.101	1276.9	499.026	344.218	1161.16	520	299.998	991.207	481.597	270.204	897.686	535.709	324.039	890.978	536.859	281.057	793.611
489	0	298.031	-3.45367	1643.68	194.173	-2.80828	1642.65	318.313	152.71	1661.53	181.278	165.475	1664.69	229.794	228.919	1515.48	224.835	340.314	1293.18	252.614	91.9443	1415.26	254.238	70.6885	1228.82	169.626	332.675	1367.36	426.504	239.676	1464.62	481.044	298.206	1275.98	497.844	336.078	1160.71	519.564	296.318	989.864	481.592	268.742	895.388	535.281	323.22	890.284	536.826	282.997	791.653
490	0	298.449	-15.891	1642.04	194.588	-15.2476	1640.96	318.706	140.341	1659.58	181.676	153.082	1662.62	230.384	216.229	1513.7	225.467	328.098	1291.59	253.015	79.4399	1413.2	254.229	58.5365	1226.64	170.239	320.228	1365.77	426.966	227.162	1462.59	480.687	288.09	1274.9	496.752	327.664	1160.12	519.144	292.308	988.515	481.558	266.957	893.155	534.848	322.005	889.646	536.688	284.571	789.848
491	0	298.948	-28.4544	1640.26	195.086	-27.7889	1639.12	319.215	127.83	1657.54	182.193	140.582	1660.43	231.112	203.453	1511.79	226.202	315.715	1289.85	253.544	66.8465	1411.02	254.342	46.263	1224.37	170.989	307.688	1364.06	427.557	214.545	1460.43	480.449	277.753	1273.68	495.756	318.967	1159.4	518.747	287.939	987.167	481.501	264.809	890.995	534.418	320.355	889.063	536.453	285.729	788.193
492	0	299.549	-41.136	1638.4	195.686	-40.4286	1637.17	319.854	115.189	1655.43	182.844	127.98	1658.16	231.98	190.591	1509.79	227.033	303.165	1288	254.206	54.1603	1408.78	254.585	33.8579	1222.04	171.87	295.048	1362.26	428.278	201.831	1458.17	480.332	267.196	1272.33	494.863	309.983	1158.56	518.382	283.185	985.824	481.43	262.255	888.914	533.999	318.23	888.531	536.131	286.423	786.686
493	0	300.269	-53.9279	1636.48	196.406	-53.1632	1635.16	320.636	102.425	1653.27	183.641	115.279	1655.85	232.988	177.643	1507.73	227.954	290.448	1286.05	255.007	41.3781	1406.5	254.964	21.3129	1219.69	172.874	282.304	1360.4	429.128	189.027	1455.83	480.34	256.422	1270.89	494.081	300.707	1157.62	518.057	278.017	984.49	481.355	259.256	886.917	533.603	315.595	888.044	535.732	286.603	785.317
494	0	301.123	-66.822	1634.53	197.262	-65.9887	1633.13	321.571	89.5484	1651.1	184.594	102.485	1653.52	234.134	164.607	1505.64	228.957	277.569	1284.04	255.95	28.4981	1404.21	255.483	8.62233	1217.35	173.991	269.453	1358.5	430.107	176.14	1453.43	480.472	245.433	1269.36	493.417	291.135	1156.59	517.781	272.409	983.167	481.287	255.771	885.006	533.239	312.413	887.595	535.271	286.216	784.077
495	0	302.124	-79.8106	1632.6	198.264	-78.9012	1631.11	322.665	76.5686	1648.94	185.71	89.6018	1651.21	235.414	151.485	1503.55	230.034	264.536	1282.01	257.033	15.52	1401.94	256.143	-4.21691	1215.06	175.212	256.493	1356.59	431.21	163.177	1451.02	480.729	234.234	1267.76	492.876	281.265	1155.48	517.561	266.338	981.857	481.236	251.761	883.182	532.916	308.649	887.174	534.763	285.212	782.953
496	0	303.279	-92.8864	1630.7	199.422	-91.8967	1629.14	323.922	63.4943	1646.8	186.992	76.6346	1648.95	236.82	138.28	1501.48	231.18	251.358	1279.97	258.254	2.44552	1399.72	256.944	-17.2046	1212.82	176.527	243.427	1354.71	432.431	150.144	1448.6	481.108	222.828	1266.12	492.463	271.094	1154.31	517.407	259.779	980.564	481.214	247.188	881.444	532.647	304.271	886.771	534.226	283.537	781.93
497	0	304.593	-106.042	1628.87	200.739	-104.971	1627.25	325.343	50.3342	1644.71	188.441	63.5881	1646.77	238.344	124.996	1499.47	232.387	238.046	1277.97	259.604	-10.7213	1397.59	257.883	-30.3372	1210.69	177.923	230.26	1352.88	433.762	137.047	1446.21	481.607	211.217	1264.44	492.184	260.62	1153.09	517.326	252.709	979.287	481.229	242.016	879.791	532.439	299.248	886.375	533.678	281.14	780.992
498	0	306.064	-119.272	1627.13	202.214	-118.12	1625.46	326.923	37.0964	1642.7	190.052	50.4674	1644.69	239.975	111.64	1497.54	233.648	224.614	1276.02	261.074	-23.9741	1395.55	258.953	-43.6076	1208.66	179.391	216.999	1351.13	435.195	123.895	1443.88	482.222	199.405	1262.76	492.041	249.842	1151.83	517.324	245.107	978.029	481.293	236.208	878.219	532.303	293.551	885.974	533.138	277.971	780.12
499	0	307.687	-132.567	1625.49	203.841	-131.337	1623.8	328.655	23.7889	1640.77	191.818	37.2778	1642.73	241.699	98.2205	1495.71	234.957	211.079	1274.17	262.65	-37.3039	1393.64	260.148	-57.0053	1206.77	180.919	203.656	1349.47	436.719	110.694	1441.63	482.948	187.393	1261.08	492.037	238.758	1150.54	517.408	236.954	976.791	481.413	229.734	876.727	532.247	287.15	885.557	532.626	273.978	779.297
500	0	309.451	-145.922	1623.96	205.608	-144.617	1622.29	330.527	10.4199	1638.95	193.726	24.0258	1640.93	243.5	84.749	1494	236.307	197.455	1272.42	264.316	-50.699	1391.88	261.456	-70.5162	1205.04	182.497	190.244	1347.94	438.32	97.4517	1439.49	483.782	175.182	1259.43	492.174	227.365	1149.25	517.582	228.23	975.576	481.599	222.561	875.31	532.28	280.02	885.116	532.161	269.114	778.506
501	0	311.34	-159.328	1622.56	207.502	-157.952	1620.93	332.523	-3.00195	1637.25	195.761	10.7187	1639.31	245.361	71.2395	1492.45	237.693	183.763	1270.81	266.054	-64.1456	1390.29	262.864	-84.1231	1203.49	184.113	176.779	1346.55	439.985	84.1755	1437.48	484.716	162.773	1257.82	492.451	215.664	1147.96	517.852	218.919	974.389	481.858	214.661	873.967	532.41	272.138	884.641	531.763	263.334	777.731
502	0	313.335	-172.775	1621.3	209.501	-171.332	1619.75	334.625	-16.467	1635.7	197.903	-2.63498	1637.87	247.263	57.708	1491.06	239.108	170.021	1269.36	267.841	-77.6273	1388.87	264.356	-97.8054	1202.12	185.757	163.28	1345.32	441.699	70.8741	1435.64	485.746	150.168	1256.28	492.868	203.654	1146.7	518.22	209.006	973.233	482.195	206.009	872.697	532.643	263.481	884.126	531.449	256.593	776.956
503	0	315.412	-186.253	1620.17	211.581	-184.747	1618.73	336.808	-29.9647	1634.3	200.128	-16.0251	1636.64	249.187	44.1725	1489.85	240.545	156.251	1268.07	269.656	-91.126	1387.66	265.916	-111.54	1200.96	187.418	149.768	1344.26	443.446	57.5564	1433.97	486.866	137.367	1254.82	493.424	191.335	1145.47	518.688	198.477	972.115	482.616	196.582	871.5	532.986	254.03	883.566	531.238	248.853	776.17
504	0	317.545	-199.749	1619.19	213.714	-198.184	1617.9	339.047	-43.4831	1633.08	202.408	-29.4399	1635.64	251.111	30.6519	1488.84	241.999	142.475	1266.98	271.476	-104.622	1386.65	267.523	-125.3	1200.01	189.085	136.262	1343.38	445.21	44.232	1432.52	488.068	124.37	1253.47	494.116	178.71	1144.29	519.257	187.324	971.042	483.123	186.362	870.377	533.443	243.769	882.96	531.146	240.077	775.364
505	0	319.703	-213.25	1618.37	215.872	-211.629	1617.25	341.312	-57.0091	1632.05	204.715	-42.8665	1634.86	253.016	17.1661	1488.04	243.463	128.715	1266.1	273.276	-118.095	1385.87	269.157	-139.057	1199.29	190.749	122.786	1342.7	446.972	30.911	1431.3	489.347	111.182	1252.23	494.942	165.781	1143.18	519.928	175.536	970.023	483.718	175.332	869.332	534.019	232.683	882.308	531.186	230.234	774.532
506	0	321.857	-226.742	1617.7	218.023	-225.067	1616.79	343.574	-70.5287	1631.22	207.017	-56.2906	1634.33	254.88	3.73446	1487.46	244.93	114.993	1265.43	275.035	-131.523	1385.32	270.799	-152.782	1198.8	192.397	109.361	1342.23	448.717	17.6043	1430.33	490.694	97.8057	1251.13	495.897	152.553	1142.15	520.701	163.111	969.068	484.402	163.482	868.371	534.716	220.763	881.614	531.371	219.298	773.672
507	0	323.973	-240.209	1617.19	220.133	-238.481	1616.51	345.799	-84.0269	1630.61	209.281	-69.6968	1634.06	256.682	-9.62394	1487.12	246.392	101.332	1264.99	276.731	-144.887	1385	272.428	-166.445	1198.54	194.02	96.0072	1341.96	450.428	4.32309	1429.63	492.102	84.2465	1250.18	496.98	139.033	1141.22	521.572	150.046	968.188	485.175	150.804	867.502	535.537	208.002	880.884	531.712	207.246	772.786
508	0	326.019	-253.635	1616.85	222.17	-251.856	1616.42	347.956	-97.4886	1630.23	211.476	-83.0696	1634.03	258.405	-22.8914	1487.01	247.842	87.7511	1264.79	278.343	-158.167	1384.92	274.025	-180.016	1198.53	195.606	82.7457	1341.92	452.089	-8.92123	1429.21	493.564	70.5123	1249.4	498.185	125.23	1140.41	522.541	136.344	967.396	486.034	137.296	866.735	536.481	194.397	880.128	532.214	194.064	771.883
509	0	327.963	-267.004	1616.69	224.102	-265.174	1616.51	350.012	-110.899	1630.1	213.569	-96.3929	1634.26	260.031	-36.0519	1487.14	249.273	74.27	1264.83	279.856	-171.345	1385.09	275.571	-193.467	1198.75	197.146	69.594	1342.09	453.684	-22.1173	1429.09	495.071	56.6133	1248.8	499.508	111.155	1139.72	523.604	122.01	966.706	486.976	122.959	866.084	537.545	179.949	879.357	532.884	179.743	770.974
510	0	329.776	-280.302	1616.71	225.9	-278.419	1616.8	351.938	-124.243	1630.22	215.531	-109.651	1634.74	261.544	-49.0916	1487.51	250.678	60.9045	1265.12	281.253	-184.406	1385.5	277.051	-206.773	1199.21	198.63	56.5676	1342.49	455.201	-35.2542	1429.28	496.613	42.5617	1248.4	500.945	96.82	1139.18	524.755	107.053	966.132	487.995	107.802	865.563	538.727	164.667	878.586	533.724	164.28	770.08
511	0	331.428	-293.515	1616.92	227.535	-291.577	1617.26	353.707	-137.509	1630.6	217.335	-122.83	1635.48	262.933	-61.9989	1488.12	252.051	47.6674	1265.65	282.524	-197.338	1386.15	278.45	-219.917	1199.91	200.051	43.6789	1343.1	456.627	-48.322	1429.77	498.183	28.3723	1248.21	502.489	82.2412	1138.79	525.992	91.4873	965.689	489.088	91.835	865.19	540.021	148.56	877.833	534.732	147.681	769.224
512	0	332.895	-306.63	1617.33	228.984	-304.632	1617.91	355.295	-150.684	1631.24	218.957	-135.913	1636.46	264.189	-74.7653	1488.97	253.385	34.568	1266.42	283.66	-210.13	1387.04	279.756	-232.883	1200.84	201.402	30.9368	1343.92	457.953	-61.3122	1430.57	499.772	14.0616	1248.23	504.136	67.4349	1138.56	527.308	75.3302	965.393	490.247	75.0767	864.984	541.418	131.646	877.117	535.907	129.957	768.434
513	0	334.155	-319.637	1617.95	230.225	-317.572	1618.74	356.684	-163.758	1632.17	220.38	-148.89	1637.69	265.305	-87.3851	1490.05	254.677	21.6118	1267.43	284.657	-222.779	1388.17	280.959	-245.666	1202	202.681	18.3466	1344.96	459.172	-74.218	1431.68	501.369	-0.352399	1248.47	505.879	52.4193	1138.51	528.696	58.603	965.258	491.465	57.5489	864.963	542.909	113.945	876.458	537.24	111.13	767.745
514	0	335.191	-332.527	1618.78	231.243	-330.384	1619.75	357.86	-176.723	1633.36	221.59	-161.747	1639.14	266.28	-99.8562	1491.35	255.922	8.8008	1268.66	285.511	-235.281	1389.52	282.053	-258.265	1203.39	203.884	5.90929	1346.19	460.279	-87.0352	1433.09	502.967	-14.8506	1248.94	507.711	37.2135	1138.64	530.15	41.3304	965.299	492.736	39.2783	865.15	544.482	95.4852	875.879	538.723	91.2297	767.193
515	0	335.992	-345.294	1619.82	232.027	-343.059	1620.92	358.816	-189.572	1634.82	222.58	-174.474	1640.8	267.114	-112.18	1492.86	257.119	-3.86634	1270.11	286.226	-247.639	1391.1	283.033	-270.686	1204.99	205.012	-6.378	1347.6	461.273	-99.7617	1434.77	504.557	-29.4136	1249.64	509.626	21.8372	1138.95	531.662	23.5407	965.529	494.052	20.2968	865.564	546.124	76.2968	875.402	540.344	70.2931	766.816
516	0	336.552	-357.935	1621.07	232.572	-355.589	1622.27	359.55	-202.301	1636.54	223.35	-187.062	1642.66	267.811	-124.362	1494.56	258.264	-16.3938	1271.74	286.806	-259.86	1392.87	283.9	-282.94	1206.79	206.065	-18.5219	1349.18	462.152	-112.398	1436.72	506.132	-44.0224	1250.55	511.615	6.31008	1139.44	533.225	5.26488	965.958	495.404	0.639969	866.223	547.821	56.4158	875.047	542.086	48.3669	766.655
517	0	336.869	-370.446	1622.54	232.879	-367.969	1623.77	360.066	-214.906	1638.51	223.903	-199.504	1644.69	268.379	-136.409	1496.42	259.354	-28.7881	1273.55	287.259	-271.953	1394.83	284.656	-295.044	1208.78	207.047	-30.5325	1350.91	462.921	-124.947	1438.91	507.686	-58.6591	1251.67	513.671	-9.34843	1140.12	534.832	-13.4635	966.595	496.785	-19.6523	867.145	549.557	35.8818	874.835	543.932	25.5059	766.745
518	0	336.952	-382.829	1624.21	232.956	-380.195	1625.42	360.375	-227.386	1640.69	224.251	-211.796	1646.86	268.826	-148.335	1498.42	260.388	-41.0571	1275.5	287.595	-283.93	1396.94	285.307	-307.015	1210.93	207.958	-42.4223	1352.76	463.583	-137.413	1441.31	509.213	-73.3072	1252.99	515.786	-25.12	1140.96	536.473	-32.6091	967.445	498.188	-40.537	868.342	551.318	14.7379	874.784	545.862	1.77207	767.123
519	0	336.811	-395.084	1626.08	232.814	-392.269	1627.21	360.491	-239.743	1643.05	224.408	-223.935	1649.14	269.164	-160.153	1500.54	261.361	-53.2102	1277.57	287.827	-295.807	1399.19	285.862	-318.872	1213.21	208.802	-54.2064	1354.71	464.144	-149.802	1443.89	510.71	-87.9527	1254.48	517.952	-40.9874	1141.96	538.142	-52.135	968.509	499.604	-61.968	869.825	553.087	-6.97051	874.908	547.853	-22.7655	767.816
520	0	336.466	-407.217	1628.12	232.472	-404.194	1629.11	360.433	-251.977	1645.57	224.394	-235.925	1651.5	269.403	-171.879	1502.75	262.269	-65.2571	1279.73	287.968	-307.6	1401.54	286.331	-330.634	1215.6	209.579	-65.901	1356.74	464.61	-162.123	1446.6	512.172	-102.584	1256.13	520.159	-56.9353	1143.09	539.83	-72.004	969.786	501.026	-83.8971	871.598	554.85	-29.1959	875.218	549.881	-48.0323	768.849
521	0	335.941	-419.235	1630.31	231.954	-415.977	1631.11	360.224	-264.095	1648.2	224.232	-247.768	1653.89	269.556	-183.53	1505	263.107	-77.2079	1281.95	288.033	-319.326	1403.95	286.725	-342.319	1218.05	210.29	-77.5229	1358.82	464.989	-174.381	1449.4	513.599	-117.192	1257.9	522.4	-72.9502	1144.34	541.529	-92.1784	971.268	502.447	-106.274	873.661	556.593	-51.8895	875.721	551.92	-73.9492	770.238
522	0	335.262	-431.145	1632.61	231.285	-427.629	1633.18	359.889	-276.101	1650.89	223.947	-259.475	1656.28	269.634	-195.125	1507.28	263.867	-89.0726	1284.2	288.038	-331.001	1406.38	287.059	-353.944	1220.53	210.935	-89.0893	1360.91	465.289	-186.586	1452.25	514.988	-131.77	1259.75	524.663	-89.0207	1145.67	543.233	-112.621	972.945	503.859	-129.048	876.009	558.303	-75.0022	876.422	553.947	-100.435	771.991
523	0	334.46	-442.958	1635	230.496	-439.163	1635.28	359.454	-288.007	1653.59	223.565	-271.056	1658.62	269.651	-206.682	1509.53	264.545	-100.861	1286.44	287.995	-342.641	1408.79	287.342	-365.522	1222.98	211.513	-100.617	1363	465.517	-198.743	1455.11	516.339	-146.314	1261.66	526.94	-105.138	1147.05	544.932	-133.295	974.801	505.255	-152.166	878.63	559.969	-98.4847	877.319	555.935	-127.405	774.109
524	0	333.567	-454.688	1637.42	229.617	-450.598	1637.39	358.946	-299.821	1656.24	223.113	-282.527	1660.87	269.616	-218.216	1511.73	265.134	-112.584	1288.63	287.918	-354.26	1411.13	287.588	-377.066	1225.38	212.022	-112.121	1365.04	465.68	-210.858	1457.92	517.653	-160.824	1263.58	529.221	-121.294	1148.46	546.618	-154.166	976.819	506.627	-175.577	881.509	561.581	-122.288	878.408	557.861	-154.777	776.583
525	0	332.615	-466.346	1639.83	228.68	-461.951	1639.46	358.392	-311.558	1658.81	222.617	-293.907	1662.99	269.54	-229.744	1513.84	265.628	-124.25	1290.75	287.82	-365.871	1413.37	287.805	-388.586	1227.66	212.46	-123.616	1367.01	465.785	-222.938	1460.64	518.927	-175.299	1265.46	531.494	-137.484	1149.84	548.284	-175.2	978.976	507.967	-199.23	884.625	563.132	-146.366	879.68	559.704	-182.469	779.398
526	0	331.637	-477.95	1642.18	227.715	-473.244	1641.46	357.816	-323.231	1661.23	222.101	-305.214	1664.96	269.432	-241.279	1515.82	266.022	-135.87	1292.75	287.71	-377.484	1415.47	288.002	-400.091	1229.79	212.824	-135.115	1368.88	465.837	-234.986	1463.23	520.161	-189.742	1267.28	533.748	-153.705	1151.18	549.919	-196.364	981.249	509.267	-223.073	887.953	564.615	-170.67	881.124	561.443	-210.401	782.535
527	0	330.662	-489.514	1644.42	226.752	-484.498	1643.35	357.241	-334.855	1663.47	221.587	-316.471	1666.72	269.297	-252.834	1517.65	266.311	-147.454	1294.61	287.597	-389.108	1417.38	288.185	-411.587	1231.73	213.113	-146.63	1370.63	465.84	-247.004	1465.65	521.353	-204.156	1268.99	535.971	-169.955	1152.42	551.517	-217.629	983.613	510.52	-247.057	891.464	566.026	-195.156	882.726	563.062	-238.498	785.965
528	0	329.716	-501.054	1646.51	225.816	-495.736	1645.09	356.686	-346.447	1665.47	221.094	-327.699	1668.26	269.141	-264.417	1519.3	266.493	-159.01	1296.31	287.486	-400.748	1419.07	288.358	-423.08	1233.45	213.322	-158.171	1372.21	465.796	-258.995	1467.85	522.499	-218.545	1270.55	538.152	-186.233	1153.55	553.067	-238.966	986.039	511.716	-271.135	895.128	567.359	-219.779	884.47	564.548	-266.688	789.658
529	0	328.822	-512.585	1648.39	224.93	-506.978	1646.64	356.168	-358.022	1667.21	220.637	-338.921	1669.56	268.967	-276.037	1520.73	266.566	-170.55	1297.8	287.38	-412.41	1420.52	288.522	-434.574	1234.9	213.449	-169.745	1373.61	465.707	-270.961	1469.8	523.595	-232.913	1271.94	540.276	-202.541	1154.52	554.56	-260.347	988.501	512.848	-295.259	898.911	568.613	-244.498	886.339	565.89	-294.903	793.582
530	0	327.998	-524.121	1650.03	224.112	-518.243	1647.98	355.698	-369.596	1668.66	220.228	-350.157	1670.59	268.776	-287.699	1521.93	266.529	-182.083	1299.08	287.281	-424.095	1421.7	288.678	-446.074	1236.08	213.493	-181.361	1374.81	465.573	-282.901	1471.49	524.634	-247.264	1273.1	542.332	-218.88	1155.31	555.986	-281.746	990.972	513.908	-319.386	902.78	569.784	-269.27	888.313	567.082	-323.08	797.701
531	0	327.257	-535.676	1651.39	223.376	-529.55	1649.06	355.284	-381.181	1669.79	219.871	-361.427	1671.33	268.567	-299.408	1522.88	266.381	-193.621	1300.11	287.187	-435.808	1422.59	288.823	-457.582	1236.97	213.449	-193.024	1375.79	465.391	-294.817	1472.87	525.61	-261.602	1274.04	544.305	-235.25	1155.9	557.336	-303.14	993.427	514.888	-343.474	906.701	570.872	-294.056	890.374	568.12	-351.162	801.978
532	0	326.607	-547.259	1652.43	222.729	-540.913	1649.87	354.93	-392.791	1670.59	219.57	-372.747	1671.8	268.335	-311.165	1523.56	266.124	-205.173	1300.9	287.094	-447.548	1423.18	288.953	-469.103	1237.54	213.315	-204.739	1376.52	465.16	-306.71	1473.95	526.512	-275.932	1274.71	546.182	-251.653	1156.26	558.599	-324.503	995.841	515.781	-367.481	910.64	571.872	-318.815	892.5	569.003	-379.094	806.378
533	0	326.051	-558.881	1653.15	222.176	-552.345	1650.39	354.633	-404.436	1671.05	219.323	-384.131	1671.97	268.077	-322.972	1523.97	265.759	-216.751	1301.41	286.998	-459.317	1423.46	289.063	-480.642	1237.8	213.089	-216.51	1377	464.875	-318.582	1474.71	527.332	-290.256	1275.11	547.949	-268.09	1156.4	559.766	-345.813	998.191	516.579	-391.371	914.565	572.783	-343.509	894.672	569.734	-406.826	810.866
534	0	325.585	-570.548	1653.53	221.714	-563.854	1650.61	354.389	-416.122	1671.17	219.122	-395.592	1671.86	267.785	-334.829	1524.1	265.288	-228.365	1301.65	286.889	-471.117	1423.44	289.146	-492.204	1237.75	212.769	-228.34	1377.22	464.532	-330.437	1475.14	528.058	-304.577	1275.23	549.593	-284.558	1156.29	560.827	-367.046	1000.46	517.276	-415.106	918.446	573.602	-368.099	896.871	570.317	-434.311	815.407
535	0	325.201	-582.265	1653.56	221.336	-575.448	1650.53	354.185	-427.856	1670.94	218.956	-407.138	1671.47	267.451	-346.737	1523.94	264.713	-240.027	1301.61	286.76	-482.949	1423.12	289.193	-503.796	1237.39	212.352	-240.232	1377.17	464.126	-342.28	1475.24	528.678	-318.898	1275.06	551.1	-301.055	1155.94	561.772	-388.179	1002.62	517.866	-438.651	922.255	574.325	-392.547	899.077	570.758	-461.505	819.97
536	0	324.887	-594.035	1653.24	221.029	-587.131	1650.15	354.009	-439.64	1670.4	218.809	-418.773	1670.81	267.066	-358.694	1523.5	264.037	-251.746	1301.3	286.599	-494.817	1422.5	289.197	-515.426	1236.73	211.837	-252.187	1376.84	463.65	-354.118	1475.03	529.181	-333.219	1274.62	552.459	-317.577	1155.36	562.594	-409.189	1004.67	518.345	-461.975	925.968	574.947	-416.813	901.271	571.064	-488.365	824.524
537	0	324.624	-605.857	1652.59	220.776	-598.903	1649.48	353.84	-451.476	1669.54	218.664	-430.5	1669.89	266.619	-370.702	1522.8	263.265	-263.533	1300.7	286.396	-506.723	1421.6	289.149	-527.103	1235.8	211.223	-264.208	1376.24	463.099	-365.958	1474.52	529.555	-347.542	1273.9	553.658	-334.115	1154.54	563.282	-430.05	1006.59	518.706	-485.045	929.561	575.464	-440.861	903.436	571.243	-514.853	829.042
538	0	324.393	-617.733	1651.63	220.557	-610.765	1648.52	353.658	-463.362	1668.4	218.498	-442.32	1668.73	266.101	-382.758	1521.82	262.399	-275.398	1299.84	286.136	-518.671	1420.44	289.038	-538.836	1234.61	210.51	-276.295	1375.38	462.467	-377.812	1473.72	529.791	-361.865	1272.92	554.686	-350.658	1153.51	563.832	-450.737	1008.37	518.947	-507.832	933.017	575.87	-464.65	905.557	571.302	-540.929	833.498
539	0	324.168	-629.659	1650.38	220.346	-622.714	1647.31	353.438	-475.297	1666.98	218.288	-454.232	1667.35	265.501	-394.865	1520.6	261.446	-287.348	1298.71	285.807	-530.668	1419.03	288.855	-550.636	1233.17	209.699	-288.451	1374.25	461.749	-389.693	1472.65	529.877	-376.189	1271.71	555.534	-367.192	1152.28	564.236	-471.224	1010.01	519.065	-530.306	936.319	576.16	-488.143	907.619	571.248	-566.557	837.87
540	0	323.923	-641.636	1648.87	220.117	-634.746	1645.86	353.155	-487.279	1665.34	218.007	-466.231	1665.76	264.809	-407.023	1519.14	260.412	-299.392	1297.34	285.396	-542.718	1417.41	288.591	-562.513	1231.53	208.793	-300.675	1372.88	460.941	-401.614	1471.34	529.806	-390.51	1270.27	556.195	-383.7	1150.88	564.489	-491.485	1011.5	519.055	-552.439	939.456	576.329	-511.3	909.608	571.09	-591.701	842.138
541	0	323.63	-653.66	1647.13	219.841	-646.857	1644.21	352.784	-499.303	1663.48	217.629	-478.315	1664	264.016	-419.233	1517.47	259.304	-311.534	1295.73	284.889	-554.829	1415.58	288.237	-574.478	1229.69	207.794	-312.968	1371.27	460.037	-413.591	1469.81	529.571	-404.825	1268.64	556.662	-400.161	1149.32	564.587	-511.491	1012.84	518.917	-574.203	942.418	576.37	-534.085	911.513	570.831	-616.327	846.281
542	0	323.26	-665.73	1645.21	219.488	-659.044	1642.38	352.297	-511.369	1661.45	217.13	-490.477	1662.07	263.113	-431.497	1515.61	258.131	-323.781	1293.92	284.273	-567.009	1413.6	287.783	-586.542	1227.69	206.708	-325.331	1369.44	459.036	-425.64	1468.1	529.169	-419.131	1266.85	556.931	-416.554	1147.64	564.527	-531.214	1014.04	518.648	-595.57	945.197	576.279	-556.458	913.322	570.476	-640.4	850.283
543	0	322.785	-677.846	1643.14	219.03	-671.301	1640.41	351.67	-523.473	1659.28	216.484	-502.714	1660	262.094	-443.82	1513.59	256.904	-336.136	1291.92	283.538	-579.264	1411.47	287.223	-598.714	1225.56	205.541	-337.765	1367.42	457.934	-437.777	1466.23	528.597	-433.422	1264.92	557	-432.852	1145.85	564.309	-550.626	1015.09	518.247	-616.515	947.79	576.05	-578.383	915.027	570.028	-663.891	854.127
544	0	322.176	-690.009	1640.96	218.437	-683.625	1638.32	350.881	-535.615	1657.01	215.669	-515.021	1657.82	260.954	-456.205	1511.42	255.632	-348.599	1289.77	282.674	-591.602	1409.23	286.55	-611.002	1223.32	204.299	-350.269	1365.23	456.732	-450.019	1464.25	527.856	-447.691	1262.89	556.869	-449.029	1144	563.931	-569.698	1015.99	517.715	-637.011	950.191	575.679	-599.826	916.619	569.487	-686.767	857.799
545	0	321.409	-702.219	1638.73	217.684	-696.012	1636.17	349.91	-547.797	1654.66	214.665	-527.395	1655.55	259.69	-468.655	1509.14	254.326	-361.171	1287.48	281.673	-604.03	1406.92	285.76	-623.415	1221	202.99	-362.843	1362.89	455.429	-462.377	1462.18	526.949	-461.931	1260.79	556.541	-465.059	1142.1	563.394	-588.403	1016.77	517.051	-657.034	952.4	575.163	-620.75	918.091	568.852	-709.001	861.283
546	0	320.462	-714.481	1636.47	216.749	-708.461	1633.97	348.742	-560.019	1652.29	213.457	-539.832	1653.22	258.301	-481.174	1506.78	252.996	-373.851	1285.1	280.53	-616.553	1404.55	284.852	-635.958	1218.64	201.62	-375.488	1360.44	454.027	-474.864	1460.06	525.881	-476.134	1258.65	556.019	-480.914	1140.18	562.701	-606.714	1017.41	516.256	-676.558	954.415	574.499	-641.124	919.435	568.122	-730.566	864.564
547	0	319.317	-726.798	1634.24	215.614	-720.971	1631.76	347.364	-572.287	1649.93	212.035	-552.331	1650.84	256.788	-493.767	1504.38	251.652	-386.635	1282.65	279.243	-629.175	1402.17	283.825	-648.633	1216.27	200.197	-388.202	1357.9	452.53	-487.488	1457.92	524.66	-490.29	1256.52	555.31	-496.567	1138.28	561.853	-624.606	1017.92	515.33	-695.56	956.235	573.686	-660.919	920.646	567.294	-751.436	867.629
548	0	317.96	-739.175	1632.06	214.266	-733.541	1629.57	345.772	-584.604	1647.6	210.392	-564.89	1648.46	255.155	-506.435	1501.96	250.299	-399.519	1280.17	277.814	-641.899	1399.8	282.683	-661.444	1213.9	198.728	-400.985	1355.32	450.943	-500.252	1455.8	523.296	-504.39	1254.42	554.421	-511.994	1136.42	560.856	-642.056	1018.32	514.275	-714.018	957.859	572.726	-680.105	921.72	566.364	-771.589	870.461
549	0	316.384	-751.618	1629.97	212.698	-746.171	1627.43	343.966	-596.977	1645.36	208.529	-577.51	1646.08	253.407	-519.18	1499.56	248.945	-412.497	1277.7	276.249	-654.725	1397.48	281.432	-674.387	1211.58	197.216	-413.833	1352.73	449.271	-513.156	1453.73	521.801	-518.423	1252.38	553.363	-527.172	1134.63	559.714	-659.041	1018.61	513.093	-731.91	959.286	571.62	-698.658	922.651	565.327	-791.004	873.046
550	0	314.588	-764.132	1628.01	210.909	-758.862	1625.37	341.951	-609.412	1643.22	206.454	-590.191	1643.75	251.554	-532.001	1497.21	247.591	-425.561	1275.28	274.557	-667.649	1395.23	280.082	-687.46	1209.34	195.667	-426.744	1350.17	447.522	-526.194	1451.74	520.188	-532.378	1250.44	552.147	-542.081	1132.92	558.433	-675.544	1018.8	511.786	-749.218	960.515	570.373	-716.555	923.438	564.179	-809.662	875.369
551	0	312.578	-776.722	1626.18	208.907	-771.615	1623.4	339.739	-621.916	1641.22	204.178	-602.933	1641.49	249.607	-544.897	1494.95	246.239	-438.702	1272.93	272.751	-680.668	1393.08	278.644	-700.654	1207.2	194.084	-439.713	1347.67	445.705	-539.356	1449.87	518.472	-546.244	1248.62	550.784	-556.703	1131.33	557.021	-691.549	1018.9	510.359	-765.923	961.543	568.99	-733.778	924.077	562.915	-827.549	877.415
552	0	310.366	-789.392	1624.53	206.704	-784.43	1621.55	337.349	-634.494	1639.39	201.72	-615.736	1639.32	247.578	-557.862	1492.81	244.886	-451.911	1270.7	270.846	-693.771	1391.06	277.132	-713.959	1205.19	192.469	-452.733	1345.26	443.831	-552.626	1448.13	516.67	-560.007	1246.96	549.288	-571.023	1129.88	555.486	-707.041	1018.91	508.815	-782.01	962.371	567.478	-750.31	924.568	561.533	-844.65	879.167
553	0	307.971	-802.145	1623.05	204.32	-797.307	1619.82	334.805	-647.152	1637.76	199.107	-628.6	1637.27	245.482	-570.888	1490.81	243.528	-465.174	1268.61	268.862	-706.948	1389.19	275.561	-727.36	1203.34	190.823	-465.796	1343	441.912	-565.984	1446.56	514.797	-573.654	1245.47	547.673	-585.031	1128.58	553.837	-722.009	1018.84	507.159	-797.465	962.995	565.849	-766.139	924.911	560.03	-860.955	880.611
554	0	305.419	-814.981	1621.76	201.781	-810.242	1618.25	332.135	-659.893	1636.34	196.366	-641.523	1635.38	243.338	-583.967	1488.99	242.161	-478.478	1266.71	266.82	-720.185	1387.51	273.947	-740.839	1201.67	189.148	-478.893	1340.91	439.959	-579.409	1445.18	512.87	-587.172	1244.18	545.955	-598.717	1127.46	552.083	-736.447	1018.69	505.399	-812.277	963.413	564.111	-781.255	925.104	558.404	-876.456	881.733
555	0	302.74	-827.898	1620.67	199.12	-823.233	1616.83	329.373	-672.716	1635.15	193.534	-654.503	1633.67	241.163	-597.086	1487.38	240.778	-491.807	1265.01	264.744	-733.465	1386.03	272.306	-754.375	1200.21	187.447	-492.011	1339.02	437.989	-592.873	1444	510.906	-600.547	1243.09	544.147	-612.074	1126.52	550.236	-750.347	1018.48	503.542	-826.438	963.625	562.278	-795.652	925.151	556.657	-891.148	882.521
556	0	299.969	-840.891	1619.78	196.371	-836.275	1615.58	326.555	-685.621	1634.21	190.647	-667.534	1632.15	238.978	-610.231	1485.99	239.373	-505.144	1263.55	262.656	-746.768	1384.77	270.655	-767.94	1198.96	185.722	-505.137	1337.37	436.016	-606.35	1443.04	508.922	-613.765	1242.23	542.264	-625.1	1125.77	548.308	-763.706	1018.2	501.598	-839.942	963.628	560.363	-809.327	925.051	554.792	-905.028	882.963
557	0	297.145	-853.953	1619.09	193.574	-849.358	1614.51	323.721	-698.602	1633.52	187.746	-680.609	1630.87	236.804	-623.385	1484.85	237.943	-518.471	1262.33	260.581	-760.074	1383.75	269.008	-781.508	1197.96	183.978	-518.257	1335.98	434.056	-619.81	1442.31	506.933	-626.811	1241.61	540.322	-637.792	1125.22	546.311	-776.524	1017.87	499.575	-852.788	963.423	558.38	-822.279	924.808	552.813	-918.095	883.05
558	0	294.311	-867.073	1618.59	190.77	-862.475	1613.61	320.912	-711.653	1633.09	184.872	-693.721	1629.82	234.661	-636.532	1483.97	236.484	-531.77	1261.39	258.542	-773.36	1382.98	267.376	-795.049	1197.2	182.221	-531.356	1334.87	432.125	-633.226	1441.82	504.953	-639.67	1241.22	538.335	-650.151	1124.88	544.258	-788.802	1017.47	497.487	-864.973	963.01	556.343	-834.511	924.424	550.729	-930.353	882.777
559	0	291.508	-880.24	1618.29	188.002	-875.613	1612.9	318.167	-724.761	1632.93	182.067	-706.858	1629.05	232.57	-649.653	1483.36	234.997	-545.021	1260.73	256.559	-786.606	1382.46	265.772	-808.533	1196.7	180.458	-544.418	1334.06	430.238	-646.57	1441.57	502.996	-652.331	1241.07	536.316	-662.177	1124.75	542.163	-800.543	1017.02	495.345	-876.503	962.39	554.267	-846.027	923.902	548.551	-941.805	882.14
560	0	288.78	-893.435	1618.16	185.312	-888.759	1612.39	315.528	-737.914	1633.02	179.371	-720.008	1628.56	230.549	-662.73	1483.04	233.482	-558.207	1260.36	254.651	-799.788	1382.21	264.203	-821.933	1196.47	178.7	-557.43	1333.57	428.409	-659.817	1441.55	501.074	-664.78	1241.16	534.277	-673.876	1124.82	540.038	-811.75	1016.52	493.163	-887.381	961.566	552.167	-856.834	923.247	546.292	-952.456	881.14
561	0	286.169	-906.643	1618.22	182.741	-901.9	1612.07	313.031	-751.093	1633.38	176.819	-733.159	1628.36	228.617	-675.746	1483	231.945	-571.311	1260.29	252.836	-812.888	1382.22	262.678	-835.222	1196.5	176.955	-570.378	1333.39	426.651	-672.944	1441.77	499.196	-677.007	1241.48	532.23	-685.251	1125.09	537.899	-822.431	1015.97	490.955	-897.616	960.543	550.056	-866.94	922.464	543.967	-962.314	879.781
562	0	283.716	-919.843	1618.44	180.328	-915.019	1611.96	310.709	-764.279	1633.98	174.446	-746.295	1628.47	226.787	-688.684	1483.26	230.391	-584.319	1260.5	251.125	-825.887	1382.51	261.203	-848.382	1196.79	175.233	-583.25	1333.53	424.974	-685.93	1442.21	497.37	-689.004	1242.02	530.182	-696.308	1125.55	535.756	-832.592	1015.37	488.737	-907.218	959.328	547.947	-876.357	921.558	541.594	-971.387	878.073
563	0	281.456	-933.012	1618.83	178.108	-928.103	1612.07	308.589	-777.45	1634.81	172.278	-759.402	1628.89	225.071	-701.53	1483.79	228.829	-597.22	1260.99	249.53	-838.771	1383.06	259.781	-861.397	1197.36	173.543	-596.038	1333.98	423.387	-698.76	1442.86	495.602	-700.763	1242.77	528.143	-707.056	1126.19	533.624	-842.241	1014.72	486.525	-916.199	957.928	545.854	-885.095	920.537	539.194	-979.685	876.028
564	0	279.424	-946.129	1619.38	176.112	-941.136	1612.4	306.693	-790.581	1635.88	170.335	-772.466	1629.63	223.476	-714.272	1484.6	227.267	-610.007	1261.75	248.055	-851.529	1383.88	258.418	-874.258	1198.19	171.895	-608.737	1334.74	421.895	-711.419	1443.72	493.895	-712.282	1243.72	526.116	-717.501	1127	531.514	-851.389	1014.02	484.333	-924.573	956.354	543.788	-893.167	919.407	536.786	-987.217	873.665
565	0	277.644	-959.171	1620.1	174.365	-954.105	1612.96	305.035	-803.649	1637.15	168.632	-785.472	1630.68	222.007	-726.901	1485.67	225.712	-622.676	1262.77	246.705	-864.154	1384.96	257.115	-886.965	1199.27	170.294	-621.342	1335.78	420.501	-723.9	1444.77	492.249	-723.558	1244.85	524.105	-727.654	1127.98	529.436	-860.045	1013.28	482.177	-932.356	954.616	541.76	-900.588	918.179	534.394	-993.994	871.005
566	0	276.137	-972.116	1620.99	172.885	-966.997	1613.77	303.624	-816.626	1638.62	167.174	-798.405	1632.03	220.665	-739.414	1486.99	224.173	-635.227	1264.03	245.48	-876.644	1386.28	255.875	-899.52	1200.61	168.746	-633.855	1337.09	419.205	-736.2	1445.99	490.663	-734.593	1246.15	522.111	-737.524	1129.1	527.399	-868.223	1012.5	480.073	-939.565	952.729	539.78	-907.372	916.864	532.039	-1000.03	868.074
567	0	274.916	-984.942	1622.05	171.683	-979.799	1614.82	302.458	-829.489	1640.26	165.96	-811.254	1633.66	219.448	-751.808	1488.53	222.656	-647.664	1265.5	244.375	-889.002	1387.84	254.698	-911.934	1202.19	167.253	-646.278	1338.64	418.006	-748.32	1447.36	489.134	-745.391	1247.61	520.134	-747.122	1130.36	525.412	-875.933	1011.67	478.034	-946.219	950.706	537.856	-913.538	915.472	529.746	-1005.33	864.902
568	0	273.984	-997.63	1623.27	170.763	-992.502	1616.12	301.531	-842.215	1642.06	164.983	-824.006	1635.57	218.351	-764.087	1490.27	221.166	-659.994	1267.15	243.386	-901.234	1389.61	253.583	-924.219	1203.99	165.819	-658.617	1340.4	416.899	-760.268	1448.87	487.655	-755.959	1249.2	518.169	-756.461	1131.74	523.482	-883.19	1010.82	476.073	-952.338	948.563	535.994	-919.102	914.018	527.535	-1009.91	861.52
569	0	273.339	-1010.17	1624.66	170.121	-1005.1	1617.68	300.829	-854.784	1643.98	164.229	-836.651	1637.72	217.366	-776.256	1492.18	219.708	-672.224	1268.97	242.505	-913.351	1391.58	252.528	-936.392	1205.99	164.441	-670.882	1342.35	415.879	-772.053	1450.49	486.221	-766.308	1250.9	516.215	-765.553	1133.23	521.613	-890.01	1009.93	474.203	-957.944	946.316	534.201	-924.084	912.514	525.428	-1013.79	857.964
570	0	272.967	-1022.54	1626.22	169.743	-1017.58	1619.47	300.332	-867.182	1646.01	163.676	-849.183	1640.07	216.485	-788.325	1494.24	218.284	-684.364	1270.91	241.723	-925.366	1393.72	251.529	-948.469	1208.17	163.119	-683.081	1344.44	414.938	-783.691	1452.19	484.824	-776.448	1252.7	514.267	-774.411	1134.81	519.809	-896.41	1009.02	472.433	-963.06	943.981	532.482	-928.508	910.973	523.444	-1016.99	854.268
571	0	272.851	-1034.74	1627.94	169.611	-1029.95	1621.49	300.016	-879.397	1648.11	163.303	-861.594	1642.58	215.697	-800.305	1496.4	216.898	-696.425	1272.96	241.029	-937.294	1395.98	250.581	-960.468	1210.48	161.851	-695.225	1346.65	414.071	-795.202	1453.97	483.456	-786.395	1254.56	512.319	-783.049	1136.46	518.072	-902.406	1008.08	470.772	-967.71	941.573	530.838	-932.396	909.41	521.599	-1019.53	850.468
572	0	272.963	-1046.76	1629.8	169.698	-1042.19	1623.7	299.854	-891.427	1650.26	163.081	-873.883	1645.22	214.991	-812.209	1498.64	215.553	-708.418	1275.07	240.412	-949.152	1398.35	249.68	-972.405	1212.91	160.634	-707.326	1348.93	413.268	-806.606	1455.77	482.11	-796.164	1256.48	510.368	-791.484	1138.16	516.404	-908.021	1007.12	469.227	-971.92	939.105	529.272	-935.776	907.837	519.908	-1021.43	846.597
573	0	273.271	-1058.62	1631.79	169.975	-1054.33	1626.09	299.815	-903.273	1652.42	162.982	-886.052	1647.92	214.357	-824.053	1500.91	214.254	-720.35	1277.22	239.861	-960.958	1400.77	248.819	-984.298	1215.39	159.466	-719.396	1351.24	412.522	-817.925	1457.59	480.779	-805.774	1258.41	508.41	-799.731	1139.9	514.805	-913.275	1006.15	467.802	-975.718	936.591	527.783	-938.676	906.266	518.38	-1022.73	842.687
574	0	273.741	-1070.33	1633.88	170.406	-1066.35	1628.61	299.872	-914.945	1654.55	162.978	-898.104	1650.65	213.784	-835.853	1503.17	213.005	-732.23	1279.36	239.365	-972.728	1403.21	247.993	-996.161	1217.89	158.345	-731.444	1353.55	411.826	-829.185	1459.38	479.457	-815.245	1260.33	506.442	-807.808	1141.64	513.273	-918.193	1005.15	466.498	-979.132	934.042	526.371	-941.128	904.708	517.021	-1023.45	838.769
575	0	274.332	-1081.89	1636.03	170.955	-1078.27	1631.21	299.993	-926.46	1656.63	163.041	-910.047	1653.33	213.261	-847.625	1505.39	211.812	-744.065	1281.48	238.913	-984.48	1405.63	247.196	-1008.01	1220.36	157.27	-743.482	1355.81	411.173	-840.408	1461.12	478.141	-824.598	1262.22	504.463	-815.733	1143.38	511.807	-922.8	1004.14	465.318	-982.192	931.468	525.032	-943.167	903.171	515.834	-1023.64	834.87
576	0	275.007	-1093.34	1638.22	171.583	-1090.11	1633.85	300.151	-937.839	1658.61	163.144	-921.895	1655.93	212.781	-859.384	1507.53	210.681	-755.86	1283.52	238.495	-996.227	1407.97	246.422	-1019.85	1222.75	156.242	-755.517	1357.99	410.558	-851.617	1462.78	476.828	-833.853	1264.05	502.472	-823.527	1145.08	510.405	-927.126	1003.1	464.257	-984.93	928.875	523.763	-944.829	901.664	514.816	-1023.34	831.013
577	0	275.727	-1104.69	1640.39	172.256	-1101.87	1636.47	300.322	-949.112	1660.47	163.265	-933.663	1658.39	212.336	-871.148	1509.55	209.618	-767.621	1285.47	238.103	-1007.98	1410.19	245.669	-1031.69	1225.01	155.262	-767.557	1360.05	409.976	-862.835	1464.32	475.515	-843.035	1265.79	500.471	-831.21	1146.73	509.063	-931.199	1002.05	463.313	-987.379	926.27	522.56	-946.153	900.193	513.962	-1022.6	827.218
578	0	276.454	-1115.98	1642.51	172.937	-1113.58	1639.01	300.484	-960.309	1662.18	163.381	-945.37	1660.67	211.919	-882.929	1511.42	208.631	-779.351	1287.29	237.73	-1019.76	1412.25	244.933	-1043.55	1227.1	154.334	-779.608	1361.96	409.424	-874.081	1465.73	474.205	-852.166	1267.41	498.462	-838.806	1148.29	507.779	-935.053	1000.98	462.481	-989.572	923.659	521.418	-947.182	898.763	513.261	-1021.46	823.502
579	0	277.157	-1127.23	1644.52	173.597	-1125.26	1641.42	300.62	-971.467	1663.7	163.478	-957.037	1662.72	211.527	-894.744	1513.1	207.725	-791.055	1288.96	237.371	-1031.57	1414.11	244.214	-1055.41	1228.99	153.461	-791.675	1363.69	408.9	-885.373	1466.97	472.898	-861.267	1268.91	496.45	-846.338	1149.76	506.549	-938.72	999.885	461.752	-991.542	921.047	520.33	-947.958	897.38	512.701	-1019.98	819.881
580	0	277.806	-1138.5	1646.39	174.209	-1136.92	1643.65	300.717	-982.623	1665.01	163.543	-968.687	1664.51	211.158	-906.604	1514.58	206.909	-802.741	1290.45	237.021	-1043.42	1415.74	243.512	-1067.29	1230.62	152.649	-803.762	1365.22	408.404	-896.729	1468.02	471.598	-870.364	1270.24	494.44	-853.832	1151.12	505.369	-942.236	998.77	461.119	-993.327	918.438	519.292	-948.526	896.047	512.266	-1018.21	816.365
581	0	278.379	-1149.8	1648.07	174.752	-1148.6	1645.63	300.766	-993.814	1666.09	163.566	-980.346	1666.01	210.811	-918.522	1515.83	206.188	-814.416	1291.75	236.679	-1055.31	1417.11	242.829	-1079.19	1231.97	151.904	-815.875	1366.53	407.935	-908.163	1468.86	470.309	-879.476	1271.41	492.439	-861.311	1152.35	504.238	-945.637	997.633	460.574	-994.96	915.837	518.296	-948.933	894.768	511.938	-1016.21	812.966
582	0	278.859	-1161.17	1649.51	175.21	-1160.32	1647.34	300.763	-1005.08	1666.93	163.546	-992.038	1667.2	210.487	-930.508	1516.82	205.567	-826.089	1292.83	236.346	-1067.26	1418.2	242.168	-1091.11	1233.02	151.233	-828.015	1367.6	407.498	-919.688	1469.48	469.038	-888.627	1272.38	490.455	-868.801	1153.43	503.15	-948.959	996.477	460.105	-996.479	913.249	517.339	-949.227	893.548	511.699	-1014.02	809.693
583	0	279.234	-1172.64	1650.68	175.573	-1172.09	1648.72	300.708	-1016.44	1667.51	163.481	-1003.79	1668.06	210.19	-942.571	1517.56	205.051	-837.773	1293.69	236.022	-1079.27	1418.97	241.535	-1103.05	1233.74	150.643	-840.188	1368.41	407.094	-931.314	1469.87	467.792	-897.838	1273.17	488.497	-876.329	1154.37	502.105	-952.241	995.304	459.705	-997.921	910.682	516.415	-949.456	892.39	511.529	-1011.72	806.556
584	0	279.501	-1184.24	1651.57	175.838	-1183.95	1649.76	300.607	-1027.95	1667.82	163.377	-1015.62	1668.58	209.924	-954.722	1518.03	204.643	-849.482	1294.3	235.712	-1091.34	1419.43	240.936	-1115.01	1234.13	150.141	-852.398	1368.97	406.729	-943.052	1470.02	466.578	-907.128	1273.75	486.575	-883.916	1155.16	501.101	-955.519	994.118	459.362	-999.321	908.143	515.521	-949.668	891.299	511.407	-1009.34	803.562
585	0	279.662	-1196	1652.13	176.007	-1195.91	1650.43	300.468	-1039.62	1667.87	163.241	-1027.55	1668.77	209.696	-966.967	1518.22	204.346	-861.232	1294.67	235.421	-1103.48	1419.57	240.376	-1126.99	1234.19	149.736	-864.649	1369.27	406.408	-954.91	1469.94	465.407	-916.515	1274.14	484.698	-891.588	1155.79	500.135	-958.83	992.923	459.069	-1000.72	905.641	514.652	-949.913	890.28	511.314	-1006.95	800.721
586	0	279.723	-1207.93	1652.37	176.086	-1207.99	1650.72	300.301	-1051.47	1667.66	163.083	-1039.61	1668.63	209.512	-979.314	1518.14	204.161	-873.04	1294.79	235.157	-1115.69	1419.39	239.864	-1139.01	1233.91	149.433	-876.947	1369.32	406.139	-966.896	1469.61	464.287	-926.017	1274.32	482.877	-899.366	1156.26	499.209	-962.211	991.725	458.815	-1002.15	903.185	513.807	-950.238	889.338	511.231	-1004.61	798.04
587	0	279.697	-1220.05	1652.27	176.088	-1220.21	1650.63	300.121	-1063.53	1667.18	162.917	-1051.8	1668.17	209.382	-991.768	1517.8	204.09	-884.924	1294.67	234.927	-1127.98	1418.9	239.407	-1151.05	1233.31	149.24	-889.3	1369.11	405.929	-979.017	1469.05	463.229	-935.649	1274.32	481.122	-907.269	1156.59	498.322	-965.699	990.53	458.594	-1003.66	900.787	512.986	-950.692	888.477	511.144	-1002.36	795.529
588	0	279.602	-1232.37	1651.84	176.028	-1232.57	1650.17	299.943	-1075.8	1666.45	162.758	-1064.14	1667.41	209.313	-1004.34	1517.2	204.131	-896.902	1294.3	234.74	-1140.36	1418.1	239.012	-1163.15	1232.4	149.161	-901.715	1368.66	405.786	-991.277	1468.27	462.245	-945.425	1274.13	479.444	-915.318	1156.78	497.478	-969.327	989.344	458.399	-1005.27	898.457	512.189	-951.321	887.7	511.036	-1000.26	793.195
589	0	279.458	-1244.89	1651.09	175.925	-1245.09	1649.35	299.785	-1088.29	1665.48	162.624	-1076.65	1666.36	209.316	-1017.02	1516.36	204.284	-908.992	1293.7	234.607	-1152.83	1417.02	238.686	-1175.29	1231.2	149.202	-914.199	1367.98	405.717	-1003.68	1467.28	461.344	-955.357	1273.77	477.854	-923.527	1156.84	496.678	-973.13	988.174	458.225	-1007.04	896.205	511.416	-952.171	887.012	510.896	-998.366	791.045
590	0	279.289	-1257.63	1650.03	175.803	-1257.78	1648.2	299.666	-1101	1664.29	162.531	-1089.32	1665.07	209.401	-1029.83	1515.29	204.548	-921.209	1292.88	234.537	-1165.4	1415.67	238.438	-1187.5	1229.74	149.366	-926.762	1367.09	405.733	-1016.23	1466.08	460.537	-965.456	1273.25	476.362	-931.912	1156.78	495.927	-977.14	987.025	458.067	-1008.99	894.041	510.672	-953.286	886.412	510.716	-996.725	789.082
591	0	279.12	-1270.57	1648.68	175.684	-1270.63	1646.74	299.604	-1113.93	1662.9	162.497	-1102.16	1663.53	209.577	-1042.76	1514.01	204.922	-933.567	1291.84	234.542	-1178.08	1414.08	238.275	-1199.79	1228.04	149.654	-939.411	1366	405.839	-1028.93	1464.71	459.836	-975.729	1272.58	474.979	-940.487	1156.6	495.23	-981.389	985.903	457.923	-1011.17	891.973	509.96	-954.709	885.902	510.49	-995.392	787.308
592	0	278.977	-1283.71	1647.07	175.593	-1283.65	1645.01	299.618	-1127.08	1661.31	162.541	-1115.17	1661.8	209.854	-1055.82	1512.54	205.403	-946.076	1290.62	234.632	-1190.86	1412.28	238.202	-1212.17	1226.13	150.068	-952.156	1364.74	406.046	-1041.79	1463.16	459.249	-986.185	1271.79	473.714	-949.264	1156.32	494.592	-985.907	984.811	457.793	-1013.61	890.009	509.286	-956.481	885.477	510.216	-994.414	785.724
593	0	278.886	-1297.05	1645.24	175.555	-1296.84	1643.04	299.726	-1140.42	1659.56	162.681	-1128.35	1659.88	210.241	-1069	1510.91	205.989	-958.743	1289.22	234.816	-1203.76	1410.29	238.226	-1224.65	1224.04	150.608	-965.004	1363.33	406.359	-1054.79	1461.46	458.787	-996.83	1270.89	472.578	-958.254	1155.95	494.019	-990.725	983.751	457.678	-1016.35	888.152	508.655	-958.64	885.135	509.893	-993.842	784.325
594	0	278.873	-1310.56	1643.21	175.594	-1310.19	1640.88	299.944	-1153.96	1657.66	162.931	-1141.69	1657.82	210.744	-1082.32	1509.14	206.676	-971.573	1287.68	235.105	-1216.79	1408.14	238.354	-1237.24	1221.81	151.27	-977.96	1361.79	406.785	-1067.94	1459.63	458.458	-1007.67	1269.88	471.58	-967.469	1155.49	493.519	-995.869	982.723	457.579	-1019.44	886.405	508.075	-961.223	884.866	509.526	-993.723	783.103
595	0	278.961	-1324.25	1641.02	175.731	-1323.7	1638.56	300.286	-1167.68	1655.64	163.308	-1155.19	1655.65	211.372	-1095.76	1507.26	207.46	-984.565	1286.01	235.507	-1229.93	1405.87	238.59	-1249.97	1219.47	152.053	-991.031	1360.15	407.33	-1081.24	1457.68	458.268	-1018.7	1268.79	470.728	-976.917	1154.96	493.099	-1001.37	981.728	457.501	-1022.9	884.767	507.555	-964.265	884.663	509.122	-994.102	782.047
596	0	279.169	-1338.09	1638.7	175.987	-1337.36	1636.13	300.766	-1181.56	1653.51	163.824	-1168.84	1653.39	212.128	-1109.32	1505.29	208.339	-997.716	1284.24	236.029	-1243.2	1403.51	238.94	-1262.83	1217.05	152.952	-1004.22	1358.43	407.996	-1094.67	1455.64	458.224	-1029.94	1267.62	470.031	-986.611	1154.37	492.765	-1007.25	980.763	457.449	-1026.77	883.236	507.103	-967.8	884.513	508.69	-995.025	781.143
597	0	279.516	-1352.08	1636.3	176.378	-1351.15	1633.63	301.393	-1195.59	1651.31	164.489	-1182.62	1651.07	213.017	-1123	1503.26	209.307	-1011.02	1282.41	236.676	-1256.59	1401.09	239.406	-1275.84	1214.59	153.962	-1017.52	1356.66	408.787	-1108.23	1453.51	458.329	-1041.38	1266.39	469.495	-996.559	1153.71	492.526	-1013.54	979.823	457.431	-1031.1	881.806	506.728	-971.86	884.402	508.242	-996.534	780.372
598	0	280.015	-1366.2	1633.84	176.918	-1365.08	1631.09	302.174	-1209.75	1649.05	165.31	-1196.54	1648.72	214.039	-1136.8	1501.2	210.359	-1024.47	1280.52	237.452	-1270.1	1398.64	239.994	-1289	1212.12	155.077	-1030.94	1354.87	409.702	-1121.92	1451.34	458.586	-1053.03	1265.12	469.127	-1006.77	1153	492.388	-1020.26	978.905	457.452	-1035.9	880.47	506.44	-976.475	884.317	507.791	-998.67	779.714
599	0	280.675	-1380.43	1631.36	177.616	-1379.12	1628.55	303.113	-1224.03	1646.76	166.293	-1210.57	1646.38	215.193	-1150.69	1499.14	211.49	-1038.05	1278.62	238.356	-1283.73	1396.2	240.703	-1302.32	1209.67	156.289	-1044.47	1353.08	410.741	-1135.72	1449.12	458.995	-1064.89	1263.8	468.93	-1017.26	1152.24	492.357	-1027.43	978.003	457.52	-1041.22	879.22	506.249	-981.672	884.243	507.354	-1001.47	779.147
600	0	281.5	-1394.76	1628.9	178.476	-1393.26	1626.05	304.21	-1238.41	1644.47	167.438	-1224.71	1644.07	216.477	-1164.67	1497.1	212.692	-1051.75	1276.74	239.388	-1297.47	1393.8	241.534	-1315.78	1207.28	157.59	-1058.11	1351.32	411.901	-1149.62	1446.9	459.557	-1076.96	1262.45	468.909	-1028.03	1151.43	492.441	-1035.09	977.112	457.645	-1047.09	878.044	506.167	-987.48	884.162	506.948	-1004.98	778.648
601	0	282.492	-1409.17	1626.49	179.499	-1407.49	1623.63	305.462	-1252.87	1642.2	168.741	-1238.93	1641.83	217.885	-1178.74	1495.12	213.96	-1065.55	1274.89	240.542	-1311.3	1391.46	242.484	-1329.4	1204.97	158.972	-1071.83	1349.62	413.176	-1163.6	1444.69	460.268	-1089.24	1261.09	469.064	-1039.1	1150.59	492.643	-1043.25	976.228	457.833	-1053.54	876.933	506.202	-993.926	884.062	506.591	-1009.23	778.195
602	0	283.644	-1423.65	1624.14	180.68	-1421.8	1621.3	306.862	-1267.41	1639.98	170.196	-1253.22	1639.67	219.406	-1192.86	1493.22	215.286	-1079.43	1273.11	241.811	-1325.21	1389.23	243.549	-1343.16	1202.78	160.425	-1085.64	1348	414.558	-1177.66	1442.52	461.124	-1101.74	1259.72	469.396	-1050.47	1149.71	492.969	-1051.93	975.346	458.092	-1060.59	875.877	506.365	-1001.03	883.928	506.302	-1014.25	777.765
603	0	284.948	-1438.17	1621.9	182.011	-1436.16	1619.11	308.399	-1281.99	1637.84	171.791	-1267.57	1637.63	221.031	-1207.03	1491.43	216.662	-1093.39	1271.42	243.184	-1339.2	1387.12	244.72	-1357.04	1200.73	161.94	-1099.52	1346.48	416.04	-1191.78	1440.41	462.12	-1114.46	1258.35	469.904	-1062.15	1148.79	493.421	-1061.15	974.464	458.431	-1068.28	874.866	506.665	-1008.82	883.749	506.101	-1020.09	777.337
604	0	286.39	-1452.73	1619.78	183.478	-1450.56	1617.06	310.058	-1296.6	1635.79	173.513	-1281.96	1635.73	222.744	-1221.21	1489.77	218.082	-1107.39	1269.85	244.645	-1353.23	1385.17	245.986	-1371.03	1198.85	163.505	-1113.44	1345.09	417.608	-1205.94	1438.4	463.247	-1127.4	1257	470.584	-1074.16	1147.86	494.003	-1070.94	973.582	458.857	-1076.63	873.891	507.111	-1017.33	883.513	506.007	-1026.77	776.893
605	0	287.952	-1467.29	1617.81	185.064	-1464.98	1615.19	311.822	-1311.23	1633.87	175.34	-1296.36	1634	224.531	-1235.41	1488.26	219.537	-1121.42	1268.41	246.179	-1367.29	1383.4	247.334	-1385.11	1197.17	165.11	-1127.38	1343.84	419.251	-1220.12	1436.51	464.499	-1140.55	1255.68	471.433	-1086.49	1146.92	494.716	-1081.31	972.699	459.376	-1085.67	872.948	507.711	-1026.55	883.216	506.038	-1034.32	776.418
606	0	289.612	-1481.84	1616.01	186.748	-1479.39	1613.51	313.67	-1325.84	1632.1	177.252	-1310.76	1632.45	226.37	-1249.58	1486.94	221.019	-1135.45	1267.14	247.765	-1381.36	1381.83	248.745	-1399.26	1195.71	166.743	-1141.34	1342.76	420.951	-1234.32	1434.77	465.864	-1153.93	1254.41	472.445	-1099.15	1145.97	495.56	-1092.28	971.819	459.995	-1095.41	872.031	508.471	-1036.53	882.85	506.212	-1042.77	775.899
607	0	291.346	-1496.35	1614.39	188.504	-1493.78	1612.04	315.578	-1340.41	1630.51	179.223	-1325.13	1631.13	228.243	-1263.7	1485.81	222.521	-1149.47	1266.05	249.383	-1395.42	1380.48	250.199	-1413.44	1194.48	168.394	-1155.27	1341.86	422.693	-1248.5	1433.21	467.332	-1167.52	1253.2	473.614	-1112.15	1145.03	496.534	-1103.86	970.949	460.719	-1105.88	871.141	509.395	-1047.28	882.416	506.546	-1052.15	775.326
608	0	293.124	-1510.81	1612.98	190.307	-1508.12	1610.79	317.52	-1354.93	1629.12	181.224	-1339.45	1630.03	230.125	-1277.76	1484.9	224.033	-1163.46	1265.16	251.008	-1409.44	1379.38	251.675	-1427.62	1193.5	170.049	-1169.16	1341.14	424.457	-1262.67	1431.85	468.893	-1181.32	1252.06	474.932	-1125.49	1144.11	497.635	-1116.06	970.095	461.551	-1117.1	870.279	510.488	-1058.8	881.914	507.053	-1062.49	774.697
609	0	294.92	-1525.18	1611.78	192.125	-1522.38	1609.79	319.468	-1369.36	1627.96	183.227	-1353.7	1629.18	231.994	-1291.72	1484.21	225.547	-1177.39	1264.48	252.618	-1423.4	1378.53	253.149	-1441.76	1192.78	171.697	-1182.98	1340.63	426.225	-1276.79	1430.73	470.533	-1195.34	1251.02	476.392	-1139.16	1143.23	498.861	-1128.89	969.267	462.495	-1129.08	869.45	511.751	-1071.13	881.35	507.744	-1073.82	774.01
610	0	296.702	-1539.44	1610.83	193.931	-1536.55	1609.03	321.393	-1383.68	1627.04	185.199	-1367.85	1628.59	233.826	-1305.57	1483.78	227.055	-1191.23	1264.03	254.19	-1437.27	1377.96	254.599	-1455.84	1192.33	173.326	-1196.72	1340.34	427.977	-1290.85	1429.86	472.241	-1209.55	1250.1	477.985	-1153.17	1142.41	500.207	-1142.35	968.479	463.552	-1141.84	868.662	513.182	-1084.26	880.732	508.631	-1086.14	773.269
611	0	298.44	-1553.58	1610.11	195.692	-1550.6	1608.53	323.266	-1397.87	1626.38	187.111	-1381.89	1628.27	235.598	-1319.29	1483.6	228.547	-1204.98	1263.82	255.7	-1451.03	1377.66	256.005	-1469.82	1192.16	174.924	-1210.34	1340.26	429.692	-1304.84	1429.28	474.003	-1223.96	1249.3	479.702	-1167.5	1141.65	501.667	-1156.46	967.745	464.722	-1155.39	867.928	514.778	-1098.2	880.071	509.717	-1099.49	772.484
612	0	300.104	-1567.56	1609.66	197.379	-1564.51	1608.29	325.058	-1411.91	1626.01	188.93	-1395.78	1628.23	237.287	-1332.85	1483.67	230.015	-1218.62	1263.85	257.129	-1464.66	1377.65	257.346	-1483.67	1192.26	176.478	-1223.83	1340.41	431.353	-1318.73	1428.99	475.807	-1238.55	1248.66	481.534	-1182.15	1140.98	503.233	-1171.19	967.081	466.002	-1169.72	867.263	516.534	-1112.95	879.381	511.007	-1113.88	771.67
613	0	301.667	-1581.37	1609.48	198.965	-1578.25	1608.32	326.741	-1425.77	1625.93	190.63	-1409.52	1628.49	238.874	-1346.23	1484.02	231.451	-1232.13	1264.13	258.457	-1478.15	1377.94	258.609	-1497.35	1192.65	177.979	-1237.17	1340.79	432.94	-1332.52	1429.01	477.64	-1253.3	1248.18	483.47	-1197.1	1140.42	504.898	-1186.56	966.504	467.388	-1184.85	866.682	518.44	-1128.53	878.678	512.498	-1129.33	770.845
614	0	303.102	-1594.99	1609.57	200.422	-1591.82	1608.63	328.289	-1439.44	1626.16	192.185	-1423.08	1629.02	240.342	-1359.44	1484.63	232.847	-1245.49	1264.67	259.67	-1491.47	1378.52	259.778	-1510.86	1193.32	179.419	-1250.34	1341.4	434.438	-1346.18	1429.36	479.489	-1268.2	1247.88	485.502	-1212.34	1139.97	506.652	-1202.55	966.034	468.874	-1200.78	866.208	520.486	-1144.91	877.984	514.187	-1145.83	770.035
615	0	304.388	-1608.4	1609.95	201.729	-1605.2	1609.2	329.68	-1452.89	1626.7	193.572	-1436.45	1629.85	241.677	-1372.44	1485.5	234.198	-1258.71	1265.45	260.754	-1504.62	1379.4	260.843	-1524.17	1194.27	180.789	-1263.34	1342.22	435.834	-1359.71	1430.04	481.342	-1283.22	1247.79	487.618	-1227.85	1139.66	508.485	-1219.14	965.69	470.45	-1217.48	865.862	522.658	-1162.1	877.318	516.065	-1163.4	769.267
616	0	305.505	-1621.6	1610.63	202.866	-1618.37	1610.06	330.896	-1466.13	1627.56	194.775	-1449.61	1630.96	242.871	-1385.25	1486.63	235.498	-1271.77	1266.48	261.701	-1517.59	1380.57	261.797	-1537.27	1195.5	182.085	-1276.16	1343.27	437.116	-1373.09	1431.05	483.188	-1298.36	1247.9	489.808	-1243.61	1139.51	510.385	-1236.32	965.492	472.108	-1234.96	865.669	524.938	-1180.07	876.704	518.118	-1182.04	768.575
617	0	306.439	-1634.57	1611.6	203.818	-1631.32	1611.18	331.923	-1479.13	1628.74	195.782	-1462.56	1632.33	243.918	-1397.85	1488	236.742	-1284.67	1267.74	262.506	-1530.38	1382.03	262.635	-1550.17	1197	183.305	-1288.8	1344.52	438.277	-1386.33	1432.39	485.015	-1313.57	1248.25	492.062	-1259.6	1139.51	512.342	-1254.07	965.46	473.837	-1253.2	865.652	527.309	-1198.82	876.167	520.33	-1201.72	767.994
618	0	307.179	-1647.32	1612.87	204.575	-1644.04	1612.58	332.756	-1491.91	1630.23	196.587	-1475.28	1633.97	244.816	-1410.25	1489.6	237.927	-1297.41	1269.21	263.168	-1542.99	1383.76	263.358	-1562.87	1198.77	184.447	-1301.25	1345.96	439.314	-1399.41	1434.04	486.813	-1328.85	1248.82	494.368	-1275.79	1139.7	514.342	-1272.36	965.611	475.623	-1272.17	865.838	529.748	-1218.3	875.731	522.681	-1222.44	767.564
619	0	307.723	-1659.83	1614.44	205.135	-1656.54	1614.24	333.391	-1504.44	1632.02	197.193	-1487.77	1635.85	245.568	-1422.46	1491.42	239.049	-1310.01	1270.89	263.689	-1555.43	1385.76	263.966	-1575.39	1200.79	185.51	-1313.54	1347.59	440.223	-1412.34	1435.98	488.574	-1344.16	1249.63	496.716	-1292.15	1140.06	516.374	-1291.15	965.961	477.454	-1291.84	866.252	532.234	-1238.49	875.419	525.146	-1244.16	767.323
620	0	308.072	-1672.12	1616.3	205.498	-1668.81	1616.14	333.833	-1516.75	1634.08	197.604	-1500.04	1637.95	246.181	-1434.48	1493.42	240.105	-1322.45	1272.75	264.077	-1567.7	1388.01	264.466	-1587.75	1203.06	186.496	-1325.66	1349.38	441.008	-1425.13	1438.2	490.291	-1359.48	1250.67	499.095	-1308.67	1140.61	518.425	-1310.42	966.526	479.316	-1312.2	866.915	534.744	-1259.36	875.254	527.698	-1266.85	767.309
621	0	308.233	-1684.2	1618.45	205.673	-1680.85	1618.29	334.092	-1528.83	1636.4	197.834	-1512.08	1640.23	246.663	-1446.34	1495.6	241.091	-1334.76	1274.77	264.34	-1579.83	1390.47	264.864	-1599.96	1205.54	187.405	-1337.64	1351.31	441.671	-1437.78	1440.67	491.956	-1374.79	1251.94	501.495	-1325.31	1141.35	520.482	-1330.13	967.314	481.196	-1333.19	867.848	537.253	-1280.87	875.257	530.306	-1290.47	767.56
622	0	308.22	-1696.06	1620.85	205.671	-1692.67	1620.65	334.183	-1540.7	1638.93	197.898	-1523.9	1642.67	247.026	-1458.04	1497.91	242.004	-1346.95	1276.92	264.491	-1591.82	1393.11	265.173	-1612.06	1208.2	188.237	-1349.49	1353.35	442.219	-1450.3	1443.34	493.565	-1390.07	1253.42	503.904	-1342.06	1142.26	522.534	-1350.24	968.333	483.079	-1354.78	869.068	539.739	-1302.98	875.445	532.94	-1314.97	768.107
623	0	308.05	-1707.72	1623.48	205.512	-1704.29	1623.2	334.125	-1552.37	1641.64	197.819	-1535.51	1645.22	247.281	-1469.62	1500.33	242.839	-1359.02	1279.17	264.543	-1603.7	1395.91	265.402	-1624.05	1211.02	188.993	-1361.23	1355.49	442.661	-1462.71	1446.18	495.115	-1405.31	1255.1	506.313	-1358.87	1143.34	524.568	-1370.7	969.585	484.951	-1376.93	870.588	542.178	-1325.63	875.832	535.566	-1340.27	768.978
624	0	307.747	-1719.21	1626.32	205.218	-1715.71	1625.91	333.939	-1563.86	1644.48	197.619	-1546.92	1647.86	247.443	-1481.09	1502.82	243.592	-1370.98	1281.5	264.512	-1615.49	1398.82	265.566	-1635.97	1213.95	189.673	-1372.88	1357.7	443.004	-1475.01	1449.15	496.604	-1420.48	1256.94	508.711	-1375.73	1144.57	526.573	-1391.49	971.068	486.799	-1399.59	872.415	544.549	-1348.78	876.428	538.151	-1366.32	770.195
625	0	307.335	-1730.54	1629.31	204.814	-1726.97	1628.74	333.653	-1575.19	1647.4	197.324	-1558.16	1650.53	247.526	-1492.47	1505.34	244.258	-1382.87	1283.86	264.414	-1627.21	1401.79	265.676	-1647.83	1216.95	190.275	-1384.46	1359.95	443.259	-1487.22	1452.19	498.03	-1435.58	1258.92	511.088	-1392.62	1145.93	528.538	-1412.55	972.774	488.608	-1422.72	874.552	546.83	-1372.38	877.239	540.662	-1393.03	771.773
626	0	306.843	-1741.74	1632.42	204.328	-1738.09	1631.65	333.291	-1586.38	1650.35	196.959	-1569.24	1653.2	247.542	-1503.8	1507.87	244.832	-1394.67	1286.23	264.264	-1638.87	1404.77	265.746	-1659.65	1219.97	190.798	-1396	1362.2	443.436	-1499.34	1455.27	499.394	-1450.6	1261	513.434	-1409.51	1147.38	530.454	-1433.84	974.692	490.366	-1446.25	876.997	549.005	-1396.38	878.264	543.07	-1420.33	773.719
627	0	306.298	-1752.82	1635.59	203.787	-1749.08	1634.6	332.88	-1597.45	1653.28	196.552	-1580.2	1655.81	247.505	-1515.09	1510.35	245.311	-1406.42	1288.58	264.079	-1650.49	1407.73	265.789	-1671.43	1222.96	191.241	-1407.51	1364.43	443.545	-1511.4	1458.32	500.695	-1465.53	1263.14	515.74	-1426.4	1148.91	532.308	-1455.33	976.806	492.059	-1470.14	879.741	551.055	-1420.72	879.503	545.345	-1448.14	776.036
628	0	305.729	-1763.82	1638.75	203.22	-1759.98	1637.54	332.445	-1608.44	1656.13	196.125	-1591.06	1658.33	247.426	-1526.37	1512.77	245.69	-1418.12	1290.86	263.873	-1662.1	1410.6	265.814	-1683.2	1225.87	191.602	-1419.01	1366.61	443.596	-1523.41	1461.31	501.934	-1480.36	1265.3	517.995	-1443.25	1150.46	534.094	-1476.96	979.097	493.673	-1494.32	882.772	552.967	-1445.35	880.945	547.463	-1476.37	778.716
629	0	305.161	-1774.77	1641.87	202.651	-1770.82	1640.41	332.008	-1619.37	1658.85	195.699	-1601.85	1660.71	247.316	-1537.66	1515.07	245.967	-1429.79	1293.04	263.657	-1673.7	1413.35	265.831	-1694.95	1228.65	191.88	-1430.51	1368.7	443.595	-1535.36	1464.18	503.111	-1495.1	1267.44	520.19	-1460.07	1152.01	535.799	-1498.71	981.542	495.197	-1518.75	886.071	554.728	-1470.23	882.582	549.402	-1504.94	781.749
630	0	304.616	-1785.68	1644.86	202.102	-1781.63	1643.18	331.59	-1630.26	1661.4	195.295	-1612.6	1662.93	247.183	-1548.97	1517.23	246.138	-1441.43	1295.1	263.441	-1685.3	1415.93	265.847	-1706.7	1231.26	192.075	-1442.04	1370.69	443.552	-1547.28	1466.89	504.225	-1509.75	1269.5	522.314	-1476.84	1153.52	537.417	-1520.53	984.116	496.619	-1543.37	889.616	556.327	-1495.3	884.399	551.145	-1533.75	785.119
631	0	304.114	-1796.59	1647.69	201.593	-1792.44	1645.78	331.206	-1641.15	1663.72	194.925	-1623.35	1664.93	247.032	-1560.31	1519.21	246.204	-1453.07	1297	263.235	-1696.92	1418.29	265.867	-1718.45	1233.65	192.184	-1453.6	1372.52	443.47	-1559.16	1469.4	505.274	-1524.31	1271.45	524.357	-1493.54	1154.95	538.938	-1542.39	986.792	497.926	-1568.12	893.384	557.756	-1520.51	886.38	552.678	-1562.74	788.806
632	0	303.669	-1807.52	1650.3	201.139	-1803.28	1648.17	330.868	-1652.05	1665.79	194.6	-1634.11	1666.7	246.867	-1571.72	1520.99	246.163	-1464.71	1298.71	263.043	-1708.56	1420.4	265.894	-1730.2	1235.78	192.208	-1465.21	1374.19	443.354	-1571.02	1471.67	506.256	-1538.78	1273.25	526.309	-1510.19	1156.26	540.354	-1564.25	989.545	499.109	-1592.94	897.346	559.008	-1545.81	888.506	553.992	-1591.81	792.787
633	0	303.29	-1818.49	1652.64	200.747	-1814.16	1650.32	330.583	-1663	1667.56	194.326	-1644.93	1668.2	246.69	-1583.19	1522.54	246.017	-1476.36	1300.22	262.868	-1720.24	1422.23	265.929	-1741.96	1237.62	192.145	-1476.87	1375.67	443.205	-1582.87	1473.67	507.168	-1553.17	1274.86	528.159	-1526.78	1157.43	541.655	-1586.09	992.346	500.159	-1617.78	901.474	560.08	-1571.16	890.76	555.084	-1620.89	797.036
634	0	302.981	-1829.53	1654.67	200.424	-1825.12	1652.18	330.352	-1674.02	1669.02	194.105	-1655.82	1669.42	246.501	-1594.73	1523.84	245.767	-1488.02	1301.49	262.711	-1731.95	1423.75	265.97	-1753.73	1239.15	191.997	-1488.6	1376.93	443.024	-1594.7	1475.38	508.003	-1567.48	1276.24	529.897	-1543.3	1158.42	542.835	-1607.87	995.169	501.067	-1642.58	905.737	560.967	-1596.51	893.122	555.951	-1649.9	801.528
635	0	302.742	-1840.66	1656.36	200.168	-1836.18	1653.73	330.174	-1685.12	1670.15	193.933	-1666.8	1670.35	246.295	-1606.35	1524.87	245.415	-1499.72	1302.51	262.568	-1743.7	1424.95	266.016	-1765.51	1240.35	191.761	-1500.4	1377.96	442.81	-1606.52	1476.77	508.756	-1581.73	1277.38	531.512	-1559.75	1159.2	543.885	-1629.56	997.989	501.826	-1667.31	910.105	561.669	-1621.81	895.574	556.595	-1678.79	806.234
636	0	302.567	-1851.89	1657.69	199.974	-1847.35	1654.95	330.042	-1696.31	1670.93	193.804	-1677.89	1670.96	246.068	-1618.07	1525.62	244.965	-1511.44	1303.28	262.434	-1755.5	1425.81	266.06	-1777.3	1241.2	191.438	-1512.28	1378.74	442.559	-1618.35	1477.84	509.418	-1595.91	1278.25	532.994	-1576.15	1159.77	544.799	-1651.15	1000.78	502.432	-1691.9	914.549	562.185	-1647.03	898.096	557.022	-1707.47	811.126
637	0	302.445	-1863.23	1658.64	199.832	-1858.64	1655.82	329.943	-1707.62	1671.36	193.704	-1689.11	1671.27	245.813	-1629.87	1526.08	244.419	-1523.21	1303.77	262.303	-1767.35	1426.32	266.098	-1789.11	1241.7	191.028	-1524.24	1379.26	442.266	-1630.18	1478.58	509.982	-1610.04	1278.82	534.333	-1592.47	1160.09	545.569	-1672.59	1003.53	502.879	-1716.31	919.037	562.516	-1672.11	900.671	557.238	-1735.9	816.176
638	0	302.363	-1874.69	1659.21	199.729	-1870.07	1656.32	329.862	-1719.05	1671.45	193.62	-1700.47	1671.27	245.521	-1641.76	1526.25	243.781	-1535.03	1303.98	262.165	-1779.26	1426.49	266.123	-1800.94	1241.85	190.532	-1536.29	1379.51	441.927	-1642.03	1478.98	510.437	-1624.12	1279.11	535.519	-1608.74	1160.18	546.189	-1693.86	1006.21	503.165	-1740.49	923.542	562.665	-1697.01	903.281	557.25	-1764.01	821.354
639	0	302.303	-1886.28	1659.39	199.646	-1881.63	1656.47	329.782	-1730.6	1671.2	193.534	-1711.97	1670.96	245.183	-1653.75	1526.13	243.057	-1546.89	1303.92	262.009	-1791.22	1426.32	266.125	-1812.81	1241.66	189.948	-1548.42	1379.49	441.535	-1653.91	1479.05	510.776	-1638.15	1279.1	536.544	-1624.94	1160.01	546.655	-1714.95	1008.81	503.287	-1764.41	928.034	562.634	-1721.7	905.912	557.069	-1791.74	826.631
640	0	302.244	-1897.99	1659.19	199.565	-1893.34	1656.27	329.68	-1742.28	1670.63	193.425	-1723.62	1670.36	244.788	-1665.83	1525.72	242.249	-1558.82	1303.57	261.823	-1803.25	1425.83	266.096	-1824.72	1241.14	189.278	-1560.64	1379.19	441.081	-1665.82	1478.81	510.988	-1652.15	1278.79	537.4	-1641.07	1159.6	546.963	-1735.82	1011.31	503.244	-1788.01	932.488	562.427	-1746.13	908.545	556.703	-1819.06	831.977
641	0	302.165	-1909.83	1658.64	199.463	-1905.18	1655.73	329.535	-1754.08	1669.75	193.271	-1735.41	1669.48	244.324	-1678	1525.03	241.364	-1570.81	1302.96	261.591	-1815.34	1425.02	266.025	-1836.68	1240.31	188.523	-1572.94	1378.62	440.559	-1677.77	1478.26	511.064	-1666.12	1278.2	538.08	-1657.12	1158.95	547.109	-1756.46	1013.7	503.035	-1811.27	936.878	562.047	-1770.26	911.168	556.162	-1845.91	837.363
642	0	302.042	-1921.79	1657.76	199.317	-1917.17	1654.87	329.322	-1766.01	1668.59	193.049	-1747.35	1668.33	243.78	-1690.26	1524.07	240.408	-1582.88	1302.08	261.301	-1827.51	1423.94	265.902	-1848.7	1239.19	187.683	-1585.33	1377.78	439.961	-1689.77	1477.44	510.997	-1680.05	1277.34	538.578	-1673.1	1158.07	547.091	-1776.83	1015.97	502.662	-1834.15	941.179	561.498	-1794.04	913.764	555.455	-1872.24	842.758
643	0	301.851	-1933.87	1656.57	199.102	-1929.28	1653.71	329.017	-1778.05	1667.18	192.735	-1759.42	1666.94	243.145	-1702.61	1522.86	239.386	-1595.02	1300.95	260.937	-1839.76	1422.58	265.716	-1860.8	1237.81	186.762	-1597.8	1376.68	439.279	-1701.84	1476.35	510.78	-1693.96	1276.24	538.891	-1688.98	1156.99	546.908	-1796.91	1018.12	502.125	-1856.6	945.369	560.784	-1817.44	916.32	554.591	-1898.03	848.131
644	0	301.568	-1946.06	1655.1	198.796	-1941.52	1652.28	328.596	-1790.19	1665.53	192.307	-1771.63	1665.33	242.409	-1715.04	1521.42	238.304	-1607.24	1299.59	260.484	-1852.09	1421	265.456	-1872.98	1236.2	185.761	-1610.36	1375.34	438.507	-1713.99	1475.03	510.408	-1707.85	1274.9	539.016	-1704.76	1155.72	546.561	-1816.68	1020.13	501.428	-1878.61	949.427	559.911	-1840.42	918.82	553.579	-1923.22	853.453
645	0	301.17	-1958.35	1653.4	198.375	-1953.87	1650.62	328.038	-1802.44	1663.69	191.742	-1783.97	1663.52	241.562	-1727.55	1519.77	237.17	-1619.55	1298.02	259.928	-1864.51	1419.21	265.11	-1885.25	1234.39	184.684	-1622.98	1373.77	437.637	-1726.22	1473.52	509.877	-1721.71	1273.37	538.952	-1720.42	1154.29	546.051	-1836.12	1022.01	500.574	-1900.13	953.334	558.882	-1862.95	921.25	552.425	-1947.79	858.69
646	0	300.635	-1970.74	1651.49	197.817	-1966.33	1648.74	327.32	-1814.78	1661.68	191.021	-1796.42	1661.54	240.597	-1740.15	1517.92	235.992	-1631.94	1296.25	259.257	-1877.02	1417.25	264.668	-1897.63	1232.4	183.534	-1635.69	1371.99	436.666	-1738.55	1471.83	509.186	-1735.55	1271.67	538.701	-1735.96	1152.72	545.379	-1855.2	1023.75	499.565	-1921.15	957.068	557.704	-1884.97	923.595	551.135	-1971.69	863.812
647	0	299.944	-1983.22	1649.42	197.104	-1978.89	1646.7	326.426	-1827.21	1659.53	190.126	-1808.98	1659.42	239.507	-1752.81	1515.92	234.775	-1644.43	1294.32	258.46	-1889.63	1415.15	264.123	-1910.12	1230.28	182.316	-1648.46	1370.03	435.589	-1750.99	1470.01	508.334	-1749.37	1269.83	538.264	-1751.34	1151.04	544.549	-1873.89	1025.34	498.407	-1941.64	960.614	556.381	-1906.46	925.841	549.716	-1994.91	868.785
648	0	299.08	-1995.78	1647.23	196.217	-1991.54	1644.52	325.341	-1839.71	1657.29	189.043	-1821.64	1657.17	238.288	-1765.55	1513.79	233.528	-1657.01	1292.25	257.527	-1902.34	1412.94	263.466	-1922.72	1228.06	181.035	-1661.3	1367.9	434.404	-1763.54	1468.09	507.326	-1763.16	1267.89	537.646	-1766.56	1149.28	543.563	-1892.19	1026.79	497.104	-1961.56	963.952	554.922	-1927.39	927.972	548.172	-2017.41	873.575
649	0	298.029	-2008.42	1644.96	195.144	-2004.28	1642.24	324.055	-1852.29	1654.99	187.762	-1834.39	1654.84	236.938	-1778.35	1511.55	232.256	-1669.69	1290.07	256.453	-1915.14	1410.67	262.694	-1935.46	1225.77	179.694	-1674.19	1365.63	433.109	-1776.22	1466.11	506.164	-1776.91	1265.89	536.852	-1781.61	1147.47	542.428	-1910.06	1028.09	495.662	-1980.91	967.067	553.332	-1947.73	929.973	546.507	-2039.17	878.149
650	0	296.78	-2021.13	1642.66	193.873	-2017.08	1639.9	322.561	-1864.93	1652.65	186.276	-1847.22	1652.44	235.457	-1791.22	1509.24	230.964	-1682.46	1287.8	255.236	-1928.04	1408.36	261.805	-1948.31	1223.44	178.298	-1687.15	1363.26	431.706	-1789.03	1464.09	504.857	-1790.64	1263.85	535.89	-1796.45	1145.65	541.148	-1927.48	1029.25	494.087	-1999.66	969.943	551.619	-1967.44	931.83	544.724	-2060.17	882.47
651	0	295.326	-2033.91	1640.34	192.398	-2029.95	1637.52	320.86	-1877.63	1650.33	184.584	-1860.12	1650.01	233.847	-1804.15	1506.9	229.656	-1695.31	1285.49	253.877	-1941.03	1406.05	260.8	-1961.3	1221.12	176.851	-1700.16	1360.81	430.196	-1801.95	1462.07	503.413	-1804.32	1261.81	534.768	-1811.09	1143.83	539.729	-1944.45	1030.25	492.386	-2017.8	972.565	549.794	-1986.5	933.527	542.828	-2080.39	886.504
652	0	293.666	-2046.75	1638.07	190.719	-2042.88	1635.16	318.956	-1890.39	1648.04	182.69	-1873.08	1647.58	232.115	-1817.14	1504.55	228.335	-1708.26	1283.16	252.38	-1954.11	1403.77	259.686	-1974.4	1218.83	175.357	-1713.21	1358.32	428.584	-1815.01	1460.09	501.843	-1817.96	1259.81	533.495	-1825.5	1142.06	538.179	-1960.95	1031.11	490.569	-2035.31	974.917	547.865	-2004.89	935.051	540.821	-2099.8	890.214
653	0	291.802	-2059.65	1635.86	188.838	-2055.85	1632.83	316.857	-1903.22	1645.83	180.603	-1886.1	1645.18	230.267	-1830.18	1502.22	227	-1721.29	1280.85	250.754	-1967.28	1401.55	258.47	-1987.62	1216.61	173.817	-1726.3	1355.83	426.876	-1828.17	1458.18	500.157	-1831.55	1257.88	532.081	-1839.68	1140.35	536.506	-1976.96	1031.82	488.643	-2052.19	976.988	545.843	-2022.58	936.387	538.711	-2118.4	893.565
654	0	289.743	-2072.61	1633.76	186.763	-2068.87	1630.56	314.58	-1916.09	1643.72	178.337	-1899.17	1642.84	228.314	-1843.26	1499.96	225.653	-1734.39	1278.59	249.011	-1980.52	1399.42	257.165	-2000.94	1214.48	172.234	-1739.44	1353.36	425.078	-1841.45	1456.36	498.37	-1845.07	1256.05	530.537	-1853.61	1138.73	534.717	-1992.47	1032.37	486.621	-2068.42	978.765	543.742	-2039.57	937.524	536.502	-2136.17	896.525
655	0	287.501	-2085.62	1631.78	184.51	-2081.92	1628.38	312.144	-1929.02	1641.76	175.91	-1912.27	1640.58	226.268	-1856.39	1497.79	224.29	-1747.55	1276.42	247.168	-1993.83	1397.41	255.785	-2014.37	1212.48	170.61	-1752.6	1350.95	423.201	-1854.81	1454.65	496.496	-1858.52	1254.34	528.875	-1867.28	1137.23	532.823	-2007.48	1032.77	484.512	-2084	980.236	541.572	-2055.84	938.451	534.203	-2153.1	899.06
656	0	285.094	-2098.68	1629.96	182.096	-2095	1626.32	309.572	-1941.99	1639.95	173.347	-1925.41	1638.44	224.146	-1869.54	1495.74	222.91	-1760.77	1274.35	245.243	-2007.18	1395.55	254.349	-2027.87	1210.63	168.947	-1765.78	1348.64	421.254	-1868.24	1453.09	494.549	-1871.88	1252.79	527.107	-1880.69	1135.86	530.834	-2021.97	1033.02	482.33	-2098.93	981.395	539.349	-2071.38	939.158	531.823	-2169.19	901.142
657	0	282.546	-2111.77	1628.32	179.545	-2108.09	1624.4	306.894	-1955.01	1638.34	170.674	-1938.56	1636.43	221.963	-1882.72	1493.83	221.51	-1774.03	1272.42	243.257	-2020.57	1393.86	252.874	-2041.43	1208.96	167.247	-1778.98	1346.46	419.252	-1881.73	1451.68	492.546	-1885.15	1251.41	525.244	-1893.83	1134.64	528.761	-2035.95	1033.12	480.089	-2113.2	982.233	537.086	-2086.18	939.638	529.375	-2184.43	902.746
658	0	279.885	-2124.9	1626.86	176.885	-2121.19	1622.63	304.141	-1968.07	1636.93	167.922	-1951.71	1634.59	219.739	-1895.91	1492.1	220.088	-1787.31	1270.66	241.235	-2033.98	1392.36	251.38	-2055.03	1207.49	165.512	-1792.18	1344.43	417.209	-1895.25	1450.45	490.501	-1898.31	1250.22	523.301	-1906.7	1133.6	526.616	-2049.41	1033.06	477.803	-2126.81	982.746	534.799	-2100.25	939.886	526.872	-2198.82	903.85
659	0	277.14	-2138.06	1625.61	174.148	-2134.29	1621.03	301.345	-1981.16	1635.75	165.125	-1964.87	1632.93	217.496	-1909.09	1490.56	218.643	-1800.61	1269.09	239.199	-2047.39	1391.07	249.884	-2068.65	1206.23	163.747	-1805.38	1342.6	415.14	-1908.77	1449.4	488.432	-1911.35	1249.24	521.29	-1919.29	1132.73	524.413	-2062.36	1032.85	475.489	-2139.78	982.933	532.502	-2113.57	939.898	524.331	-2212.36	904.44
660	0	274.346	-2151.22	1624.56	171.367	-2147.37	1619.61	298.542	-1994.27	1634.8	162.316	-1978.02	1631.47	215.254	-1922.26	1489.24	217.177	-1813.89	1267.74	237.174	-2060.78	1390	248.406	-2082.26	1205.21	161.957	-1818.56	1340.98	413.064	-1922.28	1448.55	486.353	-1924.24	1248.47	519.225	-1931.61	1132.04	522.163	-2074.78	1032.48	473.162	-2152.1	982.794	530.21	-2126.15	939.675	521.768	-2225.04	904.505
661	0	271.538	-2164.39	1623.73	168.578	-2160.43	1618.39	295.768	-2007.39	1634.1	159.532	-1991.14	1630.23	213.037	-1935.4	1488.14	215.692	-1827.14	1266.61	235.182	-2074.13	1389.16	246.959	-2095.83	1204.41	160.151	-1831.71	1339.6	410.997	-1935.75	1447.89	484.28	-1936.98	1247.92	517.12	-1943.66	1131.55	519.883	-2086.7	1031.96	470.838	-2163.79	982.332	527.94	-2138.01	939.219	519.203	-2236.88	904.044
662	0	268.752	-2177.55	1623.12	165.818	-2173.46	1617.37	293.058	-2020.51	1633.65	156.807	-2004.22	1629.23	210.866	-1948.5	1487.29	214.192	-1840.35	1265.73	233.247	-2087.43	1388.56	245.558	-2109.34	1203.86	158.338	-1844.82	1338.47	408.959	-1949.16	1447.43	482.227	-1949.56	1247.59	514.99	-1955.43	1131.25	517.586	-2098.11	1031.3	468.535	-2174.84	981.553	525.705	-2149.14	938.533	516.655	-2247.88	903.059
663	0	266.027	-2190.68	1622.72	163.123	-2186.44	1616.56	290.446	-2033.62	1633.45	154.176	-2017.26	1628.47	208.763	-1961.55	1486.69	212.684	-1853.5	1265.11	231.387	-2100.66	1388.2	244.212	-2122.76	1203.56	156.528	-1857.88	1337.61	406.967	-1962.49	1447.17	480.208	-1961.95	1247.48	512.847	-1966.94	1131.14	515.288	-2109.02	1030.49	466.27	-2185.28	980.466	523.52	-2159.55	937.626	514.146	-2258.05	901.563
664	0	263.396	-2203.77	1622.54	160.527	-2199.37	1615.96	287.962	-2046.71	1633.49	151.671	-2030.24	1627.96	206.749	-1974.52	1486.35	211.177	-1866.56	1264.75	229.619	-2113.8	1388.08	242.929	-2136.08	1203.5	154.734	-1870.87	1337.03	405.039	-1975.71	1447.11	478.235	-1974.15	1247.59	510.705	-1978.18	1131.21	513.004	-2119.44	1029.54	464.057	-2195.11	979.08	521.398	-2169.26	936.504	511.696	-2267.4	899.572
665	0	260.894	-2216.82	1622.55	158.063	-2212.23	1615.58	285.636	-2059.75	1633.77	149.321	-2043.15	1627.71	204.84	-1987.42	1486.26	209.677	-1879.53	1264.66	227.958	-2126.83	1388.21	241.715	-2149.26	1203.68	152.966	-1883.79	1336.74	403.191	-1988.82	1447.24	476.318	-1986.15	1247.91	508.576	-1989.16	1131.47	510.749	-2129.36	1028.46	461.913	-2204.33	977.408	519.352	-2178.27	935.181	509.327	-2275.94	897.112
666	0	258.553	-2229.79	1622.76	155.761	-2225.01	1615.42	283.49	-2072.74	1634.28	147.15	-2055.98	1627.73	203.052	-2000.21	1486.44	208.193	-1892.39	1264.84	226.415	-2139.74	1388.58	240.572	-2162.31	1204.11	151.237	-1896.62	1336.73	401.438	-2001.79	1447.55	474.468	-1997.94	1248.43	506.472	-1999.89	1131.9	508.54	-2138.82	1027.26	459.854	-2212.97	975.465	517.395	-2186.61	933.669	507.058	-2283.68	894.212
667	0	256.401	-2242.69	1623.17	153.647	-2237.71	1615.48	281.546	-2085.67	1635.02	145.181	-2068.73	1628.02	201.397	-2012.91	1486.88	206.733	-1905.13	1265.28	224.997	-2152.53	1389.2	239.503	-2175.2	1204.77	149.556	-1909.36	1337.02	399.792	-2014.6	1448.04	472.692	-2009.52	1249.14	504.4	-2010.38	1132.5	506.391	-2147.8	1025.94	457.892	-2221.04	973.267	515.536	-2194.27	931.983	504.911	-2290.63	890.906
668	0	254.462	-2255.5	1623.76	151.744	-2250.32	1615.78	279.819	-2098.52	1635.96	143.428	-2081.39	1628.58	199.884	-2025.49	1487.57	205.302	-1917.75	1265.98	223.71	-2165.19	1390.06	238.506	-2187.94	1205.67	147.933	-1922.01	1337.59	398.264	-2027.26	1448.71	470.996	-2020.89	1250.04	502.37	-2020.62	1133.26	504.317	-2156.32	1024.52	456.041	-2228.54	970.832	513.785	-2201.29	930.139	502.903	-2296.82	887.235
669	0	252.756	-2268.2	1624.53	150.071	-2262.83	1616.32	278.318	-2111.27	1637.11	141.903	-2093.95	1629.41	198.518	-2037.95	1488.51	203.907	-1930.24	1266.94	222.557	-2177.71	1391.15	237.579	-2200.53	1206.79	146.375	-1934.56	1338.43	396.861	-2039.74	1449.54	469.384	-2032.04	1251.11	500.387	-2030.64	1134.17	502.331	-2164.39	1023.02	454.313	-2235.48	968.176	512.15	-2207.66	928.154	501.054	-2302.24	883.238
670	0	251.3	-2280.79	1625.49	148.643	-2275.24	1617.09	277.05	-2123.92	1638.44	140.614	-2106.4	1630.52	197.304	-2050.28	1489.69	202.551	-1942.6	1268.15	221.538	-2190.09	1392.48	236.721	-2212.96	1208.15	144.886	-1947	1339.55	395.591	-2052.05	1450.54	467.86	-2042.99	1252.34	498.455	-2040.44	1135.22	500.446	-2172.01	1021.44	452.718	-2241.87	965.319	510.639	-2213.4	926.047	499.38	-2306.92	878.959
671	0	250.104	-2293.26	1626.63	147.469	-2287.54	1618.12	276.016	-2136.44	1639.96	139.563	-2118.75	1631.89	196.242	-2062.49	1491.12	201.237	-1954.84	1269.6	220.653	-2202.33	1394.04	235.928	-2225.26	1209.73	143.472	-1959.35	1340.93	394.455	-2064.18	1451.7	466.423	-2053.73	1253.73	496.578	-2050.03	1136.42	498.672	-2179.2	1019.81	451.264	-2247.73	962.279	509.258	-2218.52	923.835	497.896	-2310.86	874.44
672	0	249.179	-2305.6	1627.95	146.558	-2299.73	1619.39	275.217	-2148.84	1641.64	138.75	-2130.99	1633.53	195.332	-2074.57	1492.77	199.969	-1966.94	1271.28	219.899	-2214.43	1395.83	235.197	-2237.44	1211.53	142.133	-1971.61	1342.57	393.457	-2076.13	1453.02	465.073	-2064.27	1255.28	494.756	-2059.42	1137.75	497.017	-2185.96	1018.12	449.959	-2253.05	959.074	508.013	-2223.03	921.536	496.616	-2314.07	869.721
673	0	248.527	-2317.8	1629.45	145.913	-2311.82	1620.92	274.648	-2161.09	1643.49	138.173	-2143.13	1635.43	194.573	-2086.52	1494.64	198.747	-1978.93	1273.19	219.273	-2226.41	1397.84	234.524	-2249.49	1213.55	140.872	-1983.76	1344.46	392.596	-2087.9	1454.49	463.81	-2074.61	1256.97	492.989	-2068.62	1139.22	495.491	-2192.29	1016.4	448.81	-2257.85	955.718	506.906	-2226.93	919.165	495.551	-2316.56	864.838
674	0	248.151	-2329.85	1631.14	145.537	-2323.79	1622.71	274.306	-2173.2	1645.48	137.825	-2155.15	1637.59	193.961	-2098.35	1496.73	197.572	-1990.8	1275.32	218.771	-2238.26	1400.07	233.908	-2261.44	1215.78	139.688	-1995.83	1346.59	391.872	-2099.49	1456.12	462.631	-2084.76	1258.81	491.278	-2077.62	1140.82	494.097	-2198.2	1014.65	447.821	-2262.12	952.228	505.942	-2230.24	916.738	494.711	-2318.33	859.825
675	0	248.051	-2341.76	1633	145.428	-2335.65	1624.76	274.185	-2185.15	1647.63	137.703	-2167.05	1639.99	193.495	-2110.05	1499.04	196.447	-2002.55	1277.66	218.392	-2249.98	1402.51	233.347	-2273.29	1218.23	138.58	-2007.8	1348.95	391.283	-2110.91	1457.9	461.535	-2094.72	1260.79	489.621	-2086.45	1142.56	492.84	-2203.7	1012.89	446.995	-2265.88	948.613	505.123	-2232.96	914.265	494.103	-2319.39	854.709
676	0	248.226	-2353.52	1635.05	145.585	-2347.4	1627.06	274.281	-2196.95	1649.91	137.801	-2178.84	1642.64	193.172	-2121.63	1501.55	195.371	-2014.2	1280.22	218.13	-2261.59	1405.17	232.838	-2285.06	1220.88	137.549	-2019.69	1351.55	390.828	-2122.16	1459.82	460.519	-2104.5	1262.91	488.018	-2095.1	1144.42	491.724	-2208.78	1011.12	446.335	-2269.13	944.885	504.45	-2235.08	911.758	493.732	-2319.74	849.512
677	0	248.674	-2365.12	1637.29	146.007	-2359.04	1629.63	274.59	-2208.58	1652.33	138.113	-2190.52	1645.53	192.99	-2133.09	1504.26	194.345	-2025.75	1282.99	217.985	-2273.08	1408.03	232.382	-2296.74	1223.73	136.594	-2031.5	1354.37	390.507	-2133.24	1461.89	459.583	-2114.11	1265.16	486.469	-2103.57	1146.42	490.75	-2213.45	1009.34	445.842	-2271.86	941.05	503.925	-2236.62	909.223	493.602	-2319.38	844.252
678	0	249.393	-2376.56	1639.71	146.693	-2370.56	1632.46	275.107	-2220.05	1654.88	138.638	-2202.09	1648.65	192.947	-2144.43	1507.18	193.369	-2037.19	1285.96	217.955	-2284.46	1411.1	231.976	-2308.35	1226.78	135.714	-2043.22	1357.41	390.316	-2144.15	1464.11	458.725	-2123.54	1267.55	484.971	-2111.87	1148.55	489.918	-2217.71	1007.57	445.517	-2274.09	937.114	503.548	-2237.58	906.666	493.716	-2318.32	838.938
679	0	250.382	-2387.85	1642.31	147.64	-2381.98	1635.55	275.831	-2231.36	1657.56	139.371	-2213.54	1652	193.043	-2155.65	1510.29	192.444	-2048.53	1289.13	218.038	-2295.74	1414.37	231.622	-2319.89	1230.04	134.909	-2054.86	1360.67	390.257	-2154.9	1466.47	457.946	-2132.79	1270.07	483.527	-2119.99	1150.82	489.231	-2221.55	1005.8	445.361	-2275.81	933.078	503.32	-2237.96	904.089	494.074	-2316.55	833.579
680	0	251.64	-2398.99	1645.1	148.849	-2393.28	1638.9	276.761	-2242.5	1660.36	140.313	-2224.88	1655.58	193.276	-2166.75	1513.6	191.568	-2059.76	1292.51	218.234	-2306.9	1417.84	231.318	-2331.36	1233.49	134.178	-2066.42	1364.16	390.329	-2165.49	1468.98	457.244	-2141.87	1272.73	482.134	-2127.95	1153.21	488.688	-2224.99	1004.03	445.374	-2277.02	928.945	503.241	-2237.75	901.495	494.676	-2314.08	828.176
681	0	253.167	-2409.96	1648.07	150.319	-2404.47	1642.51	277.896	-2253.47	1663.3	141.463	-2236.1	1659.39	193.647	-2177.73	1517.11	190.743	-2070.9	1296.1	218.544	-2317.95	1421.52	231.066	-2342.75	1237.15	133.523	-2077.9	1367.86	390.531	-2175.91	1471.64	456.619	-2150.78	1275.52	480.794	-2135.73	1155.74	488.289	-2228.02	1002.27	445.556	-2277.72	924.714	503.311	-2236.97	898.883	495.525	-2310.91	822.733
[truncated: 69 more columns]

## Sheet: Sheet2
Devices
		025370 - Force			025370 - Moment			025370 - CoP			027571 - Force			027571 - Moment			027571 - CoP			037720 - Force			037720 - Moment			037720 - CoP
Frame	Sub Frame	Fx	Fy	Fz	Mx	My	Mz	Cx	Cy	Cz	Fx	Fy	Fz	Mx	My	Mz	Cx	Cy	Cz	Fx	Fy	Fz	Mx	My	Mz	Cx	Cy	Cz
		N	N	N	N.mm	N.mm	N.mm	mm	mm	mm	N	N	N	N.mm	N.mm	N.mm	mm	mm	mm	N	N	N	N.mm	N.mm	N.mm	mm	mm	mm
267	0	0	0	0	0	0	0	200	300	0	0	0	0	0	0	0	200	903	0	0	0	0	0	0	0	603	903	0
267	1	0	0	0	0	0	0	200	300	0	0	0	0	0	0	0	200	903	0	0	0	0	0	0	0	603	903	0
267	2	0	0	0	0	0	0	200	300	0	0	0	0	0	0	0	200	903	0	0	0	0	0	0	0	603	903	0
267	3	0	0	0	0	0	0	200	300	0	0	0	0	0	0	0	200	903	0	0	0	0	0	0	0	603	903	0
267	4	0	0	0	0	0	0	200	300	0	0	0	0	0	0	0	200	903	0	0	0	0	0	0	0	603	903	0
267	5	0	0	0	0	0	0	200	300	0	0	0	0	0	0	0	200	903	0	0	0	0	0	0	0	603	903	0
267	6	0	0	0	0	0	0	200	300	0	0	0	0	0	0	0	200	903	0	0	0	0	0	0	0	603	903	0
267	7	0	0	0	0	0	0	200	300	0	0	0	0	0	0	0	200	903	0	0	0	0	0	0	0	603	903	0
267	8	0	0	0	0	0	0	200	300	0	0	0	0	0	0	0	200	903	0	0	0	0	0	0	0	603	903	0
267	9	0	0	0	0	0	0	200	300	0	0	0	0	0	0	0	200	903	0	0	0	0	0	0	0	603	903	0
268	0	0	0	0	0	0	0	200	300	0	0	0	0	0	0	0	200	903	0	0	0	0	0	0	0	603	903	0
268	1	0	0	0	0	0	0	200	300	0	0	0	0	0	0	0	200	903	0	0	0	0	0	0	0	603	903	0
268	2	0	0	0	0	0	0	200	300	0	0	0	0	0	0	0	200	903	0	0	0	0	0	0	0	603	903	0
268	3	0	0	0	0	0	0	200	300	0	0	0	0	0	0	0	200	903	0	0	0	0	0	0	0	603	903	0
268	4	0	0	0	0	0	0	200	300	0	0	0	0	0	0	0	200	903	0	0	0	0	0	0	0	603	903	0
268	5	0	0	0	0	0	0	200	300	0	0	0	0	0	0	0	200	903	0	0	0	0	0	0	0	603	903	0
268	6	0	0	0	0	0	0	200	300	0	0	0	0	0	0	0	200	903	0	0	0	0	0	0	0	603	903	0
268	7	0	0	0	0	0	0	200	300	0	0	0	0	0	0	0	200	903	0	0	0	0	0	0	0	603	903	0
268	8	0	0	0	0	0	0	200	300	0	0	0	0	0	0	0	200	903	0	0	0	0	0	0	0	603	903	0
268	9	0	0	0	0	0	0	200	300	0	0	0	0	0	0	0	200	903	0	0	0	0	0	0	0	603	903	0
269	0	0	0	0	0	0	0	200	300	0	0	0	0	0	0	0	200	903	0	0	0	0	0	0	0	603	903	0
269	1	0	0	0	0	0	0	200	300	0	0	0	0	0	0	0	200	903	0	0	0	0	0	0	0	603	903	0
269	2	0	0	0	0	0	0	200	300	0	0	0	0	0	0	0	200	903	0	0	0	0	0	0	0	603	903	0
269	3	0	0	0	0	0	0	200	300	0	0	0	0	0	0	0	200	903	0	0	0	0	0	0	0	603	903	0
269	4	0	0	0	0	0	0	200	300	0	0	0	0	0	0	0	200	903	0	0	0	0	0	0	0	603	903	0
269	5	0	0	0	0	0	0	200	300	0	0	0	0	0	0	0	200	903	0	0	0	0	0	0	0	603	903	0
269	6	0	0	0	0	0	0	200	300	0	0	0	0	0	0	0	200	903	0	0	0	0	0	0	0	603	903	0
269	7	0	0	0	0	0	0	200	300	0	0	0	0	0	0	0	200	903	0	0	0	0	0	0	0	603	903	0
269	8	0	0	0	0	0	0	200	300	0	0	0	0	0	0	0	200	903	0	0	0	0	0	0	0	603	903	0
269	9	0	0	0	0	0	0	200	300	0	0	0	0	0	0	0	200	903	0	0	0	0	0	0	0	603	903	0
270	0	0	0	0	0	0	0	200	300	0	0	0	0	0	0	0	200	903	0	0	0	0	0	0	0	603	903	0
270	1	0	0	0	0	0	0	200	300	0	0	0	0	0	0	0	200	903	0	0	0	0	0	0	0	603	903	0
270	2	0	0	0	0	0	0	200	300	0	0	0	0	0	0	0	200	903	0	0	0	0	0	0	0	603	903	0
270	3	0	0	0	0	0	0	200	300	0	0	0	0	0	0	0	200	903	0	0	0	0	0	0	0	603	903	0
270	4	0	0	0	0	0	0	200	300	0	0	0	0	0	0	0	200	903	0	0	0	0	0	0	0	603	903	0
270	5	0	0	0	0	0	0	200	300	0	0	0	0	0	0	0	200	903	0	0	0	0	0	0	0	603	903	0
270	6	0	0	0	0	0	0	200	300	0	0	0	0	0	0	0	200	903	0	0	0	0	0	0	0	603	903	0
270	7	0	0	0	0	0	0	200	300	0	0	0	0	0	0	0	200	903	0	0	0	0	0	0	0	603	903	0
270	8	0	0	0	0	0	0	200	300	0	0	0	0	0	0	0	200	903	0	0	0	0	0	0	0	603	903	0
270	9	0	0	0	0	0	0	200	300	0	0	0	0	0	0	0	200	903	0	0	0	0	0	0	0	603	903	0
271	0	0	0	0	0	0	0	200	300	0	0	0	0	0	0	0	200	903	0	0	0	0	0	0	0	603	903	0
271	1	0	0	0	0	0	0	200	300	0	0	0	0	0	0	0	200	903	0	0	0	0	0	0	0	603	903	0
271	2	0	0	0	0	0	0	200	300	0	0	0	0	0	0	0	200	903	0	0	0	0	0	0	0	603	903	0
271	3	0	0	0	0	0	0	200	300	0	0	0	0	0	0	0	200	903	0	0	0	0	0	0	0	603	903	0
271	4	0	0	0	0	0	0	200	300	0	0	0	0	0	0	0	200	903	0	0	0	0	0	0	0	603	903	0
271	5	0	0	0	0	0	0	200	300	0	0	0	0	0	0	0	200	903	0	0	0	0	0	0	0	603	903	0
271	6	0	0	0	0	0	0	200	300	0	0	0	0	0	0	0	200	903	0	0	0	0	0	0	0	603	903	0
271	7	0	0	0	0	0	0	200	300	0	0	0	0	0	0	0	200	903	0	0	0	0	0	0	0	603	903	0
271	8	0	0	0	0	0	0	200	300	0	0	0	0	0	0	0	200	903	0	0	0	0	0	0	0	603	903	0
271	9	0	0	0	0	0	0	200	300	0	0	0	0	0	0	0	200	903	0	0	0	0	0	0	0	603	903	0
272	0	0	0	0	0	0	0	200	300	0	0	0	0	0	0	0	200	903	0	0	0	0	0	0	0	603	903	0
272	1	0	0	0	0	0	0	200	300	0	0	0	0	0	0	0	200	903	0	0	0	0	0	0	0	603	903	0
272	2	0	0	0	0	0	0	200	300	0	0	0	0	0	0	0	200	903	0	0	0	0	0	0	0	603	903	0
272	3	0	0	0	0	0	0	200	300	0	0	0	0	0	0	0	200	903	0	0	0	0	0	0	0	603	903	0
272	4	0	0	0	0	0	0	200	300	0	0	0	0	0	0	0	200	903	0	0	0	0	0	0	0	603	903	0
272	5	0	0	0	0	0	0	200	300	0	0	0	0	0	0	0	200	903	0	0	0	0	0	0	0	603	903	0
272	6	0	0	0	0	0	0	200	300	0	0	0	0	0	0	0	200	903	0	0	0	0	0	0	0	603	903	0
272	7	0	0	0	0	0	0	200	300	0	0	0	0	0	0	0	200	903	0	0	0	0	0	0	0	603	903	0
272	8	0	0	0	0	0	0	200	300	0	0	0	0	0	0	0	200	903	0	0	0	0	0	0	0	603	903	0
272	9	0	0	0	0	0	0	200	300	0	0	0	0	0	0	0	200	903	0	0	0	0	0	0	0	603	903	0
273	0	0	0	0	0	0	0	200	300	0	0	0	0	0	0	0	200	903	0	0	0	0	0	0	0	603	903	0
273	1	0	0	0	0	0	0	200	300	0	0	0	0	0	0	0	200	903	0	0	0	0	0	0	0	603	903	0
273	2	0	0	0	0	0	0	200	300	0	0	0	0	0	0	0	200	903	0	0	0	0	0	0	0	603	903	0
273	3	0	0	0	0	0	0	200	300	0	0	0	0	0	0	0	200	903	0	0	0	0	0	0	0	603	903	0
273	4	0	0	0	0	0	0	200	300	0	0	0	0	0	0	0	200	903	0	0	0	0	0	0	0	603	903	0
273	5	0	0	0	0	0	0	200	300	0	0	0	0	0	0	0	200	903	0	0	0	0	0	0	0	603	903	0
273	6	0	0	0	0	0	0	200	300	0	0	0	0	0	0	0	200	903	0	0	0	0	0	0	0	603	903	0
273	7	0	0	0	0	0	0	200	300	0	0	0	0	0	0	0	200	903	0	0	0	0	0	0	0	603	903	0
273	8	0	0	0	0	0	0	200	300	0	0	0	0	0	0	0	200	903	0	0	0	0	0	0	0	603	903	0
273	9	0	0	0	0	0	0	200	300	0	0	0	0	0	0	0	200	903	0	0	0	0	0	0	0	603	903	0
274	0	0	0	0	0	0	0	200	300	0	0	0	0	0	0	0	200	903	0	0	0	0	0	0	0	603	903	0
274	1	0	0	0	0	0	0	200	300	0	0	0	0	0	0	0	200	903	0	0	0	0	0	0	0	603	903	0
274	2	0	0	0	0	0	0	200	300	0	0	0	0	0	0	0	200	903	0	0	0	0	0	0	0	603	903	0
274	3	0	0	0	0	0	0	200	300	0	0	0	0	0	0	0	200	903	0	0	0	0	0	0	0	603	903	0
274	4	0	0	0	0	0	0	200	300	0	0	0	0	0	0	0	200	903	0	0	0	0	0	0	0	603	903	0
274	5	0	0	0	0	0	0	200	300	0	0	0	0	0	0	0	200	903	0	0	0	0	0	0	0	603	903	0
274	6	0	0	0	0	0	0	200	300	0	0	0	0	0	0	0	200	903	0	0	0	0	0	0	0	603	903	0
274	7	0	0	0	0	0	0	200	300	0	0	0	0	0	0	0	200	903	0	0	0	0	0	0	0	603	903	0
274	8	0	0	0	0	0	0	200	300	0	0	0	0	0	0	0	200	903	0	0	0	0	0	0	0	603	903	0
274	9	0	0	0	0	0	0	200	300	0	0	0	0	0	0	0	200	903	0	0	0	0	0	0	0	603	903	0
275	0	0	0	0	0	0	0	200	300	0	0	0	0	0	0	0	200	903	0	0	0	0	0	0	0	603	903	0
275	1	0	0	0	0	0	0	200	300	0	0	0	0	0	0	0	200	903	0	0	0	0	0	0	0	603	903	0
275	2	0	0	0	0	0	0	200	300	0	0	0	0	0	0	0	200	903	0	0	0	0	0	0	0	603	903	0
275	3	0	0	0	0	0	0	200	300	0	0	0	0	0	0	0	200	903	0	0	0	0	0	0	0	603	903	0
275	4	0	0	0	0	0	0	200	300	0	0	0	0	0	0	0	200	903	0	0	0	0	0	0	0	603	903	0
275	5	0	0	0	0	0	0	200	300	0	0	0	0	0	0	0	200	903	0	0	0	0	0	0	0	603	903	0
275	6	0	0	0	0	0	0	200	300	0	0	0	0	0	0	0	200	903	0	0	0	0	0	0	0	603	903	0
275	7	0	0	0	0	0	0	200	300	0	0	0	0	0	0	0	200	903	0	0	0	0	0	0	0	603	903	0
275	8	0	0	0	0	0	0	200	300	0	0	0	0	0	0	0	200	903	0	0	0	0	0	0	0	603	903	0
275	9	0	0	0	0	0	0	200	300	0	0	0	0	0	0	0	200	903	0	0	0	0	0	0	0	603	903	0
276	0	0	0	0	0	0	0	200	300	0	0	0	0	0	0	0	200	903	0	0	0	0	0	0	0	603	903	0
276	1	0	0	0	0	0	0	200	300	0	0	0	0	0	0	0	200	903	0	0	0	0	0	0	0	603	903	0
276	2	0	0	0	0	0	0	200	300	0	0	0	0	0	0	0	200	903	0	0	0	0	0	0	0	603	903	0
276	3	0	0	0	0	0	0	200	300	0	0	0	0	0	0	0	200	903	0	0	0	0	0	0	0	603	903	0
276	4	0	0	0	0	0	0	200	300	0	0	0	0	0	0	0	200	903	0	0	0	0	0	0	0	603	903	0
276	5	0	0	0	0	0	0	200	300	0	0	0	0	0	0	0	200	903	0	0	0	0	0	0	0	603	903	0
276	6	0	0	0	0	0	0	200	300	0	0	0	0	0	0	0	200	903	0	0	0	0	0	0	0	603	903	0
276	7	0	0	0	0	0	0	200	300	0	0	0	0	0	0	0	200	903	0	0	0	0	0	0	0	603	903	0
276	8	0	0	0	0	0	0	200	300	0	0	0	0	0	0	0	200	903	0	0	0	0	0	0	0	603	903	0
276	9	0	0	0	0	0	0	200	300	0	0	0	0	0	0	0	200	903	0	0	0	0	0	0	0	603	903	0
277	0	0	0	0	0	0	0	200	300	0	0	0	0	0	0	0	200	903	0	0	0	0	0	0	0	603	903	0
277	1	0	0	0	0	0	0	200	300	0	0	0	0	0	0	0	200	903	0	0	0	0	0	0	0	603	903	0
277	2	0	0	0	0	0	0	200	300	0	0	0	0	0	0	0	200	903	0	0	0	0	0	0	0	603	903	0
277	3	0	0	0	0	0	0	200	300	0	0	0	0	0	0	0	200	903	0	0	0	0	0	0	0	603	903	0
277	4	0	0	0	0	0	0	200	300	0	0	0	0	0	0	0	200	903	0	0	0	0	0	0	0	603	903	0
277	5	0	0	0	0	0	0	200	300	0	0	0	0	0	0	0	200	903	0	0	0	0	0	0	0	603	903	0
277	6	0	0	0	0	0	0	200	300	0	0	0	0	0	0	0	200	903	0	0	0	0	0	0	0	603	903	0
277	7	0	0	0	0	0	0	200	300	0	0	0	0	0	0	0	200	903	0	0	0	0	0	0	0	603	903	0
277	8	0	0	0	0	0	0	200	300	0	0	0	0	0	0	0	200	903	0	0	0	0	0	0	0	603	903	0
277	9	0	0	0	0	0	0	200	300	0	0	0	0	0	0	0	200	903	0	0	0	0	0	0	0	603	903	0
278	0	0	0	0	0	0	0	200	300	0	0	0	0	0	0	0	200	903	0	0	0	0	0	0	0	603	903	0
278	1	0	0	0	0	0	0	200	300	0	0	0	0	0	0	0	200	903	0	0	0	0	0	0	0	603	903	0
278	2	0	0	0	0	0	0	200	300	0	0	0	0	0	0	0	200	903	0	0	0	0	0	0	0	603	903	0
278	3	0	0	0	0	0	0	200	300	0	0	0	0	0	0	0	200	903	0	0	0	0	0	0	0	603	903	0
278	4	0	0	0	0	0	0	200	300	0	0	0	0	0	0	0	200	903	0	0	0	0	0	0	0	603	903	0
278	5	0	0	0	0	0	0	200	300	0	0	0	0	0	0	0	200	903	0	0	0	0	0	0	0	603	903	0
278	6	0	0	0	0	0	0	200	300	0	0	0	0	0	0	0	200	903	0	0	0	0	0	0	0	603	903	0
278	7	0	0	0	0	0	0	200	300	0	0	0	0	0	0	0	200	903	0	0	0	0	0	0	0	603	903	0
278	8	0	0	0	0	0	0	200	300	0	0	0	0	0	0	0	200	903	0	0	0	0	0	0	0	603	903	0
278	9	0	0	0	0	0	0	200	300	0	0	0	0	0	0	0	200	903	0	0	0	0	0	0	0	603	903	0
279	0	0	0	0	0	0	0	200	300	0	0	0	0	0	0	0	200	903	0	0	0	0	0	0	0	603	903	0
279	1	0	0	0	0	0	0	200	300	0	0	0	0	0	0	0	200	903	0	0	0	0	0	0	0	603	903	0
279	2	0	0	0	0	0	0	200	300	0	0	0	0	0	0	0	200	903	0	0	0	0	0	0	0	603	903	0
279	3	0	0	0	0	0	0	200	300	0	0	0	0	0	0	0	200	903	0	0	0	0	0	0	0	603	903	0
279	4	0	0	0	0	0	0	200	300	0	0	0	0	0	0	0	200	903	0	0	0	0	0	0	0	603	903	0
279	5	0	0	0	0	0	0	200	300	0	0	0	0	0	0	0	200	903	0	0	0	0	0	0	0	603	903	0
279	6	0	0	0	0	0	0	200	300	0	0	0	0	0	0	0	200	903	0	0	0	0	0	0	0	603	903	0
279	7	0	0	0	0	0	0	200	300	0	0	0	0	0	0	0	200	903	0	0	0	0	0	0	0	603	903	0
279	8	0	0	0	0	0	0	200	300	0	0	0	0	0	0	0	200	903	0	0	0	0	0	0	0	603	903	0
279	9	0	0	0	0	0	0	200	300	0	0	0	0	0	0	0	200	903	0	0	0	0	0	0	0	603	903	0
280	0	0	0	0	0	0	0	200	300	0	0	0	0	0	0	0	200	903	0	0	0	0	0	0	0	603	903	0
280	1	0	0	0	0	0	0	200	300	0	0	0	0	0	0	0	200	903	0	0	0	0	0	0	0	603	903	0
280	2	0	0	0	0	0	0	200	300	0	0	0	0	0	0	0	200	903	0	0	0	0	0	0	0	603	903	0
280	3	0	0	0	0	0	0	200	300	0	0	0	0	0	0	0	200	903	0	0	0	0	0	0	0	603	903	0
280	4	0	0	0	0	0	0	200	300	0	0	0	0	0	0	0	200	903	0	0	0	0	0	0	0	603	903	0
280	5	0	0	0	0	0	0	200	300	0	0	0	0	0	0	0	200	903	0	0	0	0	0	0	0	603	903	0
280	6	0	0	0	0	0	0	200	300	0	0	0	0	0	0	0	200	903	0	0	0	0	0	0	0	603	903	0
280	7	0	0	0	0	0	0	200	300	0	0	0	0	0	0	0	200	903	0	0	0	0	0	0	0	603	903	0
280	8	0	0	0	0	0	0	200	300	0	0	0	0	0	0	0	200	903	0	0	0	0	0	0	0	603	903	0
280	9	0	0	0	0	0	0	200	300	0	0	0	0	0	0	0	200	903	0	0	0	0	0	0	0	603	903	0
281	0	0	0	0	0	0	0	200	300	0	0	0	0	0	0	0	200	903	0	0	0	0	0	0	0	603	903	0
281	1	0	0	0	0	0	0	200	300	0	0	0	0	0	0	0	200	903	0	0	0	0	0	0	0	603	903	0
281	2	0	0	0	0	0	0	200	300	0	0	0	0	0	0	0	200	903	0	0	0	0	0	0	0	603	903	0
281	3	0	0	0	0	0	0	200	300	0	0	0	0	0	0	0	200	903	0	0	0	0	0	0	0	603	903	0
281	4	0	0	0	0	0	0	200	300	0	0	0	0	0	0	0	200	903	0	0	0	0	0	0	0	603	903	0
281	5	0	0	0	0	0	0	200	300	0	0	0	0	0	0	0	200	903	0	0	0	0	0	0	0	603	903	0
281	6	0	0	0	0	0	0	200	300	0	0	0	0	0	0	0	200	903	0	0	0	0	0	0	0	603	903	0
281	7	0	0	0	0	0	0	200	300	0	0	0	0	0	0	0	200	903	0	0	0	0	0	0	0	603	903	0
281	8	0	0	0	0	0	0	200	300	0	0	0	0	0	0	0	200	903	0	0	0	0	0	0	0	603	903	0
281	9	0	0	0	0	0	0	200	300	0	0	0	0	0	0	0	200	903	0	0	0	0	0	0	0	603	903	0
282	0	0	0	0	0	0	0	200	300	0	0	0	0	0	0	0	200	903	0	0	0	0	0	0	0	603	903	0
282	1	0	0	0	0	0	0	200	300	0	0	0	0	0	0	0	200	903	0	0	0	0	0	0	0	603	903	0
282	2	0	0	0	0	0	0	200	300	0	0	0	0	0	0	0	200	903	0	0	0	0	0	0	0	603	903	0
282	3	0	0	0	0	0	0	200	300	0	0	0	0	0	0	0	200	903	0	0	0	0	0	0	0	603	903	0
282	4	0	0	0	0	0	0	200	300	0	0	0	0	0	0	0	200	903	0	0	0	0	0	0	0	603	903	0
282	5	0	0	0	0	0	0	200	300	0	0	0	0	0	0	0	200	903	0	0	0	0	0	0	0	603	903	0
282	6	0	0	0	0	0	0	200	300	0	0	0	0	0	0	0	200	903	0	0	0	0	0	0	0	603	903	0
282	7	0	0	0	0	0	0	200	300	0	0	0	0	0	0	0	200	903	0	0	0	0	0	0	0	603	903	0
282	8	0	0	0	0	0	0	200	300	0	0	0	0	0	0	0	200	903	0	0	0	0	0	0	0	603	903	0
282	9	0	0	0	0	0	0	200	300	0	0	0	0	0	0	0	200	903	0	0	0	0	0	0	0	603	903	0
283	0	0	0	0	0	0	0	200	300	0	0	0	0	0	0	0	200	903	0	0	0	0	0	0	0	603	903	0
283	1	0	0	0	0	0	0	200	300	0	0	0	0	0	0	0	200	903	0	0	0	0	0	0	0	603	903	0
283	2	0	0	0	0	0	0	200	300	0	0	0	0	0	0	0	200	903	0	0	0	0	0	0	0	603	903	0
283	3	0	0	0	0	0	0	200	300	0	0	0	0	0	0	0	200	903	0	0	0	0	0	0	0	603	903	0
283	4	0	0	0	0	0	0	200	300	0	0	0	0	0	0	0	200	903	0	0	0	0	0	0	0	603	903	0
283	5	0	0	0	0	0	0	200	300	0	0	0	0	0	0	0	200	903	0	0	0	0	0	0	0	603	903	0
283	6	0	0	0	0	0	0	200	300	0	0	0	0	0	0	0	200	903	0	0	0	0	0	0	0	603	903	0
283	7	0	0	0	0	0	0	200	300	0	0	0	0	0	0	0	200	903	0	0	0	0	0	0	0	603	903	0
283	8	0	0	0	0	0	0	200	300	0	0	0	0	0	0	0	200	903	0	0	0	0	0	0	0	603	903	0
283	9	0	0	0	0	0	0	200	300	0	0	0	0	0	0	0	200	903	0	0	0	0	0	0	0	603	903	0
284	0	0	0	0	0	0	0	200	300	0	0	0	0	0	0	0	200	903	0	0	0	0	0	0	0	603	903	0
284	1	0	0	0	0	0	0	200	300	0	0	0	0	0	0	0	200	903	0	0	0	0	0	0	0	603	903	0
284	2	0	0	0	0	0	0	200	300	0	0	0	0	0	0	0	200	903	0	0	0	0	0	0	0	603	903	0
284	3	0	0	0	0	0	0	200	300	0	0	0	0	0	0	0	200	903	0	0	0	0	0	0	0	603	903	0
284	4	0	0	0	0	0	0	200	300	0	0	0	0	0	0	0	200	903	0	0	0	0	0	0	0	603	903	0
284	5	0	0	0	0	0	0	200	300	0	0	0	0	0	0	0	200	903	0	0	0	0	0	0	0	603	903	0
284	6	0	0	0	0	0	0	200	300	0	0	0	0	0	0	0	200	903	0	0	0	0	0	0	0	603	903	0
284	7	0	0	0	0	0	0	200	300	0	0	0	0	0	0	0	200	903	0	0	0	0	0	0	0	603	903	0
284	8	0	0	0	0	0	0	200	300	0	0	0	0	0	0	0	200	903	0	0	0	0	0	0	0	603	903	0
284	9	0	0	0	0	0	0	200	300	0	0	0	0	0	0	0	200	903	0	0	0	0	0	0	0	603	903	0
285	0	0	0	0	0	0	0	200	300	0	0	0	0	0	0	0	200	903	0	0	0	0	0	0	0	603	903	0
285	1	0	0	0	0	0	0	200	300	0	0	0	0	0	0	0	200	903	0	0	0	0	0	0	0	603	903	0
285	2	0	0	0	0	0	0	200	300	0	0	0	0	0	0	0	200	903	0	0	0	0	0	0	0	603	903	0
285	3	0	0	0	0	0	0	200	300	0	0	0	0	0	0	0	200	903	0	0	0	0	0	0	0	603	903	0
285	4	0	0	0	0	0	0	200	300	0	0	0	0	0	0	0	200	903	0	0	0	0	0	0	0	603	903	0
285	5	0	0	0	0	0	0	200	300	0	0	0	0	0	0	0	200	903	0	0	0	0	0	0	0	603	903	0
285	6	0	0	0	0	0	0	200	300	0	0	0	0	0	0	0	200	903	0	0	0	0	0	0	0	603	903	0
285	7	0	0	0	0	0	0	200	300	0	0	0	0	0	0	0	200	903	0	0	0	0	0	0	0	603	903	0
285	8	0	0	0	0	0	0	200	300	0	0	0	0	0	0	0	200	903	0	0	0	0	0	0	0	603	903	0
285	9	0	0	0	0	0	0	200	300	0	0	0	0	0	0	0	200	903	0	0	0	0	0	0	0	603	903	0
286	0	0	0	0	0	0	0	200	300	0	0	0	0	0	0	0	200	903	0	0	0	0	0	0	0	603	903	0
286	1	0	0	0	0	0	0	200	300	0	0	0	0	0	0	0	200	903	0	0	0	0	0	0	0	603	903	0
286	2	0	0	0	0	0	0	200	300	0	0	0	0	0	0	0	200	903	0	0	0	0	0	0	0	603	903	0
286	3	0	0	0	0	0	0	200	300	0	0	0	0	0	0	0	200	903	0	0	0	0	0	0	0	603	903	0
286	4	0	0	0	0	0	0	200	300	0	0	0	0	0	0	0	200	903	0	0	0	0	0	0	0	603	903	0
286	5	0	0	0	0	0	0	200	300	0	0	0	0	0	0	0	200	903	0	0	0	0	0	0	0	603	903	0
286	6	0	0	0	0	0	0	200	300	0	0	0	0	0	0	0	200	903	0	0	0	0	0	0	0	603	903	0
286	7	0	0	0	0	0	0	200	300	0	0	0	0	0	0	0	200	903	0	0	0	0	0	0	0	603	903	0
286	8	0	0	0	0	0	0	200	300	0	0	0	0	0	0	0	200	903	0	0	0	0	0	0	0	603	903	0
286	9	0	0	0	0	0	0	200	300	0	0	0	0	0	0	0	200	903	0	0	0	0	0	0	0	603	903	0
287	0	0	0	0	0	0	0	200	300	0	0	0	0	0	0	0	200	903	0	0	0	0	0	0	0	603	903	0
287	1	0	0	0	0	0	0	200	300	0	0	0	0	0	0	0	200	903	0	0	0	0	0	0	0	603	903	0
287	2	0	0	0	0	0	0	200	300	0	0	0	0	0	0	0	200	903	0	0	0	0	0	0	0	603	903	0
287	3	0	0	0	0	0	0	200	300	0	0	0	0	0	0	0	200	903	0	0	0	0	0	0	0	603	903	0
287	4	0	0	0	0	0	0	200	300	0	0	0	0	0	0	0	200	903	0	0	0	0	0	0	0	603	903	0
287	5	0	0	0	0	0	0	200	300	0	0	0	0	0	0	0	200	903	0	0	0	0	0	0	0	603	903	0
287	6	0	0	0	0	0	0	200	300	0	0	0	0	0	0	0	200	903	0	0	0	0	0	0	0	603	903	0
287	7	0	0	0	0	0	0	200	300	0	0	0	0	0	0	0	200	903	0	0	0	0	0	0	0	603	903	0
287	8	0	0	0	0	0	0	200	300	0	0	0	0	0	0	0	200	903	0	0	0	0	0	0	0	603	903	0
287	9	0	0	0	0	0	0	200	300	0	0	0	0	0	0	0	200	903	0	0	0	0	0	0	0	603	903	0
288	0	0	0	0	0	0	0	200	300	0	0	0	0	0	0	0	200	903	0	0	0	0	0	0	0	603	903	0
288	1	0	0	0	0	0	0	200	300	0	0	0	0	0	0	0	200	903	0	0	0	0	0	0	0	603	903	0
288	2	0	0	0	0	0	0	200	300	0	0	0	0	0	0	0	200	903	0	0	0	0	0	0	0	603	903	0
288	3	0	0	0	0	0	0	200	300	0	0	0	0	0	0	0	200	903	0	0	0	0	0	0	0	603	903	0
288	4	0	0	0	0	0	0	200	300	0	0	0	0	0	0	0	200	903	0	0	0	0	0	0	0	603	903	0
288	5	0	0	0	0	0	0	200	300	0	0	0	0	0	0	0	200	903	0	0	0	0	0	0	0	603	903	0
288	6	0	0	0	0	0	0	200	300	0	0	0	0	0	0	0	200	903	0	0	0	0	0	0	0	603	903	0
288	7	0	0	0	0	0	0	200	300	0	0	0	0	0	0	0	200	903	0	0	0	0	0	0	0	603	903	0
288	8	0	0	0	0	0	0	200	300	0	0	0	0	0	0	0	200	903	0	0	0	0	0	0	0	603	903	0
288	9	0	0	0	0	0	0	200	300	0	0	0	0	0	0	0	200	903	0	0	0	0	0	0	0	603	903	0
289	0	0	0	0	0	0	0	200	300	0	0	0	0	0	0	0	200	903	0	0	0	0	0	0	0	603	903	0
289	1	0	0	0	0	0	0	200	300	0	0	0	0	0	0	0	200	903	0	0	0	0	0	0	0	603	903	0
289	2	0	0	0	0	0	0	200	300	0	0	0	0	0	0	0	200	903	0	0	0	0	0	0	0	603	903	0
289	3	0	0	0	0	0	0	200	300	0	0	0	0	0	0	0	200	903	0	0	0	0	0	0	0	603	903	0
289	4	0	0	0	0	0	0	200	300	0	0	0	0	0	0	0	200	903	0	0	0	0	0	0	0	603	903	0
289	5	0	0	0	0	0	0	200	300	0	0	0	0	0	0	0	200	903	0	0	0	0	0	0	0	603	903	0
289	6	0	0	0	0	0	0	200	300	0	0	0	0	0	0	0	200	903	0	0	0	0	0	0	0	603	903	0
289	7	0	0	0	0	0	0	200	300	0	0	0	0	0	0	0	200	903	0	0	0	0	0	0	0	603	903	0
289	8	0	0	0	0	0	0	200	300	0	0	0	0	0	0	0	200	903	0	0	0	0	0	0	0	603	903	0
289	9	0	0	0	0	0	0	200	300	0	0	0	0	0	0	0	200	903	0	0	0	0	0	0	0	603	903	0
290	0	0	0	0	0	0	0	200	300	0	0	0	0	0	0	0	200	903	0	0	0	0	0	0	0	603	903	0
290	1	0	0	0	0	0	0	200	300	0	0	0	0	0	0	0	200	903	0	0	0	0	0	0	0	603	903	0
290	2	0	0	0	0	0	0	200	300	0	0	0	0	0	0	0	200	903	0	0	0	0	0	0	0	603	903	0
290	3	0	0	0	0	0	0	200	300	0	0	0	0	0	0	0	200	903	0	0	0	0	0	0	0	603	903	0
290	4	0	0	0	0	0	0	200	300	0	0	0	0	0	0	0	200	903	0	0	0	0	0	0	0	603	903	0
290	5	0	0	0	0	0	0	200	300	0	0	0	0	0	0	0	200	903	0	0	0	0	0	0	0	603	903	0
290	6	0	0	0	0	0	0	200	300	0	0	0	0	0	0	0	200	903	0	0	0	0	0	0	0	603	903	0
290	7	0	0	0	0	0	0	200	300	0	0	0	0	0	0	0	200	903	0	0	0	0	0	0	0	603	903	0
290	8	0	0	0	0	0	0	200	300	0	0	0	0	0	0	0	200	903	0	0	0	0	0	0	0	603	903	0
290	9	0	0	0	0	0	0	200	300	0	0	0	0	0	0	0	200	903	0	0	0	0	0	0	0	603	903	0
291	0	0	0	0	0	0	0	200	300	0	0	0	0	0	0	0	200	903	0	0	0	0	0	0	0	603	903	0
291	1	0	0	0	0	0	0	200	300	0	0	0	0	0	0	0	200	903	0	0	0	0	0	0	0	603	903	0
291	2	0	0	0	0	0	0	200	300	0	0	0	0	0	0	0	200	903	0	0	0	0	0	0	0	603	903	0
291	3	0	0	0	0	0	0	200	300	0	0	0	0	0	0	0	200	903	0	0	0	0	0	0	0	603	903	0
291	4	0	0	0	0	0	0	200	300	0	0	0	0	0	0	0	200	903	0	0	0	0	0	0	0	603	903	0
291	5	0	0	0	0	0	0	200	300	0	0	0	0	0	0	0	200	903	0	0	0	0	0	0	0	603	903	0
291	6	0	0	0	0	0	0	200	300	0	0	0	0	0	0	0	200	903	0	0	0	0	0	0	0	603	903	0
291	7	0	0	0	0	0	0	200	300	0	0	0	0	0	0	0	200	903	0	0	0	0	0	0	0	603	903	0
291	8	0	0	0	0	0	0	200	300	0	0	0	0	0	0	0	200	903	0	0	0	0	0	0	0	603	903	0
291	9	0	0	0	0	0	0	200	300	0	0	0	0	0	0	0	200	903	0	0	0	0	0	0	0	603	903	0
292	0	0	0	0	0	0	0	200	300	0	0	0	0	0	0	0	200	903	0	0	0	0	0	0	0	603	903	0
292	1	0	0	0	0	0	0	200	300	0	0	0	0	0	0	0	200	903	0	0	0	0	0	0	0	603	903	0
292	2	0	0	0	0	0	0	200	300	0	0	0	0	0	0	0	200	903	0	0	0	0	0	0	0	603	903	0
292	3	0	0	0	0	0	0	200	300	0	0	0	0	0	0	0	200	903	0	0	0	0	0	0	0	603	903	0
292	4	0	0	0	0	0	0	200	300	0	0	0	0	0	0	0	200	903	0	0	0	0	0	0	0	603	903	0
292	5	0	0	0	0	0	0	200	300	0	0	0	0	0	0	0	200	903	0	0	0	0	0	0	0	603	903	0
292	6	0	0	0	0	0	0	200	300	0	0	0	0	0	0	0	200	903	0	0	0	0	0	0	0	603	903	0
292	7	0	0	0	0	0	0	200	300	0	0	0	0	0	0	0	200	903	0	0	0	0	0	0	0	603	903	0
292	8	0	0	0	0	0	0	200	300	0	0	0	0	0	0	0	200	903	0	0	0	0	0	0	0	603	903	0
292	9	0	0	0	0	0	0	200	300	0	0	0	0	0	0	0	200	903	0	0	0	0	0	0	0	603	903	0
293	0	0	0	0	0	0	0	200	300	0	0	0	0	0	0	0	200	903	0	0	0	0	0	0	0	603	903	0
293	1	0	0	0	0	0	0	200	300	0	0	0	0	0	0	0	200	903	0	0	0	0	0	0	0	603	903	0
293	2	0	0	0	0	0	0	200	300	0	0	0	0	0	0	0	200	903	0	0	0	0	0	0	0	603	903	0
293	3	0	0	0	0	0	0	200	300	0	0	0	0	0	0	0	200	903	0	0	0	0	0	0	0	603	903	0
293	4	0	0	0	0	0	0	200	300	0	0	0	0	0	0	0	200	903	0	0	0	0	0	0	0	603	903	0
293	5	0	0	0	0	0	0	200	300	0	0	0	0	0	0	0	200	903	0	0	0	0	0	0	0	603	903	0
293	6	0	0	0	0	0	0	200	300	0	0	0	0	0	0	0	200	903	0	0	0	0	0	0	0	603	903	0
293	7	0	0	0	0	0	0	200	300	0	0	0	0	0	0	0	200	903	0	0	0	0	0	0	0	603	903	0
293	8	0	0	0	0	0	0	200	300	0	0	0	0	0	0	0	200	903	0	0	0	0	0	0	0	603	903	0
293	9	0	0	0	0	0	0	200	300	0	0	0	0	0	0	0	200	903	0	0	0	0	0	0	0	603	903	0
294	0	0	0	0	0	0	0	200	300	0	0	0	0	0	0	0	200	903	0	0	0	0	0	0	0	603	903	0
294	1	0	0	0	0	0	0	200	300	0	0	0	0	0	0	0	200	903	0	0	0	0	0	0	0	603	903	0
294	2	0	0	0	0	0	0	200	300	0	0	0	0	0	0	0	200	903	0	0	0	0	0	0	0	603	903	0
294	3	0	0	0	0	0	0	200	300	0	0	0	0	0	0	0	200	903	0	0	0	0	0	0	0	603	903	0
294	4	0	0	0	0	0	0	200	300	0	0	0	0	0	0	0	200	903	0	0	0	0	0	0	0	603	903	0
294	5	0	0	0	0	0	0	200	300	0	0	0	0	0	0	0	200	903	0	0	0	0	0	0	0	603	903	0
294	6	0	0	0	0	0	0	200	300	0	0	0	0	0	0	0	200	903	0	0	0	0	0	0	0	603	903	0
294	7	0	0	0	0	0	0	200	300	0	0	0	0	0	0	0	200	903	0	0	0	0	0	0	0	603	903	0
294	8	0	0	0	0	0	0	200	300	0	0	0	0	0	0	0	200	903	0	0	0	0	0	0	0	603	903	0
294	9	0	0	0	0	0	0	200	300	0	0	0	0	0	0	0	200	903	0	0	0	0	0	0	0	603	903	0
295	0	0	0	0	0	0	0	200	300	0	0	0	0	0	0	0	200	903	0	0	0	0	0	0	0	603	903	0
295	1	0	0	0	0	0	0	200	300	0	0	0	0	0	0	0	200	903	0	0	0	0	0	0	0	603	903	0
295	2	0	0	0	0	0	0	200	300	0	0	0	0	0	0	0	200	903	0	0	0	0	0	0	0	603	903	0
295	3	0	0	0	0	0	0	200	300	0	0	0	0	0	0	0	200	903	0	0	0	0	0	0	0	603	903	0
295	4	0	0	0	0	0	0	200	300	0	0	0	0	0	0	0	200	903	0	0	0	0	0	0	0	603	903	0
295	5	0	0	0	0	0	0	200	300	0	0	0	0	0	0	0	200	903	0	0	0	0	0	0	0	603	903	0
295	6	0	0	0	0	0	0	200	300	0	0	0	0	0	0	0	200	903	0	0	0	0	0	0	0	603	903	0
295	7	0	0	0	0	0	0	200	300	0	0	0	0	0	0	0	200	903	0	0	0	0	0	0	0	603	903	0
295	8	0	0	0	0	0	0	200	300	0	0	0	0	0	0	0	200	903	0	0	0	0	0	0	0	603	903	0
295	9	0	0	0	0	0	0	200	300	0	0	0	0	0	0	0	200	903	0	0	0	0	0	0	0	603	903	0
296	0	0	0	0	0	0	0	200	300	0	0	0	0	0	0	0	200	903	0	0	0	0	0	0	0	603	903	0
296	1	0	0	0	0	0	0	200	300	0	0	0	0	0	0	0	200	903	0	0	0	0	0	0	0	603	903	0
296	2	0	0	0	0	0	0	200	300	0	0	0	0	0	0	0	200	903	0	0	0	0	0	0	0	603	903	0
296	3	0	0	0	0	0	0	200	300	0	0	0	0	0	0	0	200	903	0	0	0	0	0	0	0	603	903	0
296	4	0	0	0	0	0	0	200	300	0	0	0	0	0	0	0	200	903	0	0	0	0	0	0	0	603	903	0
296	5	0	0	0	0	0	0	200	300	0	0	0	0	0	0	0	200	903	0	0	0	0	0	0	0	603	903	0
296	6	0	0	0	0	0	0	200	300	0	0	0	0	0	0	0	200	903	0	0	0	0	0	0	0	603	903	0
296	7	0	0	0	0	0	0	200	300	0	0	0	0	0	0	0	200	903	0	0	0	0	0	0	0	603	903	0
296	8	0	0	0	0	0	0	200	300	0	0	0	0	0	0	0	200	903	0	0	0	0	0	0	0	603	903	0
296	9	0	0	0	0	0	0	200	300	0	0	0	0	0	0	0	200	903	0	0	0	0	0	0	0	603	903	0
297	0	0	0	0	0	0	0	200	300	0	0	0	0	0	0	0	200	903	0	0	0	0	0	0	0	603	903	0
297	1	0	0	0	0	0	0	200	300	0	0	0	0	0	0	0	200	903	0	0	0	0	0	0	0	603	903	0
297	2	0	0	0	0	0	0	200	300	0	0	0	0	0	0	0	200	903	0	0	0	0	0	0	0	603	903	0
297	3	0	0	0	0	0	0	200	300	0	0	0	0	0	0	0	200	903	0	0	0	0	0	0	0	603	903	0
297	4	0	0	0	0	0	0	200	300	0	0	0	0	0	0	0	200	903	0	0	0	0	0	0	0	603	903	0
297	5	0	0	0	0	0	0	200	300	0	0	0	0	0	0	0	200	903	0	0	0	0	0	0	0	603	903	0
297	6	0	0	0	0	0	0	200	300	0	0	0	0	0	0	0	200	903	0	0	0	0	0	0	0	603	903	0
297	7	0	0	0	0	0	0	200	300	0	0	0	0	0	0	0	200	903	0	0	0	0	0	0	0	603	903	0
297	8	0	0	0	0	0	0	200	300	0	0	0	0	0	0	0	200	903	0	0	0	0	0	0	0	603	903	0
297	9	0	0	0	0	0	0	200	300	0	0	0	0	0	0	0	200	903	0	0	0	0	0	0	0	603	903	0
298	0	0	0	0	0	0	0	200	300	0	0	0	0	0	0	0	200	903	0	0	0	0	0	0	0	603	903	0
298	1	0	0	0	0	0	0	200	300	0	0	0	0	0	0	0	200	903	0	0	0	0	0	0	0	603	903	0
298	2	0	0	0	0	0	0	200	300	0	0	0	0	0	0	0	200	903	0	0	0	0	0	0	0	603	903	0
298	3	0	0	0	0	0	0	200	300	0	0	0	0	0	0	0	200	903	0	0	0	0	0	0	0	603	903	0
298	4	0	0	0	0	0	0	200	300	0	0	0	0	0	0	0	200	903	0	0	0	0	0	0	0	603	903	0
298	5	0	0	0	0	0	0	200	300	0	0	0	0	0	0	0	200	903	0	0	0	0	0	0	0	603	903	0
298	6	0	0	0	0	0	0	200	300	0	0	0	0	0	0	0	200	903	0	0	0	0	0	0	0	603	903	0
298	7	0	0	0	0	0	0	200	300	0	0	0	0	0	0	0	200	903	0	0	0	0	0	0	0	603	903	0
298	8	0	0	0	0	0	0	200	300	0	0	0	0	0	0	0	200	903	0	0	0	0	0	0	0	603	903	0
298	9	0	0	0	0	0	0	200	300	0	0	0	0	0	0	0	200	903	0	0	0	0	0	0	0	603	903	0
299	0	0	0	0	0	0	0	200	300	0	0	0	0	0	0	0	200	903	0	0	0	0	0	0	0	603	903	0
299	1	0	0	0	0	0	0	200	300	0	0	0	0	0	0	0	200	903	0	0	0	0	0	0	0	603	903	0
299	2	0	0	0	0	0	0	200	300	0	0	0	0	0	0	0	200	903	0	0	0	0	0	0	0	603	903	0
299	3	0	0	0	0	0	0	200	300	0	0	0	0	0	0	0	200	903	0	0	0	0	0	0	0	603	903	0
299	4	0	0	0	0	0	0	200	300	0	0	0	0	0	0	0	200	903	0	0	0	0	0	0	0	603	903	0
299	5	0	0	0	0	0	0	200	300	0	0	0	0	0	0	0	200	903	0	0	0	0	0	0	0	603	903	0
299	6	0	0	0	0	0	0	200	300	0	0	0	0	0	0	0	200	903	0	0	0	0	0	0	0	603	903	0
299	7	0	0	0	0	0	0	200	300	0	0	0	0	0	0	0	200	903	0	0	0	0	0	0	0	603	903	0
299	8	0	0	0	0	0	0	200	300	0	0	0	0	0	0	0	200	903	0	0	0	0	0	0	0	603	903	0
299	9	0	0	0	0	0	0	200	300	0	0	0	0	0	0	0	200	903	0	0	0	0	0	0	0	603	903	0
300	0	0	0	0	0	0	0	200	300	0	0	0	0	0	0	0	200	903	0	0	0	0	0	0	0	603	903	0
300	1	0	0	0	0	0	0	200	300	0	0	0	0	0	0	0	200	903	0	0	0	0	0	0	0	603	903	0
300	2	0	0	0	0	0	0	200	300	0	0	0	0	0	0	0	200	903	0	0	0	0	0	0	0	603	903	0
300	3	0	0	0	0	0	0	200	300	0	0	0	0	0	0	0	200	903	0	0	0	0	0	0	0	603	903	0
300	4	0	0	0	0	0	0	200	300	0	0	0	0	0	0	0	200	903	0	0	0	0	0	0	0	603	903	0
300	5	0	0	0	0	0	0	200	300	0	0	0	0	0	0	0	200	903	0	0	0	0	0	0	0	603	903	0
300	6	0	0	0	0	0	0	200	300	0	0	0	0	0	0	0	200	903	0	0	0	0	0	0	0	603	903	0
300	7	0	0	0	0	0	0	200	300	0	0	0	0	0	0	0	200	903	0	0	0	0	0	0	0	603	903	0
300	8	0	0	0	0	0	0	200	300	0	0	0	0	0	0	0	200	903	0	0	0	0	0	0	0	603	903	0
300	9	0	0	0	0	0	0	200	300	0	0	0	0	0	0	0	200	903	0	0	0	0	0	0	0	603	903	0
301	0	0	0	0	0	0	0	200	300	0	0	0	0	0	0	0	200	903	0	0	0	0	0	0	0	603	903	0
301	1	0	0	0	0	0	0	200	300	0	0	0	0	0	0	0	200	903	0	0	0	0	0	0	0	603	903	0
301	2	0	0	0	0	0	0	200	300	0	0	0	0	0	0	0	200	903	0	0	0	0	0	0	0	603	903	0
301	3	0	0	0	0	0	0	200	300	0	0	0	0	0	0	0	200	903	0	0	0	0	0	0	0	603	903	0
301	4	0	0	0	0	0	0	200	300	0	0	0	0	0	0	0	200	903	0	0	0	0	0	0	0	603	903	0
301	5	0	0	0	0	0	0	200	300	0	0	0	0	0	0	0	200	903	0	0	0	0	0	0	0	603	903	0
301	6	0	0	0	0	0	0	200	300	0	0	0	0	0	0	0	200	903	0	0	0	0	0	0	0	603	903	0
301	7	0	0	0	0	0	0	200	300	0	0	0	0	0	0	0	200	903	0	0	0	0	0	0	0	603	903	0
301	8	0	0	0	0	0	0	200	300	0	0	0	0	0	0	0	200	903	0	0	0	0	0	0	0	603	903	0
301	9	0	0	0	0	0	0	200	300	0	0	0	0	0	0	0	200	903	0	0	0	0	0	0	0	603	903	0
302	0	0	0	0	0	0	0	200	300	0	0	0	0	0	0	0	200	903	0	0	0	0	0	0	0	603	903	0
302	1	0	0	0	0	0	0	200	300	0	0	0	0	0	0	0	200	903	0	0	0	0	0	0	0	603	903	0
302	2	0	0	0	0	0	0	200	300	0	0	0	0	0	0	0	200	903	0	0	0	0	0	0	0	603	903	0
302	3	0	0	0	0	0	0	200	300	0	0	0	0	0	0	0	200	903	0	0	0	0	0	0	0	603	903	0
302	4	0	0	0	0	0	0	200	300	0	0	0	0	0	0	0	200	903	0	0	0	0	0	0	0	603	903	0
302	5	0	0	0	0	0	0	200	300	0	0	0	0	0	0	0	200	903	0	0	0	0	0	0	0	603	903	0
302	6	0	0	0	0	0	0	200	300	0	0	0	0	0	0	0	200	903	0	0	0	0	0	0	0	603	903	0
302	7	0	0	0	0	0	0	200	300	0	0	0	0	0	0	0	200	903	0	0	0	0	0	0	0	603	903	0
302	8	0	0	0	0	0	0	200	300	0	0	0	0	0	0	0	200	903	0	0	0	0	0	0	0	603	903	0
302	9	0	0	0	0	0	0	200	300	0	0	0	0	0	0	0	200	903	0	0	0	0	0	0	0	603	903	0
303	0	0	0	0	0	0	0	200	300	0	0	0	0	0	0	0	200	903	0	0	0	0	0	0	0	603	903	0
303	1	0	0	0	0	0	0	200	300	0	0	0	0	0	0	0	200	903	0	0	0	0	0	0	0	603	903	0
303	2	0	0	0	0	0	0	200	300	0	0	0	0	0	0	0	200	903	0	0	0	0	0	0	0	603	903	0
303	3	0	0	0	0	0	0	200	300	0	0	0	0	0	0	0	200	903	0	0	0	0	0	0	0	603	903	0
303	4	0	0	0	0	0	0	200	300	0	0	0	0	0	0	0	200	903	0	0	0	0	0	0	0	603	903	0
303	5	0	0	0	0	0	0	200	300	0	0	0	0	0	0	0	200	903	0	0	0	0	0	0	0	603	903	0
303	6	0	0	0	0	0	0	200	300	0	0	0	0	0	0	0	200	903	0	0	0	0	0	0	0	603	903	0
303	7	0	0	0	0	0	0	200	300	0	0	0	0	0	0	0	200	903	0	0	0	0	0	0	0	603	903	0
303	8	0	0	0	0	0	0	200	300	0	0	0	0	0	0	0	200	903	0	0	0	0	0	0	0	603	903	0
303	9	0	0	0	0	0	0	200	300	0	0	0	0	0	0	0	200	903	0	0	0	0	0	0	0	603	903	0
304	0	0	0	0	0	0	0	200	300	0	0	0	0	0	0	0	200	903	0	0	0	0	0	0	0	603	903	0
304	1	0	0	0	0	0	0	200	300	0	0	0	0	0	0	0	200	903	0	0	0	0	0	0	0	603	903	0
304	2	0	0	0	0	0	0	200	300	0	0	0	0	0	0	0	200	903	0	0	0	0	0	0	0	603	903	0
304	3	0	0	0	0	0	0	200	300	0	0	0	0	0	0	0	200	903	0	0	0	0	0	0	0	603	903	0
304	4	0	0	0	0	0	0	200	300	0	0	0	0	0	0	0	200	903	0	0	0	0	0	0	0	603	903	0
304	5	0	0	0	0	0	0	200	300	0	0	0	0	0	0	0	200	903	0	0	0	0	0	0	0	603	903	0
304	6	0	0	0	0	0	0	200	300	0	0	0	0	0	0	0	200	903	0	0	0	0	0	0	0	603	903	0
304	7	0	0	0	0	0	0	200	300	0	0	0	0	0	0	0	200	903	0	0	0	0	0	0	0	603	903	0
304	8	0	0	0	0	0	0	200	300	0	0	0	0	0	0	0	200	903	0	0	0	0	0	0	0	603	903	0
304	9	0	0	0	0	0	0	200	300	0	0	0	0	0	0	0	200	903	0	0	0	0	0	0	0	603	903	0
305	0	0	0	0	0	0	0	200	300	0	0	0	0	0	0	0	200	903	0	0	0	0	0	0	0	603	903	0
305	1	0	0	0	0	0	0	200	300	0	0	0	0	0	0	0	200	903	0	0	0	0	0	0	0	603	903	0
305	2	0	0	0	0	0	0	200	300	0	0	0	0	0	0	0	200	903	0	0	0	0	0	0	0	603	903	0
305	3	0	0	0	0	0	0	200	300	0	0	0	0	0	0	0	200	903	0	0	0	0	0	0	0	603	903	0
305	4	0	0	0	0	0	0	200	300	0	0	0	0	0	0	0	200	903	0	0	0	0	0	0	0	603	903	0
305	5	0	0	0	0	0	0	200	300	0	0	0	0	0	0	0	200	903	0	0	0	0	0	0	0	603	903	0
305	6	0	0	0	0	0	0	200	300	0	0	0	0	0	0	0	200	903	0	0	0	0	0	0	0	603	903	0
305	7	0	0	0	0	0	0	200	300	0	0	0	0	0	0	0	200	903	0	0	0	0	0	0	0	603	903	0
305	8	0	0	0	0	0	0	200	300	0	0	0	0	0	0	0	200	903	0	0	0	0	0	0	0	603	903	0
305	9	0	0	0	0	0	0	200	300	0	0	0	0	0	0	0	200	903	0	0	0	0	0	0	0	603	903	0
306	0	0	0	0	0	0	0	200	300	0	0	0	0	0	0	0	200	903	0	0	0	0	0	0	0	603	903	0
306	1	0	0	0	0	0	0	200	300	0	0	0	0	0	0	0	200	903	0	0	0	0	0	0	0	603	903	0
306	2	0	0	0	0	0	0	200	300	0	0	0	0	0	0	0	200	903	0	0	0	0	0	0	0	603	903	0
306	3	0	0	0	0	0	0	200	300	0	0	0	0	0	0	0	200	903	0	0	0	0	0	0	0	603	903	0
306	4	0	0	0	0	0	0	200	300	0	0	0	0	0	0	0	200	903	0	0	0	0	0	0	0	603	903	0
306	5	0	0	0	0	0	0	200	300	0	0	0	0	0	0	0	200	903	0	0	0	0	0	0	0	603	903	0
306	6	0	0	0	0	0	0	200	300	0	0	0	0	0	0	0	200	903	0	0	0	0	0	0	0	603	903	0
306	7	0	0	0	0	0	0	200	300	0	0	0	0	0	0	0	200	903	0	0	0	0	0	0	0	603	903	0
306	8	0	0	0	0	0	0	200	300	0	0	0	0	0	0	0	200	903	0	0	0	0	0	0	0	603	903	0
306	9	0	0	0	0	0	0	200	300	0	0	0	0	0	0	0	200	903	0	0	0	0	0	0	0	603	903	0
307	0	0	0	0	0	0	0	200	300	0	0	0	0	0	0	0	200	903	0	0	0	0	0	0	0	603	903	0
307	1	0	0	0	0	0	0	200	300	0	0	0	0	0	0	0	200	903	0	0	0	0	0	0	0	603	903	0
307	2	0	0	0	0	0	0	200	300	0	0	0	0	0	0	0	200	903	0	0	0	0	0	0	0	603	903	0
307	3	0	0	0	0	0	0	200	300	0	0	0	0	0	0	0	200	903	0	0	0	0	0	0	0	603	903	0
307	4	0	0	0	0	0	0	200	300	0	0	0	0	0	0	0	200	903	0	0	0	0	0	0	0	603	903	0
307	5	0	0	0	0	0	0	200	300	0	0	0	0	0	0	0	200	903	0	0	0	0	0	0	0	603	903	0
307	6	0	0	0	0	0	0	200	300	0	0	0	0	0	0	0	200	903	0	0	0	0	0	0	0	603	903	0
307	7	0	0	0	0	0	0	200	300	0	0	0	0	0	0	0	200	903	0	0	0	0	0	0	0	603	903	0
307	8	0	0	0	0	0	0	200	300	0	0	0	0	0	0	0	200	903	0	0	0	0	0	0	0	603	903	0
307	9	0	0	0	0	0	0	200	300	0	0	0	0	0	0	0	200	903	0	0	0	0	0	0	0	603	903	0
308	0	0	0	0	0	0	0	200	300	0	0	0	0	0	0	0	200	903	0	0	0	0	0	0	0	603	903	0
308	1	0	0	0	0	0	0	200	300	0	0	0	0	0	0	0	200	903	0	0	0	0	0	0	0	603	903	0
308	2	0	0	0	0	0	0	200	300	0	0	0	0	0	0	0	200	903	0	0	0	0	0	0	0	603	903	0
308	3	0	0	0	0	0	0	200	300	0	0	0	0	0	0	0	200	903	0	0	0	0	0	0	0	603	903	0
308	4	0	0	0	0	0	0	200	300	0	0	0	0	0	0	0	200	903	0	0	0	0	0	0	0	603	903	0
308	5	0	0	0	0	0	0	200	300	0	0	0	0	0	0	0	200	903	0	0	0	0	0	0	0	603	903	0
308	6	0	0	0	0	0	0	200	300	0	0	0	0	0	0	0	200	903	0	0	0	0	0	0	0	603	903	0
308	7	0	0	0	0	0	0	200	300	0	0	0	0	0	0	0	200	903	0	0	0	0	0	0	0	603	903	0
308	8	0	0	0	0	0	0	200	300	0	0	0	0	0	0	0	200	903	0	0	0	0	0	0	0	603	903	0
308	9	0	0	0	0	0	0	200	300	0	0	0	0	0	0	0	200	903	0	0	0	0	0	0	0	603	903	0
309	0	0	0	0	0	0	0	200	300	0	0	0	0	0	0	0	200	903	0	0	0	0	0	0	0	603	903	0
309	1	0	0	0	0	0	0	200	300	0	0	0	0	0	0	0	200	903	0	0	0	0	0	0	0	603	903	0
309	2	0	0	0	0	0	0	200	300	0	0	0	0	0	0	0	200	903	0	0	0	0	0	0	0	603	903	0
309	3	0	0	0	0	0	0	200	300	0	0	0	0	0	0	0	200	903	0	0	0	0	0	0	0	603	903	0
309	4	0	0	0	0	0	0	200	300	0	0	0	0	0	0	0	200	903	0	0	0	0	0	0	0	603	903	0
309	5	0	0	0	0	0	0	200	300	0	0	0	0	0	0	0	200	903	0	0	0	0	0	0	0	603	903	0
309	6	0	0	0	0	0	0	200	300	0	0	0	0	0	0	0	200	903	0	0	0	0	0	0	0	603	903	0
309	7	0	0	0	0	0	0	200	300	0	0	0	0	0	0	0	200	903	0	0	0	0	0	0	0	603	903	0
309	8	0	0	0	0	0	0	200	300	0	0	0	0	0	0	0	200	903	0	0	0	0	0	0	0	603	903	0
309	9	0	0	0	0	0	0	200	300	0	0	0	0	0	0	0	200	903	0	0	0	0	0	0	0	603	903	0
310	0	0	0	0	0	0	0	200	300	0	0	0	0	0	0	0	200	903	0	0	0	0	0	0	0	603	903	0
310	1	0	0	0	0	0	0	200	300	0	0	0	0	0	0	0	200	903	0	0	0	0	0	0	0	603	903	0
310	2	0	0	0	0	0	0	200	300	0	0	0	0	0	0	0	200	903	0	0	0	0	0	0	0	603	903	0
310	3	0	0	0	0	0	0	200	300	0	0	0	0	0	0	0	200	903	0	0	0	0	0	0	0	603	903	0
310	4	0	0	0	0	0	0	200	300	0	0	0	0	0	0	0	200	903	0	0	0	0	0	0	0	603	903	0
310	5	0	0	0	0	0	0	200	300	0	0	0	0	0	0	0	200	903	0	0	0	0	0	0	0	603	903	0
310	6	0	0	0	0	0	0	200	300	0	0	0	0	0	0	0	200	903	0	0	0	0	0	0	0	603	903	0
310	7	0	0	0	0	0	0	200	300	0	0	0	0	0	0	0	200	903	0	0	0	0	0	0	0	603	903	0
310	8	0	0	0	0	0	0	200	300	0	0	0	0	0	0	0	200	903	0	0	0	0	0	0	0	603	903	0
310	9	0	0	0	0	0	0	200	300	0	0	0	0	0	0	0	200	903	0	0	0	0	0	0	0	603	903	0
311	0	0	0	0	0	0	0	200	300	0	0	0	0	0	0	0	200	903	0	0	0	0	0	0	0	603	903	0
311	1	0	0	0	0	0	0	200	300	0	0	0	0	0	0	0	200	903	0	0	0	0	0	0	0	603	903	0
311	2	0	0	0	0	0	0	200	300	0	0	0	0	0	0	0	200	903	0	0	0	0	0	0	0	603	903	0
311	3	0	0	0	0	0	0	200	300	0	0	0	0	0	0	0	200	903	0	0	0	0	0	0	0	603	903	0
311	4	0	0	0	0	0	0	200	300	0	0	0	0	0	0	0	200	903	0	0	0	0	0	0	0	603	903	0
311	5	0	0	0	0	0	0	200	300	0	0	0	0	0	0	0	200	903	0	0	0	0	0	0	0	603	903	0
311	6	0	0	0	0	0	0	200	300	0	0	0	0	0	0	0	200	903	0	0	0	0	0	0	0	603	903	0
311	7	0	0	0	0	0	0	200	300	0	0	0	0	0	0	0	200	903	0	0	0	0	0	0	0	603	903	0
311	8	0	0	0	0	0	0	200	300	0	0	0	0	0	0	0	200	903	0	0	0	0	0	0	0	603	903	0
311	9	0	0	0	0	0	0	200	300	0	0	0	0	0	0	0	200	903	0	0	0	0	0	0	0	603	903	0
312	0	0	0	0	0	0	0	200	300	0	0	0	0	0	0	0	200	903	0	0	0	0	0	0	0	603	903	0
312	1	0	0	0	0	0	0	200	300	0	0	0	0	0	0	0	200	903	0	0	0	0	0	0	0	603	903	0
312	2	0	0	0	0	0	0	200	300	0	0	0	0	0	0	0	200	903	0	0	0	0	0	0	0	603	903	0
312	3	0	0	0	0	0	0	200	300	0	0	0	0	0	0	0	200	903	0	0	0	0	0	0	0	603	903	0
312	4	0	0	0	0	0	0	200	300	0	0	0	0	0	0	0	200	903	0	0	0	0	0	0	0	603	903	0
312	5	0	0	0	0	0	0	200	300	0	0	0	0	0	0	0	200	903	0	0	0	0	0	0	0	603	903	0
312	6	0	0	0	0	0	0	200	300	0	0	0	0	0	0	0	200	903	0	0	0	0	0	0	0	603	903	0
312	7	0	0	0	0	0	0	200	300	0	0	0	0	0	0	0	200	903	0	0	0	0	0	0	0	603	903	0
312	8	0	0	0	0	0	0	200	300	0	0	0	0	0	0	0	200	903	0	0	0	0	0	0	0	603	903	0
312	9	0	0	0	0	0	0	200	300	0	0	0	0	0	0	0	200	903	0	0	0	0	0	0	0	603	903	0
313	0	0	0	0	0	0	0	200	300	0	0	0	0	0	0	0	200	903	0	0	0	0	0	0	0	603	903	0
313	1	0	0	0	0	0	0	200	300	0	0	0	0	0	0	0	200	903	0	0	0	0	0	0	0	603	903	0
313	2	0	0	0	0	0	0	200	300	0	0	0	0	0	0	0	200	903	0	0	0	0	0	0	0	603	903	0
313	3	0	0	0	0	0	0	200	300	0	0	0	0	0	0	0	200	903	0	0	0	0	0	0	0	603	903	0
313	4	0	0	0	0	0	0	200	300	0	0	0	0	0	0	0	200	903	0	0	0	0	0	0	0	603	903	0
313	5	0	0	0	0	0	0	200	300	0	0	0	0	0	0	0	200	903	0	0	0	0	0	0	0	603	903	0
313	6	0	0	0	0	0	0	200	300	0	0	0	0	0	0	0	200	903	0	0	0	0	0	0	0	603	903	0
313	7	0	0	0	0	0	0	200	300	0	0	0	0	0	0	0	200	903	0	0	0	0	0	0	0	603	903	0
313	8	0	0	0	0	0	0	200	300	0	0	0	0	0	0	0	200	903	0	0	0	0	0	0	0	603	903	0
313	9	0	0	0	0	0	0	200	300	0	0	0	0	0	0	0	200	903	0	0	0	0	0	0	0	603	903	0
314	0	0	0	0	0	0	0	200	300	0	0	0	0	0	0	0	200	903	0	0	0	0	0	0	0	603	903	0
314	1	0	0	0	0	0	0	200	300	0	0	0	0	0	0	0	200	903	0	0	0	0	0	0	0	603	903	0
314	2	0	0	0	0	0	0	200	300	0	0	0	0	0	0	0	200	903	0	0	0	0	0	0	0	603	903	0
314	3	0	0	0	0	0	0	200	300	0	0	0	0	0	0	0	200	903	0	0	0	0	0	0	0	603	903	0
314	4	0	0	0	0	0	0	200	300	0	0	0	0	0	0	0	200	903	0	0	0	0	0	0	0	603	903	0
314	5	0	0	0	0	0	0	200	300	0	0	0	0	0	0	0	200	903	0	0	0	0	0	0	0	603	903	0
314	6	0	0	0	0	0	0	200	300	0	0	0	0	0	0	0	200	903	0	0	0	0	0	0	0	603	903	0
314	7	0	0	0	0	0	0	200	300	0	0	0	0	0	0	0	200	903	0	0	0	0	0	0	0	603	903	0
314	8	0	0	0	0	0	0	200	300	0	0	0	0	0	0	0	200	903	0	0	0	0	0	0	0	603	903	0
314	9	0	0	0	0	0	0	200	300	0	0	0	0	0	0	0	200	903	0	0	0	0	0	0	0	603	903	0
315	0	0	0	0	0	0	0	200	300	0	0	0	0	0	0	0	200	903	0	0	0	0	0	0	0	603	903	0
315	1	0	0	0	0	0	0	200	300	0	0	0	0	0	0	0	200	903	0	0	0	0	0	0	0	603	903	0
315	2	0	0	0	0	0	0	200	300	0	0	0	0	0	0	0	200	903	0	0	0	0	0	0	0	603	903	0
315	3	0	0	0	0	0	0	200	300	0	0	0	0	0	0	0	200	903	0	0	0	0	0	0	0	603	903	0
315	4	0	0	0	0	0	0	200	300	0	0	0	0	0	0	0	200	903	0	0	0	0	0	0	0	603	903	0
315	5	0	0	0	0	0	0	200	300	0	0	0	0	0	0	0	200	903	0	0	0	0	0	0	0	603	903	0
315	6	0	0	0	0	0	0	200	300	0	0	0	0	0	0	0	200	903	0	0	0	0	0	0	0	603	903	0
315	7	0	0	0	0	0	0	200	300	0	0	0	0	0	0	0	200	903	0	0	0	0	0	0	0	603	903	0
315	8	0	0	0	0	0	0	200	300	0	0	0	0	0	0	0	200	903	0	0	0	0	0	0	0	603	903	0
315	9	0	0	0	0	0	0	200	300	0	0	0	0	0	0	0	200	903	0	0	0	0	0	0	0	603	903	0
316	0	0	0	0	0	0	0	200	300	0	0	0	0	0	0	0	200	903	0	0	0	0	0	0	0	603	903	0
316	1	0	0	0	0	0	0	200	300	0	0	0	0	0	0	0	200	903	0	0	0	0	0	0	0	603	903	0
316	2	0	0	0	0	0	0	200	300	0	0	0	0	0	0	0	200	903	0	0	0	0	0	0	0	603	903	0
316	3	0	0	0	0	0	0	200	300	0	0	0	0	0	0	0	200	903	0	0	0	0	0	0	0	603	903	0
316	4	0	0	0	0	0	0	200	300	0	0	0	0	0	0	0	200	903	0	0	0	0	0	0	0	603	903	0
316	5	0	0	0	0	0	0	200	300	0	0	0	0	0	0	0	200	903	0	0	0	0	0	0	0	603	903	0
316	6	0	0	0	0	0	0	200	300	0	0	0	0	0	0	0	200	903	0	0	0	0	0	0	0	603	903	0
316	7	0	0	0	0	0	0	200	300	0	0	0	0	0	0	0	200	903	0	0	0	0	0	0	0	603	903	0
316	8	0	0	0	0	0	0	200	300	0	0	0	0	0	0	0	200	903	0	0	0	0	0	0	0	603	903	0
316	9	0	0	0	0	0	0	200	300	0	0	0	0	0	0	0	200	903	0	0	0	0	0	0	0	603	903	0
317	0	0	0	0	0	0	0	200	300	0	0	0	0	0	0	0	200	903	0	0	0	0	0	0	0	603	903	0
317	1	0	0	0	0	0	0	200	300	0	0	0	0	0	0	0	200	903	0	0	0	0	0	0	0	603	903	0
317	2	0	0	0	0	0	0	200	300	0	0	0	0	0	0	0	200	903	0	0	0	0	0	0	0	603	903	0
317	3	0	0	0	0	0	0	200	300	0	0	0	0	0	0	0	200	903	0	0	0	0	0	0	0	603	903	0
317	4	0	0	0	0	0	0	200	300	0	0	0	0	0	0	0	200	903	0	0	0	0	0	0	0	603	903	0
317	5	0	0	0	0	0	0	200	300	0	0	0	0	0	0	0	200	903	0	0	0	0	0	0	0	603	903	0
317	6	0	0	0	0	0	0	200	300	0	0	0	0	0	0	0	200	903	0	0	0	0	0	0	0	603	903	0
317	7	0	0	0	0	0	0	200	300	0	0	0	0	0	0	0	200	903	0	0	0	0	0	0	0	603	903	0
317	8	0	0	0	0	0	0	200	300	0	0	0	0	0	0	0	200	903	0	0	0	0	0	0	0	603	903	0
317	9	0	0	0	0	0	0	200	300	0	0	0	0	0	0	0	200	903	0	0	0	0	0	0	0	603	903	0
318	0	0	0	0	0	0	0	200	300	0	0	0	0	0	0	0	200	903	0	0	0	0	0	0	0	603	903	0
318	1	0	0	0	0	0	0	200	300	0	0	0	0	0	0	0	200	903	0	0	0	0	0	0	0	603	903	0
318	2	0	0	0	0	0	0	200	300	0	0	0	0	0	0	0	200	903	0	0	0	0	0	0	0	603	903	0
318	3	0	0	0	0	0	0	200	300	0	0	0	0	0	0	0	200	903	0	0	0	0	0	0	0	603	903	0
318	4	0	0	0	0	0	0	200	300	0	0	0	0	0	0	0	200	903	0	0	0	0	0	0	0	603	903	0
318	5	0	0	0	0	0	0	200	300	0	0	0	0	0	0	0	200	903	0	0	0	0	0	0	0	603	903	0
318	6	0	0	0	0	0	0	200	300	0	0	0	0	0	0	0	200	903	0	0	0	0	0	0	0	603	903	0
318	7	0	0	0	0	0	0	200	300	0	0	0	0	0	0	0	200	903	0	0	0	0	0	0	0	603	903	0
318	8	0	0	0	0	0	0	200	300	0	0	0	0	0	0	0	200	903	0	0	0	0	0	0	0	603	903	0
318	9	0	0	0	0	0	0	200	300	0	0	0	0	0	0	0	200	903	0	0	0	0	0	0	0	603	903	0
319	0	0	0	0	0	0	0	200	300	0	0	0	0	0	0	0	200	903	0	0	0	0	0	0	0	603	903	0
319	1	0	0	0	0	0	0	200	300	0	0	0	0	0	0	0	200	903	0	0	0	0	0	0	0	603	903	0
319	2	0	0	0	0	0	0	200	300	0	0	0	0	0	0	0	200	903	0	0	0	0	0	0	0	603	903	0
319	3	0	0	0	0	0	0	200	300	0	0	0	0	0	0	0	200	903	0	0	0	0	0	0	0	603	903	0
319	4	0	0	0	0	0	0	200	300	0	0	0	0	0	0	0	200	903	0	0	0	0	0	0	0	603	903	0
319	5	0	0	0	0	0	0	200	300	0	0	0	0	0	0	0	200	903	0	0	0	0	0	0	0	603	903	0
319	6	0	0	0	0	0	0	200	300	0	0	0	0	0	0	0	200	903	0	0	0	0	0	0	0	603	903	0
319	7	0	0	0	0	0	0	200	300	0	0	0	0	0	0	0	200	903	0	0	0	0	0	0	0	603	903	0
319	8	0	0	0	0	0	0	200	300	0	0	0	0	0	0	0	200	903	0	0	0	0	0	0	0	603	903	0
319	9	0	0	0	0	0	0	200	300	0	0	0	0	0	0	0	200	903	0	0	0	0	0	0	0	603	903	0
320	0	0	0	0	0	0	0	200	300	0	0	0	0	0	0	0	200	903	0	0	0	0	0	0	0	603	903	0
320	1	0	0	0	0	0	0	200	300	0	0	0	0	0	0	0	200	903	0	0	0	0	0	0	0	603	903	0
320	2	0	0	0	0	0	0	200	300	0	0	0	0	0	0	0	200	903	0	0	0	0	0	0	0	603	903	0
320	3	0	0	0	0	0	0	200	300	0	0	0	0	0	0	0	200	903	0	0	0	0	0	0	0	603	903	0
320	4	0	0	0	0	0	0	200	300	0	0	0	0	0	0	0	200	903	0	0	0	0	0	0	0	603	903	0
320	5	0	0	0	0	0	0	200	300	0	0	0	0	0	0	0	200	903	0	0	0	0	0	0	0	603	903	0
320	6	0	0	0	0	0	0	200	300	0	0	0	0	0	0	0	200	903	0	0	0	0	0	0	0	603	903	0
320	7	0	0	0	0	0	0	200	300	0	0	0	0	0	0	0	200	903	0	0	0	0	0	0	0	603	903	0
320	8	0	0	0	0	0	0	200	300	0	0	0	0	0	0	0	200	903	0	0	0	0	0	0	0	603	903	0
320	9	0	0	0	0	0	0	200	300	0	0	0	0	0	0	0	200	903	0	0	0	0	0	0	0	603	903	0
321	0	0	0	0	0	0	0	200	300	0	0	0	0	0	0	0	200	903	0	0	0	0	0	0	0	603	903	0
321	1	0	0	0	0	0	0	200	300	0	0	0	0	0	0	0	200	903	0	0	0	0	0	0	0	603	903	0
321	2	0	0	0	0	0	0	200	300	0	0	0	0	0	0	0	200	903	0	0	0	0	0	0	0	603	903	0
321	3	0	0	0	0	0	0	200	300	0	0	0	0	0	0	0	200	903	0	0	0	0	0	0	0	603	903	0
321	4	0	0	0	0	0	0	200	300	0	0	0	0	0	0	0	200	903	0	0	0	0	0	0	0	603	903	0
321	5	0	0	0	0	0	0	200	300	0	0	0	0	0	0	0	200	903	0	0	0	0	0	0	0	603	903	0
321	6	0	0	0	0	0	0	200	300	0	0	0	0	0	0	0	200	903	0	0	0	0	0	0	0	603	903	0
321	7	0	0	0	0	0	0	200	300	0	0	0	0	0	0	0	200	903	0	0	0	0	0	0	0	603	903	0
321	8	0	0	0	0	0	0	200	300	0	0	0	0	0	0	0	200	903	0	0	0	0	0	0	0	603	903	0
321	9	0	0	0	0	0	0	200	300	0	0	0	0	0	0	0	200	903	0	0	0	0	0	0	0	603	903	0
322	0	0	0	0	0	0	0	200	300	0	0	0	0	0	0	0	200	903	0	0	0	0	0	0	0	603	903	0
322	1	0	0	0	0	0	0	200	300	0	0	0	0	0	0	0	200	903	0	0	0	0	0	0	0	603	903	0
322	2	0	0	0	0	0	0	200	300	0	0	0	0	0	0	0	200	903	0	0	0	0	0	0	0	603	903	0
322	3	0	0	0	0	0	0	200	300	0	0	0	0	0	0	0	200	903	0	0	0	0	0	0	0	603	903	0
322	4	0	0	0	0	0	0	200	300	0	0	0	0	0	0	0	200	903	0	0	0	0	0	0	0	603	903	0
322	5	0	0	0	0	0	0	200	300	0	0	0	0	0	0	0	200	903	0	0	0	0	0	0	0	603	903	0
322	6	0	0	0	0	0	0	200	300	0	0	0	0	0	0	0	200	903	0	0	0	0	0	0	0	603	903	0
322	7	0	0	0	0	0	0	200	300	0	0	0	0	0	0	0	200	903	0	0	0	0	0	0	0	603	903	0
322	8	0	0	0	0	0	0	200	300	0	0	0	0	0	0	0	200	903	0	0	0	0	0	0	0	603	903	0
322	9	0	0	0	0	0	0	200	300	0	0	0	0	0	0	0	200	903	0	0	0	0	0	0	0	603	903	0
323	0	0	0	0	0	0	0	200	300	0	0	0	0	0	0	0	200	903	0	0	0	0	0	0	0	603	903	0
323	1	0	0	0	0	0	0	200	300	0	0	0	0	0	0	0	200	903	0	0	0	0	0	0	0	603	903	0
323	2	0	0	0	0	0	0	200	300	0	0	0	0	0	0	0	200	903	0	0	0	0	0	0	0	603	903	0
323	3	0	0	0	0	0	0	200	300	0	0	0	0	0	0	0	200	903	0	0	0	0	0	0	0	603	903	0
323	4	0	0	0	0	0	0	200	300	0	0	0	0	0	0	0	200	903	0	0	0	0	0	0	0	603	903	0
323	5	0	0	0	0	0	0	200	300	0	0	0	0	0	0	0	200	903	0	0	0	0	0	0	0	603	903	0
323	6	0	0	0	0	0	0	200	300	0	0	0	0	0	0	0	200	903	0	0	0	0	0	0	0	603	903	0
323	7	0	0	0	0	0	0	200	300	0	0	0	0	0	0	0	200	903	0	0	0	0	0	0	0	603	903	0
323	8	0	0	0	0	0	0	200	300	0	0	0	0	0	0	0	200	903	0	0	0	0	0	0	0	603	903	0
323	9	0	0	0	0	0	0	200	300	0	0	0	0	0	0	0	200	903	0	0	0	0	0	0	0	603	903	0
324	0	0	0	0	0	0	0	200	300	0	0	0	0	0	0	0	200	903	0	0	0	0	0	0	0	603	903	0
324	1	0	0	0	0	0	0	200	300	0	0	0	0	0	0	0	200	903	0	0	0	0	0	0	0	603	903	0
324	2	0	0	0	0	0	0	200	300	0	0	0	0	0	0	0	200	903	0	0	0	0	0	0	0	603	903	0
324	3	0	0	0	0	0	0	200	300	0	0	0	0	0	0	0	200	903	0	0	0	0	0	0	0	603	903	0
324	4	0	0	0	0	0	0	200	300	0	0	0	0	0	0	0	200	903	0	0	0	0	0	0	0	603	903	0
324	5	0	0	0	0	0	0	200	300	0	0	0	0	0	0	0	200	903	0	0	0	0	0	0	0	603	903	0
324	6	0	0	0	0	0	0	200	300	0	0	0	0	0	0	0	200	903	0	0	0	0	0	0	0	603	903	0
324	7	0	0	0	0	0	0	200	300	0	0	0	0	0	0	0	200	903	0	0	0	0	0	0	0	603	903	0
324	8	0	0	0	0	0	0	200	300	0	0	0	0	0	0	0	200	903	0	0	0	0	0	0	0	603	903	0
324	9	0	0	0	0	0	0	200	300	0	0	0	0	0	0	0	200	903	0	0	0	0	0	0	0	603	903	0
325	0	0	0	0	0	0	0	200	300	0	0	0	0	0	0	0	200	903	0	0	0	0	0	0	0	603	903	0
325	1	0	0	0	0	0	0	200	300	0	0	0	0	0	0	0	200	903	0	0	0	0	0	0	0	603	903	0
325	2	0	0	0	0	0	0	200	300	0	0	0	0	0	0	0	200	903	0	0	0	0	0	0	0	603	903	0
325	3	0	0	0	0	0	0	200	300	0	0	0	0	0	0	0	200	903	0	0	0	0	0	0	0	603	903	0
325	4	0	0	0	0	0	0	200	300	0	0	0	0	0	0	0	200	903	0	0	0	0	0	0	0	603	903	0
325	5	0	0	0	0	0	0	200	300	0	0	0	0	0	0	0	200	903	0	0	0	0	0	0	0	603	903	0
325	6	0	0	0	0	0	0	200	300	0	0	0	0	0	0	0	200	903	0	0	0	0	0	0	0	603	903	0
325	7	0	0	0	0	0	0	200	300	0	0	0	0	0	0	0	200	903	0	0	0	0	0	0	0	603	903	0
325	8	0	0	0	0	0	0	200	300	0	0	0	0	0	0	0	200	903	0	0	0	0	0	0	0	603	903	0
325	9	0	0	0	0	0	0	200	300	0	0	0	0	0	0	0	200	903	0	0	0	0	0	0	0	603	903	0
326	0	0	0	0	0	0	0	200	300	0	0	0	0	0	0	0	200	903	0	0	0	0	0	0	0	603	903	0
326	1	0	0	0	0	0	0	200	300	0	0	0	0	0	0	0	200	903	0	0	0	0	0	0	0	603	903	0
326	2	0	0	0	0	0	0	200	300	0	0	0	0	0	0	0	200	903	0	0	0	0	0	0	0	603	903	0
326	3	0	0	0	0	0	0	200	300	0	0	0	0	0	0	0	200	903	0	0	0	0	0	0	0	603	903	0
326	4	0	0	0	0	0	0	200	300	0	0	0	0	0	0	0	200	903	0	0	0	0	0	0	0	603	903	0
326	5	0	0	0	0	0	0	200	300	0	0	0	0	0	0	0	200	903	0	0	0	0	0	0	0	603	903	0
326	6	0	0	0	0	0	0	200	300	0	0	0	0	0	0	0	200	903	0	0	0	0	0	0	0	603	903	0
326	7	0	0	0	0	0	0	200	300	0	0	0	0	0	0	0	200	903	0	0	0	0	0	0	0	603	903	0
326	8	0	0	0	0	0	0	200	300	0	0	0	0	0	0	0	200	903	0	0	0	0	0	0	0	603	903	0
326	9	0	0	0	0	0	0	200	300	0	0	0	0	0	0	0	200	903	0	0	0	0	0	0	0	603	903	0
327	0	0	0	0	0	0	0	200	300	0	0	0	0	0	0	0	200	903	0	0	0	0	0	0	0	603	903	0
327	1	0	0	0	0	0	0	200	300	0	0	0	0	0	0	0	200	903	0	0	0	0	0	0	0	603	903	0
327	2	0	0	0	0	0	0	200	300	0	0	0	0	0	0	0	200	903	0	0	0	0	0	0	0	603	903	0
327	3	0	0	0	0	0	0	200	300	0	0	0	0	0	0	0	200	903	0	0	0	0	0	0	0	603	903	0
327	4	0	0	0	0	0	0	200	300	0	0	0	0	0	0	0	200	903	0	0	0	0	0	0	0	603	903	0
327	5	0	0	0	0	0	0	200	300	0	0	0	0	0	0	0	200	903	0	0	0	0	0	0	0	603	903	0
327	6	0	0	0	0	0	0	200	300	0	0	0	0	0	0	0	200	903	0	0	0	0	0	0	0	603	903	0
327	7	0	0	0	0	0	0	200	300	0	0	0	0	0	0	0	200	903	0	0	0	0	0	0	0	603	903	0
327	8	0	0	0	0	0	0	200	300	0	0	0	0	0	0	0	200	903	0	0	0	0	0	0	0	603	903	0
327	9	0	0	0	0	0	0	200	300	0	0	0	0	0	0	0	200	903	0	0	0	0	0	0	0	603	903	0
328	0	0	0	0	0	0	0	200	300	0	0	0	0	0	0	0	200	903	0	0	0	0	0	0	0	603	903	0
328	1	0	0	0	0	0	0	200	300	0	0	0	0	0	0	0	200	903	0	0	0	0	0	0	0	603	903	0
328	2	0	0	0	0	0	0	200	300	0	0	0	0	0	0	0	200	903	0	0	0	0	0	0	0	603	903	0
328	3	0	0	0	0	0	0	200	300	0	0	0	0	0	0	0	200	903	0	0	0	0	0	0	0	603	903	0
328	4	0	0	0	0	0	0	200	300	0	0	0	0	0	0	0	200	903	0	0	0	0	0	0	0	603	903	0
328	5	0	0	0	0	0	0	200	300	0	0	0	0	0	0	0	200	903	0	0	0	0	0	0	0	603	903	0
328	6	0	0	0	0	0	0	200	300	0	0	0	0	0	0	0	200	903	0	0	0	0	0	0	0	603	903	0
328	7	0	0	0	0	0	0	200	300	0	0	0	0	0	0	0	200	903	0	0	0	0	0	0	0	603	903	0
328	8	0	0	0	0	0	0	200	300	0	0	0	0	0	0	0	200	903	0	0	0	0	0	0	0	603	903	0
328	9	0	0	0	0	0	0	200	300	0	0	0	0	0	0	0	200	903	0	0	0	0	0	0	0	603	903	0
329	0	0	0	0	0	0	0	200	300	0	0	0	0	0	0	0	200	903	0	0	0	0	0	0	0	603	903	0
329	1	0	0	0	0	0	0	200	300	0	0	0	0	0	0	0	200	903	0	0	0	0	0	0	0	603	903	0
329	2	0	0	0	0	0	0	200	300	0	0	0	0	0	0	0	200	903	0	0	0	0	0	0	0	603	903	0
329	3	0	0	0	0	0	0	200	300	0	0	0	0	0	0	0	200	903	0	0	0	0	0	0	0	603	903	0
329	4	0	0	0	0	0	0	200	300	0	0	0	0	0	0	0	200	903	0	0	0	0	0	0	0	603	903	0
329	5	0	0	0	0	0	0	200	300	0	0	0	0	0	0	0	200	903	0	0	0	0	0	0	0	603	903	0
329	6	0	0	0	0	0	0	200	300	0	0	0	0	0	0	0	200	903	0	0	0	0	0	0	0	603	903	0
329	7	0	0	0	0	0	0	200	300	0	0	0	0	0	0	0	200	903	0	0	0	0	0	0	0	603	903	0
329	8	0	0	0	0	0	0	200	300	0	0	0	0	0	0	0	200	903	0	0	0	0	0	0	0	603	903	0
329	9	0	0	0	0	0	0	200	300	0	0	0	0	0	0	0	200	903	0	0	0	0	0	0	0	603	903	0
330	0	0	0	0	0	0	0	200	300	0	0	0	0	0	0	0	200	903	0	0	0	0	0	0	0	603	903	0
330	1	0	0	0	0	0	0	200	300	0	0	0	0	0	0	0	200	903	0	0	0	0	0	0	0	603	903	0
330	2	0	0	0	0	0	0	200	300	0	0	0	0	0	0	0	200	903	0	0	0	0	0	0	0	603	903	0
330	3	0	0	0	0	0	0	200	300	0	0	0	0	0	0	0	200	903	0	0	0	0	0	0	0	603	903	0
330	4	0	0	0	0	0	0	200	300	0	0	0	0	0	0	0	200	903	0	0	0	0	0	0	0	603	903	0
330	5	0	0	0	0	0	0	200	300	0	0	0	0	0	0	0	200	903	0	0	0	0	0	0	0	603	903	0
330	6	0	0	0	0	0	0	200	300	0	0	0	0	0	0	0	200	903	0	0	0	0	0	0	0	603	903	0
330	7	0	0	0	0	0	0	200	300	0	0	0	0	0	0	0	200	903	0	0	0	0	0	0	0	603	903	0
330	8	0	0	0	0	0	0	200	300	0	0	0	0	0	0	0	200	903	0	0	0	0	0	0	0	603	903	0
330	9	0	0	0	0	0	0	200	300	0	0	0	0	0	0	0	200	903	0	0	0	0	0	0	0	603	903	0
331	0	0	0	0	0	0	0	200	300	0	0	0	0	0	0	0	200	903	0	0	0	0	0	0	0	603	903	0
331	1	0	0	0	0	0	0	200	300	0	0	0	0	0	0	0	200	903	0	0	0	0	0	0	0	603	903	0
331	2	0	0	0	0	0	0	200	300	0	0	0	0	0	0	0	200	903	0	0	0	0	0	0	0	603	903	0
331	3	0	0	0	0	0	0	200	300	0	0	0	0	0	0	0	200	903	0	0	0	0	0	0	0	603	903	0
331	4	0	0	0	0	0	0	200	300	0	0	0	0	0	0	0	200	903	0	0	0	0	0	0	0	603	903	0
331	5	0	0	0	0	0	0	200	300	0	0	0	0	0	0	0	200	903	0	0	0	0	0	0	0	603	903	0
331	6	0	0	0	0	0	0	200	300	0	0	0	0	0	0	0	200	903	0	0	0	0	0	0	0	603	903	0
331	7	0	0	0	0	0	0	200	300	0	0	0	0	0	0	0	200	903	0	0	0	0	0	0	0	603	903	0
331	8	0	0	0	0	0	0	200	300	0	0	0	0	0	0	0	200	903	0	0	0	0	0	0	0	603	903	0
331	9	0	0	0	0	0	0	200	300	0	0	0	0	0	0	0	200	903	0	0	0	0	0	0	0	603	903	0
332	0	0	0	0	0	0	0	200	300	0	0	0	0	0	0	0	200	903	0	0	0	0	0	0	0	603	903	0
332	1	0	0	0	0	0	0	200	300	0	0	0	0	0	0	0	200	903	0	0	0	0	0	0	0	603	903	0
332	2	0	0	0	0	0	0	200	300	0	0	0	0	0	0	0	200	903	0	0	0	0	0	0	0	603	903	0
332	3	0	0	0	0	0	0	200	300	0	0	0	0	0	0	0	200	903	0	0	0	0	0	0	0	603	903	0
332	4	0	0	0	0	0	0	200	300	0	0	0	0	0	0	0	200	903	0	0	0	0	0	0	0	603	903	0
332	5	0	0	0	0	0	0	200	300	0	0	0	0	0	0	0	200	903	0	0	0	0	0	0	0	603	903	0
332	6	0	0	0	0	0	0	200	300	0	0	0	0	0	0	0	200	903	0	0	0	0	0	0	0	603	903	0
332	7	0	0	0	0	0	0	200	300	0	0	0	0	0	0	0	200	903	0	0	0	0	0	0	0	603	903	0
332	8	0	0	0	0	0	0	200	300	0	0	0	0	0	0	0	200	903	0	0	0	0	0	0	0	603	903	0
332	9	0	0	0	0	0	0	200	300	0	0	0	0	0	0	0	200	903	0	0	0	0	0	0	0	603	903	0
333	0	0	0	0	0	0	0	200	300	0	0	0	0	0	0	0	200	903	0	0	0	0	0	0	0	603	903	0
333	1	0	0	0	0	0	0	200	300	0	0	0	0	0	0	0	200	903	0	0	0	0	0	0	0	603	903	0
333	2	0	0	0	0	0	0	200	300	0	0	0	0	0	0	0	200	903	0	0	0	0	0	0	0	603	903	0
333	3	0	0	0	0	0	0	200	300	0	0	0	0	0	0	0	200	903	0	0	0	0	0	0	0	603	903	0
333	4	0	0	0	0	0	0	200	300	0	0	0	0	0	0	0	200	903	0	0	0	0	0	0	0	603	903	0
333	5	0	0	0	0	0	0	200	300	0	0	0	0	0	0	0	200	903	0	0	0	0	0	0	0	603	903	0
333	6	0	0	0	0	0	0	200	300	0	0	0	0	0	0	0	200	903	0	0	0	0	0	0	0	603	903	0
333	7	0	0	0	0	0	0	200	300	0	0	0	0	0	0	0	200	903	0	0	0	0	0	0	0	603	903	0
333	8	0	0	0	0	0	0	200	300	0	0	0	0	0	0	0	200	903	0	0	0	0	0	0	0	603	903	0
333	9	0	0	0	0	0	0	200	300	0	0	0	0	0	0	0	200	903	0	0	0	0	0	0	0	603	903	0
334	0	0	0	0	0	0	0	200	300	0	0	0	0	0	0	0	200	903	0	0	0	0	0	0	0	603	903	0
334	1	0	0	0	0	0	0	200	300	0	0	0	0	0	0	0	200	903	0	0	0	0	0	0	0	603	903	0
334	2	0	0	0	0	0	0	200	300	0	0	0	0	0	0	0	200	903	0	0	0	0	0	0	0	603	903	0
334	3	0	0	0	0	0	0	200	300	0	0	0	0	0	0	0	200	903	0	0	0	0	0	0	0	603	903	0
334	4	0	0	0	0	0	0	200	300	0	0	0	0	0	0	0	200	903	0	0	0	0	0	0	0	603	903	0
334	5	0	0	0	0	0	0	200	300	0	0	0	0	0	0	0	200	903	0	0	0	0	0	0	0	603	903	0
334	6	0	0	0	0	0	0	200	300	0	0	0	0	0	0	0	200	903	0	0	0	0	0	0	0	603	903	0
334	7	0	0	0	0	0	0	200	300	0	0	0	0	0	0	0	200	903	0	0	0	0	0	0	0	603	903	0
334	8	0	0	0	0	0	0	200	300	0	0	0	0	0	0	0	200	903	0	0	0	0	0	0	0	603	903	0
334	9	0	0	0	0	0	0	200	300	0	0	0	0	0	0	0	200	903	0	0	0	0	0	0	0	603	903	0
335	0	0	0	0	0	0	0	200	300	0	0	0	0	0	0	0	200	903	0	0	0	0	0	0	0	603	903	0
335	1	0	0	0	0	0	0	200	300	0	0	0	0	0	0	0	200	903	0	0	0	0	0	0	0	603	903	0
335	2	0	0	0	0	0	0	200	300	0	0	0	0	0	0	0	200	903	0	0	0	0	0	0	0	603	903	0
335	3	0	0	0	0	0	0	200	300	0	0	0	0	0	0	0	200	903	0	0	0	0	0	0	0	603	903	0
335	4	0	0	0	0	0	0	200	300	0	0	0	0	0	0	0	200	903	0	0	0	0	0	0	0	603	903	0
335	5	0	0	0	0	0	0	200	300	0	0	0	0	0	0	0	200	903	0	0	0	0	0	0	0	603	903	0
335	6	0	0	0	0	0	0	200	300	0	0	0	0	0	0	0	200	903	0	0	0	0	0	0	0	603	903	0
335	7	0	0	0	0	0	0	200	300	0	0	0	0	0	0	0	200	903	0	0	0	0	0	0	0	603	903	0
335	8	0	0	0	0	0	0	200	300	0	0	0	0	0	0	0	200	903	0	0	0	0	0	0	0	603	903	0
335	9	0	0	0	0	0	0	200	300	0	0	0	0	0	0	0	200	903	0	0	0	0	0	0	0	603	903	0
336	0	0	0	0	0	0	0	200	300	0	0	0	0	0	0	0	200	903	0	0	0	0	0	0	0	603	903	0
336	1	0	0	0	0	0	0	200	300	0	0	0	0	0	0	0	200	903	0	0	0	0	0	0	0	603	903	0
336	2	0	0	0	0	0	0	200	300	0	0	0	0	0	0	0	200	903	0	0	0	0	0	0	0	603	903	0
336	3	0	0	0	0	0	0	200	300	0	0	0	0	0	0	0	200	903	0	0	0	0	0	0	0	603	903	0
336	4	0	0	0	0	0	0	200	300	0	0	0	0	0	0	0	200	903	0	0	0	0	0	0	0	603	903	0
336	5	0	0	0	0	0	0	200	300	0	0	0	0	0	0	0	200	903	0	0	0	0	0	0	0	603	903	0
336	6	0	0	0	0	0	0	200	300	0	0	0	0	0	0	0	200	903	0	0	0	0	0	0	0	603	903	0
336	7	0	0	0	0	0	0	200	300	0	0	0	0	0	0	0	200	903	0	0	0	0	0	0	0	603	903	0
336	8	0	0	0	0	0	0	200	300	0	0	0	0	0	0	0	200	903	0	0	0	0	0	0	0	603	903	0
336	9	0	0	0	0	0	0	200	300	0	0	0	0	0	0	0	200	903	0	0	0	0	0	0	0	603	903	0
337	0	0	0	0	0	0	0	200	300	0	0	0	0	0	0	0	200	903	0	0	0	0	0	0	0	603	903	0
337	1	0	0	0	0	0	0	200	300	0	0	0	0	0	0	0	200	903	0	0	0	0	0	0	0	603	903	0
337	2	0	0	0	0	0	0	200	300	0	0	0	0	0	0	0	200	903	0	0	0	0	0	0	0	603	903	0
337	3	0	0	0	0	0	0	200	300	0	0	0	0	0	0	0	200	903	0	0	0	0	0	0	0	603	903	0
337	4	0	0	0	0	0	0	200	300	0	0	0	0	0	0	0	200	903	0	0	0	0	0	0	0	603	903	0
337	5	0	0	0	0	0	0	200	300	0	0	0	0	0	0	0	200	903	0	0	0	0	0	0	0	603	903	0
337	6	0	0	0	0	0	0	200	300	0	0	0	0	0	0	0	200	903	0	0	0	0	0	0	0	603	903	0
337	7	0	0	0	0	0	0	200	300	0	0	0	0	0	0	0	200	903	0	0	0	0	0	0	0	603	903	0
337	8	0	0	0	0	0	0	200	300	0	0	0	0	0	0	0	200	903	0	0	0	0	0	0	0	603	903	0
337	9	0	0	0	0	0	0	200	300	0	0	0	0	0	0	0	200	903	0	0	0	0	0	0	0	603	903	0
338	0	0	0	0	0	0	0	200	300	0	0	0	0	0	0	0	200	903	0	0	0	0	0	0	0	603	903	0
338	1	0	0	0	0	0	0	200	300	0	0	0	0	0	0	0	200	903	0	0	0	0	0	0	0	603	903	0
338	2	0	0	0	0	0	0	200	300	0	0	0	0	0	0	0	200	903	0	0	0	0	0	0	0	603	903	0
338	3	0	0	0	0	0	0	200	300	0	0	0	0	0	0	0	200	903	0	0	0	0	0	0	0	603	903	0
338	4	0	0	0	0	0	0	200	300	0	0	0	0	0	0	0	200	903	0	0	0	0	0	0	0	603	903	0
338	5	0	0	0	0	0	0	200	300	0	0	0	0	0	0	0	200	903	0	0	0	0	0	0	0	603	903	0
338	6	0	0	0	0	0	0	200	300	0	0	0	0	0	0	0	200	903	0	0	0	0	0	0	0	603	903	0
338	7	0	0	0	0	0	0	200	300	0	0	0	0	0	0	0	200	903	0	0	0	0	0	0	0	603	903	0
338	8	0	0	0	0	0	0	200	300	0	0	0	0	0	0	0	200	903	0	0	0	0	0	0	0	603	903	0
338	9	0	0	0	0	0	0	200	300	0	0	0	0	0	0	0	200	903	0	0	0	0	0	0	0	603	903	0
339	0	0	0	0	0	0	0	200	300	0	0	0	0	0	0	0	200	903	0	0	0	0	0	0	0	603	903	0
339	1	0	0	0	0	0	0	200	300	0	0	0	0	0	0	0	200	903	0	0	0	0	0	0	0	603	903	0
339	2	0	0	0	0	0	0	200	300	0	0	0	0	0	0	0	200	903	0	0	0	0	0	0	0	603	903	0
339	3	0	0	0	0	0	0	200	300	0	0	0	0	0	0	0	200	903	0	0	0	0	0	0	0	603	903	0
339	4	0	0	0	0	0	0	200	300	0	0	0	0	0	0	0	200	903	0	0	0	0	0	0	0	603	903	0
339	5	0	0	0	0	0	0	200	300	0	0	0	0	0	0	0	200	903	0	0	0	0	0	0	0	603	903	0
339	6	0	0	0	0	0	0	200	300	0	0	0	0	0	0	0	200	903	0	0	0	0	0	0	0	603	903	0
339	7	0	0	0	0	0	0	200	300	0	0	0	0	0	0	0	200	903	0	0	0	0	0	0	0	603	903	0
339	8	0	0	0	0	0	0	200	300	0	0	0	0	0	0	0	200	903	0	0	0	0	0	0	0	603	903	0
339	9	0	0	0	0	0	0	200	300	0	0	0	0	0	0	0	200	903	0	0	0	0	0	0	0	603	903	0
340	0	0	0	0	0	0	0	200	300	0	0	0	0	0	0	0	200	903	0	0	0	0	0	0	0	603	903	0
340	1	0	0	0	0	0	0	200	300	0	0	0	0	0	0	0	200	903	0	0	0	0	0	0	0	603	903	0
340	2	0	0	0	0	0	0	200	300	0	0	0	0	0	0	0	200	903	0	0	0	0	0	0	0	603	903	0
340	3	0	0	0	0	0	0	200	300	0	0	0	0	0	0	0	200	903	0	0	0	0	0	0	0	603	903	0
340	4	0	0	0	0	0	0	200	300	0	0	0	0	0	0	0	200	903	0	0	0	0	0	0	0	603	903	0
340	5	0	0	0	0	0	0	200	300	0	0	0	0	0	0	0	200	903	0	0	0	0	0	0	0	603	903	0
340	6	0	0	0	0	0	0	200	300	0	0	0	0	0	0	0	200	903	0	0	0	0	0	0	0	603	903	0
340	7	0	0	0	0	0	0	200	300	0	0	0	0	0	0	0	200	903	0	0	0	0	0	0	0	603	903	0
340	8	0	0	0	0	0	0	200	300	0	0	0	0	0	0	0	200	903	0	0	0	0	0	0	0	603	903	0
340	9	0	0	0	0	0	0	200	300	0	0	0	0	0	0	0	200	903	0	0	0	0	0	0	0	603	903	0
341	0	0	0	0	0	0	0	200	300	0	0	0	0	0	0	0	200	903	0	0	0	0	0	0	0	603	903	0
341	1	0	0	0	0	0	0	200	300	0	0	0	0	0	0	0	200	903	0	0	0	0	0	0	0	603	903	0
341	2	0	0	0	0	0	0	200	300	0	0	0	0	0	0	0	200	903	0	0	0	0	0	0	0	603	903	0
341	3	0	0	0	0	0	0	200	300	0	0	0	0	0	0	0	200	903	0	0	0	0	0	0	0	603	903	0
341	4	0	0	0	0	0	0	200	300	0	0	0	0	0	0	0	200	903	0	0	0	0	0	0	0	603	903	0
341	5	0	0	0	0	0	0	200	300	0	0	0	0	0	0	0	200	903	0	0	0	0	0	0	0	603	903	0
341	6	0	0	0	0	0	0	200	300	0	0	0	0	0	0	0	200	903	0	0	0	0	0	0	0	603	903	0
341	7	0	0	0	0	0	0	200	300	0	0	0	0	0	0	0	200	903	0	0	0	0	0	0	0	603	903	0
341	8	0	0	0	0	0	0	200	300	0	0	0	0	0	0	0	200	903	0	0	0	0	0	0	0	603	903	0
341	9	0	0	0	0	0	0	200	300	0	0	0	0	0	0	0	200	903	0	0	0	0	0	0	0	603	903	0
342	0	0	0	0	0	0	0	200	300	0	0	0	0	0	0	0	200	903	0	0	0	0	0	0	0	603	903	0
342	1	0	0	0	0	0	0	200	300	0	0	0	0	0	0	0	200	903	0	0	0	0	0	0	0	603	903	0
342	2	0	0	0	0	0	0	200	300	0	0	0	0	0	0	0	200	903	0	0	0	0	0	0	0	603	903	0
342	3	0	0	0	0	0	0	200	300	0	0	0	0	0	0	0	200	903	0	0	0	0	0	0	0	603	903	0
342	4	0	0	0	0	0	0	200	300	0	0	0	0	0	0	0	200	903	0	0	0	0	0	0	0	603	903	0
342	5	0	0	0	0	0	0	200	300	0	0	0	0	0	0	0	200	903	0	0	0	0	0	0	0	603	903	0
342	6	0	0	0	0	0	0	200	300	0	0	0	0	0	0	0	200	903	0	0	0	0	0	0	0	603	903	0
342	7	0	0	0	0	0	0	200	300	0	0	0	0	0	0	0	200	903	0	0	0	0	0	0	0	603	903	0
342	8	0	0	0	0	0	0	200	300	0	0	0	0	0	0	0	200	903	0	0	0	0	0	0	0	603	903	0
342	9	0	0	0	0	0	0	200	300	0	0	0	0	0	0	0	200	903	0	0	0	0	0	0	0	603	903	0
343	0	0	0	0	0	0	0	200	300	0	0	0	0	0	0	0	200	903	0	0	0	0	0	0	0	603	903	0
343	1	0	0	0	0	0	0	200	300	0	0	0	0	0	0	0	200	903	0	0	0	0	0	0	0	603	903	0
343	2	0	0	0	0	0	0	200	300	0	0	0	0	0	0	0	200	903	0	0	0	0	0	0	0	603	903	0
343	3	0	0	0	0	0	0	200	300	0	0	0	0	0	0	0	200	903	0	0	0	0	0	0	0	603	903	0
343	4	0	0	0	0	0	0	200	300	0	0	0	0	0	0	0	200	903	0	0	0	0	0	0	0	603	903	0
343	5	0	0	0	0	0	0	200	300	0	0	0	0	0	0	0	200	903	0	0	0	0	0	0	0	603	903	0
343	6	0	0	0	0	0	0	200	300	0	0	0	0	0	0	0	200	903	0	0	0	0	0	0	0	603	903	0
343	7	0	0	0	0	0	0	200	300	0	0	0	0	0	0	0	200	903	0	0	0	0	0	0	0	603	903	0
343	8	0	0	0	0	0	0	200	300	0	0	0	0	0	0	0	200	903	0	0	0	0	0	0	0	603	903	0
343	9	0	0	0	0	0	0	200	300	0	0	0	0	0	0	0	200	903	0	0	0	0	0	0	0	603	903	0
344	0	0	0	0	0	0	0	200	300	0	0	0	0	0	0	0	200	903	0	0	0	0	0	0	0	603	903	0
344	1	0	0	0	0	0	0	200	300	0	0	0	0	0	0	0	200	903	0	0	0	0	0	0	0	603	903	0
344	2	0	0	0	0	0	0	200	300	0	0	0	0	0	0	0	200	903	0	0	0	0	0	0	0	603	903	0
344	3	0	0	0	0	0	0	200	300	0	0	0	0	0	0	0	200	903	0	0	0	0	0	0	0	603	903	0
344	4	0	0	0	0	0	0	200	300	0	0	0	0	0	0	0	200	903	0	0	0	0	0	0	0	603	903	0
344	5	0	0	0	0	0	0	200	300	0	0	0	0	0	0	0	200	903	0	0	0	0	0	0	0	603	903	0
344	6	0	0	0	0	0	0	200	300	0	0	0	0	0	0	0	200	903	0	0	0	0	0	0	0	603	903	0
344	7	0	0	0	0	0	0	200	300	0	0	0	0	0	0	0	200	903	0	0	0	0	0	0	0	603	903	0
344	8	0	0	0	0	0	0	200	300	0	0	0	0	0	0	0	200	903	0	0	0	0	0	0	0	603	903	0
344	9	0	0	0	0	0	0	200	300	0	0	0	0	0	0	0	200	903	0	0	0	0	0	0	0	603	903	0
345	0	0	0	0	0	0	0	200	300	0	0	0	0	0	0	0	200	903	0	0	0	0	0	0	0	603	903	0
345	1	0	0	0	0	0	0	200	300	0	0	0	0	0	0	0	200	903	0	0	0	0	0	0	0	603	903	0
345	2	0	0	0	0	0	0	200	300	0	0	0	0	0	0	0	200	903	0	0	0	0	0	0	0	603	903	0
345	3	0	0	0	0	0	0	200	300	0	0	0	0	0	0	0	200	903	0	0	0	0	0	0	0	603	903	0
345	4	0	0	0	0	0	0	200	300	0	0	0	0	0	0	0	200	903	0	0	0	0	0	0	0	603	903	0
345	5	0	0	0	0	0	0	200	300	0	0	0	0	0	0	0	200	903	0	0	0	0	0	0	0	603	903	0
345	6	0	0	0	0	0	0	200	300	0	0	0	0	0	0	0	200	903	0	0	0	0	0	0	0	603	903	0
345	7	0	0	0	0	0	0	200	300	0	0	0	0	0	0	0	200	903	0	0	0	0	0	0	0	603	903	0
345	8	0	0	0	0	0	0	200	300	0	0	0	0	0	0	0	200	903	0	0	0	0	0	0	0	603	903	0
345	9	0	0	0	0	0	0	200	300	0	0	0	0	0	0	0	200	903	0	0	0	0	0	0	0	603	903	0
346	0	0	0	0	0	0	0	200	300	0	0	0	0	0	0	0	200	903	0	0	0	0	0	0	0	603	903	0
346	1	0	0	0	0	0	0	200	300	0	0	0	0	0	0	0	200	903	0	0	0	0	0	0	0	603	903	0
346	2	0	0	0	0	0	0	200	300	0	0	0	0	0	0	0	200	903	0	0	0	0	0	0	0	603	903	0
346	3	0	0	0	0	0	0	200	300	0	0	0	0	0	0	0	200	903	0	0	0	0	0	0	0	603	903	0
346	4	0	0	0	0	0	0	200	300	0	0	0	0	0	0	0	200	903	0	0	0	0	0	0	0	603	903	0
346	5	0	0	0	0	0	0	200	300	0	0	0	0	0	0	0	200	903	0	0	0	0	0	0	0	603	903	0
346	6	0	0	0	0	0	0	200	300	0	0	0	0	0	0	0	200	903	0	0	0	0	0	0	0	603	903	0
346	7	0	0	0	0	0	0	200	300	0	0	0	0	0	0	0	200	903	0	0	0	0	0	0	0	603	903	0
346	8	0	0	0	0	0	0	200	300	0	0	0	0	0	0	0	200	903	0	0	0	0	0	0	0	603	903	0
346	9	0	0	0	0	0	0	200	300	0	0	0	0	0	0	0	200	903	0	0	0	0	0	0	0	603	903	0
347	0	0	0	0	0	0	0	200	300	0	0	0	0	0	0	0	200	903	0	0	0	0	0	0	0	603	903	0
347	1	0	0	0	0	0	0	200	300	0	0	0	0	0	0	0	200	903	0	0	0	0	0	0	0	603	903	0
347	2	0	0	0	0	0	0	200	300	0	0	0	0	0	0	0	200	903	0	0	0	0	0	0	0	603	903	0
347	3	0	0	0	0	0	0	200	300	0	0	0	0	0	0	0	200	903	0	0	0	0	0	0	0	603	903	0
347	4	0	0	0	0	0	0	200	300	0	0	0	0	0	0	0	200	903	0	0	0	0	0	0	0	603	903	0
347	5	0	0	0	0	0	0	200	300	0	0	0	0	0	0	0	200	903	0	0	0	0	0	0	0	603	903	0
347	6	0	0	0	0	0	0	200	300	0	0	0	0	0	0	0	200	903	0	0	0	0	0	0	0	603	903	0
347	7	0	0	0	0	0	0	200	300	0	0	0	0	0	0	0	200	903	0	0	0	0	0	0	0	603	903	0
347	8	0	0	0	0	0	0	200	300	0	0	0	0	0	0	0	200	903	0	0	0	0	0	0	0	603	903	0
347	9	0	0	0	0	0	0	200	300	0	0	0	0	0	0	0	200	903	0	0	0	0	0	0	0	603	903	0
348	0	0	0	0	0	0	0	200	300	0	0	0	0	0	0	0	200	903	0	0	0	0	0	0	0	603	903	0
348	1	0	0	0	0	0	0	200	300	0	0	0	0	0	0	0	200	903	0	0	0	0	0	0	0	603	903	0
348	2	0	0	0	0	0	0	200	300	0	0	0	0	0	0	0	200	903	0	0	0	0	0	0	0	603	903	0
348	3	0	0	0	0	0	0	200	300	0	0	0	0	0	0	0	200	903	0	0	0	0	0	0	0	603	903	0
348	4	0	0	0	0	0	0	200	300	0	0	0	0	0	0	0	200	903	0	0	0	0	0	0	0	603	903	0
348	5	0	0	0	0	0	0	200	300	0	0	0	0	0	0	0	200	903	0	0	0	0	0	0	0	603	903	0
348	6	0	0	0	0	0	0	200	300	0	0	0	0	0	0	0	200	903	0	0	0	0	0	0	0	603	903	0
348	7	0	0	0	0	0	0	200	300	0	0	0	0	0	0	0	200	903	0	0	0	0	0	0	0	603	903	0
348	8	0	0	0	0	0	0	200	300	0	0	0	0	0	0	0	200	903	0	0	0	0	0	0	0	603	903	0
348	9	0	0	0	0	0	0	200	300	0	0	0	0	0	0	0	200	903	0	0	0	0	0	0	0	603	903	0
349	0	0	0	0	0	0	0	200	300	0	0	0	0	0	0	0	200	903	0	0	0	0	0	0	0	603	903	0
349	1	0	0	0	0	0	0	200	300	0	0	0	0	0	0	0	200	903	0	0	0	0	0	0	0	603	903	0
349	2	0	0	0	0	0	0	200	300	0	0	0	0	0	0	0	200	903	0	0	0	0	0	0	0	603	903	0
349	3	0	0	0	0	0	0	200	300	0	0	0	0	0	0	0	200	903	0	0	0	0	0	0	0	603	903	0
349	4	0	0	0	0	0	0	200	300	0	0	0	0	0	0	0	200	903	0	0	0	0	0	0	0	603	903	0
349	5	0	0	0	0	0	0	200	300	0	0	0	0	0	0	0	200	903	0	0	0	0	0	0	0	603	903	0
349	6	0	0	0	0	0	0	200	300	0	0	0	0	0	0	0	200	903	0	0	0	0	0	0	0	603	903	0
349	7	0	0	0	0	0	0	200	300	0	0	0	0	0	0	0	200	903	0	0	0	0	0	0	0	603	903	0
349	8	0	0	0	0	0	0	200	300	0	0	0	0	0	0	0	200	903	0	0	0	0	0	0	0	603	903	0
349	9	0	0	0	0	0	0	200	300	0	0	0	0	0	0	0	200	903	0	0	0	0	0	0	0	603	903	0
350	0	0	0	0	0	0	0	200	300	0	0	0	0	0	0	0	200	903	0	0	0	0	0	0	0	603	903	0
350	1	0	0	0	0	0	0	200	300	0	0	0	0	0	0	0	200	903	0	0	0	0	0	0	0	603	903	0
350	2	0	0	0	0	0	0	200	300	0	0	0	0	0	0	0	200	903	0	0	0	0	0	0	0	603	903	0
350	3	0	0	0	0	0	0	200	300	0	0	0	0	0	0	0	200	903	0	0	0	0	0	0	0	603	903	0
350	4	0	0	0	0	0	0	200	300	0	0	0	0	0	0	0	200	903	0	0	0	0	0	0	0	603	903	0
350	5	0	0	0	0	0	0	200	300	0	0	0	0	0	0	0	200	903	0	0	0	0	0	0	0	603	903	0
350	6	0	0	0	0	0	0	200	300	0	0	0	0	0	0	0	200	903	0	0	0	0	0	0	0	603	903	0
350	7	0	0	0	0	0	0	200	300	0	0	0	0	0	0	0	200	903	0	0	0	0	0	0	0	603	903	0
350	8	0	0	0	0	0	0	200	300	0	0	0	0	0	0	0	200	903	0	0	0	0	0	0	0	603	903	0
350	9	0	0	0	0	0	0	200	300	0	0	0	0	0	0	0	200	903	0	0	0	0	0	0	0	603	903	0
351	0	0	0	0	0	0	0	200	300	0	0	0	0	0	0	0	200	903	0	0	0	0	0	0	0	603	903	0
351	1	0	0	0	0	0	0	200	300	0	0	0	0	0	0	0	200	903	0	0	0	0	0	0	0	603	903	0
351	2	0	0	0	0	0	0	200	300	0	0	0	0	0	0	0	200	903	0	0	0	0	0	0	0	603	903	0
351	3	0	0	0	0	0	0	200	300	0	0	0	0	0	0	0	200	903	0	0	0	0	0	0	0	603	903	0
351	4	0	0	0	0	0	0	200	300	0	0	0	0	0	0	0	200	903	0	0	0	0	0	0	0	603	903	0
351	5	0	0	0	0	0	0	200	300	0	0	0	0	0	0	0	200	903	0	0	0	0	0	0	0	603	903	0
351	6	0	0	0	0	0	0	200	300	0	0	0	0	0	0	0	200	903	0	0	0	0	0	0	0	603	903	0
351	7	0	0	0	0	0	0	200	300	0	0	0	0	0	0	0	200	903	0	0	0	0	0	0	0	603	903	0
351	8	0	0	0	0	0	0	200	300	0	0	0	0	0	0	0	200	903	0	0	0	0	0	0	0	603	903	0
351	9	0	0	0	0	0	0	200	300	0	0	0	0	0	0	0	200	903	0	0	0	0	0	0	0	603	903	0
352	0	0	0	0	0	0	0	200	300	0	0	0	0	0	0	0	200	903	0	0	0	0	0	0	0	603	903	0
352	1	0	0	0	0	0	0	200	300	0	0	0	0	0	0	0	200	903	0	0	0	0	0	0	0	603	903	0
352	2	0	0	0	0	0	0	200	300	0	0	0	0	0	0	0	200	903	0	0	0	0	0	0	0	603	903	0
352	3	0	0	0	0	0	0	200	300	0	0	0	0	0	0	0	200	903	0	0	0	0	0	0	0	603	903	0
352	4	0	0	0	0	0	0	200	300	0	0	0	0	0	0	0	200	903	0	0	0	0	0	0	0	603	903	0
352	5	0	0	0	0	0	0	200	300	0	0	0	0	0	0	0	200	903	0	0	0	0	0	0	0	603	903	0
352	6	0	0	0	0	0	0	200	300	0	0	0	0	0	0	0	200	903	0	0	0	0	0	0	0	603	903	0
352	7	0	0	0	0	0	0	200	300	0	0	0	0	0	0	0	200	903	0	0	0	0	0	0	0	603	903	0
352	8	0	0	0	0	0	0	200	300	0	0	0	0	0	0	0	200	903	0	0	0	0	0	0	0	603	903	0
352	9	0	0	0	0	0	0	200	300	0	0	0	0	0	0	0	200	903	0	0	0	0	0	0	0	603	903	0
353	0	0	0	0	0	0	0	200	300	0	0	0	0	0	0	0	200	903	0	0	0	0	0	0	0	603	903	0
353	1	0	0	0	0	0	0	200	300	0	0	0	0	0	0	0	200	903	0	0	0	0	0	0	0	603	903	0
353	2	0	0	0	0	0	0	200	300	0	0	0	0	0	0	0	200	903	0	0	0	0	0	0	0	603	903	0
353	3	0	0	0	0	0	0	200	300	0	0	0	0	0	0	0	200	903	0	0	0	0	0	0	0	603	903	0
353	4	0	0	0	0	0	0	200	300	0	0	0	0	0	0	0	200	903	0	0	0	0	0	0	0	603	903	0
353	5	0	0	0	0	0	0	200	300	0	0	0	0	0	0	0	200	903	0	0	0	0	0	0	0	603	903	0
353	6	0	0	0	0	0	0	200	300	0	0	0	0	0	0	0	200	903	0	0	0	0	0	0	0	603	903	0
353	7	0	0	0	0	0	0	200	300	0	0	0	0	0	0	0	200	903	0	0	0	0	0	0	0	603	903	0
353	8	0	0	0	0	0	0	200	300	0	0	0	0	0	0	0	200	903	0	0	0	0	0	0	0	603	903	0
353	9	0	0	0	0	0	0	200	300	0	0	0	0	0	0	0	200	903	0	0	0	0	0	0	0	603	903	0
354	0	0	0	0	0	0	0	200	300	0	0	0	0	0	0	0	200	903	0	0	0	0	0	0	0	603	903	0
354	1	0	0	0	0	0	0	200	300	0	0	0	0	0	0	0	200	903	0	0	0	0	0	0	0	603	903	0
354	2	0	0	0	0	0	0	200	300	0	0	0	0	0	0	0	200	903	0	0	0	0	0	0	0	603	903	0
354	3	0	0	0	0	0	0	200	300	0	0	0	0	0	0	0	200	903	0	0	0	0	0	0	0	603	903	0
354	4	0	0	0	0	0	0	200	300	0	0	0	0	0	0	0	200	903	0	0	0	0	0	0	0	603	903	0
354	5	0	0	0	0	0	0	200	300	0	0	0	0	0	0	0	200	903	0	0	0	0	0	0	0	603	903	0
354	6	0	0	0	0	0	0	200	300	0	0	0	0	0	0	0	200	903	0	0	0	0	0	0	0	603	903	0
354	7	0	0	0	0	0	0	200	300	0	0	0	0	0	0	0	200	903	0	0	0	0	0	0	0	603	903	0
354	8	0	0	0	0	0	0	200	300	0	0	0	0	0	0	0	200	903	0	0	0	0	0	0	0	603	903	0
354	9	0	0	0	0	0	0	200	300	0	0	0	0	0	0	0	200	903	0	0	0	0	0	0	0	603	903	0
355	0	0	0	0	0	0	0	200	300	0	0	0	0	0	0	0	200	903	0	0	0	0	0	0	0	603	903	0
355	1	0	0	0	0	0	0	200	300	0	0	0	0	0	0	0	200	903	0	0	0	0	0	0	0	603	903	0
355	2	0	0	0	0	0	0	200	300	0	0	0	0	0	0	0	200	903	0	0	0	0	0	0	0	603	903	0
355	3	0	0	0	0	0	0	200	300	0	0	0	0	0	0	0	200	903	0	0	0	0	0	0	0	603	903	0
355	4	0	0	0	0	0	0	200	300	0	0	0	0	0	0	0	200	903	0	0	0	0	0	0	0	603	903	0
355	5	0	0	0	0	0	0	200	300	0	0	0	0	0	0	0	200	903	0	0	0	0	0	0	0	603	903	0
355	6	0	0	0	0	0	0	200	300	0	0	0	0	0	0	0	200	903	0	0	0	0	0	0	0	603	903	0
355	7	0	0	0	0	0	0	200	300	0	0	0	0	0	0	0	200	903	0	0	0	0	0	0	0	603	903	0
355	8	0	0	0	0	0	0	200	300	0	0	0	0	0	0	0	200	903	0	0	0	0	0	0	0	603	903	0
355	9	0	0	0	0	0	0	200	300	0	0	0	0	0	0	0	200	903	0	0	0	0	0	0	0	603	903	0
356	0	0	0	0	0	0	0	200	300	0	0	0	0	0	0	0	200	903	0	0	0	0	0	0	0	603	903	0
356	1	0	0	0	0	0	0	200	300	0	0	0	0	0	0	0	200	903	0	0	0	0	0	0	0	603	903	0
356	2	0	0	0	0	0	0	200	300	0	0	0	0	0	0	0	200	903	0	0	0	0	0	0	0	603	903	0
356	3	0	0	0	0	0	0	200	300	0	0	0	0	0	0	0	200	903	0	0	0	0	0	0	0	603	903	0
356	4	0	0	0	0	0	0	200	300	0	0	0	0	0	0	0	200	903	0	0	0	0	0	0	0	603	903	0
356	5	0	0	0	0	0	0	200	300	0	0	0	0	0	0	0	200	903	0	0	0	0	0	0	0	603	903	0
356	6	0	0	0	0	0	0	200	300	0	0	0	0	0	0	0	200	903	0	0	0	0	0	0	0	603	903	0
356	7	0	0	0	0	0	0	200	300	0	0	0	0	0	0	0	200	903	0	0	0	0	0	0	0	603	903	0
356	8	0	0	0	0	0	0	200	300	0	0	0	0	0	0	0	200	903	0	0	0	0	0	0	0	603	903	0
356	9	0	0	0	0	0	0	200	300	0	0	0	0	0	0	0	200	903	0	0	0	0	0	0	0	603	903	0
357	0	0	0	0	0	0	0	200	300	0	0	0	0	0	0	0	200	903	0	0	0	0	0	0	0	603	903	0
357	1	0	0	0	0	0	0	200	300	0	0	0	0	0	0	0	200	903	0	0	0	0	0	0	0	603	903	0
357	2	0	0	0	0	0	0	200	300	0	0	0	0	0	0	0	200	903	0	0	0	0	0	0	0	603	903	0
357	3	0	0	0	0	0	0	200	300	0	0	0	0	0	0	0	200	903	0	0	0	0	0	0	0	603	903	0
357	4	0	0	0	0	0	0	200	300	0	0	0	0	0	0	0	200	903	0	0	0	0	0	0	0	603	903	0
357	5	0	0	0	0	0	0	200	300	0	0	0	0	0	0	0	200	903	0	0	0	0	0	0	0	603	903	0
357	6	0	0	0	0	0	0	200	300	0	0	0	0	0	0	0	200	903	0	0	0	0	0	0	0	603	903	0
357	7	0	0	0	0	0	0	200	300	0	0	0	0	0	0	0	200	903	0	0	0	0	0	0	0	603	903	0
357	8	0	0	0	0	0	0	200	300	0	0	0	0	0	0	0	200	903	0	0	0	0	0	0	0	603	903	0
357	9	0	0	0	0	0	0	200	300	0	0	0	0	0	0	0	200	903	0	0	0	0	0	0	0	603	903	0
358	0	0	0	0	0	0	0	200	300	0	0	0	0	0	0	0	200	903	0	0	0	0	0	0	0	603	903	0
358	1	0	0	0	0	0	0	200	300	0	0	0	0	0	0	0	200	903	0	0	0	0	0	0	0	603	903	0
358	2	0	0	0	0	0	0	200	300	0	0	0	0	0	0	0	200	903	0	0	0	0	0	0	0	603	903	0
358	3	0	0	0	0	0	0	200	300	0	0	0	0	0	0	0	200	903	0	0	0	0	0	0	0	603	903	0
358	4	0	0	0	0	0	0	200	300	0	0	0	0	0	0	0	200	903	0	0	0	0	0	0	0	603	903	0
358	5	0	0	0	0	0	0	200	300	0	0	0	0	0	0	0	200	903	0	0	0	0	0	0	0	603	903	0
358	6	0	0	0	0	0	0	200	300	0	0	0	0	0	0	0	200	903	0	0	0	0	0	0	0	603	903	0
358	7	0	0	0	0	0	0	200	300	0	0	0	0	0	0	0	200	903	0	0	0	0	0	0	0	603	903	0
358	8	0	0	0	0	0	0	200	300	0	0	0	0	0	0	0	200	903	0	0	0	0	0	0	0	603	903	0
358	9	0	0	0	0	0	0	200	300	0	0	0	0	0	0	0	200	903	0	0	0	0	0	0	0	603	903	0
359	0	0	0	0	0	0	0	200	300	0	0	0	0	0	0	0	200	903	0	0	0	0	0	0	0	603	903	0
359	1	0	0	0	0	0	0	200	300	0	0	0	0	0	0	0	200	903	0	0	0	0	0	0	0	603	903	0
359	2	0	0	0	0	0	0	200	300	0	0	0	0	0	0	0	200	903	0	0	0	0	0	0	0	603	903	0
359	3	0	0	0	0	0	0	200	300	0	0	0	0	0	0	0	200	903	0	0	0	0	0	0	0	603	903	0
359	4	0	0	0	0	0	0	200	300	0	0	0	0	0	0	0	200	903	0	0	0	0	0	0	0	603	903	0
359	5	0	0	0	0	0	0	200	300	0	0	0	0	0	0	0	200	903	0	0	0	0	0	0	0	603	903	0
359	6	0	0	0	0	0	0	200	300	0	0	0	0	0	0	0	200	903	0	0	0	0	0	0	0	603	903	0
359	7	0	0	0	0	0	0	200	300	0	0	0	0	0	0	0	200	903	0	0	0	0	0	0	0	603	903	0
359	8	0	0	0	0	0	0	200	300	0	0	0	0	0	0	0	200	903	0	0	0	0	0	0	0	603	903	0
359	9	0	0	0	0	0	0	200	300	0	0	0	0	0	0	0	200	903	0	0	0	0	0	0	0	603	903	0
360	0	0	0	0	0	0	0	200	300	0	0	0	0	0	0	0	200	903	0	0	0	0	0	0	0	603	903	0
360	1	0	0	0	0	0	0	200	300	0	0	0	0	0	0	0	200	903	0	0	0	0	0	0	0	603	903	0
360	2	0	0	0	0	0	0	200	300	0	0	0	0	0	0	0	200	903	0	0	0	0	0	0	0	603	903	0
360	3	0	0	0	0	0	0	200	300	0	0	0	0	0	0	0	200	903	0	0	0	0	0	0	0	603	903	0
360	4	0	0	0	0	0	0	200	300	0	0	0	0	0	0	0	200	903	0	0	0	0	0	0	0	603	903	0
360	5	0	0	0	0	0	0	200	300	0	0	0	0	0	0	0	200	903	0	0	0	0	0	0	0	603	903	0
360	6	0	0	0	0	0	0	200	300	0	0	0	0	0	0	0	200	903	0	0	0	0	0	0	0	603	903	0
360	7	0	0	0	0	0	0	200	300	0	0	0	0	0	0	0	200	903	0	0	0	0	0	0	0	603	903	0
360	8	0	0	0	0	0	0	200	300	0	0	0	0	0	0	0	200	903	0	0	0	0	0	0	0	603	903	0
360	9	0	0	0	0	0	0	200	300	0	0	0	0	0	0	0	200	903	0	0	0	0	0	0	0	603	903	0
361	0	0	0	0	0	0	0	200	300	0	0	0	0	0	0	0	200	903	0	0	0	0	0	0	0	603	903	0
361	1	0	0	0	0	0	0	200	300	0	0	0	0	0	0	0	200	903	0	0	0	0	0	0	0	603	903	0
361	2	0	0	0	0	0	0	200	300	0	0	0	0	0	0	0	200	903	0	0	0	0	0	0	0	603	903	0
361	3	0	0	0	0	0	0	200	300	0	0	0	0	0	0	0	200	903	0	0	0	0	0	0	0	603	903	0
361	4	0	0	0	0	0	0	200	300	0	0	0	0	0	0	0	200	903	0	0	0	0	0	0	0	603	903	0
361	5	0	0	0	0	0	0	200	300	0	0	0	0	0	0	0	200	903	0	0	0	0	0	0	0	603	903	0
361	6	0	0	0	0	0	0	200	300	0	0	0	0	0	0	0	200	903	0	0	0	0	0	0	0	603	903	0
361	7	0	0	0	0	0	0	200	300	0	0	0	0	0	0	0	200	903	0	0	0	0	0	0	0	603	903	0
361	8	0	0	0	0	0	0	200	300	0	0	0	0	0	0	0	200	903	0	0	0	0	0	0	0	603	903	0
361	9	0	0	0	0	0	0	200	300	0	0	0	0	0	0	0	200	903	0	0	0	0	0	0	0	603	903	0
362	0	0	0	0	0	0	0	200	300	0	0	0	0	0	0	0	200	903	0	0	0	0	0	0	0	603	903	0
362	1	0	0	0	0	0	0	200	300	0	0	0	0	0	0	0	200	903	0	0	0	0	0	0	0	603	903	0
362	2	0	0	0	0	0	0	200	300	0	0	0	0	0	0	0	200	903	0	0	0	0	0	0	0	603	903	0
362	3	0	0	0	0	0	0	200	300	0	0	0	0	0	0	0	200	903	0	0	0	0	0	0	0	603	903	0
362	4	0	0	0	0	0	0	200	300	0	0	0	0	0	0	0	200	903	0	0	0	0	0	0	0	603	903	0
362	5	0	0	0	0	0	0	200	300	0	0	0	0	0	0	0	200	903	0	0	0	0	0	0	0	603	903	0
362	6	0	0	0	0	0	0	200	300	0	0	0	0	0	0	0	200	903	0	0	0	0	0	0	0	603	903	0
362	7	0	0	0	0	0	0	200	300	0	0	0	0	0	0	0	200	903	0	0	0	0	0	0	0	603	903	0
362	8	0	0	0	0	0	0	200	300	0	0	0	0	0	0	0	200	903	0	0	0	0	0	0	0	603	903	0
362	9	0	0	0	0	0	0	200	300	0	0	0	0	0	0	0	200	903	0	0	0	0	0	0	0	603	903	0
363	0	0	0	0	0	0	0	200	300	0	0	0	0	0	0	0	200	903	0	0	0	0	0	0	0	603	903	0
363	1	0	0	0	0	0	0	200	300	0	0	0	0	0	0	0	200	903	0	0	0	0	0	0	0	603	903	0
363	2	0	0	0	0	0	0	200	300	0	0	0	0	0	0	0	200	903	0	0	0	0	0	0	0	603	903	0
363	3	0	0	0	0	0	0	200	300	0	0	0	0	0	0	0	200	903	0	0	0	0	0	0	0	603	903	0
363	4	0	0	0	0	0	0	200	300	0	0	0	0	0	0	0	200	903	0	0	0	0	0	0	0	603	903	0
363	5	0	0	0	0	0	0	200	300	0	0	0	0	0	0	0	200	903	0	0	0	0	0	0	0	603	903	0
363	6	0	0	0	0	0	0	200	300	0	0	0	0	0	0	0	200	903	0	0	0	0	0	0	0	603	903	0
363	7	0	0	0	0	0	0	200	300	0	0	0	0	0	0	0	200	903	0	0	0	0	0	0	0	603	903	0
363	8	0	0	0	0	0	0	200	300	0	0	0	0	0	0	0	200	903	0	0	0	0	0	0	0	603	903	0
363	9	0	0	0	0	0	0	200	300	0	0	0	0	0	0	0	200	903	0	0	0	0	0	0	0	603	903	0
364	0	0	0	0	0	0	0	200	300	0	0	0	0	0	0	0	200	903	0	0	0	0	0	0	0	603	903	0
364	1	0	0	0	0	0	0	200	300	0	0	0	0	0	0	0	200	903	0	0	0	0	0	0	0	603	903	0
364	2	0	0	0	0	0	0	200	300	0	0	0	0	0	0	0	200	903	0	0	0	0	0	0	0	603	903	0
364	3	0	0	0	0	0	0	200	300	0	0	0	0	0	0	0	200	903	0	0	0	0	0	0	0	603	903	0
364	4	0	0	0	0	0	0	200	300	0	0	0	0	0	0	0	200	903	0	0	0	0	0	0	0	603	903	0
364	5	0	0	0	0	0	0	200	300	0	0	0	0	0	0	0	200	903	0	0	0	0	0	0	0	603	903	0
364	6	0	0	0	0	0	0	200	300	0	0	0	0	0	0	0	200	903	0	0	0	0	0	0	0	603	903	0
364	7	0	0	0	0	0	0	200	300	0	0	0	0	0	0	0	200	903	0	0	0	0	0	0	0	603	903	0
364	8	0	0	0	0	0	0	200	300	0	0	0	0	0	0	0	200	903	0	0	0	0	0	0	0	603	903	0
364	9	0	0	0	0	0	0	200	300	0	0	0	0	0	0	0	200	903	0	0	0	0	0	0	0	603	903	0
365	0	0	0	0	0	0	0	200	300	0	0	0	0	0	0	0	200	903	0	0	0	0	0	0	0	603	903	0
365	1	0	0	0	0	0	0	200	300	0	0	0	0	0	0	0	200	903	0	0	0	0	0	0	0	603	903	0
365	2	0	0	0	0	0	0	200	300	0	0	0	0	0	0	0	200	903	0	0	0	0	0	0	0	603	903	0
365	3	0	0	0	0	0	0	200	300	0	0	0	0	0	0	0	200	903	0	0	0	0	0	0	0	603	903	0
365	4	0	0	0	0	0	0	200	300	0	0	0	0	0	0	0	200	903	0	0	0	0	0	0	0	603	903	0
365	5	0	0	0	0	0	0	200	300	0	0	0	0	0	0	0	200	903	0	0	0	0	0	0	0	603	903	0
365	6	0	0	0	0	0	0	200	300	0	0	0	0	0	0	0	200	903	0	0	0	0	0	0	0	603	903	0
365	7	0	0	0	0	0	0	200	300	0	0	0	0	0	0	0	200	903	0	0	0	0	0	0	0	603	903	0
365	8	0	0	0	0	0	0	200	300	0	0	0	0	0	0	0	200	903	0	0	0	0	0	0	0	603	903	0
365	9	0	0	0	0	0	0	200	300	0	0	0	0	0	0	0	200	903	0	0	0	0	0	0	0	603	903	0
366	0	0	0	0	0	0	0	200	300	0	0	0	0	0	0	0	200	903	0	0	0	0	0	0	0	603	903	0
366	1	0	0	0	0	0	0	200	300	0	0	0	0	0	0	0	200	903	0	0	0	0	0	0	0	603	903	0
366	2	0	0	0	0	0	0	200	300	0	0	0	0	0	0	0	200	903	0	0	0	0	0	0	0	603	903	0
366	3	0	0	0	0	0	0	200	300	0	0	0	0	0	0	0	200	903	0	0	0	0	0	0	0	603	903	0
366	4	0	0	0	0	0	0	200	300	0	0	0	0	0	0	0	200	903	0	0	0	0	0	0	0	603	903	0
366	5	0	0	0	0	0	0	200	300	0	0	0	0	0	0	0	200	903	0	0	0	0	0	0	0	603	903	0
366	6	0	0	0	0	0	0	200	300	0	0	0	0	0	0	0	200	903	0	0	0	0	0	0	0	603	903	0
366	7	0	0	0	0	0	0	200	300	0	0	0	0	0	0	0	200	903	0	0	0	0	0	0	0	603	903	0
366	8	0	0	0	0	0	0	200	300	0	0	0	0	0	0	0	200	903	0	0	0	0	0	0	0	603	903	0
366	9	0	0	0	0	0	0	200	300	0	0	0	0	0	0	0	200	903	0	0	0	0	0	0	0	603	903	0
367	0	0	0	0	0	0	0	200	300	0	0	0	0	0	0	0	200	903	0	0	0	0	0	0	0	603	903	0
367	1	0	0	0	0	0	0	200	300	0	0	0	0	0	0	0	200	903	0	0	0	0	0	0	0	603	903	0
367	2	0	0	0	0	0	0	200	300	0	0	0	0	0	0	0	200	903	0	0	0	0	0	0	0	603	903	0
367	3	0	0	0	0	0	0	200	300	0	0	0	0	0	0	0	200	903	0	0	0	0	0	0	0	603	903	0
367	4	0	0	0	0	0	0	200	300	0	0	0	0	0	0	0	200	903	0	0	0	0	0	0	0	603	903	0
367	5	0	0	0	0	0	0	200	300	0	0	0	0	0	0	0	200	903	0	0	0	0	0	0	0	603	903	0
367	6	0	0	0	0	0	0	200	300	0	0	0	0	0	0	0	200	903	0	0	0	0	0	0	0	603	903	0
367	7	0	0	0	0	0	0	200	300	0	0	0	0	0	0	0	200	903	0	0	0	0	0	0	0	603	903	0
367	8	0	0	0	0	0	0	200	300	0	0	0	0	0	0	0	200	903	0	0	0	0	0	0	0	603	903	0
367	9	0	0	0	0	0	0	200	300	0	0	0	0	0	0	0	200	903	0	0	0	0	0	0	0	603	903	0
368	0	0	0	0	0	0	0	200	300	0	0	0	0	0	0	0	200	903	0	0	0	0	0	0	0	603	903	0
368	1	0	0	0	0	0	0	200	300	0	0	0	0	0	0	0	200	903	0	0	0	0	0	0	0	603	903	0
368	2	0	0	0	0	0	0	200	300	0	0	0	0	0	0	0	200	903	0	0	0	0	0	0	0	603	903	0
368	3	0	0	0	0	0	0	200	300	0	0	0	0	0	0	0	200	903	0	0	0	0	0	0	0	603	903	0
368	4	0	0	0	0	0	0	200	300	0	0	0	0	0	0	0	200	903	0	0	0	0	0	0	0	603	903	0
368	5	0	0	0	0	0	0	200	300	0	0	0	0	0	0	0	200	903	0	0	0	0	0	0	0	603	903	0
368	6	0	0	0	0	0	0	200	300	0	0	0	0	0	0	0	200	903	0	0	0	0	0	0	0	603	903	0
368	7	0	0	0	0	0	0	200	300	0	0	0	0	0	0	0	200	903	0	0	0	0	0	0	0	603	903	0
368	8	0	0	0	0	0	0	200	300	0	0	0	0	0	0	0	200	903	0	0	0	0	0	0	0	603	903	0
368	9	0	0	0	0	0	0	200	300	0	0	0	0	0	0	0	200	903	0	0	0	0	0	0	0	603	903	0
369	0	0	0	0	0	0	0	200	300	0	0	0	0	0	0	0	200	903	0	0	0	0	0	0	0	603	903	0
369	1	0	0	0	0	0	0	200	300	0	0	0	0	0	0	0	200	903	0	0	0	0	0	0	0	603	903	0
369	2	0	0	0	0	0	0	200	300	0	0	0	0	0	0	0	200	903	0	0	0	0	0	0	0	603	903	0
369	3	0	0	0	0	0	0	200	300	0	0	0	0	0	0	0	200	903	0	0	0	0	0	0	0	603	903	0
369	4	0	0	0	0	0	0	200	300	0	0	0	0	0	0	0	200	903	0	0	0	0	0	0	0	603	903	0
369	5	0	0	0	0	0	0	200	300	0	0	0	0	0	0	0	200	903	0	0	0	0	0	0	0	603	903	0
369	6	0	0	0	0	0	0	200	300	0	0	0	0	0	0	0	200	903	0	0	0	0	0	0	0	603	903	0
369	7	0	0	0	0	0	0	200	300	0	0	0	0	0	0	0	200	903	0	0	0	0	0	0	0	603	903	0
369	8	0	0	0	0	0	0	200	300	0	0	0	0	0	0	0	200	903	0	0	0	0	0	0	0	603	903	0
369	9	0	0	0	0	0	0	200	300	0	0	0	0	0	0	0	200	903	0	0	0	0	0	0	0	603	903	0
370	0	0	0	0	0	0	0	200	300	0	0	0	0	0	0	0	200	903	0	0	0	0	0	0	0	603	903	0
370	1	0	0	0	0	0	0	200	300	0	0	0	0	0	0	0	200	903	0	0	0	0	0	0	0	603	903	0
370	2	0	0	0	0	0	0	200	300	0	0	0	0	0	0	0	200	903	0	0	0	0	0	0	0	603	903	0
370	3	0	0	0	0	0	0	200	300	0	0	0	0	0	0	0	200	903	0	0	0	0	0	0	0	603	903	0
370	4	0	0	0	0	0	0	200	300	0	0	0	0	0	0	0	200	903	0	0	0	0	0	0	0	603	903	0
370	5	0	0	0	0	0	0	200	300	0	0	0	0	0	0	0	200	903	0	0	0	0	0	0	0	603	903	0
370	6	0	0	0	0	0	0	200	300	0	0	0	0	0	0	0	200	903	0	0	0	0	0	0	0	603	903	0
370	7	0	0	0	0	0	0	200	300	0	0	0	0	0	0	0	200	903	0	0	0	0	0	0	0	603	903	0
370	8	0	0	0	0	0	0	200	300	0	0	0	0	0	0	0	200	903	0	0	0	0	0	0	0	603	903	0
370	9	0	0	0	0	0	0	200	300	0	0	0	0	0	0	0	200	903	0	0	0	0	0	0	0	603	903	0
371	0	0	0	0	0	0	0	200	300	0	0	0	0	0	0	0	200	903	0	0	0	0	0	0	0	603	903	0
371	1	0	0	0	0	0	0	200	300	0	0	0	0	0	0	0	200	903	0	0	0	0	0	0	0	603	903	0
371	2	0	0	0	0	0	0	200	300	0	0	0	0	0	0	0	200	903	0	0	0	0	0	0	0	603	903	0
371	3	0	0	0	0	0	0	200	300	0	0	0	0	0	0	0	200	903	0	0	0	0	0	0	0	603	903	0
371	4	0	0	0	0	0	0	200	300	0	0	0	0	0	0	0	200	903	0	0	0	0	0	0	0	603	903	0
371	5	0	0	0	0	0	0	200	300	0	0	0	0	0	0	0	200	903	0	0	0	0	0	0	0	603	903	0
371	6	0	0	0	0	0	0	200	300	0	0	0	0	0	0	0	200	903	0	0	0	0	0	0	0	603	903	0
371	7	0	0	0	0	0	0	200	300	0	0	0	0	0	0	0	200	903	0	0	0	0	0	0	0	603	903	0
371	8	0	0	0	0	0	0	200	300	0	0	0	0	0	0	0	200	903	0	0	0	0	0	0	0	603	903	0
371	9	0	0	0	0	0	0	200	300	0	0	0	0	0	0	0	200	903	0	0	0	0	0	0	0	603	903	0
372	0	0	0	0	0	0	0	200	300	0	0	0	0	0	0	0	200	903	0	0	0	0	0	0	0	603	903	0
372	1	0	0	0	0	0	0	200	300	0	0	0	0	0	0	0	200	903	0	0	0	0	0	0	0	603	903	0
372	2	0	0	0	0	0	0	200	300	0	0	0	0	0	0	0	200	903	0	0	0	0	0	0	0	603	903	0
372	3	0	0	0	0	0	0	200	300	0	0	0	0	0	0	0	200	903	0	0	0	0	0	0	0	603	903	0
372	4	0	0	0	0	0	0	200	300	0	0	0	0	0	0	0	200	903	0	0	0	0	0	0	0	603	903	0
372	5	0	0	0	0	0	0	200	300	0	0	0	0	0	0	0	200	903	0	0	0	0	0	0	0	603	903	0
372	6	0	0	0	0	0	0	200	300	0	0	0	0	0	0	0	200	903	0	0	0	0	0	0	0	603	903	0
372	7	0	0	0	0	0	0	200	300	0	0	0	0	0	0	0	200	903	0	0	0	0	0	0	0	603	903	0
372	8	0	0	0	0	0	0	200	300	0	0	0	0	0	0	0	200	903	0	0	0	0	0	0	0	603	903	0
372	9	0	0	0	0	0	0	200	300	0	0	0	0	0	0	0	200	903	0	0	0	0	0	0	0	603	903	0
373	0	0	0	0	0	0	0	200	300	0	0	0	0	0	0	0	200	903	0	0	0	0	0	0	0	603	903	0
373	1	0	0	0	0	0	0	200	300	0	0	0	0	0	0	0	200	903	0	0	0	0	0	0	0	603	903	0
373	2	0	0	0	0	0	0	200	300	0	0	0	0	0	0	0	200	903	0	0	0	0	0	0	0	603	903	0
373	3	0	0	0	0	0	0	200	300	0	0	0	0	0	0	0	200	903	0	0	0	0	0	0	0	603	903	0
373	4	0	0	0	0	0	0	200	300	0	0	0	0	0	0	0	200	903	0	0	0	0	0	0	0	603	903	0
373	5	0	0	0	0	0	0	200	300	0	0	0	0	0	0	0	200	903	0	0	0	0	0	0	0	603	903	0
373	6	0	0	0	0	0	0	200	300	0	0	0	0	0	0	0	200	903	0	0	0	0	0	0	0	603	903	0
373	7	0	0	0	0	0	0	200	300	0	0	0	0	0	0	0	200	903	0	0	0	0	0	0	0	603	903	0
373	8	0	0	0	0	0	0	200	300	0	0	0	0	0	0	0	200	903	0	0	0	0	0	0	0	603	903	0
373	9	0	0	0	0	0	0	200	300	0	0	0	0	0	0	0	200	903	0	0	0	0	0	0	0	603	903	0
374	0	0	0	0	0	0	0	200	300	0	0	0	0	0	0	0	200	903	0	0	0	0	0	0	0	603	903	0
374	1	0	0	0	0	0	0	200	300	0	0	0	0	0	0	0	200	903	0	0	0	0	0	0	0	603	903	0
374	2	0	0	0	0	0	0	200	300	0	0	0	0	0	0	0	200	903	0	0	0	0	0	0	0	603	903	0
374	3	0	0	0	0	0	0	200	300	0	0	0	0	0	0	0	200	903	0	0	0	0	0	0	0	603	903	0
374	4	0	0	0	0	0	0	200	300	0	0	0	0	0	0	0	200	903	0	0	0	0	0	0	0	603	903	0
374	5	0	0	0	0	0	0	200	300	0	0	0	0	0	0	0	200	903	0	0	0	0	0	0	0	603	903	0
374	6	0	0	0	0	0	0	200	300	0	0	0	0	0	0	0	200	903	0	0	0	0	0	0	0	603	903	0
374	7	0	0	0	0	0	0	200	300	0	0	0	0	0	0	0	200	903	0	0	0	0	0	0	0	603	903	0
374	8	0	0	0	0	0	0	200	300	0	0	0	0	0	0	0	200	903	0	0	0	0	0	0	0	603	903	0
374	9	0	0	0	0	0	0	200	300	0	0	0	0	0	0	0	200	903	0	0	0	0	0	0	0	603	903	0
375	0	0	0	0	0	0	0	200	300	0	0	0	0	0	0	0	200	903	0	0	0	0	0	0	0	603	903	0
375	1	0	0	0	0	0	0	200	300	0	0	0	0	0	0	0	200	903	0	0	0	0	0	0	0	603	903	0
375	2	0	0	0	0	0	0	200	300	0	0	0	0	0	0	0	200	903	0	0	0	0	0	0	0	603	903	0
375	3	0	0	0	0	0	0	200	300	0	0	0	0	0	0	0	200	903	0	0	0	0	0	0	0	603	903	0
375	4	0	0	0	0	0	0	200	300	0	0	0	0	0	0	0	200	903	0	0	0	0	0	0	0	603	903	0
375	5	0	0	0	0	0	0	200	300	0	0	0	0	0	0	0	200	903	0	0	0	0	0	0	0	603	903	0
375	6	0	0	0	0	0	0	200	300	0	0	0	0	0	0	0	200	903	0	0	0	0	0	0	0	603	903	0
375	7	0	0	0	0	0	0	200	300	0	0	0	0	0	0	0	200	903	0	0	0	0	0	0	0	603	903	0
375	8	0	0	0	0	0	0	200	300	0	0	0	0	0	0	0	200	903	0	0	0	0	0	0	0	603	903	0
375	9	0	0	0	0	0	0	200	300	0	0	0	0	0	0	0	200	903	0	0	0	0	0	0	0	603	903	0
376	0	0	0	0	0	0	0	200	300	0	0	0	0	0	0	0	200	903	0	0	0	0	0	0	0	603	903	0
376	1	0	0	0	0	0	0	200	300	0	0	0	0	0	0	0	200	903	0	0	0	0	0	0	0	603	903	0
376	2	0	0	0	0	0	0	200	300	0	0	0	0	0	0	0	200	903	0	0	0	0	0	0	0	603	903	0
376	3	0	0	0	0	0	0	200	300	0	0	0	0	0	0	0	200	903	0	0	0	0	0	0	0	603	903	0
376	4	0	0	0	0	0	0	200	300	0	0	0	0	0	0	0	200	903	0	0	0	0	0	0	0	603	903	0
376	5	0	0	0	0	0	0	200	300	0	0	0	0	0	0	0	200	903	0	0	0	0	0	0	0	603	903	0
376	6	0	0	0	0	0	0	200	300	0	0	0	0	0	0	0	200	903	0	0	0	0	0	0	0	603	903	0
376	7	0	0	0	0	0	0	200	300	0	0	0	0	0	0	0	200	903	0	0	0	0	0	0	0	603	903	0
376	8	0	0	0	0	0	0	200	300	0	0	0	0	0	0	0	200	903	0	0	0	0	0	0	0	603	903	0
376	9	0	0	0	0	0	0	200	300	0	0	0	0	0	0	0	200	903	0	0	0	0	0	0	0	603	903	0
377	0	0	0	0	0	0	0	200	300	0	0	0	0	0	0	0	200	903	0	0	0	0	0	0	0	603	903	0
377	1	0	0	0	0	0	0	200	300	0	0	0	0	0	0	0	200	903	0	0	0	0	0	0	0	603	903	0
377	2	0	0	0	0	0	0	200	300	0	0	0	0	0	0	0	200	903	0	0	0	0	0	0	0	603	903	0
377	3	0	0	0	0	0	0	200	300	0	0	0	0	0	0	0	200	903	0	0	0	0	0	0	0	603	903	0
377	4	0	0	0	0	0	0	200	300	0	0	0	0	0	0	0	200	903	0	0	0	0	0	0	0	603	903	0
377	5	0	0	0	0	0	0	200	300	0	0	0	0	0	0	0	200	903	0	0	0	0	0	0	0	603	903	0
377	6	0	0	0	0	0	0	200	300	0	0	0	0	0	0	0	200	903	0	0	0	0	0	0	0	603	903	0
377	7	0	0	0	0	0	0	200	300	0	0	0	0	0	0	0	200	903	0	0	0	0	0	0	0	603	903	0
377	8	0	0	0	0	0	0	200	300	0	0	0	0	0	0	0	200	903	0	0	0	0	0	0	0	603	903	0
377	9	0	0	0	0	0	0	200	300	0	0	0	0	0	0	0	200	903	0	0	0	0	0	0	0	603	903	0
378	0	0	0	0	0	0	0	200	300	0	0	0	0	0	0	0	200	903	0	0	0	0	0	0	0	603	903	0
378	1	0	0	0	0	0	0	200	300	0	0	0	0	0	0	0	200	903	0	0	0	0	0	0	0	603	903	0
378	2	0	0	0	0	0	0	200	300	0	0	0	0	0	0	0	200	903	0	0	0	0	0	0	0	603	903	0
378	3	0	0	0	0	0	0	200	300	0	0	0	0	0	0	0	200	903	0	0	0	0	0	0	0	603	903	0
378	4	0	0	0	0	0	0	200	300	0	0	0	0	0	0	0	200	903	0	0	0	0	0	0	0	603	903	0
378	5	0	0	0	0	0	0	200	300	0	0	0	0	0	0	0	200	903	0	0	0	0	0	0	0	603	903	0
378	6	0	0	0	0	0	0	200	300	0	0	0	0	0	0	0	200	903	0	0	0	0	0	0	0	603	903	0
378	7	0	0	0	0	0	0	200	300	0	0	0	0	0	0	0	200	903	0	0	0	0	0	0	0	603	903	0
378	8	0	0	0	0	0	0	200	300	0	0	0	0	0	0	0	200	903	0	0	0	0	0	0	0	603	903	0
378	9	0	0	0	0	0	0	200	300	0	0	0	0	0	0	0	200	903	0	0	0	0	0	0	0	603	903	0
379	0	0	0	0	0	0	0	200	300	0	0	0	0	0	0	0	200	903	0	0	0	0	0	0	0	603	903	0
379	1	0	0	0	0	0	0	200	300	0	0	0	0	0	0	0	200	903	0	0	0	0	0	0	0	603	903	0
379	2	0	0	0	0	0	0	200	300	0	0	0	0	0	0	0	200	903	0	0	0	0	0	0	0	603	903	0
379	3	0	0	0	0	0	0	200	300	0	0	0	0	0	0	0	200	903	0	0	0	0	0	0	0	603	903	0
379	4	0	0	0	0	0	0	200	300	0	0	0	0	0	0	0	200	903	0	0	0	0	0	0	0	603	903	0
379	5	0	0	0	0	0	0	200	300	0	0	0	0	0	0	0	200	903	0	0	0	0	0	0	0	603	903	0
379	6	0	0	0	0	0	0	200	300	0	0	0	0	0	0	0	200	903	0	0	0	0	0	0	0	603	903	0
379	7	0	0	0	0	0	0	200	300	0	0	0	0	0	0	0	200	903	0	0	0	0	0	0	0	603	903	0
379	8	0	0	0	0	0	0	200	300	0	0	0	0	0	0	0	200	903	0	0	0	0	0	0	0	603	903	0
379	9	0	0	0	0	0	0	200	300	0	0	0	0	0	0	0	200	903	0	0	0	0	0	0	0	603	903	0
380	0	0	0	0	0	0	0	200	300	0	0	0	0	0	0	0	200	903	0	0	0	0	0	0	0	603	903	0
380	1	0	0	0	0	0	0	200	300	0	0	0	0	0	0	0	200	903	0	0	0	0	0	0	0	603	903	0
380	2	0	0	0	0	0	0	200	300	0	0	0	0	0	0	0	200	903	0	0	0	0	0	0	0	603	903	0
380	3	0	0	0	0	0	0	200	300	0	0	0	0	0	0	0	200	903	0	0	0	0	0	0	0	603	903	0
380	4	0	0	0	0	0	0	200	300	0	0	0	0	0	0	0	200	903	0	0	0	0	0	0	0	603	903	0
380	5	0	0	0	0	0	0	200	300	0	0	0	0	0	0	0	200	903	0	0	0	0	0	0	0	603	903	0
380	6	0	0	0	0	0	0	200	300	0	0	0	0	0	0	0	200	903	0	0	0	0	0	0	0	603	903	0
380	7	0	0	0	0	0	0	200	300	0	0	0	0	0	0	0	200	903	0	0	0	0	0	0	0	603	903	0
380	8	0	0	0	0	0	0	200	300	0	0	0	0	0	0	0	200	903	0	0	0	0	0	0	0	603	903	0
380	9	0	0	0	0	0	0	200	300	0	0	0	0	0	0	0	200	903	0	0	0	0	0	0	0	603	903	0
381	0	0	0	0	0	0	0	200	300	0	0	0	0	0	0	0	200	903	0	0	0	0	0	0	0	603	903	0
381	1	0	0	0	0	0	0	200	300	0	0	0	0	0	0	0	200	903	0	0	0	0	0	0	0	603	903	0
381	2	0	0	0	0	0	0	200	300	0	0	0	0	0	0	0	200	903	0	0	0	0	0	0	0	603	903	0
381	3	0	0	0	0	0	0	200	300	0	0	0	0	0	0	0	200	903	0	0	0	0	0	0	0	603	903	0
381	4	0	0	0	0	0	0	200	300	0	0	0	0	0	0	0	200	903	0	0	0	0	0	0	0	603	903	0
381	5	0	0	0	0	0	0	200	300	0	0	0	0	0	0	0	200	903	0	0	0	0	0	0	0	603	903	0
381	6	0	0	0	0	0	0	200	300	0	0	0	0	0	0	0	200	903	0	0	0	0	0	0	0	603	903	0
381	7	0	0	0	0	0	0	200	300	0	0	0	0	0	0	0	200	903	0	0	0	0	0	0	0	603	903	0
381	8	0	0	0	0	0	0	200	300	0	0	0	0	0	0	0	200	903	0	0	0	0	0	0	0	603	903	0
381	9	0	0	0	0	0	0	200	300	0	0	0	0	0	0	0	200	903	0	0	0	0	0	0	0	603	903	0
382	0	0	0	0	0	0	0	200	300	0	0	0	0	0	0	0	200	903	0	0	0	0	0	0	0	603	903	0
382	1	0	0	0	0	0	0	200	300	0	0	0	0	0	0	0	200	903	0	0	0	0	0	0	0	603	903	0
382	2	0	0	0	0	0	0	200	300	0	0	0	0	0	0	0	200	903	0	0	0	0	0	0	0	603	903	0
382	3	0	0	0	0	0	0	200	300	0	0	0	0	0	0	0	200	903	0	0	0	0	0	0	0	603	903	0
382	4	0	0	0	0	0	0	200	300	0	0	0	0	0	0	0	200	903	0	0	0	0	0	0	0	603	903	0
382	5	0	0	0	0	0	0	200	300	0	0	0	0	0	0	0	200	903	0	0	0	0	0	0	0	603	903	0
382	6	0	0	0	0	0	0	200	300	0	0	0	0	0	0	0	200	903	0	0	0	0	0	0	0	603	903	0
382	7	0	0	0	0	0	0	200	300	0	0	0	0	0	0	0	200	903	0	0	0	0	0	0	0	603	903	0
382	8	0	0	0	0	0	0	200	300	0	0	0	0	0	0	0	200	903	0	0	0	0	0	0	0	603	903	0
382	9	0	0	0	0	0	0	200	300	0	0	0	0	0	0	0	200	903	0	0	0	0	0	0	0	603	903	0
383	0	0	0	0	0	0	0	200	300	0	0	0	0	0	0	0	200	903	0	0	0	0	0	0	0	603	903	0
383	1	0	0	0	0	0	0	200	300	0	0	0	0	0	0	0	200	903	0	0	0	0	0	0	0	603	903	0
383	2	0	0	0	0	0	0	200	300	0	0	0	0	0	0	0	200	903	0	0	0	0	0	0	0	603	903	0
383	3	0	0	0	0	0	0	200	300	0	0	0	0	0	0	0	200	903	0	0	0	0	0	0	0	603	903	0
383	4	0	0	0	0	0	0	200	300	0	0	0	0	0	0	0	200	903	0	0	0	0	0	0	0	603	903	0
383	5	0	0	0	0	0	0	200	300	0	0	0	0	0	0	0	200	903	0	0	0	0	0	0	0	603	903	0
383	6	0	0	0	0	0	0	200	300	0	0	0	0	0	0	0	200	903	0	0	0	0	0	0	0	603	903	0
383	7	0	0	0	0	0	0	200	300	0	0	0	0	0	0	0	200	903	0	0	0	0	0	0	0	603	903	0
383	8	0	0	0	0	0	0	200	300	0	0	0	0	0	0	0	200	903	0	0	0	0	0	0	0	603	903	0
383	9	0	0	0	0	0	0	200	300	0	0	0	0	0	0	0	200	903	0	0	0	0	0	0	0	603	903	0
384	0	0	0	0	0	0	0	200	300	0	0	0	0	0	0	0	200	903	0	0	0	0	0	0	0	603	903	0
384	1	0	0	0	0	0	0	200	300	0	0	0	0	0	0	0	200	903	0	0	0	0	0	0	0	603	903	0
384	2	0	0	0	0	0	0	200	300	0	0	0	0	0	0	0	200	903	0	0	0	0	0	0	0	603	903	0
384	3	0	0	0	0	0	0	200	300	0	0	0	0	0	0	0	200	903	0	0	0	0	0	0	0	603	903	0
384	4	0	0	0	0	0	0	200	300	0	0	0	0	0	0	0	200	903	0	0	0	0	0	0	0	603	903	0
384	5	0	0	0	0	0	0	200	300	0	0	0	0	0	0	0	200	903	0	0	0	0	0	0	0	603	903	0
384	6	0	0	0	0	0	0	200	300	0	0	0	0	0	0	0	200	903	0	0	0	0	0	0	0	603	903	0
384	7	0	0	0	0	0	0	200	300	0	0	0	0	0	0	0	200	903	0	0	0	0	0	0	0	603	903	0
384	8	0	0	0	0	0	0	200	300	0	0	0	0	0	0	0	200	903	0	0	0	0	0	0	0	603	903	0
384	9	0	0	0	0	0	0	200	300	0	0	0	0	0	0	0	200	903	0	0	0	0	0	0	0	603	903	0
385	0	0	0	0	0	0	0	200	300	0	0	0	0	0	0	0	200	903	0	0	0	0	0	0	0	603	903	0
385	1	0	0	0	0	0	0	200	300	0	0	0	0	0	0	0	200	903	0	0	0	0	0	0	0	603	903	0
385	2	0	0	0	0	0	0	200	300	0	0	0	0	0	0	0	200	903	0	0	0	0	0	0	0	603	903	0
385	3	0	0	0	0	0	0	200	300	0	0	0	0	0	0	0	200	903	0	0	0	0	0	0	0	603	903	0
385	4	0	0	0	0	0	0	200	300	0	0	0	0	0	0	0	200	903	0	0	0	0	0	0	0	603	903	0
385	5	0	0	0	0	0	0	200	300	0	0	0	0	0	0	0	200	903	0	0	0	0	0	0	0	603	903	0
385	6	0	0	0	0	0	0	200	300	0	0	0	0	0	0	0	200	903	0	0	0	0	0	0	0	603	903	0
385	7	0	0	0	0	0	0	200	300	0	0	0	0	0	0	0	200	903	0	0	0	0	0	0	0	603	903	0
385	8	0	0	0	0	0	0	200	300	0	0	0	0	0	0	0	200	903	0	0	0	0	0	0	0	603	903	0
385	9	0	0	0	0	0	0	200	300	0	0	0	0	0	0	0	200	903	0	0	0	0	0	0	0	603	903	0
386	0	0	0	0	0	0	0	200	300	0	0	0	0	0	0	0	200	903	0	0	0	0	0	0	0	603	903	0
386	1	0	0	0	0	0	0	200	300	0	0	0	0	0	0	0	200	903	0	0	0	0	0	0	0	603	903	0
386	2	0	0	0	0	0	0	200	300	0	0	0	0	0	0	0	200	903	0	0	0	0	0	0	0	603	903	0
386	3	0	0	0	0	0	0	200	300	0	0	0	0	0	0	0	200	903	0	0	0	0	0	0	0	603	903	0
386	4	0	0	0	0	0	0	200	300	0	0	0	0	0	0	0	200	903	0	0	0	0	0	0	0	603	903	0
386	5	0	0	0	0	0	0	200	300	0	0	0	0	0	0	0	200	903	0	0	0	0	0	0	0	603	903	0
386	6	0	0	0	0	0	0	200	300	0	0	0	0	0	0	0	200	903	0	0	0	0	0	0	0	603	903	0
386	7	0	0	0	0	0	0	200	300	0	0	0	0	0	0	0	200	903	0	0	0	0	0	0	0	603	903	0
386	8	0	0	0	0	0	0	200	300	0	0	0	0	0	0	0	200	903	0	0	0	0	0	0	0	603	903	0
386	9	0	0	0	0	0	0	200	300	0	0	0	0	0	0	0	200	903	0	0	0	0	0	0	0	603	903	0
387	0	0	0	0	0	0	0	200	300	0	0	0	0	0	0	0	200	903	0	0	0	0	0	0	0	603	903	0
387	1	0	0	0	0	0	0	200	300	0	0	0	0	0	0	0	200	903	0	0	0	0	0	0	0	603	903	0
387	2	0	0	0	0	0	0	200	300	0	0	0	0	0	0	0	200	903	0	0	0	0	0	0	0	603	903	0
387	3	0	0	0	0	0	0	200	300	0	0	0	0	0	0	0	200	903	0	0	0	0	0	0	0	603	903	0
387	4	0	0	0	0	0	0	200	300	0	0	0	0	0	0	0	200	903	0	0	0	0	0	0	0	603	903	0
387	5	0	0	0	0	0	0	200	300	0	0	0	0	0	0	0	200	903	0	0	0	0	0	0	0	603	903	0
387	6	0	0	0	0	0	0	200	300	0	0	0	0	0	0	0	200	903	0	0	0	0	0	0	0	603	903	0
387	7	0	0	0	0	0	0	200	300	0	0	0	0	0	0	0	200	903	0	0	0	0	0	0	0	603	903	0
387	8	0	0	0	0	0	0	200	300	0	0	0	0	0	0	0	200	903	0	0	0	0	0	0	0	603	903	0
387	9	0	0	0	0	0	0	200	300	0	0	0	0	0	0	0	200	903	0	0	0	0	0	0	0	603	903	0
388	0	0	0	0	0	0	0	200	300	0	0	0	0	0	0	0	200	903	0	0	0	0	0	0	0	603	903	0
388	1	0	0	0	0	0	0	200	300	0	0	0	0	0	0	0	200	903	0	0	0	0	0	0	0	603	903	0
388	2	0	0	0	0	0	0	200	300	0	0	0	0	0	0	0	200	903	0	0	0	0	0	0	0	603	903	0
388	3	0	0	0	0	0	0	200	300	0	0	0	0	0	0	0	200	903	0	0	0	0	0	0	0	603	903	0
388	4	0	0	0	0	0	0	200	300	0	0	0	0	0	0	0	200	903	0	0	0	0	0	0	0	603	903	0
388	5	0	0	0	0	0	0	200	300	0	0	0	0	0	0	0	200	903	0	0	0	0	0	0	0	603	903	0
388	6	0	0	0	0	0	0	200	300	0	0	0	0	0	0	0	200	903	0	0	0	0	0	0	0	603	903	0
388	7	0	0	0	0	0	0	200	300	0	0	0	0	0	0	0	200	903	0	0	0	0	0	0	0	603	903	0
388	8	0	0	0	0	0	0	200	300	0	0	0	0	0	0	0	200	903	0	0	0	0	0	0	0	603	903	0
388	9	0	0	0	0	0	0	200	300	0	0	0	0	0	0	0	200	903	0	0	0	0	0	0	0	603	903	0
389	0	0	0	0	0	0	0	200	300	0	0	0	0	0	0	0	200	903	0	0	0	0	0	0	0	603	903	0
389	1	0	0	0	0	0	0	200	300	0	0	0	0	0	0	0	200	903	0	0	0	0	0	0	0	603	903	0
389	2	0	0	0	0	0	0	200	300	0	0	0	0	0	0	0	200	903	0	0	0	0	0	0	0	603	903	0
389	3	0	0	0	0	0	0	200	300	0	0	0	0	0	0	0	200	903	0	0	0	0	0	0	0	603	903	0
389	4	0	0	0	0	0	0	200	300	0	0	0	0	0	0	0	200	903	0	0	0	0	0	0	0	603	903	0
389	5	0	0	0	0	0	0	200	300	0	0	0	0	0	0	0	200	903	0	0	0	0	0	0	0	603	903	0
389	6	0	0	0	0	0	0	200	300	0	0	0	0	0	0	0	200	903	0	0	0	0	0	0	0	603	903	0
389	7	0	0	0	0	0	0	200	300	0	0	0	0	0	0	0	200	903	0	0	0	0	0	0	0	603	903	0
389	8	0	0	0	0	0	0	200	300	0	0	0	0	0	0	0	200	903	0	0	0	0	0	0	0	603	903	0
389	9	0	0	0	0	0	0	200	300	0	0	0	0	0	0	0	200	903	0	0	0	0	0	0	0	603	903	0
390	0	0	0	0	0	0	0	200	300	0	0	0	0	0	0	0	200	903	0	0	0	0	0	0	0	603	903	0
390	1	0	0	0	0	0	0	200	300	0	0	0	0	0	0	0	200	903	0	0	0	0	0	0	0	603	903	0
390	2	0	0	0	0	0	0	200	300	0	0	0	0	0	0	0	200	903	0	0	0	0	0	0	0	603	903	0
390	3	0	0	0	0	0	0	200	300	0	0	0	0	0	0	0	200	903	0	0	0	0	0	0	0	603	903	0
390	4	0	0	0	0	0	0	200	300	0	0	0	0	0	0	0	200	903	0	0	0	0	0	0	0	603	903	0
390	5	0	0	0	0	0	0	200	300	0	0	0	0	0	0	0	200	903	0	0	0	0	0	0	0	603	903	0
390	6	0	0	0	0	0	0	200	300	0	0	0	0	0	0	0	200	903	0	0	0	0	0	0	0	603	903	0
390	7	0	0	0	0	0	0	200	300	0	0	0	0	0	0	0	200	903	0	0	0	0	0	0	0	603	903	0
390	8	0	0	0	0	0	0	200	300	0	0	0	0	0	0	0	200	903	0	0	0	0	0	0	0	603	903	0
390	9	0	0	0	0	0	0	200	300	0	0	0	0	0	0	0	200	903	0	0	0	0	0	0	0	603	903	0
391	0	0	0	0	0	0	0	200	300	0	0	0	0	0	0	0	200	903	0	0	0	0	0	0	0	603	903	0
391	1	0	0	0	0	0	0	200	300	0	0	0	0	0	0	0	200	903	0	0	0	0	0	0	0	603	903	0
391	2	0	0	0	0	0	0	200	300	0	0	0	0	0	0	0	200	903	0	0	0	0	0	0	0	603	903	0
391	3	0	0	0	0	0	0	200	300	0	0	0	0	0	0	0	200	903	0	0	0	0	0	0	0	603	903	0
391	4	0	0	0	0	0	0	200	300	0	0	0	0	0	0	0	200	903	0	0	0	0	0	0	0	603	903	0
391	5	0	0	0	0	0	0	200	300	0	0	0	0	0	0	0	200	903	0	0	0	0	0	0	0	603	903	0
391	6	0	0	0	0	0	0	200	300	0	0	0	0	0	0	0	200	903	0	0	0	0	0	0	0	603	903	0
391	7	0	0	0	0	0	0	200	300	0	0	0	0	0	0	0	200	903	0	0	0	0	0	0	0	603	903	0
391	8	0	0	0	0	0	0	200	300	0	0	0	0	0	0	0	200	903	0	0	0	0	0	0	0	603	903	0
391	9	0	0	0	0	0	0	200	300	0	0	0	0	0	0	0	200	903	0	0	0	0	0	0	0	603	903	0
392	0	0	0	0	0	0	0	200	300	0	0	0	0	0	0	0	200	903	0	0	0	0	0	0	0	603	903	0
392	1	0	0	0	0	0	0	200	300	0	0	0	0	0	0	0	200	903	0	0	0	0	0	0	0	603	903	0
392	2	0	0	0	0	0	0	200	300	0	0	0	0	0	0	0	200	903	0	0	0	0	0	0	0	603	903	0
392	3	0	0	0	0	0	0	200	300	0	0	0	0	0	0	0	200	903	0	0	0	0	0	0	0	603	903	0
392	4	0	0	0	0	0	0	200	300	0	0	0	0	0	0	0	200	903	0	0	0	0	0	0	0	603	903	0
392	5	0	0	0	0	0	0	200	300	0	0	0	0	0	0	0	200	903	0	0	0	0	0	0	0	603	903	0
392	6	0	0	0	0	0	0	200	300	0	0	0	0	0	0	0	200	903	0	0	0	0	0	0	0	603	903	0
392	7	0	0	0	0	0	0	200	300	0	0	0	0	0	0	0	200	903	0	0	0	0	0	0	0	603	903	0
392	8	0	0	0	0	0	0	200	300	0	0	0	0	0	0	0	200	903	0	0	0	0	0	0	0	603	903	0
392	9	0	0	0	0	0	0	200	300	0	0	0	0	0	0	0	200	903	0	0	0	0	0	0	0	603	903	0
393	0	0	0	0	0	0	0	200	300	0	0	0	0	0	0	0	200	903	0	0	0	0	0	0	0	603	903	0
393	1	0	0	0	0	0	0	200	300	0	0	0	0	0	0	0	200	903	0	0	0	0	0	0	0	603	903	0
393	2	0	0	0	0	0	0	200	300	0	0	0	0	0	0	0	200	903	0	0	0	0	0	0	0	603	903	0
393	3	0	0	0	0	0	0	200	300	0	0	0	0	0	0	0	200	903	0	0	0	0	0	0	0	603	903	0
393	4	0	0	0	0	0	0	200	300	0	0	0	0	0	0	0	200	903	0	0	0	0	0	0	0	603	903	0
393	5	0	0	0	0	0	0	200	300	0	0	0	0	0	0	0	200	903	0	0	0	0	0	0	0	603	903	0
393	6	0	0	0	0	0	0	200	300	0	0	0	0	0	0	0	200	903	0	0	0	0	0	0	0	603	903	0
393	7	0	0	0	0	0	0	200	300	0	0	0	0	0	0	0	200	903	0	0	0	0	0	0	0	603	903	0
393	8	0	0	0	0	0	0	200	300	0	0	0	0	0	0	0	200	903	0	0	0	0	0	0	0	603	903	0
393	9	0	0	0	0	0	0	200	300	0	0	0	0	0	0	0	200	903	0	0	0	0	0	0	0	603	903	0
394	0	0	0	0	0	0	0	200	300	0	0	0	0	0	0	0	200	903	0	0	0	0	0	0	0	603	903	0
394	1	0	0	0	0	0	0	200	300	0	0	0	0	0	0	0	200	903	0	0	0	0	0	0	0	603	903	0
394	2	0	0	0	0	0	0	200	300	0	0	0	0	0	0	0	200	903	0	0	0	0	0	0	0	603	903	0
394	3	0	0	0	0	0	0	200	300	0	0	0	0	0	0	0	200	903	0	0	0	0	0	0	0	603	903	0
394	4	0	0	0	0	0	0	200	300	0	0	0	0	0	0	0	200	903	0	0	0	0	0	0	0	603	903	0
394	5	0	0	0	0	0	0	200	300	0	0	0	0	0	0	0	200	903	0	0	0	0	0	0	0	603	903	0
394	6	0	0	0	0	0	0	200	300	0	0	0	0	0	0	0	200	903	0	0	0	0	0	0	0	603	903	0
394	7	0	0	0	0	0	0	200	300	0	0	0	0	0	0	0	200	903	0	0	0	0	0	0	0	603	903	0
394	8	0	0	0	0	0	0	200	300	0	0	0	0	0	0	0	200	903	0	0	0	0	0	0	0	603	903	0
394	9	0	0	0	0	0	0	200	300	0	0	0	0	0	0	0	200	903	0	0	0	0	0	0	0	603	903	0
395	0	0	0	0	0	0	0	200	300	0	0	0	0	0	0	0	200	903	0	0	0	0	0	0	0	603	903	0
395	1	0	0	0	0	0	0	200	300	0	0	0	0	0	0	0	200	903	0	0	0	0	0	0	0	603	903	0
395	2	0	0	0	0	0	0	200	300	0	0	0	0	0	0	0	200	903	0	0	0	0	0	0	0	603	903	0
395	3	0	0	0	0	0	0	200	300	0	0	0	0	0	0	0	200	903	0	0	0	0	0	0	0	603	903	0
395	4	0	0	0	0	0	0	200	300	0	0	0	0	0	0	0	200	903	0	0	0	0	0	0	0	603	903	0
395	5	0	0	0	0	0	0	200	300	0	0	0	0	0	0	0	200	903	0	0	0	0	0	0	0	603	903	0
395	6	0	0	0	0	0	0	200	300	0	0	0	0	0	0	0	200	903	0	0	0	0	0	0	0	603	903	0
395	7	0	0	0	0	0	0	200	300	0	0	0	0	0	0	0	200	903	0	0	0	0	0	0	0	603	903	0
395	8	0	0	0	0	0	0	200	300	0	0	0	0	0	0	0	200	903	0	0	0	0	0	0	0	603	903	0
395	9	0	0	0	0	0	0	200	300	0	0	0	0	0	0	0	200	903	0	0	0	0	0	0	0	603	903	0
396	0	0	0	0	0	0	0	200	300	0	0	0	0	0	0	0	200	903	0	0	0	0	0	0	0	603	903	0
396	1	0	0	0	0	0	0	200	300	0	0	0	0	0	0	0	200	903	0	0	0	0	0	0	0	603	903	0
396	2	0	0	0	0	0	0	200	300	0	0	0	0	0	0	0	200	903	0	0	0	0	0	0	0	603	903	0
396	3	0	0	0	0	0	0	200	300	0	-6.48498	-0.615535	-31.3232	-6507.57	6432.68	1587.11	405.364	1110.76	0	0	0	0	0	0	0	603	903	0
396	4	0	0	0	0	0	0	200	300	0	3.58582	13.27	-30.4077	-4951.17	5273.01	2365.31	373.41	1065.83	0	0	0	0	0	0	0	603	903	0
396	5	0	0	0	0	0	0	200	300	0	5.41687	19.5261	-22.7783	-4951.17	4357.48	2502.64	391.3	1120.36	0	0	0	0	0	0	0	603	903	0
396	6	0	0	0	0	0	0	200	300	0	-8.62121	15.5588	-22.7783	-6507.57	6371.65	3051.96	479.724	1188.69	0	0	0	0	0	0	0	603	903	0
396	7	0	0	0	0	0	0	200	300	0	6.17981	23.4934	-38.9526	-6873.78	6920.96	4196.37	377.676	1079.47	0	0	0	0	0	0	0	603	903	0
396	8	0	0	0	0	0	0	200	300	0	9.07898	31.4279	-49.3286	-7972.41	7958.56	4150.59	361.338	1064.62	0	0	0	0	0	0	0	603	903	0
396	9	0	0	0	0	0	0	200	300	0	-1.44958	28.3762	-45.6665	-9345.7	9545.47	4745.68	409.026	1107.65	0	0	0	0	0	0	0	603	903	0
397	0	0	0	0	0	0	0	200	300	0	1.297	33.8693	-45.0562	-8704.83	9484.44	5706.99	410.503	1096.2	0	0	0	0	0	0	0	603	903	0
397	1	0	0	0	0	0	0	200	300	0	8.01087	39.3625	-57.2632	-9528.81	10522	5569.66	383.749	1069.4	0	0	0	0	0	0	0	603	903	0
397	2	0	0	0	0	0	0	200	300	0	4.50135	38.2944	-67.0288	-11909.2	11925.8	5569.66	377.921	1080.67	0	0	0	0	0	0	0	603	903	0
397	3	0	0	0	0	0	0	200	300	0	4.50135	39.6677	-68.5547	-12366.9	12536.2	6530.96	382.864	1083.4	0	0	0	0	0	0	0	603	903	0
397	4	0	0	0	0	0	0	200	300	0	5.41687	39.6677	-76.1841	-13374	13940	5798.54	382.978	1078.55	0	0	0	0	0	0	0	603	903	0
397	5	0	0	0	0	0	0	200	300	0	6.48499	38.7521	-82.8979	-15022	15588	5844.31	388.038	1084.21	0	0	0	0	0	0	0	603	903	0
397	6	0	0	0	0	0	0	200	300	0	8.62122	42.2617	-91.4429	-15388.2	15771.1	7034.5	372.469	1071.28	0	0	0	0	0	0	0	603	903	0
397	7	0	0	0	0	0	0	200	300	0	5.87464	41.4987	-97.2412	-17127.7	17113.8	6027.42	375.994	1079.14	0	0	0	0	0	0	0	603	903	0
397	8	0	0	0	0	0	0	200	300	0	1.60218	39.6677	-103.04	-17585.4	18578.7	6118.97	380.306	1073.67	0	0	0	0	0	0	0	603	903	0
397	9	0	0	0	0	0	0	200	300	0	9.68933	43.3298	-114.331	-18775.6	19372.1	7400.71	369.439	1067.22	0	0	0	0	0	0	0	603	903	0
398	0	0	0	0	0	0	0	200	300	0	7.24793	43.1772	-123.181	-20606.7	20592.8	7171.83	367.175	1070.29	0	0	0	0	0	0	0	603	903	0
398	1	0	0	0	0	0	0	200	300	0	-0.381466	43.9401	-128.979	-21980	22790.1	7080.28	376.696	1073.41	0	0	0	0	0	0	0	603	903	0
398	2	0	0	0	0	0	0	200	300	0	1.60218	46.9919	-138.135	-22529.3	23278.4	8453.57	368.519	1066.1	0	0	0	0	0	0	0	603	903	0
398	3	0	0	0	0	0	0	200	300	0	4.04358	44.3979	-145.459	-23811	24865.3	7492.26	370.944	1066.7	0	0	0	0	0	0	0	603	903	0
398	4	0	0	0	0	0	0	200	300	0	0.228886	42.7194	-156.75	-25459	26208.1	7400.71	367.196	1065.42	0	0	0	0	0	0	0	603	903	0
398	5	0	0	0	0	0	0	200	300	0	-1.29699	43.7875	-161.938	-26283	27245.7	8636.67	368.247	1065.3	0	0	0	0	0	0	0	603	903	0
398	6	0	0	0	0	0	0	200	300	0	-3.28064	39.5151	-168.652	-27198.5	28771.5	6759.84	370.597	1064.27	0	0	0	0	0	0	0	603	903	0
398	7	0	0	0	0	0	0	200	300	0	-1.14441	36.1581	-177.197	-28205.6	29626	6622.51	367.192	1062.18	0	0	0	0	0	0	0	603	903	0
398	8	0	0	0	0	0	0	200	300	0	0.839237	34.7849	-182.69	-29121.1	30114.3	7492.26	364.838	1062.4	0	0	0	0	0	0	0	603	903	0
398	9	0	0	0	0	0	0	200	300	0	-4.65393	28.8339	-190.625	-30128.2	31640.2	5340.77	365.981	1061.05	0	0	0	0	0	0	0	603	903	0
399	0	0	0	0	0	0	0	200	300	0	-4.50134	25.1718	-196.729	-30402.8	32128.5	4791.46	363.314	1057.54	0	0	0	0	0	0	0	603	903	0
399	1	0	0	0	0	0	0	200	300	0	-0.228878	25.3244	-200.696	-30219.7	32067.4	5478.1	359.781	1053.57	0	0	0	0	0	0	0	603	903	0
399	2	0	0	0	0	0	0	200	300	0	-3.43322	20.8994	-207.715	-32142.3	34264.7	3830.15	364.96	1057.74	0	0	0	0	0	0	0	603	903	0
399	3	0	0	0	0	0	0	200	300	0	-6.02722	15.7114	-206.799	-32050.8	34692	3509.72	367.757	1057.99	0	0	0	0	0	0	0	603	903	0
399	4	0	0	0	0	0	0	200	300	0	-4.50134	13.27	-215.649	-32691.6	34753	3830.15	361.155	1054.6	0	0	0	0	0	0	0	603	903	0
399	5	0	0	0	0	0	0	200	300	0	-4.34875	11.4389	-219.006	-33607.2	35729.6	2227.98	363.144	1056.45	0	0	0	0	0	0	0	603	903	0
399	6	0	0	0	0	0	0	200	300	0	-4.80651	7.92939	-221.753	-33607.2	36584.1	1724.44	364.977	1054.55	0	0	0	0	0	0	0	603	903	0
399	7	0	0	0	0	0	0	200	300	0	-6.02722	3.50434	-228.162	-33973.4	37072.3	2044.88	362.483	1051.9	0	0	0	0	0	0	0	603	903	0
399	8	0	0	0	0	0	0	200	300	0	-5.11169	-1.0733	-232.129	-34522.7	37499.6	488.48	361.546	1051.72	0	0	0	0	0	0	0	603	903	0
399	9	0	0	0	0	0	0	200	300	0	-6.02722	-3.36212	-236.096	-34522.7	38171	76.4922	361.676	1049.22	0	0	0	0	0	0	0	603	903	0
400	0	0	0	0	0	0	0	200	300	0	-5.56945	-7.02423	-237.317	-34522.7	38720.3	305.374	363.159	1048.47	0	0	0	0	0	0	0	603	903	0
400	1	0	0	0	0	0	0	200	300	0	-7.40051	-11.1441	-241.589	-35163.6	39391.7	-1251.02	363.052	1048.55	0	0	0	0	0	0	0	603	903	0
400	2	0	0	0	0	0	0	200	300	0	-6.17981	-12.5174	-247.083	-35804.4	40002	-1846.12	361.897	1047.91	0	0	0	0	0	0	0	603	903	0
400	3	0	0	0	0	0	0	200	300	0	-7.09533	-17.095	-249.219	-36079.1	41222.7	-1479.9	365.408	1047.77	0	0	0	0	0	0	0	603	903	0
400	4	0	0	0	0	0	0	200	300	0	-7.40051	-21.9778	-255.933	-36170.7	42016.2	-2715.87	364.169	1044.33	0	0	0	0	0	0	0	603	903	0
400	5	0	0	0	0	0	0	200	300	0	-7.24792	-23.6563	-260.51	-37452.4	42138.3	-3448.29	361.753	1046.77	0	0	0	0	0	0	0	603	903	0
400	6	0	0	0	0	0	0	200	300	0	-9.23156	-25.9451	-267.834	-38001.7	43603.1	-3127.85	362.799	1044.89	0	0	0	0	0	0	0	603	903	0
400	7	0	0	0	0	0	0	200	300	0	-8.92639	-29.9124	-274.854	-39191.9	45556.2	-4501.15	365.747	1045.59	0	0	0	0	0	0	0	603	903	0
400	8	0	0	0	0	0	0	200	300	0	-5.87463	-31.1331	-283.398	-38276.4	46349.7	-5142.02	363.55	1038.06	0	0	0	0	0	0	0	603	903	0
400	9	0	0	0	0	0	0	200	300	0	-7.40051	-34.9478	-292.859	-40382.1	47265.2	-4821.58	361.392	1040.89	0	0	0	0	0	0	0	603	903	0
401	0	0	0	0	0	0	0	200	300	0	-9.07898	-37.2366	-301.709	-40290.5	49950.8	-5782.89	365.559	1036.54	0	0	0	0	0	0	0	603	903	0
401	1	0	0	0	0	0	0	200	300	0	-6.33239	-37.6944	-311.78	-41846.9	51415.6	-6561.08	364.91	1037.22	0	0	0	0	0	0	0	603	903	0
401	2	0	0	0	0	0	0	200	300	0	-7.24792	-39.678	-321.24	-42854	52575.3	-6103.32	363.663	1036.4	0	0	0	0	0	0	0	603	903	0
401	3	0	0	0	0	0	0	200	300	0	-7.70568	-41.5091	-333.447	-44685.1	54528.4	-7201.95	363.529	1037.01	0	0	0	0	0	0	0	603	903	0
401	4	0	0	0	0	0	0	200	300	0	-5.41687	-42.7298	-342.908	-45417.5	56298.4	-7522.39	364.18	1035.45	0	0	0	0	0	0	0	603	903	0
401	5	0	0	0	0	0	0	200	300	0	-6.94275	-44.4083	-353.284	-46241.5	58678.8	-7522.39	366.095	1033.89	0	0	0	0	0	0	0	603	903	0
401	6	0	0	0	0	0	0	200	300	0	-5.72204	-45.1712	-364.27	-47065.4	60021.6	-8071.71	364.772	1032.2	0	0	0	0	0	0	0	603	903	0
401	7	0	0	0	0	0	0	200	300	0	-4.34875	-46.2393	-373.12	-48164.1	61120.2	-8758.35	363.808	1032.08	0	0	0	0	0	0	0	603	903	0
401	8	0	0	0	0	0	0	200	300	0	-7.24792	-48.0704	-383.801	-48164.1	63622.6	-7980.15	365.77	1028.49	0	0	0	0	0	0	0	603	903	0
401	9	0	0	0	0	0	0	200	300	0	-7.40051	-49.4437	-394.177	-50636	64782.3	-8575.25	364.348	1031.46	0	0	0	0	0	0	0	603	903	0
402	0	0	0	0	0	0	0	200	300	0	-4.65393	-50.054	-401.501	-49171.1	65270.6	-8941.46	362.566	1025.47	0	0	0	0	0	0	0	603	903	0
402	1	0	0	0	0	0	0	200	300	0	-5.72204	-51.5799	-408.215	-51093.8	67650.9	-8666.8	365.724	1028.16	0	0	0	0	0	0	0	603	903	0
402	2	0	0	0	0	0	0	200	300	0	-6.48498	-53.1058	-417.065	-52009.3	68810.6	-9033.01	364.988	1027.7	0	0	0	0	0	0	0	603	903	0
402	3	0	0	0	0	0	0	200	300	0	-2.67028	-52.9532	-424.39	-52192.4	69176.9	-9628.1	363.003	1025.98	0	0	0	0	0	0	0	603	903	0
402	4	0	0	0	0	0	0	200	300	0	-5.41687	-55.8524	-431.714	-52650.1	70458.6	-9536.55	363.207	1024.96	0	0	0	0	0	0	0	603	903	0
402	5	0	0	0	0	0	0	200	300	0	-3.89099	-57.5308	-436.902	-53199.5	72106.5	-9536.55	365.041	1024.77	0	0	0	0	0	0	0	603	903	0
402	6	0	0	0	0	0	0	200	300	0	-1.75476	-57.5308	-441.479	-53565.7	72289.6	-10177.4	363.744	1024.33	0	3.23242	-0.760651	-19.4611	-607.452	-3673.34	423.203	414.247	934.214	0
402	7	0	0	0	0	0	0	200	300	0	-4.04358	-59.2093	-447.278	-53565.7	73083.1	-10131.6	363.395	1022.76	0	3.69019	-0.150299	-21.2921	-1431.43	-4039.55	11.2153	413.28	970.228	0
402	8	0	0	0	0	0	0	200	300	0	-2.82287	-60.7352	-452.466	-53748.8	73937.6	-10360.5	363.41	1021.79	0	4.14795	0.00228843	-21.5973	-1431.43	-4405.76	-263.443	399.004	969.278	0
402	9	0	0	0	0	0	0	200	300	0	-0.534054	-62.1085	-457.654	-53931.9	74731	-10909.8	363.292	1020.84	0	4.7583	-0.608063	-24.649	-1980.74	-4710.94	102.768	411.88	983.358	0
403	0	0	0	0	0	0	0	200	300	0	-0.381466	-62.7188	-460.706	-54298.1	75280.4	-10497.9	363.402	1020.86	0	3.69019	-0.302887	-27.7008	-2163.85	-4894.04	-400.772	426.325	981.115	0
403	1	0	0	0	0	0	0	200	300	0	-0.381466	-65.0076	-462.537	-53931.9	75829.6	-10635.2	363.943	1019.6	0	4.45313	0.154876	-27.0905	-2530.06	-5077.15	-538.101	415.585	996.393	0
403	2	0	0	0	0	0	0	200	300	0	0.991825	-65.0076	-465.894	-54023.5	76379	-11230.3	363.941	1018.96	0	6.74194	-0.608063	-28.9215	-2163.85	-5687.5	-354.996	406.347	977.818	0
403	3	0	0	0	0	0	0	200	300	0	2.67029	-66.6861	-469.861	-54023.5	76928.3	-11321.8	363.726	1017.98	0	5.21607	0.154876	-29.837	-1980.74	-5931.64	-217.667	404.199	969.385	0
403	4	0	0	0	0	0	0	200	300	0	2.82288	-67.9068	-470.166	-54115	77416.6	-11367.6	364.658	1018.1	0	6.43677	0.154876	-38.0768	-3170.93	-7518.56	-766.983	405.542	986.277	0
403	5	0	0	0	0	0	0	200	300	0	4.19617	-69.2801	-475.049	-54755.9	77843.9	-11688	363.865	1018.26	0	6.58936	2.13852	-50.8942	-2530.06	-9288.57	-812.76	420.492	952.712	0
403	6	0	0	0	0	0	0	200	300	0	7.09534	-71.2637	-478.101	-55122.1	78820.4	-12145.8	364.862	1018.29	0	6.13159	5.64804	-50.589	-3354.04	-10387.2	-1316.3	397.674	969.3	0
403	7	0	0	0	0	0	0	200	300	0	11.0626	-74.4681	-481.152	-53931.9	79308.7	-12924	364.831	1015.09	0	10.0989	3.20663	-56.9977	-3354.04	-11241.7	-1041.64	405.769	961.845	0
403	8	0	0	0	0	0	0	200	300	0	17.6239	-78.5879	-483.289	-54206.6	78942.5	-14160	363.344	1015.16	0	15.4395	1.98593	-61.2701	-3537.14	-12157.2	-1041.64	404.58	960.73	0
403	9	0	0	0	0	0	0	200	300	0	13.6566	-82.0975	-485.425	-54664.3	79980	-14572	364.763	1015.61	0	12.5403	4.27475	-66.4581	-3903.35	-12340.3	-1499.41	417.314	961.734	0
404	0	0	0	0	0	0	0	200	300	0	18.9972	-83.1656	-489.087	-54481.2	79491.8	-15121.3	362.531	1014.39	0	12.8455	5.49545	-71.9513	-3628.69	-13377.9	-1178.97	417.07	953.433	0
404	1	0	0	0	0	0	0	200	300	0	23.2697	-86.5225	-490.918	-54115	80712.5	-16265.7	364.411	1013.23	0	16.9653	0.765228	-75.3082	-3720.25	-14476.6	-950.089	410.769	952.4	0
404	2	0	0	0	0	0	0	200	300	0	21.7438	-90.032	-490.918	-54298.1	81322.8	-16723.4	365.655	1013.61	0	15.7446	-1.52359	-77.7496	-3262.48	-14659.7	-446.549	414.45	944.961	0
404	3	0	0	0	0	0	0	200	300	0	20.2179	-92.1683	-498.242	-54664.3	82055.2	-17181.2	364.689	1012.71	0	12.998	-0.302887	-78.9703	-3445.59	-15148	-538.101	411.182	946.631	0
404	4	0	0	0	0	0	0	200	300	0	25.2533	-93.5416	-505.261	-54847.4	83031.8	-18051	364.334	1011.55	0	12.998	-2.13394	-83.548	-3903.35	-16002.4	102.768	411.464	949.72	0
404	5	0	0	0	0	0	0	200	300	0	25.2533	-97.9666	-508.008	-55122.1	83459.1	-18462.9	364.287	1011.51	0	17.2705	-4.88052	-85.379	-3079.38	-16307.6	377.426	411.997	939.067	0
404	6	0	0	0	0	0	0	200	300	0	24.4904	-98.8821	-512.585	-54664.3	83947.4	-18188.3	363.772	1009.64	0	14.9817	-5.33829	-84.4635	-3994.9	-16429.7	-126.114	408.482	950.297	0
404	7	0	0	0	0	0	0	200	300	0	22.5067	-101.476	-515.637	-55671.4	85046	-19012.3	364.934	1010.97	0	12.998	-4.57535	-91.1774	-4086.46	-16856.9	835.19	418.119	947.819	0
404	8	0	0	0	0	0	0	200	300	0	22.6593	-101.781	-520.825	-55396.7	85656.4	-18783.4	364.463	1009.36	0	14.0662	-5.49088	-89.9567	-2804.72	-17162.1	285.874	412.218	934.179	0
404	9	0	0	0	0	0	0	200	300	0	23.5748	-101.781	-524.792	-55122.1	85961.5	-17822.1	363.801	1008.04	0	15.1343	-10.0685	-92.0929	-3170.93	-17223.1	285.874	415.981	937.432	0
405	0	0	0	0	0	0	0	200	300	0	21.8964	-102.849	-525.098	-55396.7	86144.6	-19241.1	364.055	1008.5	0	13.1506	-8.23746	-91.1774	-3811.8	-17589.4	1292.95	410.086	944.806	0
405	1	0	0	0	0	0	0	200	300	0	21.4386	-102.544	-530.591	-55396.7	86632.9	-18829.1	363.276	1007.41	0	11.167	-7.47452	-89.9567	-3903.35	-17772.5	560.532	405.433	946.392	0
405	2	0	0	0	0	0	0	200	300	0	22.3541	-101.934	-532.422	-56037.6	87182.2	-18462.9	363.746	1008.25	0	12.0825	-10.0685	-93.924	-3903.35	-17894.5	652.085	412.479	944.559	0
405	3	0	0	0	0	0	0	200	300	0	21.8964	-100.408	-536.389	-56220.7	87853.6	-18920.7	363.787	1007.81	0	13.3032	-11.8996	-93.6188	-4086.46	-18382.8	1430.28	406.642	946.65	0
405	4	0	0	0	0	0	0	200	300	0	21.8964	-99.9502	-537.305	-56037.6	88219.8	-18646	364.19	1007.29	0	10.8618	-10.3737	-95.755	-3537.14	-18688	926.743	407.835	939.94	0
405	5	0	0	0	0	0	0	200	300	0	25.1007	-98.7295	-540.662	-55213.6	88647	-18142.5	363.96	1005.12	0	9.03076	-8.69522	-95.1447	-3720.25	-18993.2	972.519	403.376	942.101	0
405	6	0	0	0	0	0	0	200	300	0	24.1852	-98.8821	-543.408	-55854.5	88769.1	-18554.5	363.356	1005.79	0	12.8455	-11.1366	-97.5861	-3537.14	-18993.2	1384.51	408.37	939.246	0
405	7	0	0	0	0	0	0	200	300	0	24.3378	-96.5933	-541.577	-55762.9	88891.2	-18279.8	364.134	1005.96	0	12.6929	-11.5944	-98.1964	-3720.25	-19054.2	926.743	408.958	940.886	0
405	8	0	0	0	0	0	0	200	300	0	23.4222	-97.9666	-545.544	-55305.2	89684.7	-17684.7	364.395	1004.38	0	10.2515	-9.30557	-99.4171	-3445.59	-19542.5	972.519	406.429	937.658	0
405	9	0	0	0	0	0	0	200	300	0	26.0162	-97.5088	-547.375	-55305.2	89684.7	-18646	363.845	1004.04	0	8.72559	-9.15298	-101.859	-3537.14	-19847.7	1430.28	408.145	937.726	0
406	0	0	0	0	0	0	0	200	300	0	26.6266	-96.7459	-548.901	-55854.5	89623.6	-18234.1	363.278	1004.76	0	10.8618	-11.747	-102.774	-3537.14	-19969.7	697.861	408.693	937.417	0
406	1	0	0	0	0	0	0	200	300	0	25.7111	-97.9666	-551.038	-56129.1	89989.8	-18142.5	363.31	1004.86	0	11.167	-11.4418	-104.91	-3354.04	-20824.2	926.743	404.504	934.971	0
406	2	0	0	0	0	0	0	200	300	0	26.0162	-98.8821	-554.7	-55122.1	90356	-18691.8	362.892	1002.37	0	9.03076	-9.45816	-106.741	-3170.93	-20519.1	1338.73	410.768	932.707	0
406	3	0	0	0	0	0	0	200	300	0	29.068	-99.4925	-553.174	-55030.5	90478.1	-18554.5	363.562	1002.48	0	8.87817	-10.8315	-108.267	-2438.51	-20641.1	1338.73	412.35	925.523	0
406	4	0	0	0	0	0	0	200	300	0	29.8309	-99.6451	-554.089	-55122.1	90661.2	-18600.3	363.622	1002.48	0	10.8618	-11.8996	-111.319	-3170.93	-21190.4	835.19	412.642	931.485	0
406	5	0	0	0	0	0	0	200	300	0	29.6783	-101.476	-556.836	-55396.7	91454.6	-19103.8	364.24	1002.48	0	10.5566	-10.0685	-112.845	-3903.35	-21373.5	1155.62	413.594	937.59	0
406	6	0	0	0	0	0	0	200	300	0	33.6456	-101.934	-555.615	-55946	91454.6	-19424.2	364.601	1003.69	0	10.4041	-10.6789	-112.54	-3445.59	-21495.6	1155.62	411.995	933.617	0
406	7	0	0	0	0	0	0	200	300	0	31.2042	-103.307	-561.414	-54847.4	91576.7	-19286.9	363.118	1000.7	0	10.2515	-11.1366	-112.845	-3811.8	-21983.9	1201.4	408.185	936.779	0
406	8	0	0	0	0	0	0	200	300	0	33.7982	-104.07	-561.108	-55030.5	91820.9	-20019.3	363.642	1001.07	0	10.7092	-11.4418	-114.676	-3537.14	-21617.7	1338.73	414.489	933.845	0
406	9	0	0	0	0	0	0	200	300	0	34.5612	-104.833	-563.55	-55579.8	92187.1	-19698.9	363.583	1001.62	0	9.94629	-10.5263	-117.422	-3537.14	-22472.2	1292.95	411.621	933.123	0
407	0	0	0	0	0	0	0	200	300	0	34.4086	-104.375	-565.991	-55396.7	92919.5	-19698.9	364.171	1000.88	0	8.87817	-10.3737	-120.474	-3445.59	-22289.1	1064.07	417.989	931.6	0
407	1	0	0	0	0	0	0	200	300	0	34.8663	-105.596	-569.348	-55488.3	92858.5	-20156.7	363.096	1000.46	0	10.8618	-11.4418	-117.117	-3628.69	-23021.5	1064.07	406.432	933.983	0
407	2	0	0	0	0	0	0	200	300	0	38.2233	-107.122	-571.484	-55122.1	93224.7	-19973.6	363.127	999.454	0	11.3196	-11.1366	-122.916	-3079.38	-23265.6	1292.95	413.719	928.053	0
407	3	0	0	0	0	0	0	200	300	0	37.3077	-107.732	-573.01	-55946	93835.1	-19927.8	363.758	1000.64	0	9.94629	-10.984	-124.136	-3537.14	-23326.7	1201.4	415.088	931.494	0
407	4	0	0	0	0	0	0	200	300	0	37.3077	-106.817	-576.978	-54664.3	94506.4	-20202.4	363.796	997.743	0	9.64111	-11.747	-123.526	-3445.59	-23876	1430.28	409.713	930.894	0
407	5	0	0	0	0	0	0	200	300	0	40.5121	-105.443	-579.724	-55946	94445.4	-20156.7	362.914	999.505	0	12.5403	-12.6625	-125.967	-3537.14	-23753.9	1613.39	414.428	931.08	0
407	6	0	0	0	0	0	0	200	300	0	39.9017	-107.427	-583.691	-55396.7	95360.9	-19836.2	363.376	997.908	0	11.167	-12.3573	-126.883	-3903.35	-24120.1	1338.73	412.903	933.763	0
407	7	0	0	0	0	0	0	200	300	0	40.3595	-107.885	-585.828	-55946	95544	-20110.9	363.092	998.499	0	9.03076	-12.9677	-126.883	-3811.8	-23998.1	1201.4	413.865	933.042	0
407	8	0	0	0	0	0	0	200	300	0	40.2069	-107.732	-589.185	-56403.8	95849.2	-20706	362.681	998.732	0	9.94629	-13.2729	-126.578	-3720.25	-24303.2	1796.49	410.998	932.391	0
407	9	0	0	0	0	0	0	200	300	0	41.1224	-105.596	-589.49	-56495.4	96642.7	-20202.4	363.943	998.838	0	11.167	-13.8832	-128.409	-3903.35	-24425.3	1567.61	412.785	933.398	0
408	0	0	0	0	0	0	0	200	300	0	41.5802	-107.427	-595.593	-55854.5	97497.2	-20522.9	363.698	996.78	0	9.7937	-14.341	-129.324	-2896.27	-24791.5	1750.72	411.3	925.395	0
408	1	0	0	0	0	0	0	200	300	0	40.3595	-106.664	-599.866	-56129.1	98046.4	-20568.6	363.447	996.57	0	9.03076	-12.9677	-132.071	-3079.38	-24913.6	2025.38	414.362	926.316	0
408	2	0	0	0	0	0	0	200	300	0	40.6647	-107.732	-603.223	-57136.2	98351.7	-20385.5	363.044	997.718	0	10.2515	-14.0358	-130.85	-2530.06	-24974.6	1796.49	412.136	922.336	0
408	3	0	0	0	0	0	0	200	300	0	39.5966	-106.206	-606.274	-56861.6	98962	-20660.2	363.23	996.789	0	10.7092	-14.4936	-129.324	-3445.59	-25401.9	1750.72	406.58	929.643	0
408	4	0	0	0	0	0	0	200	300	0	40.6647	-107.885	-609.631	-56861.6	99816.5	-20614.4	363.733	996.272	0	9.48853	-14.7987	-134.512	-3720.25	-25523.9	2254.26	413.248	930.657	0
408	5	0	0	0	0	0	0	200	300	0	40.2069	-107.122	-612.073	-56495.4	99755.4	-20294	362.98	995.302	0	9.94629	-14.0358	-133.597	-3994.9	-25340.8	1659.17	413.319	932.903	0
408	6	0	0	0	0	0	0	200	300	0	41.1224	-107.122	-616.956	-56953.1	100183	-20385.5	362.382	995.313	0	10.5566	-14.6461	-134.818	-3445.59	-25218.8	1888.05	415.942	928.557	0
408	7	0	0	0	0	0	0	200	300	0	40.6647	-108.037	-617.261	-57960.2	101159	-20660.2	363.884	996.899	0	10.7092	-15.4091	-133.597	-3537.14	-25707	2116.93	410.577	929.476	0
408	8	0	0	0	0	0	0	200	300	0	40.8173	-108.8	-623.059	-57502.5	101648	-19836.2	363.143	995.291	0	9.7937	-14.341	-133.292	-3628.69	-25890.1	1796.49	408.763	930.224	0
408	9	0	0	0	0	0	0	200	300	0	41.7328	-107.274	-625.5	-57594	101770	-20339.8	362.701	995.077	0	9.64111	-14.6461	-137.259	-3628.69	-26012.2	1933.82	413.488	929.437	0
409	0	0	0	0	0	0	0	200	300	0	41.5802	-107.58	-628.857	-57227.8	102380	-20339.8	362.803	994.003	0	11.167	-14.6461	-137.259	-2621.61	-26195.3	1933.82	412.154	922.1	0
409	1	0	0	0	0	0	0	200	300	0	40.8173	-105.749	-630.994	-58234.9	103051	-20019.3	363.316	995.291	0	9.7937	-15.2565	-137.259	-2713.17	-26561.5	1842.27	409.486	922.767	0
409	2	0	0	0	0	0	0	200	300	0	41.1224	-106.359	-635.266	-58326.4	103784	-19698.9	363.371	994.814	0	9.03076	-13.8832	-136.649	-3079.38	-26683.6	1704.94	407.728	925.535	0
409	3	0	0	0	0	0	0	200	300	0	42.3431	-106.969	-637.708	-57868.7	103479	-20156.7	362.267	993.745	0	10.0989	-14.341	-138.174	-3537.14	-26561.5	1796.49	410.768	928.599	0
409	4	0	0	0	0	0	0	200	300	0	42.038	-106.664	-639.539	-58418	104089	-19927.8	362.756	994.344	0	10.7092	-14.6461	-137.564	-3079.38	-26317.4	1659.17	411.69	925.385	0
409	5	0	0	0	0	0	0	200	300	0	41.7328	-106.664	-643.506	-58234.9	105004	-19927.8	363.176	993.496	0	10.2515	-14.6461	-138.48	-3079.38	-26622.6	1704.94	410.751	925.237	0
409	6	0	0	0	0	0	0	200	300	0	41.8854	-105.138	-644.727	-58784.2	105249	-20019.3	363.245	994.177	0	9.94629	-12.8151	-140.616	-3628.69	-26805.7	2025.38	412.369	928.806	0
409	7	0	0	0	0	0	0	200	300	0	42.4957	-106.054	-648.999	-58326.4	105066	-19424.2	361.889	992.871	0	9.48853	-13.2729	-136.649	-3903.35	-26622.6	1384.51	408.175	931.565	0
409	8	0	0	0	0	0	0	200	300	0	43.4113	-105.749	-648.389	-58692.6	105920	-19607.4	363.359	993.521	0	9.64111	-14.341	-141.531	-3170.93	-27171.9	1796.49	411.015	925.404	0
409	9	0	0	0	0	0	0	200	300	0	42.8009	-104.68	-653.271	-59241.9	106408	-19744.7	362.885	993.685	0	9.94629	-12.5099	-139.395	-2438.51	-27110.8	1704.94	408.511	920.493	0
410	0	0	0	0	0	0	0	200	300	0	44.1742	-104.528	-654.492	-59699.7	106164	-19515.8	362.208	994.215	0	8.42041	-12.9677	-140.921	-1980.74	-26988.8	1750.72	411.483	917.056	0
410	1	0	0	0	0	0	0	200	300	0	42.038	-104.07	-656.628	-58967.3	106652	-19515.8	362.424	992.803	0	9.48853	-14.0358	-140.311	-2621.61	-27232.9	1704.94	408.91	921.684	0
410	2	0	0	0	0	0	0	200	300	0	42.8009	-103.46	-659.985	-58967.3	107202	-19424.2	362.43	992.346	0	9.03076	-13.578	-140.921	-2987.82	-27049.8	1567.61	411.05	924.202	0
410	3	0	0	0	0	0	0	200	300	0	42.4957	-103.155	-660.596	-59516.6	107690	-19012.3	363.02	993.095	0	8.573	-13.4254	-142.142	-2896.27	-27171.9	1796.49	411.839	923.376	0
410	4	0	0	0	0	0	0	200	300	0	41.5802	-104.223	-663.953	-57868.7	107751	-19149.6	362.287	990.158	0	8.11524	-12.8151	-142.447	-3079.38	-27110.8	1476.06	412.677	924.618	0
410	5	0	0	0	0	0	0	200	300	0	42.4957	-102.697	-664.868	-59608.2	107568	-18691.8	361.788	992.654	0	8.573	-14.7987	-140.616	-3262.48	-26622.6	2254.26	413.672	926.201	0
410	6	0	0	0	0	0	0	200	300	0	43.1061	-101.629	-667.615	-59241.9	107751	-18417.2	361.397	991.737	0	8.573	-13.7306	-140.005	-3079.38	-27171.9	1750.72	408.923	924.995	0
410	7	0	0	0	0	0	0	200	300	0	42.9535	-101.476	-668.53	-59058.8	108239	-18874.9	361.906	991.341	0	7.50488	-12.5099	-141.531	-2896.27	-27232.9	1659.17	410.584	923.464	0
410	8	0	0	0	0	0	0	200	300	0	41.7328	-101.781	-668.53	-59516.6	108361	-19058	362.089	992.026	0	7.65747	-13.1203	-140.921	-2896.27	-27171.9	1704.94	410.184	923.552	0
410	9	0	0	0	0	0	0	200	300	0	41.7328	-101.171	-670.972	-59608.2	108789	-18325.6	362.136	991.839	0	7.81006	-13.4254	-143.362	-2530.06	-27171.9	1659.17	413.467	920.648	0
411	0	0	0	0	0	0	0	200	300	0	40.8173	-100.713	-670.972	-59150.4	109155	-18600.3	362.682	991.156	0	7.65747	-12.6625	-141.531	-3537.14	-26927.7	1704.94	412.74	927.992	0
411	1	0	0	0	0	0	0	200	300	0	41.5802	-99.6451	-671.887	-58234.9	108667	-18646	361.733	989.674	0	7.19971	-12.8151	-140.921	-2896.27	-26988.8	1521.84	411.483	923.552	0
411	2	0	0	0	0	0	0	200	300	0	42.038	-97.3563	-672.192	-59425	108911	-18417.2	362.023	991.405	0	6.89453	-12.9677	-142.752	-3262.48	-27110.8	1933.82	413.084	925.854	0
411	3	0	0	0	0	0	0	200	300	0	40.3595	-98.577	-675.244	-58509.5	109216	-18462.9	361.743	989.649	0	7.3523	-12.6625	-141.226	-3354.04	-27110.8	1476.06	411.032	926.749	0
411	4	0	0	0	0	0	0	200	300	0	40.6647	-98.577	-675.244	-59241.9	109155	-18371.4	361.652	990.734	0	7.65747	-12.8151	-140.921	-2896.27	-26927.7	1476.06	411.916	923.552	0
411	5	0	0	0	0	0	0	200	300	0	40.9699	-98.1192	-674.329	-57960.2	108911	-18096.7	361.51	988.953	0	6.58936	-12.5099	-142.752	-2987.82	-27416	1796.49	410.947	923.93	0
411	6	0	0	0	0	0	0	200	300	0	40.9699	-98.1192	-674.939	-58692.6	109033	-18142.5	361.545	989.96	0	7.81006	-12.5099	-142.142	-2713.17	-27355	1704.94	410.551	922.088	0
411	7	0	0	0	0	0	0	200	300	0	40.8173	-97.3563	-674.329	-58692.6	109094	-18279.8	361.781	990.039	0	7.81006	-12.9677	-141.226	-3079.38	-27294	1476.06	409.736	924.805	0
411	8	0	0	0	0	0	0	200	300	0	40.6647	-96.4407	-675.854	-58509.5	109277	-17867.9	361.687	989.571	0	7.96265	-12.0522	-143.362	-2987.82	-27110.8	2025.38	413.893	923.841	0
411	9	0	0	0	0	0	0	200	300	0	41.7328	-96.2881	-673.108	-58051.8	108544	-17867.9	361.259	989.244	0	7.96265	-12.2047	-143.057	-2804.72	-27110.8	1567.61	413.49	922.606	0
412	0	0	0	0	0	0	0	200	300	0	42.8009	-97.0511	-675.549	-58143.3	108667	-17776.3	360.857	989.068	0	7.3523	-11.8996	-139.7	-2987.82	-26866.7	1521.84	410.683	924.387	0
412	1	0	0	0	0	0	0	200	300	0	40.6647	-96.1356	-673.413	-58418	108606	-17639	361.276	989.749	0	7.04712	-12.6625	-143.362	-2987.82	-27110.8	1979.6	413.893	923.841	0
412	2	0	0	0	0	0	0	200	300	0	41.8854	-94.7623	-673.108	-57960.2	109338	-17501.6	362.438	989.108	0	6.74194	-11.5944	-142.142	-2804.72	-26866.7	1567.61	413.987	922.732	0
412	3	0	0	0	0	0	0	200	300	0	40.6647	-94.4571	-673.108	-57685.6	107934	-17364.3	360.352	988.7	0	5.82642	-11.1366	-139.395	-2713.17	-27110.8	1521.84	408.511	922.464	0
412	4	0	0	0	0	0	0	200	300	0	41.7328	-93.6941	-671.582	-57227.8	108850	-17684.7	362.08	988.213	0	7.50488	-11.747	-143.668	-2621.61	-27294	1704.94	413.02	921.248	0
412	5	0	0	0	0	0	0	200	300	0	40.6647	-94.7623	-672.192	-57319.4	108667	-17272.8	361.66	988.272	0	5.82642	-11.1366	-143.057	-1797.64	-27171.9	1613.39	413.063	915.566	0
412	6	0	0	0	0	0	0	200	300	0	40.2069	-93.8467	-669.446	-57594	108056	-17043.9	361.411	989.032	0	4.91089	-10.8315	-139.09	-2163.85	-27232.9	1430.28	407.206	918.557	0
412	7	0	0	0	0	0	0	200	300	0	38.9862	-92.9312	-668.835	-56403.8	108056	-17318.5	361.559	987.331	0	6.28418	-11.2892	-142.447	-2530.06	-27110.8	1430.28	412.677	920.761	0
412	8	0	0	0	0	0	0	200	300	0	40.3595	-92.0157	-665.173	-55762.9	108056	-16952.3	362.448	986.832	0	6.13159	-11.1366	-142.447	-2346.95	-26866.7	1384.51	414.391	919.476	0
412	9	0	0	0	0	0	0	200	300	0	40.0543	-92.7786	-666.699	-56312.3	107995	-17135.4	361.985	987.464	0	5.36865	-9.76334	-140.921	-2804.72	-26988.8	1567.61	411.483	922.903	0
413	0	0	0	0	0	0	0	200	300	0	39.2914	-92.9312	-664.563	-56312.3	107263	-16860.8	361.404	987.736	0	6.58936	-11.1366	-143.668	-2255.4	-27110.8	1201.4	414.295	918.699	0
413	1	0	0	0	0	0	0	200	300	0	40.8173	-91.8631	-662.122	-56220.7	107202	-16769.2	361.906	987.91	0	5.36865	-10.0685	-141.837	-2346.95	-27171.9	1247.18	411.428	919.547	0
413	2	0	0	0	0	0	0	200	300	0	39.5966	-91.1002	-660.901	-55488.3	107446	-16677.7	362.575	986.959	0	5.67383	-10.984	-140.921	-2163.85	-27355	1247.18	408.884	918.355	0
413	3	0	0	0	0	0	0	200	300	0	40.0543	-90.4898	-657.239	-55030.5	106775	-16586.1	362.459	986.73	0	5.21607	-10.8315	-142.447	-2163.85	-26866.7	1292.95	414.391	918.191	0
413	4	0	0	0	0	0	0	200	300	0	40.2069	-90.3372	-658.459	-55396.7	106042	-16265.7	361.046	987.131	0	4.60571	-9.45816	-141.837	-1431.43	-26927.7	1109.85	413.15	913.092	0
413	5	0	0	0	0	0	0	200	300	0	39.9017	-90.795	-655.713	-54298.1	105676	-16357.2	361.162	985.808	0	4.91089	-10.2211	-140.005	-2163.85	-26866.7	1109.85	411.103	918.456	0
413	6	0	0	0	0	0	0	200	300	0	39.5966	-89.4217	-652.966	-53657.2	105737	-16265.7	361.933	985.175	0	5.36865	-10.3737	-140.311	-2438.51	-26683.6	1201.4	412.825	920.379	0
413	7	0	0	0	0	0	0	200	300	0	40.6647	-88.9639	-649.609	-52924.8	105737	-15762.1	362.77	984.472	0	3.69019	-9.15298	-139.09	-1339.87	-26378.4	1018.3	413.35	912.633	0
413	8	0	0	0	0	0	0	200	300	0	40.9699	-89.1165	-648.694	-53565.7	104089	-16357.2	360.459	985.575	0	5.06348	-9.30557	-139.7	-1706.09	-26561.5	1201.4	412.868	915.213	0
413	9	0	0	0	0	0	0	200	300	0	40.0543	-88.0484	-645.947	-53565.7	104760	-16128.3	362.181	985.926	0	4.60571	-9.76334	-140.005	-2346.95	-26683.6	880.967	412.41	919.763	0
414	0	0	0	0	0	0	0	200	300	0	40.2069	-87.7432	-645.642	-53931.9	104333	-16036.8	361.596	986.532	0	4.45313	-9.30557	-139.7	-2072.3	-26744.6	1155.62	411.557	917.834	0
414	1	0	0	0	0	0	0	200	300	0	42.1906	-87.2855	-640.454	-52650.1	103540	-15945.2	361.666	985.208	0	2.92725	-8.84781	-137.564	-2072.3	-26744.6	1109.85	408.584	918.064	0
414	2	0	0	0	0	0	0	200	300	0	42.3431	-86.3699	-636.487	-52467	103051	-15899.5	361.906	985.432	0	3.5376	-9.15298	-139.395	-2072.3	-26561.5	1064.07	412.452	917.866	0
414	3	0	0	0	0	0	0	200	300	0	41.4276	-85.1492	-635.571	-52467	102990	-15579	362.044	985.551	0	3.69019	-8.54263	-139.7	-2255.4	-26622.6	926.743	412.431	919.145	0
414	4	0	0	0	0	0	0	200	300	0	44.0216	-84.3863	-633.435	-52100.8	102624	-15670.6	362.012	985.251	0	3.69019	-9.30557	-138.48	-2163.85	-26256.4	1247.18	413.396	918.626	0
414	5	0	0	0	0	0	0	200	300	0	44.3268	-84.2337	-631.299	-51368.4	101709	-15762.1	361.11	984.369	0	3.84277	-8.84781	-137.869	-2255.4	-26439.5	1109.85	411.228	919.359	0
414	6	0	0	0	0	0	0	200	300	0	44.1742	-83.9285	-626.111	-51002.2	101342	-15167	361.86	984.459	0	3.5376	-8.08487	-139.395	-1889.19	-26622.6	972.519	412.014	916.553	0
414	7	0	0	0	0	0	0	200	300	0	43.7164	-82.4026	-621.838	-51093.8	101037	-15579	362.481	985.166	0	3.38501	-8.39005	-136.343	-2530.06	-26073.3	1155.62	411.768	921.557	0
414	8	0	0	0	0	0	0	200	300	0	42.3431	-82.2501	-622.754	-50819.1	101037	-15258.6	362.243	984.604	0	3.99536	-9.0004	-137.259	-2163.85	-26683.6	926.743	408.597	918.765	0
414	9	0	0	0	0	0	0	200	300	0	42.8009	-80.7242	-618.481	-50269.8	99999.6	-15258.6	361.686	984.279	0	3.38501	-8.08487	-137.869	-2072.3	-26744.6	1109.85	409.015	918.031	0
415	0	0	0	0	0	0	0	200	300	0	43.4113	-80.2664	-617.566	-49262.7	99694.4	-15258.6	361.431	982.769	0	3.38501	-7.62711	-136.038	-2804.72	-26378.4	972.519	409.095	923.617	0
415	1	0	0	0	0	0	0	200	300	0	44.1742	-79.9612	-612.683	-49812	99267.1	-15075.5	362.02	984.302	0	3.5376	-8.54263	-137.564	-2072.3	-26317.4	1018.3	411.69	918.064	0
415	2	0	0	0	0	0	0	200	300	0	43.2587	-79.1983	-610.547	-49995.1	99084.1	-14938.2	362.287	984.886	0	5.06348	-7.62711	-138.48	-2163.85	-26378.4	697.861	412.514	918.626	0
415	3	0	0	0	0	0	0	200	300	0	43.7164	-77.6724	-607.495	-48530.3	98412.7	-14892.4	361.997	982.886	0	3.5376	-8.23746	-136.343	-1706.09	-26134.3	1018.3	411.32	915.513	0
415	4	0	0	0	0	0	0	200	300	0	44.3268	-77.2147	-605.969	-48164.1	97680.2	-14846.6	361.197	982.483	0	3.07984	-7.93228	-135.733	-1889.19	-25890.1	880.967	412.257	916.919	0
415	5	0	0	0	0	0	0	200	300	0	44.0216	-77.5198	-604.443	-48255.6	97863.4	-14572	361.907	982.835	0	3.5376	-7.47452	-136.954	-1889.19	-26195.3	789.414	411.729	916.794	0
415	6	0	0	0	0	0	0	200	300	0	44.3268	-75.6888	-600.171	-48347.2	97253	-14572	362.042	983.556	0	3.23242	-7.62711	-134.818	-1797.64	-25707	835.19	412.32	916.334	0
415	7	0	0	0	0	0	0	200	300	0	44.0216	-75.3836	-597.424	-47248.6	96520.6	-14205.7	361.561	982.087	0	4.45313	-7.77969	-136.954	-2163.85	-25890.1	789.414	413.957	918.8	0
415	8	0	0	0	0	0	0	200	300	0	45.0897	-73.8577	-594.373	-46333	96154.4	-14160	361.775	980.953	0	2.3169	-7.16934	-136.954	-2072.3	-26134.3	835.19	412.174	918.131	0
415	9	0	0	0	0	0	0	200	300	0	44.9371	-74.0103	-592.542	-47248.6	95971.2	-13793.8	361.965	982.739	0	2.46948	-5.94864	-134.512	-1889.19	-25951.2	972.519	410.072	917.045	0
416	0	0	0	0	0	0	0	200	300	0	44.1742	-73.7051	-591.016	-47157	95666.1	-13702.2	361.867	982.79	0	2.46948	-6.71158	-135.123	-2530.06	-26073.3	652.085	410.04	921.724	0
416	1	0	0	0	0	0	0	200	300	0	44.1742	-72.7896	-586.743	-46333	94933.7	-13702.2	361.798	981.966	0	2.92725	-6.86417	-133.597	-1614.53	-25829.1	1018.3	409.664	915.085	0
416	2	0	0	0	0	0	0	200	300	0	44.632	-73.7051	-584.607	-45783.7	94689.6	-13793.8	361.971	981.315	0	1.70654	-6.25382	-136.038	-1706.09	-25951.2	652.085	412.236	915.541	0
416	3	0	0	0	0	0	0	200	300	0	45.7001	-71.4163	-581.86	-46333	94628.5	-13793.8	362.631	982.629	0	2.62207	-5.79605	-135.733	-1706.09	-26073.3	652.085	410.908	915.569	0
416	4	0	0	0	0	0	0	200	300	0	43.7164	-69.7378	-579.724	-45600.6	94018.1	-13519.1	362.177	981.659	0	3.23242	-5.64346	-134.512	-1980.74	-25340.8	697.861	414.61	917.725	0
416	5	0	0	0	0	0	0	200	300	0	44.632	-69.5853	-577.283	-45051.3	93346.8	-13336	361.7	981.04	0	2.16431	-5.49088	-134.207	-1614.53	-25340.8	514.755	414.181	915.03	0
416	6	0	0	0	0	0	0	200	300	0	45.2423	-69.2801	-573.926	-44318.9	92797.4	-13473.3	361.689	980.221	0	2.3169	-5.03311	-133.292	-1889.19	-25646	468.979	410.595	917.173	0
416	7	0	0	0	0	0	0	200	300	0	44.9371	-70.3482	-571.484	-44868.2	92614.4	-13107.1	362.059	981.512	0	1.09619	-4.27017	-134.207	-1065.22	-25707	377.426	411.453	910.937	0
416	8	0	0	0	0	0	0	200	300	0	44.7845	-66.9913	-568.127	-44227.3	92431.2	-13107.1	362.695	980.848	0	1.09619	-4.42276	-132.071	-1065.22	-25340.8	514.755	411.127	911.065	0
416	9	0	0	0	0	0	0	200	300	0	43.5638	-66.5335	-567.517	-43769.5	91942.9	-12924	362.009	980.125	0	1.85913	-4.72794	-132.071	-2163.85	-25707	285.874	408.354	919.384	0
417	0	0	0	0	0	0	0	200	300	0	45.2423	-66.2283	-563.855	-43494.9	91210.5	-12924	361.762	980.138	0	1.70654	-4.72794	-130.24	-1797.64	-25218.8	514.755	409.367	916.803	0
417	1	0	0	0	0	0	0	200	300	0	45.2423	-65.9231	-559.888	-43403.3	91393.7	-12603.6	363.236	980.522	0	1.85913	-3.35465	-130.85	-2163.85	-25646	331.65	407.005	919.537	0
417	2	0	0	0	0	0	0	200	300	0	44.3268	-64.7024	-555.615	-43220.2	90844.3	-12512	363.502	980.788	0	1.24878	-3.965	-130.545	-2346.95	-25462.9	194.321	407.949	920.978	0
417	3	0	0	0	0	0	0	200	300	0	45.8527	-63.4817	-555.005	-42945.6	90173	-12466.2	362.472	980.379	0	1.85913	-3.965	-131.155	-607.452	-25096.7	56.9917	411.649	907.632	0
417	4	0	0	0	0	0	0	200	300	0	46.0053	-63.024	-553.479	-42121.6	89806.7	-12283.1	362.259	979.103	0	1.55396	-1.82877	-130.24	-1339.87	-25096.7	148.544	410.304	913.288	0
417	5	0	0	0	0	0	0	200	300	0	47.226	-62.8714	-550.427	-41938.5	89501.5	-12191.6	362.604	979.193	0	2.62207	-2.89688	-129.935	-1431.43	-24913.6	102.768	411.261	914.017	0
417	6	0	0	0	0	0	0	200	300	0	45.2423	-62.4136	-547.375	-42487.8	89074.3	-11825.4	362.73	980.621	0	0.791017	-2.43912	-131.461	-1522.98	-25096.7	-354.996	412.093	914.585	0
417	7	0	0	0	0	0	0	200	300	0	46.9208	-59.8196	-540.967	-42121.6	88097.8	-11871.1	362.852	980.864	0	0.638429	-2.43912	-129.63	-1339.87	-24852.5	-34.5611	411.28	913.336	0
417	8	0	0	0	0	0	0	200	300	0	45.2423	-60.7352	-541.882	-40839.8	88341.9	-11916.9	363.028	978.367	0	1.09619	-2.13394	-128.104	-790.558	-24486.3	-309.219	411.855	909.171	0
417	9	0	0	0	0	0	0	200	300	0	47.0734	-59.667	-540.051	-41755.4	88097.8	-11413.4	363.129	980.317	0	0.333253	-1.06583	-126.883	-149.689	-24486.3	-34.5611	410.016	904.18	0
418	0	0	0	0	0	0	0	200	300	0	46.7682	-60.5826	-537.61	-40931.4	87121.2	-11367.6	362.053	979.136	0	1.09619	-2.43912	-128.714	-1522.98	-24486.3	-34.5611	412.762	914.832	0
418	1	0	0	0	0	0	0	200	300	0	45.8527	-59.3619	-533.643	-40839.8	86816	-10864.1	362.686	979.53	0	1.85913	-1.371	-128.409	-1706.09	-24303.2	-217.667	413.735	916.286	0
418	2	0	0	0	0	0	0	200	300	0	45.3949	-59.2093	-532.422	-40656.7	86755	-10726.7	362.944	979.362	0	0.333253	-1.52359	-126.883	-699.005	-24120.1	-80.3375	412.903	908.509	0
418	3	0	0	0	0	0	0	200	300	0	47.5311	-57.0731	-528.76	-40015.9	86388.8	-10909.8	363.38	978.679	0	0.0280775	-1.371	-128.104	-1706.09	-24425.3	-263.443	412.332	916.318	0
418	4	0	0	0	0	0	0	200	300	0	45.0897	-56.7679	-528.149	-40565.2	85656.4	-10955.6	362.182	979.806	0	-0.582274	-0.455475	-126.883	-1431.43	-23692.9	-354.996	416.27	914.282	0
418	5	0	0	0	0	0	0	200	300	0	44.4794	-56.6153	-526.013	-40015.9	84923.9	-10726.7	361.448	979.074	0	-0.429686	-0.760651	-124.442	-1339.87	-24059.1	-263.443	409.664	913.767	0
418	6	0	0	0	0	0	0	200	300	0	45.3949	-56.0049	-523.267	-39283.4	84862.9	-10635.2	362.179	978.074	0	-0.88745	-1.06583	-126.578	-1156.77	-23998.1	-354.996	413.409	912.139	0
418	7	0	0	0	0	0	0	200	300	0	45.5475	-55.0894	-519.91	-39283.4	84313.6	-10635.2	362.17	978.558	0	0.485841	-0.608063	-124.136	-1065.22	-23876	-446.549	410.663	911.581	0
418	8	0	0	0	0	0	0	200	300	0	45.8527	-54.0213	-516.553	-38459.5	84130.4	-10360.5	362.869	977.454	0	-0.582274	0.154876	-124.136	-1339.87	-23631.8	-400.772	412.63	913.794	0
418	9	0	0	0	0	0	0	200	300	0	45.2423	-53.2584	-515.332	-39191.9	83764.2	-10314.7	362.544	979.052	0	-0.88745	0.00228843	-125.052	-1339.87	-23570.8	-309.219	414.512	913.715	0
419	0	0	0	0	0	0	0	200	300	0	45.8527	-51.8851	-508.618	-38276.4	83581.2	-9994.31	364.33	978.256	0	-1.04004	0.307464	-124.136	-241.241	-23753.9	-538.101	411.647	904.943	0
419	1	0	0	0	0	0	0	200	300	0	46.9208	-52.8006	-509.229	-38367.9	82787.7	-9856.98	362.575	978.345	0	-1.19263	0.460052	-123.526	-1248.32	-23387.7	-354.996	413.666	913.106	0
419	2	0	0	0	0	0	0	200	300	0	46.0053	-51.5799	-507.397	-38001.7	82482.5	-10085.9	362.56	977.895	0	-0.88745	0.917816	-124.136	-1797.64	-23387.7	-492.325	414.597	917.481	0
419	3	0	0	0	0	0	0	200	300	0	45.2423	-50.3592	-505.261	-37818.6	82238.4	-9856.98	362.764	977.85	0	-1.19263	1.22299	-121.085	-1431.43	-23448.7	-492.325	409.344	914.822	0
419	4	0	0	0	0	0	0	200	300	0	45.0897	-49.7488	-501.904	-37360.8	81994.2	-9902.76	363.366	977.438	0	-0.12451	1.98593	-124.442	-1248.32	-23387.7	-629.654	415.059	913.031	0
419	5	0	0	0	0	0	0	200	300	0	45.3949	-49.2911	-501.599	-36170.7	81261.8	-9765.43	362.005	975.111	0	-0.277098	0.917816	-124.136	-1522.98	-23448.7	-629.654	414.105	915.269	0
419	6	0	0	0	0	0	0	200	300	0	45.8527	-49.4437	-498.242	-36903.1	80712.5	-9673.88	361.994	977.067	0	-0.734862	1.68076	-122	-1431.43	-23082.5	-721.207	413.799	914.733	0
419	7	0	0	0	0	0	0	200	300	0	45.2423	-48.6807	-495.801	-36445.3	80956.6	-9399.22	363.285	976.508	0	-0.582274	1.83334	-122.305	-1614.53	-23387.7	-995.865	411.776	916.201	0
419	8	0	0	0	0	0	0	200	300	0	44.632	-47.3074	-491.528	-36720	80285.3	-9216.12	363.338	977.706	0	-0.12451	1.83334	-121.695	-790.558	-23204.6	-766.983	412.322	909.496	0
419	9	0	0	0	0	0	0	200	300	0	45.5475	-47.6126	-490.613	-35896	79491.8	-8987.23	362.025	976.166	0	-0.734862	2.59628	-121.39	-1065.22	-23509.8	-629.654	409.328	911.775	0
420	0	0	0	0	0	0	0	200	300	0	46.7682	-46.2393	-488.782	-35712.9	79613.8	-9078.79	362.882	976.065	0	-1.34521	1.98593	-121.695	-1431.43	-23082.5	-812.76	413.325	914.763	0
420	1	0	0	0	0	0	0	200	300	0	44.9371	-46.5445	-487.561	-35987.5	78515.2	-9124.56	361.037	976.811	0	0.485841	2.44369	-121.695	-1156.77	-22716.3	-583.878	416.334	912.505	0
420	2	0	0	0	0	0	0	200	300	0	46.7682	-46.6971	-484.509	-35712.9	78576.3	-8941.46	362.177	976.709	0	-0.88745	3.6644	-120.779	-1431.43	-22655.3	-1178.97	415.424	914.852	0
420	3	0	0	0	0	0	0	200	300	0	44.632	-45.1712	-481.458	-35163.6	78149	-9307.67	362.318	976.036	0	-1.19263	2.59628	-120.779	-1065.22	-22716.3	-950.089	414.919	911.82	0
420	4	0	0	0	0	0	0	200	300	0	45.7001	-44.7134	-479.321	-34431.1	78149	-8758.35	363.041	974.833	0	-0.88745	2.29111	-119.559	-1431.43	-22777.4	-950.089	412.488	914.973	0
420	5	0	0	0	0	0	0	200	300	0	45.5475	-43.6453	-475.964	-34797.4	77904.8	-8758.35	363.678	976.109	0	-1.04004	4.12216	-119.864	-332.794	-22716.3	-995.865	413.482	905.776	0
420	6	0	0	0	0	0	0	200	300	0	43.869	-43.1876	-475.659	-34431.1	77416.6	-8575.25	362.756	975.386	0	-0.582274	3.51181	-118.948	-1065.22	-23082.5	-1178.97	408.945	911.955	0
420	7	0	0	0	0	0	0	200	300	0	46.9208	-43.1876	-472.607	-34522.7	76928.3	-8621.02	362.774	976.047	0	-2.10815	3.6644	-117.728	-1065.22	-22594.2	-904.312	411.08	912.048	0
420	8	0	0	0	0	0	0	200	300	0	45.3949	-43.035	-469.556	-33973.4	76134.9	-8575.25	362.142	975.352	0	-1.95557	3.96957	-118.338	-1339.87	-22716.3	-1087.42	411.039	914.323	0
420	9	0	0	0	0	0	0	200	300	0	46.0053	-42.272	-466.809	-33424.1	76256.9	-8254.81	363.358	974.601	0	-2.10815	3.81699	-119.864	-973.664	-22716.3	-995.865	413.482	911.123	0
421	0	0	0	0	0	0	0	200	300	0	44.9371	-41.2039	-465.283	-33973.4	75768.7	-8163.26	362.844	976.017	0	-1.65039	5.03769	-118.033	-699.005	-22289.1	-1133.19	414.162	908.922	0
421	1	0	0	0	0	0	0	200	300	0	44.1742	-40.7462	-464.062	-33607.2	76012.8	-7797.05	363.799	975.419	0	-2.41333	4.57993	-116.202	-607.452	-22472.2	-1316.3	409.611	908.228	0
421	2	0	0	0	0	0	0	200	300	0	44.3268	-41.0513	-458.264	-33057.9	75402.4	-8071.71	364.539	975.137	0	-2.7185	5.03769	-117.728	-58.1359	-22289.1	-1087.42	413.673	903.494	0
421	3	0	0	0	0	0	0	200	300	0	44.9371	-40.1358	-460.706	-32874.8	75036.2	-7705.49	362.872	974.357	0	-2.87109	5.19028	-115.897	-790.558	-22167	-1362.08	411.735	909.821	0
421	4	0	0	0	0	0	0	200	300	0	44.9371	-39.2203	-456.128	-33149.4	74364.8	-7613.94	363.035	975.676	0	-2.41333	5.19028	-117.728	-973.664	-21861.8	-1087.42	417.302	911.271	0
421	5	0	0	0	0	0	0	200	300	0	43.869	-38.9151	-453.076	-33057.9	74303.8	-7568.16	363.999	975.963	0	-2.10815	5.64804	-114.981	-149.689	-22044.9	-1499.41	411.273	904.302	0
421	6	0	0	0	0	0	0	200	300	0	44.1742	-37.9996	-452.161	-31501.5	74181.7	-7522.39	364.061	972.669	0	-2.7185	5.64804	-114.371	-515.9	-21861.8	-1362.08	411.851	907.511	0
421	7	0	0	0	0	0	0	200	300	0	44.632	-38.1522	-449.719	-31959.2	72839	-7476.61	361.965	974.065	0	-1.04004	6.41098	-117.117	-1065.22	-22106	-1316.3	414.249	912.095	0
421	8	0	0	0	0	0	0	200	300	0	44.1742	-37.847	-449.109	-31501.5	73632.4	-7339.28	363.952	973.142	0	-2.7185	6.41098	-113.15	-1065.22	-21556.7	-1453.63	412.486	912.414	0
421	9	0	0	0	0	0	0	200	300	0	43.1061	-37.084	-445.752	-32417	73083.1	-7156.18	363.955	975.724	0	-2.10815	5.64804	-114.371	-699.005	-22167	-1453.63	409.183	909.112	0
422	0	0	0	0	0	0	0	200	300	0	43.869	-36.7789	-442.395	-32050.8	72472.8	-7018.85	363.819	975.448	0	-2.87109	6.71616	-114.371	399.628	-21617.7	-1499.41	413.986	899.506	0
422	1	0	0	0	0	0	0	200	300	0	43.1061	-36.7789	-442.395	-31501.5	72106.5	-6652.64	362.991	974.207	0	-3.48144	6.86874	-114.066	-332.794	-21312.5	-1590.96	416.156	905.918	0
422	2	0	0	0	0	0	0	200	300	0	43.4113	-35.4056	-441.174	-31043.7	72167.5	-6606.86	363.581	973.366	0	-2.41333	6.56357	-112.234	-1065.22	-21434.6	-1545.18	412.02	912.491	0
422	3	0	0	0	0	0	0	200	300	0	44.0216	-35.1004	-438.428	-31135.3	71984.5	-6744.19	364.188	974.016	0	-3.48144	6.56357	-113.455	-882.111	-21068.4	-1499.41	417.302	910.775	0
422	4	0	0	0	0	0	0	200	300	0	42.038	-34.9478	-436.902	-31409.9	71496.2	-6744.19	363.644	974.892	0	-3.63403	7.02133	-111.624	-515.9	-21373.5	-1590.96	411.522	907.622	0
422	5	0	0	0	0	0	0	200	300	0	42.8009	-35.4056	-433.85	-30494.4	71252.1	-6377.98	364.232	973.288	0	-3.93921	7.32651	-111.624	-973.664	-21190.4	-1590.96	413.163	911.723	0
422	6	0	0	0	0	0	0	200	300	0	43.1061	-33.8797	-432.324	-29670.4	70336.5	-6561.08	362.694	971.63	0	-3.17627	7.63168	-112.54	-882.111	-21129.4	-1362.08	415.249	910.838	0
422	7	0	0	0	0	0	0	200	300	0	42.6483	-33.4219	-432.629	-29945.1	70458.6	-6194.87	362.861	972.216	0	-3.48144	7.02133	-111.319	-1065.22	-21739.8	-1682.51	407.708	912.569	0
422	8	0	0	0	0	0	0	200	300	0	41.7328	-33.1168	-428.052	-29304.2	70397.6	-6377.98	364.46	971.46	0	-4.39697	7.32651	-111.929	-149.689	-21129.4	-1545.18	414.225	904.337	0
422	9	0	0	0	0	0	0	200	300	0	41.8854	-33.5745	-429.272	-29945.1	70153.4	-6332.2	363.424	972.758	0	-3.93921	7.78427	-110.709	-790.558	-21190.4	-1499.41	411.593	910.141	0
423	0	0	0	0	0	0	0	200	300	0	42.8009	-32.5064	-426.221	-29487.3	69848.2	-6057.54	363.878	972.183	0	-4.0918	7.63168	-110.403	-882.111	-20946.3	-1728.29	413.275	910.99	0
423	1	0	0	0	0	0	0	200	300	0	44.0216	-31.5909	-424.39	-29212.7	69604.1	-6149.1	364.01	971.835	0	-3.63403	7.32651	-111.929	-973.664	-20946.3	-1819.84	415.861	911.699	0
423	2	0	0	0	0	0	0	200	300	0	41.8854	-31.1331	-423.169	-29945.1	69054.8	-5965.99	363.185	973.764	0	-3.32886	8.39462	-110.403	-699.005	-21129.4	-1819.84	411.616	909.331	0
423	3	0	0	0	0	0	0	200	300	0	43.4113	-30.9805	-421.643	-29670.4	69054.8	-5920.21	363.775	973.369	0	-3.17627	8.6998	-109.793	-699.005	-20458	-1636.73	416.668	909.367	0
423	4	0	0	0	0	0	0	200	300	0	40.5121	-30.9805	-421.338	-28388.7	68871.6	-5691.33	363.459	970.378	0	-3.02368	8.24203	-108.878	-699.005	-20702.2	-1590.96	412.858	909.42	0
423	5	0	0	0	0	0	0	200	300	0	42.8009	-29.4546	-417.371	-28480.2	67345.8	-5416.67	361.357	971.237	0	-4.70215	8.39462	-109.488	-515.9	-20824.2	-1957.17	412.803	907.712	0
423	6	0	0	0	0	0	0	200	300	0	41.4276	-30.065	-416.76	-28663.3	68627.5	-5828.66	364.669	971.777	0	-4.0918	8.85239	-105.826	124.97	-20763.2	-1819.84	406.798	901.819	0
423	7	0	0	0	0	0	0	200	300	0	40.6647	-28.5391	-415.54	-28663.3	68139.2	-5508.23	363.978	971.979	0	-4.54956	8.08945	-110.098	-424.347	-20824.2	-2094.5	413.858	906.854	0
423	8	0	0	0	0	0	0	200	300	0	40.3595	-28.9969	-414.929	-28480.2	67406.8	-5508.23	362.454	971.639	0	-5.00732	8.85239	-107.962	-607.452	-20824.2	-1728.29	410.115	908.627	0
423	9	0	0	0	0	0	0	200	300	0	40.3595	-30.3702	-412.488	-27747.8	67345.8	-5416.67	363.267	970.269	0	-4.54956	8.54721	-110.098	-1156.77	-20580.1	-1590.96	416.075	913.507	0
424	0	0	0	0	0	0	0	200	300	0	40.3595	-27.9288	-411.572	-28297.1	67406.8	-5416.67	363.779	971.754	0	-3.93921	9.00497	-109.793	-607.452	-20641.1	-1728.29	415	908.533	0
424	1	0	0	0	0	0	0	200	300	0	39.2914	-28.2339	-409.741	-28022.5	67406.8	-5187.79	364.511	971.391	0	-3.17627	9.61533	-105.521	-607.452	-20519.1	-1911.39	408.545	908.757	0
424	2	0	0	0	0	0	0	200	300	0	39.1388	-27.0132	-410.046	-27473.2	66674.4	-5187.79	362.602	970	0	-3.93921	8.54721	-111.014	-58.1359	-20580.1	-1499.41	417.617	903.524	0
424	3	0	0	0	0	0	0	200	300	0	39.444	-27.3184	-407.3	-27198.5	66552.3	-5142.02	363.399	969.778	0	-4.0918	9.61533	-109.183	-607.452	-20152.8	-1911.39	418.421	908.564	0
424	4	0	0	0	0	0	0	200	300	0	39.444	-26.5555	-407.91	-27106.9	66979.6	-5096.24	364.202	969.453	0	-3.63403	9.9205	-109.488	-607.452	-20519.1	-1636.73	415.591	908.548	0
424	5	0	0	0	0	0	0	200	300	0	38.681	-25.7925	-405.774	-26099.9	66247.2	-5050.46	363.261	967.321	0	-3.02368	9.46274	-107.962	-515.9	-20580.1	-1728.29	412.377	907.779	0
424	6	0	0	0	0	0	0	200	300	0	38.2233	-26.0977	-403.333	-27015.4	65881	-4775.81	363.342	969.981	0	-3.78662	10.2257	-109.183	857.392	-20946.3	-2048.72	411.154	895.147	0
424	7	0	0	0	0	0	0	200	300	0	38.681	-24.877	-402.112	-26557.6	66003	-4913.13	364.141	969.045	0	-4.24438	9.76791	-108.878	-332.794	-20702.2	-2002.94	412.858	906.057	0
424	8	0	0	0	0	0	0	200	300	0	38.3759	-24.5718	-402.417	-26099.9	65942	-4638.48	363.865	967.858	0	-4.70215	10.2257	-107.962	-424.347	-20702.2	-1911.39	411.246	906.931	0
424	9	0	0	0	0	0	0	200	300	0	37.7655	-24.5718	-402.417	-26374.5	65881	-4638.48	363.713	968.54	0	-5.15991	9.61533	-106.436	308.075	-20702.2	-1957.17	408.497	900.106	0
425	0	0	0	0	0	0	0	200	300	0	39.1388	-24.2667	-399.06	-26557.6	65331.6	-4638.48	363.714	969.55	0	-3.93921	10.6834	-108.267	-515.9	-20885.3	-1911.39	410.095	907.765	0
425	1	0	0	0	0	0	0	200	300	0	37.3077	-24.7244	-398.755	-25733.7	65209.6	-4455.37	363.533	967.535	0	-4.70215	9.31015	-109.488	-790.558	-20580.1	-2094.5	415.033	910.221	0
425	2	0	0	0	0	0	0	200	300	0	38.0707	-23.8089	-396.924	-25733.7	65392.7	-4318.04	364.749	967.833	0	-5.15991	10.0731	-109.488	-241.241	-20152.8	-1911.39	418.936	905.203	0
425	3	0	0	0	0	0	0	200	300	0	38.0707	-23.1985	-396.008	-25733.7	65209.6	-4455.37	364.667	967.983	0	-4.70215	10.6834	-108.267	-699.005	-20641.1	-1957.17	412.35	909.456	0
425	4	0	0	0	0	0	0	200	300	0	37.0026	-22.5882	-394.788	-25825.2	64721.3	-4226.49	363.939	968.415	0	-2.87109	9.31015	-109.488	124.97	-20458	-2048.72	416.148	901.859	0
425	5	0	0	0	0	0	0	200	300	0	37.0026	-22.5882	-396.619	-25367.4	65026.4	-4089.16	363.952	966.959	0	-4.54956	10.836	-107.962	-424.347	-21007.3	-2002.94	408.419	906.931	0
425	6	0	0	0	0	0	0	200	300	0	37.7655	-22.5882	-394.482	-25184.3	64904.4	-4318.04	364.53	966.841	0	-5.3125	10.9886	-108.572	-424.347	-20946.3	-2094.5	410.075	906.909	0
425	7	0	0	0	0	0	0	200	300	0	37.7655	-21.5201	-392.346	-25550.5	64416.1	-4180.71	364.182	968.122	0	-5.15991	9.76791	-107.962	216.522	-20824.2	-2048.72	410.115	900.995	0
425	8	0	0	0	0	0	0	200	300	0	36.5448	-21.3675	-391.736	-24818.1	64477.1	-3906.05	364.593	966.354	0	-5.46509	10.836	-110.098	-149.689	-21190.4	-2140.27	410.532	904.36	0
425	9	0	0	0	0	0	0	200	300	0	37.0026	-22.283	-391.125	-24635	64355.1	-3860.28	364.538	965.985	0	-4.54956	10.836	-108.267	-332.794	-20946.3	-2231.83	409.531	906.074	0
426	0	0	0	0	0	0	0	200	300	0	36.85	-20.452	-391.736	-25092.8	63866.8	-3860.28	363.035	967.055	0	-5.92285	10.6834	-108.878	-515.9	-20885.3	-2231.83	411.177	907.738	0
426	1	0	0	0	0	0	0	200	300	0	37.6129	-21.0623	-390.515	-24726.6	63988.9	-3677.17	363.858	966.318	0	-5.15991	11.1412	-106.436	33.4168	-20641.1	-2231.83	409.07	902.686	0
426	2	0	0	0	0	0	0	200	300	0	37.1552	-20.7571	-390.21	-24909.7	64233	-3677.17	364.611	966.837	0	-4.85473	10.9886	-109.793	1132.05	-20458	-2186.05	416.668	892.689	0
426	3	0	0	0	0	0	0	200	300	0	36.6974	-20.6045	-388.379	-25367.4	64294	-3722.95	365.545	968.316	0	-5.61767	11.2938	-111.014	399.628	-20824.2	-2460.71	415.418	899.4	0
426	4	0	0	0	0	0	0	200	300	0	36.6974	-20.9097	-388.074	-24360.4	63500.6	-3677.17	363.63	965.773	0	-5.00732	10.836	-111.014	-332.794	-20824.2	-2231.83	415.418	905.998	0
426	5	0	0	0	0	0	0	200	300	0	37.1552	-19.5364	-389.6	-24360.4	63744.7	-3539.84	363.616	965.527	0	-5.77026	10.9886	-108.878	-58.1359	-21007.3	-2323.38	410.055	903.534	0
426	6	0	0	0	0	0	0	200	300	0	36.2396	-19.5364	-388.684	-24177.3	63927.8	-3494.06	364.472	965.203	0	-4.54956	11.2938	-109.488	1223.6	-21007.3	-2277.6	411.131	891.824	0
426	7	0	0	0	0	0	0	200	300	0	36.087	-19.8416	-386.853	-24268.8	63744.7	-3585.62	364.778	965.734	0	-4.85473	11.1412	-110.098	491.181	-21251.5	-2277.6	409.977	898.539	0
426	8	0	0	0	0	0	0	200	300	0	37.4603	-18.7735	-385.022	-24451.9	63439.5	-3539.84	364.769	966.508	0	-5.3125	11.4464	-111.014	216.522	-21007.3	-2231.83	413.768	901.05	0
426	9	0	0	0	0	0	0	200	300	0	35.4767	-19.5364	-386.853	-23627.9	63195.4	-3356.74	363.358	964.077	0	-5.61767	11.9041	-109.488	-149.689	-20946.3	-2323.38	411.689	904.367	0
427	0	0	0	0	0	0	0	200	300	0	36.5448	-18.9261	-386.548	-23719.5	63561.6	-2990.52	364.434	964.362	0	-5.00732	10.6834	-112.845	491.181	-20946.3	-2323.38	417.38	898.647	0
427	1	0	0	0	0	0	0	200	300	0	36.6974	-18.0106	-386.853	-24360.4	63988.9	-3402.51	365.409	965.971	0	-5.61767	11.7516	-111.014	216.522	-21312.5	-2277.6	411.019	901.05	0
427	2	0	0	0	0	0	0	200	300	0	35.1715	-18.3157	-384.717	-22804	63256.4	-3036.3	364.423	962.275	0	-3.93921	11.7516	-111.929	-241.241	-21068.4	-2323.38	414.771	905.155	0
427	3	0	0	0	0	0	0	200	300	0	35.4767	-17.7054	-382.275	-23902.6	63256.4	-3127.85	365.473	965.527	0	-5.3125	10.9886	-113.455	-332.794	-21617.7	-2369.16	412.461	905.933	0
427	4	0	0	0	0	0	0	200	300	0	36.087	-17.7054	-385.022	-23353.3	63378.5	-2807.42	364.61	963.654	0	-5.3125	11.9041	-113.15	-241.241	-21434.6	-2414.93	413.565	905.132	0
427	5	0	0	0	0	0	0	200	300	0	37.3077	-16.6373	-385.327	-23261.7	63195.4	-2898.97	364.005	963.369	0	-5.46509	11.9041	-111.624	33.4168	-20885.3	-2414.93	415.897	902.701	0
427	6	0	0	0	0	0	0	200	300	0	35.7819	-16.4847	-386.243	-23811	62951.3	-2944.75	362.984	964.648	0	-5.92285	11.7516	-112.845	-149.689	-21495.6	-2460.71	412.512	904.326	0
427	7	0	0	0	0	0	0	200	300	0	36.3922	-16.6373	-383.496	-23170.2	63317.5	-2715.87	365.106	963.418	0	-5.46509	11.9041	-113.15	-332.794	-21678.7	-2414.93	411.407	905.941	0
427	8	0	0	0	0	0	0	200	300	0	34.7137	-17.7054	-383.191	-22804	63134.4	-2807.42	364.76	962.511	0	-4.70215	11.599	-111.929	-607.452	-21495.6	-2414.93	410.954	908.427	0
427	9	0	0	0	0	0	0	200	300	0	35.3241	-15.8743	-383.801	-23170.2	63134.4	-2303.88	364.498	963.37	0	-4.85473	11.7516	-114.066	-241.241	-21617.7	-2826.92	413.48	905.115	0
428	0	0	0	0	0	0	0	200	300	0	36.087	-15.7217	-383.496	-23444.8	62463	-2486.98	362.878	964.135	0	-3.93921	11.9041	-110.709	-332.794	-21800.8	-2186.05	406.08	906.006	0
428	1	0	0	0	0	0	0	200	300	0	34.256	-15.264	-384.717	-22987.1	63256.4	-2532.76	364.423	962.751	0	-5.92285	11.4464	-115.286	-332.794	-21739.8	-2231.83	414.428	905.887	0
428	2	0	0	0	0	0	0	200	300	0	34.7137	-14.8062	-382.275	-22712.4	62890.2	-2486.98	364.516	962.414	0	-4.0918	12.6671	-115.897	-58.1359	-21983.9	-2552.26	413.315	903.502	0
428	3	0	0	0	0	0	0	200	300	0	35.0189	-14.6536	-381.665	-22437.8	62829.2	-2670.09	364.619	961.789	0	-5.15991	11.7516	-115.286	33.4168	-22106	-2552.26	411.252	902.71	0
428	4	0	0	0	0	0	0	200	300	0	34.5612	-14.3484	-383.191	-22620.9	63317.5	-2486.98	365.237	962.033	0	-5.3125	11.4464	-116.507	-241.241	-22289.1	-2414.93	411.689	905.071	0
428	5	0	0	0	0	0	0	200	300	0	34.1034	-13.7381	-382.886	-22712.4	63134.4	-2349.66	364.891	962.319	0	-5.3125	12.3619	-117.422	-149.689	-22289.1	-2552.26	413.181	904.275	0
428	6	0	0	0	0	0	0	200	300	0	33.3405	-13.4329	-383.191	-22437.8	63012.3	-2441.21	364.441	961.555	0	-4.85473	12.2093	-117.117	-332.794	-22411.1	-2369.16	411.644	905.842	0
428	7	0	0	0	0	0	0	200	300	0	34.8663	-14.3484	-384.717	-22254.6	62524	-2349.66	362.52	960.847	0	-4.85473	12.2093	-119.254	-149.689	-21983.9	-2506.48	418.654	904.255	0
428	8	0	0	0	0	0	0	200	300	0	35.7819	-12.9752	-383.191	-21980	63134.4	-2120.77	364.76	960.36	0	-5.3125	13.1248	-117.117	-332.794	-22289.1	-2735.37	412.686	905.842	0
428	9	0	0	0	0	0	0	200	300	0	34.256	-12.3648	-382.581	-22712.4	63256.4	-2166.55	365.341	962.366	0	-5.00732	12.0567	-120.779	-149.689	-22533.2	-2048.72	416.435	904.239	0
429	0	0	0	0	0	0	0	200	300	0	32.7301	-12.2122	-383.801	-22529.3	62279.9	-1937.67	362.271	961.701	0	-4.70215	12.8197	-120.169	-882.111	-22289.1	-2781.14	417.519	910.341	0
429	1	0	0	0	0	0	0	200	300	0	33.0353	-12.0596	-379.224	-21796.9	63195.4	-1800.34	366.644	960.478	0	-5.00732	12.9723	-120.779	582.733	-23143.6	-2826.92	411.382	898.175	0
429	2	0	0	0	0	0	0	200	300	0	33.493	-11.7545	-384.106	-21522.2	63134.4	-1617.23	364.367	959.032	0	-4.0918	12.2093	-121.39	-58.1359	-22960.5	-2094.5	413.853	903.479	0
429	3	0	0	0	0	0	0	200	300	0	33.6456	-11.7545	-383.191	-21522.2	62951.3	-1754.56	364.282	959.166	0	-6.38061	12.9723	-122.61	-241.241	-22899.4	-2552.26	416.234	904.968	0
429	4	0	0	0	0	0	0	200	300	0	35.1715	-11.1441	-382.275	-22163.1	62951.3	-1937.67	364.675	960.977	0	-5.61767	12.9723	-124.136	-149.689	-23021.5	-2506.48	417.547	904.206	0
429	5	0	0	0	0	0	0	200	300	0	32.4249	-11.1441	-381.97	-21705.3	63195.4	-1708.79	365.446	959.825	0	-4.85473	12.5145	-122.305	-699.005	-23326.7	-2552.26	412.275	908.715	0
429	6	0	0	0	0	0	0	200	300	0	32.4249	-10.2286	-383.801	-21888.4	63195.4	-1434.13	364.657	960.031	0	-5.3125	13.1248	-125.052	33.4168	-23082.5	-2735.37	418.416	902.733	0
429	7	0	0	0	0	0	0	200	300	0	33.1879	-9.9234	-384.412	-21522.2	63134.4	-1800.34	364.236	958.987	0	-5.61767	14.0404	-123.526	-58.1359	-23570.8	-2598.04	412.183	903.471	0
429	8	0	0	0	0	0	0	200	300	0	33.3405	-9.9234	-383.191	-21980	63317.5	-1571.46	365.237	960.36	0	-4.85473	13.43	-124.747	-607.452	-23448.7	-2689.59	415.029	907.87	0
429	9	0	0	0	0	0	0	200	300	0	32.1198	-10.2286	-384.412	-21247.6	63439.5	-1479.9	365.03	958.273	0	-5.15991	14.3456	-125.052	-241.241	-23509.8	-2872.7	415	904.929	0
430	0	0	0	0	0	0	0	200	300	0	31.9672	-8.85528	-383.801	-21613.8	63256.4	-1434.13	364.816	959.315	0	-4.24438	14.0404	-125.052	-332.794	-24059.1	-3101.58	410.607	905.661	0
430	1	0	0	0	0	0	0	200	300	0	33.0353	-7.93975	-385.022	-21522.2	63012.3	-1296.8	363.659	958.899	0	-5.15991	13.43	-128.409	399.628	-24059.1	-2781.14	415.637	899.888	0
430	2	0	0	0	0	0	0	200	300	0	34.8663	-8.70269	-383.496	-21430.7	63744.7	-1205.25	366.22	958.882	0	-5.61767	14.8033	-128.409	124.97	-24242.2	-2918.47	414.211	902.027	0
430	3	0	0	0	0	0	0	200	300	0	31.8146	-8.55011	-384.106	-22163.1	63500.6	-1067.92	365.32	960.7	0	-5.15991	14.6507	-127.798	-241.241	-24425.3	-3010.02	411.876	904.888	0
430	4	0	0	0	0	0	0	200	300	0	33.6456	-7.78717	-383.496	-21796.9	63012.3	-976.365	364.31	959.837	0	-3.17627	14.8033	-128.714	-241.241	-24242.2	-3193.13	414.658	904.874	0
430	5	0	0	0	0	0	0	200	300	0	32.5775	-7.02423	-385.022	-21339.1	63988.9	-1113.69	366.195	958.423	0	-3.48144	14.4981	-131.461	33.4168	-24669.4	-2964.25	415.343	902.746	0
430	6	0	0	0	0	0	0	200	300	0	33.0353	-7.17681	-385.327	-21613.8	63683.7	-884.812	365.272	959.092	0	-3.93921	15.7188	-131.766	399.628	-24669.4	-2781.14	415.778	899.967	0
430	7	0	0	0	0	0	0	200	300	0	33.1879	-7.3294	-382.581	-21888.4	63500.6	-747.483	365.98	960.213	0	-4.39697	14.8033	-131.461	216.522	-24730.5	-3101.58	414.879	901.353	0
430	8	0	0	0	0	0	0	200	300	0	31.662	-7.17681	-386.243	-21980	63622.6	-747.483	364.722	959.907	0	-3.78662	14.4981	-129.935	216.522	-25035.7	-3238.91	410.321	901.334	0
430	9	0	0	0	0	0	0	200	300	0	31.662	-6.26129	-385.938	-21339.1	63866.8	-610.154	365.485	958.292	0	-2.41333	15.4137	-132.071	-241.241	-25035.7	-3284.68	413.438	904.827	0
431	0	0	0	0	0	0	0	200	300	0	32.4249	-5.49835	-385.632	-21247.6	64538.2	-472.824	367.357	958.098	0	-4.54956	15.4137	-136.038	-58.1359	-24974.6	-2964.25	419.415	903.427	0
431	1	0	0	0	0	0	0	200	300	0	32.4249	-5.49835	-387.463	-21247.6	63622.6	-335.495	364.203	957.838	0	-3.48144	15.8714	-134.818	491.181	-25279.8	-3284.68	415.489	899.357	0
431	2	0	0	0	0	0	0	200	300	0	32.8827	-5.04058	-387.463	-21796.9	64233	-289.719	365.778	959.255	0	-3.93921	15.5663	-136.038	491.181	-25401.9	-2964.25	416.274	899.389	0
431	3	0	0	0	0	0	0	200	300	0	33.0353	-4.73541	-388.379	-22071.5	64233	-335.495	365.387	959.83	0	-3.32886	16.4818	-136.343	-58.1359	-25829.1	-3101.58	413.558	903.426	0
431	4	0	0	0	0	0	0	200	300	0	31.9672	-5.19317	-386.853	-21339.1	64049.9	-381.272	365.566	958.161	0	-3.17627	17.2447	-136.954	-241.241	-26134.3	-3284.68	412.174	904.761	0
431	5	0	0	0	0	0	0	200	300	0	32.7301	-3.51471	-386.548	-21156	63744.7	-60.8369	364.908	957.731	0	-3.63403	15.8714	-137.259	33.4168	-26256.4	-3422.01	411.709	902.757	0
431	6	0	0	0	0	0	0	200	300	0	33.0353	-3.36212	-389.905	-21705.3	63927.8	168.045	363.958	958.668	0	-3.48144	16.4818	-139.395	-58.1359	-25951.2	-3376.24	416.83	903.417	0
431	7	0	0	0	0	0	0	200	300	0	31.9672	-2.90435	-386.243	-20881.3	64110.9	259.598	365.986	957.063	0	-4.24438	16.4818	-139.395	491.181	-26195.3	-3147.35	415.079	899.476	0
431	8	0	0	0	0	0	0	200	300	0	32.1198	-3.05694	-389.294	-21064.5	64172	-15.0605	364.842	957.109	0	-3.32886	16.1766	-139.7	-58.1359	-26500.5	-3605.12	413.305	903.416	0
431	9	0	0	0	0	0	0	200	300	0	33.1879	-2.90435	-388.074	-21339.1	64538.2	396.927	366.304	957.987	0	-3.78662	17.0921	-141.531	-241.241	-26622.6	-3513.56	414.896	904.705	0
432	0	0	0	0	0	0	0	200	300	0	32.4249	-2.59918	-388.684	-20972.9	64538.2	122.269	366.043	956.959	0	-2.7185	16.6344	-142.142	-515.9	-26805.7	-3376.24	414.416	906.63	0
432	1	0	0	0	0	0	0	200	300	0	31.8146	-3.05694	-388.684	-21247.6	64172	305.374	365.101	957.665	0	-3.17627	16.787	-143.668	-149.689	-27171.9	-3559.34	413.87	904.042	0
432	2	0	0	0	0	0	0	200	300	0	34.5612	-1.53106	-390.21	-21247.6	64294	351.15	364.768	957.452	0	-3.63403	17.3973	-140.921	-332.794	-27355	-3559.34	408.884	905.362	0
432	3	0	0	0	0	0	0	200	300	0	32.2723	-2.294	-390.21	-20515.1	64660.2	213.821	365.706	955.575	0	-2.10815	17.3973	-145.499	-424.347	-27477.1	-3513.56	414.152	905.917	0
432	4	0	0	0	0	0	0	200	300	0	34.1034	-1.22589	-388.989	-20698.2	63988.9	442.703	364.5	956.21	0	-1.80298	17.3973	-147.33	-241.241	-27355	-3742.45	417.328	904.638	0
432	5	0	0	0	0	0	0	200	300	0	32.7301	-0.920711	-387.769	-21156	64477.1	442.703	366.277	957.558	0	-1.65039	17.7025	-147.025	-424.347	-27843.3	-3513.56	413.622	905.886	0
432	6	0	0	0	0	0	0	200	300	0	34.256	-1.53106	-390.82	-21247.6	65087.5	396.927	366.541	957.367	0	-2.56592	16.787	-149.771	-241.241	-28087.4	-3376.24	415.464	904.611	0
432	7	0	0	0	0	0	0	200	300	0	32.5775	-0.31036	-391.125	-20515.1	64843.3	808.914	365.787	955.452	0	-2.41333	17.8551	-150.992	-58.1359	-27843.3	-3650.89	418.598	903.385	0
432	8	0	0	0	0	0	0	200	300	0	34.5612	-0.768123	-391.125	-20332	65026.4	213.821	366.255	954.983	0	-2.56592	16.4818	-150.076	-515.9	-28575.7	-3788.22	412.592	906.438	0
432	9	0	0	0	0	0	0	200	300	0	32.7301	0.299992	-392.041	-20789.8	64599.2	488.48	364.777	956.03	0	-2.10815	17.2447	-152.213	-149.689	-28636.7	-3513.56	414.864	903.983	0
433	0	0	0	0	0	0	0	200	300	0	34.4086	0.45258	-390.21	-20698.2	65331.6	625.809	367.427	956.044	0	-1.19263	18.1602	-152.213	-58.1359	-29002.9	-3696.67	412.458	903.382	0
433	1	0	0	0	0	0	0	200	300	0	32.5775	-0.31036	-390.21	-20332	65392.7	534.256	367.583	955.105	0	-2.41333	17.7025	-155.875	-149.689	-29002.9	-3513.56	416.934	903.96	0
433	2	0	0	0	0	0	0	200	300	0	34.1034	1.06293	-393.262	-19691.2	65087.5	717.362	365.507	953.071	0	-1.4978	18.1602	-154.959	491.181	-29002.9	-3238.91	415.835	899.83	0
433	3	0	0	0	0	0	0	200	300	0	33.3405	0.910344	-393.872	-20606.7	64904.4	534.256	364.785	955.318	0	-1.95557	18.7706	-157.401	399.628	-29125	-3742.45	417.962	900.461	0
433	4	0	0	0	0	0	0	200	300	0	34.4086	1.5207	-392.346	-20240.5	65697.8	671.585	367.449	954.588	0	-1.04004	18.9232	-155.875	-149.689	-29796.4	-3696.67	411.844	903.96	0
433	5	0	0	0	0	0	0	200	300	0	33.493	1.82587	-393.262	-19599.6	65270.6	854.691	365.972	952.839	0	-0.429686	19.2284	-158.011	-332.794	-29857.4	-3376.24	414.042	905.106	0
433	6	0	0	0	0	0	0	200	300	0	35.1715	1.5207	-393.262	-19782.7	65392.7	900.467	366.283	953.304	0	-0.582274	19.0758	-155.875	491.181	-30162.6	-3879.78	409.494	899.849	0
433	7	0	0	0	0	0	0	200	300	0	32.8827	1.82587	-395.398	-19874.3	66125.1	946.243	367.237	953.264	0	-0.12451	18.618	-160.452	399.628	-30406.7	-4108.66	413.493	900.509	0
433	8	0	0	0	0	0	0	200	300	0	34.7137	2.43622	-395.398	-20057.4	65942	900.467	366.774	953.727	0	0.0280775	19.0758	-160.757	-241.241	-30711.9	-3559.34	411.955	904.501	0
433	9	0	0	0	0	0	0	200	300	0	32.5775	2.28363	-394.482	-19508.1	65881	1175.12	367.006	952.452	0	0.0280775	19.5335	-161.063	-149.689	-31078.1	-3971.33	410.043	903.929	0
434	0	0	0	0	0	0	0	200	300	0	33.0353	3.19916	-394.482	-19416.5	65881	1312.45	367.006	952.22	0	-0.12451	18.9232	-165.03	-241.241	-30467.8	-4017.1	418.38	904.462	0
434	1	0	0	0	0	0	0	200	300	0	33.0353	3.35175	-396.924	-19691.2	66125.1	1312.45	366.594	952.609	0	0.485841	19.9913	-163.809	948.944	-30895	-3696.67	414.396	897.207	0
434	2	0	0	0	0	0	0	200	300	0	32.1198	3.35175	-396.008	-18958.7	65758.9	1312.45	366.054	950.875	0	0.180665	19.5335	-163.504	765.839	-30956.1	-4154.43	413.671	898.316	0
434	3	0	0	0	0	0	0	200	300	0	32.4249	2.7414	-397.229	-19324.9	66003	1129.35	366.159	951.649	0	1.24878	20.6017	-166.556	124.97	-31078.1	-4108.66	416.407	902.25	0
434	4	0	0	0	0	0	0	200	300	0	33.1879	3.35175	-397.534	-18958.7	66735.5	1541.34	367.874	950.691	0	-0.12451	20.9068	-165.03	-332.794	-31505.4	-3788.22	412.093	905.017	0
434	5	0	0	0	0	0	0	200	300	0	33.3405	3.80951	-396.924	-19233.4	66613.4	1541.34	367.824	951.456	0	0.0280775	20.6017	-168.692	399.628	-31810.6	-4154.43	414.428	900.631	0
434	6	0	0	0	0	0	0	200	300	0	32.2723	4.57245	-399.06	-19508.1	66552.3	1312.45	366.773	951.885	0	0.0280775	20.4491	-169.608	765.839	-31810.6	-4383.32	415.446	898.485	0
434	7	0	0	0	0	0	0	200	300	0	34.256	2.89399	-396.313	-19416.5	66491.3	1541.34	367.775	951.993	0	-0.429686	20.1439	-168.692	399.628	-31993.7	-3834	413.343	900.631	0
434	8	0	0	0	0	0	0	200	300	0	33.6456	4.41987	-400.281	-18684.1	66674.4	1724.44	366.569	949.677	0	0.485841	20.7542	-171.439	-149.689	-32726.1	-4200.21	412.109	903.873	0
434	9	0	0	0	0	0	0	200	300	0	33.9508	4.57245	-399.365	-18501	66735.5	1770.22	367.104	949.326	0	1.24878	21.0594	-171.133	33.4168	-32237.8	-4520.65	414.622	902.805	0
435	0	0	0	0	0	0	0	200	300	0	32.8827	5.1828	-400.586	-19050.3	66735.5	1815.99	366.595	950.556	0	0.791017	20.2965	-172.964	582.733	-32481.9	-3925.55	415.205	899.631	0
435	1	0	0	0	0	0	0	200	300	0	32.7301	5.03022	-402.112	-18592.5	67406.8	1907.55	367.632	949.237	0	0.943605	21.0594	-173.88	-332.794	-32665	-4429.09	415.14	904.914	0
435	2	0	0	0	0	0	0	200	300	0	32.7301	5.33539	-400.891	-18501	67345.8	1953.32	367.99	949.15	0	0.333253	21.5172	-174.185	1040.5	-32420.9	-4474.87	416.871	897.027	0
435	3	0	0	0	0	0	0	200	300	0	33.0353	5.03022	-403.638	-18409.4	67040.6	2273.76	366.091	948.609	0	1.24878	21.212	-174.796	216.522	-33336.4	-4566.42	412.283	901.761	0
435	4	0	0	0	0	0	0	200	300	0	33.0353	5.33539	-403.027	-18592.5	67345.8	2182.21	367.1	949.132	0	0.943605	21.3646	-175.711	33.4168	-33336.4	-4520.65	413.277	902.81	0
435	5	0	0	0	0	0	0	200	300	0	32.5775	6.40351	-403.027	-18043.2	67528.9	2090.65	367.554	947.769	0	2.01172	22.2801	-175.711	33.4168	-33580.6	-4474.87	411.888	902.81	0
435	6	0	0	0	0	0	0	200	300	0	33.3405	6.09833	-405.774	-17951.7	67773	2365.31	367.022	947.241	0	2.16431	21.6698	-179.373	491.181	-33824.7	-4429.09	414.428	900.262	0
435	7	0	0	0	0	0	0	200	300	0	33.9508	5.64057	-405.469	-17402.3	67284.7	2319.53	365.943	945.919	0	2.46948	23.5008	-181.509	582.733	-33885.7	-4566.42	416.311	899.789	0
435	8	0	0	0	0	0	0	200	300	0	33.3405	5.79316	-406.384	-17585.4	68078.2	2639.97	367.522	946.273	0	2.46948	22.8905	-179.678	33.4168	-33946.8	-4520.65	414.069	902.814	0
435	9	0	0	0	0	0	0	200	300	0	33.0353	6.70868	-406.384	-17493.9	68139.2	2639.97	367.672	946.048	0	3.38501	22.4327	-184.256	33.4168	-33824.7	-3925.55	419.425	902.819	0
436	0	0	0	0	0	0	0	200	300	0	32.7301	7.47162	-406.995	-17310.8	67895.1	2456.86	366.821	945.533	0	2.01172	23.1956	-183.646	-332.794	-34679.2	-4703.75	414.162	904.812	0
436	1	0	0	0	0	0	0	200	300	0	33.7982	7.92939	-408.215	-17219.2	67773	2868.85	366.023	945.182	0	2.3169	23.3482	-183.34	124.97	-34313	-4932.63	415.846	902.318	0
436	2	0	0	0	0	0	0	200	300	0	35.3241	6.40351	-406.384	-17402.3	68505.4	2639.97	368.573	945.822	0	2.92725	23.0431	-184.866	216.522	-35106.4	-4566.42	413.098	901.829	0
436	3	0	0	0	0	0	0	200	300	0	33.1879	7.62421	-409.741	-17127.7	68688.6	2594.19	367.639	944.801	0	2.62207	23.5008	-184.561	491.181	-34862.3	-4749.53	414.107	900.339	0
436	4	0	0	0	0	0	0	200	300	0	35.1715	8.23456	-408.826	-17310.8	68383.4	2685.75	367.268	945.343	0	3.84277	23.0431	-186.087	399.628	-35106.4	-4749.53	414.344	900.852	0
436	5	0	0	0	0	0	0	200	300	0	33.1879	8.84491	-410.352	-16486.8	68566.5	2777.3	367.092	943.177	0	2.92725	23.3482	-188.834	33.4168	-35289.6	-4886.86	416.118	902.823	0
436	6	0	0	0	0	0	0	200	300	0	34.8663	9.60785	-410.046	-16486.8	68383.4	2823.07	366.77	943.207	0	2.92725	24.1112	-189.139	33.4168	-35289.6	-4612.2	416.42	902.823	0
436	7	0	0	0	0	0	0	200	300	0	33.1879	8.9975	-412.793	-16578.4	68810.6	3097.73	366.695	943.161	0	2.92725	23.9586	-187.918	-58.1359	-35472.7	-4886.86	414.233	903.309	0
436	8	0	0	0	0	0	0	200	300	0	32.7301	8.9975	-412.488	-16578.4	68993.7	3097.73	367.262	943.191	0	2.46948	23.6534	-188.834	399.628	-35716.8	-4841.08	413.856	900.884	0
436	9	0	0	0	0	0	0	200	300	0	32.4249	8.69233	-412.183	-15571.3	69359.9	3143.51	368.275	940.778	0	2.92725	23.6534	-189.444	308.075	-35838.9	-4978.41	413.821	901.374	0
437	0	0	0	0	0	0	0	200	300	0	33.493	9.15009	-414.014	-15571.3	69421	3189.29	367.678	940.611	0	3.5376	24.5689	-190.665	399.628	-36022	-5298.84	414.072	900.904	0
437	1	0	0	0	0	0	0	200	300	0	33.493	9.76044	-415.234	-15937.5	69482	3326.61	367.332	941.382	0	3.69019	25.6371	-192.801	674.286	-36815.4	-4841.08	412.05	899.503	0
437	2	0	0	0	0	0	0	200	300	0	32.5775	9.60785	-414.319	-15479.7	69604.1	3647.05	367.996	940.362	0	3.07984	25.1793	-190.665	491.181	-36571.3	-4886.86	411.191	900.424	0
437	3	0	0	0	0	0	0	200	300	0	32.8827	9.76044	-415.845	-15479.7	70031.4	3372.39	368.408	940.225	0	3.23242	25.3319	-194.022	765.839	-36510.3	-4932.63	414.824	899.053	0
437	4	0	0	0	0	0	0	200	300	0	32.5775	10.0656	-417.065	-14838.9	70397.6	3326.61	368.793	938.579	0	3.84277	26.2474	-195.242	216.522	-36815.4	-5161.51	414.437	901.891	0
437	5	0	0	0	0	0	0	200	300	0	33.3405	10.676	-417.981	-15113.5	69726.1	3463.94	366.817	939.158	0	4.30054	25.4845	-195.547	948.944	-36876.5	-5253.07	414.419	898.147	0
437	6	0	0	0	0	0	0	200	300	0	31.9672	10.676	-419.507	-14381.1	70275.5	3555.5	367.519	937.281	0	3.84277	26.2474	-196.463	1132.05	-37364.7	-4886.86	412.813	897.238	0
437	7	0	0	0	0	0	0	200	300	0	32.1198	10.2182	-418.896	-14564.2	70275.5	3601.27	367.763	937.768	0	4.30054	26.4	-197.684	582.733	-36937.5	-5253.07	416.148	900.052	0
437	8	0	0	0	0	0	0	200	300	0	35.0189	11.2863	-420.728	-14289.6	70336.5	3647.05	367.178	936.964	0	5.67383	26.8578	-194.632	582.733	-36998.5	-5344.62	412.905	900.006	0
437	9	0	0	0	0	0	0	200	300	0	33.6456	9.91303	-419.507	-14014.9	70885.8	3738.6	368.974	936.408	0	4.7583	27.1629	-199.21	1132.05	-37486.8	-5436.17	414.822	897.317	0
438	0	0	0	0	0	0	0	200	300	0	33.493	11.2863	-420.422	-14198	71130	3692.83	369.187	936.771	0	4.60571	26.7052	-199.21	1040.5	-37364.7	-5253.07	415.435	897.777	0
438	1	0	0	0	0	0	0	200	300	0	32.4249	11.2863	-422.253	-13923.3	71068.9	3601.27	368.309	935.974	0	4.60571	27.7733	-199.82	1040.5	-37425.8	-5390.4	415.702	897.793	0
438	2	0	0	0	0	0	0	200	300	0	32.5775	11.4389	-420.117	-13831.8	71191	3830.15	369.455	935.924	0	3.84277	27.3155	-201.956	765.839	-37975.1	-5481.95	414.964	899.208	0
438	3	0	0	0	0	0	0	200	300	0	33.0353	10.3708	-422.559	-12824.7	71130	3875.93	368.332	933.35	0	3.69019	28.3836	-199.82	2139.13	-37792	-5481.95	413.87	892.295	0
438	4	0	0	0	0	0	0	200	300	0	33.6456	11.2863	-423.169	-13374	71435.1	3875.93	368.81	934.605	0	3.38501	27.3155	-201.346	1223.6	-38158.2	-5481.95	413.484	896.923	0
438	5	0	0	0	0	0	0	200	300	0	33.0353	11.5915	-423.169	-12550.1	71740.3	3921.71	369.531	932.657	0	4.60571	27.6207	-205.313	1040.5	-38158.2	-5161.51	417.146	897.932	0
438	6	0	0	0	0	0	0	200	300	0	32.4249	11.7441	-426.221	-12916.3	71557.2	4104.81	367.888	933.304	0	3.69019	28.8414	-202.261	1406.71	-38036.1	-5619.28	414.946	896.045	0
438	7	0	0	0	0	0	0	200	300	0	34.1034	11.2863	-423.474	-11909.2	71557.2	4242.14	368.977	931.123	0	4.14795	27.4681	-204.092	1406.71	-38158.2	-5573.5	416.035	896.108	0
438	8	0	0	0	0	0	0	200	300	0	33.9508	10.5234	-427.136	-12092.3	71496.2	4196.37	367.385	931.31	0	4.45313	29.4518	-204.092	1315.16	-38524.4	-5573.5	414.24	896.556	0
438	9	0	0	0	0	0	0	200	300	0	33.7982	11.8967	-427.136	-11909.2	71862.4	4287.92	368.242	930.881	0	3.84277	29.7569	-204.092	1223.6	-38402.3	-5527.73	414.838	897.005	0
439	0	0	0	0	0	0	0	200	300	0	33.3405	12.0493	-427.136	-11817.6	71740.3	4196.37	367.957	930.667	0	4.30054	29.7569	-206.229	1956.02	-38646.5	-5756.61	415.604	893.515	0
439	1	0	0	0	0	0	0	200	300	0	33.9508	12.0493	-428.357	-11085.2	72289.6	4425.25	368.76	928.878	0	3.99536	29.7569	-206.229	1589.81	-38768.6	-5619.28	415.012	895.291	0
439	2	0	0	0	0	0	0	200	300	0	34.256	12.2018	-429.883	-11359.9	72411.7	4379.47	368.445	929.426	0	4.30054	30.0621	-203.482	1589.81	-38646.5	-5848.16	413.074	895.187	0
439	3	0	0	0	0	0	0	200	300	0	33.493	11.4389	-429.578	-10719	72228.6	4654.13	368.139	927.952	0	4.91089	29.9095	-207.449	1589.81	-39195.8	-5756.61	414.058	895.336	0
439	4	0	0	0	0	0	0	200	300	0	33.6456	12.3544	-429.578	-10993.7	72228.6	4745.68	368.139	928.592	0	4.60571	30.5199	-208.06	1498.26	-38890.6	-5985.49	416.08	895.799	0
439	5	0	0	0	0	0	0	200	300	0	34.7137	12.9648	-430.188	-9986.57	72655.8	4745.68	368.893	926.214	0	4.30054	30.0621	-206.229	1772.92	-39073.7	-5939.71	413.532	894.403	0
439	6	0	0	0	0	0	0	200	300	0	35.0189	12.3544	-428.967	-10261.2	72900	4654.13	369.943	926.921	0	4.45313	30.825	-206.839	1956.02	-39134.8	-5619.28	413.796	893.543	0
439	7	0	0	0	0	0	0	200	300	0	33.493	13.27	-431.104	-10078.1	71679.3	4516.8	366.269	926.378	0	3.69019	31.2828	-206.534	948.944	-38768.6	-5893.94	415.29	898.405	0
439	8	0	0	0	0	0	0	200	300	0	36.5448	12.8122	-431.104	-9803.46	72655.8	4608.35	368.535	925.74	0	4.30054	31.2828	-209.586	1589.81	-39501	-5985.49	414.528	895.415	0
439	9	0	0	0	0	0	0	200	300	0	35.4767	12.6596	-430.188	-9162.6	72777.9	4745.68	369.177	924.299	0	5.36865	31.8932	-211.417	1772.92	-38707.5	-5710.83	419.914	894.614	0
440	0	0	0	0	0	0	0	200	300	0	37.1552	12.2018	-431.714	-9071.04	72472.8	4791.46	367.872	924.012	0	5.67383	31.4354	-207.755	2596.89	-39684.1	-6077.04	411.986	890.5	0
440	1	0	0	0	0	0	0	200	300	0	34.8663	13.8803	-431.409	-9254.15	72533.8	4791.46	368.132	924.451	0	5.36865	31.2828	-211.722	1772.92	-39806.2	-5665.05	414.988	894.626	0
440	2	0	0	0	0	0	0	200	300	0	34.7137	13.8803	-432.629	-8247.07	73083.1	4837.23	368.928	922.063	0	7.04712	32.6561	-208.365	1498.26	-39073.7	-6077.04	415.475	895.809	0
440	3	0	0	0	0	0	0	200	300	0	35.9345	14.1855	-433.545	-7789.31	73144.1	5111.89	368.712	920.967	0	5.52124	31.7406	-211.722	1589.81	-40111.3	-6351.7	413.547	895.491	0
440	4	0	0	0	0	0	0	200	300	0	37.3077	11.5915	-435.681	-7697.75	72777.9	4974.56	367.044	920.668	0	6.58936	32.9613	-214.163	1956.02	-40355.5	-5939.71	414.567	893.867	0
440	5	0	0	0	0	0	0	200	300	0	34.7137	13.4226	-432.629	-7789.31	72777.9	4699.91	368.222	921.005	0	6.28418	31.7406	-212.943	2047.58	-40111.3	-6077.04	414.633	893.384	0
440	6	0	0	0	0	0	0	200	300	0	37.4603	13.8803	-431.714	-7789.31	72472.8	4883.01	367.872	921.043	0	5.52124	32.8087	-214.163	1681.37	-40111.3	-6077.04	415.707	895.149	0
440	7	0	0	0	0	0	0	200	300	0	34.4086	13.5751	-433.24	-6599.12	72961	4791.46	368.408	918.232	0	5.36865	33.1139	-215.079	1406.71	-40233.4	-5848.16	415.936	896.46	0
440	8	0	0	0	0	0	0	200	300	0	37.3077	13.7277	-432.629	-6324.46	72716.9	4974.56	368.081	917.619	0	5.36865	32.6561	-215.689	2413.79	-40172.4	-6214.37	416.749	891.809	0
440	9	0	0	0	0	0	0	200	300	0	36.3922	13.4226	-433.85	-6141.35	73266.2	4928.79	368.874	917.156	0	6.43677	33.2664	-217.825	2139.13	-40477.6	-6305.92	417.174	893.18	0
441	0	0	0	0	0	0	0	200	300	0	35.3241	13.7277	-432.019	-6049.8	73449.3	5020.34	370.014	917.004	0	5.21607	33.5716	-216.299	2505.34	-40538.6	-5939.71	415.581	891.417	0
441	1	0	0	0	0	0	0	200	300	0	35.7819	13.7277	-431.714	-4951.17	73022	5111.89	369.145	914.469	0	5.82642	32.6561	-217.825	2047.58	-41148.9	-6351.7	414.092	893.6	0
441	2	0	0	0	0	0	0	200	300	0	36.5448	13.8803	-432.324	-4401.85	73022	5157.67	368.906	913.182	0	6.58936	34.4872	-220.267	2322.24	-41026.9	-6305.92	416.74	892.457	0
441	3	0	0	0	0	0	0	200	300	0	37.3077	14.1855	-432.019	-4401.85	72777.9	4883.01	368.46	913.189	0	6.89453	33.419	-216.91	2322.24	-41087.9	-6122.82	413.576	892.294	0
441	4	0	0	0	0	0	0	200	300	0	36.087	12.9648	-434.155	-4218.75	72900	5249.22	367.912	912.717	0	7.19971	33.8768	-220.267	2139.13	-41637.2	-6580.58	413.969	893.289	0
441	5	0	0	0	0	0	0	200	300	0	38.0707	13.4226	-431.409	-3944.09	73205.2	5111.89	369.689	912.142	0	7.19971	34.4872	-220.267	1956.02	-41271	-6397.48	415.632	894.12	0
441	6	0	0	0	0	0	0	200	300	0	37.0026	13.5751	-432.019	-2937.01	73327.2	5478.1	369.732	909.798	0	7.3523	34.3346	-221.182	1956.02	-41393.1	-6397.48	415.855	894.156	0
441	7	0	0	0	0	0	0	200	300	0	37.3077	12.6596	-432.019	-2937.01	73327.2	4974.56	369.732	909.798	0	7.81006	34.3346	-222.403	2505.34	-41148.9	-6305.92	417.98	891.735	0
441	8	0	0	0	0	0	0	200	300	0	37.0026	13.1174	-432.324	-2937.01	73022	4883.01	368.906	909.794	0	7.81006	34.7923	-220.877	3146.21	-41271	-6534.81	416.149	888.756	0
441	9	0	0	0	0	0	0	200	300	0	36.85	12.6596	-431.409	-2021.48	72961	5340.77	369.123	907.686	0	8.11524	34.4872	-221.487	1956.02	-41698.3	-6580.58	414.735	894.169	0
442	0	0	0	0	0	0	0	200	300	0	37.1552	12.9648	-430.493	-1563.72	73327.2	5249.22	370.333	906.632	0	7.81006	36.4708	-224.539	2596.89	-41454.1	-6580.58	418.381	891.435	0
442	1	0	0	0	0	0	0	200	300	0	37.6129	13.1174	-429.578	-556.639	73388.2	5295	370.838	904.296	0	8.26782	35.5553	-220.267	2230.68	-41942.4	-6717.91	412.584	892.873	0
442	2	0	0	0	0	0	0	200	300	0	38.8336	12.3544	-429.272	-556.639	73022	5111.89	370.107	904.297	0	7.04712	34.9449	-223.929	2596.89	-42125.5	-6809.46	414.88	891.403	0
442	3	0	0	0	0	0	0	200	300	0	37.4603	12.8122	-431.104	-98.8746	73083.1	5203.45	369.526	903.229	0	7.19971	36.3182	-225.15	2963.11	-42308.6	-6946.79	415.087	889.839	0
442	4	0	0	0	0	0	0	200	300	0	37.9181	11.8967	-430.188	633.547	72961	5111.89	369.603	901.527	0	7.19971	36.6234	-224.844	2505.34	-42247.6	-6809.46	415.103	891.857	0
442	5	0	0	0	0	0	0	200	300	0	39.444	12.2018	-429.272	999.758	72777.9	5203.45	369.538	900.671	0	8.11524	36.4708	-226.981	2596.89	-42247.6	-7038.35	416.871	891.559	0
442	6	0	0	0	0	0	0	200	300	0	40.0543	12.507	-429.883	725.1	73022	5203.45	369.865	901.313	0	7.04712	36.9286	-227.286	2780	-42369.6	-7221.45	416.584	890.769	0
442	7	0	0	0	0	0	0	200	300	0	38.9862	12.9648	-429.272	908.206	73327.2	4837.23	370.818	900.884	0	7.04712	37.5389	-224.844	2413.79	-42125.5	-6946.79	415.646	892.265	0
442	8	0	0	0	0	0	0	200	300	0	39.444	11.4389	-431.104	1549.07	73449.3	4928.79	370.375	899.407	0	6.74194	36.013	-226.37	3329.32	-42369.6	-7450.33	415.83	888.293	0
442	9	0	0	0	0	0	0	200	300	0	40.2069	11.2863	-429.883	2006.84	73144.1	5066.12	370.149	898.332	0	6.58936	38.3018	-228.506	3054.66	-42430.7	-7313	417.313	889.632	0
443	0	0	0	0	0	0	0	200	300	0	41.1224	11.1337	-430.493	2098.39	72961	5020.34	369.482	898.126	0	7.04712	38.607	-226.675	2596.89	-42491.7	-7313	415.544	891.544	0
443	1	0	0	0	0	0	0	200	300	0	40.5121	11.5915	-429.272	2922.37	73571.4	4928.79	371.386	896.192	0	7.19971	37.8441	-228.201	3329.32	-42735.9	-7541.89	415.727	888.411	0
443	2	0	0	0	0	0	0	200	300	0	40.6647	11.2863	-430.188	3288.58	73266.2	4928.79	370.312	895.356	0	7.3523	37.6915	-227.591	3146.21	-42613.8	-7450.33	415.762	889.176	0
443	3	0	0	0	0	0	0	200	300	0	41.7328	10.8286	-427.747	4112.55	72594.8	5020.34	369.715	893.386	0	7.04712	39.37	-228.201	2505.34	-42857.9	-7496.11	415.192	892.021	0
443	4	0	0	0	0	0	0	200	300	0	42.3431	10.0656	-431.104	3654.79	73449.3	4883.01	370.375	894.522	0	8.26782	38.607	-225.15	3237.76	-42857.9	-7541.89	412.647	888.62	0
443	5	0	0	0	0	0	0	200	300	0	42.038	10.2182	-429.883	4387.21	73022	4791.46	369.865	892.794	0	7.65747	39.9803	-230.338	2871.55	-42674.8	-7450.33	417.729	890.533	0
443	6	0	0	0	0	0	0	200	300	0	44.7845	10.9811	-429.578	4936.53	73266.2	4654.13	370.554	891.508	0	6.89453	40.5907	-229.422	3146.21	-42491.7	-7633.44	417.788	889.286	0
443	7	0	0	0	0	0	0	200	300	0	42.8009	9.91303	-431.714	5211.19	73266.2	4883.01	369.71	890.929	0	6.58936	40.1329	-228.812	3512.42	-42980	-7770.77	415.16	887.649	0
443	8	0	0	0	0	0	0	200	300	0	43.7164	9.76044	-430.493	6126.71	73937.6	4791.46	371.751	888.768	0	5.52124	40.1329	-229.117	3512.42	-42735.9	-7770.77	416.476	887.67	0
443	9	0	0	0	0	0	0	200	300	0	44.0216	9.15009	-431.409	5852.06	73693.5	4654.13	370.821	889.435	0	6.28418	40.5907	-228.506	3146.21	-43163.1	-7953.88	414.108	889.232	0
444	0	0	0	0	0	0	0	200	300	0	43.869	8.69233	-430.493	6401.37	73632.4	4699.91	371.042	888.13	0	7.19971	41.5062	-228.812	3054.66	-42980	-7816.55	415.16	889.65	0
444	1	0	0	0	0	0	0	200	300	0	44.4794	9.30268	-429.883	7316.9	73327.2	4745.68	370.575	885.979	0	6.13159	42.5743	-231.863	3146.21	-42919	-7999.65	417.896	889.431	0
444	2	0	0	0	0	0	0	200	300	0	44.632	8.9975	-432.935	7591.56	73998.6	4791.46	370.923	885.465	0	7.04712	42.5743	-227.286	3329.32	-43346.2	-7953.88	412.288	888.352	0
444	3	0	0	0	0	0	0	200	300	0	45.5475	8.84491	-431.409	7500	73876.5	4379.47	371.245	885.615	0	5.36865	41.8114	-229.727	3329.32	-43102.1	-7908.1	415.377	888.508	0
444	4	0	0	0	0	0	0	200	300	0	45.2423	9.30268	-431.714	8507.08	73693.5	4333.69	370.7	883.295	0	6.13159	43.6424	-228.201	3420.87	-42919	-8091.2	414.925	888.009	0
444	5	0	0	0	0	0	0	200	300	0	46.7682	8.38715	-432.019	8781.74	73815.5	4608.35	370.862	882.673	0	5.82642	43.4898	-229.117	3970.19	-43041	-8274.31	415.144	885.672	0
444	6	0	0	0	0	0	0	200	300	0	46.7682	8.53974	-431.714	9239.51	73937.6	4104.81	371.265	881.598	0	5.21607	43.3372	-229.727	3512.42	-42857.9	-8136.98	416.44	887.711	0
444	7	0	0	0	0	0	0	200	300	0	47.6837	8.53974	-434.766	9514.17	73937.6	4287.92	370.063	881.117	0	4.45313	44.1002	-229.117	3512.42	-42980	-8503.19	415.41	887.67	0
444	8	0	0	0	0	0	0	200	300	0	46.7682	7.62421	-430.188	9788.83	73876.5	4196.37	371.731	880.245	0	4.14795	45.1683	-227.896	3603.97	-43224.1	-8411.64	413.334	887.186	0
444	9	0	0	0	0	0	0	200	300	0	47.0734	7.01386	-434.155	10887.5	74608.9	4150.59	371.849	877.923	0	4.45313	43.9476	-229.422	3054.66	-43285.2	-8411.64	414.329	889.685	0
445	0	0	0	0	0	0	0	200	300	0	48.2941	7.7768	-434.46	10979	74425.9	4150.59	371.306	877.73	0	4.14795	45.4735	-230.643	3878.63	-42552.8	-8274.31	418.504	886.183	0
445	1	0	0	0	0	0	0	200	300	0	48.7518	6.70868	-435.986	11253.7	74425.9	4196.37	370.707	877.188	0	4.7583	45.7787	-228.812	3420.87	-43224.1	-8548.97	414.093	888.049	0
445	2	0	0	0	0	0	0	200	300	0	47.5311	7.47162	-437.207	11436.8	74792.1	4150.59	371.068	876.841	0	5.36865	44.558	-230.338	3695.53	-42980	-8503.19	416.404	886.956	0
445	3	0	0	0	0	0	0	200	300	0	47.6837	7.16645	-437.207	12535.4	74486.9	4059.04	370.37	874.328	0	4.45313	46.5416	-228.812	3878.63	-42491.7	-8777.85	417.294	886.049	0
445	4	0	0	0	0	0	0	200	300	0	48.9044	7.01386	-439.038	12627	75158.3	4150.59	371.189	874.24	0	3.99536	46.0838	-228.506	3512.42	-42735.9	-8503.19	415.978	887.629	0
445	5	0	0	0	0	0	0	200	300	0	49.057	7.62421	-439.648	12810.1	75524.5	4013.26	371.784	873.863	0	4.91089	46.389	-226.065	3512.42	-42491.7	-8777.85	415.038	887.463	0
445	6	0	0	0	0	0	0	200	300	0	49.057	7.62421	-440.564	13176.3	76195.9	4196.37	372.951	873.092	0	4.14795	47.4571	-226.675	3603.97	-42857.9	-8960.96	413.928	887.101	0
445	7	0	0	0	0	0	0	200	300	0	49.82	6.86127	-440.869	13176.3	76562.1	4104.81	373.662	873.113	0	3.84277	46.5416	-228.506	3787.08	-42919	-8686.3	415.176	886.427	0
445	8	0	0	0	0	0	0	200	300	0	49.3622	7.62421	-444.836	14366.5	76379	4196.37	371.701	870.704	0	4.60571	48.3727	-226.065	3329.32	-42613.8	-8869.41	414.498	888.273	0
445	9	0	0	0	0	0	0	200	300	0	50.2777	7.92939	-444.836	14641.1	76501.1	4150.59	371.976	870.087	0	4.45313	47.4571	-225.15	3970.19	-42735.9	-8548.97	413.189	885.367	0
446	0	0	0	0	0	0	0	200	300	0	49.6674	7.47162	-444.836	14183.4	77233.5	4059.04	373.622	871.116	0	3.84277	48.3727	-226.065	3878.63	-42857.9	-9006.73	413.418	885.843	0
446	1	0	0	0	0	0	0	200	300	0	51.1932	8.53974	-444.531	14915.8	77294.5	4287.92	373.879	869.446	0	3.5376	48.983	-223.624	4427.95	-42430.7	-9327.17	413.259	883.199	0
446	2	0	0	0	0	0	0	200	300	0	51.3458	7.62421	-448.499	15007.3	76623.1	4104.81	370.844	869.539	0	2.92725	48.983	-223.624	3695.53	-42369.6	-8777.85	413.531	886.474	0
446	3	0	0	0	0	0	0	200	300	0	51.4984	7.62421	-451.55	16289.1	78210.1	3967.48	373.203	866.926	0	3.38501	49.5934	-225.455	3878.63	-42186.5	-9418.72	415.882	885.796	0
446	4	0	0	0	0	0	0	200	300	0	51.4984	6.86127	-453.381	15556.6	78210.1	4104.81	372.504	868.688	0	1.85913	51.577	-225.455	4244.84	-42003.4	-9876.49	416.695	884.172	0
446	5	0	0	0	0	0	0	200	300	0	50.5829	6.70868	-454.602	16106	78576.3	4242.14	372.846	867.571	0	0.0280775	53.1029	-221.793	4336.4	-42247.6	-9876.49	412.518	883.448	0
446	6	0	0	0	0	0	0	200	300	0	51.1932	7.47162	-456.738	16289.1	78942.5	4104.81	372.84	867.336	0	0.0280775	51.1192	-223.624	5526.58	-41759.3	-9968.04	416.261	878.286	0
446	7	0	0	0	0	0	0	200	300	0	51.0407	7.47162	-457.959	16472.2	79491.8	4196.37	373.578	867.031	0	-0.734862	53.8658	-221.182	4427.95	-41881.4	-10380	413.648	882.981	0
446	8	0	0	0	0	0	0	200	300	0	50.1251	7.62421	-461.621	16197.5	79980	4333.69	373.259	867.912	0	0.180665	54.7813	-220.267	4885.71	-42003.4	-10196.9	412.306	880.819	0
446	9	0	0	0	0	0	0	200	300	0	50.5829	7.7768	-461.926	16838.4	80041.1	4425.25	373.277	866.548	0	0.791017	54.4762	-218.13	4519.5	-41820.3	-10196.9	411.278	882.281	0
447	0	0	0	0	0	0	0	200	300	0	50.8881	7.7768	-465.894	17479.2	80773.5	4745.68	373.373	865.482	0	-1.65039	55.0865	-219.962	4336.4	-41576.2	-10380	413.984	883.286	0
447	1	0	0	0	0	0	0	200	300	0	51.3458	9.45527	-465.894	16197.5	80895.6	4883.01	373.635	868.234	0	-1.65039	56.002	-219.046	5251.92	-41637.2	-10517.4	412.916	879.024	0
447	2	0	0	0	0	0	0	200	300	0	50.4303	10.9811	-468.945	17113	80956.6	5066.12	372.636	866.507	0	-2.41333	55.6969	-218.741	5160.37	-41271	-10608.9	414.325	879.409	0
447	3	0	0	0	0	0	0	200	300	0	51.9562	11.8967	-471.692	16838.4	81261.8	5157.67	372.277	867.302	0	-3.17627	54.4762	-217.825	5251.92	-41026.9	-10517.4	414.652	878.889	0
447	4	0	0	0	0	0	0	200	300	0	51.8036	11.5915	-472.607	18120.1	81689	5340.77	372.848	864.659	0	-3.02368	56.4598	-218.741	5068.82	-41087.9	-10929.3	415.162	879.827	0
447	5	0	0	0	0	0	0	200	300	0	51.8036	12.6596	-475.659	18028.6	82238.4	5203.45	372.894	865.098	0	-2.10815	55.6969	-217.215	4794.16	-40843.8	-10837.8	414.966	880.929	0
447	6	0	0	0	0	0	0	200	300	0	51.3458	13.1174	-475.659	17753.9	82177.3	5844.31	372.765	865.675	0	-2.10815	57.5279	-217.825	5160.37	-40965.8	-11020.9	414.933	879.31	0
447	7	0	0	0	0	0	0	200	300	0	51.9562	14.0329	-476.88	17937	82543.5	5798.54	373.091	865.387	0	-2.41333	57.9857	-213.553	5068.82	-40843.8	-10883.6	411.742	879.264	0
447	8	0	0	0	0	0	0	200	300	0	51.9562	15.2536	-479.321	18394.8	82299.4	5798.54	371.7	864.623	0	-2.87109	56.6124	-215.689	6075.9	-40538.6	-11204	415.051	874.83	0
447	9	0	0	0	0	0	0	200	300	0	51.9562	15.2536	-481.458	18669.4	82848.7	6164.75	372.079	864.223	0	-3.48144	58.7486	-215.079	4977.26	-40294.5	-11249.8	415.653	879.858	0
448	0	0	0	0	0	0	0	200	300	0	52.4139	15.4062	-482.068	18761	83092.9	6302.08	372.368	864.082	0	-2.56592	57.0702	-215.079	5068.82	-40233.4	-10837.8	415.936	879.433	0
448	1	0	0	0	0	0	0	200	300	0	51.651	16.0165	-482.068	18852.5	83642.1	6210.53	373.507	863.892	0	-3.78662	59.2064	-212.332	5160.37	-40050.3	-11478.7	414.379	878.697	0
448	2	0	0	0	0	0	0	200	300	0	52.2614	17.5424	-483.289	19676.5	84008.4	6530.96	373.827	862.286	0	-4.0918	59.5116	-212.027	4977.26	-39928.2	-11478.7	414.683	879.525	0
448	3	0	0	0	0	0	0	200	300	0	52.4139	18.0002	-485.425	19585	83703.2	6576.74	372.433	862.654	0	-3.63403	58.4435	-206.839	6167.45	-39378.9	-10700.5	412.616	873.182	0
448	4	0	0	0	0	0	0	200	300	0	53.9398	18.3054	-486.646	20225.8	84069.4	6851.39	372.753	861.438	0	-3.78662	59.0538	-210.501	6259	-39623	-11478.7	414.768	873.266	0
448	5	0	0	0	0	0	0	200	300	0	52.2614	19.3735	-488.782	19585	84435.6	6988.72	372.747	862.931	0	-4.24438	59.8167	-209.28	5526.58	-39745.1	-11387.1	413.087	876.593	0
448	6	0	0	0	0	0	0	200	300	0	52.8717	19.9838	-488.477	20408.9	84252.5	7034.5	372.48	861.219	0	-4.39697	59.0538	-208.06	5251.92	-39501	-11432.9	413.146	877.758	0
448	7	0.122373	-3.55954	-10.7172	-2128.42	686.89	-207.275	264.093	498.599	0	52.1088	21.0519	-488.782	20958.3	84191.5	7309.16	372.248	860.121	0	-5.46509	59.8167	-207.449	5709.69	-38951.7	-11890.6	415.235	875.477	0
448	8	0.427549	-13.1726	-23.2294	-3227.05	564.819	-207.275	224.315	438.921	0	52.7191	21.5097	-490.613	20958.3	84923.9	7217.61	373.098	860.281	0	-4.85473	60.5797	-207.144	5526.58	-39195.8	-11616	413.78	876.32	0
448	9	-0.487978	-12.257	-25.976	-2769.29	320.679	-344.605	212.345	406.61	0	52.2614	21.9675	-490.918	21049.8	85046	7171.83	373.239	860.122	0	-5.3125	57.3753	-205.313	5892.79	-39195.8	-11478.7	412.093	874.299	0
449	0	-4.30268	-4.32247	-18.0414	-2036.86	808.96	433.594	244.839	412.9	0	52.2614	21.3571	-493.359	21141.4	84923.9	7492.26	372.134	860.148	0	-5.00732	60.8849	-205.618	5618.13	-38463.4	-11478.7	415.938	875.677	0
449	1	-1.40351	-0.965541	-10.1068	-3227.05	808.96	-115.723	280.041	619.294	0	51.651	22.883	-492.749	21782.2	84984.9	7766.92	372.471	858.794	0	-5.61767	61.0374	-203.177	5343.48	-38341.3	-11616	414.291	876.7	0
449	2	2.10602	-1.72848	-15.9052	-3227.05	686.89	-527.71	243.187	502.893	0	53.1769	25.0192	-493.054	21965.3	85229.1	8041.58	372.859	858.451	0	-6.07544	59.8167	-202.567	6350.56	-38158.2	-11570.2	414.626	871.65	0
449	3	-0.487978	-1.72848	-28.7225	-3867.92	992.066	21.6065	234.54	434.665	0	52.8717	25.0192	-494.885	21965.3	85351.1	8041.58	372.467	858.615	0	-5.92285	60.4271	-202.872	6167.45	-38036.1	-11799.1	415.511	872.599	0
449	4	0.580137	4.06986	-32.995	-4691.89	1053.1	-207.275	231.917	442.2	0	51.9562	25.477	-495.496	22606.2	84923.9	8041.58	371.392	857.377	0	-6.68579	60.5797	-200.735	6167.45	-37975.1	-11341.3	413.82	872.276	0
449	5	3.02154	9.10526	-32.3846	-5607.42	808.96	-756.592	224.98	473.151	0	52.1088	25.7822	-495.19	22880.9	85534.3	8407.79	372.73	856.794	0	-6.22803	58.9012	-199.82	5984.34	-37792	-11524.4	413.87	873.051	0
449	6	-0.487978	11.3941	-34.826	-6248.29	1114.14	-344.605	231.991	479.414	0	52.4139	26.6977	-496.411	22880.9	85839.4	8636.67	372.92	856.907	0	-6.07544	61.0374	-200.125	6075.9	-37547.9	-11799.1	415.378	872.64	0
449	7	1.34308	14.4458	-43.0658	-6522.95	1175.17	250.488	227.288	451.465	0	52.5665	28.9865	-494.885	22423.1	85595.3	8636.67	372.96	857.69	0	-5.61767	60.7323	-196.768	6350.56	-37120.6	-11524.4	414.349	870.726	0
449	8	4.54742	14.5984	-49.7797	-7346.92	1236.21	-207.275	224.834	447.589	0	51.9562	28.8339	-497.021	23064	85839.4	8957.11	372.708	856.596	0	-6.38061	59.6642	-194.632	6350.56	-37120.6	-11753.3	412.278	870.372	0
449	9	1.95343	17.1924	-48.2538	-7804.69	1419.31	-344.605	229.414	461.743	0	52.1088	29.1391	-497.327	23155.5	86022.6	8957.11	372.97	856.44	0	-6.68579	60.1219	-194.937	6808.32	-36754.4	-11616	414.455	868.074	0
450	0	1.34308	16.1243	-54.3573	-8720.21	1663.45	-298.828	230.602	460.424	0	53.1769	27.9184	-496.411	24254.2	86144.6	9048.66	373.535	854.141	0	-6.99097	61.8004	-192.801	6167.45	-36449.2	-11158.2	413.949	871.011	0
450	1	3.63189	13.0725	-60.766	-9361.08	1358.28	-573.486	222.353	454.051	0	53.3295	30.3598	-496.411	24437.3	85900.5	9323.32	373.043	853.772	0	-5.77026	61.0374	-192.801	6533.66	-36510.3	-11936.4	413.632	869.112	0
450	2	3.47931	12.4622	-67.785	-9361.08	1236.21	-436.157	218.237	438.1	0	52.5665	30.8176	-495.496	24254.2	86205.6	9323.32	373.979	854.051	0	-7.29614	62.2581	-192.191	6259	-36327.1	-12028	413.984	870.433	0
450	3	3.02154	13.2251	-69.6161	-11558.4	1846.56	-481.934	226.525	466.03	0	52.2614	31.1227	-496.716	24711.9	86144.6	9277.54	373.428	853.249	0	-7.7539	63.3263	-188.528	6808.32	-36266.1	-11616	410.636	866.887	0
450	4	5.92071	12.0044	-72.0575	-11833	1785.52	-756.592	224.779	464.216	0	51.8036	28.8339	-494.275	24162.6	85778.4	9460.65	373.544	854.115	0	-7.7539	63.3263	-191.275	7357.64	-35777.8	-12394.2	415.951	864.534	0
450	5	4.70001	12.6148	-79.9921	-13114.7	1785.52	-619.263	222.321	463.951	0	51.8036	30.8176	-497.632	25169.7	85900.5	9643.75	372.619	852.421	0	-8.51684	65.1573	-187.918	6625.21	-35472.7	-12440	414.233	867.744	0
450	6	3.78448	15.9717	-88.2318	-13023.2	1846.56	-527.71	220.928	447.602	0	55.0079	31.5805	-494.885	25078.1	86266.7	9506.42	374.317	852.325	0	-9.1272	65.4625	-184.256	6899.87	-35167.5	-12577.3	412.138	865.553	0
450	7	5.92071	17.345	-92.8094	-14671.1	2029.66	-710.816	221.869	458.078	0	53.0243	31.7331	-496.716	25261.2	86510.8	9643.75	374.165	852.144	0	-9.73755	64.6996	-184.866	6625.21	-34801.3	-13035.1	414.749	867.162	0
450	8	7.90436	16.8872	-97.9974	-16136	2395.87	-1122.8	224.448	464.657	0	51.651	32.0383	-496.716	25719	85656.4	9689.53	372.445	851.222	0	-10.1953	66.5306	-184.561	6167.45	-34496.1	-12851.9	416.091	869.583	0
450	9	9.27765	22.9908	-106.542	-15769.8	2884.16	-985.474	227.071	448.014	0	52.1088	32.3434	-494.885	25719	86144.6	9552.2	374.07	851.03	0	-10.3479	67.5987	-180.594	6625.21	-33763.7	-13172.4	416.041	866.314	0
451	0	9.888	23.4485	-113.867	-17326.2	2517.95	-1260.13	222.113	452.162	0	52.8717	32.3434	-496.716	26085.2	86510.8	9781.08	374.165	850.485	0	-10.6531	67.2935	-180.594	6899.87	-34129.9	-13447	414.013	864.793	0
451	1	10.6509	22.533	-122.717	-18333.2	2945.19	-1351.69	224	449.395	0	53.1769	32.496	-494.275	26909.2	85839.4	9735.31	373.667	848.558	0	-9.73755	68.3617	-179.373	7174.53	-33397.5	-13492.8	416.81	863.002	0
451	2	9.58282	22.6856	-125.463	-18516.4	3433.47	-1351.69	227.366	447.584	0	52.1088	32.1909	-495.19	26268.3	85900.5	9964.19	373.47	849.953	0	-12.179	67.7513	-175.406	7082.98	-33458.5	-13538.6	412.251	862.62	0
451	3	12.482	21.3123	-132.787	-19889.6	3616.58	-1534.79	227.236	449.786	0	51.9562	31.2753	-493.054	26268.3	85900.5	10010	374.221	849.723	0	-11.7212	68.2091	-173.575	7449.19	-33031.2	-13218.2	412.7	860.084	0
451	4	14.313	17.345	-141.943	-21079.8	3433.47	-1717.9	224.189	448.509	0	52.7191	33.7167	-494.885	26909.2	85839.4	10055.7	373.453	848.625	0	-12.9419	69.8875	-171.133	6625.21	-32298.8	-13675.9	414.265	864.286	0
451	5	12.3294	18.2605	-148.657	-22544.7	3616.58	-1855.23	224.328	451.656	0	55.4657	32.9538	-494.885	26634.5	85839.4	10193.1	373.453	849.18	0	-12.9419	68.6668	-171.439	7449.19	-32115.7	-13675.9	415.669	859.549	0
451	6	13.7027	16.5821	-153.845	-23643.3	4226.93	-1626.34	227.475	453.683	0	53.7872	33.5642	-492.444	26634.5	85534.3	10238.8	373.693	848.914	0	-13.2471	69.1246	-170.828	8090.06	-31749.5	-13859	417.144	855.642	0
451	7	16.907	15.514	-159.338	-24375.7	4226.93	-2084.11	226.528	452.982	0	51.8036	33.8693	-493.359	27183.8	86022.6	10467.7	374.361	847.901	0	-14.1626	70.0401	-162.589	6808.32	-31139.2	-13996.4	411.479	861.125	0
451	8	16.4493	14.5984	-170.324	-25291.3	4410.03	-2358.76	225.892	448.489	0	52.5665	35.5478	-491.833	26817.6	85839.4	10833.9	374.529	848.474	0	-14.6204	67.5987	-162.894	7357.64	-30589.9	-13675.9	415.21	857.832	0
451	9	17.0596	12.7674	-174.902	-26206.8	4654.17	-2221.44	226.61	449.837	0	53.4821	35.853	-493.665	27641.6	84862.9	10696.6	371.904	847.007	0	-14.4678	69.5824	-162.894	6899.87	-30406.7	-13538.6	416.334	860.642	0
452	0	17.5174	9.8682	-182.226	-28037.8	4715.21	-2267.21	225.876	453.863	0	53.7872	36.0056	-490.002	27367	85595.3	10971.3	374.683	847.149	0	-15.2307	69.2772	-158.621	7449.19	-29491.2	-13675.9	417.078	856.038	0
452	1	17.9752	9.41044	-189.55	-27488.5	5142.46	-2175.66	227.13	445.02	0	51.8036	35.2426	-493.054	27733.2	85473.2	11291.7	373.355	846.752	0	-16.604	68.6668	-155.264	7174.53	-29796.4	-13721.7	411.092	856.792	0
452	2	18.2803	6.96903	-197.79	-28312.5	4776.25	-2084.11	224.148	443.144	0	53.0243	36.9211	-490.308	27641.6	85229.1	11429	373.828	846.624	0	-17.9773	67.9039	-154.959	7082.98	-29002.9	-14042.1	415.835	857.291	0
452	3	19.3484	2.84916	-207.861	-29594.2	4959.35	-2267.21	223.859	442.375	0	53.0243	39.0573	-490.002	28282.5	85107	11520.6	373.687	845.281	0	-18.2825	69.4298	-150.381	7082.98	-28636.7	-13813.3	412.573	855.9	0
452	4	18.5855	1.32328	-214.88	-30052	5142.46	-2541.87	223.932	439.855	0	53.0243	38.9047	-489.392	28190.9	85412.2	11657.9	374.527	845.396	0	-18.4351	68.6668	-148.856	7357.64	-28209.5	-13630.1	413.491	853.572	0
452	5	18.8907	-1.27072	-219.152	-30876	5630.74	-2450.32	225.693	440.888	0	51.3458	37.9892	-482.373	27824.7	84740.8	11520.6	375.675	845.317	0	-18.4351	68.6668	-148.245	7449.19	-27171.9	-13950.6	419.71	852.751	0
452	6	19.8062	-6.00094	-224.951	-31791.5	6057.99	-2587.65	226.93	441.327	0	52.7191	39.3625	-489.087	28282.5	84191.5	12115.7	372.14	845.173	0	-19.0454	68.6668	-141.837	7815.4	-26927.7	-13996.4	413.15	847.899	0
452	7	19.8062	-6.30612	-233.495	-32890.1	5752.81	-2404.54	224.638	440.86	0	52.2614	40.1254	-484.814	28465.6	84313.6	12069.9	373.909	844.286	0	-19.6558	67.4461	-141.226	7449.19	-26378.4	-13767.5	416.219	850.254	0
452	8	18.5855	-8.90011	-242.651	-33531	5935.92	-2404.54	224.463	438.186	0	51.9562	41.3461	-483.289	28923.4	84191.5	12115.7	374.205	843.153	0	-18.4351	68.5143	-140.921	6533.66	-26256.4	-13859	416.68	856.636	0
452	9	19.3484	-10.5786	-245.397	-34629.6	5996.95	-2587.65	224.438	441.117	0	50.4303	42.1091	-483.594	28648.7	84008.4	12573.4	373.717	843.759	0	-19.5032	67.9039	-135.428	7266.08	-25829.1	-13355.5	412.278	849.347	0
453	0	19.8062	-13.4777	-250.585	-34812.7	6119.02	-2358.76	224.419	438.926	0	51.0407	40.5832	-477.49	28740.2	82970.8	12527.7	373.764	842.81	0	-19.198	67.5987	-135.428	6899.87	-25279.8	-13859	416.334	852.051	0
453	1	19.3484	-15.614	-258.52	-35453.6	6424.2	-1992.55	224.85	437.141	0	49.2096	43.1772	-479.932	28923.4	82787.7	12710.8	372.499	842.734	0	-19.3506	67.9039	-132.986	6442.11	-24547.4	-13904.8	418.414	854.558	0
453	2	19.1959	-18.3606	-266.76	-34995.9	6546.27	-2404.54	224.54	431.189	0	49.057	43.635	-475.659	28831.8	82055.2	12756.6	372.508	842.386	0	-19.9609	67.2935	-127.798	6625.21	-24303.2	-13630.1	412.832	851.159	0
453	3	21.1795	-20.9546	-271.948	-36460.7	6241.09	-2221.44	222.95	434.073	0	47.8363	44.2453	-473.828	29014.9	81994.2	13077	373.046	841.765	0	-20.1135	67.2935	-128.409	7266.08	-23937	-13721.7	416.587	846.414	0
453	4	20.1114	-24.1589	-279.272	-38017.1	6912.48	-2267.21	224.752	436.129	0	46.7682	45.3134	-472.607	28923.4	81628	12893.9	372.718	841.801	0	-20.1135	66.5306	-125.052	7540.74	-23326.7	-13767.5	416.464	842.699	0
453	5	19.9588	-25.8374	-284.765	-38291.8	6729.37	-2221.44	223.631	434.468	0	46.0053	45.6186	-470.776	29014.9	81567	13168.5	373.261	841.368	0	-20.2661	65.9203	-121.085	6716.77	-22960.5	-13721.7	413.377	847.528	0
453	6	18.7381	-27.3632	-292.089	-39207.3	6607.3	-2038.33	222.621	434.23	0	46.1578	45.466	-468.03	29381.1	81139.8	13214.3	373.365	840.224	0	-20.8765	65.4625	-119.559	6808.32	-22533.2	-13126.6	414.53	846.055	0
453	7	18.1277	-29.3469	-301.245	-38383.3	7095.58	-1992.55	223.554	427.416	0	45.3949	45.7712	-464.368	29198	80041.1	13168.5	372.366	840.123	0	-21.4868	65.9203	-115.897	6625.21	-21922.9	-13401.3	413.841	845.835	0
453	8	17.5174	-31.1779	-306.738	-39665	6790.41	-1901	222.138	429.313	0	44.0216	46.6867	-461.926	28923.4	79797	13717.9	372.748	840.385	0	-21.792	64.2418	-114.371	6533.66	-21678.7	-13447	413.452	845.873	0
453	9	19.501	-33.9245	-313.146	-40946.8	7278.69	-1717.9	223.244	430.759	0	42.8009	46.3815	-458.264	29289.6	79430.8	13534.7	373.33	839.086	0	-19.8083	64.8521	-114.676	6716.77	-21556.7	-13538.6	415.021	844.428	0
454	0	17.67	-35.2978	-322.302	-41679.2	6973.51	-1672.12	221.637	429.317	0	43.4113	48.3652	-456.128	30022	79186.6	13763.6	373.606	837.181	0	-21.9446	64.547	-110.403	6716.77	-21129.4	-13218.2	411.616	842.162	0
454	1	16.2967	-35.2978	-330.847	-42777.9	7278.69	-1717.9	222	429.298	0	42.4957	48.06	-451.855	29289.6	78271.1	13626.3	373.221	838.179	0	-21.792	62.1056	-111.319	6350.56	-20458	-12623.1	419.222	845.952	0
454	2	16.1441	-36.8237	-338.476	-43876.5	7095.58	-1122.8	220.963	429.63	0	40.3595	48.9755	-448.499	29289.6	77721.8	13992.5	373.293	837.694	0	-21.4868	62.4107	-105.826	6075.9	-20152.8	-13080.8	412.566	845.586	0
454	3	16.7545	-37.1289	-347.936	-44700.4	7156.62	-1351.69	220.569	428.473	0	40.2069	48.6704	-444.226	29014.9	77294.5	13901	373.998	837.684	0	-21.792	61.3426	-103.69	6259	-19664.6	-12760.4	413.352	842.637	0
454	4	15.2286	-38.3496	-361.364	-45799.1	7522.83	-1031.25	220.818	426.739	0	39.7491	51.8747	-439.343	28831.8	76195.9	14038.3	373.431	837.375	0	-20.7239	60.7323	-104.3	6350.56	-19359.4	-12531.5	417.387	842.113	0
454	5	13.0923	-40.1806	-372.656	-46165.3	7278.69	-756.592	219.532	423.882	0	40.6647	52.3325	-436.902	29289.6	75646.6	14358.7	373.143	835.961	0	-20.1135	59.359	-101.248	6167.45	-18504.9	-12485.7	420.232	842.086	0
454	6	12.0242	-41.5539	-381.811	-46897.7	7522.83	-665.039	219.703	422.83	0	38.9862	53.0954	-433.85	28648.7	75219.3	14679.2	373.376	836.966	0	-20.4187	59.2064	-96.3654	6533.66	-18627	-11890.6	409.705	835.199	0
454	7	13.0923	-45.216	-392.187	-48087.9	7461.79	-573.486	219.026	422.615	0	37.0026	52.3325	-428.662	29014.9	74792.1	14679.2	374.478	835.313	0	-19.6558	56.6124	-95.1447	5984.34	-18199.7	-12256.9	411.715	840.103	0
454	8	13.3975	-44.4531	-405.615	-49369.6	7644.9	-298.828	218.848	421.716	0	35.6293	55.6894	-423.169	28465.6	73205.2	14770.7	372.993	835.732	0	-20.1135	56.002	-94.5343	6716.77	-17467.3	-11936.4	418.228	831.949	0
454	9	11.8716	-46.2841	-415.075	-50376.7	7889.04	-161.499	219.006	421.368	0	35.1715	56.7575	-418.591	28557.1	72533.8	14770.7	373.281	834.778	0	-19.8083	55.5443	-90.8722	6259	-17528.3	-11570.2	410.11	834.123	0
455	0	9.73541	-46.8945	-428.808	-51658.4	7339.72	-436.157	217.117	420.47	0	33.6456	57.5205	-415.234	28099.4	72228.6	15274.3	373.947	835.329	0	-19.6558	54.171	-89.9567	5709.69	-16918	-11524.4	414.932	839.529	0
455	1	9.888	-49.0307	-436.437	-51750	8133.18	-344.605	218.635	418.574	0	31.8146	58.5886	-407.91	28007.8	71313	15411.6	374.825	834.338	0	-20.1135	53.2555	-87.8204	5892.79	-16185.5	-11432.9	418.697	835.9	0
455	2	9.43023	-50.404	-446.813	-52116.2	8011.11	-527.71	217.929	416.64	0	30.7465	59.0463	-405.774	28007.8	70275.5	15503.1	373.189	833.977	0	-20.2661	51.1192	-83.8531	5984.34	-16185.5	-10837.8	409.978	831.633	0
455	3	9.888	-53.1506	-460.546	-52299.3	8011.11	-253.052	217.395	413.559	0	31.3568	59.8093	-398.45	27916.3	69421	15503.1	374.228	832.938	0	-19.3506	49.4408	-84.7687	5984.34	-15575.2	-10746.2	419.262	832.404	0
455	4	9.43023	-55.7446	-468.481	-53672.6	8316.28	-756.592	217.752	414.567	0	30.4413	61.1826	-394.177	27367	68322.4	15960.9	373.329	833.572	0	-19.0454	49.4408	-80.191	5618.13	-15270	-10746.2	412.579	832.941	0
455	5	9.12506	-56.3549	-475.195	-54954.3	8560.42	-893.921	218.015	415.646	0	27.6947	60.5722	-387.463	27275.4	67345.8	15915.1	373.812	832.605	0	-18.8928	46.5416	-79.5807	6442.11	-14842.8	-10059.6	416.488	822.049	0
455	6	8.6673	-57.4231	-483.74	-54221.9	8255.25	-481.934	217.065	412.089	0	26.474	63.3188	-384.412	26726.1	66247.2	16052.4	372.334	833.475	0	-18.5876	46.8468	-78.0548	5709.69	-14354.5	-10242.7	419.097	829.85	0
455	7	7.90436	-58.3386	-493.505	-56053	8194.21	-665.039	216.604	413.581	0	27.6947	62.861	-378.003	27183.8	65881	16235.5	374.287	831.086	0	-19.3506	44.8631	-73.4772	5892.79	-14354.5	-10059.6	407.64	822.801	0
455	8	6.53106	-60.1696	-501.135	-55869.9	8560.42	-573.486	217.082	411.487	0	26.1688	63.3188	-370.374	26817.6	64965.4	15869.3	375.405	830.593	0	-17.8247	44.1002	-71.6461	4885.71	-13683.1	-9510.27	412.018	834.808	0
455	9	6.53106	-61.0852	-506.323	-56510.8	8438.35	-710.816	216.666	411.61	0	24.1852	64.0817	-361.218	26176.8	63317.5	15960.9	375.289	830.532	0	-18.4351	43.0321	-70.4254	5160.37	-12950.7	-9601.83	419.108	829.726	0
456	0	6.22589	-62.9162	-512.426	-56785.4	8560.42	-710.816	216.706	410.817	0	23.5748	64.9973	-357.861	25352.8	62157.8	15915.1	373.692	832.155	0	-17.9773	41.5062	-67.6788	5526.58	-12889.7	-9189.84	412.547	821.341	0
456	1	5.00519	-65.0525	-519.445	-57792.5	8377.32	-527.71	216.127	411.258	0	23.88	64.9973	-353.589	25444.3	61242.3	15777.8	373.202	831.04	0	-17.3669	41.0484	-65.2374	5343.48	-12584.5	-8503.19	410.097	821.092	0
456	2	3.32672	-64.4421	-521.887	-58341.8	8438.35	-253.052	216.169	411.79	0	23.4222	65.3024	-347.485	25444.3	60082.6	15915.1	372.907	829.776	0	-17.2144	39.5226	-64.9323	5068.82	-11974.1	-8869.41	418.59	824.937	0
456	3	1.0379	-64.4421	-530.432	-57792.5	8377.32	-390.381	215.793	408.954	0	20.9808	64.6921	-340.466	24986.6	58312.6	15960.9	371.273	829.611	0	-16.9092	39.0648	-63.4064	4885.71	-12401.4	-8411.64	407.414	825.946	0
456	4	1.0379	-64.8999	-533.178	-58891.1	7950.08	-344.605	214.911	410.453	0	20.5231	65.6076	-332.227	24620.4	57885.3	15823.6	374.235	828.893	0	-17.2144	37.3863	-61.8805	4611.05	-11730	-8411.64	413.441	828.485	0
456	5	0.274961	-65.6628	-537.145	-57884	8743.53	-253.052	216.278	407.762	0	22.049	66.0654	-324.902	24162.6	56542.6	15823.6	374.029	828.631	0	-17.3669	36.1656	-57.3029	4977.26	-11546.9	-7953.88	401.494	816.141	0
456	6	0.427549	-66.4257	-542.333	-58250.2	8499.39	-390.381	215.672	407.407	0	20.5231	66.218	-320.02	24162.6	55199.8	15823.6	372.489	827.497	0	-17.0618	35.7079	-56.6925	4702.61	-10814.5	-7587.66	412.244	820.051	0
456	7	-1.70868	-66.5783	-543.859	-58524.9	8194.21	-69.9462	215.067	407.61	0	19.9127	65.455	-310.559	23430.2	53673.9	15365.8	372.83	827.555	0	-17.0618	34.9449	-55.1666	4427.95	-10143.1	-7770.77	419.138	822.735	0
456	8	-3.84491	-67.0361	-549.352	-59165.8	8133.18	-24.1699	214.805	407.701	0	18.0817	64.3869	-304.15	23247.1	52575.3	15365.8	372.859	826.567	0	-17.3669	33.1139	-50.2838	4794.16	-10265.1	-7633.44	398.856	807.658	0
456	9	-4.60785	-67.0361	-550.878	-58799.6	8133.18	-24.1699	214.764	406.738	0	17.4713	63.4714	-294.995	22606.2	51232.5	15091.1	373.672	826.368	0	-16.604	33.1139	-55.1666	4427.95	-9837.89	-7267.23	424.67	822.735	0
457	0	-4.30268	-67.0361	-553.625	-59074.2	8377.32	-24.1699	215.132	406.704	0	17.9291	63.4714	-287.366	22789.3	49889.7	14816.5	373.611	823.696	0	-16.7566	32.8087	-51.8097	4244.84	-9959.96	-6946.79	410.759	821.069	0
457	1	-5.37079	-67.9516	-557.287	-59257.3	8499.39	-24.1699	215.251	406.332	0	18.2343	61.1826	-280.652	22148.4	48730.1	14633.4	373.632	824.082	0	-17.5195	30.5199	-52.7252	4885.71	-9654.79	-7175.67	419.885	810.336	0
457	2	-6.74408	-67.3413	-559.728	-58158.7	7950.08	250.488	214.203	403.905	0	16.7084	61.3351	-273.633	21416	47631.4	14404.5	374.071	824.734	0	-16.7566	30.825	-50.589	4336.4	-9471.68	-6946.79	415.772	817.282	0
457	3	-6.89667	-68.7146	-558.508	-58982.7	8072.14	204.712	214.453	405.608	0	16.2506	59.3515	-265.698	21049.8	45922.4	13946.7	372.837	823.776	0	-16.604	30.3673	-48.4528	4244.84	-9227.54	-7129.9	412.556	815.392	0
457	4	-8.11737	-68.7146	-559.118	-58250.2	8194.21	296.265	214.656	404.182	0	17.9291	57.2153	-256.238	20958.3	44640.7	13351.6	374.216	821.208	0	-16.9092	27.9259	-48.4528	3878.63	-9349.61	-6305.92	410.037	822.95	0
457	5	-8.26996	-70.0879	-564.001	-58891.1	8255.25	616.7	214.637	404.417	0	17.4713	55.5368	-247.998	20775.2	43359	13580.5	374.836	819.229	0	-15.2307	28.5362	-46.9269	3878.63	-8739.26	-6443.25	416.769	820.347	0
457	6	-8.26996	-69.6301	-566.747	-58158.7	7950.08	570.923	214.028	402.618	0	15.6403	56.4523	-240.979	19951.2	41588.9	13214.3	372.583	820.208	0	-15.6885	26.8578	-44.7906	4153.29	-8373.05	-6397.48	416.063	810.273	0
457	7	-9.49066	-70.0879	-567.968	-58616.5	7461.79	754.029	213.138	403.204	0	17.7765	54.4687	-235.791	19401.9	40612.4	12802.3	372.239	820.716	0	-15.2307	27.0103	-42.6544	3878.63	-8250.98	-5939.71	409.562	812.068	0
457	8	-10.2536	-70.6982	-567.053	-58341.8	7766.97	754.029	213.697	402.886	0	15.1825	52.4851	-226.636	19493.4	39941	12710.8	376.234	816.988	0	-15.0781	26.0948	-42.9596	3878.63	-8250.98	-6031.27	410.936	812.714	0
457	9	-9.49066	-72.2241	-569.189	-58158.7	8194.21	845.581	214.396	402.178	0	15.4877	51.2643	-220.532	18761	38537.2	11978.3	374.746	817.929	0	-14.7729	24.8741	-40.5182	4153.29	-7823.73	-5893.94	409.908	800.496	0
458	0	-8.72772	-72.6818	-572.241	-58158.7	8316.28	982.911	214.533	401.633	0	15.4877	49.4333	-212.598	18120.1	37255.5	11795.2	375.239	817.768	0	-14.6204	23.1956	-41.7389	3878.63	-7823.73	-5115.74	415.555	810.074	0
458	1	-10.2536	-73.2922	-571.63	-58891.1	7828.01	982.911	213.694	403.023	0	13.8092	49.1281	-205.579	17845.5	35668.5	11337.5	373.503	816.194	0	-12.6367	23.3482	-38.6871	3787.08	-7274.42	-5298.84	414.968	805.11	0
458	2	-10.4062	-73.4448	-576.513	-58982.7	7400.76	1028.69	212.837	402.309	0	13.504	47.1445	-200.391	17479.2	35058.2	11154.4	374.949	815.774	0	-13.5522	21.8224	-36.5509	3146.21	-6908.21	-5344.62	413.998	816.923	0
458	3	-9.94843	-73.1396	-583.532	-58891.1	7461.79	1074.46	212.787	400.922	0	14.1144	46.2289	-192.761	17113	33776.4	10696.6	375.224	814.222	0	-14.01	20.9068	-37.4664	3695.53	-6908.21	-4657.97	418.616	804.364	0
458	4	-9.49066	-74.5129	-592.382	-58341.8	7522.83	1166.02	212.699	398.487	0	13.1989	43.9401	-186.963	17021.5	32372.6	10605.1	373.15	811.958	0	-13.5522	21.3646	-33.4991	3237.76	-6603.03	-4886.86	405.89	806.348	0
458	5	-12.5424	-79.2431	-596.349	-57609.4	7278.69	1532.23	212.205	396.603	0	12.8937	42.7194	-180.249	15831.3	32128.5	9964.19	378.245	815.17	0	-12.9419	19.381	-31.3629	3146.21	-6053.71	-4841.08	409.979	802.684	0
458	6	-17.2726	-83.0578	-598.181	-57517.8	6851.44	1761.11	211.454	396.155	0	11.0626	42.7194	-173.23	15190.4	30846.8	9689.53	378.068	815.311	0	-10.5005	19.381	-32.2784	3146.21	-6114.75	-4200.21	413.562	805.529	0
458	7	-17.1201	-82.9052	-600.622	-58341.8	7034.55	1623.78	211.712	397.136	0	11.9782	39.8203	-167.432	16014.4	29442.9	9689.53	375.85	807.353	0	-11.5686	17.2447	-29.2267	3054.66	-5626.47	-4200.21	410.489	798.484	0
458	8	-20.6296	-81.3794	-605.81	-58524.9	6912.48	1944.21	211.41	396.606	0	13.6566	40.4306	-161.938	14915.8	28588.4	9460.65	376.539	810.892	0	-12.0264	16.3292	-28.9215	2871.55	-5687.5	-3696.67	406.347	803.712	0
458	9	-22.4606	-85.6518	-616.186	-58616.5	7034.55	1989.99	211.416	395.128	0	11.3678	39.8203	-156.445	14458	27978.1	9140.21	378.836	810.584	0	-11.1108	15.4137	-24.3439	3054.66	-5382.33	-3513.56	381.904	777.521	0
459	0	-22.9184	-88.7036	-622.289	-57975.6	6851.44	1944.21	211.01	393.165	0	10.2997	38.447	-149.426	13817.1	27062.6	9140.21	381.11	810.532	0	-10.3479	13.2774	-25.5646	3329.32	-5321.29	-3559.34	394.849	772.768	0
459	1	-23.6813	-89.7717	-626.562	-58341.8	6973.51	1806.89	211.13	393.114	0	10.4523	36.6159	-143.933	13725.6	25902.9	8774	379.965	807.639	0	-10.6531	14.6507	-25.2594	2505.34	-5077.15	-3605.12	402	803.816	0
459	2	-23.8339	-92.0605	-631.75	-58250.2	6363.16	1898.44	210.072	392.205	0	12.7411	37.684	-136.609	13176.3	25170.5	8636.67	384.252	806.547	0	-10.0427	14.193	-23.4283	2322.24	-4588.87	-3147.35	407.132	803.879	0
459	3	-22.4606	-96.1804	-637.243	-58891.1	6912.48	1944.21	210.847	392.416	0	12.2833	37.684	-132.031	12443.9	24560.1	8499.34	386.017	808.751	0	-8.97461	11.599	-20.3766	2230.68	-4222.66	-3147.35	395.769	793.527	0
459	4	-22.308	-97.0959	-643.652	-58433.4	6912.48	1852.66	210.739	390.784	0	11.2152	34.6323	-128.979	12077.6	23278.4	8362.01	380.481	809.36	0	-7.7539	10.5309	-19.4611	2688.45	-4222.66	-3010.02	386.02	764.855	0
459	5	-22.308	-96.333	-649.45	-59257.3	7095.58	2173.1	210.926	391.242	0	13.1989	32.0383	-123.486	11711.4	22240.8	7812.7	380.107	808.16	0	-8.66943	11.2938	-19.4611	2505.34	-3612.31	-2323.38	417.383	774.264	0
459	6	-21.2399	-97.5537	-652.197	-58708	6790.41	1715.33	210.412	390.016	0	11.0626	32.8012	-119.519	11436.8	22240.8	7721.15	386.086	807.31	0	-9.27978	9.76791	-17.9352	2505.34	-3490.24	-2506.48	408.397	763.311	0
459	7	-25.5124	-100.758	-653.723	-58250.2	6729.37	2035.77	210.294	389.105	0	12.4359	31.1227	-114.026	10887.5	21142.2	7263.38	385.415	807.518	0	-7.44873	9.00497	-16.7145	2963.11	-3673.34	-2323.38	383.23	725.722	0
459	8	-25.3598	-101.368	-660.436	-59074.2	6668.34	2676.64	210.097	389.447	0	11.3678	28.9865	-112.195	10704.4	20592.8	7126.05	383.545	807.591	0	0	0	0	0	0	0	603	903	0
459	9	-25.9702	-99.0796	-667.455	-59989.8	6851.44	1944.21	210.265	389.878	0	9.99451	27.9184	-108.228	10155	20104.6	6897.17	385.762	809.17	0	0	0	0	0	0	0	603	903	0
460	0	-29.3271	-99.3847	-671.728	-59715.1	6851.44	2173.1	210.2	388.898	0	10.1471	25.7822	-105.176	10155	19616.3	6530.96	386.509	806.447	0	0	0	0	0	0	0	603	903	0
460	1	-30.3952	-100.148	-673.254	-60447.5	6668.34	2401.98	209.905	389.784	0	10.7575	25.1718	-99.9878	9422.61	18578.7	6439.41	385.809	808.762	0	0	0	0	0	0	0	603	903	0
460	2	-29.6323	-99.0796	-679.052	-59440.4	6424.2	1761.11	209.461	387.534	0	10.1471	24.2563	-95.7153	9147.96	17724.2	6073.2	385.176	807.425	0	0	0	0	0	0	0	603	903	0
460	3	-30.5478	-98.7744	-685.461	-59257.3	6363.16	2081.54	209.283	386.449	0	9.99451	23.4934	-92.6636	8873.29	17419	5890.09	387.981	807.242	0	0	0	0	0	0	0	603	903	0
460	4	-31.9211	-98.7744	-689.123	-60722.2	6729.37	2127.32	209.765	388.115	0	11.2152	23.0356	-86.5601	8049.32	16503.5	5706.99	390.659	810.009	0	0	0	0	0	0	0	603	903	0
460	5	-33.7521	-98.164	-692.175	-60447.5	6668.34	2356.2	209.634	387.33	0	8.9264	20.289	-85.0342	8140.87	15710	5661.21	384.75	807.264	0	0	0	0	0	0	0	603	903	0
460	6	-35.5832	-96.4856	-695.532	-59715.1	6485.23	2539.31	209.324	385.855	0	10.1471	20.5942	-80.1514	8140.87	15099.7	5478.1	388.389	801.431	0	0	0	0	0	0	0	603	903	0
460	7	-36.041	-97.4011	-703.466	-59715.1	6180.06	2447.75	208.785	384.887	0	9.84192	19.9838	-76.7944	6950.69	14428.3	5249.22	387.882	812.49	0	0	0	0	0	0	0	603	903	0
460	8	-37.4142	-99.0796	-710.18	-60081.3	5935.92	2127.32	208.358	384.6	0	9.38416	18.3054	-72.8271	7133.79	13879	5020.34	390.574	805.045	0	0	0	0	0	0	0	603	903	0
460	9	-38.3298	-98.927	-716.589	-60813.7	6485.23	2447.75	209.05	384.866	0	9.53675	18.3054	-70.0806	6309.82	12902.4	4791.46	384.108	812.963	0	0	0	0	0	0	0	603	903	0
461	0	-40.0082	-98.6218	-721.472	-60264.4	6302.13	2264.65	208.735	383.53	0	8.31604	16.9321	-67.0288	6584.48	12780.3	5066.12	390.669	804.767	0	0	0	0	0	0	0	603	903	0
461	1	-39.7031	-101.674	-726.049	-60722.2	5752.81	2585.08	207.923	383.634	0	9.99451	15.101	-61.5356	6309.82	12047.9	4196.37	395.788	800.461	0	0	0	0	0	0	0	603	903	0
461	2	-39.3979	-102.284	-735.815	-60539.1	6241.09	2127.32	208.482	382.275	0	9.38416	14.6433	-57.8735	5760.5	11498.6	4013.26	398.685	803.464	0	0	0	0	0	0	0	603	903	0
461	3	-40.6186	-102.894	-739.172	-59898.2	6180.06	1989.99	208.361	381.034	0	9.53675	11.4389	-57.5684	5668.95	10949.3	3784.38	390.196	804.527	0	0	0	0	0	0	0	603	903	0
461	4	-41.2289	-103.962	-748.327	-60447.5	6302.13	2493.53	208.422	380.777	0	7.5531	11.2863	-55.7373	5394.29	10705.1	3509.72	392.064	806.219	0	0	0	0	0	0	0	603	903	0
461	5	-42.4496	-105.946	-752.599	-61637.7	6424.2	2218.87	208.536	381.9	0	8.16346	11.1337	-55.127	5119.63	10338.9	3143.51	387.548	810.13	0	0	0	0	0	0	0	603	903	0
461	6	-40.9238	-105.641	-759.008	-61271.5	6424.2	2264.65	208.464	380.726	0	8.77381	10.9811	-49.939	4570.32	9362.37	3235.06	387.476	811.482	0	0	0	0	0	0	0	603	903	0
461	7	-41.3815	-106.404	-769.689	-62003.9	6241.09	2401.98	208.109	380.557	0	6.63758	10.5234	-48.7183	4570.32	9362.37	2914.63	392.174	809.189	0	0	0	0	0	0	0	603	903	0
461	8	-41.6867	-107.472	-774.572	-61820.8	6485.23	2218.87	208.373	379.813	0	6.79016	9.76044	-45.6665	4387.21	8874.08	2960.4	394.324	806.929	0	0	0	0	0	0	0	603	903	0
461	9	-39.3979	-109.456	-777.929	-61454.6	6607.3	2035.77	208.493	378.998	0	7.85828	8.9975	-42.3096	4753.42	8263.73	2594.19	395.316	790.651	0	0	0	0	0	0	0	603	903	0
462	0	-40.466	-110.218	-785.253	-60905.3	6485.23	2447.75	208.259	377.561	0	7.5531	8.84491	-39.8682	3563.24	7836.49	2685.75	396.56	813.625	0	0	0	0	0	0	0	603	903	0
462	1	-40.0082	-110.218	-790.136	-62187	6729.37	2081.54	208.517	378.704	0	6.94275	8.23456	-36.2061	4112.55	7226.14	2548.42	399.584	789.413	0	0	0	0	0	0	0	603	903	0
462	2	-40.6186	-110.981	-798.681	-63285.7	5996.95	2127.32	207.509	379.238	0	6.79016	8.08197	-34.0698	3471.68	6920.96	2594.19	403.141	801.101	0	0	0	0	0	0	0	603	903	0
462	3	-40.7712	-110.371	-805.7	-62553.2	6729.37	2173.1	208.352	377.638	0	7.40052	8.9975	-32.8491	3013.92	5822.33	2411.09	377.245	811.25	0	0	0	0	0	0	0	603	903	0
462	4	-41.0764	-110.676	-806.921	-63102.6	6912.48	2356.2	208.566	378.202	0	8.62122	7.62421	-28.5767	2556.16	5944.4	2548.42	408.016	813.551	0	0	0	0	0	0	0	603	903	0
462	5	-39.2453	-108.693	-813.94	-62553.2	6912.48	2173.1	208.493	376.852	0	6.63758	6.5561	-27.0508	2098.39	5517.15	2411.09	403.955	825.428	0	0	0	0	0	0	0	603	903	0
462	6	-39.5505	-109.608	-819.738	-63102.6	7034.55	1989.99	208.581	376.979	0	7.70569	5.33539	-23.6938	2373.05	4784.73	2227.98	401.94	802.845	0	0	0	0	0	0	0	603	903	0
462	7	-40.466	-109.303	-823.4	-63102.6	6729.37	2081.54	208.173	376.637	0	6.48499	5.64057	-23.6938	2006.84	4723.69	2182.21	399.364	818.301	0	0	0	0	0	0	0	603	903	0
462	8	-40.1608	-108.235	-827.062	-63743.4	7217.65	2035.77	208.727	377.072	0	7.70569	4.11469	-21.8628	1823.73	4418.52	1632.89	402.102	819.583	0	0	0	0	0	0	0	603	903	0
462	9	-39.5505	-107.93	-831.945	-64384.3	7095.58	1944.21	208.529	377.39	0	7.40052	1.5207	-18.5059	1915.29	4174.38	1999.1	425.571	799.504	0	0	0	0	0	0	0	603	903	0
463	0	-40.1608	-107.93	-837.744	-64109.6	6790.41	1898.44	208.106	376.527	0	6.3324	0.605168	-19.4214	1091.31	3319.89	1312.45	370.94	846.809	0	0	0	0	0	0	0	603	903	0
463	1	-41.0764	-107.93	-840.185	-63560.3	6729.37	2081.54	208.009	375.65	0	0	0	0	0	0	0	200	903	0	0	0	0	0	0	0	603	903	0
463	2	-39.7031	-107.014	-842.016	-63468.8	7034.55	1898.44	208.354	375.377	0	0	0	0	0	0	0	200	903	0	0	0	0	0	0	0	603	903	0
463	3	-41.3815	-107.472	-844.457	-63651.9	7095.58	1944.21	208.403	375.376	0	0	0	0	0	0	0	200	903	0	0	0	0	0	0	0	603	903	0
463	4	-40.3134	-107.167	-849.645	-64842	7095.58	2127.32	208.351	376.317	0	0	0	0	0	0	0	200	903	0	0	0	0	0	0	0	603	903	0
463	5	-39.7031	-105.793	-854.528	-63468.8	6912.48	2035.77	208.089	374.273	0	0	0	0	0	0	0	200	903	0	0	0	0	0	0	0	603	903	0
463	6	-41.8393	-106.251	-858.19	-64658.9	6485.23	1898.44	207.557	375.343	0	0	0	0	0	0	0	200	903	0	0	0	0	0	0	0	603	903	0
463	7	-41.0764	-105.946	-858.801	-63651.9	6729.37	1944.21	207.836	374.117	0	0	0	0	0	0	0	200	903	0	0	0	0	0	0	0	603	903	0
463	8	-39.8557	-105.946	-860.021	-64018.1	7278.69	2035.77	208.463	374.438	0	0	0	0	0	0	0	200	903	0	0	0	0	0	0	0	603	903	0
463	9	-39.5505	-104.878	-864.294	-63743.4	7156.62	1989.99	208.28	373.752	0	0	0	0	0	0	0	200	903	0	0	0	0	0	0	0	603	903	0
464	0	-40.3134	-105.793	-867.04	-63926.5	6912.48	2035.77	207.973	373.73	0	0	0	0	0	0	0	200	903	0	0	0	0	0	0	0	603	903	0
464	1	-41.2289	-105.03	-867.04	-64384.3	6790.41	1669.56	207.832	374.258	0	0	0	0	0	0	0	200	903	0	0	0	0	0	0	0	603	903	0
464	2	-39.5505	-103.505	-869.482	-62919.5	7034.55	2127.32	208.091	372.364	0	0	0	0	0	0	0	200	903	0	0	0	0	0	0	0	603	903	0
464	3	-39.2453	-103.505	-872.228	-64109.6	6912.48	2081.54	207.925	373.501	0	0	0	0	0	0	0	200	903	0	0	0	0	0	0	0	603	903	0
464	4	-40.466	-102.894	-870.397	-63011	6973.51	1806.89	208.012	372.393	0	0	0	0	0	0	0	200	903	0	0	0	0	0	0	0	603	903	0
464	5	-38.7875	-103.505	-871.313	-63011	6729.37	2127.32	207.723	372.317	0	0	0	0	0	0	0	200	903	0	0	0	0	0	0	0	603	903	0
464	6	-39.3979	-103.047	-872.228	-63102.6	6729.37	2356.2	207.715	372.346	0	0	0	0	0	0	0	200	903	0	0	0	0	0	0	0	603	903	0
464	7	-38.4824	-103.199	-874.975	-62644.8	6973.51	2722.41	207.97	371.596	0	0	0	0	0	0	0	200	903	0	0	0	0	0	0	0	603	903	0
464	8	-38.3298	-102.589	-877.416	-63560.3	6912.48	1532.23	207.878	372.44	0	0	0	0	0	0	0	200	903	0	0	0	0	0	0	0	603	903	0
464	9	-39.2453	-100.911	-878.637	-62370.1	6668.34	2035.77	207.589	370.985	0	0	0	0	0	0	0	200	903	0	0	0	0	0	0	0	603	903	0
465	0	-40.466	-101.674	-876.196	-62919.5	6424.2	1944.21	207.332	371.81	0	0	0	0	0	0	0	200	903	0	0	0	0	0	0	0	603	903	0
465	1	-38.3298	-99.5373	-876.501	-62003.9	6546.27	1898.44	207.469	370.74	0	0	0	0	0	0	0	200	903	0	0	0	0	0	0	0	603	903	0
465	2	-37.872	-100.911	-878.332	-61637.7	6668.34	1989.99	207.592	370.176	0	0	0	0	0	0	0	200	903	0	0	0	0	0	0	0	603	903	0
465	3	-38.4824	-99.6899	-874.365	-61546.1	6363.16	2035.77	207.277	370.39	0	0	0	0	0	0	0	200	903	0	0	0	0	0	0	0	603	903	0
465	4	-39.5505	-98.927	-880.163	-61179.9	6363.16	1944.21	207.23	369.51	0	0	0	0	0	0	0	200	903	0	0	0	0	0	0	0	603	903	0
465	5	-40.1608	-98.4692	-878.332	-61912.4	5996.95	1715.33	206.828	370.489	0	0	0	0	0	0	0	200	903	0	0	0	0	0	0	0	603	903	0
465	6	-38.635	-97.7063	-877.416	-60905.3	6180.06	1806.89	207.043	369.414	0	0	0	0	0	0	0	200	903	0	0	0	0	0	0	0	603	903	0
465	7	-39.2453	-96.9433	-878.942	-60996.8	6363.16	2035.77	207.24	369.398	0	0	0	0	0	0	0	200	903	0	0	0	0	0	0	0	603	903	0
465	8	-39.8557	-95.57	-878.942	-59989.8	5996.95	1944.21	206.823	368.252	0	0	0	0	0	0	0	200	903	0	0	0	0	0	0	0	603	903	0
465	9	-39.7031	-96.7907	-878.027	-60264.4	6057.99	1898.44	206.9	368.636	0	0	0	0	0	0	0	200	903	0	0	0	0	0	0	0	603	903	0
466	0	-38.9401	-95.2649	-875.891	-59806.7	5813.85	1806.89	206.638	368.281	0	0	0	0	0	0	0	200	903	0	0	0	0	0	0	0	603	903	0
466	1	-38.7875	-95.2649	-877.416	-59806.7	5813.85	1898.44	206.626	368.162	0	0	0	0	0	0	0	200	903	0	0	0	0	0	0	0	603	903	0
466	2	-39.5505	-94.8071	-876.196	-59623.6	5508.67	1715.33	206.287	368.048	0	0	0	0	0	0	0	200	903	0	0	0	0	0	0	0	603	903	0
466	3	-38.3298	-92.6709	-873.449	-58250.2	6119.02	1944.21	207.006	366.69	0	0	0	0	0	0	0	200	903	0	0	0	0	0	0	0	603	903	0
466	4	-38.4824	-93.8916	-873.754	-59165.8	5386.6	1806.89	206.165	367.714	0	0	0	0	0	0	0	200	903	0	0	0	0	0	0	0	603	903	0
466	5	-36.9565	-92.3657	-870.397	-58250.2	5569.7	1761.11	206.399	366.924	0	0	0	0	0	0	0	200	903	0	0	0	0	0	0	0	603	903	0
[truncated: 2,154 more rows]
