# Supplementary material for: The Effects of an Extemporaneous Speech Dual-task on Older Adult Gait Control
Source: Research Square preprint supplement (doi:10.21203/rs.3.rs-7674245/v1), 2025-11-18
Supplement: Supplementary file 37 [file DT3Walk04.xlsx]

## Sheet: Sheet1
Trajectories
		03:LFHD			03:RFHD			03:LBHD			03:RBHD			03:C7			03:T10			03:CLAV			03:STRN			03:RBAK			03:LSHO			03:LUPA			03:LELB			03:LFRM			03:LWRA			03:LWRB			03:LFIN
Frame	Sub Frame	X	Y	Z	X	Y	Z	X	Y	Z	X	Y	Z	X	Y	Z	X	Y	Z	X	Y	Z	X	Y	Z	X	Y	Z	X	Y	Z	X	Y	Z	X	Y	Z	X	Y	Z	X	Y	Z	X	Y	Z	X	Y	Z
		mm	mm	mm	mm	mm	mm	mm	mm	mm	mm	mm	mm	mm	mm	mm	mm	mm	mm	mm	mm	mm	mm	mm	mm	mm	mm	mm	mm	mm	mm	mm	mm	mm	mm	mm	mm	mm	mm	mm	mm	mm	mm	mm	mm	mm	mm	mm	mm
769	0	176.612	-559.641	1598.62	279.38	-560.938	1593.79	155.379	-713.86	1630.69	293.068	-726.364	1629.01	238.178	-801.111	1475.52	230.764	-903.031	1251.2	217.631	-661.609	1378.35	204.527	-632.792	1194.12	281.486	-905.052	1322.37	37.661	-797.348	1437.68	-33.0553	-788.988	1235.2	-62.8026	-780.52	1118.78	-61.8664	-636.884	1019.95	-12.4509	-558.29	973.023	-71.7107	-585.207	931.917	-63.0982	-487.138	897.398
770	0	179.59	-545.897	1598.33	282.347	-547.412	1593.04	158.2	-699.935	1631.22	295.788	-712.691	1628.94	240.101	-787.96	1476.22	232.318	-889.699	1252.08	219.361	-648.552	1378.65	206.32	-619.924	1194.35	283.532	-892.29	1323.39	39.4378	-784.187	1438.46	-31.0931	-776.601	1235.96	-60.5892	-768.801	1119.38	-59.3395	-626.08	1018.51	-9.76218	-547.872	970.562	-69.1697	-575.227	929.725	-60.3455	-477.282	894.039
771	0	182.307	-532.287	1598.25	285.054	-534.001	1592.58	160.776	-686.147	1631.95	298.271	-699.127	1629.17	241.911	-774.936	1477.12	233.842	-876.506	1253.14	220.982	-635.625	1379.18	208.021	-607.185	1194.83	285.52	-879.607	1324.59	41.1206	-771.209	1439.39	-29.208	-764.441	1236.88	-58.4142	-757.361	1120.12	-56.9212	-615.765	1017.1	-7.20685	-538.074	968.036	-66.7626	-565.9	927.553	-57.7266	-468.208	890.547
772	0	184.764	-518.811	1598.39	287.502	-520.703	1592.38	163.106	-672.496	1632.89	300.519	-685.673	1629.68	243.608	-762.036	1478.22	235.335	-863.451	1254.36	222.496	-622.83	1379.95	209.632	-594.574	1195.55	287.45	-867.003	1325.95	42.7095	-758.413	1440.45	-27.3995	-752.509	1237.95	-56.2777	-746.2	1121	-54.6115	-605.938	1015.72	-4.78505	-528.895	965.444	-64.4895	-557.227	925.403	-55.2419	-459.915	886.924
773	0	186.961	-505.471	1598.75	289.69	-507.52	1592.47	165.191	-658.984	1634.02	302.531	-672.329	1630.48	245.193	-749.261	1479.51	236.799	-850.534	1255.75	223.901	-610.164	1380.96	211.152	-582.089	1196.51	289.323	-854.477	1327.49	44.2048	-745.798	1441.67	-25.6673	-740.805	1239.18	-54.1793	-735.317	1122.03	-52.4104	-596.601	1014.37	-2.49719	-520.335	962.789	-62.3508	-549.208	923.276	-52.8931	-452.402	883.174
774	0	188.899	-492.266	1599.31	291.619	-494.451	1592.83	167.034	-645.61	1635.36	304.31	-659.096	1631.56	246.666	-736.61	1480.98	238.234	-837.755	1257.3	225.2	-597.625	1382.2	212.582	-569.728	1197.71	291.14	-842.028	1329.2	45.6072	-733.362	1443.02	-24.01	-729.328	1240.56	-52.1184	-724.712	1123.19	-50.3181	-587.75	1013.05	-0.34414	-512.392	960.074	-60.3468	-541.839	921.174	-50.6833	-445.668	879.304
775	0	190.58	-479.198	1600.09	293.293	-481.496	1593.47	168.637	-632.378	1636.88	305.859	-645.974	1632.93	248.029	-724.079	1482.65	239.643	-825.11	1259.01	226.394	-585.212	1383.66	213.922	-557.486	1199.14	292.899	-829.654	1331.08	46.918	-721.104	1444.51	-22.4254	-718.077	1242.08	-50.0941	-714.385	1124.48	-48.3349	-579.385	1011.77	1.67259	-505.061	957.302	-58.4781	-535.119	919.1	-48.6179	-439.706	875.323
776	0	192.008	-466.268	1601.07	294.715	-468.654	1594.38	170.007	-619.288	1638.6	307.181	-632.965	1634.55	249.284	-711.665	1484.49	241.028	-812.599	1260.88	227.484	-572.919	1385.35	215.175	-545.356	1200.8	294.602	-817.353	1333.11	48.1388	-709.016	1446.13	-20.9107	-707.051	1243.75	-48.1051	-704.334	1125.91	-46.461	-571.503	1010.52	3.55077	-498.336	954.481	-56.7453	-529.041	917.061	-46.7045	-434.512	871.249
777	0	193.188	-453.476	1602.26	295.891	-455.925	1595.55	171.151	-606.344	1640.48	308.284	-620.07	1636.43	250.433	-699.363	1486.5	242.392	-800.216	1262.89	228.474	-560.741	1387.24	216.344	-533.332	1202.67	296.249	-805.121	1335.29	49.2718	-697.093	1447.87	-19.4618	-696.25	1245.54	-46.1498	-694.56	1127.47	-44.6969	-564.097	1009.32	5.28747	-492.209	951.619	-55.1485	-523.597	915.062	-44.9533	-430.074	867.1
778	0	194.13	-440.824	1603.65	296.831	-443.308	1596.98	172.078	-593.546	1642.53	309.177	-607.291	1638.54	251.48	-687.166	1488.66	243.737	-787.957	1265.04	229.369	-548.67	1389.32	217.433	-521.404	1204.74	297.84	-792.953	1337.6	50.3196	-685.324	1449.72	-18.0739	-685.669	1247.45	-44.2262	-685.06	1129.14	-43.0431	-557.162	1008.15	6.87907	-486.667	948.727	-53.6878	-518.777	913.111	-43.3761	-426.38	862.902
779	0	194.844	-428.311	1605.23	297.547	-430.801	1598.64	172.801	-580.896	1644.71	309.87	-594.629	1640.85	252.428	-675.068	1490.95	245.065	-775.816	1267.3	230.172	-536.696	1391.57	218.449	-509.563	1206.98	299.377	-780.844	1340.03	51.2855	-673.698	1451.67	-16.7418	-675.307	1249.47	-42.3326	-675.831	1130.93	-41.5	-550.69	1007.02	8.32152	-481.693	945.816	-52.3623	-514.566	911.216	-41.986	-423.411	858.681
780	0	195.345	-415.935	1606.97	298.054	-418.403	1600.53	173.333	-568.394	1647	310.375	-582.086	1643.33	253.282	-663.059	1493.35	246.376	-763.787	1269.65	230.889	-524.811	1393.97	219.398	-497.8	1209.37	300.859	-768.789	1342.55	52.1728	-662.201	1453.69	-15.46	-665.157	1251.58	-40.467	-666.872	1132.8	-40.0681	-544.667	1005.94	9.61052	-477.267	942.9	-51.1705	-510.947	909.384	-40.7963	-421.145	854.465
781	0	195.651	-403.691	1608.88	298.37	-406.11	1602.61	173.691	-556.038	1649.37	310.708	-569.663	1645.95	254.047	-651.13	1495.84	247.669	-751.863	1272.09	231.527	-513.001	1396.47	220.288	-486.105	1211.87	302.287	-756.78	1345.14	52.985	-650.817	1455.75	-14.2229	-655.213	1253.74	-38.6283	-658.176	1134.75	-38.7478	-539.082	1004.9	10.7418	-473.363	939.991	-50.11	-507.897	907.624	-39.8192	-419.554	850.284
782	0	195.781	-391.574	1610.91	298.515	-393.92	1604.86	173.893	-543.824	1651.79	310.883	-557.357	1648.66	254.728	-639.27	1498.37	248.942	-740.036	1274.57	232.092	-501.256	1399.05	221.127	-474.467	1214.45	303.659	-744.812	1347.77	53.726	-639.529	1457.85	-13.0253	-645.468	1255.95	-36.8154	-649.737	1136.76	-37.5392	-533.917	1003.9	11.7117	-469.951	937.102	-49.1771	-505.39	905.94	-39.0652	-418.608	846.164
783	0	195.756	-379.576	1613.04	298.51	-381.825	1607.24	173.955	-531.746	1654.22	310.917	-545.167	1651.41	255.329	-627.468	1500.92	250.191	-728.3	1277.07	232.59	-489.563	1401.67	221.924	-462.876	1217.07	304.976	-732.879	1350.41	54.3993	-628.32	1459.93	-11.8626	-635.911	1258.16	-35.0282	-641.547	1138.81	-36.4423	-529.151	1002.95	12.517	-467	934.245	-48.3669	-503.396	904.337	-38.541	-418.268	842.128
784	0	195.601	-367.686	1615.24	298.378	-369.821	1609.71	173.898	-519.795	1656.62	310.828	-533.088	1654.17	255.856	-615.714	1503.46	251.409	-716.647	1279.56	233.028	-477.911	1404.29	222.687	-451.322	1219.68	306.236	-720.975	1353.02	55.0089	-617.172	1461.98	-10.7309	-626.53	1260.37	-33.2672	-633.595	1140.87	-35.4564	-524.762	1002.04	13.1559	-464.47	931.429	-47.6734	-501.88	902.817	-38.2495	-418.495	838.198
785	0	195.337	-355.891	1617.46	298.142	-357.899	1612.22	173.738	-507.959	1658.96	310.632	-521.114	1656.88	256.314	-603.996	1505.94	252.59	-705.071	1282.01	233.414	-466.289	1406.86	223.424	-439.796	1222.24	307.435	-709.094	1355.59	55.5581	-606.067	1463.96	-9.62692	-617.311	1262.52	-31.5336	-625.867	1142.92	-34.5805	-520.725	1001.16	13.6283	-462.323	928.664	-47.0892	-500.804	901.38	-38.1887	-419.244	834.39
786	0	194.988	-344.176	1619.67	297.823	-346.048	1614.73	173.494	-496.223	1661.19	310.347	-509.236	1659.5	256.706	-592.303	1508.34	253.724	-693.566	1284.38	233.752	-454.684	1409.34	224.142	-428.287	1224.71	308.571	-697.232	1358.06	56.0503	-594.988	1465.83	-8.54848	-608.24	1264.61	-29.8293	-618.347	1144.93	-33.8125	-517.009	1000.31	13.9357	-460.516	925.954	-46.6062	-500.127	900.026	-38.351	-420.468	830.713
787	0	194.575	-332.525	1621.83	297.444	-334.259	1617.2	173.181	-484.571	1663.28	309.989	-497.441	1661.97	257.037	-580.626	1510.61	254.802	-682.123	1286.65	234.048	-443.088	1411.69	224.844	-416.786	1227.04	309.639	-685.383	1360.42	56.4883	-583.919	1467.57	-7.49413	-599.298	1266.59	-28.1569	-611.014	1146.87	-33.1498	-513.583	999.49	14.0823	-459.006	923.304	-46.2151	-499.803	898.75	-38.7237	-422.116	827.176
788	0	194.119	-320.92	1623.88	297.022	-322.518	1619.57	172.815	-472.984	1665.19	309.573	-485.717	1664.28	257.309	-568.952	1512.72	255.814	-670.737	1288.79	234.308	-431.49	1413.87	225.537	-405.286	1229.2	310.635	-673.542	1362.62	56.8747	-572.843	1469.14	-6.46338	-590.466	1268.44	-26.5196	-603.848	1148.73	-32.5886	-510.413	998.687	14.0742	-457.75	920.716	-45.906	-499.785	897.549	-39.289	-424.138	823.782
789	0	193.637	-309.343	1625.8	296.574	-310.811	1621.8	172.406	-461.443	1666.9	309.112	-474.049	1666.36	257.526	-557.273	1514.65	256.751	-659.4	1290.76	234.536	-419.882	1415.85	226.221	-393.78	1231.15	311.552	-661.706	1364.64	57.2115	-561.746	1470.51	-5.45668	-581.723	1270.14	-24.9208	-596.821	1150.49	-32.1244	-507.463	997.897	13.9205	-456.703	918.19	-45.6689	-500.025	896.418	-40.0246	-426.482	820.531
790	0	193.142	-297.773	1627.53	296.113	-299.126	1623.84	171.965	-449.925	1668.36	308.617	-462.418	1668.21	257.687	-545.579	1516.35	257.602	-648.101	1292.54	234.733	-408.255	1417.59	226.898	-382.262	1232.86	312.386	-649.87	1366.45	57.4999	-550.615	1471.66	-4.47539	-573.048	1271.68	-23.3645	-589.908	1152.11	-31.7515	-504.694	997.114	13.6323	-455.823	915.725	-45.4933	-500.471	895.355	-40.9045	-429.093	817.423
791	0	192.645	-286.193	1629.06	295.648	-287.446	1625.66	171.5	-438.41	1669.57	308.096	-450.808	1669.78	257.795	-533.861	1517.82	258.359	-636.831	1294.11	234.901	-396.603	1419.07	227.566	-370.727	1234.3	313.131	-638.029	1368.04	57.7405	-539.435	1472.57	-3.52177	-564.416	1273.02	-21.8545	-583.077	1153.6	-31.4635	-502.066	996.333	13.223	-455.067	913.319	-45.3695	-501.071	894.356	-41.9002	-431.92	814.455
792	0	192.153	-274.585	1630.33	295.188	-275.757	1627.22	171.014	-426.877	1670.51	307.557	-439.2	1671.07	257.848	-522.109	1519.03	259.015	-625.578	1295.44	235.041	-384.917	1420.26	228.222	-359.169	1235.45	313.78	-626.178	1369.38	57.9331	-528.196	1473.22	-2.59893	-555.804	1274.16	-20.3949	-576.3	1154.92	-31.2532	-499.54	995.55	12.7077	-454.397	910.97	-45.2879	-501.774	893.418	-42.9817	-434.909	811.626
793	0	191.67	-262.93	1631.33	294.733	-264.043	1628.51	170.51	-415.306	1671.15	307.001	-427.575	1672.05	257.845	-510.315	1519.96	259.563	-614.327	1296.52	235.151	-373.19	1421.15	228.864	-347.584	1236.29	314.328	-614.312	1370.46	58.0768	-516.885	1473.6	-1.71075	-547.186	1275.09	-18.9897	-569.543	1156.09	-31.113	-497.073	994.762	12.1029	-453.774	908.676	-45.24	-502.526	892.541	-44.1184	-438.008	808.933
794	0	191.195	-251.214	1632.04	294.285	-252.291	1629.48	169.988	-403.677	1671.5	306.43	-415.916	1672.73	257.786	-498.47	1520.61	259.999	-603.064	1297.34	235.23	-361.415	1421.73	229.484	-335.967	1236.81	314.77	-602.424	1371.26	58.1696	-505.492	1473.69	-0.861823	-538.538	1275.8	-17.6426	-562.776	1157.08	-31.0349	-494.626	993.966	11.4256	-453.161	906.435	-45.2186	-503.276	891.725	-45.2806	-441.165	806.375
795	0	190.725	-239.422	1632.44	293.838	-240.485	1630.14	169.447	-391.974	1671.54	305.842	-404.205	1673.09	257.666	-486.565	1520.97	260.32	-591.771	1297.89	235.273	-349.585	1421.99	230.076	-324.312	1237.01	315.102	-590.508	1371.79	58.2088	-494.008	1473.51	-0.057334	-529.836	1276.3	-16.357	-555.966	1157.9	-31.0107	-492.157	993.16	10.6933	-452.524	904.245	-45.2174	-503.974	890.972	-46.44	-444.329	803.952
796	0	190.253	-227.542	1632.52	293.388	-228.614	1630.47	168.881	-380.182	1671.29	305.233	-392.426	1673.14	257.483	-474.592	1521.04	260.525	-580.431	1298.16	235.275	-337.693	1421.94	230.632	-312.615	1236.89	315.32	-578.555	1372.04	58.1909	-482.423	1473.05	0.697036	-521.055	1276.58	-15.1363	-549.084	1158.54	-31.0328	-489.626	992.345	9.92254	-451.83	902.106	-45.2313	-504.57	890.284	-47.5706	-447.45	801.665
797	0	189.773	-215.565	1632.29	292.925	-216.665	1630.47	168.284	-368.289	1670.75	304.598	-380.566	1672.89	257.232	-462.542	1520.82	260.615	-569.026	1298.15	235.232	-325.731	1421.56	231.144	-300.869	1236.45	315.422	-566.557	1372.02	58.1118	-470.73	1472.31	1.39524	-512.172	1276.64	-13.9833	-542.099	1159.02	-31.0939	-486.994	991.519	9.12913	-451.047	900.018	-45.2566	-505.017	889.663	-48.6497	-450.478	799.516
798	0	189.272	-203.482	1631.75	292.44	-204.628	1630.15	167.651	-356.285	1669.93	303.93	-368.611	1672.34	256.908	-450.408	1520.32	260.591	-557.536	1297.87	235.137	-313.692	1420.89	231.602	-289.068	1235.7	315.405	-554.506	1371.72	57.9669	-458.921	1471.3	2.03104	-503.168	1276.5	-12.9006	-534.985	1159.32	-31.1876	-484.224	990.683	8.32713	-450.143	897.981	-45.2906	-505.271	889.112	-49.6582	-453.365	797.507
799	0	188.74	-191.286	1630.91	291.919	-192.493	1629.52	166.972	-344.161	1668.84	303.221	-356.551	1671.52	256.508	-438.182	1519.55	260.457	-545.945	1297.32	234.983	-301.568	1419.92	231.997	-277.204	1234.66	315.268	-542.392	1371.17	57.7511	-446.991	1470.05	2.59815	-494.022	1276.16	-11.8908	-527.714	1159.46	-31.3082	-481.279	989.838	7.52872	-449.086	895.997	-45.3315	-505.287	888.63	-50.5811	-456.063	795.639
800	0	188.163	-178.975	1629.78	291.352	-180.252	1628.6	166.239	-331.912	1667.49	302.461	-344.376	1670.44	256.026	-425.855	1518.53	260.216	-534.235	1296.52	234.761	-289.352	1418.67	232.319	-265.27	1233.34	315.012	-530.204	1370.38	57.4594	-434.934	1468.55	3.09046	-484.718	1275.64	-10.9558	-520.265	1159.45	-31.4516	-478.126	988.983	6.74379	-447.846	894.066	-45.3783	-505.025	888.22	-51.4074	-458.527	793.914
801	0	187.528	-166.543	1628.39	290.725	-167.898	1627.41	165.442	-319.535	1665.92	301.641	-332.08	1669.11	255.456	-413.422	1517.27	259.873	-522.391	1295.47	234.463	-277.036	1417.18	232.559	-253.258	1231.77	314.638	-517.934	1369.37	57.0867	-422.749	1466.84	3.50222	-475.24	1274.94	-10.0979	-512.614	1159.29	-31.6146	-474.73	988.119	5.97986	-446.391	892.19	-45.4309	-504.448	887.878	-52.1303	-460.711	792.33
802	0	186.822	-153.99	1626.75	290.024	-155.426	1625.97	164.573	-307.027	1664.12	300.753	-319.657	1667.57	254.795	-400.877	1515.79	259.433	-510.4	1294.19	234.082	-264.614	1415.45	232.706	-241.16	1229.96	314.147	-505.572	1368.15	56.6281	-410.432	1464.92	3.82818	-465.577	1274.07	-9.31906	-504.743	1158.99	-31.7954	-471.061	987.245	5.242	-444.69	890.37	-45.49	-503.518	887.602	-52.7473	-462.57	790.887
803	0	186.032	-141.315	1624.91	289.237	-142.831	1624.31	163.621	-294.389	1662.13	299.787	-307.103	1665.82	254.038	-388.213	1514.12	258.901	-498.251	1292.72	233.609	-252.08	1413.51	232.75	-228.967	1227.94	313.543	-493.108	1366.74	56.0791	-397.985	1462.82	4.06379	-455.717	1273.05	-8.62123	-496.633	1158.55	-31.9933	-467.089	986.361	4.53299	-442.708	888.605	-45.5566	-502.202	887.385	-53.2594	-464.063	789.578
804	0	185.145	-128.518	1622.88	288.353	-130.111	1622.46	162.579	-281.62	1659.98	298.734	-294.414	1663.91	253.181	-375.428	1512.28	258.28	-485.936	1291.06	233.036	-239.428	1411.4	232.684	-216.671	1225.73	312.83	-480.536	1365.18	55.4358	-385.409	1460.56	4.20529	-445.653	1271.89	-8.00652	-488.268	1157.98	-32.2087	-462.784	985.465	3.85349	-440.415	886.897	-45.6325	-500.467	887.22	-53.6708	-465.145	788.397
805	0	184.152	-115.6	1620.69	287.361	-117.261	1620.46	161.437	-268.723	1657.68	297.587	-281.589	1661.85	252.221	-362.516	1510.3	257.576	-473.45	1289.25	232.356	-226.655	1409.13	232.498	-204.265	1223.38	312.011	-467.849	1363.49	54.695	-372.706	1458.16	4.24973	-435.377	1270.6	-7.47715	-479.634	1157.3	-32.4431	-458.12	984.556	3.20236	-437.774	885.242	-45.7202	-498.281	887.099	-53.9892	-465.775	787.335
806	0	183.042	-102.56	1618.38	286.252	-104.282	1618.34	160.189	-255.698	1655.26	296.338	-268.628	1659.67	251.157	-349.478	1508.21	256.791	-460.792	1287.32	231.562	-213.757	1406.74	232.185	-191.743	1220.9	311.091	-455.04	1361.69	53.8544	-359.881	1455.65	4.19504	-424.885	1269.2	-7.03542	-470.72	1156.5	-32.6989	-453.07	983.632	2.57698	-434.751	883.639	-45.8225	-495.614	887.01	-54.2245	-465.909	786.38
807	0	181.81	-89.3995	1615.99	285.019	-91.1715	1616.12	158.829	-242.548	1652.76	294.983	-255.529	1657.41	249.988	-336.311	1506.04	255.93	-447.963	1285.29	230.648	-200.734	1404.27	231.737	-179.1	1218.33	310.077	-442.108	1359.82	52.9128	-346.941	1453.06	4.03996	-414.174	1267.7	-6.68376	-461.513	1155.6	-32.9788	-447.61	982.691	1.97359	-431.31	882.087	-45.9429	-492.435	886.943	-54.3887	-465.506	785.52
808	0	180.448	-76.1201	1613.53	283.656	-77.9293	1613.85	157.354	-229.274	1650.2	293.516	-242.295	1655.09	248.716	-323.019	1503.82	254.994	-434.967	1283.2	229.611	-187.587	1401.74	231.148	-166.333	1215.71	308.973	-429.05	1357.9	51.87	-333.891	1450.41	3.78396	-403.24	1266.12	-6.42467	-452.004	1154.6	-33.2865	-441.712	981.732	1.38761	-427.414	880.581	-46.0856	-488.716	886.885	-54.4956	-464.523	784.741
809	0	178.955	-62.723	1611.06	282.161	-64.556	1611.55	155.762	-215.879	1647.61	291.938	-228.925	1652.75	247.342	-309.604	1501.58	253.989	-421.811	1281.09	228.449	-174.317	1399.18	230.415	-153.44	1213.06	307.788	-415.868	1355.97	50.7274	-320.741	1447.73	3.42713	-392.082	1264.47	-6.26074	-442.185	1153.53	-33.6258	-435.355	980.754	0.813905	-423.024	879.122	-46.2548	-484.426	886.824	-54.5598	-462.915	784.029
810	0	177.329	-49.2106	1608.59	280.533	-51.053	1609.27	154.052	-202.367	1645.02	290.247	-215.423	1650.42	245.87	-296.071	1499.35	252.917	-408.505	1278.98	227.162	-160.93	1396.64	229.535	-140.422	1210.42	306.527	-402.565	1354.06	49.4876	-307.5	1445.06	2.97008	-380.699	1262.78	-6.19454	-432.047	1152.38	-34.0005	-428.513	979.757	0.247082	-418.103	877.706	-46.4557	-479.536	886.748	-54.5965	-460.637	783.371
811	0	175.572	-35.5866	1606.15	278.772	-37.4234	1607.02	152.227	-188.743	1642.48	288.447	-201.791	1648.14	244.308	-282.428	1497.18	251.781	-395.061	1276.92	225.751	-147.433	1394.15	228.507	-127.284	1207.83	305.198	-389.147	1352.2	48.1545	-294.177	1442.43	2.41381	-369.092	1261.05	-6.22871	-421.586	1151.17	-34.4149	-421.164	978.743	-0.318324	-412.61	876.333	-46.6936	-474.016	886.646	-54.6206	-457.645	782.751
812	0	173.687	-21.8566	1603.78	276.882	-23.6719	1604.84	150.293	-175.011	1640	286.544	-188.036	1645.93	242.663	-268.686	1495.09	250.587	-381.492	1274.93	224.22	-133.835	1391.74	227.331	-114.03	1205.33	303.81	-375.625	1350.42	46.7335	-280.785	1439.88	1.75956	-357.262	1259.32	-6.36585	-410.798	1149.93	-34.8729	-413.284	977.714	-0.887684	-406.506	875.003	-46.9744	-467.837	886.508	-54.6467	-453.892	782.157
813	0	171.681	-8.02858	1601.5	274.869	-9.80557	1602.75	148.258	-161.18	1637.64	284.547	-174.163	1643.84	240.943	-254.857	1493.11	249.337	-367.815	1273.05	222.578	-120.149	1389.45	226.012	-100.669	1202.94	302.37	-362.008	1348.75	45.2315	-267.335	1437.43	1.00869	-345.209	1257.6	-6.60859	-399.677	1148.65	-35.3784	-404.853	976.675	-1.46614	-399.752	873.716	-47.3039	-460.97	886.327	-54.6883	-449.33	781.575
814	0	169.564	5.88634	1599.33	272.741	4.16557	1600.78	146.133	-147.262	1635.4	282.469	-160.183	1641.89	239.161	-240.958	1491.27	248.037	-354.047	1271.31	220.834	-106.389	1387.31	224.556	-87.2124	1200.71	300.885	-348.312	1347.21	43.6565	-253.838	1435.13	0.162581	-332.936	1255.92	-6.95956	-388.224	1147.37	-35.9352	-395.848	975.631	-2.05852	-392.31	872.477	-47.6885	-453.384	886.094	-54.758	-443.912	780.994
815	0	167.346	19.8739	1597.3	270.511	18.2282	1598.96	143.932	-133.269	1633.34	280.324	-146.109	1640.13	237.329	-227.005	1489.61	246.691	-340.207	1269.73	219	-92.5727	1385.35	222.974	-73.6726	1198.67	299.365	-334.553	1345.84	42.0174	-240.308	1433.01	-0.777464	-320.446	1254.3	-7.4215	-376.437	1146.1	-36.547	-386.251	974.59	-2.66929	-384.144	871.287	-48.1344	-445.054	885.804	-54.8672	-437.592	780.406
816	0	165.043	33.916	1595.44	268.192	32.3651	1597.29	141.672	-119.22	1631.48	278.129	-131.955	1638.58	235.458	-213.02	1488.14	245.303	-326.316	1268.34	217.092	-78.7189	1383.6	221.276	-60.0647	1196.85	297.815	-320.751	1344.65	40.3243	-226.756	1431.1	-1.81026	-307.742	1252.76	-7.9973	-364.319	1144.86	-37.2171	-376.044	973.562	-3.30255	-375.22	870.152	-48.6476	-435.952	885.454	-55.0257	-430.323	779.801
817	0	162.671	47.9912	1593.75	265.801	46.5554	1595.81	139.371	-105.133	1629.84	275.904	-117.742	1637.26	233.564	-199.025	1486.9	243.877	-312.394	1267.16	215.125	-64.8488	1382.09	219.478	-46.4059	1195.28	296.242	-306.928	1343.66	38.5878	-213.196	1429.42	-2.93476	-294.828	1251.33	-8.69008	-351.872	1143.67	-37.9486	-365.21	972.555	-3.9621	-365.506	869.077	-49.2337	-426.055	885.04	-55.2418	-422.061	779.173
818	0	160.251	62.0747	1592.26	263.36	60.774	1594.52	137.051	-91.0347	1628.45	273.67	-103.495	1636.2	231.66	-185.045	1485.89	242.417	-298.464	1266.2	213.119	-50.9849	1380.84	217.599	-32.7152	1193.98	294.652	-293.104	1342.88	36.8191	-199.64	1428.02	-4.15003	-281.711	1250.03	-9.50322	-339.103	1142.55	-38.7441	-353.737	971.581	-4.65138	-354.977	868.067	-49.898	-415.343	884.561	-55.5221	-412.766	778.515
819	0	157.804	76.139	1590.98	260.89	74.9926	1593.46	134.734	-76.9497	1627.33	271.449	-89.2394	1635.42	229.761	-171.106	1485.13	240.925	-284.546	1265.48	211.093	-37.1507	1379.87	215.657	-19.0134	1192.98	293.049	-279.305	1342.33	35.0296	-186.101	1426.9	-5.45511	-268.395	1248.87	-10.4403	-326.017	1141.52	-39.6058	-341.615	970.65	-5.37343	-343.611	867.13	-50.6452	-403.797	884.016	-55.8719	-402.401	777.824
820	0	155.356	90.1546	1589.94	258.416	89.1799	1592.62	132.443	-62.9073	1626.5	269.262	-75.0069	1634.93	227.879	-157.231	1484.63	239.405	-270.663	1265.01	209.069	-23.3697	1379.19	213.674	-5.32269	1192.28	291.437	-265.554	1342.01	33.2307	-172.59	1426.09	-6.84896	-254.888	1247.88	-11.5051	-312.623	1140.58	-40.5351	-328.838	969.773	-6.13061	-331.391	866.269	-51.479	-391.405	883.406	-56.2951	-390.934	777.094
821	0	152.932	104.092	1589.16	255.967	103.303	1592.03	130.201	-48.9368	1625.97	267.13	-60.8299	1634.74	226.029	-143.447	1484.4	237.859	-256.835	1264.79	207.066	-9.66497	1378.81	211.671	8.33382	1191.9	289.821	-251.874	1341.93	31.4339	-159.119	1425.6	-8.33017	-241.198	1247.07	-12.7009	-298.931	1139.77	-41.5326	-315.402	968.96	-6.92439	-318.309	865.493	-52.402	-378.159	882.732	-56.7945	-378.341	776.322
822	0	150.559	117.92	1588.64	253.569	117.329	1591.69	128.03	-35.0678	1625.74	265.075	-46.7424	1634.85	224.221	-129.776	1484.44	236.289	-243.083	1264.83	205.105	3.94148	1378.74	209.671	21.933	1191.83	288.202	-238.287	1342.08	29.65	-145.7	1425.43	-9.89675	-227.335	1246.45	-14.0306	-284.953	1139.07	-42.5984	-301.31	968.221	-7.75518	-304.362	864.809	-53.4154	-364.055	881.997	-57.3723	-364.602	775.51
823	0	148.263	131.612	1588.39	251.25	131.224	1591.62	125.952	-21.3283	1625.83	263.113	-32.7777	1635.25	222.468	-116.24	1484.75	234.699	-229.424	1265.11	203.205	17.4295	1378.98	207.696	35.4526	1192.07	286.583	-224.816	1342.47	27.8897	-132.342	1425.59	-11.5458	-213.307	1246.02	-15.4964	-270.7	1138.51	-43.7313	-286.567	967.566	-8.62223	-289.553	864.223	-54.5192	-349.095	881.208	-58.0298	-349.707	774.661
824	0	146.072	145.144	1588.44	249.038	144.958	1591.83	123.985	-7.74364	1626.22	261.263	-18.9679	1635.95	220.779	-102.856	1485.32	233.09	-215.874	1265.64	201.384	30.7815	1379.52	205.767	48.8718	1192.63	284.966	-211.479	1343.07	26.163	-119.055	1426.06	-13.2734	-199.126	1245.8	-17.099	-256.186	1138.09	-44.929	-271.184	967.004	-9.52353	-273.894	863.743	-55.7114	-333.285	880.371	-58.7674	-333.652	773.782
825	0	144.01	158.493	1588.79	246.959	158.504	1592.31	122.146	5.66471	1626.92	259.536	-5.34178	1636.93	219.161	-89.6409	1486.15	231.467	-202.447	1266.41	199.656	43.9827	1380.34	203.904	62.1725	1193.48	283.353	-198.291	1343.89	24.4788	-105.848	1426.86	-15.0741	-184.804	1245.78	-18.8377	-241.424	1137.82	-46.1884	-255.172	966.544	-10.4558	-257.402	863.38	-56.9886	-316.639	879.496	-59.5847	-316.444	772.886
826	0	142.1	171.644	1589.43	245.036	171.839	1593.06	120.449	18.8799	1627.92	257.944	8.07598	1638.17	217.622	-76.6058	1487.22	229.831	-189.153	1267.4	198.036	57.0217	1381.45	202.124	75.3397	1194.61	281.747	-185.267	1344.92	22.8455	-92.727	1427.95	-16.9411	-170.353	1245.97	-20.71	-226.427	1137.68	-47.5048	-238.551	966.196	-11.4147	-240.101	863.145	-58.3455	-299.172	878.597	-60.4803	-298.097	771.993
827	0	140.361	184.587	1590.37	243.29	184.947	1594.1	118.903	31.8904	1629.2	256.495	21.2658	1639.66	216.167	-63.7587	1488.51	228.188	-175.999	1268.6	196.534	69.8907	1382.82	200.443	88.3624	1196.01	280.148	-172.414	1346.14	21.2702	-79.6987	1429.32	-18.8664	-155.786	1246.35	-22.7113	-211.209	1137.69	-48.8727	-221.342	965.969	-12.3947	-222.017	863.049	-59.7753	-280.907	877.692	-61.4517	-278.634	771.127
828	0	138.811	197.317	1591.61	241.736	197.814	1595.39	117.515	44.6902	1630.74	255.194	34.214	1641.38	214.797	-51.1036	1490.02	226.541	-162.991	1270	195.157	82.586	1384.44	198.875	101.234	1197.65	278.559	-159.738	1347.53	19.7586	-66.7666	1430.97	-20.8404	-141.118	1246.92	-24.8346	-195.784	1137.84	-50.2852	-203.568	965.872	-13.3892	-203.185	863.107	-61.2693	-261.869	876.8	-62.4949	-258.089	770.317
829	0	137.462	209.834	1593.12	240.388	210.437	1596.95	116.289	57.2789	1632.55	254.041	46.9126	1643.31	213.514	-38.6403	1491.72	224.896	-150.13	1271.58	193.909	95.1076	1386.28	197.429	113.951	1199.52	276.982	-147.241	1349.09	18.3152	-53.9327	1432.85	-22.8525	-126.361	1247.68	-27.071	-180.164	1138.12	-51.735	-185.259	965.915	-14.3912	-183.641	863.336	-62.8177	-242.088	875.946	-63.6045	-236.502	769.598
830	0	136.32	222.144	1594.9	239.251	222.815	1598.74	115.223	69.6612	1634.58	253.035	59.36	1645.43	212.317	-26.3647	1493.6	223.259	-137.416	1273.32	192.793	107.459	1388.33	196.112	126.517	1201.59	275.418	-134.92	1350.78	16.9431	-41.1971	1434.96	-24.8916	-111.531	1248.62	-29.409	-164.365	1138.54	-53.2138	-166.443	966.108	-15.3931	-163.425	863.754	-64.409	-221.599	875.156	-64.7732	-213.921	769.01
831	0	135.389	234.258	1596.93	238.328	234.955	1600.76	114.313	81.8463	1636.82	252.17	71.56	1647.7	211.204	-14.2688	1495.62	221.637	-124.847	1275.19	191.806	119.649	1390.56	194.924	138.934	1203.84	273.871	-122.769	1352.6	15.6439	-28.558	1437.26	-26.9459	-96.6415	1249.71	-31.8354	-148.4	1139.08	-54.7133	-147.156	966.459	-16.3876	-142.58	864.379	-66.031	-200.437	874.46	-65.9916	-190.403	768.596
832	0	134.664	246.19	1599.19	237.615	246.866	1602.97	113.553	93.847	1639.24	251.439	83.5219	1650.11	210.17	-2.34137	1497.77	220.036	-112.418	1277.18	190.944	131.686	1392.94	193.865	151.212	1206.25	272.344	-110.777	1354.52	14.4179	-16.0115	1439.73	-29.0039	-81.708	1250.96	-34.3353	-132.285	1139.74	-56.2247	-127.432	966.978	-17.3676	-121.151	865.23	-67.6705	-178.644	873.885	-67.2482	-166.011	768.396
833	0	134.137	257.957	1601.65	237.103	258.566	1605.35	112.931	105.679	1641.82	250.831	95.2597	1652.61	209.212	9.43187	1500.03	218.464	-100.123	1279.26	190.197	143.585	1395.45	192.928	163.359	1208.77	270.839	-98.933	1356.53	13.2645	-3.55258	1442.33	-31.0542	-66.7447	1252.34	-36.8926	-116.033	1140.51	-57.7396	-107.309	967.671	-18.3273	-99.1845	866.325	-69.3142	-156.263	873.46	-68.5289	-140.813	768.453
834	0	133.795	269.578	1604.27	236.778	270.074	1607.87	112.435	117.36	1644.51	250.335	106.791	1655.18	208.322	21.0675	1502.35	216.93	-87.9547	1281.4	189.557	155.36	1398.05	192.106	175.387	1211.39	269.361	-87.2217	1358.59	12.182	8.82513	1445.04	-33.0864	-51.7656	1253.83	-39.4903	-99.6616	1141.37	-59.2499	-86.8271	968.541	-19.262	-76.7287	867.679	-70.9484	-133.34	873.211	-69.818	-114.883	768.803
835	0	133.618	281.074	1607.03	236.62	281.411	1610.5	112.051	128.909	1647.29	249.935	118.138	1657.78	207.495	32.5838	1504.72	215.44	-75.9047	1283.58	189.013	167.029	1400.71	191.386	187.307	1214.06	267.913	-75.6271	1360.68	11.1681	21.1287	1447.81	-35.0909	-36.7845	1255.41	-42.1111	-83.1861	1142.32	-60.7479	-66.0277	969.59	-20.1685	-53.8328	869.305	-72.5597	-109.924	873.161	-71.0977	-88.2997	769.48
836	0	133.584	292.463	1609.88	236.606	292.603	1613.19	111.76	140.345	1650.12	249.617	129.324	1660.39	206.724	44.0002	1507.1	214.002	-63.9633	1285.77	188.551	178.609	1403.39	190.757	199.131	1216.76	266.502	-64.1316	1362.79	10.2206	33.3653	1450.62	-37.0589	-21.8142	1257.06	-44.7381	-66.623	1143.33	-62.2267	-44.9524	970.817	-21.0449	-30.547	871.21	-74.1351	-86.0674	873.328	-72.3499	-61.1439	770.507
837	0	133.665	303.768	1612.79	236.709	303.676	1615.92	111.545	151.686	1652.95	249.363	140.374	1662.95	206.005	55.3364	1509.46	212.625	-52.1199	1287.95	188.158	190.117	1406.05	190.203	210.872	1219.44	265.132	-52.7175	1364.88	9.33668	45.5421	1453.42	-38.9827	-6.86623	1258.75	-47.3545	-49.9882	1144.38	-63.6801	-23.6435	972.215	-21.8901	-6.92179	873.398	-75.6619	-61.8222	873.724	-73.556	-33.4992	771.903
838	0	133.835	315.006	1615.71	236.901	314.655	1618.64	111.388	162.952	1655.74	249.156	151.315	1665.44	205.33	66.6121	1511.77	211.317	-40.3632	1290.08	187.822	201.571	1408.66	189.712	222.54	1222.07	263.809	-41.3668	1366.93	8.51403	57.6656	1456.19	-40.8556	8.04889	1260.46	-49.9448	-33.2972	1145.46	-65.1027	-2.14268	973.778	-22.7039	16.9916	875.866	-77.1283	-37.244	874.355	-74.6986	-5.44978	773.677
839	0	134.064	326.196	1618.6	237.153	325.568	1621.31	111.27	174.159	1658.45	248.981	162.173	1667.83	204.696	77.8461	1514	210.084	-28.6813	1292.14	187.53	212.985	1411.18	189.269	234.146	1224.61	262.54	-30.0621	1368.92	7.75054	69.7416	1458.87	-42.6714	22.9224	1262.14	-52.4943	-16.5647	1146.54	-66.4897	19.5091	975.492	-23.4866	41.142	878.606	-78.5234	-12.3884	875.223	-75.7616	22.9202	775.831
840	0	134.322	337.356	1621.41	237.435	336.44	1623.9	111.173	185.323	1661.04	248.821	172.976	1670.08	204.099	89.0559	1516.12	208.935	-17.0616	1294.09	187.271	224.374	1413.58	188.862	245.7	1227.02	261.331	-18.787	1370.81	7.04457	81.775	1461.44	-44.4242	37.7474	1263.78	-54.9899	0.196088	1147.59	-67.8364	41.2724	977.344	-24.2383	65.4786	881.606	-79.8374	12.6885	876.322	-76.7308	51.5281	778.358
841	0	134.584	348.5	1624.11	237.719	347.294	1626.36	111.082	196.461	1663.47	248.662	183.749	1672.16	203.536	100.258	1518.11	207.876	-5.49135	1295.92	187.036	235.75	1415.81	188.48	257.212	1229.27	260.187	-7.52585	1372.59	6.39505	93.7697	1463.87	-46.1086	52.5188	1265.34	-57.4196	16.9734	1148.58	-69.1386	63.1093	979.317	-24.959	89.951	884.847	-81.0621	37.9317	877.643	-77.5946	80.2933	781.244
842	0	134.824	359.642	1626.63	237.981	358.153	1628.66	110.982	207.585	1665.71	248.492	194.514	1674.04	203.006	111.466	1519.93	206.914	6.04248	1297.59	186.816	247.125	1417.84	188.116	268.69	1231.33	259.116	3.73544	1374.22	5.80151	105.729	1466.11	-47.7189	67.2333	1266.79	-59.773	33.7569	1149.5	-70.3919	84.9842	981.389	-25.6479	114.51	888.307	-82.1909	63.2872	879.17	-78.3442	109.139	784.467
843	0	135.022	370.794	1628.96	238.2	369.035	1630.77	110.861	218.709	1667.7	248.299	205.294	1675.7	202.509	122.692	1521.55	206.056	17.5529	1299.09	186.603	258.506	1419.65	187.76	280.141	1233.16	258.123	15.0097	1375.69	5.2641	117.655	1468.15	-49.2495	81.8896	1268.1	-62.0404	50.5381	1150.31	-71.5918	106.863	983.54	-26.3039	139.107	891.96	-83.2187	88.7029	880.885	-78.9742	137.991	788.002
844	0	135.162	381.967	1631.03	238.359	379.959	1632.64	110.711	229.844	1669.44	248.077	216.109	1677.12	202.046	133.946	1522.96	205.306	29.0529	1300.38	186.394	269.901	1421.21	187.409	291.572	1234.75	257.215	26.3082	1376.98	4.7835	129.55	1469.95	-50.6945	96.4881	1269.24	-64.2129	67.3098	1151	-72.7336	128.715	985.747	-26.9248	163.697	895.779	-84.1423	114.129	882.769	-79.4824	166.782	791.818
845	0	135.231	393.17	1632.84	238.447	390.937	1634.26	110.524	241	1670.89	247.822	226.974	1678.29	201.618	145.237	1524.14	204.671	40.5551	1301.46	186.185	281.314	1422.5	187.06	302.991	1236.07	256.396	37.641	1378.06	4.361	141.417	1471.49	-52.0477	111.03	1270.19	-66.282	84.0656	1151.53	-73.8128	150.509	987.989	-27.5075	188.233	899.732	-84.9602	139.518	884.798	-79.8697	195.447	795.884
846	0	135.225	404.409	1634.34	238.456	401.981	1635.6	110.3	252.186	1672.03	247.531	237.903	1679.18	201.229	156.571	1525.07	204.153	52.0716	1302.3	185.976	292.751	1423.49	186.71	314.403	1237.1	255.672	49.0164	1378.92	3.99835	153.256	1472.76	-53.3029	125.518	1270.93	-68.2397	100.8	1151.89	-74.8244	172.219	990.245	-28.0481	212.673	903.789	-85.6724	164.824	886.95	-80.1403	223.928	800.167
847	0	135.14	415.691	1635.51	238.385	413.099	1636.64	110.038	263.409	1672.85	247.207	248.909	1679.79	200.884	167.952	1525.74	203.756	63.6143	1302.9	185.768	304.214	1424.19	186.362	325.814	1237.83	255.046	60.4417	1379.54	3.6978	165.072	1473.74	-54.4537	139.956	1271.44	-70.0781	117.507	1152.08	-75.7637	193.819	992.493	-28.5422	236.974	907.919	-86.28	190.005	889.203	-80.3008	252.172	804.632
848	0	134.982	427.02	1636.35	238.239	424.297	1637.37	109.745	274.678	1673.35	246.855	259.998	1680.12	200.587	179.384	1526.14	203.48	75.1941	1303.23	185.565	315.705	1424.57	186.016	337.232	1238.26	254.523	71.923	1379.91	3.462	176.866	1474.42	-55.4937	154.345	1271.71	-71.7895	134.181	1152.07	-76.6256	215.284	994.716	-28.9849	261.099	912.089	-86.7856	215.021	891.534	-80.3596	280.13	809.248
849	0	134.757	438.399	1636.83	238.026	435.579	1637.79	109.427	285.995	1673.53	246.484	271.178	1680.16	200.344	190.869	1526.26	203.327	86.8212	1303.3	185.371	327.228	1424.65	185.676	348.664	1238.39	254.104	83.4654	1380.03	3.29397	188.643	1474.82	-56.4167	168.69	1271.74	-73.3666	150.815	1151.86	-77.4055	236.59	996.896	-29.3711	285.007	916.271	-87.1924	239.833	893.921	-80.3266	307.757	813.981
850	0	134.479	449.832	1636.97	237.757	446.948	1637.88	109.095	297.367	1673.38	246.104	282.453	1679.93	200.162	202.409	1526.11	203.295	98.5052	1303.1	185.194	338.785	1424.43	185.347	360.116	1238.21	253.792	95.0729	1379.89	3.19699	200.408	1474.91	-57.2165	182.993	1271.52	-74.8024	167.401	1151.45	-78.0988	257.714	999.02	-29.6963	308.663	920.434	-87.504	264.404	896.345	-80.2123	335.012	818.8
851	0	134.163	461.321	1636.76	237.45	458.403	1637.66	108.763	308.796	1672.92	245.73	293.824	1679.42	200.047	214.006	1525.69	203.38	110.255	1302.64	185.04	350.38	1423.91	185.035	371.599	1237.74	253.587	106.749	1379.48	3.17447	212.167	1474.72	-57.8878	197.255	1271.06	-76.0905	183.93	1150.84	-78.7008	278.635	1001.07	-29.9562	332.033	924.55	-87.7244	288.699	898.786	-80.0273	361.859	823.674
852	0	133.826	472.866	1636.22	237.121	469.944	1637.13	108.447	320.285	1672.17	245.376	305.292	1678.66	200.006	225.662	1525	203.577	122.077	1301.91	184.919	362.016	1423.11	184.745	383.121	1236.99	253.488	118.497	1378.81	3.22984	223.928	1474.26	-58.4257	211.477	1270.35	-77.2252	200.393	1150.04	-79.2077	299.33	1003.04	-30.1473	355.084	928.594	-87.8575	312.686	901.227	-79.7818	388.261	828.574
853	0	133.49	484.469	1635.36	236.792	481.571	1636.31	108.165	331.836	1671.14	245.062	316.857	1677.65	200.047	237.377	1524.05	203.881	133.979	1300.92	184.84	373.697	1422.04	184.486	394.694	1235.97	253.494	130.32	1377.89	3.36635	235.7	1473.53	-58.8262	225.658	1269.42	-78.2019	216.776	1149.06	-79.6158	319.778	1004.92	-30.2668	377.785	932.541	-87.9067	336.331	903.648	-79.4851	414.186	833.471
854	0	133.176	496.132	1634.21	236.485	493.281	1635.22	107.937	343.45	1669.85	244.806	328.517	1676.41	200.175	249.154	1522.87	204.281	145.966	1299.7	184.813	385.431	1420.73	184.265	406.329	1234.71	253.602	142.22	1376.72	3.58691	247.492	1472.57	-59.0861	239.797	1268.28	-79.0174	233.069	1147.9	-79.9221	339.956	1006.69	-30.3126	400.106	936.369	-87.8752	359.602	906.034	-79.1454	439.602	838.335
855	0	132.907	507.856	1632.79	236.223	505.074	1633.89	107.782	355.13	1668.34	244.629	340.271	1674.97	200.398	260.996	1521.46	204.769	158.043	1298.24	184.85	397.222	1419.21	184.09	418.037	1233.23	253.808	154.199	1375.31	3.89388	259.317	1471.38	-59.2038	253.893	1266.95	-79.6696	249.255	1146.58	-80.1243	359.844	1008.36	-30.2835	422.021	940.057	-87.7652	382.47	908.369	-78.7693	464.48	843.14
856	0	132.706	519.643	1631.15	236.028	516.949	1632.33	107.719	366.876	1666.63	244.549	352.117	1673.34	200.719	272.907	1519.85	205.332	170.215	1296.58	184.959	409.078	1417.49	183.969	429.833	1231.55	254.106	166.259	1373.69	4.28891	271.185	1470	-59.1786	267.942	1265.44	-80.1581	265.322	1145.13	-80.2209	379.42	1009.91	-30.1793	443.503	943.587	-87.5788	404.904	910.637	-78.3617	488.791	847.856
857	0	132.595	531.496	1629.32	235.923	528.906	1630.59	107.77	378.691	1664.75	244.588	364.054	1671.56	201.144	284.891	1518.06	205.96	182.483	1294.73	185.15	421.008	1415.6	183.91	441.728	1229.7	254.49	178.404	1371.86	4.77279	283.111	1468.45	-59.0117	281.943	1263.79	-80.4841	281.252	1143.56	-80.2113	398.664	1011.34	-30.0002	464.53	946.941	-87.3172	426.876	912.821	-77.9262	512.507	852.456
858	0	132.596	543.419	1627.34	235.929	540.943	1628.7	107.952	390.577	1662.74	244.763	376.079	1669.64	201.674	296.952	1516.11	206.639	194.851	1292.72	185.431	433.019	1413.59	183.921	453.734	1227.71	254.954	190.634	1369.86	5.34528	295.108	1466.76	-58.7056	295.891	1262.01	-80.6505	297.032	1141.89	-80.0958	417.555	1012.65	-29.7474	485.079	950.104	-86.9815	448.358	914.908	-77.4644	535.601	856.909
859	0	132.728	555.415	1625.25	236.065	553.063	1626.68	108.281	402.537	1660.63	245.09	388.191	1667.61	202.312	309.096	1514.04	207.357	207.32	1290.57	185.81	445.121	1411.46	184.007	465.863	1225.62	255.491	202.954	1367.71	6.005	307.19	1464.96	-58.2645	309.784	1260.14	-80.6614	312.646	1140.15	-79.8759	436.075	1013.83	-29.4223	505.13	953.061	-86.573	469.323	916.88	-76.977	558.047	861.187
860	0	133.01	567.49	1623.09	236.348	565.265	1624.59	108.771	414.576	1658.46	245.583	400.391	1665.5	203.055	321.328	1511.86	208.101	219.89	1288.31	186.29	457.321	1409.27	184.176	478.126	1223.45	256.093	215.363	1365.43	6.74936	319.369	1463.08	-57.6947	323.62	1258.2	-80.5228	328.077	1138.36	-79.554	454.206	1014.87	-29.0268	524.663	955.799	-86.0933	489.744	918.725	-76.4634	579.822	865.26
861	0	133.457	579.648	1620.9	236.794	577.551	1622.44	109.431	426.696	1656.26	246.251	412.676	1663.33	203.902	333.653	1509.61	208.86	232.562	1285.98	186.876	469.628	1407.03	184.429	490.531	1221.23	256.752	227.865	1363.04	7.57449	331.657	1461.14	-57.004	337.395	1256.22	-80.2418	343.313	1136.54	-79.1336	471.929	1015.78	-28.5633	543.664	958.308	-85.5444	509.599	920.428	-75.9222	600.903	869.101
862	0	134.079	591.896	1618.74	237.412	589.922	1620.28	110.27	438.904	1654.06	247.1	425.047	1661.13	204.847	346.075	1507.33	209.625	245.334	1283.59	187.566	482.047	1404.78	184.768	503.084	1219.01	257.464	240.459	1360.59	8.47523	344.065	1459.19	-56.202	351.108	1254.24	-79.8269	358.339	1134.73	-78.6193	489.228	1016.56	-28.034	562.115	960.576	-84.9295	528.863	921.977	-75.3515	621.269	872.681
863	0	134.884	604.239	1616.62	238.211	602.38	1618.13	111.287	451.203	1651.9	248.132	437.502	1658.92	205.885	358.598	1505.03	210.387	258.204	1281.19	188.357	494.583	1402.54	185.192	515.79	1216.79	258.22	253.147	1358.11	9.44512	356.599	1457.25	-55.3	364.756	1252.28	-79.2873	373.143	1132.94	-78.0164	506.09	1017.2	-27.4419	580.005	962.593	-84.2523	547.517	923.36	-74.7492	640.903	875.973
864	0	135.877	616.681	1614.59	239.193	614.924	1616.03	112.482	463.599	1649.81	249.342	450.043	1656.73	207.008	371.224	1502.76	211.14	271.169	1278.8	189.244	507.238	1400.35	185.697	528.649	1214.62	259.018	265.927	1355.61	10.4765	369.263	1455.35	-54.3106	378.338	1250.37	-78.6333	387.713	1131.2	-77.3312	522.502	1017.7	-26.7897	597.321	964.349	-83.5177	565.542	924.564	-74.1133	659.788	878.948
865	0	137.055	629.228	1612.68	240.355	627.556	1614	113.846	476.096	1647.82	250.723	462.667	1654.58	208.204	383.954	1500.53	211.88	284.222	1276.46	190.217	520.013	1398.22	186.276	541.657	1212.52	259.852	278.796	1353.15	11.5604	382.058	1453.51	-53.2479	391.851	1248.53	-77.8757	402.04	1129.54	-76.5708	538.451	1018.05	-26.081	614.055	965.837	-82.7317	582.922	925.579	-73.4423	677.911	881.58
866	0	138.413	641.882	1610.92	241.692	640.274	1612.07	115.367	488.698	1645.95	252.26	475.374	1652.49	209.462	396.784	1498.38	212.605	297.356	1274.2	191.264	532.902	1396.18	186.92	554.809	1210.52	260.72	291.75	1350.74	12.6869	394.978	1451.76	-52.1265	405.292	1246.79	-77.0259	416.117	1127.96	-75.7428	553.93	1018.27	-25.3194	630.2	967.047	-81.9009	599.643	926.396	-72.7354	695.264	883.844
867	0	139.937	654.646	1609.32	243.191	653.076	1610.25	117.03	501.406	1644.22	253.937	488.161	1650.47	210.77	409.711	1496.34	213.316	310.562	1272.05	192.368	545.898	1394.25	187.617	568.093	1208.64	261.62	304.782	1348.43	13.8451	408.014	1450.13	-50.962	418.658	1245.18	-76.0951	429.936	1126.49	-74.8555	568.931	1018.34	-24.5097	645.75	967.971	-81.0331	615.695	927.006	-71.9929	711.839	885.716
868	0	141.612	667.518	1607.9	244.835	665.96	1608.55	118.812	514.223	1642.65	255.729	501.024	1648.55	212.112	422.727	1494.43	214.016	323.826	1270.03	193.513	558.992	1392.45	188.353	581.493	1206.89	262.551	317.883	1346.23	15.0229	421.153	1448.63	-49.7697	431.943	1243.7	-75.0951	443.495	1125.15	-73.9178	583.449	1018.28	-23.657	660.701	968.602	-80.1364	631.068	927.4	-71.2166	727.631	887.173
869	0	143.416	680.496	1606.67	246.603	678.92	1607	120.688	527.146	1641.27	257.612	513.96	1646.75	213.472	435.823	1492.68	214.708	337.134	1268.17	194.679	572.168	1390.81	189.114	594.989	1205.29	263.512	331.041	1344.19	16.2076	434.376	1447.27	-48.5648	445.14	1242.38	-74.0372	456.789	1123.95	-72.9388	597.48	1018.07	-22.7675	675.052	968.931	-79.2197	645.757	927.573	-70.4098	742.639	888.196
870	0	145.323	693.574	1605.64	248.47	691.949	1605.58	122.63	540.172	1640.06	259.556	526.961	1645.06	214.833	448.984	1491.1	215.399	350.467	1266.51	195.844	585.409	1389.32	189.884	608.555	1203.86	264.503	344.242	1342.33	17.3859	447.661	1446.09	-47.3616	458.242	1241.23	-72.9324	469.818	1122.9	-71.9282	611.023	1017.71	-21.8485	688.803	968.954	-78.2922	659.758	927.518	-69.5776	756.863	888.769
871	0	147.302	706.747	1604.8	250.405	705.039	1604.32	124.606	553.294	1639.06	261.53	540.021	1643.52	216.179	462.194	1489.72	216.094	363.804	1265.05	196.988	598.692	1388	190.649	622.163	1202.61	265.523	357.469	1340.68	18.5443	460.982	1445.08	-46.1734	471.239	1240.27	-71.7917	482.582	1122.01	-70.8957	624.076	1017.22	-20.9081	701.953	968.666	-77.363	673.068	927.233	-68.7268	770.303	888.879
872	0	149.323	720.001	1604.15	252.378	718.179	1603.21	126.583	566.503	1638.26	263.498	553.129	1642.14	217.493	475.435	1488.55	216.8	377.123	1263.82	198.089	611.992	1386.86	191.396	635.779	1201.55	266.571	370.704	1339.26	19.6692	474.313	1444.26	-45.0117	484.116	1239.49	-70.6254	495.08	1121.29	-69.8515	636.639	1016.59	-19.9552	714.505	968.066	-76.4415	685.688	926.715	-67.866	782.962	888.516
873	0	151.349	733.323	1603.67	254.354	731.354	1602.24	128.526	579.789	1637.65	265.427	566.275	1640.91	218.756	488.684	1487.61	217.522	390.399	1262.84	199.13	625.284	1385.92	192.112	649.367	1200.68	267.644	383.927	1338.09	20.7478	487.622	1443.63	-43.8866	496.862	1238.9	-69.4432	507.314	1120.73	-68.8057	648.713	1015.83	-18.9999	726.461	967.152	-75.5364	697.619	925.964	-67.0049	794.841	887.675
874	0	153.346	746.696	1603.36	256.3	744.55	1601.42	130.4	593.135	1637.26	267.283	579.443	1639.87	219.953	501.917	1486.9	218.265	403.607	1262.12	200.092	638.538	1385.18	192.787	662.891	1200.02	268.738	397.117	1337.18	21.7681	500.879	1443.2	-42.8062	509.461	1238.51	-68.2542	519.286	1120.34	-67.7685	660.3	1014.93	-18.0529	737.823	965.93	-74.6564	708.863	924.984	-66.1545	805.944	886.359
875	0	155.278	760.1	1603.19	258.179	757.747	1600.74	132.172	606.525	1637.06	269.031	592.62	1639.03	221.07	515.107	1486.45	219.03	416.722	1261.67	200.962	651.725	1384.64	193.416	676.315	1199.56	269.848	410.253	1336.56	22.7198	514.053	1442.96	-41.7766	521.897	1238.32	-67.0668	530.995	1120.13	-66.7497	671.4	1013.91	-17.1253	748.594	964.405	-73.8096	719.423	923.78	-65.3267	816.273	884.573
876	0	157.11	773.511	1603.15	259.959	770.926	1600.2	133.808	619.936	1637.06	270.64	605.788	1638.39	222.095	528.229	1486.24	219.82	429.721	1261.49	201.728	664.818	1384.31	193.991	689.607	1199.32	270.97	423.316	1336.22	23.5947	527.112	1442.93	-40.8023	534.154	1238.31	-65.8884	542.443	1120.08	-65.7589	682.016	1012.77	-16.2287	758.779	962.589	-73.0034	729.305	922.363	-64.5338	825.831	882.331
877	0	158.81	786.904	1603.23	261.608	784.066	1599.8	135.28	633.345	1637.26	272.083	618.927	1637.99	223.019	541.257	1486.29	220.633	442.582	1261.57	202.384	677.789	1384.2	194.511	702.737	1199.3	272.097	436.286	1336.16	24.3866	540.026	1443.08	-39.8857	546.216	1238.49	-64.7253	553.631	1120.19	-64.8054	692.149	1011.53	-15.3749	768.38	960.497	-72.245	738.513	920.745	-63.7883	834.619	879.653
878	0	160.348	800.249	1603.42	263.097	797.142	1599.55	136.564	646.723	1637.65	273.335	632.016	1637.82	223.836	554.164	1486.59	221.467	455.291	1261.92	202.926	690.616	1384.32	194.973	715.684	1199.5	273.221	449.149	1336.39	25.0921	552.766	1443.43	-39.0275	558.068	1238.86	-63.5825	564.559	1120.47	-63.8977	701.802	1010.19	-14.5755	777.401	958.147	-71.5411	747.053	918.944	-63.1025	842.641	876.568
879	0	161.698	813.517	1603.71	264.4	810.133	1599.45	137.639	660.042	1638.23	274.379	645.034	1637.9	224.543	566.93	1487.14	222.319	467.834	1262.53	203.352	703.277	1384.67	195.377	728.432	1199.93	274.336	461.89	1336.89	25.7106	565.308	1443.95	-38.2265	569.695	1239.4	-62.4636	575.227	1120.9	-63.0434	710.976	1008.77	-13.8417	785.847	955.564	-70.8978	754.933	916.981	-62.4884	849.899	873.11
880	0	162.837	826.677	1604.1	265.498	823.015	1599.52	138.494	673.269	1639	275.202	657.959	1638.25	225.14	579.535	1487.94	223.184	480.206	1263.37	203.667	715.76	1385.26	195.723	740.975	1200.61	275.437	474.502	1337.66	26.2436	577.631	1444.66	-37.4801	581.086	1240.1	-61.3703	585.634	1121.48	-62.2492	719.674	1007.29	-13.1843	793.723	952.774	-70.3209	762.161	914.883	-61.9574	856.397	869.319
881	0	163.749	839.698	1604.61	266.375	835.767	1599.78	139.121	686.371	1639.95	275.801	670.766	1638.87	225.632	591.966	1488.97	224.061	492.405	1264.44	203.874	728.055	1386.1	196.011	753.314	1201.52	276.516	486.978	1338.68	26.6953	589.718	1445.53	-36.7837	592.23	1240.97	-60.303	595.779	1122.21	-61.521	727.899	1005.77	-12.613	801.034	949.808	-69.8155	768.746	912.676	-61.5203	862.141	865.242
882	0	164.425	852.549	1605.25	267.022	848.367	1600.25	139.522	699.313	1641.08	276.175	683.433	1639.78	226.025	604.214	1490.21	224.944	504.436	1265.72	203.982	740.159	1387.18	196.245	765.456	1202.68	277.57	499.317	1339.92	27.0716	601.56	1446.55	-36.1316	603.119	1241.99	-59.2603	605.659	1123.08	-60.8631	735.656	1004.22	-12.1363	807.787	946.7	-69.3861	774.699	910.393	-61.187	867.135	860.93
883	0	164.86	865.202	1606.03	267.436	860.797	1600.94	139.703	712.065	1642.39	276.332	695.938	1640.95	226.328	616.276	1491.66	225.833	516.308	1267.18	204	752.077	1388.51	196.425	777.417	1204.08	278.595	511.522	1341.37	27.3799	613.155	1447.72	-35.517	613.747	1243.15	-58.2396	615.274	1124.09	-60.2786	742.95	1002.66	-11.7615	813.99	943.486	-69.0367	780.031	908.065	-60.9667	871.388	856.438
884	0	165.056	877.634	1606.98	267.621	873.042	1601.89	139.677	724.594	1643.86	276.288	708.262	1642.4	226.549	628.156	1493.29	226.723	528.03	1268.79	203.938	763.819	1390.06	196.556	789.216	1205.72	279.588	523.599	1343	27.6287	624.507	1449.02	-34.9321	624.114	1244.45	-57.2371	624.621	1125.21	-59.7695	749.786	1001.13	-11.494	819.653	940.202	-68.7702	784.758	905.728	-60.8674	874.912	851.824
885	0	165.024	889.824	1608.12	267.586	885.091	1603.11	139.465	736.875	1645.48	276.062	720.386	1644.09	226.702	639.861	1495.08	227.614	539.619	1270.55	203.807	775.399	1391.84	196.64	800.874	1207.57	280.546	535.556	1344.79	27.827	635.628	1450.44	-34.3688	634.219	1245.85	-56.2483	633.7	1126.46	-59.336	756.173	999.629	-11.3378	824.786	936.885	-68.5886	788.896	903.415	-60.8961	877.72	847.146
886	0	164.776	901.757	1609.47	267.347	896.935	1604.6	139.09	748.887	1647.24	275.677	732.298	1646	226.796	651.405	1497	228.502	551.089	1272.41	203.617	786.837	1393.83	196.684	812.415	1209.62	281.47	547.407	1346.7	27.9837	646.536	1451.96	-33.8193	644.067	1247.37	-55.2686	642.511	1127.81	-58.9773	762.122	998.186	-11.2945	829.405	933.57	-68.4923	792.463	901.159	-61.0576	879.831	842.464
887	0	164.334	913.427	1611.04	266.922	908.572	1606.38	138.579	760.615	1649.11	275.159	743.989	1648.11	226.845	662.806	1499.03	229.382	562.456	1274.36	203.38	798.156	1395.98	196.693	823.864	1211.85	282.357	559.164	1348.7	28.1079	657.255	1453.56	-33.2759	653.666	1248.97	-54.2932	651.056	1129.27	-58.6911	767.645	996.817	-11.364	833.525	930.291	-68.4802	795.484	898.99	-61.3549	881.268	837.831
888	0	163.722	924.832	1612.84	266.335	920.003	1608.44	137.959	772.052	1651.07	274.539	755.455	1650.36	226.858	674.084	1501.13	230.251	573.734	1276.37	203.106	809.379	1398.28	196.673	835.241	1214.21	283.209	570.843	1350.77	28.2077	667.815	1455.21	-32.7321	663.029	1250.63	-53.3182	659.34	1130.8	-58.4743	772.757	995.534	-11.5441	837.167	927.078	-68.5493	797.984	896.933	-61.7882	882.06	833.298
889	0	162.967	935.979	1614.86	265.613	931.236	1610.75	137.262	783.201	1653.1	273.844	766.699	1652.73	226.845	685.263	1503.27	231.101	584.94	1278.41	202.805	820.532	1400.68	196.632	846.569	1216.66	284.024	582.459	1352.87	28.2903	678.245	1456.9	-32.1827	672.17	1252.35	-52.3402	667.369	1132.4	-58.3226	777.477	994.348	-11.8302	840.353	923.954	-68.6947	799.993	895.011	-62.3546	882.242	828.91
890	0	162.097	946.883	1617.08	264.782	942.284	1613.29	136.516	794.071	1655.16	273.102	777.729	1655.16	226.817	696.366	1505.42	231.924	596.084	1280.44	202.486	831.64	1403.14	196.576	857.865	1219.18	284.802	594.028	1354.97	28.362	688.579	1458.6	-31.624	681.108	1254.1	-51.357	675.155	1134.06	-58.231	781.825	993.265	-12.2162	843.108	920.942	-68.9098	801.545	893.239	-63.0482	881.854	824.702
891	0	161.144	957.565	1619.49	263.872	953.163	1616.03	135.747	804.683	1657.22	272.342	788.56	1657.59	226.779	707.418	1507.55	232.712	607.18	1282.45	202.155	842.726	1405.62	196.511	869.147	1221.7	285.542	605.566	1357.03	28.4275	698.852	1460.28	-31.0539	689.865	1255.86	-50.3677	682.709	1135.75	-58.1939	785.826	992.287	-12.6941	845.462	918.054	-69.1863	802.676	891.627	-63.8595	880.942	820.702
892	0	160.135	968.054	1622.04	262.909	963.897	1618.91	134.979	815.064	1659.24	271.585	799.215	1659.99	226.738	718.444	1509.61	233.456	618.236	1284.41	201.819	853.812	1408.06	196.444	880.427	1224.18	286.243	617.087	1359.02	28.4903	709.095	1461.91	-30.4724	698.463	1257.61	-49.3725	690.049	1137.45	-58.2052	789.508	991.413	-13.2544	847.446	915.302	-69.5144	803.427	890.182	-64.7764	879.555	816.932
893	0	159.1	978.383	1624.69	261.921	974.511	1621.88	134.234	825.249	1661.18	270.853	809.718	1662.3	226.697	729.466	1511.58	234.145	629.262	1286.28	201.484	864.917	1410.44	196.379	891.718	1226.57	286.902	628.603	1360.92	28.5525	719.339	1463.47	-29.8807	706.927	1259.32	-48.3729	697.196	1139.15	-58.2587	792.9	990.639	-13.8867	849.096	912.69	-69.8834	803.842	888.905	-65.7837	877.748	813.403
894	0	158.063	988.591	1627.39	260.931	985.034	1624.88	133.528	835.278	1663.01	270.16	820.101	1664.47	226.659	740.507	1513.42	234.772	640.266	1288.05	201.153	876.057	1412.69	196.32	903.029	1228.83	287.516	640.126	1362.69	28.6144	729.614	1464.93	-29.2819	715.285	1260.98	-47.3715	704.171	1140.83	-58.3475	796.036	989.958	-14.5796	850.447	910.219	-70.2818	803.965	887.793	-66.8642	875.579	810.12
895	0	157.048	998.719	1630.08	259.96	995.497	1627.85	132.872	845.198	1664.7	269.52	830.399	1666.46	226.623	751.585	1515.1	235.328	651.254	1289.68	200.827	887.245	1414.78	196.268	914.368	1230.91	288.082	651.668	1364.31	28.6754	739.945	1466.26	-28.6801	723.562	1262.56	-46.3718	711	1142.47	-58.4651	798.95	989.362	-15.3213	851.538	907.884	-70.6979	803.845	886.839	-67.999	873.106	807.083
896	0	156.073	1008.81	1632.71	259.028	1005.93	1630.72	132.276	855.055	1666.21	268.94	840.647	1668.24	226.589	762.718	1516.61	235.805	662.236	1291.16	200.509	898.494	1416.66	196.224	925.738	1232.77	288.594	663.236	1365.76	28.7333	750.354	1467.44	-28.0804	731.785	1264.05	-45.3782	717.712	1144.06	-58.6049	801.679	988.84	-16.0997	852.408	905.682	-71.1199	803.531	886.036	-69.1685	870.39	804.287
897	0	155.154	1018.91	1635.21	258.148	1016.37	1633.43	131.743	864.9	1667.52	268.422	850.883	1669.76	226.552	773.921	1517.9	236.197	673.219	1292.47	200.196	909.811	1418.32	196.185	937.145	1234.39	289.048	674.838	1367.01	28.7845	760.861	1468.44	-27.4886	739.981	1265.44	-44.3954	724.334	1145.57	-58.7606	804.26	988.383	-16.9028	853.1	903.604	-71.5365	803.071	885.375	-70.3526	867.49	801.724
898	0	154.303	1029.05	1637.53	257.331	1026.85	1635.93	131.271	874.779	1668.6	267.967	861.143	1671.01	226.509	785.206	1518.98	236.5	684.214	1293.58	199.887	921.202	1419.71	196.149	948.591	1235.74	289.439	686.481	1368.05	28.8245	771.481	1469.26	-26.9108	748.175	1266.7	-43.4284	730.896	1147	-58.9264	806.732	987.981	-17.719	853.654	901.641	-71.9373	802.515	884.847	-71.5317	864.466	799.384
899	0	153.525	1039.28	1639.62	256.583	1037.39	1638.16	130.857	884.739	1669.44	267.569	871.461	1671.97	226.453	796.582	1519.82	236.709	695.232	1294.49	199.577	932.674	1420.82	196.111	960.076	1236.78	289.76	698.171	1368.87	28.8476	782.228	1469.88	-26.3535	756.391	1267.83	-42.4824	737.427	1148.34	-59.097	809.132	987.624	-18.5368	854.113	899.788	-72.3128	801.913	884.441	-72.6873	861.376	797.258
900	0	152.824	1049.63	1641.44	255.907	1048.02	1640.08	130.493	894.82	1670.03	267.221	881.87	1672.63	226.377	808.059	1520.41	236.823	706.284	1295.18	199.262	944.229	1421.64	196.064	971.604	1237.52	290.006	709.912	1369.46	28.847	793.112	1470.28	-25.8232	764.651	1268.82	-41.5624	743.955	1149.58	-59.268	811.499	987.304	-19.3459	854.519	898.035	-72.6548	801.311	884.151	-73.8024	858.274	795.337
901	0	152.199	1060.14	1642.95	255.301	1058.77	1641.66	130.168	905.059	1670.35	266.912	892.398	1672.98	226.272	819.642	1520.75	236.839	717.386	1295.64	198.936	955.871	1422.14	196.002	983.176	1237.94	290.171	721.71	1369.8	28.8154	804.14	1470.46	-25.3262	772.976	1269.68	-40.6731	750.507	1150.72	-59.4356	813.869	987.013	-20.1365	854.915	896.379	-72.9566	800.757	883.969	-74.8618	855.214	793.612
902	0	151.643	1070.82	1644.13	254.76	1069.65	1642.87	129.869	915.485	1670.4	266.628	903.069	1673.02	226.13	831.336	1520.83	236.758	728.552	1295.86	198.591	967.602	1422.34	195.917	994.795	1238.04	290.25	733.569	1369.91	28.7444	815.318	1470.42	-24.8689	781.385	1270.38	-39.8189	757.109	1151.75	-59.5973	816.279	986.746	-20.9005	855.341	894.815	-73.2131	800.293	883.888	-75.8529	852.246	792.076
903	0	151.148	1081.69	1644.96	254.274	1080.68	1643.71	129.581	926.122	1670.18	266.355	913.902	1672.75	225.94	843.143	1520.66	236.579	739.797	1295.85	198.221	979.424	1422.23	195.8	1006.46	1237.83	290.238	745.493	1369.78	28.6255	826.651	1470.15	-24.4575	789.893	1270.94	-39.0039	763.785	1152.67	-59.7513	818.763	986.496	-21.6309	855.84	893.34	-73.4208	799.963	883.904	-76.7655	849.419	790.724
904	0	150.701	1092.77	1645.44	253.832	1091.87	1644.16	129.288	936.987	1669.71	266.076	924.912	1672.2	225.693	855.065	1520.24	236.305	751.136	1295.61	197.815	991.339	1421.82	195.644	1018.19	1237.31	290.13	757.486	1369.42	28.4497	838.139	1469.67	-24.0979	798.518	1271.36	-38.232	770.557	1153.49	-59.8971	821.355	986.26	-22.3226	856.452	891.953	-73.5779	799.806	884.01	-77.5919	846.778	789.548
905	0	150.286	1104.06	1645.55	253.419	1103.23	1644.24	128.971	948.09	1668.99	265.775	936.109	1671.37	225.377	867.101	1519.59	235.936	762.585	1295.14	197.367	1003.35	1421.13	195.44	1029.97	1236.5	289.921	769.551	1368.84	28.2078	849.784	1468.97	-23.7958	807.27	1271.64	-37.507	777.449	1154.2	-60.035	824.088	986.034	-22.9723	857.216	890.654	-73.6841	799.859	884.2	-78.3273	844.364	788.543
906	0	149.888	1115.57	1645.32	253.017	1114.77	1643.95	128.615	959.435	1668.03	265.432	947.498	1670.29	224.983	879.25	1518.71	235.473	774.156	1294.44	196.867	1015.46	1420.17	195.18	1041.82	1235.42	289.608	781.692	1368.05	27.8909	861.584	1468.06	-23.5568	816.164	1271.78	-36.8327	784.48	1154.81	-60.1664	826.994	985.814	-23.5783	858.17	889.44	-73.7408	800.158	884.469	-78.9691	842.218	787.702
907	0	149.485	1127.29	1644.76	252.608	1126.48	1643.32	128.2	971.021	1666.85	265.032	959.08	1668.97	224.501	891.512	1517.61	234.918	785.862	1293.53	196.306	1027.66	1418.97	194.856	1053.75	1234.1	289.186	793.911	1367.06	27.4901	873.537	1466.96	-23.3864	825.21	1271.79	-36.2133	791.67	1155.31	-60.2937	830.104	985.596	-24.1411	859.352	888.309	-73.7509	800.735	884.809	-79.5173	840.376	787.015
908	0	149.058	1139.22	1643.88	252.173	1138.35	1642.37	127.71	982.839	1665.47	264.557	970.853	1667.44	223.92	903.882	1516.33	234.27	797.71	1292.42	195.675	1039.97	1417.54	194.461	1065.75	1232.55	288.653	806.213	1365.89	26.9969	885.639	1465.68	-23.2897	834.419	1271.67	-35.6532	799.04	1155.71	-60.4205	833.449	985.376	-24.6628	860.797	887.258	-73.7191	801.622	885.209	-79.9737	838.874	786.474
909	0	148.587	1151.34	1642.72	251.692	1150.4	1641.14	127.128	994.881	1663.91	263.991	982.81	1665.74	223.232	916.358	1514.87	233.531	809.708	1291.13	194.966	1052.37	1415.92	193.988	1077.84	1230.82	288.006	818.598	1364.56	26.4034	897.885	1464.22	-23.2719	843.802	1271.42	-35.157	806.61	1156.01	-60.551	837.058	985.149	-25.1474	862.54	886.282	-73.6515	802.851	885.661	-80.3423	837.744	786.065
910	0	148.052	1163.65	1641.31	251.145	1162.6	1639.65	126.44	1007.13	1662.19	263.32	994.945	1663.88	222.429	928.935	1513.26	232.7	821.859	1289.67	194.171	1064.88	1414.14	193.433	1090.03	1228.92	287.243	831.068	1363.1	25.7027	910.27	1462.62	-23.3383	853.369	1271.06	-34.7302	814.4	1156.21	-60.6904	840.964	984.91	-25.6002	864.616	885.374	-73.5559	804.451	886.151	-80.6289	837.019	785.773
911	0	147.433	1176.13	1639.68	250.514	1174.95	1637.95	125.633	1019.58	1660.34	262.529	1007.25	1661.9	221.504	941.608	1511.53	231.777	834.163	1288.08	193.284	1077.49	1412.22	192.792	1102.33	1226.9	286.363	843.623	1361.52	24.8887	922.788	1460.88	-23.494	863.13	1270.58	-34.3785	822.431	1156.31	-60.8448	845.195	984.654	-26.0282	867.059	884.527	-73.4415	806.452	886.668	-80.8406	836.73	785.585
912	0	146.715	1188.76	1637.87	249.784	1187.45	1636.09	124.696	1032.2	1658.38	261.608	1019.7	1659.83	220.451	954.374	1509.7	230.76	846.617	1286.38	192.301	1090.19	1410.2	192.061	1114.73	1224.78	285.364	856.262	1359.86	23.9566	935.43	1459.01	-23.7443	873.098	1270	-34.1082	830.724	1156.3	-61.0208	849.785	984.373	-26.4391	869.9	883.732	-73.3193	808.886	887.197	-80.9859	836.909	785.48
913	0	145.881	1201.54	1635.93	248.939	1200.07	1634.09	123.62	1044.98	1656.34	260.548	1032.3	1657.7	219.266	967.226	1507.8	229.651	859.217	1284.59	191.217	1103	1408.11	191.239	1127.24	1222.6	284.247	868.984	1358.13	22.9029	948.191	1457.06	-24.0942	883.284	1269.3	-33.9258	839.299	1156.2	-61.2254	854.763	984.062	-26.8416	873.175	882.978	-73.2016	811.783	887.723	-81.0746	837.588	785.44
914	0	144.92	1214.45	1633.89	247.968	1212.81	1632.01	122.4	1057.91	1654.26	259.343	1045.03	1655.54	217.948	980.159	1505.86	228.449	871.954	1282.74	190.033	1115.9	1406	190.327	1139.87	1220.39	283.013	881.784	1356.37	21.7258	961.064	1455.02	-24.5487	893.699	1268.51	-33.8385	848.178	1155.99	-61.4663	860.162	983.714	-27.2446	876.915	882.254	-73.1022	815.177	888.232	-81.1174	838.8	785.447
915	0	143.825	1227.47	1631.78	246.864	1225.67	1629.89	121.033	1070.96	1652.16	257.989	1057.88	1653.38	216.497	993.165	1503.91	227.153	884.819	1280.86	188.748	1128.89	1403.88	189.327	1152.62	1218.19	281.663	894.659	1354.6	20.4252	974.041	1452.93	-25.1125	904.355	1267.63	-33.8536	857.381	1155.67	-61.7513	866.015	983.324	-27.657	881.153	881.551	-73.0357	819.1	888.71	-81.1258	840.579	785.48
916	0	142.591	1240.59	1629.67	245.623	1238.62	1627.76	119.52	1084.12	1650.06	256.485	1070.83	1651.26	214.916	1006.24	1501.97	225.765	897.8	1278.98	187.366	1141.96	1401.8	188.244	1165.49	1216.03	280.201	907.603	1352.86	19.0029	987.117	1450.82	-25.7895	915.264	1266.66	-33.9783	866.928	1155.26	-62.0883	872.354	982.887	-28.087	885.923	880.858	-73.0177	823.589	889.144	-81.112	842.962	785.521
917	0	141.216	1253.8	1627.57	244.243	1251.66	1625.67	117.864	1097.38	1648.01	254.835	1083.87	1649.2	213.211	1019.37	1500.08	224.286	910.884	1277.14	185.895	1155.11	1399.78	187.083	1178.47	1213.95	278.631	920.606	1351.17	17.4625	1000.28	1448.71	-26.5834	926.438	1265.61	-34.2201	876.837	1154.76	-62.4851	879.211	982.399	-28.5422	891.258	880.168	-73.0645	828.68	889.52	-81.0886	845.987	785.554
918	0	139.706	1267.08	1625.52	242.729	1264.79	1623.66	116.073	1110.71	1646.01	253.047	1096.99	1647.24	211.39	1032.56	1498.26	222.719	924.058	1275.36	184.343	1168.34	1397.86	185.853	1191.55	1211.97	276.958	933.661	1349.55	15.8098	1013.54	1446.62	-27.4971	937.886	1264.51	-34.5862	887.125	1154.17	-62.9493	886.618	981.861	-29.0296	897.19	879.475	-73.1925	834.41	889.828	-81.0687	849.696	785.561
919	0	138.068	1280.43	1623.57	241.089	1277.98	1621.75	114.158	1124.12	1644.11	251.131	1110.19	1645.4	209.464	1045.78	1496.54	221.067	937.305	1273.67	182.722	1181.62	1396.07	184.565	1204.74	1210.13	275.189	946.756	1348.04	14.0528	1026.88	1444.59	-28.5324	949.62	1263.36	-35.0835	897.808	1153.5	-63.4884	894.606	981.271	-29.555	903.753	878.772	-73.4181	840.817	890.059	-81.0655	854.132	785.529
920	0	136.315	1293.83	1621.73	239.334	1291.22	1619.99	112.134	1137.57	1642.33	249.101	1123.43	1643.72	207.446	1059.04	1494.96	219.336	950.61	1272.1	181.047	1194.94	1394.42	183.23	1218.02	1208.45	273.333	959.878	1346.66	12.2016	1040.29	1442.65	-29.6905	961.646	1262.18	-35.7183	908.896	1152.76	-64.1089	903.205	980.632	-30.1236	910.978	878.058	-73.7574	847.941	890.204	-81.0923	859.341	785.446
921	0	134.463	1307.27	1620.03	237.482	1304.51	1618.39	110.018	1151.06	1640.68	246.975	1136.72	1642.21	205.355	1072.31	1493.53	217.532	963.956	1270.68	179.335	1208.31	1392.96	181.861	1231.37	1206.96	271.4	973.014	1345.43	10.2686	1053.77	1440.82	-30.9714	973.971	1260.99	-36.4966	920.4	1151.96	-64.8173	912.442	979.948	-30.7399	918.897	877.331	-74.2256	855.818	890.257	-81.1623	865.368	785.298
922	0	132.532	1320.73	1618.5	235.551	1317.83	1616.99	107.832	1164.57	1639.2	244.774	1150.03	1640.89	203.208	1085.58	1492.27	215.664	977.324	1269.43	177.603	1221.68	1391.68	180.472	1244.78	1205.67	269.403	986.148	1344.36	8.26838	1067.31	1439.14	-32.3739	986.6	1259.81	-37.4232	932.326	1151.13	-65.6187	922.34	979.226	-31.4078	927.539	876.592	-74.8371	864.487	890.213	-81.2887	872.263	785.078
923	0	130.547	1334.2	1617.16	233.564	1331.16	1615.78	105.599	1178.09	1637.89	242.523	1163.36	1639.79	201.026	1098.85	1491.21	213.74	990.697	1268.38	175.873	1235.07	1390.62	179.078	1258.23	1204.61	267.354	999.264	1343.49	6.21738	1080.91	1437.63	-33.8953	999.533	1258.65	-38.5025	944.674	1150.28	-66.5177	932.922	978.472	-32.1308	936.931	875.843	-75.6043	873.98	890.07	-81.4848	880.074	784.776
924	0	128.532	1347.66	1616.01	231.549	1344.5	1614.8	103.347	1191.6	1636.78	240.248	1176.68	1638.93	198.832	1112.09	1490.35	211.773	1004.06	1267.53	174.164	1248.43	1389.78	177.693	1271.7	1203.79	265.268	1012.35	1342.82	4.13382	1094.55	1436.32	-35.5316	1012.77	1257.54	-39.7372	957.444	1149.42	-67.5178	944.205	977.697	-32.9118	947.099	875.088	-76.538	884.33	889.825	-81.7633	888.85	784.385
925	0	126.518	1361.1	1615.06	229.531	1357.81	1614.05	101.103	1205.08	1635.87	237.978	1189.99	1638.3	196.65	1125.28	1489.72	209.776	1017.38	1266.9	172.497	1261.76	1389.18	176.329	1285.17	1203.22	263.162	1025.38	1342.35	2.03725	1108.22	1435.24	-37.2771	1026.3	1256.51	-41.1292	970.628	1148.57	-68.6212	956.201	976.909	-33.7539	958.065	874.333	-77.6464	895.564	889.479	-82.1371	898.636	783.9
926	0	124.534	1374.51	1614.33	227.541	1371.1	1613.53	98.8964	1218.52	1635.18	235.744	1203.26	1637.92	194.504	1138.42	1489.33	207.762	1030.65	1266.51	170.891	1275.04	1388.81	175.001	1298.6	1202.91	261.053	1038.34	1342.11	-0.051914	1121.91	1434.4	-39.1244	1040.11	1255.56	-42.6786	984.215	1147.75	-69.8288	968.918	976.122	-34.6597	969.847	873.585	-78.9349	907.703	889.033	-82.619	909.479	783.318
927	0	122.61	1387.86	1613.81	225.608	1384.33	1613.24	96.7585	1231.91	1634.71	233.575	1216.49	1637.78	192.417	1151.48	1489.17	205.748	1043.85	1266.36	169.365	1288.24	1388.7	173.718	1311.97	1202.85	258.959	1051.21	1342.08	-2.11295	1135.59	1433.82	-41.0641	1054.19	1254.72	-44.3841	998.19	1146.98	-71.1403	982.357	975.348	-35.6317	982.46	872.852	-80.4057	920.764	888.492	-83.2212	921.417	782.639
928	0	120.776	1401.13	1613.5	223.76	1397.49	1613.18	94.7185	1245.22	1634.48	231.502	1229.65	1637.9	190.413	1164.45	1489.25	203.749	1056.96	1266.45	167.936	1301.35	1388.82	172.491	1325.25	1203.05	256.897	1063.99	1342.28	-4.1254	1149.25	1433.52	-43.0853	1068.52	1254.01	-46.2422	1012.53	1146.28	-72.5536	996.516	974.602	-36.672	995.913	872.147	-82.0571	934.756	887.862	-83.9559	934.489	781.866
929	0	119.061	1414.32	1613.41	222.026	1410.57	1613.33	92.8047	1258.43	1634.48	229.554	1242.73	1638.26	188.511	1177.31	1489.58	201.781	1069.96	1266.79	166.616	1314.36	1389.19	171.327	1338.43	1203.5	254.884	1076.65	1342.7	-6.06973	1162.87	1433.51	-45.1756	1083.08	1253.45	-48.2479	1027.22	1145.66	-74.0654	1011.38	973.897	-37.7823	1010.21	871.483	-83.8838	949.68	887.153	-84.8342	948.724	781.008
930	0	117.489	1427.41	1613.52	220.431	1423.54	1613.69	91.0432	1271.55	1634.72	227.757	1255.71	1638.87	186.73	1190.05	1490.14	199.856	1082.85	1267.37	165.418	1327.23	1389.79	170.233	1351.48	1204.2	252.935	1089.19	1343.34	-7.92801	1176.42	1433.79	-47.3208	1097.83	1253.05	-50.3939	1042.22	1145.14	-75.6707	1026.94	973.252	-38.9634	1025.35	870.874	-85.8762	965.528	886.377	-85.8661	964.144	780.078
931	0	116.085	1440.37	1613.85	218.997	1436.4	1614.25	89.4563	1284.54	1635.21	226.134	1268.59	1639.7	185.084	1202.65	1490.93	197.99	1095.61	1268.18	164.348	1339.97	1390.63	169.216	1364.39	1205.13	251.063	1101.58	1344.17	-9.68445	1189.89	1434.37	-49.5059	1112.74	1252.82	-52.671	1057.51	1144.73	-77.3629	1043.18	972.681	-40.2151	1041.33	870.339	-88.0208	982.286	885.549	-87.0596	980.764	779.095
932	0	114.867	1453.21	1614.37	217.743	1449.13	1614.99	88.0626	1297.41	1635.94	224.704	1281.34	1640.76	183.585	1215.11	1491.93	196.192	1108.23	1269.21	163.413	1352.56	1391.69	168.278	1377.14	1206.29	249.28	1113.84	1345.21	-11.326	1203.26	1435.24	-51.7151	1127.79	1252.78	-55.0683	1073.05	1144.45	-79.1343	1060.05	972.204	-41.5363	1058.13	869.898	-90.3001	999.93	884.69	-88.4201	998.589	778.087
933	0	113.849	1465.89	1615.1	216.683	1461.71	1615.91	86.8752	1310.13	1636.91	223.481	1293.96	1642.02	182.239	1227.41	1493.14	194.471	1120.7	1270.44	162.614	1364.99	1392.97	167.423	1389.72	1207.68	247.594	1125.95	1346.42	-12.8424	1216.51	1436.39	-53.9324	1142.93	1252.94	-57.5729	1088.81	1144.31	-80.9758	1077.54	971.839	-42.9246	1075.75	869.574	-92.6933	1018.43	883.821	-89.9501	1017.61	777.087
934	0	113.039	1478.43	1616.02	215.826	1474.14	1616.99	85.9018	1322.7	1638.12	222.473	1306.43	1643.47	181.05	1239.56	1494.54	192.836	1133.03	1271.86	161.948	1377.27	1394.46	166.652	1402.14	1209.27	246.01	1137.91	1347.79	-14.2271	1229.62	1437.81	-56.1419	1158.13	1253.3	-60.1706	1104.75	1144.31	-82.8775	1095.59	971.603	-44.3762	1094.14	869.391	-95.1768	1037.74	882.969	-91.6481	1037.82	776.136
935	0	112.44	1490.8	1617.14	215.175	1486.4	1618.22	85.1444	1335.11	1639.55	221.681	1318.74	1645.09	180.017	1251.55	1496.11	191.291	1145.21	1273.44	161.412	1389.38	1396.13	165.964	1414.41	1211.05	244.534	1149.72	1349.31	-15.4762	1242.59	1439.49	-58.3285	1173.36	1253.86	-62.846	1120.85	1144.46	-84.8289	1114.18	971.516	-45.8863	1113.3	869.375	-97.7249	1057.82	882.164	-93.5084	1059.17	775.279
936	0	112.049	1503.01	1618.45	214.73	1498.5	1619.6	84.5986	1347.35	1641.2	221.101	1330.9	1646.87	179.137	1263.38	1497.83	189.84	1157.24	1275.18	160.997	1401.34	1397.99	165.356	1426.52	1213	243.168	1161.4	1350.96	-16.5893	1255.4	1441.4	-60.4781	1188.58	1254.62	-65.5826	1137.06	1144.76	-86.8188	1133.26	971.595	-47.4487	1133.18	869.555	-100.311	1078.62	881.434	-95.5207	1081.64	774.568
937	0	111.857	1515.04	1619.95	214.481	1510.42	1621.12	84.2544	1359.43	1643.05	220.723	1342.88	1648.77	178.401	1275.06	1499.67	188.486	1169.14	1277.03	160.693	1413.15	1399.99	164.823	1438.5	1215.1	241.913	1172.95	1352.71	-17.5686	1268.07	1443.52	-62.578	1203.76	1255.58	-68.3634	1153.36	1145.22	-88.8361	1152.77	971.857	-49.0564	1153.75	869.958	-102.906	1100.08	880.811	-97.6699	1105.15	774.054
938	0	111.85	1526.91	1621.63	214.417	1522.16	1622.75	84.0965	1371.34	1645.07	220.533	1354.69	1650.78	177.8	1286.61	1501.62	187.232	1180.9	1278.98	160.487	1424.83	1402.13	164.36	1450.35	1217.34	240.768	1184.38	1354.55	-18.4189	1280.59	1445.81	-64.6173	1218.88	1256.72	-71.1712	1169.71	1145.83	-90.8696	1172.68	972.315	-50.7012	1174.97	870.612	-105.486	1122.14	880.327	-99.936	1129.66	773.793
939	0	112.009	1538.6	1623.47	214.52	1533.74	1624.5	84.1049	1383.09	1647.24	220.508	1366.32	1652.86	177.323	1298.03	1503.65	186.08	1192.54	1281	160.367	1436.39	1404.37	163.957	1462.08	1219.66	239.733	1195.71	1356.44	-19.1466	1292.95	1448.24	-66.587	1233.92	1258.03	-73.9885	1186.09	1146.58	-92.9084	1192.93	972.98	-52.3741	1196.78	871.542	-108.022	1144.75	880.008	-102.295	1155.08	773.833
940	0	112.309	1550.13	1625.47	214.768	1545.15	1626.35	84.256	1394.67	1649.52	220.627	1377.79	1654.98	176.956	1309.34	1505.72	185.032	1204.06	1283.07	160.316	1447.85	1406.69	163.605	1473.71	1222.06	238.808	1206.95	1358.38	-19.7597	1305.18	1450.78	-68.4796	1248.85	1259.48	-76.7984	1202.48	1147.46	-94.9421	1213.48	973.861	-54.0652	1219.15	872.77	-110.492	1167.85	879.883	-104.718	1181.32	774.223
941	0	112.726	1561.5	1627.58	215.136	1556.4	1628.27	84.5236	1406.1	1651.88	220.861	1389.09	1657.11	176.688	1320.55	1507.81	184.09	1215.49	1285.16	160.319	1459.21	1409.04	163.293	1485.26	1224.48	237.992	1218.11	1360.33	-20.267	1317.28	1453.39	-70.2899	1263.66	1261.06	-79.5842	1218.84	1148.46	-96.9603	1234.27	974.961	-55.7644	1242.01	874.317	-112.874	1191.37	879.972	-107.175	1208.29	775.002
942	0	113.229	1572.73	1629.8	215.598	1567.51	1630.25	84.8799	1417.39	1654.26	221.184	1400.25	1659.21	176.504	1331.69	1509.89	183.257	1226.83	1287.24	160.363	1470.51	1411.4	163.013	1496.72	1226.89	237.283	1229.22	1362.27	-20.6777	1329.25	1456.03	-72.0139	1278.34	1262.74	-82.33	1235.15	1149.54	-98.9535	1255.26	976.281	-57.4608	1265.32	876.196	-115.149	1215.25	880.294	-109.633	1235.89	776.201
943	0	113.791	1583.83	1632.07	216.124	1578.5	1632.26	85.297	1428.55	1656.64	221.567	1411.26	1661.26	176.392	1342.77	1511.93	182.536	1238.1	1289.29	160.434	1481.75	1413.73	162.753	1508.12	1229.25	236.681	1240.28	1364.18	-21.0012	1341.11	1458.66	-73.6492	1292.89	1264.48	-85.0204	1251.41	1150.69	-100.912	1276.41	977.817	-59.1438	1289.02	878.417	-117.301	1239.44	880.861	-112.057	1264.02	777.844
944	0	114.383	1594.83	1634.36	216.688	1589.38	1634.26	85.7476	1439.6	1658.97	221.981	1422.16	1663.22	176.34	1353.8	1513.9	181.929	1249.32	1291.27	160.518	1492.95	1415.99	162.505	1519.45	1231.53	236.185	1251.32	1366.03	-21.2463	1352.86	1461.24	-75.1939	1307.29	1266.25	-87.6411	1267.6	1151.88	-102.827	1297.67	979.559	-60.8022	1313.05	880.981	-119.316	1263.89	881.68	-114.414	1292.57	779.94
945	0	114.979	1605.73	1636.63	217.262	1600.17	1636.23	86.2062	1450.56	1661.2	222.403	1432.95	1665.06	176.338	1364.82	1515.76	181.44	1260.48	1293.16	160.606	1504.13	1418.15	162.262	1530.73	1233.67	235.792	1262.35	1367.8	-21.4215	1364.53	1463.72	-76.647	1321.55	1268	-90.1784	1283.71	1153.08	-104.69	1319.01	981.496	-62.4253	1337.36	883.886	-121.184	1288.54	882.754	-116.674	1321.44	782.493
946	0	115.553	1616.57	1638.83	217.823	1610.91	1638.13	86.6502	1461.44	1663.28	222.808	1443.67	1666.76	176.378	1375.82	1517.51	181.068	1271.62	1294.93	160.689	1515.3	1420.16	162.016	1541.95	1235.65	235.503	1273.38	1369.46	-21.5339	1376.11	1466.08	-78.0074	1335.68	1269.72	-92.6198	1299.72	1154.25	-106.49	1340.38	983.61	-64.0018	1361.88	887.121	-122.896	1313.34	884.08	-118.806	1350.53	785.494
947	0	116.087	1627.37	1640.91	218.35	1621.61	1639.93	87.0602	1472.29	1665.19	223.179	1454.34	1668.28	176.452	1386.83	1519.1	180.817	1282.73	1296.56	160.761	1526.48	1422	161.763	1553.14	1237.44	235.315	1284.43	1371	-21.5897	1387.61	1468.27	-79.2738	1349.66	1271.35	-94.9532	1315.64	1155.37	-108.219	1361.76	985.884	-65.5206	1386.55	890.669	-124.448	1338.24	885.647	-120.786	1379.73	788.925
948	0	116.562	1638.15	1642.84	218.826	1632.3	1641.58	87.4212	1483.11	1666.89	223.499	1464.98	1669.6	176.555	1397.86	1520.52	180.685	1293.84	1298.04	160.818	1537.66	1423.65	161.5	1564.28	1238.99	235.228	1295.51	1372.4	-21.5934	1399.05	1470.26	-80.4443	1363.52	1272.86	-97.1676	1331.47	1156.41	-109.867	1383.11	988.294	-66.9707	1411.32	894.508	-125.836	1363.2	887.446	-122.592	1408.96	792.763
949	0	116.968	1648.93	1644.56	219.236	1643.01	1643.05	87.7224	1493.92	1668.35	223.759	1475.62	1670.71	176.685	1408.92	1521.74	180.672	1304.93	1299.33	160.859	1548.86	1425.07	161.226	1575.39	1240.3	235.24	1306.63	1373.62	-21.5482	1410.43	1472.03	-81.5161	1377.26	1274.22	-99.2526	1347.21	1157.32	-111.425	1404.41	990.816	-68.3409	1436.11	898.61	-127.058	1388.18	889.458	-124.209	1438.13	796.976
950	0	117.296	1659.74	1646.04	219.574	1653.75	1644.32	87.9579	1504.76	1669.54	223.954	1486.29	1671.59	176.841	1420.01	1522.76	180.778	1316.03	1300.42	160.886	1560.08	1426.24	160.942	1586.47	1241.34	235.35	1317.79	1374.67	-21.4553	1421.75	1473.55	-82.4855	1390.88	1275.39	-101.198	1362.86	1158.09	-112.881	1425.62	993.425	-69.6205	1460.88	902.942	-128.116	1413.14	891.666	-125.625	1467.17	801.528
951	0	117.545	1670.6	1647.25	219.835	1664.55	1645.34	88.1268	1515.64	1670.45	224.084	1497.01	1672.23	177.024	1431.15	1523.55	181.001	1327.14	1301.3	160.902	1571.34	1427.16	160.652	1597.52	1242.1	235.558	1329.01	1375.51	-21.3144	1433.03	1474.81	-83.348	1404.4	1276.36	-102.996	1378.43	1158.7	-114.225	1446.73	996.095	-70.7985	1485.55	907.467	-129.01	1438.02	894.049	-126.834	1496	806.382
952	0	117.717	1681.52	1648.16	220.019	1675.42	1646.1	88.233	1526.57	1671.07	224.154	1507.79	1672.63	177.239	1442.34	1524.1	181.34	1338.27	1301.95	160.912	1582.63	1427.81	160.36	1608.56	1242.57	235.864	1340.28	1376.14	-21.1233	1444.27	1475.79	-84.0978	1417.83	1277.1	-104.636	1393.93	1159.11	-115.448	1467.71	998.801	-71.8646	1510.08	912.148	-129.742	1462.81	896.583	-127.833	1524.56	811.496
953	0	117.817	1692.51	1648.74	220.133	1686.39	1646.59	88.2851	1537.57	1671.39	224.174	1518.66	1672.78	177.492	1453.59	1524.42	181.794	1349.42	1302.38	160.924	1593.96	1428.18	160.072	1619.6	1242.75	236.268	1351.63	1376.55	-20.8786	1455.49	1476.49	-84.7287	1431.19	1277.6	-106.11	1409.36	1159.33	-116.538	1488.54	1001.52	-72.8086	1534.39	916.943	-130.317	1487.44	899.245	-128.623	1552.79	816.828
954	0	117.857	1703.58	1648.99	220.185	1697.45	1646.78	88.2964	1548.65	1671.4	224.157	1529.63	1672.69	177.788	1464.88	1524.49	182.359	1360.6	1302.56	160.947	1605.32	1428.29	159.799	1630.63	1242.65	236.771	1363.05	1376.73	-20.575	1466.67	1476.9	-85.2338	1444.47	1277.84	-107.412	1424.74	1159.33	-117.485	1509.2	1004.22	-73.6204	1558.45	921.813	-130.737	1511.89	902.012	-129.21	1580.63	822.337
955	0	117.851	1714.75	1648.9	220.188	1708.61	1646.67	88.284	1559.82	1671.12	224.122	1540.71	1672.36	178.139	1476.24	1524.32	183.035	1371.81	1302.51	160.993	1616.73	1428.13	159.549	1641.69	1242.28	237.374	1374.54	1376.68	-20.2065	1477.84	1477.02	-85.6058	1457.7	1277.83	-108.532	1440.07	1159.12	-118.279	1529.66	1006.89	-74.2906	1582.2	926.716	-131.007	1536.12	904.861	-129.6	1608.05	827.98
956	0	117.815	1726.01	1648.48	220.16	1719.89	1646.26	88.2686	1571.07	1670.56	224.09	1551.92	1671.79	178.552	1487.65	1523.91	183.817	1383.07	1302.21	161.073	1628.19	1427.71	159.335	1652.76	1241.65	238.078	1386.1	1376.39	-19.7658	1489	1476.87	-85.8375	1470.88	1277.55	-109.465	1455.35	1158.69	-118.913	1549.92	1009.5	-74.8103	1605.6	931.617	-131.128	1560.08	907.767	-129.802	1635	833.718
957	0	117.769	1737.35	1647.74	220.12	1731.28	1645.56	88.2736	1582.41	1669.73	224.085	1563.24	1671.01	179.04	1499.12	1523.26	184.703	1394.38	1301.68	161.202	1639.69	1427.04	159.169	1663.88	1240.79	238.884	1397.75	1375.86	-19.2453	1500.17	1476.46	-85.9221	1484.02	1277.03	-110.205	1470.58	1158.06	-119.379	1569.94	1012.05	-75.1714	1628.6	936.478	-131.105	1583.73	910.711	-129.826	1661.43	839.513
958	0	117.736	1748.79	1646.69	220.09	1742.78	1644.59	88.3246	1593.84	1668.65	224.134	1574.7	1670.02	179.613	1510.65	1522.4	185.689	1405.75	1300.92	161.392	1651.24	1426.15	159.064	1675.06	1239.7	239.791	1409.47	1375.1	-18.637	1511.35	1475.81	-85.8533	1497.13	1276.27	-110.748	1485.75	1157.24	-119.669	1589.7	1014.5	-75.3671	1651.17	941.266	-130.94	1607.04	913.669	-129.682	1687.31	845.328
959	0	117.739	1760.31	1645.37	220.093	1754.38	1643.36	88.4483	1605.35	1667.35	224.263	1586.27	1668.84	180.283	1522.23	1521.32	186.769	1417.19	1299.94	161.659	1662.84	1425.06	159.034	1686.31	1238.43	240.799	1421.27	1374.12	-17.9334	1522.55	1474.93	-85.6261	1510.22	1275.3	-111.088	1500.86	1156.24	-119.781	1609.19	1016.87	-75.3919	1673.27	945.952	-130.635	1629.96	916.621	-129.379	1712.6	851.13
960	0	117.802	1771.9	1643.8	220.155	1766.07	1641.9	88.6719	1616.93	1665.85	224.499	1597.96	1667.49	181.059	1533.87	1520.05	187.938	1428.7	1298.75	162.017	1674.5	1423.78	159.091	1697.64	1236.99	241.906	1433.15	1372.91	-17.1271	1533.8	1473.84	-85.2365	1523.28	1274.12	-111.225	1515.91	1155.09	-119.711	1628.37	1019.12	-75.2424	1694.88	950.506	-130.191	1652.45	919.547	-128.927	1737.27	856.884
961	0	117.951	1783.56	1642.02	220.301	1777.86	1640.24	89.0224	1628.58	1664.17	224.869	1609.76	1665.98	181.951	1545.56	1518.59	189.188	1440.3	1297.37	162.481	1686.23	1422.34	159.247	1709.08	1235.41	243.11	1445.1	1371.51	-16.2122	1545.09	1472.59	-84.6821	1536.32	1272.78	-111.157	1530.86	1153.79	-119.457	1647.22	1021.26	-74.9169	1715.96	954.905	-129.612	1674.47	922.427	-128.333	1761.28	862.555
962	0	118.211	1795.28	1640.07	220.557	1789.74	1638.41	89.525	1640.29	1662.36	225.4	1621.67	1664.34	182.966	1557.31	1516.98	190.511	1451.99	1295.81	163.063	1698.02	1420.76	159.514	1720.62	1233.72	244.406	1457.12	1369.92	-15.1839	1556.46	1471.18	-83.9623	1549.35	1271.28	-110.886	1545.71	1152.39	-119.022	1665.72	1023.28	-74.4156	1736.49	959.126	-128.899	1695.98	925.242	-127.605	1784.61	868.111
963	0	118.605	1807.05	1638	220.947	1801.69	1636.44	90.2032	1652.05	1660.43	226.111	1633.67	1662.58	184.112	1569.13	1515.23	191.9	1463.76	1294.1	163.775	1709.87	1419.08	159.899	1732.29	1231.94	245.79	1469.22	1368.16	-14.0391	1567.9	1469.66	-83.0785	1562.35	1269.68	-110.413	1560.44	1150.9	-118.406	1683.85	1025.16	-73.7407	1756.45	963.146	-128.053	1716.95	927.97	-126.749	1807.23	873.514
964	0	119.158	1818.88	1635.84	221.494	1813.71	1634.38	91.0767	1663.85	1658.43	227.024	1645.75	1660.73	185.391	1581	1513.37	193.344	1475.64	1292.25	164.628	1721.81	1417.31	160.411	1744.08	1230.09	247.255	1481.38	1366.24	-12.7767	1579.44	1468.05	-82.0339	1575.33	1267.98	-109.745	1575.02	1149.35	-117.614	1701.57	1026.91	-72.8959	1775.82	966.945	-127.076	1737.34	930.59	-125.771	1829.1	878.73
965	0	119.889	1830.74	1633.63	222.22	1825.8	1632.25	92.1615	1675.69	1656.38	228.153	1657.91	1658.8	186.804	1592.93	1511.41	194.835	1487.61	1290.3	165.627	1733.82	1415.48	161.055	1756.01	1228.21	248.793	1493.6	1364.21	-11.3979	1591.09	1466.38	-80.8338	1588.28	1266.24	-108.886	1589.43	1147.76	-116.652	1718.88	1028.52	-71.8865	1794.59	970.504	-125.972	1757.12	933.081	-124.676	1850.22	883.72
966	0	120.816	1842.65	1631.43	223.142	1837.93	1630.09	93.468	1687.57	1654.31	229.505	1670.14	1656.82	188.35	1604.92	1509.39	196.364	1499.69	1288.26	166.777	1745.91	1413.62	161.832	1768.07	1226.32	250.397	1505.88	1362.07	-9.90606	1602.85	1464.67	-79.4858	1601.2	1264.46	-107.847	1603.66	1146.16	-115.527	1735.74	1029.98	-70.7192	1812.74	973.804	-124.743	1776.26	935.422	-123.467	1870.55	888.446
967	0	121.954	1854.6	1629.25	224.273	1850.12	1627.93	95.0011	1699.49	1652.26	231.086	1682.41	1654.8	190.024	1616.97	1507.33	197.921	1511.85	1286.17	168.078	1758.08	1411.75	162.745	1780.27	1224.44	252.058	1518.2	1359.86	-8.3066	1614.74	1462.97	-77.9993	1614.08	1262.69	-106.637	1617.68	1144.58	-114.246	1752.15	1031.28	-69.4016	1830.27	976.825	-123.393	1794.74	937.588	-122.149	1890.07	892.867
968	0	123.311	1866.6	1627.14	225.622	1862.35	1625.78	96.7595	1711.45	1650.25	232.892	1694.74	1652.78	191.818	1629.08	1505.26	199.498	1524.11	1284.05	169.528	1770.33	1409.89	163.79	1792.6	1222.58	253.766	1530.57	1357.61	-6.60734	1626.75	1461.28	-76.3857	1626.92	1260.95	-105.268	1631.49	1143.03	-112.819	1768.08	1032.41	-67.9422	1847.17	979.548	-121.927	1812.54	939.556	-120.725	1908.78	896.942
969	0	124.89	1878.64	1625.13	227.193	1874.62	1623.69	98.735	1723.46	1648.31	234.914	1707.1	1650.75	193.722	1641.25	1503.19	201.088	1536.45	1281.93	171.118	1782.65	1408.07	164.962	1805.06	1220.77	255.513	1542.98	1355.33	-4.81815	1638.89	1459.63	-74.658	1639.7	1259.26	-103.755	1645.06	1141.53	-111.256	1783.52	1033.37	-66.3506	1863.44	981.953	-120.35	1829.64	941.302	-119.199	1926.67	900.628
970	0	126.691	1890.74	1623.22	228.981	1886.93	1621.66	100.913	1735.51	1646.45	237.135	1719.5	1648.76	195.723	1653.47	1501.17	202.684	1548.86	1279.84	172.839	1795.04	1406.3	166.253	1817.62	1219.03	257.289	1555.41	1353.07	-2.95089	1651.16	1458.06	-72.831	1652.43	1257.65	-102.112	1658.39	1140.11	-109.568	1798.48	1034.14	-64.6365	1879.07	984.018	-118.669	1846.02	942.802	-117.572	1943.72	903.882
971	0	128.703	1902.88	1621.45	230.979	1899.26	1619.72	103.272	1747.61	1644.71	239.534	1731.92	1646.82	197.806	1665.74	1499.2	204.281	1561.32	1277.81	174.675	1807.49	1404.61	167.655	1830.28	1217.38	259.085	1567.85	1350.86	-1.01929	1663.54	1456.56	-70.9205	1665.1	1256.14	-100.355	1671.47	1138.77	-107.767	1812.93	1034.73	-62.8107	1894.07	985.724	-116.89	1861.69	944.032	-115.848	1959.93	906.662
972	0	130.911	1915.08	1619.82	233.17	1911.62	1617.87	105.786	1759.77	1643.11	242.082	1744.36	1644.95	199.951	1678.05	1497.33	205.876	1573.83	1275.86	176.608	1819.99	1403.02	169.156	1843.03	1215.83	260.893	1580.31	1348.72	0.961329	1676.02	1455.16	-68.943	1677.69	1254.74	-98.5004	1684.29	1137.53	-105.865	1826.88	1035.11	-60.8841	1908.45	987.051	-115.023	1876.63	944.969	-114.03	1975.31	908.929
973	0	133.294	1927.33	1618.33	235.531	1924	1616.13	108.421	1771.99	1641.65	244.748	1756.8	1643.18	202.141	1690.38	1495.56	207.464	1586.37	1274.02	178.618	1832.52	1401.53	170.742	1855.83	1214.39	262.706	1592.75	1346.67	2.97428	1688.59	1453.88	-66.9157	1690.21	1253.47	-96.565	1696.86	1136.4	-103.877	1840.33	1035.28	-58.8683	1922.2	987.98	-113.078	1890.84	945.595	-112.121	1989.86	910.646
974	0	135.824	1939.64	1616.99	238.034	1936.38	1614.5	111.143	1784.27	1640.34	247.493	1769.25	1641.51	204.353	1702.73	1493.92	209.043	1598.91	1272.31	180.682	1845.07	1400.17	172.399	1868.68	1213.09	264.513	1605.18	1344.76	5.00185	1701.21	1452.71	-64.8558	1702.65	1252.34	-94.5652	1709.18	1135.39	-101.814	1853.29	1035.23	-56.7751	1935.35	988.494	-111.064	1904.34	945.892	-110.124	2003.6	911.78
975	0	138.467	1951.99	1615.79	240.647	1948.77	1612.99	113.911	1796.61	1639.21	250.279	1781.7	1639.98	206.566	1715.07	1492.43	210.611	1611.44	1270.75	182.775	1857.62	1398.94	174.113	1881.53	1211.93	266.309	1617.58	1343	7.02567	1713.87	1451.68	-62.7803	1714.99	1251.35	-92.517	1721.26	1134.5	-99.6902	1865.75	1034.95	-54.617	1947.88	988.579	-108.994	1917.12	945.845	-108.044	2016.51	912.305
976	0	141.186	1964.39	1614.74	243.331	1961.15	1611.6	116.684	1809	1638.25	253.064	1794.13	1638.6	208.757	1727.4	1491.1	212.165	1623.93	1269.37	184.874	1870.14	1397.87	175.868	1894.37	1210.93	268.086	1629.94	1341.42	9.02716	1726.55	1450.79	-60.7054	1727.24	1250.51	-90.4357	1733.1	1133.73	-97.5202	1877.73	1034.45	-52.4066	1959.82	988.224	-106.879	1929.19	945.447	-105.888	2028.63	912.199
977	0	143.941	1976.81	1613.82	246.047	1973.51	1610.35	119.419	1821.44	1637.46	255.805	1806.54	1637.39	210.904	1739.7	1489.96	213.703	1636.38	1268.18	186.952	1882.63	1396.96	177.652	1907.17	1210.08	269.835	1642.24	1340.03	10.988	1739.21	1450.03	-58.6464	1739.37	1249.83	-88.335	1744.71	1133.09	-95.3175	1889.23	1033.71	-50.1568	1971.18	987.422	-104.733	1940.56	944.691	-103.642	2039.95	911.431
978	0	146.688	1989.25	1613.04	248.752	1985.83	1609.23	122.077	1833.9	1636.86	258.462	1818.92	1636.37	212.986	1751.95	1489.02	215.221	1648.75	1267.19	188.988	1895.05	1396.21	179.448	1919.9	1209.41	271.551	1654.47	1338.87	12.8909	1751.82	1449.42	-56.6175	1751.39	1249.3	-86.2276	1756.1	1132.57	-93.0954	1900.27	1032.74	-47.8809	1981.96	986.17	-102.569	1951.25	943.579	-101.375	2050.51	910.053
979	0	149.384	2001.69	1612.39	251.405	1998.12	1608.25	124.617	1846.38	1636.44	260.997	1831.25	1635.54	214.982	1764.14	1488.28	216.717	1661.03	1266.42	190.959	1907.39	1395.65	181.244	1932.53	1208.92	273.225	1666.62	1337.94	14.7196	1764.36	1448.96	-54.631	1763.27	1248.93	-84.1243	1767.27	1132.16	-90.8673	1910.84	1031.54	-45.5924	1992.17	984.473	-100.401	1961.26	942.117	-99.0398	2060.29	908.014
980	0	151.986	2014.1	1611.86	253.962	2010.35	1607.42	127.004	1858.86	1636.2	263.376	1843.52	1634.93	216.875	1776.23	1487.77	218.188	1673.2	1265.88	192.846	1919.63	1395.28	183.026	1945.04	1208.62	274.854	1678.68	1337.25	16.4602	1776.81	1448.64	-52.6976	1775.02	1248.7	-82.0342	1778.24	1131.88	-88.6457	1920.97	1030.13	-43.3048	2001.81	982.338	-98.2428	1970.61	940.318	-96.6679	2069.32	905.348
981	0	154.454	2026.48	1611.45	256.386	2022.5	1606.74	129.207	1871.32	1636.14	265.567	1855.73	1634.55	218.652	1788.23	1487.48	219.631	1685.26	1265.57	194.633	1931.75	1395.09	184.782	1957.41	1208.51	276.43	1690.64	1336.82	18.101	1789.13	1448.47	-50.8261	1786.62	1248.62	-79.9642	1789.01	1131.7	-86.4428	1930.65	1028.5	-41.0318	2010.9	979.782	-96.1092	1979.31	938.199	-94.2748	2077.61	902.081
982	0	156.749	2038.8	1611.16	258.639	2034.58	1606.24	131.201	1883.73	1636.26	267.548	1867.86	1634.42	220.3	1800.11	1487.42	221.045	1697.19	1265.49	196.305	1943.73	1395.11	186.5	1969.61	1208.59	277.953	1702.48	1336.64	19.6333	1801.3	1448.44	-49.0228	1798.06	1248.68	-77.9195	1799.59	1131.64	-84.2697	1939.89	1026.68	-38.7873	2019.44	976.826	-94.0135	1987.37	935.787	-91.8779	2085.15	898.245
983	0	158.838	2051.04	1611	260.689	2046.56	1605.91	132.966	1896.06	1636.55	269.3	1879.9	1634.53	221.811	1811.86	1487.59	222.428	1708.99	1265.64	197.854	1955.57	1395.34	188.169	1981.64	1208.88	279.418	1714.22	1336.72	21.0513	1813.3	1448.56	-47.2922	1809.33	1248.87	-75.9026	1809.98	1131.68	-82.1369	1948.69	1024.69	-36.5849	2027.42	973.498	-91.9691	1994.8	933.112	-89.4964	2091.95	893.887
984	0	160.692	2063.16	1610.97	262.509	2058.44	1605.78	134.491	1908.3	1637.03	270.812	1891.84	1634.9	223.183	1823.47	1487.99	223.781	1720.66	1266.03	199.273	1967.26	1395.78	189.777	1993.49	1209.38	280.826	1725.84	1337.06	22.3524	1825.11	1448.82	-45.6362	1820.44	1249.19	-73.9145	1820.18	1131.83	-80.0538	1957.07	1022.55	-34.4386	2034.86	969.833	-89.9886	2001.61	930.211	-87.1512	2098.02	889.059
985	0	162.289	2075.16	1611.08	264.077	2070.21	1605.86	135.772	1920.42	1637.68	272.082	1903.67	1635.54	224.414	1834.93	1488.62	225.104	1732.19	1266.63	200.559	1978.79	1396.45	191.316	2005.17	1210.1	282.178	1737.35	1337.64	23.5371	1836.73	1449.23	-44.0547	1831.36	1249.64	-71.9539	1830.2	1132.08	-78.0287	1965.03	1020.29	-32.3616	2041.76	965.873	-88.0834	2007.81	927.124	-84.8643	2103.36	883.822
986	0	163.613	2087.01	1611.35	265.38	2081.86	1606.17	136.811	1932.39	1638.51	273.113	1915.39	1636.45	225.509	1846.24	1489.48	226.397	1743.59	1267.45	201.712	1990.16	1397.33	192.777	2016.66	1211.03	283.476	1748.74	1338.47	24.6084	1848.13	1449.78	-42.5456	1842.09	1250.21	-70.0184	1840.02	1132.44	-76.0691	1972.56	1017.93	-30.3668	2048.11	961.663	-86.264	2013.4	923.898	-82.6585	2107.95	878.245
987	0	164.653	2098.7	1611.79	266.409	2093.38	1606.72	137.616	1944.19	1639.51	273.914	1926.98	1637.62	226.474	1857.41	1490.55	227.662	1754.87	1268.46	202.734	2001.37	1398.44	194.153	2027.99	1212.19	284.724	1760.03	1339.52	25.5719	1859.33	1450.48	-41.105	1852.64	1250.9	-68.1043	1849.66	1132.91	-74.1812	1979.67	1015.51	-28.4663	2053.91	957.254	-84.539	2018.4	920.58	-80.5563	2111.81	872.403
988	0	165.41	2110.2	1612.41	267.163	2104.78	1607.52	138.204	1955.8	1640.69	274.501	1938.45	1639.04	227.317	1868.43	1491.82	228.899	1766.05	1269.66	203.633	2012.44	1399.77	195.442	2039.17	1213.56	285.924	1771.22	1340.78	26.4352	1870.32	1451.31	-39.7275	1862.98	1251.7	-66.2075	1859.11	1133.48	-72.3704	1986.37	1013.06	-26.6714	2059.18	952.702	-82.9156	2022.82	917.224	-78.5793	2114.93	866.375
989	0	165.887	2121.51	1613.22	267.649	2116.05	1608.58	138.594	1967.2	1642.02	274.894	1949.79	1640.71	228.049	1879.32	1493.28	230.107	1777.13	1271.02	204.415	2023.37	1401.32	196.64	2050.21	1215.13	287.081	1782.33	1342.22	27.2073	1881.1	1452.27	-38.407	1873.13	1252.62	-64.3241	1868.35	1134.17	-70.6411	1992.65	1010.62	-24.9917	2063.91	948.062	-81.3988	2026.66	913.88	-76.7474	2117.31	860.245
990	0	166.098	2132.62	1614.24	267.88	2127.2	1609.9	138.811	1978.39	1643.51	275.118	1961	1642.6	228.683	1890.08	1494.9	231.286	1788.12	1272.54	205.09	2034.19	1403.05	197.749	2061.13	1216.9	288.197	1793.35	1343.84	27.8982	1891.71	1453.36	-37.1371	1883.07	1253.64	-62.4506	1877.39	1134.97	-68.9965	1998.52	1008.22	-23.4357	2068.11	943.394	-79.992	2029.94	910.599	-75.0773	2118.97	854.094
991	0	166.062	2143.53	1615.47	267.874	2138.22	1611.47	138.882	1989.36	1645.12	275.2	1972.08	1644.68	229.232	1900.73	1496.66	232.434	1799.05	1274.17	205.668	2044.9	1404.97	198.772	2071.96	1218.85	289.276	1804.31	1345.59	28.5185	1902.14	1454.56	-35.9116	1892.81	1254.75	-60.585	1886.22	1135.88	-67.4392	2003.99	1005.89	-22.0096	2071.8	938.754	-78.696	2032.68	907.43	-73.5821	2119.9	848.004
992	0	165.805	2154.25	1616.9	267.657	2149.12	1613.29	138.834	2000.1	1646.86	275.166	1983.03	1646.92	229.708	1911.28	1498.55	233.55	1809.93	1275.91	206.162	2055.52	1407.04	199.712	2082.71	1220.94	290.32	1815.21	1347.46	29.0791	1912.44	1455.87	-34.7246	1902.36	1255.96	-58.7266	1894.83	1136.9	-65.971	2009.06	1003.66	-20.7181	2074.98	934.197	-77.51	2034.9	904.418	-72.2702	2120.15	842.05
993	0	165.355	2164.77	1618.53	267.258	2159.91	1615.32	138.696	2010.64	1648.68	275.045	1993.86	1649.29	230.125	1921.76	1500.52	234.629	1820.77	1277.72	206.583	2066.08	1409.23	200.577	2093.39	1223.16	291.33	1826.08	1349.42	29.5902	1922.62	1457.26	-33.5715	1911.7	1257.26	-56.8763	1903.22	1138.03	-64.5928	2013.75	1001.57	-19.5633	2077.67	929.773	-76.431	2036.62	901.602	-71.145	2119.73	836.302
994	0	164.748	2175.12	1620.32	266.709	2170.59	1617.55	138.496	2020.97	1650.57	274.864	2004.57	1651.74	230.494	1932.19	1502.55	235.67	1831.58	1279.58	206.944	2076.59	1411.51	201.373	2104.04	1225.46	292.306	1836.91	1351.42	30.0617	1932.7	1458.72	-32.4489	1920.86	1258.62	-55.0371	1911.38	1139.26	-63.3047	2018.07	999.617	-18.5451	2079.89	925.527	-75.4543	2037.89	899.014	-70.2043	2118.69	830.82
995	0	164.018	2185.31	1622.27	266.047	2181.19	1619.93	138.258	2031.13	1652.49	274.648	2015.19	1654.23	230.827	1942.57	1504.61	236.668	1842.38	1281.46	207.256	2087.08	1413.84	202.107	2114.65	1227.8	293.248	1847.73	1353.44	30.5025	1942.73	1460.22	-31.3544	1929.84	1260.04	-53.2138	1919.31	1140.58	-62.1061	2022.04	997.836	-17.6611	2081.68	921.497	-74.5739	2038.72	896.68	-69.4408	2117.08	825.654
996	0	163.204	2195.37	1624.33	265.306	2191.7	1622.43	138.005	2041.13	1654.41	274.42	2025.71	1656.71	231.133	1952.94	1506.66	237.619	1853.16	1283.33	207.53	2097.56	1416.18	202.789	2125.25	1230.15	294.154	1858.54	1355.45	30.9202	1952.72	1461.74	-30.2874	1938.64	1261.5	-51.4126	1927.02	1141.98	-60.9957	2025.67	996.235	-16.9064	2083.07	917.715	-73.7824	2039.18	894.619	-68.8422	2114.96	820.844
997	0	162.342	2205.34	1626.46	264.522	2202.16	1624.99	137.758	2051.02	1656.29	274.198	2036.15	1659.14	231.422	1963.31	1508.66	238.519	1863.95	1285.15	207.776	2108.04	1418.48	203.423	2135.85	1232.45	295.021	1869.35	1357.42	31.3212	1962.71	1463.24	-29.248	1947.29	1262.99	-49.6413	1934.5	1143.45	-59.9713	2029.01	994.821	-16.2738	2084.09	914.202	-73.0715	2039.3	892.84	-68.3921	2112.39	816.418
998	0	161.467	2215.24	1628.61	263.729	2212.58	1627.55	137.532	2060.81	1658.1	273.999	2046.54	1661.48	231.699	1973.7	1510.59	239.365	1874.74	1286.91	208.001	2118.55	1420.71	204.015	2146.45	1234.67	295.847	1880.17	1359.31	31.7102	1972.71	1464.71	-28.2376	1955.79	1264.49	-47.9082	1941.78	1144.97	-59.0299	2032.06	993.597	-15.7539	2084.8	910.974	-72.4324	2039.13	891.348	-68.0707	2109.44	812.391
999	0	160.614	2225.1	1630.75	262.958	2222.97	1630.08	137.339	2070.57	1659.8	273.835	2056.9	1663.67	231.97	1984.13	1512.41	240.152	1885.55	1288.57	208.212	2129.1	1422.81	204.57	2157.06	1236.75	296.626	1891.01	1361.1	32.0906	1982.75	1466.11	-27.2586	1964.16	1265.98	-46.2225	1948.85	1146.52	-58.1677	2034.88	992.562	-15.3354	2085.23	908.038	-71.8559	2038.73	890.138	-67.8563	2106.2	808.77
1000	0	159.809	2234.98	1632.81	262.235	2233.36	1632.5	137.188	2080.31	1661.37	273.714	2067.24	1665.69	232.238	1994.61	1514.1	240.876	1896.36	1290.11	208.414	2139.69	1424.76	205.091	2167.69	1238.67	297.354	1901.88	1362.75	32.4639	1992.85	1467.42	-26.3135	1972.42	1267.44	-44.5929	1955.74	1148.09	-57.3803	2037.48	991.709	-15.0053	2085.44	905.395	-71.3327	2038.15	889.201	-67.7263	2102.75	805.55
1001	0	159.078	2244.89	1634.74	261.584	2243.78	1634.77	137.084	2090.09	1662.77	273.642	2077.6	1667.5	232.503	2005.16	1515.62	241.534	1907.2	1291.51	208.608	2150.34	1426.51	205.578	2178.35	1240.39	298.026	1912.77	1364.25	32.83	2003.02	1468.6	-25.4055	1980.58	1268.87	-43.0279	1962.47	1149.66	-56.6628	2039.92	991.031	-14.7498	2085.48	903.042	-70.8537	2037.44	888.522	-67.6582	2099.15	802.72
1002	0	158.44	2254.89	1636.51	261.021	2254.24	1636.83	137.029	2099.95	1663.99	273.62	2087.99	1669.07	232.764	2015.78	1516.95	242.122	1918.06	1292.74	208.796	2161.06	1428.04	206.029	2189.03	1241.87	298.637	1923.7	1365.57	33.1871	2013.28	1469.65	-24.5379	1988.67	1270.23	-41.5349	1969.05	1151.21	-56.0099	2042.23	990.513	-14.5545	2085.41	900.967	-70.4102	2036.66	888.084	-67.631	2095.5	800.26
1003	0	157.906	2264.99	1638.06	260.559	2264.77	1638.65	137.022	2109.92	1664.99	273.646	2098.43	1670.37	233.02	2026.5	1518.08	242.635	1928.93	1293.79	208.977	2171.84	1429.33	206.443	2199.74	1243.08	299.18	1934.66	1366.69	33.5319	2023.64	1470.53	-23.7139	1996.71	1271.53	-40.1202	1975.52	1152.74	-55.4161	2044.46	990.144	-14.4056	2085.28	899.157	-69.9945	2035.85	887.866	-67.6259	2091.87	798.149
1004	0	157.484	2275.24	1639.37	260.203	2275.39	1640.18	137.058	2120.03	1665.78	273.716	2108.97	1671.4	233.264	2037.31	1518.98	243.071	1939.83	1294.65	209.146	2182.71	1430.34	206.815	2210.48	1244.02	299.652	1945.67	1367.61	33.8592	2034.12	1471.23	-22.9369	2004.72	1272.74	-38.7885	1981.91	1154.22	-54.8765	2046.64	989.907	-14.2902	2085.15	897.597	-69.5996	2035.08	887.846	-67.6269	2088.31	796.362
1005	0	157.175	2285.65	1640.4	259.953	2286.11	1641.39	137.132	2130.32	1666.32	273.822	2119.6	1672.13	233.493	2048.23	1519.65	243.425	1950.76	1295.3	209.298	2193.65	1431.06	207.14	2221.25	1244.65	300.047	1956.72	1368.32	34.1629	2044.7	1471.74	-22.2101	2012.73	1273.86	-37.5433	1988.24	1155.64	-54.3863	2048.81	989.785	-14.1972	2085.06	896.267	-69.2197	2034.39	888.001	-67.6211	2084.91	794.873
1006	0	156.973	2296.24	1641.12	259.802	2296.95	1642.26	137.232	2140.8	1666.63	273.954	2130.37	1672.56	233.696	2059.26	1520.08	243.695	1961.72	1295.74	209.426	2204.68	1431.5	207.412	2232.05	1244.98	300.36	1967.82	1368.8	34.4354	2055.41	1472.05	-21.5369	2020.74	1274.87	-36.3862	1994.54	1157	-53.9417	2051.02	989.762	-14.1174	2085.06	895.147	-68.8501	2033.82	888.31	-67.5992	2081.72	793.658
1007	0	156.868	2307.04	1641.53	259.739	2307.94	1642.77	137.349	2151.5	1666.69	274.1	2141.27	1672.7	233.867	2070.41	1520.27	243.878	1972.7	1295.96	209.522	2215.8	1431.63	207.623	2242.89	1245.01	300.585	1978.97	1369.05	34.6683	2066.24	1472.15	-20.9205	2028.8	1275.78	-35.318	2000.85	1158.28	-53.5399	2053.31	989.819	-14.0438	2085.2	894.216	-68.4878	2033.42	888.751	-67.5548	2078.78	792.693
1008	0	156.844	2318.04	1641.62	259.749	2319.07	1642.91	137.47	2162.43	1666.51	274.247	2152.33	1672.54	233.995	2081.68	1520.21	243.971	1983.73	1295.97	209.577	2227	1431.47	207.767	2253.77	1244.73	300.719	1990.18	1369.09	34.8522	2077.2	1472.05	-20.3643	2036.91	1276.58	-34.3384	2007.19	1159.48	-53.179	2055.71	989.94	-13.9721	2085.52	893.453	-68.1312	2033.22	889.302	-67.4849	2076.15	791.954
1009	0	156.881	2329.27	1641.39	259.812	2330.35	1642.69	137.578	2173.59	1666.1	274.378	2163.55	1672.09	234.069	2093.07	1519.92	243.972	1994.8	1295.77	209.579	2238.3	1431.03	207.838	2264.7	1244.15	300.757	2001.45	1368.91	34.9775	2088.29	1471.75	-19.8721	2045.11	1277.25	-33.4464	2013.59	1160.59	-52.8586	2058.26	990.107	-13.9006	2086.06	892.838	-67.7804	2033.26	889.942	-67.3894	2073.85	791.419
1010	0	156.957	2340.7	1640.84	259.905	2341.8	1642.12	137.659	2184.99	1665.46	274.477	2174.95	1671.38	234.077	2104.59	1519.39	243.877	2005.93	1295.37	209.519	2249.7	1430.3	207.829	2275.68	1243.29	300.695	2012.79	1368.51	35.034	2099.5	1471.24	-19.4475	2053.4	1277.81	-32.6408	2020.09	1161.6	-52.5795	2061	990.303	-13.8303	2086.86	892.348	-67.437	2033.59	890.652	-67.2703	2071.93	791.065
1011	0	157.045	2352.34	1639.99	260.003	2353.41	1641.2	137.694	2196.61	1664.6	274.527	2186.52	1670.41	234.009	2116.22	1518.65	243.687	2017.11	1294.77	209.385	2261.18	1429.31	207.733	2286.72	1242.17	300.53	2024.2	1367.92	35.0119	2110.83	1470.54	-19.0946	2061.81	1278.24	-31.9204	2026.71	1162.51	-52.3437	2063.95	990.51	-13.7646	2087.95	891.964	-67.1043	2034.21	891.411	-67.1322	2070.41	790.872
1012	0	157.118	2364.18	1638.86	260.078	2365.19	1639.97	137.666	2208.46	1663.55	274.508	2198.26	1669.21	233.853	2127.97	1517.71	243.399	2028.35	1293.99	209.167	2272.77	1428.08	207.547	2297.82	1240.81	300.26	2035.68	1367.15	34.9012	2122.29	1469.65	-18.8175	2070.35	1278.55	-31.2845	2033.49	1163.31	-52.1543	2067.14	990.712	-13.7094	2089.36	891.662	-66.7871	2035.18	892.199	-66.9812	2069.31	790.815
1013	0	157.149	2376.2	1637.46	260.105	2377.11	1638.46	137.556	2220.5	1662.3	274.4	2210.17	1667.8	233.598	2139.84	1516.57	243.012	2039.67	1293.03	208.854	2284.44	1426.63	207.266	2309	1239.23	299.881	2047.24	1366.2	34.6928	2133.86	1468.58	-18.6204	2079.05	1278.72	-30.733	2040.44	1163.98	-52.0155	2070.62	990.891	-13.6725	2091.12	891.421	-66.4918	2036.51	892.997	-66.8253	2068.65	790.871
1014	0	157.11	2388.39	1635.84	260.056	2389.18	1636.68	137.346	2232.74	1660.88	274.185	2222.24	1666.21	233.233	2151.82	1515.27	242.528	2051.06	1291.93	208.437	2296.21	1424.98	206.888	2320.25	1237.46	299.392	2058.88	1365.11	34.3781	2145.54	1467.35	-18.5081	2087.91	1278.76	-30.2665	2047.59	1164.54	-51.9323	2074.4	991.031	-13.6636	2093.27	891.219	-66.2259	2038.24	893.783	-66.6733	2068.46	791.014
1015	0	156.973	2400.73	1634	259.905	2401.39	1634.69	137.017	2245.15	1659.31	273.845	2234.46	1664.46	232.748	2163.9	1513.82	241.946	2062.54	1290.68	207.907	2308.08	1423.15	206.408	2331.6	1235.52	298.793	2070.6	1363.88	33.9496	2157.32	1465.96	-18.4851	2096.95	1278.66	-29.8867	2054.98	1164.95	-51.91	2078.51	991.115	-13.6933	2095.81	891.032	-65.9983	2040.39	894.538	-66.535	2068.74	791.216
1016	0	156.714	2413.2	1632	259.627	2413.73	1632.51	136.553	2257.7	1657.61	273.362	2246.81	1662.57	232.137	2176.08	1512.25	241.267	2074.11	1289.31	207.257	2320.03	1421.19	205.828	2343.04	1233.45	298.083	2082.41	1362.53	33.4009	2169.2	1464.44	-18.5563	2106.19	1278.41	-29.596	2062.62	1165.23	-51.9546	2082.98	991.128	-13.7733	2098.79	890.839	-65.8188	2042.97	895.241	-66.4211	2069.51	791.45
1017	0	156.311	2425.79	1629.85	259.202	2426.18	1630.2	135.937	2270.38	1655.79	272.721	2259.29	1660.59	231.392	2188.35	1510.57	240.495	2085.77	1287.85	206.482	2332.06	1419.1	205.145	2354.58	1231.28	297.262	2094.3	1361.1	32.7272	2181.16	1462.78	-18.7262	2115.63	1278.02	-29.3978	2070.54	1165.36	-52.072	2087.83	991.054	-13.9151	2102.21	890.616	-65.6978	2046.03	895.87	-66.3428	2070.79	791.686
1018	0	155.743	2438.46	1627.59	258.611	2438.73	1627.77	135.157	2283.17	1653.89	271.911	2271.88	1658.54	230.508	2200.7	1508.81	239.63	2097.53	1286.3	205.578	2344.17	1416.93	204.363	2366.22	1229.03	296.332	2106.27	1359.59	31.9251	2193.2	1461.01	-18.9992	2125.29	1277.48	-29.2959	2078.76	1165.32	-52.2683	2093.1	990.879	-14.1298	2106.11	890.341	-65.6462	2049.58	896.407	-66.3115	2072.59	791.894
1019	0	154.995	2451.22	1625.25	257.837	2451.37	1625.29	134.202	2296.04	1651.92	270.923	2284.56	1656.46	229.483	2213.12	1507	238.676	2109.37	1284.7	204.545	2356.35	1414.71	203.481	2377.96	1226.75	295.295	2118.31	1358.04	30.9932	2205.31	1459.15	-19.3791	2135.17	1276.78	-29.2945	2087.3	1165.13	-52.5491	2098.8	990.592	-14.4275	2110.5	889.994	-65.6753	2053.65	896.832	-66.3393	2074.93	792.045
1020	0	154.055	2464.03	1622.86	256.871	2464.07	1622.79	133.064	2308.98	1649.9	269.751	2297.32	1654.37	228.317	2225.6	1505.17	237.636	2121.31	1283.06	203.382	2368.6	1412.47	202.505	2389.81	1224.45	294.153	2130.43	1356.47	29.9319	2217.46	1457.2	-19.8691	2145.28	1275.94	-29.3981	2096.17	1164.76	-52.9198	2104.96	990.182	-14.8164	2115.4	889.557	-65.7958	2058.26	897.128	-66.4382	2077.83	792.113
1021	0	152.917	2476.89	1620.47	255.705	2476.84	1620.31	131.739	2321.96	1647.86	268.395	2310.14	1652.32	227.012	2238.13	1503.34	236.514	2133.34	1281.42	202.094	2380.9	1410.23	201.438	2401.76	1222.18	292.91	2142.61	1354.91	28.7436	2229.67	1455.21	-20.4716	2155.63	1274.94	-29.6107	2105.4	1164.22	-53.3847	2111.6	989.641	-15.3034	2120.83	889.013	-66.0182	2063.43	897.281	-66.6201	2081.33	792.072
1022	0	151.579	2489.77	1618.09	254.338	2489.65	1617.88	130.227	2334.98	1645.84	266.855	2323.01	1650.32	225.572	2250.69	1501.53	235.312	2145.44	1279.79	200.688	2393.25	1408.04	200.288	2413.8	1219.96	291.57	2154.84	1353.37	27.4326	2241.9	1453.17	-21.1879	2166.23	1273.8	-29.9362	2115	1163.52	-53.9479	2118.74	988.965	-15.8931	2126.82	888.351	-66.3523	2069.18	897.278	-66.8963	2085.43	791.902
1023	0	150.044	2502.67	1615.75	252.775	2502.49	1615.54	128.534	2348	1643.84	265.139	2335.91	1648.41	224.007	2263.28	1499.78	234.035	2157.61	1278.19	199.174	2405.64	1405.91	199.062	2425.94	1217.83	290.139	2167.12	1351.89	26.0058	2254.17	1451.13	-22.0185	2177.07	1272.53	-30.3782	2124.97	1162.65	-54.6122	2126.41	988.153	-16.5884	2133.37	887.56	-66.8066	2075.55	897.111	-67.2771	2090.18	791.587
1024	0	148.32	2515.56	1613.5	251.024	2515.34	1613.33	126.669	2361.02	1641.9	263.258	2348.83	1646.63	222.325	2275.88	1498.11	232.687	2169.84	1276.66	197.565	2418.05	1403.89	197.768	2438.15	1215.8	288.621	2179.43	1350.48	24.4716	2266.44	1449.1	-22.9625	2188.16	1271.15	-30.9391	2135.32	1161.62	-55.3793	2134.62	987.208	-17.3901	2140.52	886.638	-67.3884	2082.55	896.775	-67.7714	2095.6	791.117
1025	0	146.424	2528.44	1611.34	249.099	2528.2	1611.27	124.646	2374.01	1640.04	261.227	2361.75	1644.99	220.539	2288.47	1496.54	231.272	2182.11	1275.21	195.876	2430.47	1401.99	196.419	2450.44	1213.92	287.023	2191.75	1349.16	22.8408	2278.73	1447.12	-24.018	2199.5	1269.66	-31.6211	2146.05	1160.45	-56.2499	2143.38	986.136	-18.2972	2148.28	885.584	-68.1036	2090.2	896.268	-68.3864	2101.73	790.486
1026	0	144.375	2541.29	1609.31	247.022	2541.04	1609.39	122.485	2386.98	1638.29	259.066	2374.66	1643.51	218.665	2301.04	1495.1	229.794	2194.41	1273.86	194.126	2442.89	1400.25	195.024	2462.78	1212.2	285.353	2204.07	1347.97	21.1262	2291.02	1445.2	-25.182	2211.09	1268.09	-32.4253	2157.16	1159.16	-57.2235	2152.71	984.948	-19.307	2156.67	884.403	-68.9561	2098.52	895.593	-69.1273	2108.61	789.693
1027	0	142.197	2554.09	1607.42	244.817	2553.86	1607.7	120.21	2399.89	1636.67	256.797	2387.54	1642.23	216.72	2313.57	1493.8	228.259	2206.72	1272.64	192.333	2455.29	1398.68	193.598	2475.17	1210.66	283.619	2216.37	1346.9	19.3424	2303.3	1443.38	-26.45	2222.93	1266.46	-33.3521	2168.65	1157.76	-58.2985	2162.63	983.657	-20.4154	2165.72	883.106	-69.9481	2107.54	894.756	-69.9974	2116.27	788.742
1028	0	139.921	2566.84	1605.7	242.513	2566.63	1606.23	117.849	2412.73	1635.19	254.448	2400.37	1641.15	214.724	2326.05	1492.67	226.673	2219.03	1271.56	190.519	2467.66	1397.31	192.153	2487.58	1209.33	281.831	2228.64	1345.98	17.5054	2315.57	1441.69	-27.8165	2235	1264.81	-34.4013	2180.51	1156.29	-59.4721	2173.15	982.283	-21.6168	2175.44	881.708	-71.0799	2117.27	893.768	-70.9979	2124.75	787.642
1029	0	137.579	2579.51	1604.17	240.144	2579.34	1604.98	115.432	2425.5	1633.89	252.047	2413.14	1640.29	212.696	2338.46	1491.71	225.043	2231.32	1270.65	188.706	2479.99	1396.15	190.701	2499.99	1208.21	279.999	2240.85	1345.22	15.6328	2327.81	1440.15	-29.2748	2247.31	1263.15	-35.5718	2192.72	1154.76	-60.7406	2184.26	980.844	-22.9049	2185.85	880.229	-72.3498	2127.74	892.641	-72.1278	2134.09	786.404
1030	0	135.207	2592.1	1602.84	237.745	2591.97	1603.97	112.993	2438.18	1632.77	249.627	2425.83	1639.66	210.659	2350.78	1490.95	223.377	2243.57	1269.9	186.914	2492.25	1395.21	189.255	2512.38	1207.32	278.134	2253	1344.64	13.743	2340.03	1438.79	-30.817	2259.84	1261.53	-36.8617	2205.27	1153.2	-62.0991	2195.99	979.366	-24.2722	2196.97	878.692	-73.7542	2138.95	891.392	-73.3843	2144.33	785.046
1031	0	132.842	2604.58	1601.71	235.352	2604.52	1603.19	110.567	2450.75	1631.85	247.22	2438.42	1639.25	208.635	2363	1490.39	221.684	2255.76	1269.34	185.164	2504.43	1394.5	187.827	2524.74	1206.67	276.25	2265.06	1344.23	11.855	2352.2	1437.64	-32.4342	2272.58	1259.98	-38.2688	2218.14	1151.65	-63.542	2208.31	977.873	-25.7108	2208.82	877.124	-75.2877	2150.93	890.041	-74.7626	2155.51	783.587
1032	0	130.52	2616.96	1600.81	233.005	2616.95	1602.65	108.191	2463.2	1631.15	244.857	2450.91	1639.07	206.646	2375.11	1490.04	219.975	2267.89	1268.98	183.476	2516.52	1394.03	186.427	2537.02	1206.25	274.359	2277.01	1344	9.9877	2364.33	1436.71	-34.1164	2285.51	1258.51	-39.7896	2231.3	1150.14	-65.0628	2221.24	976.393	-27.2123	2221.4	875.558	-76.9428	2163.68	888.609	-76.2566	2167.66	782.05
1033	0	128.279	2629.2	1600.14	230.738	2629.27	1602.34	105.898	2475.53	1630.67	242.572	2463.27	1639.12	204.714	2387.09	1489.9	218.26	2279.92	1268.81	181.866	2528.51	1393.8	185.063	2549.22	1206.07	272.474	2288.84	1343.97	8.15975	2376.4	1436.02	-35.8529	2298.62	1257.18	-41.4202	2244.75	1148.7	-66.6543	2234.77	974.956	-28.7683	2234.73	874.025	-78.7104	2177.21	887.122	-77.8589	2180.82	780.46
1034	0	126.151	2641.32	1599.7	228.587	2641.45	1602.25	103.722	2487.72	1630.44	240.394	2475.5	1639.39	202.857	2398.93	1489.98	216.553	2291.85	1268.85	180.35	2540.37	1393.81	183.745	2561.3	1206.12	270.609	2300.54	1344.12	6.38868	2388.39	1435.6	-37.6322	2311.87	1256.01	-43.1554	2258.43	1147.36	-68.3088	2248.88	973.591	-30.3702	2248.81	872.56	-80.5795	2191.51	885.606	-79.561	2195	778.847
1035	0	124.167	2653.29	1599.5	226.581	2653.49	1602.38	101.692	2499.77	1630.44	238.35	2487.58	1639.88	201.096	2410.62	1490.28	214.863	2303.67	1269.09	178.941	2552.1	1394.04	182.478	2573.24	1206.41	268.776	2312.1	1344.46	4.69049	2400.31	1435.44	-39.4423	2325.25	1255.01	-44.9891	2272.33	1146.15	-70.018	2263.56	972.327	-32.0094	2263.64	871.201	-82.5371	2206.6	884.089	-81.3538	2210.23	777.245
1036	0	122.355	2665.11	1599.52	224.748	2665.38	1602.72	99.8339	2511.67	1630.69	236.464	2499.51	1640.57	199.443	2422.15	1490.78	213.201	2315.36	1269.53	177.648	2563.69	1394.51	181.269	2585.03	1206.92	266.987	2323.5	1344.98	3.07923	2412.13	1435.57	-41.271	2338.72	1254.23	-46.9143	2286.42	1145.09	-71.7734	2278.78	971.196	-33.6777	2279.21	869.986	-84.5685	2222.45	882.603	-83.2275	2226.52	775.692
1037	0	120.734	2676.78	1599.78	223.109	2677.12	1603.24	98.1681	2523.43	1631.2	234.756	2511.29	1641.46	197.912	2433.51	1491.49	211.578	2326.91	1270.16	176.479	2575.13	1395.2	180.123	2596.66	1207.65	265.253	2334.74	1345.67	1.56651	2423.84	1435.99	-43.1056	2352.26	1253.68	-48.9226	2300.65	1144.21	-73.566	2294.53	970.225	-35.3671	2295.51	868.951	-86.6574	2239.06	881.18	-85.1718	2243.87	774.229
1038	0	119.322	2688.3	1600.25	221.68	2688.69	1603.95	96.7093	2535.03	1631.95	233.24	2522.91	1642.53	196.511	2444.71	1492.39	210.003	2338.33	1270.98	175.439	2586.42	1396.1	179.044	2608.11	1208.58	263.581	2345.82	1346.54	0.161245	2435.45	1436.68	-44.9343	2365.83	1253.37	-51.0046	2315.01	1143.53	-75.387	2310.78	969.443	-37.0702	2312.52	868.136	-88.7862	2256.39	879.851	-87.1759	2262.27	772.901
1039	0	118.129	2699.66	1600.94	220.472	2700.1	1604.81	95.4663	2546.48	1632.95	231.924	2534.37	1643.78	195.246	2455.74	1493.48	208.483	2349.61	1271.98	174.529	2597.55	1397.21	178.035	2619.39	1209.72	261.979	2356.74	1347.57	-1.13049	2446.94	1437.65	-46.7453	2379.4	1253.32	-53.1501	2329.44	1143.06	-77.2272	2327.48	968.875	-38.7799	2330.22	867.577	-90.9361	2274.43	878.651	-89.2285	2281.7	771.757
1040	0	117.159	2710.88	1601.84	219.487	2711.35	1605.83	94.4416	2557.78	1634.18	230.813	2545.67	1645.18	194.117	2466.61	1494.75	207.024	2360.74	1273.14	173.747	2608.54	1398.51	177.098	2630.49	1211.05	260.452	2367.5	1348.74	-2.30546	2458.3	1438.88	-48.528	2392.95	1253.53	-55.3479	2343.94	1142.82	-79.0779	2344.62	968.545	-40.4898	2348.59	867.31	-93.0881	2293.13	877.612	-91.3177	2302.13	770.845
1041	0	116.409	2721.94	1602.94	218.726	2722.45	1606.98	93.6315	2568.94	1635.64	229.905	2556.81	1646.73	193.123	2477.32	1496.16	205.632	2371.72	1274.44	173.089	2619.38	1399.98	176.235	2641.43	1212.55	259.003	2378.11	1350.04	-3.36313	2469.54	1440.36	-50.2728	2406.44	1254	-57.586	2358.45	1142.8	-80.9303	2362.14	968.474	-42.194	2367.57	867.367	-95.2227	2312.46	876.764	-93.431	2323.53	770.215
1042	0	115.874	2732.86	1604.22	218.181	2733.38	1608.26	93.0266	2579.97	1637.31	229.193	2567.79	1648.4	192.258	2487.88	1497.72	204.311	2382.57	1275.88	172.55	2630.07	1401.61	175.446	2652.21	1214.21	257.635	2388.58	1351.47	-4.30543	2480.66	1442.06	-51.9711	2419.85	1254.72	-59.852	2372.96	1143.02	-82.7759	2380	968.677	-43.8871	2387.14	867.78	-97.3212	2332.36	876.139	-95.5552	2345.82	769.916
1043	0	115.54	2743.65	1605.67	217.838	2744.16	1609.66	92.6124	2590.85	1639.17	228.667	2578.63	1650.18	191.517	2498.29	1499.39	203.066	2393.29	1277.43	172.119	2640.65	1403.39	174.73	2662.86	1216.01	256.35	2398.91	1352.99	-5.13636	2491.65	1443.96	-53.6161	2433.16	1255.68	-62.133	2387.44	1143.45	-84.6069	2398.17	969.166	-45.5636	2407.25	868.573	-99.3655	2352.8	875.76	-97.6762	2368.95	769.993
1044	0	115.391	2754.31	1607.28	217.682	2754.8	1611.15	92.3705	2601.61	1641.19	228.309	2589.32	1652.05	190.889	2508.59	1501.16	201.9	2403.88	1279.07	171.787	2651.1	1405.28	174.084	2673.38	1217.93	255.148	2409.13	1354.6	-5.86159	2502.53	1446.02	-55.2019	2446.34	1256.86	-64.4161	2401.86	1144.1	-86.4155	2416.6	969.95	-47.2185	2427.85	869.767	-101.339	2373.71	875.652	-99.7796	2392.84	770.485
1045	0	115.406	2764.85	1609.02	217.691	2765.31	1612.74	92.2792	2612.25	1643.34	228.101	2599.87	1653.98	190.364	2518.77	1503.01	200.817	2414.36	1280.78	171.542	2661.45	1407.26	173.505	2683.8	1219.94	254.033	2419.24	1356.27	-6.48797	2513.3	1448.22	-56.7242	2459.38	1258.23	-66.6882	2416.22	1144.94	-88.1944	2435.24	971.031	-48.8464	2448.88	871.378	-103.227	2395.03	875.831	-101.85	2417.41	771.428
1046	0	115.562	2775.27	1610.87	217.841	2775.68	1614.39	92.3145	2622.77	1645.58	228.021	2610.28	1655.95	189.932	2528.85	1504.9	199.82	2424.74	1282.54	171.371	2671.71	1409.3	172.989	2694.13	1222.02	253.003	2429.27	1357.98	-7.02303	2523.96	1450.52	-58.1796	2472.28	1259.77	-68.9368	2430.49	1145.94	-89.9366	2454.06	972.406	-50.4419	2470.28	873.415	-105.016	2416.72	876.311	-103.872	2442.55	772.847
1047	0	115.832	2785.59	1612.82	218.107	2785.94	1616.09	92.4517	2633.18	1647.89	228.046	2620.57	1657.92	189.581	2538.86	1506.81	198.914	2435.03	1284.32	171.26	2681.9	1411.37	172.533	2704.38	1224.14	252.062	2439.24	1359.71	-7.47455	2534.54	1452.87	-59.566	2485.02	1261.43	-71.1494	2444.66	1147.08	-91.6355	2473	974.068	-51.9994	2492	875.88	-106.695	2438.7	877.1	-105.832	2468.19	774.76
1048	0	116.191	2795.82	1614.82	218.46	2796.1	1617.82	92.6656	2643.5	1650.21	228.152	2630.75	1659.88	189.3	2548.81	1508.72	198.102	2445.25	1286.1	171.197	2692.02	1413.45	172.131	2714.57	1226.25	251.209	2449.15	1361.44	-7.85012	2545.02	1455.25	-60.8817	2497.61	1263.18	-73.3143	2458.71	1148.33	-93.2846	2492.03	976.005	-53.5132	2513.97	878.77	-108.255	2460.93	878.199	-107.713	2494.21	777.175
1049	0	116.61	2805.97	1616.85	218.876	2806.18	1619.56	92.9322	2653.73	1652.52	228.315	2640.84	1661.79	189.08	2558.72	1510.59	197.387	2455.41	1287.86	171.169	2702.1	1415.48	171.778	2724.72	1228.34	250.447	2459.03	1363.14	-8.15679	2555.43	1457.61	-62.1257	2510.04	1264.99	-75.4202	2472.66	1149.66	-94.8773	2511.11	978.201	-54.9775	2536.14	882.074	-109.691	2483.33	879.605	-109.501	2520.53	780.092
1050	0	117.065	2816.05	1618.88	219.327	2816.18	1621.28	93.229	2663.88	1654.76	228.512	2650.84	1663.63	188.912	2568.6	1512.41	196.773	2465.52	1289.58	171.165	2712.14	1417.45	171.472	2734.84	1230.36	249.778	2468.9	1364.81	-8.40082	2565.77	1459.91	-63.297	2522.32	1266.8	-77.4565	2486.48	1151.02	-96.4073	2530.19	980.633	-56.3859	2558.43	885.773	-110.997	2505.87	881.31	-111.185	2547.03	783.5
1051	0	117.53	2826.07	1620.86	219.789	2826.13	1622.96	93.5357	2673.97	1656.9	228.724	2660.77	1665.37	188.79	2578.47	1514.14	196.263	2475.59	1291.23	171.174	2722.15	1419.31	171.208	2744.94	1232.29	249.203	2478.76	1366.4	-8.58741	2576.06	1462.13	-64.3947	2534.47	1268.59	-79.4133	2500.19	1152.39	-97.8678	2549.25	983.277	-57.7314	2580.78	889.843	-112.169	2528.47	883.302	-112.75	2573.63	787.381
1052	0	117.984	2836.05	1622.76	220.241	2836.04	1624.56	93.8353	2684.01	1658.91	228.933	2670.65	1666.98	188.709	2588.35	1515.77	195.86	2485.63	1292.78	171.189	2732.14	1421.05	170.982	2755.02	1234.09	248.724	2488.63	1367.91	-8.72059	2586.28	1464.21	-65.4175	2546.48	1270.31	-81.2812	2513.77	1153.72	-99.2519	2568.25	986.108	-59.0066	2603.14	894.257	-113.207	2551.09	885.564	-114.188	2600.23	791.71
1053	0	118.407	2846	1624.54	220.664	2845.93	1626.06	94.1138	2694	1660.75	229.126	2680.5	1668.45	188.664	2598.24	1517.27	195.564	2495.66	1294.22	171.204	2742.13	1422.62	170.793	2765.1	1235.74	248.342	2498.52	1369.31	-8.80318	2596.46	1466.15	-66.3634	2558.37	1271.93	-83.0515	2527.24	1154.98	-100.552	2587.15	989.097	-60.2033	2625.45	898.979	-114.111	2573.68	888.077	-115.487	2626.74	796.456
1054	0	118.782	2855.93	1626.18	221.042	2855.82	1627.44	94.3613	2703.97	1662.4	229.294	2690.33	1669.75	188.654	2608.15	1518.62	195.377	2505.67	1295.54	171.214	2752.1	1424.02	170.639	2775.18	1237.21	248.059	2508.44	1370.59	-8.83668	2606.6	1467.9	-67.23	2570.14	1273.41	-84.7161	2540.59	1156.15	-101.762	2605.93	992.213	-61.3129	2647.64	903.973	-114.88	2596.19	890.819	-116.639	2653.1	801.583
1055	0	119.099	2865.85	1627.62	221.363	2865.73	1628.66	94.5715	2713.93	1663.82	229.43	2700.18	1670.87	188.68	2618.1	1519.8	195.299	2515.69	1296.7	171.218	2762.08	1425.2	170.519	2785.27	1238.48	247.874	2518.4	1371.73	-8.82136	2616.71	1469.46	-68.0139	2581.81	1274.73	-86.2674	2553.83	1157.19	-102.873	2624.56	995.427	-62.3266	2669.67	909.197	-115.516	2618.57	893.767	-117.638	2679.22	807.053
1056	0	119.348	2875.78	1628.86	221.621	2875.66	1629.71	94.7419	2723.89	1665	229.532	2710.05	1671.8	188.743	2628.09	1520.8	195.329	2525.7	1297.71	171.218	2772.07	1426.17	170.433	2795.38	1239.54	247.789	2528.4	1372.71	-8.75623	2626.79	1470.8	-68.7112	2593.39	1275.86	-87.6983	2566.97	1158.09	-103.877	2643.01	998.71	-63.2351	2691.48	914.608	-116.021	2640.78	896.897	-118.477	2705.03	812.824
1057	0	119.527	2885.72	1629.86	221.81	2885.64	1630.56	94.874	2733.85	1665.93	229.601	2719.96	1672.52	188.846	2638.12	1521.61	195.465	2535.72	1298.54	171.216	2782.06	1426.91	170.381	2805.49	1240.38	247.804	2538.44	1373.52	-8.63917	2636.84	1471.91	-69.3173	2604.88	1276.8	-89.0025	2580.01	1158.82	-104.767	2661.27	1002.03	-64.0295	2713.02	920.163	-116.397	2662.78	900.182	-119.152	2730.47	818.854
1058	0	119.635	2895.69	1630.6	221.932	2895.67	1631.19	94.9728	2743.84	1666.59	229.642	2729.93	1673.04	188.993	2648.19	1522.22	195.705	2545.75	1299.18	171.217	2792.06	1427.41	170.365	2815.63	1240.98	247.919	2548.54	1374.16	-8.46702	2646.87	1472.78	-69.827	2616.29	1277.51	-90.1739	2592.95	1159.37	-105.535	2679.3	1005.36	-64.7011	2734.25	925.816	-116.646	2684.54	903.596	-119.66	2755.5	825.098
1059	0	119.678	2905.7	1631.06	221.991	2905.77	1631.6	95.0466	2753.86	1667	229.663	2739.97	1673.34	189.19	2658.31	1522.62	196.047	2555.8	1299.63	171.229	2802.08	1427.68	170.388	2825.79	1241.36	248.134	2558.69	1374.6	-8.23571	2656.89	1473.42	-70.235	2627.63	1278.01	-91.2074	2605.79	1159.74	-106.176	2697.1	1008.68	-65.2419	2755.12	931.522	-116.773	2706	907.113	-119.999	2780.05	831.51
1060	0	119.663	2915.75	1631.25	221.996	2915.93	1631.77	95.1068	2763.92	1667.14	229.674	2750.08	1673.44	189.443	2668.48	1522.81	196.486	2565.87	1299.88	171.259	2812.12	1427.7	170.45	2835.98	1241.51	248.447	2568.9	1374.85	-7.94043	2666.89	1473.81	-70.5356	2638.9	1278.28	-92.0981	2618.54	1159.91	-106.683	2714.63	1011.96	-65.6449	2775.59	937.236	-116.778	2727.14	910.706	-120.168	2804.08	838.044
1061	0	119.604	2925.85	1631.15	221.961	2926.17	1631.71	95.1674	2774.01	1667.03	229.689	2760.28	1673.33	189.759	2678.69	1522.8	197.02	2575.96	1299.93	171.318	2822.17	1427.5	170.557	2846.19	1241.43	248.859	2579.16	1374.9	-7.57582	2676.89	1473.98	-70.7232	2650.11	1278.34	-92.8421	2631.2	1159.9	-107.05	2731.88	1015.17	-65.9042	2795.64	942.915	-116.667	2747.93	914.346	-120.169	2827.56	844.655
1062	0	119.516	2936.01	1630.78	221.9	2936.48	1631.41	95.2445	2784.15	1666.68	229.725	2770.56	1673.02	190.146	2688.95	1522.57	197.644	2586.09	1299.77	171.418	2832.25	1427.07	170.711	2856.44	1241.13	249.368	2589.48	1374.75	-7.1362	2686.89	1473.92	-70.7925	2661.27	1278.18	-93.4362	2643.76	1159.7	-107.276	2748.82	1018.29	-66.0153	2815.22	948.516	-116.441	2768.33	918.005	-120.002	2850.45	851.294
1063	0	119.418	2946.21	1630.14	221.835	2946.85	1630.89	95.3566	2794.33	1666.09	229.803	2780.92	1672.52	190.61	2699.24	1522.15	198.353	2596.24	1299.42	171.568	2842.37	1426.43	170.918	2866.72	1240.63	249.973	2599.85	1374.4	-6.61581	2696.9	1473.65	-70.7387	2672.36	1277.81	-93.8778	2656.21	1159.32	-107.357	2765.45	1021.31	-65.9751	2834.32	953.997	-116.106	2788.3	921.656	-119.671	2872.71	857.915
1064	0	119.329	2956.48	1629.26	221.787	2957.3	1630.15	95.5231	2804.55	1665.3	229.942	2791.37	1671.84	191.16	2709.58	1521.53	199.144	2606.44	1298.86	171.783	2852.51	1425.61	171.181	2877.04	1239.94	250.673	2610.27	1373.85	-6.00901	2706.91	1473.18	-70.5576	2683.4	1277.26	-94.1654	2668.56	1158.78	-107.292	2781.75	1024.2	-65.7821	2852.91	959.321	-115.663	2807.82	925.27	-119.181	2894.31	864.469
1065	0	119.275	2966.8	1628.15	221.78	2967.81	1629.22	95.7646	2814.81	1664.33	230.166	2801.89	1671	191.803	2719.95	1520.72	200.01	2616.69	1298.11	172.072	2862.7	1424.61	171.505	2887.41	1239.08	251.465	2620.74	1373.11	-5.31055	2716.95	1472.52	-70.2459	2694.39	1276.54	-94.2982	2680.8	1158.09	-107.083	2797.69	1026.95	-65.4363	2870.96	964.449	-115.119	2826.86	928.816	-118.537	2915.25	870.908
1066	0	119.279	2977.17	1626.84	221.841	2978.37	1628.11	96.102	2825.1	1663.18	230.497	2812.48	1670	192.547	2730.36	1519.75	200.947	2626.99	1297.18	172.449	2872.93	1423.45	171.896	2897.83	1238.06	252.346	2631.27	1372.17	-4.51572	2727.01	1471.69	-69.8014	2705.32	1275.67	-94.2764	2692.91	1157.26	-106.732	2813.27	1029.53	-64.9394	2888.47	969.346	-114.477	2845.38	932.263	-117.747	2935.48	877.183
1067	0	119.367	2987.6	1625.37	221.995	2988.99	1626.84	96.5561	2835.41	1661.9	230.959	2823.13	1668.87	193.397	2740.8	1518.61	201.949	2637.34	1296.08	172.923	2883.21	1422.16	172.357	2908.3	1236.89	253.315	2641.84	1371.06	-3.62063	2737.1	1470.72	-69.2228	2716.2	1274.66	-94.1012	2704.89	1156.32	-106.243	2828.46	1031.94	-64.295	2905.41	973.978	-113.743	2863.37	935.581	-116.819	2955	883.244
1068	0	119.566	2998.07	1623.75	222.27	2999.63	1625.45	97.1464	2845.76	1660.5	231.573	2833.83	1667.62	194.36	2751.27	1517.33	203.013	2647.77	1294.82	173.504	2893.57	1420.79	172.89	2918.82	1235.62	254.367	2652.46	1369.78	-2.62228	2747.23	1469.61	-68.5101	2727.03	1273.54	-93.7748	2716.73	1155.28	-105.62	2843.27	1034.15	-63.5083	2921.79	978.313	-112.922	2880.79	938.737	-115.765	2973.79	889.04
1069	0	119.902	3008.59	1622.05	222.689	3010.31	1623.95	97.8913	2856.12	1659.01	232.361	2844.57	1666.27	195.439	2761.78	1515.92	204.132	2658.26	1293.41	174.202	2903.94	1419.26	173.504	2929.39	1234.21	255.499	2663.13	1368.35	-1.51874	2757.41	1468.39	-67.6648	2737.81	1272.33	-93.3002	2728.41	1154.17	-104.871	2857.66	1036.16	-62.5867	2937.6	982.321	-112.02	2897.62	941.7	-114.595	2991.84	894.52
1070	0	120.4	3019.15	1620.28	223.275	3021.01	1622.38	98.8069	2866.49	1657.45	233.337	2855.34	1664.83	196.639	2772.32	1514.41	205.302	2668.82	1291.87	175.02	2914.4	1417.7	174.201	2940.08	1232.76	256.708	2673.84	1366.78	-0.309272	2767.64	1467.08	-66.6893	2748.53	1271.06	-92.6814	2739.94	1153	-104.004	2871.65	1037.94	-61.5395	2952.82	985.971	-111.043	2913.84	944.437	-113.324	3009.13	899.631
1071	0	121.083	3029.74	1618.49	224.051	3031.72	1620.77	99.9067	2876.88	1655.87	234.518	2866.13	1663.33	197.961	2782.89	1512.81	206.52	2679.47	1290.22	175.964	2924.93	1416.08	174.975	2950.8	1231.23	257.988	2684.59	1365.09	1.00556	2777.92	1465.71	-65.5874	2759.19	1269.75	-91.923	2751.3	1151.8	-103.026	2885.21	1039.49	-60.3779	2967.46	989.238	-110.001	2929.44	946.917	-111.968	3025.67	904.324
1072	0	121.972	3040.36	1616.71	225.031	3042.43	1619.13	101.201	2887.28	1654.27	235.913	2876.93	1661.77	199.404	2793.49	1511.14	207.782	2690.19	1288.48	177.035	2935.52	1414.44	175.827	2961.59	1229.66	259.338	2695.38	1363.3	2.42382	2788.27	1464.29	-64.3644	2769.8	1268.42	-91.0302	2762.49	1150.59	-101.949	2898.33	1040.8	-59.1149	2981.52	992.092	-108.899	2944.39	949.11	-110.543	3041.44	908.545
1073	0	123.083	3051	1614.99	226.229	3053.14	1617.51	102.696	2897.69	1652.68	237.528	2887.74	1660.18	200.967	2804.12	1509.42	209.086	2701	1286.67	178.232	2946.18	1412.8	176.755	2972.45	1228.06	260.753	2706.22	1361.42	3.94219	2798.67	1462.85	-63.0267	2780.35	1267.09	-90.0087	2773.5	1149.39	-100.782	2911.03	1041.85	-57.7651	2995	994.511	-107.747	2958.68	950.987	-109.067	3056.44	912.245
1074	0	124.426	3061.66	1613.34	227.652	3063.84	1615.91	104.393	2908.12	1651.14	239.363	2898.55	1658.58	202.646	2814.79	1507.68	210.429	2711.89	1284.82	179.552	2956.92	1411.17	177.733	2983.32	1226.44	262.229	2717.09	1359.49	5.55586	2809.14	1461.4	-61.5815	2790.84	1265.79	-88.8647	2784.33	1148.21	-99.5367	2923.28	1042.62	-56.3441	3007.89	996.47	-106.553	2972.29	952.521	-107.559	3070.67	915.378
1075	0	126.005	3072.34	1611.81	229.302	3074.54	1614.36	106.291	2918.55	1649.66	241.413	2909.35	1656.98	204.435	2825.48	1505.95	211.811	2722.86	1282.95	180.988	2967.72	1409.57	178.793	2994.29	1224.86	263.764	2727.99	1357.53	7.25858	2819.66	1459.98	-60.0375	2801.28	1264.53	-87.6045	2794.97	1147.08	-98.2236	2935.1	1043.13	-54.8687	3020.21	997.948	-105.327	2985.23	953.688	-106.037	3084.13	917.898
1076	0	127.817	3083.04	1610.41	231.174	3085.22	1612.88	108.382	2929	1648.26	243.667	2920.14	1655.39	206.325	2836.2	1504.23	213.232	2733.9	1281.08	182.529	2978.59	1408.04	179.928	3005.35	1223.34	265.355	2738.93	1355.56	9.04261	2830.23	1458.6	-58.4036	2811.66	1263.33	-86.2346	2805.44	1146.01	-96.854	2946.47	1043.34	-53.3511	3031.93	998.93	-104.077	2997.48	954.466	-104.519	3096.81	919.769
1077	0	129.852	3093.75	1609.15	233.256	3095.9	1611.49	110.654	2939.47	1646.97	246.11	2930.93	1653.85	208.306	2846.95	1502.56	214.693	2745.01	1279.24	184.163	2989.52	1406.57	181.071	3016.38	1221.83	266.999	2749.89	1353.6	10.8987	2840.85	1457.28	-56.6896	2821.98	1262.21	-84.7616	2815.73	1145.01	-95.4387	2957.4	1043.27	-51.8218	3043.11	999.39	-102.812	3009.03	954.839	-103.022	3108.7	920.955
1078	0	132.091	3104.48	1608.05	235.532	3106.58	1610.19	113.089	2949.96	1645.79	248.72	2941.7	1652.35	210.364	2857.72	1500.95	216.193	2756.17	1277.44	185.873	3000.49	1405.2	182.271	3027.48	1220.42	268.694	2760.88	1351.68	12.816	2851.5	1456.04	-54.9055	2832.23	1261.18	-83.1921	2825.85	1144.09	-93.988	2967.89	1042.91	-50.283	3053.7	999.327	-101.539	3019.9	954.791	-101.562	3119.82	921.431
1079	0	134.509	3115.22	1607.12	237.978	3117.25	1608.98	115.666	2960.47	1644.75	251.471	2952.45	1650.93	212.484	2868.5	1499.43	217.734	2767.39	1275.73	187.641	3011.5	1403.93	183.477	3038.56	1219.09	270.437	2771.87	1349.83	14.7823	2862.17	1454.9	-53.0614	2842.43	1260.25	-81.5323	2835.8	1143.26	-92.5116	2977.94	1042.24	-48.754	3063.72	998.732	-100.266	3030.06	954.316	-100.152	3130.14	921.177
1080	0	137.076	3125.98	1606.34	240.565	3127.92	1607.89	118.358	2971.01	1643.85	254.331	2963.2	1649.58	214.65	2879.29	1498.01	219.315	2778.64	1274.1	189.448	3022.54	1402.77	184.688	3049.64	1217.85	272.224	2782.87	1348.07	16.7839	2872.84	1453.86	-51.1676	2852.55	1259.43	-79.7883	2845.59	1142.54	-91.0181	2987.56	1041.29	-47.2479	3073.19	997.602	-98.9995	3039.53	953.41	-98.8058	3139.67	920.185
1081	0	139.756	3136.75	1605.73	243.259	3138.58	1606.9	121.134	2981.58	1643.11	257.266	2973.93	1648.33	216.842	2890.08	1496.71	220.935	2789.91	1272.6	191.273	3033.58	1401.73	185.892	3060.69	1216.74	274.05	2793.87	1346.42	18.8059	2883.5	1452.94	-49.2345	2862.61	1258.73	-77.9663	2855.23	1141.91	-89.5151	2996.74	1040.04	-45.7759	3082.09	995.941	-97.7441	3048.3	952.074	-97.5318	3148.4	918.454
1082	0	142.513	3147.52	1605.27	246.023	3149.25	1606.02	123.959	2992.17	1642.52	260.236	2984.64	1647.2	219.04	2900.86	1495.55	222.591	2801.18	1271.23	193.095	3044.62	1400.83	187.079	3071.71	1215.74	275.91	2804.85	1344.9	20.8327	2894.13	1452.15	-47.272	2872.59	1258.15	-76.0723	2864.72	1141.38	-88.0092	3005.5	1038.5	-44.3473	3090.45	993.76	-96.5044	3056.39	950.319	-96.3384	3156.33	915.993
1083	0	145.303	3158.3	1604.95	248.818	3159.9	1605.24	126.795	3002.78	1642.08	263.201	2995.34	1646.17	221.223	2911.62	1494.53	224.278	2812.43	1270.01	194.904	3055.6	1400.02	188.196	3082.77	1215	277.797	2815.8	1343.53	22.8478	2904.72	1451.49	-45.2903	2882.49	1257.68	-74.1121	2874.06	1140.94	-86.5056	3013.83	1036.69	-42.9691	3098.26	991.074	-95.2833	3063.78	948.156	-95.2308	3163.45	912.821
1084	0	148.087	3169.08	1604.75	251.601	3170.55	1604.56	129.602	3013.41	1641.79	266.117	3006.02	1645.28	223.371	2922.35	1493.66	225.992	2823.64	1268.95	196.66	3066.56	1399.38	189.288	3093.79	1214.43	279.703	2826.72	1342.33	24.8347	2915.25	1450.96	-43.2993	2892.31	1257.32	-72.0919	2883.27	1140.6	-85.0087	3021.74	1034.62	-41.6457	3105.52	987.906	-94.0827	3070.5	945.608	-94.212	3169.76	908.97
1085	0	150.822	3179.84	1604.65	254.332	3181.17	1603.98	132.341	3024.05	1641.65	268.943	3016.68	1644.52	225.464	2933.03	1492.96	227.725	2834.78	1268.07	198.346	3077.48	1398.92	190.346	3104.76	1214.02	281.618	2837.58	1341.31	26.7775	2925.69	1450.57	-41.3085	2902.03	1257.07	-70.0178	2892.34	1140.34	-83.5216	3029.23	1032.3	-40.3798	3112.25	984.284	-92.9035	3076.56	942.7	-93.2819	3175.26	904.478
1086	0	153.466	3190.58	1604.65	256.968	3191.77	1603.49	134.969	3034.69	1641.64	271.636	3027.3	1643.91	227.481	2943.66	1492.42	229.469	2845.85	1267.37	199.966	3088.3	1398.57	191.39	3115.6	1213.72	283.533	2848.38	1340.48	28.6608	2936.03	1450.29	-39.3272	2911.65	1256.91	-67.8959	2901.28	1140.16	-82.0465	3036.3	1029.76	-39.1715	3118.45	980.241	-91.7452	3081.95	939.464	-92.4382	3179.95	899.397
1087	0	155.982	3201.28	1604.71	259.471	3202.32	1603.09	137.449	3045.32	1641.76	274.161	3037.89	1643.45	229.408	2954.21	1492.06	231.217	2856.81	1266.85	201.494	3099.01	1398.35	192.397	3126.31	1213.55	285.438	2859.1	1339.83	30.4711	2946.26	1450.14	-37.3642	2921.17	1256.84	-65.7323	2910.09	1140.04	-80.5847	3042.97	1027.01	-38.0193	3124.13	975.817	-90.6067	3086.7	935.939	-91.6758	3183.85	893.785
1088	0	158.333	3211.93	1604.83	261.804	3212.82	1602.77	139.743	3055.93	1642	276.482	3048.43	1643.14	231.228	2964.69	1491.86	232.96	2867.64	1266.51	202.918	3109.6	1398.28	193.357	3136.89	1213.52	287.321	2869.74	1339.38	32.1962	2956.35	1450.09	-35.4272	2930.58	1256.84	-63.5325	2918.76	1139.97	-79.1364	3049.23	1024.08	-36.9201	3129.29	971.055	-89.4858	3090.82	932.168	-90.9875	3186.95	887.711
1089	0	160.488	3222.51	1605	263.934	3223.25	1602.54	141.82	3066.5	1642.34	278.573	3058.91	1643	232.932	2975.07	1491.82	234.691	2878.34	1266.36	204.228	3120.06	1398.34	194.264	3147.31	1213.61	289.174	2880.29	1339.13	33.8263	2966.29	1450.15	-33.5232	2939.86	1256.91	-61.3018	2927.29	1139.95	-77.7011	3055.09	1021.01	-35.8699	3133.94	966.003	-88.3794	3094.33	928.198	-90.3643	3189.28	881.247
1090	0	162.418	3233	1605.21	265.833	3233.6	1602.41	143.655	3077.02	1642.78	280.41	3069.33	1643.03	234.509	2985.34	1491.95	236.403	2888.9	1266.38	205.416	3130.37	1398.55	195.109	3157.56	1213.83	290.988	2890.73	1339.06	35.3537	2976.08	1450.3	-31.6578	2949.02	1257.03	-59.0445	2935.69	1139.97	-76.2772	3060.56	1017.82	-34.8637	3138.1	960.715	-87.2837	3097.24	924.081	-89.7955	3190.85	874.476
1091	0	164.1	3243.39	1605.46	267.479	3243.85	1602.39	145.226	3087.47	1643.31	281.976	3079.66	1643.23	235.955	2995.51	1492.24	238.089	2899.29	1266.56	206.478	3140.52	1398.9	195.886	3167.64	1214.18	292.754	2901.08	1339.18	36.7732	2985.69	1450.53	-29.835	2958.05	1257.19	-56.7642	2943.94	1140.01	-74.8625	3065.63	1014.56	-33.8962	3141.76	955.247	-86.1942	3099.59	919.874	-89.2693	3191.69	867.483
1092	0	165.519	3253.65	1605.76	268.855	3253.99	1602.48	146.524	3097.83	1643.93	283.263	3089.91	1643.6	237.267	3005.55	1492.68	239.744	2909.53	1266.9	207.409	3150.52	1399.39	196.588	3177.56	1214.65	294.465	2911.32	1339.48	38.0816	2995.12	1450.83	-28.0575	2966.93	1257.39	-54.4639	2952.04	1140.07	-73.4538	3070.33	1011.25	-32.9614	3144.94	949.657	-85.1055	3101.4	915.633	-88.7734	3191.81	860.356
1093	0	166.661	3263.77	1606.13	269.951	3264.02	1602.7	147.543	3108.08	1644.63	284.269	3100.05	1644.16	238.443	3015.48	1493.27	241.362	2919.61	1267.39	208.209	3160.36	1400.02	197.211	3187.31	1215.25	296.116	2921.46	1339.94	39.2776	3004.38	1451.2	-26.3261	2975.66	1257.62	-52.1455	2959.99	1140.17	-72.0474	3074.66	1007.95	-32.053	3147.64	944.007	-84.0116	3102.68	911.42	-88.2952	3191.26	853.186
1094	0	167.521	3273.74	1606.56	270.764	3273.91	1603.08	148.288	3118.2	1645.41	284.998	3110.08	1644.89	239.488	3025.29	1493.99	242.938	2929.54	1268.02	208.873	3170.04	1400.82	197.808	3197.18	1216.2	297.701	2931.5	1340.56	40.362	3013.45	1451.64	-24.6406	2984.24	1257.89	-49.8105	2967.76	1140.28	-70.6392	3078.63	1004.69	-31.1644	3149.88	938.36	-82.9058	3103.48	907.293	-87.8217	3190.05	846.066
1095	0	168.101	3283.53	1607.09	271.297	3283.67	1603.61	148.771	3128.17	1646.28	285.463	3119.98	1645.79	240.403	3034.98	1494.85	244.466	2939.33	1268.78	209.422	3179.56	1401.72	198.341	3206.89	1217.24	299.217	2941.45	1341.33	41.337	3022.36	1452.13	-22.9992	2992.66	1258.18	-47.4601	2975.37	1140.43	-69.2244	3082.26	1001.51	-30.2884	3151.68	932.779	-81.7806	3103.82	903.312	-87.34	3188.24	839.085
1096	0	168.41	3293.14	1607.73	271.562	3293.3	1604.32	149.009	3137.98	1647.23	285.681	3129.75	1646.86	241.194	3044.56	1495.82	245.942	2948.98	1269.64	209.84	3188.94	1402.77	199.009	3216.5	1218.31	300.66	2951.31	1342.23	42.2059	3031.1	1452.68	-21.3993	3000.9	1258.51	-45.0955	2982.79	1140.62	-67.7987	3085.55	998.462	-29.4177	3153.05	927.328	-80.6284	3103.74	899.534	-86.837	3185.85	832.33
1097	0	168.46	3302.57	1608.5	271.573	3302.78	1605.22	149.026	3147.62	1648.26	285.675	3139.38	1648.09	241.868	3054.04	1496.91	247.36	2958.51	1270.61	210.14	3198.2	1403.95	199.584	3225.99	1219.49	302.027	2961.1	1343.25	42.9733	3039.69	1453.29	-19.8378	3008.98	1258.88	-42.7184	2990.02	1140.87	-66.3574	3088.53	995.577	-28.5443	3154.01	922.066	-79.441	3103.28	896.01	-86.2992	3182.94	825.881
1098	0	168.273	3311.81	1609.41	271.353	3312.12	1606.32	148.85	3157.07	1649.37	285.47	3148.86	1649.46	242.432	3063.41	1498.1	248.714	2967.93	1271.67	210.329	3207.34	1405.25	200.065	3235.37	1220.77	303.317	2970.82	1344.36	43.6445	3048.16	1453.95	-18.3114	3016.87	1259.29	-40.3314	2997.06	1141.17	-64.8963	3091.21	992.896	-27.6602	3154.59	917.051	-78.2103	3102.46	892.788	-85.7129	3179.55	819.812
1099	0	167.872	3320.87	1610.48	270.926	3321.33	1607.6	148.508	3166.33	1650.56	285.094	3158.19	1650.94	242.893	3072.69	1499.36	249.998	2977.26	1272.8	210.413	3216.38	1406.66	200.453	3244.67	1222.15	304.529	2980.49	1345.57	44.2253	3056.51	1454.66	-16.8171	3024.58	1259.76	-37.9384	3003.9	1141.55	-63.4121	3093.62	990.449	-26.7572	3154.82	912.334	-76.9286	3101.35	889.907	-85.0638	3175.74	814.186
1100	0	167.286	3329.75	1611.69	270.321	3330.42	1609.07	148.031	3175.4	1651.81	284.576	3167.38	1652.53	243.259	3081.89	1500.7	251.208	2986.51	1273.99	210.401	3225.34	1408.15	200.751	3253.91	1223.61	305.66	2990.11	1346.84	44.7224	3064.78	1455.42	-15.3523	3032.11	1260.28	-35.5446	3010.54	1142.01	-61.9018	3095.78	988.264	-25.8271	3154.74	907.961	-75.5886	3099.97	887.397	-84.3371	3171.56	809.054
1101	0	166.544	3338.48	1613.07	269.566	3339.38	1610.71	147.45	3184.28	1653.12	283.943	3176.41	1654.19	243.54	3091.02	1502.09	252.339	2995.7	1275.23	210.302	3234.25	1409.71	200.961	3263.08	1225.14	306.71	2999.7	1348.17	45.1425	3072.97	1456.21	-13.9156	3039.47	1260.86	-33.1567	3016.97	1142.57	-60.3636	3097.72	986.363	-24.8618	3154.38	903.97	-74.1838	3098.39	885.28	-83.518	3167.09	804.453
1102	0	165.677	3347.08	1614.58	268.692	3348.24	1612.51	146.791	3192.99	1654.48	283.215	3185.3	1655.9	243.744	3100.09	1503.51	253.385	3004.84	1276.49	210.124	3243.1	1411.31	201.085	3272.22	1226.7	307.679	3009.27	1349.52	45.4926	3081.12	1457.04	-12.5065	3046.65	1261.51	-30.7831	3023.2	1143.22	-58.7968	3099.46	984.759	-23.8536	3153.8	900.388	-72.7091	3096.66	883.566	-82.5916	3162.4	800.408
1103	0	164.716	3355.56	1616.22	267.728	3357.01	1614.43	146.08	3201.54	1655.85	282.436	3194.07	1657.63	243.879	3109.13	1504.94	254.343	3013.95	1277.76	209.875	3251.93	1412.93	201.128	3281.32	1228.29	308.564	3018.82	1350.88	45.7798	3089.25	1457.9	-11.1256	3053.66	1262.23	-28.4332	3029.24	1143.98	-57.2016	3101.04	983.461	-22.795	3153.03	897.234	-71.1608	3094.83	882.258	-81.5439	3157.56	796.928
1104	0	163.688	3363.95	1617.96	266.701	3365.7	1616.45	145.339	3209.95	1657.23	281.61	3202.72	1659.35	243.952	3118.13	1506.36	255.207	3023.03	1279.02	209.565	3260.74	1414.54	201.093	3290.4	1229.87	309.365	3028.36	1352.24	46.0105	3097.36	1458.76	-9.77466	3060.51	1263.01	-26.1176	3035.1	1144.84	-55.5796	3102.49	982.468	-21.6796	3152.13	894.517	-69.5373	3092.95	881.346	-80.3625	3152.65	794.008
1105	0	162.621	3372.28	1619.76	265.635	3374.33	1618.52	144.585	3218.26	1658.6	280.764	3211.28	1661.03	243.97	3127.11	1507.75	255.975	3032.11	1280.25	209.201	3269.56	1416.12	200.982	3299.48	1231.42	310.08	3037.89	1353.56	46.1908	3105.48	1459.61	-8.45674	3067.22	1263.85	-23.8478	3040.78	1145.79	-53.9332	3103.84	981.773	-20.5023	3151.15	892.236	-67.8385	3091.08	880.813	-79.0371	3147.76	791.63
1106	0	161.537	3380.57	1621.6	264.553	3382.92	1620.61	143.833	3226.49	1659.93	279.915	3219.77	1662.64	243.938	3136.1	1509.08	256.641	3041.17	1281.43	208.789	3278.38	1417.64	200.8	3308.55	1232.91	310.706	3047.42	1354.83	46.3254	3113.63	1460.45	-7.17572	3073.8	1264.75	-21.6352	3046.31	1146.85	-52.2658	3105.14	981.364	-19.2593	3150.15	890.381	-66.0668	3089.28	880.634	-77.5607	3142.96	789.764
1107	0	160.454	3388.86	1623.42	263.471	3391.5	1622.68	143.093	3234.66	1661.19	279.076	3228.22	1664.16	243.86	3145.09	1510.34	257.202	3050.25	1282.55	208.336	3287.23	1419.06	200.719	3317.53	1234.16	311.241	3056.94	1356.03	46.4182	3121.8	1461.26	-5.93639	3080.27	1265.7	-19.4911	3051.7	1147.98	-50.5816	3106.41	981.221	-17.9491	3149.19	888.933	-64.2266	3087.61	880.777	-75.9301	3138.34	788.374
1108	0	159.387	3397.17	1625.2	262.404	3400.08	1624.68	142.372	3242.82	1662.37	278.257	3236.64	1665.55	243.737	3154.1	1511.5	257.654	3059.33	1283.6	207.845	3296.11	1420.38	200.585	3326.5	1235.3	311.681	3066.47	1357.15	46.4711	3130.03	1462.01	-4.74417	3086.65	1266.69	-17.4264	3056.99	1149.19	-48.8859	3107.71	981.322	-16.5722	3148.31	887.864	-62.3244	3086.11	881.206	-74.1468	3133.98	787.414
1109	0	158.347	3405.52	1626.89	261.361	3408.67	1626.57	141.674	3250.99	1663.44	277.464	3245.08	1666.8	243.572	3163.14	1512.54	257.992	3068.43	1284.54	207.321	3305.04	1421.55	200.412	3335.47	1236.32	312.022	3076	1358.16	46.4847	3138.31	1462.69	-3.60499	3092.96	1267.7	-15.451	3062.19	1150.45	-47.1842	3109.06	981.64	-15.1316	3147.57	887.143	-60.3685	3084.84	881.881	-72.2171	3129.94	786.833
1110	0	157.339	3413.93	1628.45	260.349	3417.3	1628.32	140.998	3259.2	1664.38	276.698	3253.54	1667.89	243.361	3172.22	1513.46	258.214	3077.56	1285.37	206.762	3313.99	1422.58	200.169	3344.46	1237.2	312.261	3085.53	1359.06	46.4576	3146.65	1463.29	-2.52519	3099.23	1268.74	-13.5735	3067.32	1151.76	-45.4832	3110.51	982.144	-13.6327	3147.02	886.733	-58.369	3083.84	882.76	-70.1526	3126.3	786.582
1111	0	156.366	3422.42	1629.85	259.369	3425.99	1629.89	140.342	3267.48	1665.18	275.959	3262.06	1668.81	243.103	3181.35	1514.24	258.315	3086.7	1286.08	206.172	3323	1423.44	199.868	3353.48	1237.92	312.393	3095.06	1359.83	46.3869	3155.07	1463.8	-1.51146	3105.49	1269.78	-11.8013	3072.43	1153.09	-43.7903	3112.08	982.805	-12.0835	3146.71	886.593	-56.3375	3083.16	883.801	-67.9693	3123.12	786.606
1112	0	155.424	3431.01	1631.07	258.422	3434.75	1631.25	139.702	3275.85	1665.83	275.242	3270.66	1669.54	242.794	3190.54	1514.86	258.292	3095.88	1286.66	205.549	3332.07	1424.12	199.507	3362.51	1238.45	312.414	3104.59	1360.46	46.2677	3163.58	1464.2	-0.570766	3111.75	1270.81	-10.1406	3077.54	1154.44	-42.1136	3113.83	983.589	-10.4941	3146.68	886.682	-54.2867	3082.82	884.965	-65.6881	3120.45	786.856
1113	0	154.509	3439.7	1632.07	257.503	3443.59	1632.38	139.07	3284.33	1666.31	274.54	3279.34	1670.07	242.428	3199.78	1515.32	258.143	3105.09	1287.1	204.891	3341.19	1424.6	199.087	3371.58	1238.8	312.318	3114.13	1360.94	46.0941	3172.17	1464.48	0.289621	3118.05	1271.81	-8.59593	3082.68	1155.78	-40.4626	3115.78	984.465	-8.87711	3146.97	886.958	-52.2306	3082.86	886.211	-63.3333	3118.32	787.282
1114	0	153.613	3448.51	1632.85	256.606	3452.52	1633.27	138.437	3292.93	1666.62	273.842	3288.13	1670.4	241.999	3209.09	1515.62	257.865	3114.34	1287.4	204.195	3350.38	1424.89	198.605	3380.69	1239.01	312.103	3123.66	1361.28	45.8586	3180.87	1464.63	1.06215	3124.41	1272.79	-7.1712	3087.87	1157.09	-38.8476	3117.97	985.401	-7.24711	3147.63	887.378	-50.1837	3083.31	887.503	-60.9319	3116.77	787.84
1115	0	152.726	3457.44	1633.39	255.725	3461.56	1633.9	137.794	3301.67	1666.75	273.138	3297.04	1670.53	241.498	3218.47	1515.74	257.457	3123.62	1287.55	203.457	3359.63	1424.99	198.067	3389.84	1239.02	311.763	3133.21	1361.46	45.553	3189.67	1464.66	1.739	3130.86	1273.71	-5.86936	3093.14	1158.38	-37.2801	3120.42	986.367	-5.62055	3148.67	887.903	-48.1616	3084.18	888.808	-58.513	3115.83	788.489
1116	0	151.838	3466.5	1633.68	254.85	3470.7	1634.26	137.128	3310.56	1666.71	272.413	3306.06	1670.46	240.919	3227.92	1515.7	256.92	3132.95	1287.55	202.671	3368.96	1424.9	197.459	3399.03	1238.85	311.295	3142.76	1361.5	45.1687	3198.59	1464.56	2.31208	3137.42	1274.58	-4.69306	3098.53	1159.61	-35.7728	3123.15	987.334	-4.0156	3150.13	888.494	-46.1807	3085.5	890.095	-56.1065	3115.5	789.191
1117	0	150.936	3475.67	1633.74	253.971	3479.95	1634.37	136.429	3319.6	1666.49	271.654	3315.21	1670.19	240.252	3237.45	1515.5	256.253	3142.32	1287.41	201.836	3378.34	1424.6	196.784	3408.27	1238.52	310.697	3152.33	1361.39	44.6965	3207.63	1464.32	2.77303	3144.12	1275.38	-3.64499	3104.06	1160.77	-34.3397	3126.21	988.275	-2.45198	3152.02	889.115	-44.258	3087.27	891.336	-53.7425	3115.79	789.914
1118	0	150.01	3484.98	1633.57	253.076	3489.31	1634.22	135.682	3328.78	1666.09	270.847	3324.49	1669.74	239.489	3247.05	1515.14	255.457	3151.73	1287.14	200.943	3387.81	1424.13	196.04	3417.57	1238.01	309.966	3161.91	1361.13	44.1277	3216.79	1463.95	3.11328	3150.99	1276.09	-2.72815	3109.76	1161.85	-32.9955	3129.6	989.163	-0.950621	3154.36	889.733	-42.4114	3089.5	892.507	-51.4507	3116.69	790.627
1119	0	149.049	3494.41	1633.16	252.155	3498.78	1633.84	134.876	3338.13	1665.54	269.974	3333.9	1669.12	238.623	3256.73	1514.64	254.535	3161.19	1286.72	199.986	3397.35	1423.49	195.216	3426.93	1237.33	309.101	3171.51	1360.74	43.4537	3226.08	1463.46	3.32407	3158.03	1276.71	-1.94621	3115.64	1162.84	-31.7554	3133.35	989.977	0.466579	3157.18	890.317	-40.6591	3092.21	893.586	-49.2595	3118.2	791.304
1120	0	148.043	3503.96	1632.55	251.198	3508.36	1633.22	133.998	3347.62	1664.82	269.029	3343.43	1668.33	237.646	3266.49	1513.99	253.489	3170.71	1286.19	198.962	3406.97	1422.67	194.342	3436.34	1236.5	308.102	3181.13	1360.23	42.6668	3235.5	1462.83	3.39649	3165.29	1277.23	-1.3037	3121.74	1163.72	-30.635	3137.47	990.695	1.77721	3160.46	890.838	-39.0204	3095.39	894.554	-47.1961	3120.32	791.92
1121	0	146.984	3513.64	1631.73	250.192	3518.05	1632.39	133.034	3357.27	1663.97	267.992	3353.08	1667.4	236.552	3276.32	1513.21	252.323	3180.27	1285.53	197.865	3416.66	1421.71	193.387	3445.81	1235.52	306.969	3190.79	1359.6	41.7604	3245.05	1462.08	3.3217	3172.76	1277.63	-0.806072	3128.07	1164.47	-29.6498	3141.98	991.298	2.9588	3164.23	891.271	-37.5146	3099.05	895.394	-45.2856	3123.02	792.453
1122	0	145.863	3523.44	1630.73	249.128	3527.84	1631.37	131.974	3367.07	1662.97	266.854	3362.85	1666.33	235.336	3286.23	1512.31	251.041	3189.89	1284.77	196.692	3426.43	1420.6	192.36	3455.34	1234.39	305.704	3200.47	1358.86	40.7287	3254.73	1461.22	3.09099	3180.48	1277.9	-0.459656	3134.65	1165.09	-28.8149	3146.9	991.769	3.98923	3168.49	891.592	-36.1616	3103.2	896.091	-43.5516	3126.29	792.882
1123	0	144.674	3533.37	1629.55	247.997	3537.73	1630.18	130.806	3377.01	1661.85	265.604	3372.72	1665.13	233.993	3296.21	1511.31	249.648	3199.56	1283.91	195.437	3436.27	1419.35	191.261	3464.93	1233.15	304.309	3210.19	1358.03	39.5673	3264.54	1460.24	2.6961	3188.46	1278.03	-0.271502	3141.5	1165.56	-28.1448	3152.23	992.094	4.84725	3173.23	891.78	-34.9809	3107.82	896.63	-42.0152	3130.13	793.19
1124	0	143.41	3543.42	1628.23	246.787	3547.72	1628.83	129.518	3387.1	1660.62	264.232	3382.71	1663.83	232.522	3306.27	1510.21	248.149	3209.29	1282.97	194.105	3446.17	1417.96	190.047	3474.56	1231.76	302.787	3219.95	1357.12	38.273	3274.48	1459.14	2.12939	3196.7	1278.02	-0.249099	3148.63	1165.87	-27.6533	3157.99	992.258	5.51288	3178.47	891.816	-33.992	3112.93	897	-40.6957	3134.53	793.358
1125	0	142.066	3553.6	1626.76	245.498	3557.81	1627.34	128.102	3397.34	1659.29	262.732	3392.8	1662.44	230.92	3316.4	1509.03	246.55	3219.07	1281.95	192.684	3456.14	1416.48	188.79	3484.25	1230.27	301.143	3229.75	1356.14	36.8437	3284.54	1457.95	1.38412	3205.22	1277.84	-0.400083	3156.06	1166.01	-27.3527	3164.19	992.252	5.96784	3184.21	891.681	-33.2133	3118.53	897.19	-39.6104	3139.47	793.371
1126	0	140.638	3563.89	1625.17	244.116	3568	1625.74	126.548	3407.71	1657.86	261.097	3402.99	1660.97	229.187	3326.6	1507.78	244.857	3228.91	1280.87	191.172	3466.2	1414.91	187.489	3494.02	1228.7	299.38	3239.59	1355.1	35.2789	3294.71	1456.65	0.454653	3214.02	1277.5	-0.731911	3163.79	1165.97	-27.2543	3170.83	992.064	6.19588	3190.44	891.362	-32.6623	3124.61	897.19	-38.7744	3144.95	793.214
1127	0	139.12	3574.31	1623.48	242.637	3578.27	1624.04	124.849	3418.23	1656.34	259.322	3413.27	1659.44	227.324	3336.87	1506.47	243.076	3238.81	1279.73	189.568	3476.34	1413.27	186.146	3503.85	1227.06	297.502	3249.48	1354.01	33.5785	3305	1455.26	-0.663409	3223.11	1276.99	-1.25154	3171.83	1165.72	-27.3677	3177.92	991.686	6.18296	3197.16	890.845	-32.3549	3131.19	896.992	-38.2009	3150.97	792.876
1128	0	137.508	3584.84	1621.68	241.056	3588.63	1622.25	122.999	3428.89	1654.76	257.405	3423.65	1657.85	225.332	3347.21	1505.1	241.212	3248.76	1278.54	187.88	3486.52	1411.53	184.671	3513.7	1225.3	295.514	3259.41	1352.88	31.7435	3315.39	1453.77	-1.97321	3232.49	1276.29	-1.96517	3180.19	1165.28	-27.7011	3185.46	991.111	5.91732	3204.38	890.119	-32.3055	3138.27	896.589	-37.9014	3157.54	792.348
1129	0	135.797	3595.49	1619.8	239.369	3599.08	1620.39	120.993	3439.7	1653.1	255.343	3434.13	1656.22	223.213	3357.61	1503.69	239.27	3258.77	1277.31	186.103	3496.76	1409.71	183.157	3523.61	1223.48	293.42	3269.39	1351.72	29.7755	3325.87	1452.2	-3.47679	3242.15	1275.41	-2.87804	3188.88	1164.63	-28.2612	3193.47	990.335	5.38944	3212.08	889.178	-32.5259	3145.84	895.976	-37.8855	3164.64	791.62
1130	0	133.985	3606.25	1617.83	237.573	3609.62	1618.47	118.828	3450.64	1651.39	253.134	3444.69	1654.55	220.969	3368.08	1502.25	237.256	3268.83	1276.05	184.235	3507.06	1407.82	181.556	3533.55	1221.58	291.223	3279.42	1350.53	27.6759	3336.45	1450.54	-5.1753	3252.1	1274.34	-3.99433	3197.89	1163.75	-29.053	3201.94	989.352	4.59194	3220.29	888.013	-33.0263	3153.91	895.147	-38.1613	3172.3	790.688
1131	0	132.068	3617.13	1615.79	235.666	3620.25	1616.5	116.503	3461.73	1649.62	250.777	3455.35	1652.86	218.601	3378.62	1500.77	235.173	3278.95	1274.76	182.279	3517.4	1405.87	179.82	3543.51	1219.6	288.927	3289.49	1349.33	25.4466	3347.12	1448.79	-7.06935	3262.34	1273.07	-5.31723	3207.24	1162.66	-30.0804	3210.87	988.161	3.51941	3228.98	886.621	-33.8144	3162.49	894.101	-38.7349	3180.5	789.547
1132	0	130.043	3628.1	1613.68	233.646	3630.97	1614.48	114.017	3472.95	1647.81	248.273	3466.09	1651.14	216.112	3389.22	1499.27	233.024	3289.13	1273.45	180.232	3527.8	1403.86	178.046	3553.53	1217.56	286.532	3299.61	1348.11	23.0887	3357.87	1446.97	-9.15915	3272.86	1271.61	-6.849	3216.91	1161.34	-31.3459	3220.27	986.759	2.16822	3238.16	884.999	-34.896	3171.57	892.835	-39.6111	3189.26	788.196
1133	0	127.911	3639.19	1611.51	231.513	3641.77	1612.42	111.37	3484.31	1645.95	245.621	3476.93	1649.41	213.503	3399.89	1497.75	230.81	3299.36	1272.12	178.096	3538.25	1401.8	176.228	3563.58	1215.47	284.042	3309.78	1346.87	20.6035	3368.7	1445.07	-11.4447	3283.66	1269.94	-8.59107	3226.91	1159.8	-32.8513	3230.14	985.144	0.536263	3247.84	883.145	-36.2747	3181.16	891.347	-40.7932	3198.57	786.631
1134	0	125.67	3650.38	1609.27	229.262	3652.66	1610.34	108.561	3495.81	1644.04	242.822	3487.85	1647.66	210.775	3410.63	1496.2	228.533	3309.65	1270.77	175.87	3548.75	1399.68	174.372	3573.69	1213.33	281.456	3319.99	1345.63	17.9916	3379.62	1443.09	-13.926	3294.74	1268.08	-10.5443	3237.25	1158.03	-34.5974	3240.47	983.317	-1.37748	3258.01	881.058	-37.9527	3191.25	889.637	-42.2833	3208.45	784.854
1135	0	123.32	3661.68	1606.97	226.904	3663.64	1608.2	105.591	3507.44	1642.09	239.875	3498.87	1645.9	207.928	3421.43	1494.63	226.194	3319.99	1269.39	173.555	3559.3	1397.51	172.472	3583.83	1211.15	278.775	3330.25	1344.37	15.2533	3390.61	1441.04	-16.6029	3306.11	1266.03	-12.709	3247.91	1156.03	-36.5848	3251.28	981.276	-3.57339	3268.67	878.739	-39.9312	3201.86	887.705	-44.0825	3218.88	782.864
1136	0	120.861	3673.08	1604.61	224.429	3674.71	1606.03	102.461	3519.21	1640.1	236.781	3509.97	1644.12	204.962	3432.29	1493.05	223.792	3330.39	1268	171.151	3569.9	1395.29	170.44	3594	1208.88	276	3340.56	1343.11	12.3888	3401.68	1438.91	-19.4754	3317.75	1263.77	-15.0854	3258.91	1153.8	-38.8136	3262.55	979.023	-6.05159	3279.82	876.187	-42.2103	3212.97	885.55	-46.1911	3229.88	780.659
[truncated: 69 more columns]

## Sheet: Sheet2
Devices
		025370 - Force			025370 - Moment			025370 - CoP			027571 - Force			027571 - Moment			027571 - CoP			037720 - Force			037720 - Moment			037720 - CoP
Frame	Sub Frame	Fx	Fy	Fz	Mx	My	Mz	Cx	Cy	Cz	Fx	Fy	Fz	Mx	My	Mz	Cx	Cy	Cz	Fx	Fy	Fz	Mx	My	Mz	Cx	Cy	Cz
		N	N	N	N.mm	N.mm	N.mm	mm	mm	mm	N	N	N	N.mm	N.mm	N.mm	mm	mm	mm	N	N	N	N.mm	N.mm	N.mm	mm	mm	mm
769	0	0	0	0	0	0	0	200	300	0	0	0	0	0	0	0	200	903	0	0	0	0	0	0	0	603	903	0
769	1	0	0	0	0	0	0	200	300	0	0	0	0	0	0	0	200	903	0	0	0	0	0	0	0	603	903	0
769	2	0	0	0	0	0	0	200	300	0	0	0	0	0	0	0	200	903	0	0	0	0	0	0	0	603	903	0
769	3	0	0	0	0	0	0	200	300	0	0	0	0	0	0	0	200	903	0	0	0	0	0	0	0	603	903	0
769	4	0	0	0	0	0	0	200	300	0	0	0	0	0	0	0	200	903	0	0	0	0	0	0	0	603	903	0
769	5	0	0	0	0	0	0	200	300	0	0	0	0	0	0	0	200	903	0	0	0	0	0	0	0	603	903	0
769	6	0	0	0	0	0	0	200	300	0	0	0	0	0	0	0	200	903	0	0	0	0	0	0	0	603	903	0
769	7	0	0	0	0	0	0	200	300	0	0	0	0	0	0	0	200	903	0	0	0	0	0	0	0	603	903	0
769	8	0	0	0	0	0	0	200	300	0	0	0	0	0	0	0	200	903	0	0	0	0	0	0	0	603	903	0
769	9	0	0	0	0	0	0	200	300	0	0	0	0	0	0	0	200	903	0	0	0	0	0	0	0	603	903	0
770	0	0	0	0	0	0	0	200	300	0	0	0	0	0	0	0	200	903	0	0	0	0	0	0	0	603	903	0
770	1	0	0	0	0	0	0	200	300	0	0	0	0	0	0	0	200	903	0	0	0	0	0	0	0	603	903	0
770	2	0	0	0	0	0	0	200	300	0	0	0	0	0	0	0	200	903	0	0	0	0	0	0	0	603	903	0
770	3	0	0	0	0	0	0	200	300	0	0	0	0	0	0	0	200	903	0	0	0	0	0	0	0	603	903	0
770	4	0	0	0	0	0	0	200	300	0	0	0	0	0	0	0	200	903	0	0	0	0	0	0	0	603	903	0
770	5	0	0	0	0	0	0	200	300	0	0	0	0	0	0	0	200	903	0	0	0	0	0	0	0	603	903	0
770	6	0	0	0	0	0	0	200	300	0	0	0	0	0	0	0	200	903	0	0	0	0	0	0	0	603	903	0
770	7	0	0	0	0	0	0	200	300	0	0	0	0	0	0	0	200	903	0	0	0	0	0	0	0	603	903	0
770	8	0	0	0	0	0	0	200	300	0	0	0	0	0	0	0	200	903	0	0	0	0	0	0	0	603	903	0
770	9	0	0	0	0	0	0	200	300	0	0	0	0	0	0	0	200	903	0	0	0	0	0	0	0	603	903	0
771	0	0	0	0	0	0	0	200	300	0	0	0	0	0	0	0	200	903	0	0	0	0	0	0	0	603	903	0
771	1	0	0	0	0	0	0	200	300	0	0	0	0	0	0	0	200	903	0	0	0	0	0	0	0	603	903	0
771	2	0	0	0	0	0	0	200	300	0	0	0	0	0	0	0	200	903	0	0	0	0	0	0	0	603	903	0
771	3	0	0	0	0	0	0	200	300	0	0	0	0	0	0	0	200	903	0	0	0	0	0	0	0	603	903	0
771	4	0	0	0	0	0	0	200	300	0	0	0	0	0	0	0	200	903	0	0	0	0	0	0	0	603	903	0
771	5	0	0	0	0	0	0	200	300	0	0	0	0	0	0	0	200	903	0	0	0	0	0	0	0	603	903	0
771	6	0	0	0	0	0	0	200	300	0	0	0	0	0	0	0	200	903	0	0	0	0	0	0	0	603	903	0
771	7	0	0	0	0	0	0	200	300	0	0	0	0	0	0	0	200	903	0	0	0	0	0	0	0	603	903	0
771	8	0	0	0	0	0	0	200	300	0	0	0	0	0	0	0	200	903	0	0	0	0	0	0	0	603	903	0
771	9	0	0	0	0	0	0	200	300	0	0	0	0	0	0	0	200	903	0	0	0	0	0	0	0	603	903	0
772	0	0	0	0	0	0	0	200	300	0	0	0	0	0	0	0	200	903	0	0	0	0	0	0	0	603	903	0
772	1	0	0	0	0	0	0	200	300	0	0	0	0	0	0	0	200	903	0	0	0	0	0	0	0	603	903	0
772	2	0	0	0	0	0	0	200	300	0	0	0	0	0	0	0	200	903	0	0	0	0	0	0	0	603	903	0
772	3	0	0	0	0	0	0	200	300	0	0	0	0	0	0	0	200	903	0	0	0	0	0	0	0	603	903	0
772	4	0	0	0	0	0	0	200	300	0	0	0	0	0	0	0	200	903	0	0	0	0	0	0	0	603	903	0
772	5	0	0	0	0	0	0	200	300	0	0	0	0	0	0	0	200	903	0	0	0	0	0	0	0	603	903	0
772	6	0	0	0	0	0	0	200	300	0	0	0	0	0	0	0	200	903	0	0	0	0	0	0	0	603	903	0
772	7	0	0	0	0	0	0	200	300	0	0	0	0	0	0	0	200	903	0	0	0	0	0	0	0	603	903	0
772	8	0	0	0	0	0	0	200	300	0	0	0	0	0	0	0	200	903	0	0	0	0	0	0	0	603	903	0
772	9	0	0	0	0	0	0	200	300	0	0	0	0	0	0	0	200	903	0	0	0	0	0	0	0	603	903	0
773	0	0	0	0	0	0	0	200	300	0	0	0	0	0	0	0	200	903	0	0	0	0	0	0	0	603	903	0
773	1	0	0	0	0	0	0	200	300	0	0	0	0	0	0	0	200	903	0	0	0	0	0	0	0	603	903	0
773	2	0	0	0	0	0	0	200	300	0	0	0	0	0	0	0	200	903	0	0	0	0	0	0	0	603	903	0
773	3	0	0	0	0	0	0	200	300	0	0	0	0	0	0	0	200	903	0	0	0	0	0	0	0	603	903	0
773	4	0	0	0	0	0	0	200	300	0	0	0	0	0	0	0	200	903	0	0	0	0	0	0	0	603	903	0
773	5	0	0	0	0	0	0	200	300	0	0	0	0	0	0	0	200	903	0	0	0	0	0	0	0	603	903	0
773	6	0	0	0	0	0	0	200	300	0	0	0	0	0	0	0	200	903	0	0	0	0	0	0	0	603	903	0
773	7	0	0	0	0	0	0	200	300	0	0	0	0	0	0	0	200	903	0	0	0	0	0	0	0	603	903	0
773	8	0	0	0	0	0	0	200	300	0	0	0	0	0	0	0	200	903	0	0	0	0	0	0	0	603	903	0
773	9	0	0	0	0	0	0	200	300	0	0	0	0	0	0	0	200	903	0	0	0	0	0	0	0	603	903	0
774	0	0	0	0	0	0	0	200	300	0	0	0	0	0	0	0	200	903	0	0	0	0	0	0	0	603	903	0
774	1	0	0	0	0	0	0	200	300	0	0	0	0	0	0	0	200	903	0	0	0	0	0	0	0	603	903	0
774	2	0	0	0	0	0	0	200	300	0	0	0	0	0	0	0	200	903	0	0	0	0	0	0	0	603	903	0
774	3	0	0	0	0	0	0	200	300	0	0	0	0	0	0	0	200	903	0	0	0	0	0	0	0	603	903	0
774	4	0	0	0	0	0	0	200	300	0	0	0	0	0	0	0	200	903	0	0	0	0	0	0	0	603	903	0
774	5	0	0	0	0	0	0	200	300	0	0	0	0	0	0	0	200	903	0	0	0	0	0	0	0	603	903	0
774	6	0	0	0	0	0	0	200	300	0	0	0	0	0	0	0	200	903	0	0	0	0	0	0	0	603	903	0
774	7	0	0	0	0	0	0	200	300	0	0	0	0	0	0	0	200	903	0	0	0	0	0	0	0	603	903	0
774	8	0	0	0	0	0	0	200	300	0	0	0	0	0	0	0	200	903	0	0	0	0	0	0	0	603	903	0
774	9	0	0	0	0	0	0	200	300	0	0	0	0	0	0	0	200	903	0	0	0	0	0	0	0	603	903	0
775	0	0	0	0	0	0	0	200	300	0	0	0	0	0	0	0	200	903	0	0	0	0	0	0	0	603	903	0
775	1	0	0	0	0	0	0	200	300	0	0	0	0	0	0	0	200	903	0	0	0	0	0	0	0	603	903	0
775	2	0	0	0	0	0	0	200	300	0	0	0	0	0	0	0	200	903	0	0	0	0	0	0	0	603	903	0
775	3	0	0	0	0	0	0	200	300	0	0	0	0	0	0	0	200	903	0	0	0	0	0	0	0	603	903	0
775	4	0	0	0	0	0	0	200	300	0	0	0	0	0	0	0	200	903	0	0	0	0	0	0	0	603	903	0
775	5	0	0	0	0	0	0	200	300	0	0	0	0	0	0	0	200	903	0	0	0	0	0	0	0	603	903	0
775	6	0	0	0	0	0	0	200	300	0	0	0	0	0	0	0	200	903	0	0	0	0	0	0	0	603	903	0
775	7	0	0	0	0	0	0	200	300	0	0	0	0	0	0	0	200	903	0	0	0	0	0	0	0	603	903	0
775	8	0	0	0	0	0	0	200	300	0	0	0	0	0	0	0	200	903	0	0	0	0	0	0	0	603	903	0
775	9	0	0	0	0	0	0	200	300	0	0	0	0	0	0	0	200	903	0	0	0	0	0	0	0	603	903	0
776	0	0	0	0	0	0	0	200	300	0	0	0	0	0	0	0	200	903	0	0	0	0	0	0	0	603	903	0
776	1	0	0	0	0	0	0	200	300	0	0	0	0	0	0	0	200	903	0	0	0	0	0	0	0	603	903	0
776	2	0	0	0	0	0	0	200	300	0	0	0	0	0	0	0	200	903	0	0	0	0	0	0	0	603	903	0
776	3	0	0	0	0	0	0	200	300	0	0	0	0	0	0	0	200	903	0	0	0	0	0	0	0	603	903	0
776	4	0	0	0	0	0	0	200	300	0	0	0	0	0	0	0	200	903	0	0	0	0	0	0	0	603	903	0
776	5	0	0	0	0	0	0	200	300	0	0	0	0	0	0	0	200	903	0	0	0	0	0	0	0	603	903	0
776	6	0	0	0	0	0	0	200	300	0	0	0	0	0	0	0	200	903	0	0	0	0	0	0	0	603	903	0
776	7	0	0	0	0	0	0	200	300	0	0	0	0	0	0	0	200	903	0	0	0	0	0	0	0	603	903	0
776	8	0	0	0	0	0	0	200	300	0	0	0	0	0	0	0	200	903	0	0	0	0	0	0	0	603	903	0
776	9	0	0	0	0	0	0	200	300	0	0	0	0	0	0	0	200	903	0	0	0	0	0	0	0	603	903	0
777	0	0	0	0	0	0	0	200	300	0	0	0	0	0	0	0	200	903	0	0	0	0	0	0	0	603	903	0
777	1	0	0	0	0	0	0	200	300	0	0	0	0	0	0	0	200	903	0	0	0	0	0	0	0	603	903	0
777	2	0	0	0	0	0	0	200	300	0	0	0	0	0	0	0	200	903	0	0	0	0	0	0	0	603	903	0
777	3	0	0	0	0	0	0	200	300	0	0	0	0	0	0	0	200	903	0	0	0	0	0	0	0	603	903	0
777	4	0	0	0	0	0	0	200	300	0	0	0	0	0	0	0	200	903	0	0	0	0	0	0	0	603	903	0
777	5	0	0	0	0	0	0	200	300	0	0	0	0	0	0	0	200	903	0	0	0	0	0	0	0	603	903	0
777	6	0	0	0	0	0	0	200	300	0	0	0	0	0	0	0	200	903	0	0	0	0	0	0	0	603	903	0
777	7	0	0	0	0	0	0	200	300	0	0	0	0	0	0	0	200	903	0	0	0	0	0	0	0	603	903	0
777	8	0	0	0	0	0	0	200	300	0	0	0	0	0	0	0	200	903	0	0	0	0	0	0	0	603	903	0
777	9	0	0	0	0	0	0	200	300	0	0	0	0	0	0	0	200	903	0	0	0	0	0	0	0	603	903	0
778	0	0	0	0	0	0	0	200	300	0	0	0	0	0	0	0	200	903	0	0	0	0	0	0	0	603	903	0
778	1	0	0	0	0	0	0	200	300	0	0	0	0	0	0	0	200	903	0	0	0	0	0	0	0	603	903	0
778	2	0	0	0	0	0	0	200	300	0	0	0	0	0	0	0	200	903	0	0	0	0	0	0	0	603	903	0
778	3	0	0	0	0	0	0	200	300	0	0	0	0	0	0	0	200	903	0	0	0	0	0	0	0	603	903	0
778	4	0	0	0	0	0	0	200	300	0	0	0	0	0	0	0	200	903	0	0	0	0	0	0	0	603	903	0
778	5	0	0	0	0	0	0	200	300	0	0	0	0	0	0	0	200	903	0	0	0	0	0	0	0	603	903	0
778	6	0	0	0	0	0	0	200	300	0	0	0	0	0	0	0	200	903	0	0	0	0	0	0	0	603	903	0
778	7	0	0	0	0	0	0	200	300	0	0	0	0	0	0	0	200	903	0	0	0	0	0	0	0	603	903	0
778	8	0	0	0	0	0	0	200	300	0	0	0	0	0	0	0	200	903	0	0	0	0	0	0	0	603	903	0
778	9	0	0	0	0	0	0	200	300	0	0	0	0	0	0	0	200	903	0	0	0	0	0	0	0	603	903	0
779	0	0	0	0	0	0	0	200	300	0	0	0	0	0	0	0	200	903	0	0	0	0	0	0	0	603	903	0
779	1	0	0	0	0	0	0	200	300	0	0	0	0	0	0	0	200	903	0	0	0	0	0	0	0	603	903	0
779	2	0	0	0	0	0	0	200	300	0	0	0	0	0	0	0	200	903	0	0	0	0	0	0	0	603	903	0
779	3	0	0	0	0	0	0	200	300	0	0	0	0	0	0	0	200	903	0	0	0	0	0	0	0	603	903	0
779	4	0	0	0	0	0	0	200	300	0	0	0	0	0	0	0	200	903	0	0	0	0	0	0	0	603	903	0
779	5	0	0	0	0	0	0	200	300	0	0	0	0	0	0	0	200	903	0	0	0	0	0	0	0	603	903	0
779	6	0	0	0	0	0	0	200	300	0	0	0	0	0	0	0	200	903	0	0	0	0	0	0	0	603	903	0
779	7	0	0	0	0	0	0	200	300	0	0	0	0	0	0	0	200	903	0	0	0	0	0	0	0	603	903	0
779	8	0	0	0	0	0	0	200	300	0	0	0	0	0	0	0	200	903	0	0	0	0	0	0	0	603	903	0
779	9	0	0	0	0	0	0	200	300	0	0	0	0	0	0	0	200	903	0	0	0	0	0	0	0	603	903	0
780	0	0	0	0	0	0	0	200	300	0	0	0	0	0	0	0	200	903	0	0	0	0	0	0	0	603	903	0
780	1	0	0	0	0	0	0	200	300	0	0	0	0	0	0	0	200	903	0	0	0	0	0	0	0	603	903	0
780	2	0	0	0	0	0	0	200	300	0	0	0	0	0	0	0	200	903	0	0	0	0	0	0	0	603	903	0
780	3	0	0	0	0	0	0	200	300	0	0	0	0	0	0	0	200	903	0	0	0	0	0	0	0	603	903	0
780	4	0	0	0	0	0	0	200	300	0	0	0	0	0	0	0	200	903	0	0	0	0	0	0	0	603	903	0
780	5	0	0	0	0	0	0	200	300	0	0	0	0	0	0	0	200	903	0	0	0	0	0	0	0	603	903	0
780	6	0	0	0	0	0	0	200	300	0	0	0	0	0	0	0	200	903	0	0	0	0	0	0	0	603	903	0
780	7	0	0	0	0	0	0	200	300	0	0	0	0	0	0	0	200	903	0	0	0	0	0	0	0	603	903	0
780	8	0	0	0	0	0	0	200	300	0	0	0	0	0	0	0	200	903	0	0	0	0	0	0	0	603	903	0
780	9	0	0	0	0	0	0	200	300	0	0	0	0	0	0	0	200	903	0	0	0	0	0	0	0	603	903	0
781	0	0	0	0	0	0	0	200	300	0	0	0	0	0	0	0	200	903	0	0	0	0	0	0	0	603	903	0
781	1	0	0	0	0	0	0	200	300	0	0	0	0	0	0	0	200	903	0	0	0	0	0	0	0	603	903	0
781	2	0	0	0	0	0	0	200	300	0	0	0	0	0	0	0	200	903	0	0	0	0	0	0	0	603	903	0
781	3	0	0	0	0	0	0	200	300	0	0	0	0	0	0	0	200	903	0	0	0	0	0	0	0	603	903	0
781	4	0	0	0	0	0	0	200	300	0	0	0	0	0	0	0	200	903	0	0	0	0	0	0	0	603	903	0
781	5	0	0	0	0	0	0	200	300	0	0	0	0	0	0	0	200	903	0	0	0	0	0	0	0	603	903	0
781	6	0	0	0	0	0	0	200	300	0	0	0	0	0	0	0	200	903	0	0	0	0	0	0	0	603	903	0
781	7	0	0	0	0	0	0	200	300	0	0	0	0	0	0	0	200	903	0	0	0	0	0	0	0	603	903	0
781	8	0	0	0	0	0	0	200	300	0	0	0	0	0	0	0	200	903	0	0	0	0	0	0	0	603	903	0
781	9	0	0	0	0	0	0	200	300	0	0	0	0	0	0	0	200	903	0	0	0	0	0	0	0	603	903	0
782	0	0	0	0	0	0	0	200	300	0	0	0	0	0	0	0	200	903	0	0	0	0	0	0	0	603	903	0
782	1	0	0	0	0	0	0	200	300	0	0	0	0	0	0	0	200	903	0	0	0	0	0	0	0	603	903	0
782	2	0	0	0	0	0	0	200	300	0	0	0	0	0	0	0	200	903	0	0	0	0	0	0	0	603	903	0
782	3	0	0	0	0	0	0	200	300	0	0	0	0	0	0	0	200	903	0	0	0	0	0	0	0	603	903	0
782	4	0	0	0	0	0	0	200	300	0	0	0	0	0	0	0	200	903	0	0	0	0	0	0	0	603	903	0
782	5	0	0	0	0	0	0	200	300	0	0	0	0	0	0	0	200	903	0	0	0	0	0	0	0	603	903	0
782	6	0	0	0	0	0	0	200	300	0	0	0	0	0	0	0	200	903	0	0	0	0	0	0	0	603	903	0
782	7	0	0	0	0	0	0	200	300	0	0	0	0	0	0	0	200	903	0	0	0	0	0	0	0	603	903	0
782	8	0	0	0	0	0	0	200	300	0	0	0	0	0	0	0	200	903	0	0	0	0	0	0	0	603	903	0
782	9	0	0	0	0	0	0	200	300	0	0	0	0	0	0	0	200	903	0	0	0	0	0	0	0	603	903	0
783	0	0	0	0	0	0	0	200	300	0	0	0	0	0	0	0	200	903	0	0	0	0	0	0	0	603	903	0
783	1	0	0	0	0	0	0	200	300	0	0	0	0	0	0	0	200	903	0	0	0	0	0	0	0	603	903	0
783	2	0	0	0	0	0	0	200	300	0	0	0	0	0	0	0	200	903	0	0	0	0	0	0	0	603	903	0
783	3	0	0	0	0	0	0	200	300	0	0	0	0	0	0	0	200	903	0	0	0	0	0	0	0	603	903	0
783	4	0	0	0	0	0	0	200	300	0	0	0	0	0	0	0	200	903	0	0	0	0	0	0	0	603	903	0
783	5	0	0	0	0	0	0	200	300	0	0	0	0	0	0	0	200	903	0	0	0	0	0	0	0	603	903	0
783	6	0	0	0	0	0	0	200	300	0	0	0	0	0	0	0	200	903	0	0	0	0	0	0	0	603	903	0
783	7	0	0	0	0	0	0	200	300	0	0	0	0	0	0	0	200	903	0	0	0	0	0	0	0	603	903	0
783	8	0	0	0	0	0	0	200	300	0	0	0	0	0	0	0	200	903	0	0	0	0	0	0	0	603	903	0
783	9	0	0	0	0	0	0	200	300	0	0	0	0	0	0	0	200	903	0	0	0	0	0	0	0	603	903	0
784	0	0	0	0	0	0	0	200	300	0	0	0	0	0	0	0	200	903	0	0	0	0	0	0	0	603	903	0
784	1	0	0	0	0	0	0	200	300	0	0	0	0	0	0	0	200	903	0	0	0	0	0	0	0	603	903	0
784	2	0	0	0	0	0	0	200	300	0	0	0	0	0	0	0	200	903	0	0	0	0	0	0	0	603	903	0
784	3	0	0	0	0	0	0	200	300	0	0	0	0	0	0	0	200	903	0	0	0	0	0	0	0	603	903	0
784	4	0	0	0	0	0	0	200	300	0	0	0	0	0	0	0	200	903	0	0	0	0	0	0	0	603	903	0
784	5	0	0	0	0	0	0	200	300	0	0	0	0	0	0	0	200	903	0	0	0	0	0	0	0	603	903	0
784	6	0	0	0	0	0	0	200	300	0	0	0	0	0	0	0	200	903	0	0	0	0	0	0	0	603	903	0
784	7	0	0	0	0	0	0	200	300	0	0	0	0	0	0	0	200	903	0	0	0	0	0	0	0	603	903	0
784	8	0	0	0	0	0	0	200	300	0	0	0	0	0	0	0	200	903	0	0	0	0	0	0	0	603	903	0
784	9	0	0	0	0	0	0	200	300	0	0	0	0	0	0	0	200	903	0	0	0	0	0	0	0	603	903	0
785	0	0	0	0	0	0	0	200	300	0	0	0	0	0	0	0	200	903	0	0	0	0	0	0	0	603	903	0
785	1	0	0	0	0	0	0	200	300	0	0	0	0	0	0	0	200	903	0	0	0	0	0	0	0	603	903	0
785	2	0	0	0	0	0	0	200	300	0	0	0	0	0	0	0	200	903	0	0	0	0	0	0	0	603	903	0
785	3	0	0	0	0	0	0	200	300	0	0	0	0	0	0	0	200	903	0	0	0	0	0	0	0	603	903	0
785	4	0	0	0	0	0	0	200	300	0	0	0	0	0	0	0	200	903	0	0	0	0	0	0	0	603	903	0
785	5	0	0	0	0	0	0	200	300	0	0	0	0	0	0	0	200	903	0	0	0	0	0	0	0	603	903	0
785	6	0	0	0	0	0	0	200	300	0	0	0	0	0	0	0	200	903	0	0	0	0	0	0	0	603	903	0
785	7	0	0	0	0	0	0	200	300	0	0	0	0	0	0	0	200	903	0	0	0	0	0	0	0	603	903	0
785	8	0	0	0	0	0	0	200	300	0	0	0	0	0	0	0	200	903	0	0	0	0	0	0	0	603	903	0
785	9	0	0	0	0	0	0	200	300	0	0	0	0	0	0	0	200	903	0	0	0	0	0	0	0	603	903	0
786	0	0	0	0	0	0	0	200	300	0	0	0	0	0	0	0	200	903	0	0	0	0	0	0	0	603	903	0
786	1	0	0	0	0	0	0	200	300	0	0	0	0	0	0	0	200	903	0	0	0	0	0	0	0	603	903	0
786	2	0	0	0	0	0	0	200	300	0	0	0	0	0	0	0	200	903	0	0	0	0	0	0	0	603	903	0
786	3	0	0	0	0	0	0	200	300	0	0	0	0	0	0	0	200	903	0	0	0	0	0	0	0	603	903	0
786	4	0	0	0	0	0	0	200	300	0	0	0	0	0	0	0	200	903	0	0	0	0	0	0	0	603	903	0
786	5	0	0	0	0	0	0	200	300	0	0	0	0	0	0	0	200	903	0	0	0	0	0	0	0	603	903	0
786	6	0	0	0	0	0	0	200	300	0	0	0	0	0	0	0	200	903	0	0	0	0	0	0	0	603	903	0
786	7	0	0	0	0	0	0	200	300	0	0	0	0	0	0	0	200	903	0	0	0	0	0	0	0	603	903	0
786	8	0	0	0	0	0	0	200	300	0	0	0	0	0	0	0	200	903	0	0	0	0	0	0	0	603	903	0
786	9	0	0	0	0	0	0	200	300	0	0	0	0	0	0	0	200	903	0	0	0	0	0	0	0	603	903	0
787	0	0	0	0	0	0	0	200	300	0	0	0	0	0	0	0	200	903	0	0	0	0	0	0	0	603	903	0
787	1	0	0	0	0	0	0	200	300	0	0	0	0	0	0	0	200	903	0	0	0	0	0	0	0	603	903	0
787	2	0	0	0	0	0	0	200	300	0	0	0	0	0	0	0	200	903	0	0	0	0	0	0	0	603	903	0
787	3	0	0	0	0	0	0	200	300	0	0	0	0	0	0	0	200	903	0	0	0	0	0	0	0	603	903	0
787	4	0	0	0	0	0	0	200	300	0	0	0	0	0	0	0	200	903	0	0	0	0	0	0	0	603	903	0
787	5	0	0	0	0	0	0	200	300	0	0	0	0	0	0	0	200	903	0	0	0	0	0	0	0	603	903	0
787	6	0	0	0	0	0	0	200	300	0	0	0	0	0	0	0	200	903	0	0	0	0	0	0	0	603	903	0
787	7	0	0	0	0	0	0	200	300	0	0	0	0	0	0	0	200	903	0	0	0	0	0	0	0	603	903	0
787	8	0	0	0	0	0	0	200	300	0	0	0	0	0	0	0	200	903	0	0	0	0	0	0	0	603	903	0
787	9	0	0	0	0	0	0	200	300	0	0	0	0	0	0	0	200	903	0	0	0	0	0	0	0	603	903	0
788	0	0	0	0	0	0	0	200	300	0	0	0	0	0	0	0	200	903	0	0	0	0	0	0	0	603	903	0
788	1	0	0	0	0	0	0	200	300	0	0	0	0	0	0	0	200	903	0	0	0	0	0	0	0	603	903	0
788	2	0	0	0	0	0	0	200	300	0	0	0	0	0	0	0	200	903	0	0	0	0	0	0	0	603	903	0
788	3	0	0	0	0	0	0	200	300	0	0	0	0	0	0	0	200	903	0	0	0	0	0	0	0	603	903	0
788	4	0	0	0	0	0	0	200	300	0	0	0	0	0	0	0	200	903	0	0	0	0	0	0	0	603	903	0
788	5	0	0	0	0	0	0	200	300	0	0	0	0	0	0	0	200	903	0	0	0	0	0	0	0	603	903	0
788	6	0	0	0	0	0	0	200	300	0	0	0	0	0	0	0	200	903	0	0	0	0	0	0	0	603	903	0
788	7	0	0	0	0	0	0	200	300	0	0	0	0	0	0	0	200	903	0	0	0	0	0	0	0	603	903	0
788	8	0	0	0	0	0	0	200	300	0	0	0	0	0	0	0	200	903	0	0	0	0	0	0	0	603	903	0
788	9	0	0	0	0	0	0	200	300	0	0	0	0	0	0	0	200	903	0	0	0	0	0	0	0	603	903	0
789	0	0	0	0	0	0	0	200	300	0	0	0	0	0	0	0	200	903	0	0	0	0	0	0	0	603	903	0
789	1	0	0	0	0	0	0	200	300	0	0	0	0	0	0	0	200	903	0	0	0	0	0	0	0	603	903	0
789	2	0	0	0	0	0	0	200	300	0	0	0	0	0	0	0	200	903	0	0	0	0	0	0	0	603	903	0
789	3	0	0	0	0	0	0	200	300	0	0	0	0	0	0	0	200	903	0	0	0	0	0	0	0	603	903	0
789	4	0	0	0	0	0	0	200	300	0	0	0	0	0	0	0	200	903	0	0	0	0	0	0	0	603	903	0
789	5	0	0	0	0	0	0	200	300	0	0	0	0	0	0	0	200	903	0	0	0	0	0	0	0	603	903	0
789	6	0	0	0	0	0	0	200	300	0	0	0	0	0	0	0	200	903	0	0	0	0	0	0	0	603	903	0
789	7	0	0	0	0	0	0	200	300	0	0	0	0	0	0	0	200	903	0	0	0	0	0	0	0	603	903	0
789	8	0	0	0	0	0	0	200	300	0	0	0	0	0	0	0	200	903	0	0	0	0	0	0	0	603	903	0
789	9	0	0	0	0	0	0	200	300	0	0	0	0	0	0	0	200	903	0	0	0	0	0	0	0	603	903	0
790	0	0	0	0	0	0	0	200	300	0	0	0	0	0	0	0	200	903	0	0	0	0	0	0	0	603	903	0
790	1	0	0	0	0	0	0	200	300	0	0	0	0	0	0	0	200	903	0	0	0	0	0	0	0	603	903	0
790	2	0	0	0	0	0	0	200	300	0	0	0	0	0	0	0	200	903	0	0	0	0	0	0	0	603	903	0
790	3	0	0	0	0	0	0	200	300	0	0	0	0	0	0	0	200	903	0	0	0	0	0	0	0	603	903	0
790	4	0	0	0	0	0	0	200	300	0	0	0	0	0	0	0	200	903	0	0	0	0	0	0	0	603	903	0
790	5	0	0	0	0	0	0	200	300	0	0	0	0	0	0	0	200	903	0	0	0	0	0	0	0	603	903	0
790	6	0	0	0	0	0	0	200	300	0	0	0	0	0	0	0	200	903	0	0	0	0	0	0	0	603	903	0
790	7	0	0	0	0	0	0	200	300	0	0	0	0	0	0	0	200	903	0	0	0	0	0	0	0	603	903	0
790	8	0	0	0	0	0	0	200	300	0	0	0	0	0	0	0	200	903	0	0	0	0	0	0	0	603	903	0
790	9	0	0	0	0	0	0	200	300	0	0	0	0	0	0	0	200	903	0	0	0	0	0	0	0	603	903	0
791	0	0	0	0	0	0	0	200	300	0	0	0	0	0	0	0	200	903	0	0	0	0	0	0	0	603	903	0
791	1	0	0	0	0	0	0	200	300	0	0	0	0	0	0	0	200	903	0	0	0	0	0	0	0	603	903	0
791	2	0	0	0	0	0	0	200	300	0	0	0	0	0	0	0	200	903	0	0	0	0	0	0	0	603	903	0
791	3	0	0	0	0	0	0	200	300	0	0	0	0	0	0	0	200	903	0	0	0	0	0	0	0	603	903	0
791	4	0	0	0	0	0	0	200	300	0	0	0	0	0	0	0	200	903	0	0	0	0	0	0	0	603	903	0
791	5	0	0	0	0	0	0	200	300	0	0	0	0	0	0	0	200	903	0	0	0	0	0	0	0	603	903	0
791	6	0	0	0	0	0	0	200	300	0	0	0	0	0	0	0	200	903	0	0	0	0	0	0	0	603	903	0
791	7	0	0	0	0	0	0	200	300	0	0	0	0	0	0	0	200	903	0	0	0	0	0	0	0	603	903	0
791	8	0	0	0	0	0	0	200	300	0	0	0	0	0	0	0	200	903	0	0	0	0	0	0	0	603	903	0
791	9	0	0	0	0	0	0	200	300	0	0	0	0	0	0	0	200	903	0	0	0	0	0	0	0	603	903	0
792	0	0	0	0	0	0	0	200	300	0	0	0	0	0	0	0	200	903	0	0	0	0	0	0	0	603	903	0
792	1	0	0	0	0	0	0	200	300	0	0	0	0	0	0	0	200	903	0	0	0	0	0	0	0	603	903	0
792	2	0	0	0	0	0	0	200	300	0	0	0	0	0	0	0	200	903	0	0	0	0	0	0	0	603	903	0
792	3	0	0	0	0	0	0	200	300	0	0	0	0	0	0	0	200	903	0	0	0	0	0	0	0	603	903	0
792	4	0	0	0	0	0	0	200	300	0	0	0	0	0	0	0	200	903	0	0	0	0	0	0	0	603	903	0
792	5	0	0	0	0	0	0	200	300	0	0	0	0	0	0	0	200	903	0	0	0	0	0	0	0	603	903	0
792	6	0	0	0	0	0	0	200	300	0	0	0	0	0	0	0	200	903	0	0	0	0	0	0	0	603	903	0
792	7	0	0	0	0	0	0	200	300	0	0	0	0	0	0	0	200	903	0	0	0	0	0	0	0	603	903	0
792	8	0	0	0	0	0	0	200	300	0	0	0	0	0	0	0	200	903	0	0	0	0	0	0	0	603	903	0
792	9	0	0	0	0	0	0	200	300	0	0	0	0	0	0	0	200	903	0	0	0	0	0	0	0	603	903	0
793	0	0	0	0	0	0	0	200	300	0	0	0	0	0	0	0	200	903	0	0	0	0	0	0	0	603	903	0
793	1	0	0	0	0	0	0	200	300	0	0	0	0	0	0	0	200	903	0	0	0	0	0	0	0	603	903	0
793	2	0	0	0	0	0	0	200	300	0	0	0	0	0	0	0	200	903	0	0	0	0	0	0	0	603	903	0
793	3	0	0	0	0	0	0	200	300	0	0	0	0	0	0	0	200	903	0	0	0	0	0	0	0	603	903	0
793	4	0	0	0	0	0	0	200	300	0	0	0	0	0	0	0	200	903	0	0	0	0	0	0	0	603	903	0
793	5	0	0	0	0	0	0	200	300	0	0	0	0	0	0	0	200	903	0	0	0	0	0	0	0	603	903	0
793	6	0	0	0	0	0	0	200	300	0	0	0	0	0	0	0	200	903	0	0	0	0	0	0	0	603	903	0
793	7	0	0	0	0	0	0	200	300	0	0	0	0	0	0	0	200	903	0	0	0	0	0	0	0	603	903	0
793	8	0	0	0	0	0	0	200	300	0	0	0	0	0	0	0	200	903	0	0	0	0	0	0	0	603	903	0
793	9	0	0	0	0	0	0	200	300	0	0	0	0	0	0	0	200	903	0	0	0	0	0	0	0	603	903	0
794	0	0	0	0	0	0	0	200	300	0	0	0	0	0	0	0	200	903	0	0	0	0	0	0	0	603	903	0
794	1	0	0	0	0	0	0	200	300	0	0	0	0	0	0	0	200	903	0	0	0	0	0	0	0	603	903	0
794	2	0	0	0	0	0	0	200	300	0	0	0	0	0	0	0	200	903	0	0	0	0	0	0	0	603	903	0
794	3	0	0	0	0	0	0	200	300	0	0	0	0	0	0	0	200	903	0	0	0	0	0	0	0	603	903	0
794	4	0	0	0	0	0	0	200	300	0	0	0	0	0	0	0	200	903	0	0	0	0	0	0	0	603	903	0
794	5	0	0	0	0	0	0	200	300	0	0	0	0	0	0	0	200	903	0	0	0	0	0	0	0	603	903	0
794	6	0	0	0	0	0	0	200	300	0	0	0	0	0	0	0	200	903	0	0	0	0	0	0	0	603	903	0
794	7	0	0	0	0	0	0	200	300	0	0	0	0	0	0	0	200	903	0	0	0	0	0	0	0	603	903	0
794	8	0	0	0	0	0	0	200	300	0	0	0	0	0	0	0	200	903	0	0	0	0	0	0	0	603	903	0
794	9	0	0	0	0	0	0	200	300	0	0	0	0	0	0	0	200	903	0	0	0	0	0	0	0	603	903	0
795	0	0	0	0	0	0	0	200	300	0	0	0	0	0	0	0	200	903	0	0	0	0	0	0	0	603	903	0
795	1	0	0	0	0	0	0	200	300	0	0	0	0	0	0	0	200	903	0	0	0	0	0	0	0	603	903	0
795	2	0	0	0	0	0	0	200	300	0	0	0	0	0	0	0	200	903	0	0	0	0	0	0	0	603	903	0
795	3	0	0	0	0	0	0	200	300	0	0	0	0	0	0	0	200	903	0	0	0	0	0	0	0	603	903	0
795	4	0	0	0	0	0	0	200	300	0	0	0	0	0	0	0	200	903	0	0	0	0	0	0	0	603	903	0
795	5	0	0	0	0	0	0	200	300	0	0	0	0	0	0	0	200	903	0	0	0	0	0	0	0	603	903	0
795	6	0	0	0	0	0	0	200	300	0	0	0	0	0	0	0	200	903	0	0	0	0	0	0	0	603	903	0
795	7	0	0	0	0	0	0	200	300	0	0	0	0	0	0	0	200	903	0	0	0	0	0	0	0	603	903	0
795	8	0	0	0	0	0	0	200	300	0	0	0	0	0	0	0	200	903	0	0	0	0	0	0	0	603	903	0
795	9	0	0	0	0	0	0	200	300	0	0	0	0	0	0	0	200	903	0	0	0	0	0	0	0	603	903	0
796	0	0	0	0	0	0	0	200	300	0	0	0	0	0	0	0	200	903	0	0	0	0	0	0	0	603	903	0
796	1	0	0	0	0	0	0	200	300	0	0	0	0	0	0	0	200	903	0	0	0	0	0	0	0	603	903	0
796	2	0	0	0	0	0	0	200	300	0	0	0	0	0	0	0	200	903	0	0	0	0	0	0	0	603	903	0
796	3	0	0	0	0	0	0	200	300	0	0	0	0	0	0	0	200	903	0	0	0	0	0	0	0	603	903	0
796	4	0	0	0	0	0	0	200	300	0	0	0	0	0	0	0	200	903	0	0	0	0	0	0	0	603	903	0
796	5	0	0	0	0	0	0	200	300	0	0	0	0	0	0	0	200	903	0	0	0	0	0	0	0	603	903	0
796	6	0	0	0	0	0	0	200	300	0	0	0	0	0	0	0	200	903	0	0	0	0	0	0	0	603	903	0
796	7	0	0	0	0	0	0	200	300	0	0	0	0	0	0	0	200	903	0	0	0	0	0	0	0	603	903	0
796	8	0	0	0	0	0	0	200	300	0	0	0	0	0	0	0	200	903	0	0	0	0	0	0	0	603	903	0
796	9	0	0	0	0	0	0	200	300	0	0	0	0	0	0	0	200	903	0	0	0	0	0	0	0	603	903	0
797	0	0	0	0	0	0	0	200	300	0	0	0	0	0	0	0	200	903	0	0	0	0	0	0	0	603	903	0
797	1	0	0	0	0	0	0	200	300	0	0	0	0	0	0	0	200	903	0	0	0	0	0	0	0	603	903	0
797	2	0	0	0	0	0	0	200	300	0	0	0	0	0	0	0	200	903	0	0	0	0	0	0	0	603	903	0
797	3	0	0	0	0	0	0	200	300	0	0	0	0	0	0	0	200	903	0	0	0	0	0	0	0	603	903	0
797	4	0	0	0	0	0	0	200	300	0	0	0	0	0	0	0	200	903	0	0	0	0	0	0	0	603	903	0
797	5	0	0	0	0	0	0	200	300	0	0	0	0	0	0	0	200	903	0	0	0	0	0	0	0	603	903	0
797	6	0	0	0	0	0	0	200	300	0	0	0	0	0	0	0	200	903	0	0	0	0	0	0	0	603	903	0
797	7	0	0	0	0	0	0	200	300	0	0	0	0	0	0	0	200	903	0	0	0	0	0	0	0	603	903	0
797	8	0	0	0	0	0	0	200	300	0	0	0	0	0	0	0	200	903	0	0	0	0	0	0	0	603	903	0
797	9	0	0	0	0	0	0	200	300	0	0	0	0	0	0	0	200	903	0	0	0	0	0	0	0	603	903	0
798	0	0	0	0	0	0	0	200	300	0	0	0	0	0	0	0	200	903	0	0	0	0	0	0	0	603	903	0
798	1	0	0	0	0	0	0	200	300	0	0	0	0	0	0	0	200	903	0	0	0	0	0	0	0	603	903	0
798	2	0	0	0	0	0	0	200	300	0	0	0	0	0	0	0	200	903	0	0	0	0	0	0	0	603	903	0
798	3	0	0	0	0	0	0	200	300	0	0	0	0	0	0	0	200	903	0	0	0	0	0	0	0	603	903	0
798	4	0	0	0	0	0	0	200	300	0	0	0	0	0	0	0	200	903	0	0	0	0	0	0	0	603	903	0
798	5	0	0	0	0	0	0	200	300	0	0	0	0	0	0	0	200	903	0	0	0	0	0	0	0	603	903	0
798	6	0	0	0	0	0	0	200	300	0	0	0	0	0	0	0	200	903	0	0	0	0	0	0	0	603	903	0
798	7	0	0	0	0	0	0	200	300	0	0	0	0	0	0	0	200	903	0	0	0	0	0	0	0	603	903	0
798	8	0	0	0	0	0	0	200	300	0	0	0	0	0	0	0	200	903	0	0	0	0	0	0	0	603	903	0
798	9	0	0	0	0	0	0	200	300	0	0	0	0	0	0	0	200	903	0	0	0	0	0	0	0	603	903	0
799	0	0	0	0	0	0	0	200	300	0	0	0	0	0	0	0	200	903	0	0	0	0	0	0	0	603	903	0
799	1	0	0	0	0	0	0	200	300	0	0	0	0	0	0	0	200	903	0	0	0	0	0	0	0	603	903	0
799	2	0	0	0	0	0	0	200	300	0	0	0	0	0	0	0	200	903	0	0	0	0	0	0	0	603	903	0
799	3	0	0	0	0	0	0	200	300	0	0	0	0	0	0	0	200	903	0	0	0	0	0	0	0	603	903	0
799	4	0	0	0	0	0	0	200	300	0	0	0	0	0	0	0	200	903	0	0	0	0	0	0	0	603	903	0
799	5	0	0	0	0	0	0	200	300	0	0	0	0	0	0	0	200	903	0	0	0	0	0	0	0	603	903	0
799	6	0	0	0	0	0	0	200	300	0	0	0	0	0	0	0	200	903	0	0	0	0	0	0	0	603	903	0
799	7	0	0	0	0	0	0	200	300	0	0	0	0	0	0	0	200	903	0	0	0	0	0	0	0	603	903	0
799	8	0	0	0	0	0	0	200	300	0	0	0	0	0	0	0	200	903	0	0	0	0	0	0	0	603	903	0
799	9	0	0	0	0	0	0	200	300	0	0	0	0	0	0	0	200	903	0	0	0	0	0	0	0	603	903	0
800	0	0	0	0	0	0	0	200	300	0	0	0	0	0	0	0	200	903	0	0	0	0	0	0	0	603	903	0
800	1	0	0	0	0	0	0	200	300	0	0	0	0	0	0	0	200	903	0	0	0	0	0	0	0	603	903	0
800	2	0	0	0	0	0	0	200	300	0	0	0	0	0	0	0	200	903	0	0	0	0	0	0	0	603	903	0
800	3	0	0	0	0	0	0	200	300	0	0	0	0	0	0	0	200	903	0	0	0	0	0	0	0	603	903	0
800	4	0	0	0	0	0	0	200	300	0	0	0	0	0	0	0	200	903	0	0	0	0	0	0	0	603	903	0
800	5	0	0	0	0	0	0	200	300	0	0	0	0	0	0	0	200	903	0	0	0	0	0	0	0	603	903	0
800	6	0	0	0	0	0	0	200	300	0	0	0	0	0	0	0	200	903	0	0	0	0	0	0	0	603	903	0
800	7	0	0	0	0	0	0	200	300	0	0	0	0	0	0	0	200	903	0	0	0	0	0	0	0	603	903	0
800	8	0	0	0	0	0	0	200	300	0	0	0	0	0	0	0	200	903	0	0	0	0	0	0	0	603	903	0
800	9	0	0	0	0	0	0	200	300	0	0	0	0	0	0	0	200	903	0	0	0	0	0	0	0	603	903	0
801	0	0	0	0	0	0	0	200	300	0	0	0	0	0	0	0	200	903	0	0	0	0	0	0	0	603	903	0
801	1	0	0	0	0	0	0	200	300	0	0	0	0	0	0	0	200	903	0	0	0	0	0	0	0	603	903	0
801	2	0	0	0	0	0	0	200	300	0	0	0	0	0	0	0	200	903	0	0	0	0	0	0	0	603	903	0
801	3	0	0	0	0	0	0	200	300	0	0	0	0	0	0	0	200	903	0	0	0	0	0	0	0	603	903	0
801	4	0	0	0	0	0	0	200	300	0	0	0	0	0	0	0	200	903	0	0	0	0	0	0	0	603	903	0
801	5	0	0	0	0	0	0	200	300	0	0	0	0	0	0	0	200	903	0	0	0	0	0	0	0	603	903	0
801	6	0	0	0	0	0	0	200	300	0	0	0	0	0	0	0	200	903	0	0	0	0	0	0	0	603	903	0
801	7	0	0	0	0	0	0	200	300	0	0	0	0	0	0	0	200	903	0	0	0	0	0	0	0	603	903	0
801	8	0	0	0	0	0	0	200	300	0	0	0	0	0	0	0	200	903	0	0	0	0	0	0	0	603	903	0
801	9	0	0	0	0	0	0	200	300	0	0	0	0	0	0	0	200	903	0	0	0	0	0	0	0	603	903	0
802	0	0	0	0	0	0	0	200	300	0	0	0	0	0	0	0	200	903	0	0	0	0	0	0	0	603	903	0
802	1	0	0	0	0	0	0	200	300	0	0	0	0	0	0	0	200	903	0	0	0	0	0	0	0	603	903	0
802	2	0	0	0	0	0	0	200	300	0	0	0	0	0	0	0	200	903	0	0	0	0	0	0	0	603	903	0
802	3	0	0	0	0	0	0	200	300	0	0	0	0	0	0	0	200	903	0	0	0	0	0	0	0	603	903	0
802	4	0	0	0	0	0	0	200	300	0	0	0	0	0	0	0	200	903	0	0	0	0	0	0	0	603	903	0
802	5	0	0	0	0	0	0	200	300	0	0	0	0	0	0	0	200	903	0	0	0	0	0	0	0	603	903	0
802	6	0	0	0	0	0	0	200	300	0	0	0	0	0	0	0	200	903	0	0	0	0	0	0	0	603	903	0
802	7	0	0	0	0	0	0	200	300	0	0	0	0	0	0	0	200	903	0	0	0	0	0	0	0	603	903	0
802	8	0	0	0	0	0	0	200	300	0	0	0	0	0	0	0	200	903	0	0	0	0	0	0	0	603	903	0
802	9	0	0	0	0	0	0	200	300	0	0	0	0	0	0	0	200	903	0	0	0	0	0	0	0	603	903	0
803	0	0	0	0	0	0	0	200	300	0	0	0	0	0	0	0	200	903	0	0	0	0	0	0	0	603	903	0
803	1	0	0	0	0	0	0	200	300	0	0	0	0	0	0	0	200	903	0	0	0	0	0	0	0	603	903	0
803	2	0	0	0	0	0	0	200	300	0	0	0	0	0	0	0	200	903	0	0	0	0	0	0	0	603	903	0
803	3	0	0	0	0	0	0	200	300	0	0	0	0	0	0	0	200	903	0	0	0	0	0	0	0	603	903	0
803	4	0	0	0	0	0	0	200	300	0	0	0	0	0	0	0	200	903	0	0	0	0	0	0	0	603	903	0
803	5	0	0	0	0	0	0	200	300	0	0	0	0	0	0	0	200	903	0	0	0	0	0	0	0	603	903	0
803	6	0	0	0	0	0	0	200	300	0	0	0	0	0	0	0	200	903	0	0	0	0	0	0	0	603	903	0
803	7	0	0	0	0	0	0	200	300	0	0	0	0	0	0	0	200	903	0	0	0	0	0	0	0	603	903	0
803	8	0	0	0	0	0	0	200	300	0	0	0	0	0	0	0	200	903	0	0	0	0	0	0	0	603	903	0
803	9	0	0	0	0	0	0	200	300	0	0	0	0	0	0	0	200	903	0	0	0	0	0	0	0	603	903	0
804	0	0	0	0	0	0	0	200	300	0	0	0	0	0	0	0	200	903	0	0	0	0	0	0	0	603	903	0
804	1	0	0	0	0	0	0	200	300	0	0	0	0	0	0	0	200	903	0	0	0	0	0	0	0	603	903	0
804	2	0	0	0	0	0	0	200	300	0	0	0	0	0	0	0	200	903	0	0	0	0	0	0	0	603	903	0
804	3	0	0	0	0	0	0	200	300	0	0	0	0	0	0	0	200	903	0	0	0	0	0	0	0	603	903	0
804	4	0	0	0	0	0	0	200	300	0	0	0	0	0	0	0	200	903	0	0	0	0	0	0	0	603	903	0
804	5	0	0	0	0	0	0	200	300	0	0	0	0	0	0	0	200	903	0	0	0	0	0	0	0	603	903	0
804	6	0	0	0	0	0	0	200	300	0	0	0	0	0	0	0	200	903	0	0	0	0	0	0	0	603	903	0
804	7	0	0	0	0	0	0	200	300	0	0	0	0	0	0	0	200	903	0	0	0	0	0	0	0	603	903	0
804	8	0	0	0	0	0	0	200	300	0	0	0	0	0	0	0	200	903	0	0	0	0	0	0	0	603	903	0
804	9	0	0	0	0	0	0	200	300	0	0	0	0	0	0	0	200	903	0	0	0	0	0	0	0	603	903	0
805	0	0	0	0	0	0	0	200	300	0	0	0	0	0	0	0	200	903	0	0	0	0	0	0	0	603	903	0
805	1	0	0	0	0	0	0	200	300	0	0	0	0	0	0	0	200	903	0	0	0	0	0	0	0	603	903	0
805	2	0	0	0	0	0	0	200	300	0	0	0	0	0	0	0	200	903	0	0	0	0	0	0	0	603	903	0
805	3	0	0	0	0	0	0	200	300	0	0	0	0	0	0	0	200	903	0	0	0	0	0	0	0	603	903	0
805	4	0	0	0	0	0	0	200	300	0	0	0	0	0	0	0	200	903	0	0	0	0	0	0	0	603	903	0
805	5	0	0	0	0	0	0	200	300	0	0	0	0	0	0	0	200	903	0	0	0	0	0	0	0	603	903	0
805	6	0	0	0	0	0	0	200	300	0	0	0	0	0	0	0	200	903	0	0	0	0	0	0	0	603	903	0
805	7	0	0	0	0	0	0	200	300	0	0	0	0	0	0	0	200	903	0	0	0	0	0	0	0	603	903	0
805	8	0	0	0	0	0	0	200	300	0	0	0	0	0	0	0	200	903	0	0	0	0	0	0	0	603	903	0
805	9	0	0	0	0	0	0	200	300	0	0	0	0	0	0	0	200	903	0	0	0	0	0	0	0	603	903	0
806	0	0	0	0	0	0	0	200	300	0	0	0	0	0	0	0	200	903	0	0	0	0	0	0	0	603	903	0
806	1	0	0	0	0	0	0	200	300	0	0	0	0	0	0	0	200	903	0	0	0	0	0	0	0	603	903	0
806	2	0	0	0	0	0	0	200	300	0	0	0	0	0	0	0	200	903	0	0	0	0	0	0	0	603	903	0
806	3	0	0	0	0	0	0	200	300	0	0	0	0	0	0	0	200	903	0	0	0	0	0	0	0	603	903	0
806	4	0	0	0	0	0	0	200	300	0	0	0	0	0	0	0	200	903	0	0	0	0	0	0	0	603	903	0
806	5	0	0	0	0	0	0	200	300	0	0	0	0	0	0	0	200	903	0	0	0	0	0	0	0	603	903	0
806	6	0	0	0	0	0	0	200	300	0	0	0	0	0	0	0	200	903	0	0	0	0	0	0	0	603	903	0
806	7	0	0	0	0	0	0	200	300	0	0	0	0	0	0	0	200	903	0	0	0	0	0	0	0	603	903	0
806	8	0	0	0	0	0	0	200	300	0	0	0	0	0	0	0	200	903	0	0	0	0	0	0	0	603	903	0
806	9	0	0	0	0	0	0	200	300	0	0	0	0	0	0	0	200	903	0	0	0	0	0	0	0	603	903	0
807	0	0	0	0	0	0	0	200	300	0	0	0	0	0	0	0	200	903	0	0	0	0	0	0	0	603	903	0
807	1	0	0	0	0	0	0	200	300	0	0	0	0	0	0	0	200	903	0	0	0	0	0	0	0	603	903	0
807	2	0	0	0	0	0	0	200	300	0	0	0	0	0	0	0	200	903	0	0	0	0	0	0	0	603	903	0
807	3	0	0	0	0	0	0	200	300	0	0	0	0	0	0	0	200	903	0	0	0	0	0	0	0	603	903	0
807	4	0	0	0	0	0	0	200	300	0	0	0	0	0	0	0	200	903	0	0	0	0	0	0	0	603	903	0
807	5	0	0	0	0	0	0	200	300	0	0	0	0	0	0	0	200	903	0	0	0	0	0	0	0	603	903	0
807	6	0	0	0	0	0	0	200	300	0	0	0	0	0	0	0	200	903	0	0	0	0	0	0	0	603	903	0
807	7	0	0	0	0	0	0	200	300	0	0	0	0	0	0	0	200	903	0	0	0	0	0	0	0	603	903	0
807	8	0	0	0	0	0	0	200	300	0	0	0	0	0	0	0	200	903	0	0	0	0	0	0	0	603	903	0
807	9	0	0	0	0	0	0	200	300	0	0	0	0	0	0	0	200	903	0	0	0	0	0	0	0	603	903	0
808	0	0	0	0	0	0	0	200	300	0	0	0	0	0	0	0	200	903	0	0	0	0	0	0	0	603	903	0
808	1	0	0	0	0	0	0	200	300	0	0	0	0	0	0	0	200	903	0	0	0	0	0	0	0	603	903	0
808	2	0	0	0	0	0	0	200	300	0	0	0	0	0	0	0	200	903	0	0	0	0	0	0	0	603	903	0
808	3	0	0	0	0	0	0	200	300	0	0	0	0	0	0	0	200	903	0	0	0	0	0	0	0	603	903	0
808	4	0	0	0	0	0	0	200	300	0	0	0	0	0	0	0	200	903	0	0	0	0	0	0	0	603	903	0
808	5	0	0	0	0	0	0	200	300	0	0	0	0	0	0	0	200	903	0	0	0	0	0	0	0	603	903	0
808	6	0	0	0	0	0	0	200	300	0	0	0	0	0	0	0	200	903	0	0	0	0	0	0	0	603	903	0
808	7	0	0	0	0	0	0	200	300	0	0	0	0	0	0	0	200	903	0	0	0	0	0	0	0	603	903	0
808	8	0	0	0	0	0	0	200	300	0	0	0	0	0	0	0	200	903	0	0	0	0	0	0	0	603	903	0
808	9	0	0	0	0	0	0	200	300	0	0	0	0	0	0	0	200	903	0	0	0	0	0	0	0	603	903	0
809	0	0	0	0	0	0	0	200	300	0	0	0	0	0	0	0	200	903	0	0	0	0	0	0	0	603	903	0
809	1	0	0	0	0	0	0	200	300	0	0	0	0	0	0	0	200	903	0	0	0	0	0	0	0	603	903	0
809	2	0	0	0	0	0	0	200	300	0	0	0	0	0	0	0	200	903	0	0	0	0	0	0	0	603	903	0
809	3	0	0	0	0	0	0	200	300	0	0	0	0	0	0	0	200	903	0	0	0	0	0	0	0	603	903	0
809	4	0	0	0	0	0	0	200	300	0	0	0	0	0	0	0	200	903	0	0	0	0	0	0	0	603	903	0
809	5	0	0	0	0	0	0	200	300	0	0	0	0	0	0	0	200	903	0	0	0	0	0	0	0	603	903	0
809	6	0	0	0	0	0	0	200	300	0	0	0	0	0	0	0	200	903	0	0	0	0	0	0	0	603	903	0
809	7	0	0	0	0	0	0	200	300	0	0	0	0	0	0	0	200	903	0	0	0	0	0	0	0	603	903	0
809	8	0	0	0	0	0	0	200	300	0	0	0	0	0	0	0	200	903	0	0	0	0	0	0	0	603	903	0
809	9	0	0	0	0	0	0	200	300	0	0	0	0	0	0	0	200	903	0	0	0	0	0	0	0	603	903	0
810	0	0	0	0	0	0	0	200	300	0	0	0	0	0	0	0	200	903	0	0	0	0	0	0	0	603	903	0
810	1	0	0	0	0	0	0	200	300	0	0	0	0	0	0	0	200	903	0	0	0	0	0	0	0	603	903	0
810	2	0	0	0	0	0	0	200	300	0	0	0	0	0	0	0	200	903	0	0	0	0	0	0	0	603	903	0
810	3	0	0	0	0	0	0	200	300	0	0	0	0	0	0	0	200	903	0	0	0	0	0	0	0	603	903	0
810	4	0	0	0	0	0	0	200	300	0	0	0	0	0	0	0	200	903	0	0	0	0	0	0	0	603	903	0
810	5	0	0	0	0	0	0	200	300	0	0	0	0	0	0	0	200	903	0	0	0	0	0	0	0	603	903	0
810	6	0	0	0	0	0	0	200	300	0	0	0	0	0	0	0	200	903	0	0	0	0	0	0	0	603	903	0
810	7	0	0	0	0	0	0	200	300	0	0	0	0	0	0	0	200	903	0	0	0	0	0	0	0	603	903	0
810	8	0	0	0	0	0	0	200	300	0	0	0	0	0	0	0	200	903	0	0	0	0	0	0	0	603	903	0
810	9	0	0	0	0	0	0	200	300	0	0	0	0	0	0	0	200	903	0	0	0	0	0	0	0	603	903	0
811	0	0	0	0	0	0	0	200	300	0	0	0	0	0	0	0	200	903	0	0	0	0	0	0	0	603	903	0
811	1	0	0	0	0	0	0	200	300	0	0	0	0	0	0	0	200	903	0	0	0	0	0	0	0	603	903	0
811	2	0	0	0	0	0	0	200	300	0	0	0	0	0	0	0	200	903	0	0	0	0	0	0	0	603	903	0
811	3	0	0	0	0	0	0	200	300	0	0	0	0	0	0	0	200	903	0	0	0	0	0	0	0	603	903	0
811	4	0	0	0	0	0	0	200	300	0	0	0	0	0	0	0	200	903	0	0	0	0	0	0	0	603	903	0
811	5	0	0	0	0	0	0	200	300	0	0	0	0	0	0	0	200	903	0	0	0	0	0	0	0	603	903	0
811	6	0	0	0	0	0	0	200	300	0	0	0	0	0	0	0	200	903	0	0	0	0	0	0	0	603	903	0
811	7	0	0	0	0	0	0	200	300	0	0	0	0	0	0	0	200	903	0	0	0	0	0	0	0	603	903	0
811	8	0	0	0	0	0	0	200	300	0	0	0	0	0	0	0	200	903	0	0	0	0	0	0	0	603	903	0
811	9	0	0	0	0	0	0	200	300	0	0	0	0	0	0	0	200	903	0	0	0	0	0	0	0	603	903	0
812	0	0	0	0	0	0	0	200	300	0	0	0	0	0	0	0	200	903	0	0	0	0	0	0	0	603	903	0
812	1	0	0	0	0	0	0	200	300	0	0	0	0	0	0	0	200	903	0	0	0	0	0	0	0	603	903	0
812	2	0	0	0	0	0	0	200	300	0	0	0	0	0	0	0	200	903	0	0	0	0	0	0	0	603	903	0
812	3	0	0	0	0	0	0	200	300	0	0	0	0	0	0	0	200	903	0	0	0	0	0	0	0	603	903	0
812	4	0	0	0	0	0	0	200	300	0	0	0	0	0	0	0	200	903	0	0	0	0	0	0	0	603	903	0
812	5	0	0	0	0	0	0	200	300	0	0	0	0	0	0	0	200	903	0	0	0	0	0	0	0	603	903	0
812	6	0	0	0	0	0	0	200	300	0	0	0	0	0	0	0	200	903	0	0	0	0	0	0	0	603	903	0
812	7	0	0	0	0	0	0	200	300	0	0	0	0	0	0	0	200	903	0	0	0	0	0	0	0	603	903	0
812	8	0	0	0	0	0	0	200	300	0	0	0	0	0	0	0	200	903	0	0	0	0	0	0	0	603	903	0
812	9	0	0	0	0	0	0	200	300	0	0	0	0	0	0	0	200	903	0	0	0	0	0	0	0	603	903	0
813	0	0	0	0	0	0	0	200	300	0	0	0	0	0	0	0	200	903	0	0	0	0	0	0	0	603	903	0
813	1	0	0	0	0	0	0	200	300	0	0	0	0	0	0	0	200	903	0	0	0	0	0	0	0	603	903	0
813	2	0	0	0	0	0	0	200	300	0	0	0	0	0	0	0	200	903	0	0	0	0	0	0	0	603	903	0
813	3	0	0	0	0	0	0	200	300	0	0	0	0	0	0	0	200	903	0	0	0	0	0	0	0	603	903	0
813	4	0	0	0	0	0	0	200	300	0	0	0	0	0	0	0	200	903	0	0	0	0	0	0	0	603	903	0
813	5	0	0	0	0	0	0	200	300	0	0	0	0	0	0	0	200	903	0	0	0	0	0	0	0	603	903	0
813	6	0	0	0	0	0	0	200	300	0	0	0	0	0	0	0	200	903	0	0	0	0	0	0	0	603	903	0
813	7	0	0	0	0	0	0	200	300	0	0	0	0	0	0	0	200	903	0	0	0	0	0	0	0	603	903	0
813	8	0	0	0	0	0	0	200	300	0	0	0	0	0	0	0	200	903	0	0	0	0	0	0	0	603	903	0
813	9	0	0	0	0	0	0	200	300	0	0	0	0	0	0	0	200	903	0	0	0	0	0	0	0	603	903	0
814	0	0	0	0	0	0	0	200	300	0	0	0	0	0	0	0	200	903	0	0	0	0	0	0	0	603	903	0
814	1	0	0	0	0	0	0	200	300	0	0	0	0	0	0	0	200	903	0	0	0	0	0	0	0	603	903	0
814	2	0	0	0	0	0	0	200	300	0	0	0	0	0	0	0	200	903	0	0	0	0	0	0	0	603	903	0
814	3	0	0	0	0	0	0	200	300	0	0	0	0	0	0	0	200	903	0	0	0	0	0	0	0	603	903	0
814	4	1.34308	8.6475	-10.412	3181.64	15.503	-253.052	201.489	-5.57504	0	0	0	0	0	0	0	200	903	0	0	0	0	0	0	0	603	903	0
814	5	-0.33539	10.9363	-12.5482	2906.99	-167.602	67.3829	186.643	68.3348	0	0	0	0	0	0	0	200	903	0	0	0	0	0	0	0	603	903	0
814	6	1.64825	4.8328	-11.6327	1991.46	-350.708	-24.1699	169.852	128.805	0	0	0	0	0	0	0	200	903	0	0	0	0	0	0	0	603	903	0
814	7	0	0	0	0	0	0	200	300	0	0	0	0	0	0	0	200	903	0	0	0	0	0	0	0	603	903	0
814	8	-2.7768	6.0535	-8.27576	1259.04	76.5382	-69.9462	209.249	147.865	0	0	0	0	0	0	0	200	903	0	0	0	0	0	0	0	603	903	0
814	9	2.71637	8.34232	-11.6327	2266.12	-289.673	113.159	175.098	105.194	0	0	0	0	0	0	0	200	903	0	0	0	0	0	0	0	603	903	0
815	0	1.95343	7.42679	-13.7689	2266.12	137.573	204.712	209.992	135.418	0	0	0	0	0	0	0	200	903	0	0	0	0	0	0	0	603	903	0
815	1	-0.793154	6.51127	-12.8534	2540.77	137.573	158.936	210.703	102.327	0	0	0	0	0	0	0	200	903	0	0	0	0	0	0	0	603	903	0
815	2	1.95343	8.95267	-12.5482	2266.12	-289.673	113.159	176.915	119.407	0	0	0	0	0	0	0	200	903	0	0	0	0	0	0	0	603	903	0
815	3	3.32672	9.25785	-15.2948	2632.33	-289.673	570.923	181.061	127.894	0	0	0	0	0	0	0	200	903	0	0	0	0	0	0	0	603	903	0
815	4	-0.182803	8.34232	-16.2103	4188.73	-228.638	570.923	185.896	41.6014	0	0	0	0	0	0	0	200	903	0	0	0	0	0	0	0	603	903	0
815	5	1.0379	8.49491	-16.8207	3730.96	-289.673	342.041	182.779	78.1921	0	0	0	0	0	0	0	200	903	0	0	0	0	0	0	0	603	903	0
815	6	4.8526	9.71561	-18.3466	3822.51	-594.849	387.818	167.577	91.6496	0	0	0	0	0	0	0	200	903	0	0	0	0	0	0	0	603	903	0
815	7	4.08966	13.6829	-20.4828	4005.62	-533.813	525.147	173.938	104.44	0	0	0	0	0	0	0	200	903	0	0	0	0	0	0	0	603	903	0
815	8	1.95343	11.2415	-20.788	4371.83	-411.743	662.476	180.193	89.6942	0	0	0	0	0	0	0	200	903	0	0	0	0	0	0	0	603	903	0
815	9	3.78448	12.3096	-23.8397	4646.49	-655.884	616.7	172.488	105.095	0	0	0	0	0	0	0	200	903	0	0	0	0	0	0	0	603	903	0
816	0	3.78448	16.2769	-23.5345	5287.36	-594.849	570.923	174.724	75.3363	0	0	0	0	0	0	0	200	903	0	0	0	0	0	0	0	603	903	0
816	1	3.93707	16.4295	-25.0604	5287.36	-472.778	616.7	181.134	89.0156	0	0	0	0	0	0	0	200	903	0	0	0	0	0	0	0	603	903	0
816	2	5.92071	13.6829	-29.0277	6019.78	-594.849	616.7	179.508	92.6195	0	0	0	0	0	0	0	200	903	0	0	0	0	0	0	0	603	903	0
816	3	4.24225	12.4622	-29.9432	7301.52	-961.06	891.358	167.904	56.1547	0	0	0	0	0	0	0	200	903	0	0	0	0	0	0	0	603	903	0
816	4	2.56378	10.6311	-35.7416	8491.7	-1083.13	937.134	169.696	62.4139	0	0	0	0	0	0	0	200	903	0	0	0	0	0	0	0	603	903	0
816	5	3.63189	2.39139	-40.014	9681.89	-900.025	937.134	177.507	58.0376	0	0	0	0	0	0	0	200	903	0	0	0	0	0	0	0	603	903	0
816	6	3.63189	-3.55954	-46.4227	10231.2	-1266.24	1440.67	172.724	79.6078	0	0	0	0	0	0	0	200	903	0	0	0	0	0	0	0	603	903	0
816	7	5.15777	-6.76388	-54.0521	12520	-1449.34	2447.75	173.186	68.3713	0	0	0	0	0	0	0	200	903	0	0	0	0	0	0	0	603	903	0
816	8	8.20953	-9.35787	-57.1039	14168	-1388.31	2218.87	175.688	51.8912	0	0	0	0	0	0	0	200	903	0	0	0	0	0	0	0	603	903	0
816	9	6.98883	-13.7829	-67.1747	15724.4	-1327.27	2264.65	180.242	65.9182	0	0	0	0	0	0	0	200	903	0	0	0	0	0	0	0	603	903	0
817	0	5.92071	-17.1399	-74.1937	17189.2	-2120.73	3454.84	171.416	68.3199	0	0	0	0	0	0	0	200	903	0	0	0	0	0	0	0	603	903	0
817	1	10.1932	-18.3606	-80.6024	18654.1	-1632.45	3454.84	179.747	68.5671	0	0	0	0	0	0	0	200	903	0	0	0	0	0	0	0	603	903	0
817	2	13.2449	-20.802	-87.6215	21492.2	-1998.66	3592.16	177.19	54.7154	0	0	0	0	0	0	0	200	903	0	0	0	0	0	0	0	603	903	0
817	3	11.2613	-23.0908	-94.0302	22590.8	-2303.83	4187.26	175.499	59.7491	0	0	0	0	0	0	0	200	903	0	0	0	0	0	0	0	603	903	0
817	4	11.2613	-26.6003	-105.016	24513.4	-2547.97	4324.58	175.737	66.5753	0	0	0	0	0	0	0	200	903	0	0	0	0	0	0	0	603	903	0
817	5	13.7027	-28.4314	-111.12	26985.4	-2731.08	4370.36	175.422	57.1512	0	0	0	0	0	0	0	200	903	0	0	0	0	0	0	0	603	903	0
817	6	14.313	-30.2624	-121.191	28633.3	-2670.05	5285.89	177.968	63.7336	0	0	0	0	0	0	0	200	903	0	0	0	0	0	0	0	603	903	0
817	7	15.6863	-34.9926	-130.651	30555.9	-3097.29	5194.34	176.293	66.1261	0	0	0	0	0	0	0	200	903	0	0	0	0	0	0	0	603	903	0
817	8	17.9752	-39.8755	-140.417	32570.1	-3280.4	5652.1	176.638	68.0473	0	0	0	0	0	0	0	200	903	0	0	0	0	0	0	0	603	903	0
817	9	17.5174	-41.8591	-149.877	34858.9	-3463.5	5652.1	176.891	67.4172	0	0	0	0	0	0	0	200	903	0	0	0	0	0	0	0	603	903	0
818	0	17.0596	-41.8591	-156.591	36964.6	-4012.82	6064.09	174.374	63.942	0	0	0	0	0	0	0	200	903	0	0	0	0	0	0	0	603	903	0
818	1	17.8226	-44.9109	-163.61	39070.3	-4256.96	5743.65	173.981	61.1988	0	0	0	0	0	0	0	200	903	0	0	0	0	0	0	0	603	903	0
818	2	19.0433	-44.7583	-173.376	40352.1	-4317.99	6155.64	175.095	67.2567	0	0	0	0	0	0	0	200	903	0	0	0	0	0	0	0	603	903	0
818	3	17.9752	-43.0798	-181.005	42183.1	-4501.1	5880.98	175.133	66.9508	0	0	0	0	0	0	0	200	903	0	0	0	0	0	0	0	603	903	0
818	4	18.4329	-42.3169	-186.804	43556.4	-5050.42	5240.11	172.964	66.8332	0	0	0	0	0	0	0	200	903	0	0	0	0	0	0	0	603	903	0
818	5	17.2122	-40.6384	-190.466	44105.7	-5050.42	5377.44	173.484	68.4323	0	0	0	0	0	0	0	200	903	0	0	0	0	0	0	0	603	903	0
818	6	17.0596	-36.5185	-193.823	45204.3	-5294.56	5469	172.683	66.7747	0	0	0	0	0	0	0	200	903	0	0	0	0	0	0	0	603	903	0
818	7	17.9752	-31.9409	-201.452	46211.4	-5538.7	4828.12	172.506	70.6082	0	0	0	0	0	0	0	200	903	0	0	0	0	0	0	0	603	903	0
818	8	16.907	-31.3305	-203.893	46760.8	-6026.98	4645.02	170.441	70.6608	0	0	0	0	0	0	0	200	903	0	0	0	0	0	0	0	603	903	0
818	9	16.6019	-25.8374	-206.945	47859.4	-5477.66	5240.11	173.531	68.734	0	0	0	0	0	0	0	200	903	0	0	0	0	0	0	0	603	903	0
819	0	16.7545	-21.8701	-207.25	48042.5	-5538.7	4507.69	173.275	68.191	0	0	0	0	0	0	0	200	903	0	0	0	0	0	0	0	603	903	0
819	1	17.5174	-17.5976	-209.387	48591.8	-6210.09	4416.14	170.342	67.9325	0	0	0	0	0	0	0	200	903	0	0	0	0	0	0	0	603	903	0
819	2	18.4329	-14.851	-212.133	48774.9	-5843.87	4233.03	172.452	70.0741	0	0	0	0	0	0	0	200	903	0	0	0	0	0	0	0	603	903	0
819	3	17.67	-11.3415	-213.964	48774.9	-5477.66	3958.38	174.399	72.0417	0	0	0	0	0	0	0	200	903	0	0	0	0	0	0	0	603	903	0
819	4	18.2803	-6.76388	-216.1	48774.9	-5904.91	3866.82	172.675	74.2952	0	0	0	0	0	0	0	200	903	0	0	0	0	0	0	0	603	903	0
819	5	17.3648	-2.33883	-216.711	48958	-5904.91	3683.72	172.752	74.0859	0	0	0	0	0	0	0	200	903	0	0	0	0	0	0	0	603	903	0
819	6	17.8226	-0.0500139	-217.321	49232.7	-5660.77	3592.16	173.952	73.4566	0	0	0	0	0	0	0	200	903	0	0	0	0	0	0	0	603	903	0
819	7	17.3648	1.93363	-219.457	49232.7	-5904.91	3363.28	173.093	75.6618	0	0	0	0	0	0	0	200	903	0	0	0	0	0	0	0	603	903	0
819	8	17.67	7.2742	-224.34	50148.2	-6026.98	3363.28	173.135	76.4636	0	0	0	0	0	0	0	200	903	0	0	0	0	0	0	0	603	903	0
819	9	17.5174	10.6311	-226.782	50514.4	-6088.02	3409.06	173.155	77.2553	0	0	0	0	0	0	0	200	903	0	0	0	0	0	0	0	603	903	0
820	0	19.1959	12.157	-227.392	51063.7	-5965.94	3088.62	173.764	75.4374	0	0	0	0	0	0	0	200	903	0	0	0	0	0	0	0	603	903	0
820	1	17.67	15.514	-228.613	51155.3	-6210.09	2997.07	172.836	76.236	0	0	0	0	0	0	0	200	903	0	0	0	0	0	0	0	603	903	0
820	2	19.3484	19.0235	-233.801	50972.2	-6454.23	2951.3	172.394	81.9844	0	0	0	0	0	0	0	200	903	0	0	0	0	0	0	0	603	903	0
820	3	18.2803	20.5494	-238.989	51887.7	-6332.16	2859.74	173.504	82.8863	0	0	0	0	0	0	0	200	903	0	0	0	0	0	0	0	603	903	0
820	4	17.67	22.6856	-243.871	52437	-6454.23	2493.53	173.534	84.9809	0	0	0	0	0	0	0	200	903	0	0	0	0	0	0	0	603	903	0
820	5	18.1277	24.5166	-246.008	53627.2	-6698.37	2722.41	172.772	82.0101	0	0	0	0	0	0	0	200	903	0	0	0	0	0	0	0	603	903	0
820	6	17.5174	26.0425	-250.585	54542.7	-7308.72	2310.42	170.833	82.3387	0	0	0	0	0	0	0	200	903	0	0	0	0	0	0	0	603	903	0
820	7	16.2967	26.1951	-260.351	56740	-7186.65	1989.99	172.396	82.0634	0	0	0	0	0	0	0	200	903	0	0	0	0	0	0	0	603	903	0
820	8	15.5338	26.5003	-268.896	58113.3	-7980.1	1761.11	170.323	83.8818	0	0	0	0	0	0	0	200	903	0	0	0	0	0	0	0	603	903	0
820	9	14.6182	28.1787	-277.441	59669.7	-8346.31	1578	169.917	84.9282	0	0	0	0	0	0	0	200	903	0	0	0	0	0	0	0	603	903	0
821	0	12.7872	26.6529	-284.155	61134.5	-8651.49	1166.02	169.554	84.8548	0	0	0	0	0	0	0	200	903	0	0	0	0	0	0	0	603	903	0
821	1	12.482	28.0262	-291.479	61958.5	-8834.59	754.029	169.69	87.434	0	0	0	0	0	0	0	200	903	0	0	0	0	0	0	0	603	903	0
821	2	11.4139	28.7891	-300.024	63514.9	-9261.84	616.7	169.13	88.3005	0	0	0	0	0	0	0	200	903	0	0	0	0	0	0	0	603	903	0
821	3	10.6509	31.0779	-310.4	65071.3	-10543.6	387.818	166.032	90.363	0	0	0	0	0	0	0	200	903	0	0	0	0	0	0	0	603	903	0
821	4	8.6673	30.9253	-319.86	66993.9	-10116.3	67.3829	168.373	90.5525	0	0	0	0	0	0	0	200	903	0	0	0	0	0	0	0	603	903	0
821	5	7.294	31.0779	-329.321	69191.2	-10726.7	21.6065	167.428	89.8972	0	0	0	0	0	0	0	200	903	0	0	0	0	0	0	0	603	903	0
821	6	8.36212	31.8409	-338.171	70930.7	-10909.8	67.3829	167.739	90.2519	0	0	0	0	0	0	0	200	903	0	0	0	0	0	0	0	603	903	0
821	7	8.36212	32.4512	-347.021	71937.7	-11092.9	-207.275	168.034	92.6991	0	0	0	0	0	0	0	200	903	0	0	0	0	0	0	0	603	903	0
821	8	8.20953	34.4348	-356.481	73860.4	-11520.1	-115.723	167.684	92.8072	0	0	0	0	0	0	0	200	903	0	0	0	0	0	0	0	603	903	0
821	9	7.90436	34.4348	-364.111	75874.5	-12130.5	-207.275	166.685	91.6169	0	0	0	0	0	0	0	200	903	0	0	0	0	0	0	0	603	903	0
822	0	6.22589	36.4185	-374.487	76149.2	-12374.6	-344.605	166.956	96.6571	0	0	0	0	0	0	0	200	903	0	0	0	0	0	0	0	603	903	0
822	1	5.76813	39.0125	-379.37	77705.6	-12374.6	-710.816	167.381	95.1718	0	0	0	0	0	0	0	200	903	0	0	0	0	0	0	0	603	903	0
822	2	6.37848	40.0806	-388.22	78804.2	-12985	-481.934	166.552	97.0113	0	0	0	0	0	0	0	200	903	0	0	0	0	0	0	0	603	903	0
822	3	5.15777	40.0806	-397.07	79811.3	-13168.1	-985.474	166.837	98.9992	0	0	0	0	0	0	0	200	903	0	0	0	0	0	0	0	603	903	0
822	4	3.02154	44.2005	-398.901	81459.2	-13412.2	-1305.91	166.377	95.7907	0	0	0	0	0	0	0	200	903	0	0	0	0	0	0	0	603	903	0
822	5	2.71637	45.7264	-411.413	83198.7	-13656.4	-1260.13	166.806	97.7732	0	0	0	0	0	0	0	200	903	0	0	0	0	0	0	0	603	903	0
822	6	0.885313	47.2522	-417.211	83656.5	-14632.9	-1443.24	164.927	99.4865	0	0	0	0	0	0	0	200	903	0	0	0	0	0	0	0	603	903	0
822	7	0.885313	48.6255	-425.756	85212.9	-14327.8	-1489.01	166.348	99.8551	0	0	0	0	0	0	0	200	903	0	0	0	0	0	0	0	603	903	0
822	8	0.427549	50.9143	-432.47	85304.5	-14755	-1672.12	165.882	102.751	0	0	0	0	0	0	0	200	903	0	0	0	0	0	0	0	603	903	0
822	9	-0.945742	52.898	-436.743	86220	-15426.4	-1763.67	164.679	102.584	0	0	0	0	0	0	0	200	903	0	0	0	0	0	0	0	603	903	0
823	0	-4.15009	54.1187	-445.593	87410.2	-15304.3	-2404.54	165.654	103.834	0	0	0	0	0	0	0	200	903	0	0	0	0	0	0	0	603	903	0
823	1	-4.76044	55.492	-449.56	87684.8	-15670.5	-2862.31	165.142	104.954	0	0	0	0	0	0	0	200	903	0	0	0	0	0	0	0	603	903	0
823	2	-3.84491	56.1023	-458.715	90339.9	-16525	-2221.44	163.975	103.059	0	0	0	0	0	0	0	200	903	0	0	0	0	0	0	0	603	903	0
823	3	-4.76044	55.0342	-479.772	91804.7	-17745.7	-3136.96	163.012	108.649	0	0	0	0	0	0	0	200	903	0	0	0	0	0	0	0	603	903	0
823	4	-11.9321	55.492	-491.064	92903.4	-18173	-3457.4	162.993	110.812	0	0	0	0	0	0	0	200	903	0	0	0	0	0	0	0	603	903	0
823	5	-19.5615	61.7481	-496.557	94002	-18844.4	-4784.91	162.05	110.692	0	0	0	0	0	0	0	200	903	0	0	0	0	0	0	0	603	903	0
823	6	-21.8503	68.9197	-501.135	94459.8	-19515.7	-5013.79	161.057	111.508	0	0	0	0	0	0	0	200	903	0	0	0	0	0	0	0	603	903	0
823	7	-25.665	66.6309	-509.374	95833	-19943	-5242.68	160.848	111.861	0	0	0	0	0	0	0	200	903	0	0	0	0	0	0	0	603	903	0
823	8	-27.3434	66.7835	-521.276	96931.7	-20309.2	-6524.42	161.039	114.049	0	0	0	0	0	0	0	200	903	0	0	0	0	0	0	0	603	903	0
823	9	-29.3271	74.5655	-529.516	97023.2	-20858.5	-7394.17	160.608	116.77	0	0	0	0	0	0	0	200	903	0	0	0	0	0	0	0	603	903	0
824	0	-31.1581	81.1267	-534.704	99128.9	-21163.7	-7623.05	160.42	114.61	0	0	0	0	0	0	0	200	903	0	0	0	0	0	0	0	603	903	0
824	1	-33.2944	80.8216	-542.028	99769.8	-21346.8	-7897.71	160.617	115.933	0	0	0	0	0	0	0	200	903	0	0	0	0	0	0	0	603	903	0
824	2	-30.5478	81.1267	-549.963	100777	-21407.8	-8172.36	161.074	116.757	0	0	0	0	0	0	0	200	903	0	0	0	0	0	0	0	603	903	0
824	3	-25.9702	85.857	-556.982	101875	-22079.2	-7668.83	160.359	117.094	0	0	0	0	0	0	0	200	903	0	0	0	0	0	0	0	603	903	0
824	4	-27.1909	90.4346	-563.391	101509	-22506.5	-7897.71	160.052	119.824	0	0	0	0	0	0	0	200	903	0	0	0	0	0	0	0	603	903	0
824	5	-29.6323	88.7561	-571.02	102883	-21652	-8080.81	162.082	119.827	0	0	0	0	0	0	0	200	903	0	0	0	0	0	0	0	603	903	0
824	6	-28.4116	90.282	-575.903	102516	-22689.6	-7760.38	160.602	121.99	0	0	0	0	0	0	0	200	903	0	0	0	0	0	0	0	603	903	0
824	7	-22.7658	94.5545	-580.48	103981	-22384.4	-7485.72	161.438	120.87	0	0	0	0	0	0	0	200	903	0	0	0	0	0	0	0	603	903	0
824	8	-22.308	93.639	-587.805	104439	-22384.4	-7943.48	161.919	122.324	0	0	0	0	0	0	0	200	903	0	0	0	0	0	0	0	603	903	0
824	9	-23.3762	92.1131	-590.856	105171	-22445.4	-7577.27	162.012	122.002	0	0	0	0	0	0	0	200	903	0	0	0	0	0	0	0	603	903	0
825	0	-24.4443	92.876	-595.129	104988	-23361	-7806.15	160.746	123.587	0	0	0	0	0	0	0	200	903	0	0	0	0	0	0	0	603	903	0
825	1	-23.071	94.4019	-596.655	106179	-22994.8	-7897.71	161.461	122.044	0	0	0	0	0	0	0	200	903	0	0	0	0	0	0	0	603	903	0
825	2	-21.8503	91.1975	-599.706	106911	-23055.8	-7897.71	161.555	121.728	0	0	0	0	0	0	0	200	903	0	0	0	0	0	0	0	603	903	0
825	3	-21.3925	88.451	-607.641	105904	-23361	-7623.05	161.555	125.713	0	0	0	0	0	0	0	200	903	0	0	0	0	0	0	0	603	903	0
825	4	-21.6977	90.8924	-611.303	106911	-23544.1	-7943.48	161.485	125.11	0	0	0	0	0	0	0	200	903	0	0	0	0	0	0	0	603	903	0
825	5	-23.2236	90.5872	-613.745	106911	-23788.2	-7943.48	161.241	125.805	0	0	0	0	0	0	0	200	903	0	0	0	0	0	0	0	603	903	0
825	6	-24.4443	86.3147	-616.796	107460	-23788.2	-7531.5	161.433	125.777	0	0	0	0	0	0	0	200	903	0	0	0	0	0	0	0	603	903	0
825	7	-23.8339	87.688	-620.153	108559	-24520.6	-7897.71	160.46	124.948	0	0	0	0	0	0	0	200	903	0	0	0	0	0	0	0	603	903	0
825	8	-21.3925	89.3665	-625.341	109200	-24581.7	-8218.14	160.691	125.376	0	0	0	0	0	0	0	200	903	0	0	0	0	0	0	0	603	903	0
825	9	-24.902	89.6717	-629.614	107918	-24642.7	-7760.38	160.861	128.596	0	0	0	0	0	0	0	200	903	0	0	0	0	0	0	0	603	903	0
826	0	-28.259	88.7561	-632.971	109841	-24886.8	-7989.26	160.682	126.468	0	0	0	0	0	0	0	200	903	0	0	0	0	0	0	0	603	903	0
826	1	-29.0219	89.9768	-635.107	110756	-25069.9	-8538.57	160.526	125.61	0	0	0	0	0	0	0	200	903	0	0	0	0	0	0	0	603	903	0
826	2	-27.1909	92.1131	-639.99	110207	-25192	-8492.8	160.637	127.799	0	0	0	0	0	0	0	200	903	0	0	0	0	0	0	0	603	903	0
826	3	-28.259	89.8243	-647.619	110756	-25253.1	-8263.92	161.006	128.98	0	0	0	0	0	0	0	200	903	0	0	0	0	0	0	0	603	903	0
826	4	-30.853	92.4183	-644.262	111031	-25619.3	-8950.56	160.235	127.662	0	0	0	0	0	0	0	200	903	0	0	0	0	0	0	0	603	903	0
826	5	-32.2263	93.9441	-654.943	111672	-25741.3	-8813.23	160.697	129.494	0	0	0	0	0	0	0	200	903	0	0	0	0	0	0	0	603	903	0
826	6	-32.5314	96.5381	-657.995	112770	-25741.3	-8950.56	160.879	128.615	0	0	0	0	0	0	0	200	903	0	0	0	0	0	0	0	603	903	0
826	7	-31.4633	96.0804	-662.573	113686	-26107.5	-8355.47	160.597	128.418	0	0	0	0	0	0	0	200	903	0	0	0	0	0	0	0	603	903	0
826	8	-32.8366	95.3174	-668.371	113503	-26534.8	-9225.22	160.299	130.18	0	0	0	0	0	0	0	200	903	0	0	0	0	0	0	0	603	903	0
826	9	-33.447	97.9114	-674.169	114052	-26229.6	-9316.77	161.093	130.826	0	0	0	0	0	0	0	200	903	0	0	0	0	0	0	0	603	903	0
827	0	-32.2263	98.2166	-676.306	115059	-26778.9	-9133.67	160.404	129.871	0	0	0	0	0	0	0	200	903	0	0	0	0	0	0	0	603	903	0
827	1	-34.8203	97.1485	-681.188	114601	-26595.8	-9225.22	160.957	131.763	0	0	0	0	0	0	0	200	903	0	0	0	0	0	0	0	603	903	0
827	2	-34.5151	97.3011	-685.156	115059	-26717.9	-9362.55	161.005	132.069	0	0	0	0	0	0	0	200	903	0	0	0	0	0	0	0	603	903	0
827	3	-33.1418	98.9795	-690.954	115425	-27267.2	-9499.88	160.537	132.948	0	0	0	0	0	0	0	200	903	0	0	0	0	0	0	0	603	903	0
827	4	-34.6677	98.5218	-696.752	115883	-27633.4	-9087.89	160.34	133.681	0	0	0	0	0	0	0	200	903	0	0	0	0	0	0	0	603	903	0
827	5	-34.6677	97.9114	-699.194	116615	-27572.4	-9087.89	160.565	133.214	0	0	0	0	0	0	0	200	903	0	0	0	0	0	0	0	603	903	0
827	6	-34.9728	98.6744	-702.245	117714	-27450.3	-9225.22	160.911	132.375	0	0	0	0	0	0	0	200	903	0	0	0	0	0	0	0	603	903	0
827	7	-33.1418	98.5218	-707.739	117806	-27572.4	-9316.77	161.042	133.546	0	0	0	0	0	0	0	200	903	0	0	0	0	0	0	0	603	903	0
827	8	-32.5314	98.2166	-713.537	118263	-28060.7	-8904.79	160.674	134.257	0	0	0	0	0	0	0	200	903	0	0	0	0	0	0	0	603	903	0
827	9	-33.7521	96.3855	-716.894	118630	-27511.4	-8996.34	161.624	134.523	0	0	0	0	0	0	0	200	903	0	0	0	0	0	0	0	603	903	0
828	0	-32.0737	98.6744	-719.03	118080	-27999.6	-9042.11	161.059	135.778	0	0	0	0	0	0	0	200	903	0	0	0	0	0	0	0	603	903	0
828	1	-32.0737	98.5218	-723.303	118538	-28426.9	-8767.46	160.699	136.115	0	0	0	0	0	0	0	200	903	0	0	0	0	0	0	0	603	903	0
828	2	-31.3107	98.9795	-726.66	118630	-28365.8	-8630.13	160.964	136.747	0	0	0	0	0	0	0	200	903	0	0	0	0	0	0	0	603	903	0
828	3	-31.3107	99.2847	-731.542	118904	-28121.7	-8630.13	161.558	137.461	0	0	0	0	0	0	0	200	903	0	0	0	0	0	0	0	603	903	0
828	4	-31.7685	98.5218	-734.289	119362	-28487.9	-8813.23	161.203	137.445	0	0	0	0	0	0	0	200	903	0	0	0	0	0	0	0	603	903	0
828	5	-29.0219	100.048	-738.256	120278	-28793.1	-8630.13	160.999	137.079	0	0	0	0	0	0	0	200	903	0	0	0	0	0	0	0	603	903	0
828	6	-31.6159	99.4373	-738.256	120644	-29037.2	-8584.35	160.668	136.583	0	0	0	0	0	0	0	200	903	0	0	0	0	0	0	0	603	903	0
828	7	-29.3271	98.5218	-742.834	120827	-28671	-8309.69	161.403	137.343	0	0	0	0	0	0	0	200	903	0	0	0	0	0	0	0	603	903	0
828	8	-29.0219	98.8269	-747.717	120827	-28671	-8447.02	161.655	138.405	0	0	0	0	0	0	0	200	903	0	0	0	0	0	0	0	603	903	0
828	9	-29.6323	99.1321	-751.379	121651	-28976.2	-8172.36	161.436	138.096	0	0	0	0	0	0	0	200	903	0	0	0	0	0	0	0	603	903	0
829	0	-27.6486	98.2166	-753.21	121926	-28671	-7943.48	161.935	138.125	0	0	0	0	0	0	0	200	903	0	0	0	0	0	0	0	603	903	0
829	1	-28.7167	98.5218	-755.651	120918	-28732.1	-7989.26	161.977	139.981	0	0	0	0	0	0	0	200	903	0	0	0	0	0	0	0	603	903	0
829	2	-27.3434	96.9959	-757.482	121559	-28854.1	-7989.26	161.908	139.522	0	0	0	0	0	0	0	200	903	0	0	0	0	0	0	0	603	903	0
829	3	-27.8012	98.064	-762.365	120827	-28854.1	-7989.26	162.152	141.51	0	0	0	0	0	0	0	200	903	0	0	0	0	0	0	0	603	903	0
829	4	-28.259	98.6744	-766.027	121651	-28671	-7806.15	162.572	141.192	0	0	0	0	0	0	0	200	903	0	0	0	0	0	0	0	603	903	0
829	5	-26.2753	97.3011	-765.722	121834	-29403.4	-7851.93	161.6	140.89	0	0	0	0	0	0	0	200	903	0	0	0	0	0	0	0	603	903	0
829	6	-26.8857	98.8269	-766.943	122566	-29281.4	-7623.05	161.821	140.188	0	0	0	0	0	0	0	200	903	0	0	0	0	0	0	0	603	903	0
829	7	-26.7331	98.2166	-770.605	122292	-29037.2	-7577.27	162.319	141.304	0	0	0	0	0	0	0	200	903	0	0	0	0	0	0	0	603	903	0
829	8	-25.3598	98.3692	-776.098	121468	-29159.3	-7623.05	162.428	143.489	0	0	0	0	0	0	0	200	903	0	0	0	0	0	0	0	603	903	0
829	9	-26.1227	97.6062	-778.539	122292	-29525.5	-7211.06	162.076	142.922	0	0	0	0	0	0	0	200	903	0	0	0	0	0	0	0	603	903	0
830	0	-23.3762	96.6907	-779.15	122383	-29586.5	-7211.06	162.027	142.927	0	0	0	0	0	0	0	200	903	0	0	0	0	0	0	0	603	903	0
830	1	-25.5124	97.9114	-777.929	121926	-28976.2	-7165.29	162.752	143.269	0	0	0	0	0	0	0	200	903	0	0	0	0	0	0	0	603	903	0
830	2	-23.3762	98.2166	-783.422	121559	-29525.5	-6982.18	162.312	144.835	0	0	0	0	0	0	0	200	903	0	0	0	0	0	0	0	603	903	0
830	3	-22.6132	98.6744	-786.474	121376	-29525.5	-6615.97	162.458	145.67	0	0	0	0	0	0	0	200	903	0	0	0	0	0	0	0	603	903	0
830	4	-23.3762	98.8269	-789.831	121742	-29342.4	-6570.19	162.85	145.863	0	0	0	0	0	0	0	200	903	0	0	0	0	0	0	0	603	903	0
830	5	-20.477	98.5218	-789.526	121926	-29281.4	-6478.64	162.913	145.571	0	0	0	0	0	0	0	200	903	0	0	0	0	0	0	0	603	903	0
830	6	-21.8503	98.5218	-789.221	122017	-29830.7	-6432.86	162.202	145.395	0	0	0	0	0	0	0	200	903	0	0	0	0	0	0	0	603	903	0
830	7	-20.477	98.6744	-791.967	121834	-29769.7	-6570.19	162.41	146.163	0	0	0	0	0	0	0	200	903	0	0	0	0	0	0	0	603	903	0
830	8	-20.7822	98.5218	-795.934	121651	-29342.4	-6615.97	163.135	147.16	0	0	0	0	0	0	0	200	903	0	0	0	0	0	0	0	603	903	0
830	9	-21.0873	98.3692	-796.24	122109	-29769.7	-6478.64	162.612	146.643	0	0	0	0	0	0	0	200	903	0	0	0	0	0	0	0	603	903	0
831	0	-19.4089	98.9795	-794.409	122566	-29647.6	-6341.31	162.68	145.714	0	0	0	0	0	0	0	200	903	0	0	0	0	0	0	0	603	903	0
831	1	-20.3244	99.4373	-792.578	121193	-29647.6	-6295.53	162.593	147.09	0	0	0	0	0	0	0	200	903	0	0	0	0	0	0	0	603	903	0
831	2	-20.0192	98.9795	-797.766	121376	-29403.4	-6432.86	163.143	147.855	0	0	0	0	0	0	0	200	903	0	0	0	0	0	0	0	603	903	0
831	3	-18.7985	99.4373	-799.902	120369	-29647.6	-6524.42	162.936	149.52	0	0	0	0	0	0	0	200	903	0	0	0	0	0	0	0	603	903	0
831	4	-19.7141	98.2166	-799.902	120735	-29708.6	-6387.09	162.86	149.062	0	0	0	0	0	0	0	200	903	0	0	0	0	0	0	0	603	903	0
831	5	-19.8666	98.6744	-798.376	120461	-29647.6	-6478.64	162.865	149.118	0	0	0	0	0	0	0	200	903	0	0	0	0	0	0	0	603	903	0
831	6	-19.8666	98.8269	-795.019	120369	-29342.4	-6387.09	163.092	148.596	0	0	0	0	0	0	0	200	903	0	0	0	0	0	0	0	603	903	0
831	7	-19.2563	97.9114	-798.071	120369	-29830.7	-6524.42	162.621	149.175	0	0	0	0	0	0	0	200	903	0	0	0	0	0	0	0	603	903	0
831	8	-19.1037	97.7588	-801.122	119637	-29464.5	-6478.64	163.221	150.664	0	0	0	0	0	0	0	200	903	0	0	0	0	0	0	0	603	903	0
831	9	-20.3244	96.8433	-800.512	119087	-29342.4	-6478.64	163.345	151.236	0	0	0	0	0	0	0	200	903	0	0	0	0	0	0	0	603	903	0
832	0	-20.1718	94.8597	-799.291	119087	-29830.7	-6478.64	162.679	151.009	0	0	0	0	0	0	0	200	903	0	0	0	0	0	0	0	603	903	0
832	1	-20.9348	95.9278	-796.545	117714	-29769.7	-6615.97	162.627	152.219	0	0	0	0	0	0	0	200	903	0	0	0	0	0	0	0	603	903	0
832	2	-19.7141	94.8597	-798.071	117897	-29586.5	-6661.75	162.927	152.272	0	0	0	0	0	0	0	200	903	0	0	0	0	0	0	0	603	903	0
832	3	-20.477	95.7752	-800.512	117531	-29464.5	-6799.07	163.193	153.18	0	0	0	0	0	0	0	200	903	0	0	0	0	0	0	0	603	903	0
832	4	-21.6977	95.47	-800.512	117073	-29891.7	-6661.75	162.659	153.752	0	0	0	0	0	0	0	200	903	0	0	0	0	0	0	0	603	903	0
832	5	-21.5451	94.7071	-798.376	117165	-30074.8	-6615.97	162.33	153.246	0	0	0	0	0	0	0	200	903	0	0	0	0	0	0	0	603	903	0
832	6	-21.8503	93.4864	-798.071	117073	-29281.4	-6753.3	163.31	153.305	0	0	0	0	0	0	0	200	903	0	0	0	0	0	0	0	603	903	0
832	7	-21.8503	92.876	-797.766	116432	-29769.7	-6661.75	162.684	154.052	0	0	0	0	0	0	0	200	903	0	0	0	0	0	0	0	603	903	0
832	8	-20.9348	92.2657	-798.376	115700	-29952.8	-6707.52	162.483	155.081	0	0	0	0	0	0	0	200	903	0	0	0	0	0	0	0	603	903	0
832	9	-22.6132	92.2657	-797.766	115700	-29464.5	-6799.07	163.066	154.97	0	0	0	0	0	0	0	200	903	0	0	0	0	0	0	0	603	903	0
833	0	-23.5287	91.5027	-795.629	115425	-29891.7	-6982.18	162.43	154.926	0	0	0	0	0	0	0	200	903	0	0	0	0	0	0	0	603	903	0
833	1	-21.8503	91.3501	-795.324	114144	-29769.7	-6890.63	162.569	156.482	0	0	0	0	0	0	0	200	903	0	0	0	0	0	0	0	603	903	0
833	2	-22.6132	91.5027	-796.545	113411	-29708.6	-6707.52	162.703	157.621	0	0	0	0	0	0	0	200	903	0	0	0	0	0	0	0	603	903	0
833	3	-22.0029	91.8079	-793.493	113228	-30013.8	-7165.29	162.175	157.304	0	0	0	0	0	0	0	200	903	0	0	0	0	0	0	0	603	903	0
833	4	-23.8339	90.8924	-793.188	112862	-29647.6	-6936.4	162.622	157.711	0	0	0	0	0	0	0	200	903	0	0	0	0	0	0	0	603	903	0
833	5	-24.4443	90.7398	-787.695	112038	-29830.7	-7165.29	162.129	157.765	0	0	0	0	0	0	0	200	903	0	0	0	0	0	0	0	603	903	0
833	6	-23.3762	90.5872	-785.864	112404	-29403.4	-6890.63	162.585	156.967	0	0	0	0	0	0	0	200	903	0	0	0	0	0	0	0	603	903	0
833	7	-22.9184	88.1458	-786.474	111672	-29464.5	-7073.73	162.536	158.01	0	0	0	0	0	0	0	200	903	0	0	0	0	0	0	0	603	903	0
833	8	-23.8339	88.7561	-780.37	111214	-29586.5	-7165.29	162.087	157.486	0	0	0	0	0	0	0	200	903	0	0	0	0	0	0	0	603	903	0
833	9	-25.3598	88.9087	-782.202	110207	-29830.7	-6707.52	161.863	159.107	0	0	0	0	0	0	0	200	903	0	0	0	0	0	0	0	603	903	0
834	0	-24.4443	88.2984	-777.319	110207	-28976.2	-7348.39	162.723	158.222	0	0	0	0	0	0	0	200	903	0	0	0	0	0	0	0	603	903	0
834	1	-24.4443	87.688	-774.877	108193	-29342.4	-7211.06	162.133	160.375	0	0	0	0	0	0	0	200	903	0	0	0	0	0	0	0	603	903	0
834	2	-24.5969	87.9932	-774.572	107460	-29403.4	-6890.63	162.039	161.265	0	0	0	0	0	0	0	200	903	0	0	0	0	0	0	0	603	903	0
834	3	-25.5124	87.8406	-771.52	106636	-29037.2	-7348.39	162.364	161.784	0	0	0	0	0	0	0	200	903	0	0	0	0	0	0	0	603	903	0
834	4	-24.5969	85.7044	-765.112	106362	-28976.2	-7302.61	162.128	160.986	0	0	0	0	0	0	0	200	903	0	0	0	0	0	0	0	603	903	0
834	5	-25.9702	86.7725	-762.06	105629	-29281.4	-7348.39	161.576	161.39	0	0	0	0	0	0	0	200	903	0	0	0	0	0	0	0	603	903	0
834	6	-25.8176	86.4673	-761.755	104714	-29220.3	-7211.06	161.641	162.536	0	0	0	0	0	0	0	200	903	0	0	0	0	0	0	0	603	903	0
834	7	-25.5124	85.094	-761.45	103798	-28732.1	-7256.84	162.267	163.684	0	0	0	0	0	0	0	200	903	0	0	0	0	0	0	0	603	903	0
834	8	-27.8012	84.1785	-758.703	103615	-28671	-7394.17	162.21	163.431	0	0	0	0	0	0	0	200	903	0	0	0	0	0	0	0	603	903	0
834	9	-27.496	83.7207	-753.82	102883	-28793.1	-7211.06	161.804	163.518	0	0	0	0	0	0	0	200	903	0	0	0	0	0	0	0	603	903	0
835	0	-26.5805	83.4156	-749.243	103249	-28487.9	-6844.85	161.978	162.196	0	0	0	0	0	0	0	200	903	0	0	0	0	0	0	0	603	903	0
835	1	-26.8857	82.5	-749.548	101143	-28671	-7485.72	161.749	165.061	0	0	0	0	0	0	0	200	903	0	0	0	0	0	0	0	603	903	0
835	2	-26.5805	80.0586	-744.665	100411	-28976.2	-7302.61	161.088	165.16	0	0	0	0	0	0	0	200	903	0	0	0	0	0	0	0	603	903	0
835	3	-28.259	82.5	-743.444	99495.2	-28793.1	-7348.39	161.271	166.17	0	0	0	0	0	0	0	200	903	0	0	0	0	0	0	0	603	903	0
835	4	-29.7849	81.8897	-739.782	99128.9	-28304.8	-7394.17	161.739	166.003	0	0	0	0	0	0	0	200	903	0	0	0	0	0	0	0	603	903	0
835	5	-28.5641	80.9742	-735.815	98488.1	-28426.9	-7485.72	161.367	166.151	0	0	0	0	0	0	0	200	903	0	0	0	0	0	0	0	603	903	0
835	6	-28.7167	80.2112	-734.594	98579.6	-28610	-7668.83	161.053	165.804	0	0	0	0	0	0	0	200	903	0	0	0	0	0	0	0	603	903	0
835	7	-30.2426	79.6009	-733.373	97938.7	-28793.1	-7623.05	160.739	166.455	0	0	0	0	0	0	0	200	903	0	0	0	0	0	0	0	603	903	0
835	8	-29.6323	78.6853	-728.796	97389.4	-27999.6	-7394.17	161.581	166.369	0	0	0	0	0	0	0	200	903	0	0	0	0	0	0	0	603	903	0
835	9	-30.2426	77.9224	-726.354	96840.1	-28426.9	-7531.5	160.864	166.677	0	0	0	0	0	0	0	200	903	0	0	0	0	0	0	0	603	903	0
836	0	-28.1064	76.2439	-727.575	96657	-28182.7	-7439.94	161.265	167.152	0	0	0	0	0	0	0	200	903	0	0	0	0	0	0	0	603	903	0
836	1	-29.0219	76.2439	-724.218	95192.2	-28243.8	-7073.73	161.001	168.559	0	0	0	0	0	0	0	200	903	0	0	0	0	0	0	0	603	903	0
836	2	-29.6323	75.9388	-719.641	94459.8	-27877.6	-7256.84	161.262	168.74	0	0	0	0	0	0	0	200	903	0	0	0	0	0	0	0	603	903	0
836	3	-30.5478	75.0232	-715.978	93727.3	-28304.8	-7027.96	160.467	169.092	0	0	0	0	0	0	0	200	903	0	0	0	0	0	0	0	603	903	0
836	4	-29.7849	75.0232	-713.842	94002	-28121.7	-7302.61	160.605	168.315	0	0	0	0	0	0	0	200	903	0	0	0	0	0	0	0	603	903	0
836	5	-29.4797	74.1077	-712.316	92628.7	-27572.4	-6890.63	161.292	169.961	0	0	0	0	0	0	0	200	903	0	0	0	0	0	0	0	603	903	0
836	6	-30.2426	73.9551	-710.485	92262.5	-27633.4	-6936.4	161.106	170.142	0	0	0	0	0	0	0	200	903	0	0	0	0	0	0	0	603	903	0
836	7	-28.7167	73.6499	-706.518	91804.7	-27816.5	-7027.96	160.629	170.06	0	0	0	0	0	0	0	200	903	0	0	0	0	0	0	0	603	903	0
836	8	-30.7004	72.4292	-700.72	91255.4	-27511.4	-6982.18	160.738	169.769	0	0	0	0	0	0	0	200	903	0	0	0	0	0	0	0	603	903	0
836	9	-28.8693	71.8189	-701.94	91072.3	-27145.1	-7073.73	161.328	170.256	0	0	0	0	0	0	0	200	903	0	0	0	0	0	0	0	603	903	0
837	0	-29.4797	69.9878	-701.025	90614.5	-27450.3	-7073.73	160.843	170.74	0	0	0	0	0	0	0	200	903	0	0	0	0	0	0	0	603	903	0
837	1	-30.2426	69.0723	-699.499	90339.9	-27450.3	-6799.07	160.757	170.851	0	0	0	0	0	0	0	200	903	0	0	0	0	0	0	0	603	903	0
837	2	-30.5478	68.7671	-694.311	89332.8	-27145.1	-6936.4	160.903	171.336	0	0	0	0	0	0	0	200	903	0	0	0	0	0	0	0	603	903	0
837	3	-30.09	67.5464	-691.87	89058.1	-26962	-6753.3	161.03	171.279	0	0	0	0	0	0	0	200	903	0	0	0	0	0	0	0	603	903	0
837	4	-28.259	66.4783	-690.038	87684.8	-27450.3	-6478.64	160.219	172.928	0	0	0	0	0	0	0	200	903	0	0	0	0	0	0	0	603	903	0
837	5	-29.4797	65.4102	-685.156	87044	-27206.2	-6753.3	160.292	172.957	0	0	0	0	0	0	0	200	903	0	0	0	0	0	0	0	603	903	0
837	6	-30.2426	65.7154	-687.292	86494.6	-26840	-6524.42	160.948	174.152	0	0	0	0	0	0	0	200	903	0	0	0	0	0	0	0	603	903	0
837	7	-29.9374	65.105	-681.799	86220	-26717.9	-6478.64	160.813	173.54	0	0	0	0	0	0	0	200	903	0	0	0	0	0	0	0	603	903	0
837	8	-29.0219	62.8162	-679.968	86036.9	-26534.8	-6478.64	160.976	173.469	0	0	0	0	0	0	0	200	903	0	0	0	0	0	0	0	603	903	0
837	9	-28.5641	63.5791	-678.442	85853.8	-26595.8	-6524.42	160.799	173.455	0	0	0	0	0	0	0	200	903	0	0	0	0	0	0	0	603	903	0
838	0	-29.3271	62.8162	-675.085	85670.7	-26412.7	-6203.98	160.875	173.096	0	0	0	0	0	0	0	200	903	0	0	0	0	0	0	0	603	903	0
838	1	-28.7167	60.8326	-671.118	85121.3	-26717.9	-6203.98	160.189	173.165	0	0	0	0	0	0	0	200	903	0	0	0	0	0	0	0	603	903	0
838	2	-28.5641	61.1377	-671.118	84663.6	-26351.7	-6295.53	160.735	173.847	0	0	0	0	0	0	0	200	903	0	0	0	0	0	0	0	603	903	0
838	3	-26.4279	59.3067	-668.676	83839.6	-26168.6	-6249.76	160.865	174.618	0	0	0	0	0	0	0	200	903	0	0	0	0	0	0	0	603	903	0
838	4	-27.3434	59.3067	-665.014	82374.8	-25985.5	-5929.32	160.925	176.131	0	0	0	0	0	0	0	200	903	0	0	0	0	0	0	0	603	903	0
838	5	-28.1064	58.3911	-662.267	82283.2	-26473.8	-5837.77	160.026	175.755	0	0	0	0	0	0	0	200	903	0	0	0	0	0	0	0	603	903	0
838	6	-27.9538	58.3911	-658.605	82100.1	-26351.7	-6066.65	159.989	175.342	0	0	0	0	0	0	0	200	903	0	0	0	0	0	0	0	603	903	0
838	7	-27.9538	57.323	-656.469	81001.5	-25863.4	-5837.77	160.602	176.61	0	0	0	0	0	0	0	200	903	0	0	0	0	0	0	0	603	903	0
838	8	-26.8857	55.492	-655.859	80635.2	-25985.5	-5700.44	160.379	177.054	0	0	0	0	0	0	0	200	903	0	0	0	0	0	0	0	603	903	0
838	9	-27.8012	56.4075	-653.417	80818.4	-26229.6	-5700.44	159.858	176.314	0	0	0	0	0	0	0	200	903	0	0	0	0	0	0	0	603	903	0
839	0	-28.4116	55.6446	-649.45	79902.8	-26168.6	-5791.99	159.707	176.968	0	0	0	0	0	0	0	200	903	0	0	0	0	0	0	0	603	903	0
839	1	-27.6486	53.9661	-647.009	79536.6	-25497.2	-5700.44	160.592	177.07	0	0	0	0	0	0	0	200	903	0	0	0	0	0	0	0	603	903	0
839	2	-27.1909	53.3557	-642.126	79170.4	-25985.5	-5608.89	159.532	176.706	0	0	0	0	0	0	0	200	903	0	0	0	0	0	0	0	603	903	0
839	3	-27.1909	52.898	-643.652	78804.2	-25863.4	-5334.23	159.818	177.567	0	0	0	0	0	0	0	200	903	0	0	0	0	0	0	0	603	903	0
839	4	-28.259	52.135	-640.295	77339.4	-25436.2	-5059.57	160.274	179.213	0	0	0	0	0	0	0	200	903	0	0	0	0	0	0	0	603	903	0
839	5	-28.259	50.1514	-636.328	76973.1	-25314.1	-5425.78	160.218	179.035	0	0	0	0	0	0	0	200	903	0	0	0	0	0	0	0	603	903	0
839	6	-27.6486	51.2195	-633.276	76606.9	-25863.4	-4876.46	159.159	179.031	0	0	0	0	0	0	0	200	903	0	0	0	0	0	0	0	603	903	0
839	7	-27.0383	48.0152	-631.445	75783	-25558.2	-4876.46	159.524	179.985	0	0	0	0	0	0	0	200	903	0	0	0	0	0	0	0	603	903	0
839	8	-26.8857	50.7618	-629.919	76149.2	-25314.1	-5196.9	159.814	179.113	0	0	0	0	0	0	0	200	903	0	0	0	0	0	0	0	603	903	0
839	9	-28.1064	49.2359	-627.172	75508.3	-25253.1	-5105.35	159.735	179.605	0	0	0	0	0	0	0	200	903	0	0	0	0	0	0	0	603	903	0
840	0	-27.6486	48.6255	-622.595	75050.6	-25436.2	-5151.13	159.145	179.455	0	0	0	0	0	0	0	200	903	0	0	0	0	0	0	0	603	903	0
840	1	-27.0383	48.1678	-620.764	75050.6	-25008.9	-5288.45	159.713	179.1	0	0	0	0	0	0	0	200	903	0	0	0	0	0	0	0	603	903	0
840	2	-25.9702	46.0315	-619.543	74318.2	-24825.8	-5334.23	159.929	180.044	0	0	0	0	0	0	0	200	903	0	0	0	0	0	0	0	603	903	0
840	3	-26.8857	46.6419	-616.796	73219.5	-25008.9	-5013.79	159.454	181.291	0	0	0	0	0	0	0	200	903	0	0	0	0	0	0	0	603	903	0
840	4	-26.7331	46.6419	-613.745	72944.8	-24825.8	-4876.46	159.55	181.148	0	0	0	0	0	0	0	200	903	0	0	0	0	0	0	0	603	903	0
840	5	-27.9538	45.7264	-608.557	72304	-24642.7	-5059.57	159.506	181.188	0	0	0	0	0	0	0	200	903	0	0	0	0	0	0	0	603	903	0
840	6	-25.9702	45.116	-607.031	71754.7	-24459.6	-4876.46	159.706	181.794	0	0	0	0	0	0	0	200	903	0	0	0	0	0	0	0	603	903	0
840	7	-26.4279	44.2005	-607.031	71480	-24886.8	-4739.14	159.002	182.247	0	0	0	0	0	0	0	200	903	0	0	0	0	0	0	0	603	903	0
840	8	-27.0383	44.0479	-603.369	71480	-24825.8	-4784.91	158.855	181.532	0	0	0	0	0	0	0	200	903	0	0	0	0	0	0	0	603	903	0
840	9	-27.496	42.3694	-600.012	70839.1	-24276.5	-4784.91	159.54	181.937	0	0	0	0	0	0	0	200	903	0	0	0	0	0	0	0	603	903	0
841	0	-25.9702	42.2168	-598.486	69740.5	-24459.6	-4922.24	159.131	183.472	0	0	0	0	0	0	0	200	903	0	0	0	0	0	0	0	603	903	0
841	1	-24.4443	41.6065	-596.655	69923.6	-24703.7	-4464.48	158.596	182.807	0	0	0	0	0	0	0	200	903	0	0	0	0	0	0	0	603	903	0
841	2	-26.1227	41.4539	-590.856	69465.8	-24520.6	-4464.48	158.5	182.432	0	0	0	0	0	0	0	200	903	0	0	0	0	0	0	0	603	903	0
841	3	-26.5805	40.2332	-592.993	68550.3	-24154.4	-4556.03	159.267	184.399	0	0	0	0	0	0	0	200	903	0	0	0	0	0	0	0	603	903	0
841	4	-26.7331	39.3177	-588.72	67909.4	-24825.8	-4601.81	157.831	184.649	0	0	0	0	0	0	0	200	903	0	0	0	0	0	0	0	603	903	0
841	5	-26.8857	40.3858	-587.194	67360.1	-24337.5	-4327.15	158.553	185.285	0	0	0	0	0	0	0	200	903	0	0	0	0	0	0	0	603	903	0
841	6	-26.1227	39.3177	-584.448	67085.5	-24032.3	-4327.15	158.88	185.216	0	0	0	0	0	0	0	200	903	0	0	0	0	0	0	0	603	903	0
841	7	-26.4279	38.8599	-584.753	66444.6	-24093.4	-4510.25	158.797	186.372	0	0	0	0	0	0	0	200	903	0	0	0	0	0	0	0	603	903	0
841	8	-27.3434	37.334	-579.26	66902.3	-24337.5	-4189.82	157.985	184.504	0	0	0	0	0	0	0	200	903	0	0	0	0	0	0	0	603	903	0
841	9	-26.8857	38.097	-577.123	65986.8	-24276.5	-4327.15	157.935	185.663	0	0	0	0	0	0	0	200	903	0	0	0	0	0	0	0	603	903	0
842	0	-26.2753	36.5711	-575.598	66078.4	-23849.2	-4235.6	158.566	185.2	0	0	0	0	0	0	0	200	903	0	0	0	0	0	0	0	603	903	0
842	1	-26.2753	36.5711	-574.072	65712.2	-24032.3	-4327.15	158.137	185.533	0	0	0	0	0	0	0	200	903	0	0	0	0	0	0	0	603	903	0
842	2	-27.1909	35.3504	-572.546	65620.6	-24154.4	-4327.15	157.812	185.388	0	0	0	0	0	0	0	200	903	0	0	0	0	0	0	0	603	903	0
842	3	-24.5969	35.0452	-568.273	64155.8	-23727.2	-4510.25	158.247	187.104	0	0	0	0	0	0	0	200	903	0	0	0	0	0	0	0	603	903	0
842	4	-26.2753	33.8245	-563.696	63789.6	-23605.1	-4144.04	158.124	186.837	0	0	0	0	0	0	0	200	903	0	0	0	0	0	0	0	603	903	0
842	5	-25.9702	34.74	-563.696	63423.4	-23971.3	-4281.37	157.475	187.487	0	0	0	0	0	0	0	200	903	0	0	0	0	0	0	0	603	903	0
842	6	-25.5124	34.74	-563.696	63423.4	-23483	-4281.37	158.341	187.487	0	0	0	0	0	0	0	200	903	0	0	0	0	0	0	0	603	903	0
842	7	-26.4279	33.8245	-561.865	62507.8	-23605.1	-4052.49	157.988	188.749	0	0	0	0	0	0	0	200	903	0	0	0	0	0	0	0	603	903	0
842	8	-23.9865	33.0616	-558.203	62965.6	-23483	-3869.39	157.931	187.199	0	0	0	0	0	0	0	200	903	0	0	0	0	0	0	0	603	903	0
842	9	-25.5124	32.2986	-552.709	62507.8	-23727.2	-3777.83	157.071	186.906	0	0	0	0	0	0	0	200	903	0	0	0	0	0	0	0	603	903	0
843	0	-25.0546	31.6883	-553.625	61409.2	-23483	-3960.94	157.583	189.078	0	0	0	0	0	0	0	200	903	0	0	0	0	0	0	0	603	903	0
843	1	-24.902	30.9253	-553.015	61500.7	-23299.9	-3823.61	157.867	188.79	0	0	0	0	0	0	0	200	903	0	0	0	0	0	0	0	603	903	0
843	2	-25.0546	30.4676	-551.489	61317.6	-23605.1	-3869.39	157.197	188.814	0	0	0	0	0	0	0	200	903	0	0	0	0	0	0	0	603	903	0
843	3	-24.1391	30.315	-545.69	59944.4	-23483	-3732.06	156.966	190.15	0	0	0	0	0	0	0	200	903	0	0	0	0	0	0	0	603	903	0
843	4	-24.902	30.4676	-545.385	59395	-23422	-3457.4	157.054	191.095	0	0	0	0	0	0	0	200	903	0	0	0	0	0	0	0	603	903	0
843	5	-23.9865	29.552	-544.47	59669.7	-23116.8	-3594.73	157.542	190.408	0	0	0	0	0	0	0	200	903	0	0	0	0	0	0	0	603	903	0
843	6	-23.3762	28.6365	-543.859	58937.3	-23361	-3732.06	157.046	191.631	0	0	0	0	0	0	0	200	903	0	0	0	0	0	0	0	603	903	0
843	7	-23.9865	28.6365	-543.249	58937.3	-23055.8	-3411.62	157.559	191.51	0	0	0	0	0	0	0	200	903	0	0	0	0	0	0	0	603	903	0
843	8	-22.4606	28.3313	-538.671	58845.7	-22994.8	-3320.07	157.312	190.758	0	0	0	0	0	0	0	200	903	0	0	0	0	0	0	0	603	903	0
843	9	-23.6813	26.3477	-535.62	59120.4	-23361	-3503.18	156.385	189.622	0	0	0	0	0	0	0	200	903	0	0	0	0	0	0	0	603	903	0
844	0	-23.5287	26.5003	-534.704	58296.4	-23361	-3411.62	156.311	190.974	0	0	0	0	0	0	0	200	903	0	0	0	0	0	0	0	603	903	0
844	1	-22.6132	26.1951	-535.314	57838.6	-23055.8	-3411.62	156.93	191.954	0	0	0	0	0	0	0	200	903	0	0	0	0	0	0	0	603	903	0
844	2	-23.6813	26.0425	-533.178	57014.7	-23422	-3228.52	156.071	193.066	0	0	0	0	0	0	0	200	903	0	0	0	0	0	0	0	603	903	0
844	3	-22.0029	25.7373	-530.126	56740	-23361	-3228.52	155.933	192.969	0	0	0	0	0	0	0	200	903	0	0	0	0	0	0	0	603	903	0
844	4	-23.2236	25.4322	-527.075	56465.4	-22933.7	-2999.64	156.489	192.87	0	0	0	0	0	0	0	200	903	0	0	0	0	0	0	0	603	903	0
844	5	-22.0029	25.8899	-527.99	56373.8	-23116.8	-3091.19	156.217	193.229	0	0	0	0	0	0	0	200	903	0	0	0	0	0	0	0	603	903	0
844	6	-21.3925	24.5166	-527.99	56373.8	-22933.7	-2587.65	156.564	193.229	0	0	0	0	0	0	0	200	903	0	0	0	0	0	0	0	603	903	0
844	7	-22.1555	25.2796	-526.159	56282.2	-23055.8	-2724.98	156.181	193.032	0	0	0	0	0	0	0	200	903	0	0	0	0	0	0	0	603	903	0
844	8	-20.0192	24.364	-523.107	56282.2	-22689.6	-2862.31	156.625	192.408	0	0	0	0	0	0	0	200	903	0	0	0	0	0	0	0	603	903	0
844	9	-22.0029	23.4485	-519.14	55549.8	-22628.5	-2816.53	156.411	192.996	0	0	0	0	0	0	0	200	903	0	0	0	0	0	0	0	603	903	0
845	0	-20.3244	23.4485	-520.971	55092	-23055.8	-2862.31	155.745	194.251	0	0	0	0	0	0	0	200	903	0	0	0	0	0	0	0	603	903	0
845	1	-20.0192	22.0752	-519.445	55824.5	-22567.5	-2587.65	156.555	192.531	0	0	0	0	0	0	0	200	903	0	0	0	0	0	0	0	603	903	0
845	2	-20.7822	22.3804	-518.835	54176.5	-22689.6	-2496.09	156.268	195.58	0	0	0	0	0	0	0	200	903	0	0	0	0	0	0	0	603	903	0
845	3	-20.3244	22.2278	-516.088	54176.5	-22689.6	-2175.66	156.035	195.025	0	0	0	0	0	0	0	200	903	0	0	0	0	0	0	0	603	903	0
845	4	-19.2563	22.533	-515.173	53444.1	-22872.7	-2770.75	155.602	196.26	0	0	0	0	0	0	0	200	903	0	0	0	0	0	0	0	603	903	0
845	5	-16.9675	20.0916	-514.562	53352.6	-22567.5	-2679.2	156.142	196.315	0	0	0	0	0	0	0	200	903	0	0	0	0	0	0	0	603	903	0
845	6	-18.4933	21.4649	-512.121	53352.6	-22506.5	-2587.65	156.052	195.82	0	0	0	0	0	0	0	200	903	0	0	0	0	0	0	0	603	903	0
845	7	-18.9511	21.0071	-514.562	53627.2	-22628.5	-2496.09	156.024	195.781	0	0	0	0	0	0	0	200	903	0	0	0	0	0	0	0	603	903	0
845	8	-19.7141	19.4812	-509.069	52803.2	-22567.5	-2038.33	155.669	196.275	0	0	0	0	0	0	0	200	903	0	0	0	0	0	0	0	603	903	0
845	9	-17.883	18.4131	-509.374	52803.2	-22506.5	-2450.32	155.815	196.337	0	0	0	0	0	0	0	200	903	0	0	0	0	0	0	0	603	903	0
846	0	-17.7304	18.5657	-509.68	52162.4	-22567.5	-2267.21	155.722	197.657	0	0	0	0	0	0	0	200	903	0	0	0	0	0	0	0	603	903	0
846	1	-17.2726	19.0235	-508.764	51796.1	-22811.6	-2358.76	155.163	198.192	0	0	0	0	0	0	0	200	903	0	0	0	0	0	0	0	603	903	0
846	2	-16.5097	18.1079	-506.628	51796.1	-22506.5	-1946.78	155.576	197.763	0	0	0	0	0	0	0	200	903	0	0	0	0	0	0	0	603	903	0
846	3	-17.2726	18.5657	-505.102	51338.4	-23055.8	-2129.88	154.354	198.36	0	0	0	0	0	0	0	200	903	0	0	0	0	0	0	0	603	903	0
846	4	-17.2726	17.8028	-504.797	50880.6	-22872.7	-2084.11	154.689	199.206	0	0	0	0	0	0	0	200	903	0	0	0	0	0	0	0	603	903	0
846	5	-16.0519	16.8872	-505.407	51704.6	-22567.5	-2084.11	155.348	197.697	0	0	0	0	0	0	0	200	903	0	0	0	0	0	0	0	603	903	0
846	6	-15.8994	15.9717	-505.102	52162.4	-22567.5	-1809.45	155.321	196.729	0	0	0	0	0	0	0	200	903	0	0	0	0	0	0	0	603	903	0
846	7	-16.0519	16.4295	-501.44	51521.5	-23299.9	-1992.55	153.534	197.253	0	0	0	0	0	0	0	200	903	0	0	0	0	0	0	0	603	903	0
846	8	-16.3571	15.8191	-497.473	50972.2	-22933.7	-1809.45	153.9	197.538	0	0	0	0	0	0	0	200	903	0	0	0	0	0	0	0	603	903	0
846	9	-15.8994	15.514	-499.609	50422.9	-22811.6	-1855.23	154.341	199.075	0	0	0	0	0	0	0	200	903	0	0	0	0	0	0	0	603	903	0
847	0	-15.5942	15.0562	-500.219	50148.2	-23055.8	-1855.23	153.909	199.748	0	0	0	0	0	0	0	200	903	0	0	0	0	0	0	0	603	903	0
847	1	-16.3571	15.0562	-500.524	50422.9	-22994.8	-1809.45	154.059	199.26	0	0	0	0	0	0	0	200	903	0	0	0	0	0	0	0	603	903	0
847	2	-15.4416	14.2932	-498.998	49965.1	-22689.6	-2129.88	154.53	199.869	0	0	0	0	0	0	0	200	903	0	0	0	0	0	0	0	603	903	0
847	3	-14.5261	14.1407	-498.693	50972.2	-22628.5	-1534.79	154.624	197.789	0	0	0	0	0	0	0	200	903	0	0	0	0	0	0	0	603	903	0
847	4	-13.3054	13.8355	-499.609	50056.7	-23116.8	-1946.78	153.73	199.808	0	0	0	0	0	0	0	200	903	0	0	0	0	0	0	0	603	903	0
847	5	-14.0683	13.2251	-497.167	49782	-22933.7	-1534.79	153.871	199.869	0	0	0	0	0	0	0	200	903	0	0	0	0	0	0	0	603	903	0
847	6	-15.4416	12.4622	-498.083	49965.1	-22933.7	-1351.69	153.956	199.685	0	0	0	0	0	0	0	200	903	0	0	0	0	0	0	0	603	903	0
847	7	-15.1364	12.4622	-496.557	50239.8	-23116.8	-1168.58	153.446	198.824	0	0	0	0	0	0	0	200	903	0	0	0	0	0	0	0	603	903	0
847	8	-14.3735	11.8518	-495.947	49049.6	-23422	-1580.57	152.773	201.099	0	0	0	0	0	0	0	200	903	0	0	0	0	0	0	0	603	903	0
847	9	-13.4579	11.5467	-498.083	49049.6	-22994.8	-1443.24	153.834	201.523	0	0	0	0	0	0	0	200	903	0	0	0	0	0	0	0	603	903	0
848	0	-14.3735	11.5467	-495.336	48683.4	-22750.6	-1351.69	154.07	201.717	0	0	0	0	0	0	0	200	903	0	0	0	0	0	0	0	603	903	0
848	1	-14.6787	10.6311	-496.862	48683.4	-23605.1	-1077.03	152.492	202.018	0	0	0	0	0	0	0	200	903	0	0	0	0	0	0	0	603	903	0
848	2	-14.9838	10.7837	-495.336	49690.4	-23238.9	-1580.57	153.085	199.683	0	0	0	0	0	0	0	200	903	0	0	0	0	0	0	0	603	903	0
848	3	-14.3735	10.1734	-495.336	48866.5	-23116.8	-1534.79	153.331	201.347	0	0	0	0	0	0	0	200	903	0	0	0	0	0	0	0	603	903	0
848	4	-13.1528	8.03714	-495.641	49232.7	-23727.2	-1260.13	152.128	200.669	0	0	0	0	0	0	0	200	903	0	0	0	0	0	0	0	603	903	0
848	5	-14.6787	8.49491	-497.473	48958	-23727.2	-1260.13	152.305	201.586	0	0	0	0	0	0	0	200	903	0	0	0	0	0	0	0	603	903	0
848	6	-15.1364	8.18973	-498.388	48591.8	-23727.2	-1031.25	152.392	202.502	0	0	0	0	0	0	0	200	903	0	0	0	0	0	0	0	603	903	0
848	7	-15.5942	7.2742	-495.031	47950.9	-23849.2	-1305.91	151.823	203.136	0	0	0	0	0	0	0	200	903	0	0	0	0	0	0	0	603	903	0
848	8	-14.9838	7.88456	-496.862	48500.2	-24154.4	-1168.58	151.386	202.387	0	0	0	0	0	0	0	200	903	0	0	0	0	0	0	0	603	903	0
848	9	-15.289	7.88456	-495.947	47767.8	-24032.3	-1214.36	151.542	203.684	0	0	0	0	0	0	0	200	903	0	0	0	0	0	0	0	603	903	0
849	0	-14.8312	7.88456	-497.167	47950.9	-23727.2	-1260.13	152.275	203.552	0	0	0	0	0	0	0	200	903	0	0	0	0	0	0	0	603	903	0
849	1	-15.7468	7.2742	-496.862	48134	-24093.4	-1031.25	151.509	203.124	0	0	0	0	0	0	0	200	903	0	0	0	0	0	0	0	603	903	0
849	2	-14.8312	7.12162	-494.726	48591.8	-24520.6	-1077.03	150.436	201.78	0	0	0	0	0	0	0	200	903	0	0	0	0	0	0	0	603	903	0
849	3	-15.289	6.20609	-497.473	47767.8	-23910.3	-1168.58	151.937	203.979	0	0	0	0	0	0	0	200	903	0	0	0	0	0	0	0	603	903	0
849	4	-15.5942	5.59574	-497.473	48134	-24398.6	-1397.46	150.955	203.243	0	0	0	0	0	0	0	200	903	0	0	0	0	0	0	0	603	903	0
849	5	-15.289	4.98539	-500.219	48500.2	-24581.7	-1122.8	150.858	203.042	0	0	0	0	0	0	0	200	903	0	0	0	0	0	0	0	603	903	0
849	6	-15.7468	5.29056	-498.693	47859.4	-24337.5	-985.474	151.197	204.03	0	0	0	0	0	0	0	200	903	0	0	0	0	0	0	0	603	903	0
849	7	-15.1364	5.59574	-498.083	47859.4	-24154.4	-1077.03	151.505	203.913	0	0	0	0	0	0	0	200	903	0	0	0	0	0	0	0	603	903	0
849	8	-17.1201	5.13797	-498.693	47859.4	-24276.5	-1077.03	151.32	204.03	0	0	0	0	0	0	0	200	903	0	0	0	0	0	0	0	603	903	0
849	9	-15.7468	2.39139	-499.609	47676.3	-24337.5	-848.145	151.287	204.573	0	0	0	0	0	0	0	200	903	0	0	0	0	0	0	0	603	903	0
850	0	-15.5942	3.76468	-500.524	48134	-24764.8	-848.145	150.522	203.833	0	0	0	0	0	0	0	200	903	0	0	0	0	0	0	0	603	903	0
850	1	-16.6623	3.15433	-501.44	48042.5	-25131	-1260.13	149.882	204.191	0	0	0	0	0	0	0	200	903	0	0	0	0	0	0	0	603	903	0
850	2	-16.3571	2.08622	-499.304	47676.3	-24886.8	-1031.25	150.157	204.514	0	0	0	0	0	0	0	200	903	0	0	0	0	0	0	0	603	903	0
850	3	-16.9675	2.2388	-500.219	47676.3	-25253.1	-939.698	149.516	204.689	0	0	0	0	0	0	0	200	903	0	0	0	0	0	0	0	603	903	0
850	4	-16.2045	1.78104	-501.44	47401.6	-25375.1	-802.368	149.395	205.469	0	0	0	0	0	0	0	200	903	0	0	0	0	0	0	0	603	903	0
850	5	-16.3571	0.712926	-503.881	47127	-25497.2	-756.592	149.398	206.472	0	0	0	0	0	0	0	200	903	0	0	0	0	0	0	0	603	903	0
850	6	-16.8149	1.17069	-505.102	47584.7	-25253.1	-802.368	150.004	205.792	0	0	0	0	0	0	0	200	903	0	0	0	0	0	0	0	603	903	0
850	7	-16.0519	0.40775	-504.492	47035.4	-24947.9	-756.592	150.548	206.767	0	0	0	0	0	0	0	200	903	0	0	0	0	0	0	0	603	903	0
850	8	-16.9675	-0.0500139	-502.355	47676.3	-25985.5	-710.816	148.273	205.094	0	0	0	0	0	0	0	200	903	0	0	0	0	0	0	0	603	903	0
850	9	-16.2045	-0.660365	-505.712	47767.8	-25558.2	-802.368	149.461	205.544	0	0	0	0	0	0	0	200	903	0	0	0	0	0	0	0	603	903	0
851	0	-17.1201	-0.965541	-507.238	47676.3	-25680.3	-985.474	149.372	206.008	0	0	0	0	0	0	0	200	903	0	0	0	0	0	0	0	603	903	0
851	1	-18.0356	-2.03366	-508.459	47767.8	-26046.5	-527.71	148.774	206.054	0	0	0	0	0	0	0	200	903	0	0	0	0	0	0	0	603	903	0
851	2	-18.1882	-1.88107	-507.849	47218.5	-26351.7	-802.368	148.111	207.022	0	0	0	0	0	0	0	200	903	0	0	0	0	0	0	0	603	903	0
851	3	-17.7304	-1.88107	-508.459	47035.4	-26046.5	-527.71	148.774	207.494	0	0	0	0	0	0	0	200	903	0	0	0	0	0	0	0	603	903	0
851	4	-16.8149	-2.49142	-513.647	46852.3	-26412.7	-665.039	148.578	208.785	0	0	0	0	0	0	0	200	903	0	0	0	0	0	0	0	603	903	0
851	5	-17.4252	-3.10177	-512.731	47493.2	-26778.9	-436.157	147.772	207.372	0	0	0	0	0	0	0	200	903	0	0	0	0	0	0	0	603	903	0
851	6	-19.7141	-2.94918	-513.952	47676.3	-26473.8	-344.605	148.49	207.236	0	0	0	0	0	0	0	200	903	0	0	0	0	0	0	0	603	903	0
851	7	-18.7985	-3.55954	-514.257	47767.8	-26595.8	-527.71	148.283	207.113	0	0	0	0	0	0	0	200	903	0	0	0	0	0	0	0	603	903	0
851	8	-18.9511	-5.08541	-514.868	47950.9	-27023.1	-710.816	147.515	206.867	0	0	0	0	0	0	0	200	903	0	0	0	0	0	0	0	603	903	0
851	9	-17.2726	-4.78024	-520.056	47950.9	-27267.2	-436.157	147.569	207.797	0	0	0	0	0	0	0	200	903	0	0	0	0	0	0	0	603	903	0
852	0	-18.3408	-5.69577	-519.445	47767.8	-26595.8	-436.157	148.8	208.041	0	0	0	0	0	0	0	200	903	0	0	0	0	0	0	0	603	903	0
852	1	-20.0192	-5.84835	-519.14	47218.5	-27206.2	-665.039	147.594	209.045	0	0	0	0	0	0	0	200	903	0	0	0	0	0	0	0	603	903	0
852	2	-19.8666	-6.61129	-518.224	47767.8	-27511.4	-481.934	146.912	207.824	0	0	0	0	0	0	0	200	903	0	0	0	0	0	0	0	603	903	0
852	3	-19.2563	-6.15353	-520.361	47310.1	-27450.3	-161.499	147.248	209.082	0	0	0	0	0	0	0	200	903	0	0	0	0	0	0	0	603	903	0
852	4	-19.2563	-6.45871	-523.107	47493.2	-27511.4	-115.723	147.408	209.209	0	0	0	0	0	0	0	200	903	0	0	0	0	0	0	0	603	903	0
852	5	-19.4089	-7.52682	-522.802	47127	-27877.6	-115.723	146.677	209.857	0	0	0	0	0	0	0	200	903	0	0	0	0	0	0	0	603	903	0
852	6	-20.0192	-7.22164	-527.075	48042.5	-27816.5	-115.723	147.225	208.851	0	0	0	0	0	0	0	200	903	0	0	0	0	0	0	0	603	903	0
852	7	-20.1718	-8.59494	-525.549	47127	-27816.5	204.712	147.071	210.328	0	0	0	0	0	0	0	200	903	0	0	0	0	0	0	0	603	903	0
852	8	-19.5615	-9.20529	-526.464	48134	-27877.6	-436.157	147.048	208.571	0	0	0	0	0	0	0	200	903	0	0	0	0	0	0	0	603	903	0
852	9	-19.8666	-10.1208	-530.126	47767.8	-28304.8	-161.499	146.607	209.894	0	0	0	0	0	0	0	200	903	0	0	0	0	0	0	0	603	903	0
853	0	-18.3408	-9.96823	-529.821	47493.2	-28365.8	-69.9462	146.461	210.36	0	0	0	0	0	0	0	200	903	0	0	0	0	0	0	0	603	903	0
853	1	-20.3244	-9.81564	-533.483	47584.7	-28304.8	158.936	146.943	210.804	0	0	0	0	0	0	0	200	903	0	0	0	0	0	0	0	603	903	0
853	2	-21.2399	-10.2734	-534.704	47218.5	-28854.1	-24.1699	146.037	211.692	0	0	0	0	0	0	0	200	903	0	0	0	0	0	0	0	603	903	0
853	3	-19.5615	-10.5786	-533.788	47676.3	-28732.1	204.712	146.173	210.683	0	0	0	0	0	0	0	200	903	0	0	0	0	0	0	0	603	903	0
853	4	-19.4089	-11.4941	-536.535	47218.5	-28915.2	158.936	146.108	211.994	0	0	0	0	0	0	0	200	903	0	0	0	0	0	0	0	603	903	0
853	5	-19.7141	-11.6467	-534.399	48134	-28732.1	387.818	146.235	209.929	0	0	0	0	0	0	0	200	903	0	0	0	0	0	0	0	603	903	0
853	6	-21.2399	-12.8674	-539.892	47584.7	-29220.3	250.488	145.877	211.863	0	0	0	0	0	0	0	200	903	0	0	0	0	0	0	0	603	903	0
853	7	-21.5451	-13.4777	-541.723	48317.1	-29159.3	296.265	146.173	210.808	0	0	0	0	0	0	0	200	903	0	0	0	0	0	0	0	603	903	0
853	8	-20.6296	-15.0036	-544.775	48134	-29220.3	479.37	146.363	211.644	0	0	0	0	0	0	0	200	903	0	0	0	0	0	0	0	603	903	0
853	9	-20.477	-14.0881	-546.911	47401.6	-29830.7	433.594	145.456	213.328	0	0	0	0	0	0	0	200	903	0	0	0	0	0	0	0	603	903	0
854	0	-22.1555	-14.3933	-544.775	47950.9	-30074.8	296.265	144.794	211.98	0	0	0	0	0	0	0	200	903	0	0	0	0	0	0	0	603	903	0
854	1	-20.7822	-14.3933	-550.268	48500.2	-29525.5	570.923	146.343	211.861	0	0	0	0	0	0	0	200	903	0	0	0	0	0	0	0	603	903	0
854	2	-22.1555	-14.851	-550.573	47767.8	-30319	479.37	144.932	213.24	0	0	0	0	0	0	0	200	903	0	0	0	0	0	0	0	603	903	0
854	3	-21.0873	-15.3088	-552.099	47950.9	-30257.9	387.818	145.195	213.148	0	0	0	0	0	0	0	200	903	0	0	0	0	0	0	0	603	903	0
854	4	-20.6296	-15.614	-556.371	48683.4	-30135.9	662.476	145.835	212.498	0	0	0	0	0	0	0	200	903	0	0	0	0	0	0	0	603	903	0
854	5	-21.5451	-16.6821	-558.203	48591.8	-30257.9	570.923	145.794	212.949	0	0	0	0	0	0	0	200	903	0	0	0	0	0	0	0	603	903	0
854	6	-20.6296	-16.6821	-557.287	48866.5	-30380	754.029	145.486	212.314	0	0	0	0	0	0	0	200	903	0	0	0	0	0	0	0	603	903	0
854	7	-22.1555	-17.7502	-558.813	48317.1	-30196.9	754.029	145.962	213.536	0	0	0	0	0	0	0	200	903	0	0	0	0	0	0	0	603	903	0
854	8	-21.0873	-17.7502	-560.034	48866.5	-30563.1	1074.46	145.426	212.744	0	0	0	0	0	0	0	200	903	0	0	0	0	0	0	0	603	903	0
854	9	-20.9348	-18.3606	-563.696	48134	-31051.4	1211.79	144.915	214.61	0	0	0	0	0	0	0	200	903	0	0	0	0	0	0	0	603	903	0
855	0	-22.1555	-18.208	-566.137	48591.8	-31112.4	1349.12	145.044	214.17	0	0	0	0	0	0	0	200	903	0	0	0	0	0	0	0	603	903	0
855	1	-21.0873	-18.208	-566.747	48042.5	-30807.2	1211.79	145.642	215.231	0	0	0	0	0	0	0	200	903	0	0	0	0	0	0	0	603	903	0
855	2	-22.308	-19.1235	-567.358	47859.4	-31356.6	891.358	144.732	215.645	0	0	0	0	0	0	0	200	903	0	0	0	0	0	0	0	603	903	0
855	3	-21.3925	-19.1235	-570.715	48683.4	-31600.7	1486.45	144.63	214.698	0	0	0	0	0	0	0	200	903	0	0	0	0	0	0	0	603	903	0
855	4	-21.8503	-19.8864	-573.461	47676.3	-31539.7	1303.35	145.001	216.862	0	0	0	0	0	0	0	200	903	0	0	0	0	0	0	0	603	903	0
855	5	-21.8503	-20.6494	-575.292	48683.4	-31478.6	1578	145.282	215.376	0	0	0	0	0	0	0	200	903	0	0	0	0	0	0	0	603	903	0
855	6	-23.071	-21.1071	-574.987	48866.5	-32150	1349.12	144.086	215.013	0	0	0	0	0	0	0	200	903	0	0	0	0	0	0	0	603	903	0
855	7	-22.6132	-21.5649	-578.039	48042.5	-32089	1669.56	144.486	216.887	0	0	0	0	0	0	0	200	903	0	0	0	0	0	0	0	603	903	0
855	8	-21.6977	-21.8701	-579.565	48317.1	-31600.7	1532.23	145.475	216.632	0	0	0	0	0	0	0	200	903	0	0	0	0	0	0	0	603	903	0
855	9	-22.0029	-21.5649	-584.142	48317.1	-32455.2	1578	144.44	217.285	0	0	0	0	0	0	0	200	903	0	0	0	0	0	0	0	603	903	0
856	0	-22.4606	-24.6167	-584.142	48408.7	-32943.5	1944.21	143.604	217.129	0	0	0	0	0	0	0	200	903	0	0	0	0	0	0	0	603	903	0
856	1	-21.5451	-23.2434	-585.058	48408.7	-32577.3	1806.89	144.318	217.258	0	0	0	0	0	0	0	200	903	0	0	0	0	0	0	0	603	903	0
856	2	-23.3762	-22.9382	-583.837	48500.2	-32455.2	1852.66	144.411	216.929	0	0	0	0	0	0	0	200	903	0	0	0	0	0	0	0	603	903	0
856	3	-22.1555	-24.4641	-589.33	48591.8	-33248.7	1715.33	143.582	217.547	0	0	0	0	0	0	0	200	903	0	0	0	0	0	0	0	603	903	0
856	4	-22.6132	-24.7693	-593.298	48958	-32821.4	2081.54	144.68	217.482	0	0	0	0	0	0	0	200	903	0	0	0	0	0	0	0	603	903	0
856	5	-23.6813	-25.3796	-594.518	48774.9	-33126.6	2035.77	144.28	217.959	0	0	0	0	0	0	0	200	903	0	0	0	0	0	0	0	603	903	0
856	6	-22.9184	-25.5322	-595.739	48317.1	-33370.7	1989.99	143.984	218.895	0	0	0	0	0	0	0	200	903	0	0	0	0	0	0	0	603	903	0
856	7	-22.308	-25.6848	-597.57	48408.7	-33920	1944.21	143.237	218.991	0	0	0	0	0	0	0	200	903	0	0	0	0	0	0	0	603	903	0
856	8	-22.6132	-25.5322	-601.537	48591.8	-33553.8	2127.32	144.22	219.221	0	0	0	0	0	0	0	200	903	0	0	0	0	0	0	0	603	903	0
856	9	-23.2236	-28.7365	-603.063	48317.1	-34103.1	2310.42	143.45	219.881	0	0	0	0	0	0	0	200	903	0	0	0	0	0	0	0	603	903	0
857	0	-21.6977	-26.9055	-602.758	48408.7	-33798	2081.54	143.928	219.688	0	0	0	0	0	0	0	200	903	0	0	0	0	0	0	0	603	903	0
857	1	-22.9184	-27.0581	-603.369	49049.6	-33675.9	2356.2	144.187	218.707	0	0	0	0	0	0	0	200	903	0	0	0	0	0	0	0	603	903	0
857	2	-22.0029	-28.2788	-611.303	48683.4	-33981.1	2401.98	144.412	220.361	0	0	0	0	0	0	0	200	903	0	0	0	0	0	0	0	603	903	0
857	3	-22.6132	-28.584	-608.251	48774.9	-33614.9	2493.53	144.735	219.811	0	0	0	0	0	0	0	200	903	0	0	0	0	0	0	0	603	903	0
857	4	-23.3762	-29.3469	-611.913	47859.4	-34225.2	2493.53	144.069	221.787	0	0	0	0	0	0	0	200	903	0	0	0	0	0	0	0	603	903	0
857	5	-23.6813	-29.6521	-611.913	47676.3	-33920	2539.31	144.567	222.087	0	0	0	0	0	0	0	200	903	0	0	0	0	0	0	0	603	903	0
857	6	-22.9184	-29.4995	-614.965	48042.5	-34652.5	2951.3	143.651	221.878	0	0	0	0	0	0	0	200	903	0	0	0	0	0	0	0	603	903	0
857	7	-22.6132	-29.4995	-619.848	47767.8	-34835.6	2905.52	143.8	222.936	0	0	0	0	0	0	0	200	903	0	0	0	0	0	0	0	603	903	0
857	8	-23.8339	-31.6357	-620.764	47584.7	-34713.5	2722.41	144.079	223.345	0	0	0	0	0	0	0	200	903	0	0	0	0	0	0	0	603	903	0
857	9	-23.071	-30.2624	-620.764	48134	-34957.6	3225.95	143.686	222.46	0	0	0	0	0	0	0	200	903	0	0	0	0	0	0	0	603	903	0
858	0	-22.4606	-31.6357	-623.51	48042.5	-35262.8	3042.85	143.445	222.948	0	0	0	0	0	0	0	200	903	0	0	0	0	0	0	0	603	903	0
858	1	-22.7658	-32.5512	-626.867	48225.6	-35201.8	3225.95	143.845	223.069	0	0	0	0	0	0	0	200	903	0	0	0	0	0	0	0	603	903	0
858	2	-23.5287	-33.1616	-628.393	47950.9	-35262.8	3225.95	143.884	223.693	0	0	0	0	0	0	0	200	903	0	0	0	0	0	0	0	603	903	0
858	3	-24.4443	-33.7719	-629.308	47676.3	-35751.1	3042.85	143.19	224.24	0	0	0	0	0	0	0	200	903	0	0	0	0	0	0	0	603	903	0
858	4	-24.1391	-33.4668	-631.445	47584.7	-36117.3	3180.18	142.802	224.642	0	0	0	0	0	0	0	200	903	0	0	0	0	0	0	0	603	903	0
858	5	-23.5287	-33.6194	-632.665	46943.9	-35629	3088.62	143.684	225.8	0	0	0	0	0	0	0	200	903	0	0	0	0	0	0	0	603	903	0
858	6	-24.1391	-33.3142	-635.717	47127	-36117.3	3042.85	143.187	225.868	0	0	0	0	0	0	0	200	903	0	0	0	0	0	0	0	603	903	0
858	7	-25.0546	-35.2978	-637.853	47127	-36422.5	3271.73	142.898	226.116	0	0	0	0	0	0	0	200	903	0	0	0	0	0	0	0	603	903	0
858	8	-25.0546	-33.9245	-637.243	46669.2	-36178.3	3134.4	143.227	226.764	0	0	0	0	0	0	0	200	903	0	0	0	0	0	0	0	603	903	0
858	9	-25.2072	-34.6875	-639.074	47218.5	-36605.6	3225.95	142.721	226.114	0	0	0	0	0	0	0	200	903	0	0	0	0	0	0	0	603	903	0
859	0	-24.7495	-35.9082	-641.516	46577.7	-36849.7	3317.51	142.558	227.394	0	0	0	0	0	0	0	200	903	0	0	0	0	0	0	0	603	903	0
859	1	-25.2072	-35.603	-643.957	46943.9	-36361.4	3317.51	143.534	227.101	0	0	0	0	0	0	0	200	903	0	0	0	0	0	0	0	603	903	0
859	2	-26.1227	-37.1289	-645.788	47035.4	-36605.6	3134.4	143.316	227.166	0	0	0	0	0	0	0	200	903	0	0	0	0	0	0	0	603	903	0
859	3	-25.8176	-36.5185	-646.093	46211.4	-36849.7	3363.28	142.965	228.476	0	0	0	0	0	0	0	200	903	0	0	0	0	0	0	0	603	903	0
859	4	-25.5124	-37.1289	-646.398	46028.3	-36849.7	3271.73	142.992	228.793	0	0	0	0	0	0	0	200	903	0	0	0	0	0	0	0	603	903	0
859	5	-25.665	-36.0608	-650.366	45753.7	-36544.6	3592.16	143.809	229.649	0	0	0	0	0	0	0	200	903	0	0	0	0	0	0	0	603	903	0
859	6	-27.1909	-36.8237	-650.06	45662.1	-37154.9	3546.39	142.844	229.757	0	0	0	0	0	0	0	200	903	0	0	0	0	0	0	0	603	903	0
859	7	-25.665	-36.6711	-651.586	45204.3	-37215.9	3637.94	142.884	230.624	0	0	0	0	0	0	0	200	903	0	0	0	0	0	0	0	603	903	0
859	8	-26.5805	-37.2815	-651.281	45845.2	-37093.9	3500.61	143.045	229.608	0	0	0	0	0	0	0	200	903	0	0	0	0	0	0	0	603	903	0
859	9	-26.8857	-39.4177	-653.723	45479	-37032.8	3454.84	143.351	230.431	0	0	0	0	0	0	0	200	903	0	0	0	0	0	0	0	603	903	0
860	0	-26.1227	-38.6548	-656.774	45204.3	-37093.9	3775.27	143.521	231.172	0	0	0	0	0	0	0	200	903	0	0	0	0	0	0	0	603	903	0
860	1	-27.3434	-38.8073	-657.995	44746.6	-37399	3409.06	143.162	231.996	0	0	0	0	0	0	0	200	903	0	0	0	0	0	0	0	603	903	0
860	2	-26.7331	-39.1125	-658.3	44929.7	-37460.1	3409.06	143.096	231.749	0	0	0	0	0	0	0	200	903	0	0	0	0	0	0	0	603	903	0
860	3	-27.6486	-39.7229	-659.216	43922.6	-37948.4	3454.84	142.434	233.371	0	0	0	0	0	0	0	200	903	0	0	0	0	0	0	0	603	903	0
860	4	-25.9702	-39.2651	-662.267	44380.4	-37948.4	3271.73	142.699	232.987	0	0	0	0	0	0	0	200	903	0	0	0	0	0	0	0	603	903	0
860	5	-26.8857	-39.5703	-662.878	43556.4	-37887.3	3317.51	142.844	234.292	0	0	0	0	0	0	0	200	903	0	0	0	0	0	0	0	603	903	0
860	6	-28.4116	-42.3169	-661.352	43556.4	-38314.6	3592.16	142.066	234.14	0	0	0	0	0	0	0	200	903	0	0	0	0	0	0	0	603	903	0
860	7	-28.7167	-40.1806	-663.183	44105.7	-38375.6	3454.84	142.134	233.494	0	0	0	0	0	0	0	200	903	0	0	0	0	0	0	0	603	903	0
860	8	-27.6486	-40.9436	-667.761	43556.4	-38070.4	3454.84	142.988	234.772	0	0	0	0	0	0	0	200	903	0	0	0	0	0	0	0	603	903	0
860	9	-27.6486	-41.8591	-670.812	43556.4	-38314.6	3546.39	142.883	235.069	0	0	0	0	0	0	0	200	903	0	0	0	0	0	0	0	603	903	0
861	0	-29.1745	-43.2324	-672.338	43556.4	-38863.9	3500.61	142.196	235.217	0	0	0	0	0	0	0	200	903	0	0	0	0	0	0	0	603	903	0
861	1	-29.3271	-42.4694	-672.643	42824	-38802.9	3683.72	142.313	236.335	0	0	0	0	0	0	0	200	903	0	0	0	0	0	0	0	603	903	0
861	2	-28.4116	-42.622	-673.864	42457.8	-38619.8	3500.61	142.689	236.994	0	0	0	0	0	0	0	200	903	0	0	0	0	0	0	0	603	903	0
861	3	-28.4116	-42.7746	-678.442	42549.3	-39108	3592.16	142.356	237.284	0	0	0	0	0	0	0	200	903	0	0	0	0	0	0	0	603	903	0
861	4	-30.09	-44.4531	-679.662	42640.9	-39352.2	3637.94	142.1	237.262	0	0	0	0	0	0	0	200	903	0	0	0	0	0	0	0	603	903	0
861	5	-29.4797	-43.0798	-679.968	42915.5	-38924.9	3775.27	142.755	236.886	0	0	0	0	0	0	0	200	903	0	0	0	0	0	0	0	603	903	0
861	6	-28.1064	-43.8427	-681.494	42732.4	-38863.9	3775.27	142.972	237.296	0	0	0	0	0	0	0	200	903	0	0	0	0	0	0	0	603	903	0
861	7	-27.8012	-44.6057	-684.85	42549.3	-39535.3	4004.15	142.272	237.871	0	0	0	0	0	0	0	200	903	0	0	0	0	0	0	0	603	903	0
861	8	-27.6486	-45.5212	-680.883	42732.4	-39169.1	4004.15	142.473	237.24	0	0	0	0	0	0	0	200	903	0	0	0	0	0	0	0	603	903	0
861	9	-28.7167	-46.7419	-687.902	42640.9	-39291.1	3683.72	142.883	238.013	0	0	0	0	0	0	0	200	903	0	0	0	0	0	0	0	603	903	0
862	0	-28.259	-46.4367	-689.428	42000	-39657.3	4095.7	142.478	239.08	0	0	0	0	0	0	0	200	903	0	0	0	0	0	0	0	603	903	0
862	1	-26.5805	-47.0471	-691.259	41725.3	-39535.3	4187.26	142.807	239.639	0	0	0	0	0	0	0	200	903	0	0	0	0	0	0	0	603	903	0
862	2	-26.7331	-46.4367	-695.837	42183.1	-39169.1	4370.36	143.709	239.378	0	0	0	0	0	0	0	200	903	0	0	0	0	0	0	0	603	903	0
862	3	-27.9538	-48.7256	-696.447	41816.9	-39779.4	4187.26	142.882	239.957	0	0	0	0	0	0	0	200	903	0	0	0	0	0	0	0	603	903	0
862	4	-26.4279	-47.9626	-697.973	42640.9	-39962.5	4324.58	142.745	238.908	0	0	0	0	0	0	0	200	903	0	0	0	0	0	0	0	603	903	0
862	5	-26.2753	-47.9626	-700.109	42549.3	-39718.4	4645.02	143.268	239.225	0	0	0	0	0	0	0	200	903	0	0	0	0	0	0	0	603	903	0
862	6	-25.8176	-50.2514	-702.551	42000	-39718.4	4461.91	143.465	240.218	0	0	0	0	0	0	0	200	903	0	0	0	0	0	0	0	603	903	0
862	7	-26.7331	-51.167	-706.213	42091.6	-39718.4	4599.24	143.759	240.398	0	0	0	0	0	0	0	200	903	0	0	0	0	0	0	0	603	903	0
862	8	-25.9702	-50.7092	-706.213	42000	-39779.4	4690.8	143.672	240.528	0	0	0	0	0	0	0	200	903	0	0	0	0	0	0	0	603	903	0
862	9	-25.0546	-51.9299	-708.654	41084.5	-39840.5	4965.45	143.78	242.025	0	0	0	0	0	0	0	200	903	0	0	0	0	0	0	0	603	903	0
863	0	-24.5969	-52.6928	-708.959	40809.8	-40450.8	4919.68	142.943	242.437	0	0	0	0	0	0	0	200	903	0	0	0	0	0	0	0	603	903	0
863	1	-25.2072	-52.6928	-710.485	40992.9	-40267.7	4736.57	143.324	242.303	0	0	0	0	0	0	0	200	903	0	0	0	0	0	0	0	603	903	0
863	2	-26.2753	-55.8972	-715.368	40992.9	-40145.6	4873.9	143.881	242.697	0	0	0	0	0	0	0	200	903	0	0	0	0	0	0	0	603	903	0
863	3	-25.665	-54.5239	-714.758	41359.1	-40267.7	5148.56	143.662	242.135	0	0	0	0	0	0	0	200	903	0	0	0	0	0	0	0	603	903	0
863	4	-25.0546	-55.7446	-717.504	41725.3	-40878.1	5011.23	143.027	241.847	0	0	0	0	0	0	0	200	903	0	0	0	0	0	0	0	603	903	0
863	5	-25.0546	-55.7446	-721.472	41176	-40389.8	5102.79	144.018	242.928	0	0	0	0	0	0	0	200	903	0	0	0	0	0	0	0	603	903	0
863	6	-25.8176	-57.4231	-721.472	40992.9	-40633.9	5148.56	143.679	243.182	0	0	0	0	0	0	0	200	903	0	0	0	0	0	0	0	603	903	0
863	7	-23.9865	-57.2705	-720.861	41267.6	-41061.2	5194.34	143.039	242.752	0	0	0	0	0	0	0	200	903	0	0	0	0	0	0	0	603	903	0
863	8	-26.1227	-57.5756	-722.692	40443.6	-40817	5285.89	143.521	244.038	0	0	0	0	0	0	0	200	903	0	0	0	0	0	0	0	603	903	0
863	9	-25.3598	-57.5756	-727.27	40443.6	-40694.9	5194.34	144.044	244.39	0	0	0	0	0	0	0	200	903	0	0	0	0	0	0	0	603	903	0
864	0	-25.5124	-58.186	-726.965	40260.5	-40756	5011.23	143.937	244.618	0	0	0	0	0	0	0	200	903	0	0	0	0	0	0	0	603	903	0
864	1	-26.8857	-60.78	-728.185	40352.1	-41427.4	5240.11	143.109	244.585	0	0	0	0	0	0	0	200	903	0	0	0	0	0	0	0	603	903	0
864	2	-26.4279	-59.7119	-728.491	40443.6	-41061.2	5240.11	143.635	244.483	0	0	0	0	0	0	0	200	903	0	0	0	0	0	0	0	603	903	0
864	3	-25.665	-59.8645	-729.406	40169	-40939.1	5011.23	143.873	244.929	0	0	0	0	0	0	0	200	903	0	0	0	0	0	0	0	603	903	0
864	4	-25.665	-61.0852	-730.932	40077.4	-41427.4	5285.89	143.323	245.169	0	0	0	0	0	0	0	200	903	0	0	0	0	0	0	0	603	903	0
864	5	-25.8176	-61.5429	-733.373	39894.3	-41061.2	5148.56	144.011	245.602	0	0	0	0	0	0	0	200	903	0	0	0	0	0	0	0	603	903	0
864	6	-25.3598	-61.6955	-731.542	39711.2	-41305.3	5102.79	143.537	245.716	0	0	0	0	0	0	0	200	903	0	0	0	0	0	0	0	603	903	0
864	7	-26.4279	-62.3059	-731.237	39070.3	-41549.4	5331.67	143.179	246.57	0	0	0	0	0	0	0	200	903	0	0	0	0	0	0	0	603	903	0
864	8	-25.9702	-62.7636	-735.204	38704.1	-41427.4	4965.45	143.652	247.356	0	0	0	0	0	0	0	200	903	0	0	0	0	0	0	0	603	903	0
864	9	-25.8176	-62.1533	-737.341	38887.2	-41366.3	5057.01	143.898	247.26	0	0	0	0	0	0	0	200	903	0	0	0	0	0	0	0	603	903	0
865	0	-27.6486	-62.611	-737.646	37971.7	-41671.5	5011.23	143.507	248.523	0	0	0	0	0	0	0	200	903	0	0	0	0	0	0	0	603	903	0
865	1	-26.7331	-62.7636	-737.036	38337.9	-41610.5	5102.79	143.543	247.984	0	0	0	0	0	0	0	200	903	0	0	0	0	0	0	0	603	903	0
865	2	-26.4279	-63.8318	-737.036	37971.7	-41305.3	5011.23	143.958	248.481	0	0	0	0	0	0	0	200	903	0	0	0	0	0	0	0	603	903	0
865	3	-25.665	-63.6792	-740.087	38429.4	-41366.3	4919.68	144.106	248.074	0	0	0	0	0	0	0	200	903	0	0	0	0	0	0	0	603	903	0
865	4	-27.0383	-64.2895	-740.698	37880.1	-41793.6	4873.9	143.575	248.859	0	0	0	0	0	0	0	200	903	0	0	0	0	0	0	0	603	903	0
865	5	-26.5805	-65.205	-737.036	37056.2	-41488.4	4965.45	143.709	249.723	0	0	0	0	0	0	0	200	903	0	0	0	0	0	0	0	603	903	0
865	6	-27.9538	-65.8154	-735.815	37513.9	-41671.5	4919.68	143.367	249.017	0	0	0	0	0	0	0	200	903	0	0	0	0	0	0	0	603	903	0
865	7	-27.3434	-67.9516	-738.867	36873	-41854.6	4873.9	143.353	250.095	0	0	0	0	0	0	0	200	903	0	0	0	0	0	0	0	603	903	0
865	8	-27.3434	-66.8835	-742.529	36415.3	-41305.3	5057.01	144.372	250.958	0	0	0	0	0	0	0	200	903	0	0	0	0	0	0	0	603	903	0
865	9	-28.8693	-67.3413	-741.613	36140.6	-42037.7	4828.12	143.316	251.268	0	0	0	0	0	0	0	200	903	0	0	0	0	0	0	0	603	903	0
866	0	-29.0219	-66.7309	-740.698	36598.4	-41793.6	5011.23	143.575	250.589	0	0	0	0	0	0	0	200	903	0	0	0	0	0	0	0	603	903	0
866	1	-28.5641	-67.9516	-740.392	35499.8	-41427.4	4873.9	144.047	252.053	0	0	0	0	0	0	0	200	903	0	0	0	0	0	0	0	603	903	0
866	2	-27.9538	-70.0879	-742.529	35774.4	-41671.5	4782.35	143.879	251.821	0	0	0	0	0	0	0	200	903	0	0	0	0	0	0	0	603	903	0
866	3	-29.1745	-68.562	-738.256	35774.4	-41915.6	5057.01	143.223	251.542	0	0	0	0	0	0	0	200	903	0	0	0	0	0	0	0	603	903	0
866	4	-30.5478	-69.3249	-742.224	35133.5	-41854.6	4828.12	143.609	252.664	0	0	0	0	0	0	0	200	903	0	0	0	0	0	0	0	603	903	0
866	5	-31.3107	-70.2404	-740.698	34950.4	-41427.4	4736.57	144.07	252.814	0	0	0	0	0	0	0	200	903	0	0	0	0	0	0	0	603	903	0
866	6	-30.09	-71.9189	-740.087	34492.7	-42159.8	4645.02	143.034	253.394	0	0	0	0	0	0	0	200	903	0	0	0	0	0	0	0	603	903	0
866	7	-30.2426	-70.6982	-741.613	34126.5	-41793.6	4782.35	143.645	253.983	0	0	0	0	0	0	0	200	903	0	0	0	0	0	0	0	603	903	0
866	8	-32.0737	-71.3086	-740.698	33760.3	-41732.5	4690.8	143.658	254.421	0	0	0	0	0	0	0	200	903	0	0	0	0	0	0	0	603	903	0
866	9	-29.7849	-71.3086	-739.172	33485.6	-41549.4	4507.69	143.789	254.698	0	0	0	0	0	0	0	200	903	0	0	0	0	0	0	0	603	903	0
867	0	-32.2263	-71.6137	-734.289	33119.4	-41854.6	4873.9	143	254.896	0	0	0	0	0	0	0	200	903	0	0	0	0	0	0	0	603	903	0
867	1	-31.1581	-71.156	-737.646	33302.5	-41427.4	4553.47	143.838	254.853	0	0	0	0	0	0	0	200	903	0	0	0	0	0	0	0	603	903	0
867	2	-31.3107	-72.987	-739.477	33302.5	-41488.4	4645.02	143.895	254.965	0	0	0	0	0	0	0	200	903	0	0	0	0	0	0	0	603	903	0
867	3	-32.684	-73.1396	-738.256	32661.6	-41610.5	4507.69	143.637	255.758	0	0	0	0	0	0	0	200	903	0	0	0	0	0	0	0	603	903	0
867	4	-32.3788	-74.2077	-734.594	32753.2	-41549.4	4645.02	143.439	255.413	0	0	0	0	0	0	0	200	903	0	0	0	0	0	0	0	603	903	0
867	5	-31.6159	-75.581	-735.204	32020.8	-41183.2	4370.36	143.984	256.446	0	0	0	0	0	0	0	200	903	0	0	0	0	0	0	0	603	903	0
867	6	-32.5314	-75.4284	-734.899	31379.9	-41427.4	4461.91	143.629	257.3	0	0	0	0	0	0	0	200	903	0	0	0	0	0	0	0	603	903	0
867	7	-30.5478	-76.4965	-732.763	31105.2	-41671.5	4553.47	143.131	257.551	0	0	0	0	0	0	0	200	903	0	0	0	0	0	0	0	603	903	0
867	8	-33.1418	-76.344	-730.932	31105.2	-41061.2	4736.57	143.824	257.444	0	0	0	0	0	0	0	200	903	0	0	0	0	0	0	0	603	903	0
867	9	-32.8366	-77.4121	-730.322	30555.9	-41061.2	4507.69	143.777	258.161	0	0	0	0	0	0	0	200	903	0	0	0	0	0	0	0	603	903	0
868	0	-32.2263	-76.9543	-730.016	30372.8	-41122.2	4599.24	143.669	258.394	0	0	0	0	0	0	0	200	903	0	0	0	0	0	0	0	603	903	0
868	1	-32.0737	-78.0224	-730.932	29915.1	-40694.9	4919.68	144.325	259.073	0	0	0	0	0	0	0	200	903	0	0	0	0	0	0	0	603	903	0
868	2	-32.2263	-79.3957	-727.88	29915.1	-40878.1	4873.9	143.84	258.901	0	0	0	0	0	0	0	200	903	0	0	0	0	0	0	0	603	903	0
868	3	-32.684	-79.7009	-725.744	30189.7	-40817	4645.02	143.758	258.402	0	0	0	0	0	0	0	200	903	0	0	0	0	0	0	0	603	903	0
868	4	-32.3788	-80.0061	-723.913	29091.1	-40817	4873.9	143.616	259.814	0	0	0	0	0	0	0	200	903	0	0	0	0	0	0	0	603	903	0
868	5	-31.4633	-82.4475	-724.218	29182.6	-40511.8	4873.9	144.061	259.705	0	0	0	0	0	0	0	200	903	0	0	0	0	0	0	0	603	903	0
868	6	-31.0056	-81.5319	-722.387	28084	-40756	4782.35	143.582	261.123	0	0	0	0	0	0	0	200	903	0	0	0	0	0	0	0	603	903	0
868	7	-30.5478	-82.4475	-720.861	27900.9	-40572.9	5057.01	143.716	261.295	0	0	0	0	0	0	0	200	903	0	0	0	0	0	0	0	603	903	0
868	8	-32.3788	-82.1423	-713.842	27534.7	-40084.6	5057.01	143.847	261.427	0	0	0	0	0	0	0	200	903	0	0	0	0	0	0	0	603	903	0
868	9	-30.5478	-82.6001	-716.284	27168.5	-40023.6	5057.01	144.123	262.07	0	0	0	0	0	0	0	200	903	0	0	0	0	0	0	0	603	903	0
869	0	-31.0056	-84.1259	-715.063	26802.3	-40206.7	4919.68	143.772	262.518	0	0	0	0	0	0	0	200	903	0	0	0	0	0	0	0	603	903	0
869	1	-31.4633	-83.9734	-712.927	26710.7	-40267.7	5057.01	143.518	262.534	0	0	0	0	0	0	0	200	903	0	0	0	0	0	0	0	603	903	0
869	2	-31.4633	-85.6518	-709.57	26619.2	-39474.2	5102.79	144.369	262.486	0	0	0	0	0	0	0	200	903	0	0	0	0	0	0	0	603	903	0
869	3	-29.7849	-86.1096	-707.433	26252.9	-39901.5	5285.89	143.597	262.89	0	-13.0463	9.45527	-18.811	3105.47	1732.97	-1754.56	292.125	737.912	0	0	0	0	0	0	0	603	903	0
869	4	-29.6323	-86.4148	-707.128	25978.3	-39596.3	5377.44	144.004	263.262	0	-14.4196	9.30268	-22.7783	2830.81	1366.76	-1525.68	260.003	778.723	0	0	0	0	0	0	0	603	903	0
869	5	-30.7004	-87.6355	-704.992	25978.3	-39291.1	5148.56	144.267	263.151	0	0	0	0	0	0	0	200	903	0	0	0	0	0	0	0	603	903	0
869	6	-28.259	-88.551	-700.72	25154.3	-38924.9	5514.77	144.45	264.102	0	0	0	0	0	0	0	200	903	0	0	0	0	0	0	0	603	903	0
869	7	-29.4797	-88.7036	-697.057	24696.5	-39291.1	5743.65	143.633	264.57	0	-5.26428	2.89399	-18.811	2556.16	1794.01	-427.048	295.37	767.114	0	0	0	0	0	0	0	603	903	0
869	8	-28.1064	-88.7036	-696.142	24421.9	-38924.9	5652.1	144.085	264.918	0	-3.7384	-2.90435	-25.8301	3929.45	1977.11	30.7158	276.543	750.873	0	0	0	0	0	0	0	603	903	0
869	9	-27.3434	-92.2131	-696.142	23964.1	-38253.5	5743.65	145.049	265.576	0	-1.60217	-7.93975	-31.6284	5485.84	2160.22	-610.154	268.3	729.553	0	0	0	0	0	0	0	603	903	0
870	0	-27.8012	-90.8398	-693.09	23414.8	-38619.8	5789.43	144.279	266.217	0	-0.534054	-5.19317	-34.0698	5760.5	2221.25	-610.154	265.197	733.921	0	0	0	0	0	0	0	603	903	0
870	1	-27.6486	-92.2131	-687.292	23872.6	-38375.6	6155.64	144.164	265.266	0	-0.381466	-9.46563	-38.3423	6859.14	2953.68	-610.154	277.034	724.108	0	0	0	0	0	0	0	603	903	0
870	2	-27.0383	-93.5864	-685.461	23597.9	-37887.3	6155.64	144.727	265.574	0	-3.7384	-18.3157	-47.4976	7957.77	3197.82	-1251.02	267.326	735.459	0	0	0	0	0	0	0	603	903	0
870	3	-24.7495	-94.5019	-684.545	22682.4	-37338	6018.31	145.456	266.865	0	-2.05993	-17.2476	-50.5493	8964.85	2770.57	-1067.92	254.809	725.651	0	0	0	0	0	0	0	603	903	0
870	4	-25.8176	-96.6381	-680.883	22590.8	-37826.3	6384.52	144.445	266.821	0	-2.67028	-12.3648	-52.6855	9514.17	3319.89	-930.588	263.013	722.416	0	0	0	0	0	0	0	603	903	0
870	5	-25.5124	-95.7226	-678.442	21858.4	-37215.9	6384.52	145.145	267.781	0	-6.33239	-15.264	-60.0098	10704.4	4174.38	-2029.22	269.562	724.623	0	0	0	0	0	0	0	603	903	0
870	6	-25.0546	-96.7907	-671.728	21034.4	-37032.8	6476.08	144.869	268.686	0	-8.16345	-17.7054	-69.7754	12627	3869.2	-2075	255.452	722.034	0	0	0	0	0	0	0	603	903	0
870	7	-23.2236	-97.2485	-669.286	21766.9	-37277	6933.84	144.303	267.478	0	-11.0626	-13.8907	-74.6582	13634	3869.2	-2441.21	251.826	720.381	0	0	0	0	0	0	0	603	903	0
870	8	-22.308	-97.5537	-668.981	20302	-36788.7	7025.39	145.008	269.652	0	-12.5885	-13.7381	-80.4565	14549.6	4357.48	-3082.08	254.159	722.162	0	0	0	0	0	0	0	603	903	0
870	9	-22.6132	-99.6899	-665.93	20210.5	-36361.4	7574.71	145.397	269.651	0	-13.0463	-15.7217	-85.6445	15922.9	4601.62	-3539.84	253.729	717.082	0	0	0	0	0	0	0	603	903	0
871	0	-20.9348	-100.148	-659.216	20118.9	-36422.5	7345.83	144.749	269.481	0	-17.9291	-16.7899	-95.7153	17570.8	4662.66	-3494.06	248.714	719.427	0	0	0	0	0	0	0	603	903	0
871	1	-22.6132	-100.758	-656.164	19752.7	-36178.3	7254.27	144.864	269.897	0	-20.3705	-15.7217	-104.871	19218.8	4784.73	-4272.27	245.625	719.738	0	0	0	0	0	0	0	603	903	0
871	2	-20.3244	-101.826	-653.723	19569.6	-35568	7757.81	145.592	270.064	0	-20.0653	-17.858	-114.026	20775.2	5639.22	-4730.03	249.456	720.803	0	0	0	0	0	0	0	603	903	0
871	3	-20.3244	-102.742	-651.586	19111.8	-35873.2	7437.38	144.945	270.669	0	-21.8964	-19.8416	-120.74	22148.4	5944.4	-4821.58	249.233	719.56	0	0	0	0	0	0	0	603	903	0
871	4	-20.477	-103.505	-647.619	18287.8	-35323.9	7666.26	145.456	271.761	0	-26.7792	-18.3157	-130.505	23338.6	5700.26	-5325.12	243.678	724.167	0	0	0	0	0	0	0	603	903	0
871	5	-18.1882	-104.42	-640.6	18013.2	-34896.6	7895.14	145.525	271.881	0	-26.9318	-18.4683	-141.492	25444.3	6310.61	-5508.23	244.601	723.171	0	0	0	0	0	0	0	603	903	0
871	6	-18.1882	-104.115	-635.412	18196.3	-34652.5	7849.37	145.465	271.363	0	-27.5421	-18.4683	-149.121	27092.3	6982	-5279.35	246.821	721.32	0	0	0	0	0	0	0	603	903	0
871	7	-17.2726	-105.336	-632.665	17372.3	-34530.4	7986.7	145.421	272.541	0	-29.8309	-16.6373	-158.582	28923.4	7104.07	-5737.11	244.798	720.612	0	0	0	0	0	0	0	603	903	0
871	8	-16.5097	-105.488	-629.919	17555.4	-34103.1	8124.02	145.861	272.131	0	-32.5775	-13.8907	-166.211	30113.5	6982	-5828.66	242.007	721.823	0	0	0	0	0	0	0	603	903	0
871	9	-16.9675	-105.946	-625.036	16823	-33675.9	8352.91	146.122	273.085	0	-32.2723	-12.5174	-177.502	31578.4	7653.38	-5142.02	243.117	725.096	0	0	0	0	0	0	0	603	903	0
872	0	-15.8994	-106.556	-619.543	17006.1	-33920	8398.68	145.25	272.551	0	-31.662	-10.6863	-183.301	33226.3	7836.49	-5325.12	242.752	721.733	0	0	0	0	0	0	0	603	903	0
872	1	-14.3735	-107.93	-615.27	16273.7	-33492.8	8398.68	145.564	273.55	0	-33.7982	-5.80352	-191.846	34599.6	8202.7	-5462.45	242.757	722.649	0	0	0	0	0	0	0	603	903	0
872	2	-11.7795	-108.235	-610.998	15999	-32943.5	8307.13	146.083	273.815	0	-34.8663	-4.888	-202.222	36064.5	8385.8	-4775.81	241.468	724.659	0	0	0	0	0	0	0	603	903	0
872	3	-12.695	-108.54	-602.758	15449.7	-32882.4	8764.89	145.447	274.368	0	-33.6456	-4.58282	-211.682	37987.1	9240.29	-4867.36	243.652	723.547	0	0	0	0	0	0	0	603	903	0
872	4	-12.8476	-108.845	-601.232	15358.2	-32394.2	8764.89	146.12	274.456	0	-33.6456	0.147404	-220.532	39909.7	9789.61	-4913.13	244.391	722.03	0	0	0	0	0	0	0	603	903	0
872	5	-12.2372	-108.845	-594.824	14808.8	-31661.7	8856.45	146.771	275.104	0	-36.2396	3.04657	-229.688	40733.6	9911.68	-4501.15	243.153	725.656	0	0	0	0	0	0	0	603	903	0
872	6	-9.94843	-110.371	-587.805	13984.9	-31722.8	8673.34	146.032	276.208	0	-36.3922	4.87763	-239.453	42290.1	10400	-4455.37	243.432	726.389	0	0	0	0	0	0	0	603	903	0
872	7	-8.11737	-109.15	-585.668	13618.7	-31356.6	9039.55	146.46	276.747	0	-34.8663	8.84491	-248.914	44121.1	10827.2	-4272.27	243.498	725.745	0	0	0	0	0	0	0	603	903	0
872	8	-9.0329	-109.608	-578.649	13618.7	-30929.3	9268.43	146.549	276.465	0	-36.3922	14.6433	-255.933	45769.1	11498.6	-3814.5	244.928	724.168	0	0	0	0	0	0	0	603	903	0
872	9	-8.57514	-110.524	-573.766	13252.4	-30685.2	8856.45	146.52	276.903	0	-37.4603	16.6269	-267.834	46501.5	11681.7	-3768.72	243.615	729.38	0	0	0	0	0	0	0	603	903	0
873	0	-8.72772	-110.829	-566.442	12703.1	-30563.1	8948	146.044	277.574	0	-37.3077	17.3898	-278.516	47966.3	12292.1	-3494.06	244.134	730.779	0	0	0	0	0	0	0	603	903	0
873	1	-6.28632	-110.676	-561.254	12245.4	-30196.9	9222.66	146.197	278.182	0	-36.087	20.8994	-286.145	49797.4	12841.4	-3082.08	244.877	728.972	0	0	0	0	0	0	0	603	903	0
873	2	-5.67597	-110.981	-553.625	11879.2	-29769.7	9314.21	146.228	278.543	0	-35.7819	26.6977	-295.3	51353.8	13268.6	-2441.21	244.933	729.097	0	0	0	0	0	0	0	603	903	0
873	3	-5.52338	-110.829	-550.268	11146.7	-29403.4	9176.88	146.565	279.743	0	-36.5448	28.9865	-304.15	51536.9	13512.8	-2670.09	244.428	733.555	0	0	0	0	0	0	0	603	903	0
873	4	-4.30268	-110.981	-542.639	11055.2	-28915.2	9268.43	146.714	279.627	0	-37.9181	30.8176	-314.832	53093.3	14306.2	-2029.22	245.441	734.36	0	0	0	0	0	0	0	603	903	0
873	5	-3.84491	-111.287	-535.314	10322.8	-28426.9	9451.54	146.897	280.716	0	-37.4603	36.9211	-325.513	54558.1	15282.8	-2120.77	246.95	735.393	0	0	0	0	0	0	0	603	903	0
873	6	-1.86127	-110.981	-529.211	10048.1	-28060.7	9497.31	146.976	281.013	0	-35.9344	38.9047	-333.447	55839.9	14916.6	-1891.89	244.734	735.538	0	0	0	0	0	0	0	603	903	0
873	7	-1.70868	-111.744	-521.276	10231.2	-28182.7	9405.76	145.935	280.373	0	-35.9344	39.2099	-343.823	56938.5	15771.1	-1479.9	245.87	737.396	0	0	0	0	0	0	0	603	903	0
873	8	-1.55609	-110.981	-516.699	9773.44	-27572.4	9451.54	146.637	281.085	0	-37.4603	45.1608	-351.147	58769.6	16503.5	-1251.02	246.999	735.636	0	0	0	0	0	0	0	603	903	0
873	9	-1.55609	-112.355	-509.069	9498.79	-27084.1	9588.87	146.797	281.341	0	-36.5448	48.5178	-362.744	60234.4	17174.9	-1205.25	247.347	736.948	0	0	0	0	0	0	0	603	903	0
874	0	-0.793154	-109.913	-499.914	8766.36	-26778.9	9497.31	146.433	282.464	0	-34.8663	48.5178	-372.51	61607.7	17296.9	-747.483	246.434	737.615	0	0	0	0	0	0	0	603	903	0
874	1	0.885313	-109.608	-492.285	8400.15	-26351.7	9222.66	146.471	282.936	0	-35.3241	52.1799	-382.275	62614.8	17846.3	-198.166	246.684	739.205	0	0	0	0	0	0	0	603	903	0
874	2	1.19049	-108.693	-481.909	8125.49	-26107.5	9314.21	145.825	283.139	0	-35.6293	55.079	-390.515	63530.3	18761.8	-335.495	248.044	740.317	0	0	0	0	0	0	0	603	903	0
874	3	1.34308	-108.235	-479.162	7667.73	-25375.1	9497.31	147.043	283.998	0	-32.8827	55.5368	-403.333	66002.2	19311.1	-106.613	247.879	739.358	0	0	0	0	0	0	0	603	903	0
874	4	2.2586	-106.709	-470.007	7118.41	-25008.9	9359.99	146.79	284.855	0	-31.3568	56.7575	-416.76	67375.5	20043.5	580.032	248.094	741.335	0	0	0	0	0	0	0	603	903	0
874	5	2.86896	-106.404	-460.241	7301.52	-24276.5	9039.55	147.253	284.135	0	-30.1361	58.7412	-431.104	68748.8	20592.8	717.362	247.768	743.528	0	0	0	0	0	0	0	603	903	0
874	6	3.47931	-106.251	-451.696	7026.86	-23849.2	9039.55	147.201	284.443	0	-30.4413	62.4033	-445.447	70854.5	21569.4	854.691	248.422	743.936	0	0	0	0	0	0	0	603	903	0
874	7	4.70001	-105.336	-444.677	6477.54	-23361	9176.88	147.465	285.433	0	-29.3732	61.1826	-458.264	72777.1	22240.8	1266.68	248.533	744.19	0	0	0	0	0	0	0	603	903	0
874	8	6.37848	-104.42	-433.996	5928.23	-23361	8902.22	146.172	286.34	0	-26.3214	65.1498	-476.575	75065.9	23095.3	1587.11	248.461	745.489	0	0	0	0	0	0	0	603	903	0
874	9	5.46295	-103.199	-427.892	4829.59	-22262.3	8902.22	147.972	288.713	0	-25.2533	66.5231	-492.139	75981.4	24193.9	1449.78	249.161	748.61	0	0	0	0	0	0	0	603	903	0
875	0	6.37848	-102.131	-415.991	4921.15	-22201.3	8902.22	146.63	288.17	0	-25.8636	67.8964	-504.956	77995.6	25292.5	1815.99	250.089	748.54	0	0	0	0	0	0	0	603	903	0
875	1	7.294	-100.3	-407.751	4463.38	-21713	8902.22	146.749	289.054	0	-24.6429	68.6594	-516.553	80009.8	25780.8	1999.1	249.909	748.108	0	0	0	0	0	0	0	603	903	0
875	2	7.90436	-100.148	-400.732	3914.07	-21041.6	8719.12	147.492	290.233	0	-23.2696	72.0163	-530.591	82023.9	26452.2	1953.32	249.854	748.41	0	0	0	0	0	0	0	603	903	0
875	3	8.97247	-97.7063	-391.577	4097.17	-20736.4	8993.77	147.044	289.537	0	-22.5067	73.9999	-544.019	82939.5	27856	2044.88	251.204	750.543	0	0	0	0	0	0	0	603	903	0
875	4	8.81988	-95.57	-380.59	3456.3	-20248.2	8673.34	146.798	290.919	0	-23.5748	75.2206	-556.531	84312.7	28405.3	1999.1	251.04	751.503	0	0	0	0	0	0	0	603	903	0
875	5	8.81988	-94.9597	-372.656	2906.99	-19332.6	8307.13	148.122	292.199	0	-22.5067	75.9836	-568.127	86235.4	28649.5	2273.76	250.428	751.211	0	0	0	0	0	0	0	603	903	0
875	6	10.3458	-93.1286	-362.28	2998.54	-18844.4	8581.79	147.984	291.723	0	-19.6075	79.1879	-577.588	87059.4	29137.8	2136.43	250.447	752.271	0	0	0	0	0	0	0	603	903	0
875	7	10.3458	-90.9924	-355.566	2174.56	-19149.5	8032.47	146.143	293.884	0	-19.3024	80.2561	-587.354	87608.6	30480.5	2411.09	251.895	753.842	0	0	0	0	0	0	0	603	903	0
875	8	10.6509	-88.7036	-347.021	1899.9	-18478.1	8032.47	146.752	294.525	0	-19.455	81.6293	-592.847	88798.9	30480.5	2136.43	251.414	753.216	0	0	0	0	0	0	0	603	903	0
875	9	10.4984	-86.1096	-336.035	2449.22	-17257.4	7757.81	148.644	292.711	0	-18.8446	83.1552	-604.749	89622.8	30846.8	2639.97	251.008	754.802	0	0	0	0	0	0	0	603	903	0
876	0	9.888	-83.8208	-325.659	1259.04	-17013.3	7620.49	147.757	296.134	0	-15.1825	85.9018	-612.988	90538.3	31274	2868.85	251.019	755.3	0	0	0	0	0	0	0	603	903	0
876	1	10.6509	-83.0578	-316.808	892.824	-16830.2	7574.71	146.876	297.182	0	-14.267	85.2915	-618.481	90996.1	32006.4	2731.52	251.75	755.872	0	0	0	0	0	0	0	603	903	0
876	2	10.8035	-79.7009	-307.348	1167.48	-16280.9	7162.72	147.028	296.201	0	-13.8092	85.9018	-627.026	90538.3	32433.7	3051.96	251.726	758.607	0	0	0	0	0	0	0	603	903	0
876	3	9.888	-77.4121	-300.024	526.613	-15426.4	6979.62	148.583	298.245	0	-12.8937	87.1225	-631.604	92094.8	32433.7	3463.94	251.351	757.189	0	0	0	0	0	0	0	603	903	0
876	4	10.9561	-76.0388	-290.258	435.06	-15487.4	6842.29	146.643	298.501	0	-9.23156	88.3432	-638.013	92094.8	32799.9	3784.38	251.409	758.654	0	0	0	0	0	0	0	603	903	0
876	5	9.73541	-73.4448	-279.272	435.06	-14877.1	6567.63	146.729	298.442	0	-7.70568	89.8691	-642.896	93010.2	33349.2	3738.6	251.873	758.326	0	0	0	0	0	0	0	603	903	0
876	6	10.1932	-71.9189	-271.032	-755.126	-14388.8	6338.75	146.911	302.786	0	-7.5531	90.3269	-647.473	93651.2	33898.5	4104.81	252.355	758.359	0	0	0	0	0	0	0	603	903	0
876	7	10.8035	-68.8671	-264.318	-663.573	-13839.5	6155.64	147.641	302.51	0	-4.80651	91.7001	-650.83	92827.2	33593.3	4196.37	251.616	760.371	0	0	0	0	0	0	0	603	903	0
876	8	9.58282	-65.8154	-254.858	-755.126	-14022.6	5789.43	144.979	302.963	0	-2.67028	90.7846	-655.408	93651.2	34203.7	4562.58	252.187	760.11	0	0	0	0	0	0	0	603	903	0
876	9	9.73541	-63.5266	-244.787	-938.231	-13046	5697.88	146.705	303.833	0	-2.05993	90.9372	-657.849	93193.4	34569.9	4883.01	252.55	761.336	0	0	0	0	0	0	0	603	903	0
877	0	7.75177	-62.9162	-232.58	-1395.99	-12557.7	5285.89	146.007	306.002	0	-0.839229	91.7001	-660.901	93376.5	34508.9	4883.01	252.215	761.713	0	0	0	0	0	0	0	603	903	0
877	1	8.05694	-58.7964	-227.392	-1212.89	-12374.6	4919.68	145.58	305.334	0	0.0762979	92.6157	-661.816	93101.8	33959.6	5249.22	251.313	762.324	0	0	0	0	0	0	0	603	903	0
877	2	7.59918	-56.8127	-220.678	-938.231	-12069.5	4965.45	145.307	304.252	0	0.839237	92.6157	-664.563	93193.4	34997.2	5706.99	252.662	762.767	0	0	0	0	0	0	0	603	903	0
877	3	6.0733	-55.7446	-212.438	-1579.1	-11520.1	4645.02	145.772	307.433	0	2.67029	93.0734	-665.784	92003.2	35668.5	5706.99	253.574	764.812	0	0	0	0	0	0	0	603	903	0
877	4	5.31036	-53.1506	-205.724	-1579.1	-10848.8	4553.47	147.266	307.676	0	3.73841	92.6157	-666.699	93376.5	35180.3	5615.43	252.768	762.942	0	0	0	0	0	0	0	603	903	0
877	5	5.00519	-51.9299	-196.569	-1853.76	-10970.8	4187.26	144.188	309.431	0	3.58582	92.3105	-665.784	92552.5	35607.5	5981.64	253.482	763.987	0	0	0	0	0	0	0	603	903	0
877	6	4.8526	-47.5048	-190.466	-1945.31	-10421.5	4004.15	145.284	310.213	0	6.02723	92.7683	-665.784	92277.8	35973.7	5981.64	254.032	764.4	0	0	0	0	0	0	0	603	903	0
877	7	5.76813	-45.0634	-184.973	-2219.97	-9933.23	3775.27	146.299	312.002	0	5.26429	94.1415	-665.479	92735.6	36095.8	6393.63	254.24	763.648	0	0	0	0	0	0	0	603	903	0
877	8	4.24225	-43.0798	-178.259	-1945.31	-9994.26	3592.16	143.934	310.913	0	7.24793	93.8364	-667.31	91911.6	35607.5	6347.85	253.36	765.265	0	0	0	0	0	0	0	603	903	0
877	9	2.71637	-41.8591	-170.629	-2677.73	-9689.09	3454.84	143.216	315.693	0	7.40052	93.8364	-667.004	91453.9	35851.6	6530.96	253.75	765.889	0	0	0	0	0	0	0	603	903	0
878	0	3.47931	-41.5539	-164.526	-2494.63	-9261.84	3546.39	143.706	315.163	0	7.40052	94.2941	-667.004	90813	36278.9	6576.74	254.391	766.849	0	0	0	0	0	0	0	603	903	0
878	1	4.08966	-38.197	-158.422	-1762.21	-8773.56	3225.95	144.619	311.124	0	7.5531	92.0053	-661.511	90996.1	36278.9	6759.84	254.842	765.442	0	0	0	0	0	0	0	603	903	0
878	2	3.02154	-37.7392	-153.234	-2403.07	-8407.35	3134.4	145.134	315.682	0	9.68933	93.0734	-663.342	90172.1	35668.5	7263.38	253.771	767.064	0	0	0	0	0	0	0	603	903	0
878	3	2.10602	-38.5022	-146.52	-2219.97	-8041.14	3088.62	145.119	315.151	0	10.1471	94.4467	-663.342	90996.1	35912.7	6851.39	254.139	765.822	0	0	0	0	0	0	0	603	903	0
878	4	1.19049	-35.9082	-140.112	-2219.97	-7919.07	2768.19	143.48	315.844	0	9.84192	94.4467	-666.089	89439.7	37133.4	7309.16	255.748	768.724	0	0	0	0	0	0	0	603	903	0
878	5	-0.182803	-35.7556	-133.703	-1853.76	-7674.93	2768.19	142.597	313.865	0	9.38416	92.3105	-673.718	90080.6	37804.8	7217.61	256.114	769.293	0	0	0	0	0	0	0	603	903	0
878	6	-0.793154	-33.9245	-126.989	-2586.18	-7552.86	2447.75	140.524	320.365	0	12.8937	93.226	-680.127	89622.8	37377.5	7766.92	254.957	771.226	0	0	0	0	0	0	0	603	903	0
878	7	1.0379	-32.2461	-123.022	-2219.97	-6942.51	2539.31	143.567	318.045	0	17.7765	96.2778	-683.484	88524.2	37743.7	8362.01	255.223	773.481	0	0	0	0	0	0	0	603	903	0
878	8	-2.16645	-29.3469	-118.139	-2403.07	-6942.51	2310.42	141.234	320.341	0	18.9972	99.6347	-680.432	88615.7	38598.2	8545.12	256.726	772.766	0	0	0	0	0	0	0	603	903	0
878	9	-3.53974	-29.4995	-114.477	-2311.52	-6698.37	2218.87	141.487	320.192	0	22.8119	99.9399	-682.874	88615.7	38720.3	9048.66	256.702	773.231	0	0	0	0	0	0	0	603	903	0
879	0	-4.45526	-27.0581	-105.932	-1853.76	-6210.09	2035.77	141.377	317.5	0	27.6947	100.398	-688.672	88981.9	38415.1	9506.42	255.781	773.792	0	0	0	0	0	0	0	603	903	0
879	1	-4.30268	-25.227	-101.66	-1670.65	-5965.94	2356.2	141.314	316.434	0	28.6102	105.738	-689.893	88615.7	38903.4	9643.75	256.391	774.551	0	0	0	0	0	0	0	603	903	0
879	2	-4.45526	-23.7011	-101.049	-1579.1	-5721.8	2035.77	143.376	315.627	0	28.7628	105.738	-693.25	88432.7	39391.7	9643.75	256.822	775.438	0	0	0	0	0	0	0	603	903	0
879	3	-6.43891	-22.1753	-96.1664	-1853.76	-5355.59	1715.33	144.309	319.277	0	30.4413	107.112	-694.165	88158	39391.7	9872.63	256.747	776.001	0	0	0	0	0	0	0	603	903	0
879	4	-5.2182	-21.2597	-90.0629	-1487.55	-5294.56	1578	141.213	316.517	0	29.3732	108.18	-699.658	88249.5	39330.6	9689.53	256.214	776.868	0	0	0	0	0	0	0	603	903	0
879	5	-6.13373	-20.1916	-82.4335	-2403.07	-4989.38	1715.33	139.474	329.152	0	31.662	111.689	-700.269	88066.4	40002	9643.75	257.124	777.239	0	0	0	0	0	0	0	603	903	0
879	6	-5.98114	-18.5131	-81.2128	-1853.76	-4501.1	2173.1	144.576	322.826	0	31.662	110.011	-701.794	87791.8	39330.6	9964.19	256.043	777.904	0	0	0	0	0	0	0	603	903	0
879	7	-6.13373	-18.3606	-79.3817	-2219.97	-4501.1	1486.45	143.298	327.966	0	32.2723	111.231	-706.372	87700.2	40002	9918.41	256.63	778.844	0	0	0	0	0	0	0	603	903	0
879	8	-6.74408	-17.445	-74.4989	-2311.52	-3829.71	1669.56	148.594	331.028	0	31.3568	111.842	-709.729	88432.7	40063.1	9872.63	256.448	778.399	0	0	0	0	0	0	0	603	903	0
879	9	-7.04926	-16.2243	-67.4799	-663.573	-4012.82	1715.33	140.533	309.834	0	34.5612	111.689	-710.034	88158	40917.6	9872.63	257.628	778.84	0	0	0	0	0	0	0	603	903	0
880	0	-6.13373	-15.3088	-65.6488	-1395.99	-3341.43	1394.9	149.101	321.265	0	34.4086	110.926	-711.255	87425.6	41100.7	9872.63	257.786	780.083	0	0	0	0	0	0	0	603	903	0
880	1	-6.13373	-16.2243	-63.2074	-1487.55	-3280.4	1486.45	148.101	323.534	0	34.256	112.605	-714.917	87974.9	40917.6	9872.63	257.234	779.944	0	0	0	0	0	0	0	603	903	0
880	2	-5.67597	-15.1562	-58.3246	-1487.55	-3219.36	1257.57	144.803	325.505	0	35.6293	112.3	-719.495	87700.2	40734.5	10284.6	256.615	781.109	0	0	0	0	0	0	0	603	903	0
880	3	-7.04926	-16.2243	-55.8832	-938.231	-3036.26	1257.57	145.668	316.789	0	36.2396	109.553	-721.936	87791.8	41772.1	10238.8	257.861	781.394	0	0	0	0	0	0	0	603	903	0
880	4	-7.04926	-14.0881	-50.39	-2036.86	-2792.12	1211.79	144.59	340.422	0	37.6129	110.163	-722.546	87700.2	41833.1	10422	257.897	781.623	0	0	0	0	0	0	0	603	903	0
880	5	-6.89667	-13.7829	-48.2538	-1487.55	-2181.76	1257.57	154.786	330.828	0	37.9181	110.774	-725.903	87517.1	41833.1	9964.19	257.629	782.437	0	0	0	0	0	0	0	603	903	0
880	6	-7.8122	-13.4777	-45.202	-1762.21	-2670.05	1166.02	140.931	338.985	0	37.4603	108.332	-728.04	87517.1	42199.3	10330.4	257.963	782.791	0	0	0	0	0	0	0	603	903	0
880	7	-7.65961	-11.4941	-45.202	-1670.65	-2059.69	1349.12	154.434	336.96	0	38.5284	108.79	-732.007	87517.1	42565.5	10376.2	258.149	783.442	0	0	0	0	0	0	0	603	903	0
880	8	-8.11737	-9.96823	-39.7089	-2036.86	-1937.62	1028.69	151.204	351.295	0	39.2914	109.248	-735.059	87608.6	42748.6	10559.3	258.157	783.814	0	0	0	0	0	0	0	603	903	0
880	9	-8.26996	-10.426	-37.2675	-1029.78	-1937.62	891.358	148.008	327.632	0	38.8336	108.637	-734.753	86967.8	42626.5	10238.8	258.015	784.637	0	0	0	0	0	0	0	603	903	0
881	0	-8.72772	-10.5786	-34.5209	-297.362	-1876.59	891.358	145.639	308.614	0	39.2914	107.722	-740.857	87059.4	42992.8	10422	258.031	785.488	0	0	0	0	0	0	0	603	903	0
881	1	-8.26996	-8.90011	-33.9105	-1121.34	-1449.34	845.581	157.26	333.068	0	40.2069	109.248	-743.298	87883.3	43236.9	10605.1	258.169	784.766	0	0	0	0	0	0	0	603	903	0
881	2	-8.72772	-7.52682	-32.0795	-572.02	-1571.41	708.252	151.015	317.831	0	39.5966	109.4	-745.129	87608.6	43053.8	10605.1	257.78	785.425	0	0	0	0	0	0	0	603	903	0
881	3	-7.8122	-6.91647	-28.7225	-1395.99	-1388.31	754.029	151.665	348.603	0	40.8173	110.316	-751.538	87608.6	43053.8	10605.1	257.288	786.428	0	0	0	0	0	0	0	603	903	0
881	4	-9.0329	-5.69577	-23.8397	-1212.89	-1205.2	754.029	149.446	350.877	0	39.2914	110.468	-754.895	87425.6	43847.2	10467.7	258.084	787.188	0	0	0	0	0	0	0	603	903	0
881	5	-8.11737	-4.0173	-23.5345	-1304.44	-1266.24	616.7	146.197	355.427	0	38.681	110.468	-758.252	88249.5	44152.4	10742.4	258.229	786.615	0	0	0	0	0	0	0	603	903	0
881	6	-8.26996	-5.238	-23.2294	-846.678	-1388.31	433.594	140.235	336.449	0	40.5121	108.485	-761.609	88066.4	43603.1	10467.7	257.251	787.368	0	0	0	0	0	0	0	603	903	0
881	7	-9.18549	-3.40695	-21.7035	-572.02	-655.884	158.936	169.78	326.356	0	40.0543	110.468	-766.492	87974.9	44213.5	10650.8	257.683	788.224	0	0	0	0	0	0	0	603	903	0
881	8	-7.8122	-1.57589	-17.7362	-114.256	-533.813	570.923	169.903	306.442	0	39.1388	111.231	-769.238	87608.6	44457.6	10101.5	257.794	789.11	0	0	0	0	0	0	0	603	903	0
881	9	-8.72772	-1.27072	-15.2948	-755.126	-777.954	296.265	149.136	349.371	0	38.8336	111.994	-774.731	88158	44518.6	10238.8	257.463	789.208	0	0	0	0	0	0	0	603	903	0
882	0	-8.26996	-0.660365	-14.6844	-572.02	-472.778	204.712	167.804	338.954	0	39.5966	111.384	-779.004	88615.7	44457.6	10422	257.07	789.245	0	0	0	0	0	0	0	603	903	0
882	1	-8.11737	-1.57589	-14.3793	-572.02	-472.778	296.265	167.121	339.781	0	41.275	110.163	-783.582	89256.6	45190	10193.1	257.671	789.091	0	0	0	0	0	0	0	603	903	0
882	2	-8.57514	0.40775	-12.8534	-572.02	-289.673	113.159	177.463	344.503	0	39.1388	110.774	-787.244	88707.3	45495.2	10238.8	257.79	790.319	0	0	0	0	0	0	0	603	903	0
882	3	-5.98114	1.17069	-11.6327	-846.678	-167.602	250.488	185.592	372.784	0	38.0707	111.079	-786.328	89348.1	45129	10010	257.392	789.373	0	0	0	0	0	0	0	603	903	0
882	4	0	0	0	0	0	0	200	300	0	37.4603	110.926	-794.568	89805.9	45678.3	9964.19	257.488	789.975	0	0	0	0	0	0	0	603	903	0
882	5	-4.60785	2.08622	-9.49646	-846.678	15.503	67.3829	201.633	389.157	0	37.6129	111.537	-799.146	89714.4	46044.5	9597.98	257.617	790.737	0	0	0	0	0	0	0	603	903	0
882	6	0	0	0	0	0	0	200	300	0	36.5448	110.316	-802.197	89714.4	46105.6	9735.31	257.474	791.164	0	0	0	0	0	0	0	603	903	0
882	7	0	0	0	0	0	0	200	300	0	35.6293	108.637	-804.944	89439.7	45739.3	9689.53	256.823	791.887	0	0	0	0	0	0	0	603	903	0
882	8	0	0	0	0	0	0	200	300	0	34.7137	110.011	-807.996	89531.3	46105.6	9735.31	257.062	792.193	0	0	0	0	0	0	0	603	903	0
882	9	0	0	0	0	0	0	200	300	0	35.0189	111.384	-811.353	89989.1	46349.7	9689.53	257.126	792.088	0	0	0	0	0	0	0	603	903	0
883	0	0	0	0	0	0	0	200	300	0	33.6456	109.553	-812.573	89989.1	46838	9460.65	257.642	792.254	0	0	0	0	0	0	0	603	903	0
883	1	0	0	0	0	0	0	200	300	0	32.4249	110.774	-817.456	89897.5	46044.5	9277.54	256.327	793.028	0	0	0	0	0	0	0	603	903	0
883	2	0	0	0	0	0	0	200	300	0	33.7982	109.858	-821.118	90080.6	46838	9231.77	257.042	793.295	0	0	0	0	0	0	0	603	903	0
883	3	0	0	0	0	0	0	200	300	0	32.4249	108.485	-824.78	90172.1	47021.1	9277.54	257.01	793.671	0	0	0	0	0	0	0	603	903	0
883	4	0	0	0	0	0	0	200	300	0	32.1198	109.858	-824.475	89805.9	46471.8	8819.78	256.365	794.075	0	0	0	0	0	0	0	603	903	0
883	5	0	0	0	0	0	0	200	300	0	28.9154	110.163	-826.001	89622.8	46593.8	8957.11	256.409	794.498	0	0	0	0	0	0	0	603	903	0
883	6	0	0	0	0	0	0	200	300	0	30.1361	110.316	-828.748	89073.5	46838	8682.45	256.517	795.52	0	0	0	0	0	0	0	603	903	0
883	7	0	0	0	0	0	0	200	300	0	27.9999	109.553	-830.579	90080.6	47082.1	8819.78	256.686	794.545	0	0	0	0	0	0	0	603	903	0
883	8	0	0	0	0	0	0	200	300	0	27.5421	107.874	-832.104	89348.1	46227.6	8728.23	255.555	795.624	0	0	0	0	0	0	0	603	903	0
883	9	0	0	0	0	0	0	200	300	0	26.7792	107.569	-832.715	88981.9	46349.7	8774	255.661	796.142	0	0	0	0	0	0	0	603	903	0
884	0	0	0	0	0	0	0	200	300	0	25.8637	108.18	-832.104	88798.9	46899	8728.23	256.362	796.284	0	0	0	0	0	0	0	603	903	0
884	1	0	0	0	0	0	0	200	300	0	24.7955	107.722	-833.325	89073.5	46899	8453.57	256.279	796.111	0	0	0	0	0	0	0	603	903	0
884	2	0	0	0	0	0	0	200	300	0	26.0162	107.417	-835.767	88890.4	46105.6	8545.12	255.166	796.642	0	0	0	0	0	0	0	603	903	0
884	3	0	0	0	0	0	0	200	300	0	27.5421	107.112	-835.461	88707.3	46166.6	8499.34	255.259	796.822	0	0	0	0	0	0	0	603	903	0
884	4	0	0	0	0	0	0	200	300	0	24.3378	105.738	-837.292	88341.1	46654.9	8270.46	255.721	797.492	0	0	0	0	0	0	0	603	903	0
884	5	0	0	0	0	0	0	200	300	0	24.1852	104.67	-836.072	87700.2	46105.6	8133.13	255.145	798.104	0	0	0	0	0	0	0	603	903	0
884	6	0	0	0	0	0	0	200	300	0	23.2697	104.823	-836.377	88158	45983.5	8133.13	254.979	797.595	0	0	0	0	0	0	0	603	903	0
884	7	0	0	0	0	0	0	200	300	0	24.0326	104.212	-836.987	87242.4	46410.7	7904.25	255.45	798.766	0	0	0	0	0	0	0	603	903	0
884	8	0	0	0	0	0	0	200	300	0	24.1852	104.518	-837.598	88432.7	46349.7	7950.03	255.336	797.421	0	0	0	0	0	0	0	603	903	0
884	9	0	0	0	0	0	0	200	300	0	22.8119	103.755	-837.598	87608.6	45983.5	7721.15	254.899	798.405	0	0	0	0	0	0	0	603	903	0
885	0	0	0	0	0	0	0	200	300	0	23.7274	101.618	-837.292	87150.9	46044.5	7950.03	254.992	798.913	0	0	0	0	0	0	0	603	903	0
885	1	0	0	0	0	0	0	200	300	0	23.1171	103.602	-835.767	86967.8	46410.7	7995.81	255.531	798.943	0	0	0	0	0	0	0	603	903	0
885	2	0	0	0	0	0	0	200	300	0	22.6593	103.907	-835.156	86693.2	46349.7	7446.49	255.498	799.195	0	0	0	0	0	0	0	603	903	0
885	3	0	0	0	0	0	0	200	300	0	22.6593	103.297	-834.851	86235.4	45678.3	7629.6	254.714	799.706	0	0	0	0	0	0	0	603	903	0
885	4	0	0	0	0	0	0	200	300	0	21.7438	103.602	-835.156	85319.8	45922.4	7629.6	254.987	800.84	0	0	0	0	0	0	0	603	903	0
885	5	0	0	0	0	0	0	200	300	0	21.286	101.924	-833.936	85503	45190	7492.26	254.189	800.471	0	0	0	0	0	0	0	603	903	0
885	6	0	0	0	0	0	0	200	300	0	22.6593	101.618	-831.799	85594.5	45434.2	7400.71	254.622	800.097	0	0	0	0	0	0	0	603	903	0
885	7	0	0	0	0	0	0	200	300	0	23.5748	101.161	-832.41	84953.6	45556.2	7583.82	254.728	800.943	0	0	0	0	0	0	0	603	903	0
885	8	0	0	0	0	0	0	200	300	0	21.7438	101.618	-830.579	83855	45861.4	7446.49	255.216	802.04	0	0	0	0	0	0	0	603	903	0
885	9	0	0	0	0	0	0	200	300	0	21.1334	100.703	-831.189	84129.7	45800.4	7309.16	255.102	801.784	0	0	0	0	0	0	0	603	903	0
886	0	0	0	0	0	0	0	200	300	0	21.7438	99.7873	-829.053	83946.5	45006.9	7492.26	254.287	801.744	0	0	0	0	0	0	0	603	903	0
886	1	0	0	0	0	0	0	200	300	0	22.049	98.5666	-828.137	83580.3	44945.9	7492.26	254.273	802.074	0	0	0	0	0	0	0	603	903	0
886	2	0	0	0	0	0	0	200	300	0	22.5067	96.2778	-827.832	82939.5	45312.1	7309.16	254.736	802.811	0	0	0	0	0	0	0	603	903	0
886	3	0	0	0	0	0	0	200	300	0	21.4386	97.0407	-823.865	81657.7	45129	7309.16	254.777	803.885	0	0	0	0	0	0	0	603	903	0
886	4	0	0	0	0	0	0	200	300	0	21.7438	97.3459	-822.339	82023.9	43969.3	7446.49	253.469	803.255	0	0	0	0	0	0	0	603	903	0
886	5	0	0	0	0	0	0	200	300	0	22.3541	94.9045	-819.592	81749.3	45129	7263.38	255.063	803.256	0	0	0	0	0	0	0	603	903	0
886	6	0	0	0	0	0	0	200	300	0	22.2015	96.583	-821.729	81016.8	44823.8	7354.93	254.548	804.407	0	0	0	0	0	0	0	603	903	0
886	7	0	0	0	0	0	0	200	300	0	22.2015	95.5148	-818.677	80101.4	44396.6	7309.16	254.23	805.158	0	0	0	0	0	0	0	603	903	0
886	8	0	0	0	0	0	0	200	300	0	21.5912	94.7519	-815.93	80833.8	44152.4	7171.83	254.113	803.931	0	0	0	0	0	0	0	603	903	0
886	9	0	0	0	0	0	0	200	300	0	23.2697	94.1415	-812.268	80192.9	44274.5	7034.5	254.507	804.273	0	0	0	0	0	0	0	603	903	0
887	0	0	0	0	0	0	0	200	300	0	22.8119	94.1415	-811.047	79643.6	44396.6	7126.05	254.74	804.802	0	0	0	0	0	0	0	603	903	0
887	1	0	0	0	0	0	0	200	300	0	22.2015	93.226	-807.996	78728	43725.2	6988.72	254.116	805.564	0	0	0	0	0	0	0	603	903	0
887	2	0	0	0	0	0	0	200	300	0	21.7438	91.0898	-803.113	79002.7	43481	7263.38	254.141	804.629	0	0	0	0	0	0	0	603	903	0
887	3	0	0	0	0	0	0	200	300	0	22.9645	90.3269	-804.639	78636.5	43297.9	7126.05	253.81	805.271	0	0	0	0	0	0	0	603	903	0
887	4	0	0	0	0	0	0	200	300	0	22.8119	90.0217	-800.061	78911.1	43847.2	7034.5	254.805	804.369	0	0	0	0	0	0	0	603	903	0
887	5	0	0	0	0	0	0	200	300	0	22.049	90.3269	-798.23	78361.8	42565.5	6942.95	253.325	804.831	0	0	0	0	0	0	0	603	903	0
887	6	0	0	0	0	0	0	200	300	0	22.5067	88.1906	-793.652	76988.5	43725.2	6942.95	255.094	805.995	0	0	0	0	0	0	0	603	903	0
887	7	0	0	0	0	0	0	200	300	0	23.4222	88.6484	-793.042	77171.7	43664.1	6988.72	255.059	805.689	0	0	0	0	0	0	0	603	903	0
887	8	0	0	0	0	0	0	200	300	0	25.4059	87.5803	-789.38	76256.1	42565.5	6942.95	253.923	806.398	0	0	0	0	0	0	0	603	903	0
887	9	0	0	0	0	0	0	200	300	0	23.5748	86.207	-785.718	75523.7	42809.7	6851.39	254.485	806.879	0	0	0	0	0	0	0	603	903	0
888	0	0	0	0	0	0	0	200	300	0	24.6429	86.5122	-779.004	74974.4	43114.8	6988.72	255.346	806.756	0	0	0	0	0	0	0	603	903	0
888	1	0	0	0	0	0	0	200	300	0	23.2697	85.2915	-779.004	75249	42687.6	6622.51	254.798	806.404	0	0	0	0	0	0	0	603	903	0
888	2	0	0	0	0	0	0	200	300	0	24.7955	83.9182	-778.394	74242	41833.1	6668.29	253.743	807.622	0	0	0	0	0	0	0	603	903	0
888	3	0	0	0	0	0	0	200	300	0	25.7111	81.9345	-773.816	73509.6	41955.2	6576.74	254.219	808.004	0	0	0	0	0	0	0	603	903	0
888	4	0	0	0	0	0	0	200	300	0	24.1852	79.9509	-771.985	73234.9	42016.2	6576.74	254.426	808.134	0	0	0	0	0	0	0	603	903	0
888	5	0	0	0	0	0	0	200	300	0	24.4904	80.7138	-765.576	72685.5	41527.9	6485.18	254.244	808.058	0	0	0	0	0	0	0	603	903	0
888	6	0	0	0	0	0	0	200	300	0	26.3214	80.8664	-762.83	72594	41527.9	6805.62	254.439	807.836	0	0	0	0	0	0	0	603	903	0
888	7	0	0	0	0	0	0	200	300	0	26.1688	80.2561	-760.388	71403.8	41588.9	6668.29	254.694	809.096	0	0	0	0	0	0	0	603	903	0
888	8	0	0	0	0	0	0	200	300	0	25.2533	77.2043	-754.285	71129.1	41466.9	6759.84	254.975	808.7	0	0	0	0	0	0	0	603	903	0
888	9	0	0	0	0	0	0	200	300	0	25.7111	77.2043	-755.2	70854.5	40734.5	6485.18	253.939	809.178	0	0	0	0	0	0	0	603	903	0
889	0	0	0	0	0	0	0	200	300	0	26.474	76.1362	-750.317	70671.4	40673.4	6210.53	254.208	808.811	0	0	0	0	0	0	0	603	903	0
889	1	0	0	0	0	0	0	200	300	0	26.9318	76.8991	-746.96	69572.8	40795.5	6210.53	254.615	809.859	0	0	0	0	0	0	0	603	903	0
889	2	0	0	0	0	0	0	200	300	0	26.0162	73.5422	-744.214	68382.6	40734.5	6302.08	254.735	811.114	0	0	0	0	0	0	0	603	903	0
889	3	0	0	0	0	0	0	200	300	0	26.7792	74.7629	-740.552	69023.4	39696.9	6393.63	253.604	809.795	0	0	0	0	0	0	0	603	903	0
889	4	0	0	0	0	0	0	200	300	0	27.5421	73.3896	-736.584	67741.7	40246.2	6393.63	254.639	811.033	0	0	0	0	0	0	0	603	903	0
889	5	0	0	0	0	0	0	200	300	0	28.1525	72.9318	-733.533	67375.5	40185.1	6256.3	254.783	811.149	0	0	0	0	0	0	0	603	903	0
889	6	0	0	0	0	0	0	200	300	0	26.6266	72.3215	-729.565	66551.6	39452.7	6118.97	254.077	811.779	0	0	0	0	0	0	0	603	903	0
889	7	0	0	0	0	0	0	200	300	0	26.9318	71.5585	-725.293	66643.1	39452.7	6210.53	254.396	811.116	0	0	0	0	0	0	0	603	903	0
889	8	0	0	0	0	0	0	200	300	0	28.7628	70.4904	-722.852	66093.8	39757.9	6118.97	255.001	811.565	0	0	0	0	0	0	0	603	903	0
889	9	0	0	0	0	0	0	200	300	0	30.1361	69.1171	-719.495	66368.4	39635.8	6256.3	255.088	810.757	0	0	0	0	0	0	0	603	903	0
890	0	0	0	0	0	0	0	200	300	0	28.6102	65.9128	-714.307	65452.9	39086.5	6164.75	254.72	811.369	0	0	0	0	0	0	0	603	903	0
890	1	0	0	0	0	0	0	200	300	0	27.8473	66.8283	-710.339	64445.8	38720.3	5844.31	254.51	812.275	0	0	0	0	0	0	0	603	903	0
890	2	0	0	0	0	0	0	200	300	0	28.3051	66.9809	-707.593	64812	38842.4	5844.31	254.894	811.405	0	0	0	0	0	0	0	603	903	0
890	3	0	0	0	0	0	0	200	300	0	29.3732	66.3706	-704.541	63804.9	38415.1	5661.21	254.525	812.438	0	0	0	0	0	0	0	603	903	0
890	4	0	0	0	0	0	0	200	300	0	29.6783	64.6921	-700.879	63072.5	38476.2	5661.21	254.897	813.009	0	0	0	0	0	0	0	603	903	0
890	5	0	0	0	0	0	0	200	300	0	28.7628	63.1662	-697.217	62157	38232	5569.66	254.835	813.85	0	0	0	0	0	0	0	603	903	0
890	6	0	0	0	0	0	0	200	300	0	28.4576	61.9455	-691.724	61973.9	38171	5752.76	255.182	813.407	0	0	0	0	0	0	0	603	903	0
890	7	0	0	0	0	0	0	200	300	0	29.6783	61.6403	-687.756	62248.6	37621.7	5478.1	254.702	812.49	0	0	0	0	0	0	0	603	903	0
890	8	0	0	0	0	0	0	200	300	0	31.5094	60.8774	-685.62	61699.2	37438.6	5249.22	254.605	813.01	0	0	0	0	0	0	0	603	903	0
890	9	0	0	0	0	0	0	200	300	0	29.9835	60.1144	-684.094	60509	37377.5	5295	254.638	814.549	0	0	0	0	0	0	0	603	903	0
891	0	0	0	0	0	0	0	200	300	0	29.2206	58.1308	-680.432	60234.4	37011.3	5386.55	254.394	814.476	0	0	0	0	0	0	0	603	903	0
891	1	0	0	0	0	0	0	200	300	0	28.9154	56.2997	-675.854	60234.4	37072.3	5203.45	254.853	813.877	0	0	0	0	0	0	0	603	903	0
891	2	0	0	0	0	0	0	200	300	0	30.5939	56.2997	-672.803	59135.8	37316.5	5020.34	255.464	815.105	0	0	0	0	0	0	0	603	903	0
891	3	0	0	0	0	0	0	200	300	0	30.5939	55.5368	-668.835	59959.7	37072.3	5295	255.428	813.352	0	0	0	0	0	0	0	603	903	0
891	4	0	0	0	0	0	0	200	300	0	29.068	52.6376	-663.342	58494.9	36339.9	4791.46	254.783	814.818	0	0	0	0	0	0	0	603	903	0
891	5	0	0	0	0	0	0	200	300	0	31.8146	54.0109	-663.037	57945.6	36339.9	5066.12	254.808	815.606	0	0	0	0	0	0	0	603	903	0
891	6	0	0	0	0	0	0	200	300	0	30.4413	51.8747	-659.07	57762.5	36523	4837.23	255.416	815.358	0	0	0	0	0	0	0	603	903	0
891	7	0	0	0	0	0	0	200	300	0	30.2887	49.5859	-655.103	58037.1	36034.8	4745.68	255.006	814.408	0	0	0	0	0	0	0	603	903	0
891	8	0	0	0	0	0	0	200	300	0	30.7465	50.654	-651.746	56846.9	35119.2	4562.58	253.885	815.777	0	0	0	0	0	0	0	603	903	0
891	9	0	0	0	0	0	0	200	300	0	29.3732	50.0436	-648.694	55931.4	36095.8	4425.25	255.644	816.779	0	0	0	0	0	0	0	603	903	0
892	0	0	0	0	0	0	0	200	300	0	29.8309	49.1281	-640.759	55839.9	35973.7	4333.69	256.142	815.854	0	0	0	0	0	0	0	603	903	0
892	1	0	0	0	0	0	0	200	300	0	29.8309	48.5178	-641.675	56114.5	35058.2	4516.8	254.635	815.55	0	0	0	0	0	0	0	603	903	0
892	2	0	0	0	0	0	0	200	300	0	31.0516	47.2971	-638.623	55382.1	35058.2	4379.47	254.897	816.279	0	0	0	0	0	0	0	603	903	0
892	3	0	0	0	0	0	0	200	300	0	30.1361	44.8557	-633.13	54832.8	35180.3	4104.81	255.566	816.394	0	0	0	0	0	0	0	603	903	0
892	4	0	0	0	0	0	0	200	300	0	29.3732	45.6186	-631.604	54741.2	35180.3	4287.92	255.7	816.33	0	0	0	0	0	0	0	603	903	0
892	5	0	0	0	0	0	0	200	300	0	29.068	45.3134	-627.637	54191.9	34875.1	4196.37	255.566	816.657	0	0	0	0	0	0	0	603	903	0
892	6	0	0	0	0	0	0	200	300	0	29.5258	44.2453	-624.585	54008.8	34386.8	4104.81	255.055	816.529	0	0	0	0	0	0	0	603	903	0
892	7	0	0	0	0	0	0	200	300	0	29.9835	43.4824	-621.228	54008.8	34630.9	3830.15	255.746	816.061	0	0	0	0	0	0	0	603	903	0
892	8	0	0	0	0	0	0	200	300	0	28.4576	42.2617	-618.787	52360.9	34508.9	3738.6	255.769	818.381	0	0	0	0	0	0	0	603	903	0
892	9	0	0	0	0	0	0	200	300	0	28.7628	41.3461	-612.683	52544	33837.5	3647.05	255.228	817.24	0	0	0	0	0	0	0	603	903	0
893	0	0	0	0	0	0	0	200	300	0	29.3732	40.4306	-609.631	52177.8	33532.3	3601.27	255.004	817.411	0	0	0	0	0	0	0	603	903	0
893	1	0	0	0	0	0	0	200	300	0	29.3732	40.7358	-608.105	51445.3	33959.6	3509.72	255.845	818.401	0	0	0	0	0	0	0	603	903	0
893	2	0	0	0	0	0	0	200	300	0	28.7628	39.0573	-605.054	51170.7	33593.3	3326.61	255.521	818.428	0	0	0	0	0	0	0	603	903	0
893	3	0	0	0	0	0	0	200	300	0	28.1525	37.3788	-600.171	50804.4	32983	3555.5	254.956	818.35	0	0	0	0	0	0	0	603	903	0
893	4	0	0	0	0	0	0	200	300	0	28.9154	37.5314	-599.255	49614.3	32983	3235.06	255.04	820.207	0	0	0	0	0	0	0	603	903	0
893	5	0	0	0	0	0	0	200	300	0	28.4576	36.6159	-594.678	50529.8	33166.1	3235.06	255.772	818.03	0	0	0	0	0	0	0	603	903	0
893	6	0	0	0	0	0	0	200	300	0	28.1525	36.4633	-592.236	49888.9	32922	3189.29	255.589	818.762	0	0	0	0	0	0	0	603	903	0
893	7	0	0	0	0	0	0	200	300	0	27.5421	34.9374	-589.795	48881.9	32433.7	3189.29	254.991	820.121	0	0	0	0	0	0	0	603	903	0
893	8	0	0	0	0	0	0	200	300	0	28.4576	35.3952	-587.659	49248.1	32372.6	3372.39	255.087	819.196	0	0	0	0	0	0	0	603	903	0
893	9	0	0	0	0	0	0	200	300	0	27.8473	34.4797	-584.302	48607.2	31823.3	2868.85	254.464	819.812	0	0	0	0	0	0	0	603	903	0
894	0	0	0	0	0	0	0	200	300	0	27.2369	33.4116	-580.945	48057.9	31945.4	3143.51	254.989	820.276	0	0	0	0	0	0	0	603	903	0
894	1	0	0	0	0	0	0	200	300	0	28.9154	33.4116	-577.283	47417	31090.9	2868.85	253.857	820.862	0	0	0	0	0	0	0	603	903	0
894	2	0	0	0	0	0	0	200	300	0	27.6947	34.0219	-574.231	47691.7	31823.3	2960.4	255.419	819.947	0	0	0	0	0	0	0	603	903	0
894	3	0	0	0	0	0	0	200	300	0	28.6102	31.2753	-570.264	46867.7	31579.2	3143.51	255.376	820.814	0	0	0	0	0	0	0	603	903	0
894	4	0	0	0	0	0	0	200	300	0	26.9318	32.496	-569.043	46501.5	31274	2639.97	254.959	821.281	0	0	0	0	0	0	0	603	903	0
894	5	0	0	0	0	0	0	200	300	0	28.3051	31.7331	-565.381	46226.8	30907.8	2639.97	254.667	821.238	0	0	0	0	0	0	0	603	903	0
894	6	0	0	0	0	0	0	200	300	0	25.5585	30.0546	-564.465	46135.3	31090.9	2594.19	255.08	821.267	0	0	0	0	0	0	0	603	903	0
894	7	0	0	0	0	0	0	200	300	0	27.6947	30.9702	-559.583	45677.5	31090.9	2502.64	255.561	821.372	0	0	0	0	0	0	0	603	903	0
894	8	0	0	0	0	0	0	200	300	0	25.4059	30.8176	-555.92	45219.8	30419.5	2456.86	254.719	821.658	0	0	0	0	0	0	0	603	903	0
894	9	0	0	0	0	0	0	200	300	0	26.6266	28.9865	-554.089	44762	30419.5	2273.76	254.9	822.215	0	0	0	0	0	0	0	603	903	0
895	0	0	0	0	0	0	0	200	300	0	24.1852	30.3598	-553.174	45128.2	30663.6	2090.65	255.432	821.42	0	0	0	0	0	0	0	603	903	0
895	1	0	0	0	0	0	0	200	300	0	26.0162	29.1391	-550.732	44762	30602.6	2365.31	255.567	821.723	0	0	0	0	0	0	0	603	903	0
895	2	0	0	0	0	0	0	200	300	0	24.3378	28.6813	-545.85	43938	29992.2	2227.98	254.946	822.505	0	0	0	0	0	0	0	603	903	0
895	3	0	0	0	0	0	0	200	300	0	23.2697	28.8339	-544.324	43846.4	29992.2	2227.98	255.1	822.448	0	0	0	0	0	0	0	603	903	0
895	4	0	0	0	0	0	0	200	300	0	23.2697	28.6813	-541.882	43480.2	30236.4	2136.43	255.799	822.761	0	0	0	0	0	0	0	603	903	0
895	5	0	0	0	0	0	0	200	300	0	23.2697	28.071	-540.662	42930.9	30053.3	1815.99	255.586	823.596	0	0	0	0	0	0	0	603	903	0
895	6	0	0	0	0	0	0	200	300	0	23.7274	27.4606	-537.61	42473.2	29504	1999.1	254.88	823.996	0	0	0	0	0	0	0	603	903	0
895	7	0	0	0	0	0	0	200	300	0	22.2015	27.0029	-535.474	41557.6	29809.1	1815.99	255.669	825.391	0	0	0	0	0	0	0	603	903	0
895	8	0	0	0	0	0	0	200	300	0	22.2015	26.5451	-532.727	42564.7	29504	1861.77	255.383	823.1	0	0	0	0	0	0	0	603	903	0
895	9	0	0	0	0	0	0	200	300	0	23.5748	26.0873	-528.455	42015.4	28954.7	1953.32	254.791	823.494	0	0	0	0	0	0	0	603	903	0
896	0	0	0	0	0	0	0	200	300	0	22.8119	26.0873	-528.455	41740.7	29015.7	1724.44	254.907	824.014	0	0	0	0	0	0	0	603	903	0
896	1	0	0	0	0	0	0	200	300	0	22.2015	25.9348	-527.844	40550.5	29137.8	1678.67	255.201	826.177	0	0	0	0	0	0	0	603	903	0
896	2	0	0	0	0	0	0	200	300	0	21.5912	25.7822	-525.098	40825.2	29381.9	1541.34	255.955	825.252	0	0	0	0	0	0	0	603	903	0
896	3	0	0	0	0	0	0	200	300	0	21.8964	24.8666	-524.182	40550.5	28649.5	1449.78	254.656	825.64	0	0	0	0	0	0	0	603	903	0
896	4	0	0	0	0	0	0	200	300	0	22.049	24.1037	-521.436	40459	28405.3	1541.34	254.475	825.408	0	0	0	0	0	0	0	603	903	0
896	5	0	0	0	0	0	0	200	300	0	21.7438	23.7985	-518.079	40001.2	28832.6	1449.78	255.653	825.789	0	0	0	0	0	0	0	603	903	0
896	6	0	0	0	0	0	0	200	300	0	20.5231	24.5615	-517.773	39543.5	28649.5	1266.68	255.332	826.628	0	0	0	0	0	0	0	603	903	0
896	7	0	0	0	0	0	0	200	300	0	20.9808	23.4934	-516.858	39268.8	28283.3	1495.56	254.722	827.024	0	0	0	0	0	0	0	603	903	0
896	8	0	0	0	0	0	0	200	300	0	21.4386	23.0356	-514.722	39635	28161.2	1266.68	254.712	825.997	0	0	0	0	0	0	0	603	903	0
896	9	0	0	0	0	0	0	200	300	0	21.1334	22.1201	-514.722	39268.8	28039.1	1083.57	254.474	826.709	0	0	0	0	0	0	0	603	903	0
897	0	0	0	0	0	0	0	200	300	0	20.2179	21.8149	-510.754	38811.1	27672.9	1175.12	254.18	827.012	0	0	0	0	0	0	0	603	903	0
897	1	0	0	0	0	0	0	200	300	0	21.286	20.5942	-510.449	38628	27856	1083.57	254.572	827.326	0	0	0	0	0	0	0	603	903	0
897	2	0	0	0	0	0	0	200	300	0	19.455	21.9675	-508.313	38628	28039.1	1083.57	255.161	827.008	0	0	0	0	0	0	0	603	903	0
897	3	0	0	0	0	0	0	200	300	0	20.3705	20.8994	-507.397	38536.4	28039.1	900.467	255.261	827.051	0	0	0	0	0	0	0	603	903	0
897	4	0	0	0	0	0	0	200	300	0	20.5231	19.9838	-506.177	37987.1	27489.8	580.032	254.309	827.953	0	0	0	0	0	0	0	603	903	0
897	5	0	0	0	0	0	0	200	300	0	17.9291	19.2209	-505.566	37712.4	27306.7	1083.57	254.012	828.406	0	0	0	0	0	0	0	603	903	0
897	6	0	0	0	0	0	0	200	300	0	18.2343	18.6105	-504.346	37529.3	27611.9	854.691	254.748	828.588	0	0	0	0	0	0	0	603	903	0
897	7	0	0	0	0	0	0	200	300	0	18.9972	18.3054	-503.125	37712.4	27367.7	1037.8	254.396	828.044	0	0	0	0	0	0	0	603	903	0
897	8	0	0	0	0	0	0	200	300	0	18.9972	18.458	-501.294	37895.5	27306.7	717.362	254.472	827.405	0	0	0	0	0	0	0	603	903	0
897	9	0	0	0	0	0	0	200	300	0	18.2343	18.9157	-501.904	37163.1	27611.9	534.256	255.014	828.956	0	0	0	0	0	0	0	603	903	0
898	0	0	0	0	0	0	0	200	300	0	17.6239	17.2372	-500.073	37437.7	27733.9	534.256	255.46	828.136	0	0	0	0	0	0	0	603	903	0
898	1	0	0	0	0	0	0	200	300	0	18.0817	17.0847	-498.242	37346.2	27001.5	351.15	254.194	828.044	0	0	0	0	0	0	0	603	903	0
898	2	0	0	0	0	0	0	200	300	0	17.3187	16.6269	-498.242	37437.7	27062.6	534.256	254.316	827.86	0	0	0	0	0	0	0	603	903	0
898	3	0	0	0	0	0	0	200	300	0	17.1661	16.0165	-496.106	36064.5	26940.5	671.585	254.304	830.305	0	0	0	0	0	0	0	603	903	0
898	4	0	0	0	0	0	0	200	300	0	17.4713	15.864	-495.801	36156	26757.4	351.15	253.968	830.076	0	0	0	0	0	0	0	603	903	0
898	5	0	0	0	0	0	0	200	300	0	18.3868	14.4907	-496.106	35972.9	26635.3	213.821	253.689	830.49	0	0	0	0	0	0	0	603	903	0
898	6	0	0	0	0	0	0	200	300	0	17.7765	14.9484	-497.327	36613.8	27245.7	213.821	254.784	829.379	0	0	0	0	0	0	0	603	903	0
898	7	0	0	0	0	0	0	200	300	0	16.7084	14.6433	-496.106	35972.9	27184.6	122.269	254.796	830.49	0	0	0	0	0	0	0	603	903	0
898	8	0	0	0	0	0	0	200	300	0	18.0817	13.5751	-495.19	35698.2	26940.5	396.927	254.404	830.91	0	0	0	0	0	0	0	603	903	0
898	9	0	0	0	0	0	0	200	300	0	17.0136	13.7277	-494.275	35972.9	26879.5	168.045	254.382	830.221	0	0	0	0	0	0	0	603	903	0
899	0	0	0	0	0	0	0	200	300	0	17.0136	13.7277	-493.054	35515.1	27062.6	76.4922	254.888	830.969	0	0	0	0	0	0	0	603	903	0
899	1	0	0	0	0	0	0	200	300	0	16.7084	12.6596	-493.359	34965.8	27123.6	122.269	254.977	832.127	0	0	0	0	0	0	0	603	903	0
899	2	0	0	0	0	0	0	200	300	0	15.9454	12.6596	-493.97	35789.8	26818.4	-15.0605	254.292	830.547	0	0	0	0	0	0	0	603	903	0
899	3	0	0	0	0	0	0	200	300	0	15.6403	12.0493	-491.528	35057.4	26391.2	-60.8369	253.692	831.677	0	0	0	0	0	0	0	603	903	0
899	4	0	0	0	0	0	0	200	300	0	16.5558	12.0493	-492.749	35423.6	26757.4	-60.8369	254.302	831.11	0	0	0	0	0	0	0	603	903	0
899	5	0	0	0	0	0	0	200	300	0	18.2343	11.2863	-492.444	35606.7	26757.4	-15.0605	254.336	830.694	0	0	0	0	0	0	0	603	903	0
899	6	0	0	0	0	0	0	200	300	0	15.9454	10.9811	-493.665	34965.8	26574.3	-381.272	253.831	832.171	0	0	0	0	0	0	0	603	903	0
899	7	0	0	0	0	0	0	200	300	0	15.1825	10.8286	-490.613	34965.8	26818.4	-198.166	254.663	831.73	0	0	0	0	0	0	0	603	903	0
899	8	0	0	0	0	0	0	200	300	0	15.3351	10.2182	-493.665	35148.9	27184.6	-381.272	255.067	831.8	0	0	0	0	0	0	0	603	903	0
899	9	0	0	0	0	0	0	200	300	0	15.4877	9.91303	-491.833	35515.1	26452.2	-427.048	253.783	830.79	0	0	0	0	0	0	0	603	903	0
900	0	0	0	0	0	0	0	200	300	0	16.7084	9.15009	-492.749	35332	27001.5	-335.495	254.798	831.296	0	0	0	0	0	0	0	603	903	0
900	1	0	0	0	0	0	0	200	300	0	14.8773	7.62421	-491.833	34782.7	27245.7	-610.154	255.396	832.279	0	0	0	0	0	0	0	603	903	0
900	2	0	0	0	0	0	0	200	300	0	14.267	7.92939	-492.444	34782.7	26818.4	-335.495	254.46	832.367	0	0	0	0	0	0	0	603	903	0
900	3	0	0	0	0	0	0	200	300	0	14.7247	8.08197	-491.833	34691.2	26635.3	-472.824	254.155	832.466	0	0	0	0	0	0	0	603	903	0
900	4	0	0	0	0	0	0	200	300	0	15.1825	7.7768	-493.97	34325	27489.8	-381.272	255.651	833.512	0	0	0	0	0	0	0	603	903	0
900	5	0	0	0	0	0	0	200	300	0	15.3351	7.01386	-492.139	35148.9	27306.7	-564.377	255.486	831.579	0	0	0	0	0	0	0	603	903	0
900	6	0	0	0	0	0	0	200	300	0	14.5721	6.40351	-493.054	34416.5	26940.5	-701.706	254.64	833.197	0	0	0	0	0	0	0	603	903	0
900	7	0	0	0	0	0	0	200	300	0	14.7247	5.79316	-492.749	34508.1	27367.7	-655.93	255.541	832.968	0	0	0	0	0	0	0	603	903	0
900	8	0	0	0	0	0	0	200	300	0	14.8773	5.03022	-491.833	34874.3	27489.8	-839.035	255.893	832.093	0	0	0	0	0	0	0	603	903	0
900	9	0	0	0	0	0	0	200	300	0	16.861	4.87763	-492.749	34599.6	27184.6	-747.483	255.169	832.783	0	0	0	0	0	0	0	603	903	0
901	0	0	0	0	0	0	0	200	300	0	15.4877	4.87763	-495.801	34141.8	27062.6	-839.035	254.584	834.138	0	0	0	0	0	0	0	603	903	0
901	1	0	0	0	0	0	0	200	300	0	14.267	4.72504	-494.275	34233.4	27917.1	-747.483	256.481	833.74	0	0	0	0	0	0	0	603	903	0
901	2	0	0	0	0	0	0	200	300	0	15.4877	3.80951	-496.411	33958.7	27672.9	-884.812	255.746	834.591	0	0	0	0	0	0	0	603	903	0
901	3	0	0	0	0	0	0	200	300	0	15.7929	2.43622	-497.021	34416.5	27550.8	-884.812	255.432	833.755	0	0	0	0	0	0	0	603	903	0
901	4	0	0	0	0	0	0	200	300	0	15.6403	2.43622	-495.801	33958.7	27978.1	-976.365	256.43	834.507	0	0	0	0	0	0	0	603	903	0
901	5	0	0	0	0	0	0	200	300	0	15.6403	2.28363	-496.716	33775.6	28100.2	-1159.47	256.572	835.002	0	0	0	0	0	0	0	603	903	0
901	6	0	0	0	0	0	0	200	300	0	16.4032	1.97846	-497.937	34141.8	27611.9	-930.588	255.453	834.433	0	0	0	0	0	0	0	603	903	0
901	7	0	0	0	0	0	0	200	300	0	16.4032	1.82587	-497.937	33684.1	27733.9	-793.259	255.698	835.353	0	0	0	0	0	0	0	603	903	0
901	8	0	0	0	0	0	0	200	300	0	16.2506	0.605168	-499.768	33867.2	27917.1	-930.588	255.86	835.234	0	0	0	0	0	0	0	603	903	0
901	9	0	0	0	0	0	0	200	300	0	17.9291	0.45258	-499.768	33501	28039.1	-1251.02	256.104	835.967	0	0	0	0	0	0	0	603	903	0
902	0	0	0	0	0	0	0	200	300	0	16.7084	0.147404	-500.684	33775.6	28039.1	-1159.47	256.002	835.541	0	0	0	0	0	0	0	603	903	0
902	1	0	0	0	0	0	0	200	300	0	15.6403	-0.462947	-499.158	34050.3	27550.8	-1113.69	255.195	834.784	0	0	0	0	0	0	0	603	903	0
902	2	0	0	0	0	0	0	200	300	0	16.861	-0.920711	-502.209	34141.8	28283.3	-1251.02	256.318	835.017	0	0	0	0	0	0	0	603	903	0
902	3	0	0	0	0	0	0	200	300	0	16.4032	-1.37847	-503.125	33775.6	28344.3	-1251.02	256.337	835.868	0	0	0	0	0	0	0	603	903	0
902	4	0	0	0	0	0	0	200	300	0	16.2506	-1.0733	-502.515	33958.7	27795	-976.365	255.312	835.422	0	0	0	0	0	0	0	603	903	0
902	5	0	0	0	0	0	0	200	300	0	16.4032	-1.98883	-504.346	33958.7	28344.3	-1296.8	256.2	835.668	0	0	0	0	0	0	0	603	903	0
902	6	0	0	0	0	0	0	200	300	0	16.7084	-2.14141	-505.261	33684.1	27795	-1617.23	255.011	836.333	0	0	0	0	0	0	0	603	903	0
902	7	0	0	0	0	0	0	200	300	0	16.7084	-2.59918	-507.703	33867.2	28405.3	-1388.35	255.949	836.293	0	0	0	0	0	0	0	603	903	0
902	8	0	0	0	0	0	0	200	300	0	16.098	-2.14141	-506.482	33684.1	28222.2	-1571.46	255.722	836.494	0	0	0	0	0	0	0	603	903	0
902	9	0	0	0	0	0	0	200	300	0	15.6403	-3.51471	-509.229	33867.2	29015.7	-1617.23	256.98	836.493	0	0	0	0	0	0	0	603	903	0
903	0	0	0	0	0	0	0	200	300	0	17.7765	-4.12506	-509.229	33867.2	28771.5	-1525.68	256.5	836.493	0	0	0	0	0	0	0	603	903	0
903	1	0	0	0	0	0	0	200	300	0	17.1661	-4.58282	-510.449	34050.3	28710.5	-1571.46	256.246	836.294	0	0	0	0	0	0	0	603	903	0
903	2	0	0	0	0	0	0	200	300	0	16.2506	-5.04058	-511.365	33134.8	28832.6	-1296.8	256.384	838.203	0	0	0	0	0	0	0	603	903	0
903	3	0	0	0	0	0	0	200	300	0	16.5558	-5.04058	-512.891	33501	29015.7	-1891.89	256.573	837.682	0	0	0	0	0	0	0	603	903	0
903	4	0	0	0	0	0	0	200	300	0	17.4713	-5.65094	-515.332	33958.7	29015.7	-1800.34	256.305	837.103	0	0	0	0	0	0	0	603	903	0
903	5	0	0	0	0	0	0	200	300	0	17.6239	-7.17681	-515.332	34050.3	28954.7	-1891.89	256.186	836.926	0	0	0	0	0	0	0	603	903	0
903	6	0	0	0	0	0	0	200	300	0	16.7084	-7.3294	-516.553	33501	29504	-1754.56	257.117	838.145	0	0	0	0	0	0	0	603	903	0
903	7	0	0	0	0	0	0	200	300	0	17.0136	-7.02423	-516.553	32768.6	29442.9	-1617.23	256.999	839.563	0	0	0	0	0	0	0	603	903	0
903	8	0	0	0	0	0	0	200	300	0	16.861	-8.70269	-518.384	33592.5	29504	-1891.89	256.915	838.198	0	0	0	0	0	0	0	603	903	0
903	9	0	0	0	0	0	0	200	300	0	18.3868	-8.85528	-521.741	33134.8	29076.7	-1937.67	255.73	839.492	0	0	0	0	0	0	0	603	903	0
904	0	0	0	0	0	0	0	200	300	0	17.9291	-9.00787	-522.351	33226.3	29565	-1846.12	256.6	839.391	0	0	0	0	0	0	0	603	903	0
904	1	0	0	0	0	0	0	200	300	0	17.6239	-9.16046	-524.792	32951.7	29504	-2029.22	256.22	840.21	0	0	0	0	0	0	0	603	903	0
904	2	0	0	0	0	0	0	200	300	0	18.0817	-9.00787	-524.182	33592.5	29565	-1983.44	256.402	838.914	0	0	0	0	0	0	0	603	903	0
904	3	0	0	0	0	0	0	200	300	0	19.455	-9.9234	-524.792	33684.1	30297.4	-1846.12	257.732	838.815	0	0	0	0	0	0	0	603	903	0
904	4	0	0	0	0	0	0	200	300	0	18.9972	-9.9234	-527.844	33684.1	29931.2	-2029.22	256.705	839.186	0	0	0	0	0	0	0	603	903	0
904	5	0	0	0	0	0	0	200	300	0	17.9291	-10.5337	-529.675	33043.2	29870.2	-1846.12	256.393	840.616	0	0	0	0	0	0	0	603	903	0
904	6	0	0	0	0	0	0	200	300	0	20.9808	-11.4493	-530.896	32951.7	29870.2	-1891.89	256.264	840.932	0	0	0	0	0	0	0	603	903	0
904	7	0	0	0	0	0	0	200	300	0	19.455	-12.2122	-531.812	33317.9	30297.4	-2120.77	256.97	840.35	0	0	0	0	0	0	0	603	903	0
904	8	0	0	0	0	0	0	200	300	0	19.3024	-11.4493	-530.591	33317.9	29626	-2441.21	255.836	840.206	0	0	0	0	0	0	0	603	903	0
904	9	0	0	0	0	0	0	200	300	0	19.1498	-12.67	-533.948	32860.1	30236.4	-2212.33	256.628	841.458	0	0	0	0	0	0	0	603	903	0
905	0	0	0	0	0	0	0	200	300	0	18.3868	-12.3648	-536.389	33226.3	31029.9	-2532.76	257.85	841.056	0	0	0	0	0	0	0	603	903	0
905	1	0	0	0	0	0	0	200	300	0	18.2343	-13.7381	-538.831	33501	30785.7	-2486.98	257.134	840.827	0	0	0	0	0	0	0	603	903	0
905	2	0	0	0	0	0	0	200	300	0	19.7601	-13.4329	-539.136	32951.7	30602.6	-2166.55	256.762	841.881	0	0	0	0	0	0	0	603	903	0
905	3	0	0	0	0	0	0	200	300	0	19.6075	-13.7381	-540.356	32585.5	30968.8	-2761.64	257.312	842.696	0	0	0	0	0	0	0	603	903	0
905	4	0	0	0	0	0	0	200	300	0	18.692	-13.8907	-541.577	33501	31274	-2212.33	257.746	841.142	0	0	0	0	0	0	0	603	903	0
905	5	0	0	0	0	0	0	200	300	0	19.6075	-15.264	-542.798	32402.3	30785.7	-2532.76	256.717	843.305	0	0	0	0	0	0	0	603	903	0
905	6	0	0	0	0	0	0	200	300	0	19.9127	-14.8062	-545.85	33409.4	31457.1	-2670.09	257.63	841.794	0	0	0	0	0	0	0	603	903	0
905	7	0	0	0	0	0	0	200	300	0	22.049	-15.1114	-546.46	32860.1	31640.2	-2486.98	257.9	842.867	0	0	0	0	0	0	0	603	903	0
905	8	0	0	0	0	0	0	200	300	0	19.7601	-16.6373	-544.019	32585.5	31884.3	-2624.31	258.609	843.102	0	0	0	0	0	0	0	603	903	0
905	9	0	0	0	0	0	0	200	300	0	19.455	-16.4847	-548.291	32219.2	31579.2	-2578.54	257.596	844.237	0	0	0	0	0	0	0	603	903	0
906	0	0	0	0	0	0	0	200	300	0	19.1498	-16.3321	-549.817	32677	31518.1	-2486.98	257.325	843.568	0	0	0	0	0	0	0	603	903	0
906	1	0	0	0	0	0	0	200	300	0	21.1334	-17.095	-553.784	32219.2	32128.5	-2898.97	258.016	844.82	0	0	0	0	0	0	0	603	903	0
906	2	0	0	0	0	0	0	200	300	0	21.4386	-17.5528	-554.7	32127.7	31701.2	-2670.09	257.15	845.081	0	0	0	0	0	0	0	603	903	0
906	3	0	0	0	0	0	0	200	300	0	20.0653	-18.3157	-555.92	32402.3	32189.5	-2715.87	257.903	844.714	0	0	0	0	0	0	0	603	903	0
906	4	0	0	0	0	0	0	200	300	0	20.3705	-18.7735	-556.226	31853	32677.8	-2853.2	258.749	845.734	0	0	0	0	0	0	0	603	903	0
906	5	0	0	0	0	0	0	200	300	0	21.5912	-18.9261	-555.005	32585.5	32860.9	-2853.2	259.208	844.288	0	0	0	0	0	0	0	603	903	0
906	6	0	0	0	0	0	0	200	300	0	21.7438	-19.3838	-559.583	32402.3	32372.6	-2853.2	257.851	845.096	0	0	0	0	0	0	0	603	903	0
906	7	0	0	0	0	0	0	200	300	0	20.6757	-19.5364	-563.55	31669.9	32616.8	-2715.87	257.877	846.803	0	0	0	0	0	0	0	603	903	0
906	8	0	0	0	0	0	0	200	300	0	23.1171	-20.1468	-562.024	31212.2	32860.9	-2990.52	258.469	847.465	0	0	0	0	0	0	0	603	903	0
906	9	0	0	0	0	0	0	200	300	0	21.5912	-21.3675	-566.907	31853	33166.1	-2990.52	258.504	846.813	0	0	0	0	0	0	0	603	903	0
907	0	0	0	0	0	0	0	200	300	0	22.5067	-20.6045	-566.602	31761.5	32433.7	-2990.52	257.242	846.944	0	0	0	0	0	0	0	603	903	0
907	1	0	0	0	0	0	0	200	300	0	21.8964	-20.9097	-568.433	31120.6	33532.3	-2944.75	258.991	848.252	0	0	0	0	0	0	0	603	903	0
907	2	0	0	0	0	0	0	200	300	0	21.4386	-21.9778	-569.958	31029.1	33593.3	-3127.85	258.94	848.559	0	0	0	0	0	0	0	603	903	0
907	3	0	0	0	0	0	0	200	300	0	21.8964	-21.3675	-573.315	30388.2	33349.2	-3082.08	258.169	849.996	0	0	0	0	0	0	0	603	903	0
907	4	0	0	0	0	0	0	200	300	0	22.8119	-22.4356	-573.926	31303.7	33654.4	-3173.63	258.639	848.457	0	0	0	0	0	0	0	603	903	0
907	5	0	0	0	0	0	0	200	300	0	24.4904	-22.7408	-575.146	30754.4	34081.6	-3310.96	259.257	849.528	0	0	0	0	0	0	0	603	903	0
907	6	0	0	0	0	0	0	200	300	0	22.049	-22.7408	-577.588	30479.7	34203.7	-2944.75	259.218	850.229	0	0	0	0	0	0	0	603	903	0
907	7	0	0	0	0	0	0	200	300	0	24.0326	-23.046	-577.588	30205.1	34325.8	-3402.51	259.43	850.705	0	0	0	0	0	0	0	603	903	0
907	8	0	0	0	0	0	0	200	300	0	22.3541	-23.5037	-580.945	30479.7	34264.7	-3310.96	258.981	850.534	0	0	0	0	0	0	0	603	903	0
907	9	0	0	0	0	0	0	200	300	0	23.5748	-23.1985	-583.081	30388.2	34508.9	-3173.63	259.184	850.883	0	0	0	0	0	0	0	603	903	0
908	0	0	0	0	0	0	0	200	300	0	23.4222	-24.7244	-583.691	29472.7	34692	-3448.29	259.436	852.506	0	0	0	0	0	0	0	603	903	0
908	1	0	0	0	0	0	0	200	300	0	22.6593	-24.877	-585.217	29838.9	34997.2	-3219.41	259.802	852.012	0	0	0	0	0	0	0	603	903	0
908	2	0	0	0	0	0	0	200	300	0	22.5067	-24.877	-586.438	29289.6	35363.4	-3402.51	260.302	853.055	0	0	0	0	0	0	0	603	903	0
908	3	0	0	0	0	0	0	200	300	0	22.9645	-25.0296	-590.405	30022	35851.6	-3127.85	260.724	852.15	0	0	0	0	0	0	0	603	903	0
908	4	0	0	0	0	0	0	200	300	0	23.5748	-25.3348	-591.321	30022	35180.3	-3402.51	259.494	852.229	0	0	0	0	0	0	0	603	903	0
908	5	0	0	0	0	0	0	200	300	0	22.9645	-26.0977	-592.542	28648.7	35790.6	-3265.18	260.402	854.651	0	0	0	0	0	0	0	603	903	0
908	6	0	0	0	0	0	0	200	300	0	24.4904	-26.7081	-595.593	27916.3	35424.4	-3310.96	259.478	856.129	0	0	0	0	0	0	0	603	903	0
908	7	0	0	0	0	0	0	200	300	0	24.0326	-26.0977	-595.898	28099.4	35790.6	-3265.18	260.062	855.845	0	0	0	0	0	0	0	603	903	0
908	8	0	0	0	0	0	0	200	300	0	24.6429	-25.9451	-597.729	27916.3	35912.7	-3265.18	260.082	856.296	0	0	0	0	0	0	0	603	903	0
908	9	0	0	0	0	0	0	200	300	0	23.88	-26.5555	-599.561	27458.5	36462	-3219.41	260.815	857.202	0	0	0	0	0	0	0	603	903	0
909	0	0	0	0	0	0	0	200	300	0	23.88	-26.0977	-602.917	27275.4	36706.1	-3310.96	260.881	857.761	0	0	0	0	0	0	0	603	903	0
909	1	0	0	0	0	0	0	200	300	0	24.0326	-27.0132	-604.443	26726.1	36462	-3539.84	260.323	858.784	0	0	0	0	0	0	0	603	903	0
909	2	0	0	0	0	0	0	200	300	0	25.1007	-27.1658	-604.749	26726.1	36828.2	-3356.74	260.898	858.806	0	0	0	0	0	0	0	603	903	0
909	3	0	0	0	0	0	0	200	300	0	25.2533	-27.0132	-606.274	25810.6	36950.3	-3448.29	260.946	860.428	0	0	0	0	0	0	0	603	903	0
909	4	0	0	0	0	0	0	200	300	0	24.1852	-26.7081	-608.411	25993.7	37316.5	-3310.96	261.334	860.276	0	0	0	0	0	0	0	603	903	0
909	5	0	0	0	0	0	0	200	300	0	24.7955	-27.0132	-610.547	25352.8	36950.3	-3448.29	260.52	861.475	0	0	0	0	0	0	0	603	903	0
909	6	0	0	0	0	0	0	200	300	0	25.7111	-27.0132	-610.852	25627.5	37560.6	-3585.62	261.489	861.046	0	0	0	0	0	0	0	603	903	0
909	7	0	0	0	0	0	0	200	300	0	26.3214	-27.3184	-613.599	24711.9	37438.6	-3494.06	261.015	862.726	0	0	0	0	0	0	0	603	903	0
909	8	0	0	0	0	0	0	200	300	0	26.1688	-27.9288	-614.514	24437.3	37438.6	-3356.74	260.924	863.233	0	0	0	0	0	0	0	603	903	0
909	9	0	0	0	0	0	0	200	300	0	25.8637	-27.1658	-614.209	24345.7	37743.7	-3310.96	261.451	863.363	0	0	0	0	0	0	0	603	903	0
910	0	0	0	0	0	0	0	200	300	0	26.6266	-27.471	-616.65	24071.1	37987.9	-3768.72	261.604	863.965	0	0	0	0	0	0	0	603	903	0
910	1	0	0	0	0	0	0	200	300	0	28.7628	-27.1658	-619.092	23704.8	38109.9	-3494.06	261.558	864.71	0	0	0	0	0	0	0	603	903	0
910	2	0	0	0	0	0	0	200	300	0	27.2369	-26.7081	-620.007	22972.4	37560.6	-3677.17	260.581	865.948	0	0	0	0	0	0	0	603	903	0
910	3	0	0	0	0	0	0	200	300	0	26.474	-28.0814	-621.838	22972.4	38659.3	-3448.29	262.169	866.057	0	0	0	0	0	0	0	603	903	0
910	4	0	0	0	0	0	0	200	300	0	26.474	-27.471	-622.144	22514.7	38720.3	-3677.17	262.237	866.811	0	0	0	0	0	0	0	603	903	0
910	5	0	0	0	0	0	0	200	300	0	27.3895	-26.4029	-623.975	22331.6	38537.2	-3585.62	261.761	867.211	0	0	0	0	0	0	0	603	903	0
910	6	0	0	0	0	0	0	200	300	0	27.6947	-26.0977	-625.806	21507.6	38476.2	-3631.39	261.483	868.632	0	0	0	0	0	0	0	603	903	0
910	7	0	0	0	0	0	0	200	300	0	27.2369	-27.1658	-627.026	20958.3	39147.5	-3677.17	262.434	869.575	0	0	0	0	0	0	0	603	903	0
910	8	0	0	0	0	0	0	200	300	0	27.3895	-26.7081	-627.026	20317.4	39025.5	-3448.29	262.239	870.597	0	0	0	0	0	0	0	603	903	0
910	9	0	0	0	0	0	0	200	300	0	28.4576	-26.8607	-627.637	20958.3	38476.2	-3448.29	261.303	869.608	0	0	0	0	0	0	0	603	903	0
911	0	0	0	0	0	0	0	200	300	0	31.0516	-26.8607	-629.773	20225.8	39513.8	-3402.51	262.743	870.884	0	0	0	0	0	0	0	603	903	0
911	1	0	0	0	0	0	0	200	300	0	29.2206	-26.8607	-630.383	19127.2	39452.7	-3448.29	262.585	872.658	0	0	0	0	0	0	0	603	903	0
911	2	0	0	0	0	0	0	200	300	0	29.2206	-25.7925	-632.52	18761	39391.7	-3448.29	262.277	873.339	0	0	0	0	0	0	0	603	903	0
911	3	0	0	0	0	0	0	200	300	0	28.6102	-25.7925	-634.961	18577.9	39269.6	-3448.29	261.846	873.742	0	0	0	0	0	0	0	603	903	0
911	4	0	0	0	0	0	0	200	300	0	28.7628	-27.0132	-634.656	18486.3	39880	-3448.29	262.837	873.872	0	0	0	0	0	0	0	603	903	0
911	5	0	0	0	0	0	0	200	300	0	29.3732	-26.8607	-634.961	17479.2	39696.9	-3219.41	262.519	875.472	0	0	0	0	0	0	0	603	903	0
911	6	0	0	0	0	0	0	200	300	0	28.6102	-27.0132	-636.182	17021.5	39269.6	-3310.96	261.727	876.244	0	0	0	0	0	0	0	603	903	0
911	7	0	0	0	0	0	0	200	300	0	29.3732	-26.4029	-636.182	16838.4	39941	-3448.29	262.782	876.532	0	0	0	0	0	0	0	603	903	0
911	8	0	0	0	0	0	0	200	300	0	29.6783	-26.5555	-639.539	17021.5	40002	-3539.84	262.548	876.385	0	0	0	0	0	0	0	603	903	0
911	9	0	0	0	0	0	0	200	300	0	32.1198	-25.6399	-640.149	16106	39635.8	-3402.51	261.917	877.84	0	0	0	0	0	0	0	603	903	0
912	0	0	0	0	0	0	0	200	300	0	30.2887	-26.4029	-640.759	15282	39880	-3219.41	262.239	879.15	0	0	0	0	0	0	0	603	903	0
912	1	0	0	0	0	0	0	200	300	0	29.5258	-25.6399	-642.59	14549.6	40368.2	-3631.39	262.821	880.358	0	0	0	0	0	0	0	603	903	0
912	2	0	0	0	0	0	0	200	300	0	29.5258	-25.6399	-643.506	14549.6	40063.1	-3631.39	262.258	880.39	0	0	0	0	0	0	0	603	903	0
912	3	0	0	0	0	0	0	200	300	0	29.9835	-25.4874	-643.506	14274.9	40124.1	-3631.39	262.352	880.817	0	0	0	0	0	0	0	603	903	0
912	4	0	0	0	0	0	0	200	300	0	30.4413	-25.0296	-643.506	13359.4	40673.4	-3906.05	263.206	882.24	0	0	0	0	0	0	0	603	903	0
912	5	0	0	0	0	0	0	200	300	0	29.3732	-25.3348	-647.168	13267.8	40795.5	-3722.95	263.037	882.499	0	0	0	0	0	0	0	603	903	0
912	6	0	0	0	0	0	0	200	300	0	31.8146	-25.4874	-648.083	12443.9	40490.3	-3722.95	262.477	883.799	0	0	0	0	0	0	0	603	903	0
912	7	0	0	0	0	0	0	200	300	0	29.8309	-26.0977	-648.083	12535.4	40490.3	-3585.62	262.477	883.658	0	0	0	0	0	0	0	603	903	0
912	8	0	0	0	0	0	0	200	300	0	31.0516	-25.1822	-649.609	11894.5	40978.6	-3631.39	263.082	884.69	0	0	0	0	0	0	0	603	903	0
912	9	0	0	0	0	0	0	200	300	0	30.5939	-25.0296	-650.22	11253.7	41161.7	-3951.83	263.304	885.693	0	0	0	0	0	0	0	603	903	0
913	0	0	0	0	0	0	0	200	300	0	30.5939	-25.6399	-651.44	11162.1	40185.1	-3860.28	261.687	885.866	0	0	0	0	0	0	0	603	903	0
913	1	0	0	0	0	0	0	200	300	0	31.2042	-25.9451	-651.44	10429.7	40917.6	-3768.72	262.811	886.99	0	0	0	0	0	0	0	603	903	0
913	2	0	0	0	0	0	0	200	300	0	31.0516	-25.7925	-653.271	10338.1	41405.8	-3860.28	263.382	887.175	0	0	0	0	0	0	0	603	903	0
913	3	0	0	0	0	0	0	200	300	0	31.0516	-26.5555	-652.051	10155	40917.6	-4134.94	262.752	887.426	0	0	0	0	0	0	0	603	903	0
913	4	0	0	0	0	0	0	200	300	0	30.5939	-26.2503	-654.492	8873.29	41344.8	-3906.05	263.171	889.443	0	0	0	0	0	0	0	603	903	0
913	5	0	0	0	0	0	0	200	300	0	31.3568	-26.0977	-656.018	7774.66	41650	-3814.5	263.489	891.149	0	0	0	0	0	0	0	603	903	0
913	6	0	0	0	0	0	0	200	300	0	31.9672	-26.5555	-657.544	8140.87	41588.9	-3814.5	263.249	890.619	0	0	0	0	0	0	0	603	903	0
913	7	0	0	0	0	0	0	200	300	0	32.7301	-26.4029	-657.544	7591.56	41222.7	-3951.83	262.692	891.455	0	0	0	0	0	0	0	603	903	0
913	8	0	0	0	0	0	0	200	300	0	31.9672	-27.1658	-660.291	6492.92	41466.9	-3768.72	262.801	893.167	0	0	0	0	0	0	0	603	903	0
913	9	0	0	0	0	0	0	200	300	0	31.2042	-27.0132	-660.901	6309.82	41894.1	-3951.83	263.389	893.453	0	0	0	0	0	0	0	603	903	0
914	0	0	0	0	0	0	0	200	300	0	31.662	-26.7081	-662.732	5943.61	41772.1	-3997.6	263.03	894.032	0	0	0	0	0	0	0	603	903	0
914	1	0	0	0	0	0	0	200	300	0	32.8827	-27.9288	-663.342	5668.95	41833.1	-3768.72	263.064	894.454	0	0	0	0	0	0	0	603	903	0
914	2	0	0	0	0	0	0	200	300	0	32.1198	-27.471	-665.173	5394.29	42260.3	-4134.94	263.533	894.89	0	0	0	0	0	0	0	603	903	0
914	3	0	0	0	0	0	0	200	300	0	32.2723	-27.6236	-667.615	4295.66	42199.3	-3768.72	263.209	896.566	0	0	0	0	0	0	0	603	903	0
914	4	0	0	0	0	0	0	200	300	0	32.1198	-27.9288	-664.258	3929.45	41833.1	-4043.38	262.977	897.085	0	0	0	0	0	0	0	603	903	0
914	5	0	0	0	0	0	0	200	300	0	31.9672	-28.2339	-668.53	4204.11	42565.5	-4043.38	263.67	896.711	0	0	0	0	0	0	0	603	903	0
914	6	0	0	0	0	0	0	200	300	0	32.7301	-27.9288	-669.141	3288.58	42382.4	-4089.16	263.339	898.085	0	0	0	0	0	0	0	603	903	0
914	7	0	0	0	0	0	0	200	300	0	33.1879	-28.6917	-671.277	2464.6	42138.3	-4226.49	262.773	899.329	0	0	0	0	0	0	0	603	903	0
914	8	0	0	0	0	0	0	200	300	0	32.5775	-28.3865	-673.108	2006.84	42138.3	-4318.04	262.603	900.019	0	0	0	0	0	0	0	603	903	0
914	9	0	0	0	0	0	0	200	300	0	32.4249	-28.5391	-674.634	2647.71	42565.5	-4180.71	263.094	899.075	0	0	0	0	0	0	0	603	903	0
915	0	0	0	0	0	0	0	200	300	0	33.6456	-28.9969	-675.549	2189.95	42931.7	-3677.17	263.551	899.758	0	0	0	0	0	0	0	603	903	0
915	1	0	0	0	0	0	0	200	300	0	35.3241	-29.9124	-676.77	1091.31	42260.3	-4501.15	262.444	901.388	0	0	0	0	0	0	0	603	903	0
915	2	0	0	0	0	0	0	200	300	0	34.4086	-30.065	-677.38	816.653	43114.8	-4318.04	263.649	901.794	0	0	0	0	0	0	0	603	903	0
915	3	0	0	0	0	0	0	200	300	0	32.8827	-30.3702	-679.822	175.784	43175.9	-4592.7	263.511	902.742	0	0	0	0	0	0	0	603	903	0
915	4	0	0	0	0	0	0	200	300	0	32.7301	-30.6754	-681.958	358.889	42992.8	-4363.82	263.043	902.474	0	0	0	0	0	0	0	603	903	0
915	5	0	0	0	0	0	0	200	300	0	34.256	-31.1331	-683.484	267.336	43236.9	-4501.15	263.26	902.609	0	0	0	0	0	0	0	603	903	0
915	6	0	0	0	0	0	0	200	300	0	34.1034	-32.0486	-684.094	-556.639	43725.2	-4455.37	263.917	903.814	0	0	0	0	0	0	0	603	903	0
915	7	0	0	0	0	0	0	200	300	0	33.9508	-32.8116	-685.315	-1472.17	43847.2	-4226.49	263.981	905.148	0	0	0	0	0	0	0	603	903	0
915	8	0	0	0	0	0	0	200	300	0	35.1715	-32.8116	-686.841	-1746.82	43420	-4318.04	263.217	905.543	0	0	0	0	0	0	0	603	903	0
915	9	0	0	0	0	0	0	200	300	0	35.1715	-34.1849	-690.198	-1929.93	44091.4	-4775.81	263.882	905.796	0	0	0	0	0	0	0	603	903	0
916	0	0	0	0	0	0	0	200	300	0	35.7819	-34.6426	-690.198	-2296.14	44091.4	-4455.37	263.882	906.327	0	0	0	0	0	0	0	603	903	0
916	1	0	0	0	0	0	0	200	300	0	34.8663	-34.6426	-692.334	-3211.67	43786.2	-4546.92	263.244	907.639	0	0	0	0	0	0	0	603	903	0
916	2	0	0	0	0	0	0	200	300	0	35.1715	-34.6426	-692.944	-3211.67	43908.3	-4638.48	263.365	907.635	0	0	0	0	0	0	0	603	903	0
916	3	0	0	0	0	0	0	200	300	0	35.6293	-35.253	-694.47	-3760.99	44457.6	-4638.48	264.017	908.416	0	0	0	0	0	0	0	603	903	0
916	4	0	0	0	0	0	0	200	300	0	36.5448	-35.8633	-695.081	-4035.64	44396.6	-4684.25	263.873	908.806	0	0	0	0	0	0	0	603	903	0
916	5	0	0	0	0	0	0	200	300	0	37.9181	-36.4737	-699.353	-4401.85	44152.4	-4363.82	263.133	909.294	0	0	0	0	0	0	0	603	903	0
916	6	0	0	0	0	0	0	200	300	0	36.2396	-36.7789	-699.048	-5042.72	44457.6	-4638.48	263.597	910.214	0	0	0	0	0	0	0	603	903	0
916	7	0	0	0	0	0	0	200	300	0	36.2396	-36.1685	-700.574	-5408.93	44701.7	-4592.7	263.807	910.721	0	0	0	0	0	0	0	603	903	0
916	8	0	0	0	0	0	0	200	300	0	36.3922	-37.3892	-700.574	-5866.7	44823.8	-4409.59	263.982	911.374	0	0	0	0	0	0	0	603	903	0
916	9	0	0	0	0	0	0	200	300	0	37.0026	-38.1522	-703.015	-6049.8	44518.6	-4592.7	263.325	911.606	0	0	0	0	0	0	0	603	903	0
917	0	0	0	0	0	0	0	200	300	0	37.3077	-37.6944	-706.067	-6690.67	44945.9	-4546.92	263.657	912.476	0	0	0	0	0	0	0	603	903	0
917	1	0	0	0	0	0	0	200	300	0	37.3077	-38.1522	-706.982	-6965.33	44701.7	-4455.37	263.229	912.852	0	0	0	0	0	0	0	603	903	0
917	2	0	0	0	0	0	0	200	300	0	36.2396	-39.3729	-707.593	-7056.88	44701.7	-4684.25	263.174	912.973	0	0	0	0	0	0	0	603	903	0
917	3	0	0	0	0	0	0	200	300	0	37.0026	-39.2203	-706.982	-7606.2	44396.6	-4958.91	262.797	913.759	0	0	0	0	0	0	0	603	903	0
917	4	0	0	0	0	0	0	200	300	0	39.5966	-39.9832	-712.781	-7789.31	45556.2	-4867.36	263.913	913.928	0	0	0	0	0	0	0	603	903	0
917	5	0	0	0	0	0	0	200	300	0	36.6974	-41.0513	-714.917	-8613.28	45617.3	-5004.69	263.808	915.048	0	0	0	0	0	0	0	603	903	0
917	6	0	0	0	0	0	0	200	300	0	35.4767	-41.8143	-715.833	-8155.52	44884.8	-5233.57	262.703	914.393	0	0	0	0	0	0	0	603	903	0
917	7	0	0	0	0	0	0	200	300	0	35.3241	-43.1876	-721.021	-8521.73	45373.1	-5554	262.929	914.819	0	0	0	0	0	0	0	603	903	0
917	8	0	0	0	0	0	0	200	300	0	33.9508	-44.4083	-721.631	-8979.49	45556.2	-5737.11	263.13	915.443	0	0	0	0	0	0	0	603	903	0
917	9	0	0	0	0	0	0	200	300	0	34.256	-45.1712	-722.546	-9162.6	45068	-5554	262.374	915.681	0	0	0	0	0	0	0	603	903	0
918	0	0	0	0	0	0	0	200	300	0	32.8827	-46.8497	-723.767	-9803.46	45617.3	-5828.66	263.028	916.545	0	0	0	0	0	0	0	603	903	0
918	1	0	0	0	0	0	0	200	300	0	32.4249	-47.46	-726.514	-8704.83	46288.7	-5874.44	263.713	914.982	0	0	0	0	0	0	0	603	903	0
918	2	0	0	0	0	0	0	200	300	0	33.6456	-49.1385	-728.65	-9803.46	45983.5	-5874.44	263.108	916.454	0	0	0	0	0	0	0	603	903	0
918	3	0	0	0	0	0	0	200	300	0	33.493	-49.7488	-731.396	-10261.2	45861.4	-5965.99	262.704	917.03	0	0	0	0	0	0	0	603	903	0
918	4	0	0	0	0	0	0	200	300	0	33.493	-50.9695	-731.702	-10719	45861.4	-6240.65	262.678	917.649	0	0	0	0	0	0	0	603	903	0
918	5	0	0	0	0	0	0	200	300	0	32.4249	-51.5799	-734.143	-10993.7	46471.8	-6332.2	263.301	917.975	0	0	0	0	0	0	0	603	903	0
918	6	0	0	0	0	0	0	200	300	0	33.0353	-52.9532	-734.753	-11451.4	46471.8	-6194.87	263.248	918.585	0	0	0	0	0	0	0	603	903	0
918	7	0	0	0	0	0	0	200	300	0	33.493	-53.1058	-735.974	-11176.8	45800.4	-6286.43	262.231	918.186	0	0	0	0	0	0	0	603	903	0
918	8	0	0	0	0	0	0	200	300	0	33.493	-52.648	-739.026	-11543	46654.9	-6377.98	263.13	918.619	0	0	0	0	0	0	0	603	903	0
918	9	0	0	0	0	0	0	200	300	0	33.0353	-54.3265	-739.026	-12641.6	46654.9	-6332.2	263.13	920.106	0	0	0	0	0	0	0	603	903	0
919	0	0	0	0	0	0	0	200	300	0	34.4086	-56.6153	-741.162	-12550.1	46166.6	-6423.75	262.289	919.933	0	0	0	0	0	0	0	603	903	0
919	1	0	0	0	0	0	0	200	300	0	33.493	-56.7679	-741.772	-12824.7	46349.7	-6423.75	262.485	920.289	0	0	0	0	0	0	0	603	903	0
919	2	0	0	0	0	0	0	200	300	0	33.6456	-57.9886	-742.993	-13099.4	46776.9	-6377.98	262.957	920.631	0	0	0	0	0	0	0	603	903	0
919	3	0	0	0	0	0	0	200	300	0	33.493	-58.1412	-743.604	-13740.2	46532.8	-6606.86	262.577	921.478	0	0	0	0	0	0	0	603	903	0
919	4	0	0	0	0	0	0	200	300	0	32.7301	-58.7515	-745.74	-13648.7	46166.6	-6698.41	261.907	921.302	0	0	0	0	0	0	0	603	903	0
919	5	0	0	0	0	0	0	200	300	0	32.7301	-59.8196	-745.74	-13740.2	46654.9	-6606.86	262.562	921.425	0	0	0	0	0	0	0	603	903	0
919	6	0	0	0	0	0	0	200	300	0	33.7982	-61.9559	-745.74	-14198	46715.9	-6698.41	262.644	922.039	0	0	0	0	0	0	0	603	903	0
919	7	0	0	0	0	0	0	200	300	0	33.7982	-62.5662	-746.045	-14472.7	46349.7	-6744.19	262.127	922.399	0	0	0	0	0	0	0	603	903	0
919	8	0	0	0	0	0	0	200	300	0	33.3405	-62.8714	-743.909	-14106.4	46410.7	-6973.07	262.388	921.963	0	0	0	0	0	0	0	603	903	0
919	9	0	0	0	0	0	0	200	300	0	33.3405	-63.9395	-746.35	-15296.6	46960	-6881.52	262.92	923.495	0	0	0	0	0	0	0	603	903	0
920	0	0	0	0	0	0	0	200	300	0	34.4086	-64.2447	-747.266	-14106.4	46715.9	-7110.4	262.516	921.878	0	0	0	0	0	0	0	603	903	0
920	1	0	0	0	0	0	0	200	300	0	34.7137	-66.0757	-745.129	-15388.2	46715.9	-6927.29	262.695	923.652	0	0	0	0	0	0	0	603	903	0
920	2	0	0	0	0	0	0	200	300	0	33.6456	-66.2283	-746.35	-15479.7	47143.1	-7018.85	263.165	923.741	0	0	0	0	0	0	0	603	903	0
920	3	0	0	0	0	0	0	200	300	0	33.3405	-67.449	-746.655	-15479.7	47082.1	-6973.07	263.057	923.732	0	0	0	0	0	0	0	603	903	0
920	4	0	0	0	0	0	0	200	300	0	35.0189	-67.1439	-745.129	-15754.4	46593.8	-7247.73	262.531	924.143	0	0	0	0	0	0	0	603	903	0
920	5	0	0	0	0	0	0	200	300	0	35.0189	-69.4327	-746.96	-16761.5	46532.8	-7293.51	262.296	925.44	0	0	0	0	0	0	0	603	903	0
920	6	0	0	0	0	0	0	200	300	0	34.5612	-69.4327	-746.045	-16578.4	46838	-7339.28	262.782	925.222	0	0	0	0	0	0	0	603	903	0
920	7	0	0	0	0	0	0	200	300	0	35.1715	-71.1111	-747.266	-17768.6	47082.1	-7385.06	263.006	926.778	0	0	0	0	0	0	0	603	903	0
920	8	0	0	0	0	0	0	200	300	0	35.3241	-70.1956	-746.045	-18134.8	46899	-7018.85	262.864	927.308	0	0	0	0	0	0	0	603	903	0
920	9	0	0	0	0	0	0	200	300	0	35.6293	-72.4844	-744.214	-18134.8	46776.9	-7522.39	262.854	927.368	0	0	0	0	0	0	0	603	903	0
921	0	0	0	0	0	0	0	200	300	0	34.8663	-72.9422	-745.129	-18317.9	46899	-7476.61	262.941	927.583	0	0	0	0	0	0	0	603	903	0
921	1	0	0	0	0	0	0	200	300	0	35.0189	-73.7051	-744.214	-19416.5	46288.7	-7385.06	262.198	929.09	0	0	0	0	0	0	0	603	903	0
921	2	0	0	0	0	0	0	200	300	0	35.1715	-75.0784	-744.519	-19141.8	46288.7	-7568.16	262.173	928.71	0	0	0	0	0	0	0	603	903	0
921	3	0	0	0	0	0	0	200	300	0	37.6129	-76.6043	-743.604	-19508.1	46593.8	-7522.39	262.66	929.235	0	0	0	0	0	0	0	603	903	0
921	4	0	0	0	0	0	0	200	300	0	36.2396	-76.9095	-740.857	-20148.9	46410.7	-7293.51	262.645	930.197	0	0	0	0	0	0	0	603	903	0
921	5	0	0	0	0	0	0	200	300	0	35.1715	-78.1302	-740.857	-20515.1	46288.7	-7613.94	262.48	930.691	0	0	0	0	0	0	0	603	903	0
921	6	0	0	0	0	0	0	200	300	0	34.8663	-78.8931	-741.162	-20057.4	46105.6	-7842.82	262.207	930.062	0	0	0	0	0	0	0	603	903	0
921	7	0	0	0	0	0	0	200	300	0	35.7819	-80.2664	-739.941	-20881.3	46471.8	-7705.49	262.805	931.22	0	0	0	0	0	0	0	603	903	0
921	8	0	0	0	0	0	0	200	300	0	35.3241	-81.0294	-738.416	-21156	45617.3	-7888.6	261.777	931.651	0	0	0	0	0	0	0	603	903	0
921	9	0	0	0	0	0	0	200	300	0	34.256	-82.2501	-738.11	-21613.8	45556.2	-7705.49	261.72	932.283	0	0	0	0	0	0	0	603	903	0
922	0	0	0	0	0	0	0	200	300	0	34.5612	-82.8604	-734.448	-21430.7	45800.4	-8209.04	262.36	932.179	0	0	0	0	0	0	0	603	903	0
922	1	0	0	0	0	0	0	200	300	0	34.7137	-84.6915	-734.448	-21339.1	45739.3	-8300.59	262.277	932.055	0	0	0	0	0	0	0	603	903	0
922	2	0	0	0	0	0	0	200	300	0	34.8663	-83.6233	-732.922	-21980	44884.8	-8346.36	261.241	932.99	0	0	0	0	0	0	0	603	903	0
922	3	0	0	0	0	0	0	200	300	0	33.493	-85.9122	-732.007	-22804	45312.1	-8254.81	261.901	934.153	0	0	0	0	0	0	0	603	903	0
922	4	0	0	0	0	0	0	200	300	0	33.9508	-85.3018	-729.871	-22804	44945.9	-8300.59	261.581	934.244	0	0	0	0	0	0	0	603	903	0
922	5	0	0	0	0	0	0	200	300	0	33.0353	-86.8277	-727.429	-22437.8	44335.5	-8483.69	260.948	933.845	0	0	0	0	0	0	0	603	903	0
922	6	0	0	0	0	0	0	200	300	0	33.3405	-88.5062	-726.514	-22712.4	44640.7	-8804.13	261.445	934.262	0	0	0	0	0	0	0	603	903	0
922	7	0	0	0	0	0	0	200	300	0	32.1198	-88.0484	-719.189	-23170.2	44762.8	-8987.23	262.241	935.217	0	0	0	0	0	0	0	603	903	0
922	8	0	0	0	0	0	0	200	300	0	32.7301	-89.5743	-720.105	-23444.8	44579.7	-8712.58	261.907	935.558	0	0	0	0	0	0	0	603	903	0
922	9	0	0	0	0	0	0	200	300	0	31.5094	-90.3372	-718.579	-23811	43908.3	-9033.01	261.104	936.136	0	0	0	0	0	0	0	603	903	0
923	0	0	0	0	0	0	0	200	300	0	31.9672	-92.0157	-717.358	-23719.5	44213.5	-8849.9	261.634	936.065	0	0	0	0	0	0	0	603	903	0
923	1	0	0	0	0	0	0	200	300	0	30.8991	-92.4734	-715.222	-24360.4	43725.2	-9033.01	261.135	937.06	0	0	0	0	0	0	0	603	903	0
923	2	0	0	0	0	0	0	200	300	0	31.2042	-93.8467	-710.034	-24451.9	43786.2	-8987.23	261.668	937.438	0	0	0	0	0	0	0	603	903	0
923	3	0	0	0	0	0	0	200	300	0	29.8309	-93.5416	-706.982	-24635	43359	-9170.34	261.33	937.845	0	0	0	0	0	0	0	603	903	0
923	4	0	0	0	0	0	0	200	300	0	29.2206	-94.9148	-706.067	-24635	43420	-9353.44	261.496	937.891	0	0	0	0	0	0	0	603	903	0
923	5	0	0	0	0	0	0	200	300	0	29.6783	-94.9148	-703.625	-25092.8	43175.9	-9399.22	261.362	938.662	0	0	0	0	0	0	0	603	903	0
923	6	0	0	0	0	0	0	200	300	0	27.8473	-97.5088	-699.353	-25642.1	42443.4	-9445	260.69	939.665	0	0	0	0	0	0	0	603	903	0
923	7	0	0	0	0	0	0	200	300	0	27.3895	-98.1192	-695.996	-25367.4	42504.5	-9261.89	261.07	939.448	0	0	0	0	0	0	0	603	903	0
923	8	0	0	0	0	0	0	200	300	0	28.1525	-98.2718	-692.639	-25275.9	42504.5	-9582.33	261.366	939.492	0	0	0	0	0	0	0	603	903	0
923	9	0	0	0	0	0	0	200	300	0	27.6947	-98.8821	-689.282	-25825.2	42382.4	-9673.88	261.488	940.467	0	0	0	0	0	0	0	603	903	0
924	0	0	0	0	0	0	0	200	300	0	26.0162	-100.561	-685.925	-26374.5	41466.9	-9765.43	260.454	941.451	0	0	0	0	0	0	0	603	903	0
924	1	0	0	0	0	0	0	200	300	0	27.3895	-101.781	-682.568	-26374.5	41711	-9628.1	261.109	941.64	0	0	0	0	0	0	0	603	903	0
924	2	0	0	0	0	0	0	200	300	0	24.6429	-101.018	-679.211	-26191.4	41466.9	-9902.76	261.052	941.562	0	0	0	0	0	0	0	603	903	0
924	3	0	0	0	0	0	0	200	300	0	25.4059	-102.849	-675.244	-26191.4	40551.4	-9856.98	260.054	941.788	0	0	0	0	0	0	0	603	903	0
924	4	0	0	0	0	0	0	200	300	0	25.1007	-102.849	-671.277	-26649.2	40246.2	-10040.1	259.955	942.699	0	0	0	0	0	0	0	603	903	0
924	5	0	0	0	0	0	0	200	300	0	23.4222	-103.307	-667.004	-27290	40429.3	-10360.5	260.613	943.914	0	0	0	0	0	0	0	603	903	0
924	6	0	0	0	0	0	0	200	300	0	22.6593	-103.307	-663.037	-27015.4	40185.1	-10269	260.608	943.745	0	0	0	0	0	0	0	603	903	0
924	7	0	0	0	0	0	0	200	300	0	23.4222	-105.749	-657.239	-26923.8	39086.5	-10452.1	259.471	943.965	0	0	0	0	0	0	0	603	903	0
924	8	0	0	0	0	0	0	200	300	0	22.3541	-106.054	-653.271	-27290	39391.7	-10040.1	260.299	944.774	0	0	0	0	0	0	0	603	903	0
924	9	0	0	0	0	0	0	200	300	0	20.3705	-105.901	-647.168	-27930.9	39025.5	-10772.5	260.302	946.159	0	0	0	0	0	0	0	603	903	0
925	0	0	0	0	0	0	0	200	300	0	20.2179	-105.443	-643.811	-28022.5	38476.2	-10223.2	259.763	946.526	0	0	0	0	0	0	0	603	903	0
925	1	0	0	0	0	0	0	200	300	0	20.8283	-106.512	-639.539	-27106.9	38476.2	-10497.9	260.162	945.385	0	0	0	0	0	0	0	603	903	0
925	2	0	0	0	0	0	0	200	300	0	20.8283	-106.817	-634.045	-27106.9	38415.1	-10406.3	260.587	945.752	0	0	0	0	0	0	0	603	903	0
925	3	0	0	0	0	0	0	200	300	0	19.6075	-107.427	-629.468	-28022.5	37865.8	-10314.7	260.155	947.518	0	0	0	0	0	0	0	603	903	0
925	4	0	0	0	0	0	0	200	300	0	20.2179	-108.343	-623.364	-28297.1	37316.5	-10406.3	259.863	948.394	0	0	0	0	0	0	0	603	903	0
925	5	0	0	0	0	0	0	200	300	0	18.3868	-107.885	-617.261	-27656.3	37072.3	-10497.9	260.059	947.805	0	0	0	0	0	0	0	603	903	0
925	6	0	0	0	0	0	0	200	300	0	20.3705	-106.512	-609.326	-27930.9	36401	-10177.4	259.74	948.839	0	0	0	0	0	0	0	603	903	0
925	7	0	0	0	0	0	0	200	300	0	18.2343	-108.343	-606.58	-28571.8	35912.7	-10543.6	259.205	950.103	0	0	0	0	0	0	0	603	903	0
925	8	0	0	0	0	0	0	200	300	0	18.3868	-110.021	-599.255	-28388.7	35363.4	-10497.9	259.012	950.373	0	0	0	0	0	0	0	603	903	0
925	9	0	0	0	0	0	0	200	300	0	17.4713	-110.021	-592.847	-27747.8	35485.4	-10452.1	259.856	949.804	0	0	0	0	0	0	0	603	903	0
926	0	0	0	0	0	0	0	200	300	0	18.9972	-109.716	-585.217	-28114	34875.1	-10406.3	259.593	951.04	0	0	0	0	0	0	0	603	903	0
926	1	0	0	0	0	0	0	200	300	0	17.0136	-109.563	-579.419	-28480.2	33410.2	-10497.9	257.662	952.153	0	0	0	0	0	0	0	603	903	0
926	2	0	0	0	0	0	0	200	300	0	17.7765	-109.411	-574.231	-28663.3	33837.5	-10452.1	258.927	952.916	0	0	0	0	0	0	0	603	903	0
926	3	0	0	0	0	0	0	200	300	0	14.8773	-109.716	-563.55	-27930.9	33532.3	-10406.3	259.502	952.562	0	0	0	0	0	0	0	603	903	0
926	4	0	0	0	0	0	0	200	300	0	17.9291	-110.326	-560.193	-27839.4	32799.9	-10452.1	258.551	952.696	0	0	0	0	0	0	0	603	903	0
926	5	0	0	0	0	0	0	200	300	0	14.7247	-110.479	-551.648	-28388.7	32311.6	-10131.6	258.573	954.462	0	0	0	0	0	0	0	603	903	0
926	6	0	0	0	0	0	0	200	300	0	15.6403	-109.563	-544.019	-28663.3	31518.1	-10269	257.936	955.688	0	0	0	0	0	0	0	603	903	0
926	7	0	0	0	0	0	0	200	300	0	13.504	-108.495	-536.694	-27839.4	31029.9	-10314.7	257.817	954.872	0	0	0	0	0	0	0	603	903	0
926	8	0	0	0	0	0	0	200	300	0	16.2506	-108.953	-529.98	-27656.3	30846.8	-10177.4	258.204	955.184	0	0	0	0	0	0	0	603	903	0
926	9	0	0	0	0	0	0	200	300	0	13.8092	-109.716	-522.351	-28022.5	30541.6	-10177.4	258.469	956.647	0	0	0	0	0	0	0	603	903	0
927	0	0	0	0	0	0	0	200	300	0	13.0463	-109.563	-513.501	-27747.8	30236.4	-10040.1	258.883	957.037	0	0	0	0	0	0	0	603	903	0
927	1	0	0	0	0	0	0	200	300	0	12.1307	-108.037	-505.566	-27473.2	29137.8	-9856.98	257.634	957.341	0	0	0	0	0	0	0	603	903	0
927	2	0	0	0	0	0	0	200	300	0	13.1989	-107.58	-497.632	-27473.2	28832.6	-9856.98	257.94	958.208	0	0	0	0	0	0	0	603	903	0
927	3	0	0	0	0	0	0	200	300	0	12.4359	-106.969	-489.087	-27198.5	28832.6	-9856.98	258.952	958.611	0	0	0	0	0	0	0	603	903	0
927	4	0	0	0	0	0	0	200	300	0	11.0626	-107.732	-482.068	-27015.4	28100.2	-9353.44	258.291	959.041	0	0	0	0	0	0	0	603	903	0
927	5	0	0	0	0	0	0	200	300	0	13.9618	-106.817	-472.302	-27290	26696.3	-9628.1	256.524	960.781	0	0	0	0	0	0	0	603	903	0
927	6	0	0	0	0	0	0	200	300	0	10.6049	-107.274	-463.757	-26740.7	27184.6	-9856.98	258.618	960.661	0	0	0	0	0	0	0	603	903	0
927	7	0	0	0	0	0	0	200	300	0	11.5204	-105.138	-453.992	-26374.5	26513.2	-9353.44	258.4	961.095	0	0	0	0	0	0	0	603	903	0
927	8	0	0	0	0	0	0	200	300	0	11.2152	-104.223	-445.752	-27015.4	25719.8	-9261.89	257.7	963.606	0	0	0	0	0	0	0	603	903	0
927	9	0	0	0	0	0	0	200	300	0	10.6049	-104.07	-436.292	-26283	25597.7	-9399.22	258.671	963.242	0	0	0	0	0	0	0	603	903	0
928	0	0	0	0	0	0	0	200	300	0	10.2997	-103.46	-427.747	-26374.5	25048.4	-9307.67	258.559	964.659	0	0	0	0	0	0	0	603	903	0
928	1	0	0	0	0	0	0	200	300	0	11.0626	-102.392	-418.591	-25733.7	24743.2	-9033.01	259.111	964.477	0	0	0	0	0	0	0	603	903	0
928	2	0	0	0	0	0	0	200	300	0	12.5885	-100.561	-408.826	-25642.1	23705.6	-8483.69	257.985	965.721	0	0	0	0	0	0	0	603	903	0
928	3	0	0	0	0	0	0	200	300	0	11.0626	-98.577	-399.365	-25825.2	23339.4	-8666.8	258.441	967.666	0	0	0	0	0	0	0	603	903	0
928	4	0	0	0	0	0	0	200	300	0	10.7575	-98.2718	-393.567	-25550.5	23156.3	-8529.47	258.837	967.921	0	0	0	0	0	0	0	603	903	0
928	5	0	0	0	0	0	0	200	300	0	9.53675	-98.4244	-383.496	-24818.1	22484.9	-8254.81	258.631	967.716	0	0	0	0	0	0	0	603	903	0
928	6	0	0	0	0	0	0	200	300	0	9.84192	-96.7459	-373.425	-23994.1	21325.3	-8071.71	257.107	967.254	0	0	0	0	0	0	0	603	903	0
928	7	0	0	0	0	0	0	200	300	0	11.0626	-95.0674	-363.965	-24177.3	21630.4	-8025.93	259.43	969.427	0	0	0	0	0	0	0	603	903	0
928	8	0	0	0	0	0	0	200	300	0	9.53675	-92.9312	-355.115	-24085.7	21203.2	-7385.06	259.708	970.825	0	0	0	0	0	0	0	603	903	0
928	9	0	0	0	0	0	0	200	300	0	9.07898	-90.9476	-346.57	-24177.3	19860.4	-7476.61	257.306	972.762	0	0	0	0	0	0	0	603	903	0
929	0	0	0	0	0	0	0	200	300	0	8.62122	-90.6424	-336.804	-23170.2	19738.3	-7110.4	258.605	971.794	0	0	0	0	0	0	0	603	903	0
929	1	0	0	0	0	0	0	200	300	0	10.1471	-89.5743	-327.954	-22163.1	19494.2	-7156.18	259.442	970.58	0	0	0	0	0	0	0	603	903	0
929	2	0	0	0	0	0	0	200	300	0	8.77381	-86.8277	-320.63	-22163.1	19067	-6973.07	259.467	972.124	0	0	0	0	0	0	0	603	903	0
929	3	0	0	0	0	0	0	200	300	0	7.85828	-84.0811	-311.475	-22346.2	18029.4	-6423.75	257.884	974.743	0	0	0	0	0	0	0	603	903	0
929	4	0	0	0	0	0	0	200	300	0	7.40052	-82.0975	-303.845	-21980	17724.2	-6698.41	258.333	975.339	0	0	0	0	0	0	0	603	903	0
929	5	0	0	0	0	0	0	200	300	0	10.4523	-80.5716	-294.995	-21430.7	17602.1	-6561.08	259.669	975.648	0	0	0	0	0	0	0	603	903	0
929	6	0	0	0	0	0	0	200	300	0	10.4523	-79.0457	-286.145	-20698.2	16381.4	-6286.43	257.249	975.335	0	0	0	0	0	0	0	603	903	0
929	7	0	0	0	0	0	0	200	300	0	8.01087	-77.5198	-276.074	-20698.2	16320.4	-6011.77	259.116	977.974	0	0	0	0	0	0	0	603	903	0
929	8	0	0	0	0	0	0	200	300	0	6.94275	-74.1629	-264.172	-20423.6	16198.3	-6240.65	261.317	980.312	0	0	0	0	0	0	0	603	903	0
929	9	0	0	0	0	0	0	200	300	0	7.85828	-73.4	-256.848	-18958.7	15771.1	-5782.89	261.402	976.813	0	0	0	0	0	0	0	603	903	0
930	0	0	0	0	0	0	0	200	300	0	8.46863	-71.1111	-250.745	-18867.2	14672.4	-5965.99	258.515	978.245	0	0	0	0	0	0	0	603	903	0
930	1	0	0	0	0	0	0	200	300	0	7.5531	-69.2801	-240.674	-18958.7	14672.4	-5325.12	260.964	981.774	0	0	0	0	0	0	0	603	903	0
930	2	0	0	0	0	0	0	200	300	0	7.40052	-65.7706	-231.824	-18409.4	14428.3	-5370.9	262.238	982.411	0	0	0	0	0	0	0	603	903	0
930	3	0	0	0	0	0	0	200	300	0	6.94275	-66.3809	-223.584	-17402.3	13512.8	-5279.35	260.437	980.834	0	0	0	0	0	0	0	603	903	0
930	4	0	0	0	0	0	0	200	300	0	8.16346	-63.9395	-215.039	-17127.7	13024.5	-5142.02	260.568	982.649	0	0	0	0	0	0	0	603	903	0
930	5	0	0	0	0	0	0	200	300	0	8.16346	-62.1085	-208.02	-16761.5	13146.5	-5187.79	263.198	983.576	0	0	0	0	0	0	0	603	903	0
930	6	0	0	0	0	0	0	200	300	0	7.85828	-59.0567	-200.391	-16761.5	12536.2	-4226.49	262.559	986.644	0	0	0	0	0	0	0	603	903	0
930	7	0	0	0	0	0	0	200	300	0	8.31604	-58.1412	-192.456	-15937.5	11681.7	-4501.15	260.698	985.811	0	0	0	0	0	0	0	603	903	0
930	8	0	0	0	0	0	0	200	300	0	8.62122	-56.1575	-186.047	-14198	11620.7	-4226.49	262.461	979.314	0	0	0	0	0	0	0	603	903	0
930	9	0	0	0	0	0	0	200	300	0	8.31604	-52.1902	-176.587	-15296.6	11193.4	-4043.38	263.388	989.624	0	0	0	0	0	0	0	603	903	0
931	0	0	0	0	0	0	0	200	300	0	8.9264	-49.9014	-168.958	-14930.4	11010.3	-3906.05	265.166	991.368	0	0	0	0	0	0	0	603	903	0
931	1	0	0	0	0	0	0	200	300	0	10.2997	-47.46	-164.075	-14655.8	9972.72	-3906.05	260.782	992.324	0	0	0	0	0	0	0	603	903	0
931	2	0	0	0	0	0	0	200	300	0	9.23157	-45.629	-157.971	-13648.7	10338.9	-3448.29	265.448	989.4	0	0	0	0	0	0	0	603	903	0
931	3	0	0	0	0	0	0	200	300	0	8.9264	-43.9505	-150.952	-13374	9789.61	-3539.84	264.852	991.598	0	0	0	0	0	0	0	603	903	0
931	4	0	0	0	0	0	0	200	300	0	9.68933	-41.3565	-142.712	-13099.4	8996.15	-3539.84	263.037	994.789	0	0	0	0	0	0	0	603	903	0
931	5	0	0	0	0	0	0	200	300	0	9.38416	-39.3729	-137.83	-12733.2	8568.91	-2944.75	262.17	995.383	0	0	0	0	0	0	0	603	903	0
931	6	0	0	0	0	0	0	200	300	0	8.01087	-36.1685	-130.811	-12641.6	8752.01	-3219.41	266.906	999.641	0	0	0	0	0	0	0	603	903	0
931	7	0	0	0	0	0	0	200	300	0	9.68933	-34.3375	-126.538	-11268.3	8324.77	-2990.52	265.789	992.051	0	0	0	0	0	0	0	603	903	0
931	8	0	0	0	0	0	0	200	300	0	9.68933	-33.1168	-120.129	-11359.9	7165.1	-2990.52	259.645	997.564	0	0	0	0	0	0	0	603	903	0
931	9	0	0	0	0	0	0	200	300	0	9.53675	-30.6754	-113.721	-10627.4	7531.31	-2624.31	266.226	996.452	0	0	0	0	0	0	0	603	903	0
932	0	0	0	0	0	0	0	200	300	0	10.7575	-29.6072	-106.702	-10627.4	6920.96	-2578.54	264.863	1002.6	0	0	0	0	0	0	0	603	903	0
932	1	0	0	0	0	0	0	200	300	0	8.46863	-28.9969	-100.293	-9620.36	6615.79	-2578.54	265.965	998.923	0	0	0	0	0	0	0	603	903	0
932	2	0	0	0	0	0	0	200	300	0	10.7575	-26.5555	-94.7998	-9162.6	6310.61	-2532.76	266.568	999.652	0	0	0	0	0	0	0	603	903	0
932	3	0	0	0	0	0	0	200	300	0	9.68933	-25.6399	-89.3066	-8796.38	6249.58	-2441.21	269.979	1001.5	0	0	0	0	0	0	0	603	903	0
932	4	0	0	0	0	0	0	200	300	0	9.68933	-23.8089	-85.3394	-8247.07	5700.26	-2166.55	266.795	999.639	0	0	0	0	0	0	0	603	903	0
932	5	0	0	0	0	0	0	200	300	0	8.9264	-22.8934	-80.4565	-7880.86	4845.76	-2166.55	260.228	1000.95	0	0	0	0	0	0	0	603	903	0
932	6	0	0	0	0	0	0	200	300	0	10.1471	-21.3675	-74.0479	-7239.99	5273.01	-1891.89	271.211	1000.77	0	0	0	0	0	0	0	603	903	0
932	7	0	0	0	0	0	0	200	300	0	12.1307	-19.0787	-69.7754	-7239.99	5150.94	-1800.34	273.822	1006.76	0	0	0	0	0	0	0	603	903	0
932	8	0	0	0	0	0	0	200	300	0	10.6049	-16.6373	-64.5874	-7148.44	4540.59	-1617.23	270.301	1013.68	0	0	0	0	0	0	0	603	903	0
932	9	0	0	0	0	0	0	200	300	0	8.46863	-14.3484	-61.2305	-6965.33	4235.41	-1846.12	269.172	1016.76	0	0	0	0	0	0	0	603	903	0
933	0	0	0	0	0	0	0	200	300	0	9.23157	-12.2122	-57.8735	-6232.91	4296.45	-1434.13	274.239	1010.7	0	0	0	0	0	0	0	603	903	0
933	1	0	0	0	0	0	0	200	300	0	10.6049	-11.4493	-53.6011	-5775.14	3930.24	-1388.35	273.324	1010.74	0	0	0	0	0	0	0	603	903	0
933	2	0	0	0	0	0	0	200	300	0	10.4523	-10.6863	-49.6338	-5225.83	3625.06	-1022.14	273.036	1008.29	0	0	0	0	0	0	0	603	903	0
933	3	0	0	0	0	0	0	200	300	0	9.53675	-9.61822	-45.3613	-5500.49	3441.96	-1479.9	275.879	1024.26	0	0	0	0	0	0	0	603	903	0
933	4	0	0	0	0	0	0	200	300	0	8.46863	-9.46563	-41.6992	-5042.72	3258.85	-1113.69	278.151	1023.93	0	0	0	0	0	0	0	603	903	0
933	5	0	0	0	0	0	0	200	300	0	8.9264	-8.09234	-37.4268	-4584.96	2770.57	-1113.69	274.026	1025.51	0	0	0	0	0	0	0	603	903	0
933	6	0	0	0	0	0	0	200	300	0	10.1471	-6.71905	-34.6802	-4493.41	2526.43	-1205.25	272.849	1032.57	0	0	0	0	0	0	0	603	903	0
933	7	0	0	0	0	0	0	200	300	0	9.68933	-7.02423	-29.4922	-3669.43	2587.46	-930.588	287.734	1027.42	0	0	0	0	0	0	0	603	903	0
933	8	0	0	0	0	0	0	200	300	0	8.62122	-6.71905	-27.9663	-3669.43	2282.29	-976.365	281.608	1034.21	0	0	0	0	0	0	0	603	903	0
933	9	0	0	0	0	0	0	200	300	0	8.9264	-5.49835	-24.9146	-3303.22	1549.87	-747.483	262.207	1035.58	0	0	0	0	0	0	0	603	903	0
934	0	0	0	0	0	0	0	200	300	0	11.8256	-4.888	-21.5576	-3120.11	2038.15	-839.035	294.544	1047.73	0	0	0	0	0	0	0	603	903	0
934	1	0	0	0	0	0	0	200	300	0	9.84192	-2.59918	-18.811	-2662.35	1794.01	-701.706	295.37	1044.53	0	0	0	0	0	0	0	603	903	0
934	2	0	0	0	0	0	0	200	300	0	9.53675	-0.768123	-17.5903	-2662.35	1061.58	-747.483	260.35	1054.35	0	0	0	0	0	0	0	603	903	0
934	3	0	0	0	0	0	0	200	300	0	0	0	0	0	0	0	200	903	0	0	0	0	0	0	0	603	903	0
934	4	0	0	0	0	0	0	200	300	0	0	0	0	0	0	0	200	903	0	0	0	0	0	0	0	603	903	0
934	5	0	0	0	0	0	0	200	300	0	0	0	0	0	0	0	200	903	0	0	0	0	0	0	0	603	903	0
934	6	0	0	0	0	0	0	200	300	0	0	0	0	0	0	0	200	903	0	0	0	0	0	0	0	603	903	0
934	7	0	0	0	0	0	0	200	300	0	0	0	0	0	0	0	200	903	0	0	0	0	0	0	0	603	903	0
934	8	0	0	0	0	0	0	200	300	0	0	0	0	0	0	0	200	903	0	0	0	0	0	0	0	603	903	0
934	9	0	0	0	0	0	0	200	300	0	0	0	0	0	0	0	200	903	0	0	0	0	0	0	0	603	903	0
935	0	0	0	0	0	0	0	200	300	0	0	0	0	0	0	0	200	903	0	0	0	0	0	0	0	603	903	0
935	1	0	0	0	0	0	0	200	300	0	0	0	0	0	0	0	200	903	0	0	0	0	0	0	0	603	903	0
935	2	0	0	0	0	0	0	200	300	0	0	0	0	0	0	0	200	903	0	0	0	0	0	0	0	603	903	0
935	3	0	0	0	0	0	0	200	300	0	0	0	0	0	0	0	200	903	0	0	0	0	0	0	0	603	903	0
935	4	0	0	0	0	0	0	200	300	0	0	0	0	0	0	0	200	903	0	0	0	0	0	0	0	603	903	0
935	5	0	0	0	0	0	0	200	300	0	0	0	0	0	0	0	200	903	0	0	0	0	0	0	0	603	903	0
935	6	0	0	0	0	0	0	200	300	0	0	0	0	0	0	0	200	903	0	0	0	0	0	0	0	603	903	0
935	7	0	0	0	0	0	0	200	300	0	0	0	0	0	0	0	200	903	0	0	0	0	0	0	0	603	903	0
935	8	0	0	0	0	0	0	200	300	0	0	0	0	0	0	0	200	903	0	0	0	0	0	0	0	603	903	0
935	9	0	0	0	0	0	0	200	300	0	0	0	0	0	0	0	200	903	0	0	0	0	0	0	0	603	903	0
936	0	0	0	0	0	0	0	200	300	0	0	0	0	0	0	0	200	903	0	0	0	0	0	0	0	603	903	0
936	1	0	0	0	0	0	0	200	300	0	0	0	0	0	0	0	200	903	0	0	0	0	0	0	0	603	903	0
936	2	0	0	0	0	0	0	200	300	0	0	0	0	0	0	0	200	903	0	0	0	0	0	0	0	603	903	0
936	3	0	0	0	0	0	0	200	300	0	0	0	0	0	0	0	200	903	0	0	0	0	0	0	0	603	903	0
936	4	0	0	0	0	0	0	200	300	0	0	0	0	0	0	0	200	903	0	0	0	0	0	0	0	603	903	0
936	5	0	0	0	0	0	0	200	300	0	0	0	0	0	0	0	200	903	0	0	0	0	0	0	0	603	903	0
936	6	0	0	0	0	0	0	200	300	0	0	0	0	0	0	0	200	903	0	0	0	0	0	0	0	603	903	0
936	7	0	0	0	0	0	0	200	300	0	0	0	0	0	0	0	200	903	0	0	0	0	0	0	0	603	903	0
936	8	0	0	0	0	0	0	200	300	0	0	0	0	0	0	0	200	903	0	0	0	0	0	0	0	603	903	0
936	9	0	0	0	0	0	0	200	300	0	0	0	0	0	0	0	200	903	0	0	0	0	0	0	0	603	903	0
937	0	0	0	0	0	0	0	200	300	0	0	0	0	0	0	0	200	903	0	0	0	0	0	0	0	603	903	0
937	1	0	0	0	0	0	0	200	300	0	0	0	0	0	0	0	200	903	0	0	0	0	0	0	0	603	903	0
937	2	0	0	0	0	0	0	200	300	0	0	0	0	0	0	0	200	903	0	0	0	0	0	0	0	603	903	0
937	3	0	0	0	0	0	0	200	300	0	0	0	0	0	0	0	200	903	0	0	0	0	0	0	0	603	903	0
937	4	0	0	0	0	0	0	200	300	0	0	0	0	0	0	0	200	903	0	0	0	0	0	0	0	603	903	0
937	5	0	0	0	0	0	0	200	300	0	0	0	0	0	0	0	200	903	0	0	0	0	0	0	0	603	903	0
937	6	0	0	0	0	0	0	200	300	0	0	0	0	0	0	0	200	903	0	0	0	0	0	0	0	603	903	0
937	7	0	0	0	0	0	0	200	300	0	0	0	0	0	0	0	200	903	0	0	0	0	0	0	0	603	903	0
937	8	0	0	0	0	0	0	200	300	0	0	0	0	0	0	0	200	903	0	0	0	0	0	0	0	603	903	0
937	9	0	0	0	0	0	0	200	300	0	0	0	0	0	0	0	200	903	0	0	0	0	0	0	0	603	903	0
938	0	0	0	0	0	0	0	200	300	0	0	0	0	0	0	0	200	903	0	0	0	0	0	0	0	603	903	0
938	1	0	0	0	0	0	0	200	300	0	0	0	0	0	0	0	200	903	0	0	0	0	0	0	0	603	903	0
938	2	0	0	0	0	0	0	200	300	0	0	0	0	0	0	0	200	903	0	0	0	0	0	0	0	603	903	0
938	3	0	0	0	0	0	0	200	300	0	0	0	0	0	0	0	200	903	0	0	0	0	0	0	0	603	903	0
938	4	0	0	0	0	0	0	200	300	0	0	0	0	0	0	0	200	903	0	0	0	0	0	0	0	603	903	0
938	5	0	0	0	0	0	0	200	300	0	0	0	0	0	0	0	200	903	0	0	0	0	0	0	0	603	903	0
938	6	0	0	0	0	0	0	200	300	0	0	0	0	0	0	0	200	903	0	0	0	0	0	0	0	603	903	0
938	7	0	0	0	0	0	0	200	300	0	0	0	0	0	0	0	200	903	0	0	0	0	0	0	0	603	903	0
938	8	0	0	0	0	0	0	200	300	0	0	0	0	0	0	0	200	903	0	0	0	0	0	0	0	603	903	0
938	9	0	0	0	0	0	0	200	300	0	0	0	0	0	0	0	200	903	0	0	0	0	0	0	0	603	903	0
939	0	0	0	0	0	0	0	200	300	0	0	0	0	0	0	0	200	903	0	0	0	0	0	0	0	603	903	0
939	1	0	0	0	0	0	0	200	300	0	0	0	0	0	0	0	200	903	0	0	0	0	0	0	0	603	903	0
939	2	0	0	0	0	0	0	200	300	0	0	0	0	0	0	0	200	903	0	0	0	0	0	0	0	603	903	0
939	3	0	0	0	0	0	0	200	300	0	0	0	0	0	0	0	200	903	0	0	0	0	0	0	0	603	903	0
939	4	0	0	0	0	0	0	200	300	0	0	0	0	0	0	0	200	903	0	0	0	0	0	0	0	603	903	0
939	5	0	0	0	0	0	0	200	300	0	0	0	0	0	0	0	200	903	0	0	0	0	0	0	0	603	903	0
939	6	0	0	0	0	0	0	200	300	0	0	0	0	0	0	0	200	903	0	0	0	0	0	0	0	603	903	0
939	7	0	0	0	0	0	0	200	300	0	0	0	0	0	0	0	200	903	0	0	0	0	0	0	0	603	903	0
939	8	0	0	0	0	0	0	200	300	0	0	0	0	0	0	0	200	903	0	0	0	0	0	0	0	603	903	0
939	9	0	0	0	0	0	0	200	300	0	0	0	0	0	0	0	200	903	0	0	0	0	0	0	0	603	903	0
940	0	0	0	0	0	0	0	200	300	0	0	0	0	0	0	0	200	903	0	0	0	0	0	0	0	603	903	0
940	1	0	0	0	0	0	0	200	300	0	0	0	0	0	0	0	200	903	0	0	0	0	0	0	0	603	903	0
940	2	0	0	0	0	0	0	200	300	0	0	0	0	0	0	0	200	903	0	0	0	0	0	0	0	603	903	0
940	3	0	0	0	0	0	0	200	300	0	0	0	0	0	0	0	200	903	0	0	0	0	0	0	0	603	903	0
940	4	0	0	0	0	0	0	200	300	0	0	0	0	0	0	0	200	903	0	0	0	0	0	0	0	603	903	0
940	5	0	0	0	0	0	0	200	300	0	0	0	0	0	0	0	200	903	0	0	0	0	0	0	0	603	903	0
940	6	0	0	0	0	0	0	200	300	0	0	0	0	0	0	0	200	903	0	0	0	0	0	0	0	603	903	0
940	7	0	0	0	0	0	0	200	300	0	0	0	0	0	0	0	200	903	0	0	0	0	0	0	0	603	903	0
940	8	0	0	0	0	0	0	200	300	0	0	0	0	0	0	0	200	903	0	0	0	0	0	0	0	603	903	0
940	9	0	0	0	0	0	0	200	300	0	0	0	0	0	0	0	200	903	0	0	0	0	0	0	0	603	903	0
941	0	0	0	0	0	0	0	200	300	0	0	0	0	0	0	0	200	903	0	0	0	0	0	0	0	603	903	0
941	1	0	0	0	0	0	0	200	300	0	0	0	0	0	0	0	200	903	0	0	0	0	0	0	0	603	903	0
941	2	0	0	0	0	0	0	200	300	0	0	0	0	0	0	0	200	903	0	0	0	0	0	0	0	603	903	0
941	3	0	0	0	0	0	0	200	300	0	0	0	0	0	0	0	200	903	0	0	0	0	0	0	0	603	903	0
941	4	0	0	0	0	0	0	200	300	0	0	0	0	0	0	0	200	903	0	0	0	0	0	0	0	603	903	0
941	5	0	0	0	0	0	0	200	300	0	0	0	0	0	0	0	200	903	0	0	0	0	0	0	0	603	903	0
941	6	0	0	0	0	0	0	200	300	0	0	0	0	0	0	0	200	903	0	0	0	0	0	0	0	603	903	0
941	7	0	0	0	0	0	0	200	300	0	0	0	0	0	0	0	200	903	0	0	0	0	0	0	0	603	903	0
941	8	0	0	0	0	0	0	200	300	0	0	0	0	0	0	0	200	903	0	0	0	0	0	0	0	603	903	0
941	9	0	0	0	0	0	0	200	300	0	0	0	0	0	0	0	200	903	0	0	0	0	0	0	0	603	903	0
942	0	0	0	0	0	0	0	200	300	0	0	0	0	0	0	0	200	903	0	0	0	0	0	0	0	603	903	0
942	1	0	0	0	0	0	0	200	300	0	0	0	0	0	0	0	200	903	0	0	0	0	0	0	0	603	903	0
942	2	0	0	0	0	0	0	200	300	0	0	0	0	0	0	0	200	903	0	0	0	0	0	0	0	603	903	0
942	3	0	0	0	0	0	0	200	300	0	0	0	0	0	0	0	200	903	0	0	0	0	0	0	0	603	903	0
942	4	0	0	0	0	0	0	200	300	0	0	0	0	0	0	0	200	903	0	0	0	0	0	0	0	603	903	0
942	5	0	0	0	0	0	0	200	300	0	0	0	0	0	0	0	200	903	0	0	0	0	0	0	0	603	903	0
942	6	0	0	0	0	0	0	200	300	0	0	0	0	0	0	0	200	903	0	0	0	0	0	0	0	603	903	0
942	7	0	0	0	0	0	0	200	300	0	0	0	0	0	0	0	200	903	0	0	0	0	0	0	0	603	903	0
942	8	0	0	0	0	0	0	200	300	0	0	0	0	0	0	0	200	903	0	0	0	0	0	0	0	603	903	0
942	9	0	0	0	0	0	0	200	300	0	0	0	0	0	0	0	200	903	0	0	0	0	0	0	0	603	903	0
943	0	0	0	0	0	0	0	200	300	0	0	0	0	0	0	0	200	903	0	0	0	0	0	0	0	603	903	0
943	1	0	0	0	0	0	0	200	300	0	0	0	0	0	0	0	200	903	0	0	0	0	0	0	0	603	903	0
943	2	0	0	0	0	0	0	200	300	0	0	0	0	0	0	0	200	903	0	0	0	0	0	0	0	603	903	0
943	3	0	0	0	0	0	0	200	300	0	0	0	0	0	0	0	200	903	0	0	0	0	0	0	0	603	903	0
943	4	0	0	0	0	0	0	200	300	0	0	0	0	0	0	0	200	903	0	0	0	0	0	0	0	603	903	0
943	5	0	0	0	0	0	0	200	300	0	0	0	0	0	0	0	200	903	0	0	0	0	0	0	0	603	903	0
943	6	0	0	0	0	0	0	200	300	0	0	0	0	0	0	0	200	903	0	0	0	0	0	0	0	603	903	0
943	7	0	0	0	0	0	0	200	300	0	0	0	0	0	0	0	200	903	0	0	0	0	0	0	0	603	903	0
943	8	0	0	0	0	0	0	200	300	0	0	0	0	0	0	0	200	903	0	0	0	0	0	0	0	603	903	0
943	9	0	0	0	0	0	0	200	300	0	0	0	0	0	0	0	200	903	0	0	0	0	0	0	0	603	903	0
944	0	0	0	0	0	0	0	200	300	0	0	0	0	0	0	0	200	903	0	0	0	0	0	0	0	603	903	0
944	1	0	0	0	0	0	0	200	300	0	0	0	0	0	0	0	200	903	0	0	0	0	0	0	0	603	903	0
944	2	0	0	0	0	0	0	200	300	0	0	0	0	0	0	0	200	903	0	0	0	0	0	0	0	603	903	0
944	3	0	0	0	0	0	0	200	300	0	0	0	0	0	0	0	200	903	0	0	0	0	0	0	0	603	903	0
944	4	0	0	0	0	0	0	200	300	0	0	0	0	0	0	0	200	903	0	0	0	0	0	0	0	603	903	0
944	5	0	0	0	0	0	0	200	300	0	0	0	0	0	0	0	200	903	0	0	0	0	0	0	0	603	903	0
944	6	0	0	0	0	0	0	200	300	0	0	0	0	0	0	0	200	903	0	0	0	0	0	0	0	603	903	0
944	7	0	0	0	0	0	0	200	300	0	0	0	0	0	0	0	200	903	0	0	0	0	0	0	0	603	903	0
944	8	0	0	0	0	0	0	200	300	0	0	0	0	0	0	0	200	903	0	0	0	0	0	0	0	603	903	0
944	9	0	0	0	0	0	0	200	300	0	0	0	0	0	0	0	200	903	0	0	0	0	0	0	0	603	903	0
945	0	0	0	0	0	0	0	200	300	0	0	0	0	0	0	0	200	903	0	0	0	0	0	0	0	603	903	0
945	1	0	0	0	0	0	0	200	300	0	0	0	0	0	0	0	200	903	0	0	0	0	0	0	0	603	903	0
945	2	0	0	0	0	0	0	200	300	0	0	0	0	0	0	0	200	903	0	0	0	0	0	0	0	603	903	0
945	3	0	0	0	0	0	0	200	300	0	0	0	0	0	0	0	200	903	0	0	0	0	0	0	0	603	903	0
945	4	0	0	0	0	0	0	200	300	0	0	0	0	0	0	0	200	903	0	0	0	0	0	0	0	603	903	0
945	5	0	0	0	0	0	0	200	300	0	0	0	0	0	0	0	200	903	0	0	0	0	0	0	0	603	903	0
945	6	0	0	0	0	0	0	200	300	0	0	0	0	0	0	0	200	903	0	0	0	0	0	0	0	603	903	0
945	7	0	0	0	0	0	0	200	300	0	0	0	0	0	0	0	200	903	0	0	0	0	0	0	0	603	903	0
945	8	0	0	0	0	0	0	200	300	0	0	0	0	0	0	0	200	903	0	0	0	0	0	0	0	603	903	0
945	9	0	0	0	0	0	0	200	300	0	0	0	0	0	0	0	200	903	0	0	0	0	0	0	0	603	903	0
946	0	0	0	0	0	0	0	200	300	0	0	0	0	0	0	0	200	903	0	0	0	0	0	0	0	603	903	0
946	1	0	0	0	0	0	0	200	300	0	0	0	0	0	0	0	200	903	0	0	0	0	0	0	0	603	903	0
946	2	0	0	0	0	0	0	200	300	0	0	0	0	0	0	0	200	903	0	0	0	0	0	0	0	603	903	0
946	3	0	0	0	0	0	0	200	300	0	0	0	0	0	0	0	200	903	0	0	0	0	0	0	0	603	903	0
946	4	0	0	0	0	0	0	200	300	0	0	0	0	0	0	0	200	903	0	0	0	0	0	0	0	603	903	0
946	5	0	0	0	0	0	0	200	300	0	0	0	0	0	0	0	200	903	0	0	0	0	0	0	0	603	903	0
946	6	0	0	0	0	0	0	200	300	0	0	0	0	0	0	0	200	903	0	0	0	0	0	0	0	603	903	0
946	7	0	0	0	0	0	0	200	300	0	0	0	0	0	0	0	200	903	0	0	0	0	0	0	0	603	903	0
946	8	0	0	0	0	0	0	200	300	0	0	0	0	0	0	0	200	903	0	0	0	0	0	0	0	603	903	0
946	9	0	0	0	0	0	0	200	300	0	0	0	0	0	0	0	200	903	0	0	0	0	0	0	0	603	903	0
947	0	0	0	0	0	0	0	200	300	0	0	0	0	0	0	0	200	903	0	0	0	0	0	0	0	603	903	0
947	1	0	0	0	0	0	0	200	300	0	0	0	0	0	0	0	200	903	0	0	0	0	0	0	0	603	903	0
947	2	0	0	0	0	0	0	200	300	0	0	0	0	0	0	0	200	903	0	0	0	0	0	0	0	603	903	0
947	3	0	0	0	0	0	0	200	300	0	0	0	0	0	0	0	200	903	0	0	0	0	0	0	0	603	903	0
947	4	0	0	0	0	0	0	200	300	0	0	0	0	0	0	0	200	903	0	0	0	0	0	0	0	603	903	0
947	5	0	0	0	0	0	0	200	300	0	0	0	0	0	0	0	200	903	0	0	0	0	0	0	0	603	903	0
947	6	0	0	0	0	0	0	200	300	0	0	0	0	0	0	0	200	903	0	0	0	0	0	0	0	603	903	0
947	7	0	0	0	0	0	0	200	300	0	0	0	0	0	0	0	200	903	0	0	0	0	0	0	0	603	903	0
947	8	0	0	0	0	0	0	200	300	0	0	0	0	0	0	0	200	903	0	0	0	0	0	0	0	603	903	0
947	9	0	0	0	0	0	0	200	300	0	0	0	0	0	0	0	200	903	0	0	0	0	0	0	0	603	903	0
948	0	0	0	0	0	0	0	200	300	0	0	0	0	0	0	0	200	903	0	0	0	0	0	0	0	603	903	0
948	1	0	0	0	0	0	0	200	300	0	0	0	0	0	0	0	200	903	0	0	0	0	0	0	0	603	903	0
948	2	0	0	0	0	0	0	200	300	0	0	0	0	0	0	0	200	903	0	0	0	0	0	0	0	603	903	0
948	3	0	0	0	0	0	0	200	300	0	0	0	0	0	0	0	200	903	0	0	0	0	0	0	0	603	903	0
948	4	0	0	0	0	0	0	200	300	0	0	0	0	0	0	0	200	903	0	0	0	0	0	0	0	603	903	0
948	5	0	0	0	0	0	0	200	300	0	0	0	0	0	0	0	200	903	0	0	0	0	0	0	0	603	903	0
948	6	0	0	0	0	0	0	200	300	0	0	0	0	0	0	0	200	903	0	0	0	0	0	0	0	603	903	0
948	7	0	0	0	0	0	0	200	300	0	0	0	0	0	0	0	200	903	0	0	0	0	0	0	0	603	903	0
948	8	0	0	0	0	0	0	200	300	0	0	0	0	0	0	0	200	903	0	0	0	0	0	0	0	603	903	0
948	9	0	0	0	0	0	0	200	300	0	0	0	0	0	0	0	200	903	0	0	0	0	0	0	0	603	903	0
949	0	0	0	0	0	0	0	200	300	0	0	0	0	0	0	0	200	903	0	0	0	0	0	0	0	603	903	0
949	1	0	0	0	0	0	0	200	300	0	0	0	0	0	0	0	200	903	0	0	0	0	0	0	0	603	903	0
949	2	0	0	0	0	0	0	200	300	0	0	0	0	0	0	0	200	903	0	0	0	0	0	0	0	603	903	0
949	3	0	0	0	0	0	0	200	300	0	0	0	0	0	0	0	200	903	0	0	0	0	0	0	0	603	903	0
949	4	0	0	0	0	0	0	200	300	0	0	0	0	0	0	0	200	903	0	0	0	0	0	0	0	603	903	0
949	5	0	0	0	0	0	0	200	300	0	0	0	0	0	0	0	200	903	0	0	0	0	0	0	0	603	903	0
949	6	0	0	0	0	0	0	200	300	0	0	0	0	0	0	0	200	903	0	0	0	0	0	0	0	603	903	0
949	7	0	0	0	0	0	0	200	300	0	0	0	0	0	0	0	200	903	0	0	0	0	0	0	0	603	903	0
949	8	0	0	0	0	0	0	200	300	0	0	0	0	0	0	0	200	903	0	0	0	0	0	0	0	603	903	0
949	9	0	0	0	0	0	0	200	300	0	0	0	0	0	0	0	200	903	0	0	0	0	0	0	0	603	903	0
950	0	0	0	0	0	0	0	200	300	0	0	0	0	0	0	0	200	903	0	0	0	0	0	0	0	603	903	0
950	1	0	0	0	0	0	0	200	300	0	0	0	0	0	0	0	200	903	0	0	0	0	0	0	0	603	903	0
950	2	0	0	0	0	0	0	200	300	0	0	0	0	0	0	0	200	903	0	0	0	0	0	0	0	603	903	0
950	3	0	0	0	0	0	0	200	300	0	0	0	0	0	0	0	200	903	0	0	0	0	0	0	0	603	903	0
950	4	0	0	0	0	0	0	200	300	0	0	0	0	0	0	0	200	903	0	0	0	0	0	0	0	603	903	0
950	5	0	0	0	0	0	0	200	300	0	0	0	0	0	0	0	200	903	0	0	0	0	0	0	0	603	903	0
950	6	0	0	0	0	0	0	200	300	0	0	0	0	0	0	0	200	903	0	0	0	0	0	0	0	603	903	0
950	7	0	0	0	0	0	0	200	300	0	0	0	0	0	0	0	200	903	0	0	0	0	0	0	0	603	903	0
950	8	0	0	0	0	0	0	200	300	0	0	0	0	0	0	0	200	903	0	0	0	0	0	0	0	603	903	0
950	9	0	0	0	0	0	0	200	300	0	0	0	0	0	0	0	200	903	0	0	0	0	0	0	0	603	903	0
951	0	0	0	0	0	0	0	200	300	0	0	0	0	0	0	0	200	903	0	0	0	0	0	0	0	603	903	0
951	1	0	0	0	0	0	0	200	300	0	0	0	0	0	0	0	200	903	0	0	0	0	0	0	0	603	903	0
951	2	0	0	0	0	0	0	200	300	0	0	0	0	0	0	0	200	903	0	0	0	0	0	0	0	603	903	0
951	3	0	0	0	0	0	0	200	300	0	0	0	0	0	0	0	200	903	0	0	0	0	0	0	0	603	903	0
951	4	0	0	0	0	0	0	200	300	0	0	0	0	0	0	0	200	903	0	0	0	0	0	0	0	603	903	0
951	5	0	0	0	0	0	0	200	300	0	0	0	0	0	0	0	200	903	0	0	0	0	0	0	0	603	903	0
951	6	0	0	0	0	0	0	200	300	0	0	0	0	0	0	0	200	903	0	0	0	0	0	0	0	603	903	0
951	7	0	0	0	0	0	0	200	300	0	0	0	0	0	0	0	200	903	0	0	0	0	0	0	0	603	903	0
951	8	0	0	0	0	0	0	200	300	0	0	0	0	0	0	0	200	903	0	0	0	0	0	0	0	603	903	0
951	9	0	0	0	0	0	0	200	300	0	0	0	0	0	0	0	200	903	0	0	0	0	0	0	0	603	903	0
952	0	0	0	0	0	0	0	200	300	0	0	0	0	0	0	0	200	903	0	0	0	0	0	0	0	603	903	0
952	1	0	0	0	0	0	0	200	300	0	0	0	0	0	0	0	200	903	0	0	0	0	0	0	0	603	903	0
952	2	0	0	0	0	0	0	200	300	0	0	0	0	0	0	0	200	903	0	0	0	0	0	0	0	603	903	0
952	3	0	0	0	0	0	0	200	300	0	0	0	0	0	0	0	200	903	0	0	0	0	0	0	0	603	903	0
952	4	0	0	0	0	0	0	200	300	0	0	0	0	0	0	0	200	903	0	0	0	0	0	0	0	603	903	0
952	5	0	0	0	0	0	0	200	300	0	0	0	0	0	0	0	200	903	0	0	0	0	0	0	0	603	903	0
952	6	0	0	0	0	0	0	200	300	0	0	0	0	0	0	0	200	903	0	0	0	0	0	0	0	603	903	0
952	7	0	0	0	0	0	0	200	300	0	0	0	0	0	0	0	200	903	0	0	0	0	0	0	0	603	903	0
952	8	0	0	0	0	0	0	200	300	0	0	0	0	0	0	0	200	903	0	0	0	0	0	0	0	603	903	0
952	9	0	0	0	0	0	0	200	300	0	0	0	0	0	0	0	200	903	0	0	0	0	0	0	0	603	903	0
953	0	0	0	0	0	0	0	200	300	0	0	0	0	0	0	0	200	903	0	0	0	0	0	0	0	603	903	0
953	1	0	0	0	0	0	0	200	300	0	0	0	0	0	0	0	200	903	0	0	0	0	0	0	0	603	903	0
953	2	0	0	0	0	0	0	200	300	0	0	0	0	0	0	0	200	903	0	0	0	0	0	0	0	603	903	0
953	3	0	0	0	0	0	0	200	300	0	0	0	0	0	0	0	200	903	0	0	0	0	0	0	0	603	903	0
953	4	0	0	0	0	0	0	200	300	0	0	0	0	0	0	0	200	903	0	0	0	0	0	0	0	603	903	0
953	5	0	0	0	0	0	0	200	300	0	0	0	0	0	0	0	200	903	0	0	0	0	0	0	0	603	903	0
953	6	0	0	0	0	0	0	200	300	0	0	0	0	0	0	0	200	903	0	0	0	0	0	0	0	603	903	0
953	7	0	0	0	0	0	0	200	300	0	0	0	0	0	0	0	200	903	0	0	0	0	0	0	0	603	903	0
953	8	0	0	0	0	0	0	200	300	0	0	0	0	0	0	0	200	903	0	0	0	0	0	0	0	603	903	0
953	9	0	0	0	0	0	0	200	300	0	0	0	0	0	0	0	200	903	0	0	0	0	0	0	0	603	903	0
954	0	0	0	0	0	0	0	200	300	0	0	0	0	0	0	0	200	903	0	0	0	0	0	0	0	603	903	0
954	1	0	0	0	0	0	0	200	300	0	0	0	0	0	0	0	200	903	0	0	0	0	0	0	0	603	903	0
954	2	0	0	0	0	0	0	200	300	0	0	0	0	0	0	0	200	903	0	0	0	0	0	0	0	603	903	0
954	3	0	0	0	0	0	0	200	300	0	0	0	0	0	0	0	200	903	0	0	0	0	0	0	0	603	903	0
954	4	0	0	0	0	0	0	200	300	0	0	0	0	0	0	0	200	903	0	0	0	0	0	0	0	603	903	0
954	5	0	0	0	0	0	0	200	300	0	0	0	0	0	0	0	200	903	0	0	0	0	0	0	0	603	903	0
954	6	0	0	0	0	0	0	200	300	0	0	0	0	0	0	0	200	903	0	0	0	0	0	0	0	603	903	0
954	7	0	0	0	0	0	0	200	300	0	0	0	0	0	0	0	200	903	0	0	0	0	0	0	0	603	903	0
954	8	0	0	0	0	0	0	200	300	0	0	0	0	0	0	0	200	903	0	0	0	0	0	0	0	603	903	0
954	9	0	0	0	0	0	0	200	300	0	0	0	0	0	0	0	200	903	0	0	0	0	0	0	0	603	903	0
955	0	0	0	0	0	0	0	200	300	0	0	0	0	0	0	0	200	903	0	0	0	0	0	0	0	603	903	0
955	1	0	0	0	0	0	0	200	300	0	0	0	0	0	0	0	200	903	0	0	0	0	0	0	0	603	903	0
955	2	0	0	0	0	0	0	200	300	0	0	0	0	0	0	0	200	903	0	0	0	0	0	0	0	603	903	0
955	3	0	0	0	0	0	0	200	300	0	0	0	0	0	0	0	200	903	0	0	0	0	0	0	0	603	903	0
955	4	0	0	0	0	0	0	200	300	0	0	0	0	0	0	0	200	903	0	0	0	0	0	0	0	603	903	0
955	5	0	0	0	0	0	0	200	300	0	0	0	0	0	0	0	200	903	0	0	0	0	0	0	0	603	903	0
955	6	0	0	0	0	0	0	200	300	0	0	0	0	0	0	0	200	903	0	0	0	0	0	0	0	603	903	0
955	7	0	0	0	0	0	0	200	300	0	0	0	0	0	0	0	200	903	0	0	0	0	0	0	0	603	903	0
955	8	0	0	0	0	0	0	200	300	0	0	0	0	0	0	0	200	903	0	0	0	0	0	0	0	603	903	0
955	9	0	0	0	0	0	0	200	300	0	0	0	0	0	0	0	200	903	0	0	0	0	0	0	0	603	903	0
956	0	0	0	0	0	0	0	200	300	0	0	0	0	0	0	0	200	903	0	0	0	0	0	0	0	603	903	0
956	1	0	0	0	0	0	0	200	300	0	0	0	0	0	0	0	200	903	0	0	0	0	0	0	0	603	903	0
956	2	0	0	0	0	0	0	200	300	0	0	0	0	0	0	0	200	903	0	0	0	0	0	0	0	603	903	0
956	3	0	0	0	0	0	0	200	300	0	0	0	0	0	0	0	200	903	0	0	0	0	0	0	0	603	903	0
956	4	0	0	0	0	0	0	200	300	0	0	0	0	0	0	0	200	903	0	0	0	0	0	0	0	603	903	0
956	5	0	0	0	0	0	0	200	300	0	0	0	0	0	0	0	200	903	0	0	0	0	0	0	0	603	903	0
956	6	0	0	0	0	0	0	200	300	0	0	0	0	0	0	0	200	903	0	0	0	0	0	0	0	603	903	0
956	7	0	0	0	0	0	0	200	300	0	0	0	0	0	0	0	200	903	0	0	0	0	0	0	0	603	903	0
956	8	0	0	0	0	0	0	200	300	0	0	0	0	0	0	0	200	903	0	0	0	0	0	0	0	603	903	0
956	9	0	0	0	0	0	0	200	300	0	0	0	0	0	0	0	200	903	0	0	0	0	0	0	0	603	903	0
957	0	0	0	0	0	0	0	200	300	0	0	0	0	0	0	0	200	903	0	0	0	0	0	0	0	603	903	0
957	1	0	0	0	0	0	0	200	300	0	0	0	0	0	0	0	200	903	0	0	0	0	0	0	0	603	903	0
957	2	0	0	0	0	0	0	200	300	0	0	0	0	0	0	0	200	903	0	0	0	0	0	0	0	603	903	0
957	3	0	0	0	0	0	0	200	300	0	0	0	0	0	0	0	200	903	0	0	0	0	0	0	0	603	903	0
957	4	0	0	0	0	0	0	200	300	0	0	0	0	0	0	0	200	903	0	0	0	0	0	0	0	603	903	0
957	5	0	0	0	0	0	0	200	300	0	0	0	0	0	0	0	200	903	0	0	0	0	0	0	0	603	903	0
957	6	0	0	0	0	0	0	200	300	0	0	0	0	0	0	0	200	903	0	0	0	0	0	0	0	603	903	0
957	7	0	0	0	0	0	0	200	300	0	0	0	0	0	0	0	200	903	0	0	0	0	0	0	0	603	903	0
957	8	0	0	0	0	0	0	200	300	0	0	0	0	0	0	0	200	903	0	0	0	0	0	0	0	603	903	0
957	9	0	0	0	0	0	0	200	300	0	0	0	0	0	0	0	200	903	0	0	0	0	0	0	0	603	903	0
958	0	0	0	0	0	0	0	200	300	0	0	0	0	0	0	0	200	903	0	0	0	0	0	0	0	603	903	0
958	1	0	0	0	0	0	0	200	300	0	0	0	0	0	0	0	200	903	0	0	0	0	0	0	0	603	903	0
958	2	0	0	0	0	0	0	200	300	0	0	0	0	0	0	0	200	903	0	0	0	0	0	0	0	603	903	0
958	3	0	0	0	0	0	0	200	300	0	0	0	0	0	0	0	200	903	0	0	0	0	0	0	0	603	903	0
958	4	0	0	0	0	0	0	200	300	0	0	0	0	0	0	0	200	903	0	0	0	0	0	0	0	603	903	0
958	5	0	0	0	0	0	0	200	300	0	0	0	0	0	0	0	200	903	0	0	0	0	0	0	0	603	903	0
958	6	0	0	0	0	0	0	200	300	0	0	0	0	0	0	0	200	903	0	0	0	0	0	0	0	603	903	0
958	7	0	0	0	0	0	0	200	300	0	0	0	0	0	0	0	200	903	0	0	0	0	0	0	0	603	903	0
958	8	0	0	0	0	0	0	200	300	0	0	0	0	0	0	0	200	903	0	0	0	0	0	0	0	603	903	0
958	9	0	0	0	0	0	0	200	300	0	0	0	0	0	0	0	200	903	0	0	0	0	0	0	0	603	903	0
959	0	0	0	0	0	0	0	200	300	0	0	0	0	0	0	0	200	903	0	0	0	0	0	0	0	603	903	0
959	1	0	0	0	0	0	0	200	300	0	0	0	0	0	0	0	200	903	0	0	0	0	0	0	0	603	903	0
959	2	0	0	0	0	0	0	200	300	0	0	0	0	0	0	0	200	903	0	0	0	0	0	0	0	603	903	0
959	3	0	0	0	0	0	0	200	300	0	0	0	0	0	0	0	200	903	0	0	0	0	0	0	0	603	903	0
959	4	0	0	0	0	0	0	200	300	0	0	0	0	0	0	0	200	903	0	0	0	0	0	0	0	603	903	0
959	5	0	0	0	0	0	0	200	300	0	0	0	0	0	0	0	200	903	0	0	0	0	0	0	0	603	903	0
959	6	0	0	0	0	0	0	200	300	0	0	0	0	0	0	0	200	903	0	0	0	0	0	0	0	603	903	0
959	7	0	0	0	0	0	0	200	300	0	0	0	0	0	0	0	200	903	0	0	0	0	0	0	0	603	903	0
959	8	0	0	0	0	0	0	200	300	0	0	0	0	0	0	0	200	903	0	0	0	0	0	0	0	603	903	0
959	9	0	0	0	0	0	0	200	300	0	0	0	0	0	0	0	200	903	0	0	0	0	0	0	0	603	903	0
960	0	0	0	0	0	0	0	200	300	0	0	0	0	0	0	0	200	903	0	0	0	0	0	0	0	603	903	0
960	1	0	0	0	0	0	0	200	300	0	0	0	0	0	0	0	200	903	0	0	0	0	0	0	0	603	903	0
960	2	0	0	0	0	0	0	200	300	0	0	0	0	0	0	0	200	903	0	0	0	0	0	0	0	603	903	0
960	3	0	0	0	0	0	0	200	300	0	0	0	0	0	0	0	200	903	0	0	0	0	0	0	0	603	903	0
960	4	0	0	0	0	0	0	200	300	0	0	0	0	0	0	0	200	903	0	0	0	0	0	0	0	603	903	0
960	5	0	0	0	0	0	0	200	300	0	0	0	0	0	0	0	200	903	0	0	0	0	0	0	0	603	903	0
960	6	0	0	0	0	0	0	200	300	0	0	0	0	0	0	0	200	903	0	0	0	0	0	0	0	603	903	0
960	7	0	0	0	0	0	0	200	300	0	0	0	0	0	0	0	200	903	0	0	0	0	0	0	0	603	903	0
960	8	0	0	0	0	0	0	200	300	0	0	0	0	0	0	0	200	903	0	0	0	0	0	0	0	603	903	0
960	9	0	0	0	0	0	0	200	300	0	0	0	0	0	0	0	200	903	0	0	0	0	0	0	0	603	903	0
961	0	0	0	0	0	0	0	200	300	0	0	0	0	0	0	0	200	903	0	0	0	0	0	0	0	603	903	0
961	1	0	0	0	0	0	0	200	300	0	0	0	0	0	0	0	200	903	0	0	0	0	0	0	0	603	903	0
961	2	0	0	0	0	0	0	200	300	0	0	0	0	0	0	0	200	903	0	0	0	0	0	0	0	603	903	0
961	3	0	0	0	0	0	0	200	300	0	0	0	0	0	0	0	200	903	0	0	0	0	0	0	0	603	903	0
961	4	0	0	0	0	0	0	200	300	0	0	0	0	0	0	0	200	903	0	0	0	0	0	0	0	603	903	0
961	5	0	0	0	0	0	0	200	300	0	0	0	0	0	0	0	200	903	0	0	0	0	0	0	0	603	903	0
961	6	0	0	0	0	0	0	200	300	0	0	0	0	0	0	0	200	903	0	0	0	0	0	0	0	603	903	0
961	7	0	0	0	0	0	0	200	300	0	0	0	0	0	0	0	200	903	0	0	0	0	0	0	0	603	903	0
961	8	0	0	0	0	0	0	200	300	0	0	0	0	0	0	0	200	903	0	0	0	0	0	0	0	603	903	0
961	9	0	0	0	0	0	0	200	300	0	0	0	0	0	0	0	200	903	0	0	0	0	0	0	0	603	903	0
962	0	0	0	0	0	0	0	200	300	0	0	0	0	0	0	0	200	903	0	0	0	0	0	0	0	603	903	0
962	1	0	0	0	0	0	0	200	300	0	0	0	0	0	0	0	200	903	0	0	0	0	0	0	0	603	903	0
962	2	0	0	0	0	0	0	200	300	0	0	0	0	0	0	0	200	903	0	0	0	0	0	0	0	603	903	0
962	3	0	0	0	0	0	0	200	300	0	0	0	0	0	0	0	200	903	0	0	0	0	0	0	0	603	903	0
962	4	0	0	0	0	0	0	200	300	0	0	0	0	0	0	0	200	903	0	0	0	0	0	0	0	603	903	0
962	5	0	0	0	0	0	0	200	300	0	0	0	0	0	0	0	200	903	0	0	0	0	0	0	0	603	903	0
962	6	0	0	0	0	0	0	200	300	0	0	0	0	0	0	0	200	903	0	0	0	0	0	0	0	603	903	0
962	7	0	0	0	0	0	0	200	300	0	0	0	0	0	0	0	200	903	0	0	0	0	0	0	0	603	903	0
962	8	0	0	0	0	0	0	200	300	0	0	0	0	0	0	0	200	903	0	0	0	0	0	0	0	603	903	0
962	9	0	0	0	0	0	0	200	300	0	0	0	0	0	0	0	200	903	0	0	0	0	0	0	0	603	903	0
963	0	0	0	0	0	0	0	200	300	0	0	0	0	0	0	0	200	903	0	0	0	0	0	0	0	603	903	0
963	1	0	0	0	0	0	0	200	300	0	0	0	0	0	0	0	200	903	0	0	0	0	0	0	0	603	903	0
963	2	0	0	0	0	0	0	200	300	0	0	0	0	0	0	0	200	903	0	0	0	0	0	0	0	603	903	0
963	3	0	0	0	0	0	0	200	300	0	0	0	0	0	0	0	200	903	0	0	0	0	0	0	0	603	903	0
963	4	0	0	0	0	0	0	200	300	0	0	0	0	0	0	0	200	903	0	0	0	0	0	0	0	603	903	0
963	5	0	0	0	0	0	0	200	300	0	0	0	0	0	0	0	200	903	0	0	0	0	0	0	0	603	903	0
963	6	0	0	0	0	0	0	200	300	0	0	0	0	0	0	0	200	903	0	0	0	0	0	0	0	603	903	0
963	7	0	0	0	0	0	0	200	300	0	0	0	0	0	0	0	200	903	0	0	0	0	0	0	0	603	903	0
963	8	0	0	0	0	0	0	200	300	0	0	0	0	0	0	0	200	903	0	0	0	0	0	0	0	603	903	0
963	9	0	0	0	0	0	0	200	300	0	0	0	0	0	0	0	200	903	0	0	0	0	0	0	0	603	903	0
964	0	0	0	0	0	0	0	200	300	0	0	0	0	0	0	0	200	903	0	0	0	0	0	0	0	603	903	0
964	1	0	0	0	0	0	0	200	300	0	0	0	0	0	0	0	200	903	0	0	0	0	0	0	0	603	903	0
964	2	0	0	0	0	0	0	200	300	0	0	0	0	0	0	0	200	903	0	0	0	0	0	0	0	603	903	0
964	3	0	0	0	0	0	0	200	300	0	0	0	0	0	0	0	200	903	0	0	0	0	0	0	0	603	903	0
964	4	0	0	0	0	0	0	200	300	0	0	0	0	0	0	0	200	903	0	0	0	0	0	0	0	603	903	0
964	5	0	0	0	0	0	0	200	300	0	0	0	0	0	0	0	200	903	0	0	0	0	0	0	0	603	903	0
964	6	0	0	0	0	0	0	200	300	0	0	0	0	0	0	0	200	903	0	0	0	0	0	0	0	603	903	0
964	7	0	0	0	0	0	0	200	300	0	0	0	0	0	0	0	200	903	0	0	0	0	0	0	0	603	903	0
964	8	0	0	0	0	0	0	200	300	0	0	0	0	0	0	0	200	903	0	0	0	0	0	0	0	603	903	0
964	9	0	0	0	0	0	0	200	300	0	0	0	0	0	0	0	200	903	0	0	0	0	0	0	0	603	903	0
965	0	0	0	0	0	0	0	200	300	0	0	0	0	0	0	0	200	903	0	0	0	0	0	0	0	603	903	0
965	1	0	0	0	0	0	0	200	300	0	0	0	0	0	0	0	200	903	0	0	0	0	0	0	0	603	903	0
965	2	0	0	0	0	0	0	200	300	0	0	0	0	0	0	0	200	903	0	0	0	0	0	0	0	603	903	0
965	3	0	0	0	0	0	0	200	300	0	0	0	0	0	0	0	200	903	0	0	0	0	0	0	0	603	903	0
965	4	0	0	0	0	0	0	200	300	0	0	0	0	0	0	0	200	903	0	0	0	0	0	0	0	603	903	0
965	5	0	0	0	0	0	0	200	300	0	0	0	0	0	0	0	200	903	0	0	0	0	0	0	0	603	903	0
965	6	0	0	0	0	0	0	200	300	0	0	0	0	0	0	0	200	903	0	0	0	0	0	0	0	603	903	0
965	7	0	0	0	0	0	0	200	300	0	0	0	0	0	0	0	200	903	0	0	0	0	0	0	0	603	903	0
965	8	0	0	0	0	0	0	200	300	0	0	0	0	0	0	0	200	903	0	0	0	0	0	0	0	603	903	0
965	9	0	0	0	0	0	0	200	300	0	0	0	0	0	0	0	200	903	0	0	0	0	0	0	0	603	903	0
966	0	0	0	0	0	0	0	200	300	0	0	0	0	0	0	0	200	903	0	0	0	0	0	0	0	603	903	0
966	1	0	0	0	0	0	0	200	300	0	0	0	0	0	0	0	200	903	0	0	0	0	0	0	0	603	903	0
966	2	0	0	0	0	0	0	200	300	0	0	0	0	0	0	0	200	903	0	0	0	0	0	0	0	603	903	0
966	3	0	0	0	0	0	0	200	300	0	0	0	0	0	0	0	200	903	0	0	0	0	0	0	0	603	903	0
966	4	0	0	0	0	0	0	200	300	0	0	0	0	0	0	0	200	903	0	0	0	0	0	0	0	603	903	0
966	5	0	0	0	0	0	0	200	300	0	0	0	0	0	0	0	200	903	0	0	0	0	0	0	0	603	903	0
966	6	0	0	0	0	0	0	200	300	0	0	0	0	0	0	0	200	903	0	0	0	0	0	0	0	603	903	0
966	7	0	0	0	0	0	0	200	300	0	0	0	0	0	0	0	200	903	0	0	0	0	0	0	0	603	903	0
966	8	0	0	0	0	0	0	200	300	0	0	0	0	0	0	0	200	903	0	0	0	0	0	0	0	603	903	0
966	9	0	0	0	0	0	0	200	300	0	0	0	0	0	0	0	200	903	0	0	0	0	0	0	0	603	903	0
967	0	0	0	0	0	0	0	200	300	0	0	0	0	0	0	0	200	903	0	0	0	0	0	0	0	603	903	0
967	1	0	0	0	0	0	0	200	300	0	0	0	0	0	0	0	200	903	0	0	0	0	0	0	0	603	903	0
967	2	0	0	0	0	0	0	200	300	0	0	0	0	0	0	0	200	903	0	0	0	0	0	0	0	603	903	0
967	3	0	0	0	0	0	0	200	300	0	0	0	0	0	0	0	200	903	0	0	0	0	0	0	0	603	903	0
967	4	0	0	0	0	0	0	200	300	0	0	0	0	0	0	0	200	903	0	0	0	0	0	0	0	603	903	0
967	5	0	0	0	0	0	0	200	300	0	0	0	0	0	0	0	200	903	0	0	0	0	0	0	0	603	903	0
967	6	0	0	0	0	0	0	200	300	0	0	0	0	0	0	0	200	903	0	0	0	0	0	0	0	603	903	0
967	7	0	0	0	0	0	0	200	300	0	0	0	0	0	0	0	200	903	0	0	0	0	0	0	0	603	903	0
967	8	0	0	0	0	0	0	200	300	0	0	0	0	0	0	0	200	903	0	0	0	0	0	0	0	603	903	0
967	9	0	0	0	0	0	0	200	300	0	0	0	0	0	0	0	200	903	0	0	0	0	0	0	0	603	903	0
968	0	0	0	0	0	0	0	200	300	0	0	0	0	0	0	0	200	903	0	0	0	0	0	0	0	603	903	0
968	1	0	0	0	0	0	0	200	300	0	0	0	0	0	0	0	200	903	0	0	0	0	0	0	0	603	903	0
968	2	0	0	0	0	0	0	200	300	0	0	0	0	0	0	0	200	903	0	0	0	0	0	0	0	603	903	0
968	3	0	0	0	0	0	0	200	300	0	0	0	0	0	0	0	200	903	0	0	0	0	0	0	0	603	903	0
968	4	0	0	0	0	0	0	200	300	0	0	0	0	0	0	0	200	903	0	0	0	0	0	0	0	603	903	0
968	5	0	0	0	0	0	0	200	300	0	0	0	0	0	0	0	200	903	0	0	0	0	0	0	0	603	903	0
[truncated: 1,684 more rows]
