# Supplementary material for: The Effects of an Extemporaneous Speech Dual-task on Older Adult Gait Control
Source: Research Square preprint supplement (doi:10.21203/rs.3.rs-7674245/v1), 2025-11-18
Supplement: Supplementary file 39 [file DT3Walk05.xlsx]

## Sheet: Sheet1
Trajectories
		03:LFHD			03:RFHD			03:LBHD			03:RBHD			03:C7			03:T10			03:CLAV			03:STRN			03:RBAK			03:LSHO			03:LUPA			03:LELB			03:LFRM			03:LWRA			03:LWRB			03:LFIN
Frame	Sub Frame	X	Y	Z	X	Y	Z	X	Y	Z	X	Y	Z	X	Y	Z	X	Y	Z	X	Y	Z	X	Y	Z	X	Y	Z	X	Y	Z	X	Y	Z	X	Y	Z	X	Y	Z	X	Y	Z	X	Y	Z	X	Y	Z
		mm	mm	mm	mm	mm	mm	mm	mm	mm	mm	mm	mm	mm	mm	mm	mm	mm	mm	mm	mm	mm	mm	mm	mm	mm	mm	mm	mm	mm	mm	mm	mm	mm	mm	mm	mm	mm	mm	mm	mm	mm	mm	mm	mm	mm	mm	mm	mm
305	0	258.078	2721.63	1609.31	154.412	2724.34	1605.76	282.971	2877.92	1627	147.37	2892.14	1625.96	200.432	2953.18	1483.29	196.355	3074.9	1268.4	221.754	2820.6	1379.83	218.774	2806.16	1193.31	141.091	3065.15	1343.36	397.369	2963.25	1433.38	448.424	3040.92	1253.1	457.574	3094.88	1144.53	482.595	3098.37	971.423	447.918	3092.71	872.375	498.555	3152.01	882.297	497.228	3141.92	776.097
306	0	260.031	2709.95	1609.95	156.392	2712.47	1606.77	284.653	2866.26	1627.74	148.926	2880.33	1627.16	201.659	2941.65	1484.56	197.305	3062.94	1269.62	222.928	2808.88	1381.04	219.987	2794.25	1194.48	142.043	3053.49	1344.63	398.667	2951.4	1434.31	449.865	3026.44	1252.45	459.309	3079.78	1143.6	483.857	3081.61	970.062	448.946	3075.72	870.667	500.165	3134.52	880.156	498.305	3124.26	773.546
307	0	261.812	2698.4	1610.79	158.196	2700.75	1607.93	286.187	2854.73	1628.65	150.344	2868.65	1628.5	202.8	2930.23	1485.94	198.212	3051.06	1270.92	224.003	2797.27	1382.4	221.122	2782.43	1195.82	142.956	3041.94	1345.96	399.876	2939.63	1435.41	451.266	3012.11	1252.07	461.029	3064.75	1142.91	485.077	3064.67	969.018	449.902	3058.36	869.379	501.681	3116.68	878.327	499.355	3105.93	771.432
308	0	263.42	2686.97	1611.82	159.823	2689.17	1609.23	287.571	2843.33	1629.76	151.623	2857.12	1629.96	203.856	2918.93	1487.41	199.078	3039.28	1272.29	224.979	2785.77	1383.9	222.178	2770.73	1197.31	143.83	3030.49	1347.37	400.995	2927.95	1436.69	452.627	2997.92	1251.94	462.734	3049.78	1142.45	486.254	3047.57	968.29	450.786	3040.64	868.511	503.102	3098.48	876.807	500.378	3086.94	769.756
309	0	264.856	2675.68	1613.03	161.275	2677.74	1610.68	288.807	2832.05	1631.04	152.766	2845.71	1631.55	204.828	2907.75	1488.99	199.901	3027.58	1273.74	225.857	2774.38	1385.56	223.156	2759.13	1198.95	144.665	3019.14	1348.84	402.026	2916.36	1438.13	453.949	2983.87	1252.08	464.424	3034.89	1142.24	487.39	3030.3	967.878	451.598	3022.55	868.064	504.428	3079.93	875.6	501.372	3067.28	768.519
310	0	266.122	2664.5	1614.43	162.552	2666.45	1612.27	289.897	2820.89	1632.51	153.775	2834.45	1633.28	205.716	2896.68	1490.67	200.682	3015.97	1275.25	226.638	2763.09	1387.36	224.056	2747.63	1200.76	145.463	3007.89	1350.38	402.97	2904.86	1439.73	455.23	2969.97	1252.47	466.097	3020.06	1142.25	488.482	3012.86	967.781	452.339	3004.09	868.038	505.658	3061.03	874.703	502.337	3046.96	767.726
311	0	267.221	2653.45	1616.01	163.659	2655.31	1614	290.844	2809.86	1634.15	154.652	2823.31	1635.12	206.522	2885.73	1492.45	201.422	3004.45	1276.84	227.323	2751.9	1389.31	224.878	2736.23	1202.71	146.224	2996.74	1351.99	403.827	2893.44	1441.5	456.471	2956.21	1253.1	467.754	3005.3	1142.5	489.532	2995.27	967.997	453.01	2985.28	868.432	506.79	3041.78	874.117	503.268	3026.01	767.381
312	0	268.157	2642.51	1617.77	164.6	2644.3	1615.87	291.655	2798.94	1635.96	155.403	2812.3	1637.08	207.25	2874.89	1494.31	202.123	2993.01	1278.48	227.916	2740.82	1391.38	225.624	2724.93	1204.81	146.948	2985.68	1353.66	404.601	2882.1	1443.43	457.672	2942.61	1253.99	469.394	2990.62	1142.97	490.538	2977.53	968.523	453.609	2966.12	869.245	507.825	3022.19	873.842	504.16	3004.42	767.488
313	0	268.937	2631.69	1619.68	165.381	2633.42	1617.86	292.336	2788.13	1637.92	156.037	2801.41	1639.15	207.901	2864.14	1496.26	202.784	2981.66	1280.19	228.421	2729.82	1393.59	226.295	2713.71	1207.03	147.637	2974.7	1355.39	405.295	2870.83	1445.49	458.833	2929.15	1255.1	471.014	2976.01	1143.65	491.499	2959.64	969.354	454.14	2946.63	870.473	508.758	3002.28	873.875	505.006	2982.25	768.053
314	0	269.569	2620.96	1621.74	166.011	2622.66	1619.96	292.898	2777.41	1640.01	156.56	2790.64	1641.31	208.481	2853.49	1498.27	203.407	2970.38	1281.95	228.844	2718.91	1395.89	226.895	2702.57	1209.37	148.291	2963.81	1357.16	405.913	2859.64	1447.68	459.955	2915.84	1256.43	472.613	2961.49	1144.53	492.415	2941.61	970.48	454.603	2926.82	872.111	509.589	2982.06	874.213	505.798	2959.51	769.078
315	0	270.066	2610.33	1623.93	166.502	2612.01	1622.15	293.353	2766.79	1642.22	156.986	2779.98	1643.54	208.994	2842.93	1500.34	203.991	2959.17	1283.75	229.192	2708.07	1398.29	227.426	2691.5	1211.81	148.912	2952.99	1358.96	406.459	2848.51	1449.98	461.036	2902.67	1257.95	474.19	2947.05	1145.59	493.286	2923.46	971.891	454.998	2906.71	874.148	510.315	2961.56	874.849	506.525	2936.25	770.563
316	0	270.44	2599.77	1626.23	166.868	2601.47	1624.42	293.713	2756.24	1644.52	157.325	2769.42	1645.82	209.446	2832.43	1502.45	204.536	2948.03	1285.58	229.473	2697.29	1400.75	227.894	2680.49	1214.32	149.498	2942.23	1360.8	406.94	2837.43	1452.36	462.079	2889.64	1259.64	475.744	2932.7	1146.82	494.109	2905.2	973.571	455.33	2886.34	876.57	510.934	2940.79	875.772	507.175	2912.53	772.502
317	0	270.707	2589.28	1628.6	167.124	2591	1626.74	293.995	2745.75	1646.88	157.594	2758.95	1648.12	209.844	2821.98	1504.58	205.042	2936.96	1287.42	229.696	2686.57	1403.24	228.305	2669.54	1216.86	150.049	2931.53	1362.64	407.361	2826.41	1454.79	463.084	2876.75	1261.46	477.271	2918.43	1148.17	494.884	2886.85	975.5	455.598	2865.74	879.357	511.445	2919.78	876.97	507.737	2888.39	774.883
318	0	270.885	2578.84	1631.01	167.288	2580.61	1629.09	294.215	2735.32	1649.26	157.805	2748.55	1650.43	210.193	2811.57	1506.7	205.504	2925.93	1289.27	229.871	2675.88	1405.74	228.666	2658.63	1219.42	150.565	2920.86	1364.48	407.728	2815.44	1457.25	464.052	2863.99	1263.38	478.771	2904.25	1149.61	495.61	2868.42	977.655	455.806	2844.93	882.485	511.847	2898.56	878.424	508.197	2863.91	777.688
319	0	270.991	2568.43	1633.44	167.378	2570.27	1631.43	294.388	2724.91	1651.63	157.975	2738.21	1652.7	210.499	2801.19	1508.79	205.92	2914.94	1291.09	230.008	2665.23	1408.22	228.983	2647.76	1221.95	151.043	2910.22	1366.29	408.046	2804.5	1459.69	464.983	2851.34	1265.35	480.241	2890.16	1151.12	496.286	2849.92	980.008	455.955	2823.95	885.925	512.141	2877.17	880.115	508.545	2839.15	780.891
320	0	271.044	2558.05	1635.83	167.412	2559.97	1633.73	294.53	2714.53	1653.96	158.119	2727.92	1654.91	210.768	2790.81	1510.83	206.286	2904	1292.88	230.117	2654.59	1410.63	229.263	2636.92	1224.42	151.481	2899.59	1368.06	408.322	2793.6	1462.09	465.879	2838.8	1267.33	481.679	2876.14	1152.64	496.91	2831.38	982.528	456.047	2802.83	889.642	512.327	2855.63	882.016	508.769	2814.17	784.459
321	0	271.062	2547.67	1638.16	167.41	2549.68	1635.97	294.657	2704.15	1656.19	158.25	2717.64	1657.03	211.005	2780.42	1512.79	206.598	2893.08	1294.6	230.207	2643.95	1412.94	229.514	2626.1	1226.78	151.877	2888.97	1369.77	408.561	2782.73	1464.4	466.74	2826.36	1269.28	483.081	2862.19	1154.14	497.481	2812.82	985.18	456.083	2781.63	893.599	512.408	2833.97	884.101	508.863	2789.05	788.355
322	0	271.063	2537.28	1640.39	167.389	2539.39	1638.1	294.782	2693.76	1658.3	158.381	2707.37	1659.02	211.215	2770.01	1514.64	206.849	2882.18	1296.24	230.286	2633.31	1415.12	229.742	2615.31	1229.01	152.226	2878.34	1371.39	408.767	2771.88	1466.6	467.565	2813.99	1271.15	484.444	2848.3	1155.57	497.996	2794.24	987.93	456.062	2760.37	897.752	512.386	2812.23	886.34	508.819	2763.85	792.534
323	0	271.062	2526.87	1642.47	167.365	2529.09	1640.1	294.915	2683.34	1660.25	158.522	2697.09	1660.86	211.401	2759.56	1516.36	207.037	2871.3	1297.77	230.363	2622.66	1417.13	229.955	2604.53	1231.06	152.527	2867.68	1372.91	408.943	2761.05	1468.63	468.353	2801.68	1272.89	485.764	2834.45	1156.9	498.454	2775.67	990.74	455.985	2739.09	902.057	512.265	2790.44	888.701	508.634	2738.63	796.95
324	0	271.072	2516.42	1644.38	167.35	2518.74	1641.94	295.066	2672.88	1662.01	158.682	2686.78	1662.52	211.566	2749.06	1517.92	207.155	2860.43	1299.18	230.441	2611.97	1418.95	230.156	2593.75	1232.91	152.776	2856.99	1374.31	409.094	2750.24	1470.48	469.102	2789.42	1274.47	487.035	2820.64	1158.09	498.85	2757.12	993.573	455.849	2717.84	906.467	512.048	2768.64	891.152	508.306	2713.47	801.552
325	0	271.103	2505.91	1646.08	167.358	2508.34	1643.58	295.241	2662.36	1663.56	158.865	2676.42	1663.98	211.713	2738.5	1519.3	207.201	2849.56	1300.43	230.527	2601.26	1420.54	230.352	2582.98	1234.53	152.968	2846.26	1375.57	409.219	2739.44	1472.12	469.809	2777.18	1275.84	488.251	2806.85	1159.09	499.183	2738.61	996.392	455.652	2696.66	910.937	511.741	2746.86	893.661	507.839	2688.42	806.292
326	0	271.163	2495.34	1647.54	167.394	2497.87	1644.99	295.443	2651.78	1664.87	159.074	2666	1665.22	211.84	2727.87	1520.48	207.17	2838.68	1301.52	230.621	2590.5	1421.88	230.545	2572.2	1235.89	153.101	2835.48	1376.66	409.321	2728.64	1473.51	470.47	2764.96	1276.99	489.404	2793.07	1159.89	499.448	2720.15	999.162	455.392	2675.57	915.419	511.347	2725.13	896.197	507.235	2663.53	811.12
327	0	271.256	2484.69	1648.74	167.465	2487.32	1646.17	295.672	2641.13	1665.92	159.309	2655.49	1666.22	211.949	2717.16	1521.45	207.059	2827.78	1302.42	230.724	2579.7	1422.96	230.737	2561.42	1236.98	153.171	2824.64	1377.58	409.397	2717.84	1474.65	471.079	2752.74	1277.87	490.488	2779.28	1160.46	499.642	2701.76	1001.85	455.067	2654.62	919.871	510.872	2703.49	898.73	506.501	2638.85	815.987
328	0	271.383	2473.96	1649.67	167.571	2476.69	1647.08	295.926	2630.4	1666.7	159.567	2644.9	1666.96	212.035	2706.37	1522.2	206.868	2816.87	1303.12	230.835	2568.85	1423.77	230.93	2550.62	1237.78	153.175	2813.72	1378.32	409.445	2707.04	1475.51	471.63	2740.5	1278.48	491.494	2765.47	1160.78	499.76	2683.46	1004.43	454.672	2633.84	924.25	510.318	2681.97	901.232	505.647	2614.44	820.849
329	0	271.541	2463.15	1650.3	167.711	2465.95	1647.71	296.199	2619.57	1667.21	159.843	2634.2	1667.46	212.096	2695.49	1522.71	206.596	2805.93	1303.61	230.95	2557.94	1424.28	231.122	2539.8	1238.29	153.112	2802.73	1378.85	409.463	2696.22	1476.09	472.117	2728.24	1278.8	492.414	2751.64	1160.85	499.799	2665.26	1006.87	454.206	2613.25	928.519	509.691	2660.6	903.676	504.682	2590.33	825.665
330	0	271.725	2452.23	1650.63	167.877	2455.11	1648.07	296.484	2608.65	1667.43	160.127	2623.4	1667.69	212.126	2684.52	1522.98	206.244	2794.96	1303.88	231.064	2546.96	1424.51	231.31	2528.95	1238.5	152.978	2791.66	1379.17	409.445	2685.38	1476.4	472.531	2715.94	1278.83	493.239	2737.78	1160.65	499.755	2647.17	1009.16	453.667	2592.9	932.641	508.993	2639.42	906.04	503.619	2566.57	830.397
331	0	271.924	2441.22	1650.67	168.062	2444.16	1648.14	296.769	2597.64	1667.38	160.408	2612.49	1667.66	212.121	2673.46	1523.01	205.815	2783.94	1303.93	231.169	2535.92	1424.45	231.491	2518.07	1238.42	152.773	2780.51	1379.28	409.387	2674.5	1476.42	472.865	2703.59	1278.57	493.961	2723.9	1160.19	499.624	2629.22	1011.26	453.052	2572.8	936.586	508.228	2618.46	908.301	502.47	2543.19	835.012
332	0	272.128	2430.12	1650.42	168.254	2433.1	1647.93	297.041	2586.52	1667.05	160.675	2601.45	1667.38	212.072	2662.3	1522.8	205.311	2772.87	1303.75	231.256	2524.81	1424.11	231.659	2507.14	1238.06	152.495	2769.27	1379.16	409.282	2663.58	1476.18	473.111	2691.2	1278.03	494.571	2709.98	1159.48	499.404	2611.43	1013.17	452.36	2552.99	940.327	507.398	2597.75	910.441	501.245	2520.24	839.479
333	0	272.322	2418.91	1649.88	168.438	2421.93	1647.44	297.286	2575.31	1666.47	160.911	2590.31	1666.85	211.971	2651.05	1522.35	204.738	2761.75	1303.34	231.314	2513.62	1423.49	231.807	2496.15	1237.42	152.146	2757.94	1378.82	409.123	2652.61	1475.68	473.262	2678.76	1277.23	495.063	2696.04	1158.54	499.091	2593.8	1014.88	451.59	2533.48	943.84	506.505	2577.33	912.442	499.957	2497.73	843.77
334	0	272.49	2407.6	1649.07	168.598	2410.64	1646.69	297.487	2564	1665.63	161.102	2579.04	1666.09	211.812	2639.71	1521.67	204.102	2750.56	1302.71	231.332	2502.35	1422.63	231.926	2485.1	1236.53	151.725	2746.52	1378.27	408.903	2641.57	1474.94	473.312	2666.27	1276.19	495.432	2682.09	1157.38	498.684	2576.37	1016.38	450.743	2514.31	947.106	505.551	2557.22	914.291	498.616	2475.7	847.86
335	0	272.615	2396.2	1648.01	168.716	2399.25	1645.7	297.626	2552.6	1664.57	161.228	2567.66	1665.1	211.583	2628.28	1520.77	203.409	2739.3	1301.86	231.297	2491.01	1421.53	232.006	2473.97	1235.41	151.236	2735	1377.49	408.615	2630.45	1473.98	473.254	2653.72	1274.93	495.671	2668.12	1156.03	498.182	2559.15	1017.67	449.819	2495.48	950.107	504.539	2537.46	915.973	497.232	2454.18	851.727
336	0	272.677	2384.7	1646.72	168.772	2387.75	1644.48	297.686	2541.1	1663.3	161.273	2556.17	1663.91	211.278	2616.75	1519.67	202.665	2727.96	1300.81	231.196	2479.57	1420.21	232.037	2462.75	1234.07	150.68	2723.41	1376.5	408.252	2619.24	1472.83	473.084	2641.13	1273.47	495.78	2654.17	1154.51	497.584	2542.16	1018.73	448.82	2477.02	952.83	503.468	2518.07	917.476	495.81	2433.19	855.348
337	0	272.657	2373.11	1645.23	168.747	2376.14	1643.05	297.647	2529.51	1661.84	161.217	2544.57	1662.54	210.888	2605.14	1518.37	201.878	2716.54	1299.56	231.014	2468.05	1418.7	232.007	2451.44	1232.54	150.063	2711.72	1375.32	407.807	2607.93	1471.49	472.801	2628.5	1271.85	495.755	2640.23	1152.84	496.892	2525.41	1019.57	447.748	2458.95	955.265	502.343	2499.08	918.791	494.357	2412.75	858.702
338	0	272.535	2361.43	1643.55	168.619	2364.44	1641.44	297.491	2517.83	1660.23	161.043	2532.86	1661.01	210.405	2593.45	1516.9	201.057	2705.02	1298.13	230.738	2456.43	1417.01	231.907	2440.02	1230.85	149.388	2699.96	1373.94	407.277	2596.51	1470	472.404	2615.82	1270.1	495.599	2626.33	1151.06	496.108	2508.93	1020.2	446.607	2441.28	957.4	501.164	2480.52	919.906	492.878	2392.88	861.769
339	0	272.292	2349.66	1641.73	168.369	2352.64	1639.67	297.2	2506.06	1658.47	160.733	2521.06	1659.34	209.822	2581.67	1515.28	200.208	2693.41	1296.53	230.356	2444.73	1415.19	231.723	2428.48	1229.02	148.66	2688.12	1372.39	406.655	2584.97	1468.39	471.894	2603.11	1268.24	495.312	2612.48	1149.19	495.233	2492.73	1020.61	445.399	2424.02	959.229	499.935	2462.42	920.815	491.374	2373.6	864.526
340	0	271.909	2337.82	1639.78	167.979	2340.75	1637.78	296.758	2494.22	1656.62	160.27	2509.16	1657.55	209.137	2569.81	1513.52	199.339	2681.7	1294.78	229.857	2432.93	1413.26	231.447	2416.81	1227.08	147.886	2676.2	1370.67	405.94	2573.3	1466.67	471.273	2590.37	1266.31	494.898	2598.7	1147.26	494.273	2476.82	1020.81	444.128	2407.19	960.744	498.658	2444.78	921.508	489.849	2354.92	866.954
341	0	271.369	2325.89	1637.75	167.432	2328.78	1635.78	296.15	2482.29	1654.69	159.643	2497.18	1655.66	208.344	2557.88	1511.66	198.456	2669.89	1292.9	229.231	2421.04	1411.23	231.07	2405.01	1225.06	147.072	2664.21	1368.82	405.131	2561.49	1464.87	470.547	2577.61	1264.33	494.362	2584.99	1145.29	493.23	2461.23	1020.8	442.8	2390.8	961.941	497.338	2427.63	921.98	488.301	2336.86	869.033
342	0	270.658	2313.87	1635.65	166.712	2316.72	1633.7	295.365	2470.27	1652.71	158.837	2485.11	1653.71	207.442	2545.87	1509.7	197.567	2657.97	1290.92	228.471	2409.05	1409.15	230.583	2393.07	1222.98	146.225	2652.16	1366.84	404.227	2549.55	1463.03	469.722	2564.82	1262.34	493.71	2571.38	1143.32	492.112	2445.96	1020.6	441.418	2374.86	962.815	495.98	2410.99	922.224	486.733	2319.42	870.742
343	0	269.763	2301.78	1633.52	165.809	2304.58	1631.58	294.393	2458.18	1650.72	157.847	2472.96	1651.72	206.433	2533.8	1507.69	196.676	2645.94	1288.86	227.573	2396.97	1407.04	229.982	2380.98	1220.89	145.349	2640.05	1364.76	403.23	2537.47	1461.15	468.804	2552.01	1260.36	492.948	2557.87	1141.37	490.923	2431.02	1020.19	439.988	2359.37	963.362	494.588	2394.87	922.237	485.146	2302.62	872.064
344	0	268.676	2289.62	1631.39	164.715	2292.37	1629.43	293.23	2446.01	1648.74	156.668	2460.73	1649.72	205.318	2521.67	1505.64	195.788	2633.8	1286.73	226.536	2384.81	1404.93	229.264	2368.75	1218.8	144.451	2627.88	1362.61	402.143	2525.24	1459.28	467.803	2539.18	1258.42	492.083	2544.47	1139.45	489.669	2416.44	1019.6	438.515	2344.34	963.579	493.169	2379.29	922.015	483.54	2286.47	872.981
345	0	267.392	2277.37	1629.29	163.424	2280.09	1627.29	291.876	2433.75	1646.81	155.299	2448.44	1647.72	204.103	2509.48	1503.58	194.904	2621.56	1284.58	225.363	2372.56	1402.84	228.431	2356.37	1216.74	143.536	2615.67	1360.41	400.973	2512.89	1457.42	466.727	2526.34	1256.54	491.123	2531.19	1137.6	488.358	2402.2	1018.83	437.006	2329.79	963.467	491.731	2364.25	921.559	481.919	2270.97	873.479
346	0	265.911	2265.05	1627.24	161.937	2267.74	1625.17	290.335	2421.42	1644.95	153.747	2436.08	1645.77	202.794	2497.23	1501.54	194.029	2609.22	1282.42	224.059	2360.24	1400.81	227.484	2343.85	1214.75	142.607	2603.41	1358.18	399.725	2500.4	1455.61	465.587	2513.49	1254.75	490.074	2518.03	1135.83	486.997	2388.33	1017.88	435.467	2315.72	963.026	490.28	2349.78	920.87	480.286	2256.15	873.547
347	0	264.239	2252.66	1625.27	160.26	2255.34	1623.1	288.616	2409.01	1643.2	152.02	2423.66	1643.87	201.399	2484.93	1499.54	193.16	2596.79	1280.28	222.635	2347.84	1398.85	226.433	2331.2	1212.84	141.667	2591.1	1355.96	398.407	2487.8	1453.87	464.394	2500.63	1253.07	488.944	2505	1134.17	485.593	2374.83	1016.77	433.905	2302.13	962.257	488.827	2335.87	919.952	478.648	2242	873.178
348	0	262.386	2240.19	1623.41	158.403	2242.88	1621.11	286.733	2396.52	1641.57	150.134	2411.18	1642.06	199.929	2472.6	1497.62	192.297	2584.26	1278.2	221.104	2335.37	1397	225.288	2318.43	1211.04	140.717	2578.76	1353.77	397.029	2475.1	1452.22	463.157	2487.77	1251.52	487.739	2492.1	1132.63	484.154	2361.7	1015.51	432.328	2289.04	961.167	487.379	2322.54	918.811	477.012	2228.54	872.366
349	0	260.368	2227.66	1621.67	156.382	2230.38	1619.21	284.706	2383.96	1640.09	148.108	2398.66	1640.35	198.396	2460.23	1495.79	191.437	2571.66	1276.19	219.483	2322.86	1395.27	224.061	2305.54	1209.38	139.757	2566.39	1351.65	395.601	2462.31	1450.68	461.888	2474.9	1250.11	486.465	2479.33	1131.23	482.688	2348.96	1014.11	430.744	2276.44	959.762	485.947	2309.8	917.457	475.386	2215.77	871.114
350	0	258.206	2215.07	1620.07	154.219	2217.84	1617.42	282.559	2371.34	1638.78	145.965	2386.1	1638.78	196.814	2447.83	1494.08	190.577	2558.99	1274.29	217.793	2310.29	1393.69	222.77	2292.56	1207.87	138.787	2553.98	1349.61	394.135	2449.45	1449.26	460.597	2462.04	1248.87	485.129	2466.7	1129.97	481.204	2336.6	1012.58	429.163	2264.34	958.052	484.541	2297.63	915.9	473.782	2203.72	869.425
351	0	255.928	2202.44	1618.63	151.939	2205.27	1615.76	280.318	2358.66	1637.65	143.733	2373.52	1637.36	195.196	2435.41	1492.52	189.711	2546.26	1272.52	216.054	2297.7	1392.28	221.433	2279.5	1206.53	137.803	2541.56	1347.69	392.644	2436.55	1448	459.292	2449.2	1247.8	483.734	2454.2	1128.88	479.71	2324.63	1010.93	427.595	2252.75	956.051	483.17	2286.06	914.157	472.211	2192.37	867.312
352	0	253.565	2189.76	1617.36	149.574	2192.68	1614.25	278.017	2345.93	1636.73	141.444	2360.91	1636.1	193.56	2422.99	1491.12	188.835	2533.5	1270.9	214.292	2285.09	1391.04	220.067	2266.39	1205.38	136.804	2529.12	1345.91	391.141	2423.63	1446.89	457.982	2436.4	1246.92	482.286	2441.84	1127.95	478.214	2313.05	1009.18	426.05	2241.66	953.776	481.844	2275.08	912.243	470.687	2181.75	864.79
353	0	251.152	2177.06	1616.27	147.158	2180.09	1612.89	275.687	2333.17	1636.01	139.13	2348.29	1635.03	191.921	2410.56	1489.9	187.944	2520.71	1269.46	212.53	2272.48	1390	218.694	2253.25	1204.43	135.786	2516.68	1344.3	389.64	2410.72	1445.96	456.674	2423.63	1246.22	480.791	2429.63	1127.19	476.727	2301.87	1007.35	424.538	2231.09	951.247	480.573	2264.69	910.18	469.226	2171.85	861.883
354	0	248.727	2164.34	1615.36	144.729	2167.49	1611.71	273.366	2320.39	1635.5	136.826	2335.67	1634.15	190.297	2398.16	1488.88	187.033	2507.93	1268.22	210.795	2259.88	1389.16	217.333	2240.11	1203.69	134.746	2504.23	1342.89	388.156	2397.85	1445.21	455.375	2410.94	1245.7	479.251	2417.57	1126.61	475.256	2291.09	1005.45	423.072	2221.02	948.486	479.365	2254.88	907.989	467.842	2162.67	858.62
355	0	246.33	2151.62	1614.65	142.328	2154.92	1610.71	271.089	2307.6	1635.2	134.569	2323.06	1633.48	188.704	2385.77	1488.08	186.099	2495.15	1267.19	209.11	2247.32	1388.54	216	2226.99	1203.16	133.683	2491.79	1341.68	386.702	2385.04	1444.64	454.088	2398.33	1245.37	477.672	2405.67	1126.19	473.811	2280.7	1003.49	421.663	2211.46	945.522	478.229	2245.66	905.696	466.55	2154.21	855.034
356	0	244.002	2138.93	1614.12	139.993	2142.37	1609.9	268.893	2294.83	1635.11	132.392	2310.48	1633.02	187.159	2373.43	1487.49	185.138	2482.41	1266.38	207.5	2234.79	1388.13	214.714	2213.93	1202.85	132.595	2479.36	1340.7	385.293	2372.32	1444.26	452.815	2385.83	1245.22	476.059	2393.93	1125.95	472.401	2270.73	1001.5	420.323	2202.41	942.385	477.172	2237.01	903.327	465.368	2146.46	851.168
357	0	241.784	2126.27	1613.79	137.766	2129.86	1609.29	266.811	2282.09	1635.23	130.329	2297.93	1632.78	185.677	2361.13	1487.13	184.15	2469.73	1265.81	205.985	2222.33	1387.93	213.488	2200.95	1202.75	131.48	2466.96	1339.96	383.939	2359.72	1444.08	451.56	2373.48	1245.24	474.415	2382.39	1125.87	471.034	2261.15	999.501	419.063	2193.85	939.108	476.199	2228.94	900.912	464.31	2139.42	847.069
358	0	239.715	2113.66	1613.65	135.684	2117.4	1608.89	264.876	2269.4	1635.55	128.411	2285.43	1632.78	184.272	2348.89	1487	183.133	2457.11	1265.49	204.584	2209.95	1387.96	212.336	2188.08	1202.86	130.342	2454.59	1339.47	382.653	2347.26	1444.09	450.321	2361.29	1245.42	472.747	2371.04	1125.95	469.719	2251.99	997.508	417.894	2185.79	935.729	475.315	2221.42	898.479	463.392	2133.07	842.789
359	0	237.83	2101.13	1613.7	133.785	2104.99	1608.7	263.116	2256.79	1636.07	126.666	2272.99	1633	182.954	2336.73	1487.1	182.088	2444.58	1265.4	203.312	2197.65	1388.21	211.269	2175.34	1203.18	129.18	2442.25	1339.24	381.444	2334.97	1444.28	449.099	2349.3	1245.76	471.058	2359.91	1126.18	468.464	2243.23	995.545	416.827	2178.22	932.285	474.523	2214.46	896.062	462.625	2127.39	838.386
360	0	236.163	2088.68	1613.93	132.099	2092.66	1608.72	261.555	2244.26	1636.76	125.116	2260.61	1633.45	181.735	2324.64	1487.44	181.017	2432.14	1265.56	202.183	2185.46	1388.67	210.297	2162.75	1203.71	127.998	2429.96	1339.25	380.319	2322.86	1444.65	447.892	2337.53	1246.24	469.354	2349	1126.56	467.276	2234.88	993.636	415.871	2171.12	928.819	473.825	2208.03	893.693	462.022	2122.36	833.919
361	0	234.741	2076.33	1614.34	130.656	2080.4	1608.97	260.213	2231.84	1637.63	123.779	2248.3	1634.13	180.62	2312.64	1488	179.921	2419.82	1265.96	201.206	2173.37	1389.35	209.427	2150.31	1204.45	126.8	2417.72	1339.53	379.285	2310.95	1445.19	446.699	2326.01	1246.85	467.64	2338.35	1127.08	466.162	2226.94	991.803	415.036	2164.49	925.372	473.221	2202.12	891.403	461.593	2117.97	829.451
362	0	233.587	2064.1	1614.94	129.477	2068.23	1609.45	259.101	2219.54	1638.66	122.667	2236.08	1635.04	179.614	2300.73	1488.79	178.804	2407.6	1266.58	200.386	2161.4	1390.24	208.664	2138.04	1205.38	125.589	2405.53	1340.05	378.343	2299.25	1445.9	445.519	2314.76	1247.59	465.921	2327.97	1127.73	465.127	2219.41	990.07	414.328	2158.31	921.987	472.71	2196.72	889.225	461.343	2114.18	825.046
363	0	232.717	2051.99	1615.71	128.581	2056.14	1610.16	258.228	2207.37	1639.85	121.786	2223.94	1636.18	178.719	2288.91	1489.78	177.67	2395.5	1267.43	199.726	2149.54	1391.33	208.013	2125.94	1206.51	124.372	2393.39	1340.8	377.496	2287.77	1446.77	444.35	2303.8	1248.45	464.202	2317.87	1128.52	464.177	2212.27	988.461	413.754	2152.56	918.705	472.291	2191.8	887.19	461.277	2110.97	820.765
364	0	232.139	2040.02	1616.65	127.978	2044.15	1611.09	257.594	2195.36	1641.18	121.138	2211.89	1637.53	177.935	2277.19	1490.97	176.524	2383.52	1268.48	199.226	2137.8	1392.62	207.473	2113.99	1207.83	123.153	2381.31	1341.78	376.742	2276.51	1447.78	443.193	2293.15	1249.42	462.489	2308.07	1129.44	463.314	2205.53	986.996	413.32	2147.23	915.566	471.958	2187.36	885.327	461.397	2108.29	816.668
365	0	231.858	2028.2	1617.77	127.672	2032.25	1612.25	257.195	2183.5	1642.64	120.716	2199.93	1639.09	177.258	2265.56	1492.35	175.372	2371.65	1269.71	198.882	2126.18	1394.09	207.046	2102.19	1209.32	121.938	2369.29	1342.97	376.078	2265.46	1448.93	442.045	2282.8	1250.5	460.786	2298.58	1130.48	462.541	2199.17	985.698	413.028	2142.3	912.608	471.708	2183.35	883.662	461.699	2106.13	812.809
366	0	231.87	2016.52	1619.05	127.662	2020.44	1613.62	257.022	2171.8	1644.22	120.511	2188.07	1640.83	176.685	2254.02	1493.88	174.22	2359.88	1271.11	198.688	2114.65	1395.73	206.728	2090.52	1210.98	120.732	2357.32	1344.34	375.499	2254.62	1450.2	440.906	2272.78	1251.69	459.099	2289.41	1131.66	461.86	2193.18	984.582	412.88	2137.74	909.863	471.535	2179.77	882.218	462.178	2104.44	809.236
367	0	232.164	2004.98	1620.49	127.939	2008.72	1615.21	257.059	2160.27	1645.89	120.508	2176.29	1642.75	176.208	2242.56	1495.56	173.075	2348.21	1272.66	198.635	2103.23	1397.53	206.514	2078.98	1212.79	119.543	2345.4	1345.88	375	2243.97	1451.57	439.776	2263.08	1252.97	457.433	2280.56	1132.95	461.27	2187.56	983.664	412.876	2133.52	907.36	471.431	2176.58	881.012	462.825	2103.18	805.988
368	0	232.723	1993.6	1622.07	128.488	1997.1	1616.99	257.289	2148.9	1647.65	120.689	2164.61	1644.81	175.82	2231.17	1497.36	171.945	2336.63	1274.32	198.712	2091.89	1399.46	206.397	2067.53	1214.72	118.376	2333.52	1347.55	374.572	2233.51	1453.03	438.655	2253.69	1254.35	455.795	2272.03	1134.37	460.77	2182.27	982.953	413.013	2129.63	905.119	471.39	2173.75	880.058	463.625	2102.32	803.094
369	0	233.527	1982.36	1623.79	129.29	1985.56	1618.95	257.69	2137.7	1649.46	121.032	2153.02	1646.99	175.512	2219.85	1499.25	170.838	2325.13	1276.08	198.906	2080.62	1401.5	206.369	2056.17	1216.76	117.237	2321.68	1349.34	374.208	2223.19	1454.56	437.545	2244.61	1255.82	454.188	2263.82	1135.91	460.357	2177.31	982.455	413.287	2126.02	903.156	471.403	2171.25	879.362	464.563	2101.8	800.574
370	0	234.548	1971.26	1625.62	130.32	1974.11	1621.05	258.237	2126.66	1651.32	121.515	2141.52	1649.25	175.276	2208.57	1501.2	169.763	2313.69	1277.9	199.206	2069.41	1403.61	206.421	2044.88	1218.88	116.133	2309.88	1351.2	373.899	2213.01	1456.13	436.447	2235.8	1257.37	452.62	2255.91	1137.55	460.03	2172.65	982.171	413.691	2122.67	901.477	471.462	2169.04	878.926	465.616	2101.59	798.433
371	0	235.757	1960.28	1627.54	131.551	1962.75	1623.28	258.906	2115.77	1653.18	122.114	2130.09	1651.56	175.101	2197.33	1503.18	168.727	2302.31	1279.76	199.596	2058.25	1405.76	206.542	2033.63	1221.03	115.069	2298.1	1353.11	373.638	2202.94	1457.73	435.363	2227.26	1258.98	451.096	2248.29	1139.28	459.782	2168.25	982.096	414.216	2119.54	900.081	471.559	2167.08	878.744	466.763	2101.63	796.669
372	0	237.121	1949.41	1629.53	132.95	1951.45	1625.59	259.669	2105	1655.02	122.803	2118.74	1653.88	174.98	2186.12	1505.16	167.74	2290.97	1281.62	200.063	2047.12	1407.93	206.721	2022.41	1223.2	114.053	2286.35	1355.04	373.417	2192.95	1459.33	434.297	2218.96	1260.65	449.621	2240.94	1141.1	459.611	2164.09	982.221	414.852	2116.6	898.961	471.686	2165.33	878.807	467.977	2101.86	795.266
373	0	238.606	1938.65	1631.56	134.485	1940.22	1627.95	260.503	2094.36	1656.82	123.558	2107.45	1656.16	174.903	2174.92	1507.11	166.81	2279.68	1283.45	200.592	2036	1410.07	206.947	2011.22	1225.33	113.091	2274.61	1356.94	373.228	2183.01	1460.9	433.253	2210.85	1262.36	448.201	2233.82	1142.99	459.509	2160.14	982.531	415.587	2113.81	898.101	471.835	2163.75	879.097	469.233	2102.26	794.199
374	0	240.177	1927.96	1633.59	136.12	1929.05	1630.32	261.381	2083.81	1658.54	124.358	2096.23	1658.37	174.864	2163.72	1508.99	165.945	2268.41	1285.22	201.17	2024.89	1412.14	207.21	2000.03	1227.39	112.19	2262.89	1358.79	373.067	2173.1	1462.42	432.235	2202.91	1264.08	446.84	2226.92	1144.92	459.47	2156.35	983.006	416.408	2111.14	897.479	472.001	2162.31	879.595	470.504	2102.75	793.437
375	0	241.799	1917.34	1635.59	137.822	1917.92	1632.65	262.281	2073.33	1660.16	125.181	2085.05	1660.47	174.858	2152.5	1510.77	165.154	2257.15	1286.91	201.785	2013.77	1414.1	207.501	1988.84	1229.34	111.356	2251.17	1360.56	372.929	2163.18	1463.85	431.249	2195.1	1265.81	445.543	2220.18	1146.88	459.488	2152.71	983.625	417.299	2108.55	897.067	472.177	2160.94	880.275	471.766	2103.28	792.94
376	0	243.441	1906.75	1637.53	139.556	1906.83	1634.91	263.184	2062.91	1661.64	126.009	2073.9	1662.41	174.881	2141.27	1512.43	164.445	2245.91	1288.48	202.427	2002.63	1415.93	207.812	1977.63	1231.14	110.597	2239.46	1362.21	372.812	2153.24	1465.17	430.299	2187.38	1267.52	444.314	2213.57	1148.84	459.556	2149.16	984.362	418.247	2106.02	896.834	472.357	2159.63	881.112	472.996	2103.82	792.667
377	0	245.072	1896.18	1639.36	141.291	1895.76	1637.04	264.072	2052.5	1662.98	126.826	2062.77	1664.17	174.93	2130	1513.93	163.825	2234.67	1289.9	203.085	1991.45	1417.58	208.135	1966.41	1232.75	109.918	2227.74	1363.71	372.715	2143.23	1466.36	429.391	2179.7	1269.18	443.156	2207.06	1150.78	459.667	2145.66	985.19	419.237	2103.5	896.748	472.538	2158.31	882.075	474.175	2104.32	792.574
378	0	246.667	1885.61	1641.06	142.997	1884.69	1639.01	264.931	2042.09	1664.13	127.619	2051.66	1665.71	175.006	2118.69	1515.25	163.302	2223.43	1291.16	203.752	1980.24	1419.03	208.466	1955.17	1234.16	109.327	2216.02	1365.05	372.639	2133.15	1467.39	428.531	2172.04	1270.78	442.071	2200.59	1152.68	459.814	2142.19	986.079	420.254	2100.98	896.773	472.716	2156.97	883.136	475.288	2104.72	792.619
379	0	248.203	1875	1642.58	144.649	1873.62	1640.78	265.752	2031.66	1665.09	128.38	2040.53	1667	175.111	2107.33	1516.37	162.883	2212.17	1292.22	204.424	1968.98	1420.25	208.801	1943.89	1235.32	108.832	2204.29	1366.19	372.587	2122.97	1468.24	427.723	2164.33	1272.29	441.061	2194.13	1154.51	459.99	2138.69	987.001	421.286	2098.41	896.874	472.889	2155.55	884.265	476.325	2105	792.761
380	0	249.664	1864.35	1643.91	146.226	1862.52	1642.32	266.529	2021.16	1665.83	129.105	2029.38	1668.04	175.248	2095.91	1517.26	162.575	2200.89	1293.08	205.095	1957.66	1421.21	209.139	1932.58	1236.22	108.439	2192.55	1367.11	372.565	2112.67	1468.89	426.974	2156.56	1273.71	440.126	2187.63	1156.26	460.191	2135.14	987.929	422.32	2095.78	897.018	473.056	2154.02	885.434	477.28	2105.12	792.963
381	0	251.037	1853.62	1645	147.713	1851.37	1643.6	267.26	2010.59	1666.35	129.791	2018.2	1668.8	175.423	2084.42	1517.91	162.383	2189.58	1293.72	205.765	1946.28	1421.91	209.48	1921.23	1236.84	108.156	2180.78	1367.81	372.58	2102.24	1469.34	426.29	2148.68	1275	439.268	2181.06	1157.91	460.411	2131.49	988.836	423.346	2093.06	897.173	473.216	2152.35	886.615	478.152	2105.04	793.194
382	0	252.316	1842.8	1645.85	149.1	1840.18	1644.59	267.949	1999.92	1666.63	130.443	2006.97	1669.27	175.644	2072.87	1518.32	162.314	2178.22	1294.13	206.434	1934.82	1422.33	209.826	1909.84	1237.16	107.99	2169	1368.27	372.64	2091.65	1469.56	425.676	2140.66	1276.16	438.486	2174.36	1159.44	460.648	2127.71	989.697	424.357	2090.22	897.31	473.37	2150.51	887.786	478.943	2104.74	793.428
383	0	253.5	1831.87	1646.44	150.382	1828.91	1645.29	268.602	1989.12	1666.67	131.066	1995.67	1669.45	175.918	2061.24	1518.48	162.374	2166.82	1294.29	207.104	1923.29	1422.46	210.179	1898.4	1237.2	107.949	2157.18	1368.49	372.754	2080.89	1469.56	425.14	2132.48	1277.16	437.782	2167.52	1160.83	460.899	2123.77	990.489	425.348	2087.24	897.406	473.519	2148.47	888.922	479.658	2104.2	793.644
384	0	254.594	1820.81	1646.74	151.563	1817.56	1645.68	269.23	1978.19	1666.48	131.67	1984.31	1669.34	176.257	2049.53	1518.38	162.566	2155.35	1294.22	207.78	1911.68	1422.3	210.545	1886.91	1236.93	108.039	2145.33	1368.45	372.934	2069.95	1469.32	424.688	2124.09	1278	437.156	2160.49	1162.07	461.163	2119.63	991.192	426.315	2084.1	897.438	473.666	2146.2	890.004	480.307	2103.4	793.824
385	0	255.605	1809.62	1646.77	152.648	1806.12	1645.77	269.846	1967.11	1666.04	132.269	1972.85	1668.95	176.671	2037.73	1518.02	162.894	2143.81	1293.9	208.467	1899.97	1421.86	210.929	1875.35	1236.38	108.267	2133.44	1368.17	373.191	2058.83	1468.86	424.327	2115.49	1278.67	436.611	2153.23	1163.15	461.442	2115.27	991.787	427.26	2080.78	897.388	473.813	2143.67	891.013	480.897	2102.32	793.955
386	0	256.547	1798.28	1646.53	153.65	1794.57	1645.55	270.466	1955.88	1665.38	132.877	1961.31	1668.28	177.17	2025.84	1517.42	163.363	2132.19	1293.34	209.172	1888.17	1421.15	211.337	1863.72	1235.55	108.638	2121.5	1367.65	373.536	2047.51	1468.16	424.065	2106.64	1279.16	436.147	2145.74	1164.06	461.738	2110.66	992.259	428.185	2077.26	897.241	473.966	2140.86	891.933	481.438	2100.96	794.027
387	0	257.438	1786.78	1646.01	154.585	1782.91	1645.03	271.11	1944.47	1664.48	133.513	1949.66	1667.35	177.766	2013.86	1516.58	163.973	2120.48	1292.56	209.904	1876.27	1420.17	211.777	1852.02	1234.45	109.159	2109.51	1366.89	373.98	2035.99	1467.25	423.909	2097.53	1279.46	435.77	2137.97	1164.78	462.054	2105.77	992.594	429.093	2073.51	896.987	474.13	2137.75	892.751	481.943	2099.29	794.031
388	0	258.297	1775.12	1645.24	155.473	1771.14	1644.24	271.797	1932.9	1663.37	134.195	1937.91	1666.18	178.471	2001.78	1515.52	164.727	2108.68	1291.57	210.672	1864.26	1418.95	212.256	1840.23	1233.1	109.831	2097.46	1365.92	374.536	2024.27	1466.12	423.867	2088.15	1279.57	435.483	2129.91	1165.32	462.398	2100.58	992.78	429.991	2069.51	896.614	474.314	2134.31	893.452	482.42	2097.31	793.962
389	0	259.147	1763.29	1644.22	156.335	1759.24	1643.2	272.546	1921.16	1662.05	134.943	1926.06	1664.79	179.293	1989.6	1514.25	165.623	2096.77	1290.37	211.485	1852.14	1417.5	212.784	1828.35	1231.53	110.658	2085.34	1364.75	375.212	2012.35	1464.78	423.947	2078.48	1279.47	435.294	2121.53	1165.66	462.773	2095.06	992.808	430.884	2065.24	896.118	474.526	2130.53	894.027	482.882	2095	793.812
390	0	260.012	1751.3	1642.98	157.195	1747.21	1641.92	273.379	1909.25	1660.55	135.776	1914.09	1663.19	180.241	1977.32	1512.79	166.659	2084.75	1289	212.354	1839.91	1415.84	213.368	1816.37	1229.76	111.64	2073.15	1363.39	376.017	2000.23	1463.26	424.157	2068.51	1279.17	435.21	2112.82	1165.8	463.189	2089.18	992.668	431.782	2060.69	895.491	474.778	2126.37	894.466	483.337	2092.36	793.574
391	0	260.916	1739.15	1641.53	158.076	1735.05	1640.44	274.314	1897.17	1658.87	136.714	1902	1661.42	181.324	1964.93	1511.17	167.833	2072.61	1287.47	213.288	1827.56	1414.01	214.016	1804.27	1227.82	112.777	2060.88	1361.88	376.96	1987.91	1461.56	424.505	2058.24	1278.65	435.24	2103.76	1165.73	463.654	2082.92	992.356	432.691	2055.82	894.731	475.082	2121.82	894.76	483.796	2089.36	793.243
392	0	261.881	1726.83	1639.92	159.004	1722.76	1638.79	275.368	1884.92	1657.05	137.772	1889.8	1659.5	182.546	1952.43	1509.4	169.14	2060.37	1285.8	214.297	1815.09	1412.03	214.738	1792.07	1225.73	114.067	2048.54	1360.23	378.044	1975.41	1459.7	424.997	2047.65	1277.94	435.393	2094.33	1165.45	464.175	2076.27	991.865	433.617	2050.61	893.835	475.452	2116.84	894.902	484.268	2086	792.811
393	0	262.93	1714.36	1638.15	160	1710.34	1636.99	276.557	1872.52	1655.1	138.966	1877.49	1657.46	183.911	1939.83	1507.52	170.573	2048	1284.02	215.389	1802.52	1409.92	215.54	1779.74	1223.52	115.504	2036.11	1358.48	379.274	1962.72	1457.7	425.641	2036.74	1277.01	435.678	2084.53	1164.95	464.762	2069.19	991.195	434.567	2045.03	892.8	475.903	2111.42	894.887	484.763	2082.25	792.27
394	0	264.081	1701.74	1636.26	161.085	1697.79	1635.09	277.893	1859.96	1653.04	140.308	1865.05	1655.33	185.42	1927.13	1505.56	172.126	2035.52	1282.16	216.571	1789.83	1407.72	216.43	1767.29	1221.23	117.083	2023.6	1356.66	380.65	1949.87	1455.58	426.443	2025.51	1275.88	436.105	2074.34	1164.23	465.424	2061.67	990.344	435.544	2039.06	891.628	476.45	2105.53	894.71	485.289	2078.07	791.612
395	0	265.352	1688.98	1634.28	162.278	1685.11	1633.1	279.384	1847.25	1650.91	141.807	1852.5	1653.16	187.07	1914.33	1503.53	173.788	2022.94	1280.25	217.848	1777.04	1405.46	217.413	1754.72	1218.9	118.797	2011.02	1354.78	382.171	1936.87	1453.36	427.405	2013.96	1274.54	436.683	2063.75	1163.31	466.168	2053.68	989.316	436.553	2032.66	890.319	477.107	2099.13	894.368	485.855	2073.45	790.832
396	0	266.754	1676.07	1632.23	163.592	1672.31	1631.07	281.035	1834.39	1648.72	143.467	1839.84	1650.96	188.858	1901.43	1501.49	175.552	2010.25	1278.31	219.223	1764.15	1403.18	218.494	1742.03	1216.55	120.637	1998.36	1352.9	383.831	1923.73	1451.08	428.53	2002.1	1273.02	437.419	2052.76	1162.17	467.003	2045.2	988.117	437.594	2025.81	888.877	477.888	2092.21	893.863	486.471	2068.36	789.923
397	0	268.294	1663.05	1630.15	165.038	1659.38	1629.03	282.844	1821.4	1646.52	145.289	1827.07	1648.78	190.776	1888.45	1499.45	177.407	1997.46	1276.38	220.696	1751.17	1400.9	219.675	1729.23	1214.22	122.592	1985.62	1351.03	385.625	1910.48	1448.75	429.819	1989.91	1271.33	438.321	2041.36	1160.85	467.936	2036.21	986.754	438.67	2018.47	887.309	478.807	2084.72	893.194	487.144	2062.74	788.883
398	0	269.975	1649.9	1628.05	166.619	1646.35	1626.99	284.808	1808.28	1644.34	147.27	1814.18	1646.65	192.814	1875.4	1497.45	179.342	1984.58	1274.49	222.266	1738.12	1398.66	220.958	1716.33	1211.94	124.651	1972.83	1349.21	387.543	1897.12	1446.41	431.269	1977.42	1269.48	439.392	2029.56	1159.34	468.973	2026.69	985.242	439.781	2010.61	885.624	479.875	2076.64	892.367	487.884	2056.56	787.711
399	0	271.794	1636.65	1625.98	168.336	1633.21	1625.01	286.918	1795.04	1642.19	149.4	1801.19	1644.61	194.96	1862.29	1495.53	181.347	1971.63	1272.67	223.928	1725.01	1396.5	222.341	1703.33	1209.76	126.8	1959.98	1347.47	389.572	1883.68	1444.1	432.877	1964.62	1267.5	440.635	2017.37	1157.67	470.117	2016.62	983.597	440.929	2002.19	883.836	481.1	2067.93	891.389	488.698	2049.78	786.409
400	0	273.742	1623.3	1623.94	170.183	1619.97	1623.09	289.16	1781.68	1640.13	151.667	1788.1	1642.69	197.198	1849.12	1493.7	183.409	1958.62	1270.95	225.674	1711.85	1394.45	223.82	1690.26	1207.7	129.028	1947.09	1345.83	391.698	1870.18	1441.84	434.634	1951.54	1265.42	442.05	2004.78	1155.86	471.373	2006	981.838	442.115	1993.19	881.959	482.488	2058.58	890.271	489.595	2042.34	784.983
401	0	275.808	1609.88	1621.98	172.148	1606.66	1621.27	291.515	1768.23	1638.18	154.052	1774.93	1640.92	199.51	1835.93	1492.01	185.52	1945.56	1269.36	227.493	1698.67	1392.55	225.39	1677.12	1205.8	131.318	1934.18	1344.34	393.905	1856.64	1439.67	436.534	1938.18	1263.26	443.635	1991.81	1153.95	472.742	1994.8	979.991	443.341	1983.55	880.017	484.043	2048.54	889.026	490.581	2034.18	783.444
402	0	277.972	1596.39	1620.1	174.215	1593.28	1619.57	293.963	1754.69	1636.37	156.535	1761.68	1639.34	201.879	1822.72	1490.48	187.667	1932.47	1267.92	229.372	1685.48	1390.81	227.04	1663.93	1204.08	133.657	1921.25	1343.01	396.175	1843.08	1437.64	438.563	1924.56	1261.08	445.384	1978.48	1151.97	474.224	1983.02	978.083	444.609	1973.27	878.031	485.765	2037.79	887.67	491.661	2025.27	781.804
403	0	280.212	1582.85	1618.35	176.364	1579.85	1618.01	296.478	1741.09	1634.72	159.089	1748.37	1637.97	204.283	1809.52	1489.13	189.841	1919.37	1266.66	231.295	1672.3	1389.27	228.76	1650.72	1202.58	136.03	1908.33	1341.86	398.489	1829.51	1435.76	440.71	1910.7	1258.9	447.293	1964.8	1149.96	475.818	1970.65	976.145	445.923	1962.29	876.031	487.651	2026.31	886.223	492.841	2015.53	780.08
404	0	282.502	1569.3	1616.73	178.569	1566.39	1616.61	299.033	1727.45	1633.28	161.687	1735.01	1636.84	206.702	1796.34	1487.99	192.033	1906.27	1265.59	233.244	1659.14	1387.95	230.536	1637.51	1201.31	138.423	1895.43	1340.91	400.827	1815.95	1434.08	442.961	1896.62	1256.77	449.352	1950.8	1147.95	477.522	1957.69	974.208	447.287	1950.6	874.047	489.694	2014.08	884.705	494.125	2004.92	778.293
405	0	284.814	1555.74	1615.27	180.803	1552.92	1615.4	301.596	1713.78	1632.06	164.297	1721.63	1635.95	209.113	1783.2	1487.08	194.232	1893.2	1264.74	235.2	1646.04	1386.88	232.352	1624.32	1200.3	140.82	1882.57	1340.18	403.168	1802.42	1432.63	445.3	1882.34	1254.73	451.551	1936.5	1145.98	479.332	1944.14	972.309	448.703	1938.18	872.112	491.884	2001.08	883.142	495.515	1993.39	776.465
406	0	287.117	1542.21	1614	183.036	1539.47	1614.38	304.138	1700.11	1631.08	166.887	1708.25	1635.34	211.495	1770.13	1486.41	196.43	1880.18	1264.12	237.141	1633	1386.06	234.191	1611.18	1199.56	143.209	1869.78	1339.68	405.49	1788.94	1431.43	447.712	1867.89	1252.82	453.879	1921.92	1144.1	481.241	1930.01	970.482	450.176	1925	870.262	494.209	1987.31	881.558	497.014	1980.88	774.624
407	0	289.378	1528.72	1612.93	185.236	1526.07	1613.57	306.625	1686.48	1630.37	169.425	1694.9	1635	213.827	1757.15	1485.99	198.619	1867.21	1263.74	239.047	1620.04	1385.52	236.033	1598.11	1199.1	145.576	1857.06	1339.42	407.776	1775.51	1430.52	450.178	1853.29	1251.08	456.325	1907.1	1142.35	483.242	1915.3	968.761	451.708	1911.06	868.533	496.654	1972.76	879.98	498.623	1967.35	772.798
408	0	291.566	1515.3	1612.09	187.373	1512.73	1612.99	309.028	1672.9	1629.92	171.877	1681.59	1634.95	216.089	1744.27	1485.84	200.79	1854.32	1263.61	240.897	1607.19	1385.25	237.859	1585.14	1198.92	147.909	1844.44	1339.39	410.006	1762.15	1429.9	452.684	1838.58	1249.56	458.876	1892.07	1140.76	485.328	1900.04	967.182	453.3	1896.34	866.962	499.201	1957.44	878.436	500.342	1952.78	771.021
409	0	293.65	1501.97	1611.49	189.414	1499.48	1612.65	311.314	1659.4	1629.75	174.213	1668.36	1635.17	218.263	1731.5	1485.95	202.936	1841.53	1263.73	242.671	1594.45	1385.27	239.65	1572.28	1199.02	150.198	1831.93	1339.61	412.163	1748.86	1429.6	455.212	1823.77	1248.28	461.52	1876.86	1139.36	487.49	1884.24	965.778	454.953	1880.86	865.584	501.831	1941.35	876.956	502.17	1937.13	769.328
410	0	295.6	1488.76	1611.14	191.331	1486.34	1612.54	313.458	1646.01	1629.87	176.403	1655.23	1635.67	220.333	1718.87	1486.33	205.052	1828.84	1264.11	244.35	1581.84	1385.56	241.386	1559.56	1199.4	152.433	1819.55	1340.07	414.233	1735.66	1429.63	457.747	1808.9	1247.27	464.244	1861.49	1138.19	489.716	1867.93	964.581	456.663	1864.61	864.437	504.523	1924.51	875.567	504.103	1920.38	767.758
411	0	297.389	1475.68	1611.05	193.095	1473.34	1612.69	315.434	1632.75	1630.28	178.423	1642.22	1636.44	222.285	1706.38	1486.97	207.132	1816.27	1264.73	245.918	1569.37	1386.13	243.049	1546.98	1200.06	154.609	1807.31	1340.77	416.204	1722.56	1429.98	460.273	1793.99	1246.55	467.035	1846.01	1137.28	491.998	1851.12	963.617	458.427	1847.61	863.553	507.257	1906.94	874.3	506.137	1902.54	766.35
412	0	298.993	1462.75	1611.24	194.684	1460.49	1613.09	317.222	1619.64	1630.98	180.25	1629.35	1637.47	224.111	1694.04	1487.86	209.172	1803.83	1265.6	247.362	1557.04	1386.97	244.622	1534.57	1200.98	156.718	1795.21	1341.69	418.067	1709.55	1430.67	462.777	1779.07	1246.15	469.882	1830.43	1136.63	494.322	1833.85	962.913	460.238	1829.89	862.964	510.01	1888.67	873.182	508.266	1883.61	765.148
413	0	300.393	1449.97	1611.71	196.075	1447.81	1613.73	318.805	1606.69	1631.96	181.868	1616.64	1638.74	225.803	1681.85	1489	211.169	1791.52	1266.7	248.671	1544.86	1388.07	246.089	1522.33	1202.16	158.76	1783.27	1342.83	419.816	1696.65	1431.68	465.246	1764.18	1246.07	472.772	1814.79	1136.27	496.678	1816.14	962.491	462.089	1811.47	862.699	512.76	1869.73	872.241	510.483	1863.6	764.196
414	0	301.573	1437.37	1612.46	197.255	1435.31	1614.61	320.174	1593.92	1633.21	183.267	1604.09	1640.23	227.357	1669.83	1490.37	213.123	1779.35	1268.02	249.837	1532.82	1389.42	247.44	1510.25	1203.57	160.733	1771.49	1344.18	421.447	1683.84	1433.01	467.667	1749.32	1246.32	475.693	1799.11	1136.2	499.054	1798.04	962.367	463.97	1792.38	862.784	515.486	1850.16	871.501	512.776	1842.56	763.538
415	0	302.524	1424.93	1613.48	198.212	1423	1615.72	321.324	1581.32	1634.73	184.441	1591.73	1641.93	228.774	1657.96	1491.96	215.033	1767.33	1269.54	250.856	1520.93	1390.99	248.664	1498.33	1205.21	162.638	1759.86	1345.71	422.959	1671.14	1434.63	470.033	1734.53	1246.89	478.633	1783.41	1136.41	501.438	1779.57	962.555	465.87	1772.68	863.238	518.166	1830	870.986	515.135	1820.53	763.217
416	0	303.241	1412.66	1614.77	198.943	1410.88	1617.05	322.254	1568.9	1636.49	185.391	1579.56	1643.81	230.057	1646.25	1493.73	216.898	1755.45	1271.25	251.728	1509.18	1392.78	249.756	1486.57	1207.05	164.477	1748.39	1347.41	424.354	1658.54	1436.53	472.334	1719.81	1247.77	481.582	1767.71	1136.91	503.819	1760.77	963.062	467.777	1752.4	864.08	520.783	1809.29	870.715	517.542	1797.57	763.273
417	0	303.726	1400.56	1616.3	199.446	1398.95	1618.58	322.972	1556.65	1638.47	186.124	1567.57	1645.85	231.211	1634.68	1495.68	218.719	1743.71	1273.12	252.456	1497.56	1394.75	250.714	1474.95	1209.07	166.254	1737.06	1349.27	425.636	1646.04	1438.68	474.565	1705.19	1248.95	484.529	1752.01	1137.69	506.185	1741.67	963.89	469.678	1731.6	865.317	523.318	1788.08	870.703	519.981	1773.74	763.742
418	0	303.985	1388.63	1618.07	199.729	1387.22	1620.3	323.489	1544.58	1640.66	186.651	1555.76	1648.02	232.244	1623.25	1497.76	220.494	1732.11	1275.12	253.046	1486.07	1396.89	251.539	1463.45	1211.25	167.971	1725.87	1351.24	426.81	1633.64	1441.05	476.724	1690.67	1250.4	487.465	1736.34	1138.71	508.527	1722.3	965.036	471.562	1710.31	866.954	525.756	1766.41	870.963	522.43	1749.12	764.651
419	0	304.029	1376.84	1620.04	199.802	1375.66	1622.16	323.821	1532.68	1643.01	186.99	1544.14	1650.3	233.166	1611.95	1499.96	222.225	1720.63	1277.24	253.507	1474.69	1399.17	252.237	1452.07	1213.57	169.633	1714.8	1353.32	427.884	1621.32	1443.6	478.807	1676.25	1252.09	490.381	1720.7	1139.95	510.833	1702.7	966.491	473.413	1688.61	868.988	528.085	1744.33	871.499	524.869	1723.81	766.02
420	0	303.875	1365.19	1622.18	199.681	1364.28	1624.16	323.987	1520.92	1645.51	187.16	1532.7	1652.64	233.986	1600.77	1502.25	223.909	1709.27	1279.44	253.85	1463.4	1401.55	252.817	1440.77	1215.98	171.242	1703.85	1355.48	428.865	1609.08	1446.29	480.816	1661.95	1253.98	493.269	1705.08	1141.39	513.096	1682.89	968.24	475.221	1666.53	871.408	530.295	1721.88	872.313	527.27	1697.9	767.858
421	0	303.544	1353.68	1624.47	199.385	1353.07	1626.26	324.01	1509.31	1648.1	187.185	1521.42	1655.02	234.717	1589.68	1504.59	225.544	1698.03	1281.69	254.09	1452.2	1404	253.287	1429.55	1218.47	172.8	1692.98	1357.69	429.762	1596.92	1449.08	482.751	1647.74	1256.04	496.122	1689.48	1142.98	515.305	1662.9	970.262	476.974	1644.14	874.196	532.379	1699.11	873.399	529.61	1671.47	770.164
422	0	303.059	1342.27	1626.86	198.935	1341.99	1628.43	323.913	1497.82	1650.74	187.09	1510.29	1657.4	235.369	1578.68	1506.94	227.126	1686.87	1283.97	254.239	1441.08	1406.48	253.661	1418.39	1220.98	174.306	1682.2	1359.91	430.583	1584.83	1451.92	484.616	1633.64	1258.21	498.934	1673.91	1144.68	517.453	1642.76	972.533	478.66	1621.48	877.328	534.333	1676.06	874.749	531.859	1644.63	772.925
423	0	302.445	1330.97	1629.32	198.357	1331.05	1630.63	323.722	1486.44	1653.4	186.9	1499.29	1659.75	235.953	1567.74	1509.28	228.652	1675.8	1286.23	254.312	1430.01	1408.96	253.952	1407.27	1223.5	175.76	1671.47	1362.12	431.336	1572.81	1454.78	486.413	1619.62	1260.45	501.698	1658.35	1146.46	519.533	1622.49	975.021	480.27	1598.61	880.774	536.155	1652.77	876.346	533.992	1617.48	776.116
424	0	301.729	1319.75	1631.8	197.674	1320.22	1632.84	323.461	1475.15	1656.03	186.642	1488.42	1662.02	236.479	1556.85	1511.57	230.116	1664.8	1288.46	254.325	1418.98	1411.39	254.172	1396.17	1225.96	177.158	1660.79	1364.3	432.028	1560.84	1457.61	488.145	1605.68	1262.72	504.408	1642.79	1148.26	521.537	1602.12	977.694	481.794	1575.57	884.496	537.844	1629.28	878.171	535.984	1590.09	779.705
425	0	300.938	1308.6	1634.27	196.914	1309.47	1635	323.153	1463.94	1658.59	186.339	1477.65	1664.19	236.955	1546	1513.77	231.513	1653.85	1290.61	254.29	1407.98	1413.75	254.335	1385.1	1228.35	178.498	1650.12	1366.39	432.664	1548.93	1460.35	489.813	1591.79	1264.94	507.057	1627.22	1150.05	523.458	1581.66	980.515	483.223	1552.42	888.455	539.404	1605.63	880.201	537.809	1562.56	783.649
426	0	300.097	1297.5	1636.66	196.1	1298.8	1637.1	322.82	1452.79	1661.03	186.014	1466.96	1666.22	237.389	1535.16	1515.85	232.837	1642.94	1292.65	254.219	1397	1415.98	254.453	1374.03	1230.61	179.774	1639.47	1368.39	433.25	1537.06	1462.98	491.418	1577.95	1267.09	509.639	1611.64	1151.76	525.289	1561.13	983.446	484.552	1529.18	892.606	540.837	1581.85	882.409	539.449	1534.97	787.9
427	0	299.229	1286.45	1638.96	195.256	1288.18	1639.08	322.481	1441.68	1663.31	185.688	1456.34	1668.08	237.786	1524.33	1517.78	234.081	1632.04	1294.57	254.124	1386.02	1418.06	254.537	1362.96	1232.72	180.981	1628.81	1370.25	433.789	1525.23	1465.44	492.959	1564.14	1269.12	512.144	1596.02	1153.37	527.023	1540.56	986.447	485.772	1505.92	896.903	542.147	1557.97	884.767	540.888	1507.38	792.406
428	0	298.357	1275.41	1641.11	194.403	1277.59	1640.93	322.153	1430.6	1665.39	185.376	1445.76	1669.74	238.151	1513.48	1519.54	235.24	1621.16	1296.32	254.012	1375.03	1419.94	254.596	1351.89	1234.63	182.113	1618.12	1371.95	434.282	1513.42	1467.7	494.436	1550.34	1270.97	514.564	1580.35	1154.84	528.654	1519.95	989.48	486.878	1482.66	901.298	543.337	1534.03	887.244	542.114	1479.87	797.114
429	0	297.498	1264.39	1643.07	193.558	1267.02	1642.6	321.847	1419.53	1667.24	185.093	1435.2	1671.18	238.487	1502.61	1521.09	236.307	1610.27	1297.88	253.891	1364.03	1421.61	254.637	1340.8	1236.33	183.165	1607.4	1373.46	434.73	1501.64	1469.72	495.843	1536.54	1272.62	516.888	1564.64	1156.12	530.173	1499.33	992.507	487.865	1459.45	905.744	544.412	1510.07	889.81	543.122	1452.48	801.968
430	0	296.666	1253.36	1644.82	192.737	1256.44	1644.07	321.573	1408.47	1668.84	184.846	1424.65	1672.37	238.793	1491.7	1522.42	237.278	1599.36	1299.23	253.764	1353.01	1423.03	254.666	1329.69	1237.77	184.13	1596.63	1374.77	435.133	1489.88	1471.48	497.177	1522.71	1274.03	519.106	1548.86	1157.2	531.575	1478.7	995.49	488.729	1436.31	910.195	545.374	1486.11	892.434	543.912	1425.28	806.915
431	0	295.871	1242.32	1646.32	191.95	1245.84	1645.32	321.337	1397.39	1670.16	184.642	1414.09	1673.31	239.068	1480.75	1523.5	238.148	1588.41	1300.35	253.633	1341.95	1424.19	254.687	1318.56	1238.95	185.005	1585.79	1375.84	435.485	1478.11	1472.96	498.43	1508.86	1275.18	521.204	1533.01	1158.04	532.852	1458.1	998.395	489.467	1413.28	914.607	546.225	1462.19	895.084	544.487	1398.3	811.905
432	0	295.12	1231.25	1647.56	191.203	1235.2	1646.32	321.139	1386.28	1671.18	184.481	1403.49	1673.97	239.311	1469.74	1524.32	238.912	1577.42	1301.22	253.497	1330.85	1425.06	254.701	1307.41	1239.85	185.784	1574.89	1376.66	435.785	1466.34	1474.14	499.595	1494.97	1276.05	523.17	1517.09	1158.63	533.997	1437.54	1001.19	490.075	1390.39	918.939	546.966	1438.34	897.73	544.856	1371.58	816.889
433	0	294.415	1220.15	1648.5	190.501	1224.52	1647.05	320.978	1375.14	1671.9	184.36	1392.86	1674.36	239.516	1458.68	1524.87	239.568	1566.37	1301.83	253.355	1319.7	1425.64	254.707	1296.22	1240.45	186.463	1563.91	1377.23	436.026	1454.56	1475.01	500.662	1481.03	1276.63	524.99	1501.09	1158.96	535.003	1417.04	1003.85	490.553	1367.66	923.153	547.595	1414.61	900.344	545.032	1345.17	821.824
434	0	293.752	1209	1649.15	189.84	1213.78	1647.52	320.846	1363.95	1672.3	184.273	1382.16	1674.47	239.678	1447.54	1525.15	240.113	1555.25	1302.18	253.2	1308.5	1425.93	254.705	1284.99	1240.75	187.037	1552.85	1377.53	436.202	1442.75	1475.57	501.622	1467.03	1276.91	526.651	1485.02	1159.02	535.865	1396.61	1006.35	490.898	1345.12	927.216	548.111	1391.01	902.897	545.029	1319.09	826.668
435	0	293.127	1197.81	1649.49	189.217	1202.97	1647.7	320.734	1352.71	1672.39	184.208	1371.4	1674.3	239.79	1436.33	1525.14	240.546	1544.06	1302.24	253.028	1297.23	1425.91	254.691	1273.73	1240.75	187.504	1541.69	1377.55	436.307	1430.91	1475.81	502.465	1452.96	1276.89	528.139	1468.88	1158.81	536.577	1376.28	1008.66	491.112	1322.79	931.096	548.51	1367.6	905.363	544.865	1293.37	831.385
436	0	292.531	1186.56	1649.53	188.623	1192.08	1647.61	320.63	1341.41	1672.18	184.151	1360.57	1673.86	239.842	1425.04	1524.86	240.866	1532.78	1302.03	252.831	1285.9	1425.6	254.661	1262.4	1240.45	187.86	1530.44	1377.29	436.335	1419.03	1475.74	503.181	1438.84	1276.57	529.443	1452.68	1158.34	537.134	1356.08	1010.78	491.193	1300.7	934.77	548.788	1344.4	907.718	544.557	1268.05	835.942
437	0	291.95	1175.25	1649.28	188.047	1181.11	1647.25	320.516	1330.05	1671.67	184.087	1349.64	1673.16	239.828	1413.66	1524.31	241.074	1521.4	1301.55	252.601	1274.5	1425	254.612	1251.02	1239.86	188.103	1519.08	1376.76	436.279	1407.1	1475.37	503.759	1424.64	1275.98	530.552	1436.43	1157.62	537.531	1336.03	1012.68	491.142	1278.87	938.216	548.94	1321.46	909.941	544.123	1243.16	840.31
438	0	291.372	1163.88	1648.74	187.475	1170.06	1646.62	320.374	1318.63	1670.88	183.996	1338.63	1672.2	239.736	1402.2	1523.5	241.17	1509.93	1300.81	252.329	1263.01	1424.13	254.536	1239.57	1239	188.232	1507.62	1375.97	436.133	1395.11	1474.73	504.191	1410.39	1275.12	531.458	1420.15	1156.66	537.766	1316.14	1014.36	490.96	1257.32	941.418	548.958	1298.81	912.012	543.58	1218.71	844.466
439	0	290.78	1152.44	1647.93	186.892	1158.91	1645.74	320.186	1307.15	1669.82	183.857	1327.52	1671	239.559	1390.64	1522.43	241.158	1498.36	1299.81	252.005	1251.44	1422.99	254.429	1228.05	1237.88	188.246	1496.04	1374.91	435.892	1383.06	1473.83	504.47	1396.08	1274.01	532.153	1403.85	1155.49	537.836	1296.46	1015.82	490.646	1236.07	944.363	548.839	1276.48	913.914	542.941	1194.74	848.387
440	0	290.157	1140.94	1646.88	186.28	1147.67	1644.64	319.931	1295.61	1668.53	183.65	1316.31	1669.59	239.287	1378.99	1521.13	241.039	1486.67	1298.57	251.621	1239.78	1421.62	254.285	1216.43	1236.52	188.146	1484.36	1373.61	435.552	1370.93	1472.69	504.588	1381.71	1272.68	532.633	1387.56	1154.12	537.738	1277	1017.05	490.202	1215.15	947.044	548.575	1254.51	915.635	542.217	1171.28	852.059
441	0	289.487	1129.37	1645.62	185.623	1136.34	1643.32	319.587	1284	1667.02	183.352	1305	1667.96	238.913	1367.23	1519.61	240.818	1474.87	1297.11	251.168	1228.02	1420.03	254.096	1204.72	1234.93	187.933	1472.56	1372.08	435.109	1358.73	1471.34	504.542	1367.3	1271.15	532.898	1371.3	1152.58	537.473	1257.79	1018.05	489.627	1194.58	949.458	548.161	1232.94	917.165	541.415	1148.34	855.467
442	0	288.751	1117.73	1644.16	184.903	1124.9	1641.82	319.134	1272.32	1665.33	182.942	1293.59	1666.16	238.429	1355.38	1517.9	240.497	1462.95	1295.44	250.636	1216.17	1418.24	253.858	1192.9	1233.16	187.61	1460.65	1370.34	434.562	1346.44	1469.82	504.33	1352.87	1269.46	532.948	1355.1	1150.9	537.041	1238.87	1018.84	488.921	1174.39	951.603	547.592	1211.8	918.497	540.54	1125.95	858.605
443	0	287.935	1106.01	1642.56	184.105	1113.36	1640.16	318.555	1260.58	1663.47	182.403	1282.06	1664.19	237.83	1343.42	1516.02	240.083	1450.92	1293.6	250.02	1204.2	1416.29	253.564	1180.96	1231.21	187.179	1448.63	1368.41	433.909	1334.06	1468.15	503.952	1338.42	1267.63	532.787	1338.99	1149.11	536.443	1220.26	1019.42	488.084	1154.6	953.485	546.866	1191.13	919.629	539.59	1104.14	861.467
444	0	287.023	1094.23	1640.83	183.214	1101.72	1638.37	317.833	1248.77	1661.5	181.717	1270.43	1662.08	237.112	1331.35	1514	239.578	1438.76	1291.61	249.313	1192.13	1414.19	253.208	1168.9	1229.13	186.644	1436.5	1366.32	433.15	1321.59	1466.36	503.41	1323.97	1265.7	532.423	1323	1147.23	535.68	1201.99	1019.8	487.114	1135.24	955.108	545.979	1170.95	920.56	538.563	1082.93	864.052
445	0	286.003	1082.36	1639.01	182.218	1089.97	1636.48	316.956	1236.89	1659.43	180.871	1258.69	1659.86	236.272	1319.17	1511.87	238.99	1426.48	1289.5	248.511	1179.94	1411.99	252.786	1156.71	1226.93	186.012	1424.25	1364.1	432.288	1309.02	1464.48	502.709	1309.54	1263.71	531.865	1307.16	1145.31	534.758	1184.09	1020	486.013	1116.34	956.483	544.934	1151.31	921.295	537.451	1062.34	866.363
446	0	284.866	1070.41	1637.15	181.107	1078.11	1634.51	315.913	1224.94	1657.31	179.856	1246.83	1657.56	235.311	1306.88	1509.65	238.322	1414.08	1287.3	247.611	1167.64	1409.71	252.293	1144.38	1224.66	185.285	1411.9	1361.78	431.324	1296.36	1462.56	501.857	1295.15	1261.68	531.126	1291.5	1143.37	533.681	1166.59	1020.03	484.781	1097.93	957.619	543.731	1132.22	921.839	536.246	1042.4	868.403
447	0	283.606	1058.37	1635.26	179.874	1066.14	1632.5	314.701	1212.91	1655.16	178.668	1234.86	1655.21	234.228	1294.49	1507.38	237.579	1401.57	1285.05	246.614	1155.23	1407.39	251.727	1131.92	1222.35	184.471	1399.45	1359.38	430.262	1283.6	1460.61	500.863	1280.82	1259.65	530.219	1276.06	1141.44	532.456	1149.52	1019.91	483.418	1080.04	958.528	542.375	1113.72	922.202	534.936	1023.13	870.177
448	0	282.218	1046.25	1633.39	178.518	1054.06	1630.48	313.319	1200.8	1653.02	177.305	1222.77	1652.83	233.028	1281.98	1505.1	236.765	1388.94	1282.77	245.52	1142.71	1405.05	251.086	1119.32	1220.02	183.572	1386.9	1356.96	429.108	1270.75	1458.68	499.739	1266.58	1257.66	529.162	1260.86	1139.55	531.091	1132.9	1019.66	481.927	1062.71	959.223	540.875	1095.84	922.395	533.512	1004.56	871.691
449	0	280.705	1034.03	1631.56	177.04	1041.86	1628.47	311.77	1188.61	1650.93	175.774	1210.57	1650.45	231.716	1269.38	1502.83	235.884	1376.21	1280.51	244.335	1130.08	1402.74	250.37	1106.59	1217.73	182.594	1374.25	1354.53	427.868	1257.82	1456.79	498.497	1252.44	1255.73	527.97	1245.95	1137.73	529.595	1116.76	1019.3	480.313	1045.94	959.715	539.238	1078.59	922.428	531.964	986.696	872.949
450	0	279.072	1021.71	1629.8	175.445	1029.55	1626.5	310.066	1176.33	1648.91	174.083	1198.25	1648.12	230.299	1256.68	1500.62	234.938	1363.37	1278.3	243.066	1117.35	1400.49	249.582	1093.74	1215.49	181.54	1361.53	1352.14	426.549	1244.81	1454.98	497.152	1238.42	1253.9	526.661	1231.35	1136.01	527.98	1101.12	1018.84	478.579	1029.79	960.016	537.478	1062.01	922.317	530.283	969.569	873.956
451	0	277.327	1009.29	1628.14	173.742	1017.13	1624.6	308.218	1163.95	1647	172.247	1185.81	1645.86	228.787	1243.9	1498.5	233.928	1350.45	1276.18	241.723	1104.54	1398.32	248.726	1080.77	1213.34	180.413	1348.72	1349.82	425.16	1231.74	1453.27	495.72	1224.56	1252.19	525.254	1217.08	1134.41	526.257	1086.01	1018.3	476.736	1014.26	960.137	535.61	1046.1	922.072	528.467	953.197	874.715
452	0	275.484	996.774	1626.6	171.944	1004.59	1622.8	306.246	1151.48	1645.23	170.285	1173.26	1643.71	227.191	1231.03	1496.49	232.854	1337.45	1274.17	240.317	1091.64	1396.28	247.809	1067.69	1211.33	179.216	1335.86	1347.62	423.709	1218.63	1451.68	494.215	1210.86	1250.62	523.764	1203.17	1132.96	524.442	1071.43	1017.69	474.792	999.382	960.088	533.65	1030.9	921.709	526.513	937.598	875.228
453	0	273.56	984.164	1625.2	170.069	991.955	1621.1	304.171	1138.92	1643.63	168.218	1160.6	1641.69	225.523	1218.11	1494.63	231.716	1324.38	1272.31	238.865	1078.69	1394.39	246.838	1054.53	1209.48	177.95	1322.94	1345.56	422.207	1205.5	1450.25	492.654	1197.36	1249.22	522.206	1189.63	1131.67	522.549	1057.42	1017.04	472.761	985.172	959.875	531.618	1016.4	921.238	524.429	922.79	875.493
454	0	271.575	971.464	1623.95	168.136	979.22	1619.54	302.019	1126.27	1642.21	166.072	1147.85	1639.85	223.798	1205.13	1492.95	230.513	1311.27	1270.63	237.382	1065.68	1392.68	245.824	1041.31	1207.81	176.618	1309.99	1343.67	420.667	1192.37	1448.98	491.05	1184.07	1248.02	520.596	1176.47	1130.56	520.594	1043.97	1016.35	470.657	971.644	959.506	529.532	1002.63	920.671	522.222	908.787	875.508
455	0	269.553	958.682	1622.88	166.168	966.396	1618.14	299.817	1113.53	1641.01	163.875	1135	1638.19	222.032	1192.12	1491.47	229.245	1298.12	1269.16	235.886	1052.65	1391.18	244.777	1028.04	1206.36	175.221	1297.01	1342	419.099	1179.27	1447.91	489.419	1171.01	1247.01	518.944	1163.72	1129.65	518.594	1031.1	1015.63	468.498	958.807	958.985	527.414	989.588	920.017	519.91	895.601	875.269
456	0	267.519	945.832	1621.98	164.19	953.499	1616.9	297.595	1100.73	1640.04	161.657	1122.07	1636.76	220.242	1179.09	1490.23	227.913	1284.96	1267.91	234.398	1039.61	1389.91	243.71	1014.75	1205.15	173.764	1284.03	1340.55	417.518	1166.22	1447.04	487.773	1158.2	1246.22	517.261	1151.37	1128.93	516.565	1018.81	1014.89	466.303	946.667	958.316	525.286	977.286	919.284	517.514	883.243	874.772
457	0	265.5	932.927	1621.28	162.228	940.544	1615.85	295.384	1087.86	1639.31	159.449	1109.08	1635.57	218.446	1166.07	1489.22	226.517	1271.8	1266.91	232.935	1026.58	1388.89	242.636	1001.48	1204.18	172.249	1271.05	1339.37	415.939	1153.26	1446.39	486.123	1145.65	1245.65	515.555	1139.43	1128.43	514.525	1007.12	1014.14	464.094	935.226	957.502	523.167	965.726	918.478	515.062	871.721	874.011
458	0	263.524	919.984	1620.77	160.308	927.548	1615	293.216	1074.95	1638.83	157.282	1096.05	1634.64	216.661	1153.07	1488.48	225.063	1258.67	1266.17	231.517	1013.59	1388.12	241.566	988.239	1203.48	170.682	1258.1	1338.46	414.374	1140.4	1445.97	484.48	1133.39	1245.3	513.831	1127.9	1128.13	512.491	996.012	1013.38	461.891	924.479	956.543	521.079	954.907	917.603	512.583	861.037	872.982
459	0	261.619	907.022	1620.45	158.458	914.533	1614.35	291.123	1062.02	1638.61	155.188	1083	1633.98	214.907	1140.11	1488.01	223.554	1245.58	1265.7	230.162	1000.65	1387.62	240.512	975.071	1203.05	169.07	1245.19	1337.84	412.837	1127.67	1445.76	482.851	1121.42	1245.18	512.095	1116.76	1128.03	510.479	985.492	1012.61	459.719	914.42	955.442	519.041	944.829	916.663	510.115	851.192	871.681
460	0	259.814	894.063	1620.34	156.704	901.519	1613.92	289.132	1049.08	1638.64	153.196	1069.94	1633.6	213.199	1127.21	1487.81	221.999	1232.54	1265.5	228.885	987.788	1387.4	239.486	962.001	1202.88	167.421	1232.33	1337.53	411.343	1115.1	1445.79	481.244	1109.75	1245.27	510.349	1106.03	1128.14	508.505	975.553	1011.83	457.599	905.038	954.199	517.07	935.484	915.659	507.692	842.183	870.11
461	0	258.135	881.129	1620.43	155.073	888.528	1613.71	287.273	1036.16	1638.93	151.333	1056.9	1633.51	211.555	1114.38	1487.9	220.405	1219.58	1265.58	227.699	975.021	1387.45	238.497	949.054	1202.99	165.744	1219.54	1337.51	409.903	1102.7	1446.03	479.664	1098.39	1245.58	508.595	1095.68	1128.44	506.583	966.185	1011.04	455.553	896.316	952.816	515.183	926.867	914.595	505.354	834.002	868.27
462	0	256.607	868.243	1620.72	153.586	875.581	1613.74	285.569	1023.28	1639.47	149.622	1043.9	1633.7	209.987	1101.65	1488.26	218.781	1206.72	1265.93	226.615	962.366	1387.77	237.555	936.25	1203.37	164.049	1206.82	1337.79	408.526	1090.49	1446.49	478.115	1087.35	1246.09	506.834	1085.71	1128.93	504.726	957.378	1010.25	453.604	888.238	951.296	513.393	918.966	913.473	503.138	826.638	866.169
463	0	255.252	855.426	1621.2	152.264	862.7	1614	284.04	1010.47	1640.24	148.083	1030.97	1634.18	208.507	1089.03	1488.88	217.135	1193.95	1266.54	225.642	949.836	1388.36	236.668	923.607	1204	162.346	1194.2	1338.37	407.222	1078.48	1447.15	476.6	1076.62	1246.79	505.065	1076.09	1129.58	502.946	949.119	1009.44	451.77	880.783	949.643	511.711	911.768	912.297	501.08	820.078	863.82
464	0	254.088	842.701	1621.88	151.126	849.901	1614.49	282.703	997.737	1641.23	146.731	1018.11	1634.94	207.125	1076.53	1489.77	215.479	1181.3	1267.4	224.783	937.441	1389.21	235.842	911.135	1204.88	160.645	1181.67	1339.23	405.996	1066.69	1448.01	475.12	1066.21	1247.66	503.288	1066.83	1130.39	501.252	941.393	1008.62	450.069	873.929	947.864	510.148	905.258	911.07	499.211	814.305	861.239
465	0	253.13	830.085	1622.74	150.183	837.202	1615.23	281.566	985.116	1642.43	145.577	1005.36	1635.97	205.846	1064.15	1490.89	213.82	1168.78	1268.49	224.042	925.188	1390.31	235.082	898.836	1206.01	158.957	1169.24	1340.35	404.853	1055.11	1449.04	473.676	1056.11	1248.7	501.501	1057.88	1131.34	499.651	934.181	1007.79	448.517	867.651	945.968	508.71	899.419	909.8	497.562	809.3	858.448
466	0	252.386	817.596	1623.8	149.445	824.615	1616.22	280.636	972.622	1643.83	144.623	992.716	1637.27	204.675	1051.9	1492.25	212.167	1156.37	1269.79	223.417	913.078	1391.65	234.391	886.708	1207.36	157.29	1156.9	1341.72	403.795	1043.75	1450.22	472.266	1046.31	1249.88	499.704	1049.25	1132.42	498.151	927.466	1006.95	447.126	861.923	943.965	507.4	894.23	908.495	496.154	805.042	855.475
467	0	251.861	805.249	1625.04	148.916	812.15	1617.43	279.912	960.272	1645.39	143.87	980.2	1638.81	203.614	1039.78	1493.81	210.529	1144.1	1271.28	222.906	901.11	1393.2	233.771	874.744	1208.92	155.653	1144.67	1343.31	402.822	1032.59	1451.55	470.89	1036.79	1251.21	497.895	1040.91	1133.63	496.753	921.226	1006.11	445.905	856.72	941.87	506.22	889.669	907.165	495.005	801.507	852.351
468	0	251.552	793.053	1626.45	148.595	799.815	1618.88	279.388	948.077	1647.1	143.312	967.817	1640.58	202.661	1027.79	1495.55	208.913	1131.96	1272.95	222.502	889.278	1394.95	233.221	862.931	1210.67	154.053	1132.52	1345.09	401.932	1021.63	1453.01	469.545	1027.55	1252.65	496.075	1032.84	1134.93	495.462	915.439	1005.26	444.861	852.014	939.698	505.17	885.711	905.823	494.125	798.673	849.108
469	0	251.453	781.014	1628.03	148.474	787.612	1620.55	279.052	936.046	1648.94	142.939	955.573	1642.54	201.813	1015.92	1497.45	207.329	1119.94	1274.75	222.199	877.572	1396.87	232.737	851.254	1212.6	152.498	1120.46	1347.04	401.122	1010.85	1454.56	468.229	1018.55	1254.21	494.244	1025.01	1136.34	494.276	910.081	1004.42	443.998	847.778	937.468	504.247	882.329	904.482	493.517	796.513	845.782
470	0	251.551	769.135	1629.76	148.544	775.542	1622.42	278.891	924.183	1650.88	142.734	943.47	1644.68	201.065	1004.16	1499.47	205.783	1108.04	1276.68	221.988	865.979	1398.95	232.314	839.695	1214.67	150.993	1108.48	1349.12	400.388	1000.23	1456.2	466.94	1009.79	1255.85	492.405	1017.42	1137.83	493.195	905.128	1003.58	443.316	843.982	935.199	503.446	879.492	903.159	493.177	794.999	842.409
471	0	251.828	757.414	1631.63	148.788	763.603	1624.47	278.885	912.488	1652.9	142.682	931.507	1646.95	200.413	992.499	1501.59	204.285	1096.25	1278.69	221.86	854.486	1401.14	231.948	828.236	1216.85	149.542	1096.57	1351.31	399.724	989.747	1457.9	465.677	1001.23	1257.57	490.56	1010.03	1139.39	492.217	900.553	1002.77	442.812	840.596	932.911	502.761	877.167	901.868	493.095	794.1	839.023
472	0	252.263	745.844	1633.62	149.186	751.79	1626.68	279.014	900.955	1654.96	142.761	919.68	1649.32	199.85	980.923	1503.77	202.842	1084.57	1280.77	221.805	843.075	1403.41	231.629	816.858	1219.12	148.15	1084.71	1353.57	399.126	979.376	1459.62	464.438	992.847	1259.35	488.716	1002.83	1141.02	491.339	896.329	1001.97	442.48	837.592	930.622	502.184	875.317	900.626	493.25	793.782	835.658
473	0	252.832	734.416	1635.7	149.718	740.094	1629.01	279.256	889.576	1657.03	142.95	907.982	1651.74	199.368	969.418	1505.99	201.465	1072.98	1282.88	221.812	831.731	1405.73	231.351	805.544	1221.43	146.822	1072.91	1355.86	398.588	969.089	1461.36	463.224	984.615	1261.17	486.878	995.798	1142.71	490.557	892.426	1001.21	442.312	834.938	928.352	501.708	873.904	899.446	493.621	794.007	832.342
474	0	253.51	723.115	1637.85	150.357	728.505	1631.42	279.587	878.336	1659.08	143.228	896.402	1654.17	198.96	957.966	1508.19	200.163	1061.49	1285	221.871	820.434	1408.05	231.106	794.278	1223.74	145.562	1061.14	1358.14	398.106	958.856	1463.08	462.038	976.504	1263.01	485.056	988.911	1144.43	489.864	888.813	1000.48	442.296	832.602	926.118	501.323	872.883	898.344	494.176	794.734	829.102
475	0	254.27	711.925	1640.04	151.08	717.011	1633.88	279.984	867.219	1661.08	143.572	884.928	1656.57	198.619	946.553	1510.36	198.943	1050.08	1287.09	221.974	809.17	1410.34	230.885	783.044	1226.02	144.373	1049.4	1360.39	397.675	948.649	1464.76	460.88	968.483	1264.85	483.257	982.148	1146.17	489.256	885.46	999.786	442.42	830.552	923.935	501.019	872.212	897.33	494.883	795.916	825.96
476	0	255.084	700.826	1642.22	151.86	705.598	1636.34	280.428	856.202	1663	143.962	873.546	1658.89	198.339	935.161	1512.45	197.814	1038.73	1289.12	222.109	797.922	1412.56	230.682	771.829	1228.23	143.261	1037.68	1362.57	397.291	938.441	1466.36	459.756	960.523	1266.67	481.493	975.489	1147.93	488.727	882.333	999.138	442.669	828.756	921.814	500.787	871.842	896.414	495.708	797.505	822.933
477	0	255.929	689.796	1644.38	152.675	694.249	1638.76	280.897	845.264	1664.8	144.381	862.237	1661.09	198.115	923.776	1514.44	196.786	1027.46	1291.06	222.271	786.675	1414.66	230.49	760.621	1230.32	142.23	1025.97	1364.64	396.951	928.207	1467.87	458.668	952.595	1268.45	479.773	968.912	1149.68	488.27	879.399	998.533	443.026	827.18	919.766	500.618	871.725	895.602	496.613	799.445	820.035
478	0	256.782	678.811	1646.45	153.501	682.949	1641.1	281.377	834.378	1666.46	144.812	850.985	1663.13	197.942	912.383	1516.29	195.864	1016.23	1292.9	222.451	775.417	1416.62	230.304	749.411	1232.25	141.286	1014.27	1366.58	396.654	917.922	1469.25	457.623	944.672	1270.17	478.108	962.394	1151.41	487.879	876.621	997.972	443.475	825.791	917.797	500.503	871.812	894.899	497.565	801.68	817.276
479	0	257.621	667.848	1648.42	154.32	671.679	1643.31	281.855	823.519	1667.95	145.244	839.769	1664.98	197.815	900.971	1517.96	195.056	1005.06	1294.59	222.644	764.136	1418.39	230.12	738.189	1233.99	140.433	1002.57	1368.35	396.397	907.565	1470.49	456.626	936.729	1271.8	476.508	955.914	1153.09	487.547	873.966	997.453	443.998	824.555	915.912	500.433	872.051	894.307	498.532	804.153	814.665
480	0	258.432	656.882	1650.23	155.114	660.422	1645.34	282.32	812.659	1669.24	145.667	828.571	1666.59	197.734	889.526	1519.45	194.366	993.909	1296.12	222.847	752.823	1419.94	229.937	726.95	1235.51	139.679	990.867	1369.93	396.182	897.118	1471.56	455.683	928.742	1273.34	474.982	949.447	1154.73	487.269	871.396	996.974	444.579	823.44	914.112	500.402	872.394	893.826	499.486	806.804	812.205
481	0	259.201	645.89	1651.86	155.872	649.161	1647.17	282.768	801.774	1670.32	146.075	817.371	1667.95	197.697	878.04	1520.72	193.799	982.785	1297.46	223.057	741.468	1421.26	229.755	715.688	1236.78	139.027	979.153	1371.3	396.008	886.566	1472.43	454.799	920.689	1274.75	473.539	942.972	1156.29	487.04	868.876	996.532	445.201	822.412	912.397	500.404	872.79	893.453	500.403	809.572	809.9
482	0	259.921	634.851	1653.28	156.584	637.877	1648.76	283.195	790.839	1671.16	146.468	806.149	1669.03	197.704	866.502	1521.75	193.358	971.669	1298.6	223.272	730.064	1422.31	229.574	704.397	1237.78	138.485	967.426	1372.44	395.878	875.895	1473.11	453.979	912.551	1276.04	472.184	936.464	1157.76	486.854	866.37	996.123	445.85	821.439	910.765	500.433	873.193	893.185	501.265	812.401	807.751
483	0	260.587	623.742	1654.45	157.246	626.554	1650.08	283.603	779.83	1671.76	146.846	794.888	1669.83	197.757	854.905	1522.54	193.042	960.546	1299.51	223.495	718.605	1423.08	229.398	693.075	1238.48	138.055	955.68	1373.33	395.793	865.096	1473.56	453.228	904.313	1277.18	470.923	929.902	1159.14	486.707	863.845	995.742	446.512	820.489	909.211	500.485	873.557	893.016	502.059	815.231	805.758
484	0	261.2	612.548	1655.36	157.858	615.177	1651.11	283.995	768.729	1672.09	147.214	783.57	1670.32	197.857	843.241	1523.06	192.854	949.401	1300.19	223.726	707.084	1423.56	229.233	681.717	1238.89	137.743	943.911	1373.97	395.758	854.16	1473.79	452.55	895.958	1278.16	469.761	923.263	1160.42	486.598	861.264	995.384	447.178	819.53	907.732	500.558	873.837	892.939	502.777	818.009	803.92
485	0	261.766	601.253	1655.99	158.424	603.732	1651.84	284.379	757.518	1672.17	147.577	772.181	1670.52	198.01	831.505	1523.32	192.791	938.218	1300.61	223.972	695.496	1423.74	229.084	670.318	1238.99	137.552	932.112	1374.34	395.775	843.083	1473.78	451.949	887.475	1278.98	468.698	916.527	1161.57	486.523	858.596	995.043	447.837	818.53	906.32	500.649	873.99	892.947	503.415	820.684	802.236
486	0	262.292	589.843	1656.32	158.952	592.207	1652.25	284.763	746.183	1671.97	147.947	760.707	1670.41	198.219	819.69	1523.31	192.851	926.978	1300.79	224.236	683.836	1423.63	228.959	658.874	1238.78	137.486	920.279	1374.45	395.849	831.86	1473.53	451.427	878.851	1279.63	467.737	909.672	1162.6	486.482	855.808	994.715	448.484	817.46	904.97	500.758	873.979	893.031	503.972	823.205	800.702
487	0	262.792	578.31	1656.35	159.454	580.589	1652.34	285.159	734.715	1671.52	148.332	749.136	1670.01	198.49	807.791	1523.03	193.032	915.666	1300.71	224.526	672.097	1423.21	228.867	647.38	1238.27	137.546	908.403	1374.3	395.986	820.49	1473.05	450.987	870.078	1280.11	466.875	902.679	1163.5	486.475	852.87	994.392	449.115	816.289	903.675	500.885	873.764	893.182	504.454	825.528	799.314
488	0	263.281	566.646	1656.09	159.943	568.871	1652.12	285.578	723.107	1670.8	148.745	737.458	1669.32	198.829	795.804	1522.49	193.33	904.263	1300.37	224.85	660.276	1422.52	228.817	635.829	1237.47	137.733	896.477	1373.89	396.19	808.972	1472.33	450.631	861.147	1280.41	466.112	895.53	1164.26	486.504	849.753	994.068	449.73	814.988	902.428	501.03	873.311	893.389	504.867	827.612	798.066
489	0	263.774	554.848	1655.54	160.436	557.044	1651.6	286.034	711.355	1669.83	149.2	725.667	1668.37	199.243	783.724	1521.69	193.74	892.754	1299.78	225.216	648.366	1421.54	228.818	624.215	1236.38	138.048	884.494	1373.23	396.468	797.307	1471.38	450.359	852.051	1280.55	465.445	888.209	1164.88	486.571	846.429	993.736	450.33	813.527	901.221	501.196	872.587	893.642	505.221	829.417	796.953
490	0	264.291	542.914	1654.71	160.952	545.104	1650.78	286.541	699.458	1668.62	149.709	713.756	1667.15	199.739	771.546	1520.65	194.257	881.122	1298.94	225.636	636.362	1420.31	228.882	612.529	1235.03	138.489	872.445	1372.33	396.826	785.497	1470.21	450.174	842.784	1280.5	464.873	880.698	1165.35	486.678	842.87	993.389	450.92	811.876	900.046	501.385	871.56	893.93	505.526	830.907	795.965
491	0	264.851	530.844	1653.61	161.509	533.046	1649.7	287.113	687.417	1667.19	150.286	701.723	1665.71	200.323	759.269	1519.39	194.878	869.357	1297.88	226.119	624.26	1418.83	229.018	600.765	1233.43	139.056	860.322	1371.22	397.27	773.546	1468.83	450.076	833.34	1280.29	464.393	872.983	1165.68	486.83	839.052	993.019	451.504	810.004	898.896	501.601	870.2	894.24	505.795	832.05	795.091
492	0	265.472	518.64	1652.28	162.127	520.867	1648.37	287.764	675.236	1665.55	150.945	689.564	1664.05	201.004	746.888	1517.91	195.596	857.445	1296.59	226.677	612.055	1417.13	229.238	588.913	1231.61	139.746	848.116	1369.91	397.806	761.457	1467.25	450.067	823.714	1279.92	464.004	865.048	1165.86	487.03	834.948	992.619	452.091	807.881	897.762	501.848	868.479	894.559	506.041	832.812	794.321
493	0	266.172	506.305	1650.72	162.822	508.567	1646.82	288.507	662.918	1663.72	151.698	677.281	1662.2	201.786	734.401	1516.25	196.406	845.379	1295.11	227.321	599.743	1415.23	229.552	576.964	1229.59	140.555	835.819	1368.41	398.438	749.237	1465.49	450.148	813.901	1279.38	463.705	856.88	1165.88	487.282	830.533	992.181	452.689	805.476	896.635	502.129	866.37	894.876	506.277	833.163	793.641
494	0	266.969	493.842	1648.98	163.612	496.145	1645.07	289.355	650.468	1661.73	152.557	664.874	1660.19	202.677	721.808	1514.43	197.302	833.154	1293.45	228.061	587.321	1413.16	229.97	564.911	1227.4	141.478	823.424	1366.76	399.173	736.892	1463.56	450.32	803.898	1278.68	463.497	848.464	1165.76	487.593	825.784	991.697	453.307	802.755	895.509	502.45	863.845	895.176	506.517	833.073	793.036
495	0	267.877	481.256	1647.07	164.511	483.604	1643.16	290.319	637.891	1659.6	153.535	652.344	1658.04	203.68	709.108	1512.47	198.279	820.766	1291.64	228.907	574.788	1410.94	230.503	552.745	1225.07	142.512	810.926	1364.98	400.013	724.43	1461.48	450.585	793.7	1277.83	463.382	839.789	1165.48	487.967	820.677	991.161	453.955	799.683	894.375	502.818	860.877	895.445	506.774	832.51	792.489
496	0	268.908	468.55	1645.03	165.532	470.944	1641.12	291.41	625.193	1657.35	154.64	639.696	1655.78	204.799	696.301	1510.39	199.33	808.216	1289.71	229.869	562.143	1408.62	231.159	540.46	1222.63	143.648	798.32	1363.09	400.962	711.86	1459.28	450.945	783.303	1276.84	463.362	830.841	1165.05	488.409	815.187	990.565	454.641	796.225	893.226	503.237	857.44	895.672	507.06	831.444	791.983
497	0	270.072	455.731	1642.89	166.685	458.17	1638.98	292.636	612.378	1655.02	155.881	626.933	1653.44	206.036	683.389	1508.24	200.449	795.508	1287.68	230.954	549.388	1406.21	231.947	528.05	1220.12	144.882	785.604	1361.13	402.022	699.191	1456.97	451.403	772.703	1275.71	463.44	821.608	1164.48	488.924	809.291	989.903	455.373	792.344	892.056	503.715	853.508	895.842	507.387	829.843	791.502
498	0	271.377	442.801	1640.68	167.976	445.286	1636.78	294.003	599.451	1652.63	157.264	614.06	1651.06	207.39	670.376	1506.04	201.632	782.646	1285.58	232.168	536.523	1403.75	232.874	515.512	1217.56	146.204	772.778	1359.13	403.193	686.433	1454.59	451.961	761.897	1274.45	463.621	812.079	1163.76	489.517	802.966	989.173	456.16	788	890.86	504.259	849.053	895.944	507.766	827.674	791.027
499	0	272.825	429.767	1638.44	169.409	432.295	1634.54	295.516	586.417	1650.23	158.793	601.081	1648.66	208.86	657.266	1503.82	202.87	769.639	1283.44	233.514	523.555	1401.27	233.945	502.845	1214.99	147.608	759.843	1357.11	404.473	673.597	1452.16	452.621	750.882	1273.09	463.908	802.245	1162.91	490.192	796.188	988.371	457.007	783.156	889.636	504.874	844.049	895.967	508.206	824.9	790.542
500	0	274.418	416.633	1636.19	170.987	419.204	1632.31	297.176	573.282	1647.83	160.468	588.003	1646.28	210.441	644.067	1501.61	204.159	756.499	1281.31	234.991	510.489	1398.82	235.161	490.048	1212.45	149.084	746.806	1355.12	405.86	660.695	1449.7	453.385	739.654	1271.62	464.307	792.096	1161.93	490.952	788.936	987.497	457.919	777.772	888.38	505.569	838.469	895.904	508.717	821.486	790.031
501	0	276.153	403.406	1633.97	172.706	406.019	1630.12	298.982	560.05	1645.48	162.288	574.833	1643.95	212.128	630.786	1499.45	205.493	743.239	1279.21	236.599	497.333	1396.41	236.524	477.125	1209.98	150.624	733.672	1353.17	407.349	647.738	1447.25	454.255	728.212	1270.07	464.821	781.625	1160.83	491.801	781.188	986.554	458.901	771.809	887.095	506.349	832.285	895.746	509.305	817.393	789.482
502	0	278.027	390.093	1631.81	174.562	392.748	1627.99	300.927	546.73	1643.2	164.246	561.576	1641.72	213.911	617.435	1497.37	206.866	729.874	1277.17	238.33	484.099	1394.1	238.029	464.082	1207.6	152.22	720.451	1351.3	408.933	634.738	1444.85	455.231	716.555	1268.46	465.453	770.828	1159.63	492.74	772.923	985.544	459.954	765.233	885.782	507.221	825.472	895.49	509.979	812.581	788.883
503	0	280.029	376.704	1629.73	176.547	379.4	1625.97	303.005	533.329	1641.03	166.335	548.243	1639.6	215.779	604.025	1495.4	208.274	716.422	1275.23	240.176	470.798	1391.91	239.67	450.927	1205.36	153.861	707.158	1349.55	410.605	621.704	1442.52	456.313	704.682	1266.81	466.205	759.699	1158.34	493.772	764.121	984.477	461.081	758.007	884.447	508.189	818.004	895.132	510.744	807.01	788.227
504	0	282.15	363.249	1627.77	178.65	365.985	1624.07	305.202	519.86	1639	168.541	534.844	1637.64	217.721	590.57	1493.57	209.712	702.9	1273.41	242.122	457.444	1389.87	241.438	437.671	1203.29	155.541	693.805	1347.93	412.354	608.647	1440.29	457.499	692.594	1265.14	467.08	748.239	1157	494.897	754.765	983.361	462.282	750.099	883.098	509.258	809.855	894.675	511.604	800.639	787.508
505	0	284.375	349.743	1625.95	180.857	352.517	1622.33	307.502	506.335	1637.13	170.848	521.389	1635.87	219.722	577.089	1491.9	211.177	689.33	1271.75	244.154	444.053	1388.01	243.317	424.329	1201.42	157.252	680.411	1346.47	414.17	595.577	1438.21	458.788	680.294	1263.48	468.077	736.446	1155.6	496.115	744.838	982.209	463.556	741.48	881.744	510.432	801.002	894.121	512.565	793.426	786.726
506	0	286.688	336.2	1624.29	183.153	339.009	1620.77	309.887	492.769	1635.45	173.237	507.893	1634.31	221.767	563.597	1490.43	212.665	675.732	1270.27	246.252	430.642	1386.37	245.291	410.917	1199.78	158.985	666.996	1345.2	416.04	582.5	1436.3	460.175	667.783	1261.86	469.197	724.325	1154.2	497.423	734.327	981.036	464.901	732.124	880.397	511.711	791.424	893.475	513.627	785.333	785.88
507	0	289.067	322.637	1622.81	185.517	325.477	1619.41	312.335	479.18	1633.98	175.685	494.372	1633	223.84	550.114	1489.17	214.175	662.128	1268.99	248.395	417.23	1384.96	247.339	397.454	1198.39	160.735	653.578	1344.14	417.952	569.425	1434.6	461.657	655.068	1260.3	470.438	711.879	1152.8	498.82	723.22	979.857	466.316	722.007	879.073	513.096	781.102	892.745	514.794	776.321	784.977
508	0	291.491	309.075	1621.53	187.927	311.938	1618.27	314.82	465.588	1632.75	178.167	480.842	1631.94	225.923	536.66	1488.15	215.705	648.539	1267.93	250.561	403.834	1383.81	249.44	383.961	1197.27	162.496	640.18	1343.29	419.891	556.357	1433.13	463.229	642.151	1258.84	471.798	699.116	1151.43	500.303	711.508	978.691	467.795	711.113	877.785	514.586	770.02	891.94	516.065	766.355	784.021
509	0	293.936	295.532	1620.47	190.36	298.413	1617.38	317.315	452.014	1631.77	180.657	467.323	1631.17	227.998	523.253	1487.38	217.254	634.986	1267.1	252.724	390.474	1382.94	251.567	370.462	1196.44	164.262	626.824	1342.67	421.843	543.301	1431.91	464.885	629.04	1257.5	473.278	686.043	1150.13	501.869	699.187	977.556	469.336	699.427	876.552	516.178	758.164	891.072	517.442	755.405	783.023
510	0	296.375	282.03	1619.64	192.789	284.921	1616.73	319.794	438.479	1631.04	183.128	453.835	1630.68	230.05	509.915	1486.86	218.82	621.491	1266.53	254.861	377.169	1382.34	253.697	356.98	1195.9	166.029	613.531	1342.29	423.795	530.261	1430.97	466.62	615.739	1256.31	474.873	672.67	1148.92	503.511	686.253	976.471	470.932	686.94	875.389	517.869	745.525	890.154	518.922	743.443	781.994
511	0	298.781	268.591	1619.06	195.187	271.482	1616.34	322.228	425.005	1630.59	185.551	440.398	1630.49	232.061	496.661	1486.61	220.404	608.072	1266.21	256.948	363.935	1382.05	255.803	343.541	1195.67	167.793	600.322	1342.15	425.732	517.242	1430.33	468.428	602.257	1255.28	476.582	659.008	1147.82	505.226	672.706	975.454	472.578	673.649	874.316	519.652	732.097	889.198	520.502	730.449	780.946
512	0	301.127	255.233	1618.73	197.526	258.117	1616.23	324.589	411.613	1630.41	187.899	427.033	1630.59	234.015	483.51	1486.63	222.003	594.746	1266.15	258.961	350.789	1382.04	257.862	330.17	1195.73	169.548	587.216	1342.26	427.641	504.247	1429.99	470.304	588.599	1254.45	478.404	645.067	1146.85	507.007	658.552	974.525	474.265	659.555	873.35	521.521	717.881	888.22	522.179	716.408	779.895
513	0	303.384	241.976	1618.66	199.778	244.844	1616.38	326.85	398.323	1630.51	190.145	413.76	1630.98	235.898	470.474	1486.92	223.615	581.528	1266.36	260.881	337.746	1382.32	259.849	316.89	1196.09	171.291	574.23	1342.61	429.509	491.279	1429.96	472.241	574.773	1253.82	480.335	630.86	1146.03	508.849	643.796	973.701	475.986	644.666	872.509	523.468	702.877	887.237	523.947	701.311	778.858
514	0	305.526	228.835	1618.86	201.917	231.68	1616.79	328.987	385.15	1630.88	192.267	400.596	1631.65	237.696	457.568	1487.47	225.238	568.428	1266.82	262.687	324.818	1382.9	261.744	303.725	1196.74	173.017	561.379	1343.19	431.325	478.34	1430.26	474.233	560.787	1253.4	482.374	616.399	1145.38	510.742	628.45	972.998	477.732	628.993	871.811	525.485	687.093	886.263	525.799	685.156	777.856
515	0	307.53	215.823	1619.33	203.919	218.64	1617.47	330.979	372.109	1631.52	194.243	387.557	1632.59	239.399	444.802	1488.28	226.868	555.455	1267.54	264.365	312.016	1383.75	263.528	290.691	1197.66	174.722	548.675	1344	433.078	465.435	1430.86	476.274	546.648	1253.22	484.518	601.695	1144.91	512.682	612.528	972.432	479.493	612.553	871.272	527.562	670.541	885.317	527.726	667.951	776.909
516	0	309.373	202.951	1620.06	205.762	205.738	1618.4	332.807	359.209	1632.43	196.056	374.655	1633.79	240.998	432.181	1489.33	228.503	542.614	1268.5	265.902	299.347	1384.86	265.186	277.804	1198.84	176.403	536.126	1345.03	434.759	452.567	1431.78	478.357	532.366	1253.26	486.762	586.762	1144.63	514.658	596.045	972.017	481.258	595.368	870.91	529.688	653.235	884.417	529.719	649.708	776.042
517	0	311.038	190.224	1621.05	207.428	192.981	1619.57	334.458	346.457	1633.6	197.692	361.901	1635.22	242.487	419.713	1490.61	230.136	529.906	1269.69	267.29	286.815	1386.22	266.706	265.074	1200.26	178.055	523.736	1346.27	436.361	439.739	1433	480.475	517.949	1253.53	489.102	571.612	1144.54	516.663	579.02	971.765	483.018	577.466	870.74	531.852	635.195	883.581	531.764	630.45	775.281
518	0	312.509	177.645	1622.29	208.903	180.376	1620.97	335.922	333.856	1635	199.144	349.3	1636.86	243.862	407.398	1492.11	231.765	517.331	1271.09	268.525	274.423	1387.82	268.081	252.506	1201.91	179.676	511.509	1347.69	437.878	426.954	1434.51	482.62	503.408	1254.02	491.532	556.257	1144.65	518.688	561.476	971.686	484.763	558.875	870.779	534.044	616.443	882.828	533.849	610.204	774.653
519	0	313.779	165.215	1623.76	210.177	167.927	1622.57	337.195	321.406	1636.63	200.406	336.857	1638.7	245.123	395.236	1493.8	233.382	504.884	1272.68	269.604	262.169	1389.62	269.307	240.099	1203.76	181.262	499.439	1349.27	439.305	414.217	1436.28	484.786	488.753	1254.74	494.045	540.711	1144.94	520.725	543.438	971.791	486.482	539.63	871.041	536.25	597.007	882.175	535.96	589.009	774.188
520	0	314.842	152.931	1625.44	211.246	155.635	1624.35	338.277	309.102	1638.48	201.479	324.572	1640.7	246.271	383.223	1495.66	234.982	492.561	1274.44	270.531	250.05	1391.62	270.385	227.848	1205.79	182.811	487.523	1351.01	440.641	401.529	1438.29	486.962	473.998	1255.66	496.633	524.987	1145.42	522.765	524.932	972.085	488.168	519.769	871.538	538.461	576.916	881.643	538.08	566.909	773.914
521	0	315.701	140.788	1627.32	212.113	143.496	1626.29	339.172	296.941	1640.5	202.368	312.442	1642.85	247.309	371.354	1497.67	236.559	480.354	1276.34	271.314	238.059	1393.78	271.319	215.746	1207.99	184.319	475.75	1352.86	441.885	388.895	1440.52	489.141	459.154	1256.77	499.284	509.1	1146.07	524.799	505.987	972.573	489.811	499.329	872.281	540.662	556.205	881.246	540.193	543.953	773.862
522	0	316.361	128.779	1629.37	212.781	131.506	1628.37	339.891	284.915	1642.69	203.083	300.464	1645.11	248.245	359.619	1499.8	238.105	468.255	1278.36	271.961	226.187	1396.08	272.119	203.781	1210.32	185.784	464.109	1354.81	443.038	376.316	1442.93	491.313	444.238	1258.06	501.987	493.066	1146.88	526.819	486.637	973.258	491.407	478.354	873.28	542.843	534.909	881.002	542.281	520.198	774.058
523	0	316.834	116.897	1631.57	213.265	119.658	1630.56	340.445	273.015	1645.02	203.638	288.629	1647.45	249.085	348.008	1502.02	239.613	456.257	1280.47	272.485	214.423	1398.49	272.797	191.938	1212.75	187.204	452.586	1356.83	444.102	363.794	1445.49	493.468	429.265	1259.5	504.731	476.902	1147.84	528.82	466.914	974.138	492.949	456.885	874.542	544.992	513.068	880.924	544.328	495.708	774.527
524	0	317.139	105.131	1633.88	213.579	107.943	1632.82	340.853	261.234	1647.45	204.048	276.93	1649.85	249.837	336.508	1504.29	241.074	444.349	1282.64	272.901	202.756	1400.97	273.367	180.202	1215.25	188.573	441.166	1358.9	445.081	351.331	1448.16	495.598	414.252	1261.07	507.499	460.626	1148.91	530.792	446.855	975.211	494.434	434.968	876.068	547.098	490.725	881.023	546.317	470.548	775.288
525	0	317.294	93.4732	1636.28	213.744	96.3503	1635.13	341.133	249.561	1649.94	204.334	265.356	1652.25	250.512	325.103	1506.59	242.48	432.523	1284.82	273.224	191.171	1403.49	273.846	168.559	1217.8	189.89	429.83	1360.98	445.978	338.929	1450.9	497.693	399.218	1262.73	510.279	444.258	1150.08	532.73	426.496	976.471	495.86	412.648	877.858	549.151	467.923	881.307	548.231	444.789	776.357
526	0	317.325	81.9124	1638.72	213.784	84.8684	1637.45	341.307	237.986	1652.46	204.516	253.895	1654.65	251.119	313.78	1508.89	243.823	420.768	1287.01	273.471	179.655	1406.01	274.251	156.993	1220.35	191.149	418.562	1363.05	446.798	326.587	1453.66	499.743	384.182	1264.46	513.054	427.818	1151.31	534.629	405.876	977.907	497.225	389.97	879.908	551.141	444.711	881.781	550.055	418.504	777.742
527	0	317.258	70.4381	1641.18	213.724	73.4836	1639.77	341.397	226.499	1654.97	204.618	242.533	1656.99	251.666	302.52	1511.15	245.095	409.075	1289.15	273.658	168.194	1408.51	274.598	145.489	1222.86	192.348	407.345	1365.08	447.545	314.305	1456.42	501.74	369.161	1266.22	515.81	411.324	1152.59	536.481	385.034	979.507	498.53	366.982	882.211	553.058	421.137	882.445	551.777	391.767	779.449
528	0	317.121	59.0391	1643.62	213.591	62.1816	1642.03	341.428	215.09	1657.44	204.662	231.256	1659.25	252.164	291.307	1513.33	246.286	397.433	1291.22	273.8	156.773	1410.93	274.904	134.034	1225.31	193.48	396.16	1367.04	448.226	302.084	1459.12	503.675	354.174	1267.99	518.529	394.798	1153.87	538.283	364.009	981.257	499.775	343.729	884.752	554.894	397.251	883.296	553.386	364.655	781.472
529	0	316.941	47.7037	1645.99	213.414	50.9472	1644.22	341.42	203.746	1659.81	204.669	220.049	1661.4	252.619	280.126	1515.42	247.39	385.832	1293.2	273.913	145.379	1413.25	275.183	122.614	1227.65	194.543	384.992	1368.9	448.843	289.923	1461.72	505.54	339.239	1269.72	521.197	378.257	1155.12	540.03	342.841	983.138	500.959	320.259	887.516	556.642	373.104	884.33	554.872	337.241	783.806
530	0	316.746	36.42	1648.27	213.217	39.7648	1646.31	341.394	192.456	1662.05	204.661	208.897	1663.4	253.039	268.959	1517.37	248.4	374.262	1295.04	274.008	134.001	1415.43	275.447	111.219	1229.85	195.532	373.825	1370.65	449.401	277.818	1464.19	507.326	324.37	1271.37	523.799	361.718	1156.31	541.714	321.566	985.131	502.083	296.615	890.483	558.293	348.747	885.536	556.229	309.599	786.435
531	0	316.559	25.1754	1650.42	213.024	28.6185	1648.26	341.37	181.208	1664.12	204.656	197.782	1665.23	253.428	257.791	1519.17	249.31	362.711	1296.73	274.096	122.625	1417.44	275.705	99.8366	1231.88	196.443	362.644	1372.25	449.904	265.769	1466.49	509.024	309.581	1272.92	526.319	345.197	1157.41	543.332	300.224	987.215	503.147	272.846	893.632	559.84	324.233	886.903	557.455	281.801	789.344
532	0	316.402	13.957	1652.4	212.856	17.4921	1650.06	341.365	169.989	1666	204.67	186.689	1666.87	253.79	246.608	1520.78	250.116	351.171	1298.24	274.185	111.241	1419.24	275.966	88.4586	1233.7	197.274	351.437	1373.69	450.354	253.772	1468.58	510.628	294.883	1274.33	528.744	328.706	1158.39	544.877	278.849	989.367	504.148	248.994	896.937	561.278	299.61	888.416	558.546	253.917	792.51
533	0	316.292	2.75179	1654.19	212.731	6.37016	1651.67	341.39	158.786	1667.64	204.716	175.603	1668.29	254.127	235.397	1522.18	250.814	339.629	1299.55	274.281	99.841	1420.82	276.231	77.0762	1235.29	198.021	340.192	1374.94	450.753	241.822	1470.45	512.13	280.284	1275.56	531.06	312.255	1159.21	546.343	257.476	991.565	505.086	225.106	900.373	562.601	274.93	890.059	559.503	226.012	795.911
534	0	316.242	-8.45329	1655.76	212.662	-4.76276	1653.08	341.456	147.585	1669.02	204.802	164.507	1669.47	254.441	224.145	1523.36	251.401	328.077	1300.64	274.388	88.4152	1422.15	276.505	65.6816	1236.62	198.683	328.898	1376	451.103	229.915	1472.05	513.521	265.788	1276.6	533.253	295.852	1159.85	547.722	236.138	993.787	505.958	201.224	903.915	563.802	250.241	891.815	560.329	198.149	799.522
535	0	316.26	-19.6712	1657.08	212.656	-15.9211	1654.27	341.568	136.374	1670.13	204.935	153.386	1670.41	254.728	212.843	1524.3	251.878	316.504	1301.49	274.506	76.9565	1423.21	276.785	54.2673	1237.69	199.257	317.546	1376.84	451.403	218.042	1473.39	514.796	251.396	1277.41	535.312	279.504	1160.3	549.006	214.864	996.01	506.76	177.391	907.536	564.877	225.59	893.667	561.026	170.39	803.318
536	0	316.348	-30.9143	1658.13	212.718	-27.1184	1655.22	341.728	125.139	1670.94	205.114	142.227	1671.08	254.988	201.481	1524.99	252.243	304.9	1302.1	274.633	65.4582	1423.99	277.068	42.8262	1238.47	199.742	306.129	1377.45	451.652	206.197	1474.43	515.947	237.108	1277.99	537.226	263.216	1160.53	550.189	193.685	998.214	507.487	153.65	911.212	565.822	201.021	895.596	561.599	142.789	807.273
537	0	316.505	-42.1944	1658.91	212.846	-38.3671	1655.92	341.934	113.87	1671.45	205.336	131.016	1671.49	255.216	190.051	1525.42	252.5	293.256	1302.46	274.765	53.9139	1424.48	277.349	31.3511	1238.96	200.138	294.639	1377.83	451.85	194.37	1475.18	516.967	222.92	1278.31	538.982	246.993	1160.53	551.261	172.627	1000.38	508.134	130.04	914.918	566.631	176.579	897.585	562.054	115.4	811.365
538	0	316.724	-53.5223	1659.4	213.033	-49.6781	1656.36	342.178	102.553	1671.65	205.596	119.742	1671.64	255.405	178.546	1525.59	252.649	281.564	1302.56	274.896	42.3179	1424.68	277.621	19.8347	1239.15	200.445	283.07	1377.97	451.993	182.55	1475.63	517.853	208.826	1278.37	540.573	230.84	1160.31	552.215	151.717	1002.49	508.694	106.601	918.63	567.302	152.305	899.617	562.394	88.2734	815.571
539	0	316.994	-64.9078	1659.6	213.271	-61.061	1656.55	342.45	91.1806	1671.54	205.882	108.394	1671.52	255.55	166.961	1525.49	252.693	269.815	1302.4	275.018	30.6645	1424.59	277.875	8.26957	1239.05	200.661	271.417	1377.86	452.078	170.725	1475.78	518.597	194.817	1278.16	541.988	214.76	1159.85	553.042	130.98	1004.53	509.161	83.3723	922.328	567.831	128.239	901.676	562.626	61.4557	819.868
540	0	317.3	-76.3593	1659.51	213.545	-72.524	1656.48	342.736	79.7427	1671.13	206.18	96.9652	1671.13	255.643	155.291	1525.13	252.637	258.001	1301.98	275.12	18.948	1424.22	278.102	-3.35233	1238.66	200.787	259.677	1377.51	452.101	158.883	1475.65	519.196	180.886	1277.69	543.222	198.76	1159.17	553.735	110.44	1006.49	509.526	60.39	925.991	568.216	104.42	903.746	562.753	34.991	824.237
541	0	317.623	-87.8839	1659.13	213.837	-84.0738	1656.15	343.019	68.2323	1670.43	206.473	85.4467	1670.49	255.674	143.531	1524.52	252.485	246.113	1301.32	275.192	7.16281	1423.56	278.293	-15.0392	1237.99	200.823	247.845	1376.91	452.056	147.01	1475.23	519.646	167.021	1276.97	544.268	182.845	1158.26	554.288	90.1205	1008.35	509.783	37.6896	929.599	568.453	80.8842	905.811	562.778	8.92127	828.655
542	0	317.943	-99.4875	1658.48	214.128	-95.7154	1655.57	343.279	56.6435	1669.45	206.742	73.8334	1669.61	255.636	131.679	1523.66	252.241	234.146	1300.41	275.223	-4.69674	1422.65	278.437	-26.7997	1237.06	200.77	235.92	1376.08	451.939	135.094	1474.54	519.946	153.212	1276	545.123	167.021	1157.15	554.695	70.0442	1010.11	509.923	15.3048	933.134	568.542	57.6679	907.858	562.704	-16.7141	833.1
543	0	318.238	-111.175	1657.57	214.394	-107.453	1654.76	343.495	44.9716	1668.21	206.964	62.121	1668.49	255.518	119.733	1522.56	251.911	222.093	1299.26	275.199	-16.6362	1421.48	278.524	-38.6427	1235.88	200.627	223.897	1375.02	451.743	123.121	1473.61	520.094	139.45	1274.8	545.785	151.296	1155.85	554.951	50.2327	1011.75	509.941	-6.73238	936.578	568.483	34.8052	909.87	562.53	-41.8776	837.548
544	0	318.482	-122.949	1656.43	214.613	-119.289	1653.73	343.643	33.2136	1666.73	207.117	50.3066	1667.15	255.313	107.691	1521.25	251.5	209.948	1297.9	275.109	-28.6611	1420.09	278.545	-50.577	1234.48	200.394	211.777	1373.73	451.462	111.08	1472.45	520.091	125.725	1273.4	546.253	135.678	1154.38	555.054	30.7069	1013.28	509.83	-28.3915	939.914	568.274	12.3292	911.832	562.257	-66.5334	841.974
545	0	318.651	-134.813	1655.07	214.761	-131.225	1652.49	343.7	21.3673	1665.05	207.178	38.3883	1665.61	255.01	95.5522	1519.73	251.013	197.706	1296.33	274.941	-40.7762	1418.49	278.493	-62.6115	1232.86	200.074	199.559	1372.24	451.093	98.9603	1471.09	519.938	112.029	1271.81	546.53	120.173	1152.76	555	11.4872	1014.67	509.586	-49.644	943.122	567.916	-9.72829	913.729	561.883	-90.6472	846.35
546	0	318.723	-146.767	1653.52	214.813	-143.263	1651.07	343.643	9.43171	1663.18	207.124	26.3653	1663.9	254.602	83.3166	1518.03	250.456	185.365	1294.58	274.686	-52.9859	1416.71	278.361	-74.7546	1231.07	199.665	187.242	1370.55	450.628	86.7531	1469.54	519.64	98.3544	1270.07	546.62	104.79	1151.02	554.791	-7.40716	1015.93	509.205	-70.4627	946.186	567.413	-31.3364	915.545	561.405	-114.186	850.644
547	0	318.674	-158.813	1651.81	214.748	-155.401	1649.48	343.449	-2.59335	1661.16	206.932	14.2378	1662.02	254.083	70.9849	1516.17	249.835	172.922	1292.67	274.335	-65.2938	1414.77	278.144	-87.0137	1229.13	199.17	174.828	1368.68	450.065	74.4516	1467.85	519.2	84.6948	1268.2	546.53	89.5367	1149.17	554.427	-25.9575	1017.05	508.687	-90.8222	949.086	566.765	-52.4654	917.262	560.821	-137.12	854.823
548	0	318.485	-170.95	1649.97	214.545	-167.64	1647.75	343.1	-14.7073	1659.03	206.585	2.0066	1660.01	253.446	58.5588	1514.17	249.154	160.376	1290.61	273.879	-77.7024	1412.71	277.839	-99.3954	1227.06	198.588	162.317	1366.66	449.401	62.0512	1466.04	518.624	71.0463	1266.23	546.267	74.4201	1147.25	553.911	-44.1459	1018.03	508.031	-110.699	951.805	565.979	-73.0868	918.865	560.129	-159.417	858.852
549	0	318.137	-183.177	1648.03	214.187	-179.977	1645.9	342.579	-26.9088	1656.8	206.064	-10.3263	1657.89	252.689	46.0407	1512.05	248.42	147.728	1288.43	273.314	-90.213	1410.56	277.446	-111.905	1224.9	197.923	149.713	1364.5	448.634	49.5496	1464.14	517.92	57.4066	1264.2	545.841	59.4484	1145.29	553.248	-61.9554	1018.87	507.239	-130.069	954.323	565.06	-93.1734	920.336	559.326	-181.049	862.694
550	0	317.616	-195.493	1646.03	213.659	-192.41	1643.97	341.872	-39.1963	1654.53	205.357	-22.7583	1655.69	251.811	33.4339	1509.86	247.637	134.982	1286.17	272.637	-102.825	1408.33	276.966	-124.545	1222.68	197.175	137.018	1362.22	447.766	36.9472	1462.17	517.097	43.7756	1262.12	545.263	44.6297	1143.31	552.444	-79.3697	1019.56	506.317	-148.914	956.621	564.014	-112.699	921.659	558.413	-201.988	866.309
551	0	316.914	-207.897	1643.99	212.951	-204.935	1641.97	340.972	-51.5673	1652.24	204.457	-35.2856	1653.43	250.811	20.7428	1507.6	246.81	122.14	1283.84	271.849	-115.537	1406.07	276.402	-137.316	1220.43	196.346	124.238	1359.87	446.798	24.2471	1460.18	516.163	30.1559	1260.05	544.544	29.9728	1141.34	551.505	-96.3731	1020.09	505.271	-167.211	958.683	562.852	-131.638	922.818	557.39	-222.209	869.661
552	0	316.024	-220.384	1641.95	212.059	-217.547	1639.93	339.874	-64.0191	1649.98	203.36	-47.9038	1651.14	249.693	7.97295	1505.32	245.944	109.21	1281.47	270.954	-128.345	1403.81	275.76	-150.217	1218.17	195.438	111.376	1357.45	445.734	11.455	1458.19	515.128	16.5525	1258	543.697	15.4869	1139.41	550.442	-112.951	1020.48	504.108	-184.944	960.489	561.583	-149.969	923.799	556.258	-241.688	872.709
553	0	314.947	-232.952	1639.94	210.983	-230.243	1637.88	338.581	-76.5481	1647.76	202.069	-60.6069	1648.85	248.464	-4.86902	1503.03	245.044	96.1999	1279.1	269.957	-141.243	1401.58	275.048	-163.243	1215.94	194.455	98.4404	1355.01	444.581	-1.42034	1456.23	514.005	2.97333	1256.01	542.734	1.18211	1137.54	549.265	-129.089	1020.71	502.838	-202.096	962.022	560.22	-167.668	924.588	555.022	-260.402	875.416
554	0	313.688	-245.597	1637.99	209.727	-243.014	1635.85	337.101	-89.1503	1645.62	200.591	-73.3882	1646.58	247.131	-17.7751	1500.78	244.111	83.1184	1276.75	268.867	-154.223	1399.4	274.275	-176.387	1213.78	193.399	85.4386	1352.57	443.346	-14.3677	1454.33	512.804	-10.5708	1254.1	541.668	-12.931	1135.76	547.986	-144.773	1020.78	501.473	-218.651	963.268	558.777	-184.715	925.173	553.69	-278.332	877.747
555	0	312.256	-258.311	1636.13	208.302	-255.853	1633.86	335.446	-101.821	1643.6	198.941	-86.2396	1644.37	245.705	-30.736	1498.59	243.149	69.9771	1274.46	267.698	-167.276	1397.3	273.451	-189.636	1211.7	192.273	72.3797	1350.17	442.042	-27.3733	1452.51	511.538	-24.0663	1252.29	540.512	-26.841	1134.09	546.617	-159.991	1020.7	500.026	-234.596	964.211	557.268	-201.093	925.542	552.268	-295.46	879.668
556	0	310.668	-271.09	1634.38	206.724	-268.75	1631.93	333.636	-114.553	1641.72	197.137	-99.1516	1642.23	244.202	-43.741	1496.49	242.16	56.789	1272.25	266.463	-180.388	1395.32	272.589	-202.977	1209.73	191.081	59.2746	1347.84	440.678	-40.4208	1450.81	510.218	-37.4972	1250.62	539.276	-40.536	1132.55	545.173	-174.732	1020.47	498.51	-249.919	964.84	555.708	-216.783	925.688	550.769	-311.769	881.148
557	0	308.943	-283.925	1632.77	205.013	-281.697	1630.1	331.693	-127.341	1640	195.204	-112.114	1640.21	242.635	-56.7782	1494.51	241.145	43.5687	1270.17	265.179	-193.546	1393.48	271.701	-216.393	1207.91	189.829	46.1355	1345.6	439.271	-53.4921	1449.23	508.856	-50.8451	1249.1	537.971	-54.004	1131.15	543.668	-188.985	1020.09	496.941	-264.608	965.143	554.113	-231.771	925.604	549.204	-327.246	882.161
558	0	307.107	-296.806	1631.31	203.194	-294.68	1628.38	329.646	-140.175	1638.46	193.17	-125.115	1638.31	241.025	-69.8343	1492.68	240.105	30.3318	1268.22	263.865	-206.733	1391.79	270.798	-229.861	1206.25	188.521	32.9759	1343.5	437.834	-66.5676	1447.81	507.464	-64.09	1247.74	536.609	-67.233	1129.9	542.116	-202.739	1019.55	495.335	-278.657	965.113	552.5	-246.044	925.286	547.59	-341.881	882.686
559	0	305.186	-309.725	1630.02	201.295	-307.688	1626.79	327.526	-153.048	1637.13	191.066	-138.141	1636.57	239.39	-82.895	1491.01	239.04	17.0954	1266.45	262.539	-219.932	1390.29	269.893	-243.358	1204.77	187.166	19.8108	1341.57	436.386	-79.6266	1446.56	506.054	-77.2107	1246.56	535.198	-80.2114	1128.81	540.533	-215.987	1018.87	493.706	-292.058	964.745	550.884	-259.593	924.731	545.943	-355.663	882.706
560	0	303.212	-322.668	1628.92	199.345	-320.707	1625.35	325.369	-165.949	1636.02	188.929	-151.18	1635.01	237.752	-95.9451	1489.54	237.95	3.87703	1264.88	261.222	-233.121	1388.99	268.995	-256.859	1203.49	185.772	6.65576	1339.83	434.942	-92.6483	1445.48	504.635	-90.1855	1245.57	533.746	-92.9288	1127.89	538.933	-228.722	1018.04	492.071	-304.806	964.039	549.279	-272.408	923.941	544.281	-368.588	882.211
561	0	301.217	-335.625	1628.01	197.377	-333.722	1624.08	323.211	-178.867	1635.13	186.794	-164.216	1633.65	236.133	-108.969	1488.29	236.836	-9.30521	1263.53	259.934	-246.283	1387.9	268.114	-270.334	1202.43	184.348	-6.47309	1338.31	433.522	-105.612	1444.6	503.218	-102.994	1244.76	532.261	-105.376	1127.14	537.33	-240.937	1017.06	490.447	-316.899	962.995	547.7	-284.483	922.918	542.622	-380.649	881.198
562	0	299.234	-348.583	1627.3	195.424	-346.719	1622.99	321.091	-191.791	1634.48	184.7	-177.235	1632.5	234.556	-121.949	1487.27	235.699	-22.4335	1262.42	258.692	-259.396	1387.05	267.257	-283.756	1201.6	182.905	-19.5596	1337.03	432.142	-118.498	1443.91	501.812	-115.615	1244.15	530.75	-117.545	1126.57	535.737	-252.63	1015.96	488.846	-328.335	961.619	546.158	-295.817	921.671	540.987	-391.845	879.671
563	0	297.299	-361.529	1626.79	193.52	-359.682	1622.1	319.046	-204.71	1634.08	182.684	-190.223	1631.59	233.04	-134.871	1486.5	234.541	-35.4906	1261.57	257.515	-272.44	1386.43	266.431	-297.096	1201	181.455	-32.5883	1336.03	430.818	-131.287	1443.42	500.424	-128.033	1243.72	529.219	-129.431	1126.15	534.166	-263.799	1014.72	487.285	-339.116	959.921	544.664	-306.408	920.207	539.393	-402.175	877.643
564	0	295.442	-374.449	1626.49	191.695	-372.598	1621.42	317.113	-217.612	1633.91	180.783	-203.165	1630.94	231.607	-147.717	1486	233.366	-48.4608	1260.98	256.416	-285.396	1386.07	265.64	-310.329	1200.65	180.01	-45.545	1335.31	429.566	-143.962	1443.13	499.061	-140.232	1243.49	527.674	-141.031	1125.91	532.628	-274.443	1013.36	485.774	-349.244	957.915	543.228	-316.258	918.541	537.859	-411.642	875.133
565	0	293.697	-387.329	1626.4	189.983	-385.452	1620.96	315.325	-230.484	1634	179.029	-216.047	1630.55	230.273	-160.474	1485.76	232.179	-61.3301	1260.67	255.408	-298.248	1385.96	264.885	-323.433	1200.55	178.583	-58.4171	1334.88	428.398	-156.507	1443.04	497.731	-152.203	1243.44	526.118	-152.346	1125.81	531.131	-284.564	1011.88	484.326	-358.724	955.619	541.857	-325.374	916.688	536.401	-420.251	872.169
566	0	292.093	-400.158	1626.5	188.41	-398.231	1620.72	313.714	-243.314	1634.33	177.454	-228.857	1630.44	229.053	-173.128	1485.8	230.983	-74.0869	1260.64	254.502	-310.981	1386.11	264.17	-336.389	1200.71	177.186	-71.1944	1334.75	427.324	-168.91	1443.15	496.436	-163.939	1243.56	524.557	-163.378	1125.88	529.684	-294.169	1010.31	482.95	-367.564	953.053	540.556	-333.763	914.668	535.033	-428.008	868.786
567	0	290.657	-412.921	1626.81	187.004	-410.924	1620.72	312.305	-256.089	1634.89	176.082	-241.584	1630.62	227.956	-185.669	1486.11	229.786	-86.7226	1260.89	253.702	-323.583	1386.53	263.494	-349.186	1201.13	175.828	-83.8696	1334.93	426.351	-181.159	1443.45	495.182	-175.44	1243.86	522.993	-174.132	1126.08	528.293	-303.263	1008.66	481.654	-375.772	950.244	539.329	-341.438	912.505	533.767	-434.923	865.026
568	0	289.412	-425.605	1627.3	185.787	-423.522	1620.96	311.119	-268.798	1635.7	174.932	-254.218	1631.1	226.991	-198.088	1486.7	228.593	-99.2318	1261.42	253.013	-336.048	1387.21	262.856	-361.82	1201.8	174.518	-96.4383	1335.4	425.483	-193.247	1443.94	493.969	-186.706	1244.32	521.429	-184.618	1126.43	526.961	-311.856	1006.93	480.444	-383.362	947.22	538.178	-348.414	910.224	532.613	-441.008	860.937
569	0	288.376	-438.2	1627.99	184.776	-436.018	1621.44	310.168	-281.427	1636.72	174.017	-266.754	1631.88	226.159	-210.379	1487.54	227.411	-111.613	1262.2	252.435	-348.371	1388.15	262.257	-374.289	1202.74	173.263	-108.899	1336.16	424.718	-205.17	1444.6	492.8	-197.745	1244.93	519.865	-194.845	1126.91	525.693	-319.96	1005.15	479.324	-390.347	944.015	537.103	-354.71	907.853	531.577	-446.278	856.572
570	0	287.565	-450.694	1628.85	183.986	-448.407	1622.17	309.46	-293.965	1637.96	173.343	-279.185	1632.96	225.459	-222.542	1488.64	226.243	-123.866	1263.23	251.965	-360.554	1389.35	261.695	-386.602	1203.94	172.068	-121.255	1337.2	424.055	-216.928	1445.43	491.673	-208.568	1245.69	518.302	-204.826	1127.52	524.487	-327.59	1003.33	478.296	-396.743	940.662	536.105	-360.348	905.425	530.662	-450.751	851.989
571	0	286.988	-463.076	1629.89	183.426	-460.685	1623.14	308.995	-306.401	1639.39	172.909	-291.509	1634.33	224.887	-234.579	1489.98	225.095	-135.997	1264.5	251.597	-372.601	1390.8	261.168	-398.771	1205.38	170.934	-133.511	1338.49	423.489	-228.525	1446.4	490.587	-219.186	1246.59	516.738	-214.574	1128.25	523.346	-334.761	1001.51	477.363	-402.571	937.201	535.18	-365.353	902.971	529.87	-454.447	847.247
572	0	286.646	-475.34	1631.09	183.096	-472.853	1624.34	308.766	-318.723	1641	172.708	-303.726	1635.98	224.434	-246.495	1491.52	223.969	-148.013	1265.96	251.324	-384.521	1392.47	260.673	-410.809	1207.06	169.861	-145.674	1340.01	423.01	-239.969	1447.52	489.539	-229.615	1247.61	515.174	-224.104	1129.1	522.266	-341.494	999.686	476.523	-407.853	933.668	534.327	-369.756	900.526	529.198	-457.391	842.407
573	0	286.537	-487.478	1632.44	182.996	-484.913	1625.78	308.76	-330.924	1642.76	172.726	-315.835	1637.88	224.09	-258.3	1493.25	222.869	-159.924	1267.61	251.136	-396.327	1394.35	260.207	-422.736	1208.96	168.848	-157.756	1341.73	422.608	-251.273	1448.75	488.524	-239.872	1248.75	513.607	-233.43	1130.06	521.244	-347.81	997.894	475.774	-412.616	930.103	533.542	-373.59	898.122	528.642	-459.614	837.528
574	0	286.653	-499.487	1633.92	183.116	-496.869	1627.42	308.959	-342.998	1644.65	172.942	-327.841	1640.02	223.841	-270.005	1495.14	221.794	-171.742	1269.42	251.023	-408.035	1396.42	259.766	-434.57	1211.04	167.889	-169.769	1343.62	422.274	-262.453	1450.08	487.538	-249.974	1249.98	512.036	-242.567	1131.12	520.279	-353.731	996.151	475.113	-416.887	926.544	532.819	-376.89	895.792	528.195	-461.147	832.67
575	0	286.98	-511.367	1635.53	183.442	-508.726	1629.26	309.337	-354.942	1646.64	173.334	-339.75	1642.35	223.674	-281.627	1497.16	220.746	-183.478	1271.34	250.972	-419.662	1398.63	259.347	-446.33	1213.28	166.982	-181.725	1345.63	421.994	-273.528	1451.5	486.575	-259.937	1251.31	510.459	-251.527	1132.27	519.364	-359.283	994.474	474.536	-420.7	923.026	532.155	-379.697	893.565	527.849	-462.032	827.886
576	0	287.498	-523.12	1637.22	183.957	-520.496	1631.25	309.869	-366.755	1648.7	173.871	-351.569	1644.82	223.573	-293.182	1499.26	219.728	-195.145	1273.35	250.972	-431.228	1400.95	258.946	-458.036	1215.64	166.119	-193.639	1347.75	421.756	-284.521	1452.97	485.629	-269.78	1252.7	508.876	-260.325	1133.5	518.496	-364.493	992.88	474.037	-424.089	919.583	531.542	-382.055	891.47	527.592	-462.314	823.228
577	0	288.185	-534.752	1638.99	184.636	-532.187	1633.38	310.522	-378.442	1650.78	174.525	-363.309	1647.41	223.523	-304.688	1501.41	218.74	-206.756	1275.41	251.01	-442.754	1403.35	258.559	-469.704	1218.08	165.297	-205.525	1349.91	421.549	-295.456	1454.47	484.696	-279.516	1254.14	507.284	-268.97	1134.81	517.669	-369.39	991.383	473.609	-427.092	916.245	530.976	-384.01	889.53	527.414	-462.044	818.74
578	0	289.014	-546.274	1640.79	185.454	-543.814	1635.6	311.266	-390.01	1652.86	175.263	-374.981	1650.04	223.509	-316.167	1503.57	217.787	-218.322	1277.49	251.074	-454.258	1405.77	258.181	-481.35	1220.54	164.511	-217.396	1352.09	421.362	-306.356	1455.96	483.77	-289.163	1255.61	505.686	-277.474	1136.16	516.879	-374.003	989.994	473.247	-429.749	913.036	530.449	-385.611	887.763	527.301	-461.28	814.46
579	0	289.955	-557.699	1642.61	186.384	-555.392	1637.87	312.069	-401.471	1654.89	176.052	-386.601	1652.67	223.518	-327.638	1505.69	216.871	-229.853	1279.56	251.154	-465.762	1408.16	257.81	-492.988	1222.98	163.756	-229.265	1354.25	421.185	-317.246	1457.44	482.847	-298.731	1257.08	504.082	-285.848	1137.55	516.12	-378.363	988.722	472.941	-432.103	909.979	529.955	-386.908	886.186	527.24	-460.085	810.421
580	0	290.98	-569.046	1644.4	187.395	-566.937	1640.14	312.9	-412.841	1656.84	176.863	-398.185	1655.25	223.538	-339.12	1507.75	215.998	-241.358	1281.57	251.24	-477.283	1410.49	257.444	-504.63	1225.34	163.03	-241.142	1356.34	421.011	-328.15	1458.85	481.925	-308.233	1258.54	502.476	-294.099	1138.96	515.387	-382.504	987.571	472.684	-434.196	907.089	529.486	-387.953	884.806	527.216	-458.526	806.645
581	0	292.056	-580.336	1646.13	188.456	-578.468	1642.37	313.729	-424.14	1658.67	177.664	-409.75	1657.72	223.558	-350.633	1509.7	215.175	-252.845	1283.5	251.325	-488.839	1412.69	257.082	-516.285	1227.58	162.333	-253.037	1358.32	420.833	-339.088	1460.18	481.001	-317.679	1259.96	500.869	-302.237	1140.37	514.677	-386.457	986.544	472.467	-436.075	904.378	529.035	-388.799	883.63	527.215	-456.677	803.151
582	0	293.155	-591.591	1647.77	189.54	-590.004	1644.51	314.531	-435.39	1660.34	178.432	-421.317	1660.02	223.572	-362.195	1511.51	214.409	-264.32	1285.32	251.401	-500.444	1414.74	256.722	-527.96	1229.65	161.666	-264.958	1360.17	420.647	-350.082	1461.4	480.074	-327.078	1261.32	499.267	-310.271	1141.76	513.985	-390.255	985.64	472.283	-437.785	901.853	528.594	-389.497	882.657	527.222	-454.61	799.947
583	0	294.248	-602.838	1649.29	190.618	-601.565	1646.52	315.283	-446.618	1661.83	179.142	-432.904	1662.12	223.574	-373.822	1513.14	213.707	-275.792	1286.99	251.464	-512.11	1416.58	256.366	-539.66	1231.5	161.032	-276.912	1361.86	420.45	-361.148	1462.48	479.145	-336.437	1262.6	497.675	-318.211	1143.12	513.307	-393.933	984.857	472.122	-439.371	899.518	528.155	-390.099	881.884	527.225	-452.4	797.039
584	0	295.308	-614.104	1650.65	191.664	-613.17	1648.35	315.966	-457.85	1663.1	179.778	-444.533	1663.97	223.56	-385.528	1514.56	213.078	-287.266	1288.49	251.513	-523.848	1418.18	256.017	-551.39	1233.09	160.436	-288.904	1363.35	420.243	-372.302	1463.4	478.215	-345.764	1263.79	496.098	-326.065	1144.43	512.641	-397.523	984.188	471.978	-440.879	897.374	527.711	-390.655	881.304	527.212	-450.122	794.426
585	0	296.314	-625.417	1651.82	192.657	-624.839	1649.97	316.567	-469.115	1664.15	180.327	-456.222	1665.54	223.53	-397.327	1515.76	212.53	-298.751	1289.79	251.545	-535.666	1419.52	255.677	-563.154	1234.4	159.884	-300.939	1364.63	420.025	-383.556	1464.15	477.286	-355.065	1264.88	494.543	-333.846	1145.68	511.984	-401.057	983.629	471.843	-442.354	895.418	527.255	-391.211	880.908	527.171	-447.848	792.103
586	0	297.247	-636.802	1652.78	193.577	-636.59	1651.34	317.079	-480.442	1664.95	180.779	-467.991	1666.8	223.487	-409.229	1516.71	212.072	-310.256	1290.89	251.564	-547.572	1420.57	255.351	-574.953	1235.4	159.384	-313.022	1365.68	419.802	-394.923	1464.7	476.363	-364.349	1265.85	493.017	-341.564	1146.87	511.335	-404.568	983.171	471.713	-443.837	893.647	526.779	-391.815	880.682	527.093	-445.648	790.061
587	0	298.091	-648.287	1653.51	194.411	-648.44	1652.42	317.496	-491.858	1665.49	181.132	-479.857	1667.74	223.434	-421.243	1517.4	211.711	-321.79	1291.76	251.572	-559.57	1421.3	255.044	-586.792	1236.08	158.945	-325.154	1366.48	419.577	-406.409	1465.05	475.449	-373.622	1266.69	491.526	-349.234	1147.97	510.691	-408.085	982.805	471.583	-445.372	892.055	526.277	-392.507	880.613	526.971	-443.586	788.29
588	0	298.836	-659.893	1653.99	195.148	-660.402	1653.21	317.821	-503.388	1665.76	181.389	-491.834	1668.33	223.377	-433.376	1517.82	211.455	-333.367	1292.4	251.574	-571.665	1421.72	254.762	-598.673	1236.41	158.576	-337.341	1367.03	419.359	-418.024	1465.19	474.551	-382.895	1267.42	490.077	-356.87	1149.01	510.052	-411.641	982.522	471.449	-446.997	890.634	525.744	-393.327	880.687	526.801	-441.723	786.779
589	0	299.477	-671.642	1654.22	195.783	-672.489	1653.69	318.058	-515.055	1665.77	181.554	-503.935	1668.58	223.326	-445.632	1517.97	211.308	-344.998	1292.8	251.578	-583.86	1421.82	254.511	-610.602	1236.42	158.288	-349.586	1367.32	419.154	-429.771	1465.13	473.674	-392.177	1268.03	488.676	-364.489	1149.96	509.42	-415.264	982.313	471.309	-448.75	889.376	525.176	-394.313	880.889	526.579	-440.112	785.513
590	0	300.013	-683.551	1654.18	196.316	-684.711	1653.85	318.219	-526.88	1665.52	181.64	-516.17	1668.49	223.29	-458.015	1517.86	211.276	-356.698	1292.95	251.591	-596.156	1421.6	254.297	-622.583	1236.09	158.088	-361.893	1367.36	418.973	-441.656	1464.85	472.826	-401.483	1268.51	487.331	-372.11	1150.83	508.794	-418.984	982.168	471.163	-450.667	888.272	524.57	-395.499	881.201	526.304	-438.801	784.477
591	0	300.448	-695.633	1653.88	196.75	-697.073	1653.68	318.316	-538.876	1665.03	181.66	-528.545	1668.08	223.279	-470.527	1517.48	211.361	-368.484	1292.85	251.623	-608.557	1421.08	254.128	-634.625	1235.44	157.986	-374.266	1367.14	418.825	-453.682	1464.37	472.015	-410.827	1268.88	486.046	-379.753	1151.62	508.178	-422.829	982.077	471.01	-452.781	887.312	523.924	-396.914	881.61	525.978	-437.832	783.655
592	0	300.79	-707.897	1653.32	197.094	-709.58	1653.21	318.366	-551.055	1664.29	181.633	-541.063	1667.34	223.305	-483.168	1516.84	211.565	-380.369	1292.52	251.685	-621.063	1420.26	254.01	-646.733	1234.49	157.99	-386.711	1366.69	418.722	-465.851	1463.68	471.249	-420.225	1269.14	484.828	-387.441	1152.34	507.573	-426.828	982.029	470.852	-455.121	886.484	523.241	-398.59	882.098	525.601	-437.238	783.031
593	0	301.052	-720.348	1652.52	197.36	-722.232	1652.43	318.387	-563.426	1663.33	181.578	-553.726	1666.32	223.381	-495.938	1515.97	211.887	-392.369	1291.96	251.787	-633.676	1419.16	253.948	-658.918	1233.27	158.105	-399.232	1366.01	418.674	-478.166	1462.82	470.538	-429.696	1269.3	483.681	-395.199	1152.99	506.984	-431.01	982.014	470.69	-457.718	885.774	522.522	-400.553	882.65	525.177	-437.05	782.585
594	0	301.248	-732.988	1651.49	197.563	-735.029	1651.37	318.402	-575.99	1662.16	181.518	-566.531	1665.02	223.519	-508.834	1514.87	212.324	-404.498	1291.17	251.94	-646.396	1417.82	253.95	-671.187	1231.79	158.337	-411.836	1365.11	418.694	-490.627	1461.77	469.89	-439.262	1269.36	482.613	-403.055	1153.57	506.416	-435.402	982.02	470.528	-460.598	885.169	521.773	-402.828	883.25	524.71	-437.291	782.298
595	0	301.398	-745.815	1650.25	197.721	-747.966	1650.05	318.432	-588.747	1660.81	181.475	-579.473	1663.49	223.731	-521.853	1513.57	212.872	-416.769	1290.18	252.156	-659.224	1416.25	254.02	-683.552	1230.09	158.688	-424.528	1364.02	418.791	-503.234	1460.55	469.316	-448.944	1269.33	481.629	-411.039	1154.07	505.872	-440.034	982.036	470.369	-463.785	884.652	521.001	-405.441	883.881	524.206	-437.98	782.148
596	0	301.522	-758.823	1648.82	197.855	-761.037	1648.49	318.498	-601.694	1659.3	181.472	-592.547	1661.74	224.029	-534.992	1512.09	213.525	-429.192	1288.99	252.444	-672.161	1414.48	254.165	-696.02	1228.19	159.16	-437.313	1362.75	418.977	-515.986	1459.19	468.825	-458.767	1269.2	480.733	-419.18	1154.51	505.361	-444.935	982.048	470.217	-467.303	884.206	520.215	-408.414	884.526	523.672	-439.132	782.111
597	0	301.641	-772.004	1647.21	197.985	-774.235	1646.73	318.624	-614.821	1657.64	181.534	-605.745	1659.81	224.425	-548.246	1510.45	214.276	-441.774	1287.63	252.815	-685.204	1412.54	254.387	-708.6	1226.14	159.753	-450.196	1361.33	419.262	-528.88	1457.68	468.426	-468.752	1268.98	479.934	-427.511	1154.86	504.888	-450.134	982.044	470.076	-471.174	883.812	519.427	-411.771	885.17	523.113	-440.759	782.163
598	0	301.778	-785.348	1645.46	198.134	-787.552	1644.8	318.83	-628.12	1655.86	181.679	-619.057	1657.73	224.926	-561.609	1508.68	215.119	-454.519	1286.12	253.276	-698.354	1410.47	254.693	-721.3	1223.96	160.464	-463.179	1359.77	419.654	-541.913	1456.05	468.13	-478.925	1268.67	479.236	-436.064	1155.14	504.46	-455.659	982.009	469.952	-475.419	883.448	518.65	-415.534	885.794	522.537	-442.872	782.277
599	0	301.954	-798.843	1643.6	198.323	-800.978	1642.73	319.135	-641.579	1653.99	181.929	-632.474	1655.53	225.543	-575.074	1506.8	216.045	-467.429	1284.48	253.834	-711.606	1408.29	255.085	-734.127	1221.68	161.291	-476.265	1358.11	420.161	-555.08	1454.3	467.944	-489.308	1268.27	478.647	-444.871	1155.32	504.087	-461.541	981.93	469.849	-480.057	883.095	517.899	-419.727	886.381	521.952	-445.479	782.426
600	0	302.19	-812.474	1641.64	198.571	-814.503	1640.55	319.555	-655.185	1652.04	182.3	-645.986	1653.26	226.28	-588.634	1504.84	217.047	-480.502	1282.73	254.496	-724.958	1406.04	255.566	-747.084	1219.34	162.228	-489.454	1356.37	420.789	-568.373	1452.46	467.876	-499.923	1267.76	478.173	-453.964	1155.41	503.776	-467.809	981.792	469.772	-485.111	882.73	517.191	-424.374	886.913	521.369	-448.59	782.583
601	0	302.505	-826.228	1639.61	198.898	-828.117	1638.3	320.103	-668.922	1650.05	182.805	-659.582	1650.94	227.143	-602.281	1502.82	218.118	-493.732	1280.9	255.263	-738.405	1403.74	256.139	-760.175	1216.98	163.271	-502.743	1354.58	421.541	-581.786	1450.54	467.935	-510.791	1267.15	477.821	-463.373	1155.39	503.536	-474.492	981.581	469.728	-490.6	882.332	516.542	-429.499	887.375	520.796	-452.214	782.721
602	0	302.915	-840.089	1637.55	199.32	-841.809	1636.02	320.79	-682.775	1648.03	183.455	-673.251	1648.6	228.131	-616.003	1500.78	219.251	-507.109	1279.01	256.137	-751.94	1401.44	256.806	-773.399	1214.62	164.412	-516.128	1352.75	422.418	-595.308	1448.56	468.125	-521.927	1266.43	477.597	-473.126	1155.24	503.376	-481.619	981.286	469.724	-496.545	881.882	515.972	-435.127	887.749	520.245	-456.363	782.814
603	0	303.434	-854.041	1635.47	199.849	-855.566	1633.73	321.622	-696.728	1646.02	184.256	-686.982	1646.29	229.245	-629.792	1498.74	220.442	-520.624	1277.1	257.118	-765.555	1399.16	257.566	-786.755	1212.29	165.645	-529.603	1350.93	423.421	-608.93	1446.53	468.452	-533.348	1265.6	477.507	-483.249	1154.97	503.304	-489.218	980.895	469.767	-502.97	881.361	515.498	-441.285	888.021	519.728	-461.05	782.837
604	0	304.069	-868.066	1633.41	200.495	-869.378	1631.47	322.6	-710.764	1644.03	185.211	-700.765	1644.02	230.481	-643.633	1496.74	221.685	-534.262	1275.19	258.2	-779.242	1396.93	258.419	-800.237	1210.03	166.962	-543.157	1349.13	424.547	-622.638	1444.48	468.919	-545.065	1264.66	477.556	-493.764	1154.57	503.329	-497.316	980.399	469.865	-509.898	880.755	515.139	-447.999	888.179	519.257	-466.293	782.769
605	0	304.827	-882.147	1631.39	201.262	-883.23	1629.28	323.725	-724.864	1642.09	186.318	-714.585	1641.84	231.833	-657.514	1494.79	222.976	-548.006	1273.32	259.38	-792.99	1394.78	259.36	-813.838	1207.86	168.354	-556.78	1347.39	425.789	-636.42	1442.43	469.526	-557.087	1263.6	477.749	-504.689	1154.02	503.459	-505.938	979.793	470.027	-517.354	880.052	514.911	-455.296	888.211	518.846	-472.111	782.592
606	0	305.708	-896.266	1629.44	202.152	-897.11	1627.17	324.99	-739.009	1640.24	187.571	-728.432	1639.78	233.289	-671.42	1492.92	224.312	-561.838	1271.5	260.647	-806.785	1392.75	260.387	-827.547	1205.82	169.811	-570.456	1345.72	427.141	-650.262	1440.4	470.274	-569.419	1262.44	478.087	-516.037	1153.33	503.7	-515.109	979.073	470.262	-525.366	879.246	514.833	-463.205	888.109	518.508	-478.53	782.292
607	0	306.71	-910.404	1627.57	203.162	-911.003	1625.18	326.385	-753.181	1638.48	188.961	-742.29	1637.85	234.839	-685.333	1491.17	225.687	-575.74	1269.77	261.991	-820.613	1390.85	261.491	-841.35	1203.93	171.325	-584.171	1344.15	428.591	-664.149	1438.42	471.16	-582.061	1261.18	478.574	-527.817	1152.5	504.058	-524.851	978.242	470.578	-533.959	878.334	514.917	-471.755	887.869	518.26	-485.579	781.858
608	0	307.824	-924.541	1625.82	204.285	-924.892	1623.34	327.899	-767.358	1636.84	190.473	-756.145	1636.09	236.467	-699.237	1489.55	227.097	-589.689	1268.15	263.398	-834.459	1389.11	262.664	-855.232	1202.21	172.885	-597.904	1342.7	430.126	-678.067	1436.52	472.181	-595.012	1259.84	479.209	-540.034	1151.54	504.539	-535.183	977.304	470.985	-543.164	877.318	515.177	-480.974	887.488	518.116	-493.292	781.284
609	0	309.04	-938.657	1624.2	205.508	-938.763	1621.66	329.513	-781.521	1635.35	192.092	-769.982	1634.53	238.155	-713.113	1488.08	228.537	-603.665	1266.66	264.851	-848.305	1387.56	263.894	-869.172	1200.69	174.48	-611.639	1341.39	431.732	-691.999	1434.72	473.331	-608.266	1258.44	479.991	-552.685	1150.47	505.146	-546.123	976.267	471.49	-553.008	876.206	515.624	-490.889	886.967	518.091	-501.706	780.57
610	0	310.341	-952.733	1622.73	206.817	-952.599	1620.17	331.208	-795.647	1634.03	193.795	-783.784	1633.17	239.884	-726.942	1486.8	230.002	-617.647	1265.33	266.333	-862.132	1386.22	265.168	-883.15	1199.38	176.1	-625.353	1340.24	433.392	-705.931	1433.06	474.603	-621.811	1256.99	480.919	-565.763	1149.29	505.881	-557.685	975.146	472.101	-563.519	875.01	516.266	-501.526	886.311	518.202	-510.864	779.719
611	0	311.71	-966.747	1621.44	208.194	-966.381	1618.9	332.961	-809.716	1632.88	195.559	-797.535	1632.04	241.633	-740.706	1485.7	231.484	-631.611	1264.18	267.824	-875.923	1385.1	266.472	-897.141	1198.3	177.732	-639.028	1339.27	435.088	-719.847	1431.56	475.988	-635.635	1255.52	481.989	-579.258	1148.03	506.744	-569.879	973.956	472.822	-574.725	873.745	517.107	-512.91	885.529	518.461	-520.812	778.738
612	0	313.125	-980.681	1620.35	209.617	-980.095	1617.84	334.747	-823.708	1631.94	197.358	-811.22	1631.16	243.378	-754.386	1484.82	232.975	-645.536	1263.22	269.303	-889.656	1384.21	267.789	-911.118	1197.47	179.365	-652.641	1338.48	436.799	-733.731	1430.25	477.476	-649.72	1254.06	483.198	-593.151	1146.72	507.735	-582.713	972.718	473.658	-586.649	872.434	518.148	-525.063	884.631	518.882	-531.599	777.639
613	0	314.563	-994.517	1619.45	211.063	-993.724	1617.03	336.539	-837.603	1631.21	199.164	-824.823	1630.54	245.099	-767.964	1484.16	234.468	-659.403	1262.47	270.75	-903.314	1383.58	269.104	-925.053	1196.9	180.986	-666.174	1337.89	438.507	-747.57	1429.16	479.053	-664.047	1252.65	484.539	-607.424	1145.38	508.851	-596.189	971.456	474.61	-599.313	871.1	519.388	-538.003	883.631	519.477	-543.274	776.437
614	0	315.999	-1008.24	1618.78	212.507	-1007.25	1616.47	338.308	-851.385	1630.71	200.95	-838.329	1630.19	246.771	-781.426	1483.73	235.952	-673.189	1261.95	272.145	-916.877	1383.2	270.401	-938.919	1196.58	182.583	-679.607	1337.51	440.19	-761.347	1428.31	480.709	-678.592	1251.31	486.008	-622.05	1144.04	510.087	-610.307	970.194	475.677	-612.737	869.771	520.822	-551.743	882.548	520.253	-555.886	775.151
615	0	317.408	-1021.83	1618.35	213.924	-1020.67	1616.17	340.026	-865.037	1630.45	202.686	-851.729	1630.11	248.375	-794.756	1483.55	237.418	-686.879	1261.66	273.469	-930.328	1383.09	271.663	-952.688	1196.53	184.144	-692.922	1337.35	441.831	-775.049	1427.73	482.429	-693.329	1250.07	487.599	-637.004	1142.74	511.437	-625.06	968.961	476.855	-626.933	868.477	522.44	-566.295	881.402	521.217	-569.482	773.804
616	0	318.764	-1035.28	1618.15	215.287	-1033.97	1616.13	341.667	-878.549	1630.44	204.344	-865.01	1630.31	249.892	-807.942	1483.63	238.859	-700.454	1261.62	274.704	-943.651	1383.25	272.878	-966.333	1196.74	185.658	-706.103	1337.41	443.411	-788.663	1427.43	484.199	-708.232	1248.98	489.304	-652.254	1141.51	512.895	-640.441	967.786	478.139	-641.911	867.251	524.23	-581.662	880.215	522.373	-584.106	772.422
617	0	320.043	-1048.59	1618.2	216.573	-1047.13	1616.35	343.204	-891.913	1630.68	205.9	-878.166	1630.79	251.304	-820.974	1483.96	240.267	-713.901	1261.82	275.836	-956.833	1383.67	274.03	-979.834	1197.22	187.116	-719.139	1337.7	444.914	-802.177	1427.44	486.003	-723.27	1248.05	491.116	-667.77	1140.38	514.45	-656.434	966.699	479.519	-657.674	866.127	526.175	-597.843	879.013	523.719	-599.796	771.037
618	0	321.22	-1061.74	1618.5	217.757	-1060.17	1616.83	344.614	-905.122	1631.2	207.328	-891.192	1631.55	252.598	-833.845	1484.54	241.634	-727.208	1262.28	276.854	-969.863	1384.37	275.109	-993.171	1197.97	188.509	-732.018	1338.22	446.326	-815.579	1427.76	487.829	-738.415	1247.33	493.027	-683.52	1139.39	516.092	-673.021	965.732	480.985	-674.218	865.14	528.258	-614.829	877.823	525.251	-616.581	769.684
619	0	322.276	-1074.74	1619.05	218.821	-1073.06	1617.56	345.876	-918.177	1631.98	208.61	-904.084	1632.59	253.765	-846.55	1485.38	242.956	-740.368	1262.98	277.748	-982.735	1385.34	276.104	-1006.33	1198.98	189.833	-744.735	1338.96	447.636	-828.863	1428.4	489.662	-753.638	1246.83	495.029	-699.473	1138.55	517.81	-690.181	964.913	482.524	-691.535	864.324	530.454	-632.608	876.674	526.962	-634.48	768.402
620	0	323.192	-1087.58	1619.86	219.745	-1085.81	1618.53	346.976	-931.079	1633.04	209.729	-916.843	1633.9	254.799	-859.087	1486.47	244.229	-753.375	1263.93	278.513	-995.444	1386.58	277.008	-1019.31	1200.25	191.084	-757.286	1339.92	448.836	-842.022	1429.37	491.489	-768.91	1246.57	497.111	-715.597	1137.91	519.591	-707.888	964.27	484.12	-709.61	863.714	532.742	-651.16	875.595	528.838	-653.502	767.235
621	0	323.954	-1100.27	1620.9	220.516	-1098.42	1619.74	347.901	-943.831	1634.38	210.674	-929.469	1635.47	255.696	-871.458	1487.8	245.45	-766.227	1265.12	279.146	-1007.99	1388.07	277.813	-1032.11	1201.78	192.26	-769.673	1341.09	449.92	-855.052	1430.66	493.299	-784.203	1246.59	499.264	-731.864	1137.47	521.423	-726.112	963.831	485.758	-728.419	863.342	535.094	-670.458	874.618	530.863	-673.642	766.228
622	0	324.552	-1112.82	1622.19	221.125	-1110.9	1621.16	348.646	-956.441	1635.98	211.439	-941.965	1637.28	256.457	-883.667	1489.35	246.616	-778.925	1266.53	279.65	-1020.38	1389.8	278.517	-1044.73	1203.55	193.362	-781.902	1342.46	450.886	-867.954	1432.25	495.08	-799.495	1246.87	501.477	-748.246	1137.25	523.292	-744.823	963.618	487.421	-747.936	863.238	537.486	-690.471	873.77	533.018	-694.882	765.426
623	0	324.982	-1125.24	1623.7	221.568	-1123.24	1622.77	349.209	-968.916	1637.83	212.024	-954.334	1639.31	257.088	-895.723	1491.1	247.727	-791.473	1268.14	280.028	-1032.62	1391.76	279.119	-1057.18	1205.54	194.39	-793.981	1344.01	451.733	-880.729	1434.14	496.824	-814.762	1247.44	503.739	-764.717	1137.27	525.184	-763.985	963.649	489.093	-768.126	863.43	539.889	-711.164	873.081	535.277	-717.19	764.877
624	0	325.242	-1137.52	1625.41	221.845	-1135.46	1624.57	349.593	-981.265	1639.92	212.432	-966.582	1641.55	257.594	-907.638	1493.04	248.78	-803.876	1269.94	280.287	-1044.71	1393.92	279.622	-1069.48	1207.75	195.347	-805.922	1345.73	452.465	-893.383	1436.29	498.524	-829.987	1248.28	506.04	-781.256	1137.53	527.088	-783.564	963.94	490.757	-788.953	863.94	542.28	-732.496	872.575	537.614	-740.52	764.623
625	0	325.338	-1149.69	1627.32	221.961	-1147.55	1626.52	349.809	-993.498	1642.21	212.672	-978.714	1643.95	257.985	-919.426	1495.14	249.773	-816.144	1271.9	280.437	-1056.68	1396.27	280.03	-1081.64	1210.13	196.235	-817.74	1347.58	453.086	-905.923	1438.68	500.174	-845.155	1249.39	508.369	-797.84	1138.02	528.99	-803.521	964.5	492.398	-810.372	864.785	544.632	-754.423	872.274	539.998	-764.812	764.703
626	0	325.281	-1161.75	1629.39	221.926	-1159.54	1628.59	349.868	-1005.62	1644.69	212.756	-990.738	1646.48	258.271	-931.103	1497.36	250.702	-828.285	1273.99	280.489	-1068.54	1398.76	280.354	-1093.68	1212.67	197.056	-829.45	1349.55	453.601	-918.358	1441.28	501.772	-860.255	1250.74	510.715	-814.454	1138.74	530.879	-823.819	965.333	494.002	-832.341	865.977	546.924	-776.9	872.195	542.396	-789.995	765.15
627	0	325.085	-1173.72	1631.59	221.755	-1171.42	1630.77	349.788	-1017.66	1647.3	212.702	-1002.66	1649.11	258.463	-942.688	1499.68	251.562	-840.311	1276.18	280.457	-1080.31	1401.36	280.601	-1105.62	1215.33	197.811	-841.072	1351.61	454.018	-930.698	1444.03	503.314	-875.279	1252.31	513.067	-831.081	1139.65	532.744	-844.419	966.436	495.559	-854.809	867.522	549.135	-799.878	872.352	544.776	-815.988	765.99
628	0	324.766	-1185.6	1633.9	221.465	-1183.21	1633.01	349.587	-1029.6	1650.02	212.527	-1014.49	1651.79	258.574	-954.2	1502.06	252.35	-852.233	1278.43	280.354	-1092	1404.03	280.785	-1117.48	1218.05	198.501	-852.621	1353.73	454.345	-942.954	1446.9	504.798	-890.224	1254.06	515.414	-847.708	1140.75	534.575	-865.285	967.803	497.058	-877.728	869.419	551.248	-823.307	872.752	547.105	-842.702	767.238
629	0	324.347	-1197.4	1636.28	221.076	-1194.92	1635.29	349.286	-1041.47	1652.78	212.253	-1026.25	1654.48	258.614	-965.659	1504.45	253.06	-864.064	1280.72	280.194	-1103.63	1406.72	280.918	-1129.27	1220.81	199.127	-864.117	1355.88	454.59	-955.137	1449.84	506.225	-905.086	1255.96	517.748	-864.325	1142	536.363	-886.377	969.42	498.49	-901.045	871.663	553.246	-847.138	873.397	549.349	-870.042	768.902
630	0	323.85	-1209.14	1638.69	220.611	-1206.57	1637.57	348.906	-1053.27	1655.54	211.901	-1037.93	1657.13	258.596	-977.085	1506.83	253.688	-875.817	1282.99	279.99	-1115.22	1409.39	281.013	-1141.01	1223.54	199.688	-875.577	1358.02	454.759	-967.258	1452.8	507.595	-919.869	1257.95	520.056	-880.924	1143.36	538.1	-907.661	971.268	499.849	-924.711	874.239	555.118	-871.321	874.284	551.479	-897.91	770.981
631	0	323.296	-1220.84	1641.08	220.091	-1218.16	1639.81	348.47	-1065.03	1658.26	211.492	-1049.56	1659.69	258.529	-988.496	1509.16	254.23	-887.505	1285.22	279.756	-1126.79	1411.99	281.081	-1152.71	1226.21	200.185	-887.017	1360.13	454.862	-979.329	1455.72	508.906	-934.574	1260	522.329	-897.5	1144.79	539.776	-929.101	973.326	501.129	-948.67	877.13	556.855	-895.805	875.408	553.468	-926.207	773.464
632	0	322.708	-1232.5	1643.42	219.537	-1229.72	1641.97	347.999	-1076.74	1660.87	211.048	-1061.15	1662.13	258.423	-999.91	1511.38	254.682	-899.143	1287.37	279.503	-1138.35	1414.48	281.133	-1164.39	1228.77	200.616	-898.452	1362.16	454.905	-991.358	1458.55	510.157	-949.206	1262.05	524.555	-914.05	1146.25	541.386	-950.662	975.567	502.324	-972.871	880.311	558.448	-920.54	876.755	555.292	-954.835	776.334
633	0	322.108	-1244.13	1645.66	218.969	-1241.25	1644.03	347.512	-1088.42	1663.33	210.588	-1072.71	1664.39	258.285	-1011.34	1513.48	255.041	-910.744	1289.39	279.24	-1149.91	1416.81	281.177	-1176.05	1231.17	200.982	-909.897	1364.1	454.894	-1003.36	1461.26	511.349	-963.771	1264.06	526.724	-930.571	1147.7	542.921	-972.313	977.962	503.429	-997.261	883.756	559.894	-945.479	878.311	556.935	-983.698	779.567
634	0	321.513	-1255.76	1647.75	218.407	-1252.78	1645.93	347.026	-1100.09	1665.6	210.129	-1084.25	1666.45	258.121	-1022.81	1515.41	255.307	-922.322	1291.27	278.974	-1161.49	1418.95	281.22	-1187.7	1233.36	201.282	-921.365	1365.9	454.833	-1015.33	1463.79	512.477	-978.275	1265.97	528.825	-947.066	1149.09	544.374	-994.024	980.482	504.439	-1021.79	887.432	561.188	-970.573	880.057	558.381	-1012.71	783.135
635	0	320.939	-1267.39	1649.67	217.863	-1264.31	1647.66	346.555	-1111.75	1667.63	209.686	-1095.79	1668.27	257.935	-1034.31	1517.15	255.477	-933.891	1292.97	278.71	-1173.1	1420.85	281.264	-1199.36	1235.32	201.515	-932.865	1367.54	454.726	-1027.29	1466.1	513.539	-992.726	1267.75	530.846	-963.536	1150.39	545.739	-1015.76	983.093	505.35	-1046.4	891.306	562.33	-995.775	881.974	559.624	-1041.78	787.006
636	0	320.398	-1279.03	1651.36	217.351	-1275.87	1649.17	346.111	-1123.42	1669.4	209.269	-1107.35	1669.82	257.73	-1045.88	1518.66	255.553	-945.464	1294.46	278.45	-1184.74	1422.48	281.312	-1211.02	1237	201.68	-944.407	1368.99	454.576	-1039.25	1468.17	514.529	-1007.13	1269.35	532.775	-979.986	1151.55	547.007	-1037.51	985.766	506.159	-1071.04	895.343	563.32	-1021.04	884.039	560.657	-1070.83	791.144
637	0	319.9	-1290.7	1652.81	216.877	-1287.46	1650.44	345.7	-1135.12	1670.87	208.887	-1118.94	1671.09	257.506	-1057.5	1519.93	255.534	-957.055	1295.72	278.195	-1196.42	1423.83	281.361	-1222.69	1238.39	201.777	-956.001	1370.23	454.382	-1051.21	1469.95	515.441	-1021.5	1270.73	534.6	-996.42	1152.54	548.173	-1059.23	988.468	506.86	-1095.67	899.506	564.157	-1046.32	886.23	561.483	-1099.79	795.515
638	0	319.448	-1302.41	1653.97	216.448	-1299.09	1651.45	345.326	-1146.85	1672.02	208.542	-1130.57	1672.07	257.261	-1069.19	1520.93	255.422	-968.676	1296.72	277.941	-1208.15	1424.87	281.406	-1234.38	1239.46	201.804	-967.651	1371.24	454.146	-1063.17	1471.43	516.267	-1035.83	1271.86	536.311	-1012.84	1153.33	549.228	-1080.91	991.171	507.45	-1120.24	903.758	564.844	-1071.58	888.524	562.104	-1128.6	800.081
639	0	319.043	-1314.16	1654.83	216.062	-1310.78	1652.18	344.989	-1158.62	1672.85	208.235	-1142.25	1672.73	256.992	-1080.95	1521.66	255.218	-980.34	1297.46	277.683	-1219.93	1425.6	281.44	-1246.08	1240.2	201.76	-979.365	1372	453.864	-1075.15	1472.59	517	-1050.15	1272.73	537.896	-1029.26	1153.9	550.165	-1102.51	993.846	507.926	-1144.7	908.064	565.384	-1096.76	890.897	562.528	-1157.19	804.807
640	0	318.682	-1325.97	1655.37	215.717	-1322.54	1652.62	344.683	-1170.44	1673.33	207.96	-1153.99	1673.1	256.694	-1092.78	1522.11	254.924	-992.059	1297.93	277.414	-1231.76	1425.99	281.453	-1257.81	1240.61	201.643	-991.146	1372.51	453.535	-1087.16	1473.43	517.631	-1064.45	1273.32	539.345	-1045.68	1154.24	550.978	-1124.02	996.467	508.284	-1169.02	912.388	565.777	-1121.84	893.328	562.763	-1185.51	809.657
641	0	318.358	-1337.84	1655.59	215.406	-1334.37	1652.76	344.401	-1182.33	1673.48	207.71	-1165.81	1673.15	256.362	-1104.69	1522.26	254.542	-1003.84	1298.12	277.125	-1243.65	1426.06	281.434	-1269.56	1240.68	201.451	-1003	1372.74	453.155	-1099.2	1473.93	518.152	-1078.74	1273.61	540.648	-1062.11	1154.33	551.658	-1145.41	999.011	508.521	-1193.14	916.697	566.028	-1146.76	895.792	562.82	-1213.52	814.596
642	0	318.06	-1349.78	1655.48	215.119	-1346.28	1652.6	344.131	-1194.27	1673.29	207.472	-1177.7	1672.92	255.988	-1116.68	1522.13	254.073	-1015.7	1298.02	276.806	-1255.61	1425.81	281.371	-1281.34	1240.42	201.185	-1014.92	1372.71	452.719	-1111.29	1474.11	518.553	-1093.03	1273.6	541.798	-1078.53	1154.16	552.202	-1166.67	1001.46	508.634	-1217.04	920.959	566.137	-1171.49	898.269	562.71	-1241.16	819.589
643	0	317.776	-1361.78	1655.05	214.842	-1358.27	1652.15	343.858	-1206.29	1672.77	207.231	-1189.67	1672.39	255.564	-1128.74	1521.72	253.52	-1027.64	1297.64	276.445	-1267.62	1425.24	281.25	-1293.17	1239.84	200.842	-1026.92	1372.41	452.224	-1123.42	1473.96	518.827	-1107.33	1273.3	542.786	-1094.96	1153.75	552.602	-1187.76	1003.79	508.621	-1240.68	925.145	566.108	-1196	900.737	562.442	-1268.4	824.602
644	0	317.488	-1373.86	1654.31	214.559	-1370.34	1651.42	343.566	-1218.37	1671.95	206.971	-1201.73	1671.6	255.083	-1140.89	1521.03	252.886	-1039.67	1296.99	276.029	-1279.71	1424.39	281.056	-1305.03	1238.97	200.423	-1039	1371.85	451.664	-1135.62	1473.51	518.967	-1121.64	1272.72	543.606	-1111.39	1153.1	552.855	-1208.68	1005.99	508.48	-1264.01	929.227	565.943	-1220.24	903.176	562.029	-1295.2	829.601
645	0	317.179	-1386.01	1653.27	214.254	-1382.51	1650.43	343.236	-1230.53	1670.83	206.67	-1213.88	1670.56	254.537	-1153.11	1520.08	252.176	-1051.8	1296.09	275.546	-1291.86	1423.25	280.775	-1316.95	1237.8	199.927	-1051.15	1371.02	451.036	-1147.89	1472.76	518.968	-1135.98	1271.86	544.254	-1127.81	1152.21	552.957	-1229.39	1008.04	508.21	-1287.03	933.178	565.643	-1244.18	905.565	561.478	-1321.53	834.555
646	0	316.83	-1398.24	1651.96	213.906	-1394.76	1649.19	342.847	-1242.76	1669.46	206.309	-1226.11	1669.28	253.917	-1165.4	1518.89	251.395	-1064.02	1294.93	274.984	-1304.09	1421.86	280.395	-1328.92	1236.38	199.356	-1063.38	1369.95	450.334	-1160.24	1471.75	518.825	-1150.34	1270.75	544.727	-1144.22	1151.12	552.906	-1249.87	1009.94	507.81	-1309.68	936.977	565.211	-1267.78	907.887	560.8	-1347.35	839.43
647	0	316.419	-1410.53	1650.41	213.496	-1407.1	1647.72	342.379	-1255.06	1667.84	205.867	-1238.43	1667.79	253.219	-1177.78	1517.48	250.549	-1076.35	1293.55	274.329	-1316.4	1420.24	279.904	-1340.96	1234.73	198.713	-1075.69	1368.65	449.556	-1172.69	1470.49	518.536	-1164.72	1269.4	545.023	-1160.6	1149.83	552.701	-1270.11	1011.68	507.279	-1331.96	940.602	564.648	-1291.02	910.123	559.999	-1372.65	844.193
648	0	315.926	-1422.91	1648.65	213.003	-1419.53	1646.05	341.811	-1267.42	1666.02	205.321	-1250.84	1666.12	252.434	-1190.24	1515.86	249.646	-1088.79	1291.96	273.571	-1328.79	1418.42	279.291	-1353.08	1232.87	198	-1088.07	1367.13	448.699	-1185.25	1469.02	518.102	-1179.14	1267.86	545.142	-1176.93	1148.37	552.342	-1290.07	1013.25	506.619	-1353.83	944.035	563.959	-1313.85	912.257	559.084	-1397.38	848.815
649	0	315.329	-1435.35	1646.71	212.406	-1432.04	1644.22	341.123	-1279.86	1664.03	204.652	-1263.34	1664.28	251.559	-1202.77	1514.07	248.695	-1101.33	1290.18	272.701	-1341.26	1416.43	278.549	-1365.29	1230.84	197.221	-1100.52	1365.42	447.762	-1197.92	1467.36	517.522	-1193.59	1266.14	545.086	-1193.22	1146.77	551.83	-1309.75	1014.65	505.83	-1375.27	947.258	563.144	-1336.25	914.272	558.059	-1421.53	853.265
650	0	314.611	-1447.86	1644.63	211.688	-1444.63	1642.25	340.298	-1292.37	1661.89	203.842	-1275.92	1662.3	250.59	-1215.38	1512.13	247.705	-1113.97	1288.26	271.711	-1353.83	1414.3	277.676	-1377.59	1228.66	196.382	-1113.05	1363.55	446.743	-1210.71	1465.55	516.8	-1208.07	1264.27	544.859	-1209.43	1145.05	551.168	-1329.11	1015.88	504.914	-1396.25	950.257	562.206	-1358.19	916.156	556.929	-1445.07	857.516
651	0	313.753	-1460.45	1642.44	210.831	-1457.31	1640.17	339.32	-1304.94	1659.64	202.874	-1288.58	1660.21	249.525	-1228.07	1510.06	246.686	-1126.71	1286.2	270.596	-1366.48	1412.05	276.669	-1389.99	1226.37	195.487	-1125.64	1361.53	445.643	-1223.64	1463.61	515.941	-1222.57	1262.3	544.464	-1225.55	1143.24	550.359	-1348.14	1016.93	503.872	-1416.76	953.019	561.15	-1379.63	917.894	555.697	-1467.98	861.539
652	0	312.74	-1473.11	1640.19	209.82	-1470.06	1638.01	338.177	-1317.58	1657.32	201.737	-1301.31	1658.04	248.365	-1240.84	1507.91	245.649	-1139.55	1284.04	269.352	-1379.23	1409.73	275.532	-1402.51	1224	194.542	-1138.31	1359.4	444.464	-1236.71	1461.6	514.953	-1237.09	1260.25	543.909	-1241.56	1141.38	549.409	-1366.81	1017.82	502.707	-1436.78	955.534	559.979	-1400.56	919.476	554.367	-1490.24	865.309
653	0	311.56	-1485.85	1637.9	208.645	-1482.89	1635.79	336.86	-1330.29	1654.97	200.422	-1314.13	1655.81	247.111	-1253.68	1505.69	244.604	-1152.47	1281.82	267.981	-1392.08	1407.36	274.267	-1415.15	1221.59	193.554	-1151.03	1357.18	443.209	-1249.92	1459.54	513.842	-1251.63	1258.17	543.199	-1257.44	1139.49	548.323	-1385.12	1018.54	501.423	-1456.29	957.79	558.697	-1420.94	920.89	552.94	-1511.82	868.803
654	0	310.206	-1498.65	1635.61	207.297	-1495.79	1633.56	335.366	-1343.07	1652.61	198.925	-1327.01	1653.54	245.768	-1266.6	1503.44	243.559	-1165.48	1279.56	266.485	-1405.01	1404.97	272.883	-1427.91	1219.17	192.527	-1163.82	1354.91	441.883	-1263.26	1457.46	512.619	-1266.18	1256.08	542.345	-1273.16	1137.6	547.107	-1403.02	1019.1	500.023	-1475.27	959.781	557.31	-1440.75	922.128	551.42	-1532.7	871.999
655	0	308.673	-1511.54	1633.37	205.774	-1508.77	1631.34	333.694	-1355.92	1650.29	197.248	-1339.97	1651.27	244.34	-1279.58	1501.2	242.523	-1178.55	1277.31	264.87	-1418.03	1402.61	271.388	-1440.8	1216.78	191.469	-1176.66	1352.62	440.49	-1276.75	1455.4	511.295	-1280.72	1254.02	541.354	-1288.72	1135.74	545.77	-1420.52	1019.5	498.511	-1493.69	961.5	555.824	-1459.96	923.182	549.808	-1552.86	874.875
656	0	306.962	-1524.49	1631.19	204.075	-1521.81	1629.15	331.851	-1368.85	1648.03	195.397	-1353	1649.03	242.835	-1292.63	1498.99	241.502	-1191.69	1275.08	263.145	-1431.13	1400.29	269.792	-1453.8	1214.43	190.383	-1189.55	1350.34	439.037	-1290.36	1453.4	509.882	-1295.24	1252.02	540.236	-1304.1	1133.94	544.319	-1437.59	1019.75	496.893	-1511.56	962.941	554.246	-1478.56	924.046	548.104	-1572.3	877.411
657	0	305.079	-1537.52	1629.1	202.207	-1534.91	1627.02	329.846	-1381.85	1645.88	193.384	-1366.08	1646.84	241.263	-1305.74	1496.84	240.5	-1204.88	1272.92	261.322	-1444.31	1398.05	268.108	-1466.93	1212.18	189.274	-1202.48	1348.11	437.534	-1304.09	1451.48	508.391	-1309.74	1250.12	539.002	-1319.26	1132.23	542.763	-1454.22	1019.87	495.175	-1528.85	964.1	552.582	-1496.53	924.716	546.312	-1590.99	879.589
658	0	303.033	-1550.63	1627.14	200.18	-1548.07	1624.98	327.696	-1394.92	1643.85	191.226	-1379.23	1644.73	239.634	-1318.89	1494.79	239.517	-1218.11	1270.85	259.415	-1457.55	1395.92	266.349	-1480.15	1210.04	188.146	-1215.45	1345.96	435.988	-1317.93	1449.67	506.836	-1324.18	1248.33	537.661	-1334.21	1130.63	541.113	-1470.4	1019.84	493.365	-1545.55	964.973	550.843	-1513.85	925.186	544.432	-1608.91	881.39
659	0	300.84	-1563.8	1625.31	198.009	-1561.28	1623.04	325.42	-1408.07	1641.98	188.944	-1392.42	1642.73	237.961	-1332.09	1492.86	238.555	-1231.37	1268.91	257.441	-1470.85	1393.93	264.529	-1493.47	1208.05	187.002	-1228.44	1343.92	434.41	-1331.85	1448.01	505.23	-1338.57	1246.7	536.225	-1348.92	1129.15	539.377	-1486.11	1019.69	491.47	-1561.65	965.559	549.036	-1530.51	925.454	542.468	-1626.07	882.798
660	0	298.517	-1577.03	1623.65	195.711	-1574.53	1621.22	323.043	-1421.28	1640.29	186.564	-1405.66	1640.87	236.258	-1345.32	1491.08	237.61	-1244.66	1267.11	255.418	-1484.18	1392.11	262.663	-1506.87	1206.22	185.844	-1241.46	1342.01	432.812	-1345.83	1446.5	503.586	-1352.87	1245.22	534.703	-1363.39	1127.82	537.567	-1501.35	1019.41	489.499	-1577.15	965.857	547.172	-1546.49	925.518	540.424	-1642.45	883.799
661	0	296.089	-1590.32	1622.16	193.309	-1587.8	1619.55	320.592	-1434.56	1638.81	184.116	-1418.93	1639.16	234.539	-1358.56	1489.47	236.68	-1257.95	1265.49	253.365	-1497.54	1390.47	260.766	-1520.33	1204.6	184.677	-1254.48	1340.28	431.205	-1359.85	1445.17	501.916	-1367.07	1243.94	533.107	-1377.59	1126.64	535.693	-1516.1	1019.01	487.464	-1592.03	965.867	545.259	-1561.8	925.379	538.306	-1658.04	884.378
662	0	293.58	-1603.66	1620.87	190.83	-1601.09	1618.03	318.099	-1447.89	1637.55	181.631	-1432.22	1637.64	232.82	-1371.81	1488.05	235.757	-1271.23	1264.07	251.304	-1510.9	1389.04	258.852	-1533.82	1203.18	183.502	-1267.5	1338.74	429.603	-1373.89	1444.02	500.233	-1381.16	1242.84	531.447	-1391.53	1125.64	533.766	-1530.37	1018.51	485.374	-1606.3	965.591	543.309	-1576.42	925.035	536.121	-1672.85	884.525
663	0	291.018	-1617.03	1619.77	188.299	-1614.39	1616.69	315.597	-1461.28	1636.53	179.143	-1445.52	1636.32	231.117	-1385.05	1486.85	234.838	-1284.49	1262.87	249.253	-1524.26	1387.84	256.933	-1547.33	1202	182.323	-1280.51	1337.42	428.016	-1387.9	1443.09	498.548	-1395.11	1241.95	529.733	-1405.2	1124.81	531.799	-1544.14	1017.89	483.243	-1619.96	965.034	541.332	-1590.35	924.489	533.879	-1686.86	884.234
664	0	288.433	-1630.43	1618.87	185.748	-1627.67	1615.53	313.118	-1474.7	1635.76	176.687	-1458.81	1635.22	229.444	-1398.26	1485.87	233.915	-1297.72	1261.89	247.234	-1537.58	1386.87	255.025	-1560.83	1201.05	181.141	-1293.49	1336.33	426.459	-1401.88	1442.35	496.872	-1408.9	1241.27	527.975	-1418.59	1124.15	529.802	-1557.43	1017.17	481.082	-1633	964.201	539.337	-1603.6	923.745	531.588	-1700.08	883.501
665	0	285.856	-1643.83	1618.17	183.206	-1640.93	1614.57	310.697	-1488.14	1635.24	174.296	-1472.08	1634.36	227.817	-1411.44	1485.13	232.983	-1310.9	1261.15	245.265	-1550.86	1386.15	253.137	-1574.28	1200.36	179.961	-1306.44	1335.48	424.941	-1415.78	1441.83	495.213	-1422.52	1240.8	526.183	-1431.7	1123.68	527.786	-1570.21	1016.35	478.905	-1645.43	963.101	537.335	-1616.16	922.808	529.261	-1712.51	882.327
666	0	283.318	-1657.24	1617.69	180.703	-1654.15	1613.81	308.366	-1501.6	1634.98	172.003	-1485.31	1633.75	226.25	-1424.56	1484.63	232.037	-1324.02	1260.67	243.364	-1564.08	1385.69	251.283	-1587.68	1199.92	178.785	-1319.34	1334.9	423.474	-1429.59	1441.52	493.58	-1435.95	1240.53	524.366	-1444.53	1123.38	525.763	-1582.5	1015.44	476.725	-1657.25	961.743	535.335	-1628.03	921.685	526.912	-1724.15	880.719
667	0	280.849	-1670.62	1617.41	178.271	-1667.32	1613.26	306.154	-1515.04	1634.97	169.836	-1498.49	1633.4	224.752	-1437.62	1484.38	231.073	-1337.07	1260.43	241.546	-1577.22	1385.48	249.472	-1600.99	1199.73	177.614	-1332.19	1334.58	422.067	-1443.28	1441.41	491.979	-1449.17	1240.46	522.532	-1457.06	1123.25	523.743	-1594.3	1014.44	474.557	-1668.47	960.142	533.348	-1639.24	920.387	524.555	-1735.01	878.691
668	0	278.48	-1683.96	1617.33	175.938	-1680.41	1612.93	304.089	-1528.47	1635.21	167.821	-1511.61	1633.31	223.335	-1450.59	1484.39	230.088	-1350.03	1260.44	239.823	-1590.26	1385.52	247.715	-1614.19	1199.8	176.452	-1344.97	1334.53	420.726	-1456.83	1441.5	490.416	-1462.18	1240.59	520.689	-1469.32	1123.28	521.737	-1605.6	1013.35	472.413	-1679.1	958.313	531.383	-1649.77	918.926	522.207	-1745.1	876.261
669	0	276.238	-1697.25	1617.46	173.731	-1693.43	1612.82	302.193	-1541.85	1635.68	165.979	-1524.65	1633.49	222.004	-1463.48	1484.64	229.08	-1362.89	1260.7	238.208	-1603.2	1385.82	246.022	-1627.26	1200.12	175.301	-1357.69	1334.74	419.456	-1470.21	1441.79	488.895	-1474.95	1240.9	518.844	-1481.28	1123.48	519.756	-1616.42	1012.2	470.309	-1689.15	956.275	529.45	-1659.64	917.317	519.883	-1754.42	873.457
670	0	274.15	-1710.47	1617.77	171.677	-1706.36	1612.94	300.482	-1555.18	1636.38	164.328	-1537.6	1633.93	220.765	-1476.28	1485.13	228.048	-1375.65	1261.2	236.708	-1616.03	1386.36	244.402	-1640.2	1200.68	174.16	-1370.34	1335.21	418.263	-1483.41	1442.25	487.418	-1487.49	1241.38	517.002	-1492.96	1123.83	517.807	-1626.76	1010.98	468.256	-1698.62	954.048	527.556	-1668.86	915.58	517.602	-1762.98	870.31
671	0	272.237	-1723.61	1618.28	169.797	-1719.2	1613.28	298.971	-1568.42	1637.3	162.876	-1550.46	1634.63	219.619	-1488.96	1485.86	226.992	-1388.31	1261.94	235.329	-1628.73	1387.14	242.865	-1652.99	1201.47	173.029	-1382.91	1335.94	417.146	-1496.42	1442.89	485.985	-1499.77	1242.03	515.167	-1504.36	1124.32	515.899	-1636.61	1009.7	466.267	-1707.53	951.656	525.713	-1677.44	913.734	515.382	-1770.8	866.859
672	0	270.521	-1736.64	1618.98	168.11	-1731.93	1613.85	297.666	-1581.58	1638.42	161.63	-1563.22	1635.59	218.567	-1501.54	1486.81	225.91	-1400.85	1262.89	234.076	-1641.31	1388.15	241.419	-1665.63	1202.49	171.91	-1395.41	1336.9	416.105	-1509.23	1443.69	484.597	-1511.81	1242.83	513.343	-1515.47	1124.95	514.04	-1646	1008.39	464.356	-1715.9	949.125	523.927	-1685.4	911.803	513.241	-1777.88	863.148
673	0	269.018	-1749.57	1619.86	166.633	-1744.56	1614.65	296.57	-1594.63	1639.72	160.59	-1575.88	1636.8	217.607	-1514.02	1487.99	224.804	-1413.29	1264.05	232.948	-1653.76	1389.37	240.072	-1678.13	1203.72	170.799	-1407.83	1338.09	415.139	-1521.83	1444.64	483.252	-1523.59	1243.78	511.532	-1526.3	1125.71	512.237	-1654.92	1007.05	462.531	-1723.72	946.484	522.206	-1692.74	909.813	511.196	-1784.24	859.225
674	0	267.739	-1762.37	1620.91	165.377	-1757.09	1615.68	295.68	-1607.55	1641.19	159.751	-1588.43	1638.24	216.734	-1526.38	1489.36	223.673	-1425.63	1265.41	231.946	-1666.09	1390.8	238.83	-1690.49	1205.16	169.695	-1420.18	1339.5	414.245	-1534.21	1445.73	481.946	-1535.12	1244.87	509.734	-1536.85	1126.6	510.494	-1663.37	1005.69	460.805	-1731.01	943.759	520.558	-1699.48	907.79	509.264	-1789.89	855.139
675	0	266.695	-1775.05	1622.13	164.351	-1769.52	1616.92	294.99	-1620.33	1642.81	159.104	-1600.88	1639.9	215.945	-1538.64	1490.93	222.515	-1437.86	1266.94	231.066	-1678.3	1392.42	237.697	-1702.72	1206.79	168.594	-1432.46	1341.1	413.418	-1546.4	1446.96	480.677	-1546.39	1246.08	507.949	-1547.12	1127.62	508.818	-1671.37	1004.35	459.185	-1737.78	940.982	518.99	-1705.63	905.761	507.461	-1794.84	850.943
676	0	265.889	-1787.58	1623.52	163.559	-1781.85	1618.39	294.491	-1632.97	1644.57	158.638	-1613.23	1641.77	215.233	-1550.79	1492.68	221.331	-1450	1268.64	230.306	-1690.4	1394.22	236.675	-1714.84	1208.6	167.494	-1444.68	1342.88	412.652	-1558.37	1448.31	479.439	-1557.41	1247.42	506.177	-1557.12	1128.76	507.212	-1678.93	1003.02	457.679	-1744.04	938.18	517.506	-1711.21	903.752	505.799	-1799.11	846.688
677	0	265.324	-1799.97	1625.06	163.003	-1794.08	1620.06	294.169	-1645.44	1646.44	158.339	-1625.48	1643.82	214.59	-1562.85	1494.58	220.119	-1462.06	1270.49	229.659	-1702.39	1396.17	235.767	-1726.84	1210.57	166.391	-1456.85	1344.83	411.942	-1570.15	1449.78	478.228	-1568.17	1248.87	504.417	-1566.84	1130.02	505.679	-1686.04	1001.73	456.295	-1749.81	935.381	516.111	-1716.22	901.789	504.291	-1802.7	842.424
678	0	265	-1812.21	1626.76	162.681	-1806.21	1621.94	294.013	-1657.75	1648.4	158.191	-1637.63	1646.04	214.012	-1574.82	1496.63	218.876	-1474.04	1272.47	229.121	-1714.28	1398.27	234.97	-1738.76	1212.69	165.281	-1468.97	1346.92	411.282	-1581.74	1451.35	477.041	-1578.69	1250.43	502.668	-1576.28	1131.4	504.223	-1692.72	1000.49	455.037	-1755.08	932.612	514.81	-1720.69	899.896	502.944	-1805.64	838.197
679	0	264.912	-1824.29	1628.6	162.59	-1818.26	1624.01	294.008	-1669.88	1650.44	158.18	-1649.69	1648.41	213.49	-1586.7	1498.82	217.602	-1485.95	1274.57	228.686	-1726.09	1400.51	234.284	-1750.59	1214.94	164.16	-1481.04	1349.15	410.666	-1593.15	1453.02	475.872	-1588.97	1252.09	500.928	-1585.44	1132.9	502.845	-1698.96	999.315	453.91	-1759.88	929.896	513.606	-1724.62	898.093	501.766	-1807.95	834.051
680	0	265.055	-1836.22	1630.58	162.726	-1830.21	1626.27	294.141	-1681.82	1652.55	158.291	-1661.65	1650.91	213.018	-1598.5	1501.12	216.294	-1497.8	1276.78	228.349	-1737.81	1402.85	233.704	-1762.35	1217.31	163.026	-1493.09	1351.49	410.09	-1604.39	1454.78	474.718	-1599.01	1253.85	499.198	-1594.33	1134.51	501.549	-1704.78	998.218	452.917	-1764.21	927.253	512.5	-1728.03	896.398	500.761	-1809.63	830.02
681	0	265.425	-1847.99	1632.69	163.081	-1842.08	1628.71	294.4	-1693.59	1654.7	158.511	-1673.52	1653.52	212.592	-1610.24	1503.52	214.952	-1509.59	1279.09	228.104	-1749.47	1405.3	233.228	-1774.06	1219.77	161.876	-1505.1	1353.93	409.549	-1615.47	1456.62	473.576	-1608.81	1255.7	497.478	-1602.94	1136.23	500.335	-1710.18	997.207	452.06	-1768.06	924.699	511.494	-1730.93	894.828	499.933	-1810.71	826.136
682	0	266.015	-1859.61	1634.92	163.651	-1853.86	1631.32	294.773	-1705.17	1656.88	158.829	-1685.3	1656.22	212.207	-1621.9	1506.02	213.572	-1521.33	1281.48	227.947	-1761.07	1407.84	232.853	-1785.71	1222.33	160.707	-1517.09	1356.47	409.039	-1626.39	1458.54	472.443	-1618.37	1257.63	495.766	-1611.28	1138.07	499.205	-1715.16	996.292	451.339	-1771.46	922.248	510.59	-1733.32	893.392	499.282	-1811.2	822.423
683	0	266.82	-1871.07	1637.28	164.431	-1865.57	1634.1	295.253	-1716.55	1659.09	159.235	-1697	1659.01	211.859	-1633.51	1508.61	212.156	-1533.03	1283.96	227.875	-1772.61	1410.46	232.575	-1797.33	1224.97	159.519	-1529.06	1359.09	408.558	-1637.17	1460.53	471.319	-1627.71	1259.64	494.063	-1619.33	1140.01	498.16	-1719.73	995.477	450.756	-1774.41	919.91	509.788	-1735.21	892.1	498.81	-1811.11	818.9
684	0	267.836	-1882.36	1639.75	165.415	-1877.19	1637.03	295.832	-1727.75	1661.31	159.724	-1708.61	1661.87	211.546	-1645.05	1511.27	210.701	-1544.69	1286.51	227.884	-1784.09	1413.15	232.392	-1808.9	1227.68	158.31	-1541.02	1361.79	408.104	-1647.81	1462.59	470.202	-1636.82	1261.72	492.37	-1627.1	1142.06	497.2	-1723.89	994.768	450.31	-1776.9	917.691	509.089	-1736.62	890.958	498.515	-1810.45	815.579
685	0	269.058	-1893.51	1642.33	166.601	-1888.73	1640.11	296.505	-1738.76	1663.54	160.289	-1720.13	1664.79	211.265	-1656.54	1514	209.208	-1556.3	1289.13	227.975	-1795.53	1415.91	232.303	-1820.44	1230.45	157.079	-1552.96	1364.57	407.675	-1658.31	1464.71	469.09	-1645.7	1263.88	490.686	-1634.6	1144.21	496.327	-1727.64	994.165	450.002	-1778.95	915.596	508.494	-1737.53	889.969	498.397	-1809.23	812.469
686	0	270.485	-1904.49	1645.03	167.987	-1900.19	1643.35	297.271	-1749.57	1665.77	160.93	-1731.56	1667.78	211.016	-1667.97	1516.8	207.675	-1567.88	1291.82	228.144	-1806.92	1418.73	232.306	-1831.94	1233.28	155.827	-1564.89	1367.41	407.27	-1668.67	1466.89	467.985	-1654.35	1266.12	489.012	-1641.82	1146.47	495.54	-1730.98	993.671	449.831	-1780.55	913.626	508.001	-1737.97	889.135	498.457	-1807.46	809.573
687	0	272.117	-1915.32	1647.83	169.571	-1911.57	1646.74	298.127	-1760.19	1668.01	161.643	-1742.92	1670.82	210.798	-1679.34	1519.67	206.105	-1579.41	1294.58	228.393	-1818.27	1421.62	232.401	-1843.42	1236.18	154.552	-1576.8	1370.32	406.89	-1678.9	1469.13	466.885	-1662.78	1268.42	487.348	-1648.75	1148.83	494.84	-1733.92	993.287	449.798	-1781.7	911.784	507.612	-1737.92	888.458	498.693	-1805.14	806.894
688	0	273.951	-1925.99	1650.75	171.353	-1922.87	1650.27	299.074	-1770.63	1670.25	162.429	-1754.18	1673.92	210.612	-1690.66	1522.61	204.495	-1590.91	1297.41	228.72	-1829.57	1424.57	232.588	-1854.86	1239.13	153.255	-1588.7	1373.3	406.533	-1689	1471.43	465.791	-1670.98	1270.8	485.693	-1655.41	1151.29	494.226	-1736.44	993.012	449.903	-1782.41	910.069	507.326	-1737.39	887.938	499.106	-1802.26	804.433
[truncated: 69 more columns]

## Sheet: Sheet2
Devices
		025370 - Force			025370 - Moment			025370 - CoP			027571 - Force			027571 - Moment			027571 - CoP			037720 - Force			037720 - Moment			037720 - CoP
Frame	Sub Frame	Fx	Fy	Fz	Mx	My	Mz	Cx	Cy	Cz	Fx	Fy	Fz	Mx	My	Mz	Cx	Cy	Cz	Fx	Fy	Fz	Mx	My	Mz	Cx	Cy	Cz
		N	N	N	N.mm	N.mm	N.mm	mm	mm	mm	N	N	N	N.mm	N.mm	N.mm	mm	mm	mm	N	N	N	N.mm	N.mm	N.mm	mm	mm	mm
305	0	0	0	0	0	0	0	200	300	0	0	0	0	0	0	0	200	903	0	0	0	0	0	0	0	603	903	0
305	1	0	0	0	0	0	0	200	300	0	0	0	0	0	0	0	200	903	0	0	0	0	0	0	0	603	903	0
305	2	0	0	0	0	0	0	200	300	0	0	0	0	0	0	0	200	903	0	0	0	0	0	0	0	603	903	0
305	3	0	0	0	0	0	0	200	300	0	0	0	0	0	0	0	200	903	0	0	0	0	0	0	0	603	903	0
305	4	0	0	0	0	0	0	200	300	0	0	0	0	0	0	0	200	903	0	0	0	0	0	0	0	603	903	0
305	5	0	0	0	0	0	0	200	300	0	0	0	0	0	0	0	200	903	0	0	0	0	0	0	0	603	903	0
305	6	0	0	0	0	0	0	200	300	0	0	0	0	0	0	0	200	903	0	0	0	0	0	0	0	603	903	0
305	7	0	0	0	0	0	0	200	300	0	0	0	0	0	0	0	200	903	0	0	0	0	0	0	0	603	903	0
305	8	0	0	0	0	0	0	200	300	0	0	0	0	0	0	0	200	903	0	0	0	0	0	0	0	603	903	0
305	9	0	0	0	0	0	0	200	300	0	0	0	0	0	0	0	200	903	0	0	0	0	0	0	0	603	903	0
306	0	0	0	0	0	0	0	200	300	0	0	0	0	0	0	0	200	903	0	0	0	0	0	0	0	603	903	0
306	1	0	0	0	0	0	0	200	300	0	0	0	0	0	0	0	200	903	0	0	0	0	0	0	0	603	903	0
306	2	0	0	0	0	0	0	200	300	0	0	0	0	0	0	0	200	903	0	0	0	0	0	0	0	603	903	0
306	3	0	0	0	0	0	0	200	300	0	0	0	0	0	0	0	200	903	0	0	0	0	0	0	0	603	903	0
306	4	0	0	0	0	0	0	200	300	0	0	0	0	0	0	0	200	903	0	0	0	0	0	0	0	603	903	0
306	5	0	0	0	0	0	0	200	300	0	0	0	0	0	0	0	200	903	0	0	0	0	0	0	0	603	903	0
306	6	0	0	0	0	0	0	200	300	0	0	0	0	0	0	0	200	903	0	0	0	0	0	0	0	603	903	0
306	7	0	0	0	0	0	0	200	300	0	0	0	0	0	0	0	200	903	0	0	0	0	0	0	0	603	903	0
306	8	0	0	0	0	0	0	200	300	0	0	0	0	0	0	0	200	903	0	0	0	0	0	0	0	603	903	0
306	9	0	0	0	0	0	0	200	300	0	0	0	0	0	0	0	200	903	0	0	0	0	0	0	0	603	903	0
307	0	0	0	0	0	0	0	200	300	0	0	0	0	0	0	0	200	903	0	0	0	0	0	0	0	603	903	0
307	1	0	0	0	0	0	0	200	300	0	0	0	0	0	0	0	200	903	0	0	0	0	0	0	0	603	903	0
307	2	0	0	0	0	0	0	200	300	0	0	0	0	0	0	0	200	903	0	0	0	0	0	0	0	603	903	0
307	3	0	0	0	0	0	0	200	300	0	0	0	0	0	0	0	200	903	0	0	0	0	0	0	0	603	903	0
307	4	0	0	0	0	0	0	200	300	0	0	0	0	0	0	0	200	903	0	0	0	0	0	0	0	603	903	0
307	5	0	0	0	0	0	0	200	300	0	0	0	0	0	0	0	200	903	0	0	0	0	0	0	0	603	903	0
307	6	0	0	0	0	0	0	200	300	0	0	0	0	0	0	0	200	903	0	0	0	0	0	0	0	603	903	0
307	7	0	0	0	0	0	0	200	300	0	0	0	0	0	0	0	200	903	0	0	0	0	0	0	0	603	903	0
307	8	0	0	0	0	0	0	200	300	0	0	0	0	0	0	0	200	903	0	0	0	0	0	0	0	603	903	0
307	9	0	0	0	0	0	0	200	300	0	0	0	0	0	0	0	200	903	0	0	0	0	0	0	0	603	903	0
308	0	0	0	0	0	0	0	200	300	0	0	0	0	0	0	0	200	903	0	0	0	0	0	0	0	603	903	0
308	1	0	0	0	0	0	0	200	300	0	0	0	0	0	0	0	200	903	0	0	0	0	0	0	0	603	903	0
308	2	0	0	0	0	0	0	200	300	0	0	0	0	0	0	0	200	903	0	0	0	0	0	0	0	603	903	0
308	3	0	0	0	0	0	0	200	300	0	0	0	0	0	0	0	200	903	0	0	0	0	0	0	0	603	903	0
308	4	0	0	0	0	0	0	200	300	0	0	0	0	0	0	0	200	903	0	0	0	0	0	0	0	603	903	0
308	5	0	0	0	0	0	0	200	300	0	0	0	0	0	0	0	200	903	0	0	0	0	0	0	0	603	903	0
308	6	0	0	0	0	0	0	200	300	0	0	0	0	0	0	0	200	903	0	0	0	0	0	0	0	603	903	0
308	7	0	0	0	0	0	0	200	300	0	0	0	0	0	0	0	200	903	0	0	0	0	0	0	0	603	903	0
308	8	0	0	0	0	0	0	200	300	0	0	0	0	0	0	0	200	903	0	0	0	0	0	0	0	603	903	0
308	9	0	0	0	0	0	0	200	300	0	0	0	0	0	0	0	200	903	0	0	0	0	0	0	0	603	903	0
309	0	0	0	0	0	0	0	200	300	0	0	0	0	0	0	0	200	903	0	0	0	0	0	0	0	603	903	0
309	1	0	0	0	0	0	0	200	300	0	0	0	0	0	0	0	200	903	0	0	0	0	0	0	0	603	903	0
309	2	0	0	0	0	0	0	200	300	0	0	0	0	0	0	0	200	903	0	0	0	0	0	0	0	603	903	0
309	3	0	0	0	0	0	0	200	300	0	0	0	0	0	0	0	200	903	0	0	0	0	0	0	0	603	903	0
309	4	0	0	0	0	0	0	200	300	0	0	0	0	0	0	0	200	903	0	0	0	0	0	0	0	603	903	0
309	5	0	0	0	0	0	0	200	300	0	0	0	0	0	0	0	200	903	0	0	0	0	0	0	0	603	903	0
309	6	0	0	0	0	0	0	200	300	0	0	0	0	0	0	0	200	903	0	0	0	0	0	0	0	603	903	0
309	7	0	0	0	0	0	0	200	300	0	0	0	0	0	0	0	200	903	0	0	0	0	0	0	0	603	903	0
309	8	0	0	0	0	0	0	200	300	0	0	0	0	0	0	0	200	903	0	0	0	0	0	0	0	603	903	0
309	9	0	0	0	0	0	0	200	300	0	0	0	0	0	0	0	200	903	0	0	0	0	0	0	0	603	903	0
310	0	0	0	0	0	0	0	200	300	0	0	0	0	0	0	0	200	903	0	0	0	0	0	0	0	603	903	0
310	1	0	0	0	0	0	0	200	300	0	0	0	0	0	0	0	200	903	0	0	0	0	0	0	0	603	903	0
310	2	0	0	0	0	0	0	200	300	0	0	0	0	0	0	0	200	903	0	0	0	0	0	0	0	603	903	0
310	3	0	0	0	0	0	0	200	300	0	0	0	0	0	0	0	200	903	0	0	0	0	0	0	0	603	903	0
310	4	0	0	0	0	0	0	200	300	0	0	0	0	0	0	0	200	903	0	0	0	0	0	0	0	603	903	0
310	5	0	0	0	0	0	0	200	300	0	0	0	0	0	0	0	200	903	0	0	0	0	0	0	0	603	903	0
310	6	0	0	0	0	0	0	200	300	0	0	0	0	0	0	0	200	903	0	0	0	0	0	0	0	603	903	0
310	7	0	0	0	0	0	0	200	300	0	0	0	0	0	0	0	200	903	0	0	0	0	0	0	0	603	903	0
310	8	0	0	0	0	0	0	200	300	0	0	0	0	0	0	0	200	903	0	0	0	0	0	0	0	603	903	0
310	9	0	0	0	0	0	0	200	300	0	0	0	0	0	0	0	200	903	0	0	0	0	0	0	0	603	903	0
311	0	0	0	0	0	0	0	200	300	0	0	0	0	0	0	0	200	903	0	0	0	0	0	0	0	603	903	0
311	1	0	0	0	0	0	0	200	300	0	0	0	0	0	0	0	200	903	0	0	0	0	0	0	0	603	903	0
311	2	0	0	0	0	0	0	200	300	0	0	0	0	0	0	0	200	903	0	0	0	0	0	0	0	603	903	0
311	3	0	0	0	0	0	0	200	300	0	0	0	0	0	0	0	200	903	0	0	0	0	0	0	0	603	903	0
311	4	0	0	0	0	0	0	200	300	0	0	0	0	0	0	0	200	903	0	0	0	0	0	0	0	603	903	0
311	5	0	0	0	0	0	0	200	300	0	0	0	0	0	0	0	200	903	0	0	0	0	0	0	0	603	903	0
311	6	0	0	0	0	0	0	200	300	0	0	0	0	0	0	0	200	903	0	0	0	0	0	0	0	603	903	0
311	7	0	0	0	0	0	0	200	300	0	0	0	0	0	0	0	200	903	0	0	0	0	0	0	0	603	903	0
311	8	0	0	0	0	0	0	200	300	0	0	0	0	0	0	0	200	903	0	0	0	0	0	0	0	603	903	0
311	9	0	0	0	0	0	0	200	300	0	0	0	0	0	0	0	200	903	0	0	0	0	0	0	0	603	903	0
312	0	0	0	0	0	0	0	200	300	0	0	0	0	0	0	0	200	903	0	0	0	0	0	0	0	603	903	0
312	1	0	0	0	0	0	0	200	300	0	0	0	0	0	0	0	200	903	0	0	0	0	0	0	0	603	903	0
312	2	0	0	0	0	0	0	200	300	0	0	0	0	0	0	0	200	903	0	0	0	0	0	0	0	603	903	0
312	3	0	0	0	0	0	0	200	300	0	0	0	0	0	0	0	200	903	0	0	0	0	0	0	0	603	903	0
312	4	0	0	0	0	0	0	200	300	0	0	0	0	0	0	0	200	903	0	0	0	0	0	0	0	603	903	0
312	5	0	0	0	0	0	0	200	300	0	0	0	0	0	0	0	200	903	0	0	0	0	0	0	0	603	903	0
312	6	0	0	0	0	0	0	200	300	0	0	0	0	0	0	0	200	903	0	0	0	0	0	0	0	603	903	0
312	7	0	0	0	0	0	0	200	300	0	0	0	0	0	0	0	200	903	0	0	0	0	0	0	0	603	903	0
312	8	0	0	0	0	0	0	200	300	0	0	0	0	0	0	0	200	903	0	0	0	0	0	0	0	603	903	0
312	9	0	0	0	0	0	0	200	300	0	0	0	0	0	0	0	200	903	0	0	0	0	0	0	0	603	903	0
313	0	0	0	0	0	0	0	200	300	0	0	0	0	0	0	0	200	903	0	0	0	0	0	0	0	603	903	0
313	1	0	0	0	0	0	0	200	300	0	0	0	0	0	0	0	200	903	0	0	0	0	0	0	0	603	903	0
313	2	0	0	0	0	0	0	200	300	0	0	0	0	0	0	0	200	903	0	0	0	0	0	0	0	603	903	0
313	3	0	0	0	0	0	0	200	300	0	0	0	0	0	0	0	200	903	0	0	0	0	0	0	0	603	903	0
313	4	0	0	0	0	0	0	200	300	0	0	0	0	0	0	0	200	903	0	0	0	0	0	0	0	603	903	0
313	5	0	0	0	0	0	0	200	300	0	0	0	0	0	0	0	200	903	0	0	0	0	0	0	0	603	903	0
313	6	0	0	0	0	0	0	200	300	0	0	0	0	0	0	0	200	903	0	0	0	0	0	0	0	603	903	0
313	7	0	0	0	0	0	0	200	300	0	0	0	0	0	0	0	200	903	0	0	0	0	0	0	0	603	903	0
313	8	0	0	0	0	0	0	200	300	0	0	0	0	0	0	0	200	903	0	0	0	0	0	0	0	603	903	0
313	9	0	0	0	0	0	0	200	300	0	0	0	0	0	0	0	200	903	0	0	0	0	0	0	0	603	903	0
314	0	0	0	0	0	0	0	200	300	0	0	0	0	0	0	0	200	903	0	0	0	0	0	0	0	603	903	0
314	1	0	0	0	0	0	0	200	300	0	0	0	0	0	0	0	200	903	0	0	0	0	0	0	0	603	903	0
314	2	0	0	0	0	0	0	200	300	0	0	0	0	0	0	0	200	903	0	0	0	0	0	0	0	603	903	0
314	3	0	0	0	0	0	0	200	300	0	0	0	0	0	0	0	200	903	0	0	0	0	0	0	0	603	903	0
314	4	0	0	0	0	0	0	200	300	0	0	0	0	0	0	0	200	903	0	0	0	0	0	0	0	603	903	0
314	5	0	0	0	0	0	0	200	300	0	0	0	0	0	0	0	200	903	0	0	0	0	0	0	0	603	903	0
314	6	0	0	0	0	0	0	200	300	0	0	0	0	0	0	0	200	903	0	0	0	0	0	0	0	603	903	0
314	7	0	0	0	0	0	0	200	300	0	0	0	0	0	0	0	200	903	0	0	0	0	0	0	0	603	903	0
314	8	0	0	0	0	0	0	200	300	0	0	0	0	0	0	0	200	903	0	0	0	0	0	0	0	603	903	0
314	9	0	0	0	0	0	0	200	300	0	0	0	0	0	0	0	200	903	0	0	0	0	0	0	0	603	903	0
315	0	0	0	0	0	0	0	200	300	0	0	0	0	0	0	0	200	903	0	0	0	0	0	0	0	603	903	0
315	1	0	0	0	0	0	0	200	300	0	0	0	0	0	0	0	200	903	0	0	0	0	0	0	0	603	903	0
315	2	0	0	0	0	0	0	200	300	0	0	0	0	0	0	0	200	903	0	0	0	0	0	0	0	603	903	0
315	3	0	0	0	0	0	0	200	300	0	0	0	0	0	0	0	200	903	0	0	0	0	0	0	0	603	903	0
315	4	0	0	0	0	0	0	200	300	0	0	0	0	0	0	0	200	903	0	0	0	0	0	0	0	603	903	0
315	5	0	0	0	0	0	0	200	300	0	0	0	0	0	0	0	200	903	0	0	0	0	0	0	0	603	903	0
315	6	0	0	0	0	0	0	200	300	0	0	0	0	0	0	0	200	903	0	0	0	0	0	0	0	603	903	0
315	7	0	0	0	0	0	0	200	300	0	0	0	0	0	0	0	200	903	0	0	0	0	0	0	0	603	903	0
315	8	0	0	0	0	0	0	200	300	0	0	0	0	0	0	0	200	903	0	0	0	0	0	0	0	603	903	0
315	9	0	0	0	0	0	0	200	300	0	0	0	0	0	0	0	200	903	0	0	0	0	0	0	0	603	903	0
316	0	0	0	0	0	0	0	200	300	0	0	0	0	0	0	0	200	903	0	0	0	0	0	0	0	603	903	0
316	1	0	0	0	0	0	0	200	300	0	0	0	0	0	0	0	200	903	0	0	0	0	0	0	0	603	903	0
316	2	0	0	0	0	0	0	200	300	0	0	0	0	0	0	0	200	903	0	0	0	0	0	0	0	603	903	0
316	3	0	0	0	0	0	0	200	300	0	0	0	0	0	0	0	200	903	0	0	0	0	0	0	0	603	903	0
316	4	0	0	0	0	0	0	200	300	0	0	0	0	0	0	0	200	903	0	0	0	0	0	0	0	603	903	0
316	5	0	0	0	0	0	0	200	300	0	0	0	0	0	0	0	200	903	0	0	0	0	0	0	0	603	903	0
316	6	0	0	0	0	0	0	200	300	0	0	0	0	0	0	0	200	903	0	0	0	0	0	0	0	603	903	0
316	7	0	0	0	0	0	0	200	300	0	0	0	0	0	0	0	200	903	0	0	0	0	0	0	0	603	903	0
316	8	0	0	0	0	0	0	200	300	0	0	0	0	0	0	0	200	903	0	0	0	0	0	0	0	603	903	0
316	9	0	0	0	0	0	0	200	300	0	0	0	0	0	0	0	200	903	0	0	0	0	0	0	0	603	903	0
317	0	0	0	0	0	0	0	200	300	0	0	0	0	0	0	0	200	903	0	0	0	0	0	0	0	603	903	0
317	1	0	0	0	0	0	0	200	300	0	0	0	0	0	0	0	200	903	0	0	0	0	0	0	0	603	903	0
317	2	0	0	0	0	0	0	200	300	0	0	0	0	0	0	0	200	903	0	0	0	0	0	0	0	603	903	0
317	3	0	0	0	0	0	0	200	300	0	0	0	0	0	0	0	200	903	0	0	0	0	0	0	0	603	903	0
317	4	0	0	0	0	0	0	200	300	0	0	0	0	0	0	0	200	903	0	0	0	0	0	0	0	603	903	0
317	5	0	0	0	0	0	0	200	300	0	0	0	0	0	0	0	200	903	0	0	0	0	0	0	0	603	903	0
317	6	0	0	0	0	0	0	200	300	0	0	0	0	0	0	0	200	903	0	0	0	0	0	0	0	603	903	0
317	7	0	0	0	0	0	0	200	300	0	0	0	0	0	0	0	200	903	0	0	0	0	0	0	0	603	903	0
317	8	0	0	0	0	0	0	200	300	0	0	0	0	0	0	0	200	903	0	0	0	0	0	0	0	603	903	0
317	9	0	0	0	0	0	0	200	300	0	0	0	0	0	0	0	200	903	0	0	0	0	0	0	0	603	903	0
318	0	0	0	0	0	0	0	200	300	0	0	0	0	0	0	0	200	903	0	0	0	0	0	0	0	603	903	0
318	1	0	0	0	0	0	0	200	300	0	0	0	0	0	0	0	200	903	0	0	0	0	0	0	0	603	903	0
318	2	0	0	0	0	0	0	200	300	0	0	0	0	0	0	0	200	903	0	0	0	0	0	0	0	603	903	0
318	3	0	0	0	0	0	0	200	300	0	0	0	0	0	0	0	200	903	0	0	0	0	0	0	0	603	903	0
318	4	0	0	0	0	0	0	200	300	0	0	0	0	0	0	0	200	903	0	0	0	0	0	0	0	603	903	0
318	5	0	0	0	0	0	0	200	300	0	0	0	0	0	0	0	200	903	0	0	0	0	0	0	0	603	903	0
318	6	0	0	0	0	0	0	200	300	0	0	0	0	0	0	0	200	903	0	0	0	0	0	0	0	603	903	0
318	7	0	0	0	0	0	0	200	300	0	0	0	0	0	0	0	200	903	0	0	0	0	0	0	0	603	903	0
318	8	0	0	0	0	0	0	200	300	0	0	0	0	0	0	0	200	903	0	0	0	0	0	0	0	603	903	0
318	9	0	0	0	0	0	0	200	300	0	0	0	0	0	0	0	200	903	0	0	0	0	0	0	0	603	903	0
319	0	0	0	0	0	0	0	200	300	0	0	0	0	0	0	0	200	903	0	0	0	0	0	0	0	603	903	0
319	1	0	0	0	0	0	0	200	300	0	0	0	0	0	0	0	200	903	0	0	0	0	0	0	0	603	903	0
319	2	0	0	0	0	0	0	200	300	0	0	0	0	0	0	0	200	903	0	0	0	0	0	0	0	603	903	0
319	3	0	0	0	0	0	0	200	300	0	0	0	0	0	0	0	200	903	0	0	0	0	0	0	0	603	903	0
319	4	0	0	0	0	0	0	200	300	0	0	0	0	0	0	0	200	903	0	0	0	0	0	0	0	603	903	0
319	5	0	0	0	0	0	0	200	300	0	0	0	0	0	0	0	200	903	0	0	0	0	0	0	0	603	903	0
319	6	0	0	0	0	0	0	200	300	0	0	0	0	0	0	0	200	903	0	0	0	0	0	0	0	603	903	0
319	7	0	0	0	0	0	0	200	300	0	0	0	0	0	0	0	200	903	0	0	0	0	0	0	0	603	903	0
319	8	0	0	0	0	0	0	200	300	0	0	0	0	0	0	0	200	903	0	0	0	0	0	0	0	603	903	0
319	9	0	0	0	0	0	0	200	300	0	0	0	0	0	0	0	200	903	0	0	0	0	0	0	0	603	903	0
320	0	0	0	0	0	0	0	200	300	0	0	0	0	0	0	0	200	903	0	0	0	0	0	0	0	603	903	0
320	1	0	0	0	0	0	0	200	300	0	0	0	0	0	0	0	200	903	0	0	0	0	0	0	0	603	903	0
320	2	0	0	0	0	0	0	200	300	0	0	0	0	0	0	0	200	903	0	0	0	0	0	0	0	603	903	0
320	3	0	0	0	0	0	0	200	300	0	0	0	0	0	0	0	200	903	0	0	0	0	0	0	0	603	903	0
320	4	0	0	0	0	0	0	200	300	0	0	0	0	0	0	0	200	903	0	0	0	0	0	0	0	603	903	0
320	5	0	0	0	0	0	0	200	300	0	0	0	0	0	0	0	200	903	0	0	0	0	0	0	0	603	903	0
320	6	0	0	0	0	0	0	200	300	0	0	0	0	0	0	0	200	903	0	0	0	0	0	0	0	603	903	0
320	7	0	0	0	0	0	0	200	300	0	0	0	0	0	0	0	200	903	0	0	0	0	0	0	0	603	903	0
320	8	0	0	0	0	0	0	200	300	0	0	0	0	0	0	0	200	903	0	0	0	0	0	0	0	603	903	0
320	9	0	0	0	0	0	0	200	300	0	0	0	0	0	0	0	200	903	0	0	0	0	0	0	0	603	903	0
321	0	0	0	0	0	0	0	200	300	0	0	0	0	0	0	0	200	903	0	0	0	0	0	0	0	603	903	0
321	1	0	0	0	0	0	0	200	300	0	0	0	0	0	0	0	200	903	0	0	0	0	0	0	0	603	903	0
321	2	0	0	0	0	0	0	200	300	0	0	0	0	0	0	0	200	903	0	0	0	0	0	0	0	603	903	0
321	3	0	0	0	0	0	0	200	300	0	0	0	0	0	0	0	200	903	0	0	0	0	0	0	0	603	903	0
321	4	0	0	0	0	0	0	200	300	0	0	0	0	0	0	0	200	903	0	0	0	0	0	0	0	603	903	0
321	5	0	0	0	0	0	0	200	300	0	0	0	0	0	0	0	200	903	0	0	0	0	0	0	0	603	903	0
321	6	0	0	0	0	0	0	200	300	0	0	0	0	0	0	0	200	903	0	0	0	0	0	0	0	603	903	0
321	7	0	0	0	0	0	0	200	300	0	0	0	0	0	0	0	200	903	0	0	0	0	0	0	0	603	903	0
321	8	0	0	0	0	0	0	200	300	0	0	0	0	0	0	0	200	903	0	0	0	0	0	0	0	603	903	0
321	9	0	0	0	0	0	0	200	300	0	0	0	0	0	0	0	200	903	0	0	0	0	0	0	0	603	903	0
322	0	0	0	0	0	0	0	200	300	0	0	0	0	0	0	0	200	903	0	0	0	0	0	0	0	603	903	0
322	1	0	0	0	0	0	0	200	300	0	0	0	0	0	0	0	200	903	0	0	0	0	0	0	0	603	903	0
322	2	0	0	0	0	0	0	200	300	0	0	0	0	0	0	0	200	903	0	0	0	0	0	0	0	603	903	0
322	3	0	0	0	0	0	0	200	300	0	0	0	0	0	0	0	200	903	0	0	0	0	0	0	0	603	903	0
322	4	0	0	0	0	0	0	200	300	0	0	0	0	0	0	0	200	903	0	0	0	0	0	0	0	603	903	0
322	5	0	0	0	0	0	0	200	300	0	0	0	0	0	0	0	200	903	0	0	0	0	0	0	0	603	903	0
322	6	0	0	0	0	0	0	200	300	0	0	0	0	0	0	0	200	903	0	0	0	0	0	0	0	603	903	0
322	7	0	0	0	0	0	0	200	300	0	0	0	0	0	0	0	200	903	0	0	0	0	0	0	0	603	903	0
322	8	0	0	0	0	0	0	200	300	0	0	0	0	0	0	0	200	903	0	0	0	0	0	0	0	603	903	0
322	9	0	0	0	0	0	0	200	300	0	0	0	0	0	0	0	200	903	0	0	0	0	0	0	0	603	903	0
323	0	0	0	0	0	0	0	200	300	0	0	0	0	0	0	0	200	903	0	0	0	0	0	0	0	603	903	0
323	1	0	0	0	0	0	0	200	300	0	0	0	0	0	0	0	200	903	0	0	0	0	0	0	0	603	903	0
323	2	0	0	0	0	0	0	200	300	0	0	0	0	0	0	0	200	903	0	0	0	0	0	0	0	603	903	0
323	3	0	0	0	0	0	0	200	300	0	0	0	0	0	0	0	200	903	0	0	0	0	0	0	0	603	903	0
323	4	0	0	0	0	0	0	200	300	0	0	0	0	0	0	0	200	903	0	0	0	0	0	0	0	603	903	0
323	5	0	0	0	0	0	0	200	300	0	0	0	0	0	0	0	200	903	0	0	0	0	0	0	0	603	903	0
323	6	0	0	0	0	0	0	200	300	0	0	0	0	0	0	0	200	903	0	0	0	0	0	0	0	603	903	0
323	7	0	0	0	0	0	0	200	300	0	0	0	0	0	0	0	200	903	0	0	0	0	0	0	0	603	903	0
323	8	0	0	0	0	0	0	200	300	0	0	0	0	0	0	0	200	903	0	0	0	0	0	0	0	603	903	0
323	9	0	0	0	0	0	0	200	300	0	0	0	0	0	0	0	200	903	0	0	0	0	0	0	0	603	903	0
324	0	0	0	0	0	0	0	200	300	0	0	0	0	0	0	0	200	903	0	0	0	0	0	0	0	603	903	0
324	1	0	0	0	0	0	0	200	300	0	0	0	0	0	0	0	200	903	0	0	0	0	0	0	0	603	903	0
324	2	0	0	0	0	0	0	200	300	0	0	0	0	0	0	0	200	903	0	0	0	0	0	0	0	603	903	0
324	3	0	0	0	0	0	0	200	300	0	0	0	0	0	0	0	200	903	0	0	0	0	0	0	0	603	903	0
324	4	0	0	0	0	0	0	200	300	0	0	0	0	0	0	0	200	903	0	0	0	0	0	0	0	603	903	0
324	5	0	0	0	0	0	0	200	300	0	0	0	0	0	0	0	200	903	0	0	0	0	0	0	0	603	903	0
324	6	0	0	0	0	0	0	200	300	0	0	0	0	0	0	0	200	903	0	0	0	0	0	0	0	603	903	0
324	7	0	0	0	0	0	0	200	300	0	0	0	0	0	0	0	200	903	0	0	0	0	0	0	0	603	903	0
324	8	0	0	0	0	0	0	200	300	0	0	0	0	0	0	0	200	903	0	0	0	0	0	0	0	603	903	0
324	9	0	0	0	0	0	0	200	300	0	0	0	0	0	0	0	200	903	0	0	0	0	0	0	0	603	903	0
325	0	0	0	0	0	0	0	200	300	0	0	0	0	0	0	0	200	903	0	0	0	0	0	0	0	603	903	0
325	1	0	0	0	0	0	0	200	300	0	0	0	0	0	0	0	200	903	0	0	0	0	0	0	0	603	903	0
325	2	0	0	0	0	0	0	200	300	0	0	0	0	0	0	0	200	903	0	0	0	0	0	0	0	603	903	0
325	3	0	0	0	0	0	0	200	300	0	0	0	0	0	0	0	200	903	0	0	0	0	0	0	0	603	903	0
325	4	0	0	0	0	0	0	200	300	0	0	0	0	0	0	0	200	903	0	0	0	0	0	0	0	603	903	0
325	5	0	0	0	0	0	0	200	300	0	0	0	0	0	0	0	200	903	0	0	0	0	0	0	0	603	903	0
325	6	0	0	0	0	0	0	200	300	0	0	0	0	0	0	0	200	903	0	0	0	0	0	0	0	603	903	0
325	7	0	0	0	0	0	0	200	300	0	0	0	0	0	0	0	200	903	0	0	0	0	0	0	0	603	903	0
325	8	0	0	0	0	0	0	200	300	0	0	0	0	0	0	0	200	903	0	0	0	0	0	0	0	603	903	0
325	9	0	0	0	0	0	0	200	300	0	0	0	0	0	0	0	200	903	0	0	0	0	0	0	0	603	903	0
326	0	0	0	0	0	0	0	200	300	0	0	0	0	0	0	0	200	903	0	0	0	0	0	0	0	603	903	0
326	1	0	0	0	0	0	0	200	300	0	0	0	0	0	0	0	200	903	0	0	0	0	0	0	0	603	903	0
326	2	0	0	0	0	0	0	200	300	0	0	0	0	0	0	0	200	903	0	0	0	0	0	0	0	603	903	0
326	3	0	0	0	0	0	0	200	300	0	0	0	0	0	0	0	200	903	0	0	0	0	0	0	0	603	903	0
326	4	0	0	0	0	0	0	200	300	0	0	0	0	0	0	0	200	903	0	0	0	0	0	0	0	603	903	0
326	5	0	0	0	0	0	0	200	300	0	0	0	0	0	0	0	200	903	0	0	0	0	0	0	0	603	903	0
326	6	0	0	0	0	0	0	200	300	0	0	0	0	0	0	0	200	903	0	0	0	0	0	0	0	603	903	0
326	7	0	0	0	0	0	0	200	300	0	0	0	0	0	0	0	200	903	0	0	0	0	0	0	0	603	903	0
326	8	0	0	0	0	0	0	200	300	0	0	0	0	0	0	0	200	903	0	0	0	0	0	0	0	603	903	0
326	9	0	0	0	0	0	0	200	300	0	0	0	0	0	0	0	200	903	0	0	0	0	0	0	0	603	903	0
327	0	0	0	0	0	0	0	200	300	0	0	0	0	0	0	0	200	903	0	0	0	0	0	0	0	603	903	0
327	1	0	0	0	0	0	0	200	300	0	0	0	0	0	0	0	200	903	0	0	0	0	0	0	0	603	903	0
327	2	0	0	0	0	0	0	200	300	0	0	0	0	0	0	0	200	903	0	0	0	0	0	0	0	603	903	0
327	3	0	0	0	0	0	0	200	300	0	0	0	0	0	0	0	200	903	0	0	0	0	0	0	0	603	903	0
327	4	0	0	0	0	0	0	200	300	0	0	0	0	0	0	0	200	903	0	0	0	0	0	0	0	603	903	0
327	5	0	0	0	0	0	0	200	300	0	0	0	0	0	0	0	200	903	0	0	0	0	0	0	0	603	903	0
327	6	0	0	0	0	0	0	200	300	0	0	0	0	0	0	0	200	903	0	0	0	0	0	0	0	603	903	0
327	7	0	0	0	0	0	0	200	300	0	0	0	0	0	0	0	200	903	0	0	0	0	0	0	0	603	903	0
327	8	0	0	0	0	0	0	200	300	0	0	0	0	0	0	0	200	903	0	0	0	0	0	0	0	603	903	0
327	9	0	0	0	0	0	0	200	300	0	0	0	0	0	0	0	200	903	0	0	0	0	0	0	0	603	903	0
328	0	0	0	0	0	0	0	200	300	0	0	0	0	0	0	0	200	903	0	0	0	0	0	0	0	603	903	0
328	1	0	0	0	0	0	0	200	300	0	0	0	0	0	0	0	200	903	0	0	0	0	0	0	0	603	903	0
328	2	0	0	0	0	0	0	200	300	0	0	0	0	0	0	0	200	903	0	0	0	0	0	0	0	603	903	0
328	3	0	0	0	0	0	0	200	300	0	0	0	0	0	0	0	200	903	0	0	0	0	0	0	0	603	903	0
328	4	0	0	0	0	0	0	200	300	0	0	0	0	0	0	0	200	903	0	0	0	0	0	0	0	603	903	0
328	5	0	0	0	0	0	0	200	300	0	0	0	0	0	0	0	200	903	0	0	0	0	0	0	0	603	903	0
328	6	0	0	0	0	0	0	200	300	0	0	0	0	0	0	0	200	903	0	0	0	0	0	0	0	603	903	0
328	7	0	0	0	0	0	0	200	300	0	0	0	0	0	0	0	200	903	0	0	0	0	0	0	0	603	903	0
328	8	0	0	0	0	0	0	200	300	0	0	0	0	0	0	0	200	903	0	0	0	0	0	0	0	603	903	0
328	9	0	0	0	0	0	0	200	300	0	0	0	0	0	0	0	200	903	0	0	0	0	0	0	0	603	903	0
329	0	0	0	0	0	0	0	200	300	0	0	0	0	0	0	0	200	903	0	0	0	0	0	0	0	603	903	0
329	1	0	0	0	0	0	0	200	300	0	0	0	0	0	0	0	200	903	0	0	0	0	0	0	0	603	903	0
329	2	0	0	0	0	0	0	200	300	0	0	0	0	0	0	0	200	903	0	0	0	0	0	0	0	603	903	0
329	3	0	0	0	0	0	0	200	300	0	0	0	0	0	0	0	200	903	0	0	0	0	0	0	0	603	903	0
329	4	0	0	0	0	0	0	200	300	0	0	0	0	0	0	0	200	903	0	0	0	0	0	0	0	603	903	0
329	5	0	0	0	0	0	0	200	300	0	0	0	0	0	0	0	200	903	0	0	0	0	0	0	0	603	903	0
329	6	0	0	0	0	0	0	200	300	0	0	0	0	0	0	0	200	903	0	0	0	0	0	0	0	603	903	0
329	7	0	0	0	0	0	0	200	300	0	0	0	0	0	0	0	200	903	0	0	0	0	0	0	0	603	903	0
329	8	0	0	0	0	0	0	200	300	0	0	0	0	0	0	0	200	903	0	0	0	0	0	0	0	603	903	0
329	9	0	0	0	0	0	0	200	300	0	0	0	0	0	0	0	200	903	0	0	0	0	0	0	0	603	903	0
330	0	0	0	0	0	0	0	200	300	0	0	0	0	0	0	0	200	903	0	0	0	0	0	0	0	603	903	0
330	1	0	0	0	0	0	0	200	300	0	0	0	0	0	0	0	200	903	0	0	0	0	0	0	0	603	903	0
330	2	0	0	0	0	0	0	200	300	0	0	0	0	0	0	0	200	903	0	0	0	0	0	0	0	603	903	0
330	3	0	0	0	0	0	0	200	300	0	0	0	0	0	0	0	200	903	0	0	0	0	0	0	0	603	903	0
330	4	0	0	0	0	0	0	200	300	0	0	0	0	0	0	0	200	903	0	0	0	0	0	0	0	603	903	0
330	5	0	0	0	0	0	0	200	300	0	0	0	0	0	0	0	200	903	0	0	0	0	0	0	0	603	903	0
330	6	0	0	0	0	0	0	200	300	0	0	0	0	0	0	0	200	903	0	0	0	0	0	0	0	603	903	0
330	7	0	0	0	0	0	0	200	300	0	0	0	0	0	0	0	200	903	0	0	0	0	0	0	0	603	903	0
330	8	0	0	0	0	0	0	200	300	0	0	0	0	0	0	0	200	903	0	0	0	0	0	0	0	603	903	0
330	9	0	0	0	0	0	0	200	300	0	0	0	0	0	0	0	200	903	0	0	0	0	0	0	0	603	903	0
331	0	0	0	0	0	0	0	200	300	0	0	0	0	0	0	0	200	903	0	0	0	0	0	0	0	603	903	0
331	1	0	0	0	0	0	0	200	300	0	0	0	0	0	0	0	200	903	0	0	0	0	0	0	0	603	903	0
331	2	0	0	0	0	0	0	200	300	0	0	0	0	0	0	0	200	903	0	0	0	0	0	0	0	603	903	0
331	3	0	0	0	0	0	0	200	300	0	0	0	0	0	0	0	200	903	0	0	0	0	0	0	0	603	903	0
331	4	0	0	0	0	0	0	200	300	0	0	0	0	0	0	0	200	903	0	0	0	0	0	0	0	603	903	0
331	5	0	0	0	0	0	0	200	300	0	0	0	0	0	0	0	200	903	0	0	0	0	0	0	0	603	903	0
331	6	0	0	0	0	0	0	200	300	0	0	0	0	0	0	0	200	903	0	0	0	0	0	0	0	603	903	0
331	7	0	0	0	0	0	0	200	300	0	0	0	0	0	0	0	200	903	0	0	0	0	0	0	0	603	903	0
331	8	0	0	0	0	0	0	200	300	0	0	0	0	0	0	0	200	903	0	0	0	0	0	0	0	603	903	0
331	9	0	0	0	0	0	0	200	300	0	0	0	0	0	0	0	200	903	0	0	0	0	0	0	0	603	903	0
332	0	0	0	0	0	0	0	200	300	0	0	0	0	0	0	0	200	903	0	0	0	0	0	0	0	603	903	0
332	1	0	0	0	0	0	0	200	300	0	0	0	0	0	0	0	200	903	0	0	0	0	0	0	0	603	903	0
332	2	0	0	0	0	0	0	200	300	0	0	0	0	0	0	0	200	903	0	0	0	0	0	0	0	603	903	0
332	3	0	0	0	0	0	0	200	300	0	0	0	0	0	0	0	200	903	0	0	0	0	0	0	0	603	903	0
332	4	0	0	0	0	0	0	200	300	0	0	0	0	0	0	0	200	903	0	0	0	0	0	0	0	603	903	0
332	5	0	0	0	0	0	0	200	300	0	0	0	0	0	0	0	200	903	0	0	0	0	0	0	0	603	903	0
332	6	0	0	0	0	0	0	200	300	0	0	0	0	0	0	0	200	903	0	0	0	0	0	0	0	603	903	0
332	7	0	0	0	0	0	0	200	300	0	0	0	0	0	0	0	200	903	0	0	0	0	0	0	0	603	903	0
332	8	0	0	0	0	0	0	200	300	0	0	0	0	0	0	0	200	903	0	0	0	0	0	0	0	603	903	0
332	9	0	0	0	0	0	0	200	300	0	0	0	0	0	0	0	200	903	0	0	0	0	0	0	0	603	903	0
333	0	0	0	0	0	0	0	200	300	0	0	0	0	0	0	0	200	903	0	0	0	0	0	0	0	603	903	0
333	1	0	0	0	0	0	0	200	300	0	0	0	0	0	0	0	200	903	0	0	0	0	0	0	0	603	903	0
333	2	0	0	0	0	0	0	200	300	0	0	0	0	0	0	0	200	903	0	0	0	0	0	0	0	603	903	0
333	3	0	0	0	0	0	0	200	300	0	0	0	0	0	0	0	200	903	0	0	0	0	0	0	0	603	903	0
333	4	0	0	0	0	0	0	200	300	0	0	0	0	0	0	0	200	903	0	0	0	0	0	0	0	603	903	0
333	5	0	0	0	0	0	0	200	300	0	0	0	0	0	0	0	200	903	0	0	0	0	0	0	0	603	903	0
333	6	0	0	0	0	0	0	200	300	0	0	0	0	0	0	0	200	903	0	0	0	0	0	0	0	603	903	0
333	7	0	0	0	0	0	0	200	300	0	0	0	0	0	0	0	200	903	0	0	0	0	0	0	0	603	903	0
333	8	0	0	0	0	0	0	200	300	0	0	0	0	0	0	0	200	903	0	0	0	0	0	0	0	603	903	0
333	9	0	0	0	0	0	0	200	300	0	0	0	0	0	0	0	200	903	0	0	0	0	0	0	0	603	903	0
334	0	0	0	0	0	0	0	200	300	0	0	0	0	0	0	0	200	903	0	0	0	0	0	0	0	603	903	0
334	1	0	0	0	0	0	0	200	300	0	0	0	0	0	0	0	200	903	0	0	0	0	0	0	0	603	903	0
334	2	0	0	0	0	0	0	200	300	0	0	0	0	0	0	0	200	903	0	0	0	0	0	0	0	603	903	0
334	3	0	0	0	0	0	0	200	300	0	0	0	0	0	0	0	200	903	0	0	0	0	0	0	0	603	903	0
334	4	0	0	0	0	0	0	200	300	0	0	0	0	0	0	0	200	903	0	0	0	0	0	0	0	603	903	0
334	5	0	0	0	0	0	0	200	300	0	0	0	0	0	0	0	200	903	0	0	0	0	0	0	0	603	903	0
334	6	0	0	0	0	0	0	200	300	0	0	0	0	0	0	0	200	903	0	0	0	0	0	0	0	603	903	0
334	7	0	0	0	0	0	0	200	300	0	0	0	0	0	0	0	200	903	0	0	0	0	0	0	0	603	903	0
334	8	0	0	0	0	0	0	200	300	0	0	0	0	0	0	0	200	903	0	0	0	0	0	0	0	603	903	0
334	9	0	0	0	0	0	0	200	300	0	0	0	0	0	0	0	200	903	0	0	0	0	0	0	0	603	903	0
335	0	0	0	0	0	0	0	200	300	0	0	0	0	0	0	0	200	903	0	0	0	0	0	0	0	603	903	0
335	1	0	0	0	0	0	0	200	300	0	0	0	0	0	0	0	200	903	0	0	0	0	0	0	0	603	903	0
335	2	0	0	0	0	0	0	200	300	0	0	0	0	0	0	0	200	903	0	0	0	0	0	0	0	603	903	0
335	3	0	0	0	0	0	0	200	300	0	0	0	0	0	0	0	200	903	0	0	0	0	0	0	0	603	903	0
335	4	0	0	0	0	0	0	200	300	0	0	0	0	0	0	0	200	903	0	0	0	0	0	0	0	603	903	0
335	5	0	0	0	0	0	0	200	300	0	0	0	0	0	0	0	200	903	0	0	0	0	0	0	0	603	903	0
335	6	0	0	0	0	0	0	200	300	0	0	0	0	0	0	0	200	903	0	0	0	0	0	0	0	603	903	0
335	7	0	0	0	0	0	0	200	300	0	0	0	0	0	0	0	200	903	0	0	0	0	0	0	0	603	903	0
335	8	0	0	0	0	0	0	200	300	0	0	0	0	0	0	0	200	903	0	0	0	0	0	0	0	603	903	0
335	9	0	0	0	0	0	0	200	300	0	0	0	0	0	0	0	200	903	0	0	0	0	0	0	0	603	903	0
336	0	0	0	0	0	0	0	200	300	0	0	0	0	0	0	0	200	903	0	0	0	0	0	0	0	603	903	0
336	1	0	0	0	0	0	0	200	300	0	0	0	0	0	0	0	200	903	0	0	0	0	0	0	0	603	903	0
336	2	0	0	0	0	0	0	200	300	0	0	0	0	0	0	0	200	903	0	0	0	0	0	0	0	603	903	0
336	3	0	0	0	0	0	0	200	300	0	0	0	0	0	0	0	200	903	0	0	0	0	0	0	0	603	903	0
336	4	0	0	0	0	0	0	200	300	0	0	0	0	0	0	0	200	903	0	0	0	0	0	0	0	603	903	0
336	5	0	0	0	0	0	0	200	300	0	0	0	0	0	0	0	200	903	0	0	0	0	0	0	0	603	903	0
336	6	0	0	0	0	0	0	200	300	0	0	0	0	0	0	0	200	903	0	0	0	0	0	0	0	603	903	0
336	7	0	0	0	0	0	0	200	300	0	0	0	0	0	0	0	200	903	0	0	0	0	0	0	0	603	903	0
336	8	0	0	0	0	0	0	200	300	0	0	0	0	0	0	0	200	903	0	0	0	0	0	0	0	603	903	0
336	9	0	0	0	0	0	0	200	300	0	0	0	0	0	0	0	200	903	0	0	0	0	0	0	0	603	903	0
337	0	0	0	0	0	0	0	200	300	0	0	0	0	0	0	0	200	903	0	0	0	0	0	0	0	603	903	0
337	1	0	0	0	0	0	0	200	300	0	0	0	0	0	0	0	200	903	0	0	0	0	0	0	0	603	903	0
337	2	0	0	0	0	0	0	200	300	0	0	0	0	0	0	0	200	903	0	0	0	0	0	0	0	603	903	0
337	3	0	0	0	0	0	0	200	300	0	0	0	0	0	0	0	200	903	0	0	0	0	0	0	0	603	903	0
337	4	0	0	0	0	0	0	200	300	0	0	0	0	0	0	0	200	903	0	0	0	0	0	0	0	603	903	0
337	5	0	0	0	0	0	0	200	300	0	0	0	0	0	0	0	200	903	0	0	0	0	0	0	0	603	903	0
337	6	0	0	0	0	0	0	200	300	0	0	0	0	0	0	0	200	903	0	0	0	0	0	0	0	603	903	0
337	7	0	0	0	0	0	0	200	300	0	0	0	0	0	0	0	200	903	0	0	0	0	0	0	0	603	903	0
337	8	0	0	0	0	0	0	200	300	0	0	0	0	0	0	0	200	903	0	0	0	0	0	0	0	603	903	0
337	9	0	0	0	0	0	0	200	300	0	0	0	0	0	0	0	200	903	0	0	0	0	0	0	0	603	903	0
338	0	0	0	0	0	0	0	200	300	0	0	0	0	0	0	0	200	903	0	0	0	0	0	0	0	603	903	0
338	1	0	0	0	0	0	0	200	300	0	0	0	0	0	0	0	200	903	0	0	0	0	0	0	0	603	903	0
338	2	0	0	0	0	0	0	200	300	0	0	0	0	0	0	0	200	903	0	0	0	0	0	0	0	603	903	0
338	3	0	0	0	0	0	0	200	300	0	0	0	0	0	0	0	200	903	0	0	0	0	0	0	0	603	903	0
338	4	0	0	0	0	0	0	200	300	0	0	0	0	0	0	0	200	903	0	0	0	0	0	0	0	603	903	0
338	5	0	0	0	0	0	0	200	300	0	0	0	0	0	0	0	200	903	0	0	0	0	0	0	0	603	903	0
338	6	0	0	0	0	0	0	200	300	0	0	0	0	0	0	0	200	903	0	0	0	0	0	0	0	603	903	0
338	7	0	0	0	0	0	0	200	300	0	0	0	0	0	0	0	200	903	0	0	0	0	0	0	0	603	903	0
338	8	0	0	0	0	0	0	200	300	0	0	0	0	0	0	0	200	903	0	0	0	0	0	0	0	603	903	0
338	9	0	0	0	0	0	0	200	300	0	0	0	0	0	0	0	200	903	0	0	0	0	0	0	0	603	903	0
339	0	0	0	0	0	0	0	200	300	0	0	0	0	0	0	0	200	903	0	0	0	0	0	0	0	603	903	0
339	1	0	0	0	0	0	0	200	300	0	0	0	0	0	0	0	200	903	0	0	0	0	0	0	0	603	903	0
339	2	0	0	0	0	0	0	200	300	0	0	0	0	0	0	0	200	903	0	0	0	0	0	0	0	603	903	0
339	3	0	0	0	0	0	0	200	300	0	0	0	0	0	0	0	200	903	0	0	0	0	0	0	0	603	903	0
339	4	0	0	0	0	0	0	200	300	0	0	0	0	0	0	0	200	903	0	0	0	0	0	0	0	603	903	0
339	5	0	0	0	0	0	0	200	300	0	0	0	0	0	0	0	200	903	0	0	0	0	0	0	0	603	903	0
339	6	0	0	0	0	0	0	200	300	0	0	0	0	0	0	0	200	903	0	0	0	0	0	0	0	603	903	0
339	7	0	0	0	0	0	0	200	300	0	0	0	0	0	0	0	200	903	0	0	0	0	0	0	0	603	903	0
339	8	0	0	0	0	0	0	200	300	0	0	0	0	0	0	0	200	903	0	0	0	0	0	0	0	603	903	0
339	9	0	0	0	0	0	0	200	300	0	0	0	0	0	0	0	200	903	0	0	0	0	0	0	0	603	903	0
340	0	0	0	0	0	0	0	200	300	0	0	0	0	0	0	0	200	903	0	0	0	0	0	0	0	603	903	0
340	1	0	0	0	0	0	0	200	300	0	0	0	0	0	0	0	200	903	0	0	0	0	0	0	0	603	903	0
340	2	0	0	0	0	0	0	200	300	0	0	0	0	0	0	0	200	903	0	0	0	0	0	0	0	603	903	0
340	3	0	0	0	0	0	0	200	300	0	0	0	0	0	0	0	200	903	0	0	0	0	0	0	0	603	903	0
340	4	0	0	0	0	0	0	200	300	0	0	0	0	0	0	0	200	903	0	0	0	0	0	0	0	603	903	0
340	5	0	0	0	0	0	0	200	300	0	0	0	0	0	0	0	200	903	0	0	0	0	0	0	0	603	903	0
340	6	0	0	0	0	0	0	200	300	0	0	0	0	0	0	0	200	903	0	0	0	0	0	0	0	603	903	0
340	7	0	0	0	0	0	0	200	300	0	0	0	0	0	0	0	200	903	0	0	0	0	0	0	0	603	903	0
340	8	0	0	0	0	0	0	200	300	0	0	0	0	0	0	0	200	903	0	0	0	0	0	0	0	603	903	0
340	9	0	0	0	0	0	0	200	300	0	0	0	0	0	0	0	200	903	0	0	0	0	0	0	0	603	903	0
341	0	0	0	0	0	0	0	200	300	0	0	0	0	0	0	0	200	903	0	0	0	0	0	0	0	603	903	0
341	1	0	0	0	0	0	0	200	300	0	0	0	0	0	0	0	200	903	0	0	0	0	0	0	0	603	903	0
341	2	0	0	0	0	0	0	200	300	0	0	0	0	0	0	0	200	903	0	0	0	0	0	0	0	603	903	0
341	3	0	0	0	0	0	0	200	300	0	0	0	0	0	0	0	200	903	0	0	0	0	0	0	0	603	903	0
341	4	0	0	0	0	0	0	200	300	0	0	0	0	0	0	0	200	903	0	0	0	0	0	0	0	603	903	0
341	5	0	0	0	0	0	0	200	300	0	0	0	0	0	0	0	200	903	0	0	0	0	0	0	0	603	903	0
341	6	0	0	0	0	0	0	200	300	0	0	0	0	0	0	0	200	903	0	0	0	0	0	0	0	603	903	0
341	7	0	0	0	0	0	0	200	300	0	0	0	0	0	0	0	200	903	0	0	0	0	0	0	0	603	903	0
341	8	0	0	0	0	0	0	200	300	0	0	0	0	0	0	0	200	903	0	0	0	0	0	0	0	603	903	0
341	9	0	0	0	0	0	0	200	300	0	0	0	0	0	0	0	200	903	0	0	0	0	0	0	0	603	903	0
342	0	0	0	0	0	0	0	200	300	0	0	0	0	0	0	0	200	903	0	0	0	0	0	0	0	603	903	0
342	1	0	0	0	0	0	0	200	300	0	0	0	0	0	0	0	200	903	0	0	0	0	0	0	0	603	903	0
342	2	0	0	0	0	0	0	200	300	0	0	0	0	0	0	0	200	903	0	0	0	0	0	0	0	603	903	0
342	3	0	0	0	0	0	0	200	300	0	0	0	0	0	0	0	200	903	0	0	0	0	0	0	0	603	903	0
342	4	0	0	0	0	0	0	200	300	0	0	0	0	0	0	0	200	903	0	0	0	0	0	0	0	603	903	0
342	5	0	0	0	0	0	0	200	300	0	0	0	0	0	0	0	200	903	0	0	0	0	0	0	0	603	903	0
342	6	0	0	0	0	0	0	200	300	0	0	0	0	0	0	0	200	903	0	0	0	0	0	0	0	603	903	0
342	7	0	0	0	0	0	0	200	300	0	0	0	0	0	0	0	200	903	0	0	0	0	0	0	0	603	903	0
342	8	0	0	0	0	0	0	200	300	0	0	0	0	0	0	0	200	903	0	0	0	0	0	0	0	603	903	0
342	9	0	0	0	0	0	0	200	300	0	0	0	0	0	0	0	200	903	0	0	0	0	0	0	0	603	903	0
343	0	0	0	0	0	0	0	200	300	0	0	0	0	0	0	0	200	903	0	0	0	0	0	0	0	603	903	0
343	1	0	0	0	0	0	0	200	300	0	0	0	0	0	0	0	200	903	0	0	0	0	0	0	0	603	903	0
343	2	0	0	0	0	0	0	200	300	0	0	0	0	0	0	0	200	903	0	0	0	0	0	0	0	603	903	0
343	3	0	0	0	0	0	0	200	300	0	0	0	0	0	0	0	200	903	0	0	0	0	0	0	0	603	903	0
343	4	0	0	0	0	0	0	200	300	0	0	0	0	0	0	0	200	903	0	0	0	0	0	0	0	603	903	0
343	5	0	0	0	0	0	0	200	300	0	0	0	0	0	0	0	200	903	0	0	0	0	0	0	0	603	903	0
343	6	0	0	0	0	0	0	200	300	0	0	0	0	0	0	0	200	903	0	0	0	0	0	0	0	603	903	0
343	7	0	0	0	0	0	0	200	300	0	0	0	0	0	0	0	200	903	0	0	0	0	0	0	0	603	903	0
343	8	0	0	0	0	0	0	200	300	0	0	0	0	0	0	0	200	903	0	0	0	0	0	0	0	603	903	0
343	9	0	0	0	0	0	0	200	300	0	0	0	0	0	0	0	200	903	0	0	0	0	0	0	0	603	903	0
344	0	0	0	0	0	0	0	200	300	0	0	0	0	0	0	0	200	903	0	0	0	0	0	0	0	603	903	0
344	1	0	0	0	0	0	0	200	300	0	0	0	0	0	0	0	200	903	0	0	0	0	0	0	0	603	903	0
344	2	0	0	0	0	0	0	200	300	0	0	0	0	0	0	0	200	903	0	0	0	0	0	0	0	603	903	0
344	3	0	0	0	0	0	0	200	300	0	0	0	0	0	0	0	200	903	0	0	0	0	0	0	0	603	903	0
344	4	0	0	0	0	0	0	200	300	0	0	0	0	0	0	0	200	903	0	0	0	0	0	0	0	603	903	0
344	5	0	0	0	0	0	0	200	300	0	0	0	0	0	0	0	200	903	0	0	0	0	0	0	0	603	903	0
344	6	0	0	0	0	0	0	200	300	0	0	0	0	0	0	0	200	903	0	0	0	0	0	0	0	603	903	0
344	7	0	0	0	0	0	0	200	300	0	0	0	0	0	0	0	200	903	0	0	0	0	0	0	0	603	903	0
344	8	0	0	0	0	0	0	200	300	0	0	0	0	0	0	0	200	903	0	0	0	0	0	0	0	603	903	0
344	9	0	0	0	0	0	0	200	300	0	0	0	0	0	0	0	200	903	0	0	0	0	0	0	0	603	903	0
345	0	0	0	0	0	0	0	200	300	0	0	0	0	0	0	0	200	903	0	0	0	0	0	0	0	603	903	0
345	1	0	0	0	0	0	0	200	300	0	0	0	0	0	0	0	200	903	0	0	0	0	0	0	0	603	903	0
345	2	0	0	0	0	0	0	200	300	0	0	0	0	0	0	0	200	903	0	0	0	0	0	0	0	603	903	0
345	3	0	0	0	0	0	0	200	300	0	0	0	0	0	0	0	200	903	0	0	0	0	0	0	0	603	903	0
345	4	0	0	0	0	0	0	200	300	0	0	0	0	0	0	0	200	903	0	0	0	0	0	0	0	603	903	0
345	5	0	0	0	0	0	0	200	300	0	0	0	0	0	0	0	200	903	0	0	0	0	0	0	0	603	903	0
345	6	0	0	0	0	0	0	200	300	0	0	0	0	0	0	0	200	903	0	0	0	0	0	0	0	603	903	0
345	7	0	0	0	0	0	0	200	300	0	0	0	0	0	0	0	200	903	0	0	0	0	0	0	0	603	903	0
345	8	0	0	0	0	0	0	200	300	0	0	0	0	0	0	0	200	903	0	0	0	0	0	0	0	603	903	0
345	9	0	0	0	0	0	0	200	300	0	0	0	0	0	0	0	200	903	0	0	0	0	0	0	0	603	903	0
346	0	0	0	0	0	0	0	200	300	0	0	0	0	0	0	0	200	903	0	0	0	0	0	0	0	603	903	0
346	1	0	0	0	0	0	0	200	300	0	0	0	0	0	0	0	200	903	0	0	0	0	0	0	0	603	903	0
346	2	0	0	0	0	0	0	200	300	0	0	0	0	0	0	0	200	903	0	0	0	0	0	0	0	603	903	0
346	3	0	0	0	0	0	0	200	300	0	0	0	0	0	0	0	200	903	0	0	0	0	0	0	0	603	903	0
346	4	0	0	0	0	0	0	200	300	0	0	0	0	0	0	0	200	903	0	0	0	0	0	0	0	603	903	0
346	5	0	0	0	0	0	0	200	300	0	0	0	0	0	0	0	200	903	0	0	0	0	0	0	0	603	903	0
346	6	0	0	0	0	0	0	200	300	0	0	0	0	0	0	0	200	903	0	0	0	0	0	0	0	603	903	0
346	7	0	0	0	0	0	0	200	300	0	0	0	0	0	0	0	200	903	0	0	0	0	0	0	0	603	903	0
346	8	0	0	0	0	0	0	200	300	0	0	0	0	0	0	0	200	903	0	0	0	0	0	0	0	603	903	0
346	9	0	0	0	0	0	0	200	300	0	0	0	0	0	0	0	200	903	0	0	0	0	0	0	0	603	903	0
347	0	0	0	0	0	0	0	200	300	0	0	0	0	0	0	0	200	903	0	0	0	0	0	0	0	603	903	0
347	1	0	0	0	0	0	0	200	300	0	0	0	0	0	0	0	200	903	0	0	0	0	0	0	0	603	903	0
347	2	0	0	0	0	0	0	200	300	0	0	0	0	0	0	0	200	903	0	0	0	0	0	0	0	603	903	0
347	3	0	0	0	0	0	0	200	300	0	0	0	0	0	0	0	200	903	0	0	0	0	0	0	0	603	903	0
347	4	0	0	0	0	0	0	200	300	0	0	0	0	0	0	0	200	903	0	0	0	0	0	0	0	603	903	0
347	5	0	0	0	0	0	0	200	300	0	0	0	0	0	0	0	200	903	0	0	0	0	0	0	0	603	903	0
347	6	0	0	0	0	0	0	200	300	0	0	0	0	0	0	0	200	903	0	0	0	0	0	0	0	603	903	0
347	7	0	0	0	0	0	0	200	300	0	0	0	0	0	0	0	200	903	0	0	0	0	0	0	0	603	903	0
347	8	0	0	0	0	0	0	200	300	0	0	0	0	0	0	0	200	903	0	0	0	0	0	0	0	603	903	0
347	9	0	0	0	0	0	0	200	300	0	0	0	0	0	0	0	200	903	0	0	0	0	0	0	0	603	903	0
348	0	0	0	0	0	0	0	200	300	0	0	0	0	0	0	0	200	903	0	0	0	0	0	0	0	603	903	0
348	1	0	0	0	0	0	0	200	300	0	0	0	0	0	0	0	200	903	0	0	0	0	0	0	0	603	903	0
348	2	0	0	0	0	0	0	200	300	0	0	0	0	0	0	0	200	903	0	0	0	0	0	0	0	603	903	0
348	3	0	0	0	0	0	0	200	300	0	0	0	0	0	0	0	200	903	0	0	0	0	0	0	0	603	903	0
348	4	0	0	0	0	0	0	200	300	0	0	0	0	0	0	0	200	903	0	0	0	0	0	0	0	603	903	0
348	5	0	0	0	0	0	0	200	300	0	0	0	0	0	0	0	200	903	0	0	0	0	0	0	0	603	903	0
348	6	0	0	0	0	0	0	200	300	0	0	0	0	0	0	0	200	903	0	0	0	0	0	0	0	603	903	0
348	7	0	0	0	0	0	0	200	300	0	0	0	0	0	0	0	200	903	0	0	0	0	0	0	0	603	903	0
348	8	0	0	0	0	0	0	200	300	0	0	0	0	0	0	0	200	903	0	0	0	0	0	0	0	603	903	0
348	9	0	0	0	0	0	0	200	300	0	0	0	0	0	0	0	200	903	0	0	0	0	0	0	0	603	903	0
349	0	0	0	0	0	0	0	200	300	0	0	0	0	0	0	0	200	903	0	0	0	0	0	0	0	603	903	0
349	1	0	0	0	0	0	0	200	300	0	0	0	0	0	0	0	200	903	0	0	0	0	0	0	0	603	903	0
349	2	0	0	0	0	0	0	200	300	0	0	0	0	0	0	0	200	903	0	0	0	0	0	0	0	603	903	0
349	3	0	0	0	0	0	0	200	300	0	0	0	0	0	0	0	200	903	0	0	0	0	0	0	0	603	903	0
349	4	0	0	0	0	0	0	200	300	0	0	0	0	0	0	0	200	903	0	0	0	0	0	0	0	603	903	0
349	5	0	0	0	0	0	0	200	300	0	0	0	0	0	0	0	200	903	0	0	0	0	0	0	0	603	903	0
349	6	0	0	0	0	0	0	200	300	0	0	0	0	0	0	0	200	903	0	0	0	0	0	0	0	603	903	0
349	7	0	0	0	0	0	0	200	300	0	0	0	0	0	0	0	200	903	0	0	0	0	0	0	0	603	903	0
349	8	0	0	0	0	0	0	200	300	0	0	0	0	0	0	0	200	903	0	0	0	0	0	0	0	603	903	0
349	9	0	0	0	0	0	0	200	300	0	0	0	0	0	0	0	200	903	0	0	0	0	0	0	0	603	903	0
350	0	0	0	0	0	0	0	200	300	0	0	0	0	0	0	0	200	903	0	0	0	0	0	0	0	603	903	0
350	1	0	0	0	0	0	0	200	300	0	0	0	0	0	0	0	200	903	0	0	0	0	0	0	0	603	903	0
350	2	0	0	0	0	0	0	200	300	0	0	0	0	0	0	0	200	903	0	0	0	0	0	0	0	603	903	0
350	3	0	0	0	0	0	0	200	300	0	0	0	0	0	0	0	200	903	0	0	0	0	0	0	0	603	903	0
350	4	0	0	0	0	0	0	200	300	0	0	0	0	0	0	0	200	903	0	0	0	0	0	0	0	603	903	0
350	5	0	0	0	0	0	0	200	300	0	0	0	0	0	0	0	200	903	0	0	0	0	0	0	0	603	903	0
350	6	0	0	0	0	0	0	200	300	0	0	0	0	0	0	0	200	903	0	0	0	0	0	0	0	603	903	0
350	7	0	0	0	0	0	0	200	300	0	0	0	0	0	0	0	200	903	0	0	0	0	0	0	0	603	903	0
350	8	0	0	0	0	0	0	200	300	0	0	0	0	0	0	0	200	903	0	0	0	0	0	0	0	603	903	0
350	9	0	0	0	0	0	0	200	300	0	0	0	0	0	0	0	200	903	0	0	0	0	0	0	0	603	903	0
351	0	0	0	0	0	0	0	200	300	0	0	0	0	0	0	0	200	903	0	0	0	0	0	0	0	603	903	0
351	1	0	0	0	0	0	0	200	300	0	0	0	0	0	0	0	200	903	0	0	0	0	0	0	0	603	903	0
351	2	0	0	0	0	0	0	200	300	0	0	0	0	0	0	0	200	903	0	0	0	0	0	0	0	603	903	0
351	3	0	0	0	0	0	0	200	300	0	0	0	0	0	0	0	200	903	0	0	0	0	0	0	0	603	903	0
351	4	0	0	0	0	0	0	200	300	0	0	0	0	0	0	0	200	903	0	0	0	0	0	0	0	603	903	0
351	5	0	0	0	0	0	0	200	300	0	0	0	0	0	0	0	200	903	0	0	0	0	0	0	0	603	903	0
351	6	0	0	0	0	0	0	200	300	0	0	0	0	0	0	0	200	903	0	0	0	0	0	0	0	603	903	0
351	7	0	0	0	0	0	0	200	300	0	0	0	0	0	0	0	200	903	0	0	0	0	0	0	0	603	903	0
351	8	0	0	0	0	0	0	200	300	0	0	0	0	0	0	0	200	903	0	0	0	0	0	0	0	603	903	0
351	9	0	0	0	0	0	0	200	300	0	0	0	0	0	0	0	200	903	0	0	0	0	0	0	0	603	903	0
352	0	0	0	0	0	0	0	200	300	0	0	0	0	0	0	0	200	903	0	0	0	0	0	0	0	603	903	0
352	1	0	0	0	0	0	0	200	300	0	0	0	0	0	0	0	200	903	0	0	0	0	0	0	0	603	903	0
352	2	0	0	0	0	0	0	200	300	0	0	0	0	0	0	0	200	903	0	0	0	0	0	0	0	603	903	0
352	3	0	0	0	0	0	0	200	300	0	0	0	0	0	0	0	200	903	0	0	0	0	0	0	0	603	903	0
352	4	0	0	0	0	0	0	200	300	0	0	0	0	0	0	0	200	903	0	0	0	0	0	0	0	603	903	0
352	5	0	0	0	0	0	0	200	300	0	0	0	0	0	0	0	200	903	0	0	0	0	0	0	0	603	903	0
352	6	0	0	0	0	0	0	200	300	0	0	0	0	0	0	0	200	903	0	0	0	0	0	0	0	603	903	0
352	7	0	0	0	0	0	0	200	300	0	0	0	0	0	0	0	200	903	0	0	0	0	0	0	0	603	903	0
352	8	0	0	0	0	0	0	200	300	0	0	0	0	0	0	0	200	903	0	0	0	0	0	0	0	603	903	0
352	9	0	0	0	0	0	0	200	300	0	0	0	0	0	0	0	200	903	0	0	0	0	0	0	0	603	903	0
353	0	0	0	0	0	0	0	200	300	0	0	0	0	0	0	0	200	903	0	0	0	0	0	0	0	603	903	0
353	1	0	0	0	0	0	0	200	300	0	0	0	0	0	0	0	200	903	0	0	0	0	0	0	0	603	903	0
353	2	0	0	0	0	0	0	200	300	0	0	0	0	0	0	0	200	903	0	0	0	0	0	0	0	603	903	0
353	3	0	0	0	0	0	0	200	300	0	0	0	0	0	0	0	200	903	0	0	0	0	0	0	0	603	903	0
353	4	0	0	0	0	0	0	200	300	0	0	0	0	0	0	0	200	903	0	0	0	0	0	0	0	603	903	0
353	5	0	0	0	0	0	0	200	300	0	0	0	0	0	0	0	200	903	0	0	0	0	0	0	0	603	903	0
353	6	0	0	0	0	0	0	200	300	0	0	0	0	0	0	0	200	903	0	0	0	0	0	0	0	603	903	0
353	7	0	0	0	0	0	0	200	300	0	0	0	0	0	0	0	200	903	0	0	0	0	0	0	0	603	903	0
353	8	0	0	0	0	0	0	200	300	0	0	0	0	0	0	0	200	903	0	0	0	0	0	0	0	603	903	0
353	9	0	0	0	0	0	0	200	300	0	0	0	0	0	0	0	200	903	0	0	0	0	0	0	0	603	903	0
354	0	0	0	0	0	0	0	200	300	0	0	0	0	0	0	0	200	903	0	0	0	0	0	0	0	603	903	0
354	1	0	0	0	0	0	0	200	300	0	0	0	0	0	0	0	200	903	0	0	0	0	0	0	0	603	903	0
354	2	0	0	0	0	0	0	200	300	0	0	0	0	0	0	0	200	903	0	0	0	0	0	0	0	603	903	0
354	3	0	0	0	0	0	0	200	300	0	0	0	0	0	0	0	200	903	0	0	0	0	0	0	0	603	903	0
354	4	0	0	0	0	0	0	200	300	0	0	0	0	0	0	0	200	903	0	0	0	0	0	0	0	603	903	0
354	5	0	0	0	0	0	0	200	300	0	0	0	0	0	0	0	200	903	0	0	0	0	0	0	0	603	903	0
354	6	0	0	0	0	0	0	200	300	0	0	0	0	0	0	0	200	903	0	0	0	0	0	0	0	603	903	0
354	7	0	0	0	0	0	0	200	300	0	0	0	0	0	0	0	200	903	0	0	0	0	0	0	0	603	903	0
354	8	0	0	0	0	0	0	200	300	0	0	0	0	0	0	0	200	903	0	0	0	0	0	0	0	603	903	0
354	9	0	0	0	0	0	0	200	300	0	0	0	0	0	0	0	200	903	0	0	0	0	0	0	0	603	903	0
355	0	0	0	0	0	0	0	200	300	0	0	0	0	0	0	0	200	903	0	0	0	0	0	0	0	603	903	0
355	1	0	0	0	0	0	0	200	300	0	0	0	0	0	0	0	200	903	0	0	0	0	0	0	0	603	903	0
355	2	0	0	0	0	0	0	200	300	0	0	0	0	0	0	0	200	903	0	0	0	0	0	0	0	603	903	0
355	3	0	0	0	0	0	0	200	300	0	0	0	0	0	0	0	200	903	0	0	0	0	0	0	0	603	903	0
355	4	0	0	0	0	0	0	200	300	0	0	0	0	0	0	0	200	903	0	0	0	0	0	0	0	603	903	0
355	5	0	0	0	0	0	0	200	300	0	0	0	0	0	0	0	200	903	0	0	0	0	0	0	0	603	903	0
355	6	0	0	0	0	0	0	200	300	0	0	0	0	0	0	0	200	903	0	0	0	0	0	0	0	603	903	0
355	7	0	0	0	0	0	0	200	300	0	0	0	0	0	0	0	200	903	0	0	0	0	0	0	0	603	903	0
355	8	0	0	0	0	0	0	200	300	0	0	0	0	0	0	0	200	903	0	0	0	0	0	0	0	603	903	0
355	9	0	0	0	0	0	0	200	300	0	0	0	0	0	0	0	200	903	0	0	0	0	0	0	0	603	903	0
356	0	0	0	0	0	0	0	200	300	0	0	0	0	0	0	0	200	903	0	0	0	0	0	0	0	603	903	0
356	1	0	0	0	0	0	0	200	300	0	0	0	0	0	0	0	200	903	0	0	0	0	0	0	0	603	903	0
356	2	0	0	0	0	0	0	200	300	0	0	0	0	0	0	0	200	903	0	0	0	0	0	0	0	603	903	0
356	3	0	0	0	0	0	0	200	300	0	0	0	0	0	0	0	200	903	0	0	0	0	0	0	0	603	903	0
356	4	0	0	0	0	0	0	200	300	0	0	0	0	0	0	0	200	903	0	0	0	0	0	0	0	603	903	0
356	5	0	0	0	0	0	0	200	300	0	0	0	0	0	0	0	200	903	0	0	0	0	0	0	0	603	903	0
356	6	0	0	0	0	0	0	200	300	0	0	0	0	0	0	0	200	903	0	0	0	0	0	0	0	603	903	0
356	7	0	0	0	0	0	0	200	300	0	0	0	0	0	0	0	200	903	0	0	0	0	0	0	0	603	903	0
356	8	0	0	0	0	0	0	200	300	0	0	0	0	0	0	0	200	903	0	0	0	0	0	0	0	603	903	0
356	9	0	0	0	0	0	0	200	300	0	0	0	0	0	0	0	200	903	0	0	0	0	0	0	0	603	903	0
357	0	0	0	0	0	0	0	200	300	0	0	0	0	0	0	0	200	903	0	0	0	0	0	0	0	603	903	0
357	1	0	0	0	0	0	0	200	300	0	0	0	0	0	0	0	200	903	0	0	0	0	0	0	0	603	903	0
357	2	0	0	0	0	0	0	200	300	0	0	0	0	0	0	0	200	903	0	0	0	0	0	0	0	603	903	0
357	3	0	0	0	0	0	0	200	300	0	0	0	0	0	0	0	200	903	0	0	0	0	0	0	0	603	903	0
357	4	0	0	0	0	0	0	200	300	0	0	0	0	0	0	0	200	903	0	0	0	0	0	0	0	603	903	0
357	5	0	0	0	0	0	0	200	300	0	0	0	0	0	0	0	200	903	0	0	0	0	0	0	0	603	903	0
357	6	0	0	0	0	0	0	200	300	0	0	0	0	0	0	0	200	903	0	0	0	0	0	0	0	603	903	0
357	7	0	0	0	0	0	0	200	300	0	0	0	0	0	0	0	200	903	0	0	0	0	0	0	0	603	903	0
357	8	0	0	0	0	0	0	200	300	0	0	0	0	0	0	0	200	903	0	0	0	0	0	0	0	603	903	0
357	9	0	0	0	0	0	0	200	300	0	0	0	0	0	0	0	200	903	0	0	0	0	0	0	0	603	903	0
358	0	0	0	0	0	0	0	200	300	0	0	0	0	0	0	0	200	903	0	0	0	0	0	0	0	603	903	0
358	1	0	0	0	0	0	0	200	300	0	0	0	0	0	0	0	200	903	0	0	0	0	0	0	0	603	903	0
358	2	0	0	0	0	0	0	200	300	0	0	0	0	0	0	0	200	903	0	0	0	0	0	0	0	603	903	0
358	3	0	0	0	0	0	0	200	300	0	0	0	0	0	0	0	200	903	0	0	0	0	0	0	0	603	903	0
358	4	0	0	0	0	0	0	200	300	0	0	0	0	0	0	0	200	903	0	0	0	0	0	0	0	603	903	0
358	5	0	0	0	0	0	0	200	300	0	0	0	0	0	0	0	200	903	0	0	0	0	0	0	0	603	903	0
358	6	0	0	0	0	0	0	200	300	0	0	0	0	0	0	0	200	903	0	0	0	0	0	0	0	603	903	0
358	7	0	0	0	0	0	0	200	300	0	0	0	0	0	0	0	200	903	0	0	0	0	0	0	0	603	903	0
358	8	0	0	0	0	0	0	200	300	0	0	0	0	0	0	0	200	903	0	0	0	0	0	0	0	603	903	0
358	9	0	0	0	0	0	0	200	300	0	0	0	0	0	0	0	200	903	0	0	0	0	0	0	0	603	903	0
359	0	0	0	0	0	0	0	200	300	0	0	0	0	0	0	0	200	903	0	0	0	0	0	0	0	603	903	0
359	1	0	0	0	0	0	0	200	300	0	0	0	0	0	0	0	200	903	0	0	0	0	0	0	0	603	903	0
359	2	0	0	0	0	0	0	200	300	0	0	0	0	0	0	0	200	903	0	0	0	0	0	0	0	603	903	0
359	3	0	0	0	0	0	0	200	300	0	0	0	0	0	0	0	200	903	0	0	0	0	0	0	0	603	903	0
359	4	0	0	0	0	0	0	200	300	0	0	0	0	0	0	0	200	903	0	0	0	0	0	0	0	603	903	0
359	5	0	0	0	0	0	0	200	300	0	0	0	0	0	0	0	200	903	0	0	0	0	0	0	0	603	903	0
359	6	0	0	0	0	0	0	200	300	0	0	0	0	0	0	0	200	903	0	0	0	0	0	0	0	603	903	0
359	7	0	0	0	0	0	0	200	300	0	0	0	0	0	0	0	200	903	0	0	0	0	0	0	0	603	903	0
359	8	0	0	0	0	0	0	200	300	0	0	0	0	0	0	0	200	903	0	0	0	0	0	0	0	603	903	0
359	9	0	0	0	0	0	0	200	300	0	0	0	0	0	0	0	200	903	0	0	0	0	0	0	0	603	903	0
360	0	0	0	0	0	0	0	200	300	0	0	0	0	0	0	0	200	903	0	0	0	0	0	0	0	603	903	0
360	1	0	0	0	0	0	0	200	300	0	0	0	0	0	0	0	200	903	0	0	0	0	0	0	0	603	903	0
360	2	0	0	0	0	0	0	200	300	0	0	0	0	0	0	0	200	903	0	0	0	0	0	0	0	603	903	0
360	3	0	0	0	0	0	0	200	300	0	0	0	0	0	0	0	200	903	0	0	0	0	0	0	0	603	903	0
360	4	0	0	0	0	0	0	200	300	0	0	0	0	0	0	0	200	903	0	0	0	0	0	0	0	603	903	0
360	5	0	0	0	0	0	0	200	300	0	0	0	0	0	0	0	200	903	0	0	0	0	0	0	0	603	903	0
360	6	0	0	0	0	0	0	200	300	0	0	0	0	0	0	0	200	903	0	0	0	0	0	0	0	603	903	0
360	7	0	0	0	0	0	0	200	300	0	0	0	0	0	0	0	200	903	0	0	0	0	0	0	0	603	903	0
360	8	0	0	0	0	0	0	200	300	0	0	0	0	0	0	0	200	903	0	0	0	0	0	0	0	603	903	0
360	9	0	0	0	0	0	0	200	300	0	0	0	0	0	0	0	200	903	0	0	0	0	0	0	0	603	903	0
361	0	0	0	0	0	0	0	200	300	0	0	0	0	0	0	0	200	903	0	0	0	0	0	0	0	603	903	0
361	1	0	0	0	0	0	0	200	300	0	0	0	0	0	0	0	200	903	0	0	0	0	0	0	0	603	903	0
361	2	0	0	0	0	0	0	200	300	0	0	0	0	0	0	0	200	903	0	0	0	0	0	0	0	603	903	0
361	3	0	0	0	0	0	0	200	300	0	0	0	0	0	0	0	200	903	0	0	0	0	0	0	0	603	903	0
361	4	0	0	0	0	0	0	200	300	0	0	0	0	0	0	0	200	903	0	0	0	0	0	0	0	603	903	0
361	5	0	0	0	0	0	0	200	300	0	0	0	0	0	0	0	200	903	0	0	0	0	0	0	0	603	903	0
361	6	0	0	0	0	0	0	200	300	0	0	0	0	0	0	0	200	903	0	0	0	0	0	0	0	603	903	0
361	7	0	0	0	0	0	0	200	300	0	0	0	0	0	0	0	200	903	0	0	0	0	0	0	0	603	903	0
361	8	0	0	0	0	0	0	200	300	0	0	0	0	0	0	0	200	903	0	0	0	0	0	0	0	603	903	0
361	9	0	0	0	0	0	0	200	300	0	0	0	0	0	0	0	200	903	0	0	0	0	0	0	0	603	903	0
362	0	0	0	0	0	0	0	200	300	0	0	0	0	0	0	0	200	903	0	0	0	0	0	0	0	603	903	0
362	1	0	0	0	0	0	0	200	300	0	0	0	0	0	0	0	200	903	0	0	0	0	0	0	0	603	903	0
362	2	0	0	0	0	0	0	200	300	0	0	0	0	0	0	0	200	903	0	0	0	0	0	0	0	603	903	0
362	3	0	0	0	0	0	0	200	300	0	0	0	0	0	0	0	200	903	0	0	0	0	0	0	0	603	903	0
362	4	0	0	0	0	0	0	200	300	0	0	0	0	0	0	0	200	903	0	0	0	0	0	0	0	603	903	0
362	5	0	0	0	0	0	0	200	300	0	0	0	0	0	0	0	200	903	0	0	0	0	0	0	0	603	903	0
362	6	0	0	0	0	0	0	200	300	0	0	0	0	0	0	0	200	903	0	0	0	0	0	0	0	603	903	0
362	7	0	0	0	0	0	0	200	300	0	0	0	0	0	0	0	200	903	0	0	0	0	0	0	0	603	903	0
362	8	0	0	0	0	0	0	200	300	0	0	0	0	0	0	0	200	903	0	0	0	0	0	0	0	603	903	0
362	9	0	0	0	0	0	0	200	300	0	0	0	0	0	0	0	200	903	0	0	0	0	0	0	0	603	903	0
363	0	0	0	0	0	0	0	200	300	0	0	0	0	0	0	0	200	903	0	0	0	0	0	0	0	603	903	0
363	1	0	0	0	0	0	0	200	300	0	0	0	0	0	0	0	200	903	0	0	0	0	0	0	0	603	903	0
363	2	0	0	0	0	0	0	200	300	0	0	0	0	0	0	0	200	903	0	0	0	0	0	0	0	603	903	0
363	3	0	0	0	0	0	0	200	300	0	0	0	0	0	0	0	200	903	0	0	0	0	0	0	0	603	903	0
363	4	0	0	0	0	0	0	200	300	0	0	0	0	0	0	0	200	903	0	0	0	0	0	0	0	603	903	0
363	5	0	0	0	0	0	0	200	300	0	0	0	0	0	0	0	200	903	0	0	0	0	0	0	0	603	903	0
363	6	0	0	0	0	0	0	200	300	0	0	0	0	0	0	0	200	903	0	0	0	0	0	0	0	603	903	0
363	7	0	0	0	0	0	0	200	300	0	0	0	0	0	0	0	200	903	0	0	0	0	0	0	0	603	903	0
363	8	0	0	0	0	0	0	200	300	0	0	0	0	0	0	0	200	903	0	0	0	0	0	0	0	603	903	0
363	9	0	0	0	0	0	0	200	300	0	0	0	0	0	0	0	200	903	0	0	0	0	0	0	0	603	903	0
364	0	0	0	0	0	0	0	200	300	0	0	0	0	0	0	0	200	903	0	0	0	0	0	0	0	603	903	0
364	1	0	0	0	0	0	0	200	300	0	0	0	0	0	0	0	200	903	0	0	0	0	0	0	0	603	903	0
364	2	0	0	0	0	0	0	200	300	0	0	0	0	0	0	0	200	903	0	0	0	0	0	0	0	603	903	0
364	3	0	0	0	0	0	0	200	300	0	0	0	0	0	0	0	200	903	0	0	0	0	0	0	0	603	903	0
364	4	0	0	0	0	0	0	200	300	0	0	0	0	0	0	0	200	903	0	0	0	0	0	0	0	603	903	0
364	5	0	0	0	0	0	0	200	300	0	0	0	0	0	0	0	200	903	0	0	0	0	0	0	0	603	903	0
364	6	0	0	0	0	0	0	200	300	0	0	0	0	0	0	0	200	903	0	0	0	0	0	0	0	603	903	0
364	7	0	0	0	0	0	0	200	300	0	0	0	0	0	0	0	200	903	0	0	0	0	0	0	0	603	903	0
364	8	0	0	0	0	0	0	200	300	0	0	0	0	0	0	0	200	903	0	0	0	0	0	0	0	603	903	0
364	9	0	0	0	0	0	0	200	300	0	0	0	0	0	0	0	200	903	0	0	0	0	0	0	0	603	903	0
365	0	0	0	0	0	0	0	200	300	0	0	0	0	0	0	0	200	903	0	0	0	0	0	0	0	603	903	0
365	1	0	0	0	0	0	0	200	300	0	0	0	0	0	0	0	200	903	0	0	0	0	0	0	0	603	903	0
365	2	0	0	0	0	0	0	200	300	0	0	0	0	0	0	0	200	903	0	0	0	0	0	0	0	603	903	0
365	3	0	0	0	0	0	0	200	300	0	0	0	0	0	0	0	200	903	0	0	0	0	0	0	0	603	903	0
365	4	0	0	0	0	0	0	200	300	0	0	0	0	0	0	0	200	903	0	0	0	0	0	0	0	603	903	0
365	5	0	0	0	0	0	0	200	300	0	0	0	0	0	0	0	200	903	0	0	0	0	0	0	0	603	903	0
365	6	0	0	0	0	0	0	200	300	0	0	0	0	0	0	0	200	903	0	0	0	0	0	0	0	603	903	0
365	7	0	0	0	0	0	0	200	300	0	0	0	0	0	0	0	200	903	0	0	0	0	0	0	0	603	903	0
365	8	0	0	0	0	0	0	200	300	0	0	0	0	0	0	0	200	903	0	0	0	0	0	0	0	603	903	0
365	9	0	0	0	0	0	0	200	300	0	0	0	0	0	0	0	200	903	0	0	0	0	0	0	0	603	903	0
366	0	0	0	0	0	0	0	200	300	0	0	0	0	0	0	0	200	903	0	0	0	0	0	0	0	603	903	0
366	1	0	0	0	0	0	0	200	300	0	0	0	0	0	0	0	200	903	0	0	0	0	0	0	0	603	903	0
366	2	0	0	0	0	0	0	200	300	0	0	0	0	0	0	0	200	903	0	0	0	0	0	0	0	603	903	0
366	3	0	0	0	0	0	0	200	300	0	0	0	0	0	0	0	200	903	0	0	0	0	0	0	0	603	903	0
366	4	0	0	0	0	0	0	200	300	0	0	0	0	0	0	0	200	903	0	0	0	0	0	0	0	603	903	0
366	5	0	0	0	0	0	0	200	300	0	0	0	0	0	0	0	200	903	0	0	0	0	0	0	0	603	903	0
366	6	0	0	0	0	0	0	200	300	0	0	0	0	0	0	0	200	903	0	0	0	0	0	0	0	603	903	0
366	7	0	0	0	0	0	0	200	300	0	0	0	0	0	0	0	200	903	0	0	0	0	0	0	0	603	903	0
366	8	0	0	0	0	0	0	200	300	0	0	0	0	0	0	0	200	903	0	0	0	0	0	0	0	603	903	0
366	9	0	0	0	0	0	0	200	300	0	0	0	0	0	0	0	200	903	0	0	0	0	0	0	0	603	903	0
367	0	0	0	0	0	0	0	200	300	0	0	0	0	0	0	0	200	903	0	0	0	0	0	0	0	603	903	0
367	1	0	0	0	0	0	0	200	300	0	0	0	0	0	0	0	200	903	0	0	0	0	0	0	0	603	903	0
367	2	0	0	0	0	0	0	200	300	0	0	0	0	0	0	0	200	903	0	0	0	0	0	0	0	603	903	0
367	3	0	0	0	0	0	0	200	300	0	0	0	0	0	0	0	200	903	0	0	0	0	0	0	0	603	903	0
367	4	0	0	0	0	0	0	200	300	0	0	0	0	0	0	0	200	903	0	0	0	0	0	0	0	603	903	0
367	5	0	0	0	0	0	0	200	300	0	0	0	0	0	0	0	200	903	0	0	0	0	0	0	0	603	903	0
367	6	0	0	0	0	0	0	200	300	0	0	0	0	0	0	0	200	903	0	0	0	0	0	0	0	603	903	0
367	7	0	0	0	0	0	0	200	300	0	0	0	0	0	0	0	200	903	0	0	0	0	0	0	0	603	903	0
367	8	0	0	0	0	0	0	200	300	0	0	0	0	0	0	0	200	903	0	0	0	0	0	0	0	603	903	0
367	9	0	0	0	0	0	0	200	300	0	0	0	0	0	0	0	200	903	0	0	0	0	0	0	0	603	903	0
368	0	0	0	0	0	0	0	200	300	0	0	0	0	0	0	0	200	903	0	0	0	0	0	0	0	603	903	0
368	1	0	0	0	0	0	0	200	300	0	0	0	0	0	0	0	200	903	0	0	0	0	0	0	0	603	903	0
368	2	0	0	0	0	0	0	200	300	0	0	0	0	0	0	0	200	903	0	0	0	0	0	0	0	603	903	0
368	3	0	0	0	0	0	0	200	300	0	0	0	0	0	0	0	200	903	0	0	0	0	0	0	0	603	903	0
368	4	0	0	0	0	0	0	200	300	0	0	0	0	0	0	0	200	903	0	0	0	0	0	0	0	603	903	0
368	5	0	0	0	0	0	0	200	300	0	0	0	0	0	0	0	200	903	0	0	0	0	0	0	0	603	903	0
368	6	0	0	0	0	0	0	200	300	0	0	0	0	0	0	0	200	903	0	0	0	0	0	0	0	603	903	0
368	7	0	0	0	0	0	0	200	300	0	0	0	0	0	0	0	200	903	0	0	0	0	0	0	0	603	903	0
368	8	0	0	0	0	0	0	200	300	0	0	0	0	0	0	0	200	903	0	0	0	0	0	0	0	603	903	0
368	9	0	0	0	0	0	0	200	300	0	0	0	0	0	0	0	200	903	0	0	0	0	0	0	0	603	903	0
369	0	0	0	0	0	0	0	200	300	0	0	0	0	0	0	0	200	903	0	0	0	0	0	0	0	603	903	0
369	1	0	0	0	0	0	0	200	300	0	0	0	0	0	0	0	200	903	0	0	0	0	0	0	0	603	903	0
369	2	0	0	0	0	0	0	200	300	0	0	0	0	0	0	0	200	903	0	0	0	0	0	0	0	603	903	0
369	3	0	0	0	0	0	0	200	300	0	0	0	0	0	0	0	200	903	0	0	0	0	0	0	0	603	903	0
369	4	0	0	0	0	0	0	200	300	0	0	0	0	0	0	0	200	903	0	0	0	0	0	0	0	603	903	0
369	5	0	0	0	0	0	0	200	300	0	0	0	0	0	0	0	200	903	0	0	0	0	0	0	0	603	903	0
369	6	0	0	0	0	0	0	200	300	0	0	0	0	0	0	0	200	903	0	0	0	0	0	0	0	603	903	0
369	7	0	0	0	0	0	0	200	300	0	0	0	0	0	0	0	200	903	0	0	0	0	0	0	0	603	903	0
369	8	0	0	0	0	0	0	200	300	0	0	0	0	0	0	0	200	903	0	0	0	0	0	0	0	603	903	0
369	9	0	0	0	0	0	0	200	300	0	0	0	0	0	0	0	200	903	0	0	0	0	0	0	0	603	903	0
370	0	0	0	0	0	0	0	200	300	0	0	0	0	0	0	0	200	903	0	0	0	0	0	0	0	603	903	0
370	1	0	0	0	0	0	0	200	300	0	0	0	0	0	0	0	200	903	0	0	0	0	0	0	0	603	903	0
370	2	0	0	0	0	0	0	200	300	0	0	0	0	0	0	0	200	903	0	0	0	0	0	0	0	603	903	0
370	3	0	0	0	0	0	0	200	300	0	0	0	0	0	0	0	200	903	0	0	0	0	0	0	0	603	903	0
370	4	0	0	0	0	0	0	200	300	0	0	0	0	0	0	0	200	903	0	0	0	0	0	0	0	603	903	0
370	5	0	0	0	0	0	0	200	300	0	0	0	0	0	0	0	200	903	0	0	0	0	0	0	0	603	903	0
370	6	0	0	0	0	0	0	200	300	0	0	0	0	0	0	0	200	903	0	0	0	0	0	0	0	603	903	0
370	7	0	0	0	0	0	0	200	300	0	0	0	0	0	0	0	200	903	0	0	0	0	0	0	0	603	903	0
370	8	0	0	0	0	0	0	200	300	0	0	0	0	0	0	0	200	903	0	0	0	0	0	0	0	603	903	0
370	9	0	0	0	0	0	0	200	300	0	0	0	0	0	0	0	200	903	0	0	0	0	0	0	0	603	903	0
371	0	0	0	0	0	0	0	200	300	0	0	0	0	0	0	0	200	903	0	0	0	0	0	0	0	603	903	0
371	1	0	0	0	0	0	0	200	300	0	0	0	0	0	0	0	200	903	0	0	0	0	0	0	0	603	903	0
371	2	0	0	0	0	0	0	200	300	0	0	0	0	0	0	0	200	903	0	0	0	0	0	0	0	603	903	0
371	3	0	0	0	0	0	0	200	300	0	0	0	0	0	0	0	200	903	0	0	0	0	0	0	0	603	903	0
371	4	0	0	0	0	0	0	200	300	0	0	0	0	0	0	0	200	903	0	0	0	0	0	0	0	603	903	0
371	5	0	0	0	0	0	0	200	300	0	0	0	0	0	0	0	200	903	0	0	0	0	0	0	0	603	903	0
371	6	0	0	0	0	0	0	200	300	0	0	0	0	0	0	0	200	903	0	0	0	0	0	0	0	603	903	0
371	7	0	0	0	0	0	0	200	300	0	0	0	0	0	0	0	200	903	0	0	0	0	0	0	0	603	903	0
371	8	0	0	0	0	0	0	200	300	0	0	0	0	0	0	0	200	903	0	0	0	0	0	0	0	603	903	0
371	9	0	0	0	0	0	0	200	300	0	0	0	0	0	0	0	200	903	0	0	0	0	0	0	0	603	903	0
372	0	0	0	0	0	0	0	200	300	0	0	0	0	0	0	0	200	903	0	0	0	0	0	0	0	603	903	0
372	1	0	0	0	0	0	0	200	300	0	0	0	0	0	0	0	200	903	0	0	0	0	0	0	0	603	903	0
372	2	0	0	0	0	0	0	200	300	0	0	0	0	0	0	0	200	903	0	0	0	0	0	0	0	603	903	0
372	3	0	0	0	0	0	0	200	300	0	0	0	0	0	0	0	200	903	0	0	0	0	0	0	0	603	903	0
372	4	0	0	0	0	0	0	200	300	0	0	0	0	0	0	0	200	903	0	0	0	0	0	0	0	603	903	0
372	5	0	0	0	0	0	0	200	300	0	0	0	0	0	0	0	200	903	0	0	0	0	0	0	0	603	903	0
372	6	0	0	0	0	0	0	200	300	0	0	0	0	0	0	0	200	903	0	0	0	0	0	0	0	603	903	0
372	7	0	0	0	0	0	0	200	300	0	0	0	0	0	0	0	200	903	0	0	0	0	0	0	0	603	903	0
372	8	0	0	0	0	0	0	200	300	0	0	0	0	0	0	0	200	903	0	0	0	0	0	0	0	603	903	0
372	9	0	0	0	0	0	0	200	300	0	0	0	0	0	0	0	200	903	0	0	0	0	0	0	0	603	903	0
373	0	0	0	0	0	0	0	200	300	0	0	0	0	0	0	0	200	903	0	0	0	0	0	0	0	603	903	0
373	1	0	0	0	0	0	0	200	300	0	0	0	0	0	0	0	200	903	0	0	0	0	0	0	0	603	903	0
373	2	0	0	0	0	0	0	200	300	0	0	0	0	0	0	0	200	903	0	0	0	0	0	0	0	603	903	0
373	3	0	0	0	0	0	0	200	300	0	0	0	0	0	0	0	200	903	0	0	0	0	0	0	0	603	903	0
373	4	0	0	0	0	0	0	200	300	0	0	0	0	0	0	0	200	903	0	0	0	0	0	0	0	603	903	0
373	5	0	0	0	0	0	0	200	300	0	0	0	0	0	0	0	200	903	0	0	0	0	0	0	0	603	903	0
373	6	0	0	0	0	0	0	200	300	0	0	0	0	0	0	0	200	903	0	0	0	0	0	0	0	603	903	0
373	7	0	0	0	0	0	0	200	300	0	0	0	0	0	0	0	200	903	0	0	0	0	0	0	0	603	903	0
373	8	0	0	0	0	0	0	200	300	0	0	0	0	0	0	0	200	903	0	0	0	0	0	0	0	603	903	0
373	9	0	0	0	0	0	0	200	300	0	0	0	0	0	0	0	200	903	0	0	0	0	0	0	0	603	903	0
374	0	0	0	0	0	0	0	200	300	0	0	0	0	0	0	0	200	903	0	0	0	0	0	0	0	603	903	0
374	1	0	0	0	0	0	0	200	300	0	0	0	0	0	0	0	200	903	0	0	0	0	0	0	0	603	903	0
374	2	0	0	0	0	0	0	200	300	0	0	0	0	0	0	0	200	903	0	0	0	0	0	0	0	603	903	0
374	3	0	0	0	0	0	0	200	300	0	0	0	0	0	0	0	200	903	0	0	0	0	0	0	0	603	903	0
374	4	0	0	0	0	0	0	200	300	0	0	0	0	0	0	0	200	903	0	0	0	0	0	0	0	603	903	0
374	5	0	0	0	0	0	0	200	300	0	0	0	0	0	0	0	200	903	0	0	0	0	0	0	0	603	903	0
374	6	0	0	0	0	0	0	200	300	0	0	0	0	0	0	0	200	903	0	0	0	0	0	0	0	603	903	0
374	7	0	0	0	0	0	0	200	300	0	0	0	0	0	0	0	200	903	0	0	0	0	0	0	0	603	903	0
374	8	0	0	0	0	0	0	200	300	0	0	0	0	0	0	0	200	903	0	0	0	0	0	0	0	603	903	0
374	9	0	0	0	0	0	0	200	300	0	0	0	0	0	0	0	200	903	0	0	0	0	0	0	0	603	903	0
375	0	0	0	0	0	0	0	200	300	0	0	0	0	0	0	0	200	903	0	0	0	0	0	0	0	603	903	0
375	1	0	0	0	0	0	0	200	300	0	0	0	0	0	0	0	200	903	0	0	0	0	0	0	0	603	903	0
375	2	0	0	0	0	0	0	200	300	0	0	0	0	0	0	0	200	903	0	0	0	0	0	0	0	603	903	0
375	3	0	0	0	0	0	0	200	300	0	0	0	0	0	0	0	200	903	0	0	0	0	0	0	0	603	903	0
375	4	0	0	0	0	0	0	200	300	0	0	0	0	0	0	0	200	903	0	0	0	0	0	0	0	603	903	0
375	5	0	0	0	0	0	0	200	300	0	0	0	0	0	0	0	200	903	0	0	0	0	0	0	0	603	903	0
375	6	0	0	0	0	0	0	200	300	0	0	0	0	0	0	0	200	903	0	0	0	0	0	0	0	603	903	0
375	7	0	0	0	0	0	0	200	300	0	0	0	0	0	0	0	200	903	0	0	0	0	0	0	0	603	903	0
375	8	0	0	0	0	0	0	200	300	0	0	0	0	0	0	0	200	903	0	0	0	0	0	0	0	603	903	0
375	9	0	0	0	0	0	0	200	300	0	0	0	0	0	0	0	200	903	0	0	0	0	0	0	0	603	903	0
376	0	0	0	0	0	0	0	200	300	0	0	0	0	0	0	0	200	903	0	0	0	0	0	0	0	603	903	0
376	1	0	0	0	0	0	0	200	300	0	0	0	0	0	0	0	200	903	0	0	0	0	0	0	0	603	903	0
376	2	0	0	0	0	0	0	200	300	0	0	0	0	0	0	0	200	903	0	0	0	0	0	0	0	603	903	0
376	3	0	0	0	0	0	0	200	300	0	0	0	0	0	0	0	200	903	0	0	0	0	0	0	0	603	903	0
376	4	0	0	0	0	0	0	200	300	0	0	0	0	0	0	0	200	903	0	0	0	0	0	0	0	603	903	0
376	5	0	0	0	0	0	0	200	300	0	0	0	0	0	0	0	200	903	0	0	0	0	0	0	0	603	903	0
376	6	0	0	0	0	0	0	200	300	0	0	0	0	0	0	0	200	903	0	0	0	0	0	0	0	603	903	0
376	7	0	0	0	0	0	0	200	300	0	0	0	0	0	0	0	200	903	0	0	0	0	0	0	0	603	903	0
376	8	0	0	0	0	0	0	200	300	0	0	0	0	0	0	0	200	903	0	0	0	0	0	0	0	603	903	0
376	9	0	0	0	0	0	0	200	300	0	0	0	0	0	0	0	200	903	0	0	0	0	0	0	0	603	903	0
377	0	0	0	0	0	0	0	200	300	0	0	0	0	0	0	0	200	903	0	0	0	0	0	0	0	603	903	0
377	1	0	0	0	0	0	0	200	300	0	0	0	0	0	0	0	200	903	0	0	0	0	0	0	0	603	903	0
377	2	0	0	0	0	0	0	200	300	0	0	0	0	0	0	0	200	903	0	0	0	0	0	0	0	603	903	0
377	3	0	0	0	0	0	0	200	300	0	0	0	0	0	0	0	200	903	0	0	0	0	0	0	0	603	903	0
377	4	0	0	0	0	0	0	200	300	0	0	0	0	0	0	0	200	903	0	0	0	0	0	0	0	603	903	0
377	5	0	0	0	0	0	0	200	300	0	0	0	0	0	0	0	200	903	0	0	0	0	0	0	0	603	903	0
377	6	0	0	0	0	0	0	200	300	0	0	0	0	0	0	0	200	903	0	0	0	0	0	0	0	603	903	0
377	7	0	0	0	0	0	0	200	300	0	0	0	0	0	0	0	200	903	0	0	0	0	0	0	0	603	903	0
377	8	0	0	0	0	0	0	200	300	0	0	0	0	0	0	0	200	903	0	0	0	0	0	0	0	603	903	0
377	9	0	0	0	0	0	0	200	300	0	0	0	0	0	0	0	200	903	0	0	0	0	0	0	0	603	903	0
378	0	0	0	0	0	0	0	200	300	0	0	0	0	0	0	0	200	903	0	0	0	0	0	0	0	603	903	0
378	1	0	0	0	0	0	0	200	300	0	0	0	0	0	0	0	200	903	0	0	0	0	0	0	0	603	903	0
378	2	0	0	0	0	0	0	200	300	0	0	0	0	0	0	0	200	903	0	0	0	0	0	0	0	603	903	0
378	3	0	0	0	0	0	0	200	300	0	0	0	0	0	0	0	200	903	0	0	0	0	0	0	0	603	903	0
378	4	0	0	0	0	0	0	200	300	0	0	0	0	0	0	0	200	903	0	0	0	0	0	0	0	603	903	0
378	5	0	0	0	0	0	0	200	300	0	0	0	0	0	0	0	200	903	0	0	0	0	0	0	0	603	903	0
378	6	0	0	0	0	0	0	200	300	0	0	0	0	0	0	0	200	903	0	0	0	0	0	0	0	603	903	0
378	7	0	0	0	0	0	0	200	300	0	0	0	0	0	0	0	200	903	0	0	0	0	0	0	0	603	903	0
378	8	0	0	0	0	0	0	200	300	0	0	0	0	0	0	0	200	903	0	0	0	0	0	0	0	603	903	0
378	9	0	0	0	0	0	0	200	300	0	0	0	0	0	0	0	200	903	0	0	0	0	0	0	0	603	903	0
379	0	0	0	0	0	0	0	200	300	0	0	0	0	0	0	0	200	903	0	0	0	0	0	0	0	603	903	0
379	1	0	0	0	0	0	0	200	300	0	0	0	0	0	0	0	200	903	0	0	0	0	0	0	0	603	903	0
379	2	0	0	0	0	0	0	200	300	0	0	0	0	0	0	0	200	903	0	0	0	0	0	0	0	603	903	0
379	3	0	0	0	0	0	0	200	300	0	0	0	0	0	0	0	200	903	0	0	0	0	0	0	0	603	903	0
379	4	0	0	0	0	0	0	200	300	0	0	0	0	0	0	0	200	903	0	0	0	0	0	0	0	603	903	0
379	5	0	0	0	0	0	0	200	300	0	0	0	0	0	0	0	200	903	0	0	0	0	0	0	0	603	903	0
379	6	0	0	0	0	0	0	200	300	0	0	0	0	0	0	0	200	903	0	0	0	0	0	0	0	603	903	0
379	7	0	0	0	0	0	0	200	300	0	0	0	0	0	0	0	200	903	0	0	0	0	0	0	0	603	903	0
379	8	0	0	0	0	0	0	200	300	0	0	0	0	0	0	0	200	903	0	0	0	0	0	0	0	603	903	0
379	9	0	0	0	0	0	0	200	300	0	0	0	0	0	0	0	200	903	0	0	0	0	0	0	0	603	903	0
380	0	0	0	0	0	0	0	200	300	0	0	0	0	0	0	0	200	903	0	0	0	0	0	0	0	603	903	0
380	1	0	0	0	0	0	0	200	300	0	0	0	0	0	0	0	200	903	0	0	0	0	0	0	0	603	903	0
380	2	0	0	0	0	0	0	200	300	0	0	0	0	0	0	0	200	903	0	0	0	0	0	0	0	603	903	0
380	3	0	0	0	0	0	0	200	300	0	0	0	0	0	0	0	200	903	0	0	0	0	0	0	0	603	903	0
380	4	0	0	0	0	0	0	200	300	0	0	0	0	0	0	0	200	903	0	0	0	0	0	0	0	603	903	0
380	5	0	0	0	0	0	0	200	300	0	0	0	0	0	0	0	200	903	0	0	0	0	0	0	0	603	903	0
380	6	0	0	0	0	0	0	200	300	0	0	0	0	0	0	0	200	903	0	0	0	0	0	0	0	603	903	0
380	7	0	0	0	0	0	0	200	300	0	0	0	0	0	0	0	200	903	0	0	0	0	0	0	0	603	903	0
380	8	0	0	0	0	0	0	200	300	0	0	0	0	0	0	0	200	903	0	0	0	0	0	0	0	603	903	0
380	9	0	0	0	0	0	0	200	300	0	0	0	0	0	0	0	200	903	0	0	0	0	0	0	0	603	903	0
381	0	0	0	0	0	0	0	200	300	0	0	0	0	0	0	0	200	903	0	0	0	0	0	0	0	603	903	0
381	1	0	0	0	0	0	0	200	300	0	0	0	0	0	0	0	200	903	0	0	0	0	0	0	0	603	903	0
381	2	0	0	0	0	0	0	200	300	0	0	0	0	0	0	0	200	903	0	0	0	0	0	0	0	603	903	0
381	3	0	0	0	0	0	0	200	300	0	0	0	0	0	0	0	200	903	0	0	0	0	0	0	0	603	903	0
381	4	0	0	0	0	0	0	200	300	0	0	0	0	0	0	0	200	903	0	0	0	0	0	0	0	603	903	0
381	5	0	0	0	0	0	0	200	300	0	0	0	0	0	0	0	200	903	0	0	0	0	0	0	0	603	903	0
381	6	0	0	0	0	0	0	200	300	0	0	0	0	0	0	0	200	903	0	0	0	0	0	0	0	603	903	0
381	7	0	0	0	0	0	0	200	300	0	0	0	0	0	0	0	200	903	0	0	0	0	0	0	0	603	903	0
381	8	0	0	0	0	0	0	200	300	0	0	0	0	0	0	0	200	903	0	0	0	0	0	0	0	603	903	0
381	9	0	0	0	0	0	0	200	300	0	0	0	0	0	0	0	200	903	0	0	0	0	0	0	0	603	903	0
382	0	0	0	0	0	0	0	200	300	0	0	0	0	0	0	0	200	903	0	0	0	0	0	0	0	603	903	0
382	1	0	0	0	0	0	0	200	300	0	0	0	0	0	0	0	200	903	0	0	0	0	0	0	0	603	903	0
382	2	0	0	0	0	0	0	200	300	0	0	0	0	0	0	0	200	903	0	0	0	0	0	0	0	603	903	0
382	3	0	0	0	0	0	0	200	300	0	0	0	0	0	0	0	200	903	0	0	0	0	0	0	0	603	903	0
382	4	0	0	0	0	0	0	200	300	0	0	0	0	0	0	0	200	903	0	0	0	0	0	0	0	603	903	0
382	5	0	0	0	0	0	0	200	300	0	0	0	0	0	0	0	200	903	0	0	0	0	0	0	0	603	903	0
382	6	0	0	0	0	0	0	200	300	0	0	0	0	0	0	0	200	903	0	0	0	0	0	0	0	603	903	0
382	7	0	0	0	0	0	0	200	300	0	0	0	0	0	0	0	200	903	0	0	0	0	0	0	0	603	903	0
382	8	0	0	0	0	0	0	200	300	0	0	0	0	0	0	0	200	903	0	0	0	0	0	0	0	603	903	0
382	9	0	0	0	0	0	0	200	300	0	0	0	0	0	0	0	200	903	0	0	0	0	0	0	0	603	903	0
383	0	0	0	0	0	0	0	200	300	0	0	0	0	0	0	0	200	903	0	0	0	0	0	0	0	603	903	0
383	1	0	0	0	0	0	0	200	300	0	0	0	0	0	0	0	200	903	0	0	0	0	0	0	0	603	903	0
383	2	0	0	0	0	0	0	200	300	0	0	0	0	0	0	0	200	903	0	0	0	0	0	0	0	603	903	0
383	3	0	0	0	0	0	0	200	300	0	0	0	0	0	0	0	200	903	0	0	0	0	0	0	0	603	903	0
383	4	0	0	0	0	0	0	200	300	0	0	0	0	0	0	0	200	903	0	0	0	0	0	0	0	603	903	0
383	5	0	0	0	0	0	0	200	300	0	0	0	0	0	0	0	200	903	0	0	0	0	0	0	0	603	903	0
383	6	0	0	0	0	0	0	200	300	0	0	0	0	0	0	0	200	903	0	0	0	0	0	0	0	603	903	0
383	7	0	0	0	0	0	0	200	300	0	0	0	0	0	0	0	200	903	0	0	0	0	0	0	0	603	903	0
383	8	0	0	0	0	0	0	200	300	0	0	0	0	0	0	0	200	903	0	0	0	0	0	0	0	603	903	0
383	9	0	0	0	0	0	0	200	300	0	0	0	0	0	0	0	200	903	0	0	0	0	0	0	0	603	903	0
384	0	0	0	0	0	0	0	200	300	0	0	0	0	0	0	0	200	903	0	0	0	0	0	0	0	603	903	0
384	1	0	0	0	0	0	0	200	300	0	0	0	0	0	0	0	200	903	0	0	0	0	0	0	0	603	903	0
384	2	0	0	0	0	0	0	200	300	0	0	0	0	0	0	0	200	903	0	0	0	0	0	0	0	603	903	0
384	3	0	0	0	0	0	0	200	300	0	0	0	0	0	0	0	200	903	0	0	0	0	0	0	0	603	903	0
384	4	0	0	0	0	0	0	200	300	0	0	0	0	0	0	0	200	903	0	0	0	0	0	0	0	603	903	0
384	5	0	0	0	0	0	0	200	300	0	0	0	0	0	0	0	200	903	0	0	0	0	0	0	0	603	903	0
384	6	0	0	0	0	0	0	200	300	0	0	0	0	0	0	0	200	903	0	0	0	0	0	0	0	603	903	0
384	7	0	0	0	0	0	0	200	300	0	0	0	0	0	0	0	200	903	0	0	0	0	0	0	0	603	903	0
384	8	0	0	0	0	0	0	200	300	0	0	0	0	0	0	0	200	903	0	0	0	0	0	0	0	603	903	0
384	9	0	0	0	0	0	0	200	300	0	0	0	0	0	0	0	200	903	0	0	0	0	0	0	0	603	903	0
385	0	0	0	0	0	0	0	200	300	0	0	0	0	0	0	0	200	903	0	0	0	0	0	0	0	603	903	0
385	1	0	0	0	0	0	0	200	300	0	0	0	0	0	0	0	200	903	0	0	0	0	0	0	0	603	903	0
385	2	0	0	0	0	0	0	200	300	0	0	0	0	0	0	0	200	903	0	0	0	0	0	0	0	603	903	0
385	3	0	0	0	0	0	0	200	300	0	0	0	0	0	0	0	200	903	0	0	0	0	0	0	0	603	903	0
385	4	0	0	0	0	0	0	200	300	0	0	0	0	0	0	0	200	903	0	0	0	0	0	0	0	603	903	0
385	5	0	0	0	0	0	0	200	300	0	0	0	0	0	0	0	200	903	0	0	0	0	0	0	0	603	903	0
385	6	0	0	0	0	0	0	200	300	0	0	0	0	0	0	0	200	903	0	0	0	0	0	0	0	603	903	0
385	7	0	0	0	0	0	0	200	300	0	0	0	0	0	0	0	200	903	0	0	0	0	0	0	0	603	903	0
385	8	0	0	0	0	0	0	200	300	0	0	0	0	0	0	0	200	903	0	0	0	0	0	0	0	603	903	0
385	9	0	0	0	0	0	0	200	300	0	0	0	0	0	0	0	200	903	0	0	0	0	0	0	0	603	903	0
386	0	0	0	0	0	0	0	200	300	0	0	0	0	0	0	0	200	903	0	0	0	0	0	0	0	603	903	0
386	1	0	0	0	0	0	0	200	300	0	0	0	0	0	0	0	200	903	0	0	0	0	0	0	0	603	903	0
386	2	0	0	0	0	0	0	200	300	0	0	0	0	0	0	0	200	903	0	0	0	0	0	0	0	603	903	0
386	3	0	0	0	0	0	0	200	300	0	0	0	0	0	0	0	200	903	0	0	0	0	0	0	0	603	903	0
386	4	0	0	0	0	0	0	200	300	0	0	0	0	0	0	0	200	903	0	0	0	0	0	0	0	603	903	0
386	5	0	0	0	0	0	0	200	300	0	0	0	0	0	0	0	200	903	0	0	0	0	0	0	0	603	903	0
386	6	0	0	0	0	0	0	200	300	0	0	0	0	0	0	0	200	903	0	0	0	0	0	0	0	603	903	0
386	7	0	0	0	0	0	0	200	300	0	0	0	0	0	0	0	200	903	0	0	0	0	0	0	0	603	903	0
386	8	0	0	0	0	0	0	200	300	0	0	0	0	0	0	0	200	903	0	0	0	0	0	0	0	603	903	0
386	9	0	0	0	0	0	0	200	300	0	0	0	0	0	0	0	200	903	0	0	0	0	0	0	0	603	903	0
387	0	0	0	0	0	0	0	200	300	0	0	0	0	0	0	0	200	903	0	0	0	0	0	0	0	603	903	0
387	1	0	0	0	0	0	0	200	300	0	0	0	0	0	0	0	200	903	0	0	0	0	0	0	0	603	903	0
387	2	0	0	0	0	0	0	200	300	0	0	0	0	0	0	0	200	903	0	0	0	0	0	0	0	603	903	0
387	3	0	0	0	0	0	0	200	300	0	0	0	0	0	0	0	200	903	0	0	0	0	0	0	0	603	903	0
387	4	0	0	0	0	0	0	200	300	0	0	0	0	0	0	0	200	903	0	0	0	0	0	0	0	603	903	0
387	5	0	0	0	0	0	0	200	300	0	0	0	0	0	0	0	200	903	0	0	0	0	0	0	0	603	903	0
387	6	0	0	0	0	0	0	200	300	0	0	0	0	0	0	0	200	903	0	0	0	0	0	0	0	603	903	0
387	7	0	0	0	0	0	0	200	300	0	0	0	0	0	0	0	200	903	0	0	0	0	0	0	0	603	903	0
387	8	0	0	0	0	0	0	200	300	0	0	0	0	0	0	0	200	903	0	0	0	0	0	0	0	603	903	0
387	9	0	0	0	0	0	0	200	300	0	0	0	0	0	0	0	200	903	0	0	0	0	0	0	0	603	903	0
388	0	0	0	0	0	0	0	200	300	0	0	0	0	0	0	0	200	903	0	0	0	0	0	0	0	603	903	0
388	1	0	0	0	0	0	0	200	300	0	0	0	0	0	0	0	200	903	0	0	0	0	0	0	0	603	903	0
388	2	0	0	0	0	0	0	200	300	0	0	0	0	0	0	0	200	903	0	0	0	0	0	0	0	603	903	0
388	3	0	0	0	0	0	0	200	300	0	0	0	0	0	0	0	200	903	0	0	0	0	0	0	0	603	903	0
388	4	0	0	0	0	0	0	200	300	0	0	0	0	0	0	0	200	903	0	0	0	0	0	0	0	603	903	0
388	5	0	0	0	0	0	0	200	300	0	0	0	0	0	0	0	200	903	0	0	0	0	0	0	0	603	903	0
388	6	0	0	0	0	0	0	200	300	0	0	0	0	0	0	0	200	903	0	0	0	0	0	0	0	603	903	0
388	7	0	0	0	0	0	0	200	300	0	0	0	0	0	0	0	200	903	0	0	0	0	0	0	0	603	903	0
388	8	0	0	0	0	0	0	200	300	0	0	0	0	0	0	0	200	903	0	0	0	0	0	0	0	603	903	0
388	9	0	0	0	0	0	0	200	300	0	0	0	0	0	0	0	200	903	0	0	0	0	0	0	0	603	903	0
389	0	0	0	0	0	0	0	200	300	0	0	0	0	0	0	0	200	903	0	0	0	0	0	0	0	603	903	0
389	1	0	0	0	0	0	0	200	300	0	0	0	0	0	0	0	200	903	0	0	0	0	0	0	0	603	903	0
389	2	0	0	0	0	0	0	200	300	0	0	0	0	0	0	0	200	903	0	0	0	0	0	0	0	603	903	0
389	3	0	0	0	0	0	0	200	300	0	0	0	0	0	0	0	200	903	0	0	0	0	0	0	0	603	903	0
389	4	0	0	0	0	0	0	200	300	0	0	0	0	0	0	0	200	903	0	0	0	0	0	0	0	603	903	0
389	5	0	0	0	0	0	0	200	300	0	0	0	0	0	0	0	200	903	0	0	0	0	0	0	0	603	903	0
389	6	0	0	0	0	0	0	200	300	0	0	0	0	0	0	0	200	903	0	0	0	0	0	0	0	603	903	0
389	7	0	0	0	0	0	0	200	300	0	0	0	0	0	0	0	200	903	0	0	0	0	0	0	0	603	903	0
389	8	0	0	0	0	0	0	200	300	0	0	0	0	0	0	0	200	903	0	0	0	0	0	0	0	603	903	0
389	9	0	0	0	0	0	0	200	300	0	0	0	0	0	0	0	200	903	0	0	0	0	0	0	0	603	903	0
390	0	0	0	0	0	0	0	200	300	0	0	0	0	0	0	0	200	903	0	0	0	0	0	0	0	603	903	0
390	1	0	0	0	0	0	0	200	300	0	0	0	0	0	0	0	200	903	0	0	0	0	0	0	0	603	903	0
390	2	0	0	0	0	0	0	200	300	0	0	0	0	0	0	0	200	903	0	0	0	0	0	0	0	603	903	0
390	3	0	0	0	0	0	0	200	300	0	0	0	0	0	0	0	200	903	0	0	0	0	0	0	0	603	903	0
390	4	0	0	0	0	0	0	200	300	0	0	0	0	0	0	0	200	903	0	0	0	0	0	0	0	603	903	0
390	5	0	0	0	0	0	0	200	300	0	0	0	0	0	0	0	200	903	0	0	0	0	0	0	0	603	903	0
390	6	0	0	0	0	0	0	200	300	0	0	0	0	0	0	0	200	903	0	0	0	0	0	0	0	603	903	0
390	7	0	0	0	0	0	0	200	300	0	0	0	0	0	0	0	200	903	0	0	0	0	0	0	0	603	903	0
390	8	0	0	0	0	0	0	200	300	0	0	0	0	0	0	0	200	903	0	0	0	0	0	0	0	603	903	0
390	9	0	0	0	0	0	0	200	300	0	0	0	0	0	0	0	200	903	0	0	0	0	0	0	0	603	903	0
391	0	0	0	0	0	0	0	200	300	0	0	0	0	0	0	0	200	903	0	0	0	0	0	0	0	603	903	0
391	1	0	0	0	0	0	0	200	300	0	0	0	0	0	0	0	200	903	0	0	0	0	0	0	0	603	903	0
391	2	0	0	0	0	0	0	200	300	0	0	0	0	0	0	0	200	903	0	0	0	0	0	0	0	603	903	0
391	3	0	0	0	0	0	0	200	300	0	0	0	0	0	0	0	200	903	0	0	0	0	0	0	0	603	903	0
391	4	0	0	0	0	0	0	200	300	0	0	0	0	0	0	0	200	903	0	0	0	0	0	0	0	603	903	0
391	5	0	0	0	0	0	0	200	300	0	0	0	0	0	0	0	200	903	0	0	0	0	0	0	0	603	903	0
391	6	0	0	0	0	0	0	200	300	0	0	0	0	0	0	0	200	903	0	0	0	0	0	0	0	603	903	0
391	7	0	0	0	0	0	0	200	300	0	0	0	0	0	0	0	200	903	0	0	0	0	0	0	0	603	903	0
391	8	0	0	0	0	0	0	200	300	0	0	0	0	0	0	0	200	903	0	0	0	0	0	0	0	603	903	0
391	9	0	0	0	0	0	0	200	300	0	0	0	0	0	0	0	200	903	0	0	0	0	0	0	0	603	903	0
392	0	0	0	0	0	0	0	200	300	0	0	0	0	0	0	0	200	903	0	0	0	0	0	0	0	603	903	0
392	1	0	0	0	0	0	0	200	300	0	0	0	0	0	0	0	200	903	0	0	0	0	0	0	0	603	903	0
392	2	0	0	0	0	0	0	200	300	0	0	0	0	0	0	0	200	903	0	0	0	0	0	0	0	603	903	0
392	3	0	0	0	0	0	0	200	300	0	0	0	0	0	0	0	200	903	0	0	0	0	0	0	0	603	903	0
392	4	0	0	0	0	0	0	200	300	0	0	0	0	0	0	0	200	903	0	0	0	0	0	0	0	603	903	0
392	5	0	0	0	0	0	0	200	300	0	0	0	0	0	0	0	200	903	0	0	0	0	0	0	0	603	903	0
392	6	0	0	0	0	0	0	200	300	0	0	0	0	0	0	0	200	903	0	0	0	0	0	0	0	603	903	0
392	7	0	0	0	0	0	0	200	300	0	0	0	0	0	0	0	200	903	0	0	0	0	0	0	0	603	903	0
392	8	0	0	0	0	0	0	200	300	0	0	0	0	0	0	0	200	903	0	0	0	0	0	0	0	603	903	0
392	9	0	0	0	0	0	0	200	300	0	0	0	0	0	0	0	200	903	0	0	0	0	0	0	0	603	903	0
393	0	0	0	0	0	0	0	200	300	0	0	0	0	0	0	0	200	903	0	0	0	0	0	0	0	603	903	0
393	1	0	0	0	0	0	0	200	300	0	0	0	0	0	0	0	200	903	0	0	0	0	0	0	0	603	903	0
393	2	0	0	0	0	0	0	200	300	0	0	0	0	0	0	0	200	903	0	0	0	0	0	0	0	603	903	0
393	3	0	0	0	0	0	0	200	300	0	0	0	0	0	0	0	200	903	0	0	0	0	0	0	0	603	903	0
393	4	0	0	0	0	0	0	200	300	0	0	0	0	0	0	0	200	903	0	0	0	0	0	0	0	603	903	0
393	5	0	0	0	0	0	0	200	300	0	0	0	0	0	0	0	200	903	0	0	0	0	0	0	0	603	903	0
393	6	0	0	0	0	0	0	200	300	0	0	0	0	0	0	0	200	903	0	0	0	0	0	0	0	603	903	0
393	7	0	0	0	0	0	0	200	300	0	0	0	0	0	0	0	200	903	0	0	0	0	0	0	0	603	903	0
393	8	0	0	0	0	0	0	200	300	0	0	0	0	0	0	0	200	903	0	0	0	0	0	0	0	603	903	0
393	9	0	0	0	0	0	0	200	300	0	0	0	0	0	0	0	200	903	0	0	0	0	0	0	0	603	903	0
394	0	0	0	0	0	0	0	200	300	0	0	0	0	0	0	0	200	903	0	0	0	0	0	0	0	603	903	0
394	1	0	0	0	0	0	0	200	300	0	0	0	0	0	0	0	200	903	0	0	0	0	0	0	0	603	903	0
394	2	0	0	0	0	0	0	200	300	0	0	0	0	0	0	0	200	903	0	0	0	0	0	0	0	603	903	0
394	3	0	0	0	0	0	0	200	300	0	0	0	0	0	0	0	200	903	0	0	0	0	0	0	0	603	903	0
394	4	0	0	0	0	0	0	200	300	0	0	0	0	0	0	0	200	903	0	0	0	0	0	0	0	603	903	0
394	5	0	0	0	0	0	0	200	300	0	0	0	0	0	0	0	200	903	0	0	0	0	0	0	0	603	903	0
394	6	0	0	0	0	0	0	200	300	0	0	0	0	0	0	0	200	903	0	0	0	0	0	0	0	603	903	0
394	7	0	0	0	0	0	0	200	300	0	0	0	0	0	0	0	200	903	0	0	0	0	0	0	0	603	903	0
394	8	0	0	0	0	0	0	200	300	0	0	0	0	0	0	0	200	903	0	0	0	0	0	0	0	603	903	0
394	9	0	0	0	0	0	0	200	300	0	0	0	0	0	0	0	200	903	0	0	0	0	0	0	0	603	903	0
395	0	0	0	0	0	0	0	200	300	0	0	0	0	0	0	0	200	903	0	0	0	0	0	0	0	603	903	0
395	1	0	0	0	0	0	0	200	300	0	0	0	0	0	0	0	200	903	0	0	0	0	0	0	0	603	903	0
395	2	0	0	0	0	0	0	200	300	0	0	0	0	0	0	0	200	903	0	0	0	0	0	0	0	603	903	0
395	3	0	0	0	0	0	0	200	300	0	0	0	0	0	0	0	200	903	0	0	0	0	0	0	0	603	903	0
395	4	0	0	0	0	0	0	200	300	0	0	0	0	0	0	0	200	903	0	0	0	0	0	0	0	603	903	0
395	5	0	0	0	0	0	0	200	300	0	0	0	0	0	0	0	200	903	0	0	0	0	0	0	0	603	903	0
395	6	0	0	0	0	0	0	200	300	0	0	0	0	0	0	0	200	903	0	0	0	0	0	0	0	603	903	0
395	7	0	0	0	0	0	0	200	300	0	0	0	0	0	0	0	200	903	0	0	0	0	0	0	0	603	903	0
395	8	0	0	0	0	0	0	200	300	0	0	0	0	0	0	0	200	903	0	0	0	0	0	0	0	603	903	0
395	9	0	0	0	0	0	0	200	300	0	0	0	0	0	0	0	200	903	0	0	0	0	0	0	0	603	903	0
396	0	0	0	0	0	0	0	200	300	0	0	0	0	0	0	0	200	903	0	0	0	0	0	0	0	603	903	0
396	1	0	0	0	0	0	0	200	300	0	0	0	0	0	0	0	200	903	0	0	0	0	0	0	0	603	903	0
396	2	0	0	0	0	0	0	200	300	0	0	0	0	0	0	0	200	903	0	0	0	0	0	0	0	603	903	0
396	3	0	0	0	0	0	0	200	300	0	0	0	0	0	0	0	200	903	0	0	0	0	0	0	0	603	903	0
396	4	0	0	0	0	0	0	200	300	0	0	0	0	0	0	0	200	903	0	0	0	0	0	0	0	603	903	0
396	5	0	0	0	0	0	0	200	300	0	0	0	0	0	0	0	200	903	0	0	0	0	0	0	0	603	903	0
396	6	0	0	0	0	0	0	200	300	0	0	0	0	0	0	0	200	903	0	0	0	0	0	0	0	603	903	0
396	7	0	0	0	0	0	0	200	300	0	0	0	0	0	0	0	200	903	0	0	0	0	0	0	0	603	903	0
396	8	0	0	0	0	0	0	200	300	0	0	0	0	0	0	0	200	903	0	0	0	0	0	0	0	603	903	0
396	9	0	0	0	0	0	0	200	300	0	0	0	0	0	0	0	200	903	0	0	0	0	0	0	0	603	903	0
397	0	0	0	0	0	0	0	200	300	0	0	0	0	0	0	0	200	903	0	0	0	0	0	0	0	603	903	0
397	1	0	0	0	0	0	0	200	300	0	0	0	0	0	0	0	200	903	0	0	0	0	0	0	0	603	903	0
397	2	0	0	0	0	0	0	200	300	0	0	0	0	0	0	0	200	903	0	0	0	0	0	0	0	603	903	0
397	3	0	0	0	0	0	0	200	300	0	0	0	0	0	0	0	200	903	0	0	0	0	0	0	0	603	903	0
397	4	0	0	0	0	0	0	200	300	0	0	0	0	0	0	0	200	903	0	0	0	0	0	0	0	603	903	0
397	5	0	0	0	0	0	0	200	300	0	0	0	0	0	0	0	200	903	0	0	0	0	0	0	0	603	903	0
397	6	0	0	0	0	0	0	200	300	0	0	0	0	0	0	0	200	903	0	0	0	0	0	0	0	603	903	0
397	7	0	0	0	0	0	0	200	300	0	0	0	0	0	0	0	200	903	0	0	0	0	0	0	0	603	903	0
397	8	0	0	0	0	0	0	200	300	0	0	0	0	0	0	0	200	903	0	0	0	0	0	0	0	603	903	0
397	9	0	0	0	0	0	0	200	300	0	0	0	0	0	0	0	200	903	0	0	0	0	0	0	0	603	903	0
398	0	0	0	0	0	0	0	200	300	0	0	0	0	0	0	0	200	903	0	0	0	0	0	0	0	603	903	0
398	1	0	0	0	0	0	0	200	300	0	0	0	0	0	0	0	200	903	0	0	0	0	0	0	0	603	903	0
398	2	0	0	0	0	0	0	200	300	0	0	0	0	0	0	0	200	903	0	0	0	0	0	0	0	603	903	0
398	3	0	0	0	0	0	0	200	300	0	0	0	0	0	0	0	200	903	0	0	0	0	0	0	0	603	903	0
398	4	0	0	0	0	0	0	200	300	0	0	0	0	0	0	0	200	903	0	0	0	0	0	0	0	603	903	0
398	5	0	0	0	0	0	0	200	300	0	0	0	0	0	0	0	200	903	0	0	0	0	0	0	0	603	903	0
398	6	0	0	0	0	0	0	200	300	0	0	0	0	0	0	0	200	903	0	0	0	0	0	0	0	603	903	0
398	7	0	0	0	0	0	0	200	300	0	0	0	0	0	0	0	200	903	0	0	0	0	0	0	0	603	903	0
398	8	0	0	0	0	0	0	200	300	0	0	0	0	0	0	0	200	903	0	0	0	0	0	0	0	603	903	0
398	9	0	0	0	0	0	0	200	300	0	0	0	0	0	0	0	200	903	0	0	0	0	0	0	0	603	903	0
399	0	0	0	0	0	0	0	200	300	0	0	0	0	0	0	0	200	903	0	0	0	0	0	0	0	603	903	0
399	1	0	0	0	0	0	0	200	300	0	0	0	0	0	0	0	200	903	0	0	0	0	0	0	0	603	903	0
399	2	0	0	0	0	0	0	200	300	0	0	0	0	0	0	0	200	903	0	0	0	0	0	0	0	603	903	0
399	3	0	0	0	0	0	0	200	300	0	0	0	0	0	0	0	200	903	0	0	0	0	0	0	0	603	903	0
399	4	0	0	0	0	0	0	200	300	0	0	0	0	0	0	0	200	903	0	0	0	0	0	0	0	603	903	0
399	5	0	0	0	0	0	0	200	300	0	0	0	0	0	0	0	200	903	0	0	0	0	0	0	0	603	903	0
399	6	0	0	0	0	0	0	200	300	0	0	0	0	0	0	0	200	903	0	0	0	0	0	0	0	603	903	0
399	7	0	0	0	0	0	0	200	300	0	0	0	0	0	0	0	200	903	0	0	0	0	0	0	0	603	903	0
399	8	0	0	0	0	0	0	200	300	0	0	0	0	0	0	0	200	903	0	0	0	0	0	0	0	603	903	0
399	9	0	0	0	0	0	0	200	300	0	0	0	0	0	0	0	200	903	0	0	0	0	0	0	0	603	903	0
400	0	0	0	0	0	0	0	200	300	0	0	0	0	0	0	0	200	903	0	0	0	0	0	0	0	603	903	0
400	1	0	0	0	0	0	0	200	300	0	0	0	0	0	0	0	200	903	0	0	0	0	0	0	0	603	903	0
400	2	0	0	0	0	0	0	200	300	0	0	0	0	0	0	0	200	903	0	0	0	0	0	0	0	603	903	0
400	3	0	0	0	0	0	0	200	300	0	0	0	0	0	0	0	200	903	0	0	0	0	0	0	0	603	903	0
400	4	0	0	0	0	0	0	200	300	0	0	0	0	0	0	0	200	903	0	0	0	0	0	0	0	603	903	0
400	5	0	0	0	0	0	0	200	300	0	0	0	0	0	0	0	200	903	0	0	0	0	0	0	0	603	903	0
400	6	0	0	0	0	0	0	200	300	0	0	0	0	0	0	0	200	903	0	0	0	0	0	0	0	603	903	0
400	7	0	0	0	0	0	0	200	300	0	0	0	0	0	0	0	200	903	0	0	0	0	0	0	0	603	903	0
400	8	0	0	0	0	0	0	200	300	0	0	0	0	0	0	0	200	903	0	0	0	0	0	0	0	603	903	0
400	9	0	0	0	0	0	0	200	300	0	0	0	0	0	0	0	200	903	0	0	0	0	0	0	0	603	903	0
401	0	0	0	0	0	0	0	200	300	0	0	0	0	0	0	0	200	903	0	0	0	0	0	0	0	603	903	0
401	1	0	0	0	0	0	0	200	300	0	0	0	0	0	0	0	200	903	0	0	0	0	0	0	0	603	903	0
401	2	0	0	0	0	0	0	200	300	0	0	0	0	0	0	0	200	903	0	0	0	0	0	0	0	603	903	0
401	3	0	0	0	0	0	0	200	300	0	0	0	0	0	0	0	200	903	0	0	0	0	0	0	0	603	903	0
401	4	0	0	0	0	0	0	200	300	0	0	0	0	0	0	0	200	903	0	0	0	0	0	0	0	603	903	0
401	5	0	0	0	0	0	0	200	300	0	0	0	0	0	0	0	200	903	0	0	0	0	0	0	0	603	903	0
401	6	0	0	0	0	0	0	200	300	0	0	0	0	0	0	0	200	903	0	0	0	0	0	0	0	603	903	0
401	7	0	0	0	0	0	0	200	300	0	0	0	0	0	0	0	200	903	0	0	0	0	0	0	0	603	903	0
401	8	0	0	0	0	0	0	200	300	0	0	0	0	0	0	0	200	903	0	0	0	0	0	0	0	603	903	0
401	9	0	0	0	0	0	0	200	300	0	0	0	0	0	0	0	200	903	0	0	0	0	0	0	0	603	903	0
402	0	0	0	0	0	0	0	200	300	0	0	0	0	0	0	0	200	903	0	0	0	0	0	0	0	603	903	0
402	1	0	0	0	0	0	0	200	300	0	0	0	0	0	0	0	200	903	0	0	0	0	0	0	0	603	903	0
402	2	0	0	0	0	0	0	200	300	0	0	0	0	0	0	0	200	903	0	0	0	0	0	0	0	603	903	0
402	3	0	0	0	0	0	0	200	300	0	0	0	0	0	0	0	200	903	0	0	0	0	0	0	0	603	903	0
402	4	0	0	0	0	0	0	200	300	0	0	0	0	0	0	0	200	903	0	0	0	0	0	0	0	603	903	0
402	5	0	0	0	0	0	0	200	300	0	0	0	0	0	0	0	200	903	0	0	0	0	0	0	0	603	903	0
402	6	0	0	0	0	0	0	200	300	0	0	0	0	0	0	0	200	903	0	0	0	0	0	0	0	603	903	0
402	7	0	0	0	0	0	0	200	300	0	0	0	0	0	0	0	200	903	0	0	0	0	0	0	0	603	903	0
402	8	0	0	0	0	0	0	200	300	0	0	0	0	0	0	0	200	903	0	0	0	0	0	0	0	603	903	0
402	9	0	0	0	0	0	0	200	300	0	0	0	0	0	0	0	200	903	0	0	0	0	0	0	0	603	903	0
403	0	0	0	0	0	0	0	200	300	0	0	0	0	0	0	0	200	903	0	0	0	0	0	0	0	603	903	0
403	1	0	0	0	0	0	0	200	300	0	0	0	0	0	0	0	200	903	0	0	0	0	0	0	0	603	903	0
403	2	0	0	0	0	0	0	200	300	0	0	0	0	0	0	0	200	903	0	0	0	0	0	0	0	603	903	0
403	3	0	0	0	0	0	0	200	300	0	0	0	0	0	0	0	200	903	0	0	0	0	0	0	0	603	903	0
403	4	0	0	0	0	0	0	200	300	0	0	0	0	0	0	0	200	903	0	0	0	0	0	0	0	603	903	0
403	5	0	0	0	0	0	0	200	300	0	0	0	0	0	0	0	200	903	0	0	0	0	0	0	0	603	903	0
403	6	0	0	0	0	0	0	200	300	0	0	0	0	0	0	0	200	903	0	0	0	0	0	0	0	603	903	0
403	7	0	0	0	0	0	0	200	300	0	0	0	0	0	0	0	200	903	0	0	0	0	0	0	0	603	903	0
403	8	0	0	0	0	0	0	200	300	0	0	0	0	0	0	0	200	903	0	0	0	0	0	0	0	603	903	0
403	9	0	0	0	0	0	0	200	300	0	0	0	0	0	0	0	200	903	0	0	0	0	0	0	0	603	903	0
404	0	0	0	0	0	0	0	200	300	0	0	0	0	0	0	0	200	903	0	0	0	0	0	0	0	603	903	0
404	1	0	0	0	0	0	0	200	300	0	0	0	0	0	0	0	200	903	0	0	0	0	0	0	0	603	903	0
404	2	0	0	0	0	0	0	200	300	0	0	0	0	0	0	0	200	903	0	0	0	0	0	0	0	603	903	0
404	3	0	0	0	0	0	0	200	300	0	0	0	0	0	0	0	200	903	0	0	0	0	0	0	0	603	903	0
404	4	0	0	0	0	0	0	200	300	0	0	0	0	0	0	0	200	903	0	0	0	0	0	0	0	603	903	0
404	5	0	0	0	0	0	0	200	300	0	0	0	0	0	0	0	200	903	0	0	0	0	0	0	0	603	903	0
404	6	0	0	0	0	0	0	200	300	0	0	0	0	0	0	0	200	903	0	0	0	0	0	0	0	603	903	0
404	7	0	0	0	0	0	0	200	300	0	0	0	0	0	0	0	200	903	0	0	0	0	0	0	0	603	903	0
404	8	0	0	0	0	0	0	200	300	0	0	0	0	0	0	0	200	903	0	0	0	0	0	0	0	603	903	0
404	9	0	0	0	0	0	0	200	300	0	0	0	0	0	0	0	200	903	0	0	0	0	0	0	0	603	903	0
405	0	0	0	0	0	0	0	200	300	0	0	0	0	0	0	0	200	903	0	0	0	0	0	0	0	603	903	0
405	1	0	0	0	0	0	0	200	300	0	0	0	0	0	0	0	200	903	0	0	0	0	0	0	0	603	903	0
405	2	0	0	0	0	0	0	200	300	0	0	0	0	0	0	0	200	903	0	0	0	0	0	0	0	603	903	0
405	3	0	0	0	0	0	0	200	300	0	0	0	0	0	0	0	200	903	0	0	0	0	0	0	0	603	903	0
405	4	0	0	0	0	0	0	200	300	0	0	0	0	0	0	0	200	903	0	0	0	0	0	0	0	603	903	0
405	5	0	0	0	0	0	0	200	300	0	0	0	0	0	0	0	200	903	0	0	0	0	0	0	0	603	903	0
405	6	0	0	0	0	0	0	200	300	0	0	0	0	0	0	0	200	903	0	0	0	0	0	0	0	603	903	0
405	7	0	0	0	0	0	0	200	300	0	0	0	0	0	0	0	200	903	0	0	0	0	0	0	0	603	903	0
405	8	0	0	0	0	0	0	200	300	0	0	0	0	0	0	0	200	903	0	0	0	0	0	0	0	603	903	0
405	9	0	0	0	0	0	0	200	300	0	0	0	0	0	0	0	200	903	0	0	0	0	0	0	0	603	903	0
406	0	0	0	0	0	0	0	200	300	0	0	0	0	0	0	0	200	903	0	0	0	0	0	0	0	603	903	0
406	1	0	0	0	0	0	0	200	300	0	0	0	0	0	0	0	200	903	0	0	0	0	0	0	0	603	903	0
406	2	0	0	0	0	0	0	200	300	0	0	0	0	0	0	0	200	903	0	0	0	0	0	0	0	603	903	0
406	3	0	0	0	0	0	0	200	300	0	0	0	0	0	0	0	200	903	0	0	0	0	0	0	0	603	903	0
406	4	0	0	0	0	0	0	200	300	0	0	0	0	0	0	0	200	903	0	0	0	0	0	0	0	603	903	0
406	5	0	0	0	0	0	0	200	300	0	0	0	0	0	0	0	200	903	0	0	0	0	0	0	0	603	903	0
406	6	0	0	0	0	0	0	200	300	0	0	0	0	0	0	0	200	903	0	0	0	0	0	0	0	603	903	0
406	7	0	0	0	0	0	0	200	300	0	0	0	0	0	0	0	200	903	0	0	0	0	0	0	0	603	903	0
406	8	0	0	0	0	0	0	200	300	0	0	0	0	0	0	0	200	903	0	0	0	0	0	0	0	603	903	0
406	9	0	0	0	0	0	0	200	300	0	0	0	0	0	0	0	200	903	0	0	0	0	0	0	0	603	903	0
407	0	0	0	0	0	0	0	200	300	0	0	0	0	0	0	0	200	903	0	0	0	0	0	0	0	603	903	0
407	1	0	0	0	0	0	0	200	300	0	0	0	0	0	0	0	200	903	0	0	0	0	0	0	0	603	903	0
407	2	0	0	0	0	0	0	200	300	0	0	0	0	0	0	0	200	903	0	0	0	0	0	0	0	603	903	0
407	3	0	0	0	0	0	0	200	300	0	0	0	0	0	0	0	200	903	0	0	0	0	0	0	0	603	903	0
407	4	0	0	0	0	0	0	200	300	0	0	0	0	0	0	0	200	903	0	0	0	0	0	0	0	603	903	0
407	5	0	0	0	0	0	0	200	300	0	0	0	0	0	0	0	200	903	0	0	0	0	0	0	0	603	903	0
407	6	0	0	0	0	0	0	200	300	0	0	0	0	0	0	0	200	903	0	0	0	0	0	0	0	603	903	0
407	7	0	0	0	0	0	0	200	300	0	0	0	0	0	0	0	200	903	0	0	0	0	0	0	0	603	903	0
407	8	0	0	0	0	0	0	200	300	0	0	0	0	0	0	0	200	903	0	0	0	0	0	0	0	603	903	0
407	9	0	0	0	0	0	0	200	300	0	0	0	0	0	0	0	200	903	0	0	0	0	0	0	0	603	903	0
408	0	0	0	0	0	0	0	200	300	0	0	0	0	0	0	0	200	903	0	0	0	0	0	0	0	603	903	0
408	1	0	0	0	0	0	0	200	300	0	0	0	0	0	0	0	200	903	0	0	0	0	0	0	0	603	903	0
408	2	0	0	0	0	0	0	200	300	0	0	0	0	0	0	0	200	903	0	0	0	0	0	0	0	603	903	0
408	3	0	0	0	0	0	0	200	300	0	0	0	0	0	0	0	200	903	0	0	0	0	0	0	0	603	903	0
408	4	0	0	0	0	0	0	200	300	0	0	0	0	0	0	0	200	903	0	0	0	0	0	0	0	603	903	0
408	5	0	0	0	0	0	0	200	300	0	0	0	0	0	0	0	200	903	0	0	0	0	0	0	0	603	903	0
408	6	0	0	0	0	0	0	200	300	0	0	0	0	0	0	0	200	903	0	0	0	0	0	0	0	603	903	0
408	7	0	0	0	0	0	0	200	300	0	0	0	0	0	0	0	200	903	0	0	0	0	0	0	0	603	903	0
408	8	0	0	0	0	0	0	200	300	0	0	0	0	0	0	0	200	903	0	0	0	0	0	0	0	603	903	0
408	9	0	0	0	0	0	0	200	300	0	0	0	0	0	0	0	200	903	0	0	0	0	0	0	0	603	903	0
409	0	0	0	0	0	0	0	200	300	0	0	0	0	0	0	0	200	903	0	0	0	0	0	0	0	603	903	0
409	1	0	0	0	0	0	0	200	300	0	0	0	0	0	0	0	200	903	0	0	0	0	0	0	0	603	903	0
409	2	0	0	0	0	0	0	200	300	0	0	0	0	0	0	0	200	903	0	0	0	0	0	0	0	603	903	0
409	3	0	0	0	0	0	0	200	300	0	0	0	0	0	0	0	200	903	0	0	0	0	0	0	0	603	903	0
409	4	0	0	0	0	0	0	200	300	0	0	0	0	0	0	0	200	903	0	0	0	0	0	0	0	603	903	0
409	5	0	0	0	0	0	0	200	300	0	0	0	0	0	0	0	200	903	0	0	0	0	0	0	0	603	903	0
409	6	0	0	0	0	0	0	200	300	0	0	0	0	0	0	0	200	903	0	0	0	0	0	0	0	603	903	0
409	7	0	0	0	0	0	0	200	300	0	0	0	0	0	0	0	200	903	0	0	0	0	0	0	0	603	903	0
409	8	0	0	0	0	0	0	200	300	0	0	0	0	0	0	0	200	903	0	0	0	0	0	0	0	603	903	0
409	9	0	0	0	0	0	0	200	300	0	0	0	0	0	0	0	200	903	0	0	0	0	0	0	0	603	903	0
410	0	0	0	0	0	0	0	200	300	0	0	0	0	0	0	0	200	903	0	0	0	0	0	0	0	603	903	0
410	1	0	0	0	0	0	0	200	300	0	0	0	0	0	0	0	200	903	0	0	0	0	0	0	0	603	903	0
410	2	0	0	0	0	0	0	200	300	0	0	0	0	0	0	0	200	903	0	0	0	0	0	0	0	603	903	0
410	3	0	0	0	0	0	0	200	300	0	0	0	0	0	0	0	200	903	0	0	0	0	0	0	0	603	903	0
410	4	0	0	0	0	0	0	200	300	0	0	0	0	0	0	0	200	903	0	0	0	0	0	0	0	603	903	0
410	5	0	0	0	0	0	0	200	300	0	0	0	0	0	0	0	200	903	0	0	0	0	0	0	0	603	903	0
410	6	0	0	0	0	0	0	200	300	0	0	0	0	0	0	0	200	903	0	0	0	0	0	0	0	603	903	0
410	7	0	0	0	0	0	0	200	300	0	0	0	0	0	0	0	200	903	0	0	0	0	0	0	0	603	903	0
410	8	0	0	0	0	0	0	200	300	0	0	0	0	0	0	0	200	903	0	0	0	0	0	0	0	603	903	0
410	9	0	0	0	0	0	0	200	300	0	0	0	0	0	0	0	200	903	0	0	0	0	0	0	0	603	903	0
411	0	0	0	0	0	0	0	200	300	0	0	0	0	0	0	0	200	903	0	0	0	0	0	0	0	603	903	0
411	1	0	0	0	0	0	0	200	300	0	0	0	0	0	0	0	200	903	0	0	0	0	0	0	0	603	903	0
411	2	0	0	0	0	0	0	200	300	0	0	0	0	0	0	0	200	903	0	0	0	0	0	0	0	603	903	0
411	3	0	0	0	0	0	0	200	300	0	0	0	0	0	0	0	200	903	0	0	0	0	0	0	0	603	903	0
411	4	0	0	0	0	0	0	200	300	0	0	0	0	0	0	0	200	903	0	0	0	0	0	0	0	603	903	0
411	5	0	0	0	0	0	0	200	300	0	0	0	0	0	0	0	200	903	0	0	0	0	0	0	0	603	903	0
411	6	0	0	0	0	0	0	200	300	0	0	0	0	0	0	0	200	903	0	0	0	0	0	0	0	603	903	0
411	7	0	0	0	0	0	0	200	300	0	0	0	0	0	0	0	200	903	0	0	0	0	0	0	0	603	903	0
411	8	0	0	0	0	0	0	200	300	0	0	0	0	0	0	0	200	903	0	0	0	0	0	0	0	603	903	0
411	9	0	0	0	0	0	0	200	300	0	0	0	0	0	0	0	200	903	0	0	0	0	0	0	0	603	903	0
412	0	0	0	0	0	0	0	200	300	0	0	0	0	0	0	0	200	903	0	0	0	0	0	0	0	603	903	0
412	1	0	0	0	0	0	0	200	300	0	0	0	0	0	0	0	200	903	0	0	0	0	0	0	0	603	903	0
412	2	0	0	0	0	0	0	200	300	0	0	0	0	0	0	0	200	903	0	0	0	0	0	0	0	603	903	0
412	3	0	0	0	0	0	0	200	300	0	0	0	0	0	0	0	200	903	0	0	0	0	0	0	0	603	903	0
412	4	0	0	0	0	0	0	200	300	0	0	0	0	0	0	0	200	903	0	0	0	0	0	0	0	603	903	0
412	5	0	0	0	0	0	0	200	300	0	0	0	0	0	0	0	200	903	0	0	0	0	0	0	0	603	903	0
412	6	0	0	0	0	0	0	200	300	0	0	0	0	0	0	0	200	903	0	0	0	0	0	0	0	603	903	0
412	7	0	0	0	0	0	0	200	300	0	0	0	0	0	0	0	200	903	0	0	0	0	0	0	0	603	903	0
412	8	0	0	0	0	0	0	200	300	0	0	0	0	0	0	0	200	903	0	0	0	0	0	0	0	603	903	0
412	9	0	0	0	0	0	0	200	300	0	0	0	0	0	0	0	200	903	0	0	0	0	0	0	0	603	903	0
413	0	0	0	0	0	0	0	200	300	0	0	0	0	0	0	0	200	903	0	0	0	0	0	0	0	603	903	0
413	1	0	0	0	0	0	0	200	300	0	0	0	0	0	0	0	200	903	0	0	0	0	0	0	0	603	903	0
413	2	0	0	0	0	0	0	200	300	0	0	0	0	0	0	0	200	903	0	0	0	0	0	0	0	603	903	0
413	3	0	0	0	0	0	0	200	300	0	0	0	0	0	0	0	200	903	0	0	0	0	0	0	0	603	903	0
413	4	0	0	0	0	0	0	200	300	0	0	0	0	0	0	0	200	903	0	0	0	0	0	0	0	603	903	0
413	5	0	0	0	0	0	0	200	300	0	0	0	0	0	0	0	200	903	0	0	0	0	0	0	0	603	903	0
413	6	0	0	0	0	0	0	200	300	0	0	0	0	0	0	0	200	903	0	0	0	0	0	0	0	603	903	0
413	7	0	0	0	0	0	0	200	300	0	0	0	0	0	0	0	200	903	0	0	0	0	0	0	0	603	903	0
413	8	0	0	0	0	0	0	200	300	0	0	0	0	0	0	0	200	903	0	0	0	0	0	0	0	603	903	0
413	9	0	0	0	0	0	0	200	300	0	0	0	0	0	0	0	200	903	0	0	0	0	0	0	0	603	903	0
414	0	0	0	0	0	0	0	200	300	0	0	0	0	0	0	0	200	903	0	0	0	0	0	0	0	603	903	0
414	1	0	0	0	0	0	0	200	300	0	0	0	0	0	0	0	200	903	0	0	0	0	0	0	0	603	903	0
414	2	0	0	0	0	0	0	200	300	0	0	0	0	0	0	0	200	903	0	0	0	0	0	0	0	603	903	0
414	3	0	0	0	0	0	0	200	300	0	0	0	0	0	0	0	200	903	0	0	0	0	0	0	0	603	903	0
414	4	0	0	0	0	0	0	200	300	0	0	0	0	0	0	0	200	903	0	0	0	0	0	0	0	603	903	0
414	5	0	0	0	0	0	0	200	300	0	0	0	0	0	0	0	200	903	0	0	0	0	0	0	0	603	903	0
414	6	0	0	0	0	0	0	200	300	0	0	0	0	0	0	0	200	903	0	0	0	0	0	0	0	603	903	0
414	7	0	0	0	0	0	0	200	300	0	0	0	0	0	0	0	200	903	0	0	0	0	0	0	0	603	903	0
414	8	0	0	0	0	0	0	200	300	0	0	0	0	0	0	0	200	903	0	0	0	0	0	0	0	603	903	0
414	9	0	0	0	0	0	0	200	300	0	0	0	0	0	0	0	200	903	0	0	0	0	0	0	0	603	903	0
415	0	0	0	0	0	0	0	200	300	0	0	0	0	0	0	0	200	903	0	0	0	0	0	0	0	603	903	0
415	1	0	0	0	0	0	0	200	300	0	0	0	0	0	0	0	200	903	0	0	0	0	0	0	0	603	903	0
415	2	0	0	0	0	0	0	200	300	0	0	0	0	0	0	0	200	903	0	0	0	0	0	0	0	603	903	0
415	3	0	0	0	0	0	0	200	300	0	0	0	0	0	0	0	200	903	0	0	0	0	0	0	0	603	903	0
415	4	0	0	0	0	0	0	200	300	0	0	0	0	0	0	0	200	903	0	0	0	0	0	0	0	603	903	0
415	5	0	0	0	0	0	0	200	300	0	0	0	0	0	0	0	200	903	0	0	0	0	0	0	0	603	903	0
415	6	0	0	0	0	0	0	200	300	0	0	0	0	0	0	0	200	903	0	0	0	0	0	0	0	603	903	0
415	7	0	0	0	0	0	0	200	300	0	0	0	0	0	0	0	200	903	0	0	0	0	0	0	0	603	903	0
415	8	0	0	0	0	0	0	200	300	0	0	0	0	0	0	0	200	903	0	0	0	0	0	0	0	603	903	0
415	9	0	0	0	0	0	0	200	300	0	0	0	0	0	0	0	200	903	0	0	0	0	0	0	0	603	903	0
416	0	0	0	0	0	0	0	200	300	0	0	0	0	0	0	0	200	903	0	0	0	0	0	0	0	603	903	0
416	1	0	0	0	0	0	0	200	300	0	0	0	0	0	0	0	200	903	0	0	0	0	0	0	0	603	903	0
416	2	0	0	0	0	0	0	200	300	0	0	0	0	0	0	0	200	903	0	0	0	0	0	0	0	603	903	0
416	3	0	0	0	0	0	0	200	300	0	0	0	0	0	0	0	200	903	0	0	0	0	0	0	0	603	903	0
416	4	0	0	0	0	0	0	200	300	0	0	0	0	0	0	0	200	903	0	0	0	0	0	0	0	603	903	0
416	5	0	0	0	0	0	0	200	300	0	0	0	0	0	0	0	200	903	0	0	0	0	0	0	0	603	903	0
416	6	0	0	0	0	0	0	200	300	0	0	0	0	0	0	0	200	903	0	0	0	0	0	0	0	603	903	0
416	7	0	0	0	0	0	0	200	300	0	0	0	0	0	0	0	200	903	0	0	0	0	0	0	0	603	903	0
416	8	0	0	0	0	0	0	200	300	0	0	0	0	0	0	0	200	903	0	0	0	0	0	0	0	603	903	0
416	9	0	0	0	0	0	0	200	300	0	0	0	0	0	0	0	200	903	0	0	0	0	0	0	0	603	903	0
417	0	0	0	0	0	0	0	200	300	0	0	0	0	0	0	0	200	903	0	0	0	0	0	0	0	603	903	0
417	1	0	0	0	0	0	0	200	300	0	0	0	0	0	0	0	200	903	0	0	0	0	0	0	0	603	903	0
417	2	0	0	0	0	0	0	200	300	0	0	0	0	0	0	0	200	903	0	0	0	0	0	0	0	603	903	0
417	3	0	0	0	0	0	0	200	300	0	0	0	0	0	0	0	200	903	0	0	0	0	0	0	0	603	903	0
417	4	0	0	0	0	0	0	200	300	0	0	0	0	0	0	0	200	903	0	0	0	0	0	0	0	603	903	0
417	5	0	0	0	0	0	0	200	300	0	0	0	0	0	0	0	200	903	0	0	0	0	0	0	0	603	903	0
417	6	0	0	0	0	0	0	200	300	0	0	0	0	0	0	0	200	903	0	0	0	0	0	0	0	603	903	0
417	7	0	0	0	0	0	0	200	300	0	0	0	0	0	0	0	200	903	0	0	0	0	0	0	0	603	903	0
417	8	0	0	0	0	0	0	200	300	0	0	0	0	0	0	0	200	903	0	0	0	0	0	0	0	603	903	0
417	9	0	0	0	0	0	0	200	300	0	0	0	0	0	0	0	200	903	0	0	0	0	0	0	0	603	903	0
418	0	0	0	0	0	0	0	200	300	0	0	0	0	0	0	0	200	903	0	0	0	0	0	0	0	603	903	0
418	1	0	0	0	0	0	0	200	300	0	0	0	0	0	0	0	200	903	0	0	0	0	0	0	0	603	903	0
418	2	0	0	0	0	0	0	200	300	0	0	0	0	0	0	0	200	903	0	0	0	0	0	0	0	603	903	0
418	3	0	0	0	0	0	0	200	300	0	0	0	0	0	0	0	200	903	0	0	0	0	0	0	0	603	903	0
418	4	0	0	0	0	0	0	200	300	0	0	0	0	0	0	0	200	903	0	0	0	0	0	0	0	603	903	0
418	5	0	0	0	0	0	0	200	300	0	0	0	0	0	0	0	200	903	0	0	0	0	0	0	0	603	903	0
418	6	0	0	0	0	0	0	200	300	0	0	0	0	0	0	0	200	903	0	0	0	0	0	0	0	603	903	0
418	7	0	0	0	0	0	0	200	300	0	0	0	0	0	0	0	200	903	0	0	0	0	0	0	0	603	903	0
418	8	0	0	0	0	0	0	200	300	0	0	0	0	0	0	0	200	903	0	0	0	0	0	0	0	603	903	0
418	9	0	0	0	0	0	0	200	300	0	0	0	0	0	0	0	200	903	0	0	0	0	0	0	0	603	903	0
419	0	0	0	0	0	0	0	200	300	0	0	0	0	0	0	0	200	903	0	0	0	0	0	0	0	603	903	0
419	1	0	0	0	0	0	0	200	300	0	0	0	0	0	0	0	200	903	0	0	0	0	0	0	0	603	903	0
419	2	0	0	0	0	0	0	200	300	0	0	0	0	0	0	0	200	903	0	0	0	0	0	0	0	603	903	0
419	3	0	0	0	0	0	0	200	300	0	0	0	0	0	0	0	200	903	0	0	0	0	0	0	0	603	903	0
419	4	0	0	0	0	0	0	200	300	0	0	0	0	0	0	0	200	903	0	0	0	0	0	0	0	603	903	0
419	5	0	0	0	0	0	0	200	300	0	0	0	0	0	0	0	200	903	0	0	0	0	0	0	0	603	903	0
419	6	0	0	0	0	0	0	200	300	0	0	0	0	0	0	0	200	903	0	0	0	0	0	0	0	603	903	0
419	7	0	0	0	0	0	0	200	300	0	0	0	0	0	0	0	200	903	0	0	0	0	0	0	0	603	903	0
419	8	0	0	0	0	0	0	200	300	0	0	0	0	0	0	0	200	903	0	0	0	0	0	0	0	603	903	0
419	9	0	0	0	0	0	0	200	300	0	0	0	0	0	0	0	200	903	0	0	0	0	0	0	0	603	903	0
420	0	0	0	0	0	0	0	200	300	0	0	0	0	0	0	0	200	903	0	0	0	0	0	0	0	603	903	0
420	1	0	0	0	0	0	0	200	300	0	0	0	0	0	0	0	200	903	0	0	0	0	0	0	0	603	903	0
420	2	0	0	0	0	0	0	200	300	0	0	0	0	0	0	0	200	903	0	0	0	0	0	0	0	603	903	0
420	3	0	0	0	0	0	0	200	300	0	0	0	0	0	0	0	200	903	0	0	0	0	0	0	0	603	903	0
420	4	0	0	0	0	0	0	200	300	0	0	0	0	0	0	0	200	903	0	0	0	0	0	0	0	603	903	0
420	5	0	0	0	0	0	0	200	300	0	0	0	0	0	0	0	200	903	0	0	0	0	0	0	0	603	903	0
420	6	0	0	0	0	0	0	200	300	0	0	0	0	0	0	0	200	903	0	0	0	0	0	0	0	603	903	0
420	7	0	0	0	0	0	0	200	300	0	0	0	0	0	0	0	200	903	0	0	0	0	0	0	0	603	903	0
420	8	0	0	0	0	0	0	200	300	0	0	0	0	0	0	0	200	903	0	0	0	0	0	0	0	603	903	0
420	9	0	0	0	0	0	0	200	300	0	0	0	0	0	0	0	200	903	0	0	0	0	0	0	0	603	903	0
421	0	0	0	0	0	0	0	200	300	0	0	0	0	0	0	0	200	903	0	0	0	0	0	0	0	603	903	0
421	1	0	0	0	0	0	0	200	300	0	0	0	0	0	0	0	200	903	0	0	0	0	0	0	0	603	903	0
421	2	0	0	0	0	0	0	200	300	0	0	0	0	0	0	0	200	903	0	0	0	0	0	0	0	603	903	0
421	3	0	0	0	0	0	0	200	300	0	0	0	0	0	0	0	200	903	0	0	0	0	0	0	0	603	903	0
421	4	0	0	0	0	0	0	200	300	0	0	0	0	0	0	0	200	903	0	0	0	0	0	0	0	603	903	0
421	5	0	0	0	0	0	0	200	300	0	0	0	0	0	0	0	200	903	0	0	0	0	0	0	0	603	903	0
421	6	0	0	0	0	0	0	200	300	0	0	0	0	0	0	0	200	903	0	0	0	0	0	0	0	603	903	0
421	7	0	0	0	0	0	0	200	300	0	0	0	0	0	0	0	200	903	0	0	0	0	0	0	0	603	903	0
421	8	0	0	0	0	0	0	200	300	0	0	0	0	0	0	0	200	903	0	0	0	0	0	0	0	603	903	0
421	9	0	0	0	0	0	0	200	300	0	0	0	0	0	0	0	200	903	0	0	0	0	0	0	0	603	903	0
422	0	0	0	0	0	0	0	200	300	0	0	0	0	0	0	0	200	903	0	0	0	0	0	0	0	603	903	0
422	1	0	0	0	0	0	0	200	300	0	0	0	0	0	0	0	200	903	0	0	0	0	0	0	0	603	903	0
422	2	0	0	0	0	0	0	200	300	0	0	0	0	0	0	0	200	903	0	0	0	0	0	0	0	603	903	0
422	3	0	0	0	0	0	0	200	300	0	0	0	0	0	0	0	200	903	0	0	0	0	0	0	0	603	903	0
422	4	0	0	0	0	0	0	200	300	0	0	0	0	0	0	0	200	903	0	0	0	0	0	0	0	603	903	0
422	5	0	0	0	0	0	0	200	300	0	0	0	0	0	0	0	200	903	0	0	0	0	0	0	0	603	903	0
422	6	0	0	0	0	0	0	200	300	0	0	0	0	0	0	0	200	903	0	0	0	0	0	0	0	603	903	0
422	7	0	0	0	0	0	0	200	300	0	0	0	0	0	0	0	200	903	0	0	0	0	0	0	0	603	903	0
422	8	0	0	0	0	0	0	200	300	0	0	0	0	0	0	0	200	903	0	0	0	0	0	0	0	603	903	0
422	9	0	0	0	0	0	0	200	300	0	0	0	0	0	0	0	200	903	0	0	0	0	0	0	0	603	903	0
423	0	0	0	0	0	0	0	200	300	0	0	0	0	0	0	0	200	903	0	0	0	0	0	0	0	603	903	0
423	1	0	0	0	0	0	0	200	300	0	0	0	0	0	0	0	200	903	0	0	0	0	0	0	0	603	903	0
423	2	0	0	0	0	0	0	200	300	0	0	0	0	0	0	0	200	903	0	0	0	0	0	0	0	603	903	0
423	3	0	0	0	0	0	0	200	300	0	0	0	0	0	0	0	200	903	0	0	0	0	0	0	0	603	903	0
423	4	0	0	0	0	0	0	200	300	0	0	0	0	0	0	0	200	903	0	0	0	0	0	0	0	603	903	0
423	5	0	0	0	0	0	0	200	300	0	0	0	0	0	0	0	200	903	0	0	0	0	0	0	0	603	903	0
423	6	0	0	0	0	0	0	200	300	0	0	0	0	0	0	0	200	903	0	0	0	0	0	0	0	603	903	0
423	7	0	0	0	0	0	0	200	300	0	0	0	0	0	0	0	200	903	0	0	0	0	0	0	0	603	903	0
423	8	0	0	0	0	0	0	200	300	0	0	0	0	0	0	0	200	903	0	0	0	0	0	0	0	603	903	0
423	9	0	0	0	0	0	0	200	300	0	0	0	0	0	0	0	200	903	0	0	0	0	0	0	0	603	903	0
424	0	0	0	0	0	0	0	200	300	0	0	0	0	0	0	0	200	903	0	0	0	0	0	0	0	603	903	0
424	1	0	0	0	0	0	0	200	300	0	0	0	0	0	0	0	200	903	0	0	0	0	0	0	0	603	903	0
424	2	0	0	0	0	0	0	200	300	0	0	0	0	0	0	0	200	903	0	0	0	0	0	0	0	603	903	0
424	3	0	0	0	0	0	0	200	300	0	0	0	0	0	0	0	200	903	0	0	0	0	0	0	0	603	903	0
424	4	0	0	0	0	0	0	200	300	0	0	0	0	0	0	0	200	903	0	0	0	0	0	0	0	603	903	0
424	5	0	0	0	0	0	0	200	300	0	0	0	0	0	0	0	200	903	0	0	0	0	0	0	0	603	903	0
424	6	0	0	0	0	0	0	200	300	0	0	0	0	0	0	0	200	903	0	0	0	0	0	0	0	603	903	0
424	7	0	0	0	0	0	0	200	300	0	0	0	0	0	0	0	200	903	0	0	0	0	0	0	0	603	903	0
424	8	0	0	0	0	0	0	200	300	0	0	0	0	0	0	0	200	903	0	0	0	0	0	0	0	603	903	0
424	9	0	0	0	0	0	0	200	300	0	0	0	0	0	0	0	200	903	0	0	0	0	0	0	0	603	903	0
425	0	0	0	0	0	0	0	200	300	0	0	0	0	0	0	0	200	903	0	0	0	0	0	0	0	603	903	0
425	1	0	0	0	0	0	0	200	300	0	0	0	0	0	0	0	200	903	0	0	0	0	0	0	0	603	903	0
425	2	0	0	0	0	0	0	200	300	0	0	0	0	0	0	0	200	903	0	0	0	0	0	0	0	603	903	0
425	3	0	0	0	0	0	0	200	300	0	0	0	0	0	0	0	200	903	0	0	0	0	0	0	0	603	903	0
425	4	0	0	0	0	0	0	200	300	0	0	0	0	0	0	0	200	903	0	0	0	0	0	0	0	603	903	0
425	5	0	0	0	0	0	0	200	300	0	0	0	0	0	0	0	200	903	0	0	0	0	0	0	0	603	903	0
425	6	0	0	0	0	0	0	200	300	0	0	0	0	0	0	0	200	903	0	0	0	0	0	0	0	603	903	0
425	7	0	0	0	0	0	0	200	300	0	0	0	0	0	0	0	200	903	0	0	0	0	0	0	0	603	903	0
425	8	0	0	0	0	0	0	200	300	0	0	0	0	0	0	0	200	903	0	0	0	0	0	0	0	603	903	0
425	9	0	0	0	0	0	0	200	300	0	0	0	0	0	0	0	200	903	0	0	0	0	0	0	0	603	903	0
426	0	0	0	0	0	0	0	200	300	0	0	0	0	0	0	0	200	903	0	0	0	0	0	0	0	603	903	0
426	1	0	0	0	0	0	0	200	300	0	0	0	0	0	0	0	200	903	0	0	0	0	0	0	0	603	903	0
426	2	0	0	0	0	0	0	200	300	0	0	0	0	0	0	0	200	903	0	0	0	0	0	0	0	603	903	0
426	3	0	0	0	0	0	0	200	300	0	0	0	0	0	0	0	200	903	0	0	0	0	0	0	0	603	903	0
426	4	0	0	0	0	0	0	200	300	0	0	0	0	0	0	0	200	903	0	0	0	0	0	0	0	603	903	0
426	5	0	0	0	0	0	0	200	300	0	0	0	0	0	0	0	200	903	0	0	0	0	0	0	0	603	903	0
426	6	0	0	0	0	0	0	200	300	0	0	0	0	0	0	0	200	903	0	0	0	0	0	0	0	603	903	0
426	7	0	0	0	0	0	0	200	300	0	0	0	0	0	0	0	200	903	0	0	0	0	0	0	0	603	903	0
426	8	0	0	0	0	0	0	200	300	0	0	0	0	0	0	0	200	903	0	0	0	0	0	0	0	603	903	0
426	9	0	0	0	0	0	0	200	300	0	0	0	0	0	0	0	200	903	0	0	0	0	0	0	0	603	903	0
427	0	0	0	0	0	0	0	200	300	0	0	0	0	0	0	0	200	903	0	0	0	0	0	0	0	603	903	0
427	1	0	0	0	0	0	0	200	300	0	0	0	0	0	0	0	200	903	0	0	0	0	0	0	0	603	903	0
427	2	0	0	0	0	0	0	200	300	0	0	0	0	0	0	0	200	903	0	0	0	0	0	0	0	603	903	0
427	3	0	0	0	0	0	0	200	300	0	0	0	0	0	0	0	200	903	0	0	0	0	0	0	0	603	903	0
427	4	0	0	0	0	0	0	200	300	0	0	0	0	0	0	0	200	903	0	0	0	0	0	0	0	603	903	0
427	5	0	0	0	0	0	0	200	300	0	0	0	0	0	0	0	200	903	0	0	0	0	0	0	0	603	903	0
427	6	0	0	0	0	0	0	200	300	0	0	0	0	0	0	0	200	903	0	0	0	0	0	0	0	603	903	0
427	7	0	0	0	0	0	0	200	300	0	0	0	0	0	0	0	200	903	0	0	0	0	0	0	0	603	903	0
427	8	0	0	0	0	0	0	200	300	0	0	0	0	0	0	0	200	903	0	0	0	0	0	0	0	603	903	0
427	9	0	0	0	0	0	0	200	300	0	0	0	0	0	0	0	200	903	0	0	0	0	0	0	0	603	903	0
428	0	0	0	0	0	0	0	200	300	0	0	0	0	0	0	0	200	903	0	0	0	0	0	0	0	603	903	0
428	1	0	0	0	0	0	0	200	300	0	0	0	0	0	0	0	200	903	0	0	0	0	0	0	0	603	903	0
428	2	0	0	0	0	0	0	200	300	0	0	0	0	0	0	0	200	903	0	0	0	0	0	0	0	603	903	0
428	3	0	0	0	0	0	0	200	300	0	0	0	0	0	0	0	200	903	0	0	0	0	0	0	0	603	903	0
428	4	0	0	0	0	0	0	200	300	0	0	0	0	0	0	0	200	903	0	0	0	0	0	0	0	603	903	0
428	5	0	0	0	0	0	0	200	300	0	0	0	0	0	0	0	200	903	0	0	0	0	0	0	0	603	903	0
428	6	0	0	0	0	0	0	200	300	0	0	0	0	0	0	0	200	903	0	0	0	0	0	0	0	603	903	0
428	7	0	0	0	0	0	0	200	300	0	0	0	0	0	0	0	200	903	0	0	0	0	0	0	0	603	903	0
428	8	0	0	0	0	0	0	200	300	0	0	0	0	0	0	0	200	903	0	0	0	0	0	0	0	603	903	0
428	9	0	0	0	0	0	0	200	300	0	0	0	0	0	0	0	200	903	0	0	0	0	0	0	0	603	903	0
429	0	0	0	0	0	0	0	200	300	0	0	0	0	0	0	0	200	903	0	0	0	0	0	0	0	603	903	0
429	1	0	0	0	0	0	0	200	300	0	0	0	0	0	0	0	200	903	0	0	0	0	0	0	0	603	903	0
429	2	0	0	0	0	0	0	200	300	0	0	0	0	0	0	0	200	903	0	0	0	0	0	0	0	603	903	0
429	3	0	0	0	0	0	0	200	300	0	0	0	0	0	0	0	200	903	0	0	0	0	0	0	0	603	903	0
429	4	0	0	0	0	0	0	200	300	0	0	0	0	0	0	0	200	903	0	0	0	0	0	0	0	603	903	0
429	5	0	0	0	0	0	0	200	300	0	0	0	0	0	0	0	200	903	0	0	0	0	0	0	0	603	903	0
429	6	0	0	0	0	0	0	200	300	0	0	0	0	0	0	0	200	903	0	0	0	0	0	0	0	603	903	0
429	7	0	0	0	0	0	0	200	300	0	0	0	0	0	0	0	200	903	0	0	0	0	0	0	0	603	903	0
429	8	0	0	0	0	0	0	200	300	0	0	0	0	0	0	0	200	903	0	0	0	0	0	0	0	603	903	0
429	9	0	0	0	0	0	0	200	300	0	0	0	0	0	0	0	200	903	0	0	0	0	0	0	0	603	903	0
430	0	0	0	0	0	0	0	200	300	0	0	0	0	0	0	0	200	903	0	0	0	0	0	0	0	603	903	0
430	1	0	0	0	0	0	0	200	300	0	0	0	0	0	0	0	200	903	0	0	0	0	0	0	0	603	903	0
430	2	0	0	0	0	0	0	200	300	0	0	0	0	0	0	0	200	903	0	0	0	0	0	0	0	603	903	0
430	3	0	0	0	0	0	0	200	300	0	0	0	0	0	0	0	200	903	0	0	0	0	0	0	0	603	903	0
430	4	0	0	0	0	0	0	200	300	0	0	0	0	0	0	0	200	903	0	0	0	0	0	0	0	603	903	0
430	5	0	0	0	0	0	0	200	300	0	0	0	0	0	0	0	200	903	0	0	0	0	0	0	0	603	903	0
430	6	0	0	0	0	0	0	200	300	0	0	0	0	0	0	0	200	903	0	0	0	0	0	0	0	603	903	0
430	7	0	0	0	0	0	0	200	300	0	0	0	0	0	0	0	200	903	0	0	0	0	0	0	0	603	903	0
430	8	0	0	0	0	0	0	200	300	0	0	0	0	0	0	0	200	903	0	0	0	0	0	0	0	603	903	0
430	9	0	0	0	0	0	0	200	300	0	0	0	0	0	0	0	200	903	0	0	0	0	0	0	0	603	903	0
431	0	0	0	0	0	0	0	200	300	0	0	0	0	0	0	0	200	903	0	0	0	0	0	0	0	603	903	0
431	1	0	0	0	0	0	0	200	300	0	0	0	0	0	0	0	200	903	0	0	0	0	0	0	0	603	903	0
431	2	0	0	0	0	0	0	200	300	0	0	0	0	0	0	0	200	903	0	0	0	0	0	0	0	603	903	0
431	3	0	0	0	0	0	0	200	300	0	0	0	0	0	0	0	200	903	0	0	0	0	0	0	0	603	903	0
431	4	0	0	0	0	0	0	200	300	0	0	0	0	0	0	0	200	903	0	0	0	0	0	0	0	603	903	0
431	5	0	0	0	0	0	0	200	300	0	0	0	0	0	0	0	200	903	0	0	0	0	0	0	0	603	903	0
431	6	0	0	0	0	0	0	200	300	0	0	0	0	0	0	0	200	903	0	0	0	0	0	0	0	603	903	0
431	7	0	0	0	0	0	0	200	300	0	0	0	0	0	0	0	200	903	0	0	0	0	0	0	0	603	903	0
431	8	0	0	0	0	0	0	200	300	0	0	0	0	0	0	0	200	903	0	0	0	0	0	0	0	603	903	0
431	9	0	0	0	0	0	0	200	300	0	0	0	0	0	0	0	200	903	0	0	0	0	0	0	0	603	903	0
432	0	0	0	0	0	0	0	200	300	0	0	0	0	0	0	0	200	903	0	0	0	0	0	0	0	603	903	0
432	1	0	0	0	0	0	0	200	300	0	0	0	0	0	0	0	200	903	0	0	0	0	0	0	0	603	903	0
432	2	0	0	0	0	0	0	200	300	0	0	0	0	0	0	0	200	903	0	0	0	0	0	0	0	603	903	0
432	3	0	0	0	0	0	0	200	300	0	0	0	0	0	0	0	200	903	0	0	0	0	0	0	0	603	903	0
432	4	0	0	0	0	0	0	200	300	0	0	0	0	0	0	0	200	903	0	0	0	0	0	0	0	603	903	0
432	5	0	0	0	0	0	0	200	300	0	0	0	0	0	0	0	200	903	0	0	0	0	0	0	0	603	903	0
432	6	0	0	0	0	0	0	200	300	0	0	0	0	0	0	0	200	903	0	0	0	0	0	0	0	603	903	0
432	7	0	0	0	0	0	0	200	300	0	0	0	0	0	0	0	200	903	0	0	0	0	0	0	0	603	903	0
432	8	0	0	0	0	0	0	200	300	0	0	0	0	0	0	0	200	903	0	0	0	0	0	0	0	603	903	0
432	9	0	0	0	0	0	0	200	300	0	0	0	0	0	0	0	200	903	0	0	0	0	0	0	0	603	903	0
433	0	0	0	0	0	0	0	200	300	0	0	0	0	0	0	0	200	903	0	0	0	0	0	0	0	603	903	0
433	1	0	0	0	0	0	0	200	300	0	0	0	0	0	0	0	200	903	0	0	0	0	0	0	0	603	903	0
433	2	0	0	0	0	0	0	200	300	0	0	0	0	0	0	0	200	903	0	0	0	0	0	0	0	603	903	0
433	3	0	0	0	0	0	0	200	300	0	0	0	0	0	0	0	200	903	0	0	0	0	0	0	0	603	903	0
433	4	0	0	0	0	0	0	200	300	0	0	0	0	0	0	0	200	903	0	0	0	0	0	0	0	603	903	0
433	5	0	0	0	0	0	0	200	300	0	0	0	0	0	0	0	200	903	0	0	0	0	0	0	0	603	903	0
433	6	0	0	0	0	0	0	200	300	0	0	0	0	0	0	0	200	903	0	0	0	0	0	0	0	603	903	0
433	7	0	0	0	0	0	0	200	300	0	0	0	0	0	0	0	200	903	0	0	0	0	0	0	0	603	903	0
433	8	0	0	0	0	0	0	200	300	0	0	0	0	0	0	0	200	903	0	0	0	0	0	0	0	603	903	0
433	9	0	0	0	0	0	0	200	300	0	0	0	0	0	0	0	200	903	0	0	0	0	0	0	0	603	903	0
434	0	0	0	0	0	0	0	200	300	0	0	0	0	0	0	0	200	903	0	0	0	0	0	0	0	603	903	0
434	1	0	0	0	0	0	0	200	300	0	0	0	0	0	0	0	200	903	0	0	0	0	0	0	0	603	903	0
434	2	0	0	0	0	0	0	200	300	0	0	0	0	0	0	0	200	903	0	0	0	0	0	0	0	603	903	0
434	3	0	0	0	0	0	0	200	300	0	0	0	0	0	0	0	200	903	0	0	0	0	0	0	0	603	903	0
434	4	0	0	0	0	0	0	200	300	0	0	0	0	0	0	0	200	903	0	0	0	0	0	0	0	603	903	0
434	5	0	0	0	0	0	0	200	300	0	0	0	0	0	0	0	200	903	0	0	0	0	0	0	0	603	903	0
434	6	0	0	0	0	0	0	200	300	0	0	0	0	0	0	0	200	903	0	0	0	0	0	0	0	603	903	0
434	7	0	0	0	0	0	0	200	300	0	0	0	0	0	0	0	200	903	0	0	0	0	0	0	0	603	903	0
434	8	0	0	0	0	0	0	200	300	0	0	0	0	0	0	0	200	903	0	0	0	0	0	0	0	603	903	0
434	9	0	0	0	0	0	0	200	300	0	0	0	0	0	0	0	200	903	0	0	0	0	0	0	0	603	903	0
435	0	0	0	0	0	0	0	200	300	0	0	0	0	0	0	0	200	903	0	0	0	0	0	0	0	603	903	0
435	1	0	0	0	0	0	0	200	300	0	0	0	0	0	0	0	200	903	0	0	0	0	0	0	0	603	903	0
435	2	0	0	0	0	0	0	200	300	0	0	0	0	0	0	0	200	903	0	0	0	0	0	0	0	603	903	0
435	3	0	0	0	0	0	0	200	300	0	0	0	0	0	0	0	200	903	0	0	0	0	0	0	0	603	903	0
435	4	0	0	0	0	0	0	200	300	0	0	0	0	0	0	0	200	903	0	0	0	0	0	0	0	603	903	0
435	5	0	0	0	0	0	0	200	300	0	0	0	0	0	0	0	200	903	0	0	0	0	0	0	0	603	903	0
435	6	0	0	0	0	0	0	200	300	0	0	0	0	0	0	0	200	903	0	0	0	0	0	0	0	603	903	0
435	7	0	0	0	0	0	0	200	300	0	0	0	0	0	0	0	200	903	0	0	0	0	0	0	0	603	903	0
435	8	0	0	0	0	0	0	200	300	0	0	0	0	0	0	0	200	903	0	0	0	0	0	0	0	603	903	0
435	9	0	0	0	0	0	0	200	300	0	0	0	0	0	0	0	200	903	0	0	0	0	0	0	0	603	903	0
436	0	0	0	0	0	0	0	200	300	0	0	0	0	0	0	0	200	903	0	0	0	0	0	0	0	603	903	0
436	1	0	0	0	0	0	0	200	300	0	0	0	0	0	0	0	200	903	0	0	0	0	0	0	0	603	903	0
436	2	0	0	0	0	0	0	200	300	0	0	0	0	0	0	0	200	903	0	0	0	0	0	0	0	603	903	0
436	3	0	0	0	0	0	0	200	300	0	0	0	0	0	0	0	200	903	0	0	0	0	0	0	0	603	903	0
436	4	0	0	0	0	0	0	200	300	0	0	0	0	0	0	0	200	903	0	0	0	0	0	0	0	603	903	0
436	5	0	0	0	0	0	0	200	300	0	0	0	0	0	0	0	200	903	0	0	0	0	0	0	0	603	903	0
436	6	0	0	0	0	0	0	200	300	0	0	0	0	0	0	0	200	903	0	0	0	0	0	0	0	603	903	0
436	7	0	0	0	0	0	0	200	300	0	0	0	0	0	0	0	200	903	0	0	0	0	0	0	0	603	903	0
436	8	0	0	0	0	0	0	200	300	0	0	0	0	0	0	0	200	903	0	0	0	0	0	0	0	603	903	0
436	9	0	0	0	0	0	0	200	300	0	0	0	0	0	0	0	200	903	0	0	0	0	0	0	0	603	903	0
437	0	0	0	0	0	0	0	200	300	0	0	0	0	0	0	0	200	903	0	0	0	0	0	0	0	603	903	0
437	1	0	0	0	0	0	0	200	300	0	0	0	0	0	0	0	200	903	0	0	0	0	0	0	0	603	903	0
437	2	0	0	0	0	0	0	200	300	0	0	0	0	0	0	0	200	903	0	0	0	0	0	0	0	603	903	0
437	3	0	0	0	0	0	0	200	300	0	0	0	0	0	0	0	200	903	0	0	0	0	0	0	0	603	903	0
437	4	0	0	0	0	0	0	200	300	0	0	0	0	0	0	0	200	903	0	0	0	0	0	0	0	603	903	0
437	5	0	0	0	0	0	0	200	300	0	0	0	0	0	0	0	200	903	0	0	0	0	0	0	0	603	903	0
437	6	0	0	0	0	0	0	200	300	0	0	0	0	0	0	0	200	903	0	0	0	0	0	0	0	603	903	0
437	7	0	0	0	0	0	0	200	300	0	0	0	0	0	0	0	200	903	0	0	0	0	0	0	0	603	903	0
437	8	0	0	0	0	0	0	200	300	0	0	0	0	0	0	0	200	903	0	0	0	0	0	0	0	603	903	0
437	9	0	0	0	0	0	0	200	300	0	0	0	0	0	0	0	200	903	0	0	0	0	0	0	0	603	903	0
438	0	0	0	0	0	0	0	200	300	0	0	0	0	0	0	0	200	903	0	0	0	0	0	0	0	603	903	0
438	1	0	0	0	0	0	0	200	300	0	0	0	0	0	0	0	200	903	0	0	0	0	0	0	0	603	903	0
438	2	0	0	0	0	0	0	200	300	0	0	0	0	0	0	0	200	903	0	0	0	0	0	0	0	603	903	0
438	3	0	0	0	0	0	0	200	300	0	0	0	0	0	0	0	200	903	0	0	0	0	0	0	0	603	903	0
438	4	0	0	0	0	0	0	200	300	0	0	0	0	0	0	0	200	903	0	0	0	0	0	0	0	603	903	0
438	5	0	0	0	0	0	0	200	300	0	0	0	0	0	0	0	200	903	0	0	0	0	0	0	0	603	903	0
438	6	0	0	0	0	0	0	200	300	0	0	0	0	0	0	0	200	903	0	0	0	0	0	0	0	603	903	0
438	7	0	0	0	0	0	0	200	300	0	0	0	0	0	0	0	200	903	0	0	0	0	0	0	0	603	903	0
438	8	0	0	0	0	0	0	200	300	0	0	0	0	0	0	0	200	903	0	0	0	0	0	0	0	603	903	0
438	9	0	0	0	0	0	0	200	300	0	0	0	0	0	0	0	200	903	0	0	0	0	0	0	0	603	903	0
439	0	0	0	0	0	0	0	200	300	0	0	0	0	0	0	0	200	903	0	0	0	0	0	0	0	603	903	0
439	1	0	0	0	0	0	0	200	300	0	0	0	0	0	0	0	200	903	0	0	0	0	0	0	0	603	903	0
439	2	0	0	0	0	0	0	200	300	0	0	0	0	0	0	0	200	903	0	0	0	0	0	0	0	603	903	0
439	3	0	0	0	0	0	0	200	300	0	0	0	0	0	0	0	200	903	0	0	0	0	0	0	0	603	903	0
439	4	0	0	0	0	0	0	200	300	0	0	0	0	0	0	0	200	903	0	0	0	0	0	0	0	603	903	0
439	5	0	0	0	0	0	0	200	300	0	0	0	0	0	0	0	200	903	0	0	0	0	0	0	0	603	903	0
439	6	0	0	0	0	0	0	200	300	0	0	0	0	0	0	0	200	903	0	0	0	0	0	0	0	603	903	0
439	7	0	0	0	0	0	0	200	300	0	0	0	0	0	0	0	200	903	0	0	0	0	0	0	0	603	903	0
439	8	0	0	0	0	0	0	200	300	0	0	0	0	0	0	0	200	903	0	0	0	0	0	0	0	603	903	0
439	9	0	0	0	0	0	0	200	300	0	0	0	0	0	0	0	200	903	0	0	0	0	0	0	0	603	903	0
440	0	0	0	0	0	0	0	200	300	0	0	0	0	0	0	0	200	903	0	0	0	0	0	0	0	603	903	0
440	1	0	0	0	0	0	0	200	300	0	0	0	0	0	0	0	200	903	0	0	0	0	0	0	0	603	903	0
440	2	0	0	0	0	0	0	200	300	0	0	0	0	0	0	0	200	903	0	0	0	0	0	0	0	603	903	0
440	3	0	0	0	0	0	0	200	300	0	0	0	0	0	0	0	200	903	0	0	0	0	0	0	0	603	903	0
440	4	0	0	0	0	0	0	200	300	0	0	0	0	0	0	0	200	903	0	0	0	0	0	0	0	603	903	0
440	5	0	0	0	0	0	0	200	300	0	0	0	0	0	0	0	200	903	0	0	0	0	0	0	0	603	903	0
440	6	0	0	0	0	0	0	200	300	0	0	0	0	0	0	0	200	903	0	0	0	0	0	0	0	603	903	0
440	7	0	0	0	0	0	0	200	300	0	0	0	0	0	0	0	200	903	0	0	0	0	0	0	0	603	903	0
440	8	0	0	0	0	0	0	200	300	0	0	0	0	0	0	0	200	903	0	0	0	0	0	0	0	603	903	0
440	9	0	0	0	0	0	0	200	300	0	0	0	0	0	0	0	200	903	0	0	0	0	0	0	0	603	903	0
441	0	0	0	0	0	0	0	200	300	0	0	0	0	0	0	0	200	903	0	0	0	0	0	0	0	603	903	0
441	1	0	0	0	0	0	0	200	300	0	0	0	0	0	0	0	200	903	0	0	0	0	0	0	0	603	903	0
441	2	0	0	0	0	0	0	200	300	0	0	0	0	0	0	0	200	903	0	0	0	0	0	0	0	603	903	0
441	3	0	0	0	0	0	0	200	300	0	0	0	0	0	0	0	200	903	0	0	0	0	0	0	0	603	903	0
441	4	0	0	0	0	0	0	200	300	0	0	0	0	0	0	0	200	903	0	0	0	0	0	0	0	603	903	0
441	5	0	0	0	0	0	0	200	300	0	0	0	0	0	0	0	200	903	0	0	0	0	0	0	0	603	903	0
441	6	0	0	0	0	0	0	200	300	0	0	0	0	0	0	0	200	903	0	0	0	0	0	0	0	603	903	0
441	7	0	0	0	0	0	0	200	300	0	0	0	0	0	0	0	200	903	0	0	0	0	0	0	0	603	903	0
441	8	0	0	0	0	0	0	200	300	0	0	0	0	0	0	0	200	903	0	0	0	0	0	0	0	603	903	0
441	9	0	0	0	0	0	0	200	300	0	0	0	0	0	0	0	200	903	0	0	0	0	0	0	0	603	903	0
442	0	0	0	0	0	0	0	200	300	0	0	0	0	0	0	0	200	903	0	0	0	0	0	0	0	603	903	0
442	1	0	0	0	0	0	0	200	300	0	0	0	0	0	0	0	200	903	0	0	0	0	0	0	0	603	903	0
442	2	0	0	0	0	0	0	200	300	0	0	0	0	0	0	0	200	903	0	0	0	0	0	0	0	603	903	0
442	3	0	0	0	0	0	0	200	300	0	0	0	0	0	0	0	200	903	0	0	0	0	0	0	0	603	903	0
442	4	0	0	0	0	0	0	200	300	0	0	0	0	0	0	0	200	903	0	0	0	0	0	0	0	603	903	0
442	5	0	0	0	0	0	0	200	300	0	0	0	0	0	0	0	200	903	0	0	0	0	0	0	0	603	903	0
442	6	0	0	0	0	0	0	200	300	0	0	0	0	0	0	0	200	903	0	0	0	0	0	0	0	603	903	0
442	7	0	0	0	0	0	0	200	300	0	0	0	0	0	0	0	200	903	0	0	0	0	0	0	0	603	903	0
442	8	0	0	0	0	0	0	200	300	0	0	0	0	0	0	0	200	903	0	0	0	0	0	0	0	603	903	0
442	9	0	0	0	0	0	0	200	300	0	0	0	0	0	0	0	200	903	0	0	0	0	0	0	0	603	903	0
443	0	0	0	0	0	0	0	200	300	0	0	0	0	0	0	0	200	903	0	0	0	0	0	0	0	603	903	0
443	1	0	0	0	0	0	0	200	300	0	0	0	0	0	0	0	200	903	0	0	0	0	0	0	0	603	903	0
443	2	0	0	0	0	0	0	200	300	0	0	0	0	0	0	0	200	903	0	0	0	0	0	0	0	603	903	0
443	3	0	0	0	0	0	0	200	300	0	0	0	0	0	0	0	200	903	0	0	0	0	0	0	0	603	903	0
443	4	0	0	0	0	0	0	200	300	0	0	0	0	0	0	0	200	903	0	0	0	0	0	0	0	603	903	0
443	5	0	0	0	0	0	0	200	300	0	0	0	0	0	0	0	200	903	0	0	0	0	0	0	0	603	903	0
443	6	0	0	0	0	0	0	200	300	0	0	0	0	0	0	0	200	903	0	0	0	0	0	0	0	603	903	0
443	7	0	0	0	0	0	0	200	300	0	0	0	0	0	0	0	200	903	0	0	0	0	0	0	0	603	903	0
443	8	0	0	0	0	0	0	200	300	0	0	0	0	0	0	0	200	903	0	0	0	0	0	0	0	603	903	0
443	9	0	0	0	0	0	0	200	300	0	0	0	0	0	0	0	200	903	0	0	0	0	0	0	0	603	903	0
444	0	0	0	0	0	0	0	200	300	0	0	0	0	0	0	0	200	903	0	0	0	0	0	0	0	603	903	0
444	1	0	0	0	0	0	0	200	300	0	0	0	0	0	0	0	200	903	0	0	0	0	0	0	0	603	903	0
444	2	0	0	0	0	0	0	200	300	0	0	0	0	0	0	0	200	903	0	0	0	0	0	0	0	603	903	0
444	3	0	0	0	0	0	0	200	300	0	0	0	0	0	0	0	200	903	0	0	0	0	0	0	0	603	903	0
444	4	0	0	0	0	0	0	200	300	0	0	0	0	0	0	0	200	903	0	0	0	0	0	0	0	603	903	0
444	5	0	0	0	0	0	0	200	300	0	0	0	0	0	0	0	200	903	0	0	0	0	0	0	0	603	903	0
444	6	0	0	0	0	0	0	200	300	0	0	0	0	0	0	0	200	903	0	0	0	0	0	0	0	603	903	0
444	7	0	0	0	0	0	0	200	300	0	0	0	0	0	0	0	200	903	0	0	0	0	0	0	0	603	903	0
444	8	0	0	0	0	0	0	200	300	0	0	0	0	0	0	0	200	903	0	0	0	0	0	0	0	603	903	0
444	9	0	0	0	0	0	0	200	300	0	0	0	0	0	0	0	200	903	0	0	0	0	0	0	0	603	903	0
445	0	0	0	0	0	0	0	200	300	0	0	0	0	0	0	0	200	903	0	0	0	0	0	0	0	603	903	0
445	1	0	0	0	0	0	0	200	300	0	0	0	0	0	0	0	200	903	0	0	0	0	0	0	0	603	903	0
445	2	0	0	0	0	0	0	200	300	0	0	0	0	0	0	0	200	903	0	0	0	0	0	0	0	603	903	0
445	3	0	0	0	0	0	0	200	300	0	0	0	0	0	0	0	200	903	0	0	0	0	0	0	0	603	903	0
445	4	0	0	0	0	0	0	200	300	0	0	0	0	0	0	0	200	903	0	0	0	0	0	0	0	603	903	0
445	5	0	0	0	0	0	0	200	300	0	0	0	0	0	0	0	200	903	0	0	0	0	0	0	0	603	903	0
445	6	0	0	0	0	0	0	200	300	0	0	0	0	0	0	0	200	903	0	0	0	0	0	0	0	603	903	0
445	7	0	0	0	0	0	0	200	300	0	0	0	0	0	0	0	200	903	0	0	0	0	0	0	0	603	903	0
445	8	0	0	0	0	0	0	200	300	0	0	0	0	0	0	0	200	903	0	0	0	0	0	0	0	603	903	0
445	9	0	0	0	0	0	0	200	300	0	0	0	0	0	0	0	200	903	0	0	0	0	0	0	0	603	903	0
446	0	0	0	0	0	0	0	200	300	0	0	0	0	0	0	0	200	903	0	0	0	0	0	0	0	603	903	0
446	1	0	0	0	0	0	0	200	300	0	0	0	0	0	0	0	200	903	0	0	0	0	0	0	0	603	903	0
446	2	0	0	0	0	0	0	200	300	0	0	0	0	0	0	0	200	903	0	0	0	0	0	0	0	603	903	0
446	3	0	0	0	0	0	0	200	300	0	0	0	0	0	0	0	200	903	0	0	0	0	0	0	0	603	903	0
446	4	0	0	0	0	0	0	200	300	0	0	0	0	0	0	0	200	903	0	0	0	0	0	0	0	603	903	0
446	5	0	0	0	0	0	0	200	300	0	0	0	0	0	0	0	200	903	0	0	0	0	0	0	0	603	903	0
446	6	0	0	0	0	0	0	200	300	0	0	0	0	0	0	0	200	903	0	0	0	0	0	0	0	603	903	0
446	7	0	0	0	0	0	0	200	300	0	0	0	0	0	0	0	200	903	0	0	0	0	0	0	0	603	903	0
446	8	0	0	0	0	0	0	200	300	0	0	0	0	0	0	0	200	903	0	0	0	0	0	0	0	603	903	0
446	9	0	0	0	0	0	0	200	300	0	0	0	0	0	0	0	200	903	0	0	0	0	0	0	0	603	903	0
447	0	0	0	0	0	0	0	200	300	0	0	0	0	0	0	0	200	903	0	0	0	0	0	0	0	603	903	0
447	1	0	0	0	0	0	0	200	300	0	0	0	0	0	0	0	200	903	0	0	0	0	0	0	0	603	903	0
447	2	0	0	0	0	0	0	200	300	0	0	0	0	0	0	0	200	903	0	0	0	0	0	0	0	603	903	0
447	3	0	0	0	0	0	0	200	300	0	0	0	0	0	0	0	200	903	0	0	0	0	0	0	0	603	903	0
447	4	0	0	0	0	0	0	200	300	0	0	0	0	0	0	0	200	903	0	0	0	0	0	0	0	603	903	0
447	5	0	0	0	0	0	0	200	300	0	0	0	0	0	0	0	200	903	0	0	0	0	0	0	0	603	903	0
447	6	0	0	0	0	0	0	200	300	0	0	0	0	0	0	0	200	903	0	0	0	0	0	0	0	603	903	0
447	7	0	0	0	0	0	0	200	300	0	0	0	0	0	0	0	200	903	0	0	0	0	0	0	0	603	903	0
447	8	0	0	0	0	0	0	200	300	0	0	0	0	0	0	0	200	903	0	0	0	0	0	0	0	603	903	0
447	9	0	0	0	0	0	0	200	300	0	0	0	0	0	0	0	200	903	0	0	0	0	0	0	0	603	903	0
448	0	0	0	0	0	0	0	200	300	0	0	0	0	0	0	0	200	903	0	0	0	0	0	0	0	603	903	0
448	1	0	0	0	0	0	0	200	300	0	0	0	0	0	0	0	200	903	0	0	0	0	0	0	0	603	903	0
448	2	0	0	0	0	0	0	200	300	0	0	0	0	0	0	0	200	903	0	0	0	0	0	0	0	603	903	0
448	3	0	0	0	0	0	0	200	300	0	0	0	0	0	0	0	200	903	0	0	0	0	0	0	0	603	903	0
448	4	0	0	0	0	0	0	200	300	0	0	0	0	0	0	0	200	903	0	0	0	0	0	0	0	603	903	0
448	5	0	0	0	0	0	0	200	300	0	0	0	0	0	0	0	200	903	0	0	0	0	0	0	0	603	903	0
448	6	0	0	0	0	0	0	200	300	0	0	0	0	0	0	0	200	903	0	0	0	0	0	0	0	603	903	0
448	7	0	0	0	0	0	0	200	300	0	0	0	0	0	0	0	200	903	0	0	0	0	0	0	0	603	903	0
448	8	0	0	0	0	0	0	200	300	0	0	0	0	0	0	0	200	903	0	0	0	0	0	0	0	603	903	0
448	9	0	0	0	0	0	0	200	300	0	0	0	0	0	0	0	200	903	0	0	0	0	0	0	0	603	903	0
449	0	0	0	0	0	0	0	200	300	0	0	0	0	0	0	0	200	903	0	0	0	0	0	0	0	603	903	0
449	1	0	0	0	0	0	0	200	300	0	0	0	0	0	0	0	200	903	0	0	0	0	0	0	0	603	903	0
449	2	0	0	0	0	0	0	200	300	0	0	0	0	0	0	0	200	903	0	0	0	0	0	0	0	603	903	0
449	3	0	0	0	0	0	0	200	300	0	0	0	0	0	0	0	200	903	0	0	0	0	0	0	0	603	903	0
449	4	0	0	0	0	0	0	200	300	0	0	0	0	0	0	0	200	903	0	0	0	0	0	0	0	603	903	0
449	5	0	0	0	0	0	0	200	300	0	0	0	0	0	0	0	200	903	0	0	0	0	0	0	0	603	903	0
449	6	0	0	0	0	0	0	200	300	0	0	0	0	0	0	0	200	903	0	0	0	0	0	0	0	603	903	0
449	7	0	0	0	0	0	0	200	300	0	0	0	0	0	0	0	200	903	0	0	0	0	0	0	0	603	903	0
449	8	0	0	0	0	0	0	200	300	0	0	0	0	0	0	0	200	903	0	0	0	0	0	0	0	603	903	0
449	9	0	0	0	0	0	0	200	300	0	0	0	0	0	0	0	200	903	0	0	0	0	0	0	0	603	903	0
450	0	0	0	0	0	0	0	200	300	0	0	0	0	0	0	0	200	903	0	0	0	0	0	0	0	603	903	0
450	1	0	0	0	0	0	0	200	300	0	0	0	0	0	0	0	200	903	0	0	0	0	0	0	0	603	903	0
450	2	0	0	0	0	0	0	200	300	0	0	0	0	0	0	0	200	903	0	0	0	0	0	0	0	603	903	0
450	3	0	0	0	0	0	0	200	300	0	0	0	0	0	0	0	200	903	0	0	0	0	0	0	0	603	903	0
450	4	0	0	0	0	0	0	200	300	0	0	0	0	0	0	0	200	903	0	0	0	0	0	0	0	603	903	0
450	5	0	0	0	0	0	0	200	300	0	0	0	0	0	0	0	200	903	0	0	0	0	0	0	0	603	903	0
450	6	0	0	0	0	0	0	200	300	0	0	0	0	0	0	0	200	903	0	0	0	0	0	0	0	603	903	0
450	7	0	0	0	0	0	0	200	300	0	0	0	0	0	0	0	200	903	0	0	0	0	0	0	0	603	903	0
450	8	0	0	0	0	0	0	200	300	0	0	0	0	0	0	0	200	903	0	0	0	0	0	0	0	603	903	0
450	9	0	0	0	0	0	0	200	300	0	0	0	0	0	0	0	200	903	0	0	0	0	0	0	0	603	903	0
451	0	0	0	0	0	0	0	200	300	0	0	0	0	0	0	0	200	903	0	0	0	0	0	0	0	603	903	0
451	1	0	0	0	0	0	0	200	300	0	0	0	0	0	0	0	200	903	0	0	0	0	0	0	0	603	903	0
451	2	0	0	0	0	0	0	200	300	0	0	0	0	0	0	0	200	903	0	0	0	0	0	0	0	603	903	0
451	3	0	0	0	0	0	0	200	300	0	0	0	0	0	0	0	200	903	0	0	0	0	0	0	0	603	903	0
451	4	0	0	0	0	0	0	200	300	0	0	0	0	0	0	0	200	903	0	0	0	0	0	0	0	603	903	0
451	5	0	0	0	0	0	0	200	300	0	0	0	0	0	0	0	200	903	0	0	0	0	0	0	0	603	903	0
451	6	0	0	0	0	0	0	200	300	0	0	0	0	0	0	0	200	903	0	0	0	0	0	0	0	603	903	0
451	7	0	0	0	0	0	0	200	300	0	0	0	0	0	0	0	200	903	0	0	0	0	0	0	0	603	903	0
451	8	0	0	0	0	0	0	200	300	0	0	0	0	0	0	0	200	903	0	0	0	0	0	0	0	603	903	0
451	9	0	0	0	0	0	0	200	300	0	0	0	0	0	0	0	200	903	0	0	0	0	0	0	0	603	903	0
452	0	0	0	0	0	0	0	200	300	0	0	0	0	0	0	0	200	903	0	0	0	0	0	0	0	603	903	0
452	1	0	0	0	0	0	0	200	300	0	0	0	0	0	0	0	200	903	0	0	0	0	0	0	0	603	903	0
452	2	0	0	0	0	0	0	200	300	0	0	0	0	0	0	0	200	903	0	0	0	0	0	0	0	603	903	0
452	3	0	0	0	0	0	0	200	300	0	0	0	0	0	0	0	200	903	0	0	0	0	0	0	0	603	903	0
452	4	0	0	0	0	0	0	200	300	0	0	0	0	0	0	0	200	903	0	0	0	0	0	0	0	603	903	0
452	5	0	0	0	0	0	0	200	300	0	0	0	0	0	0	0	200	903	0	0	0	0	0	0	0	603	903	0
452	6	0	0	0	0	0	0	200	300	0	0	0	0	0	0	0	200	903	0	0	0	0	0	0	0	603	903	0
452	7	0	0	0	0	0	0	200	300	0	0	0	0	0	0	0	200	903	0	0	0	0	0	0	0	603	903	0
452	8	0	0	0	0	0	0	200	300	0	0	0	0	0	0	0	200	903	0	0	0	0	0	0	0	603	903	0
452	9	0	0	0	0	0	0	200	300	0	0	0	0	0	0	0	200	903	0	0	0	0	0	0	0	603	903	0
453	0	0	0	0	0	0	0	200	300	0	0	0	0	0	0	0	200	903	0	0	0	0	0	0	0	603	903	0
453	1	0	0	0	0	0	0	200	300	0	0	0	0	0	0	0	200	903	0	0	0	0	0	0	0	603	903	0
453	2	0	0	0	0	0	0	200	300	0	0	0	0	0	0	0	200	903	0	0	0	0	0	0	0	603	903	0
453	3	0	0	0	0	0	0	200	300	0	0	0	0	0	0	0	200	903	0	0	0	0	0	0	0	603	903	0
453	4	0	0	0	0	0	0	200	300	0	2.05994	-10.6863	-21.2524	-2387.69	-586.365	671.585	172.41	1015.35	0	0	0	0	0	0	0	603	903	0
453	5	0	0	0	0	0	0	200	300	0	3.43323	-15.1114	-25.5249	-922.85	-37.0482	717.362	198.549	939.155	0	0	0	0	0	0	0	603	903	0
453	6	0	0	0	0	0	0	200	300	0	0	0	0	0	0	0	200	903	0	0	0	0	0	0	0	603	903	0
453	7	0	0	0	0	0	0	200	300	0	0	0	0	0	0	0	200	903	0	0	0	0	0	0	0	603	903	0
453	8	0	0	0	0	0	0	200	300	0	0	0	0	0	0	0	200	903	0	0	0	0	0	0	0	603	903	0
453	9	0	0	0	0	0	0	200	300	0	3.58582	1.5207	-27.9663	-1929.93	-586.365	580.032	179.033	972.009	0	0	0	0	0	0	0	603	903	0
454	0	0	0	0	0	0	0	200	300	0	-1.29699	10.676	-34.6802	-2204.59	-464.294	213.821	186.612	966.569	0	0	0	0	0	0	0	603	903	0
454	1	0	0	0	0	0	0	200	300	0	0.686649	14.4907	-32.2388	-3120.11	-159.119	351.15	195.064	999.781	0	0	0	0	0	0	0	603	903	0
454	2	0	0	0	0	0	0	200	300	0	5.56946	15.101	-33.7646	-3120.11	-708.435	213.821	179.018	995.408	0	0	0	0	0	0	0	603	903	0
454	3	0	0	0	0	0	0	200	300	0	1.90735	20.8994	-46.582	-3120.11	-525.329	-60.8369	188.722	969.981	0	0	0	0	0	0	0	603	903	0
454	4	0	0	0	0	0	0	200	300	0	-2.21252	23.1882	-52.6855	-3303.22	-464.294	-60.8369	191.187	965.697	0	0	0	0	0	0	0	603	903	0
454	5	0	0	0	0	0	0	200	300	0	2.5177	17.8476	-54.5166	-3669.43	-464.294	-15.0605	191.483	970.309	0	0	0	0	0	0	0	603	903	0
454	6	0	0	0	0	0	0	200	300	0	4.95911	19.9838	-57.8735	-4768.06	-525.329	-152.39	190.923	985.388	0	0	0	0	0	0	0	603	903	0
454	7	0	0	0	0	0	0	200	300	0	2.67029	22.7304	-69.7754	-3211.67	-769.47	30.7158	188.972	949.029	0	0	0	0	0	0	0	603	903	0
454	8	0	0	0	0	0	0	200	300	0	3.73841	18.9157	-75.2686	-3577.88	-586.365	-60.8369	192.21	950.535	0	0	0	0	0	0	0	603	903	0
454	9	0	0	0	0	0	0	200	300	0	7.24793	16.3217	-78.6255	-4859.62	-647.4	-198.166	191.766	964.807	0	0	0	0	0	0	0	603	903	0
455	0	0	0	0	0	0	0	200	300	0	9.68933	21.6623	-84.4238	-5134.27	-586.365	30.7158	193.055	963.815	0	0	0	0	0	0	0	603	903	0
455	1	0	0	0	0	0	0	200	300	0	9.99451	24.7141	-92.3584	-5866.7	-708.435	-381.272	192.33	966.521	0	0	0	0	0	0	0	603	903	0
455	2	0	0	0	0	0	0	200	300	0	8.01087	20.4416	-103.04	-5134.27	-464.294	-335.495	195.494	952.828	0	0	0	0	0	0	0	603	903	0
455	3	0	0	0	0	0	0	200	300	0	12.8937	24.8666	-112.805	-6232.91	-342.224	-381.272	196.966	958.254	0	0	0	0	0	0	0	603	903	0
455	4	0	0	0	0	0	0	200	300	0	15.3351	30.9702	-119.519	-6782.23	-525.329	-655.93	195.605	959.746	0	0	0	0	0	0	0	603	903	0
455	5	0	0	0	0	0	0	200	300	0	15.3351	28.2236	-128.979	-6507.57	-1013.61	-655.93	192.141	953.454	0	0	0	0	0	0	0	603	903	0
455	6	0	0	0	0	0	0	200	300	0	17.4713	25.6296	-138.44	-7239.99	-952.576	-427.048	193.119	955.297	0	0	0	0	0	0	0	603	903	0
455	7	0	0	0	0	0	0	200	300	0	18.692	31.1227	-146.68	-7056.88	-586.365	-655.93	196.002	951.111	0	0	0	0	0	0	0	603	903	0
455	8	0	0	0	0	0	0	200	300	0	23.1171	31.5805	-155.53	-8063.96	-403.259	-747.483	197.407	954.848	0	0	0	0	0	0	0	603	903	0
455	9	0	0	0	0	0	0	200	300	0	21.1334	23.7985	-161.938	-8155.52	-708.435	-427.048	195.625	953.362	0	0	0	0	0	0	0	603	903	0
456	0	0	0	0	0	0	0	200	300	0	19.7601	21.5097	-170.789	-8338.62	-769.47	-381.272	195.495	951.824	0	0	0	0	0	0	0	603	903	0
456	1	0	0	0	0	0	0	200	300	0	19.7601	23.9511	-179.944	-8521.73	-525.329	-335.495	197.081	950.358	0	0	0	0	0	0	0	603	903	0
456	2	0	0	0	0	0	0	200	300	0	24.0326	20.289	-185.742	-8613.28	-342.224	-152.39	198.158	949.372	0	0	0	0	0	0	0	603	903	0
456	3	0	0	0	0	0	0	200	300	0	24.7955	14.1855	-192.761	-9345.7	-891.541	-381.272	195.375	951.483	0	0	0	0	0	0	0	603	903	0
456	4	0	0	0	0	0	0	200	300	0	20.6757	15.5588	-205.579	-8247.07	-1074.65	30.7158	194.773	943.116	0	0	0	0	0	0	0	603	903	0
456	5	0	0	0	0	0	0	200	300	0	24.1852	13.27	-213.513	-9620.36	-891.541	-15.0605	195.824	948.057	0	0	0	0	0	0	0	603	903	0
456	6	0	0	0	0	0	0	200	300	0	26.0162	6.5561	-223.584	-9803.46	-769.47	-106.613	196.558	946.847	0	0	0	0	0	0	0	603	903	0
456	7	0	0	0	0	0	0	200	300	0	24.6429	4.87763	-229.077	-9986.57	-891.541	-15.0605	196.108	946.595	0	0	0	0	0	0	0	603	903	0
456	8	0	0	0	0	0	0	200	300	0	22.8119	3.19916	-237.012	-9986.57	-1257.75	-15.0605	194.693	945.135	0	0	0	0	0	0	0	603	903	0
456	9	0	0	0	0	0	0	200	300	0	23.7274	-2.59918	-247.998	-9711.91	-1013.61	442.703	195.913	942.161	0	0	0	0	0	0	0	603	903	0
457	0	0	0	0	0	0	0	200	300	0	25.8637	-6.41388	-253.796	-10719	-1074.65	671.585	195.766	945.235	0	0	0	0	0	0	0	603	903	0
457	1	0	0	0	0	0	0	200	300	0	23.7274	-7.3294	-263.562	-9803.46	-1562.93	717.362	194.07	940.196	0	0	0	0	0	0	0	603	903	0
457	2	0	0	0	0	0	0	200	300	0	23.4222	-12.67	-271.802	-10169.7	-1623.96	671.585	194.025	940.416	0	0	0	0	0	0	0	603	903	0
457	3	0	0	0	0	0	0	200	300	0	26.0162	-19.0787	-281.567	-10535.9	-1562.93	763.138	194.449	940.419	0	0	0	0	0	0	0	603	903	0
457	4	0	0	0	0	0	0	200	300	0	24.9481	-21.9778	-289.807	-10444.3	-1501.89	854.691	194.818	939.039	0	0	0	0	0	0	0	603	903	0
457	5	0	0	0	0	0	0	200	300	0	22.3541	-23.046	-301.099	-10810.5	-1929.14	808.914	193.593	938.904	0	0	0	0	0	0	0	603	903	0
457	6	0	0	0	0	0	0	200	300	0	23.1171	-30.2176	-309.949	-10078.1	-2478.45	1175.12	192.004	935.515	0	0	0	0	0	0	0	603	903	0
457	7	0	0	0	0	0	0	200	300	0	24.7955	-34.49	-317.578	-10444.3	-2051.21	1175.12	193.541	935.888	0	0	0	0	0	0	0	603	903	0
457	8	0	0	0	0	0	0	200	300	0	23.2697	-35.1004	-326.733	-10719	-2356.38	1541.34	192.788	935.807	0	0	0	0	0	0	0	603	903	0
457	9	0	0	0	0	0	0	200	300	0	22.2015	-36.6263	-334.973	-10810.5	-2417.42	1815.99	192.783	935.273	0	0	0	0	0	0	0	603	903	0
458	0	0	0	0	0	0	0	200	300	0	21.1334	-41.6617	-345.959	-10169.7	-3210.88	1541.34	190.719	932.396	0	0	0	0	0	0	0	603	903	0
458	1	0	0	0	0	0	0	200	300	0	21.4386	-42.8824	-355.115	-9895.02	-3210.88	1678.67	190.958	930.864	0	0	0	0	0	0	0	603	903	0
458	2	0	0	0	0	0	0	200	300	0	20.5231	-42.5772	-363.049	-10810.5	-3393.98	1770.22	190.651	932.777	0	0	0	0	0	0	0	603	903	0
458	3	0	0	0	0	0	0	200	300	0	19.1498	-46.5445	-368.848	-9986.57	-3393.98	2044.88	190.798	930.075	0	0	0	0	0	0	0	603	903	0
458	4	0	0	0	0	0	0	200	300	0	18.3868	-48.6807	-382.275	-10078.1	-4065.37	1999.1	189.365	929.364	0	0	0	0	0	0	0	603	903	0
458	5	0	0	0	0	0	0	200	300	0	16.861	-47.6126	-396.619	-9803.46	-3943.3	1815.99	190.058	927.718	0	0	0	0	0	0	0	603	903	0
458	6	0	0	0	0	0	0	200	300	0	16.4032	-48.6807	-410.962	-9711.91	-4492.61	2090.65	189.068	926.632	0	0	0	0	0	0	0	603	903	0
458	7	0	0	0	0	0	0	200	300	0	13.9618	-52.0377	-421.338	-9711.91	-4858.83	2227.98	188.468	926.05	0	0	0	0	0	0	0	603	903	0
458	8	0	0	0	0	0	0	200	300	0	12.1307	-51.5799	-435.986	-9528.81	-5408.14	2182.21	187.596	924.856	0	0	0	0	0	0	0	603	903	0
458	9	0	0	0	0	0	0	200	300	0	11.9782	-52.1902	-448.499	-9254.15	-5652.29	2136.43	187.397	923.634	0	0	0	0	0	0	0	603	903	0
459	0	0	0	0	0	0	0	200	300	0	11.8256	-55.3946	-460.706	-8887.94	-5713.32	2136.43	187.599	922.292	0	0	0	0	0	0	0	603	903	0
459	1	0	0	0	0	0	0	200	300	0	11.2152	-55.5472	-472.607	-8796.38	-6018.5	2090.65	187.265	921.612	0	0	0	0	0	0	0	603	903	0
459	2	0	0	0	0	0	0	200	300	0	9.07898	-55.0894	-485.425	-7972.41	-6750.92	1953.32	186.093	919.424	0	0	0	0	0	0	0	603	903	0
459	3	0	0	0	0	0	0	200	300	0	8.31604	-57.5308	-498.547	-8155.52	-6628.85	2273.76	186.704	919.359	0	0	0	0	0	0	0	603	903	0
459	4	0	0	0	0	0	0	200	300	0	9.38416	-61.6507	-508.618	-7880.86	-6811.95	1907.55	186.607	918.495	0	0	0	0	0	0	0	603	903	0
459	5	0	0	0	0	0	0	200	300	0	8.62122	-62.7188	-517.468	-7331.54	-7056.09	1953.32	186.364	917.168	0	0	0	0	0	0	0	603	903	0
459	6	0	0	0	0	0	0	200	300	0	6.02723	-63.6343	-527.844	-7239.99	-7605.41	1999.1	185.592	916.716	0	0	0	0	0	0	0	603	903	0
459	7	0	0	0	0	0	0	200	300	0	6.17981	-66.5335	-537	-7056.88	-7788.52	1678.67	185.496	916.141	0	0	0	0	0	0	0	603	903	0
459	8	0	0	0	0	0	0	200	300	0	4.34876	-68.5171	-546.765	-6141.35	-7727.48	1815.99	185.867	914.232	0	0	0	0	0	0	0	603	903	0
459	9	0	0	0	0	0	0	200	300	0	3.73841	-69.1275	-553.174	-6232.91	-8093.69	1724.44	185.369	914.268	0	0	0	0	0	0	0	603	903	0
460	0	0	0	0	0	0	0	200	300	0	2.97547	-72.637	-562.024	-5958.25	-8643.01	1587.11	184.622	913.601	0	0	0	0	0	0	0	603	903	0
460	1	0	0	0	0	0	0	200	300	0	2.36512	-74.9258	-567.212	-5592.04	-8887.15	1724.44	184.332	912.859	0	0	0	0	0	0	0	603	903	0
460	2	0	0	0	0	0	0	200	300	0	-0.686642	-75.9939	-573.01	-5592.04	-8643.01	1770.22	184.917	912.759	0	0	0	0	0	0	0	603	903	0
460	3	0	0	0	0	0	0	200	300	0	-0.991817	-76.1465	-578.503	-4584.96	-8704.04	1861.77	184.954	910.926	0	0	0	0	0	0	0	603	903	0
460	4	0	0	0	0	0	0	200	300	0	-0.381466	-77.825	-581.86	-4768.06	-9314.39	1632.89	183.992	911.195	0	0	0	0	0	0	0	603	903	0
460	5	0	0	0	0	0	0	200	300	0	-3.89099	-79.1983	-588.879	-4676.51	-9863.71	1770.22	183.25	910.941	0	0	0	0	0	0	0	603	903	0
460	6	0	0	0	0	0	0	200	300	0	-5.87463	-78.8931	-592.236	-4218.75	-9985.78	1587.11	183.139	910.123	0	0	0	0	0	0	0	603	903	0
460	7	0	0	0	0	0	0	200	300	0	-7.24792	-80.8768	-596.509	-3577.88	-10046.8	1678.67	183.157	908.998	0	0	0	0	0	0	0	603	903	0
460	8	0	0	0	0	0	0	200	300	0	-7.09533	-81.1819	-598.34	-3486.33	-9802.67	1678.67	183.617	908.827	0	0	0	0	0	0	0	603	903	0
460	9	0	0	0	0	0	0	200	300	0	-8.31604	-80.419	-598.645	-3394.77	-10596.1	1770.22	182.3	908.671	0	0	0	0	0	0	0	603	903	0
461	0	0	0	0	0	0	0	200	300	0	-10.91	-79.8086	-603.223	-2387.69	-10229.9	1724.44	183.041	906.958	0	0	0	0	0	0	0	603	903	0
461	1	0	0	0	0	0	0	200	300	0	-10.7574	-81.3345	-605.969	-3211.67	-10474.1	1770.22	182.715	908.3	0	0	0	0	0	0	0	603	903	0
461	2	0	0	0	0	0	0	200	300	0	-10.2997	-80.7242	-607.19	-2021.48	-10474.1	1815.99	182.75	906.329	0	0	0	0	0	0	0	603	903	0
461	3	0	0	0	0	0	0	200	300	0	-10.1471	-80.2664	-608.411	-2204.59	-10840.3	1587.11	182.183	906.624	0	0	0	0	0	0	0	603	903	0
461	4	0	0	0	0	0	0	200	300	0	-12.7411	-81.1819	-607.8	-1746.82	-11023.4	1861.77	181.863	905.874	0	0	0	0	0	0	0	603	903	0
461	5	0	0	0	0	0	0	200	300	0	-13.3514	-81.4871	-608.411	-1655.27	-10779.2	1770.22	182.283	905.721	0	0	0	0	0	0	0	603	903	0
461	6	0	0	0	0	0	0	200	300	0	-14.267	-79.9612	-608.105	-1197.51	-10840.3	1724.44	182.174	904.969	0	0	0	0	0	0	0	603	903	0
461	7	0	0	0	0	0	0	200	300	0	-14.267	-80.2664	-609.326	-1014.4	-11023.4	1907.55	181.909	904.665	0	0	0	0	0	0	0	603	903	0
461	8	0	0	0	0	0	0	200	300	0	-14.4196	-81.7923	-608.411	-1197.51	-11267.5	1861.77	181.48	904.968	0	0	0	0	0	0	0	603	903	0
461	9	0	0	0	0	0	0	200	300	0	-15.9454	-82.5552	-610.547	-465.086	-11145.4	1953.32	181.745	903.762	0	0	0	0	0	0	0	603	903	0
462	0	0	0	0	0	0	0	200	300	0	-16.4032	-83.1656	-609.631	-1105.95	-11023.4	2044.88	181.918	904.814	0	0	0	0	0	0	0	603	903	0
462	1	0	0	0	0	0	0	200	300	0	-16.4032	-84.0811	-609.021	-98.8746	-11450.6	1907.55	181.198	903.162	0	0	0	0	0	0	0	603	903	0
462	2	0	0	0	0	0	0	200	300	0	-15.7928	-83.9285	-606.274	541.995	-11755.8	2365.31	180.61	902.106	0	0	0	0	0	0	0	603	903	0
462	3	0	0	0	0	0	0	200	300	0	-18.0817	-83.1656	-608.716	-98.8746	-11389.6	2182.21	181.289	903.162	0	0	0	0	0	0	0	603	903	0
462	4	0	0	0	0	0	0	200	300	0	-18.0817	-84.3863	-609.326	358.889	-11572.7	2227.98	181.007	902.411	0	0	0	0	0	0	0	603	903	0
462	5	0	0	0	0	0	0	200	300	0	-16.4032	-86.0648	-608.411	633.547	-11877.9	2411.09	180.477	901.959	0	0	0	0	0	0	0	603	903	0
462	6	0	0	0	0	0	0	200	300	0	-16.2506	-86.0648	-610.852	816.653	-11755.8	2365.31	180.755	901.663	0	0	0	0	0	0	0	603	903	0
462	7	0	0	0	0	0	0	200	300	0	-18.0817	-85.1492	-612.988	1823.73	-12122	2502.64	180.225	900.025	0	0	0	0	0	0	0	603	903	0
462	8	0	0	0	0	0	0	200	300	0	-17.9291	-86.0648	-620.618	2006.84	-12549.3	2411.09	179.779	899.766	0	0	0	0	0	0	0	603	903	0
462	9	0	0	0	0	0	0	200	300	0	-22.3541	-87.438	-627.332	3380.13	-13098.6	2914.63	179.12	897.612	0	0	0	0	0	0	0	603	903	0
463	0	0	0	0	0	0	0	200	300	0	-26.0162	-90.6424	-631.299	3380.13	-13647.9	2273.76	178.381	897.646	0	0	0	0	0	0	0	603	903	0
463	1	0	0	0	0	0	0	200	300	0	-27.0843	-91.8631	-630.994	3929.45	-13342.7	2182.21	178.854	896.773	0	0	0	0	0	0	0	603	903	0
463	2	0	0	0	0	0	0	200	300	0	-31.662	-91.7105	-637.708	4387.21	-13770	1999.1	178.407	896.12	0	0	0	0	0	0	0	603	903	0
463	3	0	0	0	0	0	0	200	300	0	-35.9344	-95.3726	-643.506	4753.42	-14197.2	2090.65	177.938	895.613	0	0	0	0	0	0	0	603	903	0
463	4	0	0	0	0	0	0	200	300	0	-35.9344	-96.1356	-643.811	5760.5	-14502.4	1724.44	177.474	894.052	0	0	0	0	0	0	0	603	903	0
463	5	0	0	0	0	0	0	200	300	0	-34.8663	-97.3563	-648.694	5852.06	-14624.5	1815.99	177.456	893.979	0	0	0	0	0	0	0	603	903	0
463	6	0	0	0	0	0	0	200	300	0	-37.0026	-99.7977	-656.934	6218.27	-14441.3	2273.76	178.017	893.534	0	0	0	0	0	0	0	603	903	0
463	7	0	0	0	0	0	0	200	300	0	-37.6129	-102.392	-660.901	6584.48	-15173.8	1907.55	177.041	893.037	0	0	0	0	0	0	0	603	903	0
463	8	0	0	0	0	0	0	200	300	0	-40.2069	-104.375	-663.953	7408.45	-15723.1	1770.22	176.319	891.842	0	0	0	0	0	0	0	603	903	0
463	9	0	0	0	0	0	0	200	300	0	-38.0707	-103.765	-667.92	7591.56	-15112.7	1907.55	177.373	891.634	0	0	0	0	0	0	0	603	903	0
464	0	0	0	0	0	0	0	200	300	0	-37.7655	-103.46	-671.887	7316.9	-15967.2	1907.55	176.235	892.11	0	0	0	0	0	0	0	603	903	0
464	1	0	0	0	0	0	0	200	300	0	-42.1905	-104.528	-675.244	8049.32	-15478.9	1678.67	177.077	891.079	0	0	0	0	0	0	0	603	903	0
464	2	0	0	0	0	0	0	200	300	0	-41.5802	-104.07	-680.737	8049.32	-16150.3	1770.22	176.275	891.176	0	0	0	0	0	0	0	603	903	0
464	3	0	0	0	0	0	0	200	300	0	-42.4957	-103.765	-678.906	9239.51	-16577.6	1815.99	175.582	889.391	0	0	0	0	0	0	0	603	903	0
464	4	0	0	0	0	0	0	200	300	0	-41.8854	-104.528	-687.146	9239.51	-16272.4	1632.89	176.319	889.554	0	0	0	0	0	0	0	603	903	0
464	5	0	0	0	0	0	0	200	300	0	-44.4794	-104.986	-690.198	9788.83	-16638.6	1587.11	175.893	888.817	0	0	0	0	0	0	0	603	903	0
464	6	0	0	0	0	0	0	200	300	0	-45.8527	-103.155	-692.029	10338.1	-17004.8	1632.89	175.428	888.061	0	0	0	0	0	0	0	603	903	0
464	7	0	0	0	0	0	0	200	300	0	-46.1578	-103.155	-699.658	10338.1	-17126.9	1404.01	175.521	888.224	0	0	0	0	0	0	0	603	903	0
464	8	0	0	0	0	0	0	200	300	0	-44.3268	-103.307	-705.457	12077.6	-17126.9	1861.77	175.722	885.88	0	0	0	0	0	0	0	603	903	0
464	9	0	0	0	0	0	0	200	300	0	-45.5475	-103.46	-709.424	11528.3	-17554.1	1587.11	175.256	886.75	0	0	0	0	0	0	0	603	903	0
465	0	0	0	0	0	0	0	200	300	0	-47.9889	-103.307	-714.307	11803	-17859.3	1678.67	174.998	886.476	0	0	0	0	0	0	0	603	903	0
465	1	0	0	0	0	0	0	200	300	0	-44.4794	-103.918	-717.969	12169.2	-18103.5	1770.22	174.785	886.051	0	0	0	0	0	0	0	603	903	0
465	2	0	0	0	0	0	0	200	300	0	-46.1578	-103.155	-721.631	13084.7	-18042.4	1861.77	174.998	884.868	0	0	0	0	0	0	0	603	903	0
465	3	0	0	0	0	0	0	200	300	0	-46.463	-103.765	-723.157	13450.9	-17981.4	1861.77	175.135	884.4	0	0	0	0	0	0	0	603	903	0
465	4	0	0	0	0	0	0	200	300	0	-46.7682	-104.986	-731.702	13450.9	-18652.8	1999.1	174.508	884.617	0	0	0	0	0	0	0	603	903	0
465	5	0	0	0	0	0	0	200	300	0	-45.7001	-105.901	-737.805	13908.7	-18713.8	2365.31	174.636	884.149	0	0	0	0	0	0	0	603	903	0
465	6	0	0	0	0	0	0	200	300	0	-46.463	-106.054	-739.331	14549.6	-18469.7	1907.55	175.018	883.321	0	0	0	0	0	0	0	603	903	0
465	7	0	0	0	0	0	0	200	300	0	-46.1578	-107.732	-744.824	15098.9	-18713.8	2044.88	174.875	882.728	0	0	0	0	0	0	0	603	903	0
465	8	0	0	0	0	0	0	200	300	0	-45.3949	-107.885	-750.317	15098.9	-19141.1	2227.98	174.489	882.877	0	0	0	0	0	0	0	603	903	0
465	9	0	0	0	0	0	0	200	300	0	-46.3104	-107.732	-755.2	15648.2	-19446.2	2044.88	174.25	882.279	0	0	0	0	0	0	0	603	903	0
466	0	0	0	0	0	0	0	200	300	0	-45.5475	-107.885	-759.778	16289.1	-19263.1	2365.31	174.646	881.561	0	0	0	0	0	0	0	603	903	0
466	1	0	0	0	0	0	0	200	300	0	-45.0897	-108.8	-763.745	16197.5	-19324.2	1999.1	174.698	881.792	0	0	0	0	0	0	0	603	903	0
466	2	0	0	0	0	0	0	200	300	0	-45.5475	-108.495	-767.102	17113	-19446.2	1861.77	174.65	880.691	0	0	0	0	0	0	0	603	903	0
466	3	0	0	0	0	0	0	200	300	0	-45.3949	-105.749	-768.323	17021.5	-19995.6	2365.31	173.975	880.846	0	0	0	0	0	0	0	603	903	0
466	4	0	0	0	0	0	0	200	300	0	-46.1578	-106.664	-775.647	17204.6	-19812.4	2136.43	174.457	880.819	0	0	0	0	0	0	0	603	903	0
466	5	0	0	0	0	0	0	200	300	0	-45.3949	-106.817	-779.919	17937	-19873.5	1999.1	174.519	880.001	0	0	0	0	0	0	0	603	903	0
466	6	0	0	0	0	0	0	200	300	0	-44.3268	-107.122	-780.53	17570.8	-20239.7	1861.77	174.069	880.489	0	0	0	0	0	0	0	603	903	0
466	7	0	0	0	0	0	0	200	300	0	-46.1578	-107.122	-787.854	18120.1	-20422.8	1907.55	174.078	880.001	0	0	0	0	0	0	0	603	903	0
466	8	0	0	0	0	0	0	200	300	0	-43.5638	-104.68	-789.685	18394.8	-20728	1632.89	173.752	879.706	0	0	0	0	0	0	0	603	903	0
466	9	0	0	0	0	0	0	200	300	0	-45.7001	-104.528	-793.347	19218.8	-20239.7	1953.32	174.488	878.775	0	0	0	0	0	0	0	603	903	0
467	0	0	0	0	0	0	0	200	300	0	-44.3268	-104.07	-795.178	19493.4	-20361.8	1815.99	174.393	878.485	0	0	0	0	0	0	0	603	903	0
467	1	0	0	0	0	0	0	200	300	0	-43.869	-102.849	-799.451	19310.3	-21094.2	1999.1	173.614	878.846	0	0	0	0	0	0	0	603	903	0
467	2	0	0	0	0	0	0	200	300	0	-45.0897	-103.307	-802.502	19859.6	-21094.2	1999.1	173.715	878.253	0	0	0	0	0	0	0	603	903	0
467	3	0	0	0	0	0	0	200	300	0	-44.7845	-101.934	-804.639	20042.7	-20972.1	1724.44	173.936	878.091	0	0	0	0	0	0	0	603	903	0
467	4	0	0	0	0	0	0	200	300	0	-43.1061	-102.086	-806.47	20592.1	-20911.1	1770.22	174.071	877.466	0	0	0	0	0	0	0	603	903	0
467	5	0	0	0	0	0	0	200	300	0	-42.4957	-100.561	-808.301	20775.2	-21216.3	1999.1	173.752	877.298	0	0	0	0	0	0	0	603	903	0
467	6	0	0	0	0	0	0	200	300	0	-43.4113	-99.9502	-809.216	21049.8	-21582.5	1770.22	173.329	876.987	0	0	0	0	0	0	0	603	903	0
467	7	0	0	0	0	0	0	200	300	0	-42.1905	-99.9502	-813.794	21049.8	-20850	1861.77	174.379	877.134	0	0	0	0	0	0	0	603	903	0
467	8	0	0	0	0	0	0	200	300	0	-40.8173	-100.103	-813.489	21141.4	-21033.2	1770.22	174.145	877.012	0	0	0	0	0	0	0	603	903	0
467	9	0	0	0	0	0	0	200	300	0	-37.9181	-98.1192	-811.658	21599.1	-21460.4	2182.21	173.56	876.389	0	0	0	0	0	0	0	603	903	0
468	0	0	0	0	0	0	0	200	300	0	-39.2914	-99.1873	-814.404	21599.1	-21277.3	1861.77	173.874	876.479	0	0	0	0	0	0	0	603	903	0
468	1	0	0	0	0	0	0	200	300	0	-40.0543	-98.1192	-817.456	22514.7	-21155.2	1953.32	174.121	875.458	0	0	0	0	0	0	0	603	903	0
468	2	0	0	0	0	0	0	200	300	0	-39.444	-97.814	-818.982	22606.2	-21033.2	1999.1	174.318	875.397	0	0	0	0	0	0	0	603	903	0
468	3	0	0	0	0	0	0	200	300	0	-37.7655	-96.2881	-819.287	22880.9	-21399.4	1907.55	173.881	875.072	0	0	0	0	0	0	0	603	903	0
468	4	0	0	0	0	0	0	200	300	0	-37.0026	-97.0511	-820.813	23247.1	-21826.6	2319.53	173.409	874.678	0	0	0	0	0	0	0	603	903	0
468	5	0	0	0	0	0	0	200	300	0	-37.7655	-97.2037	-820.203	23247.1	-21643.5	2044.88	173.612	874.657	0	0	0	0	0	0	0	603	903	0
468	6	0	0	0	0	0	0	200	300	0	-36.3922	-95.983	-820.813	23704.8	-21399.4	2044.88	173.929	874.12	0	0	0	0	0	0	0	603	903	0
468	7	0	0	0	0	0	0	200	300	0	-36.3922	-94.4571	-821.423	23888	-21521.4	2044.88	173.8	873.919	0	0	0	0	0	0	0	603	903	0
468	8	0	0	0	0	0	0	200	300	0	-36.3922	-95.22	-821.729	24071.1	-21582.5	2044.88	173.735	873.707	0	0	0	0	0	0	0	603	903	0
468	9	0	0	0	0	0	0	200	300	0	-35.3241	-93.9993	-822.034	24345.7	-21582.5	2044.88	173.745	873.384	0	0	0	0	0	0	0	603	903	0
469	0	0	0	0	0	0	0	200	300	0	-36.2396	-94.4571	-823.56	23704.8	-21460.4	2090.65	173.942	874.217	0	0	0	0	0	0	0	603	903	0
469	1	0	0	0	0	0	0	200	300	0	-35.9344	-93.9993	-821.729	24071.1	-21094.2	2182.21	174.329	873.707	0	0	0	0	0	0	0	603	903	0
469	2	0	0	0	0	0	0	200	300	0	-33.9508	-93.8467	-822.339	25078.1	-21826.6	2319.53	173.458	872.504	0	0	0	0	0	0	0	603	903	0
469	3	0	0	0	0	0	0	200	300	0	-34.256	-92.4734	-820.813	24803.5	-21582.5	2044.88	173.706	872.782	0	0	0	0	0	0	0	603	903	0
469	4	0	0	0	0	0	0	200	300	0	-34.7137	-91.8631	-820.508	24803.5	-21582.5	2044.88	173.696	872.771	0	0	0	0	0	0	0	603	903	0
469	5	0	0	0	0	0	0	200	300	0	-35.7819	-92.0157	-819.287	25169.7	-21582.5	2319.53	173.657	872.279	0	0	0	0	0	0	0	603	903	0
469	6	0	0	0	0	0	0	200	300	0	-35.1715	-91.2527	-820.203	25535.9	-21765.6	1815.99	173.463	871.866	0	0	0	0	0	0	0	603	903	0
469	7	0	0	0	0	0	0	200	300	0	-34.256	-90.9476	-817.456	25444.3	-22009.7	1770.22	173.075	871.874	0	0	0	0	0	0	0	603	903	0
469	8	0	0	0	0	0	0	200	300	0	-34.1034	-89.8794	-816.235	25627.5	-21460.4	1907.55	173.708	871.603	0	0	0	0	0	0	0	603	903	0
469	9	0	0	0	0	0	0	200	300	0	-35.4767	-89.7269	-815.32	26176.8	-21643.5	1953.32	173.454	870.894	0	0	0	0	0	0	0	603	903	0
470	0	0	0	0	0	0	0	200	300	0	-34.4086	-88.3536	-816.541	26176.8	-21887.6	1724.44	173.195	870.942	0	0	0	0	0	0	0	603	903	0
470	1	0	0	0	0	0	0	200	300	0	-35.0189	-88.201	-815.32	26451.4	-22375.9	1953.32	172.556	870.557	0	0	0	0	0	0	0	603	903	0
470	2	0	0	0	0	0	0	200	300	0	-34.8663	-88.0484	-813.184	26543	-21948.7	1907.55	173.009	870.359	0	0	0	0	0	0	0	603	903	0
470	3	0	0	0	0	0	0	200	300	0	-35.0189	-86.9803	-811.963	26634.5	-21826.6	2044.88	173.119	870.197	0	0	0	0	0	0	0	603	903	0
470	4	0	0	0	0	0	0	200	300	0	-35.3241	-85.9122	-808.911	26359.9	-21948.7	1953.32	172.866	870.413	0	0	0	0	0	0	0	603	903	0
470	5	0	0	0	0	0	0	200	300	0	-35.6293	-84.0811	-804.333	27458.5	-21948.7	1861.77	172.712	868.862	0	0	0	0	0	0	0	603	903	0
470	6	0	0	0	0	0	0	200	300	0	-34.7137	-84.844	-806.47	27458.5	-22070.8	1861.77	172.633	868.952	0	0	0	0	0	0	0	603	903	0
470	7	0	0	0	0	0	0	200	300	0	-34.4086	-84.844	-804.639	27733.2	-21582.5	1770.22	173.177	868.533	0	0	0	0	0	0	0	603	903	0
470	8	0	0	0	0	0	0	200	300	0	-35.4767	-84.2337	-801.282	27550.1	-21643.5	1953.32	172.989	868.618	0	0	0	0	0	0	0	603	903	0
470	9	0	0	0	0	0	0	200	300	0	-34.5612	-84.2337	-799.451	27183.8	-21826.6	1815.99	172.698	868.997	0	0	0	0	0	0	0	603	903	0
471	0	0	0	0	0	0	0	200	300	0	-35.4767	-82.5552	-797.62	28007.8	-21948.7	1724.44	172.482	867.886	0	0	0	0	0	0	0	603	903	0
471	1	0	0	0	0	0	0	200	300	0	-34.256	-81.3345	-795.483	27733.2	-21826.6	1770.22	172.562	868.137	0	0	0	0	0	0	0	603	903	0
471	2	0	0	0	0	0	0	200	300	0	-34.1034	-80.1138	-790.906	27916.3	-21887.6	1953.32	172.326	867.703	0	0	0	0	0	0	0	603	903	0
471	3	0	0	0	0	0	0	200	300	0	-35.9344	-81.1819	-790.601	27641.6	-21826.6	1999.1	172.392	868.037	0	0	0	0	0	0	0	603	903	0
471	4	0	0	0	0	0	0	200	300	0	-36.5448	-79.6561	-787.854	28190.9	-22070.8	1815.99	171.986	867.218	0	0	0	0	0	0	0	603	903	0
471	5	0	0	0	0	0	0	200	300	0	-33.7982	-78.2828	-783.582	28831.8	-21826.6	2182.21	172.145	866.205	0	0	0	0	0	0	0	603	903	0
471	6	0	0	0	0	0	0	200	300	0	-34.256	-77.3672	-782.361	28740.2	-21948.7	1632.89	171.946	866.265	0	0	0	0	0	0	0	603	903	0
471	7	0	0	0	0	0	0	200	300	0	-36.3922	-77.0621	-780.225	29014.9	-22314.9	1907.55	171.399	865.812	0	0	0	0	0	0	0	603	903	0
471	8	0	0	0	0	0	0	200	300	0	-36.087	-76.7569	-776.257	28648.7	-22437	1678.67	171.096	866.094	0	0	0	0	0	0	0	603	903	0
471	9	0	0	0	0	0	0	200	300	0	-34.4086	-76.6043	-773.206	28831.8	-22070.8	1724.44	171.456	865.711	0	0	0	0	0	0	0	603	903	0
472	0	0	0	0	0	0	0	200	300	0	-33.9508	-74.4681	-769.849	29289.6	-22131.8	1724.44	171.252	864.954	0	0	0	0	0	0	0	603	903	0
472	1	0	0	0	0	0	0	200	300	0	-35.1715	-73.5525	-767.102	29106.5	-22070.8	1495.56	171.228	865.057	0	0	0	0	0	0	0	603	903	0
472	2	0	0	0	0	0	0	200	300	0	-35.9344	-71.5689	-762.524	29106.5	-22498	1724.44	170.495	864.829	0	0	0	0	0	0	0	603	903	0
472	3	0	0	0	0	0	0	200	300	0	-35.4767	-72.1793	-760.999	28923.4	-22131.8	1587.11	170.917	864.993	0	0	0	0	0	0	0	603	903	0
472	4	0	0	0	0	0	0	200	300	0	-35.0189	-72.1793	-758.252	29472.7	-21826.6	1449.78	171.215	864.131	0	0	0	0	0	0	0	603	903	0
472	5	0	0	0	0	0	0	200	300	0	-34.8663	-70.043	-751.233	29838.9	-22131.8	1541.34	170.539	863.28	0	0	0	0	0	0	0	603	903	0
472	6	0	0	0	0	0	0	200	300	0	-36.087	-70.806	-750.012	29289.6	-22131.8	1449.78	170.491	863.948	0	0	0	0	0	0	0	603	903	0
472	7	0	0	0	0	0	0	200	300	0	-34.4086	-69.4327	-747.266	29472.7	-22192.8	1495.56	170.301	863.559	0	0	0	0	0	0	0	603	903	0
472	8	0	0	0	0	0	0	200	300	0	-35.6293	-68.5171	-744.519	29838.9	-22253.9	1449.78	170.11	862.922	0	0	0	0	0	0	0	603	903	0
472	9	0	0	0	0	0	0	200	300	0	-35.7819	-67.9068	-742.688	30296.6	-21826.6	1312.45	170.611	862.207	0	0	0	0	0	0	0	603	903	0
473	0	0	0	0	0	0	0	200	300	0	-35.3241	-66.9913	-739.331	29930.4	-22498	1358.23	169.57	862.517	0	0	0	0	0	0	0	603	903	0
473	1	0	0	0	0	0	0	200	300	0	-37.0026	-66.3809	-733.838	29747.3	-22131.8	1587.11	169.841	862.463	0	0	0	0	0	0	0	603	903	0
473	2	0	0	0	0	0	0	200	300	0	-37.1551	-65.9231	-728.345	30937.5	-21704.5	1129.35	170.2	860.524	0	0	0	0	0	0	0	603	903	0
473	3	0	0	0	0	0	0	200	300	0	-35.6293	-64.5499	-725.598	30479.7	-21948.7	1083.57	169.751	860.994	0	0	0	0	0	0	0	603	903	0
473	4	0	0	0	0	0	0	200	300	0	-35.6293	-63.9395	-724.377	30754.4	-22070.8	1129.35	169.531	860.544	0	0	0	0	0	0	0	603	903	0
473	5	0	0	0	0	0	0	200	300	0	-37.9181	-62.1085	-719.495	30205.1	-21887.6	854.691	169.579	861.019	0	0	0	0	0	0	0	603	903	0
473	6	0	0	0	0	0	0	200	300	0	-35.7819	-62.7188	-717.053	30479.7	-22375.9	1083.57	168.795	860.493	0	0	0	0	0	0	0	603	903	0
473	7	0	0	0	0	0	0	200	300	0	-37.3077	-62.1085	-710.95	30571.3	-21643.5	808.914	169.557	859.999	0	0	0	0	0	0	0	603	903	0
473	8	0	0	0	0	0	0	200	300	0	-36.3922	-60.43	-706.067	31212.2	-21826.6	946.243	169.087	858.794	0	0	0	0	0	0	0	603	903	0
473	9	0	0	0	0	0	0	200	300	0	-36.5448	-59.9722	-704.541	30571.3	-21826.6	1083.57	169.02	859.608	0	0	0	0	0	0	0	603	903	0
474	0	0	0	0	0	0	0	200	300	0	-37.9181	-58.9041	-701.489	30662.9	-21826.6	717.362	168.885	859.289	0	0	0	0	0	0	0	603	903	0
474	1	0	0	0	0	0	0	200	300	0	-38.2233	-58.7515	-696.912	31212.2	-21765.6	946.243	168.769	858.214	0	0	0	0	0	0	0	603	903	0
474	2	0	0	0	0	0	0	200	300	0	-37.1551	-56.7679	-692.944	30754.4	-21582.5	671.585	168.854	858.618	0	0	0	0	0	0	0	603	903	0
474	3	0	0	0	0	0	0	200	300	0	-37.6129	-57.0731	-688.977	31303.7	-21704.5	717.362	168.497	857.565	0	0	0	0	0	0	0	603	903	0
474	4	0	0	0	0	0	0	200	300	0	-37.6129	-55.3946	-684.094	30937.5	-21887.6	854.691	168.005	857.776	0	0	0	0	0	0	0	603	903	0
474	5	0	0	0	0	0	0	200	300	0	-38.3759	-54.6316	-683.484	30662.9	-21399.4	625.809	168.691	858.137	0	0	0	0	0	0	0	603	903	0
474	6	0	0	0	0	0	0	200	300	0	-36.85	-52.9532	-677.686	31212.2	-21399.4	580.032	168.423	856.943	0	0	0	0	0	0	0	603	903	0
474	7	0	0	0	0	0	0	200	300	0	-38.2233	-52.8006	-675.549	31120.6	-21521.4	442.703	168.142	856.933	0	0	0	0	0	0	0	603	903	0
474	8	0	0	0	0	0	0	200	300	0	-37.6129	-51.7325	-670.361	30662.9	-21460.4	625.809	167.987	857.259	0	0	0	0	0	0	0	603	903	0
474	9	0	0	0	0	0	0	200	300	0	-38.681	-50.054	-662.732	30571.3	-21521.4	488.48	167.526	856.871	0	0	0	0	0	0	0	603	903	0
475	0	0	0	0	0	0	0	200	300	0	-39.1388	-50.817	-664.258	30479.7	-21155.2	488.48	168.152	857.115	0	0	0	0	0	0	0	603	903	0
475	1	0	0	0	0	0	0	200	300	0	-37.9181	-49.4437	-661.206	31303.7	-21521.4	396.927	167.451	855.657	0	0	0	0	0	0	0	603	903	0
475	2	0	0	0	0	0	0	200	300	0	-36.087	-48.5281	-657.849	31120.6	-21704.5	351.15	167.007	855.693	0	0	0	0	0	0	0	603	903	0
475	3	0	0	0	0	0	0	200	300	0	-37.7655	-47.6126	-653.882	30846	-21521.4	213.821	167.087	855.826	0	0	0	0	0	0	0	603	903	0
475	4	0	0	0	0	0	0	200	300	0	-39.444	-47.1548	-649.304	30754.4	-21338.3	259.598	167.137	855.635	0	0	0	0	0	0	0	603	903	0
475	5	0	0	0	0	0	0	200	300	0	-39.9017	-45.7816	-646.863	31212.2	-21399.4	580.032	166.918	854.748	0	0	0	0	0	0	0	603	903	0
475	6	0	0	0	0	0	0	200	300	0	-38.5284	-44.4083	-643.201	31303.7	-21521.4	213.821	166.54	854.331	0	0	0	0	0	0	0	603	903	0
475	7	0	0	0	0	0	0	200	300	0	-38.5284	-44.4083	-641.37	30662.9	-21521.4	213.821	166.445	855.192	0	0	0	0	0	0	0	603	903	0
475	8	0	0	0	0	0	0	200	300	0	-38.9862	-43.6453	-638.013	30571.3	-21216.3	76.4922	166.746	855.084	0	0	0	0	0	0	0	603	903	0
475	9	0	0	0	0	0	0	200	300	0	-39.444	-43.035	-633.435	30754.4	-21338.3	351.15	166.313	854.448	0	0	0	0	0	0	0	603	903	0
476	0	0	0	0	0	0	0	200	300	0	-38.3759	-42.272	-629.468	31395.3	-21521.4	30.7158	165.81	853.124	0	0	0	0	0	0	0	603	903	0
476	1	0	0	0	0	0	0	200	300	0	-37.0026	-40.5936	-626.416	30754.4	-21399.4	-152.39	165.838	853.904	0	0	0	0	0	0	0	603	903	0
476	2	0	0	0	0	0	0	200	300	0	-38.2233	-39.8306	-623.975	30937.5	-20972.1	-106.613	166.389	853.419	0	0	0	0	0	0	0	603	903	0
476	3	0	0	0	0	0	0	200	300	0	-37.7655	-38.4573	-616.65	31303.7	-21216.3	-106.613	165.594	852.236	0	0	0	0	0	0	0	603	903	0
476	4	0	0	0	0	0	0	200	300	0	-39.9017	-38.7625	-618.787	31486.8	-21460.4	-60.8369	165.319	852.115	0	0	0	0	0	0	0	603	903	0
476	5	0	0	0	0	0	0	200	300	0	-38.8336	-37.6944	-613.904	31486.8	-21277.3	-152.39	165.341	851.711	0	0	0	0	0	0	0	603	903	0
476	6	0	0	0	0	0	0	200	300	0	-38.8336	-36.3211	-611.157	31029.1	-21033.2	-289.719	165.585	852.229	0	0	0	0	0	0	0	603	903	0
476	7	0	0	0	0	0	0	200	300	0	-39.5966	-37.084	-608.716	30754.4	-20972.1	122.269	165.547	852.477	0	0	0	0	0	0	0	603	903	0
476	8	0	0	0	0	0	0	200	300	0	-40.0543	-35.4056	-604.749	31761.5	-21338.3	-381.272	164.715	850.48	0	0	0	0	0	0	0	603	903	0
476	9	0	0	0	0	0	0	200	300	0	-39.1388	-34.7952	-603.223	31761.5	-21277.3	-198.166	164.727	850.347	0	0	0	0	0	0	0	603	903	0
477	0	0	0	0	0	0	0	200	300	0	-38.681	-33.4219	-600.781	31669.9	-20789	-289.719	165.397	850.285	0	0	0	0	0	0	0	603	903	0
477	1	0	0	0	0	0	0	200	300	0	-39.9017	-33.2693	-595.593	31395.3	-20728	-152.39	165.198	850.287	0	0	0	0	0	0	0	603	903	0
477	2	0	0	0	0	0	0	200	300	0	-37.3077	-31.8961	-591.931	31303.7	-21338.3	-152.39	163.951	850.116	0	0	0	0	0	0	0	603	903	0
477	3	0	0	0	0	0	0	200	300	0	-39.9017	-31.1331	-591.321	31486.8	-21033.2	-427.048	164.43	849.752	0	0	0	0	0	0	0	603	903	0
477	4	0	0	0	0	0	0	200	300	0	-39.2914	-30.3702	-588.879	31853	-20911.1	-427.048	164.49	848.909	0	0	0	0	0	0	0	603	903	0
477	5	0	0	0	0	0	0	200	300	0	-38.0707	-30.6754	-585.217	31395.3	-20850	-289.719	164.372	849.353	0	0	0	0	0	0	0	603	903	0
477	6	0	0	0	0	0	0	200	300	0	-40.5121	-30.065	-580.64	31395.3	-20728	-747.483	164.301	848.93	0	0	0	0	0	0	0	603	903	0
477	7	0	0	0	0	0	0	200	300	0	-39.5966	-28.8443	-577.893	31853	-21338.3	-564.377	163.076	847.881	0	0	0	0	0	0	0	603	903	0
477	8	0	0	0	0	0	0	200	300	0	-36.3922	-28.8443	-575.757	31944.6	-20972.1	-884.812	163.575	847.517	0	0	0	0	0	0	0	603	903	0
477	9	0	0	0	0	0	0	200	300	0	-38.0707	-27.7762	-574.231	32219.2	-20728	-427.048	163.903	846.892	0	0	0	0	0	0	0	603	903	0
478	0	0	0	0	0	0	0	200	300	0	-37.7655	-27.471	-570.874	31578.4	-20728	-793.259	163.691	847.684	0	0	0	0	0	0	0	603	903	0
478	1	0	0	0	0	0	0	200	300	0	-38.9862	-27.9288	-569.043	31761.5	-20728	-976.365	163.574	847.184	0	0	0	0	0	0	0	603	903	0
478	2	0	0	0	0	0	0	200	300	0	-38.3759	-26.2503	-565.076	32036.1	-20972.1	-930.588	162.886	846.307	0	0	0	0	0	0	0	603	903	0
478	3	0	0	0	0	0	0	200	300	0	-37.4603	-25.6399	-562.024	32127.7	-20544.9	-976.365	163.445	845.836	0	0	0	0	0	0	0	603	903	0
478	4	0	0	0	0	0	0	200	300	0	-37.1551	-24.877	-560.803	32310.8	-20544.9	-884.812	163.365	845.385	0	0	0	0	0	0	0	603	903	0
478	5	0	0	0	0	0	0	200	300	0	-36.2396	-24.2667	-557.141	31761.5	-20728	-839.035	162.796	845.992	0	0	0	0	0	0	0	603	903	0
478	6	0	0	0	0	0	0	200	300	0	-36.3922	-23.8089	-556.531	32127.7	-20666.9	-1067.92	162.865	845.272	0	0	0	0	0	0	0	603	903	0
478	7	0	0	0	0	0	0	200	300	0	-38.3759	-23.6563	-552.563	32219.2	-20483.8	-1159.47	162.929	844.691	0	0	0	0	0	0	0	603	903	0
478	8	0	0	0	0	0	0	200	300	0	-35.9344	-23.3511	-550.732	32585.5	-20361.8	-930.588	163.028	843.833	0	0	0	0	0	0	0	603	903	0
478	9	0	0	0	0	0	0	200	300	0	-36.3922	-22.7408	-547.375	32219.2	-20544.9	-1159.47	162.467	844.139	0	0	0	0	0	0	0	603	903	0
479	0	0	0	0	0	0	0	200	300	0	-37.1551	-22.4356	-546.765	32127.7	-20728	-1067.92	162.09	844.24	0	0	0	0	0	0	0	603	903	0
479	1	0	0	0	0	0	0	200	300	0	-36.3922	-21.9778	-544.629	32493.9	-20300.7	-1205.25	162.726	843.338	0	0	0	0	0	0	0	603	903	0
479	2	0	0	0	0	0	0	200	300	0	-35.7819	-21.0623	-541.272	32493.9	-20361.8	-1251.02	162.382	842.968	0	0	0	0	0	0	0	603	903	0
479	3	0	0	0	0	0	0	200	300	0	-35.3241	-21.2149	-540.051	32402.3	-20178.7	-839.035	162.636	843.001	0	0	0	0	0	0	0	603	903	0
479	4	0	0	0	0	0	0	200	300	0	-36.2396	-20.452	-537	32310.8	-20300.7	-1342.58	162.196	842.831	0	0	0	0	0	0	0	603	903	0
479	5	0	0	0	0	0	0	200	300	0	-36.3922	-19.3838	-535.779	33317.9	-20666.9	-1296.8	161.426	840.814	0	0	0	0	0	0	0	603	903	0
479	6	0	0	0	0	0	0	200	300	0	-34.8663	-19.2313	-534.558	32951.7	-20239.7	-1296.8	162.138	841.357	0	0	0	0	0	0	0	603	903	0
479	7	0	0	0	0	0	0	200	300	0	-33.9508	-19.3838	-530.591	33043.2	-20056.6	-1525.68	162.2	840.724	0	0	0	0	0	0	0	603	903	0
479	8	0	0	0	0	0	0	200	300	0	-34.1034	-18.9261	-528.76	32677	-19751.4	-1296.8	162.646	841.201	0	0	0	0	0	0	0	603	903	0
479	9	0	0	0	0	0	0	200	300	0	-34.4086	-17.095	-522.961	32493.9	-19995.6	-1479.9	161.765	840.866	0	0	0	0	0	0	0	603	903	0
480	0	0	0	0	0	0	0	200	300	0	-35.6293	-17.5528	-524.182	32585.5	-19934.5	-1479.9	161.97	840.836	0	0	0	0	0	0	0	603	903	0
480	1	0	0	0	0	0	0	200	300	0	-33.1879	-17.4002	-523.572	32951.7	-19568.3	-1571.46	162.625	840.064	0	0	0	0	0	0	0	603	903	0
480	2	0	0	0	0	0	0	200	300	0	-31.0516	-16.9424	-523.267	32860.1	-19568.3	-1525.68	162.604	840.202	0	0	0	0	0	0	0	603	903	0
480	3	0	0	0	0	0	0	200	300	0	-32.7301	-17.5528	-518.384	33043.2	-19873.5	-1434.13	161.663	839.257	0	0	0	0	0	0	0	603	903	0
480	4	0	0	0	0	0	0	200	300	0	-31.3568	-16.3321	-516.553	32860.1	-19690.4	-1434.13	161.881	839.386	0	0	0	0	0	0	0	603	903	0
480	5	0	0	0	0	0	0	200	300	0	-33.9508	-15.8743	-515.027	33409.4	-19324.2	-1388.35	162.479	838.131	0	0	0	0	0	0	0	603	903	0
480	6	0	0	0	0	0	0	200	300	0	-31.8146	-16.1795	-513.806	33226.3	-19263.1	-1159.47	162.509	838.333	0	0	0	0	0	0	0	603	903	0
480	7	0	0	0	0	0	0	200	300	0	-31.9672	-15.5691	-514.111	32951.7	-19507.3	-1663.01	162.056	838.906	0	0	0	0	0	0	0	603	903	0
480	8	0	0	0	0	0	0	200	300	0	-32.4249	-15.264	-510.754	33226.3	-19507.3	-1571.46	161.807	837.947	0	0	0	0	0	0	0	603	903	0
480	9	0	0	0	0	0	0	200	300	0	-31.8146	-14.0433	-510.144	33501	-19629.3	-1617.23	161.522	837.33	0	0	0	0	0	0	0	603	903	0
481	0	0	0	0	0	0	0	200	300	0	-31.2042	-14.1959	-508.008	33958.7	-18835.9	-1525.68	162.922	836.153	0	0	0	0	0	0	0	603	903	0
481	1	0	0	0	0	0	0	200	300	0	-30.2887	-13.8907	-505.261	32677	-19202.1	-1800.34	161.996	838.327	0	0	0	0	0	0	0	603	903	0
481	2	0	0	0	0	0	0	200	300	0	-31.662	-13.5855	-502.515	32860.1	-19202.1	-1617.23	161.788	837.609	0	0	0	0	0	0	0	603	903	0
481	3	0	0	0	0	0	0	200	300	0	-31.5094	-12.5174	-503.735	32860.1	-19324.2	-1800.34	161.638	837.767	0	0	0	0	0	0	0	603	903	0
481	4	0	0	0	0	0	0	200	300	0	-30.7465	-13.2803	-502.82	33684.1	-18896.9	-1846.12	162.418	836.01	0	0	0	0	0	0	0	603	903	0
481	5	0	0	0	0	0	0	200	300	0	-30.4413	-13.1277	-499.463	33867.2	-19019	-1800.34	161.921	835.193	0	0	0	0	0	0	0	603	903	0
481	6	0	0	0	0	0	0	200	300	0	-31.2042	-12.0596	-499.768	33592.5	-18958	-1846.12	162.066	835.784	0	0	0	0	0	0	0	603	903	0
481	7	0	0	0	0	0	0	200	300	0	-31.5094	-11.4493	-498.853	33958.7	-18958	-1846.12	161.997	834.926	0	0	0	0	0	0	0	603	903	0
481	8	0	0	0	0	0	0	200	300	0	-30.1361	-11.4493	-498.547	34141.8	-19324.2	-1891.89	161.239	834.517	0	0	0	0	0	0	0	603	903	0
481	9	0	0	0	0	0	0	200	300	0	-29.9835	-10.8389	-496.411	33958.7	-18958	-1891.89	161.81	834.591	0	0	0	0	0	0	0	603	903	0
482	0	0	0	0	0	0	0	200	300	0	-30.7465	-10.2286	-497.021	33501	-18958	-2075	161.857	835.597	0	0	0	0	0	0	0	603	903	0
482	1	0	0	0	0	0	0	200	300	0	-30.7465	-10.3812	-494.58	33775.6	-19141.1	-1663.01	161.298	834.708	0	0	0	0	0	0	0	603	903	0
482	2	0	0	0	0	0	0	200	300	0	-31.5094	-9.61822	-492.444	33867.2	-19019	-1937.67	161.378	834.226	0	0	0	0	0	0	0	603	903	0
482	3	0	0	0	0	0	0	200	300	0	-28.7628	-9.46563	-493.665	33958.7	-19019	-2029.22	161.474	834.211	0	0	0	0	0	0	0	603	903	0
482	4	0	0	0	0	0	0	200	300	0	-29.068	-9.16046	-493.054	33867.2	-18774.9	-1800.34	161.921	834.311	0	0	0	0	0	0	0	603	903	0
482	5	0	0	0	0	0	0	200	300	0	-30.1361	-8.70269	-492.444	33958.7	-19080	-2212.33	161.254	834.04	0	0	0	0	0	0	0	603	903	0
482	6	0	0	0	0	0	0	200	300	0	-30.1361	-8.85528	-493.054	34325	-19019	-2075	161.426	833.383	0	0	0	0	0	0	0	603	903	0
482	7	0	0	0	0	0	0	200	300	0	-28.6102	-7.78717	-490.002	34508.1	-18530.7	-2212.33	162.182	832.576	0	0	0	0	0	0	0	603	903	0
482	8	0	0	0	0	0	0	200	300	0	-27.3895	-6.87164	-490.918	34141.8	-18774.9	-2258.1	161.756	833.453	0	0	0	0	0	0	0	603	903	0
482	9	0	0	0	0	0	0	200	300	0	-28.7628	-7.78717	-488.477	34508.1	-18958	-2029.22	161.19	832.356	0	0	0	0	0	0	0	603	903	0
483	0	0	0	0	0	0	0	200	300	0	-29.5258	-6.41388	-490.308	34233.4	-18958	-1983.44	161.335	833.18	0	0	0	0	0	0	0	603	903	0
483	1	0	0	0	0	0	0	200	300	0	-28.6102	-6.1087	-490.308	34599.6	-18652.8	-2212.33	161.957	832.433	0	0	0	0	0	0	0	603	903	0
483	2	0	0	0	0	0	0	200	300	0	-27.5421	-5.34576	-487.256	34691.2	-18713.8	-2441.21	161.593	831.803	0	0	0	0	0	0	0	603	903	0
483	3	0	0	0	0	0	0	200	300	0	-27.9999	-5.04058	-486.951	35332	-18835.9	-2578.54	161.319	830.442	0	0	0	0	0	0	0	603	903	0
483	4	0	0	0	0	0	0	200	300	0	-28.4576	-4.58282	-487.561	34782.7	-19141.1	-2486.98	160.741	831.66	0	0	0	0	0	0	0	603	903	0
483	5	0	0	0	0	0	0	200	300	0	-26.7792	-3.51471	-486.035	34782.7	-18652.8	-2486.98	161.623	831.436	0	0	0	0	0	0	0	603	903	0
483	6	0	0	0	0	0	0	200	300	0	-28.4576	-3.51471	-487.866	35148.9	-18469.7	-2441.21	162.142	830.954	0	0	0	0	0	0	0	603	903	0
483	7	0	0	0	0	0	0	200	300	0	-27.6947	-3.66729	-487.256	35332	-18713.8	-2670.09	161.593	830.488	0	0	0	0	0	0	0	603	903	0
483	8	0	0	0	0	0	0	200	300	0	-27.6947	-3.97247	-484.509	35148.9	-18591.7	-2624.31	161.628	830.455	0	0	0	0	0	0	0	603	903	0
483	9	0	0	0	0	0	0	200	300	0	-28.6102	-2.294	-486.34	35148.9	-19141.1	-2624.31	160.643	830.728	0	0	0	0	0	0	0	603	903	0
484	0	0	0	0	0	0	0	200	300	0	-28.7628	-1.83624	-486.34	35057.4	-18652.8	-2395.43	161.647	830.916	0	0	0	0	0	0	0	603	903	0
484	1	0	0	0	0	0	0	200	300	0	-27.6947	-2.294	-483.594	35698.2	-18713.8	-2715.87	161.303	829.181	0	0	0	0	0	0	0	603	903	0
484	2	0	0	0	0	0	0	200	300	0	-27.8473	-1.0733	-487.256	36064.5	-19263.1	-2670.09	160.466	828.985	0	0	0	0	0	0	0	603	903	0
484	3	0	0	0	0	0	0	200	300	0	-28.9154	-1.22589	-487.866	35332	-18896.9	-2715.87	161.266	830.578	0	0	0	0	0	0	0	603	903	0
484	4	0	0	0	0	0	0	200	300	0	-28.6102	-0.462947	-483.289	35606.7	-18835.9	-2990.52	161.026	829.324	0	0	0	0	0	0	0	603	903	0
484	5	0	0	0	0	0	0	200	300	0	-27.3895	-0.462947	-487.256	36156	-18713.8	-2944.75	161.593	828.797	0	0	0	0	0	0	0	603	903	0
484	6	0	0	0	0	0	0	200	300	0	-27.0843	0.757756	-486.34	35972.9	-18896.9	-3082.08	161.145	829.034	0	0	0	0	0	0	0	603	903	0
484	7	0	0	0	0	0	0	200	300	0	-29.2206	1.21552	-487.561	35972.9	-19446.2	-3036.3	160.115	829.219	0	0	0	0	0	0	0	603	903	0
484	8	0	0	0	0	0	0	200	300	0	-25.1007	1.21552	-487.256	36064.5	-19141.1	-2990.52	160.717	828.985	0	0	0	0	0	0	0	603	903	0
484	9	0	0	0	0	0	0	200	300	0	-28.305	1.21552	-488.171	36430.7	-18896.9	-3219.41	161.29	828.373	0	0	0	0	0	0	0	603	903	0
485	0	0	0	0	0	0	0	200	300	0	-26.6266	2.43622	-487.561	36888.4	-18713.8	-3219.41	161.618	827.341	0	0	0	0	0	0	0	603	903	0
485	1	0	0	0	0	0	0	200	300	0	-27.2369	3.04657	-488.171	36064.5	-19141.1	-3310.96	160.79	829.123	0	0	0	0	0	0	0	603	903	0
485	2	0	0	0	0	0	0	200	300	0	-27.9999	2.28363	-488.782	36888.4	-18896.9	-3356.74	161.339	827.53	0	0	0	0	0	0	0	603	903	0
485	3	0	0	0	0	0	0	200	300	0	-27.6947	3.80951	-490.002	36888.4	-18652.8	-3265.18	161.933	827.718	0	0	0	0	0	0	0	603	903	0
485	4	0	0	0	0	0	0	200	300	0	-27.9999	4.41987	-490.918	36980	-18958	-3448.29	161.383	827.672	0	0	0	0	0	0	0	603	903	0
485	5	0	0	0	0	0	0	200	300	0	-27.0843	4.72504	-489.392	37071.5	-19507.3	-3356.74	160.14	827.25	0	0	0	0	0	0	0	603	903	0
485	6	0	0	0	0	0	0	200	300	0	-27.9999	4.87763	-491.528	36980	-19141.1	-3402.51	161.058	827.765	0	0	0	0	0	0	0	603	903	0
485	7	0	0	0	0	0	0	200	300	0	-28.6102	6.40351	-491.223	37437.7	-18896.9	-3631.39	161.531	826.787	0	0	0	0	0	0	0	603	903	0
485	8	0	0	0	0	0	0	200	300	0	-26.7792	6.86127	-493.054	37529.3	-18774.9	-3677.17	161.921	826.884	0	0	0	0	0	0	0	603	903	0
485	9	0	0	0	0	0	0	200	300	0	-27.3895	5.33539	-489.697	37346.2	-18835.9	-3631.39	161.536	826.736	0	0	0	0	0	0	0	603	903	0
486	0	0	0	0	0	0	0	200	300	0	-27.9999	7.01386	-492.749	37712.4	-19263.1	-3585.62	160.907	826.465	0	0	0	0	0	0	0	603	903	0
486	1	0	0	0	0	0	0	200	300	0	-27.9999	8.23456	-493.359	37712.4	-19202.1	-3631.39	161.079	826.56	0	0	0	0	0	0	0	603	903	0
486	2	0	0	0	0	0	0	200	300	0	-26.7792	8.53974	-493.359	37804	-18713.8	-3906.05	162.069	826.374	0	0	0	0	0	0	0	603	903	0
486	3	0	0	0	0	0	0	200	300	0	-26.474	8.9975	-493.97	37712.4	-18896.9	-3997.6	161.745	826.654	0	0	0	0	0	0	0	603	903	0
486	4	0	0	0	0	0	0	200	300	0	-27.8473	9.45527	-496.716	37163.1	-19446.2	-3951.83	160.85	828.182	0	0	0	0	0	0	0	603	903	0
486	5	0	0	0	0	0	0	200	300	0	-27.8473	9.60785	-495.19	38078.6	-19263.1	-3768.72	161.1	826.103	0	0	0	0	0	0	0	603	903	0
486	6	0	0	0	0	0	0	200	300	0	-27.0843	9.45527	-498.547	38170.2	-19019	-4134.94	161.851	826.437	0	0	0	0	0	0	0	603	903	0
486	7	0	0	0	0	0	0	200	300	0	-26.474	10.3708	-498.547	38261.7	-19263.1	-4089.16	161.361	826.254	0	0	0	0	0	0	0	603	903	0
486	8	0	0	0	0	0	0	200	300	0	-27.8473	11.1337	-498.547	38444.8	-19568.3	-4226.49	160.749	825.886	0	0	0	0	0	0	0	603	903	0
486	9	0	0	0	0	0	0	200	300	0	-27.5421	11.7441	-500.378	38994.2	-19080	-3951.83	161.869	825.071	0	0	0	0	0	0	0	603	903	0
487	0	0	0	0	0	0	0	200	300	0	-27.0843	11.5915	-501.904	38902.6	-19080	-4180.71	161.985	825.49	0	0	0	0	0	0	0	603	903	0
487	1	0	0	0	0	0	0	200	300	0	-26.9318	12.0493	-502.82	39085.7	-19263.1	-4455.37	161.69	825.267	0	0	0	0	0	0	0	603	903	0
487	2	0	0	0	0	0	0	200	300	0	-27.3895	12.8122	-503.125	39085.7	-19568.3	-4363.82	161.106	825.314	0	0	0	0	0	0	0	603	903	0
487	3	0	0	0	0	0	0	200	300	0	-27.2369	12.9648	-505.261	39818.1	-19324.2	-4043.38	161.754	824.193	0	0	0	0	0	0	0	603	903	0
487	4	0	0	0	0	0	0	200	300	0	-26.9318	12.507	-504.346	39909.7	-19202.1	-4272.27	161.927	823.868	0	0	0	0	0	0	0	603	903	0
487	5	0	0	0	0	0	0	200	300	0	-26.7792	14.4907	-507.092	39818.1	-19690.4	-4501.15	161.17	824.478	0	0	0	0	0	0	0	603	903	0
487	6	0	0	0	0	0	0	200	300	0	-27.5421	14.1855	-508.618	40092.8	-19202.1	-4592.7	162.247	824.173	0	0	0	0	0	0	0	603	903	0
487	7	0	0	0	0	0	0	200	300	0	-27.3895	14.7958	-507.397	40092.8	-19385.2	-4363.82	161.795	823.984	0	0	0	0	0	0	0	603	903	0
487	8	0	0	0	0	0	0	200	300	0	-26.7792	16.3217	-506.482	40825.2	-19751.4	-4775.81	161.003	822.395	0	0	0	0	0	0	0	603	903	0
487	9	0	0	0	0	0	0	200	300	0	-27.0843	16.4743	-510.449	40733.6	-19629.3	-4775.81	161.545	823.2	0	0	0	0	0	0	0	603	903	0
488	0	0	0	0	0	0	0	200	300	0	-27.9999	16.9321	-513.196	40459	-19446.2	-4821.58	162.108	824.163	0	0	0	0	0	0	0	603	903	0
488	1	0	0	0	0	0	0	200	300	0	-27.9999	16.6269	-513.501	40642.1	-19263.1	-4684.25	162.487	823.853	0	0	0	0	0	0	0	603	903	0
488	2	0	0	0	0	0	0	200	300	0	-27.0843	16.7795	-511.365	41008.3	-19995.6	-5096.24	160.898	822.806	0	0	0	0	0	0	0	603	903	0
488	3	0	0	0	0	0	0	200	300	0	-26.7792	17.3898	-515.637	41283	-19629.3	-4913.13	161.932	822.938	0	0	0	0	0	0	0	603	903	0
488	4	0	0	0	0	0	0	200	300	0	-26.7792	18.458	-516.553	41466.1	-19690.4	-4913.13	161.881	822.725	0	0	0	0	0	0	0	603	903	0
488	5	0	0	0	0	0	0	200	300	0	-28.9154	19.2209	-519.91	41099.9	-19995.6	-5096.24	161.54	823.948	0	0	0	0	0	0	0	603	903	0
488	6	0	0	0	0	0	0	200	300	0	-28.305	19.0683	-519.299	41740.7	-19934.5	-5004.69	161.613	822.621	0	0	0	0	0	0	0	603	903	0
488	7	0	0	0	0	0	0	200	300	0	-27.0843	18.9157	-520.825	42381.6	-19995.6	-5187.79	161.608	821.626	0	0	0	0	0	0	0	603	903	0
488	8	0	0	0	0	0	0	200	300	0	-27.3895	19.8312	-522.046	41832.3	-20117.6	-4958.91	161.464	822.869	0	0	0	0	0	0	0	603	903	0
488	9	0	0	0	0	0	0	200	300	0	-28.4576	21.0519	-521.436	42015.4	-20178.7	-5187.79	161.302	822.424	0	0	0	0	0	0	0	603	903	0
489	0	0	0	0	0	0	0	200	300	0	-26.9318	19.3735	-523.572	42381.6	-20056.6	-5279.35	161.693	822.053	0	0	0	0	0	0	0	603	903	0
489	1	0	0	0	0	0	0	200	300	0	-28.1525	21.5097	-525.403	43022.5	-20178.7	-4867.36	161.594	821.115	0	0	0	0	0	0	0	603	903	0
489	2	0	0	0	0	0	0	200	300	0	-27.0843	21.8149	-526.318	43205.6	-20422.8	-5416.67	161.197	820.91	0	0	0	0	0	0	0	603	903	0
489	3	0	0	0	0	0	0	200	300	0	-27.8473	22.883	-527.539	43022.5	-20239.7	-5508.23	161.634	821.447	0	0	0	0	0	0	0	603	903	0
489	4	0	0	0	0	0	0	200	300	0	-28.305	22.883	-528.76	43022.5	-20239.7	-5416.67	161.722	821.635	0	0	0	0	0	0	0	603	903	0
489	5	0	0	0	0	0	0	200	300	0	-29.068	23.3408	-530.286	43938	-20239.7	-5508.23	161.832	820.143	0	0	0	0	0	0	0	603	903	0
489	6	0	0	0	0	0	0	200	300	0	-28.1525	24.1037	-532.117	44395.8	-20544.9	-5599.78	161.39	819.568	0	0	0	0	0	0	0	603	903	0
489	7	0	0	0	0	0	0	200	300	0	-27.9999	24.1037	-533.337	43388.7	-20056.6	-5828.66	162.394	821.647	0	0	0	0	0	0	0	603	903	0
489	8	0	0	0	0	0	0	200	300	0	-29.2206	23.7985	-533.948	44762	-20056.6	-5920.21	162.437	819.168	0	0	0	0	0	0	0	603	903	0
489	9	0	0	0	0	0	0	200	300	0	-29.5258	24.5615	-536.084	44578.9	-20605.9	-5920.21	161.562	819.844	0	0	0	0	0	0	0	603	903	0
490	0	0	0	0	0	0	0	200	300	0	-29.6783	26.3925	-537.61	45219.8	-20300.7	-5782.89	162.239	818.887	0	0	0	0	0	0	0	603	903	0
490	1	0	0	0	0	0	0	200	300	0	-28.6102	26.8503	-539.136	45494.4	-20483.8	-6149.1	162.006	818.616	0	0	0	0	0	0	0	603	903	0
490	2	0	0	0	0	0	0	200	300	0	-28.7628	26.3925	-542.493	45128.2	-20422.8	-6194.87	162.354	819.813	0	0	0	0	0	0	0	603	903	0
490	3	0	0	0	0	0	0	200	300	0	-29.9835	25.477	-541.882	45219.8	-20666.9	-6194.87	161.861	819.551	0	0	0	0	0	0	0	603	903	0
490	4	0	0	0	0	0	0	200	300	0	-30.2887	27.1555	-541.882	46501.5	-20483.8	-6194.87	162.199	817.185	0	0	0	0	0	0	0	603	903	0
490	5	0	0	0	0	0	0	200	300	0	-28.9154	28.3762	-544.324	46776.1	-20544.9	-6149.1	162.256	817.066	0	0	0	0	0	0	0	603	903	0
490	6	0	0	0	0	0	0	200	300	0	-29.2206	29.2917	-545.85	46501.5	-20850	-6561.08	161.803	817.809	0	0	0	0	0	0	0	603	903	0
490	7	0	0	0	0	0	0	200	300	0	-29.6783	27.0029	-544.324	46501.5	-20728	-6286.43	161.92	817.57	0	0	0	0	0	0	0	603	903	0
490	8	0	0	0	0	0	0	200	300	0	-28.9154	28.8339	-547.986	46867.7	-20300.7	-6606.86	162.954	817.473	0	0	0	0	0	0	0	603	903	0
490	9	0	0	0	0	0	0	200	300	0	-31.662	29.5969	-549.817	47874.8	-20605.9	-6377.98	162.522	815.926	0	0	0	0	0	0	0	603	903	0
491	0	0	0	0	0	0	0	200	300	0	-29.9835	31.1227	-550.427	47783.2	-21033.2	-6377.98	161.788	816.189	0	0	0	0	0	0	0	603	903	0
491	1	0	0	0	0	0	0	200	300	0	-29.9835	31.2753	-552.869	47691.7	-20850	-6789.97	162.288	816.738	0	0	0	0	0	0	0	603	903	0
491	2	0	0	0	0	0	0	200	300	0	-31.2042	31.4279	-554.7	48149.4	-20666.9	-6698.41	162.742	816.197	0	0	0	0	0	0	0	603	903	0
491	3	0	0	0	0	0	0	200	300	0	-31.0516	31.2753	-555.005	48607.2	-21033.2	-6789.97	162.103	815.42	0	0	0	0	0	0	0	603	903	0
491	4	0	0	0	0	0	0	200	300	0	-30.7465	31.4279	-556.836	49431.2	-20728	-6881.52	162.775	814.228	0	0	0	0	0	0	0	603	903	0
491	5	0	0	0	0	0	0	200	300	0	-30.2887	33.259	-556.836	49248.1	-20361.8	-6606.86	163.433	814.557	0	0	0	0	0	0	0	603	903	0
491	6	0	0	0	0	0	0	200	300	0	-30.4413	32.6486	-559.583	49431.2	-20666.9	-7110.4	163.067	814.664	0	0	0	0	0	0	0	603	903	0
491	7	0	0	0	0	0	0	200	300	0	-31.9672	33.7167	-561.719	49797.4	-21033.2	-7110.4	162.556	814.348	0	0	0	0	0	0	0	603	903	0
491	8	0	0	0	0	0	0	200	300	0	-31.662	33.1064	-562.634	50255.1	-20972.1	-7293.51	162.725	813.679	0	0	0	0	0	0	0	603	903	0
491	9	0	0	0	0	0	0	200	300	0	-30.7465	31.8857	-563.245	50346.7	-20300.7	-7064.62	163.958	813.613	0	0	0	0	0	0	0	603	903	0
492	0	0	0	0	0	0	0	200	300	0	-30.1361	34.4797	-564.465	50896	-21033.2	-7339.28	162.738	812.833	0	0	0	0	0	0	0	603	903	0
492	1	0	0	0	0	0	0	200	300	0	-32.1197	35.2426	-565.991	51445.3	-21033.2	-7430.83	162.838	812.106	0	0	0	0	0	0	0	603	903	0
492	2	0	0	0	0	0	0	200	300	0	-31.9672	35.5478	-568.127	51170.7	-21033.2	-7339.28	162.978	812.931	0	0	0	0	0	0	0	603	903	0
492	3	0	0	0	0	0	0	200	300	0	-30.899	35.3952	-565.076	52452.4	-20789	-6973.07	163.21	810.176	0	0	0	0	0	0	0	603	903	0
492	4	0	0	0	0	0	0	200	300	0	-30.7465	35.3952	-571.179	52360.9	-21033.2	-7385.06	163.176	811.329	0	0	0	0	0	0	0	603	903	0
492	5	0	0	0	0	0	0	200	300	0	-31.8146	36.0056	-570.874	52269.3	-21704.5	-7430.83	161.98	811.44	0	0	0	0	0	0	0	603	903	0
492	6	0	0	0	0	0	0	200	300	0	-30.5939	36.7685	-573.01	52635.5	-20972.1	-7430.83	163.4	811.142	0	0	0	0	0	0	0	603	903	0
492	7	0	0	0	0	0	0	200	300	0	-32.2723	36.3107	-570.874	53001.7	-21094.2	-7247.73	163.049	810.157	0	0	0	0	0	0	0	603	903	0
492	8	0	0	0	0	0	0	200	300	0	-30.5939	37.5314	-577.588	53459.5	-21277.3	-7705.49	163.162	810.444	0	0	0	0	0	0	0	603	903	0
492	9	0	0	0	0	0	0	200	300	0	-30.4413	37.5314	-578.503	53459.5	-21033.2	-7659.72	163.642	810.59	0	0	0	0	0	0	0	603	903	0
493	0	0	0	0	0	0	0	200	300	0	-32.2723	37.3788	-579.724	54191.9	-21094.2	-7659.72	163.613	809.521	0	0	0	0	0	0	0	603	903	0
493	1	0	0	0	0	0	0	200	300	0	-33.1879	38.5996	-579.724	55199	-21704.5	-7385.06	162.561	807.784	0	0	0	0	0	0	0	603	903	0
493	2	0	0	0	0	0	0	200	300	0	-31.3568	38.7521	-582.471	55107.4	-21338.3	-7797.05	163.366	808.39	0	0	0	0	0	0	0	603	903	0
493	3	0	0	0	0	0	0	200	300	0	-31.2042	39.0573	-583.691	55107.4	-21338.3	-7980.15	163.442	808.588	0	0	0	0	0	0	0	603	903	0
493	4	0	0	0	0	0	0	200	300	0	-31.9672	38.5996	-586.133	55473.7	-21521.4	-7934.37	163.282	808.357	0	0	0	0	0	0	0	603	903	0
493	5	0	0	0	0	0	0	200	300	0	-32.8827	38.447	-587.048	56206.1	-21704.5	-8117.48	163.028	807.257	0	0	0	0	0	0	0	603	903	0
493	6	0	0	0	0	0	0	200	300	0	-31.3568	39.2099	-589.49	57213.1	-21277.3	-7934.37	163.906	805.945	0	0	0	0	0	0	0	603	903	0
493	7	0	0	0	0	0	0	200	300	0	-30.4413	40.278	-589.795	56938.5	-21521.4	-7797.05	163.51	806.461	0	0	0	0	0	0	0	603	903	0
493	8	0	0	0	0	0	0	200	300	0	-32.2723	39.3625	-592.542	57670.9	-21643.5	-8117.48	163.473	805.672	0	0	0	0	0	0	0	603	903	0
493	9	0	0	0	0	0	0	200	300	0	-32.7301	39.8203	-591.626	57670.9	-21887.6	-8071.71	163.004	805.521	0	0	0	0	0	0	0	603	903	0
494	0	0	0	0	0	0	0	200	300	0	-33.1879	39.8203	-596.814	58311.8	-21765.6	-7842.82	163.53	805.295	0	0	0	0	0	0	0	603	903	0
494	1	0	0	0	0	0	0	200	300	0	-31.662	40.5832	-595.593	58220.2	-22009.7	-8025.93	163.046	805.248	0	0	0	0	0	0	0	603	903	0
494	2	0	0	0	0	0	0	200	300	0	-31.9672	41.4987	-598.95	59502	-21948.7	-8117.48	163.355	803.656	0	0	0	0	0	0	0	603	903	0
494	3	0	0	0	0	0	0	200	300	0	-32.5775	40.1254	-600.781	59593.5	-21460.4	-7980.15	164.279	803.807	0	0	0	0	0	0	0	603	903	0
494	4	0	0	0	0	0	0	200	300	0	-33.3405	41.8039	-600.781	60051.3	-21643.5	-8117.48	163.974	803.045	0	0	0	0	0	0	0	603	903	0
494	5	0	0	0	0	0	0	200	300	0	-33.6456	41.3461	-604.749	60783.7	-21704.5	-8300.59	164.11	802.489	0	0	0	0	0	0	0	603	903	0
494	6	0	0	0	0	0	0	200	300	0	-32.1197	41.6513	-604.138	60783.7	-22070.8	-8392.14	163.467	802.388	0	0	0	0	0	0	0	603	903	0
494	7	0	0	0	0	0	0	200	300	0	-32.2723	42.5668	-603.528	61333	-21765.6	-8483.69	163.936	801.376	0	0	0	0	0	0	0	603	903	0
494	8	0	0	0	0	0	0	200	300	0	-33.0353	40.8884	-606.274	62340.1	-22070.8	-8071.71	163.596	800.175	0	0	0	0	0	0	0	603	903	0
494	9	0	0	0	0	0	0	200	300	0	-33.7982	42.4142	-609.326	62248.6	-22192.8	-8666.8	163.578	800.84	0	0	0	0	0	0	0	603	903	0
495	0	0	0	0	0	0	0	200	300	0	-33.1879	42.2617	-612.683	63530.3	-21704.5	-8437.92	164.575	799.308	0	0	0	0	0	0	0	603	903	0
495	1	0	0	0	0	0	0	200	300	0	-30.899	42.1091	-612.073	63621.8	-22192.8	-8666.8	163.742	799.055	0	0	0	0	0	0	0	603	903	0
495	2	0	0	0	0	0	0	200	300	0	-32.8827	41.8039	-613.293	64079.6	-22437	-8300.59	163.416	798.516	0	0	0	0	0	0	0	603	903	0
495	3	0	0	0	0	0	0	200	300	0	-32.1197	43.7875	-614.514	64537.4	-22437	-8575.25	163.488	797.978	0	0	0	0	0	0	0	603	903	0
495	4	0	0	0	0	0	0	200	300	0	-34.1034	43.0246	-616.65	65178.2	-22314.9	-8712.58	163.813	797.303	0	0	0	0	0	0	0	603	903	0
495	5	0	0	0	0	0	0	200	300	0	-33.3405	43.3298	-617.871	66185.3	-22437	-8941.46	163.687	795.882	0	0	0	0	0	0	0	603	903	0
495	6	0	0	0	0	0	0	200	300	0	-32.8827	42.7194	-620.312	66002.2	-22681.1	-8849.9	163.436	796.599	0	0	0	0	0	0	0	603	903	0
495	7	0	0	0	0	0	0	200	300	0	-34.256	42.2617	-620.007	66734.6	-22192.8	-8941.46	164.206	795.365	0	0	0	0	0	0	0	603	903	0
495	8	0	0	0	0	0	0	200	300	0	-34.4086	44.0927	-620.312	67100.8	-22498	-8941.46	163.731	794.827	0	0	0	0	0	0	0	603	903	0
495	9	0	0	0	0	0	0	200	300	0	-33.9508	43.9401	-622.754	68840.3	-22803.2	-8941.46	163.383	792.458	0	0	0	0	0	0	0	603	903	0
496	0	0	0	0	0	0	0	200	300	0	-31.9672	44.3979	-625.5	68657.2	-22925.2	-9078.79	163.349	793.236	0	0	0	0	0	0	0	603	903	0
496	1	0	0	0	0	0	0	200	300	0	-34.7137	43.1772	-626.416	68840.3	-22681.1	-8849.9	163.792	793.104	0	0	0	0	0	0	0	603	903	0
496	2	0	0	0	0	0	0	200	300	0	-35.0189	41.6513	-627.332	69572.8	-22620.1	-9078.79	163.942	792.097	0	0	0	0	0	0	0	603	903	0
496	3	0	0	0	0	0	0	200	300	0	-35.4767	44.5505	-628.857	70488.3	-22986.3	-9353.44	163.448	790.911	0	0	0	0	0	0	0	603	903	0
496	4	0	0	0	0	0	0	200	300	0	-34.8663	45.0082	-630.078	71129.1	-22559	-9170.34	164.196	790.111	0	0	0	0	0	0	0	603	903	0
496	5	0	0	0	0	0	0	200	300	0	-34.4086	45.0082	-632.52	71312.3	-22620.1	-9353.44	164.238	790.257	0	0	0	0	0	0	0	603	903	0
496	6	0	0	0	0	0	0	200	300	0	-35.9344	45.6186	-632.825	72044.7	-23169.4	-9170.34	163.387	789.154	0	0	0	0	0	0	0	603	903	0
496	7	0	0	0	0	0	0	200	300	0	-35.6293	44.0927	-636.182	73051.8	-22986.3	-9536.55	163.868	788.172	0	0	0	0	0	0	0	603	903	0
496	8	0	0	0	0	0	0	200	300	0	-34.8663	43.9401	-636.487	73418	-22864.2	-9811.21	164.077	787.651	0	0	0	0	0	0	0	603	903	0
496	9	0	0	0	0	0	0	200	300	0	-34.8663	45.3134	-638.318	73784.2	-22925.2	-9536.55	164.085	787.408	0	0	0	0	0	0	0	603	903	0
497	0	0	0	0	0	0	0	200	300	0	-37.0026	45.6186	-638.623	74150.4	-23047.3	-9673.88	163.911	786.89	0	0	0	0	0	0	0	603	903	0
497	1	0	0	0	0	0	0	200	300	0	-37.4603	45.9238	-642.59	75615.2	-22742.1	-9582.33	164.609	785.328	0	0	0	0	0	0	0	603	903	0
497	2	0	0	0	0	0	0	200	300	0	-35.0189	44.7031	-645.337	75981.4	-22864.2	-9719.66	164.57	785.261	0	0	0	0	0	0	0	603	903	0
497	3	0	0	0	0	0	0	200	300	0	-35.4767	45.466	-644.421	75981.4	-23169.4	-9536.55	164.046	785.094	0	0	0	0	0	0	0	603	903	0
497	4	0	0	0	0	0	0	200	300	0	-37.1551	46.0764	-643.811	77080.1	-23291.5	-10040.1	163.823	783.275	0	0	0	0	0	0	0	603	903	0
497	5	0	0	0	0	0	0	200	300	0	-37.0026	45.9238	-647.778	77995.6	-23108.3	-9902.76	164.327	782.595	0	0	0	0	0	0	0	603	903	0
497	6	0	0	0	0	0	0	200	300	0	-36.3922	45.6186	-650.22	78819.6	-23047.3	-10040.1	164.555	781.78	0	0	0	0	0	0	0	603	903	0
497	7	0	0	0	0	0	0	200	300	0	-36.3922	45.6186	-650.83	78544.9	-23718.7	-9948.54	163.556	782.316	0	0	0	0	0	0	0	603	903	0
497	8	0	0	0	0	0	0	200	300	0	-37.4603	44.2453	-654.187	79277.3	-22986.3	-9536.55	164.863	781.816	0	0	0	0	0	0	0	603	903	0
497	9	0	0	0	0	0	0	200	300	0	-37.3077	45.9238	-653.882	81291.5	-23047.3	-9811.21	164.753	778.679	0	0	0	0	0	0	0	603	903	0
498	0	0	0	0	0	0	0	200	300	0	-36.6974	46.2289	-655.408	80376	-23657.7	-10040.1	163.904	780.365	0	0	0	0	0	0	0	603	903	0
498	1	0	0	0	0	0	0	200	300	0	-37.4603	46.5341	-657.239	82756.3	-23474.6	-10040.1	164.283	777.085	0	0	0	0	0	0	0	603	903	0
498	2	0	0	0	0	0	0	200	300	0	-37.7655	46.0764	-657.239	81474.6	-23352.5	-10269	164.469	779.035	0	0	0	0	0	0	0	603	903	0
498	3	0	0	0	0	0	0	200	300	0	-38.3759	46.3815	-660.596	82390.1	-23596.6	-9856.98	164.28	778.279	0	0	0	0	0	0	0	603	903	0
498	4	0	0	0	0	0	0	200	300	0	-37.3077	46.5341	-661.206	84495.9	-24207	-10314.7	163.39	775.209	0	0	0	0	0	0	0	603	903	0
498	5	0	0	0	0	0	0	200	300	0	-37.3077	47.6022	-662.732	84587.4	-24145.9	-10223.2	163.566	775.366	0	0	0	0	0	0	0	603	903	0
498	6	0	0	0	0	0	0	200	300	0	-38.5284	45.9238	-664.258	85045.2	-23474.6	-10269	164.66	774.97	0	0	0	0	0	0	0	603	903	0
498	7	0	0	0	0	0	0	200	300	0	-37.1551	48.2126	-667.004	85594.5	-24329.1	-10360.5	163.525	774.673	0	0	0	0	0	0	0	603	903	0
498	8	0	0	0	0	0	0	200	300	0	-38.2233	47.2971	-668.835	86418.5	-23901.8	-10452.1	164.264	773.793	0	0	0	0	0	0	0	603	903	0
498	9	0	0	0	0	0	0	200	300	0	-38.3759	47.6022	-669.141	87150.9	-24023.9	-10223.2	164.097	772.757	0	0	0	0	0	0	0	603	903	0
499	0	0	0	0	0	0	0	200	300	0	-38.8336	47.9074	-671.582	87150.9	-24084.9	-10543.6	164.137	773.23	0	0	0	0	0	0	0	603	903	0
499	1	0	0	0	0	0	0	200	300	0	-39.444	48.8229	-674.329	88158	-24390.1	-10681	163.831	772.266	0	0	0	0	0	0	0	603	903	0
499	2	0	0	0	0	0	0	200	300	0	-40.2069	48.5178	-674.939	89073.5	-24573.2	-10818.3	163.592	771.027	0	0	0	0	0	0	0	603	903	0
499	3	0	0	0	0	0	0	200	300	0	-38.9862	49.5859	-676.465	89714.4	-23962.8	-10681	164.576	770.378	0	0	0	0	0	0	0	603	903	0
499	4	0	0	0	0	0	0	200	300	0	-39.2914	49.2807	-678.601	89622.8	-24573.2	-10543.6	163.788	770.93	0	0	0	0	0	0	0	603	903	0
499	5	0	0	0	0	0	0	200	300	0	-40.5121	48.5178	-680.127	91087.7	-24634.2	-10726.7	163.78	769.073	0	0	0	0	0	0	0	603	903	0
499	6	0	0	0	0	0	0	200	300	0	-40.2069	49.8911	-680.127	91362.3	-24573.2	-10864.1	163.87	768.669	0	0	0	0	0	0	0	603	903	0
499	7	0	0	0	0	0	0	200	300	0	-39.2914	49.7385	-682.874	92277.8	-24512.2	-10955.6	164.104	767.868	0	0	0	0	0	0	0	603	903	0
499	8	0	0	0	0	0	0	200	300	0	-39.5966	50.1962	-685.62	93559.6	-25061.5	-10864.1	163.447	766.54	0	0	0	0	0	0	0	603	903	0
499	9	0	0	0	0	0	0	200	300	0	-40.5121	50.0436	-688.977	93010.2	-25061.5	-10955.6	163.625	768.002	0	0	0	0	0	0	0	603	903	0
500	0	0	0	0	0	0	0	200	300	0	-39.2914	50.0436	-691.418	94108.9	-24817.3	-10909.8	164.107	766.89	0	0	0	0	0	0	0	603	903	0
500	1	0	0	0	0	0	0	200	300	0	-40.0543	51.5695	-691.418	95024.5	-25122.5	-11001.4	163.665	765.566	0	0	0	0	0	0	0	603	903	0
500	2	0	0	0	0	0	0	200	300	0	-40.2069	52.6376	-695.081	95939.9	-25061.5	-10909.8	163.945	764.973	0	0	0	0	0	0	0	603	903	0
500	3	0	0	0	0	0	0	200	300	0	-39.444	53.0954	-695.996	96031.5	-24878.4	-10955.6	164.255	765.023	0	0	0	0	0	0	0	603	903	0
500	4	0	0	0	0	0	0	200	300	0	-40.9698	54.3161	-699.963	96214.6	-24939.4	-11001.4	164.37	765.543	0	0	0	0	0	0	0	603	903	0
500	5	0	0	0	0	0	0	200	300	0	-41.4276	53.8583	-701.794	98045.7	-25183.5	-11047.2	164.116	763.293	0	0	0	0	0	0	0	603	903	0
500	6	0	0	0	0	0	0	200	300	0	-40.2069	54.1635	-703.625	98045.7	-25122.5	-11092.9	164.296	763.656	0	0	0	0	0	0	0	603	903	0
500	7	0	0	0	0	0	0	200	300	0	-39.9017	55.079	-705.151	99510.5	-25122.5	-11001.4	164.373	761.881	0	0	0	0	0	0	0	603	903	0
500	8	0	0	0	0	0	0	200	300	0	-41.8854	56.2997	-706.677	99510.5	-25732.9	-11276.1	163.586	762.185	0	0	0	0	0	0	0	603	903	0
500	9	0	0	0	0	0	0	200	300	0	-40.0543	54.9265	-709.424	100151	-25610.8	-11367.6	163.899	761.827	0	0	0	0	0	0	0	603	903	0
501	0	0	0	0	0	0	0	200	300	0	-41.5802	57.673	-712.17	101158	-25427.7	-11138.7	164.296	760.958	0	0	0	0	0	0	0	603	903	0
501	1	0	0	0	0	0	0	200	300	0	-40.8173	56.9101	-714.307	101982	-25793.9	-11596.5	163.89	760.229	0	0	0	0	0	0	0	603	903	0
501	2	0	0	0	0	0	0	200	300	0	-41.4276	56.6049	-715.527	102074	-25977	-11367.6	163.695	760.344	0	0	0	0	0	0	0	603	903	0
501	3	0	0	0	0	0	0	200	300	0	-41.7328	58.2834	-718.274	102715	-25977	-11596.5	163.834	759.998	0	0	0	0	0	0	0	603	903	0
501	4	0	0	0	0	0	0	200	300	0	-42.4957	59.1989	-720.105	103722	-25671.8	-11550.7	164.35	758.963	0	0	0	0	0	0	0	603	903	0
501	5	0	0	0	0	0	0	200	300	0	-40.2069	58.8937	-720.715	104729	-26648.4	-11047.2	163.025	757.687	0	0	0	0	0	0	0	603	903	0
501	6	0	0	0	0	0	0	200	300	0	-39.7491	61.1826	-726.514	105095	-26221.1	-11596.5	163.908	758.343	0	0	0	0	0	0	0	603	903	0
501	7	0	0	0	0	0	0	200	300	0	-40.2069	61.4877	-730.176	105461	-26038	-11550.7	164.34	758.567	0	0	0	0	0	0	0	603	903	0
501	8	0	0	0	0	0	0	200	300	0	-39.5966	62.7084	-730.176	105736	-26221.1	-11642.3	164.089	758.191	0	0	0	0	0	0	0	603	903	0
501	9	0	0	0	0	0	0	200	300	0	-38.0707	63.624	-733.228	107476	-26343.2	-11550.7	164.072	756.421	0	0	0	0	0	0	0	603	903	0
502	0	0	0	0	0	0	0	200	300	0	-37.7655	65.9128	-735.669	107659	-26404.2	-11688	164.109	756.659	0	0	0	0	0	0	0	603	903	0
502	1	0	0	0	0	0	0	200	300	0	-38.3759	63.9291	-737.805	107659	-26343.2	-11504.9	164.295	757.083	0	0	0	0	0	0	0	603	903	0
502	2	0	0	0	0	0	0	200	300	0	-35.6293	68.049	-740.247	108025	-25977	-11459.2	164.908	757.069	0	0	0	0	0	0	0	603	903	0
502	3	0	0	0	0	0	0	200	300	0	-37.7655	68.5068	-742.383	109490	-26404.2	-11733.8	164.433	755.516	0	0	0	0	0	0	0	603	903	0
502	4	0	0	0	0	0	0	200	300	0	-37.1551	67.4387	-743.604	109856	-26221.1	-11504.9	164.738	755.265	0	0	0	0	0	0	0	603	903	0
502	5	0	0	0	0	0	0	200	300	0	-37.1551	70.643	-746.045	109856	-26648.4	-11825.4	164.28	755.749	0	0	0	0	0	0	0	603	903	0
502	6	0	0	0	0	0	0	200	300	0	-38.5284	71.406	-747.876	110497	-26587.4	-11550.7	164.45	755.253	0	0	0	0	0	0	0	603	903	0
502	7	0	0	0	0	0	0	200	300	0	-37.9181	71.1008	-748.181	111412	-26770.5	-11916.9	164.219	754.089	0	0	0	0	0	0	0	603	903	0
502	8	0	0	0	0	0	0	200	300	0	-37.4603	73.3896	-751.538	112145	-26648.4	-11916.9	164.542	753.78	0	0	0	0	0	0	0	603	903	0
502	9	0	0	0	0	0	0	200	300	0	-36.85	73.5422	-754.59	112969	-26404.2	-11642.3	165.008	753.291	0	0	0	0	0	0	0	603	903	0
503	0	0	0	0	0	0	0	200	300	0	-38.0707	74.6103	-752.759	112969	-26892.5	-12191.6	164.275	752.927	0	0	0	0	0	0	0	603	903	0
503	1	0	0	0	0	0	0	200	300	0	-37.6129	75.0681	-756.421	113610	-26343.2	-12191.6	165.174	752.806	0	0	0	0	0	0	0	603	903	0
503	2	0	0	0	0	0	0	200	300	0	-36.6974	76.4414	-756.726	114067	-26587.4	-12191.6	164.865	752.262	0	0	0	0	0	0	0	603	903	0
503	3	0	0	0	0	0	0	200	300	0	-36.6974	77.6621	-759.473	115074	-26892.5	-12145.8	164.591	751.481	0	0	0	0	0	0	0	603	903	0
503	4	0	0	0	0	0	0	200	300	0	-37.6129	76.1362	-756.726	115166	-26892.5	-12100	164.462	750.81	0	0	0	0	0	0	0	603	903	0
503	5	0	0	0	0	0	0	200	300	0	-36.6974	78.7302	-762.219	115532	-26648.4	-12100	165.038	751.427	0	0	0	0	0	0	0	603	903	0
503	6	0	0	0	0	0	0	200	300	0	-37.0026	79.3405	-761.609	116631	-26587.4	-12145.8	165.091	749.863	0	0	0	0	0	0	0	603	903	0
503	7	0	0	0	0	0	0	200	300	0	-36.85	81.6293	-762.83	116448	-27319.8	-12466.2	164.186	750.348	0	0	0	0	0	0	0	603	903	0
503	8	0	0	0	0	0	0	200	300	0	-38.3759	82.3923	-766.187	116997	-27014.6	-12374.7	164.741	750.299	0	0	0	0	0	0	0	603	903	0
503	9	0	0	0	0	0	0	200	300	0	-37.1551	83.0026	-766.492	117455	-26892.5	-12512	164.915	749.763	0	0	0	0	0	0	0	603	903	0
504	0	0	0	0	0	0	0	200	300	0	-37.7655	83.0026	-766.492	118096	-27075.6	-12100	164.676	748.927	0	0	0	0	0	0	0	603	903	0
504	1	-3.23456	-9.35787	-10.7172	-846.678	1602.42	-253.052	349.519	379.002	0	-36.6974	83.9182	-766.797	118737	-27197.7	-12237.4	164.531	748.153	0	0	0	0	0	0	0	603	903	0
504	2	-1.40351	-14.0881	-15.6	-1121.34	2029.66	-1397.46	330.107	371.881	0	-36.85	85.444	-765.271	118645	-26831.5	-12100	164.939	747.963	0	0	0	0	0	0	0	603	903	0
504	3	1.80084	-11.6467	-9.80164	-663.573	1602.42	-436.157	363.485	367.7	0	-38.0707	85.7492	-768.933	119286	-26648.4	-11962.7	165.344	747.868	0	0	0	0	0	0	0	603	903	0
504	4	1.64825	-5.54318	-10.1068	-1121.34	1480.35	113.159	346.47	410.949	0	-38.681	87.4277	-769.543	120018	-27380.8	-12466.2	164.419	747.04	0	0	0	0	0	0	0	603	903	0
504	5	-3.9975	-5.54318	-8.58093	-1029.78	1358.28	-802.368	358.29	420.008	0	-37.6129	86.9699	-770.764	120110	-26709.4	-12420.5	165.347	747.168	0	0	0	0	0	0	0	603	903	0
[truncated: 1,844 more rows]
