# Supplementary material for: The Effects of an Extemporaneous Speech Dual-task on Older Adult Gait Control
Source: Research Square preprint supplement (doi:10.21203/rs.3.rs-7674245/v1), 2025-11-18
Supplement: Supplementary file 41 [file DT3Walk06.xlsx]

## Sheet: Sheet1
Trajectories
		03:LFHD			03:RFHD			03:LBHD			03:RBHD			03:C7			03:T10			03:CLAV			03:STRN			03:RBAK			03:LSHO			03:LUPA			03:LELB			03:LFRM			03:LWRA			03:LWRB			03:LFIN
Frame	Sub Frame	X	Y	Z	X	Y	Z	X	Y	Z	X	Y	Z	X	Y	Z	X	Y	Z	X	Y	Z	X	Y	Z	X	Y	Z	X	Y	Z	X	Y	Z	X	Y	Z	X	Y	Z	X	Y	Z	X	Y	Z	X	Y	Z
		mm	mm	mm	mm	mm	mm	mm	mm	mm	mm	mm	mm	mm	mm	mm	mm	mm	mm	mm	mm	mm	mm	mm	mm	mm	mm	mm	mm	mm	mm	mm	mm	mm	mm	mm	mm	mm	mm	mm	mm	mm	mm	mm	mm	mm	mm	mm	mm
587	0	157.611	-1871.45	1627.91	260.444	-1881.47	1622.23	123.246	-2026.11	1642.37	258.364	-2049.26	1637	202.654	-2102.43	1489.39	193.632	-2203.27	1265.03	190.688	-1961.97	1392.64	182.152	-1936.63	1207.07	247.242	-2205.46	1338.46	6.26694	-2090.31	1447.72	-60.4606	-2073.27	1243.09	-87.6076	-2057.96	1125.5	-76.3301	-1916.28	1022.84	-20.8851	-1844.03	970.802	-83.5119	-1866.41	933.275	-66.3865	-1769.63	894.706
588	0	160.224	-1857.85	1627.67	263.025	-1867.82	1621.47	125.976	-2012.5	1641.67	261.05	-2035.63	1635.63	204.352	-2088.33	1488.49	195.192	-2189.64	1264.4	192.578	-1947.75	1391.66	183.922	-1922.23	1206.17	248.69	-2191.79	1337.64	7.83433	-2075.64	1447.26	-58.7539	-2059.07	1242.75	-85.6973	-2044.72	1125.16	-73.9144	-1903.2	1021.87	-18.2835	-1831.36	969.517	-81.1929	-1853.53	932.24	-63.5991	-1756.98	893.332
589	0	162.674	-1844.27	1627.45	265.44	-1854.22	1620.79	128.489	-1998.89	1641.14	263.518	-2022.05	1634.5	205.952	-2074.39	1487.8	196.725	-2176.11	1263.96	194.349	-1933.71	1390.86	185.622	-1908.05	1205.44	250.12	-2178.23	1337.03	9.31744	-2061.19	1446.91	-57.112	-2045.14	1242.51	-83.8403	-2031.76	1124.91	-71.6142	-1890.59	1020.8	-15.8132	-1819.23	968.036	-79.0055	-1841.25	931.051	-60.9434	-1745.02	891.626
590	0	164.96	-1830.71	1627.27	267.69	-1840.68	1620.21	130.784	-1985.3	1640.77	265.769	-2008.52	1633.61	207.453	-2060.6	1487.3	198.232	-2162.65	1263.69	196	-1919.83	1390.24	187.251	-1894.08	1204.86	251.531	-2164.79	1336.62	10.7164	-2046.99	1446.68	-55.5348	-2031.5	1242.36	-82.0364	-2019.08	1124.74	-69.4296	-1878.45	1019.65	-13.4746	-1807.64	966.36	-76.9499	-1829.58	929.707	-58.4199	-1733.73	889.591
591	0	167.082	-1817.17	1627.13	269.772	-1827.18	1619.71	132.861	-1971.72	1640.56	267.802	-1995.03	1632.95	208.856	-2046.96	1487.01	199.712	-2149.29	1263.6	197.532	-1906.13	1389.81	188.81	-1880.34	1204.46	252.923	-2151.46	1336.42	12.0316	-2033.02	1446.56	-54.0221	-2018.14	1242.32	-80.2854	-2006.7	1124.65	-67.3608	-1866.77	1018.42	-11.2687	-1796.59	964.49	-75.0263	-1818.52	928.209	-56.0303	-1723.11	887.227
592	0	169.036	-1803.65	1627.02	271.685	-1813.73	1619.3	134.721	-1958.16	1640.51	269.619	-1981.59	1632.54	210.162	-2033.48	1486.9	201.167	-2136.01	1263.69	198.945	-1892.59	1389.56	190.295	-1866.81	1204.22	254.297	-2138.24	1336.43	13.2639	-2019.28	1446.55	-52.5735	-2005.06	1242.37	-78.5862	-1994.6	1124.64	-65.4083	-1855.56	1017.1	-9.19718	-1786.07	962.429	-73.2355	-1808.06	926.561	-53.7781	-1713.18	884.541
593	0	170.817	-1790.15	1626.95	273.426	-1800.34	1618.98	136.364	-1944.61	1640.63	271.22	-1968.2	1632.37	211.373	-2020.14	1487	202.597	-2122.82	1263.95	200.237	-1879.23	1389.51	191.704	-1853.49	1204.16	255.652	-2125.14	1336.64	14.4147	-2005.79	1446.66	-51.1879	-1992.27	1242.53	-76.9374	-1982.78	1124.72	-63.573	-1844.82	1015.7	-7.26321	-1776.1	960.181	-71.5781	-1798.21	924.768	-51.6693	-1703.92	881.542
594	0	172.419	-1776.69	1626.93	274.988	-1787	1618.77	137.79	-1931.1	1640.92	272.606	-1954.85	1632.44	212.491	-2006.96	1487.29	204.004	-2109.71	1264.38	201.411	-1866.04	1389.65	193.034	-1840.37	1204.28	256.989	-2112.15	1337.04	15.4862	-1992.55	1446.88	-49.8639	-1979.77	1242.79	-75.3362	-1971.26	1124.89	-61.8559	-1834.55	1014.23	-5.47124	-1766.67	957.754	-70.0556	-1788.97	922.836	-49.713	-1695.34	878.244
595	0	173.833	-1763.27	1626.96	276.365	-1773.72	1618.68	139.002	-1917.63	1641.38	273.782	-1941.57	1632.77	213.519	-1993.93	1487.77	205.391	-2096.69	1264.98	202.465	-1853.01	1389.99	194.279	-1827.45	1204.58	258.31	-2099.26	1337.65	16.4815	-1979.55	1447.22	-48.5987	-1967.55	1243.15	-73.7789	-1960.02	1125.14	-60.2584	-1824.75	1012.69	-3.82726	-1757.77	955.161	-68.6696	-1780.34	920.777	-47.9216	-1687.44	874.667
596	0	175.052	-1749.91	1627.06	277.549	-1760.5	1618.71	140.004	-1904.21	1642	274.752	-1928.34	1633.35	214.462	-1981.06	1488.45	206.761	-2083.75	1265.74	203.401	-1840.15	1390.53	195.433	-1814.71	1205.08	259.615	-2086.48	1338.44	17.4044	-1966.79	1447.67	-47.3888	-1955.62	1243.62	-72.2604	-1949.08	1125.49	-58.7822	-1815.42	1011.09	-2.33856	-1749.4	952.415	-67.4222	-1772.32	918.606	-46.3112	-1680.21	870.838
597	0	176.063	-1736.61	1627.25	278.533	-1747.35	1618.89	140.8	-1890.86	1642.8	275.523	-1915.17	1634.18	215.326	-1968.33	1489.32	208.119	-2070.9	1266.65	204.22	-1827.45	1391.27	196.492	-1802.14	1205.77	260.907	-2073.79	1339.42	18.26	-1954.3	1448.25	-46.2293	-1943.98	1244.2	-70.7742	-1938.42	1125.93	-57.4287	-1806.56	1009.45	-1.01353	-1741.56	949.537	-66.3158	-1764.91	916.342	-44.9009	-1673.67	866.792
598	0	176.86	-1723.4	1627.54	279.309	-1734.27	1619.24	141.4	-1877.6	1643.77	276.105	-1902.06	1635.27	216.117	-1955.74	1490.37	209.471	-2058.12	1267.72	204.924	-1814.9	1392.23	197.45	-1789.72	1206.67	262.189	-2061.19	1340.58	19.0541	-1942.04	1448.95	-45.1143	-1932.63	1244.89	-69.313	-1928.07	1126.47	-56.1997	-1798.17	1007.78	0.138725	-1734.25	946.549	-65.3531	-1758.12	914.008	-43.7124	-1667.8	862.567
599	0	177.433	-1710.3	1627.95	279.872	-1721.26	1619.78	141.811	-1864.44	1644.91	276.51	-1889.03	1636.61	216.844	-1943.28	1491.6	210.82	-2045.43	1268.93	205.516	-1802.5	1393.4	198.304	-1777.42	1207.79	263.464	-2048.66	1341.9	19.7931	-1930.04	1449.77	-44.0367	-1921.58	1245.69	-67.8684	-1918.01	1127.11	-55.0964	-1790.25	1006.09	1.10886	-1727.45	943.479	-64.5363	-1751.94	911.63	-42.7691	-1662.61	858.21
600	0	177.778	-1697.31	1628.51	280.216	-1708.34	1620.51	142.049	-1851.41	1646.21	276.751	-1876.07	1638.19	217.515	-1930.95	1492.99	212.173	-2032.82	1270.27	206.002	-1790.22	1394.77	199.053	-1765.23	1209.11	264.736	-2036.21	1343.38	20.4845	-1918.26	1450.71	-42.9889	-1910.82	1246.61	-66.4321	-1908.26	1127.86	-54.12	-1782.81	1004.42	1.88782	-1721.17	940.354	-63.8672	-1746.37	909.237	-42.0946	-1658.1	853.773
601	0	177.894	-1684.45	1629.22	280.343	-1695.49	1621.47	142.126	-1838.52	1647.67	276.845	-1863.19	1639.99	218.139	-1918.72	1494.54	213.532	-2020.28	1271.74	206.386	-1778.06	1396.34	199.696	-1753.13	1210.64	266.01	-2023.81	1344.99	21.1361	-1906.71	1451.77	-41.9625	-1900.36	1247.65	-64.9956	-1898.81	1128.72	-53.2709	-1775.83	1002.77	2.46739	-1715.38	937.206	-63.3467	-1741.41	906.86	-41.7112	-1654.27	849.307
602	0	177.782	-1671.74	1630.11	280.254	-1682.74	1622.65	142.06	-1825.79	1649.26	276.809	-1850.4	1642	218.724	-1906.6	1496.23	214.901	-2007.82	1273.31	206.674	-1766	1398.09	200.237	-1741.1	1212.35	267.29	-2011.45	1346.73	21.7558	-1895.36	1452.95	-40.9495	-1890.18	1248.8	-63.5517	-1889.67	1129.7	-52.5491	-1769.31	1001.17	2.84072	-1710.08	934.064	-62.9743	-1737.04	904.531	-41.6381	-1651.09	844.867
603	0	177.45	-1659.18	1631.19	279.957	-1670.07	1624.07	141.871	-1813.23	1650.97	276.664	-1837.69	1644.19	219.281	-1894.55	1498.04	216.278	-1995.43	1274.98	206.876	-1754.03	1400	200.681	-1729.12	1214.24	268.578	-1999.12	1348.58	22.3514	-1884.19	1454.23	-39.942	-1880.28	1250.06	-62.0943	-1880.84	1130.79	-51.9539	-1763.24	999.635	3.00288	-1705.25	930.959	-62.7481	-1733.26	902.278	-41.8899	-1648.57	840.504
604	0	176.908	-1646.79	1632.44	279.463	-1657.49	1625.7	141.577	-1800.84	1652.77	276.429	-1825.07	1646.52	219.817	-1882.56	1499.94	217.663	-1983.1	1276.72	206.999	-1742.12	1402.05	201.032	-1717.18	1216.28	269.878	-1986.81	1350.5	22.9303	-1873.19	1455.61	-38.9332	-1870.65	1251.42	-60.619	-1872.31	1131.99	-51.484	-1757.62	998.18	2.95126	-1700.87	927.919	-62.6645	-1730.04	900.129	-42.475	-1646.67	836.268
605	0	176.172	-1634.56	1633.86	278.785	-1645	1627.54	141.2	-1788.64	1654.64	276.125	-1812.53	1648.97	220.34	-1870.62	1501.92	219.051	-1970.85	1278.52	207.052	-1730.25	1404.21	201.299	-1705.26	1218.43	271.191	-1974.52	1352.48	23.499	-1862.32	1457.07	-37.9174	-1861.29	1252.88	-59.124	-1864.09	1133.3	-51.1369	-1752.42	996.822	2.68598	-1696.92	924.968	-62.7178	-1727.36	898.109	-43.3944	-1645.38	832.2
606	0	175.261	-1622.48	1635.44	277.943	-1632.58	1629.57	140.762	-1776.62	1656.55	275.774	-1800.07	1651.48	220.857	-1858.71	1503.93	220.437	-1958.66	1280.35	207.046	-1718.42	1406.44	201.492	-1693.34	1220.66	272.515	-1962.22	1354.49	24.0629	-1851.56	1458.58	-36.8908	-1852.17	1254.4	-57.6094	-1856.15	1134.7	-50.9099	-1747.63	995.57	2.2101	-1693.38	922.126	-62.9007	-1725.19	896.237	-44.6408	-1644.66	828.335
607	0	174.196	-1610.55	1637.15	276.956	-1620.23	1631.74	140.284	-1764.77	1658.46	275.396	-1787.68	1654.02	221.374	-1846.81	1505.95	221.813	-1946.53	1282.2	206.992	-1706.59	1408.7	201.62	-1681.42	1222.92	273.848	-1949.91	1356.49	24.6261	-1840.88	1460.12	-35.8511	-1843.28	1255.99	-56.078	-1848.5	1136.18	-50.7989	-1743.22	994.432	1.52977	-1690.22	919.411	-63.2042	-1723.49	894.527	-46.1989	-1644.46	824.699
608	0	173.004	-1598.76	1638.96	275.848	-1607.95	1634.02	139.787	-1753.08	1660.33	275.011	-1775.36	1656.53	221.894	-1834.9	1507.94	223.169	-1934.46	1284.02	206.899	-1694.76	1410.94	201.695	-1669.49	1225.18	275.184	-1937.58	1358.46	25.1917	-1830.26	1461.67	-34.7983	-1834.6	1257.61	-54.5351	-1841.11	1137.72	-50.7995	-1739.17	993.412	0.654227	-1687.4	916.835	-63.6174	-1722.23	892.99	-48.0451	-1644.76	821.309
609	0	171.711	-1587.08	1640.82	274.643	-1595.7	1636.36	139.29	-1741.52	1662.13	274.637	-1763.08	1658.98	222.419	-1822.97	1509.86	224.496	-1922.44	1285.8	206.777	-1682.91	1413.13	201.725	-1657.54	1227.38	276.516	-1925.24	1360.36	25.7608	-1819.65	1463.19	-33.7341	-1826.1	1259.25	-52.988	-1833.96	1139.32	-50.906	-1735.45	992.508	-0.404222	-1684.9	914.404	-64.1282	-1721.35	891.628	-50.1485	-1645.49	818.173
610	0	170.345	-1575.49	1642.69	273.367	-1583.49	1638.7	138.813	-1730.08	1663.82	274.291	-1750.84	1661.31	222.951	-1811.01	1511.69	225.781	-1910.47	1287.5	206.637	-1671.03	1415.22	201.723	-1645.57	1229.48	277.834	-1912.86	1362.15	26.3334	-1809.05	1464.66	-32.6622	-1817.77	1260.89	-51.4462	-1827.04	1140.93	-51.1122	-1732.02	991.718	-1.63038	-1682.67	912.122	-64.7237	-1720.8	890.441	-52.4722	-1646.59	815.291
611	0	168.934	-1563.98	1644.52	272.044	-1571.3	1641	138.37	-1718.73	1665.36	273.986	-1738.62	1663.48	223.486	-1798.99	1513.39	227.013	-1898.55	1289.09	206.487	-1659.1	1417.16	201.698	-1633.57	1231.42	279.124	-1900.46	1363.82	26.9074	-1798.41	1466.03	-31.5879	-1809.56	1262.49	-49.9206	-1820.32	1142.56	-51.4109	-1728.85	991.034	-3.00639	-1680.69	909.986	-65.3902	-1720.55	889.423	-54.9742	-1648.03	812.655
612	0	167.506	-1552.5	1646.27	270.702	-1559.1	1643.19	137.977	-1707.44	1666.73	273.735	-1726.4	1665.44	224.023	-1786.92	1514.91	228.177	-1886.67	1290.56	206.333	-1647.12	1418.92	201.659	-1621.53	1233.17	280.374	-1888.02	1365.33	27.4793	-1787.72	1467.28	-30.5182	-1801.46	1264.05	-48.4233	-1813.76	1144.17	-51.7944	-1725.9	990.448	-4.51202	-1678.92	907.991	-66.1138	-1720.53	888.565	-57.6097	-1649.72	810.251
613	0	166.087	-1541.03	1647.88	269.362	-1546.88	1645.22	137.643	-1696.17	1667.89	273.545	-1714.17	1667.17	224.554	-1774.77	1516.25	229.261	-1874.82	1291.87	206.182	-1635.08	1420.46	201.614	-1609.47	1234.68	281.566	-1875.55	1366.65	28.0434	-1776.95	1468.37	-29.4613	-1793.42	1265.53	-46.9666	-1807.33	1145.75	-52.2543	-1723.13	989.95	-6.12509	-1677.32	906.13	-66.881	-1720.69	887.858	-60.3317	-1651.63	808.062
614	0	164.7	-1529.55	1649.31	268.049	-1534.62	1647.04	137.376	-1684.89	1668.81	273.422	-1701.89	1668.62	225.073	-1762.55	1517.36	230.251	-1862.99	1292.99	206.036	-1622.97	1421.74	201.57	-1597.37	1235.93	282.684	-1863.05	1367.76	28.5925	-1766.07	1469.29	-28.4265	-1785.42	1266.92	-45.5631	-1801	1147.27	-52.7817	-1720.5	989.528	-7.82195	-1675.86	904.393	-67.6786	-1720.97	887.289	-63.0937	-1653.69	806.07
615	0	163.368	-1518.02	1650.51	266.781	-1522.3	1648.6	137.178	-1673.57	1669.49	273.366	-1689.57	1669.78	225.57	-1750.24	1518.22	231.131	-1851.17	1293.92	205.898	-1610.78	1422.73	201.531	-1585.23	1236.87	283.711	-1850.52	1368.64	29.1176	-1755.07	1470	-27.4239	-1777.42	1268.2	-44.2246	-1794.73	1148.73	-53.3674	-1717.97	989.17	-9.57805	-1674.5	902.767	-68.4946	-1721.33	886.846	-65.8503	-1655.85	804.253
616	0	162.108	-1506.41	1651.46	265.576	-1509.91	1649.86	137.049	-1662.18	1669.91	273.375	-1677.17	1670.62	226.034	-1737.84	1518.83	231.888	-1839.35	1294.63	205.766	-1598.52	1423.42	201.502	-1573.05	1237.49	284.629	-1837.94	1369.28	29.6083	-1743.92	1470.48	-26.4645	-1769.39	1269.36	-42.9621	-1788.48	1150.11	-54.0022	-1715.49	988.865	-11.3686	-1673.21	901.241	-69.3177	-1721.72	886.516	-68.5592	-1658.05	802.594
617	0	160.932	-1494.69	1652.12	264.447	-1497.43	1650.79	136.983	-1650.68	1670.05	273.441	-1664.69	1671.12	226.452	-1725.34	1519.16	232.509	-1827.52	1295.11	205.639	-1586.16	1423.79	201.484	-1560.84	1237.78	285.422	-1825.33	1369.66	30.0529	-1732.6	1470.73	-25.5599	-1761.3	1270.39	-41.7852	-1782.21	1151.4	-54.6769	-1713.02	988.6	-13.1691	-1671.97	899.801	-70.1382	-1722.08	886.287	-71.1819	-1660.26	801.072
618	0	159.85	-1482.84	1652.48	263.402	-1484.85	1651.37	136.972	-1639.04	1669.91	273.552	-1652.11	1671.29	226.811	-1712.74	1519.22	232.982	-1815.65	1295.34	205.512	-1573.72	1423.84	201.476	-1548.57	1237.72	286.075	-1812.67	1369.78	30.4388	-1721.1	1470.72	-24.7219	-1753.1	1271.28	-40.7023	-1775.89	1152.58	-55.3829	-1710.53	988.365	-14.9565	-1670.75	898.436	-70.9479	-1722.37	886.149	-73.6847	-1662.43	799.673
619	0	158.865	-1470.85	1652.51	262.446	-1472.16	1651.57	137	-1627.24	1669.5	273.694	-1639.41	1671.11	227.096	-1700.03	1518.99	233.296	-1803.73	1295.34	205.377	-1561.18	1423.55	201.477	-1536.26	1237.32	286.574	-1799.97	1369.64	30.7526	-1709.39	1470.46	-23.9623	-1744.76	1272.01	-39.7204	-1769.46	1153.66	-56.112	-1707.96	988.15	-16.7091	-1669.5	897.132	-71.7402	-1722.55	886.092	-76.0392	-1664.51	798.382
620	0	157.976	-1458.68	1652.21	261.576	-1459.35	1651.41	137.051	-1615.26	1668.81	273.848	-1626.59	1670.61	227.292	-1687.21	1518.49	233.443	-1791.75	1295.08	205.226	-1548.54	1422.93	201.481	-1523.89	1236.58	286.907	-1787.22	1369.24	30.9807	-1697.47	1469.93	-23.293	-1736.25	1272.6	-38.845	-1762.9	1154.62	-56.857	-1705.29	987.945	-18.408	-1668.22	895.88	-72.5108	-1722.57	886.109	-78.2226	-1666.48	797.186
621	0	157.177	-1446.32	1651.58	260.789	-1446.4	1650.87	137.104	-1603.07	1667.86	273.991	-1613.65	1669.78	227.385	-1674.29	1517.72	233.419	-1779.68	1294.58	205.05	-1535.8	1422	201.483	-1511.46	1235.52	287.065	-1774.41	1368.59	31.1095	-1685.34	1469.16	-22.7252	-1727.54	1273.02	-38.0805	-1756.17	1155.47	-57.6119	-1702.47	987.742	-20.0374	-1666.86	894.669	-73.2572	-1722.39	886.191	-80.2183	-1668.29	796.076
622	0	156.455	-1433.76	1650.64	260.071	-1433.33	1649.97	137.136	-1590.66	1666.67	274.099	-1600.57	1668.65	227.361	-1661.25	1516.7	233.222	-1767.52	1293.85	204.837	-1522.95	1420.77	201.475	-1498.95	1234.15	287.039	-1761.53	1367.7	31.1259	-1672.97	1468.13	-22.2697	-1718.59	1273.29	-37.4301	-1749.22	1156.2	-58.372	-1699.46	987.533	-21.585	-1665.4	893.49	-73.9795	-1721.98	886.333	-82.0151	-1669.93	795.043
623	0	155.794	-1420.99	1649.39	259.41	-1420.12	1648.74	137.121	-1578.02	1665.25	274.148	-1587.35	1667.25	227.205	-1648.1	1515.44	232.853	-1755.24	1292.9	204.574	-1509.98	1419.27	201.449	-1486.36	1232.51	286.826	-1748.58	1366.59	31.0178	-1660.37	1466.87	-21.9361	-1709.39	1273.4	-36.8962	-1742.03	1156.81	-59.1342	-1696.21	987.311	-23.0425	-1663.81	892.337	-74.6796	-1721.3	886.527	-83.6076	-1671.37	794.08
624	0	155.174	-1408.01	1647.85	258.784	-1406.77	1647.19	137.034	-1565.15	1663.62	274.11	-1574	1665.6	226.906	-1634.83	1513.97	232.315	-1742.83	1291.74	204.25	-1496.9	1417.52	201.392	-1473.68	1230.63	286.424	-1735.55	1365.29	30.7742	-1647.53	1465.38	-21.7329	-1699.91	1273.35	-36.4803	-1734.56	1157.29	-59.8968	-1692.71	987.068	-24.4056	-1662.05	891.202	-75.362	-1720.31	886.768	-84.9958	-1672.57	793.179
625	0	154.57	-1394.82	1646.06	258.17	-1393.28	1645.36	136.848	-1552.04	1661.81	273.961	-1560.51	1663.73	226.453	-1621.45	1512.31	231.615	-1730.27	1290.39	203.85	-1483.7	1415.56	201.294	-1460.89	1228.54	285.835	-1722.44	1363.81	30.386	-1634.48	1463.69	-21.6673	-1690.12	1273.15	-36.1833	-1726.78	1157.66	-60.6599	-1688.89	986.798	-25.674	-1660.09	890.08	-76.0328	-1718.97	887.049	-86.1845	-1673.51	792.336
626	0	153.955	-1381.41	1644.04	257.545	-1379.66	1643.29	136.541	-1538.69	1659.84	273.677	-1546.88	1661.67	225.838	-1607.96	1510.5	230.762	-1717.56	1288.88	203.364	-1470.39	1413.42	201.142	-1447.99	1226.27	285.062	-1709.24	1362.19	29.8456	-1621.2	1461.81	-21.7445	-1680.01	1272.79	-36.0056	-1718.65	1157.89	-61.425	-1684.74	986.495	-26.851	-1657.89	888.967	-76.6997	-1717.25	887.362	-87.1831	-1674.16	791.544
627	0	153.303	-1367.8	1641.82	256.881	-1365.9	1641.01	136.088	-1525.12	1657.75	273.236	-1533.11	1659.48	225.056	-1594.36	1508.55	229.766	-1704.68	1287.22	202.779	-1456.95	1411.13	200.924	-1434.97	1223.87	284.112	-1695.94	1360.45	29.1477	-1607.71	1459.76	-21.9684	-1669.57	1272.27	-35.9472	-1710.16	1158	-62.1951	-1680.21	986.151	-27.9433	-1655.4	887.859	-77.3721	-1715.11	887.699	-88.0051	-1674.5	790.799
628	0	152.583	-1353.98	1639.45	256.15	-1352.01	1638.58	135.472	-1511.32	1655.55	272.622	-1519.21	1657.17	224.102	-1580.65	1506.51	228.641	-1691.64	1285.46	202.084	-1443.39	1408.73	200.627	-1421.82	1221.38	282.993	-1682.55	1358.63	28.2894	-1594.03	1457.58	-22.3408	-1658.79	1271.61	-36.0079	-1701.28	1157.97	-62.9742	-1675.26	985.76	-28.9602	-1652.58	886.751	-78.0598	-1712.52	888.051	-88.6675	-1674.47	790.095
629	0	151.771	-1339.99	1636.96	255.328	-1337.99	1636.03	134.676	-1497.33	1653.28	271.82	-1505.19	1654.8	222.977	-1566.83	1504.4	227.398	-1678.43	1283.61	201.272	-1429.71	1406.27	200.241	-1408.53	1218.83	281.716	-1669.05	1356.76	27.2704	-1580.17	1455.29	-22.8615	-1647.67	1270.8	-36.1871	-1691.99	1157.82	-63.7672	-1669.87	985.318	-29.9131	-1649.39	885.643	-78.7734	-1709.44	888.407	-89.19	-1674.06	789.428
630	0	150.84	-1325.81	1634.4	254.39	-1323.85	1633.42	133.69	-1483.14	1650.98	270.822	-1491.05	1652.41	221.683	-1552.91	1502.26	226.051	-1665.05	1281.71	200.337	-1415.93	1403.79	199.754	-1395.11	1216.28	280.294	-1655.46	1354.87	26.0931	-1566.15	1452.91	-23.5287	-1636.2	1269.85	-36.4842	-1682.28	1157.53	-64.5797	-1663.99	984.818	-30.8152	-1645.79	884.53	-79.5232	-1705.82	888.756	-89.5947	-1673.21	788.792
631	0	149.77	-1311.49	1631.79	253.318	-1309.59	1630.78	132.507	-1468.79	1648.67	269.625	-1476.79	1650.02	220.226	-1538.9	1500.13	224.614	-1651.51	1279.8	199.276	-1402.03	1401.31	199.161	-1381.56	1213.75	278.741	-1641.78	1352.99	24.7626	-1552	1450.48	-24.3387	-1624.4	1268.77	-36.898	-1672.14	1157.1	-65.4175	-1657.6	984.256	-31.6802	-1641.71	883.411	-80.3194	-1701.62	889.085	-89.9052	-1671.88	788.184
632	0	148.546	-1297.02	1629.19	252.095	-1295.22	1628.16	131.127	-1454.28	1646.39	268.228	-1462.42	1647.69	218.615	-1524.8	1498.04	223.099	-1637.82	1277.9	198.089	-1388.05	1398.87	198.457	-1367.89	1211.29	277.069	-1628.01	1351.17	23.2869	-1537.72	1448.02	-25.2861	-1612.26	1267.57	-37.4274	-1661.55	1156.55	-66.286	-1650.68	983.629	-32.5223	-1637.11	882.284	-81.1712	-1696.82	889.382	-90.1458	-1670.01	787.598
633	0	147.158	-1282.44	1626.62	250.713	-1280.75	1625.6	129.553	-1439.65	1644.16	266.641	-1447.96	1645.44	216.863	-1510.63	1496.02	221.518	-1623.99	1276.04	196.781	-1373.98	1396.52	197.639	-1354.09	1208.92	275.296	-1614.17	1349.42	21.6767	-1523.35	1445.57	-26.3643	-1599.79	1266.26	-38.071	-1650.53	1155.87	-67.1909	-1643.18	982.936	-33.3552	-1631.94	881.149	-82.0868	-1691.36	889.635	-90.3407	-1667.55	787.029
634	0	145.602	-1267.76	1624.13	249.167	-1266.19	1623.13	127.796	-1424.91	1642.01	264.873	-1433.42	1643.31	214.983	-1496.4	1494.1	219.884	-1610.04	1274.26	195.36	-1359.84	1394.28	196.711	-1340.19	1206.68	273.436	-1600.26	1347.78	19.9453	-1508.91	1443.17	-27.5656	-1587.02	1264.86	-38.8269	-1639.06	1155.07	-68.1367	-1635.08	982.177	-34.1917	-1626.15	880.006	-83.0728	-1685.21	889.83	-90.5138	-1664.44	786.472
635	0	143.883	-1253	1621.72	247.463	-1251.55	1620.79	125.871	-1410.1	1639.97	262.943	-1418.81	1641.34	212.996	-1482.13	1492.3	218.206	-1595.98	1272.58	193.838	-1345.66	1392.19	195.678	-1326.2	1204.61	271.505	-1586.32	1346.28	18.1084	-1494.41	1440.84	-28.8813	-1573.94	1263.38	-39.6932	-1627.16	1154.16	-69.1274	-1626.36	981.352	-35.0433	-1619.69	878.854	-84.1341	-1678.33	889.957	-90.6874	-1660.6	785.921
636	0	142.012	-1238.19	1619.45	245.61	-1236.86	1618.6	123.796	-1395.22	1638.06	260.87	-1404.14	1639.54	210.92	-1467.83	1490.66	216.495	-1581.85	1271.04	192.232	-1331.44	1390.26	194.549	-1312.14	1202.71	269.52	-1572.34	1344.93	16.184	-1479.88	1438.61	-30.3023	-1560.58	1261.85	-40.6675	-1614.84	1153.15	-70.1659	-1617.01	980.466	-35.9201	-1612.52	877.696	-85.2742	-1670.69	890.002	-90.8827	-1655.98	785.366
637	0	140.008	-1223.36	1617.31	243.628	-1222.14	1616.59	121.597	-1380.32	1636.31	258.68	-1389.45	1637.95	208.778	-1453.53	1489.2	214.759	-1567.65	1269.64	190.559	-1317.22	1388.52	193.338	-1298.03	1201.03	267.495	-1558.36	1343.75	14.1917	-1465.33	1436.52	-31.8187	-1546.95	1260.29	-41.7473	-1602.1	1152.07	-71.2542	-1606.99	979.524	-36.8299	-1604.58	876.534	-86.4944	-1662.25	889.955	-91.1185	-1650.5	784.8
638	0	137.897	-1208.53	1615.34	241.542	-1207.4	1614.77	119.302	-1365.41	1634.73	256.401	-1374.74	1636.58	206.595	-1439.26	1487.92	213.006	-1553.43	1268.42	188.843	-1303.01	1386.99	192.061	-1283.91	1199.57	265.446	-1544.39	1342.76	12.1524	-1450.8	1434.6	-33.4208	-1533.07	1258.72	-42.9296	-1588.96	1150.92	-72.3929	-1596.3	978.533	-37.7785	-1595.84	875.371	-87.7945	-1652.98	889.808	-91.4113	-1644.09	784.211
639	0	135.712	-1193.72	1613.54	239.382	-1192.67	1613.16	116.94	-1350.52	1633.34	254.063	-1360.05	1635.45	204.395	-1425.03	1486.86	211.246	-1539.2	1267.4	187.106	-1288.85	1385.69	190.733	-1269.79	1198.34	263.388	-1530.46	1341.97	10.088	-1436.29	1432.87	-35.0984	-1518.96	1257.17	-44.2116	-1575.44	1149.74	-73.5814	-1584.93	977.502	-38.7696	-1586.27	874.213	-89.1723	-1642.85	889.552	-91.7753	-1636.68	783.588
640	0	133.489	-1178.97	1611.93	237.185	-1177.99	1611.77	114.546	-1335.67	1632.16	251.699	-1345.39	1634.58	202.205	-1410.87	1486.01	209.484	-1524.98	1266.57	185.373	-1274.75	1384.63	189.375	-1255.7	1197.37	261.335	-1516.59	1341.38	8.02042	-1421.84	1431.37	-36.8412	-1504.63	1255.67	-45.5901	-1561.55	1148.53	-74.8178	-1572.87	976.442	-39.8042	-1575.82	873.065	-90.6242	-1631.84	889.18	-92.2217	-1628.21	782.917
641	0	131.268	-1164.29	1610.51	234.991	-1163.38	1610.6	112.153	-1320.9	1631.2	249.342	-1330.8	1633.97	200.049	-1396.8	1485.4	207.729	-1510.82	1265.97	183.669	-1260.74	1383.81	188.005	-1241.69	1196.65	259.301	-1502.8	1341.01	5.97135	-1407.44	1430.11	-38.6388	-1490.11	1254.25	-47.062	-1547.33	1147.33	-76.0991	-1560.11	975.364	-40.8813	-1564.48	871.933	-92.1446	-1619.94	888.687	-92.7588	-1618.6	782.185
642	0	129.093	-1149.72	1609.3	232.841	-1148.86	1609.66	109.798	-1306.22	1630.47	247.026	-1316.31	1633.63	197.952	-1382.86	1485.02	205.988	-1496.73	1265.58	182.017	-1246.85	1383.25	186.642	-1227.76	1196.19	257.3	-1489.12	1340.85	3.96155	-1393.14	1429.12	-40.4807	-1475.42	1252.92	-48.6239	-1532.79	1146.15	-77.4208	-1546.66	974.281	-41.9971	-1552.23	870.827	-93.7261	-1607.12	888.073	-93.3925	-1607.8	781.378
643	0	127.006	-1135.27	1608.31	230.777	-1134.48	1608.96	107.513	-1291.65	1629.98	244.782	-1301.94	1633.56	195.936	-1369.06	1484.88	204.267	-1482.73	1265.41	180.439	-1233.09	1382.95	185.303	-1213.96	1195.98	255.343	-1475.57	1340.9	2.01033	-1378.93	1428.41	-42.356	-1460.57	1251.71	-50.2721	-1517.96	1145.02	-78.7773	-1532.52	973.208	-43.1456	-1539.05	869.756	-95.3601	-1593.39	887.336	-94.1255	-1595.77	780.488
644	0	125.05	-1120.96	1607.53	228.841	-1120.25	1608.48	105.334	-1277.22	1629.74	242.643	-1287.71	1633.75	194.022	-1355.43	1484.97	202.575	-1468.84	1265.48	178.954	-1219.49	1382.91	184.004	-1200.3	1196.03	253.44	-1462.16	1341.16	0.135215	-1364.85	1427.99	-44.2537	-1445.6	1250.65	-52.0025	-1502.86	1143.96	-80.1617	-1517.7	972.159	-44.3185	-1524.94	868.732	-97.0359	-1578.74	886.482	-94.9581	-1582.45	779.508
645	0	123.263	-1106.83	1606.98	227.071	-1106.21	1608.22	103.288	-1262.95	1629.75	240.637	-1273.66	1634.2	192.226	-1341.97	1485.3	200.916	-1455.09	1265.76	177.578	-1206.05	1383.12	182.761	-1186.8	1196.34	251.602	-1448.91	1341.62	-1.64841	-1350.9	1427.88	-46.1626	-1430.51	1249.76	-53.8106	-1487.51	1142.98	-81.5661	-1502.22	971.152	-45.5054	-1509.9	867.768	-98.7413	-1563.18	885.519	-95.8879	-1567.83	778.438
646	0	121.679	-1092.87	1606.67	225.499	-1092.37	1608.2	101.404	-1248.84	1630.03	238.789	-1259.79	1634.9	190.563	-1328.72	1485.87	199.298	-1441.48	1266.27	176.325	-1192.81	1383.6	181.586	-1173.49	1196.89	249.836	-1435.84	1342.28	-3.32748	-1337.1	1428.08	-48.0713	-1415.34	1249.04	-55.6908	-1471.94	1142.11	-82.9816	-1486.09	970.203	-46.6941	-1493.94	866.882	-100.463	-1546.72	884.46	-96.9099	-1551.88	777.285
647	0	120.326	-1079.1	1606.59	224.154	-1078.75	1608.39	99.7041	-1234.9	1630.57	237.118	-1246.13	1635.85	189.042	-1315.67	1486.66	197.725	-1428.03	1266.98	175.204	-1179.75	1384.32	180.49	-1160.36	1197.69	248.148	-1422.94	1343.13	-4.89144	-1323.45	1428.58	-49.9681	-1400.09	1248.53	-57.6366	-1456.17	1141.36	-84.3985	-1469.33	969.331	-47.8715	-1477.09	866.092	-102.186	-1529.38	883.323	-98.0169	-1534.59	776.066
648	0	119.227	-1065.53	1606.76	223.056	-1065.36	1608.8	98.2047	-1221.16	1631.39	235.642	-1232.69	1637.04	187.672	-1302.83	1487.66	196.202	-1414.74	1267.9	174.221	-1166.9	1385.3	179.482	-1147.42	1198.73	246.542	-1410.23	1344.15	-6.33239	-1309.98	1429.4	-51.842	-1384.81	1248.23	-59.6406	-1440.22	1140.75	-85.8062	-1451.97	968.557	-49.0234	-1459.36	865.421	-103.893	-1511.18	882.131	-99.1986	-1515.98	774.808
649	0	118.394	-1052.16	1607.18	222.218	-1052.22	1609.42	96.9179	-1207.6	1632.47	234.371	-1219.47	1638.45	186.453	-1290.21	1488.88	194.734	-1401.62	1269.01	173.378	-1154.24	1386.52	178.566	-1134.67	1200.01	245.021	-1397.7	1345.33	-7.64512	-1296.68	1430.51	-53.6818	-1369.49	1248.14	-61.6941	-1424.11	1140.28	-87.194	-1434.03	967.901	-50.1356	-1440.79	864.894	-105.57	-1492.15	880.914	-100.443	-1496.07	773.545
650	0	117.834	-1039	1607.85	221.645	-1039.32	1610.24	95.85	-1194.23	1633.82	233.311	-1206.49	1640.07	185.388	-1277.8	1490.29	193.326	-1388.66	1270.29	172.673	-1141.77	1387.97	177.747	-1122.1	1201.51	243.587	-1385.36	1346.67	-8.82712	-1283.56	1431.91	-55.4772	-1354.16	1248.29	-63.7875	-1407.85	1139.98	-88.5511	-1415.53	967.384	-51.1943	-1421.41	864.538	-107.199	-1472.33	879.702	-101.733	-1474.89	772.323
651	0	117.543	-1026.03	1608.76	221.333	-1026.66	1611.26	95.0015	-1181.06	1635.43	232.461	-1193.74	1641.88	184.471	-1265.59	1491.88	191.98	-1375.85	1271.73	172.101	-1129.48	1389.64	177.025	-1109.7	1203.22	242.241	-1373.18	1348.15	-9.87841	-1270.61	1433.58	-57.2188	-1338.84	1248.66	-65.9105	-1391.47	1139.85	-89.8671	-1396.52	967.027	-52.1862	-1401.27	864.382	-108.763	-1451.75	878.534	-103.052	-1452.5	771.194
652	0	117.512	-1013.26	1609.93	221.273	-1014.25	1612.46	94.3676	-1168.07	1637.29	231.818	-1181.21	1643.87	183.698	-1253.57	1493.63	190.704	-1363.2	1273.32	171.654	-1117.37	1391.52	176.397	-1097.46	1205.14	240.984	-1361.16	1349.75	-10.8012	-1257.83	1435.5	-58.8983	-1323.54	1249.25	-68.0519	-1374.97	1139.89	-91.1318	-1377.03	966.852	-53.0994	-1380.4	864.453	-110.247	-1430.46	877.447	-104.379	-1428.95	770.217
653	0	117.723	-1000.68	1611.32	221.447	-1002.06	1613.85	93.9385	-1155.27	1639.37	231.372	-1168.91	1646.01	183.06	-1241.74	1495.52	189.501	-1350.69	1275.04	171.323	-1105.42	1393.59	175.856	-1085.35	1207.24	239.818	-1349.29	1351.45	-11.5998	-1245.21	1437.65	-60.509	-1308.27	1250.06	-70.2002	-1358.39	1140.11	-92.3363	-1357.09	966.877	-53.9232	-1358.86	864.781	-111.636	-1408.49	876.479	-105.689	-1404.32	769.45
654	0	118.153	-988.274	1612.95	221.832	-990.078	1615.39	93.7003	-1142.65	1641.65	231.109	-1156.81	1648.28	182.548	-1230.06	1497.53	188.376	-1338.31	1276.85	171.094	-1093.6	1395.82	175.396	-1073.36	1209.5	238.742	-1337.54	1353.24	-12.2796	-1232.73	1439.99	-62.0455	-1293.05	1251.08	-72.3438	-1341.72	1140.5	-93.4725	-1336.73	967.119	-54.6488	-1336.7	865.39	-112.918	-1385.9	875.671	-106.958	-1378.69	768.955
655	0	118.775	-976.037	1614.77	222.403	-978.296	1617.08	93.6353	-1130.19	1644.11	231.012	-1144.9	1650.65	182.151	-1218.52	1499.64	187.336	-1326.05	1278.75	170.955	-1081.9	1398.18	175.004	-1061.48	1211.9	237.759	-1325.9	1355.1	-12.8474	-1220.4	1442.5	-63.5039	-1277.88	1252.29	-74.4713	-1324.99	1141.06	-94.5337	-1316	967.592	-55.2687	-1313.96	866.304	-114.081	-1362.72	875.058	-108.158	-1352.17	768.787
656	0	119.556	-963.954	1616.78	223.127	-966.689	1618.9	93.7229	-1117.89	1646.7	231.061	-1133.17	1653.08	181.86	-1207.1	1501.81	186.386	-1313.9	1280.7	170.891	-1070.3	1400.64	174.67	-1049.68	1214.4	236.869	-1314.35	1357.01	-13.3104	-1208.19	1445.14	-64.8819	-1262.78	1253.67	-76.5717	-1308.22	1141.76	-95.5145	-1294.93	968.306	-55.7771	-1290.71	867.542	-115.115	-1339.02	874.671	-109.26	-1324.84	768.998
657	0	120.464	-952.011	1618.93	223.975	-955.236	1620.81	93.9405	-1105.74	1649.38	231.235	-1121.6	1655.54	181.661	-1195.76	1504.02	185.531	-1301.84	1282.69	170.889	-1058.79	1403.17	174.381	-1037.96	1216.97	236.075	-1302.87	1358.94	-13.676	-1196.09	1447.87	-66.1788	-1247.75	1255.19	-78.6345	-1291.41	1142.61	-96.4107	-1273.57	969.266	-56.1697	-1267	869.116	-116.013	-1314.84	874.539	-110.236	-1296.81	769.629
658	0	121.466	-940.192	1621.21	224.913	-943.912	1622.8	94.2646	-1093.72	1652.12	231.51	-1110.17	1657.99	181.546	-1184.5	1506.24	184.776	-1289.87	1284.67	170.935	-1047.32	1405.72	174.124	-1026.29	1219.56	235.377	-1291.43	1360.86	-13.9514	-1184.09	1450.65	-67.3948	-1232.8	1256.83	-80.6501	-1274.58	1143.57	-97.2192	-1251.95	970.474	-56.4435	-1242.88	871.034	-116.769	-1290.23	874.683	-111.059	-1268.18	770.714
659	0	122.526	-928.479	1623.56	225.91	-932.692	1624.84	94.6712	-1081.82	1654.86	231.865	-1098.85	1660.4	181.504	-1173.29	1508.42	184.126	-1277.98	1286.63	171.016	-1035.9	1408.26	173.889	-1014.67	1222.14	234.776	-1280.03	1362.76	-14.1434	-1172.17	1453.43	-68.5312	-1217.93	1258.54	-82.6093	-1257.75	1144.61	-97.938	-1230.12	971.925	-56.5965	-1218.42	873.297	-117.38	-1265.25	875.117	-111.703	-1239.07	772.273
660	0	123.616	-916.857	1625.95	226.937	-921.551	1626.88	95.1371	-1070.03	1657.55	232.275	-1087.63	1662.71	181.527	-1162.09	1510.55	183.584	-1266.14	1288.53	171.121	-1024.51	1410.73	173.665	-1003.07	1224.66	234.274	-1268.64	1364.61	-14.2582	-1160.32	1456.16	-69.5897	-1203.15	1260.29	-84.5038	-1240.92	1145.72	-98.5656	-1208.11	973.613	-56.628	-1193.68	875.902	-117.843	-1239.94	875.849	-112.145	-1209.57	774.318
661	0	124.705	-905.307	1628.33	227.966	-910.464	1628.91	95.6401	-1058.33	1660.15	232.72	-1076.47	1664.91	181.607	-1150.9	1512.58	183.153	-1254.34	1290.34	171.241	-1013.11	1413.11	173.443	-991.496	1227.08	233.87	-1257.25	1366.37	-14.3014	-1148.52	1458.82	-70.5721	-1188.45	1262.05	-86.3261	-1224.12	1146.85	-99.101	-1185.97	975.522	-56.5379	-1168.7	878.838	-118.158	-1214.36	876.882	-112.368	-1179.78	776.847
662	0	125.77	-893.81	1630.66	228.974	-899.407	1630.87	96.1603	-1046.71	1662.61	233.18	-1065.37	1666.95	181.737	-1139.69	1514.48	182.835	-1242.58	1292.05	171.368	-1001.72	1415.33	173.219	-979.93	1229.35	233.566	-1245.84	1368.02	-14.2775	-1136.78	1461.35	-71.4797	-1173.85	1263.77	-88.0689	-1207.34	1147.97	-99.5434	-1163.73	977.635	-56.3273	-1143.55	882.089	-118.324	-1188.57	878.21	-112.357	-1149.79	779.851
663	0	126.789	-882.348	1632.89	229.939	-888.357	1632.74	96.6803	-1035.14	1664.88	233.639	-1054.3	1668.79	181.914	-1128.44	1516.23	182.632	-1230.84	1293.6	171.497	-990.299	1417.38	172.988	-968.365	1231.44	233.361	-1234.39	1369.54	-14.1905	-1125.07	1463.71	-72.3132	-1159.33	1265.41	-89.7252	-1190.6	1149.05	-99.8917	-1141.43	979.932	-55.9977	-1118.29	885.634	-118.344	-1162.61	879.823	-112.104	-1119.7	783.308
664	0	127.747	-870.904	1634.97	230.848	-877.292	1634.47	97.1857	-1023.61	1666.93	234.083	-1043.23	1670.42	182.134	-1117.15	1517.79	182.544	-1219.11	1295	171.624	-978.854	1419.2	172.751	-956.795	1233.31	233.255	-1222.91	1370.9	-14.0431	-1113.39	1465.86	-73.0722	-1144.89	1266.93	-91.288	-1173.9	1150.05	-100.145	-1119.11	982.388	-55.5513	-1092.97	889.449	-118.221	-1136.53	881.705	-111.606	-1089.59	787.194
665	0	128.631	-859.46	1636.87	231.687	-866.192	1636.04	97.6657	-1012.1	1668.71	234.501	-1032.15	1671.8	182.395	-1105.8	1519.15	182.572	-1207.38	1296.2	171.749	-967.374	1420.77	172.509	-945.213	1234.93	233.246	-1211.36	1372.08	-13.8373	-1101.74	1467.78	-73.7549	-1130.53	1268.3	-92.7503	-1157.24	1150.94	-100.301	-1096.8	984.976	-54.9908	-1067.64	893.506	-117.957	-1110.4	883.836	-110.866	-1059.53	791.474
666	0	129.435	-848	1638.54	232.451	-855.04	1637.4	98.1136	-1000.6	1670.21	234.888	-1021.03	1672.91	182.698	-1094.38	1520.26	182.714	-1195.63	1297.18	171.872	-955.852	1422.06	172.266	-933.615	1236.27	233.336	-1199.76	1373.05	-13.5741	-1090.1	1469.43	-74.3582	-1116.25	1269.48	-94.1045	-1140.62	1151.68	-100.358	-1074.54	987.669	-54.3194	-1042.35	897.773	-117.556	-1084.26	886.194	-109.893	-1029.6	796.113
667	0	130.156	-836.51	1639.94	233.135	-843.821	1638.54	98.5263	-989.089	1671.39	235.241	-1009.86	1673.74	183.043	-1082.88	1521.13	182.97	-1183.86	1297.94	171.997	-944.284	1423.05	172.028	-921.994	1237.31	233.524	-1188.09	1373.8	-13.2532	-1078.46	1470.79	-74.8775	-1102.04	1270.44	-95.3427	-1124.05	1152.26	-100.313	-1052.35	990.438	-53.5402	-1017.17	902.218	-117.022	-1058.16	888.753	-108.701	-999.856	801.071
668	0	130.797	-824.977	1641.06	233.743	-832.522	1639.41	98.9049	-977.551	1672.25	235.562	-998.624	1674.28	183.435	-1071.29	1521.73	183.339	-1172.04	1298.45	172.129	-932.665	1423.72	171.803	-910.347	1238.03	233.808	-1176.34	1374.31	-12.8735	-1066.83	1471.84	-75.3067	-1087.88	1271.17	-96.4564	-1107.53	1152.64	-100.164	-1030.28	993.255	-52.657	-992.134	906.806	-116.36	-1032.16	891.489	-107.307	-970.368	806.307
669	0	131.363	-813.39	1641.87	234.281	-821.131	1640.01	99.2544	-965.975	1672.76	235.856	-987.308	1674.52	183.876	-1059.62	1522.06	183.819	-1160.18	1298.7	172.275	-920.992	1424.06	171.6	-898.667	1238.42	234.19	-1164.51	1374.57	-12.4332	-1055.19	1472.58	-75.6387	-1073.78	1271.63	-97.4367	-1091.06	1152.81	-99.909	-1008.36	996.092	-51.6737	-967.295	911.503	-115.572	-1006.31	894.372	-105.733	-941.192	811.781
670	0	131.863	-801.74	1642.34	234.757	-809.642	1640.32	99.5832	-954.349	1672.93	236.133	-975.898	1674.46	184.372	-1047.86	1522.1	184.408	-1148.26	1298.68	172.442	-909.262	1424.07	171.427	-886.951	1238.49	234.668	-1152.6	1374.56	-11.9295	-1043.54	1472.99	-75.8656	-1059.73	1271.81	-98.2744	-1074.64	1152.77	-99.5441	-986.615	998.924	-50.5943	-942.699	916.274	-114.664	-980.657	897.377	-104.005	-912.383	817.453
671	0	132.312	-790.02	1642.48	235.185	-798.046	1640.33	99.9034	-942.665	1672.76	236.405	-964.386	1674.11	184.929	-1036.01	1521.86	185.103	-1136.27	1298.39	172.64	-897.471	1423.75	171.295	-875.193	1238.23	235.243	-1140.6	1374.29	-11.3589	-1031.86	1473.08	-75.979	-1045.72	1271.72	-98.9604	-1058.28	1152.49	-99.0676	-965.078	1001.72	-49.4234	-918.39	921.086	-113.639	-955.256	900.476	-102.147	-883.994	823.282
672	0	132.724	-778.226	1642.29	235.582	-786.341	1640.04	100.23	-930.913	1672.25	236.689	-952.765	1673.47	185.552	-1024.07	1521.33	185.901	-1124.21	1297.84	172.88	-885.617	1423.11	171.214	-863.386	1237.64	235.913	-1128.52	1373.75	-10.7177	-1020.15	1472.86	-75.9703	-1031.73	1271.34	-99.4859	-1041.98	1151.98	-98.4776	-943.781	1004.47	-48.1654	-894.41	925.906	-112.501	-930.155	903.644	-100.186	-856.075	829.233
673	0	133.117	-766.352	1641.75	235.966	-774.524	1639.45	100.579	-919.089	1671.43	237.001	-941.029	1672.55	186.249	-1012.03	1520.53	186.798	-1112.06	1297.02	173.172	-873.694	1422.16	171.192	-851.523	1236.75	236.677	-1116.34	1372.95	-10.0017	-1008.4	1472.33	-75.8315	-1017.78	1270.7	-99.8429	-1025.76	1151.25	-97.7727	-922.754	1007.15	-46.8251	-870.801	930.704	-111.254	-905.404	906.853	-98.1481	-828.674	835.267
674	0	133.511	-754.398	1640.91	236.357	-762.593	1638.57	100.97	-907.188	1670.31	237.363	-929.174	1671.37	187.027	-999.913	1519.46	187.789	-1099.83	1295.94	173.53	-861.699	1420.91	171.24	-839.597	1235.57	237.533	-1104.08	1371.88	-9.20683	-996.582	1471.52	-75.5552	-1003.85	1269.79	-100.025	-1009.63	1150.3	-96.9525	-902.027	1009.73	-45.4072	-847.6	935.451	-109.902	-881.048	910.08	-96.0572	-801.838	841.351
675	0	133.927	-742.361	1639.76	236.777	-750.549	1637.42	101.424	-895.206	1668.91	237.793	-917.199	1669.94	187.893	-987.702	1518.15	188.867	-1087.5	1294.61	173.963	-849.627	1419.4	171.365	-827.599	1234.12	238.48	-1091.73	1370.56	-8.32929	-984.699	1470.45	-75.1355	-989.948	1268.63	-100.026	-993.596	1149.15	-96.0171	-881.63	1012.21	-43.916	-824.843	940.118	-108.449	-857.134	913.3	-93.9349	-775.607	847.449
676	0	134.388	-730.24	1638.33	237.247	-738.392	1636.02	101.96	-883.14	1667.26	238.314	-905.103	1668.29	188.851	-975.4	1516.6	190.025	-1075.07	1293.06	174.485	-837.47	1417.65	171.576	-815.52	1232.44	239.512	-1079.28	1369.01	-7.36568	-972.735	1469.14	-74.5679	-976.067	1267.25	-99.8436	-977.687	1147.82	-94.9676	-861.59	1014.57	-42.3559	-802.563	944.678	-106.899	-833.706	916.487	-91.7993	-750.024	853.527
677	0	134.916	-718.036	1636.67	237.791	-726.124	1634.4	102.599	-870.99	1665.39	238.947	-892.886	1666.45	189.907	-963.009	1514.84	191.255	-1062.55	1291.3	175.106	-825.225	1415.68	171.881	-803.35	1230.54	240.627	-1066.74	1367.24	-6.31344	-960.676	1467.63	-73.8499	-962.213	1265.67	-99.4768	-961.916	1146.33	-93.8057	-841.934	1016.8	-40.7309	-780.793	949.105	-105.258	-810.804	919.618	-89.6648	-725.124	859.55
678	0	135.532	-705.747	1634.8	238.428	-713.746	1632.58	103.361	-858.753	1663.34	239.709	-880.551	1664.43	191.066	-950.527	1512.89	192.546	-1049.93	1289.36	175.837	-812.883	1413.54	172.285	-791.079	1228.46	241.82	-1054.12	1365.28	-5.17097	-948.51	1465.94	-72.9813	-948.387	1263.92	-98.9268	-946.304	1144.69	-92.5344	-822.688	1018.88	-39.0448	-759.56	953.372	-103.53	-788.467	922.667	-87.5419	-700.941	865.481
679	0	136.256	-693.373	1632.76	239.178	-701.26	1630.6	104.264	-846.43	1661.14	240.621	-868.097	1662.26	192.328	-937.954	1510.79	193.89	-1037.2	1287.25	176.685	-800.44	1411.25	172.794	-778.697	1226.24	243.083	-1041.4	1363.14	-3.93793	-936.224	1464.11	-71.9639	-934.594	1262.03	-98.1977	-930.87	1142.94	-91.1572	-803.873	1020.81	-37.3011	-738.89	957.454	-101.721	-766.729	925.61	-85.4372	-677.505	871.281
680	0	137.109	-680.912	1630.59	240.06	-688.666	1628.49	105.322	-834.018	1658.82	241.696	-855.529	1659.98	193.695	-925.288	1508.56	195.273	-1024.39	1285.02	177.657	-787.889	1408.85	173.413	-766.196	1223.9	244.411	-1028.6	1360.86	-2.61538	-923.807	1462.17	-70.8025	-920.838	1260.04	-97.2958	-915.631	1141.11	-89.679	-785.511	1022.58	-35.5035	-718.806	961.324	-99.8378	-745.622	928.421	-83.3538	-654.841	876.911
681	0	138.107	-668.363	1628.34	241.088	-675.966	1626.29	106.549	-821.516	1656.43	242.947	-842.846	1657.61	195.165	-912.527	1506.24	196.687	-1011.47	1282.69	178.759	-775.226	1406.37	174.146	-753.568	1221.49	245.797	-1015.71	1358.47	-1.20598	-911.249	1460.16	-69.5037	-907.125	1257.98	-96.2297	-900.604	1139.22	-88.1054	-767.618	1024.18	-33.6557	-699.328	964.957	-97.8879	-725.174	931.074	-81.2923	-632.973	882.325
682	0	139.262	-655.722	1626.05	242.273	-663.161	1624.03	107.954	-808.922	1653.99	244.382	-830.054	1655.17	196.733	-899.673	1503.85	198.12	-998.475	1280.3	179.992	-762.447	1403.85	174.994	-740.805	1219.05	247.234	-1002.74	1356	0.285903	-898.541	1458.12	-68.0769	-893.459	1255.88	-95.0102	-885.804	1137.3	-86.4431	-750.209	1025.6	-31.7618	-680.471	968.327	-95.8794	-705.408	933.544	-79.2505	-611.92	887.479
683	0	140.585	-642.988	1623.76	243.626	-650.253	1621.75	109.54	-796.235	1651.56	246.003	-817.154	1652.71	198.395	-886.724	1501.44	199.561	-985.393	1277.88	181.354	-749.551	1401.34	175.959	-727.904	1216.6	248.715	-989.689	1353.49	1.8542	-885.678	1456.08	-66.5332	-879.843	1253.79	-93.6496	-871.242	1135.39	-84.6997	-733.295	1026.84	-29.8265	-662.25	971.406	-93.8215	-686.345	935.804	-77.2256	-591.695	892.323
684	0	142.082	-630.157	1621.51	245.148	-637.243	1619.48	111.306	-783.454	1649.16	247.809	-804.15	1650.24	200.141	-873.683	1499.04	201.003	-972.237	1275.46	182.843	-736.538	1398.85	177.038	-714.863	1214.18	250.234	-976.566	1350.97	3.49117	-872.657	1454.06	-64.8857	-866.281	1251.73	-92.1617	-856.927	1133.51	-82.884	-716.886	1027.89	-27.8553	-644.672	974.169	-91.7242	-668	937.83	-75.2136	-572.313	896.806
685	0	143.752	-617.228	1619.34	246.839	-624.134	1617.25	113.248	-770.577	1646.83	249.793	-791.047	1647.81	201.962	-860.552	1496.68	202.439	-959.014	1273.09	184.45	-723.411	1396.43	178.23	-701.683	1211.83	251.785	-963.374	1348.48	5.18755	-859.48	1452.12	-63.1491	-852.774	1249.75	-90.5614	-842.864	1131.69	-81.006	-700.986	1028.74	-25.8542	-627.746	976.59	-89.5986	-650.387	939.595	-73.2113	-553.781	900.874
686	0	145.591	-604.2	1617.28	248.694	-610.932	1615.1	115.353	-757.605	1644.6	251.941	-777.85	1645.43	203.844	-847.336	1494.4	203.862	-945.734	1270.8	186.165	-710.175	1394.11	179.528	-688.368	1209.57	253.362	-950.12	1346.06	6.93268	-846.151	1450.26	-61.3391	-839.324	1247.87	-88.8642	-829.054	1129.97	-79.0764	-685.597	1029.39	-23.8307	-611.474	978.644	-87.4566	-633.515	941.077	-71.2164	-536.106	904.474
687	0	147.589	-591.073	1615.36	250.702	-597.641	1613.04	117.604	-744.538	1642.5	254.237	-764.566	1643.14	205.776	-834.043	1492.23	205.27	-932.41	1268.63	187.975	-696.839	1391.91	180.927	-674.926	1207.45	254.959	-936.815	1343.74	8.71471	-832.68	1448.53	-59.4724	-825.933	1246.11	-87.0859	-815.497	1128.35	-77.1072	-670.72	1029.83	-21.7931	-595.856	980.308	-85.3112	-617.388	942.252	-69.228	-519.291	907.553
688	0	149.731	-577.851	1613.6	252.846	-584.27	1611.11	119.981	-731.381	1640.56	256.655	-751.205	1640.96	207.74	-820.683	1490.21	206.66	-919.054	1266.6	189.864	-683.414	1389.88	182.418	-661.372	1205.48	256.574	-923.467	1341.56	10.5207	-819.082	1446.94	-57.566	-812.601	1244.52	-85.2426	-802.189	1126.88	-75.1112	-656.353	1030.06	-19.751	-580.891	981.561	-83.1757	-602.011	943.103	-67.2475	-503.337	910.059
689	0	151.995	-564.539	1612.02	255.105	-570.828	1609.33	122.456	-718.138	1638.81	259.17	-737.775	1638.93	209.721	-807.267	1488.35	208.033	-905.679	1264.74	191.814	-669.917	1388.03	183.989	-647.721	1203.7	258.201	-910.088	1339.55	12.3372	-805.373	1445.51	-55.6372	-799.33	1243.1	-83.3499	-789.122	1125.57	-73.1019	-642.489	1030.08	-17.7152	-566.575	982.384	-81.0645	-587.382	943.61	-65.2788	-488.244	911.945
690	0	154.354	-551.148	1610.64	257.454	-557.328	1607.71	124.999	-704.819	1637.26	261.749	-724.289	1637.06	211.702	-793.81	1486.7	209.391	-892.3	1263.1	193.804	-656.363	1386.38	185.628	-633.994	1202.12	259.837	-896.691	1337.75	14.1498	-791.578	1444.27	-53.7026	-786.122	1241.89	-81.4232	-776.289	1124.43	-71.0938	-629.124	1029.87	-15.6978	-552.903	982.762	-78.9922	-573.499	943.762	-63.3284	-474.008	913.168
691	0	156.779	-537.69	1609.47	259.862	-543.784	1606.27	127.577	-691.434	1635.94	264.359	-710.763	1635.39	213.666	-780.328	1485.27	210.736	-878.934	1261.68	195.813	-642.774	1384.96	187.322	-620.217	1200.77	261.478	-883.289	1336.17	15.9444	-777.723	1443.23	-51.7784	-772.982	1240.88	-79.4769	-763.678	1123.49	-69.1014	-616.25	1029.45	-13.7118	-539.866	982.684	-76.9737	-560.359	943.549	-61.4053	-460.628	913.693
692	0	159.235	-524.18	1608.52	262.297	-530.214	1605.03	130.154	-677.997	1634.85	266.964	-697.211	1633.94	215.595	-766.839	1484.08	212.072	-865.595	1260.51	197.818	-629.171	1383.78	189.057	-606.418	1199.66	263.123	-869.898	1334.85	17.7071	-763.836	1442.39	-49.8793	-759.915	1240.1	-77.5246	-751.281	1122.74	-67.1397	-603.859	1028.81	-11.7712	-527.458	982.144	-75.024	-547.954	942.967	-59.5207	-448.1	913.493
693	0	161.686	-510.639	1607.78	264.722	-516.637	1603.99	132.696	-664.527	1634.01	269.526	-683.653	1632.71	217.474	-753.363	1483.15	213.404	-852.3	1259.61	199.798	-615.576	1382.86	190.815	-592.626	1198.8	264.767	-856.53	1333.8	19.4246	-749.949	1441.77	-48.0187	-746.93	1239.56	-75.5791	-739.087	1122.21	-65.2235	-591.944	1027.95	-9.89042	-515.672	981.14	-73.1582	-536.278	942.016	-57.6881	-436.419	912.551
694	0	164.095	-497.087	1607.27	267.102	-503.074	1603.16	135.165	-651.044	1633.42	272.012	-670.108	1631.74	219.288	-739.919	1482.5	214.737	-839.064	1258.99	201.732	-602.014	1382.2	192.583	-578.872	1198.2	266.408	-843.201	1333.03	21.0852	-736.096	1441.37	-46.208	-734.036	1239.24	-73.6517	-727.087	1121.88	-63.3673	-580.497	1026.89	-8.08451	-504.501	979.679	-71.3908	-525.322	940.703	-55.9225	-425.581	910.865
695	0	166.424	-483.55	1606.97	269.401	-489.546	1602.57	137.529	-637.57	1633.09	274.386	-656.596	1631.04	221.025	-726.527	1482.12	216.076	-825.901	1258.66	203.6	-588.507	1381.82	194.345	-565.186	1197.87	268.044	-829.923	1332.57	22.6785	-722.308	1441.18	-44.4566	-721.246	1239.16	-71.7522	-715.273	1121.76	-61.585	-569.513	1025.62	-6.36856	-493.94	977.773	-69.7359	-515.079	939.044	-54.2402	-415.582	908.442
696	0	168.637	-470.053	1606.89	271.582	-476.076	1602.2	139.755	-624.131	1633.01	276.619	-643.138	1630.62	222.673	-713.205	1482.02	217.424	-812.824	1258.62	205.384	-575.077	1381.72	196.086	-551.597	1197.81	269.672	-816.709	1332.41	24.1962	-708.618	1441.21	-42.7718	-708.573	1239.3	-69.8892	-703.64	1121.86	-59.8897	-558.986	1024.16	-4.75753	-483.981	975.44	-68.207	-505.538	937.057	-52.6585	-406.42	905.309
697	0	170.699	-456.622	1607.03	273.614	-462.683	1602.08	141.818	-610.752	1633.19	278.684	-629.753	1630.49	224.225	-699.97	1482.21	218.787	-799.842	1258.86	207.069	-561.742	1381.9	197.79	-538.13	1198.02	271.291	-803.568	1332.56	25.6324	-695.057	1441.45	-41.1583	-696.034	1239.67	-68.0692	-692.185	1122.15	-58.2935	-548.913	1022.53	-3.26603	-474.623	972.707	-66.8163	-496.69	934.771	-51.1952	-398.09	901.503
698	0	172.58	-443.285	1607.38	275.468	-449.388	1602.22	143.695	-597.459	1633.62	280.56	-616.461	1630.65	225.677	-686.839	1482.68	220.166	-786.965	1259.39	208.644	-548.52	1382.35	199.445	-524.802	1198.5	272.901	-790.508	1333	26.9833	-681.651	1441.9	-39.6188	-683.645	1240.25	-66.2966	-680.909	1122.63	-56.807	-539.291	1020.75	-1.90803	-465.86	969.606	-65.5751	-488.527	932.22	-49.8684	-390.59	897.076
699	0	174.256	-430.065	1607.94	277.119	-436.207	1602.61	145.371	-584.277	1634.28	282.235	-603.279	1631.11	227.026	-673.821	1483.42	221.565	-774.198	1260.19	210.098	-535.423	1383.09	201.035	-511.627	1199.25	274.5	-777.534	1333.74	28.2475	-668.424	1442.55	-38.1534	-671.422	1241.03	-64.5741	-669.814	1123.31	-55.4394	-530.119	1018.83	-0.696668	-457.69	966.177	-64.4929	-481.039	929.442	-48.6965	-383.917	892.096
700	0	175.704	-416.987	1608.72	278.549	-423.156	1603.27	146.837	-571.232	1635.18	283.698	-590.221	1631.87	228.272	-660.926	1484.42	222.985	-761.542	1261.26	211.427	-522.46	1384.09	202.55	-498.613	1200.26	276.088	-764.648	1334.75	29.4261	-655.397	1443.38	-36.7601	-659.383	1242.01	-62.9016	-658.907	1124.15	-54.1984	-521.397	1016.81	0.35602	-450.11	962.467	-63.5775	-474.217	926.482	-47.6976	-378.067	886.639
701	0	176.913	-404.07	1609.72	279.745	-410.244	1604.21	148.089	-558.345	1636.29	284.951	-577.299	1632.91	229.419	-648.159	1485.67	224.425	-748.999	1262.56	212.627	-509.634	1385.36	203.978	-485.759	1201.52	277.667	-751.85	1336.02	30.5219	-642.581	1444.39	-35.4346	-647.544	1243.16	-61.2775	-648.197	1125.16	-53.0898	-513.127	1014.72	1.23936	-443.115	958.526	-62.8346	-468.051	923.392	-46.8894	-373.038	880.794
702	0	177.874	-391.33	1610.94	280.702	-397.481	1605.42	149.132	-545.634	1637.61	285.997	-564.524	1634.23	230.473	-635.521	1487.15	225.885	-736.565	1264.08	213.698	-496.945	1386.88	205.312	-473.06	1203.03	279.235	-739.137	1337.52	31.5398	-629.985	1445.56	-34.171	-635.918	1244.47	-59.6977	-637.694	1126.33	-52.1173	-505.31	1012.58	1.9443	-436.701	954.408	-62.2674	-462.53	920.222	-46.2885	-368.822	874.654
703	0	178.59	-378.781	1612.37	281.42	-384.87	1606.91	149.977	-533.115	1639.12	286.849	-551.9	1635.82	231.44	-623.009	1488.82	227.362	-724.236	1265.8	214.643	-484.39	1388.62	206.545	-460.504	1204.76	280.795	-726.504	1339.24	32.4857	-617.611	1446.89	-32.962	-624.519	1245.94	-58.1572	-627.41	1127.64	-51.283	-497.946	1010.43	2.46367	-430.861	950.172	-61.8767	-457.644	917.026	-45.91	-365.411	868.32
704	0	179.068	-366.429	1614.02	281.907	-372.414	1608.68	150.638	-520.798	1640.79	287.522	-539.431	1637.63	232.328	-610.616	1490.68	228.852	-712.005	1267.69	215.467	-471.96	1390.58	207.674	-448.076	1206.71	282.344	-713.944	1341.14	33.3666	-605.452	1448.35	-31.7992	-613.357	1247.54	-56.6495	-617.36	1129.08	-50.5872	-491.035	1008.3	2.79246	-425.585	945.875	-61.6606	-453.376	913.86	-45.7669	-362.792	861.892
705	0	179.324	-354.277	1615.88	282.179	-360.109	1610.7	151.135	-508.688	1642.6	288.038	-527.117	1639.65	233.146	-598.333	1492.69	230.351	-699.865	1269.72	216.178	-459.643	1392.72	208.699	-435.758	1208.85	283.884	-701.448	1343.2	34.1897	-593.499	1449.93	-30.6741	-602.438	1249.26	-55.1681	-607.556	1130.65	-50.0281	-484.575	1006.23	2.92798	-420.859	941.576	-61.6145	-449.713	910.774	-45.8689	-360.946	855.471
706	0	179.378	-342.321	1617.94	282.255	-347.951	1612.96	151.493	-496.783	1644.53	288.421	-514.954	1641.83	233.904	-586.149	1494.82	231.851	-687.807	1271.86	216.785	-447.426	1395.02	209.624	-423.532	1211.14	285.411	-689.009	1345.37	34.9624	-581.735	1451.6	-29.5781	-591.766	1251.09	-53.7064	-598.009	1132.33	-49.6026	-478.562	1004.24	2.87007	-416.665	937.331	-61.7308	-446.633	907.818	-46.2223	-359.848	849.15
707	0	179.258	-330.552	1620.18	282.162	-335.931	1615.44	151.737	-485.077	1646.55	288.695	-502.936	1644.15	234.61	-574.05	1497.04	233.343	-675.823	1274.09	217.297	-435.294	1397.43	210.452	-411.379	1213.56	286.924	-676.618	1347.63	35.6917	-570.141	1453.35	-28.5035	-581.341	1252.99	-52.2587	-588.732	1134.1	-49.3059	-472.988	1002.36	2.6212	-412.982	933.189	-61.9993	-444.113	905.035	-46.8288	-359.467	843.018
708	0	178.992	-318.958	1622.57	281.928	-324.039	1618.09	151.892	-473.558	1648.62	288.885	-491.054	1646.54	235.273	-562.02	1499.31	234.819	-663.904	1276.36	217.726	-423.231	1399.93	211.193	-399.281	1216.06	288.418	-664.266	1349.94	36.384	-558.693	1455.14	-27.4438	-571.16	1254.95	-50.8202	-579.729	1135.95	-49.1318	-467.842	1000.62	2.18655	-409.784	929.197	-62.4071	-442.126	902.462	-47.6848	-359.762	837.15
709	0	178.615	-307.518	1625.09	281.584	-312.261	1620.88	151.984	-462.207	1650.71	289.018	-479.294	1648.97	235.9	-550.046	1501.59	236.267	-652.041	1278.64	218.082	-411.222	1402.47	211.856	-387.223	1218.61	289.887	-651.945	1352.26	37.0448	-547.364	1456.96	-26.3938	-561.215	1256.96	-49.3879	-571.004	1137.87	-49.0727	-463.108	999.022	1.57404	-407.039	925.392	-62.9388	-440.639	900.127	-48.7815	-360.686	831.612
710	0	178.158	-296.209	1627.7	281.163	-300.582	1623.76	152.038	-451.002	1652.78	289.115	-467.641	1651.39	236.497	-538.11	1503.84	237.673	-640.228	1280.91	218.378	-399.25	1405	212.451	-375.192	1221.15	291.324	-639.649	1354.55	37.6783	-536.129	1458.77	-25.3501	-551.494	1258.98	-47.9602	-562.556	1139.83	-49.1201	-458.767	997.593	0.794272	-404.712	921.807	-63.5768	-439.616	898.05	-50.1043	-362.182	826.453
711	0	177.656	-285.006	1630.35	280.695	-288.983	1626.66	152.074	-439.913	1654.8	289.197	-456.078	1653.74	237.07	-526.2	1506.04	239.024	-628.457	1283.12	218.624	-387.304	1407.49	212.99	-363.176	1223.65	292.719	-627.373	1356.79	38.288	-524.958	1460.54	-24.3108	-541.982	1260.99	-46.5375	-554.376	1141.82	-49.2641	-454.794	996.335	-0.139646	-402.766	918.462	-64.3019	-439.016	896.245	-51.6332	-364.189	821.711
712	0	177.137	-273.877	1632.99	280.21	-277.445	1629.55	152.111	-428.912	1656.73	289.279	-444.584	1655.99	237.621	-514.301	1508.14	240.307	-616.722	1285.24	218.831	-375.369	1409.88	213.483	-351.168	1226.05	294.064	-615.113	1358.92	38.8758	-513.826	1462.25	-23.2761	-532.661	1262.98	-45.1221	-546.454	1143.83	-49.4944	-451.161	995.253	-1.21226	-401.156	915.372	-65.0935	-438.792	894.715	-53.3432	-366.641	817.405
713	0	176.628	-262.793	1635.57	279.733	-265.949	1632.35	152.163	-417.965	1658.53	289.377	-433.138	1658.08	238.154	-502.4	1510.1	241.506	-605.018	1287.24	219.008	-363.437	1412.13	213.942	-339.163	1228.31	295.346	-602.865	1360.93	39.4425	-502.706	1463.86	-22.2476	-523.509	1264.91	-43.7175	-538.768	1145.82	-49.7997	-447.833	994.344	-2.40607	-399.84	912.543	-65.9307	-438.897	893.458	-55.2051	-369.466	813.546
714	0	176.153	-251.722	1638.03	279.288	-254.471	1635.01	152.24	-407.037	1660.18	289.497	-421.717	1659.99	238.667	-490.488	1511.91	242.61	-593.338	1289.1	219.165	-351.497	1414.21	214.375	-327.157	1230.39	296.554	-590.627	1362.78	39.9876	-491.574	1465.34	-21.2287	-514.501	1266.77	-42.3289	-531.297	1147.78	-50.1682	-444.773	993.602	-3.70181	-398.771	909.974	-66.7923	-439.277	892.465	-57.1863	-372.592	810.13
715	0	175.729	-240.633	1640.32	278.892	-242.99	1637.48	152.348	-396.097	1661.64	289.646	-410.299	1661.67	239.161	-478.553	1513.52	243.605	-581.676	1290.77	219.307	-339.543	1416.08	214.79	-315.15	1232.24	297.677	-578.398	1364.44	40.5093	-480.405	1466.68	-20.224	-505.61	1268.54	-40.9624	-524.009	1149.69	-50.5879	-441.939	993.018	-5.07887	-397.902	907.659	-67.6579	-439.877	891.721	-59.252	-375.946	807.143
716	0	175.369	-229.496	1642.4	278.557	-231.486	1639.71	152.49	-385.11	1662.88	289.824	-398.861	1663.09	239.633	-466.589	1514.91	244.48	-570.024	1292.25	219.44	-327.567	1417.71	215.193	-303.141	1233.84	298.702	-566.176	1365.89	41.0047	-469.179	1467.85	-19.2395	-496.805	1270.2	-39.6248	-516.872	1151.54	-51.0466	-439.289	992.58	-6.51575	-397.185	905.586	-68.5087	-440.64	891.212	-61.3662	-379.454	804.565
717	0	175.081	-218.284	1644.21	278.292	-219.938	1641.64	152.664	-374.048	1663.89	290.029	-387.382	1664.25	240.077	-454.588	1516.07	245.227	-558.374	1293.5	219.568	-315.565	1419.07	215.586	-291.133	1235.16	299.618	-553.958	1367.11	41.4694	-457.878	1468.82	-18.2822	-488.055	1271.73	-38.3231	-509.848	1153.31	-51.5325	-436.774	992.273	-7.99055	-396.574	903.739	-69.3275	-441.508	890.916	-63.493	-383.047	802.369
718	0	174.866	-206.974	1645.71	278.098	-208.329	1643.25	152.865	-362.883	1664.64	290.255	-375.843	1665.11	240.488	-442.544	1516.98	245.836	-546.716	1294.51	219.692	-303.532	1420.14	215.971	-279.127	1236.17	300.415	-541.744	1368.07	41.898	-446.483	1469.58	-17.3597	-479.328	1273.13	-37.0643	-502.896	1154.99	-52.034	-434.346	992.082	-9.48151	-396.022	902.099	-70.0994	-442.421	890.815	-65.5974	-386.655	800.523
719	0	174.723	-195.544	1646.89	277.975	-196.641	1644.51	153.085	-351.591	1665.13	290.495	-364.225	1665.68	240.859	-430.453	1517.62	246.304	-535.037	1295.27	219.81	-291.463	1420.91	216.347	-267.122	1236.85	301.082	-529.528	1368.78	42.2837	-434.981	1470.12	-16.4805	-470.59	1274.38	-35.8552	-495.976	1156.57	-52.54	-431.955	991.991	-10.9676	-395.485	900.647	-70.8124	-443.321	890.888	-67.6468	-390.215	798.997
720	0	174.645	-183.979	1647.71	277.916	-184.862	1645.4	153.315	-340.155	1665.35	290.736	-352.516	1665.94	241.181	-418.309	1517.98	246.625	-523.326	1295.76	219.92	-279.353	1421.36	216.709	-255.119	1237.21	301.612	-517.309	1369.22	42.6188	-423.357	1470.43	-15.6535	-461.807	1275.47	-34.702	-489.044	1158.04	-53.0408	-429.552	991.981	-12.4287	-394.918	899.363	-71.4573	-444.15	891.116	-69.6114	-393.665	797.758
721	0	174.624	-172.266	1648.16	277.912	-172.98	1645.9	153.54	-328.559	1665.3	290.965	-340.703	1665.9	241.444	-406.109	1518.07	246.798	-511.567	1295.99	220.018	-267.196	1421.5	217.052	-243.115	1237.23	301.997	-505.079	1369.39	42.8946	-411.603	1470.5	-14.888	-452.947	1276.4	-33.6104	-482.058	1159.38	-53.5275	-427.086	992.037	-13.8468	-394.28	898.225	-72.0281	-444.849	891.48	-71.4651	-396.948	796.774
722	0	174.647	-160.397	1648.25	277.951	-160.989	1646.02	153.748	-316.794	1664.98	291.169	-328.778	1665.57	241.638	-393.848	1517.89	246.821	-499.748	1295.94	220.094	-254.986	1421.34	217.368	-231.104	1236.93	302.231	-492.832	1369.29	43.1015	-399.707	1470.34	-14.1935	-443.978	1277.16	-32.5856	-474.977	1160.6	-53.9932	-424.507	992.142	-15.2055	-393.528	897.214	-72.5218	-445.364	891.961	-73.1861	-400.012	796.015
723	0	174.699	-148.368	1647.98	278.017	-148.884	1645.76	153.922	-304.853	1664.41	291.332	-316.735	1664.96	241.75	-381.521	1517.45	246.696	-487.852	1295.63	220.142	-242.717	1420.88	217.648	-219.079	1236.3	302.311	-480.56	1368.93	43.2296	-387.665	1469.95	-13.5795	-434.869	1277.76	-31.6321	-467.762	1161.7	-54.4324	-421.769	992.28	-16.4913	-392.622	896.312	-72.938	-445.643	892.543	-74.7569	-402.806	795.455
724	0	174.764	-136.178	1647.36	278.094	-136.663	1645.15	154.046	-292.736	1663.58	291.437	-304.572	1664.08	241.77	-369.125	1516.74	246.425	-475.865	1295.06	220.149	-230.381	1420.13	217.882	-207.031	1235.38	302.233	-468.254	1368.32	43.2684	-375.469	1469.32	-13.0553	-425.594	1278.19	-30.754	-460.375	1162.65	-54.8419	-418.825	992.435	-17.6935	-391.523	895.501	-73.2793	-445.634	893.209	-76.1646	-405.286	795.065
725	0	174.823	-123.829	1646.42	278.163	-124.326	1644.2	154.102	-280.444	1662.52	291.467	-292.289	1662.95	241.685	-356.654	1515.8	246.01	-463.774	1294.24	220.104	-217.971	1419.11	218.058	-194.946	1234.18	301.997	-455.903	1367.46	43.2077	-363.118	1468.48	-12.63	-416.128	1278.45	-29.9553	-452.784	1163.48	-55.2202	-415.631	992.59	-18.8043	-390.19	894.765	-73.5506	-445.29	893.942	-77.401	-407.41	794.822
726	0	174.857	-111.327	1645.19	278.204	-111.877	1642.95	154.074	-267.982	1661.24	291.407	-279.887	1661.6	241.483	-344.104	1514.63	245.457	-451.567	1293.19	219.993	-205.479	1417.86	218.166	-182.81	1232.72	301.603	-443.496	1366.38	43.0368	-350.609	1467.43	-12.3119	-406.448	1278.54	-29.2398	-444.956	1164.16	-55.5683	-412.144	992.731	-19.8196	-388.587	894.088	-73.759	-444.567	894.724	-78.4627	-409.137	794.703
727	0	174.845	-98.6786	1643.71	278.197	-99.3189	1641.44	153.943	-255.358	1659.77	291.238	-267.371	1660.04	241.153	-331.469	1513.25	244.771	-439.233	1291.92	219.803	-192.897	1416.38	218.194	-170.606	1231.04	301.053	-431.023	1365.1	42.7459	-337.943	1466.18	-12.1089	-396.537	1278.47	-28.6114	-436.865	1164.69	-55.889	-408.327	992.843	-20.7381	-386.675	893.456	-73.9132	-443.422	895.539	-79.3506	-410.431	794.684
728	0	174.767	-85.8914	1642	278.12	-86.6568	1639.69	153.691	-242.58	1658.12	290.944	-254.743	1658.3	240.684	-318.745	1511.7	243.957	-426.764	1290.46	219.518	-180.217	1414.72	218.13	-158.317	1229.17	300.351	-418.473	1363.65	42.3254	-325.123	1464.74	-12.0278	-386.379	1278.24	-28.0747	-428.484	1165.08	-56.1871	-404.141	992.911	-21.5618	-384.416	892.853	-74.0238	-441.816	896.366	-80.0698	-411.258	794.744
729	0	174.599	-72.9748	1640.12	277.95	-73.8957	1637.76	153.301	-229.658	1656.32	290.509	-242.01	1656.4	240.065	-305.926	1509.98	243.023	-414.153	1288.83	219.125	-167.432	1412.89	217.965	-145.926	1227.14	299.502	-405.834	1362.04	41.7669	-312.152	1463.14	-12.0747	-375.961	1277.84	-27.6343	-419.794	1165.32	-56.4692	-399.552	992.921	-22.2956	-381.773	892.266	-74.1024	-439.713	897.188	-80.6292	-411.583	794.86
730	0	174.32	-59.938	1638.09	277.666	-61.0404	1635.68	152.758	-216.604	1654.39	289.919	-229.176	1654.39	239.291	-293.009	1508.14	241.976	-401.397	1287.06	218.611	-154.537	1410.94	217.688	-133.415	1224.98	298.511	-393.099	1360.3	41.0631	-299.035	1461.38	-12.2546	-365.277	1277.28	-27.2955	-410.776	1165.4	-56.7435	-394.527	992.858	-22.9466	-378.708	891.678	-74.1619	-437.076	897.981	-81.0406	-411.374	795.01
731	0	173.908	-46.7901	1635.97	277.247	-48.0951	1633.51	152.045	-203.429	1652.36	289.159	-216.246	1652.27	238.353	-279.991	1506.2	240.823	-388.496	1285.18	217.963	-141.527	1408.89	217.291	-120.77	1222.74	297.385	-380.258	1358.47	40.2082	-285.782	1459.49	-12.5713	-354.319	1276.56	-27.064	-401.415	1165.32	-57.0192	-389.036	992.711	-23.5242	-375.184	891.078	-74.216	-433.873	898.726	-81.3183	-410.598	795.171
732	0	173.341	-33.5397	1633.78	276.67	-35.0629	1631.27	151.149	-190.142	1650.26	288.217	-203.223	1650.1	237.249	-266.869	1504.19	239.572	-375.45	1283.22	217.172	-128.4	1406.77	216.767	-107.978	1220.45	296.133	-367.307	1356.58	39.1985	-272.4	1457.49	-13.0278	-343.085	1275.69	-26.9459	-391.698	1165.08	-57.3062	-383.049	992.466	-24.0394	-371.162	890.45	-74.2787	-430.071	899.4	-81.4785	-409.221	795.318
733	0	172.599	-20.1949	1631.58	275.918	-21.946	1629.02	150.06	-176.755	1648.1	287.085	-190.111	1647.89	235.977	-253.645	1502.13	238.231	-362.264	1281.21	216.23	-115.157	1404.62	216.11	-95.0322	1218.14	294.764	-354.243	1354.66	38.032	-258.901	1455.4	-13.6256	-331.575	1274.68	-26.9473	-381.616	1164.67	-57.6149	-376.54	992.112	-24.5041	-366.604	889.78	-74.3646	-425.638	899.981	-81.5388	-407.207	795.428
734	0	171.665	-6.76305	1629.37	274.973	-8.74564	1626.79	148.769	-163.277	1645.92	285.755	-176.911	1645.69	234.54	-240.319	1500.08	236.81	-348.944	1279.19	215.132	-101.799	1402.48	215.317	-81.9277	1215.86	293.286	-341.065	1352.75	36.7095	-245.298	1453.25	-14.3651	-319.789	1273.52	-27.0743	-371.16	1164.11	-57.9555	-369.481	991.64	-24.9305	-361.472	889.057	-74.4882	-420.544	900.447	-81.5176	-404.516	795.477
735	0	170.523	6.74889	1627.21	273.822	4.5373	1624.62	147.272	-149.716	1643.75	284.223	-163.627	1643.52	232.941	-226.896	1498.05	235.315	-335.501	1277.2	213.876	-88.3333	1400.37	214.387	-68.6655	1213.63	291.712	-327.776	1350.86	35.2339	-231.605	1451.05	-15.2455	-307.732	1272.24	-27.3325	-360.326	1163.38	-58.3378	-361.847	991.042	-25.3312	-355.725	888.271	-74.6634	-414.756	900.778	-81.4342	-401.109	795.441
736	0	169.164	20.3342	1625.11	272.456	17.9021	1622.53	145.568	-136.083	1641.61	282.491	-150.26	1641.42	231.188	-213.384	1496.07	233.755	-321.946	1275.25	212.465	-74.7666	1398.32	213.321	-55.2514	1211.49	290.051	-314.382	1349.05	33.611	-217.836	1448.85	-16.2648	-295.407	1270.83	-27.7272	-349.11	1162.5	-58.7708	-353.616	990.314	-25.7181	-349.327	887.411	-74.9036	-408.243	900.954	-81.3079	-396.939	795.298
737	0	167.583	33.986	1623.1	270.869	31.3473	1620.56	143.66	-122.386	1639.53	280.562	-136.814	1639.42	229.292	-199.79	1494.19	232.139	-308.293	1273.4	210.904	-61.1108	1396.37	212.123	-41.6957	1209.47	288.316	-300.893	1347.34	31.8493	-204.007	1446.66	-17.4196	-282.821	1269.33	-28.2624	-337.511	1161.47	-59.2622	-344.764	989.454	-26.1024	-342.237	886.471	-75.221	-400.975	900.96	-81.1581	-391.96	795.029
738	0	165.78	47.6966	1621.19	269.064	44.8702	1618.73	141.559	-108.635	1637.53	278.446	-123.292	1637.55	227.266	-186.128	1492.43	230.474	-294.56	1271.66	209.204	-47.3798	1394.56	210.799	-28.0133	1207.6	286.517	-287.321	1345.76	29.9598	-190.135	1444.53	-18.7052	-269.98	1267.74	-28.9412	-325.529	1160.3	-59.8187	-335.271	988.463	-26.4942	-334.42	885.449	-75.6264	-392.922	900.782	-81.0038	-386.12	794.616
739	0	163.762	61.457	1619.41	267.048	58.4657	1617.06	139.277	-94.8388	1635.66	276.157	-109.702	1635.85	225.127	-172.412	1490.82	228.767	-280.766	1270.07	207.377	-33.5904	1392.9	209.36	-14.2227	1205.91	284.665	-273.682	1344.34	27.9563	-176.236	1442.48	-20.1159	-256.892	1266.08	-29.7654	-313.166	1159.02	-60.4451	-325.117	987.348	-26.9022	-325.838	884.343	-76.1286	-384.053	900.41	-80.8631	-379.365	794.045
740	0	161.543	75.2567	1617.78	264.834	72.126	1615.57	136.834	-81.0094	1633.93	273.713	-96.0517	1634.35	222.893	-158.661	1489.38	227.025	-266.93	1268.66	205.442	-19.7618	1391.43	207.818	-0.346222	1204.42	282.773	-259.996	1343.11	25.8549	-162.327	1440.55	-21.6446	-243.565	1264.39	-30.7354	-300.426	1157.63	-61.1444	-314.285	986.116	-27.3338	-316.458	883.156	-76.7343	-374.341	899.84	-80.7532	-371.642	793.305
741	0	159.145	89.0826	1616.29	262.444	85.8398	1614.28	134.253	-67.1597	1632.38	271.138	-82.3529	1633.07	220.584	-144.892	1488.15	225.255	-253.075	1267.46	203.418	-5.91489	1390.16	206.187	13.5915	1203.17	280.851	-246.283	1342.08	23.6738	-148.423	1438.77	-23.283	-230.006	1262.69	-31.85	-287.314	1156.17	-61.9182	-302.759	984.78	-27.795	-306.248	881.894	-77.4477	-363.761	899.069	-80.6898	-362.896	792.388
742	0	156.596	102.919	1614.98	259.906	99.5922	1613.19	131.562	-53.3044	1631.02	268.459	-68.6206	1632.03	218.223	-131.128	1487.14	223.464	-239.222	1266.48	201.329	7.928	1389.14	204.485	27.5634	1202.16	278.911	-232.566	1341.28	21.4327	-134.539	1437.17	-25.0218	-216.223	1261.01	-33.1066	-273.837	1154.65	-62.7661	-290.529	983.357	-28.2903	-295.18	880.568	-78.2704	-352.289	898.103	-80.6869	-353.072	791.294
743	0	153.929	116.749	1613.85	257.252	113.364	1612.32	128.794	-39.4605	1629.88	265.706	-54.8731	1631.25	215.834	-117.392	1486.38	221.659	-225.393	1265.74	199.2	21.7439	1388.36	202.731	41.5412	1201.43	276.962	-218.867	1340.72	19.1527	-120.691	1435.79	-26.8507	-202.225	1259.37	-34.5012	-260.003	1153.1	-63.686	-277.585	981.866	-28.8225	-283.229	879.191	-79.2013	-339.906	896.949	-80.7568	-342.121	790.026
744	0	151.185	130.551	1612.91	254.521	127.134	1611.68	125.984	-25.6465	1628.98	262.915	-41.1318	1630.76	213.441	-103.705	1485.86	219.846	-211.612	1265.27	197.058	35.51	1387.86	200.943	55.496	1200.97	275.015	-205.212	1340.4	16.8555	-106.891	1434.66	-28.7585	-188.021	1257.82	-36.0286	-245.821	1151.55	-64.6745	-263.921	980.332	-29.3928	-270.376	877.781	-80.2366	-326.598	895.623	-80.91	-329.996	788.593
745	0	148.405	144.303	1612.18	251.755	140.876	1611.27	123.168	-11.8828	1628.34	260.121	-27.4206	1630.56	211.068	-90.0906	1485.62	218.032	-197.897	1265.06	194.928	49.2041	1387.64	199.143	69.3989	1200.81	273.08	-191.624	1340.35	14.5629	-93.1505	1433.79	-30.7334	-173.618	1256.37	-37.6821	-231.301	1150.04	-65.7267	-249.538	978.781	-30.0013	-256.607	876.359	-81.37	-312.356	894.142	-81.1546	-316.659	787.011
746	0	145.635	157.982	1611.68	248.999	154.563	1611.11	120.385	1.80908	1627.97	257.36	-13.765	1630.65	208.738	-76.5696	1485.65	216.225	-184.27	1265.13	192.838	62.8059	1387.71	197.349	83.2218	1200.95	271.167	-178.124	1340.56	12.2965	-79.4808	1433.22	-32.7632	-159.026	1255.06	-39.4543	-216.454	1148.59	-66.8367	-234.438	977.241	-30.6462	-241.913	874.951	-82.5928	-297.175	892.53	-81.4964	-302.077	785.301
747	0	142.92	171.565	1611.42	246.297	168.167	1611.2	117.671	15.4077	1627.89	254.669	-0.19127	1631.03	206.474	-63.1609	1485.95	214.432	-170.746	1265.48	190.81	76.2967	1388.07	195.581	96.9384	1201.38	269.285	-164.734	1341.03	10.0769	-65.8907	1432.96	-34.8354	-144.253	1253.93	-41.3367	-201.294	1147.24	-67.9974	-218.628	975.743	-31.3249	-226.294	873.585	-83.8942	-281.057	890.816	-81.9389	-286.228	783.492
748	0	140.303	185.029	1611.41	243.692	181.661	1611.54	115.063	28.8919	1628.11	252.081	13.2747	1631.71	204.295	-49.8811	1486.54	212.662	-157.342	1266.11	188.867	89.6612	1388.72	193.855	110.525	1202.11	267.443	-151.472	1341.76	7.92328	-52.3878	1433.03	-36.9372	-129.311	1252.98	-43.3201	-185.832	1146.01	-69.201	-202.121	974.32	-32.0331	-209.754	872.29	-85.2618	-264.011	889.033	-82.4824	-269.1	781.617
749	0	137.827	198.353	1611.67	241.224	195.019	1612.15	112.592	42.2423	1628.61	249.63	26.6087	1632.67	202.221	-36.7434	1487.39	210.923	-144.069	1267.01	187.028	102.887	1389.67	192.186	123.961	1203.13	265.651	-138.352	1342.75	5.85318	-38.9786	1433.44	-39.0561	-114.21	1252.26	-45.3948	-170.084	1144.93	-70.4389	-184.932	973.003	-32.7656	-192.305	871.101	-86.6818	-246.048	887.216	-83.1249	-250.693	779.717
750	0	135.525	211.52	1612.22	238.93	208.219	1613.01	110.287	55.4417	1629.42	247.342	39.7891	1633.89	200.266	-23.7579	1488.51	209.223	-130.939	1268.19	185.308	115.964	1390.9	190.588	137.23	1204.43	263.916	-125.385	1343.98	3.88206	-25.6682	1434.19	-41.1797	-98.9631	1251.77	-47.5504	-154.065	1144.02	-71.7023	-167.084	971.826	-33.5159	-173.967	870.053	-88.1394	-227.19	885.405	-83.861	-231.016	777.839
751	0	133.429	224.516	1613.06	236.837	221.243	1614.14	108.171	68.476	1630.52	245.24	52.798	1635.37	198.444	-10.9309	1489.88	207.571	-117.958	1269.62	183.72	128.888	1392.4	189.071	150.321	1206	262.247	-112.58	1345.44	2.02293	-12.4606	1435.28	-43.2959	-83.5842	1251.54	-49.7763	-137.792	1143.31	-72.9821	-148.6	970.821	-34.2767	-154.764	869.183	-89.6193	-207.459	883.643	-84.6826	-210.092	776.036
752	0	131.558	237.33	1614.19	234.968	234.075	1615.52	106.262	81.3347	1631.91	243.34	65.6218	1637.08	196.762	1.7347	1491.49	205.975	-105.131	1271.29	182.271	141.655	1394.16	187.642	163.229	1207.81	260.65	-99.9409	1347.12	0.28615	0.641222	1436.7	-45.3934	-68.0898	1251.57	-52.0613	-121.283	1142.82	-74.2693	-129.511	970.021	-35.0397	-134.728	868.529	-91.1063	-186.887	881.974	-85.5788	-187.954	774.365
753	0	129.929	249.956	1615.62	233.338	246.709	1617.14	104.57	94.0111	1633.57	241.654	78.2512	1639.01	195.228	14.2393	1493.32	204.443	-92.4608	1273.19	180.966	154.268	1396.15	186.306	175.95	1209.86	259.131	-87.4666	1349	-1.32076	13.6354	1438.43	-47.4615	-52.4985	1251.87	-54.3941	-104.561	1142.55	-75.5552	-109.849	969.454	-35.7966	-113.897	868.13	-92.585	-165.508	880.445	-86.5359	-164.647	772.889
754	0	128.547	262.394	1617.33	231.953	259.14	1619.01	103.1	106.503	1635.48	240.187	90.6817	1641.12	193.843	26.5864	1495.35	202.982	-79.946	1275.3	179.805	166.73	1398.36	185.067	188.49	1212.13	257.696	-75.1537	1351.06	-2.79318	26.5209	1440.47	-49.4906	-36.8312	1252.45	-56.7634	-87.6476	1142.51	-76.8315	-89.652	969.15	-36.5387	-92.3148	868.023	-94.0407	-143.362	879.099	-87.5372	-140.223	771.67
755	0	127.409	274.646	1619.31	230.812	271.368	1621.09	101.85	118.81	1637.62	238.935	102.913	1643.39	192.607	38.7825	1497.56	201.6	-67.5832	1277.59	178.785	179.048	1400.76	183.923	200.856	1214.57	256.349	-62.9953	1353.28	-4.12934	39.2979	1442.78	-51.4721	-21.1117	1253.29	-59.1581	-70.5695	1142.72	-78.0905	-68.9611	969.133	-37.2578	-70.0282	868.245	-95.4594	-120.491	877.983	-88.5639	-114.748	770.773
756	0	126.507	286.718	1621.54	229.906	283.401	1623.36	100.812	130.939	1639.97	237.892	114.951	1645.79	191.516	50.8364	1499.91	200.301	-55.3664	1280.02	177.899	191.231	1403.33	182.871	213.058	1217.18	255.093	-50.9815	1355.64	-5.33024	51.9672	1445.33	-53.3991	-5.36571	1254.39	-61.5674	-53.3551	1143.17	-79.3253	-47.8205	969.423	-37.9464	-47.0902	868.83	-96.8278	-96.9454	877.138	-89.5949	-88.2938	770.261
757	0	125.824	298.62	1623.99	229.219	295.247	1625.8	99.9716	142.896	1642.49	237.044	126.801	1648.3	190.564	62.759	1502.39	199.092	-43.2877	1282.59	177.138	203.29	1406.03	181.905	225.11	1219.92	253.929	-39.1	1358.1	-6.39931	64.5304	1448.09	-55.2661	10.3788	1255.75	-63.9811	-36.0355	1143.85	-80.5299	-26.2776	970.038	-38.5978	-23.5572	869.808	-98.1339	-72.7769	876.601	-90.6079	-60.9399	770.19
758	0	125.338	310.364	1626.63	228.73	306.92	1628.38	99.3103	154.694	1645.14	236.372	138.478	1650.87	189.74	74.5629	1504.94	197.976	-31.3371	1285.24	176.489	215.238	1408.82	181.019	237.027	1222.75	252.86	-27.3366	1360.64	-7.34217	76.9895	1451.02	-57.0693	26.0925	1257.32	-66.3897	-18.6436	1144.75	-81.6994	-4.38272	970.988	-39.2063	0.510293	871.205	-99.3665	-48.0425	876.406	-91.5797	-32.7734	770.614
759	0	125.022	321.965	1629.41	228.412	318.436	1631.06	98.8061	166.344	1647.88	235.856	149.994	1653.47	189.036	86.2619	1507.55	196.955	-19.5033	1287.95	175.94	227.086	1411.68	180.202	248.823	1225.63	251.884	-15.6757	1363.22	-8.16616	89.347	1454.07	-58.8063	41.7457	1259.1	-68.7845	-1.21357	1145.85	-82.8296	17.8118	972.279	-39.7671	25.0489	873.04	-100.516	-22.8029	876.579	-92.4871	-3.88683	771.576
760	0	124.848	333.438	1632.29	228.238	329.811	1633.8	98.434	177.861	1650.67	235.472	161.367	1656.07	188.44	97.8703	1510.18	196.034	-7.77449	1290.68	175.475	238.848	1414.56	179.444	260.515	1228.54	251.003	-4.10124	1365.82	-8.87988	101.605	1457.21	-60.4762	57.3089	1261.04	-71.1579	16.22	1147.13	-83.9174	40.2519	973.911	-40.2763	49.9925	875.326	-101.574	2.8781	877.14	-93.308	25.6225	773.112
761	0	124.783	344.801	1635.23	228.175	341.068	1636.55	98.1677	189.263	1653.46	235.193	172.615	1658.63	187.94	109.403	1512.78	195.212	3.86145	1293.4	175.079	250.537	1417.41	178.735	272.116	1231.42	250.215	7.4033	1368.4	-9.49272	113.767	1460.37	-62.0792	72.754	1263.12	-73.5026	33.6238	1148.55	-84.9603	62.8829	975.877	-40.7308	75.2726	878.07	-102.532	28.9337	878.101	-94.0218	55.6538	775.246
762	0	124.796	356.072	1638.16	228.193	352.225	1639.29	97.9808	200.566	1656.21	234.995	183.759	1661.11	187.523	120.874	1515.33	194.492	15.4164	1296.07	174.736	262.166	1420.21	178.064	283.641	1234.24	249.518	18.8541	1370.93	-10.0145	125.834	1463.51	-63.6158	88.0554	1265.28	-75.8124	50.9664	1150.09	-85.9563	85.6502	978.165	-41.1281	100.819	881.27	-103.387	55.2951	879.466	-94.6105	86.1042	777.993
763	0	124.856	367.268	1641.04	228.261	363.305	1641.96	97.8475	211.789	1658.86	234.851	194.819	1663.48	187.178	132.297	1517.78	193.873	26.9016	1298.65	174.433	273.746	1422.9	177.42	295.102	1236.95	248.912	30.2665	1373.37	-10.4548	137.809	1466.58	-65.0872	103.191	1267.49	-78.0812	68.2199	1151.69	-86.9036	108.5	980.756	-41.466	126.563	884.915	-104.131	81.8925	881.231	-95.0593	116.87	781.355
764	0	124.936	378.407	1643.81	228.351	374.328	1644.51	97.7439	222.949	1661.37	234.739	205.817	1665.7	186.894	143.685	1520.11	193.356	38.3275	1301.11	174.156	285.287	1425.45	176.796	306.51	1239.52	248.394	41.6549	1375.7	-10.8229	149.693	1469.53	-66.4942	118.143	1269.7	-80.3029	85.3609	1153.33	-87.8004	131.38	983.627	-41.7426	152.433	888.988	-104.764	108.656	883.385	-95.3566	147.847	785.323
765	0	125.012	389.508	1646.43	228.438	385.314	1646.92	97.6487	234.065	1663.71	234.638	216.772	1667.75	186.662	155.05	1522.27	192.94	49.7038	1303.42	173.892	296.799	1427.83	176.185	317.875	1241.9	247.964	53.0324	1377.88	-11.1273	161.487	1472.32	-67.8369	132.899	1271.86	-82.4714	102.371	1154.96	-88.6446	154.241	986.75	-41.956	178.36	893.465	-105.281	135.515	885.91	-95.4952	178.933	789.877
766	0	125.064	400.588	1648.85	228.502	396.285	1649.13	97.5438	245.154	1665.83	234.529	227.706	1669.59	186.474	166.402	1524.25	192.624	61.0392	1305.55	173.633	308.288	1429.99	175.579	329.205	1244.07	247.618	64.4106	1379.89	-11.3756	173.194	1474.91	-69.1144	147.452	1273.93	-84.5799	119.237	1156.53	-89.4337	177.036	990.091	-42.1042	204.277	898.312	-105.684	162.402	888.782	-95.4716	210.028	794.988
767	0	125.077	411.663	1651.02	228.527	407.256	1651.12	97.4151	256.235	1667.7	234.399	238.636	1671.21	186.323	177.749	1526.02	192.408	72.342	1307.46	173.369	319.762	1431.91	174.977	340.507	1246	247.356	75.7996	1381.69	-11.574	184.815	1477.26	-70.3247	161.799	1275.87	-86.6212	135.952	1158.01	-90.1648	199.723	993.617	-42.1853	230.119	903.493	-105.973	189.252	891.972	-95.2868	241.037	800.62
768	0	125.041	422.749	1652.92	228.503	418.245	1652.85	97.2525	267.322	1669.31	234.236	249.58	1672.58	186.203	189.098	1527.55	192.289	83.6201	1309.14	173.097	331.225	1433.57	174.376	351.789	1247.65	247.176	87.208	1383.28	-11.7275	196.352	1479.34	-71.4645	175.945	1277.63	-88.5871	152.514	1159.35	-90.8344	222.261	997.29	-42.1974	255.824	908.964	-106.149	216	895.449	-94.9454	271.867	806.727
769	0	124.952	433.859	1654.51	228.425	429.266	1654.29	97.0501	278.431	1670.62	234.036	260.552	1673.7	186.113	200.455	1528.83	192.264	94.881	1310.55	172.814	342.682	1434.94	173.775	363.056	1249.02	247.075	98.6429	1384.62	-11.8395	207.81	1481.12	-72.5291	189.899	1279.17	-90.4682	168.924	1160.54	-91.4388	244.615	1001.07	-42.1391	281.335	914.68	-106.218	242.587	899.177	-94.4559	302.432	813.261
770	0	124.81	445.005	1655.77	228.291	440.329	1655.44	96.8063	289.575	1671.62	233.795	271.564	1674.54	186.05	211.824	1529.85	192.331	106.132	1311.7	172.519	354.138	1436.02	173.178	374.317	1250.08	247.053	110.11	1385.71	-11.912	219.193	1482.59	-73.5126	203.673	1280.47	-92.2543	185.188	1161.52	-91.9737	266.752	1004.93	-42.0095	306.597	920.589	-106.182	268.957	903.12	-93.8298	332.651	820.166
771	0	124.619	456.198	1656.69	228.106	451.444	1656.26	96.5234	300.763	1672.31	233.516	282.628	1675.12	186.015	223.209	1530.58	192.486	117.382	1312.56	172.215	365.595	1436.8	172.587	385.576	1250.84	247.107	121.615	1386.52	-11.9452	230.508	1483.73	-74.4081	217.284	1281.5	-93.9345	201.313	1162.3	-92.4352	288.644	1008.82	-41.8084	331.56	926.642	-106.048	295.057	907.239	-93.0812	362.448	827.384
772	0	124.388	467.444	1657.26	227.878	462.619	1656.77	96.208	312.004	1672.69	233.204	293.752	1675.41	186.01	234.613	1531.03	192.725	128.639	1313.12	171.908	377.058	1437.28	172.008	396.841	1251.29	247.236	133.16	1387.06	-11.9381	241.763	1484.54	-75.208	230.753	1282.25	-95.4971	217.308	1162.84	-92.8189	310.265	1012.71	-41.5368	356.18	932.785	-105.821	320.838	911.498	-92.2261	391.755	834.853
773	0	124.129	478.75	1657.48	227.618	473.857	1656.95	95.8699	323.305	1672.76	232.869	304.941	1675.44	186.04	246.037	1531.2	193.042	139.912	1313.39	171.605	388.53	1437.45	171.448	408.119	1251.43	247.437	144.748	1387.31	-11.8881	252.968	1485.03	-75.9043	244.101	1282.7	-96.9303	233.182	1163.14	-93.121	331.592	1016.56	-41.1962	380.414	938.968	-105.508	346.256	915.857	-91.2817	420.508	842.511
774	0	123.854	490.117	1657.35	227.339	485.161	1656.81	95.5224	334.667	1672.53	232.523	316.199	1675.21	186.108	257.483	1531.08	193.433	151.21	1313.36	171.315	400.016	1437.33	170.914	419.419	1251.28	247.709	156.382	1387.28	-11.7916	264.135	1485.19	-76.489	257.349	1282.85	-98.2222	248.943	1163.19	-93.338	352.603	1020.35	-40.7896	404.226	945.141	-105.116	371.268	920.279	-90.2657	448.653	850.293
775	0	123.58	501.547	1656.89	227.058	496.532	1656.37	95.1815	346.093	1672.01	232.181	327.528	1674.72	186.222	268.953	1530.69	193.89	162.544	1313.03	171.052	411.519	1436.93	170.416	430.749	1250.83	248.049	168.064	1386.97	-11.6439	275.277	1485.04	-76.9546	270.52	1282.71	-99.3617	264.596	1163	-93.467	373.279	1024.04	-40.3203	427.585	951.254	-104.649	395.838	924.726	-89.1964	476.139	858.134
776	0	123.324	513.037	1656.12	226.793	507.969	1655.63	94.8659	357.581	1671.22	231.861	338.929	1673.99	186.389	280.449	1530.03	194.409	173.922	1312.41	170.827	423.047	1436.27	169.964	442.12	1250.12	248.454	179.793	1386.37	-11.44	286.409	1484.6	-77.2942	283.634	1282.28	-100.339	280.146	1162.57	-93.5057	393.605	1027.61	-39.7928	450.462	957.264	-104.115	419.931	929.16	-88.0911	502.926	865.97
777	0	123.104	524.586	1655.06	226.562	519.47	1654.63	94.596	369.129	1670.19	231.585	350.4	1673.03	186.615	291.973	1529.12	194.98	185.357	1311.52	170.655	434.605	1435.36	169.568	453.541	1249.17	248.921	191.573	1385.51	-11.1741	297.55	1483.88	-77.502	296.711	1281.57	-101.144	295.594	1161.91	-93.4527	413.564	1031.02	-39.2117	472.835	963.127	-103.518	443.514	933.545	-86.9667	528.977	873.738
778	0	122.939	536.188	1653.74	226.385	531.034	1653.38	94.3935	380.731	1668.92	231.373	361.94	1671.87	186.91	303.529	1527.97	195.598	196.857	1310.36	170.551	446.2	1434.23	169.239	465.025	1247.98	249.447	203.403	1384.39	-10.8408	308.716	1482.92	-77.5737	309.766	1280.61	-101.771	310.937	1161.04	-93.3073	433.142	1034.27	-38.5821	494.684	968.804	-102.863	466.559	937.843	-85.8384	554.265	881.377
779	0	122.848	547.839	1652.18	226.282	542.657	1651.9	94.281	392.384	1667.46	231.248	373.547	1670.52	187.279	315.12	1526.6	196.255	208.435	1308.96	170.529	457.84	1432.89	168.989	476.582	1246.59	250.027	215.286	1383.02	-10.4348	319.928	1481.73	-77.506	322.815	1279.41	-102.215	326.172	1159.98	-93.0694	452.326	1037.31	-37.909	515.994	974.256	-102.154	489.042	942.018	-84.7197	578.768	888.826
780	0	122.851	559.535	1650.44	226.273	554.336	1650.24	94.2807	404.083	1665.83	231.233	385.218	1669	187.732	326.753	1525.02	196.942	220.099	1307.33	170.604	469.533	1431.38	168.829	488.225	1245.03	250.657	227.223	1381.42	-9.95145	331.206	1480.35	-77.2977	335.867	1278.01	-102.473	341.291	1158.73	-92.7398	471.105	1040.15	-37.1971	536.751	979.448	-101.395	510.937	946.032	-83.6215	602.47	896.026
781	0	122.968	571.273	1648.53	226.377	566.068	1648.42	94.4141	415.824	1664.05	231.35	396.949	1667.33	188.272	338.432	1523.27	197.651	231.859	1305.49	170.788	481.29	1429.72	168.768	499.965	1243.31	251.331	239.216	1379.61	-9.38687	342.57	1478.8	-76.949	348.931	1276.43	-102.546	356.287	1157.34	-92.3198	489.47	1042.75	-36.4505	556.947	984.346	-100.588	532.226	949.851	-82.5521	625.362	902.922
782	0	123.217	583.05	1646.51	226.613	577.853	1646.47	94.7012	427.604	1662.15	231.619	408.738	1665.52	188.906	350.166	1521.36	198.376	243.724	1303.47	171.094	493.118	1427.93	168.817	511.815	1241.47	252.045	251.267	1377.61	-8.73824	354.041	1477.12	-76.4618	362.011	1274.7	-102.435	371.149	1155.81	-91.8113	507.411	1045.11	-35.6723	576.574	988.918	-99.7358	552.89	953.437	-81.517	647.439	909.457
783	0	123.616	594.866	1644.4	226.998	589.688	1644.42	95.1593	439.422	1660.17	232.059	420.585	1663.61	189.636	361.962	1519.32	199.11	255.701	1301.29	171.532	505.029	1426.04	168.983	523.783	1239.53	252.792	263.379	1375.45	-8.00394	365.639	1475.32	-75.84	375.111	1272.85	-102.147	385.866	1154.18	-91.2166	524.921	1047.2	-34.8649	595.627	993.135	-98.8403	572.915	956.758	-80.5189	668.7	915.583
784	0	124.18	606.722	1642.26	227.549	601.574	1642.31	95.8026	451.278	1658.12	232.684	432.486	1661.61	190.464	373.829	1517.17	199.846	267.799	1298.99	172.109	517.031	1424.08	169.273	535.881	1237.52	253.567	275.557	1373.15	-7.18361	377.383	1473.45	-75.089	388.231	1270.92	-101.687	400.428	1152.47	-90.5383	541.994	1049.03	-34.0295	614.104	996.968	-97.903	592.288	959.781	-79.5573	689.146	921.25
785	0	124.925	618.623	1640.11	228.279	613.512	1640.16	96.6414	463.177	1656.05	233.506	444.444	1659.54	191.389	385.776	1514.94	200.579	280.022	1296.58	172.83	529.135	1422.07	169.692	548.117	1235.46	254.365	287.802	1370.73	-6.27822	389.289	1471.52	-74.2158	401.369	1268.92	-101.067	414.822	1150.7	-89.7795	558.625	1050.57	-33.1664	632.002	1000.39	-96.925	610.998	962.476	-78.6294	708.784	926.415
786	0	125.859	630.574	1638	229.197	625.504	1638.02	97.6815	475.122	1653.98	234.53	456.458	1657.42	192.411	397.811	1512.67	201.306	292.374	1294.11	173.698	541.347	1420.04	170.242	560.498	1233.38	255.18	300.119	1368.23	-5.29009	401.374	1469.58	-73.229	414.522	1266.91	-100.296	429.039	1148.91	-88.9436	574.81	1051.82	-32.2752	649.32	1003.39	-95.9078	629.038	964.815	-77.7296	727.619	931.034
787	0	126.991	642.584	1635.96	230.311	637.554	1635.91	98.9235	487.122	1651.93	235.756	468.533	1655.27	193.523	409.943	1510.37	202.023	304.857	1291.6	174.712	553.675	1418	170.924	573.028	1231.31	256.008	312.511	1365.68	-4.2228	413.647	1467.64	-72.1382	427.686	1264.9	-99.3874	443.07	1147.1	-88.0345	590.549	1052.78	-31.3549	666.06	1005.93	-94.8528	646.402	966.773	-76.8501	745.66	935.069
788	0	128.323	654.661	1634.02	231.622	649.667	1633.85	100.363	499.185	1649.93	237.181	480.67	1653.12	194.722	422.178	1508.07	202.732	317.472	1289.08	175.867	566.124	1415.99	171.734	585.711	1229.26	256.846	324.982	1363.1	-3.08124	426.115	1465.73	-70.9544	440.857	1262.93	-98.3546	456.907	1145.32	-87.0565	605.838	1053.44	-30.4043	682.221	1007.99	-93.762	663.087	968.328	-75.9813	762.916	938.484
789	0	129.851	666.816	1632.2	233.126	661.848	1631.86	101.989	511.322	1648.01	238.793	492.875	1650.99	196	434.524	1505.81	203.431	330.216	1286.6	177.156	578.696	1414.02	172.669	598.546	1227.27	257.691	337.535	1360.53	-1.87154	438.783	1463.87	-69.6893	454.028	1261.02	-97.2115	470.544	1143.58	-86.0146	620.679	1053.79	-29.4222	697.804	1009.57	-92.6377	679.092	969.462	-75.1129	779.396	941.244
790	0	131.568	679.058	1630.53	234.814	674.102	1629.98	103.788	523.542	1646.18	240.576	505.152	1648.89	197.347	446.984	1503.61	204.125	343.083	1284.17	178.566	591.393	1412.11	173.72	611.533	1225.35	258.542	350.17	1358.01	-0.601056	451.647	1462.09	-68.3551	467.193	1259.2	-95.9724	483.976	1141.91	-84.9141	635.072	1053.84	-28.408	712.812	1010.65	-91.4832	694.416	970.161	-74.2345	795.108	943.321
791	0	133.459	691.397	1629.02	236.67	686.436	1628.21	105.738	535.857	1644.46	242.51	517.506	1646.86	198.753	459.558	1501.5	204.817	356.067	1281.83	180.085	604.21	1410.29	174.877	624.665	1223.53	259.398	362.888	1355.55	0.7216	464.7	1460.4	-66.9648	480.346	1257.5	-94.6512	497.202	1140.32	-83.761	649.017	1053.58	-27.3618	727.246	1011.22	-90.3031	709.061	970.415	-73.3365	810.06	944.688
792	0	135.504	703.841	1627.68	238.676	698.853	1626.58	107.815	548.273	1642.88	244.569	529.943	1644.91	200.208	472.246	1499.49	205.511	369.157	1279.6	181.695	617.142	1408.57	176.128	637.932	1221.81	260.26	375.686	1353.19	2.0866	477.929	1458.82	-65.5311	493.478	1255.92	-93.262	510.22	1138.84	-82.5623	662.518	1053.02	-26.2846	741.107	1011.26	-89.103	723.028	970.22	-72.4114	824.256	945.324
793	0	137.68	716.396	1626.52	240.807	711.36	1625.08	109.991	560.8	1641.45	246.723	542.465	1643.06	201.697	485.043	1497.63	206.213	382.339	1277.53	183.376	630.179	1406.96	177.459	651.323	1220.23	261.127	388.559	1350.97	3.48292	491.318	1457.37	-64.0671	506.58	1254.5	-91.8181	523.029	1137.48	-81.3254	675.575	1052.17	-25.1789	754.396	1010.78	-87.89	736.32	969.574	-71.4543	837.702	945.216
794	0	139.958	729.066	1625.54	243.035	723.958	1623.74	112.233	573.443	1640.18	248.94	555.076	1641.33	203.207	497.942	1495.91	206.927	395.599	1275.62	185.107	643.31	1405.48	178.854	664.819	1218.79	262	401.5	1348.9	4.89842	504.844	1456.06	-62.5853	519.642	1253.24	-90.3321	535.632	1136.26	-80.0588	688.189	1051.03	-24.0491	767.112	1009.78	-86.6726	748.939	968.484	-70.4638	850.397	944.355
795	0	142.306	741.853	1624.74	245.329	736.65	1622.55	114.507	586.205	1639.07	251.187	567.777	1639.75	204.723	510.931	1494.38	207.66	408.917	1273.91	186.865	656.517	1404.15	180.298	678.4	1217.51	262.881	414.498	1347.03	6.31999	518.483	1454.89	-61.0979	532.654	1252.16	-88.8159	548.028	1135.19	-78.7717	700.361	1049.61	-22.9013	779.255	1008.26	-85.4608	760.887	966.96	-69.4422	862.341	942.742
796	0	144.689	754.756	1624.11	247.654	749.435	1621.52	116.778	599.085	1638.15	253.426	580.566	1638.34	206.23	523.997	1493.03	208.414	422.273	1272.42	188.626	669.782	1402.96	181.776	692.038	1216.39	263.769	427.541	1345.36	7.73386	532.205	1453.89	-59.6165	545.601	1251.26	-87.2808	560.218	1134.27	-77.4745	712.091	1047.93	-21.7437	790.823	1006.23	-84.2657	772.165	965.015	-68.3959	873.529	940.383
797	0	147.071	767.77	1623.63	249.975	762.308	1620.64	119.01	612.082	1637.4	255.622	593.441	1637.1	207.71	537.123	1491.9	209.192	435.645	1271.16	190.367	683.085	1401.94	183.271	705.704	1215.44	264.663	440.612	1343.92	9.12589	545.98	1453.04	-58.1519	558.469	1250.55	-85.7371	572.202	1133.51	-76.1782	723.375	1045.99	-20.5866	801.812	1003.72	-83.0997	782.774	962.671	-67.3354	883.955	937.295
798	0	149.416	780.889	1623.29	252.259	775.264	1619.91	121.166	625.19	1636.84	257.74	606.396	1636.06	209.149	550.289	1490.99	209.995	449.009	1270.14	192.066	696.4	1401.08	184.769	719.366	1214.67	265.561	453.696	1342.74	10.482	559.773	1452.36	-56.7141	571.242	1250.02	-84.1943	583.98	1132.92	-74.8945	734.214	1043.82	-19.442	812.218	1000.73	-81.976	792.713	959.95	-66.2749	893.612	933.504
799	0	151.689	794.101	1623.08	254.47	788.294	1619.33	123.214	638.4	1636.46	259.745	619.423	1635.24	210.532	563.473	1490.31	210.822	462.343	1269.39	193.701	709.704	1400.4	186.256	732.99	1214.08	266.462	466.773	1341.82	11.7888	573.549	1451.85	-55.3119	583.905	1249.68	-82.6609	595.55	1132.49	-73.6358	744.601	1041.44	-18.3238	822.036	997.302	-80.9081	801.983	956.883	-65.2322	902.492	929.046
800	0	153.857	807.393	1622.97	256.575	801.385	1618.89	125.121	651.698	1636.28	261.608	632.511	1634.65	211.844	576.653	1489.87	211.673	475.623	1268.89	195.253	722.97	1399.9	187.719	746.542	1213.68	267.363	479.824	1341.18	13.0341	587.272	1451.5	-53.9534	596.438	1249.51	-81.1442	606.91	1132.22	-72.4147	754.533	1038.86	-17.2474	831.261	993.458	-79.9102	810.581	953.501	-64.2277	910.583	923.965
801	0	155.886	820.749	1622.96	258.543	814.523	1618.58	126.861	665.068	1636.28	263.301	645.647	1634.3	213.076	589.803	1489.68	212.547	488.827	1268.66	196.704	736.173	1399.58	189.145	759.99	1213.47	268.261	492.832	1340.82	14.2071	600.903	1451.32	-52.645	608.823	1249.52	-79.6503	618.054	1132.11	-71.2438	764.005	1036.1	-16.2291	839.888	989.235	-78.9958	818.508	949.843	-63.2839	917.878	918.314
802	0	157.748	834.146	1623.03	260.347	827.691	1618.42	128.41	678.491	1636.48	264.801	658.815	1634.22	214.217	602.901	1489.72	213.442	501.938	1268.69	198.041	749.288	1399.46	190.522	773.307	1213.46	269.155	505.78	1340.74	15.2996	614.406	1451.29	-51.3919	621.042	1249.69	-78.1834	628.979	1132.14	-70.1353	773.012	1033.21	-15.2862	847.911	984.675	-78.1782	825.763	945.949	-62.4247	924.369	912.156
803	0	159.416	847.562	1623.16	261.962	840.87	1618.38	129.751	691.942	1636.86	266.093	672	1634.41	215.261	615.922	1490.02	214.356	514.938	1268.98	199.253	762.295	1399.55	191.838	786.47	1213.65	270.043	518.653	1340.93	16.3058	627.746	1451.42	-50.1974	633.076	1250.01	-76.7462	639.678	1132.31	-69.1011	781.546	1030.19	-14.4363	855.327	979.821	-77.4696	832.345	941.864	-61.6744	930.047	905.558
804	0	160.87	860.969	1623.37	263.367	854.039	1618.49	130.873	705.392	1637.44	267.166	685.181	1634.88	216.205	628.848	1490.55	215.288	527.817	1269.51	200.33	775.175	1399.84	193.084	799.465	1214.05	270.923	531.44	1341.4	17.2226	640.889	1451.7	-49.0627	644.907	1250.47	-75.3392	650.145	1132.6	-68.1519	789.605	1027.09	-13.6968	862.135	974.723	-76.8808	838.258	937.635	-61.0574	934.909	898.595
805	0	162.091	874.338	1623.65	264.545	867.177	1618.75	131.771	718.811	1638.2	268.016	698.34	1635.64	217.051	641.66	1491.31	216.239	540.567	1270.28	201.267	787.912	1400.34	194.249	812.283	1214.67	271.798	544.133	1342.13	18.0499	653.807	1452.12	-47.9868	656.517	1251.07	-73.9608	660.372	1133.02	-67.2972	797.182	1023.93	-13.0845	868.334	969.431	-76.4211	843.502	933.311	-60.5974	938.952	891.346
806	0	163.066	887.638	1624.01	265.486	880.264	1619.17	132.447	732.167	1639.14	268.647	711.455	1636.68	217.799	654.346	1492.3	217.207	553.185	1271.26	202.063	800.498	1401.07	195.326	824.925	1215.51	272.666	556.728	1343.11	18.7903	666.477	1452.68	-46.9667	667.889	1251.79	-72.6078	670.351	1133.56	-66.5451	804.275	1020.75	-12.6146	873.928	964.003	-76.0978	848.084	928.947	-60.3167	942.178	883.896
807	0	163.787	900.837	1624.47	266.182	893.278	1619.77	132.909	745.424	1640.27	269.069	724.507	1638.01	218.457	666.897	1493.49	218.192	565.673	1272.43	202.717	812.929	1402.01	196.309	837.398	1216.56	273.532	569.223	1344.31	19.4489	678.884	1453.37	-45.9968	679.01	1252.62	-71.2751	680.072	1134.2	-65.9019	810.882	1017.58	-12.3004	878.923	958.495	-75.9159	852.01	924.595	-60.2357	944.589	876.333
808	0	164.253	913.905	1625.04	266.631	906.2	1620.56	133.171	758.55	1641.56	269.296	737.477	1639.59	219.031	679.31	1494.87	219.193	578.037	1273.78	203.235	825.206	1403.17	197.193	849.715	1217.84	274.396	581.622	1345.71	20.033	691.021	1454.18	-45.0698	689.868	1253.56	-69.9562	689.528	1134.95	-65.3718	817.003	1014.46	-12.1528	883.329	952.968	-75.8782	855.291	920.311	-60.3722	946.195	868.747
809	0	164.468	926.813	1625.76	266.84	919.012	1621.55	133.253	771.512	1643.01	269.35	750.345	1641.43	219.533	691.586	1496.43	220.21	590.284	1275.27	203.621	837.335	1404.53	197.976	861.892	1219.32	275.263	593.93	1347.29	20.5516	702.886	1455.1	-44.177	700.452	1254.59	-68.6441	698.71	1135.79	-64.9571	822.641	1011.43	-12.1798	887.159	947.482	-75.9846	857.941	916.151	-60.7403	947.009	861.23
810	0	164.441	939.535	1626.62	266.817	931.701	1622.75	133.179	784.283	1644.6	269.256	763.097	1643.48	219.973	703.732	1498.13	221.238	602.426	1276.9	203.886	849.328	1406.08	198.657	873.95	1220.98	276.134	606.155	1349.02	21.0148	714.488	1456.12	-43.3085	710.756	1255.71	-67.3313	707.61	1136.74	-64.6578	827.803	1008.52	-12.3862	890.432	942.097	-76.2326	859.978	912.166	-61.3494	947.05	853.868
811	0	164.187	952.054	1627.66	266.578	944.255	1624.17	132.974	796.839	1646.32	269.042	775.72	1645.71	220.362	715.756	1499.95	222.275	614.477	1278.61	204.04	861.199	1407.81	199.239	885.909	1222.82	277.013	618.306	1350.86	21.4338	725.842	1457.24	-42.4542	720.778	1256.92	-66.0106	716.224	1137.77	-64.4719	832.499	1005.77	-12.7735	893.168	936.867	-76.6165	861.426	908.406	-62.2038	946.345	846.746
812	0	163.728	964.354	1628.87	266.144	956.667	1625.81	132.669	809.166	1648.13	268.736	788.205	1648.09	220.712	727.673	1501.86	223.317	626.449	1280.4	204.097	872.967	1409.67	199.725	897.792	1224.8	277.899	630.396	1352.8	21.8196	736.971	1458.44	-41.6046	730.519	1258.2	-64.6757	724.549	1138.9	-64.3953	836.742	1003.2	-13.3397	895.395	931.846	-77.1278	862.312	904.916	-63.3017	944.928	839.94
813	0	163.087	976.433	1630.26	265.539	968.936	1627.63	132.293	821.255	1650.02	268.37	800.548	1650.57	221.036	739.498	1503.83	224.357	638.356	1282.23	204.069	884.65	1411.65	200.121	909.616	1226.89	278.793	642.435	1354.78	22.1833	747.9	1459.71	-40.7506	739.986	1259.54	-63.3216	732.585	1140.12	-64.4221	840.551	1000.84	-14.0795	897.142	927.078	-77.7552	862.672	901.734	-64.6347	942.844	833.519
814	0	162.294	988.29	1631.81	264.79	981.062	1629.63	131.873	833.105	1651.94	267.971	812.748	1653.11	221.344	751.246	1505.83	225.389	650.211	1284.07	203.971	896.269	1413.71	200.434	921.401	1229.04	279.695	654.437	1356.78	22.5352	758.66	1461.02	-39.8849	749.186	1260.93	-61.9453	740.337	1141.42	-64.5447	843.949	998.714	-14.9838	898.445	922.604	-78.4847	862.544	898.89	-66.1883	940.143	827.54
815	0	161.381	999.937	1633.5	263.927	993.054	1631.77	131.439	844.726	1653.88	267.568	824.812	1655.64	221.647	762.937	1507.82	226.406	662.027	1285.9	203.817	907.844	1415.81	200.671	933.16	1231.22	280.602	666.41	1358.77	22.8843	769.284	1462.36	-39.0019	758.136	1262.37	-60.5456	747.813	1142.79	-64.7541	846.965	996.837	-16.0405	899.343	918.455	-79.2997	861.976	896.408	-67.9417	936.886	822.049
816	0	160.379	1011.39	1635.31	262.982	1004.92	1634.01	131.014	856.133	1655.79	267.185	836.75	1658.13	221.951	774.587	1509.76	227.399	673.813	1287.68	203.622	919.394	1417.9	200.84	944.906	1233.38	281.51	678.367	1360.71	23.2383	779.806	1463.7	-38.0978	766.852	1263.84	-59.1236	755.026	1144.23	-65.04	849.63	995.22	-17.2347	899.877	914.656	-80.1819	861.017	894.302	-69.8685	933.139	817.08
817	0	159.323	1022.68	1637.19	261.985	1016.69	1636.3	130.621	867.351	1657.64	266.844	848.574	1660.52	222.265	786.213	1511.63	228.36	685.579	1289.38	203.397	930.935	1419.94	200.948	956.648	1235.48	282.414	690.315	1362.56	23.6031	790.26	1465.03	-37.1714	775.357	1265.33	-57.6826	761.996	1145.74	-65.3914	851.981	993.868	-18.5489	900.095	911.221	-81.1113	859.722	892.577	-71.9376	928.977	812.652
818	0	158.246	1033.82	1639.1	260.969	1028.36	1638.58	130.278	878.41	1659.4	266.561	860.303	1662.76	222.591	797.832	1513.38	229.279	697.332	1290.97	203.155	942.483	1421.9	201.004	968.393	1237.46	283.308	702.262	1364.3	23.9826	800.68	1466.32	-36.2233	783.677	1266.82	-56.2278	768.744	1147.29	-65.7965	854.059	992.78	-19.9638	900.044	908.158	-82.0671	858.152	891.233	-74.1144	924.476	808.773
819	0	157.179	1044.86	1640.99	259.963	1039.97	1640.8	129.999	889.347	1661.03	266.351	871.958	1664.82	222.934	809.459	1515	230.148	709.08	1292.44	202.905	954.052	1423.72	201.015	980.145	1239.3	284.183	714.214	1365.89	24.3784	811.098	1467.54	-35.2566	791.841	1268.3	-54.7661	775.299	1148.88	-66.2432	855.909	991.95	-21.4585	899.778	905.464	-83.0279	856.367	890.258	-76.3618	919.72	805.438
820	0	156.151	1055.84	1642.82	258.993	1051.54	1642.91	129.794	900.198	1662.51	266.221	883.562	1666.66	223.291	821.107	1516.45	230.957	720.827	1293.76	202.657	965.652	1425.38	200.987	991.908	1240.94	285.031	726.175	1367.31	24.7899	821.544	1468.68	-34.2762	799.879	1269.76	-53.3058	781.691	1150.5	-66.7194	857.575	991.37	-23.0114	899.348	903.132	-83.9727	854.433	889.639	-78.6414	914.792	802.632
821	0	155.188	1066.78	1644.52	258.084	1063.09	1644.84	129.67	911.007	1663.81	266.177	895.138	1668.25	223.661	832.788	1517.7	231.695	732.578	1294.9	202.415	977.293	1426.84	200.926	1003.68	1242.36	285.84	738.15	1368.54	25.2142	832.047	1469.7	-33.2888	807.827	1271.18	-51.8563	787.953	1152.13	-67.2132	859.107	991.023	-24.6	898.808	901.146	-84.8817	852.413	889.353	-80.9154	909.776	800.331
822	0	154.31	1077.74	1646.06	257.255	1074.65	1646.57	129.628	921.812	1664.91	266.217	906.709	1669.56	224.039	844.514	1518.74	232.354	744.338	1295.85	202.185	988.983	1428.07	200.837	1015.47	1243.53	286.6	750.141	1369.55	25.646	842.631	1470.59	-32.3025	815.719	1272.56	-50.4274	794.123	1153.77	-67.7131	860.554	990.895	-26.202	898.214	899.488	-85.7365	850.372	889.376	-83.1474	904.755	798.506
823	0	153.534	1088.74	1647.4	256.523	1086.23	1648.03	129.665	932.655	1665.8	266.337	918.299	1670.58	224.417	856.292	1519.55	232.925	756.112	1296.6	201.968	1000.73	1429.04	200.725	1027.27	1244.42	287.299	762.152	1370.35	26.0782	853.321	1471.33	-31.3269	823.591	1273.88	-49.0292	800.237	1155.39	-68.2084	861.967	990.966	-27.7956	897.62	898.134	-86.5211	848.375	889.683	-85.3038	899.808	797.123
824	0	152.871	1099.81	1648.5	255.898	1097.87	1649.2	129.774	943.572	1666.45	266.529	929.928	1671.28	224.787	868.131	1520.12	233.398	767.904	1297.13	201.763	1012.53	1429.75	200.592	1039.09	1245.02	287.924	774.184	1370.91	26.5015	864.135	1471.91	-30.372	831.479	1275.14	-47.6714	806.333	1157	-68.6893	863.395	991.216	-29.36	897.079	897.059	-87.2221	846.484	890.245	-87.3545	895.011	796.146
825	0	152.327	1111	1649.32	255.387	1109.57	1650.06	129.944	954.597	1666.87	266.78	941.615	1671.68	225.137	880.038	1520.45	233.765	779.721	1297.44	201.569	1024.4	1430.18	200.44	1050.92	1245.33	288.464	786.242	1371.23	26.9051	875.092	1472.31	-29.4488	839.419	1276.31	-46.3634	812.451	1158.58	-69.1473	864.889	991.622	-30.876	896.644	896.238	-87.8292	844.758	891.034	-89.2738	890.437	795.536
826	0	151.903	1122.32	1649.87	254.989	1121.35	1650.59	130.163	965.759	1667.05	267.075	953.376	1671.78	225.456	892.018	1520.53	234.019	791.568	1297.52	201.382	1036.33	1430.32	200.271	1062.78	1245.34	288.906	798.328	1371.31	27.277	886.206	1472.52	-28.5684	847.445	1277.41	-45.1136	818.626	1160.13	-69.5754	866.496	992.164	-32.3268	896.365	895.644	-88.3352	843.254	892.022	-91.0407	886.152	795.255
827	0	151.592	1133.79	1650.13	254.7	1133.22	1650.78	130.413	977.08	1666.98	267.395	965.225	1671.57	225.729	904.078	1520.37	234.153	803.455	1297.38	201.195	1048.35	1430.18	200.085	1074.67	1245.06	289.238	810.448	1371.15	27.6041	897.491	1472.53	-27.7418	855.59	1278.41	-43.9294	824.897	1161.62	-69.9678	868.263	992.819	-33.6978	896.289	895.249	-88.7361	842.025	893.181	-92.6391	882.215	795.267
828	0	151.384	1145.43	1650.09	254.51	1145.2	1650.64	130.675	988.58	1666.69	267.72	977.17	1671.07	225.942	916.223	1519.96	234.162	815.388	1297.02	201.001	1060.44	1429.76	199.881	1086.6	1244.5	289.449	822.606	1370.75	27.8729	908.956	1472.35	-26.9802	863.886	1279.31	-42.8176	831.299	1163.06	-70.321	870.236	993.562	-34.9773	896.461	895.028	-89.0311	841.119	894.483	-94.0579	878.682	795.533
829	0	151.266	1157.24	1649.76	254.404	1157.28	1650.17	130.928	1000.27	1666.17	268.028	989.22	1670.3	226.08	928.456	1519.33	234.039	827.377	1296.45	200.791	1072.61	1429.07	199.658	1098.57	1243.66	289.531	834.809	1370.14	28.0694	920.61	1471.96	-26.2939	872.359	1280.12	-41.784	837.867	1164.44	-70.6329	872.458	994.373	-36.1564	896.923	894.956	-89.2225	840.582	895.903	-95.2908	875.601	796.019
830	0	151.215	1169.24	1649.16	254.365	1169.48	1649.41	131.149	1012.16	1665.43	268.294	1001.38	1669.29	226.129	940.782	1518.48	233.783	839.432	1295.67	200.555	1084.87	1428.13	199.413	1110.6	1242.58	289.473	847.063	1369.31	28.1799	932.458	1471.39	-25.6928	881.038	1280.81	-40.834	844.634	1165.74	-70.9037	874.971	995.226	-37.2295	897.714	895.007	-89.3153	840.455	897.414	-96.3359	873.013	796.69
831	0	151.211	1181.42	1648.31	254.368	1181.78	1648.38	131.315	1024.25	1664.49	268.496	1013.65	1668.05	226.074	953.206	1517.43	233.39	851.563	1294.7	200.284	1097.23	1426.96	199.144	1122.71	1241.27	289.269	859.375	1368.29	28.191	944.503	1470.62	-25.1863	889.943	1281.4	-39.9724	851.633	1166.96	-71.1354	877.815	996.099	-38.1936	898.869	895.158	-89.3174	840.776	898.989	-97.1955	870.956	797.511
832	0	151.226	1193.78	1647.22	254.389	1194.2	1647.09	131.403	1036.55	1663.37	268.61	1026.04	1666.61	225.902	965.732	1516.2	232.859	863.781	1293.55	199.967	1109.69	1425.58	198.846	1134.89	1239.76	288.913	871.754	1367.1	28.0902	956.746	1469.66	-24.7828	899.097	1281.86	-39.2042	858.895	1168.08	-71.3322	881.026	996.969	-39.049	900.423	895.383	-89.2393	841.578	900.601	-97.8752	869.459	798.45
833	0	151.233	1206.33	1645.93	254.4	1206.72	1645.6	131.391	1049.04	1662.07	268.611	1038.53	1664.99	225.599	978.361	1514.8	232.191	876.093	1292.25	199.592	1122.26	1424.01	198.516	1147.17	1238.07	288.401	884.206	1365.75	27.8662	969.187	1468.53	-24.4899	908.518	1282.2	-38.5341	866.449	1169.1	-71.4999	884.642	997.811	-39.7984	902.406	895.661	-89.0938	842.892	902.225	-98.3839	868.548	799.475
834	0	151.203	1219.04	1644.45	254.373	1219.36	1643.92	131.256	1061.72	1660.62	268.48	1051.15	1663.23	225.155	991.099	1513.26	231.387	888.51	1290.81	199.149	1134.93	1422.28	198.148	1159.56	1236.23	287.731	896.738	1364.27	27.5091	981.822	1467.24	-24.3147	918.22	1282.41	-37.9674	874.323	1169.99	-71.6463	888.696	998.603	-40.4473	904.846	895.966	-88.8961	844.749	903.832	-98.7327	868.245	800.552
835	0	151.109	1231.91	1642.82	254.281	1232.11	1642.1	130.979	1074.58	1659.03	268.197	1063.87	1661.35	224.56	1003.95	1511.61	230.451	901.039	1289.25	198.628	1147.72	1420.42	197.737	1172.06	1234.27	286.903	909.356	1362.68	27.0107	994.646	1465.79	-24.2633	928.217	1282.48	-37.5095	882.543	1170.75	-71.7804	893.22	999.32	-41.0034	907.771	896.275	-88.6632	847.174	905.396	-98.9348	868.57	801.651
836	0	150.922	1244.94	1641.07	254.095	1244.96	1640.16	130.542	1087.62	1657.33	267.746	1076.71	1659.39	223.809	1016.9	1509.85	229.386	913.685	1287.6	198.021	1160.62	1418.45	197.277	1184.69	1232.22	285.919	922.066	1361.01	26.3652	1007.65	1464.21	-24.3415	938.521	1282.41	-37.1663	891.134	1171.37	-71.9127	898.247	999.941	-41.4766	911.206	896.563	-88.4139	850.193	906.887	-99.0049	869.541	802.737
837	0	150.617	1258.11	1639.22	253.792	1257.93	1638.15	129.932	1100.82	1655.54	267.113	1089.66	1657.37	222.896	1029.97	1508.03	228.201	926.451	1285.87	197.32	1173.63	1416.4	196.764	1197.45	1230.11	284.781	934.87	1359.28	25.5688	1020.83	1462.49	-24.5542	949.14	1282.18	-36.944	900.117	1171.82	-72.0545	903.804	1000.44	-41.8783	915.177	896.806	-88.1683	853.833	908.278	-98.9592	871.174	803.779
838	0	150.174	1271.41	1637.3	253.349	1270.99	1636.09	129.137	1114.17	1653.67	266.289	1102.72	1655.32	221.822	1043.15	1506.15	226.9	939.339	1284.08	196.521	1186.76	1414.3	196.192	1210.34	1227.95	283.497	947.77	1357.51	24.6203	1034.18	1460.67	-24.9055	960.081	1281.8	-36.8487	909.509	1172.1	-72.2177	909.921	1000.8	-42.2211	919.709	896.979	-87.9474	858.12	909.542	-98.8146	873.488	804.741
839	0	149.574	1284.85	1635.33	252.749	1284.17	1634.02	128.153	1127.66	1651.75	265.269	1115.89	1653.26	220.587	1056.43	1504.26	225.493	952.346	1282.28	195.619	1200	1412.17	195.557	1223.37	1225.79	282.073	960.765	1355.73	23.5214	1047.67	1458.76	-25.3985	971.348	1281.25	-36.8867	919.328	1172.2	-72.4144	916.624	1001.01	-42.5189	924.826	897.058	-87.7722	863.078	910.649	-98.5893	876.502	805.593
840	0	148.804	1298.4	1633.34	251.978	1297.45	1631.95	126.976	1141.27	1649.8	264.055	1129.17	1651.23	219.198	1069.81	1502.36	223.989	965.469	1280.47	194.615	1213.34	1410.05	194.855	1236.53	1223.64	280.52	973.853	1353.96	22.2764	1061.3	1456.77	-26.0355	982.943	1280.54	-37.0637	929.585	1172.1	-72.6566	923.937	1001.03	-42.786	930.554	897.019	-87.664	868.736	911.573	-98.3023	880.239	806.301
841	0	147.857	1312.06	1631.34	251.03	1310.83	1629.92	125.611	1155	1647.84	262.65	1142.55	1649.24	217.664	1083.29	1500.48	222.398	978.699	1278.67	193.509	1226.77	1407.94	194.085	1249.83	1221.54	278.848	987.027	1352.23	20.8924	1075.04	1454.73	-26.8173	994.868	1279.67	-37.3848	940.29	1171.79	-72.9557	931.883	1000.86	-43.0368	936.919	896.842	-87.6431	875.12	912.29	-97.9733	884.723	806.836
842	0	146.732	1325.82	1629.36	249.902	1324.31	1627.94	124.066	1168.83	1645.89	261.065	1156.03	1647.32	215.997	1096.85	1498.65	220.732	992.027	1276.92	192.307	1240.28	1405.89	193.245	1263.24	1219.49	277.07	1000.28	1350.56	19.3793	1088.89	1452.66	-27.7433	1007.12	1278.63	-37.854	951.446	1171.28	-73.3224	940.484	1000.49	-43.2861	943.95	896.506	-87.7283	882.258	912.776	-97.6225	889.984	807.168
843	0	145.434	1339.67	1627.41	248.599	1337.89	1626.03	122.355	1182.75	1643.97	259.315	1169.6	1645.49	214.213	1110.48	1496.88	219.003	1005.44	1275.24	191.017	1253.87	1403.9	192.335	1276.77	1217.53	275.201	1013.6	1348.96	17.7497	1102.83	1450.59	-28.8115	1019.69	1277.43	-38.4744	963.056	1170.57	-73.766	949.757	999.917	-43.5483	951.673	895.998	-87.9368	890.178	913.011	-97.271	896.055	807.271
844	0	143.974	1353.59	1625.5	247.131	1351.55	1624.21	120.498	1196.75	1642.1	257.42	1183.27	1643.76	212.33	1124.18	1495.21	217.222	1018.92	1273.64	189.649	1267.51	1402	191.36	1290.39	1215.67	273.257	1026.98	1347.47	16.0186	1116.83	1448.53	-30.018	1032.58	1276.09	-39.2477	975.117	1169.65	-74.2944	959.72	999.126	-43.8371	960.116	895.303	-88.2833	898.907	912.979	-96.9399	902.973	807.123
845	0	142.369	1367.58	1623.65	245.515	1365.3	1622.48	118.518	1210.81	1640.3	255.406	1197.01	1642.17	210.37	1137.91	1493.63	215.404	1032.45	1272.15	188.217	1281.19	1400.21	190.322	1304.08	1213.94	271.254	1040.39	1346.09	14.2033	1130.87	1446.52	-31.3571	1045.77	1274.63	-40.1743	987.621	1168.54	-74.9137	970.384	998.126	-44.1652	969.309	894.416	-88.7795	908.471	912.667	-96.6508	910.778	806.705
846	0	140.643	1381.62	1621.88	243.775	1379.1	1620.86	116.445	1224.9	1638.6	253.301	1210.82	1640.72	208.355	1151.66	1492.18	213.559	1046.01	1270.78	186.736	1294.88	1398.54	189.228	1317.83	1212.34	269.21	1053.82	1344.85	12.3231	1144.94	1444.59	-32.8212	1059.26	1273.04	-41.2527	1000.56	1167.25	-75.6281	981.761	996.922	-44.5438	979.279	893.335	-89.4342	918.896	912.068	-96.4252	919.516	806.001
847	0	138.825	1395.68	1620.2	241.937	1392.96	1619.36	114.31	1239.03	1637.02	251.137	1224.68	1639.42	206.311	1165.42	1490.88	211.701	1059.58	1269.55	185.224	1308.57	1397.02	188.087	1331.6	1210.89	267.141	1067.26	1343.74	10.3989	1159	1442.76	-34.4007	1073.02	1271.38	-42.48	1013.91	1165.8	-76.4399	993.857	995.526	-44.982	990.052	892.064	-90.2525	930.202	911.181	-96.2843	929.234	805.005
848	0	136.946	1409.76	1618.61	240.035	1406.84	1617.98	112.148	1253.15	1635.57	248.95	1238.58	1638.3	204.263	1179.15	1489.72	209.844	1073.13	1268.49	183.701	1322.23	1395.65	186.907	1345.38	1209.61	265.067	1080.67	1342.8	8.45266	1173.05	1441.07	-36.0843	1087.04	1269.65	-43.8519	1027.67	1164.21	-77.3493	1006.68	993.957	-45.4869	1001.65	890.613	-91.2358	942.409	910.01	-96.2484	939.979	803.716
849	0	135.043	1423.82	1617.15	238.105	1420.74	1616.74	109.996	1267.26	1634.27	246.775	1252.49	1637.36	202.238	1192.84	1488.74	207.998	1086.65	1267.59	182.186	1335.83	1394.45	185.701	1359.14	1208.51	263.004	1094.04	1342.03	6.50705	1187.05	1439.53	-37.8588	1101.31	1267.89	-45.3624	1041.81	1162.51	-78.3545	1020.22	992.238	-46.0632	1014.11	889.001	-92.3818	955.531	908.567	-96.3367	951.802	802.14
850	0	133.154	1437.84	1615.8	236.183	1434.62	1615.63	107.892	1281.33	1633.16	244.651	1266.39	1636.61	200.261	1206.46	1487.95	206.176	1100.11	1266.88	180.701	1349.36	1393.44	184.481	1372.84	1207.59	260.97	1107.34	1341.43	4.5848	1200.99	1438.19	-39.7096	1115.79	1266.13	-47.0041	1056.3	1160.74	-79.4516	1034.47	990.396	-46.7135	1027.43	887.25	-93.6844	969.578	906.87	-96.5664	964.748	800.294
851	0	131.318	1451.81	1614.6	234.309	1448.46	1614.66	105.873	1295.34	1632.24	242.614	1280.27	1636.05	198.358	1219.98	1487.35	204.39	1113.48	1266.37	179.265	1362.79	1392.62	183.259	1386.45	1206.88	258.981	1120.56	1341.02	2.70804	1214.84	1437.07	-41.6213	1130.46	1264.41	-48.7686	1071.13	1158.92	-80.635	1049.44	988.465	-47.4383	1041.64	885.39	-95.1338	984.553	904.944	-96.9524	978.862	798.202
852	0	129.572	1465.69	1613.55	232.523	1462.24	1613.85	103.975	1309.26	1631.53	240.7	1294.08	1635.71	196.55	1233.39	1486.96	202.649	1126.75	1266.07	177.898	1376.09	1392.02	182.05	1399.96	1206.37	257.051	1133.67	1340.8	0.897692	1228.59	1436.2	-43.5772	1145.3	1262.76	-50.6464	1086.25	1157.09	-81.8971	1065.1	986.482	-48.2361	1056.74	883.458	-96.7163	1000.46	902.822	-97.5061	994.183	795.899
853	0	127.955	1479.46	1612.68	230.862	1475.93	1613.18	102.232	1323.08	1631.06	238.942	1307.82	1635.58	194.858	1246.65	1486.78	200.961	1139.9	1265.97	176.618	1389.25	1391.63	180.866	1413.32	1206.08	255.195	1146.64	1340.78	-0.827229	1242.22	1435.6	-45.5608	1160.28	1261.22	-52.6273	1101.65	1155.3	-83.2291	1081.43	984.488	-49.1033	1072.75	881.494	-98.4152	1017.28	900.541	-98.2349	1010.74	793.429
854	0	126.501	1493.11	1611.98	229.362	1489.51	1612.68	100.673	1336.78	1630.84	237.367	1321.45	1635.66	193.298	1259.76	1486.82	199.334	1152.91	1266.1	175.441	1402.24	1391.46	179.722	1426.51	1206.01	253.421	1159.47	1340.95	-2.45014	1255.71	1435.28	-47.5554	1175.37	1259.83	-54.7006	1117.29	1153.58	-84.6208	1098.42	982.526	-50.0344	1089.65	879.545	-100.211	1035	898.147	-99.1415	1028.56	790.844
855	0	125.241	1506.6	1611.49	228.053	1502.94	1612.35	99.321	1350.33	1630.89	235.999	1334.94	1635.98	191.883	1272.68	1487.09	197.774	1165.76	1266.44	174.381	1415.06	1391.54	178.63	1439.52	1206.16	251.738	1172.13	1341.33	-3.95739	1269.04	1435.28	-49.5452	1190.53	1258.63	-56.8553	1133.15	1151.97	-86.0611	1116.04	980.642	-51.022	1107.45	877.66	-102.08	1053.6	895.687	-100.223	1047.66	788.209
856	0	124.201	1519.91	1611.21	226.965	1516.2	1612.2	98.1953	1363.71	1631.21	234.855	1348.28	1636.52	190.622	1285.41	1487.59	196.282	1178.45	1267	173.45	1427.68	1391.86	177.604	1452.32	1206.55	250.152	1184.61	1341.9	-5.33862	1282.22	1435.58	-51.5153	1205.75	1257.64	-59.0804	1149.18	1150.51	-87.538	1134.25	978.881	-52.0572	1126.12	875.893	-103.999	1073.06	893.217	-101.471	1068.03	785.591
857	0	123.402	1533.04	1611.16	226.118	1529.28	1612.24	97.3068	1376.92	1631.82	233.945	1361.44	1637.28	189.518	1297.93	1488.31	194.86	1190.97	1267.77	172.655	1440.11	1392.43	176.654	1464.91	1207.17	248.663	1196.91	1342.66	-6.58696	1295.23	1436.21	-53.4527	1220.99	1256.89	-61.3648	1165.37	1149.23	-89.0394	1153.03	977.289	-53.1293	1145.64	874.3	-105.942	1093.33	890.793	-102.871	1089.65	783.07
858	0	122.859	1545.96	1611.36	225.528	1542.14	1612.48	96.6598	1389.94	1632.72	233.271	1374.39	1638.28	188.57	1310.24	1489.26	193.508	1203.31	1268.75	172.001	1452.34	1393.25	175.79	1477.28	1208.03	247.271	1209.02	1343.61	-7.69905	1308.08	1437.16	-55.3459	1236.23	1256.4	-63.6979	1181.69	1148.16	-90.553	1172.33	975.912	-54.2268	1165.97	872.936	-107.882	1114.38	888.472	-104.402	1112.5	780.723
859	0	122.58	1558.67	1611.82	225.204	1554.78	1612.93	96.2513	1402.76	1633.92	232.83	1387.11	1639.5	187.776	1322.34	1490.42	192.224	1215.49	1269.93	171.493	1464.36	1394.33	175.019	1489.43	1209.13	245.973	1220.93	1344.74	-8.67489	1320.76	1438.42	-57.1857	1251.45	1256.19	-66.0692	1198.12	1147.33	-92.0667	1192.13	974.788	-55.3371	1187.09	871.856	-109.794	1136.15	886.311	-106.037	1136.53	778.635
860	0	122.566	1571.16	1612.55	225.146	1567.17	1613.61	96.071	1415.38	1635.39	232.61	1399.59	1640.94	187.127	1334.22	1491.78	191.006	1227.49	1271.29	171.128	1476.2	1395.65	174.348	1501.37	1210.46	244.763	1232.66	1346.04	-9.51755	1333.28	1439.98	-58.9651	1266.63	1256.28	-68.4687	1214.63	1146.76	-93.569	1212.37	973.955	-56.4472	1208.94	871.112	-111.653	1158.61	884.365	-107.745	1161.68	776.885
861	0	122.81	1583.42	1613.56	225.35	1579.3	1614.52	96.1026	1427.78	1637.14	232.593	1411.82	1642.58	186.611	1345.89	1493.34	189.852	1239.34	1272.82	170.902	1487.85	1397.21	173.777	1513.11	1212	243.637	1244.21	1347.49	-10.2327	1345.65	1441.82	-60.6794	1281.75	1256.66	-70.8866	1231.2	1146.45	-95.0489	1233.02	973.445	-57.5437	1231.48	870.751	-113.436	1181.69	882.687	-109.49	1187.88	775.549
862	0	123.299	1595.45	1614.86	225.801	1591.17	1615.67	96.3243	1439.97	1639.13	232.756	1423.78	1644.41	186.217	1357.37	1495.07	188.762	1251.03	1274.5	170.809	1499.33	1399	173.307	1524.67	1213.75	242.588	1255.6	1349.07	-10.828	1357.88	1443.91	-62.326	1296.8	1257.32	-73.3134	1247.83	1146.41	-96.4964	1254.03	973.283	-58.613	1254.65	870.814	-115.122	1205.35	881.321	-111.233	1215.03	774.695
863	0	124.014	1607.26	1616.43	226.48	1602.78	1617.06	96.7097	1451.95	1641.35	233.073	1435.47	1646.41	185.931	1368.67	1496.95	187.733	1262.59	1276.31	170.84	1510.66	1400.98	172.935	1536.05	1215.68	241.61	1266.84	1350.78	-11.3126	1369.99	1446.23	-63.9042	1311.78	1258.26	-75.7399	1264.49	1146.64	-97.9026	1275.37	973.485	-59.6415	1278.38	871.337	-116.694	1229.52	880.307	-112.934	1243.04	774.381
864	0	124.929	1618.86	1618.27	227.36	1614.13	1618.68	97.2297	1463.72	1643.75	233.515	1446.88	1648.54	185.736	1379.81	1498.96	186.768	1274.03	1278.22	170.983	1521.85	1403.14	172.656	1547.28	1217.77	240.699	1277.94	1352.58	-11.6966	1381.99	1448.72	-65.4146	1326.69	1259.44	-78.1567	1281.18	1147.12	-99.2592	1296.99	974.063	-60.6165	1302.61	872.344	-118.138	1254.16	879.677	-114.552	1271.79	774.652
865	0	126.013	1630.25	1620.35	228.411	1625.22	1620.53	97.8535	1475.3	1646.29	234.051	1458.04	1650.77	185.62	1390.81	1501.06	185.867	1285.35	1280.21	171.224	1532.94	1405.43	172.463	1558.39	1219.98	239.851	1288.94	1354.46	-11.9903	1393.9	1451.36	-66.8589	1341.53	1260.85	-80.5541	1297.89	1147.83	-100.559	1318.86	975.019	-61.5257	1327.29	873.851	-119.444	1279.21	879.452	-116.049	1301.17	775.539
866	0	127.234	1641.46	1622.65	229.599	1636.09	1622.57	98.55	1486.69	1648.94	234.652	1468.94	1653.08	185.568	1401.69	1503.23	185.035	1296.59	1282.26	171.55	1543.94	1407.83	172.35	1569.38	1222.28	239.065	1299.84	1356.39	-12.2039	1405.73	1454.09	-68.2393	1356.3	1262.44	-82.9221	1314.62	1148.75	-101.796	1340.92	976.348	-62.3583	1352.33	875.864	-120.604	1304.61	879.648	-117.389	1331.06	777.059
867	0	128.555	1652.5	1625.14	230.888	1646.74	1624.78	99.2893	1497.91	1651.64	235.287	1479.62	1655.43	185.566	1412.48	1505.43	184.273	1307.76	1284.33	171.946	1554.86	1410.29	172.308	1580.29	1224.62	238.338	1310.67	1358.35	-12.3471	1417.49	1456.86	-69.5578	1371	1264.18	-85.2503	1331.35	1149.85	-102.965	1363.15	978.037	-63.1046	1377.67	878.38	-121.613	1330.31	880.269	-118.542	1361.34	779.213
868	0	129.939	1663.39	1627.76	232.242	1657.21	1627.12	100.043	1508.98	1654.34	235.933	1490.09	1657.77	185.605	1423.2	1507.63	183.588	1318.87	1286.4	172.397	1565.74	1412.76	172.33	1591.13	1226.97	237.673	1321.45	1360.31	-12.4284	1429.2	1459.64	-70.8158	1385.65	1266.02	-87.5276	1348.08	1151.08	-104.059	1385.5	980.065	-63.7559	1403.25	881.384	-122.471	1356.26	881.311	-119.484	1391.9	781.988
869	0	131.353	1674.17	1630.47	233.625	1667.53	1629.55	100.788	1519.92	1656.99	236.565	1500.39	1660.06	185.675	1433.88	1509.8	182.983	1329.94	1288.43	172.889	1576.6	1415.21	172.41	1601.93	1229.29	237.07	1332.2	1362.24	-12.4553	1440.87	1462.38	-72.0138	1400.24	1267.91	-89.7425	1364.81	1152.41	-105.074	1407.94	982.408	-64.3046	1428.99	884.853	-123.177	1382.4	882.765	-120.195	1422.62	785.36
870	0	132.761	1684.84	1633.2	235.004	1677.73	1632.02	101.501	1530.75	1659.55	237.166	1510.56	1662.27	185.768	1444.54	1511.9	182.464	1340.98	1290.4	173.41	1587.43	1417.58	172.539	1612.7	1231.52	236.532	1342.93	1364.12	-12.4338	1452.5	1465.01	-73.1507	1414.79	1269.81	-91.8829	1381.54	1153.79	-106.005	1430.43	985.034	-64.744	1454.84	888.756	-123.733	1408.69	884.61	-120.664	1453.4	789.295
871	0	134.135	1695.44	1635.91	236.348	1687.85	1634.48	102.166	1541.5	1661.97	237.722	1520.62	1664.37	185.88	1455.2	1513.9	182.034	1352.01	1292.27	173.949	1598.27	1419.84	172.713	1623.45	1233.65	236.064	1353.66	1365.92	-12.3686	1464.12	1467.52	-74.224	1429.29	1271.68	-93.9364	1398.26	1155.18	-106.846	1452.94	987.908	-65.068	1480.74	893.056	-124.142	1435.08	886.824	-120.887	1484.15	793.749
872	0	135.448	1706	1638.54	237.631	1697.93	1636.87	102.771	1552.19	1664.22	238.222	1530.63	1666.31	186.008	1465.87	1515.76	181.7	1363.03	1294.03	174.497	1609.13	1421.94	172.927	1634.22	1235.62	235.668	1364.41	1367.61	-12.2623	1475.71	1469.85	-75.2291	1443.75	1273.46	-95.8903	1414.97	1156.54	-107.592	1475.44	990.992	-65.2714	1506.61	897.708	-124.408	1461.5	889.375	-120.864	1514.77	798.673
873	0	136.678	1716.55	1641.01	238.831	1708	1639.14	103.309	1562.84	1666.24	238.663	1540.61	1668.07	186.152	1476.57	1517.46	181.464	1374.06	1295.63	175.047	1620.01	1423.86	173.177	1645	1237.4	235.351	1375.18	1369.16	-12.1163	1487.3	1471.98	-76.1598	1458.18	1275.12	-97.7319	1431.67	1157.82	-108.236	1497.89	994.246	-65.3498	1532.4	902.663	-124.535	1487.92	892.232	-120.602	1545.19	804.015
874	0	137.809	1727.1	1643.29	239.932	1718.09	1641.23	103.777	1573.49	1668.02	239.044	1550.62	1669.62	186.314	1487.31	1518.97	181.33	1385.1	1297.07	175.594	1630.92	1425.55	173.459	1655.81	1238.98	235.116	1385.99	1370.56	-11.9302	1498.87	1473.87	-77.0084	1472.57	1276.62	-99.4485	1448.37	1159	-108.771	1520.27	997.63	-65.2996	1558.05	907.871	-124.526	1514.28	895.356	-120.114	1575.34	809.718
875	0	138.831	1737.68	1645.31	240.921	1728.24	1643.11	104.178	1584.15	1669.53	239.37	1560.68	1670.95	186.497	1498.11	1520.28	181.301	1396.15	1298.31	176.138	1641.87	1426.99	173.771	1666.65	1240.32	234.97	1396.84	1371.78	-11.7019	1510.44	1475.5	-77.7659	1486.93	1277.93	-101.028	1465.05	1160.03	-109.192	1542.54	1001.1	-65.1181	1583.52	913.277	-124.385	1540.53	898.709	-119.415	1605.16	815.727
876	0	139.737	1748.3	1647.04	241.795	1738.47	1644.72	104.519	1594.83	1670.75	239.649	1570.82	1672.03	186.708	1508.96	1521.35	181.38	1407.23	1299.33	176.677	1652.87	1428.16	174.113	1677.54	1241.4	234.918	1407.75	1372.81	-11.4282	1522	1476.85	-78.4221	1501.25	1279.03	-102.457	1481.71	1160.89	-109.492	1564.67	1004.62	-64.8037	1608.75	918.829	-124.115	1566.63	902.25	-118.523	1634.6	821.984
877	0	140.528	1758.99	1648.44	242.552	1748.81	1646.04	104.808	1605.57	1671.67	239.893	1581.07	1672.86	186.953	1519.88	1522.18	181.568	1418.34	1300.13	177.214	1663.91	1429.05	174.482	1688.47	1242.21	234.965	1418.72	1373.61	-11.1043	1533.55	1477.92	-78.9662	1515.54	1279.88	-103.726	1498.35	1161.57	-109.664	1586.64	1008.16	-64.3557	1633.7	924.473	-123.719	1592.52	905.939	-117.457	1663.6	828.435
878	0	141.209	1769.76	1649.49	243.198	1759.27	1647.04	105.062	1616.36	1672.28	240.118	1591.46	1673.43	187.243	1530.87	1522.75	181.867	1429.47	1300.69	177.754	1675	1429.65	174.879	1699.46	1242.74	235.119	1429.75	1374.19	-10.7245	1545.1	1478.7	-79.3873	1529.78	1280.48	-104.822	1514.96	1162.03	-109.701	1608.42	1011.66	-63.7744	1658.32	930.158	-123.199	1618.15	909.734	-116.238	1692.13	835.025
879	0	141.79	1780.61	1650.16	243.743	1769.87	1647.7	105.296	1627.23	1672.58	240.341	1602	1673.74	187.586	1541.93	1523.05	182.278	1440.64	1301	178.303	1686.14	1429.94	175.306	1710.49	1242.99	235.383	1440.85	1374.52	-10.2821	1556.65	1479.18	-79.6745	1543.99	1280.82	-105.737	1531.53	1162.28	-109.599	1629.98	1015.11	-63.0614	1682.58	935.836	-122.558	1643.48	913.598	-114.885	1720.15	841.703
880	0	142.284	1791.54	1650.46	244.203	1780.61	1648	105.532	1638.17	1672.58	240.582	1612.71	1673.78	187.993	1553.06	1523.09	182.8	1451.84	1301.05	178.869	1697.33	1429.95	175.764	1721.58	1242.95	235.761	1452.02	1374.61	-9.76996	1568.19	1479.37	-79.8175	1558.15	1280.89	-106.459	1548.06	1162.31	-109.353	1651.29	1018.47	-62.2189	1706.44	941.462	-121.797	1668.46	917.491	-113.415	1747.61	848.418
881	0	142.711	1802.57	1650.38	244.596	1791.5	1647.96	105.79	1649.18	1672.29	240.862	1623.57	1673.56	188.474	1564.25	1522.86	183.433	1463.08	1300.85	179.463	1708.58	1429.67	176.257	1732.74	1242.64	236.258	1463.26	1374.44	-9.18065	1579.74	1479.29	-79.8066	1572.27	1280.7	-106.982	1564.53	1162.11	-108.959	1672.33	1021.72	-61.25	1729.88	946.993	-120.917	1693.05	921.376	-111.847	1774.49	855.123
882	0	143.092	1813.68	1649.94	244.944	1802.54	1647.58	106.093	1660.27	1671.72	241.203	1634.61	1673.09	189.041	1575.52	1522.37	184.173	1474.36	1300.38	180.093	1719.88	1429.1	176.788	1743.95	1242.06	236.875	1474.58	1374.02	-8.50666	1591.29	1478.93	-79.6335	1586.33	1280.25	-107.299	1580.92	1161.7	-108.415	1693.06	1024.83	-60.1585	1752.86	952.392	-119.92	1717.21	925.221	-110.195	1800.77	861.773
883	0	143.451	1824.87	1649.16	245.274	1813.72	1646.88	106.466	1671.44	1670.89	241.626	1645.8	1672.39	189.704	1586.86	1521.63	185.017	1485.7	1299.67	180.774	1731.25	1428.28	177.363	1755.23	1241.22	237.613	1485.98	1373.35	-7.74085	1602.85	1478.32	-79.2915	1600.34	1279.55	-107.403	1597.22	1161.07	-107.719	1713.46	1027.78	-58.9483	1775.35	957.625	-118.808	1740.89	928.992	-108.472	1826.4	868.323
884	0	143.815	1836.14	1648.06	245.612	1825.03	1645.87	106.931	1682.67	1669.82	242.152	1657.15	1671.45	190.471	1598.27	1520.64	185.962	1497.08	1298.71	181.515	1742.67	1427.21	177.987	1766.59	1240.15	238.471	1497.45	1372.43	-6.87664	1614.42	1477.48	-78.7755	1614.29	1278.62	-107.293	1613.4	1160.25	-106.872	1733.51	1030.55	-57.6239	1797.35	962.663	-117.58	1764.07	932.66	-106.69	1851.36	874.731
885	0	144.212	1847.48	1646.69	245.988	1836.46	1644.59	107.511	1693.98	1668.53	242.801	1668.63	1670.3	191.352	1609.75	1519.42	187.001	1508.52	1297.53	182.33	1754.17	1425.92	178.667	1778.03	1238.86	239.446	1509	1371.28	-5.90837	1626.03	1476.43	-78.0822	1628.18	1277.47	-106.964	1629.44	1159.24	-105.873	1753.18	1033.13	-56.1894	1818.82	967.477	-116.239	1786.7	936.196	-104.856	1875.64	880.957
886	0	144.671	1858.88	1645.08	246.43	1848.01	1643.06	108.227	1705.34	1667.05	243.591	1680.24	1668.95	192.353	1621.3	1517.99	188.129	1520.03	1296.13	183.23	1765.73	1424.43	179.412	1789.56	1237.37	240.533	1520.63	1369.9	-4.83149	1637.67	1475.19	-77.2106	1641.99	1276.14	-106.419	1645.33	1158.07	-104.726	1772.43	1035.51	-54.6493	1839.74	972.046	-114.785	1808.75	939.573	-102.979	1899.21	886.963
887	0	145.22	1870.34	1643.28	246.968	1859.66	1641.34	109.099	1716.76	1665.4	244.538	1691.97	1667.42	193.479	1632.92	1516.38	189.338	1531.61	1294.53	184.227	1777.37	1422.76	180.227	1801.18	1235.71	241.728	1532.34	1368.32	-3.64274	1649.37	1473.78	-76.1617	1655.73	1274.64	-105.659	1661.03	1156.74	-103.434	1791.26	1037.68	-53.0079	1860.11	976.348	-113.22	1830.2	942.768	-101.062	1922.04	892.713
888	0	145.888	1881.86	1641.33	247.628	1871.4	1639.45	110.141	1728.24	1663.62	245.655	1703.78	1665.73	194.736	1644.62	1514.59	190.622	1543.27	1292.76	185.331	1789.09	1420.95	181.122	1812.9	1233.9	243.022	1544.12	1366.55	-2.34026	1661.12	1472.23	-74.9388	1669.39	1272.99	-104.69	1676.52	1155.29	-102.001	1809.64	1039.63	-51.2698	1879.9	980.363	-111.546	1851.02	945.757	-99.1111	1944.12	898.171
889	0	146.7	1893.44	1639.27	248.436	1883.22	1637.43	111.366	1739.77	1661.73	246.952	1715.68	1663.9	196.123	1656.39	1512.67	191.972	1555.02	1290.85	186.549	1800.89	1419.01	182.103	1824.73	1231.98	244.407	1555.99	1364.62	-0.923662	1672.95	1470.58	-73.5474	1682.96	1271.24	-103.518	1691.78	1153.74	-100.432	1827.55	1041.35	-49.4395	1899.11	984.074	-109.765	1871.19	948.52	-97.1264	1965.43	903.306
890	0	147.68	1905.07	1637.15	249.414	1895.11	1635.33	112.783	1751.36	1659.77	248.435	1727.65	1661.97	197.643	1668.25	1510.64	193.382	1566.86	1288.8	187.889	1812.77	1416.98	183.178	1836.67	1229.97	245.876	1567.93	1362.55	0.605963	1684.86	1468.84	-71.995	1696.44	1269.4	-102.153	1706.78	1152.11	-98.7341	1844.96	1042.85	-47.5217	1917.71	987.465	-107.881	1890.67	951.036	-95.1091	1985.96	908.085
891	0	148.847	1916.76	1635.02	250.581	1907.06	1633.18	114.395	1763.01	1657.75	250.106	1739.68	1659.94	199.292	1680.18	1508.52	194.846	1578.79	1286.67	189.355	1824.75	1414.9	184.353	1848.73	1227.89	247.421	1579.95	1360.38	2.24604	1696.86	1467.04	-70.2914	1709.81	1267.5	-100.606	1721.51	1150.43	-96.9142	1861.86	1044.11	-45.5216	1935.69	990.52	-105.898	1909.47	953.288	-93.0588	2005.69	912.478
892	0	150.215	1928.51	1632.9	251.95	1919.06	1631.02	116.201	1774.72	1655.73	251.964	1751.76	1657.86	201.066	1692.2	1506.36	196.357	1590.82	1284.47	190.947	1836.81	1412.77	185.63	1860.9	1225.79	249.032	1592.05	1358.12	3.99258	1708.97	1465.21	-68.448	1723.09	1265.58	-98.8913	1735.94	1148.71	-94.9809	1878.25	1045.14	-43.4444	1953.05	993.227	-103.823	1927.55	955.26	-90.9744	2024.61	916.458
893	0	151.792	1940.34	1630.84	253.529	1931.13	1628.88	118.198	1786.5	1653.71	254.004	1763.88	1655.74	202.961	1704.31	1504.17	197.913	1602.95	1282.24	192.665	1848.97	1410.65	187.011	1873.2	1223.69	250.704	1604.22	1355.81	5.84022	1721.18	1463.38	-66.4781	1736.25	1263.66	-97.0239	1750.07	1146.99	-92.9433	1894.09	1045.94	-41.2964	1969.77	995.571	-101.662	1944.91	956.938	-88.8544	2042.71	919.997
894	0	153.583	1952.23	1628.87	255.32	1943.24	1626.8	120.374	1798.36	1651.74	256.217	1776.03	1653.62	204.969	1716.49	1501.99	199.51	1615.18	1280.01	194.502	1861.21	1408.55	188.497	1885.62	1221.62	252.43	1616.46	1353.48	7.78229	1733.49	1461.57	-64.3961	1749.3	1261.78	-95.0204	1763.88	1145.29	-90.812	1909.39	1046.51	-39.0843	1985.84	997.541	-99.424	1961.54	958.31	-86.6976	2059.99	923.068
895	0	155.583	1964.21	1627.02	257.318	1955.41	1624.8	122.716	1810.3	1649.84	258.587	1788.22	1651.52	207.081	1728.75	1499.86	201.149	1627.5	1277.81	196.451	1873.53	1406.51	190.083	1898.16	1219.62	254.206	1628.77	1351.17	9.81082	1745.9	1459.82	-62.2178	1762.22	1259.96	-92.8984	1777.35	1143.64	-88.598	1924.14	1046.85	-36.8157	2001.26	999.125	-97.1209	1977.42	959.367	-84.503	2076.44	925.648
896	0	157.78	1976.26	1625.29	259.512	1967.62	1622.9	125.206	1822.32	1648.04	261.1	1800.45	1649.48	209.287	1741.09	1497.8	202.829	1639.92	1275.68	198.501	1885.93	1404.54	191.765	1910.8	1217.7	256.03	1641.13	1348.92	11.9166	1758.4	1458.13	-59.9593	1775.02	1258.23	-90.6759	1790.47	1142.06	-86.3135	1938.33	1046.97	-34.4995	2016.01	1000.31	-94.7645	1992.56	960.101	-82.2707	2092.05	927.712
897	0	160.157	1988.41	1623.72	261.884	1979.89	1621.13	127.822	1834.43	1646.35	263.733	1812.71	1647.52	211.573	1753.49	1495.84	204.553	1652.41	1273.64	200.638	1898.4	1402.69	193.534	1923.54	1215.9	257.9	1653.54	1346.74	14.089	1770.98	1456.55	-57.6373	1787.68	1256.61	-88.3712	1803.26	1140.57	-83.9713	1951.96	1046.86	-32.1455	2030.09	1001.09	-92.3689	2006.94	960.508	-80.002	2106.82	929.24
898	0	162.691	2000.64	1622.32	264.411	1992.21	1619.5	130.541	1846.62	1644.81	266.465	1825.01	1645.68	213.927	1765.95	1494.01	206.324	1664.97	1271.72	202.845	1910.92	1400.96	195.381	1936.37	1214.24	259.815	1666	1344.68	16.3162	1783.6	1455.07	-55.2686	1800.18	1255.12	-86.0021	1815.69	1139.19	-81.5851	1965.02	1046.54	-29.7648	2043.5	1001.46	-89.949	2020.56	960.584	-77.7006	2120.74	930.213
899	0	165.353	2012.95	1621.08	267.064	2004.58	1618.02	133.334	1858.9	1643.43	269.267	1837.34	1643.97	216.334	1778.44	1492.33	208.143	1677.57	1269.96	205.103	1923.49	1399.38	197.293	1949.26	1212.75	261.774	1678.47	1342.77	18.5851	1796.27	1453.74	-52.8693	1812.53	1253.79	-83.5856	1827.77	1137.95	-79.1689	1977.52	1046.01	-27.3695	2056.23	1001.4	-87.5209	2033.43	960.329	-75.3723	2133.83	930.613
900	0	168.108	2025.34	1620.02	269.81	2017	1616.71	136.174	1871.26	1642.22	272.114	1849.71	1642.43	218.776	1790.97	1490.84	210.013	1690.22	1268.38	207.392	1936.07	1397.98	199.258	1962.2	1211.43	263.778	1690.96	1341.03	20.8813	1808.94	1452.55	-50.4551	1824.71	1252.63	-81.1375	1839.5	1136.84	-76.7371	1989.45	1045.27	-24.9728	2068.28	1000.92	-85.101	2045.54	959.745	-73.0255	2146.07	930.429
901	0	170.92	2037.79	1619.13	272.615	2029.46	1615.56	139.029	1883.69	1641.21	274.974	1862.1	1641.06	221.236	1803.5	1489.54	211.934	1702.87	1266.99	209.69	1948.67	1396.76	201.262	1975.15	1210.31	265.826	1703.45	1339.49	23.1897	1821.59	1451.52	-48.0406	1836.71	1251.65	-78.6724	1850.89	1135.9	-74.3044	2000.82	1044.34	-22.5885	2079.65	1000.01	-82.7057	2056.89	958.835	-70.6717	2157.47	929.653
902	0	173.752	2050.3	1618.42	275.44	2041.97	1614.58	141.869	1896.17	1640.39	277.818	1874.52	1639.91	223.696	1816.02	1488.45	213.905	1715.52	1265.82	211.978	1961.25	1395.74	203.291	1988.09	1209.4	267.915	1715.92	1338.18	25.4947	1834.2	1450.67	-45.6394	1848.5	1250.85	-76.203	1861.93	1135.12	-71.885	2011.63	1043.21	-20.2312	2090.34	998.675	-80.351	2067.48	957.606	-68.3248	2168.02	928.282
903	0	176.562	2062.84	1617.86	278.246	2054.5	1613.77	144.663	1908.7	1639.79	280.615	1886.97	1638.97	226.136	1828.52	1487.6	215.922	1728.14	1264.89	214.235	1973.79	1394.93	205.331	2000.98	1208.7	270.042	1728.34	1337.1	27.7803	1846.73	1450	-43.2635	1860.08	1250.26	-73.7403	1872.64	1134.51	-69.4932	2021.87	1041.89	-17.9154	2100.34	996.919	-78.0522	2077.32	956.066	-66.001	2177.72	926.318
904	0	179.313	2075.41	1617.46	280.996	2067.04	1613.13	147.38	1921.25	1639.39	283.334	1899.43	1638.27	228.54	1840.96	1486.99	217.981	1740.7	1264.2	216.44	1986.27	1394.34	207.368	2013.8	1208.23	272.202	1740.72	1336.29	30.0314	1859.16	1449.51	-40.9233	1871.44	1249.86	-71.2934	1883.01	1134.06	-67.1423	2031.57	1040.39	-15.6557	2109.68	994.753	-75.8233	2086.41	954.225	-63.7184	2186.58	923.77
905	0	181.966	2087.98	1617.2	283.652	2079.59	1612.65	149.991	1933.81	1639.21	285.949	1911.89	1637.82	230.889	1853.34	1486.62	220.076	1753.19	1263.76	218.577	1998.67	1393.98	209.388	2026.52	1207.98	274.39	1753.03	1335.75	32.2336	1871.46	1449.21	-38.6276	1882.56	1249.65	-68.8691	1893.07	1133.79	-64.8448	2040.71	1038.72	-13.4662	2118.33	992.187	-73.6769	2094.75	952.098	-61.4965	2194.59	920.654
906	0	184.486	2100.53	1617.07	286.179	2092.12	1612.35	152.469	1946.36	1639.25	288.432	1924.35	1637.63	233.169	1865.62	1486.51	222.199	1765.58	1263.59	220.629	2010.97	1393.85	211.377	2039.1	1207.96	276.598	1765.26	1335.48	34.3744	1883.61	1449.1	-36.3832	1893.43	1249.64	-66.472	1902.81	1133.69	-62.6116	2049.3	1036.89	-11.36	2126.33	989.241	-71.6241	2102.35	949.7	-59.3552	2201.76	916.992
907	0	186.839	2113.04	1617.06	288.544	2104.63	1612.2	154.793	1958.87	1639.49	290.762	1936.79	1637.71	235.367	1877.8	1486.65	224.344	1777.87	1263.67	222.585	2023.15	1393.96	213.324	2051.53	1208.17	278.819	1777.41	1335.49	36.4429	1895.58	1449.17	-34.1949	1904.05	1249.81	-64.1044	1912.24	1133.74	-60.4523	2057.36	1034.91	-9.3494	2133.66	985.937	-69.674	2109.21	947.051	-57.3149	2208.09	912.815
908	0	188.997	2125.49	1617.18	290.718	2117.08	1612.23	156.944	1971.32	1639.95	292.92	1949.2	1638.06	237.473	1889.86	1487.03	226.504	1790.03	1263.99	224.433	2035.2	1394.31	215.215	2063.79	1208.61	281.046	1789.45	1335.76	38.4308	1907.36	1449.43	-32.0657	1914.41	1250.17	-61.7662	1921.38	1133.94	-58.3746	2064.88	1032.8	-7.44519	2140.35	982.302	-67.8341	2115.35	944.177	-55.3951	2213.58	908.16
909	0	190.933	2137.84	1617.42	292.675	2129.47	1612.44	158.908	1983.69	1640.61	294.893	1961.57	1638.69	239.48	1901.78	1487.66	228.672	1802.05	1264.57	226.167	2047.1	1394.89	217.04	2075.87	1209.28	283.274	1801.4	1336.31	40.3323	1918.92	1449.86	-29.9962	1924.51	1250.69	-59.4554	1930.24	1134.29	-56.3841	2071.87	1030.57	-5.65652	2146.39	978.368	-66.1098	2120.77	941.103	-53.6143	2218.24	903.07
910	0	192.63	2150.09	1617.77	294.396	2141.78	1612.83	160.679	1995.94	1641.48	296.675	1973.89	1639.59	241.383	1913.56	1488.52	230.842	1813.93	1265.37	227.781	2058.84	1395.72	218.79	2087.76	1210.19	285.495	1813.24	1337.1	42.1441	1930.26	1450.46	-27.9852	1934.35	1251.37	-57.1676	1938.83	1134.78	-54.4845	2078.35	1028.24	-3.9907	2151.81	974.173	-64.5043	2125.48	937.862	-51.9896	2222.06	897.599
911	0	194.072	2162.2	1618.26	295.868	2153.99	1613.41	162.256	2008.07	1642.53	298.264	1986.13	1640.76	243.181	1925.19	1489.61	233.009	1825.68	1266.39	229.274	2070.44	1396.79	220.456	2099.48	1211.32	287.706	1824.98	1338.13	43.8654	1941.37	1451.22	-26.0293	1943.93	1252.21	-54.8968	1947.15	1135.39	-52.6773	2084.33	1025.83	-2.45291	2156.61	969.758	-63.0187	2129.49	934.492	-50.536	2225.07	891.802
912	0	195.253	2174.16	1618.89	297.084	2166.1	1614.19	163.643	2020.05	1643.77	299.666	1998.3	1642.19	244.877	1936.67	1490.9	235.168	1837.28	1267.6	230.647	2081.87	1398.09	222.034	2111.02	1212.67	289.901	1836.63	1339.39	45.4976	1952.24	1452.13	-24.1233	1953.26	1253.18	-52.6359	1955.23	1136.13	-50.9619	2089.81	1023.38	-1.04615	2160.8	965.169	-61.6522	2132.82	931.03	-49.2656	2227.26	885.745
913	0	196.174	2185.95	1619.68	298.044	2178.1	1615.19	164.85	2031.85	1645.17	300.892	2010.39	1643.87	246.474	1948.02	1492.39	237.314	1848.75	1269	231.903	2093.17	1399.61	223.521	2122.42	1214.24	292.078	1848.18	1340.85	47.0444	1962.9	1453.18	-22.261	1962.36	1254.29	-50.3768	1963.06	1136.98	-49.3359	2094.81	1020.89	0.228761	2164.41	960.454	-60.4019	2135.49	927.52	-48.1878	2228.64	879.495
914	0	196.841	2197.57	1620.62	298.756	2189.97	1616.41	165.893	2043.47	1646.74	301.956	2022.37	1645.77	247.976	1959.22	1494.04	239.441	1860.11	1270.56	233.047	2104.32	1401.33	224.918	2133.67	1216.01	294.231	1859.65	1342.48	48.5107	1973.34	1454.36	-20.4348	1971.22	1255.51	-48.1116	1970.67	1137.94	-47.7953	2099.34	1018.41	1.3731	2167.45	955.663	-59.2629	2137.52	924.007	-47.3081	2229.24	873.128
915	0	197.269	2209	1621.75	299.234	2201.73	1617.85	166.79	2054.9	1648.44	302.878	2034.24	1647.86	249.393	1970.31	1495.85	241.544	1871.35	1272.25	234.088	2115.36	1403.25	226.226	2144.8	1217.95	296.359	1871.05	1344.27	49.9029	1983.59	1455.66	-18.6371	1979.88	1256.84	-45.8329	1978.06	1139.01	-46.3348	2103.44	1015.96	2.3901	2169.93	950.848	-58.2286	2138.93	920.539	-46.6276	2229.06	866.717
916	0	197.48	2220.25	1623.05	299.501	2213.36	1619.5	167.562	2066.12	1650.26	303.679	2046	1650.12	250.73	1981.3	1497.78	243.615	1882.49	1274.06	235.032	2126.29	1405.33	227.448	2155.84	1220.05	298.455	1882.38	1346.19	51.228	1993.67	1457.06	-16.8607	1988.33	1258.27	-43.5344	1985.24	1140.17	-44.9479	2107.1	1013.57	3.2849	2171.89	946.058	-57.2905	2139.75	917.16	-46.1431	2228.14	860.339
917	0	197.499	2231.3	1624.53	299.582	2224.87	1621.36	168.232	2077.15	1652.18	304.381	2057.64	1652.51	251.995	1992.19	1499.81	245.648	1893.55	1275.96	235.891	2137.14	1407.54	228.592	2166.79	1222.27	300.516	1893.67	1348.21	52.4935	2003.6	1458.55	-15.0991	1996.6	1259.78	-41.2117	1992.22	1141.42	-43.6279	2110.36	1011.27	4.06447	2173.35	941.344	-56.4385	2140.01	913.914	-45.8459	2226.5	854.068
918	0	197.36	2242.19	1626.18	299.509	2236.26	1623.4	168.823	2087.99	1654.16	305.006	2069.16	1654.98	253.199	2003.02	1501.9	247.634	1904.55	1277.91	236.674	2147.92	1409.84	229.663	2177.68	1224.58	302.536	1904.91	1350.29	53.7066	2013.43	1460.09	-13.347	2004.7	1261.36	-38.8625	1999.01	1142.76	-42.3676	2113.25	1009.07	4.7375	2174.33	936.75	-55.6612	2139.76	910.843	-45.7224	2224.19	847.973
919	0	197.095	2252.91	1627.99	299.317	2247.54	1625.6	169.358	2098.64	1656.19	305.577	2080.56	1657.49	254.346	2013.8	1504.03	249.567	1915.49	1279.9	237.392	2158.66	1412.21	230.669	2188.52	1226.94	304.51	1916.12	1352.4	54.8742	2023.18	1461.69	-11.6011	2012.67	1262.99	-36.487	2005.63	1144.18	-41.1599	2115.78	1007.02	5.31419	2174.86	932.318	-54.9457	2139.03	907.981	-45.7538	2221.24	842.115
920	0	196.743	2263.48	1629.94	299.042	2258.72	1627.93	169.856	2109.14	1658.22	306.112	2091.85	1660	255.446	2024.56	1506.16	251.438	1926.4	1281.89	238.055	2169.38	1414.6	231.617	2199.33	1229.31	306.43	1927.31	1354.52	56.0026	2032.87	1463.3	-9.85979	2020.5	1264.66	-34.0877	2012.09	1145.66	-39.9982	2117.99	1005.12	5.80597	2174.99	928.084	-54.2787	2137.87	905.36	-45.9171	2217.73	836.551
921	0	196.339	2273.94	1631.99	298.719	2269.8	1630.34	170.335	2119.51	1660.23	306.63	2103.02	1662.45	256.504	2035.3	1508.26	253.239	1937.28	1283.85	238.673	2180.09	1416.96	232.514	2210.13	1231.64	308.29	1938.48	1356.62	57.0971	2042.56	1464.9	-8.12324	2028.24	1266.36	-31.6699	2018.39	1147.19	-38.8762	2119.91	1003.38	6.22517	2174.76	924.08	-53.6461	2136.34	903.002	-46.1853	2213.7	831.325
922	0	195.922	2284.3	1634.11	298.383	2280.8	1632.79	170.812	2129.77	1662.18	307.145	2114.09	1664.82	257.525	2046.05	1510.3	254.962	1948.14	1285.77	239.255	2190.81	1419.27	233.367	2220.91	1233.89	310.082	1949.64	1358.64	58.1616	2052.25	1466.47	-6.39356	2035.89	1268.05	-29.241	2024.56	1148.77	-37.7884	2121.58	1001.83	6.58475	2174.2	920.329	-53.0342	2134.49	900.926	-46.5287	2209.23	826.472
923	0	195.523	2294.59	1636.26	298.068	2291.73	1635.23	171.298	2139.95	1664.04	307.669	2125.08	1667.04	258.514	2056.82	1512.24	256.601	1958.99	1287.6	239.808	2201.55	1421.46	234.181	2231.7	1236.02	311.8	1960.81	1360.58	59.1992	2061.99	1467.99	-4.67451	2043.47	1269.73	-26.8104	2030.6	1150.38	-36.7301	2123.03	1000.47	6.8979	2173.37	916.851	-52.4295	2132.37	899.142	-46.916	2204.39	822.018
924	0	195.174	2304.85	1638.39	297.8	2302.61	1637.62	171.801	2150.09	1665.77	308.208	2135.98	1669.09	259.473	2067.63	1514.05	258.148	1969.84	1289.32	240.34	2212.33	1423.51	234.961	2242.5	1238	313.437	1971.97	1362.4	60.2114	2071.79	1469.42	-2.97129	2051.02	1271.39	-24.3891	2036.55	1152.01	-35.6972	2124.3	999.301	7.17779	2172.32	913.658	-51.8198	2130.05	897.655	-47.3153	2199.26	817.978
925	0	194.9	2315.11	1640.45	297.604	2313.45	1639.89	172.328	2160.21	1667.36	308.769	2146.83	1670.94	260.403	2078.49	1515.71	259.598	1980.69	1290.92	240.856	2223.15	1425.38	235.711	2253.31	1239.78	314.984	1983.14	1364.07	61.1985	2081.68	1470.74	-1.29028	2058.54	1273	-21.9893	2042.42	1153.64	-34.6867	2125.43	998.321	7.43727	2171.1	910.759	-51.194	2127.59	896.464	-47.6957	2193.9	814.359
926	0	194.721	2325.4	1642.4	297.497	2324.27	1642.01	172.879	2170.37	1668.76	309.353	2157.64	1672.54	261.305	2089.4	1517.19	260.944	1991.55	1292.35	241.36	2234.03	1427.04	236.432	2264.14	1241.33	316.437	1994.32	1365.58	62.1596	2091.67	1471.93	0.361291	2066.07	1274.55	-19.6237	2048.24	1155.26	-33.6962	2126.47	997.528	7.6886	2169.76	908.154	-50.5428	2125.06	895.561	-48.0282	2188.42	811.159
927	0	194.65	2335.74	1644.18	297.492	2335.08	1643.92	173.456	2180.57	1669.96	309.959	2168.42	1673.88	262.178	2100.38	1518.47	262.184	2002.43	1293.62	241.856	2244.96	1428.46	237.124	2274.99	1242.64	317.788	2005.5	1366.89	63.0926	2101.78	1472.97	1.97562	2073.61	1276.02	-17.3051	2054.01	1156.87	-32.724	2127.46	996.915	7.94315	2168.35	905.844	-49.8593	2122.5	894.938	-48.2868	2182.88	808.369
928	0	194.695	2346.17	1645.77	297.595	2345.91	1645.6	174.055	2190.86	1670.94	310.584	2179.21	1674.95	263.019	2111.43	1519.54	263.312	2013.33	1294.69	242.342	2255.96	1429.62	237.788	2285.87	1243.67	319.033	2016.71	1368	63.9943	2112.01	1473.84	3.54461	2081.19	1277.42	-15.0462	2059.78	1158.45	-31.7693	2128.43	996.472	8.21114	2166.94	903.821	-49.1387	2120	894.58	-48.4496	2177.35	805.976
929	0	194.855	2356.7	1647.12	297.805	2356.77	1647	174.671	2201.26	1671.68	311.222	2190.01	1675.73	263.824	2122.56	1520.37	264.327	2024.25	1295.56	242.82	2267.02	1430.51	238.42	2296.76	1244.42	320.166	2027.93	1368.88	64.8604	2122.38	1474.53	5.06014	2088.82	1278.72	-12.8586	2065.56	1159.98	-30.832	2129.44	996.188	8.50134	2165.57	902.078	-48.3787	2117.6	894.471	-48.4991	2171.92	803.963
930	0	195.126	2367.35	1648.21	298.117	2367.68	1648.1	175.297	2211.79	1672.17	311.865	2200.85	1676.22	264.589	2133.76	1520.96	265.227	2035.21	1296.22	243.286	2278.16	1431.11	239.018	2307.68	1244.87	321.185	2039.17	1369.54	65.6859	2132.88	1475.02	6.51426	2096.53	1279.92	-10.7531	2071.38	1161.47	-29.9124	2130.52	996.049	8.82077	2164.29	900.602	-47.5795	2115.35	894.593	-48.4231	2166.66	802.309
931	0	195.495	2378.15	1649	298.518	2378.66	1648.88	175.924	2222.46	1672.42	312.505	2211.75	1676.42	265.307	2145.04	1521.31	266.012	2046.2	1296.65	243.737	2289.36	1431.43	239.579	2318.63	1245.03	322.085	2050.44	1369.97	66.4648	2143.53	1475.32	7.89938	2104.32	1281.02	-8.73911	2077.26	1162.91	-29.0119	2131.71	996.041	9.17451	2163.16	899.38	-46.7434	2113.33	894.926	-48.2146	2161.63	800.993
932	0	195.946	2389.09	1649.49	298.993	2389.72	1649.32	176.543	2233.3	1672.41	313.132	2222.73	1676.33	265.973	2156.39	1521.41	266.681	2057.23	1296.86	244.166	2300.63	1431.45	240.097	2329.61	1244.9	322.864	2061.73	1370.16	67.1907	2154.31	1475.42	9.20843	2112.22	1282	-6.82447	2083.22	1164.29	-28.1324	2133.06	996.148	9.56552	2162.21	898.395	-45.8752	2111.56	895.448	-47.872	2156.9	799.991
933	0	196.459	2400.18	1649.67	299.522	2400.87	1649.44	177.142	2244.3	1672.16	313.734	2233.8	1675.97	266.578	2167.83	1521.27	267.236	2068.31	1296.85	244.567	2311.98	1431.2	240.568	2340.62	1244.48	323.521	2073.05	1370.11	67.8566	2165.23	1475.31	10.435	2120.24	1282.87	-5.01566	2089.29	1165.59	-27.2765	2134.6	996.352	9.99453	2161.51	897.629	-44.981	2110.11	896.137	-47.3988	2152.52	799.277
934	0	197.008	2411.43	1649.53	300.081	2412.13	1649.22	177.709	2255.47	1671.66	314.299	2244.98	1675.36	267.115	2179.34	1520.89	267.677	2079.45	1296.62	244.931	2323.39	1430.68	240.988	2351.67	1243.8	324.055	2084.42	1369.84	68.4551	2176.28	1475.01	11.5733	2128.38	1283.62	-3.31776	2095.49	1166.83	-26.4475	2136.37	996.636	10.4599	2161.08	897.061	-44.0687	2109.01	896.97	-46.8034	2148.55	798.824
935	0	197.569	2422.84	1649.08	300.645	2423.5	1648.68	178.229	2266.82	1670.94	314.814	2256.27	1674.5	267.574	2190.94	1520.28	268.007	2090.65	1296.17	245.25	2334.88	1429.9	241.35	2362.76	1242.86	324.466	2095.83	1369.35	68.9789	2187.46	1474.5	12.6187	2136.67	1284.25	-1.73465	2101.84	1167.98	-25.6493	2138.41	996.981	10.9576	2160.97	896.669	-43.1472	2108.3	897.919	-46.0982	2145.03	798.602
936	0	198.113	2434.39	1648.34	301.189	2434.99	1647.84	178.689	2278.33	1670	315.264	2267.69	1673.43	267.948	2202.61	1519.46	268.229	2101.92	1295.51	245.513	2346.45	1428.89	241.65	2373.91	1241.69	324.754	2107.28	1368.66	69.4205	2198.77	1473.81	13.5671	2145.12	1284.75	-0.269136	2108.37	1169.04	-24.8867	2140.73	997.365	11.4812	2161.21	896.43	-42.2263	2108.01	898.96	-45.2994	2142	798.583
937	0	198.612	2446.08	1647.32	301.684	2446.6	1646.71	179.074	2290	1668.87	315.634	2279.24	1672.15	268.226	2214.36	1518.44	268.345	2113.27	1294.65	245.709	2358.09	1427.66	241.883	2385.12	1240.3	324.92	2118.8	1367.76	69.7722	2210.19	1472.93	14.4155	2153.72	1285.12	1.0768	2115.08	1169.99	-24.1651	2143.39	997.768	12.0217	2161.84	896.315	-41.3168	2108.19	900.063	-44.4262	2139.51	798.732
938	0	199.041	2457.9	1646.04	302.105	2458.34	1645.33	179.367	2301.82	1667.55	315.91	2290.93	1670.7	268.401	2226.18	1517.24	268.36	2124.7	1293.62	245.827	2369.81	1426.23	242.045	2396.41	1238.74	324.967	2130.38	1366.69	70.0269	2221.71	1471.87	15.1615	2162.5	1285.36	2.30187	2122.02	1170.84	-23.4906	2146.4	998.168	12.5683	2162.89	896.298	-40.4295	2108.84	901.199	-43.4999	2137.58	799.018
939	0	199.372	2469.85	1644.54	302.426	2470.2	1643.71	179.553	2313.79	1666.08	316.075	2302.74	1669.1	268.463	2238.08	1515.87	268.277	2136.22	1292.41	245.857	2381.6	1424.64	242.131	2407.77	1237.01	324.896	2142.03	1365.47	70.1776	2233.34	1470.65	15.8036	2171.47	1285.46	3.40532	2129.18	1171.57	-22.8696	2149.79	998.543	13.1081	2164.39	896.349	-39.5758	2110	902.34	-42.5433	2136.25	799.406
940	0	199.583	2481.91	1642.84	302.626	2482.18	1641.91	179.616	2325.88	1664.46	316.114	2314.68	1667.37	268.405	2250.06	1514.35	268.101	2147.84	1291.06	245.789	2393.47	1422.9	242.138	2419.22	1235.14	324.712	2153.75	1364.1	70.2176	2245.07	1469.27	16.3405	2180.62	1285.42	4.3868	2136.6	1172.16	-22.3093	2153.59	998.87	13.6274	2166.37	896.437	-38.7674	2111.7	903.454	-41.5803	2135.53	799.86
941	0	199.652	2494.06	1640.98	302.683	2494.27	1639.95	179.541	2338.09	1662.72	316.013	2326.75	1665.53	268.219	2262.11	1512.72	267.837	2159.56	1289.58	245.613	2405.43	1421.04	242.064	2430.77	1233.17	324.417	2165.56	1362.61	70.1413	2256.88	1467.75	16.7716	2189.97	1285.22	5.24622	2144.3	1172.6	-21.8167	2157.82	999.128	14.1124	2168.86	896.531	-38.0159	2113.94	904.512	-40.6348	2135.45	800.343
942	0	199.561	2506.32	1638.99	302.579	2506.47	1637.87	179.313	2350.4	1660.88	315.756	2338.93	1663.62	267.899	2274.24	1510.98	267.488	2171.37	1287.99	245.322	2417.46	1419.09	241.906	2442.42	1231.12	324.016	2177.46	1361.04	69.9437	2268.77	1466.09	17.0963	2199.53	1284.88	5.9836	2152.28	1172.89	-21.3992	2162.51	999.295	14.5498	2171.89	896.6	-37.3327	2116.76	905.484	-39.7303	2136.04	800.82
943	0	199.295	2518.65	1636.9	302.3	2518.76	1635.71	178.919	2362.81	1658.96	315.33	2351.21	1661.65	267.439	2286.45	1509.17	267.061	2183.29	1286.31	244.909	2429.58	1417.07	241.664	2454.19	1229.02	323.513	2189.44	1359.39	69.6208	2280.74	1464.3	17.3144	2209.3	1284.37	6.59902	2160.57	1173	-21.0638	2167.68	999.35	14.9275	2175.47	896.614	-36.7287	2120.16	906.341	-38.8893	2137.3	801.254
944	0	198.845	2531.07	1634.74	301.835	2531.15	1633.51	178.348	2375.31	1656.99	314.726	2363.59	1659.66	266.838	2298.73	1507.31	266.559	2195.32	1284.57	244.37	2441.78	1415.01	241.339	2466.07	1226.88	322.914	2201.52	1357.7	69.17	2292.78	1462.41	17.4254	2219.3	1283.69	7.09253	2169.19	1172.93	-20.8168	2173.34	999.274	15.2352	2179.63	896.543	-36.2142	2124.16	907.057	-38.1327	2139.26	801.612
945	0	198.202	2543.56	1632.56	301.176	2543.61	1631.3	177.593	2387.87	1654.97	313.934	2376.06	1657.65	266.093	2311.09	1505.42	265.989	2207.44	1282.79	243.704	2454.06	1412.92	240.933	2478.07	1224.75	322.223	2213.7	1355.99	68.5902	2304.89	1460.42	17.429	2229.52	1282.85	7.46409	2178.15	1172.66	-20.6643	2179.52	999.052	15.4642	2184.4	896.36	-35.7986	2128.79	907.608	-37.4795	2141.94	801.864
946	0	197.363	2556.11	1630.38	300.321	2556.15	1629.11	176.647	2400.51	1652.94	312.951	2388.6	1655.67	265.206	2323.51	1503.53	265.354	2219.66	1280.99	242.913	2466.42	1410.84	240.448	2490.18	1222.63	321.447	2225.96	1354.29	67.882	2317.07	1458.35	17.3247	2239.99	1281.85	7.71354	2187.46	1172.2	-20.6108	2186.24	998.668	15.6079	2189.79	896.042	-35.49	2134.05	907.971	-36.9462	2145.36	801.98
947	0	196.329	2568.71	1628.22	299.272	2568.75	1626.99	175.511	2413.2	1650.92	311.775	2401.2	1653.73	264.18	2336.01	1501.66	264.659	2231.98	1279.21	241.999	2478.86	1408.8	239.891	2502.41	1220.56	320.59	2238.31	1352.62	67.048	2329.31	1456.22	17.112	2250.7	1280.68	7.8406	2197.14	1171.53	-20.6603	2193.51	998.113	15.6616	2195.83	895.567	-35.2957	2139.97	908.128	-36.5463	2149.53	801.939
948	0	195.107	2581.38	1626.12	298.034	2581.41	1624.96	174.186	2425.94	1648.92	310.41	2413.86	1651.86	263.021	2348.57	1499.83	263.909	2244.38	1277.46	240.971	2491.37	1406.8	239.268	2514.75	1218.56	319.661	2250.74	1351.01	66.0926	2341.61	1454.06	16.7904	2261.66	1279.36	7.8448	2207.2	1170.67	-20.815	2201.35	997.38	15.6222	2202.55	894.919	-35.2216	2146.57	908.064	-36.2901	2154.48	801.719
949	0	193.705	2594.09	1624.09	296.617	2594.11	1623.04	172.681	2438.72	1646.96	308.865	2426.56	1650.08	261.739	2361.18	1498.08	263.108	2256.85	1275.77	239.839	2503.94	1404.87	238.585	2527.2	1216.64	318.664	2263.23	1349.48	65.0226	2353.96	1451.88	16.3594	2272.89	1277.89	7.72552	2217.64	1169.6	-21.0759	2209.78	996.467	15.4879	2209.95	894.086	-35.2723	2153.85	907.77	-36.1845	2160.24	801.307
950	0	192.138	2606.83	1622.15	295.037	2606.86	1621.26	171.008	2451.54	1645.06	307.154	2439.31	1648.41	260.346	2373.84	1496.41	262.261	2269.39	1274.16	238.616	2516.56	1403.04	237.853	2539.73	1214.83	317.608	2275.78	1348.05	63.8469	2366.38	1449.7	15.819	2284.38	1276.28	7.48201	2228.48	1168.36	-21.4428	2218.83	995.374	15.2577	2218.07	893.061	-35.4513	2161.86	907.24	-36.2326	2166.82	800.689
951	0	190.426	2619.61	1620.32	293.312	2619.63	1619.62	169.185	2464.38	1643.25	305.294	2452.08	1646.88	258.856	2386.53	1494.86	261.373	2281.97	1272.67	237.318	2529.22	1401.32	237.082	2552.34	1213.15	316.499	2288.37	1346.75	62.5768	2378.84	1447.57	15.1697	2296.14	1274.57	7.11335	2239.72	1166.93	-21.9139	2228.49	994.109	14.9311	2226.93	891.843	-35.7608	2170.59	906.471	-36.4341	2174.27	799.86
952	0	188.591	2632.42	1618.59	291.465	2632.43	1618.14	167.232	2477.25	1641.54	303.308	2464.87	1645.5	257.286	2399.25	1493.44	260.447	2294.59	1271.29	235.965	2541.91	1399.74	236.281	2565.01	1211.62	315.347	2300.99	1345.58	61.2256	2391.35	1445.49	14.4126	2308.18	1272.76	6.61859	2251.36	1165.36	-22.4863	2238.79	992.682	14.5079	2236.54	890.436	-36.2018	2180.08	905.466	-36.7854	2182.6	798.816
953	0	186.658	2645.24	1616.99	289.522	2645.24	1616.82	165.176	2490.13	1639.95	301.222	2477.67	1644.29	255.656	2411.96	1492.16	259.49	2307.22	1270.06	234.576	2554.61	1398.29	235.462	2577.72	1210.24	314.161	2313.61	1344.56	59.8089	2403.89	1443.5	13.5497	2320.49	1270.88	5.99684	2263.4	1163.65	-23.1559	2249.74	991.106	13.988	2246.93	888.848	-36.7742	2190.34	904.233	-37.2799	2191.85	797.558
954	0	184.658	2658.06	1615.51	287.512	2658.05	1615.67	163.049	2503.01	1638.49	299.066	2490.48	1643.27	253.988	2424.67	1491.05	258.509	2319.84	1269	233.172	2567.31	1397	234.633	2590.44	1209.02	312.949	2326.22	1343.71	58.3439	2416.47	1441.63	12.5843	2333.06	1268.96	5.24743	2275.82	1161.83	-23.9174	2261.34	989.402	13.3718	2258.11	887.096	-37.4766	2201.4	902.784	-37.9084	2202.06	796.091
955	0	182.621	2670.86	1614.16	285.464	2670.86	1614.68	160.882	2515.87	1637.18	296.872	2503.28	1642.44	252.306	2437.34	1490.12	257.509	2332.43	1268.11	231.777	2579.97	1395.89	233.805	2603.15	1207.99	311.724	2338.78	1343.03	56.8493	2429.06	1439.91	11.5208	2345.9	1267.03	4.37012	2288.63	1159.94	-24.7648	2273.61	987.593	12.6601	2270.1	885.201	-38.3062	2213.28	901.132	-38.6598	2213.25	794.424
956	0	180.579	2683.64	1612.94	283.411	2683.64	1613.85	158.714	2528.72	1636.04	294.675	2516.06	1641.81	250.632	2449.95	1489.37	256.5	2344.98	1267.41	230.411	2592.58	1394.95	232.985	2615.81	1207.13	310.497	2351.29	1342.54	55.345	2441.65	1438.37	10.3654	2358.99	1265.12	3.36534	2301.8	1158.01	-25.6914	2286.54	985.704	11.8544	2282.9	883.191	-39.2592	2225.99	899.3	-39.5219	2225.47	792.571
957	0	178.566	2696.38	1611.85	281.383	2696.39	1613.18	156.581	2541.52	1635.08	292.512	2528.81	1641.39	248.994	2462.49	1488.82	255.491	2357.45	1266.91	229.096	2605.12	1394.2	232.18	2628.4	1206.47	309.279	2363.71	1342.24	53.8515	2454.23	1437.02	9.12556	2372.31	1263.27	2.23443	2315.31	1156.06	-26.6895	2300.14	983.766	10.9577	2296.53	881.098	-40.3298	2239.54	897.312	-40.4813	2238.74	790.554
958	0	176.614	2709.06	1610.9	279.414	2709.09	1612.65	154.521	2554.27	1634.32	290.418	2541.53	1641.18	247.413	2474.94	1488.48	254.49	2369.84	1266.62	227.849	2617.56	1393.65	231.393	2640.89	1206	308.082	2376.04	1342.14	52.3891	2466.77	1435.91	7.81068	2385.84	1261.5	0.979922	2329.14	1154.14	-27.751	2314.39	981.812	9.97533	2310.97	878.964	-41.5108	2253.94	895.195	-41.5247	2253.09	788.397
959	0	174.752	2721.66	1610.09	277.531	2721.73	1612.26	152.572	2566.94	1633.77	288.43	2554.2	1641.19	245.915	2487.27	1488.35	253.507	2382.11	1266.55	226.687	2629.89	1393.3	230.629	2653.24	1205.72	306.919	2388.23	1342.23	50.9776	2479.25	1435.06	6.4316	2399.56	1259.85	-0.394225	2343.27	1152.28	-28.8673	2329.29	979.878	8.91564	2326.22	876.832	-42.793	2269.2	892.985	-42.639	2268.54	786.136
960	0	173.01	2734.17	1609.42	275.763	2734.3	1612	150.769	2579.53	1633.44	286.582	2566.81	1641.4	244.519	2499.47	1488.44	252.553	2394.26	1266.69	225.623	2642.08	1393.15	229.89	2665.43	1205.65	305.799	2400.29	1342.52	49.6351	2491.65	1434.48	5.00061	2413.43	1258.36	-1.88239	2357.66	1150.52	-30.0293	2344.81	978.003	7.79088	2342.27	874.753	-44.1648	2285.31	890.72	-43.8119	2285.1	783.811
961	0	171.413	2746.56	1608.9	274.134	2746.78	1611.86	149.142	2592.01	1633.35	284.903	2579.35	1641.83	243.242	2511.52	1488.74	251.635	2406.27	1267.05	224.669	2654.12	1393.23	229.177	2677.44	1205.77	304.733	2412.19	1343	48.378	2503.95	1434.19	3.53114	2427.42	1257.06	-3.47717	2372.27	1148.89	-31.2278	2360.94	976.228	6.61675	2359.1	872.782	-45.6125	2302.26	888.44	-45.0321	2302.8	781.472
962	0	169.981	2758.83	1608.54	272.666	2759.16	1611.84	147.716	2604.37	1633.51	283.419	2591.8	1642.46	242.1	2523.39	1489.26	250.76	2418.12	1267.62	223.83	2665.99	1393.52	228.493	2689.25	1206.11	303.729	2423.92	1343.67	47.2199	2516.13	1434.2	2.03742	2441.49	1255.97	-5.16937	2387.07	1147.42	-32.4531	2377.65	974.593	5.4117	2376.67	870.977	-47.1201	2320.03	886.193	-46.2889	2321.62	779.176
963	0	168.734	2770.95	1608.34	271.376	2771.42	1611.93	146.513	2616.6	1633.93	282.149	2604.16	1643.3	241.102	2535.09	1490	249.935	2429.82	1268.4	223.112	2677.67	1394.04	227.839	2700.84	1206.66	302.791	2435.46	1344.53	46.1713	2528.16	1434.53	0.534007	2455.6	1255.13	-6.9481	2402.02	1146.15	-33.6959	2394.9	973.141	4.1956	2394.97	869.398	-48.6696	2338.6	884.027	-47.5725	2341.56	776.989
964	0	167.682	2782.92	1608.32	270.276	2783.55	1612.14	145.543	2628.69	1634.62	281.105	2616.41	1644.33	240.253	2546.6	1490.93	249.163	2441.34	1269.37	222.513	2689.17	1394.78	227.215	2712.22	1207.42	301.924	2446.83	1345.56	45.2395	2540.02	1435.18	-0.964809	2469.72	1254.55	-8.80102	2417.08	1145.1	-34.9469	2412.65	971.912	2.98769	2413.94	868.103	-50.2412	2357.92	881.993	-48.8731	2362.6	774.981
965	0	166.835	2794.72	1608.48	269.375	2795.53	1612.47	144.811	2640.61	1635.57	280.293	2628.53	1645.56	239.553	2557.91	1492.07	248.448	2452.7	1270.54	222.031	2700.47	1395.74	226.623	2723.4	1208.41	301.13	2458.01	1346.75	44.428	2551.72	1436.13	-2.4455	2483.79	1254.25	-10.7147	2432.21	1144.29	-36.1971	2430.87	970.946	1.80446	2433.55	867.149	-51.8139	2377.97	880.143	-50.1809	2384.68	773.227
966	0	166.193	2806.34	1608.83	268.675	2807.36	1612.93	144.314	2652.37	1636.79	279.71	2640.51	1646.97	238.999	2569.02	1493.39	247.789	2463.88	1271.87	221.66	2711.57	1396.93	226.062	2734.37	1209.6	300.408	2469	1348.08	43.7373	2563.23	1437.39	-3.89581	2497.8	1254.25	-12.6748	2447.37	1143.74	-37.438	2449.5	970.277	0.65859	2453.76	866.588	-53.3663	2398.68	878.525	-51.4853	2407.78	771.801
967	0	165.753	2817.78	1609.39	268.174	2819.01	1613.51	144.04	2663.96	1638.27	279.345	2652.33	1648.56	238.583	2579.93	1494.88	247.189	2474.91	1273.35	221.39	2722.49	1398.33	225.533	2745.16	1211.01	299.756	2479.82	1349.55	43.1646	2574.55	1438.93	-5.30517	2511.69	1254.53	-14.6671	2462.52	1143.46	-38.662	2468.49	969.937	-0.440657	2474.52	866.464	-54.8771	2420.01	877.188	-52.7751	2431.82	770.778
968	0	165.506	2829.03	1610.16	267.866	2830.49	1614.24	143.971	2675.37	1639.98	279.183	2663.99	1650.29	238.294	2590.65	1496.53	246.646	2485.77	1274.96	221.211	2733.22	1399.93	225.034	2755.79	1212.63	299.173	2490.48	1351.13	42.7044	2585.69	1440.74	-6.66495	2525.44	1255.11	-16.6769	2477.64	1143.46	-39.8619	2487.8	969.951	-1.48664	2495.8	866.815	-56.326	2441.89	876.173	-54.0377	2456.73	770.226
969	0	165.439	2840.1	1611.14	267.739	2841.77	1615.11	144.085	2686.59	1641.91	279.199	2675.45	1652.17	238.119	2601.19	1498.3	246.162	2496.49	1276.69	221.109	2743.79	1401.71	224.565	2766.27	1214.43	298.654	2500.98	1352.81	42.3488	2596.64	1442.77	-7.96866	2539.03	1255.96	-18.6907	2492.68	1143.72	-41.0315	2507.36	970.337	-2.47464	2517.53	867.672	-57.6942	2464.25	875.518	-55.2598	2482.42	770.206
970	0	165.533	2850.97	1612.32	267.775	2852.86	1616.13	144.352	2697.63	1644.03	279.369	2686.72	1654.16	238.042	2611.56	1500.18	245.737	2507.08	1278.49	221.07	2754.2	1403.64	224.123	2776.64	1216.39	298.198	2511.35	1354.56	42.0884	2607.41	1445	-9.21187	2552.44	1257.06	-20.6952	2507.64	1144.23	-42.1655	2527.13	971.107	-3.40126	2539.66	869.058	-58.9651	2487.03	875.253	-56.4272	2508.79	770.769
971	0	165.767	2861.67	1613.71	267.956	2863.75	1617.3	144.74	2708.48	1646.3	279.661	2697.78	1656.23	238.047	2621.78	1502.15	245.37	2517.55	1280.36	221.08	2764.47	1405.7	223.706	2786.91	1218.5	297.801	2521.6	1356.36	41.9126	2618.02	1447.39	-10.3922	2565.65	1258.39	-22.6788	2522.48	1144.97	-43.2592	2547.06	972.265	-4.2642	2562.14	870.983	-60.1249	2510.16	875.4	-57.5255	2535.75	771.954
972	0	166.115	2872.19	1615.28	268.258	2874.44	1618.62	145.217	2719.16	1648.67	280.045	2708.62	1658.36	238.118	2631.87	1504.16	245.064	2527.92	1282.26	221.122	2774.61	1407.86	223.311	2797.1	1220.71	297.46	2531.75	1358.19	41.8102	2628.48	1449.88	-11.5089	2578.65	1259.91	-24.6306	2537.19	1145.91	-44.3086	2567.09	973.805	-5.06203	2584.91	873.45	-61.1624	2533.58	875.971	-58.54	2563.18	773.786
973	0	166.552	2882.55	1617.02	268.657	2884.95	1620.07	145.749	2729.67	1651.12	280.489	2719.26	1660.51	238.239	2641.84	1506.2	244.818	2538.2	1284.17	221.184	2784.66	1410.08	222.938	2807.25	1222.99	297.174	2541.83	1360.03	41.7699	2638.79	1452.45	-12.5628	2591.45	1261.58	-26.5414	2551.77	1147.03	-45.3101	2587.18	975.716	-5.79387	2607.89	876.452	-62.0695	2557.2	876.972	-59.4568	2590.96	776.277
974	0	167.051	2892.76	1618.89	269.13	2895.28	1621.65	146.305	2740.02	1653.59	280.961	2729.69	1662.65	238.395	2651.72	1508.23	244.633	2548.41	1286.05	221.251	2794.63	1412.32	222.583	2817.36	1225.31	296.94	2551.84	1361.85	41.781	2648.99	1455.04	-13.5556	2604.05	1263.36	-28.403	2566.2	1148.27	-46.2608	2607.28	977.977	-6.45901	2631.04	879.973	-62.8412	2580.98	878.398	-60.2627	2618.99	779.424
975	0	167.586	2902.83	1620.87	269.65	2905.44	1623.33	146.856	2750.22	1656.04	281.435	2739.92	1664.75	238.572	2661.53	1510.22	244.51	2558.57	1287.88	221.313	2804.53	1414.54	222.248	2827.46	1227.62	296.757	2561.82	1363.62	41.8335	2659.07	1457.59	-14.4893	2616.46	1265.21	-30.2085	2580.48	1149.6	-47.1576	2627.36	980.563	-7.05647	2654.29	883.988	-63.4751	2604.84	880.238	-60.9461	2647.16	783.21
976	0	168.132	2912.8	1622.93	270.195	2915.45	1625.08	147.374	2760.29	1658.42	281.885	2749.96	1666.77	238.76	2671.29	1512.14	244.45	2568.69	1289.64	221.359	2814.39	1416.7	221.932	2837.56	1229.88	296.624	2571.78	1365.33	41.9184	2669.07	1460.08	-15.3664	2628.68	1267.06	-31.9518	2594.61	1150.98	-47.9978	2647.36	983.442	-7.58471	2677.58	888.464	-63.9713	2628.73	882.472	-61.4968	2675.36	787.607
977	0	168.666	2922.66	1625	270.744	2925.34	1626.88	147.84	2770.25	1660.69	282.291	2759.83	1668.68	238.95	2681.03	1513.96	244.452	2578.79	1291.3	221.383	2824.21	1418.77	221.636	2847.68	1232.05	296.54	2581.73	1366.95	42.0284	2678.99	1462.46	-16.1888	2640.74	1268.89	-33.6278	2608.62	1152.36	-48.7785	2667.27	986.578	-8.04151	2700.85	893.36	-64.3324	2652.59	885.074	-61.9067	2703.48	792.576
978	0	169.17	2932.46	1627.07	271.278	2935.12	1628.69	148.237	2780.1	1662.81	282.635	2769.56	1670.46	239.135	2690.75	1515.66	244.518	2588.88	1292.84	221.381	2834.03	1420.7	221.362	2857.83	1234.1	296.505	2591.7	1368.46	42.1579	2688.85	1464.68	-16.9579	2652.65	1270.64	-35.2317	2622.49	1153.69	-49.4966	2687.05	989.93	-8.42388	2724.03	898.63	-64.5626	2676.37	888.013	-62.1699	2731.45	798.066
979	0	169.626	2942.21	1629.07	271.78	2944.81	1630.48	148.552	2789.88	1664.75	282.908	2779.17	1672.07	239.311	2700.48	1517.21	244.647	2598.96	1294.24	221.351	2843.85	1422.47	221.112	2868.02	1235.99	296.52	2601.68	1369.83	42.3031	2698.66	1466.71	-17.6739	2664.43	1272.27	-36.7592	2636.25	1154.95	-50.1487	2706.67	993.457	-8.72813	2747.09	904.222	-64.6678	2700.03	891.251	-62.283	2759.16	804.023
980	0	170.022	2951.94	1630.97	272.237	2954.45	1632.2	148.779	2799.61	1666.48	283.102	2788.69	1673.5	239.477	2710.23	1518.58	244.839	2609.06	1295.47	221.295	2853.69	1424.04	220.889	2878.24	1237.7	296.585	2611.71	1371.06	42.4621	2708.45	1468.53	-18.3361	2676.1	1273.74	-38.2062	2649.91	1156.09	-50.7313	2726.12	997.113	-8.95001	2769.96	910.081	-64.6549	2723.51	894.751	-62.2447	2786.56	810.381
981	0	170.351	2961.66	1632.72	272.639	2964.05	1633.82	148.917	2809.29	1667.97	283.216	2798.15	1674.73	239.636	2720.01	1519.77	245.094	2619.17	1296.53	221.216	2863.55	1425.41	220.695	2888.52	1239.2	296.701	2621.78	1372.12	42.6352	2718.21	1470.11	-18.9426	2687.69	1275.03	-39.5682	2663.5	1157.08	-51.2408	2745.37	1000.86	-9.08506	2792.59	916.147	-64.5319	2746.78	898.468	-62.0564	2813.57	817.075
982	0	170.607	2971.39	1634.29	272.979	2973.65	1635.31	148.969	2818.96	1669.21	283.255	2807.57	1675.75	239.792	2729.84	1520.75	245.412	2629.31	1297.4	221.121	2873.45	1426.54	220.535	2898.85	1240.47	296.871	2631.9	1373	42.8243	2727.97	1471.43	-19.4905	2699.21	1276.11	-40.841	2677.01	1157.9	-51.6733	2764.41	1004.64	-9.12908	2814.95	922.36	-64.307	2769.81	902.358	-61.7218	2840.13	824.033
983	0	170.789	2981.17	1635.63	273.253	2983.25	1636.62	148.944	2828.63	1670.18	283.227	2816.99	1676.54	239.95	2739.71	1521.52	245.792	2639.48	1298.06	221.018	2883.4	1427.44	220.412	2909.23	1241.5	297.097	2642.08	1373.68	43.0333	2737.74	1472.49	-19.9758	2710.69	1276.95	-42.0198	2690.48	1158.52	-52.025	2783.22	1008.42	-9.07855	2837	928.658	-63.9891	2792.55	906.376	-61.2468	2866.2	831.184
984	0	170.902	2990.99	1636.74	273.461	2992.88	1637.73	148.852	2838.31	1670.87	283.144	2826.44	1677.1	240.118	2749.65	1522.07	246.233	2649.68	1298.52	220.916	2893.4	1428.08	220.328	2919.66	1242.28	297.381	2652.32	1374.17	43.2671	2747.52	1473.27	-20.3938	2722.14	1277.55	-43.0995	2703.92	1158.94	-52.2925	2801.8	1012.17	-8.93095	2858.7	934.978	-63.5866	2814.98	910.476	-60.6394	2891.74	838.456
985	0	170.953	3000.88	1637.57	273.607	3002.56	1638.61	148.709	2848.03	1671.28	283.024	2835.93	1677.43	240.306	2759.64	1522.38	246.735	2659.92	1298.76	220.828	2903.45	1428.47	220.287	2930.14	1242.8	297.727	2662.63	1374.45	43.532	2757.33	1473.78	-20.739	2733.6	1277.89	-44.0752	2717.34	1159.13	-52.4726	2820.14	1015.83	-8.68502	2880.02	941.259	-63.1081	2837.08	914.612	-59.9094	2916.72	845.776
986	0	170.953	3010.84	1638.13	273.699	3012.3	1639.25	148.534	2857.78	1671.42	282.885	2845.49	1677.53	240.523	2769.7	1522.47	247.295	2670.2	1298.79	220.764	2913.57	1428.62	220.291	2940.66	1243.06	298.137	2673	1374.52	43.8348	2767.17	1474.02	-21.006	2745.07	1277.98	-44.9413	2730.75	1159.11	-52.5624	2838.23	1019.38	-8.34093	2900.94	947.443	-62.5615	2858.8	918.74	-59.0684	2941.1	853.075
987	0	170.917	3020.89	1638.4	273.747	3022.11	1639.64	148.346	2867.58	1671.28	282.75	2855.14	1677.4	240.78	2779.82	1522.34	247.912	2680.53	1298.61	220.737	2923.76	1428.51	220.345	2951.22	1243.08	298.613	2683.43	1374.37	44.1826	2777.05	1474	-21.1891	2756.58	1277.81	-45.6926	2744.16	1158.87	-52.5601	2856.06	1022.78	-7.90043	2921.42	953.472	-61.9541	2880.14	922.817	-58.129	2964.87	860.285
988	0	170.86	3031.01	1638.39	273.768	3032	1639.77	148.167	2877.44	1670.89	282.643	2864.89	1677.05	241.086	2790.01	1521.98	248.581	2690.9	1298.21	220.759	2934.02	1428.18	220.45	2961.82	1242.85	299.156	2693.93	1374.01	44.5826	2786.99	1473.73	-21.2828	2768.12	1277.41	-46.3241	2757.59	1158.42	-52.4641	2873.62	1026.01	-7.36678	2941.46	959.293	-61.2924	2901.07	926.801	-57.105	2988.01	867.341
989	0	170.803	3041.22	1638.1	273.777	3041.97	1639.64	148.02	2887.36	1670.25	282.588	2874.76	1676.5	241.45	2800.26	1521.4	249.299	2701.33	1297.6	220.843	2944.34	1427.62	220.61	2972.45	1242.39	299.766	2704.49	1373.45	45.0416	2796.99	1473.23	-21.2822	2779.73	1276.77	-46.8308	2771.02	1157.77	-52.2739	2890.91	1029.04	-6.74464	2961.04	964.856	-60.5819	2921.56	930.652	-56.0106	3010.51	874.182
990	0	170.767	3051.5	1637.55	273.795	3052.03	1639.27	147.928	2897.33	1669.39	282.609	2884.75	1675.75	241.882	2810.58	1520.63	250.06	2711.8	1296.8	221	2954.74	1426.86	220.83	2983.12	1241.72	300.442	2715.11	1372.68	45.5658	2807.07	1472.52	-21.1829	2791.39	1275.92	-47.2084	2784.45	1156.94	-51.9898	2907.93	1031.84	-6.03975	2980.14	970.114	-59.8271	2941.59	934.332	-54.8602	3032.37	880.749
991	0	170.771	3061.85	1636.77	273.841	3062.18	1638.66	147.914	2907.38	1668.31	282.73	2894.86	1674.82	242.387	2820.97	1519.66	250.859	2722.34	1295.81	221.241	2965.22	1425.91	221.113	2993.83	1240.85	301.18	2725.79	1371.71	46.1603	2817.22	1471.62	-20.9813	2803.12	1274.88	-47.453	2797.89	1155.94	-51.6129	2924.66	1034.39	-5.25859	2998.76	975.028	-59.0311	2961.16	937.805	-53.6676	3053.57	886.985
992	0	170.838	3072.27	1635.77	273.939	3072.43	1637.83	147.999	2917.49	1667.06	282.973	2905.09	1673.72	242.973	2831.42	1518.52	251.69	2732.93	1294.64	221.576	2975.77	1424.78	221.464	3004.57	1239.8	301.976	2736.53	1370.57	46.8295	2827.47	1470.56	-20.6746	2814.92	1273.68	-47.5615	2811.32	1154.8	-51.1452	2941.1	1036.69	-4.40803	3016.9	979.56	-58.1963	2980.23	941.036	-52.4457	3074.11	892.84
993	0	170.987	3082.75	1634.59	274.109	3082.76	1636.82	148.203	2927.67	1665.64	283.358	2915.44	1672.47	243.644	2841.94	1517.21	252.546	2743.58	1293.3	222.014	2986.4	1423.51	221.885	3015.36	1238.59	302.825	2747.32	1369.25	47.5761	2837.83	1469.35	-20.261	2826.79	1272.32	-47.5318	2824.72	1153.53	-50.589	2957.23	1038.7	-3.495	3034.54	983.678	-57.3237	2998.8	943.994	-51.2062	3093.99	898.265
994	0	171.238	3093.29	1633.26	274.373	3093.19	1635.64	148.543	2937.91	1664.09	283.899	2925.91	1671.08	244.403	2852.53	1515.76	253.419	2754.31	1291.82	222.562	2997.1	1422.1	222.382	3026.21	1237.24	303.72	2758.16	1367.77	48.4016	2848.29	1468.01	-19.7395	2838.72	1270.84	-47.3626	2838.1	1152.15	-49.9476	2973.06	1040.42	-2.52604	3051.7	987.356	-56.4139	3016.84	946.649	-49.9587	3113.21	903.216
995	0	171.609	3103.87	1631.81	274.749	3103.7	1634.32	149.035	2948.23	1662.43	284.608	2936.49	1669.58	245.253	2863.2	1514.19	254.305	2765.1	1290.21	223.226	3007.89	1420.59	222.955	3037.11	1235.78	304.652	2769.06	1366.15	49.3061	2858.88	1466.59	-19.1102	2850.7	1269.27	-47.0536	2851.42	1150.68	-49.2243	2988.58	1041.84	-1.50717	3068.36	990.569	-55.4668	3034.35	948.973	-48.7109	3131.76	907.654
996	0	172.115	3114.49	1630.28	275.257	3114.3	1632.89	149.69	2958.62	1660.69	285.492	2947.17	1667.98	246.192	2873.94	1512.51	255.196	2775.97	1288.49	224.009	3018.76	1418.98	223.609	3048.07	1234.23	305.614	2780.01	1364.4	50.2884	2869.59	1465.09	-18.374	2862.73	1267.62	-46.6055	2864.67	1149.15	-48.4229	3003.76	1042.95	-0.443737	3084.54	993.301	-54.4819	3051.3	950.943	-47.4684	3149.63	911.544
997	0	172.767	3125.17	1628.7	275.909	3124.98	1631.39	150.514	2969.09	1658.89	286.553	2957.95	1666.3	247.221	2884.75	1510.75	256.087	2786.92	1286.67	224.915	3029.72	1417.31	224.344	3059.11	1232.61	306.598	2791.02	1362.54	51.3459	2880.45	1463.53	-17.5328	2874.81	1265.92	-46.0199	2877.84	1147.57	-47.5473	3018.62	1043.74	0.65967	3100.23	995.536	-53.4587	3067.7	952.537	-46.2349	3166.83	914.853
998	0	173.576	3135.89	1627.1	276.719	3135.75	1629.84	151.514	2979.64	1657.07	287.787	2968.81	1664.56	248.337	2895.66	1508.93	256.976	2797.96	1284.79	225.943	3040.77	1415.59	225.162	3070.24	1230.94	307.597	2802.08	1360.6	52.4747	2891.45	1461.96	-16.5896	2886.91	1264.2	-45.2991	2890.91	1145.97	-46.6015	3033.13	1044.21	1.7992	3115.44	997.264	-52.3972	3083.52	953.739	-45.0124	3183.35	917.557
999	0	174.548	3146.66	1625.51	277.693	3146.59	1628.26	152.687	2990.27	1655.25	289.186	2979.75	1662.78	249.535	2906.64	1507.08	257.859	2809.09	1282.85	227.09	3051.9	1413.85	226.061	3081.46	1229.26	308.604	2813.19	1358.6	53.6699	2902.6	1460.37	-15.5479	2899.04	1262.48	-44.4464	2903.86	1144.36	-45.5893	3047.28	1044.35	2.97171	3130.16	998.479	-51.2973	3098.76	954.534	-43.8016	3199.18	919.632
1000	0	175.685	3157.49	1623.96	278.837	3157.51	1626.7	154.03	3001	1653.45	290.739	2990.77	1660.98	250.811	2917.72	1505.21	258.736	2820.31	1280.89	228.351	3063.13	1412.11	227.039	3092.79	1227.57	309.614	2824.37	1356.55	54.9256	2913.9	1458.79	-14.4122	2911.18	1260.77	-43.4656	2916.68	1142.75	-44.5143	3061.08	1044.18	4.17468	3144.39	999.178	-50.16	3113.41	954.914	-42.602	3214.33	921.062
1001	0	176.986	3168.39	1622.46	280.152	3168.51	1625.16	155.534	3011.84	1651.7	292.429	3001.85	1659.18	252.16	2928.89	1503.34	259.608	2831.63	1278.92	229.72	3074.45	1410.4	228.094	3104.22	1225.91	310.625	2835.61	1354.48	56.2351	2925.35	1457.25	-13.1878	2923.32	1259.1	-42.3611	2929.35	1141.17	-43.38	3074.51	1043.69	5.4061	3158.14	999.361	-48.9869	3127.47	954.872	-41.4126	3228.79	921.836
1002	0	178.448	3179.35	1621.05	281.633	3179.59	1623.68	157.188	3022.78	1650.02	294.238	3013	1657.4	253.574	2940.16	1501.5	260.477	2843.05	1276.97	231.187	3085.85	1408.72	229.221	3115.77	1224.29	311.634	2846.91	1352.41	57.5907	2936.94	1455.75	-11.8805	2935.45	1257.49	-41.1381	2941.85	1139.64	-42.1894	3087.56	1042.88	6.66433	3171.39	999.03	-47.7807	3140.93	954.409	-40.2313	3242.54	921.944
1003	0	180.061	3190.39	1619.74	283.274	3190.74	1622.28	158.977	3033.83	1648.43	296.143	3024.21	1655.66	255.044	2951.52	1499.72	261.348	2854.56	1275.07	232.74	3097.34	1407.1	230.415	3127.43	1222.75	312.641	2858.27	1350.38	58.9842	2948.67	1454.32	-10.4966	2947.56	1255.95	-39.8021	2954.19	1138.15	-40.9455	3100.22	1041.77	7.94788	3184.14	998.192	-46.5448	3153.78	953.527	-39.0562	3255.59	921.387
1004	0	181.814	3201.51	1618.54	285.064	3201.96	1620.95	160.884	3044.99	1646.94	298.123	3035.48	1653.97	256.564	2962.98	1498	262.224	2866.18	1273.22	234.367	3108.92	1405.56	231.668	3139.2	1221.28	313.649	2869.7	1348.4	60.4063	2960.53	1452.96	-9.04294	2959.64	1254.5	-38.3592	2966.35	1136.74	-39.6507	3112.49	1040.37	9.25525	3196.39	996.856	-45.2835	3166.02	952.235	-37.8852	3267.93	920.166
1005	0	183.695	3212.72	1617.45	286.99	3213.26	1619.73	162.888	3056.27	1645.58	300.154	3046.8	1652.36	258.121	2974.52	1496.37	263.112	2877.88	1271.46	236.053	3120.56	1404.11	232.974	3151.09	1219.92	314.658	2881.18	1346.49	61.8472	2972.51	1451.69	-7.527	2971.68	1253.14	-36.8162	2978.33	1135.4	-38.3078	3124.36	1038.69	10.5847	3208.12	995.032	-44.0017	3177.66	950.544	-36.7172	3279.56	918.292
1006	0	185.685	3224.01	1616.48	289.034	3224.62	1618.61	164.968	3067.65	1644.35	302.212	3058.18	1650.83	259.704	2986.14	1494.84	264.016	2889.66	1269.81	237.78	3132.28	1402.77	234.323	3163.07	1218.66	315.673	2892.71	1344.68	63.2964	2984.58	1450.51	-5.95672	2983.66	1251.89	-35.1801	2990.12	1134.15	-36.9195	3135.82	1036.74	11.9342	3219.33	992.736	-42.7047	3188.67	948.469	-35.5518	3290.46	915.778
1007	0	187.768	3235.4	1615.64	291.178	3236.04	1617.6	167.1	3079.14	1643.27	304.277	3069.61	1649.4	261.302	2997.82	1493.42	264.941	2901.51	1268.27	239.531	3144.05	1401.54	235.708	3175.13	1217.53	316.696	2904.28	1342.98	64.7424	2996.73	1449.44	-4.34064	2995.58	1250.75	-33.459	3001.71	1132.99	-35.4889	3146.86	1034.54	13.3012	3230.01	989.985	-41.3979	3199.07	946.029	-34.3897	3300.62	912.644
1008	0	189.922	3246.87	1614.91	293.399	3247.52	1616.7	169.261	3090.73	1642.33	306.327	3081.09	1648.09	262.9	3009.56	1492.14	265.891	2913.42	1266.87	241.287	3155.86	1400.44	237.118	3187.25	1216.53	317.73	2915.89	1341.43	66.1737	3008.94	1448.48	-2.68796	3007.43	1249.72	-31.6614	3013.11	1131.93	-34.0197	3157.49	1032.12	14.6823	3240.15	986.8	-40.0869	3208.84	943.247	-33.2325	3310.05	908.916
1009	0	192.126	3258.42	1614.31	295.676	3259.05	1615.91	171.423	3102.41	1641.54	308.34	3092.6	1646.89	264.485	3021.33	1491	266.866	2925.36	1265.63	243.03	3167.69	1399.46	238.542	3199.41	1215.67	318.778	2927.53	1340.02	67.5784	3021.18	1447.64	-1.00848	3019.19	1248.81	-29.7964	3024.3	1130.96	-32.5163	3167.69	1029.49	16.0737	3249.74	983.206	-38.7765	3217.99	940.147	-32.0827	3318.73	904.626
1010	0	194.357	3270.04	1613.81	297.981	3270.61	1615.21	173.56	3114.16	1640.9	310.298	3104.14	1645.82	266.041	3033.11	1490.01	267.869	2937.32	1264.55	244.741	3179.52	1398.61	239.97	3211.58	1214.94	319.839	2939.17	1338.79	68.945	3033.42	1446.9	0.687355	3030.85	1248.01	-27.874	3035.3	1130.1	-30.9839	3177.46	1026.67	17.4708	3258.77	979.23	-37.4719	3226.51	936.759	-30.9432	3326.66	899.81
1011	0	196.589	3281.73	1613.41	300.288	3282.19	1614.61	175.646	3125.97	1640.41	312.18	3115.69	1644.88	267.555	3044.87	1489.18	268.898	2949.27	1263.64	246.401	3191.35	1397.9	241.388	3223.72	1214.36	320.915	2950.82	1337.74	70.2626	3045.65	1446.29	2.38855	3042.4	1247.33	-25.9047	3046.09	1129.33	-29.4285	3186.79	1023.69	18.8685	3267.24	974.903	-36.1776	3234.4	933.113	-29.8174	3333.84	894.512
1012	0	198.795	3293.45	1613.09	302.569	3293.78	1614.09	177.652	3137.84	1640.06	313.969	3127.25	1644.08	269.014	3056.6	1488.5	269.952	2961.19	1262.91	247.992	3203.13	1397.33	242.784	3235.82	1213.91	322.004	2962.44	1336.87	71.5213	3057.83	1445.79	4.08377	3053.83	1246.75	-23.8993	3056.68	1128.66	-27.8569	3195.69	1020.56	20.2607	3275.14	970.261	-34.8983	3241.66	929.244	-28.7087	3340.25	888.778
1013	0	200.946	3305.2	1612.84	304.795	3305.36	1613.64	179.553	3149.73	1639.85	315.645	3138.8	1643.43	270.406	3068.26	1487.99	271.028	2973.06	1262.37	249.498	3214.85	1396.89	244.144	3247.84	1213.61	323.104	2974.04	1336.2	72.713	3069.92	1445.4	5.76161	3065.13	1246.28	-21.8685	3067.06	1128.08	-26.2768	3204.15	1017.33	21.6411	3282.46	965.341	-33.6386	3248.3	925.189	-27.6202	3345.92	882.661
1014	0	203.012	3316.96	1612.66	306.934	3316.92	1613.25	181.324	3161.64	1639.78	317.194	3150.33	1642.92	271.72	3079.84	1487.64	272.125	2984.85	1262.01	250.902	3226.5	1396.59	245.452	3259.74	1213.44	324.214	2985.6	1335.72	73.8312	3081.9	1445.12	7.41097	3076.27	1245.9	-19.8227	3077.23	1127.59	-24.6962	3212.17	1014	23.0027	3289.21	960.187	-32.4026	3254.31	920.987	-26.555	3350.83	876.218
1015	0	204.962	3328.69	1612.52	308.957	3328.43	1612.93	182.944	3173.54	1639.83	318.6	3161.83	1642.57	272.948	3091.3	1487.46	273.24	2996.54	1261.84	252.193	3238.05	1396.43	246.696	3271.52	1213.42	325.331	2997.09	1335.44	74.8716	3093.72	1444.95	9.02162	3087.26	1245.62	-17.7716	3087.18	1127.18	-23.1237	3219.74	1010.61	24.3382	3295.39	954.844	-31.1947	3259.71	916.683	-25.516	3354.99	869.511
1016	0	206.767	3340.38	1612.43	310.834	3339.89	1612.68	184.393	3185.42	1640.01	319.849	3173.28	1642.38	274.085	3102.65	1487.44	274.37	3008.12	1261.85	253.358	3249.48	1396.42	247.862	3283.14	1213.53	326.453	3008.53	1335.35	75.832	3105.37	1444.88	10.5846	3098.07	1245.43	-15.7236	3096.91	1126.85	-21.5676	3226.87	1007.2	25.6401	3301	949.363	-30.0188	3264.5	912.321	-24.5063	3358.43	862.606
1017	0	208.397	3352	1612.38	312.535	3351.28	1612.49	185.658	3197.24	1640.33	320.931	3184.67	1642.37	275.124	3113.86	1487.59	275.512	3019.58	1262.03	254.389	3260.77	1396.55	248.938	3294.61	1213.79	327.576	3019.88	1335.46	76.712	3116.81	1444.91	12.0927	3108.69	1245.33	-13.6856	3106.41	1126.6	-20.0359	3233.57	1003.78	26.9007	3306.06	943.796	-28.879	3268.71	907.95	-23.5295	3361.14	855.575
1018	0	209.825	3363.53	1612.38	314.033	3362.58	1612.39	186.727	3208.98	1640.77	321.838	3196	1642.53	276.062	3124.93	1487.91	276.666	3030.89	1262.38	255.278	3271.93	1396.84	249.914	3305.9	1214.2	328.697	3031.16	1335.75	77.513	3128.01	1445.04	13.541	3119.11	1245.32	-11.6629	3115.68	1126.44	-18.5363	3239.82	1000.4	28.1125	3310.57	938.2	-27.7786	3272.34	903.621	-22.5901	3363.15	848.493
1019	0	211.026	3374.94	1612.44	315.304	3373.8	1612.39	187.594	3220.63	1641.33	322.566	3207.24	1642.89	276.898	3135.88	1488.39	277.828	3042.06	1262.89	256.021	3282.93	1397.29	250.78	3317.03	1214.76	329.814	3042.34	1336.23	78.2381	3138.96	1445.27	14.9269	3129.31	1245.39	-9.65884	3124.71	1126.36	-17.0751	3245.65	997.095	29.2682	3314.55	932.633	-26.7208	3275.41	899.386	-21.6936	3364.48	841.437
1020	0	211.981	3386.22	1612.58	316.327	3384.93	1612.51	188.258	3232.15	1642.04	323.113	3218.41	1643.44	277.633	3146.69	1489.03	278.994	3053.09	1263.55	256.616	3293.78	1397.91	251.526	3327.99	1215.47	330.924	3053.44	1336.87	78.8913	3149.63	1445.61	16.2504	3139.27	1245.56	-7.6752	3133.5	1126.37	-15.6579	3251.05	993.895	30.3611	3318.03	927.153	-25.7075	3277.94	895.296	-20.8467	3365.15	834.486
1021	0	212.673	3397.36	1612.82	317.086	3395.95	1612.76	188.721	3243.53	1642.87	323.482	3229.48	1644.19	278.267	3157.38	1489.83	280.16	3063.98	1264.35	257.063	3304.48	1398.69	252.146	3338.81	1216.34	332.022	3064.44	1337.69	79.4774	3160.03	1446.04	17.5139	3148.98	1245.83	-5.71223	3142.02	1126.48	-14.2889	3256.03	990.837	31.3848	3321.01	921.817	-24.74	3279.96	891.403	-20.057	3365.18	827.719
1022	0	213.095	3408.34	1613.17	317.571	3406.87	1613.18	188.991	3254.74	1643.83	323.677	3240.46	1645.14	278.805	3167.97	1490.79	281.32	3074.73	1265.29	257.364	3315.03	1399.65	252.634	3349.49	1217.37	333.105	3075.36	1338.66	80.0019	3170.16	1446.58	18.7218	3158.43	1246.2	-3.76909	3150.27	1126.71	-12.9715	3260.6	987.957	32.3339	3323.53	916.681	-23.8178	3281.49	887.756	-19.3325	3364.61	821.214
1023	0	213.241	3419.15	1613.66	317.775	3417.68	1613.77	189.078	3265.77	1644.93	323.708	3251.35	1646.29	279.25	3178.48	1491.9	282.47	3085.36	1266.35	257.526	3325.44	1400.77	252.983	3360.05	1218.56	334.17	3086.2	1339.79	80.4705	3180.02	1447.22	19.8801	3167.6	1246.68	-1.84428	3158.26	1127.05	-11.7076	3264.78	985.288	33.2035	3325.62	911.796	-22.9394	3282.56	884.399	-18.681	3363.48	815.044
1024	0	213.116	3429.79	1614.31	317.7	3428.39	1614.56	188.994	3276.6	1646.15	323.584	3262.14	1647.62	279.61	3188.91	1493.15	283.601	3095.87	1267.53	257.554	3335.72	1402.05	253.193	3370.5	1219.89	335.213	3096.96	1341.04	80.8889	3189.63	1447.97	20.9959	3176.48	1247.28	0.063882	3165.96	1127.52	-10.4987	3268.58	982.858	33.9902	3327.29	907.208	-22.1022	3283.19	881.372	-18.1095	3361.82	809.274
1025	0	212.727	3440.26	1615.12	317.352	3439	1615.56	188.755	3287.23	1647.47	323.318	3272.83	1649.14	279.892	3199.29	1494.52	284.707	3106.29	1268.81	257.458	3345.9	1403.48	253.263	3380.87	1221.36	336.231	3107.65	1342.43	81.263	3199.03	1448.82	22.0765	3185.08	1247.99	1.95674	3173.37	1128.13	-9.3454	3272.02	980.694	34.6914	3328.58	902.957	-21.3024	3283.43	878.708	-17.6227	3359.68	803.963
1026	0	212.09	3450.56	1616.11	316.743	3449.51	1616.76	188.375	3297.65	1648.9	322.924	3283.42	1650.81	280.103	3209.63	1496.01	285.782	3116.62	1270.19	257.248	3355.98	1405.04	253.197	3391.17	1222.95	337.22	3118.28	1343.91	81.5981	3208.22	1449.76	23.1287	3193.38	1248.82	3.83494	3180.5	1128.88	-8.24775	3275.11	978.814	35.3061	3329.53	899.076	-20.5359	3283.3	876.431	-17.2229	3357.1	799.158
1027	0	211.224	3460.71	1617.27	315.89	3459.93	1618.16	187.872	3307.86	1650.4	322.417	3293.92	1652.62	280.253	3219.93	1497.58	286.818	3126.87	1271.64	256.936	3365.99	1406.71	253	3401.41	1224.64	338.177	3128.87	1345.49	81.8995	3217.26	1450.79	24.159	3201.41	1249.77	5.69803	3187.34	1129.77	-7.20562	3277.89	977.233	35.8349	3330.17	895.589	-19.7978	3282.85	874.555	-16.9091	3354.15	794.891
1028	0	210.15	3470.71	1618.6	314.812	3470.26	1619.76	187.264	3317.88	1651.96	321.81	3304.34	1654.53	280.35	3230.22	1499.23	287.81	3137.07	1273.15	256.535	3375.94	1408.46	252.684	3411.61	1226.41	339.099	3139.41	1347.14	82.1718	3226.17	1451.89	25.1728	3209.15	1250.84	7.5443	3193.9	1130.82	-6.21871	3280.37	975.959	36.2797	3330.53	892.51	-19.083	3282.12	873.088	-16.6765	3350.89	791.181
1029	0	208.894	3480.58	1620.08	313.534	3480.51	1621.51	186.568	3327.72	1653.54	321.12	3314.67	1656.52	280.401	3240.5	1500.92	288.753	3147.22	1274.71	256.056	3385.85	1410.27	252.259	3421.76	1228.23	339.984	3149.92	1348.84	82.4194	3234.98	1453.05	26.1748	3216.63	1252.02	9.37073	3200.19	1132	-5.28668	3282.58	974.993	36.6439	3330.66	889.848	-18.3865	3281.15	872.026	-16.5169	3347.37	788.032
1030	0	207.482	3490.33	1621.68	312.082	3490.69	1623.41	185.802	3337.39	1655.13	320.361	3324.92	1658.54	280.413	3250.77	1502.63	289.643	3157.32	1276.29	255.512	3395.75	1412.1	251.742	3431.87	1230.07	340.828	3160.41	1350.57	82.6458	3243.73	1454.25	27.1689	3223.86	1253.29	11.173	3206.21	1133.32	-4.40912	3284.55	974.331	36.9324	3330.59	887.599	-17.7033	3279.99	871.359	-16.4188	3343.65	785.437
1031	0	205.941	3499.97	1623.37	310.484	3500.81	1625.41	184.983	3346.9	1656.69	319.551	3335.11	1660.57	280.392	3261.03	1504.35	290.478	3167.39	1277.9	254.915	3405.63	1413.93	251.148	3441.94	1231.88	341.63	3170.88	1352.31	82.8541	3252.44	1455.48	28.1583	3230.85	1254.66	12.9458	3211.97	1134.77	-3.58563	3286.3	973.964	37.1511	3330.37	885.758	-17.0291	3278.68	871.069	-16.3682	3339.8	783.372
1032	0	204.297	3509.53	1625.13	308.767	3510.88	1627.47	184.128	3356.29	1658.19	318.702	3345.24	1662.56	280.346	3271.31	1506.04	291.255	3177.44	1279.49	254.275	3415.53	1415.72	250.492	3451.96	1233.64	342.388	3181.34	1354.04	83.0465	3261.15	1456.7	29.1452	3237.63	1256.09	14.683	3217.51	1136.33	-2.81575	3287.86	973.879	37.3069	3330.03	884.31	-16.3598	3277.27	871.133	-16.349	3335.87	781.808
1033	0	202.574	3519.02	1626.9	306.96	3520.92	1629.56	183.251	3365.57	1659.62	317.831	3355.33	1664.49	280.276	3281.59	1507.68	291.972	3187.46	1281.07	253.601	3425.44	1417.44	249.791	3461.92	1235.3	343.098	3191.8	1355.73	83.2246	3269.87	1457.91	30.1316	3244.21	1257.59	16.378	3222.82	1138	-2.09899	3289.27	974.062	37.4073	3329.6	883.239	-15.6919	3275.79	871.525	-16.3441	3331.92	780.707
1034	0	200.795	3528.44	1628.66	305.086	3530.94	1631.62	182.368	3374.77	1660.94	316.949	3365.39	1666.31	280.189	3291.88	1509.24	292.626	3197.46	1282.61	252.903	3435.38	1419.06	249.059	3471.8	1236.83	343.76	3202.25	1357.38	83.3892	3278.64	1459.07	31.1185	3250.6	1259.13	18.0238	3227.94	1139.75	-1.43475	3290.54	974.495	37.4605	3329.13	882.527	-15.0226	3274.3	872.219	-16.3366	3328	780.029
1035	0	198.98	3537.83	1630.35	303.171	3540.94	1633.63	181.492	3383.9	1662.13	316.068	3375.41	1668.01	280.086	3302.18	1510.73	293.217	3207.43	1284.1	252.186	3445.35	1420.56	248.31	3481.59	1238.19	344.37	3212.69	1358.96	83.5408	3287.46	1460.18	32.1067	3256.83	1260.7	19.6139	3232.88	1141.58	-0.822385	3291.7	975.162	37.4745	3328.62	882.154	-14.3498	3272.82	873.186	-16.3099	3324.15	779.733
1036	0	197.147	3547.18	1631.97	301.233	3550.93	1635.54	180.632	3392.99	1663.19	315.199	3385.43	1669.55	279.969	3312.49	1512.1	293.744	3217.39	1285.53	251.456	3455.36	1421.91	247.555	3491.28	1239.36	344.927	3223.14	1360.47	83.6791	3296.34	1461.21	33.0966	3262.91	1262.29	21.1419	3237.65	1143.48	-0.261228	3292.77	976.048	37.4571	3328.12	882.103	-13.6719	3271.39	874.404	-16.2491	3320.4	779.779
1037	0	195.31	3556.51	1633.46	299.29	3560.93	1637.32	179.799	3402.05	1664.08	314.351	3395.44	1670.91	279.84	3322.83	1513.36	294.206	3227.32	1286.9	250.718	3465.41	1423.1	246.804	3500.85	1240.31	345.43	3233.59	1361.89	83.8037	3305.31	1462.15	34.0882	3268.84	1263.88	22.6023	3242.27	1145.43	0.249375	3293.77	977.139	37.4156	3327.63	882.358	-12.9878	3270.02	875.849	-16.1413	3316.79	780.133
1038	0	193.48	3565.83	1634.82	297.356	3570.94	1638.95	178.999	3411.09	1664.82	313.529	3405.45	1672.09	279.699	3333.17	1514.49	294.6	3237.23	1288.18	249.974	3475.51	1424.12	246.065	3510.29	1241.02	345.876	3244.04	1363.2	83.9138	3314.36	1462.99	35.0815	3274.65	1265.48	23.9905	3246.76	1147.42	0.710008	3294.7	978.423	37.3561	3327.18	882.905	-12.2967	3268.74	877.505	-15.9756	3313.32	780.768
1039	0	191.668	3575.15	1636.02	295.44	3580.97	1640.41	178.237	3420.13	1665.38	312.738	3415.47	1673.06	279.546	3343.53	1515.49	294.927	3247.11	1289.38	249.226	3485.65	1424.95	245.344	3519.59	1241.48	346.265	3254.49	1364.42	84.0088	3323.49	1463.72	36.0764	3280.33	1267.07	25.3029	3251.12	1149.46	1.12114	3295.59	979.893	37.2835	3326.77	883.735	-11.5981	3267.56	879.358	-15.7439	3310.02	781.662
1040	0	189.878	3584.47	1637.05	293.549	3591.02	1641.69	177.516	3429.17	1665.76	311.982	3425.49	1673.83	279.381	3353.91	1516.35	295.185	3256.97	1290.5	248.476	3495.84	1425.6	244.645	3528.74	1241.67	346.597	3264.94	1365.52	84.088	3332.72	1464.34	37.0728	3285.9	1268.64	26.5369	3255.37	1151.52	1.4831	3296.43	981.543	37.2012	3326.4	884.84	-10.8914	3266.5	881.4	-15.4405	3306.9	782.799
1041	0	188.116	3593.8	1637.92	291.689	3601.08	1642.77	176.839	3438.21	1665.96	311.263	3435.53	1674.39	279.203	3364.31	1517.06	295.374	3266.81	1291.52	247.723	3506.07	1426.05	243.971	3537.73	1241.59	346.869	3275.39	1366.52	84.151	3342.05	1464.84	38.0707	3291.34	1270.2	27.6909	3259.49	1153.63	1.79608	3297.23	983.368	37.1112	3326.09	886.216	-10.1766	3265.55	883.626	-15.0615	3303.95	784.172
1042	0	186.383	3603.14	1638.61	289.86	3611.18	1643.67	176.206	3447.26	1665.99	310.582	3445.58	1674.73	279.014	3374.72	1517.63	295.493	3276.63	1292.46	246.968	3516.35	1426.3	243.323	3546.58	1241.24	347.083	3285.84	1367.4	84.1975	3351.47	1465.23	39.0702	3296.68	1271.75	28.7641	3263.51	1155.76	2.0602	3298	985.368	37.0146	3325.82	887.861	-9.4534	3264.72	886.032	-14.6052	3301.19	785.774
1043	0	184.68	3612.49	1639.13	288.064	3621.29	1644.37	175.618	3456.32	1665.83	309.938	3455.65	1674.86	278.812	3385.15	1518.06	295.543	3286.42	1293.3	246.212	3526.67	1426.36	242.7	3555.27	1240.62	347.239	3296.29	1368.17	84.2275	3360.98	1465.5	40.0714	3301.89	1273.27	29.7563	3267.42	1157.92	2.27549	3298.72	987.542	36.9115	3325.62	889.774	-8.72187	3264.01	888.618	-14.0708	3298.6	787.605
[truncated: 69 more columns]

## Sheet: Sheet2
Devices
		025370 - Force			025370 - Moment			025370 - CoP			027571 - Force			027571 - Moment			027571 - CoP			037720 - Force			037720 - Moment			037720 - CoP
Frame	Sub Frame	Fx	Fy	Fz	Mx	My	Mz	Cx	Cy	Cz	Fx	Fy	Fz	Mx	My	Mz	Cx	Cy	Cz	Fx	Fy	Fz	Mx	My	Mz	Cx	Cy	Cz
		N	N	N	N.mm	N.mm	N.mm	mm	mm	mm	N	N	N	N.mm	N.mm	N.mm	mm	mm	mm	N	N	N	N.mm	N.mm	N.mm	mm	mm	mm
587	0	0	0	0	0	0	0	200	300	0	0	0	0	0	0	0	200	903	0	0	0	0	0	0	0	603	903	0
587	1	0	0	0	0	0	0	200	300	0	0	0	0	0	0	0	200	903	0	0	0	0	0	0	0	603	903	0
587	2	0	0	0	0	0	0	200	300	0	0	0	0	0	0	0	200	903	0	0	0	0	0	0	0	603	903	0
587	3	0	0	0	0	0	0	200	300	0	0	0	0	0	0	0	200	903	0	0	0	0	0	0	0	603	903	0
587	4	0	0	0	0	0	0	200	300	0	0	0	0	0	0	0	200	903	0	0	0	0	0	0	0	603	903	0
587	5	0	0	0	0	0	0	200	300	0	0	0	0	0	0	0	200	903	0	0	0	0	0	0	0	603	903	0
587	6	0	0	0	0	0	0	200	300	0	0	0	0	0	0	0	200	903	0	0	0	0	0	0	0	603	903	0
587	7	0	0	0	0	0	0	200	300	0	0	0	0	0	0	0	200	903	0	0	0	0	0	0	0	603	903	0
587	8	0	0	0	0	0	0	200	300	0	0	0	0	0	0	0	200	903	0	0	0	0	0	0	0	603	903	0
587	9	0	0	0	0	0	0	200	300	0	0	0	0	0	0	0	200	903	0	0	0	0	0	0	0	603	903	0
588	0	0	0	0	0	0	0	200	300	0	0	0	0	0	0	0	200	903	0	0	0	0	0	0	0	603	903	0
588	1	0	0	0	0	0	0	200	300	0	0	0	0	0	0	0	200	903	0	0	0	0	0	0	0	603	903	0
588	2	0	0	0	0	0	0	200	300	0	0	0	0	0	0	0	200	903	0	0	0	0	0	0	0	603	903	0
588	3	0	0	0	0	0	0	200	300	0	0	0	0	0	0	0	200	903	0	0	0	0	0	0	0	603	903	0
588	4	0	0	0	0	0	0	200	300	0	0	0	0	0	0	0	200	903	0	0	0	0	0	0	0	603	903	0
588	5	0	0	0	0	0	0	200	300	0	0	0	0	0	0	0	200	903	0	0	0	0	0	0	0	603	903	0
588	6	0	0	0	0	0	0	200	300	0	0	0	0	0	0	0	200	903	0	0	0	0	0	0	0	603	903	0
588	7	0	0	0	0	0	0	200	300	0	0	0	0	0	0	0	200	903	0	0	0	0	0	0	0	603	903	0
588	8	0	0	0	0	0	0	200	300	0	0	0	0	0	0	0	200	903	0	0	0	0	0	0	0	603	903	0
588	9	0	0	0	0	0	0	200	300	0	0	0	0	0	0	0	200	903	0	0	0	0	0	0	0	603	903	0
589	0	0	0	0	0	0	0	200	300	0	0	0	0	0	0	0	200	903	0	0	0	0	0	0	0	603	903	0
589	1	0	0	0	0	0	0	200	300	0	0	0	0	0	0	0	200	903	0	0	0	0	0	0	0	603	903	0
589	2	0	0	0	0	0	0	200	300	0	0	0	0	0	0	0	200	903	0	0	0	0	0	0	0	603	903	0
589	3	0	0	0	0	0	0	200	300	0	0	0	0	0	0	0	200	903	0	0	0	0	0	0	0	603	903	0
589	4	0	0	0	0	0	0	200	300	0	0	0	0	0	0	0	200	903	0	0	0	0	0	0	0	603	903	0
589	5	0	0	0	0	0	0	200	300	0	0	0	0	0	0	0	200	903	0	0	0	0	0	0	0	603	903	0
589	6	0	0	0	0	0	0	200	300	0	0	0	0	0	0	0	200	903	0	0	0	0	0	0	0	603	903	0
589	7	0	0	0	0	0	0	200	300	0	0	0	0	0	0	0	200	903	0	0	0	0	0	0	0	603	903	0
589	8	0	0	0	0	0	0	200	300	0	0	0	0	0	0	0	200	903	0	0	0	0	0	0	0	603	903	0
589	9	0	0	0	0	0	0	200	300	0	0	0	0	0	0	0	200	903	0	0	0	0	0	0	0	603	903	0
590	0	0	0	0	0	0	0	200	300	0	0	0	0	0	0	0	200	903	0	0	0	0	0	0	0	603	903	0
590	1	0	0	0	0	0	0	200	300	0	0	0	0	0	0	0	200	903	0	0	0	0	0	0	0	603	903	0
590	2	0	0	0	0	0	0	200	300	0	0	0	0	0	0	0	200	903	0	0	0	0	0	0	0	603	903	0
590	3	0	0	0	0	0	0	200	300	0	0	0	0	0	0	0	200	903	0	0	0	0	0	0	0	603	903	0
590	4	0	0	0	0	0	0	200	300	0	0	0	0	0	0	0	200	903	0	0	0	0	0	0	0	603	903	0
590	5	0	0	0	0	0	0	200	300	0	0	0	0	0	0	0	200	903	0	0	0	0	0	0	0	603	903	0
590	6	0	0	0	0	0	0	200	300	0	0	0	0	0	0	0	200	903	0	0	0	0	0	0	0	603	903	0
590	7	0	0	0	0	0	0	200	300	0	0	0	0	0	0	0	200	903	0	0	0	0	0	0	0	603	903	0
590	8	0	0	0	0	0	0	200	300	0	0	0	0	0	0	0	200	903	0	0	0	0	0	0	0	603	903	0
590	9	0	0	0	0	0	0	200	300	0	0	0	0	0	0	0	200	903	0	0	0	0	0	0	0	603	903	0
591	0	0	0	0	0	0	0	200	300	0	0	0	0	0	0	0	200	903	0	0	0	0	0	0	0	603	903	0
591	1	0	0	0	0	0	0	200	300	0	0	0	0	0	0	0	200	903	0	0	0	0	0	0	0	603	903	0
591	2	0	0	0	0	0	0	200	300	0	0	0	0	0	0	0	200	903	0	0	0	0	0	0	0	603	903	0
591	3	0	0	0	0	0	0	200	300	0	0	0	0	0	0	0	200	903	0	0	0	0	0	0	0	603	903	0
591	4	0	0	0	0	0	0	200	300	0	0	0	0	0	0	0	200	903	0	0	0	0	0	0	0	603	903	0
591	5	0	0	0	0	0	0	200	300	0	0	0	0	0	0	0	200	903	0	0	0	0	0	0	0	603	903	0
591	6	0	0	0	0	0	0	200	300	0	0	0	0	0	0	0	200	903	0	0	0	0	0	0	0	603	903	0
591	7	0	0	0	0	0	0	200	300	0	0	0	0	0	0	0	200	903	0	0	0	0	0	0	0	603	903	0
591	8	0	0	0	0	0	0	200	300	0	0	0	0	0	0	0	200	903	0	0	0	0	0	0	0	603	903	0
591	9	0	0	0	0	0	0	200	300	0	0	0	0	0	0	0	200	903	0	0	0	0	0	0	0	603	903	0
592	0	0	0	0	0	0	0	200	300	0	0	0	0	0	0	0	200	903	0	0	0	0	0	0	0	603	903	0
592	1	0	0	0	0	0	0	200	300	0	0	0	0	0	0	0	200	903	0	0	0	0	0	0	0	603	903	0
592	2	0	0	0	0	0	0	200	300	0	0	0	0	0	0	0	200	903	0	0	0	0	0	0	0	603	903	0
592	3	0	0	0	0	0	0	200	300	0	0	0	0	0	0	0	200	903	0	0	0	0	0	0	0	603	903	0
592	4	0	0	0	0	0	0	200	300	0	0	0	0	0	0	0	200	903	0	0	0	0	0	0	0	603	903	0
592	5	0	0	0	0	0	0	200	300	0	0	0	0	0	0	0	200	903	0	0	0	0	0	0	0	603	903	0
592	6	0	0	0	0	0	0	200	300	0	0	0	0	0	0	0	200	903	0	0	0	0	0	0	0	603	903	0
592	7	0	0	0	0	0	0	200	300	0	0	0	0	0	0	0	200	903	0	0	0	0	0	0	0	603	903	0
592	8	0	0	0	0	0	0	200	300	0	0	0	0	0	0	0	200	903	0	0	0	0	0	0	0	603	903	0
592	9	0	0	0	0	0	0	200	300	0	0	0	0	0	0	0	200	903	0	0	0	0	0	0	0	603	903	0
593	0	0	0	0	0	0	0	200	300	0	0	0	0	0	0	0	200	903	0	0	0	0	0	0	0	603	903	0
593	1	0	0	0	0	0	0	200	300	0	0	0	0	0	0	0	200	903	0	0	0	0	0	0	0	603	903	0
593	2	0	0	0	0	0	0	200	300	0	0	0	0	0	0	0	200	903	0	0	0	0	0	0	0	603	903	0
593	3	0	0	0	0	0	0	200	300	0	0	0	0	0	0	0	200	903	0	0	0	0	0	0	0	603	903	0
593	4	0	0	0	0	0	0	200	300	0	0	0	0	0	0	0	200	903	0	0	0	0	0	0	0	603	903	0
593	5	0	0	0	0	0	0	200	300	0	0	0	0	0	0	0	200	903	0	0	0	0	0	0	0	603	903	0
593	6	0	0	0	0	0	0	200	300	0	0	0	0	0	0	0	200	903	0	0	0	0	0	0	0	603	903	0
593	7	0	0	0	0	0	0	200	300	0	0	0	0	0	0	0	200	903	0	0	0	0	0	0	0	603	903	0
593	8	0	0	0	0	0	0	200	300	0	0	0	0	0	0	0	200	903	0	0	0	0	0	0	0	603	903	0
593	9	0	0	0	0	0	0	200	300	0	0	0	0	0	0	0	200	903	0	0	0	0	0	0	0	603	903	0
594	0	0	0	0	0	0	0	200	300	0	0	0	0	0	0	0	200	903	0	0	0	0	0	0	0	603	903	0
594	1	0	0	0	0	0	0	200	300	0	0	0	0	0	0	0	200	903	0	0	0	0	0	0	0	603	903	0
594	2	0	0	0	0	0	0	200	300	0	0	0	0	0	0	0	200	903	0	0	0	0	0	0	0	603	903	0
594	3	0	0	0	0	0	0	200	300	0	0	0	0	0	0	0	200	903	0	0	0	0	0	0	0	603	903	0
594	4	0	0	0	0	0	0	200	300	0	0	0	0	0	0	0	200	903	0	0	0	0	0	0	0	603	903	0
594	5	0	0	0	0	0	0	200	300	0	0	0	0	0	0	0	200	903	0	0	0	0	0	0	0	603	903	0
594	6	0	0	0	0	0	0	200	300	0	0	0	0	0	0	0	200	903	0	0	0	0	0	0	0	603	903	0
594	7	0	0	0	0	0	0	200	300	0	0	0	0	0	0	0	200	903	0	0	0	0	0	0	0	603	903	0
594	8	0	0	0	0	0	0	200	300	0	0	0	0	0	0	0	200	903	0	0	0	0	0	0	0	603	903	0
594	9	0	0	0	0	0	0	200	300	0	0	0	0	0	0	0	200	903	0	0	0	0	0	0	0	603	903	0
595	0	0	0	0	0	0	0	200	300	0	0	0	0	0	0	0	200	903	0	0	0	0	0	0	0	603	903	0
595	1	0	0	0	0	0	0	200	300	0	0	0	0	0	0	0	200	903	0	0	0	0	0	0	0	603	903	0
595	2	0	0	0	0	0	0	200	300	0	0	0	0	0	0	0	200	903	0	0	0	0	0	0	0	603	903	0
595	3	0	0	0	0	0	0	200	300	0	0	0	0	0	0	0	200	903	0	0	0	0	0	0	0	603	903	0
595	4	0	0	0	0	0	0	200	300	0	0	0	0	0	0	0	200	903	0	0	0	0	0	0	0	603	903	0
595	5	0	0	0	0	0	0	200	300	0	0	0	0	0	0	0	200	903	0	0	0	0	0	0	0	603	903	0
595	6	0	0	0	0	0	0	200	300	0	0	0	0	0	0	0	200	903	0	0	0	0	0	0	0	603	903	0
595	7	0	0	0	0	0	0	200	300	0	0	0	0	0	0	0	200	903	0	0	0	0	0	0	0	603	903	0
595	8	0	0	0	0	0	0	200	300	0	0	0	0	0	0	0	200	903	0	0	0	0	0	0	0	603	903	0
595	9	0	0	0	0	0	0	200	300	0	0	0	0	0	0	0	200	903	0	0	0	0	0	0	0	603	903	0
596	0	0	0	0	0	0	0	200	300	0	0	0	0	0	0	0	200	903	0	0	0	0	0	0	0	603	903	0
596	1	0	0	0	0	0	0	200	300	0	0	0	0	0	0	0	200	903	0	0	0	0	0	0	0	603	903	0
596	2	0	0	0	0	0	0	200	300	0	0	0	0	0	0	0	200	903	0	0	0	0	0	0	0	603	903	0
596	3	0	0	0	0	0	0	200	300	0	0	0	0	0	0	0	200	903	0	0	0	0	0	0	0	603	903	0
596	4	0	0	0	0	0	0	200	300	0	0	0	0	0	0	0	200	903	0	0	0	0	0	0	0	603	903	0
596	5	0	0	0	0	0	0	200	300	0	0	0	0	0	0	0	200	903	0	0	0	0	0	0	0	603	903	0
596	6	0	0	0	0	0	0	200	300	0	0	0	0	0	0	0	200	903	0	0	0	0	0	0	0	603	903	0
596	7	0	0	0	0	0	0	200	300	0	0	0	0	0	0	0	200	903	0	0	0	0	0	0	0	603	903	0
596	8	0	0	0	0	0	0	200	300	0	0	0	0	0	0	0	200	903	0	0	0	0	0	0	0	603	903	0
596	9	0	0	0	0	0	0	200	300	0	0	0	0	0	0	0	200	903	0	0	0	0	0	0	0	603	903	0
597	0	0	0	0	0	0	0	200	300	0	0	0	0	0	0	0	200	903	0	0	0	0	0	0	0	603	903	0
597	1	0	0	0	0	0	0	200	300	0	0	0	0	0	0	0	200	903	0	0	0	0	0	0	0	603	903	0
597	2	0	0	0	0	0	0	200	300	0	0	0	0	0	0	0	200	903	0	0	0	0	0	0	0	603	903	0
597	3	0	0	0	0	0	0	200	300	0	0	0	0	0	0	0	200	903	0	0	0	0	0	0	0	603	903	0
597	4	0	0	0	0	0	0	200	300	0	0	0	0	0	0	0	200	903	0	0	0	0	0	0	0	603	903	0
597	5	0	0	0	0	0	0	200	300	0	0	0	0	0	0	0	200	903	0	0	0	0	0	0	0	603	903	0
597	6	0	0	0	0	0	0	200	300	0	0	0	0	0	0	0	200	903	0	0	0	0	0	0	0	603	903	0
597	7	0	0	0	0	0	0	200	300	0	0	0	0	0	0	0	200	903	0	0	0	0	0	0	0	603	903	0
597	8	0	0	0	0	0	0	200	300	0	0	0	0	0	0	0	200	903	0	0	0	0	0	0	0	603	903	0
597	9	0	0	0	0	0	0	200	300	0	0	0	0	0	0	0	200	903	0	0	0	0	0	0	0	603	903	0
598	0	0	0	0	0	0	0	200	300	0	0	0	0	0	0	0	200	903	0	0	0	0	0	0	0	603	903	0
598	1	0	0	0	0	0	0	200	300	0	0	0	0	0	0	0	200	903	0	0	0	0	0	0	0	603	903	0
598	2	0	0	0	0	0	0	200	300	0	0	0	0	0	0	0	200	903	0	0	0	0	0	0	0	603	903	0
598	3	0	0	0	0	0	0	200	300	0	0	0	0	0	0	0	200	903	0	0	0	0	0	0	0	603	903	0
598	4	0	0	0	0	0	0	200	300	0	0	0	0	0	0	0	200	903	0	0	0	0	0	0	0	603	903	0
598	5	0	0	0	0	0	0	200	300	0	0	0	0	0	0	0	200	903	0	0	0	0	0	0	0	603	903	0
598	6	0	0	0	0	0	0	200	300	0	0	0	0	0	0	0	200	903	0	0	0	0	0	0	0	603	903	0
598	7	0	0	0	0	0	0	200	300	0	0	0	0	0	0	0	200	903	0	0	0	0	0	0	0	603	903	0
598	8	0	0	0	0	0	0	200	300	0	0	0	0	0	0	0	200	903	0	0	0	0	0	0	0	603	903	0
598	9	0	0	0	0	0	0	200	300	0	0	0	0	0	0	0	200	903	0	0	0	0	0	0	0	603	903	0
599	0	0	0	0	0	0	0	200	300	0	0	0	0	0	0	0	200	903	0	0	0	0	0	0	0	603	903	0
599	1	0	0	0	0	0	0	200	300	0	0	0	0	0	0	0	200	903	0	0	0	0	0	0	0	603	903	0
599	2	0	0	0	0	0	0	200	300	0	0	0	0	0	0	0	200	903	0	0	0	0	0	0	0	603	903	0
599	3	0	0	0	0	0	0	200	300	0	0	0	0	0	0	0	200	903	0	0	0	0	0	0	0	603	903	0
599	4	0	0	0	0	0	0	200	300	0	0	0	0	0	0	0	200	903	0	0	0	0	0	0	0	603	903	0
599	5	0	0	0	0	0	0	200	300	0	0	0	0	0	0	0	200	903	0	0	0	0	0	0	0	603	903	0
599	6	0	0	0	0	0	0	200	300	0	0	0	0	0	0	0	200	903	0	0	0	0	0	0	0	603	903	0
599	7	0	0	0	0	0	0	200	300	0	0	0	0	0	0	0	200	903	0	0	0	0	0	0	0	603	903	0
599	8	0	0	0	0	0	0	200	300	0	0	0	0	0	0	0	200	903	0	0	0	0	0	0	0	603	903	0
599	9	0	0	0	0	0	0	200	300	0	0	0	0	0	0	0	200	903	0	0	0	0	0	0	0	603	903	0
600	0	0	0	0	0	0	0	200	300	0	0	0	0	0	0	0	200	903	0	0	0	0	0	0	0	603	903	0
600	1	0	0	0	0	0	0	200	300	0	0	0	0	0	0	0	200	903	0	0	0	0	0	0	0	603	903	0
600	2	0	0	0	0	0	0	200	300	0	0	0	0	0	0	0	200	903	0	0	0	0	0	0	0	603	903	0
600	3	0	0	0	0	0	0	200	300	0	0	0	0	0	0	0	200	903	0	0	0	0	0	0	0	603	903	0
600	4	0	0	0	0	0	0	200	300	0	0	0	0	0	0	0	200	903	0	0	0	0	0	0	0	603	903	0
600	5	0	0	0	0	0	0	200	300	0	0	0	0	0	0	0	200	903	0	0	0	0	0	0	0	603	903	0
600	6	0	0	0	0	0	0	200	300	0	0	0	0	0	0	0	200	903	0	0	0	0	0	0	0	603	903	0
600	7	0	0	0	0	0	0	200	300	0	0	0	0	0	0	0	200	903	0	0	0	0	0	0	0	603	903	0
600	8	0	0	0	0	0	0	200	300	0	0	0	0	0	0	0	200	903	0	0	0	0	0	0	0	603	903	0
600	9	0	0	0	0	0	0	200	300	0	0	0	0	0	0	0	200	903	0	0	0	0	0	0	0	603	903	0
601	0	0	0	0	0	0	0	200	300	0	0	0	0	0	0	0	200	903	0	0	0	0	0	0	0	603	903	0
601	1	0	0	0	0	0	0	200	300	0	0	0	0	0	0	0	200	903	0	0	0	0	0	0	0	603	903	0
601	2	0	0	0	0	0	0	200	300	0	0	0	0	0	0	0	200	903	0	0	0	0	0	0	0	603	903	0
601	3	0	0	0	0	0	0	200	300	0	0	0	0	0	0	0	200	903	0	0	0	0	0	0	0	603	903	0
601	4	0	0	0	0	0	0	200	300	0	0	0	0	0	0	0	200	903	0	0	0	0	0	0	0	603	903	0
601	5	0	0	0	0	0	0	200	300	0	0	0	0	0	0	0	200	903	0	0	0	0	0	0	0	603	903	0
601	6	0	0	0	0	0	0	200	300	0	0	0	0	0	0	0	200	903	0	0	0	0	0	0	0	603	903	0
601	7	0	0	0	0	0	0	200	300	0	0	0	0	0	0	0	200	903	0	0	0	0	0	0	0	603	903	0
601	8	0	0	0	0	0	0	200	300	0	0	0	0	0	0	0	200	903	0	0	0	0	0	0	0	603	903	0
601	9	0	0	0	0	0	0	200	300	0	0	0	0	0	0	0	200	903	0	0	0	0	0	0	0	603	903	0
602	0	0	0	0	0	0	0	200	300	0	0	0	0	0	0	0	200	903	0	0	0	0	0	0	0	603	903	0
602	1	0	0	0	0	0	0	200	300	0	0	0	0	0	0	0	200	903	0	0	0	0	0	0	0	603	903	0
602	2	0	0	0	0	0	0	200	300	0	0	0	0	0	0	0	200	903	0	0	0	0	0	0	0	603	903	0
602	3	0	0	0	0	0	0	200	300	0	0	0	0	0	0	0	200	903	0	0	0	0	0	0	0	603	903	0
602	4	0	0	0	0	0	0	200	300	0	0	0	0	0	0	0	200	903	0	0	0	0	0	0	0	603	903	0
602	5	0	0	0	0	0	0	200	300	0	0	0	0	0	0	0	200	903	0	0	0	0	0	0	0	603	903	0
602	6	0	0	0	0	0	0	200	300	0	0	0	0	0	0	0	200	903	0	0	0	0	0	0	0	603	903	0
602	7	0	0	0	0	0	0	200	300	0	0	0	0	0	0	0	200	903	0	0	0	0	0	0	0	603	903	0
602	8	0	0	0	0	0	0	200	300	0	0	0	0	0	0	0	200	903	0	0	0	0	0	0	0	603	903	0
602	9	0	0	0	0	0	0	200	300	0	0	0	0	0	0	0	200	903	0	0	0	0	0	0	0	603	903	0
603	0	0	0	0	0	0	0	200	300	0	0	0	0	0	0	0	200	903	0	0	0	0	0	0	0	603	903	0
603	1	0	0	0	0	0	0	200	300	0	0	0	0	0	0	0	200	903	0	0	0	0	0	0	0	603	903	0
603	2	0	0	0	0	0	0	200	300	0	0	0	0	0	0	0	200	903	0	0	0	0	0	0	0	603	903	0
603	3	0	0	0	0	0	0	200	300	0	0	0	0	0	0	0	200	903	0	0	0	0	0	0	0	603	903	0
603	4	0	0	0	0	0	0	200	300	0	0	0	0	0	0	0	200	903	0	0	0	0	0	0	0	603	903	0
603	5	0	0	0	0	0	0	200	300	0	0	0	0	0	0	0	200	903	0	0	0	0	0	0	0	603	903	0
603	6	0	0	0	0	0	0	200	300	0	0	0	0	0	0	0	200	903	0	0	0	0	0	0	0	603	903	0
603	7	0	0	0	0	0	0	200	300	0	0	0	0	0	0	0	200	903	0	0	0	0	0	0	0	603	903	0
603	8	0	0	0	0	0	0	200	300	0	0	0	0	0	0	0	200	903	0	0	0	0	0	0	0	603	903	0
603	9	0	0	0	0	0	0	200	300	0	0	0	0	0	0	0	200	903	0	0	0	0	0	0	0	603	903	0
604	0	0	0	0	0	0	0	200	300	0	0	0	0	0	0	0	200	903	0	0	0	0	0	0	0	603	903	0
604	1	0	0	0	0	0	0	200	300	0	0	0	0	0	0	0	200	903	0	0	0	0	0	0	0	603	903	0
604	2	0	0	0	0	0	0	200	300	0	0	0	0	0	0	0	200	903	0	0	0	0	0	0	0	603	903	0
604	3	0	0	0	0	0	0	200	300	0	0	0	0	0	0	0	200	903	0	0	0	0	0	0	0	603	903	0
604	4	0	0	0	0	0	0	200	300	0	0	0	0	0	0	0	200	903	0	0	0	0	0	0	0	603	903	0
604	5	0	0	0	0	0	0	200	300	0	0	0	0	0	0	0	200	903	0	0	0	0	0	0	0	603	903	0
604	6	0	0	0	0	0	0	200	300	0	0	0	0	0	0	0	200	903	0	0	0	0	0	0	0	603	903	0
604	7	0	0	0	0	0	0	200	300	0	0	0	0	0	0	0	200	903	0	0	0	0	0	0	0	603	903	0
604	8	0	0	0	0	0	0	200	300	0	0	0	0	0	0	0	200	903	0	0	0	0	0	0	0	603	903	0
604	9	0	0	0	0	0	0	200	300	0	0	0	0	0	0	0	200	903	0	0	0	0	0	0	0	603	903	0
605	0	0	0	0	0	0	0	200	300	0	0	0	0	0	0	0	200	903	0	0	0	0	0	0	0	603	903	0
605	1	0	0	0	0	0	0	200	300	0	0	0	0	0	0	0	200	903	0	0	0	0	0	0	0	603	903	0
605	2	0	0	0	0	0	0	200	300	0	0	0	0	0	0	0	200	903	0	0	0	0	0	0	0	603	903	0
605	3	0	0	0	0	0	0	200	300	0	0	0	0	0	0	0	200	903	0	0	0	0	0	0	0	603	903	0
605	4	0	0	0	0	0	0	200	300	0	0	0	0	0	0	0	200	903	0	0	0	0	0	0	0	603	903	0
605	5	0	0	0	0	0	0	200	300	0	0	0	0	0	0	0	200	903	0	0	0	0	0	0	0	603	903	0
605	6	0	0	0	0	0	0	200	300	0	0	0	0	0	0	0	200	903	0	0	0	0	0	0	0	603	903	0
605	7	0	0	0	0	0	0	200	300	0	0	0	0	0	0	0	200	903	0	0	0	0	0	0	0	603	903	0
605	8	0	0	0	0	0	0	200	300	0	0	0	0	0	0	0	200	903	0	0	0	0	0	0	0	603	903	0
605	9	0	0	0	0	0	0	200	300	0	0	0	0	0	0	0	200	903	0	0	0	0	0	0	0	603	903	0
606	0	0	0	0	0	0	0	200	300	0	0	0	0	0	0	0	200	903	0	0	0	0	0	0	0	603	903	0
606	1	0	0	0	0	0	0	200	300	0	0	0	0	0	0	0	200	903	0	0	0	0	0	0	0	603	903	0
606	2	0	0	0	0	0	0	200	300	0	0	0	0	0	0	0	200	903	0	0	0	0	0	0	0	603	903	0
606	3	0	0	0	0	0	0	200	300	0	0	0	0	0	0	0	200	903	0	0	0	0	0	0	0	603	903	0
606	4	0	0	0	0	0	0	200	300	0	0	0	0	0	0	0	200	903	0	0	0	0	0	0	0	603	903	0
606	5	0	0	0	0	0	0	200	300	0	0	0	0	0	0	0	200	903	0	0	0	0	0	0	0	603	903	0
606	6	0	0	0	0	0	0	200	300	0	0	0	0	0	0	0	200	903	0	0	0	0	0	0	0	603	903	0
606	7	0	0	0	0	0	0	200	300	0	0	0	0	0	0	0	200	903	0	0	0	0	0	0	0	603	903	0
606	8	0	0	0	0	0	0	200	300	0	0	0	0	0	0	0	200	903	0	0	0	0	0	0	0	603	903	0
606	9	0	0	0	0	0	0	200	300	0	0	0	0	0	0	0	200	903	0	0	0	0	0	0	0	603	903	0
607	0	0	0	0	0	0	0	200	300	0	0	0	0	0	0	0	200	903	0	0	0	0	0	0	0	603	903	0
607	1	0	0	0	0	0	0	200	300	0	0	0	0	0	0	0	200	903	0	0	0	0	0	0	0	603	903	0
607	2	0	0	0	0	0	0	200	300	0	0	0	0	0	0	0	200	903	0	0	0	0	0	0	0	603	903	0
607	3	0	0	0	0	0	0	200	300	0	0	0	0	0	0	0	200	903	0	0	0	0	0	0	0	603	903	0
607	4	0	0	0	0	0	0	200	300	0	0	0	0	0	0	0	200	903	0	0	0	0	0	0	0	603	903	0
607	5	0	0	0	0	0	0	200	300	0	0	0	0	0	0	0	200	903	0	0	0	0	0	0	0	603	903	0
607	6	0	0	0	0	0	0	200	300	0	0	0	0	0	0	0	200	903	0	0	0	0	0	0	0	603	903	0
607	7	0	0	0	0	0	0	200	300	0	0	0	0	0	0	0	200	903	0	0	0	0	0	0	0	603	903	0
607	8	0	0	0	0	0	0	200	300	0	0	0	0	0	0	0	200	903	0	0	0	0	0	0	0	603	903	0
607	9	0	0	0	0	0	0	200	300	0	0	0	0	0	0	0	200	903	0	0	0	0	0	0	0	603	903	0
608	0	0	0	0	0	0	0	200	300	0	0	0	0	0	0	0	200	903	0	0	0	0	0	0	0	603	903	0
608	1	0	0	0	0	0	0	200	300	0	0	0	0	0	0	0	200	903	0	0	0	0	0	0	0	603	903	0
608	2	0	0	0	0	0	0	200	300	0	0	0	0	0	0	0	200	903	0	0	0	0	0	0	0	603	903	0
608	3	0	0	0	0	0	0	200	300	0	0	0	0	0	0	0	200	903	0	0	0	0	0	0	0	603	903	0
608	4	0	0	0	0	0	0	200	300	0	0	0	0	0	0	0	200	903	0	0	0	0	0	0	0	603	903	0
608	5	0	0	0	0	0	0	200	300	0	0	0	0	0	0	0	200	903	0	0	0	0	0	0	0	603	903	0
608	6	0	0	0	0	0	0	200	300	0	0	0	0	0	0	0	200	903	0	0	0	0	0	0	0	603	903	0
608	7	0	0	0	0	0	0	200	300	0	0	0	0	0	0	0	200	903	0	0	0	0	0	0	0	603	903	0
608	8	0	0	0	0	0	0	200	300	0	0	0	0	0	0	0	200	903	0	0	0	0	0	0	0	603	903	0
608	9	0	0	0	0	0	0	200	300	0	0	0	0	0	0	0	200	903	0	0	0	0	0	0	0	603	903	0
609	0	0	0	0	0	0	0	200	300	0	0	0	0	0	0	0	200	903	0	0	0	0	0	0	0	603	903	0
609	1	0	0	0	0	0	0	200	300	0	0	0	0	0	0	0	200	903	0	0	0	0	0	0	0	603	903	0
609	2	0	0	0	0	0	0	200	300	0	0	0	0	0	0	0	200	903	0	0	0	0	0	0	0	603	903	0
609	3	0	0	0	0	0	0	200	300	0	0	0	0	0	0	0	200	903	0	0	0	0	0	0	0	603	903	0
609	4	0	0	0	0	0	0	200	300	0	0	0	0	0	0	0	200	903	0	0	0	0	0	0	0	603	903	0
609	5	0	0	0	0	0	0	200	300	0	0	0	0	0	0	0	200	903	0	0	0	0	0	0	0	603	903	0
609	6	0	0	0	0	0	0	200	300	0	0	0	0	0	0	0	200	903	0	0	0	0	0	0	0	603	903	0
609	7	0	0	0	0	0	0	200	300	0	0	0	0	0	0	0	200	903	0	0	0	0	0	0	0	603	903	0
609	8	0	0	0	0	0	0	200	300	0	0	0	0	0	0	0	200	903	0	0	0	0	0	0	0	603	903	0
609	9	0	0	0	0	0	0	200	300	0	0	0	0	0	0	0	200	903	0	0	0	0	0	0	0	603	903	0
610	0	0	0	0	0	0	0	200	300	0	0	0	0	0	0	0	200	903	0	0	0	0	0	0	0	603	903	0
610	1	0	0	0	0	0	0	200	300	0	0	0	0	0	0	0	200	903	0	0	0	0	0	0	0	603	903	0
610	2	0	0	0	0	0	0	200	300	0	0	0	0	0	0	0	200	903	0	0	0	0	0	0	0	603	903	0
610	3	0	0	0	0	0	0	200	300	0	0	0	0	0	0	0	200	903	0	0	0	0	0	0	0	603	903	0
610	4	0	0	0	0	0	0	200	300	0	0	0	0	0	0	0	200	903	0	0	0	0	0	0	0	603	903	0
610	5	0	0	0	0	0	0	200	300	0	0	0	0	0	0	0	200	903	0	0	0	0	0	0	0	603	903	0
610	6	0	0	0	0	0	0	200	300	0	0	0	0	0	0	0	200	903	0	0	0	0	0	0	0	603	903	0
610	7	0	0	0	0	0	0	200	300	0	0	0	0	0	0	0	200	903	0	0	0	0	0	0	0	603	903	0
610	8	0	0	0	0	0	0	200	300	0	0	0	0	0	0	0	200	903	0	0	0	0	0	0	0	603	903	0
610	9	0	0	0	0	0	0	200	300	0	0	0	0	0	0	0	200	903	0	0	0	0	0	0	0	603	903	0
611	0	0	0	0	0	0	0	200	300	0	0	0	0	0	0	0	200	903	0	0	0	0	0	0	0	603	903	0
611	1	0	0	0	0	0	0	200	300	0	0	0	0	0	0	0	200	903	0	0	0	0	0	0	0	603	903	0
611	2	0	0	0	0	0	0	200	300	0	0	0	0	0	0	0	200	903	0	0	0	0	0	0	0	603	903	0
611	3	0	0	0	0	0	0	200	300	0	0	0	0	0	0	0	200	903	0	0	0	0	0	0	0	603	903	0
611	4	0	0	0	0	0	0	200	300	0	0	0	0	0	0	0	200	903	0	0	0	0	0	0	0	603	903	0
611	5	0	0	0	0	0	0	200	300	0	0	0	0	0	0	0	200	903	0	0	0	0	0	0	0	603	903	0
611	6	0	0	0	0	0	0	200	300	0	0	0	0	0	0	0	200	903	0	0	0	0	0	0	0	603	903	0
611	7	0	0	0	0	0	0	200	300	0	0	0	0	0	0	0	200	903	0	0	0	0	0	0	0	603	903	0
611	8	0	0	0	0	0	0	200	300	0	0	0	0	0	0	0	200	903	0	0	0	0	0	0	0	603	903	0
611	9	0	0	0	0	0	0	200	300	0	0	0	0	0	0	0	200	903	0	0	0	0	0	0	0	603	903	0
612	0	0	0	0	0	0	0	200	300	0	0	0	0	0	0	0	200	903	0	0	0	0	0	0	0	603	903	0
612	1	0	0	0	0	0	0	200	300	0	0	0	0	0	0	0	200	903	0	0	0	0	0	0	0	603	903	0
612	2	0	0	0	0	0	0	200	300	0	0	0	0	0	0	0	200	903	0	0	0	0	0	0	0	603	903	0
612	3	0	0	0	0	0	0	200	300	0	0	0	0	0	0	0	200	903	0	0	0	0	0	0	0	603	903	0
612	4	0	0	0	0	0	0	200	300	0	0	0	0	0	0	0	200	903	0	0	0	0	0	0	0	603	903	0
612	5	0	0	0	0	0	0	200	300	0	0	0	0	0	0	0	200	903	0	0	0	0	0	0	0	603	903	0
612	6	0	0	0	0	0	0	200	300	0	0	0	0	0	0	0	200	903	0	0	0	0	0	0	0	603	903	0
612	7	0	0	0	0	0	0	200	300	0	0	0	0	0	0	0	200	903	0	0	0	0	0	0	0	603	903	0
612	8	0	0	0	0	0	0	200	300	0	0	0	0	0	0	0	200	903	0	0	0	0	0	0	0	603	903	0
612	9	0	0	0	0	0	0	200	300	0	0	0	0	0	0	0	200	903	0	0	0	0	0	0	0	603	903	0
613	0	0	0	0	0	0	0	200	300	0	0	0	0	0	0	0	200	903	0	0	0	0	0	0	0	603	903	0
613	1	0	0	0	0	0	0	200	300	0	0	0	0	0	0	0	200	903	0	0	0	0	0	0	0	603	903	0
613	2	0	0	0	0	0	0	200	300	0	0	0	0	0	0	0	200	903	0	0	0	0	0	0	0	603	903	0
613	3	0	0	0	0	0	0	200	300	0	0	0	0	0	0	0	200	903	0	0	0	0	0	0	0	603	903	0
613	4	0	0	0	0	0	0	200	300	0	0	0	0	0	0	0	200	903	0	0	0	0	0	0	0	603	903	0
613	5	0	0	0	0	0	0	200	300	0	0	0	0	0	0	0	200	903	0	0	0	0	0	0	0	603	903	0
613	6	0	0	0	0	0	0	200	300	0	0	0	0	0	0	0	200	903	0	0	0	0	0	0	0	603	903	0
613	7	0	0	0	0	0	0	200	300	0	0	0	0	0	0	0	200	903	0	0	0	0	0	0	0	603	903	0
613	8	0	0	0	0	0	0	200	300	0	0	0	0	0	0	0	200	903	0	0	0	0	0	0	0	603	903	0
613	9	0	0	0	0	0	0	200	300	0	0	0	0	0	0	0	200	903	0	0	0	0	0	0	0	603	903	0
614	0	0	0	0	0	0	0	200	300	0	0	0	0	0	0	0	200	903	0	0	0	0	0	0	0	603	903	0
614	1	0	0	0	0	0	0	200	300	0	0	0	0	0	0	0	200	903	0	0	0	0	0	0	0	603	903	0
614	2	0	0	0	0	0	0	200	300	0	0	0	0	0	0	0	200	903	0	0	0	0	0	0	0	603	903	0
614	3	0	0	0	0	0	0	200	300	0	0	0	0	0	0	0	200	903	0	0	0	0	0	0	0	603	903	0
614	4	0	0	0	0	0	0	200	300	0	0	0	0	0	0	0	200	903	0	0	0	0	0	0	0	603	903	0
614	5	0	0	0	0	0	0	200	300	0	0	0	0	0	0	0	200	903	0	0	0	0	0	0	0	603	903	0
614	6	0	0	0	0	0	0	200	300	0	0	0	0	0	0	0	200	903	0	0	0	0	0	0	0	603	903	0
614	7	0	0	0	0	0	0	200	300	0	0	0	0	0	0	0	200	903	0	0	0	0	0	0	0	603	903	0
614	8	0	0	0	0	0	0	200	300	0	0	0	0	0	0	0	200	903	0	0	0	0	0	0	0	603	903	0
614	9	0	0	0	0	0	0	200	300	0	0	0	0	0	0	0	200	903	0	0	0	0	0	0	0	603	903	0
615	0	0	0	0	0	0	0	200	300	0	0	0	0	0	0	0	200	903	0	0	0	0	0	0	0	603	903	0
615	1	0	0	0	0	0	0	200	300	0	0	0	0	0	0	0	200	903	0	0	0	0	0	0	0	603	903	0
615	2	0	0	0	0	0	0	200	300	0	0	0	0	0	0	0	200	903	0	0	0	0	0	0	0	603	903	0
615	3	0	0	0	0	0	0	200	300	0	0	0	0	0	0	0	200	903	0	0	0	0	0	0	0	603	903	0
615	4	0	0	0	0	0	0	200	300	0	0	0	0	0	0	0	200	903	0	0	0	0	0	0	0	603	903	0
615	5	0	0	0	0	0	0	200	300	0	0	0	0	0	0	0	200	903	0	0	0	0	0	0	0	603	903	0
615	6	0	0	0	0	0	0	200	300	0	0	0	0	0	0	0	200	903	0	0	0	0	0	0	0	603	903	0
615	7	0	0	0	0	0	0	200	300	0	0	0	0	0	0	0	200	903	0	0	0	0	0	0	0	603	903	0
615	8	0	0	0	0	0	0	200	300	0	0	0	0	0	0	0	200	903	0	0	0	0	0	0	0	603	903	0
615	9	0	0	0	0	0	0	200	300	0	0	0	0	0	0	0	200	903	0	0	0	0	0	0	0	603	903	0
616	0	0	0	0	0	0	0	200	300	0	0	0	0	0	0	0	200	903	0	0	0	0	0	0	0	603	903	0
616	1	0	0	0	0	0	0	200	300	0	0	0	0	0	0	0	200	903	0	0	0	0	0	0	0	603	903	0
616	2	0	0	0	0	0	0	200	300	0	0	0	0	0	0	0	200	903	0	0	0	0	0	0	0	603	903	0
616	3	0	0	0	0	0	0	200	300	0	0	0	0	0	0	0	200	903	0	0	0	0	0	0	0	603	903	0
616	4	0	0	0	0	0	0	200	300	0	0	0	0	0	0	0	200	903	0	0	0	0	0	0	0	603	903	0
616	5	0	0	0	0	0	0	200	300	0	0	0	0	0	0	0	200	903	0	0	0	0	0	0	0	603	903	0
616	6	0	0	0	0	0	0	200	300	0	0	0	0	0	0	0	200	903	0	0	0	0	0	0	0	603	903	0
616	7	0	0	0	0	0	0	200	300	0	0	0	0	0	0	0	200	903	0	0	0	0	0	0	0	603	903	0
616	8	0	0	0	0	0	0	200	300	0	0	0	0	0	0	0	200	903	0	0	0	0	0	0	0	603	903	0
616	9	0	0	0	0	0	0	200	300	0	0	0	0	0	0	0	200	903	0	0	0	0	0	0	0	603	903	0
617	0	0	0	0	0	0	0	200	300	0	0	0	0	0	0	0	200	903	0	0	0	0	0	0	0	603	903	0
617	1	0	0	0	0	0	0	200	300	0	0	0	0	0	0	0	200	903	0	0	0	0	0	0	0	603	903	0
617	2	0	0	0	0	0	0	200	300	0	0	0	0	0	0	0	200	903	0	0	0	0	0	0	0	603	903	0
617	3	0	0	0	0	0	0	200	300	0	0	0	0	0	0	0	200	903	0	0	0	0	0	0	0	603	903	0
617	4	0	0	0	0	0	0	200	300	0	0	0	0	0	0	0	200	903	0	0	0	0	0	0	0	603	903	0
617	5	0	0	0	0	0	0	200	300	0	0	0	0	0	0	0	200	903	0	0	0	0	0	0	0	603	903	0
617	6	0	0	0	0	0	0	200	300	0	0	0	0	0	0	0	200	903	0	0	0	0	0	0	0	603	903	0
617	7	0	0	0	0	0	0	200	300	0	0	0	0	0	0	0	200	903	0	0	0	0	0	0	0	603	903	0
617	8	0	0	0	0	0	0	200	300	0	0	0	0	0	0	0	200	903	0	0	0	0	0	0	0	603	903	0
617	9	0	0	0	0	0	0	200	300	0	0	0	0	0	0	0	200	903	0	0	0	0	0	0	0	603	903	0
618	0	0	0	0	0	0	0	200	300	0	0	0	0	0	0	0	200	903	0	0	0	0	0	0	0	603	903	0
618	1	0	0	0	0	0	0	200	300	0	0	0	0	0	0	0	200	903	0	0	0	0	0	0	0	603	903	0
618	2	0	0	0	0	0	0	200	300	0	0	0	0	0	0	0	200	903	0	0	0	0	0	0	0	603	903	0
618	3	0	0	0	0	0	0	200	300	0	0	0	0	0	0	0	200	903	0	0	0	0	0	0	0	603	903	0
618	4	0	0	0	0	0	0	200	300	0	0	0	0	0	0	0	200	903	0	0	0	0	0	0	0	603	903	0
618	5	0	0	0	0	0	0	200	300	0	0	0	0	0	0	0	200	903	0	0	0	0	0	0	0	603	903	0
618	6	0	0	0	0	0	0	200	300	0	0	0	0	0	0	0	200	903	0	0	0	0	0	0	0	603	903	0
618	7	0	0	0	0	0	0	200	300	0	0	0	0	0	0	0	200	903	0	0	0	0	0	0	0	603	903	0
618	8	0	0	0	0	0	0	200	300	0	0	0	0	0	0	0	200	903	0	0	0	0	0	0	0	603	903	0
618	9	0	0	0	0	0	0	200	300	0	0	0	0	0	0	0	200	903	0	0	0	0	0	0	0	603	903	0
619	0	0	0	0	0	0	0	200	300	0	0	0	0	0	0	0	200	903	0	0	0	0	0	0	0	603	903	0
619	1	0	0	0	0	0	0	200	300	0	0	0	0	0	0	0	200	903	0	0	0	0	0	0	0	603	903	0
619	2	0	0	0	0	0	0	200	300	0	0	0	0	0	0	0	200	903	0	0	0	0	0	0	0	603	903	0
619	3	0	0	0	0	0	0	200	300	0	0	0	0	0	0	0	200	903	0	0	0	0	0	0	0	603	903	0
619	4	0	0	0	0	0	0	200	300	0	0	0	0	0	0	0	200	903	0	0	0	0	0	0	0	603	903	0
619	5	0	0	0	0	0	0	200	300	0	0	0	0	0	0	0	200	903	0	0	0	0	0	0	0	603	903	0
619	6	0	0	0	0	0	0	200	300	0	0	0	0	0	0	0	200	903	0	0	0	0	0	0	0	603	903	0
619	7	0	0	0	0	0	0	200	300	0	0	0	0	0	0	0	200	903	0	0	0	0	0	0	0	603	903	0
619	8	0	0	0	0	0	0	200	300	0	0	0	0	0	0	0	200	903	0	0	0	0	0	0	0	603	903	0
619	9	0	0	0	0	0	0	200	300	0	0	0	0	0	0	0	200	903	0	0	0	0	0	0	0	603	903	0
620	0	0	0	0	0	0	0	200	300	0	0	0	0	0	0	0	200	903	0	0	0	0	0	0	0	603	903	0
620	1	0	0	0	0	0	0	200	300	0	0	0	0	0	0	0	200	903	0	0	0	0	0	0	0	603	903	0
620	2	0	0	0	0	0	0	200	300	0	0	0	0	0	0	0	200	903	0	0	0	0	0	0	0	603	903	0
620	3	0	0	0	0	0	0	200	300	0	0	0	0	0	0	0	200	903	0	0	0	0	0	0	0	603	903	0
620	4	0	0	0	0	0	0	200	300	0	0	0	0	0	0	0	200	903	0	0	0	0	0	0	0	603	903	0
620	5	0	0	0	0	0	0	200	300	0	0	0	0	0	0	0	200	903	0	0	0	0	0	0	0	603	903	0
620	6	0	0	0	0	0	0	200	300	0	0	0	0	0	0	0	200	903	0	0	0	0	0	0	0	603	903	0
620	7	0	0	0	0	0	0	200	300	0	0	0	0	0	0	0	200	903	0	0	0	0	0	0	0	603	903	0
620	8	0	0	0	0	0	0	200	300	0	0	0	0	0	0	0	200	903	0	0	0	0	0	0	0	603	903	0
620	9	0	0	0	0	0	0	200	300	0	0	0	0	0	0	0	200	903	0	0	0	0	0	0	0	603	903	0
621	0	0	0	0	0	0	0	200	300	0	0	0	0	0	0	0	200	903	0	0	0	0	0	0	0	603	903	0
621	1	0	0	0	0	0	0	200	300	0	0	0	0	0	0	0	200	903	0	0	0	0	0	0	0	603	903	0
621	2	0	0	0	0	0	0	200	300	0	0	0	0	0	0	0	200	903	0	0	0	0	0	0	0	603	903	0
621	3	0	0	0	0	0	0	200	300	0	0	0	0	0	0	0	200	903	0	0	0	0	0	0	0	603	903	0
621	4	0	0	0	0	0	0	200	300	0	0	0	0	0	0	0	200	903	0	0	0	0	0	0	0	603	903	0
621	5	0	0	0	0	0	0	200	300	0	0	0	0	0	0	0	200	903	0	0	0	0	0	0	0	603	903	0
621	6	0	0	0	0	0	0	200	300	0	0	0	0	0	0	0	200	903	0	0	0	0	0	0	0	603	903	0
621	7	0	0	0	0	0	0	200	300	0	0	0	0	0	0	0	200	903	0	0	0	0	0	0	0	603	903	0
621	8	0	0	0	0	0	0	200	300	0	0	0	0	0	0	0	200	903	0	0	0	0	0	0	0	603	903	0
621	9	0	0	0	0	0	0	200	300	0	0	0	0	0	0	0	200	903	0	0	0	0	0	0	0	603	903	0
622	0	0	0	0	0	0	0	200	300	0	0	0	0	0	0	0	200	903	0	0	0	0	0	0	0	603	903	0
622	1	0	0	0	0	0	0	200	300	0	0	0	0	0	0	0	200	903	0	0	0	0	0	0	0	603	903	0
622	2	0	0	0	0	0	0	200	300	0	0	0	0	0	0	0	200	903	0	0	0	0	0	0	0	603	903	0
622	3	0	0	0	0	0	0	200	300	0	0	0	0	0	0	0	200	903	0	0	0	0	0	0	0	603	903	0
622	4	0	0	0	0	0	0	200	300	0	0	0	0	0	0	0	200	903	0	0	0	0	0	0	0	603	903	0
622	5	0	0	0	0	0	0	200	300	0	0	0	0	0	0	0	200	903	0	0	0	0	0	0	0	603	903	0
622	6	0	0	0	0	0	0	200	300	0	0	0	0	0	0	0	200	903	0	0	0	0	0	0	0	603	903	0
622	7	0	0	0	0	0	0	200	300	0	0	0	0	0	0	0	200	903	0	0	0	0	0	0	0	603	903	0
622	8	0	0	0	0	0	0	200	300	0	0	0	0	0	0	0	200	903	0	0	0	0	0	0	0	603	903	0
622	9	0	0	0	0	0	0	200	300	0	0	0	0	0	0	0	200	903	0	0	0	0	0	0	0	603	903	0
623	0	0	0	0	0	0	0	200	300	0	0	0	0	0	0	0	200	903	0	0	0	0	0	0	0	603	903	0
623	1	0	0	0	0	0	0	200	300	0	0	0	0	0	0	0	200	903	0	0	0	0	0	0	0	603	903	0
623	2	0	0	0	0	0	0	200	300	0	0	0	0	0	0	0	200	903	0	0	0	0	0	0	0	603	903	0
623	3	0	0	0	0	0	0	200	300	0	0	0	0	0	0	0	200	903	0	0	0	0	0	0	0	603	903	0
623	4	0	0	0	0	0	0	200	300	0	0	0	0	0	0	0	200	903	0	0	0	0	0	0	0	603	903	0
623	5	0	0	0	0	0	0	200	300	0	0	0	0	0	0	0	200	903	0	0	0	0	0	0	0	603	903	0
623	6	0	0	0	0	0	0	200	300	0	0	0	0	0	0	0	200	903	0	0	0	0	0	0	0	603	903	0
623	7	0	0	0	0	0	0	200	300	0	0	0	0	0	0	0	200	903	0	0	0	0	0	0	0	603	903	0
623	8	0	0	0	0	0	0	200	300	0	0	0	0	0	0	0	200	903	0	0	0	0	0	0	0	603	903	0
623	9	0	0	0	0	0	0	200	300	0	0	0	0	0	0	0	200	903	0	0	0	0	0	0	0	603	903	0
624	0	0	0	0	0	0	0	200	300	0	0	0	0	0	0	0	200	903	0	0	0	0	0	0	0	603	903	0
624	1	0	0	0	0	0	0	200	300	0	0	0	0	0	0	0	200	903	0	0	0	0	0	0	0	603	903	0
624	2	0	0	0	0	0	0	200	300	0	0	0	0	0	0	0	200	903	0	0	0	0	0	0	0	603	903	0
624	3	0	0	0	0	0	0	200	300	0	0	0	0	0	0	0	200	903	0	0	0	0	0	0	0	603	903	0
624	4	0	0	0	0	0	0	200	300	0	0	0	0	0	0	0	200	903	0	0	0	0	0	0	0	603	903	0
624	5	0	0	0	0	0	0	200	300	0	0	0	0	0	0	0	200	903	0	0	0	0	0	0	0	603	903	0
624	6	0	0	0	0	0	0	200	300	0	0	0	0	0	0	0	200	903	0	0	0	0	0	0	0	603	903	0
624	7	0	0	0	0	0	0	200	300	0	0	0	0	0	0	0	200	903	0	0	0	0	0	0	0	603	903	0
624	8	0	0	0	0	0	0	200	300	0	0	0	0	0	0	0	200	903	0	0	0	0	0	0	0	603	903	0
624	9	0	0	0	0	0	0	200	300	0	0	0	0	0	0	0	200	903	0	0	0	0	0	0	0	603	903	0
625	0	0	0	0	0	0	0	200	300	0	0	0	0	0	0	0	200	903	0	0	0	0	0	0	0	603	903	0
625	1	0	0	0	0	0	0	200	300	0	0	0	0	0	0	0	200	903	0	0	0	0	0	0	0	603	903	0
625	2	0	0	0	0	0	0	200	300	0	0	0	0	0	0	0	200	903	0	0	0	0	0	0	0	603	903	0
625	3	0	0	0	0	0	0	200	300	0	0	0	0	0	0	0	200	903	0	0	0	0	0	0	0	603	903	0
625	4	0	0	0	0	0	0	200	300	0	0	0	0	0	0	0	200	903	0	0	0	0	0	0	0	603	903	0
625	5	0	0	0	0	0	0	200	300	0	0	0	0	0	0	0	200	903	0	0	0	0	0	0	0	603	903	0
625	6	0	0	0	0	0	0	200	300	0	0	0	0	0	0	0	200	903	0	0	0	0	0	0	0	603	903	0
625	7	0	0	0	0	0	0	200	300	0	0	0	0	0	0	0	200	903	0	0	0	0	0	0	0	603	903	0
625	8	0	0	0	0	0	0	200	300	0	0	0	0	0	0	0	200	903	0	0	0	0	0	0	0	603	903	0
625	9	0	0	0	0	0	0	200	300	0	0	0	0	0	0	0	200	903	0	0	0	0	0	0	0	603	903	0
626	0	0	0	0	0	0	0	200	300	0	0	0	0	0	0	0	200	903	0	0	0	0	0	0	0	603	903	0
626	1	0	0	0	0	0	0	200	300	0	0	0	0	0	0	0	200	903	0	0	0	0	0	0	0	603	903	0
626	2	0	0	0	0	0	0	200	300	0	0	0	0	0	0	0	200	903	0	0	0	0	0	0	0	603	903	0
626	3	0	0	0	0	0	0	200	300	0	0	0	0	0	0	0	200	903	0	0	0	0	0	0	0	603	903	0
626	4	0	0	0	0	0	0	200	300	0	0	0	0	0	0	0	200	903	0	0	0	0	0	0	0	603	903	0
626	5	0	0	0	0	0	0	200	300	0	0	0	0	0	0	0	200	903	0	0	0	0	0	0	0	603	903	0
626	6	0	0	0	0	0	0	200	300	0	0	0	0	0	0	0	200	903	0	0	0	0	0	0	0	603	903	0
626	7	0	0	0	0	0	0	200	300	0	0	0	0	0	0	0	200	903	0	0	0	0	0	0	0	603	903	0
626	8	0	0	0	0	0	0	200	300	0	0	0	0	0	0	0	200	903	0	0	0	0	0	0	0	603	903	0
626	9	0	0	0	0	0	0	200	300	0	0	0	0	0	0	0	200	903	0	0	0	0	0	0	0	603	903	0
627	0	0	0	0	0	0	0	200	300	0	0	0	0	0	0	0	200	903	0	0	0	0	0	0	0	603	903	0
627	1	0	0	0	0	0	0	200	300	0	0	0	0	0	0	0	200	903	0	0	0	0	0	0	0	603	903	0
627	2	0	0	0	0	0	0	200	300	0	0	0	0	0	0	0	200	903	0	0	0	0	0	0	0	603	903	0
627	3	0	0	0	0	0	0	200	300	0	0	0	0	0	0	0	200	903	0	0	0	0	0	0	0	603	903	0
627	4	0	0	0	0	0	0	200	300	0	0	0	0	0	0	0	200	903	0	0	0	0	0	0	0	603	903	0
627	5	0	0	0	0	0	0	200	300	0	0	0	0	0	0	0	200	903	0	0	0	0	0	0	0	603	903	0
627	6	0	0	0	0	0	0	200	300	0	0	0	0	0	0	0	200	903	0	0	0	0	0	0	0	603	903	0
627	7	0	0	0	0	0	0	200	300	0	0	0	0	0	0	0	200	903	0	0	0	0	0	0	0	603	903	0
627	8	0	0	0	0	0	0	200	300	0	0	0	0	0	0	0	200	903	0	0	0	0	0	0	0	603	903	0
627	9	0	0	0	0	0	0	200	300	0	0	0	0	0	0	0	200	903	0	0	0	0	0	0	0	603	903	0
628	0	0	0	0	0	0	0	200	300	0	0	0	0	0	0	0	200	903	0	0	0	0	0	0	0	603	903	0
628	1	0	0	0	0	0	0	200	300	0	0	0	0	0	0	0	200	903	0	0	0	0	0	0	0	603	903	0
628	2	0	0	0	0	0	0	200	300	0	0	0	0	0	0	0	200	903	0	0	0	0	0	0	0	603	903	0
628	3	0	0	0	0	0	0	200	300	0	0	0	0	0	0	0	200	903	0	0	0	0	0	0	0	603	903	0
628	4	0	0	0	0	0	0	200	300	0	0	0	0	0	0	0	200	903	0	0	0	0	0	0	0	603	903	0
628	5	0	0	0	0	0	0	200	300	0	0	0	0	0	0	0	200	903	0	0	0	0	0	0	0	603	903	0
628	6	0	0	0	0	0	0	200	300	0	0	0	0	0	0	0	200	903	0	0	0	0	0	0	0	603	903	0
628	7	0	0	0	0	0	0	200	300	0	0	0	0	0	0	0	200	903	0	0	0	0	0	0	0	603	903	0
628	8	0	0	0	0	0	0	200	300	0	0	0	0	0	0	0	200	903	0	0	0	0	0	0	0	603	903	0
628	9	0	0	0	0	0	0	200	300	0	0	0	0	0	0	0	200	903	0	0	0	0	0	0	0	603	903	0
629	0	0	0	0	0	0	0	200	300	0	0	0	0	0	0	0	200	903	0	0	0	0	0	0	0	603	903	0
629	1	0	0	0	0	0	0	200	300	0	0	0	0	0	0	0	200	903	0	0	0	0	0	0	0	603	903	0
629	2	0	0	0	0	0	0	200	300	0	0	0	0	0	0	0	200	903	0	0	0	0	0	0	0	603	903	0
629	3	0	0	0	0	0	0	200	300	0	0	0	0	0	0	0	200	903	0	0	0	0	0	0	0	603	903	0
629	4	0	0	0	0	0	0	200	300	0	0	0	0	0	0	0	200	903	0	0	0	0	0	0	0	603	903	0
629	5	0	0	0	0	0	0	200	300	0	0	0	0	0	0	0	200	903	0	0	0	0	0	0	0	603	903	0
629	6	0	0	0	0	0	0	200	300	0	0	0	0	0	0	0	200	903	0	0	0	0	0	0	0	603	903	0
629	7	0	0	0	0	0	0	200	300	0	0	0	0	0	0	0	200	903	0	0	0	0	0	0	0	603	903	0
629	8	0	0	0	0	0	0	200	300	0	0	0	0	0	0	0	200	903	0	0	0	0	0	0	0	603	903	0
629	9	0	0	0	0	0	0	200	300	0	0	0	0	0	0	0	200	903	0	0	0	0	0	0	0	603	903	0
630	0	0	0	0	0	0	0	200	300	0	0	0	0	0	0	0	200	903	0	0	0	0	0	0	0	603	903	0
630	1	0	0	0	0	0	0	200	300	0	0	0	0	0	0	0	200	903	0	0	0	0	0	0	0	603	903	0
630	2	0	0	0	0	0	0	200	300	0	0	0	0	0	0	0	200	903	0	0	0	0	0	0	0	603	903	0
630	3	0	0	0	0	0	0	200	300	0	0	0	0	0	0	0	200	903	0	0	0	0	0	0	0	603	903	0
630	4	0	0	0	0	0	0	200	300	0	0	0	0	0	0	0	200	903	0	0	0	0	0	0	0	603	903	0
630	5	0	0	0	0	0	0	200	300	0	0	0	0	0	0	0	200	903	0	0	0	0	0	0	0	603	903	0
630	6	0	0	0	0	0	0	200	300	0	0	0	0	0	0	0	200	903	0	0	0	0	0	0	0	603	903	0
630	7	0	0	0	0	0	0	200	300	0	0	0	0	0	0	0	200	903	0	0	0	0	0	0	0	603	903	0
630	8	0	0	0	0	0	0	200	300	0	0	0	0	0	0	0	200	903	0	0	0	0	0	0	0	603	903	0
630	9	0	0	0	0	0	0	200	300	0	0	0	0	0	0	0	200	903	0	0	0	0	0	0	0	603	903	0
631	0	0	0	0	0	0	0	200	300	0	0	0	0	0	0	0	200	903	0	0	0	0	0	0	0	603	903	0
631	1	0	0	0	0	0	0	200	300	0	0	0	0	0	0	0	200	903	0	0	0	0	0	0	0	603	903	0
631	2	0	0	0	0	0	0	200	300	0	0	0	0	0	0	0	200	903	0	0	0	0	0	0	0	603	903	0
631	3	0	0	0	0	0	0	200	300	0	0	0	0	0	0	0	200	903	0	0	0	0	0	0	0	603	903	0
631	4	0	0	0	0	0	0	200	300	0	0	0	0	0	0	0	200	903	0	0	0	0	0	0	0	603	903	0
631	5	0	0	0	0	0	0	200	300	0	0	0	0	0	0	0	200	903	0	0	0	0	0	0	0	603	903	0
631	6	0	0	0	0	0	0	200	300	0	0	0	0	0	0	0	200	903	0	0	0	0	0	0	0	603	903	0
631	7	0	0	0	0	0	0	200	300	0	0	0	0	0	0	0	200	903	0	0	0	0	0	0	0	603	903	0
631	8	0	0	0	0	0	0	200	300	0	0	0	0	0	0	0	200	903	0	0	0	0	0	0	0	603	903	0
631	9	0	0	0	0	0	0	200	300	0	0	0	0	0	0	0	200	903	0	0	0	0	0	0	0	603	903	0
632	0	0	0	0	0	0	0	200	300	0	0	0	0	0	0	0	200	903	0	0	0	0	0	0	0	603	903	0
632	1	0	0	0	0	0	0	200	300	0	0	0	0	0	0	0	200	903	0	0	0	0	0	0	0	603	903	0
632	2	0	0	0	0	0	0	200	300	0	0	0	0	0	0	0	200	903	0	0	0	0	0	0	0	603	903	0
632	3	0	0	0	0	0	0	200	300	0	0	0	0	0	0	0	200	903	0	0	0	0	0	0	0	603	903	0
632	4	0	0	0	0	0	0	200	300	0	0	0	0	0	0	0	200	903	0	0	0	0	0	0	0	603	903	0
632	5	0	0	0	0	0	0	200	300	0	0	0	0	0	0	0	200	903	0	0	0	0	0	0	0	603	903	0
632	6	0	0	0	0	0	0	200	300	0	0	0	0	0	0	0	200	903	0	0	0	0	0	0	0	603	903	0
632	7	0	0	0	0	0	0	200	300	0	0	0	0	0	0	0	200	903	0	0	0	0	0	0	0	603	903	0
632	8	0	0	0	0	0	0	200	300	0	0	0	0	0	0	0	200	903	0	0	0	0	0	0	0	603	903	0
632	9	0	0	0	0	0	0	200	300	0	0	0	0	0	0	0	200	903	0	0	0	0	0	0	0	603	903	0
633	0	0	0	0	0	0	0	200	300	0	0	0	0	0	0	0	200	903	0	0	0	0	0	0	0	603	903	0
633	1	0	0	0	0	0	0	200	300	0	0	0	0	0	0	0	200	903	0	0	0	0	0	0	0	603	903	0
633	2	0	0	0	0	0	0	200	300	0	0	0	0	0	0	0	200	903	0	0	0	0	0	0	0	603	903	0
633	3	0	0	0	0	0	0	200	300	0	0	0	0	0	0	0	200	903	0	0	0	0	0	0	0	603	903	0
633	4	0	0	0	0	0	0	200	300	0	0	0	0	0	0	0	200	903	0	0	0	0	0	0	0	603	903	0
633	5	0	0	0	0	0	0	200	300	0	0	0	0	0	0	0	200	903	0	0	0	0	0	0	0	603	903	0
633	6	0	0	0	0	0	0	200	300	0	0	0	0	0	0	0	200	903	0	0	0	0	0	0	0	603	903	0
633	7	0	0	0	0	0	0	200	300	0	0	0	0	0	0	0	200	903	0	0	0	0	0	0	0	603	903	0
633	8	0	0	0	0	0	0	200	300	0	0	0	0	0	0	0	200	903	0	0	0	0	0	0	0	603	903	0
633	9	0	0	0	0	0	0	200	300	0	0	0	0	0	0	0	200	903	0	0	0	0	0	0	0	603	903	0
634	0	0	0	0	0	0	0	200	300	0	0	0	0	0	0	0	200	903	0	0	0	0	0	0	0	603	903	0
634	1	0	0	0	0	0	0	200	300	0	0	0	0	0	0	0	200	903	0	0	0	0	0	0	0	603	903	0
634	2	0	0	0	0	0	0	200	300	0	0	0	0	0	0	0	200	903	0	0	0	0	0	0	0	603	903	0
634	3	0	0	0	0	0	0	200	300	0	0	0	0	0	0	0	200	903	0	0	0	0	0	0	0	603	903	0
634	4	0	0	0	0	0	0	200	300	0	0	0	0	0	0	0	200	903	0	0	0	0	0	0	0	603	903	0
634	5	0	0	0	0	0	0	200	300	0	0	0	0	0	0	0	200	903	0	0	0	0	0	0	0	603	903	0
634	6	0	0	0	0	0	0	200	300	0	0	0	0	0	0	0	200	903	0	0	0	0	0	0	0	603	903	0
634	7	0	0	0	0	0	0	200	300	0	0	0	0	0	0	0	200	903	0	0	0	0	0	0	0	603	903	0
634	8	0	0	0	0	0	0	200	300	0	0	0	0	0	0	0	200	903	0	0	0	0	0	0	0	603	903	0
634	9	0	0	0	0	0	0	200	300	0	0	0	0	0	0	0	200	903	0	0	0	0	0	0	0	603	903	0
635	0	0	0	0	0	0	0	200	300	0	0	0	0	0	0	0	200	903	0	0	0	0	0	0	0	603	903	0
635	1	0	0	0	0	0	0	200	300	0	0	0	0	0	0	0	200	903	0	0	0	0	0	0	0	603	903	0
635	2	0	0	0	0	0	0	200	300	0	0	0	0	0	0	0	200	903	0	0	0	0	0	0	0	603	903	0
635	3	0	0	0	0	0	0	200	300	0	0	0	0	0	0	0	200	903	0	0	0	0	0	0	0	603	903	0
635	4	0	0	0	0	0	0	200	300	0	0	0	0	0	0	0	200	903	0	0	0	0	0	0	0	603	903	0
635	5	0	0	0	0	0	0	200	300	0	0	0	0	0	0	0	200	903	0	0	0	0	0	0	0	603	903	0
635	6	0	0	0	0	0	0	200	300	0	0	0	0	0	0	0	200	903	0	0	0	0	0	0	0	603	903	0
635	7	0	0	0	0	0	0	200	300	0	0	0	0	0	0	0	200	903	0	0	0	0	0	0	0	603	903	0
635	8	0	0	0	0	0	0	200	300	0	0	0	0	0	0	0	200	903	0	0	0	0	0	0	0	603	903	0
635	9	0	0	0	0	0	0	200	300	0	0	0	0	0	0	0	200	903	0	0	0	0	0	0	0	603	903	0
636	0	0	0	0	0	0	0	200	300	0	0	0	0	0	0	0	200	903	0	0	0	0	0	0	0	603	903	0
636	1	0	0	0	0	0	0	200	300	0	0	0	0	0	0	0	200	903	0	0	0	0	0	0	0	603	903	0
636	2	0	0	0	0	0	0	200	300	0	0	0	0	0	0	0	200	903	0	0	0	0	0	0	0	603	903	0
636	3	0	0	0	0	0	0	200	300	0	0	0	0	0	0	0	200	903	0	0	0	0	0	0	0	603	903	0
636	4	0	0	0	0	0	0	200	300	0	0	0	0	0	0	0	200	903	0	0	0	0	0	0	0	603	903	0
636	5	0	0	0	0	0	0	200	300	0	0	0	0	0	0	0	200	903	0	0	0	0	0	0	0	603	903	0
636	6	0	0	0	0	0	0	200	300	0	0	0	0	0	0	0	200	903	0	0	0	0	0	0	0	603	903	0
636	7	0	0	0	0	0	0	200	300	0	0	0	0	0	0	0	200	903	0	0	0	0	0	0	0	603	903	0
636	8	0	0	0	0	0	0	200	300	0	0	0	0	0	0	0	200	903	0	0	0	0	0	0	0	603	903	0
636	9	0	0	0	0	0	0	200	300	0	0	0	0	0	0	0	200	903	0	0	0	0	0	0	0	603	903	0
637	0	0	0	0	0	0	0	200	300	0	0	0	0	0	0	0	200	903	0	0	0	0	0	0	0	603	903	0
637	1	0	0	0	0	0	0	200	300	0	0	0	0	0	0	0	200	903	0	0	0	0	0	0	0	603	903	0
637	2	0	0	0	0	0	0	200	300	0	0	0	0	0	0	0	200	903	0	0	0	0	0	0	0	603	903	0
637	3	0	0	0	0	0	0	200	300	0	0	0	0	0	0	0	200	903	0	0	0	0	0	0	0	603	903	0
637	4	0	0	0	0	0	0	200	300	0	0	0	0	0	0	0	200	903	0	0	0	0	0	0	0	603	903	0
637	5	0	0	0	0	0	0	200	300	0	0	0	0	0	0	0	200	903	0	0	0	0	0	0	0	603	903	0
637	6	0	0	0	0	0	0	200	300	0	0	0	0	0	0	0	200	903	0	0	0	0	0	0	0	603	903	0
637	7	0	0	0	0	0	0	200	300	0	0	0	0	0	0	0	200	903	0	0	0	0	0	0	0	603	903	0
637	8	0	0	0	0	0	0	200	300	0	0	0	0	0	0	0	200	903	0	0	0	0	0	0	0	603	903	0
637	9	0	0	0	0	0	0	200	300	0	0	0	0	0	0	0	200	903	0	0	0	0	0	0	0	603	903	0
638	0	0	0	0	0	0	0	200	300	0	0	0	0	0	0	0	200	903	0	0	0	0	0	0	0	603	903	0
638	1	0	0	0	0	0	0	200	300	0	0	0	0	0	0	0	200	903	0	0	0	0	0	0	0	603	903	0
638	2	0	0	0	0	0	0	200	300	0	0	0	0	0	0	0	200	903	0	0	0	0	0	0	0	603	903	0
638	3	0	0	0	0	0	0	200	300	0	0	0	0	0	0	0	200	903	0	0	0	0	0	0	0	603	903	0
638	4	0	0	0	0	0	0	200	300	0	0	0	0	0	0	0	200	903	0	0	0	0	0	0	0	603	903	0
638	5	0	0	0	0	0	0	200	300	0	0	0	0	0	0	0	200	903	0	0	0	0	0	0	0	603	903	0
638	6	0	0	0	0	0	0	200	300	0	0	0	0	0	0	0	200	903	0	0	0	0	0	0	0	603	903	0
638	7	0	0	0	0	0	0	200	300	0	0	0	0	0	0	0	200	903	0	0	0	0	0	0	0	603	903	0
638	8	0	0	0	0	0	0	200	300	0	0	0	0	0	0	0	200	903	0	0	0	0	0	0	0	603	903	0
638	9	0	0	0	0	0	0	200	300	0	0	0	0	0	0	0	200	903	0	0	0	0	0	0	0	603	903	0
639	0	0	0	0	0	0	0	200	300	0	0	0	0	0	0	0	200	903	0	0	0	0	0	0	0	603	903	0
639	1	0	0	0	0	0	0	200	300	0	0	0	0	0	0	0	200	903	0	0	0	0	0	0	0	603	903	0
639	2	0	0	0	0	0	0	200	300	0	0	0	0	0	0	0	200	903	0	0	0	0	0	0	0	603	903	0
639	3	0	0	0	0	0	0	200	300	0	0	0	0	0	0	0	200	903	0	0	0	0	0	0	0	603	903	0
639	4	0	0	0	0	0	0	200	300	0	0	0	0	0	0	0	200	903	0	0	0	0	0	0	0	603	903	0
639	5	0	0	0	0	0	0	200	300	0	0	0	0	0	0	0	200	903	0	0	0	0	0	0	0	603	903	0
639	6	0	0	0	0	0	0	200	300	0	0	0	0	0	0	0	200	903	0	0	0	0	0	0	0	603	903	0
639	7	0	0	0	0	0	0	200	300	0	0	0	0	0	0	0	200	903	0	0	0	0	0	0	0	603	903	0
639	8	0	0	0	0	0	0	200	300	0	0	0	0	0	0	0	200	903	0	0	0	0	0	0	0	603	903	0
639	9	0	0	0	0	0	0	200	300	0	0	0	0	0	0	0	200	903	0	0	0	0	0	0	0	603	903	0
640	0	0	0	0	0	0	0	200	300	0	0	0	0	0	0	0	200	903	0	0	0	0	0	0	0	603	903	0
640	1	0	0	0	0	0	0	200	300	0	0	0	0	0	0	0	200	903	0	0	0	0	0	0	0	603	903	0
640	2	0	0	0	0	0	0	200	300	0	0	0	0	0	0	0	200	903	0	0	0	0	0	0	0	603	903	0
640	3	0	0	0	0	0	0	200	300	0	0	0	0	0	0	0	200	903	0	0	0	0	0	0	0	603	903	0
640	4	0	0	0	0	0	0	200	300	0	0	0	0	0	0	0	200	903	0	0	0	0	0	0	0	603	903	0
640	5	0	0	0	0	0	0	200	300	0	0	0	0	0	0	0	200	903	0	0	0	0	0	0	0	603	903	0
640	6	0	0	0	0	0	0	200	300	0	0	0	0	0	0	0	200	903	0	0	0	0	0	0	0	603	903	0
640	7	0	0	0	0	0	0	200	300	0	0	0	0	0	0	0	200	903	0	0	0	0	0	0	0	603	903	0
640	8	0	0	0	0	0	0	200	300	0	0	0	0	0	0	0	200	903	0	0	0	0	0	0	0	603	903	0
640	9	0	0	0	0	0	0	200	300	0	0	0	0	0	0	0	200	903	0	0	0	0	0	0	0	603	903	0
641	0	0	0	0	0	0	0	200	300	0	0	0	0	0	0	0	200	903	0	0	0	0	0	0	0	603	903	0
641	1	0	0	0	0	0	0	200	300	0	0	0	0	0	0	0	200	903	0	0	0	0	0	0	0	603	903	0
641	2	0	0	0	0	0	0	200	300	0	0	0	0	0	0	0	200	903	0	0	0	0	0	0	0	603	903	0
641	3	0	0	0	0	0	0	200	300	0	0	0	0	0	0	0	200	903	0	0	0	0	0	0	0	603	903	0
641	4	0	0	0	0	0	0	200	300	0	0	0	0	0	0	0	200	903	0	0	0	0	0	0	0	603	903	0
641	5	0	0	0	0	0	0	200	300	0	0	0	0	0	0	0	200	903	0	0	0	0	0	0	0	603	903	0
641	6	0	0	0	0	0	0	200	300	0	0	0	0	0	0	0	200	903	0	0	0	0	0	0	0	603	903	0
641	7	0	0	0	0	0	0	200	300	0	0	0	0	0	0	0	200	903	0	0	0	0	0	0	0	603	903	0
641	8	0	0	0	0	0	0	200	300	0	0	0	0	0	0	0	200	903	0	0	0	0	0	0	0	603	903	0
641	9	0	0	0	0	0	0	200	300	0	0	0	0	0	0	0	200	903	0	0	0	0	0	0	0	603	903	0
642	0	0	0	0	0	0	0	200	300	0	0	0	0	0	0	0	200	903	0	0	0	0	0	0	0	603	903	0
642	1	0	0	0	0	0	0	200	300	0	0	0	0	0	0	0	200	903	0	0	0	0	0	0	0	603	903	0
642	2	0	0	0	0	0	0	200	300	0	0	0	0	0	0	0	200	903	0	0	0	0	0	0	0	603	903	0
642	3	0	0	0	0	0	0	200	300	0	0	0	0	0	0	0	200	903	0	0	0	0	0	0	0	603	903	0
642	4	0	0	0	0	0	0	200	300	0	0	0	0	0	0	0	200	903	0	0	0	0	0	0	0	603	903	0
642	5	0	0	0	0	0	0	200	300	0	0	0	0	0	0	0	200	903	0	0	0	0	0	0	0	603	903	0
642	6	0	0	0	0	0	0	200	300	0	0	0	0	0	0	0	200	903	0	0	0	0	0	0	0	603	903	0
642	7	0	0	0	0	0	0	200	300	0	0	0	0	0	0	0	200	903	0	0	0	0	0	0	0	603	903	0
642	8	0	0	0	0	0	0	200	300	0	0	0	0	0	0	0	200	903	0	0	0	0	0	0	0	603	903	0
642	9	0	0	0	0	0	0	200	300	0	0	0	0	0	0	0	200	903	0	0	0	0	0	0	0	603	903	0
643	0	0	0	0	0	0	0	200	300	0	0	0	0	0	0	0	200	903	0	0	0	0	0	0	0	603	903	0
643	1	0	0	0	0	0	0	200	300	0	0	0	0	0	0	0	200	903	0	0	0	0	0	0	0	603	903	0
643	2	0	0	0	0	0	0	200	300	0	0	0	0	0	0	0	200	903	0	0	0	0	0	0	0	603	903	0
643	3	0	0	0	0	0	0	200	300	0	0	0	0	0	0	0	200	903	0	0	0	0	0	0	0	603	903	0
643	4	0	0	0	0	0	0	200	300	0	0	0	0	0	0	0	200	903	0	0	0	0	0	0	0	603	903	0
643	5	0	0	0	0	0	0	200	300	0	0	0	0	0	0	0	200	903	0	0	0	0	0	0	0	603	903	0
643	6	0	0	0	0	0	0	200	300	0	0	0	0	0	0	0	200	903	0	0	0	0	0	0	0	603	903	0
643	7	0	0	0	0	0	0	200	300	0	0	0	0	0	0	0	200	903	0	0	0	0	0	0	0	603	903	0
643	8	0	0	0	0	0	0	200	300	0	0	0	0	0	0	0	200	903	0	0	0	0	0	0	0	603	903	0
643	9	0	0	0	0	0	0	200	300	0	0	0	0	0	0	0	200	903	0	0	0	0	0	0	0	603	903	0
644	0	0	0	0	0	0	0	200	300	0	0	0	0	0	0	0	200	903	0	0	0	0	0	0	0	603	903	0
644	1	0	0	0	0	0	0	200	300	0	0	0	0	0	0	0	200	903	0	0	0	0	0	0	0	603	903	0
644	2	0	0	0	0	0	0	200	300	0	0	0	0	0	0	0	200	903	0	0	0	0	0	0	0	603	903	0
644	3	0	0	0	0	0	0	200	300	0	0	0	0	0	0	0	200	903	0	0	0	0	0	0	0	603	903	0
644	4	0	0	0	0	0	0	200	300	0	0	0	0	0	0	0	200	903	0	0	0	0	0	0	0	603	903	0
644	5	0	0	0	0	0	0	200	300	0	0	0	0	0	0	0	200	903	0	0	0	0	0	0	0	603	903	0
644	6	0	0	0	0	0	0	200	300	0	0	0	0	0	0	0	200	903	0	0	0	0	0	0	0	603	903	0
644	7	0	0	0	0	0	0	200	300	0	0	0	0	0	0	0	200	903	0	0	0	0	0	0	0	603	903	0
644	8	0	0	0	0	0	0	200	300	0	0	0	0	0	0	0	200	903	0	0	0	0	0	0	0	603	903	0
644	9	0	0	0	0	0	0	200	300	0	0	0	0	0	0	0	200	903	0	0	0	0	0	0	0	603	903	0
645	0	0	0	0	0	0	0	200	300	0	0	0	0	0	0	0	200	903	0	0	0	0	0	0	0	603	903	0
645	1	0	0	0	0	0	0	200	300	0	0	0	0	0	0	0	200	903	0	0	0	0	0	0	0	603	903	0
645	2	0	0	0	0	0	0	200	300	0	0	0	0	0	0	0	200	903	0	0	0	0	0	0	0	603	903	0
645	3	0	0	0	0	0	0	200	300	0	0	0	0	0	0	0	200	903	0	0	0	0	0	0	0	603	903	0
645	4	0	0	0	0	0	0	200	300	0	0	0	0	0	0	0	200	903	0	0	0	0	0	0	0	603	903	0
645	5	0	0	0	0	0	0	200	300	0	0	0	0	0	0	0	200	903	0	0	0	0	0	0	0	603	903	0
645	6	0	0	0	0	0	0	200	300	0	0	0	0	0	0	0	200	903	0	0	0	0	0	0	0	603	903	0
645	7	0	0	0	0	0	0	200	300	0	0	0	0	0	0	0	200	903	0	0	0	0	0	0	0	603	903	0
645	8	0	0	0	0	0	0	200	300	0	0	0	0	0	0	0	200	903	0	0	0	0	0	0	0	603	903	0
645	9	0	0	0	0	0	0	200	300	0	0	0	0	0	0	0	200	903	0	0	0	0	0	0	0	603	903	0
646	0	0	0	0	0	0	0	200	300	0	0	0	0	0	0	0	200	903	0	0	0	0	0	0	0	603	903	0
646	1	0	0	0	0	0	0	200	300	0	0	0	0	0	0	0	200	903	0	0	0	0	0	0	0	603	903	0
646	2	0	0	0	0	0	0	200	300	0	0	0	0	0	0	0	200	903	0	0	0	0	0	0	0	603	903	0
646	3	0	0	0	0	0	0	200	300	0	0	0	0	0	0	0	200	903	0	0	0	0	0	0	0	603	903	0
646	4	0	0	0	0	0	0	200	300	0	0	0	0	0	0	0	200	903	0	0	0	0	0	0	0	603	903	0
646	5	0	0	0	0	0	0	200	300	0	0	0	0	0	0	0	200	903	0	0	0	0	0	0	0	603	903	0
646	6	0	0	0	0	0	0	200	300	0	0	0	0	0	0	0	200	903	0	0	0	0	0	0	0	603	903	0
646	7	0	0	0	0	0	0	200	300	0	0	0	0	0	0	0	200	903	0	0	0	0	0	0	0	603	903	0
646	8	0	0	0	0	0	0	200	300	0	0	0	0	0	0	0	200	903	0	0	0	0	0	0	0	603	903	0
646	9	0	0	0	0	0	0	200	300	0	0	0	0	0	0	0	200	903	0	0	0	0	0	0	0	603	903	0
647	0	0	0	0	0	0	0	200	300	0	0	0	0	0	0	0	200	903	0	0	0	0	0	0	0	603	903	0
647	1	0	0	0	0	0	0	200	300	0	0	0	0	0	0	0	200	903	0	0	0	0	0	0	0	603	903	0
647	2	0	0	0	0	0	0	200	300	0	0	0	0	0	0	0	200	903	0	0	0	0	0	0	0	603	903	0
647	3	0	0	0	0	0	0	200	300	0	0	0	0	0	0	0	200	903	0	0	0	0	0	0	0	603	903	0
647	4	0	0	0	0	0	0	200	300	0	0	0	0	0	0	0	200	903	0	0	0	0	0	0	0	603	903	0
647	5	0	0	0	0	0	0	200	300	0	0	0	0	0	0	0	200	903	0	0	0	0	0	0	0	603	903	0
647	6	0	0	0	0	0	0	200	300	0	0	0	0	0	0	0	200	903	0	0	0	0	0	0	0	603	903	0
647	7	0	0	0	0	0	0	200	300	0	0	0	0	0	0	0	200	903	0	0	0	0	0	0	0	603	903	0
647	8	0	0	0	0	0	0	200	300	0	0	0	0	0	0	0	200	903	0	0	0	0	0	0	0	603	903	0
647	9	0	0	0	0	0	0	200	300	0	0	0	0	0	0	0	200	903	0	0	0	0	0	0	0	603	903	0
648	0	0	0	0	0	0	0	200	300	0	0	0	0	0	0	0	200	903	0	0	0	0	0	0	0	603	903	0
648	1	0	0	0	0	0	0	200	300	0	0	0	0	0	0	0	200	903	0	0	0	0	0	0	0	603	903	0
648	2	0	0	0	0	0	0	200	300	0	0	0	0	0	0	0	200	903	0	0	0	0	0	0	0	603	903	0
648	3	0	0	0	0	0	0	200	300	0	0	0	0	0	0	0	200	903	0	0	0	0	0	0	0	603	903	0
648	4	0	0	0	0	0	0	200	300	0	0	0	0	0	0	0	200	903	0	0	0	0	0	0	0	603	903	0
648	5	0	0	0	0	0	0	200	300	0	0	0	0	0	0	0	200	903	0	0	0	0	0	0	0	603	903	0
648	6	0	0	0	0	0	0	200	300	0	0	0	0	0	0	0	200	903	0	0	0	0	0	0	0	603	903	0
648	7	0	0	0	0	0	0	200	300	0	0	0	0	0	0	0	200	903	0	0	0	0	0	0	0	603	903	0
648	8	0	0	0	0	0	0	200	300	0	0	0	0	0	0	0	200	903	0	0	0	0	0	0	0	603	903	0
648	9	0	0	0	0	0	0	200	300	0	0	0	0	0	0	0	200	903	0	0	0	0	0	0	0	603	903	0
649	0	0	0	0	0	0	0	200	300	0	0	0	0	0	0	0	200	903	0	0	0	0	0	0	0	603	903	0
649	1	0	0	0	0	0	0	200	300	0	0	0	0	0	0	0	200	903	0	0	0	0	0	0	0	603	903	0
649	2	0	0	0	0	0	0	200	300	0	0	0	0	0	0	0	200	903	0	0	0	0	0	0	0	603	903	0
649	3	0	0	0	0	0	0	200	300	0	0	0	0	0	0	0	200	903	0	0	0	0	0	0	0	603	903	0
649	4	0	0	0	0	0	0	200	300	0	0	0	0	0	0	0	200	903	0	0	0	0	0	0	0	603	903	0
649	5	0	0	0	0	0	0	200	300	0	0	0	0	0	0	0	200	903	0	0	0	0	0	0	0	603	903	0
649	6	0	0	0	0	0	0	200	300	0	0	0	0	0	0	0	200	903	0	0	0	0	0	0	0	603	903	0
649	7	0	0	0	0	0	0	200	300	0	0	0	0	0	0	0	200	903	0	0	0	0	0	0	0	603	903	0
649	8	0	0	0	0	0	0	200	300	0	0	0	0	0	0	0	200	903	0	0	0	0	0	0	0	603	903	0
649	9	0	0	0	0	0	0	200	300	0	0	0	0	0	0	0	200	903	0	0	0	0	0	0	0	603	903	0
650	0	0	0	0	0	0	0	200	300	0	0	0	0	0	0	0	200	903	0	0	0	0	0	0	0	603	903	0
650	1	0	0	0	0	0	0	200	300	0	0	0	0	0	0	0	200	903	0	0	0	0	0	0	0	603	903	0
650	2	0	0	0	0	0	0	200	300	0	0	0	0	0	0	0	200	903	0	0	0	0	0	0	0	603	903	0
650	3	0	0	0	0	0	0	200	300	0	0	0	0	0	0	0	200	903	0	0	0	0	0	0	0	603	903	0
650	4	0	0	0	0	0	0	200	300	0	0	0	0	0	0	0	200	903	0	0	0	0	0	0	0	603	903	0
650	5	0	0	0	0	0	0	200	300	0	0	0	0	0	0	0	200	903	0	0	0	0	0	0	0	603	903	0
650	6	0	0	0	0	0	0	200	300	0	0	0	0	0	0	0	200	903	0	0	0	0	0	0	0	603	903	0
650	7	0	0	0	0	0	0	200	300	0	0	0	0	0	0	0	200	903	0	0	0	0	0	0	0	603	903	0
650	8	0	0	0	0	0	0	200	300	0	0	0	0	0	0	0	200	903	0	0	0	0	0	0	0	603	903	0
650	9	0	0	0	0	0	0	200	300	0	0	0	0	0	0	0	200	903	0	0	0	0	0	0	0	603	903	0
651	0	0	0	0	0	0	0	200	300	0	0	0	0	0	0	0	200	903	0	0	0	0	0	0	0	603	903	0
651	1	0	0	0	0	0	0	200	300	0	0	0	0	0	0	0	200	903	0	0	0	0	0	0	0	603	903	0
651	2	0	0	0	0	0	0	200	300	0	0	0	0	0	0	0	200	903	0	0	0	0	0	0	0	603	903	0
651	3	0	0	0	0	0	0	200	300	0	0	0	0	0	0	0	200	903	0	0	0	0	0	0	0	603	903	0
651	4	0	0	0	0	0	0	200	300	0	0	0	0	0	0	0	200	903	0	0	0	0	0	0	0	603	903	0
651	5	0	0	0	0	0	0	200	300	0	0	0	0	0	0	0	200	903	0	0	0	0	0	0	0	603	903	0
651	6	0	0	0	0	0	0	200	300	0	0	0	0	0	0	0	200	903	0	0	0	0	0	0	0	603	903	0
651	7	0	0	0	0	0	0	200	300	0	0	0	0	0	0	0	200	903	0	0	0	0	0	0	0	603	903	0
651	8	0	0	0	0	0	0	200	300	0	0	0	0	0	0	0	200	903	0	0	0	0	0	0	0	603	903	0
651	9	0	0	0	0	0	0	200	300	0	0	0	0	0	0	0	200	903	0	0	0	0	0	0	0	603	903	0
652	0	0	0	0	0	0	0	200	300	0	0	0	0	0	0	0	200	903	0	0	0	0	0	0	0	603	903	0
652	1	0	0	0	0	0	0	200	300	0	0	0	0	0	0	0	200	903	0	0	0	0	0	0	0	603	903	0
652	2	0	0	0	0	0	0	200	300	0	0	0	0	0	0	0	200	903	0	0	0	0	0	0	0	603	903	0
652	3	0	0	0	0	0	0	200	300	0	0	0	0	0	0	0	200	903	0	0	0	0	0	0	0	603	903	0
652	4	0	0	0	0	0	0	200	300	0	0	0	0	0	0	0	200	903	0	0	0	0	0	0	0	603	903	0
652	5	0	0	0	0	0	0	200	300	0	0	0	0	0	0	0	200	903	0	0	0	0	0	0	0	603	903	0
652	6	0	0	0	0	0	0	200	300	0	0	0	0	0	0	0	200	903	0	0	0	0	0	0	0	603	903	0
652	7	0	0	0	0	0	0	200	300	0	0	0	0	0	0	0	200	903	0	0	0	0	0	0	0	603	903	0
652	8	0	0	0	0	0	0	200	300	0	0	0	0	0	0	0	200	903	0	0	0	0	0	0	0	603	903	0
652	9	0	0	0	0	0	0	200	300	0	0	0	0	0	0	0	200	903	0	0	0	0	0	0	0	603	903	0
653	0	0	0	0	0	0	0	200	300	0	0	0	0	0	0	0	200	903	0	0	0	0	0	0	0	603	903	0
653	1	0	0	0	0	0	0	200	300	0	0	0	0	0	0	0	200	903	0	0	0	0	0	0	0	603	903	0
653	2	0	0	0	0	0	0	200	300	0	0	0	0	0	0	0	200	903	0	0	0	0	0	0	0	603	903	0
653	3	0	0	0	0	0	0	200	300	0	0	0	0	0	0	0	200	903	0	0	0	0	0	0	0	603	903	0
653	4	0	0	0	0	0	0	200	300	0	0	0	0	0	0	0	200	903	0	0	0	0	0	0	0	603	903	0
653	5	0	0	0	0	0	0	200	300	0	0	0	0	0	0	0	200	903	0	0	0	0	0	0	0	603	903	0
653	6	0	0	0	0	0	0	200	300	0	0	0	0	0	0	0	200	903	0	0	0	0	0	0	0	603	903	0
653	7	0	0	0	0	0	0	200	300	0	0	0	0	0	0	0	200	903	0	0	0	0	0	0	0	603	903	0
653	8	0	0	0	0	0	0	200	300	0	0	0	0	0	0	0	200	903	0	0	0	0	0	0	0	603	903	0
653	9	0	0	0	0	0	0	200	300	0	0	0	0	0	0	0	200	903	0	0	0	0	0	0	0	603	903	0
654	0	0	0	0	0	0	0	200	300	0	0	0	0	0	0	0	200	903	0	0	0	0	0	0	0	603	903	0
654	1	0	0	0	0	0	0	200	300	0	0	0	0	0	0	0	200	903	0	0	0	0	0	0	0	603	903	0
654	2	0	0	0	0	0	0	200	300	0	0	0	0	0	0	0	200	903	0	0	0	0	0	0	0	603	903	0
654	3	0	0	0	0	0	0	200	300	0	0	0	0	0	0	0	200	903	0	0	0	0	0	0	0	603	903	0
654	4	0	0	0	0	0	0	200	300	0	0	0	0	0	0	0	200	903	0	0	0	0	0	0	0	603	903	0
654	5	0	0	0	0	0	0	200	300	0	0	0	0	0	0	0	200	903	0	0	0	0	0	0	0	603	903	0
654	6	0	0	0	0	0	0	200	300	0	0	0	0	0	0	0	200	903	0	0	0	0	0	0	0	603	903	0
654	7	0	0	0	0	0	0	200	300	0	0	0	0	0	0	0	200	903	0	0	0	0	0	0	0	603	903	0
654	8	0	0	0	0	0	0	200	300	0	0	0	0	0	0	0	200	903	0	0	0	0	0	0	0	603	903	0
654	9	0	0	0	0	0	0	200	300	0	0	0	0	0	0	0	200	903	0	0	0	0	0	0	0	603	903	0
655	0	0	0	0	0	0	0	200	300	0	0	0	0	0	0	0	200	903	0	0	0	0	0	0	0	603	903	0
655	1	0	0	0	0	0	0	200	300	0	0	0	0	0	0	0	200	903	0	0	0	0	0	0	0	603	903	0
655	2	0	0	0	0	0	0	200	300	0	0	0	0	0	0	0	200	903	0	0	0	0	0	0	0	603	903	0
655	3	0	0	0	0	0	0	200	300	0	0	0	0	0	0	0	200	903	0	0	0	0	0	0	0	603	903	0
655	4	0	0	0	0	0	0	200	300	0	0	0	0	0	0	0	200	903	0	0	0	0	0	0	0	603	903	0
655	5	0	0	0	0	0	0	200	300	0	0	0	0	0	0	0	200	903	0	0	0	0	0	0	0	603	903	0
655	6	0	0	0	0	0	0	200	300	0	0	0	0	0	0	0	200	903	0	0	0	0	0	0	0	603	903	0
655	7	0	0	0	0	0	0	200	300	0	0	0	0	0	0	0	200	903	0	0	0	0	0	0	0	603	903	0
655	8	0	0	0	0	0	0	200	300	0	0	0	0	0	0	0	200	903	0	0	0	0	0	0	0	603	903	0
655	9	0	0	0	0	0	0	200	300	0	0	0	0	0	0	0	200	903	0	0	0	0	0	0	0	603	903	0
656	0	0	0	0	0	0	0	200	300	0	0	0	0	0	0	0	200	903	0	0	0	0	0	0	0	603	903	0
656	1	0	0	0	0	0	0	200	300	0	0	0	0	0	0	0	200	903	0	0	0	0	0	0	0	603	903	0
656	2	0	0	0	0	0	0	200	300	0	0	0	0	0	0	0	200	903	0	0	0	0	0	0	0	603	903	0
656	3	0	0	0	0	0	0	200	300	0	0	0	0	0	0	0	200	903	0	0	0	0	0	0	0	603	903	0
656	4	0	0	0	0	0	0	200	300	0	0	0	0	0	0	0	200	903	0	0	0	0	0	0	0	603	903	0
656	5	0	0	0	0	0	0	200	300	0	0	0	0	0	0	0	200	903	0	0	0	0	0	0	0	603	903	0
656	6	0	0	0	0	0	0	200	300	0	0	0	0	0	0	0	200	903	0	0	0	0	0	0	0	603	903	0
656	7	0	0	0	0	0	0	200	300	0	0	0	0	0	0	0	200	903	0	0	0	0	0	0	0	603	903	0
656	8	0	0	0	0	0	0	200	300	0	0	0	0	0	0	0	200	903	0	0	0	0	0	0	0	603	903	0
656	9	0	0	0	0	0	0	200	300	0	0	0	0	0	0	0	200	903	0	0	0	0	0	0	0	603	903	0
657	0	0	0	0	0	0	0	200	300	0	0	0	0	0	0	0	200	903	0	0	0	0	0	0	0	603	903	0
657	1	0	0	0	0	0	0	200	300	0	0	0	0	0	0	0	200	903	0	0	0	0	0	0	0	603	903	0
657	2	0	0	0	0	0	0	200	300	0	0	0	0	0	0	0	200	903	0	0	0	0	0	0	0	603	903	0
657	3	0	0	0	0	0	0	200	300	0	0	0	0	0	0	0	200	903	0	0	0	0	0	0	0	603	903	0
657	4	0	0	0	0	0	0	200	300	0	0	0	0	0	0	0	200	903	0	0	0	0	0	0	0	603	903	0
657	5	0	0	0	0	0	0	200	300	0	0	0	0	0	0	0	200	903	0	0	0	0	0	0	0	603	903	0
657	6	0	0	0	0	0	0	200	300	0	0	0	0	0	0	0	200	903	0	0	0	0	0	0	0	603	903	0
657	7	0	0	0	0	0	0	200	300	0	0	0	0	0	0	0	200	903	0	0	0	0	0	0	0	603	903	0
657	8	0	0	0	0	0	0	200	300	0	0	0	0	0	0	0	200	903	0	0	0	0	0	0	0	603	903	0
657	9	0	0	0	0	0	0	200	300	0	0	0	0	0	0	0	200	903	0	0	0	0	0	0	0	603	903	0
658	0	0	0	0	0	0	0	200	300	0	0	0	0	0	0	0	200	903	0	0	0	0	0	0	0	603	903	0
658	1	0	0	0	0	0	0	200	300	0	0	0	0	0	0	0	200	903	0	0	0	0	0	0	0	603	903	0
658	2	0	0	0	0	0	0	200	300	0	0	0	0	0	0	0	200	903	0	0	0	0	0	0	0	603	903	0
658	3	0	0	0	0	0	0	200	300	0	0	0	0	0	0	0	200	903	0	0	0	0	0	0	0	603	903	0
658	4	0	0	0	0	0	0	200	300	0	0	0	0	0	0	0	200	903	0	0	0	0	0	0	0	603	903	0
658	5	0	0	0	0	0	0	200	300	0	0	0	0	0	0	0	200	903	0	0	0	0	0	0	0	603	903	0
658	6	0	0	0	0	0	0	200	300	0	0	0	0	0	0	0	200	903	0	0	0	0	0	0	0	603	903	0
658	7	0	0	0	0	0	0	200	300	0	0	0	0	0	0	0	200	903	0	0	0	0	0	0	0	603	903	0
658	8	0	0	0	0	0	0	200	300	0	0	0	0	0	0	0	200	903	0	0	0	0	0	0	0	603	903	0
658	9	0	0	0	0	0	0	200	300	0	0	0	0	0	0	0	200	903	0	0	0	0	0	0	0	603	903	0
659	0	0	0	0	0	0	0	200	300	0	0	0	0	0	0	0	200	903	0	0	0	0	0	0	0	603	903	0
659	1	0	0	0	0	0	0	200	300	0	0	0	0	0	0	0	200	903	0	0	0	0	0	0	0	603	903	0
659	2	0	0	0	0	0	0	200	300	0	0	0	0	0	0	0	200	903	0	0	0	0	0	0	0	603	903	0
659	3	0	0	0	0	0	0	200	300	0	0	0	0	0	0	0	200	903	0	0	0	0	0	0	0	603	903	0
659	4	0	0	0	0	0	0	200	300	0	0	0	0	0	0	0	200	903	0	0	0	0	0	0	0	603	903	0
659	5	0	0	0	0	0	0	200	300	0	0	0	0	0	0	0	200	903	0	0	0	0	0	0	0	603	903	0
659	6	0	0	0	0	0	0	200	300	0	0	0	0	0	0	0	200	903	0	0	0	0	0	0	0	603	903	0
659	7	0	0	0	0	0	0	200	300	0	0	0	0	0	0	0	200	903	0	0	0	0	0	0	0	603	903	0
659	8	0	0	0	0	0	0	200	300	0	0	0	0	0	0	0	200	903	0	0	0	0	0	0	0	603	903	0
659	9	0	0	0	0	0	0	200	300	0	0	0	0	0	0	0	200	903	0	0	0	0	0	0	0	603	903	0
660	0	0	0	0	0	0	0	200	300	0	0	0	0	0	0	0	200	903	0	0	0	0	0	0	0	603	903	0
660	1	0	0	0	0	0	0	200	300	0	0	0	0	0	0	0	200	903	0	0	0	0	0	0	0	603	903	0
660	2	0	0	0	0	0	0	200	300	0	0	0	0	0	0	0	200	903	0	0	0	0	0	0	0	603	903	0
660	3	0	0	0	0	0	0	200	300	0	0	0	0	0	0	0	200	903	0	0	0	0	0	0	0	603	903	0
660	4	0	0	0	0	0	0	200	300	0	0	0	0	0	0	0	200	903	0	0	0	0	0	0	0	603	903	0
660	5	0	0	0	0	0	0	200	300	0	0	0	0	0	0	0	200	903	0	0	0	0	0	0	0	603	903	0
660	6	0	0	0	0	0	0	200	300	0	0	0	0	0	0	0	200	903	0	0	0	0	0	0	0	603	903	0
660	7	0	0	0	0	0	0	200	300	0	0	0	0	0	0	0	200	903	0	0	0	0	0	0	0	603	903	0
660	8	0	0	0	0	0	0	200	300	0	0	0	0	0	0	0	200	903	0	0	0	0	0	0	0	603	903	0
660	9	0	0	0	0	0	0	200	300	0	0	0	0	0	0	0	200	903	0	0	0	0	0	0	0	603	903	0
661	0	0	0	0	0	0	0	200	300	0	0	0	0	0	0	0	200	903	0	0	0	0	0	0	0	603	903	0
661	1	0	0	0	0	0	0	200	300	0	0	0	0	0	0	0	200	903	0	0	0	0	0	0	0	603	903	0
661	2	0	0	0	0	0	0	200	300	0	0	0	0	0	0	0	200	903	0	0	0	0	0	0	0	603	903	0
661	3	0	0	0	0	0	0	200	300	0	0	0	0	0	0	0	200	903	0	0	0	0	0	0	0	603	903	0
661	4	0	0	0	0	0	0	200	300	0	0	0	0	0	0	0	200	903	0	0	0	0	0	0	0	603	903	0
661	5	0	0	0	0	0	0	200	300	0	0	0	0	0	0	0	200	903	0	0	0	0	0	0	0	603	903	0
661	6	0	0	0	0	0	0	200	300	0	0	0	0	0	0	0	200	903	0	0	0	0	0	0	0	603	903	0
661	7	0	0	0	0	0	0	200	300	0	0	0	0	0	0	0	200	903	0	0	0	0	0	0	0	603	903	0
661	8	0	0	0	0	0	0	200	300	0	0	0	0	0	0	0	200	903	0	0	0	0	0	0	0	603	903	0
661	9	0	0	0	0	0	0	200	300	0	0	0	0	0	0	0	200	903	0	0	0	0	0	0	0	603	903	0
662	0	0	0	0	0	0	0	200	300	0	0	0	0	0	0	0	200	903	0	0	0	0	0	0	0	603	903	0
662	1	0	0	0	0	0	0	200	300	0	0	0	0	0	0	0	200	903	0	0	0	0	0	0	0	603	903	0
662	2	0	0	0	0	0	0	200	300	0	0	0	0	0	0	0	200	903	0	0	0	0	0	0	0	603	903	0
662	3	0	0	0	0	0	0	200	300	0	0	0	0	0	0	0	200	903	0	0	0	0	0	0	0	603	903	0
662	4	0	0	0	0	0	0	200	300	0	0	0	0	0	0	0	200	903	0	0	0	0	0	0	0	603	903	0
662	5	0	0	0	0	0	0	200	300	0	0	0	0	0	0	0	200	903	0	0	0	0	0	0	0	603	903	0
662	6	0	0	0	0	0	0	200	300	0	0	0	0	0	0	0	200	903	0	0	0	0	0	0	0	603	903	0
662	7	0	0	0	0	0	0	200	300	0	0	0	0	0	0	0	200	903	0	0	0	0	0	0	0	603	903	0
662	8	0	0	0	0	0	0	200	300	0	0	0	0	0	0	0	200	903	0	0	0	0	0	0	0	603	903	0
662	9	0	0	0	0	0	0	200	300	0	0	0	0	0	0	0	200	903	0	0	0	0	0	0	0	603	903	0
663	0	0	0	0	0	0	0	200	300	0	0	0	0	0	0	0	200	903	0	0	0	0	0	0	0	603	903	0
663	1	0	0	0	0	0	0	200	300	0	0	0	0	0	0	0	200	903	0	0	0	0	0	0	0	603	903	0
663	2	0	0	0	0	0	0	200	300	0	0	0	0	0	0	0	200	903	0	0	0	0	0	0	0	603	903	0
663	3	0	0	0	0	0	0	200	300	0	0	0	0	0	0	0	200	903	0	0	0	0	0	0	0	603	903	0
663	4	0	0	0	0	0	0	200	300	0	0	0	0	0	0	0	200	903	0	0	0	0	0	0	0	603	903	0
663	5	0	0	0	0	0	0	200	300	0	0	0	0	0	0	0	200	903	0	0	0	0	0	0	0	603	903	0
663	6	0	0	0	0	0	0	200	300	0	0	0	0	0	0	0	200	903	0	0	0	0	0	0	0	603	903	0
663	7	0	0	0	0	0	0	200	300	0	0	0	0	0	0	0	200	903	0	0	0	0	0	0	0	603	903	0
663	8	0	0	0	0	0	0	200	300	0	0	0	0	0	0	0	200	903	0	0	0	0	0	0	0	603	903	0
663	9	0	0	0	0	0	0	200	300	0	0	0	0	0	0	0	200	903	0	0	0	0	0	0	0	603	903	0
664	0	0	0	0	0	0	0	200	300	0	0	0	0	0	0	0	200	903	0	0	0	0	0	0	0	603	903	0
664	1	0	0	0	0	0	0	200	300	0	0	0	0	0	0	0	200	903	0	0	0	0	0	0	0	603	903	0
664	2	0	0	0	0	0	0	200	300	0	0	0	0	0	0	0	200	903	0	0	0	0	0	0	0	603	903	0
664	3	0	0	0	0	0	0	200	300	0	0	0	0	0	0	0	200	903	0	0	0	0	0	0	0	603	903	0
664	4	0	0	0	0	0	0	200	300	0	0	0	0	0	0	0	200	903	0	0	0	0	0	0	0	603	903	0
664	5	0	0	0	0	0	0	200	300	0	0	0	0	0	0	0	200	903	0	0	0	0	0	0	0	603	903	0
664	6	0	0	0	0	0	0	200	300	0	0	0	0	0	0	0	200	903	0	0	0	0	0	0	0	603	903	0
664	7	0	0	0	0	0	0	200	300	0	0	0	0	0	0	0	200	903	0	0	0	0	0	0	0	603	903	0
664	8	0	0	0	0	0	0	200	300	0	0	0	0	0	0	0	200	903	0	0	0	0	0	0	0	603	903	0
664	9	0	0	0	0	0	0	200	300	0	0	0	0	0	0	0	200	903	0	0	0	0	0	0	0	603	903	0
665	0	0	0	0	0	0	0	200	300	0	0	0	0	0	0	0	200	903	0	0	0	0	0	0	0	603	903	0
665	1	0	0	0	0	0	0	200	300	0	0	0	0	0	0	0	200	903	0	0	0	0	0	0	0	603	903	0
665	2	0	0	0	0	0	0	200	300	0	0	0	0	0	0	0	200	903	0	0	0	0	0	0	0	603	903	0
665	3	0	0	0	0	0	0	200	300	0	0	0	0	0	0	0	200	903	0	0	0	0	0	0	0	603	903	0
665	4	0	0	0	0	0	0	200	300	0	0	0	0	0	0	0	200	903	0	0	0	0	0	0	0	603	903	0
665	5	0	0	0	0	0	0	200	300	0	0	0	0	0	0	0	200	903	0	0	0	0	0	0	0	603	903	0
665	6	0	0	0	0	0	0	200	300	0	0	0	0	0	0	0	200	903	0	0	0	0	0	0	0	603	903	0
665	7	0	0	0	0	0	0	200	300	0	0	0	0	0	0	0	200	903	0	0	0	0	0	0	0	603	903	0
665	8	0	0	0	0	0	0	200	300	0	0	0	0	0	0	0	200	903	0	0	0	0	0	0	0	603	903	0
665	9	0	0	0	0	0	0	200	300	0	0	0	0	0	0	0	200	903	0	0	0	0	0	0	0	603	903	0
666	0	0	0	0	0	0	0	200	300	0	0	0	0	0	0	0	200	903	0	0	0	0	0	0	0	603	903	0
666	1	0	0	0	0	0	0	200	300	0	0	0	0	0	0	0	200	903	0	0	0	0	0	0	0	603	903	0
666	2	0	0	0	0	0	0	200	300	0	0	0	0	0	0	0	200	903	0	0	0	0	0	0	0	603	903	0
666	3	0	0	0	0	0	0	200	300	0	0	0	0	0	0	0	200	903	0	0	0	0	0	0	0	603	903	0
666	4	0	0	0	0	0	0	200	300	0	0	0	0	0	0	0	200	903	0	0	0	0	0	0	0	603	903	0
666	5	0	0	0	0	0	0	200	300	0	0	0	0	0	0	0	200	903	0	0	0	0	0	0	0	603	903	0
666	6	0	0	0	0	0	0	200	300	0	0	0	0	0	0	0	200	903	0	0	0	0	0	0	0	603	903	0
666	7	0	0	0	0	0	0	200	300	0	0	0	0	0	0	0	200	903	0	0	0	0	0	0	0	603	903	0
666	8	0	0	0	0	0	0	200	300	0	0	0	0	0	0	0	200	903	0	0	0	0	0	0	0	603	903	0
666	9	0	0	0	0	0	0	200	300	0	0	0	0	0	0	0	200	903	0	0	0	0	0	0	0	603	903	0
667	0	0	0	0	0	0	0	200	300	0	0	0	0	0	0	0	200	903	0	0	0	0	0	0	0	603	903	0
667	1	0	0	0	0	0	0	200	300	0	0	0	0	0	0	0	200	903	0	0	0	0	0	0	0	603	903	0
667	2	0	0	0	0	0	0	200	300	0	0	0	0	0	0	0	200	903	0	0	0	0	0	0	0	603	903	0
667	3	0	0	0	0	0	0	200	300	0	0	0	0	0	0	0	200	903	0	0	0	0	0	0	0	603	903	0
667	4	0	0	0	0	0	0	200	300	0	0	0	0	0	0	0	200	903	0	0	0	0	0	0	0	603	903	0
667	5	0	0	0	0	0	0	200	300	0	0	0	0	0	0	0	200	903	0	0	0	0	0	0	0	603	903	0
667	6	0	0	0	0	0	0	200	300	0	0	0	0	0	0	0	200	903	0	0	0	0	0	0	0	603	903	0
667	7	0	0	0	0	0	0	200	300	0	0	0	0	0	0	0	200	903	0	0	0	0	0	0	0	603	903	0
667	8	0	0	0	0	0	0	200	300	0	0	0	0	0	0	0	200	903	0	0	0	0	0	0	0	603	903	0
667	9	0	0	0	0	0	0	200	300	0	0	0	0	0	0	0	200	903	0	0	0	0	0	0	0	603	903	0
668	0	0	0	0	0	0	0	200	300	0	0	0	0	0	0	0	200	903	0	0	0	0	0	0	0	603	903	0
668	1	0	0	0	0	0	0	200	300	0	0	0	0	0	0	0	200	903	0	0	0	0	0	0	0	603	903	0
668	2	0	0	0	0	0	0	200	300	0	0	0	0	0	0	0	200	903	0	0	0	0	0	0	0	603	903	0
668	3	0	0	0	0	0	0	200	300	0	0	0	0	0	0	0	200	903	0	0	0	0	0	0	0	603	903	0
668	4	0	0	0	0	0	0	200	300	0	0	0	0	0	0	0	200	903	0	0	0	0	0	0	0	603	903	0
668	5	0	0	0	0	0	0	200	300	0	0	0	0	0	0	0	200	903	0	0	0	0	0	0	0	603	903	0
668	6	0	0	0	0	0	0	200	300	0	0	0	0	0	0	0	200	903	0	0	0	0	0	0	0	603	903	0
668	7	0	0	0	0	0	0	200	300	0	0	0	0	0	0	0	200	903	0	0	0	0	0	0	0	603	903	0
668	8	0	0	0	0	0	0	200	300	0	0	0	0	0	0	0	200	903	0	0	0	0	0	0	0	603	903	0
668	9	0	0	0	0	0	0	200	300	0	0	0	0	0	0	0	200	903	0	0	0	0	0	0	0	603	903	0
669	0	0	0	0	0	0	0	200	300	0	0	0	0	0	0	0	200	903	0	0	0	0	0	0	0	603	903	0
669	1	0	0	0	0	0	0	200	300	0	0	0	0	0	0	0	200	903	0	0	0	0	0	0	0	603	903	0
669	2	0	0	0	0	0	0	200	300	0	0	0	0	0	0	0	200	903	0	0	0	0	0	0	0	603	903	0
669	3	0	0	0	0	0	0	200	300	0	0	0	0	0	0	0	200	903	0	0	0	0	0	0	0	603	903	0
669	4	0	0	0	0	0	0	200	300	0	0	0	0	0	0	0	200	903	0	0	0	0	0	0	0	603	903	0
669	5	0	0	0	0	0	0	200	300	0	0	0	0	0	0	0	200	903	0	0	0	0	0	0	0	603	903	0
669	6	0	0	0	0	0	0	200	300	0	0	0	0	0	0	0	200	903	0	0	0	0	0	0	0	603	903	0
669	7	0	0	0	0	0	0	200	300	0	0	0	0	0	0	0	200	903	0	0	0	0	0	0	0	603	903	0
669	8	0	0	0	0	0	0	200	300	0	0	0	0	0	0	0	200	903	0	0	0	0	0	0	0	603	903	0
669	9	0	0	0	0	0	0	200	300	0	0	0	0	0	0	0	200	903	0	0	0	0	0	0	0	603	903	0
670	0	0	0	0	0	0	0	200	300	0	0	0	0	0	0	0	200	903	0	0	0	0	0	0	0	603	903	0
670	1	0	0	0	0	0	0	200	300	0	0	0	0	0	0	0	200	903	0	0	0	0	0	0	0	603	903	0
670	2	0	0	0	0	0	0	200	300	0	0	0	0	0	0	0	200	903	0	0	0	0	0	0	0	603	903	0
670	3	0	0	0	0	0	0	200	300	0	0	0	0	0	0	0	200	903	0	0	0	0	0	0	0	603	903	0
670	4	0	0	0	0	0	0	200	300	0	0	0	0	0	0	0	200	903	0	0	0	0	0	0	0	603	903	0
670	5	0	0	0	0	0	0	200	300	0	0	0	0	0	0	0	200	903	0	0	0	0	0	0	0	603	903	0
670	6	0	0	0	0	0	0	200	300	0	0	0	0	0	0	0	200	903	0	0	0	0	0	0	0	603	903	0
670	7	0	0	0	0	0	0	200	300	0	0	0	0	0	0	0	200	903	0	0	0	0	0	0	0	603	903	0
670	8	0	0	0	0	0	0	200	300	0	0	0	0	0	0	0	200	903	0	0	0	0	0	0	0	603	903	0
670	9	0	0	0	0	0	0	200	300	0	0	0	0	0	0	0	200	903	0	0	0	0	0	0	0	603	903	0
671	0	0	0	0	0	0	0	200	300	0	0	0	0	0	0	0	200	903	0	0	0	0	0	0	0	603	903	0
671	1	0	0	0	0	0	0	200	300	0	0	0	0	0	0	0	200	903	0	0	0	0	0	0	0	603	903	0
671	2	0	0	0	0	0	0	200	300	0	0	0	0	0	0	0	200	903	0	0	0	0	0	0	0	603	903	0
671	3	0	0	0	0	0	0	200	300	0	0	0	0	0	0	0	200	903	0	0	0	0	0	0	0	603	903	0
671	4	0	0	0	0	0	0	200	300	0	0	0	0	0	0	0	200	903	0	0	0	0	0	0	0	603	903	0
671	5	0	0	0	0	0	0	200	300	0	0	0	0	0	0	0	200	903	0	0	0	0	0	0	0	603	903	0
671	6	0	0	0	0	0	0	200	300	0	0	0	0	0	0	0	200	903	0	0	0	0	0	0	0	603	903	0
671	7	0	0	0	0	0	0	200	300	0	0	0	0	0	0	0	200	903	0	0	0	0	0	0	0	603	903	0
671	8	0	0	0	0	0	0	200	300	0	0	0	0	0	0	0	200	903	0	0	0	0	0	0	0	603	903	0
671	9	0	0	0	0	0	0	200	300	0	0	0	0	0	0	0	200	903	0	0	0	0	0	0	0	603	903	0
672	0	0	0	0	0	0	0	200	300	0	0	0	0	0	0	0	200	903	0	0	0	0	0	0	0	603	903	0
672	1	0	0	0	0	0	0	200	300	0	0	0	0	0	0	0	200	903	0	0	0	0	0	0	0	603	903	0
672	2	0	0	0	0	0	0	200	300	0	0	0	0	0	0	0	200	903	0	0	0	0	0	0	0	603	903	0
672	3	0	0	0	0	0	0	200	300	0	0	0	0	0	0	0	200	903	0	0	0	0	0	0	0	603	903	0
672	4	0	0	0	0	0	0	200	300	0	0	0	0	0	0	0	200	903	0	0	0	0	0	0	0	603	903	0
672	5	0	0	0	0	0	0	200	300	0	0	0	0	0	0	0	200	903	0	0	0	0	0	0	0	603	903	0
672	6	0	0	0	0	0	0	200	300	0	0	0	0	0	0	0	200	903	0	0	0	0	0	0	0	603	903	0
672	7	0	0	0	0	0	0	200	300	0	0	0	0	0	0	0	200	903	0	0	0	0	0	0	0	603	903	0
672	8	0	0	0	0	0	0	200	300	0	0	0	0	0	0	0	200	903	0	0	0	0	0	0	0	603	903	0
672	9	0	0	0	0	0	0	200	300	0	0	0	0	0	0	0	200	903	0	0	0	0	0	0	0	603	903	0
673	0	0	0	0	0	0	0	200	300	0	0	0	0	0	0	0	200	903	0	0	0	0	0	0	0	603	903	0
673	1	0	0	0	0	0	0	200	300	0	0	0	0	0	0	0	200	903	0	0	0	0	0	0	0	603	903	0
673	2	0	0	0	0	0	0	200	300	0	0	0	0	0	0	0	200	903	0	0	0	0	0	0	0	603	903	0
673	3	0	0	0	0	0	0	200	300	0	0	0	0	0	0	0	200	903	0	0	0	0	0	0	0	603	903	0
673	4	0	0	0	0	0	0	200	300	0	0	0	0	0	0	0	200	903	0	0	0	0	0	0	0	603	903	0
673	5	0	0	0	0	0	0	200	300	0	0	0	0	0	0	0	200	903	0	0	0	0	0	0	0	603	903	0
673	6	0	0	0	0	0	0	200	300	0	0	0	0	0	0	0	200	903	0	0	0	0	0	0	0	603	903	0
673	7	0	0	0	0	0	0	200	300	0	0	0	0	0	0	0	200	903	0	0	0	0	0	0	0	603	903	0
673	8	0	0	0	0	0	0	200	300	0	0	0	0	0	0	0	200	903	0	0	0	0	0	0	0	603	903	0
673	9	0	0	0	0	0	0	200	300	0	0	0	0	0	0	0	200	903	0	0	0	0	0	0	0	603	903	0
674	0	0	0	0	0	0	0	200	300	0	0	0	0	0	0	0	200	903	0	0	0	0	0	0	0	603	903	0
674	1	0	0	0	0	0	0	200	300	0	0	0	0	0	0	0	200	903	0	0	0	0	0	0	0	603	903	0
674	2	0	0	0	0	0	0	200	300	0	0	0	0	0	0	0	200	903	0	0	0	0	0	0	0	603	903	0
674	3	0	0	0	0	0	0	200	300	0	0	0	0	0	0	0	200	903	0	0	0	0	0	0	0	603	903	0
674	4	0	0	0	0	0	0	200	300	0	0	0	0	0	0	0	200	903	0	0	0	0	0	0	0	603	903	0
674	5	0	0	0	0	0	0	200	300	0	0	0	0	0	0	0	200	903	0	0	0	0	0	0	0	603	903	0
674	6	0	0	0	0	0	0	200	300	0	0	0	0	0	0	0	200	903	0	0	0	0	0	0	0	603	903	0
674	7	0	0	0	0	0	0	200	300	0	0	0	0	0	0	0	200	903	0	0	0	0	0	0	0	603	903	0
674	8	0	0	0	0	0	0	200	300	0	0	0	0	0	0	0	200	903	0	0	0	0	0	0	0	603	903	0
674	9	0	0	0	0	0	0	200	300	0	0	0	0	0	0	0	200	903	0	0	0	0	0	0	0	603	903	0
675	0	0	0	0	0	0	0	200	300	0	0	0	0	0	0	0	200	903	0	0	0	0	0	0	0	603	903	0
675	1	0	0	0	0	0	0	200	300	0	0	0	0	0	0	0	200	903	0	0	0	0	0	0	0	603	903	0
675	2	0	0	0	0	0	0	200	300	0	0	0	0	0	0	0	200	903	0	0	0	0	0	0	0	603	903	0
675	3	0	0	0	0	0	0	200	300	0	0	0	0	0	0	0	200	903	0	0	0	0	0	0	0	603	903	0
675	4	0	0	0	0	0	0	200	300	0	0	0	0	0	0	0	200	903	0	0	0	0	0	0	0	603	903	0
675	5	0	0	0	0	0	0	200	300	0	0	0	0	0	0	0	200	903	0	0	0	0	0	0	0	603	903	0
675	6	0	0	0	0	0	0	200	300	0	0	0	0	0	0	0	200	903	0	0	0	0	0	0	0	603	903	0
675	7	0	0	0	0	0	0	200	300	0	0	0	0	0	0	0	200	903	0	0	0	0	0	0	0	603	903	0
675	8	0	0	0	0	0	0	200	300	0	0	0	0	0	0	0	200	903	0	0	0	0	0	0	0	603	903	0
675	9	0	0	0	0	0	0	200	300	0	0	0	0	0	0	0	200	903	0	0	0	0	0	0	0	603	903	0
676	0	0	0	0	0	0	0	200	300	0	0	0	0	0	0	0	200	903	0	0	0	0	0	0	0	603	903	0
676	1	0	0	0	0	0	0	200	300	0	0	0	0	0	0	0	200	903	0	0	0	0	0	0	0	603	903	0
676	2	0	0	0	0	0	0	200	300	0	0	0	0	0	0	0	200	903	0	0	0	0	0	0	0	603	903	0
676	3	0	0	0	0	0	0	200	300	0	0	0	0	0	0	0	200	903	0	0	0	0	0	0	0	603	903	0
676	4	0	0	0	0	0	0	200	300	0	0	0	0	0	0	0	200	903	0	0	0	0	0	0	0	603	903	0
676	5	0	0	0	0	0	0	200	300	0	0	0	0	0	0	0	200	903	0	0	0	0	0	0	0	603	903	0
676	6	0	0	0	0	0	0	200	300	0	0	0	0	0	0	0	200	903	0	0	0	0	0	0	0	603	903	0
676	7	0	0	0	0	0	0	200	300	0	0	0	0	0	0	0	200	903	0	0	0	0	0	0	0	603	903	0
676	8	0	0	0	0	0	0	200	300	0	0	0	0	0	0	0	200	903	0	0	0	0	0	0	0	603	903	0
676	9	0	0	0	0	0	0	200	300	0	0	0	0	0	0	0	200	903	0	0	0	0	0	0	0	603	903	0
677	0	0	0	0	0	0	0	200	300	0	0	0	0	0	0	0	200	903	0	0	0	0	0	0	0	603	903	0
677	1	0	0	0	0	0	0	200	300	0	0	0	0	0	0	0	200	903	0	0	0	0	0	0	0	603	903	0
677	2	0	0	0	0	0	0	200	300	0	0	0	0	0	0	0	200	903	0	0	0	0	0	0	0	603	903	0
677	3	0	0	0	0	0	0	200	300	0	0	0	0	0	0	0	200	903	0	0	0	0	0	0	0	603	903	0
677	4	0	0	0	0	0	0	200	300	0	0	0	0	0	0	0	200	903	0	0	0	0	0	0	0	603	903	0
677	5	0	0	0	0	0	0	200	300	0	0	0	0	0	0	0	200	903	0	0	0	0	0	0	0	603	903	0
677	6	0	0	0	0	0	0	200	300	0	0	0	0	0	0	0	200	903	0	0	0	0	0	0	0	603	903	0
677	7	0	0	0	0	0	0	200	300	0	0	0	0	0	0	0	200	903	0	0	0	0	0	0	0	603	903	0
677	8	0	0	0	0	0	0	200	300	0	0	0	0	0	0	0	200	903	0	0	0	0	0	0	0	603	903	0
677	9	0	0	0	0	0	0	200	300	0	0	0	0	0	0	0	200	903	0	0	0	0	0	0	0	603	903	0
678	0	0	0	0	0	0	0	200	300	0	0	0	0	0	0	0	200	903	0	0	0	0	0	0	0	603	903	0
678	1	0	0	0	0	0	0	200	300	0	0	0	0	0	0	0	200	903	0	0	0	0	0	0	0	603	903	0
678	2	0	0	0	0	0	0	200	300	0	0	0	0	0	0	0	200	903	0	0	0	0	0	0	0	603	903	0
678	3	0	0	0	0	0	0	200	300	0	0	0	0	0	0	0	200	903	0	0	0	0	0	0	0	603	903	0
678	4	0	0	0	0	0	0	200	300	0	0	0	0	0	0	0	200	903	0	0	0	0	0	0	0	603	903	0
678	5	0	0	0	0	0	0	200	300	0	0	0	0	0	0	0	200	903	0	0	0	0	0	0	0	603	903	0
678	6	0	0	0	0	0	0	200	300	0	0	0	0	0	0	0	200	903	0	0	0	0	0	0	0	603	903	0
678	7	0	0	0	0	0	0	200	300	0	0	0	0	0	0	0	200	903	0	0	0	0	0	0	0	603	903	0
678	8	0	0	0	0	0	0	200	300	0	0	0	0	0	0	0	200	903	0	0	0	0	0	0	0	603	903	0
678	9	0	0	0	0	0	0	200	300	0	0	0	0	0	0	0	200	903	0	0	0	0	0	0	0	603	903	0
679	0	0	0	0	0	0	0	200	300	0	0	0	0	0	0	0	200	903	0	0	0	0	0	0	0	603	903	0
679	1	0	0	0	0	0	0	200	300	0	0	0	0	0	0	0	200	903	0	0	0	0	0	0	0	603	903	0
679	2	0	0	0	0	0	0	200	300	0	0	0	0	0	0	0	200	903	0	0	0	0	0	0	0	603	903	0
679	3	0	0	0	0	0	0	200	300	0	0	0	0	0	0	0	200	903	0	0	0	0	0	0	0	603	903	0
679	4	0	0	0	0	0	0	200	300	0	0	0	0	0	0	0	200	903	0	0	0	0	0	0	0	603	903	0
679	5	0	0	0	0	0	0	200	300	0	0	0	0	0	0	0	200	903	0	0	0	0	0	0	0	603	903	0
679	6	0	0	0	0	0	0	200	300	0	0	0	0	0	0	0	200	903	0	0	0	0	0	0	0	603	903	0
679	7	0	0	0	0	0	0	200	300	0	0	0	0	0	0	0	200	903	0	0	0	0	0	0	0	603	903	0
679	8	0	0	0	0	0	0	200	300	0	0	0	0	0	0	0	200	903	0	0	0	0	0	0	0	603	903	0
679	9	0	0	0	0	0	0	200	300	0	0	0	0	0	0	0	200	903	0	0	0	0	0	0	0	603	903	0
680	0	0	0	0	0	0	0	200	300	0	0	0	0	0	0	0	200	903	0	0	0	0	0	0	0	603	903	0
680	1	0	0	0	0	0	0	200	300	0	0	0	0	0	0	0	200	903	0	0	0	0	0	0	0	603	903	0
680	2	0	0	0	0	0	0	200	300	0	0	0	0	0	0	0	200	903	0	0	0	0	0	0	0	603	903	0
680	3	0	0	0	0	0	0	200	300	0	0	0	0	0	0	0	200	903	0	0	0	0	0	0	0	603	903	0
680	4	0	0	0	0	0	0	200	300	0	0	0	0	0	0	0	200	903	0	0	0	0	0	0	0	603	903	0
680	5	0	0	0	0	0	0	200	300	0	0	0	0	0	0	0	200	903	0	0	0	0	0	0	0	603	903	0
680	6	0	0	0	0	0	0	200	300	0	0	0	0	0	0	0	200	903	0	0	0	0	0	0	0	603	903	0
680	7	0	0	0	0	0	0	200	300	0	0	0	0	0	0	0	200	903	0	0	0	0	0	0	0	603	903	0
680	8	0	0	0	0	0	0	200	300	0	0	0	0	0	0	0	200	903	0	0	0	0	0	0	0	603	903	0
680	9	0	0	0	0	0	0	200	300	0	0	0	0	0	0	0	200	903	0	0	0	0	0	0	0	603	903	0
681	0	0	0	0	0	0	0	200	300	0	0	0	0	0	0	0	200	903	0	0	0	0	0	0	0	603	903	0
681	1	0	0	0	0	0	0	200	300	0	0	0	0	0	0	0	200	903	0	0	0	0	0	0	0	603	903	0
681	2	0	0	0	0	0	0	200	300	0	0	0	0	0	0	0	200	903	0	0	0	0	0	0	0	603	903	0
681	3	0	0	0	0	0	0	200	300	0	0	0	0	0	0	0	200	903	0	0	0	0	0	0	0	603	903	0
681	4	0	0	0	0	0	0	200	300	0	0	0	0	0	0	0	200	903	0	0	0	0	0	0	0	603	903	0
681	5	0	0	0	0	0	0	200	300	0	0	0	0	0	0	0	200	903	0	0	0	0	0	0	0	603	903	0
681	6	0	0	0	0	0	0	200	300	0	0	0	0	0	0	0	200	903	0	0	0	0	0	0	0	603	903	0
681	7	0	0	0	0	0	0	200	300	0	0	0	0	0	0	0	200	903	0	0	0	0	0	0	0	603	903	0
681	8	0	0	0	0	0	0	200	300	0	0	0	0	0	0	0	200	903	0	0	0	0	0	0	0	603	903	0
681	9	0	0	0	0	0	0	200	300	0	0	0	0	0	0	0	200	903	0	0	0	0	0	0	0	603	903	0
682	0	0	0	0	0	0	0	200	300	0	0	0	0	0	0	0	200	903	0	0	0	0	0	0	0	603	903	0
682	1	0	0	0	0	0	0	200	300	0	0	0	0	0	0	0	200	903	0	0	0	0	0	0	0	603	903	0
682	2	0	0	0	0	0	0	200	300	0	0	0	0	0	0	0	200	903	0	0	0	0	0	0	0	603	903	0
682	3	0	0	0	0	0	0	200	300	0	0	0	0	0	0	0	200	903	0	0	0	0	0	0	0	603	903	0
682	4	0	0	0	0	0	0	200	300	0	0	0	0	0	0	0	200	903	0	0	0	0	0	0	0	603	903	0
682	5	0	0	0	0	0	0	200	300	0	0	0	0	0	0	0	200	903	0	0	0	0	0	0	0	603	903	0
682	6	0	0	0	0	0	0	200	300	0	0	0	0	0	0	0	200	903	0	0	0	0	0	0	0	603	903	0
682	7	0	0	0	0	0	0	200	300	0	0	0	0	0	0	0	200	903	0	0	0	0	0	0	0	603	903	0
682	8	0	0	0	0	0	0	200	300	0	0	0	0	0	0	0	200	903	0	0	0	0	0	0	0	603	903	0
682	9	0	0	0	0	0	0	200	300	0	0	0	0	0	0	0	200	903	0	0	0	0	0	0	0	603	903	0
683	0	0	0	0	0	0	0	200	300	0	0	0	0	0	0	0	200	903	0	0	0	0	0	0	0	603	903	0
683	1	0	0	0	0	0	0	200	300	0	0	0	0	0	0	0	200	903	0	0	0	0	0	0	0	603	903	0
683	2	0	0	0	0	0	0	200	300	0	0	0	0	0	0	0	200	903	0	0	0	0	0	0	0	603	903	0
683	3	0	0	0	0	0	0	200	300	0	0	0	0	0	0	0	200	903	0	0	0	0	0	0	0	603	903	0
683	4	0	0	0	0	0	0	200	300	0	0	0	0	0	0	0	200	903	0	0	0	0	0	0	0	603	903	0
683	5	0	0	0	0	0	0	200	300	0	0	0	0	0	0	0	200	903	0	0	0	0	0	0	0	603	903	0
683	6	0	0	0	0	0	0	200	300	0	0	0	0	0	0	0	200	903	0	0	0	0	0	0	0	603	903	0
683	7	0	0	0	0	0	0	200	300	0	0	0	0	0	0	0	200	903	0	0	0	0	0	0	0	603	903	0
683	8	0	0	0	0	0	0	200	300	0	0	0	0	0	0	0	200	903	0	0	0	0	0	0	0	603	903	0
683	9	0	0	0	0	0	0	200	300	0	0	0	0	0	0	0	200	903	0	0	0	0	0	0	0	603	903	0
684	0	0	0	0	0	0	0	200	300	0	0	0	0	0	0	0	200	903	0	0	0	0	0	0	0	603	903	0
684	1	0	0	0	0	0	0	200	300	0	0	0	0	0	0	0	200	903	0	0	0	0	0	0	0	603	903	0
684	2	0	0	0	0	0	0	200	300	0	0	0	0	0	0	0	200	903	0	0	0	0	0	0	0	603	903	0
684	3	0	0	0	0	0	0	200	300	0	0	0	0	0	0	0	200	903	0	0	0	0	0	0	0	603	903	0
684	4	0	0	0	0	0	0	200	300	0	0	0	0	0	0	0	200	903	0	0	0	0	0	0	0	603	903	0
684	5	0	0	0	0	0	0	200	300	0	0	0	0	0	0	0	200	903	0	0	0	0	0	0	0	603	903	0
684	6	0	0	0	0	0	0	200	300	0	0	0	0	0	0	0	200	903	0	0	0	0	0	0	0	603	903	0
684	7	0	0	0	0	0	0	200	300	0	0	0	0	0	0	0	200	903	0	0	0	0	0	0	0	603	903	0
684	8	0	0	0	0	0	0	200	300	0	0	0	0	0	0	0	200	903	0	0	0	0	0	0	0	603	903	0
684	9	0	0	0	0	0	0	200	300	0	0	0	0	0	0	0	200	903	0	0	0	0	0	0	0	603	903	0
685	0	0	0	0	0	0	0	200	300	0	0	0	0	0	0	0	200	903	0	0	0	0	0	0	0	603	903	0
685	1	0	0	0	0	0	0	200	300	0	0	0	0	0	0	0	200	903	0	0	0	0	0	0	0	603	903	0
685	2	0	0	0	0	0	0	200	300	0	0	0	0	0	0	0	200	903	0	0	0	0	0	0	0	603	903	0
685	3	0	0	0	0	0	0	200	300	0	0	0	0	0	0	0	200	903	0	0	0	0	0	0	0	603	903	0
685	4	0	0	0	0	0	0	200	300	0	0	0	0	0	0	0	200	903	0	0	0	0	0	0	0	603	903	0
685	5	0	0	0	0	0	0	200	300	0	0	0	0	0	0	0	200	903	0	0	0	0	0	0	0	603	903	0
685	6	0	0	0	0	0	0	200	300	0	0	0	0	0	0	0	200	903	0	0	0	0	0	0	0	603	903	0
685	7	0	0	0	0	0	0	200	300	0	0	0	0	0	0	0	200	903	0	0	0	0	0	0	0	603	903	0
685	8	0	0	0	0	0	0	200	300	0	0	0	0	0	0	0	200	903	0	0	0	0	0	0	0	603	903	0
685	9	0	0	0	0	0	0	200	300	0	0	0	0	0	0	0	200	903	0	0	0	0	0	0	0	603	903	0
686	0	0	0	0	0	0	0	200	300	0	0	0	0	0	0	0	200	903	0	0	0	0	0	0	0	603	903	0
686	1	0	0	0	0	0	0	200	300	0	0	0	0	0	0	0	200	903	0	0	0	0	0	0	0	603	903	0
686	2	0	0	0	0	0	0	200	300	0	0	0	0	0	0	0	200	903	0	0	0	0	0	0	0	603	903	0
686	3	0	0	0	0	0	0	200	300	0	0	0	0	0	0	0	200	903	0	0	0	0	0	0	0	603	903	0
686	4	0	0	0	0	0	0	200	300	0	0	0	0	0	0	0	200	903	0	0	0	0	0	0	0	603	903	0
686	5	0	0	0	0	0	0	200	300	0	0	0	0	0	0	0	200	903	0	0	0	0	0	0	0	603	903	0
686	6	0	0	0	0	0	0	200	300	0	0	0	0	0	0	0	200	903	0	0	0	0	0	0	0	603	903	0
686	7	0	0	0	0	0	0	200	300	0	0	0	0	0	0	0	200	903	0	0	0	0	0	0	0	603	903	0
686	8	0	0	0	0	0	0	200	300	0	0	0	0	0	0	0	200	903	0	0	0	0	0	0	0	603	903	0
686	9	0	0	0	0	0	0	200	300	0	0	0	0	0	0	0	200	903	0	0	0	0	0	0	0	603	903	0
687	0	0	0	0	0	0	0	200	300	0	0	0	0	0	0	0	200	903	0	0	0	0	0	0	0	603	903	0
687	1	0	0	0	0	0	0	200	300	0	0	0	0	0	0	0	200	903	0	0	0	0	0	0	0	603	903	0
687	2	0	0	0	0	0	0	200	300	0	0	0	0	0	0	0	200	903	0	0	0	0	0	0	0	603	903	0
687	3	0	0	0	0	0	0	200	300	0	0	0	0	0	0	0	200	903	0	0	0	0	0	0	0	603	903	0
687	4	0	0	0	0	0	0	200	300	0	0	0	0	0	0	0	200	903	0	0	0	0	0	0	0	603	903	0
687	5	0	0	0	0	0	0	200	300	0	0	0	0	0	0	0	200	903	0	0	0	0	0	0	0	603	903	0
687	6	0	0	0	0	0	0	200	300	0	0	0	0	0	0	0	200	903	0	0	0	0	0	0	0	603	903	0
687	7	0	0	0	0	0	0	200	300	0	0	0	0	0	0	0	200	903	0	0	0	0	0	0	0	603	903	0
687	8	0	0	0	0	0	0	200	300	0	0	0	0	0	0	0	200	903	0	0	0	0	0	0	0	603	903	0
687	9	0	0	0	0	0	0	200	300	0	0	0	0	0	0	0	200	903	0	0	0	0	0	0	0	603	903	0
688	0	0	0	0	0	0	0	200	300	0	0	0	0	0	0	0	200	903	0	0	0	0	0	0	0	603	903	0
688	1	0	0	0	0	0	0	200	300	0	0	0	0	0	0	0	200	903	0	0	0	0	0	0	0	603	903	0
688	2	0	0	0	0	0	0	200	300	0	0	0	0	0	0	0	200	903	0	0	0	0	0	0	0	603	903	0
688	3	0	0	0	0	0	0	200	300	0	0	0	0	0	0	0	200	903	0	0	0	0	0	0	0	603	903	0
688	4	0	0	0	0	0	0	200	300	0	0	0	0	0	0	0	200	903	0	0	0	0	0	0	0	603	903	0
688	5	0	0	0	0	0	0	200	300	0	0	0	0	0	0	0	200	903	0	0	0	0	0	0	0	603	903	0
688	6	0	0	0	0	0	0	200	300	0	0	0	0	0	0	0	200	903	0	0	0	0	0	0	0	603	903	0
688	7	0	0	0	0	0	0	200	300	0	0	0	0	0	0	0	200	903	0	0	0	0	0	0	0	603	903	0
688	8	0	0	0	0	0	0	200	300	0	0	0	0	0	0	0	200	903	0	0	0	0	0	0	0	603	903	0
688	9	0	0	0	0	0	0	200	300	0	0	0	0	0	0	0	200	903	0	0	0	0	0	0	0	603	903	0
689	0	0	0	0	0	0	0	200	300	0	0	0	0	0	0	0	200	903	0	0	0	0	0	0	0	603	903	0
689	1	0	0	0	0	0	0	200	300	0	0	0	0	0	0	0	200	903	0	0	0	0	0	0	0	603	903	0
689	2	0	0	0	0	0	0	200	300	0	0	0	0	0	0	0	200	903	0	0	0	0	0	0	0	603	903	0
689	3	0	0	0	0	0	0	200	300	0	0	0	0	0	0	0	200	903	0	0	0	0	0	0	0	603	903	0
689	4	0	0	0	0	0	0	200	300	0	0	0	0	0	0	0	200	903	0	0	0	0	0	0	0	603	903	0
689	5	0	0	0	0	0	0	200	300	0	0	0	0	0	0	0	200	903	0	0	0	0	0	0	0	603	903	0
689	6	0	0	0	0	0	0	200	300	0	0	0	0	0	0	0	200	903	0	0	0	0	0	0	0	603	903	0
689	7	0	0	0	0	0	0	200	300	0	0	0	0	0	0	0	200	903	0	0	0	0	0	0	0	603	903	0
689	8	0	0	0	0	0	0	200	300	0	0	0	0	0	0	0	200	903	0	0	0	0	0	0	0	603	903	0
689	9	0	0	0	0	0	0	200	300	0	0	0	0	0	0	0	200	903	0	0	0	0	0	0	0	603	903	0
690	0	0	0	0	0	0	0	200	300	0	0	0	0	0	0	0	200	903	0	0	0	0	0	0	0	603	903	0
690	1	0	0	0	0	0	0	200	300	0	0	0	0	0	0	0	200	903	0	0	0	0	0	0	0	603	903	0
690	2	0	0	0	0	0	0	200	300	0	0	0	0	0	0	0	200	903	0	0	0	0	0	0	0	603	903	0
690	3	0	0	0	0	0	0	200	300	0	0	0	0	0	0	0	200	903	0	0	0	0	0	0	0	603	903	0
690	4	0	0	0	0	0	0	200	300	0	0	0	0	0	0	0	200	903	0	0	0	0	0	0	0	603	903	0
690	5	0	0	0	0	0	0	200	300	0	0	0	0	0	0	0	200	903	0	0	0	0	0	0	0	603	903	0
690	6	0	0	0	0	0	0	200	300	0	0	0	0	0	0	0	200	903	0	0	0	0	0	0	0	603	903	0
690	7	0	0	0	0	0	0	200	300	0	0	0	0	0	0	0	200	903	0	0	0	0	0	0	0	603	903	0
690	8	0	0	0	0	0	0	200	300	0	0	0	0	0	0	0	200	903	0	0	0	0	0	0	0	603	903	0
690	9	0	0	0	0	0	0	200	300	0	0	0	0	0	0	0	200	903	0	0	0	0	0	0	0	603	903	0
691	0	0	0	0	0	0	0	200	300	0	0	0	0	0	0	0	200	903	0	0	0	0	0	0	0	603	903	0
691	1	0	0	0	0	0	0	200	300	0	0	0	0	0	0	0	200	903	0	0	0	0	0	0	0	603	903	0
691	2	0	0	0	0	0	0	200	300	0	0	0	0	0	0	0	200	903	0	0	0	0	0	0	0	603	903	0
691	3	0	0	0	0	0	0	200	300	0	0	0	0	0	0	0	200	903	0	0	0	0	0	0	0	603	903	0
691	4	0	0	0	0	0	0	200	300	0	0	0	0	0	0	0	200	903	0	0	0	0	0	0	0	603	903	0
691	5	0	0	0	0	0	0	200	300	0	0	0	0	0	0	0	200	903	0	0	0	0	0	0	0	603	903	0
691	6	0	0	0	0	0	0	200	300	0	0	0	0	0	0	0	200	903	0	0	0	0	0	0	0	603	903	0
691	7	0	0	0	0	0	0	200	300	0	0	0	0	0	0	0	200	903	0	0	0	0	0	0	0	603	903	0
691	8	0	0	0	0	0	0	200	300	0	0	0	0	0	0	0	200	903	0	0	0	0	0	0	0	603	903	0
691	9	0	0	0	0	0	0	200	300	0	0	0	0	0	0	0	200	903	0	0	0	0	0	0	0	603	903	0
692	0	0	0	0	0	0	0	200	300	0	0	0	0	0	0	0	200	903	0	0	0	0	0	0	0	603	903	0
692	1	0	0	0	0	0	0	200	300	0	0	0	0	0	0	0	200	903	0	0	0	0	0	0	0	603	903	0
692	2	0	0	0	0	0	0	200	300	0	0	0	0	0	0	0	200	903	0	0	0	0	0	0	0	603	903	0
692	3	0	0	0	0	0	0	200	300	0	0	0	0	0	0	0	200	903	0	0	0	0	0	0	0	603	903	0
692	4	0	0	0	0	0	0	200	300	0	0	0	0	0	0	0	200	903	0	0	0	0	0	0	0	603	903	0
692	5	0	0	0	0	0	0	200	300	0	0	0	0	0	0	0	200	903	0	0	0	0	0	0	0	603	903	0
692	6	0	0	0	0	0	0	200	300	0	0	0	0	0	0	0	200	903	0	0	0	0	0	0	0	603	903	0
692	7	0	0	0	0	0	0	200	300	0	0	0	0	0	0	0	200	903	0	0	0	0	0	0	0	603	903	0
692	8	0	0	0	0	0	0	200	300	0	0	0	0	0	0	0	200	903	0	0	0	0	0	0	0	603	903	0
692	9	0	0	0	0	0	0	200	300	0	0	0	0	0	0	0	200	903	0	0	0	0	0	0	0	603	903	0
693	0	0	0	0	0	0	0	200	300	0	0	0	0	0	0	0	200	903	0	0	0	0	0	0	0	603	903	0
693	1	0	0	0	0	0	0	200	300	0	0	0	0	0	0	0	200	903	0	0	0	0	0	0	0	603	903	0
693	2	0	0	0	0	0	0	200	300	0	0	0	0	0	0	0	200	903	0	0	0	0	0	0	0	603	903	0
693	3	0	0	0	0	0	0	200	300	0	0	0	0	0	0	0	200	903	0	0	0	0	0	0	0	603	903	0
693	4	0	0	0	0	0	0	200	300	0	0	0	0	0	0	0	200	903	0	0	0	0	0	0	0	603	903	0
693	5	0	0	0	0	0	0	200	300	0	0	0	0	0	0	0	200	903	0	0	0	0	0	0	0	603	903	0
693	6	0	0	0	0	0	0	200	300	0	0	0	0	0	0	0	200	903	0	0	0	0	0	0	0	603	903	0
693	7	0	0	0	0	0	0	200	300	0	0	0	0	0	0	0	200	903	0	0	0	0	0	0	0	603	903	0
693	8	0	0	0	0	0	0	200	300	0	0	0	0	0	0	0	200	903	0	0	0	0	0	0	0	603	903	0
693	9	0	0	0	0	0	0	200	300	0	0	0	0	0	0	0	200	903	0	0	0	0	0	0	0	603	903	0
694	0	0	0	0	0	0	0	200	300	0	0	0	0	0	0	0	200	903	0	0	0	0	0	0	0	603	903	0
694	1	0	0	0	0	0	0	200	300	0	0	0	0	0	0	0	200	903	0	0	0	0	0	0	0	603	903	0
694	2	0	0	0	0	0	0	200	300	0	0	0	0	0	0	0	200	903	0	0	0	0	0	0	0	603	903	0
694	3	0	0	0	0	0	0	200	300	0	0	0	0	0	0	0	200	903	0	0	0	0	0	0	0	603	903	0
694	4	0	0	0	0	0	0	200	300	0	0	0	0	0	0	0	200	903	0	0	0	0	0	0	0	603	903	0
694	5	0	0	0	0	0	0	200	300	0	0	0	0	0	0	0	200	903	0	0	0	0	0	0	0	603	903	0
694	6	0	0	0	0	0	0	200	300	0	0	0	0	0	0	0	200	903	0	0	0	0	0	0	0	603	903	0
694	7	0	0	0	0	0	0	200	300	0	0	0	0	0	0	0	200	903	0	0	0	0	0	0	0	603	903	0
694	8	0	0	0	0	0	0	200	300	0	0	0	0	0	0	0	200	903	0	0	0	0	0	0	0	603	903	0
694	9	0	0	0	0	0	0	200	300	0	0	0	0	0	0	0	200	903	0	0	0	0	0	0	0	603	903	0
695	0	0	0	0	0	0	0	200	300	0	0	0	0	0	0	0	200	903	0	0	0	0	0	0	0	603	903	0
695	1	0	0	0	0	0	0	200	300	0	0	0	0	0	0	0	200	903	0	0	0	0	0	0	0	603	903	0
695	2	0	0	0	0	0	0	200	300	0	0	0	0	0	0	0	200	903	0	0	0	0	0	0	0	603	903	0
695	3	0	0	0	0	0	0	200	300	0	0	0	0	0	0	0	200	903	0	0	0	0	0	0	0	603	903	0
695	4	0	0	0	0	0	0	200	300	0	0	0	0	0	0	0	200	903	0	0	0	0	0	0	0	603	903	0
695	5	0	0	0	0	0	0	200	300	0	0	0	0	0	0	0	200	903	0	0	0	0	0	0	0	603	903	0
695	6	0	0	0	0	0	0	200	300	0	0	0	0	0	0	0	200	903	0	0	0	0	0	0	0	603	903	0
695	7	0	0	0	0	0	0	200	300	0	0	0	0	0	0	0	200	903	0	0	0	0	0	0	0	603	903	0
695	8	0	0	0	0	0	0	200	300	0	0	0	0	0	0	0	200	903	0	0	0	0	0	0	0	603	903	0
695	9	0	0	0	0	0	0	200	300	0	0	0	0	0	0	0	200	903	0	0	0	0	0	0	0	603	903	0
696	0	0	0	0	0	0	0	200	300	0	0	0	0	0	0	0	200	903	0	0	0	0	0	0	0	603	903	0
696	1	0	0	0	0	0	0	200	300	0	0	0	0	0	0	0	200	903	0	0	0	0	0	0	0	603	903	0
696	2	0	0	0	0	0	0	200	300	0	0	0	0	0	0	0	200	903	0	0	0	0	0	0	0	603	903	0
696	3	0	0	0	0	0	0	200	300	0	0	0	0	0	0	0	200	903	0	0	0	0	0	0	0	603	903	0
696	4	0	0	0	0	0	0	200	300	0	0	0	0	0	0	0	200	903	0	0	0	0	0	0	0	603	903	0
696	5	0	0	0	0	0	0	200	300	0	0	0	0	0	0	0	200	903	0	0	0	0	0	0	0	603	903	0
696	6	0	0	0	0	0	0	200	300	0	0	0	0	0	0	0	200	903	0	0	0	0	0	0	0	603	903	0
696	7	0	0	0	0	0	0	200	300	0	0	0	0	0	0	0	200	903	0	0	0	0	0	0	0	603	903	0
696	8	0	0	0	0	0	0	200	300	0	0	0	0	0	0	0	200	903	0	0	0	0	0	0	0	603	903	0
696	9	0	0	0	0	0	0	200	300	0	0	0	0	0	0	0	200	903	0	0	0	0	0	0	0	603	903	0
697	0	0	0	0	0	0	0	200	300	0	0	0	0	0	0	0	200	903	0	0	0	0	0	0	0	603	903	0
697	1	0	0	0	0	0	0	200	300	0	0	0	0	0	0	0	200	903	0	0	0	0	0	0	0	603	903	0
697	2	0	0	0	0	0	0	200	300	0	0	0	0	0	0	0	200	903	0	0	0	0	0	0	0	603	903	0
697	3	0	0	0	0	0	0	200	300	0	0	0	0	0	0	0	200	903	0	0	0	0	0	0	0	603	903	0
697	4	0	0	0	0	0	0	200	300	0	0	0	0	0	0	0	200	903	0	0	0	0	0	0	0	603	903	0
697	5	0	0	0	0	0	0	200	300	0	0	0	0	0	0	0	200	903	0	0	0	0	0	0	0	603	903	0
697	6	0	0	0	0	0	0	200	300	0	0	0	0	0	0	0	200	903	0	0	0	0	0	0	0	603	903	0
697	7	0	0	0	0	0	0	200	300	0	0	0	0	0	0	0	200	903	0	0	0	0	0	0	0	603	903	0
697	8	0	0	0	0	0	0	200	300	0	0	0	0	0	0	0	200	903	0	0	0	0	0	0	0	603	903	0
697	9	0	0	0	0	0	0	200	300	0	0	0	0	0	0	0	200	903	0	0	0	0	0	0	0	603	903	0
698	0	0	0	0	0	0	0	200	300	0	0	0	0	0	0	0	200	903	0	0	0	0	0	0	0	603	903	0
698	1	0	0	0	0	0	0	200	300	0	0	0	0	0	0	0	200	903	0	0	0	0	0	0	0	603	903	0
698	2	0	0	0	0	0	0	200	300	0	0	0	0	0	0	0	200	903	0	0	0	0	0	0	0	603	903	0
698	3	0	0	0	0	0	0	200	300	0	0	0	0	0	0	0	200	903	0	0	0	0	0	0	0	603	903	0
698	4	0	0	0	0	0	0	200	300	0	0	0	0	0	0	0	200	903	0	0	0	0	0	0	0	603	903	0
698	5	0	0	0	0	0	0	200	300	0	0	0	0	0	0	0	200	903	0	0	0	0	0	0	0	603	903	0
698	6	0	0	0	0	0	0	200	300	0	0	0	0	0	0	0	200	903	0	0	0	0	0	0	0	603	903	0
698	7	0	0	0	0	0	0	200	300	0	0	0	0	0	0	0	200	903	0	0	0	0	0	0	0	603	903	0
698	8	0	0	0	0	0	0	200	300	0	0	0	0	0	0	0	200	903	0	0	0	0	0	0	0	603	903	0
698	9	0	0	0	0	0	0	200	300	0	0	0	0	0	0	0	200	903	0	0	0	0	0	0	0	603	903	0
699	0	0	0	0	0	0	0	200	300	0	0	0	0	0	0	0	200	903	0	0	0	0	0	0	0	603	903	0
699	1	0	0	0	0	0	0	200	300	0	0	0	0	0	0	0	200	903	0	0	0	0	0	0	0	603	903	0
699	2	0	0	0	0	0	0	200	300	0	0	0	0	0	0	0	200	903	0	0	0	0	0	0	0	603	903	0
699	3	0	0	0	0	0	0	200	300	0	0	0	0	0	0	0	200	903	0	0	0	0	0	0	0	603	903	0
699	4	0	0	0	0	0	0	200	300	0	0	0	0	0	0	0	200	903	0	0	0	0	0	0	0	603	903	0
699	5	0	0	0	0	0	0	200	300	0	0	0	0	0	0	0	200	903	0	0	0	0	0	0	0	603	903	0
699	6	0	0	0	0	0	0	200	300	0	0	0	0	0	0	0	200	903	0	0	0	0	0	0	0	603	903	0
699	7	0	0	0	0	0	0	200	300	0	0	0	0	0	0	0	200	903	0	0	0	0	0	0	0	603	903	0
699	8	0	0	0	0	0	0	200	300	0	0	0	0	0	0	0	200	903	0	0	0	0	0	0	0	603	903	0
699	9	0	0	0	0	0	0	200	300	0	0	0	0	0	0	0	200	903	0	0	0	0	0	0	0	603	903	0
700	0	0	0	0	0	0	0	200	300	0	0	0	0	0	0	0	200	903	0	0	0	0	0	0	0	603	903	0
700	1	0	0	0	0	0	0	200	300	0	0	0	0	0	0	0	200	903	0	0	0	0	0	0	0	603	903	0
700	2	0	0	0	0	0	0	200	300	0	0	0	0	0	0	0	200	903	0	0	0	0	0	0	0	603	903	0
700	3	0	0	0	0	0	0	200	300	0	0	0	0	0	0	0	200	903	0	0	0	0	0	0	0	603	903	0
700	4	0	0	0	0	0	0	200	300	0	0	0	0	0	0	0	200	903	0	0	0	0	0	0	0	603	903	0
700	5	0	0	0	0	0	0	200	300	0	0	0	0	0	0	0	200	903	0	0	0	0	0	0	0	603	903	0
700	6	0	0	0	0	0	0	200	300	0	0	0	0	0	0	0	200	903	0	0	0	0	0	0	0	603	903	0
700	7	0	0	0	0	0	0	200	300	0	0	0	0	0	0	0	200	903	0	0	0	0	0	0	0	603	903	0
700	8	0	0	0	0	0	0	200	300	0	0	0	0	0	0	0	200	903	0	0	0	0	0	0	0	603	903	0
700	9	0	0	0	0	0	0	200	300	0	0	0	0	0	0	0	200	903	0	0	0	0	0	0	0	603	903	0
701	0	0	0	0	0	0	0	200	300	0	0	0	0	0	0	0	200	903	0	0	0	0	0	0	0	603	903	0
701	1	0	0	0	0	0	0	200	300	0	0	0	0	0	0	0	200	903	0	0	0	0	0	0	0	603	903	0
701	2	0	0	0	0	0	0	200	300	0	0	0	0	0	0	0	200	903	0	0	0	0	0	0	0	603	903	0
701	3	0	0	0	0	0	0	200	300	0	0	0	0	0	0	0	200	903	0	0	0	0	0	0	0	603	903	0
701	4	0	0	0	0	0	0	200	300	0	0	0	0	0	0	0	200	903	0	0	0	0	0	0	0	603	903	0
701	5	0	0	0	0	0	0	200	300	0	0	0	0	0	0	0	200	903	0	0	0	0	0	0	0	603	903	0
701	6	0	0	0	0	0	0	200	300	0	0	0	0	0	0	0	200	903	0	0	0	0	0	0	0	603	903	0
701	7	0	0	0	0	0	0	200	300	0	0	0	0	0	0	0	200	903	0	0	0	0	0	0	0	603	903	0
701	8	0	0	0	0	0	0	200	300	0	0	0	0	0	0	0	200	903	0	0	0	0	0	0	0	603	903	0
701	9	0	0	0	0	0	0	200	300	0	0	0	0	0	0	0	200	903	0	0	0	0	0	0	0	603	903	0
702	0	0	0	0	0	0	0	200	300	0	0	0	0	0	0	0	200	903	0	0	0	0	0	0	0	603	903	0
702	1	0	0	0	0	0	0	200	300	0	0	0	0	0	0	0	200	903	0	0	0	0	0	0	0	603	903	0
702	2	0	0	0	0	0	0	200	300	0	0	0	0	0	0	0	200	903	0	0	0	0	0	0	0	603	903	0
702	3	0	0	0	0	0	0	200	300	0	0	0	0	0	0	0	200	903	0	0	0	0	0	0	0	603	903	0
702	4	0	0	0	0	0	0	200	300	0	0	0	0	0	0	0	200	903	0	0	0	0	0	0	0	603	903	0
702	5	0	0	0	0	0	0	200	300	0	0	0	0	0	0	0	200	903	0	0	0	0	0	0	0	603	903	0
702	6	0	0	0	0	0	0	200	300	0	0	0	0	0	0	0	200	903	0	0	0	0	0	0	0	603	903	0
702	7	0	0	0	0	0	0	200	300	0	0	0	0	0	0	0	200	903	0	0	0	0	0	0	0	603	903	0
702	8	0	0	0	0	0	0	200	300	0	0	0	0	0	0	0	200	903	0	0	0	0	0	0	0	603	903	0
702	9	0	0	0	0	0	0	200	300	0	0	0	0	0	0	0	200	903	0	0	0	0	0	0	0	603	903	0
703	0	0	0	0	0	0	0	200	300	0	0	0	0	0	0	0	200	903	0	0	0	0	0	0	0	603	903	0
703	1	0	0	0	0	0	0	200	300	0	0	0	0	0	0	0	200	903	0	0	0	0	0	0	0	603	903	0
703	2	0	0	0	0	0	0	200	300	0	0	0	0	0	0	0	200	903	0	0	0	0	0	0	0	603	903	0
703	3	0	0	0	0	0	0	200	300	0	0	0	0	0	0	0	200	903	0	0	0	0	0	0	0	603	903	0
703	4	0	0	0	0	0	0	200	300	0	0	0	0	0	0	0	200	903	0	0	0	0	0	0	0	603	903	0
703	5	0	0	0	0	0	0	200	300	0	0	0	0	0	0	0	200	903	0	0	0	0	0	0	0	603	903	0
703	6	0	0	0	0	0	0	200	300	0	0	0	0	0	0	0	200	903	0	0	0	0	0	0	0	603	903	0
703	7	0	0	0	0	0	0	200	300	0	0	0	0	0	0	0	200	903	0	0	0	0	0	0	0	603	903	0
703	8	0	0	0	0	0	0	200	300	0	0	0	0	0	0	0	200	903	0	0	0	0	0	0	0	603	903	0
703	9	0	0	0	0	0	0	200	300	0	0	0	0	0	0	0	200	903	0	0	0	0	0	0	0	603	903	0
704	0	0	0	0	0	0	0	200	300	0	0	0	0	0	0	0	200	903	0	0	0	0	0	0	0	603	903	0
704	1	0	0	0	0	0	0	200	300	0	0	0	0	0	0	0	200	903	0	0	0	0	0	0	0	603	903	0
704	2	0	0	0	0	0	0	200	300	0	0	0	0	0	0	0	200	903	0	0	0	0	0	0	0	603	903	0
704	3	0	0	0	0	0	0	200	300	0	0	0	0	0	0	0	200	903	0	0	0	0	0	0	0	603	903	0
704	4	0	0	0	0	0	0	200	300	0	0	0	0	0	0	0	200	903	0	0	0	0	0	0	0	603	903	0
704	5	0	0	0	0	0	0	200	300	0	0	0	0	0	0	0	200	903	0	0	0	0	0	0	0	603	903	0
704	6	0	0	0	0	0	0	200	300	0	0	0	0	0	0	0	200	903	0	0	0	0	0	0	0	603	903	0
704	7	0	0	0	0	0	0	200	300	0	0	0	0	0	0	0	200	903	0	0	0	0	0	0	0	603	903	0
704	8	0	0	0	0	0	0	200	300	0	0	0	0	0	0	0	200	903	0	0	0	0	0	0	0	603	903	0
704	9	0	0	0	0	0	0	200	300	0	0	0	0	0	0	0	200	903	0	0	0	0	0	0	0	603	903	0
705	0	0	0	0	0	0	0	200	300	0	0	0	0	0	0	0	200	903	0	0	0	0	0	0	0	603	903	0
705	1	0	0	0	0	0	0	200	300	0	0	0	0	0	0	0	200	903	0	0	0	0	0	0	0	603	903	0
705	2	0	0	0	0	0	0	200	300	0	0	0	0	0	0	0	200	903	0	0	0	0	0	0	0	603	903	0
705	3	0	0	0	0	0	0	200	300	0	0	0	0	0	0	0	200	903	0	0	0	0	0	0	0	603	903	0
705	4	0	0	0	0	0	0	200	300	0	0	0	0	0	0	0	200	903	0	0	0	0	0	0	0	603	903	0
705	5	0	0	0	0	0	0	200	300	0	0	0	0	0	0	0	200	903	0	0	0	0	0	0	0	603	903	0
705	6	0	0	0	0	0	0	200	300	0	0	0	0	0	0	0	200	903	0	0	0	0	0	0	0	603	903	0
705	7	0	0	0	0	0	0	200	300	0	0	0	0	0	0	0	200	903	0	0	0	0	0	0	0	603	903	0
705	8	0	0	0	0	0	0	200	300	0	0	0	0	0	0	0	200	903	0	0	0	0	0	0	0	603	903	0
705	9	0	0	0	0	0	0	200	300	0	0	0	0	0	0	0	200	903	0	0	0	0	0	0	0	603	903	0
706	0	0	0	0	0	0	0	200	300	0	0	0	0	0	0	0	200	903	0	0	0	0	0	0	0	603	903	0
706	1	0	0	0	0	0	0	200	300	0	0	0	0	0	0	0	200	903	0	0	0	0	0	0	0	603	903	0
706	2	0	0	0	0	0	0	200	300	0	0	0	0	0	0	0	200	903	0	0	0	0	0	0	0	603	903	0
706	3	0	0	0	0	0	0	200	300	0	0	0	0	0	0	0	200	903	0	0	0	0	0	0	0	603	903	0
706	4	0	0	0	0	0	0	200	300	0	0	0	0	0	0	0	200	903	0	0	0	0	0	0	0	603	903	0
706	5	0	0	0	0	0	0	200	300	0	0	0	0	0	0	0	200	903	0	0	0	0	0	0	0	603	903	0
706	6	0	0	0	0	0	0	200	300	0	0	0	0	0	0	0	200	903	0	0	0	0	0	0	0	603	903	0
706	7	0	0	0	0	0	0	200	300	0	0	0	0	0	0	0	200	903	0	0	0	0	0	0	0	603	903	0
706	8	0	0	0	0	0	0	200	300	0	0	0	0	0	0	0	200	903	0	0	0	0	0	0	0	603	903	0
706	9	0	0	0	0	0	0	200	300	0	0	0	0	0	0	0	200	903	0	0	0	0	0	0	0	603	903	0
707	0	0	0	0	0	0	0	200	300	0	0	0	0	0	0	0	200	903	0	0	0	0	0	0	0	603	903	0
707	1	0	0	0	0	0	0	200	300	0	0	0	0	0	0	0	200	903	0	0	0	0	0	0	0	603	903	0
707	2	0	0	0	0	0	0	200	300	0	0	0	0	0	0	0	200	903	0	0	0	0	0	0	0	603	903	0
707	3	0	0	0	0	0	0	200	300	0	0	0	0	0	0	0	200	903	0	0	0	0	0	0	0	603	903	0
707	4	0	0	0	0	0	0	200	300	0	0	0	0	0	0	0	200	903	0	0	0	0	0	0	0	603	903	0
707	5	0	0	0	0	0	0	200	300	0	0	0	0	0	0	0	200	903	0	0	0	0	0	0	0	603	903	0
707	6	0	0	0	0	0	0	200	300	0	0	0	0	0	0	0	200	903	0	0	0	0	0	0	0	603	903	0
707	7	0	0	0	0	0	0	200	300	0	0	0	0	0	0	0	200	903	0	0	0	0	0	0	0	603	903	0
707	8	0	0	0	0	0	0	200	300	0	0	0	0	0	0	0	200	903	0	0	0	0	0	0	0	603	903	0
707	9	0	0	0	0	0	0	200	300	0	0	0	0	0	0	0	200	903	0	0	0	0	0	0	0	603	903	0
708	0	0	0	0	0	0	0	200	300	0	0	0	0	0	0	0	200	903	0	0	0	0	0	0	0	603	903	0
708	1	0	0	0	0	0	0	200	300	0	0	0	0	0	0	0	200	903	0	0	0	0	0	0	0	603	903	0
708	2	0	0	0	0	0	0	200	300	0	0	0	0	0	0	0	200	903	0	0	0	0	0	0	0	603	903	0
708	3	0	0	0	0	0	0	200	300	0	0	0	0	0	0	0	200	903	0	0	0	0	0	0	0	603	903	0
708	4	0	0	0	0	0	0	200	300	0	0	0	0	0	0	0	200	903	0	0	0	0	0	0	0	603	903	0
708	5	0	0	0	0	0	0	200	300	0	0	0	0	0	0	0	200	903	0	0	0	0	0	0	0	603	903	0
708	6	0	0	0	0	0	0	200	300	0	0	0	0	0	0	0	200	903	0	0	0	0	0	0	0	603	903	0
708	7	0	0	0	0	0	0	200	300	0	0	0	0	0	0	0	200	903	0	0	0	0	0	0	0	603	903	0
708	8	0	0	0	0	0	0	200	300	0	0	0	0	0	0	0	200	903	0	0	0	0	0	0	0	603	903	0
708	9	0	0	0	0	0	0	200	300	0	0	0	0	0	0	0	200	903	0	0	0	0	0	0	0	603	903	0
709	0	0	0	0	0	0	0	200	300	0	0	0	0	0	0	0	200	903	0	0	0	0	0	0	0	603	903	0
709	1	0	0	0	0	0	0	200	300	0	0	0	0	0	0	0	200	903	0	0	0	0	0	0	0	603	903	0
709	2	0	0	0	0	0	0	200	300	0	0	0	0	0	0	0	200	903	0	0	0	0	0	0	0	603	903	0
709	3	0	0	0	0	0	0	200	300	0	0	0	0	0	0	0	200	903	0	0	0	0	0	0	0	603	903	0
709	4	0	0	0	0	0	0	200	300	0	0	0	0	0	0	0	200	903	0	0	0	0	0	0	0	603	903	0
709	5	0	0	0	0	0	0	200	300	0	0	0	0	0	0	0	200	903	0	0	0	0	0	0	0	603	903	0
709	6	0	0	0	0	0	0	200	300	0	0	0	0	0	0	0	200	903	0	0	0	0	0	0	0	603	903	0
709	7	0	0	0	0	0	0	200	300	0	0	0	0	0	0	0	200	903	0	0	0	0	0	0	0	603	903	0
709	8	0	0	0	0	0	0	200	300	0	0	0	0	0	0	0	200	903	0	0	0	0	0	0	0	603	903	0
709	9	0	0	0	0	0	0	200	300	0	0	0	0	0	0	0	200	903	0	0	0	0	0	0	0	603	903	0
710	0	0	0	0	0	0	0	200	300	0	0	0	0	0	0	0	200	903	0	0	0	0	0	0	0	603	903	0
710	1	0	0	0	0	0	0	200	300	0	0	0	0	0	0	0	200	903	0	0	0	0	0	0	0	603	903	0
710	2	0	0	0	0	0	0	200	300	0	0	0	0	0	0	0	200	903	0	0	0	0	0	0	0	603	903	0
710	3	0	0	0	0	0	0	200	300	0	0	0	0	0	0	0	200	903	0	0	0	0	0	0	0	603	903	0
710	4	0	0	0	0	0	0	200	300	0	0	0	0	0	0	0	200	903	0	0	0	0	0	0	0	603	903	0
710	5	0	0	0	0	0	0	200	300	0	0	0	0	0	0	0	200	903	0	0	0	0	0	0	0	603	903	0
710	6	0	0	0	0	0	0	200	300	0	0	0	0	0	0	0	200	903	0	0	0	0	0	0	0	603	903	0
710	7	0	0	0	0	0	0	200	300	0	0	0	0	0	0	0	200	903	0	0	0	0	0	0	0	603	903	0
710	8	0	0	0	0	0	0	200	300	0	0	0	0	0	0	0	200	903	0	0	0	0	0	0	0	603	903	0
710	9	0	0	0	0	0	0	200	300	0	0	0	0	0	0	0	200	903	0	0	0	0	0	0	0	603	903	0
711	0	0	0	0	0	0	0	200	300	0	0	0	0	0	0	0	200	903	0	0	0	0	0	0	0	603	903	0
711	1	0	0	0	0	0	0	200	300	0	0	0	0	0	0	0	200	903	0	0	0	0	0	0	0	603	903	0
711	2	0	0	0	0	0	0	200	300	0	0	0	0	0	0	0	200	903	0	0	0	0	0	0	0	603	903	0
711	3	0	0	0	0	0	0	200	300	0	0	0	0	0	0	0	200	903	0	0	0	0	0	0	0	603	903	0
711	4	0	0	0	0	0	0	200	300	0	0	0	0	0	0	0	200	903	0	0	0	0	0	0	0	603	903	0
711	5	0	0	0	0	0	0	200	300	0	0	0	0	0	0	0	200	903	0	0	0	0	0	0	0	603	903	0
711	6	0	0	0	0	0	0	200	300	0	0	0	0	0	0	0	200	903	0	0	0	0	0	0	0	603	903	0
711	7	0	0	0	0	0	0	200	300	0	0	0	0	0	0	0	200	903	0	0	0	0	0	0	0	603	903	0
711	8	0	0	0	0	0	0	200	300	0	0	0	0	0	0	0	200	903	0	0	0	0	0	0	0	603	903	0
711	9	0	0	0	0	0	0	200	300	0	0	0	0	0	0	0	200	903	0	0	0	0	0	0	0	603	903	0
712	0	0	0	0	0	0	0	200	300	0	0	0	0	0	0	0	200	903	0	0	0	0	0	0	0	603	903	0
712	1	0	0	0	0	0	0	200	300	0	0	0	0	0	0	0	200	903	0	0	0	0	0	0	0	603	903	0
712	2	0	0	0	0	0	0	200	300	0	0	0	0	0	0	0	200	903	0	0	0	0	0	0	0	603	903	0
712	3	0	0	0	0	0	0	200	300	0	0	0	0	0	0	0	200	903	0	0	0	0	0	0	0	603	903	0
712	4	0	0	0	0	0	0	200	300	0	0	0	0	0	0	0	200	903	0	0	0	0	0	0	0	603	903	0
712	5	0	0	0	0	0	0	200	300	0	0	0	0	0	0	0	200	903	0	0	0	0	0	0	0	603	903	0
712	6	0	0	0	0	0	0	200	300	0	0	0	0	0	0	0	200	903	0	0	0	0	0	0	0	603	903	0
712	7	0	0	0	0	0	0	200	300	0	0	0	0	0	0	0	200	903	0	0	0	0	0	0	0	603	903	0
712	8	0	0	0	0	0	0	200	300	0	0	0	0	0	0	0	200	903	0	0	0	0	0	0	0	603	903	0
712	9	0	0	0	0	0	0	200	300	0	0	0	0	0	0	0	200	903	0	0	0	0	0	0	0	603	903	0
713	0	0	0	0	0	0	0	200	300	0	0	0	0	0	0	0	200	903	0	0	0	0	0	0	0	603	903	0
713	1	0	0	0	0	0	0	200	300	0	0	0	0	0	0	0	200	903	0	0	0	0	0	0	0	603	903	0
713	2	0	0	0	0	0	0	200	300	0	0	0	0	0	0	0	200	903	0	0	0	0	0	0	0	603	903	0
713	3	0	0	0	0	0	0	200	300	0	0	0	0	0	0	0	200	903	0	0	0	0	0	0	0	603	903	0
713	4	0	0	0	0	0	0	200	300	0	0	0	0	0	0	0	200	903	0	0	0	0	0	0	0	603	903	0
713	5	0	0	0	0	0	0	200	300	0	0	0	0	0	0	0	200	903	0	0	0	0	0	0	0	603	903	0
713	6	0	0	0	0	0	0	200	300	0	0	0	0	0	0	0	200	903	0	0	0	0	0	0	0	603	903	0
713	7	0	0	0	0	0	0	200	300	0	0	0	0	0	0	0	200	903	0	0	0	0	0	0	0	603	903	0
713	8	0	0	0	0	0	0	200	300	0	0	0	0	0	0	0	200	903	0	0	0	0	0	0	0	603	903	0
713	9	0	0	0	0	0	0	200	300	0	0	0	0	0	0	0	200	903	0	0	0	0	0	0	0	603	903	0
714	0	0	0	0	0	0	0	200	300	0	0	0	0	0	0	0	200	903	0	0	0	0	0	0	0	603	903	0
714	1	0	0	0	0	0	0	200	300	0	0	0	0	0	0	0	200	903	0	0	0	0	0	0	0	603	903	0
714	2	0	0	0	0	0	0	200	300	0	0	0	0	0	0	0	200	903	0	0	0	0	0	0	0	603	903	0
714	3	0	0	0	0	0	0	200	300	0	0	0	0	0	0	0	200	903	0	0	0	0	0	0	0	603	903	0
714	4	0	0	0	0	0	0	200	300	0	0	0	0	0	0	0	200	903	0	0	0	0	0	0	0	603	903	0
714	5	0	0	0	0	0	0	200	300	0	0	0	0	0	0	0	200	903	0	0	0	0	0	0	0	603	903	0
714	6	0	0	0	0	0	0	200	300	0	0	0	0	0	0	0	200	903	0	0	0	0	0	0	0	603	903	0
714	7	0	0	0	0	0	0	200	300	0	0	0	0	0	0	0	200	903	0	0	0	0	0	0	0	603	903	0
714	8	0	0	0	0	0	0	200	300	0	0	0	0	0	0	0	200	903	0	0	0	0	0	0	0	603	903	0
714	9	0	0	0	0	0	0	200	300	0	0	0	0	0	0	0	200	903	0	0	0	0	0	0	0	603	903	0
715	0	0	0	0	0	0	0	200	300	0	0	0	0	0	0	0	200	903	0	0	0	0	0	0	0	603	903	0
715	1	0	0	0	0	0	0	200	300	0	0	0	0	0	0	0	200	903	0	0	0	0	0	0	0	603	903	0
715	2	0	0	0	0	0	0	200	300	0	0	0	0	0	0	0	200	903	0	0	0	0	0	0	0	603	903	0
715	3	0	0	0	0	0	0	200	300	0	0	0	0	0	0	0	200	903	0	0	0	0	0	0	0	603	903	0
715	4	0	0	0	0	0	0	200	300	0	0	0	0	0	0	0	200	903	0	0	0	0	0	0	0	603	903	0
715	5	0	0	0	0	0	0	200	300	0	0	0	0	0	0	0	200	903	0	0	0	0	0	0	0	603	903	0
715	6	0	0	0	0	0	0	200	300	0	0	0	0	0	0	0	200	903	0	0	0	0	0	0	0	603	903	0
715	7	0	0	0	0	0	0	200	300	0	0	0	0	0	0	0	200	903	0	0	0	0	0	0	0	603	903	0
715	8	0	0	0	0	0	0	200	300	0	0	0	0	0	0	0	200	903	0	0	0	0	0	0	0	603	903	0
715	9	0	0	0	0	0	0	200	300	0	0	0	0	0	0	0	200	903	0	0	0	0	0	0	0	603	903	0
716	0	0	0	0	0	0	0	200	300	0	0	0	0	0	0	0	200	903	0	0	0	0	0	0	0	603	903	0
716	1	0	0	0	0	0	0	200	300	0	0	0	0	0	0	0	200	903	0	0	0	0	0	0	0	603	903	0
716	2	0	0	0	0	0	0	200	300	0	0	0	0	0	0	0	200	903	0	0	0	0	0	0	0	603	903	0
716	3	0	0	0	0	0	0	200	300	0	0	0	0	0	0	0	200	903	0	0	0	0	0	0	0	603	903	0
716	4	0	0	0	0	0	0	200	300	0	0	0	0	0	0	0	200	903	0	0	0	0	0	0	0	603	903	0
716	5	0	0	0	0	0	0	200	300	0	0	0	0	0	0	0	200	903	0	0	0	0	0	0	0	603	903	0
716	6	0	0	0	0	0	0	200	300	0	0	0	0	0	0	0	200	903	0	0	0	0	0	0	0	603	903	0
716	7	0	0	0	0	0	0	200	300	0	0	0	0	0	0	0	200	903	0	0	0	0	0	0	0	603	903	0
716	8	0	0	0	0	0	0	200	300	0	0	0	0	0	0	0	200	903	0	0	0	0	0	0	0	603	903	0
716	9	0	0	0	0	0	0	200	300	0	0	0	0	0	0	0	200	903	0	0	0	0	0	0	0	603	903	0
717	0	0	0	0	0	0	0	200	300	0	0	0	0	0	0	0	200	903	0	0	0	0	0	0	0	603	903	0
717	1	0	0	0	0	0	0	200	300	0	0	0	0	0	0	0	200	903	0	0	0	0	0	0	0	603	903	0
717	2	0	0	0	0	0	0	200	300	0	0	0	0	0	0	0	200	903	0	0	0	0	0	0	0	603	903	0
717	3	0	0	0	0	0	0	200	300	0	0	0	0	0	0	0	200	903	0	0	0	0	0	0	0	603	903	0
717	4	0	0	0	0	0	0	200	300	0	0	0	0	0	0	0	200	903	0	0	0	0	0	0	0	603	903	0
717	5	0	0	0	0	0	0	200	300	0	0	0	0	0	0	0	200	903	0	0	0	0	0	0	0	603	903	0
717	6	0	0	0	0	0	0	200	300	0	0	0	0	0	0	0	200	903	0	0	0	0	0	0	0	603	903	0
717	7	0	0	0	0	0	0	200	300	0	0	0	0	0	0	0	200	903	0	0	0	0	0	0	0	603	903	0
717	8	0	0	0	0	0	0	200	300	0	0	0	0	0	0	0	200	903	0	0	0	0	0	0	0	603	903	0
717	9	0	0	0	0	0	0	200	300	0	0	0	0	0	0	0	200	903	0	0	0	0	0	0	0	603	903	0
718	0	0	0	0	0	0	0	200	300	0	0	0	0	0	0	0	200	903	0	0	0	0	0	0	0	603	903	0
718	1	0	0	0	0	0	0	200	300	0	0	0	0	0	0	0	200	903	0	0	0	0	0	0	0	603	903	0
718	2	0	0	0	0	0	0	200	300	0	0	0	0	0	0	0	200	903	0	0	0	0	0	0	0	603	903	0
718	3	0	0	0	0	0	0	200	300	0	0	0	0	0	0	0	200	903	0	0	0	0	0	0	0	603	903	0
718	4	0	0	0	0	0	0	200	300	0	0	0	0	0	0	0	200	903	0	0	0	0	0	0	0	603	903	0
718	5	0	0	0	0	0	0	200	300	0	0	0	0	0	0	0	200	903	0	0	0	0	0	0	0	603	903	0
718	6	0	0	0	0	0	0	200	300	0	0	0	0	0	0	0	200	903	0	0	0	0	0	0	0	603	903	0
718	7	0	0	0	0	0	0	200	300	0	0	0	0	0	0	0	200	903	0	0	0	0	0	0	0	603	903	0
718	8	0	0	0	0	0	0	200	300	0	0	0	0	0	0	0	200	903	0	0	0	0	0	0	0	603	903	0
718	9	0	0	0	0	0	0	200	300	0	0	0	0	0	0	0	200	903	0	0	0	0	0	0	0	603	903	0
719	0	0	0	0	0	0	0	200	300	0	0	0	0	0	0	0	200	903	0	0	0	0	0	0	0	603	903	0
719	1	0	0	0	0	0	0	200	300	0	0	0	0	0	0	0	200	903	0	0	0	0	0	0	0	603	903	0
719	2	0	0	0	0	0	0	200	300	0	0	0	0	0	0	0	200	903	0	0	0	0	0	0	0	603	903	0
719	3	0	0	0	0	0	0	200	300	0	0	0	0	0	0	0	200	903	0	0	0	0	0	0	0	603	903	0
719	4	0	0	0	0	0	0	200	300	0	0	0	0	0	0	0	200	903	0	0	0	0	0	0	0	603	903	0
719	5	0	0	0	0	0	0	200	300	0	0	0	0	0	0	0	200	903	0	0	0	0	0	0	0	603	903	0
719	6	0	0	0	0	0	0	200	300	0	0	0	0	0	0	0	200	903	0	0	0	0	0	0	0	603	903	0
719	7	0	0	0	0	0	0	200	300	0	0	0	0	0	0	0	200	903	0	0	0	0	0	0	0	603	903	0
719	8	0	0	0	0	0	0	200	300	0	0	0	0	0	0	0	200	903	0	0	0	0	0	0	0	603	903	0
719	9	0	0	0	0	0	0	200	300	0	0	0	0	0	0	0	200	903	0	0	0	0	0	0	0	603	903	0
720	0	0	0	0	0	0	0	200	300	0	0	0	0	0	0	0	200	903	0	0	0	0	0	0	0	603	903	0
720	1	0	0	0	0	0	0	200	300	0	0	0	0	0	0	0	200	903	0	0	0	0	0	0	0	603	903	0
720	2	0	0	0	0	0	0	200	300	0	0	0	0	0	0	0	200	903	0	0	0	0	0	0	0	603	903	0
720	3	0	0	0	0	0	0	200	300	0	0	0	0	0	0	0	200	903	0	0	0	0	0	0	0	603	903	0
720	4	0	0	0	0	0	0	200	300	0	0	0	0	0	0	0	200	903	0	0	0	0	0	0	0	603	903	0
720	5	0	0	0	0	0	0	200	300	0	0	0	0	0	0	0	200	903	0	0	0	0	0	0	0	603	903	0
720	6	0	0	0	0	0	0	200	300	0	0	0	0	0	0	0	200	903	0	0	0	0	0	0	0	603	903	0
720	7	0	0	0	0	0	0	200	300	0	0	0	0	0	0	0	200	903	0	0	0	0	0	0	0	603	903	0
720	8	0	0	0	0	0	0	200	300	0	0	0	0	0	0	0	200	903	0	0	0	0	0	0	0	603	903	0
720	9	0	0	0	0	0	0	200	300	0	0	0	0	0	0	0	200	903	0	0	0	0	0	0	0	603	903	0
721	0	0	0	0	0	0	0	200	300	0	0	0	0	0	0	0	200	903	0	0	0	0	0	0	0	603	903	0
721	1	0	0	0	0	0	0	200	300	0	0	0	0	0	0	0	200	903	0	0	0	0	0	0	0	603	903	0
721	2	0	0	0	0	0	0	200	300	0	0	0	0	0	0	0	200	903	0	0	0	0	0	0	0	603	903	0
721	3	0	0	0	0	0	0	200	300	0	0	0	0	0	0	0	200	903	0	0	0	0	0	0	0	603	903	0
721	4	0	0	0	0	0	0	200	300	0	0	0	0	0	0	0	200	903	0	0	0	0	0	0	0	603	903	0
721	5	0	0	0	0	0	0	200	300	0	0	0	0	0	0	0	200	903	0	0	0	0	0	0	0	603	903	0
721	6	0	0	0	0	0	0	200	300	0	0	0	0	0	0	0	200	903	0	0	0	0	0	0	0	603	903	0
721	7	0	0	0	0	0	0	200	300	0	0	0	0	0	0	0	200	903	0	0	0	0	0	0	0	603	903	0
721	8	0	0	0	0	0	0	200	300	0	0	0	0	0	0	0	200	903	0	0	0	0	0	0	0	603	903	0
721	9	0	0	0	0	0	0	200	300	0	0	0	0	0	0	0	200	903	0	0	0	0	0	0	0	603	903	0
722	0	0	0	0	0	0	0	200	300	0	0	0	0	0	0	0	200	903	0	0	0	0	0	0	0	603	903	0
722	1	0	0	0	0	0	0	200	300	0	0	0	0	0	0	0	200	903	0	0	0	0	0	0	0	603	903	0
722	2	0	0	0	0	0	0	200	300	0	0	0	0	0	0	0	200	903	0	0	0	0	0	0	0	603	903	0
722	3	0	0	0	0	0	0	200	300	0	0	0	0	0	0	0	200	903	0	0	0	0	0	0	0	603	903	0
722	4	0	0	0	0	0	0	200	300	0	0	0	0	0	0	0	200	903	0	0	0	0	0	0	0	603	903	0
722	5	0	0	0	0	0	0	200	300	0	0	0	0	0	0	0	200	903	0	0	0	0	0	0	0	603	903	0
722	6	0	0	0	0	0	0	200	300	0	0	0	0	0	0	0	200	903	0	0	0	0	0	0	0	603	903	0
722	7	0	0	0	0	0	0	200	300	0	0	0	0	0	0	0	200	903	0	0	0	0	0	0	0	603	903	0
722	8	0	0	0	0	0	0	200	300	0	0	0	0	0	0	0	200	903	0	0	0	0	0	0	0	603	903	0
722	9	0	0	0	0	0	0	200	300	0	0	0	0	0	0	0	200	903	0	0	0	0	0	0	0	603	903	0
723	0	0	0	0	0	0	0	200	300	0	0	0	0	0	0	0	200	903	0	0	0	0	0	0	0	603	903	0
723	1	0	0	0	0	0	0	200	300	0	0	0	0	0	0	0	200	903	0	0	0	0	0	0	0	603	903	0
723	2	0	0	0	0	0	0	200	300	0	0	0	0	0	0	0	200	903	0	0	0	0	0	0	0	603	903	0
723	3	0	0	0	0	0	0	200	300	0	0	0	0	0	0	0	200	903	0	0	0	0	0	0	0	603	903	0
723	4	0	0	0	0	0	0	200	300	0	0	0	0	0	0	0	200	903	0	0	0	0	0	0	0	603	903	0
723	5	0	0	0	0	0	0	200	300	0	0	0	0	0	0	0	200	903	0	0	0	0	0	0	0	603	903	0
723	6	0	0	0	0	0	0	200	300	0	0	0	0	0	0	0	200	903	0	0	0	0	0	0	0	603	903	0
723	7	0	0	0	0	0	0	200	300	0	0	0	0	0	0	0	200	903	0	0	0	0	0	0	0	603	903	0
723	8	0	0	0	0	0	0	200	300	0	0	0	0	0	0	0	200	903	0	0	0	0	0	0	0	603	903	0
723	9	0	0	0	0	0	0	200	300	0	0	0	0	0	0	0	200	903	0	0	0	0	0	0	0	603	903	0
724	0	0	0	0	0	0	0	200	300	0	0	0	0	0	0	0	200	903	0	0	0	0	0	0	0	603	903	0
724	1	0	0	0	0	0	0	200	300	0	0	0	0	0	0	0	200	903	0	0	0	0	0	0	0	603	903	0
724	2	0	0	0	0	0	0	200	300	0	0	0	0	0	0	0	200	903	0	0	0	0	0	0	0	603	903	0
724	3	0	0	0	0	0	0	200	300	0	0	0	0	0	0	0	200	903	0	0	0	0	0	0	0	603	903	0
724	4	0	0	0	0	0	0	200	300	0	0	0	0	0	0	0	200	903	0	0	0	0	0	0	0	603	903	0
724	5	0	0	0	0	0	0	200	300	0	0	0	0	0	0	0	200	903	0	0	0	0	0	0	0	603	903	0
724	6	0	0	0	0	0	0	200	300	0	0	0	0	0	0	0	200	903	0	0	0	0	0	0	0	603	903	0
724	7	0	0	0	0	0	0	200	300	0	0	0	0	0	0	0	200	903	0	0	0	0	0	0	0	603	903	0
724	8	0	0	0	0	0	0	200	300	0	0	0	0	0	0	0	200	903	0	0	0	0	0	0	0	603	903	0
724	9	0	0	0	0	0	0	200	300	0	0	0	0	0	0	0	200	903	0	0	0	0	0	0	0	603	903	0
725	0	0	0	0	0	0	0	200	300	0	0	0	0	0	0	0	200	903	0	0	0	0	0	0	0	603	903	0
725	1	0	0	0	0	0	0	200	300	0	0	0	0	0	0	0	200	903	0	0	0	0	0	0	0	603	903	0
725	2	0	0	0	0	0	0	200	300	0	0	0	0	0	0	0	200	903	0	0	0	0	0	0	0	603	903	0
725	3	0	0	0	0	0	0	200	300	0	0	0	0	0	0	0	200	903	0	0	0	0	0	0	0	603	903	0
725	4	0	0	0	0	0	0	200	300	0	0	0	0	0	0	0	200	903	0	0	0	0	0	0	0	603	903	0
725	5	0	0	0	0	0	0	200	300	0	0	0	0	0	0	0	200	903	0	0	0	0	0	0	0	603	903	0
725	6	0	0	0	0	0	0	200	300	0	0	0	0	0	0	0	200	903	0	0	0	0	0	0	0	603	903	0
725	7	0	0	0	0	0	0	200	300	0	0	0	0	0	0	0	200	903	0	0	0	0	0	0	0	603	903	0
725	8	0	0	0	0	0	0	200	300	0	0	0	0	0	0	0	200	903	0	0	0	0	0	0	0	603	903	0
725	9	0	0	0	0	0	0	200	300	0	0	0	0	0	0	0	200	903	0	0	0	0	0	0	0	603	903	0
726	0	0	0	0	0	0	0	200	300	0	0	0	0	0	0	0	200	903	0	0	0	0	0	0	0	603	903	0
726	1	0	0	0	0	0	0	200	300	0	0	0	0	0	0	0	200	903	0	0	0	0	0	0	0	603	903	0
726	2	0	0	0	0	0	0	200	300	0	0	0	0	0	0	0	200	903	0	0	0	0	0	0	0	603	903	0
726	3	0	0	0	0	0	0	200	300	0	0	0	0	0	0	0	200	903	0	0	0	0	0	0	0	603	903	0
726	4	0	0	0	0	0	0	200	300	0	0	0	0	0	0	0	200	903	0	0	0	0	0	0	0	603	903	0
726	5	0	0	0	0	0	0	200	300	0	0	0	0	0	0	0	200	903	0	0	0	0	0	0	0	603	903	0
726	6	0	0	0	0	0	0	200	300	0	0	0	0	0	0	0	200	903	0	0	0	0	0	0	0	603	903	0
726	7	0	0	0	0	0	0	200	300	0	0	0	0	0	0	0	200	903	0	0	0	0	0	0	0	603	903	0
726	8	0	0	0	0	0	0	200	300	0	0	0	0	0	0	0	200	903	0	0	0	0	0	0	0	603	903	0
726	9	0	0	0	0	0	0	200	300	0	0	0	0	0	0	0	200	903	0	0	0	0	0	0	0	603	903	0
727	0	0	0	0	0	0	0	200	300	0	0	0	0	0	0	0	200	903	0	0	0	0	0	0	0	603	903	0
727	1	0	0	0	0	0	0	200	300	0	0	0	0	0	0	0	200	903	0	0	0	0	0	0	0	603	903	0
727	2	0	0	0	0	0	0	200	300	0	0	0	0	0	0	0	200	903	0	0	0	0	0	0	0	603	903	0
727	3	0	0	0	0	0	0	200	300	0	0	0	0	0	0	0	200	903	0	0	0	0	0	0	0	603	903	0
727	4	0	0	0	0	0	0	200	300	0	0	0	0	0	0	0	200	903	0	0	0	0	0	0	0	603	903	0
727	5	0	0	0	0	0	0	200	300	0	0	0	0	0	0	0	200	903	0	0	0	0	0	0	0	603	903	0
727	6	0	0	0	0	0	0	200	300	0	0	0	0	0	0	0	200	903	0	0	0	0	0	0	0	603	903	0
727	7	0	0	0	0	0	0	200	300	0	0	0	0	0	0	0	200	903	0	0	0	0	0	0	0	603	903	0
727	8	0	0	0	0	0	0	200	300	0	0	0	0	0	0	0	200	903	0	0	0	0	0	0	0	603	903	0
727	9	0	0	0	0	0	0	200	300	0	0	0	0	0	0	0	200	903	0	0	0	0	0	0	0	603	903	0
728	0	0	0	0	0	0	0	200	300	0	0	0	0	0	0	0	200	903	0	0	0	0	0	0	0	603	903	0
728	1	0	0	0	0	0	0	200	300	0	0	0	0	0	0	0	200	903	0	0	0	0	0	0	0	603	903	0
728	2	0	0	0	0	0	0	200	300	0	0	0	0	0	0	0	200	903	0	0	0	0	0	0	0	603	903	0
728	3	0	0	0	0	0	0	200	300	0	0	0	0	0	0	0	200	903	0	0	0	0	0	0	0	603	903	0
728	4	0	0	0	0	0	0	200	300	0	0	0	0	0	0	0	200	903	0	0	0	0	0	0	0	603	903	0
728	5	0	0	0	0	0	0	200	300	0	0	0	0	0	0	0	200	903	0	0	0	0	0	0	0	603	903	0
728	6	0	0	0	0	0	0	200	300	0	0	0	0	0	0	0	200	903	0	0	0	0	0	0	0	603	903	0
728	7	0	0	0	0	0	0	200	300	0	0	0	0	0	0	0	200	903	0	0	0	0	0	0	0	603	903	0
728	8	0	0	0	0	0	0	200	300	0	0	0	0	0	0	0	200	903	0	0	0	0	0	0	0	603	903	0
728	9	0	0	0	0	0	0	200	300	0	0	0	0	0	0	0	200	903	0	0	0	0	0	0	0	603	903	0
729	0	0	0	0	0	0	0	200	300	0	0	0	0	0	0	0	200	903	0	0	0	0	0	0	0	603	903	0
729	1	0	0	0	0	0	0	200	300	0	0	0	0	0	0	0	200	903	0	0	0	0	0	0	0	603	903	0
729	2	0	0	0	0	0	0	200	300	0	0	0	0	0	0	0	200	903	0	0	0	0	0	0	0	603	903	0
729	3	0	0	0	0	0	0	200	300	0	0	0	0	0	0	0	200	903	0	0	0	0	0	0	0	603	903	0
729	4	0	0	0	0	0	0	200	300	0	0	0	0	0	0	0	200	903	0	0	0	0	0	0	0	603	903	0
729	5	0	0	0	0	0	0	200	300	0	0	0	0	0	0	0	200	903	0	0	0	0	0	0	0	603	903	0
729	6	0	0	0	0	0	0	200	300	0	0	0	0	0	0	0	200	903	0	0	0	0	0	0	0	603	903	0
729	7	0	0	0	0	0	0	200	300	0	0	0	0	0	0	0	200	903	0	0	0	0	0	0	0	603	903	0
729	8	0	0	0	0	0	0	200	300	0	0	0	0	0	0	0	200	903	0	0	0	0	0	0	0	603	903	0
729	9	0	0	0	0	0	0	200	300	0	0	0	0	0	0	0	200	903	0	0	0	0	0	0	0	603	903	0
730	0	0	0	0	0	0	0	200	300	0	0	0	0	0	0	0	200	903	0	0	0	0	0	0	0	603	903	0
730	1	0	0	0	0	0	0	200	300	0	0	0	0	0	0	0	200	903	0	0	0	0	0	0	0	603	903	0
730	2	0	0	0	0	0	0	200	300	0	0	0	0	0	0	0	200	903	0	0	0	0	0	0	0	603	903	0
730	3	0	0	0	0	0	0	200	300	0	0	0	0	0	0	0	200	903	0	0	0	0	0	0	0	603	903	0
730	4	0	0	0	0	0	0	200	300	0	0	0	0	0	0	0	200	903	0	0	0	0	0	0	0	603	903	0
730	5	0	0	0	0	0	0	200	300	0	0	0	0	0	0	0	200	903	0	0	0	0	0	0	0	603	903	0
730	6	0	0	0	0	0	0	200	300	0	0	0	0	0	0	0	200	903	0	0	0	0	0	0	0	603	903	0
730	7	0	0	0	0	0	0	200	300	0	0	0	0	0	0	0	200	903	0	0	0	0	0	0	0	603	903	0
730	8	0	0	0	0	0	0	200	300	0	0	0	0	0	0	0	200	903	0	0	0	0	0	0	0	603	903	0
730	9	0	0	0	0	0	0	200	300	0	0	0	0	0	0	0	200	903	0	0	0	0	0	0	0	603	903	0
731	0	0	0	0	0	0	0	200	300	0	0	0	0	0	0	0	200	903	0	0	0	0	0	0	0	603	903	0
731	1	0	0	0	0	0	0	200	300	0	0	0	0	0	0	0	200	903	0	0	0	0	0	0	0	603	903	0
731	2	0	0	0	0	0	0	200	300	0	0	0	0	0	0	0	200	903	0	0	0	0	0	0	0	603	903	0
731	3	0	0	0	0	0	0	200	300	0	0	0	0	0	0	0	200	903	0	0	0	0	0	0	0	603	903	0
731	4	0	0	0	0	0	0	200	300	0	0	0	0	0	0	0	200	903	0	0	0	0	0	0	0	603	903	0
731	5	0	0	0	0	0	0	200	300	0	0	0	0	0	0	0	200	903	0	0	0	0	0	0	0	603	903	0
731	6	0	0	0	0	0	0	200	300	0	0	0	0	0	0	0	200	903	0	0	0	0	0	0	0	603	903	0
731	7	0	0	0	0	0	0	200	300	0	0	0	0	0	0	0	200	903	0	0	0	0	0	0	0	603	903	0
731	8	0	0	0	0	0	0	200	300	0	0	0	0	0	0	0	200	903	0	0	0	0	0	0	0	603	903	0
731	9	0	0	0	0	0	0	200	300	0	0	0	0	0	0	0	200	903	0	0	0	0	0	0	0	603	903	0
732	0	0	0	0	0	0	0	200	300	0	0	0	0	0	0	0	200	903	0	0	0	0	0	0	0	603	903	0
732	1	0	0	0	0	0	0	200	300	0	0	0	0	0	0	0	200	903	0	0	0	0	0	0	0	603	903	0
732	2	0	0	0	0	0	0	200	300	0	0	0	0	0	0	0	200	903	0	0	0	0	0	0	0	603	903	0
732	3	0	0	0	0	0	0	200	300	0	0	0	0	0	0	0	200	903	0	0	0	0	0	0	0	603	903	0
732	4	0	0	0	0	0	0	200	300	0	0	0	0	0	0	0	200	903	0	0	0	0	0	0	0	603	903	0
732	5	0	0	0	0	0	0	200	300	0	0	0	0	0	0	0	200	903	0	0	0	0	0	0	0	603	903	0
732	6	0	0	0	0	0	0	200	300	0	0	0	0	0	0	0	200	903	0	0	0	0	0	0	0	603	903	0
732	7	0	0	0	0	0	0	200	300	0	0	0	0	0	0	0	200	903	0	0	0	0	0	0	0	603	903	0
732	8	0	0	0	0	0	0	200	300	0	0	0	0	0	0	0	200	903	0	0	0	0	0	0	0	603	903	0
732	9	0	0	0	0	0	0	200	300	0	0	0	0	0	0	0	200	903	0	0	0	0	0	0	0	603	903	0
733	0	0	0	0	0	0	0	200	300	0	0	0	0	0	0	0	200	903	0	0	0	0	0	0	0	603	903	0
733	1	0	0	0	0	0	0	200	300	0	0	0	0	0	0	0	200	903	0	0	0	0	0	0	0	603	903	0
733	2	0	0	0	0	0	0	200	300	0	0	0	0	0	0	0	200	903	0	0	0	0	0	0	0	603	903	0
733	3	0	0	0	0	0	0	200	300	0	0	0	0	0	0	0	200	903	0	0	0	0	0	0	0	603	903	0
733	4	0	0	0	0	0	0	200	300	0	0	0	0	0	0	0	200	903	0	0	0	0	0	0	0	603	903	0
733	5	0	0	0	0	0	0	200	300	0	0	0	0	0	0	0	200	903	0	0	0	0	0	0	0	603	903	0
733	6	0	0	0	0	0	0	200	300	0	0	0	0	0	0	0	200	903	0	0	0	0	0	0	0	603	903	0
733	7	0	0	0	0	0	0	200	300	0	0	0	0	0	0	0	200	903	0	0	0	0	0	0	0	603	903	0
733	8	0	0	0	0	0	0	200	300	0	0	0	0	0	0	0	200	903	0	0	0	0	0	0	0	603	903	0
733	9	0	0	0	0	0	0	200	300	0	0	0	0	0	0	0	200	903	0	0	0	0	0	0	0	603	903	0
734	0	0	0	0	0	0	0	200	300	0	0	0	0	0	0	0	200	903	0	0	0	0	0	0	0	603	903	0
734	1	0	0	0	0	0	0	200	300	0	0	0	0	0	0	0	200	903	0	0	0	0	0	0	0	603	903	0
734	2	0	0	0	0	0	0	200	300	0	0	0	0	0	0	0	200	903	0	0	0	0	0	0	0	603	903	0
734	3	0	0	0	0	0	0	200	300	0	0	0	0	0	0	0	200	903	0	0	0	0	0	0	0	603	903	0
734	4	0	0	0	0	0	0	200	300	0	0	0	0	0	0	0	200	903	0	0	0	0	0	0	0	603	903	0
734	5	0	0	0	0	0	0	200	300	0	0	0	0	0	0	0	200	903	0	0	0	0	0	0	0	603	903	0
734	6	0	0	0	0	0	0	200	300	0	0	0	0	0	0	0	200	903	0	0	0	0	0	0	0	603	903	0
734	7	0	0	0	0	0	0	200	300	0	0	0	0	0	0	0	200	903	0	0	0	0	0	0	0	603	903	0
734	8	0	0	0	0	0	0	200	300	0	0	0	0	0	0	0	200	903	0	0	0	0	0	0	0	603	903	0
734	9	0	0	0	0	0	0	200	300	0	0	0	0	0	0	0	200	903	0	0	0	0	0	0	0	603	903	0
735	0	0	0	0	0	0	0	200	300	0	0	0	0	0	0	0	200	903	0	0	0	0	0	0	0	603	903	0
735	1	0	0	0	0	0	0	200	300	0	0	0	0	0	0	0	200	903	0	0	0	0	0	0	0	603	903	0
735	2	0	0	0	0	0	0	200	300	0	0	0	0	0	0	0	200	903	0	0	0	0	0	0	0	603	903	0
735	3	0	0	0	0	0	0	200	300	0	0	0	0	0	0	0	200	903	0	0	0	0	0	0	0	603	903	0
735	4	0	0	0	0	0	0	200	300	0	0	0	0	0	0	0	200	903	0	0	0	0	0	0	0	603	903	0
735	5	0	0	0	0	0	0	200	300	0	0	0	0	0	0	0	200	903	0	0	0	0	0	0	0	603	903	0
735	6	0	0	0	0	0	0	200	300	0	0	0	0	0	0	0	200	903	0	0	0	0	0	0	0	603	903	0
735	7	0	0	0	0	0	0	200	300	0	0	0	0	0	0	0	200	903	0	0	0	0	0	0	0	603	903	0
735	8	0	0	0	0	0	0	200	300	0	0	0	0	0	0	0	200	903	0	0	0	0	0	0	0	603	903	0
735	9	0	0	0	0	0	0	200	300	0	0	0	0	0	0	0	200	903	0	0	0	0	0	0	0	603	903	0
736	0	0	0	0	0	0	0	200	300	0	0	0	0	0	0	0	200	903	0	0	0	0	0	0	0	603	903	0
736	1	0	0	0	0	0	0	200	300	0	0	0	0	0	0	0	200	903	0	0	0	0	0	0	0	603	903	0
736	2	0	0	0	0	0	0	200	300	0	0	0	0	0	0	0	200	903	0	0	0	0	0	0	0	603	903	0
736	3	0	0	0	0	0	0	200	300	0	0	0	0	0	0	0	200	903	0	0	0	0	0	0	0	603	903	0
736	4	0	0	0	0	0	0	200	300	0	0	0	0	0	0	0	200	903	0	0	0	0	0	0	0	603	903	0
736	5	0	0	0	0	0	0	200	300	0	0	0	0	0	0	0	200	903	0	0	0	0	0	0	0	603	903	0
736	6	0	0	0	0	0	0	200	300	0	0	0	0	0	0	0	200	903	0	0	0	0	0	0	0	603	903	0
736	7	0	0	0	0	0	0	200	300	0	0	0	0	0	0	0	200	903	0	0	0	0	0	0	0	603	903	0
736	8	0	0	0	0	0	0	200	300	0	0	0	0	0	0	0	200	903	0	0	0	0	0	0	0	603	903	0
736	9	0	0	0	0	0	0	200	300	0	0	0	0	0	0	0	200	903	0	0	0	0	0	0	0	603	903	0
737	0	0	0	0	0	0	0	200	300	0	0	0	0	0	0	0	200	903	0	0	0	0	0	0	0	603	903	0
737	1	0	0	0	0	0	0	200	300	0	0	0	0	0	0	0	200	903	0	0	0	0	0	0	0	603	903	0
737	2	0	0	0	0	0	0	200	300	0	0	0	0	0	0	0	200	903	0	0	0	0	0	0	0	603	903	0
737	3	0	0	0	0	0	0	200	300	0	0	0	0	0	0	0	200	903	0	0	0	0	0	0	0	603	903	0
737	4	0	0	0	0	0	0	200	300	0	0	0	0	0	0	0	200	903	0	0	0	0	0	0	0	603	903	0
737	5	0	0	0	0	0	0	200	300	0	0	0	0	0	0	0	200	903	0	0	0	0	0	0	0	603	903	0
737	6	0	0	0	0	0	0	200	300	0	0	0	0	0	0	0	200	903	0	0	0	0	0	0	0	603	903	0
737	7	0	0	0	0	0	0	200	300	0	0	0	0	0	0	0	200	903	0	0	0	0	0	0	0	603	903	0
737	8	0	0	0	0	0	0	200	300	0	0	0	0	0	0	0	200	903	0	0	0	0	0	0	0	603	903	0
737	9	0	0	0	0	0	0	200	300	0	0	0	0	0	0	0	200	903	0	0	0	0	0	0	0	603	903	0
738	0	0	0	0	0	0	0	200	300	0	0	0	0	0	0	0	200	903	0	0	0	0	0	0	0	603	903	0
738	1	0	0	0	0	0	0	200	300	0	0	0	0	0	0	0	200	903	0	0	0	0	0	0	0	603	903	0
738	2	0	0	0	0	0	0	200	300	0	0	0	0	0	0	0	200	903	0	0	0	0	0	0	0	603	903	0
738	3	0	0	0	0	0	0	200	300	0	0	0	0	0	0	0	200	903	0	0	0	0	0	0	0	603	903	0
738	4	0	0	0	0	0	0	200	300	0	0	0	0	0	0	0	200	903	0	0	0	0	0	0	0	603	903	0
738	5	0	0	0	0	0	0	200	300	0	0	0	0	0	0	0	200	903	0	0	0	0	0	0	0	603	903	0
738	6	0	0	0	0	0	0	200	300	0	0	0	0	0	0	0	200	903	0	0	0	0	0	0	0	603	903	0
738	7	0	0	0	0	0	0	200	300	0	0	0	0	0	0	0	200	903	0	0	0	0	0	0	0	603	903	0
738	8	0	0	0	0	0	0	200	300	0	0	0	0	0	0	0	200	903	0	0	0	0	0	0	0	603	903	0
738	9	0	0	0	0	0	0	200	300	0	0	0	0	0	0	0	200	903	0	0	0	0	0	0	0	603	903	0
739	0	0.580137	5.90091	-9.80164	1167.48	76.5382	-115.723	207.809	180.889	0	0	0	0	0	0	0	200	903	0	0	0	0	0	0	0	603	903	0
739	1	0.274961	4.68021	-10.412	892.824	137.573	-115.723	213.213	214.25	0	0	0	0	0	0	0	200	903	0	0	0	0	0	0	0	603	903	0
739	2	0.580137	3.91727	-10.7172	1625.25	-533.813	-115.723	150.191	148.351	0	0	0	0	0	0	0	200	903	0	0	0	0	0	0	0	603	903	0
739	3	-0.33539	5.44315	-9.80164	1075.93	-289.673	-115.723	170.447	190.23	0	0	0	0	0	0	0	200	903	0	0	0	0	0	0	0	603	903	0
739	4	2.56378	6.35868	-11.0223	892.824	-106.567	-115.723	190.332	218.999	0	0	0	0	0	0	0	200	903	0	0	0	0	0	0	0	603	903	0
739	5	1.19049	5.59574	-12.5482	1442.14	-289.673	21.6065	176.915	185.072	0	0	0	0	0	0	0	200	903	0	0	0	0	0	0	0	603	903	0
739	6	0.274961	5.90091	-14.0741	1259.04	-411.743	-161.499	170.745	210.542	0	0	0	0	0	0	0	200	903	0	0	0	0	0	0	0	603	903	0
739	7	2.10602	8.34232	-13.1586	2266.12	-167.602	-115.723	187.263	127.784	0	0	0	0	0	0	0	200	903	0	0	0	0	0	0	0	603	903	0
739	8	1.64825	10.0208	-14.3793	1533.69	-838.989	-115.723	141.653	193.34	0	0	0	0	0	0	0	200	903	0	0	0	0	0	0	0	603	903	0
739	9	2.41119	8.18973	-15.6	2174.56	-716.919	-24.1699	154.044	160.605	0	0	0	0	0	0	0	200	903	0	0	0	0	0	0	0	603	903	0
740	0	3.78448	9.56302	-18.0414	2815.43	-472.778	-24.1699	173.795	143.946	0	0	0	0	0	0	0	200	903	0	0	0	0	0	0	0	603	903	0
740	1	2.41119	12.3096	-19.5673	2723.88	-777.954	-115.723	160.242	160.794	0	0	0	0	0	0	0	200	903	0	0	0	0	0	0	0	603	903	0
740	2	3.47931	11.8518	-19.5673	3273.2	-655.884	-115.723	166.481	132.721	0	0	0	0	0	0	0	200	903	0	0	0	0	0	0	0	603	903	0
740	3	2.41119	10.9363	-19.2621	3181.64	-961.06	-24.1699	150.106	134.824	0	0	0	0	0	0	0	200	903	0	0	0	0	0	0	0	603	903	0
740	4	3.93707	11.2415	-22.0087	3456.3	-900.025	250.488	159.106	142.957	0	0	0	0	0	0	0	200	903	0	0	0	0	0	0	0	603	903	0
740	5	4.70001	14.751	-23.8397	2998.54	-900.025	-69.9462	162.247	174.221	0	0	0	0	0	0	0	200	903	0	0	0	0	0	0	0	603	903	0
740	6	4.70001	14.2932	-25.6708	3181.64	-1266.24	-115.723	150.674	176.06	0	0	0	0	0	0	0	200	903	0	0	0	0	0	0	0	603	903	0
740	7	5.92071	14.4458	-24.4501	3547.85	-1327.27	204.712	145.715	154.894	0	0	0	0	0	0	0	200	903	0	0	0	0	0	0	0	603	903	0
740	8	4.08966	16.2769	-25.976	4097.17	-1083.13	21.6065	158.303	142.271	0	0	0	0	0	0	0	200	903	0	0	0	0	0	0	0	603	903	0
740	9	6.0733	18.5657	-28.7225	3822.51	-1083.13	67.3829	162.29	166.916	0	0	0	0	0	0	0	200	903	0	0	0	0	0	0	0	603	903	0
741	0	6.53106	18.7183	-32.0795	4097.17	-1449.34	67.3829	154.82	172.281	0	0	0	0	0	0	0	200	903	0	0	0	0	0	0	0	603	903	0
741	1	5.76813	19.4812	-34.2157	4829.59	-1388.31	67.3829	159.425	158.849	0	0	0	0	0	0	0	200	903	0	0	0	0	0	0	0	603	903	0
741	2	6.22589	20.3968	-35.7416	5378.91	-1449.34	113.159	159.449	149.506	0	0	0	0	0	0	0	200	903	0	0	0	0	0	0	0	603	903	0
741	3	7.75177	22.3804	-37.2675	5928.23	-1876.59	113.159	149.645	140.928	0	0	0	0	0	0	0	200	903	0	0	0	0	0	0	0	603	903	0
741	4	8.36212	21.1597	-43.0658	7301.52	-1815.55	250.488	157.842	130.457	0	0	0	0	0	0	0	200	903	0	0	0	0	0	0	0	603	903	0
741	5	7.44659	17.6502	-44.8969	7209.97	-2059.69	342.041	154.124	139.41	0	0	0	0	0	0	0	200	903	0	0	0	0	0	0	0	603	903	0
741	6	6.83624	13.3777	-54.0521	9132.58	-2425.9	525.147	155.119	131.041	0	0	0	0	0	0	0	200	903	0	0	0	0	0	0	0	603	903	0
741	7	6.68365	6.0535	-60.1556	9681.89	-2914.19	1211.79	151.556	139.053	0	0	0	0	0	0	0	200	903	0	0	0	0	0	0	0	603	903	0
741	8	8.51471	2.54398	-70.5316	10689	-3097.29	1440.67	156.086	148.451	0	0	0	0	0	0	0	200	903	0	0	0	0	0	0	0	603	903	0
741	9	10.3458	-2.64401	-81.8231	12611.6	-3463.5	1944.21	157.671	145.868	0	0	0	0	0	0	0	200	903	0	0	0	0	0	0	0	603	903	0
742	0	12.0242	-7.832	-90.0629	13984.9	-3829.71	2859.74	157.477	144.721	0	0	0	0	0	0	0	200	903	0	0	0	0	0	0	0	603	903	0
742	1	14.7708	-9.0527	-99.5233	16182.1	-4012.82	3088.62	159.68	137.404	0	0	0	0	0	0	0	200	903	0	0	0	0	0	0	0	603	903	0
742	2	13.7027	-11.1889	-109.899	17555.4	-4562.13	3180.18	158.488	140.259	0	0	0	0	0	0	0	200	903	0	0	0	0	0	0	0	603	903	0
742	3	15.8389	-14.6985	-121.496	19294.9	-4867.31	3637.94	159.939	141.189	0	0	0	0	0	0	0	200	903	0	0	0	0	0	0	0	603	903	0
742	4	16.7545	-16.0717	-133.703	22133.1	-5355.59	3912.6	159.944	134.461	0	0	0	0	0	0	0	200	903	0	0	0	0	0	0	0	603	903	0
742	5	16.907	-18.9709	-147.131	23781	-6271.12	4233.03	157.377	138.368	0	0	0	0	0	0	0	200	903	0	0	0	0	0	0	0	603	903	0
742	6	18.5855	-22.9382	-158.727	25612.1	-6881.47	4416.14	156.646	138.641	0	0	0	0	0	0	0	200	903	0	0	0	0	0	0	0	603	903	0
742	7	19.6536	-26.1425	-168.188	27351.6	-7308.72	5102.79	156.544	137.375	0	0	0	0	0	0	0	200	903	0	0	0	0	0	0	0	603	903	0
742	8	21.6373	-30.7202	-183.141	30281.3	-8102.17	5514.77	155.76	134.656	0	0	0	0	0	0	0	200	903	0	0	0	0	0	0	0	603	903	0
742	9	22.5528	-34.3823	-198.095	31746.1	-8651.49	6338.75	156.327	139.743	0	0	0	0	0	0	0	200	903	0	0	0	0	0	0	0	603	903	0
743	0	22.7054	-35.603	-210.607	34126.5	-9139.77	5835.21	156.603	137.962	0	0	0	0	0	0	0	200	903	0	0	0	0	0	0	0	603	903	0
743	1	24.2313	-37.1289	-218.237	35408.2	-9505.98	5926.76	156.442	137.753	0	0	0	0	0	0	0	200	903	0	0	0	0	0	0	0	603	903	0
743	2	23.7735	-37.8918	-230.749	36415.3	-9872.19	5743.65	157.217	142.187	0	0	0	0	0	0	0	200	903	0	0	0	0	0	0	0	603	903	0
743	3	24.3838	-35.1452	-240.209	38154.8	-10665.7	6384.52	155.599	141.16	0	0	0	0	0	0	0	200	903	0	0	0	0	0	0	0	603	903	0
743	4	24.3838	-32.8564	-250.585	39161.9	-11276	5743.65	155.001	143.718	0	0	0	0	0	0	0	200	903	0	0	0	0	0	0	0	603	903	0
743	5	23.4683	-29.8047	-258.825	40169	-11337	5331.67	156.198	144.803	0	0	0	0	0	0	0	200	903	0	0	0	0	0	0	0	603	903	0
743	6	23.0106	-26.2951	-262.182	41267.6	-11764.3	5331.67	155.129	142.599	0	0	0	0	0	0	0	200	903	0	0	0	0	0	0	0	603	903	0
743	7	22.095	-22.4804	-267.065	41450.7	-12374.6	4782.35	153.664	144.792	0	0	0	0	0	0	0	200	903	0	0	0	0	0	0	0	603	903	0
743	8	21.7899	-17.7502	-273.168	42274.7	-12313.6	4278.81	154.923	145.243	0	0	0	0	0	0	0	200	903	0	0	0	0	0	0	0	603	903	0
743	9	20.7217	-13.4777	-278.661	42457.8	-12557.7	4233.03	154.936	147.637	0	0	0	0	0	0	0	200	903	0	0	0	0	0	0	0	603	903	0
744	0	20.1114	-8.74752	-283.239	43190.2	-12679.8	4049.93	155.233	147.513	0	0	0	0	0	0	0	200	903	0	0	0	0	0	0	0	603	903	0
744	1	19.501	-3.40695	-284.46	43373.3	-13290.2	3546.39	153.279	147.524	0	0	0	0	0	0	0	200	903	0	0	0	0	0	0	0	603	903	0
744	2	19.3484	1.62845	-287.206	43648	-12740.8	2859.74	155.639	148.026	0	0	0	0	0	0	0	200	903	0	0	0	0	0	0	0	603	903	0
744	3	19.1959	6.0535	-288.427	44014.2	-13046	2951.3	154.768	147.399	0	0	0	0	0	0	0	200	903	0	0	0	0	0	0	0	603	903	0
744	4	18.1277	10.4786	-292.7	43922.6	-13290.2	2585.08	154.595	149.94	0	0	0	0	0	0	0	200	903	0	0	0	0	0	0	0	603	903	0
744	5	17.5174	15.6665	-295.141	44014.2	-13046	2310.42	155.797	150.871	0	0	0	0	0	0	0	200	903	0	0	0	0	0	0	0	603	903	0
744	6	17.0596	18.7183	-296.057	43739.5	-13534.3	1989.99	154.285	152.26	0	0	0	0	0	0	0	200	903	0	0	0	0	0	0	0	603	903	0
744	7	17.67	24.8218	-300.634	43648	-13839.5	1989.99	153.966	154.814	0	0	0	0	0	0	0	200	903	0	0	0	0	0	0	0	603	903	0
744	8	17.5174	28.1787	-303.686	44197.3	-13900.5	1669.56	154.227	154.464	0	0	0	0	0	0	0	200	903	0	0	0	0	0	0	0	603	903	0
744	9	16.2967	31.3831	-307.653	44288.8	-14144.7	1257.57	154.024	156.043	0	0	0	0	0	0	0	200	903	0	0	0	0	0	0	0	603	903	0
745	0	16.7545	36.1133	-309.789	44471.9	-14022.6	1074.46	154.735	156.445	0	0	0	0	0	0	0	200	903	0	0	0	0	0	0	0	603	903	0
745	1	15.076	38.4021	-313.146	44105.7	-14632.9	525.147	153.271	159.153	0	0	0	0	0	0	0	200	903	0	0	0	0	0	0	0	603	903	0
745	2	15.6863	40.691	-321.386	45387.5	-14755	891.358	154.089	158.776	0	0	0	0	0	0	0	200	903	0	0	0	0	0	0	0	603	903	0
745	3	13.5501	41.4539	-325.048	45662.1	-15182.3	158.936	153.292	159.522	0	0	0	0	0	0	0	200	903	0	0	0	0	0	0	0	603	903	0
745	4	11.1087	44.2005	-335.424	47493.2	-16219.8	-253.052	151.644	158.409	0	0	0	0	0	0	0	200	903	0	0	0	0	0	0	0	603	903	0
745	5	9.58282	45.5738	-342.138	47767.8	-16525	-390.381	151.701	160.384	0	0	0	0	0	0	0	200	903	0	0	0	0	0	0	0	603	903	0
745	6	9.888	46.4893	-347.326	48683.4	-16708.1	-802.368	151.895	159.834	0	0	0	0	0	0	0	200	903	0	0	0	0	0	0	0	603	903	0
745	7	8.6673	47.2522	-359.228	49690.4	-17257.4	-1031.25	151.96	161.674	0	0	0	0	0	0	0	200	903	0	0	0	0	0	0	0	603	903	0
745	8	6.83624	46.0315	-367.773	49965.1	-18050.9	-1489.01	150.918	164.141	0	0	0	0	0	0	0	200	903	0	0	0	0	0	0	0	603	903	0
745	9	5.46295	46.6419	-373.571	51338.4	-18661.3	-1489.01	150.046	162.574	0	0	0	0	0	0	0	200	903	0	0	0	0	0	0	0	603	903	0
746	0	3.93707	46.9471	-382.116	51704.6	-19027.5	-1992.55	150.205	164.689	0	0	0	0	0	0	0	200	903	0	0	0	0	0	0	0	603	903	0
746	1	3.78448	48.0152	-391.271	51887.7	-19454.7	-2129.88	150.278	167.387	0	0	0	0	0	0	0	200	903	0	0	0	0	0	0	0	603	903	0
746	2	2.2586	48.1678	-401.342	53261	-20309.2	-2084.11	149.397	167.293	0	0	0	0	0	0	0	200	903	0	0	0	0	0	0	0	603	903	0
746	3	1.34308	49.541	-410.497	54268.1	-20980.6	-2175.66	148.89	167.799	0	0	0	0	0	0	0	200	903	0	0	0	0	0	0	0	603	903	0
746	4	1.0379	49.9988	-417.211	54725.8	-20980.6	-2312.99	149.712	168.829	0	0	0	0	0	0	0	200	903	0	0	0	0	0	0	0	603	903	0
746	5	-0.33539	50.9143	-426.061	55366.7	-22445.4	-2724.98	147.319	170.05	0	0	0	0	0	0	0	200	903	0	0	0	0	0	0	0	603	903	0
746	6	-1.40351	52.5928	-436.437	56190.7	-22689.6	-3091.19	148.012	171.251	0	0	0	0	0	0	0	200	903	0	0	0	0	0	0	0	603	903	0
746	7	-1.40351	54.1187	-443.151	57564	-22872.7	-2816.53	148.386	170.103	0	0	0	0	0	0	0	200	903	0	0	0	0	0	0	0	603	903	0
746	8	-1.55609	55.492	-448.034	57930.2	-23361	-2587.65	147.859	170.701	0	0	0	0	0	0	0	200	903	0	0	0	0	0	0	0	603	903	0
746	9	-2.01386	55.6446	-454.138	58845.7	-24093.4	-2953.86	146.947	170.423	0	0	0	0	0	0	0	200	903	0	0	0	0	0	0	0	603	903	0
747	0	-3.08197	58.6963	-462.988	59395	-24825.8	-3411.62	146.379	171.714	0	0	0	0	0	0	0	200	903	0	0	0	0	0	0	0	603	903	0
747	1	-3.9975	61.2903	-473.669	59669.7	-24825.8	-3640.5	147.588	174.027	0	0	0	0	0	0	0	200	903	0	0	0	0	0	0	0	603	903	0
747	2	-6.13373	62.8162	-477.941	60310.6	-25314.1	-3503.18	147.035	173.812	0	0	0	0	0	0	0	200	903	0	0	0	0	0	0	0	603	903	0
747	3	-6.43891	65.2576	-483.129	61043	-25741.3	-3732.06	146.72	173.651	0	0	0	0	0	0	0	200	903	0	0	0	0	0	0	0	603	903	0
747	4	-6.59149	66.9361	-488.622	60310.6	-25802.4	-4510.25	147.194	176.57	0	0	0	0	0	0	0	200	903	0	0	0	0	0	0	0	603	903	0
747	5	-8.11737	69.2249	-495.947	60585.2	-26656.9	-4556.03	146.251	177.839	0	0	0	0	0	0	0	200	903	0	0	0	0	0	0	0	603	903	0
747	6	-10.2536	71.6663	-501.135	60676.8	-26962	-4601.81	146.198	178.921	0	0	0	0	0	0	0	200	903	0	0	0	0	0	0	0	603	903	0
747	7	-9.94843	72.7344	-502.966	60951.4	-27328.2	-5196.9	145.666	178.816	0	0	0	0	0	0	0	200	903	0	0	0	0	0	0	0	603	903	0
747	8	-12.695	72.5818	-505.102	61409.2	-26962	-5425.78	146.621	178.422	0	0	0	0	0	0	0	200	903	0	0	0	0	0	0	0	603	903	0
747	9	-12.0847	75.1758	-511.511	62233.2	-27938.6	-5196.9	145.38	178.335	0	0	0	0	0	0	0	200	903	0	0	0	0	0	0	0	603	903	0
748	0	-13.3054	76.3965	-518.224	62324.7	-28365.8	-5517.34	145.263	179.734	0	0	0	0	0	0	0	200	903	0	0	0	0	0	0	0	603	903	0
748	1	-15.5942	77.9224	-520.361	62324.7	-28060.7	-5700.44	146.075	180.228	0	0	0	0	0	0	0	200	903	0	0	0	0	0	0	0	603	903	0
748	2	-16.0519	78.6853	-521.887	62141.6	-28793.1	-6112.43	144.829	180.929	0	0	0	0	0	0	0	200	903	0	0	0	0	0	0	0	603	903	0
748	3	-15.4416	79.2957	-525.244	62874	-28854.1	-6066.65	145.065	180.295	0	0	0	0	0	0	0	200	903	0	0	0	0	0	0	0	603	903	0
748	4	-16.9675	79.1431	-533.788	62416.3	-30013.8	-6020.88	143.772	183.069	0	0	0	0	0	0	0	200	903	0	0	0	0	0	0	0	603	903	0
748	5	-17.7304	78.2276	-546.911	62599.4	-30624.1	-6341.31	144.005	185.54	0	0	0	0	0	0	0	200	903	0	0	0	0	0	0	0	603	903	0
748	6	-25.3598	80.0586	-556.677	62233.2	-31234.5	-6890.63	143.891	188.206	0	0	0	0	0	0	0	200	903	0	0	0	0	0	0	0	603	903	0
748	7	-31.4633	84.0259	-564.001	62965.6	-32577.3	-7119.51	142.239	188.359	0	0	0	0	0	0	0	200	903	0	0	0	0	0	0	0	603	903	0
748	8	-31.4633	88.9087	-568.273	63789.6	-32699.3	-7714.6	142.458	187.748	0	0	0	0	0	0	0	200	903	0	0	0	0	0	0	0	603	903	0
748	9	-34.3625	89.8243	-574.987	63881.1	-33431.8	-8263.92	141.857	188.9	0	0	0	0	0	0	0	200	903	0	0	0	0	0	0	0	603	903	0
749	0	-38.635	92.1131	-580.48	64430.4	-34042.1	-9087.89	141.355	189.005	0	0	0	0	0	0	0	200	903	0	0	0	0	0	0	0	603	903	0
749	1	-40.466	98.2166	-590.551	63972.7	-34286.3	-9271	141.942	191.673	0	0	0	0	0	0	0	200	903	0	0	0	0	0	0	0	603	903	0
749	2	-39.3979	104.625	-595.739	64613.5	-34835.6	-9545.65	141.525	191.541	0	0	0	0	0	0	0	200	903	0	0	0	0	0	0	0	603	903	0
749	3	-40.7712	107.067	-605.2	64338.9	-35018.7	-10232.3	142.137	193.69	0	0	0	0	0	0	0	200	903	0	0	0	0	0	0	0	603	903	0
749	4	-37.7194	109.966	-612.524	64796.6	-35690.1	-10552.7	141.733	194.214	0	0	0	0	0	0	0	200	903	0	0	0	0	0	0	0	603	903	0
749	5	-34.5151	113.781	-616.491	64705.1	-35995.2	-10003.4	141.613	195.043	0	0	0	0	0	0	0	200	903	0	0	0	0	0	0	0	603	903	0
749	6	-35.5832	115.612	-620.153	64796.6	-35934.2	-10598.5	142.056	195.515	0	0	0	0	0	0	0	200	903	0	0	0	0	0	0	0	603	903	0
749	7	-35.8884	117.748	-629.308	66078.4	-36849.7	-10415.4	141.444	194.998	0	0	0	0	0	0	0	200	903	0	0	0	0	0	0	0	603	903	0
749	8	-35.1254	117.9	-636.938	65986.8	-37154.9	-10415.4	141.666	196.4	0	0	0	0	0	0	0	200	903	0	0	0	0	0	0	0	603	903	0
749	9	-32.8366	120.342	-640.905	66078.4	-37032.8	-10690.1	142.218	196.898	0	0	0	0	0	0	0	200	903	0	0	0	0	0	0	0	603	903	0
750	0	-31.0056	119.884	-645.483	66810.8	-37215.9	-10735.8	142.344	196.495	0	0	0	0	0	0	0	200	903	0	0	0	0	0	0	0	603	903	0
750	1	-30.3952	118.206	-652.502	66444.6	-38192.5	-10873.2	141.468	198.17	0	0	0	0	0	0	0	200	903	0	0	0	0	0	0	0	603	903	0
750	2	-33.447	120.952	-659.826	66719.2	-38497.7	-11010.5	141.655	198.884	0	0	0	0	0	0	0	200	903	0	0	0	0	0	0	0	603	903	0
750	3	-34.3625	120.494	-665.93	66627.7	-38619.8	-11056.3	142.006	199.948	0	0	0	0	0	0	0	200	903	0	0	0	0	0	0	0	603	903	0
750	4	-31.6159	119.579	-669.592	66444.6	-38741.8	-10827.4	142.141	200.769	0	0	0	0	0	0	0	200	903	0	0	0	0	0	0	0	603	903	0
750	5	-31.4633	119.426	-675.39	68092.6	-39901.5	-11010.5	140.921	199.18	0	0	0	0	0	0	0	200	903	0	0	0	0	0	0	0	603	903	0
750	6	-32.3788	120.952	-685.461	67451.7	-40450.8	-11422.5	140.987	201.597	0	0	0	0	0	0	0	200	903	0	0	0	0	0	0	0	603	903	0
750	7	-33.2944	122.173	-692.48	67360.1	-40084.6	-11056.3	142.114	202.726	0	0	0	0	0	0	0	200	903	0	0	0	0	0	0	0	603	903	0
750	8	-32.3788	122.173	-695.532	68092.6	-40756	-11102.1	141.403	202.1	0	0	0	0	0	0	0	200	903	0	0	0	0	0	0	0	603	903	0
750	9	-32.684	123.394	-698.889	68458.8	-40939.1	-11559.8	141.423	202.046	0	0	0	0	0	0	0	200	903	0	0	0	0	0	0	0	603	903	0
751	0	-30.7004	125.682	-707.739	68825	-41305.3	-11605.6	141.638	202.754	0	0	0	0	0	0	0	200	903	0	0	0	0	0	0	0	603	903	0
751	1	-33.1418	125.988	-715.368	68550.3	-41610.5	-11239.4	141.833	204.175	0	0	0	0	0	0	0	200	903	0	0	0	0	0	0	0	603	903	0
751	2	-34.0573	127.208	-720.861	69191.2	-42220.8	-11147.8	141.43	204.016	0	0	0	0	0	0	0	200	903	0	0	0	0	0	0	0	603	903	0
751	3	-33.1418	126.445	-724.828	69465.8	-42709.1	-11605.6	141.077	204.162	0	0	0	0	0	0	0	200	903	0	0	0	0	0	0	0	603	903	0
751	4	-31.6159	130.26	-731.542	69008.1	-42526	-11651.4	141.868	205.668	0	0	0	0	0	0	0	200	903	0	0	0	0	0	0	0	603	903	0
751	5	-32.5314	130.718	-737.341	69099.6	-42831.2	-11880.3	141.911	206.285	0	0	0	0	0	0	0	200	903	0	0	0	0	0	0	0	603	903	0
751	6	-32.9892	131.328	-742.834	69282.7	-43319.5	-11742.9	141.684	206.732	0	0	0	0	0	0	0	200	903	0	0	0	0	0	0	0	603	903	0
751	7	-31.9211	133.312	-745.58	69008.1	-43868.8	-11651.4	141.162	207.444	0	0	0	0	0	0	0	200	903	0	0	0	0	0	0	0	603	903	0
751	8	-32.3788	134.075	-749.853	69923.6	-44235	-12017.6	141.008	206.75	0	0	0	0	0	0	0	200	903	0	0	0	0	0	0	0	603	903	0
751	9	-29.7849	133.922	-758.398	69832	-44357.1	-11697.1	141.512	207.922	0	0	0	0	0	0	0	200	903	0	0	0	0	0	0	0	603	903	0
752	0	-32.0737	133.312	-760.839	70747.6	-44784.3	-11514	141.138	207.014	0	0	0	0	0	0	0	200	903	0	0	0	0	0	0	0	603	903	0
752	1	-33.1418	134.685	-768.469	71296.9	-44723.3	-11605.6	141.802	207.222	0	0	0	0	0	0	0	200	903	0	0	0	0	0	0	0	603	903	0
752	2	-32.684	133.617	-771.52	70930.7	-44845.3	-11971.8	141.874	208.064	0	0	0	0	0	0	0	200	903	0	0	0	0	0	0	0	603	903	0
752	3	-30.853	132.396	-774.572	71663.1	-45638.8	-11742.9	141.079	207.48	0	0	0	0	0	0	0	200	903	0	0	0	0	0	0	0	603	903	0
752	4	-31.3107	132.701	-782.507	71754.7	-45699.8	-11422.5	141.598	208.302	0	0	0	0	0	0	0	200	903	0	0	0	0	0	0	0	603	903	0
752	5	-31.1581	133.159	-787.084	71205.3	-45882.9	-11697.1	141.705	209.533	0	0	0	0	0	0	0	200	903	0	0	0	0	0	0	0	603	903	0
752	6	-30.853	133.159	-791.357	71480	-46066	-11742.9	141.789	209.674	0	0	0	0	0	0	0	200	903	0	0	0	0	0	0	0	603	903	0
752	7	-29.6323	133.159	-793.493	71754.7	-46615.4	-11742.9	141.253	209.571	0	0	0	0	0	0	0	200	903	0	0	0	0	0	0	0	603	903	0
752	8	-28.4116	133.464	-800.512	71846.2	-46554.3	-11422.5	141.844	210.25	0	0	0	0	0	0	0	200	903	0	0	0	0	0	0	0	603	903	0
752	9	-29.0219	133.77	-804.174	72212.4	-46310.2	-11468.3	142.413	210.203	0	0	0	0	0	0	0	200	903	0	0	0	0	0	0	0	603	903	0
753	0	-26.4279	132.244	-807.531	71846.2	-47042.6	-11422.5	141.745	211.03	0	0	0	0	0	0	0	200	903	0	0	0	0	0	0	0	603	903	0
753	1	-27.6486	132.701	-808.752	73036.4	-47164.7	-11605.6	141.682	209.692	0	0	0	0	0	0	0	200	903	0	0	0	0	0	0	0	603	903	0
753	2	-26.4279	132.701	-812.719	72670.2	-47225.7	-11285.2	141.892	210.584	0	0	0	0	0	0	0	200	903	0	0	0	0	0	0	0	603	903	0
753	3	-25.5124	133.922	-818.517	73402.6	-47469.8	-11147.8	142.005	210.323	0	0	0	0	0	0	0	200	903	0	0	0	0	0	0	0	603	903	0
753	4	-25.3598	131.939	-821.569	72761.7	-47958.1	-11514	141.626	211.436	0	0	0	0	0	0	0	200	903	0	0	0	0	0	0	0	603	903	0
753	5	-24.902	131.328	-821.569	72944.8	-48019.2	-11422.5	141.552	211.213	0	0	0	0	0	0	0	200	903	0	0	0	0	0	0	0	603	903	0
753	6	-23.9865	131.481	-821.874	73402.6	-47591.9	-11056.3	142.093	210.689	0	0	0	0	0	0	0	200	903	0	0	0	0	0	0	0	603	903	0
753	7	-23.5287	130.87	-826.452	72487.1	-48080.2	-11147.8	141.823	212.291	0	0	0	0	0	0	0	200	903	0	0	0	0	0	0	0	603	903	0
753	8	-22.9184	130.565	-832.25	72853.3	-48141.2	-11056.3	142.155	212.462	0	0	0	0	0	0	0	200	903	0	0	0	0	0	0	0	603	903	0
753	9	-23.3762	131.176	-832.556	72670.2	-48385.4	-11147.8	141.883	212.714	0	0	0	0	0	0	0	200	903	0	0	0	0	0	0	0	603	903	0
754	0	-22.1555	131.328	-833.776	72853.3	-48263.3	-11056.3	142.115	212.622	0	0	0	0	0	0	0	200	903	0	0	0	0	0	0	0	603	903	0
754	1	-23.5287	130.565	-833.776	72761.7	-49056.8	-10827.4	141.163	212.732	0	0	0	0	0	0	0	200	903	0	0	0	0	0	0	0	603	903	0
754	2	-22.1555	129.802	-836.828	73127.9	-49178.8	-11010.5	141.232	212.613	0	0	0	0	0	0	0	200	903	0	0	0	0	0	0	0	603	903	0
754	3	-22.4606	129.955	-840.795	73402.6	-48873.7	-11056.3	141.872	212.699	0	0	0	0	0	0	0	200	903	0	0	0	0	0	0	0	603	903	0
754	4	-22.6132	129.192	-842.016	72670.2	-48873.7	-10964.7	141.956	213.695	0	0	0	0	0	0	0	200	903	0	0	0	0	0	0	0	603	903	0
754	5	-22.7658	129.039	-842.016	72944.8	-49300.9	-10873.2	141.449	213.369	0	0	0	0	0	0	0	200	903	0	0	0	0	0	0	0	603	903	0
754	6	-22.1555	127.971	-841.406	73219.5	-49484	-10873.2	141.189	212.98	0	0	0	0	0	0	0	200	903	0	0	0	0	0	0	0	603	903	0
754	7	-21.3925	128.276	-841.711	72304	-49300.9	-11010.5	141.428	214.099	0	0	0	0	0	0	0	200	903	0	0	0	0	0	0	0	603	903	0
754	8	-21.2399	126.903	-845.373	71846.2	-49545	-10644.3	141.393	215.012	0	0	0	0	0	0	0	200	903	0	0	0	0	0	0	0	603	903	0
754	9	-21.6977	127.208	-845.678	72029.3	-49789.2	-10644.3	141.125	214.827	0	0	0	0	0	0	0	200	903	0	0	0	0	0	0	0	603	903	0
755	0	-19.8666	126.751	-845.373	71754.7	-49056.8	-10827.4	141.97	215.121	0	0	0	0	0	0	0	200	903	0	0	0	0	0	0	0	603	903	0
755	1	-22.0029	125.225	-843.237	71663.1	-49239.9	-10735.8	141.606	215.014	0	0	0	0	0	0	0	200	903	0	0	0	0	0	0	0	603	903	0
755	2	-20.1718	126.293	-844.763	72212.4	-49728.1	-10232.3	141.134	214.518	0	0	0	0	0	0	0	200	903	0	0	0	0	0	0	0	603	903	0
755	3	-20.0192	124.004	-847.509	71663.1	-49667.1	-10369.6	141.396	215.443	0	0	0	0	0	0	0	200	903	0	0	0	0	0	0	0	603	903	0
755	4	-21.0873	124.004	-845.983	71571.5	-49606.1	-10552.7	141.363	215.398	0	0	0	0	0	0	0	200	903	0	0	0	0	0	0	0	603	903	0
755	5	-20.3244	123.241	-845.678	71571.5	-49361.9	-10323.9	141.63	215.368	0	0	0	0	0	0	0	200	903	0	0	0	0	0	0	0	603	903	0
755	6	-20.477	121.257	-843.847	71205.3	-49728.1	-10461.2	141.07	215.618	0	0	0	0	0	0	0	200	903	0	0	0	0	0	0	0	603	903	0
755	7	-19.2563	121.563	-842.932	70564.5	-49850.2	-10507	140.861	216.287	0	0	0	0	0	0	0	200	903	0	0	0	0	0	0	0	603	903	0
755	8	-19.2563	121.715	-842.932	70381.3	-48812.6	-10598.5	142.092	216.504	0	0	0	0	0	0	0	200	903	0	0	0	0	0	0	0	603	903	0
755	9	-19.4089	121.257	-838.659	70381.3	-49850.2	-10278.1	140.56	216.079	0	0	0	0	0	0	0	200	903	0	0	0	0	0	0	0	603	903	0
756	0	-19.5615	120.342	-841.406	69923.6	-49423	-10232.3	141.261	216.897	0	0	0	0	0	0	0	200	903	0	0	0	0	0	0	0	603	903	0
756	1	-20.1718	120.189	-840.185	69282.7	-49178.8	-10049.2	141.467	217.539	0	0	0	0	0	0	0	200	903	0	0	0	0	0	0	0	603	903	0
756	2	-18.3408	119.426	-837.744	69465.8	-49178.8	-9408.33	141.296	217.08	0	0	0	0	0	0	0	200	903	0	0	0	0	0	0	0	603	903	0
756	3	-17.2726	118.053	-838.354	69740.5	-49117.8	-9545.65	141.412	216.813	0	0	0	0	0	0	0	200	903	0	0	0	0	0	0	0	603	903	0
756	4	-18.3408	117.9	-837.744	69832	-49178.8	-10232.3	141.296	216.643	0	0	0	0	0	0	0	200	903	0	0	0	0	0	0	0	603	903	0
756	5	-19.7141	116.375	-835.912	69099.6	-49300.9	-10049.2	141.021	217.336	0	0	0	0	0	0	0	200	903	0	0	0	0	0	0	0	603	903	0
756	6	-18.9511	115.612	-833.471	68733.4	-49423	-10140.8	140.702	217.534	0	0	0	0	0	0	0	200	903	0	0	0	0	0	0	0	603	903	0
756	7	-17.883	114.696	-831.03	69099.6	-49361.9	-9866.09	140.601	216.851	0	0	0	0	0	0	0	200	903	0	0	0	0	0	0	0	603	903	0
756	8	-16.3571	111.95	-830.724	67817.9	-48629.5	-10049.2	141.461	218.363	0	0	0	0	0	0	0	200	903	0	0	0	0	0	0	0	603	903	0
756	9	-18.3408	113.17	-830.114	67726.4	-49117.8	-9866.09	140.83	218.413	0	0	0	0	0	0	0	200	903	0	0	0	0	0	0	0	603	903	0
757	0	-19.8666	111.339	-827.062	66902.3	-49300.9	-9774.54	140.39	219.108	0	0	0	0	0	0	0	200	903	0	0	0	0	0	0	0	603	903	0
757	1	-20.1718	109.966	-824.011	66810.8	-48812.6	-10095	140.762	218.92	0	0	0	0	0	0	0	200	903	0	0	0	0	0	0	0	603	903	0
757	2	-19.2563	109.813	-822.18	67177	-48751.6	-10003.4	140.704	218.294	0	0	0	0	0	0	0	200	903	0	0	0	0	0	0	0	603	903	0
757	3	-18.4933	108.593	-820.043	66353	-49239.9	-9728.76	139.955	219.086	0	0	0	0	0	0	0	200	903	0	0	0	0	0	0	0	603	903	0
757	4	-20.477	107.524	-816.381	65986.8	-48690.6	-9499.88	140.358	219.172	0	0	0	0	0	0	0	200	903	0	0	0	0	0	0	0	603	903	0
757	5	-22.308	105.846	-816.381	65529.1	-48690.6	-9866.09	140.358	219.732	0	0	0	0	0	0	0	200	903	0	0	0	0	0	0	0	603	903	0
757	6	-21.8503	106.151	-812.719	65529.1	-48812.6	-9957.64	139.939	219.371	0	0	0	0	0	0	0	200	903	0	0	0	0	0	0	0	603	903	0
757	7	-21.5451	104.93	-809.362	65712.2	-48873.7	-9820.31	139.615	218.81	0	0	0	0	0	0	0	200	903	0	0	0	0	0	0	0	603	903	0
757	8	-21.5451	102.947	-809.667	65437.5	-48385.4	-9774.54	140.24	219.18	0	0	0	0	0	0	0	200	903	0	0	0	0	0	0	0	603	903	0
757	9	-22.9184	101.574	-805.395	64888.2	-48263.3	-9637.21	140.075	219.433	0	0	0	0	0	0	0	200	903	0	0	0	0	0	0	0	603	903	0
758	0	-24.5969	100.658	-803.259	64247.3	-48629.5	-9728.76	139.46	220.017	0	0	0	0	0	0	0	200	903	0	0	0	0	0	0	0	603	903	0
758	1	-24.902	99.4373	-798.986	64064.2	-48568.5	-9728.76	139.212	219.818	0	0	0	0	0	0	0	200	903	0	0	0	0	0	0	0	603	903	0
758	2	-24.7495	99.4373	-793.188	62782.5	-47775	-9637.21	139.768	220.848	0	0	0	0	0	0	0	200	903	0	0	0	0	0	0	0	603	903	0
758	3	-24.902	97.6062	-791.357	62233.2	-48507.4	-9682.98	138.703	221.359	0	0	0	0	0	0	0	200	903	0	0	0	0	0	0	0	603	903	0
758	4	-25.0546	97.1485	-790.746	62233.2	-48019.2	-9866.09	139.274	221.298	0	0	0	0	0	0	0	200	903	0	0	0	0	0	0	0	603	903	0
758	5	-26.8857	96.2329	-785.558	61409.2	-47836.1	-9774.54	139.106	221.827	0	0	0	0	0	0	0	200	903	0	0	0	0	0	0	0	603	903	0
758	6	-26.7331	95.1648	-780.37	61226.1	-47591.9	-9499.88	139.014	221.542	0	0	0	0	0	0	0	200	903	0	0	0	0	0	0	0	603	903	0
758	7	-26.5805	94.0967	-776.708	60493.7	-47836.1	-9499.88	138.412	222.115	0	0	0	0	0	0	0	200	903	0	0	0	0	0	0	0	603	903	0
758	8	-26.8857	93.639	-773.046	60951.4	-47836.1	-9682.98	138.12	221.154	0	0	0	0	0	0	0	200	903	0	0	0	0	0	0	0	603	903	0
758	9	-27.496	91.045	-771.215	60219	-47469.8	-9591.43	138.448	221.917	0	0	0	0	0	0	0	200	903	0	0	0	0	0	0	0	603	903	0
759	0	-28.259	90.4346	-766.638	59486.6	-47591.9	-9408.33	137.921	222.406	0	0	0	0	0	0	0	200	903	0	0	0	0	0	0	0	603	903	0
759	1	-29.3271	90.282	-761.755	59303.5	-47225.7	-9362.55	138.004	222.149	0	0	0	0	0	0	0	200	903	0	0	0	0	0	0	0	603	903	0
759	2	-29.0219	87.2303	-756.262	58204.8	-46981.6	-9591.43	137.877	223.036	0	0	0	0	0	0	0	200	903	0	0	0	0	0	0	0	603	903	0
759	3	-27.0383	88.2984	-754.431	58113.3	-46676.4	-9087.89	138.13	222.971	0	0	0	0	0	0	0	200	903	0	0	0	0	0	0	0	603	903	0
759	4	-29.6323	87.3829	-750.463	57106.2	-46859.5	-9545.65	137.559	223.905	0	0	0	0	0	0	0	200	903	0	0	0	0	0	0	0	603	903	0
759	5	-30.3952	86.6199	-747.106	56740	-46859.5	-8813.23	137.279	224.054	0	0	0	0	0	0	0	200	903	0	0	0	0	0	0	0	603	903	0
759	6	-31.3107	85.2466	-739.782	56190.7	-46371.2	-9133.67	137.318	224.044	0	0	0	0	0	0	0	200	903	0	0	0	0	0	0	0	603	903	0
759	7	-31.7685	83.8733	-736.425	55458.2	-46127.1	-9179.44	137.364	224.693	0	0	0	0	0	0	0	200	903	0	0	0	0	0	0	0	603	903	0
759	8	-29.3271	83.5682	-735.204	56190.7	-45944	-9179.44	137.509	223.571	0	0	0	0	0	0	0	200	903	0	0	0	0	0	0	0	603	903	0
759	9	-31.3107	82.3475	-730.016	55366.7	-45944	-8813.23	137.064	224.157	0	0	0	0	0	0	0	200	903	0	0	0	0	0	0	0	603	903	0
760	0	-32.684	80.5164	-726.66	55275.1	-45821.9	-8675.9	136.942	223.933	0	0	0	0	0	0	0	200	903	0	0	0	0	0	0	0	603	903	0
760	1	-32.684	79.6009	-720.251	54634.3	-45638.8	-9042.11	136.635	224.145	0	0	0	0	0	0	0	200	903	0	0	0	0	0	0	0	603	903	0
760	2	-32.2263	76.8543	-717.199	54085	-45638.8	-9042.11	136.365	224.589	0	0	0	0	0	0	0	200	903	0	0	0	0	0	0	0	603	903	0
760	3	-31.4633	77.0069	-713.537	53169.5	-45272.6	-8721.68	136.552	225.485	0	0	0	0	0	0	0	200	903	0	0	0	0	0	0	0	603	903	0
760	4	-33.2944	75.481	-705.602	52528.6	-45394.7	-8767.46	135.665	225.555	0	0	0	0	0	0	0	200	903	0	0	0	0	0	0	0	603	903	0
760	5	-34.3625	74.1077	-707.739	52528.6	-45394.7	-8538.57	135.86	225.78	0	0	0	0	0	0	0	200	903	0	0	0	0	0	0	0	603	903	0
760	6	-34.5151	73.8025	-701.33	51704.6	-45333.6	-8767.46	135.361	226.276	0	0	0	0	0	0	0	200	903	0	0	0	0	0	0	0	603	903	0
760	7	-33.7521	73.0396	-696.752	51429.9	-45028.4	-8401.25	135.374	226.186	0	0	0	0	0	0	0	200	903	0	0	0	0	0	0	0	603	903	0
760	8	-34.3625	69.8352	-694.311	51246.8	-45150.5	-7806.15	134.971	226.19	0	0	0	0	0	0	0	200	903	0	0	0	0	0	0	0	603	903	0
760	9	-35.4306	70.293	-691.87	50514.4	-44723.3	-8126.59	135.359	226.989	0	0	0	0	0	0	0	200	903	0	0	0	0	0	0	0	603	903	0
761	0	-35.8884	69.5301	-684.545	50697.5	-44296	-7760.38	135.291	225.94	0	0	0	0	0	0	0	200	903	0	0	0	0	0	0	0	603	903	0
761	1	-35.278	67.3938	-681.799	50331.3	-44296	-8218.14	135.031	226.179	0	0	0	0	0	0	0	200	903	0	0	0	0	0	0	0	603	903	0
761	2	-34.3625	66.1731	-679.052	50789.1	-44540.2	-7989.26	134.408	225.206	0	0	0	0	0	0	0	200	903	0	0	0	0	0	0	0	603	903	0
761	3	-35.278	65.105	-677.831	49873.6	-44479.1	-7943.48	134.38	226.422	0	0	0	0	0	0	0	200	903	0	0	0	0	0	0	0	603	903	0
761	4	-35.5832	63.7317	-673.559	49598.9	-43746.7	-7989.26	135.051	226.363	0	0	0	0	0	0	0	200	903	0	0	0	0	0	0	0	603	903	0
761	5	-35.8884	63.1214	-669.286	49690.4	-43868.8	-7943.48	134.454	225.756	0	0	0	0	0	0	0	200	903	0	0	0	0	0	0	0	603	903	0
761	6	-36.8039	61.7481	-664.404	47950.9	-44296	-8035.03	133.33	227.829	0	0	0	0	0	0	0	200	903	0	0	0	0	0	0	0	603	903	0
761	7	-35.7358	60.8326	-662.878	47950.9	-43441.5	-7714.6	134.465	227.662	0	0	0	0	0	0	0	200	903	0	0	0	0	0	0	0	603	903	0
761	8	-36.3461	60.0696	-660.742	47310.1	-43502.6	-7851.93	134.161	228.399	0	0	0	0	0	0	0	200	903	0	0	0	0	0	0	0	603	903	0
761	9	-36.9565	59.0015	-656.774	46760.8	-43624.6	-7806.15	133.577	228.802	0	0	0	0	0	0	0	200	903	0	0	0	0	0	0	0	603	903	0
762	0	-36.9565	58.2386	-652.807	46760.8	-43746.7	-7348.39	132.987	228.37	0	0	0	0	0	0	0	200	903	0	0	0	0	0	0	0	603	903	0
762	1	-36.8039	56.1023	-648.535	46486.1	-42831.2	-7531.5	133.957	228.321	0	0	0	0	0	0	0	200	903	0	0	0	0	0	0	0	603	903	0
762	2	-35.8884	55.7972	-644.567	46852.3	-43197.4	-7439.94	132.982	227.312	0	0	0	0	0	0	0	200	903	0	0	0	0	0	0	0	603	903	0
762	3	-37.2617	55.6446	-645.178	46211.4	-43502.6	-7394.17	132.573	228.374	0	0	0	0	0	0	0	200	903	0	0	0	0	0	0	0	603	903	0
762	4	-38.0246	54.4239	-640.905	46303	-42648.1	-7165.29	133.457	227.754	0	0	0	0	0	0	0	200	903	0	0	0	0	0	0	0	603	903	0
762	5	-37.7194	52.2876	-636.633	45662.1	-42465	-6982.18	133.298	228.276	0	0	0	0	0	0	0	200	903	0	0	0	0	0	0	0	603	903	0
762	6	-37.2617	51.8299	-634.191	45387.5	-43014.3	-6936.4	132.175	228.433	0	0	0	0	0	0	0	200	903	0	0	0	0	0	0	0	603	903	0
762	7	-37.4142	50.7618	-633.886	45112.8	-42465	-6707.52	133.009	228.831	0	0	0	0	0	0	0	200	903	0	0	0	0	0	0	0	603	903	0
762	8	-37.872	48.4729	-625.341	44563.5	-42159.8	-6844.85	132.581	228.737	0	0	0	0	0	0	0	200	903	0	0	0	0	0	0	0	603	903	0
762	9	-38.3298	49.0833	-626.257	44105.7	-42403.9	-6570.19	132.29	229.572	0	0	0	0	0	0	0	200	903	0	0	0	0	0	0	0	603	903	0
763	0	-38.635	47.8626	-620.458	43556.4	-42220.8	-6661.75	131.952	229.8	0	0	0	0	0	0	0	200	903	0	0	0	0	0	0	0	603	903	0
763	1	-37.7194	48.0152	-618.627	43190.2	-41732.5	-6570.19	132.54	230.184	0	0	0	0	0	0	0	200	903	0	0	0	0	0	0	0	603	903	0
763	2	-38.0246	46.9471	-616.186	42549.3	-41671.5	-6432.86	132.372	230.947	0	0	0	0	0	0	0	200	903	0	0	0	0	0	0	0	603	903	0
763	3	-37.1091	45.5738	-613.745	42274.7	-41732.5	-6295.53	132.003	231.12	0	0	0	0	0	0	0	200	903	0	0	0	0	0	0	0	603	903	0
763	4	-37.872	44.5056	-609.472	42183.1	-41610.5	-6295.53	131.727	230.787	0	0	0	0	0	0	0	200	903	0	0	0	0	0	0	0	603	903	0
763	5	-38.635	43.2849	-606.115	41816.9	-41183.2	-6112.43	132.054	231.008	0	0	0	0	0	0	0	200	903	0	0	0	0	0	0	0	603	903	0
763	6	-36.8039	43.5901	-603.063	42000	-41366.3	-5746.22	131.406	230.356	0	0	0	0	0	0	0	200	903	0	0	0	0	0	0	0	603	903	0
763	7	-36.6513	42.0642	-601.843	41359.1	-41488.4	-5791.99	131.064	231.279	0	0	0	0	0	0	0	200	903	0	0	0	0	0	0	0	603	903	0
763	8	-37.2617	40.691	-599.096	41084.5	-41000.1	-5837.77	131.563	231.423	0	0	0	0	0	0	0	200	903	0	0	0	0	0	0	0	603	903	0
763	9	-36.041	39.7754	-591.772	41267.6	-40511.8	-5700.44	131.541	230.264	0	0	0	0	0	0	0	200	903	0	0	0	0	0	0	0	603	903	0
764	0	-37.4142	38.7073	-591.161	40352.1	-40939.1	-5380.01	130.748	231.741	0	0	0	0	0	0	0	200	903	0	0	0	0	0	0	0	603	903	0
764	1	-36.041	36.5711	-589.025	40169	-40328.7	-4739.14	131.533	231.804	0	0	0	0	0	0	0	200	903	0	0	0	0	0	0	0	603	903	0
764	2	-36.041	36.8763	-585.974	39253.4	-40450.8	-5471.56	130.968	233.012	0	0	0	0	0	0	0	200	903	0	0	0	0	0	0	0	603	903	0
764	3	-35.8884	36.2659	-584.753	39070.3	-40389.8	-5059.57	130.928	233.185	0	0	0	0	0	0	0	200	903	0	0	0	0	0	0	0	603	903	0
764	4	-34.3625	35.6556	-581.091	39070.3	-40389.8	-4968.02	130.493	232.764	0	0	0	0	0	0	0	200	903	0	0	0	0	0	0	0	603	903	0
764	5	-36.1935	35.1978	-574.987	38429.4	-40450.8	-4876.46	129.649	233.165	0	0	0	0	0	0	0	200	903	0	0	0	0	0	0	0	603	903	0
764	6	-34.6677	34.1297	-575.598	37880.1	-40145.6	-4876.46	130.254	234.19	0	0	0	0	0	0	0	200	903	0	0	0	0	0	0	0	603	903	0
764	7	-34.3625	33.0616	-574.072	37880.1	-40145.6	-4739.14	130.069	234.015	0	0	0	0	0	0	0	200	903	0	0	0	0	0	0	0	603	903	0
764	8	-35.1254	33.2141	-572.546	38063.2	-39718.4	-4464.48	130.628	233.519	0	0	0	0	0	0	0	200	903	0	0	0	0	0	0	0	603	903	0
764	9	-32.684	31.3831	-568.273	36781.5	-39474.2	-4510.25	130.537	235.275	0	0	0	0	0	0	0	200	903	0	0	0	0	0	0	0	603	903	0
765	0	-34.5151	29.3994	-562.17	37788.6	-39657.3	-4372.92	129.457	232.781	0	0	0	0	0	0	0	200	903	0	0	0	0	0	0	0	603	903	0
765	1	-33.2944	29.3994	-563.696	37147.7	-40084.6	-4281.37	128.89	234.1	0	0	0	0	0	0	0	200	903	0	0	0	0	0	0	0	603	903	0
765	2	-32.3788	28.9417	-562.475	36781.5	-39108	-3915.16	130.472	234.608	0	0	0	0	0	0	0	200	903	0	0	0	0	0	0	0	603	903	0
765	3	-33.9047	26.958	-559.423	36323.7	-39413.2	-3686.28	129.547	235.069	0	0	0	0	0	0	0	200	903	0	0	0	0	0	0	0	603	903	0
765	4	-31.7685	27.8736	-556.982	35499.8	-39352.2	-3960.94	129.347	236.264	0	0	0	0	0	0	0	200	903	0	0	0	0	0	0	0	603	903	0
765	5	-33.447	26.6529	-553.625	35499.8	-38741.8	-3777.83	130.022	235.878	0	0	0	0	0	0	0	200	903	0	0	0	0	0	0	0	603	903	0
765	6	-32.2263	26.958	-551.489	35499.8	-38863.9	-3594.73	129.529	235.629	0	0	0	0	0	0	0	200	903	0	0	0	0	0	0	0	603	903	0
765	7	-32.0737	26.6529	-551.489	35042	-39230.1	-3503.18	128.865	236.459	0	0	0	0	0	0	0	200	903	0	0	0	0	0	0	0	603	903	0
765	8	-32.8366	25.4322	-549.352	34492.7	-38375.6	-3640.5	130.144	237.212	0	0	0	0	0	0	0	200	903	0	0	0	0	0	0	0	603	903	0
765	9	-33.1418	23.4485	-544.164	34401.1	-38558.7	-3228.52	129.141	236.782	0	0	0	0	0	0	0	200	903	0	0	0	0	0	0	0	603	903	0
766	0	-32.0737	24.5166	-542.944	34401.1	-38924.9	-3320.07	128.308	236.64	0	0	0	0	0	0	0	200	903	0	0	0	0	0	0	0	603	903	0
766	1	-31.3107	23.7537	-540.807	34218	-38741.8	-3045.41	128.363	236.728	0	0	0	0	0	0	0	200	903	0	0	0	0	0	0	0	603	903	0
766	2	-31.7685	22.6856	-541.418	34401.1	-38070.4	-2862.31	129.684	236.461	0	0	0	0	0	0	0	200	903	0	0	0	0	0	0	0	603	903	0
766	3	-31.9211	21.7701	-538.366	34034.9	-38192.5	-3091.19	129.059	236.781	0	0	0	0	0	0	0	200	903	0	0	0	0	0	0	0	603	903	0
766	4	-31.0056	21.0071	-535.009	33943.4	-38497.7	-3182.74	128.043	236.556	0	0	0	0	0	0	0	200	903	0	0	0	0	0	0	0	603	903	0
766	5	-32.3788	18.8709	-532.263	33485.6	-38680.8	-2770.75	127.328	237.088	0	0	0	0	0	0	0	200	903	0	0	0	0	0	0	0	603	903	0
766	6	-31.3107	19.939	-530.126	32844.7	-37826.3	-2862.31	128.647	238.044	0	0	0	0	0	0	0	200	903	0	0	0	0	0	0	0	603	903	0
766	7	-31.7685	19.3286	-531.347	32570.1	-38253.5	-2953.86	128.006	238.703	0	0	0	0	0	0	0	200	903	0	0	0	0	0	0	0	603	903	0
766	8	-32.5314	18.4131	-528.295	32020.8	-38253.5	-2908.08	127.591	239.389	0	0	0	0	0	0	0	200	903	0	0	0	0	0	0	0	603	903	0
766	9	-31.4633	19.1761	-524.633	32203.9	-37704.2	-2770.75	128.132	238.616	0	0	0	0	0	0	0	200	903	0	0	0	0	0	0	0	603	903	0
767	0	-32.9892	18.2605	-521.581	31654.6	-37704.2	-2541.87	127.712	239.31	0	0	0	0	0	0	0	200	903	0	0	0	0	0	0	0	603	903	0
767	1	-31.7685	16.2769	-521.581	31379.9	-38009.4	-2724.98	127.127	239.837	0	0	0	0	0	0	0	200	903	0	0	0	0	0	0	0	603	903	0
767	2	-31.6159	16.7347	-520.971	31288.3	-37887.3	-2724.98	127.276	239.942	0	0	0	0	0	0	0	200	903	0	0	0	0	0	0	0	603	903	0
767	3	-32.5314	16.2769	-519.75	31379.9	-37765.3	-2358.76	127.34	239.625	0	0	0	0	0	0	0	200	903	0	0	0	0	0	0	0	603	903	0
767	4	-32.9892	15.8191	-516.393	31471.4	-37704.2	-2587.65	126.985	239.055	0	0	0	0	0	0	0	200	903	0	0	0	0	0	0	0	603	903	0
767	5	-32.2263	14.751	-514.868	30922.1	-37948.4	-2541.87	126.295	239.942	0	0	0	0	0	0	0	200	903	0	0	0	0	0	0	0	603	903	0
767	6	-30.853	14.4458	-515.173	31105.2	-37338	-2175.66	127.523	239.622	0	0	0	0	0	0	0	200	903	0	0	0	0	0	0	0	603	903	0
767	7	-31.9211	13.2251	-511.205	30739	-37215.9	-2404.54	127.2	239.87	0	0	0	0	0	0	0	200	903	0	0	0	0	0	0	0	603	903	0
767	8	-32.5314	13.2251	-510.9	31105.2	-37460.1	-2129.88	126.678	239.117	0	0	0	0	0	0	0	200	903	0	0	0	0	0	0	0	603	903	0
767	9	-32.684	12.7674	-508.459	29823.5	-37154.9	-1992.55	126.926	241.345	0	0	0	0	0	0	0	200	903	0	0	0	0	0	0	0	603	903	0
768	0	-31.9211	12.0044	-505.407	29457.3	-37154.9	-2541.87	126.485	241.716	0	0	0	0	0	0	0	200	903	0	0	0	0	0	0	0	603	903	0
768	1	-31.4633	12.3096	-507.238	30098.2	-37338	-2175.66	126.39	240.663	0	0	0	0	0	0	0	200	903	0	0	0	0	0	0	0	603	903	0
768	2	-33.1418	11.0889	-505.407	29365.7	-37215.9	-2084.11	126.364	241.897	0	0	0	0	0	0	0	200	903	0	0	0	0	0	0	0	603	903	0
768	3	-32.8366	12.0044	-502.661	29365.7	-36971.8	-2038.33	126.448	241.579	0	0	0	0	0	0	0	200	903	0	0	0	0	0	0	0	603	903	0
768	4	-31.9211	10.9363	-502.661	28816.4	-36910.8	-2038.33	126.569	242.672	0	0	0	0	0	0	0	200	903	0	0	0	0	0	0	0	603	903	0
768	5	-32.2263	10.326	-501.745	29274.2	-37215.9	-2221.44	125.827	241.655	0	0	0	0	0	0	0	200	903	0	0	0	0	0	0	0	603	903	0
768	6	-31.1581	9.8682	-499.609	29457.3	-36971.8	-1946.78	125.998	241.039	0	0	0	0	0	0	0	200	903	0	0	0	0	0	0	0	603	903	0
768	7	-31.0056	8.49491	-497.167	29091.1	-36361.4	-1809.45	126.863	241.486	0	0	0	0	0	0	0	200	903	0	0	0	0	0	0	0	603	903	0
768	8	-32.3788	8.80008	-492.59	28175.5	-36788.7	-1946.78	125.316	242.801	0	0	0	0	0	0	0	200	903	0	0	0	0	0	0	0	603	903	0
768	9	-31.3107	8.03714	-494.421	28267.1	-36971.8	-1580.57	125.222	242.828	0	0	0	0	0	0	0	200	903	0	0	0	0	0	0	0	603	903	0
769	0	-31.0056	5.90091	-495.031	28084	-36544.6	-1717.9	126.177	243.268	0	0	0	0	0	0	0	200	903	0	0	0	0	0	0	0	603	903	0
769	1	-32.2263	7.73197	-492.285	27351.6	-36544.6	-1443.24	125.765	244.44	0	0	0	0	0	0	0	200	903	0	0	0	0	0	0	0	603	903	0
769	2	-32.684	7.2742	-490.453	27076.9	-36971.8	-1489.01	124.617	244.792	0	0	0	0	0	0	0	200	903	0	0	0	0	0	0	0	603	903	0
769	3	-30.853	6.96903	-490.148	27260	-36788.7	-1534.79	124.944	244.384	0	0	0	0	0	0	0	200	903	0	0	0	0	0	0	0	603	903	0
769	4	-29.3271	6.96903	-491.064	26893.8	-36239.4	-1717.9	126.202	245.234	0	0	0	0	0	0	0	200	903	0	0	0	0	0	0	0	603	903	0
769	5	-30.3952	6.96903	-487.097	26985.4	-36910.8	-1260.13	124.223	244.6	0	0	0	0	0	0	0	200	903	0	0	0	0	0	0	0	603	903	0
769	6	-31.6159	6.0535	-489.843	26436	-36849.7	-1260.13	124.772	246.032	0	0	0	0	0	0	0	200	903	0	0	0	0	0	0	0	603	903	0
769	7	-31.4633	6.51127	-488.317	26436	-36483.5	-1443.24	125.287	245.863	0	0	0	0	0	0	0	200	903	0	0	0	0	0	0	0	603	903	0
769	8	-30.09	5.90091	-487.097	26436	-36239.4	-1397.46	125.601	245.727	0	0	0	0	0	0	0	200	903	0	0	0	0	0	0	0	603	903	0
769	9	-29.6323	5.29056	-488.012	26893.8	-36727.7	-1305.91	124.74	244.891	0	0	0	0	0	0	0	200	903	0	0	0	0	0	0	0	603	903	0
770	0	-30.2426	4.06986	-487.707	26069.8	-36300.4	-1077.03	125.569	246.546	0	0	0	0	0	0	0	200	903	0	0	0	0	0	0	0	603	903	0
770	1	-31.0056	3.76468	-484.655	26252.9	-36300.4	-1168.58	125.101	245.832	0	0	0	0	0	0	0	200	903	0	0	0	0	0	0	0	603	903	0
770	2	-30.2426	3.76468	-484.96	26252.9	-36727.7	-1305.91	124.267	245.866	0	0	0	0	0	0	0	200	903	0	0	0	0	0	0	0	603	903	0
770	3	-27.8012	2.39139	-487.097	25795.2	-36727.7	-1168.58	124.599	247.043	0	0	0	0	0	0	0	200	903	0	0	0	0	0	0	0	603	903	0
770	4	-29.0219	2.69657	-486.791	25612.1	-36422.5	-710.816	125.178	247.386	0	0	0	0	0	0	0	200	903	0	0	0	0	0	0	0	603	903	0
770	5	-29.3271	3.00174	-486.486	25795.2	-36056.3	-848.145	125.884	246.977	0	0	0	0	0	0	0	200	903	0	0	0	0	0	0	0	603	903	0
770	6	-29.9374	2.39139	-484.045	24696.5	-35995.2	-893.921	125.637	248.979	0	0	0	0	0	0	0	200	903	0	0	0	0	0	0	0	603	903	0
770	7	-28.1064	2.69657	-484.045	25612.1	-36361.4	-939.698	124.88	247.087	0	0	0	0	0	0	0	200	903	0	0	0	0	0	0	0	603	903	0
770	8	-27.9538	2.08622	-486.791	24696.5	-36605.6	-756.592	124.802	249.267	0	0	0	0	0	0	0	200	903	0	0	0	0	0	0	0	603	903	0
770	9	-27.3434	2.39139	-484.35	24879.7	-36788.7	-527.71	124.045	248.633	0	0	0	0	0	0	0	200	903	0	0	0	0	0	0	0	603	903	0
771	0	-29.0219	0.560338	-487.097	24971.2	-36788.7	-573.486	124.474	248.735	0	0	0	0	0	0	0	200	903	0	0	0	0	0	0	0	603	903	0
771	1	-29.1745	1.62845	-484.655	24879.7	-36483.5	-436.157	124.723	248.665	0	0	0	0	0	0	0	200	903	0	0	0	0	0	0	0	603	903	0
771	2	-27.496	1.47587	-485.266	25154.3	-36422.5	-436.157	124.943	248.164	0	0	0	0	0	0	0	200	903	0	0	0	0	0	0	0	603	903	0
771	3	-27.6486	-0.812953	-486.791	24971.2	-37154.9	-390.381	123.674	248.702	0	0	0	0	0	0	0	200	903	0	0	0	0	0	0	0	603	903	0
771	4	-27.496	0.255162	-487.402	25062.8	-36666.6	-253.052	124.771	248.579	0	0	0	0	0	0	0	200	903	0	0	0	0	0	0	0	603	903	0
771	5	-27.8012	0.102574	-485.266	24696.5	-36361.4	-344.605	125.069	249.107	0	0	0	0	0	0	0	200	903	0	0	0	0	0	0	0	603	903	0
771	6	-26.8857	-1.57589	-484.655	24330.3	-36849.7	-344.605	123.967	249.799	0	0	0	0	0	0	0	200	903	0	0	0	0	0	0	0	603	903	0
771	7	-26.2753	-1.11813	-485.876	23964.1	-37032.8	21.6065	123.781	250.679	0	0	0	0	0	0	0	200	903	0	0	0	0	0	0	0	603	903	0
771	8	-26.1227	-1.27072	-487.402	24147.2	-36788.7	-24.1699	124.521	250.457	0	0	0	0	0	0	0	200	903	0	0	0	0	0	0	0	603	903	0
771	9	-27.1909	-1.27072	-488.317	23964.1	-36788.7	158.936	124.662	250.925	0	0	0	0	0	0	0	200	903	0	0	0	0	0	0	0	603	903	0
772	0	-27.8012	-0.812953	-486.791	23781	-37277	-207.275	123.423	251.147	0	0	0	0	0	0	0	200	903	0	0	0	0	0	0	0	603	903	0
772	1	-26.8857	-1.27072	-487.402	24055.7	-36727.7	-115.723	124.646	250.645	0	0	0	0	0	0	0	200	903	0	0	0	0	0	0	0	603	903	0
772	2	-24.902	-1.27072	-489.843	23872.6	-37032.8	113.159	124.399	251.265	0	0	0	0	0	0	0	200	903	0	0	0	0	0	0	0	603	903	0
772	3	-26.2753	-2.18624	-489.843	23323.3	-37215.9	-69.9462	124.025	252.386	0	0	0	0	0	0	0	200	903	0	0	0	0	0	0	0	603	903	0
772	4	-27.6486	-1.11813	-491.674	23323.3	-37215.9	342.041	124.308	252.564	0	0	0	0	0	0	0	200	903	0	0	0	0	0	0	0	603	903	0
772	5	-27.1909	-2.18624	-488.622	23506.4	-37032.8	21.6065	124.21	251.893	0	0	0	0	0	0	0	200	903	0	0	0	0	0	0	0	603	903	0
772	6	-26.4279	-2.03366	-489.538	23323.3	-37277	67.3829	123.853	252.357	0	0	0	0	0	0	0	200	903	0	0	0	0	0	0	0	603	903	0
772	7	-25.0546	-1.4233	-491.674	23414.8	-37582.2	21.6065	123.563	252.377	0	0	0	0	0	0	0	200	903	0	0	0	0	0	0	0	603	903	0
772	8	-25.9702	-2.94918	-491.674	23048.6	-37277	-24.1699	124.184	253.122	0	0	0	0	0	0	0	200	903	0	0	0	0	0	0	0	603	903	0
772	9	-27.0383	-3.40695	-492.895	23140.1	-37215.9	387.818	124.495	253.053	0	0	0	0	0	0	0	200	903	0	0	0	0	0	0	0	603	903	0
773	0	-27.1909	-5.238	-491.979	22957	-37887.3	525.147	122.99	253.337	0	0	0	0	0	0	0	200	903	0	0	0	0	0	0	0	603	903	0
773	1	-25.9702	-3.71212	-492.895	22865.5	-37704.2	479.37	123.505	253.61	0	0	0	0	0	0	0	200	903	0	0	0	0	0	0	0	603	903	0
773	2	-23.8339	-3.86471	-495.947	22407.7	-37399	387.818	124.591	254.818	0	0	0	0	0	0	0	200	903	0	0	0	0	0	0	0	603	903	0
773	3	-25.3598	-4.78024	-496.252	22224.6	-37338	662.476	124.76	255.215	0	0	0	0	0	0	0	200	903	0	0	0	0	0	0	0	603	903	0
773	4	-26.8857	-3.86471	-496.252	23048.6	-37765.3	525.147	123.899	253.555	0	0	0	0	0	0	0	200	903	0	0	0	0	0	0	0	603	903	0
773	5	-26.2753	-3.86471	-494.726	22407.7	-37582.2	662.476	124.034	254.707	0	0	0	0	0	0	0	200	903	0	0	0	0	0	0	0	603	903	0
773	6	-26.2753	-5.54318	-498.083	22499.3	-37765.3	708.252	124.179	254.828	0	0	0	0	0	0	0	200	903	0	0	0	0	0	0	0	603	903	0
773	7	-25.8176	-3.86471	-495.336	22682.4	-38070.4	570.923	123.142	254.208	0	0	0	0	0	0	0	200	903	0	0	0	0	0	0	0	603	903	0
773	8	-25.665	-4.78024	-498.693	22682.4	-38192.5	1074.46	123.415	254.516	0	0	0	0	0	0	0	200	903	0	0	0	0	0	0	0	603	903	0
773	9	-26.4279	-5.238	-499.609	22682.4	-37826.3	799.805	124.288	254.6	0	0	0	0	0	0	0	200	903	0	0	0	0	0	0	0	603	903	0
774	0	-26.7331	-6.00094	-500.219	22407.7	-37643.2	891.358	124.747	255.204	0	0	0	0	0	0	0	200	903	0	0	0	0	0	0	0	603	903	0
774	1	-26.2753	-6.30612	-498.998	22133.1	-38314.6	937.134	123.217	255.645	0	0	0	0	0	0	0	200	903	0	0	0	0	0	0	0	603	903	0
774	2	-25.8176	-6.30612	-498.388	21400.6	-38009.4	937.134	123.735	257.06	0	0	0	0	0	0	0	200	903	0	0	0	0	0	0	0	603	903	0
774	3	-25.5124	-6.30612	-503.271	21858.4	-37948.4	891.358	124.597	256.567	0	0	0	0	0	0	0	200	903	0	0	0	0	0	0	0	603	903	0
774	4	-27.0383	-6.30612	-504.492	21766.9	-38619.8	754.029	123.448	256.854	0	0	0	0	0	0	0	200	903	0	0	0	0	0	0	0	603	903	0
774	5	-27.0383	-6.45871	-503.271	21583.8	-38253.5	891.358	123.99	257.113	0	0	0	0	0	0	0	200	903	0	0	0	0	0	0	0	603	903	0
774	6	-26.2753	-6.76388	-504.797	21675.3	-38314.6	1257.57	124.099	257.061	0	0	0	0	0	0	0	200	903	0	0	0	0	0	0	0	603	903	0
774	7	-24.7495	-7.22164	-509.069	21400.6	-38253.5	1349.12	124.856	257.961	0	0	0	0	0	0	0	200	903	0	0	0	0	0	0	0	603	903	0
774	8	-25.665	-6.91647	-507.849	21217.5	-38741.8	1761.11	123.714	258.221	0	0	0	0	0	0	0	200	903	0	0	0	0	0	0	0	603	903	0
774	9	-26.2753	-7.832	-510.9	21766.9	-39047	1211.79	123.572	257.395	0	0	0	0	0	0	0	200	903	0	0	0	0	0	0	0	603	903	0
775	0	-26.5805	-8.13717	-509.68	21309.1	-38680.8	1669.56	124.108	258.191	0	0	0	0	0	0	0	200	903	0	0	0	0	0	0	0	603	903	0
775	1	-26.2753	-8.44235	-511.205	21309.1	-39291.1	1349.12	123.14	258.316	0	0	0	0	0	0	0	200	903	0	0	0	0	0	0	0	603	903	0
775	2	-25.3598	-8.74752	-512.121	20668.2	-39230.1	1669.56	123.397	259.642	0	0	0	0	0	0	0	200	903	0	0	0	0	0	0	0	603	903	0
775	3	-25.3598	-8.74752	-515.173	20485.1	-39047	1578	124.206	260.236	0	0	0	0	0	0	0	200	903	0	0	0	0	0	0	0	603	903	0
775	4	-25.8176	-8.28976	-516.699	21034.4	-39047	1578	124.43	259.291	0	0	0	0	0	0	0	200	903	0	0	0	0	0	0	0	603	903	0
775	5	-26.5805	-8.59494	-516.088	20302	-39474.2	1761.11	123.513	260.662	0	0	0	0	0	0	0	200	903	0	0	0	0	0	0	0	603	903	0
775	6	-25.3598	-9.81564	-518.224	20485.1	-39840.5	1806.89	123.121	260.471	0	0	0	0	0	0	0	200	903	0	0	0	0	0	0	0	603	903	0
775	7	-23.5287	-9.35787	-521.276	20576.7	-39291.1	1989.99	124.625	260.526	0	0	0	0	0	0	0	200	903	0	0	0	0	0	0	0	603	903	0
775	8	-25.5124	-9.51046	-523.107	20668.2	-39413.2	2081.54	124.656	260.49	0	0	0	0	0	0	0	200	903	0	0	0	0	0	0	0	603	903	0
775	9	-26.1227	-10.7312	-524.328	20942.9	-39718.4	2127.32	124.249	260.058	0	0	0	0	0	0	0	200	903	0	0	0	0	0	0	0	603	903	0
776	0	-26.5805	-11.1889	-524.023	20942.9	-39596.3	2310.42	124.438	260.034	0	0	0	0	0	0	0	200	903	0	0	0	0	0	0	0	603	903	0
776	1	-25.5124	-11.1889	-526.159	20485.1	-39901.5	2127.32	124.165	261.067	0	0	0	0	0	0	0	200	903	0	0	0	0	0	0	0	603	903	0
776	2	-25.665	-11.9519	-531.652	20485.1	-40389.8	2173.1	124.03	261.469	0	0	0	0	0	0	0	200	903	0	0	0	0	0	0	0	603	903	0
776	3	-25.665	-11.7993	-531.347	19752.7	-40450.8	2218.87	123.871	262.825	0	0	0	0	0	0	0	200	903	0	0	0	0	0	0	0	603	903	0
776	4	-26.1227	-11.9519	-532.263	19935.8	-40084.6	2310.42	124.69	262.545	0	0	0	0	0	0	0	200	903	0	0	0	0	0	0	0	603	903	0
776	5	-25.9702	-12.4096	-531.042	19661.1	-40572.9	2127.32	123.598	262.976	0	0	0	0	0	0	0	200	903	0	0	0	0	0	0	0	603	903	0
776	6	-25.0546	-12.4096	-534.094	19661.1	-40145.6	2676.64	124.834	263.188	0	0	0	0	0	0	0	200	903	0	0	0	0	0	0	0	603	903	0
776	7	-23.5287	-12.8674	-536.84	19844.2	-40633.9	2539.31	124.309	263.035	0	0	0	0	0	0	0	200	903	0	0	0	0	0	0	0	603	903	0
776	8	-25.8176	-12.4096	-540.197	19294.9	-40572.9	2493.53	124.892	264.282	0	0	0	0	0	0	0	200	903	0	0	0	0	0	0	0	603	903	0
776	9	-26.8857	-13.02	-541.113	19752.7	-41244.3	2722.41	123.779	263.496	0	0	0	0	0	0	0	200	903	0	0	0	0	0	0	0	603	903	0
777	0	-27.1909	-15.1562	-540.807	19478	-41610.5	2539.31	123.059	263.983	0	0	0	0	0	0	0	200	903	0	0	0	0	0	0	0	603	903	0
777	1	-26.7331	-14.2407	-542.639	19386.5	-41000.1	2905.52	124.443	264.274	0	0	0	0	0	0	0	200	903	0	0	0	0	0	0	0	603	903	0
777	2	-25.665	-14.6985	-546.301	19569.6	-41244.3	2722.41	124.503	264.178	0	0	0	0	0	0	0	200	903	0	0	0	0	0	0	0	603	903	0
777	3	-26.8857	-14.6985	-541.723	19661.1	-41793.6	2630.86	122.851	263.706	0	0	0	0	0	0	0	200	903	0	0	0	0	0	0	0	603	903	0
777	4	-27.9538	-15.9192	-548.742	19020.3	-41976.7	3088.62	123.504	265.338	0	0	0	0	0	0	0	200	903	0	0	0	0	0	0	0	603	903	0
777	5	-27.8012	-15.7666	-548.742	18837.2	-41671.5	3088.62	124.06	265.672	0	0	0	0	0	0	0	200	903	0	0	0	0	0	0	0	603	903	0
777	6	-27.0383	-15.7666	-550.268	18928.7	-41671.5	3180.18	124.271	265.601	0	0	0	0	0	0	0	200	903	0	0	0	0	0	0	0	603	903	0
777	7	-27.1909	-15.614	-553.32	18379.4	-42403.9	3042.85	123.365	266.783	0	0	0	0	0	0	0	200	903	0	0	0	0	0	0	0	603	903	0
777	8	-27.6486	-16.5295	-555.761	18837.2	-42587	3134.4	123.372	266.106	0	0	0	0	0	0	0	200	903	0	0	0	0	0	0	0	603	903	0
777	9	-28.8693	-16.5295	-557.592	18928.7	-42098.8	3317.51	124.499	266.053	0	0	0	0	0	0	0	200	903	0	0	0	0	0	0	0	603	903	0
778	0	-27.9538	-16.9873	-557.287	18745.6	-42709.1	3317.51	123.362	266.363	0	0	0	0	0	0	0	200	903	0	0	0	0	0	0	0	603	903	0
778	1	-27.3434	-17.7502	-558.508	19111.8	-42831.2	3225.95	123.311	265.781	0	0	0	0	0	0	0	200	903	0	0	0	0	0	0	0	603	903	0
778	2	-27.8012	-18.208	-561.254	19111.8	-42709.1	3454.84	123.904	265.948	0	0	0	0	0	0	0	200	903	0	0	0	0	0	0	0	603	903	0
778	3	-26.8857	-19.1235	-561.559	18654.1	-42709.1	3500.61	123.946	266.782	0	0	0	0	0	0	0	200	903	0	0	0	0	0	0	0	603	903	0
778	4	-29.1745	-18.6657	-565.222	17921.6	-43075.3	3500.61	123.79	268.293	0	0	0	0	0	0	0	200	903	0	0	0	0	0	0	0	603	903	0
778	5	-28.259	-18.5131	-564.611	17921.6	-43075.3	3729.49	123.708	268.258	0	0	0	0	0	0	0	200	903	0	0	0	0	0	0	0	603	903	0
778	6	-27.6486	-19.1235	-566.137	18196.3	-42831.2	3637.94	124.345	267.859	0	0	0	0	0	0	0	200	903	0	0	0	0	0	0	0	603	903	0
778	7	-28.1064	-19.1235	-569.189	17921.6	-42892.2	3775.27	124.643	268.514	0	0	0	0	0	0	0	200	903	0	0	0	0	0	0	0	603	903	0
778	8	-29.0219	-19.5813	-569.494	17738.5	-43319.5	3729.49	123.933	268.852	0	0	0	0	0	0	0	200	903	0	0	0	0	0	0	0	603	903	0
778	9	-27.8012	-19.8864	-570.715	17738.5	-43563.6	3729.49	123.668	268.919	0	0	0	0	0	0	0	200	903	0	0	0	0	0	0	0	603	903	0
779	0	-29.0219	-21.4123	-569.494	17921.6	-43319.5	4416.14	123.933	268.531	0	0	0	0	0	0	0	200	903	0	0	0	0	0	0	0	603	903	0
779	1	-28.259	-21.5649	-573.461	18196.3	-43868.8	4507.69	123.502	268.269	0	0	0	0	0	0	0	200	903	0	0	0	0	0	0	0	603	903	0
779	2	-28.1064	-21.7175	-576.513	17647	-43624.6	4141.48	124.33	269.39	0	0	0	0	0	0	0	200	903	0	0	0	0	0	0	0	603	903	0
779	3	-29.9374	-22.7856	-577.734	17372.3	-43624.6	4187.26	124.49	269.93	0	0	0	0	0	0	0	200	903	0	0	0	0	0	0	0	603	903	0
779	4	-27.9538	-22.9382	-577.734	16731.4	-43502.6	4278.81	124.701	271.04	0	0	0	0	0	0	0	200	903	0	0	0	0	0	0	0	603	903	0
779	5	-29.7849	-22.3278	-577.734	17280.8	-43929.8	4278.81	123.962	270.089	0	0	0	0	0	0	0	200	903	0	0	0	0	0	0	0	603	903	0
779	6	-29.1745	-23.7011	-579.26	16639.9	-44357.1	4187.26	123.425	271.274	0	0	0	0	0	0	0	200	903	0	0	0	0	0	0	0	603	903	0
779	7	-28.8693	-24.6167	-582.922	16456.8	-43441.5	4690.8	125.476	271.768	0	0	0	0	0	0	0	200	903	0	0	0	0	0	0	0	603	903	0
779	8	-30.2426	-24.1589	-583.227	16823	-43990.8	4645.02	124.573	271.155	0	0	0	0	0	0	0	200	903	0	0	0	0	0	0	0	603	903	0
779	9	-29.9374	-24.6167	-584.142	16365.2	-44112.9	4553.47	124.483	271.984	0	0	0	0	0	0	0	200	903	0	0	0	0	0	0	0	603	903	0
780	0	-29.3271	-26.1425	-584.142	16823	-43990.8	4690.8	124.692	271.201	0	0	0	0	0	0	0	200	903	0	0	0	0	0	0	0	603	903	0
780	1	-29.3271	-25.8374	-586.279	16182.1	-44112.9	4919.68	124.758	272.399	0	0	0	0	0	0	0	200	903	0	0	0	0	0	0	0	603	903	0
780	2	-29.4797	-26.1425	-590.551	15632.8	-44540.2	5011.23	124.579	273.528	0	0	0	0	0	0	0	200	903	0	0	0	0	0	0	0	603	903	0
780	3	-30.3952	-26.7529	-589.941	15358.2	-44540.2	4736.57	124.501	273.967	0	0	0	0	0	0	0	200	903	0	0	0	0	0	0	0	603	903	0
780	4	-30.5478	-26.9055	-589.025	15541.3	-44479.1	5011.23	124.487	273.615	0	0	0	0	0	0	0	200	903	0	0	0	0	0	0	0	603	903	0
780	5	-29.4797	-27.6684	-592.382	14808.8	-44845.3	5240.11	124.297	275.001	0	0	0	0	0	0	0	200	903	0	0	0	0	0	0	0	603	903	0
780	6	-29.0219	-27.0581	-595.739	14900.4	-44540.2	5102.79	125.235	274.988	0	0	0	0	0	0	0	200	903	0	0	0	0	0	0	0	603	903	0
780	7	-30.09	-27.9736	-595.129	14259.5	-44479.1	5285.89	125.261	276.04	0	0	0	0	0	0	0	200	903	0	0	0	0	0	0	0	603	903	0
780	8	-30.3952	-28.8891	-596.96	14900.4	-44723.3	5240.11	125.082	275.04	0	0	0	0	0	0	0	200	903	0	0	0	0	0	0	0	603	903	0
780	9	-31.3107	-28.584	-596.044	14625.7	-44906.4	5514.77	124.659	275.462	0	0	0	0	0	0	0	200	903	0	0	0	0	0	0	0	603	903	0
781	0	-30.7004	-29.6521	-598.181	14534.2	-44845.3	5560.55	125.03	275.703	0	0	0	0	0	0	0	200	903	0	0	0	0	0	0	0	603	903	0
781	1	-28.1064	-30.1098	-600.622	14351.1	-45028.4	5514.77	125.03	276.106	0	0	0	0	0	0	0	200	903	0	0	0	0	0	0	0	603	903	0
781	2	-30.2426	-31.9409	-601.843	13984.9	-45333.6	5606.33	124.675	276.763	0	0	0	0	0	0	0	200	903	0	0	0	0	0	0	0	603	903	0
781	3	-30.3952	-30.8728	-606.115	13618.7	-45272.6	6064.09	125.307	277.531	0	0	0	0	0	0	0	200	903	0	0	0	0	0	0	0	603	903	0
781	4	-31.6159	-31.6357	-605.505	13252.4	-45028.4	5880.98	125.635	278.113	0	0	0	0	0	0	0	200	903	0	0	0	0	0	0	0	603	903	0
781	5	-30.2426	-30.8728	-608.557	13160.9	-45150.5	5697.88	125.807	278.374	0	0	0	0	0	0	0	200	903	0	0	0	0	0	0	0	603	903	0
781	6	-29.4797	-31.7883	-611.303	13160.9	-45638.8	6064.09	125.342	278.471	0	0	0	0	0	0	0	200	903	0	0	0	0	0	0	0	603	903	0
781	7	-30.2426	-31.7883	-611.913	12611.6	-46005	5972.54	124.818	279.39	0	0	0	0	0	0	0	200	903	0	0	0	0	0	0	0	603	903	0
781	8	-29.4797	-31.9409	-611.913	13069.3	-45577.8	6384.52	125.516	278.642	0	0	0	0	0	0	0	200	903	0	0	0	0	0	0	0	603	903	0
781	9	-30.5478	-32.3986	-614.965	12703.1	-45455.7	6018.31	126.084	279.343	0	0	0	0	0	0	0	200	903	0	0	0	0	0	0	0	603	903	0
782	0	-29.6323	-32.7038	-617.712	13160.9	-45577.8	6201.42	126.215	278.694	0	0	0	0	0	0	0	200	903	0	0	0	0	0	0	0	603	903	0
782	1	-29.1745	-33.9245	-621.374	12336.9	-46005	6430.3	125.962	280.146	0	0	0	0	0	0	0	200	903	0	0	0	0	0	0	0	603	903	0
782	2	-29.7849	-35.2978	-623.51	12062.3	-46249.1	6430.3	125.825	280.654	0	0	0	0	0	0	0	200	903	0	0	0	0	0	0	0	603	903	0
782	3	-29.1745	-33.7719	-622.595	11604.5	-46493.3	6384.52	125.323	281.361	0	0	0	0	0	0	0	200	903	0	0	0	0	0	0	0	603	903	0
782	4	-30.2426	-34.6875	-622.9	11146.7	-46737.4	6521.85	124.968	282.105	0	0	0	0	0	0	0	200	903	0	0	0	0	0	0	0	603	903	0
782	5	-29.3271	-34.0771	-627.477	11421.4	-46615.4	6476.08	125.71	281.798	0	0	0	0	0	0	0	200	903	0	0	0	0	0	0	0	603	903	0
782	6	-29.6323	-34.5349	-630.529	10872.1	-46920.5	6750.73	125.585	282.757	0	0	0	0	0	0	0	200	903	0	0	0	0	0	0	0	603	903	0
782	7	-29.7849	-34.5349	-632.36	10414.3	-46981.6	6979.62	125.704	283.531	0	0	0	0	0	0	0	200	903	0	0	0	0	0	0	0	603	903	0
782	8	-30.3952	-35.1452	-632.971	10689	-46981.6	6567.63	125.776	283.113	0	0	0	0	0	0	0	200	903	0	0	0	0	0	0	0	603	903	0
782	9	-29.4797	-35.1452	-635.717	10231.2	-47408.8	6750.73	125.425	283.906	0	0	0	0	0	0	0	200	903	0	0	0	0	0	0	0	603	903	0
783	0	-28.259	-35.9082	-641.21	10505.9	-47714	6659.18	125.588	283.616	0	0	0	0	0	0	0	200	903	0	0	0	0	0	0	0	603	903	0
783	1	-29.6323	-36.8237	-640.295	10505.9	-47958.1	6888.06	125.1	283.592	0	0	0	0	0	0	0	200	903	0	0	0	0	0	0	0	603	903	0
783	2	-30.2426	-36.8237	-641.821	9498.79	-47653	7025.39	125.753	285.2	0	0	0	0	0	0	0	200	903	0	0	0	0	0	0	0	603	903	0
783	3	-30.3952	-38.6548	-641.21	9224.13	-47714	7116.95	125.588	285.615	0	0	0	0	0	0	0	200	903	0	0	0	0	0	0	0	603	903	0
783	4	-28.8693	-37.2815	-643.041	8674.81	-48263.3	7162.72	124.945	286.51	0	0	0	0	0	0	0	200	903	0	0	0	0	0	0	0	603	903	0
783	5	-27.6486	-37.7392	-648.229	8308.6	-47897.1	7162.72	126.111	287.183	0	0	0	0	0	0	0	200	903	0	0	0	0	0	0	0	603	903	0
783	6	-29.1745	-36.9763	-646.398	8583.25	-48324.3	6933.84	125.241	286.721	0	0	0	0	0	0	0	200	903	0	0	0	0	0	0	0	603	903	0
783	7	-29.9374	-37.5866	-650.671	7759.28	-48446.4	7162.72	125.544	288.075	0	0	0	0	0	0	0	200	903	0	0	0	0	0	0	0	603	903	0
783	8	-30.853	-39.5703	-650.976	7301.52	-48629.5	6933.84	125.298	288.784	0	0	0	0	0	0	0	200	903	0	0	0	0	0	0	0	603	903	0
783	9	-29.4797	-37.434	-651.891	7118.41	-48507.4	7208.5	125.59	289.08	0	0	0	0	0	0	0	200	903	0	0	0	0	0	0	0	603	903	0
784	0	-29.0219	-38.197	-655.554	6935.31	-49056.8	7208.5	125.167	289.421	0	0	0	0	0	0	0	200	903	0	0	0	0	0	0	0	603	903	0
784	1	-29.0219	-37.5866	-650.671	6385.99	-49178.8	7116.95	124.418	290.186	0	0	0	0	0	0	0	200	903	0	0	0	0	0	0	0	603	903	0
784	2	-30.3952	-39.4177	-658.3	6202.89	-48873.7	7162.72	125.758	290.577	0	0	0	0	0	0	0	200	903	0	0	0	0	0	0	0	603	903	0
784	3	-30.7004	-39.2651	-657.995	5745.12	-48995.7	7071.17	125.538	291.269	0	0	0	0	0	0	0	200	903	0	0	0	0	0	0	0	603	903	0
784	4	-29.4797	-39.4177	-660.131	5195.81	-49300.9	7574.71	125.317	292.129	0	0	0	0	0	0	0	200	903	0	0	0	0	0	0	0	603	903	0
784	5	-29.6323	-39.5703	-662.878	4738.04	-49606.1	7345.83	125.166	292.852	0	0	0	0	0	0	0	200	903	0	0	0	0	0	0	0	603	903	0
784	6	-29.4797	-39.1125	-658.911	4280.28	-49361.9	7391.6	125.086	293.504	0	0	0	0	0	0	0	200	903	0	0	0	0	0	0	0	603	903	0
784	7	-30.7004	-39.5703	-664.709	4097.17	-49423	7483.16	125.647	293.836	0	0	0	0	0	0	0	200	903	0	0	0	0	0	0	0	603	903	0
784	8	-31.7685	-40.3332	-665.014	3547.85	-49728.1	7208.5	125.222	294.665	0	0	0	0	0	0	0	200	903	0	0	0	0	0	0	0	603	903	0
784	9	-29.7849	-39.8755	-667.761	3914.07	-49484	7162.72	125.896	294.139	0	0	0	0	0	0	0	200	903	0	0	0	0	0	0	0	603	903	0
785	0	-30.3952	-40.028	-668.981	2906.99	-50094.4	7116.95	125.118	295.655	0	0	0	0	0	0	0	200	903	0	0	0	0	0	0	0	603	903	0
785	1	-30.853	-40.4858	-670.812	3273.2	-50399.5	7254.27	124.868	295.121	0	0	0	0	0	0	0	200	903	0	0	0	0	0	0	0	603	903	0
785	2	-30.3952	-40.9436	-669.897	2266.12	-50399.5	7300.05	124.765	296.617	0	0	0	0	0	0	0	200	903	0	0	0	0	0	0	0	603	903	0
785	3	-31.9211	-42.622	-671.423	1899.9	-50277.5	7483.16	125.118	297.17	0	0	0	0	0	0	0	200	903	0	0	0	0	0	0	0	603	903	0
785	4	-31.4633	-41.2487	-672.643	984.377	-50338.5	7300.05	125.163	298.537	0	0	0	0	0	0	0	200	903	0	0	0	0	0	0	0	603	903	0
785	5	-30.7004	-41.5539	-675.085	801.271	-50582.6	7528.93	125.072	298.813	0	0	0	0	0	0	0	200	903	0	0	0	0	0	0	0	603	903	0
785	6	-32.0737	-40.791	-675.39	618.166	-50643.7	7666.26	125.016	299.085	0	0	0	0	0	0	0	200	903	0	0	0	0	0	0	0	603	903	0
785	7	-31.1581	-41.4013	-675.39	-388.914	-50704.7	7116.95	124.925	300.576	0	0	0	0	0	0	0	200	903	0	0	0	0	0	0	0	603	903	0
785	8	-32.9892	-41.8591	-676.916	-388.914	-51376.1	7391.6	124.103	300.575	0	0	0	0	0	0	0	200	903	0	0	0	0	0	0	0	603	903	0
785	9	-32.2263	-41.4013	-677.526	-1121.34	-51315.1	7528.93	124.261	301.655	0	0	0	0	0	0	0	200	903	0	0	0	0	0	0	0	603	903	0
786	0	-32.3788	-41.8591	-679.968	-1029.78	-51132	7437.38	124.802	301.514	0	0	0	0	0	0	0	200	903	0	0	0	0	0	0	0	603	903	0
786	1	-34.9728	-42.1643	-680.883	-1395.99	-51132	7254.27	124.903	302.05	0	0	0	0	0	0	0	200	903	0	0	0	0	0	0	0	603	903	0
786	2	-34.6677	-42.622	-680.578	-2036.86	-51742.3	7300.05	123.973	302.993	0	0	0	0	0	0	0	200	903	0	0	0	0	0	0	0	603	903	0
786	3	-33.9047	-42.9272	-679.968	-2403.07	-51559.2	7300.05	124.174	303.534	0	0	0	0	0	0	0	200	903	0	0	0	0	0	0	0	603	903	0
786	4	-33.7521	-43.9953	-685.156	-2769.29	-51742.3	7345.83	124.481	304.042	0	0	0	0	0	0	0	200	903	0	0	0	0	0	0	0	603	903	0
786	5	-34.2099	-43.0798	-686.376	-4142.58	-51681.3	7437.38	124.704	306.035	0	0	0	0	0	0	0	200	903	0	0	0	0	0	0	0	603	903	0
[truncated: 2,574 more rows]
