# Supplementary material for: The Effects of an Extemporaneous Speech Dual-task on Older Adult Gait Control
Source: Research Square preprint supplement (doi:10.21203/rs.3.rs-7674245/v1), 2025-11-18
Supplement: Supplementary file 43 [file DT3Walk07.xlsx]

## Sheet: Sheet1
Trajectories
		03:LFHD			03:RFHD			03:LBHD			03:RBHD			03:C7			03:T10			03:CLAV			03:STRN			03:RBAK			03:LSHO			03:LUPA			03:LELB			03:LFRM			03:LWRA			03:LWRB			03:LFIN
Frame	Sub Frame	X	Y	Z	X	Y	Z	X	Y	Z	X	Y	Z	X	Y	Z	X	Y	Z	X	Y	Z	X	Y	Z	X	Y	Z	X	Y	Z	X	Y	Z	X	Y	Z	X	Y	Z	X	Y	Z	X	Y	Z	X	Y	Z
		mm	mm	mm	mm	mm	mm	mm	mm	mm	mm	mm	mm	mm	mm	mm	mm	mm	mm	mm	mm	mm	mm	mm	mm	mm	mm	mm	mm	mm	mm	mm	mm	mm	mm	mm	mm	mm	mm	mm	mm	mm	mm	mm	mm	mm	mm	mm	mm
284	0	251.571	2616.44	1646.3	147.674	2616.3	1645.9	272.268	2773.44	1659.81	135.911	2784.46	1662.21	185.611	2843.6	1515.67	181.52	2954.54	1297.57	205.998	2706.57	1418.73	206.306	2686.44	1232.74	126.4	2948.4	1371.84	383.447	2848.86	1466.17	439.861	2893.58	1270.68	456.487	2929.67	1155.82	471.289	2887.93	983.537	430.348	2861.53	889.273	487.561	2913.68	882.846	484.842	2871.83	784.92
285	0	251.378	2606.11	1648.5	147.497	2606.15	1647.9	272.343	2763.11	1661.98	135.997	2774.31	1664.19	186.084	2833.19	1517.55	181.729	2943.43	1299.11	206.246	2696.03	1420.56	206.71	2676.09	1234.59	126.636	2937.48	1373.3	383.803	2837.98	1468.35	441.201	2880.21	1272.16	458.513	2914.3	1156.76	471.999	2866.9	986.121	430.186	2837.73	893.373	487.545	2889.17	884.748	484.105	2844.06	788.654
286	0	251.214	2595.71	1650.4	147.347	2595.93	1649.62	272.445	2752.71	1663.86	136.109	2764.09	1665.9	186.512	2822.72	1519.17	181.876	2932.33	1300.43	206.476	2685.44	1422.11	207.088	2665.71	1236.15	126.842	2926.57	1374.58	384.111	2827.1	1470.23	442.46	2866.83	1273.4	460.409	2898.93	1157.47	472.614	2846.03	988.586	429.959	2814.15	897.387	487.449	2864.85	886.623	483.297	2816.56	792.422
287	0	251.08	2585.23	1652	147.221	2585.63	1651.07	272.574	2742.22	1665.44	136.245	2753.81	1667.34	186.894	2812.18	1520.55	181.961	2921.27	1301.52	206.686	2674.82	1423.39	207.438	2655.28	1237.44	127.019	2915.67	1375.67	384.371	2816.22	1471.82	443.638	2853.46	1274.37	462.175	2883.55	1157.95	473.136	2825.31	990.93	429.67	2790.78	901.315	487.27	2840.71	888.471	482.419	2789.31	796.224
288	0	250.974	2574.68	1653.32	147.121	2575.25	1652.25	272.729	2731.66	1666.73	136.405	2743.45	1668.52	187.23	2801.59	1521.67	181.983	2910.22	1302.4	206.877	2664.16	1424.39	207.762	2644.82	1238.44	127.166	2904.77	1376.57	384.582	2805.33	1473.11	444.733	2840.09	1275.1	463.81	2868.18	1158.2	473.563	2804.74	993.156	429.316	2767.63	905.158	487.011	2816.77	890.293	481.47	2762.34	800.058
289	0	250.895	2564.05	1654.33	147.044	2564.8	1653.16	272.908	2721.01	1667.73	136.588	2733.02	1669.42	187.518	2790.94	1522.55	181.944	2899.2	1303.05	207.047	2653.45	1425.12	208.057	2634.32	1239.16	127.283	2893.88	1377.29	384.744	2794.43	1474.11	445.745	2826.71	1275.57	465.313	2852.81	1158.23	473.895	2784.33	995.261	428.899	2744.71	908.913	486.67	2793.01	892.089	480.454	2735.62	803.924
290	0	250.841	2553.35	1655.06	146.989	2554.27	1653.8	273.109	2710.29	1668.45	136.791	2722.52	1670.05	187.756	2780.23	1523.17	181.841	2888.2	1303.49	207.194	2642.71	1425.57	208.321	2623.78	1239.61	127.368	2883	1377.83	384.855	2783.52	1474.81	446.671	2813.34	1275.79	466.684	2837.44	1158.04	474.131	2764.08	997.247	428.418	2722.01	912.58	486.248	2769.45	893.856	479.371	2709.19	807.818
291	0	250.809	2542.57	1655.49	146.952	2543.67	1654.17	273.327	2699.49	1668.87	137.008	2711.94	1670.43	187.942	2769.46	1523.55	181.674	2877.22	1303.71	207.314	2631.93	1425.76	208.553	2613.2	1239.79	127.416	2872.12	1378.17	384.913	2772.6	1475.23	447.509	2799.96	1275.76	467.919	2822.08	1157.63	474.271	2743.99	999.115	427.872	2699.54	916.157	485.745	2746.1	895.594	478.225	2683.04	811.736
292	0	250.793	2531.72	1655.64	146.928	2532.99	1654.28	273.554	2688.61	1669.02	137.233	2701.29	1670.55	188.07	2758.63	1523.68	181.442	2866.25	1303.71	207.404	2621.1	1425.68	208.747	2602.57	1239.7	127.426	2861.24	1378.33	384.915	2761.67	1475.37	448.254	2786.59	1275.5	469.018	2806.72	1157.01	474.313	2724.07	1000.86	427.262	2677.32	919.641	485.161	2722.97	897.302	477.021	2657.2	815.673
293	0	250.786	2520.8	1655.51	146.911	2522.23	1654.14	273.78	2677.65	1668.9	137.456	2690.56	1670.42	188.136	2747.73	1523.57	181.142	2855.28	1303.5	207.457	2610.23	1425.36	208.899	2591.9	1239.35	127.393	2850.35	1378.3	384.857	2750.72	1475.24	448.902	2773.21	1275	469.975	2791.38	1156.18	474.255	2704.33	1002.49	426.587	2655.35	923.029	484.495	2700.07	898.977	475.763	2631.67	819.621
294	0	250.779	2509.8	1655.11	146.891	2511.39	1653.75	273.995	2666.62	1668.51	137.666	2679.76	1670.05	188.134	2736.78	1523.22	180.775	2844.31	1303.07	207.465	2599.31	1424.79	209.003	2581.16	1238.77	127.31	2839.45	1378.07	384.735	2739.74	1474.85	449.446	2759.84	1274.28	470.789	2776.06	1155.17	474.097	2684.77	1004.01	425.847	2633.64	926.317	483.748	2677.43	900.618	474.458	2606.5	823.572
295	0	250.761	2498.74	1654.44	146.857	2500.47	1653.11	274.183	2655.52	1667.87	137.847	2668.87	1669.45	188.056	2725.77	1522.65	180.339	2833.33	1302.44	207.421	2588.34	1423.99	209.052	2570.36	1237.95	127.171	2828.52	1377.66	384.543	2728.73	1474.22	449.879	2746.46	1273.36	471.456	2760.78	1153.97	473.837	2665.42	1005.4	425.04	2612.22	929.499	482.92	2655.05	902.22	473.112	2581.7	827.513
296	0	250.717	2487.6	1653.53	146.798	2489.46	1652.25	274.328	2644.35	1667	137.983	2657.9	1668.64	187.893	2714.7	1521.85	179.833	2822.32	1301.6	207.313	2577.31	1422.97	209.038	2559.49	1236.92	126.971	2817.57	1377.06	384.276	2717.69	1473.35	450.194	2733.1	1272.24	471.971	2745.53	1152.61	473.472	2646.29	1006.69	424.167	2591.11	932.571	482.01	2632.98	903.782	471.73	2557.31	831.431
297	0	250.633	2476.4	1652.39	146.698	2478.38	1651.17	274.409	2633.11	1665.9	138.054	2646.85	1667.63	187.639	2703.57	1520.84	179.258	2811.27	1300.56	207.132	2566.23	1421.76	208.953	2548.53	1235.69	126.703	2806.58	1376.27	383.927	2706.6	1472.28	450.384	2719.74	1270.94	472.333	2730.34	1151.11	473.002	2627.4	1007.86	423.226	2570.32	935.527	481.019	2611.23	905.297	470.319	2533.36	835.312
298	0	250.492	2465.14	1651.03	146.541	2467.22	1649.89	274.407	2621.82	1664.6	138.038	2635.72	1666.43	187.284	2692.38	1519.64	178.614	2800.18	1299.33	206.865	2555.07	1420.36	208.789	2537.49	1234.28	126.361	2795.55	1375.28	383.49	2695.45	1471.02	450.439	2706.4	1269.49	472.538	2715.23	1149.48	472.425	2608.76	1008.92	422.218	2549.89	938.359	479.947	2589.83	906.763	468.884	2509.89	839.138
299	0	250.277	2453.82	1649.48	146.309	2455.99	1648.44	274.3	2610.47	1663.13	137.915	2624.51	1665.06	186.821	2681.14	1518.25	177.903	2789.03	1297.92	206.502	2543.86	1418.81	208.537	2526.35	1232.72	125.939	2784.46	1374.11	382.959	2684.24	1469.59	450.355	2693.07	1267.9	472.584	2700.2	1147.74	471.741	2590.4	1009.88	421.141	2529.82	941.062	478.794	2568.82	908.174	467.427	2486.93	842.891
300	0	249.967	2442.45	1647.76	145.983	2444.67	1646.82	274.064	2599.07	1661.49	137.66	2613.22	1663.54	186.241	2669.84	1516.68	177.128	2777.81	1296.33	206.032	2532.57	1417.12	208.191	2515.1	1231.03	125.434	2773.31	1372.76	382.328	2672.95	1468.02	450.124	2679.78	1266.2	472.472	2685.28	1145.92	470.95	2572.34	1010.73	419.995	2510.16	943.627	477.562	2548.23	909.523	465.952	2464.52	846.552
301	0	249.546	2431.02	1645.9	145.547	2433.28	1645.06	273.677	2587.62	1659.73	137.253	2601.85	1661.89	185.539	2658.48	1514.97	176.292	2766.5	1294.58	205.443	2521.2	1415.31	207.744	2503.73	1229.23	124.842	2762.08	1371.22	381.592	2661.59	1466.33	449.743	2666.51	1264.41	472.201	2670.49	1144.04	470.052	2554.61	1011.47	418.781	2490.92	946.046	476.251	2528.09	910.804	464.458	2442.7	850.098
302	0	248.993	2419.56	1643.93	144.981	2421.82	1643.18	273.12	2576.14	1657.86	136.671	2590.4	1660.13	184.708	2647.07	1513.13	175.4	2755.11	1292.69	204.728	2509.76	1413.42	207.192	2492.24	1227.34	124.163	2750.78	1369.52	380.748	2650.14	1464.55	449.209	2653.29	1262.55	471.773	2655.84	1142.13	469.048	2537.21	1012.12	417.499	2472.13	948.312	474.864	2508.43	912.011	462.946	2421.5	853.508
303	0	248.293	2408.05	1641.88	144.27	2410.29	1641.21	272.374	2564.63	1655.91	135.896	2578.89	1658.28	183.744	2635.61	1511.17	174.457	2743.62	1290.66	203.88	2498.24	1411.45	206.533	2480.63	1225.39	123.396	2739.4	1367.65	379.793	2638.59	1462.7	448.522	2640.12	1260.66	471.194	2641.37	1140.2	467.943	2520.19	1012.67	416.148	2453.82	950.415	473.405	2489.28	913.135	461.413	2400.95	856.759
304	0	247.43	2396.5	1639.77	143.397	2398.7	1639.18	271.423	2553.08	1653.91	134.913	2567.3	1656.36	182.645	2624.1	1509.12	173.469	2732.04	1288.53	202.895	2486.64	1409.44	205.766	2468.88	1223.41	122.543	2727.94	1365.65	378.725	2626.95	1460.82	447.686	2627.01	1258.75	470.466	2627.08	1138.28	466.738	2503.55	1013.12	414.732	2436.01	952.347	471.878	2470.68	914.169	459.857	2381.08	859.825
305	0	246.392	2384.92	1637.65	142.352	2387.04	1637.11	270.254	2541.51	1651.89	133.712	2555.65	1654.38	181.41	2612.54	1507.01	172.443	2720.35	1286.31	201.771	2474.96	1407.41	204.895	2457	1221.42	121.607	2716.39	1363.52	377.545	2615.22	1458.93	446.704	2613.97	1256.85	469.598	2612.99	1136.4	465.439	2487.33	1013.48	413.251	2418.72	954.098	470.289	2452.64	915.104	458.274	2361.92	862.683
306	0	245.169	2373.31	1635.55	141.125	2375.33	1635.02	268.862	2529.92	1649.88	132.284	2543.93	1652.39	180.042	2600.93	1504.86	171.382	2708.56	1284.02	200.511	2463.21	1405.39	203.926	2444.99	1219.44	120.592	2704.76	1361.29	376.255	2603.39	1457.04	445.586	2601.01	1254.98	468.597	2599.14	1134.58	464.052	2471.54	1013.75	411.71	2401.98	955.658	468.644	2435.21	915.931	456.661	2343.5	865.307
307	0	243.756	2361.67	1633.48	139.711	2363.57	1632.94	267.244	2518.3	1647.91	130.629	2532.16	1650.38	178.545	2589.27	1502.69	170.293	2696.68	1281.7	199.122	2451.38	1403.4	202.866	2432.85	1217.51	119.501	2693.05	1358.99	374.859	2591.47	1455.2	444.341	2588.14	1253.18	467.473	2585.52	1132.83	462.584	2456.2	1013.93	410.111	2385.8	957.017	466.951	2418.39	916.641	455.014	2325.82	867.672
308	0	242.153	2350	1631.5	138.111	2351.76	1630.9	265.405	2506.67	1646.01	128.752	2520.35	1648.39	176.926	2577.58	1500.54	169.18	2684.71	1279.37	197.613	2439.49	1401.46	201.728	2420.59	1215.63	118.341	2681.27	1356.64	373.365	2579.47	1453.42	442.983	2575.37	1251.46	466.236	2572.16	1131.18	461.042	2441.32	1014.02	408.462	2370.2	958.165	465.221	2402.22	917.226	453.331	2308.91	869.751
309	0	240.364	2338.31	1629.61	136.328	2339.9	1628.91	263.355	2495.01	1644.2	126.664	2508.48	1646.44	175.195	2565.85	1498.43	168.047	2672.66	1277.06	195.998	2427.53	1399.61	200.524	2408.22	1213.85	117.116	2669.43	1354.27	371.78	2567.41	1451.73	441.524	2562.71	1249.85	464.898	2559.06	1129.65	459.438	2426.92	1014.02	406.768	2355.21	959.091	463.463	2386.71	917.677	451.611	2292.79	871.521
310	0	238.4	2326.58	1627.85	134.374	2328.02	1627.01	261.109	2483.34	1642.51	124.382	2496.58	1644.56	173.364	2554.08	1496.4	166.896	2660.53	1274.8	194.293	2415.52	1397.85	199.27	2395.75	1212.17	115.832	2657.52	1351.92	370.117	2555.29	1450.14	439.98	2550.18	1248.37	463.47	2546.24	1128.26	457.78	2413.01	1013.93	405.038	2340.82	959.787	461.69	2371.87	917.985	449.857	2277.46	872.958
311	0	236.274	2314.84	1626.24	132.262	2316.1	1625.21	258.691	2471.65	1640.97	121.931	2484.65	1642.75	171.45	2542.29	1494.45	165.73	2648.35	1272.63	192.518	2403.47	1396.22	197.981	2383.19	1210.62	114.495	2645.56	1349.62	368.388	2543.15	1448.69	438.368	2537.78	1247.03	461.964	2533.71	1127.01	456.081	2399.61	1013.75	403.28	2327.05	960.243	459.915	2357.72	918.144	448.073	2262.94	874.039
312	0	234.008	2303.07	1624.79	130.013	2304.16	1623.53	256.128	2459.93	1639.6	119.339	2472.69	1641.06	169.47	2530.48	1492.64	164.551	2636.13	1270.56	190.696	2391.38	1394.73	196.674	2370.57	1209.23	113.113	2633.56	1347.4	366.61	2530.99	1447.38	436.704	2525.52	1245.86	460.393	2521.46	1125.92	454.353	2386.71	1013.49	401.508	2313.91	960.453	458.152	2344.27	918.148	446.268	2249.23	874.748
313	0	231.627	2291.28	1623.54	127.652	2292.2	1621.99	253.454	2448.19	1638.42	116.64	2460.71	1639.49	167.445	2518.65	1490.97	163.362	2623.88	1268.65	188.851	2379.28	1393.4	195.363	2357.89	1207.99	111.693	2621.54	1345.31	364.799	2518.83	1446.23	435.005	2513.43	1244.86	458.768	2509.51	1125	452.61	2374.33	1013.13	399.731	2301.41	960.411	456.416	2331.53	917.992	444.452	2236.33	875.068
314	0	229.16	2279.47	1622.48	125.207	2280.24	1620.61	250.707	2436.44	1637.44	113.873	2448.73	1638.08	165.398	2506.82	1489.48	162.166	2611.63	1266.91	187.006	2367.18	1392.25	194.064	2345.19	1206.95	110.243	2609.49	1343.38	362.974	2506.7	1445.26	433.288	2501.5	1244.05	457.1	2497.85	1124.27	450.865	2362.47	1012.69	397.966	2289.53	960.113	454.721	2319.49	917.673	442.641	2224.25	874.99
315	0	226.639	2267.64	1621.64	122.712	2268.28	1619.4	247.928	2424.67	1636.69	111.081	2436.74	1636.84	163.354	2494.99	1488.19	160.964	2599.38	1265.37	185.188	2355.08	1391.3	192.788	2332.5	1206.09	108.774	2597.45	1341.64	361.157	2494.62	1444.48	431.567	2489.75	1243.44	455.4	2486.5	1123.72	449.132	2351.13	1012.16	396.226	2278.3	959.558	453.083	2308.17	917.19	440.855	2212.99	874.509
316	0	224.1	2255.8	1621.01	120.199	2256.33	1618.37	245.161	2412.88	1636.16	108.306	2424.77	1635.79	161.338	2483.17	1487.11	159.763	2587.16	1264.06	183.419	2343.01	1390.55	191.547	2319.83	1205.44	107.295	2585.41	1340.12	359.367	2482.6	1443.89	429.857	2478.2	1243.02	453.679	2475.44	1123.35	447.426	2340.32	1011.55	394.527	2267.7	958.748	451.516	2297.57	916.546	439.114	2202.55	873.623
317	0	221.58	2243.96	1620.6	117.707	2244.4	1617.55	242.45	2401.08	1635.87	105.593	2412.82	1634.94	159.374	2471.37	1486.27	158.565	2574.99	1263	181.722	2330.99	1390.02	190.348	2307.22	1205	105.819	2573.39	1338.84	357.625	2470.66	1443.5	428.171	2466.85	1242.81	451.947	2464.68	1123.17	445.76	2330.04	1010.85	392.887	2257.73	957.685	450.034	2287.68	915.742	437.443	2192.91	872.341
318	0	219.119	2232.11	1620.41	115.272	2232.5	1616.93	239.84	2389.27	1635.82	102.987	2400.89	1634.32	157.488	2459.6	1485.69	157.376	2562.88	1262.21	180.117	2319.01	1389.71	189.198	2294.68	1204.77	104.357	2561.41	1337.85	355.95	2458.82	1443.31	426.52	2455.72	1242.8	450.211	2454.21	1123.18	444.148	2320.28	1010.08	391.32	2248.39	956.377	448.649	2278.49	914.784	435.868	2184.09	870.673
319	0	216.753	2220.27	1620.45	112.931	2220.64	1616.53	237.374	2377.45	1636.01	100.529	2389.01	1633.94	155.702	2447.87	1485.36	156.201	2550.85	1261.7	178.62	2307.1	1389.63	188.101	2282.26	1204.77	102.919	2549.47	1337.14	354.361	2447.08	1443.33	424.915	2444.8	1242.98	448.48	2444.04	1123.36	442.603	2311.03	1009.22	389.843	2239.66	954.834	447.373	2270.01	913.681	434.414	2176.05	868.637
320	0	214.522	2208.45	1620.7	110.721	2208.82	1616.36	235.09	2365.64	1636.44	98.2581	2377.17	1633.82	154.036	2436.18	1485.3	155.044	2538.9	1261.49	177.247	2295.27	1389.79	187.059	2269.96	1204.99	101.516	2537.58	1336.74	352.873	2435.46	1443.54	423.362	2434.11	1243.35	446.76	2434.16	1123.72	441.136	2302.31	1008.3	388.472	2231.54	953.069	446.216	2262.23	912.442	433.107	2168.81	866.259
321	0	212.459	2196.64	1621.15	108.675	2197.05	1616.42	233.024	2353.84	1637.09	96.2074	2365.39	1633.96	152.508	2424.55	1485.52	153.908	2527.05	1261.58	176.007	2283.53	1390.19	186.075	2257.8	1205.43	100.157	2525.75	1336.66	351.498	2423.97	1443.95	421.869	2423.65	1243.91	445.058	2424.56	1124.24	439.757	2294.09	1007.31	387.222	2224.01	951.099	445.184	2255.13	911.082	431.972	2162.34	863.568
322	0	210.598	2184.86	1621.82	106.826	2185.35	1616.72	231.205	2342.06	1637.97	94.4046	2353.67	1634.37	151.13	2412.98	1486.01	152.797	2515.3	1261.96	174.908	2271.88	1390.82	185.148	2245.8	1206.1	98.8489	2513.99	1336.89	350.246	2412.6	1444.55	420.439	2413.42	1244.65	443.378	2415.23	1124.92	438.477	2286.36	1006.27	386.105	2217.06	948.942	444.284	2248.71	909.616	431.031	2156.64	860.598
323	0	208.966	2173.12	1622.68	105.202	2173.7	1617.27	229.656	2330.31	1639.07	92.8705	2342.01	1635.06	149.91	2401.47	1486.78	151.712	2503.64	1262.63	173.954	2260.33	1391.69	184.278	2233.95	1206.99	97.5966	2502.29	1337.44	349.124	2401.37	1445.32	419.073	2403.42	1245.55	441.724	2406.18	1125.76	437.301	2279.13	1005.19	385.134	2210.68	946.621	443.518	2242.94	908.063	430.303	2151.68	857.39
324	0	207.587	2161.43	1623.72	103.824	2162.12	1618.06	228.391	2318.59	1640.36	91.6187	2330.41	1636.03	148.855	2390.03	1487.8	150.652	2492.09	1263.59	173.146	2248.87	1392.79	183.466	2222.27	1208.11	96.403	2490.65	1338.3	348.133	2390.28	1446.26	417.773	2393.64	1246.6	440.099	2397.39	1126.73	436.237	2272.37	1004.07	384.318	2204.84	944.16	442.889	2237.82	906.443	429.803	2147.45	853.986
325	0	206.478	2149.79	1624.95	102.71	2150.6	1619.1	227.418	2306.92	1641.85	90.6554	2318.88	1637.29	147.963	2378.65	1489.08	149.618	2480.64	1264.81	172.482	2237.51	1394.11	182.71	2210.73	1209.43	95.2688	2479.08	1339.46	347.273	2379.32	1447.36	416.535	2384.07	1247.8	438.504	2388.84	1127.84	435.287	2266.07	1002.94	383.664	2199.54	941.587	442.394	2233.31	904.779	429.544	2143.94	850.431
326	0	205.65	2138.21	1626.34	101.873	2139.14	1620.37	226.736	2295.3	1643.5	89.9791	2307.41	1638.81	147.231	2367.34	1490.58	148.608	2469.27	1266.29	171.957	2226.24	1395.64	182.007	2199.34	1210.97	94.1931	2467.57	1340.89	346.539	2368.49	1448.59	415.357	2374.72	1249.13	436.94	2380.54	1129.08	434.455	2260.22	1001.8	383.178	2194.74	938.929	442.032	2229.41	903.096	429.531	2141.12	846.772
327	0	205.109	2126.69	1627.88	101.317	2127.75	1621.87	226.338	2283.75	1645.3	89.5815	2296	1640.58	146.652	2356.09	1492.3	147.619	2457.97	1267.98	171.563	2215.06	1397.37	181.357	2188.08	1212.69	93.1733	2456.11	1342.57	345.925	2357.78	1449.95	414.233	2365.56	1250.58	435.408	2372.46	1130.43	433.74	2254.79	1000.67	382.864	2190.43	936.216	441.797	2226.09	901.418	429.766	2138.98	843.055
328	0	204.851	2115.25	1629.55	101.042	2116.41	1623.59	226.21	2272.27	1647.22	89.4478	2284.65	1642.59	146.215	2344.89	1494.2	146.65	2446.75	1269.87	171.292	2203.96	1399.28	180.757	2176.93	1214.59	92.2057	2444.69	1344.47	345.421	2347.18	1451.42	413.159	2356.59	1252.14	433.908	2364.6	1131.89	433.14	2249.76	999.563	382.72	2186.58	933.477	441.683	2223.31	899.771	430.246	2137.49	839.325
329	0	204.868	2103.89	1631.35	101.039	2105.12	1625.5	226.331	2260.86	1649.24	89.5578	2273.35	1644.8	145.908	2333.74	1496.25	145.698	2435.59	1271.92	171.133	2192.91	1401.34	180.204	2165.88	1216.63	91.2862	2433.3	1346.56	345.016	2336.68	1452.97	412.129	2347.79	1253.78	432.438	2356.94	1133.45	432.654	2245.1	998.498	382.746	2183.16	930.74	441.683	2221.04	898.179	430.959	2136.61	835.626
330	0	205.144	2092.6	1633.24	101.296	2093.89	1627.58	226.677	2249.54	1651.32	89.8866	2262.09	1647.18	145.717	2322.64	1498.42	144.762	2424.47	1274.09	171.074	2181.92	1403.51	179.695	2154.9	1218.8	90.4106	2421.94	1348.8	344.698	2326.27	1454.59	411.135	2339.14	1255.49	431	2349.47	1135.1	432.277	2240.81	997.485	382.936	2180.15	928.032	441.788	2219.25	896.665	431.891	2136.32	831.994
331	0	205.659	2081.4	1635.2	101.794	2082.7	1629.79	227.219	2238.29	1653.44	90.4061	2250.88	1649.69	145.625	2311.56	1500.68	143.844	2413.39	1276.35	171.103	2170.97	1405.77	179.228	2143.98	1221.05	89.5752	2410.6	1351.15	344.454	2315.94	1456.24	410.173	2330.64	1257.26	429.593	2342.17	1136.82	432.003	2236.83	996.536	383.283	2177.5	925.378	441.988	2217.89	895.249	433.02	2136.58	828.464
332	0	206.388	2070.26	1637.21	102.509	2071.55	1632.12	227.925	2227.13	1655.55	91.0859	2239.71	1652.27	145.618	2300.51	1502.97	142.944	2402.33	1278.66	171.208	2160.05	1408.08	178.8	2133.11	1223.35	88.7771	2399.27	1353.56	344.272	2305.66	1457.91	409.236	2322.27	1259.06	428.218	2335.02	1138.59	431.826	2233.15	995.658	383.777	2175.2	922.797	442.273	2216.93	893.949	434.321	2137.34	825.064
333	0	207.301	2059.2	1639.23	103.414	2060.43	1634.5	228.764	2216.05	1657.63	91.8949	2228.56	1654.88	145.679	2289.46	1505.28	142.066	2391.3	1280.98	171.378	2149.15	1410.39	178.409	2122.27	1225.65	88.0149	2387.94	1356	344.14	2295.42	1459.56	408.321	2314	1260.87	426.876	2328.02	1140.41	431.737	2229.74	994.859	384.407	2173.2	920.309	442.632	2216.31	892.777	435.765	2138.56	821.815
334	0	208.368	2048.2	1641.23	104.48	2049.33	1636.91	229.702	2205.04	1659.62	92.802	2217.43	1657.46	145.795	2278.42	1507.54	141.215	2380.27	1283.26	171.6	2138.24	1412.67	178.054	2111.44	1227.92	87.2883	2376.61	1358.42	344.047	2285.2	1461.17	407.424	2305.83	1262.67	425.568	2321.14	1142.24	431.73	2226.55	994.143	385.158	2171.46	917.926	443.052	2215.98	891.745	437.32	2140.18	818.734
335	0	209.557	2037.25	1643.19	105.674	2038.25	1639.3	230.71	2194.09	1661.51	93.7776	2206.32	1659.98	145.952	2267.37	1509.74	140.397	2369.25	1285.48	171.865	2127.33	1414.87	177.735	2100.61	1230.1	86.599	2365.27	1360.78	343.983	2274.99	1462.71	406.542	2297.73	1264.44	424.296	2314.38	1144.09	431.794	2223.57	993.51	386.016	2169.96	915.659	443.523	2215.9	890.857	438.95	2142.14	815.83
336	0	210.835	2026.34	1645.07	106.967	2027.18	1641.62	231.76	2183.2	1663.26	94.7941	2195.21	1662.37	146.138	2256.3	1511.81	139.62	2358.23	1287.58	172.163	2116.41	1416.95	177.451	2089.77	1232.17	85.9498	2353.92	1363.03	343.941	2264.78	1464.14	405.677	2289.68	1266.15	423.062	2307.69	1145.91	431.922	2220.74	992.959	386.965	2168.64	913.514	444.033	2216.01	890.115	440.622	2144.38	813.108
337	0	212.171	2015.45	1646.83	108.327	2016.11	1643.83	232.824	2172.34	1664.83	95.8271	2184.09	1664.59	146.346	2245.2	1513.74	138.892	2347.21	1289.55	172.487	2105.45	1418.88	177.203	2078.92	1234.07	85.345	2342.56	1365.15	343.916	2254.54	1465.46	404.829	2281.67	1267.79	421.869	2301.08	1147.7	432.103	2218.05	992.488	387.986	2167.48	911.494	444.57	2216.26	889.519	442.301	2146.84	810.569
338	0	213.538	2004.57	1648.45	109.726	2005.02	1645.89	233.884	2161.5	1666.2	96.8557	2172.96	1666.6	146.567	2234.06	1515.49	138.223	2336.18	1291.34	172.831	2094.47	1420.61	176.993	2068.05	1235.77	84.7901	2331.18	1367.09	343.903	2244.26	1466.62	404	2273.68	1269.33	420.72	2294.52	1149.43	432.329	2215.45	992.091	389.064	2166.44	909.6	445.123	2216.6	889.063	443.955	2149.47	808.211
339	0	214.91	1993.69	1649.89	111.139	1993.9	1647.76	234.92	2150.67	1667.34	97.863	2161.81	1668.36	146.799	2222.89	1517.03	137.621	2325.14	1292.93	173.189	2083.44	1422.12	176.823	2057.15	1237.23	84.2915	2319.79	1368.84	343.902	2233.92	1467.61	403.194	2265.69	1270.76	419.618	2288	1151.1	432.591	2212.9	991.761	390.181	2165.47	907.829	445.683	2216.97	888.742	445.557	2152.19	806.028
340	0	216.265	1982.77	1651.12	112.544	1982.76	1649.4	235.921	2139.81	1668.26	98.8364	2150.61	1669.86	147.037	2211.66	1518.34	137.096	2314.08	1294.3	173.559	2072.36	1423.37	176.695	2046.21	1238.44	83.8563	2308.38	1370.35	343.914	2223.52	1468.41	402.416	2257.68	1272.08	418.565	2281.48	1152.69	432.882	2210.39	991.493	391.32	2164.54	906.177	446.24	2217.33	888.547	447.081	2154.95	804.016
341	0	217.588	1971.82	1652.14	113.922	1971.56	1650.79	236.879	2128.93	1668.91	99.7678	2139.38	1671.06	147.283	2200.37	1519.4	136.655	2303.01	1295.43	173.941	2061.24	1424.35	176.613	2035.24	1239.36	83.4918	2296.94	1371.63	343.941	2213.04	1469.02	401.671	2249.63	1273.26	417.565	2274.95	1154.18	433.193	2207.86	991.278	392.467	2163.62	904.638	446.785	2217.64	888.469	448.508	2157.69	802.169
342	0	218.865	1960.8	1652.9	115.26	1960.31	1651.9	237.789	2117.99	1669.32	100.653	2128.08	1671.95	147.539	2189.03	1520.19	136.308	2291.91	1296.31	174.335	2050.05	1425.05	176.579	2024.24	1239.99	83.2055	2285.49	1372.64	343.987	2202.48	1469.41	400.965	2241.52	1274.3	416.621	2268.39	1155.58	433.52	2205.3	991.11	393.608	2162.66	903.208	447.313	2217.84	888.498	449.827	2160.37	800.481
343	0	220.091	1949.72	1653.41	116.55	1948.99	1652.72	238.653	2106.98	1669.46	101.492	2116.72	1672.52	147.809	2177.62	1520.72	136.061	2280.78	1296.92	174.743	2038.81	1425.45	176.598	2013.18	1240.32	83.0047	2274	1373.38	344.06	2191.81	1469.59	400.305	2233.35	1275.19	415.735	2261.78	1156.86	433.857	2202.67	990.979	394.73	2161.65	901.877	447.818	2217.9	888.624	451.028	2162.92	798.95
344	0	221.261	1938.54	1653.64	117.785	1937.6	1653.23	239.473	2095.88	1669.34	102.289	2105.28	1672.77	148.1	2166.14	1520.98	135.918	2269.61	1297.27	175.17	2027.5	1425.55	176.673	2002.08	1240.34	82.8961	2262.49	1373.85	344.166	2181.03	1469.56	399.696	2225.09	1275.95	414.91	2255.11	1158.03	434.201	2199.95	990.878	395.824	2160.54	900.64	448.296	2217.79	888.836	452.112	2165.32	797.571
345	0	222.379	1927.26	1653.61	118.968	1926.12	1653.43	240.258	2084.68	1668.97	103.051	2093.75	1672.72	148.419	2154.58	1520.96	135.885	2258.39	1297.36	175.62	2016.11	1425.35	176.807	1990.93	1240.07	82.886	2250.94	1374.05	344.313	2170.14	1469.3	399.146	2216.74	1276.55	414.149	2248.36	1159.09	434.549	2197.1	990.801	396.882	2159.32	899.488	448.744	2217.46	889.124	453.081	2167.5	796.344
346	0	223.448	1915.87	1653.3	120.101	1914.54	1653.31	241.018	2073.38	1668.36	103.787	2082.13	1672.36	148.773	2142.94	1520.68	135.964	2247.12	1297.18	176.101	2004.65	1424.87	177.005	1979.72	1239.49	82.9796	2239.34	1373.97	344.51	2159.12	1468.84	398.662	2208.27	1277.01	413.454	2241.5	1160.03	434.901	2194.11	990.741	397.899	2157.94	898.415	449.161	2216.9	889.476	453.944	2169.45	795.265
347	0	224.48	1904.37	1652.72	121.194	1902.87	1652.9	241.764	2061.95	1667.52	104.509	2070.41	1671.71	149.174	2131.21	1520.15	136.157	2235.77	1296.76	176.621	1993.11	1424.11	177.271	1968.44	1238.64	83.1813	2227.7	1373.64	344.766	2147.97	1468.17	398.248	2199.68	1277.34	412.827	2234.53	1160.86	435.256	2190.94	990.69	398.871	2156.38	897.411	449.547	2216.06	889.883	454.713	2171.11	794.332
348	0	225.484	1892.74	1651.89	122.257	1891.09	1652.19	242.51	2050.39	1666.46	105.232	2058.6	1670.8	149.629	2119.4	1519.37	136.466	2224.35	1296.09	177.187	1981.49	1423.09	177.608	1957.09	1237.53	83.4944	2215.99	1373.05	345.09	2136.7	1467.31	397.911	2190.96	1277.53	412.271	2227.42	1161.57	435.617	2187.58	990.643	399.798	2154.62	896.469	449.905	2214.94	890.334	455.399	2172.47	793.54
349	0	226.476	1880.98	1650.82	123.302	1879.2	1651.21	243.272	2038.71	1665.19	105.97	2046.67	1669.64	150.15	2107.49	1518.37	136.89	2212.84	1295.21	177.809	1969.77	1421.83	178.021	1945.66	1236.18	83.9212	2204.22	1372.24	345.491	2125.29	1466.26	397.657	2182.1	1277.59	411.787	2220.17	1162.17	435.986	2184	990.592	400.682	2152.64	895.581	450.238	2213.49	890.817	456.019	2173.5	792.885
350	0	227.471	1869.1	1649.52	124.346	1867.2	1649.98	244.063	2026.89	1663.75	106.739	2034.64	1668.25	150.745	2095.49	1517.16	137.427	2201.24	1294.12	178.495	1957.95	1420.34	178.514	1934.13	1234.62	84.463	2192.37	1371.2	345.977	2113.74	1465.04	397.489	2173.09	1277.53	411.378	2212.75	1162.67	436.367	2180.18	990.532	401.527	2150.39	894.739	450.549	2211.72	891.322	456.587	2174.16	792.356
351	0	228.484	1857.09	1648.02	125.401	1855.09	1648.53	244.901	2014.94	1662.14	107.554	2022.5	1666.67	151.425	2083.38	1515.76	138.077	2189.53	1292.84	179.254	1946.03	1418.67	179.091	1922.51	1232.86	85.12	2180.44	1369.97	346.555	2102.06	1463.67	397.413	2163.92	1277.35	411.047	2205.16	1163.06	436.766	2176.1	990.456	402.34	2147.87	893.933	450.843	2209.58	891.837	457.117	2174.44	791.944
352	0	229.531	1844.95	1646.34	126.485	1842.87	1646.88	245.798	2002.85	1660.39	108.43	2010.26	1664.92	152.197	2071.17	1514.2	138.837	2177.71	1291.4	180.096	1934	1416.82	179.758	1910.77	1230.93	85.8916	2168.41	1368.57	347.232	2090.25	1462.15	397.431	2154.58	1277.06	410.796	2197.37	1163.35	437.186	2171.74	990.358	403.126	2145.04	893.155	451.129	2207.08	892.351	457.624	2174.3	791.634
353	0	230.626	1832.69	1644.51	127.611	1830.53	1645.06	246.771	1990.64	1658.51	109.382	1997.9	1663.02	153.07	2058.85	1512.5	139.703	2165.78	1289.82	181.028	1921.86	1414.83	180.516	1898.92	1228.87	86.7768	2156.28	1367.02	348.012	2078.3	1460.49	397.547	2145.07	1276.66	410.629	2189.37	1163.53	437.635	2167.07	990.233	403.897	2141.89	892.397	451.412	2204.19	892.852	458.119	2173.73	791.411
354	0	231.784	1820.3	1642.56	128.793	1818.07	1643.11	247.83	1978.3	1656.53	110.421	1985.44	1661.01	154.049	2046.42	1510.69	140.673	2153.73	1288.14	182.057	1909.6	1412.72	181.371	1886.95	1226.69	87.7735	2144.04	1365.34	348.899	2066.23	1458.73	397.763	2135.37	1276.17	410.547	2181.14	1163.61	438.119	2162.08	990.073	404.661	2138.38	891.65	451.701	2200.89	893.329	458.615	2172.7	791.257
355	0	233.016	1807.79	1640.51	130.04	1805.5	1641.05	248.988	1965.83	1654.47	111.56	1972.87	1658.91	155.141	2033.87	1508.79	141.745	2141.56	1286.37	183.189	1897.22	1410.53	182.325	1874.84	1224.43	88.8797	2131.69	1363.58	349.896	2054.04	1456.87	398.081	2125.49	1275.57	410.556	2172.66	1163.59	438.645	2156.73	989.875	405.427	2134.49	890.906	452.005	2197.16	893.772	459.122	2171.19	791.155
356	0	234.332	1795.15	1638.39	131.364	1792.82	1638.92	250.252	1953.24	1652.36	112.806	1960.2	1656.75	156.349	2021.2	1506.84	142.914	2129.27	1284.55	184.427	1884.72	1408.27	183.381	1862.61	1222.12	90.0931	2119.22	1361.75	351.004	2041.73	1454.93	398.504	2115.4	1274.88	410.658	2163.92	1163.47	439.219	2151.02	989.632	406.208	2130.2	890.159	452.336	2193	894.173	459.648	2169.17	791.086
357	0	235.738	1782.39	1636.23	132.769	1780.01	1636.75	251.63	1940.53	1650.21	114.168	1947.41	1654.55	157.675	2008.42	1504.85	144.179	2116.87	1282.7	185.775	1872.1	1405.99	184.54	1850.24	1219.78	91.4113	2106.64	1359.88	352.222	2029.3	1452.93	399.034	2105.1	1274.11	410.858	2154.9	1163.26	439.848	2144.91	989.341	407.012	2125.49	889.401	452.702	2188.38	894.523	460.203	2166.62	791.033
358	0	237.238	1769.51	1634.05	134.26	1767.09	1634.56	253.126	1927.69	1648.05	115.649	1934.53	1652.36	159.12	1995.53	1502.86	145.538	2104.35	1280.87	187.233	1859.36	1403.71	185.803	1837.73	1217.44	92.8319	2093.94	1358.01	353.55	2016.77	1450.89	399.672	2094.57	1273.26	411.16	2145.57	1162.95	440.539	2138.38	989	407.848	2120.32	888.627	453.115	2183.28	894.815	460.795	2163.51	790.981
359	0	238.833	1756.49	1631.89	135.837	1754.05	1632.39	254.741	1914.72	1645.91	117.251	1921.53	1650.19	160.684	1982.52	1500.9	146.99	2091.73	1279.07	188.798	1846.5	1401.45	187.169	1825.09	1215.14	94.3528	2081.13	1356.17	354.984	2004.13	1448.84	400.42	2083.81	1272.33	411.568	2135.92	1162.54	441.298	2131.41	988.605	408.725	2114.67	887.835	453.587	2177.69	895.045	461.43	2159.83	790.916
360	0	240.522	1743.36	1629.76	137.497	1740.89	1630.26	256.474	1901.62	1643.81	118.974	1908.43	1648.08	162.364	1969.41	1499	148.533	2079.02	1277.34	190.468	1833.54	1399.25	188.635	1812.33	1212.9	95.9718	2068.22	1354.39	356.523	1991.39	1446.8	401.281	2072.8	1271.34	412.086	2125.93	1162.05	442.13	2123.98	988.158	409.651	2108.52	887.023	454.128	2171.57	895.208	462.116	2155.56	790.826
361	0	242.3	1730.09	1627.68	139.238	1727.61	1628.2	258.32	1888.39	1641.79	120.814	1895.22	1646.06	164.155	1956.21	1497.18	150.168	2066.22	1275.72	192.235	1820.47	1397.14	190.198	1799.45	1210.75	97.6868	2055.21	1352.7	358.162	1978.54	1444.79	402.259	2061.54	1270.29	412.722	2115.59	1161.48	443.041	2116.05	987.659	410.631	2101.84	886.191	454.75	2164.92	895.303	462.857	2150.66	790.704
362	0	244.161	1716.7	1625.69	141.051	1714.21	1626.22	260.273	1875.03	1639.87	122.765	1881.91	1644.15	166.051	1942.91	1495.47	151.893	2053.34	1274.22	194.091	1807.31	1395.14	191.852	1786.45	1208.72	99.4954	2042.12	1351.12	359.896	1965.61	1442.85	403.355	2050	1269.2	413.478	2104.88	1160.84	444.034	2107.62	987.112	411.671	2094.6	885.342	455.463	2157.69	895.33	463.659	2145.12	790.544
363	0	246.095	1703.2	1623.79	142.928	1700.71	1624.35	262.323	1861.55	1638.07	124.819	1868.5	1642.39	168.044	1929.54	1493.9	153.708	2040.41	1272.88	196.024	1794.07	1393.29	193.587	1773.36	1206.84	101.395	2028.97	1349.68	361.72	1952.57	1441	404.574	2038.17	1268.09	414.362	2093.78	1160.14	445.115	2098.65	986.522	412.774	2086.79	884.48	456.279	2149.88	895.288	464.525	2138.91	790.34
364	0	248.091	1689.57	1622.02	144.858	1687.11	1622.6	264.458	1847.94	1636.42	126.963	1854.99	1640.8	170.123	1916.11	1492.5	155.61	2027.43	1271.71	198.021	1780.76	1391.6	195.395	1760.18	1205.13	103.381	2015.76	1348.41	363.627	1939.45	1439.28	405.919	2026.05	1266.96	415.379	2082.29	1159.38	446.285	2089.12	985.895	413.942	2078.36	883.61	457.208	2141.44	895.181	465.456	2132.01	790.092
365	0	250.136	1675.85	1620.37	146.83	1673.41	1621	266.664	1834.22	1634.95	129.185	1841.4	1639.41	172.278	1902.63	1491.27	157.596	2014.41	1270.74	200.064	1767.41	1390.1	197.262	1746.93	1203.63	105.45	2002.53	1347.33	365.608	1926.23	1437.7	407.392	2013.63	1265.83	416.535	2070.39	1158.6	447.548	2079.01	985.238	415.176	2069.3	882.741	458.259	2132.35	895.01	466.454	2124.38	789.797
366	0	252.217	1662.04	1618.87	148.83	1659.65	1619.56	268.923	1820.4	1633.67	131.467	1827.73	1638.23	174.492	1889.13	1490.25	159.663	2001.37	1269.98	202.138	1754.02	1388.81	199.176	1733.64	1202.34	107.594	1989.28	1346.44	367.654	1912.93	1436.29	408.996	2000.9	1264.73	417.834	2058.08	1157.79	448.905	2068.3	984.56	416.476	2059.58	881.881	459.444	2122.59	894.78	467.519	2115.99	789.454
367	0	254.318	1648.17	1617.53	150.845	1645.82	1618.3	271.218	1806.49	1632.61	133.793	1814.01	1637.3	176.752	1875.62	1489.44	161.802	1988.32	1269.45	204.221	1740.62	1387.75	201.12	1720.31	1201.29	109.807	1976.03	1345.78	369.754	1899.54	1435.09	410.731	1987.85	1263.67	419.281	2045.37	1156.98	450.357	2056.98	983.87	417.842	2049.18	881.041	460.769	2112.11	894.494	468.649	2106.8	789.063
368	0	256.423	1634.25	1616.36	152.86	1631.97	1617.21	273.527	1792.51	1631.76	136.141	1800.25	1636.62	179.039	1862.13	1488.86	164.004	1975.28	1269.14	206.296	1727.23	1386.93	203.081	1706.98	1200.49	112.078	1962.82	1345.33	371.895	1886.08	1434.11	412.598	1974.49	1262.66	420.881	2032.25	1156.18	451.903	2045.03	983.178	419.27	2038.08	880.23	462.241	2100.91	894.155	469.844	2096.79	788.622
369	0	258.516	1620.31	1615.38	154.862	1618.1	1616.33	275.831	1778.5	1631.16	138.489	1786.47	1636.19	181.334	1848.67	1488.51	166.258	1962.24	1269.07	208.341	1713.86	1386.35	205.042	1693.66	1199.95	114.395	1949.65	1345.12	374.061	1872.56	1433.37	414.593	1960.83	1261.72	422.635	2018.73	1155.4	453.543	2032.44	982.494	420.758	2026.27	879.46	463.868	2088.95	893.767	471.102	2085.92	788.13
370	0	260.581	1606.38	1614.59	156.834	1604.25	1615.65	278.105	1764.48	1630.79	140.815	1772.7	1636.04	183.618	1835.27	1488.41	168.55	1949.24	1269.23	210.339	1700.54	1386.03	206.989	1680.39	1199.67	116.745	1936.56	1345.14	376.238	1858.99	1432.88	416.711	1946.87	1260.88	424.546	2004.82	1154.67	455.274	2019.21	981.829	422.303	2013.72	878.741	465.652	2076.21	893.333	472.423	2074.14	787.584
371	0	262.601	1592.49	1614.01	158.764	1590.45	1615.18	280.329	1750.48	1630.67	143.095	1758.95	1636.14	185.87	1821.94	1488.54	170.865	1936.26	1269.61	212.27	1687.28	1385.96	208.907	1667.18	1199.65	119.112	1923.55	1345.39	378.408	1845.39	1432.67	418.944	1932.63	1260.14	426.613	1990.55	1153.99	457.093	2005.33	981.192	423.902	2000.42	878.085	467.594	2062.68	892.856	473.806	2061.43	786.985
372	0	264.559	1578.67	1613.63	160.637	1576.7	1614.92	282.478	1736.52	1630.79	145.304	1745.26	1636.51	188.071	1808.7	1488.91	173.187	1923.33	1270.2	214.119	1674.11	1386.15	210.782	1654.07	1199.88	121.482	1910.64	1345.86	380.553	1831.77	1432.72	421.283	1918.13	1259.52	428.833	1975.93	1153.38	458.996	1990.8	980.594	425.549	1986.38	877.503	469.693	2048.34	892.34	475.253	2047.74	786.333
373	0	266.44	1564.95	1613.46	162.439	1563.06	1614.87	284.532	1722.65	1631.15	147.419	1731.65	1637.13	190.202	1795.57	1489.52	175.499	1910.44	1271	215.872	1661.03	1386.58	212.602	1641.07	1200.36	123.839	1897.85	1346.55	382.657	1818.15	1433.06	423.713	1903.4	1259.03	431.201	1960.98	1152.85	460.976	1975.64	980.045	427.24	1971.58	877.005	471.944	2033.19	891.79	476.766	2033.04	785.632
374	0	268.227	1551.35	1613.5	164.158	1549.52	1615.04	286.47	1708.89	1631.75	149.418	1718.13	1637.99	192.246	1782.57	1490.34	177.786	1897.61	1271.98	217.517	1648.07	1387.24	214.354	1628.2	1201.08	126.166	1885.19	1347.44	384.705	1804.56	1433.67	426.219	1888.45	1258.68	433.711	1945.73	1152.4	463.028	1959.84	979.555	428.97	1956.03	876.602	474.338	2017.23	891.211	478.346	2017.32	784.888
375	0	269.906	1537.9	1613.75	165.779	1536.12	1615.41	288.274	1695.26	1632.58	151.281	1704.73	1639.07	194.189	1769.7	1491.37	180.035	1884.84	1273.13	219.045	1635.24	1388.14	216.028	1615.48	1202.01	128.451	1872.68	1348.53	386.68	1791.01	1434.55	428.785	1873.34	1258.48	436.351	1930.21	1152.05	465.144	1943.44	979.134	430.733	1939.73	876.307	476.863	2000.46	890.61	479.998	2000.56	784.113
376	0	271.464	1524.62	1614.21	167.293	1522.87	1615.98	289.93	1681.8	1633.62	152.991	1691.46	1640.36	196.02	1756.99	1492.6	182.234	1872.14	1274.43	220.45	1622.54	1389.24	217.615	1602.91	1203.16	130.682	1860.31	1349.78	388.573	1777.52	1435.7	431.391	1858.09	1258.43	439.112	1914.46	1151.8	467.314	1926.45	978.792	432.524	1922.7	876.131	479.502	1982.91	889.995	481.726	1982.73	783.323
377	0	272.887	1511.5	1614.87	168.687	1509.79	1616.74	291.426	1668.5	1634.88	154.536	1678.33	1641.85	197.731	1744.42	1494	184.374	1859.51	1275.86	221.727	1609.99	1390.55	219.106	1590.51	1204.49	132.849	1848.1	1351.2	390.373	1764.11	1437.1	434.018	1842.72	1258.55	441.977	1898.49	1151.66	469.53	1908.89	978.539	434.337	1904.96	876.084	482.238	1964.59	889.379	483.531	1963.85	782.539
378	0	274.167	1498.58	1615.72	169.952	1496.88	1617.67	292.756	1655.38	1636.34	155.907	1665.37	1643.51	199.318	1732.02	1495.57	186.447	1846.96	1277.41	222.877	1597.59	1392.04	220.497	1578.26	1206.01	134.945	1836.03	1352.75	392.074	1750.8	1438.73	436.648	1827.29	1258.83	444.931	1882.34	1151.62	471.781	1890.81	978.385	436.167	1886.53	876.179	485.046	1945.53	888.771	485.416	1943.93	781.789
379	0	275.296	1485.84	1616.75	171.082	1484.15	1618.76	293.916	1642.46	1637.99	157.099	1652.57	1645.32	200.779	1719.78	1497.28	188.451	1834.48	1279.05	223.901	1585.33	1393.7	221.783	1566.16	1207.68	136.966	1824.13	1354.42	393.674	1737.6	1440.57	439.262	1811.82	1259.27	447.958	1866.04	1151.7	474.057	1872.23	978.339	438.006	1867.44	876.427	487.904	1925.76	888.188	487.38	1922.98	781.104
380	0	276.269	1473.28	1617.95	172.071	1471.6	1620	294.909	1629.72	1639.8	158.116	1639.93	1647.26	202.117	1707.7	1499.1	190.383	1822.1	1280.76	224.804	1573.22	1395.5	222.962	1554.21	1209.5	138.909	1812.36	1356.19	395.173	1724.51	1442.6	441.844	1796.35	1259.87	451.04	1849.62	1151.88	476.347	1853.19	978.41	439.848	1847.71	876.839	490.784	1905.34	887.643	489.42	1901.04	780.517
381	0	277.086	1460.9	1619.31	172.917	1459.23	1621.36	295.742	1617.17	1641.77	158.963	1627.47	1649.31	203.34	1695.77	1501.03	192.241	1809.8	1282.53	225.593	1561.26	1397.43	224.038	1542.4	1211.43	140.772	1800.74	1358.03	396.576	1711.54	1444.8	444.378	1780.89	1260.61	454.156	1833.11	1152.17	478.642	1833.73	978.604	441.688	1827.38	877.425	493.661	1884.29	887.152	491.531	1878.16	780.066
382	0	277.75	1448.69	1620.81	173.619	1447.05	1622.83	296.426	1604.8	1643.86	159.653	1615.17	1651.44	204.453	1683.99	1503.02	194.026	1797.59	1284.34	226.279	1549.42	1399.46	225.012	1530.7	1213.47	142.557	1789.24	1359.92	397.89	1698.7	1447.14	446.854	1765.48	1261.5	457.291	1816.51	1152.55	480.93	1813.88	978.928	443.519	1806.49	878.193	496.508	1862.67	886.73	493.702	1854.38	779.786
383	0	278.266	1436.63	1622.42	174.181	1435.03	1624.38	296.976	1592.58	1646.05	160.2	1603.03	1653.62	205.469	1672.34	1505.07	195.738	1785.48	1286.17	226.872	1537.71	1401.56	225.893	1519.11	1215.58	144.265	1777.86	1361.85	399.121	1685.97	1449.58	449.26	1750.13	1262.5	460.425	1799.87	1153.01	483.203	1793.7	979.386	445.334	1785.08	879.15	499.3	1840.53	886.392	495.921	1829.77	779.712
384	0	278.644	1424.71	1624.13	174.61	1423.17	1626	297.41	1580.52	1648.33	160.624	1591.06	1655.84	206.399	1660.82	1507.14	197.376	1773.47	1288	227.385	1526.11	1403.71	226.686	1507.61	1217.73	145.898	1766.58	1363.79	400.281	1673.37	1452.1	451.59	1734.87	1263.6	463.541	1783.19	1153.54	485.452	1773.21	979.979	447.126	1763.2	880.3	502.015	1817.91	886.151	498.169	1804.41	779.872
385	0	278.897	1412.91	1625.91	174.917	1411.46	1627.67	297.748	1568.59	1650.64	160.948	1579.23	1658.05	207.254	1649.4	1509.21	198.94	1761.55	1289.81	227.832	1514.62	1405.87	227.403	1496.19	1219.9	147.456	1755.39	1365.72	401.381	1660.87	1454.66	453.839	1719.69	1264.79	466.624	1766.48	1154.12	487.666	1752.47	980.706	448.889	1740.87	881.644	504.632	1794.88	886.018	500.427	1778.38	780.294
386	0	279.042	1401.22	1627.72	175.114	1399.88	1629.35	298.013	1556.77	1652.96	161.193	1567.54	1660.24	208.047	1638.08	1511.26	200.43	1749.72	1291.59	228.227	1503.2	1408.03	228.053	1484.83	1222.07	148.943	1744.26	1367.62	402.43	1648.49	1457.22	456.004	1704.62	1266.02	469.658	1749.78	1154.74	489.84	1731.5	981.564	450.616	1718.16	883.183	507.132	1771.47	886.001	502.673	1751.75	780.995
387	0	279.096	1389.62	1629.55	175.218	1388.43	1631.02	298.226	1545.06	1655.27	161.384	1555.97	1662.36	208.79	1626.82	1513.25	201.843	1737.97	1293.32	228.582	1491.86	1410.14	228.647	1473.51	1224.19	150.358	1733.19	1369.47	403.44	1636.21	1459.76	458.083	1689.65	1267.28	472.63	1733.07	1155.36	491.963	1710.36	982.547	452.299	1695.1	884.912	509.501	1747.73	886.107	504.88	1724.61	781.99
388	0	279.079	1378.09	1631.36	175.246	1377.07	1632.66	298.41	1533.42	1657.51	161.545	1544.52	1664.4	209.493	1615.63	1515.16	203.177	1726.31	1294.97	228.913	1480.58	1412.17	229.196	1462.23	1226.24	151.702	1722.15	1371.24	404.42	1624.02	1462.23	460.077	1674.78	1268.54	475.527	1716.38	1155.98	494.03	1689.06	983.647	453.932	1671.73	886.825	511.727	1723.72	886.339	507.025	1697.05	783.283
389	0	279.012	1366.61	1633.12	175.216	1365.8	1634.24	298.585	1521.85	1659.65	161.695	1533.16	1666.33	210.167	1604.48	1516.96	204.431	1714.71	1296.53	229.23	1469.33	1414.1	229.711	1450.98	1228.18	152.977	1711.13	1372.91	405.377	1611.93	1464.6	461.986	1660.02	1269.75	478.339	1699.72	1156.55	496.032	1667.65	984.854	455.507	1648.12	888.916	513.8	1699.48	886.7	509.08	1669.15	784.875
390	0	278.916	1355.18	1634.79	175.148	1354.6	1635.73	298.768	1510.33	1661.67	161.856	1521.87	1668.11	210.817	1593.36	1518.64	205.603	1703.18	1297.98	229.544	1458.12	1415.9	230.202	1439.73	1229.99	154.18	1700.12	1374.47	406.317	1599.91	1466.85	463.81	1645.35	1270.89	481.054	1683.07	1157.07	497.962	1646.16	986.155	457.016	1624.29	891.174	515.713	1675.05	887.187	511.023	1640.99	786.76
391	0	278.81	1343.77	1636.35	175.06	1343.44	1637.11	298.975	1498.84	1663.53	162.043	1510.65	1669.71	211.452	1582.24	1520.16	206.69	1691.7	1299.3	229.865	1446.92	1417.54	230.677	1428.49	1231.65	155.313	1689.1	1375.89	407.244	1587.96	1468.94	465.55	1630.78	1271.93	483.664	1666.46	1157.49	499.811	1624.62	987.537	458.452	1600.3	893.587	517.461	1650.47	887.798	512.829	1612.66	788.925
392	0	278.713	1332.37	1637.76	174.971	1332.31	1638.35	299.219	1487.37	1665.2	162.268	1499.47	1671.13	212.074	1571.12	1521.5	207.689	1680.27	1300.47	230.199	1435.73	1418.98	231.143	1417.25	1233.12	156.373	1678.05	1377.16	408.159	1576.08	1470.83	467.206	1616.31	1272.83	486.16	1649.88	1157.81	501.572	1603.06	988.985	459.806	1576.19	896.143	519.04	1625.78	888.529	514.481	1584.23	791.358
393	0	278.64	1320.96	1639	174.896	1321.18	1639.43	299.509	1475.9	1666.64	162.541	1488.31	1672.33	212.685	1559.98	1522.66	208.601	1668.86	1301.47	230.551	1424.53	1420.23	231.606	1405.99	1234.37	157.36	1666.97	1378.25	409.059	1564.26	1472.52	468.777	1601.91	1273.58	488.534	1633.33	1158	503.236	1581.49	990.485	461.069	1552	898.828	520.45	1601.02	889.373	515.961	1555.76	794.04
394	0	278.605	1309.55	1640.04	174.85	1310.05	1640.33	299.849	1464.42	1667.85	162.868	1477.16	1673.3	213.285	1548.81	1523.61	209.422	1657.48	1302.31	230.922	1413.31	1421.24	232.07	1394.71	1235.41	158.27	1655.84	1379.17	409.94	1552.49	1473.97	470.259	1587.6	1274.15	490.778	1616.82	1158.04	504.793	1559.96	992.02	462.235	1527.78	901.627	521.69	1576.24	890.324	517.257	1527.32	796.951
395	0	278.617	1298.11	1640.86	174.844	1298.89	1641.02	300.241	1452.93	1668.81	163.249	1465.99	1674.03	213.872	1537.6	1524.33	210.153	1646.12	1302.95	231.313	1402.07	1422.01	232.538	1383.4	1236.2	159.101	1644.66	1379.88	410.795	1540.76	1475.17	471.649	1573.35	1274.51	492.885	1600.34	1157.92	506.236	1538.47	993.575	463.292	1503.57	904.524	522.759	1551.46	891.373	518.361	1498.98	800.072
396	0	278.684	1286.65	1641.44	174.885	1287.69	1641.49	300.683	1441.41	1669.48	163.682	1454.79	1674.5	214.442	1526.35	1524.83	210.793	1634.76	1303.41	231.721	1390.78	1422.53	233.01	1372.06	1236.73	159.852	1633.41	1380.39	411.614	1529.07	1476.1	472.943	1559.17	1274.66	494.847	1583.9	1157.62	507.554	1517.06	995.136	464.234	1479.42	907.502	523.659	1526.73	892.512	519.269	1470.78	803.38
397	0	278.807	1275.14	1641.76	174.978	1276.44	1641.73	301.17	1429.85	1669.88	164.163	1443.55	1674.72	214.989	1515.03	1525.08	211.343	1623.39	1303.66	232.14	1379.46	1422.79	233.484	1360.69	1237.01	160.517	1622.09	1380.68	412.389	1517.4	1476.75	474.134	1545.04	1274.58	496.658	1567.49	1157.14	508.74	1495.75	996.687	465.052	1455.37	910.545	524.39	1502.07	893.732	519.978	1442.78	806.854
398	0	278.986	1263.58	1641.82	175.123	1265.11	1641.72	301.694	1418.25	1669.99	164.683	1432.25	1674.67	215.506	1503.66	1525.09	211.802	1612.02	1303.7	232.565	1368.08	1422.79	233.957	1349.27	1237.02	161.096	1610.69	1380.75	413.107	1505.74	1477.12	475.215	1530.96	1274.27	498.311	1551.13	1156.47	509.784	1474.55	998.216	465.737	1431.45	913.634	524.954	1477.54	895.024	520.492	1415.03	810.473
399	0	279.215	1251.98	1641.61	175.319	1253.72	1641.47	302.243	1406.6	1669.81	165.23	1420.87	1674.36	215.986	1492.21	1524.86	212.171	1600.61	1303.55	232.987	1356.65	1422.52	234.425	1337.8	1236.77	161.583	1599.21	1380.58	413.758	1494.09	1477.21	476.181	1516.93	1273.72	499.8	1534.81	1155.6	510.679	1453.49	999.709	466.282	1407.71	916.754	525.352	1453.15	896.378	520.814	1387.58	814.214
400	0	279.486	1240.31	1641.12	175.558	1242.24	1640.95	302.804	1394.89	1669.35	165.791	1409.41	1673.8	216.418	1480.7	1524.38	212.453	1589.18	1303.18	233.395	1345.15	1422	234.882	1326.27	1236.26	161.978	1587.63	1380.19	414.331	1482.43	1477.01	477.022	1502.93	1272.94	501.12	1518.54	1154.56	511.417	1432.59	1001.16	466.68	1384.19	919.886	525.585	1428.96	897.784	520.95	1360.47	818.056
401	0	279.788	1228.58	1640.36	175.832	1230.67	1640.19	303.362	1383.12	1668.62	166.349	1397.86	1673	216.794	1469.11	1523.66	212.648	1577.7	1302.61	233.778	1333.58	1421.23	235.321	1314.68	1235.51	162.276	1575.97	1379.56	414.816	1470.75	1476.54	477.734	1488.97	1271.94	502.264	1502.32	1153.33	511.993	1411.88	1002.55	466.926	1360.92	923.014	525.654	1404.99	899.231	520.908	1333.74	821.978
402	0	280.106	1216.78	1639.33	176.128	1219	1639.18	303.899	1371.28	1667.62	166.887	1386.2	1671.96	217.105	1457.44	1522.72	212.759	1566.17	1301.84	234.125	1321.94	1420.22	235.734	1303.02	1234.52	162.477	1564.21	1378.71	415.205	1459.04	1475.81	478.309	1475.03	1270.71	503.23	1486.16	1151.93	512.402	1391.38	1003.87	467.015	1337.95	926.12	525.561	1381.29	900.708	520.695	1307.44	825.957
403	0	280.424	1204.91	1638.05	176.431	1207.24	1637.92	304.396	1359.37	1666.38	167.385	1374.44	1670.71	217.342	1445.7	1521.55	212.79	1554.58	1300.87	234.422	1310.21	1419	236.113	1291.28	1233.31	162.581	1552.36	1377.64	415.492	1447.29	1474.83	478.742	1461.1	1269.29	504.014	1470.07	1150.37	512.639	1371.1	1005.12	466.944	1315.3	929.189	525.306	1357.89	902.203	520.32	1281.59	829.971
404	0	280.725	1192.97	1636.53	176.723	1195.38	1636.44	304.836	1347.39	1664.92	167.825	1362.58	1669.26	217.496	1433.87	1520.18	212.744	1542.92	1299.71	234.658	1298.4	1417.56	236.448	1279.45	1231.89	162.589	1540.42	1376.35	415.671	1435.48	1473.62	479.031	1447.2	1267.68	504.614	1454.07	1148.67	512.703	1351.07	1006.28	466.711	1293.01	932.203	524.89	1334.83	903.702	519.789	1256.24	833.996
405	0	280.987	1180.95	1634.8	176.984	1183.42	1634.76	305.197	1335.33	1663.26	168.187	1350.59	1667.63	217.561	1421.97	1518.61	212.627	1531.17	1298.38	234.821	1286.49	1415.95	236.729	1267.53	1230.3	162.503	1528.38	1374.85	415.739	1423.61	1472.2	479.174	1433.31	1265.9	505.029	1438.16	1146.84	512.593	1331.32	1007.36	466.315	1271.11	935.144	524.315	1312.13	905.19	519.11	1231.42	838.006
406	0	281.191	1168.86	1632.87	177.196	1171.36	1632.88	305.462	1323.2	1661.42	168.452	1338.5	1665.84	217.53	1409.98	1516.88	212.446	1519.33	1296.87	234.898	1274.49	1414.17	236.949	1255.5	1228.54	162.327	1516.25	1373.16	415.695	1411.65	1470.61	479.169	1419.43	1263.98	505.261	1422.35	1144.9	512.308	1311.87	1008.34	465.756	1249.63	937.995	523.582	1289.85	906.652	518.287	1207.16	841.976
407	0	281.318	1156.69	1630.77	177.336	1159.2	1630.83	305.612	1310.99	1659.43	168.6	1326.3	1663.91	217.4	1397.91	1514.98	212.206	1507.38	1295.2	234.881	1262.39	1412.26	237.097	1243.37	1226.65	162.069	1504.03	1371.3	415.539	1399.59	1468.85	479.02	1405.56	1261.95	505.313	1406.66	1142.87	511.851	1292.73	1009.22	465.037	1228.59	940.739	522.693	1268	908.073	517.326	1183.49	845.878
408	0	281.346	1144.44	1628.53	177.386	1146.95	1628.64	305.632	1298.7	1657.33	168.617	1313.99	1661.88	217.168	1385.76	1512.96	211.917	1495.32	1293.38	234.759	1250.19	1410.23	237.165	1231.11	1224.65	161.734	1491.72	1369.27	415.275	1387.43	1466.97	478.73	1391.69	1259.81	505.188	1391.1	1140.77	511.226	1273.93	1009.99	464.159	1208.01	943.358	521.651	1246.62	909.435	516.228	1160.43	849.681
409	0	281.26	1132.11	1626.19	177.325	1134.6	1626.34	305.506	1286.32	1655.14	168.489	1301.57	1659.75	216.833	1373.52	1510.83	211.586	1483.13	1291.43	234.528	1237.89	1408.12	237.148	1218.73	1222.56	161.332	1479.33	1367.11	414.906	1375.15	1464.98	478.305	1377.84	1257.61	504.894	1375.68	1138.62	510.436	1255.49	1010.65	463.126	1187.93	945.831	520.46	1225.74	910.721	514.998	1138.02	853.354
410	0	281.042	1119.7	1623.78	177.137	1122.16	1623.95	305.223	1273.87	1652.9	168.204	1289.05	1657.57	216.398	1361.2	1508.62	211.222	1470.82	1289.37	234.183	1225.48	1405.95	237.038	1206.21	1220.42	160.872	1466.85	1364.83	414.438	1362.75	1462.92	477.754	1364	1255.36	504.437	1360.43	1136.44	509.489	1237.42	1011.19	461.945	1168.36	948.141	519.124	1205.39	911.913	513.635	1116.27	856.865
411	0	280.679	1107.2	1621.33	176.809	1109.63	1621.51	304.778	1261.33	1650.65	167.756	1276.44	1655.34	215.866	1348.8	1506.35	210.833	1458.36	1287.22	233.722	1212.96	1403.74	236.833	1193.57	1218.25	160.364	1454.3	1362.46	413.878	1350.21	1460.8	477.084	1350.16	1253.1	503.829	1345.33	1134.26	508.392	1219.74	1011.62	460.619	1149.32	950.269	517.651	1185.58	912.995	512.142	1095.2	860.18
412	0	280.164	1094.62	1618.89	176.329	1097.01	1619.05	304.165	1248.7	1648.4	167.142	1263.73	1653.11	215.243	1336.31	1504.06	210.429	1445.78	1285	233.146	1200.35	1401.54	236.529	1180.78	1216.08	159.819	1441.66	1360.02	413.237	1337.55	1458.68	476.308	1336.34	1250.85	503.078	1330.42	1132.09	507.154	1202.47	1011.92	459.158	1130.83	952.196	516.048	1166.36	913.95	510.518	1074.83	863.263
413	0	279.489	1081.95	1616.48	175.691	1084.32	1616.61	303.387	1236	1646.2	166.364	1250.95	1650.89	214.538	1323.75	1501.77	210.017	1433.06	1282.74	232.46	1187.63	1399.35	236.126	1167.86	1213.94	159.246	1428.96	1357.54	412.522	1324.75	1456.55	475.437	1322.54	1248.64	502.199	1315.69	1129.96	505.786	1185.62	1012.1	457.57	1112.89	953.903	514.327	1147.73	914.762	508.766	1055.18	866.08
414	0	278.654	1069.2	1614.14	174.894	1071.55	1614.2	302.45	1223.21	1644.08	165.429	1238.09	1648.71	213.759	1311.11	1499.5	209.603	1420.22	1280.47	231.671	1174.82	1397.22	235.628	1154.8	1211.85	158.655	1416.19	1355.06	411.746	1311.82	1454.47	474.486	1308.76	1246.49	501.204	1301.14	1127.89	504.298	1169.2	1012.16	455.863	1095.53	955.373	512.499	1129.71	915.419	506.888	1036.26	868.597
415	0	277.663	1056.38	1611.91	173.941	1058.72	1611.87	301.364	1210.34	1642.07	164.348	1225.17	1646.6	212.919	1298.39	1497.3	209.194	1407.26	1278.21	230.79	1161.92	1395.17	235.037	1141.61	1209.85	158.053	1403.37	1352.6	410.92	1298.77	1452.44	473.467	1295	1244.43	500.108	1286.8	1125.91	502.704	1153.21	1012.09	454.051	1078.75	956.589	510.58	1112.32	915.908	504.89	1018.09	870.781
416	0	276.524	1043.47	1609.8	172.84	1045.83	1609.64	300.145	1197.4	1640.18	163.139	1212.19	1644.58	212.029	1285.62	1495.19	208.791	1394.19	1276	229.828	1148.95	1393.22	234.361	1128.3	1207.95	157.448	1390.49	1350.2	410.055	1285.6	1450.5	472.396	1281.28	1242.48	498.925	1272.66	1124.03	501.019	1137.67	1011.89	452.145	1062.57	957.537	508.584	1095.58	916.218	502.779	1000.67	872.599
417	0	275.25	1030.5	1607.86	171.604	1032.9	1607.54	298.814	1184.4	1638.45	161.82	1199.17	1642.67	211.105	1272.78	1493.19	208.397	1381.02	1273.87	228.8	1135.91	1391.39	233.607	1114.89	1206.19	156.844	1377.57	1347.88	409.166	1272.35	1448.67	471.287	1267.59	1240.66	497.671	1258.73	1122.27	499.258	1122.59	1011.56	450.16	1046.98	958.203	506.531	1079.49	916.34	500.566	984.014	874.024
418	0	273.86	1017.47	1606.09	170.252	1019.93	1605.59	297.395	1171.33	1636.89	160.418	1186.12	1640.9	210.159	1259.91	1491.33	208.012	1367.78	1271.84	227.725	1122.81	1389.72	232.788	1101.38	1204.58	156.247	1364.61	1345.68	408.262	1259.01	1446.97	470.154	1253.96	1239	496.36	1245	1120.66	497.436	1107.97	1011.11	448.111	1032	958.576	504.44	1064.07	916.268	498.263	968.137	875.03
419	0	272.376	1004.39	1604.53	168.806	1006.93	1603.83	295.914	1158.21	1635.53	158.959	1173.05	1639.29	209.207	1247	1489.64	207.634	1354.49	1269.96	226.619	1109.68	1388.21	231.914	1087.8	1203.15	155.659	1351.64	1343.63	407.359	1245.62	1445.41	469.012	1240.39	1237.5	495.009	1231.49	1119.2	495.572	1093.82	1010.54	446.016	1017.63	958.65	502.33	1049.31	915.999	495.889	953.042	875.598
420	0	270.823	991.269	1603.17	167.292	993.933	1602.25	294.403	1145.05	1634.37	157.473	1159.98	1637.86	208.262	1234.07	1488.14	207.259	1341.15	1268.25	225.503	1096.54	1386.9	231	1074.19	1201.91	155.082	1338.65	1341.76	406.466	1232.2	1444.02	467.872	1226.89	1236.19	493.631	1218.2	1117.92	493.683	1080.13	1009.86	443.894	1003.87	958.418	500.224	1035.24	915.529	493.463	938.734	875.711
421	0	269.231	978.126	1602.05	165.739	980.937	1600.89	292.891	1131.86	1633.43	155.99	1146.92	1636.63	207.34	1221.13	1486.84	206.885	1327.8	1266.73	224.395	1083.39	1385.78	230.061	1060.55	1200.87	154.516	1325.67	1340.09	405.596	1218.77	1442.82	466.747	1213.49	1235.08	492.241	1205.13	1116.83	491.788	1066.92	1009.06	441.763	990.731	957.88	498.144	1021.84	914.861	491.012	925.219	875.363
422	0	267.629	964.976	1601.15	164.176	967.961	1599.76	291.41	1118.67	1632.71	154.542	1133.88	1635.6	206.453	1208.22	1485.77	206.505	1314.46	1265.42	223.316	1070.27	1384.89	229.112	1046.93	1200.06	153.96	1312.7	1338.65	404.759	1205.37	1441.81	465.649	1200.19	1234.17	490.852	1192.28	1115.93	489.906	1054.18	1008.15	439.645	978.203	957.039	496.111	1009.12	913.999	488.56	912.498	874.55
423	0	266.052	951.838	1600.48	162.637	955.021	1598.86	289.991	1105.48	1632.21	153.158	1120.89	1634.81	205.613	1195.33	1484.95	206.115	1301.14	1264.36	222.284	1057.18	1384.22	228.169	1033.36	1199.47	153.413	1299.77	1337.46	403.963	1192.02	1441	464.586	1187.03	1233.47	489.476	1179.67	1115.23	488.056	1041.92	1007.15	437.561	966.29	955.902	494.147	997.085	912.95	486.14	900.573	873.279
424	0	264.533	938.732	1600.05	161.154	942.131	1598.2	288.663	1092.32	1631.95	151.867	1107.96	1634.25	204.829	1182.49	1484.37	205.708	1287.88	1263.55	221.314	1044.16	1383.79	227.25	1019.86	1199.11	152.873	1286.88	1336.54	403.217	1178.76	1440.41	463.566	1174.01	1232.99	488.125	1167.29	1114.74	486.257	1030.15	1006.06	435.533	954.99	954.479	492.274	985.73	911.724	483.782	889.443	871.562
425	0	263.103	925.678	1599.86	159.76	929.306	1597.79	287.454	1079.22	1631.92	150.695	1095.09	1633.94	204.11	1169.71	1484.05	205.28	1274.68	1263.01	220.424	1031.22	1383.6	226.369	1006.47	1198.99	152.337	1274.04	1335.9	402.526	1165.61	1440.04	462.597	1161.17	1232.73	486.807	1155.15	1114.47	484.526	1018.85	1004.89	433.584	944.3	952.787	490.512	975.054	910.336	481.519	879.106	869.422
426	0	261.797	912.698	1599.89	158.485	916.56	1597.64	286.386	1066.18	1632.12	149.664	1082.31	1633.89	203.461	1157.02	1484	204.826	1261.57	1262.74	219.625	1018.38	1383.67	225.543	993.209	1199.12	151.802	1261.27	1335.54	401.895	1152.61	1439.88	461.682	1148.53	1232.69	485.53	1143.26	1114.4	482.882	1008.04	1003.66	431.735	934.216	950.844	488.881	965.053	908.804	479.384	869.557	866.888
427	0	260.642	899.812	1600.16	157.36	903.905	1597.75	285.478	1053.24	1632.54	148.79	1069.62	1634.1	202.886	1144.42	1484.21	204.34	1248.55	1262.74	218.928	1005.65	1383.98	224.786	980.1	1199.5	151.264	1248.58	1335.47	401.325	1139.78	1439.96	460.825	1136.1	1232.86	484.301	1131.64	1114.55	481.34	997.72	1002.37	430.009	924.734	948.676	487.397	955.722	907.146	477.409	860.791	863.994
428	0	259.666	887.042	1600.65	156.41	891.351	1598.12	284.745	1040.42	1633.19	148.088	1057.04	1634.59	202.385	1131.93	1484.68	203.817	1235.64	1263.01	218.341	993.051	1384.56	224.112	967.154	1200.12	150.72	1235.98	1335.69	400.818	1127.14	1440.25	460.027	1123.91	1233.25	483.124	1120.29	1114.9	479.915	987.884	1001.06	428.425	915.845	946.309	486.076	947.055	905.389	475.625	852.8	860.786
429	0	258.892	874.406	1601.38	155.657	878.908	1598.76	284.196	1027.73	1634.06	147.564	1044.57	1635.35	201.956	1119.55	1485.41	203.255	1222.85	1263.55	217.869	980.583	1385.39	223.532	954.38	1201	150.166	1223.45	1336.19	400.372	1114.71	1440.76	459.287	1111.99	1233.84	482	1109.21	1115.45	478.62	978.535	999.723	427.005	907.544	943.775	484.932	939.047	903.557	474.063	845.577	857.31
430	0	258.337	861.92	1602.34	155.12	866.583	1599.68	283.835	1015.2	1635.14	147.222	1032.22	1636.38	201.597	1107.29	1486.39	202.649	1210.16	1264.34	217.515	968.252	1386.47	223.054	941.777	1202.12	149.598	1211.02	1336.97	399.985	1102.5	1441.48	458.604	1100.34	1234.63	480.931	1098.43	1116.19	477.467	969.672	998.389	425.765	899.819	941.107	483.976	931.687	901.681	472.748	839.111	853.621
431	0	258.014	849.6	1603.53	154.809	854.38	1600.87	283.662	1002.85	1636.43	147.059	1019.99	1637.67	201.302	1095.15	1487.61	201.997	1197.6	1265.37	217.278	956.057	1387.8	222.685	929.34	1203.49	149.012	1198.67	1338.01	399.653	1090.52	1442.4	457.974	1088.98	1235.62	479.915	1087.95	1117.12	476.464	961.293	997.074	424.723	892.661	938.341	483.216	924.967	899.788	471.704	833.39	849.775
432	0	257.93	837.455	1604.95	154.733	842.303	1602.34	283.669	990.688	1637.91	147.069	1007.9	1639.22	201.066	1083.13	1489.05	201.299	1185.13	1266.61	217.157	943.993	1389.37	222.428	917.06	1205.09	148.407	1186.39	1339.29	399.369	1078.78	1443.51	457.394	1077.93	1236.79	478.949	1077.77	1118.22	475.619	953.395	995.794	423.892	886.055	935.513	482.657	918.874	897.909	470.952	828.401	845.828
433	0	258.085	825.493	1606.6	154.891	830.351	1604.07	283.848	978.726	1639.58	147.242	995.933	1641	200.88	1071.22	1490.69	200.554	1172.78	1268.06	217.147	932.051	1391.15	222.281	904.921	1206.91	147.779	1174.19	1340.8	399.129	1067.26	1444.8	456.857	1067.19	1238.14	478.03	1067.92	1119.49	474.937	945.974	994.567	423.283	879.986	932.659	482.3	913.394	896.074	470.504	824.129	841.839
434	0	258.473	813.716	1608.47	155.279	818.523	1606.08	284.184	966.971	1641.4	147.564	984.099	1643.01	200.738	1059.4	1492.51	199.763	1160.51	1269.68	217.24	920.22	1393.14	222.241	892.907	1208.93	147.127	1162.06	1342.51	398.924	1055.95	1446.25	456.358	1056.77	1239.65	477.154	1058.38	1120.91	474.419	939.021	993.407	422.906	874.435	929.812	482.144	908.512	894.309	470.371	820.555	837.86
435	0	259.084	802.123	1610.55	155.884	806.815	1608.33	284.66	955.421	1643.36	148.018	972.393	1645.2	200.632	1047.67	1494.48	198.928	1148.33	1271.46	217.431	908.484	1395.3	222.302	881	1211.13	146.451	1149.97	1344.38	398.747	1044.85	1447.84	455.891	1046.65	1241.3	476.316	1049.18	1122.47	474.066	932.528	992.329	422.764	869.382	927.006	482.185	904.206	892.639	470.557	817.657	833.942
436	0	259.899	790.706	1612.83	156.69	795.22	1610.8	285.259	944.074	1645.44	148.586	960.81	1647.56	200.553	1036.02	1496.58	198.055	1136.22	1273.35	217.708	896.826	1397.61	222.456	869.18	1213.48	145.752	1137.92	1346.4	398.591	1033.93	1449.54	455.449	1036.84	1243.08	475.512	1040.29	1124.15	473.876	926.482	991.343	422.861	864.804	924.269	482.415	900.455	891.086	471.059	815.409	830.128
437	0	260.899	779.456	1615.29	157.677	783.728	1613.48	285.959	932.918	1647.61	149.25	949.341	1650.03	200.496	1024.42	1498.77	197.15	1124.18	1275.33	218.063	885.231	1400.04	222.691	857.429	1215.94	145.032	1125.91	1348.52	398.448	1023.16	1451.33	455.027	1027.32	1244.98	474.738	1031.73	1125.94	473.843	920.869	990.455	423.193	860.673	921.625	482.822	897.233	889.666	471.868	813.782	826.457
438	0	262.056	768.356	1617.89	158.82	772.33	1616.33	286.739	921.939	1649.82	149.989	937.978	1652.59	200.454	1012.86	1501.01	196.222	1112.19	1277.38	218.485	873.679	1402.54	222.996	845.729	1218.48	144.295	1113.9	1350.72	398.311	1012.52	1453.18	454.621	1018.07	1246.95	473.99	1023.49	1127.82	473.961	915.669	989.671	423.755	856.962	919.094	483.394	894.51	888.39	472.969	812.741	822.955
439	0	263.345	757.387	1620.61	160.091	761.012	1619.3	287.58	911.114	1652.06	150.785	926.707	1655.18	200.423	1001.32	1503.28	195.28	1100.26	1279.45	218.963	862.153	1405.08	223.36	834.063	1221.04	143.546	1101.91	1352.95	398.176	1001.99	1455.06	454.225	1009.07	1249	473.266	1015.54	1129.76	474.221	910.863	988.99	424.538	853.641	916.691	484.113	892.252	887.265	474.34	812.248	819.644
440	0	264.736	746.526	1623.4	161.462	749.758	1622.36	288.461	900.419	1654.27	151.619	915.513	1657.76	200.398	989.785	1505.52	194.338	1088.36	1281.51	219.488	850.636	1407.6	223.771	822.418	1223.6	142.791	1089.91	1355.18	398.037	991.534	1456.92	453.836	1000.3	1251.08	472.564	1007.88	1131.76	474.613	906.427	988.411	425.529	850.676	914.425	484.963	890.425	886.293	475.954	812.259	816.535
441	0	266.198	735.748	1626.21	162.903	738.551	1625.45	289.364	889.825	1656.43	152.474	904.38	1660.29	200.378	978.241	1507.71	193.409	1076.5	1283.54	220.05	839.113	1410.07	224.216	810.78	1226.09	142.038	1077.9	1357.36	397.894	981.122	1458.75	453.453	991.722	1253.17	471.882	1000.49	1133.78	475.125	902.332	987.927	426.713	848.036	912.299	485.924	888.988	885.471	477.779	812.73	813.632
442	0	267.705	725.025	1629.01	164.388	727.375	1628.52	290.273	879.3	1658.49	153.335	893.288	1662.71	200.362	966.671	1509.81	192.51	1064.68	1285.48	220.639	827.57	1412.45	224.686	799.139	1228.48	141.296	1065.87	1359.47	397.744	970.727	1460.5	453.073	983.316	1255.24	471.222	993.338	1135.8	475.743	898.549	987.53	428.071	845.684	910.312	486.976	887.9	884.792	479.779	813.609	810.933
443	0	269.228	714.326	1631.74	165.888	716.208	1631.51	291.173	868.811	1660.42	154.19	882.217	1664.98	200.351	955.06	1511.78	191.656	1052.88	1287.32	221.25	815.995	1414.68	225.171	787.487	1230.71	140.576	1053.82	1361.47	397.588	960.324	1462.14	452.697	975.049	1257.27	470.584	986.402	1137.81	476.453	895.047	987.209	429.582	843.588	908.46	488.1	887.117	884.247	481.917	814.846	808.427
444	0	270.743	703.622	1634.36	167.38	705.032	1634.37	292.054	858.324	1662.18	155.026	871.145	1667.06	200.348	943.397	1513.58	190.863	1041.12	1289.03	221.876	804.378	1416.73	225.663	775.818	1232.75	139.889	1041.73	1363.32	397.428	949.886	1463.64	452.325	966.889	1259.24	469.968	979.651	1139.78	477.24	891.791	986.953	431.223	841.712	906.733	489.276	886.594	883.824	484.153	816.388	806.104
445	0	272.227	692.883	1636.81	168.841	693.826	1637.05	292.907	847.804	1663.74	155.838	860.051	1668.92	200.355	931.669	1515.19	190.147	1029.37	1290.57	222.512	792.708	1418.56	226.155	764.128	1234.55	139.245	1029.61	1364.99	397.268	939.39	1464.97	451.959	958.804	1261.11	469.378	973.053	1141.69	478.09	888.745	986.75	432.971	840.023	905.121	490.485	886.284	883.51	486.451	818.182	803.946
446	0	273.663	682.081	1639.05	170.255	682.572	1639.51	293.727	837.218	1665.07	156.619	848.912	1670.51	200.38	919.867	1516.57	189.524	1017.65	1291.92	223.156	780.978	1420.14	226.644	752.413	1236.09	138.659	1017.46	1366.46	397.115	928.814	1466.11	451.601	950.764	1262.86	468.814	966.575	1143.52	478.987	885.873	986.585	434.802	838.489	903.611	491.711	886.142	883.292	488.774	820.175	801.94
447	0	275.037	671.188	1641.04	171.607	671.249	1641.69	294.509	826.536	1666.16	157.367	837.706	1671.81	200.429	907.981	1517.71	189.008	1005.94	1293.06	223.806	769.182	1421.43	227.128	740.671	1237.32	138.141	1005.26	1367.71	396.976	918.138	1467.02	451.256	942.738	1264.48	468.281	960.182	1145.26	479.918	883.136	986.446	436.691	837.078	902.189	492.937	886.122	883.157	491.088	822.314	800.069
448	0	276.338	660.18	1642.75	172.887	659.84	1643.56	295.255	815.728	1666.97	158.083	826.415	1672.8	200.51	896.005	1518.59	188.609	994.24	1293.97	224.462	757.313	1422.42	227.605	728.9	1238.23	137.706	993.023	1368.72	396.859	907.342	1467.7	450.928	934.698	1265.95	467.78	953.84	1146.89	480.87	880.497	986.322	438.616	835.759	900.841	494.149	886.178	883.095	493.367	824.548	798.322
449	0	277.56	649.034	1644.14	174.091	648.33	1645.09	295.968	804.771	1667.5	158.769	815.019	1673.46	200.634	883.932	1519.2	188.34	982.539	1294.65	225.127	745.368	1423.08	228.079	717.098	1238.79	137.364	980.741	1369.47	396.777	896.41	1468.12	450.622	926.614	1267.26	467.314	947.513	1148.4	481.831	877.918	986.202	440.553	834.503	899.553	495.337	886.268	883.095	495.586	826.828	796.688
450	0	278.703	637.731	1645.2	175.217	636.702	1646.26	296.653	793.641	1667.74	159.432	803.502	1673.8	200.81	871.756	1519.52	188.207	970.828	1295.08	225.805	733.341	1423.4	228.551	705.264	1239.01	137.13	968.411	1369.96	396.739	885.327	1468.29	450.345	918.461	1268.39	466.888	941.167	1149.79	482.791	875.361	986.075	442.483	833.284	898.313	496.489	886.35	883.148	497.727	829.107	795.16
451	0	279.769	626.256	1645.9	176.268	624.946	1647.05	297.318	782.323	1667.68	160.08	791.851	1673.79	201.05	859.475	1519.55	188.218	959.097	1295.25	226.499	721.227	1423.39	229.027	693.393	1238.88	137.013	956.032	1370.18	396.76	874.081	1468.19	450.105	910.213	1269.34	466.503	934.769	1151.04	483.742	872.789	985.934	444.387	832.072	897.11	497.6	886.383	883.249	499.776	831.338	793.735
452	0	280.765	614.596	1646.25	177.251	613.051	1647.46	297.975	770.802	1667.32	160.724	780.052	1673.45	201.367	847.085	1519.3	188.377	947.334	1295.17	227.216	709.024	1423.04	229.513	681.481	1238.39	137.025	943.6	1370.14	396.853	862.659	1467.82	449.909	901.846	1270.11	466.164	928.285	1152.15	484.677	870.164	985.772	446.249	830.842	895.934	498.663	886.329	883.391	501.723	833.481	792.41
453	0	281.702	602.743	1646.25	178.178	601.009	1647.48	298.635	759.069	1666.67	161.375	768.098	1672.79	201.771	834.583	1518.78	188.687	935.525	1294.84	227.964	696.727	1422.36	230.016	669.523	1237.56	137.176	931.111	1369.83	397.03	851.054	1467.18	449.766	893.337	1270.69	465.873	921.683	1153.12	485.592	867.45	985.583	448.056	829.567	894.777	499.676	886.152	883.57	503.56	835.498	791.183
454	0	282.593	590.692	1645.89	179.062	588.815	1647.13	299.314	747.119	1665.74	162.049	755.983	1671.82	202.275	821.97	1517.98	189.151	923.657	1294.27	228.751	684.332	1421.36	230.543	657.512	1236.41	137.473	918.563	1369.27	397.306	839.259	1466.29	449.684	884.665	1271.08	465.634	914.933	1153.95	486.485	864.612	985.363	449.797	828.221	893.632	500.637	885.816	883.783	505.282	837.352	790.055
455	0	283.457	578.44	1645.2	179.92	576.466	1646.43	300.027	734.95	1664.54	162.762	743.704	1670.56	202.891	809.245	1516.93	189.768	911.716	1293.46	229.586	671.837	1420.06	231.105	645.44	1234.95	137.923	905.953	1368.47	397.694	827.27	1465.16	449.675	875.809	1271.29	465.45	908.005	1154.63	487.355	861.613	985.109	451.464	826.776	892.496	501.546	885.286	884.026	506.886	839.012	789.023
456	0	284.312	565.99	1644.19	180.772	563.96	1645.38	300.791	722.564	1663.09	163.53	731.259	1669.03	203.628	796.411	1515.64	190.537	899.687	1292.43	230.478	659.239	1418.49	231.709	633.3	1233.21	138.533	893.275	1367.44	398.205	815.086	1463.79	449.745	866.75	1271.33	465.327	900.869	1155.16	488.204	858.419	984.817	453.053	825.203	891.365	502.407	884.529	884.296	508.371	840.448	788.086
457	0	285.179	553.344	1642.88	181.638	551.3	1644.03	301.625	709.967	1661.42	164.37	718.65	1667.26	204.498	783.468	1514.14	191.455	887.556	1291.2	231.437	646.536	1416.67	232.365	621.081	1231.23	139.305	880.529	1366.21	398.851	802.706	1462.21	449.906	857.471	1271.19	465.268	893.498	1155.55	489.033	854.995	984.485	454.562	823.473	890.236	503.224	883.511	884.59	509.737	841.63	787.242
458	0	286.079	540.51	1641.3	182.539	538.489	1642.4	302.547	697.164	1659.54	165.302	705.881	1665.29	205.507	770.42	1512.46	192.518	875.311	1289.78	232.471	633.728	1414.64	233.082	608.774	1229.04	140.241	867.71	1364.8	399.639	790.135	1460.43	450.166	847.956	1270.88	465.277	885.865	1155.8	489.847	851.307	984.112	455.989	821.554	889.108	504.004	882.197	884.903	510.985	842.532	786.485
459	0	287.034	527.495	1639.48	183.496	525.53	1640.52	303.573	684.167	1657.48	166.341	692.959	1663.13	206.662	757.273	1510.61	193.721	862.94	1288.2	233.589	620.815	1412.43	233.868	596.372	1226.67	141.342	854.819	1363.23	400.578	777.378	1458.47	450.533	838.19	1270.41	465.36	877.947	1155.91	490.652	847.319	983.696	457.337	819.412	887.981	504.754	880.553	885.231	512.117	843.124	785.812
460	0	288.066	514.31	1637.46	184.531	512.432	1638.44	304.721	670.986	1655.27	167.505	679.888	1660.84	207.969	744.03	1508.63	195.057	850.434	1286.48	234.798	607.797	1410.07	234.732	583.865	1224.17	142.606	841.853	1361.54	401.672	764.444	1456.37	451.015	828.161	1269.79	465.523	869.72	1155.88	491.453	842.997	983.235	458.608	817.011	886.852	505.485	878.542	885.569	513.135	843.379	785.215
461	0	289.193	500.967	1635.27	185.663	499.2	1636.2	306.004	657.635	1652.95	168.806	666.68	1658.44	209.427	730.699	1506.54	196.52	837.784	1284.64	236.103	594.679	1407.6	235.681	571.248	1221.56	144.028	828.815	1359.74	402.922	751.344	1454.13	451.619	817.857	1269.03	465.77	861.164	1155.72	492.258	838.306	982.728	459.808	814.313	885.723	506.207	876.126	885.91	514.046	843.264	784.685
462	0	290.432	487.478	1632.94	186.908	485.844	1633.83	307.435	644.127	1650.54	170.257	653.342	1655.98	211.038	717.285	1504.39	198.099	824.988	1282.72	237.509	581.465	1405.06	236.721	558.514	1218.9	145.605	815.705	1357.87	404.329	738.09	1451.8	452.35	807.27	1268.12	466.107	852.26	1155.43	493.072	833.214	982.173	460.941	811.275	884.592	506.932	873.267	886.246	514.854	842.747	784.212
463	0	291.799	473.859	1630.53	188.282	472.374	1631.39	309.021	630.48	1648.07	171.866	639.887	1653.48	212.796	703.797	1502.2	199.787	812.043	1280.74	239.018	568.161	1402.5	237.857	545.662	1216.23	147.327	802.528	1355.96	405.889	724.697	1449.39	453.213	796.393	1267.1	466.538	842.992	1155	493.905	827.686	981.57	462.015	807.854	883.459	507.674	869.925	886.57	515.566	841.792	783.787
464	0	293.305	460.123	1628.05	189.794	458.799	1628.92	310.769	616.709	1645.58	173.637	626.325	1651	214.696	690.243	1500	201.574	798.953	1278.72	240.629	554.775	1399.94	239.092	532.691	1213.57	149.185	789.288	1354.04	407.596	711.181	1446.95	454.209	785.223	1265.96	467.07	833.346	1154.46	494.763	821.69	980.918	463.037	804.006	882.325	508.444	866.057	886.873	516.189	840.358	783.396
465	0	294.955	446.287	1625.56	191.451	445.132	1626.45	312.678	602.831	1643.1	175.571	612.668	1648.57	216.727	676.635	1497.84	203.45	785.724	1276.71	242.339	541.317	1397.43	240.427	519.604	1210.98	151.169	775.994	1352.15	409.442	697.559	1444.49	455.34	773.757	1264.72	467.706	823.313	1153.8	495.652	815.193	980.218	464.015	799.682	881.189	509.255	861.623	887.143	516.734	838.402	783.028
466	0	296.752	432.369	1623.08	193.255	431.385	1624.02	314.743	588.866	1640.66	177.661	598.931	1646.22	218.876	662.983	1495.73	205.403	772.366	1274.74	244.143	527.799	1394.99	241.862	506.409	1208.48	153.266	762.654	1350.3	411.416	683.85	1442.06	456.603	761.998	1263.4	468.451	812.883	1153.04	496.581	808.165	979.469	464.957	794.834	880.053	510.12	856.579	887.373	517.209	835.876	782.67
467	0	298.692	418.387	1620.65	195.202	417.572	1621.68	316.956	574.831	1638.3	179.898	585.128	1643.99	221.129	649.3	1493.71	207.425	758.893	1272.83	246.03	514.235	1392.67	243.393	493.114	1206.11	155.461	749.281	1348.54	413.503	670.072	1439.69	457.997	749.948	1262.01	469.307	802.054	1152.18	497.554	800.577	978.674	465.874	789.414	878.918	511.049	850.884	887.55	517.627	832.727	782.309
468	0	300.767	404.359	1618.31	197.284	403.707	1619.46	319.302	560.748	1636.04	182.266	571.272	1641.9	223.466	635.6	1491.82	209.502	745.322	1271.01	247.99	500.641	1390.5	245.014	479.734	1203.91	157.738	735.889	1346.89	415.688	656.245	1437.41	459.515	737.615	1260.57	470.278	790.824	1151.24	498.576	792.401	977.837	466.773	783.372	877.787	512.053	844.497	887.665	518	828.901	781.934
469	0	302.963	390.305	1616.09	199.486	389.807	1617.39	321.761	546.637	1633.91	184.746	557.381	1640	225.867	621.901	1490.07	211.626	731.675	1269.32	250.009	487.034	1388.49	246.717	466.286	1201.89	160.081	722.493	1345.38	417.954	642.391	1435.25	461.152	725.007	1259.1	471.366	779.195	1150.23	499.653	783.614	976.962	467.663	776.661	876.663	513.14	837.377	887.709	518.341	824.337	781.531
470	0	305.262	376.246	1614.01	201.789	375.889	1615.49	324.309	532.519	1631.95	187.312	543.472	1638.29	228.31	608.218	1488.5	213.784	717.974	1267.78	252.069	473.435	1386.69	248.492	452.792	1200.09	162.473	709.112	1344.02	420.28	628.528	1433.26	462.899	712.136	1257.63	472.572	767.174	1149.16	500.787	774.194	976.055	468.555	769.236	875.55	514.318	829.488	887.672	518.665	818.975	781.089
471	0	307.638	362.204	1612.09	204.17	361.972	1613.79	326.919	518.417	1630.16	189.935	529.563	1636.8	230.772	594.573	1487.12	215.967	704.247	1266.41	254.152	459.864	1385.1	250.326	439.275	1198.52	164.897	695.765	1342.85	422.646	614.678	1431.46	464.748	699.017	1256.17	473.895	754.77	1148.07	501.981	764.122	975.123	469.454	761.055	874.453	515.591	820.794	887.546	518.987	812.749	780.598
472	0	310.063	348.2	1610.37	206.6	348.076	1612.3	329.559	504.351	1628.59	192.585	515.674	1635.56	233.228	580.984	1485.96	218.163	690.521	1265.24	256.237	446.343	1383.75	252.204	425.761	1197.2	167.334	682.472	1341.88	425.032	600.861	1429.88	466.688	685.665	1254.76	475.337	741.995	1146.96	503.236	753.384	974.177	470.369	752.079	873.38	516.962	811.266	887.326	519.324	805.597	780.046
473	0	312.507	334.256	1608.85	209.046	334.222	1611.03	332.196	490.346	1627.24	195.228	501.825	1634.57	235.655	567.473	1485.04	220.362	676.824	1264.28	258.305	432.894	1382.65	254.109	412.28	1196.15	169.77	669.254	1341.11	427.415	587.096	1428.54	468.709	672.099	1253.41	476.895	728.864	1145.86	504.553	741.969	973.227	471.305	742.275	872.336	518.43	800.878	887.006	519.691	797.454	779.427
474	0	314.933	320.394	1607.56	211.476	320.433	1610.01	334.793	476.424	1626.15	197.827	488.038	1633.85	238.03	554.06	1484.35	222.556	663.185	1263.56	260.333	419.539	1381.83	256.025	398.86	1195.38	172.187	656.133	1340.57	429.776	573.402	1427.49	470.799	658.338	1252.16	478.568	715.394	1144.79	505.929	729.87	972.283	472.267	731.614	871.331	519.994	789.608	886.584	520.105	788.26	778.732
475	0	317.306	306.636	1606.5	213.852	306.731	1609.23	337.318	462.605	1625.31	200.35	474.334	1633.4	240.33	540.768	1483.93	224.734	649.631	1263.07	262.302	406.3	1381.27	257.931	385.529	1194.88	174.571	643.129	1340.27	432.095	559.797	1426.73	472.947	644.401	1251.03	480.353	701.605	1143.77	507.362	717.086	971.361	473.258	720.077	870.375	521.649	777.442	886.059	520.582	777.958	777.96
476	0	319.591	293.002	1605.7	216.138	293.14	1608.7	339.734	448.91	1624.76	202.761	460.737	1633.22	242.537	527.615	1483.76	226.89	636.188	1262.83	264.191	393.196	1381	259.81	372.316	1194.68	176.909	630.261	1340.19	434.354	546.295	1426.28	475.143	630.31	1250.04	482.247	687.516	1142.82	508.85	703.617	970.473	474.278	707.647	869.478	523.386	764.372	885.435	521.136	766.494	777.11
477	0	321.75	279.512	1605.17	218.3	279.681	1608.43	342.01	435.359	1624.49	205.03	447.267	1633.32	244.634	514.619	1483.86	229.015	622.879	1262.84	265.984	380.245	1381.01	261.643	359.244	1194.76	179.192	617.546	1340.35	436.538	532.91	1426.16	477.374	616.084	1249.21	484.247	673.15	1141.96	510.387	689.473	969.635	475.329	694.318	868.652	525.196	750.397	884.718	521.783	753.826	776.187
478	0	323.752	266.183	1604.9	220.303	266.376	1608.42	344.117	421.969	1624.52	207.128	433.946	1633.7	246.608	501.796	1484.22	231.106	609.724	1263.11	267.665	367.461	1381.3	263.413	346.333	1195.12	181.411	604.998	1340.75	438.632	519.654	1426.36	479.63	601.743	1248.56	486.348	658.528	1141.22	511.969	674.663	968.864	476.407	680.089	867.912	527.067	735.52	883.917	522.533	739.919	775.202
479	0	325.565	253.029	1604.92	222.118	253.245	1608.65	346.031	408.753	1624.86	209.032	420.793	1634.34	248.45	489.161	1484.84	233.156	596.738	1263.62	269.222	354.857	1381.88	265.103	333.599	1195.77	183.559	592.629	1341.37	440.625	506.535	1426.9	481.902	587.306	1248.12	488.544	643.669	1140.6	513.588	659.203	968.175	477.509	664.967	867.273	528.984	719.755	883.046	523.396	724.748	774.17
480	0	327.165	240.063	1605.23	223.72	240.304	1609.14	347.733	395.724	1625.5	210.723	407.828	1635.25	250.152	476.721	1485.71	235.164	583.933	1264.38	270.644	342.439	1382.74	266.698	321.05	1196.7	185.633	580.446	1342.21	442.51	493.557	1427.77	484.18	572.789	1247.88	490.829	628.593	1140.13	515.239	643.112	967.587	478.631	648.966	866.752	530.931	703.118	882.12	524.38	708.3	773.115
481	0	328.532	227.295	1605.83	225.089	227.568	1609.88	349.208	382.891	1626.45	212.188	395.064	1636.4	251.714	464.485	1486.84	237.127	571.316	1265.37	271.927	330.212	1383.87	268.185	308.69	1197.89	187.631	568.453	1343.27	444.282	480.723	1428.96	486.456	558.207	1247.86	493.197	613.318	1139.81	516.913	626.412	967.115	479.767	632.106	866.367	532.893	685.634	881.162	525.487	690.576	772.065
482	0	329.653	214.731	1606.73	226.213	215.049	1610.87	350.449	370.261	1627.7	213.422	382.514	1637.8	253.136	452.453	1488.19	239.043	558.888	1266.58	273.065	318.175	1385.26	269.554	296.518	1199.35	189.554	556.648	1344.52	445.939	468.031	1430.46	488.723	543.573	1248.07	495.639	597.862	1139.65	518.604	609.13	966.778	480.911	614.413	866.138	534.852	667.332	880.194	526.715	671.59	771.055
483	0	330.521	202.375	1607.91	227.084	202.754	1612.09	351.457	357.836	1629.24	214.424	370.189	1639.42	254.424	440.625	1489.76	240.913	546.65	1268	274.061	306.325	1386.9	270.799	284.526	1201.06	191.401	545.026	1345.96	447.482	455.479	1432.25	490.973	528.896	1248.51	498.149	582.24	1139.66	520.303	591.292	966.592	482.056	595.92	866.085	536.793	648.244	879.244	528.061	651.368	770.125
484	0	331.136	190.226	1609.38	227.703	190.687	1613.53	352.235	345.618	1631.06	215.201	358.093	1641.24	255.583	428.994	1491.53	242.734	534.596	1269.6	274.916	294.654	1388.77	271.916	272.702	1203.01	193.176	533.578	1347.56	448.913	443.059	1434.31	493.203	514.188	1249.18	500.717	566.464	1139.85	522.005	572.931	966.57	483.196	576.662	866.227	538.699	628.408	878.339	529.512	629.953	769.319
485	0	331.508	178.284	1611.12	228.079	178.85	1615.2	352.796	333.604	1633.13	215.764	346.23	1643.25	256.625	417.553	1493.48	244.506	522.719	1271.37	275.639	283.149	1390.85	272.904	261.031	1205.17	194.878	522.291	1349.31	450.236	430.764	1436.61	495.406	499.454	1250.07	503.334	550.55	1140.2	523.7	554.076	966.728	484.322	556.68	866.585	540.557	607.863	877.51	531.053	607.396	768.68
486	0	331.65	166.541	1613.11	228.226	167.238	1617.06	353.158	321.79	1635.43	216.13	334.598	1645.41	257.56	406.287	1495.59	246.227	511.007	1273.29	276.237	271.798	1393.12	273.769	249.497	1207.53	196.509	511.15	1351.18	451.458	418.584	1439.12	497.581	484.702	1251.17	505.99	534.507	1140.71	525.383	534.763	967.076	485.429	536.017	867.177	542.354	586.653	876.786	532.667	583.764	768.257
487	0	331.583	154.992	1615.34	228.164	155.845	1619.11	353.34	310.169	1637.93	216.323	323.193	1647.71	258.398	395.181	1497.82	247.892	499.449	1275.32	276.724	260.584	1395.56	274.517	238.081	1210.05	198.07	500.136	1353.16	452.585	406.511	1441.8	499.722	469.938	1252.45	508.675	518.349	1141.38	527.048	515.025	967.623	486.511	514.72	868.018	544.078	564.82	876.194	534.328	559.132	768.091
488	0	331.335	143.625	1617.78	227.918	144.661	1621.32	353.369	298.733	1640.59	216.366	312.005	1650.1	259.154	384.216	1500.14	249.499	488.031	1277.45	277.111	249.487	1398.12	275.158	226.764	1212.72	199.559	489.229	1355.21	453.624	394.532	1444.63	501.83	455.165	1253.91	511.379	502.087	1142.19	528.688	494.899	968.374	487.562	492.837	869.124	545.723	542.411	875.763	536.01	533.584	768.224
489	0	330.934	132.428	1620.39	227.518	133.67	1623.67	353.273	287.471	1643.37	216.289	301.023	1652.55	259.838	373.372	1502.54	251.041	476.738	1279.64	277.415	238.49	1400.78	275.704	215.527	1215.49	200.977	478.408	1357.32	454.582	382.64	1447.55	503.9	440.391	1255.52	514.092	485.731	1143.12	530.298	474.421	969.331	488.578	470.418	870.504	547.28	519.47	875.515	537.685	507.213	768.69
490	0	330.412	121.388	1623.15	226.996	122.858	1626.13	353.08	276.369	1646.22	216.119	290.231	1655.03	260.461	362.627	1504.96	252.513	465.553	1281.87	277.649	227.57	1403.49	276.172	204.354	1218.32	202.32	467.653	1359.44	455.466	370.824	1450.52	505.932	425.62	1257.24	516.804	469.294	1144.15	531.874	453.626	970.493	489.554	447.515	872.165	548.745	496.046	875.47	539.323	480.115	769.517
491	0	329.805	110.487	1626	226.385	112.202	1628.66	352.82	265.412	1649.1	215.886	279.61	1657.5	261.033	351.958	1507.39	253.907	454.46	1284.1	277.831	216.71	1406.22	276.574	193.228	1221.18	203.586	456.94	1361.56	456.283	359.077	1453.51	507.924	410.857	1259.04	519.505	452.785	1145.25	533.409	432.553	971.854	490.487	424.181	874.11	550.115	472.185	875.644	540.892	452.39	770.725
492	0	329.145	99.7075	1628.92	225.718	101.683	1631.24	352.521	254.585	1651.95	215.617	269.139	1659.93	261.563	341.342	1509.77	255.216	443.441	1286.3	277.975	205.889	1408.93	276.929	182.134	1224.01	204.771	446.251	1363.65	457.036	347.392	1456.47	509.872	396.111	1260.89	522.184	436.216	1146.41	534.899	411.237	973.407	491.372	400.469	876.337	551.388	447.935	876.048	542.366	424.139	772.327
493	0	328.463	89.0309	1631.84	225.026	91.2759	1633.82	352.21	243.87	1654.74	215.34	258.794	1662.27	262.058	330.758	1512.09	256.432	432.481	1288.44	278.095	195.089	1411.58	277.252	171.06	1226.79	205.871	435.565	1365.67	457.732	335.761	1459.35	511.772	381.387	1262.76	524.832	419.598	1147.58	536.34	389.715	975.14	492.205	376.433	878.84	552.563	423.343	876.69	543.715	395.462	774.326
494	0	327.79	78.4368	1634.73	224.338	80.9564	1636.38	351.91	233.246	1657.41	215.076	248.551	1664.49	262.523	320.182	1514.3	257.548	421.561	1290.49	278.204	184.293	1414.11	277.556	159.996	1229.45	206.883	424.865	1367.61	458.373	324.181	1462.12	513.622	366.692	1264.6	527.437	402.94	1148.74	537.725	368.023	977.036	492.982	352.128	881.608	553.639	398.458	877.571	544.918	366.455	776.72
495	0	327.151	67.9045	1637.55	223.68	70.6993	1638.86	351.641	222.695	1659.92	214.846	238.383	1666.56	262.962	309.596	1516.38	258.557	410.667	1292.43	278.313	173.486	1416.51	277.856	148.932	1231.97	207.803	414.134	1369.43	458.963	312.645	1464.73	515.413	352.035	1266.38	529.989	386.252	1149.87	539.05	346.197	979.081	493.698	327.608	884.626	554.617	373.328	878.688	545.953	337.211	779.498
496	0	326.567	57.4132	1640.23	223.074	60.4797	1641.24	351.421	212.196	1662.22	214.666	228.263	1668.44	263.377	298.981	1518.29	259.453	399.783	1294.21	278.432	162.654	1418.73	278.162	137.861	1234.31	208.629	403.357	1371.11	459.504	301.149	1467.15	517.141	337.421	1268.06	532.477	369.542	1150.92	540.31	324.27	981.253	494.349	302.927	887.877	555.495	348	880.036	546.806	307.818	782.644
497	0	326.055	46.9424	1642.75	222.537	50.2731	1643.48	351.26	201.727	1664.3	214.547	218.165	1670.11	263.77	288.321	1520.01	260.233	388.895	1295.82	278.567	151.785	1420.73	278.483	126.778	1236.42	209.357	392.524	1372.62	459.996	289.688	1469.35	518.797	322.857	1269.6	534.89	352.818	1151.87	541.497	302.278	983.531	494.929	278.139	891.337	556.275	322.524	881.603	547.465	278.359	786.136
498	0	325.627	36.4724	1645.07	222.081	40.0563	1645.53	351.168	191.269	1666.11	214.498	208.065	1671.54	264.14	277.601	1521.51	260.893	377.989	1297.24	278.722	140.868	1422.5	278.824	115.676	1238.27	209.985	381.621	1373.96	460.44	278.257	1471.3	520.373	308.349	1270.97	537.215	336.088	1152.7	542.605	280.253	985.895	495.433	253.296	894.983	556.956	296.947	883.376	547.926	248.91	789.948
499	0	325.289	25.9844	1647.15	221.715	29.8078	1647.38	351.148	180.801	1667.63	214.521	197.937	1672.71	264.486	266.809	1522.78	261.432	367.055	1298.45	278.899	129.894	1424	279.188	104.553	1239.85	210.511	370.642	1375.08	460.836	266.85	1472.97	521.859	293.9	1272.15	539.441	319.358	1153.38	543.629	258.226	988.321	495.857	228.449	898.788	557.537	271.318	885.338	548.188	219.539	794.052
500	0	325.043	15.4614	1648.95	221.44	19.5082	1648.98	351.2	170.306	1668.84	214.616	187.761	1673.61	264.804	255.936	1523.8	261.849	356.081	1299.42	279.097	118.855	1425.21	279.576	93.4031	1241.14	210.934	359.578	1376	461.182	255.459	1474.35	523.245	279.513	1273.1	541.555	302.634	1153.88	544.563	236.23	990.786	496.196	203.648	902.725	558.016	245.683	887.468	548.257	190.313	798.418
501	0	324.887	4.88791	1650.46	221.255	9.14027	1650.33	351.319	159.767	1669.74	214.777	177.516	1674.23	265.091	244.972	1524.55	262.147	345.058	1300.15	279.312	107.745	1426.14	279.982	82.2229	1242.11	211.254	348.423	1376.68	461.477	244.078	1475.43	524.52	265.188	1273.81	543.544	285.921	1154.2	545.399	214.293	993.267	496.446	178.937	906.764	558.392	220.091	889.746	548.14	161.288	803.012
502	0	324.814	-5.74928	1651.67	221.155	-1.3107	1651.4	351.497	149.169	1670.31	214.997	167.187	1674.56	265.342	233.913	1525.03	262.327	333.978	1300.64	279.54	96.5578	1426.76	280.403	71.0076	1242.76	211.47	337.173	1377.12	461.718	232.698	1476.19	525.676	250.924	1274.26	545.396	269.226	1154.32	546.132	192.444	995.744	496.605	154.362	910.877	558.663	194.587	892.147	547.85	132.519	807.802
503	0	324.815	-16.4613	1652.55	221.128	-11.8569	1652.17	351.722	138.5	1670.55	215.263	156.758	1674.6	265.55	222.753	1525.24	262.394	322.834	1300.86	279.771	85.2882	1427.07	280.828	59.7516	1243.09	211.582	325.825	1377.32	461.901	221.309	1476.64	526.701	236.718	1274.44	547.098	252.555	1154.23	546.756	170.714	998.193	496.669	129.963	915.034	558.827	169.219	894.648	547.403	104.054	812.752
504	0	324.875	-27.2571	1653.1	221.163	-22.5079	1652.66	351.98	127.75	1670.47	215.559	146.22	1674.36	265.71	211.49	1525.17	262.35	311.62	1300.83	279.996	73.9318	1427.08	281.249	48.4488	1243.09	211.592	314.377	1377.26	462.022	209.9	1476.77	527.586	222.567	1274.35	548.639	235.913	1153.93	547.267	149.128	1000.6	496.637	105.778	919.206	558.883	144.03	897.221	546.816	75.9384	817.826
505	0	324.979	-38.1434	1653.34	221.244	-33.2712	1652.84	352.254	116.911	1670.08	215.869	135.562	1673.84	265.812	200.12	1524.82	262.202	300.331	1300.54	280.203	62.4844	1426.79	281.653	37.0917	1242.79	211.501	302.826	1376.96	462.077	198.461	1476.6	528.323	208.462	1273.98	550.007	219.308	1153.41	547.66	127.714	1002.93	496.51	81.8437	923.367	558.828	119.065	899.842	546.107	48.2152	822.989
506	0	325.108	-49.1248	1653.25	221.352	-44.152	1652.74	352.522	105.977	1669.38	216.171	124.779	1673.05	265.851	188.644	1524.21	261.954	288.962	1300	280.381	50.9423	1426.21	282.027	25.6722	1242.19	211.31	291.172	1376.4	462.061	186.978	1476.12	528.903	194.398	1273.34	551.191	202.747	1152.68	547.933	106.497	1005.19	496.287	58.192	927.488	558.661	94.3659	902.484	545.295	20.9233	828.203
507	0	325.244	-60.2043	1652.86	221.467	-55.154	1652.35	352.765	94.946	1668.41	216.444	113.867	1672.01	265.818	177.06	1523.34	261.612	277.51	1299.21	280.516	39.302	1425.37	282.357	14.1811	1241.31	211.022	279.416	1375.6	461.969	175.439	1475.37	529.32	180.367	1272.44	552.184	186.24	1151.74	548.082	85.5046	1007.34	495.969	34.8537	931.545	558.381	69.975	905.121	544.398	-5.90033	833.433
508	0	325.365	-71.3831	1652.18	221.57	-66.2791	1651.69	352.961	83.815	1667.16	216.665	102.822	1670.73	265.703	165.37	1522.23	261.183	265.97	1298.19	280.594	27.5601	1424.26	282.632	2.60858	1240.16	210.639	267.557	1374.57	461.797	163.831	1474.35	529.57	166.359	1271.3	552.976	169.795	1150.61	548.105	64.7602	1009.39	495.559	11.857	935.513	557.988	45.932	907.73	543.435	-32.2207	838.642
509	0	325.452	-82.6619	1651.24	221.638	-77.5283	1650.78	353.085	72.5839	1665.68	216.812	91.6453	1669.23	265.501	153.573	1520.89	260.673	254.341	1296.94	280.601	15.7137	1422.93	282.836	-9.05547	1238.78	210.164	255.597	1373.31	461.539	152.14	1473.1	529.647	152.368	1269.93	553.563	153.425	1149.3	548.003	44.2885	1011.31	495.061	-10.7712	939.371	557.482	22.2754	910.287	542.421	-58.0048	843.794
510	0	325.482	-94.0401	1650.06	221.651	-88.9018	1649.63	353.115	61.2532	1663.98	216.861	80.335	1667.53	265.203	141.671	1519.33	260.09	242.618	1295.49	280.524	3.75993	1421.38	282.958	-20.8212	1237.18	209.602	243.537	1371.83	461.191	140.353	1471.63	529.551	138.385	1268.35	553.941	137.141	1147.83	547.775	24.1132	1013.1	494.476	-33.0055	943.098	556.864	-0.957913	912.769	541.372	-83.2213	848.855
511	0	325.436	-105.517	1648.67	221.588	-100.399	1648.29	353.029	49.8238	1662.09	216.79	68.8922	1665.65	264.801	129.666	1517.59	259.44	230.801	1293.84	280.351	-8.30359	1419.65	282.987	-32.6986	1235.39	208.954	231.379	1370.15	460.75	128.458	1469.98	529.282	124.405	1266.6	554.107	120.957	1146.23	547.422	4.25768	1014.75	493.81	-54.8214	946.675	556.136	-23.7328	915.158	540.299	-107.84	853.791
512	0	325.295	-117.093	1647.1	221.429	-112.021	1646.75	352.807	38.2967	1660.03	216.579	57.3177	1663.62	264.291	117.56	1515.68	258.731	218.886	1292.03	280.069	-20.4788	1417.76	282.915	-44.6968	1233.44	208.227	219.125	1368.29	460.211	116.444	1468.17	528.842	110.423	1264.7	554.064	104.889	1144.5	546.947	-15.2556	1016.26	493.065	-76.1952	950.086	555.302	-46.0159	917.435	539.212	-131.833	858.572
513	0	325.039	-128.767	1645.38	221.157	-123.765	1645.07	352.43	26.6728	1657.84	216.211	45.6129	1661.45	263.667	105.353	1513.63	257.971	206.873	1290.07	279.669	-32.767	1415.74	282.733	-56.8239	1231.36	207.425	206.777	1366.26	459.573	104.299	1466.24	528.236	96.4367	1262.68	553.815	88.9533	1142.68	546.351	-34.4048	1017.62	492.245	-97.1034	953.316	554.364	-67.7757	919.585	538.119	-155.173	863.168
514	0	324.654	-140.539	1643.54	220.754	-135.631	1643.25	351.883	14.9527	1655.56	215.669	33.7791	1659.18	262.925	93.0495	1511.46	257.167	194.76	1287.98	279.143	-45.1687	1413.62	282.438	-69.0868	1229.18	206.552	194.338	1364.1	458.835	92.0168	1464.23	527.47	82.4462	1260.58	553.367	73.1665	1140.8	545.638	-53.1684	1018.84	491.355	-117.523	956.35	553.329	-88.9826	921.594	537.026	-177.834	867.553
515	0	324.125	-152.409	1641.62	220.208	-147.618	1641.34	351.155	3.13624	1653.21	214.944	21.8178	1656.82	262.065	80.6508	1509.2	256.325	182.546	1285.8	278.488	-57.6834	1411.43	282.028	-81.4903	1226.93	205.613	181.81	1361.82	457.996	79.5915	1462.16	526.553	68.4542	1258.44	552.727	57.5473	1138.88	544.814	-71.5262	1019.91	490.398	-137.431	959.177	552.202	-109.609	923.452	535.934	-199.794	871.702
516	0	323.442	-164.379	1639.64	219.509	-159.725	1639.35	350.237	-8.77693	1650.82	214.027	9.731	1654.41	261.085	68.1607	1506.88	255.451	170.231	1283.54	277.699	-70.3094	1409.2	281.504	-94.0374	1224.65	204.612	169.198	1359.44	457.058	67.0212	1460.07	525.496	54.4664	1256.28	551.909	42.1145	1136.96	543.885	-89.4583	1020.83	489.378	-156.806	961.786	550.991	-129.63	925.15	534.844	-221.03	875.593
517	0	322.597	-176.45	1637.64	218.648	-171.95	1637.32	349.127	-20.7875	1648.44	212.916	-2.47878	1651.97	259.987	55.5832	1504.53	254.548	157.816	1281.25	276.78	-83.0436	1406.96	280.87	-106.729	1222.37	203.552	156.503	1357.01	456.022	54.3079	1458.01	524.312	40.4915	1254.14	550.927	26.8873	1135.06	542.856	-106.946	1021.62	488.298	-175.625	964.168	549.705	-149.022	926.681	533.754	-241.523	879.207
518	0	321.587	-188.621	1635.66	217.623	-184.29	1635.28	347.826	-32.8962	1646.08	211.612	-14.8083	1649.54	258.775	42.9233	1502.18	253.62	145.302	1278.95	275.733	-95.8813	1404.73	280.131	-119.562	1220.11	202.438	143.732	1354.54	454.894	41.4578	1455.99	523.015	26.5412	1252.07	549.795	11.885	1133.22	541.735	-123.972	1022.28	487.164	-193.868	966.315	548.353	-167.765	928.042	532.662	-261.255	882.524
519	0	320.413	-200.893	1633.72	216.434	-196.741	1633.25	346.34	-45.1032	1643.8	210.123	-27.2531	1647.13	257.454	30.1869	1499.86	252.667	132.694	1276.67	274.566	-108.816	1402.57	279.299	-132.533	1217.92	201.271	130.889	1352.08	453.677	28.4812	1454.05	521.621	12.6302	1250.08	548.534	-2.87358	1131.45	540.534	-140.519	1022.81	485.981	-211.515	968.218	546.948	-185.839	929.229	531.563	-280.211	885.529
520	0	319.078	-213.265	1631.84	215.087	-209.299	1631.25	344.68	-57.408	1641.62	208.459	-39.8074	1644.79	256.034	17.3814	1497.61	251.688	119.994	1274.44	273.291	-121.838	1400.48	278.382	-145.632	1215.81	200.054	117.98	1349.65	452.379	15.3928	1452.23	520.147	-1.22413	1248.21	547.161	-17.3699	1129.79	539.26	-156.573	1023.22	484.753	-228.548	969.872	545.503	-203.23	930.241	530.453	-298.379	888.204
521	0	317.591	-225.735	1630.06	213.59	-221.956	1629.33	342.863	-69.8091	1639.56	206.638	-52.4639	1642.53	254.524	4.51515	1495.45	250.681	107.211	1272.3	271.921	-134.939	1398.5	277.395	-158.849	1213.83	198.788	105.013	1347.29	451.008	2.21099	1450.53	518.611	-15.0017	1246.49	545.696	-31.5863	1128.27	537.927	-172.119	1023.51	483.489	-244.948	971.272	544.031	-219.924	931.078	529.33	-315.746	890.537
522	0	315.966	-238.298	1628.4	211.956	-234.702	1627.49	340.908	-82.3035	1637.67	204.68	-65.2132	1640.39	252.936	-8.40183	1493.41	249.642	94.3526	1270.28	270.474	-148.103	1396.66	276.35	-172.167	1212	197.476	91.9983	1345.04	449.576	-11.0425	1449	517.03	-28.6805	1244.95	544.162	-45.5063	1126.9	536.547	-187.145	1023.71	482.195	-260.702	972.413	542.548	-235.909	931.742	528.19	-332.304	892.512
523	0	314.217	-250.948	1626.89	210.202	-247.529	1625.76	338.841	-94.8863	1635.96	202.609	-78.0442	1638.38	251.286	-21.3583	1491.53	248.57	81.4305	1268.4	268.968	-161.318	1394.99	275.262	-185.567	1210.34	196.12	78.9468	1342.92	448.093	-24.3433	1447.65	515.422	-42.2366	1243.6	542.577	-59.1145	1125.7	535.133	-201.639	1023.8	480.881	-275.797	973.291	541.071	-251.175	932.232	527.035	-348.046	894.116
524	0	312.366	-263.679	1625.53	208.347	-260.421	1624.17	336.688	-107.551	1634.45	200.455	-90.9437	1636.55	249.59	-34.3415	1489.82	247.461	68.4585	1266.7	267.425	-174.565	1393.5	274.143	-199.025	1208.87	194.722	65.8714	1340.98	446.574	-37.6657	1446.49	513.805	-55.6451	1242.46	540.962	-72.3971	1124.69	533.7	-215.593	1023.79	479.557	-290.221	973.905	539.616	-265.716	932.552	525.865	-362.966	895.338
525	0	310.434	-276.479	1624.35	206.416	-273.365	1622.72	334.481	-120.289	1633.18	198.248	-103.896	1634.9	247.867	-47.3377	1488.32	246.314	55.453	1265.21	265.866	-187.827	1392.22	273.006	-212.517	1207.62	193.288	52.7865	1339.25	445.034	-50.9831	1445.55	512.194	-68.8809	1241.55	539.336	-85.3418	1123.88	532.262	-228.996	1023.7	478.235	-303.967	974.251	538.198	-279.525	932.703	524.685	-377.059	896.166
526	0	308.446	-289.337	1623.36	204.432	-286.344	1621.45	332.253	-133.091	1632.14	196.022	-116.886	1633.46	246.136	-60.3319	1487.05	245.131	42.4321	1263.94	264.312	-201.083	1391.16	271.863	-226.011	1206.59	191.823	39.7075	1337.75	443.488	-64.269	1444.82	510.605	-81.9192	1240.88	537.716	-97.938	1123.28	530.834	-241.844	1023.52	476.927	-317.028	974.332	536.833	-292.597	932.685	523.502	-390.321	896.591
527	0	306.431	-302.239	1622.58	202.424	-299.339	1620.36	330.038	-145.943	1631.36	193.812	-129.893	1632.25	244.418	-73.3083	1486.03	243.915	29.4159	1262.93	262.785	-214.312	1390.35	270.721	-239.478	1205.81	190.334	26.6506	1336.51	441.953	-77.4975	1444.32	509.051	-94.7365	1240.44	536.117	-110.177	1122.89	529.432	-254.129	1023.27	475.647	-329.401	974.147	535.535	-304.928	932.5	522.326	-402.749	896.605
528	0	304.417	-315.17	1622	200.42	-312.331	1619.46	327.871	-158.832	1630.84	191.653	-142.899	1631.29	242.731	-86.2507	1485.27	242.67	16.425	1262.18	261.303	-227.495	1389.79	269.59	-252.886	1205.27	188.83	13.6318	1335.55	440.445	-90.6443	1444.04	507.545	-107.312	1240.25	534.553	-122.053	1122.72	528.07	-265.849	1022.93	474.408	-341.084	973.699	534.316	-316.516	932.148	521.169	-414.342	896.202
529	0	302.432	-328.112	1621.63	198.449	-325.3	1618.78	325.785	-171.741	1630.59	189.579	-155.884	1630.59	241.096	-99.1426	1484.78	241.403	3.4801	1261.72	259.885	-240.61	1389.48	268.474	-266.207	1205	187.32	0.666191	1334.9	438.978	-103.687	1444	506.095	-119.627	1240.3	533.035	-133.562	1122.77	526.761	-277.002	1022.52	473.224	-352.078	972.992	533.188	-327.361	931.632	520.046	-425.096	895.382
530	0	300.507	-341.046	1621.48	196.539	-338.227	1618.32	323.811	-184.652	1630.6	187.621	-168.829	1630.17	239.528	-111.968	1484.58	240.121	-9.39925	1261.55	258.545	-253.639	1389.45	267.38	-279.413	1204.98	185.812	-12.2322	1334.55	437.565	-116.605	1444.18	504.711	-131.667	1240.59	531.572	-144.704	1123.03	525.519	-287.586	1022.03	472.11	-362.386	972.031	532.16	-337.461	930.952	518.972	-435.013	894.146
531	0	298.671	-353.953	1621.54	194.72	-351.094	1618.09	321.978	-197.547	1630.89	185.807	-181.715	1630.04	238.043	-124.713	1484.67	238.833	-22.1953	1261.67	257.293	-266.564	1389.7	266.31	-292.483	1205.23	184.317	-25.0516	1334.52	436.219	-129.38	1444.58	503.395	-143.421	1241.11	530.168	-155.479	1123.5	524.355	-297.603	1021.47	471.081	-372.015	970.825	531.242	-346.819	930.113	517.968	-444.091	892.5
532	0	296.949	-366.812	1621.82	193.018	-363.881	1618.1	320.31	-210.404	1631.43	184.161	-194.524	1630.21	236.651	-137.364	1485.04	237.544	-34.8931	1262.08	256.139	-279.372	1390.22	265.267	-305.4	1205.74	182.842	-37.7826	1334.81	434.946	-141.999	1445.19	502.153	-154.884	1241.85	528.825	-165.893	1124.17	523.278	-307.057	1020.83	470.148	-380.971	969.382	530.438	-355.437	929.117	517.052	-452.332	890.456
533	0	295.368	-379.603	1622.32	191.456	-376.574	1618.37	318.824	-223.203	1632.23	182.699	-207.241	1630.69	235.36	-149.911	1485.7	236.262	-47.4813	1262.79	255.088	-292.052	1391.01	264.255	-318.153	1206.53	181.395	-50.4188	1335.41	433.754	-154.45	1446	500.982	-166.053	1242.81	527.543	-175.954	1125.03	522.297	-315.952	1020.13	469.324	-389.263	967.714	529.753	-363.32	927.973	516.244	-459.737	888.029
534	0	293.949	-392.305	1623.04	190.055	-389.16	1618.9	317.533	-235.922	1633.27	181.433	-219.853	1631.47	234.175	-162.347	1486.64	234.992	-59.9524	1263.77	254.141	-304.597	1392.08	263.276	-330.738	1207.57	179.981	-62.9568	1336.32	432.645	-166.727	1447.01	499.882	-176.931	1243.97	526.318	-185.673	1126.07	521.418	-324.297	1019.37	468.62	-396.904	965.833	529.19	-370.474	926.688	515.565	-466.309	885.242
535	0	292.707	-404.9	1623.97	188.83	-401.628	1619.7	316.44	-248.542	1634.55	180.366	-232.348	1632.55	233.095	-174.668	1487.84	233.738	-72.303	1265.01	253.297	-317.005	1393.41	262.332	-343.159	1208.88	178.603	-75.3963	1337.51	431.619	-178.828	1448.2	498.845	-187.524	1245.32	525.144	-195.063	1127.29	520.643	-332.101	1018.54	468.045	-403.906	963.756	528.751	-376.909	925.276	515.031	-472.052	882.12
536	0	291.656	-417.37	1625.13	187.794	-413.972	1620.77	315.545	-261.043	1636.04	179.496	-244.719	1633.92	232.118	-186.874	1489.29	232.505	-84.5342	1266.5	252.552	-329.277	1395	261.423	-355.422	1210.44	177.265	-87.7403	1338.97	430.673	-190.754	1449.56	497.865	-197.843	1246.86	524.011	-204.14	1128.66	519.974	-339.376	1017.67	467.606	-410.284	961.499	528.434	-382.635	923.75	514.662	-476.971	878.694
537	0	290.801	-429.7	1626.5	186.951	-426.187	1622.12	314.837	-273.408	1637.72	178.813	-256.962	1635.57	231.239	-198.969	1490.96	231.296	-96.6509	1268.21	251.899	-341.42	1396.82	260.551	-367.542	1212.23	175.967	-99.9939	1340.67	429.802	-202.514	1451.06	496.932	-207.902	1248.55	522.91	-212.923	1130.19	519.411	-346.137	1016.74	467.307	-416.056	959.08	528.237	-387.667	922.128	514.47	-481.072	875.001
538	0	290.141	-441.881	1628.08	186.3	-438.272	1623.73	314.305	-285.623	1639.57	178.3	-269.075	1637.47	230.45	-210.96	1492.83	230.112	-108.661	1270.12	251.331	-353.443	1398.85	259.713	-379.532	1214.23	174.708	-112.165	1342.59	429.001	-214.119	1452.7	496.035	-217.719	1250.39	521.83	-221.43	1131.85	518.949	-352.4	1015.77	467.151	-421.238	956.521	528.157	-392.022	920.427	514.468	-484.368	871.079
539	0	289.671	-453.904	1629.85	185.836	-450.23	1625.59	313.926	-297.68	1641.57	177.938	-281.059	1639.58	229.739	-222.855	1494.88	228.957	-120.577	1272.19	250.837	-365.358	1401.07	258.909	-391.412	1216.43	173.487	-124.262	1344.69	428.26	-225.585	1454.46	495.164	-227.314	1252.36	520.759	-229.684	1133.63	518.585	-358.185	1014.77	467.138	-425.854	953.84	528.188	-395.722	918.67	514.663	-486.871	866.971
540	0	289.376	-465.766	1631.81	185.546	-462.065	1627.69	313.678	-309.574	1643.68	177.701	-292.918	1641.88	229.097	-234.668	1497.06	227.833	-132.41	1274.41	250.407	-377.18	1403.44	258.138	-403.2	1218.78	172.302	-136.296	1346.94	427.571	-236.931	1456.31	494.308	-236.71	1254.43	519.686	-237.707	1135.53	518.311	-363.513	1013.74	467.265	-429.924	951.06	528.323	-398.791	916.877	515.06	-488.603	862.721
541	0	289.24	-477.472	1633.93	185.411	-473.786	1629.99	313.535	-321.306	1645.87	177.565	-304.661	1644.32	228.51	-246.411	1499.35	226.743	-144.176	1276.73	250.029	-388.925	1405.93	257.396	-414.913	1221.25	171.152	-148.277	1349.3	426.926	-248.178	1458.23	493.456	-245.933	1256.59	518.603	-245.521	1137.51	518.119	-368.408	1012.69	467.527	-433.474	948.201	528.555	-401.259	915.069	515.657	-489.588	858.372
542	0	289.239	-489.027	1636.18	185.411	-485.405	1632.46	313.469	-332.88	1648.1	177.5	-316.296	1646.85	227.967	-258.1	1501.7	225.688	-155.887	1279.11	249.692	-400.61	1408.48	256.68	-426.568	1223.8	170.036	-160.216	1351.72	426.314	-259.348	1460.2	492.601	-255.008	1258.8	517.499	-253.151	1139.55	518.001	-372.898	1011.63	467.917	-436.533	945.284	528.873	-403.16	913.268	516.449	-489.858	853.97
543	0	289.347	-500.444	1638.54	185.519	-496.933	1635.05	313.452	-344.31	1650.34	177.479	-327.839	1649.41	227.456	-269.75	1504.08	224.672	-167.557	1281.52	249.384	-412.252	1411.07	255.989	-438.18	1226.38	168.953	-172.122	1354.18	425.729	-270.465	1462.18	491.735	-263.962	1261.05	516.369	-260.619	1141.65	517.947	-377.011	1010.56	468.423	-439.128	942.327	529.268	-404.532	911.493	517.424	-489.451	849.556
544	0	289.536	-511.742	1640.95	185.708	-508.388	1637.72	313.457	-355.613	1652.55	177.476	-339.302	1651.97	226.967	-281.377	1506.43	223.699	-179.2	1283.91	249.097	-423.867	1413.64	255.319	-449.764	1228.94	167.905	-184.004	1356.61	425.161	-281.551	1464.14	490.854	-272.821	1263.3	515.207	-267.95	1143.78	517.946	-380.778	1009.5	469.036	-441.294	939.348	529.728	-405.417	909.763	518.566	-488.412	845.167
545	0	289.777	-522.94	1643.37	185.95	-519.785	1640.4	313.459	-366.808	1654.69	177.467	-350.705	1654.46	226.49	-292.995	1508.73	222.77	-190.825	1286.26	248.819	-435.47	1416.14	254.667	-461.329	1231.44	166.893	-195.87	1358.99	424.607	-292.629	1466.06	489.955	-281.611	1265.52	514.011	-275.168	1145.9	517.989	-384.232	1008.44	469.743	-443.065	936.365	530.243	-405.862	908.093	519.855	-486.791	840.84
546	0	290.041	-534.066	1645.77	186.215	-531.144	1643.06	313.437	-377.923	1656.71	177.432	-362.066	1656.84	226.018	-304.618	1510.93	221.892	-202.441	1288.51	248.543	-447.076	1418.53	254.033	-472.885	1233.82	165.92	-207.727	1361.27	424.06	-303.719	1467.91	489.039	-290.357	1267.69	512.782	-282.296	1148	518.065	-387.407	1007.39	470.528	-444.477	933.393	530.799	-405.917	906.498	521.265	-484.644	836.605
547	0	290.3	-545.145	1648.08	186.477	-542.485	1645.62	313.372	-388.985	1658.59	177.355	-373.405	1659.05	225.545	-316.261	1512.99	221.066	-214.057	1290.63	248.263	-458.697	1420.76	253.414	-484.438	1236.03	164.992	-219.58	1363.42	423.518	-314.84	1469.64	488.106	-299.082	1269.77	511.52	-289.356	1150.05	518.165	-390.341	1006.35	471.377	-445.57	930.445	531.385	-405.632	904.991	522.769	-482.031	832.488
548	0	290.529	-556.208	1650.26	186.712	-553.828	1648.04	313.252	-400.026	1660.29	177.221	-384.744	1661.05	225.068	-327.934	1514.87	220.3	-225.677	1292.58	247.975	-470.344	1422.79	252.81	-495.993	1238.03	164.113	-231.433	1365.39	422.98	-326.01	1471.23	487.161	-307.808	1271.75	510.229	-296.372	1152.03	518.28	-393.068	1005.33	472.276	-446.383	927.536	531.99	-405.063	903.581	524.34	-479.015	828.514
549	0	290.709	-567.285	1652.27	186.897	-565.192	1650.26	313.065	-411.075	1661.78	177.025	-396.103	1662.81	224.587	-339.65	1516.55	219.596	-237.308	1294.34	247.673	-482.025	1424.58	252.22	-507.554	1239.78	163.289	-243.291	1367.16	422.446	-337.245	1472.65	486.208	-316.553	1273.58	508.915	-303.364	1153.92	518.402	-395.629	1004.32	473.209	-446.958	924.676	532.601	-404.264	902.276	525.946	-475.66	824.701
550	0	290.821	-578.404	1654.06	187.016	-576.599	1652.23	312.809	-422.165	1663.04	176.76	-407.503	1664.3	224.102	-351.417	1518	218.962	-248.953	1295.88	247.359	-493.749	1426.1	251.645	-519.123	1241.25	162.529	-255.157	1368.7	421.919	-348.558	1473.88	485.254	-325.336	1275.27	507.585	-310.355	1155.69	518.523	-398.062	1003.34	474.163	-447.339	921.878	533.208	-403.291	901.086	527.561	-472.032	821.065
551	0	290.853	-589.595	1655.6	187.056	-588.065	1653.9	312.482	-433.323	1664.05	176.429	-418.962	1665.48	223.617	-363.243	1519.19	218.402	-260.616	1297.18	247.033	-505.521	1427.33	251.085	-530.701	1242.41	161.839	-267.034	1369.99	421.402	-359.961	1474.89	484.304	-334.174	1276.78	506.245	-317.363	1157.34	518.639	-400.404	1002.38	475.124	-447.568	919.153	533.8	-402.2	900.013	529.155	-468.199	817.621
552	0	290.797	-600.883	1656.84	187.011	-599.608	1655.26	312.09	-444.578	1664.8	176.035	-430.499	1666.36	223.138	-375.135	1520.11	217.921	-272.302	1298.21	246.696	-517.349	1428.24	250.543	-542.291	1243.24	161.227	-278.926	1371.01	420.902	-371.464	1475.67	483.367	-343.08	1278.1	504.905	-324.408	1158.84	518.744	-402.694	1001.45	476.079	-447.688	916.511	534.369	-401.045	899.065	530.704	-464.225	814.381
553	0	290.651	-612.29	1657.78	186.877	-611.243	1656.26	311.64	-455.952	1665.27	175.587	-442.13	1666.91	222.672	-387.099	1520.75	217.526	-284.017	1298.97	246.354	-529.235	1428.82	250.021	-553.895	1243.72	160.701	-290.836	1371.75	420.426	-383.076	1476.2	482.452	-352.067	1279.23	503.573	-331.508	1160.2	518.833	-404.971	1000.55	477.018	-447.744	913.962	534.907	-399.882	898.244	532.185	-460.175	811.355
554	0	290.418	-623.836	1658.38	186.657	-622.982	1656.9	311.145	-467.466	1665.48	175.096	-453.866	1667.13	222.229	-399.141	1521.1	217.221	-295.765	1299.46	246.013	-541.185	1429.07	249.522	-565.519	1243.86	160.268	-302.771	1372.21	419.98	-394.804	1476.48	481.565	-361.147	1280.15	502.258	-338.678	1161.4	518.907	-407.271	999.683	477.932	-447.78	911.516	535.406	-398.761	897.553	533.579	-456.114	808.553
555	0	290.104	-635.536	1658.65	186.358	-634.835	1657.17	310.622	-479.135	1665.41	174.577	-465.719	1667.04	221.819	-411.264	1521.16	217.011	-307.554	1299.66	245.68	-553.203	1428.99	249.05	-577.168	1243.66	159.936	-314.734	1372.38	419.575	-406.654	1476.5	480.716	-370.331	1280.88	500.971	-345.934	1162.45	518.961	-409.63	998.853	478.813	-447.84	909.184	535.862	-397.735	896.994	534.869	-452.102	805.984
556	0	289.721	-647.4	1658.58	185.992	-646.809	1657.06	310.088	-490.97	1665.09	174.047	-477.695	1666.63	221.455	-423.472	1520.94	216.9	-319.392	1299.58	245.363	-565.293	1428.58	248.609	-588.851	1243.12	159.71	-326.734	1372.27	419.221	-418.63	1476.25	479.913	-379.627	1281.4	499.719	-353.291	1163.34	518.999	-412.085	998.062	479.655	-447.968	906.972	536.269	-396.851	896.567	536.045	-448.2	803.653
557	0	289.285	-659.435	1658.19	185.574	-658.91	1656.59	309.565	-502.979	1664.53	173.525	-489.799	1665.94	221.149	-435.769	1520.43	216.89	-331.288	1299.23	245.072	-577.459	1427.86	248.203	-600.578	1242.27	159.597	-338.778	1371.89	418.926	-430.737	1475.75	479.163	-389.044	1281.72	498.512	-360.762	1164.09	519.019	-414.668	997.312	480.454	-448.206	904.888	536.626	-396.158	896.271	537.097	-444.466	801.566
558	0	288.815	-671.643	1657.48	185.123	-671.14	1655.78	309.075	-515.165	1663.73	173.031	-502.034	1664.97	220.914	-448.157	1519.67	216.985	-343.25	1298.63	244.818	-589.707	1426.85	247.839	-612.361	1241.11	159.6	-350.875	1371.24	418.702	-442.975	1475	478.475	-398.589	1281.85	497.359	-368.36	1164.69	519.025	-417.413	996.603	481.209	-448.599	902.938	536.931	-395.699	896.102	538.02	-440.957	799.724
559	0	288.333	-684.025	1656.47	184.661	-683.498	1654.65	308.641	-527.526	1662.72	172.588	-514.399	1663.76	220.762	-460.639	1518.65	217.185	-355.288	1297.77	244.613	-602.041	1425.56	247.521	-624.214	1239.69	159.724	-363.035	1370.35	418.558	-455.347	1474	477.856	-408.27	1281.81	496.267	-376.097	1165.16	519.019	-420.352	995.936	481.919	-449.188	901.124	537.183	-395.518	896.055	538.814	-437.727	798.128
560	0	287.863	-696.576	1655.2	184.211	-695.984	1653.24	308.287	-540.058	1661.52	172.216	-526.891	1662.32	220.708	-473.219	1517.41	217.489	-367.412	1296.69	244.468	-614.465	1424.03	247.255	-636.151	1238.03	159.969	-375.268	1369.24	418.503	-467.853	1472.78	477.311	-418.092	1281.59	495.245	-383.986	1165.49	519.006	-423.518	995.307	482.585	-450.016	899.448	537.384	-395.655	896.122	539.478	-434.83	796.773
561	0	287.431	-709.289	1653.68	183.798	-708.594	1651.58	308.036	-552.756	1660.14	171.937	-539.507	1660.69	220.761	-485.899	1515.97	217.898	-379.632	1295.4	244.395	-626.986	1422.27	247.047	-648.189	1236.15	160.336	-387.583	1367.92	418.548	-480.491	1471.34	476.848	-428.062	1281.22	494.3	-392.04	1165.7	518.991	-426.94	994.714	483.208	-451.123	897.908	537.536	-396.15	896.293	540.018	-432.317	795.65
562	0	287.061	-722.155	1651.96	183.448	-721.324	1649.7	307.91	-565.609	1658.61	171.773	-552.243	1658.89	220.934	-498.682	1514.34	218.408	-391.957	1293.92	244.405	-639.608	1420.33	246.903	-660.343	1234.09	160.826	-399.99	1366.43	418.698	-493.258	1469.7	476.472	-438.185	1280.69	493.439	-400.272	1165.8	518.979	-430.65	994.151	483.793	-452.55	896.498	537.644	-397.039	896.553	540.438	-430.235	794.745
563	0	286.781	-735.166	1650.07	183.186	-734.17	1647.65	307.927	-578.609	1656.95	171.743	-565.092	1656.96	221.235	-511.569	1512.55	219.017	-404.395	1292.28	244.51	-652.335	1418.23	246.829	-672.626	1231.89	161.436	-412.497	1364.78	418.961	-506.152	1467.88	476.187	-448.467	1280.04	492.669	-408.697	1165.79	518.976	-434.678	993.611	484.342	-454.337	895.211	537.714	-398.358	896.887	540.746	-428.634	794.04
564	0	286.614	-748.31	1648.03	183.035	-747.125	1645.47	308.106	-591.745	1655.17	171.865	-578.049	1654.91	221.672	-524.563	1510.63	219.72	-416.953	1290.51	244.72	-665.17	1416	246.831	-685.053	1229.56	162.164	-425.113	1363.01	419.343	-519.167	1465.9	475.997	-458.914	1279.25	491.997	-417.329	1165.67	518.986	-439.053	993.084	484.861	-456.522	894.035	537.751	-400.142	897.275	540.951	-427.557	793.514
565	0	286.583	-761.578	1645.89	183.017	-760.186	1643.2	308.46	-605.007	1653.3	172.152	-591.11	1652.78	222.249	-537.664	1508.61	220.512	-429.635	1288.62	245.042	-678.116	1413.67	246.914	-697.633	1227.16	163.005	-437.842	1361.15	419.846	-532.299	1463.77	475.906	-469.534	1278.35	491.426	-426.184	1165.45	519.018	-443.805	992.562	485.353	-459.144	892.956	537.764	-402.424	897.697	541.064	-427.049	793.14
566	0	286.706	-774.958	1643.69	183.15	-773.346	1640.88	308.998	-618.384	1651.36	172.617	-604.268	1650.6	222.971	-550.871	1506.52	221.387	-442.446	1286.65	245.484	-691.172	1411.28	247.083	-710.373	1224.7	163.954	-450.688	1359.22	420.474	-545.538	1461.52	475.916	-480.331	1277.34	490.964	-435.278	1165.14	519.077	-448.964	992.033	485.824	-462.239	891.96	537.761	-405.235	898.131	541.097	-427.151	792.889
567	0	286.998	-788.442	1641.44	183.45	-786.603	1638.54	309.727	-631.867	1649.37	173.267	-617.519	1648.4	223.838	-564.184	1504.39	222.339	-455.385	1284.63	246.048	-704.339	1408.85	247.343	-723.278	1222.22	165.005	-463.653	1357.25	421.225	-558.879	1459.18	476.029	-491.313	1276.23	490.613	-444.628	1164.73	519.168	-454.56	991.485	486.278	-465.844	891.028	537.754	-408.609	898.555	541.063	-427.904	792.73
568	0	287.47	-802.02	1639.18	183.927	-799.951	1636.23	310.648	-645.449	1647.35	174.108	-630.858	1646.2	224.847	-577.598	1502.24	223.361	-468.452	1282.59	246.738	-717.611	1406.42	247.696	-736.348	1219.74	166.152	-476.735	1355.28	422.099	-572.31	1456.76	476.246	-502.487	1275.03	490.376	-454.251	1164.22	519.297	-460.621	990.909	486.721	-469.994	890.142	537.752	-412.575	898.943	540.974	-429.348	792.631
569	0	288.128	-815.685	1636.95	184.585	-813.386	1633.97	311.758	-659.121	1645.31	175.138	-644.282	1644.04	225.994	-591.108	1500.1	224.446	-481.642	1280.55	247.552	-730.984	1404.02	248.144	-749.578	1217.31	167.386	-489.928	1353.34	423.091	-585.823	1454.29	476.567	-513.861	1273.75	490.257	-464.164	1163.61	519.469	-467.176	990.291	487.155	-474.725	889.284	537.767	-417.166	899.275	540.846	-431.519	792.56
570	0	288.971	-829.429	1634.76	185.427	-826.904	1631.79	313.05	-672.876	1643.29	176.353	-657.786	1641.93	227.27	-604.707	1498.01	225.587	-494.946	1278.55	248.485	-744.449	1401.67	248.688	-762.961	1214.94	168.7	-503.226	1351.45	424.196	-599.407	1451.81	476.992	-525.442	1272.4	490.255	-474.383	1162.92	519.689	-474.253	989.624	487.587	-480.07	888.434	537.81	-422.411	899.529	540.692	-434.457	792.483
571	0	289.994	-843.244	1632.64	186.445	-840.499	1629.71	314.511	-686.706	1641.31	177.743	-671.365	1639.91	228.665	-618.383	1496	226.777	-508.356	1276.61	249.531	-757.996	1399.41	249.326	-776.484	1212.66	170.084	-516.617	1349.64	425.406	-613.048	1449.33	477.519	-537.236	1270.99	490.373	-484.924	1162.13	519.96	-481.88	988.899	488.019	-486.062	887.578	537.893	-428.34	899.685	540.528	-438.196	792.372
572	0	291.187	-857.121	1630.6	187.632	-854.166	1627.75	316.127	-700.605	1639.38	179.295	-685.013	1638	230.166	-632.123	1494.09	228.01	-521.858	1274.77	250.678	-771.61	1397.25	250.055	-790.132	1210.51	171.53	-530.088	1347.94	426.71	-626.736	1446.9	478.147	-549.25	1269.53	490.609	-495.801	1161.26	520.287	-490.082	988.111	488.457	-492.734	886.7	538.027	-434.984	899.726	540.369	-442.774	792.2
573	0	292.534	-871.052	1628.67	188.971	-867.896	1625.94	317.877	-714.561	1637.54	180.99	-698.723	1636.24	231.756	-645.911	1492.3	229.277	-535.435	1273.04	251.914	-785.276	1395.24	250.87	-803.885	1208.5	173.025	-543.622	1346.37	428.096	-640.455	1444.54	478.873	-561.49	1268.04	490.962	-507.026	1160.3	520.672	-498.885	987.257	488.903	-500.115	885.79	538.222	-442.371	899.638	540.227	-448.226	791.942
574	0	294.014	-885.023	1626.87	190.443	-881.679	1624.28	319.737	-728.563	1635.81	182.806	-712.484	1634.64	233.416	-659.728	1490.67	230.572	-549.071	1271.45	253.222	-798.975	1393.38	251.762	-817.72	1206.67	174.56	-557.199	1344.96	429.55	-654.191	1442.29	479.692	-573.96	1266.53	491.43	-518.609	1159.27	521.117	-508.309	986.336	489.363	-508.236	884.838	538.49	-450.528	899.411	540.117	-454.586	791.578
575	0	295.606	-899.022	1625.19	192.026	-895.504	1622.78	321.681	-742.599	1634.21	184.716	-726.287	1633.23	235.127	-673.551	1489.21	231.886	-562.744	1270.03	254.584	-812.686	1391.72	252.721	-831.612	1205.03	176.122	-570.798	1343.71	431.057	-667.93	1440.18	480.6	-586.663	1265.02	492.011	-530.558	1158.18	521.622	-518.376	985.352	489.837	-517.122	883.841	538.837	-459.483	899.036	540.052	-461.891	791.092
576	0	297.281	-913.033	1623.66	193.694	-909.354	1621.47	323.678	-756.65	1632.77	186.691	-740.116	1632.03	236.866	-687.358	1487.94	233.213	-576.434	1268.79	255.98	-826.388	1390.26	253.736	-845.533	1203.6	177.7	-584.395	1342.66	432.598	-681.656	1438.23	481.593	-599.598	1263.52	492.699	-542.875	1157.05	522.188	-529.103	984.309	490.33	-526.799	882.798	539.272	-469.259	898.512	540.043	-470.174	790.472
577	0	299.013	-927.036	1622.29	195.419	-923.213	1620.34	325.699	-770.698	1631.51	188.698	-753.958	1631.06	238.61	-701.124	1486.88	234.543	-590.119	1267.75	257.387	-840.058	1389.02	254.793	-859.453	1202.41	179.281	-597.966	1341.8	434.155	-695.352	1436.49	482.662	-612.765	1262.07	493.492	-555.563	1155.87	522.815	-540.503	983.218	490.842	-537.288	881.712	539.8	-479.878	897.837	540.101	-479.469	789.709
578	0	300.771	-941.01	1621.09	197.171	-937.063	1619.4	327.708	-784.72	1630.46	190.704	-767.793	1630.34	240.335	-714.824	1486.05	235.867	-603.775	1266.92	258.784	-853.672	1388.03	255.878	-873.343	1201.47	180.851	-611.487	1341.15	435.71	-709.002	1434.97	483.8	-626.158	1260.67	494.384	-568.619	1154.68	523.5	-552.587	982.089	491.375	-548.607	880.589	540.423	-491.359	897.016	540.233	-489.809	788.803
579	0	302.525	-954.932	1620.07	198.921	-950.882	1618.66	329.674	-798.695	1629.63	192.675	-781.603	1629.88	242.017	-728.432	1485.45	237.178	-617.381	1266.32	260.149	-867.206	1387.29	256.974	-887.172	1200.79	182.4	-624.931	1340.72	437.243	-722.589	1433.72	485	-639.77	1259.35	495.371	-582.035	1153.49	524.241	-565.36	980.938	491.927	-560.771	879.442	541.143	-503.717	896.058	540.448	-501.224	787.755
580	0	304.246	-968.779	1619.23	200.64	-964.649	1618.12	331.564	-812.596	1629.04	194.576	-795.368	1629.69	243.635	-741.923	1485.1	238.466	-630.916	1265.95	261.459	-880.639	1386.81	258.066	-900.91	1200.38	183.913	-638.276	1340.51	438.735	-736.097	1432.74	486.252	-653.591	1258.14	496.448	-595.804	1152.33	525.034	-578.826	979.781	492.498	-573.79	878.286	541.959	-516.963	894.974	540.75	-513.742	786.575
581	0	305.904	-982.527	1618.6	202.298	-978.341	1617.79	333.346	-826.399	1628.7	196.374	-809.066	1629.77	245.165	-755.276	1485	239.723	-644.358	1265.82	262.695	-893.948	1386.61	259.139	-914.529	1200.24	185.38	-651.5	1340.52	440.168	-749.511	1432.06	487.546	-667.608	1257.05	497.609	-609.911	1151.2	525.873	-592.981	978.638	493.085	-587.67	877.14	542.866	-531.101	893.781	541.145	-527.388	785.276
582	0	307.474	-996.153	1618.18	203.869	-991.938	1617.67	334.992	-840.081	1628.63	198.04	-822.677	1630.14	246.591	-768.471	1485.15	240.94	-657.69	1265.92	263.839	-907.115	1386.68	260.178	-928.004	1200.38	186.79	-664.581	1340.76	441.526	-762.816	1431.7	488.872	-681.803	1256.11	498.849	-624.341	1150.14	526.753	-607.818	977.531	493.684	-602.411	876.025	543.858	-546.133	892.499	541.632	-542.182	783.88
583	0	308.93	-1009.64	1617.97	205.329	-1005.42	1617.76	336.477	-853.619	1628.83	199.547	-836.182	1630.77	247.895	-781.488	1485.55	242.111	-670.896	1266.26	264.875	-920.124	1387.03	261.169	-941.315	1200.8	188.133	-677.505	1341.21	442.794	-775.999	1431.67	490.22	-696.158	1255.34	500.161	-639.073	1149.16	527.669	-623.326	976.481	494.292	-618.008	874.969	544.925	-562.052	891.15	542.211	-558.137	782.414
584	0	310.252	-1022.96	1617.99	206.655	-1018.77	1618.06	337.779	-866.993	1629.32	200.872	-849.563	1631.69	249.065	-794.315	1486.2	243.23	-683.961	1266.84	265.791	-932.962	1387.66	262.1	-954.447	1201.49	189.404	-690.256	1341.87	443.96	-789.049	1431.97	491.579	-710.653	1254.75	501.54	-654.087	1148.29	528.611	-639.487	975.513	494.9	-634.45	873.998	546.056	-578.847	889.762	542.881	-575.261	780.91
585	0	311.42	-1036.1	1618.25	207.83	-1031.96	1618.58	338.882	-880.189	1630.09	201.997	-862.804	1632.86	250.092	-806.942	1487.09	244.292	-696.875	1267.63	266.577	-945.619	1388.56	262.96	-967.389	1202.45	190.595	-702.826	1342.74	445.015	-801.957	1432.61	492.938	-725.264	1254.36	502.979	-669.359	1147.54	529.574	-656.28	974.651	495.504	-651.723	873.144	547.235	-596.5	888.362	543.634	-593.555	779.409
586	0	312.422	-1049.05	1618.74	208.84	-1045	1619.3	339.776	-893.194	1631.15	202.912	-875.891	1634.3	250.972	-819.362	1488.21	245.294	-709.631	1268.64	267.228	-958.09	1389.73	263.74	-980.139	1203.68	191.704	-715.209	1343.8	445.952	-814.717	1433.58	494.287	-739.968	1254.19	504.473	-684.863	1146.94	530.548	-673.681	973.921	496.095	-669.804	872.438	548.447	-614.988	886.983	544.463	-613.008	777.955
587	0	313.247	-1061.81	1619.46	209.674	-1057.85	1620.23	340.456	-906.002	1632.49	203.61	-888.815	1635.97	251.702	-831.574	1489.55	246.233	-722.223	1269.84	267.742	-970.374	1391.14	264.432	-992.697	1205.16	192.729	-727.405	1345.04	446.768	-827.325	1434.86	495.617	-754.74	1254.25	506.014	-700.573	1146.5	531.526	-691.66	973.344	496.666	-688.666	871.912	549.675	-634.282	885.656	545.356	-633.604	776.598
588	0	313.888	-1074.37	1620.42	210.328	-1070.53	1621.36	340.923	-918.609	1634.09	204.091	-901.567	1637.87	252.285	-843.58	1491.1	247.11	-734.65	1271.23	268.12	-982.475	1392.8	265.034	-1005.07	1206.88	193.671	-739.415	1346.44	447.461	-839.782	1436.45	496.921	-769.558	1254.54	507.596	-716.463	1146.22	532.5	-710.183	972.945	497.209	-708.278	871.599	550.898	-654.347	884.414	546.3	-655.311	775.388
589	0	314.346	-1086.73	1621.6	210.801	-1083.03	1622.66	341.183	-931.018	1635.95	204.363	-914.143	1639.96	252.729	-855.389	1492.83	247.924	-746.914	1272.78	268.367	-994.399	1394.68	265.544	-1017.28	1208.83	194.531	-751.249	1347.99	448.034	-852.091	1438.32	498.19	-784.397	1255.05	509.213	-732.504	1146.12	533.461	-729.216	972.741	497.716	-728.603	871.528	552.099	-675.143	883.29	547.276	-678.092	774.379
590	0	314.624	-1098.9	1623	211.096	-1095.34	1624.14	341.248	-943.234	1638.04	204.436	-926.541	1642.23	253.041	-867.01	1494.71	248.674	-759.022	1274.48	268.491	-1006.16	1396.75	265.963	-1029.33	1210.97	195.311	-762.918	1349.67	448.492	-864.257	1440.45	499.419	-799.236	1255.79	510.857	-748.672	1146.21	534.401	-748.718	972.751	498.18	-749.6	871.727	553.258	-696.626	882.315	548.266	-701.896	773.622
591	0	314.73	-1110.89	1624.59	211.222	-1107.47	1625.77	341.136	-955.267	1640.34	204.328	-938.762	1644.64	253.234	-878.461	1496.73	249.359	-770.98	1276.29	268.502	-1017.76	1399	266.295	-1041.24	1213.3	196.014	-774.435	1351.46	448.839	-876.288	1442.78	500.602	-814.054	1256.74	512.522	-764.938	1146.47	535.314	-768.65	972.987	498.595	-771.226	872.223	554.357	-718.749	881.515	549.246	-726.662	773.166
592	0	314.675	-1122.71	1626.37	211.19	-1119.42	1627.53	340.865	-967.128	1642.81	204.059	-950.81	1647.17	253.32	-889.758	1498.86	249.979	-782.8	1278.2	268.411	-1029.23	1401.38	266.547	-1053.04	1215.76	196.644	-785.819	1353.33	449.086	-888.196	1445.3	501.738	-828.835	1257.89	514.201	-781.28	1146.9	536.193	-788.968	973.458	498.957	-793.434	873.035	555.378	-741.461	880.917	550.192	-752.32	773.054
593	0	314.474	-1134.38	1628.29	211.016	-1131.21	1629.4	340.461	-978.833	1645.41	203.655	-962.693	1649.76	253.315	-900.923	1501.06	250.533	-794.495	1280.17	268.233	-1040.58	1403.86	266.726	-1064.74	1218.34	197.203	-797.089	1355.26	449.239	-899.992	1447.95	502.822	-843.562	1259.21	515.885	-797.673	1147.48	537.031	-809.629	974.168	499.259	-816.172	874.177	556.306	-764.71	880.541	551.08	-778.791	773.324
594	0	314.145	-1145.9	1630.34	210.718	-1142.84	1631.35	339.949	-990.398	1648.1	203.142	-974.419	1652.39	253.231	-911.979	1503.3	251.018	-806.081	1282.18	267.982	-1051.84	1406.41	266.841	-1076.36	1220.99	197.694	-808.264	1357.23	449.31	-911.69	1450.69	503.855	-858.223	1260.67	517.569	-814.098	1148.2	537.823	-830.59	975.117	499.499	-839.389	875.662	557.128	-788.44	880.401	551.884	-805.991	774.005
595	0	313.71	-1157.3	1632.47	210.317	-1154.34	1633.34	339.355	-1001.84	1650.84	202.549	-985.999	1655.01	253.085	-922.95	1505.54	251.432	-817.574	1284.19	267.67	-1063.01	1408.98	266.901	-1087.91	1223.66	198.118	-819.367	1359.2	449.307	-923.303	1453.46	504.834	-872.809	1262.24	519.243	-830.534	1149.03	538.564	-851.807	976.3	499.674	-863.03	877.491	557.831	-812.596	880.51	552.578	-833.827	775.117
596	0	313.188	-1168.6	1634.66	209.832	-1165.71	1635.36	338.707	-1013.18	1653.57	201.901	-997.448	1657.58	252.889	-933.859	1507.76	251.772	-828.991	1286.18	267.312	-1074.13	1411.53	266.914	-1099.42	1226.32	198.477	-830.419	1361.14	449.24	-934.845	1456.23	505.76	-887.313	1263.88	520.899	-846.968	1149.95	539.25	-873.237	977.707	499.78	-887.038	879.662	558.405	-837.123	880.873	553.141	-862.205	776.669
597	0	312.601	-1179.82	1636.86	209.285	-1176.97	1637.37	338.031	-1024.44	1656.25	201.228	-1008.78	1660.06	252.656	-944.731	1509.91	252.034	-840.351	1288.12	266.921	-1085.21	1414.01	266.888	-1110.9	1228.92	198.771	-841.439	1363.04	449.118	-946.332	1458.93	506.631	-901.731	1265.54	522.529	-863.386	1150.91	539.876	-894.839	979.323	499.815	-911.357	882.168	558.845	-861.966	881.489	553.551	-891.029	778.665
598	0	311.972	-1190.98	1639.03	208.696	-1188.14	1639.33	337.35	-1035.63	1658.82	200.552	-1020.01	1662.41	252.395	-955.589	1511.97	252.217	-851.669	1289.97	266.506	-1096.27	1416.39	266.828	-1122.34	1231.41	198.999	-852.447	1364.86	448.947	-957.777	1461.52	507.447	-916.062	1267.19	524.122	-879.78	1151.88	540.438	-916.573	981.132	499.776	-935.927	884.993	559.144	-887.068	882.356	553.791	-920.2	781.098
599	0	311.318	-1202.1	1641.13	208.085	-1199.25	1641.21	336.686	-1046.78	1661.25	199.897	-1031.17	1664.61	252.116	-966.453	1513.9	252.317	-862.962	1291.7	266.076	-1107.32	1418.62	266.738	-1133.78	1233.76	199.162	-863.461	1366.58	448.735	-969.192	1463.96	508.206	-930.309	1268.78	525.669	-896.142	1152.83	540.932	-938.401	983.112	499.659	-960.691	888.119	559.299	-912.378	883.463	553.849	-949.624	783.951
600	0	310.659	-1213.19	1643.12	207.469	-1210.31	1642.98	336.057	-1057.91	1663.48	199.279	-1042.26	1666.61	251.823	-977.344	1515.67	252.331	-874.246	1293.3	265.639	-1118.39	1420.67	266.617	-1145.2	1235.91	199.258	-874.499	1368.17	448.485	-980.592	1466.2	508.904	-944.476	1270.26	527.157	-912.472	1153.72	541.354	-960.286	985.24	499.463	-985.591	891.521	559.309	-937.84	884.8	553.714	-979.208	787.204
601	0	310.009	-1224.28	1644.97	206.861	-1221.34	1644.62	335.476	-1069.02	1665.49	198.713	-1053.31	1668.39	251.522	-988.279	1517.25	252.258	-885.532	1294.73	265.199	-1129.49	1422.51	266.465	-1156.61	1237.84	199.286	-885.575	1369.61	448.201	-991.987	1468.21	509.538	-958.569	1271.61	528.576	-928.768	1154.51	541.697	-982.196	987.491	499.184	-1010.57	895.171	559.174	-963.405	886.352	553.383	-1008.86	790.83
602	0	309.381	-1235.38	1646.62	206.274	-1232.36	1646.08	334.952	-1080.15	1667.24	198.207	-1064.33	1669.93	251.213	-999.273	1518.62	252.094	-896.835	1295.98	264.757	-1140.62	1424.1	266.276	-1168.01	1239.51	199.242	-896.701	1370.87	447.884	-1003.39	1469.96	510.101	-972.599	1272.78	529.914	-945.033	1155.17	541.958	-1004.1	989.839	498.819	-1035.57	899.041	558.895	-989.022	888.101	552.855	-1038.5	794.798
603	0	308.785	-1246.51	1648.06	205.716	-1243.4	1647.35	334.49	-1091.31	1668.7	197.767	-1075.36	1671.2	250.895	-1010.34	1519.76	251.839	-908.163	1297.02	264.313	-1151.81	1425.42	266.046	-1179.41	1240.89	199.124	-907.891	1371.93	447.533	-1014.81	1471.42	510.588	-986.575	1273.75	531.157	-961.272	1155.68	542.129	-1025.96	992.259	498.365	-1060.55	903.097	558.476	-1014.64	890.029	552.136	-1068.05	799.075
604	0	308.224	-1257.68	1649.25	205.191	-1254.46	1648.4	334.089	-1102.5	1669.86	197.391	-1086.4	1672.2	250.565	-1021.48	1520.65	251.493	-919.527	1297.84	263.864	-1163.05	1426.46	265.767	-1190.81	1241.98	198.93	-919.152	1372.79	447.147	-1026.26	1472.58	510.991	-1000.51	1274.48	532.293	-977.49	1156.01	542.205	-1047.76	994.726	497.819	-1085.44	907.307	557.918	-1040.22	892.117	551.232	-1097.43	803.624
605	0	307.702	-1268.91	1650.17	204.701	-1265.56	1649.21	333.746	-1113.75	1670.69	197.074	-1097.48	1672.92	250.217	-1032.71	1521.29	251.053	-930.935	1298.42	263.406	-1174.35	1427.2	265.43	-1202.2	1242.74	198.655	-930.494	1373.42	446.722	-1037.75	1473.42	511.301	-1014.42	1274.97	533.308	-993.69	1156.14	542.177	-1069.47	997.214	497.179	-1110.2	911.635	557.226	-1065.71	894.344	550.155	-1126.58	808.411
606	0	307.215	-1280.2	1650.8	204.243	-1276.72	1649.76	333.451	-1125.05	1671.2	196.805	-1108.61	1673.36	249.843	-1044.03	1521.66	250.521	-942.394	1298.76	262.932	-1185.73	1427.64	265.029	-1213.6	1243.18	198.297	-941.922	1373.81	446.252	-1049.28	1473.94	511.511	-1028.31	1275.18	534.189	-1009.88	1156.06	542.041	-1091.05	999.701	496.44	-1134.78	916.049	556.403	-1091.06	896.69	548.919	-1155.43	813.399
607	0	306.758	-1291.55	1651.13	203.811	-1287.95	1650.06	333.19	-1136.42	1671.38	196.57	-1119.8	1673.5	249.435	-1055.45	1521.76	249.896	-953.911	1298.85	262.433	-1197.18	1427.77	264.557	-1225	1243.29	197.851	-953.44	1373.95	445.731	-1060.88	1474.15	511.609	-1042.2	1275.14	534.925	-1026.06	1155.77	541.788	-1112.49	1002.17	495.601	-1159.14	920.516	555.453	-1116.23	899.135	547.538	-1183.93	818.552
608	0	306.322	-1302.98	1651.15	203.395	-1299.27	1650.08	332.944	-1147.86	1671.24	196.35	-1131.07	1673.37	248.981	-1066.97	1521.59	249.182	-965.492	1298.69	261.9	-1208.72	1427.6	264.011	-1236.42	1243.08	197.314	-965.053	1373.85	445.151	-1072.53	1474.05	511.588	-1056.1	1274.82	535.502	-1042.22	1155.26	541.412	-1133.76	1004.59	494.658	-1183.23	925.003	554.378	-1141.18	901.658	546.029	-1212.02	823.837
609	0	305.892	-1314.49	1650.87	202.982	-1310.67	1649.83	332.694	-1159.38	1670.78	196.123	-1142.43	1672.96	248.469	-1078.59	1521.16	248.379	-977.143	1298.28	261.321	-1220.34	1427.13	263.387	-1247.87	1242.56	196.684	-976.761	1373.49	444.505	-1084.26	1473.66	511.439	-1070.01	1274.23	535.911	-1058.38	1154.54	540.907	-1154.83	1006.96	493.609	-1207.01	929.479	553.182	-1165.87	904.238	544.407	-1239.65	829.22
610	0	305.455	-1326.07	1650.29	202.557	-1322.16	1649.32	332.415	-1170.97	1670.01	195.865	-1153.88	1672.29	247.887	-1090.3	1520.46	247.491	-988.87	1297.62	260.686	-1232.04	1426.38	262.684	-1259.37	1241.74	195.959	-988.565	1372.88	443.782	-1096.08	1472.99	511.153	-1083.95	1273.4	536.143	-1074.51	1153.62	540.266	-1175.67	1009.25	492.45	-1230.44	933.915	551.866	-1190.25	906.856	542.687	-1266.78	834.667
611	0	304.99	-1337.74	1649.42	202.101	-1333.76	1648.54	332.082	-1182.64	1668.97	195.549	-1165.44	1671.37	247.223	-1102.11	1519.53	246.522	-1000.68	1296.72	259.98	-1243.84	1425.37	261.901	-1270.92	1240.65	195.136	-1000.47	1372.02	442.976	-1107.98	1472.06	510.726	-1097.92	1272.34	536.19	-1090.61	1152.52	539.487	-1196.27	1011.45	491.181	-1253.5	938.284	550.434	-1214.27	909.491	540.882	-1293.37	840.146
612	0	304.479	-1349.48	1648.28	201.593	-1345.45	1647.53	331.667	-1194.39	1667.66	195.148	-1177.09	1670.21	246.465	-1114.01	1518.35	245.477	-1012.57	1295.59	259.194	-1255.74	1424.11	261.038	-1282.55	1239.3	194.216	-1012.46	1370.93	442.077	-1119.97	1470.9	510.152	-1111.92	1271.06	536.047	-1106.67	1151.24	538.565	-1216.58	1013.56	489.799	-1276.13	942.56	548.886	-1237.91	912.123	539.002	-1319.38	845.623
613	0	303.898	-1361.29	1646.91	201.014	-1357.25	1646.29	331.144	-1206.2	1666.12	194.634	-1188.85	1668.84	245.601	-1126.01	1516.96	244.362	-1024.55	1294.25	258.314	-1267.73	1422.62	260.096	-1294.26	1237.73	193.201	-1024.55	1369.61	441.08	-1132.08	1469.55	509.427	-1125.95	1269.59	535.711	-1122.67	1149.82	537.497	-1236.59	1015.56	488.303	-1298.31	946.716	547.225	-1261.11	914.731	537.057	-1344.76	851.066
614	0	303.225	-1373.18	1645.32	200.339	-1369.15	1644.84	330.484	-1218.08	1664.38	193.981	-1200.72	1667.28	244.621	-1138.1	1515.38	243.182	-1036.63	1292.7	257.329	-1279.81	1420.94	259.073	-1306.08	1235.97	192.092	-1036.72	1368.07	439.977	-1144.29	1468.02	508.55	-1140	1267.97	535.182	-1138.58	1148.28	536.285	-1256.26	1017.44	486.695	-1320.01	950.73	545.453	-1283.84	917.294	535.052	-1369.49	856.441
615	0	302.438	-1385.14	1643.55	199.547	-1381.15	1643.21	329.663	-1230.03	1662.46	193.163	-1212.69	1665.54	243.518	-1150.28	1513.62	241.944	-1048.8	1290.99	256.23	-1292	1419.09	257.971	-1318.01	1234.03	190.894	-1048.99	1366.35	438.765	-1156.61	1466.35	507.523	-1154.07	1266.22	534.462	-1154.39	1146.64	534.929	-1275.57	1019.2	484.974	-1341.19	954.58	543.572	-1306.05	919.791	532.992	-1393.53	861.712
616	0	301.512	-1397.17	1641.64	198.616	-1393.24	1641.44	328.658	-1242.03	1660.4	192.158	-1224.76	1663.64	242.285	-1162.55	1511.72	240.655	-1061.06	1289.11	255.009	-1304.28	1417.1	256.788	-1330.06	1231.97	189.611	-1061.33	1364.44	437.44	-1169.05	1464.57	506.346	-1168.14	1264.37	533.555	-1170.07	1144.92	533.431	-1294.49	1020.82	483.145	-1361.83	958.243	541.586	-1327.72	922.2	530.876	-1416.86	866.842
617	0	300.428	-1409.27	1639.62	197.525	-1405.43	1639.53	327.448	-1254.11	1658.24	190.947	-1236.92	1661.63	240.918	-1174.89	1509.7	239.321	-1073.43	1287.11	253.661	-1316.66	1414.99	255.526	-1342.25	1229.8	188.248	-1073.75	1362.4	436.002	-1181.6	1462.71	505.025	-1182.21	1262.46	532.467	-1185.6	1143.16	531.797	-1313	1022.31	481.21	-1381.91	961.699	539.499	-1348.79	924.499	528.706	-1439.44	871.794
618	0	299.165	-1421.44	1637.54	196.256	-1417.71	1637.54	326.02	-1266.24	1656.01	189.516	-1249.18	1659.51	239.416	-1187.32	1507.59	237.949	-1085.88	1285	252.182	-1329.14	1412.81	254.186	-1354.57	1227.57	186.813	-1086.24	1360.22	434.453	-1194.28	1460.81	503.566	-1196.26	1260.52	531.206	-1200.95	1141.39	530.032	-1331.06	1023.65	479.175	-1401.4	964.926	537.316	-1369.23	926.667	526.48	-1461.25	876.526
619	0	297.708	-1433.67	1635.43	194.794	-1430.08	1635.48	324.364	-1278.44	1653.76	187.858	-1261.52	1657.33	237.78	-1199.83	1505.42	236.545	-1098.43	1282.82	250.573	-1341.71	1410.59	252.771	-1367.03	1225.3	185.311	-1098.8	1357.96	432.795	-1207.07	1458.9	501.977	-1210.28	1258.57	529.783	-1216.09	1139.62	528.145	-1348.67	1024.84	477.047	-1420.27	967.906	535.044	-1389.02	928.681	524.196	-1482.26	880.997
620	0	296.044	-1445.97	1633.33	193.128	-1442.52	1633.39	322.476	-1290.7	1651.52	185.969	-1273.94	1655.1	236.014	-1212.41	1503.22	235.113	-1111.07	1280.6	248.838	-1354.37	1408.35	251.284	-1379.63	1223.03	183.749	-1111.42	1355.64	431.034	-1219.96	1457.01	500.267	-1224.24	1256.67	528.21	-1231.01	1137.88	526.145	-1365.78	1025.88	474.834	-1438.51	970.618	532.691	-1408.12	930.52	521.854	-1502.45	885.163
621	0	294.167	-1458.34	1631.28	191.25	-1455.04	1631.3	320.36	-1303.02	1649.33	183.855	-1286.44	1652.87	234.125	-1225.06	1501.03	233.656	-1123.78	1278.38	246.984	-1367.11	1406.14	249.732	-1392.36	1220.8	182.133	-1124.1	1353.29	429.177	-1232.96	1455.17	498.448	-1238.13	1254.82	526.498	-1245.68	1136.21	524.042	-1382.39	1026.77	472.546	-1456.11	973.042	530.268	-1426.51	932.162	519.454	-1521.81	888.979
622	0	292.073	-1470.78	1629.31	189.16	-1467.62	1629.24	318.026	-1315.42	1647.23	181.525	-1299	1650.65	232.123	-1237.77	1498.87	232.177	-1136.57	1276.17	245.021	-1379.93	1403.98	248.122	-1405.22	1218.64	180.468	-1136.83	1350.94	427.235	-1246.04	1453.4	496.532	-1251.93	1253.06	524.662	-1260.08	1134.61	521.85	-1398.48	1027.48	470.193	-1473.04	975.16	527.786	-1444.16	933.588	516.997	-1540.31	892.4
623	0	289.766	-1483.29	1627.46	186.862	-1480.25	1627.24	315.49	-1327.88	1645.25	178.997	-1311.61	1648.48	230.018	-1250.53	1496.79	230.676	-1149.43	1274.03	242.963	-1392.81	1401.9	246.463	-1418.2	1216.57	178.759	-1149.59	1348.64	425.218	-1259.2	1451.74	494.531	-1265.63	1251.42	522.716	-1274.19	1133.12	519.581	-1414.04	1028.04	467.788	-1489.3	976.954	525.259	-1461.05	934.779	514.487	-1557.94	895.381
624	0	287.258	-1495.87	1625.76	184.368	-1492.94	1625.32	312.774	-1340.42	1643.43	176.294	-1324.27	1646.39	227.827	-1263.35	1494.81	229.151	-1162.34	1271.98	240.828	-1405.75	1399.95	244.766	-1431.28	1214.64	177.009	-1162.39	1346.42	423.139	-1272.41	1450.21	492.461	-1279.21	1249.92	520.673	-1288.01	1131.75	517.25	-1429.05	1028.41	465.344	-1504.88	978.407	522.702	-1477.17	935.717	511.931	-1574.68	897.878
625	0	284.565	-1508.51	1624.23	181.695	-1505.66	1623.52	309.906	-1353.03	1641.79	173.445	-1336.97	1644.4	225.564	-1276.2	1492.95	227.6	-1175.29	1270.06	238.635	-1418.73	1398.13	243.043	-1444.45	1212.86	175.221	-1175.21	1344.31	421.012	-1285.65	1448.82	490.336	-1292.65	1248.58	518.548	-1301.53	1130.53	514.872	-1443.5	1028.62	462.874	-1519.78	979.503	520.131	-1492.51	936.389	509.337	-1590.54	899.852
626	0	281.711	-1521.21	1622.89	178.868	-1518.4	1621.85	306.92	-1365.7	1640.35	170.483	-1349.7	1642.56	223.248	-1289.08	1491.26	226.021	-1188.27	1268.29	236.405	-1431.74	1396.48	241.305	-1457.68	1211.26	173.398	-1188.05	1342.36	418.852	-1298.91	1447.6	488.168	-1305.94	1247.41	516.355	-1314.73	1129.45	512.463	-1457.39	1028.64	460.394	-1533.98	980.23	517.564	-1507.05	936.781	506.718	-1605.49	901.267
627	0	278.727	-1533.97	1621.76	175.916	-1531.17	1620.34	303.852	-1378.43	1639.14	167.445	-1362.43	1640.87	220.899	-1301.97	1489.75	224.409	-1201.27	1266.7	234.161	-1444.76	1395.03	239.566	-1470.96	1209.86	171.542	-1200.89	1340.58	416.676	-1312.15	1446.56	485.973	-1319.06	1246.43	514.108	-1327.61	1128.54	510.037	-1470.71	1028.49	457.918	-1547.49	980.576	515.019	-1520.8	936.884	504.088	-1619.54	902.094
628	0	275.647	-1546.76	1620.84	172.874	-1543.93	1619.01	300.742	-1391.21	1638.17	164.369	-1375.17	1639.37	218.538	-1314.86	1488.44	222.762	-1214.27	1265.32	231.928	-1457.77	1393.78	237.837	-1484.25	1208.68	169.656	-1213.71	1339.01	414.499	-1325.35	1445.71	483.765	-1332	1245.65	511.82	-1340.17	1127.8	507.611	-1483.47	1028.15	455.462	-1560.31	980.533	512.514	-1533.75	936.694	501.463	-1632.69	902.309
629	0	272.51	-1559.58	1620.16	169.782	-1556.68	1617.86	297.632	-1404.02	1637.45	161.297	-1387.9	1638.07	216.186	-1327.74	1487.36	221.078	-1227.25	1264.16	229.727	-1470.76	1392.75	236.129	-1497.54	1207.73	167.744	-1226.52	1337.68	412.338	-1338.49	1445.06	481.557	-1344.74	1245.06	509.502	-1352.41	1127.25	505.201	-1495.67	1027.63	453.041	-1572.44	980.099	510.068	-1545.9	936.209	498.862	-1644.93	901.901
630	0	269.361	-1572.42	1619.69	166.681	-1569.41	1616.93	294.564	-1416.86	1636.99	158.27	-1400.61	1636.99	213.864	-1340.59	1486.51	219.358	-1240.2	1263.25	227.58	-1483.71	1391.95	234.45	-1510.78	1207.01	165.81	-1239.28	1336.6	410.21	-1351.54	1444.62	479.362	-1357.27	1244.69	507.168	-1364.34	1126.87	502.821	-1507.3	1026.93	450.671	-1583.89	979.272	507.699	-1557.27	935.431	496.307	-1656.28	900.867
631	0	266.243	-1585.25	1619.46	163.615	-1582.1	1616.21	291.578	-1429.7	1636.77	155.328	-1413.28	1636.16	211.592	-1353.4	1485.92	217.604	-1253.1	1262.6	225.509	-1496.6	1391.39	232.81	-1523.95	1206.53	163.859	-1252	1335.8	408.129	-1364.48	1444.37	477.191	-1369.59	1244.51	504.83	-1375.95	1126.66	500.487	-1518.37	1026.05	448.367	-1594.66	978.058	505.424	-1567.86	934.366	493.819	-1666.72	899.213
632	0	263.203	-1598.06	1619.44	160.629	-1594.74	1615.71	288.716	-1442.53	1636.81	152.51	-1425.9	1635.57	209.391	-1366.14	1485.58	215.819	-1265.93	1262.21	223.53	-1509.41	1391.08	231.215	-1537.02	1206.3	161.898	-1264.66	1335.29	406.11	-1377.28	1444.32	475.056	-1381.67	1244.53	502.497	-1387.25	1126.64	498.212	-1528.89	1025.01	446.144	-1604.77	976.466	503.259	-1577.68	933.025	491.421	-1676.28	896.959
633	0	260.285	-1610.83	1619.64	157.766	-1607.31	1615.44	286.014	-1455.33	1637.08	149.851	-1438.46	1635.24	207.277	-1378.8	1485.5	214.007	-1278.67	1262.09	221.659	-1522.12	1391.01	229.671	-1549.97	1206.3	159.935	-1277.24	1335.07	404.165	-1389.93	1444.46	472.965	-1393.51	1244.74	500.18	-1398.24	1126.78	496.009	-1538.87	1023.8	444.017	-1614.21	974.509	501.218	-1586.75	931.424	489.135	-1684.97	894.132
634	0	257.532	-1623.54	1620.04	155.067	-1619.81	1615.4	283.504	-1468.07	1637.58	147.383	-1450.95	1635.17	205.264	-1391.38	1485.69	212.175	-1291.32	1262.24	219.907	-1534.72	1391.18	228.182	-1562.77	1206.53	157.978	-1289.75	1335.13	402.304	-1402.4	1444.78	470.927	-1405.11	1245.14	497.888	-1408.94	1127.08	493.89	-1548.31	1022.44	442	-1623.01	972.207	499.315	-1595.07	929.579	486.984	-1692.79	890.772
635	0	254.984	-1636.17	1620.63	152.569	-1632.23	1615.6	281.214	-1480.73	1638.3	145.13	-1463.35	1635.38	203.364	-1403.85	1486.12	210.33	-1303.85	1262.64	218.284	-1547.19	1391.59	226.752	-1575.41	1207	156.033	-1302.16	1335.49	400.536	-1414.69	1445.28	468.949	-1416.46	1245.69	495.629	-1419.35	1127.52	491.866	-1557.21	1020.94	440.106	-1631.17	969.581	497.558	-1602.67	927.515	484.987	-1699.76	886.924
636	0	252.675	-1648.7	1621.4	150.307	-1644.56	1616.03	279.166	-1493.31	1639.21	143.115	-1475.67	1635.86	201.585	-1416.2	1486.8	208.476	-1316.25	1263.29	216.794	-1559.53	1392.23	225.384	-1587.87	1207.69	154.109	-1314.48	1336.13	398.866	-1426.78	1445.93	467.034	-1427.56	1246.41	493.41	-1429.47	1128.11	489.945	-1565.6	1019.32	438.348	-1638.71	966.66	495.958	-1609.56	925.256	483.166	-1705.89	882.644
637	0	250.635	-1661.13	1622.34	148.308	-1656.78	1616.7	277.376	-1505.77	1640.32	141.349	-1487.89	1636.62	199.931	-1428.43	1487.72	206.62	-1328.53	1264.18	215.44	-1571.73	1393.11	224.081	-1600.15	1208.6	152.211	-1326.7	1337.03	397.296	-1438.66	1446.74	465.187	-1438.41	1247.27	491.234	-1439.32	1128.83	488.135	-1573.47	1017.59	436.737	-1645.63	963.476	494.519	-1615.75	922.833	481.535	-1711.21	877.99
638	0	248.886	-1673.42	1623.44	146.593	-1668.91	1617.61	275.852	-1518.11	1641.6	139.841	-1500.02	1637.64	198.405	-1440.53	1488.86	204.766	-1340.68	1265.29	214.223	-1583.78	1394.21	222.845	-1612.26	1209.72	150.345	-1338.82	1338.19	395.826	-1450.33	1447.68	463.407	-1449.01	1248.25	489.104	-1448.9	1129.67	486.443	-1580.85	1015.77	435.284	-1651.95	960.065	493.245	-1621.28	920.279	480.11	-1715.72	873.026
639	0	247.443	-1685.58	1624.7	145.176	-1680.93	1618.76	274.594	-1530.3	1643.03	138.59	-1512.04	1638.94	197.005	-1452.5	1490.21	202.919	-1352.69	1266.6	213.138	-1595.68	1395.52	221.677	-1624.2	1211.05	148.515	-1350.85	1339.57	394.455	-1461.78	1448.74	461.694	-1459.37	1249.36	487.022	-1458.21	1130.61	484.873	-1587.74	1013.88	433.998	-1657.68	956.464	492.137	-1626.15	917.628	478.903	-1719.44	867.819
640	0	246.315	-1697.59	1626.1	144.065	-1692.84	1620.14	273.598	-1542.33	1644.6	137.591	-1523.96	1640.48	195.726	-1464.35	1491.75	201.083	-1364.58	1268.08	212.182	-1607.45	1397.02	220.578	-1635.98	1212.57	146.722	-1362.79	1341.16	393.179	-1473.03	1449.91	460.046	-1469.48	1250.57	484.985	-1467.28	1131.66	483.428	-1594.16	1011.95	432.885	-1662.85	952.715	491.195	-1630.39	914.917	477.925	-1722.4	862.437
641	0	245.502	-1709.45	1627.65	143.259	-1704.65	1621.75	272.852	-1554.2	1646.29	136.832	-1535.77	1642.26	194.561	-1476.08	1493.46	199.261	-1376.34	1269.73	211.346	-1619.08	1398.72	219.545	-1647.62	1214.27	144.969	-1374.66	1342.94	391.991	-1484.07	1451.18	458.456	-1479.37	1251.87	482.992	-1476.09	1132.8	482.109	-1600.11	1010	431.951	-1667.47	948.86	490.414	-1634.01	912.184	477.182	-1724.6	856.948
642	0	244.994	-1721.15	1629.33	142.75	-1716.36	1623.58	272.337	-1565.9	1648.08	136.293	-1547.48	1644.24	193.503	-1487.7	1495.32	197.459	-1388	1271.51	210.624	-1630.59	1400.57	218.576	-1659.15	1216.13	143.255	-1386.45	1344.87	390.884	-1494.94	1452.52	456.919	-1489.03	1253.26	481.038	-1484.66	1134.02	480.916	-1605.62	1008.05	431.198	-1671.56	944.943	489.788	-1637.04	909.469	476.679	-1726.07	851.419
643	0	244.778	-1732.69	1631.14	142.523	-1727.97	1625.61	272.033	-1577.43	1649.94	135.955	-1559.1	1646.41	192.54	-1499.22	1497.29	195.68	-1399.56	1273.41	210.004	-1642	1402.57	217.669	-1670.57	1218.13	141.581	-1398.19	1346.93	389.851	-1505.64	1453.94	455.429	-1498.48	1254.71	479.118	-1493	1135.32	479.848	-1610.7	1006.13	430.628	-1675.14	941.005	489.311	-1639.51	906.808	476.416	-1726.84	845.916
644	0	244.831	-1744.07	1633.06	142.556	-1739.48	1627.83	271.912	-1588.78	1651.86	135.791	-1570.62	1648.73	191.662	-1510.66	1499.36	193.929	-1411.03	1275.39	209.477	-1653.33	1404.68	216.819	-1681.91	1220.24	139.945	-1409.89	1349.09	388.882	-1516.19	1455.39	453.978	-1507.73	1256.22	477.226	-1501.11	1136.68	478.9	-1615.37	1004.26	430.237	-1678.24	937.086	488.972	-1641.44	904.239	476.392	-1726.92	840.498
645	0	245.125	-1755.31	1635.08	142.823	-1750.91	1630.22	271.945	-1599.97	1653.81	135.773	-1582.04	1651.16	190.859	-1522.04	1501.49	192.212	-1422.44	1277.43	209.032	-1664.58	1406.87	216.021	-1693.19	1222.44	138.347	-1421.55	1351.31	387.97	-1526.63	1456.88	452.559	-1516.8	1257.77	475.358	-1509.01	1138.1	478.069	-1619.65	1002.47	430.021	-1680.88	933.226	488.76	-1642.87	901.793	476.599	-1726.36	835.223
646	0	245.629	-1766.41	1637.19	143.292	-1762.26	1632.73	272.103	-1611	1655.77	135.873	-1593.39	1653.66	190.119	-1533.37	1503.65	190.536	-1433.79	1279.51	208.658	-1675.78	1409.11	215.269	-1704.43	1224.68	136.787	-1433.19	1353.56	387.106	-1536.98	1458.38	451.164	-1525.69	1259.34	473.509	-1516.69	1139.57	477.348	-1623.56	1000.76	429.97	-1683.09	929.458	488.664	-1643.82	899.502	477.026	-1725.18	830.141
647	0	246.306	-1777.38	1639.37	143.929	-1773.55	1635.35	272.353	-1621.88	1657.69	136.061	-1604.66	1656.17	189.432	-1544.67	1505.8	188.906	-1445.1	1281.59	208.343	-1686.95	1411.36	214.558	-1715.65	1226.93	135.265	-1444.83	1355.81	386.283	-1547.26	1459.87	449.788	-1534.42	1260.93	471.675	-1524.17	1141.07	476.73	-1627.13	999.162	430.075	-1684.9	925.813	488.667	-1644.34	897.391	477.658	-1723.45	825.295
648	0	247.118	-1788.25	1641.58	144.698	-1784.77	1638.02	272.668	-1632.65	1659.57	136.308	-1615.88	1658.66	188.789	-1555.97	1507.93	187.329	-1456.38	1283.65	208.078	-1698.11	1413.58	213.882	-1726.85	1229.16	133.783	-1456.48	1358.03	385.495	-1557.5	1461.32	448.426	-1543.01	1262.51	469.852	-1531.46	1142.6	476.207	-1630.38	997.684	430.32	-1686.35	922.315	488.756	-1644.46	895.48	478.476	-1721.2	820.722
649	0	248.027	-1799.03	1643.8	145.56	-1795.95	1640.72	273.017	-1643.31	1661.36	136.588	-1627.04	1661.07	188.183	-1567.28	1509.98	185.814	-1467.65	1285.65	207.854	-1709.27	1415.74	213.237	-1738.06	1231.31	132.344	-1468.14	1360.17	384.737	-1567.74	1462.71	447.074	-1551.48	1264.06	468.039	-1538.57	1144.14	475.767	-1633.35	996.335	430.69	-1687.47	918.985	488.914	-1644.24	893.786	479.456	-1718.49	816.45
650	0	248.994	-1809.76	1646	146.479	-1807.1	1643.38	273.375	-1653.9	1663.03	136.877	-1638.17	1663.36	187.607	-1578.61	1511.93	184.368	-1478.91	1287.57	207.661	-1720.45	1417.78	212.618	-1749.29	1233.35	130.952	-1479.83	1362.22	384.004	-1578	1464.02	445.73	-1559.84	1265.57	466.236	-1545.52	1145.68	475.402	-1636.06	995.121	431.165	-1688.3	915.838	489.125	-1643.72	892.319	480.572	-1715.4	812.501
651	0	249.983	-1820.45	1648.14	147.42	-1818.23	1645.97	273.721	-1664.44	1664.57	137.152	-1649.28	1665.49	187.058	-1590	1513.75	182.997	-1490.18	1289.38	207.493	-1731.67	1419.69	212.023	-1760.54	1235.24	129.613	-1491.55	1364.13	383.295	-1588.3	1465.23	444.395	-1568.11	1267.03	464.445	-1552.32	1147.2	475.1	-1638.56	994.044	431.725	-1688.89	912.885	489.372	-1642.95	891.083	481.795	-1711.98	808.889
652	0	250.961	-1831.14	1650.18	148.351	-1829.37	1648.44	274.034	-1674.96	1665.95	137.397	-1660.39	1667.41	186.532	-1601.44	1515.41	181.71	-1501.46	1291.05	207.344	-1742.94	1421.41	211.449	-1771.82	1236.93	128.333	-1503.31	1365.89	382.608	-1598.67	1466.3	443.068	-1576.32	1268.41	462.67	-1559	1148.7	474.85	-1640.88	993.103	432.352	-1689.26	910.132	489.637	-1641.99	890.079	483.093	-1708.3	805.62
653	0	251.898	-1841.84	1652.09	149.244	-1840.53	1650.74	274.301	-1685.51	1667.14	137.597	-1671.53	1669.09	186.031	-1612.95	1516.89	180.514	-1512.76	1292.57	207.21	-1754.27	1422.92	210.895	-1783.15	1238.41	127.119	-1515.12	1367.47	381.945	-1609.12	1467.23	441.753	-1584.48	1269.7	460.913	-1565.58	1150.16	474.641	-1643.04	992.296	433.022	-1689.47	907.58	489.905	-1640.88	889.303	484.435	-1704.44	802.694
654	0	252.771	-1852.6	1653.84	150.075	-1851.73	1652.83	274.511	-1696.1	1668.12	137.745	-1682.7	1670.5	185.553	-1624.54	1518.16	179.415	-1524.08	1293.9	207.088	-1765.67	1424.2	210.363	-1794.51	1239.63	125.979	-1526.96	1368.85	381.308	-1619.69	1467.98	440.453	-1592.61	1270.89	459.181	-1572.08	1151.56	474.462	-1645.11	991.615	433.718	-1689.55	905.229	490.161	-1639.68	888.747	485.789	-1700.47	800.108
655	0	253.559	-1863.44	1655.39	150.825	-1862.99	1654.66	274.659	-1706.78	1668.88	137.836	-1693.92	1671.62	185.103	-1636.23	1519.2	178.418	-1535.44	1295.04	206.977	-1777.14	1425.2	209.853	-1805.93	1240.57	124.921	-1538.86	1370.01	380.699	-1630.37	1468.55	439.175	-1600.74	1271.97	457.479	-1578.53	1152.91	474.303	-1647.11	991.054	434.422	-1689.56	903.076	490.39	-1638.45	888.4	487.125	-1696.47	797.852
656	0	254.251	-1874.39	1656.7	151.482	-1874.32	1656.21	274.744	-1717.56	1669.41	137.869	-1705.23	1672.43	184.684	-1648.01	1520	177.531	-1546.83	1295.96	206.877	-1788.7	1425.93	209.37	-1817.39	1241.22	123.953	-1550.81	1370.93	380.124	-1641.18	1468.92	437.924	-1608.89	1272.92	455.816	-1584.97	1154.19	474.156	-1649.08	990.602	435.118	-1689.53	901.114	490.58	-1637.24	888.248	488.415	-1692.49	795.912
657	0	254.84	-1885.46	1657.75	152.038	-1885.74	1657.45	274.767	-1728.48	1669.69	137.847	-1716.63	1672.92	184.301	-1659.89	1520.55	176.756	-1558.26	1296.65	206.79	-1800.35	1426.36	208.916	-1828.9	1241.56	123.085	-1562.81	1371.6	379.588	-1652.14	1469.08	436.706	-1617.09	1273.75	454.198	-1591.41	1155.38	474.012	-1651.07	990.248	435.793	-1689.52	899.337	490.722	-1636.1	888.276	489.634	-1688.61	794.272
658	0	255.323	-1896.68	1658.52	152.492	-1897.27	1658.35	274.738	-1739.55	1669.72	137.78	-1728.13	1673.09	183.962	-1671.87	1520.84	176.097	-1569.74	1297.1	206.718	-1812.1	1426.49	208.497	-1840.46	1241.6	122.323	-1574.86	1372.03	379.097	-1663.25	1469.03	435.531	-1625.35	1274.44	452.633	-1597.89	1156.5	473.865	-1653.12	989.981	436.44	-1689.57	897.737	490.808	-1635.09	888.468	490.758	-1684.89	792.914
659	0	255.705	-1908.07	1659	152.848	-1908.91	1658.9	274.666	-1750.81	1669.51	137.678	-1739.76	1672.94	183.671	-1683.96	1520.87	175.558	-1581.29	1297.32	206.665	-1823.93	1426.32	208.117	-1852.07	1241.32	121.675	-1586.97	1372.21	378.658	-1674.53	1468.76	434.405	-1633.71	1274.99	451.129	-1604.44	1157.52	473.712	-1655.27	989.788	437.052	-1689.73	896.304	490.831	-1634.25	888.806	491.771	-1681.39	791.817
660	0	255.997	-1919.63	1659.17	153.115	-1920.68	1659.1	274.565	-1762.25	1669.05	137.554	-1751.52	1672.48	183.437	-1696.15	1520.65	175.141	-1592.9	1297.29	206.637	-1835.87	1425.85	207.782	-1863.75	1240.74	121.147	-1599.13	1372.13	378.278	-1685.96	1468.27	433.337	-1642.19	1275.4	449.691	-1611.09	1158.45	473.548	-1657.56	989.657	437.626	-1690.03	895.029	490.79	-1633.64	889.271	492.658	-1678.15	790.96
661	0	256.212	-1931.38	1659.02	153.306	-1932.59	1658.94	274.452	-1773.88	1668.36	137.425	-1763.42	1671.73	183.268	-1708.44	1520.18	174.846	-1604.59	1297.02	206.639	-1847.9	1425.09	207.498	-1875.48	1239.86	120.744	-1611.35	1371.81	377.964	-1697.56	1467.57	432.335	-1650.81	1275.66	448.328	-1617.87	1159.28	473.374	-1660.03	989.574	438.161	-1690.53	893.9	490.684	-1633.3	889.845	493.409	-1675.23	790.319
662	0	256.369	-1943.32	1658.57	153.441	-1944.63	1658.45	274.344	-1785.72	1667.44	137.307	-1775.46	1670.7	183.171	-1720.83	1519.47	174.673	-1616.36	1296.52	206.678	-1860.03	1424.06	207.271	-1887.28	1238.71	120.471	-1623.62	1371.25	377.723	-1709.32	1466.67	431.407	-1659.59	1275.79	447.046	-1624.8	1160.02	473.189	-1662.72	989.528	438.656	-1691.27	892.906	490.515	-1633.27	890.507	494.019	-1672.68	789.871
663	0	256.488	-1955.44	1657.81	153.539	-1956.82	1657.62	274.26	-1797.77	1666.3	137.218	-1787.66	1669.43	183.153	-1733.32	1518.54	174.62	-1628.23	1295.79	206.761	-1872.26	1422.78	207.106	-1899.15	1237.31	120.329	-1635.96	1370.48	377.56	-1721.25	1465.57	430.559	-1668.56	1275.77	445.85	-1631.93	1160.65	472.996	-1665.66	989.504	439.114	-1692.3	892.031	490.289	-1633.59	891.238	494.487	-1670.52	789.593
664	0	256.593	-1967.76	1656.76	153.624	-1969.16	1656.48	274.22	-1810	1664.96	137.177	-1800	1667.93	183.22	-1745.89	1517.4	174.687	-1640.21	1294.85	206.894	-1884.59	1421.26	207.009	-1911.09	1235.68	120.318	-1648.36	1369.49	377.481	-1733.33	1464.29	429.798	-1677.72	1275.61	444.746	-1639.26	1161.17	472.798	-1668.9	989.49	439.536	-1693.64	891.261	490.013	-1634.31	892.018	494.817	-1668.81	789.458
665	0	256.707	-1980.24	1655.44	153.72	-1981.63	1655.06	274.241	-1822.43	1663.44	137.2	-1812.49	1666.24	183.377	-1758.55	1516.07	174.868	-1652.29	1293.72	207.086	-1897.01	1419.54	206.986	-1923.11	1233.85	120.439	-1660.82	1368.31	377.491	-1745.56	1462.83	429.131	-1687.1	1275.32	443.739	-1646.83	1161.59	472.601	-1672.47	989.474	439.925	-1695.34	890.579	489.696	-1635.45	892.827	495.016	-1667.57	789.441
666	0	256.855	-1992.9	1653.88	153.85	-1994.24	1653.39	274.34	-1835.04	1661.77	137.303	-1825.13	1664.38	183.63	-1771.29	1514.57	175.159	-1664.49	1292.4	207.343	-1909.52	1417.65	207.04	-1935.22	1231.84	120.688	-1673.35	1366.96	377.593	-1757.94	1461.23	428.561	-1696.7	1274.89	442.833	-1654.66	1161.9	472.41	-1676.4	989.442	440.284	-1697.43	889.968	489.351	-1637.07	893.646	495.093	-1666.84	789.515
667	0	257.06	-2005.72	1652.09	154.038	-2006.99	1651.5	274.532	-1847.81	1659.95	137.501	-1837.9	1662.4	183.982	-1784.11	1512.92	175.555	-1676.82	1290.92	207.673	-1922.12	1415.61	207.177	-1947.42	1229.7	121.061	-1685.94	1365.46	377.789	-1770.44	1459.49	428.094	-1706.55	1274.33	442.032	-1662.78	1162.1	472.232	-1680.73	989.385	440.616	-1699.96	889.41	488.99	-1639.18	894.453	495.064	-1666.64	789.656
668	0	257.344	-2018.68	1650.11	154.305	-2019.85	1649.44	274.83	-1860.73	1658.03	137.806	-1850.8	1660.32	184.434	-1797	1511.16	176.05	-1689.27	1289.31	208.081	-1934.81	1413.46	207.401	-1959.71	1227.45	121.554	-1698.6	1363.84	378.081	-1783.07	1457.64	427.733	-1716.64	1273.65	441.341	-1671.19	1162.18	472.074	-1685.48	989.289	440.925	-1702.95	888.886	488.628	-1641.82	895.232	494.943	-1667.01	789.835
669	0	257.724	-2031.77	1647.98	154.67	-2032.84	1647.23	275.244	-1873.78	1656.02	138.227	-1863.82	1658.19	184.987	-1809.95	1509.31	176.636	-1701.84	1287.58	208.573	-1947.58	1411.23	207.716	-1972.1	1225.14	122.161	-1711.33	1362.12	378.467	-1795.81	1455.69	427.481	-1726.98	1272.86	440.762	-1679.92	1162.15	471.946	-1690.68	989.146	441.218	-1706.43	888.381	488.28	-1645.02	895.962	494.749	-1667.98	790.028
670	0	258.217	-2044.97	1645.73	155.147	-2045.93	1644.92	275.78	-1886.95	1653.95	138.77	-1876.96	1656.02	185.641	-1822.95	1507.39	177.307	-1714.54	1285.77	209.154	-1960.42	1408.95	208.124	-1984.58	1222.79	122.875	-1724.12	1360.33	378.946	-1808.64	1453.67	427.339	-1737.57	1271.95	440.298	-1688.98	1162	471.853	-1696.38	988.946	441.5	-1710.44	887.879	487.961	-1648.82	896.628	494.501	-1669.58	790.211
671	0	258.834	-2058.27	1643.4	155.747	-2059.11	1642.55	276.442	-1900.22	1651.86	139.439	-1890.18	1653.86	186.394	-1836.01	1505.44	178.056	-1727.37	1283.89	209.826	-1973.34	1406.67	208.628	-1997.17	1220.44	123.688	-1736.98	1358.5	379.517	-1821.54	1451.59	427.309	-1748.42	1270.95	439.953	-1698.39	1161.73	471.804	-1702.58	988.681	441.776	-1715.01	887.364	487.687	-1653.23	897.214	494.219	-1671.84	790.361
672	0	259.582	-2071.66	1641.02	156.476	-2072.38	1640.16	277.228	-1913.57	1649.76	140.232	-1903.5	1651.73	187.242	-1849.11	1503.48	178.877	-1740.31	1281.99	210.591	-1986.32	1404.41	209.23	-2009.85	1218.13	124.594	-1749.9	1356.66	380.174	-1834.52	1449.5	427.392	-1759.51	1269.85	439.727	-1708.15	1161.35	471.806	-1709.31	988.346	442.055	-1720.16	886.825	487.473	-1658.28	897.707	493.922	-1674.79	790.459
673	0	260.463	-2085.11	1638.65	157.337	-2085.72	1637.79	278.136	-1926.99	1647.7	141.148	-1916.88	1649.68	188.181	-1862.25	1501.54	179.763	-1753.37	1280.08	211.449	-1999.35	1402.21	209.93	-2022.62	1215.88	125.585	-1762.88	1354.82	380.916	-1847.55	1447.4	427.588	-1770.85	1268.69	439.624	-1718.27	1160.86	471.866	-1716.6	987.935	442.342	-1725.93	886.252	487.331	-1664.01	898.094	493.63	-1678.48	790.487
674	0	261.475	-2098.61	1636.32	158.326	-2099.11	1635.48	279.16	-1940.47	1645.69	142.179	-1930.32	1647.71	189.205	-1875.42	1499.65	180.708	-1766.54	1278.19	212.398	-2012.44	1400.09	210.725	-2035.49	1213.74	126.654	-1775.9	1353.03	381.735	-1860.62	1445.33	427.897	-1782.43	1267.46	439.644	-1728.75	1160.26	471.99	-1724.46	987.446	442.646	-1732.34	885.638	487.273	-1670.42	898.366	493.361	-1682.93	790.432
675	0	262.612	-2112.16	1634.06	159.438	-2112.54	1633.27	280.289	-1953.98	1643.77	143.316	-1943.81	1645.87	190.308	-1888.61	1497.83	181.71	-1779.8	1276.35	213.434	-2025.57	1398.09	211.615	-2048.45	1211.72	127.793	-1788.98	1351.29	382.628	-1873.72	1443.31	428.317	-1794.24	1266.19	439.788	-1739.6	1159.56	472.183	-1732.91	986.878	442.974	-1739.41	884.979	487.311	-1677.55	898.517	493.132	-1688.17	790.282
676	0	263.861	-2125.72	1631.92	160.662	-2126	1631.18	281.514	-1967.52	1641.96	144.549	-1957.32	1644.16	191.483	-1901.82	1496.12	182.762	-1793.15	1274.59	214.552	-2038.73	1396.24	212.596	-2061.5	1209.87	128.995	-1802.1	1349.65	383.59	-1886.84	1441.36	428.849	-1806.27	1264.9	440.056	-1750.82	1158.78	472.45	-1741.97	986.233	443.333	-1747.17	884.273	487.453	-1685.4	898.543	492.958	-1694.26	790.032
677	0	265.21	-2139.29	1629.91	161.984	-2139.47	1629.25	282.82	-1981.08	1640.28	145.863	-1970.83	1642.62	192.722	-1915.03	1494.52	183.864	-1806.57	1272.93	215.745	-2051.92	1394.55	213.66	-2074.63	1208.2	130.255	-1815.25	1348.11	384.614	-1899.97	1439.52	429.491	-1818.53	1263.6	440.448	-1762.4	1157.93	472.794	-1751.64	985.513	443.729	-1755.65	883.52	487.706	-1694.01	898.439	492.852	-1701.2	789.675
678	0	266.642	-2152.84	1628.08	163.387	-2152.94	1627.5	284.194	-1994.62	1638.76	147.245	-1984.34	1641.26	194.016	-1928.24	1493.07	185.01	-1820.04	1271.39	217.002	-2065.13	1393.06	214.803	-2087.84	1206.73	131.565	-1828.42	1346.69	385.697	-1913.12	1437.8	430.241	-1831.01	1262.32	440.964	-1774.35	1157.01	473.218	-1761.95	984.721	444.17	-1764.85	882.724	488.074	-1703.38	898.207	492.826	-1709.06	789.211
679	0	268.137	-2166.37	1626.45	164.855	-2166.38	1625.96	285.622	-2008.16	1637.4	148.68	-1997.82	1640.08	195.357	-1941.45	1491.78	186.2	-1833.56	1269.99	218.315	-2078.35	1391.76	216.016	-2101.12	1205.49	132.921	-1841.62	1345.43	386.832	-1926.26	1436.23	431.1	-1843.7	1261.07	441.602	-1786.64	1156.04	473.724	-1772.89	983.864	444.662	-1774.81	881.89	488.562	-1713.53	897.847	492.889	-1717.84	788.642
680	0	269.677	-2179.85	1625.03	166.368	-2179.78	1624.65	287.087	-2021.66	1636.22	150.153	-2011.26	1639.11	196.736	-1954.64	1490.67	187.43	-1847.1	1268.75	219.673	-2091.58	1390.69	217.292	-2114.47	1204.47	134.315	-1854.83	1344.31	388.015	-1939.4	1434.83	432.066	-1856.6	1259.87	442.363	-1799.3	1155.04	474.315	-1784.48	982.946	445.21	-1785.53	881.022	489.172	-1724.47	897.361	493.05	-1727.58	787.968
681	0	271.241	-2193.27	1623.86	167.909	-2193.12	1623.57	288.576	-2035.12	1635.24	151.651	-2024.64	1638.34	198.144	-1967.81	1489.74	188.699	-1860.66	1267.68	221.065	-2104.8	1389.84	218.621	-2127.88	1203.7	135.741	-1868.04	1343.37	389.241	-1952.55	1433.61	433.14	-1869.7	1258.73	443.244	-1812.29	1154.02	474.991	-1796.71	981.974	445.819	-1797.04	880.128	489.903	-1736.2	896.751	493.313	-1738.31	787.194
682	0	272.812	-2206.63	1622.94	169.46	-2206.4	1622.76	290.077	-2048.53	1634.45	153.16	-2037.94	1637.79	199.574	-1980.95	1489.02	190.002	-1874.21	1266.8	222.481	-2118.01	1389.23	219.997	-2141.33	1203.18	137.194	-1881.26	1342.61	390.505	-1965.69	1432.59	434.321	-1883.01	1257.68	444.247	-1825.63	1152.99	475.753	-1809.6	980.953	446.494	-1809.34	879.213	490.758	-1748.75	896.02	493.684	-1750.05	786.323
683	0	274.372	-2219.89	1622.28	171.005	-2219.59	1622.2	291.575	-2061.88	1633.86	154.67	-2051.15	1637.44	201.017	-1994.07	1488.5	191.336	-1887.74	1266.11	223.911	-2131.21	1388.85	221.412	-2154.82	1202.9	138.668	-1894.46	1342.04	391.802	-1978.83	1431.77	435.61	-1896.52	1256.72	445.37	-1839.3	1151.96	476.603	-1823.15	979.89	447.239	-1822.45	878.285	491.735	-1762.1	895.172	494.164	-1762.81	785.359
684	0	275.907	-2233.06	1621.9	172.532	-2232.69	1621.92	293.063	-2075.15	1633.47	156.169	-2064.27	1637.3	202.465	-2007.14	1488.2	192.698	-1901.25	1265.63	225.347	-2144.38	1388.71	222.861	-2168.34	1202.87	140.157	-1907.65	1341.66	393.129	-1991.97	1431.18	437.007	-1910.24	1255.87	446.614	-1853.3	1150.95	477.541	-1837.35	978.789	448.056	-1836.37	877.348	492.834	-1776.27	894.208	494.756	-1776.62	784.304
685	0	277.405	-2246.12	1621.8	174.03	-2245.69	1621.92	294.531	-2088.34	1633.29	157.651	-2077.27	1637.37	203.914	-2020.19	1488.11	194.082	-1914.72	1265.37	226.781	-2157.52	1388.81	224.338	-2181.87	1203.08	141.654	-1920.82	1341.48	394.482	-2005.1	1430.82	438.513	-1924.16	1255.13	447.978	-1867.63	1149.95	478.566	-1852.21	977.655	448.949	-1851.11	876.407	494.055	-1791.27	893.132	495.461	-1791.48	783.162
686	0	278.856	-2259.07	1621.98	175.49	-2258.59	1622.2	295.974	-2101.45	1633.3	159.109	-2090.16	1637.64	205.357	-2033.19	1488.25	195.487	-1928.13	1265.32	228.209	-2170.64	1389.14	225.841	-2195.42	1203.53	143.156	-1933.97	1341.5	395.857	-2018.24	1430.68	440.128	-1938.29	1254.51	449.464	-1882.28	1148.99	479.68	-1867.72	976.49	449.918	-1866.67	875.466	495.397	-1807.08	891.945	496.28	-1807.41	781.935
687	0	280.255	-2271.89	1622.44	176.906	-2271.37	1622.75	297.385	-2114.46	1633.51	160.538	-2102.93	1638.12	206.792	-2046.16	1488.61	196.907	-1941.5	1265.5	229.626	-2183.72	1389.71	227.367	-2208.96	1204.22	144.659	-1947.09	1341.74	397.252	-2031.37	1430.79	441.853	-1952.62	1254.01	451.07	-1897.25	1148.05	480.883	-1883.9	975.297	450.965	-1883.06	874.526	496.86	-1823.72	890.649	497.212	-1824.41	780.624
688	0	281.595	-2284.59	1623.18	178.275	-2284.04	1623.59	298.764	-2127.38	1633.93	161.935	-2115.58	1638.79	208.214	-2059.08	1489.2	198.341	-1954.8	1265.91	231.03	-2196.77	1390.5	228.914	-2222.5	1205.14	146.159	-1960.18	1342.18	398.665	-2044.5	1431.13	443.688	-1967.16	1253.63	452.797	-1912.54	1147.15	482.174	-1900.73	974.078	452.091	-1900.28	873.591	498.444	-1841.18	889.244	498.259	-1842.48	779.23
689	0	282.875	-2297.16	1624.21	179.594	-2296.59	1624.7	300.106	-2140.2	1634.54	163.299	-2128.1	1639.66	209.623	-2071.97	1490.01	199.788	-1968.05	1266.54	232.419	-2209.78	1391.53	230.481	-2236.03	1206.29	147.655	-1973.25	1342.83	400.096	-2057.63	1431.71	445.634	-1981.89	1253.38	454.646	-1928.14	1146.28	483.555	-1918.21	972.833	453.295	-1918.33	872.661	500.148	-1859.47	887.731	499.42	-1861.63	777.754
690	0	284.093	-2309.6	1625.52	180.862	-2309.03	1626.1	301.413	-2152.92	1635.34	164.627	-2140.5	1640.73	211.018	-2084.81	1491.05	201.245	-1981.23	1267.39	233.792	-2222.75	1392.79	232.068	-2249.56	1207.67	149.145	-1986.28	1343.69	401.543	-2070.75	1432.53	447.691	-1996.84	1253.26	456.615	-1944.07	1145.44	485.024	-1936.36	971.565	454.579	-1937.21	871.736	501.973	-1878.58	886.109	500.695	-1881.86	776.196
691	0	285.248	-2321.91	1627.11	182.078	-2321.35	1627.78	302.683	-2165.55	1636.35	165.92	-2152.77	1642	212.398	-2097.61	1492.31	202.714	-1994.35	1268.48	235.149	-2235.68	1394.28	233.675	-2263.07	1209.29	150.63	-1999.28	1344.77	403.007	-2083.87	1433.59	449.859	-2011.98	1253.27	458.706	-1960.31	1144.64	486.583	-1955.16	970.271	455.942	-1956.93	870.817	503.919	-1898.52	884.38	502.083	-1903.17	774.557
[truncated: 69 more columns]

## Sheet: Sheet2
Devices
		025370 - Force			025370 - Moment			025370 - CoP			027571 - Force			027571 - Moment			027571 - CoP			037720 - Force			037720 - Moment			037720 - CoP
Frame	Sub Frame	Fx	Fy	Fz	Mx	My	Mz	Cx	Cy	Cz	Fx	Fy	Fz	Mx	My	Mz	Cx	Cy	Cz	Fx	Fy	Fz	Mx	My	Mz	Cx	Cy	Cz
		N	N	N	N.mm	N.mm	N.mm	mm	mm	mm	N	N	N	N.mm	N.mm	N.mm	mm	mm	mm	N	N	N	N.mm	N.mm	N.mm	mm	mm	mm
284	0	0	0	0	0	0	0	200	300	0	0	0	0	0	0	0	200	903	0	0	0	0	0	0	0	603	903	0
284	1	0	0	0	0	0	0	200	300	0	0	0	0	0	0	0	200	903	0	0	0	0	0	0	0	603	903	0
284	2	0	0	0	0	0	0	200	300	0	0	0	0	0	0	0	200	903	0	0	0	0	0	0	0	603	903	0
284	3	0	0	0	0	0	0	200	300	0	0	0	0	0	0	0	200	903	0	0	0	0	0	0	0	603	903	0
284	4	0	0	0	0	0	0	200	300	0	0	0	0	0	0	0	200	903	0	0	0	0	0	0	0	603	903	0
284	5	0	0	0	0	0	0	200	300	0	0	0	0	0	0	0	200	903	0	0	0	0	0	0	0	603	903	0
284	6	0	0	0	0	0	0	200	300	0	0	0	0	0	0	0	200	903	0	0	0	0	0	0	0	603	903	0
284	7	0	0	0	0	0	0	200	300	0	0	0	0	0	0	0	200	903	0	0	0	0	0	0	0	603	903	0
284	8	0	0	0	0	0	0	200	300	0	0	0	0	0	0	0	200	903	0	0	0	0	0	0	0	603	903	0
284	9	0	0	0	0	0	0	200	300	0	0	0	0	0	0	0	200	903	0	0	0	0	0	0	0	603	903	0
285	0	0	0	0	0	0	0	200	300	0	0	0	0	0	0	0	200	903	0	0	0	0	0	0	0	603	903	0
285	1	0	0	0	0	0	0	200	300	0	0	0	0	0	0	0	200	903	0	0	0	0	0	0	0	603	903	0
285	2	0	0	0	0	0	0	200	300	0	0	0	0	0	0	0	200	903	0	0	0	0	0	0	0	603	903	0
285	3	0	0	0	0	0	0	200	300	0	0	0	0	0	0	0	200	903	0	0	0	0	0	0	0	603	903	0
285	4	0	0	0	0	0	0	200	300	0	0	0	0	0	0	0	200	903	0	0	0	0	0	0	0	603	903	0
285	5	0	0	0	0	0	0	200	300	0	0	0	0	0	0	0	200	903	0	0	0	0	0	0	0	603	903	0
285	6	0	0	0	0	0	0	200	300	0	0	0	0	0	0	0	200	903	0	0	0	0	0	0	0	603	903	0
285	7	0	0	0	0	0	0	200	300	0	0	0	0	0	0	0	200	903	0	0	0	0	0	0	0	603	903	0
285	8	0	0	0	0	0	0	200	300	0	0	0	0	0	0	0	200	903	0	0	0	0	0	0	0	603	903	0
285	9	0	0	0	0	0	0	200	300	0	0	0	0	0	0	0	200	903	0	0	0	0	0	0	0	603	903	0
286	0	0	0	0	0	0	0	200	300	0	0	0	0	0	0	0	200	903	0	0	0	0	0	0	0	603	903	0
286	1	0	0	0	0	0	0	200	300	0	0	0	0	0	0	0	200	903	0	0	0	0	0	0	0	603	903	0
286	2	0	0	0	0	0	0	200	300	0	0	0	0	0	0	0	200	903	0	0	0	0	0	0	0	603	903	0
286	3	0	0	0	0	0	0	200	300	0	0	0	0	0	0	0	200	903	0	0	0	0	0	0	0	603	903	0
286	4	0	0	0	0	0	0	200	300	0	0	0	0	0	0	0	200	903	0	0	0	0	0	0	0	603	903	0
286	5	0	0	0	0	0	0	200	300	0	0	0	0	0	0	0	200	903	0	0	0	0	0	0	0	603	903	0
286	6	0	0	0	0	0	0	200	300	0	0	0	0	0	0	0	200	903	0	0	0	0	0	0	0	603	903	0
286	7	0	0	0	0	0	0	200	300	0	0	0	0	0	0	0	200	903	0	0	0	0	0	0	0	603	903	0
286	8	0	0	0	0	0	0	200	300	0	0	0	0	0	0	0	200	903	0	0	0	0	0	0	0	603	903	0
286	9	0	0	0	0	0	0	200	300	0	0	0	0	0	0	0	200	903	0	0	0	0	0	0	0	603	903	0
287	0	0	0	0	0	0	0	200	300	0	0	0	0	0	0	0	200	903	0	0	0	0	0	0	0	603	903	0
287	1	0	0	0	0	0	0	200	300	0	0	0	0	0	0	0	200	903	0	0	0	0	0	0	0	603	903	0
287	2	0	0	0	0	0	0	200	300	0	0	0	0	0	0	0	200	903	0	0	0	0	0	0	0	603	903	0
287	3	0	0	0	0	0	0	200	300	0	0	0	0	0	0	0	200	903	0	0	0	0	0	0	0	603	903	0
287	4	0	0	0	0	0	0	200	300	0	0	0	0	0	0	0	200	903	0	0	0	0	0	0	0	603	903	0
287	5	0	0	0	0	0	0	200	300	0	0	0	0	0	0	0	200	903	0	0	0	0	0	0	0	603	903	0
287	6	0	0	0	0	0	0	200	300	0	0	0	0	0	0	0	200	903	0	0	0	0	0	0	0	603	903	0
287	7	0	0	0	0	0	0	200	300	0	0	0	0	0	0	0	200	903	0	0	0	0	0	0	0	603	903	0
287	8	0	0	0	0	0	0	200	300	0	0	0	0	0	0	0	200	903	0	0	0	0	0	0	0	603	903	0
287	9	0	0	0	0	0	0	200	300	0	0	0	0	0	0	0	200	903	0	0	0	0	0	0	0	603	903	0
288	0	0	0	0	0	0	0	200	300	0	0	0	0	0	0	0	200	903	0	0	0	0	0	0	0	603	903	0
288	1	0	0	0	0	0	0	200	300	0	0	0	0	0	0	0	200	903	0	0	0	0	0	0	0	603	903	0
288	2	0	0	0	0	0	0	200	300	0	0	0	0	0	0	0	200	903	0	0	0	0	0	0	0	603	903	0
288	3	0	0	0	0	0	0	200	300	0	0	0	0	0	0	0	200	903	0	0	0	0	0	0	0	603	903	0
288	4	0	0	0	0	0	0	200	300	0	0	0	0	0	0	0	200	903	0	0	0	0	0	0	0	603	903	0
288	5	0	0	0	0	0	0	200	300	0	0	0	0	0	0	0	200	903	0	0	0	0	0	0	0	603	903	0
288	6	0	0	0	0	0	0	200	300	0	0	0	0	0	0	0	200	903	0	0	0	0	0	0	0	603	903	0
288	7	0	0	0	0	0	0	200	300	0	0	0	0	0	0	0	200	903	0	0	0	0	0	0	0	603	903	0
288	8	0	0	0	0	0	0	200	300	0	0	0	0	0	0	0	200	903	0	0	0	0	0	0	0	603	903	0
288	9	0	0	0	0	0	0	200	300	0	0	0	0	0	0	0	200	903	0	0	0	0	0	0	0	603	903	0
289	0	0	0	0	0	0	0	200	300	0	0	0	0	0	0	0	200	903	0	0	0	0	0	0	0	603	903	0
289	1	0	0	0	0	0	0	200	300	0	0	0	0	0	0	0	200	903	0	0	0	0	0	0	0	603	903	0
289	2	0	0	0	0	0	0	200	300	0	0	0	0	0	0	0	200	903	0	0	0	0	0	0	0	603	903	0
289	3	0	0	0	0	0	0	200	300	0	0	0	0	0	0	0	200	903	0	0	0	0	0	0	0	603	903	0
289	4	0	0	0	0	0	0	200	300	0	0	0	0	0	0	0	200	903	0	0	0	0	0	0	0	603	903	0
289	5	0	0	0	0	0	0	200	300	0	0	0	0	0	0	0	200	903	0	0	0	0	0	0	0	603	903	0
289	6	0	0	0	0	0	0	200	300	0	0	0	0	0	0	0	200	903	0	0	0	0	0	0	0	603	903	0
289	7	0	0	0	0	0	0	200	300	0	0	0	0	0	0	0	200	903	0	0	0	0	0	0	0	603	903	0
289	8	0	0	0	0	0	0	200	300	0	0	0	0	0	0	0	200	903	0	0	0	0	0	0	0	603	903	0
289	9	0	0	0	0	0	0	200	300	0	0	0	0	0	0	0	200	903	0	0	0	0	0	0	0	603	903	0
290	0	0	0	0	0	0	0	200	300	0	0	0	0	0	0	0	200	903	0	0	0	0	0	0	0	603	903	0
290	1	0	0	0	0	0	0	200	300	0	0	0	0	0	0	0	200	903	0	0	0	0	0	0	0	603	903	0
290	2	0	0	0	0	0	0	200	300	0	0	0	0	0	0	0	200	903	0	0	0	0	0	0	0	603	903	0
290	3	0	0	0	0	0	0	200	300	0	0	0	0	0	0	0	200	903	0	0	0	0	0	0	0	603	903	0
290	4	0	0	0	0	0	0	200	300	0	0	0	0	0	0	0	200	903	0	0	0	0	0	0	0	603	903	0
290	5	0	0	0	0	0	0	200	300	0	0	0	0	0	0	0	200	903	0	0	0	0	0	0	0	603	903	0
290	6	0	0	0	0	0	0	200	300	0	0	0	0	0	0	0	200	903	0	0	0	0	0	0	0	603	903	0
290	7	0	0	0	0	0	0	200	300	0	0	0	0	0	0	0	200	903	0	0	0	0	0	0	0	603	903	0
290	8	0	0	0	0	0	0	200	300	0	0	0	0	0	0	0	200	903	0	0	0	0	0	0	0	603	903	0
290	9	0	0	0	0	0	0	200	300	0	0	0	0	0	0	0	200	903	0	0	0	0	0	0	0	603	903	0
291	0	0	0	0	0	0	0	200	300	0	0	0	0	0	0	0	200	903	0	0	0	0	0	0	0	603	903	0
291	1	0	0	0	0	0	0	200	300	0	0	0	0	0	0	0	200	903	0	0	0	0	0	0	0	603	903	0
291	2	0	0	0	0	0	0	200	300	0	0	0	0	0	0	0	200	903	0	0	0	0	0	0	0	603	903	0
291	3	0	0	0	0	0	0	200	300	0	0	0	0	0	0	0	200	903	0	0	0	0	0	0	0	603	903	0
291	4	0	0	0	0	0	0	200	300	0	0	0	0	0	0	0	200	903	0	0	0	0	0	0	0	603	903	0
291	5	0	0	0	0	0	0	200	300	0	0	0	0	0	0	0	200	903	0	0	0	0	0	0	0	603	903	0
291	6	0	0	0	0	0	0	200	300	0	0	0	0	0	0	0	200	903	0	0	0	0	0	0	0	603	903	0
291	7	0	0	0	0	0	0	200	300	0	0	0	0	0	0	0	200	903	0	0	0	0	0	0	0	603	903	0
291	8	0	0	0	0	0	0	200	300	0	0	0	0	0	0	0	200	903	0	0	0	0	0	0	0	603	903	0
291	9	0	0	0	0	0	0	200	300	0	0	0	0	0	0	0	200	903	0	0	0	0	0	0	0	603	903	0
292	0	0	0	0	0	0	0	200	300	0	0	0	0	0	0	0	200	903	0	0	0	0	0	0	0	603	903	0
292	1	0	0	0	0	0	0	200	300	0	0	0	0	0	0	0	200	903	0	0	0	0	0	0	0	603	903	0
292	2	0	0	0	0	0	0	200	300	0	0	0	0	0	0	0	200	903	0	0	0	0	0	0	0	603	903	0
292	3	0	0	0	0	0	0	200	300	0	0	0	0	0	0	0	200	903	0	0	0	0	0	0	0	603	903	0
292	4	0	0	0	0	0	0	200	300	0	0	0	0	0	0	0	200	903	0	0	0	0	0	0	0	603	903	0
292	5	0	0	0	0	0	0	200	300	0	0	0	0	0	0	0	200	903	0	0	0	0	0	0	0	603	903	0
292	6	0	0	0	0	0	0	200	300	0	0	0	0	0	0	0	200	903	0	0	0	0	0	0	0	603	903	0
292	7	0	0	0	0	0	0	200	300	0	0	0	0	0	0	0	200	903	0	0	0	0	0	0	0	603	903	0
292	8	0	0	0	0	0	0	200	300	0	0	0	0	0	0	0	200	903	0	0	0	0	0	0	0	603	903	0
292	9	0	0	0	0	0	0	200	300	0	0	0	0	0	0	0	200	903	0	0	0	0	0	0	0	603	903	0
293	0	0	0	0	0	0	0	200	300	0	0	0	0	0	0	0	200	903	0	0	0	0	0	0	0	603	903	0
293	1	0	0	0	0	0	0	200	300	0	0	0	0	0	0	0	200	903	0	0	0	0	0	0	0	603	903	0
293	2	0	0	0	0	0	0	200	300	0	0	0	0	0	0	0	200	903	0	0	0	0	0	0	0	603	903	0
293	3	0	0	0	0	0	0	200	300	0	0	0	0	0	0	0	200	903	0	0	0	0	0	0	0	603	903	0
293	4	0	0	0	0	0	0	200	300	0	0	0	0	0	0	0	200	903	0	0	0	0	0	0	0	603	903	0
293	5	0	0	0	0	0	0	200	300	0	0	0	0	0	0	0	200	903	0	0	0	0	0	0	0	603	903	0
293	6	0	0	0	0	0	0	200	300	0	0	0	0	0	0	0	200	903	0	0	0	0	0	0	0	603	903	0
293	7	0	0	0	0	0	0	200	300	0	0	0	0	0	0	0	200	903	0	0	0	0	0	0	0	603	903	0
293	8	0	0	0	0	0	0	200	300	0	0	0	0	0	0	0	200	903	0	0	0	0	0	0	0	603	903	0
293	9	0	0	0	0	0	0	200	300	0	0	0	0	0	0	0	200	903	0	0	0	0	0	0	0	603	903	0
294	0	0	0	0	0	0	0	200	300	0	0	0	0	0	0	0	200	903	0	0	0	0	0	0	0	603	903	0
294	1	0	0	0	0	0	0	200	300	0	0	0	0	0	0	0	200	903	0	0	0	0	0	0	0	603	903	0
294	2	0	0	0	0	0	0	200	300	0	0	0	0	0	0	0	200	903	0	0	0	0	0	0	0	603	903	0
294	3	0	0	0	0	0	0	200	300	0	0	0	0	0	0	0	200	903	0	0	0	0	0	0	0	603	903	0
294	4	0	0	0	0	0	0	200	300	0	0	0	0	0	0	0	200	903	0	0	0	0	0	0	0	603	903	0
294	5	0	0	0	0	0	0	200	300	0	0	0	0	0	0	0	200	903	0	0	0	0	0	0	0	603	903	0
294	6	0	0	0	0	0	0	200	300	0	0	0	0	0	0	0	200	903	0	0	0	0	0	0	0	603	903	0
294	7	0	0	0	0	0	0	200	300	0	0	0	0	0	0	0	200	903	0	0	0	0	0	0	0	603	903	0
294	8	0	0	0	0	0	0	200	300	0	0	0	0	0	0	0	200	903	0	0	0	0	0	0	0	603	903	0
294	9	0	0	0	0	0	0	200	300	0	0	0	0	0	0	0	200	903	0	0	0	0	0	0	0	603	903	0
295	0	0	0	0	0	0	0	200	300	0	0	0	0	0	0	0	200	903	0	0	0	0	0	0	0	603	903	0
295	1	0	0	0	0	0	0	200	300	0	0	0	0	0	0	0	200	903	0	0	0	0	0	0	0	603	903	0
295	2	0	0	0	0	0	0	200	300	0	0	0	0	0	0	0	200	903	0	0	0	0	0	0	0	603	903	0
295	3	0	0	0	0	0	0	200	300	0	0	0	0	0	0	0	200	903	0	0	0	0	0	0	0	603	903	0
295	4	0	0	0	0	0	0	200	300	0	0	0	0	0	0	0	200	903	0	0	0	0	0	0	0	603	903	0
295	5	0	0	0	0	0	0	200	300	0	0	0	0	0	0	0	200	903	0	0	0	0	0	0	0	603	903	0
295	6	0	0	0	0	0	0	200	300	0	0	0	0	0	0	0	200	903	0	0	0	0	0	0	0	603	903	0
295	7	0	0	0	0	0	0	200	300	0	0	0	0	0	0	0	200	903	0	0	0	0	0	0	0	603	903	0
295	8	0	0	0	0	0	0	200	300	0	0	0	0	0	0	0	200	903	0	0	0	0	0	0	0	603	903	0
295	9	0	0	0	0	0	0	200	300	0	0	0	0	0	0	0	200	903	0	0	0	0	0	0	0	603	903	0
296	0	0	0	0	0	0	0	200	300	0	0	0	0	0	0	0	200	903	0	0	0	0	0	0	0	603	903	0
296	1	0	0	0	0	0	0	200	300	0	0	0	0	0	0	0	200	903	0	0	0	0	0	0	0	603	903	0
296	2	0	0	0	0	0	0	200	300	0	0	0	0	0	0	0	200	903	0	0	0	0	0	0	0	603	903	0
296	3	0	0	0	0	0	0	200	300	0	0	0	0	0	0	0	200	903	0	0	0	0	0	0	0	603	903	0
296	4	0	0	0	0	0	0	200	300	0	0	0	0	0	0	0	200	903	0	0	0	0	0	0	0	603	903	0
296	5	0	0	0	0	0	0	200	300	0	0	0	0	0	0	0	200	903	0	0	0	0	0	0	0	603	903	0
296	6	0	0	0	0	0	0	200	300	0	0	0	0	0	0	0	200	903	0	0	0	0	0	0	0	603	903	0
296	7	0	0	0	0	0	0	200	300	0	0	0	0	0	0	0	200	903	0	0	0	0	0	0	0	603	903	0
296	8	0	0	0	0	0	0	200	300	0	0	0	0	0	0	0	200	903	0	0	0	0	0	0	0	603	903	0
296	9	0	0	0	0	0	0	200	300	0	0	0	0	0	0	0	200	903	0	0	0	0	0	0	0	603	903	0
297	0	0	0	0	0	0	0	200	300	0	0	0	0	0	0	0	200	903	0	0	0	0	0	0	0	603	903	0
297	1	0	0	0	0	0	0	200	300	0	0	0	0	0	0	0	200	903	0	0	0	0	0	0	0	603	903	0
297	2	0	0	0	0	0	0	200	300	0	0	0	0	0	0	0	200	903	0	0	0	0	0	0	0	603	903	0
297	3	0	0	0	0	0	0	200	300	0	0	0	0	0	0	0	200	903	0	0	0	0	0	0	0	603	903	0
297	4	0	0	0	0	0	0	200	300	0	0	0	0	0	0	0	200	903	0	0	0	0	0	0	0	603	903	0
297	5	0	0	0	0	0	0	200	300	0	0	0	0	0	0	0	200	903	0	0	0	0	0	0	0	603	903	0
297	6	0	0	0	0	0	0	200	300	0	0	0	0	0	0	0	200	903	0	0	0	0	0	0	0	603	903	0
297	7	0	0	0	0	0	0	200	300	0	0	0	0	0	0	0	200	903	0	0	0	0	0	0	0	603	903	0
297	8	0	0	0	0	0	0	200	300	0	0	0	0	0	0	0	200	903	0	0	0	0	0	0	0	603	903	0
297	9	0	0	0	0	0	0	200	300	0	0	0	0	0	0	0	200	903	0	0	0	0	0	0	0	603	903	0
298	0	0	0	0	0	0	0	200	300	0	0	0	0	0	0	0	200	903	0	0	0	0	0	0	0	603	903	0
298	1	0	0	0	0	0	0	200	300	0	0	0	0	0	0	0	200	903	0	0	0	0	0	0	0	603	903	0
298	2	0	0	0	0	0	0	200	300	0	0	0	0	0	0	0	200	903	0	0	0	0	0	0	0	603	903	0
298	3	0	0	0	0	0	0	200	300	0	0	0	0	0	0	0	200	903	0	0	0	0	0	0	0	603	903	0
298	4	0	0	0	0	0	0	200	300	0	0	0	0	0	0	0	200	903	0	0	0	0	0	0	0	603	903	0
298	5	0	0	0	0	0	0	200	300	0	0	0	0	0	0	0	200	903	0	0	0	0	0	0	0	603	903	0
298	6	0	0	0	0	0	0	200	300	0	0	0	0	0	0	0	200	903	0	0	0	0	0	0	0	603	903	0
298	7	0	0	0	0	0	0	200	300	0	0	0	0	0	0	0	200	903	0	0	0	0	0	0	0	603	903	0
298	8	0	0	0	0	0	0	200	300	0	0	0	0	0	0	0	200	903	0	0	0	0	0	0	0	603	903	0
298	9	0	0	0	0	0	0	200	300	0	0	0	0	0	0	0	200	903	0	0	0	0	0	0	0	603	903	0
299	0	0	0	0	0	0	0	200	300	0	0	0	0	0	0	0	200	903	0	0	0	0	0	0	0	603	903	0
299	1	0	0	0	0	0	0	200	300	0	0	0	0	0	0	0	200	903	0	0	0	0	0	0	0	603	903	0
299	2	0	0	0	0	0	0	200	300	0	0	0	0	0	0	0	200	903	0	0	0	0	0	0	0	603	903	0
299	3	0	0	0	0	0	0	200	300	0	0	0	0	0	0	0	200	903	0	0	0	0	0	0	0	603	903	0
299	4	0	0	0	0	0	0	200	300	0	0	0	0	0	0	0	200	903	0	0	0	0	0	0	0	603	903	0
299	5	0	0	0	0	0	0	200	300	0	0	0	0	0	0	0	200	903	0	0	0	0	0	0	0	603	903	0
299	6	0	0	0	0	0	0	200	300	0	0	0	0	0	0	0	200	903	0	0	0	0	0	0	0	603	903	0
299	7	0	0	0	0	0	0	200	300	0	0	0	0	0	0	0	200	903	0	0	0	0	0	0	0	603	903	0
299	8	0	0	0	0	0	0	200	300	0	0	0	0	0	0	0	200	903	0	0	0	0	0	0	0	603	903	0
299	9	0	0	0	0	0	0	200	300	0	0	0	0	0	0	0	200	903	0	0	0	0	0	0	0	603	903	0
300	0	0	0	0	0	0	0	200	300	0	0	0	0	0	0	0	200	903	0	0	0	0	0	0	0	603	903	0
300	1	0	0	0	0	0	0	200	300	0	0	0	0	0	0	0	200	903	0	0	0	0	0	0	0	603	903	0
300	2	0	0	0	0	0	0	200	300	0	0	0	0	0	0	0	200	903	0	0	0	0	0	0	0	603	903	0
300	3	0	0	0	0	0	0	200	300	0	0	0	0	0	0	0	200	903	0	0	0	0	0	0	0	603	903	0
300	4	0	0	0	0	0	0	200	300	0	0	0	0	0	0	0	200	903	0	0	0	0	0	0	0	603	903	0
300	5	0	0	0	0	0	0	200	300	0	0	0	0	0	0	0	200	903	0	0	0	0	0	0	0	603	903	0
300	6	0	0	0	0	0	0	200	300	0	0	0	0	0	0	0	200	903	0	0	0	0	0	0	0	603	903	0
300	7	0	0	0	0	0	0	200	300	0	0	0	0	0	0	0	200	903	0	0	0	0	0	0	0	603	903	0
300	8	0	0	0	0	0	0	200	300	0	0	0	0	0	0	0	200	903	0	0	0	0	0	0	0	603	903	0
300	9	0	0	0	0	0	0	200	300	0	0	0	0	0	0	0	200	903	0	0	0	0	0	0	0	603	903	0
301	0	0	0	0	0	0	0	200	300	0	0	0	0	0	0	0	200	903	0	0	0	0	0	0	0	603	903	0
301	1	0	0	0	0	0	0	200	300	0	0	0	0	0	0	0	200	903	0	0	0	0	0	0	0	603	903	0
301	2	0	0	0	0	0	0	200	300	0	0	0	0	0	0	0	200	903	0	0	0	0	0	0	0	603	903	0
301	3	0	0	0	0	0	0	200	300	0	0	0	0	0	0	0	200	903	0	0	0	0	0	0	0	603	903	0
301	4	0	0	0	0	0	0	200	300	0	0	0	0	0	0	0	200	903	0	0	0	0	0	0	0	603	903	0
301	5	0	0	0	0	0	0	200	300	0	0	0	0	0	0	0	200	903	0	0	0	0	0	0	0	603	903	0
301	6	0	0	0	0	0	0	200	300	0	0	0	0	0	0	0	200	903	0	0	0	0	0	0	0	603	903	0
301	7	0	0	0	0	0	0	200	300	0	0	0	0	0	0	0	200	903	0	0	0	0	0	0	0	603	903	0
301	8	0	0	0	0	0	0	200	300	0	0	0	0	0	0	0	200	903	0	0	0	0	0	0	0	603	903	0
301	9	0	0	0	0	0	0	200	300	0	0	0	0	0	0	0	200	903	0	0	0	0	0	0	0	603	903	0
302	0	0	0	0	0	0	0	200	300	0	0	0	0	0	0	0	200	903	0	0	0	0	0	0	0	603	903	0
302	1	0	0	0	0	0	0	200	300	0	0	0	0	0	0	0	200	903	0	0	0	0	0	0	0	603	903	0
302	2	0	0	0	0	0	0	200	300	0	0	0	0	0	0	0	200	903	0	0	0	0	0	0	0	603	903	0
302	3	0	0	0	0	0	0	200	300	0	0	0	0	0	0	0	200	903	0	0	0	0	0	0	0	603	903	0
302	4	0	0	0	0	0	0	200	300	0	0	0	0	0	0	0	200	903	0	0	0	0	0	0	0	603	903	0
302	5	0	0	0	0	0	0	200	300	0	0	0	0	0	0	0	200	903	0	0	0	0	0	0	0	603	903	0
302	6	0	0	0	0	0	0	200	300	0	0	0	0	0	0	0	200	903	0	0	0	0	0	0	0	603	903	0
302	7	0	0	0	0	0	0	200	300	0	0	0	0	0	0	0	200	903	0	0	0	0	0	0	0	603	903	0
302	8	0	0	0	0	0	0	200	300	0	0	0	0	0	0	0	200	903	0	0	0	0	0	0	0	603	903	0
302	9	0	0	0	0	0	0	200	300	0	0	0	0	0	0	0	200	903	0	0	0	0	0	0	0	603	903	0
303	0	0	0	0	0	0	0	200	300	0	0	0	0	0	0	0	200	903	0	0	0	0	0	0	0	603	903	0
303	1	0	0	0	0	0	0	200	300	0	0	0	0	0	0	0	200	903	0	0	0	0	0	0	0	603	903	0
303	2	0	0	0	0	0	0	200	300	0	0	0	0	0	0	0	200	903	0	0	0	0	0	0	0	603	903	0
303	3	0	0	0	0	0	0	200	300	0	0	0	0	0	0	0	200	903	0	0	0	0	0	0	0	603	903	0
303	4	0	0	0	0	0	0	200	300	0	0	0	0	0	0	0	200	903	0	0	0	0	0	0	0	603	903	0
303	5	0	0	0	0	0	0	200	300	0	0	0	0	0	0	0	200	903	0	0	0	0	0	0	0	603	903	0
303	6	0	0	0	0	0	0	200	300	0	0	0	0	0	0	0	200	903	0	0	0	0	0	0	0	603	903	0
303	7	0	0	0	0	0	0	200	300	0	0	0	0	0	0	0	200	903	0	0	0	0	0	0	0	603	903	0
303	8	0	0	0	0	0	0	200	300	0	0	0	0	0	0	0	200	903	0	0	0	0	0	0	0	603	903	0
303	9	0	0	0	0	0	0	200	300	0	0	0	0	0	0	0	200	903	0	0	0	0	0	0	0	603	903	0
304	0	0	0	0	0	0	0	200	300	0	0	0	0	0	0	0	200	903	0	0	0	0	0	0	0	603	903	0
304	1	0	0	0	0	0	0	200	300	0	0	0	0	0	0	0	200	903	0	0	0	0	0	0	0	603	903	0
304	2	0	0	0	0	0	0	200	300	0	0	0	0	0	0	0	200	903	0	0	0	0	0	0	0	603	903	0
304	3	0	0	0	0	0	0	200	300	0	0	0	0	0	0	0	200	903	0	0	0	0	0	0	0	603	903	0
304	4	0	0	0	0	0	0	200	300	0	0	0	0	0	0	0	200	903	0	0	0	0	0	0	0	603	903	0
304	5	0	0	0	0	0	0	200	300	0	0	0	0	0	0	0	200	903	0	0	0	0	0	0	0	603	903	0
304	6	0	0	0	0	0	0	200	300	0	0	0	0	0	0	0	200	903	0	0	0	0	0	0	0	603	903	0
304	7	0	0	0	0	0	0	200	300	0	0	0	0	0	0	0	200	903	0	0	0	0	0	0	0	603	903	0
304	8	0	0	0	0	0	0	200	300	0	0	0	0	0	0	0	200	903	0	0	0	0	0	0	0	603	903	0
304	9	0	0	0	0	0	0	200	300	0	0	0	0	0	0	0	200	903	0	0	0	0	0	0	0	603	903	0
305	0	0	0	0	0	0	0	200	300	0	0	0	0	0	0	0	200	903	0	0	0	0	0	0	0	603	903	0
305	1	0	0	0	0	0	0	200	300	0	0	0	0	0	0	0	200	903	0	0	0	0	0	0	0	603	903	0
305	2	0	0	0	0	0	0	200	300	0	0	0	0	0	0	0	200	903	0	0	0	0	0	0	0	603	903	0
305	3	0	0	0	0	0	0	200	300	0	0	0	0	0	0	0	200	903	0	0	0	0	0	0	0	603	903	0
305	4	0	0	0	0	0	0	200	300	0	0	0	0	0	0	0	200	903	0	0	0	0	0	0	0	603	903	0
305	5	0	0	0	0	0	0	200	300	0	0	0	0	0	0	0	200	903	0	0	0	0	0	0	0	603	903	0
305	6	0	0	0	0	0	0	200	300	0	0	0	0	0	0	0	200	903	0	0	0	0	0	0	0	603	903	0
305	7	0	0	0	0	0	0	200	300	0	0	0	0	0	0	0	200	903	0	0	0	0	0	0	0	603	903	0
305	8	0	0	0	0	0	0	200	300	0	0	0	0	0	0	0	200	903	0	0	0	0	0	0	0	603	903	0
305	9	0	0	0	0	0	0	200	300	0	0	0	0	0	0	0	200	903	0	0	0	0	0	0	0	603	903	0
306	0	0	0	0	0	0	0	200	300	0	0	0	0	0	0	0	200	903	0	0	0	0	0	0	0	603	903	0
306	1	0	0	0	0	0	0	200	300	0	0	0	0	0	0	0	200	903	0	0	0	0	0	0	0	603	903	0
306	2	0	0	0	0	0	0	200	300	0	0	0	0	0	0	0	200	903	0	0	0	0	0	0	0	603	903	0
306	3	0	0	0	0	0	0	200	300	0	0	0	0	0	0	0	200	903	0	0	0	0	0	0	0	603	903	0
306	4	0	0	0	0	0	0	200	300	0	0	0	0	0	0	0	200	903	0	0	0	0	0	0	0	603	903	0
306	5	0	0	0	0	0	0	200	300	0	0	0	0	0	0	0	200	903	0	0	0	0	0	0	0	603	903	0
306	6	0	0	0	0	0	0	200	300	0	0	0	0	0	0	0	200	903	0	0	0	0	0	0	0	603	903	0
306	7	0	0	0	0	0	0	200	300	0	0	0	0	0	0	0	200	903	0	0	0	0	0	0	0	603	903	0
306	8	0	0	0	0	0	0	200	300	0	0	0	0	0	0	0	200	903	0	0	0	0	0	0	0	603	903	0
306	9	0	0	0	0	0	0	200	300	0	0	0	0	0	0	0	200	903	0	0	0	0	0	0	0	603	903	0
307	0	0	0	0	0	0	0	200	300	0	0	0	0	0	0	0	200	903	0	0	0	0	0	0	0	603	903	0
307	1	0	0	0	0	0	0	200	300	0	0	0	0	0	0	0	200	903	0	0	0	0	0	0	0	603	903	0
307	2	0	0	0	0	0	0	200	300	0	0	0	0	0	0	0	200	903	0	0	0	0	0	0	0	603	903	0
307	3	0	0	0	0	0	0	200	300	0	0	0	0	0	0	0	200	903	0	0	0	0	0	0	0	603	903	0
307	4	0	0	0	0	0	0	200	300	0	0	0	0	0	0	0	200	903	0	0	0	0	0	0	0	603	903	0
307	5	0	0	0	0	0	0	200	300	0	0	0	0	0	0	0	200	903	0	0	0	0	0	0	0	603	903	0
307	6	0	0	0	0	0	0	200	300	0	0	0	0	0	0	0	200	903	0	0	0	0	0	0	0	603	903	0
307	7	0	0	0	0	0	0	200	300	0	0	0	0	0	0	0	200	903	0	0	0	0	0	0	0	603	903	0
307	8	0	0	0	0	0	0	200	300	0	0	0	0	0	0	0	200	903	0	0	0	0	0	0	0	603	903	0
307	9	0	0	0	0	0	0	200	300	0	0	0	0	0	0	0	200	903	0	0	0	0	0	0	0	603	903	0
308	0	0	0	0	0	0	0	200	300	0	0	0	0	0	0	0	200	903	0	0	0	0	0	0	0	603	903	0
308	1	0	0	0	0	0	0	200	300	0	0	0	0	0	0	0	200	903	0	0	0	0	0	0	0	603	903	0
308	2	0	0	0	0	0	0	200	300	0	0	0	0	0	0	0	200	903	0	0	0	0	0	0	0	603	903	0
308	3	0	0	0	0	0	0	200	300	0	0	0	0	0	0	0	200	903	0	0	0	0	0	0	0	603	903	0
308	4	0	0	0	0	0	0	200	300	0	0	0	0	0	0	0	200	903	0	0	0	0	0	0	0	603	903	0
308	5	0	0	0	0	0	0	200	300	0	0	0	0	0	0	0	200	903	0	0	0	0	0	0	0	603	903	0
308	6	0	0	0	0	0	0	200	300	0	0	0	0	0	0	0	200	903	0	0	0	0	0	0	0	603	903	0
308	7	0	0	0	0	0	0	200	300	0	0	0	0	0	0	0	200	903	0	0	0	0	0	0	0	603	903	0
308	8	0	0	0	0	0	0	200	300	0	0	0	0	0	0	0	200	903	0	0	0	0	0	0	0	603	903	0
308	9	0	0	0	0	0	0	200	300	0	0	0	0	0	0	0	200	903	0	0	0	0	0	0	0	603	903	0
309	0	0	0	0	0	0	0	200	300	0	0	0	0	0	0	0	200	903	0	0	0	0	0	0	0	603	903	0
309	1	0	0	0	0	0	0	200	300	0	0	0	0	0	0	0	200	903	0	0	0	0	0	0	0	603	903	0
309	2	0	0	0	0	0	0	200	300	0	0	0	0	0	0	0	200	903	0	0	0	0	0	0	0	603	903	0
309	3	0	0	0	0	0	0	200	300	0	0	0	0	0	0	0	200	903	0	0	0	0	0	0	0	603	903	0
309	4	0	0	0	0	0	0	200	300	0	0	0	0	0	0	0	200	903	0	0	0	0	0	0	0	603	903	0
309	5	0	0	0	0	0	0	200	300	0	0	0	0	0	0	0	200	903	0	0	0	0	0	0	0	603	903	0
309	6	0	0	0	0	0	0	200	300	0	0	0	0	0	0	0	200	903	0	0	0	0	0	0	0	603	903	0
309	7	0	0	0	0	0	0	200	300	0	0	0	0	0	0	0	200	903	0	0	0	0	0	0	0	603	903	0
309	8	0	0	0	0	0	0	200	300	0	0	0	0	0	0	0	200	903	0	0	0	0	0	0	0	603	903	0
309	9	0	0	0	0	0	0	200	300	0	0	0	0	0	0	0	200	903	0	0	0	0	0	0	0	603	903	0
310	0	0	0	0	0	0	0	200	300	0	0	0	0	0	0	0	200	903	0	0	0	0	0	0	0	603	903	0
310	1	0	0	0	0	0	0	200	300	0	0	0	0	0	0	0	200	903	0	0	0	0	0	0	0	603	903	0
310	2	0	0	0	0	0	0	200	300	0	0	0	0	0	0	0	200	903	0	0	0	0	0	0	0	603	903	0
310	3	0	0	0	0	0	0	200	300	0	0	0	0	0	0	0	200	903	0	0	0	0	0	0	0	603	903	0
310	4	0	0	0	0	0	0	200	300	0	0	0	0	0	0	0	200	903	0	0	0	0	0	0	0	603	903	0
310	5	0	0	0	0	0	0	200	300	0	0	0	0	0	0	0	200	903	0	0	0	0	0	0	0	603	903	0
310	6	0	0	0	0	0	0	200	300	0	0	0	0	0	0	0	200	903	0	0	0	0	0	0	0	603	903	0
310	7	0	0	0	0	0	0	200	300	0	0	0	0	0	0	0	200	903	0	0	0	0	0	0	0	603	903	0
310	8	0	0	0	0	0	0	200	300	0	0	0	0	0	0	0	200	903	0	0	0	0	0	0	0	603	903	0
310	9	0	0	0	0	0	0	200	300	0	0	0	0	0	0	0	200	903	0	0	0	0	0	0	0	603	903	0
311	0	0	0	0	0	0	0	200	300	0	0	0	0	0	0	0	200	903	0	0	0	0	0	0	0	603	903	0
311	1	0	0	0	0	0	0	200	300	0	0	0	0	0	0	0	200	903	0	0	0	0	0	0	0	603	903	0
311	2	0	0	0	0	0	0	200	300	0	0	0	0	0	0	0	200	903	0	0	0	0	0	0	0	603	903	0
311	3	0	0	0	0	0	0	200	300	0	0	0	0	0	0	0	200	903	0	0	0	0	0	0	0	603	903	0
311	4	0	0	0	0	0	0	200	300	0	0	0	0	0	0	0	200	903	0	0	0	0	0	0	0	603	903	0
311	5	0	0	0	0	0	0	200	300	0	0	0	0	0	0	0	200	903	0	0	0	0	0	0	0	603	903	0
311	6	0	0	0	0	0	0	200	300	0	0	0	0	0	0	0	200	903	0	0	0	0	0	0	0	603	903	0
311	7	0	0	0	0	0	0	200	300	0	0	0	0	0	0	0	200	903	0	0	0	0	0	0	0	603	903	0
311	8	0	0	0	0	0	0	200	300	0	0	0	0	0	0	0	200	903	0	0	0	0	0	0	0	603	903	0
311	9	0	0	0	0	0	0	200	300	0	0	0	0	0	0	0	200	903	0	0	0	0	0	0	0	603	903	0
312	0	0	0	0	0	0	0	200	300	0	0	0	0	0	0	0	200	903	0	0	0	0	0	0	0	603	903	0
312	1	0	0	0	0	0	0	200	300	0	0	0	0	0	0	0	200	903	0	0	0	0	0	0	0	603	903	0
312	2	0	0	0	0	0	0	200	300	0	0	0	0	0	0	0	200	903	0	0	0	0	0	0	0	603	903	0
312	3	0	0	0	0	0	0	200	300	0	0	0	0	0	0	0	200	903	0	0	0	0	0	0	0	603	903	0
312	4	0	0	0	0	0	0	200	300	0	0	0	0	0	0	0	200	903	0	0	0	0	0	0	0	603	903	0
312	5	0	0	0	0	0	0	200	300	0	0	0	0	0	0	0	200	903	0	0	0	0	0	0	0	603	903	0
312	6	0	0	0	0	0	0	200	300	0	0	0	0	0	0	0	200	903	0	0	0	0	0	0	0	603	903	0
312	7	0	0	0	0	0	0	200	300	0	0	0	0	0	0	0	200	903	0	0	0	0	0	0	0	603	903	0
312	8	0	0	0	0	0	0	200	300	0	0	0	0	0	0	0	200	903	0	0	0	0	0	0	0	603	903	0
312	9	0	0	0	0	0	0	200	300	0	0	0	0	0	0	0	200	903	0	0	0	0	0	0	0	603	903	0
313	0	0	0	0	0	0	0	200	300	0	0	0	0	0	0	0	200	903	0	0	0	0	0	0	0	603	903	0
313	1	0	0	0	0	0	0	200	300	0	0	0	0	0	0	0	200	903	0	0	0	0	0	0	0	603	903	0
313	2	0	0	0	0	0	0	200	300	0	0	0	0	0	0	0	200	903	0	0	0	0	0	0	0	603	903	0
313	3	0	0	0	0	0	0	200	300	0	0	0	0	0	0	0	200	903	0	0	0	0	0	0	0	603	903	0
313	4	0	0	0	0	0	0	200	300	0	0	0	0	0	0	0	200	903	0	0	0	0	0	0	0	603	903	0
313	5	0	0	0	0	0	0	200	300	0	0	0	0	0	0	0	200	903	0	0	0	0	0	0	0	603	903	0
313	6	0	0	0	0	0	0	200	300	0	0	0	0	0	0	0	200	903	0	0	0	0	0	0	0	603	903	0
313	7	0	0	0	0	0	0	200	300	0	0	0	0	0	0	0	200	903	0	0	0	0	0	0	0	603	903	0
313	8	0	0	0	0	0	0	200	300	0	0	0	0	0	0	0	200	903	0	0	0	0	0	0	0	603	903	0
313	9	0	0	0	0	0	0	200	300	0	0	0	0	0	0	0	200	903	0	0	0	0	0	0	0	603	903	0
314	0	0	0	0	0	0	0	200	300	0	0	0	0	0	0	0	200	903	0	0	0	0	0	0	0	603	903	0
314	1	0	0	0	0	0	0	200	300	0	0	0	0	0	0	0	200	903	0	0	0	0	0	0	0	603	903	0
314	2	0	0	0	0	0	0	200	300	0	0	0	0	0	0	0	200	903	0	0	0	0	0	0	0	603	903	0
314	3	0	0	0	0	0	0	200	300	0	0	0	0	0	0	0	200	903	0	0	0	0	0	0	0	603	903	0
314	4	0	0	0	0	0	0	200	300	0	0	0	0	0	0	0	200	903	0	0	0	0	0	0	0	603	903	0
314	5	0	0	0	0	0	0	200	300	0	0	0	0	0	0	0	200	903	0	0	0	0	0	0	0	603	903	0
314	6	0	0	0	0	0	0	200	300	0	0	0	0	0	0	0	200	903	0	0	0	0	0	0	0	603	903	0
314	7	0	0	0	0	0	0	200	300	0	0	0	0	0	0	0	200	903	0	0	0	0	0	0	0	603	903	0
314	8	0	0	0	0	0	0	200	300	0	0	0	0	0	0	0	200	903	0	0	0	0	0	0	0	603	903	0
314	9	0	0	0	0	0	0	200	300	0	0	0	0	0	0	0	200	903	0	0	0	0	0	0	0	603	903	0
315	0	0	0	0	0	0	0	200	300	0	0	0	0	0	0	0	200	903	0	0	0	0	0	0	0	603	903	0
315	1	0	0	0	0	0	0	200	300	0	0	0	0	0	0	0	200	903	0	0	0	0	0	0	0	603	903	0
315	2	0	0	0	0	0	0	200	300	0	0	0	0	0	0	0	200	903	0	0	0	0	0	0	0	603	903	0
315	3	0	0	0	0	0	0	200	300	0	0	0	0	0	0	0	200	903	0	0	0	0	0	0	0	603	903	0
315	4	0	0	0	0	0	0	200	300	0	0	0	0	0	0	0	200	903	0	0	0	0	0	0	0	603	903	0
315	5	0	0	0	0	0	0	200	300	0	0	0	0	0	0	0	200	903	0	0	0	0	0	0	0	603	903	0
315	6	0	0	0	0	0	0	200	300	0	0	0	0	0	0	0	200	903	0	0	0	0	0	0	0	603	903	0
315	7	0	0	0	0	0	0	200	300	0	0	0	0	0	0	0	200	903	0	0	0	0	0	0	0	603	903	0
315	8	0	0	0	0	0	0	200	300	0	0	0	0	0	0	0	200	903	0	0	0	0	0	0	0	603	903	0
315	9	0	0	0	0	0	0	200	300	0	0	0	0	0	0	0	200	903	0	0	0	0	0	0	0	603	903	0
316	0	0	0	0	0	0	0	200	300	0	0	0	0	0	0	0	200	903	0	0	0	0	0	0	0	603	903	0
316	1	0	0	0	0	0	0	200	300	0	0	0	0	0	0	0	200	903	0	0	0	0	0	0	0	603	903	0
316	2	0	0	0	0	0	0	200	300	0	0	0	0	0	0	0	200	903	0	0	0	0	0	0	0	603	903	0
316	3	0	0	0	0	0	0	200	300	0	0	0	0	0	0	0	200	903	0	0	0	0	0	0	0	603	903	0
316	4	0	0	0	0	0	0	200	300	0	0	0	0	0	0	0	200	903	0	0	0	0	0	0	0	603	903	0
316	5	0	0	0	0	0	0	200	300	0	0	0	0	0	0	0	200	903	0	0	0	0	0	0	0	603	903	0
316	6	0	0	0	0	0	0	200	300	0	0	0	0	0	0	0	200	903	0	0	0	0	0	0	0	603	903	0
316	7	0	0	0	0	0	0	200	300	0	0	0	0	0	0	0	200	903	0	0	0	0	0	0	0	603	903	0
316	8	0	0	0	0	0	0	200	300	0	0	0	0	0	0	0	200	903	0	0	0	0	0	0	0	603	903	0
316	9	0	0	0	0	0	0	200	300	0	0	0	0	0	0	0	200	903	0	0	0	0	0	0	0	603	903	0
317	0	0	0	0	0	0	0	200	300	0	0	0	0	0	0	0	200	903	0	0	0	0	0	0	0	603	903	0
317	1	0	0	0	0	0	0	200	300	0	0	0	0	0	0	0	200	903	0	0	0	0	0	0	0	603	903	0
317	2	0	0	0	0	0	0	200	300	0	0	0	0	0	0	0	200	903	0	0	0	0	0	0	0	603	903	0
317	3	0	0	0	0	0	0	200	300	0	0	0	0	0	0	0	200	903	0	0	0	0	0	0	0	603	903	0
317	4	0	0	0	0	0	0	200	300	0	0	0	0	0	0	0	200	903	0	0	0	0	0	0	0	603	903	0
317	5	0	0	0	0	0	0	200	300	0	0	0	0	0	0	0	200	903	0	0	0	0	0	0	0	603	903	0
317	6	0	0	0	0	0	0	200	300	0	0	0	0	0	0	0	200	903	0	0	0	0	0	0	0	603	903	0
317	7	0	0	0	0	0	0	200	300	0	0	0	0	0	0	0	200	903	0	0	0	0	0	0	0	603	903	0
317	8	0	0	0	0	0	0	200	300	0	0	0	0	0	0	0	200	903	0	0	0	0	0	0	0	603	903	0
317	9	0	0	0	0	0	0	200	300	0	0	0	0	0	0	0	200	903	0	0	0	0	0	0	0	603	903	0
318	0	0	0	0	0	0	0	200	300	0	0	0	0	0	0	0	200	903	0	0	0	0	0	0	0	603	903	0
318	1	0	0	0	0	0	0	200	300	0	0	0	0	0	0	0	200	903	0	0	0	0	0	0	0	603	903	0
318	2	0	0	0	0	0	0	200	300	0	0	0	0	0	0	0	200	903	0	0	0	0	0	0	0	603	903	0
318	3	0	0	0	0	0	0	200	300	0	0	0	0	0	0	0	200	903	0	0	0	0	0	0	0	603	903	0
318	4	0	0	0	0	0	0	200	300	0	0	0	0	0	0	0	200	903	0	0	0	0	0	0	0	603	903	0
318	5	0	0	0	0	0	0	200	300	0	0	0	0	0	0	0	200	903	0	0	0	0	0	0	0	603	903	0
318	6	0	0	0	0	0	0	200	300	0	0	0	0	0	0	0	200	903	0	0	0	0	0	0	0	603	903	0
318	7	0	0	0	0	0	0	200	300	0	0	0	0	0	0	0	200	903	0	0	0	0	0	0	0	603	903	0
318	8	0	0	0	0	0	0	200	300	0	0	0	0	0	0	0	200	903	0	0	0	0	0	0	0	603	903	0
318	9	0	0	0	0	0	0	200	300	0	0	0	0	0	0	0	200	903	0	0	0	0	0	0	0	603	903	0
319	0	0	0	0	0	0	0	200	300	0	0	0	0	0	0	0	200	903	0	0	0	0	0	0	0	603	903	0
319	1	0	0	0	0	0	0	200	300	0	0	0	0	0	0	0	200	903	0	0	0	0	0	0	0	603	903	0
319	2	0	0	0	0	0	0	200	300	0	0	0	0	0	0	0	200	903	0	0	0	0	0	0	0	603	903	0
319	3	0	0	0	0	0	0	200	300	0	0	0	0	0	0	0	200	903	0	0	0	0	0	0	0	603	903	0
319	4	0	0	0	0	0	0	200	300	0	0	0	0	0	0	0	200	903	0	0	0	0	0	0	0	603	903	0
319	5	0	0	0	0	0	0	200	300	0	0	0	0	0	0	0	200	903	0	0	0	0	0	0	0	603	903	0
319	6	0	0	0	0	0	0	200	300	0	0	0	0	0	0	0	200	903	0	0	0	0	0	0	0	603	903	0
319	7	0	0	0	0	0	0	200	300	0	0	0	0	0	0	0	200	903	0	0	0	0	0	0	0	603	903	0
319	8	0	0	0	0	0	0	200	300	0	0	0	0	0	0	0	200	903	0	0	0	0	0	0	0	603	903	0
319	9	0	0	0	0	0	0	200	300	0	0	0	0	0	0	0	200	903	0	0	0	0	0	0	0	603	903	0
320	0	0	0	0	0	0	0	200	300	0	0	0	0	0	0	0	200	903	0	0	0	0	0	0	0	603	903	0
320	1	0	0	0	0	0	0	200	300	0	0	0	0	0	0	0	200	903	0	0	0	0	0	0	0	603	903	0
320	2	0	0	0	0	0	0	200	300	0	0	0	0	0	0	0	200	903	0	0	0	0	0	0	0	603	903	0
320	3	0	0	0	0	0	0	200	300	0	0	0	0	0	0	0	200	903	0	0	0	0	0	0	0	603	903	0
320	4	0	0	0	0	0	0	200	300	0	0	0	0	0	0	0	200	903	0	0	0	0	0	0	0	603	903	0
320	5	0	0	0	0	0	0	200	300	0	0	0	0	0	0	0	200	903	0	0	0	0	0	0	0	603	903	0
320	6	0	0	0	0	0	0	200	300	0	0	0	0	0	0	0	200	903	0	0	0	0	0	0	0	603	903	0
320	7	0	0	0	0	0	0	200	300	0	0	0	0	0	0	0	200	903	0	0	0	0	0	0	0	603	903	0
320	8	0	0	0	0	0	0	200	300	0	0	0	0	0	0	0	200	903	0	0	0	0	0	0	0	603	903	0
320	9	0	0	0	0	0	0	200	300	0	0	0	0	0	0	0	200	903	0	0	0	0	0	0	0	603	903	0
321	0	0	0	0	0	0	0	200	300	0	0	0	0	0	0	0	200	903	0	0	0	0	0	0	0	603	903	0
321	1	0	0	0	0	0	0	200	300	0	0	0	0	0	0	0	200	903	0	0	0	0	0	0	0	603	903	0
321	2	0	0	0	0	0	0	200	300	0	0	0	0	0	0	0	200	903	0	0	0	0	0	0	0	603	903	0
321	3	0	0	0	0	0	0	200	300	0	0	0	0	0	0	0	200	903	0	0	0	0	0	0	0	603	903	0
321	4	0	0	0	0	0	0	200	300	0	0	0	0	0	0	0	200	903	0	0	0	0	0	0	0	603	903	0
321	5	0	0	0	0	0	0	200	300	0	0	0	0	0	0	0	200	903	0	0	0	0	0	0	0	603	903	0
321	6	0	0	0	0	0	0	200	300	0	0	0	0	0	0	0	200	903	0	0	0	0	0	0	0	603	903	0
321	7	0	0	0	0	0	0	200	300	0	0	0	0	0	0	0	200	903	0	0	0	0	0	0	0	603	903	0
321	8	0	0	0	0	0	0	200	300	0	0	0	0	0	0	0	200	903	0	0	0	0	0	0	0	603	903	0
321	9	0	0	0	0	0	0	200	300	0	0	0	0	0	0	0	200	903	0	0	0	0	0	0	0	603	903	0
322	0	0	0	0	0	0	0	200	300	0	0	0	0	0	0	0	200	903	0	0	0	0	0	0	0	603	903	0
322	1	0	0	0	0	0	0	200	300	0	0	0	0	0	0	0	200	903	0	0	0	0	0	0	0	603	903	0
322	2	0	0	0	0	0	0	200	300	0	0	0	0	0	0	0	200	903	0	0	0	0	0	0	0	603	903	0
322	3	0	0	0	0	0	0	200	300	0	0	0	0	0	0	0	200	903	0	0	0	0	0	0	0	603	903	0
322	4	0	0	0	0	0	0	200	300	0	0	0	0	0	0	0	200	903	0	0	0	0	0	0	0	603	903	0
322	5	0	0	0	0	0	0	200	300	0	0	0	0	0	0	0	200	903	0	0	0	0	0	0	0	603	903	0
322	6	0	0	0	0	0	0	200	300	0	0	0	0	0	0	0	200	903	0	0	0	0	0	0	0	603	903	0
322	7	0	0	0	0	0	0	200	300	0	0	0	0	0	0	0	200	903	0	0	0	0	0	0	0	603	903	0
322	8	0	0	0	0	0	0	200	300	0	0	0	0	0	0	0	200	903	0	0	0	0	0	0	0	603	903	0
322	9	0	0	0	0	0	0	200	300	0	0	0	0	0	0	0	200	903	0	0	0	0	0	0	0	603	903	0
323	0	0	0	0	0	0	0	200	300	0	0	0	0	0	0	0	200	903	0	0	0	0	0	0	0	603	903	0
323	1	0	0	0	0	0	0	200	300	0	0	0	0	0	0	0	200	903	0	0	0	0	0	0	0	603	903	0
323	2	0	0	0	0	0	0	200	300	0	0	0	0	0	0	0	200	903	0	0	0	0	0	0	0	603	903	0
323	3	0	0	0	0	0	0	200	300	0	0	0	0	0	0	0	200	903	0	0	0	0	0	0	0	603	903	0
323	4	0	0	0	0	0	0	200	300	0	0	0	0	0	0	0	200	903	0	0	0	0	0	0	0	603	903	0
323	5	0	0	0	0	0	0	200	300	0	0	0	0	0	0	0	200	903	0	0	0	0	0	0	0	603	903	0
323	6	0	0	0	0	0	0	200	300	0	0	0	0	0	0	0	200	903	0	0	0	0	0	0	0	603	903	0
323	7	0	0	0	0	0	0	200	300	0	0	0	0	0	0	0	200	903	0	0	0	0	0	0	0	603	903	0
323	8	0	0	0	0	0	0	200	300	0	0	0	0	0	0	0	200	903	0	0	0	0	0	0	0	603	903	0
323	9	0	0	0	0	0	0	200	300	0	0	0	0	0	0	0	200	903	0	0	0	0	0	0	0	603	903	0
324	0	0	0	0	0	0	0	200	300	0	0	0	0	0	0	0	200	903	0	0	0	0	0	0	0	603	903	0
324	1	0	0	0	0	0	0	200	300	0	0	0	0	0	0	0	200	903	0	0	0	0	0	0	0	603	903	0
324	2	0	0	0	0	0	0	200	300	0	0	0	0	0	0	0	200	903	0	0	0	0	0	0	0	603	903	0
324	3	0	0	0	0	0	0	200	300	0	0	0	0	0	0	0	200	903	0	0	0	0	0	0	0	603	903	0
324	4	0	0	0	0	0	0	200	300	0	0	0	0	0	0	0	200	903	0	0	0	0	0	0	0	603	903	0
324	5	0	0	0	0	0	0	200	300	0	0	0	0	0	0	0	200	903	0	0	0	0	0	0	0	603	903	0
324	6	0	0	0	0	0	0	200	300	0	0	0	0	0	0	0	200	903	0	0	0	0	0	0	0	603	903	0
324	7	0	0	0	0	0	0	200	300	0	0	0	0	0	0	0	200	903	0	0	0	0	0	0	0	603	903	0
324	8	0	0	0	0	0	0	200	300	0	0	0	0	0	0	0	200	903	0	0	0	0	0	0	0	603	903	0
324	9	0	0	0	0	0	0	200	300	0	0	0	0	0	0	0	200	903	0	0	0	0	0	0	0	603	903	0
325	0	0	0	0	0	0	0	200	300	0	0	0	0	0	0	0	200	903	0	0	0	0	0	0	0	603	903	0
325	1	0	0	0	0	0	0	200	300	0	0	0	0	0	0	0	200	903	0	0	0	0	0	0	0	603	903	0
325	2	0	0	0	0	0	0	200	300	0	0	0	0	0	0	0	200	903	0	0	0	0	0	0	0	603	903	0
325	3	0	0	0	0	0	0	200	300	0	0	0	0	0	0	0	200	903	0	0	0	0	0	0	0	603	903	0
325	4	0	0	0	0	0	0	200	300	0	0	0	0	0	0	0	200	903	0	0	0	0	0	0	0	603	903	0
325	5	0	0	0	0	0	0	200	300	0	0	0	0	0	0	0	200	903	0	0	0	0	0	0	0	603	903	0
325	6	0	0	0	0	0	0	200	300	0	0	0	0	0	0	0	200	903	0	0	0	0	0	0	0	603	903	0
325	7	0	0	0	0	0	0	200	300	0	0	0	0	0	0	0	200	903	0	0	0	0	0	0	0	603	903	0
325	8	0	0	0	0	0	0	200	300	0	0	0	0	0	0	0	200	903	0	0	0	0	0	0	0	603	903	0
325	9	0	0	0	0	0	0	200	300	0	0	0	0	0	0	0	200	903	0	0	0	0	0	0	0	603	903	0
326	0	0	0	0	0	0	0	200	300	0	0	0	0	0	0	0	200	903	0	0	0	0	0	0	0	603	903	0
326	1	0	0	0	0	0	0	200	300	0	0	0	0	0	0	0	200	903	0	0	0	0	0	0	0	603	903	0
326	2	0	0	0	0	0	0	200	300	0	0	0	0	0	0	0	200	903	0	0	0	0	0	0	0	603	903	0
326	3	0	0	0	0	0	0	200	300	0	0	0	0	0	0	0	200	903	0	0	0	0	0	0	0	603	903	0
326	4	0	0	0	0	0	0	200	300	0	0	0	0	0	0	0	200	903	0	0	0	0	0	0	0	603	903	0
326	5	0	0	0	0	0	0	200	300	0	0	0	0	0	0	0	200	903	0	0	0	0	0	0	0	603	903	0
326	6	0	0	0	0	0	0	200	300	0	0	0	0	0	0	0	200	903	0	0	0	0	0	0	0	603	903	0
326	7	0	0	0	0	0	0	200	300	0	0	0	0	0	0	0	200	903	0	0	0	0	0	0	0	603	903	0
326	8	0	0	0	0	0	0	200	300	0	0	0	0	0	0	0	200	903	0	0	0	0	0	0	0	603	903	0
326	9	0	0	0	0	0	0	200	300	0	0	0	0	0	0	0	200	903	0	0	0	0	0	0	0	603	903	0
327	0	0	0	0	0	0	0	200	300	0	0	0	0	0	0	0	200	903	0	0	0	0	0	0	0	603	903	0
327	1	0	0	0	0	0	0	200	300	0	0	0	0	0	0	0	200	903	0	0	0	0	0	0	0	603	903	0
327	2	0	0	0	0	0	0	200	300	0	0	0	0	0	0	0	200	903	0	0	0	0	0	0	0	603	903	0
327	3	0	0	0	0	0	0	200	300	0	0	0	0	0	0	0	200	903	0	0	0	0	0	0	0	603	903	0
327	4	0	0	0	0	0	0	200	300	0	0	0	0	0	0	0	200	903	0	0	0	0	0	0	0	603	903	0
327	5	0	0	0	0	0	0	200	300	0	0	0	0	0	0	0	200	903	0	0	0	0	0	0	0	603	903	0
327	6	0	0	0	0	0	0	200	300	0	0	0	0	0	0	0	200	903	0	0	0	0	0	0	0	603	903	0
327	7	0	0	0	0	0	0	200	300	0	0	0	0	0	0	0	200	903	0	0	0	0	0	0	0	603	903	0
327	8	0	0	0	0	0	0	200	300	0	0	0	0	0	0	0	200	903	0	0	0	0	0	0	0	603	903	0
327	9	0	0	0	0	0	0	200	300	0	0	0	0	0	0	0	200	903	0	0	0	0	0	0	0	603	903	0
328	0	0	0	0	0	0	0	200	300	0	0	0	0	0	0	0	200	903	0	0	0	0	0	0	0	603	903	0
328	1	0	0	0	0	0	0	200	300	0	0	0	0	0	0	0	200	903	0	0	0	0	0	0	0	603	903	0
328	2	0	0	0	0	0	0	200	300	0	0	0	0	0	0	0	200	903	0	0	0	0	0	0	0	603	903	0
328	3	0	0	0	0	0	0	200	300	0	0	0	0	0	0	0	200	903	0	0	0	0	0	0	0	603	903	0
328	4	0	0	0	0	0	0	200	300	0	0	0	0	0	0	0	200	903	0	0	0	0	0	0	0	603	903	0
328	5	0	0	0	0	0	0	200	300	0	0	0	0	0	0	0	200	903	0	0	0	0	0	0	0	603	903	0
328	6	0	0	0	0	0	0	200	300	0	0	0	0	0	0	0	200	903	0	0	0	0	0	0	0	603	903	0
328	7	0	0	0	0	0	0	200	300	0	0	0	0	0	0	0	200	903	0	0	0	0	0	0	0	603	903	0
328	8	0	0	0	0	0	0	200	300	0	0	0	0	0	0	0	200	903	0	0	0	0	0	0	0	603	903	0
328	9	0	0	0	0	0	0	200	300	0	0	0	0	0	0	0	200	903	0	0	0	0	0	0	0	603	903	0
329	0	0	0	0	0	0	0	200	300	0	0	0	0	0	0	0	200	903	0	0	0	0	0	0	0	603	903	0
329	1	0	0	0	0	0	0	200	300	0	0	0	0	0	0	0	200	903	0	0	0	0	0	0	0	603	903	0
329	2	0	0	0	0	0	0	200	300	0	0	0	0	0	0	0	200	903	0	0	0	0	0	0	0	603	903	0
329	3	0	0	0	0	0	0	200	300	0	0	0	0	0	0	0	200	903	0	0	0	0	0	0	0	603	903	0
329	4	0	0	0	0	0	0	200	300	0	0	0	0	0	0	0	200	903	0	0	0	0	0	0	0	603	903	0
329	5	0	0	0	0	0	0	200	300	0	0	0	0	0	0	0	200	903	0	0	0	0	0	0	0	603	903	0
329	6	0	0	0	0	0	0	200	300	0	0	0	0	0	0	0	200	903	0	0	0	0	0	0	0	603	903	0
329	7	0	0	0	0	0	0	200	300	0	0	0	0	0	0	0	200	903	0	0	0	0	0	0	0	603	903	0
329	8	0	0	0	0	0	0	200	300	0	0	0	0	0	0	0	200	903	0	0	0	0	0	0	0	603	903	0
329	9	0	0	0	0	0	0	200	300	0	0	0	0	0	0	0	200	903	0	0	0	0	0	0	0	603	903	0
330	0	0	0	0	0	0	0	200	300	0	0	0	0	0	0	0	200	903	0	0	0	0	0	0	0	603	903	0
330	1	0	0	0	0	0	0	200	300	0	0	0	0	0	0	0	200	903	0	0	0	0	0	0	0	603	903	0
330	2	0	0	0	0	0	0	200	300	0	0	0	0	0	0	0	200	903	0	0	0	0	0	0	0	603	903	0
330	3	0	0	0	0	0	0	200	300	0	0	0	0	0	0	0	200	903	0	0	0	0	0	0	0	603	903	0
330	4	0	0	0	0	0	0	200	300	0	0	0	0	0	0	0	200	903	0	0	0	0	0	0	0	603	903	0
330	5	0	0	0	0	0	0	200	300	0	0	0	0	0	0	0	200	903	0	0	0	0	0	0	0	603	903	0
330	6	0	0	0	0	0	0	200	300	0	0	0	0	0	0	0	200	903	0	0	0	0	0	0	0	603	903	0
330	7	0	0	0	0	0	0	200	300	0	0	0	0	0	0	0	200	903	0	0	0	0	0	0	0	603	903	0
330	8	0	0	0	0	0	0	200	300	0	0	0	0	0	0	0	200	903	0	0	0	0	0	0	0	603	903	0
330	9	0	0	0	0	0	0	200	300	0	0	0	0	0	0	0	200	903	0	0	0	0	0	0	0	603	903	0
331	0	0	0	0	0	0	0	200	300	0	0	0	0	0	0	0	200	903	0	0	0	0	0	0	0	603	903	0
331	1	0	0	0	0	0	0	200	300	0	0	0	0	0	0	0	200	903	0	0	0	0	0	0	0	603	903	0
331	2	0	0	0	0	0	0	200	300	0	0	0	0	0	0	0	200	903	0	0	0	0	0	0	0	603	903	0
331	3	0	0	0	0	0	0	200	300	0	0	0	0	0	0	0	200	903	0	0	0	0	0	0	0	603	903	0
331	4	0	0	0	0	0	0	200	300	0	0	0	0	0	0	0	200	903	0	0	0	0	0	0	0	603	903	0
331	5	0	0	0	0	0	0	200	300	0	0	0	0	0	0	0	200	903	0	0	0	0	0	0	0	603	903	0
331	6	0	0	0	0	0	0	200	300	0	0	0	0	0	0	0	200	903	0	0	0	0	0	0	0	603	903	0
331	7	0	0	0	0	0	0	200	300	0	0	0	0	0	0	0	200	903	0	0	0	0	0	0	0	603	903	0
331	8	0	0	0	0	0	0	200	300	0	0	0	0	0	0	0	200	903	0	0	0	0	0	0	0	603	903	0
331	9	0	0	0	0	0	0	200	300	0	0	0	0	0	0	0	200	903	0	0	0	0	0	0	0	603	903	0
332	0	0	0	0	0	0	0	200	300	0	0	0	0	0	0	0	200	903	0	0	0	0	0	0	0	603	903	0
332	1	0	0	0	0	0	0	200	300	0	0	0	0	0	0	0	200	903	0	0	0	0	0	0	0	603	903	0
332	2	0	0	0	0	0	0	200	300	0	0	0	0	0	0	0	200	903	0	0	0	0	0	0	0	603	903	0
332	3	0	0	0	0	0	0	200	300	0	0	0	0	0	0	0	200	903	0	0	0	0	0	0	0	603	903	0
332	4	0	0	0	0	0	0	200	300	0	0	0	0	0	0	0	200	903	0	0	0	0	0	0	0	603	903	0
332	5	0	0	0	0	0	0	200	300	0	0	0	0	0	0	0	200	903	0	0	0	0	0	0	0	603	903	0
332	6	0	0	0	0	0	0	200	300	0	0	0	0	0	0	0	200	903	0	0	0	0	0	0	0	603	903	0
332	7	0	0	0	0	0	0	200	300	0	0	0	0	0	0	0	200	903	0	0	0	0	0	0	0	603	903	0
332	8	0	0	0	0	0	0	200	300	0	0	0	0	0	0	0	200	903	0	0	0	0	0	0	0	603	903	0
332	9	0	0	0	0	0	0	200	300	0	0	0	0	0	0	0	200	903	0	0	0	0	0	0	0	603	903	0
333	0	0	0	0	0	0	0	200	300	0	0	0	0	0	0	0	200	903	0	0	0	0	0	0	0	603	903	0
333	1	0	0	0	0	0	0	200	300	0	0	0	0	0	0	0	200	903	0	0	0	0	0	0	0	603	903	0
333	2	0	0	0	0	0	0	200	300	0	0	0	0	0	0	0	200	903	0	0	0	0	0	0	0	603	903	0
333	3	0	0	0	0	0	0	200	300	0	0	0	0	0	0	0	200	903	0	0	0	0	0	0	0	603	903	0
333	4	0	0	0	0	0	0	200	300	0	0	0	0	0	0	0	200	903	0	0	0	0	0	0	0	603	903	0
333	5	0	0	0	0	0	0	200	300	0	0	0	0	0	0	0	200	903	0	0	0	0	0	0	0	603	903	0
333	6	0	0	0	0	0	0	200	300	0	0	0	0	0	0	0	200	903	0	0	0	0	0	0	0	603	903	0
333	7	0	0	0	0	0	0	200	300	0	0	0	0	0	0	0	200	903	0	0	0	0	0	0	0	603	903	0
333	8	0	0	0	0	0	0	200	300	0	0	0	0	0	0	0	200	903	0	0	0	0	0	0	0	603	903	0
333	9	0	0	0	0	0	0	200	300	0	0	0	0	0	0	0	200	903	0	0	0	0	0	0	0	603	903	0
334	0	0	0	0	0	0	0	200	300	0	0	0	0	0	0	0	200	903	0	0	0	0	0	0	0	603	903	0
334	1	0	0	0	0	0	0	200	300	0	0	0	0	0	0	0	200	903	0	0	0	0	0	0	0	603	903	0
334	2	0	0	0	0	0	0	200	300	0	0	0	0	0	0	0	200	903	0	0	0	0	0	0	0	603	903	0
334	3	0	0	0	0	0	0	200	300	0	0	0	0	0	0	0	200	903	0	0	0	0	0	0	0	603	903	0
334	4	0	0	0	0	0	0	200	300	0	0	0	0	0	0	0	200	903	0	0	0	0	0	0	0	603	903	0
334	5	0	0	0	0	0	0	200	300	0	0	0	0	0	0	0	200	903	0	0	0	0	0	0	0	603	903	0
334	6	0	0	0	0	0	0	200	300	0	0	0	0	0	0	0	200	903	0	0	0	0	0	0	0	603	903	0
334	7	0	0	0	0	0	0	200	300	0	0	0	0	0	0	0	200	903	0	0	0	0	0	0	0	603	903	0
334	8	0	0	0	0	0	0	200	300	0	0	0	0	0	0	0	200	903	0	0	0	0	0	0	0	603	903	0
334	9	0	0	0	0	0	0	200	300	0	0	0	0	0	0	0	200	903	0	0	0	0	0	0	0	603	903	0
335	0	0	0	0	0	0	0	200	300	0	0	0	0	0	0	0	200	903	0	0	0	0	0	0	0	603	903	0
335	1	0	0	0	0	0	0	200	300	0	0	0	0	0	0	0	200	903	0	0	0	0	0	0	0	603	903	0
335	2	0	0	0	0	0	0	200	300	0	0	0	0	0	0	0	200	903	0	0	0	0	0	0	0	603	903	0
335	3	0	0	0	0	0	0	200	300	0	0	0	0	0	0	0	200	903	0	0	0	0	0	0	0	603	903	0
335	4	0	0	0	0	0	0	200	300	0	0	0	0	0	0	0	200	903	0	0	0	0	0	0	0	603	903	0
335	5	0	0	0	0	0	0	200	300	0	0	0	0	0	0	0	200	903	0	0	0	0	0	0	0	603	903	0
335	6	0	0	0	0	0	0	200	300	0	0	0	0	0	0	0	200	903	0	0	0	0	0	0	0	603	903	0
335	7	0	0	0	0	0	0	200	300	0	0	0	0	0	0	0	200	903	0	0	0	0	0	0	0	603	903	0
335	8	0	0	0	0	0	0	200	300	0	0	0	0	0	0	0	200	903	0	0	0	0	0	0	0	603	903	0
335	9	0	0	0	0	0	0	200	300	0	0	0	0	0	0	0	200	903	0	0	0	0	0	0	0	603	903	0
336	0	0	0	0	0	0	0	200	300	0	0	0	0	0	0	0	200	903	0	0	0	0	0	0	0	603	903	0
336	1	0	0	0	0	0	0	200	300	0	0	0	0	0	0	0	200	903	0	0	0	0	0	0	0	603	903	0
336	2	0	0	0	0	0	0	200	300	0	0	0	0	0	0	0	200	903	0	0	0	0	0	0	0	603	903	0
336	3	0	0	0	0	0	0	200	300	0	0	0	0	0	0	0	200	903	0	0	0	0	0	0	0	603	903	0
336	4	0	0	0	0	0	0	200	300	0	0	0	0	0	0	0	200	903	0	0	0	0	0	0	0	603	903	0
336	5	0	0	0	0	0	0	200	300	0	0	0	0	0	0	0	200	903	0	0	0	0	0	0	0	603	903	0
336	6	0	0	0	0	0	0	200	300	0	0	0	0	0	0	0	200	903	0	0	0	0	0	0	0	603	903	0
336	7	0	0	0	0	0	0	200	300	0	0	0	0	0	0	0	200	903	0	0	0	0	0	0	0	603	903	0
336	8	0	0	0	0	0	0	200	300	0	0	0	0	0	0	0	200	903	0	0	0	0	0	0	0	603	903	0
336	9	0	0	0	0	0	0	200	300	0	0	0	0	0	0	0	200	903	0	0	0	0	0	0	0	603	903	0
337	0	0	0	0	0	0	0	200	300	0	0	0	0	0	0	0	200	903	0	0	0	0	0	0	0	603	903	0
337	1	0	0	0	0	0	0	200	300	0	0	0	0	0	0	0	200	903	0	0	0	0	0	0	0	603	903	0
337	2	0	0	0	0	0	0	200	300	0	0	0	0	0	0	0	200	903	0	0	0	0	0	0	0	603	903	0
337	3	0	0	0	0	0	0	200	300	0	0	0	0	0	0	0	200	903	0	0	0	0	0	0	0	603	903	0
337	4	0	0	0	0	0	0	200	300	0	0	0	0	0	0	0	200	903	0	0	0	0	0	0	0	603	903	0
337	5	0	0	0	0	0	0	200	300	0	0	0	0	0	0	0	200	903	0	0	0	0	0	0	0	603	903	0
337	6	0	0	0	0	0	0	200	300	0	0	0	0	0	0	0	200	903	0	0	0	0	0	0	0	603	903	0
337	7	0	0	0	0	0	0	200	300	0	0	0	0	0	0	0	200	903	0	0	0	0	0	0	0	603	903	0
337	8	0	0	0	0	0	0	200	300	0	0	0	0	0	0	0	200	903	0	0	0	0	0	0	0	603	903	0
337	9	0	0	0	0	0	0	200	300	0	0	0	0	0	0	0	200	903	0	0	0	0	0	0	0	603	903	0
338	0	0	0	0	0	0	0	200	300	0	0	0	0	0	0	0	200	903	0	0	0	0	0	0	0	603	903	0
338	1	0	0	0	0	0	0	200	300	0	0	0	0	0	0	0	200	903	0	0	0	0	0	0	0	603	903	0
338	2	0	0	0	0	0	0	200	300	0	0	0	0	0	0	0	200	903	0	0	0	0	0	0	0	603	903	0
338	3	0	0	0	0	0	0	200	300	0	0	0	0	0	0	0	200	903	0	0	0	0	0	0	0	603	903	0
338	4	0	0	0	0	0	0	200	300	0	0	0	0	0	0	0	200	903	0	0	0	0	0	0	0	603	903	0
338	5	0	0	0	0	0	0	200	300	0	0	0	0	0	0	0	200	903	0	0	0	0	0	0	0	603	903	0
338	6	0	0	0	0	0	0	200	300	0	0	0	0	0	0	0	200	903	0	0	0	0	0	0	0	603	903	0
338	7	0	0	0	0	0	0	200	300	0	0	0	0	0	0	0	200	903	0	0	0	0	0	0	0	603	903	0
338	8	0	0	0	0	0	0	200	300	0	0	0	0	0	0	0	200	903	0	0	0	0	0	0	0	603	903	0
338	9	0	0	0	0	0	0	200	300	0	0	0	0	0	0	0	200	903	0	0	0	0	0	0	0	603	903	0
339	0	0	0	0	0	0	0	200	300	0	0	0	0	0	0	0	200	903	0	0	0	0	0	0	0	603	903	0
339	1	0	0	0	0	0	0	200	300	0	0	0	0	0	0	0	200	903	0	0	0	0	0	0	0	603	903	0
339	2	0	0	0	0	0	0	200	300	0	0	0	0	0	0	0	200	903	0	0	0	0	0	0	0	603	903	0
339	3	0	0	0	0	0	0	200	300	0	0	0	0	0	0	0	200	903	0	0	0	0	0	0	0	603	903	0
339	4	0	0	0	0	0	0	200	300	0	0	0	0	0	0	0	200	903	0	0	0	0	0	0	0	603	903	0
339	5	0	0	0	0	0	0	200	300	0	0	0	0	0	0	0	200	903	0	0	0	0	0	0	0	603	903	0
339	6	0	0	0	0	0	0	200	300	0	0	0	0	0	0	0	200	903	0	0	0	0	0	0	0	603	903	0
339	7	0	0	0	0	0	0	200	300	0	0	0	0	0	0	0	200	903	0	0	0	0	0	0	0	603	903	0
339	8	0	0	0	0	0	0	200	300	0	0	0	0	0	0	0	200	903	0	0	0	0	0	0	0	603	903	0
339	9	0	0	0	0	0	0	200	300	0	0	0	0	0	0	0	200	903	0	0	0	0	0	0	0	603	903	0
340	0	0	0	0	0	0	0	200	300	0	0	0	0	0	0	0	200	903	0	0	0	0	0	0	0	603	903	0
340	1	0	0	0	0	0	0	200	300	0	0	0	0	0	0	0	200	903	0	0	0	0	0	0	0	603	903	0
340	2	0	0	0	0	0	0	200	300	0	0	0	0	0	0	0	200	903	0	0	0	0	0	0	0	603	903	0
340	3	0	0	0	0	0	0	200	300	0	0	0	0	0	0	0	200	903	0	0	0	0	0	0	0	603	903	0
340	4	0	0	0	0	0	0	200	300	0	0	0	0	0	0	0	200	903	0	0	0	0	0	0	0	603	903	0
340	5	0	0	0	0	0	0	200	300	0	0	0	0	0	0	0	200	903	0	0	0	0	0	0	0	603	903	0
340	6	0	0	0	0	0	0	200	300	0	0	0	0	0	0	0	200	903	0	0	0	0	0	0	0	603	903	0
340	7	0	0	0	0	0	0	200	300	0	0	0	0	0	0	0	200	903	0	0	0	0	0	0	0	603	903	0
340	8	0	0	0	0	0	0	200	300	0	0	0	0	0	0	0	200	903	0	0	0	0	0	0	0	603	903	0
340	9	0	0	0	0	0	0	200	300	0	0	0	0	0	0	0	200	903	0	0	0	0	0	0	0	603	903	0
341	0	0	0	0	0	0	0	200	300	0	0	0	0	0	0	0	200	903	0	0	0	0	0	0	0	603	903	0
341	1	0	0	0	0	0	0	200	300	0	0	0	0	0	0	0	200	903	0	0	0	0	0	0	0	603	903	0
341	2	0	0	0	0	0	0	200	300	0	0	0	0	0	0	0	200	903	0	0	0	0	0	0	0	603	903	0
341	3	0	0	0	0	0	0	200	300	0	0	0	0	0	0	0	200	903	0	0	0	0	0	0	0	603	903	0
341	4	0	0	0	0	0	0	200	300	0	0	0	0	0	0	0	200	903	0	0	0	0	0	0	0	603	903	0
341	5	0	0	0	0	0	0	200	300	0	0	0	0	0	0	0	200	903	0	0	0	0	0	0	0	603	903	0
341	6	0	0	0	0	0	0	200	300	0	0	0	0	0	0	0	200	903	0	0	0	0	0	0	0	603	903	0
341	7	0	0	0	0	0	0	200	300	0	0	0	0	0	0	0	200	903	0	0	0	0	0	0	0	603	903	0
341	8	0	0	0	0	0	0	200	300	0	0	0	0	0	0	0	200	903	0	0	0	0	0	0	0	603	903	0
341	9	0	0	0	0	0	0	200	300	0	0	0	0	0	0	0	200	903	0	0	0	0	0	0	0	603	903	0
342	0	0	0	0	0	0	0	200	300	0	0	0	0	0	0	0	200	903	0	0	0	0	0	0	0	603	903	0
342	1	0	0	0	0	0	0	200	300	0	0	0	0	0	0	0	200	903	0	0	0	0	0	0	0	603	903	0
342	2	0	0	0	0	0	0	200	300	0	0	0	0	0	0	0	200	903	0	0	0	0	0	0	0	603	903	0
342	3	0	0	0	0	0	0	200	300	0	0	0	0	0	0	0	200	903	0	0	0	0	0	0	0	603	903	0
342	4	0	0	0	0	0	0	200	300	0	0	0	0	0	0	0	200	903	0	0	0	0	0	0	0	603	903	0
342	5	0	0	0	0	0	0	200	300	0	0	0	0	0	0	0	200	903	0	0	0	0	0	0	0	603	903	0
342	6	0	0	0	0	0	0	200	300	0	0	0	0	0	0	0	200	903	0	0	0	0	0	0	0	603	903	0
342	7	0	0	0	0	0	0	200	300	0	0	0	0	0	0	0	200	903	0	0	0	0	0	0	0	603	903	0
342	8	0	0	0	0	0	0	200	300	0	0	0	0	0	0	0	200	903	0	0	0	0	0	0	0	603	903	0
342	9	0	0	0	0	0	0	200	300	0	0	0	0	0	0	0	200	903	0	0	0	0	0	0	0	603	903	0
343	0	0	0	0	0	0	0	200	300	0	0	0	0	0	0	0	200	903	0	0	0	0	0	0	0	603	903	0
343	1	0	0	0	0	0	0	200	300	0	0	0	0	0	0	0	200	903	0	0	0	0	0	0	0	603	903	0
343	2	0	0	0	0	0	0	200	300	0	0	0	0	0	0	0	200	903	0	0	0	0	0	0	0	603	903	0
343	3	0	0	0	0	0	0	200	300	0	0	0	0	0	0	0	200	903	0	0	0	0	0	0	0	603	903	0
343	4	0	0	0	0	0	0	200	300	0	0	0	0	0	0	0	200	903	0	0	0	0	0	0	0	603	903	0
343	5	0	0	0	0	0	0	200	300	0	0	0	0	0	0	0	200	903	0	0	0	0	0	0	0	603	903	0
343	6	0	0	0	0	0	0	200	300	0	0	0	0	0	0	0	200	903	0	0	0	0	0	0	0	603	903	0
343	7	0	0	0	0	0	0	200	300	0	0	0	0	0	0	0	200	903	0	0	0	0	0	0	0	603	903	0
343	8	0	0	0	0	0	0	200	300	0	0	0	0	0	0	0	200	903	0	0	0	0	0	0	0	603	903	0
343	9	0	0	0	0	0	0	200	300	0	0	0	0	0	0	0	200	903	0	0	0	0	0	0	0	603	903	0
344	0	0	0	0	0	0	0	200	300	0	0	0	0	0	0	0	200	903	0	0	0	0	0	0	0	603	903	0
344	1	0	0	0	0	0	0	200	300	0	0	0	0	0	0	0	200	903	0	0	0	0	0	0	0	603	903	0
344	2	0	0	0	0	0	0	200	300	0	0	0	0	0	0	0	200	903	0	0	0	0	0	0	0	603	903	0
344	3	0	0	0	0	0	0	200	300	0	0	0	0	0	0	0	200	903	0	0	0	0	0	0	0	603	903	0
344	4	0	0	0	0	0	0	200	300	0	0	0	0	0	0	0	200	903	0	0	0	0	0	0	0	603	903	0
344	5	0	0	0	0	0	0	200	300	0	0	0	0	0	0	0	200	903	0	0	0	0	0	0	0	603	903	0
344	6	0	0	0	0	0	0	200	300	0	0	0	0	0	0	0	200	903	0	0	0	0	0	0	0	603	903	0
344	7	0	0	0	0	0	0	200	300	0	0	0	0	0	0	0	200	903	0	0	0	0	0	0	0	603	903	0
344	8	0	0	0	0	0	0	200	300	0	0	0	0	0	0	0	200	903	0	0	0	0	0	0	0	603	903	0
344	9	0	0	0	0	0	0	200	300	0	0	0	0	0	0	0	200	903	0	0	0	0	0	0	0	603	903	0
345	0	0	0	0	0	0	0	200	300	0	0	0	0	0	0	0	200	903	0	0	0	0	0	0	0	603	903	0
345	1	0	0	0	0	0	0	200	300	0	0	0	0	0	0	0	200	903	0	0	0	0	0	0	0	603	903	0
345	2	0	0	0	0	0	0	200	300	0	0	0	0	0	0	0	200	903	0	0	0	0	0	0	0	603	903	0
345	3	0	0	0	0	0	0	200	300	0	0	0	0	0	0	0	200	903	0	0	0	0	0	0	0	603	903	0
345	4	0	0	0	0	0	0	200	300	0	0	0	0	0	0	0	200	903	0	0	0	0	0	0	0	603	903	0
345	5	0	0	0	0	0	0	200	300	0	0	0	0	0	0	0	200	903	0	0	0	0	0	0	0	603	903	0
345	6	0	0	0	0	0	0	200	300	0	0	0	0	0	0	0	200	903	0	0	0	0	0	0	0	603	903	0
345	7	0	0	0	0	0	0	200	300	0	0	0	0	0	0	0	200	903	0	0	0	0	0	0	0	603	903	0
345	8	0	0	0	0	0	0	200	300	0	0	0	0	0	0	0	200	903	0	0	0	0	0	0	0	603	903	0
345	9	0	0	0	0	0	0	200	300	0	0	0	0	0	0	0	200	903	0	0	0	0	0	0	0	603	903	0
346	0	0	0	0	0	0	0	200	300	0	0	0	0	0	0	0	200	903	0	0	0	0	0	0	0	603	903	0
346	1	0	0	0	0	0	0	200	300	0	0	0	0	0	0	0	200	903	0	0	0	0	0	0	0	603	903	0
346	2	0	0	0	0	0	0	200	300	0	0	0	0	0	0	0	200	903	0	0	0	0	0	0	0	603	903	0
346	3	0	0	0	0	0	0	200	300	0	0	0	0	0	0	0	200	903	0	0	0	0	0	0	0	603	903	0
346	4	0	0	0	0	0	0	200	300	0	0	0	0	0	0	0	200	903	0	0	0	0	0	0	0	603	903	0
346	5	0	0	0	0	0	0	200	300	0	0	0	0	0	0	0	200	903	0	0	0	0	0	0	0	603	903	0
346	6	0	0	0	0	0	0	200	300	0	0	0	0	0	0	0	200	903	0	0	0	0	0	0	0	603	903	0
346	7	0	0	0	0	0	0	200	300	0	0	0	0	0	0	0	200	903	0	0	0	0	0	0	0	603	903	0
346	8	0	0	0	0	0	0	200	300	0	0	0	0	0	0	0	200	903	0	0	0	0	0	0	0	603	903	0
346	9	0	0	0	0	0	0	200	300	0	0	0	0	0	0	0	200	903	0	0	0	0	0	0	0	603	903	0
347	0	0	0	0	0	0	0	200	300	0	0	0	0	0	0	0	200	903	0	0	0	0	0	0	0	603	903	0
347	1	0	0	0	0	0	0	200	300	0	0	0	0	0	0	0	200	903	0	0	0	0	0	0	0	603	903	0
347	2	0	0	0	0	0	0	200	300	0	0	0	0	0	0	0	200	903	0	0	0	0	0	0	0	603	903	0
347	3	0	0	0	0	0	0	200	300	0	0	0	0	0	0	0	200	903	0	0	0	0	0	0	0	603	903	0
347	4	0	0	0	0	0	0	200	300	0	0	0	0	0	0	0	200	903	0	0	0	0	0	0	0	603	903	0
347	5	0	0	0	0	0	0	200	300	0	0	0	0	0	0	0	200	903	0	0	0	0	0	0	0	603	903	0
347	6	0	0	0	0	0	0	200	300	0	0	0	0	0	0	0	200	903	0	0	0	0	0	0	0	603	903	0
347	7	0	0	0	0	0	0	200	300	0	0	0	0	0	0	0	200	903	0	0	0	0	0	0	0	603	903	0
347	8	0	0	0	0	0	0	200	300	0	0	0	0	0	0	0	200	903	0	0	0	0	0	0	0	603	903	0
347	9	0	0	0	0	0	0	200	300	0	0	0	0	0	0	0	200	903	0	0	0	0	0	0	0	603	903	0
348	0	0	0	0	0	0	0	200	300	0	0	0	0	0	0	0	200	903	0	0	0	0	0	0	0	603	903	0
348	1	0	0	0	0	0	0	200	300	0	0	0	0	0	0	0	200	903	0	0	0	0	0	0	0	603	903	0
348	2	0	0	0	0	0	0	200	300	0	0	0	0	0	0	0	200	903	0	0	0	0	0	0	0	603	903	0
348	3	0	0	0	0	0	0	200	300	0	0	0	0	0	0	0	200	903	0	0	0	0	0	0	0	603	903	0
348	4	0	0	0	0	0	0	200	300	0	0	0	0	0	0	0	200	903	0	0	0	0	0	0	0	603	903	0
348	5	0	0	0	0	0	0	200	300	0	0	0	0	0	0	0	200	903	0	0	0	0	0	0	0	603	903	0
348	6	0	0	0	0	0	0	200	300	0	0	0	0	0	0	0	200	903	0	0	0	0	0	0	0	603	903	0
348	7	0	0	0	0	0	0	200	300	0	0	0	0	0	0	0	200	903	0	0	0	0	0	0	0	603	903	0
348	8	0	0	0	0	0	0	200	300	0	0	0	0	0	0	0	200	903	0	0	0	0	0	0	0	603	903	0
348	9	0	0	0	0	0	0	200	300	0	0	0	0	0	0	0	200	903	0	0	0	0	0	0	0	603	903	0
349	0	0	0	0	0	0	0	200	300	0	0	0	0	0	0	0	200	903	0	0	0	0	0	0	0	603	903	0
349	1	0	0	0	0	0	0	200	300	0	0	0	0	0	0	0	200	903	0	0	0	0	0	0	0	603	903	0
349	2	0	0	0	0	0	0	200	300	0	0	0	0	0	0	0	200	903	0	0	0	0	0	0	0	603	903	0
349	3	0	0	0	0	0	0	200	300	0	0	0	0	0	0	0	200	903	0	0	0	0	0	0	0	603	903	0
349	4	0	0	0	0	0	0	200	300	0	0	0	0	0	0	0	200	903	0	0	0	0	0	0	0	603	903	0
349	5	0	0	0	0	0	0	200	300	0	0	0	0	0	0	0	200	903	0	0	0	0	0	0	0	603	903	0
349	6	0	0	0	0	0	0	200	300	0	0	0	0	0	0	0	200	903	0	0	0	0	0	0	0	603	903	0
349	7	0	0	0	0	0	0	200	300	0	0	0	0	0	0	0	200	903	0	0	0	0	0	0	0	603	903	0
349	8	0	0	0	0	0	0	200	300	0	0	0	0	0	0	0	200	903	0	0	0	0	0	0	0	603	903	0
349	9	0	0	0	0	0	0	200	300	0	0	0	0	0	0	0	200	903	0	0	0	0	0	0	0	603	903	0
350	0	0	0	0	0	0	0	200	300	0	0	0	0	0	0	0	200	903	0	0	0	0	0	0	0	603	903	0
350	1	0	0	0	0	0	0	200	300	0	0	0	0	0	0	0	200	903	0	0	0	0	0	0	0	603	903	0
350	2	0	0	0	0	0	0	200	300	0	0	0	0	0	0	0	200	903	0	0	0	0	0	0	0	603	903	0
350	3	0	0	0	0	0	0	200	300	0	0	0	0	0	0	0	200	903	0	0	0	0	0	0	0	603	903	0
350	4	0	0	0	0	0	0	200	300	0	0	0	0	0	0	0	200	903	0	0	0	0	0	0	0	603	903	0
350	5	0	0	0	0	0	0	200	300	0	0	0	0	0	0	0	200	903	0	0	0	0	0	0	0	603	903	0
350	6	0	0	0	0	0	0	200	300	0	0	0	0	0	0	0	200	903	0	0	0	0	0	0	0	603	903	0
350	7	0	0	0	0	0	0	200	300	0	0	0	0	0	0	0	200	903	0	0	0	0	0	0	0	603	903	0
350	8	0	0	0	0	0	0	200	300	0	0	0	0	0	0	0	200	903	0	0	0	0	0	0	0	603	903	0
350	9	0	0	0	0	0	0	200	300	0	0	0	0	0	0	0	200	903	0	0	0	0	0	0	0	603	903	0
351	0	0	0	0	0	0	0	200	300	0	0	0	0	0	0	0	200	903	0	0	0	0	0	0	0	603	903	0
351	1	0	0	0	0	0	0	200	300	0	0	0	0	0	0	0	200	903	0	0	0	0	0	0	0	603	903	0
351	2	0	0	0	0	0	0	200	300	0	0	0	0	0	0	0	200	903	0	0	0	0	0	0	0	603	903	0
351	3	0	0	0	0	0	0	200	300	0	0	0	0	0	0	0	200	903	0	0	0	0	0	0	0	603	903	0
351	4	0	0	0	0	0	0	200	300	0	0	0	0	0	0	0	200	903	0	0	0	0	0	0	0	603	903	0
351	5	0	0	0	0	0	0	200	300	0	0	0	0	0	0	0	200	903	0	0	0	0	0	0	0	603	903	0
351	6	0	0	0	0	0	0	200	300	0	0	0	0	0	0	0	200	903	0	0	0	0	0	0	0	603	903	0
351	7	0	0	0	0	0	0	200	300	0	0	0	0	0	0	0	200	903	0	0	0	0	0	0	0	603	903	0
351	8	0	0	0	0	0	0	200	300	0	0	0	0	0	0	0	200	903	0	0	0	0	0	0	0	603	903	0
351	9	0	0	0	0	0	0	200	300	0	0	0	0	0	0	0	200	903	0	0	0	0	0	0	0	603	903	0
352	0	0	0	0	0	0	0	200	300	0	0	0	0	0	0	0	200	903	0	0	0	0	0	0	0	603	903	0
352	1	0	0	0	0	0	0	200	300	0	0	0	0	0	0	0	200	903	0	0	0	0	0	0	0	603	903	0
352	2	0	0	0	0	0	0	200	300	0	0	0	0	0	0	0	200	903	0	0	0	0	0	0	0	603	903	0
352	3	0	0	0	0	0	0	200	300	0	0	0	0	0	0	0	200	903	0	0	0	0	0	0	0	603	903	0
352	4	0	0	0	0	0	0	200	300	0	0	0	0	0	0	0	200	903	0	0	0	0	0	0	0	603	903	0
352	5	0	0	0	0	0	0	200	300	0	0	0	0	0	0	0	200	903	0	0	0	0	0	0	0	603	903	0
352	6	0	0	0	0	0	0	200	300	0	0	0	0	0	0	0	200	903	0	0	0	0	0	0	0	603	903	0
352	7	0	0	0	0	0	0	200	300	0	0	0	0	0	0	0	200	903	0	0	0	0	0	0	0	603	903	0
352	8	0	0	0	0	0	0	200	300	0	0	0	0	0	0	0	200	903	0	0	0	0	0	0	0	603	903	0
352	9	0	0	0	0	0	0	200	300	0	0	0	0	0	0	0	200	903	0	0	0	0	0	0	0	603	903	0
353	0	0	0	0	0	0	0	200	300	0	0	0	0	0	0	0	200	903	0	0	0	0	0	0	0	603	903	0
353	1	0	0	0	0	0	0	200	300	0	0	0	0	0	0	0	200	903	0	0	0	0	0	0	0	603	903	0
353	2	0	0	0	0	0	0	200	300	0	0	0	0	0	0	0	200	903	0	0	0	0	0	0	0	603	903	0
353	3	0	0	0	0	0	0	200	300	0	0	0	0	0	0	0	200	903	0	0	0	0	0	0	0	603	903	0
353	4	0	0	0	0	0	0	200	300	0	0	0	0	0	0	0	200	903	0	0	0	0	0	0	0	603	903	0
353	5	0	0	0	0	0	0	200	300	0	0	0	0	0	0	0	200	903	0	0	0	0	0	0	0	603	903	0
353	6	0	0	0	0	0	0	200	300	0	0	0	0	0	0	0	200	903	0	0	0	0	0	0	0	603	903	0
353	7	0	0	0	0	0	0	200	300	0	0	0	0	0	0	0	200	903	0	0	0	0	0	0	0	603	903	0
353	8	0	0	0	0	0	0	200	300	0	0	0	0	0	0	0	200	903	0	0	0	0	0	0	0	603	903	0
353	9	0	0	0	0	0	0	200	300	0	0	0	0	0	0	0	200	903	0	0	0	0	0	0	0	603	903	0
354	0	0	0	0	0	0	0	200	300	0	0	0	0	0	0	0	200	903	0	0	0	0	0	0	0	603	903	0
354	1	0	0	0	0	0	0	200	300	0	0	0	0	0	0	0	200	903	0	0	0	0	0	0	0	603	903	0
354	2	0	0	0	0	0	0	200	300	0	0	0	0	0	0	0	200	903	0	0	0	0	0	0	0	603	903	0
354	3	0	0	0	0	0	0	200	300	0	0	0	0	0	0	0	200	903	0	0	0	0	0	0	0	603	903	0
354	4	0	0	0	0	0	0	200	300	0	0	0	0	0	0	0	200	903	0	0	0	0	0	0	0	603	903	0
354	5	0	0	0	0	0	0	200	300	0	0	0	0	0	0	0	200	903	0	0	0	0	0	0	0	603	903	0
354	6	0	0	0	0	0	0	200	300	0	0	0	0	0	0	0	200	903	0	0	0	0	0	0	0	603	903	0
354	7	0	0	0	0	0	0	200	300	0	0	0	0	0	0	0	200	903	0	0	0	0	0	0	0	603	903	0
354	8	0	0	0	0	0	0	200	300	0	0	0	0	0	0	0	200	903	0	0	0	0	0	0	0	603	903	0
354	9	0	0	0	0	0	0	200	300	0	0	0	0	0	0	0	200	903	0	0	0	0	0	0	0	603	903	0
355	0	0	0	0	0	0	0	200	300	0	0	0	0	0	0	0	200	903	0	0	0	0	0	0	0	603	903	0
355	1	0	0	0	0	0	0	200	300	0	0	0	0	0	0	0	200	903	0	0	0	0	0	0	0	603	903	0
355	2	0	0	0	0	0	0	200	300	0	0	0	0	0	0	0	200	903	0	0	0	0	0	0	0	603	903	0
355	3	0	0	0	0	0	0	200	300	0	0	0	0	0	0	0	200	903	0	0	0	0	0	0	0	603	903	0
355	4	0	0	0	0	0	0	200	300	0	0	0	0	0	0	0	200	903	0	0	0	0	0	0	0	603	903	0
355	5	0	0	0	0	0	0	200	300	0	0	0	0	0	0	0	200	903	0	0	0	0	0	0	0	603	903	0
355	6	0	0	0	0	0	0	200	300	0	0	0	0	0	0	0	200	903	0	0	0	0	0	0	0	603	903	0
355	7	0	0	0	0	0	0	200	300	0	0	0	0	0	0	0	200	903	0	0	0	0	0	0	0	603	903	0
355	8	0	0	0	0	0	0	200	300	0	0	0	0	0	0	0	200	903	0	0	0	0	0	0	0	603	903	0
355	9	0	0	0	0	0	0	200	300	0	0	0	0	0	0	0	200	903	0	0	0	0	0	0	0	603	903	0
356	0	0	0	0	0	0	0	200	300	0	0	0	0	0	0	0	200	903	0	0	0	0	0	0	0	603	903	0
356	1	0	0	0	0	0	0	200	300	0	0	0	0	0	0	0	200	903	0	0	0	0	0	0	0	603	903	0
356	2	0	0	0	0	0	0	200	300	0	0	0	0	0	0	0	200	903	0	0	0	0	0	0	0	603	903	0
356	3	0	0	0	0	0	0	200	300	0	0	0	0	0	0	0	200	903	0	0	0	0	0	0	0	603	903	0
356	4	0	0	0	0	0	0	200	300	0	0	0	0	0	0	0	200	903	0	0	0	0	0	0	0	603	903	0
356	5	0	0	0	0	0	0	200	300	0	0	0	0	0	0	0	200	903	0	0	0	0	0	0	0	603	903	0
356	6	0	0	0	0	0	0	200	300	0	0	0	0	0	0	0	200	903	0	0	0	0	0	0	0	603	903	0
356	7	0	0	0	0	0	0	200	300	0	0	0	0	0	0	0	200	903	0	0	0	0	0	0	0	603	903	0
356	8	0	0	0	0	0	0	200	300	0	0	0	0	0	0	0	200	903	0	0	0	0	0	0	0	603	903	0
356	9	0	0	0	0	0	0	200	300	0	0	0	0	0	0	0	200	903	0	0	0	0	0	0	0	603	903	0
357	0	0	0	0	0	0	0	200	300	0	0	0	0	0	0	0	200	903	0	0	0	0	0	0	0	603	903	0
357	1	0	0	0	0	0	0	200	300	0	0	0	0	0	0	0	200	903	0	0	0	0	0	0	0	603	903	0
357	2	0	0	0	0	0	0	200	300	0	0	0	0	0	0	0	200	903	0	0	0	0	0	0	0	603	903	0
357	3	0	0	0	0	0	0	200	300	0	0	0	0	0	0	0	200	903	0	0	0	0	0	0	0	603	903	0
357	4	0	0	0	0	0	0	200	300	0	0	0	0	0	0	0	200	903	0	0	0	0	0	0	0	603	903	0
357	5	0	0	0	0	0	0	200	300	0	0	0	0	0	0	0	200	903	0	0	0	0	0	0	0	603	903	0
357	6	0	0	0	0	0	0	200	300	0	0	0	0	0	0	0	200	903	0	0	0	0	0	0	0	603	903	0
357	7	0	0	0	0	0	0	200	300	0	0	0	0	0	0	0	200	903	0	0	0	0	0	0	0	603	903	0
357	8	0	0	0	0	0	0	200	300	0	0	0	0	0	0	0	200	903	0	0	0	0	0	0	0	603	903	0
357	9	0	0	0	0	0	0	200	300	0	0	0	0	0	0	0	200	903	0	0	0	0	0	0	0	603	903	0
358	0	0	0	0	0	0	0	200	300	0	0	0	0	0	0	0	200	903	0	0	0	0	0	0	0	603	903	0
358	1	0	0	0	0	0	0	200	300	0	0	0	0	0	0	0	200	903	0	0	0	0	0	0	0	603	903	0
358	2	0	0	0	0	0	0	200	300	0	0	0	0	0	0	0	200	903	0	0	0	0	0	0	0	603	903	0
358	3	0	0	0	0	0	0	200	300	0	0	0	0	0	0	0	200	903	0	0	0	0	0	0	0	603	903	0
358	4	0	0	0	0	0	0	200	300	0	0	0	0	0	0	0	200	903	0	0	0	0	0	0	0	603	903	0
358	5	0	0	0	0	0	0	200	300	0	0	0	0	0	0	0	200	903	0	0	0	0	0	0	0	603	903	0
358	6	0	0	0	0	0	0	200	300	0	0	0	0	0	0	0	200	903	0	0	0	0	0	0	0	603	903	0
358	7	0	0	0	0	0	0	200	300	0	0	0	0	0	0	0	200	903	0	0	0	0	0	0	0	603	903	0
358	8	0	0	0	0	0	0	200	300	0	0	0	0	0	0	0	200	903	0	0	0	0	0	0	0	603	903	0
358	9	0	0	0	0	0	0	200	300	0	0	0	0	0	0	0	200	903	0	0	0	0	0	0	0	603	903	0
359	0	0	0	0	0	0	0	200	300	0	0	0	0	0	0	0	200	903	0	0	0	0	0	0	0	603	903	0
359	1	0	0	0	0	0	0	200	300	0	0	0	0	0	0	0	200	903	0	0	0	0	0	0	0	603	903	0
359	2	0	0	0	0	0	0	200	300	0	0	0	0	0	0	0	200	903	0	0	0	0	0	0	0	603	903	0
359	3	0	0	0	0	0	0	200	300	0	0	0	0	0	0	0	200	903	0	0	0	0	0	0	0	603	903	0
359	4	0	0	0	0	0	0	200	300	0	0	0	0	0	0	0	200	903	0	0	0	0	0	0	0	603	903	0
359	5	0	0	0	0	0	0	200	300	0	0	0	0	0	0	0	200	903	0	0	0	0	0	0	0	603	903	0
359	6	0	0	0	0	0	0	200	300	0	0	0	0	0	0	0	200	903	0	0	0	0	0	0	0	603	903	0
359	7	0	0	0	0	0	0	200	300	0	0	0	0	0	0	0	200	903	0	0	0	0	0	0	0	603	903	0
359	8	0	0	0	0	0	0	200	300	0	0	0	0	0	0	0	200	903	0	0	0	0	0	0	0	603	903	0
359	9	0	0	0	0	0	0	200	300	0	0	0	0	0	0	0	200	903	0	0	0	0	0	0	0	603	903	0
360	0	0	0	0	0	0	0	200	300	0	0	0	0	0	0	0	200	903	0	0	0	0	0	0	0	603	903	0
360	1	0	0	0	0	0	0	200	300	0	0	0	0	0	0	0	200	903	0	0	0	0	0	0	0	603	903	0
360	2	0	0	0	0	0	0	200	300	0	0	0	0	0	0	0	200	903	0	0	0	0	0	0	0	603	903	0
360	3	0	0	0	0	0	0	200	300	0	0	0	0	0	0	0	200	903	0	0	0	0	0	0	0	603	903	0
360	4	0	0	0	0	0	0	200	300	0	0	0	0	0	0	0	200	903	0	0	0	0	0	0	0	603	903	0
360	5	0	0	0	0	0	0	200	300	0	0	0	0	0	0	0	200	903	0	0	0	0	0	0	0	603	903	0
360	6	0	0	0	0	0	0	200	300	0	0	0	0	0	0	0	200	903	0	0	0	0	0	0	0	603	903	0
360	7	0	0	0	0	0	0	200	300	0	0	0	0	0	0	0	200	903	0	0	0	0	0	0	0	603	903	0
360	8	0	0	0	0	0	0	200	300	0	0	0	0	0	0	0	200	903	0	0	0	0	0	0	0	603	903	0
360	9	0	0	0	0	0	0	200	300	0	0	0	0	0	0	0	200	903	0	0	0	0	0	0	0	603	903	0
361	0	0	0	0	0	0	0	200	300	0	0	0	0	0	0	0	200	903	0	0	0	0	0	0	0	603	903	0
361	1	0	0	0	0	0	0	200	300	0	0	0	0	0	0	0	200	903	0	0	0	0	0	0	0	603	903	0
361	2	0	0	0	0	0	0	200	300	0	0	0	0	0	0	0	200	903	0	0	0	0	0	0	0	603	903	0
361	3	0	0	0	0	0	0	200	300	0	0	0	0	0	0	0	200	903	0	0	0	0	0	0	0	603	903	0
361	4	0	0	0	0	0	0	200	300	0	0	0	0	0	0	0	200	903	0	0	0	0	0	0	0	603	903	0
361	5	0	0	0	0	0	0	200	300	0	0	0	0	0	0	0	200	903	0	0	0	0	0	0	0	603	903	0
361	6	0	0	0	0	0	0	200	300	0	0	0	0	0	0	0	200	903	0	0	0	0	0	0	0	603	903	0
361	7	0	0	0	0	0	0	200	300	0	0	0	0	0	0	0	200	903	0	0	0	0	0	0	0	603	903	0
361	8	0	0	0	0	0	0	200	300	0	0	0	0	0	0	0	200	903	0	0	0	0	0	0	0	603	903	0
361	9	0	0	0	0	0	0	200	300	0	0	0	0	0	0	0	200	903	0	0	0	0	0	0	0	603	903	0
362	0	0	0	0	0	0	0	200	300	0	0	0	0	0	0	0	200	903	0	0	0	0	0	0	0	603	903	0
362	1	0	0	0	0	0	0	200	300	0	0	0	0	0	0	0	200	903	0	0	0	0	0	0	0	603	903	0
362	2	0	0	0	0	0	0	200	300	0	0	0	0	0	0	0	200	903	0	0	0	0	0	0	0	603	903	0
362	3	0	0	0	0	0	0	200	300	0	0	0	0	0	0	0	200	903	0	0	0	0	0	0	0	603	903	0
362	4	0	0	0	0	0	0	200	300	0	0	0	0	0	0	0	200	903	0	0	0	0	0	0	0	603	903	0
362	5	0	0	0	0	0	0	200	300	0	0	0	0	0	0	0	200	903	0	0	0	0	0	0	0	603	903	0
362	6	0	0	0	0	0	0	200	300	0	0	0	0	0	0	0	200	903	0	0	0	0	0	0	0	603	903	0
362	7	0	0	0	0	0	0	200	300	0	0	0	0	0	0	0	200	903	0	0	0	0	0	0	0	603	903	0
362	8	0	0	0	0	0	0	200	300	0	0	0	0	0	0	0	200	903	0	0	0	0	0	0	0	603	903	0
362	9	0	0	0	0	0	0	200	300	0	0	0	0	0	0	0	200	903	0	0	0	0	0	0	0	603	903	0
363	0	0	0	0	0	0	0	200	300	0	0	0	0	0	0	0	200	903	0	0	0	0	0	0	0	603	903	0
363	1	0	0	0	0	0	0	200	300	0	0	0	0	0	0	0	200	903	0	0	0	0	0	0	0	603	903	0
363	2	0	0	0	0	0	0	200	300	0	0	0	0	0	0	0	200	903	0	0	0	0	0	0	0	603	903	0
363	3	0	0	0	0	0	0	200	300	0	0	0	0	0	0	0	200	903	0	0	0	0	0	0	0	603	903	0
363	4	0	0	0	0	0	0	200	300	0	0	0	0	0	0	0	200	903	0	0	0	0	0	0	0	603	903	0
363	5	0	0	0	0	0	0	200	300	0	0	0	0	0	0	0	200	903	0	0	0	0	0	0	0	603	903	0
363	6	0	0	0	0	0	0	200	300	0	0	0	0	0	0	0	200	903	0	0	0	0	0	0	0	603	903	0
363	7	0	0	0	0	0	0	200	300	0	0	0	0	0	0	0	200	903	0	0	0	0	0	0	0	603	903	0
363	8	0	0	0	0	0	0	200	300	0	0	0	0	0	0	0	200	903	0	0	0	0	0	0	0	603	903	0
363	9	0	0	0	0	0	0	200	300	0	0	0	0	0	0	0	200	903	0	0	0	0	0	0	0	603	903	0
364	0	0	0	0	0	0	0	200	300	0	0	0	0	0	0	0	200	903	0	0	0	0	0	0	0	603	903	0
364	1	0	0	0	0	0	0	200	300	0	0	0	0	0	0	0	200	903	0	0	0	0	0	0	0	603	903	0
364	2	0	0	0	0	0	0	200	300	0	0	0	0	0	0	0	200	903	0	0	0	0	0	0	0	603	903	0
364	3	0	0	0	0	0	0	200	300	0	0	0	0	0	0	0	200	903	0	0	0	0	0	0	0	603	903	0
364	4	0	0	0	0	0	0	200	300	0	0	0	0	0	0	0	200	903	0	0	0	0	0	0	0	603	903	0
364	5	0	0	0	0	0	0	200	300	0	0	0	0	0	0	0	200	903	0	0	0	0	0	0	0	603	903	0
364	6	0	0	0	0	0	0	200	300	0	0	0	0	0	0	0	200	903	0	0	0	0	0	0	0	603	903	0
364	7	0	0	0	0	0	0	200	300	0	0	0	0	0	0	0	200	903	0	0	0	0	0	0	0	603	903	0
364	8	0	0	0	0	0	0	200	300	0	0	0	0	0	0	0	200	903	0	0	0	0	0	0	0	603	903	0
364	9	0	0	0	0	0	0	200	300	0	0	0	0	0	0	0	200	903	0	0	0	0	0	0	0	603	903	0
365	0	0	0	0	0	0	0	200	300	0	0	0	0	0	0	0	200	903	0	0	0	0	0	0	0	603	903	0
365	1	0	0	0	0	0	0	200	300	0	0	0	0	0	0	0	200	903	0	0	0	0	0	0	0	603	903	0
365	2	0	0	0	0	0	0	200	300	0	0	0	0	0	0	0	200	903	0	0	0	0	0	0	0	603	903	0
365	3	0	0	0	0	0	0	200	300	0	0	0	0	0	0	0	200	903	0	0	0	0	0	0	0	603	903	0
365	4	0	0	0	0	0	0	200	300	0	0	0	0	0	0	0	200	903	0	0	0	0	0	0	0	603	903	0
365	5	0	0	0	0	0	0	200	300	0	0	0	0	0	0	0	200	903	0	0	0	0	0	0	0	603	903	0
365	6	0	0	0	0	0	0	200	300	0	0	0	0	0	0	0	200	903	0	0	0	0	0	0	0	603	903	0
365	7	0	0	0	0	0	0	200	300	0	0	0	0	0	0	0	200	903	0	0	0	0	0	0	0	603	903	0
365	8	0	0	0	0	0	0	200	300	0	0	0	0	0	0	0	200	903	0	0	0	0	0	0	0	603	903	0
365	9	0	0	0	0	0	0	200	300	0	0	0	0	0	0	0	200	903	0	0	0	0	0	0	0	603	903	0
366	0	0	0	0	0	0	0	200	300	0	0	0	0	0	0	0	200	903	0	0	0	0	0	0	0	603	903	0
366	1	0	0	0	0	0	0	200	300	0	0	0	0	0	0	0	200	903	0	0	0	0	0	0	0	603	903	0
366	2	0	0	0	0	0	0	200	300	0	0	0	0	0	0	0	200	903	0	0	0	0	0	0	0	603	903	0
366	3	0	0	0	0	0	0	200	300	0	0	0	0	0	0	0	200	903	0	0	0	0	0	0	0	603	903	0
366	4	0	0	0	0	0	0	200	300	0	0	0	0	0	0	0	200	903	0	0	0	0	0	0	0	603	903	0
366	5	0	0	0	0	0	0	200	300	0	0	0	0	0	0	0	200	903	0	0	0	0	0	0	0	603	903	0
366	6	0	0	0	0	0	0	200	300	0	0	0	0	0	0	0	200	903	0	0	0	0	0	0	0	603	903	0
366	7	0	0	0	0	0	0	200	300	0	0	0	0	0	0	0	200	903	0	0	0	0	0	0	0	603	903	0
366	8	0	0	0	0	0	0	200	300	0	0	0	0	0	0	0	200	903	0	0	0	0	0	0	0	603	903	0
366	9	0	0	0	0	0	0	200	300	0	0	0	0	0	0	0	200	903	0	0	0	0	0	0	0	603	903	0
367	0	0	0	0	0	0	0	200	300	0	0	0	0	0	0	0	200	903	0	0	0	0	0	0	0	603	903	0
367	1	0	0	0	0	0	0	200	300	0	0	0	0	0	0	0	200	903	0	0	0	0	0	0	0	603	903	0
367	2	0	0	0	0	0	0	200	300	0	0	0	0	0	0	0	200	903	0	0	0	0	0	0	0	603	903	0
367	3	0	0	0	0	0	0	200	300	0	0	0	0	0	0	0	200	903	0	0	0	0	0	0	0	603	903	0
367	4	0	0	0	0	0	0	200	300	0	0	0	0	0	0	0	200	903	0	0	0	0	0	0	0	603	903	0
367	5	0	0	0	0	0	0	200	300	0	0	0	0	0	0	0	200	903	0	0	0	0	0	0	0	603	903	0
367	6	0	0	0	0	0	0	200	300	0	0	0	0	0	0	0	200	903	0	0	0	0	0	0	0	603	903	0
367	7	0	0	0	0	0	0	200	300	0	0	0	0	0	0	0	200	903	0	0	0	0	0	0	0	603	903	0
367	8	0	0	0	0	0	0	200	300	0	0	0	0	0	0	0	200	903	0	0	0	0	0	0	0	603	903	0
367	9	0	0	0	0	0	0	200	300	0	0	0	0	0	0	0	200	903	0	0	0	0	0	0	0	603	903	0
368	0	0	0	0	0	0	0	200	300	0	0	0	0	0	0	0	200	903	0	0	0	0	0	0	0	603	903	0
368	1	0	0	0	0	0	0	200	300	0	0	0	0	0	0	0	200	903	0	0	0	0	0	0	0	603	903	0
368	2	0	0	0	0	0	0	200	300	0	0	0	0	0	0	0	200	903	0	0	0	0	0	0	0	603	903	0
368	3	0	0	0	0	0	0	200	300	0	0	0	0	0	0	0	200	903	0	0	0	0	0	0	0	603	903	0
368	4	0	0	0	0	0	0	200	300	0	0	0	0	0	0	0	200	903	0	0	0	0	0	0	0	603	903	0
368	5	0	0	0	0	0	0	200	300	0	0	0	0	0	0	0	200	903	0	0	0	0	0	0	0	603	903	0
368	6	0	0	0	0	0	0	200	300	0	0	0	0	0	0	0	200	903	0	0	0	0	0	0	0	603	903	0
368	7	0	0	0	0	0	0	200	300	0	0	0	0	0	0	0	200	903	0	0	0	0	0	0	0	603	903	0
368	8	0	0	0	0	0	0	200	300	0	0	0	0	0	0	0	200	903	0	0	0	0	0	0	0	603	903	0
368	9	0	0	0	0	0	0	200	300	0	0	0	0	0	0	0	200	903	0	0	0	0	0	0	0	603	903	0
369	0	0	0	0	0	0	0	200	300	0	0	0	0	0	0	0	200	903	0	0	0	0	0	0	0	603	903	0
369	1	0	0	0	0	0	0	200	300	0	0	0	0	0	0	0	200	903	0	0	0	0	0	0	0	603	903	0
369	2	0	0	0	0	0	0	200	300	0	0	0	0	0	0	0	200	903	0	0	0	0	0	0	0	603	903	0
369	3	0	0	0	0	0	0	200	300	0	0	0	0	0	0	0	200	903	0	0	0	0	0	0	0	603	903	0
369	4	0	0	0	0	0	0	200	300	0	0	0	0	0	0	0	200	903	0	0	0	0	0	0	0	603	903	0
369	5	0	0	0	0	0	0	200	300	0	0	0	0	0	0	0	200	903	0	0	0	0	0	0	0	603	903	0
369	6	0	0	0	0	0	0	200	300	0	0	0	0	0	0	0	200	903	0	0	0	0	0	0	0	603	903	0
369	7	0	0	0	0	0	0	200	300	0	0	0	0	0	0	0	200	903	0	0	0	0	0	0	0	603	903	0
369	8	0	0	0	0	0	0	200	300	0	0	0	0	0	0	0	200	903	0	0	0	0	0	0	0	603	903	0
369	9	0	0	0	0	0	0	200	300	0	0	0	0	0	0	0	200	903	0	0	0	0	0	0	0	603	903	0
370	0	0	0	0	0	0	0	200	300	0	0	0	0	0	0	0	200	903	0	0	0	0	0	0	0	603	903	0
370	1	0	0	0	0	0	0	200	300	0	0	0	0	0	0	0	200	903	0	0	0	0	0	0	0	603	903	0
370	2	0	0	0	0	0	0	200	300	0	0	0	0	0	0	0	200	903	0	0	0	0	0	0	0	603	903	0
370	3	0	0	0	0	0	0	200	300	0	0	0	0	0	0	0	200	903	0	0	0	0	0	0	0	603	903	0
370	4	0	0	0	0	0	0	200	300	0	0	0	0	0	0	0	200	903	0	0	0	0	0	0	0	603	903	0
370	5	0	0	0	0	0	0	200	300	0	0	0	0	0	0	0	200	903	0	0	0	0	0	0	0	603	903	0
370	6	0	0	0	0	0	0	200	300	0	0	0	0	0	0	0	200	903	0	0	0	0	0	0	0	603	903	0
370	7	0	0	0	0	0	0	200	300	0	0	0	0	0	0	0	200	903	0	0	0	0	0	0	0	603	903	0
370	8	0	0	0	0	0	0	200	300	0	0	0	0	0	0	0	200	903	0	0	0	0	0	0	0	603	903	0
370	9	0	0	0	0	0	0	200	300	0	0	0	0	0	0	0	200	903	0	0	0	0	0	0	0	603	903	0
371	0	0	0	0	0	0	0	200	300	0	0	0	0	0	0	0	200	903	0	0	0	0	0	0	0	603	903	0
371	1	0	0	0	0	0	0	200	300	0	0	0	0	0	0	0	200	903	0	0	0	0	0	0	0	603	903	0
371	2	0	0	0	0	0	0	200	300	0	0	0	0	0	0	0	200	903	0	0	0	0	0	0	0	603	903	0
371	3	0	0	0	0	0	0	200	300	0	0	0	0	0	0	0	200	903	0	0	0	0	0	0	0	603	903	0
371	4	0	0	0	0	0	0	200	300	0	0	0	0	0	0	0	200	903	0	0	0	0	0	0	0	603	903	0
371	5	0	0	0	0	0	0	200	300	0	0	0	0	0	0	0	200	903	0	0	0	0	0	0	0	603	903	0
371	6	0	0	0	0	0	0	200	300	0	0	0	0	0	0	0	200	903	0	0	0	0	0	0	0	603	903	0
371	7	0	0	0	0	0	0	200	300	0	0	0	0	0	0	0	200	903	0	0	0	0	0	0	0	603	903	0
371	8	0	0	0	0	0	0	200	300	0	0	0	0	0	0	0	200	903	0	0	0	0	0	0	0	603	903	0
371	9	0	0	0	0	0	0	200	300	0	0	0	0	0	0	0	200	903	0	0	0	0	0	0	0	603	903	0
372	0	0	0	0	0	0	0	200	300	0	0	0	0	0	0	0	200	903	0	0	0	0	0	0	0	603	903	0
372	1	0	0	0	0	0	0	200	300	0	0	0	0	0	0	0	200	903	0	0	0	0	0	0	0	603	903	0
372	2	0	0	0	0	0	0	200	300	0	0	0	0	0	0	0	200	903	0	0	0	0	0	0	0	603	903	0
372	3	0	0	0	0	0	0	200	300	0	0	0	0	0	0	0	200	903	0	0	0	0	0	0	0	603	903	0
372	4	0	0	0	0	0	0	200	300	0	0	0	0	0	0	0	200	903	0	0	0	0	0	0	0	603	903	0
372	5	0	0	0	0	0	0	200	300	0	0	0	0	0	0	0	200	903	0	0	0	0	0	0	0	603	903	0
372	6	0	0	0	0	0	0	200	300	0	0	0	0	0	0	0	200	903	0	0	0	0	0	0	0	603	903	0
372	7	0	0	0	0	0	0	200	300	0	0	0	0	0	0	0	200	903	0	0	0	0	0	0	0	603	903	0
372	8	0	0	0	0	0	0	200	300	0	0	0	0	0	0	0	200	903	0	0	0	0	0	0	0	603	903	0
372	9	0	0	0	0	0	0	200	300	0	0	0	0	0	0	0	200	903	0	0	0	0	0	0	0	603	903	0
373	0	0	0	0	0	0	0	200	300	0	0	0	0	0	0	0	200	903	0	0	0	0	0	0	0	603	903	0
373	1	0	0	0	0	0	0	200	300	0	0	0	0	0	0	0	200	903	0	0	0	0	0	0	0	603	903	0
373	2	0	0	0	0	0	0	200	300	0	0	0	0	0	0	0	200	903	0	0	0	0	0	0	0	603	903	0
373	3	0	0	0	0	0	0	200	300	0	0	0	0	0	0	0	200	903	0	0	0	0	0	0	0	603	903	0
373	4	0	0	0	0	0	0	200	300	0	0	0	0	0	0	0	200	903	0	0	0	0	0	0	0	603	903	0
373	5	0	0	0	0	0	0	200	300	0	0	0	0	0	0	0	200	903	0	0	0	0	0	0	0	603	903	0
373	6	0	0	0	0	0	0	200	300	0	0	0	0	0	0	0	200	903	0	0	0	0	0	0	0	603	903	0
373	7	0	0	0	0	0	0	200	300	0	0	0	0	0	0	0	200	903	0	0	0	0	0	0	0	603	903	0
373	8	0	0	0	0	0	0	200	300	0	0	0	0	0	0	0	200	903	0	0	0	0	0	0	0	603	903	0
373	9	0	0	0	0	0	0	200	300	0	0	0	0	0	0	0	200	903	0	0	0	0	0	0	0	603	903	0
374	0	0	0	0	0	0	0	200	300	0	0	0	0	0	0	0	200	903	0	0	0	0	0	0	0	603	903	0
374	1	0	0	0	0	0	0	200	300	0	0	0	0	0	0	0	200	903	0	0	0	0	0	0	0	603	903	0
374	2	0	0	0	0	0	0	200	300	0	0	0	0	0	0	0	200	903	0	0	0	0	0	0	0	603	903	0
374	3	0	0	0	0	0	0	200	300	0	0	0	0	0	0	0	200	903	0	0	0	0	0	0	0	603	903	0
374	4	0	0	0	0	0	0	200	300	0	0	0	0	0	0	0	200	903	0	0	0	0	0	0	0	603	903	0
374	5	0	0	0	0	0	0	200	300	0	0	0	0	0	0	0	200	903	0	0	0	0	0	0	0	603	903	0
374	6	0	0	0	0	0	0	200	300	0	0	0	0	0	0	0	200	903	0	0	0	0	0	0	0	603	903	0
374	7	0	0	0	0	0	0	200	300	0	0	0	0	0	0	0	200	903	0	0	0	0	0	0	0	603	903	0
374	8	0	0	0	0	0	0	200	300	0	0	0	0	0	0	0	200	903	0	0	0	0	0	0	0	603	903	0
374	9	0	0	0	0	0	0	200	300	0	0	0	0	0	0	0	200	903	0	0	0	0	0	0	0	603	903	0
375	0	0	0	0	0	0	0	200	300	0	0	0	0	0	0	0	200	903	0	0	0	0	0	0	0	603	903	0
375	1	0	0	0	0	0	0	200	300	0	0	0	0	0	0	0	200	903	0	0	0	0	0	0	0	603	903	0
375	2	0	0	0	0	0	0	200	300	0	0	0	0	0	0	0	200	903	0	0	0	0	0	0	0	603	903	0
375	3	0	0	0	0	0	0	200	300	0	0	0	0	0	0	0	200	903	0	0	0	0	0	0	0	603	903	0
375	4	0	0	0	0	0	0	200	300	0	0	0	0	0	0	0	200	903	0	0	0	0	0	0	0	603	903	0
375	5	0	0	0	0	0	0	200	300	0	0	0	0	0	0	0	200	903	0	0	0	0	0	0	0	603	903	0
375	6	0	0	0	0	0	0	200	300	0	0	0	0	0	0	0	200	903	0	0	0	0	0	0	0	603	903	0
375	7	0	0	0	0	0	0	200	300	0	0	0	0	0	0	0	200	903	0	0	0	0	0	0	0	603	903	0
375	8	0	0	0	0	0	0	200	300	0	0	0	0	0	0	0	200	903	0	0	0	0	0	0	0	603	903	0
375	9	0	0	0	0	0	0	200	300	0	0	0	0	0	0	0	200	903	0	0	0	0	0	0	0	603	903	0
376	0	0	0	0	0	0	0	200	300	0	0	0	0	0	0	0	200	903	0	0	0	0	0	0	0	603	903	0
376	1	0	0	0	0	0	0	200	300	0	0	0	0	0	0	0	200	903	0	0	0	0	0	0	0	603	903	0
376	2	0	0	0	0	0	0	200	300	0	0	0	0	0	0	0	200	903	0	0	0	0	0	0	0	603	903	0
376	3	0	0	0	0	0	0	200	300	0	0	0	0	0	0	0	200	903	0	0	0	0	0	0	0	603	903	0
376	4	0	0	0	0	0	0	200	300	0	0	0	0	0	0	0	200	903	0	0	0	0	0	0	0	603	903	0
376	5	0	0	0	0	0	0	200	300	0	0	0	0	0	0	0	200	903	0	0	0	0	0	0	0	603	903	0
376	6	0	0	0	0	0	0	200	300	0	0	0	0	0	0	0	200	903	0	0	0	0	0	0	0	603	903	0
376	7	0	0	0	0	0	0	200	300	0	0	0	0	0	0	0	200	903	0	0	0	0	0	0	0	603	903	0
376	8	0	0	0	0	0	0	200	300	0	0	0	0	0	0	0	200	903	0	0	0	0	0	0	0	603	903	0
376	9	0	0	0	0	0	0	200	300	0	0	0	0	0	0	0	200	903	0	0	0	0	0	0	0	603	903	0
377	0	0	0	0	0	0	0	200	300	0	0	0	0	0	0	0	200	903	0	0	0	0	0	0	0	603	903	0
377	1	0	0	0	0	0	0	200	300	0	0	0	0	0	0	0	200	903	0	0	0	0	0	0	0	603	903	0
377	2	0	0	0	0	0	0	200	300	0	0	0	0	0	0	0	200	903	0	0	0	0	0	0	0	603	903	0
377	3	0	0	0	0	0	0	200	300	0	0	0	0	0	0	0	200	903	0	0	0	0	0	0	0	603	903	0
377	4	0	0	0	0	0	0	200	300	0	0	0	0	0	0	0	200	903	0	0	0	0	0	0	0	603	903	0
377	5	0	0	0	0	0	0	200	300	0	0	0	0	0	0	0	200	903	0	0	0	0	0	0	0	603	903	0
377	6	0	0	0	0	0	0	200	300	0	0	0	0	0	0	0	200	903	0	0	0	0	0	0	0	603	903	0
377	7	0	0	0	0	0	0	200	300	0	0	0	0	0	0	0	200	903	0	0	0	0	0	0	0	603	903	0
377	8	0	0	0	0	0	0	200	300	0	0	0	0	0	0	0	200	903	0	0	0	0	0	0	0	603	903	0
377	9	0	0	0	0	0	0	200	300	0	0	0	0	0	0	0	200	903	0	0	0	0	0	0	0	603	903	0
378	0	0	0	0	0	0	0	200	300	0	0	0	0	0	0	0	200	903	0	0	0	0	0	0	0	603	903	0
378	1	0	0	0	0	0	0	200	300	0	0	0	0	0	0	0	200	903	0	0	0	0	0	0	0	603	903	0
378	2	0	0	0	0	0	0	200	300	0	0	0	0	0	0	0	200	903	0	0	0	0	0	0	0	603	903	0
378	3	0	0	0	0	0	0	200	300	0	0	0	0	0	0	0	200	903	0	0	0	0	0	0	0	603	903	0
378	4	0	0	0	0	0	0	200	300	0	0	0	0	0	0	0	200	903	0	0	0	0	0	0	0	603	903	0
378	5	0	0	0	0	0	0	200	300	0	0	0	0	0	0	0	200	903	0	0	0	0	0	0	0	603	903	0
378	6	0	0	0	0	0	0	200	300	0	0	0	0	0	0	0	200	903	0	0	0	0	0	0	0	603	903	0
378	7	0	0	0	0	0	0	200	300	0	0	0	0	0	0	0	200	903	0	0	0	0	0	0	0	603	903	0
378	8	0	0	0	0	0	0	200	300	0	0	0	0	0	0	0	200	903	0	0	0	0	0	0	0	603	903	0
378	9	0	0	0	0	0	0	200	300	0	0	0	0	0	0	0	200	903	0	0	0	0	0	0	0	603	903	0
379	0	0	0	0	0	0	0	200	300	0	0	0	0	0	0	0	200	903	0	0	0	0	0	0	0	603	903	0
379	1	0	0	0	0	0	0	200	300	0	0	0	0	0	0	0	200	903	0	0	0	0	0	0	0	603	903	0
379	2	0	0	0	0	0	0	200	300	0	0	0	0	0	0	0	200	903	0	0	0	0	0	0	0	603	903	0
379	3	0	0	0	0	0	0	200	300	0	0	0	0	0	0	0	200	903	0	0	0	0	0	0	0	603	903	0
379	4	0	0	0	0	0	0	200	300	0	0	0	0	0	0	0	200	903	0	0	0	0	0	0	0	603	903	0
379	5	0	0	0	0	0	0	200	300	0	0	0	0	0	0	0	200	903	0	0	0	0	0	0	0	603	903	0
379	6	0	0	0	0	0	0	200	300	0	0	0	0	0	0	0	200	903	0	0	0	0	0	0	0	603	903	0
379	7	0	0	0	0	0	0	200	300	0	0	0	0	0	0	0	200	903	0	0	0	0	0	0	0	603	903	0
379	8	0	0	0	0	0	0	200	300	0	0	0	0	0	0	0	200	903	0	0	0	0	0	0	0	603	903	0
379	9	0	0	0	0	0	0	200	300	0	0	0	0	0	0	0	200	903	0	0	0	0	0	0	0	603	903	0
380	0	0	0	0	0	0	0	200	300	0	0	0	0	0	0	0	200	903	0	0	0	0	0	0	0	603	903	0
380	1	0	0	0	0	0	0	200	300	0	0	0	0	0	0	0	200	903	0	0	0	0	0	0	0	603	903	0
380	2	0	0	0	0	0	0	200	300	0	0	0	0	0	0	0	200	903	0	0	0	0	0	0	0	603	903	0
380	3	0	0	0	0	0	0	200	300	0	0	0	0	0	0	0	200	903	0	0	0	0	0	0	0	603	903	0
380	4	0	0	0	0	0	0	200	300	0	0	0	0	0	0	0	200	903	0	0	0	0	0	0	0	603	903	0
380	5	0	0	0	0	0	0	200	300	0	0	0	0	0	0	0	200	903	0	0	0	0	0	0	0	603	903	0
380	6	0	0	0	0	0	0	200	300	0	0	0	0	0	0	0	200	903	0	0	0	0	0	0	0	603	903	0
380	7	0	0	0	0	0	0	200	300	0	0	0	0	0	0	0	200	903	0	0	0	0	0	0	0	603	903	0
380	8	0	0	0	0	0	0	200	300	0	0	0	0	0	0	0	200	903	0	0	0	0	0	0	0	603	903	0
380	9	0	0	0	0	0	0	200	300	0	0	0	0	0	0	0	200	903	0	0	0	0	0	0	0	603	903	0
381	0	0	0	0	0	0	0	200	300	0	0	0	0	0	0	0	200	903	0	0	0	0	0	0	0	603	903	0
381	1	0	0	0	0	0	0	200	300	0	0	0	0	0	0	0	200	903	0	0	0	0	0	0	0	603	903	0
381	2	0	0	0	0	0	0	200	300	0	0	0	0	0	0	0	200	903	0	0	0	0	0	0	0	603	903	0
381	3	0	0	0	0	0	0	200	300	0	0	0	0	0	0	0	200	903	0	0	0	0	0	0	0	603	903	0
381	4	0	0	0	0	0	0	200	300	0	0	0	0	0	0	0	200	903	0	0	0	0	0	0	0	603	903	0
381	5	0	0	0	0	0	0	200	300	0	0	0	0	0	0	0	200	903	0	0	0	0	0	0	0	603	903	0
381	6	0	0	0	0	0	0	200	300	0	0	0	0	0	0	0	200	903	0	0	0	0	0	0	0	603	903	0
381	7	0	0	0	0	0	0	200	300	0	0	0	0	0	0	0	200	903	0	0	0	0	0	0	0	603	903	0
381	8	0	0	0	0	0	0	200	300	0	0	0	0	0	0	0	200	903	0	0	0	0	0	0	0	603	903	0
381	9	0	0	0	0	0	0	200	300	0	0	0	0	0	0	0	200	903	0	0	0	0	0	0	0	603	903	0
382	0	0	0	0	0	0	0	200	300	0	0	0	0	0	0	0	200	903	0	0	0	0	0	0	0	603	903	0
382	1	0	0	0	0	0	0	200	300	0	0	0	0	0	0	0	200	903	0	0	0	0	0	0	0	603	903	0
382	2	0	0	0	0	0	0	200	300	0	0	0	0	0	0	0	200	903	0	0	0	0	0	0	0	603	903	0
382	3	0	0	0	0	0	0	200	300	0	0	0	0	0	0	0	200	903	0	0	0	0	0	0	0	603	903	0
382	4	0	0	0	0	0	0	200	300	0	0	0	0	0	0	0	200	903	0	0	0	0	0	0	0	603	903	0
382	5	0	0	0	0	0	0	200	300	0	0	0	0	0	0	0	200	903	0	0	0	0	0	0	0	603	903	0
382	6	0	0	0	0	0	0	200	300	0	0	0	0	0	0	0	200	903	0	0	0	0	0	0	0	603	903	0
382	7	0	0	0	0	0	0	200	300	0	0	0	0	0	0	0	200	903	0	0	0	0	0	0	0	603	903	0
382	8	0	0	0	0	0	0	200	300	0	0	0	0	0	0	0	200	903	0	0	0	0	0	0	0	603	903	0
382	9	0	0	0	0	0	0	200	300	0	0	0	0	0	0	0	200	903	0	0	0	0	0	0	0	603	903	0
383	0	0	0	0	0	0	0	200	300	0	0	0	0	0	0	0	200	903	0	0	0	0	0	0	0	603	903	0
383	1	0	0	0	0	0	0	200	300	0	0	0	0	0	0	0	200	903	0	0	0	0	0	0	0	603	903	0
383	2	0	0	0	0	0	0	200	300	0	0	0	0	0	0	0	200	903	0	0	0	0	0	0	0	603	903	0
383	3	0	0	0	0	0	0	200	300	0	0	0	0	0	0	0	200	903	0	0	0	0	0	0	0	603	903	0
383	4	0	0	0	0	0	0	200	300	0	0	0	0	0	0	0	200	903	0	0	0	0	0	0	0	603	903	0
383	5	0	0	0	0	0	0	200	300	0	0	0	0	0	0	0	200	903	0	0	0	0	0	0	0	603	903	0
383	6	0	0	0	0	0	0	200	300	0	0	0	0	0	0	0	200	903	0	0	0	0	0	0	0	603	903	0
383	7	0	0	0	0	0	0	200	300	0	0	0	0	0	0	0	200	903	0	0	0	0	0	0	0	603	903	0
383	8	0	0	0	0	0	0	200	300	0	0	0	0	0	0	0	200	903	0	0	0	0	0	0	0	603	903	0
383	9	0	0	0	0	0	0	200	300	0	0	0	0	0	0	0	200	903	0	0	0	0	0	0	0	603	903	0
384	0	0	0	0	0	0	0	200	300	0	0	0	0	0	0	0	200	903	0	0	0	0	0	0	0	603	903	0
384	1	0	0	0	0	0	0	200	300	0	0	0	0	0	0	0	200	903	0	0	0	0	0	0	0	603	903	0
384	2	0	0	0	0	0	0	200	300	0	0	0	0	0	0	0	200	903	0	0	0	0	0	0	0	603	903	0
384	3	0	0	0	0	0	0	200	300	0	0	0	0	0	0	0	200	903	0	0	0	0	0	0	0	603	903	0
384	4	0	0	0	0	0	0	200	300	0	0	0	0	0	0	0	200	903	0	0	0	0	0	0	0	603	903	0
384	5	0	0	0	0	0	0	200	300	0	0	0	0	0	0	0	200	903	0	0	0	0	0	0	0	603	903	0
384	6	0	0	0	0	0	0	200	300	0	0	0	0	0	0	0	200	903	0	0	0	0	0	0	0	603	903	0
384	7	0	0	0	0	0	0	200	300	0	0	0	0	0	0	0	200	903	0	0	0	0	0	0	0	603	903	0
384	8	0	0	0	0	0	0	200	300	0	0	0	0	0	0	0	200	903	0	0	0	0	0	0	0	603	903	0
384	9	0	0	0	0	0	0	200	300	0	0	0	0	0	0	0	200	903	0	0	0	0	0	0	0	603	903	0
385	0	0	0	0	0	0	0	200	300	0	0	0	0	0	0	0	200	903	0	0	0	0	0	0	0	603	903	0
385	1	0	0	0	0	0	0	200	300	0	0	0	0	0	0	0	200	903	0	0	0	0	0	0	0	603	903	0
385	2	0	0	0	0	0	0	200	300	0	0	0	0	0	0	0	200	903	0	0	0	0	0	0	0	603	903	0
385	3	0	0	0	0	0	0	200	300	0	0	0	0	0	0	0	200	903	0	0	0	0	0	0	0	603	903	0
385	4	0	0	0	0	0	0	200	300	0	0	0	0	0	0	0	200	903	0	0	0	0	0	0	0	603	903	0
385	5	0	0	0	0	0	0	200	300	0	0	0	0	0	0	0	200	903	0	0	0	0	0	0	0	603	903	0
385	6	0	0	0	0	0	0	200	300	0	0	0	0	0	0	0	200	903	0	0	0	0	0	0	0	603	903	0
385	7	0	0	0	0	0	0	200	300	0	0	0	0	0	0	0	200	903	0	0	0	0	0	0	0	603	903	0
385	8	0	0	0	0	0	0	200	300	0	0	0	0	0	0	0	200	903	0	0	0	0	0	0	0	603	903	0
385	9	0	0	0	0	0	0	200	300	0	0	0	0	0	0	0	200	903	0	0	0	0	0	0	0	603	903	0
386	0	0	0	0	0	0	0	200	300	0	0	0	0	0	0	0	200	903	0	0	0	0	0	0	0	603	903	0
386	1	0	0	0	0	0	0	200	300	0	0	0	0	0	0	0	200	903	0	0	0	0	0	0	0	603	903	0
386	2	0	0	0	0	0	0	200	300	0	0	0	0	0	0	0	200	903	0	0	0	0	0	0	0	603	903	0
386	3	0	0	0	0	0	0	200	300	0	0	0	0	0	0	0	200	903	0	0	0	0	0	0	0	603	903	0
386	4	0	0	0	0	0	0	200	300	0	0	0	0	0	0	0	200	903	0	0	0	0	0	0	0	603	903	0
386	5	0	0	0	0	0	0	200	300	0	0	0	0	0	0	0	200	903	0	0	0	0	0	0	0	603	903	0
386	6	0	0	0	0	0	0	200	300	0	0	0	0	0	0	0	200	903	0	0	0	0	0	0	0	603	903	0
386	7	0	0	0	0	0	0	200	300	0	0	0	0	0	0	0	200	903	0	0	0	0	0	0	0	603	903	0
386	8	0	0	0	0	0	0	200	300	0	0	0	0	0	0	0	200	903	0	0	0	0	0	0	0	603	903	0
386	9	0	0	0	0	0	0	200	300	0	0	0	0	0	0	0	200	903	0	0	0	0	0	0	0	603	903	0
387	0	0	0	0	0	0	0	200	300	0	0	0	0	0	0	0	200	903	0	0	0	0	0	0	0	603	903	0
387	1	0	0	0	0	0	0	200	300	0	0	0	0	0	0	0	200	903	0	0	0	0	0	0	0	603	903	0
387	2	0	0	0	0	0	0	200	300	0	0	0	0	0	0	0	200	903	0	0	0	0	0	0	0	603	903	0
387	3	0	0	0	0	0	0	200	300	0	0	0	0	0	0	0	200	903	0	0	0	0	0	0	0	603	903	0
387	4	0	0	0	0	0	0	200	300	0	0	0	0	0	0	0	200	903	0	0	0	0	0	0	0	603	903	0
387	5	0	0	0	0	0	0	200	300	0	0	0	0	0	0	0	200	903	0	0	0	0	0	0	0	603	903	0
387	6	0	0	0	0	0	0	200	300	0	0	0	0	0	0	0	200	903	0	0	0	0	0	0	0	603	903	0
387	7	0	0	0	0	0	0	200	300	0	0	0	0	0	0	0	200	903	0	0	0	0	0	0	0	603	903	0
387	8	0	0	0	0	0	0	200	300	0	0	0	0	0	0	0	200	903	0	0	0	0	0	0	0	603	903	0
387	9	0	0	0	0	0	0	200	300	0	0	0	0	0	0	0	200	903	0	0	0	0	0	0	0	603	903	0
388	0	0	0	0	0	0	0	200	300	0	0	0	0	0	0	0	200	903	0	0	0	0	0	0	0	603	903	0
388	1	0	0	0	0	0	0	200	300	0	0	0	0	0	0	0	200	903	0	0	0	0	0	0	0	603	903	0
388	2	0	0	0	0	0	0	200	300	0	0	0	0	0	0	0	200	903	0	0	0	0	0	0	0	603	903	0
388	3	0	0	0	0	0	0	200	300	0	0	0	0	0	0	0	200	903	0	0	0	0	0	0	0	603	903	0
388	4	0	0	0	0	0	0	200	300	0	0	0	0	0	0	0	200	903	0	0	0	0	0	0	0	603	903	0
388	5	0	0	0	0	0	0	200	300	0	0	0	0	0	0	0	200	903	0	0	0	0	0	0	0	603	903	0
388	6	0	0	0	0	0	0	200	300	0	0	0	0	0	0	0	200	903	0	0	0	0	0	0	0	603	903	0
388	7	0	0	0	0	0	0	200	300	0	0	0	0	0	0	0	200	903	0	0	0	0	0	0	0	603	903	0
388	8	0	0	0	0	0	0	200	300	0	0	0	0	0	0	0	200	903	0	0	0	0	0	0	0	603	903	0
388	9	0	0	0	0	0	0	200	300	0	0	0	0	0	0	0	200	903	0	0	0	0	0	0	0	603	903	0
389	0	0	0	0	0	0	0	200	300	0	0	0	0	0	0	0	200	903	0	0	0	0	0	0	0	603	903	0
389	1	0	0	0	0	0	0	200	300	0	0	0	0	0	0	0	200	903	0	0	0	0	0	0	0	603	903	0
389	2	0	0	0	0	0	0	200	300	0	0	0	0	0	0	0	200	903	0	0	0	0	0	0	0	603	903	0
389	3	0	0	0	0	0	0	200	300	0	0	0	0	0	0	0	200	903	0	0	0	0	0	0	0	603	903	0
389	4	0	0	0	0	0	0	200	300	0	0	0	0	0	0	0	200	903	0	0	0	0	0	0	0	603	903	0
389	5	0	0	0	0	0	0	200	300	0	0	0	0	0	0	0	200	903	0	0	0	0	0	0	0	603	903	0
389	6	0	0	0	0	0	0	200	300	0	0	0	0	0	0	0	200	903	0	0	0	0	0	0	0	603	903	0
389	7	0	0	0	0	0	0	200	300	0	0	0	0	0	0	0	200	903	0	0	0	0	0	0	0	603	903	0
389	8	0	0	0	0	0	0	200	300	0	0	0	0	0	0	0	200	903	0	0	0	0	0	0	0	603	903	0
389	9	0	0	0	0	0	0	200	300	0	0	0	0	0	0	0	200	903	0	0	0	0	0	0	0	603	903	0
390	0	0	0	0	0	0	0	200	300	0	0	0	0	0	0	0	200	903	0	0	0	0	0	0	0	603	903	0
390	1	0	0	0	0	0	0	200	300	0	0	0	0	0	0	0	200	903	0	0	0	0	0	0	0	603	903	0
390	2	0	0	0	0	0	0	200	300	0	0	0	0	0	0	0	200	903	0	0	0	0	0	0	0	603	903	0
390	3	0	0	0	0	0	0	200	300	0	0	0	0	0	0	0	200	903	0	0	0	0	0	0	0	603	903	0
390	4	0	0	0	0	0	0	200	300	0	0	0	0	0	0	0	200	903	0	0	0	0	0	0	0	603	903	0
390	5	0	0	0	0	0	0	200	300	0	0	0	0	0	0	0	200	903	0	0	0	0	0	0	0	603	903	0
390	6	0	0	0	0	0	0	200	300	0	0	0	0	0	0	0	200	903	0	0	0	0	0	0	0	603	903	0
390	7	0	0	0	0	0	0	200	300	0	0	0	0	0	0	0	200	903	0	0	0	0	0	0	0	603	903	0
390	8	0	0	0	0	0	0	200	300	0	0	0	0	0	0	0	200	903	0	0	0	0	0	0	0	603	903	0
390	9	0	0	0	0	0	0	200	300	0	0	0	0	0	0	0	200	903	0	0	0	0	0	0	0	603	903	0
391	0	0	0	0	0	0	0	200	300	0	0	0	0	0	0	0	200	903	0	0	0	0	0	0	0	603	903	0
391	1	0	0	0	0	0	0	200	300	0	0	0	0	0	0	0	200	903	0	0	0	0	0	0	0	603	903	0
391	2	0	0	0	0	0	0	200	300	0	0	0	0	0	0	0	200	903	0	0	0	0	0	0	0	603	903	0
391	3	0	0	0	0	0	0	200	300	0	0	0	0	0	0	0	200	903	0	0	0	0	0	0	0	603	903	0
391	4	0	0	0	0	0	0	200	300	0	0	0	0	0	0	0	200	903	0	0	0	0	0	0	0	603	903	0
391	5	0	0	0	0	0	0	200	300	0	0	0	0	0	0	0	200	903	0	0	0	0	0	0	0	603	903	0
391	6	0	0	0	0	0	0	200	300	0	0	0	0	0	0	0	200	903	0	0	0	0	0	0	0	603	903	0
391	7	0	0	0	0	0	0	200	300	0	0	0	0	0	0	0	200	903	0	0	0	0	0	0	0	603	903	0
391	8	0	0	0	0	0	0	200	300	0	0	0	0	0	0	0	200	903	0	0	0	0	0	0	0	603	903	0
391	9	0	0	0	0	0	0	200	300	0	0	0	0	0	0	0	200	903	0	0	0	0	0	0	0	603	903	0
392	0	0	0	0	0	0	0	200	300	0	0	0	0	0	0	0	200	903	0	0	0	0	0	0	0	603	903	0
392	1	0	0	0	0	0	0	200	300	0	0	0	0	0	0	0	200	903	0	0	0	0	0	0	0	603	903	0
392	2	0	0	0	0	0	0	200	300	0	0	0	0	0	0	0	200	903	0	0	0	0	0	0	0	603	903	0
392	3	0	0	0	0	0	0	200	300	0	0	0	0	0	0	0	200	903	0	0	0	0	0	0	0	603	903	0
392	4	0	0	0	0	0	0	200	300	0	0	0	0	0	0	0	200	903	0	0	0	0	0	0	0	603	903	0
392	5	0	0	0	0	0	0	200	300	0	0	0	0	0	0	0	200	903	0	0	0	0	0	0	0	603	903	0
392	6	0	0	0	0	0	0	200	300	0	0	0	0	0	0	0	200	903	0	0	0	0	0	0	0	603	903	0
392	7	0	0	0	0	0	0	200	300	0	0	0	0	0	0	0	200	903	0	0	0	0	0	0	0	603	903	0
392	8	0	0	0	0	0	0	200	300	0	0	0	0	0	0	0	200	903	0	0	0	0	0	0	0	603	903	0
392	9	0	0	0	0	0	0	200	300	0	0	0	0	0	0	0	200	903	0	0	0	0	0	0	0	603	903	0
393	0	0	0	0	0	0	0	200	300	0	0	0	0	0	0	0	200	903	0	0	0	0	0	0	0	603	903	0
393	1	0	0	0	0	0	0	200	300	0	0	0	0	0	0	0	200	903	0	0	0	0	0	0	0	603	903	0
393	2	0	0	0	0	0	0	200	300	0	0	0	0	0	0	0	200	903	0	0	0	0	0	0	0	603	903	0
393	3	0	0	0	0	0	0	200	300	0	0	0	0	0	0	0	200	903	0	0	0	0	0	0	0	603	903	0
393	4	0	0	0	0	0	0	200	300	0	0	0	0	0	0	0	200	903	0	0	0	0	0	0	0	603	903	0
393	5	0	0	0	0	0	0	200	300	0	0	0	0	0	0	0	200	903	0	0	0	0	0	0	0	603	903	0
393	6	0	0	0	0	0	0	200	300	0	0	0	0	0	0	0	200	903	0	0	0	0	0	0	0	603	903	0
393	7	0	0	0	0	0	0	200	300	0	0	0	0	0	0	0	200	903	0	0	0	0	0	0	0	603	903	0
393	8	0	0	0	0	0	0	200	300	0	0	0	0	0	0	0	200	903	0	0	0	0	0	0	0	603	903	0
393	9	0	0	0	0	0	0	200	300	0	0	0	0	0	0	0	200	903	0	0	0	0	0	0	0	603	903	0
394	0	0	0	0	0	0	0	200	300	0	0	0	0	0	0	0	200	903	0	0	0	0	0	0	0	603	903	0
394	1	0	0	0	0	0	0	200	300	0	0	0	0	0	0	0	200	903	0	0	0	0	0	0	0	603	903	0
394	2	0	0	0	0	0	0	200	300	0	0	0	0	0	0	0	200	903	0	0	0	0	0	0	0	603	903	0
394	3	0	0	0	0	0	0	200	300	0	0	0	0	0	0	0	200	903	0	0	0	0	0	0	0	603	903	0
394	4	0	0	0	0	0	0	200	300	0	0	0	0	0	0	0	200	903	0	0	0	0	0	0	0	603	903	0
394	5	0	0	0	0	0	0	200	300	0	0	0	0	0	0	0	200	903	0	0	0	0	0	0	0	603	903	0
394	6	0	0	0	0	0	0	200	300	0	0	0	0	0	0	0	200	903	0	0	0	0	0	0	0	603	903	0
394	7	0	0	0	0	0	0	200	300	0	0	0	0	0	0	0	200	903	0	0	0	0	0	0	0	603	903	0
394	8	0	0	0	0	0	0	200	300	0	0	0	0	0	0	0	200	903	0	0	0	0	0	0	0	603	903	0
394	9	0	0	0	0	0	0	200	300	0	0	0	0	0	0	0	200	903	0	0	0	0	0	0	0	603	903	0
395	0	0	0	0	0	0	0	200	300	0	0	0	0	0	0	0	200	903	0	0	0	0	0	0	0	603	903	0
395	1	0	0	0	0	0	0	200	300	0	0	0	0	0	0	0	200	903	0	0	0	0	0	0	0	603	903	0
395	2	0	0	0	0	0	0	200	300	0	0	0	0	0	0	0	200	903	0	0	0	0	0	0	0	603	903	0
395	3	0	0	0	0	0	0	200	300	0	0	0	0	0	0	0	200	903	0	0	0	0	0	0	0	603	903	0
395	4	0	0	0	0	0	0	200	300	0	0	0	0	0	0	0	200	903	0	0	0	0	0	0	0	603	903	0
395	5	0	0	0	0	0	0	200	300	0	0	0	0	0	0	0	200	903	0	0	0	0	0	0	0	603	903	0
395	6	0	0	0	0	0	0	200	300	0	0	0	0	0	0	0	200	903	0	0	0	0	0	0	0	603	903	0
395	7	0	0	0	0	0	0	200	300	0	0	0	0	0	0	0	200	903	0	0	0	0	0	0	0	603	903	0
395	8	0	0	0	0	0	0	200	300	0	0	0	0	0	0	0	200	903	0	0	0	0	0	0	0	603	903	0
395	9	0	0	0	0	0	0	200	300	0	0	0	0	0	0	0	200	903	0	0	0	0	0	0	0	603	903	0
396	0	0	0	0	0	0	0	200	300	0	0	0	0	0	0	0	200	903	0	0	0	0	0	0	0	603	903	0
396	1	0	0	0	0	0	0	200	300	0	0	0	0	0	0	0	200	903	0	0	0	0	0	0	0	603	903	0
396	2	0	0	0	0	0	0	200	300	0	0	0	0	0	0	0	200	903	0	0	0	0	0	0	0	603	903	0
396	3	0	0	0	0	0	0	200	300	0	0	0	0	0	0	0	200	903	0	0	0	0	0	0	0	603	903	0
396	4	0	0	0	0	0	0	200	300	0	0	0	0	0	0	0	200	903	0	0	0	0	0	0	0	603	903	0
396	5	0	0	0	0	0	0	200	300	0	0	0	0	0	0	0	200	903	0	0	0	0	0	0	0	603	903	0
396	6	0	0	0	0	0	0	200	300	0	0	0	0	0	0	0	200	903	0	0	0	0	0	0	0	603	903	0
396	7	0	0	0	0	0	0	200	300	0	0	0	0	0	0	0	200	903	0	0	0	0	0	0	0	603	903	0
396	8	0	0	0	0	0	0	200	300	0	0	0	0	0	0	0	200	903	0	0	0	0	0	0	0	603	903	0
396	9	0	0	0	0	0	0	200	300	0	0	0	0	0	0	0	200	903	0	0	0	0	0	0	0	603	903	0
397	0	0	0	0	0	0	0	200	300	0	0	0	0	0	0	0	200	903	0	0	0	0	0	0	0	603	903	0
397	1	0	0	0	0	0	0	200	300	0	0	0	0	0	0	0	200	903	0	0	0	0	0	0	0	603	903	0
397	2	0	0	0	0	0	0	200	300	0	0	0	0	0	0	0	200	903	0	0	0	0	0	0	0	603	903	0
397	3	0	0	0	0	0	0	200	300	0	0	0	0	0	0	0	200	903	0	0	0	0	0	0	0	603	903	0
397	4	0	0	0	0	0	0	200	300	0	0	0	0	0	0	0	200	903	0	0	0	0	0	0	0	603	903	0
397	5	0	0	0	0	0	0	200	300	0	0	0	0	0	0	0	200	903	0	0	0	0	0	0	0	603	903	0
397	6	0	0	0	0	0	0	200	300	0	0	0	0	0	0	0	200	903	0	0	0	0	0	0	0	603	903	0
397	7	0	0	0	0	0	0	200	300	0	0	0	0	0	0	0	200	903	0	0	0	0	0	0	0	603	903	0
397	8	0	0	0	0	0	0	200	300	0	0	0	0	0	0	0	200	903	0	0	0	0	0	0	0	603	903	0
397	9	0	0	0	0	0	0	200	300	0	0	0	0	0	0	0	200	903	0	0	0	0	0	0	0	603	903	0
398	0	0	0	0	0	0	0	200	300	0	0	0	0	0	0	0	200	903	0	0	0	0	0	0	0	603	903	0
398	1	0	0	0	0	0	0	200	300	0	0	0	0	0	0	0	200	903	0	0	0	0	0	0	0	603	903	0
398	2	0	0	0	0	0	0	200	300	0	0	0	0	0	0	0	200	903	0	0	0	0	0	0	0	603	903	0
398	3	0	0	0	0	0	0	200	300	0	0	0	0	0	0	0	200	903	0	0	0	0	0	0	0	603	903	0
398	4	0	0	0	0	0	0	200	300	0	0	0	0	0	0	0	200	903	0	0	0	0	0	0	0	603	903	0
398	5	0	0	0	0	0	0	200	300	0	0	0	0	0	0	0	200	903	0	0	0	0	0	0	0	603	903	0
398	6	0	0	0	0	0	0	200	300	0	0	0	0	0	0	0	200	903	0	0	0	0	0	0	0	603	903	0
398	7	0	0	0	0	0	0	200	300	0	0	0	0	0	0	0	200	903	0	0	0	0	0	0	0	603	903	0
398	8	0	0	0	0	0	0	200	300	0	0	0	0	0	0	0	200	903	0	0	0	0	0	0	0	603	903	0
398	9	0	0	0	0	0	0	200	300	0	0	0	0	0	0	0	200	903	0	0	0	0	0	0	0	603	903	0
399	0	0	0	0	0	0	0	200	300	0	0	0	0	0	0	0	200	903	0	0	0	0	0	0	0	603	903	0
399	1	0	0	0	0	0	0	200	300	0	0	0	0	0	0	0	200	903	0	0	0	0	0	0	0	603	903	0
399	2	0	0	0	0	0	0	200	300	0	0	0	0	0	0	0	200	903	0	0	0	0	0	0	0	603	903	0
399	3	0	0	0	0	0	0	200	300	0	0	0	0	0	0	0	200	903	0	0	0	0	0	0	0	603	903	0
399	4	0	0	0	0	0	0	200	300	0	0	0	0	0	0	0	200	903	0	0	0	0	0	0	0	603	903	0
399	5	0	0	0	0	0	0	200	300	0	0	0	0	0	0	0	200	903	0	0	0	0	0	0	0	603	903	0
399	6	0	0	0	0	0	0	200	300	0	0	0	0	0	0	0	200	903	0	0	0	0	0	0	0	603	903	0
399	7	0	0	0	0	0	0	200	300	0	0	0	0	0	0	0	200	903	0	0	0	0	0	0	0	603	903	0
399	8	0	0	0	0	0	0	200	300	0	0	0	0	0	0	0	200	903	0	0	0	0	0	0	0	603	903	0
399	9	0	0	0	0	0	0	200	300	0	0	0	0	0	0	0	200	903	0	0	0	0	0	0	0	603	903	0
400	0	0	0	0	0	0	0	200	300	0	0	0	0	0	0	0	200	903	0	0	0	0	0	0	0	603	903	0
400	1	0	0	0	0	0	0	200	300	0	0	0	0	0	0	0	200	903	0	0	0	0	0	0	0	603	903	0
400	2	0	0	0	0	0	0	200	300	0	0	0	0	0	0	0	200	903	0	0	0	0	0	0	0	603	903	0
400	3	0	0	0	0	0	0	200	300	0	0	0	0	0	0	0	200	903	0	0	0	0	0	0	0	603	903	0
400	4	0	0	0	0	0	0	200	300	0	0	0	0	0	0	0	200	903	0	0	0	0	0	0	0	603	903	0
400	5	0	0	0	0	0	0	200	300	0	0	0	0	0	0	0	200	903	0	0	0	0	0	0	0	603	903	0
400	6	0	0	0	0	0	0	200	300	0	0	0	0	0	0	0	200	903	0	0	0	0	0	0	0	603	903	0
400	7	0	0	0	0	0	0	200	300	0	0	0	0	0	0	0	200	903	0	0	0	0	0	0	0	603	903	0
400	8	0	0	0	0	0	0	200	300	0	0	0	0	0	0	0	200	903	0	0	0	0	0	0	0	603	903	0
400	9	0	0	0	0	0	0	200	300	0	0	0	0	0	0	0	200	903	0	0	0	0	0	0	0	603	903	0
401	0	0	0	0	0	0	0	200	300	0	0	0	0	0	0	0	200	903	0	0	0	0	0	0	0	603	903	0
401	1	0	0	0	0	0	0	200	300	0	0	0	0	0	0	0	200	903	0	0	0	0	0	0	0	603	903	0
401	2	0	0	0	0	0	0	200	300	0	0	0	0	0	0	0	200	903	0	0	0	0	0	0	0	603	903	0
401	3	0	0	0	0	0	0	200	300	0	0	0	0	0	0	0	200	903	0	0	0	0	0	0	0	603	903	0
401	4	0	0	0	0	0	0	200	300	0	0	0	0	0	0	0	200	903	0	0	0	0	0	0	0	603	903	0
401	5	0	0	0	0	0	0	200	300	0	0	0	0	0	0	0	200	903	0	0	0	0	0	0	0	603	903	0
401	6	0	0	0	0	0	0	200	300	0	0	0	0	0	0	0	200	903	0	0	0	0	0	0	0	603	903	0
401	7	0	0	0	0	0	0	200	300	0	0	0	0	0	0	0	200	903	0	0	0	0	0	0	0	603	903	0
401	8	0	0	0	0	0	0	200	300	0	0	0	0	0	0	0	200	903	0	0	0	0	0	0	0	603	903	0
401	9	0	0	0	0	0	0	200	300	0	0	0	0	0	0	0	200	903	0	0	0	0	0	0	0	603	903	0
402	0	0	0	0	0	0	0	200	300	0	0	0	0	0	0	0	200	903	0	0	0	0	0	0	0	603	903	0
402	1	0	0	0	0	0	0	200	300	0	0	0	0	0	0	0	200	903	0	0	0	0	0	0	0	603	903	0
402	2	0	0	0	0	0	0	200	300	0	0	0	0	0	0	0	200	903	0	0	0	0	0	0	0	603	903	0
402	3	0	0	0	0	0	0	200	300	0	0	0	0	0	0	0	200	903	0	0	0	0	0	0	0	603	903	0
402	4	0	0	0	0	0	0	200	300	0	0	0	0	0	0	0	200	903	0	0	0	0	0	0	0	603	903	0
402	5	0	0	0	0	0	0	200	300	0	0	0	0	0	0	0	200	903	0	0	0	0	0	0	0	603	903	0
402	6	0	0	0	0	0	0	200	300	0	0	0	0	0	0	0	200	903	0	0	0	0	0	0	0	603	903	0
402	7	0	0	0	0	0	0	200	300	0	0	0	0	0	0	0	200	903	0	0	0	0	0	0	0	603	903	0
402	8	0	0	0	0	0	0	200	300	0	0	0	0	0	0	0	200	903	0	0	0	0	0	0	0	603	903	0
402	9	0	0	0	0	0	0	200	300	0	0	0	0	0	0	0	200	903	0	0	0	0	0	0	0	603	903	0
403	0	0	0	0	0	0	0	200	300	0	0	0	0	0	0	0	200	903	0	0	0	0	0	0	0	603	903	0
403	1	0	0	0	0	0	0	200	300	0	0	0	0	0	0	0	200	903	0	0	0	0	0	0	0	603	903	0
403	2	0	0	0	0	0	0	200	300	0	0	0	0	0	0	0	200	903	0	0	0	0	0	0	0	603	903	0
403	3	0	0	0	0	0	0	200	300	0	0	0	0	0	0	0	200	903	0	0	0	0	0	0	0	603	903	0
403	4	0	0	0	0	0	0	200	300	0	0	0	0	0	0	0	200	903	0	0	0	0	0	0	0	603	903	0
403	5	0	0	0	0	0	0	200	300	0	0	0	0	0	0	0	200	903	0	0	0	0	0	0	0	603	903	0
403	6	0	0	0	0	0	0	200	300	0	0	0	0	0	0	0	200	903	0	0	0	0	0	0	0	603	903	0
403	7	0	0	0	0	0	0	200	300	0	0	0	0	0	0	0	200	903	0	0	0	0	0	0	0	603	903	0
403	8	0	0	0	0	0	0	200	300	0	0	0	0	0	0	0	200	903	0	0	0	0	0	0	0	603	903	0
403	9	0	0	0	0	0	0	200	300	0	0	0	0	0	0	0	200	903	0	0	0	0	0	0	0	603	903	0
404	0	0	0	0	0	0	0	200	300	0	0	0	0	0	0	0	200	903	0	0	0	0	0	0	0	603	903	0
404	1	0	0	0	0	0	0	200	300	0	0	0	0	0	0	0	200	903	0	0	0	0	0	0	0	603	903	0
404	2	0	0	0	0	0	0	200	300	0	0	0	0	0	0	0	200	903	0	0	0	0	0	0	0	603	903	0
404	3	0	0	0	0	0	0	200	300	0	0	0	0	0	0	0	200	903	0	0	0	0	0	0	0	603	903	0
404	4	0	0	0	0	0	0	200	300	0	0	0	0	0	0	0	200	903	0	0	0	0	0	0	0	603	903	0
404	5	0	0	0	0	0	0	200	300	0	0	0	0	0	0	0	200	903	0	0	0	0	0	0	0	603	903	0
404	6	0	0	0	0	0	0	200	300	0	0	0	0	0	0	0	200	903	0	0	0	0	0	0	0	603	903	0
404	7	0	0	0	0	0	0	200	300	0	0	0	0	0	0	0	200	903	0	0	0	0	0	0	0	603	903	0
404	8	0	0	0	0	0	0	200	300	0	0	0	0	0	0	0	200	903	0	0	0	0	0	0	0	603	903	0
404	9	0	0	0	0	0	0	200	300	0	0	0	0	0	0	0	200	903	0	0	0	0	0	0	0	603	903	0
405	0	0	0	0	0	0	0	200	300	0	0	0	0	0	0	0	200	903	0	0	0	0	0	0	0	603	903	0
405	1	0	0	0	0	0	0	200	300	0	0	0	0	0	0	0	200	903	0	0	0	0	0	0	0	603	903	0
405	2	0	0	0	0	0	0	200	300	0	0	0	0	0	0	0	200	903	0	0	0	0	0	0	0	603	903	0
405	3	0	0	0	0	0	0	200	300	0	0	0	0	0	0	0	200	903	0	0	0	0	0	0	0	603	903	0
405	4	0	0	0	0	0	0	200	300	0	0	0	0	0	0	0	200	903	0	0	0	0	0	0	0	603	903	0
405	5	0	0	0	0	0	0	200	300	0	0	0	0	0	0	0	200	903	0	0	0	0	0	0	0	603	903	0
405	6	0	0	0	0	0	0	200	300	0	0	0	0	0	0	0	200	903	0	0	0	0	0	0	0	603	903	0
405	7	0	0	0	0	0	0	200	300	0	0	0	0	0	0	0	200	903	0	0	0	0	0	0	0	603	903	0
405	8	0	0	0	0	0	0	200	300	0	0	0	0	0	0	0	200	903	0	0	0	0	0	0	0	603	903	0
405	9	0	0	0	0	0	0	200	300	0	0	0	0	0	0	0	200	903	0	0	0	0	0	0	0	603	903	0
406	0	0	0	0	0	0	0	200	300	0	0	0	0	0	0	0	200	903	0	0	0	0	0	0	0	603	903	0
406	1	0	0	0	0	0	0	200	300	0	0	0	0	0	0	0	200	903	0	0	0	0	0	0	0	603	903	0
406	2	0	0	0	0	0	0	200	300	0	0	0	0	0	0	0	200	903	0	0	0	0	0	0	0	603	903	0
406	3	0	0	0	0	0	0	200	300	0	0	0	0	0	0	0	200	903	0	0	0	0	0	0	0	603	903	0
406	4	0	0	0	0	0	0	200	300	0	0	0	0	0	0	0	200	903	0	0	0	0	0	0	0	603	903	0
406	5	0	0	0	0	0	0	200	300	0	0	0	0	0	0	0	200	903	0	0	0	0	0	0	0	603	903	0
406	6	0	0	0	0	0	0	200	300	0	0	0	0	0	0	0	200	903	0	0	0	0	0	0	0	603	903	0
406	7	0	0	0	0	0	0	200	300	0	0	0	0	0	0	0	200	903	0	0	0	0	0	0	0	603	903	0
406	8	0	0	0	0	0	0	200	300	0	0	0	0	0	0	0	200	903	0	0	0	0	0	0	0	603	903	0
406	9	0	0	0	0	0	0	200	300	0	0	0	0	0	0	0	200	903	0	0	0	0	0	0	0	603	903	0
407	0	0	0	0	0	0	0	200	300	0	0	0	0	0	0	0	200	903	0	0	0	0	0	0	0	603	903	0
407	1	0	0	0	0	0	0	200	300	0	0	0	0	0	0	0	200	903	0	0	0	0	0	0	0	603	903	0
407	2	0	0	0	0	0	0	200	300	0	0	0	0	0	0	0	200	903	0	0	0	0	0	0	0	603	903	0
407	3	0	0	0	0	0	0	200	300	0	0	0	0	0	0	0	200	903	0	0	0	0	0	0	0	603	903	0
407	4	0	0	0	0	0	0	200	300	0	0	0	0	0	0	0	200	903	0	0	0	0	0	0	0	603	903	0
407	5	0	0	0	0	0	0	200	300	0	0	0	0	0	0	0	200	903	0	0	0	0	0	0	0	603	903	0
407	6	0	0	0	0	0	0	200	300	0	0	0	0	0	0	0	200	903	0	0	0	0	0	0	0	603	903	0
407	7	0	0	0	0	0	0	200	300	0	0	0	0	0	0	0	200	903	0	0	0	0	0	0	0	603	903	0
407	8	0	0	0	0	0	0	200	300	0	0	0	0	0	0	0	200	903	0	0	0	0	0	0	0	603	903	0
407	9	0	0	0	0	0	0	200	300	0	0	0	0	0	0	0	200	903	0	0	0	0	0	0	0	603	903	0
408	0	0	0	0	0	0	0	200	300	0	0	0	0	0	0	0	200	903	0	0	0	0	0	0	0	603	903	0
408	1	0	0	0	0	0	0	200	300	0	0	0	0	0	0	0	200	903	0	0	0	0	0	0	0	603	903	0
408	2	0	0	0	0	0	0	200	300	0	0	0	0	0	0	0	200	903	0	0	0	0	0	0	0	603	903	0
408	3	0	0	0	0	0	0	200	300	0	0	0	0	0	0	0	200	903	0	0	0	0	0	0	0	603	903	0
408	4	0	0	0	0	0	0	200	300	0	0	0	0	0	0	0	200	903	0	0	0	0	0	0	0	603	903	0
408	5	0	0	0	0	0	0	200	300	0	0	0	0	0	0	0	200	903	0	0	0	0	0	0	0	603	903	0
408	6	0	0	0	0	0	0	200	300	0	0	0	0	0	0	0	200	903	0	0	0	0	0	0	0	603	903	0
408	7	0	0	0	0	0	0	200	300	0	0	0	0	0	0	0	200	903	0	0	0	0	0	0	0	603	903	0
408	8	0	0	0	0	0	0	200	300	0	0	0	0	0	0	0	200	903	0	0	0	0	0	0	0	603	903	0
408	9	0	0	0	0	0	0	200	300	0	0	0	0	0	0	0	200	903	0	0	0	0	0	0	0	603	903	0
409	0	0	0	0	0	0	0	200	300	0	0	0	0	0	0	0	200	903	0	0	0	0	0	0	0	603	903	0
409	1	0	0	0	0	0	0	200	300	0	0	0	0	0	0	0	200	903	0	0	0	0	0	0	0	603	903	0
409	2	0	0	0	0	0	0	200	300	0	0	0	0	0	0	0	200	903	0	0	0	0	0	0	0	603	903	0
409	3	0	0	0	0	0	0	200	300	0	0	0	0	0	0	0	200	903	0	0	0	0	0	0	0	603	903	0
409	4	0	0	0	0	0	0	200	300	0	0	0	0	0	0	0	200	903	0	0	0	0	0	0	0	603	903	0
409	5	0	0	0	0	0	0	200	300	0	0	0	0	0	0	0	200	903	0	0	0	0	0	0	0	603	903	0
409	6	0	0	0	0	0	0	200	300	0	0	0	0	0	0	0	200	903	0	0	0	0	0	0	0	603	903	0
409	7	0	0	0	0	0	0	200	300	0	0	0	0	0	0	0	200	903	0	0	0	0	0	0	0	603	903	0
409	8	0	0	0	0	0	0	200	300	0	0	0	0	0	0	0	200	903	0	0	0	0	0	0	0	603	903	0
409	9	0	0	0	0	0	0	200	300	0	0	0	0	0	0	0	200	903	0	0	0	0	0	0	0	603	903	0
410	0	0	0	0	0	0	0	200	300	0	0	0	0	0	0	0	200	903	0	0	0	0	0	0	0	603	903	0
410	1	0	0	0	0	0	0	200	300	0	0	0	0	0	0	0	200	903	0	0	0	0	0	0	0	603	903	0
410	2	0	0	0	0	0	0	200	300	0	0	0	0	0	0	0	200	903	0	0	0	0	0	0	0	603	903	0
410	3	0	0	0	0	0	0	200	300	0	0	0	0	0	0	0	200	903	0	0	0	0	0	0	0	603	903	0
410	4	0	0	0	0	0	0	200	300	0	0	0	0	0	0	0	200	903	0	0	0	0	0	0	0	603	903	0
410	5	0	0	0	0	0	0	200	300	0	0	0	0	0	0	0	200	903	0	0	0	0	0	0	0	603	903	0
410	6	0	0	0	0	0	0	200	300	0	0	0	0	0	0	0	200	903	0	0	0	0	0	0	0	603	903	0
410	7	0	0	0	0	0	0	200	300	0	0	0	0	0	0	0	200	903	0	0	0	0	0	0	0	603	903	0
410	8	0	0	0	0	0	0	200	300	0	0	0	0	0	0	0	200	903	0	0	0	0	0	0	0	603	903	0
410	9	0	0	0	0	0	0	200	300	0	0	0	0	0	0	0	200	903	0	0	0	0	0	0	0	603	903	0
411	0	0	0	0	0	0	0	200	300	0	0	0	0	0	0	0	200	903	0	0	0	0	0	0	0	603	903	0
411	1	0	0	0	0	0	0	200	300	0	0	0	0	0	0	0	200	903	0	0	0	0	0	0	0	603	903	0
411	2	0	0	0	0	0	0	200	300	0	0	0	0	0	0	0	200	903	0	0	0	0	0	0	0	603	903	0
411	3	0	0	0	0	0	0	200	300	0	0	0	0	0	0	0	200	903	0	0	0	0	0	0	0	603	903	0
411	4	0	0	0	0	0	0	200	300	0	0	0	0	0	0	0	200	903	0	0	0	0	0	0	0	603	903	0
411	5	0	0	0	0	0	0	200	300	0	0	0	0	0	0	0	200	903	0	0	0	0	0	0	0	603	903	0
411	6	0	0	0	0	0	0	200	300	0	0	0	0	0	0	0	200	903	0	0	0	0	0	0	0	603	903	0
411	7	0	0	0	0	0	0	200	300	0	0	0	0	0	0	0	200	903	0	0	0	0	0	0	0	603	903	0
411	8	0	0	0	0	0	0	200	300	0	0	0	0	0	0	0	200	903	0	0	0	0	0	0	0	603	903	0
411	9	0	0	0	0	0	0	200	300	0	0	0	0	0	0	0	200	903	0	0	0	0	0	0	0	603	903	0
412	0	0	0	0	0	0	0	200	300	0	0	0	0	0	0	0	200	903	0	0	0	0	0	0	0	603	903	0
412	1	0	0	0	0	0	0	200	300	0	0	0	0	0	0	0	200	903	0	0	0	0	0	0	0	603	903	0
412	2	0	0	0	0	0	0	200	300	0	0	0	0	0	0	0	200	903	0	0	0	0	0	0	0	603	903	0
412	3	0	0	0	0	0	0	200	300	0	0	0	0	0	0	0	200	903	0	0	0	0	0	0	0	603	903	0
412	4	0	0	0	0	0	0	200	300	0	0	0	0	0	0	0	200	903	0	0	0	0	0	0	0	603	903	0
412	5	0	0	0	0	0	0	200	300	0	0	0	0	0	0	0	200	903	0	0	0	0	0	0	0	603	903	0
412	6	0	0	0	0	0	0	200	300	0	0	0	0	0	0	0	200	903	0	0	0	0	0	0	0	603	903	0
412	7	0	0	0	0	0	0	200	300	0	0	0	0	0	0	0	200	903	0	0	0	0	0	0	0	603	903	0
412	8	0	0	0	0	0	0	200	300	0	0	0	0	0	0	0	200	903	0	0	0	0	0	0	0	603	903	0
412	9	0	0	0	0	0	0	200	300	0	0	0	0	0	0	0	200	903	0	0	0	0	0	0	0	603	903	0
413	0	0	0	0	0	0	0	200	300	0	0	0	0	0	0	0	200	903	0	0	0	0	0	0	0	603	903	0
413	1	0	0	0	0	0	0	200	300	0	0	0	0	0	0	0	200	903	0	0	0	0	0	0	0	603	903	0
413	2	0	0	0	0	0	0	200	300	0	0	0	0	0	0	0	200	903	0	0	0	0	0	0	0	603	903	0
413	3	0	0	0	0	0	0	200	300	0	0	0	0	0	0	0	200	903	0	0	0	0	0	0	0	603	903	0
413	4	0	0	0	0	0	0	200	300	0	0	0	0	0	0	0	200	903	0	0	0	0	0	0	0	603	903	0
413	5	0	0	0	0	0	0	200	300	0	0	0	0	0	0	0	200	903	0	0	0	0	0	0	0	603	903	0
413	6	0	0	0	0	0	0	200	300	0	0	0	0	0	0	0	200	903	0	0	0	0	0	0	0	603	903	0
413	7	0	0	0	0	0	0	200	300	0	0	0	0	0	0	0	200	903	0	0	0	0	0	0	0	603	903	0
413	8	0	0	0	0	0	0	200	300	0	0	0	0	0	0	0	200	903	0	0	0	0	0	0	0	603	903	0
413	9	0	0	0	0	0	0	200	300	0	0	0	0	0	0	0	200	903	0	0	0	0	0	0	0	603	903	0
414	0	0	0	0	0	0	0	200	300	0	0	0	0	0	0	0	200	903	0	0	0	0	0	0	0	603	903	0
414	1	0	0	0	0	0	0	200	300	0	0	0	0	0	0	0	200	903	0	0	0	0	0	0	0	603	903	0
414	2	0	0	0	0	0	0	200	300	0	0	0	0	0	0	0	200	903	0	0	0	0	0	0	0	603	903	0
414	3	0	0	0	0	0	0	200	300	0	0	0	0	0	0	0	200	903	0	0	0	0	0	0	0	603	903	0
414	4	0	0	0	0	0	0	200	300	0	0	0	0	0	0	0	200	903	0	0	0	0	0	0	0	603	903	0
414	5	0	0	0	0	0	0	200	300	0	0	0	0	0	0	0	200	903	0	0	0	0	0	0	0	603	903	0
414	6	0	0	0	0	0	0	200	300	0	0	0	0	0	0	0	200	903	0	0	0	0	0	0	0	603	903	0
414	7	0	0	0	0	0	0	200	300	0	0	0	0	0	0	0	200	903	0	0	0	0	0	0	0	603	903	0
414	8	0	0	0	0	0	0	200	300	0	0	0	0	0	0	0	200	903	0	0	0	0	0	0	0	603	903	0
414	9	0	0	0	0	0	0	200	300	0	0	0	0	0	0	0	200	903	0	0	0	0	0	0	0	603	903	0
415	0	0	0	0	0	0	0	200	300	0	0	0	0	0	0	0	200	903	0	0	0	0	0	0	0	603	903	0
415	1	0	0	0	0	0	0	200	300	0	0	0	0	0	0	0	200	903	0	0	0	0	0	0	0	603	903	0
415	2	0	0	0	0	0	0	200	300	0	0	0	0	0	0	0	200	903	0	0	0	0	0	0	0	603	903	0
415	3	0	0	0	0	0	0	200	300	0	0	0	0	0	0	0	200	903	0	0	0	0	0	0	0	603	903	0
415	4	0	0	0	0	0	0	200	300	0	0	0	0	0	0	0	200	903	0	0	0	0	0	0	0	603	903	0
415	5	0	0	0	0	0	0	200	300	0	0	0	0	0	0	0	200	903	0	0	0	0	0	0	0	603	903	0
415	6	0	0	0	0	0	0	200	300	0	0	0	0	0	0	0	200	903	0	0	0	0	0	0	0	603	903	0
415	7	0	0	0	0	0	0	200	300	0	0	0	0	0	0	0	200	903	0	0	0	0	0	0	0	603	903	0
415	8	0	0	0	0	0	0	200	300	0	0	0	0	0	0	0	200	903	0	0	0	0	0	0	0	603	903	0
415	9	0	0	0	0	0	0	200	300	0	0	0	0	0	0	0	200	903	0	0	0	0	0	0	0	603	903	0
416	0	0	0	0	0	0	0	200	300	0	0	0	0	0	0	0	200	903	0	0	0	0	0	0	0	603	903	0
416	1	0	0	0	0	0	0	200	300	0	0	0	0	0	0	0	200	903	0	0	0	0	0	0	0	603	903	0
416	2	0	0	0	0	0	0	200	300	0	0	0	0	0	0	0	200	903	0	0	0	0	0	0	0	603	903	0
416	3	0	0	0	0	0	0	200	300	0	0	0	0	0	0	0	200	903	0	0	0	0	0	0	0	603	903	0
416	4	0	0	0	0	0	0	200	300	0	0	0	0	0	0	0	200	903	0	0	0	0	0	0	0	603	903	0
416	5	0	0	0	0	0	0	200	300	0	0	0	0	0	0	0	200	903	0	0	0	0	0	0	0	603	903	0
416	6	0	0	0	0	0	0	200	300	0	0	0	0	0	0	0	200	903	0	0	0	0	0	0	0	603	903	0
416	7	0	0	0	0	0	0	200	300	0	0	0	0	0	0	0	200	903	0	0	0	0	0	0	0	603	903	0
416	8	0	0	0	0	0	0	200	300	0	0	0	0	0	0	0	200	903	0	0	0	0	0	0	0	603	903	0
416	9	0	0	0	0	0	0	200	300	0	0	0	0	0	0	0	200	903	0	0	0	0	0	0	0	603	903	0
417	0	0	0	0	0	0	0	200	300	0	0	0	0	0	0	0	200	903	0	0	0	0	0	0	0	603	903	0
417	1	0	0	0	0	0	0	200	300	0	0	0	0	0	0	0	200	903	0	0	0	0	0	0	0	603	903	0
417	2	0	0	0	0	0	0	200	300	0	3.73841	-12.3648	-19.1162	-3028.56	-342.224	534.256	182.098	1061.43	0	0	0	0	0	0	0	603	903	0
417	3	0	0	0	0	0	0	200	300	0	0	0	0	0	0	0	200	903	0	0	0	0	0	0	0	603	903	0
417	4	0	0	0	0	0	0	200	300	0	0	0	0	0	0	0	200	903	0	0	0	0	0	0	0	603	903	0
417	5	0	0	0	0	0	0	200	300	0	0	0	0	0	0	0	200	903	0	0	0	0	0	0	0	603	903	0
417	6	0	0	0	0	0	0	200	300	0	0	0	0	0	0	0	200	903	0	0	0	0	0	0	0	603	903	0
417	7	0	0	0	0	0	0	200	300	0	-0.686642	-1.0733	-23.3887	-3760.99	-586.365	808.914	174.93	1063.8	0	0	0	0	0	0	0	603	903	0
417	8	0	0	0	0	0	0	200	300	0	-1.60217	1.36811	-24.3042	-3669.43	-830.506	442.703	165.829	1053.98	0	0	0	0	0	0	0	603	903	0
417	9	0	0	0	0	0	0	200	300	0	0.839237	4.87763	-27.6611	-4127.19	-1013.61	488.48	163.356	1052.21	0	0	0	0	0	0	0	603	903	0
418	0	0	0	0	0	0	0	200	300	0	-0.07629	11.4389	-33.1543	-5225.83	-708.435	534.256	178.632	1060.62	0	0	0	0	0	0	0	603	903	0
418	1	0	0	0	0	0	0	200	300	0	-3.58581	16.4743	-38.9526	-5958.25	-1135.68	122.269	170.845	1055.96	0	0	0	0	0	0	0	603	903	0
418	2	0	0	0	0	0	0	200	300	0	-2.5177	15.5588	-43.5303	-5592.04	-1562.93	305.374	164.096	1031.46	0	0	0	0	0	0	0	603	903	0
418	3	0	0	0	0	0	0	200	300	0	1.60218	14.6433	-46.582	-6141.35	-1623.96	122.269	165.138	1034.84	0	0	0	0	0	0	0	603	903	0
418	4	0	0	0	0	0	0	200	300	0	1.75476	16.0165	-55.7373	-7239.99	-1746.03	-152.39	168.674	1032.9	0	0	0	0	0	0	0	603	903	0
418	5	0	0	0	0	0	0	200	300	0	-0.381466	14.4907	-59.7046	-7697.75	-1807.07	-106.613	169.733	1031.93	0	0	0	0	0	0	0	603	903	0
418	6	0	0	0	0	0	0	200	300	0	2.21253	10.9811	-61.5356	-8338.62	-1929.14	-243.942	168.65	1038.51	0	0	0	0	0	0	0	603	903	0
418	7	0	0	0	0	0	0	200	300	0	2.97547	12.6596	-67.9443	-8430.17	-1623.96	-106.613	176.099	1027.07	0	0	0	0	0	0	0	603	903	0
418	8	0	0	0	0	0	0	200	300	0	5.1117	15.864	-76.1841	-9071.04	-1990.17	-381.272	173.877	1022.07	0	0	0	0	0	0	0	603	903	0
418	9	0	0	0	0	0	0	200	300	0	4.95911	13.7277	-83.5083	-10169.7	-2173.28	-564.377	173.975	1024.78	0	0	0	0	0	0	0	603	903	0
419	0	0	0	0	0	0	0	200	300	0	5.41687	16.4743	-91.1377	-10902.1	-2234.31	-884.812	175.484	1022.62	0	0	0	0	0	0	0	603	903	0
419	1	0	0	0	0	0	0	200	300	0	8.77381	22.1201	-97.8516	-11451.4	-2417.42	-1113.69	175.295	1020.03	0	0	0	0	0	0	0	603	903	0
419	2	0	0	0	0	0	0	200	300	0	12.2833	23.7985	-106.396	-12550.1	-2417.42	-1205.25	177.279	1020.96	0	0	0	0	0	0	0	603	903	0
419	3	0	0	0	0	0	0	200	300	0	12.8937	23.7985	-114.331	-13190.9	-2661.56	-1571.46	176.721	1018.37	0	0	0	0	0	0	0	603	903	0
419	4	0	0	0	0	0	0	200	300	0	14.4196	26.0873	-124.402	-14198	-2783.63	-1663.01	177.624	1017.13	0	0	0	0	0	0	0	603	903	0
419	5	0	0	0	0	0	0	200	300	0	15.7929	28.071	-131.116	-15296.6	-2478.45	-1937.67	181.097	1019.67	0	0	0	0	0	0	0	603	903	0
419	6	0	0	0	0	0	0	200	300	0	17.4713	24.7141	-138.44	-15388.2	-2661.56	-1754.56	180.775	1014.15	0	0	0	0	0	0	0	603	903	0
419	7	0	0	0	0	0	0	200	300	0	19.7601	21.9675	-147.595	-16212.2	-3271.91	-1846.12	177.832	1012.84	0	0	0	0	0	0	0	603	903	0
419	8	0	0	0	0	0	0	200	300	0	20.0653	24.8666	-154.004	-16761.5	-3027.77	-1983.44	180.34	1011.84	0	0	0	0	0	0	0	603	903	0
419	9	0	0	0	0	0	0	200	300	0	22.6593	23.9511	-161.938	-17493.9	-2844.67	-1846.12	182.434	1011.03	0	0	0	0	0	0	0	603	903	0
420	0	0	0	0	0	0	0	200	300	0	24.7955	18.9157	-169.568	-18958.7	-3149.84	-1525.68	181.424	1014.81	0	0	0	0	0	0	0	603	903	0
420	1	0	0	0	0	0	0	200	300	0	24.3378	19.9838	-179.028	-18958.7	-3088.81	-1846.12	182.747	1008.9	0	0	0	0	0	0	0	603	903	0
420	2	0	0	0	0	0	0	200	300	0	26.1688	19.5261	-186.353	-19782.7	-3393.98	-1754.56	181.787	1009.16	0	0	0	0	0	0	0	603	903	0
420	3	0	0	0	0	0	0	200	300	0	27.9999	14.7958	-193.982	-20881.3	-3210.88	-1663.01	183.448	1010.65	0	0	0	0	0	0	0	603	903	0
420	4	0	0	0	0	0	0	200	300	0	28.3051	13.8803	-200.696	-21430.7	-3821.23	-1251.02	180.96	1009.78	0	0	0	0	0	0	0	603	903	0
420	5	0	0	0	0	0	0	200	300	0	27.0844	13.27	-208.63	-20606.7	-3882.26	-1342.58	181.392	1001.77	0	0	0	0	0	0	0	603	903	0
420	6	0	0	0	0	0	0	200	300	0	29.6783	8.9975	-215.039	-21980	-3516.05	-1388.35	183.649	1005.21	0	0	0	0	0	0	0	603	903	0
420	7	0	0	0	0	0	0	200	300	0	31.5094	4.72504	-222.363	-22895.5	-3882.26	-1251.02	182.541	1005.96	0	0	0	0	0	0	0	603	903	0
420	8	0	0	0	0	0	0	200	300	0	30.5939	2.89399	-227.551	-23627.9	-4370.54	-930.588	180.793	1006.84	0	0	0	0	0	0	0	603	903	0
420	9	0	0	0	0	0	0	200	300	0	30.5939	-0.157772	-235.486	-24360.4	-4126.4	-701.706	182.477	1006.45	0	0	0	0	0	0	0	603	903	0
421	0	0	0	0	0	0	0	200	300	0	30.1361	-5.04058	-240.674	-24085.7	-4248.47	-747.483	182.348	1003.08	0	0	0	0	0	0	0	603	903	0
421	1	0	0	0	0	0	0	200	300	0	33.0353	-6.71905	-246.472	-24635	-4736.76	-381.272	180.782	1002.95	0	0	0	0	0	0	0	603	903	0
421	2	0	0	0	0	0	0	200	300	0	31.8146	-8.24493	-254.102	-25275.9	-4797.79	-198.166	181.119	1002.47	0	0	0	0	0	0	0	603	903	0
421	3	0	0	0	0	0	0	200	300	0	31.9672	-12.67	-263.562	-24818.1	-4553.65	-15.0605	182.723	997.164	0	0	0	0	0	0	0	603	903	0
421	4	0	0	0	0	0	0	200	300	0	33.7982	-17.095	-268.445	-26283	-4980.9	-15.0605	181.445	1000.91	0	0	0	0	0	0	0	603	903	0
421	5	0	0	0	0	0	0	200	300	0	33.493	-19.5364	-276.685	-26099.9	-5286.07	213.821	180.895	997.331	0	0	0	0	0	0	0	603	903	0
421	6	0	0	0	0	0	0	200	300	0	34.1034	-22.4356	-283.704	-26740.7	-5530.21	580.032	180.507	997.256	0	0	0	0	0	0	0	603	903	0
421	7	0	0	0	0	0	0	200	300	0	33.493	-27.6236	-288.892	-26740.7	-5530.21	717.362	180.857	995.563	0	0	0	0	0	0	0	603	903	0
421	8	0	0	0	0	0	0	200	300	0	33.0353	-29.4546	-297.437	-27381.6	-6018.5	854.691	179.765	995.059	0	0	0	0	0	0	0	603	903	0
421	9	0	0	0	0	0	0	200	300	0	34.4086	-30.9805	-306.287	-28388.7	-6445.74	1037.8	178.955	995.687	0	0	0	0	0	0	0	603	903	0
422	0	0	0	0	0	0	0	200	300	0	33.0353	-35.1004	-313.306	-27839.4	-6323.67	1129.35	179.816	991.857	0	0	0	0	0	0	0	603	903	0
422	1	0	0	0	0	0	0	200	300	0	33.3405	-38.7625	-320.325	-27930.9	-6811.95	1449.78	178.734	990.196	0	0	0	0	0	0	0	603	903	0
422	2	0	0	0	0	0	0	200	300	0	32.4249	-38.7625	-329.175	-28754.9	-7117.13	1907.55	178.379	990.355	0	0	0	0	0	0	0	603	903	0
422	3	0	0	0	0	0	0	200	300	0	32.7301	-40.5936	-338.025	-29762	-7300.23	1907.55	178.403	991.047	0	0	0	0	0	0	0	603	903	0
422	4	0	0	0	0	0	0	200	300	0	33.0353	-43.9505	-349.316	-30128.2	-7788.52	2273.76	177.704	989.249	0	0	0	0	0	0	0	603	903	0
422	5	0	0	0	0	0	0	200	300	0	29.8309	-45.9341	-362.744	-30036.6	-8520.94	2823.07	176.51	985.804	0	0	0	0	0	0	0	603	903	0
422	6	0	0	0	0	0	0	200	300	0	28.1525	-46.3919	-373.73	-30769.1	-9497.5	2823.07	174.587	985.33	0	0	0	0	0	0	0	603	903	0
422	7	0	0	0	0	0	0	200	300	0	28.1525	-48.0704	-387.463	-31684.6	-9314.39	3143.51	175.961	984.774	0	0	0	0	0	0	0	603	903	0
422	8	0	0	0	0	0	0	200	300	0	27.6947	-49.9014	-399.06	-32508.5	-9619.57	3372.39	175.894	984.463	0	0	0	0	0	0	0	603	903	0
422	9	0	0	0	0	0	0	200	300	0	26.474	-51.5799	-414.319	-32417	-10229.9	3463.94	175.309	981.242	0	0	0	0	0	0	0	603	903	0
423	0	0	0	0	0	0	0	200	300	0	26.6266	-51.7325	-425.916	-32783.2	-10840.3	3326.61	174.548	979.971	0	0	0	0	0	0	0	603	903	0
423	1	0	0	0	0	0	0	200	300	0	25.7111	-54.3265	-438.733	-33973.4	-10962.3	3509.72	175.014	980.435	0	0	0	0	0	0	0	603	903	0
423	2	0	0	0	0	0	0	200	300	0	24.6429	-55.242	-448.499	-33241	-11206.5	3509.72	175.013	977.116	0	0	0	0	0	0	0	603	903	0
423	3	0	0	0	0	0	0	200	300	0	24.6429	-56.9205	-462.842	-34064.9	-12305.1	3372.39	173.414	976.6	0	0	0	0	0	0	0	603	903	0
423	4	0	0	0	0	0	0	200	300	0	24.7955	-59.2093	-474.438	-34248	-11938.9	3326.61	174.836	975.187	0	0	0	0	0	0	0	603	903	0
423	5	0	0	0	0	0	0	200	300	0	24.7955	-59.5145	-481.458	-34431.1	-12610.3	3601.27	173.808	974.514	0	0	0	0	0	0	0	603	903	0
423	6	0	0	0	0	0	0	200	300	0	23.5748	-61.3455	-493.97	-35072	-12915.5	3692.83	173.854	974	0	0	0	0	0	0	0	603	903	0
423	7	0	0	0	0	0	0	200	300	0	22.5067	-63.1766	-504.956	-35621.3	-13159.6	3235.06	173.939	973.544	0	0	0	0	0	0	0	603	903	0
423	8	0	0	0	0	0	0	200	300	0	20.2179	-65.7706	-510.754	-35072	-13403.7	3280.84	173.757	971.667	0	0	0	0	0	0	0	603	903	0
423	9	0	0	0	0	0	0	200	300	0	20.8283	-66.3809	-521.741	-35346.7	-13647.9	3235.06	173.842	970.748	0	0	0	0	0	0	0	603	903	0
424	0	0	0	0	0	0	0	200	300	0	19.455	-66.9913	-529.37	-36170.7	-14624.5	3189.29	172.374	971.328	0	0	0	0	0	0	0	603	903	0
424	1	0	0	0	0	0	0	200	300	0	17.3187	-69.2801	-536.084	-35529.8	-14441.3	3463.94	173.061	969.277	0	0	0	0	0	0	0	603	903	0
424	2	0	0	0	0	0	0	200	300	0	16.2506	-69.5853	-544.019	-35621.3	-14563.4	3372.39	173.23	968.478	0	0	0	0	0	0	0	603	903	0
424	3	0	0	0	0	0	0	200	300	0	13.6566	-70.043	-550.732	-35072	-14929.6	3418.17	172.891	966.683	0	0	0	0	0	0	0	603	903	0
424	4	0	0	0	0	0	0	200	300	0	14.4196	-72.0267	-555.615	-35804.4	-15478.9	3601.27	172.141	967.441	0	0	0	0	0	0	0	603	903	0
424	5	0	0	0	0	0	0	200	300	0	9.68933	-74.0103	-562.939	-36170.7	-15295.8	3326.61	172.829	967.253	0	0	0	0	0	0	0	603	903	0
424	6	0	0	0	0	0	0	200	300	0	7.85828	-73.7051	-566.907	-35987.5	-15723.1	3463.94	172.265	966.481	0	0	0	0	0	0	0	603	903	0
424	7	0	0	0	0	0	0	200	300	0	5.72205	-73.0948	-569.348	-35438.2	-16150.3	3418.17	171.634	965.244	0	0	0	0	0	0	0	603	903	0
424	8	0	0	0	0	0	0	200	300	0	4.95911	-74.6207	-576.672	-34431.1	-16089.3	3555.5	172.1	962.707	0	0	0	0	0	0	0	603	903	0
424	9	0	0	0	0	0	0	200	300	0	3.28064	-74.1629	-580.64	-35621.3	-16638.6	3463.94	171.344	964.349	0	0	0	0	0	0	0	603	903	0
425	0	0	0	0	0	0	0	200	300	0	0.839237	-75.231	-583.386	-35529.8	-16394.5	3647.05	171.898	963.903	0	0	0	0	0	0	0	603	903	0
425	1	0	0	0	0	0	0	200	300	0	-1.29699	-75.0784	-583.386	-35529.8	-17187.9	3830.15	170.538	963.903	0	0	0	0	0	0	0	603	903	0
425	2	0	0	0	0	0	0	200	300	0	-2.82287	-76.4517	-586.133	-34705.8	-16882.8	3647.05	171.196	962.212	0	0	0	0	0	0	0	603	903	0
425	3	0	0	0	0	0	0	200	300	0	-3.12805	-75.6888	-588.269	-33698.7	-16516.6	3647.05	171.923	960.285	0	0	0	0	0	0	0	603	903	0
425	4	0	0	0	0	0	0	200	300	0	-4.80651	-76.4517	-587.659	-34614.3	-17310	3601.27	170.544	961.902	0	0	0	0	0	0	0	603	903	0
425	5	0	0	0	0	0	0	200	300	0	-6.48498	-77.9776	-591.016	-34797.4	-17371	3784.38	170.608	961.877	0	0	0	0	0	0	0	603	903	0
425	6	0	0	0	0	0	0	200	300	0	-6.63757	-78.1302	-591.016	-34980.5	-17187.9	4059.04	170.918	962.187	0	0	0	0	0	0	0	603	903	0
425	7	0	0	0	0	0	0	200	300	0	-9.07898	-76.4517	-593.762	-33698.7	-17554.1	3921.71	170.436	959.755	0	0	0	0	0	0	0	603	903	0
425	8	0	0	0	0	0	0	200	300	0	-7.40051	-77.825	-602.612	-33332.5	-18469.7	4242.14	169.351	958.313	0	0	0	0	0	0	0	603	903	0
425	9	0	0	0	0	0	0	200	300	0	-10.1471	-78.7405	-610.547	-33057.9	-19080	4471.02	168.749	957.145	0	0	0	0	0	0	0	603	903	0
426	0	0	0	0	0	0	0	200	300	0	-16.861	-83.4708	-612.073	-31684.6	-18774.9	4654.13	169.326	954.766	0	0	0	0	0	0	0	603	903	0
426	1	0	0	0	0	0	0	200	300	0	-19.7601	-86.6751	-615.43	-32600.1	-19324.2	4745.68	168.601	955.971	0	0	0	0	0	0	0	603	903	0
426	2	0	0	0	0	0	0	200	300	0	-17.6239	-87.5906	-618.787	-31043.7	-19873.5	4791.46	167.883	953.169	0	0	0	0	0	0	0	603	903	0
426	3	0	0	0	0	0	0	200	300	0	-22.5067	-88.3536	-623.364	-31043.7	-20178.7	5111.89	167.629	952.8	0	0	0	0	0	0	0	603	903	0
426	4	0	0	0	0	0	0	200	300	0	-25.2533	-93.9993	-627.637	-31318.4	-19995.6	5157.67	168.142	952.899	0	0	0	0	0	0	0	603	903	0
426	5	0	0	0	0	0	0	200	300	0	-25.8636	-94.6097	-630.688	-30219.7	-20422.8	5203.45	167.618	950.916	0	0	0	0	0	0	0	603	903	0
426	6	0	0	0	0	0	0	200	300	0	-22.6593	-94.9148	-637.402	-30585.9	-20483.8	5340.77	167.864	950.985	0	0	0	0	0	0	0	603	903	0
426	7	0	0	0	0	0	0	200	300	0	-21.7438	-99.9502	-643.506	-29762	-20361.8	5569.66	168.358	949.25	0	0	0	0	0	0	0	603	903	0
426	8	0	0	0	0	0	0	200	300	0	-21.4386	-103.612	-645.642	-29304.2	-20728	5706.99	167.896	948.388	0	0	0	0	0	0	0	603	903	0
426	9	0	0	0	0	0	0	200	300	0	-21.4386	-101.476	-650.525	-29762	-20789	5706.99	168.043	948.751	0	0	0	0	0	0	0	603	903	0
427	0	0	0	0	0	0	0	200	300	0	-20.0653	-102.086	-649.915	-29029.5	-20789	5798.54	168.013	947.667	0	0	0	0	0	0	0	603	903	0
427	1	0	0	0	0	0	0	200	300	0	-18.8446	-104.375	-654.492	-29212.7	-20728	5661.21	168.33	947.634	0	0	0	0	0	0	0	603	903	0
427	2	0	0	0	0	0	0	200	300	0	-18.0817	-103.918	-657.239	-28754.9	-21094.2	5981.64	167.905	946.751	0	0	0	0	0	0	0	603	903	0
427	3	0	0	0	0	0	0	200	300	0	-20.0653	-102.544	-659.985	-28297.1	-21582.5	5798.54	167.299	945.875	0	0	0	0	0	0	0	603	903	0
427	4	0	0	0	0	0	0	200	300	0	-19.3024	-102.544	-661.816	-28663.3	-21033.2	5569.66	168.219	946.31	0	0	0	0	0	0	0	603	903	0
427	5	0	0	0	0	0	0	200	300	0	-20.5231	-102.697	-659.68	-28663.3	-21094.2	5661.21	168.024	946.45	0	0	0	0	0	0	0	603	903	0
427	6	0	0	0	0	0	0	200	300	0	-23.5748	-102.239	-664.258	-27198.5	-21399.4	5890.09	167.785	943.946	0	0	0	0	0	0	0	603	903	0
427	7	0	0	0	0	0	0	200	300	0	-22.3541	-99.0347	-664.868	-26740.7	-21704.5	5661.21	167.355	943.22	0	0	0	0	0	0	0	603	903	0
427	8	0	0	0	0	0	0	200	300	0	-22.5067	-99.0347	-667.004	-27198.5	-21216.3	5523.88	168.192	943.777	0	0	0	0	0	0	0	603	903	0
427	9	0	0	0	0	0	0	200	300	0	-25.5585	-98.1192	-669.446	-27106.9	-21643.5	5615.43	167.67	943.492	0	0	0	0	0	0	0	603	903	0
428	0	0	0	0	0	0	0	200	300	0	-29.5258	-97.9666	-671.277	-27015.4	-22314.9	5386.55	166.758	943.245	0	0	0	0	0	0	0	603	903	0
428	1	0	0	0	0	0	0	200	300	0	-29.8309	-97.3563	-672.192	-25916.8	-22131.8	5432.33	167.075	941.556	0	0	0	0	0	0	0	603	903	0
428	2	0	0	0	0	0	0	200	300	0	-28.7628	-97.814	-673.718	-24818.1	-22070.8	5340.77	167.24	939.838	0	0	0	0	0	0	0	603	903	0
428	3	0	0	0	0	0	0	200	300	0	-31.9672	-97.5088	-677.38	-25550.5	-22314.9	5203.45	167.057	940.72	0	0	0	0	0	0	0	603	903	0
428	4	0	0	0	0	0	0	200	300	0	-36.087	-98.4244	-680.737	-25459	-22681.1	5020.34	166.682	940.399	0	0	0	0	0	0	0	603	903	0
428	5	0	0	0	0	0	0	200	300	0	-36.85	-99.4925	-684.399	-24726.6	-22681.1	5157.67	166.86	939.129	0	0	0	0	0	0	0	603	903	0
428	6	0	0	0	0	0	0	200	300	0	-37.9181	-100.713	-689.282	-24451.9	-22681.1	5111.89	167.095	938.475	0	0	0	0	0	0	0	603	903	0
428	7	0	0	0	0	0	0	200	300	0	-39.9017	-101.934	-692.944	-23811	-23169.4	4928.79	166.564	937.362	0	0	0	0	0	0	0	603	903	0
428	8	0	0	0	0	0	0	200	300	0	-38.5284	-104.07	-696.912	-23627.9	-23291.5	5386.55	166.579	936.904	0	0	0	0	0	0	0	603	903	0
428	9	0	0	0	0	0	0	200	300	0	-41.4276	-106.969	-701.794	-24177.3	-23230.4	5066.12	166.899	937.451	0	0	0	0	0	0	0	603	903	0
429	0	0	0	0	0	0	0	200	300	0	-43.4113	-105.443	-706.372	-23170.2	-23535.6	5203.45	166.681	935.802	0	0	0	0	0	0	0	603	903	0
429	1	0	0	0	0	0	0	200	300	0	-44.0216	-106.969	-712.17	-22895.5	-24023.9	5157.67	166.267	935.149	0	0	0	0	0	0	0	603	903	0
429	2	0	0	0	0	0	0	200	300	0	-44.1742	-109.563	-718.274	-21888.4	-24145.9	5020.34	166.383	933.474	0	0	0	0	0	0	0	603	903	0
429	3	0	0	0	0	0	0	200	300	0	-44.0216	-110.479	-722.241	-21980	-24573.2	5066.12	165.976	933.433	0	0	0	0	0	0	0	603	903	0
429	4	0	0	0	0	0	0	200	300	0	-45.0897	-110.021	-727.429	-22437.8	-24329.1	5249.22	166.555	933.845	0	0	0	0	0	0	0	603	903	0
429	5	0	0	0	0	0	0	200	300	0	-44.7845	-112.615	-733.838	-22254.6	-24512.2	5111.89	166.597	933.326	0	0	0	0	0	0	0	603	903	0
429	6	0	0	0	0	0	0	200	300	0	-45.5475	-112.157	-739.026	-21522.2	-24512.2	5066.12	166.832	932.122	0	0	0	0	0	0	0	603	903	0
429	7	0	0	0	0	0	0	200	300	0	-44.7845	-111.394	-744.519	-21522.2	-24390.1	5523.88	167.24	931.908	0	0	0	0	0	0	0	603	903	0
429	8	0	0	0	0	0	0	200	300	0	-44.4794	-112.615	-750.623	-21339.1	-25061.5	5249.22	166.612	931.429	0	0	0	0	0	0	0	603	903	0
429	9	0	0	0	0	0	0	200	300	0	-44.0216	-113.683	-756.726	-21339.1	-25244.6	5111.89	166.64	931.199	0	0	0	0	0	0	0	603	903	0
430	0	0	0	0	0	0	0	200	300	0	-45.0897	-111.394	-761.609	-21522.2	-24695.3	5157.67	167.575	931.259	0	0	0	0	0	0	0	603	903	0
430	1	0	0	0	0	0	0	200	300	0	-44.3268	-113.073	-765.271	-20881.3	-25183.5	5386.55	167.092	930.286	0	0	0	0	0	0	0	603	903	0
430	2	0	0	0	0	0	0	200	300	0	-42.038	-112.005	-771.985	-19965.8	-25305.6	5203.45	167.22	928.863	0	0	0	0	0	0	0	603	903	0
430	3	0	0	0	0	0	0	200	300	0	-41.275	-111.242	-775.342	-21064.5	-25244.6	5111.89	167.441	930.168	0	0	0	0	0	0	0	603	903	0
430	4	0	0	0	0	0	0	200	300	0	-42.8009	-111.089	-781.75	-20698.2	-25183.5	4928.79	167.786	929.477	0	0	0	0	0	0	0	603	903	0
430	5	0	0	0	0	0	0	200	300	0	-41.4276	-111.089	-786.023	-20698.2	-25671.8	4745.68	167.34	929.333	0	0	0	0	0	0	0	603	903	0
430	6	0	0	0	0	0	0	200	300	0	-41.4276	-109.563	-790.295	-20148.9	-25854.9	4974.56	167.284	928.495	0	0	0	0	0	0	0	603	903	0
430	7	0	0	0	0	0	0	200	300	0	-40.0543	-110.784	-795.178	-18958.7	-25488.7	4974.56	167.946	926.842	0	0	0	0	0	0	0	603	903	0
430	8	0	0	0	0	0	0	200	300	0	-39.5966	-109.411	-799.451	-20057.4	-25610.8	4699.91	167.965	928.089	0	0	0	0	0	0	0	603	903	0
430	9	0	0	0	0	0	0	200	300	0	-39.444	-109.563	-802.502	-19782.7	-25732.9	4608.35	167.934	927.651	0	0	0	0	0	0	0	603	903	0
431	0	0	0	0	0	0	0	200	300	0	-39.2914	-108.648	-806.47	-19599.6	-26099.1	4471.02	167.638	927.303	0	0	0	0	0	0	0	603	903	0
431	1	0	0	0	0	0	0	200	300	0	-40.6647	-109.411	-812.268	-18958.7	-26099.1	4287.92	167.869	926.341	0	0	0	0	0	0	0	603	903	0
431	2	0	0	0	0	0	0	200	300	0	-39.2914	-107.885	-815.625	-18775.6	-25854.9	4471.02	168.3	926.02	0	0	0	0	0	0	0	603	903	0
431	3	0	0	0	0	0	0	200	300	0	-39.5966	-108.648	-817.761	-19416.5	-26160.1	4333.69	168.01	926.744	0	0	0	0	0	0	0	603	903	0
431	4	0	0	0	0	0	0	200	300	0	-39.444	-107.58	-820.508	-18043.2	-25916	4333.69	168.415	924.99	0	0	0	0	0	0	0	603	903	0
431	5	0	0	0	0	0	0	200	300	0	-39.5966	-106.054	-823.254	-18867.2	-26160.1	4242.14	168.224	925.918	0	0	0	0	0	0	0	603	903	0
431	6	0	0	0	0	0	0	200	300	0	-38.9862	-106.664	-826.917	-18226.3	-26404.2	4516.8	168.069	925.041	0	0	0	0	0	0	0	603	903	0
431	7	0	0	0	0	0	0	200	300	0	-37.7655	-106.664	-829.358	-17860.1	-26038	4379.47	168.605	924.535	0	0	0	0	0	0	0	603	903	0
431	8	0	0	0	0	0	0	200	300	0	-37.9181	-104.68	-828.748	-17402.3	-26099.1	4104.81	168.508	923.998	0	0	0	0	0	0	0	603	903	0
431	9	0	0	0	0	0	0	200	300	0	-37.9181	-107.122	-833.63	-17768.6	-25916	4150.59	168.912	924.315	0	0	0	0	0	0	0	603	903	0
432	0	0	0	0	0	0	0	200	300	0	-37.3077	-104.833	-835.461	-17585.4	-26465.3	3875.93	168.323	924.049	0	0	0	0	0	0	0	603	903	0
432	1	0	0	0	0	0	0	200	300	0	-38.9862	-104.528	-837.903	-16944.6	-26282.2	4196.37	168.633	923.223	0	0	0	0	0	0	0	603	903	0
432	2	0	0	0	0	0	0	200	300	0	-36.087	-103.155	-837.903	-15937.5	-25916	4150.59	169.07	922.021	0	0	0	0	0	0	0	603	903	0
432	3	0	0	0	0	0	0	200	300	0	-35.7819	-104.986	-840.344	-16761.5	-26404.2	3647.05	168.579	922.946	0	0	0	0	0	0	0	603	903	0
432	4	0	0	0	0	0	0	200	300	0	-36.85	-104.07	-840.344	-16303.7	-26404.2	3967.48	168.579	922.401	0	0	0	0	0	0	0	603	903	0
432	5	0	0	0	0	0	0	200	300	0	-34.7137	-104.223	-840.344	-16029.1	-26038	3692.83	169.015	922.074	0	0	0	0	0	0	0	603	903	0
432	6	0	0	0	0	0	0	200	300	0	-35.0189	-102.849	-842.48	-15754.4	-25854.9	3830.15	169.311	921.7	0	0	0	0	0	0	0	603	903	0
432	7	0	0	0	0	0	0	200	300	0	-33.9508	-102.239	-841.87	-15205.1	-26282.2	3830.15	168.781	921.061	0	0	0	0	0	0	0	603	903	0
432	8	0	0	0	0	0	0	200	300	0	-35.3241	-101.476	-837.598	-15296.6	-26038	3555.5	168.913	921.263	0	0	0	0	0	0	0	603	903	0
432	9	0	0	0	0	0	0	200	300	0	-35.3241	-101.781	-842.48	-15022	-25793.9	3601.27	169.383	920.831	0	0	0	0	0	0	0	603	903	0
433	0	0	0	0	0	0	0	200	300	0	-35.6293	-101.781	-842.175	-14472.7	-25732.9	3601.27	169.445	920.185	0	0	0	0	0	0	0	603	903	0
433	1	0	0	0	0	0	0	200	300	0	-34.256	-102.697	-843.396	-13923.3	-25977	3372.39	169.2	919.509	0	0	0	0	0	0	0	603	903	0
433	2	0	0	0	0	0	0	200	300	0	-32.4249	-100.255	-842.175	-13740.2	-26221.1	3463.94	168.865	919.315	0	0	0	0	0	0	0	603	903	0
433	3	0	0	0	0	0	0	200	300	0	-34.4086	-101.018	-843.396	-13374	-25549.8	3463.94	169.706	918.857	0	0	0	0	0	0	0	603	903	0
433	4	0	0	0	0	0	0	200	300	0	-36.5448	-99.7977	-841.565	-13282.5	-25977	3372.39	169.133	918.783	0	0	0	0	0	0	0	603	903	0
433	5	0	0	0	0	0	0	200	300	0	-35.7819	-99.9502	-843.701	-12916.3	-25977	3463.94	169.211	918.309	0	0	0	0	0	0	0	603	903	0
433	6	0	0	0	0	0	0	200	300	0	-34.5612	-99.4925	-842.175	-11817.6	-25427.7	3372.39	169.807	917.032	0	0	0	0	0	0	0	603	903	0
433	7	0	0	0	0	0	0	200	300	0	-34.4086	-99.3399	-840.649	-11909.2	-25793.9	3509.72	169.317	917.167	0	0	0	0	0	0	0	603	903	0
433	8	0	0	0	0	0	0	200	300	0	-35.7819	-98.1192	-841.87	-11909.2	-25854.9	3418.17	169.289	917.146	0	0	0	0	0	0	0	603	903	0
433	9	0	0	0	0	0	0	200	300	0	-34.8663	-97.0511	-842.786	-11817.6	-25916	3143.51	169.25	917.022	0	0	0	0	0	0	0	603	903	0
434	0	0	0	0	0	0	0	200	300	0	-35.7819	-97.6614	-839.429	-10902.1	-25427.7	3189.29	169.708	915.988	0	0	0	0	0	0	0	603	903	0
434	1	0	0	0	0	0	0	200	300	0	-34.5612	-97.9666	-842.175	-10993.7	-25366.6	3006.18	169.88	916.054	0	0	0	0	0	0	0	603	903	0
434	2	0	0	0	0	0	0	200	300	0	-35.1715	-96.7459	-840.039	-10719	-25427.7	3143.51	169.73	915.76	0	0	0	0	0	0	0	603	903	0
434	3	0	0	0	0	0	0	200	300	0	-35.1715	-95.6778	-840.955	-10261.2	-25854.9	3143.51	169.255	915.202	0	0	0	0	0	0	0	603	903	0
434	4	0	0	0	0	0	0	200	300	0	-34.256	-95.0674	-839.124	-10352.8	-25366.6	2685.75	169.77	915.338	0	0	0	0	0	0	0	603	903	0
434	5	0	0	0	0	0	0	200	300	0	-35.6293	-94.4571	-839.734	-9620.36	-25549.8	2823.07	169.574	914.456	0	0	0	0	0	0	0	603	903	0
434	6	0	0	0	0	0	0	200	300	0	-34.256	-94.4571	-835.461	-9437.25	-25549.8	2914.63	169.418	914.296	0	0	0	0	0	0	0	603	903	0
434	7	0	0	0	0	0	0	200	300	0	-34.7137	-94.1519	-837.598	-9254.15	-25061.5	2868.85	170.079	914.049	0	0	0	0	0	0	0	603	903	0
434	8	0	0	0	0	0	0	200	300	0	-36.087	-92.4734	-835.156	-8704.83	-25000.4	2823.07	170.065	913.423	0	0	0	0	0	0	0	603	903	0
434	9	0	0	0	0	0	0	200	300	0	-34.7137	-91.8631	-832.104	-9254.15	-25427.7	2685.75	169.442	914.121	0	0	0	0	0	0	0	603	903	0
435	0	0	0	0	0	0	0	200	300	0	-35.9344	-91.2527	-832.41	-8155.52	-25366.6	2594.19	169.526	912.797	0	0	0	0	0	0	0	603	903	0
435	1	0	0	0	0	0	0	200	300	0	-35.0189	-90.3372	-833.02	-8430.17	-24878.4	2639.97	170.135	913.12	0	0	0	0	0	0	0	603	903	0
435	2	0	0	0	0	0	0	200	300	0	-34.8663	-90.032	-828.748	-8063.96	-24878.4	2823.07	169.981	912.73	0	0	0	0	0	0	0	603	903	0
435	3	0	0	0	0	0	0	200	300	0	-36.087	-89.1165	-828.137	-7423.1	-25183.5	2594.19	169.59	911.964	0	0	0	0	0	0	0	603	903	0
435	4	0	0	0	0	0	0	200	300	0	-36.087	-89.5743	-826.611	-7789.31	-24939.4	2639.97	169.829	912.423	0	0	0	0	0	0	0	603	903	0
435	5	0	0	0	0	0	0	200	300	0	-35.1715	-87.8958	-824.17	-6782.23	-25183.5	2685.75	169.444	911.229	0	0	0	0	0	0	0	603	903	0
435	6	0	0	0	0	0	0	200	300	0	-33.9508	-87.438	-823.56	-6507.57	-24878.4	2594.19	169.792	910.902	0	0	0	0	0	0	0	603	903	0
435	7	0	0	0	0	0	0	200	300	0	-34.5612	-86.6751	-822.644	-6782.23	-24573.2	2731.52	170.129	911.245	0	0	0	0	0	0	0	603	903	0
435	8	0	0	0	0	0	0	200	300	0	-35.6293	-86.6751	-818.677	-6324.46	-24268	2365.31	170.357	910.725	0	0	0	0	0	0	0	603	903	0
435	9	0	0	0	0	0	0	200	300	0	-36.6974	-84.5389	-817.761	-5592.04	-24390.1	2411.09	170.175	909.838	0	0	0	0	0	0	0	603	903	0
436	0	0	0	0	0	0	0	200	300	0	-35.7819	-85.1492	-814.709	-4951.17	-24695.3	2548.42	169.688	909.077	0	0	0	0	0	0	0	603	903	0
436	1	0	0	0	0	0	0	200	300	0	-36.2396	-83.7759	-813.794	-5225.83	-24207	2548.42	170.254	909.422	0	0	0	0	0	0	0	603	903	0
436	2	0	0	0	0	0	0	200	300	0	-35.3241	-82.5552	-809.827	-5134.27	-24023.9	2456.86	170.335	909.34	0	0	0	0	0	0	0	603	903	0
436	3	0	0	0	0	0	0	200	300	0	-36.5448	-83.013	-808.606	-5134.27	-24268	2273.76	169.988	909.35	0	0	0	0	0	0	0	603	903	0
436	4	0	0	0	0	0	0	200	300	0	-37.3077	-82.7078	-806.165	-4127.19	-24023.9	2456.86	170.2	908.12	0	0	0	0	0	0	0	603	903	0
436	5	0	0	0	0	0	0	200	300	0	-35.6293	-79.8086	-803.418	-4310.3	-23840.8	2319.53	170.326	908.365	0	0	0	0	0	0	0	603	903	0
436	6	0	0	0	0	0	0	200	300	0	-35.6293	-81.3345	-800.061	-3852.54	-23535.6	2182.21	170.583	907.815	0	0	0	0	0	0	0	603	903	0
436	7	0	0	0	0	0	0	200	300	0	-37.1551	-79.3509	-797.62	-3577.88	-24268	2411.09	169.574	907.486	0	0	0	0	0	0	0	603	903	0
436	8	0	0	0	0	0	0	200	300	0	-37.1551	-79.8086	-795.178	-3120.11	-24023.9	2319.53	169.788	906.924	0	0	0	0	0	0	0	603	903	0
436	9	0	0	0	0	0	0	200	300	0	-35.7819	-77.5198	-792.737	-2753.9	-23657.7	2090.65	170.157	906.474	0	0	0	0	0	0	0	603	903	0
437	0	0	0	0	0	0	0	200	300	0	-34.7137	-77.6724	-790.601	-2479.25	-23535.6	1907.55	170.231	906.136	0	0	0	0	0	0	0	603	903	0
437	1	0	0	0	0	0	0	200	300	0	-36.087	-77.825	-787.244	-2296.14	-23413.5	2273.76	170.259	905.917	0	0	0	0	0	0	0	603	903	0
437	2	0	0	0	0	0	0	200	300	0	-37.7655	-76.2991	-783.887	-2479.25	-23352.5	1999.1	170.209	906.163	0	0	0	0	0	0	0	603	903	0
437	3	0	0	0	0	0	0	200	300	0	-37.7655	-75.231	-780.53	-1655.27	-23230.4	2227.98	170.238	905.121	0	0	0	0	0	0	0	603	903	0
437	4	0	0	0	0	0	0	200	300	0	-36.5448	-75.0784	-776.868	-1655.27	-23535.6	2090.65	169.705	905.131	0	0	0	0	0	0	0	603	903	0
437	5	0	0	0	0	0	0	200	300	0	-35.0189	-74.0103	-775.037	-1197.51	-23291.5	1953.32	169.948	904.545	0	0	0	0	0	0	0	603	903	0
437	6	0	0	0	0	0	0	200	300	0	-36.3922	-73.8577	-771.985	-1197.51	-22925.2	2090.65	170.304	904.551	0	0	0	0	0	0	0	603	903	0
437	7	0	0	0	0	0	0	200	300	0	-37.9181	-72.7896	-767.407	-1014.4	-22803.2	1907.55	170.285	904.322	0	0	0	0	0	0	0	603	903	0
437	8	0	0	0	0	0	0	200	300	0	-37.9181	-72.3318	-765.271	-465.086	-22986.3	1953.32	169.963	903.608	0	0	0	0	0	0	0	603	903	0
437	9	0	0	0	0	0	0	200	300	0	-37.7655	-70.806	-760.388	-281.98	-23230.4	2044.88	169.449	903.371	0	0	0	0	0	0	0	603	903	0
438	0	0	0	0	0	0	0	200	300	0	-36.087	-70.3482	-757.642	175.784	-22681.1	1449.78	170.064	902.768	0	0	0	0	0	0	0	603	903	0
438	1	0	0	0	0	0	0	200	300	0	-36.3922	-69.1275	-755.505	267.336	-22986.3	1495.56	169.575	902.646	0	0	0	0	0	0	0	603	903	0
438	2	0	0	0	0	0	0	200	300	0	-38.3759	-69.2801	-752.148	541.995	-22559	1495.56	170.007	902.279	0	0	0	0	0	0	0	603	903	0
438	3	0	0	0	0	0	0	200	300	0	-37.7655	-66.8387	-748.486	999.758	-22131.8	1678.67	170.431	901.664	0	0	0	0	0	0	0	603	903	0
438	4	0	0	0	0	0	0	200	300	0	-36.6974	-67.1439	-744.519	1182.86	-22314.9	1449.78	170.028	901.411	0	0	0	0	0	0	0	603	903	0
438	5	0	0	0	0	0	0	200	300	0	-36.6974	-66.3809	-741.162	1182.86	-22375.9	1358.23	169.81	901.404	0	0	0	0	0	0	0	603	903	0
438	6	0	0	0	0	0	0	200	300	0	-38.3759	-65.4654	-737.195	2189.95	-22253.9	1129.35	169.813	900.029	0	0	0	0	0	0	0	603	903	0
438	7	0	0	0	0	0	0	200	300	0	-38.8336	-64.0921	-735.059	1823.73	-21826.6	1266.68	170.306	900.519	0	0	0	0	0	0	0	603	903	0
438	8	0	0	0	0	0	0	200	300	0	-36.85	-63.1766	-728.345	2464.6	-21643.5	1175.12	170.284	899.616	0	0	0	0	0	0	0	603	903	0
438	9	0	0	0	0	0	0	200	300	0	-37.9181	-63.7869	-728.65	2830.81	-22009.7	1129.35	169.794	899.115	0	0	0	0	0	0	0	603	903	0
439	0	0	0	0	0	0	0	200	300	0	-38.5284	-62.4136	-724.988	2556.16	-21704.5	1220.9	170.062	899.474	0	0	0	0	0	0	0	603	903	0
439	1	0	0	0	0	0	0	200	300	0	-39.1388	-60.7352	-720.715	2556.16	-21460.4	1175.12	170.223	899.453	0	0	0	0	0	0	0	603	903	0
439	2	0	0	0	0	0	0	200	300	0	-37.4603	-60.5826	-716.748	3471.68	-21582.5	1220.9	169.888	898.156	0	0	0	0	0	0	0	603	903	0
439	3	0	0	0	0	0	0	200	300	0	-36.2396	-59.667	-714.307	3288.58	-21521.4	1037.8	169.871	898.396	0	0	0	0	0	0	0	603	903	0
439	4	0	0	0	0	0	0	200	300	0	-37.7655	-58.9041	-711.865	3837.89	-20972.1	900.467	170.539	897.609	0	0	0	0	0	0	0	603	903	0
439	5	0	0	0	0	0	0	200	300	0	-37.7655	-58.4463	-706.677	3563.24	-21094.2	763.138	170.15	897.958	0	0	0	0	0	0	0	603	903	0
439	6	0	0	0	0	0	0	200	300	0	-37.9181	-57.5308	-702.71	4021	-21033.2	717.362	170.069	897.278	0	0	0	0	0	0	0	603	903	0
439	7	0	0	0	0	0	0	200	300	0	-37.4603	-55.8524	-696.301	4478.76	-20972.1	717.362	169.881	896.568	0	0	0	0	0	0	0	603	903	0
439	8	0	0	0	0	0	0	200	300	0	-37.4603	-55.0894	-696.301	4021	-20728	625.809	170.231	897.225	0	0	0	0	0	0	0	603	903	0
439	9	0	0	0	0	0	0	200	300	0	-38.681	-54.9368	-693.555	4570.32	-20483.8	625.809	170.465	896.41	0	0	0	0	0	0	0	603	903	0
440	0	0	0	0	0	0	0	200	300	0	-38.0707	-53.4109	-687.146	5028.08	-20728	625.809	169.835	895.683	0	0	0	0	0	0	0	603	903	0
440	1	0	0	0	0	0	0	200	300	0	-37.4603	-53.4109	-686.536	4753.42	-19995.6	625.809	170.875	896.076	0	0	0	0	0	0	0	603	903	0
440	2	0	0	0	0	0	0	200	300	0	-37.7655	-52.1902	-681.348	4936.53	-20117.6	534.256	170.474	895.755	0	0	0	0	0	0	0	603	903	0
440	3	0	0	0	0	0	0	200	300	0	-38.3759	-51.5799	-677.686	5119.63	-20300.7	534.256	170.044	895.445	0	0	0	0	0	0	0	603	903	0
440	4	0	0	0	0	0	0	200	300	0	-38.5284	-50.054	-674.023	5394.29	-20117.6	534.256	170.153	894.997	0	0	0	0	0	0	0	603	903	0
440	5	0	0	0	0	0	0	200	300	0	-37.1551	-48.6807	-666.699	5760.5	-20056.6	351.15	169.917	894.36	0	0	0	0	0	0	0	603	903	0
440	6	0	0	0	0	0	0	200	300	0	-37.6129	-48.8333	-667.31	5668.95	-19690.4	763.138	170.493	894.505	0	0	0	0	0	0	0	603	903	0
440	7	0	0	0	0	0	0	200	300	0	-38.0707	-48.8333	-664.258	5394.29	-20117.6	259.598	169.714	894.879	0	0	0	0	0	0	0	603	903	0
440	8	0	0	0	0	0	0	200	300	0	-38.3759	-47.1548	-659.985	6035.16	-19629.3	213.821	170.258	893.856	0	0	0	0	0	0	0	603	903	0
440	9	0	0	0	0	0	0	200	300	0	-36.5448	-46.8497	-656.323	6767.58	-19141.1	351.15	170.836	892.689	0	0	0	0	0	0	0	603	903	0
441	0	0	0	0	0	0	0	200	300	0	-35.6293	-45.7816	-652.356	6492.92	-19263.1	122.269	170.471	893.047	0	0	0	0	0	0	0	603	903	0
441	1	0	0	0	0	0	0	200	300	0	-37.3077	-45.3238	-649.304	6767.58	-19263.1	351.15	170.333	892.577	0	0	0	0	0	0	0	603	903	0
441	2	0	0	0	0	0	0	200	300	0	-36.2396	-44.7134	-646.252	6401.37	-19080	76.4922	170.476	893.095	0	0	0	0	0	0	0	603	903	0
441	3	0	0	0	0	0	0	200	300	0	-37.4603	-44.2557	-643.201	7133.79	-18774.9	122.269	170.81	891.909	0	0	0	0	0	0	0	603	903	0
441	4	0	0	0	0	0	0	200	300	0	-35.9344	-42.272	-640.149	7133.79	-19202.1	30.7158	170.004	891.856	0	0	0	0	0	0	0	603	903	0
441	5	0	0	0	0	0	0	200	300	0	-36.3922	-42.5772	-635.266	7316.9	-18958	213.821	170.157	891.482	0	0	0	0	0	0	0	603	903	0
441	6	0	0	0	0	0	0	200	300	0	-37.0026	-41.6617	-631.604	7591.56	-18591.7	-15.0605	170.564	890.981	0	0	0	0	0	0	0	603	903	0
441	7	0	0	0	0	0	0	200	300	0	-36.85	-40.7462	-627.942	7500	-18469.7	-152.39	170.587	891.056	0	0	0	0	0	0	0	603	903	0
441	8	0	0	0	0	0	0	200	300	0	-35.3241	-40.441	-626.111	7683.11	-18713.8	-335.495	170.111	890.729	0	0	0	0	0	0	0	603	903	0
441	9	0	0	0	0	0	0	200	300	0	-35.9344	-39.8306	-623.059	8049.32	-18958	-518.601	169.573	890.081	0	0	0	0	0	0	0	603	903	0
442	0	0	0	0	0	0	0	200	300	0	-35.3241	-39.9832	-619.397	8140.87	-18225.5	-106.613	170.575	889.857	0	0	0	0	0	0	0	603	903	0
442	1	0	0	0	0	0	0	200	300	0	-35.6293	-38.6099	-613.599	8049.32	-18286.6	-472.824	170.198	889.882	0	0	0	0	0	0	0	603	903	0
442	2	0	0	0	0	0	0	200	300	0	-35.6293	-37.6944	-610.852	8781.74	-18103.5	-198.166	170.364	888.624	0	0	0	0	0	0	0	603	903	0
442	3	0	0	0	0	0	0	200	300	0	-34.1034	-36.3211	-606.58	9056.4	-17920.4	-152.39	170.457	888.07	0	0	0	0	0	0	0	603	903	0
442	4	0	0	0	0	0	0	200	300	0	-34.1034	-35.8633	-605.054	8964.85	-17859.3	-381.272	170.483	888.183	0	0	0	0	0	0	0	603	903	0
442	5	0	0	0	0	0	0	200	300	0	-35.1715	-35.253	-602.612	9514.17	-17920.4	-381.272	170.262	887.212	0	0	0	0	0	0	0	603	903	0
442	6	0	0	0	0	0	0	200	300	0	-34.5612	-35.5582	-600.171	8781.74	-17676.2	-60.8369	170.548	888.368	0	0	0	0	0	0	0	603	903	0
442	7	0	0	0	0	0	0	200	300	0	-33.9508	-34.6426	-595.593	9788.83	-17310	-610.154	170.937	886.565	0	0	0	0	0	0	0	603	903	0
442	8	0	0	0	0	0	0	200	300	0	-33.3405	-33.1168	-591.321	9422.61	-17737.3	-655.93	170.004	887.065	0	0	0	0	0	0	0	603	903	0
442	9	0	0	0	0	0	0	200	300	0	-33.9508	-33.5745	-588.574	9422.61	-17432.1	-701.706	170.383	886.991	0	0	0	0	0	0	0	603	903	0
443	0	0	0	0	0	0	0	200	300	0	-33.7982	-32.2012	-585.522	9514.17	-17065.9	-427.048	170.854	886.751	0	0	0	0	0	0	0	603	903	0
443	1	0	0	0	0	0	0	200	300	0	-32.5775	-32.3538	-581.86	10246.6	-17310	-793.259	170.251	885.39	0	0	0	0	0	0	0	603	903	0
443	2	0	0	0	0	0	0	200	300	0	-29.9835	-32.3538	-578.809	10063.5	-17126.9	-793.259	170.41	885.614	0	0	0	0	0	0	0	603	903	0
443	3	0	0	0	0	0	0	200	300	0	-32.7301	-30.8279	-574.231	10155	-16821.7	-1022.14	170.706	885.315	0	0	0	0	0	0	0	603	903	0
443	4	0	0	0	0	0	0	200	300	0	-32.5775	-30.2176	-571.484	10063.5	-16638.6	-747.483	170.885	885.391	0	0	0	0	0	0	0	603	903	0
443	5	0	0	0	0	0	0	200	300	0	-32.2723	-29.4546	-568.433	10795.9	-16699.7	-1022.14	170.622	884.008	0	0	0	0	0	0	0	603	903	0
443	6	0	0	0	0	0	0	200	300	0	-30.899	-29.1495	-566.296	10795.9	-16638.6	-1067.92	170.619	883.936	0	0	0	0	0	0	0	603	903	0
443	7	0	0	0	0	0	0	200	300	0	-30.5939	-28.9969	-564.16	10795.9	-16333.4	-884.812	171.048	883.864	0	0	0	0	0	0	0	603	903	0
443	8	0	0	0	0	0	0	200	300	0	-31.5094	-28.0814	-561.414	10979	-16272.4	-1205.25	171.015	883.444	0	0	0	0	0	0	0	603	903	0
443	9	0	0	0	0	0	0	200	300	0	-30.7465	-27.9288	-557.446	11528.3	-16516.6	-1022.14	170.371	882.319	0	0	0	0	0	0	0	603	903	0
444	0	0	0	0	0	0	0	200	300	0	-29.2206	-27.471	-554.089	11253.7	-16150.3	-701.706	170.852	882.69	0	0	0	0	0	0	0	603	903	0
444	1	0	0	0	0	0	0	200	300	0	-30.2887	-26.7081	-550.732	11619.9	-16211.4	-1159.47	170.564	881.901	0	0	0	0	0	0	0	603	903	0
444	2	0	0	0	0	0	0	200	300	0	-30.4413	-26.8607	-550.122	11253.7	-16028.3	-1251.02	170.864	882.543	0	0	0	0	0	0	0	603	903	0
444	3	0	0	0	0	0	0	200	300	0	-29.8309	-26.5555	-547.07	11711.4	-15784.1	-1296.8	171.148	881.593	0	0	0	0	0	0	0	603	903	0
444	4	0	0	0	0	0	0	200	300	0	-29.2206	-25.9451	-543.408	11803	-15845.2	-1022.14	170.841	881.28	0	0	0	0	0	0	0	603	903	0
444	5	0	0	0	0	0	0	200	300	0	-29.068	-24.5718	-542.493	11528.3	-15356.9	-1525.68	171.692	881.749	0	0	0	0	0	0	0	603	903	0
444	6	0	0	0	0	0	0	200	300	0	-29.2206	-24.877	-539.136	11894.5	-15540	-1296.8	171.176	880.938	0	0	0	0	0	0	0	603	903	0
444	7	0	0	0	0	0	0	200	300	0	-28.7628	-23.5037	-535.474	11986.1	-15601	-1479.9	170.865	880.616	0	0	0	0	0	0	0	603	903	0
444	8	0	0	0	0	0	0	200	300	0	-27.5421	-24.1141	-533.948	12535.4	-15173.8	-1296.8	171.582	879.523	0	0	0	0	0	0	0	603	903	0
444	9	0	0	0	0	0	0	200	300	0	-27.6947	-22.5882	-531.506	12260.7	-15173.8	-1342.58	171.451	879.932	0	0	0	0	0	0	0	603	903	0
445	0	0	0	0	0	0	0	200	300	0	-28.6102	-22.8934	-527.844	12260.7	-15478.9	-1434.13	170.675	879.772	0	0	0	0	0	0	0	603	903	0
445	1	0	0	0	0	0	0	200	300	0	-26.474	-22.7408	-527.539	12260.7	-15295.8	-1479.9	171.005	879.759	0	0	0	0	0	0	0	603	903	0
445	2	0	0	0	0	0	0	200	300	0	-27.9999	-21.8253	-523.877	12993.2	-14624.5	-1342.58	172.084	878.198	0	0	0	0	0	0	0	603	903	0
445	3	0	0	0	0	0	0	200	300	0	-27.0843	-21.0623	-521.13	13359.4	-15051.7	-1388.35	171.117	877.365	0	0	0	0	0	0	0	603	903	0
445	4	0	0	0	0	0	0	200	300	0	-26.1688	-20.6045	-519.299	12993.2	-14990.7	-1479.9	171.133	877.979	0	0	0	0	0	0	0	603	903	0
445	5	0	0	0	0	0	0	200	300	0	-27.3895	-20.452	-518.689	13267.8	-14502.4	-1663.01	172.04	877.42	0	0	0	0	0	0	0	603	903	0
445	6	0	0	0	0	0	0	200	300	0	-25.5585	-19.9942	-517.163	12810.1	-14685.5	-1571.46	171.604	878.23	0	0	0	0	0	0	0	603	903	0
445	7	0	0	0	0	0	0	200	300	0	-26.1688	-19.9942	-514.417	13359.4	-14807.6	-1571.46	171.215	877.03	0	0	0	0	0	0	0	603	903	0
445	8	0	0	0	0	0	0	200	300	0	-25.8636	-19.689	-514.111	13542.5	-14807.6	-1617.23	171.198	876.659	0	0	0	0	0	0	0	603	903	0
445	9	0	0	0	0	0	0	200	300	0	-26.0162	-19.2313	-509.839	12993.2	-14868.6	-1708.79	170.837	877.515	0	0	0	0	0	0	0	603	903	0
446	0	0	0	0	0	0	0	200	300	0	-26.7792	-18.0106	-507.397	13542.5	-14502.4	-1708.79	171.418	876.31	0	0	0	0	0	0	0	603	903	0
446	1	0	0	0	0	0	0	200	300	0	-26.7792	-18.1631	-504.346	13725.6	-14624.5	-1617.23	171.003	875.785	0	0	0	0	0	0	0	603	903	0
446	2	0	0	0	0	0	0	200	300	0	-26.1688	-17.2476	-505.566	13908.7	-14258.2	-1205.25	171.798	875.489	0	0	0	0	0	0	0	603	903	0
446	3	0	0	0	0	0	0	200	300	0	-25.8636	-16.4847	-501.599	13725.6	-14258.2	-1846.12	171.574	875.636	0	0	0	0	0	0	0	603	903	0
446	4	0	0	0	0	0	0	200	300	0	-26.3214	-16.6373	-500.378	13908.7	-14624.5	-1754.56	170.773	875.204	0	0	0	0	0	0	0	603	903	0
446	5	0	0	0	0	0	0	200	300	0	-25.7111	-16.1795	-497.937	13817.1	-14258.2	-1846.12	171.365	875.251	0	0	0	0	0	0	0	603	903	0
446	6	0	0	0	0	0	0	200	300	0	-24.9481	-15.264	-496.716	14458	-14380.3	-1983.44	171.049	873.893	0	0	0	0	0	0	0	603	903	0
446	7	0	0	0	0	0	0	200	300	0	-24.0326	-15.1114	-494.58	14366.5	-13892	-1205.25	171.911	873.952	0	0	0	0	0	0	0	603	903	0
446	8	0	0	0	0	0	0	200	300	0	-25.8636	-14.501	-494.275	14091.8	-14441.3	-1937.67	170.783	874.49	0	0	0	0	0	0	0	603	903	0
446	9	0	0	0	0	0	0	200	300	0	-26.9318	-14.1959	-493.054	14366.5	-13770	-1937.67	172.072	873.862	0	0	0	0	0	0	0	603	903	0
447	0	0	0	0	0	0	0	200	300	0	-25.4059	-13.7381	-491.833	14641.1	-13892	-1754.56	171.755	873.232	0	0	0	0	0	0	0	603	903	0
447	1	0	0	0	0	0	0	200	300	0	-24.6429	-13.1277	-489.697	14824.2	-13953.1	-1800.34	171.507	872.728	0	0	0	0	0	0	0	603	903	0
447	2	0	0	0	0	0	0	200	300	0	-24.7955	-12.5174	-488.782	14915.8	-13953.1	-1708.79	171.453	872.484	0	0	0	0	0	0	0	603	903	0
447	3	0	0	0	0	0	0	200	300	0	-24.3378	-13.2803	-486.951	14458	-13708.9	-2029.22	171.847	873.309	0	0	0	0	0	0	0	603	903	0
447	4	0	0	0	0	0	0	200	300	0	-25.7111	-12.2122	-486.34	15098.9	-13708.9	-2075	171.812	871.954	0	0	0	0	0	0	0	603	903	0
447	5	0	0	0	0	0	0	200	300	0	-24.7955	-11.7545	-484.814	15465.1	-14441.3	-1983.44	170.213	871.101	0	0	0	0	0	0	0	603	903	0
447	6	0	0	0	0	0	0	200	300	0	-24.3378	-12.3648	-483.899	15190.4	-14258.2	-1983.44	170.535	871.608	0	0	0	0	0	0	0	603	903	0
447	7	0	0	0	0	0	0	200	300	0	-24.3378	-10.8389	-482.678	15373.5	-13647.9	-1937.67	171.725	871.15	0	0	0	0	0	0	0	603	903	0
447	8	0	0	0	0	0	0	200	300	0	-24.6429	-10.6863	-481.458	16197.5	-13892	-2029.22	171.146	869.357	0	0	0	0	0	0	0	603	903	0
447	9	0	0	0	0	0	0	200	300	0	-23.2696	-10.3812	-479.932	15922.9	-13831	-2212.33	171.181	869.823	0	0	0	0	0	0	0	603	903	0
448	0	0	0	0	0	0	0	200	300	0	-24.7955	-9.46563	-479.932	16106	-13708.9	-2075	171.436	869.441	0	0	0	0	0	0	0	603	903	0
448	1	0	0	0	0	0	0	200	300	0	-24.3378	-9.61822	-478.406	16380.6	-13525.8	-2212.33	171.727	868.76	0	0	0	0	0	0	0	603	903	0
448	2	0	0	0	0	0	0	200	300	0	-23.7274	-9.9234	-479.321	16014.4	-13892	-2258.1	171.017	869.589	0	0	0	0	0	0	0	603	903	0
448	3	0	0	0	0	0	0	200	300	0	-24.0326	-9.31305	-476.88	16380.6	-14197.2	-2395.43	170.229	868.651	0	0	0	0	0	0	0	603	903	0
448	4	0	0	0	0	0	0	200	300	0	-24.3378	-8.09234	-475.354	17021.5	-13403.7	-2395.43	171.803	867.192	0	0	0	0	0	0	0	603	903	0
448	5	0	0	0	0	0	0	200	300	0	-23.88	-6.56646	-473.218	17113	-13953.1	-2578.54	170.515	866.837	0	0	0	0	0	0	0	603	903	0
448	6	0	0	0	0	0	0	200	300	0	-22.0489	-7.3294	-475.964	17021.5	-13892	-2395.43	170.813	867.238	0	0	0	0	0	0	0	603	903	0
448	7	0	0	0	0	0	0	200	300	0	-23.2696	-6.87164	-474.438	17113	-12976.5	-2029.22	172.649	866.93	0	0	0	0	0	0	0	603	903	0
448	8	0	0	0	0	0	0	200	300	0	-24.3378	-6.87164	-472.302	17204.6	-13403.7	-2486.98	171.62	866.573	0	0	0	0	0	0	0	603	903	0
448	9	0	0	0	0	0	0	200	300	0	-23.5748	-7.17681	-472.913	17204.6	-13770	-2441.21	170.883	866.62	0	0	0	0	0	0	0	603	903	0
449	0	0	0	0	0	0	0	200	300	0	-22.9645	-5.95611	-471.387	17937	-13525.8	-2715.87	171.306	864.948	0	0	0	0	0	0	0	603	903	0
449	1	0	0	0	0	0	0	200	300	0	-22.3541	-5.19317	-471.692	18120.1	-13708.9	-2624.31	170.937	864.585	0	0	0	0	0	0	0	603	903	0
449	2	0	0	0	0	0	0	200	300	0	-23.5748	-5.04058	-467.419	17387.7	-13159.6	-2807.42	171.846	865.801	0	0	0	0	0	0	0	603	903	0
449	3	0	0	0	0	0	0	200	300	0	-24.1852	-5.04058	-470.471	18211.7	-13403.7	-2486.98	171.51	864.291	0	0	0	0	0	0	0	603	903	0
449	4	0	0	0	0	0	0	200	300	0	-22.9645	-4.43023	-468.335	17753.9	-13220.6	-2578.54	171.771	865.091	0	0	0	0	0	0	0	603	903	0
449	5	0	0	0	0	0	0	200	300	0	-22.5067	-4.27764	-466.809	18120.1	-13159.6	-2807.42	171.809	864.183	0	0	0	0	0	0	0	603	903	0
449	6	0	0	0	0	0	0	200	300	0	-22.2015	-3.81988	-468.03	18303.2	-13647.9	-2715.87	170.84	863.893	0	0	0	0	0	0	0	603	903	0
449	7	0	0	0	0	0	0	200	300	0	-23.1171	-3.36212	-468.64	18120.1	-13647.9	-2624.31	170.878	864.335	0	0	0	0	0	0	0	603	903	0
449	8	0	0	0	0	0	0	200	300	0	-23.4222	-3.05694	-468.335	18394.8	-13220.6	-2349.66	171.771	863.723	0	0	0	0	0	0	0	603	903	0
449	9	0	0	0	0	0	0	200	300	0	-22.8119	-2.59918	-468.64	18211.7	-13403.7	-2715.87	171.399	864.139	0	0	0	0	0	0	0	603	903	0
450	0	0	0	0	0	0	0	200	300	0	-21.286	-2.44659	-467.725	18486.3	-13770	-2715.87	170.56	863.476	0	0	0	0	0	0	0	603	903	0
450	1	0	0	0	0	0	0	200	300	0	-21.5912	-1.68365	-468.335	18852.5	-13281.7	-2761.64	171.641	862.746	0	0	0	0	0	0	0	603	903	0
450	2	0	0	0	0	0	0	200	300	0	-23.4222	-1.83624	-468.03	18120.1	-13037.5	-2853.2	172.144	864.284	0	0	0	0	0	0	0	603	903	0
450	3	0	0	0	0	0	0	200	300	0	-22.5067	-0.615535	-469.25	18394.8	-13281.7	-2944.75	171.696	863.8	0	0	0	0	0	0	0	603	903	0
450	4	0	0	0	0	0	0	200	300	0	-21.5912	-1.0733	-468.335	19585	-13525.8	-3219.41	171.119	861.182	0	0	0	0	0	0	0	603	903	0
450	5	0	0	0	0	0	0	200	300	0	-20.2179	-0.920711	-468.945	19401.9	-13220.6	-2898.97	171.808	861.627	0	0	0	0	0	0	0	603	903	0
450	6	0	0	0	0	0	0	200	300	0	-20.0653	-0.00518374	-469.25	18944.1	-13220.6	-3082.08	171.826	862.629	0	0	0	0	0	0	0	603	903	0
450	7	0	0	0	0	0	0	200	300	0	-20.6757	-0.00518374	-468.64	19493.4	-13525.8	-3265.18	171.138	861.404	0	0	0	0	0	0	0	603	903	0
450	8	0	0	0	0	0	0	200	300	0	-22.2015	0.605168	-469.861	19585	-13220.6	-3082.08	171.863	861.318	0	0	0	0	0	0	0	603	903	0
450	9	0	0	0	0	0	0	200	300	0	-21.286	1.21552	-470.776	20042.7	-13525.8	-3127.85	171.269	860.426	0	0	0	0	0	0	0	603	903	0
451	0	0	0	0	0	0	0	200	300	0	-20.8282	1.5207	-471.082	20042.7	-13647.9	-2853.2	171.029	860.454	0	0	0	0	0	0	0	603	903	0
451	1	0	0	0	0	0	0	200	300	0	-21.8964	1.67328	-471.692	19859.6	-13586.9	-2898.97	171.196	860.897	0	0	0	0	0	0	0	603	903	0
451	2	0	0	0	0	0	0	200	300	0	-21.8964	0.910344	-472.302	20500.5	-13220.6	-3082.08	172.008	859.595	0	0	0	0	0	0	0	603	903	0
451	3	0	0	0	0	0	0	200	300	0	-20.3705	2.28363	-471.997	20592.1	-13586.9	-3173.63	171.214	859.373	0	0	0	0	0	0	0	603	903	0
451	4	0	0	0	0	0	0	200	300	0	-20.9808	2.7414	-471.692	21141.4	-13647.9	-3127.85	171.066	858.18	0	0	0	0	0	0	0	603	903	0
451	5	0	0	0	0	0	0	200	300	0	-20.8282	3.65693	-472.607	20866.7	-13464.8	-3265.18	171.51	858.848	0	0	0	0	0	0	0	603	903	0
451	6	0	0	0	0	0	0	200	300	0	-21.7438	3.9621	-475.049	20775.2	-13831	-3265.18	170.885	859.267	0	0	0	0	0	0	0	603	903	0
451	7	0	0	0	0	0	0	200	300	0	-21.286	2.7414	-471.387	21324.5	-13525.8	-2670.09	171.306	857.762	0	0	0	0	0	0	0	603	903	0
451	8	0	0	0	0	0	0	200	300	0	-19.6075	4.11469	-476.27	21232.9	-13708.9	-3402.51	171.216	858.418	0	0	0	0	0	0	0	603	903	0
451	9	0	0	0	0	0	0	200	300	0	-20.5231	4.87763	-475.964	21873.8	-13525.8	-3036.3	171.582	857.043	0	0	0	0	0	0	0	603	903	0
452	0	0	0	0	0	0	0	200	300	0	-20.3705	5.1828	-475.964	21049.8	-13525.8	-3448.29	171.582	858.774	0	0	0	0	0	0	0	603	903	0
452	1	0	0	0	0	0	0	200	300	0	-20.9808	5.64057	-478.406	21782.2	-13770	-3402.51	171.217	857.469	0	0	0	0	0	0	0	603	903	0
452	2	0	0	0	0	0	0	200	300	0	-20.6757	6.40351	-480.237	22423.1	-13953.1	-3173.63	170.945	856.308	0	0	0	0	0	0	0	603	903	0
452	3	0	0	0	0	0	0	200	300	0	-19.455	6.5561	-482.068	22697.8	-13831	-3402.51	171.309	855.916	0	0	0	0	0	0	0	603	903	0
452	4	0	0	0	0	0	0	200	300	0	-17.7765	6.86127	-483.899	22789.3	-13647.9	-3265.18	171.796	855.905	0	0	0	0	0	0	0	603	903	0
452	5	0	0	0	0	0	0	200	300	0	-18.3868	5.48798	-481.152	22514.7	-14075.1	-3448.29	170.747	856.207	0	0	0	0	0	0	0	603	903	0
452	6	0	0	0	0	0	0	200	300	0	-20.6757	7.01386	-484.509	23247.1	-13953.1	-3722.95	171.202	855.019	0	0	0	0	0	0	0	603	903	0
452	7	0	0	0	0	0	0	200	300	0	-20.0653	8.69233	-485.425	23704.8	-13831	-3585.62	171.507	854.167	0	0	0	0	0	0	0	603	903	0
452	8	0	0	0	0	0	0	200	300	0	-19.3024	8.38715	-486.646	23979.5	-14380.3	-3494.06	170.45	853.725	0	0	0	0	0	0	0	603	903	0
452	9	0	0	0	0	0	0	200	300	0	-19.1498	9.15009	-488.477	24071.1	-14197.2	-3814.5	170.936	853.722	0	0	0	0	0	0	0	603	903	0
453	0	0	0	0	0	0	0	200	300	0	-19.7601	9.30268	-489.392	23888	-14258.2	-3768.72	170.865	854.189	0	0	0	0	0	0	0	603	903	0
453	1	0	0	0	0	0	0	200	300	0	-17.4713	9.15009	-491.528	24437.3	-14014.1	-3814.5	171.489	853.283	0	0	0	0	0	0	0	603	903	0
453	2	0	0	0	0	0	0	200	300	0	-19.9127	10.0656	-490.918	24711.9	-14502.4	-3997.6	170.459	852.662	0	0	0	0	0	0	0	603	903	0
453	3	0	0	0	0	0	0	200	300	0	-18.8446	10.2182	-491.528	24986.6	-14441.3	-3585.62	170.62	852.166	0	0	0	0	0	0	0	603	903	0
453	4	0	0	0	0	0	0	200	300	0	-19.7601	10.8286	-495.19	24803.5	-14197.2	-4043.38	171.33	852.911	0	0	0	0	0	0	0	603	903	0
453	5	0	0	0	0	0	0	200	300	0	-19.7601	10.9811	-496.411	25535.9	-14502.4	-3951.83	170.786	851.559	0	0	0	0	0	0	0	603	903	0
453	6	0	0	0	0	0	0	200	300	0	-20.2179	11.2863	-497.632	25993.7	-14563.4	-3677.17	170.735	850.765	0	0	0	0	0	0	0	603	903	0
453	7	0	0	0	0	0	0	200	300	0	-19.1498	11.7441	-498.547	25719	-14502.4	-4134.94	170.911	851.412	0	0	0	0	0	0	0	603	903	0
453	8	0	0	0	0	0	0	200	300	0	-18.9972	11.5915	-500.073	26268.3	-14868.6	-3951.83	170.267	850.471	0	0	0	0	0	0	0	603	903	0
453	9	0	0	0	0	0	0	200	300	0	-20.8282	12.6596	-501.294	26176.8	-14197.2	-3997.6	171.679	850.782	0	0	0	0	0	0	0	603	903	0
454	0	0	0	0	0	0	0	200	300	0	-20.5231	12.0493	-501.904	26634.5	-14929.6	-3860.28	170.254	849.933	0	0	0	0	0	0	0	603	903	0
454	1	0	0	0	0	0	0	200	300	0	-18.692	13.1174	-504.651	26817.6	-14563.4	-4089.16	171.142	849.859	0	0	0	0	0	0	0	603	903	0
454	2	0	0	0	0	0	0	200	300	0	-19.455	12.8122	-506.482	27367	-14624.5	-4272.27	171.125	848.967	0	0	0	0	0	0	0	603	903	0
454	3	0	0	0	0	0	0	200	300	0	-19.455	13.27	-508.008	27367	-15051.7	-4089.16	170.371	849.129	0	0	0	0	0	0	0	603	903	0
454	4	0	0	0	0	0	0	200	300	0	-20.3705	14.6433	-508.618	27367	-14990.7	-4043.38	170.527	849.194	0	0	0	0	0	0	0	603	903	0
454	5	0	0	0	0	0	0	200	300	0	-21.1334	14.9484	-511.67	28190.9	-14563.4	-4363.82	171.537	847.904	0	0	0	0	0	0	0	603	903	0
454	6	0	0	0	0	0	0	200	300	0	-19.7601	14.1855	-511.67	28099.4	-14990.7	-4363.82	170.702	848.083	0	0	0	0	0	0	0	603	903	0
454	7	0	0	0	0	0	0	200	300	0	-20.2179	15.4062	-515.027	28557.1	-15173.8	-4363.82	170.538	847.552	0	0	0	0	0	0	0	603	903	0
454	8	0	0	0	0	0	0	200	300	0	-20.9808	14.7958	-515.027	28465.6	-15417.9	-3906.05	170.064	847.73	0	0	0	0	0	0	0	603	903	0
454	9	0	0	0	0	0	0	200	300	0	-19.3024	15.7114	-517.163	29014.9	-15234.8	-4501.15	170.542	846.896	0	0	0	0	0	0	0	603	903	0
455	0	0	0	0	0	0	0	200	300	0	-20.5231	16.0165	-518.994	29289.6	-14868.6	-4592.7	171.351	846.565	0	0	0	0	0	0	0	603	903	0
455	1	0	0	0	0	0	0	200	300	0	-20.0653	16.9321	-520.215	29930.4	-15906.2	-4730.03	169.424	845.465	0	0	0	0	0	0	0	603	903	0
455	2	0	0	0	0	0	0	200	300	0	-19.7601	15.5588	-521.436	29564.2	-15234.8	-4409.59	170.783	846.302	0	0	0	0	0	0	0	603	903	0
455	3	0	0	0	0	0	0	200	300	0	-21.286	17.2372	-524.792	29472.7	-15417.9	-4409.59	170.621	846.839	0	0	0	0	0	0	0	603	903	0
455	4	0	0	0	0	0	0	200	300	0	-21.8964	17.3898	-526.929	30022	-15845.2	-4730.03	169.929	846.025	0	0	0	0	0	0	0	603	903	0
455	5	0	0	0	0	0	0	200	300	0	-20.3705	17.695	-527.844	30846	-15906.2	-4501.15	169.866	844.562	0	0	0	0	0	0	0	603	903	0
455	6	0	0	0	0	0	0	200	300	0	-19.1498	17.3898	-528.76	30754.4	-15784.1	-4821.58	170.149	844.837	0	0	0	0	0	0	0	603	903	0
455	7	0	0	0	0	0	0	200	300	0	-21.286	18.7631	-530.286	30662.9	-15723.1	-4501.15	170.35	845.177	0	0	0	0	0	0	0	603	903	0
455	8	0	0	0	0	0	0	200	300	0	-22.2015	19.0683	-533.337	31029.1	-16211.4	-4501.15	169.604	844.821	0	0	0	0	0	0	0	603	903	0
455	9	0	0	0	0	0	0	200	300	0	-22.0489	18.6105	-535.168	32127.7	-15845.2	-4363.82	170.392	842.967	0	0	0	0	0	0	0	603	903	0
456	0	0	0	0	0	0	0	200	300	0	-20.8282	19.0683	-536.694	32219.2	-16089.3	-4775.81	170.021	842.967	0	0	0	0	0	0	0	603	903	0
456	1	0	0	0	0	0	0	200	300	0	-21.4386	18.9157	-537.915	32036.1	-16028.3	-4546.92	170.203	843.444	0	0	0	0	0	0	0	603	903	0
456	2	0	0	0	0	0	0	200	300	0	-22.8119	19.0683	-538.831	32585.5	-16455.5	-4775.81	169.461	842.526	0	0	0	0	0	0	0	603	903	0
456	3	0	0	0	0	0	0	200	300	0	-22.9645	20.289	-540.967	33226.3	-16150.3	-4730.03	170.145	841.58	0	0	0	0	0	0	0	603	903	0
456	4	0	0	0	0	0	0	200	300	0	-21.5912	20.289	-544.019	33043.2	-16272.4	-4546.92	170.089	842.261	0	0	0	0	0	0	0	603	903	0
456	5	0	0	0	0	0	0	200	300	0	-19.7601	20.5942	-545.239	33592.5	-16882.8	-4775.81	169.036	841.389	0	0	0	0	0	0	0	603	903	0
456	6	0	0	0	0	0	0	200	300	0	-22.3541	20.5942	-548.291	33867.2	-16821.7	-4684.25	169.32	841.231	0	0	0	0	0	0	0	603	903	0
456	7	0	0	0	0	0	0	200	300	0	-23.1171	21.0519	-548.291	33958.7	-16699.7	-4821.58	169.542	841.064	0	0	0	0	0	0	0	603	903	0
456	8	0	0	0	0	0	0	200	300	0	-23.7274	20.8994	-551.038	34874.3	-16760.7	-4958.91	169.583	839.712	0	0	0	0	0	0	0	603	903	0
456	9	0	0	0	0	0	0	200	300	0	-23.2696	21.9675	-551.953	35057.4	-17249	-4730.03	168.749	839.485	0	0	0	0	0	0	0	603	903	0
457	0	0	0	0	0	0	0	200	300	0	-23.2696	21.6623	-554.7	35240.5	-17126.9	-4821.58	169.124	839.469	0	0	0	0	0	0	0	603	903	0
457	1	0	0	0	0	0	0	200	300	0	-23.88	22.7304	-557.751	35698.2	-17187.9	-4958.91	169.184	838.996	0	0	0	0	0	0	0	603	903	0
457	2	0	0	0	0	0	0	200	300	0	-23.5748	22.1201	-558.972	35606.7	-17554.1	-4958.91	168.596	839.3	0	0	0	0	0	0	0	603	903	0
457	3	0	0	0	0	0	0	200	300	0	-23.7274	22.1201	-560.803	36980	-17798.3	-5004.69	168.263	837.059	0	0	0	0	0	0	0	603	903	0
457	4	0	0	0	0	0	0	200	300	0	-22.9645	23.1882	-560.803	36980	-17798.3	-4867.36	168.263	837.059	0	0	0	0	0	0	0	603	903	0
457	5	0	0	0	0	0	0	200	300	0	-24.4904	23.1882	-562.329	36796.9	-17676.2	-5187.79	168.566	837.564	0	0	0	0	0	0	0	603	903	0
457	6	0	0	0	0	0	0	200	300	0	-25.1007	23.6459	-564.465	37163.1	-17737.3	-5233.57	168.577	837.162	0	0	0	0	0	0	0	603	903	0
457	7	0	0	0	0	0	0	200	300	0	-24.1852	23.7985	-568.127	38170.2	-18164.5	-5187.79	168.027	835.814	0	0	0	0	0	0	0	603	903	0
457	8	0	0	0	0	0	0	200	300	0	-26.1688	23.9511	-568.738	38994.2	-17798.3	-5142.02	168.706	834.437	0	0	0	0	0	0	0	603	903	0
457	9	0	0	0	0	0	0	200	300	0	-25.2533	24.1037	-572.095	38444.8	-18103.5	-5187.79	168.356	835.8	0	0	0	0	0	0	0	603	903	0
458	0	0	0	0	0	0	0	200	300	0	-26.3214	23.7985	-572.4	38719.5	-18286.6	-5370.9	168.053	835.356	0	0	0	0	0	0	0	603	903	0
458	1	0	0	0	0	0	0	200	300	0	-27.0843	24.5615	-574.536	39909.7	-18286.6	-5462.45	168.172	833.536	0	0	0	0	0	0	0	603	903	0
458	2	0	0	0	0	0	0	200	300	0	-25.5585	24.8666	-575.452	40550.5	-18408.6	-5370.9	168.01	832.533	0	0	0	0	0	0	0	603	903	0
458	3	0	0	0	0	0	0	200	300	0	-25.2533	25.1718	-579.114	40825.2	-18408.6	-5370.9	168.212	832.504	0	0	0	0	0	0	0	603	903	0
458	4	0	0	0	0	0	0	200	300	0	-27.3895	23.1882	-577.588	40642.1	-18652.8	-5645.56	167.706	832.635	0	0	0	0	0	0	0	603	903	0
458	5	0	0	0	0	0	0	200	300	0	-25.4059	24.5615	-581.555	40916.8	-18408.6	-5233.57	168.346	832.643	0	0	0	0	0	0	0	603	903	0
458	6	0	0	0	0	0	0	200	300	0	-27.6947	25.3244	-582.471	41649.2	-18286.6	-5554	168.605	831.496	0	0	0	0	0	0	0	603	903	0
458	7	0	0	0	0	0	0	200	300	0	-26.6266	25.0192	-583.691	42290.1	-19080	-5554	167.311	830.547	0	0	0	0	0	0	0	603	903	0
458	8	0	0	0	0	0	0	200	300	0	-26.6266	26.3925	-586.743	42290.1	-19080	-5187.79	167.481	830.924	0	0	0	0	0	0	0	603	903	0
458	9	0	0	0	0	0	0	200	300	0	-26.7792	26.0873	-589.49	42381.6	-18652.8	-5645.56	168.358	831.105	0	0	0	0	0	0	0	603	903	0
459	0	0	0	0	0	0	0	200	300	0	-26.0162	26.2399	-590.1	43205.6	-18835.9	-5599.78	168.08	829.783	0	0	0	0	0	0	0	603	903	0
459	1	0	0	0	0	0	0	200	300	0	-25.8636	26.3925	-593.457	43205.6	-19263.1	-5599.78	167.541	830.197	0	0	0	0	0	0	0	603	903	0
459	2	0	0	0	0	0	0	200	300	0	-27.2369	26.2399	-594.067	43571.8	-18958	-5691.33	168.088	829.655	0	0	0	0	0	0	0	603	903	0
459	3	0	0	0	0	0	0	200	300	0	-27.6947	26.6977	-594.983	43846.4	-19019	-5691.33	168.034	829.306	0	0	0	0	0	0	0	603	903	0
459	4	0	0	0	0	0	0	200	300	0	-28.305	26.8503	-597.729	44670.4	-19080	-5462.45	168.079	828.266	0	0	0	0	0	0	0	603	903	0
459	5	0	0	0	0	0	0	200	300	0	-27.5421	27.6132	-600.476	45128.2	-19629.3	-5874.44	167.31	827.846	0	0	0	0	0	0	0	603	903	0
459	6	0	0	0	0	0	0	200	300	0	-27.9999	27.4606	-602.002	45219.8	-19324.2	-5965.99	167.9	827.884	0	0	0	0	0	0	0	603	903	0
459	7	0	0	0	0	0	0	200	300	0	-28.6102	27.308	-605.054	45036.6	-19080	-5874.44	168.466	828.566	0	0	0	0	0	0	0	603	903	0
459	8	0	0	0	0	0	0	200	300	0	-28.7628	27.9184	-607.19	45769.1	-19690.4	-6194.87	167.571	827.622	0	0	0	0	0	0	0	603	903	0
459	9	0	0	0	0	0	0	200	300	0	-27.9999	27.4606	-607.495	46226.8	-19751.4	-5691.33	167.487	826.906	0	0	0	0	0	0	0	603	903	0
460	0	0	0	0	0	0	0	200	300	0	-27.6947	28.6813	-609.326	47142.3	-19568.3	-5828.66	167.885	825.632	0	0	0	0	0	0	0	603	903	0
460	1	0	0	0	0	0	0	200	300	0	-28.9154	28.8339	-612.988	47691.7	-19629.3	-6240.65	167.978	825.198	0	0	0	0	0	0	0	603	903	0
460	2	0	0	0	0	0	0	200	300	0	-29.2206	29.2917	-615.125	47417	-20117.6	-6057.54	167.295	825.915	0	0	0	0	0	0	0	603	903	0
460	3	0	0	0	0	0	0	200	300	0	-29.2206	28.6813	-616.65	48515.6	-20361.8	-6103.32	166.98	824.324	0	0	0	0	0	0	0	603	903	0
460	4	0	0	0	0	0	0	200	300	0	-27.9999	29.7495	-618.787	49156.5	-20178.7	-6011.77	167.39	823.56	0	0	0	0	0	0	0	603	903	0
460	5	0	0	0	0	0	0	200	300	0	-28.6102	30.0546	-620.618	48698.8	-19873.5	-6194.87	167.978	824.532	0	0	0	0	0	0	0	603	903	0
460	6	0	0	0	0	0	0	200	300	0	-30.1361	30.2072	-622.754	49248.1	-20117.6	-6149.1	167.696	823.919	0	0	0	0	0	0	0	603	903	0
460	7	0	0	0	0	0	0	200	300	0	-29.5258	30.665	-625.5	49705.8	-20239.7	-6286.43	167.642	823.534	0	0	0	0	0	0	0	603	903	0
460	8	0	0	0	0	0	0	200	300	0	-28.7628	30.665	-626.721	51170.7	-20483.8	-6057.54	167.316	821.352	0	0	0	0	0	0	0	603	903	0
460	9	0	0	0	0	0	0	200	300	0	-26.9318	31.4279	-629.773	51170.7	-20605.9	-6057.54	167.28	821.747	0	0	0	0	0	0	0	603	903	0
461	0	0	0	0	0	0	0	200	300	0	-28.7628	31.4279	-627.942	50896	-20728	-6286.43	166.991	821.948	0	0	0	0	0	0	0	603	903	0
461	1	0	0	0	0	0	0	200	300	0	-29.6783	31.5805	-631.909	51720	-20544.9	-6469.53	167.488	821.153	0	0	0	0	0	0	0	603	903	0
461	2	0	0	0	0	0	0	200	300	0	-30.4413	32.9538	-634.961	52452.4	-20911.1	-6515.31	167.067	820.393	0	0	0	0	0	0	0	603	903	0
461	3	0	0	0	0	0	0	200	300	0	-30.5939	32.9538	-636.487	53093.3	-21338.3	-6423.75	166.475	819.584	0	0	0	0	0	0	0	603	903	0
461	4	0	0	0	0	0	0	200	300	0	-29.2206	33.8693	-639.539	52727.1	-21399.4	-6606.86	166.539	820.555	0	0	0	0	0	0	0	603	903	0
461	5	0	0	0	0	0	0	200	300	0	-30.7465	33.4116	-642.285	53367.9	-20972.1	-6698.41	167.348	819.909	0	0	0	0	0	0	0	603	903	0
461	6	0	0	0	0	0	0	200	300	0	-30.7465	32.1909	-643.201	54283.4	-21643.5	-6561.08	166.35	818.604	0	0	0	0	0	0	0	603	903	0
461	7	0	0	0	0	0	0	200	300	0	-29.9835	34.0219	-644.421	54466.6	-21521.4	-6423.75	166.603	818.48	0	0	0	0	0	0	0	603	903	0
461	8	0	0	0	0	0	0	200	300	0	-30.5939	35.3952	-647.473	54741.2	-21338.3	-6789.97	167.044	818.454	0	0	0	0	0	0	0	603	903	0
461	9	0	0	0	0	0	0	200	300	0	-31.3568	33.259	-647.473	54924.3	-21338.3	-6835.74	167.044	818.171	0	0	0	0	0	0	0	603	903	0
462	0	0	0	0	0	0	0	200	300	0	-32.4249	34.7849	-651.44	56114.5	-21521.4	-6835.74	166.963	816.861	0	0	0	0	0	0	0	603	903	0
462	1	0	0	0	0	0	0	200	300	0	-30.7465	35.2426	-650.22	56297.6	-22009.7	-6881.52	166.15	816.418	0	0	0	0	0	0	0	603	903	0
462	2	0	0	0	0	0	0	200	300	0	-31.8146	34.6323	-655.713	55931.4	-21765.6	-7156.18	166.806	817.701	0	0	0	0	0	0	0	603	903	0
462	3	0	0	0	0	0	0	200	300	0	-32.7301	36.0056	-655.713	56663.8	-21887.6	-7247.73	166.62	816.584	0	0	0	0	0	0	0	603	903	0
462	4	0	0	0	0	0	0	200	300	0	-32.7301	36.7685	-656.323	57487.8	-22131.8	-7110.4	166.279	815.409	0	0	0	0	0	0	0	603	903	0
462	5	0	0	0	0	0	0	200	300	0	-31.5094	36.9211	-660.596	58494.9	-21765.6	-7156.18	167.052	814.451	0	0	0	0	0	0	0	603	903	0
462	6	0	0	0	0	0	0	200	300	0	-30.2887	37.9892	-663.037	58586.4	-21826.6	-7293.51	167.081	814.639	0	0	0	0	0	0	0	603	903	0
462	7	0	0	0	0	0	0	200	300	0	-32.4249	37.5314	-664.258	59044.2	-22437	-7110.4	166.223	814.113	0	0	0	0	0	0	0	603	903	0
462	8	0	0	0	0	0	0	200	300	0	-30.899	38.1418	-665.479	59318.9	-22192.8	-7385.06	166.651	813.863	0	0	0	0	0	0	0	603	903	0
462	9	0	0	0	0	0	0	200	300	0	-33.493	38.447	-668.225	60600.6	-22009.7	-7247.73	167.062	812.311	0	0	0	0	0	0	0	603	903	0
463	0	0	0	0	0	0	0	200	300	0	-32.5775	39.5151	-670.056	60692.1	-22375.9	-7201.95	166.606	812.422	0	0	0	0	0	0	0	603	903	0
463	1	0	0	0	0	0	0	200	300	0	-32.5775	40.1254	-672.192	60325.9	-22620.1	-7339.28	166.349	813.255	0	0	0	0	0	0	0	603	903	0
463	2	0	0	0	0	0	0	200	300	0	-33.1879	41.041	-674.939	61516.1	-22253.9	-7247.73	167.028	811.857	0	0	0	0	0	0	0	603	903	0
463	3	0	0	0	0	0	0	200	300	0	-33.1879	41.6513	-677.686	61973.9	-22437	-7247.73	166.892	811.551	0	0	0	0	0	0	0	603	903	0
463	4	0	0	0	0	0	0	200	300	0	-32.5775	41.4987	-680.127	62523.2	-22620.1	-7568.16	166.741	811.071	0	0	0	0	0	0	0	603	903	0
463	5	0	0	0	0	0	0	200	300	0	-32.5775	41.3461	-681.958	62614.8	-22864.2	-7751.27	166.473	811.184	0	0	0	0	0	0	0	603	903	0
463	6	0	0	0	0	0	0	200	300	0	-33.9508	42.4142	-685.01	62889.4	-22559	-7613.94	167.068	811.192	0	0	0	0	0	0	0	603	903	0
463	7	0	0	0	0	0	0	200	300	0	-33.3405	43.7875	-686.23	63988	-22803.2	-7751.27	166.77	809.754	0	0	0	0	0	0	0	603	903	0
463	8	0	0	0	0	0	0	200	300	0	-32.2723	45.7712	-688.672	63713.4	-23230.4	-7888.6	166.268	810.484	0	0	0	0	0	0	0	603	903	0
463	9	0	0	0	0	0	0	200	300	0	-31.9672	46.2289	-692.944	65178.2	-23291.5	-7888.6	166.388	808.94	0	0	0	0	0	0	0	603	903	0
464	0	0	0	0	0	0	0	200	300	0	-32.8827	46.9919	-694.775	64995.1	-22986.3	-7934.37	166.916	809.452	0	0	0	0	0	0	0	603	903	0
464	1	0	0	0	0	0	0	200	300	0	-29.9835	47.2971	-699.353	65178.2	-23352.5	-8025.93	166.608	809.802	0	0	0	0	0	0	0	603	903	0
464	2	0	0	0	0	0	0	200	300	0	-33.1879	48.8229	-700.269	65361.3	-23474.6	-8163.26	166.478	809.663	0	0	0	0	0	0	0	603	903	0
464	3	0	0	0	0	0	0	200	300	0	-32.2723	49.4333	-703.015	66185.3	-22986.3	-8392.14	167.303	808.855	0	0	0	0	0	0	0	603	903	0
464	4	0	0	0	0	0	0	200	300	0	-30.2887	51.1118	-703.931	65910.6	-23169.4	-8392.14	167.086	809.368	0	0	0	0	0	0	0	603	903	0
464	5	0	0	0	0	0	0	200	300	0	-32.7301	50.8066	-706.067	66643.1	-23352.5	-8483.69	166.926	808.614	0	0	0	0	0	0	0	603	903	0
464	6	0	0	0	0	0	0	200	300	0	-31.9672	52.9428	-710.645	67100.8	-23657.7	-8163.26	166.71	808.578	0	0	0	0	0	0	0	603	903	0
464	7	0	0	0	0	0	0	200	300	0	-32.2723	53.248	-712.781	67192.4	-23535.6	-8163.26	166.981	808.732	0	0	0	0	0	0	0	603	903	0
464	8	0	0	0	0	0	0	200	300	0	-32.2723	52.4851	-714.307	67924.8	-23413.5	-8163.26	167.222	807.908	0	0	0	0	0	0	0	603	903	0
464	9	0	0	0	0	0	0	200	300	0	-31.8146	55.2316	-717.053	68016.4	-23962.8	-8575.25	166.582	808.145	0	0	0	0	0	0	0	603	903	0
465	0	0	0	0	0	0	0	200	300	0	-33.3405	55.9946	-717.969	68291	-24695.3	-8621.02	165.604	807.883	0	0	0	0	0	0	0	603	903	0
465	1	0	0	0	0	0	0	200	300	0	-32.8827	55.6894	-718.884	69298.1	-23657.7	-8575.25	167.091	806.603	0	0	0	0	0	0	0	603	903	0
465	2	0	0	0	0	0	0	200	300	0	-32.2723	57.9782	-722.852	69206.5	-24084.9	-8758.35	166.681	807.259	0	0	0	0	0	0	0	603	903	0
465	3	0	0	0	0	0	0	200	300	0	-32.4249	57.9782	-725.293	70671.4	-23962.8	-8849.9	166.961	805.562	0	0	0	0	0	0	0	603	903	0
465	4	0	0	0	0	0	0	200	300	0	-33.493	57.2153	-729.871	70488.3	-23840.8	-8575.25	167.336	806.424	0	0	0	0	0	0	0	603	903	0
465	5	0	0	0	0	0	0	200	300	0	-33.6456	59.6567	-728.65	70488.3	-23840.8	-8529.47	167.281	806.262	0	0	0	0	0	0	0	603	903	0
465	6	0	0	0	0	0	0	200	300	0	-32.2723	61.1826	-729.26	71129.1	-24329.1	-8758.35	166.639	805.464	0	0	0	0	0	0	0	603	903	0
465	7	0	0	0	0	0	0	200	300	0	-33.1879	62.5559	-732.922	71495.4	-24268	-8849.9	166.889	805.452	0	0	0	0	0	0	0	603	903	0
465	8	0	0	0	0	0	0	200	300	0	-33.9508	63.1662	-734.448	71586.9	-23901.8	-8758.35	167.456	805.53	0	0	0	0	0	0	0	603	903	0
465	9	0	0	0	0	0	0	200	300	0	-31.5094	63.624	-735.669	71953.1	-24268	-8804.13	167.012	805.194	0	0	0	0	0	0	0	603	903	0
466	0	0	0	0	0	0	0	200	300	0	-34.256	64.5395	-736.584	72594	-24695.3	-8849.9	166.473	804.445	0	0	0	0	0	0	0	603	903	0
466	1	0	0	0	0	0	0	200	300	0	-32.8827	64.9973	-737.805	72960.2	-24329.1	-8987.23	167.025	804.112	0	0	0	0	0	0	0	603	903	0
466	2	0	0	0	0	0	0	200	300	0	-33.6456	66.9809	-739.941	73234.9	-24268	-8575.25	167.203	804.026	0	0	0	0	0	0	0	603	903	0
466	3	0	0	0	0	0	0	200	300	0	-34.4086	65.9128	-740.247	73509.6	-24756.3	-8987.23	166.557	803.696	0	0	0	0	0	0	0	603	903	0
466	4	0	0	0	0	0	0	200	300	0	-34.4086	68.5068	-742.383	73784.2	-24817.3	-9124.56	166.571	803.612	0	0	0	0	0	0	0	603	903	0
466	5	0	0	0	0	0	0	200	300	0	-33.3405	68.5068	-744.214	73509.6	-24329.1	-9170.34	167.309	804.225	0	0	0	0	0	0	0	603	903	0
466	6	0	0	0	0	0	0	200	300	0	-33.6456	69.2697	-746.35	75157.5	-24695.3	-9216.12	166.912	802.3	0	0	0	0	0	0	0	603	903	0
466	7	0	0	0	0	0	0	200	300	0	-33.9508	70.4904	-745.74	74974.4	-24817.3	-9261.89	166.721	802.463	0	0	0	0	0	0	0	603	903	0
466	8	0	0	0	0	0	0	200	300	0	-35.3241	71.5585	-746.35	75065.9	-25244.6	-8987.23	166.176	802.423	0	0	0	0	0	0	0	603	903	0
466	9	0	0	0	0	0	0	200	300	0	-35.6293	72.9318	-748.792	76073	-24817.3	-9490.77	166.857	801.406	0	0	0	0	0	0	0	603	903	0
467	0	0	0	0	0	0	0	200	300	0	-34.5612	71.8637	-747.571	76347.7	-24695.3	-9490.77	166.966	800.872	0	0	0	0	0	0	0	603	903	0
467	1	0	0	0	0	0	0	200	300	0	-34.7137	74.6103	-749.707	77263.2	-25427.7	-9399.22	166.083	799.942	0	0	0	0	0	0	0	603	903	0
467	2	0	0	0	0	0	0	200	300	0	-35.9344	75.0681	-751.233	76713.9	-24817.3	-9490.77	166.965	800.883	0	0	0	0	0	0	0	603	903	0
467	3	0	0	0	0	0	0	200	300	0	-33.493	75.2206	-752.148	76897	-25061.5	-9856.98	166.68	800.764	0	0	0	0	0	0	0	603	903	0
467	4	0	0	0	0	0	0	200	300	0	-36.3922	75.831	-751.843	78087.2	-24817.3	-9445	166.991	799.139	0	0	0	0	0	0	0	603	903	0
467	5	0	0	0	0	0	0	200	300	0	-34.8663	77.2043	-751.538	77904.1	-25122.5	-9719.66	166.572	799.341	0	0	0	0	0	0	0	603	903	0
467	6	0	0	0	0	0	0	200	300	0	-35.6293	78.2724	-752.454	77995.6	-24634.2	-9536.55	167.261	799.345	0	0	0	0	0	0	0	603	903	0
467	7	0	0	0	0	0	0	200	300	0	-35.9344	79.9509	-753.369	77904.1	-24878.4	-9765.43	166.977	799.592	0	0	0	0	0	0	0	603	903	0
467	8	0	0	0	0	0	0	200	300	0	-36.85	79.6457	-754.285	78819.6	-25061.5	-9902.76	166.775	798.504	0	0	0	0	0	0	0	603	903	0
467	9	0	0	0	0	0	0	200	300	0	-35.9344	80.2561	-753.979	79094.2	-25061.5	-9765.43	166.761	798.098	0	0	0	0	0	0	0	603	903	0
468	0	0	0	0	0	0	0	200	300	0	-35.7819	79.7983	-751.233	80101.4	-25000.4	-9811.21	166.721	796.373	0	0	0	0	0	0	0	603	903	0
468	1	0	0	0	0	0	0	200	300	0	-37.1551	81.9345	-753.674	79643.6	-24512.2	-9856.98	167.476	797.326	0	0	0	0	0	0	0	603	903	0
468	2	0	0	0	0	0	0	200	300	0	-37.0026	83.4604	-753.674	79643.6	-25061.5	-9902.76	166.748	797.326	0	0	0	0	0	0	0	603	903	0
468	3	0	0	0	0	0	0	200	300	0	-36.6974	84.3759	-754.285	80009.8	-25000.4	-9856.98	166.855	796.926	0	0	0	0	0	0	0	603	903	0
468	4	0	0	0	0	0	0	200	300	0	-35.0189	85.2915	-754.285	80192.9	-25122.5	-9856.98	166.694	796.684	0	0	0	0	0	0	0	603	903	0
468	5	0	0	0	0	0	0	200	300	0	-37.3077	85.444	-752.148	80192.9	-25549.8	-9994.31	166.031	796.382	0	0	0	0	0	0	0	603	903	0
468	6	0	0	0	0	0	0	200	300	0	-37.4603	86.6647	-754.895	80742.2	-24756.3	-9994.31	167.206	796.042	0	0	0	0	0	0	0	603	903	0
468	7	0	0	0	0	0	0	200	300	0	-38.681	87.4277	-753.369	81291.5	-24878.4	-10177.4	166.977	795.096	0	0	0	0	0	0	0	603	903	0
468	8	0	0	0	0	0	0	200	300	0	-37.6129	89.1061	-752.454	81291.5	-24573.2	-9811.21	167.343	794.965	0	0	0	0	0	0	0	603	903	0
468	9	0	0	0	0	0	0	200	300	0	-38.2233	88.801	-752.454	80742.2	-25122.5	-9719.66	166.613	795.695	0	0	0	0	0	0	0	603	903	0
469	0	0	0	0	0	0	0	200	300	0	-39.444	90.4794	-752.759	81108.4	-25000.4	-10131.6	166.788	795.252	0	0	0	0	0	0	0	603	903	0
469	1	0	0	0	0	0	0	200	300	0	-38.9862	91.5476	-751.538	81108.4	-24573.2	-10131.6	167.303	795.077	0	0	0	0	0	0	0	603	903	0
469	2	0	0	0	0	0	0	200	300	0	-38.2233	92.0053	-752.148	82207.1	-24756.3	-10223.2	167.086	793.704	0	0	0	0	0	0	0	603	903	0
469	3	0	0	0	0	0	0	200	300	0	-36.3922	93.6838	-749.097	82481.7	-24634.2	-10269	167.115	792.892	0	0	0	0	0	0	0	603	903	0
469	4	0	0	0	0	0	0	200	300	0	-38.9862	93.989	-748.181	81383.1	-24084.9	-10223.2	167.809	794.226	0	0	0	0	0	0	0	603	903	0
469	5	-3.9975	-5.39059	-12.5482	-846.678	1785.52	-69.9462	342.293	367.474	0	-39.5966	95.9726	-747.876	82023.9	-24329.1	-10223.2	167.469	793.324	0	0	0	0	0	0	0	603	903	0
469	6	-11.1691	-14.3933	-23.2294	-1487.55	3128.3	-1397.46	334.67	364.037	0	-39.5966	97.1933	-747.571	82481.7	-24878.4	-10497.9	166.721	792.667	0	0	0	0	0	0	0	603	903	0
469	7	-6.89667	-15.614	-22.3138	-663.573	2701.05	-1214.36	321.048	329.738	0	-38.9862	97.3459	-746.96	82207.1	-24756.3	-10360.5	166.857	792.945	0	0	0	0	0	0	0	603	903	0
469	8	-0.945742	-8.90011	-14.3793	-1029.78	1907.59	-24.1699	332.663	371.616	0	-39.2914	97.8037	-745.74	83305.7	-24390.1	-10589.4	167.294	791.291	0	0	0	0	0	0	0	603	903	0
469	9	0	0	0	0	0	0	200	300	0	-40.2069	98.1088	-739.941	82390.1	-24390.1	-10726.7	167.038	791.653	0	0	0	0	0	0	0	603	903	0
470	0	-9.94843	-9.0527	-14.9896	-755.126	1785.52	-1305.91	319.117	350.377	0	-39.5966	100.245	-741.772	82664.8	-24451.1	-10452.1	167.037	791.558	0	0	0	0	0	0	0	603	903	0
470	1	-9.64325	-16.3769	-23.8397	-1212.89	2823.12	-298.828	318.421	350.877	0	-37.4603	101.161	-738.416	82847.9	-24634.2	-10497.9	166.639	790.803	0	0	0	0	0	0	0	603	903	0
470	2	-3.69232	-12.1045	-26.5863	-1304.44	3372.44	-802.368	326.849	349.064	0	-36.6974	101.466	-737.805	83031	-24145.9	-10269	167.273	790.462	0	0	0	0	0	0	0	603	903	0
470	3	-1.86127	-4.78024	-22.3138	-1212.89	3799.68	-893.921	370.284	354.356	0	-38.5284	103.449	-737.195	82664.8	-23901.8	-10360.5	167.577	790.866	0	0	0	0	0	0	0	603	903	0
470	4	-1.55609	-1.57589	-23.8397	-2219.97	3921.75	754.029	364.505	393.121	0	-40.0543	105.128	-733.838	82664.8	-24023.9	-10772.5	167.263	790.353	0	0	0	0	0	0	0	603	903	0
470	5	-2.7768	5.29056	-35.7416	-2036.86	4532.1	1440.67	326.802	356.989	0	-39.444	105.128	-733.228	83214.1	-23840.8	-10681	167.485	789.51	0	0	0	0	0	0	0	603	903	0
470	6	-3.53974	11.0889	-46.7279	-2219.97	5508.67	1532.23	317.888	347.508	0	-38.2233	106.501	-729.871	82573.3	-23901.8	-10772.5	167.252	789.866	0	0	0	0	0	0	0	603	903	0
470	7	1.49566	15.3614	-51.6107	-2128.42	6851.44	2447.75	332.752	341.24	0	-38.3759	107.264	-729.26	83122.6	-23840.8	-10681	167.308	789.018	0	0	0	0	0	0	0	603	903	0
470	8	4.08966	17.345	-51.6107	-2128.42	7766.97	3637.94	350.491	341.24	0	-38.681	108.943	-726.514	83031	-23901.8	-10864.1	167.101	788.713	0	0	0	0	0	0	0	603	903	0
470	9	1.49566	18.2605	-59.2401	-2311.52	8377.32	3180.18	341.413	339.02	0	-37.7655	108.18	-722.241	83031	-23352.5	-10864.1	167.667	788.037	0	0	0	0	0	0	0	603	903	0
471	0	0.580137	20.2442	-71.7523	-2769.29	8987.67	2768.19	325.26	338.595	0	-38.8336	110.926	-721.326	83397.3	-23413.5	-10406.3	167.541	787.383	0	0	0	0	0	0	0	603	903	0
471	1	-0.0302147	20.0916	-76.0248	-3227.05	9903.2	4049.93	330.263	342.447	0	-37.6129	110.163	-720.41	83122.6	-23535.6	-10864.1	167.33	787.618	0	0	0	0	0	0	0	603	903	0
471	2	-1.25092	19.6338	-78.161	-4142.58	10757.7	3409.06	337.635	353.001	0	-37.0026	112.147	-717.969	82847.9	-23352.5	-10909.8	167.474	787.608	0	0	0	0	0	0	0	603	903	0
471	3	1.64825	22.6856	-88.8422	-3684.81	12100.5	3088.62	336.202	341.476	0	-37.7655	112.605	-713.086	82573.3	-23474.6	-10909.8	167.08	787.203	0	0	0	0	0	0	0	603	903	0
471	4	3.32672	24.5166	-98.6078	-4508.79	13138.1	4278.81	333.236	345.724	0	-37.1551	113.52	-710.95	82939.5	-23047.3	-10818.3	167.582	786.34	0	0	0	0	0	0	0	603	903	0
471	5	1.19049	25.8899	-111.12	-4783.45	13748.4	4690.8	323.726	343.048	0	-35.3241	115.962	-707.288	82664.8	-23169.4	-10909.8	167.242	786.124	0	0	0	0	0	0	0	603	903	0
471	6	-4.30268	31.0779	-119.36	-4966.55	15335.3	4461.91	328.48	341.61	0	-35.6293	114.588	-704.541	82756.3	-22498	-10864.1	168.067	785.539	0	0	0	0	0	0	0	603	903	0
471	7	-3.69232	36.7237	-128.82	-5698.97	16678.1	5606.33	329.468	344.24	0	-34.256	116.419	-701.184	82207.1	-22253.9	-11001.4	168.262	785.76	0	0	0	0	0	0	0	603	903	0
471	8	-2.92938	39.0125	-139.807	-5698.97	18387.1	6704.96	331.518	340.763	0	-34.256	116.572	-696.606	82481.7	-22742.1	-10589.4	167.353	784.595	0	0	0	0	0	0	0	603	903	0
471	9	-3.53974	40.0806	-151.098	-5973.63	19302.6	6338.75	327.749	339.535	0	-33.493	117.793	-694.775	82756.3	-22070.8	-10543.6	168.233	783.888	0	0	0	0	0	0	0	603	903	0
472	0	-3.69232	42.3694	-164.526	-6522.95	20706.4	6704.96	325.855	339.647	0	-33.6456	118.708	-690.198	81932.4	-22070.8	-11184.5	168.023	784.291	0	0	0	0	0	0	0	603	903	0
472	1	-5.82855	45.116	-174.597	-7163.82	22049.2	7574.71	326.287	341.031	0	-33.3405	118.556	-685.925	81932.4	-21704.5	-11184.5	168.357	783.552	0	0	0	0	0	0	0	603	903	0
472	2	-6.89667	45.116	-185.278	-7255.37	23208.9	7025.39	325.265	339.159	0	-33.0353	120.692	-681.348	81474.6	-21582.5	-11001.4	168.324	783.421	0	0	0	0	0	0	0	603	903	0
472	3	-6.89667	41.7591	-195.043	-7987.79	24429.6	6476.08	325.252	340.954	0	-34.1034	121.607	-678.906	81932.4	-21277.3	-11001.4	168.659	782.317	0	0	0	0	0	0	0	603	903	0
472	4	-5.67597	39.3177	-202.368	-7896.24	25711.3	6888.06	327.053	339.019	0	-32.1197	121.15	-676.465	81108.4	-20728	-10955.6	169.358	783.1	0	0	0	0	0	0	0	603	903	0
472	5	-5.06562	38.097	-214.88	-7804.69	26260.6	6613.41	322.211	336.321	0	-31.8146	121.15	-671.582	81108.4	-21155.2	-11230.3	168.499	782.228	0	0	0	0	0	0	0	603	903	0
472	6	-7.35443	34.2823	-223.425	-7896.24	27664.4	5697.88	323.82	335.342	0	-32.5775	119.319	-666.089	81108.4	-20972.1	-11047.2	168.515	781.232	0	0	0	0	0	0	0	603	903	0
472	7	-8.11737	30.1624	-230.444	-7896.24	29129.3	5514.77	326.405	334.265	0	-29.9835	122.523	-660.596	80467.6	-20422.8	-11138.7	169.084	781.189	0	0	0	0	0	0	0	603	903	0
472	8	-7.04926	27.1106	-237.463	-8720.21	29678.6	5469	324.982	336.722	0	-31.9672	122.828	-656.018	80742.2	-20178.7	-11092.9	169.241	779.921	0	0	0	0	0	0	0	603	903	0
472	9	-4.91303	24.364	-246.008	-8354	30288.9	4370.36	323.122	333.958	0	-29.9835	123.744	-650.525	80009.8	-20483.8	-10955.6	168.512	780.007	0	0	0	0	0	0	0	603	903	0
473	0	-6.43891	20.2442	-248.754	-8445.55	31265.5	4416.14	325.688	333.951	0	-28.9154	123.744	-646.863	79368.9	-20056.6	-11001.4	168.994	780.302	0	0	0	0	0	0	0	603	903	0
473	1	-7.04926	15.3614	-256.689	-8628.66	31814.8	4278.81	323.943	333.615	0	-29.2206	123.438	-637.097	79368.9	-19629.3	-11092.9	169.189	778.421	0	0	0	0	0	0	0	603	903	0
473	2	-7.20185	9.56302	-261.266	-8354	32486.2	2951.3	324.341	331.975	0	-28.7628	124.201	-635.876	78636.5	-19385.2	-10955.6	169.514	779.334	0	0	0	0	0	0	0	603	903	0
473	3	-6.74408	7.42679	-264.929	-7804.69	32730.3	2218.87	323.544	329.46	0	-27.2369	124.354	-628.857	79185.8	-19385.2	-10955.6	169.174	777.08	0	0	0	0	0	0	0	603	903	0
473	4	-6.28632	2.39139	-266.149	-7896.24	33340.7	2218.87	325.271	329.668	0	-23.7274	124.964	-622.449	78270.3	-18896.9	-11001.4	169.641	777.254	0	0	0	0	0	0	0	603	903	0
473	5	-6.89667	-3.71212	-274.694	-7530.03	34073.1	1349.12	324.04	327.412	0	-26.0162	125.269	-616.345	76988.5	-18530.7	-10635.2	169.935	778.089	0	0	0	0	0	0	0	603	903	0
473	6	-7.8122	-6.45871	-280.798	-7804.69	34500.4	250.488	322.866	327.795	0	-26.474	124.201	-609.631	76805.5	-18530.7	-10635.2	169.603	777.013	0	0	0	0	0	0	0	603	903	0
473	7	-6.13373	-11.7993	-280.493	-7804.69	34927.6	433.594	324.522	327.825	0	-25.2533	125.88	-605.664	76897	-18286.6	-10681	169.807	776.037	0	0	0	0	0	0	0	603	903	0
473	8	-5.52338	-16.5295	-284.155	-8262.45	35293.8	-115.723	324.206	329.077	0	-24.0326	124.812	-598.95	76256.1	-17615.2	-10085.9	170.59	775.684	0	0	0	0	0	0	0	603	903	0
473	9	-6.43891	-19.5813	-286.291	-7530.03	35538	-1260.13	324.132	326.302	0	-22.9645	125.575	-592.236	74882.8	-17737.3	-10452.1	170.05	776.559	0	0	0	0	0	0	0	603	903	0
474	0	-5.52338	-22.9382	-293.92	-7713.14	36209.4	-1717.9	323.195	326.242	0	-23.88	124.659	-584.912	74333.5	-17554.1	-10635.2	169.988	775.915	0	0	0	0	0	0	0	603	903	0
474	1	-5.2182	-25.99	-299.108	-7438.48	36331.4	-1855.23	321.466	324.869	0	-23.2696	124.049	-574.231	74242	-17432.1	-10406.3	169.643	773.711	0	0	0	0	0	0	0	603	903	0
474	2	-5.2182	-30.2624	-301.245	-7438.48	37063.9	-2679.2	323.036	324.693	0	-21.5912	125.575	-570.569	73967.3	-16699.7	-10314.7	170.732	773.362	0	0	0	0	0	0	0	603	903	0
474	3	-4.76044	-31.9409	-307.043	-6522.95	37918.4	-3182.74	323.495	321.244	0	-21.1334	125.575	-564.771	72502.4	-16699.7	-10177.4	170.431	774.625	0	0	0	0	0	0	0	603	903	0
474	4	-5.2182	-34.2297	-317.114	-6614.5	39139.1	-2908.08	323.423	320.858	0	-21.4386	124.812	-555.92	72594	-16577.6	-10360.5	170.18	772.417	0	0	0	0	0	0	0	603	903	0
474	5	-4.91303	-37.8918	-322.607	-6431.4	39993.6	-3777.83	323.97	319.936	0	-20.8282	124.507	-548.901	71403.8	-15723.1	-9994.31	171.355	772.915	0	0	0	0	0	0	0	603	903	0
474	6	-4.76044	-40.028	-331.457	-6156.74	41458.4	-4144.04	325.079	318.575	0	-20.8282	123.133	-540.967	70671.4	-15601	-9765.43	171.161	772.361	0	0	0	0	0	0	0	603	903	0
474	7	-3.38715	-42.0117	-338.171	-5607.42	41885.6	-4006.71	323.859	316.582	0	-20.0653	123.744	-533.948	70122.1	-15601	-9856.98	170.782	771.672	0	0	0	0	0	0	0	603	903	0
474	8	-1.86127	-42.7746	-349.462	-6431.4	43655.7	-4647.58	324.922	318.404	0	-18.2342	124.201	-525.403	68840.3	-15173.8	-9673.88	171.12	771.976	0	0	0	0	0	0	0	603	903	0
474	9	-3.53974	-43.8427	-358.923	-5332.76	44693.3	-5242.68	324.521	314.858	0	-19.3024	123.286	-516.248	68474.1	-14685.5	-9582.33	171.553	770.362	0	0	0	0	0	0	0	603	903	0
475	0	-3.38715	-44.6057	-369.604	-5882.08	46219.1	-5196.9	325.05	315.915	0	-18.2342	123.438	-509.229	67558.6	-14319.3	-9261.89	171.88	770.331	0	0	0	0	0	0	0	603	903	0
475	1	-2.31903	-45.3686	-380.285	-5332.76	47561.9	-5105.35	325.069	314.023	0	-16.7084	122.218	-498.547	65819.1	-14563.4	-8804.13	170.788	770.978	0	0	0	0	0	0	0	603	903	0
475	2	-1.25092	-47.0471	-389.44	-5058.1	48843.6	-5608.89	325.42	312.988	0	-16.5558	122.218	-492.139	66185.3	-14136.2	-8849.9	171.276	768.515	0	0	0	0	0	0	0	603	903	0
475	3	-2.01386	-48.2678	-394.933	-4875	49576.1	-5929.32	325.53	312.344	0	-16.098	122.065	-484.204	64903.6	-13770	-9261.89	171.562	768.958	0	0	0	0	0	0	0	603	903	0
475	4	-0.793154	-49.1833	-411.108	-4325.68	51895.4	-5929.32	326.233	310.522	0	-14.267	121.607	-476.27	63896.5	-13403.7	-8987.23	171.857	768.84	0	0	0	0	0	0	0	603	903	0
475	5	-0.33539	-51.6247	-423.925	-4508.79	53299.2	-6203.98	325.728	310.636	0	-16.098	121.15	-466.809	63530.3	-13159.6	-8529.47	171.809	766.905	0	0	0	0	0	0	0	603	903	0
475	6	-0.945742	-51.6247	-435.522	-4234.13	54703	-6478.64	325.603	309.722	0	-15.1825	121.302	-458.875	62157	-12732.4	-8529.47	172.253	767.545	0	0	0	0	0	0	0	603	903	0
475	7	-0.945742	-53.6084	-444.372	-3959.47	55740.6	-6432.86	325.437	308.91	0	-14.1144	119.471	-450.33	60966.8	-12549.3	-8392.14	172.133	767.617	0	0	0	0	0	0	0	603	903	0
475	8	0.427549	-53.6084	-454.748	-3776.37	57144.4	-6890.63	325.662	308.304	0	-14.4196	117.945	-440.564	59593.5	-12610.3	-8254.81	171.377	767.734	0	0	0	0	0	0	0	603	903	0
475	9	0.580137	-56.9653	-464.514	-3501.71	58426.2	-7256.84	325.779	307.538	0	-14.4196	116.877	-430.798	59044.2	-12122	-7980.15	171.862	765.942	0	0	0	0	0	0	0	603	903	0
476	0	1.34308	-58.186	-475.195	-2494.63	59585.8	-7165.29	325.392	305.25	0	-13.6566	116.267	-421.948	58952.7	-11755.8	-7888.6	172.139	763.285	0	0	0	0	0	0	0	603	903	0
476	1	0.580137	-59.5593	-484.655	-1945.31	61416.9	-7531.5	326.723	304.014	0	-12.5885	115.962	-412.793	56755.4	-11206.5	-7934.37	172.852	765.509	0	0	0	0	0	0	0	603	903	0
476	2	1.34308	-61.3903	-491.674	-1304.44	62332.4	-7989.26	326.776	302.653	0	-13.3514	112.605	-402.722	55931.4	-11206.5	-7613.94	172.173	764.117	0	0	0	0	0	0	0	603	903	0
476	3	3.17413	-63.5266	-499.304	-1395.99	63370	-8035.03	326.917	302.796	0	-11.5204	113.673	-396.619	55015.9	-11023.4	-7476.61	172.207	764.288	0	0	0	0	0	0	0	603	903	0
476	4	4.24225	-67.4939	-511.205	-1212.89	64468.7	-8263.92	326.111	302.373	0	-11.2152	110.926	-387.158	54466.6	-10657.2	-7293.51	172.473	762.317	0	0	0	0	0	0	0	603	903	0
476	5	4.39483	-67.3413	-516.393	-846.678	65018	-8492.8	325.908	301.64	0	-11.0626	109.858	-376.782	53093.3	-10413	-7156.18	172.363	762.088	0	0	0	0	0	0	0	603	903	0
476	6	5.31036	-69.0197	-523.412	-938.231	65994.5	-8492.8	326.085	301.793	0	-11.3678	108.332	-367.017	51720	-10352	-6881.52	171.794	762.08	0	0	0	0	0	0	0	603	903	0
476	7	5.61554	-69.6301	-527.075	-755.126	67032.1	-8538.57	327.178	301.433	0	-11.5204	106.959	-357.251	51079.1	-10046.8	-6469.53	171.877	760.022	0	0	0	0	0	0	0	603	903	0
476	8	8.20953	-71.4611	-533.178	-114.256	68069.7	-8767.46	327.668	300.214	0	-11.673	104.67	-350.232	50072	-9680.6	-6469.53	172.359	760.032	0	0	0	0	0	0	0	603	903	0
476	9	7.59918	-72.8344	-540.807	343.508	68741.1	-8904.79	327.108	299.365	0	-11.2152	102.839	-342.603	48973.4	-9314.39	-6240.65	172.813	760.055	0	0	0	0	0	0	0	603	903	0
477	0	9.58282	-73.75	-544.775	1259.04	69107.3	-8401.25	326.855	297.689	0	-10.4523	101.618	-331.311	47508.5	-9070.25	-6286.43	172.623	759.604	0	0	0	0	0	0	0	603	903	0
477	1	10.6509	-76.344	-547.827	984.377	69900.8	-9362.55	327.597	298.203	0	-9.23156	98.414	-324.597	46593	-8765.08	-6057.54	172.997	759.459	0	0	0	0	0	0	0	603	903	0
477	2	11.4139	-77.1069	-550.268	1259.04	70511.1	-9637.21	328.14	297.712	0	-9.53674	96.583	-314.832	46135.3	-9070.25	-5645.56	171.19	756.461	0	0	0	0	0	0	0	603	903	0
477	3	12.9398	-77.7172	-555.456	2174.56	71243.6	-9362.55	328.261	296.085	0	-8.16345	94.7519	-306.592	44670.4	-8765.08	-5828.66	171.411	757.3	0	0	0	0	0	0	0	603	903	0
477	4	13.3975	-76.344	-567.968	3822.51	73196.7	-9042.11	328.875	293.27	0	-10.4523	94.4467	-297.131	43480.2	-8032.65	-5599.78	172.966	756.667	0	0	0	0	0	0	0	603	903	0
477	5	15.5338	-74.5129	-582.006	4463.38	75699.1	-8584.35	330.066	292.331	0	-8.31604	91.7001	-288.586	42107	-7910.59	-5462.45	172.589	757.092	0	0	0	0	0	0	0	603	903	0
477	6	28.046	-79.2431	-592.382	5378.91	76736.7	-8492.8	329.539	290.92	0	-9.07898	89.8691	-280.347	41832.3	-8337.83	-5828.66	170.259	753.784	0	0	0	0	0	0	0	603	903	0
477	7	33.3865	-86.4148	-595.129	5562.02	77835.4	-9133.67	330.787	290.654	0	-8.01086	87.1225	-271.802	40275.9	-7605.41	-5142.02	172.019	754.819	0	0	0	0	0	0	0	603	903	0
477	8	31.0977	-86.2622	-597.875	6752.2	79483.3	-8904.79	332.943	288.706	0	-8.7738	84.3759	-263.867	38811.1	-7361.27	-5187.79	172.102	755.914	0	0	0	0	0	0	0	603	903	0
477	9	40.253	-88.551	-609.777	6935.31	80276.8	-9225.22	331.649	288.627	0	-9.38415	82.3923	-253.491	37712.4	-7300.23	-4821.58	171.201	754.228	0	0	0	0	0	0	0	603	903	0
478	0	44.8306	-93.1286	-617.407	8491.7	81070.2	-10095	331.308	286.246	0	-7.24792	80.4086	-243.115	36705.3	-7178.16	-4638.48	170.474	752.021	0	0	0	0	0	0	0	603	903	0
478	1	39.0323	-100.148	-625.646	8949.46	82046.8	-10644.3	331.139	285.696	0	-6.02722	78.7302	-237.012	35698.2	-6628.85	-4592.7	172.032	752.382	0	0	0	0	0	0	0	603	903	0
478	2	39.9478	-103.657	-625.952	9407.23	82779.2	-10919	332.245	284.971	0	-7.70568	76.7465	-229.688	34325	-6750.92	-4501.15	170.608	753.558	0	0	0	0	0	0	0	603	903	0
478	3	44.678	-105.946	-632.055	9681.89	83572.7	-11971.8	332.224	284.682	0	-8.92639	75.5258	-221.753	33317.9	-6445.74	-4272.27	170.933	752.752	0	0	0	0	0	0	0	603	903	0
478	4	43.1522	-108.998	-642.126	10689	84610.2	-12658.5	331.766	283.354	0	-8.46862	72.1689	-211.682	32402.3	-6262.64	-4180.71	170.415	749.929	0	0	0	0	0	0	0	603	903	0
478	5	42.5418	-114.644	-642.126	11146.7	85464.7	-12109.1	333.097	282.641	0	-7.40051	69.7275	-204.053	31486.8	-6384.71	-3906.05	168.711	748.693	0	0	0	0	0	0	0	603	903	0
478	6	39.7952	-116.322	-650.366	10780.5	85892	-13070.4	332.067	283.424	0	-7.40051	67.4387	-196.118	30022	-5286.07	-3722.95	173.046	749.919	0	0	0	0	0	0	0	603	903	0
478	7	38.1168	-113.27	-655.554	11604.5	86624.4	-12795.8	332.139	282.298	0	-9.53674	66.6757	-187.268	28740.2	-5713.32	-3768.72	169.491	749.529	0	0	0	0	0	0	0	603	903	0
478	8	38.4219	-116.627	-658.911	11970.7	86807.5	-13619.8	331.744	281.833	0	-8.7738	63.3188	-180.249	28007.8	-4980.9	-3768.72	172.367	747.616	0	0	0	0	0	0	0	603	903	0
478	9	39.49	-120.289	-665.319	12336.9	87478.9	-13116.2	331.484	281.457	0	-6.94275	61.7929	-173.535	26909.2	-4919.86	-3768.72	171.649	747.935	0	0	0	0	0	0	0	603	903	0
479	0	37.5064	-117.543	-661.657	12886.2	87845.1	-14077.5	332.765	280.524	0	-8.62121	59.1989	-166.821	26726.1	-5102.97	-3448.29	169.411	742.792	0	0	0	0	0	0	0	603	903	0
479	1	38.2693	-116.475	-670.507	13252.4	88394.4	-14077.5	331.832	280.235	0	-9.53674	56.1472	-160.107	24986.6	-4797.79	-3310.96	170.034	746.939	0	0	0	0	0	0	0	603	903	0
479	2	38.4219	-116.627	-674.474	13893.3	89310	-13848.6	332.414	279.401	0	-9.23156	50.5014	-153.699	23521.7	-4492.61	-3219.41	170.77	749.962	0	0	0	0	0	0	0	603	903	0
479	3	35.6754	-116.932	-679.052	14351.1	89798.3	-13940.2	332.241	278.866	0	-6.94275	50.654	-145.154	23613.3	-4248.47	-2853.2	170.731	740.322	0	0	0	0	0	0	0	603	903	0
479	4	37.5064	-114.644	-685.461	15449.7	90408.6	-14077.5	331.895	277.461	0	-7.85827	50.5014	-139.661	22148.4	-4248.47	-2944.75	169.58	744.412	0	0	0	0	0	0	0	603	903	0
479	5	37.2012	-113.728	-686.376	15266.6	90652.8	-14123.3	332.074	277.758	0	-8.31604	47.1445	-133.252	20958.3	-3821.23	-2853.2	171.323	745.717	0	0	0	0	0	0	0	603	903	0
479	6	37.0486	-115.559	-692.785	16273.7	91568.2	-13528.2	332.174	276.51	0	-6.63757	45.1608	-128.674	19951.2	-3638.12	-2670.09	171.726	747.948	0	0	0	0	0	0	0	603	903	0
479	7	35.6754	-116.475	-694.921	17280.8	91751.4	-14123.3	332.031	275.133	0	-6.48498	41.9565	-120.129	19401.9	-3882.26	-2807.42	167.683	741.492	0	0	0	0	0	0	0	603	903	0
479	8	37.9642	-114.796	-697.668	16090.6	92361.7	-14443.7	332.386	276.937	0	-6.33239	39.6677	-115.552	18852.5	-3638.12	-2578.54	168.515	739.848	0	0	0	0	0	0	0	603	903	0
479	9	38.4219	-115.559	-703.771	16914.6	93094.2	-14169.1	332.279	275.966	0	-6.94275	37.2263	-110.059	17479.2	-3455.02	-2395.43	168.607	744.182	0	0	0	0	0	0	0	603	903	0
480	0	35.9805	-117.848	-707.433	17830.1	93399.3	-14214.8	332.026	274.796	0	-6.63757	35.09	-104.871	16838.4	-2905.7	-2303.88	172.293	742.437	0	0	0	0	0	0	0	603	903	0
480	1	38.1168	-119.374	-712.927	17921.6	93643.4	-14169.1	331.351	274.862	0	-7.70568	34.9374	-98.4619	16289.1	-3332.95	-2441.21	166.15	737.565	0	0	0	0	0	0	0	603	903	0
480	2	37.9642	-118.611	-713.842	18379.4	94681.1	-14489.5	332.636	274.253	0	-7.70568	30.665	-92.3584	15282	-2905.7	-2075	168.539	737.536	0	0	0	0	0	0	0	603	903	0
480	3	39.6426	-119.984	-717.504	18928.7	94742.1	-14672.6	332.044	273.619	0	-7.5531	30.5124	-89.6118	14000.3	-2600.53	-1983.44	170.98	746.768	0	0	0	0	0	0	0	603	903	0
480	4	41.6263	-123.494	-721.166	19752.7	95169.4	-14489.5	331.966	272.61	0	-8.31604	28.3762	-82.8979	13359.4	-3027.77	-2029.22	163.476	741.845	0	0	0	0	0	0	0	603	903	0
480	5	41.4737	-123.494	-726.049	19935.8	95535.6	-14398	331.583	272.542	0	-7.40051	27.0029	-80.4565	12535.4	-2417.42	-1800.34	169.954	747.197	0	0	0	0	0	0	0	603	903	0
480	6	42.6944	-122.731	-728.185	20118.9	96512.1	-14489.5	332.538	272.371	0	-6.33239	25.477	-73.1323	11894.5	-2173.28	-2075	170.283	740.356	0	0	0	0	0	0	0	603	903	0
480	7	43.4573	-124.409	-729.101	20576.7	96573.1	-14809.9	332.455	271.778	0	-6.48498	24.1037	-69.4702	10887.5	-2112.24	-1891.89	169.595	746.279	0	0	0	0	0	0	0	603	903	0
480	8	43.9151	-126.088	-735.51	20668.2	97122.5	-14169.1	332.048	271.899	0	-7.70568	23.3408	-64.5874	10338.1	-2112.24	-1525.68	167.296	742.936	0	0	0	0	0	0	0	603	903	0
480	9	44.9832	-126.24	-739.782	21492.2	97793.8	-14581.1	332.193	270.948	0	-7.5531	20.7468	-61.2305	10521.2	-1685	-1846.12	172.481	731.17	0	0	0	0	0	0	0	603	903	0
481	0	46.3565	-125.172	-744.055	21858.4	98465.2	-14306.4	332.336	270.623	0	-6.63757	19.0683	-59.0942	9422.61	-1746.03	-1388.35	170.453	743.549	0	0	0	0	0	0	0	603	903	0
481	1	46.2039	-125.63	-746.801	21858.4	98770.4	-14352.2	332.258	270.731	0	-6.63757	15.864	-51.77	8690.19	-1990.17	-1342.58	161.557	735.139	0	0	0	0	0	0	0	603	903	0
481	2	46.9669	-127.919	-747.106	22316.2	99197.7	-14260.6	332.776	270.13	0	-7.70568	15.4062	-51.1597	8049.32	-1746.03	-1113.69	165.871	745.663	0	0	0	0	0	0	0	603	903	0
481	3	48.7979	-127.003	-754.125	22957	99563.9	-14764.2	332.026	269.558	0	-5.72204	12.8122	-47.8027	7133.79	-1379.82	-1296.8	171.135	753.766	0	0	0	0	0	0	0	603	903	0
481	4	47.7298	-126.851	-760.229	23231.7	100174	-14535.3	331.769	269.441	0	-6.79016	11.1337	-43.8354	6950.69	-1257.75	-930.588	171.307	744.437	0	0	0	0	0	0	0	603	903	0
481	5	48.035	-126.393	-764.807	24147.2	101029	-14077.5	332.097	268.427	0	-7.09533	11.8967	-40.4785	6309.82	-1440.86	-1022.14	164.404	747.119	0	0	0	0	0	0	0	603	903	0
481	6	48.3401	-127.613	-766.027	24330.3	101639	-14581.1	332.683	268.238	0	-6.17981	11.5915	-38.9526	5394.29	-1196.72	-701.706	169.278	764.517	0	0	0	0	0	0	0	603	903	0
481	7	49.1031	-127.003	-767.858	24605	101639	-14764.2	332.367	267.956	0	-6.94275	10.2182	-34.0698	4936.53	-1196.72	-747.483	164.875	758.106	0	0	0	0	0	0	0	603	903	0
481	8	48.7979	-127.308	-773.351	24788.1	102249	-14443.7	332.216	267.947	0	-7.85827	9.91303	-31.3232	4295.66	-647.4	-1067.92	179.332	765.86	0	0	0	0	0	0	0	603	903	0
481	9	47.7298	-126.698	-778.539	25154.3	102677	-14489.5	331.884	267.69	0	-5.72204	8.38715	-28.5767	4661.87	-769.47	-1022.14	173.073	739.864	0	0	0	0	0	0	0	603	903	0
482	0	47.5772	-127.766	-781.591	25520.5	103287	-14306.4	332.15	267.348	0	-4.80651	8.53974	-23.0835	3105.47	-586.365	-701.706	174.598	768.468	0	0	0	0	0	0	0	603	903	0
482	1	46.3565	-126.088	-783.117	25245.9	103592	-14169.1	332.282	267.762	0	-6.48498	7.92939	-20.9473	2830.81	-464.294	-472.824	177.835	767.86	0	0	0	0	0	0	0	603	903	0
482	2	47.272	-125.63	-787.084	26161.4	103958	-14626.8	332.08	266.762	0	-6.48498	7.16645	-17.8955	3288.58	-525.329	-381.272	170.645	719.234	0	0	0	0	0	0	0	603	903	0
482	3	46.8143	-127.003	-793.188	26161.4	104386	-14764.2	331.603	267.017	0	0	0	0	0	0	0	200	903	0	0	0	0	0	0	0	603	903	0
482	4	46.6617	-125.63	-791.662	26802.3	104630	-15084.6	332.165	266.144	0	0	0	0	0	0	0	200	903	0	0	0	0	0	0	0	603	903	0
482	5	45.441	-125.63	-797.46	27076.9	104325	-14626.8	330.821	266.046	0	0	0	0	0	0	0	200	903	0	0	0	0	0	0	0	603	903	0
482	6	44.2203	-126.393	-798.376	27168.5	105606	-14855.7	332.276	265.97	0	0	0	0	0	0	0	200	903	0	0	0	0	0	0	0	603	903	0
482	7	44.5254	-125.63	-803.259	27809.3	105912	-14947.3	331.852	265.379	0	0	0	0	0	0	0	200	903	0	0	0	0	0	0	0	603	903	0
482	8	45.1358	-126.088	-806.616	27443.1	106156	-14809.9	331.606	265.977	0	0	0	0	0	0	0	200	903	0	0	0	0	0	0	0	603	903	0
482	9	44.2203	-124.562	-810.278	27534.7	106888	-14626.8	331.915	266.018	0	0	0	0	0	0	0	200	903	0	0	0	0	0	0	0	603	903	0
483	0	43.7625	-125.172	-809.973	28358.7	106888	-14535.3	331.965	264.988	0	0	0	0	0	0	0	200	903	0	0	0	0	0	0	0	603	903	0
483	1	43.1522	-123.951	-813.635	27992.4	107193	-14809.9	331.746	265.596	0	0	0	0	0	0	0	200	903	0	0	0	0	0	0	0	603	903	0
483	2	44.2203	-123.341	-817.297	28633.3	107987	-14581.1	332.127	264.966	0	0	0	0	0	0	0	200	903	0	0	0	0	0	0	0	603	903	0
483	3	44.0677	-122.731	-820.349	28633.3	107804	-14398	331.412	265.096	0	0	0	0	0	0	0	200	903	0	0	0	0	0	0	0	603	903	0
483	4	43.6099	-122.883	-823.4	29182.6	107804	-14031.7	330.925	264.558	0	0	0	0	0	0	0	200	903	0	0	0	0	0	0	0	603	903	0
483	5	43.7625	-122.425	-822.18	29823.5	108414	-14123.3	331.862	263.726	0	0	0	0	0	0	0	200	903	0	0	0	0	0	0	0	603	903	0
[truncated: 2,084 more rows]
