# Supplementary material for: The Effects of an Extemporaneous Speech Dual-task on Older Adult Gait Control
Source: Research Square preprint supplement (doi:10.21203/rs.3.rs-7674245/v1), 2025-11-18
Supplement: Supplementary file 45 [file DT3Walk10.xlsx]

## Sheet: Sheet1
Trajectories
		03:LFHD			03:RFHD			03:LBHD			03:RBHD			03:C7			03:T10			03:CLAV			03:STRN			03:RBAK			03:LSHO			03:LUPA			03:LELB			03:LFRM			03:LWRA			03:LWRB			03:LFIN
Frame	Sub Frame	X	Y	Z	X	Y	Z	X	Y	Z	X	Y	Z	X	Y	Z	X	Y	Z	X	Y	Z	X	Y	Z	X	Y	Z	X	Y	Z	X	Y	Z	X	Y	Z	X	Y	Z	X	Y	Z	X	Y	Z	X	Y	Z
		mm	mm	mm	mm	mm	mm	mm	mm	mm	mm	mm	mm	mm	mm	mm	mm	mm	mm	mm	mm	mm	mm	mm	mm	mm	mm	mm	mm	mm	mm	mm	mm	mm	mm	mm	mm	mm	mm	mm	mm	mm	mm	mm	mm	mm	mm	mm	mm
586	0	162.823	-1797.74	1623.41	265.944	-1803.41	1620.74	134.857	-1953.54	1636.76	270.934	-1971.01	1635.58	216.508	-2026.68	1484.54	208.913	-2122.95	1259.71	205.552	-1886.12	1387.91	199.921	-1859.23	1202	261.164	-2132.05	1334.58	19.9335	-2015.32	1441.92	-44.457	-2007.47	1237.79	-70.1465	-1999.39	1120.09	-63.0258	-1857.72	1017.65	-10.254	-1781.65	969.216	-68.7522	-1807.9	927.786	-55.3188	-1710.46	890.344
587	0	165.394	-1785.05	1623.62	268.473	-1791.13	1620.65	136.784	-1940.77	1637.05	272.775	-1958.79	1635.53	217.848	-2014.26	1484.82	210.217	-2110.39	1260.06	207.28	-1873.47	1388.16	202.006	-1846.49	1202.22	262.461	-2119.72	1334.83	21.3025	-2002.26	1442.22	-42.7067	-1994.45	1238.07	-68.0158	-1986.91	1120.19	-60.6069	-1846.33	1015.73	-7.72858	-1770.75	966.378	-66.1728	-1797.58	925.136	-52.7334	-1700.39	886.687
588	0	167.729	-1772.48	1623.98	270.772	-1778.92	1620.78	138.55	-1928.13	1637.52	274.464	-1946.63	1635.7	219.143	-2001.94	1485.26	211.553	-2097.92	1260.57	208.879	-1860.92	1388.59	203.934	-1833.88	1202.62	263.784	-2107.43	1335.24	22.6226	-1989.41	1442.65	-41.0222	-1981.69	1238.48	-65.9502	-1974.72	1120.42	-58.297	-1835.38	1013.86	-5.32555	-1760.4	963.505	-63.7612	-1787.81	922.543	-50.2633	-1690.99	882.922
589	0	169.828	-1760.03	1624.51	272.84	-1766.77	1621.1	140.153	-1915.61	1638.15	276.002	-1934.53	1636.08	220.393	-1989.71	1485.86	212.921	-2085.56	1261.23	210.35	-1848.48	1389.21	205.703	-1821.38	1203.21	265.134	-2095.18	1335.82	23.8939	-1976.8	1443.22	-39.4033	-1969.2	1239.02	-63.9495	-1962.81	1120.78	-56.0963	-1824.87	1012.06	-3.04509	-1750.61	960.596	-61.5177	-1778.59	920.007	-47.9092	-1682.27	879.052
590	0	171.691	-1747.68	1625.21	274.679	-1754.69	1621.64	141.595	-1903.21	1638.94	277.388	-1922.49	1636.68	221.599	-1977.56	1486.64	214.321	-2073.29	1262.04	211.693	-1836.15	1390.01	207.314	-1808.99	1203.99	266.509	-2082.98	1336.56	25.1165	-1964.4	1443.92	-37.8495	-1956.97	1239.69	-62.0131	-1951.19	1121.27	-54.0049	-1814.81	1010.31	-0.887839	-1741.38	957.654	-59.4423	-1769.94	917.53	-45.6728	-1674.22	875.079
591	0	173.316	-1735.46	1626.07	276.286	-1742.68	1622.37	142.876	-1890.95	1639.9	278.623	-1910.51	1637.49	222.761	-1965.5	1487.58	215.753	-2061.13	1262.99	212.908	-1823.94	1390.99	208.768	-1796.73	1204.96	267.911	-2070.83	1337.47	26.2906	-1952.23	1444.74	-36.3595	-1945	1240.5	-60.14	-1939.85	1121.9	-52.0233	-1805.2	1008.62	1.14486	-1732.7	954.68	-57.5352	-1761.84	915.114	-43.5577	-1666.85	871.012
592	0	174.704	-1723.35	1627.09	277.662	-1730.73	1623.32	143.998	-1878.8	1641.02	279.71	-1898.58	1638.52	223.88	-1953.53	1488.68	217.217	-2049.06	1264.09	213.998	-1811.82	1392.16	210.065	-1784.57	1206.12	269.338	-2058.73	1338.53	27.4169	-1940.28	1445.7	-34.9316	-1933.3	1241.43	-58.328	-1928.81	1122.65	-50.1519	-1796.02	1006.99	3.05075	-1724.57	951.682	-55.7968	-1754.29	912.763	-41.5701	-1660.14	866.86
593	0	175.855	-1711.35	1628.27	278.806	-1718.83	1624.46	144.963	-1866.79	1642.29	280.65	-1886.71	1639.75	224.956	-1941.64	1489.93	218.712	-2037.08	1265.33	214.963	-1799.82	1393.5	211.207	-1772.53	1207.45	270.791	-2046.67	1339.76	28.4964	-1928.55	1446.78	-33.5629	-1921.86	1242.48	-56.574	-1918.06	1123.53	-48.3916	-1787.3	1005.43	4.82643	-1716.99	948.665	-54.2273	-1747.29	910.483	-39.7188	-1654.1	862.642
594	0	176.769	-1699.46	1629.6	279.719	-1707	1625.79	145.774	-1854.9	1643.72	281.448	-1874.89	1641.19	225.991	-1929.84	1491.34	220.237	-2025.2	1266.7	215.806	-1787.91	1395	212.198	-1760.58	1208.96	272.269	-2034.65	1341.13	29.5306	-1917.03	1447.99	-32.2496	-1910.7	1243.66	-54.8739	-1907.6	1124.53	-46.7435	-1779.01	1003.94	6.46735	-1709.96	945.641	-52.8269	-1740.84	908.28	-38.0159	-1648.72	858.379
595	0	177.448	-1687.68	1631.07	280.401	-1695.21	1627.31	146.438	-1843.13	1645.27	282.109	-1863.12	1642.81	226.986	-1918.1	1492.89	221.791	-2013.39	1268.2	216.531	-1776.1	1396.67	213.044	-1748.73	1210.64	273.772	-2022.66	1342.64	30.5214	-1905.71	1449.3	-30.9868	-1899.8	1244.95	-53.2226	-1897.45	1125.65	-45.2088	-1771.17	1002.53	7.96786	-1703.46	942.621	-51.5951	-1734.94	906.164	-36.4761	-1643.99	854.098
596	0	177.896	-1676.01	1632.68	280.858	-1683.47	1629	146.961	-1831.48	1646.95	282.639	-1851.38	1644.61	227.944	-1906.43	1494.57	223.372	-2001.67	1269.82	217.143	-1764.38	1398.47	213.751	-1736.97	1212.46	275.297	-2010.71	1344.28	31.4713	-1894.58	1450.72	-29.7688	-1889.17	1246.34	-51.6141	-1887.61	1126.88	-43.7889	-1763.77	1001.19	9.32135	-1697.49	939.62	-50.531	-1729.57	904.143	-35.1163	-1639.9	849.829
597	0	178.12	-1664.44	1634.4	281.094	-1671.78	1630.86	147.351	-1819.94	1648.73	283.049	-1839.69	1646.57	228.866	-1894.82	1496.35	224.978	-1990.02	1271.53	217.649	-1752.74	1400.41	214.328	-1725.28	1214.41	276.844	-1998.79	1346.03	32.3829	-1883.63	1452.23	-28.5895	-1878.82	1247.83	-50.0421	-1878.08	1128.21	-42.4853	-1756.81	999.933	10.5205	-1692.03	936.652	-49.6323	-1724.72	902.227	-33.9547	-1636.44	845.607
598	0	178.129	-1652.96	1636.22	281.119	-1660.11	1632.85	147.618	-1808.51	1650.6	283.347	-1828.02	1648.66	229.754	-1883.26	1498.24	226.604	-1978.43	1273.34	218.054	-1741.17	1402.45	214.785	-1713.67	1216.47	278.41	-1986.89	1347.88	33.2595	-1872.85	1453.82	-27.4421	-1868.74	1249.4	-48.4998	-1868.87	1129.64	-41.2996	-1750.28	998.765	11.5579	-1687.06	933.734	-48.8956	-1720.39	900.424	-33.0096	-1633.58	841.463
599	0	177.934	-1641.58	1638.12	280.945	-1648.47	1634.97	147.776	-1797.19	1652.51	283.545	-1816.38	1650.85	230.612	-1871.73	1500.19	228.246	-1966.9	1275.21	218.368	-1729.67	1404.57	215.136	-1702.12	1218.61	279.992	-1975.01	1349.81	34.1041	-1862.2	1455.47	-26.3203	-1858.93	1251.04	-46.9809	-1859.99	1131.14	-40.2329	-1744.18	997.686	12.4259	-1682.57	930.881	-48.3158	-1716.56	898.741	-32.2981	-1631.29	837.431
600	0	177.552	-1630.27	1640.08	280.587	-1636.86	1637.18	147.836	-1785.96	1654.46	283.657	-1804.75	1653.12	231.44	-1860.23	1502.19	229.898	-1955.41	1277.13	218.599	-1718.21	1406.74	215.393	-1690.63	1220.79	281.586	-1963.14	1351.79	34.9199	-1851.68	1457.15	-25.218	-1849.39	1252.73	-45.4795	-1851.43	1132.71	-39.2863	-1738.5	996.696	13.1177	-1678.53	928.109	-47.8859	-1713.22	897.183	-31.8347	-1629.56	833.541
601	0	177.001	-1619.04	1642.07	280.062	-1625.25	1639.44	147.816	-1774.81	1656.41	283.697	-1793.14	1655.42	232.241	-1848.75	1504.21	231.553	-1943.98	1279.08	218.757	-1706.79	1408.93	215.57	-1679.18	1223	283.186	-1951.27	1353.79	35.7097	-1841.27	1458.86	-24.13	-1840.11	1254.44	-43.9905	-1843.2	1134.33	-38.4604	-1733.23	995.792	13.6277	-1674.91	925.428	-47.5973	-1710.34	895.751	-31.6302	-1628.36	829.817
602	0	176.301	-1607.86	1644.06	279.391	-1613.65	1641.74	147.73	-1763.74	1658.32	283.681	-1781.52	1657.73	233.015	-1837.27	1506.22	233.202	-1932.58	1281.03	218.85	-1695.39	1411.1	215.678	-1667.77	1225.19	284.788	-1939.41	1355.8	36.4758	-1830.93	1460.56	-23.052	-1831.09	1256.17	-42.5099	-1835.29	1135.98	-37.7553	-1728.35	994.972	13.9517	-1671.69	922.85	-47.4394	-1707.89	894.446	-31.6908	-1627.64	826.277
603	0	175.475	-1596.73	1646.01	278.596	-1602.04	1644.02	147.595	-1752.72	1660.17	283.622	-1769.89	1660	233.764	-1825.78	1508.19	234.836	-1921.21	1282.95	218.887	-1684.01	1413.22	215.732	-1656.39	1227.32	286.383	-1927.54	1357.78	37.2199	-1820.66	1462.23	-21.9813	-1822.31	1257.89	-41.0348	-1827.69	1137.64	-37.1701	-1723.84	994.227	14.0877	-1668.82	920.381	-47.4001	-1705.87	893.262	-32.0166	-1627.37	822.933
604	0	174.549	-1585.63	1647.9	277.702	-1590.41	1646.24	147.429	-1741.73	1661.93	283.538	-1758.25	1662.19	234.486	-1814.28	1510.09	236.445	-1909.87	1284.82	218.879	-1672.64	1415.26	215.743	-1645.04	1229.36	287.962	-1915.66	1359.71	37.9431	-1810.42	1463.83	-20.9162	-1813.76	1259.58	-39.5642	-1820.4	1139.29	-36.703	-1719.7	993.551	14.036	-1666.28	918.025	-47.4658	-1704.22	892.193	-32.6021	-1627.51	819.79
605	0	173.548	-1574.54	1649.69	276.732	-1578.76	1648.38	147.245	-1730.77	1663.56	283.442	-1746.57	1664.26	235.181	-1802.74	1511.9	238.015	-1898.56	1286.62	218.832	-1661.25	1417.18	215.72	-1633.7	1231.27	289.515	-1903.77	1361.54	38.6452	-1800.2	1465.36	-19.857	-1805.42	1261.22	-38.0983	-1813.39	1140.91	-36.3513	-1715.88	992.934	13.7999	-1664.02	915.782	-47.6221	-1702.93	891.231	-33.4353	-1628.02	816.847
606	0	172.497	-1563.45	1651.34	275.714	-1567.08	1650.37	147.06	-1719.81	1665.04	283.347	-1734.86	1666.18	235.847	-1791.17	1513.57	239.535	-1887.27	1288.31	218.754	-1649.85	1418.94	215.671	-1622.38	1233.01	291.03	-1891.87	1363.27	39.3249	-1789.97	1466.77	-18.8049	-1797.27	1262.8	-36.6391	-1806.64	1142.49	-36.1109	-1712.36	992.366	13.3856	-1662.02	913.65	-47.8541	-1701.97	890.364	-34.4984	-1628.86	814.096
607	0	171.421	-1552.33	1652.84	274.669	-1555.35	1652.2	146.886	-1708.83	1666.36	283.263	-1723.1	1667.91	236.481	-1779.56	1515.09	240.99	-1876	1289.87	218.65	-1638.42	1420.52	215.605	-1611.06	1234.56	292.496	-1879.95	1364.86	39.9799	-1779.73	1468.06	-17.7629	-1789.29	1264.28	-35.19	-1800.13	1144.01	-35.9766	-1709.12	991.835	12.8022	-1660.22	911.625	-48.1466	-1701.28	889.581	-35.7681	-1629.97	811.528
608	0	170.344	-1541.17	1654.14	273.623	-1543.56	1653.81	146.731	-1697.81	1667.47	283.2	-1711.28	1669.43	237.078	-1767.9	1516.43	242.367	-1864.74	1291.28	218.524	-1626.95	1421.88	215.524	-1599.74	1235.89	293.899	-1868.01	1366.28	40.6064	-1769.44	1469.18	-16.7351	-1781.45	1265.67	-33.7559	-1793.82	1145.46	-35.9418	-1706.12	991.333	12.0621	-1658.6	909.699	-48.4851	-1700.84	888.874	-37.2167	-1631.33	809.128
609	0	169.287	-1529.95	1655.23	272.595	-1531.71	1655.18	146.605	-1686.73	1668.38	283.163	-1699.4	1670.7	237.635	-1756.18	1517.57	243.652	-1853.48	1292.53	218.38	-1615.45	1423.02	215.431	-1588.41	1236.97	295.224	-1856.05	1367.53	41.1998	-1759.09	1470.13	-15.7267	-1773.71	1266.95	-32.3427	-1787.69	1146.82	-35.9993	-1703.33	990.85	11.1802	-1657.13	907.866	-48.8555	-1700.61	888.231	-38.813	-1632.89	806.883
610	0	168.267	-1518.65	1656.08	271.602	-1519.79	1656.28	146.509	-1675.57	1669.07	283.153	-1687.44	1671.71	238.145	-1744.4	1518.5	244.83	-1842.23	1293.58	218.218	-1603.9	1423.89	215.328	-1577.07	1237.79	296.457	-1844.06	1368.57	41.754	-1748.66	1470.89	-14.7439	-1766.06	1268.11	-30.9574	-1781.69	1148.09	-36.1405	-1700.7	990.378	10.1739	-1655.77	906.115	-49.2452	-1700.54	887.644	-40.5232	-1634.61	804.777
611	0	167.3	-1507.26	1656.68	270.66	-1507.8	1657.09	146.444	-1664.31	1669.52	283.17	-1675.41	1672.45	238.6	-1732.56	1519.19	245.888	-1830.96	1294.42	218.037	-1592.3	1424.51	215.212	-1565.72	1238.33	297.584	-1832.05	1369.39	42.2619	-1738.14	1471.45	-13.7938	-1758.45	1269.13	-29.6076	-1775.78	1149.27	-36.3564	-1698.21	989.911	9.0625	-1654.48	904.438	-49.643	-1700.6	887.108	-42.3126	-1636.45	802.796
612	0	166.397	-1495.76	1657	269.779	-1495.71	1657.59	146.407	-1652.93	1669.75	283.209	-1663.29	1672.9	238.995	-1720.64	1519.64	246.815	-1819.67	1295.05	217.835	-1580.63	1424.84	215.081	-1554.34	1238.59	298.591	-1820	1369.99	42.7156	-1727.52	1471.79	-12.8842	-1750.85	1270.02	-28.3014	-1769.93	1150.34	-36.6377	-1695.81	989.445	7.86676	-1653.25	902.825	-50.0393	-1700.74	886.617	-44.1465	-1638.38	800.93
613	0	165.564	-1484.13	1657.06	268.965	-1483.54	1657.77	146.39	-1641.43	1669.74	283.262	-1651.08	1673.05	239.32	-1708.66	1519.85	247.6	-1808.35	1295.46	217.609	-1568.91	1424.9	214.931	-1542.92	1238.57	299.465	-1807.93	1370.35	43.1063	-1716.77	1471.92	-12.0236	-1743.22	1270.78	-27.0473	-1764.09	1151.31	-36.9747	-1693.46	988.978	6.60829	-1652.05	901.27	-50.4268	-1700.94	886.172	-45.9915	-1640.36	799.168
614	0	164.804	-1472.37	1656.85	268.22	-1471.28	1657.64	146.383	-1629.77	1669.49	283.317	-1638.78	1672.93	239.565	-1696.6	1519.81	248.234	-1796.98	1295.64	217.352	-1557.11	1424.68	214.757	-1531.46	1238.25	300.193	-1795.81	1370.47	43.4243	-1705.89	1471.83	-11.221	-1735.53	1271.4	-25.8538	-1758.22	1152.19	-37.358	-1691.13	988.508	5.30884	-1650.84	899.764	-50.8	-1701.13	885.771	-47.8166	-1642.35	797.505
615	0	164.114	-1460.47	1656.36	267.543	-1458.93	1657.19	146.374	-1617.97	1669.02	283.361	-1626.39	1672.52	239.722	-1684.47	1519.52	248.709	-1785.56	1295.58	217.059	-1545.24	1424.19	214.554	-1519.95	1237.67	300.765	-1783.66	1370.36	43.6599	-1694.86	1471.51	-10.4857	-1727.75	1271.88	-24.7292	-1752.28	1152.96	-37.779	-1688.77	988.036	3.98961	-1649.62	898.302	-51.1556	-1701.29	885.418	-49.5939	-1644.33	795.938
616	0	163.489	-1448.41	1655.62	266.928	-1446.49	1656.45	146.348	-1606	1668.33	283.379	-1613.91	1671.84	239.781	-1672.25	1519	249.019	-1774.06	1295.3	216.723	-1533.29	1423.43	214.314	-1508.38	1236.82	301.171	-1771.45	1370.02	43.8029	-1683.67	1470.98	-9.82703	-1719.84	1272.23	-23.6816	-1746.23	1153.64	-38.2295	-1686.34	987.563	2.67057	-1648.36	896.878	-51.4925	-1701.37	885.114	-51.2992	-1646.26	794.463
617	0	162.919	-1436.21	1654.63	266.366	-1433.95	1655.42	146.286	-1593.87	1667.43	283.352	-1601.35	1670.9	239.731	-1659.95	1518.25	249.162	-1762.47	1294.8	216.335	-1521.25	1422.43	214.032	-1496.73	1235.72	301.403	-1759.18	1369.45	43.8434	-1672.31	1470.24	-9.25438	-1711.76	1272.44	-22.7189	-1740.03	1154.22	-38.703	-1683.81	987.088	1.36981	-1647.03	895.487	-51.8113	-1701.34	884.865	-52.9128	-1648.1	793.081
618	0	162.389	-1423.85	1653.41	265.843	-1421.32	1654.13	146.171	-1581.57	1666.34	283.263	-1588.7	1669.72	239.564	-1647.56	1517.29	249.135	-1750.77	1294.08	215.888	-1509.12	1421.21	213.701	-1485	1234.39	301.456	-1746.86	1368.68	43.7717	-1660.79	1469.29	-8.77696	-1703.5	1272.52	-21.8484	-1733.64	1154.71	-39.1937	-1681.14	986.613	0.102995	-1645.62	894.127	-52.1144	-1701.15	884.672	-54.4194	-1649.84	791.792
619	0	161.884	-1411.35	1651.98	265.345	-1408.61	1652.6	145.985	-1569.1	1665.07	283.094	-1575.96	1668.33	239.269	-1635.09	1516.12	248.939	-1738.97	1293.15	215.372	-1496.89	1419.77	213.314	-1473.17	1232.85	301.325	-1734.47	1367.7	43.5789	-1649.08	1468.16	-8.40365	-1695.02	1272.48	-21.0769	-1727.04	1155.12	-39.6979	-1678.29	986.139	-1.11702	-1644.1	892.794	-52.4056	-1700.77	884.539	-55.8085	-1651.43	790.597
620	0	161.386	-1398.69	1650.36	264.853	-1395.81	1650.87	145.709	-1556.47	1663.63	282.826	-1563.15	1666.74	238.838	-1622.52	1514.78	248.576	-1727.03	1292.04	214.78	-1484.55	1418.14	212.867	-1461.24	1231.13	301.009	-1722	1366.55	43.2568	-1637.18	1466.84	-8.14285	-1686.31	1272.31	-20.4107	-1720.19	1155.43	-40.2131	-1675.23	985.663	-2.28045	-1642.45	891.486	-52.6903	-1700.16	884.467	-57.0737	-1652.85	789.497
621	0	160.875	-1385.88	1648.59	264.35	-1382.93	1648.96	145.326	-1543.68	1662.05	282.442	-1550.27	1664.97	238.265	-1609.85	1513.27	248.048	-1714.95	1290.76	214.103	-1472.11	1416.35	212.352	-1449.18	1229.25	300.507	-1709.45	1365.23	42.7985	-1625.1	1465.35	-8.00231	-1677.32	1272.02	-19.8556	-1713.06	1155.66	-40.7383	-1671.91	985.185	-3.38064	-1640.64	890.201	-52.9746	-1699.28	884.456	-58.2132	-1654.06	788.492
622	0	160.331	-1372.94	1646.68	263.815	-1369.97	1646.91	144.819	-1530.74	1660.34	281.928	-1537.31	1663.07	237.543	-1597.09	1511.62	247.36	-1702.72	1289.32	213.335	-1459.55	1414.42	211.765	-1437	1227.24	299.822	-1696.82	1363.78	42.1982	-1612.84	1463.7	-7.98896	-1668.07	1271.61	-19.4169	-1705.63	1155.79	-41.274	-1668.31	984.702	-4.41408	-1638.64	888.937	-53.2659	-1698.1	884.502	-59.2285	-1655.04	787.579
623	0	159.735	-1359.86	1644.67	263.23	-1356.94	1644.75	144.173	-1517.66	1658.51	281.269	-1524.28	1661.04	236.668	-1584.23	1509.86	246.519	-1690.34	1287.76	212.469	-1446.88	1412.38	211.101	-1424.69	1225.13	298.957	-1684.1	1362.21	41.4517	-1600.39	1461.92	-8.1087	-1658.51	1271.08	-19.0993	-1697.86	1155.83	-41.8223	-1664.39	984.21	-5.38018	-1636.43	887.694	-53.5721	-1696.58	884.603	-60.1246	-1655.73	786.758
624	0	159.069	-1346.66	1642.58	262.578	-1343.82	1642.52	143.378	-1504.44	1656.6	280.456	-1511.19	1658.92	235.638	-1571.28	1508.01	245.53	-1677.8	1286.08	211.501	-1434.1	1410.26	210.356	-1412.24	1222.94	297.917	-1671.3	1360.55	40.5568	-1587.76	1460.02	-8.36629	-1648.66	1270.43	-18.9068	-1689.75	1155.77	-42.3863	-1660.12	983.705	-6.2811	-1633.97	886.469	-53.902	-1694.69	884.751	-60.909	-1656.12	786.023
625	0	158.316	-1333.34	1640.43	261.841	-1330.64	1640.24	142.423	-1491.09	1654.63	279.479	-1498.04	1656.75	234.453	-1558.23	1506.09	244.402	-1665.11	1284.33	210.427	-1421.2	1408.08	209.527	-1399.64	1220.71	296.71	-1658.41	1358.83	39.5128	-1574.96	1458.02	-8.76525	-1638.49	1269.67	-18.8431	-1681.28	1155.62	-42.9702	-1655.47	983.182	-7.1214	-1631.21	885.263	-54.2645	-1692.38	884.937	-61.5909	-1656.16	785.369
626	0	157.461	-1319.91	1638.27	261.006	-1317.39	1637.95	141.301	-1477.62	1652.61	278.335	-1484.82	1654.54	233.114	-1545.08	1504.14	243.142	-1652.25	1282.51	209.247	-1408.19	1405.88	208.612	-1386.9	1218.46	295.343	-1645.43	1357.07	38.3213	-1561.99	1455.93	-9.30773	-1628	1268.8	-18.9109	-1672.42	1155.36	-43.579	-1650.41	982.637	-7.90771	-1628.13	884.075	-54.6691	-1689.62	885.153	-62.1809	-1655.82	784.789
627	0	156.495	-1306.38	1636.1	260.061	-1304.07	1635.68	140.011	-1464.05	1650.56	277.022	-1471.55	1652.33	231.628	-1531.85	1502.17	241.758	-1639.26	1280.67	207.96	-1395.07	1403.68	207.609	-1374.01	1216.22	293.826	-1632.37	1355.29	36.9859	-1548.87	1453.79	-9.99455	-1617.19	1267.83	-19.1126	-1663.16	1155	-44.2183	-1644.9	982.063	-8.64831	-1624.68	882.905	-55.1255	-1686.37	885.387	-62.6907	-1655.05	784.275
628	0	155.411	-1292.75	1633.95	259	-1290.68	1633.46	138.552	-1450.37	1648.52	275.542	-1458.23	1650.15	230.001	-1518.53	1500.22	240.261	-1626.12	1278.82	206.571	-1381.85	1401.5	206.517	-1360.99	1214.02	292.171	-1619.24	1353.54	35.5126	-1535.61	1451.61	-10.8251	-1606.06	1266.76	-19.4497	-1653.5	1154.54	-44.8939	-1638.91	981.458	-9.35265	-1620.82	881.751	-55.6435	-1682.6	885.628	-63.1321	-1653.8	783.818
629	0	154.206	-1279.05	1631.86	257.819	-1277.24	1631.31	136.93	-1436.61	1646.51	273.902	-1444.86	1648.03	228.245	-1505.14	1498.31	238.66	-1612.85	1276.99	205.085	-1368.54	1399.38	205.34	-1347.84	1211.88	290.39	-1606.04	1351.83	33.9096	-1522.21	1449.42	-11.7975	-1594.61	1265.6	-19.9232	-1643.43	1153.97	-45.6116	-1632.42	980.817	-10.031	-1616.49	880.616	-56.2328	-1678.25	885.862	-63.5175	-1652.04	783.407
630	0	152.881	-1265.27	1629.83	256.519	-1263.75	1629.26	135.152	-1422.77	1644.54	272.112	-1431.44	1645.99	226.371	-1491.68	1496.47	236.963	-1599.47	1275.22	203.51	-1355.15	1397.34	204.079	-1334.58	1209.84	288.497	-1592.79	1350.18	32.1872	-1508.7	1447.26	-12.9083	-1582.85	1264.37	-20.5331	-1632.94	1153.31	-46.3771	-1625.39	980.139	-10.6939	-1611.65	879.499	-56.9029	-1673.3	886.077	-63.8592	-1649.72	783.031
631	0	151.442	-1251.43	1627.89	255.105	-1250.21	1627.32	133.232	-1408.86	1642.64	270.184	-1417.99	1644.06	224.395	-1478.18	1494.73	235.181	-1586	1273.52	201.858	-1341.7	1395.4	202.74	-1321.22	1207.91	286.507	-1579.5	1348.63	30.3581	-1495.09	1445.14	-14.153	-1570.77	1263.08	-21.2792	-1622.03	1152.56	-47.1958	-1617.81	979.423	-11.3521	-1606.26	878.402	-57.6631	-1667.69	886.261	-64.1694	-1646.76	782.679
632	0	149.899	-1237.55	1626.05	253.587	-1236.63	1625.51	131.186	-1394.91	1640.84	268.137	-1404.5	1642.27	222.334	-1464.63	1493.1	233.324	-1572.45	1271.93	200.142	-1328.21	1393.59	201.33	-1307.77	1206.11	284.435	-1566.18	1347.19	28.4367	-1481.4	1443.1	-15.5258	-1558.4	1261.74	-22.1605	-1610.7	1151.74	-48.072	-1609.64	978.669	-12.0162	-1600.26	877.327	-58.5218	-1661.4	886.401	-64.4603	-1643.13	782.338
633	0	148.266	-1223.63	1624.33	251.977	-1223.03	1623.86	129.034	-1380.92	1639.15	265.989	-1391	1640.64	220.209	-1451.07	1491.61	231.402	-1558.85	1270.46	198.376	-1314.68	1391.93	199.858	-1294.27	1204.48	282.297	-1552.85	1345.89	26.4395	-1467.65	1441.17	-17.0196	-1545.73	1260.38	-23.1757	-1598.97	1150.84	-49.0096	-1600.85	977.881	-12.6962	-1593.61	876.274	-59.4867	-1654.37	886.487	-64.7438	-1638.76	781.995
634	0	146.561	-1209.71	1622.74	250.295	-1209.41	1622.36	126.799	-1366.91	1637.6	263.765	-1377.49	1639.18	218.041	-1437.5	1490.28	229.426	-1545.22	1269.14	196.58	-1301.15	1390.43	198.334	-1280.73	1203.02	280.11	-1539.54	1344.74	24.3845	-1453.86	1439.38	-18.6263	-1532.78	1259	-24.323	-1586.83	1149.89	-50.0113	-1591.43	977.063	-13.4013	-1586.27	875.248	-60.5639	-1646.57	886.506	-65.0318	-1633.58	781.636
635	0	144.805	-1195.78	1621.3	248.558	-1195.8	1621.04	124.508	-1352.89	1636.2	261.49	-1363.98	1637.92	215.851	-1423.95	1489.13	227.405	-1531.58	1267.99	194.77	-1287.63	1389.12	196.77	-1267.17	1201.76	277.891	-1526.26	1343.75	22.2908	-1440.04	1437.76	-20.3367	-1519.57	1257.65	-25.6003	-1574.3	1148.91	-51.079	-1581.36	976.219	-14.1396	-1578.18	874.25	-61.7581	-1637.96	886.451	-65.3364	-1627.54	781.249
636	0	143.021	-1181.88	1620.01	246.792	-1182.2	1619.89	122.189	-1338.9	1634.98	259.192	-1350.49	1636.88	213.664	-1410.45	1488.17	225.351	-1517.96	1267.02	192.968	-1274.15	1388.01	195.181	-1253.64	1200.7	275.658	-1513.02	1342.95	20.1787	-1426.22	1436.32	-22.1406	-1506.1	1256.33	-27.0052	-1561.39	1147.91	-52.213	-1570.62	975.357	-14.9176	-1569.3	873.285	-63.072	-1628.52	886.312	-65.6697	-1620.57	780.818
637	0	141.235	-1168.01	1618.88	245.02	-1168.63	1618.93	119.874	-1324.93	1633.95	256.9	-1337.03	1636.06	211.502	-1397	1487.42	223.274	-1504.38	1266.25	191.191	-1260.73	1387.11	193.58	-1240.15	1199.86	273.427	-1499.86	1342.35	18.0684	-1412.42	1435.11	-24.027	-1492.41	1255.07	-28.5348	-1548.11	1146.91	-53.4127	-1559.2	974.487	-15.7404	-1559.62	872.356	-64.506	-1618.21	886.084	-66.0439	-1612.61	780.332
638	0	139.473	-1154.2	1617.92	243.269	-1155.11	1618.16	117.592	-1311.03	1633.12	254.645	-1323.61	1635.48	209.389	-1383.64	1486.89	221.186	-1490.86	1265.7	189.461	-1247.39	1386.44	191.983	-1226.74	1199.25	271.215	-1486.79	1341.94	15.9804	-1398.67	1434.15	-25.9839	-1478.5	1253.9	-30.1857	-1534.49	1145.93	-54.6762	-1547.09	973.618	-16.6111	-1549.08	871.47	-66.0578	-1607	885.763	-66.4714	-1603.59	779.78
639	0	137.761	-1140.48	1617.14	241.566	-1141.66	1617.57	115.375	-1297.19	1632.52	252.454	-1310.25	1635.14	207.345	-1370.38	1486.59	219.097	-1477.44	1265.37	187.794	-1234.15	1386	190.403	-1213.43	1198.87	269.036	-1473.83	1341.75	13.934	-1384.98	1433.45	-27.999	-1464.39	1252.84	-31.9542	-1520.55	1145	-56.0004	-1534.3	972.764	-17.5313	-1537.67	870.634	-67.7229	-1594.89	885.347	-66.9648	-1593.46	779.153
640	0	136.125	-1126.85	1616.55	239.935	-1128.29	1617.18	113.253	-1283.45	1632.14	250.358	-1296.96	1635.05	205.391	-1357.24	1486.51	217.018	-1464.13	1265.27	186.208	-1221.03	1385.79	188.856	-1200.25	1198.73	266.907	-1460.99	1341.77	11.9477	-1371.37	1433.03	-30.0592	-1450.12	1251.91	-33.8357	-1506.31	1144.14	-57.3808	-1520.81	971.936	-18.5004	-1525.38	869.855	-69.4935	-1581.86	884.84	-67.536	-1582.17	778.448
641	0	134.592	-1113.33	1616.14	238.404	-1115.02	1616.98	111.253	-1269.82	1632.01	248.382	-1283.76	1635.22	203.545	-1344.25	1486.67	214.96	-1450.96	1265.41	184.717	-1208.06	1385.82	187.354	-1187.23	1198.82	264.838	-1448.3	1342	10.0381	-1357.86	1432.91	-32.1515	-1435.7	1251.14	-35.8253	-1491.79	1143.36	-58.812	-1506.65	971.151	-19.5165	-1512.19	869.144	-71.3593	-1567.92	884.245	-68.1963	-1569.67	777.665
642	0	133.185	-1099.94	1615.93	236.993	-1101.87	1616.96	109.402	-1256.32	1632.13	246.551	-1270.67	1635.63	201.819	-1331.41	1487.07	212.933	-1437.93	1265.78	183.334	-1195.24	1386.1	185.911	-1174.37	1199.16	262.841	-1435.77	1342.45	8.21945	-1344.48	1433.09	-34.2626	-1421.16	1250.54	-37.9169	-1477.01	1142.69	-60.2878	-1491.81	970.424	-20.576	-1498.1	868.513	-73.3071	-1553.05	883.575	-68.9557	-1555.92	776.811
643	0	131.924	-1086.7	1615.93	235.726	-1088.85	1617.13	107.72	-1242.96	1632.5	244.884	-1257.69	1636.28	200.227	-1318.74	1487.7	210.945	-1425.06	1266.38	182.067	-1182.59	1386.62	184.537	-1161.7	1199.74	260.924	-1423.4	1343.11	6.50359	-1331.23	1433.59	-36.3795	-1406.53	1250.14	-40.1039	-1462.01	1142.14	-61.8007	-1476.33	969.774	-21.6737	-1483.12	867.977	-75.3214	-1537.28	882.843	-69.8224	-1540.91	775.9
644	0	130.828	-1073.61	1616.13	234.618	-1075.98	1617.49	106.224	-1229.75	1633.15	243.398	-1244.83	1637.18	198.774	-1306.25	1488.55	209.006	-1412.36	1267.21	180.923	-1170.11	1387.38	183.242	-1149.22	1200.55	259.092	-1411.2	1343.97	4.89958	-1318.14	1434.39	-38.4897	-1391.82	1249.95	-42.3785	-1446.81	1141.73	-63.3432	-1460.21	969.22	-22.8036	-1467.27	867.554	-77.3846	-1520.63	882.067	-70.8022	-1524.62	774.954
645	0	129.91	-1060.69	1616.53	233.683	-1063.27	1618.02	104.926	-1216.7	1634.05	242.103	-1232.12	1638.31	197.465	-1293.96	1489.62	207.122	-1399.84	1268.26	179.906	-1157.82	1388.38	182.034	-1136.93	1201.59	257.348	-1399.18	1345.03	3.41359	-1305.2	1435.51	-40.5817	-1377.07	1249.97	-44.732	-1431.42	1141.48	-64.907	-1443.5	968.783	-23.9587	-1450.55	867.262	-79.4775	-1503.12	881.27	-71.8978	-1507.05	774.003
646	0	129.182	-1047.95	1617.16	232.932	-1050.73	1618.73	103.831	-1203.82	1635.23	241.006	-1219.56	1639.67	196.299	-1281.85	1490.91	205.301	-1387.5	1269.51	179.016	-1145.72	1389.62	180.918	-1124.85	1202.86	255.693	-1387.34	1346.27	2.049	-1292.43	1436.92	-42.6447	-1362.3	1250.23	-47.1547	-1415.88	1141.4	-66.4841	-1426.21	968.481	-25.1315	-1433	867.126	-81.58	-1484.79	880.48	-73.1086	-1488.21	773.084
647	0	128.646	-1035.38	1617.99	232.367	-1038.37	1619.61	102.942	-1191.12	1636.66	240.107	-1207.16	1641.24	195.273	-1269.93	1492.39	203.548	-1375.34	1270.96	178.249	-1133.8	1391.07	179.899	-1112.94	1204.36	254.127	-1375.67	1347.68	0.806527	-1279.83	1438.62	-44.6697	-1347.53	1250.73	-49.6361	-1400.22	1141.5	-68.0665	-1408.39	968.337	-26.3144	-1414.65	867.167	-83.6718	-1465.67	879.724	-74.4298	-1468.13	772.242
648	0	128.303	-1023	1619.05	231.99	-1026.2	1620.66	102.252	-1178.6	1638.35	239.401	-1194.93	1643.01	194.379	-1258.21	1494.04	201.869	-1363.35	1272.58	177.601	-1122.05	1392.74	178.977	-1101.22	1206.05	252.647	-1364.17	1349.24	-0.315474	-1267.39	1440.57	-46.6486	-1332.78	1251.46	-52.1649	-1384.45	1141.78	-69.6467	-1390.07	968.369	-27.5001	-1395.55	867.41	-85.7327	-1445.82	879.035	-75.8522	-1446.85	771.526
649	0	128.146	-1010.8	1620.31	231.792	-1014.22	1621.87	101.752	-1166.26	1640.27	238.877	-1182.87	1644.95	193.611	-1246.66	1495.86	200.271	-1351.53	1274.35	177.063	-1110.47	1394.6	178.151	-1089.65	1207.95	251.251	-1352.82	1350.94	-1.32069	-1255.13	1442.76	-48.5753	-1318.08	1252.42	-54.7292	-1368.6	1142.24	-71.2181	-1371.29	968.594	-28.6818	-1375.72	867.88	-87.7435	-1425.27	878.444	-77.3624	-1424.42	770.988
650	0	128.163	-998.781	1621.78	231.764	-1002.44	1623.24	101.426	-1154.11	1642.41	238.523	-1170.99	1647.05	192.956	-1235.28	1497.81	198.758	-1339.88	1276.24	176.624	-1099.04	1396.63	177.416	-1078.22	1210.01	249.936	-1341.61	1352.76	-2.21448	-1243.01	1445.16	-50.4447	-1303.44	1253.59	-57.3166	-1352.69	1142.88	-72.7747	-1352.1	969.029	-29.8531	-1355.22	868.599	-89.6866	-1404.07	877.981	-78.9423	-1400.91	770.679
651	0	128.339	-986.946	1623.45	231.888	-990.846	1624.76	101.256	-1142.13	1644.73	238.318	-1159.3	1649.27	192.402	-1224.06	1499.87	197.339	-1328.37	1278.25	176.274	-1087.75	1398.8	176.768	-1066.92	1212.22	248.7	-1330.53	1354.66	-3.00343	-1231.05	1447.72	-52.2534	-1288.87	1254.97	-59.9147	-1336.74	1143.7	-74.3113	-1332.53	969.684	-31.0087	-1334.1	869.59	-91.546	-1382.29	877.677	-80.5702	-1376.4	770.65
652	0	128.65	-975.287	1625.29	232.145	-979.446	1626.4	101.22	-1130.34	1647.21	238.242	-1147.78	1651.59	191.938	-1212.98	1502.01	196.019	-1317	1280.33	175.999	-1076.58	1401.1	176.199	-1055.72	1214.55	247.54	-1319.56	1356.63	-3.69497	-1219.23	1450.42	-53.9989	-1274.4	1256.54	-62.5106	-1320.78	1144.67	-75.8237	-1312.64	970.567	-32.1432	-1312.4	870.869	-93.3079	-1359.97	877.557	-82.2211	-1350.98	770.948
653	0	129.075	-963.798	1627.29	232.511	-968.228	1628.17	101.293	-1118.71	1649.8	238.272	-1136.45	1653.97	191.55	-1202.01	1504.21	194.806	-1305.76	1282.46	175.788	-1065.52	1403.48	175.7	-1044.6	1216.97	246.455	-1308.67	1358.65	-4.29699	-1207.53	1453.2	-55.6798	-1260.03	1258.25	-65.0916	-1304.83	1145.78	-77.3082	-1292.46	971.681	-33.2521	-1290.19	872.451	-94.9608	-1337.17	877.643	-83.8677	-1324.75	771.612
654	0	129.584	-952.469	1629.42	232.961	-957.18	1630.03	101.45	-1107.26	1652.47	238.384	-1125.28	1656.38	191.227	-1191.14	1506.43	193.708	-1294.63	1284.61	175.627	-1054.54	1405.91	175.263	-1033.56	1219.44	245.444	-1297.86	1360.68	-4.8175	-1195.94	1456.03	-57.2952	-1245.77	1260.09	-67.6453	-1288.89	1147.01	-78.7615	-1272.03	973.024	-34.3308	-1267.51	874.344	-96.4954	-1313.95	877.952	-85.4817	-1297.81	772.675
655	0	130.152	-941.288	1631.65	233.469	-946.287	1631.97	101.666	-1095.96	1655.16	238.552	-1114.27	1658.78	190.957	-1180.36	1508.64	192.73	-1283.6	1286.75	175.505	-1043.62	1408.35	174.878	-1022.56	1221.92	244.508	-1287.1	1362.7	-5.26427	-1184.46	1458.87	-58.8449	-1231.63	1262.01	-70.1594	-1273	1148.31	-80.1804	-1251.41	974.591	-35.3749	-1244.43	876.554	-97.905	-1290.35	878.497	-87.0344	-1270.26	774.159
656	0	130.75	-930.242	1633.94	234.009	-935.531	1633.97	101.916	-1084.8	1657.83	238.755	-1103.41	1661.14	190.73	-1169.62	1510.8	191.88	-1272.66	1288.86	175.411	-1032.75	1410.77	174.536	-1011.6	1224.37	243.647	-1276.37	1364.69	-5.64466	-1173.06	1461.66	-60.3283	-1217.6	1263.98	-72.6221	-1257.15	1149.68	-81.5617	-1230.62	976.37	-36.3796	-1221	879.077	-99.1849	-1266.44	879.282	-88.4985	-1242.22	776.08
657	0	131.352	-919.314	1636.27	234.557	-924.891	1635.98	102.178	-1073.78	1660.44	238.969	-1092.67	1663.42	190.538	-1158.93	1512.9	191.161	-1261.79	1290.89	175.334	-1021.91	1413.12	174.229	-1000.66	1226.76	242.86	-1265.67	1366.6	-5.9654	-1161.73	1464.36	-61.7449	-1203.7	1265.95	-75.0218	-1241.35	1151.06	-82.9016	-1209.72	978.345	-37.3398	-1197.27	881.908	-100.332	-1242.26	880.31	-89.8483	-1213.79	778.439
658	0	131.935	-908.487	1638.58	235.091	-914.345	1637.99	102.43	-1062.86	1662.94	239.177	-1082.04	1665.59	190.373	-1148.25	1514.88	190.577	-1250.98	1292.84	175.267	-1011.08	1415.37	173.951	-989.728	1229.04	242.149	-1254.96	1368.43	-6.23247	-1150.47	1466.93	-63.0934	-1189.91	1267.89	-77.3476	-1225.63	1152.42	-84.1954	-1188.72	980.497	-38.25	-1173.31	885.031	-101.347	-1217.86	881.576	-91.0615	-1185.08	781.231
659	0	132.479	-897.741	1640.84	235.591	-903.868	1639.96	102.655	-1052.05	1665.28	239.361	-1071.5	1667.6	190.23	-1137.58	1516.74	190.132	-1240.22	1294.66	175.203	-1000.25	1417.47	173.695	-978.795	1231.18	241.515	-1244.23	1370.14	-6.45091	-1139.26	1469.34	-64.3719	-1176.24	1269.74	-79.5886	-1209.96	1153.72	-85.4379	-1167.67	982.803	-39.1038	-1149.17	888.431	-102.229	-1193.3	883.072	-92.119	-1156.17	784.441
660	0	132.966	-887.055	1642.99	236.043	-893.436	1641.85	102.84	-1041.3	1667.43	239.508	-1061.02	1669.43	190.104	-1126.88	1518.43	189.823	-1229.48	1296.33	175.139	-989.404	1419.41	173.458	-967.853	1233.15	240.957	-1233.48	1371.72	-6.62478	-1128.09	1471.54	-65.5775	-1162.67	1271.48	-81.7343	-1194.36	1154.92	-86.6227	-1146.59	985.237	-39.8944	-1124.9	892.083	-102.98	-1168.61	884.782	-93.0063	-1127.17	788.047
661	0	133.385	-876.407	1645.01	236.435	-883.024	1643.62	102.973	-1030.61	1669.35	239.608	-1050.58	1671.07	189.994	-1116.16	1519.94	189.651	-1218.76	1297.84	175.071	-978.534	1421.14	173.237	-956.893	1234.9	240.478	-1222.69	1373.13	-6.757	-1116.95	1473.51	-66.7065	-1149.2	1273.05	-83.7746	-1178.82	1156	-87.7422	-1125.51	987.772	-40.6145	-1100.55	895.96	-103.604	-1143.84	886.693	-93.7133	-1098.15	792.019
662	0	133.728	-865.777	1646.85	236.759	-872.61	1645.26	103.05	-1019.95	1671.03	239.656	-1040.16	1672.47	189.899	-1105.39	1521.25	189.612	-1208.05	1299.16	174.999	-967.629	1422.64	173.033	-945.91	1236.42	240.077	-1211.85	1374.37	-6.84933	-1105.83	1475.23	-67.7539	-1135.82	1274.43	-85.6992	-1163.33	1156.91	-88.7881	-1104.46	990.38	-41.2564	-1076.19	900.032	-104.103	-1119.04	888.784	-94.2345	-1069.2	796.325
663	0	133.993	-855.144	1648.48	237.013	-862.17	1646.71	103.067	-1009.29	1672.42	239.65	-1029.73	1673.63	189.82	-1094.57	1522.33	189.699	-1197.31	1300.27	174.926	-956.684	1423.89	172.846	-934.899	1237.69	239.755	-1200.95	1375.4	-6.90236	-1094.72	1476.66	-68.7142	-1122.51	1275.58	-87.4983	-1147.89	1157.63	-89.7512	-1083.45	993.033	-41.8122	-1051.85	904.265	-104.482	-1094.24	891.034	-94.569	-1040.38	800.926
664	0	134.18	-844.487	1649.87	237.198	-851.683	1647.96	103.028	-998.624	1673.52	239.592	-1019.27	1674.53	189.761	-1083.68	1523.17	189.908	-1186.55	1301.16	174.854	-945.69	1424.87	172.679	-923.854	1238.69	239.515	-1189.97	1376.23	-6.91547	-1083.61	1477.81	-69.5806	-1109.25	1276.48	-89.1618	-1132.47	1158.15	-90.6218	-1062.51	995.702	-42.2743	-1027.58	908.623	-104.743	-1069.48	893.422	-94.72	-1011.76	805.782
665	0	134.294	-833.789	1650.98	237.318	-841.133	1648.97	102.936	-987.923	1674.31	239.488	-1008.75	1675.17	189.726	-1072.73	1523.78	190.229	-1175.75	1301.82	174.79	-934.645	1425.58	172.537	-912.774	1239.4	239.356	-1178.93	1376.83	-6.88687	-1072.5	1478.65	-70.346	-1096.04	1277.12	-90.6803	-1117.06	1158.43	-91.39	-1041.65	998.362	-42.6351	-1003.44	913.071	-104.89	-1044.81	895.922	-94.6945	-983.393	810.853
666	0	134.346	-823.033	1651.8	237.381	-830.502	1649.74	102.802	-977.171	1674.79	239.345	-998.17	1675.54	189.72	-1061.71	1524.13	190.654	-1164.88	1302.23	174.741	-923.544	1426	172.423	-901.652	1239.83	239.28	-1167.8	1377.2	-6.81369	-1061.38	1479.19	-71.0028	-1082.85	1277.47	-92.0443	-1101.66	1158.47	-92.046	-1020.88	1000.99	-42.888	-979.468	917.571	-104.926	-1020.26	898.512	-94.5023	-955.33	816.095
667	0	134.348	-812.206	1652.32	237.398	-819.779	1650.23	102.638	-966.351	1674.97	239.177	-987.5	1675.65	189.751	-1050.6	1524.22	191.173	-1153.94	1302.39	174.715	-912.384	1426.14	172.346	-890.485	1239.98	239.29	-1156.59	1377.33	-6.69207	-1050.22	1479.42	-71.5434	-1069.67	1277.53	-93.2453	-1086.26	1158.27	-92.5803	-1000.24	1003.55	-43.0268	-955.699	922.086	-104.852	-995.862	901.166	-94.1555	-927.619	821.465
668	0	134.314	-801.295	1652.52	237.382	-808.952	1650.44	102.459	-955.451	1674.83	238.999	-976.73	1675.49	189.826	-1039.42	1524.06	191.779	-1142.92	1302.31	174.721	-901.161	1425.99	172.31	-879.268	1239.84	239.387	-1145.3	1377.22	-6.51727	-1039.04	1479.36	-71.9601	-1056.49	1277.31	-94.2751	-1070.83	1157.83	-92.9845	-979.73	1006.04	-43.0467	-932.173	926.582	-104.67	-971.66	903.862	-93.6676	-900.302	826.921
669	0	134.261	-790.293	1652.41	237.348	-798.014	1650.37	102.281	-944.461	1674.41	238.827	-965.85	1675.07	189.954	-1028.16	1523.65	192.462	-1131.8	1301.97	174.77	-889.874	1425.57	172.322	-867.996	1239.42	239.571	-1133.92	1376.86	-6.28389	-1027.8	1479.02	-72.2463	-1043.27	1276.81	-95.1268	-1055.39	1157.15	-93.2511	-959.37	1008.43	-42.9436	-908.926	931.025	-104.379	-947.688	906.575	-93.0527	-873.419	832.422
670	0	134.209	-779.193	1651.99	237.313	-786.96	1650.01	102.126	-933.371	1673.71	238.68	-954.85	1674.42	190.145	-1016.82	1523	193.214	-1120.58	1301.39	174.872	-878.518	1424.87	172.39	-856.662	1238.75	239.845	-1122.44	1376.26	-5.98602	-1016.52	1478.41	-72.3957	-1030.02	1276.03	-95.7946	-1039.92	1156.24	-93.3739	-939.18	1010.71	-42.715	-885.992	935.384	-103.98	-923.98	909.283	-92.3245	-847.006	837.926
671	0	134.178	-767.99	1651.28	237.297	-775.786	1649.38	102.012	-922.179	1672.74	238.578	-943.724	1673.53	190.408	-1005.4	1522.11	194.029	-1109.25	1300.56	175.04	-867.092	1423.93	172.52	-845.26	1237.82	240.21	-1110.88	1375.43	-5.61747	-1005.16	1477.55	-72.4034	-1016.72	1275	-96.2745	-1024.42	1155.12	-93.3486	-919.178	1012.86	-42.3595	-863.401	939.628	-103.472	-900.573	911.961	-91.4961	-821.096	843.394
672	0	134.186	-756.684	1650.28	237.317	-764.491	1648.48	101.962	-910.881	1671.54	238.542	-932.471	1672.43	190.753	-993.893	1521.01	194.899	-1097.79	1299.5	175.283	-855.591	1422.76	172.718	-833.781	1236.67	240.665	-1099.22	1374.36	-5.17197	-993.728	1476.46	-72.2657	-1003.35	1273.74	-96.5638	-1008.9	1153.81	-93.1722	-899.385	1014.87	-41.8767	-841.181	943.733	-102.853	-877.503	914.588	-90.5786	-795.72	848.787
673	0	134.254	-745.273	1649.03	237.393	-753.075	1647.33	101.997	-899.478	1670.12	238.594	-921.089	1671.14	191.189	-982.305	1519.69	195.819	-1086.22	1298.23	175.613	-844.011	1421.37	172.99	-822.219	1235.32	241.211	-1087.47	1373.07	-4.64341	-982.208	1475.16	-71.9804	-989.918	1272.27	-96.662	-993.362	1152.34	-92.8438	-879.824	1016.73	-41.2677	-819.359	947.674	-102.123	-854.804	917.144	-89.5817	-770.909	854.068
674	0	134.401	-733.76	1647.55	237.545	-741.538	1645.95	102.139	-887.971	1668.51	238.754	-909.578	1669.66	191.725	-970.633	1518.19	196.782	-1074.53	1296.75	176.039	-832.349	1419.78	173.34	-810.564	1233.77	241.848	-1075.63	1371.57	-4.02599	-970.59	1473.69	-71.5467	-976.411	1270.61	-96.5706	-977.83	1150.71	-92.3639	-860.516	1018.44	-40.5344	-797.959	951.43	-101.28	-832.511	919.607	-88.5129	-746.689	859.202
675	0	134.646	-722.148	1645.87	237.79	-729.884	1644.37	102.408	-876.364	1666.73	239.043	-897.941	1668.03	192.368	-958.877	1516.51	197.784	-1062.71	1295.08	176.57	-820.601	1418.03	173.773	-798.809	1232.07	242.575	-1063.69	1369.88	-3.31445	-958.865	1472.06	-70.9656	-962.83	1268.81	-96.2933	-962.316	1148.97	-91.735	-841.486	1020	-39.68	-777.005	954.983	-100.326	-810.657	921.958	-87.3772	-723.086	864.154
676	0	135.004	-710.439	1644.01	238.146	-718.114	1642.61	102.822	-864.662	1664.82	239.478	-886.18	1666.25	193.128	-947.035	1514.68	198.821	-1050.77	1293.24	177.213	-808.761	1416.14	174.292	-786.946	1230.23	243.39	-1051.67	1368.01	-2.50426	-947.026	1470.3	-70.2396	-949.18	1266.88	-95.8357	-946.84	1147.14	-90.9607	-822.758	1021.38	-38.7083	-756.516	958.316	-99.2587	-789.276	924.18	-86.1782	-700.124	868.891
677	0	135.49	-698.637	1642.03	238.626	-706.231	1640.71	103.399	-852.87	1662.8	240.077	-874.3	1664.36	194.009	-935.106	1512.72	199.887	-1038.71	1291.26	177.975	-796.826	1414.12	174.9	-774.969	1228.27	244.292	-1039.56	1365.99	-1.59177	-935.066	1468.45	-69.3728	-935.467	1264.86	-95.2053	-931.425	1145.25	-90.0465	-804.358	1022.61	-37.6239	-736.515	961.416	-98.0807	-768.398	926.254	-84.9172	-677.825	873.383
678	0	136.116	-686.747	1639.94	239.245	-694.24	1638.69	104.153	-840.992	1660.7	240.853	-862.303	1662.37	195.016	-923.089	1510.65	200.98	-1026.53	1289.16	178.859	-784.793	1412.01	175.596	-762.87	1226.23	245.281	-1027.35	1363.82	-0.574456	-922.982	1466.52	-68.371	-921.703	1262.78	-94.4116	-916.098	1143.31	-88.9987	-786.309	1023.67	-36.4321	-717.018	964.27	-96.7942	-748.054	928.165	-83.5944	-656.209	877.601
679	0	136.892	-674.772	1637.79	240.01	-682.142	1636.58	105.094	-829.036	1658.55	241.818	-850.196	1660.3	196.152	-910.983	1508.49	202.097	-1014.25	1286.96	179.866	-772.659	1409.84	176.382	-750.647	1224.13	246.354	-1015.06	1361.55	0.549013	-910.771	1464.55	-67.241	-907.9	1260.67	-93.4656	-900.886	1141.37	-87.825	-768.638	1024.56	-35.1385	-698.045	966.868	-95.4027	-728.271	929.899	-82.2088	-635.294	881.518
680	0	137.823	-662.715	1635.6	240.93	-669.942	1634.42	106.23	-817.004	1656.37	242.98	-837.981	1658.17	197.419	-898.787	1506.28	203.237	-1001.85	1284.68	180.997	-760.423	1407.62	177.254	-738.296	1221.99	247.511	-1002.69	1359.19	1.77862	-898.436	1462.57	-65.9911	-894.077	1258.57	-92.3794	-885.816	1139.44	-86.5338	-751.367	1025.29	-33.7492	-679.612	969.201	-93.911	-709.076	931.443	-80.759	-615.098	885.109
681	0	138.913	-650.581	1633.42	242.008	-657.642	1632.24	107.565	-804.903	1654.2	244.341	-825.665	1656.01	198.816	-886.504	1504.03	204.4	-989.358	1282.36	182.248	-748.085	1405.39	178.212	-725.817	1219.84	248.752	-990.234	1356.76	3.11293	-885.981	1460.59	-64.6306	-880.252	1256.49	-91.1662	-870.916	1137.56	-85.1341	-734.519	1025.86	-32.2701	-661.735	971.261	-92.3255	-690.492	932.787	-79.2431	-595.636	888.353
682	0	140.163	-638.371	1631.27	243.244	-645.247	1630.05	109.098	-792.736	1652.05	245.903	-813.25	1653.84	200.339	-874.135	1501.77	205.584	-976.767	1280.03	183.613	-735.648	1403.17	179.249	-713.211	1217.7	250.074	-977.702	1354.31	4.54891	-873.414	1458.64	-63.1697	-866.449	1254.48	-89.8398	-856.215	1135.73	-83.6356	-718.117	1026.27	-30.7079	-644.429	973.043	-90.6538	-672.541	933.922	-77.6597	-576.923	891.23
683	0	141.568	-626.09	1629.18	244.634	-632.761	1627.9	110.824	-780.506	1649.96	247.659	-800.743	1651.69	201.985	-861.683	1499.52	206.793	-964.088	1277.7	185.085	-723.116	1400.99	180.36	-700.485	1215.6	251.478	-965.099	1351.85	6.08185	-860.745	1456.76	-61.6191	-852.69	1252.55	-88.4142	-841.739	1133.99	-82.0483	-702.18	1026.53	-29.0691	-627.709	974.54	-88.9048	-655.242	934.84	-76.008	-558.97	893.722
684	0	143.122	-613.741	1627.17	246.174	-620.189	1625.79	112.734	-768.218	1647.94	249.602	-788.149	1649.56	203.744	-849.155	1497.32	208.026	-951.33	1275.41	186.654	-710.497	1398.88	181.538	-687.645	1213.57	252.961	-952.432	1349.42	7.70511	-847.989	1454.95	-59.9902	-839.001	1250.73	-86.9032	-827.512	1132.35	-80.3825	-686.726	1026.64	-27.3607	-611.588	975.749	-87.0888	-638.613	935.536	-74.2882	-541.79	895.816
685	0	144.815	-601.328	1625.27	247.852	-607.536	1623.76	114.815	-755.875	1646.03	251.717	-775.475	1647.5	205.608	-836.557	1495.19	209.286	-938.502	1273.19	188.305	-697.799	1396.85	182.776	-674.703	1211.61	254.522	-939.71	1347.04	9.41005	-835.162	1453.24	-58.2949	-825.408	1249.04	-85.3202	-813.557	1130.83	-78.649	-671.771	1026.61	-25.5902	-596.078	976.665	-85.2174	-622.668	936.007	-72.5017	-525.391	897.499
686	0	146.635	-588.854	1623.49	249.656	-594.811	1621.83	117.05	-743.48	1644.24	253.988	-762.729	1645.51	207.562	-823.898	1493.16	210.575	-925.613	1271.06	190.026	-685.034	1394.92	184.063	-661.674	1209.77	256.155	-926.944	1344.76	11.1859	-822.283	1451.65	-56.5453	-811.937	1247.5	-83.6781	-799.894	1129.45	-76.8586	-657.328	1026.43	-23.7658	-581.189	977.286	-83.3031	-607.418	936.251	-70.6517	-509.781	898.761
687	0	148.568	-576.326	1621.86	251.57	-582.022	1620	119.416	-731.037	1642.6	256.392	-749.919	1643.63	209.592	-811.191	1491.24	211.893	-912.676	1269.05	191.799	-672.217	1393.13	185.391	-648.576	1208.05	257.858	-914.145	1342.58	13.0197	-809.37	1450.2	-54.7536	-798.613	1246.12	-81.9888	-786.54	1128.21	-75.0224	-643.407	1026.12	-21.8964	-566.931	977.61	-81.3594	-592.875	936.267	-68.7434	-494.966	899.594
688	0	150.594	-563.749	1620.38	253.578	-569.182	1618.3	121.89	-718.552	1641.11	258.904	-737.057	1641.87	211.679	-798.448	1489.47	213.239	-899.705	1267.18	193.608	-659.363	1391.49	186.749	-635.431	1206.47	259.621	-901.328	1340.56	14.8966	-796.446	1448.9	-52.9323	-785.459	1244.92	-80.2631	-773.511	1127.13	-73.1517	-630.017	1025.69	-19.9917	-553.31	977.636	-79.4005	-579.044	936.058	-66.7837	-480.952	899.993
689	0	152.694	-551.132	1619.06	255.659	-556.303	1616.73	124.443	-706.029	1639.8	261.496	-724.156	1640.26	213.803	-785.682	1487.86	214.611	-886.713	1265.48	195.433	-646.49	1390.01	188.128	-622.262	1205.06	261.436	-888.507	1338.7	16.8001	-783.53	1447.76	-51.0938	-772.498	1243.9	-78.5105	-760.816	1126.22	-71.2581	-617.165	1025.12	-18.0628	-540.333	977.365	-77.4409	-565.932	935.626	-64.7822	-467.74	899.954
690	0	154.848	-538.484	1617.92	257.792	-543.399	1615.32	127.044	-693.476	1638.69	264.134	-711.23	1638.8	215.943	-772.91	1486.44	216.005	-873.717	1263.96	197.256	-633.617	1388.71	189.518	-609.096	1203.82	263.293	-875.698	1337.05	18.7126	-770.644	1446.8	-49.2504	-759.75	1243.08	-76.7393	-748.465	1125.47	-69.3533	-604.853	1024.44	-16.1214	-528.001	976.796	-75.4952	-553.539	934.973	-62.7507	-455.33	899.476
691	0	157.03	-525.816	1616.96	259.952	-530.488	1614.07	129.661	-680.9	1637.77	266.787	-698.295	1637.53	218.077	-760.149	1485.23	217.415	-860.734	1262.65	199.06	-620.763	1387.61	190.911	-595.961	1202.76	265.179	-862.917	1335.61	20.6159	-757.807	1446.02	-47.4138	-747.23	1242.45	-74.9564	-736.461	1124.9	-67.4489	-593.082	1023.64	-14.1803	-516.317	975.933	-73.5782	-541.867	934.107	-60.7033	-443.722	898.56
692	0	159.217	-513.139	1616.18	262.116	-517.587	1612.99	132.259	-668.313	1637.07	269.418	-685.368	1636.45	220.182	-747.414	1484.23	218.833	-847.781	1261.55	200.826	-607.948	1386.72	192.298	-582.884	1201.91	267.08	-850.179	1334.42	22.4918	-745.039	1445.43	-45.5954	-734.951	1242.02	-73.1672	-724.806	1124.49	-65.5567	-581.852	1022.73	-12.2534	-505.278	974.78	-71.704	-530.913	933.032	-58.6568	-432.912	897.21
693	0	161.381	-500.468	1615.58	264.257	-504.715	1612.08	134.804	-655.724	1636.58	271.992	-672.469	1635.59	222.235	-734.724	1483.47	220.249	-834.877	1260.69	202.539	-595.191	1386.04	193.672	-569.891	1201.27	268.981	-837.499	1333.48	24.3229	-732.359	1445.03	-43.8055	-722.922	1241.79	-71.376	-713.497	1124.25	-63.6883	-571.159	1021.7	-10.355	-494.882	973.342	-69.8861	-520.674	931.756	-56.6301	-422.896	895.432
694	0	163.495	-487.819	1615.18	266.349	-491.891	1611.37	137.262	-643.148	1636.32	274.476	-659.615	1634.95	224.217	-722.094	1482.95	221.654	-822.039	1260.08	204.185	-582.511	1385.6	195.026	-557.005	1200.84	270.868	-824.89	1332.82	26.0931	-719.783	1444.83	-42.0533	-711.147	1241.75	-69.5856	-702.53	1124.18	-61.8551	-560.997	1020.58	-8.50036	-485.123	971.627	-68.1376	-511.145	930.29	-54.6445	-413.667	893.237
695	0	165.532	-475.207	1614.97	268.364	-479.133	1610.86	139.602	-630.599	1636.29	276.836	-646.825	1634.54	226.109	-709.541	1482.69	223.039	-809.282	1259.71	205.75	-569.924	1385.39	196.356	-544.247	1200.64	272.728	-812.363	1332.43	27.7883	-707.327	1444.82	-40.3464	-699.629	1241.9	-67.7975	-691.896	1124.27	-60.068	-551.361	1019.35	-6.70478	-475.993	969.646	-66.4704	-502.319	928.643	-52.7233	-405.219	890.639
696	0	167.464	-462.649	1614.95	270.275	-466.459	1610.57	141.794	-618.094	1636.47	279.043	-634.116	1634.39	227.897	-697.076	1482.68	224.395	-796.622	1259.61	207.225	-557.441	1385.42	197.655	-531.631	1200.67	274.548	-799.927	1332.33	29.3967	-695.005	1445	-38.6909	-688.363	1242.24	-66.0121	-681.584	1124.52	-58.3373	-542.242	1018.03	-4.9838	-467.486	967.412	-64.8955	-494.187	926.83	-50.8914	-397.543	887.658
697	0	169.265	-450.164	1615.15	272.057	-453.883	1610.5	143.813	-605.65	1636.89	281.072	-621.506	1634.49	229.567	-684.712	1482.94	225.716	-784.07	1259.76	208.602	-545.076	1385.69	198.918	-519.168	1200.94	276.319	-787.588	1332.51	30.9093	-682.829	1445.37	-37.0909	-677.346	1242.75	-64.2285	-671.582	1124.91	-56.6725	-533.631	1016.62	-3.35275	-459.589	964.941	-63.4225	-486.74	924.868	-49.1751	-390.633	884.321
698	0	170.911	-437.768	1615.55	273.686	-441.418	1610.68	145.638	-593.284	1637.52	282.904	-609.008	1634.86	231.112	-672.456	1483.46	227	-771.634	1260.16	209.876	-532.833	1386.22	200.14	-506.861	1201.45	278.033	-775.348	1332.98	32.3195	-670.807	1445.93	-35.5484	-666.57	1243.44	-62.4451	-661.877	1125.45	-55.0824	-525.516	1015.13	-1.82649	-452.292	962.251	-62.06	-479.967	922.774	-47.6011	-384.48	880.655
699	0	172.381	-425.476	1616.17	275.143	-429.076	1611.11	147.256	-581.014	1638.38	284.523	-596.633	1635.5	232.526	-660.313	1484.24	228.245	-759.321	1260.82	211.042	-520.716	1386.99	201.316	-494.711	1202.2	279.683	-763.208	1333.72	33.624	-658.945	1446.66	-34.0633	-656.026	1244.29	-60.6591	-652.453	1126.13	-53.5745	-517.888	1013.59	-0.41909	-445.582	959.366	-60.8152	-473.857	920.57	-46.1963	-379.077	876.699
700	0	173.658	-413.303	1617.01	276.411	-416.864	1611.82	148.656	-568.856	1639.44	285.922	-584.391	1636.4	233.808	-648.284	1485.26	229.455	-747.133	1261.73	212.102	-508.726	1388.02	202.443	-482.712	1203.2	281.268	-751.164	1334.73	34.8217	-647.244	1447.56	-32.6338	-645.703	1245.29	-58.8676	-643.296	1126.94	-52.1553	-510.734	1011.99	0.856509	-439.444	956.311	-59.6934	-468.397	918.281	-44.9862	-374.417	872.491
701	0	174.731	-401.262	1618.08	277.478	-404.787	1612.81	149.835	-556.823	1640.7	287.098	-572.289	1637.56	234.958	-636.368	1486.53	230.632	-735.07	1262.86	213.054	-496.858	1389.28	203.517	-470.854	1204.44	282.785	-739.212	1336	35.9142	-635.701	1448.62	-31.2562	-635.591	1246.45	-57.0678	-634.388	1127.89	-50.8303	-504.04	1010.36	1.98877	-433.864	953.115	-58.6986	-463.572	915.933	-43.9944	-370.493	868.077
702	0	175.594	-389.36	1619.38	278.338	-392.848	1614.08	150.797	-544.928	1642.15	288.055	-560.329	1638.98	235.982	-624.559	1488.02	231.782	-723.129	1264.22	213.903	-485.105	1390.77	204.536	-459.125	1205.9	284.236	-727.343	1337.5	36.9054	-624.312	1449.83	-29.9255	-625.676	1247.74	-55.2572	-625.717	1128.97	-49.6037	-497.793	1008.71	2.96793	-428.824	949.806	-57.8331	-459.366	913.554	-43.2412	-367.296	863.506
703	0	176.247	-377.603	1620.91	278.992	-381.046	1615.62	151.549	-533.178	1643.76	288.802	-548.513	1640.63	236.884	-612.85	1489.71	232.911	-711.305	1265.78	214.654	-473.457	1392.48	205.499	-447.51	1207.59	285.624	-715.547	1339.21	37.8007	-613.065	1451.18	-28.6356	-615.948	1249.15	-53.4346	-617.267	1130.16	-48.4788	-491.977	1007.07	3.78626	-424.305	946.419	-57.0971	-455.761	911.174	-42.7423	-364.816	858.829
704	0	176.697	-365.993	1622.65	279.445	-369.378	1617.45	152.104	-521.577	1645.53	289.352	-536.837	1642.48	237.675	-601.23	1491.59	234.024	-699.591	1267.52	215.311	-461.902	1394.38	206.407	-435.993	1209.47	286.953	-703.814	1341.1	38.6072	-601.948	1452.64	-27.3804	-606.394	1250.68	-51.5998	-609.025	1131.48	-47.4576	-486.575	1005.45	4.43839	-420.288	942.985	-56.4896	-452.735	908.822	-42.508	-363.039	854.097
705	0	176.954	-354.528	1624.6	279.708	-357.836	1619.52	152.48	-510.125	1647.41	289.723	-525.297	1644.53	238.363	-589.688	1493.62	235.125	-687.978	1269.42	215.883	-450.426	1396.44	207.261	-424.557	1211.53	288.227	-692.132	1343.16	39.3333	-590.946	1454.21	-26.1535	-597.002	1252.31	-49.7547	-600.978	1132.91	-46.5413	-481.571	1003.87	4.92147	-416.748	939.538	-56.0073	-450.262	906.528	-42.5418	-361.945	849.363
706	0	177.035	-343.2	1626.74	279.799	-346.413	1621.82	152.697	-498.817	1649.4	289.935	-513.882	1646.72	238.96	-578.21	1495.77	236.216	-676.457	1271.44	216.378	-439.015	1398.65	208.063	-413.186	1213.73	289.451	-680.49	1345.34	39.9875	-580.04	1455.85	-24.9495	-587.758	1254.01	-47.9027	-593.114	1134.44	-45.7303	-476.943	1002.36	5.23532	-413.66	936.11	-55.6458	-448.314	904.317	-42.84	-361.511	844.676
707	0	176.961	-331.999	1629.03	279.736	-335.096	1624.32	152.777	-487.644	1651.45	290.012	-502.583	1649.02	239.477	-566.784	1498.02	237.299	-665.021	1273.56	216.804	-427.654	1400.95	208.817	-401.864	1216.04	290.631	-668.876	1347.61	40.5791	-569.212	1457.55	-23.7639	-578.651	1255.79	-46.0492	-585.421	1136.05	-45.0241	-472.669	1000.92	5.38247	-410.996	932.729	-55.3988	-446.857	902.216	-43.3918	-361.705	840.08
708	0	176.754	-320.91	1631.43	279.544	-323.873	1626.97	152.745	-476.591	1653.53	289.978	-491.384	1651.39	239.927	-555.394	1500.31	238.372	-653.658	1275.75	217.169	-416.328	1403.32	209.525	-390.577	1218.42	291.77	-657.281	1349.93	41.1168	-558.444	1459.28	-22.5936	-569.666	1257.6	-44.2016	-577.888	1137.75	-44.4212	-468.724	999.567	5.36808	-408.724	929.422	-55.259	-445.854	900.244	-44.1788	-362.49	835.617
709	0	176.44	-309.917	1633.92	279.248	-312.726	1629.72	152.625	-465.643	1655.6	289.857	-480.269	1653.78	240.319	-544.027	1502.61	239.433	-642.36	1277.96	217.483	-405.023	1405.7	210.192	-379.312	1220.82	292.87	-645.695	1352.27	41.6091	-547.715	1461.02	-21.4372	-560.792	1259.44	-42.3686	-570.502	1139.5	-43.9196	-465.083	998.315	5.1999	-406.811	926.214	-55.2178	-445.261	898.418	-45.1763	-363.82	831.321
710	0	176.047	-298.999	1636.45	278.873	-301.639	1632.52	152.441	-454.777	1657.64	289.674	-469.22	1656.16	240.665	-532.67	1504.89	240.478	-631.117	1280.16	217.753	-393.726	1408.07	210.82	-368.057	1223.2	293.933	-634.112	1354.59	42.0638	-537.007	1462.72	-20.2948	-552.016	1261.27	-40.5604	-563.251	1141.29	-43.5162	-461.717	997.168	4.88804	-405.221	923.122	-55.2658	-445.033	896.752	-46.3541	-365.643	827.22
711	0	175.598	-288.133	1638.96	278.446	-290.593	1635.32	152.216	-443.972	1659.6	289.451	-458.217	1658.46	240.974	-521.31	1507.1	241.5	-619.922	1282.32	217.988	-382.425	1410.37	211.414	-356.802	1225.52	294.957	-622.526	1356.85	42.4874	-526.303	1464.36	-19.168	-543.322	1263.09	-38.7878	-556.122	1143.1	-43.2069	-458.593	996.13	4.44476	-403.915	920.163	-55.3928	-445.121	895.254	-47.6781	-367.902	823.336
712	0	175.12	-277.295	1641.41	277.991	-279.567	1638.06	151.969	-433.202	1661.44	289.209	-447.239	1660.65	241.252	-509.937	1509.21	242.492	-608.764	1284.4	218.194	-371.108	1412.56	211.975	-345.541	1227.72	295.94	-610.932	1359.01	42.8855	-515.585	1465.91	-18.0599	-534.697	1264.85	-37.0619	-549.1	1144.9	-42.9867	-455.68	995.2	3.88414	-402.856	917.347	-55.588	-445.472	893.928	-49.1116	-370.533	819.685
713	0	174.636	-266.461	1643.74	277.53	-268.543	1640.68	151.719	-422.441	1663.14	288.965	-436.264	1662.69	241.507	-498.538	1511.17	243.446	-597.635	1286.36	218.375	-359.768	1414.6	212.504	-334.267	1229.78	296.877	-599.327	1361.03	43.262	-504.839	1467.34	-16.9745	-526.127	1266.55	-35.3939	-542.168	1146.69	-42.8494	-452.941	994.377	3.22169	-402.001	914.682	-55.8402	-446.032	892.776	-50.6171	-373.47	816.275
714	0	174.166	-255.606	1645.92	277.085	-257.501	1643.13	151.48	-411.664	1664.67	288.735	-425.273	1664.54	241.742	-487.106	1512.96	244.352	-586.523	1288.18	218.537	-348.396	1416.46	213.002	-322.977	1231.64	297.762	-587.71	1362.9	43.6197	-494.051	1468.62	-15.917	-517.597	1268.15	-33.7941	-535.309	1148.43	-42.7881	-450.343	993.656	2.47393	-401.311	912.171	-56.1381	-446.747	891.795	-52.1582	-376.645	813.112
715	0	173.726	-244.708	1647.89	276.67	-246.421	1645.35	151.265	-400.845	1665.99	288.529	-414.246	1666.16	241.959	-475.632	1514.55	245.201	-575.418	1289.82	218.682	-336.986	1418.09	213.468	-311.668	1233.27	298.587	-576.078	1364.57	43.9595	-483.208	1469.73	-14.893	-509.091	1269.65	-32.2715	-528.505	1150.11	-42.7949	-447.847	993.029	1.65795	-400.745	909.815	-56.4704	-447.562	890.981	-53.7002	-379.989	810.195
716	0	173.329	-233.744	1649.62	276.299	-235.286	1647.31	151.08	-389.962	1667.08	288.355	-403.164	1667.53	242.16	-464.109	1515.9	245.982	-564.309	1291.25	218.812	-325.531	1419.47	213.901	-300.337	1234.64	299.345	-564.432	1366.02	44.2808	-472.299	1470.65	-13.9088	-500.592	1271.03	-30.834	-521.736	1151.71	-42.8616	-445.417	992.489	0.79092	-400.262	907.611	-56.8262	-448.422	890.326	-55.2119	-383.434	807.522
717	0	172.985	-222.695	1651.07	275.98	-224.081	1648.97	150.929	-378.994	1667.93	288.217	-392.011	1668.62	242.342	-452.53	1517.01	246.684	-553.183	1292.47	218.926	-314.029	1420.57	214.298	-288.982	1235.73	300.024	-552.768	1367.24	44.5815	-461.315	1471.36	-12.9708	-492.084	1272.26	-29.4876	-514.981	1153.23	-42.9792	-443.017	992.028	-0.110303	-399.822	905.556	-57.1954	-449.276	889.823	-56.6663	-386.912	805.086
718	0	172.697	-211.545	1652.22	275.717	-212.792	1650.3	150.814	-367.922	1668.51	288.115	-380.773	1669.42	242.503	-440.89	1517.85	247.297	-542.026	1293.44	219.022	-302.473	1421.39	214.657	-277.601	1236.51	300.617	-541.087	1368.21	44.8582	-450.246	1471.84	-12.0853	-483.55	1273.35	-28.2362	-508.219	1154.63	-43.1388	-440.61	991.634	-1.0297	-399.386	903.644	-57.5685	-450.073	889.463	-58.0406	-390.361	802.882
719	0	172.467	-200.28	1653.06	275.511	-201.408	1651.28	150.731	-356.731	1668.83	288.044	-369.44	1669.92	242.637	-429.185	1518.41	247.811	-530.827	1294.15	219.097	-290.861	1421.89	214.974	-266.193	1236.98	301.113	-529.386	1368.92	45.106	-439.084	1472.09	-11.2588	-474.971	1274.29	-27.0822	-501.429	1155.93	-43.3319	-438.162	991.299	-1.95249	-398.916	901.868	-57.937	-450.766	889.236	-59.3174	-393.72	800.9
720	0	172.291	-188.889	1653.56	275.359	-189.92	1651.9	150.674	-345.412	1668.88	287.998	-358.001	1670.11	242.739	-417.41	1518.7	248.217	-519.571	1294.6	219.148	-279.189	1422.08	215.244	-254.753	1237.12	301.505	-517.661	1369.35	45.3187	-427.823	1472.1	-10.4972	-466.332	1275.06	-26.026	-494.59	1157.1	-43.5501	-435.638	991.013	-2.86556	-398.377	900.221	-58.2937	-451.311	889.133	-60.4837	-396.935	799.134
721	0	172.162	-177.365	1653.74	275.252	-178.323	1652.17	150.635	-333.954	1668.65	287.967	-346.453	1669.99	242.801	-405.562	1518.7	248.508	-508.245	1294.77	219.169	-267.454	1421.96	215.463	-243.278	1236.94	301.784	-505.908	1369.52	45.4896	-416.455	1471.88	-9.80617	-457.615	1275.68	-25.0663	-487.681	1158.16	-43.7859	-433.006	990.768	-3.75765	-397.732	898.695	-58.6321	-451.668	889.143	-61.5317	-399.954	797.574
722	0	172.068	-165.706	1653.59	275.18	-166.613	1652.09	150.601	-322.355	1668.16	287.94	-334.79	1669.56	242.816	-393.638	1518.42	248.678	-496.836	1294.68	219.154	-255.653	1421.54	215.628	-231.763	1236.44	301.943	-494.122	1369.41	45.6109	-404.976	1471.42	-9.19099	-448.805	1276.13	-24.2009	-480.68	1159.09	-44.0331	-430.235	990.554	-4.61967	-396.948	897.282	-58.9475	-451.799	889.256	-62.4578	-402.732	796.211
723	0	171.998	-153.909	1653.13	275.13	-154.789	1651.67	150.559	-310.614	1667.4	287.902	-323.012	1668.84	242.773	-381.635	1517.88	248.724	-485.334	1294.32	219.095	-243.781	1420.81	215.732	-220.202	1235.64	301.978	-482.295	1369.05	45.6745	-393.382	1470.73	-8.65627	-439.886	1276.43	-23.4262	-473.566	1159.89	-44.2862	-427.295	990.362	-5.44471	-395.991	895.973	-59.2358	-451.671	889.461	-63.2622	-405.226	795.036
724	0	171.934	-141.978	1652.38	275.085	-142.852	1650.93	150.495	-298.731	1666.4	287.838	-311.119	1667.85	242.665	-369.55	1517.08	248.642	-473.727	1293.71	218.985	-231.836	1419.81	215.773	-208.587	1234.54	301.886	-470.42	1368.44	45.672	-381.668	1469.82	-8.20599	-430.843	1276.57	-22.7385	-466.32	1160.56	-44.5413	-424.159	990.184	-6.22812	-394.829	894.759	-59.4949	-451.25	889.746	-63.9485	-407.4	794.039
725	0	171.859	-129.917	1651.35	275.028	-130.805	1649.91	150.393	-286.712	1665.16	287.734	-299.114	1666.6	242.482	-357.381	1516.04	248.433	-462.008	1292.85	218.816	-219.814	1418.55	215.744	-196.911	1233.18	301.664	-458.488	1367.59	45.5951	-369.832	1468.7	-7.84348	-421.664	1276.56	-22.1336	-458.922	1161.11	-44.796	-420.798	990.011	-6.96741	-393.431	893.632	-59.7235	-450.51	890.098	-64.5228	-409.219	793.206
726	0	171.754	-117.73	1650.09	274.939	-118.65	1648.64	150.237	-274.563	1663.71	287.572	-287	1665.1	242.215	-345.125	1514.78	248.099	-450.17	1291.77	218.579	-207.711	1417.05	215.643	-185.165	1231.58	301.314	-446.49	1366.53	45.4357	-357.874	1467.39	-7.57138	-412.336	1276.41	-21.6075	-451.35	1161.52	-45.049	-417.187	989.835	-7.66207	-391.767	892.58	-59.922	-449.422	890.505	-64.9934	-410.654	792.524
727	0	171.599	-105.426	1648.62	274.798	-106.393	1647.14	150.01	-262.29	1662.06	287.337	-274.779	1663.4	241.857	-332.781	1513.32	247.643	-438.208	1290.48	218.267	-195.524	1415.34	215.465	-173.34	1229.76	300.837	-434.417	1365.27	45.1863	-345.792	1465.89	-7.39169	-402.845	1276.12	-21.1569	-443.585	1161.82	-45.3007	-413.298	989.647	-8.31332	-389.807	891.594	-60.0923	-447.962	890.952	-65.37	-411.676	791.977
728	0	171.374	-93.0122	1646.97	274.587	-94.0374	1645.45	149.697	-249.902	1660.24	287.013	-262.457	1661.51	241.398	-320.347	1511.69	247.07	-426.119	1289	217.871	-183.249	1413.44	215.206	-161.428	1227.75	300.238	-422.259	1363.84	44.8398	-333.589	1464.24	-7.30584	-393.182	1275.69	-20.779	-435.608	1161.98	-45.5524	-409.106	989.436	-8.92379	-387.522	890.662	-60.2377	-446.103	891.423	-65.6632	-412.259	791.546
729	0	171.06	-80.4951	1645.17	274.285	-81.5875	1643.62	149.284	-237.407	1658.27	286.587	-250.036	1659.47	240.834	-307.822	1509.91	246.386	-413.903	1287.37	217.385	-170.885	1411.4	214.865	-149.418	1225.59	299.52	-410.009	1362.26	44.3903	-321.267	1462.44	-7.31479	-383.334	1275.14	-20.4718	-427.397	1162.02	-45.8068	-404.586	989.194	-9.49724	-384.883	889.772	-60.3629	-443.823	891.903	-65.8843	-412.375	791.212
730	0	170.639	-67.8821	1643.27	273.876	-69.0468	1641.68	148.756	-224.812	1656.18	286.045	-237.521	1657.31	240.158	-295.204	1508.02	245.6	-401.561	1285.61	216.801	-158.429	1409.24	214.436	-137.303	1223.31	298.691	-397.659	1360.56	43.8328	-308.828	1460.53	-7.41908	-373.291	1274.45	-20.2346	-418.934	1161.92	-46.0673	-399.711	988.91	-10.0383	-381.86	888.911	-60.4739	-441.095	892.374	-66.045	-412	790.951
731	0	170.097	-55.1787	1641.29	273.344	-56.4183	1639.67	148.103	-212.123	1653.99	285.377	-224.914	1655.06	239.367	-282.493	1506.04	244.718	-389.095	1283.76	216.115	-145.879	1406.99	213.92	-125.077	1220.95	297.758	-385.204	1358.77	43.1634	-296.277	1458.51	-7.61898	-363.043	1273.65	-20.0674	-410.199	1161.7	-46.3383	-394.454	988.575	-10.5519	-378.424	888.068	-60.5781	-437.896	892.821	-66.1571	-411.107	790.741
732	0	169.42	-42.3897	1639.26	272.676	-43.7039	1637.62	147.316	-199.345	1651.74	284.574	-212.218	1652.75	238.458	-269.69	1504	243.749	-376.51	1281.83	215.322	-133.235	1404.69	213.312	-112.733	1218.53	296.728	-372.639	1356.93	42.3795	-283.62	1456.41	-7.91451	-352.579	1272.73	-19.9714	-401.174	1161.35	-46.6242	-388.789	988.18	-11.0433	-374.545	887.228	-60.6836	-434.197	893.226	-66.2323	-409.671	790.559
733	0	168.599	-29.5181	1637.22	271.864	-30.9047	1635.57	146.387	-186.483	1649.46	283.63	-199.434	1650.42	237.431	-256.795	1501.94	242.701	-363.812	1279.87	214.42	-120.497	1402.38	212.613	-100.269	1216.09	295.61	-359.965	1355.06	41.48	-270.862	1454.25	-8.30557	-341.89	1271.7	-19.9486	-391.839	1160.87	-46.9301	-382.69	987.717	-11.5176	-370.192	886.381	-60.7992	-429.973	893.574	-66.2824	-407.662	790.383
734	0	167.628	-16.566	1635.2	270.901	-18.0214	1633.54	145.314	-173.539	1647.17	282.542	-186.563	1648.1	236.286	-243.812	1499.9	241.582	-351.007	1277.9	213.409	-107.669	1400.08	211.822	-87.6815	1213.68	294.411	-347.182	1353.2	40.4652	-258.009	1452.07	-8.792	-330.967	1270.58	-20.0017	-382.177	1160.27	-47.2609	-376.127	987.18	-11.9798	-365.334	885.517	-60.9342	-425.194	893.852	-66.3184	-405.05	790.193
735	0	166.505	-3.53449	1633.22	269.787	-5.05404	1631.58	144.096	-160.514	1644.91	281.309	-173.608	1645.84	235.027	-230.744	1497.9	240.399	-338.104	1275.97	212.289	-94.7534	1397.83	210.94	-74.9715	1211.32	293.139	-334.294	1351.37	39.3369	-245.068	1449.89	-9.37361	-319.8	1269.36	-20.134	-372.172	1159.54	-47.6215	-369.074	986.563	-12.4342	-359.938	884.627	-61.0979	-419.832	894.045	-66.3508	-401.805	789.972
736	0	165.234	9.57579	1631.31	268.523	7.9969	1629.7	142.735	-147.41	1642.71	279.935	-160.569	1643.66	233.659	-217.598	1495.97	239.16	-325.112	1274.11	211.066	-81.7554	1395.66	209.967	-62.1417	1209.05	291.803	-321.308	1349.61	38.0985	-232.045	1447.74	-10.0503	-308.382	1268.06	-20.3495	-361.809	1158.71	-48.0165	-361.502	985.867	-12.885	-353.972	883.706	-61.2996	-413.854	894.145	-66.3887	-397.891	789.703
737	0	163.82	22.7638	1629.5	267.117	21.1304	1627.93	141.239	-134.228	1640.6	278.426	-147.448	1641.6	232.188	-204.38	1494.14	237.87	-312.041	1272.33	209.745	-68.6824	1393.61	208.908	-49.1974	1206.91	290.408	-308.234	1347.96	36.755	-218.949	1445.65	-10.8221	-296.705	1266.7	-20.6525	-351.075	1157.77	-48.4501	-353.383	985.091	-13.3356	-347.4	882.751	-61.548	-407.231	894.143	-66.4401	-393.272	789.376
738	0	162.276	36.0277	1627.79	265.581	34.3439	1626.3	139.618	-120.969	1638.62	276.793	-134.25	1639.7	230.625	-191.102	1492.45	236.536	-298.903	1270.68	208.334	-55.5435	1391.7	207.766	-36.1465	1204.92	288.963	-295.085	1346.43	35.3132	-205.785	1443.64	-11.689	-284.763	1265.3	-21.0476	-339.958	1156.74	-48.9259	-344.691	984.24	-13.7893	-340.19	881.762	-61.8516	-399.929	894.033	-66.5112	-387.909	788.981
739	0	160.615	49.3639	1626.21	263.928	47.6329	1624.81	137.885	-107.637	1636.79	275.049	-120.98	1637.97	228.98	-177.775	1490.92	235.16	-285.708	1269.19	206.845	-42.3499	1389.97	206.547	-22.9998	1203.12	287.472	-281.875	1345.06	33.7813	-192.562	1441.76	-12.6511	-272.551	1263.87	-21.5394	-328.451	1155.65	-49.4469	-335.401	983.322	-14.2484	-332.306	880.742	-62.2179	-391.917	893.813	-66.6069	-381.759	788.512
740	0	158.857	62.7663	1624.77	262.18	60.9902	1623.48	136.056	-94.2376	1635.14	273.211	-107.646	1636.45	227.265	-164.415	1489.58	233.747	-272.472	1267.87	205.29	-29.1145	1388.44	205.26	-9.77117	1201.54	285.943	-268.623	1343.87	32.1692	-179.287	1440.04	-13.7084	-260.066	1262.44	-22.133	-316.549	1154.5	-50.0157	-325.487	982.346	-14.7152	-323.716	879.698	-62.6535	-383.162	893.484	-66.7301	-374.779	787.967
741	0	157.024	76.226	1623.49	260.356	74.4054	1622.33	134.152	-80.779	1633.7	271.298	-94.2579	1635.17	225.496	-151.038	1488.44	232.3	-259.208	1266.74	203.685	-15.8519	1387.12	203.912	3.52294	1200.19	284.379	-255.347	1342.87	30.4883	-165.97	1438.49	-14.8606	-247.308	1261.03	-22.8334	-304.25	1153.33	-50.6344	-314.929	981.324	-15.1908	-314.386	878.639	-63.1639	-373.634	893.046	-66.8825	-366.921	787.342
742	0	155.142	89.7311	1622.38	258.483	87.8646	1621.36	132.194	-67.2724	1632.48	269.333	-80.8306	1634.13	223.688	-137.663	1487.53	230.821	-245.932	1265.83	202.047	-2.57825	1386.05	202.516	16.8634	1199.1	282.788	-242.068	1342.08	28.7512	-152.617	1437.16	-16.107	-234.279	1259.67	-23.6454	-291.558	1152.15	-51.3043	-303.708	980.272	-15.6762	-304.288	877.576	-63.7536	-363.303	892.504	-67.0642	-358.139	786.64
743	0	153.236	103.266	1621.45	256.587	101.35	1620.59	130.207	-53.7323	1631.5	267.339	-67.3807	1633.36	221.857	-124.308	1486.84	229.314	-232.659	1265.15	200.393	10.6893	1385.23	201.085	30.2286	1198.27	281.173	-228.808	1341.52	26.9714	-139.24	1436.06	-17.4462	-220.985	1258.39	-24.5738	-278.478	1150.98	-52.0264	-291.811	979.206	-16.1716	-293.394	876.523	-64.4253	-352.144	891.865	-67.2745	-348.385	785.862
744	0	151.337	116.813	1620.72	254.697	114.842	1620.02	128.215	-40.1762	1630.78	265.342	-53.9279	1632.87	220.02	-110.994	1486.41	227.78	-219.407	1264.7	198.742	23.9328	1384.67	199.631	43.5956	1197.73	279.541	-215.587	1341.18	25.1636	-125.847	1435.21	-18.8762	-207.434	1257.21	-25.6231	-265.022	1149.87	-52.8012	-279.226	978.145	-16.6768	-281.681	875.496	-65.1807	-340.134	891.135	-67.5118	-337.613	785.011
745	0	149.472	130.35	1620.18	252.842	128.317	1619.66	126.244	-26.6241	1630.32	263.367	-40.4943	1632.65	218.194	-97.7404	1486.22	226.222	-206.19	1264.5	197.113	37.1343	1384.38	198.169	56.9397	1197.48	277.896	-202.428	1341.08	23.3427	-112.45	1434.64	-20.394	-193.638	1256.16	-26.7972	-251.205	1148.82	-53.6284	-265.95	977.106	-17.1915	-269.131	874.512	-66.0196	-327.255	890.324	-67.7745	-325.78	784.092
746	0	147.671	143.855	1619.84	251.05	141.75	1619.51	124.32	-13.0981	1630.13	261.44	-27.1037	1632.71	216.396	-84.5676	1486.28	224.644	-193.026	1264.54	195.524	50.2761	1384.36	196.714	70.2364	1197.5	276.244	-189.351	1341.21	21.5242	-99.0586	1434.36	-21.9956	-179.613	1255.26	-28.099	-237.044	1147.87	-54.5073	-251.983	976.11	-17.715	-255.731	873.589	-66.9402	-313.495	889.443	-68.0608	-312.846	783.111
747	0	145.961	157.304	1619.72	249.348	155.115	1619.56	122.468	0.378887	1630.21	259.585	-13.7804	1633.04	214.641	-71.4934	1486.59	223.049	-179.928	1264.83	193.993	63.3414	1384.62	195.282	83.4617	1197.8	274.591	-176.374	1341.57	19.7233	-85.6848	1434.37	-23.6756	-165.376	1254.53	-29.5306	-222.562	1147.03	-55.4364	-237.33	975.177	-18.2463	-241.476	872.746	-67.9392	-298.849	888.504	-68.3698	-298.779	782.078
748	0	144.367	170.672	1619.81	247.761	168.388	1619.83	120.71	13.7836	1630.56	257.825	-0.548146	1633.63	212.946	-58.5343	1487.14	221.441	-166.911	1265.35	192.535	76.3146	1385.13	193.887	96.5934	1198.37	272.943	-163.513	1342.15	17.9549	-72.3403	1434.69	-25.4274	-150.949	1254	-31.0925	-207.781	1146.32	-56.4137	-222.005	974.325	-18.7847	-226.365	872.001	-69.0113	-283.317	887.521	-68.7013	-283.553	781.003
749	0	142.911	183.939	1620.12	246.311	181.544	1620.31	119.067	27.0935	1631.16	256.18	12.5704	1634.47	211.323	-45.7044	1487.92	219.827	-153.985	1266.1	191.166	89.1819	1385.9	192.544	109.612	1199.2	271.307	-150.784	1342.95	16.2334	-59.037	1435.29	-27.2432	-136.354	1253.67	-32.7836	-192.729	1145.76	-57.4362	-206.025	973.574	-19.329	-210.405	871.376	-70.1499	-266.906	886.509	-69.0566	-267.152	779.904
750	0	141.61	197.082	1620.66	245.016	194.562	1620.99	117.557	40.288	1632.01	254.668	25.5553	1635.54	209.784	-33.0154	1488.92	218.211	-141.162	1267.07	189.898	101.932	1386.9	191.266	122.5	1200.27	269.689	-138.196	1343.95	14.5721	-45.7864	1436.19	-29.1135	-121.617	1253.56	-34.6006	-177.432	1145.37	-58.5003	-189.412	972.944	-19.8784	-193.612	870.89	-71.3466	-249.634	885.489	-69.4383	-249.568	778.803
751	0	140.479	210.084	1621.41	243.89	207.425	1621.87	116.194	53.3488	1633.1	253.301	38.3897	1636.82	208.339	-20.4759	1490.13	216.6	-128.449	1268.24	188.739	114.555	1388.14	190.066	135.247	1201.57	268.096	-125.759	1345.13	12.983	-32.6001	1437.37	-31.0279	-106.764	1253.67	-36.5382	-161.917	1145.14	-59.6017	-172.195	972.453	-20.4323	-176.005	870.566	-72.5921	-231.521	884.482	-69.8506	-230.808	777.728
752	0	139.525	222.93	1622.38	242.94	220.118	1622.94	114.987	66.2608	1634.42	252.091	51.0604	1638.3	206.996	-8.09131	1491.53	215.003	-115.852	1269.61	187.697	127.045	1389.59	188.954	147.843	1203.08	266.535	-113.475	1346.49	11.4766	-19.4885	1438.81	-32.9746	-91.8205	1254.01	-38.5887	-146.212	1145.09	-60.7354	-154.407	972.118	-20.9902	-157.612	870.426	-73.8759	-212.598	883.511	-70.2984	-210.886	776.715
753	0	138.751	235.609	1623.55	242.171	232.633	1624.2	113.943	79.0124	1635.94	251.041	63.5586	1639.96	205.761	4.13584	1493.11	213.426	-103.375	1271.15	186.777	139.398	1391.23	187.938	160.286	1204.78	265.014	-101.347	1348.01	10.0616	-6.46147	1440.51	-34.9412	-76.8136	1254.58	-40.7424	-130.346	1145.23	-61.8963	-136.083	971.959	-21.5516	-138.467	870.491	-75.1865	-192.898	882.602	-70.7872	-189.832	775.804
754	0	138.158	248.115	1624.93	241.581	244.965	1625.63	113.063	91.5958	1637.66	250.154	75.8792	1641.77	204.637	16.2064	1494.84	211.878	-91.021	1272.84	185.98	151.613	1393.05	187.023	172.575	1206.65	263.539	-89.3713	1349.66	8.74473	6.47254	1442.43	-36.9148	-61.7695	1255.36	-42.987	-114.344	1145.54	-63.0785	-117.264	971.992	-22.1168	-118.607	870.785	-76.5123	-172.464	881.785	-71.3223	-167.686	775.043
755	0	137.738	260.444	1626.49	241.165	257.112	1627.22	112.345	104.007	1639.55	249.426	88.0215	1643.71	203.625	28.1242	1496.7	210.369	-78.79	1274.67	185.304	163.692	1395.02	186.214	184.714	1208.68	262.118	-77.5424	1351.44	7.53073	19.3064	1444.55	-38.8822	-46.7136	1256.36	-45.3089	-98.2342	1146.03	-64.2765	-97.9917	972.23	-22.6861	-98.0757	871.331	-77.841	-151.341	881.088	-71.9077	-144.499	774.479
756	0	137.481	272.599	1628.22	240.912	269.08	1628.95	111.782	116.246	1641.59	248.852	99.9885	1645.77	202.724	39.896	1498.68	208.906	-66.6811	1276.62	184.745	175.641	1397.14	185.509	196.711	1210.83	260.758	-65.8518	1353.32	6.42229	32.0347	1446.85	-40.8309	-31.6702	1257.55	-47.6926	-82.0407	1146.69	-65.4846	-78.3108	972.686	-23.26	-76.9198	872.148	-79.1607	-129.58	880.542	-72.5457	-120.335	774.166
757	0	137.373	284.582	1630.11	240.807	280.873	1630.8	111.364	128.316	1643.76	248.419	111.786	1647.91	201.931	51.531	1500.75	207.5	-54.6918	1278.66	184.296	187.465	1399.36	184.904	208.574	1213.1	259.464	-54.2885	1355.27	5.42019	44.6534	1449.3	-42.7486	-16.6621	1258.92	-50.1218	-65.7881	1147.51	-66.6975	-58.267	973.37	-23.8393	-55.1898	873.256	-80.4594	-107.234	880.174	-73.236	-95.2658	774.153
758	0	137.395	296.401	1632.12	240.833	292.503	1632.75	111.077	140.224	1646.03	248.115	123.424	1650.11	201.241	63.0407	1502.89	206.16	-42.8184	1280.78	183.949	199.174	1401.67	184.395	220.316	1215.44	258.245	-42.8394	1357.29	4.52345	57.1601	1451.86	-44.6243	-1.70993	1260.45	-52.5796	-49.4995	1148.47	-67.9104	-37.9071	974.287	-24.4248	-32.9389	874.672	-81.7259	-84.3604	880.012	-73.9752	-69.3749	774.487
759	0	137.529	308.068	1634.23	240.97	303.983	1634.79	110.905	151.978	1648.38	247.923	134.914	1652.36	200.649	74.4383	1505.07	204.894	-31.0556	1282.94	183.692	210.779	1404.04	183.972	231.949	1217.85	257.105	-31.49	1359.34	3.72956	69.5538	1454.5	-46.4481	13.1677	1262.12	-55.049	-33.1962	1149.56	-69.1186	-17.2779	975.441	-25.0175	-10.2227	876.408	-82.9499	-61.0183	880.078	-74.7568	-42.752	775.211
760	0	137.752	319.594	1636.43	241.196	315.325	1636.88	110.829	163.589	1650.77	247.826	146.268	1654.61	200.146	85.7387	1507.26	203.712	-19.3972	1285.12	183.513	222.292	1406.44	183.623	243.487	1220.28	256.051	-20.2245	1361.41	3.03478	81.8348	1457.19	-48.2112	27.9548	1263.89	-57.5133	-16.8974	1150.75	-70.318	3.57408	976.829	-25.6179	12.9017	878.473	-84.1217	-37.268	880.393	-75.5708	-15.4934	776.358
761	0	138.041	330.994	1638.66	241.488	326.548	1639	110.831	175.071	1653.17	247.804	157.503	1656.85	199.727	96.9571	1509.45	202.624	-7.83578	1287.3	183.399	233.726	1408.85	183.338	254.942	1222.71	255.09	-9.02681	1363.47	2.4344	94.0045	1459.9	-49.9064	42.6382	1265.74	-59.9564	-0.620654	1152.02	-71.5046	24.6037	978.446	-26.2261	36.3761	880.87	-85.2332	-13.1702	880.97	-76.4046	12.3001	777.951
762	0	138.375	342.282	1640.92	241.824	337.666	1641.12	110.89	186.439	1655.54	247.839	168.634	1659.04	199.381	108.109	1511.61	201.636	3.63692	1289.45	183.338	245.094	1411.24	183.103	266.327	1225.12	254.226	2.11944	1365.51	1.92306	106.065	1462.58	-51.5278	57.2077	1267.64	-62.3633	15.6194	1153.35	-72.6749	45.7672	980.282	-26.8417	60.1416	883.598	-86.2773	11.2144	881.818	-77.2434	40.5254	780.007
763	0	138.731	353.475	1643.15	242.182	348.698	1643.21	110.987	197.706	1657.87	247.912	179.677	1661.16	199.103	119.212	1513.7	200.758	15.0299	1291.54	183.315	256.408	1413.57	182.905	277.655	1227.47	253.464	13.2303	1367.48	1.49502	118.02	1465.2	-53.0704	71.6557	1269.54	-64.72	31.8105	1154.7	-73.8252	67.0234	982.322	-27.4634	84.1395	886.649	-87.2483	35.8264	882.939	-78.0711	69.0789	782.53
764	0	139.089	364.589	1645.33	242.542	359.663	1645.24	111.105	208.888	1660.1	248.004	190.65	1663.19	198.883	130.279	1515.7	199.997	26.3525	1293.56	183.32	267.682	1415.81	182.731	288.937	1229.72	252.809	24.3212	1369.39	1.1445	129.872	1467.73	-54.5301	85.9782	1271.43	-67.0134	47.943	1156.04	-74.9518	88.3329	984.55	-28.0889	108.312	890.009	-88.1418	60.608	884.333	-78.8709	97.8588	785.513
765	0	139.431	375.641	1647.43	242.886	370.576	1647.19	111.226	220.002	1662.21	248.101	201.569	1665.09	198.717	141.325	1517.59	199.36	37.6146	1295.47	183.339	278.927	1417.94	182.569	300.183	1231.86	252.266	35.4068	1371.19	0.865931	141.626	1470.13	-55.9037	100.173	1273.25	-69.2315	64.0101	1157.35	-76.0505	109.659	986.946	-28.7148	132.601	893.661	-88.955	85.5038	885.99	-79.6264	126.767	788.942
766	0	139.742	386.646	1649.41	243.199	381.455	1649.02	111.337	231.062	1664.17	248.189	212.45	1666.84	198.597	152.364	1519.34	198.852	48.826	1297.26	183.364	290.154	1419.92	182.41	311.404	1233.86	251.836	46.5008	1372.88	0.654219	153.287	1472.38	-57.1881	114.243	1274.98	-71.3631	80.007	1158.59	-77.1169	130.968	989.485	-29.3366	156.951	897.582	-89.6863	110.461	887.899	-80.3223	155.71	792.792
767	0	140.009	397.62	1651.23	243.467	392.316	1650.71	111.426	242.084	1665.95	248.257	223.309	1668.42	198.519	163.407	1520.93	198.477	59.9964	1298.89	183.387	301.374	1421.74	182.245	322.606	1235.67	251.524	57.6156	1374.42	0.504984	164.859	1474.44	-58.3806	128.189	1276.59	-73.3979	95.9311	1159.74	-78.1458	152.229	992.142	-29.9486	181.308	901.745	-90.3352	135.429	890.044	-80.9448	184.602	797.035
768	0	140.225	408.578	1652.89	243.684	403.173	1652.23	111.487	253.081	1667.53	248.298	234.159	1669.81	198.48	174.465	1522.34	198.239	71.1352	1300.36	183.401	312.595	1423.36	182.067	333.799	1237.3	251.329	68.7626	1375.81	0.414733	176.349	1476.29	-59.4782	142.017	1278.04	-75.3263	111.781	1160.76	-79.1317	173.411	994.891	-30.5443	205.621	906.122	-90.9026	160.362	892.406	-81.4827	213.362	801.633
769	0	140.385	419.532	1654.34	243.842	414.04	1653.56	111.512	264.066	1668.88	248.307	245.014	1670.98	198.478	185.547	1523.55	198.138	82.2519	1301.64	183.403	323.826	1424.77	181.875	344.991	1238.71	251.253	79.9517	1377.02	0.381007	187.763	1477.92	-60.4778	155.734	1279.32	-77.1392	127.558	1161.63	-80.0684	194.488	997.705	-31.1159	229.84	910.679	-91.3901	185.214	894.961	-81.9275	241.919	806.547
770	0	140.486	430.493	1655.56	243.942	424.929	1654.67	111.502	275.051	1669.98	248.284	255.886	1671.94	198.513	196.66	1524.56	198.175	93.3554	1302.71	183.391	335.073	1425.95	181.665	356.188	1239.88	251.297	91.1918	1378.04	0.402476	199.107	1479.3	-61.3761	169.346	1280.38	-78.8281	143.261	1162.34	-80.9493	215.436	1000.56	-31.6552	253.917	915.383	-91.7998	209.943	897.686	-82.2737	270.208	811.735
771	0	140.531	441.472	1656.54	243.985	435.849	1655.56	111.458	286.047	1670.83	248.229	266.784	1672.66	198.585	207.809	1525.33	198.349	104.454	1303.56	183.368	346.344	1426.89	181.439	367.397	1240.82	251.458	102.49	1378.85	0.478987	210.39	1480.41	-62.1692	182.862	1281.23	-80.3851	158.891	1162.85	-81.7675	236.229	1003.42	-32.1538	277.808	920.198	-92.1343	234.51	900.556	-82.519	298.173	817.153
772	0	140.525	452.477	1657.26	243.976	446.808	1656.2	111.384	297.061	1671.41	248.149	277.717	1673.14	198.698	219	1525.88	198.656	115.558	1304.19	183.335	357.642	1427.58	181.202	378.626	1241.5	251.736	113.853	1379.44	0.61156	221.619	1481.27	-62.8527	196.291	1281.83	-81.803	174.448	1163.17	-82.5157	256.847	1006.28	-32.6032	301.47	925.088	-92.396	258.874	903.544	-82.664	325.763	822.759
773	0	140.476	463.513	1657.72	243.925	457.812	1656.59	111.29	308.1	1671.73	248.051	288.692	1673.37	198.857	230.237	1526.18	199.092	126.674	1304.57	183.3	368.975	1428.02	180.958	389.882	1241.92	252.128	125.286	1379.8	0.802324	232.805	1481.85	-63.4223	209.64	1282.19	-83.0749	189.932	1163.28	-83.1869	277.268	1009.1	-32.9954	324.861	930.017	-92.5872	283	906.624	-82.712	352.933	828.509
774	0	140.396	474.587	1657.91	243.842	468.867	1656.73	111.186	319.17	1671.77	247.946	299.715	1673.36	199.065	241.521	1526.24	199.652	137.811	1304.72	183.27	380.347	1428.19	180.715	401.172	1242.09	252.632	136.791	1379.93	1.05441	243.956	1482.15	-63.8731	222.917	1282.29	-84.1948	205.341	1163.18	-83.7739	297.472	1011.86	-33.3233	347.944	934.947	-92.7095	306.85	909.769	-82.6685	379.646	834.361
775	0	140.298	485.7	1657.83	243.74	479.976	1656.62	111.085	330.274	1671.55	247.847	310.788	1673.09	199.33	252.856	1526.06	200.329	148.977	1304.62	183.255	391.761	1428.12	180.482	412.504	1242.01	253.244	148.372	1379.82	1.37177	255.085	1482.19	-64.2003	236.129	1282.14	-85.1573	220.671	1162.86	-84.2701	317.438	1014.56	-33.5805	370.682	939.842	-92.7642	330.39	912.952	-82.5409	405.866	840.272
776	0	140.197	496.854	1657.48	243.636	491.139	1656.26	111.004	341.415	1671.06	247.77	321.917	1672.59	199.66	264.242	1525.64	201.115	160.182	1304.27	183.267	403.224	1427.8	180.27	423.886	1241.69	253.961	160.029	1379.47	1.75899	266.203	1481.98	-64.3992	249.283	1281.75	-85.9581	235.918	1162.34	-84.6693	337.146	1017.16	-33.762	393.04	944.668	-92.7516	353.584	916.147	-82.3373	431.56	846.2
777	0	140.111	508.051	1656.89	243.546	502.36	1655.66	110.96	352.593	1670.33	247.732	333.102	1671.85	200.062	275.681	1524.98	202.004	171.433	1303.69	183.318	414.739	1427.25	180.091	435.326	1241.13	254.777	171.763	1378.89	2.22099	277.324	1481.51	-64.4657	262.385	1281.11	-86.5935	251.075	1161.62	-84.9657	356.575	1019.65	-33.8636	414.988	949.391	-92.6714	376.4	919.327	-82.0669	456.701	852.107
778	0	140.058	519.29	1656.05	243.49	513.636	1654.83	110.972	363.809	1669.36	247.752	344.346	1670.89	200.543	287.173	1524.1	202.985	182.74	1302.87	183.422	426.31	1426.47	179.957	446.834	1240.34	255.688	183.574	1378.06	2.76279	288.46	1480.81	-64.396	275.439	1280.25	-87.0613	266.133	1160.7	-85.1547	375.706	1022.03	-33.8827	436.496	953.978	-92.5226	398.803	922.467	-81.7385	481.259	857.952
779	0	140.058	530.57	1655	243.486	524.969	1653.79	111.061	375.064	1668.18	247.849	355.648	1669.72	201.113	298.72	1523	204.049	194.11	1301.84	183.593	437.943	1425.49	179.88	458.417	1239.36	256.687	195.459	1377.01	3.38913	299.627	1479.9	-64.1872	288.449	1279.18	-87.3603	281.083	1159.62	-85.2324	394.518	1024.27	-33.8173	457.536	958.399	-92.3034	420.761	925.54	-81.3605	505.208	863.696
780	0	140.131	541.892	1653.74	243.557	536.358	1652.55	111.248	386.356	1666.8	248.044	367.011	1668.36	201.777	310.323	1521.71	205.186	205.553	1300.59	183.845	449.641	1424.32	179.873	470.084	1238.19	257.769	207.417	1375.75	4.1043	310.84	1478.79	-63.8376	301.418	1277.93	-87.4908	295.911	1158.39	-85.196	412.991	1026.36	-33.6667	478.085	962.628	-92.0117	442.241	928.522	-80.9404	528.522	869.303
781	0	140.297	553.256	1652.32	243.721	547.803	1651.15	111.551	397.687	1665.24	248.357	378.435	1666.82	202.542	321.983	1520.23	206.386	217.075	1299.15	184.191	461.411	1422.99	179.949	481.844	1236.85	258.927	219.445	1374.27	4.91174	322.113	1477.51	-63.3466	314.347	1276.51	-87.4543	310.605	1157.02	-85.0437	431.104	1028.3	-33.4308	498.119	966.639	-91.6448	463.211	931.388	-80.4845	551.176	874.734
782	0	140.578	564.663	1650.75	243.999	559.304	1649.6	111.992	409.058	1663.53	248.806	389.92	1665.12	203.413	333.701	1518.59	207.638	228.685	1297.54	184.645	473.255	1421.51	180.118	493.704	1235.38	260.154	231.539	1372.62	5.81391	333.464	1476.08	-62.7151	327.236	1274.95	-87.2541	325.15	1155.55	-84.7752	448.839	1030.08	-33.1102	517.62	970.409	-91.2003	483.642	934.112	-79.9973	573.146	879.955
783	0	140.993	576.115	1649.06	244.41	570.861	1647.92	112.586	420.471	1661.7	249.408	401.466	1663.29	204.393	345.48	1516.8	208.931	240.388	1295.77	185.216	485.179	1419.91	180.392	505.671	1233.78	261.442	243.696	1370.79	6.81205	344.906	1474.52	-61.9454	340.087	1273.29	-86.8949	339.532	1153.99	-84.3912	466.175	1031.68	-32.7059	536.569	973.917	-90.676	503.505	936.673	-79.482	594.41	884.927
784	0	141.559	587.616	1647.28	244.973	582.476	1646.14	113.35	431.929	1659.78	250.178	413.076	1661.34	205.484	357.321	1514.9	210.254	252.191	1293.87	185.915	497.185	1418.23	180.778	517.75	1232.09	262.783	255.912	1368.81	7.90609	356.454	1472.87	-61.0417	352.898	1271.55	-86.383	353.735	1152.37	-83.8936	483.095	1033.11	-32.2191	554.952	977.143	-90.0705	522.773	939.046	-78.9396	614.945	889.616
785	0	142.294	599.168	1645.44	245.702	594.15	1644.28	114.295	443.437	1657.78	251.129	424.749	1659.29	206.687	369.226	1512.9	211.599	264.096	1291.87	186.747	509.279	1416.47	181.283	529.945	1230.34	264.171	268.184	1366.72	9.09452	368.12	1471.16	-60.0094	365.669	1269.75	-85.726	367.747	1150.71	-83.2857	499.584	1034.36	-31.6514	572.756	980.069	-89.3833	541.42	941.21	-78.3696	634.733	893.985
786	0	143.21	610.779	1643.58	246.609	605.883	1642.38	115.43	454.999	1655.75	252.267	436.488	1657.19	207.998	381.198	1510.83	212.955	276.107	1289.78	187.717	521.46	1414.67	181.913	542.258	1228.54	265.598	280.508	1364.52	10.3744	379.914	1469.4	-58.8562	378.399	1267.94	-84.933	381.553	1149.05	-82.5714	515.626	1035.42	-31.0043	589.97	982.679	-88.615	559.425	943.144	-77.7698	653.755	898
787	0	144.316	622.452	1641.72	247.705	617.68	1640.44	116.758	466.623	1653.72	253.598	448.292	1655.04	209.415	393.236	1508.71	214.315	288.224	1287.65	188.824	533.73	1412.85	182.668	554.69	1226.73	267.058	292.88	1362.26	11.7413	391.845	1467.62	-57.591	391.086	1266.14	-84.0142	395.144	1147.41	-81.7559	531.21	1036.28	-30.2793	606.585	984.958	-87.7674	576.768	944.828	-77.1368	671.999	901.625
788	0	145.62	634.195	1639.88	248.994	629.539	1638.51	118.278	478.315	1651.71	255.119	460.163	1652.87	210.932	405.341	1506.58	215.674	300.445	1285.49	190.068	546.088	1411.03	183.548	567.237	1224.93	268.545	305.295	1359.95	13.1894	403.915	1465.86	-56.2242	403.729	1264.37	-82.9807	408.511	1145.81	-80.8451	546.326	1036.95	-29.4782	622.595	986.89	-86.8437	593.434	946.246	-76.4659	689.45	904.83
789	0	147.122	646.013	1638.1	250.477	641.464	1636.59	119.985	490.081	1649.74	256.824	472.101	1650.72	212.541	417.512	1504.47	217.027	312.766	1283.34	191.441	558.532	1409.26	184.55	579.896	1223.16	270.053	317.749	1357.64	14.7115	416.126	1464.14	-54.7678	416.327	1262.67	-81.8444	421.647	1144.28	-79.8455	560.965	1037.42	-28.603	637.996	988.462	-85.8484	609.408	947.382	-75.7515	706.099	907.58
790	0	148.817	657.911	1636.39	252.149	653.455	1634.71	121.867	501.927	1647.85	258.704	484.106	1648.61	214.233	429.748	1502.39	218.37	325.178	1281.22	192.934	571.056	1407.53	185.667	592.658	1221.46	271.579	330.238	1355.34	16.299	428.472	1462.48	-53.2346	428.876	1261.07	-80.6171	434.549	1142.84	-78.7644	575.123	1037.69	-27.656	652.785	989.663	-84.7872	624.682	948.223	-74.9878	721.941	909.845
791	0	150.698	669.893	1634.78	254.001	665.51	1632.89	123.908	513.859	1646.07	260.74	496.176	1646.56	215.997	442.043	1500.39	219.703	337.674	1279.18	194.535	583.652	1405.89	186.891	605.513	1219.83	273.118	342.755	1353.11	17.9421	440.946	1460.91	-51.6383	441.374	1259.58	-79.3111	447.216	1141.5	-77.6093	588.798	1037.75	-26.6403	666.96	990.481	-83.6666	639.248	948.758	-74.1688	736.97	911.597
792	0	152.749	681.961	1633.27	256.017	677.627	1631.15	126.088	525.878	1644.41	262.913	508.308	1644.6	217.819	454.391	1498.48	221.025	350.241	1277.23	196.229	596.312	1404.35	188.209	618.447	1218.31	274.667	355.293	1350.95	19.6297	453.534	1459.45	-49.9928	453.818	1258.23	-77.9378	459.65	1140.3	-76.3884	601.988	1037.61	-25.5597	680.523	990.907	-82.4943	653.102	948.978	-73.2894	751.184	912.81
793	0	154.95	694.115	1631.89	258.177	689.803	1629.5	128.38	537.988	1642.9	265.195	520.499	1642.75	219.686	466.786	1496.69	222.339	362.863	1275.4	197.997	609.023	1402.92	189.609	631.443	1216.92	276.223	367.845	1348.91	21.3494	466.22	1458.12	-48.3122	466.202	1257.04	-76.5084	471.854	1139.24	-75.1101	614.696	1037.27	-24.4191	693.473	990.932	-81.2788	666.243	948.878	-72.3456	764.583	913.46
794	0	157.277	706.352	1630.64	260.457	702.032	1627.95	130.756	550.186	1641.55	267.559	532.744	1641.04	221.581	479.217	1495.05	223.645	375.524	1273.72	199.821	621.77	1401.64	191.076	644.481	1215.67	277.784	380.403	1347.02	23.0881	478.984	1456.93	-46.6105	478.521	1256.02	-75.033	483.835	1138.34	-73.7832	626.924	1036.72	-23.2243	705.815	990.551	-80.0291	678.672	948.453	-71.3356	777.168	913.529
795	0	159.699	718.667	1629.53	262.828	714.308	1626.53	133.183	562.467	1640.38	269.972	545.034	1639.49	223.488	491.673	1493.57	224.944	388.206	1272.21	201.678	634.539	1400.51	192.595	657.539	1214.58	279.344	392.956	1345.3	24.8316	491.802	1455.9	-44.9011	490.768	1255.18	-73.5206	495.6	1137.6	-72.4165	638.677	1035.97	-21.9823	717.551	989.761	-78.7549	690.393	947.706	-70.2596	788.943	913.003
796	0	162.185	731.051	1628.57	265.258	726.622	1625.24	135.627	574.826	1639.4	272.4	557.363	1638.12	225.387	504.139	1492.28	226.238	400.889	1270.9	203.546	647.31	1399.56	194.15	670.593	1213.66	280.902	405.493	1343.77	26.565	504.651	1455.04	-43.1965	502.935	1254.53	-71.9793	507.154	1137.03	-71.019	649.96	1035.03	-20.7014	728.685	988.564	-77.4662	701.41	946.641	-69.1211	799.911	911.875
797	0	164.699	743.494	1627.76	267.714	738.964	1624.09	138.052	587.253	1638.62	274.808	569.719	1636.95	227.261	516.601	1491.2	227.526	413.552	1269.8	205.404	660.066	1398.78	195.725	683.618	1212.92	282.451	418.002	1342.47	28.2732	517.504	1454.35	-41.5082	515.012	1254.07	-70.4158	518.508	1136.63	-69.5999	660.779	1033.89	-19.3908	739.222	986.963	-76.173	711.729	945.265	-67.9266	810.077	910.146
798	0	167.204	755.983	1627.1	270.159	751.322	1623.09	140.424	599.734	1638.05	277.16	582.093	1636	229.09	529.045	1490.33	228.809	426.176	1268.92	207.229	672.787	1398.2	197.307	696.586	1212.37	283.986	430.473	1341.4	29.9415	530.335	1453.85	-39.8466	526.992	1253.8	-68.836	529.667	1136.4	-68.1683	671.14	1032.57	-18.0609	749.166	984.969	-74.8858	721.359	943.592	-66.6858	819.447	907.822
799	0	169.661	768.502	1626.6	272.556	763.683	1622.25	142.707	612.256	1637.68	279.422	594.47	1635.27	230.856	541.452	1489.7	230.085	438.742	1268.29	209	685.452	1397.81	198.88	709.473	1212.03	285.502	442.892	1340.59	31.5553	543.118	1453.53	-38.2204	538.863	1253.72	-67.2443	540.639	1136.34	-66.733	681.049	1031.09	-16.7228	758.523	982.593	-73.6144	730.308	941.637	-65.4117	828.026	904.92
800	0	172.034	781.034	1626.24	274.871	776.034	1621.59	144.87	624.801	1637.53	281.563	606.84	1634.79	232.543	553.808	1489.3	231.351	451.231	1267.9	210.7	698.045	1397.64	200.433	722.256	1211.88	286.991	455.248	1340.04	33.1016	555.827	1453.39	-36.637	550.615	1253.83	-65.6441	551.429	1136.44	-65.3028	690.511	1029.44	-15.3883	767.296	979.855	-72.3688	738.586	939.422	-64.1202	835.82	901.465
801	0	174.287	793.562	1626.04	277.069	788.362	1621.11	146.883	637.352	1637.6	283.553	619.188	1634.56	234.137	566.097	1489.16	232.605	463.631	1267.77	212.312	710.545	1397.67	201.954	734.912	1211.94	288.447	467.532	1339.76	34.5684	568.438	1453.44	-35.1021	562.24	1254.11	-64.0377	562.043	1136.69	-63.8858	699.532	1027.65	-14.0697	775.491	976.778	-71.1586	746.203	936.972	-62.8297	842.836	897.494
802	0	176.388	806.065	1625.99	279.118	800.653	1620.82	148.72	649.889	1637.87	285.368	631.503	1634.6	235.624	578.305	1489.26	233.843	475.927	1267.89	213.82	722.939	1397.92	203.432	747.426	1212.22	289.863	479.735	1339.77	35.946	580.93	1453.67	-33.6195	573.727	1254.55	-62.4258	572.484	1137.08	-62.4899	708.117	1025.73	-12.7792	783.114	973.39	-69.9928	753.171	934.318	-61.5606	849.082	893.05
803	0	178.306	818.525	1626.09	280.991	812.895	1620.73	150.362	662.391	1638.36	286.988	643.771	1634.91	236.995	590.419	1489.61	235.064	488.111	1268.27	215.215	735.213	1398.39	204.859	759.785	1212.7	291.235	491.848	1340.04	37.2266	593.285	1454.06	-32.1915	585.069	1255.16	-60.8087	582.753	1137.61	-61.1221	716.272	1023.71	-11.5289	790.169	969.726	-68.88	759.501	931.493	-60.3349	854.563	888.191
804	0	180.019	830.923	1626.35	282.663	825.075	1620.85	151.794	674.839	1639.05	288.397	655.982	1635.49	238.244	602.431	1490.21	236.263	500.178	1268.88	216.489	747.358	1399.07	206.227	771.981	1213.4	292.558	503.869	1340.59	38.4051	605.488	1454.63	-30.8186	596.257	1255.91	-59.185	592.851	1138.27	-59.7887	724.001	1021.62	-10.3304	796.664	965.823	-67.8282	765.206	928.536	-59.1754	859.289	882.979
805	0	181.507	843.24	1626.77	284.116	837.182	1621.19	153.008	687.214	1639.94	289.587	668.123	1636.34	239.368	614.333	1491.04	237.438	512.125	1269.74	217.637	759.366	1399.97	207.531	784.012	1214.31	293.827	515.793	1341.4	39.4789	617.527	1455.35	-29.4997	607.286	1256.79	-57.5531	602.777	1139.04	-58.4953	731.309	1019.47	-9.19449	802.606	961.727	-66.8444	770.302	925.491	-58.1046	863.268	877.487
806	0	182.756	855.459	1627.36	285.338	849.208	1621.75	154.001	699.495	1641.02	290.557	680.187	1637.46	240.367	626.122	1492.11	238.587	523.955	1270.81	218.657	771.234	1401.08	208.766	795.88	1215.42	295.04	527.622	1342.46	40.448	629.397	1456.22	-28.2323	618.148	1257.8	-55.9105	612.529	1139.91	-57.2468	738.202	1017.3	-8.13106	808.006	957.485	-65.9345	774.803	922.401	-57.1441	866.509	871.79
807	0	183.762	867.567	1628.12	286.322	861.145	1622.55	154.775	711.666	1642.28	291.308	692.166	1638.84	241.243	637.799	1493.39	239.707	535.671	1272.09	219.55	782.965	1402.39	209.93	807.593	1216.74	296.197	539.356	1343.75	41.3146	641.095	1457.23	-27.0127	628.841	1258.93	-54.2548	622.104	1140.9	-56.0473	744.686	1015.14	-7.1488	812.873	953.149	-65.1035	778.727	919.313	-56.3138	869.025	865.97
808	0	184.522	879.55	1629.04	287.068	872.986	1623.59	155.342	723.713	1643.72	291.852	704.052	1640.46	242.002	649.365	1494.87	240.797	547.279	1273.57	220.319	794.562	1403.89	211.022	819.16	1218.24	297.296	551.002	1345.25	42.0836	652.624	1458.36	-25.8361	639.361	1260.16	-52.5837	631.498	1141.98	-54.9002	750.769	1013.02	-6.25498	817.223	948.772	-64.3548	782.096	916.276	-55.6304	870.83	860.109
809	0	185.044	891.4	1630.15	287.583	884.729	1624.86	155.713	735.623	1645.3	292.201	715.841	1642.31	242.652	660.828	1496.54	241.853	558.791	1275.2	220.972	806.033	1405.57	212.042	830.594	1219.91	298.339	562.565	1346.94	42.7616	663.992	1459.61	-24.6973	649.705	1261.48	-50.8958	640.705	1143.16	-53.8085	756.462	1010.97	-5.45537	821.073	944.408	-63.6903	784.932	913.336	-55.1071	871.944	854.288
810	0	185.341	903.111	1631.42	287.877	896.371	1626.36	155.91	747.388	1647.02	292.375	727.532	1644.36	243.203	672.196	1498.35	242.875	570.215	1276.98	221.515	817.388	1407.39	212.993	841.911	1221.73	299.327	574.053	1348.79	43.3566	675.208	1460.97	-23.5908	659.874	1262.89	-49.1907	649.722	1144.43	-52.7745	761.776	1009.02	-4.75409	824.444	940.11	-63.1106	787.264	910.538	-54.752	872.393	848.586
811	0	185.429	914.68	1632.85	287.97	907.914	1628.07	155.953	759.004	1648.86	292.398	739.122	1646.57	243.666	683.48	1500.3	243.86	581.565	1278.87	221.958	828.641	1409.34	213.877	853.128	1223.68	300.262	585.476	1350.77	43.8781	686.286	1462.4	-22.5116	669.867	1264.38	-47.4697	658.542	1145.78	-51.8003	766.726	1007.2	-4.15355	827.36	935.928	-62.6148	789.124	907.922	-54.5679	872.209	843.078
812	0	185.331	926.109	1634.44	287.882	919.361	1629.97	155.868	770.47	1650.77	292.294	750.615	1648.91	244.053	694.693	1502.34	244.805	592.851	1280.85	222.312	839.805	1411.39	214.699	864.261	1225.73	301.145	596.844	1352.85	44.3359	697.243	1463.9	-21.455	679.685	1265.92	-45.7357	667.162	1147.21	-50.8876	771.33	1005.52	-3.65443	829.852	931.911	-62.2008	790.549	905.526	-54.5517	871.431	837.828
813	0	185.073	937.405	1636.16	287.641	930.717	1632.03	155.682	781.79	1652.74	292.091	762.014	1651.34	244.378	705.85	1504.45	245.708	604.085	1282.88	222.585	850.896	1413.49	215.463	875.327	1227.84	301.979	608.168	1354.99	44.7401	708.094	1465.44	-20.4174	689.332	1267.52	-43.9936	675.579	1148.72	-50.0377	775.608	1004.02	-3.25571	831.954	928.1	-61.8648	791.58	903.378	-54.6945	870.11	832.892
814	0	184.684	948.576	1637.99	287.273	941.991	1634.23	155.422	792.973	1654.74	291.817	773.327	1653.81	244.651	716.965	1506.58	246.567	615.278	1284.94	222.79	861.93	1415.62	216.171	886.343	1229.97	302.766	619.456	1357.16	45.1007	718.86	1466.99	-19.3962	698.812	1269.15	-42.25	683.791	1150.28	-49.2518	779.584	1002.69	-2.9548	833.702	924.531	-61.6018	792.263	901.502	-54.9818	868.303	828.314
815	0	184.194	959.636	1639.9	286.809	953.193	1636.51	155.115	804.03	1656.72	291.499	784.563	1656.27	244.885	728.053	1508.71	247.38	626.441	1286.98	222.937	872.924	1417.74	216.829	897.325	1232.1	303.508	630.719	1359.32	45.4269	729.557	1468.54	-18.3901	708.129	1270.8	-40.5131	691.799	1151.9	-48.5307	783.287	1001.56	-2.74769	835.14	921.231	-61.4057	792.646	899.913	-55.3944	866.074	824.125
816	0	183.633	970.603	1641.85	286.278	964.336	1638.85	154.786	814.978	1658.66	291.162	795.733	1658.69	245.092	739.129	1510.79	248.144	637.582	1288.98	223.034	883.892	1419.8	217.438	908.287	1234.17	304.203	641.967	1361.43	45.727	740.204	1470.05	-17.3987	717.289	1272.44	-38.7924	699.607	1153.56	-47.8746	786.745	1000.62	-2.62924	836.311	918.221	-61.2693	792.781	898.616	-55.9096	863.496	820.344
817	0	183.03	981.495	1643.82	285.71	975.434	1641.18	154.459	825.837	1660.52	290.831	806.851	1661.01	245.278	750.208	1512.79	248.857	648.709	1290.9	223.092	894.849	1421.76	218	919.242	1236.15	304.853	653.205	1363.46	46.008	750.819	1471.51	-16.423	726.301	1274.08	-37.0983	707.221	1155.24	-47.2835	789.991	999.862	-2.59341	837.265	915.511	-61.1845	792.723	897.611	-56.5021	860.645	816.977
818	0	182.414	992.335	1645.76	285.13	986.504	1643.47	154.154	836.628	1662.28	290.524	817.933	1663.19	245.453	761.302	1514.68	249.515	659.827	1292.71	223.117	905.808	1423.59	218.517	930.198	1237.99	305.458	664.443	1365.38	46.2756	761.417	1472.87	-15.4646	735.174	1275.68	-35.4415	714.651	1156.93	-46.7566	793.06	999.291	-2.63362	838.049	913.106	-61.1425	792.527	896.89	-57.146	857.601	814.02
819	0	181.808	1003.15	1647.63	284.563	997.562	1645.66	153.886	847.377	1663.89	290.258	828.996	1665.19	245.622	772.424	1516.42	250.116	670.943	1294.39	223.116	916.783	1425.26	218.987	941.167	1239.67	306.014	675.685	1367.16	46.534	772.014	1474.13	-14.5259	743.918	1277.23	-33.8324	721.912	1158.61	-46.2925	795.988	998.892	-2.74289	838.714	911.001	-61.1342	792.246	896.438	-57.8161	854.444	811.46
820	0	181.234	1013.95	1649.39	284.027	1008.63	1647.7	153.667	858.108	1665.34	290.044	840.057	1666.98	245.787	783.585	1517.99	250.657	682.06	1295.92	223.093	927.783	1426.73	219.412	952.153	1241.14	306.521	686.938	1368.78	46.7853	782.623	1475.25	-13.6102	752.548	1278.71	-32.2809	729.018	1160.27	-45.8892	798.812	998.652	-2.91398	839.311	909.185	-61.1505	791.935	896.236	-58.4888	851.256	809.277
821	0	180.709	1024.77	1651	283.539	1019.71	1649.55	153.506	868.846	1666.6	289.89	851.134	1668.52	245.95	794.794	1519.37	251.134	693.184	1297.25	223.052	938.818	1427.98	219.788	963.164	1242.39	306.974	698.205	1370.2	47.0305	793.258	1476.22	-12.7209	761.078	1280.13	-30.7957	735.992	1161.89	-45.5439	801.569	998.554	-3.13951	839.89	907.642	-61.1822	791.646	896.262	-59.1434	848.111	807.447
822	0	180.243	1035.63	1652.43	283.11	1030.84	1651.18	153.405	879.616	1667.65	289.799	862.243	1669.79	246.11	806.059	1520.52	251.544	704.317	1298.39	222.994	949.898	1428.97	220.114	974.203	1243.39	307.371	709.491	1371.41	47.2685	803.931	1477.02	-11.8622	769.524	1281.45	-29.3842	742.854	1163.46	-45.2534	804.298	998.582	-3.41216	840.498	906.351	-61.2208	791.428	896.492	-59.7631	845.083	805.942
823	0	179.844	1046.56	1653.64	282.744	1042.02	1652.54	153.361	890.441	1668.48	289.769	873.402	1670.78	246.264	817.386	1521.43	251.884	715.465	1299.32	222.919	961.028	1429.71	220.386	985.275	1244.11	307.708	720.802	1372.39	47.4967	814.653	1477.64	-11.0382	777.907	1282.68	-28.0519	749.631	1164.98	-45.014	807.034	998.719	-3.72486	841.184	905.292	-61.2583	791.327	896.899	-60.335	842.238	804.732
824	0	179.514	1057.56	1654.61	282.443	1053.27	1653.62	153.369	901.342	1669.07	289.792	884.624	1671.47	246.406	828.782	1522.1	252.15	726.632	1300.01	222.824	972.217	1430.18	220.603	996.383	1244.56	307.98	732.141	1373.15	47.711	825.435	1478.07	-10.2535	786.247	1283.81	-26.803	756.349	1166.43	-44.8219	809.816	998.948	-4.07103	841.992	904.44	-61.2881	791.386	897.458	-60.8508	839.635	803.789
825	0	179.248	1068.66	1655.32	282.204	1064.6	1654.39	153.419	912.339	1669.42	289.859	895.923	1671.86	246.529	840.252	1522.52	252.338	737.824	1300.48	222.708	983.469	1430.36	220.759	1007.53	1244.72	308.183	743.514	1373.65	47.906	836.286	1478.3	-9.51273	794.567	1284.82	-25.6399	763.036	1167.8	-44.6733	812.677	999.25	-4.44481	842.964	903.772	-61.3044	791.643	898.144	-61.3064	837.328	803.084
826	0	179.039	1079.87	1655.76	282.017	1076.02	1654.84	153.497	923.446	1669.52	289.956	907.31	1671.95	246.626	851.798	1522.68	252.446	749.048	1300.71	222.563	994.791	1430.27	220.854	1018.73	1244.6	308.312	754.927	1373.92	48.0748	847.216	1478.32	-8.82086	802.888	1285.73	-24.5639	769.723	1169.1	-44.5648	815.651	999.609	-4.84124	844.139	903.263	-61.303	792.135	898.932	-61.7016	835.361	802.591
827	0	178.875	1091.2	1655.91	281.872	1087.53	1654.98	153.587	934.676	1669.38	290.066	918.793	1671.75	246.687	863.425	1522.59	252.47	760.311	1300.7	222.386	1006.19	1429.91	220.882	1029.97	1244.21	308.361	766.387	1373.94	48.2095	858.233	1478.15	-8.18287	811.238	1286.52	-23.5752	776.44	1170.31	-44.4934	818.772	1000.01	-5.25627	845.552	902.889	-61.2813	792.893	899.799	-62.0397	833.774	802.285
828	0	178.74	1102.65	1655.78	281.752	1099.15	1654.8	153.67	946.039	1669.01	290.171	930.38	1671.27	246.701	875.134	1522.25	252.408	771.622	1300.47	222.168	1017.66	1429.29	220.842	1041.27	1243.54	308.328	777.901	1373.73	48.3011	869.345	1477.78	-7.60396	819.639	1287.19	-22.6734	783.218	1171.43	-44.4568	822.07	1000.44	-5.68694	847.237	902.626	-61.2384	793.945	900.724	-62.3268	832.598	802.143
829	0	178.616	1114.24	1655.38	281.641	1110.88	1654.32	153.727	957.54	1668.4	290.251	942.074	1670.53	246.656	886.929	1521.67	252.257	782.991	1300.01	221.902	1029.23	1428.42	220.731	1052.64	1242.63	308.207	789.477	1373.29	48.34	880.561	1477.22	-7.08944	828.118	1287.74	-21.8579	790.087	1172.46	-44.4537	825.575	1000.88	-6.13126	849.22	902.451	-61.1749	795.317	901.685	-62.5709	831.857	802.141
830	0	178.482	1125.96	1654.72	281.516	1122.71	1653.55	153.738	969.181	1667.58	290.284	953.877	1669.54	246.542	898.811	1520.87	252.015	794.426	1299.34	221.579	1040.88	1427.32	220.545	1064.07	1241.48	307.996	801.124	1372.63	48.316	891.886	1476.47	-6.64482	836.701	1288.18	-21.1281	797.08	1173.4	-44.4836	829.316	1001.31	-6.58824	851.528	902.341	-61.0935	797.032	902.661	-62.7812	831.572	802.258
831	0	178.317	1137.8	1653.8	281.358	1134.64	1652.52	153.682	980.964	1666.55	290.251	965.791	1668.32	246.347	910.782	1519.86	251.683	805.939	1298.47	221.191	1052.63	1426.01	220.283	1075.59	1240.12	307.69	812.849	1371.77	48.2189	903.325	1475.54	-6.27571	845.411	1288.49	-20.4843	804.228	1174.22	-44.547	833.321	1001.73	-7.05782	854.184	902.273	-60.9985	799.111	903.632	-62.9674	831.759	802.467
832	0	178.098	1149.78	1652.66	281.146	1146.69	1651.25	153.54	992.884	1665.34	290.131	977.815	1666.91	246.06	922.844	1518.66	251.258	817.54	1297.41	220.73	1064.47	1424.52	219.943	1087.19	1238.57	307.287	824.662	1370.73	48.0382	914.883	1474.45	-5.98791	854.275	1288.68	-19.927	811.563	1174.94	-44.6457	837.615	1002.1	-7.54073	857.208	902.223	-60.8958	801.573	904.577	-63.1394	832.43	802.745
833	0	177.805	1161.88	1651.32	280.857	1158.83	1649.77	153.293	1004.94	1663.96	289.905	989.947	1665.32	245.67	934.998	1517.29	250.741	829.238	1296.18	220.186	1076.42	1422.85	219.521	1098.89	1236.86	306.787	836.569	1369.51	47.764	926.563	1473.19	-5.78729	863.314	1288.73	-19.4581	819.114	1175.53	-44.7821	842.227	1002.43	-8.03843	860.617	902.168	-60.7934	804.438	905.475	-63.3064	833.594	803.062
834	0	177.417	1174.1	1649.79	280.472	1171.08	1648.12	152.924	1017.12	1662.42	289.556	1002.18	1663.58	245.167	947.245	1515.77	250.133	841.044	1294.81	219.552	1088.48	1421.04	219.018	1110.7	1235	306.186	848.578	1368.15	47.387	938.367	1471.79	-5.67984	872.552	1288.65	-19.0802	826.911	1175.99	-44.9598	847.18	1002.68	-8.55296	864.428	902.085	-60.7004	807.722	906.304	-63.4771	835.259	803.392
835	0	176.915	1186.43	1648.11	279.974	1183.42	1646.32	152.419	1029.43	1660.75	289.069	1014.52	1661.72	244.543	959.586	1514.12	249.435	852.965	1293.3	218.82	1100.64	1419.12	218.43	1122.61	1233.03	305.485	860.694	1366.66	46.8988	950.295	1470.24	-5.67155	882.01	1288.42	-18.7967	834.985	1176.31	-45.1829	852.501	1002.83	-9.08676	868.656	901.949	-60.6273	811.445	907.044	-63.6595	837.433	803.704
836	0	176.285	1198.87	1646.31	279.346	1195.86	1644.4	151.765	1041.86	1658.97	288.432	1026.96	1659.77	243.791	972.021	1512.37	248.649	865.006	1291.68	217.985	1112.91	1417.1	217.757	1134.65	1230.97	304.683	872.921	1365.08	46.2922	962.345	1468.57	-5.76833	891.708	1288.04	-18.612	843.362	1176.47	-45.456	858.215	1002.88	-9.64248	873.316	901.739	-60.5858	815.624	907.674	-63.8607	840.121	803.968
837	0	175.513	1211.41	1644.42	278.577	1208.38	1642.41	150.953	1054.39	1657.11	287.635	1039.49	1657.75	242.905	984.549	1510.55	247.775	877.173	1289.97	217.043	1125.29	1415.02	216.998	1146.81	1228.84	303.781	885.26	1363.41	45.5612	974.517	1466.78	-5.97589	901.663	1287.5	-18.5306	852.068	1176.46	-45.7842	864.346	1002.8	-10.2229	878.421	901.432	-60.588	820.278	908.174	-64.0874	843.333	804.155
838	0	174.592	1224.05	1642.45	277.658	1221	1640.36	149.977	1067.04	1655.17	286.671	1052.12	1655.68	241.883	997.17	1508.66	246.818	889.466	1288.2	215.99	1137.77	1412.89	216.151	1159.09	1226.67	302.78	897.711	1361.69	44.7016	986.807	1464.9	-6.29949	911.891	1286.79	-18.5576	861.126	1176.26	-46.1725	870.917	1002.58	-10.8306	883.986	901.009	-60.6465	825.429	908.525	-64.3459	847.076	804.236
839	0	173.515	1236.79	1640.45	276.583	1233.7	1638.3	148.833	1079.78	1653.2	285.538	1064.83	1653.6	240.723	1009.88	1506.75	245.779	901.886	1286.39	214.827	1150.36	1410.75	215.219	1171.5	1224.49	301.682	910.27	1359.94	43.7112	999.209	1462.93	-6.74385	922.406	1285.92	-18.6977	870.559	1175.88	-46.6257	877.954	1002.19	-11.4682	890.027	900.453	-60.774	831.096	908.711	-64.6423	851.362	804.186
840	0	172.282	1249.61	1638.42	275.351	1246.49	1636.24	147.522	1092.62	1651.2	284.235	1077.63	1651.54	239.428	1022.67	1504.84	244.662	914.427	1284.57	213.554	1163.04	1408.62	214.2	1184.03	1222.32	300.491	922.934	1358.19	42.5894	1011.72	1460.9	-7.31294	933.22	1284.88	-18.9554	880.384	1175.29	-47.1483	885.478	1001.64	-12.1382	896.562	899.748	-60.9825	837.303	908.719	-64.9824	856.205	803.984
841	0	170.895	1262.53	1636.41	273.964	1259.36	1634.21	146.048	1105.56	1649.22	282.766	1090.52	1649.51	238.001	1035.55	1502.95	243.469	927.083	1282.75	212.176	1175.81	1406.51	213.097	1196.68	1220.18	299.208	935.693	1356.46	41.3383	1024.33	1458.83	-8.00981	944.342	1283.67	-19.3344	890.616	1174.5	-47.7441	893.513	1000.91	-12.8425	903.608	898.885	-61.2833	844.072	908.538	-65.3723	861.621	803.614
842	0	169.36	1275.52	1634.43	272.428	1272.31	1632.24	144.418	1118.58	1647.26	281.138	1103.48	1647.55	236.45	1048.5	1501.11	242.205	939.845	1280.98	210.698	1188.67	1404.46	211.913	1209.43	1218.1	297.839	948.537	1354.78	39.9619	1037.03	1456.73	-8.8364	955.779	1282.29	-19.838	901.268	1173.51	-48.4163	902.079	999.997	-13.5831	911.185	897.856	-61.6866	851.429	908.161	-65.8175	867.631	803.063
843	0	167.687	1288.6	1632.5	270.754	1285.34	1630.34	142.642	1131.69	1645.35	279.363	1116.51	1645.68	234.783	1061.51	1499.33	240.873	952.7	1279.26	209.129	1201.59	1402.49	210.652	1222.29	1216.11	296.389	961.453	1353.18	38.4667	1049.82	1454.64	-9.79343	967.534	1280.76	-20.4681	912.348	1172.32	-49.167	911.198	998.905	-14.3615	919.317	896.66	-62.2009	859.399	907.585	-66.3234	874.258	802.323
844	0	165.891	1301.74	1630.64	268.954	1298.43	1628.54	140.736	1144.87	1643.53	277.454	1129.61	1643.93	233.012	1074.56	1497.66	239.477	965.635	1277.63	207.479	1214.57	1400.63	209.318	1235.24	1214.22	294.863	974.425	1351.67	36.8614	1062.68	1452.59	-10.8803	979.609	1279.1	-21.2259	923.86	1170.95	-49.9974	920.886	997.639	-15.1791	928.026	895.299	-62.8333	868.009	906.811	-66.8946	881.532	801.394
845	0	163.988	1314.96	1628.87	267.046	1311.58	1626.85	138.715	1158.11	1641.8	275.43	1142.76	1642.32	231.152	1087.66	1496.1	238.023	978.632	1276.11	205.762	1227.6	1398.88	207.92	1248.26	1212.47	293.268	987.436	1350.28	35.1571	1075.61	1450.59	-12.0948	992.001	1277.31	-22.1117	935.804	1169.4	-50.9078	931.163	996.209	-16.0368	937.337	893.781	-63.5889	877.284	905.843	-67.5348	889.483	800.278
846	0	161.997	1328.22	1627.2	265.049	1324.79	1625.29	136.601	1171.41	1640.2	273.31	1155.97	1640.86	229.219	1100.77	1494.69	236.515	991.674	1274.72	203.991	1240.65	1397.28	206.466	1261.33	1210.86	291.611	1000.47	1349.02	33.3669	1088.59	1448.68	-13.4335	1004.7	1275.43	-23.1247	948.176	1167.71	-51.8972	942.041	994.631	-16.9351	947.278	892.12	-64.4706	887.251	904.69	-68.2464	898.15	798.982
847	0	159.941	1341.53	1625.65	262.983	1338.03	1623.87	134.415	1184.76	1638.74	271.118	1169.21	1639.59	227.23	1113.89	1493.42	234.96	1004.74	1273.48	202.185	1253.7	1395.84	204.966	1274.44	1209.43	289.902	1013.5	1347.92	31.5058	1101.6	1446.89	-14.891	1017.71	1273.48	-24.2635	960.966	1165.9	-52.9637	953.534	992.924	-17.8737	957.873	890.333	-65.4796	897.937	903.363	-69.0305	907.571	797.517
848	0	157.842	1354.86	1624.23	260.873	1351.29	1622.6	132.183	1198.12	1637.44	268.878	1182.47	1638.51	225.206	1126.99	1492.34	233.363	1017.81	1272.41	200.36	1266.74	1394.59	203.431	1287.57	1208.19	288.149	1026.5	1346.98	29.5903	1114.64	1445.25	-16.4607	1031.01	1271.49	-25.5259	974.162	1163.99	-54.1042	965.651	991.111	-18.8519	969.149	888.443	-66.6147	909.364	901.879	-69.8865	917.792	795.898
849	0	155.726	1368.19	1622.96	258.743	1364.55	1621.49	129.93	1211.49	1636.33	266.618	1195.73	1637.64	223.166	1140.04	1491.43	231.732	1030.87	1271.51	198.535	1279.75	1393.52	201.875	1300.7	1207.15	286.363	1039.47	1346.22	27.6381	1127.68	1443.78	-18.1342	1044.57	1269.49	-26.9094	987.746	1162.01	-55.3145	978.398	989.221	-19.8682	981.129	886.475	-67.8727	921.555	900.254	-70.8124	928.856	794.142
850	0	153.618	1381.51	1621.84	256.617	1377.79	1620.56	127.683	1224.85	1635.41	264.363	1208.98	1636.99	221.131	1153.03	1490.73	230.074	1043.9	1270.8	196.729	1292.7	1392.66	200.311	1313.8	1206.34	284.553	1052.36	1345.65	25.6675	1140.72	1442.52	-19.902	1058.39	1267.52	-28.4109	1001.7	1160.01	-56.5894	991.776	987.282	-20.9202	993.834	884.459	-69.2482	934.528	898.51	-71.8044	940.812	792.269
851	0	151.543	1394.79	1620.9	254.522	1390.99	1619.8	125.47	1238.16	1634.7	262.141	1222.18	1636.57	219.123	1165.94	1490.23	228.397	1056.87	1270.29	194.96	1305.57	1392.02	198.752	1326.85	1205.75	282.73	1065.17	1345.26	23.6971	1153.73	1441.48	-21.7532	1072.44	1265.63	-30.0268	1015.99	1158.02	-57.9229	1005.78	985.325	-22.005	1007.28	882.428	-70.7337	948.297	896.668	-72.8578	953.705	790.302
852	0	149.527	1408	1620.13	252.481	1404.13	1619.22	123.317	1251.4	1634.2	259.98	1235.32	1636.38	217.159	1178.75	1489.93	226.709	1069.76	1269.98	193.245	1318.36	1391.61	197.211	1339.83	1205.4	280.904	1077.87	1345.07	21.7454	1166.7	1440.68	-23.6758	1086.69	1263.83	-31.7532	1030.59	1156.08	-59.3079	1020.42	983.385	-23.1189	1021.48	880.416	-72.3193	962.871	894.754	-73.9666	967.579	788.268
853	0	147.592	1421.12	1619.55	250.519	1417.18	1618.84	121.251	1264.55	1633.93	257.906	1248.38	1636.41	215.26	1191.43	1489.86	225.018	1082.57	1269.88	191.601	1331.03	1391.42	195.704	1352.73	1205.29	279.086	1090.45	1345.07	19.8297	1179.6	1440.15	-25.6573	1101.11	1262.17	-33.5856	1045.47	1154.21	-60.7367	1035.66	981.495	-24.2573	1036.45	878.459	-73.9931	978.253	892.794	-75.1241	982.472	786.196
854	0	145.763	1434.13	1619.17	248.657	1430.11	1618.65	119.294	1277.59	1633.89	255.941	1261.33	1636.68	213.441	1203.96	1489.99	223.332	1095.26	1269.98	190.042	1343.57	1391.47	194.241	1365.51	1205.42	277.286	1102.88	1345.26	17.9665	1192.44	1439.89	-27.6845	1115.67	1260.67	-35.519	1060.61	1152.45	-62.2008	1051.51	979.689	-25.4148	1052.17	876.597	-75.7409	994.441	890.816	-76.3228	998.419	784.117
855	0	144.058	1447	1619	246.917	1442.91	1618.66	117.468	1290.49	1634.08	254.107	1274.16	1637.17	211.715	1216.34	1490.34	221.657	1107.84	1270.28	188.58	1355.97	1391.75	192.836	1378.16	1205.8	275.511	1115.16	1345.64	16.1703	1205.18	1439.91	-29.7442	1130.33	1259.38	-37.5476	1075.95	1150.84	-63.6911	1067.92	978.001	-26.5855	1068.65	874.867	-77.5465	1011.42	888.851	-77.5547	1015.44	782.069
856	0	142.495	1459.72	1619.04	245.315	1455.56	1618.86	115.792	1303.24	1634.51	252.423	1286.83	1637.88	210.096	1228.55	1490.9	220	1120.29	1270.78	187.226	1368.22	1392.27	191.498	1390.67	1206.41	273.769	1127.27	1346.2	14.4536	1217.82	1440.21	-31.823	1145.07	1258.3	-39.6647	1091.47	1149.39	-65.1983	1084.9	976.464	-27.7626	1085.86	873.307	-79.392	1029.18	886.93	-78.8114	1033.56	780.091
857	0	141.088	1472.27	1619.3	243.866	1468.03	1619.26	114.278	1315.81	1635.18	250.901	1299.35	1638.8	208.59	1240.58	1491.66	218.367	1132.6	1271.47	185.988	1380.3	1393.01	190.238	1403.03	1207.25	272.066	1139.21	1346.93	12.8269	1230.34	1440.8	-33.908	1159.85	1257.48	-41.8626	1107.14	1148.14	-66.713	1102.39	975.108	-28.939	1103.79	871.957	-81.258	1047.69	885.085	-80.084	1052.76	778.229
858	0	139.85	1484.63	1619.78	242.582	1480.33	1619.85	112.938	1328.21	1636.08	249.552	1311.69	1639.93	207.202	1252.42	1492.62	216.764	1144.76	1272.34	184.871	1392.22	1393.98	189.063	1415.24	1208.32	270.407	1150.98	1347.82	11.2979	1242.74	1441.67	-35.987	1174.64	1256.91	-44.1328	1122.93	1147.11	-68.2258	1120.37	973.964	-30.1069	1122.41	870.853	-83.1244	1066.93	883.35	-81.3632	1073.05	776.531
859	0	138.786	1496.8	1620.49	241.47	1492.43	1620.64	111.776	1340.41	1637.21	248.38	1323.84	1641.24	205.935	1264.08	1493.75	215.193	1156.77	1273.37	183.878	1403.97	1395.17	187.977	1427.28	1209.6	268.796	1162.57	1348.87	9.87174	1255.01	1442.8	-38.0482	1189.42	1256.61	-46.4656	1138.79	1146.3	-69.7276	1138.81	973.057	-31.2579	1141.68	870.029	-84.9705	1086.84	881.757	-82.6393	1094.39	775.046
860	0	137.9	1508.78	1621.41	240.536	1504.33	1621.61	110.793	1352.42	1638.56	247.385	1335.8	1642.73	204.786	1275.54	1495.06	213.661	1168.63	1274.56	183.009	1415.55	1396.56	186.984	1439.17	1211.09	267.236	1173.98	1350.06	8.55116	1267.14	1444.19	-40.081	1204.14	1256.59	-48.8501	1154.72	1145.74	-71.2099	1157.67	972.411	-32.3837	1161.57	869.519	-86.7759	1107.4	880.341	-83.9019	1116.74	773.826
861	0	137.192	1520.56	1622.55	239.778	1516.03	1622.77	109.983	1364.23	1640.11	246.562	1347.57	1644.39	203.752	1286.83	1496.52	212.169	1180.35	1275.89	182.261	1426.98	1398.15	186.082	1450.91	1212.76	265.728	1185.24	1351.37	7.33635	1279.15	1445.81	-42.0758	1218.81	1256.84	-51.2746	1170.67	1145.41	-72.665	1176.9	972.047	-33.4761	1182.03	869.351	-88.5213	1128.55	879.132	-85.1398	1140.06	772.922
862	0	136.656	1532.16	1623.89	239.192	1527.54	1624.09	109.339	1375.87	1641.86	245.903	1359.14	1646.19	202.828	1297.94	1498.12	210.722	1191.92	1277.34	181.63	1438.25	1399.92	185.27	1462.49	1214.59	264.275	1196.34	1352.8	6.22534	1291.02	1447.64	-44.0243	1233.39	1257.36	-53.7268	1186.63	1145.32	-74.0856	1196.47	971.978	-34.527	1203.02	869.55	-90.1885	1150.25	878.16	-86.3411	1164.27	772.383
863	0	136.285	1543.57	1625.42	238.771	1538.85	1625.57	108.847	1387.32	1643.79	245.393	1370.52	1648.11	202.003	1308.9	1499.84	209.325	1203.35	1278.89	181.108	1449.37	1401.84	184.542	1473.94	1216.57	262.878	1207.3	1354.32	5.2143	1302.76	1449.64	-45.9194	1247.87	1258.12	-56.1933	1202.58	1145.47	-75.4658	1216.33	972.217	-35.529	1224.5	870.136	-91.7617	1172.44	877.452	-87.4928	1189.29	772.251
864	0	136.064	1554.81	1627.13	238.504	1549.98	1627.19	108.491	1398.61	1645.86	245.017	1381.72	1650.14	201.269	1319.71	1501.65	207.982	1214.65	1280.53	180.688	1460.37	1403.9	183.89	1485.25	1218.67	261.538	1218.13	1355.91	4.29791	1314.39	1451.8	-47.755	1262.24	1259.11	-58.6607	1218.51	1145.83	-76.8003	1236.44	972.767	-36.4759	1246.41	871.125	-93.2275	1195.07	877.03	-88.5813	1215.04	772.563
865	0	135.979	1565.89	1628.98	238.374	1560.95	1628.93	108.251	1409.74	1648.06	244.754	1392.75	1652.25	200.616	1330.4	1503.55	206.697	1225.84	1282.24	180.358	1471.25	1406.07	183.306	1496.45	1220.86	260.257	1228.85	1357.57	3.46977	1325.9	1454.08	-49.5265	1276.51	1260.3	-61.115	1234.4	1146.4	-78.085	1256.76	973.628	-37.3622	1268.71	872.527	-94.5749	1218.08	876.912	-89.5928	1241.42	773.346
866	0	136.01	1576.84	1630.97	238.365	1571.76	1630.77	108.108	1420.74	1650.35	244.584	1403.61	1654.4	200.032	1340.97	1505.49	205.476	1236.93	1283.98	180.108	1482.04	1408.32	182.781	1507.53	1223.11	259.038	1239.49	1359.27	2.72285	1337.32	1456.43	-51.2301	1290.65	1261.65	-63.5424	1250.24	1147.13	-79.3164	1277.26	974.795	-38.1836	1291.36	874.346	-95.796	1241.43	877.112	-90.5134	1268.35	774.621
867	0	136.138	1587.66	1633.04	238.456	1582.43	1632.68	108.038	1431.63	1652.69	244.484	1414.34	1656.58	199.506	1351.47	1507.46	204.324	1247.92	1285.75	179.926	1492.74	1410.61	182.305	1518.51	1225.38	257.881	1250.05	1360.99	2.04985	1348.65	1458.83	-52.8629	1304.68	1263.14	-65.9293	1266.02	1148.02	-80.4919	1297.9	976.255	-38.9372	1314.3	876.577	-96.8856	1265.06	877.637	-91.33	1295.71	776.397
868	0	136.341	1598.38	1635.18	238.627	1592.99	1634.65	108.021	1442.41	1655.05	244.433	1424.93	1658.75	199.028	1361.89	1509.42	203.245	1258.84	1287.51	179.801	1503.38	1412.92	181.868	1529.4	1227.64	256.789	1260.56	1362.71	1.44358	1359.9	1461.23	-54.4226	1318.59	1264.72	-68.2624	1281.74	1149.02	-81.6093	1318.63	977.994	-39.6205	1337.48	879.213	-97.8408	1288.93	878.489	-92.0305	1323.41	778.674
869	0	136.598	1609.01	1637.34	238.856	1603.44	1636.63	108.034	1453.12	1657.4	244.408	1435.42	1660.88	198.59	1372.27	1511.36	202.245	1269.7	1289.25	179.721	1513.97	1415.21	181.464	1540.21	1229.86	255.766	1271.03	1364.41	0.897277	1371.08	1463.6	-55.907	1332.4	1266.36	-70.5291	1297.4	1150.09	-82.6668	1339.44	979.99	-40.2317	1360.87	882.235	-98.6611	1312.98	879.664	-92.6045	1351.35	781.442
870	0	136.886	1619.58	1639.49	239.121	1613.83	1638.59	108.059	1463.76	1659.69	244.391	1445.83	1662.94	198.182	1382.63	1513.24	201.329	1280.52	1290.94	179.675	1524.52	1417.44	181.087	1550.95	1232.01	254.812	1281.48	1366.06	0.404917	1382.21	1465.9	-57.3144	1346.1	1268	-72.7176	1313	1151.21	-83.6625	1360.27	982.219	-40.7693	1384.4	885.624	-99.3477	1337.17	881.154	-93.0434	1379.45	784.685
871	0	137.186	1630.1	1641.58	239.402	1624.16	1640.5	108.077	1474.36	1661.88	244.363	1456.16	1664.91	197.799	1392.97	1515.03	200.501	1291.3	1292.55	179.655	1535.06	1419.58	180.731	1561.63	1234.04	253.931	1291.92	1367.64	-0.038531	1393.29	1468.08	-58.6425	1359.7	1269.61	-74.8168	1328.53	1152.34	-84.594	1381.12	984.651	-41.2314	1408.03	889.35	-99.9031	1361.46	882.943	-93.3406	1407.61	788.375
872	0	137.48	1640.6	1643.59	239.681	1634.46	1642.34	108.075	1484.94	1663.94	244.311	1466.46	1666.74	197.436	1403.33	1516.71	199.766	1302.05	1294.06	179.651	1545.6	1421.58	180.395	1572.28	1235.93	253.124	1302.38	1369.13	-0.4369	1404.34	1470.13	-59.8891	1373.22	1271.16	-76.817	1344	1153.43	-85.4589	1401.94	987.257	-41.6157	1431.72	893.383	-100.331	1385.81	885.014	-93.4918	1435.76	792.482
873	0	137.751	1651.09	1645.47	239.941	1644.75	1644.06	108.04	1495.51	1665.84	244.223	1476.73	1668.41	197.092	1413.71	1518.25	199.127	1312.8	1295.45	179.657	1556.14	1423.43	180.078	1582.9	1237.65	252.396	1312.87	1370.51	-0.792669	1415.36	1472	-61.0514	1386.66	1272.59	-78.7092	1359.41	1154.45	-86.2537	1422.72	990.004	-41.9196	1455.42	897.687	-100.635	1410.17	887.342	-93.4948	1463.83	796.969
874	0	137.988	1661.58	1647.18	240.168	1655.05	1645.63	107.965	1506.09	1667.53	244.092	1487	1669.91	196.765	1424.13	1519.63	198.587	1323.54	1296.69	179.668	1566.7	1425.09	179.782	1593.5	1239.17	251.749	1323.39	1371.76	-1.10688	1426.36	1473.66	-62.126	1400.02	1273.87	-80.4855	1374.77	1155.37	-86.9747	1443.43	992.857	-42.1398	1479.08	902.224	-100.82	1434.52	889.902	-93.35	1491.76	801.794
875	0	138.179	1672.1	1648.7	240.352	1665.38	1647.04	107.846	1516.69	1669.01	243.914	1497.28	1671.21	196.457	1434.6	1520.83	198.149	1334.29	1297.78	179.681	1577.29	1426.52	179.509	1604.1	1240.48	251.185	1333.96	1372.86	-1.37906	1437.35	1475.1	-63.1092	1413.31	1274.98	-82.1388	1390.08	1156.15	-87.6173	1464.04	995.784	-42.2731	1502.65	906.953	-100.891	1458.8	892.665	-93.06	1519.48	806.915
876	0	138.318	1682.66	1650	240.486	1675.75	1648.24	107.681	1527.32	1670.24	243.691	1507.61	1672.28	196.172	1445.12	1521.83	197.816	1345.05	1298.68	179.696	1587.92	1427.73	179.261	1614.71	1241.55	250.708	1344.58	1373.79	-1.60729	1448.33	1476.3	-63.9966	1426.55	1275.88	-83.6626	1405.35	1156.77	-88.1766	1484.54	998.751	-42.316	1526.1	911.835	-100.852	1482.99	895.603	-92.6296	1546.95	812.289
877	0	138.403	1693.26	1651.04	240.566	1686.18	1649.22	107.475	1537.99	1671.21	243.427	1517.98	1673.13	195.917	1455.72	1522.61	197.588	1355.84	1299.39	179.712	1598.6	1428.67	179.043	1625.34	1242.38	250.322	1355.27	1374.53	-1.78824	1459.31	1477.24	-64.7837	1439.75	1276.55	-85.0512	1420.59	1157.21	-88.6474	1504.91	1001.73	-42.2653	1549.38	916.826	-100.708	1507.04	898.684	-92.0656	1574.13	817.874
878	0	138.434	1703.92	1651.82	240.593	1696.68	1649.97	107.235	1548.71	1671.89	243.131	1528.42	1673.74	195.697	1466.38	1523.17	197.467	1366.65	1299.88	179.733	1609.32	1429.34	178.857	1636	1242.94	250.029	1366.03	1375.07	-1.91735	1470.3	1477.9	-65.4652	1452.89	1276.99	-86.2992	1435.78	1157.46	-89.0244	1525.13	1004.69	-42.1182	1572.44	921.888	-100.463	1530.92	901.877	-91.3765	1600.97	823.627
879	0	138.416	1714.64	1652.31	240.571	1707.26	1650.46	106.972	1559.5	1672.3	242.814	1538.95	1674.09	195.523	1477.12	1523.49	197.453	1377.5	1300.17	179.763	1620.11	1429.74	178.708	1646.7	1243.24	249.834	1376.86	1375.39	-1.98906	1481.3	1478.3	-66.036	1466.01	1277.17	-87.4018	1450.95	1157.49	-89.3024	1545.16	1007.6	-41.8724	1595.25	926.98	-100.12	1554.6	905.154	-90.5723	1627.43	829.507
880	0	138.357	1725.43	1652.52	240.506	1717.93	1650.68	106.699	1570.34	1672.42	242.491	1549.57	1674.2	195.402	1487.94	1523.57	197.545	1388.38	1300.22	179.807	1630.95	1429.85	178.6	1657.45	1243.28	249.74	1387.78	1375.5	-1.99699	1492.32	1478.42	-66.4909	1479.1	1277.09	-88.3541	1466.08	1157.3	-89.4765	1565.01	1010.44	-41.5263	1617.78	932.066	-99.6837	1578.04	908.482	-89.664	1653.49	835.475
881	0	138.266	1736.3	1652.43	240.41	1728.69	1650.64	106.433	1581.25	1672.25	242.182	1560.28	1674.06	195.347	1498.85	1523.4	197.743	1399.31	1300.05	179.874	1641.86	1429.68	178.535	1668.26	1243.05	249.749	1398.78	1375.38	-1.9343	1503.36	1478.27	-66.8248	1492.16	1276.75	-89.1521	1481.17	1156.9	-89.5425	1584.63	1013.2	-41.0792	1639.99	937.11	-99.1565	1601.19	911.835	-88.6637	1679.11	841.492
882	0	138.159	1747.24	1652.04	240.297	1739.56	1650.32	106.193	1592.23	1671.8	241.904	1571.11	1673.67	195.368	1509.84	1522.99	198.045	1410.3	1299.65	179.971	1652.83	1429.23	178.519	1679.14	1242.56	249.865	1409.87	1375.03	-1.79392	1514.43	1477.87	-67.0332	1505.2	1276.17	-89.792	1496.21	1156.29	-89.4967	1604.02	1015.84	-40.5312	1661.85	942.08	-98.541	1624.03	915.184	-87.5835	1704.26	847.521
883	0	138.051	1758.25	1651.37	240.182	1750.53	1649.74	105.999	1603.28	1671.08	241.68	1582.05	1673.04	195.475	1520.92	1522.34	198.446	1421.34	1299.02	180.109	1663.89	1428.51	178.554	1690.09	1241.81	250.088	1421.04	1374.45	-1.56887	1525.54	1477.21	-67.1122	1518.23	1275.34	-90.2705	1511.2	1155.46	-89.3361	1623.15	1018.37	-39.8831	1683.33	946.947	-97.8392	1646.52	918.503	-86.4357	1728.9	853.526
884	0	137.959	1769.34	1650.43	240.083	1761.6	1648.91	105.873	1614.39	1670.1	241.531	1593.1	1672.18	195.678	1532.08	1521.46	198.943	1432.44	1298.17	180.299	1675.02	1427.53	178.643	1701.11	1240.83	250.419	1432.31	1373.64	-1.25255	1536.69	1476.33	-67.0585	1531.23	1274.29	-90.5854	1526.13	1154.45	-89.0589	1641.99	1020.75	-39.1368	1704.4	951.682	-97.0524	1668.61	921.767	-85.2319	1753.01	859.474
885	0	137.904	1780.5	1649.24	240.022	1772.78	1647.83	105.836	1625.58	1668.89	241.48	1604.28	1671.1	195.988	1543.33	1520.36	199.531	1443.61	1297.1	180.549	1686.23	1426.32	178.79	1712.22	1239.63	250.858	1443.66	1372.62	-0.839049	1547.88	1475.24	-66.8699	1544.22	1273.04	-90.7353	1540.97	1153.26	-88.6638	1660.53	1022.99	-38.2948	1725.03	956.26	-96.1815	1690.28	924.951	-83.9827	1776.55	865.329
886	0	137.906	1791.74	1647.81	240.018	1784.06	1646.52	105.91	1636.84	1667.46	241.549	1615.57	1669.83	196.413	1554.67	1519.05	200.203	1454.86	1295.84	180.872	1697.52	1424.89	178.998	1723.43	1238.21	251.403	1455.1	1371.37	-0.323413	1559.14	1473.97	-66.5454	1557.19	1271.6	-90.7201	1555.71	1151.91	-88.1506	1678.74	1025.07	-37.3602	1745.21	960.657	-95.2266	1711.49	928.032	-82.6974	1799.5	871.058
887	0	137.985	1803.05	1646.18	240.092	1795.45	1645.02	106.114	1648.16	1665.85	241.758	1626.99	1668.36	196.959	1566.11	1517.55	200.953	1466.2	1294.39	181.276	1708.91	1423.27	179.27	1734.73	1236.62	252.052	1466.64	1369.93	0.298134	1570.47	1472.54	-66.085	1570.14	1270.01	-90.5408	1570.34	1150.43	-87.5201	1696.61	1026.99	-36.3368	1764.91	964.851	-94.1877	1732.21	930.986	-81.3829	1821.83	876.628
888	0	138.16	1814.44	1644.37	240.264	1806.95	1643.33	106.467	1659.56	1664.07	242.125	1638.52	1666.74	197.631	1577.63	1515.88	201.773	1477.62	1292.77	181.772	1720.39	1421.47	179.608	1746.14	1234.86	252.799	1478.26	1368.31	1.02798	1581.87	1470.97	-65.4902	1583.06	1268.28	-90.2	1584.83	1148.83	-86.7738	1714.11	1028.73	-35.2288	1784.12	968.82	-93.0645	1752.4	933.791	-80.0443	1843.51	882.003
889	0	138.45	1825.91	1642.42	240.554	1818.56	1641.48	106.984	1671.03	1662.15	242.667	1650.18	1664.97	198.433	1589.25	1514.06	202.655	1489.14	1291.01	182.366	1731.97	1419.53	180.014	1757.65	1232.96	253.64	1489.97	1366.52	1.86695	1593.36	1469.29	-64.7639	1595.94	1266.45	-89.7018	1599.17	1147.15	-85.9144	1731.23	1030.3	-34.041	1802.81	972.544	-91.8568	1772.04	936.424	-78.6845	1864.51	887.148
890	0	138.873	1837.46	1640.36	240.979	1830.27	1639.51	107.679	1682.58	1660.14	243.395	1661.96	1663.09	199.366	1600.97	1512.13	203.593	1500.76	1289.12	183.066	1743.66	1417.48	180.491	1769.28	1230.96	254.568	1501.77	1364.6	2.81424	1604.95	1467.54	-63.9102	1608.79	1264.56	-89.0516	1613.33	1145.4	-84.9451	1747.94	1031.68	-32.7788	1820.96	976.001	-90.5652	1791.09	938.865	-77.3041	1884.81	892.027
891	0	139.441	1849.1	1638.22	241.553	1842.09	1637.44	108.56	1694.21	1658.05	244.318	1673.85	1661.1	200.429	1612.79	1510.09	204.577	1512.49	1287.13	183.875	1755.44	1415.34	181.04	1781.04	1228.87	255.575	1513.66	1362.55	3.86726	1616.63	1465.73	-62.9348	1621.59	1262.62	-88.2562	1627.31	1143.62	-83.8702	1764.23	1032.87	-31.448	1838.57	979.174	-89.1909	1809.54	941.093	-75.9018	1904.39	896.602
892	0	140.167	1860.82	1636.04	242.288	1854.01	1635.3	109.632	1705.91	1655.92	245.44	1685.86	1659.05	201.617	1624.7	1507.99	205.602	1524.32	1285.07	184.794	1767.33	1413.15	181.661	1792.91	1226.73	256.656	1525.63	1360.41	5.02165	1628.43	1463.91	-61.8445	1634.34	1260.67	-87.3234	1641.09	1141.83	-82.6948	1780.1	1033.87	-30.0553	1855.62	982.041	-87.7363	1827.36	943.087	-74.475	1923.23	900.838
893	0	141.058	1872.63	1633.85	243.19	1866.04	1633.13	110.896	1717.71	1653.78	246.76	1697.97	1656.95	202.926	1636.71	1505.85	206.661	1536.26	1282.97	185.824	1779.32	1410.93	182.355	1804.91	1224.56	257.801	1537.69	1358.21	6.2713	1640.34	1462.08	-60.6476	1647.04	1258.74	-86.2625	1654.64	1140.05	-81.4247	1795.53	1034.67	-28.6082	1872.09	984.583	-86.2054	1844.54	944.83	-73.02	1941.32	904.695
894	0	142.118	1884.54	1631.69	244.263	1878.18	1630.96	112.347	1729.59	1651.68	248.272	1710.2	1654.84	204.346	1648.83	1503.69	207.748	1548.31	1280.85	186.959	1791.43	1408.71	183.12	1817.04	1222.4	259.003	1549.82	1355.98	7.60837	1652.37	1460.28	-59.3533	1659.67	1256.85	-85.0833	1667.97	1138.32	-80.0662	1810.5	1035.27	-27.1143	1887.99	986.781	-84.6039	1861.06	946.303	-71.5327	1958.65	908.136
895	0	143.345	1896.55	1629.59	245.506	1890.41	1628.8	113.977	1741.57	1649.63	249.965	1722.53	1652.73	205.868	1661.04	1501.56	208.858	1560.46	1278.75	188.195	1803.63	1406.53	183.955	1829.28	1220.27	260.255	1562.03	1353.75	9.02346	1664.51	1458.54	-57.972	1672.24	1255.04	-83.7964	1681.06	1136.64	-78.6264	1825.03	1035.68	-25.5818	1903.31	988.617	-82.9391	1876.91	947.491	-70.0093	1975.2	911.124
896	0	144.735	1908.66	1627.57	246.913	1902.75	1626.7	115.77	1753.64	1647.66	251.822	1734.95	1650.66	207.479	1673.35	1499.48	209.988	1572.72	1276.7	189.521	1815.93	1404.41	184.857	1841.65	1218.21	261.549	1574.32	1351.55	10.5057	1676.77	1456.87	-56.5146	1684.74	1253.33	-82.4127	1693.9	1135.05	-77.1131	1839.1	1035.88	-24.019	1918.03	990.074	-81.2201	1892.08	948.379	-68.447	1990.97	913.62
897	0	146.279	1920.87	1625.66	248.473	1915.18	1624.67	117.71	1765.82	1645.81	253.824	1747.47	1648.65	209.165	1685.75	1497.48	211.136	1585.06	1274.72	190.928	1828.33	1402.38	185.821	1854.13	1216.24	262.879	1586.67	1349.41	12.0427	1689.14	1455.29	-54.993	1697.17	1251.73	-80.9437	1706.51	1133.56	-75.5346	1852.72	1035.89	-22.4339	1932.16	991.135	-79.4577	1906.56	948.954	-66.8447	2005.97	915.592
898	0	147.962	1933.19	1623.89	250.172	1927.71	1622.75	119.773	1778.09	1644.09	255.946	1760.07	1646.73	210.91	1698.23	1495.58	212.3	1597.5	1272.84	192.399	1840.8	1400.46	186.841	1866.71	1214.38	264.24	1599.08	1347.37	13.6211	1701.61	1453.83	-53.4193	1709.53	1250.27	-79.4006	1718.87	1132.19	-73.8999	1865.89	1035.68	-20.8345	1945.71	991.787	-77.6642	1920.37	949.208	-65.2039	2020.19	917.008
899	0	149.767	1945.61	1622.28	251.991	1940.31	1620.95	121.933	1790.47	1642.53	258.158	1772.74	1644.92	212.696	1710.79	1493.82	213.479	1610	1271.1	193.92	1853.35	1398.68	187.912	1879.38	1212.67	265.625	1611.54	1345.45	15.2265	1714.16	1452.49	-51.8059	1721.81	1248.96	-77.7947	1731	1130.95	-72.2187	1878.61	1035.28	-19.2281	1958.66	992.019	-75.8532	1933.49	949.131	-63.5287	2033.63	917.841
900	0	151.671	1958.12	1620.83	253.905	1952.98	1619.28	124.161	1802.94	1641.14	260.431	1785.47	1643.24	214.504	1723.41	1492.21	214.671	1622.56	1269.51	195.473	1865.96	1397.06	189.027	1892.13	1211.1	267.028	1624.04	1343.68	16.8438	1726.78	1451.3	-50.1652	1734	1247.81	-76.1371	1742.89	1129.86	-70.5014	1890.88	1034.67	-17.6219	1971.03	991.823	-74.0394	1945.94	948.721	-61.8264	2046.31	918.072
901	0	153.649	1970.72	1619.56	255.89	1965.71	1617.77	126.424	1815.5	1639.95	262.731	1798.25	1641.71	216.315	1736.08	1490.78	215.877	1635.17	1268.1	197.04	1878.61	1395.61	190.175	1904.92	1209.72	268.445	1636.57	1342.08	18.4573	1739.46	1450.25	-48.5097	1746.11	1246.84	-74.4384	1754.56	1128.92	-68.7591	1902.72	1033.86	-16.0226	1982.82	991.194	-72.2383	1957.72	947.976	-60.1074	2058.21	917.684
902	0	155.674	1983.39	1618.47	257.917	1978.49	1616.42	128.69	1828.14	1638.95	265.023	1811.07	1640.35	218.109	1748.78	1489.54	217.096	1647.79	1266.88	198.6	1891.29	1394.34	191.349	1917.75	1208.52	269.869	1649.11	1340.69	20.0514	1752.16	1449.37	-46.8514	1758.13	1246.04	-72.7088	1766.01	1128.13	-67.0036	1914.12	1032.86	-14.4375	1994.04	990.129	-70.4653	1968.83	946.898	-58.385	2069.36	916.67
903	0	157.716	1996.13	1617.58	259.955	1991.3	1615.24	130.925	1840.84	1638.17	267.275	1823.9	1639.17	219.866	1761.49	1488.52	218.325	1660.43	1265.88	200.135	1903.97	1393.28	192.54	1930.57	1207.52	271.295	1661.65	1339.51	21.611	1764.87	1448.64	-45.2019	1770.06	1245.43	-70.9579	1777.25	1127.5	-65.2472	1925.09	1031.65	-12.874	2004.7	988.632	-68.7361	1979.29	945.491	-56.6752	2079.75	915.026
904	0	159.744	2008.91	1616.86	261.973	2004.11	1614.24	133.093	1853.6	1637.59	269.451	1836.74	1638.19	221.567	1774.19	1487.71	219.564	1673.04	1265.1	201.627	1916.63	1392.42	193.736	1943.38	1206.72	272.718	1674.17	1338.57	23.1213	1777.56	1448.09	-43.5721	1781.88	1244.98	-69.1947	1788.29	1127.03	-63.5027	1935.63	1030.25	-11.3401	2014.8	986.708	-67.0654	1989.11	943.763	-54.9961	2089.39	912.758
905	0	161.728	2021.71	1616.33	263.94	2016.92	1613.41	135.163	1866.4	1637.22	271.52	1849.57	1637.43	223.195	1786.87	1487.14	220.81	1685.62	1264.55	203.057	1929.25	1391.78	194.929	1956.13	1206.13	274.131	1686.66	1337.87	24.569	1790.2	1447.7	-41.972	1793.59	1244.71	-67.4275	1799.13	1126.7	-61.7834	1945.74	1028.66	-9.84443	2024.35	984.368	-65.4675	1998.28	941.725	-53.3677	2098.29	909.879
906	0	163.635	2034.53	1615.97	265.824	2029.71	1612.76	137.105	1879.2	1637.07	273.453	1862.36	1636.88	224.732	1799.49	1486.79	222.061	1698.14	1264.24	204.411	1941.8	1391.36	196.108	1968.8	1205.76	275.53	1699.11	1337.42	25.9425	1802.77	1447.47	-40.4106	1805.18	1244.6	-65.6634	1809.8	1126.52	-60.1025	1955.43	1026.9	-8.39651	2033.35	981.625	-63.9554	2006.84	939.392	-51.811	2106.45	906.409
907	0	165.435	2047.32	1615.78	267.597	2042.44	1612.29	138.89	1892.01	1637.11	275.223	1875.11	1636.56	226.165	1812.03	1486.68	223.313	1710.58	1264.16	205.674	1954.28	1391.16	197.262	1981.37	1205.6	276.908	1711.49	1337.23	27.2318	1815.23	1447.4	-38.8954	1816.63	1244.65	-63.9089	1820.29	1126.48	-58.4735	1964.69	1024.95	-7.0065	2041.82	978.499	-62.5409	2014.77	936.784	-50.3479	2113.89	902.38
908	0	167.101	2060.08	1615.74	269.23	2055.11	1612	140.494	1904.78	1637.36	276.809	1887.79	1636.47	227.484	1824.48	1486.8	224.565	1722.92	1264.32	206.833	1966.65	1391.18	198.38	1993.82	1205.66	278.261	1723.79	1337.29	28.4296	1827.57	1447.48	-37.4323	1827.95	1244.83	-62.169	1830.6	1126.56	-56.9094	1973.51	1022.84	-5.6853	2049.76	975.013	-61.2341	2022.09	933.924	-49.0001	2120.59	897.829
909	0	168.605	2072.77	1615.86	270.699	2067.7	1611.88	141.9	1917.5	1637.8	278.193	1900.39	1636.62	228.68	1836.81	1487.15	225.815	1735.15	1264.71	207.881	1978.89	1391.42	199.453	2006.12	1205.93	279.587	1736.01	1337.59	29.531	1839.75	1447.71	-36.0256	1839.12	1245.15	-60.4476	1840.75	1126.75	-55.4221	1981.91	1020.59	-4.4443	2057.17	971.194	-60.0439	2028.8	930.838	-47.7893	2126.58	892.805
910	0	169.926	2085.37	1616.12	271.983	2080.18	1611.95	143.094	1930.14	1638.43	279.365	1912.89	1637	229.75	1849	1487.72	227.062	1747.26	1265.31	208.808	1991	1391.88	200.47	2018.27	1206.41	280.882	1748.14	1338.14	30.5337	1851.75	1448.08	-34.6775	1850.12	1245.58	-58.747	1850.72	1127.05	-54.0224	1989.87	1018.2	-3.29508	2064.05	967.077	-58.9773	2034.91	927.56	-46.7359	2131.85	887.361
911	0	171.044	2097.86	1616.53	273.065	2092.55	1612.2	144.068	1942.68	1639.24	280.318	1925.27	1637.63	230.693	1861.06	1488.5	228.304	1759.24	1266.11	209.611	2002.96	1392.55	201.421	2030.26	1207.1	282.145	1760.16	1338.9	31.438	1863.55	1448.58	-33.3883	1860.95	1246.12	-57.068	1860.53	1127.45	-52.7195	1997.38	1015.7	-2.24912	2070.41	962.697	-58.0397	2040.43	924.123	-45.8588	2136.4	881.56
912	0	171.944	2110.22	1617.07	273.931	2104.8	1612.63	144.819	1955.09	1640.21	281.051	1937.54	1638.5	231.511	1872.95	1489.48	229.542	1771.08	1267.1	210.288	2014.76	1393.44	202.298	2042.08	1207.99	283.376	1772.08	1339.88	32.2465	1875.14	1449.2	-32.1565	1871.59	1246.76	-55.4102	1870.16	1127.93	-51.5204	2004.46	1013.11	-1.31753	2076.25	958.098	-57.2347	2045.36	920.566	-45.175	2140.24	875.469
913	0	172.618	2122.42	1617.75	274.574	2116.9	1613.26	145.351	1967.36	1641.34	281.57	1949.66	1639.59	232.209	1884.68	1490.64	230.776	1782.79	1268.26	210.838	2026.4	1394.52	203.094	2053.75	1209.09	284.576	1783.9	1341.05	32.9641	1886.5	1449.93	-30.9787	1882.04	1247.48	-53.7718	1879.61	1128.49	-50.4302	2011.1	1010.46	-0.510684	2081.57	953.324	-56.5641	2049.71	916.932	-44.6989	2143.37	869.162
914	0	173.06	2134.45	1618.57	274.991	2128.86	1614.07	145.673	1979.47	1642.62	281.885	1961.65	1640.91	232.795	1896.25	1491.97	232.005	1794.36	1269.57	211.265	2037.88	1395.8	203.804	2065.26	1210.38	285.747	1795.62	1342.4	33.5974	1897.63	1450.77	-29.8499	1892.29	1248.29	-52.1499	1888.87	1129.13	-49.4519	2017.3	1007.78	0.162008	2086.37	948.425	-56.0282	2053.47	913.266	-44.4421	2145.79	862.716
915	0	173.273	2146.31	1619.53	275.186	2140.66	1615.07	145.799	1991.39	1644.03	282.01	1973.49	1642.44	233.278	1907.66	1493.44	233.23	1805.8	1271.01	211.572	2049.21	1397.26	204.423	2076.63	1211.84	286.89	1807.23	1343.89	34.1544	1908.53	1451.7	-28.7639	1902.32	1249.16	-50.5411	1897.94	1129.83	-48.5862	2023.07	1005.1	0.69252	2090.66	943.453	-55.6253	2056.68	909.612	-44.4127	2147.51	856.21
916	0	173.264	2157.97	1620.62	275.166	2152.31	1616.26	145.747	2003.12	1645.57	281.964	1985.18	1644.16	233.67	1918.92	1495.05	234.45	1817.13	1272.56	211.767	2060.39	1398.88	204.949	2087.87	1213.48	288.007	1818.76	1345.52	34.6442	1919.2	1452.71	-27.714	1912.14	1250.1	-48.9419	1906.81	1130.61	-47.8317	2028.41	1002.45	1.07453	2094.45	938.459	-55.352	2059.33	906.02	-44.6149	2148.55	849.726
917	0	173.044	2169.43	1621.85	274.944	2163.81	1617.62	145.536	2014.65	1647.21	281.767	1996.71	1646.05	233.983	1930.03	1496.77	235.662	1828.34	1274.19	211.857	2071.44	1400.65	205.385	2099	1215.25	289.102	1830.21	1347.25	35.0765	1929.65	1453.8	-26.6932	1921.73	1251.1	-47.349	1915.45	1131.45	-47.1857	2033.34	999.874	1.30374	2097.75	933.498	-55.2035	2061.44	902.535	-45.0483	2148.91	843.343
918	0	172.631	2180.69	1623.21	274.537	2175.16	1619.16	145.191	2025.98	1648.94	281.444	2008.1	1648.08	234.23	1941.02	1498.56	236.863	1839.46	1275.9	211.852	2082.37	1402.54	205.73	2110.04	1217.16	290.174	1841.58	1349.06	35.4612	1939.91	1454.94	-25.6947	1931.09	1252.15	-45.7598	1923.88	1132.35	-46.6441	2037.87	997.398	1.37822	2100.57	928.62	-55.1732	2063.04	899.202	-45.7078	2148.62	837.133
919	0	172.043	2191.76	1624.7	273.965	2186.37	1620.85	144.735	2037.11	1650.73	281.017	2019.34	1650.22	234.422	1951.9	1500.42	238.051	1850.51	1277.64	211.762	2093.2	1404.52	205.99	2120.99	1219.15	291.227	1852.9	1350.92	35.8082	1949.99	1456.14	-24.7126	1940.23	1253.25	-44.173	1932.06	1133.31	-46.202	2042.01	995.053	1.29858	2102.93	923.875	-55.2531	2064.15	896.061	-46.5834	2147.71	831.166
920	0	171.305	2202.64	1626.29	273.251	2197.44	1622.67	144.193	2048.04	1652.56	280.512	2030.44	1652.43	234.572	1962.68	1502.31	239.22	1861.48	1279.4	211.598	2103.94	1406.56	206.169	2131.87	1221.22	292.259	1864.17	1352.8	36.1265	1959.91	1457.36	-23.7419	1949.14	1254.38	-42.5887	1940.01	1134.33	-45.854	2045.78	992.866	1.06814	2104.87	919.308	-55.434	2064.81	893.15	-47.6599	2146.21	825.5
921	0	170.442	2213.36	1627.98	272.42	2208.39	1624.6	143.588	2058.78	1654.41	279.951	2041.41	1654.69	234.691	1973.39	1504.2	240.365	1872.41	1281.16	211.372	2114.62	1408.64	206.276	2142.71	1223.31	293.271	1875.4	1354.68	36.4249	1969.7	1458.6	-22.7789	1957.84	1255.54	-41.0088	1947.72	1135.4	-45.5938	2049.22	990.86	0.692859	2106.41	914.958	-55.705	2065.04	890.497	-48.9172	2144.17	820.184
922	0	169.479	2223.91	1629.74	271.497	2219.23	1626.61	142.943	2069.36	1656.24	279.356	2052.26	1656.94	234.79	1984.05	1506.07	241.48	1883.3	1282.88	211.096	2125.25	1410.71	206.316	2153.51	1225.4	294.26	1886.6	1356.53	36.7104	1979.39	1459.83	-21.8217	1966.32	1256.72	-39.4365	1955.18	1136.51	-45.4153	2052.33	989.053	0.181307	2107.59	910.86	-56.0544	2064.91	888.126	-50.3306	2141.65	815.257
923	0	168.442	2234.33	1631.54	270.507	2229.98	1628.67	142.279	2079.79	1658.03	278.747	2063.02	1659.16	234.877	1994.67	1507.88	242.559	1894.16	1284.55	210.78	2135.86	1412.74	206.298	2164.29	1227.45	295.225	1897.78	1358.33	36.9892	1989.01	1461.04	-20.8697	1974.61	1257.92	-37.8771	1962.4	1137.67	-45.3118	2055.16	987.459	-0.455529	2108.45	907.042	-56.4695	2064.44	886.054	-51.872	2138.69	810.746
924	0	167.355	2244.65	1633.35	269.472	2240.66	1630.73	141.612	2090.1	1659.75	278.14	2073.69	1661.29	234.958	2005.28	1509.61	243.594	1905.01	1286.15	210.434	2146.46	1414.7	206.229	2175.05	1229.41	296.161	1908.96	1360.04	37.2654	1998.59	1462.21	-19.924	1982.71	1259.11	-36.3371	1969.39	1138.87	-45.2767	2057.73	986.084	-1.20444	2109.03	903.526	-56.9369	2063.7	884.291	-53.5102	2135.38	806.667
925	0	166.242	2254.87	1635.15	268.414	2251.28	1632.77	140.959	2100.31	1661.36	277.55	2084.3	1663.31	235.039	2015.9	1511.24	244.579	1915.85	1287.64	210.069	2157.06	1416.56	206.118	2185.81	1231.27	297.064	1920.13	1361.65	37.5418	2008.16	1463.32	-18.9872	1990.65	1260.29	-34.824	1976.15	1140.09	-45.303	2060.07	984.93	-2.05028	2109.39	900.325	-57.443	2062.73	882.838	-55.2126	2131.78	803.027
926	0	165.123	2265.04	1636.89	267.353	2261.87	1634.73	140.331	2110.44	1662.85	276.985	2094.86	1665.18	235.123	2026.54	1512.73	245.506	1926.7	1289.02	209.69	2167.68	1418.27	205.971	2196.57	1232.97	297.93	1931.31	1363.13	37.8193	2017.73	1464.34	-18.0631	1998.44	1261.45	-33.3462	1982.72	1141.33	-45.3837	2062.23	983.996	-2.97626	2109.56	897.448	-57.974	2061.59	881.692	-56.9457	2127.98	799.821
927	0	164.016	2275.19	1638.54	266.305	2272.44	1636.59	139.736	2120.54	1664.17	276.455	2105.4	1666.87	235.21	2037.22	1514.07	246.368	1937.56	1290.26	209.305	2178.34	1419.82	205.794	2207.33	1234.5	298.751	1942.5	1364.46	38.097	2027.35	1465.26	-17.1565	2006.11	1262.59	-31.9122	1989.1	1142.58	-45.5114	2064.24	983.273	-3.96447	2109.61	894.897	-58.5164	2060.34	880.843	-58.6769	2124.04	797.036
928	0	162.936	2285.33	1640.06	265.283	2283.02	1638.31	139.18	2130.63	1665.33	275.963	2115.95	1668.35	235.3	2047.95	1515.23	247.158	1948.43	1291.35	208.917	2189.04	1421.17	205.59	2218.11	1235.82	299.521	1953.7	1365.63	38.3724	2037.02	1466.07	-16.2731	2013.68	1263.69	-30.5302	1995.31	1143.83	-45.6785	2066.14	982.751	-4.99632	2109.58	892.67	-59.0574	2059.02	880.277	-60.3748	2120.04	794.654
929	0	161.892	2295.51	1641.43	264.297	2293.64	1639.85	138.665	2140.73	1666.28	275.51	2126.52	1669.59	235.389	2058.75	1516.21	247.87	1959.32	1292.27	208.529	2199.8	1422.3	205.364	2228.91	1236.92	300.233	1964.93	1366.61	38.6413	2046.78	1466.74	-15.419	2021.18	1264.74	-29.2079	2001.4	1145.08	-45.8776	2067.97	982.417	-6.05309	2109.52	890.758	-59.5846	2057.7	879.976	-62.0109	2116.05	792.652
930	0	160.895	2305.75	1642.6	263.353	2304.3	1641.18	138.189	2150.89	1667.02	275.095	2137.14	1670.59	235.472	2069.62	1516.99	248.497	1970.23	1293.02	208.14	2210.62	1423.2	205.117	2239.73	1237.76	300.878	1976.18	1367.41	38.8978	2056.63	1467.27	-14.6007	2028.64	1265.74	-27.9518	2007.37	1146.32	-46.1012	2069.77	982.255	-7.11651	2109.49	889.15	-60.0869	2056.43	879.919	-63.5599	2112.16	791.004
931	0	159.947	2316.07	1643.56	262.455	2315.03	1642.27	137.75	2161.13	1667.54	274.714	2147.82	1671.33	235.542	2080.57	1517.55	249.032	1981.18	1293.58	207.748	2221.51	1423.85	204.847	2250.57	1238.35	301.448	1987.46	1368	39.135	2066.6	1467.65	-13.8245	2036.07	1266.69	-26.7675	2013.27	1147.55	-46.342	2071.57	982.249	-8.16922	2109.52	887.831	-60.554	2055.26	880.086	-65.0002	2108.42	789.684
932	0	159.051	2326.49	1644.29	261.604	2325.84	1643.1	137.339	2171.47	1667.84	274.358	2158.59	1671.81	235.592	2091.61	1517.89	249.47	1992.15	1293.95	207.348	2232.47	1424.25	204.555	2261.45	1238.68	301.935	1998.77	1368.4	39.3445	2076.69	1467.85	-13.0969	2043.5	1267.58	-25.6592	2019.11	1148.75	-46.5933	2073.41	982.379	-9.19527	2109.66	886.783	-60.977	2054.23	880.453	-66.3149	2104.89	788.665
933	0	158.205	2337.05	1644.76	260.797	2336.75	1643.67	136.95	2181.94	1667.9	274.02	2169.46	1672.02	235.611	2102.76	1518.02	249.805	2003.16	1294.12	206.936	2243.51	1424.39	204.236	2272.36	1238.73	302.33	2010.12	1368.58	39.5172	2086.91	1467.89	-12.424	2050.96	1268.42	-24.6295	2024.94	1149.93	-46.8488	2075.33	982.63	-10.1806	2109.94	885.986	-61.3484	2053.39	880.998	-67.4917	2101.62	787.921
934	0	157.404	2347.74	1644.97	260.029	2347.78	1643.95	136.571	2192.55	1667.73	273.688	2180.45	1671.97	235.588	2114	1517.92	250.031	2014.22	1294.1	206.503	2254.64	1424.27	203.886	2283.31	1238.52	302.625	2021.51	1368.56	39.6435	2097.28	1467.76	-11.8116	2058.48	1269.19	-23.6803	2030.78	1151.09	-47.1033	2077.35	982.981	-11.1133	2110.39	885.42	-61.6621	2052.79	881.698	-68.523	2098.68	787.424
935	0	156.641	2358.59	1644.92	259.294	2358.92	1643.95	136.19	2203.32	1667.34	273.349	2191.56	1671.66	235.514	2125.34	1517.61	250.145	2025.33	1293.88	206.042	2265.85	1423.89	203.501	2294.3	1238.04	302.812	2032.95	1368.34	39.7132	2107.8	1467.45	-11.2651	2066.07	1269.89	-22.8123	2036.65	1152.21	-47.3522	2079.52	983.415	-11.9841	2111.05	885.06	-61.9139	2052.45	882.53	-69.4058	2096.09	787.148
936	0	155.907	2369.61	1644.6	258.583	2370.2	1643.67	135.794	2214.26	1666.74	272.992	2202.81	1671.11	235.376	2136.8	1517.09	250.141	2036.49	1293.48	205.542	2277.16	1423.27	203.074	2305.35	1237.32	302.883	2044.44	1367.92	39.7161	2118.47	1466.98	-10.7892	2073.76	1270.54	-22.0256	2042.59	1153.3	-47.5925	2081.87	983.914	-12.7867	2111.93	884.884	-62.1014	2052.42	883.471	-70.1412	2093.89	787.068
937	0	155.191	2380.8	1644.02	257.885	2381.6	1643.13	135.369	2225.38	1665.93	272.602	2214.19	1670.32	235.164	2148.37	1516.37	250.017	2047.72	1292.89	204.995	2288.55	1422.41	202.6	2316.46	1236.36	302.832	2055.98	1367.32	39.6421	2129.29	1466.33	-10.3882	2081.57	1271.12	-21.32	2048.63	1154.35	-47.8221	2084.41	984.461	-13.5175	2113.07	884.865	-62.224	2052.71	884.499	-70.7341	2092.11	787.16
938	0	154.479	2392.17	1643.2	257.188	2393.15	1642.32	134.902	2236.69	1664.92	272.165	2225.72	1669.32	234.866	2160.05	1515.46	249.77	2059.02	1292.14	204.387	2300.05	1421.32	202.072	2327.64	1235.18	302.655	2067.6	1366.54	39.4815	2140.28	1465.52	-10.0659	2089.51	1271.63	-20.6953	2054.79	1155.35	-48.0406	2087.18	985.038	-14.1762	2114.47	884.975	-62.2834	2053.36	885.593	-71.1924	2090.77	787.398
939	0	153.759	2403.71	1642.15	256.479	2404.83	1641.28	134.377	2248.18	1663.73	271.669	2237.38	1668.11	234.472	2171.84	1514.38	249.398	2070.4	1291.22	203.71	2311.64	1420.04	201.483	2338.9	1233.79	302.345	2079.28	1365.6	39.2251	2151.42	1464.55	-9.82555	2097.62	1272.06	-20.1515	2061.11	1156.3	-48.2489	2090.2	985.631	-14.7652	2116.16	885.188	-62.2832	2054.38	886.731	-71.527	2089.89	787.761
940	0	153.016	2415.43	1640.88	255.744	2416.66	1640.01	133.781	2259.85	1662.38	271.101	2249.19	1666.73	233.974	2183.75	1513.14	248.901	2081.86	1290.15	202.952	2323.33	1418.56	200.826	2350.24	1232.22	301.902	2091.04	1364.51	38.8646	2162.71	1463.44	-9.67039	2105.89	1272.43	-19.6894	2067.6	1157.2	-48.4495	2093.49	986.222	-15.2901	2118.15	885.475	-62.2292	2055.8	887.894	-71.7511	2089.49	788.223
941	0	152.236	2427.31	1639.42	254.968	2428.61	1638.54	133.101	2271.71	1660.88	270.448	2261.15	1665.18	233.363	2195.77	1511.75	248.279	2093.42	1288.96	202.103	2335.13	1416.91	200.097	2361.67	1230.49	301.323	2102.88	1363.28	38.3927	2174.16	1462.19	-9.60348	2114.36	1272.71	-19.3103	2074.3	1158.02	-48.6464	2097.09	986.796	-15.759	2120.46	885.807	-62.1297	2057.62	889.06	-71.8798	2089.56	788.761
942	0	151.404	2439.37	1637.79	254.14	2440.7	1636.9	132.327	2283.73	1659.25	269.699	2273.24	1663.5	232.631	2207.91	1510.24	247.533	2105.08	1287.64	201.155	2347.02	1415.12	199.288	2373.2	1228.61	300.608	2114.8	1361.95	37.8033	2185.75	1460.81	-9.628	2123.03	1272.9	-19.0164	2081.24	1158.77	-48.8452	2101.01	987.338	-16.1825	2123.11	886.156	-61.9946	2059.87	890.21	-71.9294	2090.12	789.351
943	0	150.508	2451.58	1636.01	253.246	2452.92	1635.11	131.446	2295.93	1657.51	268.844	2285.46	1661.69	231.775	2220.15	1508.63	246.666	2116.84	1286.23	200.101	2359.01	1413.19	198.397	2384.83	1226.62	299.759	2126.81	1360.52	37.0914	2197.48	1459.33	-9.74737	2131.92	1273	-18.8109	2088.43	1159.44	-49.0528	2105.28	987.833	-16.5732	2126.12	886.496	-61.8362	2062.55	891.327	-71.9176	2091.16	789.966
944	0	149.537	2463.94	1634.12	252.276	2465.26	1633.2	130.45	2308.29	1655.68	267.874	2297.81	1659.78	230.79	2232.51	1506.94	245.681	2128.71	1284.74	198.937	2371.1	1411.17	197.418	2396.57	1224.54	298.778	2138.91	1359.02	36.2535	2209.36	1457.74	-9.96536	2141.04	1273	-18.698	2095.91	1160	-49.2771	2109.92	988.266	-16.9449	2129.51	886.802	-61.6685	2065.68	892.391	-71.8624	2092.71	790.582
945	0	148.482	2476.45	1632.12	251.221	2477.72	1631.19	129.334	2320.8	1653.77	266.784	2310.29	1657.81	229.674	2244.97	1505.19	244.581	2140.67	1283.2	197.658	2383.29	1409.07	196.349	2408.41	1222.39	297.67	2151.1	1357.47	35.2875	2221.36	1456.06	-10.2861	2150.42	1272.9	-18.6824	2103.69	1160.46	-49.5274	2114.95	988.624	-17.3119	2133.31	887.05	-61.5069	2069.27	893.385	-71.7818	2094.74	791.174
946	0	147.335	2489.09	1630.06	250.074	2490.3	1629.11	128.092	2333.45	1651.82	265.568	2322.88	1655.79	228.428	2257.53	1503.4	243.373	2152.75	1281.61	196.266	2395.57	1406.92	195.189	2420.37	1220.2	296.438	2163.37	1355.89	34.1928	2233.49	1454.33	-10.714	2160.05	1272.67	-18.7698	2111.81	1160.8	-49.8134	2120.4	988.894	-17.6883	2137.53	887.222	-61.3683	2073.33	894.294	-71.6938	2097.29	791.72
947	0	146.092	2501.86	1627.95	248.831	2502.98	1626.98	126.722	2346.24	1649.84	264.227	2335.59	1653.75	227.052	2270.18	1501.6	242.06	2164.92	1280.02	194.762	2407.93	1404.74	193.936	2432.42	1217.99	295.088	2175.73	1354.32	32.9703	2245.74	1452.54	-11.2538	2169.96	1272.34	-18.9658	2120.27	1161.01	-50.1456	2126.28	989.067	-18.0875	2142.19	887.302	-61.2704	2077.89	895.106	-71.6158	2100.34	792.199
948	0	144.75	2514.74	1625.82	247.49	2515.77	1624.85	125.225	2359.16	1647.86	262.759	2348.39	1651.71	225.553	2282.91	1499.82	240.65	2177.19	1278.44	193.151	2420.38	1402.57	192.594	2444.58	1215.8	293.627	2188.16	1352.76	31.6227	2258.09	1450.73	-11.9102	2180.15	1271.88	-19.2764	2129.11	1161.09	-50.5345	2132.64	989.134	-18.5217	2147.33	887.276	-61.2312	2082.96	895.807	-71.5644	2103.91	792.594
949	0	143.312	2527.74	1623.7	246.053	2528.65	1622.72	123.604	2372.2	1645.9	261.168	2361.3	1649.71	223.936	2295.73	1498.08	239.148	2189.54	1276.9	191.44	2432.9	1400.43	191.164	2456.83	1213.66	292.063	2200.66	1351.25	30.1544	2270.54	1448.92	-12.6878	2190.63	1271.31	-19.7073	2138.34	1161.03	-50.9908	2139.47	989.09	-19.0021	2152.97	887.137	-61.2693	2088.56	896.388	-71.555	2108.02	792.892
950	0	141.781	2540.82	1621.6	244.523	2541.61	1620.63	121.867	2385.34	1644	259.461	2374.28	1647.78	222.209	2308.6	1496.4	237.561	2201.97	1275.42	189.64	2445.48	1398.36	189.652	2469.17	1211.58	290.404	2213.22	1349.82	28.5712	2283.09	1447.13	-13.5909	2201.41	1270.62	-20.2638	2147.98	1160.84	-51.5245	2146.82	988.932	-19.5389	2159.12	886.88	-61.4028	2094.71	896.842	-71.6021	2112.67	793.081
951	0	140.164	2553.99	1619.55	242.907	2554.65	1618.6	120.022	2398.57	1642.16	257.644	2387.35	1645.94	220.385	2321.52	1494.81	235.896	2214.46	1274.02	187.764	2458.11	1396.37	188.065	2481.59	1209.6	288.658	2225.82	1348.47	26.8813	2295.71	1445.38	-14.6231	2212.49	1269.83	-20.9508	2158.03	1160.51	-52.1453	2154.7	988.659	-20.1407	2165.82	886.504	-61.6494	2101.43	897.165	-71.7184	2117.91	793.154
952	0	138.469	2567.23	1617.58	241.214	2567.75	1616.66	118.081	2411.88	1640.43	255.73	2400.47	1644.22	218.474	2334.47	1493.33	234.16	2227.01	1272.73	185.828	2470.79	1394.5	186.411	2494.07	1207.75	286.834	2238.45	1347.24	25.094	2308.41	1443.71	-15.7871	2223.88	1268.95	-21.7726	2168.51	1160.05	-52.8618	2163.13	988.274	-20.8153	2173.1	886.011	-62.0259	2108.76	897.353	-71.9155	2123.74	793.106
953	0	136.708	2580.52	1615.7	239.455	2580.9	1614.83	116.061	2425.25	1638.81	253.731	2413.64	1642.65	216.492	2347.44	1491.99	232.36	2239.59	1271.57	183.848	2483.49	1392.78	184.702	2506.6	1206.05	284.943	2251.09	1346.15	23.2207	2321.16	1442.14	-17.0844	2235.57	1267.99	-22.7327	2179.42	1159.47	-53.6817	2172.14	987.783	-21.5689	2180.96	885.41	-62.5477	2116.71	897.407	-72.2035	2130.2	792.935
954	0	134.896	2593.84	1613.93	237.643	2594.08	1613.13	113.98	2438.66	1637.34	251.664	2426.84	1641.24	214.456	2360.41	1490.81	230.503	2252.19	1270.55	181.846	2496.21	1391.22	182.951	2519.17	1204.53	282.994	2263.72	1345.2	21.2743	2333.96	1440.69	-18.515	2247.57	1266.97	-23.8336	2190.76	1158.8	-54.6113	2181.73	987.193	-22.4063	2189.46	884.71	-63.2287	2125.31	897.328	-72.5911	2137.33	792.642
955	0	133.047	2607.16	1612.29	235.794	2607.27	1611.57	111.857	2452.09	1636.04	249.547	2440.06	1640.03	212.382	2373.35	1489.79	228.598	2264.79	1269.69	179.841	2508.92	1389.85	181.173	2531.75	1203.2	280.997	2276.33	1344.42	19.2688	2346.79	1439.39	-20.0774	2259.86	1265.92	-25.0773	2202.53	1158.03	-55.6557	2191.93	986.516	-23.3311	2198.6	883.925	-64.0808	2134.6	897.119	-73.0859	2145.17	792.231
956	0	131.18	2620.48	1610.8	233.924	2620.46	1610.18	109.715	2465.51	1634.92	247.399	2453.26	1639.03	210.289	2386.25	1488.97	226.652	2277.37	1269	177.855	2521.6	1388.69	179.382	2544.32	1202.09	278.964	2288.89	1343.82	17.2197	2359.64	1438.27	-21.7683	2272.43	1264.84	-26.4646	2214.71	1157.19	-56.8182	2202.75	985.764	-24.3455	2208.41	883.071	-65.1135	2144.6	896.787	-73.6943	2153.77	791.705
957	0	129.312	2633.75	1609.47	232.051	2633.62	1608.97	107.578	2478.9	1634	245.245	2466.44	1638.26	208.197	2399.08	1488.34	224.673	2289.92	1268.51	175.91	2534.25	1387.76	177.596	2556.88	1201.2	276.905	2301.38	1343.4	15.1432	2372.49	1437.34	-23.5826	2285.27	1263.78	-27.9956	2227.29	1156.32	-58.1006	2214.2	984.954	-25.4505	2218.92	882.167	-66.3339	2155.33	896.338	-74.422	2163.17	791.071
958	0	127.463	2646.96	1608.33	230.194	2646.73	1607.95	105.471	2492.23	1633.3	243.105	2479.57	1637.72	206.123	2411.83	1487.92	222.67	2302.42	1268.2	174.027	2546.84	1387.06	175.83	2569.39	1200.55	274.832	2313.78	1343.18	13.056	2385.34	1436.63	-25.5132	2298.36	1262.76	-29.6692	2240.26	1155.42	-59.503	2226.28	984.1	-26.6457	2230.15	881.231	-67.7458	2166.82	895.781	-75.2733	2173.42	790.335
959	0	125.654	2660.08	1607.38	228.372	2659.76	1607.13	103.417	2505.48	1632.81	241.005	2492.63	1637.42	204.087	2424.46	1487.71	220.653	2314.84	1268.09	172.225	2559.35	1386.61	174.101	2581.82	1200.14	272.754	2326.07	1343.15	10.9753	2398.16	1436.15	-27.5512	2311.68	1261.79	-31.4836	2253.58	1154.52	-61.0238	2238.99	983.222	-27.9294	2242.11	880.284	-69.3501	2179.09	895.124	-76.2524	2184.57	789.506
960	0	123.902	2673.08	1606.63	226.604	2672.69	1606.51	101.44	2518.62	1632.56	238.966	2505.58	1637.36	202.106	2436.96	1487.72	218.63	2327.18	1268.18	170.523	2571.78	1386.4	172.423	2594.17	1199.98	270.684	2338.24	1343.31	8.9179	2410.94	1435.9	-29.6859	2325.21	1260.92	-33.4357	2267.23	1153.65	-62.6595	2252.34	982.338	-29.299	2254.82	879.346	-71.1438	2192.14	894.377	-77.3622	2196.67	788.593
961	0	122.229	2685.94	1606.08	224.91	2685.51	1606.1	99.5639	2531.62	1632.54	237.012	2518.42	1637.54	200.196	2449.32	1487.95	216.612	2339.41	1268.47	168.936	2584.09	1386.45	170.809	2606.41	1200.07	268.632	2350.25	1343.66	6.89998	2423.67	1435.91	-31.9051	2338.91	1260.16	-35.5214	2281.18	1152.83	-64.4049	2266.3	981.467	-30.7508	2268.29	878.439	-73.1205	2206	893.553	-78.6053	2209.76	787.608
962	0	120.652	2698.64	1605.75	223.307	2698.17	1605.9	97.8074	2544.46	1632.75	235.163	2531.12	1637.96	198.37	2461.51	1488.38	214.608	2351.53	1268.95	167.477	2596.28	1386.73	169.274	2618.52	1200.4	266.608	2362.11	1344.2	4.93688	2436.31	1436.17	-34.195	2352.76	1259.53	-37.7351	2295.4	1152.08	-66.2533	2280.87	980.628	-32.2798	2282.51	877.583	-75.2699	2220.66	892.664	-79.9836	2223.87	786.564
963	0	119.186	2711.16	1605.64	221.813	2710.68	1605.91	96.1884	2557.12	1633.19	233.437	2543.66	1638.61	196.641	2473.51	1489.02	212.628	2363.53	1269.62	166.155	2608.34	1387.26	167.827	2630.49	1200.96	264.621	2373.8	1344.91	3.04259	2448.87	1436.68	-36.5408	2366.72	1259.05	-40.0702	2309.84	1151.42	-68.1963	2296.03	979.841	-33.8805	2297.49	876.8	-77.5778	2236.11	891.725	-81.4978	2239.04	785.48
964	0	117.848	2723.49	1605.74	220.441	2723	1606.11	94.7211	2569.59	1633.87	231.85	2556.02	1639.47	195.018	2485.33	1489.85	210.68	2375.38	1270.46	164.977	2620.25	1388.03	166.477	2642.29	1201.74	262.68	2385.31	1345.79	1.2294	2461.31	1437.44	-38.9265	2380.76	1258.74	-42.5184	2324.46	1150.88	-70.2243	2311.74	979.125	-35.5466	2313.21	876.112	-80.0267	2252.35	890.751	-83.1477	2255.29	784.376
965	0	116.648	2735.61	1606.05	219.205	2735.13	1606.51	93.4156	2581.86	1634.76	230.413	2568.2	1640.54	193.506	2496.94	1490.87	208.773	2387.09	1271.46	163.945	2632	1389.01	165.233	2653.94	1202.74	260.792	2396.63	1346.83	-0.492305	2473.63	1438.45	-41.3358	2394.85	1258.62	-45.07	2339.24	1150.45	-72.3263	2328	978.5	-37.2714	2329.66	875.539	-82.5959	2269.35	889.761	-84.9319	2272.62	783.28
966	0	115.596	2747.52	1606.57	218.113	2747.06	1607.08	92.2781	2593.91	1635.87	229.136	2580.19	1641.8	192.11	2508.34	1492.06	206.915	2398.66	1272.62	163.06	2643.58	1390.2	164.1	2665.41	1203.94	258.963	2407.76	1348	-2.11429	2485.81	1439.67	-43.7523	2408.96	1258.68	-47.7139	2354.14	1150.15	-74.4904	2344.75	977.983	-39.0478	2346.83	875.106	-85.2621	2287.1	888.776	-86.8469	2291.04	782.221
967	0	114.696	2759.21	1607.29	217.174	2758.78	1607.83	91.31	2605.74	1637.19	228.022	2591.97	1643.24	190.83	2519.53	1493.4	205.113	2410.07	1273.91	162.317	2655	1391.59	163.081	2676.71	1205.33	257.198	2418.7	1349.3	-3.63056	2497.84	1441.11	-46.1595	2423.05	1258.93	-50.4375	2369.11	1150	-76.7041	2361.98	977.594	-40.8683	2364.68	874.834	-88	2305.55	887.817	-88.8875	2310.53	781.237
968	0	113.953	2770.69	1608.19	216.389	2770.28	1608.74	90.5087	2617.35	1638.69	227.073	2603.54	1644.83	189.666	2530.51	1494.88	203.373	2421.32	1275.32	161.71	2666.25	1393.16	162.177	2687.86	1206.9	255.503	2429.45	1350.7	-5.03732	2509.72	1442.74	-48.5416	2437.09	1259.37	-53.2268	2384.13	1149.99	-78.9545	2379.62	977.351	-42.7255	2383.19	874.748	-90.7829	2324.67	886.91	-91.0459	2331.05	780.367
969	0	113.363	2781.95	1609.27	215.758	2781.57	1609.8	89.8672	2628.76	1640.36	226.285	2614.91	1646.55	188.613	2541.28	1496.48	201.701	2432.43	1276.83	161.228	2677.32	1394.89	161.387	2698.84	1208.62	253.88	2440.03	1352.2	-6.33296	2521.43	1444.54	-50.8839	2451.07	1260	-56.0664	2399.16	1150.13	-81.2284	2397.65	977.271	-44.6121	2402.32	874.87	-93.5839	2344.42	886.08	-93.3117	2352.57	779.657
970	0	112.922	2793	1610.51	215.278	2792.65	1610.99	89.3748	2639.95	1642.19	225.65	2626.07	1648.4	187.665	2551.86	1498.18	200.104	2443.38	1278.42	160.859	2688.23	1396.75	160.707	2709.68	1210.48	252.334	2450.45	1353.77	-7.51782	2532.97	1446.49	-53.1727	2464.94	1260.81	-58.9399	2414.19	1150.4	-83.5127	2416.03	977.368	-46.5205	2422.02	875.224	-96.376	2364.73	885.355	-95.6716	2375.03	779.152
971	0	112.622	2803.86	1611.89	214.94	2803.52	1612.31	89.0179	2650.94	1644.14	225.157	2637.03	1650.33	186.817	2562.25	1499.97	198.587	2454.19	1280.07	160.589	2698.98	1398.72	160.131	2720.39	1212.46	250.868	2460.71	1355.4	-8.59398	2544.34	1448.56	-55.3957	2478.71	1261.78	-61.8301	2429.17	1150.82	-85.7947	2434.7	977.658	-48.4436	2442.26	875.833	-99.1333	2385.57	884.762	-98.1093	2398.37	778.901
972	0	112.452	2814.53	1613.4	214.734	2814.19	1613.73	88.78	2661.75	1646.21	224.791	2647.79	1652.34	186.059	2572.47	1501.81	197.157	2464.87	1281.77	160.403	2709.58	1400.79	159.652	2730.98	1214.53	249.484	2470.83	1357.07	-9.56491	2555.54	1450.72	-57.5425	2492.34	1262.89	-64.7191	2444.1	1151.35	-88.0622	2453.62	978.152	-50.3739	2462.98	876.719	-101.832	2406.88	884.328	-100.605	2422.5	778.95
973	0	112.396	2825.03	1615.02	214.647	2824.68	1615.24	88.643	2672.38	1648.35	224.536	2658.37	1654.39	185.385	2582.54	1503.69	195.818	2475.41	1283.5	160.283	2720.03	1402.91	159.259	2741.46	1216.67	248.187	2480.84	1358.76	-10.4352	2566.58	1452.94	-59.604	2505.82	1264.12	-67.589	2458.95	1152	-90.3033	2472.75	978.859	-52.3036	2484.15	877.902	-104.449	2428.6	884.077	-103.138	2447.35	779.342
974	0	112.439	2835.37	1616.73	214.663	2835	1616.82	88.5876	2682.85	1650.54	224.374	2668.78	1656.46	184.785	2592.47	1505.59	194.576	2485.84	1285.22	160.215	2730.34	1405.07	158.943	2751.84	1218.84	246.978	2490.74	1360.45	-11.2102	2577.47	1455.2	-61.5729	2519.14	1265.45	-70.4217	2473.7	1152.75	-92.5069	2492.05	979.786	-54.2244	2505.7	879.401	-106.965	2450.67	884.034	-105.684	2472.82	780.114
975	0	112.564	2845.56	1618.5	214.765	2845.16	1618.45	88.5944	2693.18	1652.75	224.286	2679.02	1658.52	184.251	2602.29	1507.48	193.435	2496.15	1286.94	160.183	2740.54	1407.23	158.691	2762.13	1221.04	245.862	2500.56	1362.13	-11.8954	2588.2	1457.46	-63.4434	2532.3	1266.86	-73.1997	2488.35	1153.57	-94.6627	2511.47	980.936	-56.1272	2527.58	881.229	-109.362	2473.04	884.218	-108.216	2498.8	781.3
976	0	112.753	2855.63	1620.31	214.935	2855.18	1620.11	88.6443	2703.37	1654.95	224.253	2689.11	1660.55	183.776	2612.02	1509.34	192.4	2506.37	1288.62	160.172	2750.62	1409.37	158.492	2772.36	1223.21	244.84	2510.31	1363.78	-12.4968	2598.79	1459.7	-65.2108	2545.29	1268.32	-75.9058	2502.88	1154.45	-96.7605	2530.97	982.308	-58.0023	2549.74	883.398	-111.627	2495.66	884.646	-110.708	2525.21	782.921
977	0	112.987	2865.58	1622.13	215.154	2865.08	1621.79	88.7193	2713.46	1657.1	224.255	2699.07	1662.52	183.354	2621.68	1511.16	191.476	2516.51	1290.25	160.171	2760.62	1411.45	158.334	2782.52	1225.34	243.915	2520.02	1365.39	-13.0197	2609.26	1461.89	-66.8715	2558.1	1269.79	-78.5239	2517.28	1155.37	-98.7911	2550.51	983.898	-59.8395	2572.12	885.914	-113.747	2518.45	885.329	-113.134	2551.94	784.995
978	0	113.249	2875.45	1623.94	215.404	2874.87	1623.45	88.8031	2723.44	1659.18	224.277	2708.91	1664.41	182.979	2631.28	1512.9	190.664	2526.57	1291.81	160.169	2770.53	1413.44	158.206	2792.62	1227.4	243.091	2529.69	1366.93	-13.4692	2619.6	1464	-68.4228	2570.74	1271.25	-81.0388	2531.55	1156.29	-100.745	2570.04	985.699	-61.6279	2594.67	888.778	-115.713	2541.37	886.276	-115.468	2578.89	787.528
979	0	113.523	2885.23	1625.7	215.67	2884.59	1625.07	88.8817	2733.34	1661.16	224.301	2718.65	1666.19	182.646	2640.86	1514.55	189.969	2536.58	1293.29	160.159	2780.38	1415.33	158.1	2802.69	1229.35	242.367	2539.34	1368.38	-13.8493	2629.83	1466	-69.8621	2583.2	1272.67	-83.4367	2545.69	1157.2	-102.614	2589.55	987.7	-63.3563	2617.33	891.986	-117.518	2564.38	887.489	-117.685	2605.96	790.518
980	0	113.794	2894.95	1627.39	215.935	2894.24	1626.63	88.9433	2743.18	1663.01	224.316	2728.3	1667.84	182.353	2650.41	1516.09	189.393	2546.54	1294.65	160.134	2790.17	1417.09	158.006	2812.71	1231.18	241.748	2548.99	1369.75	-14.1635	2639.97	1467.87	-71.1872	2595.5	1274.02	-85.7047	2559.68	1158.06	-104.388	2608.98	989.886	-65.0134	2640.04	895.529	-119.157	2587.4	888.969	-119.764	2633.06	793.957
981	0	114.051	2904.63	1628.99	216.186	2903.84	1628.11	88.9791	2752.96	1664.7	224.309	2737.89	1669.34	182.099	2659.97	1517.5	188.937	2556.46	1295.9	160.093	2799.92	1418.7	157.92	2822.71	1232.86	241.235	2558.65	1371	-14.4139	2650.02	1469.59	-72.3957	2607.63	1275.28	-87.8313	2573.53	1158.87	-106.06	2628.31	992.241	-66.5875	2662.75	899.391	-120.626	2610.41	890.711	-121.685	2660.1	797.827
982	0	114.283	2914.29	1630.47	216.414	2913.43	1629.48	88.9833	2762.72	1666.21	224.272	2747.44	1670.68	181.885	2669.54	1518.76	188.602	2566.36	1297.02	160.033	2809.64	1420.13	157.837	2832.68	1234.37	240.828	2568.33	1372.13	-14.6017	2659.99	1471.14	-73.4852	2619.6	1276.43	-89.8064	2587.24	1159.59	-107.619	2647.51	994.747	-68.0672	2685.4	903.554	-121.924	2633.34	892.705	-123.433	2687	802.109
983	0	114.483	2923.92	1631.8	216.61	2923	1630.71	88.953	2772.45	1667.52	224.201	2756.96	1671.85	181.712	2679.13	1519.87	188.391	2576.25	1297.98	159.958	2819.35	1421.37	157.757	2842.64	1235.69	240.53	2578.04	1373.12	-14.7266	2669.9	1472.5	-74.4526	2631.42	1277.43	-91.6208	2600.81	1160.21	-109.059	2666.54	997.382	-69.4412	2707.93	907.992	-123.051	2656.15	894.941	-124.994	2713.69	806.773
984	0	114.646	2933.57	1632.96	216.77	2932.59	1631.8	88.8882	2782.17	1668.63	224.092	2766.46	1672.82	181.584	2688.76	1520.8	188.302	2586.13	1298.79	159.871	2829.04	1422.41	157.682	2852.6	1236.82	240.342	2587.78	1373.97	-14.7873	2679.75	1473.67	-75.2949	2643.1	1278.27	-93.2666	2614.24	1160.7	-110.369	2685.39	1000.13	-70.6986	2730.29	912.676	-124.008	2678.8	897.403	-126.362	2740.09	811.791
985	0	114.771	2943.22	1633.93	216.892	2942.21	1632.72	88.7922	2791.9	1669.51	223.947	2775.98	1673.6	181.506	2698.42	1521.55	188.335	2596.01	1299.44	159.779	2838.74	1423.25	157.615	2862.56	1237.74	240.265	2597.58	1374.65	-14.7812	2689.55	1474.63	-76.0082	2654.64	1278.95	-94.737	2627.53	1161.07	-111.542	2704.02	1002.95	-71.8295	2752.43	917.575	-124.796	2701.25	900.073	-127.531	2766.15	817.127
986	0	114.858	2952.91	1634.7	216.979	2951.86	1633.45	88.6711	2801.63	1670.17	223.771	2785.51	1674.17	181.485	2708.13	1522.12	188.49	2605.91	1299.9	159.69	2848.44	1423.87	157.561	2872.52	1238.45	240.3	2607.42	1375.17	-14.7046	2699.31	1475.37	-76.5885	2666.06	1279.44	-96.0265	2640.69	1161.28	-112.57	2722.41	1005.85	-72.8247	2774.29	922.653	-125.416	2723.45	902.931	-128.499	2791.79	822.746
987	0	114.911	2962.63	1635.24	217.034	2961.56	1633.99	88.5343	2811.39	1670.59	223.571	2795.08	1674.55	181.53	2717.88	1522.49	188.764	2615.82	1300.19	159.614	2858.16	1424.27	157.528	2882.51	1238.95	240.449	2617.31	1375.51	-14.5529	2709.04	1475.9	-77.0316	2677.36	1279.74	-97.1303	2653.71	1161.35	-113.445	2740.54	1008.78	-73.6763	2795.83	927.871	-125.873	2745.36	905.954	-129.268	2816.99	828.608
988	0	114.937	2972.4	1635.56	217.065	2971.33	1634.33	88.3935	2821.17	1670.77	223.361	2804.71	1674.72	181.648	2727.69	1522.66	189.157	2625.76	1300.29	159.564	2867.91	1424.47	157.524	2892.51	1239.23	240.713	2627.27	1375.68	-14.3208	2718.76	1476.21	-77.333	2688.55	1279.85	-98.0451	2666.6	1161.26	-114.16	2758.39	1011.72	-74.3776	2816.98	933.188	-126.168	2766.95	909.117	-129.842	2841.67	834.672
989	0	114.945	2982.22	1635.65	217.083	2981.15	1634.45	88.2632	2830.98	1670.72	223.155	2814.39	1674.69	181.85	2737.54	1522.64	189.665	2635.74	1300.21	159.553	2877.69	1424.45	157.556	2902.54	1239.31	241.093	2637.29	1375.65	-14.0021	2728.46	1476.31	-77.4887	2699.65	1279.76	-98.7684	2679.37	1161.01	-114.71	2775.93	1014.66	-74.9233	2837.72	938.561	-126.306	2788.17	912.392	-130.226	2865.81	840.897
990	0	114.945	2992.1	1635.5	217.099	2991.04	1634.37	88.16	2840.82	1670.45	222.973	2824.15	1674.47	182.145	2747.44	1522.42	190.285	2645.75	1299.93	159.595	2887.51	1424.23	157.632	2912.61	1239.18	241.59	2647.37	1375.44	-13.5905	2738.15	1476.2	-77.4948	2710.65	1279.48	-99.2993	2692	1160.6	-115.09	2793.16	1017.57	-75.309	2858	943.948	-126.289	2808.99	915.751	-130.426	2889.37	847.236
991	0	114.95	3002.04	1635.12	217.127	3001	1634.08	88.1025	2850.7	1669.96	222.836	2833.99	1674.06	182.545	2757.4	1522	191.015	2655.8	1299.47	159.705	2897.37	1423.82	157.761	2922.71	1238.85	242.205	2657.51	1375.04	-13.0794	2747.85	1475.9	-77.3482	2721.58	1279.02	-99.6376	2704.49	1160.04	-115.298	2810.05	1020.43	-75.5316	2877.77	949.305	-126.121	2829.38	919.164	-130.451	2912.3	853.644
992	0	114.977	3012.05	1634.51	217.183	3011.03	1633.59	88.1106	2860.6	1669.26	222.767	2843.91	1673.48	183.059	2767.4	1521.4	191.85	2665.9	1298.83	159.898	2907.29	1423.22	157.948	2932.84	1238.32	242.937	2667.73	1374.45	-12.4623	2757.57	1475.4	-77.0466	2732.44	1278.38	-99.7845	2716.86	1159.34	-115.331	2826.58	1023.21	-75.5887	2897.02	954.589	-125.807	2849.31	922.599	-130.308	2934.59	860.071
993	0	115.04	3022.11	1633.7	217.284	3021.12	1632.91	88.2052	2870.53	1668.36	222.791	2853.92	1672.72	183.696	2777.45	1520.62	192.787	2676.05	1298.01	160.187	2917.28	1422.45	158.201	2943.01	1237.62	243.786	2678	1373.67	-11.7334	2767.31	1474.73	-76.5887	2743.23	1277.57	-99.7425	2729.08	1158.51	-115.188	2842.75	1025.9	-75.4788	2915.72	959.758	-125.351	2868.74	926.023	-130.004	2956.19	866.467
994	0	115.158	3032.24	1632.69	217.447	3031.28	1632.05	88.4075	2880.49	1667.29	222.932	2864.02	1671.8	184.464	2787.54	1519.67	193.82	2686.26	1297.02	160.587	2927.32	1421.52	158.524	2953.21	1236.75	244.749	2688.35	1372.7	-10.8872	2777.08	1473.89	-75.9743	2753.96	1276.62	-99.515	2741.16	1157.55	-114.873	2858.54	1028.47	-75.2012	2933.84	964.77	-124.757	2887.65	929.401	-129.55	2977.1	872.778
995	0	115.349	3042.43	1631.51	217.693	3041.5	1631.04	88.739	2890.47	1666.05	223.215	2874.22	1670.74	185.37	2797.69	1518.56	194.944	2696.53	1295.86	161.109	2937.44	1420.45	158.922	2963.46	1235.72	245.826	2698.75	1371.56	-9.91957	2786.89	1472.9	-75.2047	2764.64	1275.53	-99.1066	2753.1	1156.49	-114.385	2873.94	1030.91	-74.7562	2951.38	969.586	-124.03	2906.02	932.698	-128.95	2997.29	878.95
996	0	115.634	3052.67	1630.17	218.039	3051.77	1629.88	89.22	2900.47	1664.68	223.663	2884.5	1669.54	186.419	2807.89	1517.3	196.154	2706.87	1294.55	161.762	2947.64	1419.25	159.399	2973.74	1234.55	247.012	2709.23	1370.26	-8.82738	2796.75	1471.79	-74.2822	2775.27	1274.32	-98.5231	2764.88	1155.33	-113.731	2888.94	1033.19	-74.1449	2968.31	974.168	-123.176	2923.82	935.879	-128.214	3016.74	884.926
997	0	116.033	3062.97	1628.71	218.505	3062.09	1628.6	89.8697	2910.48	1663.18	224.297	2894.87	1668.22	187.615	2818.13	1515.9	197.442	2717.27	1293.11	162.555	2957.91	1417.93	159.958	2984.07	1233.25	248.302	2719.76	1368.8	-7.60912	2806.67	1470.56	-73.2107	2785.87	1273.02	-97.7711	2776.52	1154.09	-112.915	2903.52	1035.29	-73.3694	2984.65	978.479	-122.201	2941.03	938.909	-127.346	3035.45	890.651
998	0	116.565	3073.3	1627.14	219.11	3072.46	1627.22	90.705	2920.52	1661.58	225.135	2905.32	1666.8	188.958	2828.43	1514.39	198.803	2727.75	1291.53	163.493	2968.27	1416.52	160.6	2994.44	1231.83	249.692	2730.35	1367.19	-6.26489	2816.66	1469.23	-71.9953	2796.43	1271.64	-96.8579	2787.99	1152.79	-111.944	2917.7	1037.2	-72.4332	3000.38	982.484	-121.11	2957.64	941.753	-126.354	3053.41	896.067
999	0	117.249	3083.69	1625.49	219.871	3082.87	1625.76	91.7403	2930.57	1659.91	226.191	2915.85	1665.28	190.448	2838.79	1512.78	200.23	2738.31	1289.85	164.576	2978.7	1415.04	161.326	3004.87	1230.33	251.175	2741	1365.46	-4.79655	2826.71	1467.83	-70.6424	2806.95	1270.21	-95.7915	2799.31	1151.45	-110.824	2931.45	1038.91	-71.3415	3015.5	986.148	-119.911	2973.64	944.377	-125.243	3070.61	901.121
1000	0	118.104	3094.11	1623.81	220.802	3093.34	1624.24	92.9863	2940.65	1658.19	227.476	2926.46	1663.68	192.082	2849.2	1511.08	201.715	2748.94	1288.08	165.805	2989.2	1413.49	162.135	3015.35	1228.75	252.744	2751.7	1363.62	-3.20779	2836.84	1466.37	-69.1596	2817.45	1268.75	-94.5803	2810.46	1150.09	-109.565	2944.78	1040.4	-70.1009	3030.03	989.439	-118.611	2989	946.748	-124.019	3087.04	905.757
1001	0	119.143	3104.57	1622.1	221.917	3103.84	1622.68	94.4497	2950.76	1656.44	228.993	2937.13	1662.02	193.854	2859.67	1509.33	203.252	2759.65	1286.24	167.175	2999.78	1411.9	163.025	3025.89	1227.11	254.391	2762.45	1361.69	-1.50408	2847.05	1464.88	-67.5553	2827.91	1267.27	-93.2329	2821.45	1148.73	-108.174	2957.68	1041.65	-68.7194	3043.95	992.329	-117.217	3003.72	948.837	-122.689	3102.7	909.923
1002	0	120.378	3115.06	1620.41	223.225	3114.4	1621.11	96.1328	2960.91	1654.7	230.742	2947.86	1660.32	195.757	2870.21	1507.53	204.834	2770.43	1284.35	168.68	3010.44	1410.29	163.996	3036.5	1225.45	256.109	2773.26	1359.7	0.307308	2857.34	1463.38	-65.8391	2838.35	1265.81	-91.7582	2832.27	1147.39	-106.662	2970.16	1042.66	-67.2063	3057.28	994.791	-115.737	3017.8	950.615	-121.26	3117.59	913.572
1003	0	121.815	3125.6	1618.76	224.732	3124.99	1619.54	98.0326	2971.1	1652.99	232.715	2958.65	1658.6	197.78	2880.8	1505.72	206.455	2781.29	1282.44	170.311	3021.16	1408.68	165.044	3047.19	1223.78	257.891	2784.1	1357.67	2.21748	2867.71	1461.88	-64.0211	2848.76	1264.38	-90.1651	2842.94	1146.08	-105.038	2982.22	1043.41	-65.5723	3070.01	996.8	-114.181	3031.23	952.057	-119.738	3131.72	916.656
1004	0	123.458	3136.18	1617.16	226.439	3135.64	1617.99	100.141	2981.34	1651.33	234.9	2969.49	1656.86	199.912	2891.46	1503.92	208.109	2792.23	1280.53	172.056	3031.94	1407.09	166.164	3057.95	1222.13	259.728	2794.98	1355.63	4.21599	2878.16	1460.42	-62.1123	2859.15	1263.01	-88.4622	2853.44	1144.83	-103.314	2993.85	1043.91	-63.8288	3082.15	998.337	-112.556	3043.99	953.143	-118.134	3145.08	919.135
1005	0	125.303	3146.81	1615.66	228.341	3146.34	1616.48	102.445	2991.65	1649.76	237.28	2980.37	1655.15	202.139	2902.18	1502.15	209.793	2803.23	1278.64	173.901	3042.77	1405.55	167.353	3068.78	1220.52	261.614	2805.89	1353.59	6.29105	2888.68	1459.02	-60.1237	2869.5	1261.71	-86.6582	2863.79	1143.65	-101.5	3005.06	1044.13	-61.9878	3093.71	999.385	-110.873	3056.1	953.854	-116.454	3157.67	920.974
1006	0	127.341	3157.48	1614.25	230.43	3157.08	1615.02	104.925	3002.04	1648.28	239.83	2991.29	1653.46	204.444	2912.95	1500.44	211.503	2814.28	1276.8	175.831	3053.65	1404.06	168.604	3079.7	1218.98	263.541	2816.83	1351.6	8.42967	2899.26	1457.68	-58.067	2879.82	1260.51	-84.7615	2873.98	1142.56	-99.6059	3015.86	1044.09	-60.0623	3104.68	999.931	-109.139	3067.55	954.177	-114.71	3169.49	922.143
1007	0	129.559	3168.21	1612.96	232.691	3167.87	1613.62	107.558	3012.51	1646.94	242.527	3002.24	1651.83	206.81	2923.78	1498.81	213.235	2825.39	1275.04	177.827	3064.57	1402.66	169.911	3090.68	1217.53	265.505	2827.79	1349.67	10.6179	2909.9	1456.44	-55.9537	2890.09	1259.42	-82.7802	2884.02	1141.58	-97.6442	3026.24	1043.78	-58.0658	3115.08	999.968	-107.365	3078.34	954.104	-112.91	3180.54	922.62
1008	0	131.937	3178.98	1611.8	235.107	3178.71	1612.3	110.316	3023.07	1645.73	245.342	3013.23	1650.28	209.219	2934.64	1497.28	214.989	2836.54	1273.37	179.871	3075.52	1401.36	171.267	3101.73	1216.2	267.498	2838.77	1347.84	12.8409	2920.57	1455.31	-53.7952	2900.33	1258.46	-80.7221	2893.92	1140.71	-95.6256	3036.21	1043.19	-56.0124	3124.91	999.491	-105.558	3088.46	953.63	-111.066	3190.82	922.389
1009	0	134.451	3189.8	1610.78	237.652	3189.58	1611.06	113.167	3033.72	1644.69	248.242	3024.23	1648.82	211.651	2945.54	1495.87	216.762	2847.72	1271.83	181.944	3086.49	1400.19	172.665	3112.83	1215	269.516	2849.75	1346.13	15.0835	2931.26	1454.31	-51.6028	2910.51	1257.64	-78.5946	2903.67	1139.98	-93.5614	3045.77	1042.34	-53.9168	3134.19	998.502	-103.729	3097.92	952.758	-109.19	3200.33	921.444
1010	0	137.074	3200.67	1609.89	240.301	3200.49	1609.9	116.078	3044.47	1643.82	251.196	3035.25	1647.47	214.086	2956.47	1494.61	218.553	2858.9	1270.43	184.025	3097.46	1399.14	174.096	3123.96	1213.95	271.552	2860.72	1344.56	17.3301	2941.95	1453.44	-49.387	2920.63	1256.97	-76.4047	2913.28	1139.37	-91.4625	3054.92	1041.23	-51.7938	3142.91	997.008	-101.883	3106.72	951.492	-107.293	3209.06	919.788
1011	0	139.776	3211.57	1609.15	243.022	3211.42	1608.85	119.011	3055.31	1643.13	254.171	3046.27	1646.26	216.505	2967.4	1493.5	220.362	2870.08	1269.19	186.094	3108.42	1398.24	175.553	3135.11	1213.06	273.602	2871.68	1343.14	19.5652	2952.63	1452.72	-47.158	2930.68	1256.44	-74.1592	2922.75	1138.91	-89.3398	3063.67	1039.87	-49.659	3151.09	995.02	-100.029	3114.85	949.845	-105.386	3217.01	917.431
1012	0	142.522	3222.5	1608.55	245.784	3222.35	1607.89	121.929	3066.24	1642.63	257.132	3057.3	1645.19	218.888	2978.32	1492.57	222.186	2881.24	1268.12	188.132	3119.36	1397.5	177.027	3146.26	1212.35	275.661	2882.62	1341.91	21.7735	2963.27	1452.14	-44.9253	2940.64	1256.07	-71.8644	2932.08	1138.58	-87.2039	3072	1038.26	-47.5276	3158.74	992.557	-98.1742	3122.33	947.833	-103.483	3224.18	914.395
1013	0	145.279	3233.44	1608.08	248.55	3233.28	1607.04	124.797	3077.23	1642.32	260.048	3068.3	1644.28	221.218	2989.22	1491.82	224.025	2892.35	1267.24	190.119	3130.25	1396.93	178.512	3157.39	1211.82	277.721	2893.52	1340.87	23.9404	2973.86	1451.72	-42.6975	2950.51	1255.85	-69.5264	2941.27	1138.38	-85.0646	3079.92	1036.42	-45.4146	3165.86	989.639	-96.3234	3129.14	945.477	-101.593	3230.56	910.713
1014	0	148.01	3244.38	1607.74	251.288	3244.19	1606.3	127.579	3088.27	1642.2	262.884	3079.28	1643.54	223.478	3000.09	1491.25	225.874	2903.41	1266.55	192.038	3141.09	1396.53	179.998	3168.47	1211.47	279.779	2904.38	1340.03	26.0524	2984.37	1451.45	-40.4824	2960.27	1255.77	-67.1509	2950.31	1138.32	-82.9313	3087.42	1034.36	-43.3344	3172.46	986.293	-94.4822	3135.3	942.804	-99.7273	3236.15	906.424
1015	0	150.681	3255.3	1607.53	253.962	3255.06	1605.68	130.242	3099.35	1642.25	265.612	3090.22	1642.98	225.653	3010.9	1490.88	227.733	2914.39	1266.05	193.872	3151.84	1396.29	181.477	3179.48	1211.32	281.827	2915.18	1339.4	28.0969	2994.79	1451.33	-38.2868	2969.91	1255.82	-64.7433	2959.2	1138.37	-80.8127	3094.52	1032.11	-41.3002	3178.55	982.553	-92.6549	3140.81	939.846	-97.8954	3240.96	901.579
1016	0	153.256	3266.18	1607.43	256.538	3265.88	1605.17	132.759	3110.43	1642.47	268.202	3101.09	1642.61	227.731	3021.63	1490.7	229.596	2925.28	1265.76	195.608	3162.5	1396.24	182.94	3190.4	1211.34	283.86	2925.93	1338.98	30.063	3005.1	1451.35	-36.1165	2979.41	1256	-62.3086	2967.93	1138.53	-78.7164	3101.19	1029.68	-39.3242	3184.13	978.452	-90.8446	3145.67	936.636	-96.106	3244.98	896.237
1017	0	155.704	3277	1607.44	258.987	3276.61	1604.79	135.104	3121.49	1642.86	270.63	3111.9	1642.42	229.701	3032.29	1490.71	231.46	2936.06	1265.66	197.234	3173.05	1396.35	184.378	3201.22	1211.54	285.871	2936.6	1338.76	31.9417	3015.28	1451.5	-33.9761	2988.76	1256.29	-59.8514	2976.49	1138.78	-76.649	3107.44	1027.1	-37.4168	3189.21	974.033	-89.0539	3149.89	933.216	-94.3668	3248.21	890.465
1018	0	157.995	3287.74	1607.55	261.28	3287.26	1604.54	137.258	3132.5	1643.39	272.873	3122.61	1642.43	231.555	3042.83	1490.9	233.319	2946.72	1265.75	198.741	3183.47	1396.62	185.782	3211.91	1211.92	287.853	2947.19	1338.75	33.7255	3025.32	1451.78	-31.8695	2997.95	1256.68	-57.3755	2984.88	1139.13	-74.6159	3113.26	1024.4	-35.5869	3193.77	969.339	-87.2839	3153.47	929.628	-92.6846	3250.67	884.335
1019	0	160.104	3298.37	1607.77	263.392	3297.8	1604.43	139.207	3143.43	1644.05	274.916	3133.22	1642.62	233.287	3053.27	1491.28	235.167	2957.25	1266.02	200.123	3193.77	1397.07	187.143	3222.47	1212.46	289.801	2957.7	1338.94	35.4091	3035.21	1452.17	-29.7991	3006.96	1257.16	-54.8842	2993.09	1139.54	-72.6211	3118.66	1021.59	-33.8408	3197.83	964.42	-85.5344	3156.43	925.918	-91.0651	3252.36	877.927
1020	0	162.008	3308.88	1608.08	265.304	3308.22	1604.47	140.943	3154.25	1644.84	276.744	3143.72	1643.01	234.894	3063.57	1491.82	236.999	2967.65	1266.46	201.377	3203.92	1397.67	188.45	3232.88	1213.16	291.705	2968.13	1339.32	36.989	3044.94	1452.66	-27.7667	3015.8	1257.71	-52.3801	3001.11	1140.02	-70.6674	3123.63	1018.72	-32.1825	3201.38	959.327	-83.8043	3158.78	922.135	-89.513	3253.29	871.322
1021	0	163.694	3319.26	1608.49	267	3318.51	1604.66	142.461	3164.94	1645.73	278.349	3154.09	1643.57	236.376	3073.75	1492.52	238.807	2977.9	1267.06	202.502	3213.92	1398.42	189.695	3243.15	1214.01	293.561	2978.46	1339.87	38.4637	3054.51	1453.24	-25.7729	3024.45	1258.33	-49.8655	3008.94	1140.56	-68.7563	3128.18	1015.81	-30.6133	3204.43	954.115	-82.0911	3160.53	918.33	-88.0316	3253.47	864.604
1022	0	165.151	3329.49	1609	268.471	3328.66	1605.01	143.763	3175.46	1646.72	279.729	3164.32	1644.32	237.731	3083.78	1493.37	240.585	2988.01	1267.81	203.5	3223.79	1399.32	190.868	3253.26	1215.01	295.361	2988.7	1340.58	39.8333	3063.91	1453.9	-23.8178	3032.91	1259.01	-47.3419	3016.56	1141.15	-66.8878	3132.31	1012.91	-29.1323	3206.96	948.841	-80.3915	3161.7	914.554	-86.6224	3252.92	857.858
1023	0	166.374	3339.55	1609.61	269.711	3338.67	1605.54	144.854	3185.81	1647.79	280.885	3174.4	1645.23	238.965	3093.67	1494.36	242.323	2997.99	1268.7	204.375	3233.51	1400.36	191.962	3263.23	1216.13	297.099	2998.85	1341.44	41.0996	3073.15	1454.64	-21.9009	3041.18	1259.74	-44.8109	3023.98	1141.78	-65.0611	3136.03	1010.04	-27.7365	3208.99	943.562	-78.7014	3162.3	910.857	-85.2854	3251.65	851.169
1024	0	167.364	3349.45	1610.33	270.721	3348.53	1606.23	145.743	3195.97	1648.94	281.824	3184.34	1646.3	240.079	3103.43	1495.48	244.014	3007.82	1269.7	205.131	3243.11	1401.52	192.968	3273.05	1217.37	298.768	3008.91	1342.44	42.2654	3082.23	1455.44	-20.0217	3049.26	1260.52	-42.2741	3031.19	1142.47	-63.2745	3139.34	1007.25	-26.4212	3210.53	938.337	-77.0164	3162.37	907.291	-84.0181	3249.68	844.615
1025	0	168.128	3359.18	1611.15	271.505	3358.25	1607.09	146.443	3205.92	1650.15	282.554	3194.12	1647.51	241.081	3113.05	1496.7	245.651	3017.53	1270.81	205.776	3252.58	1402.8	193.88	3282.72	1218.72	300.362	3018.88	1343.55	43.335	3091.16	1456.3	-18.1797	3057.15	1261.34	-39.7335	3038.19	1143.22	-61.5255	3142.27	1004.57	-25.1802	3211.57	933.221	-75.3323	3161.91	903.905	-82.8155	3247.04	838.272
1026	0	168.675	3368.74	1612.09	272.074	3367.82	1608.13	146.969	3215.67	1651.41	283.089	3203.75	1648.85	241.974	3122.54	1498.01	247.226	3027.12	1272	206.317	3261.93	1404.18	194.693	3292.26	1220.16	301.878	3028.76	1344.77	44.3132	3099.95	1457.2	-16.375	3064.86	1262.2	-37.1921	3044.99	1144.01	-59.8115	3144.82	1002.03	-24.0061	3212.15	928.269	-73.6451	3160.98	900.742	-81.6701	3243.76	832.21
1027	0	169.018	3378.14	1613.13	272.439	3377.26	1609.32	147.339	3225.2	1652.71	283.446	3213.24	1650.31	242.768	3131.91	1499.4	248.73	3036.59	1273.27	206.763	3271.19	1405.66	195.404	3301.68	1221.67	303.309	3038.57	1346.07	45.2054	3108.61	1458.15	-14.6081	3072.4	1263.1	-34.6537	3051.59	1144.87	-58.1294	3147.03	999.672	-22.8904	3212.28	923.53	-71.9519	3159.6	897.845	-80.5715	3239.88	826.49
1028	0	169.175	3387.38	1614.28	272.616	3386.57	1610.66	147.572	3234.53	1654.03	283.642	3222.58	1651.85	243.467	3141.18	1500.84	250.158	3045.95	1274.6	207.121	3280.36	1407.2	196.015	3310.98	1223.24	304.654	3048.29	1347.43	46.0172	3117.15	1459.12	-12.8806	3079.78	1264.05	-32.1235	3058	1145.78	-56.4766	3148.9	997.517	-21.824	3211.99	919.051	-70.2508	3157.83	895.25	-79.5069	3235.43	821.166
1029	0	169.162	3396.46	1615.53	272.625	3395.75	1612.14	147.687	3243.66	1655.38	283.696	3231.78	1653.47	244.08	3150.35	1502.33	251.503	3055.22	1275.96	207.401	3289.44	1408.8	196.526	3320.17	1224.85	305.907	3057.95	1348.84	46.7541	3125.6	1460.12	-11.1948	3087.01	1265.03	-29.6079	3064.22	1146.77	-54.8504	3150.48	995.591	-20.7969	3211.31	914.871	-68.5415	3155.7	892.988	-78.4613	3230.48	816.282
1030	0	169.001	3405.4	1616.86	272.485	3404.83	1613.73	147.704	3252.6	1656.73	283.629	3240.86	1655.12	244.612	3159.44	1503.84	252.759	3064.41	1277.35	207.612	3298.47	1410.43	196.943	3329.27	1226.47	307.068	3067.53	1350.28	47.4213	3133.97	1461.12	-9.55398	3094.12	1266.04	-27.1148	3070.27	1147.82	-53.2488	3151.79	993.914	-19.7987	3210.29	911.026	-66.8246	3153.27	891.083	-77.4184	3225.08	811.87
1031	0	168.711	3414.22	1618.27	272.219	3413.8	1615.42	147.641	3261.37	1658.07	283.461	3249.82	1656.8	245.07	3168.46	1505.34	253.921	3073.52	1278.75	207.76	3307.43	1412.06	197.272	3338.28	1228.09	308.135	3077.05	1351.73	48.0234	3142.27	1462.13	-7.96216	3101.11	1267.09	-24.6533	3076.16	1148.94	-51.6704	3152.87	992.5	-18.819	3208.96	907.543	-65.1026	3150.6	889.551	-76.3615	3219.31	807.953
1032	0	168.314	3422.91	1619.74	271.848	3422.69	1617.17	147.515	3269.99	1659.38	283.212	3258.67	1658.47	245.459	3177.42	1506.83	254.985	3082.56	1280.14	207.854	3316.36	1413.68	197.521	3347.22	1229.68	309.106	3086.51	1353.18	48.5641	3150.54	1463.12	-6.42422	3108	1268.17	-22.2334	3081.9	1150.12	-50.1144	3153.75	991.357	-17.8474	3207.37	904.442	-63.3788	3147.75	888.402	-75.2743	3213.25	804.544
1033	0	167.829	3431.51	1621.25	271.394	3431.5	1618.96	147.343	3278.48	1660.66	282.901	3267.44	1660.11	245.783	3186.34	1508.29	255.946	3091.54	1281.5	207.899	3325.24	1415.27	197.697	3356.09	1231.22	309.98	3095.91	1354.6	49.0464	3158.77	1464.09	-4.94562	3114.81	1269.27	-19.8662	3087.51	1151.37	-48.5807	3154.49	990.49	-16.8745	3205.57	901.736	-61.6578	3144.79	887.638	-74.1417	3206.97	801.645
1034	0	167.279	3440.03	1622.76	270.879	3440.25	1620.75	147.138	3286.87	1661.88	282.544	3276.14	1661.7	246.046	3195.23	1509.69	256.802	3100.47	1282.82	207.901	3334.1	1416.79	197.81	3364.91	1232.69	310.756	3105.25	1355.98	49.4722	3166.99	1465.03	-3.53222	3121.57	1270.39	-17.5631	3093.02	1152.68	-47.07	3155.12	989.895	-15.8919	3203.63	899.429	-59.9452	3141.78	887.253	-72.9513	3200.57	799.249
1035	0	166.683	3448.49	1624.27	270.323	3448.96	1622.52	146.911	3295.18	1663.04	282.158	3284.78	1663.21	246.249	3204.1	1511.01	257.549	3109.34	1284.09	207.864	3342.94	1418.24	197.867	3373.69	1234.07	311.432	3114.53	1357.31	49.8426	3175.22	1465.92	-2.19009	3128.28	1271.53	-15.3358	3098.43	1154.04	-45.584	3155.69	989.566	-14.8929	3201.59	897.52	-58.247	3138.78	887.235	-71.6936	3194.13	797.343
1036	0	166.062	3456.92	1625.73	269.744	3457.64	1624.23	146.671	3303.44	1664.11	281.753	3293.38	1664.61	246.394	3212.97	1512.25	258.185	3118.18	1285.29	207.791	3351.76	1419.58	197.877	3382.42	1235.33	312.007	3123.76	1358.56	50.1578	3183.48	1466.75	-0.925323	3134.96	1272.67	-13.1959	3103.77	1155.45	-44.1247	3156.25	989.491	-13.8732	3199.51	895.999	-56.5697	3135.87	887.566	-70.3627	3187.76	795.904
1037	0	165.434	3465.33	1627.13	269.16	3466.3	1625.85	146.423	3311.67	1665.1	281.339	3301.96	1665.89	246.48	3221.83	1513.39	258.708	3126.98	1286.41	207.686	3360.58	1420.79	197.845	3391.12	1236.47	312.478	3132.94	1359.74	50.4171	3191.76	1467.52	0.256044	3141.62	1273.82	-11.1545	3109.05	1156.91	-42.6954	3156.83	989.654	-12.8308	3197.46	894.85	-54.92	3133.1	888.223	-68.9571	3181.54	794.908
1038	0	164.816	3473.75	1628.43	268.585	3474.96	1627.36	146.171	3319.91	1665.98	280.923	3310.54	1667.04	246.507	3230.69	1514.42	259.114	3135.74	1287.44	207.548	3369.39	1421.87	197.776	3399.8	1237.46	312.843	3142.07	1360.82	50.619	3200.08	1468.21	1.34817	3148.29	1274.96	-9.22213	3114.3	1158.39	-41.3004	3157.49	990.038	-11.7667	3195.49	894.053	-53.3046	3130.54	889.178	-67.4794	3175.56	794.323
1039	0	164.221	3482.21	1629.63	268.03	3483.63	1628.71	145.915	3328.19	1666.75	280.509	3319.11	1668.03	246.471	3239.57	1515.32	259.4	3144.47	1288.37	207.378	3378.2	1422.8	197.673	3408.45	1238.3	313.098	3151.15	1361.79	50.7607	3208.46	1468.82	2.34543	3154.98	1276.09	-7.40864	3119.54	1159.9	-39.9452	3158.25	990.62	-10.6846	3193.66	893.58	-51.7306	3128.23	890.399	-65.9372	3169.91	794.114
1040	0	163.662	3490.72	1630.68	267.503	3492.32	1629.9	145.652	3336.52	1667.4	280.098	3327.71	1668.86	246.37	3248.46	1516.09	259.565	3153.18	1289.18	207.176	3387.02	1423.56	197.539	3417.08	1238.98	313.24	3160.18	1362.66	50.8389	3216.9	1469.33	3.24252	3161.68	1277.21	-5.72295	3124.77	1161.43	-38.6368	3159.17	991.378	-9.59185	3192.03	893.404	-50.2047	3126.24	891.851	-64.342	3164.66	794.244
1041	0	163.146	3499.3	1631.58	267.012	3501.03	1630.89	145.376	3344.93	1667.92	279.689	3336.34	1669.52	246.198	3257.37	1516.72	259.605	3161.86	1289.89	206.94	3395.84	1424.16	197.373	3425.7	1239.48	313.263	3169.16	1363.4	50.849	3225.4	1469.75	4.03439	3168.42	1278.31	-4.17316	3130.03	1162.96	-37.3836	3160.27	992.288	-8.49831	3190.65	893.493	-48.7339	3124.59	893.497	-62.7091	3159.9	794.676
1042	0	162.677	3507.96	1632.31	266.558	3509.79	1631.67	145.081	3353.44	1668.32	279.278	3345.02	1670	245.95	3266.29	1517.21	259.516	3170.51	1290.47	206.666	3404.66	1424.57	197.175	3434.3	1239.8	313.165	3178.1	1364.01	50.7856	3233.97	1470.07	4.71627	3175.2	1279.38	-2.76654	3135.31	1164.48	-36.1959	3161.6	993.325	-7.41653	3189.57	893.813	-47.3254	3123.34	895.299	-61.0571	3155.68	795.369
1043	0	162.257	3516.72	1632.84	266.142	3518.58	1632.22	144.76	3362.08	1668.59	278.861	3353.74	1670.3	245.621	3275.24	1517.55	259.296	3179.16	1290.92	206.352	3413.5	1424.81	196.944	3442.89	1239.95	312.94	3187	1364.5	50.6426	3242.62	1470.28	5.28365	3182.02	1280.42	-1.5097	3140.66	1166	-35.0853	3163.17	994.462	-6.36104	3188.84	894.331	-45.9866	3122.52	897.218	-59.4067	3152.05	796.284
1044	0	161.882	3525.58	1633.18	265.763	3527.41	1632.55	144.404	3370.85	1668.72	278.43	3362.51	1670.43	245.204	3284.21	1517.75	258.94	3187.78	1291.24	205.993	3422.34	1424.87	196.675	3451.48	1239.93	312.583	3195.85	1364.85	50.4135	3251.34	1470.38	5.73217	3188.9	1281.43	-0.408774	3146.07	1167.49	-34.0654	3165	995.677	-5.34799	3188.5	895.011	-44.7258	3122.16	899.215	-57.7805	3149.07	797.383
1045	0	161.547	3534.53	1633.32	265.416	3536.29	1632.65	144.004	3379.75	1668.72	277.976	3371.34	1670.38	244.693	3293.2	1517.81	258.447	3196.4	1291.44	205.584	3431.2	1424.76	196.367	3460.06	1239.73	312.091	3204.66	1365.07	50.0912	3260.15	1470.38	6.05747	3195.84	1282.39	0.530394	3151.57	1168.94	-33.1512	3167.13	996.942	-4.39479	3188.59	895.819	-43.552	3122.28	901.25	-56.2024	3146.75	798.626
1046	0	161.243	3543.59	1633.25	265.093	3545.21	1632.51	143.552	3388.8	1668.58	277.489	3380.23	1670.16	244.082	3302.2	1517.72	257.814	3205.02	1291.51	205.12	3440.07	1424.48	196.013	3468.64	1239.37	311.459	3213.44	1365.16	49.6684	3269.03	1470.26	6.25505	3202.85	1283.29	1.30203	3157.17	1170.34	-32.3592	3169.56	998.235	-3.51978	3189.14	896.719	-42.4754	3122.91	903.285	-54.697	3145.13	799.974
1047	0	160.958	3552.73	1632.97	264.787	3554.17	1632.15	143.039	3397.99	1668.31	276.958	3389.17	1669.78	243.365	3311.22	1517.5	257.039	3213.63	1291.44	204.596	3448.95	1424.04	195.611	3477.23	1238.86	310.685	3222.18	1365.11	49.1381	3277.99	1470.04	6.3201	3209.93	1284.13	1.9003	3162.9	1171.68	-31.7068	3172.31	999.529	-2.7419	3190.18	897.676	-41.5076	3124.06	905.283	-53.2894	3144.21	801.391
1048	0	160.678	3561.95	1632.49	264.488	3563.16	1631.58	142.456	3407.31	1667.9	276.372	3398.15	1669.26	242.537	3320.24	1517.14	256.122	3222.25	1291.25	204.007	3457.84	1423.46	195.155	3485.83	1238.2	309.766	3230.89	1364.94	48.4934	3287.03	1469.7	6.24746	3217.1	1284.9	2.31927	3168.76	1172.94	-31.2122	3175.39	1000.8	-2.08027	3191.72	898.654	-40.6618	3125.74	907.207	-52.0049	3144.01	802.837
1049	0	160.387	3571.23	1631.82	264.185	3572.17	1630.8	141.797	3416.76	1667.37	275.717	3407.18	1668.59	241.594	3329.27	1516.67	255.062	3230.88	1290.94	203.346	3466.74	1422.73	194.64	3494.44	1237.41	308.702	3239.57	1364.64	47.7281	3296.14	1469.25	6.03169	3224.36	1285.58	2.5529	3174.79	1174.11	-30.8935	3178.81	1002.03	-1.55383	3193.79	899.62	-39.9525	3127.96	909.022	-50.8686	3144.51	804.275
1050	0	160.071	3580.57	1630.96	263.866	3581.2	1629.84	141.052	3426.31	1666.71	274.982	3416.24	1667.81	240.532	3338.31	1516.07	253.862	3239.52	1290.5	202.609	3475.65	1421.88	194.063	3503.07	1236.51	307.492	3248.22	1364.23	46.8366	3305.32	1468.69	5.66714	3231.72	1286.17	2.59516	3181	1175.17	-30.7687	3182.57	1003.19	-1.18096	3196.4	900.538	-39.3955	3130.73	910.696	-49.905	3145.71	805.668
1051	0	159.71	3589.94	1629.93	263.518	3590.24	1628.72	140.216	3435.95	1665.94	274.154	3425.33	1666.91	239.35	3347.34	1515.38	252.524	3248.18	1289.95	201.791	3484.56	1420.91	193.419	3511.73	1235.5	306.138	3256.86	1363.71	45.8145	3314.57	1468.03	5.14815	3239.2	1286.64	2.44019	3187.41	1176.09	-30.8547	3186.68	1004.26	-0.979146	3199.56	901.377	-39.0078	3134.06	912.198	-49.1379	3147.6	806.979
1052	0	159.29	3599.32	1628.74	263.128	3599.29	1627.46	139.281	3445.66	1665.07	273.221	3434.43	1665.92	238.046	3356.36	1514.58	251.051	3256.87	1289.3	200.888	3493.49	1419.86	192.704	3520.42	1234.41	304.642	3265.47	1363.08	44.6588	3323.88	1467.27	4.46928	3246.82	1286.99	2.08251	3194.03	1176.87	-31.1667	3191.15	1005.22	-0.964719	3203.27	902.104	-38.8071	3137.96	913.499	-48.5893	3150.17	808.173
1053	0	158.793	3608.71	1627.42	262.682	3608.32	1626.08	138.241	3455.43	1664.1	272.175	3443.54	1664.85	236.62	3365.37	1513.71	249.451	3265.58	1288.55	199.896	3502.42	1418.72	191.914	3529.13	1233.25	303.009	3274.08	1362.36	43.3676	3333.23	1466.4	3.62561	3254.57	1287.2	1.51726	3200.89	1177.48	-31.7179	3195.97	1006.04	-1.15253	3207.55	902.69	-38.8115	3142.42	914.573	-48.2796	3153.4	809.213
1054	0	158.208	3618.08	1625.99	262.167	3617.34	1624.61	137.089	3465.23	1663.05	271.005	3452.64	1663.73	235.075	3374.37	1512.77	247.729	3274.32	1287.7	198.812	3511.35	1417.52	191.048	3537.89	1232.04	301.245	3282.67	1361.56	41.941	3342.63	1465.44	2.61303	3262.48	1287.25	0.740392	3208	1177.91	-32.5187	3201.18	1006.7	-1.55563	3212.39	903.108	-39.0387	3147.44	915.399	-48.2264	3157.3	810.067
1055	0	157.522	3627.43	1624.46	261.571	3626.34	1623.08	135.822	3475.05	1661.93	269.707	3461.72	1662.56	233.414	3383.34	1511.76	245.894	3283.1	1286.79	197.635	3520.28	1416.28	190.103	3546.68	1230.79	299.356	3291.25	1360.69	40.3809	3352.05	1464.4	1.42854	3270.56	1287.15	-0.251026	3215.38	1178.14	-33.5759	3206.76	1007.2	-2.18481	3217.81	903.334	-39.5056	3153.04	915.959	-48.4444	3161.86	810.701
1056	0	156.727	3636.75	1622.87	260.88	3635.31	1621.51	134.435	3484.88	1660.75	268.274	3470.78	1661.36	231.641	3392.3	1510.72	243.956	3291.91	1285.8	196.365	3529.21	1415.02	189.077	3555.52	1229.54	297.352	3299.83	1359.76	38.6912	3361.5	1463.28	0.070599	3278.81	1286.87	-1.45867	3223.03	1178.15	-34.8923	3212.75	1007.49	-3.04825	3223.82	903.35	-40.2275	3159.22	916.239	-48.9449	3167.07	811.087
1057	0	155.817	3646.04	1621.25	260.083	3644.26	1619.94	132.927	3494.69	1659.55	266.705	3479.81	1660.16	229.763	3401.22	1509.65	241.925	3300.75	1284.77	195.002	3538.13	1413.74	187.971	3564.4	1228.29	295.242	3308.4	1358.79	36.878	3370.96	1462.1	-1.46056	3287.24	1286.42	-2.88277	3230.97	1177.95	-36.4662	3219.15	1007.59	-4.15112	3230.4	903.141	-41.2175	3165.97	916.229	-49.7351	3172.94	811.199
1058	0	154.79	3655.29	1619.62	259.171	3653.18	1618.38	131.296	3504.47	1658.33	265	3488.81	1658.97	227.788	3410.12	1508.57	239.812	3309.62	1283.69	193.548	3547.05	1412.48	186.785	3573.32	1227.06	293.036	3316.98	1357.79	34.9493	3380.41	1460.86	-3.16265	3295.87	1285.78	-4.52184	3239.22	1177.51	-38.2912	3226	1007.46	-5.49541	3237.58	902.698	-42.4854	3173.3	915.926	-50.8189	3179.48	811.018
1059	0	153.644	3664.5	1618	258.134	3662.08	1616.87	129.545	3514.21	1657.12	263.163	3497.76	1657.81	225.726	3418.98	1507.49	237.628	3318.53	1282.6	192.007	3555.96	1411.25	185.521	3582.29	1225.87	290.747	3325.55	1356.78	32.9155	3389.85	1459.58	-5.03102	3304.7	1284.97	-6.37246	3247.77	1176.85	-40.3565	3233.3	1007.1	-7.07986	3245.35	902.019	-44.0376	3181.2	915.332	-52.1959	3186.71	810.53
1060	0	152.382	3673.68	1616.43	256.968	3670.95	1615.43	127.677	3523.89	1655.94	261.199	3506.68	1656.7	223.585	3427.82	1506.43	235.385	3327.46	1281.5	190.384	3564.86	1410.07	184.184	3591.31	1224.75	288.386	3334.13	1355.78	30.7881	3399.26	1458.28	-7.05852	3313.72	1283.99	-8.42898	3256.63	1175.97	-42.6469	3241.1	1006.52	-8.90008	3253.72	901.108	-45.8763	3189.68	914.456	-53.8632	3194.65	809.73
1061	0	151.008	3682.83	1614.94	255.669	3679.8	1614.09	125.696	3533.51	1654.8	259.117	3515.55	1655.66	221.378	3436.61	1505.41	233.095	3336.42	1280.41	188.686	3573.74	1408.95	182.78	3600.36	1223.71	285.966	3342.7	1354.79	28.5796	3408.63	1456.97	-9.23562	3322.95	1282.85	-10.6833	3265.8	1174.87	-45.1442	3249.41	1005.7	-10.9489	3262.69	899.978	-47.9996	3198.74	913.31	-55.8155	3203.31	808.621
1062	0	149.528	3691.95	1613.54	254.238	3688.63	1612.85	123.611	3543.04	1653.72	256.928	3524.37	1654.7	219.117	3445.38	1504.44	230.767	3345.38	1279.36	186.919	3582.61	1407.91	181.316	3609.46	1222.76	283.497	3351.27	1353.85	26.3034	3417.96	1455.68	-11.5507	3332.36	1281.56	-13.1249	3275.29	1173.57	-47.8276	3258.26	1004.66	-13.2167	3272.26	898.646	-50.4016	3208.37	911.915	-58.0459	3212.73	807.217
1063	0	147.952	3701.04	1612.25	252.68	3697.45	1611.75	121.432	3552.5	1652.72	254.645	3533.15	1653.84	216.815	3454.1	1503.53	228.412	3354.36	1278.35	185.095	3591.45	1406.97	179.803	3618.59	1221.93	280.991	3359.83	1352.96	23.9728	3427.24	1454.42	-13.9906	3341.97	1280.15	-15.7414	3285.08	1172.1	-50.6745	3267.67	1003.42	-15.6916	3282.43	897.137	-53.0719	3218.58	910.293	-60.546	3222.9	805.54
1064	0	146.289	3710.11	1611.09	251.003	3706.24	1610.79	119.171	3561.86	1651.82	252.283	3541.89	1653.09	214.483	3462.78	1502.71	226.038	3363.33	1277.4	183.223	3600.26	1406.14	178.251	3627.76	1221.22	278.459	3368.38	1352.14	21.6011	3436.47	1453.22	-16.5414	3351.76	1278.64	-18.519	3295.17	1170.47	-53.6612	3277.67	1001.97	-18.3602	3293.21	895.479	-55.9968	3229.37	908.474	-63.3057	3233.86	803.62
1065	0	144.554	3719.15	1610.07	249.218	3715.03	1609.98	116.844	3571.13	1651.02	249.861	3550.58	1652.46	212.135	3471.41	1501.97	223.652	3372.29	1276.53	181.317	3609.04	1405.43	176.673	3636.96	1220.66	275.91	3376.92	1351.4	19.2013	3445.64	1452.1	-19.1889	3361.72	1277.05	-21.4436	3305.55	1168.71	-56.7636	3288.26	1000.36	-21.2085	3304.59	893.708	-59.1591	3240.72	906.49	-66.3137	3245.61	801.498
1066	0	142.762	3728.15	1609.21	247.344	3723.78	1609.33	114.468	3580.3	1650.35	247.394	3559.22	1651.97	209.784	3480	1501.34	221.26	3381.23	1275.75	179.39	3617.79	1404.84	175.084	3646.17	1220.24	273.352	3385.43	1350.76	16.7854	3454.76	1451.07	-21.9192	3371.85	1275.41	-24.5011	3316.22	1166.86	-59.958	3299.47	998.608	-24.2221	3316.56	891.861	-62.5389	3252.65	904.375	-69.5577	3258.16	799.219
1067	0	140.931	3737.13	1608.5	245.399	3732.51	1608.84	112.063	3589.38	1649.8	244.904	3567.82	1651.61	207.443	3488.55	1500.82	218.866	3390.13	1275.08	177.456	3626.49	1404.39	173.499	3655.4	1219.99	270.791	3393.91	1350.22	14.365	3463.84	1450.15	-24.7191	3382.15	1273.76	-27.678	3327.15	1164.95	-63.2217	3311.29	996.737	-27.387	3329.12	889.978	-66.1145	3265.15	902.165	-73.0246	3271.49	796.836
1068	0	139.079	3746.06	1607.96	243.409	3741.21	1608.51	109.65	3598.36	1649.38	242.409	3576.37	1651.41	205.121	3497.04	1500.42	216.474	3398.98	1274.52	175.53	3635.14	1404.08	171.931	3664.63	1219.9	268.235	3402.35	1349.8	11.9502	3472.88	1449.37	-27.5766	3392.61	1272.11	-30.9622	3338.35	1163.01	-66.5337	3323.74	994.784	-30.6887	3342.27	888.099	-69.8628	3278.21	899.898	-76.6999	3285.62	794.404
1069	0	137.224	3754.94	1607.57	241.4	3749.85	1608.34	107.25	3607.24	1649.09	239.929	3584.86	1651.34	202.832	3505.47	1500.15	214.085	3407.78	1274.1	173.628	3643.75	1403.91	170.395	3673.85	1219.96	265.688	3410.74	1349.51	9.55053	3481.89	1448.72	-30.4812	3403.21	1270.51	-34.3428	3349.8	1161.07	-69.8756	3336.81	992.78	-34.1124	3356	886.264	-73.7604	3291.84	897.611	-80.5671	3300.5	791.979
1070	0	135.386	3763.76	1607.34	239.404	3758.42	1608.31	104.886	3616.04	1648.95	237.484	3593.3	1651.42	200.585	3513.85	1500	211.701	3416.51	1273.81	171.764	3652.29	1403.88	168.904	3683.04	1220.19	263.154	3419.08	1349.35	7.17424	3490.88	1448.24	-33.4239	3413.97	1268.97	-37.8104	3361.48	1159.17	-73.2319	3350.49	990.76	-37.6418	3370.28	884.511	-77.7844	3306.03	895.337	-84.6065	3316.14	789.616
1071	0	133.584	3772.51	1607.27	237.454	3766.92	1608.42	102.581	3624.75	1648.93	235.091	3601.67	1651.64	198.388	3522.17	1499.98	209.324	3425.16	1273.65	169.955	3660.78	1403.99	167.469	3692.18	1220.56	260.637	3427.36	1349.31	4.82862	3499.86	1447.92	-36.3974	3424.88	1267.53	-41.3575	3373.41	1157.34	-76.5908	3364.76	988.758	-41.2593	3385.12	882.876	-81.9127	3320.78	893.11	-88.7954	3332.5	787.364
1072	0	131.835	3781.18	1607.33	235.584	3775.31	1608.67	100.356	3633.36	1649.05	232.769	3609.97	1651.99	196.252	3530.43	1500.1	206.952	3433.72	1273.65	168.212	3669.2	1404.23	166.1	3701.26	1221.08	258.14	3435.57	1349.42	2.52002	3508.84	1447.77	-39.3959	3435.92	1266.19	-44.978	3385.56	1155.59	-79.9438	3379.62	986.808	-44.9466	3400.49	881.391	-86.125	3336.08	890.959	-93.1083	3349.56	785.267
1073	0	130.158	3789.75	1607.53	233.831	3783.59	1609.04	98.2323	3641.88	1649.3	230.534	3618.2	1652.47	194.181	3538.63	1500.35	204.587	3442.2	1273.79	166.549	3677.55	1404.59	164.805	3710.26	1221.73	255.666	3443.7	1349.66	0.253936	3517.83	1447.8	-42.4151	3447.12	1264.99	-48.6671	3397.92	1153.97	-83.2862	3395.03	984.94	-48.6847	3416.38	880.081	-90.403	3351.94	888.911	-97.5181	3367.31	783.365
1074	0	128.566	3798.22	1607.86	232.228	3791.74	1609.53	96.2282	3650.31	1649.68	228.4	3626.34	1653.07	192.182	3546.76	1500.73	202.229	3450.57	1274.08	164.978	3685.83	1405.07	163.59	3719.15	1222.5	253.216	3451.74	1350.04	-1.96492	3526.84	1448.01	-45.4522	3458.45	1263.95	-52.4215	3410.5	1152.48	-86.6161	3410.96	983.185	-52.455	3432.78	878.973	-94.7305	3368.35	886.988	-101.997	3385.72	781.688
1075	0	127.072	3806.56	1608.3	230.81	3799.75	1610.14	94.361	3658.65	1650.17	226.38	3634.4	1653.78	190.258	3554.82	1501.24	199.877	3458.83	1274.53	163.508	3694.04	1405.66	162.461	3727.93	1223.37	250.793	3459.7	1350.55	-4.13258	3535.88	1448.4	-48.5051	3469.93	1263.06	-56.2386	3423.29	1151.14	-89.9337	3427.4	981.568	-56.2396	3449.67	878.083	-99.0938	3385.31	885.209	-106.52	3404.79	780.264
1076	0	125.688	3814.78	1608.84	229.606	3807.59	1610.86	92.6455	3666.89	1650.79	224.486	3642.36	1654.6	188.415	3562.82	1501.88	197.532	3466.98	1275.12	162.147	3702.16	1406.36	161.421	3736.58	1224.35	248.397	3467.55	1351.2	-6.24575	3544.95	1448.98	-51.5725	3481.55	1262.35	-60.1167	3436.27	1149.96	-93.2407	3444.31	980.113	-60.0222	3467.04	877.428	-103.481	3402.81	883.59	-111.06	3424.5	779.111
1077	0	124.421	3822.86	1609.49	228.641	3815.26	1611.68	91.0938	3675.04	1651.51	222.724	3650.23	1655.51	186.653	3570.74	1502.65	195.194	3475.02	1275.86	160.902	3710.21	1407.17	160.475	3745.08	1225.41	246.029	3475.31	1351.98	-8.30185	3554.05	1449.73	-54.6539	3493.31	1261.82	-64.0547	3449.46	1148.96	-96.539	3461.67	978.837	-63.7888	3484.87	877.018	-107.885	3420.85	882.142	-115.599	3444.83	778.246
1078	0	123.277	3830.8	1610.23	227.937	3822.74	1612.61	89.7158	3683.08	1652.35	221.102	3658	1656.51	184.975	3578.6	1503.54	192.862	3482.95	1276.75	159.777	3718.18	1408.07	159.625	3753.43	1226.55	243.691	3482.96	1352.89	-10.2989	3563.2	1450.67	-57.7488	3505.21	1261.47	-68.0517	3462.83	1148.14	-99.8305	3479.46	977.755	-67.5276	3503.16	876.862	-112.296	3439.43	880.874	-120.117	3465.79	777.678
1079	0	122.261	3838.58	1611.06	227.508	3830.02	1613.64	88.5188	3691.02	1653.29	219.623	3665.66	1657.6	183.381	3586.38	1504.55	190.536	3490.76	1277.78	158.777	3726.07	1409.06	158.874	3761.62	1227.76	241.382	3490.51	1353.93	-12.2356	3572.39	1451.79	-60.8572	3517.25	1261.31	-72.1073	3476.4	1147.5	-103.117	3497.68	976.876	-71.2297	3521.91	876.963	-116.712	3458.55	879.792	-124.602	3487.37	777.414
1080	0	121.374	3846.21	1611.96	227.364	3837.11	1614.78	87.5076	3698.85	1654.34	218.292	3673.22	1658.77	181.872	3594.09	1505.69	188.216	3498.45	1278.96	157.904	3733.87	1410.15	158.223	3769.65	1229.05	239.104	3497.95	1355.1	-14.1109	3581.62	1453.08	-63.9792	3529.43	1261.35	-76.2213	3490.15	1147.05	-106.398	3516.3	976.207	-74.889	3541.09	877.325	-121.127	3478.2	878.899	-129.045	3509.56	777.457
1081	0	120.617	3853.67	1612.95	227.513	3843.98	1616.01	86.6855	3706.58	1655.5	217.109	3680.67	1660.03	180.448	3601.73	1506.94	185.903	3506.02	1280.29	157.159	3741.59	1411.33	157.673	3777.52	1230.4	236.855	3505.29	1356.39	-15.9245	3590.9	1454.56	-67.1148	3541.76	1261.58	-80.3937	3504.09	1146.79	-109.676	3535.32	975.75	-78.5018	3560.71	877.949	-125.542	3498.38	878.197	-133.439	3532.36	777.81
1082	0	119.993	3860.98	1614.02	227.956	3850.65	1617.35	86.054	3714.2	1656.76	216.074	3688.02	1661.36	179.11	3609.29	1508.32	183.595	3513.47	1281.76	156.543	3749.23	1412.6	157.225	3785.22	1231.82	234.637	3512.51	1357.82	-17.6761	3600.22	1456.21	-70.264	3554.22	1262	-84.6243	3518.22	1146.72	-112.95	3554.75	975.508	-82.0664	3580.77	878.836	-129.953	3519.1	877.687	-137.783	3555.77	778.473
1083	0	119.499	3868.13	1615.17	228.695	3857.12	1618.78	85.6137	3721.71	1658.12	215.19	3695.27	1662.78	177.858	3616.79	1509.83	181.294	3520.81	1283.38	156.055	3756.79	1413.95	156.879	3792.76	1233.31	232.45	3519.63	1359.36	-19.3655	3609.59	1458.04	-73.4269	3566.83	1262.61	-88.9132	3532.54	1146.84	-116.221	3574.58	975.481	-85.5822	3601.27	879.985	-134.363	3540.36	877.369	-142.076	3579.78	779.446
[truncated: 69 more columns]

## Sheet: Sheet2
Devices
		025370 - Force			025370 - Moment			025370 - CoP			027571 - Force			027571 - Moment			027571 - CoP			037720 - Force			037720 - Moment			037720 - CoP
Frame	Sub Frame	Fx	Fy	Fz	Mx	My	Mz	Cx	Cy	Cz	Fx	Fy	Fz	Mx	My	Mz	Cx	Cy	Cz	Fx	Fy	Fz	Mx	My	Mz	Cx	Cy	Cz
		N	N	N	N.mm	N.mm	N.mm	mm	mm	mm	N	N	N	N.mm	N.mm	N.mm	mm	mm	mm	N	N	N	N.mm	N.mm	N.mm	mm	mm	mm
586	0	0	0	0	0	0	0	200	300	0	0	0	0	0	0	0	200	903	0	0	0	0	0	0	0	603	903	0
586	1	0	0	0	0	0	0	200	300	0	0	0	0	0	0	0	200	903	0	0	0	0	0	0	0	603	903	0
586	2	0	0	0	0	0	0	200	300	0	0	0	0	0	0	0	200	903	0	0	0	0	0	0	0	603	903	0
586	3	0	0	0	0	0	0	200	300	0	0	0	0	0	0	0	200	903	0	0	0	0	0	0	0	603	903	0
586	4	0	0	0	0	0	0	200	300	0	0	0	0	0	0	0	200	903	0	0	0	0	0	0	0	603	903	0
586	5	0	0	0	0	0	0	200	300	0	0	0	0	0	0	0	200	903	0	0	0	0	0	0	0	603	903	0
586	6	0	0	0	0	0	0	200	300	0	0	0	0	0	0	0	200	903	0	0	0	0	0	0	0	603	903	0
586	7	0	0	0	0	0	0	200	300	0	0	0	0	0	0	0	200	903	0	0	0	0	0	0	0	603	903	0
586	8	0	0	0	0	0	0	200	300	0	0	0	0	0	0	0	200	903	0	0	0	0	0	0	0	603	903	0
586	9	0	0	0	0	0	0	200	300	0	0	0	0	0	0	0	200	903	0	0	0	0	0	0	0	603	903	0
587	0	0	0	0	0	0	0	200	300	0	0	0	0	0	0	0	200	903	0	0	0	0	0	0	0	603	903	0
587	1	0	0	0	0	0	0	200	300	0	0	0	0	0	0	0	200	903	0	0	0	0	0	0	0	603	903	0
587	2	0	0	0	0	0	0	200	300	0	0	0	0	0	0	0	200	903	0	0	0	0	0	0	0	603	903	0
587	3	0	0	0	0	0	0	200	300	0	0	0	0	0	0	0	200	903	0	0	0	0	0	0	0	603	903	0
587	4	0	0	0	0	0	0	200	300	0	0	0	0	0	0	0	200	903	0	0	0	0	0	0	0	603	903	0
587	5	0	0	0	0	0	0	200	300	0	0	0	0	0	0	0	200	903	0	0	0	0	0	0	0	603	903	0
587	6	0	0	0	0	0	0	200	300	0	0	0	0	0	0	0	200	903	0	0	0	0	0	0	0	603	903	0
587	7	0	0	0	0	0	0	200	300	0	0	0	0	0	0	0	200	903	0	0	0	0	0	0	0	603	903	0
587	8	0	0	0	0	0	0	200	300	0	0	0	0	0	0	0	200	903	0	0	0	0	0	0	0	603	903	0
587	9	0	0	0	0	0	0	200	300	0	0	0	0	0	0	0	200	903	0	0	0	0	0	0	0	603	903	0
588	0	0	0	0	0	0	0	200	300	0	0	0	0	0	0	0	200	903	0	0	0	0	0	0	0	603	903	0
588	1	0	0	0	0	0	0	200	300	0	0	0	0	0	0	0	200	903	0	0	0	0	0	0	0	603	903	0
588	2	0	0	0	0	0	0	200	300	0	0	0	0	0	0	0	200	903	0	0	0	0	0	0	0	603	903	0
588	3	0	0	0	0	0	0	200	300	0	0	0	0	0	0	0	200	903	0	0	0	0	0	0	0	603	903	0
588	4	0	0	0	0	0	0	200	300	0	0	0	0	0	0	0	200	903	0	0	0	0	0	0	0	603	903	0
588	5	0	0	0	0	0	0	200	300	0	0	0	0	0	0	0	200	903	0	0	0	0	0	0	0	603	903	0
588	6	0	0	0	0	0	0	200	300	0	0	0	0	0	0	0	200	903	0	0	0	0	0	0	0	603	903	0
588	7	0	0	0	0	0	0	200	300	0	0	0	0	0	0	0	200	903	0	0	0	0	0	0	0	603	903	0
588	8	0	0	0	0	0	0	200	300	0	0	0	0	0	0	0	200	903	0	0	0	0	0	0	0	603	903	0
588	9	0	0	0	0	0	0	200	300	0	0	0	0	0	0	0	200	903	0	0	0	0	0	0	0	603	903	0
589	0	0	0	0	0	0	0	200	300	0	0	0	0	0	0	0	200	903	0	0	0	0	0	0	0	603	903	0
589	1	0	0	0	0	0	0	200	300	0	0	0	0	0	0	0	200	903	0	0	0	0	0	0	0	603	903	0
589	2	0	0	0	0	0	0	200	300	0	0	0	0	0	0	0	200	903	0	0	0	0	0	0	0	603	903	0
589	3	0	0	0	0	0	0	200	300	0	0	0	0	0	0	0	200	903	0	0	0	0	0	0	0	603	903	0
589	4	0	0	0	0	0	0	200	300	0	0	0	0	0	0	0	200	903	0	0	0	0	0	0	0	603	903	0
589	5	0	0	0	0	0	0	200	300	0	0	0	0	0	0	0	200	903	0	0	0	0	0	0	0	603	903	0
589	6	0	0	0	0	0	0	200	300	0	0	0	0	0	0	0	200	903	0	0	0	0	0	0	0	603	903	0
589	7	0	0	0	0	0	0	200	300	0	0	0	0	0	0	0	200	903	0	0	0	0	0	0	0	603	903	0
589	8	0	0	0	0	0	0	200	300	0	0	0	0	0	0	0	200	903	0	0	0	0	0	0	0	603	903	0
589	9	0	0	0	0	0	0	200	300	0	0	0	0	0	0	0	200	903	0	0	0	0	0	0	0	603	903	0
590	0	0	0	0	0	0	0	200	300	0	0	0	0	0	0	0	200	903	0	0	0	0	0	0	0	603	903	0
590	1	0	0	0	0	0	0	200	300	0	0	0	0	0	0	0	200	903	0	0	0	0	0	0	0	603	903	0
590	2	0	0	0	0	0	0	200	300	0	0	0	0	0	0	0	200	903	0	0	0	0	0	0	0	603	903	0
590	3	0	0	0	0	0	0	200	300	0	0	0	0	0	0	0	200	903	0	0	0	0	0	0	0	603	903	0
590	4	0	0	0	0	0	0	200	300	0	0	0	0	0	0	0	200	903	0	0	0	0	0	0	0	603	903	0
590	5	0	0	0	0	0	0	200	300	0	0	0	0	0	0	0	200	903	0	0	0	0	0	0	0	603	903	0
590	6	0	0	0	0	0	0	200	300	0	0	0	0	0	0	0	200	903	0	0	0	0	0	0	0	603	903	0
590	7	0	0	0	0	0	0	200	300	0	0	0	0	0	0	0	200	903	0	0	0	0	0	0	0	603	903	0
590	8	0	0	0	0	0	0	200	300	0	0	0	0	0	0	0	200	903	0	0	0	0	0	0	0	603	903	0
590	9	0	0	0	0	0	0	200	300	0	0	0	0	0	0	0	200	903	0	0	0	0	0	0	0	603	903	0
591	0	0	0	0	0	0	0	200	300	0	0	0	0	0	0	0	200	903	0	0	0	0	0	0	0	603	903	0
591	1	0	0	0	0	0	0	200	300	0	0	0	0	0	0	0	200	903	0	0	0	0	0	0	0	603	903	0
591	2	0	0	0	0	0	0	200	300	0	0	0	0	0	0	0	200	903	0	0	0	0	0	0	0	603	903	0
591	3	0	0	0	0	0	0	200	300	0	0	0	0	0	0	0	200	903	0	0	0	0	0	0	0	603	903	0
591	4	0	0	0	0	0	0	200	300	0	0	0	0	0	0	0	200	903	0	0	0	0	0	0	0	603	903	0
591	5	0	0	0	0	0	0	200	300	0	0	0	0	0	0	0	200	903	0	0	0	0	0	0	0	603	903	0
591	6	0	0	0	0	0	0	200	300	0	0	0	0	0	0	0	200	903	0	0	0	0	0	0	0	603	903	0
591	7	0	0	0	0	0	0	200	300	0	0	0	0	0	0	0	200	903	0	0	0	0	0	0	0	603	903	0
591	8	0	0	0	0	0	0	200	300	0	0	0	0	0	0	0	200	903	0	0	0	0	0	0	0	603	903	0
591	9	0	0	0	0	0	0	200	300	0	0	0	0	0	0	0	200	903	0	0	0	0	0	0	0	603	903	0
592	0	0	0	0	0	0	0	200	300	0	0	0	0	0	0	0	200	903	0	0	0	0	0	0	0	603	903	0
592	1	0	0	0	0	0	0	200	300	0	0	0	0	0	0	0	200	903	0	0	0	0	0	0	0	603	903	0
592	2	0	0	0	0	0	0	200	300	0	0	0	0	0	0	0	200	903	0	0	0	0	0	0	0	603	903	0
592	3	0	0	0	0	0	0	200	300	0	0	0	0	0	0	0	200	903	0	0	0	0	0	0	0	603	903	0
592	4	0	0	0	0	0	0	200	300	0	0	0	0	0	0	0	200	903	0	0	0	0	0	0	0	603	903	0
592	5	0	0	0	0	0	0	200	300	0	0	0	0	0	0	0	200	903	0	0	0	0	0	0	0	603	903	0
592	6	0	0	0	0	0	0	200	300	0	0	0	0	0	0	0	200	903	0	0	0	0	0	0	0	603	903	0
592	7	0	0	0	0	0	0	200	300	0	0	0	0	0	0	0	200	903	0	0	0	0	0	0	0	603	903	0
592	8	0	0	0	0	0	0	200	300	0	0	0	0	0	0	0	200	903	0	0	0	0	0	0	0	603	903	0
592	9	0	0	0	0	0	0	200	300	0	0	0	0	0	0	0	200	903	0	0	0	0	0	0	0	603	903	0
593	0	0	0	0	0	0	0	200	300	0	0	0	0	0	0	0	200	903	0	0	0	0	0	0	0	603	903	0
593	1	0	0	0	0	0	0	200	300	0	0	0	0	0	0	0	200	903	0	0	0	0	0	0	0	603	903	0
593	2	0	0	0	0	0	0	200	300	0	0	0	0	0	0	0	200	903	0	0	0	0	0	0	0	603	903	0
593	3	0	0	0	0	0	0	200	300	0	0	0	0	0	0	0	200	903	0	0	0	0	0	0	0	603	903	0
593	4	0	0	0	0	0	0	200	300	0	0	0	0	0	0	0	200	903	0	0	0	0	0	0	0	603	903	0
593	5	0	0	0	0	0	0	200	300	0	0	0	0	0	0	0	200	903	0	0	0	0	0	0	0	603	903	0
593	6	0	0	0	0	0	0	200	300	0	0	0	0	0	0	0	200	903	0	0	0	0	0	0	0	603	903	0
593	7	0	0	0	0	0	0	200	300	0	0	0	0	0	0	0	200	903	0	0	0	0	0	0	0	603	903	0
593	8	0	0	0	0	0	0	200	300	0	0	0	0	0	0	0	200	903	0	0	0	0	0	0	0	603	903	0
593	9	0	0	0	0	0	0	200	300	0	0	0	0	0	0	0	200	903	0	0	0	0	0	0	0	603	903	0
594	0	0	0	0	0	0	0	200	300	0	0	0	0	0	0	0	200	903	0	0	0	0	0	0	0	603	903	0
594	1	0	0	0	0	0	0	200	300	0	0	0	0	0	0	0	200	903	0	0	0	0	0	0	0	603	903	0
594	2	0	0	0	0	0	0	200	300	0	0	0	0	0	0	0	200	903	0	0	0	0	0	0	0	603	903	0
594	3	0	0	0	0	0	0	200	300	0	0	0	0	0	0	0	200	903	0	0	0	0	0	0	0	603	903	0
594	4	0	0	0	0	0	0	200	300	0	0	0	0	0	0	0	200	903	0	0	0	0	0	0	0	603	903	0
594	5	0	0	0	0	0	0	200	300	0	0	0	0	0	0	0	200	903	0	0	0	0	0	0	0	603	903	0
594	6	0	0	0	0	0	0	200	300	0	0	0	0	0	0	0	200	903	0	0	0	0	0	0	0	603	903	0
594	7	0	0	0	0	0	0	200	300	0	0	0	0	0	0	0	200	903	0	0	0	0	0	0	0	603	903	0
594	8	0	0	0	0	0	0	200	300	0	0	0	0	0	0	0	200	903	0	0	0	0	0	0	0	603	903	0
594	9	0	0	0	0	0	0	200	300	0	0	0	0	0	0	0	200	903	0	0	0	0	0	0	0	603	903	0
595	0	0	0	0	0	0	0	200	300	0	0	0	0	0	0	0	200	903	0	0	0	0	0	0	0	603	903	0
595	1	0	0	0	0	0	0	200	300	0	0	0	0	0	0	0	200	903	0	0	0	0	0	0	0	603	903	0
595	2	0	0	0	0	0	0	200	300	0	0	0	0	0	0	0	200	903	0	0	0	0	0	0	0	603	903	0
595	3	0	0	0	0	0	0	200	300	0	0	0	0	0	0	0	200	903	0	0	0	0	0	0	0	603	903	0
595	4	0	0	0	0	0	0	200	300	0	0	0	0	0	0	0	200	903	0	0	0	0	0	0	0	603	903	0
595	5	0	0	0	0	0	0	200	300	0	0	0	0	0	0	0	200	903	0	0	0	0	0	0	0	603	903	0
595	6	0	0	0	0	0	0	200	300	0	0	0	0	0	0	0	200	903	0	0	0	0	0	0	0	603	903	0
595	7	0	0	0	0	0	0	200	300	0	0	0	0	0	0	0	200	903	0	0	0	0	0	0	0	603	903	0
595	8	0	0	0	0	0	0	200	300	0	0	0	0	0	0	0	200	903	0	0	0	0	0	0	0	603	903	0
595	9	0	0	0	0	0	0	200	300	0	0	0	0	0	0	0	200	903	0	0	0	0	0	0	0	603	903	0
596	0	0	0	0	0	0	0	200	300	0	0	0	0	0	0	0	200	903	0	0	0	0	0	0	0	603	903	0
596	1	0	0	0	0	0	0	200	300	0	0	0	0	0	0	0	200	903	0	0	0	0	0	0	0	603	903	0
596	2	0	0	0	0	0	0	200	300	0	0	0	0	0	0	0	200	903	0	0	0	0	0	0	0	603	903	0
596	3	0	0	0	0	0	0	200	300	0	0	0	0	0	0	0	200	903	0	0	0	0	0	0	0	603	903	0
596	4	0	0	0	0	0	0	200	300	0	0	0	0	0	0	0	200	903	0	0	0	0	0	0	0	603	903	0
596	5	0	0	0	0	0	0	200	300	0	0	0	0	0	0	0	200	903	0	0	0	0	0	0	0	603	903	0
596	6	0	0	0	0	0	0	200	300	0	0	0	0	0	0	0	200	903	0	0	0	0	0	0	0	603	903	0
596	7	0	0	0	0	0	0	200	300	0	0	0	0	0	0	0	200	903	0	0	0	0	0	0	0	603	903	0
596	8	0	0	0	0	0	0	200	300	0	0	0	0	0	0	0	200	903	0	0	0	0	0	0	0	603	903	0
596	9	0	0	0	0	0	0	200	300	0	0	0	0	0	0	0	200	903	0	0	0	0	0	0	0	603	903	0
597	0	0	0	0	0	0	0	200	300	0	0	0	0	0	0	0	200	903	0	0	0	0	0	0	0	603	903	0
597	1	0	0	0	0	0	0	200	300	0	0	0	0	0	0	0	200	903	0	0	0	0	0	0	0	603	903	0
597	2	0	0	0	0	0	0	200	300	0	0	0	0	0	0	0	200	903	0	0	0	0	0	0	0	603	903	0
597	3	0	0	0	0	0	0	200	300	0	0	0	0	0	0	0	200	903	0	0	0	0	0	0	0	603	903	0
597	4	0	0	0	0	0	0	200	300	0	0	0	0	0	0	0	200	903	0	0	0	0	0	0	0	603	903	0
597	5	0	0	0	0	0	0	200	300	0	0	0	0	0	0	0	200	903	0	0	0	0	0	0	0	603	903	0
597	6	0	0	0	0	0	0	200	300	0	0	0	0	0	0	0	200	903	0	0	0	0	0	0	0	603	903	0
597	7	0	0	0	0	0	0	200	300	0	0	0	0	0	0	0	200	903	0	0	0	0	0	0	0	603	903	0
597	8	0	0	0	0	0	0	200	300	0	0	0	0	0	0	0	200	903	0	0	0	0	0	0	0	603	903	0
597	9	0	0	0	0	0	0	200	300	0	0	0	0	0	0	0	200	903	0	0	0	0	0	0	0	603	903	0
598	0	0	0	0	0	0	0	200	300	0	0	0	0	0	0	0	200	903	0	0	0	0	0	0	0	603	903	0
598	1	0	0	0	0	0	0	200	300	0	0	0	0	0	0	0	200	903	0	0	0	0	0	0	0	603	903	0
598	2	0	0	0	0	0	0	200	300	0	0	0	0	0	0	0	200	903	0	0	0	0	0	0	0	603	903	0
598	3	0	0	0	0	0	0	200	300	0	0	0	0	0	0	0	200	903	0	0	0	0	0	0	0	603	903	0
598	4	0	0	0	0	0	0	200	300	0	0	0	0	0	0	0	200	903	0	0	0	0	0	0	0	603	903	0
598	5	0	0	0	0	0	0	200	300	0	0	0	0	0	0	0	200	903	0	0	0	0	0	0	0	603	903	0
598	6	0	0	0	0	0	0	200	300	0	0	0	0	0	0	0	200	903	0	0	0	0	0	0	0	603	903	0
598	7	0	0	0	0	0	0	200	300	0	0	0	0	0	0	0	200	903	0	0	0	0	0	0	0	603	903	0
598	8	0	0	0	0	0	0	200	300	0	0	0	0	0	0	0	200	903	0	0	0	0	0	0	0	603	903	0
598	9	0	0	0	0	0	0	200	300	0	0	0	0	0	0	0	200	903	0	0	0	0	0	0	0	603	903	0
599	0	0	0	0	0	0	0	200	300	0	0	0	0	0	0	0	200	903	0	0	0	0	0	0	0	603	903	0
599	1	0	0	0	0	0	0	200	300	0	0	0	0	0	0	0	200	903	0	0	0	0	0	0	0	603	903	0
599	2	0	0	0	0	0	0	200	300	0	0	0	0	0	0	0	200	903	0	0	0	0	0	0	0	603	903	0
599	3	0	0	0	0	0	0	200	300	0	0	0	0	0	0	0	200	903	0	0	0	0	0	0	0	603	903	0
599	4	0	0	0	0	0	0	200	300	0	0	0	0	0	0	0	200	903	0	0	0	0	0	0	0	603	903	0
599	5	0	0	0	0	0	0	200	300	0	0	0	0	0	0	0	200	903	0	0	0	0	0	0	0	603	903	0
599	6	0	0	0	0	0	0	200	300	0	0	0	0	0	0	0	200	903	0	0	0	0	0	0	0	603	903	0
599	7	0	0	0	0	0	0	200	300	0	0	0	0	0	0	0	200	903	0	0	0	0	0	0	0	603	903	0
599	8	0	0	0	0	0	0	200	300	0	0	0	0	0	0	0	200	903	0	0	0	0	0	0	0	603	903	0
599	9	0	0	0	0	0	0	200	300	0	0	0	0	0	0	0	200	903	0	0	0	0	0	0	0	603	903	0
600	0	0	0	0	0	0	0	200	300	0	0	0	0	0	0	0	200	903	0	0	0	0	0	0	0	603	903	0
600	1	0	0	0	0	0	0	200	300	0	0	0	0	0	0	0	200	903	0	0	0	0	0	0	0	603	903	0
600	2	0	0	0	0	0	0	200	300	0	0	0	0	0	0	0	200	903	0	0	0	0	0	0	0	603	903	0
600	3	0	0	0	0	0	0	200	300	0	0	0	0	0	0	0	200	903	0	0	0	0	0	0	0	603	903	0
600	4	0	0	0	0	0	0	200	300	0	0	0	0	0	0	0	200	903	0	0	0	0	0	0	0	603	903	0
600	5	0	0	0	0	0	0	200	300	0	0	0	0	0	0	0	200	903	0	0	0	0	0	0	0	603	903	0
600	6	0	0	0	0	0	0	200	300	0	0	0	0	0	0	0	200	903	0	0	0	0	0	0	0	603	903	0
600	7	0	0	0	0	0	0	200	300	0	0	0	0	0	0	0	200	903	0	0	0	0	0	0	0	603	903	0
600	8	0	0	0	0	0	0	200	300	0	0	0	0	0	0	0	200	903	0	0	0	0	0	0	0	603	903	0
600	9	0	0	0	0	0	0	200	300	0	0	0	0	0	0	0	200	903	0	0	0	0	0	0	0	603	903	0
601	0	0	0	0	0	0	0	200	300	0	0	0	0	0	0	0	200	903	0	0	0	0	0	0	0	603	903	0
601	1	0	0	0	0	0	0	200	300	0	0	0	0	0	0	0	200	903	0	0	0	0	0	0	0	603	903	0
601	2	0	0	0	0	0	0	200	300	0	0	0	0	0	0	0	200	903	0	0	0	0	0	0	0	603	903	0
601	3	0	0	0	0	0	0	200	300	0	0	0	0	0	0	0	200	903	0	0	0	0	0	0	0	603	903	0
601	4	0	0	0	0	0	0	200	300	0	0	0	0	0	0	0	200	903	0	0	0	0	0	0	0	603	903	0
601	5	0	0	0	0	0	0	200	300	0	0	0	0	0	0	0	200	903	0	0	0	0	0	0	0	603	903	0
601	6	0	0	0	0	0	0	200	300	0	0	0	0	0	0	0	200	903	0	0	0	0	0	0	0	603	903	0
601	7	0	0	0	0	0	0	200	300	0	0	0	0	0	0	0	200	903	0	0	0	0	0	0	0	603	903	0
601	8	0	0	0	0	0	0	200	300	0	0	0	0	0	0	0	200	903	0	0	0	0	0	0	0	603	903	0
601	9	0	0	0	0	0	0	200	300	0	0	0	0	0	0	0	200	903	0	0	0	0	0	0	0	603	903	0
602	0	0	0	0	0	0	0	200	300	0	0	0	0	0	0	0	200	903	0	0	0	0	0	0	0	603	903	0
602	1	0	0	0	0	0	0	200	300	0	0	0	0	0	0	0	200	903	0	0	0	0	0	0	0	603	903	0
602	2	0	0	0	0	0	0	200	300	0	0	0	0	0	0	0	200	903	0	0	0	0	0	0	0	603	903	0
602	3	0	0	0	0	0	0	200	300	0	0	0	0	0	0	0	200	903	0	0	0	0	0	0	0	603	903	0
602	4	0	0	0	0	0	0	200	300	0	0	0	0	0	0	0	200	903	0	0	0	0	0	0	0	603	903	0
602	5	0	0	0	0	0	0	200	300	0	0	0	0	0	0	0	200	903	0	0	0	0	0	0	0	603	903	0
602	6	0	0	0	0	0	0	200	300	0	0	0	0	0	0	0	200	903	0	0	0	0	0	0	0	603	903	0
602	7	0	0	0	0	0	0	200	300	0	0	0	0	0	0	0	200	903	0	0	0	0	0	0	0	603	903	0
602	8	0	0	0	0	0	0	200	300	0	0	0	0	0	0	0	200	903	0	0	0	0	0	0	0	603	903	0
602	9	0	0	0	0	0	0	200	300	0	0	0	0	0	0	0	200	903	0	0	0	0	0	0	0	603	903	0
603	0	0	0	0	0	0	0	200	300	0	0	0	0	0	0	0	200	903	0	0	0	0	0	0	0	603	903	0
603	1	0	0	0	0	0	0	200	300	0	0	0	0	0	0	0	200	903	0	0	0	0	0	0	0	603	903	0
603	2	0	0	0	0	0	0	200	300	0	0	0	0	0	0	0	200	903	0	0	0	0	0	0	0	603	903	0
603	3	0	0	0	0	0	0	200	300	0	0	0	0	0	0	0	200	903	0	0	0	0	0	0	0	603	903	0
603	4	0	0	0	0	0	0	200	300	0	0	0	0	0	0	0	200	903	0	0	0	0	0	0	0	603	903	0
603	5	0	0	0	0	0	0	200	300	0	0	0	0	0	0	0	200	903	0	0	0	0	0	0	0	603	903	0
603	6	0	0	0	0	0	0	200	300	0	0	0	0	0	0	0	200	903	0	0	0	0	0	0	0	603	903	0
603	7	0	0	0	0	0	0	200	300	0	0	0	0	0	0	0	200	903	0	0	0	0	0	0	0	603	903	0
603	8	0	0	0	0	0	0	200	300	0	0	0	0	0	0	0	200	903	0	0	0	0	0	0	0	603	903	0
603	9	0	0	0	0	0	0	200	300	0	0	0	0	0	0	0	200	903	0	0	0	0	0	0	0	603	903	0
604	0	0	0	0	0	0	0	200	300	0	0	0	0	0	0	0	200	903	0	0	0	0	0	0	0	603	903	0
604	1	0	0	0	0	0	0	200	300	0	0	0	0	0	0	0	200	903	0	0	0	0	0	0	0	603	903	0
604	2	0	0	0	0	0	0	200	300	0	0	0	0	0	0	0	200	903	0	0	0	0	0	0	0	603	903	0
604	3	0	0	0	0	0	0	200	300	0	0	0	0	0	0	0	200	903	0	0	0	0	0	0	0	603	903	0
604	4	0	0	0	0	0	0	200	300	0	0	0	0	0	0	0	200	903	0	0	0	0	0	0	0	603	903	0
604	5	0	0	0	0	0	0	200	300	0	0	0	0	0	0	0	200	903	0	0	0	0	0	0	0	603	903	0
604	6	0	0	0	0	0	0	200	300	0	0	0	0	0	0	0	200	903	0	0	0	0	0	0	0	603	903	0
604	7	0	0	0	0	0	0	200	300	0	0	0	0	0	0	0	200	903	0	0	0	0	0	0	0	603	903	0
604	8	0	0	0	0	0	0	200	300	0	0	0	0	0	0	0	200	903	0	0	0	0	0	0	0	603	903	0
604	9	0	0	0	0	0	0	200	300	0	0	0	0	0	0	0	200	903	0	0	0	0	0	0	0	603	903	0
605	0	0	0	0	0	0	0	200	300	0	0	0	0	0	0	0	200	903	0	0	0	0	0	0	0	603	903	0
605	1	0	0	0	0	0	0	200	300	0	0	0	0	0	0	0	200	903	0	0	0	0	0	0	0	603	903	0
605	2	0	0	0	0	0	0	200	300	0	0	0	0	0	0	0	200	903	0	0	0	0	0	0	0	603	903	0
605	3	0	0	0	0	0	0	200	300	0	0	0	0	0	0	0	200	903	0	0	0	0	0	0	0	603	903	0
605	4	0	0	0	0	0	0	200	300	0	0	0	0	0	0	0	200	903	0	0	0	0	0	0	0	603	903	0
605	5	0	0	0	0	0	0	200	300	0	0	0	0	0	0	0	200	903	0	0	0	0	0	0	0	603	903	0
605	6	0	0	0	0	0	0	200	300	0	0	0	0	0	0	0	200	903	0	0	0	0	0	0	0	603	903	0
605	7	0	0	0	0	0	0	200	300	0	0	0	0	0	0	0	200	903	0	0	0	0	0	0	0	603	903	0
605	8	0	0	0	0	0	0	200	300	0	0	0	0	0	0	0	200	903	0	0	0	0	0	0	0	603	903	0
605	9	0	0	0	0	0	0	200	300	0	0	0	0	0	0	0	200	903	0	0	0	0	0	0	0	603	903	0
606	0	0	0	0	0	0	0	200	300	0	0	0	0	0	0	0	200	903	0	0	0	0	0	0	0	603	903	0
606	1	0	0	0	0	0	0	200	300	0	0	0	0	0	0	0	200	903	0	0	0	0	0	0	0	603	903	0
606	2	0	0	0	0	0	0	200	300	0	0	0	0	0	0	0	200	903	0	0	0	0	0	0	0	603	903	0
606	3	0	0	0	0	0	0	200	300	0	0	0	0	0	0	0	200	903	0	0	0	0	0	0	0	603	903	0
606	4	0	0	0	0	0	0	200	300	0	0	0	0	0	0	0	200	903	0	0	0	0	0	0	0	603	903	0
606	5	0	0	0	0	0	0	200	300	0	0	0	0	0	0	0	200	903	0	0	0	0	0	0	0	603	903	0
606	6	0	0	0	0	0	0	200	300	0	0	0	0	0	0	0	200	903	0	0	0	0	0	0	0	603	903	0
606	7	0	0	0	0	0	0	200	300	0	0	0	0	0	0	0	200	903	0	0	0	0	0	0	0	603	903	0
606	8	0	0	0	0	0	0	200	300	0	0	0	0	0	0	0	200	903	0	0	0	0	0	0	0	603	903	0
606	9	0	0	0	0	0	0	200	300	0	0	0	0	0	0	0	200	903	0	0	0	0	0	0	0	603	903	0
607	0	0	0	0	0	0	0	200	300	0	0	0	0	0	0	0	200	903	0	0	0	0	0	0	0	603	903	0
607	1	0	0	0	0	0	0	200	300	0	0	0	0	0	0	0	200	903	0	0	0	0	0	0	0	603	903	0
607	2	0	0	0	0	0	0	200	300	0	0	0	0	0	0	0	200	903	0	0	0	0	0	0	0	603	903	0
607	3	0	0	0	0	0	0	200	300	0	0	0	0	0	0	0	200	903	0	0	0	0	0	0	0	603	903	0
607	4	0	0	0	0	0	0	200	300	0	0	0	0	0	0	0	200	903	0	0	0	0	0	0	0	603	903	0
607	5	0	0	0	0	0	0	200	300	0	0	0	0	0	0	0	200	903	0	0	0	0	0	0	0	603	903	0
607	6	0	0	0	0	0	0	200	300	0	0	0	0	0	0	0	200	903	0	0	0	0	0	0	0	603	903	0
607	7	0	0	0	0	0	0	200	300	0	0	0	0	0	0	0	200	903	0	0	0	0	0	0	0	603	903	0
607	8	0	0	0	0	0	0	200	300	0	0	0	0	0	0	0	200	903	0	0	0	0	0	0	0	603	903	0
607	9	0	0	0	0	0	0	200	300	0	0	0	0	0	0	0	200	903	0	0	0	0	0	0	0	603	903	0
608	0	0	0	0	0	0	0	200	300	0	0	0	0	0	0	0	200	903	0	0	0	0	0	0	0	603	903	0
608	1	0	0	0	0	0	0	200	300	0	0	0	0	0	0	0	200	903	0	0	0	0	0	0	0	603	903	0
608	2	0	0	0	0	0	0	200	300	0	0	0	0	0	0	0	200	903	0	0	0	0	0	0	0	603	903	0
608	3	0	0	0	0	0	0	200	300	0	0	0	0	0	0	0	200	903	0	0	0	0	0	0	0	603	903	0
608	4	0	0	0	0	0	0	200	300	0	0	0	0	0	0	0	200	903	0	0	0	0	0	0	0	603	903	0
608	5	0	0	0	0	0	0	200	300	0	0	0	0	0	0	0	200	903	0	0	0	0	0	0	0	603	903	0
608	6	0	0	0	0	0	0	200	300	0	0	0	0	0	0	0	200	903	0	0	0	0	0	0	0	603	903	0
608	7	0	0	0	0	0	0	200	300	0	0	0	0	0	0	0	200	903	0	0	0	0	0	0	0	603	903	0
608	8	0	0	0	0	0	0	200	300	0	0	0	0	0	0	0	200	903	0	0	0	0	0	0	0	603	903	0
608	9	0	0	0	0	0	0	200	300	0	0	0	0	0	0	0	200	903	0	0	0	0	0	0	0	603	903	0
609	0	0	0	0	0	0	0	200	300	0	0	0	0	0	0	0	200	903	0	0	0	0	0	0	0	603	903	0
609	1	0	0	0	0	0	0	200	300	0	0	0	0	0	0	0	200	903	0	0	0	0	0	0	0	603	903	0
609	2	0	0	0	0	0	0	200	300	0	0	0	0	0	0	0	200	903	0	0	0	0	0	0	0	603	903	0
609	3	0	0	0	0	0	0	200	300	0	0	0	0	0	0	0	200	903	0	0	0	0	0	0	0	603	903	0
609	4	0	0	0	0	0	0	200	300	0	0	0	0	0	0	0	200	903	0	0	0	0	0	0	0	603	903	0
609	5	0	0	0	0	0	0	200	300	0	0	0	0	0	0	0	200	903	0	0	0	0	0	0	0	603	903	0
609	6	0	0	0	0	0	0	200	300	0	0	0	0	0	0	0	200	903	0	0	0	0	0	0	0	603	903	0
609	7	0	0	0	0	0	0	200	300	0	0	0	0	0	0	0	200	903	0	0	0	0	0	0	0	603	903	0
609	8	0	0	0	0	0	0	200	300	0	0	0	0	0	0	0	200	903	0	0	0	0	0	0	0	603	903	0
609	9	0	0	0	0	0	0	200	300	0	0	0	0	0	0	0	200	903	0	0	0	0	0	0	0	603	903	0
610	0	0	0	0	0	0	0	200	300	0	0	0	0	0	0	0	200	903	0	0	0	0	0	0	0	603	903	0
610	1	0	0	0	0	0	0	200	300	0	0	0	0	0	0	0	200	903	0	0	0	0	0	0	0	603	903	0
610	2	0	0	0	0	0	0	200	300	0	0	0	0	0	0	0	200	903	0	0	0	0	0	0	0	603	903	0
610	3	0	0	0	0	0	0	200	300	0	0	0	0	0	0	0	200	903	0	0	0	0	0	0	0	603	903	0
610	4	0	0	0	0	0	0	200	300	0	0	0	0	0	0	0	200	903	0	0	0	0	0	0	0	603	903	0
610	5	0	0	0	0	0	0	200	300	0	0	0	0	0	0	0	200	903	0	0	0	0	0	0	0	603	903	0
610	6	0	0	0	0	0	0	200	300	0	0	0	0	0	0	0	200	903	0	0	0	0	0	0	0	603	903	0
610	7	0	0	0	0	0	0	200	300	0	0	0	0	0	0	0	200	903	0	0	0	0	0	0	0	603	903	0
610	8	0	0	0	0	0	0	200	300	0	0	0	0	0	0	0	200	903	0	0	0	0	0	0	0	603	903	0
610	9	0	0	0	0	0	0	200	300	0	0	0	0	0	0	0	200	903	0	0	0	0	0	0	0	603	903	0
611	0	0	0	0	0	0	0	200	300	0	0	0	0	0	0	0	200	903	0	0	0	0	0	0	0	603	903	0
611	1	0	0	0	0	0	0	200	300	0	0	0	0	0	0	0	200	903	0	0	0	0	0	0	0	603	903	0
611	2	0	0	0	0	0	0	200	300	0	0	0	0	0	0	0	200	903	0	0	0	0	0	0	0	603	903	0
611	3	0	0	0	0	0	0	200	300	0	0	0	0	0	0	0	200	903	0	0	0	0	0	0	0	603	903	0
611	4	0	0	0	0	0	0	200	300	0	0	0	0	0	0	0	200	903	0	0	0	0	0	0	0	603	903	0
611	5	0	0	0	0	0	0	200	300	0	0	0	0	0	0	0	200	903	0	0	0	0	0	0	0	603	903	0
611	6	0	0	0	0	0	0	200	300	0	0	0	0	0	0	0	200	903	0	0	0	0	0	0	0	603	903	0
611	7	0	0	0	0	0	0	200	300	0	0	0	0	0	0	0	200	903	0	0	0	0	0	0	0	603	903	0
611	8	0	0	0	0	0	0	200	300	0	0	0	0	0	0	0	200	903	0	0	0	0	0	0	0	603	903	0
611	9	0	0	0	0	0	0	200	300	0	0	0	0	0	0	0	200	903	0	0	0	0	0	0	0	603	903	0
612	0	0	0	0	0	0	0	200	300	0	0	0	0	0	0	0	200	903	0	0	0	0	0	0	0	603	903	0
612	1	0	0	0	0	0	0	200	300	0	0	0	0	0	0	0	200	903	0	0	0	0	0	0	0	603	903	0
612	2	0	0	0	0	0	0	200	300	0	0	0	0	0	0	0	200	903	0	0	0	0	0	0	0	603	903	0
612	3	0	0	0	0	0	0	200	300	0	0	0	0	0	0	0	200	903	0	0	0	0	0	0	0	603	903	0
612	4	0	0	0	0	0	0	200	300	0	0	0	0	0	0	0	200	903	0	0	0	0	0	0	0	603	903	0
612	5	0	0	0	0	0	0	200	300	0	0	0	0	0	0	0	200	903	0	0	0	0	0	0	0	603	903	0
612	6	0	0	0	0	0	0	200	300	0	0	0	0	0	0	0	200	903	0	0	0	0	0	0	0	603	903	0
612	7	0	0	0	0	0	0	200	300	0	0	0	0	0	0	0	200	903	0	0	0	0	0	0	0	603	903	0
612	8	0	0	0	0	0	0	200	300	0	0	0	0	0	0	0	200	903	0	0	0	0	0	0	0	603	903	0
612	9	0	0	0	0	0	0	200	300	0	0	0	0	0	0	0	200	903	0	0	0	0	0	0	0	603	903	0
613	0	0	0	0	0	0	0	200	300	0	0	0	0	0	0	0	200	903	0	0	0	0	0	0	0	603	903	0
613	1	0	0	0	0	0	0	200	300	0	0	0	0	0	0	0	200	903	0	0	0	0	0	0	0	603	903	0
613	2	0	0	0	0	0	0	200	300	0	0	0	0	0	0	0	200	903	0	0	0	0	0	0	0	603	903	0
613	3	0	0	0	0	0	0	200	300	0	0	0	0	0	0	0	200	903	0	0	0	0	0	0	0	603	903	0
613	4	0	0	0	0	0	0	200	300	0	0	0	0	0	0	0	200	903	0	0	0	0	0	0	0	603	903	0
613	5	0	0	0	0	0	0	200	300	0	0	0	0	0	0	0	200	903	0	0	0	0	0	0	0	603	903	0
613	6	0	0	0	0	0	0	200	300	0	0	0	0	0	0	0	200	903	0	0	0	0	0	0	0	603	903	0
613	7	0	0	0	0	0	0	200	300	0	0	0	0	0	0	0	200	903	0	0	0	0	0	0	0	603	903	0
613	8	0	0	0	0	0	0	200	300	0	0	0	0	0	0	0	200	903	0	0	0	0	0	0	0	603	903	0
613	9	0	0	0	0	0	0	200	300	0	0	0	0	0	0	0	200	903	0	0	0	0	0	0	0	603	903	0
614	0	0	0	0	0	0	0	200	300	0	0	0	0	0	0	0	200	903	0	0	0	0	0	0	0	603	903	0
614	1	0	0	0	0	0	0	200	300	0	0	0	0	0	0	0	200	903	0	0	0	0	0	0	0	603	903	0
614	2	0	0	0	0	0	0	200	300	0	0	0	0	0	0	0	200	903	0	0	0	0	0	0	0	603	903	0
614	3	0	0	0	0	0	0	200	300	0	0	0	0	0	0	0	200	903	0	0	0	0	0	0	0	603	903	0
614	4	0	0	0	0	0	0	200	300	0	0	0	0	0	0	0	200	903	0	0	0	0	0	0	0	603	903	0
614	5	0	0	0	0	0	0	200	300	0	0	0	0	0	0	0	200	903	0	0	0	0	0	0	0	603	903	0
614	6	0	0	0	0	0	0	200	300	0	0	0	0	0	0	0	200	903	0	0	0	0	0	0	0	603	903	0
614	7	0	0	0	0	0	0	200	300	0	0	0	0	0	0	0	200	903	0	0	0	0	0	0	0	603	903	0
614	8	0	0	0	0	0	0	200	300	0	0	0	0	0	0	0	200	903	0	0	0	0	0	0	0	603	903	0
614	9	0	0	0	0	0	0	200	300	0	0	0	0	0	0	0	200	903	0	0	0	0	0	0	0	603	903	0
615	0	0	0	0	0	0	0	200	300	0	0	0	0	0	0	0	200	903	0	0	0	0	0	0	0	603	903	0
615	1	0	0	0	0	0	0	200	300	0	0	0	0	0	0	0	200	903	0	0	0	0	0	0	0	603	903	0
615	2	0	0	0	0	0	0	200	300	0	0	0	0	0	0	0	200	903	0	0	0	0	0	0	0	603	903	0
615	3	0	0	0	0	0	0	200	300	0	0	0	0	0	0	0	200	903	0	0	0	0	0	0	0	603	903	0
615	4	0	0	0	0	0	0	200	300	0	0	0	0	0	0	0	200	903	0	0	0	0	0	0	0	603	903	0
615	5	0	0	0	0	0	0	200	300	0	0	0	0	0	0	0	200	903	0	0	0	0	0	0	0	603	903	0
615	6	0	0	0	0	0	0	200	300	0	0	0	0	0	0	0	200	903	0	0	0	0	0	0	0	603	903	0
615	7	0	0	0	0	0	0	200	300	0	0	0	0	0	0	0	200	903	0	0	0	0	0	0	0	603	903	0
615	8	0	0	0	0	0	0	200	300	0	0	0	0	0	0	0	200	903	0	0	0	0	0	0	0	603	903	0
615	9	0	0	0	0	0	0	200	300	0	0	0	0	0	0	0	200	903	0	0	0	0	0	0	0	603	903	0
616	0	0	0	0	0	0	0	200	300	0	0	0	0	0	0	0	200	903	0	0	0	0	0	0	0	603	903	0
616	1	0	0	0	0	0	0	200	300	0	0	0	0	0	0	0	200	903	0	0	0	0	0	0	0	603	903	0
616	2	0	0	0	0	0	0	200	300	0	0	0	0	0	0	0	200	903	0	0	0	0	0	0	0	603	903	0
616	3	0	0	0	0	0	0	200	300	0	0	0	0	0	0	0	200	903	0	0	0	0	0	0	0	603	903	0
616	4	0	0	0	0	0	0	200	300	0	0	0	0	0	0	0	200	903	0	0	0	0	0	0	0	603	903	0
616	5	0	0	0	0	0	0	200	300	0	0	0	0	0	0	0	200	903	0	0	0	0	0	0	0	603	903	0
616	6	0	0	0	0	0	0	200	300	0	0	0	0	0	0	0	200	903	0	0	0	0	0	0	0	603	903	0
616	7	0	0	0	0	0	0	200	300	0	0	0	0	0	0	0	200	903	0	0	0	0	0	0	0	603	903	0
616	8	0	0	0	0	0	0	200	300	0	0	0	0	0	0	0	200	903	0	0	0	0	0	0	0	603	903	0
616	9	0	0	0	0	0	0	200	300	0	0	0	0	0	0	0	200	903	0	0	0	0	0	0	0	603	903	0
617	0	0	0	0	0	0	0	200	300	0	0	0	0	0	0	0	200	903	0	0	0	0	0	0	0	603	903	0
617	1	0	0	0	0	0	0	200	300	0	0	0	0	0	0	0	200	903	0	0	0	0	0	0	0	603	903	0
617	2	0	0	0	0	0	0	200	300	0	0	0	0	0	0	0	200	903	0	0	0	0	0	0	0	603	903	0
617	3	0	0	0	0	0	0	200	300	0	0	0	0	0	0	0	200	903	0	0	0	0	0	0	0	603	903	0
617	4	0	0	0	0	0	0	200	300	0	0	0	0	0	0	0	200	903	0	0	0	0	0	0	0	603	903	0
617	5	0	0	0	0	0	0	200	300	0	0	0	0	0	0	0	200	903	0	0	0	0	0	0	0	603	903	0
617	6	0	0	0	0	0	0	200	300	0	0	0	0	0	0	0	200	903	0	0	0	0	0	0	0	603	903	0
617	7	0	0	0	0	0	0	200	300	0	0	0	0	0	0	0	200	903	0	0	0	0	0	0	0	603	903	0
617	8	0	0	0	0	0	0	200	300	0	0	0	0	0	0	0	200	903	0	0	0	0	0	0	0	603	903	0
617	9	0	0	0	0	0	0	200	300	0	0	0	0	0	0	0	200	903	0	0	0	0	0	0	0	603	903	0
618	0	0	0	0	0	0	0	200	300	0	0	0	0	0	0	0	200	903	0	0	0	0	0	0	0	603	903	0
618	1	0	0	0	0	0	0	200	300	0	0	0	0	0	0	0	200	903	0	0	0	0	0	0	0	603	903	0
618	2	0	0	0	0	0	0	200	300	0	0	0	0	0	0	0	200	903	0	0	0	0	0	0	0	603	903	0
618	3	0	0	0	0	0	0	200	300	0	0	0	0	0	0	0	200	903	0	0	0	0	0	0	0	603	903	0
618	4	0	0	0	0	0	0	200	300	0	0	0	0	0	0	0	200	903	0	0	0	0	0	0	0	603	903	0
618	5	0	0	0	0	0	0	200	300	0	0	0	0	0	0	0	200	903	0	0	0	0	0	0	0	603	903	0
618	6	0	0	0	0	0	0	200	300	0	0	0	0	0	0	0	200	903	0	0	0	0	0	0	0	603	903	0
618	7	0	0	0	0	0	0	200	300	0	0	0	0	0	0	0	200	903	0	0	0	0	0	0	0	603	903	0
618	8	0	0	0	0	0	0	200	300	0	0	0	0	0	0	0	200	903	0	0	0	0	0	0	0	603	903	0
618	9	0	0	0	0	0	0	200	300	0	0	0	0	0	0	0	200	903	0	0	0	0	0	0	0	603	903	0
619	0	0	0	0	0	0	0	200	300	0	0	0	0	0	0	0	200	903	0	0	0	0	0	0	0	603	903	0
619	1	0	0	0	0	0	0	200	300	0	0	0	0	0	0	0	200	903	0	0	0	0	0	0	0	603	903	0
619	2	0	0	0	0	0	0	200	300	0	0	0	0	0	0	0	200	903	0	0	0	0	0	0	0	603	903	0
619	3	0	0	0	0	0	0	200	300	0	0	0	0	0	0	0	200	903	0	0	0	0	0	0	0	603	903	0
619	4	0	0	0	0	0	0	200	300	0	0	0	0	0	0	0	200	903	0	0	0	0	0	0	0	603	903	0
619	5	0	0	0	0	0	0	200	300	0	0	0	0	0	0	0	200	903	0	0	0	0	0	0	0	603	903	0
619	6	0	0	0	0	0	0	200	300	0	0	0	0	0	0	0	200	903	0	0	0	0	0	0	0	603	903	0
619	7	0	0	0	0	0	0	200	300	0	0	0	0	0	0	0	200	903	0	0	0	0	0	0	0	603	903	0
619	8	0	0	0	0	0	0	200	300	0	0	0	0	0	0	0	200	903	0	0	0	0	0	0	0	603	903	0
619	9	0	0	0	0	0	0	200	300	0	0	0	0	0	0	0	200	903	0	0	0	0	0	0	0	603	903	0
620	0	0	0	0	0	0	0	200	300	0	0	0	0	0	0	0	200	903	0	0	0	0	0	0	0	603	903	0
620	1	0	0	0	0	0	0	200	300	0	0	0	0	0	0	0	200	903	0	0	0	0	0	0	0	603	903	0
620	2	0	0	0	0	0	0	200	300	0	0	0	0	0	0	0	200	903	0	0	0	0	0	0	0	603	903	0
620	3	0	0	0	0	0	0	200	300	0	0	0	0	0	0	0	200	903	0	0	0	0	0	0	0	603	903	0
620	4	0	0	0	0	0	0	200	300	0	0	0	0	0	0	0	200	903	0	0	0	0	0	0	0	603	903	0
620	5	0	0	0	0	0	0	200	300	0	0	0	0	0	0	0	200	903	0	0	0	0	0	0	0	603	903	0
620	6	0	0	0	0	0	0	200	300	0	0	0	0	0	0	0	200	903	0	0	0	0	0	0	0	603	903	0
620	7	0	0	0	0	0	0	200	300	0	0	0	0	0	0	0	200	903	0	0	0	0	0	0	0	603	903	0
620	8	0	0	0	0	0	0	200	300	0	0	0	0	0	0	0	200	903	0	0	0	0	0	0	0	603	903	0
620	9	0	0	0	0	0	0	200	300	0	0	0	0	0	0	0	200	903	0	0	0	0	0	0	0	603	903	0
621	0	0	0	0	0	0	0	200	300	0	0	0	0	0	0	0	200	903	0	0	0	0	0	0	0	603	903	0
621	1	0	0	0	0	0	0	200	300	0	0	0	0	0	0	0	200	903	0	0	0	0	0	0	0	603	903	0
621	2	0	0	0	0	0	0	200	300	0	0	0	0	0	0	0	200	903	0	0	0	0	0	0	0	603	903	0
621	3	0	0	0	0	0	0	200	300	0	0	0	0	0	0	0	200	903	0	0	0	0	0	0	0	603	903	0
621	4	0	0	0	0	0	0	200	300	0	0	0	0	0	0	0	200	903	0	0	0	0	0	0	0	603	903	0
621	5	0	0	0	0	0	0	200	300	0	0	0	0	0	0	0	200	903	0	0	0	0	0	0	0	603	903	0
621	6	0	0	0	0	0	0	200	300	0	0	0	0	0	0	0	200	903	0	0	0	0	0	0	0	603	903	0
621	7	0	0	0	0	0	0	200	300	0	0	0	0	0	0	0	200	903	0	0	0	0	0	0	0	603	903	0
621	8	0	0	0	0	0	0	200	300	0	0	0	0	0	0	0	200	903	0	0	0	0	0	0	0	603	903	0
621	9	0	0	0	0	0	0	200	300	0	0	0	0	0	0	0	200	903	0	0	0	0	0	0	0	603	903	0
622	0	0	0	0	0	0	0	200	300	0	0	0	0	0	0	0	200	903	0	0	0	0	0	0	0	603	903	0
622	1	0	0	0	0	0	0	200	300	0	0	0	0	0	0	0	200	903	0	0	0	0	0	0	0	603	903	0
622	2	0	0	0	0	0	0	200	300	0	0	0	0	0	0	0	200	903	0	0	0	0	0	0	0	603	903	0
622	3	0	0	0	0	0	0	200	300	0	0	0	0	0	0	0	200	903	0	0	0	0	0	0	0	603	903	0
622	4	0	0	0	0	0	0	200	300	0	0	0	0	0	0	0	200	903	0	0	0	0	0	0	0	603	903	0
622	5	0	0	0	0	0	0	200	300	0	0	0	0	0	0	0	200	903	0	0	0	0	0	0	0	603	903	0
622	6	0	0	0	0	0	0	200	300	0	0	0	0	0	0	0	200	903	0	0	0	0	0	0	0	603	903	0
622	7	0	0	0	0	0	0	200	300	0	0	0	0	0	0	0	200	903	0	0	0	0	0	0	0	603	903	0
622	8	0	0	0	0	0	0	200	300	0	0	0	0	0	0	0	200	903	0	0	0	0	0	0	0	603	903	0
622	9	0	0	0	0	0	0	200	300	0	0	0	0	0	0	0	200	903	0	0	0	0	0	0	0	603	903	0
623	0	0	0	0	0	0	0	200	300	0	0	0	0	0	0	0	200	903	0	0	0	0	0	0	0	603	903	0
623	1	0	0	0	0	0	0	200	300	0	0	0	0	0	0	0	200	903	0	0	0	0	0	0	0	603	903	0
623	2	0	0	0	0	0	0	200	300	0	0	0	0	0	0	0	200	903	0	0	0	0	0	0	0	603	903	0
623	3	0	0	0	0	0	0	200	300	0	0	0	0	0	0	0	200	903	0	0	0	0	0	0	0	603	903	0
623	4	0	0	0	0	0	0	200	300	0	0	0	0	0	0	0	200	903	0	0	0	0	0	0	0	603	903	0
623	5	0	0	0	0	0	0	200	300	0	0	0	0	0	0	0	200	903	0	0	0	0	0	0	0	603	903	0
623	6	0	0	0	0	0	0	200	300	0	0	0	0	0	0	0	200	903	0	0	0	0	0	0	0	603	903	0
623	7	0	0	0	0	0	0	200	300	0	0	0	0	0	0	0	200	903	0	0	0	0	0	0	0	603	903	0
623	8	0	0	0	0	0	0	200	300	0	0	0	0	0	0	0	200	903	0	0	0	0	0	0	0	603	903	0
623	9	0	0	0	0	0	0	200	300	0	0	0	0	0	0	0	200	903	0	0	0	0	0	0	0	603	903	0
624	0	0	0	0	0	0	0	200	300	0	0	0	0	0	0	0	200	903	0	0	0	0	0	0	0	603	903	0
624	1	0	0	0	0	0	0	200	300	0	0	0	0	0	0	0	200	903	0	0	0	0	0	0	0	603	903	0
624	2	0	0	0	0	0	0	200	300	0	0	0	0	0	0	0	200	903	0	0	0	0	0	0	0	603	903	0
624	3	0	0	0	0	0	0	200	300	0	0	0	0	0	0	0	200	903	0	0	0	0	0	0	0	603	903	0
624	4	0	0	0	0	0	0	200	300	0	0	0	0	0	0	0	200	903	0	0	0	0	0	0	0	603	903	0
624	5	0	0	0	0	0	0	200	300	0	0	0	0	0	0	0	200	903	0	0	0	0	0	0	0	603	903	0
624	6	0	0	0	0	0	0	200	300	0	0	0	0	0	0	0	200	903	0	0	0	0	0	0	0	603	903	0
624	7	0	0	0	0	0	0	200	300	0	0	0	0	0	0	0	200	903	0	0	0	0	0	0	0	603	903	0
624	8	0	0	0	0	0	0	200	300	0	0	0	0	0	0	0	200	903	0	0	0	0	0	0	0	603	903	0
624	9	0	0	0	0	0	0	200	300	0	0	0	0	0	0	0	200	903	0	0	0	0	0	0	0	603	903	0
625	0	0	0	0	0	0	0	200	300	0	0	0	0	0	0	0	200	903	0	0	0	0	0	0	0	603	903	0
625	1	0	0	0	0	0	0	200	300	0	0	0	0	0	0	0	200	903	0	0	0	0	0	0	0	603	903	0
625	2	0	0	0	0	0	0	200	300	0	0	0	0	0	0	0	200	903	0	0	0	0	0	0	0	603	903	0
625	3	0	0	0	0	0	0	200	300	0	0	0	0	0	0	0	200	903	0	0	0	0	0	0	0	603	903	0
625	4	0	0	0	0	0	0	200	300	0	0	0	0	0	0	0	200	903	0	0	0	0	0	0	0	603	903	0
625	5	0	0	0	0	0	0	200	300	0	0	0	0	0	0	0	200	903	0	0	0	0	0	0	0	603	903	0
625	6	0	0	0	0	0	0	200	300	0	0	0	0	0	0	0	200	903	0	0	0	0	0	0	0	603	903	0
625	7	0	0	0	0	0	0	200	300	0	0	0	0	0	0	0	200	903	0	0	0	0	0	0	0	603	903	0
625	8	0	0	0	0	0	0	200	300	0	0	0	0	0	0	0	200	903	0	0	0	0	0	0	0	603	903	0
625	9	0	0	0	0	0	0	200	300	0	0	0	0	0	0	0	200	903	0	0	0	0	0	0	0	603	903	0
626	0	0	0	0	0	0	0	200	300	0	0	0	0	0	0	0	200	903	0	0	0	0	0	0	0	603	903	0
626	1	0	0	0	0	0	0	200	300	0	0	0	0	0	0	0	200	903	0	0	0	0	0	0	0	603	903	0
626	2	0	0	0	0	0	0	200	300	0	0	0	0	0	0	0	200	903	0	0	0	0	0	0	0	603	903	0
626	3	0	0	0	0	0	0	200	300	0	0	0	0	0	0	0	200	903	0	0	0	0	0	0	0	603	903	0
626	4	0	0	0	0	0	0	200	300	0	0	0	0	0	0	0	200	903	0	0	0	0	0	0	0	603	903	0
626	5	0	0	0	0	0	0	200	300	0	0	0	0	0	0	0	200	903	0	0	0	0	0	0	0	603	903	0
626	6	0	0	0	0	0	0	200	300	0	0	0	0	0	0	0	200	903	0	0	0	0	0	0	0	603	903	0
626	7	0	0	0	0	0	0	200	300	0	0	0	0	0	0	0	200	903	0	0	0	0	0	0	0	603	903	0
626	8	0	0	0	0	0	0	200	300	0	0	0	0	0	0	0	200	903	0	0	0	0	0	0	0	603	903	0
626	9	0	0	0	0	0	0	200	300	0	0	0	0	0	0	0	200	903	0	0	0	0	0	0	0	603	903	0
627	0	0	0	0	0	0	0	200	300	0	0	0	0	0	0	0	200	903	0	0	0	0	0	0	0	603	903	0
627	1	0	0	0	0	0	0	200	300	0	0	0	0	0	0	0	200	903	0	0	0	0	0	0	0	603	903	0
627	2	0	0	0	0	0	0	200	300	0	0	0	0	0	0	0	200	903	0	0	0	0	0	0	0	603	903	0
627	3	0	0	0	0	0	0	200	300	0	0	0	0	0	0	0	200	903	0	0	0	0	0	0	0	603	903	0
627	4	0	0	0	0	0	0	200	300	0	0	0	0	0	0	0	200	903	0	0	0	0	0	0	0	603	903	0
627	5	0	0	0	0	0	0	200	300	0	0	0	0	0	0	0	200	903	0	0	0	0	0	0	0	603	903	0
627	6	0	0	0	0	0	0	200	300	0	0	0	0	0	0	0	200	903	0	0	0	0	0	0	0	603	903	0
627	7	0	0	0	0	0	0	200	300	0	0	0	0	0	0	0	200	903	0	0	0	0	0	0	0	603	903	0
627	8	0	0	0	0	0	0	200	300	0	0	0	0	0	0	0	200	903	0	0	0	0	0	0	0	603	903	0
627	9	0	0	0	0	0	0	200	300	0	0	0	0	0	0	0	200	903	0	0	0	0	0	0	0	603	903	0
628	0	0	0	0	0	0	0	200	300	0	0	0	0	0	0	0	200	903	0	0	0	0	0	0	0	603	903	0
628	1	0	0	0	0	0	0	200	300	0	0	0	0	0	0	0	200	903	0	0	0	0	0	0	0	603	903	0
628	2	0	0	0	0	0	0	200	300	0	0	0	0	0	0	0	200	903	0	0	0	0	0	0	0	603	903	0
628	3	0	0	0	0	0	0	200	300	0	0	0	0	0	0	0	200	903	0	0	0	0	0	0	0	603	903	0
628	4	0	0	0	0	0	0	200	300	0	0	0	0	0	0	0	200	903	0	0	0	0	0	0	0	603	903	0
628	5	0	0	0	0	0	0	200	300	0	0	0	0	0	0	0	200	903	0	0	0	0	0	0	0	603	903	0
628	6	0	0	0	0	0	0	200	300	0	0	0	0	0	0	0	200	903	0	0	0	0	0	0	0	603	903	0
628	7	0	0	0	0	0	0	200	300	0	0	0	0	0	0	0	200	903	0	0	0	0	0	0	0	603	903	0
628	8	0	0	0	0	0	0	200	300	0	0	0	0	0	0	0	200	903	0	0	0	0	0	0	0	603	903	0
628	9	0	0	0	0	0	0	200	300	0	0	0	0	0	0	0	200	903	0	0	0	0	0	0	0	603	903	0
629	0	0	0	0	0	0	0	200	300	0	0	0	0	0	0	0	200	903	0	0	0	0	0	0	0	603	903	0
629	1	0	0	0	0	0	0	200	300	0	0	0	0	0	0	0	200	903	0	0	0	0	0	0	0	603	903	0
629	2	0	0	0	0	0	0	200	300	0	0	0	0	0	0	0	200	903	0	0	0	0	0	0	0	603	903	0
629	3	0	0	0	0	0	0	200	300	0	0	0	0	0	0	0	200	903	0	0	0	0	0	0	0	603	903	0
629	4	0	0	0	0	0	0	200	300	0	0	0	0	0	0	0	200	903	0	0	0	0	0	0	0	603	903	0
629	5	0	0	0	0	0	0	200	300	0	0	0	0	0	0	0	200	903	0	0	0	0	0	0	0	603	903	0
629	6	0	0	0	0	0	0	200	300	0	0	0	0	0	0	0	200	903	0	0	0	0	0	0	0	603	903	0
629	7	0	0	0	0	0	0	200	300	0	0	0	0	0	0	0	200	903	0	0	0	0	0	0	0	603	903	0
629	8	0	0	0	0	0	0	200	300	0	0	0	0	0	0	0	200	903	0	0	0	0	0	0	0	603	903	0
629	9	0	0	0	0	0	0	200	300	0	0	0	0	0	0	0	200	903	0	0	0	0	0	0	0	603	903	0
630	0	0	0	0	0	0	0	200	300	0	0	0	0	0	0	0	200	903	0	0	0	0	0	0	0	603	903	0
630	1	0	0	0	0	0	0	200	300	0	0	0	0	0	0	0	200	903	0	0	0	0	0	0	0	603	903	0
630	2	0	0	0	0	0	0	200	300	0	0	0	0	0	0	0	200	903	0	0	0	0	0	0	0	603	903	0
630	3	0	0	0	0	0	0	200	300	0	0	0	0	0	0	0	200	903	0	0	0	0	0	0	0	603	903	0
630	4	0	0	0	0	0	0	200	300	0	0	0	0	0	0	0	200	903	0	0	0	0	0	0	0	603	903	0
630	5	0	0	0	0	0	0	200	300	0	0	0	0	0	0	0	200	903	0	0	0	0	0	0	0	603	903	0
630	6	0	0	0	0	0	0	200	300	0	0	0	0	0	0	0	200	903	0	0	0	0	0	0	0	603	903	0
630	7	0	0	0	0	0	0	200	300	0	0	0	0	0	0	0	200	903	0	0	0	0	0	0	0	603	903	0
630	8	0	0	0	0	0	0	200	300	0	0	0	0	0	0	0	200	903	0	0	0	0	0	0	0	603	903	0
630	9	0	0	0	0	0	0	200	300	0	0	0	0	0	0	0	200	903	0	0	0	0	0	0	0	603	903	0
631	0	0	0	0	0	0	0	200	300	0	0	0	0	0	0	0	200	903	0	0	0	0	0	0	0	603	903	0
631	1	0	0	0	0	0	0	200	300	0	0	0	0	0	0	0	200	903	0	0	0	0	0	0	0	603	903	0
631	2	0	0	0	0	0	0	200	300	0	0	0	0	0	0	0	200	903	0	0	0	0	0	0	0	603	903	0
631	3	0	0	0	0	0	0	200	300	0	0	0	0	0	0	0	200	903	0	0	0	0	0	0	0	603	903	0
631	4	0	0	0	0	0	0	200	300	0	0	0	0	0	0	0	200	903	0	0	0	0	0	0	0	603	903	0
631	5	0	0	0	0	0	0	200	300	0	0	0	0	0	0	0	200	903	0	0	0	0	0	0	0	603	903	0
631	6	0	0	0	0	0	0	200	300	0	0	0	0	0	0	0	200	903	0	0	0	0	0	0	0	603	903	0
631	7	0	0	0	0	0	0	200	300	0	0	0	0	0	0	0	200	903	0	0	0	0	0	0	0	603	903	0
631	8	0	0	0	0	0	0	200	300	0	0	0	0	0	0	0	200	903	0	0	0	0	0	0	0	603	903	0
631	9	0	0	0	0	0	0	200	300	0	0	0	0	0	0	0	200	903	0	0	0	0	0	0	0	603	903	0
632	0	0	0	0	0	0	0	200	300	0	0	0	0	0	0	0	200	903	0	0	0	0	0	0	0	603	903	0
632	1	0	0	0	0	0	0	200	300	0	0	0	0	0	0	0	200	903	0	0	0	0	0	0	0	603	903	0
632	2	0	0	0	0	0	0	200	300	0	0	0	0	0	0	0	200	903	0	0	0	0	0	0	0	603	903	0
632	3	0	0	0	0	0	0	200	300	0	0	0	0	0	0	0	200	903	0	0	0	0	0	0	0	603	903	0
632	4	0	0	0	0	0	0	200	300	0	0	0	0	0	0	0	200	903	0	0	0	0	0	0	0	603	903	0
632	5	0	0	0	0	0	0	200	300	0	0	0	0	0	0	0	200	903	0	0	0	0	0	0	0	603	903	0
632	6	0	0	0	0	0	0	200	300	0	0	0	0	0	0	0	200	903	0	0	0	0	0	0	0	603	903	0
632	7	0	0	0	0	0	0	200	300	0	0	0	0	0	0	0	200	903	0	0	0	0	0	0	0	603	903	0
632	8	0	0	0	0	0	0	200	300	0	0	0	0	0	0	0	200	903	0	0	0	0	0	0	0	603	903	0
632	9	0	0	0	0	0	0	200	300	0	0	0	0	0	0	0	200	903	0	0	0	0	0	0	0	603	903	0
633	0	0	0	0	0	0	0	200	300	0	0	0	0	0	0	0	200	903	0	0	0	0	0	0	0	603	903	0
633	1	0	0	0	0	0	0	200	300	0	0	0	0	0	0	0	200	903	0	0	0	0	0	0	0	603	903	0
633	2	0	0	0	0	0	0	200	300	0	0	0	0	0	0	0	200	903	0	0	0	0	0	0	0	603	903	0
633	3	0	0	0	0	0	0	200	300	0	0	0	0	0	0	0	200	903	0	0	0	0	0	0	0	603	903	0
633	4	0	0	0	0	0	0	200	300	0	0	0	0	0	0	0	200	903	0	0	0	0	0	0	0	603	903	0
633	5	0	0	0	0	0	0	200	300	0	0	0	0	0	0	0	200	903	0	0	0	0	0	0	0	603	903	0
633	6	0	0	0	0	0	0	200	300	0	0	0	0	0	0	0	200	903	0	0	0	0	0	0	0	603	903	0
633	7	0	0	0	0	0	0	200	300	0	0	0	0	0	0	0	200	903	0	0	0	0	0	0	0	603	903	0
633	8	0	0	0	0	0	0	200	300	0	0	0	0	0	0	0	200	903	0	0	0	0	0	0	0	603	903	0
633	9	0	0	0	0	0	0	200	300	0	0	0	0	0	0	0	200	903	0	0	0	0	0	0	0	603	903	0
634	0	0	0	0	0	0	0	200	300	0	0	0	0	0	0	0	200	903	0	0	0	0	0	0	0	603	903	0
634	1	0	0	0	0	0	0	200	300	0	0	0	0	0	0	0	200	903	0	0	0	0	0	0	0	603	903	0
634	2	0	0	0	0	0	0	200	300	0	0	0	0	0	0	0	200	903	0	0	0	0	0	0	0	603	903	0
634	3	0	0	0	0	0	0	200	300	0	0	0	0	0	0	0	200	903	0	0	0	0	0	0	0	603	903	0
634	4	0	0	0	0	0	0	200	300	0	0	0	0	0	0	0	200	903	0	0	0	0	0	0	0	603	903	0
634	5	0	0	0	0	0	0	200	300	0	0	0	0	0	0	0	200	903	0	0	0	0	0	0	0	603	903	0
634	6	0	0	0	0	0	0	200	300	0	0	0	0	0	0	0	200	903	0	0	0	0	0	0	0	603	903	0
634	7	0	0	0	0	0	0	200	300	0	0	0	0	0	0	0	200	903	0	0	0	0	0	0	0	603	903	0
634	8	0	0	0	0	0	0	200	300	0	0	0	0	0	0	0	200	903	0	0	0	0	0	0	0	603	903	0
634	9	0	0	0	0	0	0	200	300	0	0	0	0	0	0	0	200	903	0	0	0	0	0	0	0	603	903	0
635	0	0	0	0	0	0	0	200	300	0	0	0	0	0	0	0	200	903	0	0	0	0	0	0	0	603	903	0
635	1	0	0	0	0	0	0	200	300	0	0	0	0	0	0	0	200	903	0	0	0	0	0	0	0	603	903	0
635	2	0	0	0	0	0	0	200	300	0	0	0	0	0	0	0	200	903	0	0	0	0	0	0	0	603	903	0
635	3	0	0	0	0	0	0	200	300	0	0	0	0	0	0	0	200	903	0	0	0	0	0	0	0	603	903	0
635	4	0	0	0	0	0	0	200	300	0	0	0	0	0	0	0	200	903	0	0	0	0	0	0	0	603	903	0
635	5	0	0	0	0	0	0	200	300	0	0	0	0	0	0	0	200	903	0	0	0	0	0	0	0	603	903	0
635	6	0	0	0	0	0	0	200	300	0	0	0	0	0	0	0	200	903	0	0	0	0	0	0	0	603	903	0
635	7	0	0	0	0	0	0	200	300	0	0	0	0	0	0	0	200	903	0	0	0	0	0	0	0	603	903	0
635	8	0	0	0	0	0	0	200	300	0	0	0	0	0	0	0	200	903	0	0	0	0	0	0	0	603	903	0
635	9	0	0	0	0	0	0	200	300	0	0	0	0	0	0	0	200	903	0	0	0	0	0	0	0	603	903	0
636	0	0	0	0	0	0	0	200	300	0	0	0	0	0	0	0	200	903	0	0	0	0	0	0	0	603	903	0
636	1	0	0	0	0	0	0	200	300	0	0	0	0	0	0	0	200	903	0	0	0	0	0	0	0	603	903	0
636	2	0	0	0	0	0	0	200	300	0	0	0	0	0	0	0	200	903	0	0	0	0	0	0	0	603	903	0
636	3	0	0	0	0	0	0	200	300	0	0	0	0	0	0	0	200	903	0	0	0	0	0	0	0	603	903	0
636	4	0	0	0	0	0	0	200	300	0	0	0	0	0	0	0	200	903	0	0	0	0	0	0	0	603	903	0
636	5	0	0	0	0	0	0	200	300	0	0	0	0	0	0	0	200	903	0	0	0	0	0	0	0	603	903	0
636	6	0	0	0	0	0	0	200	300	0	0	0	0	0	0	0	200	903	0	0	0	0	0	0	0	603	903	0
636	7	0	0	0	0	0	0	200	300	0	0	0	0	0	0	0	200	903	0	0	0	0	0	0	0	603	903	0
636	8	0	0	0	0	0	0	200	300	0	0	0	0	0	0	0	200	903	0	0	0	0	0	0	0	603	903	0
636	9	0	0	0	0	0	0	200	300	0	0	0	0	0	0	0	200	903	0	0	0	0	0	0	0	603	903	0
637	0	0	0	0	0	0	0	200	300	0	0	0	0	0	0	0	200	903	0	0	0	0	0	0	0	603	903	0
637	1	0	0	0	0	0	0	200	300	0	0	0	0	0	0	0	200	903	0	0	0	0	0	0	0	603	903	0
637	2	0	0	0	0	0	0	200	300	0	0	0	0	0	0	0	200	903	0	0	0	0	0	0	0	603	903	0
637	3	0	0	0	0	0	0	200	300	0	0	0	0	0	0	0	200	903	0	0	0	0	0	0	0	603	903	0
637	4	0	0	0	0	0	0	200	300	0	0	0	0	0	0	0	200	903	0	0	0	0	0	0	0	603	903	0
637	5	0	0	0	0	0	0	200	300	0	0	0	0	0	0	0	200	903	0	0	0	0	0	0	0	603	903	0
637	6	0	0	0	0	0	0	200	300	0	0	0	0	0	0	0	200	903	0	0	0	0	0	0	0	603	903	0
637	7	0	0	0	0	0	0	200	300	0	0	0	0	0	0	0	200	903	0	0	0	0	0	0	0	603	903	0
637	8	0	0	0	0	0	0	200	300	0	0	0	0	0	0	0	200	903	0	0	0	0	0	0	0	603	903	0
637	9	0	0	0	0	0	0	200	300	0	0	0	0	0	0	0	200	903	0	0	0	0	0	0	0	603	903	0
638	0	0	0	0	0	0	0	200	300	0	0	0	0	0	0	0	200	903	0	0	0	0	0	0	0	603	903	0
638	1	0	0	0	0	0	0	200	300	0	0	0	0	0	0	0	200	903	0	0	0	0	0	0	0	603	903	0
638	2	0	0	0	0	0	0	200	300	0	0	0	0	0	0	0	200	903	0	0	0	0	0	0	0	603	903	0
638	3	0	0	0	0	0	0	200	300	0	0	0	0	0	0	0	200	903	0	0	0	0	0	0	0	603	903	0
638	4	0	0	0	0	0	0	200	300	0	0	0	0	0	0	0	200	903	0	0	0	0	0	0	0	603	903	0
638	5	0	0	0	0	0	0	200	300	0	0	0	0	0	0	0	200	903	0	0	0	0	0	0	0	603	903	0
638	6	0	0	0	0	0	0	200	300	0	0	0	0	0	0	0	200	903	0	0	0	0	0	0	0	603	903	0
638	7	0	0	0	0	0	0	200	300	0	0	0	0	0	0	0	200	903	0	0	0	0	0	0	0	603	903	0
638	8	0	0	0	0	0	0	200	300	0	0	0	0	0	0	0	200	903	0	0	0	0	0	0	0	603	903	0
638	9	0	0	0	0	0	0	200	300	0	0	0	0	0	0	0	200	903	0	0	0	0	0	0	0	603	903	0
639	0	0	0	0	0	0	0	200	300	0	0	0	0	0	0	0	200	903	0	0	0	0	0	0	0	603	903	0
639	1	0	0	0	0	0	0	200	300	0	0	0	0	0	0	0	200	903	0	0	0	0	0	0	0	603	903	0
639	2	0	0	0	0	0	0	200	300	0	0	0	0	0	0	0	200	903	0	0	0	0	0	0	0	603	903	0
639	3	0	0	0	0	0	0	200	300	0	0	0	0	0	0	0	200	903	0	0	0	0	0	0	0	603	903	0
639	4	0	0	0	0	0	0	200	300	0	0	0	0	0	0	0	200	903	0	0	0	0	0	0	0	603	903	0
639	5	0	0	0	0	0	0	200	300	0	0	0	0	0	0	0	200	903	0	0	0	0	0	0	0	603	903	0
639	6	0	0	0	0	0	0	200	300	0	0	0	0	0	0	0	200	903	0	0	0	0	0	0	0	603	903	0
639	7	0	0	0	0	0	0	200	300	0	0	0	0	0	0	0	200	903	0	0	0	0	0	0	0	603	903	0
639	8	0	0	0	0	0	0	200	300	0	0	0	0	0	0	0	200	903	0	0	0	0	0	0	0	603	903	0
639	9	0	0	0	0	0	0	200	300	0	0	0	0	0	0	0	200	903	0	0	0	0	0	0	0	603	903	0
640	0	0	0	0	0	0	0	200	300	0	0	0	0	0	0	0	200	903	0	0	0	0	0	0	0	603	903	0
640	1	0	0	0	0	0	0	200	300	0	0	0	0	0	0	0	200	903	0	0	0	0	0	0	0	603	903	0
640	2	0	0	0	0	0	0	200	300	0	0	0	0	0	0	0	200	903	0	0	0	0	0	0	0	603	903	0
640	3	0	0	0	0	0	0	200	300	0	0	0	0	0	0	0	200	903	0	0	0	0	0	0	0	603	903	0
640	4	0	0	0	0	0	0	200	300	0	0	0	0	0	0	0	200	903	0	0	0	0	0	0	0	603	903	0
640	5	0	0	0	0	0	0	200	300	0	0	0	0	0	0	0	200	903	0	0	0	0	0	0	0	603	903	0
640	6	0	0	0	0	0	0	200	300	0	0	0	0	0	0	0	200	903	0	0	0	0	0	0	0	603	903	0
640	7	0	0	0	0	0	0	200	300	0	0	0	0	0	0	0	200	903	0	0	0	0	0	0	0	603	903	0
640	8	0	0	0	0	0	0	200	300	0	0	0	0	0	0	0	200	903	0	0	0	0	0	0	0	603	903	0
640	9	0	0	0	0	0	0	200	300	0	0	0	0	0	0	0	200	903	0	0	0	0	0	0	0	603	903	0
641	0	0	0	0	0	0	0	200	300	0	0	0	0	0	0	0	200	903	0	0	0	0	0	0	0	603	903	0
641	1	0	0	0	0	0	0	200	300	0	0	0	0	0	0	0	200	903	0	0	0	0	0	0	0	603	903	0
641	2	0	0	0	0	0	0	200	300	0	0	0	0	0	0	0	200	903	0	0	0	0	0	0	0	603	903	0
641	3	0	0	0	0	0	0	200	300	0	0	0	0	0	0	0	200	903	0	0	0	0	0	0	0	603	903	0
641	4	0	0	0	0	0	0	200	300	0	0	0	0	0	0	0	200	903	0	0	0	0	0	0	0	603	903	0
641	5	0	0	0	0	0	0	200	300	0	0	0	0	0	0	0	200	903	0	0	0	0	0	0	0	603	903	0
641	6	0	0	0	0	0	0	200	300	0	0	0	0	0	0	0	200	903	0	0	0	0	0	0	0	603	903	0
641	7	0	0	0	0	0	0	200	300	0	0	0	0	0	0	0	200	903	0	0	0	0	0	0	0	603	903	0
641	8	0	0	0	0	0	0	200	300	0	0	0	0	0	0	0	200	903	0	0	0	0	0	0	0	603	903	0
641	9	0	0	0	0	0	0	200	300	0	0	0	0	0	0	0	200	903	0	0	0	0	0	0	0	603	903	0
642	0	0	0	0	0	0	0	200	300	0	0	0	0	0	0	0	200	903	0	0	0	0	0	0	0	603	903	0
642	1	0	0	0	0	0	0	200	300	0	0	0	0	0	0	0	200	903	0	0	0	0	0	0	0	603	903	0
642	2	0	0	0	0	0	0	200	300	0	0	0	0	0	0	0	200	903	0	0	0	0	0	0	0	603	903	0
642	3	0	0	0	0	0	0	200	300	0	0	0	0	0	0	0	200	903	0	0	0	0	0	0	0	603	903	0
642	4	0	0	0	0	0	0	200	300	0	0	0	0	0	0	0	200	903	0	0	0	0	0	0	0	603	903	0
642	5	0	0	0	0	0	0	200	300	0	0	0	0	0	0	0	200	903	0	0	0	0	0	0	0	603	903	0
642	6	0	0	0	0	0	0	200	300	0	0	0	0	0	0	0	200	903	0	0	0	0	0	0	0	603	903	0
642	7	0	0	0	0	0	0	200	300	0	0	0	0	0	0	0	200	903	0	0	0	0	0	0	0	603	903	0
642	8	0	0	0	0	0	0	200	300	0	0	0	0	0	0	0	200	903	0	0	0	0	0	0	0	603	903	0
642	9	0	0	0	0	0	0	200	300	0	0	0	0	0	0	0	200	903	0	0	0	0	0	0	0	603	903	0
643	0	0	0	0	0	0	0	200	300	0	0	0	0	0	0	0	200	903	0	0	0	0	0	0	0	603	903	0
643	1	0	0	0	0	0	0	200	300	0	0	0	0	0	0	0	200	903	0	0	0	0	0	0	0	603	903	0
643	2	0	0	0	0	0	0	200	300	0	0	0	0	0	0	0	200	903	0	0	0	0	0	0	0	603	903	0
643	3	0	0	0	0	0	0	200	300	0	0	0	0	0	0	0	200	903	0	0	0	0	0	0	0	603	903	0
643	4	0	0	0	0	0	0	200	300	0	0	0	0	0	0	0	200	903	0	0	0	0	0	0	0	603	903	0
643	5	0	0	0	0	0	0	200	300	0	0	0	0	0	0	0	200	903	0	0	0	0	0	0	0	603	903	0
643	6	0	0	0	0	0	0	200	300	0	0	0	0	0	0	0	200	903	0	0	0	0	0	0	0	603	903	0
643	7	0	0	0	0	0	0	200	300	0	0	0	0	0	0	0	200	903	0	0	0	0	0	0	0	603	903	0
643	8	0	0	0	0	0	0	200	300	0	0	0	0	0	0	0	200	903	0	0	0	0	0	0	0	603	903	0
643	9	0	0	0	0	0	0	200	300	0	0	0	0	0	0	0	200	903	0	0	0	0	0	0	0	603	903	0
644	0	0	0	0	0	0	0	200	300	0	0	0	0	0	0	0	200	903	0	0	0	0	0	0	0	603	903	0
644	1	0	0	0	0	0	0	200	300	0	0	0	0	0	0	0	200	903	0	0	0	0	0	0	0	603	903	0
644	2	0	0	0	0	0	0	200	300	0	0	0	0	0	0	0	200	903	0	0	0	0	0	0	0	603	903	0
644	3	0	0	0	0	0	0	200	300	0	0	0	0	0	0	0	200	903	0	0	0	0	0	0	0	603	903	0
644	4	0	0	0	0	0	0	200	300	0	0	0	0	0	0	0	200	903	0	0	0	0	0	0	0	603	903	0
644	5	0	0	0	0	0	0	200	300	0	0	0	0	0	0	0	200	903	0	0	0	0	0	0	0	603	903	0
644	6	0	0	0	0	0	0	200	300	0	0	0	0	0	0	0	200	903	0	0	0	0	0	0	0	603	903	0
644	7	0	0	0	0	0	0	200	300	0	0	0	0	0	0	0	200	903	0	0	0	0	0	0	0	603	903	0
644	8	0	0	0	0	0	0	200	300	0	0	0	0	0	0	0	200	903	0	0	0	0	0	0	0	603	903	0
644	9	0	0	0	0	0	0	200	300	0	0	0	0	0	0	0	200	903	0	0	0	0	0	0	0	603	903	0
645	0	0	0	0	0	0	0	200	300	0	0	0	0	0	0	0	200	903	0	0	0	0	0	0	0	603	903	0
645	1	0	0	0	0	0	0	200	300	0	0	0	0	0	0	0	200	903	0	0	0	0	0	0	0	603	903	0
645	2	0	0	0	0	0	0	200	300	0	0	0	0	0	0	0	200	903	0	0	0	0	0	0	0	603	903	0
645	3	0	0	0	0	0	0	200	300	0	0	0	0	0	0	0	200	903	0	0	0	0	0	0	0	603	903	0
645	4	0	0	0	0	0	0	200	300	0	0	0	0	0	0	0	200	903	0	0	0	0	0	0	0	603	903	0
645	5	0	0	0	0	0	0	200	300	0	0	0	0	0	0	0	200	903	0	0	0	0	0	0	0	603	903	0
645	6	0	0	0	0	0	0	200	300	0	0	0	0	0	0	0	200	903	0	0	0	0	0	0	0	603	903	0
645	7	0	0	0	0	0	0	200	300	0	0	0	0	0	0	0	200	903	0	0	0	0	0	0	0	603	903	0
645	8	0	0	0	0	0	0	200	300	0	0	0	0	0	0	0	200	903	0	0	0	0	0	0	0	603	903	0
645	9	0	0	0	0	0	0	200	300	0	0	0	0	0	0	0	200	903	0	0	0	0	0	0	0	603	903	0
646	0	0	0	0	0	0	0	200	300	0	0	0	0	0	0	0	200	903	0	0	0	0	0	0	0	603	903	0
646	1	0	0	0	0	0	0	200	300	0	0	0	0	0	0	0	200	903	0	0	0	0	0	0	0	603	903	0
646	2	0	0	0	0	0	0	200	300	0	0	0	0	0	0	0	200	903	0	0	0	0	0	0	0	603	903	0
646	3	0	0	0	0	0	0	200	300	0	0	0	0	0	0	0	200	903	0	0	0	0	0	0	0	603	903	0
646	4	0	0	0	0	0	0	200	300	0	0	0	0	0	0	0	200	903	0	0	0	0	0	0	0	603	903	0
646	5	0	0	0	0	0	0	200	300	0	0	0	0	0	0	0	200	903	0	0	0	0	0	0	0	603	903	0
646	6	0	0	0	0	0	0	200	300	0	0	0	0	0	0	0	200	903	0	0	0	0	0	0	0	603	903	0
646	7	0	0	0	0	0	0	200	300	0	0	0	0	0	0	0	200	903	0	0	0	0	0	0	0	603	903	0
646	8	0	0	0	0	0	0	200	300	0	0	0	0	0	0	0	200	903	0	0	0	0	0	0	0	603	903	0
646	9	0	0	0	0	0	0	200	300	0	0	0	0	0	0	0	200	903	0	0	0	0	0	0	0	603	903	0
647	0	0	0	0	0	0	0	200	300	0	0	0	0	0	0	0	200	903	0	0	0	0	0	0	0	603	903	0
647	1	0	0	0	0	0	0	200	300	0	0	0	0	0	0	0	200	903	0	0	0	0	0	0	0	603	903	0
647	2	0	0	0	0	0	0	200	300	0	0	0	0	0	0	0	200	903	0	0	0	0	0	0	0	603	903	0
647	3	0	0	0	0	0	0	200	300	0	0	0	0	0	0	0	200	903	0	0	0	0	0	0	0	603	903	0
647	4	0	0	0	0	0	0	200	300	0	0	0	0	0	0	0	200	903	0	0	0	0	0	0	0	603	903	0
647	5	0	0	0	0	0	0	200	300	0	0	0	0	0	0	0	200	903	0	0	0	0	0	0	0	603	903	0
647	6	0	0	0	0	0	0	200	300	0	0	0	0	0	0	0	200	903	0	0	0	0	0	0	0	603	903	0
647	7	0	0	0	0	0	0	200	300	0	0	0	0	0	0	0	200	903	0	0	0	0	0	0	0	603	903	0
647	8	0	0	0	0	0	0	200	300	0	0	0	0	0	0	0	200	903	0	0	0	0	0	0	0	603	903	0
647	9	0	0	0	0	0	0	200	300	0	0	0	0	0	0	0	200	903	0	0	0	0	0	0	0	603	903	0
648	0	0	0	0	0	0	0	200	300	0	0	0	0	0	0	0	200	903	0	0	0	0	0	0	0	603	903	0
648	1	0	0	0	0	0	0	200	300	0	0	0	0	0	0	0	200	903	0	0	0	0	0	0	0	603	903	0
648	2	0	0	0	0	0	0	200	300	0	0	0	0	0	0	0	200	903	0	0	0	0	0	0	0	603	903	0
648	3	0	0	0	0	0	0	200	300	0	0	0	0	0	0	0	200	903	0	0	0	0	0	0	0	603	903	0
648	4	0	0	0	0	0	0	200	300	0	0	0	0	0	0	0	200	903	0	0	0	0	0	0	0	603	903	0
648	5	0	0	0	0	0	0	200	300	0	0	0	0	0	0	0	200	903	0	0	0	0	0	0	0	603	903	0
648	6	0	0	0	0	0	0	200	300	0	0	0	0	0	0	0	200	903	0	0	0	0	0	0	0	603	903	0
648	7	0	0	0	0	0	0	200	300	0	0	0	0	0	0	0	200	903	0	0	0	0	0	0	0	603	903	0
648	8	0	0	0	0	0	0	200	300	0	0	0	0	0	0	0	200	903	0	0	0	0	0	0	0	603	903	0
648	9	0	0	0	0	0	0	200	300	0	0	0	0	0	0	0	200	903	0	0	0	0	0	0	0	603	903	0
649	0	0	0	0	0	0	0	200	300	0	0	0	0	0	0	0	200	903	0	0	0	0	0	0	0	603	903	0
649	1	0	0	0	0	0	0	200	300	0	0	0	0	0	0	0	200	903	0	0	0	0	0	0	0	603	903	0
649	2	0	0	0	0	0	0	200	300	0	0	0	0	0	0	0	200	903	0	0	0	0	0	0	0	603	903	0
649	3	0	0	0	0	0	0	200	300	0	0	0	0	0	0	0	200	903	0	0	0	0	0	0	0	603	903	0
649	4	0	0	0	0	0	0	200	300	0	0	0	0	0	0	0	200	903	0	0	0	0	0	0	0	603	903	0
649	5	0	0	0	0	0	0	200	300	0	0	0	0	0	0	0	200	903	0	0	0	0	0	0	0	603	903	0
649	6	0	0	0	0	0	0	200	300	0	0	0	0	0	0	0	200	903	0	0	0	0	0	0	0	603	903	0
649	7	0	0	0	0	0	0	200	300	0	0	0	0	0	0	0	200	903	0	0	0	0	0	0	0	603	903	0
649	8	0	0	0	0	0	0	200	300	0	0	0	0	0	0	0	200	903	0	0	0	0	0	0	0	603	903	0
649	9	0	0	0	0	0	0	200	300	0	0	0	0	0	0	0	200	903	0	0	0	0	0	0	0	603	903	0
650	0	0	0	0	0	0	0	200	300	0	0	0	0	0	0	0	200	903	0	0	0	0	0	0	0	603	903	0
650	1	0	0	0	0	0	0	200	300	0	0	0	0	0	0	0	200	903	0	0	0	0	0	0	0	603	903	0
650	2	0	0	0	0	0	0	200	300	0	0	0	0	0	0	0	200	903	0	0	0	0	0	0	0	603	903	0
650	3	0	0	0	0	0	0	200	300	0	0	0	0	0	0	0	200	903	0	0	0	0	0	0	0	603	903	0
650	4	0	0	0	0	0	0	200	300	0	0	0	0	0	0	0	200	903	0	0	0	0	0	0	0	603	903	0
650	5	0	0	0	0	0	0	200	300	0	0	0	0	0	0	0	200	903	0	0	0	0	0	0	0	603	903	0
650	6	0	0	0	0	0	0	200	300	0	0	0	0	0	0	0	200	903	0	0	0	0	0	0	0	603	903	0
650	7	0	0	0	0	0	0	200	300	0	0	0	0	0	0	0	200	903	0	0	0	0	0	0	0	603	903	0
650	8	0	0	0	0	0	0	200	300	0	0	0	0	0	0	0	200	903	0	0	0	0	0	0	0	603	903	0
650	9	0	0	0	0	0	0	200	300	0	0	0	0	0	0	0	200	903	0	0	0	0	0	0	0	603	903	0
651	0	0	0	0	0	0	0	200	300	0	0	0	0	0	0	0	200	903	0	0	0	0	0	0	0	603	903	0
651	1	0	0	0	0	0	0	200	300	0	0	0	0	0	0	0	200	903	0	0	0	0	0	0	0	603	903	0
651	2	0	0	0	0	0	0	200	300	0	0	0	0	0	0	0	200	903	0	0	0	0	0	0	0	603	903	0
651	3	0	0	0	0	0	0	200	300	0	0	0	0	0	0	0	200	903	0	0	0	0	0	0	0	603	903	0
651	4	0	0	0	0	0	0	200	300	0	0	0	0	0	0	0	200	903	0	0	0	0	0	0	0	603	903	0
651	5	0	0	0	0	0	0	200	300	0	0	0	0	0	0	0	200	903	0	0	0	0	0	0	0	603	903	0
651	6	0	0	0	0	0	0	200	300	0	0	0	0	0	0	0	200	903	0	0	0	0	0	0	0	603	903	0
651	7	0	0	0	0	0	0	200	300	0	0	0	0	0	0	0	200	903	0	0	0	0	0	0	0	603	903	0
651	8	0	0	0	0	0	0	200	300	0	0	0	0	0	0	0	200	903	0	0	0	0	0	0	0	603	903	0
651	9	0	0	0	0	0	0	200	300	0	0	0	0	0	0	0	200	903	0	0	0	0	0	0	0	603	903	0
652	0	0	0	0	0	0	0	200	300	0	0	0	0	0	0	0	200	903	0	0	0	0	0	0	0	603	903	0
652	1	0	0	0	0	0	0	200	300	0	0	0	0	0	0	0	200	903	0	0	0	0	0	0	0	603	903	0
652	2	0	0	0	0	0	0	200	300	0	0	0	0	0	0	0	200	903	0	0	0	0	0	0	0	603	903	0
652	3	0	0	0	0	0	0	200	300	0	0	0	0	0	0	0	200	903	0	0	0	0	0	0	0	603	903	0
652	4	0	0	0	0	0	0	200	300	0	0	0	0	0	0	0	200	903	0	0	0	0	0	0	0	603	903	0
652	5	0	0	0	0	0	0	200	300	0	0	0	0	0	0	0	200	903	0	0	0	0	0	0	0	603	903	0
652	6	0	0	0	0	0	0	200	300	0	0	0	0	0	0	0	200	903	0	0	0	0	0	0	0	603	903	0
652	7	0	0	0	0	0	0	200	300	0	0	0	0	0	0	0	200	903	0	0	0	0	0	0	0	603	903	0
652	8	0	0	0	0	0	0	200	300	0	0	0	0	0	0	0	200	903	0	0	0	0	0	0	0	603	903	0
652	9	0	0	0	0	0	0	200	300	0	0	0	0	0	0	0	200	903	0	0	0	0	0	0	0	603	903	0
653	0	0	0	0	0	0	0	200	300	0	0	0	0	0	0	0	200	903	0	0	0	0	0	0	0	603	903	0
653	1	0	0	0	0	0	0	200	300	0	0	0	0	0	0	0	200	903	0	0	0	0	0	0	0	603	903	0
653	2	0	0	0	0	0	0	200	300	0	0	0	0	0	0	0	200	903	0	0	0	0	0	0	0	603	903	0
653	3	0	0	0	0	0	0	200	300	0	0	0	0	0	0	0	200	903	0	0	0	0	0	0	0	603	903	0
653	4	0	0	0	0	0	0	200	300	0	0	0	0	0	0	0	200	903	0	0	0	0	0	0	0	603	903	0
653	5	0	0	0	0	0	0	200	300	0	0	0	0	0	0	0	200	903	0	0	0	0	0	0	0	603	903	0
653	6	0	0	0	0	0	0	200	300	0	0	0	0	0	0	0	200	903	0	0	0	0	0	0	0	603	903	0
653	7	0	0	0	0	0	0	200	300	0	0	0	0	0	0	0	200	903	0	0	0	0	0	0	0	603	903	0
653	8	0	0	0	0	0	0	200	300	0	0	0	0	0	0	0	200	903	0	0	0	0	0	0	0	603	903	0
653	9	0	0	0	0	0	0	200	300	0	0	0	0	0	0	0	200	903	0	0	0	0	0	0	0	603	903	0
654	0	0	0	0	0	0	0	200	300	0	0	0	0	0	0	0	200	903	0	0	0	0	0	0	0	603	903	0
654	1	0	0	0	0	0	0	200	300	0	0	0	0	0	0	0	200	903	0	0	0	0	0	0	0	603	903	0
654	2	0	0	0	0	0	0	200	300	0	0	0	0	0	0	0	200	903	0	0	0	0	0	0	0	603	903	0
654	3	0	0	0	0	0	0	200	300	0	0	0	0	0	0	0	200	903	0	0	0	0	0	0	0	603	903	0
654	4	0	0	0	0	0	0	200	300	0	0	0	0	0	0	0	200	903	0	0	0	0	0	0	0	603	903	0
654	5	0	0	0	0	0	0	200	300	0	0	0	0	0	0	0	200	903	0	0	0	0	0	0	0	603	903	0
654	6	0	0	0	0	0	0	200	300	0	0	0	0	0	0	0	200	903	0	0	0	0	0	0	0	603	903	0
654	7	0	0	0	0	0	0	200	300	0	0	0	0	0	0	0	200	903	0	0	0	0	0	0	0	603	903	0
654	8	0	0	0	0	0	0	200	300	0	0	0	0	0	0	0	200	903	0	0	0	0	0	0	0	603	903	0
654	9	0	0	0	0	0	0	200	300	0	0	0	0	0	0	0	200	903	0	0	0	0	0	0	0	603	903	0
655	0	0	0	0	0	0	0	200	300	0	0	0	0	0	0	0	200	903	0	0	0	0	0	0	0	603	903	0
655	1	0	0	0	0	0	0	200	300	0	0	0	0	0	0	0	200	903	0	0	0	0	0	0	0	603	903	0
655	2	0	0	0	0	0	0	200	300	0	0	0	0	0	0	0	200	903	0	0	0	0	0	0	0	603	903	0
655	3	0	0	0	0	0	0	200	300	0	0	0	0	0	0	0	200	903	0	0	0	0	0	0	0	603	903	0
655	4	0	0	0	0	0	0	200	300	0	0	0	0	0	0	0	200	903	0	0	0	0	0	0	0	603	903	0
655	5	0	0	0	0	0	0	200	300	0	0	0	0	0	0	0	200	903	0	0	0	0	0	0	0	603	903	0
655	6	0	0	0	0	0	0	200	300	0	0	0	0	0	0	0	200	903	0	0	0	0	0	0	0	603	903	0
655	7	0	0	0	0	0	0	200	300	0	0	0	0	0	0	0	200	903	0	0	0	0	0	0	0	603	903	0
655	8	0	0	0	0	0	0	200	300	0	0	0	0	0	0	0	200	903	0	0	0	0	0	0	0	603	903	0
655	9	0	0	0	0	0	0	200	300	0	0	0	0	0	0	0	200	903	0	0	0	0	0	0	0	603	903	0
656	0	0	0	0	0	0	0	200	300	0	0	0	0	0	0	0	200	903	0	0	0	0	0	0	0	603	903	0
656	1	0	0	0	0	0	0	200	300	0	0	0	0	0	0	0	200	903	0	0	0	0	0	0	0	603	903	0
656	2	0	0	0	0	0	0	200	300	0	0	0	0	0	0	0	200	903	0	0	0	0	0	0	0	603	903	0
656	3	0	0	0	0	0	0	200	300	0	0	0	0	0	0	0	200	903	0	0	0	0	0	0	0	603	903	0
656	4	0	0	0	0	0	0	200	300	0	0	0	0	0	0	0	200	903	0	0	0	0	0	0	0	603	903	0
656	5	0	0	0	0	0	0	200	300	0	0	0	0	0	0	0	200	903	0	0	0	0	0	0	0	603	903	0
656	6	0	0	0	0	0	0	200	300	0	0	0	0	0	0	0	200	903	0	0	0	0	0	0	0	603	903	0
656	7	0	0	0	0	0	0	200	300	0	0	0	0	0	0	0	200	903	0	0	0	0	0	0	0	603	903	0
656	8	0	0	0	0	0	0	200	300	0	0	0	0	0	0	0	200	903	0	0	0	0	0	0	0	603	903	0
656	9	0	0	0	0	0	0	200	300	0	0	0	0	0	0	0	200	903	0	0	0	0	0	0	0	603	903	0
657	0	0	0	0	0	0	0	200	300	0	0	0	0	0	0	0	200	903	0	0	0	0	0	0	0	603	903	0
657	1	0	0	0	0	0	0	200	300	0	0	0	0	0	0	0	200	903	0	0	0	0	0	0	0	603	903	0
657	2	0	0	0	0	0	0	200	300	0	0	0	0	0	0	0	200	903	0	0	0	0	0	0	0	603	903	0
657	3	0	0	0	0	0	0	200	300	0	0	0	0	0	0	0	200	903	0	0	0	0	0	0	0	603	903	0
657	4	0	0	0	0	0	0	200	300	0	0	0	0	0	0	0	200	903	0	0	0	0	0	0	0	603	903	0
657	5	0	0	0	0	0	0	200	300	0	0	0	0	0	0	0	200	903	0	0	0	0	0	0	0	603	903	0
657	6	0	0	0	0	0	0	200	300	0	0	0	0	0	0	0	200	903	0	0	0	0	0	0	0	603	903	0
657	7	0	0	0	0	0	0	200	300	0	0	0	0	0	0	0	200	903	0	0	0	0	0	0	0	603	903	0
657	8	0	0	0	0	0	0	200	300	0	0	0	0	0	0	0	200	903	0	0	0	0	0	0	0	603	903	0
657	9	0	0	0	0	0	0	200	300	0	0	0	0	0	0	0	200	903	0	0	0	0	0	0	0	603	903	0
658	0	0	0	0	0	0	0	200	300	0	0	0	0	0	0	0	200	903	0	0	0	0	0	0	0	603	903	0
658	1	0	0	0	0	0	0	200	300	0	0	0	0	0	0	0	200	903	0	0	0	0	0	0	0	603	903	0
658	2	0	0	0	0	0	0	200	300	0	0	0	0	0	0	0	200	903	0	0	0	0	0	0	0	603	903	0
658	3	0	0	0	0	0	0	200	300	0	0	0	0	0	0	0	200	903	0	0	0	0	0	0	0	603	903	0
658	4	0	0	0	0	0	0	200	300	0	0	0	0	0	0	0	200	903	0	0	0	0	0	0	0	603	903	0
658	5	0	0	0	0	0	0	200	300	0	0	0	0	0	0	0	200	903	0	0	0	0	0	0	0	603	903	0
658	6	0	0	0	0	0	0	200	300	0	0	0	0	0	0	0	200	903	0	0	0	0	0	0	0	603	903	0
658	7	0	0	0	0	0	0	200	300	0	0	0	0	0	0	0	200	903	0	0	0	0	0	0	0	603	903	0
658	8	0	0	0	0	0	0	200	300	0	0	0	0	0	0	0	200	903	0	0	0	0	0	0	0	603	903	0
658	9	0	0	0	0	0	0	200	300	0	0	0	0	0	0	0	200	903	0	0	0	0	0	0	0	603	903	0
659	0	0	0	0	0	0	0	200	300	0	0	0	0	0	0	0	200	903	0	0	0	0	0	0	0	603	903	0
659	1	0	0	0	0	0	0	200	300	0	0	0	0	0	0	0	200	903	0	0	0	0	0	0	0	603	903	0
659	2	0	0	0	0	0	0	200	300	0	0	0	0	0	0	0	200	903	0	0	0	0	0	0	0	603	903	0
659	3	0	0	0	0	0	0	200	300	0	0	0	0	0	0	0	200	903	0	0	0	0	0	0	0	603	903	0
659	4	0	0	0	0	0	0	200	300	0	0	0	0	0	0	0	200	903	0	0	0	0	0	0	0	603	903	0
659	5	0	0	0	0	0	0	200	300	0	0	0	0	0	0	0	200	903	0	0	0	0	0	0	0	603	903	0
659	6	0	0	0	0	0	0	200	300	0	0	0	0	0	0	0	200	903	0	0	0	0	0	0	0	603	903	0
659	7	0	0	0	0	0	0	200	300	0	0	0	0	0	0	0	200	903	0	0	0	0	0	0	0	603	903	0
659	8	0	0	0	0	0	0	200	300	0	0	0	0	0	0	0	200	903	0	0	0	0	0	0	0	603	903	0
659	9	0	0	0	0	0	0	200	300	0	0	0	0	0	0	0	200	903	0	0	0	0	0	0	0	603	903	0
660	0	0	0	0	0	0	0	200	300	0	0	0	0	0	0	0	200	903	0	0	0	0	0	0	0	603	903	0
660	1	0	0	0	0	0	0	200	300	0	0	0	0	0	0	0	200	903	0	0	0	0	0	0	0	603	903	0
660	2	0	0	0	0	0	0	200	300	0	0	0	0	0	0	0	200	903	0	0	0	0	0	0	0	603	903	0
660	3	0	0	0	0	0	0	200	300	0	0	0	0	0	0	0	200	903	0	0	0	0	0	0	0	603	903	0
660	4	0	0	0	0	0	0	200	300	0	0	0	0	0	0	0	200	903	0	0	0	0	0	0	0	603	903	0
660	5	0	0	0	0	0	0	200	300	0	0	0	0	0	0	0	200	903	0	0	0	0	0	0	0	603	903	0
660	6	0	0	0	0	0	0	200	300	0	0	0	0	0	0	0	200	903	0	0	0	0	0	0	0	603	903	0
660	7	0	0	0	0	0	0	200	300	0	0	0	0	0	0	0	200	903	0	0	0	0	0	0	0	603	903	0
660	8	0	0	0	0	0	0	200	300	0	0	0	0	0	0	0	200	903	0	0	0	0	0	0	0	603	903	0
660	9	0	0	0	0	0	0	200	300	0	0	0	0	0	0	0	200	903	0	0	0	0	0	0	0	603	903	0
661	0	0	0	0	0	0	0	200	300	0	0	0	0	0	0	0	200	903	0	0	0	0	0	0	0	603	903	0
661	1	0	0	0	0	0	0	200	300	0	0	0	0	0	0	0	200	903	0	0	0	0	0	0	0	603	903	0
661	2	0	0	0	0	0	0	200	300	0	0	0	0	0	0	0	200	903	0	0	0	0	0	0	0	603	903	0
661	3	0	0	0	0	0	0	200	300	0	0	0	0	0	0	0	200	903	0	0	0	0	0	0	0	603	903	0
661	4	0	0	0	0	0	0	200	300	0	0	0	0	0	0	0	200	903	0	0	0	0	0	0	0	603	903	0
661	5	0	0	0	0	0	0	200	300	0	0	0	0	0	0	0	200	903	0	0	0	0	0	0	0	603	903	0
661	6	0	0	0	0	0	0	200	300	0	0	0	0	0	0	0	200	903	0	0	0	0	0	0	0	603	903	0
661	7	0	0	0	0	0	0	200	300	0	0	0	0	0	0	0	200	903	0	0	0	0	0	0	0	603	903	0
661	8	0	0	0	0	0	0	200	300	0	0	0	0	0	0	0	200	903	0	0	0	0	0	0	0	603	903	0
661	9	0	0	0	0	0	0	200	300	0	0	0	0	0	0	0	200	903	0	0	0	0	0	0	0	603	903	0
662	0	0	0	0	0	0	0	200	300	0	0	0	0	0	0	0	200	903	0	0	0	0	0	0	0	603	903	0
662	1	0	0	0	0	0	0	200	300	0	0	0	0	0	0	0	200	903	0	0	0	0	0	0	0	603	903	0
662	2	0	0	0	0	0	0	200	300	0	0	0	0	0	0	0	200	903	0	0	0	0	0	0	0	603	903	0
662	3	0	0	0	0	0	0	200	300	0	0	0	0	0	0	0	200	903	0	0	0	0	0	0	0	603	903	0
662	4	0	0	0	0	0	0	200	300	0	0	0	0	0	0	0	200	903	0	0	0	0	0	0	0	603	903	0
662	5	0	0	0	0	0	0	200	300	0	0	0	0	0	0	0	200	903	0	0	0	0	0	0	0	603	903	0
662	6	0	0	0	0	0	0	200	300	0	0	0	0	0	0	0	200	903	0	0	0	0	0	0	0	603	903	0
662	7	0	0	0	0	0	0	200	300	0	0	0	0	0	0	0	200	903	0	0	0	0	0	0	0	603	903	0
662	8	0	0	0	0	0	0	200	300	0	0	0	0	0	0	0	200	903	0	0	0	0	0	0	0	603	903	0
662	9	0	0	0	0	0	0	200	300	0	0	0	0	0	0	0	200	903	0	0	0	0	0	0	0	603	903	0
663	0	0	0	0	0	0	0	200	300	0	0	0	0	0	0	0	200	903	0	0	0	0	0	0	0	603	903	0
663	1	0	0	0	0	0	0	200	300	0	0	0	0	0	0	0	200	903	0	0	0	0	0	0	0	603	903	0
663	2	0	0	0	0	0	0	200	300	0	0	0	0	0	0	0	200	903	0	0	0	0	0	0	0	603	903	0
663	3	0	0	0	0	0	0	200	300	0	0	0	0	0	0	0	200	903	0	0	0	0	0	0	0	603	903	0
663	4	0	0	0	0	0	0	200	300	0	0	0	0	0	0	0	200	903	0	0	0	0	0	0	0	603	903	0
663	5	0	0	0	0	0	0	200	300	0	0	0	0	0	0	0	200	903	0	0	0	0	0	0	0	603	903	0
663	6	0	0	0	0	0	0	200	300	0	0	0	0	0	0	0	200	903	0	0	0	0	0	0	0	603	903	0
663	7	0	0	0	0	0	0	200	300	0	0	0	0	0	0	0	200	903	0	0	0	0	0	0	0	603	903	0
663	8	0	0	0	0	0	0	200	300	0	0	0	0	0	0	0	200	903	0	0	0	0	0	0	0	603	903	0
663	9	0	0	0	0	0	0	200	300	0	0	0	0	0	0	0	200	903	0	0	0	0	0	0	0	603	903	0
664	0	0	0	0	0	0	0	200	300	0	0	0	0	0	0	0	200	903	0	0	0	0	0	0	0	603	903	0
664	1	0	0	0	0	0	0	200	300	0	0	0	0	0	0	0	200	903	0	0	0	0	0	0	0	603	903	0
664	2	0	0	0	0	0	0	200	300	0	0	0	0	0	0	0	200	903	0	0	0	0	0	0	0	603	903	0
664	3	0	0	0	0	0	0	200	300	0	0	0	0	0	0	0	200	903	0	0	0	0	0	0	0	603	903	0
664	4	0	0	0	0	0	0	200	300	0	0	0	0	0	0	0	200	903	0	0	0	0	0	0	0	603	903	0
664	5	0	0	0	0	0	0	200	300	0	0	0	0	0	0	0	200	903	0	0	0	0	0	0	0	603	903	0
664	6	0	0	0	0	0	0	200	300	0	0	0	0	0	0	0	200	903	0	0	0	0	0	0	0	603	903	0
664	7	0	0	0	0	0	0	200	300	0	0	0	0	0	0	0	200	903	0	0	0	0	0	0	0	603	903	0
664	8	0	0	0	0	0	0	200	300	0	0	0	0	0	0	0	200	903	0	0	0	0	0	0	0	603	903	0
664	9	0	0	0	0	0	0	200	300	0	0	0	0	0	0	0	200	903	0	0	0	0	0	0	0	603	903	0
665	0	0	0	0	0	0	0	200	300	0	0	0	0	0	0	0	200	903	0	0	0	0	0	0	0	603	903	0
665	1	0	0	0	0	0	0	200	300	0	0	0	0	0	0	0	200	903	0	0	0	0	0	0	0	603	903	0
665	2	0	0	0	0	0	0	200	300	0	0	0	0	0	0	0	200	903	0	0	0	0	0	0	0	603	903	0
665	3	0	0	0	0	0	0	200	300	0	0	0	0	0	0	0	200	903	0	0	0	0	0	0	0	603	903	0
665	4	0	0	0	0	0	0	200	300	0	0	0	0	0	0	0	200	903	0	0	0	0	0	0	0	603	903	0
665	5	0	0	0	0	0	0	200	300	0	0	0	0	0	0	0	200	903	0	0	0	0	0	0	0	603	903	0
665	6	0	0	0	0	0	0	200	300	0	0	0	0	0	0	0	200	903	0	0	0	0	0	0	0	603	903	0
665	7	0	0	0	0	0	0	200	300	0	0	0	0	0	0	0	200	903	0	0	0	0	0	0	0	603	903	0
665	8	0	0	0	0	0	0	200	300	0	0	0	0	0	0	0	200	903	0	0	0	0	0	0	0	603	903	0
665	9	0	0	0	0	0	0	200	300	0	0	0	0	0	0	0	200	903	0	0	0	0	0	0	0	603	903	0
666	0	0	0	0	0	0	0	200	300	0	0	0	0	0	0	0	200	903	0	0	0	0	0	0	0	603	903	0
666	1	0	0	0	0	0	0	200	300	0	0	0	0	0	0	0	200	903	0	0	0	0	0	0	0	603	903	0
666	2	0	0	0	0	0	0	200	300	0	0	0	0	0	0	0	200	903	0	0	0	0	0	0	0	603	903	0
666	3	0	0	0	0	0	0	200	300	0	0	0	0	0	0	0	200	903	0	0	0	0	0	0	0	603	903	0
666	4	0	0	0	0	0	0	200	300	0	0	0	0	0	0	0	200	903	0	0	0	0	0	0	0	603	903	0
666	5	0	0	0	0	0	0	200	300	0	0	0	0	0	0	0	200	903	0	0	0	0	0	0	0	603	903	0
666	6	0	0	0	0	0	0	200	300	0	0	0	0	0	0	0	200	903	0	0	0	0	0	0	0	603	903	0
666	7	0	0	0	0	0	0	200	300	0	0	0	0	0	0	0	200	903	0	0	0	0	0	0	0	603	903	0
666	8	0	0	0	0	0	0	200	300	0	0	0	0	0	0	0	200	903	0	0	0	0	0	0	0	603	903	0
666	9	0	0	0	0	0	0	200	300	0	0	0	0	0	0	0	200	903	0	0	0	0	0	0	0	603	903	0
667	0	0	0	0	0	0	0	200	300	0	0	0	0	0	0	0	200	903	0	0	0	0	0	0	0	603	903	0
667	1	0	0	0	0	0	0	200	300	0	0	0	0	0	0	0	200	903	0	0	0	0	0	0	0	603	903	0
667	2	0	0	0	0	0	0	200	300	0	0	0	0	0	0	0	200	903	0	0	0	0	0	0	0	603	903	0
667	3	0	0	0	0	0	0	200	300	0	0	0	0	0	0	0	200	903	0	0	0	0	0	0	0	603	903	0
667	4	0	0	0	0	0	0	200	300	0	0	0	0	0	0	0	200	903	0	0	0	0	0	0	0	603	903	0
667	5	0	0	0	0	0	0	200	300	0	0	0	0	0	0	0	200	903	0	0	0	0	0	0	0	603	903	0
667	6	0	0	0	0	0	0	200	300	0	0	0	0	0	0	0	200	903	0	0	0	0	0	0	0	603	903	0
667	7	0	0	0	0	0	0	200	300	0	0	0	0	0	0	0	200	903	0	0	0	0	0	0	0	603	903	0
667	8	0	0	0	0	0	0	200	300	0	0	0	0	0	0	0	200	903	0	0	0	0	0	0	0	603	903	0
667	9	0	0	0	0	0	0	200	300	0	0	0	0	0	0	0	200	903	0	0	0	0	0	0	0	603	903	0
668	0	0	0	0	0	0	0	200	300	0	0	0	0	0	0	0	200	903	0	0	0	0	0	0	0	603	903	0
668	1	0	0	0	0	0	0	200	300	0	0	0	0	0	0	0	200	903	0	0	0	0	0	0	0	603	903	0
668	2	0	0	0	0	0	0	200	300	0	0	0	0	0	0	0	200	903	0	0	0	0	0	0	0	603	903	0
668	3	0	0	0	0	0	0	200	300	0	0	0	0	0	0	0	200	903	0	0	0	0	0	0	0	603	903	0
668	4	0	0	0	0	0	0	200	300	0	0	0	0	0	0	0	200	903	0	0	0	0	0	0	0	603	903	0
668	5	0	0	0	0	0	0	200	300	0	0	0	0	0	0	0	200	903	0	0	0	0	0	0	0	603	903	0
668	6	0	0	0	0	0	0	200	300	0	0	0	0	0	0	0	200	903	0	0	0	0	0	0	0	603	903	0
668	7	0	0	0	0	0	0	200	300	0	0	0	0	0	0	0	200	903	0	0	0	0	0	0	0	603	903	0
668	8	0	0	0	0	0	0	200	300	0	0	0	0	0	0	0	200	903	0	0	0	0	0	0	0	603	903	0
668	9	0	0	0	0	0	0	200	300	0	0	0	0	0	0	0	200	903	0	0	0	0	0	0	0	603	903	0
669	0	0	0	0	0	0	0	200	300	0	0	0	0	0	0	0	200	903	0	0	0	0	0	0	0	603	903	0
669	1	0	0	0	0	0	0	200	300	0	0	0	0	0	0	0	200	903	0	0	0	0	0	0	0	603	903	0
669	2	0	0	0	0	0	0	200	300	0	0	0	0	0	0	0	200	903	0	0	0	0	0	0	0	603	903	0
669	3	0	0	0	0	0	0	200	300	0	0	0	0	0	0	0	200	903	0	0	0	0	0	0	0	603	903	0
669	4	0	0	0	0	0	0	200	300	0	0	0	0	0	0	0	200	903	0	0	0	0	0	0	0	603	903	0
669	5	0	0	0	0	0	0	200	300	0	0	0	0	0	0	0	200	903	0	0	0	0	0	0	0	603	903	0
669	6	0	0	0	0	0	0	200	300	0	0	0	0	0	0	0	200	903	0	0	0	0	0	0	0	603	903	0
669	7	0	0	0	0	0	0	200	300	0	0	0	0	0	0	0	200	903	0	0	0	0	0	0	0	603	903	0
669	8	0	0	0	0	0	0	200	300	0	0	0	0	0	0	0	200	903	0	0	0	0	0	0	0	603	903	0
669	9	0	0	0	0	0	0	200	300	0	0	0	0	0	0	0	200	903	0	0	0	0	0	0	0	603	903	0
670	0	0	0	0	0	0	0	200	300	0	0	0	0	0	0	0	200	903	0	0	0	0	0	0	0	603	903	0
670	1	0	0	0	0	0	0	200	300	0	0	0	0	0	0	0	200	903	0	0	0	0	0	0	0	603	903	0
670	2	0	0	0	0	0	0	200	300	0	0	0	0	0	0	0	200	903	0	0	0	0	0	0	0	603	903	0
670	3	0	0	0	0	0	0	200	300	0	0	0	0	0	0	0	200	903	0	0	0	0	0	0	0	603	903	0
670	4	0	0	0	0	0	0	200	300	0	0	0	0	0	0	0	200	903	0	0	0	0	0	0	0	603	903	0
670	5	0	0	0	0	0	0	200	300	0	0	0	0	0	0	0	200	903	0	0	0	0	0	0	0	603	903	0
670	6	0	0	0	0	0	0	200	300	0	0	0	0	0	0	0	200	903	0	0	0	0	0	0	0	603	903	0
670	7	0	0	0	0	0	0	200	300	0	0	0	0	0	0	0	200	903	0	0	0	0	0	0	0	603	903	0
670	8	0	0	0	0	0	0	200	300	0	0	0	0	0	0	0	200	903	0	0	0	0	0	0	0	603	903	0
670	9	0	0	0	0	0	0	200	300	0	0	0	0	0	0	0	200	903	0	0	0	0	0	0	0	603	903	0
671	0	0	0	0	0	0	0	200	300	0	0	0	0	0	0	0	200	903	0	0	0	0	0	0	0	603	903	0
671	1	0	0	0	0	0	0	200	300	0	0	0	0	0	0	0	200	903	0	0	0	0	0	0	0	603	903	0
671	2	0	0	0	0	0	0	200	300	0	0	0	0	0	0	0	200	903	0	0	0	0	0	0	0	603	903	0
671	3	0	0	0	0	0	0	200	300	0	0	0	0	0	0	0	200	903	0	0	0	0	0	0	0	603	903	0
671	4	0	0	0	0	0	0	200	300	0	0	0	0	0	0	0	200	903	0	0	0	0	0	0	0	603	903	0
671	5	0	0	0	0	0	0	200	300	0	0	0	0	0	0	0	200	903	0	0	0	0	0	0	0	603	903	0
671	6	0	0	0	0	0	0	200	300	0	0	0	0	0	0	0	200	903	0	0	0	0	0	0	0	603	903	0
671	7	0	0	0	0	0	0	200	300	0	0	0	0	0	0	0	200	903	0	0	0	0	0	0	0	603	903	0
671	8	0	0	0	0	0	0	200	300	0	0	0	0	0	0	0	200	903	0	0	0	0	0	0	0	603	903	0
671	9	0	0	0	0	0	0	200	300	0	0	0	0	0	0	0	200	903	0	0	0	0	0	0	0	603	903	0
672	0	0	0	0	0	0	0	200	300	0	0	0	0	0	0	0	200	903	0	0	0	0	0	0	0	603	903	0
672	1	0	0	0	0	0	0	200	300	0	0	0	0	0	0	0	200	903	0	0	0	0	0	0	0	603	903	0
672	2	0	0	0	0	0	0	200	300	0	0	0	0	0	0	0	200	903	0	0	0	0	0	0	0	603	903	0
672	3	0	0	0	0	0	0	200	300	0	0	0	0	0	0	0	200	903	0	0	0	0	0	0	0	603	903	0
672	4	0	0	0	0	0	0	200	300	0	0	0	0	0	0	0	200	903	0	0	0	0	0	0	0	603	903	0
672	5	0	0	0	0	0	0	200	300	0	0	0	0	0	0	0	200	903	0	0	0	0	0	0	0	603	903	0
672	6	0	0	0	0	0	0	200	300	0	0	0	0	0	0	0	200	903	0	0	0	0	0	0	0	603	903	0
672	7	0	0	0	0	0	0	200	300	0	0	0	0	0	0	0	200	903	0	0	0	0	0	0	0	603	903	0
672	8	0	0	0	0	0	0	200	300	0	0	0	0	0	0	0	200	903	0	0	0	0	0	0	0	603	903	0
672	9	0	0	0	0	0	0	200	300	0	0	0	0	0	0	0	200	903	0	0	0	0	0	0	0	603	903	0
673	0	0	0	0	0	0	0	200	300	0	0	0	0	0	0	0	200	903	0	0	0	0	0	0	0	603	903	0
673	1	0	0	0	0	0	0	200	300	0	0	0	0	0	0	0	200	903	0	0	0	0	0	0	0	603	903	0
673	2	0	0	0	0	0	0	200	300	0	0	0	0	0	0	0	200	903	0	0	0	0	0	0	0	603	903	0
673	3	0	0	0	0	0	0	200	300	0	0	0	0	0	0	0	200	903	0	0	0	0	0	0	0	603	903	0
673	4	0	0	0	0	0	0	200	300	0	0	0	0	0	0	0	200	903	0	0	0	0	0	0	0	603	903	0
673	5	0	0	0	0	0	0	200	300	0	0	0	0	0	0	0	200	903	0	0	0	0	0	0	0	603	903	0
673	6	0	0	0	0	0	0	200	300	0	0	0	0	0	0	0	200	903	0	0	0	0	0	0	0	603	903	0
673	7	0	0	0	0	0	0	200	300	0	0	0	0	0	0	0	200	903	0	0	0	0	0	0	0	603	903	0
673	8	0	0	0	0	0	0	200	300	0	0	0	0	0	0	0	200	903	0	0	0	0	0	0	0	603	903	0
673	9	0	0	0	0	0	0	200	300	0	0	0	0	0	0	0	200	903	0	0	0	0	0	0	0	603	903	0
674	0	0	0	0	0	0	0	200	300	0	0	0	0	0	0	0	200	903	0	0	0	0	0	0	0	603	903	0
674	1	0	0	0	0	0	0	200	300	0	0	0	0	0	0	0	200	903	0	0	0	0	0	0	0	603	903	0
674	2	0	0	0	0	0	0	200	300	0	0	0	0	0	0	0	200	903	0	0	0	0	0	0	0	603	903	0
674	3	0	0	0	0	0	0	200	300	0	0	0	0	0	0	0	200	903	0	0	0	0	0	0	0	603	903	0
674	4	0	0	0	0	0	0	200	300	0	0	0	0	0	0	0	200	903	0	0	0	0	0	0	0	603	903	0
674	5	0	0	0	0	0	0	200	300	0	0	0	0	0	0	0	200	903	0	0	0	0	0	0	0	603	903	0
674	6	0	0	0	0	0	0	200	300	0	0	0	0	0	0	0	200	903	0	0	0	0	0	0	0	603	903	0
674	7	0	0	0	0	0	0	200	300	0	0	0	0	0	0	0	200	903	0	0	0	0	0	0	0	603	903	0
674	8	0	0	0	0	0	0	200	300	0	0	0	0	0	0	0	200	903	0	0	0	0	0	0	0	603	903	0
674	9	0	0	0	0	0	0	200	300	0	0	0	0	0	0	0	200	903	0	0	0	0	0	0	0	603	903	0
675	0	0	0	0	0	0	0	200	300	0	0	0	0	0	0	0	200	903	0	0	0	0	0	0	0	603	903	0
675	1	0	0	0	0	0	0	200	300	0	0	0	0	0	0	0	200	903	0	0	0	0	0	0	0	603	903	0
675	2	0	0	0	0	0	0	200	300	0	0	0	0	0	0	0	200	903	0	0	0	0	0	0	0	603	903	0
675	3	0	0	0	0	0	0	200	300	0	0	0	0	0	0	0	200	903	0	0	0	0	0	0	0	603	903	0
675	4	0	0	0	0	0	0	200	300	0	0	0	0	0	0	0	200	903	0	0	0	0	0	0	0	603	903	0
675	5	0	0	0	0	0	0	200	300	0	0	0	0	0	0	0	200	903	0	0	0	0	0	0	0	603	903	0
675	6	0	0	0	0	0	0	200	300	0	0	0	0	0	0	0	200	903	0	0	0	0	0	0	0	603	903	0
675	7	0	0	0	0	0	0	200	300	0	0	0	0	0	0	0	200	903	0	0	0	0	0	0	0	603	903	0
675	8	0	0	0	0	0	0	200	300	0	0	0	0	0	0	0	200	903	0	0	0	0	0	0	0	603	903	0
675	9	0	0	0	0	0	0	200	300	0	0	0	0	0	0	0	200	903	0	0	0	0	0	0	0	603	903	0
676	0	0	0	0	0	0	0	200	300	0	0	0	0	0	0	0	200	903	0	0	0	0	0	0	0	603	903	0
676	1	0	0	0	0	0	0	200	300	0	0	0	0	0	0	0	200	903	0	0	0	0	0	0	0	603	903	0
676	2	0	0	0	0	0	0	200	300	0	0	0	0	0	0	0	200	903	0	0	0	0	0	0	0	603	903	0
676	3	0	0	0	0	0	0	200	300	0	0	0	0	0	0	0	200	903	0	0	0	0	0	0	0	603	903	0
676	4	0	0	0	0	0	0	200	300	0	0	0	0	0	0	0	200	903	0	0	0	0	0	0	0	603	903	0
676	5	0	0	0	0	0	0	200	300	0	0	0	0	0	0	0	200	903	0	0	0	0	0	0	0	603	903	0
676	6	0	0	0	0	0	0	200	300	0	0	0	0	0	0	0	200	903	0	0	0	0	0	0	0	603	903	0
676	7	0	0	0	0	0	0	200	300	0	0	0	0	0	0	0	200	903	0	0	0	0	0	0	0	603	903	0
676	8	0	0	0	0	0	0	200	300	0	0	0	0	0	0	0	200	903	0	0	0	0	0	0	0	603	903	0
676	9	0	0	0	0	0	0	200	300	0	0	0	0	0	0	0	200	903	0	0	0	0	0	0	0	603	903	0
677	0	0	0	0	0	0	0	200	300	0	0	0	0	0	0	0	200	903	0	0	0	0	0	0	0	603	903	0
677	1	0	0	0	0	0	0	200	300	0	0	0	0	0	0	0	200	903	0	0	0	0	0	0	0	603	903	0
677	2	0	0	0	0	0	0	200	300	0	0	0	0	0	0	0	200	903	0	0	0	0	0	0	0	603	903	0
677	3	0	0	0	0	0	0	200	300	0	0	0	0	0	0	0	200	903	0	0	0	0	0	0	0	603	903	0
677	4	0	0	0	0	0	0	200	300	0	0	0	0	0	0	0	200	903	0	0	0	0	0	0	0	603	903	0
677	5	0	0	0	0	0	0	200	300	0	0	0	0	0	0	0	200	903	0	0	0	0	0	0	0	603	903	0
677	6	0	0	0	0	0	0	200	300	0	0	0	0	0	0	0	200	903	0	0	0	0	0	0	0	603	903	0
677	7	0	0	0	0	0	0	200	300	0	0	0	0	0	0	0	200	903	0	0	0	0	0	0	0	603	903	0
677	8	0	0	0	0	0	0	200	300	0	0	0	0	0	0	0	200	903	0	0	0	0	0	0	0	603	903	0
677	9	0	0	0	0	0	0	200	300	0	0	0	0	0	0	0	200	903	0	0	0	0	0	0	0	603	903	0
678	0	0	0	0	0	0	0	200	300	0	0	0	0	0	0	0	200	903	0	0	0	0	0	0	0	603	903	0
678	1	0	0	0	0	0	0	200	300	0	0	0	0	0	0	0	200	903	0	0	0	0	0	0	0	603	903	0
678	2	0	0	0	0	0	0	200	300	0	0	0	0	0	0	0	200	903	0	0	0	0	0	0	0	603	903	0
678	3	0	0	0	0	0	0	200	300	0	0	0	0	0	0	0	200	903	0	0	0	0	0	0	0	603	903	0
678	4	0	0	0	0	0	0	200	300	0	0	0	0	0	0	0	200	903	0	0	0	0	0	0	0	603	903	0
678	5	0	0	0	0	0	0	200	300	0	0	0	0	0	0	0	200	903	0	0	0	0	0	0	0	603	903	0
678	6	0	0	0	0	0	0	200	300	0	0	0	0	0	0	0	200	903	0	0	0	0	0	0	0	603	903	0
678	7	0	0	0	0	0	0	200	300	0	0	0	0	0	0	0	200	903	0	0	0	0	0	0	0	603	903	0
678	8	0	0	0	0	0	0	200	300	0	0	0	0	0	0	0	200	903	0	0	0	0	0	0	0	603	903	0
678	9	0	0	0	0	0	0	200	300	0	0	0	0	0	0	0	200	903	0	0	0	0	0	0	0	603	903	0
679	0	0	0	0	0	0	0	200	300	0	0	0	0	0	0	0	200	903	0	0	0	0	0	0	0	603	903	0
679	1	0	0	0	0	0	0	200	300	0	0	0	0	0	0	0	200	903	0	0	0	0	0	0	0	603	903	0
679	2	0	0	0	0	0	0	200	300	0	0	0	0	0	0	0	200	903	0	0	0	0	0	0	0	603	903	0
679	3	0	0	0	0	0	0	200	300	0	0	0	0	0	0	0	200	903	0	0	0	0	0	0	0	603	903	0
679	4	0	0	0	0	0	0	200	300	0	0	0	0	0	0	0	200	903	0	0	0	0	0	0	0	603	903	0
679	5	0	0	0	0	0	0	200	300	0	0	0	0	0	0	0	200	903	0	0	0	0	0	0	0	603	903	0
679	6	0	0	0	0	0	0	200	300	0	0	0	0	0	0	0	200	903	0	0	0	0	0	0	0	603	903	0
679	7	0	0	0	0	0	0	200	300	0	0	0	0	0	0	0	200	903	0	0	0	0	0	0	0	603	903	0
679	8	0	0	0	0	0	0	200	300	0	0	0	0	0	0	0	200	903	0	0	0	0	0	0	0	603	903	0
679	9	0	0	0	0	0	0	200	300	0	0	0	0	0	0	0	200	903	0	0	0	0	0	0	0	603	903	0
680	0	0	0	0	0	0	0	200	300	0	0	0	0	0	0	0	200	903	0	0	0	0	0	0	0	603	903	0
680	1	0	0	0	0	0	0	200	300	0	0	0	0	0	0	0	200	903	0	0	0	0	0	0	0	603	903	0
680	2	0	0	0	0	0	0	200	300	0	0	0	0	0	0	0	200	903	0	0	0	0	0	0	0	603	903	0
680	3	0	0	0	0	0	0	200	300	0	0	0	0	0	0	0	200	903	0	0	0	0	0	0	0	603	903	0
680	4	0	0	0	0	0	0	200	300	0	0	0	0	0	0	0	200	903	0	0	0	0	0	0	0	603	903	0
680	5	0	0	0	0	0	0	200	300	0	0	0	0	0	0	0	200	903	0	0	0	0	0	0	0	603	903	0
680	6	0	0	0	0	0	0	200	300	0	0	0	0	0	0	0	200	903	0	0	0	0	0	0	0	603	903	0
680	7	0	0	0	0	0	0	200	300	0	0	0	0	0	0	0	200	903	0	0	0	0	0	0	0	603	903	0
680	8	0	0	0	0	0	0	200	300	0	0	0	0	0	0	0	200	903	0	0	0	0	0	0	0	603	903	0
680	9	0	0	0	0	0	0	200	300	0	0	0	0	0	0	0	200	903	0	0	0	0	0	0	0	603	903	0
681	0	0	0	0	0	0	0	200	300	0	0	0	0	0	0	0	200	903	0	0	0	0	0	0	0	603	903	0
681	1	0	0	0	0	0	0	200	300	0	0	0	0	0	0	0	200	903	0	0	0	0	0	0	0	603	903	0
681	2	0	0	0	0	0	0	200	300	0	0	0	0	0	0	0	200	903	0	0	0	0	0	0	0	603	903	0
681	3	0	0	0	0	0	0	200	300	0	0	0	0	0	0	0	200	903	0	0	0	0	0	0	0	603	903	0
681	4	0	0	0	0	0	0	200	300	0	0	0	0	0	0	0	200	903	0	0	0	0	0	0	0	603	903	0
681	5	0	0	0	0	0	0	200	300	0	0	0	0	0	0	0	200	903	0	0	0	0	0	0	0	603	903	0
681	6	0	0	0	0	0	0	200	300	0	0	0	0	0	0	0	200	903	0	0	0	0	0	0	0	603	903	0
681	7	0	0	0	0	0	0	200	300	0	0	0	0	0	0	0	200	903	0	0	0	0	0	0	0	603	903	0
681	8	0	0	0	0	0	0	200	300	0	0	0	0	0	0	0	200	903	0	0	0	0	0	0	0	603	903	0
681	9	0	0	0	0	0	0	200	300	0	0	0	0	0	0	0	200	903	0	0	0	0	0	0	0	603	903	0
682	0	0	0	0	0	0	0	200	300	0	0	0	0	0	0	0	200	903	0	0	0	0	0	0	0	603	903	0
682	1	0	0	0	0	0	0	200	300	0	0	0	0	0	0	0	200	903	0	0	0	0	0	0	0	603	903	0
682	2	0	0	0	0	0	0	200	300	0	0	0	0	0	0	0	200	903	0	0	0	0	0	0	0	603	903	0
682	3	0	0	0	0	0	0	200	300	0	0	0	0	0	0	0	200	903	0	0	0	0	0	0	0	603	903	0
682	4	0	0	0	0	0	0	200	300	0	0	0	0	0	0	0	200	903	0	0	0	0	0	0	0	603	903	0
682	5	0	0	0	0	0	0	200	300	0	0	0	0	0	0	0	200	903	0	0	0	0	0	0	0	603	903	0
682	6	0	0	0	0	0	0	200	300	0	0	0	0	0	0	0	200	903	0	0	0	0	0	0	0	603	903	0
682	7	0	0	0	0	0	0	200	300	0	0	0	0	0	0	0	200	903	0	0	0	0	0	0	0	603	903	0
682	8	0	0	0	0	0	0	200	300	0	0	0	0	0	0	0	200	903	0	0	0	0	0	0	0	603	903	0
682	9	0	0	0	0	0	0	200	300	0	0	0	0	0	0	0	200	903	0	0	0	0	0	0	0	603	903	0
683	0	0	0	0	0	0	0	200	300	0	0	0	0	0	0	0	200	903	0	0	0	0	0	0	0	603	903	0
683	1	0	0	0	0	0	0	200	300	0	0	0	0	0	0	0	200	903	0	0	0	0	0	0	0	603	903	0
683	2	0	0	0	0	0	0	200	300	0	0	0	0	0	0	0	200	903	0	0	0	0	0	0	0	603	903	0
683	3	0	0	0	0	0	0	200	300	0	0	0	0	0	0	0	200	903	0	0	0	0	0	0	0	603	903	0
683	4	0	0	0	0	0	0	200	300	0	0	0	0	0	0	0	200	903	0	0	0	0	0	0	0	603	903	0
683	5	0	0	0	0	0	0	200	300	0	0	0	0	0	0	0	200	903	0	0	0	0	0	0	0	603	903	0
683	6	0	0	0	0	0	0	200	300	0	0	0	0	0	0	0	200	903	0	0	0	0	0	0	0	603	903	0
683	7	0	0	0	0	0	0	200	300	0	0	0	0	0	0	0	200	903	0	0	0	0	0	0	0	603	903	0
683	8	0	0	0	0	0	0	200	300	0	0	0	0	0	0	0	200	903	0	0	0	0	0	0	0	603	903	0
683	9	0	0	0	0	0	0	200	300	0	0	0	0	0	0	0	200	903	0	0	0	0	0	0	0	603	903	0
684	0	0	0	0	0	0	0	200	300	0	0	0	0	0	0	0	200	903	0	0	0	0	0	0	0	603	903	0
684	1	0	0	0	0	0	0	200	300	0	0	0	0	0	0	0	200	903	0	0	0	0	0	0	0	603	903	0
684	2	0	0	0	0	0	0	200	300	0	0	0	0	0	0	0	200	903	0	0	0	0	0	0	0	603	903	0
684	3	0	0	0	0	0	0	200	300	0	0	0	0	0	0	0	200	903	0	0	0	0	0	0	0	603	903	0
684	4	0	0	0	0	0	0	200	300	0	0	0	0	0	0	0	200	903	0	0	0	0	0	0	0	603	903	0
684	5	0	0	0	0	0	0	200	300	0	0	0	0	0	0	0	200	903	0	0	0	0	0	0	0	603	903	0
684	6	0	0	0	0	0	0	200	300	0	0	0	0	0	0	0	200	903	0	0	0	0	0	0	0	603	903	0
684	7	0	0	0	0	0	0	200	300	0	0	0	0	0	0	0	200	903	0	0	0	0	0	0	0	603	903	0
684	8	0	0	0	0	0	0	200	300	0	0	0	0	0	0	0	200	903	0	0	0	0	0	0	0	603	903	0
684	9	0	0	0	0	0	0	200	300	0	0	0	0	0	0	0	200	903	0	0	0	0	0	0	0	603	903	0
685	0	0	0	0	0	0	0	200	300	0	0	0	0	0	0	0	200	903	0	0	0	0	0	0	0	603	903	0
685	1	0	0	0	0	0	0	200	300	0	0	0	0	0	0	0	200	903	0	0	0	0	0	0	0	603	903	0
685	2	0	0	0	0	0	0	200	300	0	0	0	0	0	0	0	200	903	0	0	0	0	0	0	0	603	903	0
685	3	0	0	0	0	0	0	200	300	0	0	0	0	0	0	0	200	903	0	0	0	0	0	0	0	603	903	0
685	4	0	0	0	0	0	0	200	300	0	0	0	0	0	0	0	200	903	0	0	0	0	0	0	0	603	903	0
685	5	0	0	0	0	0	0	200	300	0	0	0	0	0	0	0	200	903	0	0	0	0	0	0	0	603	903	0
685	6	0	0	0	0	0	0	200	300	0	0	0	0	0	0	0	200	903	0	0	0	0	0	0	0	603	903	0
685	7	0	0	0	0	0	0	200	300	0	0	0	0	0	0	0	200	903	0	0	0	0	0	0	0	603	903	0
685	8	0	0	0	0	0	0	200	300	0	0	0	0	0	0	0	200	903	0	0	0	0	0	0	0	603	903	0
685	9	0	0	0	0	0	0	200	300	0	0	0	0	0	0	0	200	903	0	0	0	0	0	0	0	603	903	0
686	0	0	0	0	0	0	0	200	300	0	0	0	0	0	0	0	200	903	0	0	0	0	0	0	0	603	903	0
686	1	0	0	0	0	0	0	200	300	0	0	0	0	0	0	0	200	903	0	0	0	0	0	0	0	603	903	0
686	2	0	0	0	0	0	0	200	300	0	0	0	0	0	0	0	200	903	0	0	0	0	0	0	0	603	903	0
686	3	0	0	0	0	0	0	200	300	0	0	0	0	0	0	0	200	903	0	0	0	0	0	0	0	603	903	0
686	4	0	0	0	0	0	0	200	300	0	0	0	0	0	0	0	200	903	0	0	0	0	0	0	0	603	903	0
686	5	0	0	0	0	0	0	200	300	0	0	0	0	0	0	0	200	903	0	0	0	0	0	0	0	603	903	0
686	6	0	0	0	0	0	0	200	300	0	0	0	0	0	0	0	200	903	0	0	0	0	0	0	0	603	903	0
686	7	0	0	0	0	0	0	200	300	0	0	0	0	0	0	0	200	903	0	0	0	0	0	0	0	603	903	0
686	8	0	0	0	0	0	0	200	300	0	0	0	0	0	0	0	200	903	0	0	0	0	0	0	0	603	903	0
686	9	0	0	0	0	0	0	200	300	0	0	0	0	0	0	0	200	903	0	0	0	0	0	0	0	603	903	0
687	0	0	0	0	0	0	0	200	300	0	0	0	0	0	0	0	200	903	0	0	0	0	0	0	0	603	903	0
687	1	0	0	0	0	0	0	200	300	0	0	0	0	0	0	0	200	903	0	0	0	0	0	0	0	603	903	0
687	2	0	0	0	0	0	0	200	300	0	0	0	0	0	0	0	200	903	0	0	0	0	0	0	0	603	903	0
687	3	0	0	0	0	0	0	200	300	0	0	0	0	0	0	0	200	903	0	0	0	0	0	0	0	603	903	0
687	4	0	0	0	0	0	0	200	300	0	0	0	0	0	0	0	200	903	0	0	0	0	0	0	0	603	903	0
687	5	0	0	0	0	0	0	200	300	0	0	0	0	0	0	0	200	903	0	0	0	0	0	0	0	603	903	0
687	6	0	0	0	0	0	0	200	300	0	0	0	0	0	0	0	200	903	0	0	0	0	0	0	0	603	903	0
687	7	0	0	0	0	0	0	200	300	0	0	0	0	0	0	0	200	903	0	0	0	0	0	0	0	603	903	0
687	8	0	0	0	0	0	0	200	300	0	0	0	0	0	0	0	200	903	0	0	0	0	0	0	0	603	903	0
687	9	0	0	0	0	0	0	200	300	0	0	0	0	0	0	0	200	903	0	0	0	0	0	0	0	603	903	0
688	0	0	0	0	0	0	0	200	300	0	0	0	0	0	0	0	200	903	0	0	0	0	0	0	0	603	903	0
688	1	0	0	0	0	0	0	200	300	0	0	0	0	0	0	0	200	903	0	0	0	0	0	0	0	603	903	0
688	2	0	0	0	0	0	0	200	300	0	0	0	0	0	0	0	200	903	0	0	0	0	0	0	0	603	903	0
688	3	0	0	0	0	0	0	200	300	0	0	0	0	0	0	0	200	903	0	0	0	0	0	0	0	603	903	0
688	4	0	0	0	0	0	0	200	300	0	0	0	0	0	0	0	200	903	0	0	0	0	0	0	0	603	903	0
688	5	0	0	0	0	0	0	200	300	0	0	0	0	0	0	0	200	903	0	0	0	0	0	0	0	603	903	0
688	6	0	0	0	0	0	0	200	300	0	0	0	0	0	0	0	200	903	0	0	0	0	0	0	0	603	903	0
688	7	0	0	0	0	0	0	200	300	0	0	0	0	0	0	0	200	903	0	0	0	0	0	0	0	603	903	0
688	8	0	0	0	0	0	0	200	300	0	0	0	0	0	0	0	200	903	0	0	0	0	0	0	0	603	903	0
688	9	0	0	0	0	0	0	200	300	0	0	0	0	0	0	0	200	903	0	0	0	0	0	0	0	603	903	0
689	0	0	0	0	0	0	0	200	300	0	0	0	0	0	0	0	200	903	0	0	0	0	0	0	0	603	903	0
689	1	0	0	0	0	0	0	200	300	0	0	0	0	0	0	0	200	903	0	0	0	0	0	0	0	603	903	0
689	2	0	0	0	0	0	0	200	300	0	0	0	0	0	0	0	200	903	0	0	0	0	0	0	0	603	903	0
689	3	0	0	0	0	0	0	200	300	0	0	0	0	0	0	0	200	903	0	0	0	0	0	0	0	603	903	0
689	4	0	0	0	0	0	0	200	300	0	0	0	0	0	0	0	200	903	0	0	0	0	0	0	0	603	903	0
689	5	0	0	0	0	0	0	200	300	0	0	0	0	0	0	0	200	903	0	0	0	0	0	0	0	603	903	0
689	6	0	0	0	0	0	0	200	300	0	0	0	0	0	0	0	200	903	0	0	0	0	0	0	0	603	903	0
689	7	0	0	0	0	0	0	200	300	0	0	0	0	0	0	0	200	903	0	0	0	0	0	0	0	603	903	0
689	8	0	0	0	0	0	0	200	300	0	0	0	0	0	0	0	200	903	0	0	0	0	0	0	0	603	903	0
689	9	0	0	0	0	0	0	200	300	0	0	0	0	0	0	0	200	903	0	0	0	0	0	0	0	603	903	0
690	0	0	0	0	0	0	0	200	300	0	0	0	0	0	0	0	200	903	0	0	0	0	0	0	0	603	903	0
690	1	0	0	0	0	0	0	200	300	0	0	0	0	0	0	0	200	903	0	0	0	0	0	0	0	603	903	0
690	2	0	0	0	0	0	0	200	300	0	0	0	0	0	0	0	200	903	0	0	0	0	0	0	0	603	903	0
690	3	0	0	0	0	0	0	200	300	0	0	0	0	0	0	0	200	903	0	0	0	0	0	0	0	603	903	0
690	4	0	0	0	0	0	0	200	300	0	0	0	0	0	0	0	200	903	0	0	0	0	0	0	0	603	903	0
690	5	0	0	0	0	0	0	200	300	0	0	0	0	0	0	0	200	903	0	0	0	0	0	0	0	603	903	0
690	6	0	0	0	0	0	0	200	300	0	0	0	0	0	0	0	200	903	0	0	0	0	0	0	0	603	903	0
690	7	0	0	0	0	0	0	200	300	0	0	0	0	0	0	0	200	903	0	0	0	0	0	0	0	603	903	0
690	8	0	0	0	0	0	0	200	300	0	0	0	0	0	0	0	200	903	0	0	0	0	0	0	0	603	903	0
690	9	0	0	0	0	0	0	200	300	0	0	0	0	0	0	0	200	903	0	0	0	0	0	0	0	603	903	0
691	0	0	0	0	0	0	0	200	300	0	0	0	0	0	0	0	200	903	0	0	0	0	0	0	0	603	903	0
691	1	0	0	0	0	0	0	200	300	0	0	0	0	0	0	0	200	903	0	0	0	0	0	0	0	603	903	0
691	2	0	0	0	0	0	0	200	300	0	0	0	0	0	0	0	200	903	0	0	0	0	0	0	0	603	903	0
691	3	0	0	0	0	0	0	200	300	0	0	0	0	0	0	0	200	903	0	0	0	0	0	0	0	603	903	0
691	4	0	0	0	0	0	0	200	300	0	0	0	0	0	0	0	200	903	0	0	0	0	0	0	0	603	903	0
691	5	0	0	0	0	0	0	200	300	0	0	0	0	0	0	0	200	903	0	0	0	0	0	0	0	603	903	0
691	6	0	0	0	0	0	0	200	300	0	0	0	0	0	0	0	200	903	0	0	0	0	0	0	0	603	903	0
691	7	0	0	0	0	0	0	200	300	0	0	0	0	0	0	0	200	903	0	0	0	0	0	0	0	603	903	0
691	8	0	0	0	0	0	0	200	300	0	0	0	0	0	0	0	200	903	0	0	0	0	0	0	0	603	903	0
691	9	0	0	0	0	0	0	200	300	0	0	0	0	0	0	0	200	903	0	0	0	0	0	0	0	603	903	0
692	0	0	0	0	0	0	0	200	300	0	0	0	0	0	0	0	200	903	0	0	0	0	0	0	0	603	903	0
692	1	0	0	0	0	0	0	200	300	0	0	0	0	0	0	0	200	903	0	0	0	0	0	0	0	603	903	0
692	2	0	0	0	0	0	0	200	300	0	0	0	0	0	0	0	200	903	0	0	0	0	0	0	0	603	903	0
692	3	0	0	0	0	0	0	200	300	0	0	0	0	0	0	0	200	903	0	0	0	0	0	0	0	603	903	0
692	4	0	0	0	0	0	0	200	300	0	0	0	0	0	0	0	200	903	0	0	0	0	0	0	0	603	903	0
692	5	0	0	0	0	0	0	200	300	0	0	0	0	0	0	0	200	903	0	0	0	0	0	0	0	603	903	0
692	6	0	0	0	0	0	0	200	300	0	0	0	0	0	0	0	200	903	0	0	0	0	0	0	0	603	903	0
692	7	0	0	0	0	0	0	200	300	0	0	0	0	0	0	0	200	903	0	0	0	0	0	0	0	603	903	0
692	8	0	0	0	0	0	0	200	300	0	0	0	0	0	0	0	200	903	0	0	0	0	0	0	0	603	903	0
692	9	0	0	0	0	0	0	200	300	0	0	0	0	0	0	0	200	903	0	0	0	0	0	0	0	603	903	0
693	0	0	0	0	0	0	0	200	300	0	0	0	0	0	0	0	200	903	0	0	0	0	0	0	0	603	903	0
693	1	0	0	0	0	0	0	200	300	0	0	0	0	0	0	0	200	903	0	0	0	0	0	0	0	603	903	0
693	2	0	0	0	0	0	0	200	300	0	0	0	0	0	0	0	200	903	0	0	0	0	0	0	0	603	903	0
693	3	0	0	0	0	0	0	200	300	0	0	0	0	0	0	0	200	903	0	0	0	0	0	0	0	603	903	0
693	4	0	0	0	0	0	0	200	300	0	0	0	0	0	0	0	200	903	0	0	0	0	0	0	0	603	903	0
693	5	0	0	0	0	0	0	200	300	0	0	0	0	0	0	0	200	903	0	0	0	0	0	0	0	603	903	0
693	6	0	0	0	0	0	0	200	300	0	0	0	0	0	0	0	200	903	0	0	0	0	0	0	0	603	903	0
693	7	0	0	0	0	0	0	200	300	0	0	0	0	0	0	0	200	903	0	0	0	0	0	0	0	603	903	0
693	8	0	0	0	0	0	0	200	300	0	0	0	0	0	0	0	200	903	0	0	0	0	0	0	0	603	903	0
693	9	0	0	0	0	0	0	200	300	0	0	0	0	0	0	0	200	903	0	0	0	0	0	0	0	603	903	0
694	0	0	0	0	0	0	0	200	300	0	0	0	0	0	0	0	200	903	0	0	0	0	0	0	0	603	903	0
694	1	0	0	0	0	0	0	200	300	0	0	0	0	0	0	0	200	903	0	0	0	0	0	0	0	603	903	0
694	2	0	0	0	0	0	0	200	300	0	0	0	0	0	0	0	200	903	0	0	0	0	0	0	0	603	903	0
694	3	0	0	0	0	0	0	200	300	0	0	0	0	0	0	0	200	903	0	0	0	0	0	0	0	603	903	0
694	4	0	0	0	0	0	0	200	300	0	0	0	0	0	0	0	200	903	0	0	0	0	0	0	0	603	903	0
694	5	0	0	0	0	0	0	200	300	0	0	0	0	0	0	0	200	903	0	0	0	0	0	0	0	603	903	0
694	6	0	0	0	0	0	0	200	300	0	0	0	0	0	0	0	200	903	0	0	0	0	0	0	0	603	903	0
694	7	0	0	0	0	0	0	200	300	0	0	0	0	0	0	0	200	903	0	0	0	0	0	0	0	603	903	0
694	8	0	0	0	0	0	0	200	300	0	0	0	0	0	0	0	200	903	0	0	0	0	0	0	0	603	903	0
694	9	0	0	0	0	0	0	200	300	0	0	0	0	0	0	0	200	903	0	0	0	0	0	0	0	603	903	0
695	0	0	0	0	0	0	0	200	300	0	0	0	0	0	0	0	200	903	0	0	0	0	0	0	0	603	903	0
695	1	0	0	0	0	0	0	200	300	0	0	0	0	0	0	0	200	903	0	0	0	0	0	0	0	603	903	0
695	2	0	0	0	0	0	0	200	300	0	0	0	0	0	0	0	200	903	0	0	0	0	0	0	0	603	903	0
695	3	0	0	0	0	0	0	200	300	0	0	0	0	0	0	0	200	903	0	0	0	0	0	0	0	603	903	0
695	4	0	0	0	0	0	0	200	300	0	0	0	0	0	0	0	200	903	0	0	0	0	0	0	0	603	903	0
695	5	0	0	0	0	0	0	200	300	0	0	0	0	0	0	0	200	903	0	0	0	0	0	0	0	603	903	0
695	6	0	0	0	0	0	0	200	300	0	0	0	0	0	0	0	200	903	0	0	0	0	0	0	0	603	903	0
695	7	0	0	0	0	0	0	200	300	0	0	0	0	0	0	0	200	903	0	0	0	0	0	0	0	603	903	0
695	8	0	0	0	0	0	0	200	300	0	0	0	0	0	0	0	200	903	0	0	0	0	0	0	0	603	903	0
695	9	0	0	0	0	0	0	200	300	0	0	0	0	0	0	0	200	903	0	0	0	0	0	0	0	603	903	0
696	0	0	0	0	0	0	0	200	300	0	0	0	0	0	0	0	200	903	0	0	0	0	0	0	0	603	903	0
696	1	0	0	0	0	0	0	200	300	0	0	0	0	0	0	0	200	903	0	0	0	0	0	0	0	603	903	0
696	2	0	0	0	0	0	0	200	300	0	0	0	0	0	0	0	200	903	0	0	0	0	0	0	0	603	903	0
696	3	0	0	0	0	0	0	200	300	0	0	0	0	0	0	0	200	903	0	0	0	0	0	0	0	603	903	0
696	4	0	0	0	0	0	0	200	300	0	0	0	0	0	0	0	200	903	0	0	0	0	0	0	0	603	903	0
696	5	0	0	0	0	0	0	200	300	0	0	0	0	0	0	0	200	903	0	0	0	0	0	0	0	603	903	0
696	6	0	0	0	0	0	0	200	300	0	0	0	0	0	0	0	200	903	0	0	0	0	0	0	0	603	903	0
696	7	0	0	0	0	0	0	200	300	0	0	0	0	0	0	0	200	903	0	0	0	0	0	0	0	603	903	0
696	8	0	0	0	0	0	0	200	300	0	0	0	0	0	0	0	200	903	0	0	0	0	0	0	0	603	903	0
696	9	0	0	0	0	0	0	200	300	0	0	0	0	0	0	0	200	903	0	0	0	0	0	0	0	603	903	0
697	0	0	0	0	0	0	0	200	300	0	0	0	0	0	0	0	200	903	0	0	0	0	0	0	0	603	903	0
697	1	0	0	0	0	0	0	200	300	0	0	0	0	0	0	0	200	903	0	0	0	0	0	0	0	603	903	0
697	2	0	0	0	0	0	0	200	300	0	0	0	0	0	0	0	200	903	0	0	0	0	0	0	0	603	903	0
697	3	0	0	0	0	0	0	200	300	0	0	0	0	0	0	0	200	903	0	0	0	0	0	0	0	603	903	0
697	4	0	0	0	0	0	0	200	300	0	0	0	0	0	0	0	200	903	0	0	0	0	0	0	0	603	903	0
697	5	0	0	0	0	0	0	200	300	0	0	0	0	0	0	0	200	903	0	0	0	0	0	0	0	603	903	0
697	6	0	0	0	0	0	0	200	300	0	0	0	0	0	0	0	200	903	0	0	0	0	0	0	0	603	903	0
697	7	0	0	0	0	0	0	200	300	0	0	0	0	0	0	0	200	903	0	0	0	0	0	0	0	603	903	0
697	8	0	0	0	0	0	0	200	300	0	0	0	0	0	0	0	200	903	0	0	0	0	0	0	0	603	903	0
697	9	0	0	0	0	0	0	200	300	0	0	0	0	0	0	0	200	903	0	0	0	0	0	0	0	603	903	0
698	0	0	0	0	0	0	0	200	300	0	0	0	0	0	0	0	200	903	0	0	0	0	0	0	0	603	903	0
698	1	0	0	0	0	0	0	200	300	0	0	0	0	0	0	0	200	903	0	0	0	0	0	0	0	603	903	0
698	2	0	0	0	0	0	0	200	300	0	0	0	0	0	0	0	200	903	0	0	0	0	0	0	0	603	903	0
698	3	0	0	0	0	0	0	200	300	0	0	0	0	0	0	0	200	903	0	0	0	0	0	0	0	603	903	0
698	4	0	0	0	0	0	0	200	300	0	0	0	0	0	0	0	200	903	0	0	0	0	0	0	0	603	903	0
698	5	0	0	0	0	0	0	200	300	0	0	0	0	0	0	0	200	903	0	0	0	0	0	0	0	603	903	0
698	6	0	0	0	0	0	0	200	300	0	0	0	0	0	0	0	200	903	0	0	0	0	0	0	0	603	903	0
698	7	0	0	0	0	0	0	200	300	0	0	0	0	0	0	0	200	903	0	0	0	0	0	0	0	603	903	0
698	8	0	0	0	0	0	0	200	300	0	0	0	0	0	0	0	200	903	0	0	0	0	0	0	0	603	903	0
698	9	0	0	0	0	0	0	200	300	0	0	0	0	0	0	0	200	903	0	0	0	0	0	0	0	603	903	0
699	0	0	0	0	0	0	0	200	300	0	0	0	0	0	0	0	200	903	0	0	0	0	0	0	0	603	903	0
699	1	0	0	0	0	0	0	200	300	0	0	0	0	0	0	0	200	903	0	0	0	0	0	0	0	603	903	0
699	2	0	0	0	0	0	0	200	300	0	0	0	0	0	0	0	200	903	0	0	0	0	0	0	0	603	903	0
699	3	0	0	0	0	0	0	200	300	0	0	0	0	0	0	0	200	903	0	0	0	0	0	0	0	603	903	0
699	4	0	0	0	0	0	0	200	300	0	0	0	0	0	0	0	200	903	0	0	0	0	0	0	0	603	903	0
699	5	0	0	0	0	0	0	200	300	0	0	0	0	0	0	0	200	903	0	0	0	0	0	0	0	603	903	0
699	6	0	0	0	0	0	0	200	300	0	0	0	0	0	0	0	200	903	0	0	0	0	0	0	0	603	903	0
699	7	0	0	0	0	0	0	200	300	0	0	0	0	0	0	0	200	903	0	0	0	0	0	0	0	603	903	0
699	8	0	0	0	0	0	0	200	300	0	0	0	0	0	0	0	200	903	0	0	0	0	0	0	0	603	903	0
699	9	0	0	0	0	0	0	200	300	0	0	0	0	0	0	0	200	903	0	0	0	0	0	0	0	603	903	0
700	0	0	0	0	0	0	0	200	300	0	0	0	0	0	0	0	200	903	0	0	0	0	0	0	0	603	903	0
700	1	0	0	0	0	0	0	200	300	0	0	0	0	0	0	0	200	903	0	0	0	0	0	0	0	603	903	0
700	2	0	0	0	0	0	0	200	300	0	0	0	0	0	0	0	200	903	0	0	0	0	0	0	0	603	903	0
700	3	0	0	0	0	0	0	200	300	0	0	0	0	0	0	0	200	903	0	0	0	0	0	0	0	603	903	0
700	4	0	0	0	0	0	0	200	300	0	0	0	0	0	0	0	200	903	0	0	0	0	0	0	0	603	903	0
700	5	0	0	0	0	0	0	200	300	0	0	0	0	0	0	0	200	903	0	0	0	0	0	0	0	603	903	0
700	6	0	0	0	0	0	0	200	300	0	0	0	0	0	0	0	200	903	0	0	0	0	0	0	0	603	903	0
700	7	0	0	0	0	0	0	200	300	0	0	0	0	0	0	0	200	903	0	0	0	0	0	0	0	603	903	0
700	8	0	0	0	0	0	0	200	300	0	0	0	0	0	0	0	200	903	0	0	0	0	0	0	0	603	903	0
700	9	0	0	0	0	0	0	200	300	0	0	0	0	0	0	0	200	903	0	0	0	0	0	0	0	603	903	0
701	0	0	0	0	0	0	0	200	300	0	0	0	0	0	0	0	200	903	0	0	0	0	0	0	0	603	903	0
701	1	0	0	0	0	0	0	200	300	0	0	0	0	0	0	0	200	903	0	0	0	0	0	0	0	603	903	0
701	2	0	0	0	0	0	0	200	300	0	0	0	0	0	0	0	200	903	0	0	0	0	0	0	0	603	903	0
701	3	0	0	0	0	0	0	200	300	0	0	0	0	0	0	0	200	903	0	0	0	0	0	0	0	603	903	0
701	4	0	0	0	0	0	0	200	300	0	0	0	0	0	0	0	200	903	0	0	0	0	0	0	0	603	903	0
701	5	0	0	0	0	0	0	200	300	0	0	0	0	0	0	0	200	903	0	0	0	0	0	0	0	603	903	0
701	6	0	0	0	0	0	0	200	300	0	0	0	0	0	0	0	200	903	0	0	0	0	0	0	0	603	903	0
701	7	0	0	0	0	0	0	200	300	0	0	0	0	0	0	0	200	903	0	0	0	0	0	0	0	603	903	0
701	8	0	0	0	0	0	0	200	300	0	0	0	0	0	0	0	200	903	0	0	0	0	0	0	0	603	903	0
701	9	0	0	0	0	0	0	200	300	0	0	0	0	0	0	0	200	903	0	0	0	0	0	0	0	603	903	0
702	0	0	0	0	0	0	0	200	300	0	0	0	0	0	0	0	200	903	0	0	0	0	0	0	0	603	903	0
702	1	0	0	0	0	0	0	200	300	0	0	0	0	0	0	0	200	903	0	0	0	0	0	0	0	603	903	0
702	2	0	0	0	0	0	0	200	300	0	0	0	0	0	0	0	200	903	0	0	0	0	0	0	0	603	903	0
702	3	0	0	0	0	0	0	200	300	0	0	0	0	0	0	0	200	903	0	0	0	0	0	0	0	603	903	0
702	4	0	0	0	0	0	0	200	300	0	0	0	0	0	0	0	200	903	0	0	0	0	0	0	0	603	903	0
702	5	0	0	0	0	0	0	200	300	0	0	0	0	0	0	0	200	903	0	0	0	0	0	0	0	603	903	0
702	6	0	0	0	0	0	0	200	300	0	0	0	0	0	0	0	200	903	0	0	0	0	0	0	0	603	903	0
702	7	0	0	0	0	0	0	200	300	0	0	0	0	0	0	0	200	903	0	0	0	0	0	0	0	603	903	0
702	8	0	0	0	0	0	0	200	300	0	0	0	0	0	0	0	200	903	0	0	0	0	0	0	0	603	903	0
702	9	0	0	0	0	0	0	200	300	0	0	0	0	0	0	0	200	903	0	0	0	0	0	0	0	603	903	0
703	0	0	0	0	0	0	0	200	300	0	0	0	0	0	0	0	200	903	0	0	0	0	0	0	0	603	903	0
703	1	0	0	0	0	0	0	200	300	0	0	0	0	0	0	0	200	903	0	0	0	0	0	0	0	603	903	0
703	2	0	0	0	0	0	0	200	300	0	0	0	0	0	0	0	200	903	0	0	0	0	0	0	0	603	903	0
703	3	0	0	0	0	0	0	200	300	0	0	0	0	0	0	0	200	903	0	0	0	0	0	0	0	603	903	0
703	4	0	0	0	0	0	0	200	300	0	0	0	0	0	0	0	200	903	0	0	0	0	0	0	0	603	903	0
703	5	0	0	0	0	0	0	200	300	0	0	0	0	0	0	0	200	903	0	0	0	0	0	0	0	603	903	0
703	6	0	0	0	0	0	0	200	300	0	0	0	0	0	0	0	200	903	0	0	0	0	0	0	0	603	903	0
703	7	0	0	0	0	0	0	200	300	0	0	0	0	0	0	0	200	903	0	0	0	0	0	0	0	603	903	0
703	8	0	0	0	0	0	0	200	300	0	0	0	0	0	0	0	200	903	0	0	0	0	0	0	0	603	903	0
703	9	0	0	0	0	0	0	200	300	0	0	0	0	0	0	0	200	903	0	0	0	0	0	0	0	603	903	0
704	0	0	0	0	0	0	0	200	300	0	0	0	0	0	0	0	200	903	0	0	0	0	0	0	0	603	903	0
704	1	0	0	0	0	0	0	200	300	0	0	0	0	0	0	0	200	903	0	0	0	0	0	0	0	603	903	0
704	2	0	0	0	0	0	0	200	300	0	0	0	0	0	0	0	200	903	0	0	0	0	0	0	0	603	903	0
704	3	0	0	0	0	0	0	200	300	0	0	0	0	0	0	0	200	903	0	0	0	0	0	0	0	603	903	0
704	4	0	0	0	0	0	0	200	300	0	0	0	0	0	0	0	200	903	0	0	0	0	0	0	0	603	903	0
704	5	0	0	0	0	0	0	200	300	0	0	0	0	0	0	0	200	903	0	0	0	0	0	0	0	603	903	0
704	6	0	0	0	0	0	0	200	300	0	0	0	0	0	0	0	200	903	0	0	0	0	0	0	0	603	903	0
704	7	0	0	0	0	0	0	200	300	0	0	0	0	0	0	0	200	903	0	0	0	0	0	0	0	603	903	0
704	8	0	0	0	0	0	0	200	300	0	0	0	0	0	0	0	200	903	0	0	0	0	0	0	0	603	903	0
704	9	0	0	0	0	0	0	200	300	0	0	0	0	0	0	0	200	903	0	0	0	0	0	0	0	603	903	0
705	0	0	0	0	0	0	0	200	300	0	0	0	0	0	0	0	200	903	0	0	0	0	0	0	0	603	903	0
705	1	0	0	0	0	0	0	200	300	0	0	0	0	0	0	0	200	903	0	0	0	0	0	0	0	603	903	0
705	2	0	0	0	0	0	0	200	300	0	0	0	0	0	0	0	200	903	0	0	0	0	0	0	0	603	903	0
705	3	0	0	0	0	0	0	200	300	0	0	0	0	0	0	0	200	903	0	0	0	0	0	0	0	603	903	0
705	4	0	0	0	0	0	0	200	300	0	0	0	0	0	0	0	200	903	0	0	0	0	0	0	0	603	903	0
705	5	0	0	0	0	0	0	200	300	0	0	0	0	0	0	0	200	903	0	0	0	0	0	0	0	603	903	0
705	6	0	0	0	0	0	0	200	300	0	0	0	0	0	0	0	200	903	0	0	0	0	0	0	0	603	903	0
705	7	0	0	0	0	0	0	200	300	0	0	0	0	0	0	0	200	903	0	0	0	0	0	0	0	603	903	0
705	8	0	0	0	0	0	0	200	300	0	0	0	0	0	0	0	200	903	0	0	0	0	0	0	0	603	903	0
705	9	0	0	0	0	0	0	200	300	0	0	0	0	0	0	0	200	903	0	0	0	0	0	0	0	603	903	0
706	0	0	0	0	0	0	0	200	300	0	0	0	0	0	0	0	200	903	0	0	0	0	0	0	0	603	903	0
706	1	0	0	0	0	0	0	200	300	0	0	0	0	0	0	0	200	903	0	0	0	0	0	0	0	603	903	0
706	2	0	0	0	0	0	0	200	300	0	0	0	0	0	0	0	200	903	0	0	0	0	0	0	0	603	903	0
706	3	0	0	0	0	0	0	200	300	0	0	0	0	0	0	0	200	903	0	0	0	0	0	0	0	603	903	0
706	4	0	0	0	0	0	0	200	300	0	0	0	0	0	0	0	200	903	0	0	0	0	0	0	0	603	903	0
706	5	0	0	0	0	0	0	200	300	0	0	0	0	0	0	0	200	903	0	0	0	0	0	0	0	603	903	0
706	6	0	0	0	0	0	0	200	300	0	0	0	0	0	0	0	200	903	0	0	0	0	0	0	0	603	903	0
706	7	0	0	0	0	0	0	200	300	0	0	0	0	0	0	0	200	903	0	0	0	0	0	0	0	603	903	0
706	8	0	0	0	0	0	0	200	300	0	0	0	0	0	0	0	200	903	0	0	0	0	0	0	0	603	903	0
706	9	0	0	0	0	0	0	200	300	0	0	0	0	0	0	0	200	903	0	0	0	0	0	0	0	603	903	0
707	0	0	0	0	0	0	0	200	300	0	0	0	0	0	0	0	200	903	0	0	0	0	0	0	0	603	903	0
707	1	0	0	0	0	0	0	200	300	0	0	0	0	0	0	0	200	903	0	0	0	0	0	0	0	603	903	0
707	2	0	0	0	0	0	0	200	300	0	0	0	0	0	0	0	200	903	0	0	0	0	0	0	0	603	903	0
707	3	0	0	0	0	0	0	200	300	0	0	0	0	0	0	0	200	903	0	0	0	0	0	0	0	603	903	0
707	4	0	0	0	0	0	0	200	300	0	0	0	0	0	0	0	200	903	0	0	0	0	0	0	0	603	903	0
707	5	0	0	0	0	0	0	200	300	0	0	0	0	0	0	0	200	903	0	0	0	0	0	0	0	603	903	0
707	6	0	0	0	0	0	0	200	300	0	0	0	0	0	0	0	200	903	0	0	0	0	0	0	0	603	903	0
707	7	0	0	0	0	0	0	200	300	0	0	0	0	0	0	0	200	903	0	0	0	0	0	0	0	603	903	0
707	8	0	0	0	0	0	0	200	300	0	0	0	0	0	0	0	200	903	0	0	0	0	0	0	0	603	903	0
707	9	0	0	0	0	0	0	200	300	0	0	0	0	0	0	0	200	903	0	0	0	0	0	0	0	603	903	0
708	0	0	0	0	0	0	0	200	300	0	0	0	0	0	0	0	200	903	0	0	0	0	0	0	0	603	903	0
708	1	0	0	0	0	0	0	200	300	0	0	0	0	0	0	0	200	903	0	0	0	0	0	0	0	603	903	0
708	2	0	0	0	0	0	0	200	300	0	0	0	0	0	0	0	200	903	0	0	0	0	0	0	0	603	903	0
708	3	0	0	0	0	0	0	200	300	0	0	0	0	0	0	0	200	903	0	0	0	0	0	0	0	603	903	0
708	4	0	0	0	0	0	0	200	300	0	0	0	0	0	0	0	200	903	0	0	0	0	0	0	0	603	903	0
708	5	0	0	0	0	0	0	200	300	0	0	0	0	0	0	0	200	903	0	0	0	0	0	0	0	603	903	0
708	6	0	0	0	0	0	0	200	300	0	0	0	0	0	0	0	200	903	0	0	0	0	0	0	0	603	903	0
708	7	0	0	0	0	0	0	200	300	0	0	0	0	0	0	0	200	903	0	0	0	0	0	0	0	603	903	0
708	8	0	0	0	0	0	0	200	300	0	0	0	0	0	0	0	200	903	0	0	0	0	0	0	0	603	903	0
708	9	0	0	0	0	0	0	200	300	0	0	0	0	0	0	0	200	903	0	0	0	0	0	0	0	603	903	0
709	0	0	0	0	0	0	0	200	300	0	0	0	0	0	0	0	200	903	0	0	0	0	0	0	0	603	903	0
709	1	0	0	0	0	0	0	200	300	0	0	0	0	0	0	0	200	903	0	0	0	0	0	0	0	603	903	0
709	2	0	0	0	0	0	0	200	300	0	0	0	0	0	0	0	200	903	0	0	0	0	0	0	0	603	903	0
709	3	0	0	0	0	0	0	200	300	0	0	0	0	0	0	0	200	903	0	0	0	0	0	0	0	603	903	0
709	4	0	0	0	0	0	0	200	300	0	0	0	0	0	0	0	200	903	0	0	0	0	0	0	0	603	903	0
709	5	0	0	0	0	0	0	200	300	0	0	0	0	0	0	0	200	903	0	0	0	0	0	0	0	603	903	0
709	6	0	0	0	0	0	0	200	300	0	0	0	0	0	0	0	200	903	0	0	0	0	0	0	0	603	903	0
709	7	0	0	0	0	0	0	200	300	0	0	0	0	0	0	0	200	903	0	0	0	0	0	0	0	603	903	0
709	8	0	0	0	0	0	0	200	300	0	0	0	0	0	0	0	200	903	0	0	0	0	0	0	0	603	903	0
709	9	0	0	0	0	0	0	200	300	0	0	0	0	0	0	0	200	903	0	0	0	0	0	0	0	603	903	0
710	0	0	0	0	0	0	0	200	300	0	0	0	0	0	0	0	200	903	0	0	0	0	0	0	0	603	903	0
710	1	0	0	0	0	0	0	200	300	0	0	0	0	0	0	0	200	903	0	0	0	0	0	0	0	603	903	0
710	2	0	0	0	0	0	0	200	300	0	0	0	0	0	0	0	200	903	0	0	0	0	0	0	0	603	903	0
710	3	0	0	0	0	0	0	200	300	0	0	0	0	0	0	0	200	903	0	0	0	0	0	0	0	603	903	0
710	4	0	0	0	0	0	0	200	300	0	0	0	0	0	0	0	200	903	0	0	0	0	0	0	0	603	903	0
710	5	0	0	0	0	0	0	200	300	0	0	0	0	0	0	0	200	903	0	0	0	0	0	0	0	603	903	0
710	6	0	0	0	0	0	0	200	300	0	0	0	0	0	0	0	200	903	0	0	0	0	0	0	0	603	903	0
710	7	0	0	0	0	0	0	200	300	0	0	0	0	0	0	0	200	903	0	0	0	0	0	0	0	603	903	0
710	8	0	0	0	0	0	0	200	300	0	0	0	0	0	0	0	200	903	0	0	0	0	0	0	0	603	903	0
710	9	0	0	0	0	0	0	200	300	0	0	0	0	0	0	0	200	903	0	0	0	0	0	0	0	603	903	0
711	0	0	0	0	0	0	0	200	300	0	0	0	0	0	0	0	200	903	0	0	0	0	0	0	0	603	903	0
711	1	0	0	0	0	0	0	200	300	0	0	0	0	0	0	0	200	903	0	0	0	0	0	0	0	603	903	0
711	2	0	0	0	0	0	0	200	300	0	0	0	0	0	0	0	200	903	0	0	0	0	0	0	0	603	903	0
711	3	0	0	0	0	0	0	200	300	0	0	0	0	0	0	0	200	903	0	0	0	0	0	0	0	603	903	0
711	4	0	0	0	0	0	0	200	300	0	0	0	0	0	0	0	200	903	0	0	0	0	0	0	0	603	903	0
711	5	0	0	0	0	0	0	200	300	0	0	0	0	0	0	0	200	903	0	0	0	0	0	0	0	603	903	0
711	6	0	0	0	0	0	0	200	300	0	0	0	0	0	0	0	200	903	0	0	0	0	0	0	0	603	903	0
711	7	0	0	0	0	0	0	200	300	0	0	0	0	0	0	0	200	903	0	0	0	0	0	0	0	603	903	0
711	8	0	0	0	0	0	0	200	300	0	0	0	0	0	0	0	200	903	0	0	0	0	0	0	0	603	903	0
711	9	0	0	0	0	0	0	200	300	0	0	0	0	0	0	0	200	903	0	0	0	0	0	0	0	603	903	0
712	0	0	0	0	0	0	0	200	300	0	0	0	0	0	0	0	200	903	0	0	0	0	0	0	0	603	903	0
712	1	0	0	0	0	0	0	200	300	0	0	0	0	0	0	0	200	903	0	0	0	0	0	0	0	603	903	0
712	2	0	0	0	0	0	0	200	300	0	0	0	0	0	0	0	200	903	0	0	0	0	0	0	0	603	903	0
712	3	0	0	0	0	0	0	200	300	0	0	0	0	0	0	0	200	903	0	0	0	0	0	0	0	603	903	0
712	4	0	0	0	0	0	0	200	300	0	0	0	0	0	0	0	200	903	0	0	0	0	0	0	0	603	903	0
712	5	0	0	0	0	0	0	200	300	0	0	0	0	0	0	0	200	903	0	0	0	0	0	0	0	603	903	0
712	6	0	0	0	0	0	0	200	300	0	0	0	0	0	0	0	200	903	0	0	0	0	0	0	0	603	903	0
712	7	0	0	0	0	0	0	200	300	0	0	0	0	0	0	0	200	903	0	0	0	0	0	0	0	603	903	0
712	8	0	0	0	0	0	0	200	300	0	0	0	0	0	0	0	200	903	0	0	0	0	0	0	0	603	903	0
712	9	0	0	0	0	0	0	200	300	0	0	0	0	0	0	0	200	903	0	0	0	0	0	0	0	603	903	0
713	0	0	0	0	0	0	0	200	300	0	0	0	0	0	0	0	200	903	0	0	0	0	0	0	0	603	903	0
713	1	0	0	0	0	0	0	200	300	0	0	0	0	0	0	0	200	903	0	0	0	0	0	0	0	603	903	0
713	2	0	0	0	0	0	0	200	300	0	0	0	0	0	0	0	200	903	0	0	0	0	0	0	0	603	903	0
713	3	0	0	0	0	0	0	200	300	0	0	0	0	0	0	0	200	903	0	0	0	0	0	0	0	603	903	0
713	4	0	0	0	0	0	0	200	300	0	0	0	0	0	0	0	200	903	0	0	0	0	0	0	0	603	903	0
713	5	0	0	0	0	0	0	200	300	0	0	0	0	0	0	0	200	903	0	0	0	0	0	0	0	603	903	0
713	6	0	0	0	0	0	0	200	300	0	0	0	0	0	0	0	200	903	0	0	0	0	0	0	0	603	903	0
713	7	0	0	0	0	0	0	200	300	0	0	0	0	0	0	0	200	903	0	0	0	0	0	0	0	603	903	0
713	8	0	0	0	0	0	0	200	300	0	0	0	0	0	0	0	200	903	0	0	0	0	0	0	0	603	903	0
713	9	0	0	0	0	0	0	200	300	0	0	0	0	0	0	0	200	903	0	0	0	0	0	0	0	603	903	0
714	0	0	0	0	0	0	0	200	300	0	0	0	0	0	0	0	200	903	0	0	0	0	0	0	0	603	903	0
714	1	0	0	0	0	0	0	200	300	0	0	0	0	0	0	0	200	903	0	0	0	0	0	0	0	603	903	0
714	2	0	0	0	0	0	0	200	300	0	0	0	0	0	0	0	200	903	0	0	0	0	0	0	0	603	903	0
714	3	0	0	0	0	0	0	200	300	0	0	0	0	0	0	0	200	903	0	0	0	0	0	0	0	603	903	0
714	4	0	0	0	0	0	0	200	300	0	0	0	0	0	0	0	200	903	0	0	0	0	0	0	0	603	903	0
714	5	0	0	0	0	0	0	200	300	0	0	0	0	0	0	0	200	903	0	0	0	0	0	0	0	603	903	0
714	6	0	0	0	0	0	0	200	300	0	0	0	0	0	0	0	200	903	0	0	0	0	0	0	0	603	903	0
714	7	0	0	0	0	0	0	200	300	0	0	0	0	0	0	0	200	903	0	0	0	0	0	0	0	603	903	0
714	8	0	0	0	0	0	0	200	300	0	0	0	0	0	0	0	200	903	0	0	0	0	0	0	0	603	903	0
714	9	0	0	0	0	0	0	200	300	0	0	0	0	0	0	0	200	903	0	0	0	0	0	0	0	603	903	0
715	0	0	0	0	0	0	0	200	300	0	0	0	0	0	0	0	200	903	0	0	0	0	0	0	0	603	903	0
715	1	0	0	0	0	0	0	200	300	0	0	0	0	0	0	0	200	903	0	0	0	0	0	0	0	603	903	0
715	2	0	0	0	0	0	0	200	300	0	0	0	0	0	0	0	200	903	0	0	0	0	0	0	0	603	903	0
715	3	0	0	0	0	0	0	200	300	0	0	0	0	0	0	0	200	903	0	0	0	0	0	0	0	603	903	0
715	4	0	0	0	0	0	0	200	300	0	0	0	0	0	0	0	200	903	0	0	0	0	0	0	0	603	903	0
715	5	0	0	0	0	0	0	200	300	0	0	0	0	0	0	0	200	903	0	0	0	0	0	0	0	603	903	0
715	6	0	0	0	0	0	0	200	300	0	0	0	0	0	0	0	200	903	0	0	0	0	0	0	0	603	903	0
715	7	0	0	0	0	0	0	200	300	0	0	0	0	0	0	0	200	903	0	0	0	0	0	0	0	603	903	0
715	8	0	0	0	0	0	0	200	300	0	0	0	0	0	0	0	200	903	0	0	0	0	0	0	0	603	903	0
715	9	0	0	0	0	0	0	200	300	0	0	0	0	0	0	0	200	903	0	0	0	0	0	0	0	603	903	0
716	0	0	0	0	0	0	0	200	300	0	0	0	0	0	0	0	200	903	0	0	0	0	0	0	0	603	903	0
716	1	0	0	0	0	0	0	200	300	0	0	0	0	0	0	0	200	903	0	0	0	0	0	0	0	603	903	0
716	2	0	0	0	0	0	0	200	300	0	0	0	0	0	0	0	200	903	0	0	0	0	0	0	0	603	903	0
716	3	0	0	0	0	0	0	200	300	0	0	0	0	0	0	0	200	903	0	0	0	0	0	0	0	603	903	0
716	4	0	0	0	0	0	0	200	300	0	0	0	0	0	0	0	200	903	0	0	0	0	0	0	0	603	903	0
716	5	0	0	0	0	0	0	200	300	0	0	0	0	0	0	0	200	903	0	0	0	0	0	0	0	603	903	0
716	6	0	0	0	0	0	0	200	300	0	0	0	0	0	0	0	200	903	0	0	0	0	0	0	0	603	903	0
716	7	0	0	0	0	0	0	200	300	0	0	0	0	0	0	0	200	903	0	0	0	0	0	0	0	603	903	0
716	8	0	0	0	0	0	0	200	300	0	0	0	0	0	0	0	200	903	0	0	0	0	0	0	0	603	903	0
716	9	0	0	0	0	0	0	200	300	0	0	0	0	0	0	0	200	903	0	0	0	0	0	0	0	603	903	0
717	0	0	0	0	0	0	0	200	300	0	0	0	0	0	0	0	200	903	0	0	0	0	0	0	0	603	903	0
717	1	0	0	0	0	0	0	200	300	0	0	0	0	0	0	0	200	903	0	0	0	0	0	0	0	603	903	0
717	2	0	0	0	0	0	0	200	300	0	0	0	0	0	0	0	200	903	0	0	0	0	0	0	0	603	903	0
717	3	0	0	0	0	0	0	200	300	0	0	0	0	0	0	0	200	903	0	0	0	0	0	0	0	603	903	0
717	4	0	0	0	0	0	0	200	300	0	0	0	0	0	0	0	200	903	0	0	0	0	0	0	0	603	903	0
717	5	0	0	0	0	0	0	200	300	0	0	0	0	0	0	0	200	903	0	0	0	0	0	0	0	603	903	0
717	6	0	0	0	0	0	0	200	300	0	0	0	0	0	0	0	200	903	0	0	0	0	0	0	0	603	903	0
717	7	0	0	0	0	0	0	200	300	0	0	0	0	0	0	0	200	903	0	0	0	0	0	0	0	603	903	0
717	8	0	0	0	0	0	0	200	300	0	0	0	0	0	0	0	200	903	0	0	0	0	0	0	0	603	903	0
717	9	0	0	0	0	0	0	200	300	0	0	0	0	0	0	0	200	903	0	0	0	0	0	0	0	603	903	0
718	0	0	0	0	0	0	0	200	300	0	0	0	0	0	0	0	200	903	0	0	0	0	0	0	0	603	903	0
718	1	0	0	0	0	0	0	200	300	0	0	0	0	0	0	0	200	903	0	0	0	0	0	0	0	603	903	0
718	2	0	0	0	0	0	0	200	300	0	0	0	0	0	0	0	200	903	0	0	0	0	0	0	0	603	903	0
718	3	0	0	0	0	0	0	200	300	0	0	0	0	0	0	0	200	903	0	0	0	0	0	0	0	603	903	0
718	4	0	0	0	0	0	0	200	300	0	0	0	0	0	0	0	200	903	0	0	0	0	0	0	0	603	903	0
718	5	0	0	0	0	0	0	200	300	0	0	0	0	0	0	0	200	903	0	0	0	0	0	0	0	603	903	0
718	6	0	0	0	0	0	0	200	300	0	0	0	0	0	0	0	200	903	0	0	0	0	0	0	0	603	903	0
718	7	0	0	0	0	0	0	200	300	0	0	0	0	0	0	0	200	903	0	0	0	0	0	0	0	603	903	0
718	8	0	0	0	0	0	0	200	300	0	0	0	0	0	0	0	200	903	0	0	0	0	0	0	0	603	903	0
718	9	0	0	0	0	0	0	200	300	0	0	0	0	0	0	0	200	903	0	0	0	0	0	0	0	603	903	0
719	0	0	0	0	0	0	0	200	300	0	0	0	0	0	0	0	200	903	0	0	0	0	0	0	0	603	903	0
719	1	0	0	0	0	0	0	200	300	0	0	0	0	0	0	0	200	903	0	0	0	0	0	0	0	603	903	0
719	2	0	0	0	0	0	0	200	300	0	0	0	0	0	0	0	200	903	0	0	0	0	0	0	0	603	903	0
719	3	0	0	0	0	0	0	200	300	0	0	0	0	0	0	0	200	903	0	0	0	0	0	0	0	603	903	0
719	4	0	0	0	0	0	0	200	300	0	0	0	0	0	0	0	200	903	0	0	0	0	0	0	0	603	903	0
719	5	0	0	0	0	0	0	200	300	0	0	0	0	0	0	0	200	903	0	0	0	0	0	0	0	603	903	0
719	6	0	0	0	0	0	0	200	300	0	0	0	0	0	0	0	200	903	0	0	0	0	0	0	0	603	903	0
719	7	0	0	0	0	0	0	200	300	0	0	0	0	0	0	0	200	903	0	0	0	0	0	0	0	603	903	0
719	8	0	0	0	0	0	0	200	300	0	0	0	0	0	0	0	200	903	0	0	0	0	0	0	0	603	903	0
719	9	0	0	0	0	0	0	200	300	0	0	0	0	0	0	0	200	903	0	0	0	0	0	0	0	603	903	0
720	0	0	0	0	0	0	0	200	300	0	0	0	0	0	0	0	200	903	0	0	0	0	0	0	0	603	903	0
720	1	0	0	0	0	0	0	200	300	0	0	0	0	0	0	0	200	903	0	0	0	0	0	0	0	603	903	0
720	2	0	0	0	0	0	0	200	300	0	0	0	0	0	0	0	200	903	0	0	0	0	0	0	0	603	903	0
720	3	0	0	0	0	0	0	200	300	0	0	0	0	0	0	0	200	903	0	0	0	0	0	0	0	603	903	0
720	4	0	0	0	0	0	0	200	300	0	0	0	0	0	0	0	200	903	0	0	0	0	0	0	0	603	903	0
720	5	0	0	0	0	0	0	200	300	0	0	0	0	0	0	0	200	903	0	0	0	0	0	0	0	603	903	0
720	6	0	0	0	0	0	0	200	300	0	0	0	0	0	0	0	200	903	0	0	0	0	0	0	0	603	903	0
720	7	0	0	0	0	0	0	200	300	0	0	0	0	0	0	0	200	903	0	0	0	0	0	0	0	603	903	0
720	8	0	0	0	0	0	0	200	300	0	0	0	0	0	0	0	200	903	0	0	0	0	0	0	0	603	903	0
720	9	0	0	0	0	0	0	200	300	0	0	0	0	0	0	0	200	903	0	0	0	0	0	0	0	603	903	0
721	0	0	0	0	0	0	0	200	300	0	0	0	0	0	0	0	200	903	0	0	0	0	0	0	0	603	903	0
721	1	0	0	0	0	0	0	200	300	0	0	0	0	0	0	0	200	903	0	0	0	0	0	0	0	603	903	0
721	2	0	0	0	0	0	0	200	300	0	0	0	0	0	0	0	200	903	0	0	0	0	0	0	0	603	903	0
721	3	0	0	0	0	0	0	200	300	0	0	0	0	0	0	0	200	903	0	0	0	0	0	0	0	603	903	0
721	4	0	0	0	0	0	0	200	300	0	0	0	0	0	0	0	200	903	0	0	0	0	0	0	0	603	903	0
721	5	0	0	0	0	0	0	200	300	0	0	0	0	0	0	0	200	903	0	0	0	0	0	0	0	603	903	0
721	6	0	0	0	0	0	0	200	300	0	0	0	0	0	0	0	200	903	0	0	0	0	0	0	0	603	903	0
721	7	0	0	0	0	0	0	200	300	0	0	0	0	0	0	0	200	903	0	0	0	0	0	0	0	603	903	0
721	8	0	0	0	0	0	0	200	300	0	0	0	0	0	0	0	200	903	0	0	0	0	0	0	0	603	903	0
721	9	0	0	0	0	0	0	200	300	0	0	0	0	0	0	0	200	903	0	0	0	0	0	0	0	603	903	0
722	0	0	0	0	0	0	0	200	300	0	0	0	0	0	0	0	200	903	0	0	0	0	0	0	0	603	903	0
722	1	0	0	0	0	0	0	200	300	0	0	0	0	0	0	0	200	903	0	0	0	0	0	0	0	603	903	0
722	2	0	0	0	0	0	0	200	300	0	0	0	0	0	0	0	200	903	0	0	0	0	0	0	0	603	903	0
722	3	0	0	0	0	0	0	200	300	0	0	0	0	0	0	0	200	903	0	0	0	0	0	0	0	603	903	0
722	4	0	0	0	0	0	0	200	300	0	0	0	0	0	0	0	200	903	0	0	0	0	0	0	0	603	903	0
722	5	0	0	0	0	0	0	200	300	0	0	0	0	0	0	0	200	903	0	0	0	0	0	0	0	603	903	0
722	6	0	0	0	0	0	0	200	300	0	0	0	0	0	0	0	200	903	0	0	0	0	0	0	0	603	903	0
722	7	0	0	0	0	0	0	200	300	0	0	0	0	0	0	0	200	903	0	0	0	0	0	0	0	603	903	0
722	8	0	0	0	0	0	0	200	300	0	0	0	0	0	0	0	200	903	0	0	0	0	0	0	0	603	903	0
722	9	0	0	0	0	0	0	200	300	0	0	0	0	0	0	0	200	903	0	0	0	0	0	0	0	603	903	0
723	0	0	0	0	0	0	0	200	300	0	0	0	0	0	0	0	200	903	0	0	0	0	0	0	0	603	903	0
723	1	0	0	0	0	0	0	200	300	0	0	0	0	0	0	0	200	903	0	0	0	0	0	0	0	603	903	0
723	2	0	0	0	0	0	0	200	300	0	0	0	0	0	0	0	200	903	0	0	0	0	0	0	0	603	903	0
723	3	0	0	0	0	0	0	200	300	0	0	0	0	0	0	0	200	903	0	0	0	0	0	0	0	603	903	0
723	4	0	0	0	0	0	0	200	300	0	0	0	0	0	0	0	200	903	0	0	0	0	0	0	0	603	903	0
723	5	0	0	0	0	0	0	200	300	0	0	0	0	0	0	0	200	903	0	0	0	0	0	0	0	603	903	0
723	6	0	0	0	0	0	0	200	300	0	0	0	0	0	0	0	200	903	0	0	0	0	0	0	0	603	903	0
723	7	0	0	0	0	0	0	200	300	0	0	0	0	0	0	0	200	903	0	0	0	0	0	0	0	603	903	0
723	8	0	0	0	0	0	0	200	300	0	0	0	0	0	0	0	200	903	0	0	0	0	0	0	0	603	903	0
723	9	0	0	0	0	0	0	200	300	0	0	0	0	0	0	0	200	903	0	0	0	0	0	0	0	603	903	0
724	0	0	0	0	0	0	0	200	300	0	0	0	0	0	0	0	200	903	0	0	0	0	0	0	0	603	903	0
724	1	0	0	0	0	0	0	200	300	0	0	0	0	0	0	0	200	903	0	0	0	0	0	0	0	603	903	0
724	2	0	0	0	0	0	0	200	300	0	0	0	0	0	0	0	200	903	0	0	0	0	0	0	0	603	903	0
724	3	0	0	0	0	0	0	200	300	0	0	0	0	0	0	0	200	903	0	0	0	0	0	0	0	603	903	0
724	4	0	0	0	0	0	0	200	300	0	0	0	0	0	0	0	200	903	0	0	0	0	0	0	0	603	903	0
724	5	0	0	0	0	0	0	200	300	0	0	0	0	0	0	0	200	903	0	0	0	0	0	0	0	603	903	0
724	6	0	0	0	0	0	0	200	300	0	0	0	0	0	0	0	200	903	0	0	0	0	0	0	0	603	903	0
724	7	0	0	0	0	0	0	200	300	0	0	0	0	0	0	0	200	903	0	0	0	0	0	0	0	603	903	0
724	8	0	0	0	0	0	0	200	300	0	0	0	0	0	0	0	200	903	0	0	0	0	0	0	0	603	903	0
724	9	0	0	0	0	0	0	200	300	0	0	0	0	0	0	0	200	903	0	0	0	0	0	0	0	603	903	0
725	0	0	0	0	0	0	0	200	300	0	0	0	0	0	0	0	200	903	0	0	0	0	0	0	0	603	903	0
725	1	0	0	0	0	0	0	200	300	0	0	0	0	0	0	0	200	903	0	0	0	0	0	0	0	603	903	0
725	2	0	0	0	0	0	0	200	300	0	0	0	0	0	0	0	200	903	0	0	0	0	0	0	0	603	903	0
725	3	0	0	0	0	0	0	200	300	0	0	0	0	0	0	0	200	903	0	0	0	0	0	0	0	603	903	0
725	4	0	0	0	0	0	0	200	300	0	0	0	0	0	0	0	200	903	0	0	0	0	0	0	0	603	903	0
725	5	0	0	0	0	0	0	200	300	0	0	0	0	0	0	0	200	903	0	0	0	0	0	0	0	603	903	0
725	6	0	0	0	0	0	0	200	300	0	0	0	0	0	0	0	200	903	0	0	0	0	0	0	0	603	903	0
725	7	0	0	0	0	0	0	200	300	0	0	0	0	0	0	0	200	903	0	0	0	0	0	0	0	603	903	0
725	8	0	0	0	0	0	0	200	300	0	0	0	0	0	0	0	200	903	0	0	0	0	0	0	0	603	903	0
725	9	0	0	0	0	0	0	200	300	0	0	0	0	0	0	0	200	903	0	0	0	0	0	0	0	603	903	0
726	0	0	0	0	0	0	0	200	300	0	0	0	0	0	0	0	200	903	0	0	0	0	0	0	0	603	903	0
726	1	0	0	0	0	0	0	200	300	0	0	0	0	0	0	0	200	903	0	0	0	0	0	0	0	603	903	0
726	2	0	0	0	0	0	0	200	300	0	0	0	0	0	0	0	200	903	0	0	0	0	0	0	0	603	903	0
726	3	0	0	0	0	0	0	200	300	0	0	0	0	0	0	0	200	903	0	0	0	0	0	0	0	603	903	0
726	4	0	0	0	0	0	0	200	300	0	0	0	0	0	0	0	200	903	0	0	0	0	0	0	0	603	903	0
726	5	0	0	0	0	0	0	200	300	0	0	0	0	0	0	0	200	903	0	0	0	0	0	0	0	603	903	0
726	6	0	0	0	0	0	0	200	300	0	0	0	0	0	0	0	200	903	0	0	0	0	0	0	0	603	903	0
726	7	0	0	0	0	0	0	200	300	0	0	0	0	0	0	0	200	903	0	0	0	0	0	0	0	603	903	0
726	8	0	0	0	0	0	0	200	300	0	0	0	0	0	0	0	200	903	0	0	0	0	0	0	0	603	903	0
726	9	0	0	0	0	0	0	200	300	0	0	0	0	0	0	0	200	903	0	0	0	0	0	0	0	603	903	0
727	0	0	0	0	0	0	0	200	300	0	0	0	0	0	0	0	200	903	0	0	0	0	0	0	0	603	903	0
727	1	0	0	0	0	0	0	200	300	0	0	0	0	0	0	0	200	903	0	0	0	0	0	0	0	603	903	0
727	2	0	0	0	0	0	0	200	300	0	0	0	0	0	0	0	200	903	0	0	0	0	0	0	0	603	903	0
727	3	0	0	0	0	0	0	200	300	0	0	0	0	0	0	0	200	903	0	0	0	0	0	0	0	603	903	0
727	4	0	0	0	0	0	0	200	300	0	0	0	0	0	0	0	200	903	0	0	0	0	0	0	0	603	903	0
727	5	0	0	0	0	0	0	200	300	0	0	0	0	0	0	0	200	903	0	0	0	0	0	0	0	603	903	0
727	6	0	0	0	0	0	0	200	300	0	0	0	0	0	0	0	200	903	0	0	0	0	0	0	0	603	903	0
727	7	0	0	0	0	0	0	200	300	0	0	0	0	0	0	0	200	903	0	0	0	0	0	0	0	603	903	0
727	8	0	0	0	0	0	0	200	300	0	0	0	0	0	0	0	200	903	0	0	0	0	0	0	0	603	903	0
727	9	0	0	0	0	0	0	200	300	0	0	0	0	0	0	0	200	903	0	0	0	0	0	0	0	603	903	0
728	0	0	0	0	0	0	0	200	300	0	0	0	0	0	0	0	200	903	0	0	0	0	0	0	0	603	903	0
728	1	0	0	0	0	0	0	200	300	0	0	0	0	0	0	0	200	903	0	0	0	0	0	0	0	603	903	0
728	2	0	0	0	0	0	0	200	300	0	0	0	0	0	0	0	200	903	0	0	0	0	0	0	0	603	903	0
728	3	0	0	0	0	0	0	200	300	0	0	0	0	0	0	0	200	903	0	0	0	0	0	0	0	603	903	0
728	4	0	0	0	0	0	0	200	300	0	0	0	0	0	0	0	200	903	0	0	0	0	0	0	0	603	903	0
728	5	0	0	0	0	0	0	200	300	0	0	0	0	0	0	0	200	903	0	0	0	0	0	0	0	603	903	0
728	6	0	0	0	0	0	0	200	300	0	0	0	0	0	0	0	200	903	0	0	0	0	0	0	0	603	903	0
728	7	0	0	0	0	0	0	200	300	0	0	0	0	0	0	0	200	903	0	0	0	0	0	0	0	603	903	0
728	8	0	0	0	0	0	0	200	300	0	0	0	0	0	0	0	200	903	0	0	0	0	0	0	0	603	903	0
728	9	0	0	0	0	0	0	200	300	0	0	0	0	0	0	0	200	903	0	0	0	0	0	0	0	603	903	0
729	0	0	0	0	0	0	0	200	300	0	0	0	0	0	0	0	200	903	0	0	0	0	0	0	0	603	903	0
729	1	0	0	0	0	0	0	200	300	0	0	0	0	0	0	0	200	903	0	0	0	0	0	0	0	603	903	0
729	2	0	0	0	0	0	0	200	300	0	0	0	0	0	0	0	200	903	0	0	0	0	0	0	0	603	903	0
729	3	0	0	0	0	0	0	200	300	0	0	0	0	0	0	0	200	903	0	0	0	0	0	0	0	603	903	0
729	4	0	0	0	0	0	0	200	300	0	0	0	0	0	0	0	200	903	0	0	0	0	0	0	0	603	903	0
729	5	0	0	0	0	0	0	200	300	0	0	0	0	0	0	0	200	903	0	0	0	0	0	0	0	603	903	0
729	6	0	0	0	0	0	0	200	300	0	0	0	0	0	0	0	200	903	0	0	0	0	0	0	0	603	903	0
729	7	0	0	0	0	0	0	200	300	0	0	0	0	0	0	0	200	903	0	0	0	0	0	0	0	603	903	0
729	8	0	0	0	0	0	0	200	300	0	0	0	0	0	0	0	200	903	0	0	0	0	0	0	0	603	903	0
729	9	0	0	0	0	0	0	200	300	0	0	0	0	0	0	0	200	903	0	0	0	0	0	0	0	603	903	0
730	0	0	0	0	0	0	0	200	300	0	0	0	0	0	0	0	200	903	0	0	0	0	0	0	0	603	903	0
730	1	0	0	0	0	0	0	200	300	0	0	0	0	0	0	0	200	903	0	0	0	0	0	0	0	603	903	0
730	2	0	0	0	0	0	0	200	300	0	0	0	0	0	0	0	200	903	0	0	0	0	0	0	0	603	903	0
730	3	0	0	0	0	0	0	200	300	0	0	0	0	0	0	0	200	903	0	0	0	0	0	0	0	603	903	0
730	4	0	0	0	0	0	0	200	300	0	0	0	0	0	0	0	200	903	0	0	0	0	0	0	0	603	903	0
730	5	0	0	0	0	0	0	200	300	0	0	0	0	0	0	0	200	903	0	0	0	0	0	0	0	603	903	0
730	6	0	0	0	0	0	0	200	300	0	0	0	0	0	0	0	200	903	0	0	0	0	0	0	0	603	903	0
730	7	0	0	0	0	0	0	200	300	0	0	0	0	0	0	0	200	903	0	0	0	0	0	0	0	603	903	0
730	8	0	0	0	0	0	0	200	300	0	0	0	0	0	0	0	200	903	0	0	0	0	0	0	0	603	903	0
730	9	0	0	0	0	0	0	200	300	0	0	0	0	0	0	0	200	903	0	0	0	0	0	0	0	603	903	0
731	0	0	0	0	0	0	0	200	300	0	0	0	0	0	0	0	200	903	0	0	0	0	0	0	0	603	903	0
731	1	0	0	0	0	0	0	200	300	0	0	0	0	0	0	0	200	903	0	0	0	0	0	0	0	603	903	0
731	2	0	0	0	0	0	0	200	300	0	0	0	0	0	0	0	200	903	0	0	0	0	0	0	0	603	903	0
731	3	0	0	0	0	0	0	200	300	0	0	0	0	0	0	0	200	903	0	0	0	0	0	0	0	603	903	0
731	4	0	0	0	0	0	0	200	300	0	0	0	0	0	0	0	200	903	0	0	0	0	0	0	0	603	903	0
731	5	0	0	0	0	0	0	200	300	0	0	0	0	0	0	0	200	903	0	0	0	0	0	0	0	603	903	0
731	6	0	0	0	0	0	0	200	300	0	0	0	0	0	0	0	200	903	0	0	0	0	0	0	0	603	903	0
731	7	0	0	0	0	0	0	200	300	0	0	0	0	0	0	0	200	903	0	0	0	0	0	0	0	603	903	0
731	8	0	0	0	0	0	0	200	300	0	0	0	0	0	0	0	200	903	0	0	0	0	0	0	0	603	903	0
731	9	0	0	0	0	0	0	200	300	0	0	0	0	0	0	0	200	903	0	0	0	0	0	0	0	603	903	0
732	0	0	0	0	0	0	0	200	300	0	0	0	0	0	0	0	200	903	0	0	0	0	0	0	0	603	903	0
732	1	0	0	0	0	0	0	200	300	0	0	0	0	0	0	0	200	903	0	0	0	0	0	0	0	603	903	0
732	2	0	0	0	0	0	0	200	300	0	0	0	0	0	0	0	200	903	0	0	0	0	0	0	0	603	903	0
732	3	0	0	0	0	0	0	200	300	0	0	0	0	0	0	0	200	903	0	0	0	0	0	0	0	603	903	0
732	4	0	0	0	0	0	0	200	300	0	0	0	0	0	0	0	200	903	0	0	0	0	0	0	0	603	903	0
732	5	0	0	0	0	0	0	200	300	0	0	0	0	0	0	0	200	903	0	0	0	0	0	0	0	603	903	0
732	6	0	0	0	0	0	0	200	300	0	0	0	0	0	0	0	200	903	0	0	0	0	0	0	0	603	903	0
732	7	0	0	0	0	0	0	200	300	0	0	0	0	0	0	0	200	903	0	0	0	0	0	0	0	603	903	0
732	8	0	0	0	0	0	0	200	300	0	0	0	0	0	0	0	200	903	0	0	0	0	0	0	0	603	903	0
732	9	0	0	0	0	0	0	200	300	0	0	0	0	0	0	0	200	903	0	0	0	0	0	0	0	603	903	0
733	0	0	0	0	0	0	0	200	300	0	0	0	0	0	0	0	200	903	0	0	0	0	0	0	0	603	903	0
733	1	0	0	0	0	0	0	200	300	0	0	0	0	0	0	0	200	903	0	0	0	0	0	0	0	603	903	0
733	2	0	0	0	0	0	0	200	300	0	0	0	0	0	0	0	200	903	0	0	0	0	0	0	0	603	903	0
733	3	0	0	0	0	0	0	200	300	0	0	0	0	0	0	0	200	903	0	0	0	0	0	0	0	603	903	0
733	4	0	0	0	0	0	0	200	300	0	0	0	0	0	0	0	200	903	0	0	0	0	0	0	0	603	903	0
733	5	0	0	0	0	0	0	200	300	0	0	0	0	0	0	0	200	903	0	0	0	0	0	0	0	603	903	0
733	6	0	0	0	0	0	0	200	300	0	0	0	0	0	0	0	200	903	0	0	0	0	0	0	0	603	903	0
733	7	0	0	0	0	0	0	200	300	0	0	0	0	0	0	0	200	903	0	0	0	0	0	0	0	603	903	0
733	8	0	0	0	0	0	0	200	300	0	0	0	0	0	0	0	200	903	0	0	0	0	0	0	0	603	903	0
733	9	0	0	0	0	0	0	200	300	0	0	0	0	0	0	0	200	903	0	0	0	0	0	0	0	603	903	0
734	0	0	0	0	0	0	0	200	300	0	0	0	0	0	0	0	200	903	0	0	0	0	0	0	0	603	903	0
734	1	0	0	0	0	0	0	200	300	0	0	0	0	0	0	0	200	903	0	0	0	0	0	0	0	603	903	0
734	2	0	0	0	0	0	0	200	300	0	0	0	0	0	0	0	200	903	0	0	0	0	0	0	0	603	903	0
734	3	0	0	0	0	0	0	200	300	0	0	0	0	0	0	0	200	903	0	0	0	0	0	0	0	603	903	0
734	4	0	0	0	0	0	0	200	300	0	0	0	0	0	0	0	200	903	0	0	0	0	0	0	0	603	903	0
734	5	0	0	0	0	0	0	200	300	0	0	0	0	0	0	0	200	903	0	0	0	0	0	0	0	603	903	0
734	6	0	0	0	0	0	0	200	300	0	0	0	0	0	0	0	200	903	0	0	0	0	0	0	0	603	903	0
734	7	0	0	0	0	0	0	200	300	0	0	0	0	0	0	0	200	903	0	0	0	0	0	0	0	603	903	0
734	8	0	0	0	0	0	0	200	300	0	0	0	0	0	0	0	200	903	0	0	0	0	0	0	0	603	903	0
734	9	0	0	0	0	0	0	200	300	0	0	0	0	0	0	0	200	903	0	0	0	0	0	0	0	603	903	0
735	0	0	0	0	0	0	0	200	300	0	0	0	0	0	0	0	200	903	0	0	0	0	0	0	0	603	903	0
735	1	0	0	0	0	0	0	200	300	0	0	0	0	0	0	0	200	903	0	0	0	0	0	0	0	603	903	0
735	2	0	0	0	0	0	0	200	300	0	0	0	0	0	0	0	200	903	0	0	0	0	0	0	0	603	903	0
735	3	0	0	0	0	0	0	200	300	0	0	0	0	0	0	0	200	903	0	0	0	0	0	0	0	603	903	0
735	4	0	0	0	0	0	0	200	300	0	0	0	0	0	0	0	200	903	0	0	0	0	0	0	0	603	903	0
735	5	0	0	0	0	0	0	200	300	0	0	0	0	0	0	0	200	903	0	0	0	0	0	0	0	603	903	0
735	6	0	0	0	0	0	0	200	300	0	0	0	0	0	0	0	200	903	0	0	0	0	0	0	0	603	903	0
735	7	0	0	0	0	0	0	200	300	0	0	0	0	0	0	0	200	903	0	0	0	0	0	0	0	603	903	0
735	8	0	0	0	0	0	0	200	300	0	0	0	0	0	0	0	200	903	0	0	0	0	0	0	0	603	903	0
735	9	0	0	0	0	0	0	200	300	0	0	0	0	0	0	0	200	903	0	0	0	0	0	0	0	603	903	0
736	0	0	0	0	0	0	0	200	300	0	0	0	0	0	0	0	200	903	0	0	0	0	0	0	0	603	903	0
736	1	0	0	0	0	0	0	200	300	0	0	0	0	0	0	0	200	903	0	0	0	0	0	0	0	603	903	0
736	2	0	0	0	0	0	0	200	300	0	0	0	0	0	0	0	200	903	0	0	0	0	0	0	0	603	903	0
736	3	0	0	0	0	0	0	200	300	0	0	0	0	0	0	0	200	903	0	0	0	0	0	0	0	603	903	0
736	4	0	0	0	0	0	0	200	300	0	0	0	0	0	0	0	200	903	0	0	0	0	0	0	0	603	903	0
736	5	0	0	0	0	0	0	200	300	0	0	0	0	0	0	0	200	903	0	0	0	0	0	0	0	603	903	0
736	6	0	0	0	0	0	0	200	300	0	0	0	0	0	0	0	200	903	0	0	0	0	0	0	0	603	903	0
736	7	0	0	0	0	0	0	200	300	0	0	0	0	0	0	0	200	903	0	0	0	0	0	0	0	603	903	0
736	8	0	0	0	0	0	0	200	300	0	0	0	0	0	0	0	200	903	0	0	0	0	0	0	0	603	903	0
736	9	0	0	0	0	0	0	200	300	0	0	0	0	0	0	0	200	903	0	0	0	0	0	0	0	603	903	0
737	0	0	0	0	0	0	0	200	300	0	0	0	0	0	0	0	200	903	0	0	0	0	0	0	0	603	903	0
737	1	0	0	0	0	0	0	200	300	0	0	0	0	0	0	0	200	903	0	0	0	0	0	0	0	603	903	0
737	2	0	0	0	0	0	0	200	300	0	0	0	0	0	0	0	200	903	0	0	0	0	0	0	0	603	903	0
737	3	0	0	0	0	0	0	200	300	0	0	0	0	0	0	0	200	903	0	0	0	0	0	0	0	603	903	0
737	4	0	0	0	0	0	0	200	300	0	0	0	0	0	0	0	200	903	0	0	0	0	0	0	0	603	903	0
737	5	0	0	0	0	0	0	200	300	0	0	0	0	0	0	0	200	903	0	0	0	0	0	0	0	603	903	0
737	6	0	0	0	0	0	0	200	300	0	0	0	0	0	0	0	200	903	0	0	0	0	0	0	0	603	903	0
737	7	0	0	0	0	0	0	200	300	0	0	0	0	0	0	0	200	903	0	0	0	0	0	0	0	603	903	0
737	8	0	0	0	0	0	0	200	300	0	0	0	0	0	0	0	200	903	0	0	0	0	0	0	0	603	903	0
737	9	0	0	0	0	0	0	200	300	0	0	0	0	0	0	0	200	903	0	0	0	0	0	0	0	603	903	0
738	0	0	0	0	0	0	0	200	300	0	0	0	0	0	0	0	200	903	0	0	0	0	0	0	0	603	903	0
738	1	0	0	0	0	0	0	200	300	0	0	0	0	0	0	0	200	903	0	0	0	0	0	0	0	603	903	0
738	2	0	0	0	0	0	0	200	300	0	0	0	0	0	0	0	200	903	0	0	0	0	0	0	0	603	903	0
738	3	0	0	0	0	0	0	200	300	0	0	0	0	0	0	0	200	903	0	0	0	0	0	0	0	603	903	0
738	4	0	0	0	0	0	0	200	300	0	0	0	0	0	0	0	200	903	0	0	0	0	0	0	0	603	903	0
738	5	0	0	0	0	0	0	200	300	0	0	0	0	0	0	0	200	903	0	0	0	0	0	0	0	603	903	0
738	6	0	0	0	0	0	0	200	300	0	0	0	0	0	0	0	200	903	0	0	0	0	0	0	0	603	903	0
738	7	0	0	0	0	0	0	200	300	0	0	0	0	0	0	0	200	903	0	0	0	0	0	0	0	603	903	0
738	8	0	0	0	0	0	0	200	300	0	0	0	0	0	0	0	200	903	0	0	0	0	0	0	0	603	903	0
738	9	0	0	0	0	0	0	200	300	0	0	0	0	0	0	0	200	903	0	0	0	0	0	0	0	603	903	0
739	0	3.17413	9.25785	-14.9896	2540.77	-594.849	204.712	160.316	130.498	0	0	0	0	0	0	0	200	903	0	0	0	0	0	0	0	603	903	0
739	1	4.8526	12.0044	-19.8724	2815.43	-655.884	433.594	166.995	158.325	0	0	0	0	0	0	0	200	903	0	0	0	0	0	0	0	603	903	0
739	2	3.02154	5.44315	-14.0741	1899.9	-228.638	204.712	183.755	165.007	0	0	0	0	0	0	0	200	903	0	0	0	0	0	0	0	603	903	0
739	3	0	0	0	0	0	0	200	300	0	0	0	0	0	0	0	200	903	0	0	0	0	0	0	0	603	903	0
739	4	2.41119	6.66385	-9.80164	1991.46	-472.778	387.818	151.765	96.824	0	0	0	0	0	0	0	200	903	0	0	0	0	0	0	0	603	903	0
739	5	4.39483	9.71561	-14.3793	1625.25	-594.849	204.712	158.632	186.973	0	0	0	0	0	0	0	200	903	0	0	0	0	0	0	0	603	903	0
739	6	4.8526	7.88456	-18.9569	2449.22	-594.849	433.594	168.621	170.801	0	0	0	0	0	0	0	200	903	0	0	0	0	0	0	0	603	903	0
739	7	2.41119	5.44315	-14.3793	2632.33	-533.813	479.37	162.876	116.936	0	0	0	0	0	0	0	200	903	0	0	0	0	0	0	0	603	903	0
739	8	5.46295	9.10526	-14.3793	2266.12	-838.989	433.594	141.653	142.404	0	0	0	0	0	0	0	200	903	0	0	0	0	0	0	0	603	903	0
739	9	7.294	11.5467	-16.5155	2083.01	-838.989	250.488	149.2	173.875	0	0	0	0	0	0	0	200	903	0	0	0	0	0	0	0	603	903	0
740	0	3.63189	7.88456	-20.4828	3090.09	-1083.13	296.265	147.12	149.137	0	0	0	0	0	0	0	200	903	0	0	0	0	0	0	0	603	903	0
740	1	3.32672	7.88456	-22.0087	3639.41	-1022.09	525.147	153.559	134.638	0	0	0	0	0	0	0	200	903	0	0	0	0	0	0	0	603	903	0
740	2	5.15777	12.0044	-20.1776	3273.2	-838.989	204.712	158.42	137.781	0	0	0	0	0	0	0	200	903	0	0	0	0	0	0	0	603	903	0
740	3	4.24225	12.6148	-22.619	3914.07	-1083.13	21.6065	152.114	126.957	0	0	0	0	0	0	0	200	903	0	0	0	0	0	0	0	603	903	0
740	4	0.427549	6.0535	-28.4174	4188.72	-1632.45	21.6065	142.555	152.6	0	0	0	0	0	0	0	200	903	0	0	0	0	0	0	0	603	903	0
740	5	-0.945742	0.560338	-34.826	5653.57	-1693.48	-344.605	151.373	137.663	0	0	0	0	0	0	0	200	903	0	0	0	0	0	0	0	603	903	0
740	6	-0.793154	-1.11813	-40.6244	7118.41	-1937.62	387.818	152.304	124.775	0	0	0	0	0	0	0	200	903	0	0	0	0	0	0	0	603	903	0
740	7	0.580137	-3.86471	-43.0658	7942.39	-2242.8	662.476	147.922	115.576	0	0	0	0	0	0	0	200	903	0	0	0	0	0	0	0	603	903	0
740	8	-0.793154	-10.8838	-45.8124	8766.36	-2792.12	708.252	139.053	108.646	0	0	0	0	0	0	0	200	903	0	0	0	0	0	0	0	603	903	0
740	9	-0.33539	-12.4096	-54.0521	9590.34	-2792.12	1211.79	148.344	122.572	0	0	0	0	0	0	0	200	903	0	0	0	0	0	0	0	603	903	0
741	0	0.580137	-12.4096	-62.2919	10689	-3219.36	1486.45	148.318	128.405	0	0	0	0	0	0	0	200	903	0	0	0	0	0	0	0	603	903	0
741	1	2.10602	-14.0881	-68.3954	12153.8	-3463.5	1852.66	149.361	122.301	0	0	0	0	0	0	0	200	903	0	0	0	0	0	0	0	603	903	0
741	2	2.2586	-19.1235	-72.6678	13160.9	-3646.61	2081.54	149.818	118.89	0	0	0	0	0	0	0	200	903	0	0	0	0	0	0	0	603	903	0
741	3	3.17413	-19.7339	-78.7714	14442.6	-4256.96	2264.65	145.958	116.651	0	0	0	0	0	0	0	200	903	0	0	0	0	0	0	0	603	903	0
741	4	5.92071	-19.1235	-87.6215	15724.4	-4134.89	2905.52	152.81	120.542	0	0	0	0	0	0	0	200	903	0	0	0	0	0	0	0	603	903	0
741	5	6.0733	-22.633	-97.3871	17280.8	-4562.13	3180.18	153.155	122.556	0	0	0	0	0	0	0	200	903	0	0	0	0	0	0	0	603	903	0
741	6	6.98883	-27.9736	-104.711	19294.9	-4623.17	3821.05	155.848	115.732	0	0	0	0	0	0	0	200	903	0	0	0	0	0	0	0	603	903	0
741	7	8.97247	-31.4831	-115.087	20851.3	-5172.49	4141.48	155.056	118.822	0	0	0	0	0	0	0	200	903	0	0	0	0	0	0	0	603	903	0
741	8	12.1768	-32.0935	-123.022	22041.5	-5782.84	4736.57	152.993	120.833	0	0	0	0	0	0	0	200	903	0	0	0	0	0	0	0	603	903	0
741	9	12.6346	-35.2978	-132.177	24238.8	-5904.91	5011.23	155.326	116.619	0	0	0	0	0	0	0	200	903	0	0	0	0	0	0	0	603	903	0
742	0	14.313	-38.5022	-142.858	25520.5	-6515.26	5514.77	154.394	121.358	0	0	0	0	0	0	0	200	903	0	0	0	0	0	0	0	603	903	0
742	1	15.5338	-37.7392	-152.929	27534.7	-6820.44	5102.79	155.401	119.951	0	0	0	0	0	0	0	200	903	0	0	0	0	0	0	0	603	903	0
742	2	15.8389	-37.5866	-162.695	28724.9	-7003.54	5514.77	156.953	123.443	0	0	0	0	0	0	0	200	903	0	0	0	0	0	0	0	603	903	0
742	3	17.67	-38.3496	-167.578	30098.2	-7491.82	5606.33	155.293	120.393	0	0	0	0	0	0	0	200	903	0	0	0	0	0	0	0	603	903	0
742	4	19.0433	-36.8237	-175.817	31563	-7919.07	5469	154.959	120.478	0	0	0	0	0	0	0	200	903	0	0	0	0	0	0	0	603	903	0
742	5	18.4329	-32.3986	-184.667	32661.6	-8956.67	5057.01	151.498	123.133	0	0	0	0	0	0	0	200	903	0	0	0	0	0	0	0	603	903	0
742	6	19.3484	-30.7202	-194.738	34309.6	-8529.42	5331.67	156.201	123.817	0	0	0	0	0	0	0	200	903	0	0	0	0	0	0	0	603	903	0
742	7	18.2803	-29.1943	-201.452	35591.3	-9017.7	5148.56	155.236	123.326	0	0	0	0	0	0	0	200	903	0	0	0	0	0	0	0	603	903	0
742	8	19.8062	-26.6003	-204.199	36140.6	-9383.91	4782.35	154.045	123.012	0	0	0	0	0	0	0	200	903	0	0	0	0	0	0	0	603	903	0
742	9	19.6536	-21.4123	-209.081	37147.7	-9383.91	4645.02	155.118	122.329	0	0	0	0	0	0	0	200	903	0	0	0	0	0	0	0	603	903	0
743	0	19.1959	-19.5813	-217.626	37880.1	-9750.12	4324.58	155.198	125.94	0	0	0	0	0	0	0	200	903	0	0	0	0	0	0	0	603	903	0
743	1	18.8907	-15.7666	-223.73	38795.7	-10055.3	4324.58	155.056	126.596	0	0	0	0	0	0	0	200	903	0	0	0	0	0	0	0	603	903	0
743	2	17.8226	-12.1045	-227.697	39619.6	-10604.6	4004.15	153.427	125.999	0	0	0	0	0	0	0	200	903	0	0	0	0	0	0	0	603	903	0
743	3	20.1114	-7.98458	-229.223	39253.4	-10177.4	3683.72	155.601	128.754	0	0	0	0	0	0	0	200	903	0	0	0	0	0	0	0	603	903	0
743	4	19.0433	-6.00094	-234.106	39985.8	-10421.5	3500.61	155.484	129.198	0	0	0	0	0	0	0	200	903	0	0	0	0	0	0	0	603	903	0
743	5	18.4329	-2.18624	-236.242	40718.3	-10726.7	3317.51	154.595	127.642	0	0	0	0	0	0	0	200	903	0	0	0	0	0	0	0	603	903	0
743	6	19.8062	2.84916	-242.956	41176	-10665.7	3042.85	156.1	130.521	0	0	0	0	0	0	0	200	903	0	0	0	0	0	0	0	603	903	0
743	7	18.8907	6.51127	-244.482	40992.9	-10543.6	3042.85	156.874	132.327	0	0	0	0	0	0	0	200	903	0	0	0	0	0	0	0	603	903	0
743	8	18.8907	8.6475	-246.923	41542.2	-11092.9	2585.08	155.076	131.761	0	0	0	0	0	0	0	200	903	0	0	0	0	0	0	0	603	903	0
743	9	18.7381	11.2415	-248.754	41450.7	-11215	2585.08	154.915	133.367	0	0	0	0	0	0	0	200	903	0	0	0	0	0	0	0	603	903	0
744	0	18.5855	15.514	-252.111	42366.2	-11276	2447.75	155.274	131.954	0	0	0	0	0	0	0	200	903	0	0	0	0	0	0	0	603	903	0
744	1	19.501	18.5657	-256.078	42091.6	-11520.1	2035.77	155.013	135.63	0	0	0	0	0	0	0	200	903	0	0	0	0	0	0	0	603	903	0
744	2	18.5855	19.3286	-257.604	43007.1	-11581.2	2173.1	155.043	133.05	0	0	0	0	0	0	0	200	903	0	0	0	0	0	0	0	603	903	0
744	3	18.2803	22.3804	-262.487	43464.9	-11398.1	1898.44	156.577	134.411	0	0	0	0	0	0	0	200	903	0	0	0	0	0	0	0	603	903	0
744	4	18.8907	24.2115	-264.929	44105.7	-11764.3	1623.78	155.594	133.519	0	0	0	0	0	0	0	200	903	0	0	0	0	0	0	0	603	903	0
744	5	19.0433	25.4322	-267.98	44655	-12191.5	1578	154.506	133.365	0	0	0	0	0	0	0	200	903	0	0	0	0	0	0	0	603	903	0
744	6	18.2803	26.1951	-271.337	44288.8	-12496.7	1578	153.944	136.776	0	0	0	0	0	0	0	200	903	0	0	0	0	0	0	0	603	903	0
744	7	17.8226	28.4839	-278.356	44746.6	-12496.7	1349.12	155.105	139.247	0	0	0	0	0	0	0	200	903	0	0	0	0	0	0	0	603	903	0
744	8	17.8226	30.1624	-282.629	45112.8	-12740.8	937.134	154.92	140.381	0	0	0	0	0	0	0	200	903	0	0	0	0	0	0	0	603	903	0
744	9	17.67	29.552	-287.817	46760.8	-13534.3	1120.24	152.976	137.533	0	0	0	0	0	0	0	200	903	0	0	0	0	0	0	0	603	903	0
745	0	15.2286	28.1787	-291.479	48042.5	-13717.4	616.7	152.939	135.177	0	0	0	0	0	0	0	200	903	0	0	0	0	0	0	0	603	903	0
745	1	14.7708	28.9417	-302.465	48408.7	-14449.8	296.265	152.226	139.953	0	0	0	0	0	0	0	200	903	0	0	0	0	0	0	0	603	903	0
745	2	14.6182	31.0779	-311.62	48408.7	-14816	433.594	152.455	144.655	0	0	0	0	0	0	0	200	903	0	0	0	0	0	0	0	603	903	0
745	3	12.7872	30.7727	-319.25	49507.3	-15304.3	-207.275	152.062	144.926	0	0	0	0	0	0	0	200	903	0	0	0	0	0	0	0	603	903	0
745	4	12.1768	29.3994	-324.438	50606	-15548.5	-802.368	152.076	144.02	0	0	0	0	0	0	0	200	903	0	0	0	0	0	0	0	603	903	0
745	5	10.8035	31.2305	-330.847	52162.4	-16036.7	-298.828	151.528	142.337	0	0	0	0	0	0	0	200	903	0	0	0	0	0	0	0	603	903	0
745	6	9.12506	32.4512	-340.612	52070.8	-17074.3	-1077.03	149.872	147.126	0	0	0	0	0	0	0	200	903	0	0	0	0	0	0	0	603	903	0
745	7	7.44659	31.8409	-350.073	53901.9	-17501.6	-619.263	150.006	146.027	0	0	0	0	0	0	0	200	903	0	0	0	0	0	0	0	603	903	0
745	8	6.0733	33.2141	-356.481	54359.6	-17440.6	-710.816	151.076	147.511	0	0	0	0	0	0	0	200	903	0	0	0	0	0	0	0	603	903	0
745	9	7.59918	36.5711	-362.89	55183.6	-18111.9	-1031.25	150.09	147.933	0	0	0	0	0	0	0	200	903	0	0	0	0	0	0	0	603	903	0
746	0	5.76813	36.1133	-366.857	56007.6	-18600.2	-1397.46	149.299	147.331	0	0	0	0	0	0	0	200	903	0	0	0	0	0	0	0	603	903	0
746	1	4.54742	39.1651	-376.013	57564	-18966.4	-1534.79	149.559	146.909	0	0	0	0	0	0	0	200	903	0	0	0	0	0	0	0	603	903	0
746	2	3.78448	40.3858	-386.389	57289.3	-19088.5	-1260.13	150.598	151.731	0	0	0	0	0	0	0	200	903	0	0	0	0	0	0	0	603	903	0
746	3	2.86896	42.2168	-394.018	58937.3	-19637.8	-1855.23	150.16	150.42	0	0	0	0	0	0	0	200	903	0	0	0	0	0	0	0	603	903	0
746	4	2.71637	44.6582	-397.985	58662.6	-20126.1	-2221.44	149.43	152.601	0	0	0	0	0	0	0	200	903	0	0	0	0	0	0	0	603	903	0
746	5	1.49566	46.3367	-403.173	59669.7	-20370.2	-2129.88	149.475	152	0	0	0	0	0	0	0	200	903	0	0	0	0	0	0	0	603	903	0
746	6	0.732725	48.6255	-408.972	60127.5	-20858.5	-2541.87	148.998	152.979	0	0	0	0	0	0	0	200	903	0	0	0	0	0	0	0	603	903	0
746	7	0.885313	51.2195	-418.127	60859.9	-21468.9	-2541.87	148.655	154.446	0	0	0	0	0	0	0	200	903	0	0	0	0	0	0	0	603	903	0
746	8	-1.55609	52.135	-421.484	61958.5	-21041.6	-2862.31	150.077	152.999	0	0	0	0	0	0	0	200	903	0	0	0	0	0	0	0	603	903	0
746	9	-2.16645	52.898	-425.756	61866.9	-21774	-3365.85	148.858	154.689	0	0	0	0	0	0	0	200	903	0	0	0	0	0	0	0	603	903	0
747	0	-3.53974	54.2713	-428.198	62507.8	-22384.4	-3594.73	147.724	154.021	0	0	0	0	0	0	0	200	903	0	0	0	0	0	0	0	603	903	0
747	1	-4.15009	55.6446	-433.691	61958.5	-22384.4	-3640.5	148.386	157.137	0	0	0	0	0	0	0	200	903	0	0	0	0	0	0	0	603	903	0
747	2	-5.52338	57.323	-441.625	62233.2	-22750.6	-3503.17	148.484	159.082	0	0	0	0	0	0	0	200	903	0	0	0	0	0	0	0	603	903	0
747	3	-7.96479	55.492	-444.677	62599.4	-22811.6	-3960.94	148.701	159.225	0	0	0	0	0	0	0	200	903	0	0	0	0	0	0	0	603	903	0
747	4	-7.8122	58.8489	-446.508	63881.1	-23605.1	-4189.82	147.134	156.932	0	0	0	0	0	0	0	200	903	0	0	0	0	0	0	0	603	903	0
747	5	-9.0329	58.6963	-450.17	63881.1	-23727.2	-4327.15	147.293	158.096	0	0	0	0	0	0	0	200	903	0	0	0	0	0	0	0	603	903	0
747	6	-9.94843	58.3911	-452.612	63972.7	-23788.2	-4418.7	147.442	158.659	0	0	0	0	0	0	0	200	903	0	0	0	0	0	0	0	603	903	0
747	7	-10.864	58.3911	-459.02	64064.2	-24154.4	-4510.25	147.378	160.433	0	0	0	0	0	0	0	200	903	0	0	0	0	0	0	0	603	903	0
747	8	-12.3898	59.917	-460.546	64247.3	-24215.5	-4830.69	147.42	160.498	0	0	0	0	0	0	0	200	903	0	0	0	0	0	0	0	603	903	0
747	9	-12.0847	60.0696	-462.377	63789.6	-24703.7	-5151.12	146.572	162.04	0	0	0	0	0	0	0	200	903	0	0	0	0	0	0	0	603	903	0
748	0	-14.0683	59.7644	-462.072	64979.7	-24825.8	-5013.79	146.273	159.373	0	0	0	0	0	0	0	200	903	0	0	0	0	0	0	0	603	903	0
748	1	-14.3735	59.4593	-468.481	65254.4	-25069.9	-5059.57	146.487	160.711	0	0	0	0	0	0	0	200	903	0	0	0	0	0	0	0	603	903	0
748	2	-13.6105	59.7644	-478.552	65529.1	-25924.4	-5242.68	145.827	163.068	0	0	0	0	0	0	0	200	903	0	0	0	0	0	0	0	603	903	0
748	3	-16.6623	58.5437	-488.928	65254.4	-26840	-5563.11	145.104	166.536	0	0	0	0	0	0	0	200	903	0	0	0	0	0	0	0	603	903	0
748	4	-22.4606	60.5274	-495.947	64979.7	-27206.2	-6066.65	145.143	168.978	0	0	0	0	0	0	0	200	903	0	0	0	0	0	0	0	603	903	0
748	5	-26.1227	66.7835	-499.304	65895.3	-27999.6	-6707.52	143.923	168.026	0	0	0	0	0	0	0	200	903	0	0	0	0	0	0	0	603	903	0
748	6	-28.1064	68.1568	-500.829	65529.1	-28548.9	-7119.51	142.997	169.159	0	0	0	0	0	0	0	200	903	0	0	0	0	0	0	0	603	903	0
748	7	-29.9374	68.6145	-510.9	67085.5	-28548.9	-7485.72	144.12	168.692	0	0	0	0	0	0	0	200	903	0	0	0	0	0	0	0	603	903	0
748	8	-34.8203	70.5982	-517.919	66536.1	-28793.1	-7943.48	144.406	171.532	0	0	0	0	0	0	0	200	903	0	0	0	0	0	0	0	603	903	0
748	9	-34.9728	77.0069	-518.53	66444.6	-29708.6	-8355.47	142.706	171.86	0	0	0	0	0	0	0	200	903	0	0	0	0	0	0	0	603	903	0
749	0	-33.7521	81.4319	-522.497	66810.8	-29891.7	-8309.69	142.791	172.132	0	0	0	0	0	0	0	200	903	0	0	0	0	0	0	0	603	903	0
749	1	-34.2099	80.0586	-531.042	66444.6	-29586.5	-8996.34	144.286	174.879	0	0	0	0	0	0	0	200	903	0	0	0	0	0	0	0	603	903	0
749	2	-31.0056	84.3311	-535.314	67268.6	-30441	-8721.68	143.134	174.338	0	0	0	0	0	0	0	200	903	0	0	0	0	0	0	0	603	903	0
749	3	-30.09	88.7561	-541.113	67360.1	-30380	-8996.34	143.856	175.516	0	0	0	0	0	0	0	200	903	0	0	0	0	0	0	0	603	903	0
749	4	-32.684	90.282	-542.028	68184.1	-30441	-9225.22	143.839	174.206	0	0	0	0	0	0	0	200	903	0	0	0	0	0	0	0	603	903	0
749	5	-31.6159	88.6036	-548.742	68092.6	-30807.2	-9087.89	143.858	175.912	0	0	0	0	0	0	0	200	903	0	0	0	0	0	0	0	603	903	0
749	6	-31.0056	90.282	-555.456	68641.8	-31600.7	-8996.34	143.109	176.423	0	0	0	0	0	0	0	200	903	0	0	0	0	0	0	0	603	903	0
749	7	-27.6486	93.0286	-558.813	68458.8	-31417.6	-9271	143.778	177.492	0	0	0	0	0	0	0	200	903	0	0	0	0	0	0	0	603	903	0
749	8	-30.2426	91.8079	-563.085	68733.4	-31600.7	-9362.55	143.879	177.934	0	0	0	0	0	0	0	200	903	0	0	0	0	0	0	0	603	903	0
749	9	-31.7685	91.6553	-567.968	68550.3	-32028	-9271	143.61	179.306	0	0	0	0	0	0	0	200	903	0	0	0	0	0	0	0	603	903	0
750	0	-31.4633	92.7234	-572.851	69557.4	-32150	-9408.33	143.877	178.577	0	0	0	0	0	0	0	200	903	0	0	0	0	0	0	0	603	903	0
750	1	-30.7004	93.9441	-579.26	69740.5	-32272.1	-9682.98	144.287	179.604	0	0	0	0	0	0	0	200	903	0	0	0	0	0	0	0	603	903	0
750	2	-30.09	91.1975	-583.837	70381.3	-32760.4	-9408.33	143.888	179.45	0	0	0	0	0	0	0	200	903	0	0	0	0	0	0	0	603	903	0
750	3	-29.0219	91.5027	-588.11	70747.6	-33126.6	-9316.77	143.673	179.703	0	0	0	0	0	0	0	200	903	0	0	0	0	0	0	0	603	903	0
750	4	-32.0737	92.7234	-591.161	70656	-33614.9	-9591.43	143.138	180.479	0	0	0	0	0	0	0	200	903	0	0	0	0	0	0	0	603	903	0
750	5	-30.853	92.7234	-599.096	70656	-33675.9	-9911.87	143.789	182.062	0	0	0	0	0	0	0	200	903	0	0	0	0	0	0	0	603	903	0
750	6	-32.0737	92.1131	-606.115	70656	-33920	-9545.65	144.037	183.428	0	0	0	0	0	0	0	200	903	0	0	0	0	0	0	0	603	903	0
750	7	-32.2263	93.4864	-611.303	71113.8	-34591.4	-9591.43	143.414	183.669	0	0	0	0	0	0	0	200	903	0	0	0	0	0	0	0	603	903	0
750	8	-31.4633	95.0122	-614.66	72120.9	-34835.6	-9499.88	143.325	182.665	0	0	0	0	0	0	0	200	903	0	0	0	0	0	0	0	603	903	0
750	9	-33.7521	95.47	-621.069	72212.4	-34957.6	-9728.76	143.714	183.729	0	0	0	0	0	0	0	200	903	0	0	0	0	0	0	0	603	903	0
751	0	-34.0573	96.2329	-620.458	73036.4	-35262.8	-9957.64	143.167	182.286	0	0	0	0	0	0	0	200	903	0	0	0	0	0	0	0	603	903	0
751	1	-32.2263	96.9959	-631.445	72761.7	-35629	-9682.98	143.575	184.769	0	0	0	0	0	0	0	200	903	0	0	0	0	0	0	0	603	903	0
751	2	-32.9892	99.2847	-637.548	73036.4	-35690.1	-9820.31	144.02	185.442	0	0	0	0	0	0	0	200	903	0	0	0	0	0	0	0	603	903	0
751	3	-34.0573	99.4373	-640.905	74135	-35812.1	-9408.33	144.123	184.328	0	0	0	0	0	0	0	200	903	0	0	0	0	0	0	0	603	903	0
751	4	-34.0573	100.2	-645.178	74409.7	-36544.6	-9957.64	143.357	184.668	0	0	0	0	0	0	0	200	903	0	0	0	0	0	0	0	603	903	0
751	5	-34.0573	100.048	-652.502	75142.1	-36910.8	-9637.21	143.432	184.84	0	0	0	0	0	0	0	200	903	0	0	0	0	0	0	0	603	903	0
751	6	-34.5151	100.505	-653.417	74501.2	-36544.6	-9957.64	144.072	185.982	0	0	0	0	0	0	0	200	903	0	0	0	0	0	0	0	603	903	0
751	7	-34.9728	98.8269	-663.183	74959	-37032.8	-10049.2	144.159	186.971	0	0	0	0	0	0	0	200	903	0	0	0	0	0	0	0	603	903	0
751	8	-34.6677	100.963	-668.066	75599.9	-37582.2	-9591.43	143.745	186.838	0	0	0	0	0	0	0	200	903	0	0	0	0	0	0	0	603	903	0
751	9	-35.1254	101.574	-671.423	76515.4	-38009.4	-9774.54	143.39	186.04	0	0	0	0	0	0	0	200	903	0	0	0	0	0	0	0	603	903	0
752	0	-34.3625	101.726	-678.747	76606.9	-37948.4	-10003.4	144.091	187.135	0	0	0	0	0	0	0	200	903	0	0	0	0	0	0	0	603	903	0
752	1	-34.9728	100.048	-683.935	77064.7	-37887.3	-9774.54	144.604	187.322	0	0	0	0	0	0	0	200	903	0	0	0	0	0	0	0	603	903	0
752	2	-34.2099	100.505	-686.987	77339.4	-38863.9	-9682.98	143.428	187.422	0	0	0	0	0	0	0	200	903	0	0	0	0	0	0	0	603	903	0
752	3	-35.278	100.505	-693.395	77339.4	-39291.1	-9545.65	143.335	188.463	0	0	0	0	0	0	0	200	903	0	0	0	0	0	0	0	603	903	0
752	4	-33.7521	100.963	-697.363	77614	-38680.8	-9591.43	144.533	188.703	0	0	0	0	0	0	0	200	903	0	0	0	0	0	0	0	603	903	0
752	5	-34.5151	100.658	-703.466	77797.1	-39596.3	-9682.98	143.713	189.409	0	0	0	0	0	0	0	200	903	0	0	0	0	0	0	0	603	903	0
752	6	-34.3625	101.421	-707.739	78804.2	-39291.1	-9591.43	144.484	188.654	0	0	0	0	0	0	0	200	903	0	0	0	0	0	0	0	603	903	0
752	7	-33.1418	100.811	-710.79	79262	-39474.2	-9591.43	144.464	188.488	0	0	0	0	0	0	0	200	903	0	0	0	0	0	0	0	603	903	0
752	8	-32.2263	100.353	-715.673	78621.1	-39474.2	-9637.21	144.843	190.144	0	0	0	0	0	0	0	200	903	0	0	0	0	0	0	0	603	903	0
752	9	-32.2263	101.421	-721.472	79170.4	-40267.7	-9591.43	144.187	190.265	0	0	0	0	0	0	0	200	903	0	0	0	0	0	0	0	603	903	0
753	0	-31.7685	102.642	-724.828	79170.4	-40267.7	-9316.77	144.445	190.774	0	0	0	0	0	0	0	200	903	0	0	0	0	0	0	0	603	903	0
753	1	-31.4633	102.947	-730.627	80177.5	-40023.6	-9225.22	145.22	190.262	0	0	0	0	0	0	0	200	903	0	0	0	0	0	0	0	603	903	0
753	2	-30.5478	101.421	-731.542	79994.4	-40389.8	-9545.65	144.788	190.65	0	0	0	0	0	0	0	200	903	0	0	0	0	0	0	0	603	903	0
753	3	-27.496	101.421	-736.12	80635.2	-40756	-9408.33	144.634	190.459	0	0	0	0	0	0	0	200	903	0	0	0	0	0	0	0	603	903	0
753	4	-28.259	102.031	-740.392	80177.5	-40694.9	-9133.67	145.036	191.709	0	0	0	0	0	0	0	200	903	0	0	0	0	0	0	0	603	903	0
753	5	-28.8693	102.489	-742.224	80360.6	-40450.8	-9042.11	145.501	191.73	0	0	0	0	0	0	0	200	903	0	0	0	0	0	0	0	603	903	0
753	6	-27.6486	100.2	-749.243	80726.8	-41061.2	-9271	145.196	192.255	0	0	0	0	0	0	0	200	903	0	0	0	0	0	0	0	603	903	0
753	7	-27.3434	102.489	-750.768	81276.2	-41488.4	-9179.44	144.739	191.743	0	0	0	0	0	0	0	200	903	0	0	0	0	0	0	0	603	903	0
753	8	-25.665	101.726	-754.125	81550.8	-41183.2	-8950.56	145.389	191.86	0	0	0	0	0	0	0	200	903	0	0	0	0	0	0	0	603	903	0
753	9	-24.7495	100.963	-758.398	82283.2	-41183.2	-8721.68	145.697	191.504	0	0	0	0	0	0	0	200	903	0	0	0	0	0	0	0	603	903	0
754	0	-25.2072	101.421	-758.398	81459.2	-41793.6	-8904.79	144.892	192.59	0	0	0	0	0	0	0	200	903	0	0	0	0	0	0	0	603	903	0
754	1	-25.3598	101.116	-765.417	81459.2	-41915.6	-8767.46	145.238	193.575	0	0	0	0	0	0	0	200	903	0	0	0	0	0	0	0	603	903	0
754	2	-25.5124	100.048	-765.417	81367.7	-41854.6	-8630.13	145.318	193.695	0	0	0	0	0	0	0	200	903	0	0	0	0	0	0	0	603	903	0
754	3	-24.1391	100.2	-769.384	82649.4	-41854.6	-8492.8	145.6	192.577	0	0	0	0	0	0	0	200	903	0	0	0	0	0	0	0	603	903	0
754	4	-24.1391	99.7425	-773.046	82008.6	-42526	-8538.57	144.989	193.915	0	0	0	0	0	0	0	200	903	0	0	0	0	0	0	0	603	903	0
754	5	-23.2236	99.5899	-772.436	81642.4	-42098.8	-8492.8	145.499	194.305	0	0	0	0	0	0	0	200	903	0	0	0	0	0	0	0	603	903	0
754	6	-24.2917	99.5899	-778.539	81825.4	-41793.6	-8263.92	146.318	194.899	0	0	0	0	0	0	0	200	903	0	0	0	0	0	0	0	603	903	0
754	7	-24.2917	98.9795	-777.624	81917	-42648.1	-8447.02	145.156	194.657	0	0	0	0	0	0	0	200	903	0	0	0	0	0	0	0	603	903	0
754	8	-22.6132	99.8951	-780.065	82191.6	-42648.1	-8584.35	145.328	194.635	0	0	0	0	0	0	0	200	903	0	0	0	0	0	0	0	603	903	0
754	9	-22.0029	98.5218	-784.033	82191.6	-42526	-8218.14	145.76	195.168	0	0	0	0	0	0	0	200	903	0	0	0	0	0	0	0	603	903	0
755	0	-22.6132	98.6744	-782.202	82191.6	-42403.9	-8172.36	145.789	194.923	0	0	0	0	0	0	0	200	903	0	0	0	0	0	0	0	603	903	0
755	1	-22.4606	98.3692	-787.084	81093	-42465	-8172.36	146.048	196.97	0	0	0	0	0	0	0	200	903	0	0	0	0	0	0	0	603	903	0
755	2	-21.6977	98.2166	-785.558	81276.2	-42892.2	-8355.47	145.399	196.537	0	0	0	0	0	0	0	200	903	0	0	0	0	0	0	0	603	903	0
755	3	-20.7822	99.5899	-787.695	81093	-42465	-8080.81	146.09	197.05	0	0	0	0	0	0	0	200	903	0	0	0	0	0	0	0	603	903	0
755	4	-20.0192	98.6744	-789.221	81642.4	-42770.1	-7806.15	145.807	196.553	0	0	0	0	0	0	0	200	903	0	0	0	0	0	0	0	603	903	0
755	5	-20.0192	98.3692	-786.169	81733.9	-42465	-7989.26	145.985	196.035	0	0	0	0	0	0	0	200	903	0	0	0	0	0	0	0	603	903	0
755	6	-20.1718	98.6744	-791.967	81367.7	-42220.8	-7806.15	146.689	197.259	0	0	0	0	0	0	0	200	903	0	0	0	0	0	0	0	603	903	0
755	7	-19.8666	97.7588	-789.831	80085.9	-42892.2	-7943.48	145.694	198.604	0	0	0	0	0	0	0	200	903	0	0	0	0	0	0	0	603	903	0
755	8	-18.6459	97.7588	-790.441	80177.5	-42953.2	-7348.39	145.659	198.566	0	0	0	0	0	0	0	200	903	0	0	0	0	0	0	0	603	903	0
755	9	-18.4933	98.064	-790.441	80177.5	-43075.3	-7943.48	145.505	198.566	0	0	0	0	0	0	0	200	903	0	0	0	0	0	0	0	603	903	0
756	0	-19.2563	97.9114	-791.357	80543.7	-43014.3	-7577.27	145.645	198.221	0	0	0	0	0	0	0	200	903	0	0	0	0	0	0	0	603	903	0
756	1	-18.6459	97.3011	-791.662	80452.2	-42403.9	-7806.15	146.437	198.376	0	0	0	0	0	0	0	200	903	0	0	0	0	0	0	0	603	903	0
756	2	-19.4089	96.5381	-790.136	79811.3	-43075.3	-7851.93	145.484	198.99	0	0	0	0	0	0	0	200	903	0	0	0	0	0	0	0	603	903	0
756	3	-17.7304	96.2329	-788.61	78804.2	-43014.3	-8035.03	145.456	200.072	0	0	0	0	0	0	0	200	903	0	0	0	0	0	0	0	603	903	0
756	4	-18.0356	95.47	-790.746	78895.8	-42709.1	-7851.93	145.989	200.226	0	0	0	0	0	0	0	200	903	0	0	0	0	0	0	0	603	903	0
756	5	-19.4089	95.9278	-791.052	78254.9	-42892.2	-7851.93	145.778	201.075	0	0	0	0	0	0	0	200	903	0	0	0	0	0	0	0	603	903	0
756	6	-17.883	96.3855	-789.526	79078.9	-42892.2	-7897.71	145.673	199.84	0	0	0	0	0	0	0	200	903	0	0	0	0	0	0	0	603	903	0
756	7	-19.4089	95.3174	-788	78987.3	-42770.1	-7897.71	145.723	199.762	0	0	0	0	0	0	0	200	903	0	0	0	0	0	0	0	603	903	0
756	8	-18.6459	95.1648	-788.305	78254.9	-42465	-8080.81	146.131	200.73	0	0	0	0	0	0	0	200	903	0	0	0	0	0	0	0	603	903	0
756	9	-19.1037	94.2493	-789.831	77614	-43014.3	-7851.93	145.54	201.733	0	0	0	0	0	0	0	200	903	0	0	0	0	0	0	0	603	903	0
757	0	-19.8666	93.7915	-789.221	76698.5	-43136.4	-7989.26	145.343	202.817	0	0	0	0	0	0	0	200	903	0	0	0	0	0	0	0	603	903	0
757	1	-20.477	93.0286	-787.084	77064.7	-42403.9	-8172.36	146.125	202.088	0	0	0	0	0	0	0	200	903	0	0	0	0	0	0	0	603	903	0
757	2	-18.4933	92.876	-786.474	77156.2	-42587	-8126.59	145.851	201.896	0	0	0	0	0	0	0	200	903	0	0	0	0	0	0	0	603	903	0
757	3	-20.1718	92.2657	-785.558	75599.9	-42892.2	-8035.03	145.399	203.763	0	0	0	0	0	0	0	200	903	0	0	0	0	0	0	0	603	903	0
757	4	-20.6296	90.5872	-786.474	76973.1	-43136.4	-7943.48	145.152	202.129	0	0	0	0	0	0	0	200	903	0	0	0	0	0	0	0	603	903	0
757	5	-21.6977	90.4346	-784.643	75599.9	-42892.2	-8355.47	145.335	203.651	0	0	0	0	0	0	0	200	903	0	0	0	0	0	0	0	603	903	0
757	6	-22.1555	91.045	-782.202	75508.3	-42892.2	-8401.25	145.165	203.467	0	0	0	0	0	0	0	200	903	0	0	0	0	0	0	0	603	903	0
757	7	-22.308	89.8243	-780.676	74592.8	-42831.2	-7897.71	145.136	204.451	0	0	0	0	0	0	0	200	903	0	0	0	0	0	0	0	603	903	0
757	8	-20.3244	90.4346	-782.202	74867.4	-43014.3	-8401.25	145.009	204.286	0	0	0	0	0	0	0	200	903	0	0	0	0	0	0	0	603	903	0
757	9	-22.1555	88.2984	-780.37	75142.1	-42892.2	-8080.81	145.036	203.71	0	0	0	0	0	0	0	200	903	0	0	0	0	0	0	0	603	903	0
758	0	-24.1391	87.3829	-778.234	73768.8	-43197.4	-8538.57	144.493	205.21	0	0	0	0	0	0	0	200	903	0	0	0	0	0	0	0	603	903	0
758	1	-24.4443	88.2984	-776.098	74135	-43136.4	-8401.25	144.419	204.477	0	0	0	0	0	0	0	200	903	0	0	0	0	0	0	0	603	903	0
758	2	-24.7495	86.9251	-773.657	72853.3	-42648.1	-8172.36	144.875	205.833	0	0	0	0	0	0	0	200	903	0	0	0	0	0	0	0	603	903	0
758	3	-24.7495	87.3829	-770.91	73127.9	-42770.1	-8813.23	144.52	205.141	0	0	0	0	0	0	0	200	903	0	0	0	0	0	0	0	603	903	0
758	4	-24.7495	85.857	-772.436	72578.6	-43075.3	-8630.13	144.234	206.039	0	0	0	0	0	0	0	200	903	0	0	0	0	0	0	0	603	903	0
758	5	-26.8857	85.094	-771.215	72120.9	-43380.5	-8355.47	143.75	206.484	0	0	0	0	0	0	0	200	903	0	0	0	0	0	0	0	603	903	0
758	6	-26.8857	85.2466	-767.553	71663.1	-42587	-8401.25	144.516	206.634	0	0	0	0	0	0	0	200	903	0	0	0	0	0	0	0	603	903	0
758	7	-26.8857	84.4837	-764.196	70839.1	-42831.2	-8584.35	143.953	207.302	0	0	0	0	0	0	0	200	903	0	0	0	0	0	0	0	603	903	0
758	8	-27.0383	84.9414	-762.06	69923.6	-43258.4	-8996.34	143.235	208.244	0	0	0	0	0	0	0	200	903	0	0	0	0	0	0	0	603	903	0
758	9	-27.3434	84.1785	-761.755	70564.5	-43014.3	-8447.02	143.533	207.366	0	0	0	0	0	0	0	200	903	0	0	0	0	0	0	0	603	903	0
759	0	-29.0219	82.3475	-759.008	69923.6	-42342.9	-9042.11	144.213	207.875	0	0	0	0	0	0	0	200	903	0	0	0	0	0	0	0	603	903	0
759	1	-28.7167	82.6526	-755.956	68825	-42587	-8950.56	143.665	208.956	0	0	0	0	0	0	0	200	903	0	0	0	0	0	0	0	603	903	0
759	2	-29.1745	80.9742	-753.21	68275.6	-43014.3	-8584.35	142.892	209.354	0	0	0	0	0	0	0	200	903	0	0	0	0	0	0	0	603	903	0
759	3	-29.3271	82.9578	-750.158	67726.4	-43075.3	-9042.11	142.578	209.717	0	0	0	0	0	0	0	200	903	0	0	0	0	0	0	0	603	903	0
759	4	-29.1745	82.1949	-748.022	68001	-42220.8	-8950.56	143.557	209.092	0	0	0	0	0	0	0	200	903	0	0	0	0	0	0	0	603	903	0
759	5	-31.4633	80.5164	-745.58	67543.2	-42403.9	-9087.89	143.126	209.409	0	0	0	0	0	0	0	200	903	0	0	0	0	0	0	0	603	903	0
759	6	-30.09	80.8216	-740.698	67268.6	-42587	-8996.34	142.504	209.182	0	0	0	0	0	0	0	200	903	0	0	0	0	0	0	0	603	903	0
759	7	-31.3107	79.4483	-735.204	65620.6	-42098.8	-8767.46	142.739	210.745	0	0	0	0	0	0	0	200	903	0	0	0	0	0	0	0	603	903	0
759	8	-30.7004	80.2112	-734.899	64979.7	-42037.7	-8904.79	142.798	211.58	0	0	0	0	0	0	0	200	903	0	0	0	0	0	0	0	603	903	0
759	9	-31.1581	78.075	-734.899	64522	-42403.9	-9087.89	142.3	212.203	0	0	0	0	0	0	0	200	903	0	0	0	0	0	0	0	603	903	0
760	0	-31.7685	78.5328	-730.932	64888.2	-42098.8	-8447.02	142.404	211.225	0	0	0	0	0	0	0	200	903	0	0	0	0	0	0	0	603	903	0
760	1	-31.9211	77.9224	-727.575	64613.5	-41793.6	-9087.89	142.558	211.193	0	0	0	0	0	0	0	200	903	0	0	0	0	0	0	0	603	903	0
760	2	-31.3107	76.8543	-723.913	63881.1	-42037.7	-9087.89	141.93	211.756	0	0	0	0	0	0	0	200	903	0	0	0	0	0	0	0	603	903	0
760	3	-32.3788	77.0069	-721.472	62599.4	-42098.8	-8996.34	141.649	213.234	0	0	0	0	0	0	0	200	903	0	0	0	0	0	0	0	603	903	0
760	4	-31.6159	76.3965	-720.251	62233.2	-41488.4	-8904.79	142.397	213.595	0	0	0	0	0	0	0	200	903	0	0	0	0	0	0	0	603	903	0
760	5	-33.5996	75.6336	-717.809	62233.2	-41610.5	-9179.44	142.031	213.301	0	0	0	0	0	0	0	200	903	0	0	0	0	0	0	0	603	903	0
760	6	-33.2944	74.7181	-712.621	62050	-41793.6	-9042.11	141.352	212.927	0	0	0	0	0	0	0	200	903	0	0	0	0	0	0	0	603	903	0
760	7	-32.0737	73.4974	-712.011	61500.7	-41244.3	-8904.79	142.074	213.624	0	0	0	0	0	0	0	200	903	0	0	0	0	0	0	0	603	903	0
760	8	-33.5996	73.4974	-707.433	60310.6	-41244.3	-8996.34	141.699	214.747	0	0	0	0	0	0	0	200	903	0	0	0	0	0	0	0	603	903	0
760	9	-33.1418	73.4974	-707.128	60402.1	-41244.3	-9133.67	141.674	214.581	0	0	0	0	0	0	0	200	903	0	0	0	0	0	0	0	603	903	0
761	0	-34.8203	71.9715	-704.687	59761.2	-41061.2	-9179.44	141.731	215.195	0	0	0	0	0	0	0	200	903	0	0	0	0	0	0	0	603	903	0
761	1	-34.6677	71.2085	-700.414	59761.2	-41183.2	-8721.68	141.202	214.677	0	0	0	0	0	0	0	200	903	0	0	0	0	0	0	0	603	903	0
761	2	-33.1418	70.1404	-697.668	59028.8	-41366.3	-8492.8	140.708	215.391	0	0	0	0	0	0	0	200	903	0	0	0	0	0	0	0	603	903	0
761	3	-33.447	69.3775	-696.142	58662.6	-40939.1	-8813.23	141.191	215.732	0	0	0	0	0	0	0	200	903	0	0	0	0	0	0	0	603	903	0
761	4	-34.2099	68.462	-690.954	57838.6	-40939.1	-8859.01	140.75	216.292	0	0	0	0	0	0	0	200	903	0	0	0	0	0	0	0	603	903	0
761	5	-36.1935	68.6145	-692.785	57930.2	-41183.2	-8813.23	140.554	216.381	0	0	0	0	0	0	0	200	903	0	0	0	0	0	0	0	603	903	0
761	6	-35.5832	67.3938	-687.597	57014.7	-40511.8	-8767.46	141.082	217.081	0	0	0	0	0	0	0	200	903	0	0	0	0	0	0	0	603	903	0
761	7	-34.2099	66.4783	-686.987	57564	-40633.9	-8859.01	140.852	216.208	0	0	0	0	0	0	0	200	903	0	0	0	0	0	0	0	603	903	0
761	8	-35.278	65.2576	-686.071	57197.8	-41122.2	-8721.68	140.061	216.63	0	0	0	0	0	0	0	200	903	0	0	0	0	0	0	0	603	903	0
761	9	-34.9728	64.3421	-676.916	56556.9	-40878.1	-8447.02	139.611	216.449	0	0	0	0	0	0	0	200	903	0	0	0	0	0	0	0	603	903	0
762	0	-36.6513	63.274	-680.273	55732.9	-40267.7	-8218.14	140.807	218.073	0	0	0	0	0	0	0	200	903	0	0	0	0	0	0	0	603	903	0
762	1	-36.1935	62.8162	-676.306	55366.7	-40694.9	-8309.69	139.828	218.134	0	0	0	0	0	0	0	200	903	0	0	0	0	0	0	0	603	903	0
762	2	-34.6677	62.511	-674.169	55092	-40633.9	-8309.69	139.727	218.282	0	0	0	0	0	0	0	200	903	0	0	0	0	0	0	0	603	903	0
762	3	-33.447	61.4429	-673.559	55366.7	-40328.7	-8263.92	140.126	217.8	0	0	0	0	0	0	0	200	903	0	0	0	0	0	0	0	603	903	0
762	4	-35.1254	60.0696	-671.423	54634.3	-40145.6	-8492.8	140.208	218.629	0	0	0	0	0	0	0	200	903	0	0	0	0	0	0	0	603	903	0
762	5	-36.6513	60.2222	-669.897	53993.4	-40267.7	-8447.02	139.89	219.4	0	0	0	0	0	0	0	200	903	0	0	0	0	0	0	0	603	903	0
762	6	-36.1935	58.086	-665.014	53261	-40145.6	-8126.59	139.632	219.91	0	0	0	0	0	0	0	200	903	0	0	0	0	0	0	0	603	903	0
762	7	-35.7358	58.3911	-662.573	54085	-40084.6	-8126.59	139.502	218.371	0	0	0	0	0	0	0	200	903	0	0	0	0	0	0	0	603	903	0
762	8	-35.5832	56.5601	-657.385	52620.1	-40023.6	-7943.48	139.117	219.955	0	0	0	0	0	0	0	200	903	0	0	0	0	0	0	0	603	903	0
762	9	-34.8203	56.7127	-660.131	53077.9	-39901.5	-7943.48	139.555	219.595	0	0	0	0	0	0	0	200	903	0	0	0	0	0	0	0	603	903	0
763	0	-36.4987	55.492	-657.995	52528.6	-39779.4	-7806.15	139.544	220.169	0	0	0	0	0	0	0	200	903	0	0	0	0	0	0	0	603	903	0
763	1	-35.5832	53.5083	-653.112	52345.5	-40023.6	-7760.38	138.719	219.852	0	0	0	0	0	0	0	200	903	0	0	0	0	0	0	0	603	903	0
763	2	-34.9728	53.3557	-650.976	51796.1	-39962.5	-7760.38	138.611	220.433	0	0	0	0	0	0	0	200	903	0	0	0	0	0	0	0	603	903	0
763	3	-35.1254	53.2032	-649.755	50606	-39413.2	-7668.83	139.341	222.115	0	0	0	0	0	0	0	200	903	0	0	0	0	0	0	0	603	903	0
763	4	-34.9728	49.6936	-648.84	50880.6	-39840.5	-7439.94	138.597	221.582	0	0	0	0	0	0	0	200	903	0	0	0	0	0	0	0	603	903	0
763	5	-35.5832	51.9825	-647.619	51063.7	-39352.2	-7256.84	139.236	221.152	0	0	0	0	0	0	0	200	903	0	0	0	0	0	0	0	603	903	0
763	6	-35.7358	50.4566	-642.431	50239.8	-39352.2	-7439.94	138.745	221.797	0	0	0	0	0	0	0	200	903	0	0	0	0	0	0	0	603	903	0
763	7	-34.6677	47.71	-641.516	50880.6	-39657.3	-7348.39	138.182	220.687	0	0	0	0	0	0	0	200	903	0	0	0	0	0	0	0	603	903	0
763	8	-33.9047	48.7781	-640.905	49782	-39535.3	-6982.18	138.313	222.326	0	0	0	0	0	0	0	200	903	0	0	0	0	0	0	0	603	903	0
763	9	-34.3625	48.6255	-636.633	49324.2	-38924.9	-7165.29	138.858	222.523	0	0	0	0	0	0	0	200	903	0	0	0	0	0	0	0	603	903	0
764	0	-35.278	45.8789	-635.717	48866.5	-39169.1	-7027.96	138.386	223.132	0	0	0	0	0	0	0	200	903	0	0	0	0	0	0	0	603	903	0
764	1	-34.5151	47.2522	-630.834	49232.7	-39047	-6982.18	138.103	221.956	0	0	0	0	0	0	0	200	903	0	0	0	0	0	0	0	603	903	0
764	2	-33.5996	44.9634	-629.003	49141.1	-38741.8	-6753.3	138.408	221.875	0	0	0	0	0	0	0	200	903	0	0	0	0	0	0	0	603	903	0
764	3	-31.4633	43.8953	-627.783	48591.8	-38741.8	-6478.64	138.288	222.598	0	0	0	0	0	0	0	200	903	0	0	0	0	0	0	0	603	903	0
764	4	-32.684	44.0479	-622.595	47767.8	-38924.9	-6661.75	137.479	223.276	0	0	0	0	0	0	0	200	903	0	0	0	0	0	0	0	603	903	0
764	5	-34.2099	43.7427	-623.815	47310.1	-38375.6	-6432.86	138.482	224.16	0	0	0	0	0	0	0	200	903	0	0	0	0	0	0	0	603	903	0
764	6	-34.0573	41.3013	-618.627	46852.3	-38436.6	-6570.19	137.868	224.264	0	0	0	0	0	0	0	200	903	0	0	0	0	0	0	0	603	903	0
764	7	-32.8366	42.522	-618.017	47310.1	-38680.8	-6432.86	137.411	223.449	0	0	0	0	0	0	0	200	903	0	0	0	0	0	0	0	603	903	0
764	8	-32.2263	40.5384	-616.186	46669.2	-38253.5	-6066.65	137.919	224.261	0	0	0	0	0	0	0	200	903	0	0	0	0	0	0	0	603	903	0
764	9	-32.3788	40.2332	-608.557	46577.7	-38375.6	-6432.86	136.94	223.462	0	0	0	0	0	0	0	200	903	0	0	0	0	0	0	0	603	903	0
765	0	-33.9047	40.0806	-612.524	45662.1	-38680.8	-5975.1	136.85	225.452	0	0	0	0	0	0	0	200	903	0	0	0	0	0	0	0	603	903	0
765	1	-33.2944	39.4702	-607.031	45845.2	-37948.4	-6158.21	137.485	224.476	0	0	0	0	0	0	0	200	903	0	0	0	0	0	0	0	603	903	0
765	2	-32.3788	39.3177	-604.894	45204.3	-37887.3	-5791.99	137.365	225.269	0	0	0	0	0	0	0	200	903	0	0	0	0	0	0	0	603	903	0
765	3	-32.3788	38.097	-603.979	45387.5	-38192.5	-5837.77	136.765	224.853	0	0	0	0	0	0	0	200	903	0	0	0	0	0	0	0	603	903	0
765	4	-33.2944	37.7918	-600.317	44471.9	-37704.2	-5929.32	137.193	225.919	0	0	0	0	0	0	0	200	903	0	0	0	0	0	0	0	603	903	0
765	5	-34.0573	35.3504	-600.622	44471.9	-37582.2	-5791.99	137.428	225.957	0	0	0	0	0	0	0	200	903	0	0	0	0	0	0	0	603	903	0
765	6	-33.5996	35.8081	-595.739	43556.4	-37887.3	-5883.55	136.403	226.887	0	0	0	0	0	0	0	200	903	0	0	0	0	0	0	0	603	903	0
765	7	-32.9892	36.5711	-593.603	43281.8	-37338	-5700.44	137.099	227.086	0	0	0	0	0	0	0	200	903	0	0	0	0	0	0	0	603	903	0
765	8	-33.1418	34.5874	-592.687	43190.2	-37460.1	-5471.56	136.796	227.128	0	0	0	0	0	0	0	200	903	0	0	0	0	0	0	0	603	903	0
765	9	-32.8366	35.3504	-590.551	43190.2	-38009.4	-5700.44	135.637	226.865	0	0	0	0	0	0	0	200	903	0	0	0	0	0	0	0	603	903	0
766	0	-33.5996	34.8926	-584.448	42732.4	-37215.9	-5654.67	136.323	226.884	0	0	0	0	0	0	0	200	903	0	0	0	0	0	0	0	603	903	0
766	1	-34.3625	31.9934	-584.142	42457.8	-37460.1	-5380.01	135.872	227.316	0	0	0	0	0	0	0	200	903	0	0	0	0	0	0	0	603	903	0
766	2	-32.8366	33.2141	-582.006	41542.2	-37338	-5608.89	135.846	228.622	0	0	0	0	0	0	0	200	903	0	0	0	0	0	0	0	603	903	0
766	3	-32.684	32.6038	-580.48	41359.1	-37154.9	-5105.35	135.993	228.75	0	0	0	0	0	0	0	200	903	0	0	0	0	0	0	0	603	903	0
766	4	-34.3625	33.0616	-576.513	41176	-37277	-5288.45	135.341	228.577	0	0	0	0	0	0	0	200	903	0	0	0	0	0	0	0	603	903	0
766	5	-33.7521	31.9934	-578.039	41542.2	-37215.9	-5105.35	135.617	228.132	0	0	0	0	0	0	0	200	903	0	0	0	0	0	0	0	603	903	0
766	6	-33.7521	30.7727	-573.156	41176	-36666.6	-5288.45	136.027	228.159	0	0	0	0	0	0	0	200	903	0	0	0	0	0	0	0	603	903	0
766	7	-33.2944	30.315	-571.325	40626.7	-37277	-5334.23	134.753	228.89	0	0	0	0	0	0	0	200	903	0	0	0	0	0	0	0	603	903	0
766	8	-31.1581	30.6202	-569.799	39985.8	-36971.8	-4830.69	135.114	229.825	0	0	0	0	0	0	0	200	903	0	0	0	0	0	0	0	603	903	0
766	9	-33.5996	30.315	-568.884	39711.2	-36727.7	-5013.79	135.439	230.195	0	0	0	0	0	0	0	200	903	0	0	0	0	0	0	0	603	903	0
767	0	-33.5996	28.7891	-566.747	39619.6	-36849.7	-4876.46	134.98	230.093	0	0	0	0	0	0	0	200	903	0	0	0	0	0	0	0	603	903	0
767	1	-34.2099	29.2469	-562.475	39436.5	-36849.7	-5105.35	134.486	229.888	0	0	0	0	0	0	0	200	903	0	0	0	0	0	0	0	603	903	0
767	2	-34.0573	28.6365	-559.728	39528.1	-36544.6	-4510.25	134.71	229.38	0	0	0	0	0	0	0	200	903	0	0	0	0	0	0	0	603	903	0
767	3	-32.684	27.5684	-556.371	39161.9	-36605.6	-4922.24	134.207	229.612	0	0	0	0	0	0	0	200	903	0	0	0	0	0	0	0	603	903	0
767	4	-33.447	27.4158	-558.508	38521	-36483.5	-4830.69	134.677	231.029	0	0	0	0	0	0	0	200	903	0	0	0	0	0	0	0	603	903	0
767	5	-33.7521	27.5684	-557.592	38337.9	-36422.5	-4784.91	134.679	231.244	0	0	0	0	0	0	0	200	903	0	0	0	0	0	0	0	603	903	0
767	6	-34.0573	27.1106	-553.93	37788.6	-36727.7	-4922.24	133.696	231.781	0	0	0	0	0	0	0	200	903	0	0	0	0	0	0	0	603	903	0
767	7	-34.0573	25.8899	-548.437	37788.6	-36178.3	-4739.14	134.034	231.098	0	0	0	0	0	0	0	200	903	0	0	0	0	0	0	0	603	903	0
767	8	-32.684	26.0425	-548.742	37788.6	-36056.3	-4876.46	134.293	231.136	0	0	0	0	0	0	0	200	903	0	0	0	0	0	0	0	603	903	0
767	9	-33.1418	24.9744	-549.658	36689.9	-36727.7	-4739.14	133.181	233.249	0	0	0	0	0	0	0	200	903	0	0	0	0	0	0	0	603	903	0
768	0	-33.7521	25.127	-548.132	37056.2	-36178.3	-4556.03	133.997	232.396	0	0	0	0	0	0	0	200	903	0	0	0	0	0	0	0	603	903	0
768	1	-32.0737	23.7537	-545.995	36689.9	-36056.3	-4418.7	133.962	232.802	0	0	0	0	0	0	0	200	903	0	0	0	0	0	0	0	603	903	0
768	2	-34.3625	24.5166	-540.502	36415.3	-36056.3	-4464.48	133.291	232.627	0	0	0	0	0	0	0	200	903	0	0	0	0	0	0	0	603	903	0
768	3	-32.8366	23.2959	-542.944	36873	-35934.2	-4327.15	133.816	232.087	0	0	0	0	0	0	0	200	903	0	0	0	0	0	0	0	603	903	0
768	4	-32.8366	21.0071	-542.028	36049.1	-36117.3	-4464.48	133.366	233.492	0	0	0	0	0	0	0	200	903	0	0	0	0	0	0	0	603	903	0
768	5	-33.5996	22.3804	-541.113	35774.4	-36056.3	-4464.48	133.366	233.887	0	0	0	0	0	0	0	200	903	0	0	0	0	0	0	0	603	903	0
768	6	-33.1418	22.0752	-538.671	35225.1	-35690.1	-4372.92	133.744	234.607	0	0	0	0	0	0	0	200	903	0	0	0	0	0	0	0	603	903	0
768	7	-32.684	21.3123	-537.756	34950.4	-35751.1	-4144.04	133.518	235.007	0	0	0	0	0	0	0	200	903	0	0	0	0	0	0	0	603	903	0
768	8	-32.5314	21.6175	-536.535	35591.3	-35568	-4327.15	133.708	233.665	0	0	0	0	0	0	0	200	903	0	0	0	0	0	0	0	603	903	0
768	9	-32.8366	20.2442	-536.84	35133.5	-35690.1	-4372.92	133.518	234.555	0	0	0	0	0	0	0	200	903	0	0	0	0	0	0	0	603	903	0
769	0	-34.0573	18.2605	-535.009	34950.4	-35751.1	-4144.04	133.177	234.673	0	0	0	0	0	0	0	200	903	0	0	0	0	0	0	0	603	903	0
769	1	-32.5314	19.939	-532.263	34401.1	-35873.2	-3869.39	132.602	235.368	0	0	0	0	0	0	0	200	903	0	0	0	0	0	0	0	603	903	0
769	2	-34.5151	19.4812	-527.38	33851.8	-35690.1	-3960.94	132.326	235.811	0	0	0	0	0	0	0	200	903	0	0	0	0	0	0	0	603	903	0
769	3	-32.3788	19.3286	-530.432	33943.4	-35629	-4006.71	132.83	236.008	0	0	0	0	0	0	0	200	903	0	0	0	0	0	0	0	603	903	0
769	4	-32.5314	18.7183	-531.652	34034.9	-35873.2	-3823.61	132.525	235.983	0	0	0	0	0	0	0	200	903	0	0	0	0	0	0	0	603	903	0
769	5	-33.5996	17.9554	-530.432	33943.4	-35690.1	-3777.83	132.715	236.008	0	0	0	0	0	0	0	200	903	0	0	0	0	0	0	0	603	903	0
769	6	-31.1581	16.4295	-529.211	34126.5	-35629	-3777.83	132.675	235.514	0	0	0	0	0	0	0	200	903	0	0	0	0	0	0	0	603	903	0
769	7	-33.5996	17.4976	-526.769	32753.2	-35934.2	-3640.5	131.784	237.823	0	0	0	0	0	0	0	200	903	0	0	0	0	0	0	0	603	903	0
769	8	-32.3788	17.6502	-527.075	33027.8	-35568	-3732.06	132.518	237.337	0	0	0	0	0	0	0	200	903	0	0	0	0	0	0	0	603	903	0
769	9	-32.5314	15.514	-527.685	32753.2	-35445.9	-3548.95	132.827	237.93	0	0	0	0	0	0	0	200	903	0	0	0	0	0	0	0	603	903	0
770	0	-32.8366	16.2769	-526.159	33119.4	-35995.2	-3594.73	131.589	237.054	0	0	0	0	0	0	0	200	903	0	0	0	0	0	0	0	603	903	0
770	1	-32.9892	15.514	-524.633	33119.4	-35507	-3411.62	132.32	236.871	0	0	0	0	0	0	0	200	903	0	0	0	0	0	0	0	603	903	0
770	2	-33.2944	13.8355	-523.412	32936.3	-35690.1	-2953.86	131.813	237.074	0	0	0	0	0	0	0	200	903	0	0	0	0	0	0	0	603	903	0
770	3	-31.7685	15.2088	-523.412	32295.4	-35934.2	-3045.41	131.346	238.298	0	0	0	0	0	0	0	200	903	0	0	0	0	0	0	0	603	903	0
770	4	-32.3788	15.2088	-525.244	32295.4	-35873.2	-2999.63	131.702	238.513	0	0	0	0	0	0	0	200	903	0	0	0	0	0	0	0	603	903	0
770	5	-31.4633	14.9036	-518.53	31654.6	-35629	-3136.96	131.288	238.953	0	0	0	0	0	0	0	200	903	0	0	0	0	0	0	0	603	903	0
770	6	-32.0737	14.5984	-523.412	32478.5	-35690.1	-2999.63	131.813	237.949	0	0	0	0	0	0	0	200	903	0	0	0	0	0	0	0	603	903	0
770	7	-32.8366	13.3777	-521.276	32020.8	-36056.3	-2999.63	130.831	238.572	0	0	0	0	0	0	0	200	903	0	0	0	0	0	0	0	603	903	0
770	8	-31.4633	12.6148	-520.971	31654.6	-35995.2	-2953.86	130.907	239.239	0	0	0	0	0	0	0	200	903	0	0	0	0	0	0	0	603	903	0
770	9	-30.2426	13.0725	-522.192	31379.9	-35507	-2358.76	132.004	239.907	0	0	0	0	0	0	0	200	903	0	0	0	0	0	0	0	603	903	0
771	0	-30.5478	13.2251	-519.75	31288.3	-35751.1	-2999.63	131.215	239.801	0	0	0	0	0	0	0	200	903	0	0	0	0	0	0	0	603	903	0
771	1	-31.3107	12.3096	-521.276	31746.1	-35812.1	-2770.75	131.299	239.099	0	0	0	0	0	0	0	200	903	0	0	0	0	0	0	0	603	903	0
771	2	-31.9211	10.326	-518.53	31654.6	-35629	-2587.65	131.288	238.953	0	0	0	0	0	0	0	200	903	0	0	0	0	0	0	0	603	903	0
771	3	-30.853	10.6311	-519.14	31196.8	-35812.1	-2724.98	131.016	239.907	0	0	0	0	0	0	0	200	903	0	0	0	0	0	0	0	603	903	0
771	4	-31.1581	10.326	-518.835	30922.1	-35873.2	-2816.53	130.858	240.401	0	0	0	0	0	0	0	200	903	0	0	0	0	0	0	0	603	903	0
771	5	-30.5478	10.4786	-520.361	31013.7	-36056.3	-2770.75	130.709	240.4	0	0	0	0	0	0	0	200	903	0	0	0	0	0	0	0	603	903	0
771	6	-31.0056	8.95267	-520.056	30739	-35568	-2358.76	131.607	240.893	0	0	0	0	0	0	0	200	903	0	0	0	0	0	0	0	603	903	0
771	7	-30.3952	10.0208	-518.224	30922.1	-35690.1	-2450.32	131.13	240.331	0	0	0	0	0	0	0	200	903	0	0	0	0	0	0	0	603	903	0
771	8	-31.1581	8.95267	-515.478	31105.2	-36300.4	-2450.32	129.579	239.657	0	0	0	0	0	0	0	200	903	0	0	0	0	0	0	0	603	903	0
771	9	-29.6323	8.6475	-519.14	31013.7	-35934.2	-2267.21	130.781	240.26	0	0	0	0	0	0	0	200	903	0	0	0	0	0	0	0	603	903	0
772	0	-30.3952	8.34232	-520.666	30189.7	-36056.3	-2084.11	130.75	242.017	0	0	0	0	0	0	0	200	903	0	0	0	0	0	0	0	603	903	0
772	1	-30.5478	8.95267	-520.971	30189.7	-35751.1	-2129.88	131.376	242.051	0	0	0	0	0	0	0	200	903	0	0	0	0	0	0	0	603	903	0
772	2	-30.09	8.34232	-518.835	30647.5	-36056.3	-1992.55	130.505	240.93	0	0	0	0	0	0	0	200	903	0	0	0	0	0	0	0	603	903	0
772	3	-31.9211	8.6475	-516.088	30372.8	-35934.2	-2358.76	130.372	241.148	0	0	0	0	0	0	0	200	903	0	0	0	0	0	0	0	603	903	0
772	4	-29.6323	7.12162	-518.835	30098.2	-35812.1	-1717.9	130.976	241.989	0	0	0	0	0	0	0	200	903	0	0	0	0	0	0	0	603	903	0
772	5	-30.3952	6.96903	-520.361	29731.9	-36300.4	-2038.33	130.24	242.863	0	0	0	0	0	0	0	200	903	0	0	0	0	0	0	0	603	903	0
772	6	-30.7004	7.2742	-520.666	29915	-36422.5	-1901	130.046	242.545	0	0	0	0	0	0	0	200	903	0	0	0	0	0	0	0	603	903	0
772	7	-31.3107	5.74833	-520.056	29457.3	-36178.3	-1168.58	130.434	243.357	0	0	0	0	0	0	0	200	903	0	0	0	0	0	0	0	603	903	0
772	8	-31.9211	6.0535	-519.445	29457.3	-36178.3	-1351.69	130.352	243.291	0	0	0	0	0	0	0	200	903	0	0	0	0	0	0	0	603	903	0
772	9	-30.7004	5.29056	-520.056	29182.6	-36483.5	-1901	129.847	243.886	0	0	0	0	0	0	0	200	903	0	0	0	0	0	0	0	603	903	0
773	0	-30.7004	3.30692	-521.887	29365.7	-36605.6	-1580.57	129.859	243.732	0	0	0	0	0	0	0	200	903	0	0	0	0	0	0	0	603	903	0
773	1	-29.7849	4.68021	-521.276	28816.4	-35812.1	-1305.91	131.299	244.72	0	0	0	0	0	0	0	200	903	0	0	0	0	0	0	0	603	903	0
773	2	-29.6323	4.8328	-520.056	28999.5	-36483.5	-1489.01	129.847	244.238	0	0	0	0	0	0	0	200	903	0	0	0	0	0	0	0	603	903	0
773	3	-31.1581	4.37503	-520.056	29182.6	-36605.6	-1534.79	129.612	243.886	0	0	0	0	0	0	0	200	903	0	0	0	0	0	0	0	603	903	0
773	4	-29.6323	3.91727	-520.666	29548.8	-36056.3	-1443.24	130.75	243.248	0	0	0	0	0	0	0	200	903	0	0	0	0	0	0	0	603	903	0
773	5	-30.2426	3.30692	-522.192	28450.2	-36422.5	-1214.36	130.251	245.518	0	0	0	0	0	0	0	200	903	0	0	0	0	0	0	0	603	903	0
773	6	-30.2426	2.84916	-523.412	28175.5	-36605.6	-1443.24	130.064	246.17	0	0	0	0	0	0	0	200	903	0	0	0	0	0	0	0	603	903	0
773	7	-31.1581	3.76468	-521.581	28541.8	-36361.4	-1260.13	130.286	245.278	0	0	0	0	0	0	0	200	903	0	0	0	0	0	0	0	603	903	0
773	8	-31.4633	1.0181	-521.276	28267.1	-36544.6	-1122.8	129.894	245.773	0	0	0	0	0	0	0	200	903	0	0	0	0	0	0	0	603	903	0
773	9	-30.5478	3.30692	-522.192	28908	-36666.6	-985.474	129.783	244.641	0	0	0	0	0	0	0	200	903	0	0	0	0	0	0	0	603	903	0
774	0	-30.3952	1.62845	-524.938	28175.5	-37032.8	-985.474	129.453	246.326	0	0	0	0	0	0	0	200	903	0	0	0	0	0	0	0	603	903	0
774	1	-29.3271	0.102574	-522.192	28267.1	-36605.6	-1031.25	129.9	245.868	0	0	0	0	0	0	0	200	903	0	0	0	0	0	0	0	603	903	0
774	2	-31.4633	1.47587	-525.854	27992.4	-36361.4	-939.697	130.853	246.768	0	0	0	0	0	0	0	200	903	0	0	0	0	0	0	0	603	903	0
774	3	-31.3107	1.62845	-523.718	27351.6	-36971.8	-802.368	129.405	247.774	0	0	0	0	0	0	0	200	903	0	0	0	0	0	0	0	603	903	0
774	4	-30.7004	1.47587	-524.328	27992.4	-37277	-710.816	128.905	246.613	0	0	0	0	0	0	0	200	903	0	0	0	0	0	0	0	603	903	0
774	5	-30.5478	0.865513	-523.412	27260	-37032.8	-710.816	129.247	247.919	0	0	0	0	0	0	0	200	903	0	0	0	0	0	0	0	603	903	0
774	6	-29.6323	-0.0500139	-527.685	27809.3	-37215.9	-756.592	129.473	247.299	0	0	0	0	0	0	0	200	903	0	0	0	0	0	0	0	603	903	0
774	7	-31.1581	-0.660365	-527.685	27443.1	-37093.9	-481.934	129.704	247.993	0	0	0	0	0	0	0	200	903	0	0	0	0	0	0	0	603	903	0
774	8	-31.1581	-0.507778	-527.075	26436	-37215.9	-298.828	129.392	249.844	0	0	0	0	0	0	0	200	903	0	0	0	0	0	0	0	603	903	0
774	9	-30.7004	-1.72848	-525.854	27260	-36971.8	-115.723	129.692	248.16	0	0	0	0	0	0	0	200	903	0	0	0	0	0	0	0	603	903	0
775	0	-29.1745	-1.27072	-531.652	27626.2	-37704.2	-69.9462	129.081	248.037	0	0	0	0	0	0	0	200	903	0	0	0	0	0	0	0	603	903	0
775	1	-30.09	-2.03366	-531.957	27076.9	-37582.2	-115.723	129.351	249.099	0	0	0	0	0	0	0	200	903	0	0	0	0	0	0	0	603	903	0
775	2	-30.7004	-2.49142	-532.263	27992.4	-37032.8	-207.275	130.424	247.409	0	0	0	0	0	0	0	200	903	0	0	0	0	0	0	0	603	903	0
775	3	-31.1581	-3.25436	-529.821	26436	-37826.3	-207.275	128.606	250.104	0	0	0	0	0	0	0	200	903	0	0	0	0	0	0	0	603	903	0
775	4	-30.3952	-2.03366	-531.347	26893.8	-37704.2	-69.9462	129.04	249.386	0	0	0	0	0	0	0	200	903	0	0	0	0	0	0	0	603	903	0
775	5	-28.1064	-2.94918	-533.483	26252.9	-37399	-161.499	129.896	250.79	0	0	0	0	0	0	0	200	903	0	0	0	0	0	0	0	603	903	0
775	6	-29.0219	-3.10177	-534.094	26436	-37582.2	-24.1699	129.634	250.503	0	0	0	0	0	0	0	200	903	0	0	0	0	0	0	0	603	903	0
775	7	-30.3952	-4.32247	-535.009	26802.3	-37948.4	296.265	129.07	249.903	0	0	0	0	0	0	0	200	903	0	0	0	0	0	0	0	603	903	0
775	8	-30.5478	-4.62765	-535.62	26069.8	-38009.4	158.936	129.037	251.328	0	0	0	0	0	0	0	200	903	0	0	0	0	0	0	0	603	903	0
775	9	-29.9374	-3.86471	-535.62	26710.7	-37582.2	342.041	129.834	250.131	0	0	0	0	0	0	0	200	903	0	0	0	0	0	0	0	603	903	0
776	0	-30.2426	-5.39059	-537.451	26161.4	-37582.2	342.041	130.073	251.323	0	0	0	0	0	0	0	200	903	0	0	0	0	0	0	0	603	903	0
776	1	-30.09	-4.93283	-534.399	26344.5	-37643.2	158.936	129.56	250.703	0	0	0	0	0	0	0	200	903	0	0	0	0	0	0	0	603	903	0
776	2	-30.7004	-6.15353	-539.587	26436	-37826.3	479.37	129.898	251.007	0	0	0	0	0	0	0	200	903	0	0	0	0	0	0	0	603	903	0
776	3	-30.7004	-6.45871	-539.282	25703.6	-37887.3	525.147	129.745	252.337	0	0	0	0	0	0	0	200	903	0	0	0	0	0	0	0	603	903	0
776	4	-29.6323	-6.15353	-540.502	25886.7	-38375.6	616.7	129	252.106	0	0	0	0	0	0	0	200	903	0	0	0	0	0	0	0	603	903	0
776	5	-29.7849	-6.76388	-542.639	25520.5	-38436.6	845.581	129.167	252.97	0	0	0	0	0	0	0	200	903	0	0	0	0	0	0	0	603	903	0
776	6	-30.5478	-6.91647	-543.859	25703.6	-38253.5	754.029	129.663	252.738	0	0	0	0	0	0	0	200	903	0	0	0	0	0	0	0	603	903	0
776	7	-30.3952	-7.832	-545.385	26344.5	-38436.6	1028.69	129.524	251.696	0	0	0	0	0	0	0	200	903	0	0	0	0	0	0	0	603	903	0
776	8	-30.5478	-10.1208	-544.164	25795.2	-38741.8	799.805	128.805	252.597	0	0	0	0	0	0	0	200	903	0	0	0	0	0	0	0	603	903	0
776	9	-29.4797	-8.13717	-546.301	25337.4	-38986	1120.24	128.636	253.62	0	0	0	0	0	0	0	200	903	0	0	0	0	0	0	0	603	903	0
777	0	-29.6323	-8.44235	-549.352	25154.3	-38802.9	1166.02	129.366	254.211	0	0	0	0	0	0	0	200	903	0	0	0	0	0	0	0	603	903	0
777	1	-30.3952	-8.74752	-549.658	25154.3	-38802.9	1074.46	129.405	254.236	0	0	0	0	0	0	0	200	903	0	0	0	0	0	0	0	603	903	0
777	2	-29.9374	-9.66305	-550.573	25795.2	-39291.1	1166.02	128.636	253.148	0	0	0	0	0	0	0	200	903	0	0	0	0	0	0	0	603	903	0
777	3	-30.7004	-9.66305	-550.878	25337.4	-39413.2	1257.57	128.454	254.005	0	0	0	0	0	0	0	200	903	0	0	0	0	0	0	0	603	903	0
777	4	-29.6323	-10.1208	-551.794	24879.6	-38924.9	1349.12	129.457	254.911	0	0	0	0	0	0	0	200	903	0	0	0	0	0	0	0	603	903	0
777	5	-29.6323	-10.8838	-554.846	24605	-39596.3	1532.23	128.635	255.654	0	0	0	0	0	0	0	200	903	0	0	0	0	0	0	0	603	903	0
777	6	-31.1581	-10.5786	-556.677	24421.9	-39840.5	1532.23	128.432	256.129	0	0	0	0	0	0	0	200	903	0	0	0	0	0	0	0	603	903	0
777	7	-28.5641	-10.7312	-556.982	24788.1	-39413.2	1669.56	129.238	255.496	0	0	0	0	0	0	0	200	903	0	0	0	0	0	0	0	603	903	0
777	8	-30.7004	-11.7993	-556.066	24513.4	-39474.2	1669.56	129.012	255.916	0	0	0	0	0	0	0	200	903	0	0	0	0	0	0	0	603	903	0
777	9	-29.6323	-12.1045	-559.118	24421.9	-40145.6	1761.11	128.198	256.321	0	0	0	0	0	0	0	200	903	0	0	0	0	0	0	0	603	903	0
778	0	-29.6323	-12.5622	-560.949	24513.4	-40206.7	1715.33	128.324	256.3	0	0	0	0	0	0	0	200	903	0	0	0	0	0	0	0	603	903	0
778	1	-31.3107	-13.1726	-562.78	23872.6	-39901.5	1806.89	129.099	257.581	0	0	0	0	0	0	0	200	903	0	0	0	0	0	0	0	603	903	0
778	2	-30.3952	-13.02	-563.085	23964.1	-40206.7	1989.99	128.596	257.441	0	0	0	0	0	0	0	200	903	0	0	0	0	0	0	0	603	903	0
778	3	-29.6323	-13.9355	-564.611	23872.6	-40450.8	1944.21	128.356	257.719	0	0	0	0	0	0	0	200	903	0	0	0	0	0	0	0	603	903	0
778	4	-29.4797	-13.7829	-565.527	24055.7	-40450.8	2264.65	128.472	257.463	0	0	0	0	0	0	0	200	903	0	0	0	0	0	0	0	603	903	0
778	5	-29.4797	-13.9355	-569.189	23414.8	-40328.7	2447.75	129.147	258.863	0	0	0	0	0	0	0	200	903	0	0	0	0	0	0	0	603	903	0
778	6	-31.1581	-14.0881	-570.104	23231.7	-40939.1	2173.1	128.19	259.25	0	0	0	0	0	0	0	200	903	0	0	0	0	0	0	0	603	903	0
778	7	-30.3952	-14.2407	-570.41	23689.5	-41000.1	2356.2	128.122	258.469	0	0	0	0	0	0	0	200	903	0	0	0	0	0	0	0	603	903	0
778	8	-30.7004	-15.3088	-571.325	23231.7	-40572.9	2493.53	128.985	259.337	0	0	0	0	0	0	0	200	903	0	0	0	0	0	0	0	603	903	0
778	9	-28.1064	-15.9192	-574.682	23140.1	-40939.1	2585.08	128.762	259.734	0	0	0	0	0	0	0	200	903	0	0	0	0	0	0	0	603	903	0
779	0	-29.7849	-16.6821	-576.513	22957	-41366.3	2539.31	128.247	260.18	0	0	0	0	0	0	0	200	903	0	0	0	0	0	0	0	603	903	0
779	1	-31.0056	-16.3769	-577.123	22957	-41610.5	2722.41	127.9	260.222	0	0	0	0	0	0	0	200	903	0	0	0	0	0	0	0	603	903	0
779	2	-30.5478	-18.3606	-577.123	22407.7	-41122.2	2630.86	128.746	261.173	0	0	0	0	0	0	0	200	903	0	0	0	0	0	0	0	603	903	0
779	3	-30.7004	-16.5295	-577.734	22773.9	-41549.4	2768.19	128.082	260.581	0	0	0	0	0	0	0	200	903	0	0	0	0	0	0	0	603	903	0
779	4	-28.4116	-18.3606	-582.006	22407.7	-41976.7	2951.29	127.876	261.499	0	0	0	0	0	0	0	200	903	0	0	0	0	0	0	0	603	903	0
779	5	-29.7849	-18.6657	-583.837	22407.7	-41488.4	2813.97	128.938	261.62	0	0	0	0	0	0	0	200	903	0	0	0	0	0	0	0	603	903	0
779	6	-31.7685	-18.9709	-585.974	21950	-41915.6	2951.29	128.468	262.541	0	0	0	0	0	0	0	200	903	0	0	0	0	0	0	0	603	903	0
779	7	-30.7004	-18.6657	-584.753	21950	-42159.8	2997.07	127.902	262.463	0	0	0	0	0	0	0	200	903	0	0	0	0	0	0	0	603	903	0
779	8	-30.3952	-18.6657	-585.974	21400.6	-42281.9	2997.07	127.843	263.478	0	0	0	0	0	0	0	200	903	0	0	0	0	0	0	0	603	903	0
779	9	-30.853	-19.7339	-586.889	21766.9	-42220.8	3180.18	128.06	262.911	0	0	0	0	0	0	0	200	903	0	0	0	0	0	0	0	603	903	0
780	0	-30.3952	-20.4968	-590.551	22133.1	-42220.8	3363.28	128.506	262.521	0	0	0	0	0	0	0	200	903	0	0	0	0	0	0	0	603	903	0
780	1	-32.0737	-20.802	-591.467	21675.3	-43014.3	3409.06	127.275	263.353	0	0	0	0	0	0	0	200	903	0	0	0	0	0	0	0	603	903	0
780	2	-31.4633	-20.9546	-591.467	21034.4	-43014.3	3317.51	127.275	264.437	0	0	0	0	0	0	0	200	903	0	0	0	0	0	0	0	603	903	0
780	3	-31.4633	-21.8701	-593.298	21034.4	-42403.9	3546.39	128.528	264.547	0	0	0	0	0	0	0	200	903	0	0	0	0	0	0	0	603	903	0
780	4	-31.1581	-21.8701	-594.518	20393.6	-43258.4	3775.27	127.238	265.697	0	0	0	0	0	0	0	200	903	0	0	0	0	0	0	0	603	903	0
780	5	-30.853	-21.4123	-598.181	20942.9	-43075.3	3775.27	127.989	264.989	0	0	0	0	0	0	0	200	903	0	0	0	0	0	0	0	603	903	0
780	6	-32.3788	-22.9382	-599.706	21309.1	-43136.4	3821.05	128.071	264.467	0	0	0	0	0	0	0	200	903	0	0	0	0	0	0	0	603	903	0
780	7	-31.6159	-23.396	-599.096	20576.7	-43319.5	3775.27	127.692	265.654	0	0	0	0	0	0	0	200	903	0	0	0	0	0	0	0	603	903	0
780	8	-31.6159	-23.2434	-600.317	20027.4	-43746.7	3912.6	127.127	266.639	0	0	0	0	0	0	0	200	903	0	0	0	0	0	0	0	603	903	0
780	9	-31.7685	-23.7011	-602.148	19752.7	-43685.7	3866.82	127.45	267.196	0	0	0	0	0	0	0	200	903	0	0	0	0	0	0	0	603	903	0
781	0	-31.3107	-24.1589	-605.505	19844.2	-43075.3	3821.05	128.86	267.227	0	0	0	0	0	0	0	200	903	0	0	0	0	0	0	0	603	903	0
781	1	-32.5314	-23.8537	-607.031	19752.7	-43929.8	4141.48	127.632	267.46	0	0	0	0	0	0	0	200	903	0	0	0	0	0	0	0	603	903	0
781	2	-32.3788	-24.7693	-606.115	20118.9	-43868.8	4187.26	127.623	266.807	0	0	0	0	0	0	0	200	903	0	0	0	0	0	0	0	603	903	0
781	3	-32.0737	-25.0744	-608.557	19294.9	-43929.8	4233.03	127.813	268.294	0	0	0	0	0	0	0	200	903	0	0	0	0	0	0	0	603	903	0
781	4	-31.1581	-26.1425	-612.219	18562.5	-44112.9	4233.03	127.946	269.68	0	0	0	0	0	0	0	200	903	0	0	0	0	0	0	0	603	903	0
781	5	-31.7685	-25.6848	-612.524	18745.6	-44296	4324.58	127.683	269.396	0	0	0	0	0	0	0	200	903	0	0	0	0	0	0	0	603	903	0
781	6	-33.1418	-25.6848	-613.134	18287.8	-44601.2	4370.36	127.257	270.173	0	0	0	0	0	0	0	200	903	0	0	0	0	0	0	0	603	903	0
781	7	-33.2944	-25.6848	-613.134	18470.9	-44662.2	4370.36	127.157	269.875	0	0	0	0	0	0	0	200	903	0	0	0	0	0	0	0	603	903	0
781	8	-32.8366	-27.0581	-615.576	18470.9	-44601.2	4690.8	127.546	269.994	0	0	0	0	0	0	0	200	903	0	0	0	0	0	0	0	603	903	0
781	9	-32.5314	-27.2107	-614.66	18013.2	-44845.3	4461.91	127.04	270.694	0	0	0	0	0	0	0	200	903	0	0	0	0	0	0	0	603	903	0
782	0	-32.3788	-27.821	-618.322	17372.3	-44479.1	4690.8	128.065	271.904	0	0	0	0	0	0	0	200	903	0	0	0	0	0	0	0	603	903	0
782	1	-33.5996	-27.3632	-620.153	17463.9	-44601.2	5011.23	128.08	271.839	0	0	0	0	0	0	0	200	903	0	0	0	0	0	0	0	603	903	0
782	2	-33.9047	-27.6684	-618.932	16914.6	-45150.5	4873.9	127.051	272.671	0	0	0	0	0	0	0	200	903	0	0	0	0	0	0	0	603	903	0
782	3	-32.5314	-27.5158	-619.848	16914.6	-45089.5	5011.23	127.257	272.712	0	0	0	0	0	0	0	200	903	0	0	0	0	0	0	0	603	903	0
782	4	-32.9892	-29.0417	-623.815	17006.1	-45150.5	5194.34	127.622	272.739	0	0	0	0	0	0	0	200	903	0	0	0	0	0	0	0	603	903	0
782	5	-32.8366	-28.584	-625.036	16731.4	-45394.7	4965.45	127.373	273.231	0	0	0	0	0	0	0	200	903	0	0	0	0	0	0	0	603	903	0
782	6	-33.447	-29.8047	-625.341	15999	-45699.8	5148.56	126.92	274.416	0	0	0	0	0	0	0	200	903	0	0	0	0	0	0	0	603	903	0
782	7	-34.3625	-29.6521	-625.646	15724.4	-45516.7	5148.56	127.248	274.867	0	0	0	0	0	0	0	200	903	0	0	0	0	0	0	0	603	903	0
782	8	-32.9892	-29.0417	-627.783	15449.7	-45211.5	5377.44	127.982	275.39	0	0	0	0	0	0	0	200	903	0	0	0	0	0	0	0	603	903	0
782	9	-33.7521	-29.6521	-629.003	15541.3	-45882.9	5331.67	127.055	275.292	0	0	0	0	0	0	0	200	903	0	0	0	0	0	0	0	603	903	0
783	0	-34.6677	-30.415	-629.614	15266.6	-45944	5285.89	127.028	275.752	0	0	0	0	0	0	0	200	903	0	0	0	0	0	0	0	603	903	0
783	1	-34.3625	-31.4831	-631.75	14717.3	-45882.9	5469	127.372	276.704	0	0	0	0	0	0	0	200	903	0	0	0	0	0	0	0	603	903	0
783	2	-34.3625	-31.4831	-629.919	14808.8	-46127.1	5331.67	126.773	276.491	0	0	0	0	0	0	0	200	903	0	0	0	0	0	0	0	603	903	0
783	3	-33.2944	-31.9409	-633.886	14442.6	-46310.2	5606.33	126.942	277.216	0	0	0	0	0	0	0	200	903	0	0	0	0	0	0	0	603	903	0
783	4	-33.7521	-31.7883	-635.412	14076.4	-45760.9	5514.77	127.982	277.847	0	0	0	0	0	0	0	200	903	0	0	0	0	0	0	0	603	903	0
783	5	-32.5314	-31.9409	-635.412	13710.2	-46066	5606.33	127.502	278.423	0	0	0	0	0	0	0	200	903	0	0	0	0	0	0	0	603	903	0
783	6	-34.6677	-32.2461	-636.938	14168	-46493.3	5743.65	127.005	277.756	0	0	0	0	0	0	0	200	903	0	0	0	0	0	0	0	603	903	0
783	7	-35.5832	-33.6194	-637.243	13527.1	-46676.4	5743.65	126.753	278.772	0	0	0	0	0	0	0	200	903	0	0	0	0	0	0	0	603	903	0
783	8	-34.0573	-33.3142	-639.99	13801.8	-46676.4	5789.43	127.067	278.434	0	0	0	0	0	0	0	200	903	0	0	0	0	0	0	0	603	903	0
783	9	-34.6677	-33.9245	-641.821	12611.6	-46920.5	5606.33	126.895	280.35	0	0	0	0	0	0	0	200	903	0	0	0	0	0	0	0	603	903	0
784	0	-34.6677	-33.3142	-642.126	12336.9	-47042.6	5835.21	126.739	280.787	0	0	0	0	0	0	0	200	903	0	0	0	0	0	0	0	603	903	0
784	1	-35.5832	-33.6194	-641.21	12428.5	-46554.3	5880.98	127.396	280.617	0	0	0	0	0	0	0	200	903	0	0	0	0	0	0	0	603	903	0
784	2	-35.8884	-34.2297	-644.567	12153.8	-46981.6	5835.21	127.111	281.144	0	0	0	0	0	0	0	200	903	0	0	0	0	0	0	0	603	903	0
784	3	-34.9728	-34.5349	-644.567	12062.3	-47530.9	6109.87	126.259	281.286	0	0	0	0	0	0	0	200	903	0	0	0	0	0	0	0	603	903	0
784	4	-35.1254	-35.4504	-646.703	11787.6	-47408.8	6018.31	126.692	281.773	0	0	0	0	0	0	0	200	903	0	0	0	0	0	0	0	603	903	0
784	5	-35.278	-35.4504	-648.84	10689	-47469.8	6109.87	126.839	283.526	0	0	0	0	0	0	0	200	903	0	0	0	0	0	0	0	603	903	0
784	6	-36.4987	-34.8401	-649.145	10689	-47469.8	6109.87	126.873	283.534	0	0	0	0	0	0	0	200	903	0	0	0	0	0	0	0	603	903	0
784	7	-37.2617	-35.4504	-650.06	10048.1	-47836.1	6338.75	126.413	284.543	0	0	0	0	0	0	0	200	903	0	0	0	0	0	0	0	603	903	0
784	8	-35.278	-35.7556	-650.366	10689	-47469.8	6247.19	127.011	283.565	0	0	0	0	0	0	0	200	903	0	0	0	0	0	0	0	603	903	0
784	9	-36.1935	-36.5185	-653.417	10139.7	-47469.8	6338.75	127.351	284.482	0	0	0	0	0	0	0	200	903	0	0	0	0	0	0	0	603	903	0
785	0	-36.9565	-36.2133	-654.943	8766.36	-48141.2	6155.64	126.496	286.615	0	0	0	0	0	0	0	200	903	0	0	0	0	0	0	0	603	903	0
785	1	-35.4306	-36.6711	-653.112	9224.13	-48080.2	6201.42	126.383	285.877	0	0	0	0	0	0	0	200	903	0	0	0	0	0	0	0	603	903	0
785	2	-37.7194	-36.0608	-654.943	8583.25	-48202.3	6338.75	126.402	286.895	0	0	0	0	0	0	0	200	903	0	0	0	0	0	0	0	603	903	0
785	3	-36.3461	-36.0608	-656.164	8674.81	-48019.2	6109.87	126.818	286.78	0	0	0	0	0	0	0	200	903	0	0	0	0	0	0	0	603	903	0
785	4	-37.1091	-36.9763	-659.216	8400.15	-48080.2	6430.3	127.065	287.257	0	0	0	0	0	0	0	200	903	0	0	0	0	0	0	0	603	903	0
785	5	-38.9401	-37.1289	-660.131	7667.73	-48324.3	6430.3	126.796	288.385	0	0	0	0	0	0	0	200	903	0	0	0	0	0	0	0	603	903	0
[truncated: 2,984 more rows]
