# Supplementary material for: The Effects of an Extemporaneous Speech Dual-task on Older Adult Gait Control
Source: Research Square preprint supplement (doi:10.21203/rs.3.rs-7674245/v1), 2025-11-18
Supplement: Supplementary file 47 [file DT3Walk11.xlsx]

## Sheet: Sheet1
Trajectories
		03:LFHD			03:RFHD			03:LBHD			03:RBHD			03:C7			03:T10			03:CLAV			03:STRN			03:RBAK			03:LSHO			03:LUPA			03:LELB			03:LFRM			03:LWRA			03:LWRB			03:LFIN
Frame	Sub Frame	X	Y	Z	X	Y	Z	X	Y	Z	X	Y	Z	X	Y	Z	X	Y	Z	X	Y	Z	X	Y	Z	X	Y	Z	X	Y	Z	X	Y	Z	X	Y	Z	X	Y	Z	X	Y	Z	X	Y	Z	X	Y	Z
		mm	mm	mm	mm	mm	mm	mm	mm	mm	mm	mm	mm	mm	mm	mm	mm	mm	mm	mm	mm	mm	mm	mm	mm	mm	mm	mm	mm	mm	mm	mm	mm	mm	mm	mm	mm	mm	mm	mm	mm	mm	mm	mm	mm	mm	mm	mm	mm
362	0	284.459	2591.91	1645.63	180.642	2590.95	1643.63	303.254	2748.53	1665.12	166.82	2758.25	1665.97	215.52	2821.82	1518.21	214.081	2935.7	1300.2	244.586	2684.57	1421.76	250.615	2665.71	1235.58	157.535	2925.89	1373.26	413.602	2835.63	1476.95	474.369	2899.77	1294.39	494.728	2939.26	1181.05	518.853	2902.26	1007.92	482.638	2872.66	913.07	535.28	2930.53	908.159	540.06	2889.39	810.698
363	0	283.246	2581.07	1644.01	179.403	2580.24	1641.84	302.188	2737.67	1663.8	165.702	2747.55	1664.44	214.735	2811.39	1516.78	213.802	2925.47	1298.64	243.823	2674.29	1420.1	249.924	2655.81	1233.89	157.213	2915.85	1371.59	412.713	2825.26	1475.93	473.154	2891.74	1294.83	493.126	2932.88	1182.09	518.054	2899.33	1008.5	482.314	2871.34	912.989	534.491	2929.67	909.286	539.68	2890.32	810.913
364	0	282.18	2570.14	1642.38	178.311	2569.45	1640.06	301.283	2726.72	1662.42	164.751	2736.78	1662.87	214.109	2800.83	1515.3	213.614	2915.09	1297.05	243.176	2663.87	1418.39	249.295	2645.74	1232.16	157.006	2905.66	1369.92	411.976	2814.74	1474.8	472.066	2883.42	1295.08	491.638	2926.16	1182.91	517.342	2895.98	1008.92	482.048	2869.61	912.789	533.78	2928.35	910.296	539.33	2890.85	811.061
365	0	281.26	2559.13	1640.74	177.368	2558.59	1638.28	300.539	2715.69	1660.97	163.969	2725.94	1661.24	213.642	2790.14	1513.78	213.515	2904.55	1295.43	242.645	2653.3	1416.63	248.728	2635.5	1230.39	156.914	2895.32	1368.24	411.392	2804.07	1473.55	471.106	2874.82	1295.13	490.264	2919.09	1183.51	516.716	2892.21	1009.21	481.839	2867.46	912.473	533.149	2926.57	911.19	539.01	2890.97	811.141
366	0	280.487	2548.04	1639.09	176.573	2547.65	1636.49	299.958	2704.58	1659.47	163.354	2715.02	1659.57	213.334	2779.32	1512.22	213.507	2893.85	1293.78	242.229	2642.6	1414.84	248.222	2625.09	1228.57	156.937	2884.82	1366.56	410.959	2793.23	1472.19	470.273	2865.95	1295	489.005	2911.68	1183.9	516.177	2888.02	1009.35	481.688	2864.91	912.038	532.599	2924.34	911.967	538.721	2890.68	811.152
367	0	279.862	2536.86	1637.44	175.928	2536.63	1634.71	299.54	2693.39	1657.91	162.907	2704.04	1657.85	213.185	2768.37	1510.61	213.588	2883.01	1292.1	241.929	2631.75	1413.01	247.779	2614.52	1226.71	157.074	2874.17	1364.87	410.679	2782.24	1470.72	469.569	2856.79	1294.67	487.861	2903.92	1184.07	515.724	2883.42	1009.34	481.594	2861.94	911.487	532.128	2921.65	912.625	538.463	2889.98	811.093
368	0	279.387	2525.6	1635.77	175.434	2525.53	1632.94	299.285	2682.11	1656.29	162.63	2692.97	1656.09	213.195	2757.28	1508.98	213.759	2872	1290.4	241.745	2620.75	1411.15	247.399	2603.77	1224.82	157.325	2863.35	1363.19	410.551	2771.09	1469.13	468.992	2847.35	1294.15	486.835	2895.82	1184.03	515.359	2878.38	1009.19	481.559	2858.56	910.818	531.738	2918.5	913.164	538.239	2888.85	810.963
369	0	279.063	2514.25	1634.11	175.094	2514.35	1631.17	299.196	2670.74	1654.62	162.524	2681.83	1654.29	213.363	2746.06	1507.3	214.019	2860.84	1288.68	241.677	2609.62	1409.25	247.082	2592.86	1222.89	157.688	2852.39	1361.5	410.577	2759.78	1467.44	468.545	2837.63	1293.45	485.929	2887.37	1183.78	515.082	2872.93	1008.89	481.581	2854.75	910.032	531.43	2914.87	913.581	538.051	2887.29	810.76
370	0	278.893	2502.81	1632.44	174.909	2503.08	1629.43	299.274	2659.29	1652.9	162.59	2670.61	1652.46	213.688	2734.7	1505.61	214.366	2849.54	1286.95	241.725	2598.34	1407.33	246.83	2581.78	1220.93	158.161	2841.27	1359.83	410.754	2748.32	1465.64	468.227	2827.64	1292.55	485.145	2878.57	1183.32	514.894	2867.03	1008.45	481.663	2850.5	909.13	531.206	2910.77	913.873	537.901	2885.27	810.479
371	0	278.88	2491.27	1630.78	174.884	2491.73	1627.7	299.521	2647.74	1651.15	162.83	2659.3	1650.61	214.169	2723.21	1503.89	214.801	2838.08	1285.21	241.888	2586.93	1405.39	246.643	2570.53	1218.96	158.744	2829.99	1358.18	411.084	2736.71	1463.75	468.039	2817.37	1291.48	484.487	2869.41	1182.66	514.796	2860.7	1007.86	481.804	2845.81	908.113	531.067	2906.19	914.036	537.794	2882.79	810.117
372	0	279.025	2479.64	1629.14	175.019	2480.28	1626	299.938	2636.1	1649.37	163.244	2647.9	1648.76	214.803	2711.59	1502.17	215.321	2826.47	1283.47	242.166	2575.37	1403.45	246.523	2559.11	1216.98	159.432	2818.57	1356.55	411.564	2724.95	1461.78	467.982	2806.82	1290.24	483.959	2859.91	1181.8	514.789	2853.93	1007.13	482.006	2840.66	906.983	531.015	2901.1	914.067	537.734	2879.82	809.67
373	0	279.331	2467.91	1627.52	175.317	2468.74	1624.35	300.526	2624.36	1647.56	163.832	2636.41	1646.91	215.587	2699.83	1500.46	215.924	2814.72	1281.76	242.556	2563.68	1401.51	246.47	2547.53	1215	160.223	2807	1354.95	412.191	2713.04	1459.73	468.056	2796	1288.83	483.565	2850.05	1180.76	514.872	2846.69	1006.25	482.268	2835.03	905.741	531.053	2895.5	913.962	537.724	2876.32	809.132
374	0	279.796	2456.07	1625.93	175.778	2457.09	1622.75	301.284	2612.52	1645.76	164.592	2624.81	1645.09	216.516	2687.95	1498.77	216.609	2802.84	1280.07	243.056	2551.85	1399.59	246.484	2535.8	1213.05	161.114	2795.29	1353.41	412.961	2700.98	1457.63	468.261	2784.91	1287.27	483.309	2839.84	1179.54	515.046	2838.99	1005.24	482.591	2828.89	904.393	531.182	2889.37	913.718	537.77	2872.26	808.499
375	0	280.421	2444.12	1624.38	176.4	2445.34	1621.21	302.209	2600.57	1643.97	165.522	2613.11	1643.31	217.582	2675.95	1497.12	217.372	2790.83	1278.43	243.659	2539.9	1397.72	246.564	2523.91	1211.14	162.099	2783.44	1351.94	413.868	2688.79	1455.48	468.596	2773.55	1285.57	483.193	2829.26	1178.15	515.31	2830.8	1004.1	482.975	2822.24	902.942	531.404	2882.69	913.332	537.874	2867.61	807.766
376	0	281.202	2432.07	1622.88	177.18	2433.48	1619.75	303.296	2588.51	1642.21	166.616	2601.3	1641.6	218.777	2663.82	1495.52	218.209	2778.7	1276.85	244.361	2527.82	1395.9	246.711	2511.88	1209.29	163.173	2771.48	1350.54	414.905	2676.48	1453.33	469.06	2761.92	1283.75	483.219	2818.33	1176.62	515.662	2822.12	1002.83	483.419	2815.03	901.396	531.721	2875.42	912.803	538.039	2862.33	806.929
377	0	282.132	2419.9	1621.43	178.111	2421.51	1618.38	304.537	2576.34	1640.5	167.866	2589.38	1639.98	220.09	2651.59	1494.01	219.117	2766.45	1275.36	245.153	2515.64	1394.16	246.92	2499.71	1207.52	164.33	2759.4	1349.25	416.062	2664.03	1451.18	469.65	2750.03	1281.83	483.389	2807.04	1174.95	516.101	2812.93	1001.44	483.921	2807.25	899.764	532.134	2867.56	912.128	538.267	2856.38	805.984
378	0	283.204	2407.63	1620.06	179.185	2409.43	1617.11	305.921	2564.06	1638.86	169.26	2577.35	1638.47	221.509	2639.26	1492.59	220.089	2754.12	1273.96	246.025	2503.36	1392.52	247.19	2487.42	1205.86	165.562	2747.22	1348.07	417.326	2651.48	1449.07	470.364	2737.87	1279.83	483.701	2795.4	1173.18	516.623	2803.21	999.948	484.479	2798.87	898.055	532.643	2859.07	911.311	538.561	2849.72	804.93
379	0	284.405	2395.25	1618.77	180.387	2397.24	1615.95	307.435	2551.67	1637.31	170.785	2565.21	1637.1	223.019	2626.85	1491.3	221.122	2741.7	1272.69	246.964	2490.99	1390.99	247.514	2475.02	1204.32	166.862	2734.97	1347.01	418.685	2638.83	1447.03	471.195	2725.45	1277.78	484.154	2783.39	1171.32	517.224	2792.94	998.36	485.089	2789.86	896.283	533.249	2849.93	910.352	538.921	2842.29	803.765
380	0	285.719	2382.77	1617.57	181.704	2384.95	1614.92	309.061	2539.17	1635.88	172.422	2552.97	1635.89	224.603	2614.37	1490.14	222.207	2729.21	1271.56	247.957	2478.56	1389.61	247.888	2462.53	1202.94	168.22	2722.64	1346.11	420.123	2626.08	1445.08	472.138	2712.77	1275.7	484.746	2771.04	1169.39	517.898	2782.12	996.693	485.746	2780.2	894.462	533.95	2840.11	909.256	539.345	2834.07	802.49
381	0	287.13	2370.21	1616.48	183.115	2372.57	1614.03	310.779	2526.59	1634.58	174.152	2540.63	1634.87	226.242	2601.84	1489.14	223.339	2716.68	1270.58	248.987	2466.07	1388.4	248.304	2449.96	1201.72	169.625	2710.27	1345.36	421.622	2613.26	1443.25	473.185	2699.85	1273.63	485.471	2758.34	1167.43	518.639	2770.73	994.963	486.445	2769.86	892.608	534.742	2829.58	908.03	539.832	2824.99	801.107
382	0	288.615	2357.57	1615.5	184.599	2360.12	1613.29	312.566	2513.93	1633.44	175.951	2528.21	1634.04	227.916	2589.28	1488.32	224.508	2704.11	1269.77	250.037	2453.55	1387.36	248.755	2437.33	1200.7	171.066	2697.88	1344.78	423.163	2600.39	1441.59	474.327	2686.69	1271.58	486.325	2745.3	1165.45	519.439	2758.76	993.189	487.177	2758.81	890.739	535.622	2818.33	906.68	540.378	2815.02	799.62
383	0	290.151	2344.89	1614.65	186.133	2347.6	1612.71	314.395	2501.22	1632.48	177.793	2515.73	1633.43	229.604	2576.71	1487.68	225.707	2691.54	1269.14	251.09	2441.02	1386.53	249.233	2424.67	1199.89	172.531	2685.48	1344.38	424.728	2587.47	1440.11	475.553	2673.3	1269.59	487.3	2731.93	1163.49	520.292	2746.19	991.391	487.935	2747.04	888.875	536.585	2806.33	905.217	540.979	2804.13	798.036
384	0	291.713	2332.18	1613.94	187.689	2335.05	1612.3	316.239	2488.46	1631.71	179.651	2503.21	1633.06	231.284	2564.16	1487.25	226.926	2678.97	1268.7	252.129	2428.5	1385.91	249.729	2412	1199.3	174.009	2673.1	1344.16	426.295	2574.53	1438.84	476.852	2659.7	1267.69	488.389	2718.24	1161.57	521.187	2733.02	989.59	488.708	2734.53	887.036	537.623	2793.56	903.652	541.63	2792.26	796.364
385	0	293.272	2319.46	1613.39	189.241	2322.48	1612.07	318.069	2475.7	1631.14	181.494	2490.66	1632.92	232.933	2551.65	1487.02	228.155	2666.42	1268.47	253.134	2416.02	1385.51	250.235	2399.34	1198.94	175.485	2660.76	1344.14	427.846	2561.6	1437.81	478.212	2645.89	1265.9	489.583	2704.25	1159.72	522.115	2719.25	987.809	489.485	2721.26	885.245	538.727	2780	902.002	542.322	2779.39	794.613
386	0	294.802	2306.77	1613	190.76	2309.93	1612.02	319.855	2462.95	1630.8	183.294	2478.12	1633.03	234.531	2539.21	1487.01	229.384	2653.93	1268.44	254.091	2403.59	1385.35	250.743	2386.72	1198.83	176.948	2648.48	1344.31	429.359	2548.68	1437.04	479.619	2631.91	1264.26	490.873	2689.97	1157.97	523.067	2704.88	986.07	490.255	2707.23	883.526	539.888	2765.65	900.281	543.049	2765.49	792.801
387	0	296.274	2294.12	1612.8	192.22	2297.41	1612.16	321.567	2450.25	1630.69	185.02	2465.62	1633.39	236.058	2526.85	1487.22	230.603	2641.49	1268.61	254.984	2391.23	1385.43	251.245	2374.17	1198.97	178.386	2636.28	1344.67	430.818	2535.8	1436.55	481.059	2617.76	1262.78	492.25	2675.43	1156.33	524.031	2689.91	984.398	491.005	2692.43	881.901	541.093	2750.5	898.511	543.801	2750.53	790.945
388	0	297.661	2281.56	1612.79	193.593	2284.96	1612.5	323.179	2437.62	1630.81	186.645	2453.18	1633.99	237.494	2514.6	1487.65	231.803	2629.13	1269	255.799	2378.98	1385.76	251.736	2361.71	1199.35	179.786	2624.19	1345.22	432.205	2522.99	1436.35	482.519	2603.48	1261.48	493.703	2660.64	1154.83	524.997	2674.36	982.816	491.724	2676.86	880.398	542.328	2734.56	896.711	544.568	2734.51	789.069
389	0	298.938	2269.1	1612.98	194.854	2272.62	1613.03	324.663	2425.1	1631.19	188.142	2440.83	1634.83	238.824	2502.48	1488.3	232.973	2616.87	1269.58	256.526	2366.84	1386.33	252.207	2349.36	1199.97	181.14	2612.21	1345.95	433.505	2510.26	1436.45	483.985	2589.08	1260.4	495.221	2645.64	1153.49	525.956	2658.23	981.348	492.398	2660.54	879.04	543.578	2717.82	894.907	545.339	2717.4	787.201
390	0	300.084	2256.77	1613.39	195.982	2260.39	1613.76	325.996	2412.7	1631.81	189.489	2428.59	1635.9	240.035	2490.5	1489.15	234.105	2604.71	1270.37	257.156	2354.83	1387.13	252.653	2337.14	1200.84	182.436	2600.36	1346.86	434.706	2497.63	1436.85	485.443	2574.61	1259.54	496.794	2630.45	1152.32	526.895	2641.55	980.018	493.016	2643.47	877.855	544.826	2700.3	893.125	546.103	2699.21	785.375
391	0	301.077	2244.6	1614.01	196.956	2248.31	1614.69	327.16	2400.46	1632.67	190.667	2416.5	1637.18	241.117	2478.68	1490.21	235.192	2592.66	1271.33	257.684	2342.96	1388.17	253.068	2325.06	1201.93	183.668	2588.66	1347.93	435.798	2485.12	1437.55	486.881	2560.07	1258.91	498.41	2615.09	1151.35	527.805	2624.34	978.851	493.567	2625.67	876.869	546.055	2682.03	891.392	546.847	2679.95	783.627
392	0	301.903	2232.61	1614.86	197.762	2236.4	1615.81	328.139	2388.39	1633.78	191.661	2404.58	1638.66	242.064	2467.03	1491.46	236.227	2580.74	1272.48	258.104	2331.25	1389.43	253.447	2313.14	1203.25	184.827	2577.1	1349.16	436.773	2472.75	1438.55	488.287	2545.52	1258.53	500.058	2599.6	1150.57	528.677	2606.64	977.868	494.039	2607.17	876.107	547.243	2663.03	889.738	547.557	2659.64	782.002
393	0	302.55	2220.81	1615.94	198.388	2224.68	1617.11	328.925	2376.52	1635.12	192.462	2392.84	1640.33	242.873	2455.56	1492.88	237.207	2568.95	1273.78	258.417	2319.7	1390.9	253.785	2301.38	1204.78	185.909	2565.7	1350.52	437.628	2460.52	1439.82	489.65	2530.96	1258.39	501.726	2584.01	1150	529.502	2588.46	977.09	494.425	2588	875.596	548.372	2643.32	888.194	548.218	2638.31	780.545
394	0	303.012	2209.21	1617.24	198.828	2213.16	1618.6	329.513	2364.85	1636.69	193.065	2381.3	1642.17	243.543	2444.26	1494.47	238.125	2557.29	1275.22	258.623	2308.3	1392.57	254.077	2289.79	1206.5	186.909	2554.45	1352	438.36	2448.45	1441.37	490.96	2516.44	1258.51	503.403	2568.34	1149.64	530.271	2569.85	976.538	494.716	2568.18	875.36	549.423	2622.95	886.791	548.817	2615.99	779.305
395	0	303.287	2197.82	1618.77	199.08	2201.85	1620.25	329.903	2353.39	1638.47	193.472	2369.96	1644.14	244.079	2433.14	1496.2	238.979	2545.77	1276.8	258.726	2297.07	1394.42	254.322	2278.35	1208.4	187.824	2543.34	1353.59	438.971	2436.53	1443.15	492.211	2501.97	1258.88	505.079	2552.62	1149.5	530.977	2550.85	976.227	494.909	2547.76	875.423	550.375	2601.97	885.558	549.338	2592.74	778.332
396	0	303.378	2186.64	1620.5	199.148	2190.75	1622.07	330.103	2342.14	1640.44	193.69	2358.83	1646.24	244.486	2422.2	1498.06	239.766	2534.38	1278.48	258.732	2285.99	1396.43	254.518	2267.06	1210.45	188.653	2532.38	1355.27	439.464	2424.78	1445.16	493.395	2487.58	1259.48	506.743	2536.87	1149.56	531.613	2531.49	976.172	494.998	2526.78	875.805	551.212	2580.41	884.523	549.764	2568.62	777.675
397	0	303.293	2175.66	1622.43	199.039	2179.86	1624.02	330.123	2331.09	1642.57	193.73	2347.92	1648.44	244.772	2411.42	1500.02	240.483	2523.11	1280.25	258.649	2275.06	1398.57	254.664	2255.92	1212.65	189.395	2521.55	1357.01	439.843	2413.18	1447.35	494.508	2473.29	1260.3	508.384	2521.12	1149.81	532.176	2511.81	976.384	494.981	2505.28	876.525	551.915	2558.33	883.714	550.082	2543.68	777.378
398	0	303.044	2164.88	1624.54	198.766	2169.17	1626.11	329.979	2320.26	1644.85	193.608	2337.22	1650.71	244.947	2400.8	1502.06	241.129	2511.97	1282.08	258.485	2264.27	1400.83	254.764	2244.9	1214.95	190.05	2510.83	1358.8	440.116	2401.74	1449.7	495.546	2459.11	1261.33	509.994	2505.38	1150.25	532.659	2491.87	976.868	494.857	2483.32	877.595	552.471	2535.79	883.152	550.274	2518.02	777.482
399	0	302.645	2154.29	1626.8	198.346	2158.68	1628.3	329.69	2309.61	1647.24	193.342	2326.71	1653.02	245.022	2390.31	1504.16	241.7	2500.94	1283.96	258.252	2253.6	1403.18	254.818	2234	1217.34	190.619	2500.23	1360.63	440.291	2390.44	1452.17	496.508	2445.06	1262.54	511.562	2489.68	1150.85	533.061	2471.69	977.627	494.627	2460.95	879.026	552.87	2512.83	882.855	550.329	2491.72	778.019
400	0	302.117	2143.87	1629.19	197.796	2148.37	1630.57	329.278	2299.14	1649.7	192.956	2316.39	1655.35	245.009	2379.95	1506.3	242.194	2490.01	1285.86	257.959	2243.03	1405.58	254.833	2223.21	1219.78	191.103	2489.71	1362.46	440.376	2379.28	1454.72	497.394	2431.13	1263.9	513.08	2474.02	1151.59	533.379	2451.32	978.656	494.292	2438.21	880.82	553.1	2489.51	882.838	550.231	2464.86	779.014
401	0	301.48	2133.6	1631.67	197.139	2138.22	1632.9	328.765	2288.82	1652.2	192.471	2306.23	1657.66	244.921	2369.69	1508.43	242.609	2479.18	1287.76	257.62	2232.56	1408.01	254.812	2212.5	1222.24	191.505	2479.27	1364.28	440.382	2368.24	1457.32	498.203	2417.35	1265.38	514.541	2458.41	1152.45	533.612	2430.8	979.95	493.854	2415.18	882.976	553.159	2465.89	883.108	549.971	2437.53	780.481
402	0	300.756	2123.46	1634.21	196.398	2128.21	1635.26	328.176	2278.65	1654.71	191.911	2296.22	1659.93	244.768	2359.52	1510.55	242.942	2468.43	1289.63	257.245	2222.17	1410.43	254.762	2201.87	1224.7	191.825	2468.9	1366.07	440.317	2357.32	1459.91	498.938	2403.69	1266.94	515.935	2442.86	1153.39	533.759	2410.17	981.494	493.318	2391.89	885.487	553.041	2442.02	883.669	549.539	2409.83	782.425
403	0	299.969	2113.44	1636.77	195.595	2118.32	1637.61	327.534	2268.59	1657.19	191.3	2286.34	1662.13	244.562	2349.41	1512.62	243.193	2457.75	1291.44	256.845	2211.84	1412.8	254.688	2191.3	1227.11	192.067	2458.58	1367.82	440.19	2346.51	1462.48	499.599	2390.17	1268.55	517.256	2427.37	1154.38	533.82	2389.45	983.274	492.686	2368.41	888.34	552.75	2417.95	884.518	548.93	2381.86	784.841
404	0	299.142	2103.5	1639.31	194.755	2108.53	1639.94	326.862	2258.63	1659.59	190.66	2276.57	1664.24	244.312	2339.36	1514.61	243.359	2447.12	1293.19	256.43	2201.56	1415.11	254.596	2180.79	1229.44	192.231	2448.29	1369.49	440.009	2335.78	1464.96	500.19	2376.76	1270.15	518.495	2411.94	1155.39	533.795	2368.7	985.269	491.964	2344.79	891.516	552.286	2393.74	885.65	548.141	2353.7	787.716
405	0	298.297	2093.62	1641.79	193.898	2098.8	1642.19	326.179	2248.74	1661.88	190.01	2266.86	1666.21	244.028	2329.33	1516.5	243.439	2436.54	1294.84	256.008	2191.31	1417.31	254.49	2170.31	1231.67	192.319	2438.03	1371.08	439.783	2325.14	1467.34	500.71	2363.47	1271.72	519.645	2396.58	1156.38	533.685	2347.92	987.457	491.157	2321.09	894.994	551.657	2369.44	887.053	547.173	2325.45	791.027
406	0	297.452	2083.78	1644.17	193.044	2089.11	1644.35	325.505	2238.91	1664.03	189.368	2257.21	1668.04	243.716	2319.32	1518.27	243.433	2426	1296.37	255.588	2181.07	1419.37	254.375	2159.86	1233.76	192.334	2427.78	1372.56	439.516	2314.56	1469.57	501.162	2350.27	1273.22	520.699	2381.26	1157.33	533.49	2327.17	989.812	490.268	2297.36	898.747	550.87	2345.09	888.712	546.029	2297.19	794.747
407	0	296.626	2073.97	1646.43	192.21	2079.44	1646.38	324.853	2229.09	1666	188.748	2247.59	1669.69	243.381	2309.31	1519.89	243.34	2415.48	1297.77	255.173	2170.84	1421.27	254.254	2149.43	1235.69	192.276	2417.52	1373.91	439.214	2304.03	1471.62	501.545	2337.16	1274.62	521.65	2366.01	1158.19	533.21	2306.46	992.307	489.301	2273.64	902.744	549.933	2320.74	890.608	544.718	2269	798.843
408	0	295.832	2064.15	1648.51	191.41	2069.77	1648.25	324.236	2219.29	1667.77	188.161	2237.97	1671.15	243.027	2299.28	1521.34	243.161	2404.98	1299.02	254.769	2160.61	1422.99	254.129	2139.01	1237.42	192.145	2407.26	1375.13	438.879	2293.55	1473.48	501.859	2324.12	1275.87	522.489	2350.8	1158.95	532.845	2285.82	994.915	488.26	2249.99	906.954	548.857	2296.43	892.721	543.248	2240.95	803.277
409	0	295.082	2054.31	1650.39	190.654	2060.07	1649.94	323.66	2209.46	1669.32	187.613	2228.32	1672.4	242.654	2289.21	1522.6	242.895	2394.48	1300.09	254.376	2150.35	1424.49	254.001	2128.59	1238.94	191.943	2396.97	1376.18	438.513	2283.11	1475.11	502.103	2311.14	1276.96	523.211	2335.63	1159.58	532.393	2265.27	997.606	487.146	2226.46	911.344	547.651	2272.2	895.028	541.633	2213.12	808.009
410	0	294.382	2044.43	1652.04	189.95	2050.32	1651.42	323.131	2199.61	1670.62	187.109	2218.64	1673.43	242.262	2279.11	1523.66	242.545	2383.99	1300.99	253.994	2140.07	1425.76	253.867	2118.17	1240.22	191.667	2386.65	1377.07	438.116	2272.68	1476.5	502.273	2298.21	1277.86	523.81	2320.51	1160.05	531.854	2244.86	1000.35	485.962	2203.08	915.877	546.326	2248.11	897.503	539.887	2185.57	812.999
411	0	293.735	2034.5	1653.44	189.299	2040.51	1652.67	322.648	2189.7	1671.65	186.647	2208.89	1674.22	241.848	2268.95	1524.51	242.11	2373.48	1301.68	253.619	2129.76	1426.79	253.726	2107.74	1241.26	191.318	2376.28	1377.77	437.686	2262.27	1477.64	502.366	2285.32	1278.54	524.28	2305.43	1160.35	531.227	2224.58	1003.13	484.708	2179.9	920.518	544.891	2224.18	900.122	538.025	2158.34	818.204
412	0	293.142	2024.49	1654.57	188.7	2030.62	1653.68	322.208	2179.74	1672.42	186.224	2199.06	1674.78	241.409	2258.72	1525.13	241.592	2362.95	1302.18	253.249	2119.4	1427.57	253.574	2097.29	1242.04	190.893	2365.87	1378.28	437.221	2251.85	1478.53	502.379	2272.46	1279.01	524.616	2290.4	1160.46	530.51	2204.48	1005.9	483.384	2156.97	925.231	543.355	2200.45	902.857	536.061	2131.5	823.584
413	0	292.597	2014.41	1655.42	188.151	2020.63	1654.44	321.803	2169.69	1672.9	185.833	2189.13	1675.1	240.937	2248.43	1525.51	240.993	2352.39	1302.46	252.876	2108.99	1428.08	253.405	2086.81	1242.57	190.39	2355.39	1378.58	436.715	2241.43	1479.15	502.307	2259.63	1279.24	524.817	2275.4	1160.39	529.701	2184.57	1008.66	481.99	2134.31	929.981	541.725	2176.96	905.682	534.012	2105.08	829.096
414	0	292.094	2004.24	1655.98	187.641	2010.53	1654.93	321.423	2159.56	1673.11	185.461	2179.1	1675.18	240.427	2238.06	1525.66	240.315	2341.8	1302.52	252.492	2098.52	1428.33	253.213	2076.29	1242.82	189.809	2344.84	1378.67	436.164	2230.99	1479.51	502.143	2246.82	1279.24	524.879	2260.46	1160.12	528.798	2164.87	1011.36	480.525	2111.98	934.734	540.009	2153.76	908.568	531.891	2079.12	834.701
415	0	291.622	1993.98	1656.24	187.161	2000.33	1655.15	321.055	2149.34	1673.05	185.096	2168.96	1675.02	239.869	2227.61	1525.57	239.558	2331.17	1302.37	252.089	2087.99	1428.33	252.992	2065.73	1242.82	189.147	2334.22	1378.54	435.562	2220.53	1479.61	501.884	2234.03	1279.01	524.802	2245.56	1159.65	527.8	2145.41	1013.99	478.989	2090	939.454	538.212	2130.86	911.49	529.708	2053.67	840.359
416	0	291.168	1983.62	1656.22	186.697	1990	1655.11	320.682	2139.01	1672.72	184.72	2158.69	1674.63	239.255	2217.08	1525.25	238.726	2320.49	1301.99	251.656	2077.39	1428.06	252.734	2055.12	1242.56	188.403	2323.52	1378.19	434.901	2210.02	1479.46	501.523	2221.26	1278.54	524.586	2230.73	1158.99	526.704	2126.2	1016.54	477.381	2068.4	944.11	536.337	2108.31	914.418	527.475	2028.75	846.031
417	0	290.716	1973.15	1655.91	186.233	1979.55	1654.8	320.286	2128.59	1672.12	184.318	2148.29	1674.01	238.577	2206.46	1524.69	237.82	2309.75	1301.4	251.182	2066.72	1427.55	252.429	2044.45	1242.05	187.576	2312.74	1377.62	434.176	2199.47	1479.08	501.057	2208.51	1277.85	524.233	2215.98	1158.15	525.51	2107.28	1018.97	475.699	2047.21	948.671	534.387	2086.14	917.328	525.198	2004.39	851.682
418	0	290.25	1962.58	1655.32	185.75	1968.98	1654.24	319.847	2118.06	1671.29	183.867	2137.77	1673.18	237.825	2195.75	1523.91	236.843	2298.95	1300.59	250.655	2055.98	1426.8	252.071	2033.71	1241.31	186.665	2301.86	1376.83	433.379	2188.87	1478.47	500.48	2195.78	1276.95	523.745	2201.3	1157.14	524.218	2088.65	1021.28	473.943	2026.47	953.107	532.367	2064.39	920.193	522.881	1980.62	857.273
419	0	289.75	1951.91	1654.48	185.23	1958.28	1653.44	319.346	2107.42	1670.22	183.35	2127.12	1672.15	236.99	2184.94	1522.92	235.799	2288.08	1299.57	250.064	2045.15	1425.82	251.651	2022.88	1240.34	185.672	2290.89	1375.83	432.505	2178.2	1477.65	499.789	2183.08	1275.86	523.125	2186.72	1155.96	522.827	2070.35	1023.45	472.113	2006.2	957.391	530.277	2043.07	922.987	520.527	1957.46	862.771
420	0	289.196	1941.13	1653.4	184.653	1947.45	1652.4	318.76	2096.68	1668.95	182.745	2116.33	1670.92	236.066	2174.04	1521.72	234.691	2277.12	1298.35	249.396	2034.23	1424.64	251.16	2011.96	1239.17	184.597	2279.82	1374.61	431.547	2167.46	1476.62	498.981	2170.41	1274.58	522.378	2172.25	1154.64	521.338	2052.39	1025.46	470.209	1986.41	961.497	528.12	2022.22	925.687	518.135	1934.93	868.138
421	0	288.57	1930.25	1652.1	184	1936.51	1651.15	318.071	2085.84	1667.49	182.033	2105.42	1669.52	235.046	2163.04	1520.32	233.525	2266.09	1296.94	248.641	2023.22	1423.26	250.591	2000.94	1237.8	183.443	2268.66	1373.2	430.502	2156.63	1475.42	498.054	2157.77	1273.14	521.507	2157.92	1153.18	519.754	2034.78	1027.31	468.232	1967.13	965.399	525.9	2001.87	928.268	515.704	1913.05	873.341
422	0	287.852	1919.27	1650.61	183.251	1925.44	1649.71	317.259	2074.9	1665.86	181.195	2094.39	1667.96	233.925	2151.95	1518.76	232.304	2254.96	1295.35	247.788	2012.12	1421.71	249.938	1989.82	1236.27	182.214	2257.39	1371.59	429.367	2145.7	1474.06	497.008	2145.17	1271.56	520.519	2143.72	1151.62	518.076	2017.55	1028.98	466.183	1948.37	969.074	523.618	1982.04	930.708	513.231	1891.82	878.344
423	0	287.022	1908.2	1648.95	182.389	1914.26	1648.09	316.307	2063.86	1664.09	180.215	2083.24	1666.25	232.698	2140.76	1517.04	231.036	2243.73	1293.61	246.828	2000.91	1420.01	249.193	1978.57	1234.59	180.914	2246.02	1369.81	428.138	2134.66	1472.55	495.843	2132.61	1269.86	519.42	2129.69	1149.95	516.31	2000.71	1030.47	464.064	1930.15	972.498	521.28	1962.75	932.984	510.715	1871.28	883.111
424	0	286.065	1897.03	1647.15	181.396	1902.96	1646.33	315.2	2052.72	1662.2	179.079	2071.97	1664.42	231.364	2129.47	1515.18	229.724	2232.4	1291.73	245.755	1989.61	1418.17	248.352	1967.2	1232.78	179.547	2234.55	1367.87	426.817	2123.5	1470.93	494.562	2120.1	1268.05	518.214	2115.83	1148.21	514.459	1984.28	1031.77	461.878	1912.48	975.648	518.889	1944.03	935.073	508.152	1851.42	887.605
425	0	284.965	1885.77	1645.25	180.259	1891.56	1644.44	313.925	2041.49	1660.22	177.776	2060.59	1662.48	229.923	2118.07	1513.2	228.377	2220.97	1289.72	244.563	1978.19	1416.23	247.412	1955.7	1230.86	178.121	2222.98	1365.8	425.403	2112.22	1469.19	493.169	2107.63	1266.16	516.908	2102.16	1146.4	512.529	1968.26	1032.86	459.63	1895.37	978.503	516.453	1925.88	936.955	505.543	1832.26	891.79
426	0	283.709	1874.41	1643.27	178.967	1880.05	1642.45	312.475	2030.17	1658.17	176.297	2049.1	1660.44	228.376	2106.57	1511.14	226.997	2209.42	1287.62	243.249	1966.66	1414.2	246.369	1944.07	1228.86	176.639	2211.31	1363.61	423.901	2100.8	1467.38	491.669	2095.2	1264.22	515.508	2088.69	1144.55	510.527	1952.66	1033.74	457.323	1878.81	981.04	513.977	1908.33	938.606	502.888	1813.8	895.627
427	0	282.29	1862.96	1641.25	177.51	1868.43	1640.39	310.845	2018.75	1656.09	174.639	2037.51	1658.34	226.728	2094.97	1509.01	225.592	2197.76	1285.45	241.813	1955.03	1412.12	245.224	1932.29	1226.81	175.11	2199.54	1361.33	422.315	2089.23	1465.52	490.068	2082.83	1262.24	514.021	2075.43	1142.68	508.461	1937.5	1034.41	454.963	1862.82	983.238	511.471	1891.38	940.008	500.19	1796.04	899.078
428	0	280.701	1851.41	1639.22	175.887	1856.72	1638.29	309.036	2007.24	1654.01	172.802	2025.82	1656.19	224.985	2083.26	1506.84	224.166	2185.99	1283.23	240.257	1943.27	1410	243.978	1920.38	1224.72	173.538	2187.68	1358.99	420.651	2077.52	1463.61	488.373	2070.5	1260.25	512.453	2062.38	1140.8	506.337	1922.77	1034.85	452.558	1847.39	985.076	508.945	1875.06	941.14	497.455	1779.01	902.104
429	0	278.942	1839.76	1637.2	174.095	1844.91	1636.18	307.051	1995.63	1651.95	170.791	2014.02	1654.02	223.155	2071.45	1504.66	222.721	2174.12	1281.01	238.588	1931.41	1407.87	242.633	1908.34	1222.63	171.929	2175.72	1356.62	418.916	2065.66	1461.7	486.593	2058.21	1258.27	510.81	2049.54	1138.93	504.166	1908.48	1035.07	450.114	1832.53	986.534	506.408	1859.37	941.985	494.69	1762.69	904.667
430	0	277.015	1828.01	1635.24	172.141	1833.01	1634.07	304.9	1983.93	1649.94	168.616	2002.14	1651.85	221.247	2059.54	1502.5	221.262	2162.13	1278.8	236.812	1919.44	1405.76	241.193	1896.16	1220.56	170.29	2163.67	1354.24	417.119	2053.66	1459.81	484.737	2045.97	1256.33	509.099	2036.91	1137.1	501.957	1894.64	1035.06	447.64	1818.22	987.596	503.872	1844.32	942.525	491.906	1747.1	906.73
431	0	274.928	1816.16	1633.34	170.033	1821.01	1632	302.598	1972.13	1648.01	166.292	1990.16	1649.71	219.274	2047.53	1500.39	219.789	2150.05	1276.63	234.941	1907.36	1403.7	239.665	1883.86	1218.54	168.626	2151.55	1351.9	415.27	2041.51	1457.95	482.814	2033.76	1254.44	507.326	2024.49	1135.33	499.72	1881.22	1034.81	445.146	1804.47	988.243	501.349	1829.91	942.747	489.114	1732.24	908.258
432	0	272.694	1804.21	1631.55	167.785	1808.93	1630	300.164	1960.23	1646.18	163.838	1978.1	1647.62	217.248	2035.43	1498.36	218.304	2137.88	1274.55	232.988	1895.19	1401.71	238.056	1871.45	1216.6	166.94	2139.36	1349.63	413.379	2029.24	1456.16	480.835	2021.58	1252.65	505.498	2012.27	1133.63	497.465	1868.25	1034.33	442.643	1791.27	988.464	498.853	1816.16	942.64	486.329	1718.11	909.218
433	0	270.33	1792.16	1629.88	165.416	1796.77	1628.08	297.62	1948.22	1644.49	161.278	1965.95	1645.62	215.182	2023.25	1496.44	216.806	2125.62	1272.58	230.967	1882.92	1399.83	236.376	1858.94	1214.76	165.236	2127.1	1347.45	411.457	2016.84	1454.47	478.811	2009.43	1250.95	503.621	2000.24	1132.04	495.204	1855.71	1033.62	440.143	1778.63	988.247	496.396	1803.06	942.194	483.565	1704.74	909.583
434	0	267.858	1780.01	1628.35	162.948	1784.54	1626.27	294.994	1936.13	1642.95	158.639	1953.73	1643.73	213.093	2011	1494.65	215.295	2113.3	1270.74	228.897	1870.59	1398.07	234.635	1846.34	1213.05	163.516	2114.79	1345.4	409.517	2004.34	1452.88	476.753	1997.32	1249.39	501.701	1988.39	1130.56	492.947	1843.59	1032.68	437.659	1766.52	987.588	493.993	1790.62	941.406	480.84	1692.11	909.328
435	0	265.304	1767.76	1626.97	160.409	1772.24	1624.59	292.317	1923.94	1641.59	155.952	1941.44	1641.98	210.996	1998.69	1493.02	213.769	2100.92	1269.08	226.796	1858.19	1396.47	232.844	1833.68	1211.49	161.784	2102.45	1343.52	407.568	1991.75	1451.44	474.673	1985.23	1247.98	499.744	1976.71	1129.21	490.707	1831.91	1031.51	435.205	1754.96	986.482	491.659	1778.84	940.276	478.171	1680.25	908.438
436	0	262.697	1755.43	1625.77	157.826	1759.88	1623.06	289.619	1911.66	1640.41	153.248	1929.09	1640.4	208.906	1986.33	1491.58	212.226	2088.51	1267.6	224.683	1845.74	1395.04	231.018	1820.97	1210.11	160.041	2090.08	1341.82	405.624	1979.11	1450.15	472.581	1973.18	1246.73	497.757	1965.19	1128.02	488.494	1820.64	1030.12	432.796	1743.94	984.933	489.407	1767.72	938.81	475.578	1669.16	906.904
437	0	260.071	1743.03	1624.74	155.233	1747.47	1621.7	286.936	1899.31	1639.45	150.563	1916.69	1639.01	206.839	1973.94	1490.34	210.665	2076.08	1266.32	222.579	1833.27	1393.8	229.17	1808.24	1208.92	158.29	2077.7	1340.34	403.697	1966.43	1449.03	470.489	1961.17	1245.67	495.744	1953.82	1127	486.321	1809.8	1028.52	430.448	1733.46	982.948	487.253	1757.26	937.015	473.079	1658.84	904.724
438	0	257.458	1730.57	1623.89	152.663	1735.04	1620.52	284.3	1886.89	1638.7	147.929	1904.26	1637.83	204.809	1961.55	1489.32	209.083	2063.64	1265.28	220.503	1820.79	1392.77	227.313	1795.52	1207.95	156.531	2065.32	1339.1	401.797	1953.74	1448.09	468.407	1949.21	1244.79	493.711	1942.6	1126.15	484.198	1799.37	1026.73	428.178	1723.51	980.541	485.21	1747.46	934.908	470.696	1649.31	901.91
439	0	254.897	1718.07	1623.23	150.15	1722.58	1619.54	281.746	1874.43	1638.18	145.38	1891.81	1636.88	202.833	1949.16	1488.54	207.48	2051.23	1264.48	218.476	1808.33	1391.97	225.463	1782.84	1207.19	154.766	2052.97	1338.11	399.937	1941.08	1447.35	466.346	1937.3	1244.11	491.664	1931.52	1125.48	482.135	1789.36	1024.74	426.002	1714.09	977.728	483.292	1738.32	932.508	468.45	1640.56	898.482
440	0	252.422	1705.54	1622.76	147.728	1710.12	1618.75	279.304	1861.95	1637.88	142.948	1879.35	1636.19	200.923	1936.81	1487.99	205.854	2038.85	1263.92	216.515	1795.9	1391.39	223.634	1770.21	1206.67	152.998	2040.65	1337.38	398.125	1928.47	1446.81	464.312	1925.47	1243.62	489.607	1920.58	1124.99	480.145	1779.76	1022.6	423.937	1705.21	974.534	481.511	1729.84	929.84	466.361	1632.6	894.471
441	0	250.069	1693.02	1622.48	145.43	1697.68	1618.18	277.006	1849.45	1637.8	140.662	1866.91	1635.75	199.091	1924.5	1487.7	204.204	2026.53	1263.62	214.639	1783.53	1391.06	221.841	1757.67	1206.38	151.228	2028.38	1336.93	396.373	1915.94	1446.47	462.315	1913.73	1243.34	487.543	1909.78	1124.68	478.235	1770.59	1020.3	421.998	1696.87	970.987	479.877	1722.01	926.931	464.452	1625.42	889.919
442	0	247.871	1680.52	1622.39	143.288	1685.28	1617.83	274.875	1836.98	1637.95	138.547	1854.5	1635.57	197.347	1912.26	1487.65	202.532	2014.29	1263.57	212.864	1771.24	1390.96	220.099	1745.23	1206.33	149.459	2016.17	1336.76	394.687	1903.53	1446.32	460.359	1902.1	1243.24	485.476	1899.14	1124.55	476.416	1761.83	1017.87	420.202	1689.06	967.122	478.401	1714.82	923.817	462.743	1619.03	884.88
443	0	245.861	1668.07	1622.47	141.331	1672.92	1617.7	272.936	1824.55	1638.3	136.625	1842.14	1635.67	195.7	1900.1	1487.85	200.839	2002.13	1263.77	211.202	1759.04	1391.11	218.421	1732.92	1206.51	147.692	2004.04	1336.85	393.074	1891.27	1446.36	458.451	1890.6	1243.32	483.41	1888.64	1124.58	474.696	1753.49	1015.33	418.562	1681.79	962.977	477.091	1708.26	920.533	461.256	1613.42	879.419
444	0	244.065	1655.7	1622.73	139.583	1660.63	1617.8	271.205	1812.19	1638.86	134.912	1829.85	1636.04	194.155	1888.05	1488.29	199.125	1990.08	1264.2	209.665	1746.95	1391.5	216.82	1720.74	1206.93	145.928	1991.98	1337.22	391.54	1879.17	1446.59	456.593	1879.25	1243.56	481.347	1878.32	1124.77	473.081	1745.57	1012.71	417.093	1675.05	958.596	475.951	1702.34	917.121	460.01	1608.56	873.607
445	0	242.506	1643.43	1623.17	138.067	1648.43	1618.12	269.694	1799.93	1639.6	133.42	1817.65	1636.67	192.715	1876.1	1488.96	197.394	1978.13	1264.86	208.262	1734.98	1392.12	215.309	1708.72	1207.58	144.171	1980.02	1337.85	390.087	1867.27	1446.98	454.789	1868.08	1243.97	479.29	1868.17	1125.1	471.578	1738.07	1010.04	415.806	1668.84	954.027	474.986	1697.04	913.624	459.025	1604.46	867.524
446	0	241.204	1631.28	1623.78	136.799	1636.32	1618.68	268.411	1787.78	1640.52	132.155	1805.54	1637.56	191.381	1864.28	1489.85	195.647	1966.3	1265.72	207	1723.15	1392.97	213.899	1696.85	1208.45	142.422	1968.14	1338.71	388.718	1855.59	1447.54	453.04	1857.1	1244.51	477.241	1858.23	1125.57	470.191	1731.01	1007.34	414.711	1663.16	949.321	474.198	1692.34	910.088	458.317	1601.1	861.258
447	0	240.169	1619.26	1624.55	135.791	1624.32	1619.46	267.357	1775.76	1641.61	131.118	1793.54	1638.7	190.151	1852.59	1490.94	193.887	1954.59	1266.78	205.882	1711.45	1394.03	212.599	1685.13	1209.54	140.683	1956.35	1339.8	387.432	1844.13	1448.24	451.346	1846.34	1245.19	475.203	1848.5	1126.16	468.926	1724.37	1004.66	413.816	1658	944.531	473.584	1688.24	906.561	457.899	1598.45	854.896
448	0	239.409	1607.41	1625.48	135.05	1612.43	1620.46	266.529	1763.9	1642.84	130.303	1781.66	1640.08	189.023	1841.02	1492.22	192.118	1943	1268.02	204.91	1699.9	1395.3	211.415	1673.55	1210.82	138.955	1944.65	1341.1	386.23	1832.92	1449.07	449.706	1835.83	1245.98	473.175	1839.01	1126.86	467.783	1718.15	1002.01	413.129	1653.35	939.715	473.141	1684.71	903.091	457.784	1596.49	848.529
449	0	238.924	1595.72	1626.57	134.576	1600.67	1621.69	265.918	1752.21	1644.21	129.702	1769.9	1641.67	187.989	1829.59	1493.67	190.344	1931.52	1269.41	204.083	1688.47	1396.76	210.353	1662.12	1212.29	137.24	1933.03	1342.58	385.106	1821.96	1450.02	448.118	1825.57	1246.87	471.161	1829.77	1127.67	466.766	1712.36	999.428	412.653	1649.2	934.928	472.865	1681.75	899.724	457.975	1595.2	842.245
450	0	238.709	1584.21	1627.81	134.365	1589.04	1623.12	265.511	1740.7	1645.69	129.3	1758.26	1643.45	187.045	1818.27	1495.26	188.57	1920.15	1270.93	203.397	1677.18	1398.39	209.415	1650.81	1213.93	135.54	1921.49	1344.23	384.057	1811.23	1451.08	446.577	1815.59	1247.87	469.16	1820.81	1128.58	465.874	1707	996.954	412.39	1645.53	930.227	472.747	1679.33	896.506	458.474	1594.55	836.128
451	0	238.751	1572.88	1629.2	134.407	1577.52	1624.75	265.292	1729.37	1647.26	129.081	1746.75	1645.4	186.182	1807.07	1496.98	186.801	1908.87	1272.56	202.846	1666.01	1400.18	208.599	1639.61	1215.71	133.856	1910	1346.01	383.079	1800.75	1452.24	445.081	1805.91	1248.94	467.175	1812.13	1129.58	465.107	1702.04	994.615	412.339	1642.33	925.667	472.776	1677.42	893.481	459.277	1594.51	830.257
452	0	239.036	1561.73	1630.71	134.686	1566.13	1626.57	265.241	1718.23	1648.92	129.024	1735.37	1647.5	185.391	1795.96	1498.8	185.045	1897.68	1274.28	202.424	1654.95	1402.09	207.904	1628.5	1217.63	132.19	1898.57	1347.89	382.163	1790.48	1453.47	443.627	1796.52	1250.1	465.208	1803.75	1130.66	464.462	1697.49	992.441	412.497	1639.57	921.298	472.942	1676	890.688	460.37	1595.04	824.7
453	0	239.54	1550.75	1632.34	135.184	1554.86	1628.54	265.337	1707.26	1650.62	129.109	1724.09	1649.7	184.664	1784.94	1500.69	183.309	1886.56	1276.08	202.121	1643.99	1404.11	207.323	1617.48	1219.64	130.545	1887.19	1349.87	381.304	1780.41	1454.76	442.21	1787.43	1251.32	463.262	1795.69	1131.83	463.937	1693.33	990.456	412.857	1637.22	917.166	473.231	1675.04	888.16	461.735	1596.11	819.517
454	0	240.241	1539.94	1634.07	135.878	1543.69	1630.65	265.557	1696.46	1652.36	129.312	1712.93	1651.98	183.992	1774	1502.64	181.6	1875.51	1277.91	201.927	1633.1	1406.2	206.849	1606.51	1221.72	128.925	1875.83	1351.89	380.496	1770.52	1456.1	440.829	1778.64	1252.61	461.343	1787.94	1133.08	463.527	1689.55	988.682	413.41	1635.25	913.313	473.628	1674.5	885.927	463.345	1597.67	814.752
455	0	241.112	1529.27	1635.88	136.742	1532.62	1632.87	265.879	1685.82	1654.11	129.611	1701.85	1654.29	183.368	1763.1	1504.61	179.928	1864.5	1279.78	201.831	1622.27	1408.33	206.472	1595.59	1223.85	127.332	1864.49	1353.95	379.73	1760.77	1457.47	439.482	1770.14	1253.95	459.457	1780.51	1134.41	463.227	1686.11	987.136	414.143	1633.64	909.771	474.117	1674.34	884.008	465.168	1599.66	810.438
456	0	242.123	1518.73	1637.73	137.75	1521.63	1635.16	266.278	1675.32	1655.85	129.984	1690.86	1656.61	182.784	1752.25	1506.58	178.303	1853.52	1281.64	201.82	1611.49	1410.47	206.184	1584.71	1225.98	125.773	1853.16	1356.01	379.001	1751.14	1458.84	438.17	1761.93	1255.33	457.609	1773.39	1135.8	463.03	1683.01	985.829	415.041	1632.33	906.563	474.682	1674.52	882.418	467.164	1602.05	806.594
457	0	243.248	1508.3	1639.62	138.875	1510.7	1637.49	266.733	1664.93	1657.54	130.409	1679.93	1658.9	182.233	1741.41	1508.51	176.733	1842.58	1283.49	201.883	1600.73	1412.59	205.972	1573.85	1228.08	124.252	1841.83	1358.03	378.304	1741.61	1460.21	436.893	1753.98	1256.76	455.81	1766.57	1137.27	462.928	1680.2	984.765	416.085	1631.29	903.707	475.306	1674.97	881.162	469.288	1604.76	803.226
458	0	244.456	1497.96	1641.49	140.089	1499.82	1639.82	267.223	1654.64	1659.17	130.866	1669.04	1661.12	181.71	1730.58	1510.38	175.228	1831.66	1285.3	202.007	1589.99	1414.64	205.828	1563	1230.11	122.775	1830.49	1360.01	377.634	1732.12	1461.55	435.653	1746.26	1258.21	454.066	1760.04	1138.78	462.913	1677.66	983.946	417.253	1630.49	901.208	475.971	1675.67	880.238	471.495	1607.74	800.327
459	0	245.723	1487.68	1643.33	141.369	1488.97	1642.1	267.731	1644.42	1660.7	131.337	1658.18	1663.23	181.212	1719.73	1512.17	173.799	1820.75	1287.05	202.182	1579.24	1416.61	205.739	1552.15	1232.05	121.349	1819.13	1361.9	376.988	1722.66	1462.83	434.453	1738.76	1259.68	452.386	1753.77	1140.35	462.975	1675.36	983.366	418.522	1629.86	899.065	476.66	1676.54	879.637	473.735	1610.92	797.878
460	0	247.023	1477.43	1645.09	142.689	1478.13	1644.3	268.239	1634.24	1662.12	131.807	1647.33	1665.2	180.736	1708.86	1513.84	172.453	1809.85	1288.71	202.398	1568.48	1418.45	205.698	1541.3	1233.86	119.982	1807.76	1363.69	376.364	1713.2	1464.05	433.296	1731.43	1261.16	450.778	1747.74	1141.96	463.103	1673.24	983.014	419.867	1629.37	897.268	477.357	1677.54	879.345	475.961	1614.23	795.853
461	0	248.335	1467.2	1646.74	144.03	1467.29	1646.38	268.734	1624.07	1663.41	132.263	1636.46	1667.01	180.28	1697.95	1515.37	171.199	1798.96	1290.27	202.645	1557.68	1420.13	205.697	1530.43	1235.51	118.682	1796.36	1365.34	375.761	1703.7	1465.17	432.187	1724.25	1262.64	449.249	1741.91	1143.59	463.286	1671.28	982.876	421.262	1628.98	895.8	478.046	1678.61	879.34	478.128	1617.6	794.22
462	0	249.64	1456.95	1648.25	145.373	1456.41	1648.29	269.207	1613.89	1664.53	132.695	1625.56	1668.63	179.847	1686.98	1516.75	170.047	1788.07	1291.72	202.917	1546.84	1421.64	205.728	1519.54	1236.97	117.458	1784.93	1366.84	375.183	1694.15	1466.18	431.129	1717.17	1264.11	447.804	1736.25	1145.24	463.513	1669.43	982.934	422.68	1628.65	894.639	478.712	1679.7	879.599	480.196	1620.98	792.942
463	0	250.923	1446.66	1649.6	146.704	1445.5	1650.01	269.649	1603.68	1665.49	133.096	1614.6	1670.03	179.439	1675.96	1517.95	169.002	1777.19	1293.02	203.207	1535.95	1422.93	205.787	1508.63	1238.21	116.318	1773.48	1368.17	374.63	1684.51	1467.06	430.125	1710.16	1265.55	446.447	1730.73	1146.91	463.771	1667.65	983.17	424.097	1628.33	893.757	479.341	1680.75	880.096	482.13	1624.3	791.981
464	0	252.173	1436.3	1650.74	148.011	1434.52	1651.5	270.057	1593.41	1666.25	133.461	1603.57	1671.19	179.058	1664.87	1518.95	168.074	1766.29	1294.17	203.512	1525	1424	205.873	1497.7	1239.22	115.272	1761.99	1369.3	374.109	1674.77	1467.79	429.18	1703.18	1266.96	445.18	1725.3	1148.57	464.049	1665.9	983.56	425.487	1627.98	893.125	479.923	1681.71	880.802	483.904	1627.49	791.301
465	0	253.38	1425.86	1651.67	149.285	1423.47	1652.73	270.429	1583.05	1666.81	133.79	1592.46	1672.11	178.712	1653.7	1519.74	167.266	1755.39	1295.15	203.831	1513.99	1424.82	205.982	1486.73	1239.98	114.33	1750.48	1370.23	373.625	1664.91	1468.38	428.297	1696.2	1268.32	444.003	1719.92	1150.22	464.337	1664.14	984.083	426.829	1627.57	892.71	480.448	1682.55	881.689	485.5	1630.51	790.865
466	0	254.54	1415.32	1652.35	150.522	1412.33	1653.67	270.768	1572.59	1667.15	134.084	1581.25	1672.78	178.407	1642.45	1520.31	166.586	1744.47	1295.95	204.164	1502.9	1425.38	206.117	1475.74	1240.48	113.5	1738.93	1370.94	373.186	1654.9	1468.79	427.478	1689.17	1269.64	442.915	1714.56	1151.85	464.625	1662.33	984.716	428.103	1627.07	892.48	480.906	1683.21	882.729	486.906	1633.31	790.642
467	0	255.652	1404.66	1652.78	151.717	1401.09	1654.33	271.079	1562.01	1667.29	134.348	1569.93	1673.18	178.151	1631.11	1520.66	166.037	1733.53	1296.56	204.513	1491.74	1425.68	206.279	1464.7	1240.7	112.792	1727.35	1371.43	372.802	1644.75	1469.03	426.726	1682.08	1270.89	441.911	1709.19	1153.45	464.904	1660.44	985.436	429.293	1626.44	892.402	481.292	1683.67	883.892	488.12	1635.85	790.602
468	0	256.717	1393.86	1652.94	152.872	1389.74	1654.67	271.37	1551.3	1667.2	134.591	1558.48	1673.31	177.953	1619.69	1520.76	165.623	1722.56	1296.96	204.882	1480.5	1425.71	206.473	1453.63	1240.64	112.213	1715.74	1371.68	372.483	1634.44	1469.09	426.044	1674.88	1272.07	440.989	1703.75	1155	465.167	1658.43	986.221	430.388	1625.66	892.444	481.601	1683.88	885.152	489.145	1638.1	790.719
469	0	257.74	1382.92	1652.83	153.989	1378.28	1654.7	271.652	1540.44	1666.89	134.823	1546.92	1673.19	177.822	1608.18	1520.64	165.348	1711.54	1297.15	205.276	1469.18	1425.47	206.701	1442.51	1240.32	111.773	1704.09	1371.7	372.24	1623.95	1468.96	425.431	1667.55	1273.17	440.143	1698.23	1156.51	465.41	1656.26	987.048	431.38	1624.69	892.575	481.832	1683.83	886.484	489.987	1640.02	790.969
470	0	258.727	1371.83	1652.45	155.073	1366.7	1654.42	271.938	1529.43	1666.37	135.057	1535.23	1672.8	177.77	1596.57	1520.28	165.215	1700.47	1297.13	205.702	1457.77	1424.96	206.969	1431.35	1239.72	111.477	1692.4	1371.49	372.083	1613.29	1468.65	424.891	1660.06	1274.19	439.368	1692.59	1157.96	465.628	1653.91	987.898	432.265	1623.53	892.768	481.982	1683.49	887.862	490.659	1641.59	791.329
471	0	259.688	1360.58	1651.8	156.13	1355	1653.84	272.242	1518.26	1665.63	135.307	1523.41	1672.17	177.806	1584.87	1519.68	165.224	1689.33	1296.89	206.168	1446.26	1424.2	207.284	1420.12	1238.86	111.333	1680.67	1371.05	372.025	1602.44	1468.16	424.423	1652.41	1275.11	438.659	1686.8	1159.33	465.821	1651.36	988.748	433.045	1622.14	892.993	482.053	1682.84	889.263	491.175	1642.8	791.779
472	0	260.633	1349.17	1650.89	157.168	1343.18	1652.97	272.581	1506.92	1664.69	135.589	1511.48	1671.3	177.941	1573.07	1518.87	165.377	1678.11	1296.44	206.681	1434.67	1423.18	207.65	1408.83	1237.74	111.343	1668.88	1370.4	372.077	1591.42	1467.49	424.03	1644.56	1275.92	438.014	1680.83	1160.63	465.988	1648.57	989.58	433.723	1620.5	893.228	482.049	1681.87	890.664	491.549	1643.64	792.296
473	0	261.575	1337.6	1649.73	158.198	1331.24	1651.82	272.972	1495.42	1663.55	135.922	1499.42	1670.21	178.184	1561.18	1517.84	165.674	1666.79	1295.78	207.252	1422.97	1421.94	208.073	1397.47	1236.4	111.513	1657.05	1369.53	372.247	1580.21	1466.64	423.712	1636.51	1276.62	437.429	1674.65	1161.83	466.133	1645.52	990.375	434.308	1618.6	893.448	481.974	1680.55	892.044	491.801	1644.09	792.86
474	0	262.527	1325.87	1648.34	159.232	1319.19	1650.41	273.432	1483.76	1662.23	136.321	1487.24	1668.91	178.545	1549.19	1516.62	166.114	1655.37	1294.91	207.888	1411.18	1420.47	208.56	1386.02	1234.84	111.843	1645.15	1368.47	372.547	1568.83	1465.63	423.472	1628.24	1277.2	436.903	1668.25	1162.92	466.261	1642.2	991.114	434.81	1616.42	893.634	481.837	1678.89	893.381	491.948	1644.15	793.451
475	0	263.502	1313.99	1646.74	160.281	1307.03	1648.78	273.978	1471.93	1660.73	136.806	1474.97	1667.41	179.034	1537.1	1515.21	166.696	1643.84	1293.86	208.599	1399.29	1418.81	209.115	1374.49	1233.07	112.335	1633.19	1367.22	372.984	1557.27	1464.45	423.312	1619.74	1277.64	436.439	1661.59	1163.89	466.377	1638.57	991.781	435.243	1613.95	893.767	481.647	1676.86	894.657	492.01	1643.81	794.048
476	0	264.515	1301.95	1644.95	161.359	1294.75	1646.95	274.626	1459.95	1659.07	137.392	1462.59	1665.75	179.656	1524.91	1513.63	167.417	1632.18	1292.63	209.392	1387.29	1416.98	209.744	1362.86	1231.14	112.987	1621.15	1365.81	373.564	1545.54	1463.11	423.236	1611	1277.95	436.037	1654.66	1164.72	466.489	1634.61	992.358	435.62	1611.15	893.828	481.416	1674.46	895.853	492.006	1643.08	794.63
477	0	265.578	1289.76	1643	162.478	1282.38	1644.95	275.392	1447.81	1657.28	138.096	1450.11	1663.94	180.418	1512.62	1511.91	168.274	1620.38	1291.24	210.277	1375.19	1414.99	210.452	1351.12	1229.06	113.798	1609.04	1364.26	374.293	1533.64	1461.64	423.248	1602	1278.09	435.704	1647.42	1165.41	466.606	1630.31	992.832	435.956	1608.03	893.805	481.158	1671.67	896.953	491.955	1641.93	795.177
478	0	266.705	1277.43	1640.91	163.651	1269.9	1642.81	276.289	1435.51	1655.36	138.93	1437.55	1662	181.326	1500.23	1510.06	169.261	1608.45	1289.71	211.258	1362.98	1412.87	211.242	1339.26	1226.85	114.764	1596.84	1362.6	375.173	1521.59	1460.02	423.353	1592.74	1278.08	435.444	1639.86	1165.94	466.737	1625.64	993.187	436.268	1604.56	893.684	480.889	1668.49	897.942	491.876	1640.38	795.671
479	0	267.907	1264.96	1638.71	164.89	1257.34	1640.56	277.327	1423.07	1653.34	139.908	1424.91	1659.96	182.381	1487.74	1508.12	170.375	1596.38	1288.06	212.342	1350.66	1410.66	212.118	1327.28	1224.55	115.88	1584.55	1360.84	376.205	1509.39	1458.29	423.557	1583.22	1277.9	435.266	1631.95	1166.3	466.892	1620.57	993.412	436.568	1600.71	893.454	480.626	1664.88	898.807	491.786	1638.4	796.092
480	0	269.193	1252.36	1636.44	166.204	1244.68	1638.25	278.515	1410.49	1651.24	141.036	1412.19	1657.84	183.584	1475.15	1506.1	171.609	1584.16	1286.32	213.533	1338.24	1408.37	213.083	1315.18	1222.18	117.14	1572.18	1359.01	377.387	1497.05	1456.46	423.867	1573.4	1277.54	435.177	1623.67	1166.47	467.083	1615.08	993.497	436.873	1596.48	893.108	480.387	1660.84	899.538	491.702	1636	796.423
481	0	270.571	1239.62	1634.12	167.602	1231.93	1635.9	279.856	1397.77	1649.09	142.322	1399.4	1655.69	184.935	1462.46	1504.05	172.956	1571.8	1284.51	214.833	1325.71	1406.05	214.14	1302.95	1219.79	118.538	1559.71	1357.15	378.715	1484.57	1454.53	424.289	1563.3	1277.01	435.188	1615	1166.46	467.319	1609.15	993.435	437.195	1591.84	892.641	480.19	1656.35	900.126	491.637	1633.14	796.65
482	0	272.046	1226.76	1631.8	169.09	1219.1	1633.55	281.352	1384.92	1646.92	143.766	1386.52	1653.51	186.429	1449.67	1501.99	174.409	1559.3	1282.66	216.241	1313.07	1403.72	215.289	1290.59	1217.39	120.065	1547.15	1355.28	380.183	1471.98	1452.55	424.831	1552.89	1276.3	435.307	1605.92	1166.25	467.61	1602.74	993.22	437.548	1586.76	892.052	480.056	1651.37	900.566	491.604	1629.82	796.761
483	0	273.62	1213.78	1629.49	170.671	1206.18	1631.23	283.002	1371.93	1644.76	145.368	1373.58	1651.36	188.061	1436.79	1499.94	175.962	1546.67	1280.81	217.756	1300.34	1401.41	216.533	1278.09	1215.02	121.713	1534.5	1353.44	381.783	1459.26	1450.52	425.499	1542.17	1275.42	435.544	1596.41	1165.85	467.967	1595.84	992.852	437.942	1581.21	891.342	480.003	1645.88	900.856	491.614	1626.02	796.748
484	0	275.291	1200.69	1627.22	172.344	1193.18	1628.97	284.798	1358.83	1642.63	147.122	1360.56	1649.25	189.822	1423.81	1497.96	177.606	1533.91	1278.99	219.374	1287.51	1399.16	217.87	1265.48	1212.71	123.473	1521.76	1351.66	383.508	1446.44	1448.47	426.302	1531.13	1274.38	435.909	1586.45	1165.27	468.399	1588.41	992.333	438.387	1575.17	890.517	480.05	1639.84	900.997	491.675	1621.69	796.609
485	0	277.056	1187.48	1625.04	174.106	1180.09	1626.81	286.732	1345.6	1640.58	149.019	1347.46	1647.23	191.702	1410.74	1496.06	179.334	1521.03	1277.23	221.088	1274.59	1397	219.299	1252.74	1210.5	125.332	1508.94	1349.96	385.346	1433.52	1446.45	427.245	1519.76	1273.19	436.41	1576.03	1164.52	468.913	1580.44	991.671	438.891	1568.6	889.586	480.215	1633.23	900.992	491.793	1616.82	796.341
486	0	278.906	1174.16	1622.96	175.95	1166.92	1624.76	288.791	1332.26	1638.62	151.046	1334.29	1645.32	193.689	1397.6	1494.28	181.138	1508.06	1275.55	222.89	1261.59	1394.96	220.817	1239.9	1208.42	127.281	1496.05	1348.39	387.288	1420.52	1444.47	428.334	1508.05	1271.88	437.057	1565.15	1163.61	469.518	1571.88	990.875	439.461	1561.46	888.56	480.513	1626.01	900.849	491.973	1611.36	795.948
487	0	280.83	1160.75	1621.01	177.867	1153.68	1622.85	290.958	1318.81	1636.8	153.187	1321.05	1643.56	195.768	1384.38	1492.64	183.011	1495	1274.01	224.768	1248.52	1393.08	222.419	1226.97	1206.5	129.308	1483.1	1346.96	389.321	1407.42	1442.58	429.573	1496	1270.46	437.856	1553.79	1162.57	470.22	1562.72	989.96	440.102	1553.72	887.457	480.961	1618.14	900.575	492.217	1605.26	795.435
488	0	282.815	1147.25	1619.21	179.843	1140.37	1621.11	293.213	1305.27	1635.15	155.423	1307.74	1641.98	197.923	1371.12	1491.18	184.944	1481.87	1272.61	226.709	1235.39	1391.37	224.101	1213.95	1204.77	131.401	1470.11	1345.71	391.434	1394.26	1440.81	430.964	1483.62	1268.97	438.813	1541.97	1161.41	471.024	1552.94	988.942	440.817	1545.34	886.293	481.57	1609.57	900.181	492.527	1598.48	794.811
489	0	284.842	1133.68	1617.58	181.86	1126.99	1619.55	295.536	1291.64	1633.68	157.732	1294.37	1640.59	200.137	1357.82	1489.92	186.931	1468.7	1271.39	228.698	1222.21	1389.87	225.852	1200.87	1203.25	133.549	1457.09	1344.65	393.615	1381.03	1439.2	432.509	1470.89	1267.44	439.933	1529.68	1160.17	471.934	1542.5	987.842	441.608	1536.29	885.09	482.352	1600.29	899.679	492.901	1590.96	794.083
490	0	286.893	1120.04	1616.14	183.902	1113.57	1618.18	297.902	1277.95	1632.43	160.09	1280.96	1639.43	202.391	1344.49	1488.87	188.963	1455.51	1270.38	230.718	1209.02	1388.6	227.665	1187.75	1201.96	135.74	1444.05	1343.8	395.849	1367.74	1437.79	434.206	1457.84	1265.9	441.219	1516.93	1158.89	472.953	1531.41	986.681	442.476	1526.51	883.868	483.313	1590.24	899.08	493.341	1582.65	793.261
491	0	288.947	1106.36	1614.9	185.945	1100.11	1617.01	300.287	1264.21	1631.42	162.473	1267.5	1638.52	204.667	1331.17	1488.06	191.032	1442.31	1269.58	232.753	1195.81	1387.57	229.527	1174.61	1200.93	137.961	1431.03	1343.18	398.124	1354.41	1436.6	436.052	1444.48	1264.4	442.672	1503.74	1157.58	474.082	1519.64	985.484	443.419	1515.98	882.65	484.458	1579.39	898.396	493.845	1573.48	792.355
492	0	290.981	1092.66	1613.87	187.969	1086.64	1616.06	302.666	1250.44	1630.66	164.855	1254.03	1637.87	206.944	1317.88	1487.5	193.132	1429.12	1269.03	234.783	1182.62	1386.81	231.424	1161.47	1200.17	140.203	1418.04	1342.8	400.423	1341.06	1435.66	438.042	1430.81	1262.96	444.294	1490.14	1156.3	475.322	1507.18	984.274	444.436	1504.67	881.459	485.788	1567.71	897.638	494.414	1563.41	791.373
493	0	292.972	1078.97	1613.06	189.949	1073.18	1615.33	305.013	1236.66	1630.17	167.209	1240.57	1637.48	209.205	1304.63	1487.2	195.256	1415.98	1268.71	236.79	1169.46	1386.32	233.343	1148.36	1199.69	142.454	1405.1	1342.66	402.733	1327.68	1435.01	440.167	1416.87	1261.63	446.084	1476.14	1155.06	476.672	1494.04	983.076	445.524	1492.54	880.317	487.301	1555.19	896.817	495.049	1552.36	790.324
494	0	294.896	1065.29	1612.48	191.864	1059.75	1614.83	307.302	1222.89	1629.96	169.51	1227.12	1637.37	211.432	1291.45	1487.16	197.395	1402.9	1268.65	238.755	1156.36	1386.11	235.267	1135.31	1199.49	144.705	1392.23	1342.77	405.036	1314.3	1434.65	442.418	1402.68	1260.43	448.039	1461.77	1153.9	478.129	1480.21	981.913	446.677	1479.57	879.244	488.991	1541.8	895.943	495.752	1540.29	789.218
495	0	296.731	1051.67	1612.14	193.689	1046.38	1614.56	309.511	1209.18	1630.03	171.734	1213.74	1637.53	213.607	1278.35	1487.38	199.544	1389.9	1268.84	240.661	1143.33	1386.18	237.179	1122.33	1199.58	146.947	1379.46	1343.12	407.317	1300.94	1434.61	444.785	1388.26	1259.41	450.156	1447.07	1152.85	479.69	1465.7	980.808	447.891	1465.75	878.262	490.847	1527.53	895.024	496.527	1527.15	788.063
496	0	298.455	1038.12	1612.04	195.403	1033.09	1614.51	311.617	1195.53	1630.38	173.858	1200.42	1637.96	215.716	1265.38	1487.85	201.695	1376.99	1269.27	242.492	1130.4	1386.53	239.062	1109.44	1199.94	149.173	1366.8	1343.71	409.562	1287.6	1434.88	447.254	1373.66	1258.57	452.432	1432.08	1151.93	481.348	1450.53	979.782	449.159	1451.07	877.39	492.856	1512.38	894.072	497.377	1512.9	786.87
497	0	300.049	1024.68	1612.17	196.987	1019.9	1614.69	313.601	1181.97	1631	175.863	1187.21	1638.65	217.746	1252.53	1488.58	203.843	1364.2	1269.95	244.231	1117.58	1387.14	240.897	1096.68	1200.57	151.376	1354.28	1344.52	411.755	1274.31	1435.46	449.814	1358.89	1257.95	454.859	1416.83	1151.16	483.097	1434.72	978.856	450.473	1435.53	876.647	495	1496.36	893.094	498.309	1497.49	785.653
498	0	301.494	1011.36	1612.55	198.422	1006.85	1615.09	315.445	1168.53	1631.89	177.732	1174.13	1639.58	219.686	1239.83	1489.53	205.983	1351.52	1270.85	245.866	1104.89	1388.01	242.668	1084.04	1201.47	153.549	1341.89	1345.55	413.883	1261.08	1436.35	452.448	1344	1257.57	457.431	1401.35	1150.55	484.93	1418.29	978.047	451.825	1419.14	876.049	497.26	1479.48	892.101	499.328	1480.92	784.428
499	0	302.776	998.18	1613.16	199.693	993.959	1615.71	317.137	1155.23	1633.03	179.451	1161.2	1640.75	221.529	1227.29	1490.71	208.108	1338.98	1271.97	247.387	1092.34	1389.13	244.359	1071.54	1202.61	155.69	1329.67	1346.77	415.936	1247.92	1437.53	455.142	1329.01	1257.42	460.138	1385.68	1150.11	486.835	1401.26	977.371	453.206	1401.92	875.616	499.612	1461.76	891.106	500.438	1463.16	783.218
500	0	303.881	985.161	1613.99	200.787	981.238	1616.54	318.667	1142.09	1634.41	181.01	1148.45	1642.13	223.268	1214.92	1492.09	210.215	1326.58	1273.28	248.783	1079.94	1390.48	245.954	1059.19	1203.97	157.793	1317.62	1348.17	417.905	1234.84	1438.99	457.882	1313.96	1257.52	462.97	1369.85	1149.86	488.803	1383.68	976.845	454.607	1383.9	875.363	502.033	1443.23	890.124	501.644	1444.21	782.05
501	0	304.801	972.314	1615.06	201.696	968.706	1617.57	320.027	1129.11	1636.01	182.402	1135.87	1643.7	224.9	1202.74	1493.66	212.299	1314.32	1274.77	250.05	1067.7	1392.04	247.44	1046.99	1205.55	159.858	1305.73	1349.73	419.782	1221.86	1440.71	460.652	1298.87	1257.87	465.915	1353.9	1149.78	490.823	1365.58	976.48	456.019	1365.11	875.307	504.497	1423.94	889.17	502.948	1424.1	780.957
502	0	305.53	959.648	1616.33	202.413	956.374	1618.78	321.216	1116.31	1637.82	183.626	1123.5	1645.45	226.427	1190.73	1495.4	214.355	1302.21	1276.42	251.184	1055.62	1393.79	248.809	1034.94	1207.32	161.881	1294.02	1351.43	421.564	1208.97	1442.66	463.438	1283.76	1258.46	468.959	1337.84	1149.89	492.881	1346.98	976.289	457.434	1345.6	875.463	506.978	1403.91	888.265	504.353	1402.84	779.978
503	0	306.066	947.167	1617.8	202.936	944.249	1620.17	322.236	1103.69	1639.8	184.682	1111.33	1647.34	227.849	1178.91	1497.27	216.38	1290.23	1278.2	252.186	1043.7	1395.7	250.052	1023.03	1209.26	163.862	1282.48	1353.25	423.247	1196.18	1444.82	466.224	1268.67	1259.27	472.086	1321.71	1150.16	494.967	1327.95	976.283	458.842	1325.42	875.846	509.451	1383.2	887.431	505.853	1380.48	779.156
504	0	306.412	934.87	1619.44	203.268	932.332	1621.71	323.091	1091.26	1641.95	185.577	1099.37	1649.36	229.17	1167.26	1499.27	218.369	1278.39	1280.09	253.058	1031.93	1397.77	251.166	1011.26	1211.35	165.799	1271.1	1355.17	424.832	1183.5	1447.15	468.998	1253.6	1260.3	475.282	1305.53	1150.59	497.067	1308.5	976.47	460.234	1304.62	876.468	511.894	1361.86	886.69	507.443	1357.07	778.538
505	0	306.572	922.754	1621.25	203.413	920.622	1623.39	323.789	1079	1644.23	186.319	1087.63	1651.48	230.397	1155.79	1501.37	220.317	1266.68	1282.07	253.805	1020.32	1399.95	252.152	999.623	1213.56	167.691	1259.88	1357.16	426.321	1170.93	1449.62	471.746	1238.57	1261.53	478.53	1289.3	1151.18	499.171	1288.69	976.855	461.604	1283.26	877.341	514.285	1339.93	886.066	509.113	1332.68	778.17
506	0	306.556	910.812	1623.2	203.381	909.111	1625.17	324.343	1066.91	1646.62	186.919	1076.08	1653.67	231.535	1144.48	1503.53	222.22	1255.09	1284.11	254.434	1008.85	1402.22	253.012	988.099	1215.86	169.536	1248.8	1359.19	427.717	1158.45	1452.19	474.457	1223.6	1262.92	481.811	1273.05	1151.89	501.267	1268.55	977.444	462.943	1261.39	878.472	516.604	1317.47	885.584	510.848	1307.38	778.097
507	0	306.378	899.033	1625.25	203.186	897.789	1627.05	324.766	1054.98	1649.08	187.392	1064.73	1655.91	232.594	1133.31	1505.75	224.072	1243.62	1286.18	254.954	997.515	1404.56	253.753	976.682	1218.23	171.333	1237.85	1361.26	429.023	1146.08	1454.85	477.118	1208.69	1264.45	485.109	1256.79	1152.72	503.344	1248.12	978.236	464.245	1239.08	879.869	518.836	1294.53	885.265	512.628	1281.26	778.36
508	0	306.054	887.405	1627.38	202.843	886.643	1628.99	325.074	1043.2	1651.59	187.754	1053.56	1658.16	233.58	1122.28	1507.98	225.868	1232.24	1288.27	255.377	986.294	1406.94	254.383	965.359	1220.64	173.079	1227.02	1363.32	430.244	1133.79	1457.54	479.72	1193.84	1266.1	488.406	1240.52	1153.63	505.393	1227.43	979.23	465.507	1216.36	881.532	520.969	1271.17	885.129	514.431	1254.42	778.992
509	0	305.603	875.916	1629.57	202.372	875.656	1630.96	325.284	1031.56	1654.11	188.02	1042.55	1660.41	234.501	1111.37	1510.2	227.602	1220.96	1290.34	255.714	975.178	1409.32	254.914	954.12	1223.06	174.77	1216.28	1365.37	431.387	1121.6	1460.23	482.255	1179.06	1267.82	491.684	1224.25	1154.62	507.406	1206.53	980.419	466.725	1193.31	883.461	522.991	1247.43	885.19	516.233	1226.96	780.02
510	0	305.046	864.549	1631.77	201.795	864.81	1632.94	325.412	1020.04	1656.61	188.21	1031.69	1662.61	235.364	1100.56	1512.39	229.267	1209.76	1292.36	255.976	964.151	1411.67	255.358	942.955	1225.46	176.403	1205.63	1367.37	432.454	1109.49	1462.9	484.712	1164.36	1269.58	494.929	1207.98	1155.65	509.374	1185.44	981.795	467.895	1169.97	885.649	524.896	1223.35	885.461	518.006	1198.97	781.458
511	0	304.407	853.289	1633.96	201.135	854.083	1634.89	325.476	1008.63	1659.06	188.339	1020.96	1664.75	236.175	1089.83	1514.52	230.857	1198.62	1294.33	256.175	953.199	1413.98	255.727	931.853	1227.81	177.972	1195.04	1369.3	433.451	1097.46	1465.5	487.086	1149.72	1271.34	498.123	1191.7	1156.69	511.29	1164.2	983.344	469.015	1146.39	888.086	526.681	1199	885.946	519.721	1170.57	783.308
512	0	303.709	842.122	1636.1	200.416	843.454	1636.79	325.494	997.31	1661.42	188.425	1010.33	1666.79	236.939	1079.16	1516.56	232.366	1187.55	1296.2	256.324	942.306	1416.2	256.035	920.806	1230.07	179.472	1184.49	1371.15	434.38	1085.5	1468	489.368	1135.14	1273.08	501.251	1175.42	1157.71	513.146	1142.83	985.05	470.084	1122.61	890.756	528.342	1174.41	886.647	521.353	1141.86	785.563
513	0	302.975	831.03	1638.16	199.661	832.903	1638.62	325.479	986.07	1663.66	188.482	999.788	1668.71	237.659	1068.55	1518.48	233.786	1176.52	1297.96	256.433	931.458	1418.3	256.295	909.807	1232.21	180.899	1173.98	1372.88	435.246	1073.62	1470.37	491.552	1120.63	1274.73	504.299	1159.13	1158.69	514.937	1121.37	986.895	471.099	1098.69	893.641	529.881	1149.62	887.56	522.874	1112.94	788.205
514	0	302.228	820	1640.11	198.892	822.406	1640.33	325.446	974.895	1665.75	188.524	989.308	1670.48	238.338	1057.96	1520.27	235.111	1165.52	1299.58	256.512	920.643	1420.26	256.518	898.848	1234.21	182.246	1163.48	1374.48	436.048	1061.8	1472.58	493.631	1106.17	1276.29	507.253	1142.82	1159.6	516.655	1099.83	988.856	472.058	1074.66	896.717	531.299	1124.68	888.677	524.261	1083.9	791.207
515	0	301.486	809.017	1641.92	198.131	811.943	1641.91	325.407	963.772	1667.66	188.561	978.868	1672.07	238.977	1047.38	1521.91	236.336	1154.55	1301.05	256.57	909.846	1422.05	256.715	887.923	1236.04	183.507	1152.98	1375.93	436.788	1050.05	1474.61	495.599	1091.76	1277.7	510.1	1126.49	1160.4	518.294	1078.24	990.912	472.959	1050.56	899.959	532.598	1099.62	889.987	525.495	1054.83	794.533
516	0	300.769	798.066	1643.56	197.394	801.494	1643.34	325.371	952.689	1669.37	188.602	968.448	1673.48	239.575	1036.8	1523.36	237.454	1143.6	1302.35	256.614	899.056	1423.65	256.896	877.028	1237.67	184.676	1142.47	1377.22	437.465	1038.35	1476.43	497.449	1077.39	1278.95	512.827	1110.13	1161.08	519.845	1056.62	993.038	473.798	1026.43	903.339	533.781	1074.48	891.474	526.559	1025.8	798.144
517	0	300.09	787.134	1645.01	196.696	791.04	1644.59	325.346	941.633	1670.85	188.654	958.029	1674.67	240.131	1026.2	1524.61	238.461	1132.65	1303.45	256.65	888.263	1425.04	257.069	866.155	1239.08	185.748	1131.93	1378.32	438.078	1026.72	1478.01	499.174	1063.06	1280	515.421	1093.74	1161.61	521.303	1034.99	995.211	474.571	1002.3	906.828	534.852	1049.3	893.12	527.445	996.897	801.999
518	0	299.461	776.209	1646.26	196.049	780.566	1645.64	325.337	930.593	1672.09	188.721	947.593	1675.64	240.642	1015.57	1525.66	239.352	1121.71	1304.36	256.681	877.457	1426.2	257.24	855.299	1240.26	186.716	1121.34	1379.24	438.625	1015.15	1479.35	500.768	1048.76	1280.83	517.871	1077.3	1161.97	522.658	1013.37	997.407	475.272	978.217	910.396	535.813	1024.12	894.907	528.145	968.168	806.054
519	0	298.887	765.28	1647.28	195.459	770.056	1646.48	325.344	919.557	1673.07	188.804	937.126	1676.38	241.104	1004.91	1526.48	240.123	1110.76	1305.05	256.709	866.628	1427.11	257.413	844.454	1241.19	187.576	1110.71	1379.94	439.101	1003.62	1480.43	502.224	1034.48	1281.42	520.165	1060.82	1162.15	523.904	991.786	999.603	475.896	954.2	914.015	536.667	998.969	896.813	528.661	939.67	810.268
520	0	298.373	754.335	1648.06	194.929	759.498	1647.1	325.37	908.517	1673.79	188.901	926.614	1676.87	241.514	994.192	1527.07	240.772	1099.79	1305.53	256.736	855.768	1427.78	257.589	833.612	1241.85	188.321	1100.02	1380.43	439.504	992.149	1481.23	503.533	1020.21	1281.78	522.291	1044.28	1162.14	525.032	970.25	1001.78	476.436	930.284	917.655	537.414	973.885	898.818	528.996	911.449	814.601
521	0	297.918	743.366	1648.59	194.458	748.882	1647.49	325.41	897.461	1674.25	189.01	916.044	1677.12	241.865	983.418	1527.43	241.296	1088.8	1305.78	256.759	844.87	1428.18	257.769	822.764	1242.26	188.947	1089.25	1380.7	439.828	980.715	1481.77	504.691	1005.97	1281.87	524.24	1027.7	1161.93	526.036	948.786	1003.91	476.886	906.501	921.29	538.056	948.907	900.9	529.16	883.542	819.015
522	0	297.518	732.364	1648.88	194.042	738.199	1647.65	325.46	886.382	1674.44	189.125	905.408	1677.12	242.152	972.579	1527.54	241.695	1077.77	1305.8	256.774	833.926	1428.33	257.949	811.902	1242.4	189.45	1078.41	1380.75	440.069	969.315	1482.03	505.689	991.733	1281.71	526.001	1011.08	1161.52	526.908	927.416	1005.99	477.24	882.88	924.894	538.592	924.072	903.038	529.162	855.984	823.479
523	0	297.165	721.321	1648.91	193.674	727.442	1647.57	325.512	875.271	1674.36	189.237	894.698	1676.88	242.367	961.667	1527.41	241.968	1066.71	1305.59	256.778	822.929	1428.22	258.126	801.015	1242.28	189.826	1067.48	1380.57	440.22	957.941	1482.02	506.522	977.509	1281.3	527.567	994.418	1160.91	527.642	906.16	1008	477.491	859.45	928.445	539.021	899.417	905.212	529.018	828.806	827.961
524	0	296.849	710.231	1648.69	193.343	716.606	1647.25	325.557	864.123	1674.03	189.338	883.908	1676.4	242.503	950.679	1527.05	242.116	1055.61	1305.15	256.762	811.872	1427.85	258.293	790.092	1241.9	190.073	1056.46	1380.17	440.278	946.583	1481.75	507.185	963.294	1280.64	528.928	977.732	1160.11	528.233	885.043	1009.92	477.635	836.241	931.922	539.341	874.981	907.402	528.74	802.034	832.434
525	0	296.558	699.089	1648.23	193.036	705.687	1646.71	325.584	852.931	1673.45	189.415	873.033	1675.69	242.555	939.609	1526.45	242.14	1044.45	1304.5	256.719	800.748	1427.24	258.442	779.118	1241.27	190.189	1045.35	1379.54	440.235	935.229	1481.21	507.672	949.089	1279.74	530.081	961.034	1159.13	528.677	864.089	1011.75	477.666	813.279	935.308	539.547	850.802	909.588	528.345	775.694	836.875
526	0	296.275	687.891	1647.53	192.738	694.683	1645.94	325.579	841.691	1672.63	189.456	862.069	1674.77	242.514	928.454	1525.62	242.041	1033.22	1303.63	256.639	789.552	1426.4	258.565	768.083	1240.41	190.173	1034.13	1378.69	440.086	923.866	1480.44	507.981	934.893	1278.62	531.02	944.34	1157.98	528.97	843.324	1013.47	477.581	790.594	938.586	539.638	826.919	911.753	527.846	749.81	841.261
527	0	295.986	676.632	1646.62	192.433	683.591	1644.97	325.529	830.399	1671.59	189.445	851.015	1673.64	242.373	917.21	1524.58	241.824	1021.93	1302.55	256.512	778.276	1425.34	258.652	756.972	1239.33	190.027	1022.81	1377.63	439.827	912.48	1479.43	508.111	920.709	1277.3	531.743	927.67	1156.67	529.109	822.773	1015.07	477.378	768.213	941.744	539.607	803.368	913.878	527.256	724.406	845.574
528	0	295.673	665.311	1645.5	192.104	672.41	1643.81	325.417	819.052	1670.35	189.367	839.868	1672.32	242.127	905.875	1523.34	241.493	1010.55	1301.28	256.326	766.915	1424.08	258.691	745.773	1238.05	189.752	1011.39	1376.37	439.454	901.055	1478.22	508.06	906.537	1275.8	532.251	911.044	1155.23	529.095	802.464	1016.57	477.056	746.162	944.771	539.451	780.186	915.946	526.585	699.503	849.794
529	0	295.318	653.925	1644.2	191.734	661.139	1642.47	325.227	807.646	1668.93	189.205	828.628	1670.83	241.769	894.444	1521.91	241.052	999.096	1299.82	256.071	755.462	1422.63	258.674	734.472	1236.58	189.352	999.853	1374.92	438.962	889.575	1476.81	507.83	892.381	1274.14	532.546	894.484	1153.67	528.927	782.422	1017.94	476.612	724.469	947.659	539.166	757.41	917.944	525.842	675.126	853.906
530	0	294.903	642.472	1642.73	191.304	649.777	1640.97	324.943	796.182	1667.34	188.944	817.294	1669.19	241.296	882.917	1520.31	240.509	987.544	1298.2	255.735	743.912	1421.02	258.588	723.057	1234.95	188.833	988.21	1373.28	438.35	878.024	1475.24	507.426	878.244	1272.34	532.634	878.015	1152.02	528.606	762.676	1019.19	476.049	703.16	950.399	538.747	735.073	919.856	525.031	651.296	857.896
531	0	294.412	630.95	1641.12	190.798	638.322	1639.34	324.548	784.656	1665.61	188.566	805.865	1667.41	240.703	871.29	1518.56	239.869	975.893	1296.43	255.307	732.26	1419.26	258.423	711.519	1233.18	188.2	976.457	1371.49	437.617	866.384	1473.52	506.853	864.127	1270.44	532.521	861.662	1150.29	528.135	743.251	1020.31	475.365	682.263	952.987	538.191	713.207	921.671	524.156	628.037	861.749
532	0	293.828	619.357	1639.4	190.201	626.774	1637.59	324.027	773.069	1663.76	188.057	794.34	1665.51	239.988	859.562	1516.67	239.142	964.138	1294.53	254.776	720.502	1417.38	258.172	699.848	1231.29	187.462	964.596	1369.55	436.764	854.64	1471.68	506.12	850.035	1268.46	532.217	845.448	1148.51	527.518	724.174	1021.32	474.562	661.802	955.417	537.495	691.843	923.378	523.216	605.369	865.453
533	0	293.137	607.691	1637.59	189.497	615.131	1635.76	323.366	761.416	1661.81	187.401	782.719	1663.52	239.15	847.732	1514.67	238.334	952.277	1292.51	254.135	708.632	1415.4	257.825	688.036	1229.31	186.625	952.627	1367.48	435.793	842.777	1469.76	505.237	835.972	1266.43	531.734	829.398	1146.7	526.758	705.469	1022.21	473.641	641.805	957.687	536.659	671.007	924.968	522.208	583.315	868.994
534	0	292.325	595.95	1635.72	188.675	603.391	1633.86	322.553	749.698	1659.8	186.588	771.002	1661.45	238.189	835.798	1512.59	237.456	940.306	1290.41	253.376	696.649	1413.35	257.375	676.079	1227.25	185.7	940.554	1365.31	434.707	830.782	1467.77	504.215	821.943	1264.39	531.086	813.537	1144.88	525.86	687.159	1022.98	472.604	622.295	959.793	535.683	650.726	926.433	521.128	561.896	872.36
535	0	291.382	584.133	1633.82	187.722	591.555	1631.92	321.577	737.913	1657.74	185.607	759.187	1659.33	237.107	823.759	1510.44	236.513	928.226	1288.25	252.495	684.55	1411.24	256.819	663.973	1225.15	184.694	928.379	1363.06	433.511	818.646	1465.74	503.069	807.954	1262.35	530.286	797.889	1143.09	524.833	669.267	1023.65	471.455	603.297	961.732	534.568	631.022	927.767	519.97	541.131	875.538
536	0	290.3	572.236	1631.91	186.632	579.621	1629.96	320.431	726.057	1655.66	184.451	747.274	1657.17	235.906	811.616	1508.25	235.516	916.039	1286.05	251.489	672.336	1409.11	256.152	651.718	1223.02	183.616	916.105	1360.74	432.211	806.363	1463.71	501.811	794.013	1260.35	529.351	782.473	1141.33	523.681	651.813	1024.21	470.195	584.834	963.5	533.319	611.915	928.966	518.727	521.04	878.515
537	0	289.073	560.258	1630.03	185.399	567.588	1628.01	319.112	714.128	1653.59	183.119	735.263	1655.01	234.592	799.372	1506.06	234.469	903.747	1283.83	250.359	660.008	1406.98	255.376	639.314	1220.9	182.476	903.737	1358.4	430.815	793.93	1461.71	500.458	780.127	1258.41	528.296	767.312	1139.64	522.414	634.816	1024.67	468.828	566.927	965.093	531.942	593.423	930.024	517.392	501.641	881.275
538	0	287.698	548.198	1628.19	184.021	555.458	1626.09	317.62	702.125	1651.56	181.61	723.156	1652.86	233.171	787.029	1503.88	233.38	891.357	1281.64	249.109	647.569	1404.87	254.492	626.767	1218.81	181.279	891.282	1356.05	429.332	781.351	1459.75	499.025	766.307	1256.56	527.137	752.422	1138.02	521.041	618.291	1025.03	467.361	549.596	966.507	530.446	575.56	930.94	515.96	482.95	883.803
539	0	286.178	536.055	1626.43	182.5	543.231	1624.22	315.96	690.045	1649.59	179.93	710.954	1650.74	231.651	774.591	1501.74	232.252	878.873	1279.48	247.746	635.026	1402.81	253.505	614.084	1216.77	180.032	878.746	1353.72	427.77	768.634	1457.87	497.529	752.563	1254.81	525.892	737.819	1136.51	519.57	602.254	1025.3	465.798	532.859	967.737	528.843	558.341	931.713	514.425	464.984	886.082
540	0	284.516	523.828	1624.76	180.84	530.912	1622.41	314.14	677.886	1647.71	178.089	698.66	1648.67	230.041	762.068	1499.67	231.088	866.306	1277.4	246.28	622.387	1400.83	252.424	601.274	1214.82	178.74	866.138	1351.45	426.141	755.792	1456.09	495.983	738.908	1253.2	524.574	723.518	1135.1	518.014	586.715	1025.48	464.149	516.732	968.777	527.148	541.773	932.342	512.786	447.756	888.095
541	0	282.721	511.52	1623.21	179.052	518.505	1620.7	312.173	665.65	1645.94	176.101	686.279	1646.69	228.352	749.466	1497.7	229.891	853.665	1275.41	244.725	609.664	1398.94	251.258	588.351	1212.97	177.408	853.466	1349.25	424.456	742.844	1454.42	494.404	725.357	1251.74	523.198	709.531	1133.83	516.383	571.686	1025.57	462.421	501.226	969.621	525.377	525.867	932.826	511.044	431.278	889.823
542	0	280.807	499.135	1621.78	177.147	506.017	1619.09	310.077	653.337	1644.3	173.983	673.816	1644.8	226.598	736.799	1495.84	228.662	840.961	1273.54	243.096	596.868	1397.18	250.02	575.33	1211.24	176.037	840.742	1347.17	422.727	729.813	1452.9	492.804	711.926	1250.44	521.777	695.867	1132.69	514.69	557.174	1025.58	460.626	486.352	970.263	523.548	510.628	933.164	509.201	415.562	891.247
543	0	278.788	486.677	1620.5	175.142	493.457	1617.59	307.873	640.951	1642.83	171.757	661.281	1643.03	224.793	724.079	1494.13	227.399	828.206	1271.81	241.412	584.016	1395.55	248.723	562.231	1209.67	174.632	827.979	1345.22	420.968	716.726	1451.54	491.194	698.633	1249.31	520.323	682.535	1131.71	512.948	543.187	1025.51	458.776	472.118	970.697	521.68	496.062	933.355	507.267	400.617	892.347
544	0	276.686	474.154	1619.38	173.058	480.835	1616.22	305.585	628.498	1641.52	169.449	648.682	1641.4	222.951	711.323	1492.58	226.105	815.415	1270.24	239.693	571.127	1394.09	247.383	549.076	1208.26	173.193	815.192	1343.43	419.193	703.612	1450.34	489.584	685.496	1248.36	518.844	669.543	1130.88	511.17	529.729	1025.36	456.886	458.528	970.917	519.793	482.173	933.4	505.252	386.45	893.107
545	0	274.524	461.576	1618.41	170.917	468.164	1615	303.241	615.985	1640.41	167.088	636.032	1639.93	221.089	698.547	1491.22	224.779	802.602	1268.85	237.959	558.219	1392.81	246.016	535.889	1207.04	171.724	802.394	1341.82	417.416	690.503	1449.33	487.983	672.537	1247.6	517.349	656.895	1130.21	509.371	516.803	1025.12	454.971	445.584	970.917	517.907	468.964	933.296	503.173	373.065	893.509
546	0	272.327	448.956	1617.62	168.744	455.46	1613.92	300.872	603.423	1639.5	164.703	623.345	1638.63	219.225	685.771	1490.05	223.421	789.781	1267.67	236.233	545.315	1391.72	244.636	522.698	1206.02	170.227	789.603	1340.42	415.651	677.431	1448.51	486.397	659.775	1247.02	515.843	644.595	1129.71	507.566	504.412	1024.81	453.049	433.284	970.695	516.041	456.438	933.043	501.052	360.467	893.541
547	0	270.124	436.308	1616.99	166.569	442.738	1613	298.509	590.824	1638.8	162.327	610.637	1637.53	217.375	673.014	1489.1	222.036	776.969	1266.69	234.534	532.436	1390.85	243.258	509.53	1205.22	168.707	776.834	1339.25	413.914	664.428	1447.88	484.832	647.23	1246.63	514.333	632.647	1129.36	505.77	492.557	1024.41	451.138	421.627	970.247	514.215	444.596	932.637	498.911	348.656	893.192
548	0	267.945	423.648	1616.54	164.419	430.016	1612.24	296.186	578.204	1638.32	159.994	597.923	1636.64	215.556	660.298	1488.37	220.626	764.18	1265.93	232.882	519.604	1390.19	241.896	496.415	1204.64	167.166	764.105	1338.32	412.217	651.525	1447.46	483.292	634.924	1246.43	512.82	621.052	1129.18	503.996	481.237	1023.93	449.257	410.605	969.571	512.447	433.44	932.079	496.781	337.631	892.456
549	0	265.82	410.995	1616.26	162.326	417.313	1611.65	293.934	565.578	1638.06	157.734	585.222	1635.96	213.786	647.643	1487.88	219.195	751.43	1265.41	231.295	506.842	1389.76	240.563	483.38	1204.29	165.611	751.431	1337.64	410.574	638.753	1447.23	481.778	622.872	1246.4	511.305	609.81	1129.15	502.26	470.452	1023.36	447.426	400.212	968.668	510.751	422.97	931.366	494.69	327.389	891.331
550	0	263.78	398.366	1616.15	160.318	404.646	1611.25	291.784	552.966	1638.02	155.581	572.552	1635.53	212.08	635.069	1487.64	217.748	738.732	1265.11	229.789	494.169	1389.58	239.271	470.449	1204.18	164.048	738.826	1337.23	408.995	626.139	1447.2	480.295	611.092	1246.54	509.789	598.921	1129.27	500.576	460.199	1022.7	445.665	390.438	967.542	509.144	413.185	930.499	492.671	317.926	889.821
551	0	261.855	385.782	1616.21	158.425	392.034	1611.03	289.767	540.386	1638.21	153.561	559.93	1635.35	210.449	622.595	1487.63	216.293	726.1	1265.05	228.379	481.604	1389.63	238.029	457.643	1204.31	162.484	726.303	1337.08	407.491	613.706	1447.37	478.841	599.596	1246.84	508.27	588.383	1129.54	498.955	450.475	1021.96	443.994	381.273	966.196	507.637	404.085	929.479	490.759	309.237	887.936
552	0	260.073	373.263	1616.44	156.673	379.494	1611	287.906	527.86	1638.63	151.7	547.372	1635.42	208.906	610.236	1487.88	214.832	713.544	1265.23	227.074	469.163	1389.94	236.847	444.98	1204.68	160.925	713.871	1337.19	406.069	601.475	1447.72	477.418	588.395	1247.31	506.746	578.192	1129.94	497.41	441.277	1021.14	442.429	372.704	964.639	506.24	395.668	928.31	488.986	301.314	885.69
553	0	258.46	360.828	1616.84	155.088	367.041	1611.19	286.224	515.408	1639.26	150.018	534.896	1635.77	207.459	598.005	1488.37	213.372	701.076	1265.62	225.882	456.857	1390.5	235.732	432.47	1205.31	159.377	701.538	1337.56	404.734	589.463	1448.26	476.024	577.495	1247.92	505.211	568.343	1130.47	495.951	432.6	1020.23	440.991	364.72	962.88	504.962	387.932	926.998	487.385	294.152	883.105
554	0	257.04	348.496	1617.41	153.691	354.69	1611.59	284.737	503.05	1640.09	148.531	522.516	1636.39	206.114	585.913	1489.09	211.917	688.702	1266.24	224.811	444.696	1391.31	234.689	420.117	1206.18	157.847	689.307	1338.19	403.489	577.68	1448.98	474.658	566.899	1248.68	503.662	558.832	1131.13	494.586	424.437	1019.25	439.694	357.306	960.933	503.81	380.872	925.551	485.989	287.742	880.207
555	0	255.829	336.285	1618.16	152.5	342.452	1612.22	283.456	490.808	1641.14	147.248	510.244	1637.29	204.873	573.964	1490.05	210.469	676.428	1267.06	223.861	432.682	1392.37	233.724	407.922	1207.3	156.339	677.179	1339.06	402.337	566.133	1449.86	473.318	556.607	1249.58	502.094	549.65	1131.9	493.323	416.784	1018.2	438.553	350.451	958.812	502.786	374.485	923.982	484.824	282.079	877.03
556	0	254.842	324.21	1619.1	151.527	330.337	1613.09	282.386	478.699	1642.37	146.176	498.092	1638.45	203.737	562.158	1491.22	209.03	664.259	1268.08	223.034	420.816	1393.67	232.839	395.878	1208.66	154.859	665.151	1340.16	401.276	554.82	1450.91	472.001	546.614	1250.6	500.502	540.788	1132.78	492.166	409.631	1017.08	437.58	344.139	956.537	501.894	368.764	922.304	483.916	277.153	873.611
557	0	254.087	312.285	1620.22	150.779	318.351	1614.2	281.528	466.741	1643.79	145.312	486.07	1639.89	202.703	550.493	1492.6	207.604	652.193	1269.28	222.328	409.091	1395.21	232.034	383.974	1210.24	153.408	653.216	1341.47	400.303	543.735	1452.1	470.703	536.914	1251.75	498.882	532.237	1133.78	491.119	402.97	1015.92	436.786	338.358	954.126	501.134	363.699	920.536	483.286	272.957	869.99
558	0	253.566	300.52	1621.53	150.261	306.5	1615.56	280.877	454.946	1645.37	144.65	474.183	1641.57	201.767	538.959	1494.16	206.191	640.232	1270.64	221.737	397.498	1396.96	231.31	372.198	1212.03	151.99	641.366	1342.97	399.412	532.867	1453.43	469.422	527.494	1253.02	497.229	523.986	1134.87	490.184	396.791	1014.71	436.178	333.092	951.602	500.504	359.281	918.698	482.948	269.483	866.21
559	0	253.277	288.92	1623.03	149.968	294.784	1617.17	280.422	443.326	1647.09	144.181	462.435	1643.47	200.924	527.544	1495.89	204.793	628.37	1272.14	221.255	386.025	1398.91	230.663	360.533	1214.02	150.604	629.59	1344.63	398.599	522.198	1454.88	468.153	518.342	1254.4	495.544	516.023	1136.06	489.36	391.081	1013.48	435.759	328.326	948.985	500.002	355.493	916.809	482.91	266.718	862.315
560	0	253.212	277.489	1624.71	149.891	283.202	1619.02	280.151	431.885	1648.93	143.889	450.828	1645.58	200.165	516.233	1497.75	203.411	616.603	1273.77	220.875	374.654	1401.03	230.088	348.964	1216.18	149.251	617.874	1346.43	397.853	511.706	1456.44	466.892	509.44	1255.87	493.824	508.333	1137.34	488.646	385.826	1012.22	435.532	324.045	946.299	499.623	352.318	914.891	483.173	264.65	858.347
561	0	253.355	266.224	1626.57	150.02	271.75	1621.1	280.044	420.626	1650.87	143.756	439.359	1647.85	199.482	505.007	1499.73	202.049	604.925	1275.5	220.586	363.369	1403.29	229.58	337.471	1218.46	147.929	606.206	1348.34	397.169	501.364	1458.07	465.638	500.769	1257.42	492.071	500.901	1138.71	488.039	381.008	1010.96	435.493	320.229	943.563	499.359	349.734	912.966	483.732	263.26	854.346
562	0	253.69	255.12	1628.59	150.334	260.42	1623.38	280.082	409.544	1652.87	143.763	428.023	1650.24	198.866	493.847	1501.78	200.709	593.327	1277.3	220.379	352.148	1405.65	229.132	326.041	1220.85	146.639	594.57	1350.33	396.536	491.144	1459.77	464.387	492.307	1259.04	490.29	493.71	1140.14	487.533	376.61	1009.7	435.637	316.861	940.798	499.204	347.714	911.052	484.572	262.526	850.348
563	0	254.196	244.165	1630.75	150.814	249.202	1625.84	280.242	398.63	1654.9	143.888	416.81	1652.71	198.308	482.731	1503.88	199.395	581.802	1279.15	220.244	340.973	1408.08	228.736	314.655	1223.29	145.379	582.954	1352.36	395.947	481.017	1461.49	463.138	484.03	1260.71	488.484	486.742	1141.62	487.123	372.608	1008.45	435.957	313.918	938.02	499.147	346.225	909.169	485.672	262.423	846.383
564	0	254.846	233.344	1633.01	151.437	238.083	1628.44	280.502	387.871	1656.92	144.107	405.709	1655.22	197.8	471.639	1505.99	198.113	570.339	1281.02	220.168	329.823	1410.53	228.385	303.301	1225.74	144.149	571.345	1354.41	395.393	470.952	1463.22	461.892	475.913	1262.4	486.661	479.976	1143.15	486.803	368.977	1007.21	436.44	311.379	935.245	499.179	345.232	907.332	487.002	262.918	842.478
565	0	255.617	222.639	1635.35	152.177	227.046	1631.13	280.839	377.246	1658.91	144.4	394.703	1657.72	197.332	460.55	1508.08	196.868	558.931	1282.88	220.142	318.68	1412.96	228.071	291.965	1228.17	142.949	559.732	1356.43	394.868	460.919	1464.92	460.65	467.929	1264.1	484.829	473.389	1144.7	486.564	365.689	1006	437.073	309.218	932.484	499.288	344.694	905.554	488.528	263.974	838.65
566	0	256.48	212.026	1637.72	153.008	216.074	1633.87	281.229	366.734	1660.82	144.743	383.773	1660.15	196.899	449.444	1510.1	195.666	547.569	1284.7	220.156	307.526	1415.32	227.788	280.634	1230.51	141.783	548.103	1358.41	394.366	450.889	1466.57	459.412	460.052	1265.78	482.997	466.957	1146.25	486.397	362.714	1004.81	437.838	307.408	929.747	499.463	344.567	903.847	490.21	265.548	834.914
567	0	257.41	201.481	1640.09	153.905	205.145	1636.61	281.65	356.307	1662.63	145.117	372.896	1662.47	196.494	438.303	1512.03	194.514	536.245	1286.45	220.2	296.347	1417.57	227.529	269.3	1232.74	140.652	536.452	1360.29	393.883	440.836	1468.12	458.184	452.252	1267.42	481.174	460.654	1147.78	486.294	360.016	1003.64	438.718	305.92	927.042	499.691	344.801	902.218	492.005	267.595	831.277
568	0	258.382	190.976	1642.4	154.843	194.237	1639.29	282.085	345.937	1664.29	145.502	362.05	1664.64	196.112	427.113	1513.84	193.42	524.949	1288.11	220.267	285.128	1419.67	227.289	257.954	1234.8	139.563	524.772	1362.05	393.415	430.736	1469.56	456.967	444.504	1268.98	479.369	454.452	1149.28	486.245	357.56	1002.49	439.692	304.723	924.373	499.961	345.347	900.674	493.869	270.063	827.744
569	0	259.37	180.484	1644.6	155.8	183.329	1641.86	282.515	335.591	1665.79	145.883	351.209	1666.62	195.752	415.86	1515.48	192.393	513.674	1289.64	220.352	273.859	1421.59	227.067	246.588	1236.66	138.521	513.057	1363.67	392.962	420.565	1470.85	455.767	436.779	1270.46	477.593	448.322	1150.72	486.238	355.309	1001.37	440.739	303.784	921.744	500.26	346.151	899.221	495.759	272.899	824.317
570	0	260.355	169.975	1646.66	156.756	172.396	1644.26	282.927	325.238	1667.1	146.245	340.348	1668.38	195.413	404.532	1516.94	191.441	502.412	1291.03	220.448	262.531	1423.27	226.858	235.199	1238.28	137.535	501.306	1365.12	392.525	410.307	1471.97	454.589	429.051	1271.83	475.855	442.234	1152.09	486.266	353.221	1000.28	441.838	303.069	919.159	500.578	347.161	897.862	497.633	276.047	820.997
571	0	261.318	159.42	1648.53	157.692	161.417	1646.45	283.311	314.846	1668.19	146.58	329.442	1669.88	195.097	393.12	1518.18	190.573	491.153	1292.25	220.554	251.137	1424.71	226.664	223.78	1239.63	136.613	489.514	1366.37	392.104	399.942	1472.89	453.438	421.296	1273.06	474.161	436.159	1153.37	486.318	351.258	999.208	442.969	302.544	916.621	500.904	348.321	896.604	499.454	279.449	817.787
572	0	262.245	148.793	1650.18	158.596	150.369	1648.38	283.658	304.383	1669.05	146.88	318.465	1671.1	194.806	381.618	1519.2	189.798	479.887	1293.29	220.669	239.67	1425.87	226.486	212.328	1240.7	135.766	477.682	1367.41	391.706	389.459	1473.61	452.32	413.488	1274.16	472.519	430.067	1154.55	486.385	349.378	998.164	444.111	302.172	914.134	501.228	349.579	895.449	501.19	283.045	814.69
573	0	263.125	138.067	1651.56	159.456	139.234	1650.02	283.966	293.823	1669.68	147.141	307.397	1672.04	194.546	370.019	1519.97	189.123	468.604	1294.12	220.794	228.127	1426.74	226.327	200.84	1241.47	135.005	465.806	1368.22	391.335	378.843	1474.09	451.242	405.604	1275.1	470.935	423.932	1155.62	486.458	347.542	997.149	445.247	301.915	911.703	501.542	350.883	894.402	502.817	286.778	811.714
574	0	263.951	127.22	1652.65	160.265	127.992	1651.33	284.235	283.137	1670.06	147.365	296.217	1672.68	194.323	358.321	1520.49	188.558	457.293	1294.73	220.932	216.504	1427.3	226.191	189.31	1241.92	134.341	453.886	1368.79	390.998	368.085	1474.35	450.21	397.624	1275.88	469.413	417.725	1156.57	486.531	345.711	996.163	446.358	301.736	909.334	501.838	352.183	893.468	504.314	290.586	808.868
575	0	264.719	116.232	1653.44	161.021	116.629	1652.3	284.469	272.303	1670.19	147.554	284.909	1673.02	194.147	346.52	1520.75	188.109	445.941	1295.12	221.087	204.797	1427.56	226.084	177.736	1242.05	133.785	441.92	1369.12	390.706	357.175	1474.36	449.231	389.527	1276.5	467.958	411.423	1157.41	486.599	343.847	995.212	447.433	301.598	907.035	502.108	353.43	892.654	505.669	294.414	806.166
576	0	265.431	105.085	1653.9	161.723	105.132	1652.91	284.674	261.302	1670.07	147.716	273.458	1673.07	194.028	334.615	1520.75	187.783	434.536	1295.28	221.266	193.005	1427.51	226.011	166.112	1241.88	133.349	429.906	1369.2	390.467	346.107	1474.14	448.312	381.297	1276.95	466.573	405.004	1158.13	486.656	341.914	994.3	448.457	301.46	904.814	502.346	354.581	891.963	506.875	298.203	803.623
577	0	266.089	93.7653	1654.05	162.375	93.4913	1653.16	284.862	250.118	1669.72	147.861	261.855	1672.82	193.976	322.606	1520.49	187.587	423.065	1295.21	221.476	181.125	1427.16	225.98	154.433	1241.39	133.041	417.841	1369.04	390.293	334.875	1473.68	447.462	372.917	1277.24	465.26	398.447	1158.73	486.701	339.876	993.43	449.423	301.286	902.682	502.547	355.591	891.4	507.931	301.9	801.256
578	0	266.702	82.2637	1653.87	162.983	81.7014	1653.05	285.046	238.74	1669.14	148.003	250.093	1672.3	194.003	310.491	1519.99	187.524	411.515	1294.91	221.726	169.155	1426.52	225.997	142.692	1240.62	132.872	405.723	1368.65	390.195	323.474	1473	446.688	364.374	1277.38	464.022	391.734	1159.22	486.73	337.7	992.606	450.323	301.035	900.647	502.706	356.422	890.97	508.838	305.452	799.081
579	0	267.279	70.5737	1653.39	163.558	69.7587	1652.59	285.239	227.16	1668.34	148.156	238.169	1671.51	194.122	298.272	1519.24	187.599	399.872	1294.38	222.025	157.092	1425.61	226.069	130.882	1239.57	132.849	393.545	1368.03	390.185	311.902	1472.1	445.998	355.655	1277.37	462.86	384.848	1159.61	486.745	335.355	991.832	451.155	300.67	898.719	502.821	357.034	890.673	509.601	308.811	797.113
580	0	267.831	58.6924	1652.62	164.11	57.663	1651.82	285.461	215.376	1667.34	148.338	226.085	1670.49	194.343	285.948	1518.28	187.813	388.125	1293.63	222.382	144.935	1424.44	226.205	118.995	1238.28	132.978	381.305	1367.2	390.274	300.156	1471	445.401	346.75	1277.22	461.778	377.773	1159.9	486.747	332.81	991.11	451.918	300.152	896.906	502.887	357.392	890.508	510.225	311.93	795.363
581	0	268.374	46.62	1651.57	164.653	45.4169	1650.73	285.728	203.387	1666.15	148.569	213.844	1669.24	194.679	273.522	1517.1	188.169	376.263	1292.68	222.809	132.681	1423.05	226.409	107.023	1236.76	133.263	368.996	1366.17	390.475	288.237	1469.71	444.905	337.65	1276.94	460.778	370.494	1160.1	486.738	330.036	990.438	452.612	299.441	895.214	502.906	357.461	890.472	510.718	314.763	793.838
582	0	268.922	34.3599	1650.27	165.203	33.0253	1649.38	286.06	191.197	1664.8	148.867	201.451	1667.8	195.14	260.993	1515.74	188.664	364.276	1291.54	223.316	120.328	1421.45	226.69	94.9584	1235.04	133.707	356.614	1364.96	390.796	276.147	1468.25	444.517	328.346	1276.54	459.865	362.999	1160.2	486.722	327.003	989.816	453.24	298.498	893.647	502.878	357.207	890.558	511.087	317.27	792.54
583	0	269.492	21.9181	1648.76	165.774	20.4955	1647.79	286.477	178.811	1663.29	149.253	188.917	1666.18	195.735	248.364	1514.22	189.299	352.158	1290.22	223.911	107.876	1419.67	227.053	82.7932	1233.15	134.31	344.154	1363.59	391.249	263.888	1466.63	444.245	318.833	1276.02	459.043	355.273	1160.23	486.705	323.683	989.239	453.807	297.285	892.203	502.805	356.598	890.755	511.34	319.409	791.464
584	0	270.101	9.30285	1647.06	166.384	7.83617	1646	286.997	166.238	1661.64	149.747	176.252	1664.41	196.473	235.637	1512.55	190.07	339.903	1288.74	224.606	95.3231	1417.74	227.504	70.5203	1231.13	135.072	331.611	1362.08	391.841	251.467	1464.87	444.095	309.103	1275.4	458.318	347.303	1160.17	486.691	320.047	988.699	454.318	295.762	890.881	502.693	355.599	891.049	511.484	321.141	790.601
585	0	270.765	-3.47559	1645.21	167.049	-4.9423	1644.03	287.638	153.489	1659.89	150.368	163.466	1662.52	197.36	222.814	1510.77	190.971	327.509	1287.12	225.406	82.67	1415.69	228.047	58.134	1228.99	135.989	318.983	1360.46	392.577	238.89	1462.99	444.075	299.151	1274.68	457.695	339.076	1160.02	486.689	316.068	988.189	454.779	293.892	889.672	502.55	354.179	891.422	511.526	322.428	789.933
586	0	271.501	-16.4055	1643.23	167.785	-17.8288	1641.95	288.415	140.575	1658.04	151.133	150.574	1660.53	198.399	209.899	1508.89	191.999	314.975	1285.4	226.32	69.9177	1413.56	228.685	45.6298	1226.78	137.057	306.268	1358.74	393.464	226.166	1460.99	444.188	288.973	1273.86	457.181	330.579	1159.8	486.705	311.715	987.695	455.196	291.634	888.566	502.384	352.302	891.856	511.475	323.229	789.438
587	0	272.323	-29.4739	1641.16	168.606	-30.8114	1639.76	289.343	127.51	1656.12	152.057	137.587	1658.46	199.593	196.896	1506.93	193.146	302.305	1283.57	227.353	57.069	1411.35	229.423	33.0052	1224.51	138.269	293.465	1356.95	394.502	213.306	1458.9	444.439	278.565	1272.95	456.783	321.801	1159.48	486.749	306.959	987.206	455.578	288.95	887.549	502.209	349.935	892.326	511.337	323.507	789.089
588	0	273.245	-42.6667	1639.03	169.526	-43.8781	1637.53	290.433	114.308	1654.14	153.151	124.519	1656.36	200.941	183.811	1504.94	194.405	289.504	1281.69	228.506	44.1276	1409.12	230.26	20.2599	1222.23	139.617	280.577	1355.13	395.691	200.32	1456.73	444.832	267.922	1271.94	456.508	312.727	1159.08	486.828	301.773	986.708	455.931	285.802	886.604	502.037	347.043	892.808	511.12	323.22	788.854
589	0	274.276	-55.9693	1636.88	170.555	-57.0167	1635.28	291.693	100.985	1652.13	154.425	111.383	1654.23	202.44	170.65	1502.92	195.767	276.578	1279.76	229.78	31.0994	1406.88	231.198	7.39599	1219.95	141.092	267.607	1353.28	397.03	187.222	1454.51	445.368	257.044	1270.85	456.363	303.348	1158.58	486.952	296.126	986.184	456.263	282.152	885.713	501.885	343.588	893.277	510.833	322.328	788.7
590	0	275.427	-69.3662	1634.72	171.701	-70.215	1633.04	293.126	87.5552	1650.11	155.882	98.1916	1652.12	204.084	157.421	1500.9	197.224	263.538	1277.81	231.174	17.9915	1404.66	232.235	-5.58206	1217.71	142.683	254.562	1351.44	398.512	174.026	1452.24	446.048	245.927	1269.67	456.354	293.651	1157.99	487.128	289.991	985.622	456.583	277.962	884.856	501.768	339.537	893.705	510.486	320.789	788.59
591	0	276.701	-82.8412	1632.59	172.971	-83.461	1630.85	294.733	74.0363	1648.09	157.523	84.9564	1650.04	205.863	144.135	1498.91	198.764	250.396	1275.87	232.683	4.81306	1402.49	233.367	-18.667	1215.53	144.379	241.451	1349.63	400.129	160.746	1449.95	446.87	234.571	1268.41	456.487	283.628	1157.3	487.366	283.338	985.006	456.899	273.194	884.014	501.705	334.852	894.068	510.092	318.558	788.488
592	0	278.1	-96.3779	1630.5	174.366	-96.7426	1628.73	296.509	60.4454	1646.1	159.343	71.6894	1648.01	207.765	130.801	1496.97	200.378	237.164	1273.96	234.297	-8.42493	1400.4	234.59	-31.8488	1213.43	146.167	228.284	1347.87	401.871	147.399	1447.66	447.832	222.976	1267.07	456.767	273.27	1156.51	487.674	276.14	984.325	457.219	267.811	883.168	501.712	329.498	894.34	509.662	315.593	788.359
593	0	279.622	-109.959	1628.48	175.884	-110.048	1626.71	298.444	46.8005	1644.15	161.332	58.402	1646.07	209.776	117.434	1495.1	202.056	223.859	1272.11	236.006	-21.7098	1398.39	235.896	-45.1149	1211.44	148.033	215.075	1346.18	403.725	133.998	1445.39	448.929	211.142	1265.67	457.197	262.57	1155.61	488.058	268.372	983.568	457.553	261.778	882.301	501.808	323.439	894.498	509.214	311.848	788.17
594	0	281.261	-123.567	1626.55	177.519	-123.365	1624.81	300.524	33.1202	1642.27	163.474	45.1053	1644.24	211.878	104.048	1493.33	203.787	210.497	1270.34	237.796	-35.0271	1396.5	237.276	-58.4501	1209.57	149.965	201.839	1344.59	405.675	120.562	1443.17	450.156	199.072	1264.21	457.78	251.521	1154.62	488.526	260.008	982.728	457.911	255.06	881.398	502.008	316.643	894.523	508.763	307.277	787.891
595	0	283.008	-137.184	1624.72	179.261	-136.683	1623.05	302.731	19.424	1640.46	165.752	31.8105	1642.53	214.05	90.6594	1491.67	205.559	197.096	1268.67	239.65	-48.3609	1394.75	238.719	-71.8367	1207.85	151.946	188.594	1343.11	407.702	107.104	1441.02	451.506	186.768	1262.71	458.517	240.121	1153.54	489.082	251.025	981.801	458.299	247.623	880.446	502.326	309.078	894.398	508.328	301.836	787.494
596	0	284.846	-150.791	1623.01	181.096	-149.987	1621.44	305.04	5.73134	1638.76	168.138	18.5284	1640.97	216.27	77.2853	1490.14	207.363	183.674	1267.13	241.549	-61.6935	1393.15	240.212	-85.2547	1206.29	153.962	175.357	1341.76	409.788	93.6419	1438.96	452.971	174.235	1261.17	459.406	228.367	1152.37	489.732	241.405	980.785	458.727	239.438	879.437	502.776	300.714	894.108	507.931	295.48	786.958
597	0	286.76	-164.37	1621.43	183.005	-163.268	1620	307.426	-7.93779	1637.18	170.606	5.27003	1639.57	218.514	63.9443	1488.76	209.186	170.252	1265.72	243.471	-75.0066	1391.72	241.74	-98.6821	1204.91	155.998	162.15	1340.56	411.912	80.1902	1437.03	454.541	161.477	1259.62	460.446	216.26	1151.13	490.477	231.13	979.684	459.203	230.476	878.366	503.368	291.525	893.646	507.593	288.163	786.265
598	0	288.727	-177.904	1619.99	184.969	-176.512	1618.74	309.857	-21.5638	1635.73	173.121	-7.95392	1638.35	220.759	50.6552	1487.55	211.019	156.85	1264.47	245.393	-88.2806	1390.47	243.289	-112.095	1203.71	158.039	148.992	1339.51	414.052	66.7643	1435.25	456.206	148.5	1258.07	461.633	203.804	1149.83	491.318	220.186	978.505	459.731	220.71	877.234	504.109	281.488	893.006	507.335	279.844	785.404
599	0	290.723	-191.374	1618.71	186.961	-189.707	1617.67	312.3	-35.1279	1634.43	175.65	-21.1329	1637.33	222.978	37.4371	1486.51	212.852	143.487	1263.4	247.292	-101.496	1389.41	244.841	-125.469	1202.72	160.071	135.904	1338.63	416.186	53.3793	1433.65	457.954	135.313	1256.56	462.963	191.002	1148.5	492.257	208.562	977.258	460.318	210.121	876.044	505.005	270.585	892.189	507.181	270.48	784.369
600	0	292.722	-204.764	1617.59	188.955	-202.842	1616.79	314.72	-48.6122	1633.31	178.156	-34.257	1636.52	225.148	24.3088	1485.67	214.673	130.184	1262.52	249.145	-114.632	1388.57	246.38	-138.777	1201.94	162.079	122.907	1337.94	418.294	40.0495	1432.26	459.775	121.925	1255.09	464.431	177.862	1147.15	493.29	196.253	975.959	460.967	198.689	874.806	506.054	258.8	891.201	507.151	260.035	783.162
601	0	294.694	-218.059	1616.65	190.923	-215.907	1616.11	317.082	-62.0007	1632.39	180.6	-47.3165	1635.94	227.245	11.2884	1485.04	216.473	116.96	1261.85	250.93	-127.669	1387.94	247.891	-151.995	1201.37	164.051	110.02	1337.44	420.355	26.7891	1431.09	461.656	108.347	1253.7	466.029	164.395	1145.8	494.415	183.256	974.625	461.678	186.402	873.533	507.255	246.125	890.051	507.265	248.472	781.792
602	0	296.611	-231.247	1615.89	192.835	-228.89	1615.63	319.352	-75.2797	1631.67	182.947	-60.303	1635.58	229.248	-1.60725	1484.62	218.243	103.833	1261.39	252.625	-140.59	1387.54	249.357	-165.099	1201.03	165.974	97.2631	1337.15	422.349	13.6113	1430.19	463.585	94.5915	1252.41	467.751	150.611	1144.48	495.625	169.574	973.278	462.452	173.253	872.246	508.602	232.555	888.756	507.541	235.761	780.274
603	0	298.444	-244.315	1615.32	194.661	-241.782	1615.34	321.497	-88.4379	1631.19	185.162	-73.2085	1635.47	231.138	-14.3626	1484.43	219.976	90.8182	1261.15	254.211	-153.377	1387.37	250.765	-178.065	1200.92	167.838	84.6519	1337.06	424.26	0.528112	1429.56	465.548	80.6738	1251.25	469.589	136.527	1143.22	496.916	155.213	971.945	463.286	159.237	870.968	510.083	218.09	887.338	507.994	221.877	778.633
604	0	300.163	-257.257	1614.95	196.375	-254.576	1615.25	323.485	-101.467	1630.95	187.214	-86.026	1635.6	232.9	-26.964	1484.47	221.665	77.9311	1261.15	255.672	-166.014	1387.45	252.1	-190.875	1201.05	169.635	72.2007	1337.19	426.073	-12.4496	1429.24	467.534	66.6102	1250.25	471.534	122.159	1142.04	498.278	140.185	970.654	464.175	144.358	869.728	511.687	202.736	885.823	508.634	206.801	776.903
605	0	301.742	-270.065	1614.79	197.949	-267.264	1615.36	325.293	-114.362	1630.98	189.077	-98.7495	1635.99	234.521	-39.4	1484.76	223.306	65.1832	1261.38	256.996	-178.49	1387.77	253.35	-203.515	1201.43	171.359	59.9209	1337.54	427.776	-25.3129	1429.23	469.53	52.4184	1249.42	473.577	107.524	1140.97	499.704	124.505	969.434	465.113	128.624	868.56	513.397	186.507	884.243	509.468	190.521	775.124
606	0	303.157	-282.737	1614.83	199.36	-279.838	1615.66	326.898	-127.121	1631.29	190.729	-111.373	1636.64	235.995	-51.6617	1485.29	224.894	52.584	1261.86	258.172	-190.796	1388.34	254.504	-215.974	1202.05	173.006	47.8203	1338.1	429.363	-38.0552	1429.55	471.525	38.1174	1248.8	475.709	92.6435	1140.04	501.183	108.194	968.318	466.092	112.05	867.498	515.195	169.419	882.634	510.495	173.034	773.344
607	0	304.388	-295.271	1615.09	200.588	-292.294	1616.14	328.287	-139.743	1631.88	192.156	-123.893	1637.56	237.318	-63.7431	1486.07	226.43	40.14	1262.57	259.195	-202.925	1389.17	255.555	-228.249	1202.93	174.576	35.9027	1338.89	430.826	-50.6723	1430.2	473.509	23.727	1248.4	477.921	77.5388	1139.28	502.705	91.2747	967.339	467.104	94.6543	866.584	517.058	151.495	881.035	511.711	154.344	771.619
608	0	305.419	-307.666	1615.56	201.617	-304.626	1616.81	329.45	-152.231	1632.78	193.351	-136.303	1638.73	238.49	-75.6416	1487.09	227.913	27.8551	1263.52	260.062	-214.875	1390.26	256.494	-240.338	1204.06	176.07	24.1683	1339.89	432.164	-63.1629	1431.19	475.47	9.26714	1248.24	480.203	62.2324	1138.71	504.259	73.7762	966.529	468.138	76.4631	865.856	518.965	132.764	879.486	513.103	134.47	770.006
609	0	306.239	-319.927	1616.25	202.438	-316.829	1617.66	330.386	-164.589	1633.96	194.313	-148.6	1640.17	239.516	-87.3579	1488.34	229.343	15.73	1264.69	260.775	-226.648	1391.59	257.318	-252.248	1205.44	177.49	12.6131	1341.09	433.377	-75.5283	1432.5	477.403	-5.2427	1248.35	482.545	46.7471	1138.34	505.836	55.7298	965.918	469.185	57.5062	865.355	520.893	113.258	878.03	514.654	113.437	768.567
610	0	306.845	-332.056	1617.15	203.046	-328.901	1618.68	331.1	-176.823	1635.45	195.048	-160.779	1641.85	240.404	-98.8965	1489.82	230.722	3.763	1266.07	261.339	-238.251	1393.17	258.025	-263.989	1207.07	178.84	1.22953	1342.49	434.471	-87.7726	1434.14	479.299	-19.7838	1248.72	484.939	31.1061	1138.2	507.426	37.1699	965.535	470.236	37.819	865.121	522.819	93.0154	876.709	516.339	91.2854	767.364
611	0	307.237	-344.058	1618.25	203.442	-340.84	1619.87	331.603	-188.938	1637.21	195.57	-172.838	1643.76	241.165	-110.265	1491.51	232.051	-8.05042	1267.65	261.76	-249.691	1394.98	258.617	-275.572	1208.93	180.125	-9.99369	1344.07	435.449	-99.9024	1436.06	481.154	-34.339	1249.35	487.376	15.332	1138.29	509.018	18.1337	965.402	471.281	17.4411	865.188	524.722	72.0781	875.561	518.13	68.0659	766.456
612	0	307.422	-355.938	1619.55	203.635	-352.643	1621.21	331.91	-200.941	1639.23	195.895	-184.773	1645.89	241.811	-121.476	1493.39	233.331	-19.7172	1269.41	262.05	-260.982	1397.01	259.095	-287.016	1211	181.35	-21.0706	1345.81	436.32	-111.926	1438.26	482.964	-48.8927	1250.25	489.847	-0.553366	1138.62	510.605	-1.33978	965.541	472.313	-3.5839	865.588	526.579	50.4913	874.621	519.991	43.8411	765.897
613	0	307.414	-367.703	1621.03	203.637	-364.313	1622.69	332.043	-212.837	1641.48	196.046	-196.582	1648.21	242.355	-132.544	1495.43	234.562	-31.2465	1271.33	262.222	-272.14	1399.22	259.467	-298.336	1213.27	182.518	-32.0176	1347.69	437.091	-123.854	1440.7	484.728	-63.4318	1251.4	492.344	-16.5296	1139.18	512.179	-21.2102	965.963	473.324	-25.2087	866.347	528.373	28.3034	873.92	521.887	18.6845	765.735
614	0	307.23	-379.358	1622.68	203.465	-375.851	1624.31	332.026	-224.632	1643.94	196.05	-208.265	1650.68	242.812	-143.484	1497.62	235.742	-42.6494	1273.37	262.289	-283.182	1401.6	259.74	-309.551	1215.71	183.634	-42.8528	1349.69	437.774	-135.696	1443.33	486.445	-77.9456	1252.77	494.859	-32.578	1139.95	513.734	-41.4365	966.675	474.309	-47.3832	867.481	530.087	5.56482	873.483	523.777	-7.32094	766.005
615	0	306.894	-390.911	1624.47	203.142	-387.262	1626.03	331.884	-236.333	1646.55	195.933	-219.824	1653.27	243.197	-154.318	1499.91	236.87	-53.9388	1275.52	262.266	-294.128	1404.11	259.923	-320.681	1218.28	184.699	-53.5954	1351.78	438.376	-147.465	1446.11	488.115	-92.4256	1254.35	497.385	-48.6822	1140.92	515.263	-61.9776	967.678	475.262	-70.0547	869.002	531.708	-17.6724	873.325	525.624	-34.0842	766.735
616	0	306.43	-402.369	1626.38	202.693	-398.554	1627.86	331.646	-247.945	1649.27	195.724	-231.26	1655.94	243.522	-165.066	1502.27	237.942	-65.1289	1277.72	262.17	-304.998	1406.7	260.026	-331.742	1220.94	185.716	-64.2652	1353.94	438.907	-159.172	1449	489.741	-106.866	1256.09	499.913	-64.8281	1142.05	516.761	-82.7931	968.964	476.18	-93.1688	870.91	533.224	-41.3553	873.459	527.389	-61.5085	767.94
617	0	305.865	-413.739	1628.38	202.143	-409.733	1629.75	331.338	-259.475	1652.05	195.451	-242.58	1658.64	243.801	-175.749	1504.67	238.956	-76.2346	1279.96	262.015	-315.812	1409.34	260.061	-342.753	1223.64	186.686	-74.8818	1356.12	439.376	-170.828	1451.94	491.322	-121.264	1257.95	502.435	-81.0047	1143.31	518.224	-103.843	970.52	477.057	-116.67	873.2	534.627	-65.4307	873.887	529.038	-89.4933	769.624
618	0	305.226	-425.032	1630.44	201.52	-420.812	1631.68	330.986	-270.928	1654.85	195.14	-253.789	1661.34	244.045	-186.389	1507.06	239.906	-87.2718	1282.2	261.816	-326.59	1411.99	260.037	-353.729	1226.36	187.607	-85.4642	1358.3	439.79	-182.444	1454.88	492.86	-135.618	1259.9	504.942	-97.2036	1144.67	519.647	-125.091	972.328	477.891	-140.502	875.856	535.912	-89.8458	874.606	530.538	-117.937	771.778
619	0	304.541	-436.255	1632.52	200.85	-431.803	1633.63	330.614	-282.311	1657.6	194.815	-264.898	1663.97	244.264	-197.007	1509.41	240.789	-98.2562	1284.4	261.586	-337.351	1414.59	259.966	-364.684	1229.02	188.48	-96.0309	1360.45	440.157	-194.031	1457.77	494.356	-149.93	1261.88	507.425	-113.42	1146.08	521.025	-146.5	974.362	478.677	-164.609	878.857	537.076	-114.548	875.606	531.865	-146.738	774.384
620	0	303.835	-447.42	1634.59	200.158	-442.719	1635.56	330.244	-293.633	1660.26	194.498	-275.916	1666.5	244.464	-207.622	1511.68	241.6	-109.204	1286.52	261.336	-348.112	1417.11	259.856	-375.631	1231.6	189.303	-106.599	1362.53	440.481	-205.597	1460.56	495.807	-164.203	1263.84	509.873	-129.651	1147.49	522.353	-168.036	976.593	479.411	-188.935	882.172	538.118	-139.487	876.872	532.997	-175.799	777.416
621	0	303.13	-458.536	1636.6	199.464	-453.575	1637.43	329.894	-304.901	1662.78	194.205	-286.857	1668.89	244.653	-218.254	1513.83	242.335	-120.13	1288.53	261.075	-358.889	1419.49	259.717	-386.58	1234.05	190.074	-117.184	1364.51	440.767	-217.152	1463.19	497.213	-178.443	1265.74	512.276	-145.897	1148.87	523.626	-189.669	978.99	480.09	-213.426	885.768	539.039	-164.613	878.385	533.921	-205.026	780.838
622	0	302.446	-469.615	1638.52	198.789	-464.387	1639.23	329.577	-316.125	1665.1	193.952	-297.734	1671.09	244.833	-228.919	1515.83	242.99	-131.049	1290.4	260.81	-369.695	1421.7	259.554	-397.54	1236.31	190.789	-127.8	1366.37	441.017	-228.704	1465.62	498.568	-192.655	1267.52	514.62	-162.161	1150.16	524.837	-211.369	981.519	480.709	-238.029	889.605	539.842	-189.877	880.121	534.627	-234.331	784.611
623	0	301.797	-480.668	1640.32	198.147	-475.17	1640.91	329.306	-327.314	1667.2	193.747	-308.561	1673.06	245.005	-239.63	1517.64	243.563	-141.976	1292.1	260.545	-380.542	1423.71	259.373	-408.52	1238.36	191.447	-138.461	1368.06	441.233	-240.26	1467.82	499.867	-206.848	1269.15	516.894	-178.448	1151.33	525.98	-233.109	984.144	481.26	-262.692	893.64	540.528	-215.233	882.055	535.114	-263.633	788.692
624	0	301.194	-491.707	1641.95	197.55	-485.94	1642.43	329.085	-338.478	1669.03	193.596	-319.356	1674.79	245.169	-250.401	1519.23	244.05	-152.925	1293.59	260.282	-391.44	1425.47	259.177	-419.525	1240.17	192.041	-149.177	1369.57	441.413	-251.828	1469.74	501.102	-221.031	1270.59	519.081	-194.763	1152.35	527.047	-254.864	986.83	481.74	-287.367	897.828	541.101	-240.637	884.159	535.386	-292.857	793.034
625	0	300.646	-502.744	1643.39	197.004	-496.711	1643.79	328.92	-349.628	1670.57	193.501	-330.133	1676.23	245.321	-261.241	1520.58	244.45	-163.908	1294.87	260.021	-402.396	1426.96	258.967	-430.56	1241.69	192.569	-159.96	1370.87	441.556	-263.414	1471.37	502.264	-235.211	1271.79	521.169	-211.113	1153.18	528.029	-276.611	989.541	482.14	-312.007	902.123	541.564	-266.047	886.405	535.452	-321.938	797.591
626	0	300.154	-513.788	1644.6	196.513	-507.499	1644.94	328.807	-360.773	1671.8	193.458	-340.909	1677.39	245.456	-272.159	1521.68	244.759	-174.937	1295.91	259.758	-413.417	1428.16	258.743	-441.632	1242.92	193.025	-170.817	1371.95	441.658	-275.023	1472.69	503.343	-249.4	1272.74	523.14	-227.506	1153.79	528.92	-298.327	992.245	482.456	-336.57	906.481	541.919	-291.421	888.762	535.323	-350.814	802.319
627	0	299.718	-524.851	1645.57	196.077	-518.317	1645.86	328.742	-371.925	1672.7	193.462	-351.699	1678.23	245.567	-283.161	1522.5	244.976	-186.023	1296.69	259.49	-424.508	1429.06	258.505	-452.743	1243.83	193.404	-181.755	1372.77	441.716	-286.662	1473.67	504.327	-263.606	1273.42	524.981	-243.947	1154.17	529.709	-319.992	994.91	482.68	-361.014	910.858	542.168	-316.72	891.202	535.015	-379.433	807.171
628	0	299.334	-535.943	1646.27	195.691	-529.178	1646.54	328.716	-383.093	1673.27	193.503	-362.519	1678.76	245.647	-294.252	1523.04	245.098	-197.176	1297.2	259.209	-435.674	1429.64	258.247	-463.9	1244.42	193.701	-192.783	1373.34	441.722	-298.337	1474.33	505.205	-277.838	1273.8	526.675	-260.442	1154.31	530.388	-341.586	997.507	482.807	-385.303	915.213	542.312	-341.906	893.695	534.547	-407.748	812.106
629	0	298.992	-547.073	1646.7	195.348	-540.093	1646.97	328.716	-394.286	1673.49	193.565	-373.383	1678.98	245.685	-305.436	1523.29	245.125	-208.405	1297.44	258.908	-446.919	1429.89	257.967	-475.107	1244.68	193.91	-203.903	1373.65	441.671	-310.053	1474.64	505.963	-292.105	1273.88	528.208	-276.992	1154.2	530.949	-363.087	1000.01	482.831	-409.4	919.507	542.351	-366.942	896.213	533.937	-435.717	817.084
630	0	298.683	-558.249	1646.85	195.038	-551.075	1647.14	328.727	-405.512	1673.39	193.635	-384.306	1678.88	245.67	-316.716	1523.25	245.054	-219.717	1297.41	258.578	-458.246	1429.83	257.659	-486.37	1244.62	194.027	-215.121	1373.68	441.556	-321.817	1474.63	506.59	-306.413	1273.67	529.565	-293.6	1153.84	531.384	-384.475	1002.4	482.748	-433.275	923.706	542.285	-391.792	898.729	533.203	-463.302	822.065
631	0	298.394	-569.479	1646.71	194.749	-562.134	1647.04	328.731	-416.781	1672.96	193.693	-395.299	1678.48	245.593	-328.095	1522.92	244.884	-231.12	1297.11	258.21	-469.658	1429.46	257.318	-497.694	1244.24	194.046	-226.44	1373.45	441.37	-333.636	1474.31	507.075	-320.769	1273.16	530.734	-310.262	1153.23	531.685	-405.729	1004.66	482.554	-456.895	927.779	542.113	-416.42	901.22	532.362	-490.471	827.016
632	0	298.11	-580.769	1646.29	194.466	-573.278	1646.68	328.708	-428.098	1672.22	193.718	-406.375	1677.8	245.441	-339.574	1522.31	244.615	-242.62	1296.54	257.794	-481.159	1428.79	256.936	-509.087	1243.56	193.965	-237.862	1372.95	441.105	-345.518	1473.69	507.407	-335.175	1272.38	531.704	-326.971	1152.39	531.846	-426.828	1006.77	482.246	-480.234	931.7	541.833	-440.79	903.663	531.431	-517.191	831.903
633	0	297.815	-592.126	1645.61	194.173	-584.516	1646.07	328.636	-439.471	1671.19	193.689	-417.544	1676.84	245.204	-351.155	1521.43	244.247	-254.22	1295.72	257.32	-492.753	1427.83	256.507	-520.556	1242.58	193.779	-249.39	1372.18	440.755	-357.471	1472.79	507.578	-349.635	1271.33	532.466	-343.717	1151.33	531.863	-447.748	1008.72	481.822	-503.265	935.448	541.445	-464.868	906.036	530.423	-543.436	836.695
634	0	297.492	-603.556	1644.67	193.853	-595.856	1645.22	328.493	-450.905	1669.89	193.584	-428.816	1675.62	244.871	-362.841	1520.3	243.78	-265.924	1294.65	256.776	-504.443	1426.6	256.024	-532.108	1241.34	193.489	-261.025	1371.17	440.312	-369.504	1471.64	507.579	-364.147	1270.04	533.011	-360.486	1150.08	531.732	-468.465	1010.5	481.281	-525.963	939.004	540.947	-488.619	908.323	529.351	-569.178	841.367
635	0	297.123	-615.063	1643.5	193.489	-607.305	1644.13	328.258	-462.406	1668.36	193.381	-440.199	1674.18	244.433	-374.634	1518.94	243.218	-277.734	1293.35	256.154	-516.234	1425.13	255.48	-543.752	1239.85	193.093	-272.768	1369.92	439.771	-381.628	1470.26	507.406	-378.709	1268.53	533.334	-377.258	1148.64	531.452	-488.954	1012.11	480.624	-548.303	942.356	540.337	-512.006	910.507	528.224	-594.392	845.892
636	0	296.691	-626.652	1642.11	193.063	-618.869	1642.84	327.909	-473.98	1666.61	193.059	-451.699	1672.52	243.881	-386.535	1517.36	242.563	-289.651	1291.85	255.444	-528.128	1423.43	254.87	-555.496	1238.14	192.592	-284.62	1368.45	439.126	-393.852	1468.69	507.054	-393.315	1266.83	533.435	-394.012	1147.05	531.02	-509.189	1013.55	479.852	-570.262	945.495	539.613	-534.996	912.575	527.05	-619.052	850.248
637	0	296.179	-638.33	1640.54	192.557	-630.553	1641.36	327.428	-485.631	1664.68	192.599	-463.323	1670.67	243.209	-398.548	1515.58	241.82	-301.675	1290.16	254.637	-540.132	1421.54	254.186	-567.347	1236.23	191.987	-296.581	1366.78	438.373	-406.186	1466.95	506.524	-407.957	1264.98	533.311	-410.721	1145.33	530.44	-529.141	1014.82	478.969	-591.817	948.414	538.776	-557.555	914.516	525.834	-643.136	854.415
638	0	295.57	-650.099	1638.81	191.955	-642.363	1639.72	326.798	-497.363	1662.59	191.984	-475.075	1668.67	242.409	-410.674	1513.64	240.995	-313.803	1288.31	253.727	-552.248	1419.48	253.426	-579.313	1234.15	191.281	-308.651	1364.93	437.508	-418.641	1465.08	505.816	-422.627	1263	532.967	-427.357	1143.51	529.711	-548.782	1015.92	477.977	-612.944	951.11	537.824	-579.648	916.319	524.581	-666.619	858.375
639	0	294.85	-661.966	1636.94	191.241	-654.301	1637.93	326.004	-509.182	1660.38	191.197	-486.96	1666.52	241.479	-422.915	1511.55	240.094	-326.034	1286.31	252.707	-564.48	1417.28	252.585	-591.4	1231.93	190.478	-320.831	1362.92	436.529	-431.222	1463.1	504.934	-437.31	1260.93	532.409	-443.888	1141.62	528.839	-568.083	1016.86	476.881	-633.622	953.583	536.757	-601.243	917.978	523.291	-689.479	862.111
640	0	294.005	-673.935	1634.98	190.402	-666.371	1636.02	325.037	-521.092	1658.07	190.229	-498.98	1664.26	240.415	-435.273	1509.35	239.125	-338.362	1284.2	251.573	-576.829	1414.96	251.662	-603.614	1229.59	189.579	-333.118	1360.78	435.434	-443.936	1461.05	503.884	-451.992	1258.79	531.643	-460.281	1139.68	527.827	-587.016	1017.64	475.684	-653.827	955.835	535.577	-622.309	919.486	521.966	-711.693	865.61
641	0	293.026	-686.01	1632.93	189.429	-678.576	1634.02	323.887	-533.098	1655.71	189.07	-511.137	1661.92	239.216	-447.746	1507.06	238.094	-350.784	1282	250.325	-589.298	1412.55	250.657	-615.958	1227.17	188.588	-345.513	1358.52	434.224	-456.785	1458.95	502.674	-466.657	1256.63	530.682	-476.503	1137.72	526.682	-605.552	1018.26	474.392	-673.536	957.868	534.285	-642.816	920.84	520.603	-733.239	868.86
642	0	291.905	-698.195	1630.84	188.312	-690.916	1631.94	322.553	-545.203	1653.31	187.717	-523.431	1659.51	237.882	-460.334	1504.71	237.008	-363.293	1279.75	248.963	-601.885	1410.09	249.572	-628.433	1224.7	187.507	-358.011	1356.19	432.9	-469.767	1456.85	501.314	-481.286	1254.46	529.537	-492.521	1135.76	525.41	-623.662	1018.75	473.009	-692.727	959.685	532.884	-662.735	922.037	519.201	-754.096	871.849
643	0	290.636	-710.492	1628.73	187.047	-703.393	1629.82	321.035	-557.411	1650.92	186.168	-535.865	1657.06	236.417	-473.034	1502.32	235.871	-375.883	1277.46	247.489	-614.588	1407.6	248.411	-641.04	1222.2	186.339	-370.61	1353.8	431.463	-482.875	1454.76	499.816	-495.858	1252.32	528.225	-508.3	1133.82	524.018	-641.321	1019.1	471.539	-711.376	961.291	531.379	-682.042	923.075	517.755	-774.245	874.57
644	0	289.219	-722.905	1626.63	185.633	-716.004	1627.67	319.336	-569.724	1648.55	184.427	-548.435	1654.6	234.823	-485.842	1499.93	234.687	-388.547	1275.17	245.911	-627.403	1405.1	247.181	-653.776	1219.7	185.083	-383.305	1351.39	429.918	-496.1	1452.71	498.193	-510.351	1250.23	526.761	-523.809	1131.94	522.514	-658.502	1019.33	469.987	-729.462	962.689	529.774	-700.711	923.956	516.26	-793.667	877.015
645	0	287.655	-735.432	1624.55	184.072	-728.747	1625.52	317.464	-582.144	1646.25	182.5	-561.14	1652.15	233.106	-498.75	1497.57	233.457	-401.276	1272.92	244.236	-640.321	1402.63	245.889	-666.636	1217.23	183.742	-396.09	1348.98	428.27	-509.426	1450.73	496.462	-524.743	1248.23	525.163	-539.019	1130.13	520.907	-675.183	1019.44	468.357	-746.961	963.884	528.077	-718.721	924.68	514.713	-812.344	879.179
646	0	285.95	-748.073	1622.52	182.37	-741.617	1623.39	315.431	-594.671	1644.03	180.398	-573.975	1649.74	231.275	-511.749	1495.26	232.182	-414.062	1270.71	242.477	-653.332	1400.22	244.545	-679.611	1214.82	182.315	-408.955	1346.6	426.526	-522.833	1448.84	494.636	-539.008	1246.34	523.448	-553.902	1128.41	519.206	-691.344	1019.45	466.653	-763.853	964.879	526.296	-736.054	925.251	513.108	-830.263	881.057
647	0	284.113	-760.824	1620.56	180.536	-754.607	1621.29	313.252	-607.301	1641.93	178.136	-586.934	1647.4	229.338	-524.827	1493.03	230.86	-426.896	1268.59	240.645	-666.426	1397.89	243.158	-692.69	1212.5	180.803	-421.891	1344.29	424.695	-536.296	1447.06	492.732	-553.12	1244.57	521.635	-568.433	1126.81	517.421	-706.964	1019.36	464.88	-780.118	965.678	524.441	-752.693	925.671	511.441	-847.407	882.646
648	0	282.155	-773.678	1618.7	178.582	-767.708	1619.25	310.943	-620.032	1639.97	175.731	-600.01	1645.14	227.309	-537.972	1490.91	229.488	-439.767	1266.59	238.758	-679.585	1395.67	241.741	-705.857	1210.3	179.206	-434.886	1342.07	422.787	-549.789	1445.41	490.767	-567.054	1242.94	519.742	-582.59	1125.33	515.562	-722.027	1019.19	463.043	-795.737	966.283	522.522	-768.623	925.946	509.708	-863.766	883.942
649	0	280.091	-786.629	1616.94	176.524	-780.908	1617.28	308.526	-632.856	1638.17	173.204	-613.189	1642.99	225.2	-551.166	1488.92	228.061	-452.666	1264.72	236.833	-692.793	1393.59	240.304	-719.094	1208.24	177.527	-447.926	1339.98	420.817	-563.284	1443.92	488.758	-580.782	1241.48	517.785	-596.354	1123.99	513.639	-736.521	1018.94	461.148	-810.693	966.695	520.553	-783.833	926.08	507.906	-879.328	884.943
650	0	277.939	-799.663	1615.3	174.378	-794.19	1615.4	306.023	-645.765	1636.56	170.58	-626.46	1640.98	223.029	-564.393	1487.1	226.579	-465.581	1263.01	234.888	-706.031	1391.67	238.859	-732.379	1206.34	175.769	-460.995	1338.03	418.798	-576.748	1442.59	486.719	-594.279	1240.2	515.78	-609.709	1122.81	511.665	-750.433	1018.61	459.202	-824.973	966.918	518.547	-798.313	926.078	506.037	-894.085	885.647
651	0	275.716	-812.769	1613.81	172.164	-807.539	1613.62	303.459	-658.748	1635.15	167.884	-639.805	1639.12	220.813	-577.632	1485.46	225.037	-478.5	1261.49	232.943	-719.277	1389.93	237.418	-745.688	1204.64	173.937	-474.077	1336.27	416.747	-590.152	1441.44	484.666	-607.518	1239.11	513.744	-622.642	1121.8	509.65	-763.755	1018.23	457.213	-838.563	966.95	516.518	-812.056	925.945	504.103	-908.031	886.051
652	0	273.444	-825.93	1612.46	169.903	-820.932	1611.97	300.86	-671.793	1633.97	165.145	-653.204	1637.45	218.572	-590.862	1484.02	223.438	-491.412	1260.17	231.018	-732.51	1388.39	235.991	-758.994	1203.14	172.039	-487.154	1334.7	414.682	-603.466	1440.48	482.613	-620.478	1238.22	511.688	-635.145	1120.96	507.607	-776.481	1017.8	455.19	-851.457	966.793	514.481	-825.056	925.685	502.108	-921.16	886.153
653	0	271.146	-839.127	1611.28	167.618	-834.348	1610.46	298.253	-684.883	1633.02	162.394	-666.636	1635.98	216.328	-604.061	1482.81	221.783	-504.305	1259.07	229.132	-745.705	1387.08	234.587	-772.269	1201.86	170.085	-500.208	1333.36	412.619	-616.661	1439.72	480.575	-633.136	1237.54	509.624	-647.21	1120.3	505.548	-788.606	1017.31	453.144	-863.647	966.447	512.451	-837.311	925.302	500.063	-933.471	885.95
654	0	268.845	-852.341	1610.28	165.332	-847.761	1609.11	295.667	-698.002	1632.32	159.662	-680.077	1634.73	214.102	-617.207	1481.83	220.078	-517.167	1258.21	227.302	-758.84	1386	233.215	-785.486	1200.83	168.084	-513.221	1332.26	410.578	-629.711	1439.17	478.562	-645.477	1237.06	507.561	-658.836	1119.83	503.485	-800.129	1016.77	451.089	-875.133	965.912	510.442	-848.817	924.799	497.979	-944.964	885.442
655	0	266.565	-865.551	1609.46	163.07	-861.146	1607.92	293.13	-711.13	1631.87	156.982	-693.501	1633.72	211.913	-630.278	1481.11	218.329	-529.985	1257.6	225.547	-771.893	1385.18	231.884	-798.617	1200.06	166.05	-526.176	1331.42	408.576	-642.59	1438.83	476.584	-657.485	1236.8	505.506	-670.023	1119.55	501.431	-811.051	1016.2	449.037	-885.914	965.188	508.468	-859.575	924.176	495.874	-955.637	884.628
656	0	264.331	-878.731	1608.83	160.856	-874.477	1606.92	290.671	-724.248	1631.69	154.386	-706.882	1632.96	209.783	-643.253	1480.65	216.546	-542.749	1257.24	223.88	-784.844	1384.63	230.598	-811.639	1199.55	163.997	-539.059	1330.85	406.628	-655.276	1438.7	474.652	-669.151	1236.74	503.465	-680.776	1119.46	499.399	-821.373	1015.57	447.004	-895.996	964.275	506.542	-869.586	923.436	493.767	-965.495	883.506
657	0	262.17	-891.86	1608.41	158.716	-887.728	1606.12	288.316	-737.332	1631.76	151.903	-720.195	1632.47	207.729	-656.111	1480.46	214.738	-555.45	1257.13	222.313	-797.674	1384.35	229.365	-824.531	1199.31	161.937	-551.855	1330.56	404.749	-667.751	1438.78	472.771	-680.471	1236.9	501.44	-691.103	1119.55	497.401	-831.101	1014.91	445.007	-905.386	963.175	504.676	-878.852	922.579	491.681	-974.539	882.078
658	0	260.105	-904.914	1608.19	156.675	-900.875	1605.55	286.09	-750.359	1632.1	149.561	-733.414	1632.27	205.765	-668.837	1480.54	212.914	-568.078	1257.28	220.857	-810.366	1384.36	228.19	-837.279	1199.36	159.883	-564.555	1330.54	402.95	-679.999	1439.08	470.945	-691.442	1237.27	499.431	-701.013	1119.82	495.448	-840.241	1014.2	443.064	-914.095	961.89	502.88	-887.376	921.605	489.644	-982.775	880.349
659	0	258.162	-917.867	1608.2	154.756	-913.895	1605.21	284.018	-763.307	1632.7	147.385	-746.517	1632.36	203.905	-681.415	1480.89	211.084	-580.626	1257.68	219.518	-822.91	1384.67	227.077	-849.873	1199.7	157.849	-577.149	1330.79	401.242	-692.008	1439.58	469.178	-702.068	1237.83	497.437	-710.522	1120.28	493.552	-848.801	1013.45	441.192	-922.136	960.423	501.165	-895.164	920.518	487.684	-990.205	878.325
660	0	256.362	-930.7	1608.44	152.982	-926.771	1605.13	282.117	-776.151	1633.56	145.395	-759.482	1632.75	202.157	-693.836	1481.52	209.255	-593.089	1258.33	218.301	-835.296	1385.26	226.031	-862.308	1200.33	155.843	-589.632	1331.32	399.63	-703.77	1440.27	467.47	-712.355	1238.6	495.456	-719.644	1120.91	491.722	-856.791	1012.65	439.409	-929.523	958.78	499.54	-902.22	919.318	485.833	-996.836	876.016
661	0	254.728	-943.39	1608.91	151.372	-939.487	1605.33	280.403	-788.869	1634.66	143.608	-772.292	1633.44	200.528	-706.092	1482.4	207.433	-605.463	1259.2	217.208	-847.52	1386.15	225.055	-874.585	1201.24	153.876	-602.003	1332.12	398.118	-715.284	1441.17	465.818	-722.313	1239.56	493.482	-728.397	1121.71	489.968	-864.223	1011.81	437.734	-936.274	956.968	498.01	-908.553	918.013	484.123	-1002.67	873.435
662	0	253.275	-955.921	1609.63	149.942	-952.031	1605.8	278.888	-801.44	1636	142.032	-784.932	1634.44	199.019	-718.181	1483.54	205.621	-617.744	1260.29	216.238	-859.581	1387.33	224.151	-886.71	1202.45	151.954	-614.262	1333.16	396.708	-726.552	1442.24	464.219	-731.955	1240.69	491.509	-736.802	1122.67	488.297	-871.108	1010.93	436.183	-942.408	954.997	496.583	-914.17	916.608	482.585	-1007.71	870.601
663	0	252.016	-968.278	1610.6	148.707	-964.396	1606.58	277.576	-813.845	1637.56	140.674	-797.393	1635.73	197.63	-730.107	1484.91	203.823	-629.933	1261.59	215.388	-871.485	1388.79	223.321	-898.693	1203.93	150.082	-626.414	1334.44	395.396	-737.581	1443.49	462.666	-741.296	1242	489.533	-744.879	1123.79	486.716	-877.463	1010.01	434.774	-947.944	952.878	495.264	-919.083	915.114	481.25	-1011.97	867.535
664	0	250.962	-980.45	1611.81	147.672	-976.577	1607.65	276.469	-826.071	1639.33	139.531	-809.667	1637.3	196.358	-741.875	1486.5	202.041	-642.028	1263.07	214.653	-883.239	1390.5	222.562	-910.545	1205.67	148.264	-638.465	1335.93	394.18	-748.386	1444.9	461.153	-750.355	1243.48	487.546	-752.651	1125.05	485.229	-883.303	1009.05	433.519	-952.903	950.624	494.055	-923.304	913.543	480.145	-1015.45	864.264
665	0	250.115	-992.432	1613.27	146.843	-988.576	1609.02	275.563	-838.106	1641.28	138.6	-821.752	1639.14	195.198	-753.495	1488.29	200.277	-654.033	1264.72	214.025	-894.854	1392.46	221.874	-922.281	1207.65	146.501	-650.424	1337.61	393.052	-758.983	1446.46	459.67	-759.151	1245.1	485.544	-760.138	1126.46	483.842	-888.646	1008.07	432.433	-957.307	948.25	492.96	-926.852	911.909	479.294	-1018.15	860.815
666	0	249.474	-1004.22	1614.97	146.217	-1000.4	1610.68	274.851	-849.943	1643.39	137.87	-833.65	1641.21	194.142	-764.981	1490.25	198.534	-665.95	1266.5	213.497	-906.345	1394.64	221.252	-933.917	1209.85	144.793	-662.3	1339.47	392.006	-769.394	1448.14	458.21	-767.706	1246.86	483.521	-767.366	1128	482.554	-893.512	1007.06	431.523	-961.179	945.771	491.98	-929.744	910.228	478.715	-1020.1	857.22
667	0	249.034	-1015.82	1616.88	145.788	-1012.05	1612.62	274.32	-861.582	1645.63	137.327	-845.366	1643.49	193.181	-776.349	1492.36	196.815	-677.782	1268.4	213.059	-917.727	1397	220.691	-945.469	1212.24	143.141	-674.106	1341.46	391.033	-779.646	1449.92	456.765	-776.044	1248.73	481.477	-774.358	1129.65	481.369	-897.924	1006.04	430.798	-964.545	943.204	491.113	-932.006	908.518	478.419	-1021.3	853.512
668	0	248.783	-1027.23	1618.99	145.546	-1023.54	1614.8	273.955	-873.026	1647.96	136.954	-856.909	1645.94	192.306	-787.617	1494.57	195.126	-689.534	1270.4	212.7	-929.018	1399.51	220.185	-956.951	1214.77	141.542	-685.853	1343.55	390.123	-789.764	1451.79	455.328	-784.19	1250.7	479.409	-781.138	1131.41	480.286	-901.906	1005	430.261	-967.43	940.565	490.36	-933.667	906.797	478.412	-1021.78	849.723
669	0	248.708	-1038.48	1621.27	145.476	-1034.89	1617.2	273.74	-884.283	1650.36	136.73	-868.291	1648.52	191.505	-798.804	1496.86	193.472	-701.211	1272.45	212.409	-940.236	1402.13	219.728	-968.378	1217.41	139.996	-697.552	1345.72	389.267	-799.78	1453.71	453.892	-792.17	1252.73	477.32	-787.731	1133.25	479.303	-905.485	1003.96	429.913	-969.862	937.872	489.716	-934.76	905.083	478.689	-1021.56	845.886
670	0	248.791	-1049.57	1623.69	145.561	-1046.11	1619.79	273.652	-895.367	1652.78	136.636	-879.53	1651.18	190.77	-809.93	1499.2	191.859	-712.817	1274.54	212.176	-951.401	1404.82	219.312	-979.766	1220.11	138.501	-709.217	1347.93	388.457	-809.722	1455.66	452.454	-800.013	1254.82	475.213	-794.161	1135.15	478.419	-908.69	1002.92	429.75	-971.87	935.139	489.178	-935.323	903.394	479.241	-1020.68	842.034
671	0	249.011	-1060.52	1626.2	145.782	-1057.23	1622.5	273.673	-906.294	1655.19	136.648	-890.643	1653.87	190.09	-821.015	1501.53	190.296	-724.359	1276.62	211.99	-962.531	1407.52	218.93	-991.125	1222.84	137.057	-720.857	1350.14	387.684	-819.62	1457.6	451.012	-807.744	1256.93	473.094	-800.453	1137.1	477.63	-911.554	1001.89	429.768	-973.485	932.383	488.74	-935.399	901.749	480.049	-1019.17	838.194
672	0	249.347	-1071.36	1628.77	146.117	-1068.25	1625.3	273.78	-917.085	1657.54	136.745	-901.651	1656.54	189.456	-832.079	1503.83	188.791	-735.839	1278.68	211.841	-973.642	1410.2	218.575	-1002.47	1225.52	135.665	-732.482	1352.32	386.942	-829.504	1459.5	449.565	-815.394	1259.03	470.971	-806.634	1139.08	476.934	-914.11	1000.87	429.957	-974.74	929.617	488.396	-935.037	900.162	481.087	-1017.08	834.395
673	0	249.777	-1082.1	1631.35	146.545	-1079.21	1628.13	273.952	-927.765	1659.8	136.904	-912.578	1659.16	188.861	-843.142	1506.05	187.352	-747.265	1280.68	211.72	-984.752	1412.8	218.241	-1013.8	1228.13	134.324	-744.101	1354.43	386.224	-839.402	1461.33	448.114	-822.99	1261.09	468.853	-812.729	1141.05	476.325	-916.397	999.872	430.305	-975.668	926.856	488.139	-934.287	898.649	482.325	-1014.46	830.66
674	0	250.278	-1092.78	1633.89	147.042	-1090.13	1630.94	274.169	-938.36	1661.94	137.105	-923.447	1661.66	188.298	-854.221	1508.16	185.989	-758.639	1282.59	211.618	-995.875	1415.28	217.923	-1025.14	1230.61	133.038	-755.722	1356.45	385.527	-849.338	1463.06	446.664	-830.56	1263.09	466.751	-818.764	1143	475.799	-918.452	998.893	430.798	-976.306	924.111	487.959	-933.205	897.222	483.725	-1011.37	827.011
675	0	250.828	-1103.42	1636.35	147.59	-1101.03	1633.67	274.412	-948.899	1663.91	137.329	-934.283	1664.01	187.762	-865.332	1510.13	184.709	-769.969	1284.39	211.53	-1007.03	1417.6	217.616	-1036.49	1232.92	131.811	-767.351	1358.33	384.85	-859.339	1464.66	445.22	-838.132	1265	464.676	-824.767	1144.9	475.35	-920.316	997.941	431.418	-976.689	921.396	487.848	-931.846	895.895	485.248	-1007.87	823.467
676	0	251.409	-1114.04	1638.67	148.167	-1111.93	1636.28	274.665	-959.411	1665.69	137.562	-945.112	1666.16	187.252	-876.491	1511.92	183.522	-781.261	1286.04	211.45	-1018.22	1419.72	217.317	-1047.84	1235.02	130.647	-778.993	1360.05	384.191	-869.425	1466.09	443.789	-845.732	1266.8	462.642	-830.765	1146.74	474.97	-922.033	997.018	432.146	-976.857	918.722	487.798	-930.271	894.676	486.852	-1004.01	820.043
677	0	252.003	-1124.68	1640.82	148.758	-1122.86	1638.7	274.915	-969.925	1667.24	137.79	-955.959	1668.08	186.765	-887.711	1513.52	182.436	-792.521	1287.52	211.376	-1029.46	1421.6	217.026	-1059.22	1236.87	129.552	-790.654	1361.6	383.553	-879.616	1467.34	442.379	-853.388	1268.46	460.659	-836.784	1148.49	474.653	-923.644	996.13	432.963	-976.847	916.099	487.797	-928.539	893.575	488.494	-999.869	816.757
678	0	252.595	-1135.36	1642.76	149.347	-1133.83	1640.9	275.151	-980.47	1668.56	138.004	-966.848	1669.75	186.304	-899.003	1514.88	181.457	-803.759	1288.83	211.304	-1040.76	1423.21	216.741	-1070.61	1238.44	128.533	-802.338	1362.93	382.939	-889.928	1468.39	440.999	-861.123	1269.97	458.739	-842.851	1150.14	474.392	-925.193	995.281	433.848	-976.699	913.54	487.835	-926.71	892.6	490.134	-995.513	813.621
679	0	253.173	-1146.11	1644.44	149.923	-1144.86	1642.83	275.365	-991.075	1669.62	138.197	-977.801	1671.13	185.87	-910.377	1516.01	180.593	-814.983	1289.92	211.236	-1052.12	1424.54	216.464	-1082.03	1239.71	127.597	-814.049	1364.05	382.354	-900.378	1469.22	439.66	-868.961	1271.32	456.892	-848.992	1151.68	474.178	-926.723	994.473	434.778	-976.454	911.055	487.903	-924.844	891.756	491.732	-991.008	810.65
680	0	253.729	-1156.94	1645.85	150.477	-1155.99	1644.46	275.555	-1001.77	1670.4	138.366	-988.841	1672.22	185.469	-921.842	1516.88	179.85	-826.204	1290.81	211.173	-1063.56	1425.56	216.197	-1093.47	1240.66	126.752	-825.791	1364.93	381.805	-910.977	1469.82	438.373	-876.923	1272.5	455.128	-855.231	1153.09	474.004	-928.275	993.711	435.734	-976.151	908.656	487.992	-922.998	891.05	493.251	-986.424	807.855
681	0	254.257	-1167.88	1646.95	151.004	-1167.21	1645.78	275.718	-1012.57	1670.91	138.512	-999.988	1673.01	185.107	-933.406	1517.48	179.232	-837.434	1291.46	211.119	-1075.09	1426.26	215.944	-1104.95	1241.29	126.008	-837.569	1365.57	381.3	-921.737	1470.18	437.147	-885.03	1273.5	453.456	-861.589	1154.39	473.862	-929.89	992.999	436.695	-975.831	906.354	488.09	-921.228	890.486	494.66	-981.825	805.251
682	0	254.755	-1178.94	1647.74	151.502	-1178.56	1646.75	275.859	-1023.5	1671.13	138.638	-1011.26	1673.48	184.792	-945.074	1517.81	178.745	-848.686	1291.89	211.078	-1086.7	1426.65	215.709	-1116.47	1241.58	125.371	-849.388	1365.97	380.847	-932.666	1470.3	435.994	-893.298	1274.32	451.88	-868.09	1155.55	473.746	-931.607	992.339	437.641	-975.535	904.159	488.19	-919.589	890.068	495.932	-977.278	802.848
683	0	255.223	-1190.15	1648.2	151.972	-1190.03	1647.37	275.982	-1034.59	1671.08	138.751	-1022.66	1673.65	184.532	-956.853	1517.87	178.391	-859.972	1292.08	211.057	-1098.4	1426.71	215.498	-1128.03	1241.53	124.851	-861.253	1366.11	380.457	-943.771	1470.18	434.924	-901.744	1274.96	450.408	-874.75	1156.58	473.65	-933.462	991.736	438.556	-975.302	902.082	488.284	-918.131	889.797	497.046	-972.846	800.657
684	0	255.667	-1201.52	1648.32	152.418	-1201.64	1647.64	276.097	-1045.84	1670.76	138.858	-1034.22	1673.52	184.338	-968.745	1517.66	178.174	-871.308	1292.03	211.063	-1110.2	1426.46	215.316	-1139.64	1241.17	124.456	-873.171	1366.01	380.139	-955.059	1469.82	433.947	-910.38	1275.44	449.042	-881.587	1157.5	473.569	-935.491	991.191	439.424	-975.175	900.133	488.366	-916.901	889.674	497.985	-968.588	798.688
685	0	256.091	-1213.06	1648.12	152.846	-1213.4	1647.55	276.213	-1057.28	1670.18	138.972	-1045.94	1673.1	184.22	-980.756	1517.2	178.096	-882.706	1291.76	211.105	-1122.1	1425.9	215.171	-1151.3	1240.5	124.192	-885.148	1365.68	379.904	-966.534	1469.24	433.074	-919.216	1275.74	447.786	-888.615	1158.29	473.499	-937.727	990.705	440.233	-975.193	898.317	488.43	-915.945	889.697	498.739	-964.564	796.948
686	0	256.505	-1224.77	1647.6	153.264	-1225.32	1647.12	276.345	-1068.9	1669.36	139.105	-1057.82	1672.4	184.189	-992.888	1516.49	178.158	-894.181	1291.26	211.192	-1134.11	1425.06	215.07	-1163.04	1239.53	124.066	-897.191	1365.11	379.762	-978.197	1468.44	432.311	-928.261	1275.9	446.641	-895.845	1158.96	473.437	-940.199	990.277	440.971	-975.396	896.642	488.471	-915.303	889.863	499.304	-960.829	795.44
687	0	256.918	-1236.67	1646.78	153.684	-1237.39	1646.38	276.506	-1080.73	1668.3	139.27	-1069.87	1671.44	184.257	-1005.14	1515.55	178.359	-905.746	1290.56	211.334	-1146.22	1423.94	215.02	-1174.85	1238.28	124.084	-909.308	1364.34	379.724	-990.049	1467.44	431.667	-937.521	1275.91	445.61	-903.29	1159.53	473.382	-942.938	989.907	441.631	-975.825	895.108	488.488	-915.015	890.163	499.682	-957.436	794.165
688	0	257.344	-1248.75	1645.68	154.117	-1249.63	1645.33	276.712	-1092.75	1667.02	139.483	-1082.08	1670.24	184.433	-1017.53	1514.39	178.699	-917.415	1289.65	211.542	-1158.45	1422.58	215.028	-1186.75	1236.79	124.249	-921.506	1363.37	379.8	-1002.09	1466.24	431.148	-947	1275.78	444.693	-910.957	1160	473.334	-945.969	989.589	442.211	-976.519	893.717	488.478	-915.116	890.589	499.878	-954.435	793.119
689	0	257.795	-1261.02	1644.32	154.577	-1262.02	1644	276.98	-1104.97	1665.55	139.758	-1094.47	1668.83	184.729	-1030.03	1513.04	179.174	-929.198	1288.56	211.826	-1170.8	1420.99	215.103	-1198.74	1235.08	124.564	-933.792	1362.22	379.998	-1014.32	1464.87	430.758	-956.699	1275.52	443.892	-918.857	1160.36	473.295	-949.32	989.317	442.708	-977.518	892.465	488.443	-915.64	891.127	499.904	-951.875	792.295
690	0	258.286	-1273.47	1642.73	155.078	-1274.58	1642.44	277.324	-1117.4	1663.91	140.112	-1107.03	1667.22	185.152	-1042.67	1511.51	179.782	-941.107	1287.31	212.196	-1183.27	1419.2	215.252	-1210.83	1233.17	125.03	-946.173	1360.92	380.325	-1026.73	1463.33	430.502	-966.621	1275.15	443.208	-926.996	1160.63	473.267	-953.016	989.084	443.126	-978.862	891.346	488.385	-916.617	891.761	499.774	-949.802	791.68
691	0	258.829	-1286.11	1640.94	155.633	-1287.29	1640.65	277.761	-1130.02	1662.12	140.559	-1119.74	1665.45	185.711	-1055.43	1509.84	180.518	-953.151	1285.92	212.662	-1195.86	1417.24	215.482	-1223.04	1231.1	125.646	-958.653	1359.49	380.788	-1039.32	1461.66	430.381	-976.766	1274.67	442.644	-935.383	1160.81	473.254	-957.081	988.88	443.469	-980.59	890.35	488.307	-918.077	892.471	499.508	-948.26	791.256
692	0	259.441	-1298.93	1638.98	156.256	-1300.16	1638.7	278.305	-1142.83	1660.2	141.114	-1132.62	1663.53	186.413	-1068.32	1508.05	181.375	-965.335	1284.4	213.231	-1208.57	1415.15	215.8	-1235.36	1228.89	126.41	-971.238	1357.95	381.392	-1052.08	1459.85	430.398	-987.134	1274.08	442.201	-944.026	1160.9	473.262	-961.539	988.692	443.747	-982.74	889.465	488.215	-920.049	893.235	499.126	-947.294	791.003
693	0	260.132	-1311.92	1636.9	156.961	-1313.17	1636.6	278.969	-1155.82	1658.19	141.789	-1145.64	1661.5	187.26	-1081.33	1506.16	182.349	-977.665	1282.79	213.912	-1221.41	1412.95	216.213	-1247.81	1226.58	127.318	-983.93	1356.33	382.139	-1064.99	1457.93	430.553	-997.725	1273.4	441.882	-952.936	1160.9	473.297	-966.414	988.509	443.969	-985.352	888.677	488.117	-922.56	894.03	498.65	-946.945	790.893
694	0	260.917	-1325.08	1634.71	157.759	-1326.32	1634.4	279.764	-1168.99	1656.09	142.595	-1158.8	1659.4	188.257	-1094.47	1504.2	183.43	-990.144	1281.11	214.709	-1234.36	1410.67	216.725	-1260.39	1224.2	128.365	-996.729	1354.65	383.029	-1078.06	1455.92	430.846	-1008.54	1272.63	441.689	-962.122	1160.81	473.365	-971.731	988.316	444.147	-988.463	887.968	488.023	-925.637	894.83	498.105	-947.252	790.899
695	0	261.804	-1338.39	1632.46	158.661	-1339.61	1632.13	280.698	-1182.32	1653.95	143.541	-1172.1	1657.24	189.403	-1107.71	1502.21	184.612	-1002.77	1279.39	215.626	-1247.43	1408.34	217.34	-1273.09	1221.8	129.544	-1009.64	1352.96	384.062	-1091.26	1453.85	431.275	-1019.58	1271.76	441.625	-971.595	1160.62	473.474	-977.514	988.099	444.295	-992.109	887.32	487.942	-929.307	895.61	497.515	-948.254	790.991
696	0	262.803	-1351.85	1630.19	159.676	-1353.02	1629.84	281.779	-1195.8	1651.79	144.635	-1185.52	1655.06	190.695	-1121.06	1500.22	185.885	-1015.54	1277.65	216.664	-1260.6	1406.01	218.062	-1285.92	1219.39	130.846	-1022.65	1351.27	385.235	-1104.59	1451.72	431.838	-1030.84	1270.82	441.694	-981.368	1160.34	473.631	-983.789	987.845	444.427	-996.327	886.715	487.888	-933.596	896.346	496.906	-949.988	791.136
697	0	263.919	-1365.44	1627.91	160.81	-1366.54	1627.55	283.009	-1209.42	1649.64	145.878	-1199.05	1652.9	192.129	-1134.52	1498.25	187.242	-1028.46	1275.93	217.821	-1273.88	1403.7	218.892	-1298.87	1217.02	132.262	-1035.75	1349.62	386.541	-1118.03	1449.58	432.535	-1042.33	1269.81	441.896	-991.454	1159.96	473.843	-990.582	987.54	444.555	-1001.15	886.135	487.874	-938.531	897.012	496.3	-952.492	791.303
698	0	265.155	-1379.15	1625.67	162.065	-1380.17	1625.3	284.388	-1223.17	1647.53	147.273	-1212.68	1650.79	193.697	-1148.05	1496.34	188.673	-1041.51	1274.25	219.095	-1287.25	1401.45	219.828	-1311.94	1214.71	133.781	-1048.95	1348.03	387.974	-1131.57	1447.44	433.362	-1054.06	1268.72	442.235	-1001.86	1159.49	474.119	-997.917	987.175	444.694	-1006.62	885.561	487.913	-944.141	897.587	495.72	-955.799	791.461
699	0	266.513	-1392.97	1623.5	163.442	-1393.89	1623.13	285.914	-1237.04	1645.48	148.815	-1226.41	1648.76	195.39	-1161.67	1494.52	190.169	-1054.68	1272.64	220.478	-1300.7	1399.28	220.867	-1325.12	1212.51	135.391	-1062.23	1346.53	389.524	-1145.19	1445.33	434.316	-1066.01	1267.58	442.712	-1012.61	1158.93	474.464	-1005.82	986.74	444.856	-1012.76	884.979	488.02	-950.454	898.05	495.188	-959.945	791.582
700	0	267.987	-1406.88	1621.42	164.938	-1407.69	1621.06	287.578	-1250.99	1643.54	150.498	-1240.2	1646.85	197.193	-1175.34	1492.82	191.721	-1067.96	1271.13	221.961	-1314.22	1397.24	222.005	-1338.39	1210.44	137.08	-1075.57	1345.15	391.18	-1158.87	1443.29	435.394	-1078.2	1266.4	443.327	-1023.71	1158.28	474.885	-1014.32	986.228	445.054	-1019.61	884.373	488.209	-957.496	898.384	494.723	-964.964	791.638
701	0	269.572	-1420.87	1619.46	166.546	-1421.55	1619.12	289.372	-1265.03	1641.71	152.311	-1254.06	1645.08	199.092	-1189.05	1491.26	193.319	-1081.33	1269.74	223.53	-1327.79	1395.35	223.232	-1351.75	1208.53	138.836	-1088.96	1343.91	392.928	-1172.6	1441.34	436.59	-1090.63	1265.18	444.079	-1035.18	1157.54	475.387	-1023.43	985.635	445.297	-1027.2	883.733	488.495	-965.296	898.576	494.341	-970.889	791.608
702	0	271.257	-1434.9	1617.64	168.256	-1435.45	1617.35	291.28	-1279.11	1640.03	154.241	-1267.96	1643.49	201.068	-1202.79	1489.87	194.955	-1094.79	1268.49	225.172	-1341.4	1393.63	224.539	-1365.17	1206.82	140.645	-1102.38	1342.83	394.754	-1186.37	1439.51	437.901	-1103.31	1263.95	444.969	-1047.01	1156.74	475.975	-1033.19	984.962	445.595	-1035.55	883.052	488.889	-973.881	898.614	494.058	-977.754	791.469
703	0	273.029	-1448.96	1615.98	170.055	-1449.38	1615.76	293.284	-1293.23	1638.53	156.269	-1281.89	1642.1	203.103	-1216.54	1488.67	196.62	-1108.3	1267.42	226.868	-1355.01	1392.12	225.914	-1378.64	1205.31	142.494	-1115.82	1341.94	396.641	-1200.16	1437.84	439.32	-1116.23	1262.72	445.994	-1059.22	1155.87	476.651	-1043.61	984.211	445.954	-1044.69	882.323	489.403	-983.278	898.49	493.885	-985.591	791.206
704	0	274.872	-1463.03	1614.5	171.925	-1463.32	1614.37	295.364	-1307.37	1637.21	158.374	-1295.82	1640.93	205.173	-1230.27	1487.68	198.306	-1121.85	1266.53	228.6	-1368.63	1390.84	227.342	-1392.13	1204.05	144.368	-1129.26	1341.23	398.572	-1213.95	1436.35	440.84	-1129.39	1261.5	447.152	-1071.81	1154.96	477.419	-1054.71	983.387	446.38	-1054.66	881.546	490.045	-993.511	898.202	493.833	-994.432	790.804
705	0	276.766	-1477.08	1613.23	173.847	-1477.24	1613.2	297.496	-1321.48	1636.11	160.533	-1309.74	1640.02	207.257	-1243.95	1486.92	200.002	-1135.42	1265.85	230.347	-1382.22	1389.8	228.81	-1405.62	1203.04	146.255	-1142.67	1340.74	400.529	-1227.72	1435.08	442.455	-1142.8	1260.33	448.44	-1084.79	1154.01	478.278	-1066.51	982.5	446.877	-1065.46	880.724	490.824	-1004.6	897.75	493.908	-1004.31	790.255
706	0	278.689	-1491.09	1612.16	175.8	-1491.12	1612.27	299.654	-1335.56	1635.24	162.717	-1323.62	1639.36	209.331	-1257.58	1486.39	201.702	-1148.99	1265.38	232.089	-1395.77	1389.01	230.301	-1419.09	1202.29	148.141	-1156.03	1340.46	402.492	-1241.46	1434.04	444.156	-1156.44	1259.21	449.854	-1098.16	1153.05	479.228	-1079.01	981.56	447.446	-1077.13	879.861	491.744	-1016.57	897.135	494.116	-1015.25	789.554
707	0	280.619	-1505.03	1611.33	177.76	-1504.94	1611.59	301.809	-1349.57	1634.61	164.9	-1337.44	1638.98	211.371	-1271.13	1486.11	203.396	-1162.53	1265.13	233.805	-1409.24	1388.5	231.801	-1432.52	1201.82	150.013	-1169.32	1340.4	404.443	-1255.16	1433.27	445.935	-1170.32	1258.17	451.391	-1111.89	1152.09	480.267	-1092.23	980.582	448.087	-1089.66	878.967	492.805	-1029.44	896.366	494.46	-1027.28	788.699
708	0	282.53	-1518.88	1610.73	179.701	-1518.67	1611.16	303.932	-1363.48	1634.23	167.05	-1351.18	1638.87	213.355	-1284.57	1486.07	205.075	-1176.02	1265.12	235.475	-1422.63	1388.26	233.296	-1445.86	1201.63	151.857	-1182.53	1340.57	406.363	-1268.79	1432.78	447.782	-1184.42	1257.23	453.046	-1126	1151.16	481.392	-1106.18	979.581	448.797	-1103.08	878.054	494.008	-1043.21	895.452	494.94	-1040.44	787.697
709	0	284.399	-1532.6	1610.37	181.599	-1532.3	1610.98	305.994	-1377.28	1634.12	169.139	-1364.83	1639.04	215.263	-1297.9	1486.29	206.732	-1189.44	1265.35	237.082	-1435.92	1388.29	234.77	-1459.11	1201.72	153.663	-1195.62	1340.96	408.236	-1282.35	1432.58	449.685	-1198.73	1256.42	454.813	-1140.46	1150.26	482.597	-1120.84	978.577	449.573	-1117.38	877.14	495.347	-1057.9	894.407	495.556	-1054.73	786.556
710	0	286.2	-1546.2	1610.27	183.427	-1545.81	1611.07	307.966	-1390.94	1634.26	171.136	-1378.35	1639.49	217.074	-1311.09	1486.75	208.358	-1202.77	1265.81	238.61	-1449.07	1388.6	236.212	-1472.23	1202.08	155.418	-1208.6	1341.57	410.043	-1295.81	1432.7	451.635	-1213.23	1255.73	456.688	-1155.26	1149.42	483.877	-1136.21	977.59	450.409	-1132.57	876.243	496.815	-1073.5	893.247	496.305	-1070.19	785.292
711	0	287.909	-1559.63	1610.42	185.161	-1559.17	1611.41	309.821	-1404.44	1634.68	173.015	-1391.73	1640.2	218.774	-1324.12	1487.45	209.946	-1216	1266.5	240.044	-1462.09	1389.19	237.612	-1485.21	1202.72	157.114	-1221.44	1342.4	411.772	-1309.15	1433.12	453.62	-1227.91	1255.21	458.665	-1170.38	1148.65	485.225	-1152.28	976.64	451.297	-1148.64	875.385	498.401	-1090.01	891.995	497.18	-1086.81	783.929
712	0	289.503	-1572.88	1610.83	186.779	-1572.37	1612	311.534	-1417.76	1635.36	174.751	-1404.96	1641.17	220.349	-1336.99	1488.39	211.49	-1229.11	1267.42	241.374	-1474.95	1390.04	238.958	-1498.04	1203.62	158.743	-1234.12	1343.43	413.408	-1322.38	1433.86	455.628	-1242.73	1254.85	460.735	-1185.79	1147.98	486.631	-1169.03	975.753	452.229	-1165.58	874.593	500.09	-1107.43	890.673	498.176	-1104.62	782.494
713	0	290.964	-1585.95	1611.49	188.26	-1585.39	1612.83	313.086	-1430.9	1636.3	176.323	-1418.01	1642.38	221.789	-1349.68	1489.54	212.983	-1242.08	1268.55	242.592	-1487.65	1391.14	240.242	-1510.69	1204.76	160.298	-1246.65	1344.65	414.943	-1335.47	1434.91	457.649	-1257.69	1254.67	462.892	-1201.48	1147.42	488.087	-1186.43	974.951	453.195	-1183.37	873.895	501.867	-1125.72	889.31	499.282	-1123.6	781.024
714	0	292.274	-1598.82	1612.4	189.587	-1598.23	1613.89	314.46	-1443.82	1637.5	177.714	-1430.89	1643.82	223.089	-1362.19	1490.9	214.421	-1254.91	1269.87	243.692	-1500.18	1392.48	241.459	-1523.18	1206.15	161.776	-1259.02	1346.06	416.368	-1348.42	1436.26	459.67	-1272.74	1254.68	465.126	-1217.4	1146.98	489.583	-1204.47	974.259	454.184	-1201.99	873.322	503.711	-1144.88	887.936	500.486	-1143.75	779.562
715	0	293.419	-1611.48	1613.56	190.748	-1610.88	1615.16	315.646	-1456.54	1638.95	178.915	-1443.57	1645.46	224.246	-1374.52	1492.45	215.799	-1267.6	1271.39	244.673	-1512.53	1394.05	242.603	-1535.48	1207.75	163.174	-1271.21	1347.62	417.679	-1361.22	1437.89	461.681	-1287.86	1254.9	467.429	-1233.53	1146.68	491.108	-1223.1	973.703	455.188	-1221.4	872.905	505.601	-1164.87	886.585	501.777	-1165.04	778.156
716	0	294.392	-1623.94	1614.96	191.733	-1623.32	1616.63	316.638	-1469.05	1640.63	179.918	-1456.06	1647.28	225.264	-1386.67	1494.17	217.115	-1280.13	1273.06	245.536	-1524.71	1395.82	243.672	-1547.62	1209.55	164.491	-1283.25	1349.34	418.873	-1373.86	1439.78	463.673	-1303.03	1255.31	469.79	-1249.84	1146.52	492.653	-1242.29	973.306	456.195	-1241.58	872.679	507.515	-1185.65	885.291	503.137	-1187.46	776.861
717	0	295.188	-1636.2	1616.57	192.539	-1635.57	1618.29	317.437	-1481.35	1642.52	180.725	-1468.35	1649.26	226.146	-1398.64	1496.04	218.366	-1292.52	1274.89	246.285	-1536.72	1397.77	244.662	-1559.6	1211.53	165.729	-1295.12	1351.18	419.951	-1386.36	1441.91	465.636	-1318.21	1255.93	472.2	-1266.29	1146.51	494.205	-1262	973.092	457.196	-1262.48	872.677	509.429	-1207.18	884.09	504.55	-1210.96	775.734
718	0	295.809	-1648.25	1618.4	193.166	-1647.61	1620.11	318.049	-1493.45	1644.61	181.342	-1480.43	1651.37	226.901	-1410.43	1498.03	219.549	-1304.75	1276.82	246.925	-1548.57	1399.88	245.576	-1571.42	1213.67	166.888	-1306.84	1353.12	420.916	-1398.7	1444.24	467.561	-1333.38	1256.75	474.647	-1282.85	1146.66	495.756	-1282.17	973.082	458.181	-1284.07	872.932	511.319	-1229.41	883.018	505.996	-1235.49	774.834
719	0	296.259	-1660.11	1620.41	193.621	-1659.46	1622.07	318.484	-1505.34	1646.86	181.78	-1492.32	1653.59	227.539	-1422.07	1500.13	220.662	-1316.84	1278.86	247.465	-1560.26	1402.12	246.414	-1583.1	1215.93	167.97	-1318.42	1355.15	421.772	-1410.9	1446.75	469.442	-1348.5	1257.76	477.119	-1299.5	1146.96	497.296	-1302.75	973.293	459.144	-1306.28	873.474	513.162	-1252.29	882.111	507.454	-1260.99	774.22
720	0	296.551	-1671.79	1622.58	193.916	-1671.12	1624.15	318.758	-1517.05	1649.25	182.054	-1504.02	1655.87	228.073	-1433.56	1502.31	221.705	-1328.8	1280.96	247.916	-1571.82	1404.45	247.181	-1594.65	1218.28	168.979	-1329.88	1357.23	422.526	-1422.96	1449.39	471.273	-1363.57	1258.94	479.606	-1316.19	1147.41	498.815	-1323.71	973.741	460.076	-1329.07	874.331	514.937	-1275.76	881.399	508.903	-1287.39	773.946
721	0	296.699	-1683.29	1624.89	194.064	-1682.6	1626.32	318.892	-1528.58	1651.74	182.186	-1515.53	1658.19	228.514	-1444.92	1504.54	222.674	-1340.62	1283.11	248.287	-1583.25	1406.85	247.88	-1606.09	1220.7	169.916	-1341.22	1359.35	423.184	-1434.9	1452.13	473.047	-1378.55	1260.27	482.095	-1332.9	1147.99	500.305	-1344.98	974.437	460.973	-1352.38	875.526	516.621	-1299.76	880.911	510.32	-1314.61	774.064
722	0	296.723	-1694.65	1627.31	194.087	-1693.92	1628.56	318.907	-1539.95	1654.28	182.198	-1526.87	1660.52	228.877	-1456.17	1506.79	223.569	-1352.32	1285.27	248.591	-1594.57	1409.28	248.518	-1617.43	1223.15	170.782	-1352.46	1361.48	423.754	-1446.72	1454.91	474.762	-1393.42	1261.73	484.574	-1349.6	1148.7	501.758	-1366.52	975.386	461.827	-1376.16	877.077	518.198	-1324.23	880.673	511.683	-1342.55	774.617
723	0	296.642	-1705.87	1629.79	194.004	-1705.08	1630.83	318.828	-1551.18	1656.85	182.116	-1538.05	1662.82	229.174	-1467.32	1509.04	224.387	-1363.91	1287.42	248.838	-1605.8	1411.7	249.098	-1628.68	1225.58	171.58	-1363.62	1363.59	424.244	-1458.43	1457.71	476.413	-1408.18	1263.3	487.032	-1366.26	1149.51	503.167	-1388.26	976.591	462.635	-1400.34	878.995	519.652	-1349.1	880.702	512.969	-1371.13	775.639
724	0	296.481	-1716.97	1632.3	193.84	-1716.12	1633.11	318.68	-1562.28	1659.4	181.966	-1549.09	1665.07	229.418	-1478.39	1511.25	225.128	-1375.41	1289.53	249.041	-1616.94	1414.08	249.628	-1639.87	1227.98	172.309	-1374.71	1365.67	424.661	-1470.05	1460.48	477.997	-1422.81	1264.92	489.457	-1382.88	1150.4	504.526	-1410.17	978.047	463.393	-1424.86	881.287	520.968	-1374.31	881.012	514.158	-1400.23	777.154
725	0	296.263	-1727.97	1634.81	193.618	-1727.05	1635.37	318.487	-1573.28	1661.89	181.774	-1560.02	1667.23	229.619	-1489.41	1513.41	225.789	-1386.82	1291.57	249.209	-1628.03	1416.39	250.113	-1650.99	1230.29	172.972	-1385.75	1367.69	425.013	-1481.59	1463.17	479.512	-1437.31	1266.58	491.838	-1399.42	1151.34	505.827	-1432.18	979.745	464.095	-1449.65	883.95	522.137	-1399.8	881.61	515.229	-1429.77	779.178
726	0	296.012	-1738.9	1637.26	193.363	-1737.9	1637.56	318.275	-1584.2	1664.27	181.562	-1570.84	1669.27	229.787	-1500.38	1515.47	226.369	-1398.16	1293.53	249.352	-1639.06	1418.58	250.558	-1662.07	1232.5	173.567	-1396.76	1369.62	425.305	-1493.05	1465.76	480.955	-1451.67	1268.23	494.162	-1415.88	1152.31	507.065	-1454.27	981.672	464.738	-1474.65	886.976	523.152	-1425.5	882.499	516.164	-1459.63	781.713
727	0	295.748	-1749.77	1639.62	193.095	-1748.68	1639.67	318.063	-1595.05	1666.51	181.354	-1581.59	1671.17	229.929	-1511.33	1517.42	226.865	-1409.44	1295.37	249.478	-1650.06	1420.63	250.968	-1673.11	1234.57	174.093	-1407.75	1371.44	425.543	-1504.45	1468.19	482.323	-1465.89	1269.84	496.419	-1432.25	1153.26	508.235	-1476.38	983.808	465.317	-1499.8	890.349	524.01	-1451.35	883.674	516.95	-1489.71	784.75
728	0	295.492	-1760.6	1641.86	192.834	-1759.41	1641.65	317.87	-1605.87	1668.58	181.168	-1592.28	1672.9	230.051	-1522.26	1519.24	227.277	-1420.68	1297.07	249.593	-1661.04	1422.51	251.346	-1684.12	1236.46	174.551	-1418.73	1373.13	425.731	-1515.78	1470.44	483.611	-1479.97	1271.36	498.596	-1448.54	1154.17	509.329	-1498.48	986.133	465.829	-1525.03	894.049	524.708	-1477.29	885.127	517.574	-1519.92	788.273
729	0	295.259	-1771.42	1643.92	192.596	-1770.13	1643.47	317.711	-1616.66	1670.45	181.018	-1602.94	1674.45	230.156	-1533.2	1520.89	227.603	-1431.89	1298.62	249.702	-1672	1424.2	251.696	-1695.11	1238.16	174.938	-1429.71	1374.68	425.872	-1527.06	1472.48	484.816	-1493.93	1272.76	500.683	-1464.74	1155.01	510.343	-1520.54	988.622	466.268	-1550.28	898.047	525.249	-1503.28	886.846	518.027	-1550.14	792.254
730	0	295.062	-1782.24	1645.78	192.394	-1780.84	1645.12	317.596	-1627.45	1672.08	180.914	-1613.6	1675.79	230.244	-1544.15	1522.36	227.839	-1443.07	1299.99	249.808	-1682.96	1425.66	252.019	-1706.1	1239.64	175.253	-1440.7	1376.05	425.968	-1538.29	1474.28	485.932	-1507.78	1274.01	502.668	-1480.85	1155.75	511.271	-1542.51	991.247	466.63	-1575.5	902.313	525.637	-1529.25	888.815	518.305	-1580.3	796.66
731	0	294.911	-1793.07	1647.41	192.237	-1791.57	1646.56	317.532	-1638.26	1673.46	180.863	-1624.27	1676.91	230.315	-1555.12	1523.64	227.984	-1454.25	1301.16	249.911	-1693.92	1426.9	252.316	-1717.08	1240.89	175.495	-1451.73	1377.24	426.021	-1549.48	1475.82	486.955	-1521.51	1275.07	504.54	-1496.89	1156.36	512.106	-1564.39	993.982	466.912	-1600.63	906.811	525.879	-1555.16	891.015	518.405	-1610.31	801.451
732	0	294.808	-1803.94	1648.78	192.129	-1802.34	1647.77	317.52	-1649.1	1674.58	180.865	-1634.96	1677.81	230.367	-1566.12	1524.69	228.037	-1465.43	1302.14	250.011	-1704.9	1427.89	252.588	-1728.06	1241.9	175.661	-1462.78	1378.24	426.03	-1560.64	1477.1	487.879	-1535.16	1275.93	506.289	-1512.88	1156.81	512.843	-1586.14	996.797	467.11	-1625.61	911.504	525.982	-1580.96	893.425	518.331	-1640.09	806.584
733	0	294.755	-1814.85	1649.87	192.069	-1813.16	1648.73	317.559	-1659.99	1675.42	180.917	-1645.71	1678.46	230.395	-1577.16	1525.52	227.995	-1476.63	1302.89	250.105	-1715.89	1428.62	252.833	-1739.05	1242.65	175.748	-1473.88	1379.02	425.995	-1571.77	1478.09	488.696	-1548.73	1276.56	507.905	-1528.81	1157.09	513.477	-1607.75	999.666	467.22	-1650.41	916.351	525.956	-1606.61	896.024	518.088	-1669.56	812.013
734	0	294.747	-1825.82	1650.68	192.054	-1824.03	1649.44	317.641	-1670.93	1675.97	181.012	-1656.51	1678.88	230.393	-1588.24	1526.12	227.858	-1487.86	1303.41	250.189	-1726.92	1429.1	253.05	-1750.06	1243.14	175.754	-1485.03	1379.58	425.913	-1582.88	1478.8	489.401	-1562.24	1276.95	509.379	-1544.7	1157.19	514.002	-1629.19	1002.56	467.239	-1674.96	921.312	525.81	-1632.07	898.788	517.685	-1698.67	817.689
735	0	294.778	-1836.86	1651.19	192.076	-1834.98	1649.88	317.757	-1681.94	1676.25	181.14	-1667.39	1679.05	230.354	-1599.37	1526.47	227.624	-1499.12	1303.71	250.256	-1737.98	1429.31	253.236	-1761.1	1243.37	175.678	-1496.23	1379.92	425.781	-1593.98	1479.22	489.988	-1575.71	1277.09	510.703	-1560.56	1157.1	514.415	-1650.44	1005.45	467.163	-1699.24	926.345	525.553	-1657.3	901.691	517.134	-1727.36	823.566
736	0	294.835	-1847.96	1651.4	192.123	-1846	1650.05	317.892	-1693.02	1676.24	181.285	-1678.35	1678.97	230.271	-1610.56	1526.58	227.293	-1510.42	1303.76	250.3	-1749.08	1429.26	253.387	-1772.16	1243.35	175.516	-1507.49	1380.02	425.596	-1605.08	1479.36	490.451	-1589.14	1276.97	511.868	-1576.4	1156.81	514.711	-1671.5	1008.32	466.991	-1723.21	931.411	525.193	-1682.26	904.708	516.446	-1755.57	829.593
737	0	294.906	-1859.14	1651.33	192.182	-1857.1	1649.96	318.031	-1704.18	1675.96	181.432	-1689.39	1678.66	230.136	-1621.8	1526.44	226.867	-1521.78	1303.58	250.313	-1760.23	1428.96	253.498	-1783.27	1243.07	175.268	-1518.82	1379.89	425.353	-1616.2	1479.22	490.785	-1602.56	1276.61	512.87	-1592.22	1156.33	514.888	-1692.35	1011.14	466.72	-1746.83	936.47	524.737	-1706.92	907.812	515.637	-1783.26	835.725
738	0	294.974	-1870.39	1650.96	192.235	-1868.28	1649.6	318.156	-1715.41	1675.42	181.562	-1700.52	1678.11	229.94	-1633.1	1526.06	226.347	-1533.19	1303.17	250.283	-1771.44	1428.42	253.564	-1794.43	1242.54	174.93	-1530.22	1379.52	425.047	-1627.34	1478.82	490.987	-1615.98	1276	513.704	-1608.04	1155.65	514.945	-1712.96	1013.9	466.348	-1770.08	941.483	524.192	-1731.25	910.975	514.721	-1810.39	841.915
739	0	295.02	-1881.72	1650.34	192.265	-1879.55	1649	318.246	-1726.71	1674.63	181.654	-1711.73	1677.34	229.674	-1644.46	1525.45	225.736	-1544.67	1302.52	250.203	-1782.71	1427.64	253.579	-1805.64	1241.79	174.504	-1541.69	1378.92	424.674	-1638.52	1478.17	491.055	-1629.41	1275.17	514.367	-1623.83	1154.8	514.879	-1733.32	1016.56	465.875	-1792.91	946.416	523.561	-1755.21	914.169	513.709	-1836.92	848.117
740	0	295.026	-1893.11	1649.46	192.252	-1890.89	1648.16	318.281	-1738.09	1673.61	181.687	-1723.03	1676.35	229.329	-1655.88	1524.61	225.039	-1556.22	1301.65	250.059	-1794.04	1426.64	253.537	-1816.92	1240.81	173.99	-1553.24	1378.09	424.226	-1649.74	1477.29	490.986	-1642.85	1274.12	514.859	-1639.61	1153.78	514.693	-1753.42	1019.12	465.302	-1815.32	951.234	522.848	-1778.78	917.364	512.616	-1862.83	854.287
741	0	294.971	-1904.58	1648.36	192.177	-1902.31	1647.11	318.239	-1749.53	1672.37	181.641	-1734.41	1675.17	228.897	-1667.37	1523.56	224.261	-1567.84	1300.56	249.843	-1805.45	1425.43	253.43	-1828.28	1239.63	173.388	-1564.86	1377.05	423.699	-1661.04	1476.2	490.783	-1656.33	1272.88	515.179	-1655.36	1152.61	514.385	-1773.24	1021.57	464.629	-1837.27	955.906	522.056	-1801.91	920.533	511.451	-1888.09	860.381
742	0	294.837	-1916.11	1647.06	192.019	-1913.81	1645.87	318.099	-1761.03	1670.94	181.495	-1745.87	1673.79	228.371	-1678.93	1522.3	223.409	-1579.54	1299.27	249.542	-1816.93	1424.04	253.253	-1839.71	1238.27	172.701	-1576.56	1375.79	423.087	-1672.41	1474.92	490.446	-1669.83	1271.47	515.33	-1671.06	1151.31	513.961	-1792.75	1023.88	463.86	-1858.76	960.403	521.187	-1824.59	923.647	510.224	-1912.69	866.355
743	0	294.602	-1927.7	1645.59	191.761	-1925.37	1644.45	317.842	-1772.59	1669.34	181.228	-1757.4	1672.25	227.743	-1690.56	1520.87	222.489	-1591.32	1297.78	249.146	-1828.5	1422.48	252.998	-1851.24	1236.74	171.932	-1588.34	1374.34	422.385	-1683.87	1473.48	489.979	-1683.36	1269.91	515.316	-1686.71	1149.89	513.422	-1811.94	1026.04	462.996	-1879.75	964.698	520.242	-1846.78	926.678	508.941	-1936.6	872.168
744	0	294.251	-1939.35	1643.99	191.384	-1937	1642.89	317.449	-1784.2	1667.59	180.823	-1769	1670.55	227.008	-1702.25	1519.26	221.511	-1603.18	1296.13	248.646	-1840.15	1420.77	252.658	-1862.87	1235.06	171.086	-1600.2	1372.7	421.589	-1695.44	1471.88	489.387	-1696.92	1268.23	515.142	-1702.29	1148.38	512.774	-1830.79	1028.05	462.043	-1900.23	968.768	519.225	-1868.46	929.599	507.608	-1959.8	877.778
745	0	293.767	-1951.05	1642.27	190.873	-1948.69	1641.22	316.904	-1795.86	1665.72	180.263	-1780.67	1668.72	226.161	-1714.02	1517.51	220.482	-1615.13	1294.32	248.033	-1851.89	1418.94	252.229	-1874.6	1233.26	170.167	-1612.13	1370.89	420.694	-1707.12	1470.17	488.676	-1710.51	1266.45	514.813	-1717.77	1146.79	512.021	-1849.28	1029.9	461.005	-1920.19	972.588	518.135	-1889.59	932.384	506.23	-1982.29	883.145
746	0	293.137	-1962.81	1640.47	190.215	-1960.45	1639.46	316.191	-1807.56	1663.76	179.534	-1792.41	1666.77	225.2	-1725.86	1515.64	219.411	-1627.17	1292.38	247.3	-1863.72	1417	251.704	-1886.44	1231.37	169.18	-1624.14	1368.94	419.699	-1718.91	1468.37	487.851	-1724.12	1264.61	514.336	-1733.14	1145.14	511.17	-1867.39	1031.57	459.889	-1939.62	976.141	516.978	-1910.15	935.009	504.809	-2004.06	888.231
747	0	292.348	-1974.61	1638.64	189.399	-1972.26	1637.64	315.301	-1819.3	1661.72	178.626	-1804.2	1664.74	224.122	-1737.78	1513.67	218.306	-1639.29	1290.32	246.443	-1875.65	1414.99	251.08	-1898.4	1229.4	168.133	-1636.23	1366.87	418.6	-1730.84	1466.49	486.92	-1737.73	1262.72	513.719	-1748.37	1143.45	510.227	-1885.1	1033.07	458.699	-1958.49	979.407	515.755	-1930.12	937.451	503.349	-2025.09	893
748	0	291.394	-1986.46	1636.78	188.418	-1984.13	1635.78	314.225	-1831.08	1659.65	177.532	-1816.05	1662.65	222.927	-1749.77	1511.62	217.176	-1651.49	1288.18	245.457	-1887.67	1412.93	250.354	-1910.47	1227.37	167.028	-1648.39	1364.69	417.398	-1742.9	1464.57	485.891	-1751.35	1260.83	512.969	-1763.43	1141.75	509.197	-1902.39	1034.39	457.443	-1976.8	982.371	514.471	-1949.48	939.688	501.853	-2045.37	897.417
749	0	290.269	-1998.35	1634.95	187.266	-1996.05	1633.92	312.958	-1842.9	1657.56	176.246	-1827.96	1660.51	221.618	-1761.83	1509.53	216.026	-1663.78	1285.98	244.343	-1899.78	1410.85	249.527	-1922.67	1225.33	165.873	-1660.62	1362.43	416.093	-1755.08	1462.63	484.769	-1764.95	1258.94	512.094	-1778.31	1140.05	508.088	-1919.24	1035.52	456.126	-1994.54	985.019	513.131	-1968.19	941.703	500.322	-2064.9	901.451
750	0	288.97	-2010.3	1633.15	185.943	-2008.03	1632.09	311.501	-1854.75	1655.49	174.771	-1839.93	1658.35	220.197	-1773.97	1507.41	214.862	-1676.16	1283.74	243.104	-1911.99	1408.76	248.599	-1934.98	1223.29	164.671	-1672.92	1360.13	414.687	-1767.4	1460.69	483.561	-1778.52	1257.09	511.1	-1792.98	1138.37	506.905	-1935.63	1036.46	454.755	-2011.69	987.339	511.741	-1986.25	943.48	498.762	-2083.66	905.073
751	0	287.5	-2022.29	1631.43	184.45	-2020.07	1630.3	309.855	-1866.64	1653.46	173.108	-1851.95	1656.2	218.67	-1786.19	1505.3	213.688	-1688.61	1281.5	241.742	-1924.29	1406.7	247.573	-1947.41	1221.27	163.426	-1685.29	1357.8	413.182	-1779.85	1458.79	482.275	-1792.05	1255.31	509.995	-1807.42	1136.73	505.655	-1951.54	1037.21	453.337	-2028.23	989.32	510.307	-2003.63	945.003	497.175	-2101.65	908.257
752	0	285.862	-2034.33	1629.81	182.793	-2032.16	1628.58	308.028	-1878.57	1651.5	171.265	-1864.03	1654.08	217.041	-1798.48	1503.22	212.506	-1701.15	1279.27	240.266	-1936.68	1404.69	246.457	-1959.96	1219.31	162.14	-1697.73	1355.47	411.583	-1792.41	1456.93	480.914	-1805.52	1253.61	508.786	-1821.61	1135.15	504.343	-1966.96	1037.77	451.878	-2044.17	990.954	508.837	-2020.32	946.261	495.567	-2118.86	910.981
753	0	284.064	-2046.43	1628.31	180.978	-2044.31	1626.95	306.03	-1890.55	1649.63	169.253	-1876.16	1652.01	215.318	-1810.85	1501.19	211.317	-1713.76	1277.1	238.686	-1949.15	1402.75	245.257	-1972.62	1217.43	160.815	-1710.23	1353.18	409.895	-1805.09	1455.16	479.484	-1818.91	1252.01	507.479	-1835.53	1133.65	502.974	-1981.88	1038.14	450.383	-2059.49	992.234	507.339	-2036.3	947.246	493.944	-2135.27	913.225
754	0	282.116	-2058.57	1626.94	179.016	-2056.51	1625.43	303.873	-1902.57	1647.88	167.085	-1888.35	1650.02	213.509	-1823.28	1499.25	210.12	-1726.44	1274.99	237.011	-1961.71	1400.91	243.983	-1985.38	1215.64	159.449	-1722.79	1350.94	408.125	-1817.87	1453.48	477.989	-1832.21	1250.53	506.082	-1849.16	1132.25	501.554	-1996.28	1038.32	448.86	-2074.18	993.155	505.819	-2051.55	947.948	492.312	-2150.87	914.972
755	0	280.03	-2070.76	1625.72	176.92	-2068.76	1624.03	301.573	-1914.63	1646.27	164.776	-1900.59	1648.12	211.622	-1835.79	1497.41	208.913	-1739.19	1272.98	235.256	-1974.33	1399.19	242.647	-1998.24	1213.99	158.042	-1735.41	1348.79	406.28	-1830.72	1451.92	476.432	-1845.4	1249.2	504.6	-1862.48	1130.97	500.089	-2010.14	1038.32	447.315	-2088.23	993.713	504.287	-2066.07	948.364	490.679	-2165.66	916.207
756	0	277.819	-2083.01	1624.67	174.704	-2081.05	1622.77	299.147	-1926.74	1644.82	162.343	-1912.88	1646.33	209.667	-1848.36	1495.69	207.692	-1752	1271.09	233.435	-1987.02	1397.61	241.26	-2011.19	1212.47	156.592	-1748.09	1346.74	404.369	-1843.65	1450.5	474.814	-1858.46	1248.01	503.038	-1875.49	1129.81	498.584	-2023.46	1038.13	445.754	-2101.64	993.906	502.751	-2079.85	948.489	489.053	-2179.62	916.92
757	0	275.499	-2095.3	1623.8	172.381	-2093.4	1621.65	296.613	-1938.9	1643.54	159.805	-1925.21	1644.68	207.653	-1860.98	1494.11	206.452	-1764.86	1269.34	231.562	-1999.77	1396.19	239.835	-2024.21	1211.11	155.096	-1760.81	1344.83	402.402	-1856.63	1449.24	473.139	-1871.38	1246.99	501.402	-1888.16	1128.81	497.046	-2036.24	1037.76	444.185	-2114.4	993.732	501.218	-2092.87	948.32	487.444	-2192.75	917.101
758	0	273.084	-2107.64	1623.12	169.968	-2105.78	1620.69	293.989	-1951.1	1642.45	157.179	-1937.59	1643.17	205.591	-1873.67	1492.7	205.186	-1777.76	1267.76	229.651	-2012.57	1394.93	238.383	-2037.31	1209.93	153.554	-1773.58	1343.07	400.388	-1869.65	1448.15	471.407	-1884.15	1246.14	499.697	-1900.49	1127.96	495.479	-2048.46	1037.21	442.614	-2126.51	993.191	499.695	-2105.13	947.855	485.86	-2205.03	916.744
759	0	270.59	-2120.02	1622.62	167.479	-2118.2	1619.89	291.294	-1963.35	1641.56	154.484	-1950.01	1641.82	203.488	-1886.4	1491.45	203.89	-1790.71	1266.34	227.717	-2025.41	1393.85	236.916	-2050.46	1208.94	151.961	-1786.39	1341.48	398.338	-1882.7	1447.24	469.619	-1896.74	1245.47	497.928	-1912.47	1127.29	493.89	-2060.12	1036.49	441.048	-2137.96	992.284	498.188	-2116.62	947.093	484.309	-2216.47	915.842
760	0	268.029	-2132.44	1622.33	164.926	-2130.65	1619.26	288.545	-1975.64	1640.87	151.736	-1962.47	1640.63	201.356	-1899.18	1490.4	202.556	-1803.69	1265.12	225.772	-2038.28	1392.97	235.444	-2063.65	1208.14	150.316	-1799.24	1340.08	396.263	-1895.75	1446.52	467.775	-1909.15	1244.99	496.098	-1924.1	1126.79	492.282	-2071.23	1035.59	439.492	-2148.76	991.011	496.702	-2127.34	946.034	482.801	-2227.05	914.393
761	0	265.413	-2144.9	1622.23	162.323	-2143.12	1618.79	285.757	-1987.98	1640.4	148.949	-1974.95	1639.62	199.201	-1911.99	1489.53	201.18	-1816.7	1264.1	223.828	-2051.18	1392.27	233.974	-2076.88	1207.54	148.618	-1812.11	1338.88	394.172	-1908.8	1446.01	465.876	-1921.37	1244.69	494.211	-1935.36	1126.49	490.66	-2081.77	1034.53	437.952	-2158.9	989.374	495.242	-2137.29	944.678	481.343	-2236.77	912.394
762	0	262.753	-2157.39	1622.32	159.68	-2155.62	1618.48	282.944	-2000.35	1640.15	146.138	-1987.46	1638.78	197.031	-1924.85	1488.87	199.756	-1829.73	1263.28	221.894	-2064.11	1391.78	232.513	-2090.12	1207.14	146.866	-1825.02	1337.89	392.073	-1921.84	1445.71	463.922	-1933.38	1244.58	492.27	-1946.27	1126.37	489.027	-2091.74	1033.3	436.432	-2168.38	987.374	493.811	-2146.46	943.024	479.941	-2245.64	909.844
763	0	260.057	-2169.92	1622.61	157.003	-2168.14	1618.35	280.116	-2012.76	1640.12	143.311	-1999.99	1638.11	194.852	-1937.74	1488.42	198.28	-1842.78	1262.68	219.976	-2077.04	1391.49	231.065	-2103.39	1206.95	145.059	-1837.95	1337.11	389.972	-1934.86	1445.62	461.912	-1945.2	1244.66	490.277	-1956.81	1126.45	487.386	-2101.15	1031.91	434.937	-2177.21	985.012	492.412	-2154.85	941.073	478.6	-2253.64	906.742
764	0	257.331	-2182.48	1623.1	154.3	-2180.67	1618.37	277.283	-2025.2	1640.31	140.477	-2012.54	1637.63	192.669	-1950.65	1488.17	196.751	-1855.84	1262.3	218.08	-2089.99	1391.41	229.632	-2116.66	1206.96	143.197	-1850.9	1336.56	387.876	-1947.85	1445.75	459.848	-1956.79	1244.92	488.234	-1966.99	1126.74	485.74	-2110	1030.34	433.468	-2185.38	982.29	491.046	-2162.47	938.825	477.323	-2260.77	903.089
765	0	254.578	-2195.07	1623.79	151.575	-2193.21	1618.56	274.448	-2037.68	1640.73	137.642	-2025.11	1637.33	190.483	-1963.6	1488.14	195.165	-1868.92	1262.14	216.21	-2102.95	1391.52	228.217	-2129.93	1207.18	141.281	-1863.88	1336.23	385.787	-1960.82	1446.09	457.73	-1968.18	1245.38	486.142	-1976.8	1127.22	484.089	-2118.29	1028.62	432.028	-2192.9	979.207	489.714	-2169.31	936.281	476.113	-2267.04	898.885
766	0	251.802	-2207.68	1624.66	148.83	-2205.76	1618.92	271.617	-2050.19	1641.36	134.808	-2037.68	1637.21	188.298	-1976.57	1488.32	193.523	-1882.01	1262.21	214.367	-2115.92	1391.85	226.82	-2143.21	1207.61	139.309	-1876.87	1336.12	383.708	-1973.76	1446.65	455.558	-1979.34	1246.02	484.003	-1986.24	1127.9	482.435	-2126	1026.72	430.617	-2199.77	975.765	488.418	-2175.37	933.44	474.971	-2272.45	894.129
767	0	249.003	-2220.33	1625.73	146.065	-2218.33	1619.44	268.792	-2062.73	1642.22	131.977	-2050.27	1637.27	186.113	-1989.57	1488.71	191.823	-1895.1	1262.5	212.553	-2128.89	1392.37	225.442	-2156.48	1208.24	137.284	-1889.88	1336.25	381.639	-1986.67	1447.43	453.331	-1990.29	1246.85	481.816	-1995.32	1128.78	480.778	-2133.16	1024.67	429.236	-2205.98	971.963	487.158	-2180.65	930.303	473.899	-2276.99	888.823
768	0	246.182	-2233	1626.99	143.283	-2230.9	1620.12	265.971	-2075.31	1643.31	129.149	-2062.88	1637.51	183.93	-2002.6	1489.31	190.066	-1908.21	1263.01	210.767	-2141.87	1393.1	224.083	-2169.75	1209.08	135.203	-1902.91	1336.6	379.581	-1999.54	1448.43	451.052	-2001.02	1247.86	479.583	-2004.03	1129.86	479.118	-2139.75	1022.44	427.884	-2211.54	967.802	485.934	-2185.16	926.87	472.896	-2280.68	882.965
[truncated: 69 more columns]

## Sheet: Sheet2
Devices
		025370 - Force			025370 - Moment			025370 - CoP			027571 - Force			027571 - Moment			027571 - CoP			037720 - Force			037720 - Moment			037720 - CoP
Frame	Sub Frame	Fx	Fy	Fz	Mx	My	Mz	Cx	Cy	Cz	Fx	Fy	Fz	Mx	My	Mz	Cx	Cy	Cz	Fx	Fy	Fz	Mx	My	Mz	Cx	Cy	Cz
		N	N	N	N.mm	N.mm	N.mm	mm	mm	mm	N	N	N	N.mm	N.mm	N.mm	mm	mm	mm	N	N	N	N.mm	N.mm	N.mm	mm	mm	mm
362	0	0	0	0	0	0	0	200	300	0	0	0	0	0	0	0	200	903	0	0	0	0	0	0	0	603	903	0
362	1	0	0	0	0	0	0	200	300	0	0	0	0	0	0	0	200	903	0	0	0	0	0	0	0	603	903	0
362	2	0	0	0	0	0	0	200	300	0	0	0	0	0	0	0	200	903	0	0	0	0	0	0	0	603	903	0
362	3	0	0	0	0	0	0	200	300	0	0	0	0	0	0	0	200	903	0	0	0	0	0	0	0	603	903	0
362	4	0	0	0	0	0	0	200	300	0	0	0	0	0	0	0	200	903	0	0	0	0	0	0	0	603	903	0
362	5	0	0	0	0	0	0	200	300	0	0	0	0	0	0	0	200	903	0	0	0	0	0	0	0	603	903	0
362	6	0	0	0	0	0	0	200	300	0	0	0	0	0	0	0	200	903	0	0	0	0	0	0	0	603	903	0
362	7	0	0	0	0	0	0	200	300	0	0	0	0	0	0	0	200	903	0	0	0	0	0	0	0	603	903	0
362	8	0	0	0	0	0	0	200	300	0	0	0	0	0	0	0	200	903	0	0	0	0	0	0	0	603	903	0
362	9	0	0	0	0	0	0	200	300	0	0	0	0	0	0	0	200	903	0	0	0	0	0	0	0	603	903	0
363	0	0	0	0	0	0	0	200	300	0	0	0	0	0	0	0	200	903	0	0	0	0	0	0	0	603	903	0
363	1	0	0	0	0	0	0	200	300	0	0	0	0	0	0	0	200	903	0	0	0	0	0	0	0	603	903	0
363	2	0	0	0	0	0	0	200	300	0	0	0	0	0	0	0	200	903	0	0	0	0	0	0	0	603	903	0
363	3	0	0	0	0	0	0	200	300	0	0	0	0	0	0	0	200	903	0	0	0	0	0	0	0	603	903	0
363	4	0	0	0	0	0	0	200	300	0	0	0	0	0	0	0	200	903	0	0	0	0	0	0	0	603	903	0
363	5	0	0	0	0	0	0	200	300	0	0	0	0	0	0	0	200	903	0	0	0	0	0	0	0	603	903	0
363	6	0	0	0	0	0	0	200	300	0	0	0	0	0	0	0	200	903	0	0	0	0	0	0	0	603	903	0
363	7	0	0	0	0	0	0	200	300	0	0	0	0	0	0	0	200	903	0	0	0	0	0	0	0	603	903	0
363	8	0	0	0	0	0	0	200	300	0	0	0	0	0	0	0	200	903	0	0	0	0	0	0	0	603	903	0
363	9	0	0	0	0	0	0	200	300	0	0	0	0	0	0	0	200	903	0	0	0	0	0	0	0	603	903	0
364	0	0	0	0	0	0	0	200	300	0	0	0	0	0	0	0	200	903	0	0	0	0	0	0	0	603	903	0
364	1	0	0	0	0	0	0	200	300	0	0	0	0	0	0	0	200	903	0	0	0	0	0	0	0	603	903	0
364	2	0	0	0	0	0	0	200	300	0	0	0	0	0	0	0	200	903	0	0	0	0	0	0	0	603	903	0
364	3	0	0	0	0	0	0	200	300	0	0	0	0	0	0	0	200	903	0	0	0	0	0	0	0	603	903	0
364	4	0	0	0	0	0	0	200	300	0	0	0	0	0	0	0	200	903	0	0	0	0	0	0	0	603	903	0
364	5	0	0	0	0	0	0	200	300	0	0	0	0	0	0	0	200	903	0	0	0	0	0	0	0	603	903	0
364	6	0	0	0	0	0	0	200	300	0	0	0	0	0	0	0	200	903	0	0	0	0	0	0	0	603	903	0
364	7	0	0	0	0	0	0	200	300	0	0	0	0	0	0	0	200	903	0	0	0	0	0	0	0	603	903	0
364	8	0	0	0	0	0	0	200	300	0	0	0	0	0	0	0	200	903	0	0	0	0	0	0	0	603	903	0
364	9	0	0	0	0	0	0	200	300	0	0	0	0	0	0	0	200	903	0	0	0	0	0	0	0	603	903	0
365	0	0	0	0	0	0	0	200	300	0	0	0	0	0	0	0	200	903	0	0	0	0	0	0	0	603	903	0
365	1	0	0	0	0	0	0	200	300	0	0	0	0	0	0	0	200	903	0	0	0	0	0	0	0	603	903	0
365	2	0	0	0	0	0	0	200	300	0	0	0	0	0	0	0	200	903	0	0	0	0	0	0	0	603	903	0
365	3	0	0	0	0	0	0	200	300	0	0	0	0	0	0	0	200	903	0	0	0	0	0	0	0	603	903	0
365	4	0	0	0	0	0	0	200	300	0	0	0	0	0	0	0	200	903	0	0	0	0	0	0	0	603	903	0
365	5	0	0	0	0	0	0	200	300	0	0	0	0	0	0	0	200	903	0	0	0	0	0	0	0	603	903	0
365	6	0	0	0	0	0	0	200	300	0	0	0	0	0	0	0	200	903	0	0	0	0	0	0	0	603	903	0
365	7	0	0	0	0	0	0	200	300	0	0	0	0	0	0	0	200	903	0	0	0	0	0	0	0	603	903	0
365	8	0	0	0	0	0	0	200	300	0	0	0	0	0	0	0	200	903	0	0	0	0	0	0	0	603	903	0
365	9	0	0	0	0	0	0	200	300	0	0	0	0	0	0	0	200	903	0	0	0	0	0	0	0	603	903	0
366	0	0	0	0	0	0	0	200	300	0	0	0	0	0	0	0	200	903	0	0	0	0	0	0	0	603	903	0
366	1	0	0	0	0	0	0	200	300	0	0	0	0	0	0	0	200	903	0	0	0	0	0	0	0	603	903	0
366	2	0	0	0	0	0	0	200	300	0	0	0	0	0	0	0	200	903	0	0	0	0	0	0	0	603	903	0
366	3	0	0	0	0	0	0	200	300	0	0	0	0	0	0	0	200	903	0	0	0	0	0	0	0	603	903	0
366	4	0	0	0	0	0	0	200	300	0	0	0	0	0	0	0	200	903	0	0	0	0	0	0	0	603	903	0
366	5	0	0	0	0	0	0	200	300	0	0	0	0	0	0	0	200	903	0	0	0	0	0	0	0	603	903	0
366	6	0	0	0	0	0	0	200	300	0	0	0	0	0	0	0	200	903	0	0	0	0	0	0	0	603	903	0
366	7	0	0	0	0	0	0	200	300	0	0	0	0	0	0	0	200	903	0	0	0	0	0	0	0	603	903	0
366	8	0	0	0	0	0	0	200	300	0	0	0	0	0	0	0	200	903	0	0	0	0	0	0	0	603	903	0
366	9	0	0	0	0	0	0	200	300	0	0	0	0	0	0	0	200	903	0	0	0	0	0	0	0	603	903	0
367	0	0	0	0	0	0	0	200	300	0	0	0	0	0	0	0	200	903	0	0	0	0	0	0	0	603	903	0
367	1	0	0	0	0	0	0	200	300	0	0	0	0	0	0	0	200	903	0	0	0	0	0	0	0	603	903	0
367	2	0	0	0	0	0	0	200	300	0	0	0	0	0	0	0	200	903	0	0	0	0	0	0	0	603	903	0
367	3	0	0	0	0	0	0	200	300	0	0	0	0	0	0	0	200	903	0	0	0	0	0	0	0	603	903	0
367	4	0	0	0	0	0	0	200	300	0	0	0	0	0	0	0	200	903	0	0	0	0	0	0	0	603	903	0
367	5	0	0	0	0	0	0	200	300	0	0	0	0	0	0	0	200	903	0	0	0	0	0	0	0	603	903	0
367	6	0	0	0	0	0	0	200	300	0	0	0	0	0	0	0	200	903	0	0	0	0	0	0	0	603	903	0
367	7	0	0	0	0	0	0	200	300	0	0	0	0	0	0	0	200	903	0	0	0	0	0	0	0	603	903	0
367	8	0	0	0	0	0	0	200	300	0	0	0	0	0	0	0	200	903	0	0	0	0	0	0	0	603	903	0
367	9	0	0	0	0	0	0	200	300	0	0	0	0	0	0	0	200	903	0	0	0	0	0	0	0	603	903	0
368	0	0	0	0	0	0	0	200	300	0	0	0	0	0	0	0	200	903	0	0	0	0	0	0	0	603	903	0
368	1	0	0	0	0	0	0	200	300	0	0	0	0	0	0	0	200	903	0	0	0	0	0	0	0	603	903	0
368	2	0	0	0	0	0	0	200	300	0	0	0	0	0	0	0	200	903	0	0	0	0	0	0	0	603	903	0
368	3	0	0	0	0	0	0	200	300	0	0	0	0	0	0	0	200	903	0	0	0	0	0	0	0	603	903	0
368	4	0	0	0	0	0	0	200	300	0	0	0	0	0	0	0	200	903	0	0	0	0	0	0	0	603	903	0
368	5	0	0	0	0	0	0	200	300	0	0	0	0	0	0	0	200	903	0	0	0	0	0	0	0	603	903	0
368	6	0	0	0	0	0	0	200	300	0	0	0	0	0	0	0	200	903	0	0	0	0	0	0	0	603	903	0
368	7	0	0	0	0	0	0	200	300	0	0	0	0	0	0	0	200	903	0	0	0	0	0	0	0	603	903	0
368	8	0	0	0	0	0	0	200	300	0	0	0	0	0	0	0	200	903	0	0	0	0	0	0	0	603	903	0
368	9	0	0	0	0	0	0	200	300	0	0	0	0	0	0	0	200	903	0	0	0	0	0	0	0	603	903	0
369	0	0	0	0	0	0	0	200	300	0	0	0	0	0	0	0	200	903	0	0	0	0	0	0	0	603	903	0
369	1	0	0	0	0	0	0	200	300	0	0	0	0	0	0	0	200	903	0	0	0	0	0	0	0	603	903	0
369	2	0	0	0	0	0	0	200	300	0	0	0	0	0	0	0	200	903	0	0	0	0	0	0	0	603	903	0
369	3	0	0	0	0	0	0	200	300	0	0	0	0	0	0	0	200	903	0	0	0	0	0	0	0	603	903	0
369	4	0	0	0	0	0	0	200	300	0	0	0	0	0	0	0	200	903	0	0	0	0	0	0	0	603	903	0
369	5	0	0	0	0	0	0	200	300	0	0	0	0	0	0	0	200	903	0	0	0	0	0	0	0	603	903	0
369	6	0	0	0	0	0	0	200	300	0	0	0	0	0	0	0	200	903	0	0	0	0	0	0	0	603	903	0
369	7	0	0	0	0	0	0	200	300	0	0	0	0	0	0	0	200	903	0	0	0	0	0	0	0	603	903	0
369	8	0	0	0	0	0	0	200	300	0	0	0	0	0	0	0	200	903	0	0	0	0	0	0	0	603	903	0
369	9	0	0	0	0	0	0	200	300	0	0	0	0	0	0	0	200	903	0	0	0	0	0	0	0	603	903	0
370	0	0	0	0	0	0	0	200	300	0	0	0	0	0	0	0	200	903	0	0	0	0	0	0	0	603	903	0
370	1	0	0	0	0	0	0	200	300	0	0	0	0	0	0	0	200	903	0	0	0	0	0	0	0	603	903	0
370	2	0	0	0	0	0	0	200	300	0	0	0	0	0	0	0	200	903	0	0	0	0	0	0	0	603	903	0
370	3	0	0	0	0	0	0	200	300	0	0	0	0	0	0	0	200	903	0	0	0	0	0	0	0	603	903	0
370	4	0	0	0	0	0	0	200	300	0	0	0	0	0	0	0	200	903	0	0	0	0	0	0	0	603	903	0
370	5	0	0	0	0	0	0	200	300	0	0	0	0	0	0	0	200	903	0	0	0	0	0	0	0	603	903	0
370	6	0	0	0	0	0	0	200	300	0	0	0	0	0	0	0	200	903	0	0	0	0	0	0	0	603	903	0
370	7	0	0	0	0	0	0	200	300	0	0	0	0	0	0	0	200	903	0	0	0	0	0	0	0	603	903	0
370	8	0	0	0	0	0	0	200	300	0	0	0	0	0	0	0	200	903	0	0	0	0	0	0	0	603	903	0
370	9	0	0	0	0	0	0	200	300	0	0	0	0	0	0	0	200	903	0	0	0	0	0	0	0	603	903	0
371	0	0	0	0	0	0	0	200	300	0	0	0	0	0	0	0	200	903	0	0	0	0	0	0	0	603	903	0
371	1	0	0	0	0	0	0	200	300	0	0	0	0	0	0	0	200	903	0	0	0	0	0	0	0	603	903	0
371	2	0	0	0	0	0	0	200	300	0	0	0	0	0	0	0	200	903	0	0	0	0	0	0	0	603	903	0
371	3	0	0	0	0	0	0	200	300	0	0	0	0	0	0	0	200	903	0	0	0	0	0	0	0	603	903	0
371	4	0	0	0	0	0	0	200	300	0	0	0	0	0	0	0	200	903	0	0	0	0	0	0	0	603	903	0
371	5	0	0	0	0	0	0	200	300	0	0	0	0	0	0	0	200	903	0	0	0	0	0	0	0	603	903	0
371	6	0	0	0	0	0	0	200	300	0	0	0	0	0	0	0	200	903	0	0	0	0	0	0	0	603	903	0
371	7	0	0	0	0	0	0	200	300	0	0	0	0	0	0	0	200	903	0	0	0	0	0	0	0	603	903	0
371	8	0	0	0	0	0	0	200	300	0	0	0	0	0	0	0	200	903	0	0	0	0	0	0	0	603	903	0
371	9	0	0	0	0	0	0	200	300	0	0	0	0	0	0	0	200	903	0	0	0	0	0	0	0	603	903	0
372	0	0	0	0	0	0	0	200	300	0	0	0	0	0	0	0	200	903	0	0	0	0	0	0	0	603	903	0
372	1	0	0	0	0	0	0	200	300	0	0	0	0	0	0	0	200	903	0	0	0	0	0	0	0	603	903	0
372	2	0	0	0	0	0	0	200	300	0	0	0	0	0	0	0	200	903	0	0	0	0	0	0	0	603	903	0
372	3	0	0	0	0	0	0	200	300	0	0	0	0	0	0	0	200	903	0	0	0	0	0	0	0	603	903	0
372	4	0	0	0	0	0	0	200	300	0	0	0	0	0	0	0	200	903	0	0	0	0	0	0	0	603	903	0
372	5	0	0	0	0	0	0	200	300	0	0	0	0	0	0	0	200	903	0	0	0	0	0	0	0	603	903	0
372	6	0	0	0	0	0	0	200	300	0	0	0	0	0	0	0	200	903	0	0	0	0	0	0	0	603	903	0
372	7	0	0	0	0	0	0	200	300	0	0	0	0	0	0	0	200	903	0	0	0	0	0	0	0	603	903	0
372	8	0	0	0	0	0	0	200	300	0	0	0	0	0	0	0	200	903	0	0	0	0	0	0	0	603	903	0
372	9	0	0	0	0	0	0	200	300	0	0	0	0	0	0	0	200	903	0	0	0	0	0	0	0	603	903	0
373	0	0	0	0	0	0	0	200	300	0	0	0	0	0	0	0	200	903	0	0	0	0	0	0	0	603	903	0
373	1	0	0	0	0	0	0	200	300	0	0	0	0	0	0	0	200	903	0	0	0	0	0	0	0	603	903	0
373	2	0	0	0	0	0	0	200	300	0	0	0	0	0	0	0	200	903	0	0	0	0	0	0	0	603	903	0
373	3	0	0	0	0	0	0	200	300	0	0	0	0	0	0	0	200	903	0	0	0	0	0	0	0	603	903	0
373	4	0	0	0	0	0	0	200	300	0	0	0	0	0	0	0	200	903	0	0	0	0	0	0	0	603	903	0
373	5	0	0	0	0	0	0	200	300	0	0	0	0	0	0	0	200	903	0	0	0	0	0	0	0	603	903	0
373	6	0	0	0	0	0	0	200	300	0	0	0	0	0	0	0	200	903	0	0	0	0	0	0	0	603	903	0
373	7	0	0	0	0	0	0	200	300	0	0	0	0	0	0	0	200	903	0	0	0	0	0	0	0	603	903	0
373	8	0	0	0	0	0	0	200	300	0	0	0	0	0	0	0	200	903	0	0	0	0	0	0	0	603	903	0
373	9	0	0	0	0	0	0	200	300	0	0	0	0	0	0	0	200	903	0	0	0	0	0	0	0	603	903	0
374	0	0	0	0	0	0	0	200	300	0	0	0	0	0	0	0	200	903	0	0	0	0	0	0	0	603	903	0
374	1	0	0	0	0	0	0	200	300	0	0	0	0	0	0	0	200	903	0	0	0	0	0	0	0	603	903	0
374	2	0	0	0	0	0	0	200	300	0	0	0	0	0	0	0	200	903	0	0	0	0	0	0	0	603	903	0
374	3	0	0	0	0	0	0	200	300	0	0	0	0	0	0	0	200	903	0	0	0	0	0	0	0	603	903	0
374	4	0	0	0	0	0	0	200	300	0	0	0	0	0	0	0	200	903	0	0	0	0	0	0	0	603	903	0
374	5	0	0	0	0	0	0	200	300	0	0	0	0	0	0	0	200	903	0	0	0	0	0	0	0	603	903	0
374	6	0	0	0	0	0	0	200	300	0	0	0	0	0	0	0	200	903	0	0	0	0	0	0	0	603	903	0
374	7	0	0	0	0	0	0	200	300	0	0	0	0	0	0	0	200	903	0	0	0	0	0	0	0	603	903	0
374	8	0	0	0	0	0	0	200	300	0	0	0	0	0	0	0	200	903	0	0	0	0	0	0	0	603	903	0
374	9	0	0	0	0	0	0	200	300	0	0	0	0	0	0	0	200	903	0	0	0	0	0	0	0	603	903	0
375	0	0	0	0	0	0	0	200	300	0	0	0	0	0	0	0	200	903	0	0	0	0	0	0	0	603	903	0
375	1	0	0	0	0	0	0	200	300	0	0	0	0	0	0	0	200	903	0	0	0	0	0	0	0	603	903	0
375	2	0	0	0	0	0	0	200	300	0	0	0	0	0	0	0	200	903	0	0	0	0	0	0	0	603	903	0
375	3	0	0	0	0	0	0	200	300	0	0	0	0	0	0	0	200	903	0	0	0	0	0	0	0	603	903	0
375	4	0	0	0	0	0	0	200	300	0	0	0	0	0	0	0	200	903	0	0	0	0	0	0	0	603	903	0
375	5	0	0	0	0	0	0	200	300	0	0	0	0	0	0	0	200	903	0	0	0	0	0	0	0	603	903	0
375	6	0	0	0	0	0	0	200	300	0	0	0	0	0	0	0	200	903	0	0	0	0	0	0	0	603	903	0
375	7	0	0	0	0	0	0	200	300	0	0	0	0	0	0	0	200	903	0	0	0	0	0	0	0	603	903	0
375	8	0	0	0	0	0	0	200	300	0	0	0	0	0	0	0	200	903	0	0	0	0	0	0	0	603	903	0
375	9	0	0	0	0	0	0	200	300	0	0	0	0	0	0	0	200	903	0	0	0	0	0	0	0	603	903	0
376	0	0	0	0	0	0	0	200	300	0	0	0	0	0	0	0	200	903	0	0	0	0	0	0	0	603	903	0
376	1	0	0	0	0	0	0	200	300	0	0	0	0	0	0	0	200	903	0	0	0	0	0	0	0	603	903	0
376	2	0	0	0	0	0	0	200	300	0	0	0	0	0	0	0	200	903	0	0	0	0	0	0	0	603	903	0
376	3	0	0	0	0	0	0	200	300	0	0	0	0	0	0	0	200	903	0	0	0	0	0	0	0	603	903	0
376	4	0	0	0	0	0	0	200	300	0	0	0	0	0	0	0	200	903	0	0	0	0	0	0	0	603	903	0
376	5	0	0	0	0	0	0	200	300	0	0	0	0	0	0	0	200	903	0	0	0	0	0	0	0	603	903	0
376	6	0	0	0	0	0	0	200	300	0	0	0	0	0	0	0	200	903	0	0	0	0	0	0	0	603	903	0
376	7	0	0	0	0	0	0	200	300	0	0	0	0	0	0	0	200	903	0	0	0	0	0	0	0	603	903	0
376	8	0	0	0	0	0	0	200	300	0	0	0	0	0	0	0	200	903	0	0	0	0	0	0	0	603	903	0
376	9	0	0	0	0	0	0	200	300	0	0	0	0	0	0	0	200	903	0	0	0	0	0	0	0	603	903	0
377	0	0	0	0	0	0	0	200	300	0	0	0	0	0	0	0	200	903	0	0	0	0	0	0	0	603	903	0
377	1	0	0	0	0	0	0	200	300	0	0	0	0	0	0	0	200	903	0	0	0	0	0	0	0	603	903	0
377	2	0	0	0	0	0	0	200	300	0	0	0	0	0	0	0	200	903	0	0	0	0	0	0	0	603	903	0
377	3	0	0	0	0	0	0	200	300	0	0	0	0	0	0	0	200	903	0	0	0	0	0	0	0	603	903	0
377	4	0	0	0	0	0	0	200	300	0	0	0	0	0	0	0	200	903	0	0	0	0	0	0	0	603	903	0
377	5	0	0	0	0	0	0	200	300	0	0	0	0	0	0	0	200	903	0	0	0	0	0	0	0	603	903	0
377	6	0	0	0	0	0	0	200	300	0	0	0	0	0	0	0	200	903	0	0	0	0	0	0	0	603	903	0
377	7	0	0	0	0	0	0	200	300	0	0	0	0	0	0	0	200	903	0	0	0	0	0	0	0	603	903	0
377	8	0	0	0	0	0	0	200	300	0	0	0	0	0	0	0	200	903	0	0	0	0	0	0	0	603	903	0
377	9	0	0	0	0	0	0	200	300	0	0	0	0	0	0	0	200	903	0	0	0	0	0	0	0	603	903	0
378	0	0	0	0	0	0	0	200	300	0	0	0	0	0	0	0	200	903	0	0	0	0	0	0	0	603	903	0
378	1	0	0	0	0	0	0	200	300	0	0	0	0	0	0	0	200	903	0	0	0	0	0	0	0	603	903	0
378	2	0	0	0	0	0	0	200	300	0	0	0	0	0	0	0	200	903	0	0	0	0	0	0	0	603	903	0
378	3	0	0	0	0	0	0	200	300	0	0	0	0	0	0	0	200	903	0	0	0	0	0	0	0	603	903	0
378	4	0	0	0	0	0	0	200	300	0	0	0	0	0	0	0	200	903	0	0	0	0	0	0	0	603	903	0
378	5	0	0	0	0	0	0	200	300	0	0	0	0	0	0	0	200	903	0	0	0	0	0	0	0	603	903	0
378	6	0	0	0	0	0	0	200	300	0	0	0	0	0	0	0	200	903	0	0	0	0	0	0	0	603	903	0
378	7	0	0	0	0	0	0	200	300	0	0	0	0	0	0	0	200	903	0	0	0	0	0	0	0	603	903	0
378	8	0	0	0	0	0	0	200	300	0	0	0	0	0	0	0	200	903	0	0	0	0	0	0	0	603	903	0
378	9	0	0	0	0	0	0	200	300	0	0	0	0	0	0	0	200	903	0	0	0	0	0	0	0	603	903	0
379	0	0	0	0	0	0	0	200	300	0	0	0	0	0	0	0	200	903	0	0	0	0	0	0	0	603	903	0
379	1	0	0	0	0	0	0	200	300	0	0	0	0	0	0	0	200	903	0	0	0	0	0	0	0	603	903	0
379	2	0	0	0	0	0	0	200	300	0	0	0	0	0	0	0	200	903	0	0	0	0	0	0	0	603	903	0
379	3	0	0	0	0	0	0	200	300	0	0	0	0	0	0	0	200	903	0	0	0	0	0	0	0	603	903	0
379	4	0	0	0	0	0	0	200	300	0	0	0	0	0	0	0	200	903	0	0	0	0	0	0	0	603	903	0
379	5	0	0	0	0	0	0	200	300	0	0	0	0	0	0	0	200	903	0	0	0	0	0	0	0	603	903	0
379	6	0	0	0	0	0	0	200	300	0	0	0	0	0	0	0	200	903	0	0	0	0	0	0	0	603	903	0
379	7	0	0	0	0	0	0	200	300	0	0	0	0	0	0	0	200	903	0	0	0	0	0	0	0	603	903	0
379	8	0	0	0	0	0	0	200	300	0	0	0	0	0	0	0	200	903	0	0	0	0	0	0	0	603	903	0
379	9	0	0	0	0	0	0	200	300	0	0	0	0	0	0	0	200	903	0	0	0	0	0	0	0	603	903	0
380	0	0	0	0	0	0	0	200	300	0	0	0	0	0	0	0	200	903	0	0	0	0	0	0	0	603	903	0
380	1	0	0	0	0	0	0	200	300	0	0	0	0	0	0	0	200	903	0	0	0	0	0	0	0	603	903	0
380	2	0	0	0	0	0	0	200	300	0	0	0	0	0	0	0	200	903	0	0	0	0	0	0	0	603	903	0
380	3	0	0	0	0	0	0	200	300	0	0	0	0	0	0	0	200	903	0	0	0	0	0	0	0	603	903	0
380	4	0	0	0	0	0	0	200	300	0	0	0	0	0	0	0	200	903	0	0	0	0	0	0	0	603	903	0
380	5	0	0	0	0	0	0	200	300	0	0	0	0	0	0	0	200	903	0	0	0	0	0	0	0	603	903	0
380	6	0	0	0	0	0	0	200	300	0	0	0	0	0	0	0	200	903	0	0	0	0	0	0	0	603	903	0
380	7	0	0	0	0	0	0	200	300	0	0	0	0	0	0	0	200	903	0	0	0	0	0	0	0	603	903	0
380	8	0	0	0	0	0	0	200	300	0	0	0	0	0	0	0	200	903	0	0	0	0	0	0	0	603	903	0
380	9	0	0	0	0	0	0	200	300	0	0	0	0	0	0	0	200	903	0	0	0	0	0	0	0	603	903	0
381	0	0	0	0	0	0	0	200	300	0	0	0	0	0	0	0	200	903	0	0	0	0	0	0	0	603	903	0
381	1	0	0	0	0	0	0	200	300	0	0	0	0	0	0	0	200	903	0	0	0	0	0	0	0	603	903	0
381	2	0	0	0	0	0	0	200	300	0	0	0	0	0	0	0	200	903	0	0	0	0	0	0	0	603	903	0
381	3	0	0	0	0	0	0	200	300	0	0	0	0	0	0	0	200	903	0	0	0	0	0	0	0	603	903	0
381	4	0	0	0	0	0	0	200	300	0	0	0	0	0	0	0	200	903	0	0	0	0	0	0	0	603	903	0
381	5	0	0	0	0	0	0	200	300	0	0	0	0	0	0	0	200	903	0	0	0	0	0	0	0	603	903	0
381	6	0	0	0	0	0	0	200	300	0	0	0	0	0	0	0	200	903	0	0	0	0	0	0	0	603	903	0
381	7	0	0	0	0	0	0	200	300	0	0	0	0	0	0	0	200	903	0	0	0	0	0	0	0	603	903	0
381	8	0	0	0	0	0	0	200	300	0	0	0	0	0	0	0	200	903	0	0	0	0	0	0	0	603	903	0
381	9	0	0	0	0	0	0	200	300	0	0	0	0	0	0	0	200	903	0	0	0	0	0	0	0	603	903	0
382	0	0	0	0	0	0	0	200	300	0	0	0	0	0	0	0	200	903	0	0	0	0	0	0	0	603	903	0
382	1	0	0	0	0	0	0	200	300	0	0	0	0	0	0	0	200	903	0	0	0	0	0	0	0	603	903	0
382	2	0	0	0	0	0	0	200	300	0	0	0	0	0	0	0	200	903	0	0	0	0	0	0	0	603	903	0
382	3	0	0	0	0	0	0	200	300	0	0	0	0	0	0	0	200	903	0	0	0	0	0	0	0	603	903	0
382	4	0	0	0	0	0	0	200	300	0	0	0	0	0	0	0	200	903	0	0	0	0	0	0	0	603	903	0
382	5	0	0	0	0	0	0	200	300	0	0	0	0	0	0	0	200	903	0	0	0	0	0	0	0	603	903	0
382	6	0	0	0	0	0	0	200	300	0	0	0	0	0	0	0	200	903	0	0	0	0	0	0	0	603	903	0
382	7	0	0	0	0	0	0	200	300	0	0	0	0	0	0	0	200	903	0	0	0	0	0	0	0	603	903	0
382	8	0	0	0	0	0	0	200	300	0	0	0	0	0	0	0	200	903	0	0	0	0	0	0	0	603	903	0
382	9	0	0	0	0	0	0	200	300	0	0	0	0	0	0	0	200	903	0	0	0	0	0	0	0	603	903	0
383	0	0	0	0	0	0	0	200	300	0	0	0	0	0	0	0	200	903	0	0	0	0	0	0	0	603	903	0
383	1	0	0	0	0	0	0	200	300	0	0	0	0	0	0	0	200	903	0	0	0	0	0	0	0	603	903	0
383	2	0	0	0	0	0	0	200	300	0	0	0	0	0	0	0	200	903	0	0	0	0	0	0	0	603	903	0
383	3	0	0	0	0	0	0	200	300	0	0	0	0	0	0	0	200	903	0	0	0	0	0	0	0	603	903	0
383	4	0	0	0	0	0	0	200	300	0	0	0	0	0	0	0	200	903	0	0	0	0	0	0	0	603	903	0
383	5	0	0	0	0	0	0	200	300	0	0	0	0	0	0	0	200	903	0	0	0	0	0	0	0	603	903	0
383	6	0	0	0	0	0	0	200	300	0	0	0	0	0	0	0	200	903	0	0	0	0	0	0	0	603	903	0
383	7	0	0	0	0	0	0	200	300	0	0	0	0	0	0	0	200	903	0	0	0	0	0	0	0	603	903	0
383	8	0	0	0	0	0	0	200	300	0	0	0	0	0	0	0	200	903	0	0	0	0	0	0	0	603	903	0
383	9	0	0	0	0	0	0	200	300	0	0	0	0	0	0	0	200	903	0	0	0	0	0	0	0	603	903	0
384	0	0	0	0	0	0	0	200	300	0	0	0	0	0	0	0	200	903	0	0	0	0	0	0	0	603	903	0
384	1	0	0	0	0	0	0	200	300	0	0	0	0	0	0	0	200	903	0	0	0	0	0	0	0	603	903	0
384	2	0	0	0	0	0	0	200	300	0	0	0	0	0	0	0	200	903	0	0	0	0	0	0	0	603	903	0
384	3	0	0	0	0	0	0	200	300	0	0	0	0	0	0	0	200	903	0	0	0	0	0	0	0	603	903	0
384	4	0	0	0	0	0	0	200	300	0	0	0	0	0	0	0	200	903	0	0	0	0	0	0	0	603	903	0
384	5	0	0	0	0	0	0	200	300	0	0	0	0	0	0	0	200	903	0	0	0	0	0	0	0	603	903	0
384	6	0	0	0	0	0	0	200	300	0	0	0	0	0	0	0	200	903	0	0	0	0	0	0	0	603	903	0
384	7	0	0	0	0	0	0	200	300	0	0	0	0	0	0	0	200	903	0	0	0	0	0	0	0	603	903	0
384	8	0	0	0	0	0	0	200	300	0	0	0	0	0	0	0	200	903	0	0	0	0	0	0	0	603	903	0
384	9	0	0	0	0	0	0	200	300	0	0	0	0	0	0	0	200	903	0	0	0	0	0	0	0	603	903	0
385	0	0	0	0	0	0	0	200	300	0	0	0	0	0	0	0	200	903	0	0	0	0	0	0	0	603	903	0
385	1	0	0	0	0	0	0	200	300	0	0	0	0	0	0	0	200	903	0	0	0	0	0	0	0	603	903	0
385	2	0	0	0	0	0	0	200	300	0	0	0	0	0	0	0	200	903	0	0	0	0	0	0	0	603	903	0
385	3	0	0	0	0	0	0	200	300	0	0	0	0	0	0	0	200	903	0	0	0	0	0	0	0	603	903	0
385	4	0	0	0	0	0	0	200	300	0	0	0	0	0	0	0	200	903	0	0	0	0	0	0	0	603	903	0
385	5	0	0	0	0	0	0	200	300	0	0	0	0	0	0	0	200	903	0	0	0	0	0	0	0	603	903	0
385	6	0	0	0	0	0	0	200	300	0	0	0	0	0	0	0	200	903	0	0	0	0	0	0	0	603	903	0
385	7	0	0	0	0	0	0	200	300	0	0	0	0	0	0	0	200	903	0	0	0	0	0	0	0	603	903	0
385	8	0	0	0	0	0	0	200	300	0	0	0	0	0	0	0	200	903	0	0	0	0	0	0	0	603	903	0
385	9	0	0	0	0	0	0	200	300	0	0	0	0	0	0	0	200	903	0	0	0	0	0	0	0	603	903	0
386	0	0	0	0	0	0	0	200	300	0	0	0	0	0	0	0	200	903	0	0	0	0	0	0	0	603	903	0
386	1	0	0	0	0	0	0	200	300	0	0	0	0	0	0	0	200	903	0	0	0	0	0	0	0	603	903	0
386	2	0	0	0	0	0	0	200	300	0	0	0	0	0	0	0	200	903	0	0	0	0	0	0	0	603	903	0
386	3	0	0	0	0	0	0	200	300	0	0	0	0	0	0	0	200	903	0	0	0	0	0	0	0	603	903	0
386	4	0	0	0	0	0	0	200	300	0	0	0	0	0	0	0	200	903	0	0	0	0	0	0	0	603	903	0
386	5	0	0	0	0	0	0	200	300	0	0	0	0	0	0	0	200	903	0	0	0	0	0	0	0	603	903	0
386	6	0	0	0	0	0	0	200	300	0	0	0	0	0	0	0	200	903	0	0	0	0	0	0	0	603	903	0
386	7	0	0	0	0	0	0	200	300	0	0	0	0	0	0	0	200	903	0	0	0	0	0	0	0	603	903	0
386	8	0	0	0	0	0	0	200	300	0	0	0	0	0	0	0	200	903	0	0	0	0	0	0	0	603	903	0
386	9	0	0	0	0	0	0	200	300	0	0	0	0	0	0	0	200	903	0	0	0	0	0	0	0	603	903	0
387	0	0	0	0	0	0	0	200	300	0	0	0	0	0	0	0	200	903	0	0	0	0	0	0	0	603	903	0
387	1	0	0	0	0	0	0	200	300	0	0	0	0	0	0	0	200	903	0	0	0	0	0	0	0	603	903	0
387	2	0	0	0	0	0	0	200	300	0	0	0	0	0	0	0	200	903	0	0	0	0	0	0	0	603	903	0
387	3	0	0	0	0	0	0	200	300	0	0	0	0	0	0	0	200	903	0	0	0	0	0	0	0	603	903	0
387	4	0	0	0	0	0	0	200	300	0	0	0	0	0	0	0	200	903	0	0	0	0	0	0	0	603	903	0
387	5	0	0	0	0	0	0	200	300	0	0	0	0	0	0	0	200	903	0	0	0	0	0	0	0	603	903	0
387	6	0	0	0	0	0	0	200	300	0	0	0	0	0	0	0	200	903	0	0	0	0	0	0	0	603	903	0
387	7	0	0	0	0	0	0	200	300	0	0	0	0	0	0	0	200	903	0	0	0	0	0	0	0	603	903	0
387	8	0	0	0	0	0	0	200	300	0	0	0	0	0	0	0	200	903	0	0	0	0	0	0	0	603	903	0
387	9	0	0	0	0	0	0	200	300	0	0	0	0	0	0	0	200	903	0	0	0	0	0	0	0	603	903	0
388	0	0	0	0	0	0	0	200	300	0	0	0	0	0	0	0	200	903	0	0	0	0	0	0	0	603	903	0
388	1	0	0	0	0	0	0	200	300	0	0	0	0	0	0	0	200	903	0	0	0	0	0	0	0	603	903	0
388	2	0	0	0	0	0	0	200	300	0	0	0	0	0	0	0	200	903	0	0	0	0	0	0	0	603	903	0
388	3	0	0	0	0	0	0	200	300	0	0	0	0	0	0	0	200	903	0	0	0	0	0	0	0	603	903	0
388	4	0	0	0	0	0	0	200	300	0	0	0	0	0	0	0	200	903	0	0	0	0	0	0	0	603	903	0
388	5	0	0	0	0	0	0	200	300	0	0	0	0	0	0	0	200	903	0	0	0	0	0	0	0	603	903	0
388	6	0	0	0	0	0	0	200	300	0	0	0	0	0	0	0	200	903	0	0	0	0	0	0	0	603	903	0
388	7	0	0	0	0	0	0	200	300	0	0	0	0	0	0	0	200	903	0	0	0	0	0	0	0	603	903	0
388	8	0	0	0	0	0	0	200	300	0	0	0	0	0	0	0	200	903	0	0	0	0	0	0	0	603	903	0
388	9	0	0	0	0	0	0	200	300	0	0	0	0	0	0	0	200	903	0	0	0	0	0	0	0	603	903	0
389	0	0	0	0	0	0	0	200	300	0	0	0	0	0	0	0	200	903	0	0	0	0	0	0	0	603	903	0
389	1	0	0	0	0	0	0	200	300	0	0	0	0	0	0	0	200	903	0	0	0	0	0	0	0	603	903	0
389	2	0	0	0	0	0	0	200	300	0	0	0	0	0	0	0	200	903	0	0	0	0	0	0	0	603	903	0
389	3	0	0	0	0	0	0	200	300	0	0	0	0	0	0	0	200	903	0	0	0	0	0	0	0	603	903	0
389	4	0	0	0	0	0	0	200	300	0	0	0	0	0	0	0	200	903	0	0	0	0	0	0	0	603	903	0
389	5	0	0	0	0	0	0	200	300	0	0	0	0	0	0	0	200	903	0	0	0	0	0	0	0	603	903	0
389	6	0	0	0	0	0	0	200	300	0	0	0	0	0	0	0	200	903	0	0	0	0	0	0	0	603	903	0
389	7	0	0	0	0	0	0	200	300	0	0	0	0	0	0	0	200	903	0	0	0	0	0	0	0	603	903	0
389	8	0	0	0	0	0	0	200	300	0	0	0	0	0	0	0	200	903	0	0	0	0	0	0	0	603	903	0
389	9	0	0	0	0	0	0	200	300	0	0	0	0	0	0	0	200	903	0	0	0	0	0	0	0	603	903	0
390	0	0	0	0	0	0	0	200	300	0	0	0	0	0	0	0	200	903	0	0	0	0	0	0	0	603	903	0
390	1	0	0	0	0	0	0	200	300	0	0	0	0	0	0	0	200	903	0	0	0	0	0	0	0	603	903	0
390	2	0	0	0	0	0	0	200	300	0	0	0	0	0	0	0	200	903	0	0	0	0	0	0	0	603	903	0
390	3	0	0	0	0	0	0	200	300	0	0	0	0	0	0	0	200	903	0	0	0	0	0	0	0	603	903	0
390	4	0	0	0	0	0	0	200	300	0	0	0	0	0	0	0	200	903	0	0	0	0	0	0	0	603	903	0
390	5	0	0	0	0	0	0	200	300	0	0	0	0	0	0	0	200	903	0	0	0	0	0	0	0	603	903	0
390	6	0	0	0	0	0	0	200	300	0	0	0	0	0	0	0	200	903	0	0	0	0	0	0	0	603	903	0
390	7	0	0	0	0	0	0	200	300	0	0	0	0	0	0	0	200	903	0	0	0	0	0	0	0	603	903	0
390	8	0	0	0	0	0	0	200	300	0	0	0	0	0	0	0	200	903	0	0	0	0	0	0	0	603	903	0
390	9	0	0	0	0	0	0	200	300	0	0	0	0	0	0	0	200	903	0	0	0	0	0	0	0	603	903	0
391	0	0	0	0	0	0	0	200	300	0	0	0	0	0	0	0	200	903	0	0	0	0	0	0	0	603	903	0
391	1	0	0	0	0	0	0	200	300	0	0	0	0	0	0	0	200	903	0	0	0	0	0	0	0	603	903	0
391	2	0	0	0	0	0	0	200	300	0	0	0	0	0	0	0	200	903	0	0	0	0	0	0	0	603	903	0
391	3	0	0	0	0	0	0	200	300	0	0	0	0	0	0	0	200	903	0	0	0	0	0	0	0	603	903	0
391	4	0	0	0	0	0	0	200	300	0	0	0	0	0	0	0	200	903	0	0	0	0	0	0	0	603	903	0
391	5	0	0	0	0	0	0	200	300	0	0	0	0	0	0	0	200	903	0	0	0	0	0	0	0	603	903	0
391	6	0	0	0	0	0	0	200	300	0	0	0	0	0	0	0	200	903	0	0	0	0	0	0	0	603	903	0
391	7	0	0	0	0	0	0	200	300	0	0	0	0	0	0	0	200	903	0	0	0	0	0	0	0	603	903	0
391	8	0	0	0	0	0	0	200	300	0	0	0	0	0	0	0	200	903	0	0	0	0	0	0	0	603	903	0
391	9	0	0	0	0	0	0	200	300	0	0	0	0	0	0	0	200	903	0	0	0	0	0	0	0	603	903	0
392	0	0	0	0	0	0	0	200	300	0	0	0	0	0	0	0	200	903	0	0	0	0	0	0	0	603	903	0
392	1	0	0	0	0	0	0	200	300	0	0	0	0	0	0	0	200	903	0	0	0	0	0	0	0	603	903	0
392	2	0	0	0	0	0	0	200	300	0	0	0	0	0	0	0	200	903	0	0	0	0	0	0	0	603	903	0
392	3	0	0	0	0	0	0	200	300	0	0	0	0	0	0	0	200	903	0	0	0	0	0	0	0	603	903	0
392	4	0	0	0	0	0	0	200	300	0	0	0	0	0	0	0	200	903	0	0	0	0	0	0	0	603	903	0
392	5	0	0	0	0	0	0	200	300	0	0	0	0	0	0	0	200	903	0	0	0	0	0	0	0	603	903	0
392	6	0	0	0	0	0	0	200	300	0	0	0	0	0	0	0	200	903	0	0	0	0	0	0	0	603	903	0
392	7	0	0	0	0	0	0	200	300	0	0	0	0	0	0	0	200	903	0	0	0	0	0	0	0	603	903	0
392	8	0	0	0	0	0	0	200	300	0	0	0	0	0	0	0	200	903	0	0	0	0	0	0	0	603	903	0
392	9	0	0	0	0	0	0	200	300	0	0	0	0	0	0	0	200	903	0	0	0	0	0	0	0	603	903	0
393	0	0	0	0	0	0	0	200	300	0	0	0	0	0	0	0	200	903	0	0	0	0	0	0	0	603	903	0
393	1	0	0	0	0	0	0	200	300	0	0	0	0	0	0	0	200	903	0	0	0	0	0	0	0	603	903	0
393	2	0	0	0	0	0	0	200	300	0	0	0	0	0	0	0	200	903	0	0	0	0	0	0	0	603	903	0
393	3	0	0	0	0	0	0	200	300	0	0	0	0	0	0	0	200	903	0	0	0	0	0	0	0	603	903	0
393	4	0	0	0	0	0	0	200	300	0	0	0	0	0	0	0	200	903	0	0	0	0	0	0	0	603	903	0
393	5	0	0	0	0	0	0	200	300	0	0	0	0	0	0	0	200	903	0	0	0	0	0	0	0	603	903	0
393	6	0	0	0	0	0	0	200	300	0	0	0	0	0	0	0	200	903	0	0	0	0	0	0	0	603	903	0
393	7	0	0	0	0	0	0	200	300	0	0	0	0	0	0	0	200	903	0	0	0	0	0	0	0	603	903	0
393	8	0	0	0	0	0	0	200	300	0	0	0	0	0	0	0	200	903	0	0	0	0	0	0	0	603	903	0
393	9	0	0	0	0	0	0	200	300	0	0	0	0	0	0	0	200	903	0	0	0	0	0	0	0	603	903	0
394	0	0	0	0	0	0	0	200	300	0	0	0	0	0	0	0	200	903	0	0	0	0	0	0	0	603	903	0
394	1	0	0	0	0	0	0	200	300	0	0	0	0	0	0	0	200	903	0	0	0	0	0	0	0	603	903	0
394	2	0	0	0	0	0	0	200	300	0	0	0	0	0	0	0	200	903	0	0	0	0	0	0	0	603	903	0
394	3	0	0	0	0	0	0	200	300	0	0	0	0	0	0	0	200	903	0	0	0	0	0	0	0	603	903	0
394	4	0	0	0	0	0	0	200	300	0	0	0	0	0	0	0	200	903	0	0	0	0	0	0	0	603	903	0
394	5	0	0	0	0	0	0	200	300	0	0	0	0	0	0	0	200	903	0	0	0	0	0	0	0	603	903	0
394	6	0	0	0	0	0	0	200	300	0	0	0	0	0	0	0	200	903	0	0	0	0	0	0	0	603	903	0
394	7	0	0	0	0	0	0	200	300	0	0	0	0	0	0	0	200	903	0	0	0	0	0	0	0	603	903	0
394	8	0	0	0	0	0	0	200	300	0	0	0	0	0	0	0	200	903	0	0	0	0	0	0	0	603	903	0
394	9	0	0	0	0	0	0	200	300	0	0	0	0	0	0	0	200	903	0	0	0	0	0	0	0	603	903	0
395	0	0	0	0	0	0	0	200	300	0	0	0	0	0	0	0	200	903	0	0	0	0	0	0	0	603	903	0
395	1	0	0	0	0	0	0	200	300	0	0	0	0	0	0	0	200	903	0	0	0	0	0	0	0	603	903	0
395	2	0	0	0	0	0	0	200	300	0	0	0	0	0	0	0	200	903	0	0	0	0	0	0	0	603	903	0
395	3	0	0	0	0	0	0	200	300	0	0	0	0	0	0	0	200	903	0	0	0	0	0	0	0	603	903	0
395	4	0	0	0	0	0	0	200	300	0	0	0	0	0	0	0	200	903	0	0	0	0	0	0	0	603	903	0
395	5	0	0	0	0	0	0	200	300	0	0	0	0	0	0	0	200	903	0	0	0	0	0	0	0	603	903	0
395	6	0	0	0	0	0	0	200	300	0	0	0	0	0	0	0	200	903	0	0	0	0	0	0	0	603	903	0
395	7	0	0	0	0	0	0	200	300	0	0	0	0	0	0	0	200	903	0	0	0	0	0	0	0	603	903	0
395	8	0	0	0	0	0	0	200	300	0	0	0	0	0	0	0	200	903	0	0	0	0	0	0	0	603	903	0
395	9	0	0	0	0	0	0	200	300	0	0	0	0	0	0	0	200	903	0	0	0	0	0	0	0	603	903	0
396	0	0	0	0	0	0	0	200	300	0	0	0	0	0	0	0	200	903	0	0	0	0	0	0	0	603	903	0
396	1	0	0	0	0	0	0	200	300	0	0	0	0	0	0	0	200	903	0	0	0	0	0	0	0	603	903	0
396	2	0	0	0	0	0	0	200	300	0	0	0	0	0	0	0	200	903	0	0	0	0	0	0	0	603	903	0
396	3	0	0	0	0	0	0	200	300	0	0	0	0	0	0	0	200	903	0	0	0	0	0	0	0	603	903	0
396	4	0	0	0	0	0	0	200	300	0	0	0	0	0	0	0	200	903	0	0	0	0	0	0	0	603	903	0
396	5	0	0	0	0	0	0	200	300	0	0	0	0	0	0	0	200	903	0	0	0	0	0	0	0	603	903	0
396	6	0	0	0	0	0	0	200	300	0	0	0	0	0	0	0	200	903	0	0	0	0	0	0	0	603	903	0
396	7	0	0	0	0	0	0	200	300	0	0	0	0	0	0	0	200	903	0	0	0	0	0	0	0	603	903	0
396	8	0	0	0	0	0	0	200	300	0	0	0	0	0	0	0	200	903	0	0	0	0	0	0	0	603	903	0
396	9	0	0	0	0	0	0	200	300	0	0	0	0	0	0	0	200	903	0	0	0	0	0	0	0	603	903	0
397	0	0	0	0	0	0	0	200	300	0	0	0	0	0	0	0	200	903	0	0	0	0	0	0	0	603	903	0
397	1	0	0	0	0	0	0	200	300	0	0	0	0	0	0	0	200	903	0	0	0	0	0	0	0	603	903	0
397	2	0	0	0	0	0	0	200	300	0	0	0	0	0	0	0	200	903	0	0	0	0	0	0	0	603	903	0
397	3	0	0	0	0	0	0	200	300	0	0	0	0	0	0	0	200	903	0	0	0	0	0	0	0	603	903	0
397	4	0	0	0	0	0	0	200	300	0	0	0	0	0	0	0	200	903	0	0	0	0	0	0	0	603	903	0
397	5	0	0	0	0	0	0	200	300	0	0	0	0	0	0	0	200	903	0	0	0	0	0	0	0	603	903	0
397	6	0	0	0	0	0	0	200	300	0	0	0	0	0	0	0	200	903	0	0	0	0	0	0	0	603	903	0
397	7	0	0	0	0	0	0	200	300	0	0	0	0	0	0	0	200	903	0	0	0	0	0	0	0	603	903	0
397	8	0	0	0	0	0	0	200	300	0	0	0	0	0	0	0	200	903	0	0	0	0	0	0	0	603	903	0
397	9	0	0	0	0	0	0	200	300	0	0	0	0	0	0	0	200	903	0	0	0	0	0	0	0	603	903	0
398	0	0	0	0	0	0	0	200	300	0	0	0	0	0	0	0	200	903	0	0	0	0	0	0	0	603	903	0
398	1	0	0	0	0	0	0	200	300	0	0	0	0	0	0	0	200	903	0	0	0	0	0	0	0	603	903	0
398	2	0	0	0	0	0	0	200	300	0	0	0	0	0	0	0	200	903	0	0	0	0	0	0	0	603	903	0
398	3	0	0	0	0	0	0	200	300	0	0	0	0	0	0	0	200	903	0	0	0	0	0	0	0	603	903	0
398	4	0	0	0	0	0	0	200	300	0	0	0	0	0	0	0	200	903	0	0	0	0	0	0	0	603	903	0
398	5	0	0	0	0	0	0	200	300	0	0	0	0	0	0	0	200	903	0	0	0	0	0	0	0	603	903	0
398	6	0	0	0	0	0	0	200	300	0	0	0	0	0	0	0	200	903	0	0	0	0	0	0	0	603	903	0
398	7	0	0	0	0	0	0	200	300	0	0	0	0	0	0	0	200	903	0	0	0	0	0	0	0	603	903	0
398	8	0	0	0	0	0	0	200	300	0	0	0	0	0	0	0	200	903	0	0	0	0	0	0	0	603	903	0
398	9	0	0	0	0	0	0	200	300	0	0	0	0	0	0	0	200	903	0	0	0	0	0	0	0	603	903	0
399	0	0	0	0	0	0	0	200	300	0	0	0	0	0	0	0	200	903	0	0	0	0	0	0	0	603	903	0
399	1	0	0	0	0	0	0	200	300	0	0	0	0	0	0	0	200	903	0	0	0	0	0	0	0	603	903	0
399	2	0	0	0	0	0	0	200	300	0	0	0	0	0	0	0	200	903	0	0	0	0	0	0	0	603	903	0
399	3	0	0	0	0	0	0	200	300	0	0	0	0	0	0	0	200	903	0	0	0	0	0	0	0	603	903	0
399	4	0	0	0	0	0	0	200	300	0	0	0	0	0	0	0	200	903	0	0	0	0	0	0	0	603	903	0
399	5	0	0	0	0	0	0	200	300	0	0	0	0	0	0	0	200	903	0	0	0	0	0	0	0	603	903	0
399	6	0	0	0	0	0	0	200	300	0	0	0	0	0	0	0	200	903	0	0	0	0	0	0	0	603	903	0
399	7	0	0	0	0	0	0	200	300	0	0	0	0	0	0	0	200	903	0	0	0	0	0	0	0	603	903	0
399	8	0	0	0	0	0	0	200	300	0	0	0	0	0	0	0	200	903	0	0	0	0	0	0	0	603	903	0
399	9	0	0	0	0	0	0	200	300	0	0	0	0	0	0	0	200	903	0	0	0	0	0	0	0	603	903	0
400	0	0	0	0	0	0	0	200	300	0	0	0	0	0	0	0	200	903	0	0	0	0	0	0	0	603	903	0
400	1	0	0	0	0	0	0	200	300	0	0	0	0	0	0	0	200	903	0	0	0	0	0	0	0	603	903	0
400	2	0	0	0	0	0	0	200	300	0	0	0	0	0	0	0	200	903	0	0	0	0	0	0	0	603	903	0
400	3	0	0	0	0	0	0	200	300	0	0	0	0	0	0	0	200	903	0	0	0	0	0	0	0	603	903	0
400	4	0	0	0	0	0	0	200	300	0	0	0	0	0	0	0	200	903	0	0	0	0	0	0	0	603	903	0
400	5	0	0	0	0	0	0	200	300	0	0	0	0	0	0	0	200	903	0	0	0	0	0	0	0	603	903	0
400	6	0	0	0	0	0	0	200	300	0	0	0	0	0	0	0	200	903	0	0	0	0	0	0	0	603	903	0
400	7	0	0	0	0	0	0	200	300	0	0	0	0	0	0	0	200	903	0	0	0	0	0	0	0	603	903	0
400	8	0	0	0	0	0	0	200	300	0	0	0	0	0	0	0	200	903	0	0	0	0	0	0	0	603	903	0
400	9	0	0	0	0	0	0	200	300	0	0	0	0	0	0	0	200	903	0	0	0	0	0	0	0	603	903	0
401	0	0	0	0	0	0	0	200	300	0	0	0	0	0	0	0	200	903	0	0	0	0	0	0	0	603	903	0
401	1	0	0	0	0	0	0	200	300	0	0	0	0	0	0	0	200	903	0	0	0	0	0	0	0	603	903	0
401	2	0	0	0	0	0	0	200	300	0	0	0	0	0	0	0	200	903	0	0	0	0	0	0	0	603	903	0
401	3	0	0	0	0	0	0	200	300	0	0	0	0	0	0	0	200	903	0	0	0	0	0	0	0	603	903	0
401	4	0	0	0	0	0	0	200	300	0	0	0	0	0	0	0	200	903	0	0	0	0	0	0	0	603	903	0
401	5	0	0	0	0	0	0	200	300	0	0	0	0	0	0	0	200	903	0	0	0	0	0	0	0	603	903	0
401	6	0	0	0	0	0	0	200	300	0	0	0	0	0	0	0	200	903	0	0	0	0	0	0	0	603	903	0
401	7	0	0	0	0	0	0	200	300	0	0	0	0	0	0	0	200	903	0	0	0	0	0	0	0	603	903	0
401	8	0	0	0	0	0	0	200	300	0	0	0	0	0	0	0	200	903	0	0	0	0	0	0	0	603	903	0
401	9	0	0	0	0	0	0	200	300	0	0	0	0	0	0	0	200	903	0	0	0	0	0	0	0	603	903	0
402	0	0	0	0	0	0	0	200	300	0	0	0	0	0	0	0	200	903	0	0	0	0	0	0	0	603	903	0
402	1	0	0	0	0	0	0	200	300	0	0	0	0	0	0	0	200	903	0	0	0	0	0	0	0	603	903	0
402	2	0	0	0	0	0	0	200	300	0	0	0	0	0	0	0	200	903	0	0	0	0	0	0	0	603	903	0
402	3	0	0	0	0	0	0	200	300	0	0	0	0	0	0	0	200	903	0	0	0	0	0	0	0	603	903	0
402	4	0	0	0	0	0	0	200	300	0	0	0	0	0	0	0	200	903	0	0	0	0	0	0	0	603	903	0
402	5	0	0	0	0	0	0	200	300	0	0	0	0	0	0	0	200	903	0	0	0	0	0	0	0	603	903	0
402	6	0	0	0	0	0	0	200	300	0	0	0	0	0	0	0	200	903	0	0	0	0	0	0	0	603	903	0
402	7	0	0	0	0	0	0	200	300	0	0	0	0	0	0	0	200	903	0	0	0	0	0	0	0	603	903	0
402	8	0	0	0	0	0	0	200	300	0	0	0	0	0	0	0	200	903	0	0	0	0	0	0	0	603	903	0
402	9	0	0	0	0	0	0	200	300	0	0	0	0	0	0	0	200	903	0	0	0	0	0	0	0	603	903	0
403	0	0	0	0	0	0	0	200	300	0	0	0	0	0	0	0	200	903	0	0	0	0	0	0	0	603	903	0
403	1	0	0	0	0	0	0	200	300	0	0	0	0	0	0	0	200	903	0	0	0	0	0	0	0	603	903	0
403	2	0	0	0	0	0	0	200	300	0	0	0	0	0	0	0	200	903	0	0	0	0	0	0	0	603	903	0
403	3	0	0	0	0	0	0	200	300	0	0	0	0	0	0	0	200	903	0	0	0	0	0	0	0	603	903	0
403	4	0	0	0	0	0	0	200	300	0	0	0	0	0	0	0	200	903	0	0	0	0	0	0	0	603	903	0
403	5	0	0	0	0	0	0	200	300	0	0	0	0	0	0	0	200	903	0	0	0	0	0	0	0	603	903	0
403	6	0	0	0	0	0	0	200	300	0	0	0	0	0	0	0	200	903	0	0	0	0	0	0	0	603	903	0
403	7	0	0	0	0	0	0	200	300	0	0	0	0	0	0	0	200	903	0	0	0	0	0	0	0	603	903	0
403	8	0	0	0	0	0	0	200	300	0	0	0	0	0	0	0	200	903	0	0	0	0	0	0	0	603	903	0
403	9	0	0	0	0	0	0	200	300	0	0	0	0	0	0	0	200	903	0	0	0	0	0	0	0	603	903	0
404	0	0	0	0	0	0	0	200	300	0	0	0	0	0	0	0	200	903	0	0	0	0	0	0	0	603	903	0
404	1	0	0	0	0	0	0	200	300	0	0	0	0	0	0	0	200	903	0	0	0	0	0	0	0	603	903	0
404	2	0	0	0	0	0	0	200	300	0	0	0	0	0	0	0	200	903	0	0	0	0	0	0	0	603	903	0
404	3	0	0	0	0	0	0	200	300	0	0	0	0	0	0	0	200	903	0	0	0	0	0	0	0	603	903	0
404	4	0	0	0	0	0	0	200	300	0	0	0	0	0	0	0	200	903	0	0	0	0	0	0	0	603	903	0
404	5	0	0	0	0	0	0	200	300	0	0	0	0	0	0	0	200	903	0	0	0	0	0	0	0	603	903	0
404	6	0	0	0	0	0	0	200	300	0	0	0	0	0	0	0	200	903	0	0	0	0	0	0	0	603	903	0
404	7	0	0	0	0	0	0	200	300	0	0	0	0	0	0	0	200	903	0	0	0	0	0	0	0	603	903	0
404	8	0	0	0	0	0	0	200	300	0	0	0	0	0	0	0	200	903	0	0	0	0	0	0	0	603	903	0
404	9	0	0	0	0	0	0	200	300	0	0	0	0	0	0	0	200	903	0	0	0	0	0	0	0	603	903	0
405	0	0	0	0	0	0	0	200	300	0	0	0	0	0	0	0	200	903	0	0	0	0	0	0	0	603	903	0
405	1	0	0	0	0	0	0	200	300	0	0	0	0	0	0	0	200	903	0	0	0	0	0	0	0	603	903	0
405	2	0	0	0	0	0	0	200	300	0	0	0	0	0	0	0	200	903	0	0	0	0	0	0	0	603	903	0
405	3	0	0	0	0	0	0	200	300	0	0	0	0	0	0	0	200	903	0	0	0	0	0	0	0	603	903	0
405	4	0	0	0	0	0	0	200	300	0	0	0	0	0	0	0	200	903	0	0	0	0	0	0	0	603	903	0
405	5	0	0	0	0	0	0	200	300	0	0	0	0	0	0	0	200	903	0	0	0	0	0	0	0	603	903	0
405	6	0	0	0	0	0	0	200	300	0	0	0	0	0	0	0	200	903	0	0	0	0	0	0	0	603	903	0
405	7	0	0	0	0	0	0	200	300	0	0	0	0	0	0	0	200	903	0	0	0	0	0	0	0	603	903	0
405	8	0	0	0	0	0	0	200	300	0	0	0	0	0	0	0	200	903	0	0	0	0	0	0	0	603	903	0
405	9	0	0	0	0	0	0	200	300	0	0	0	0	0	0	0	200	903	0	0	0	0	0	0	0	603	903	0
406	0	0	0	0	0	0	0	200	300	0	0	0	0	0	0	0	200	903	0	0	0	0	0	0	0	603	903	0
406	1	0	0	0	0	0	0	200	300	0	0	0	0	0	0	0	200	903	0	0	0	0	0	0	0	603	903	0
406	2	0	0	0	0	0	0	200	300	0	0	0	0	0	0	0	200	903	0	0	0	0	0	0	0	603	903	0
406	3	0	0	0	0	0	0	200	300	0	0	0	0	0	0	0	200	903	0	0	0	0	0	0	0	603	903	0
406	4	0	0	0	0	0	0	200	300	0	0	0	0	0	0	0	200	903	0	0	0	0	0	0	0	603	903	0
406	5	0	0	0	0	0	0	200	300	0	0	0	0	0	0	0	200	903	0	0	0	0	0	0	0	603	903	0
406	6	0	0	0	0	0	0	200	300	0	0	0	0	0	0	0	200	903	0	0	0	0	0	0	0	603	903	0
406	7	0	0	0	0	0	0	200	300	0	0	0	0	0	0	0	200	903	0	0	0	0	0	0	0	603	903	0
406	8	0	0	0	0	0	0	200	300	0	0	0	0	0	0	0	200	903	0	0	0	0	0	0	0	603	903	0
406	9	0	0	0	0	0	0	200	300	0	0	0	0	0	0	0	200	903	0	0	0	0	0	0	0	603	903	0
407	0	0	0	0	0	0	0	200	300	0	0	0	0	0	0	0	200	903	0	0	0	0	0	0	0	603	903	0
407	1	0	0	0	0	0	0	200	300	0	0	0	0	0	0	0	200	903	0	0	0	0	0	0	0	603	903	0
407	2	0	0	0	0	0	0	200	300	0	0	0	0	0	0	0	200	903	0	0	0	0	0	0	0	603	903	0
407	3	0	0	0	0	0	0	200	300	0	0	0	0	0	0	0	200	903	0	0	0	0	0	0	0	603	903	0
407	4	0	0	0	0	0	0	200	300	0	0	0	0	0	0	0	200	903	0	0	0	0	0	0	0	603	903	0
407	5	0	0	0	0	0	0	200	300	0	0	0	0	0	0	0	200	903	0	0	0	0	0	0	0	603	903	0
407	6	0	0	0	0	0	0	200	300	0	0	0	0	0	0	0	200	903	0	0	0	0	0	0	0	603	903	0
407	7	0	0	0	0	0	0	200	300	0	0	0	0	0	0	0	200	903	0	0	0	0	0	0	0	603	903	0
407	8	0	0	0	0	0	0	200	300	0	0	0	0	0	0	0	200	903	0	0	0	0	0	0	0	603	903	0
407	9	0	0	0	0	0	0	200	300	0	0	0	0	0	0	0	200	903	0	0	0	0	0	0	0	603	903	0
408	0	0	0	0	0	0	0	200	300	0	0	0	0	0	0	0	200	903	0	0	0	0	0	0	0	603	903	0
408	1	0	0	0	0	0	0	200	300	0	0	0	0	0	0	0	200	903	0	0	0	0	0	0	0	603	903	0
408	2	0	0	0	0	0	0	200	300	0	0	0	0	0	0	0	200	903	0	0	0	0	0	0	0	603	903	0
408	3	0	0	0	0	0	0	200	300	0	0	0	0	0	0	0	200	903	0	0	0	0	0	0	0	603	903	0
408	4	0	0	0	0	0	0	200	300	0	0	0	0	0	0	0	200	903	0	0	0	0	0	0	0	603	903	0
408	5	0	0	0	0	0	0	200	300	0	0	0	0	0	0	0	200	903	0	0	0	0	0	0	0	603	903	0
408	6	0	0	0	0	0	0	200	300	0	0	0	0	0	0	0	200	903	0	0	0	0	0	0	0	603	903	0
408	7	0	0	0	0	0	0	200	300	0	0	0	0	0	0	0	200	903	0	0	0	0	0	0	0	603	903	0
408	8	0	0	0	0	0	0	200	300	0	0	0	0	0	0	0	200	903	0	0	0	0	0	0	0	603	903	0
408	9	0	0	0	0	0	0	200	300	0	0	0	0	0	0	0	200	903	0	0	0	0	0	0	0	603	903	0
409	0	0	0	0	0	0	0	200	300	0	0	0	0	0	0	0	200	903	0	0	0	0	0	0	0	603	903	0
409	1	0	0	0	0	0	0	200	300	0	0	0	0	0	0	0	200	903	0	0	0	0	0	0	0	603	903	0
409	2	0	0	0	0	0	0	200	300	0	0	0	0	0	0	0	200	903	0	0	0	0	0	0	0	603	903	0
409	3	0	0	0	0	0	0	200	300	0	0	0	0	0	0	0	200	903	0	0	0	0	0	0	0	603	903	0
409	4	0	0	0	0	0	0	200	300	0	0	0	0	0	0	0	200	903	0	0	0	0	0	0	0	603	903	0
409	5	0	0	0	0	0	0	200	300	0	0	0	0	0	0	0	200	903	0	0	0	0	0	0	0	603	903	0
409	6	0	0	0	0	0	0	200	300	0	0	0	0	0	0	0	200	903	0	0	0	0	0	0	0	603	903	0
409	7	0	0	0	0	0	0	200	300	0	0	0	0	0	0	0	200	903	0	0	0	0	0	0	0	603	903	0
409	8	0	0	0	0	0	0	200	300	0	0	0	0	0	0	0	200	903	0	0	0	0	0	0	0	603	903	0
409	9	0	0	0	0	0	0	200	300	0	0	0	0	0	0	0	200	903	0	0	0	0	0	0	0	603	903	0
410	0	0	0	0	0	0	0	200	300	0	0	0	0	0	0	0	200	903	0	0	0	0	0	0	0	603	903	0
410	1	0	0	0	0	0	0	200	300	0	0	0	0	0	0	0	200	903	0	0	0	0	0	0	0	603	903	0
410	2	0	0	0	0	0	0	200	300	0	0	0	0	0	0	0	200	903	0	0	0	0	0	0	0	603	903	0
410	3	0	0	0	0	0	0	200	300	0	0	0	0	0	0	0	200	903	0	0	0	0	0	0	0	603	903	0
410	4	0	0	0	0	0	0	200	300	0	0	0	0	0	0	0	200	903	0	0	0	0	0	0	0	603	903	0
410	5	0	0	0	0	0	0	200	300	0	0	0	0	0	0	0	200	903	0	0	0	0	0	0	0	603	903	0
410	6	0	0	0	0	0	0	200	300	0	0	0	0	0	0	0	200	903	0	0	0	0	0	0	0	603	903	0
410	7	0	0	0	0	0	0	200	300	0	0	0	0	0	0	0	200	903	0	0	0	0	0	0	0	603	903	0
410	8	0	0	0	0	0	0	200	300	0	0	0	0	0	0	0	200	903	0	0	0	0	0	0	0	603	903	0
410	9	0	0	0	0	0	0	200	300	0	0	0	0	0	0	0	200	903	0	0	0	0	0	0	0	603	903	0
411	0	0	0	0	0	0	0	200	300	0	0	0	0	0	0	0	200	903	0	0	0	0	0	0	0	603	903	0
411	1	0	0	0	0	0	0	200	300	0	0	0	0	0	0	0	200	903	0	0	0	0	0	0	0	603	903	0
411	2	0	0	0	0	0	0	200	300	0	0	0	0	0	0	0	200	903	0	0	0	0	0	0	0	603	903	0
411	3	0	0	0	0	0	0	200	300	0	0	0	0	0	0	0	200	903	0	0	0	0	0	0	0	603	903	0
411	4	0	0	0	0	0	0	200	300	0	0	0	0	0	0	0	200	903	0	0	0	0	0	0	0	603	903	0
411	5	0	0	0	0	0	0	200	300	0	0	0	0	0	0	0	200	903	0	0	0	0	0	0	0	603	903	0
411	6	0	0	0	0	0	0	200	300	0	0	0	0	0	0	0	200	903	0	0	0	0	0	0	0	603	903	0
411	7	0	0	0	0	0	0	200	300	0	0	0	0	0	0	0	200	903	0	0	0	0	0	0	0	603	903	0
411	8	0	0	0	0	0	0	200	300	0	0	0	0	0	0	0	200	903	0	0	0	0	0	0	0	603	903	0
411	9	0	0	0	0	0	0	200	300	0	0	0	0	0	0	0	200	903	0	0	0	0	0	0	0	603	903	0
412	0	0	0	0	0	0	0	200	300	0	0	0	0	0	0	0	200	903	0	0	0	0	0	0	0	603	903	0
412	1	0	0	0	0	0	0	200	300	0	0	0	0	0	0	0	200	903	0	0	0	0	0	0	0	603	903	0
412	2	0	0	0	0	0	0	200	300	0	0	0	0	0	0	0	200	903	0	0	0	0	0	0	0	603	903	0
412	3	0	0	0	0	0	0	200	300	0	0	0	0	0	0	0	200	903	0	0	0	0	0	0	0	603	903	0
412	4	0	0	0	0	0	0	200	300	0	0	0	0	0	0	0	200	903	0	0	0	0	0	0	0	603	903	0
412	5	0	0	0	0	0	0	200	300	0	0	0	0	0	0	0	200	903	0	0	0	0	0	0	0	603	903	0
412	6	0	0	0	0	0	0	200	300	0	0	0	0	0	0	0	200	903	0	0	0	0	0	0	0	603	903	0
412	7	0	0	0	0	0	0	200	300	0	0	0	0	0	0	0	200	903	0	0	0	0	0	0	0	603	903	0
412	8	0	0	0	0	0	0	200	300	0	0	0	0	0	0	0	200	903	0	0	0	0	0	0	0	603	903	0
412	9	0	0	0	0	0	0	200	300	0	0	0	0	0	0	0	200	903	0	0	0	0	0	0	0	603	903	0
413	0	0	0	0	0	0	0	200	300	0	0	0	0	0	0	0	200	903	0	0	0	0	0	0	0	603	903	0
413	1	0	0	0	0	0	0	200	300	0	0	0	0	0	0	0	200	903	0	0	0	0	0	0	0	603	903	0
413	2	0	0	0	0	0	0	200	300	0	0	0	0	0	0	0	200	903	0	0	0	0	0	0	0	603	903	0
413	3	0	0	0	0	0	0	200	300	0	0	0	0	0	0	0	200	903	0	0	0	0	0	0	0	603	903	0
413	4	0	0	0	0	0	0	200	300	0	0	0	0	0	0	0	200	903	0	0	0	0	0	0	0	603	903	0
413	5	0	0	0	0	0	0	200	300	0	0	0	0	0	0	0	200	903	0	0	0	0	0	0	0	603	903	0
413	6	0	0	0	0	0	0	200	300	0	0	0	0	0	0	0	200	903	0	0	0	0	0	0	0	603	903	0
413	7	0	0	0	0	0	0	200	300	0	0	0	0	0	0	0	200	903	0	0	0	0	0	0	0	603	903	0
413	8	0	0	0	0	0	0	200	300	0	0	0	0	0	0	0	200	903	0	0	0	0	0	0	0	603	903	0
413	9	0	0	0	0	0	0	200	300	0	0	0	0	0	0	0	200	903	0	0	0	0	0	0	0	603	903	0
414	0	0	0	0	0	0	0	200	300	0	0	0	0	0	0	0	200	903	0	0	0	0	0	0	0	603	903	0
414	1	0	0	0	0	0	0	200	300	0	0	0	0	0	0	0	200	903	0	0	0	0	0	0	0	603	903	0
414	2	0	0	0	0	0	0	200	300	0	0	0	0	0	0	0	200	903	0	0	0	0	0	0	0	603	903	0
414	3	0	0	0	0	0	0	200	300	0	0	0	0	0	0	0	200	903	0	0	0	0	0	0	0	603	903	0
414	4	0	0	0	0	0	0	200	300	0	0	0	0	0	0	0	200	903	0	0	0	0	0	0	0	603	903	0
414	5	0	0	0	0	0	0	200	300	0	0	0	0	0	0	0	200	903	0	0	0	0	0	0	0	603	903	0
414	6	0	0	0	0	0	0	200	300	0	0	0	0	0	0	0	200	903	0	0	0	0	0	0	0	603	903	0
414	7	0	0	0	0	0	0	200	300	0	0	0	0	0	0	0	200	903	0	0	0	0	0	0	0	603	903	0
414	8	0	0	0	0	0	0	200	300	0	0	0	0	0	0	0	200	903	0	0	0	0	0	0	0	603	903	0
414	9	0	0	0	0	0	0	200	300	0	0	0	0	0	0	0	200	903	0	0	0	0	0	0	0	603	903	0
415	0	0	0	0	0	0	0	200	300	0	0	0	0	0	0	0	200	903	0	0	0	0	0	0	0	603	903	0
415	1	0	0	0	0	0	0	200	300	0	0	0	0	0	0	0	200	903	0	0	0	0	0	0	0	603	903	0
415	2	0	0	0	0	0	0	200	300	0	0	0	0	0	0	0	200	903	0	0	0	0	0	0	0	603	903	0
415	3	0	0	0	0	0	0	200	300	0	0	0	0	0	0	0	200	903	0	0	0	0	0	0	0	603	903	0
415	4	0	0	0	0	0	0	200	300	0	0	0	0	0	0	0	200	903	0	0	0	0	0	0	0	603	903	0
415	5	0	0	0	0	0	0	200	300	0	0	0	0	0	0	0	200	903	0	0	0	0	0	0	0	603	903	0
415	6	0	0	0	0	0	0	200	300	0	0	0	0	0	0	0	200	903	0	0	0	0	0	0	0	603	903	0
415	7	0	0	0	0	0	0	200	300	0	0	0	0	0	0	0	200	903	0	0	0	0	0	0	0	603	903	0
415	8	0	0	0	0	0	0	200	300	0	0	0	0	0	0	0	200	903	0	0	0	0	0	0	0	603	903	0
415	9	0	0	0	0	0	0	200	300	0	0	0	0	0	0	0	200	903	0	0	0	0	0	0	0	603	903	0
416	0	0	0	0	0	0	0	200	300	0	0	0	0	0	0	0	200	903	0	0	0	0	0	0	0	603	903	0
416	1	0	0	0	0	0	0	200	300	0	0	0	0	0	0	0	200	903	0	0	0	0	0	0	0	603	903	0
416	2	0	0	0	0	0	0	200	300	0	0	0	0	0	0	0	200	903	0	0	0	0	0	0	0	603	903	0
416	3	0	0	0	0	0	0	200	300	0	0	0	0	0	0	0	200	903	0	0	0	0	0	0	0	603	903	0
416	4	0	0	0	0	0	0	200	300	0	0	0	0	0	0	0	200	903	0	0	0	0	0	0	0	603	903	0
416	5	0	0	0	0	0	0	200	300	0	0	0	0	0	0	0	200	903	0	0	0	0	0	0	0	603	903	0
416	6	0	0	0	0	0	0	200	300	0	0	0	0	0	0	0	200	903	0	0	0	0	0	0	0	603	903	0
416	7	0	0	0	0	0	0	200	300	0	0	0	0	0	0	0	200	903	0	0	0	0	0	0	0	603	903	0
416	8	0	0	0	0	0	0	200	300	0	0	0	0	0	0	0	200	903	0	0	0	0	0	0	0	603	903	0
416	9	0	0	0	0	0	0	200	300	0	0	0	0	0	0	0	200	903	0	0	0	0	0	0	0	603	903	0
417	0	0	0	0	0	0	0	200	300	0	0	0	0	0	0	0	200	903	0	0	0	0	0	0	0	603	903	0
417	1	0	0	0	0	0	0	200	300	0	0	0	0	0	0	0	200	903	0	0	0	0	0	0	0	603	903	0
417	2	0	0	0	0	0	0	200	300	0	0	0	0	0	0	0	200	903	0	0	0	0	0	0	0	603	903	0
417	3	0	0	0	0	0	0	200	300	0	0	0	0	0	0	0	200	903	0	0	0	0	0	0	0	603	903	0
417	4	0	0	0	0	0	0	200	300	0	0	0	0	0	0	0	200	903	0	0	0	0	0	0	0	603	903	0
417	5	0	0	0	0	0	0	200	300	0	0	0	0	0	0	0	200	903	0	0	0	0	0	0	0	603	903	0
417	6	0	0	0	0	0	0	200	300	0	0	0	0	0	0	0	200	903	0	0	0	0	0	0	0	603	903	0
417	7	0	0	0	0	0	0	200	300	0	0	0	0	0	0	0	200	903	0	0	0	0	0	0	0	603	903	0
417	8	0	0	0	0	0	0	200	300	0	0	0	0	0	0	0	200	903	0	0	0	0	0	0	0	603	903	0
417	9	0	0	0	0	0	0	200	300	0	0	0	0	0	0	0	200	903	0	0	0	0	0	0	0	603	903	0
418	0	0	0	0	0	0	0	200	300	0	0	0	0	0	0	0	200	903	0	0	0	0	0	0	0	603	903	0
418	1	0	0	0	0	0	0	200	300	0	0	0	0	0	0	0	200	903	0	0	0	0	0	0	0	603	903	0
418	2	0	0	0	0	0	0	200	300	0	0	0	0	0	0	0	200	903	0	0	0	0	0	0	0	603	903	0
418	3	0	0	0	0	0	0	200	300	0	0	0	0	0	0	0	200	903	0	0	0	0	0	0	0	603	903	0
418	4	0	0	0	0	0	0	200	300	0	0	0	0	0	0	0	200	903	0	0	0	0	0	0	0	603	903	0
418	5	0	0	0	0	0	0	200	300	0	0	0	0	0	0	0	200	903	0	0	0	0	0	0	0	603	903	0
418	6	0	0	0	0	0	0	200	300	0	0	0	0	0	0	0	200	903	0	0	0	0	0	0	0	603	903	0
418	7	0	0	0	0	0	0	200	300	0	0	0	0	0	0	0	200	903	0	0	0	0	0	0	0	603	903	0
418	8	0	0	0	0	0	0	200	300	0	0	0	0	0	0	0	200	903	0	0	0	0	0	0	0	603	903	0
418	9	0	0	0	0	0	0	200	300	0	0	0	0	0	0	0	200	903	0	0	0	0	0	0	0	603	903	0
419	0	0	0	0	0	0	0	200	300	0	0	0	0	0	0	0	200	903	0	0	0	0	0	0	0	603	903	0
419	1	0	0	0	0	0	0	200	300	0	0	0	0	0	0	0	200	903	0	0	0	0	0	0	0	603	903	0
419	2	0	0	0	0	0	0	200	300	0	0	0	0	0	0	0	200	903	0	0	0	0	0	0	0	603	903	0
419	3	0	0	0	0	0	0	200	300	0	0	0	0	0	0	0	200	903	0	0	0	0	0	0	0	603	903	0
419	4	0	0	0	0	0	0	200	300	0	0	0	0	0	0	0	200	903	0	0	0	0	0	0	0	603	903	0
419	5	0	0	0	0	0	0	200	300	0	0	0	0	0	0	0	200	903	0	0	0	0	0	0	0	603	903	0
419	6	0	0	0	0	0	0	200	300	0	0	0	0	0	0	0	200	903	0	0	0	0	0	0	0	603	903	0
419	7	0	0	0	0	0	0	200	300	0	0	0	0	0	0	0	200	903	0	0	0	0	0	0	0	603	903	0
419	8	0	0	0	0	0	0	200	300	0	0	0	0	0	0	0	200	903	0	0	0	0	0	0	0	603	903	0
419	9	0	0	0	0	0	0	200	300	0	0	0	0	0	0	0	200	903	0	0	0	0	0	0	0	603	903	0
420	0	0	0	0	0	0	0	200	300	0	0	0	0	0	0	0	200	903	0	0	0	0	0	0	0	603	903	0
420	1	0	0	0	0	0	0	200	300	0	0	0	0	0	0	0	200	903	0	0	0	0	0	0	0	603	903	0
420	2	0	0	0	0	0	0	200	300	0	0	0	0	0	0	0	200	903	0	0	0	0	0	0	0	603	903	0
420	3	0	0	0	0	0	0	200	300	0	0	0	0	0	0	0	200	903	0	0	0	0	0	0	0	603	903	0
420	4	0	0	0	0	0	0	200	300	0	0	0	0	0	0	0	200	903	0	0	0	0	0	0	0	603	903	0
420	5	0	0	0	0	0	0	200	300	0	0	0	0	0	0	0	200	903	0	0	0	0	0	0	0	603	903	0
420	6	0	0	0	0	0	0	200	300	0	0	0	0	0	0	0	200	903	0	0	0	0	0	0	0	603	903	0
420	7	0	0	0	0	0	0	200	300	0	0	0	0	0	0	0	200	903	0	0	0	0	0	0	0	603	903	0
420	8	0	0	0	0	0	0	200	300	0	0	0	0	0	0	0	200	903	0	0	0	0	0	0	0	603	903	0
420	9	0	0	0	0	0	0	200	300	0	0	0	0	0	0	0	200	903	0	0	0	0	0	0	0	603	903	0
421	0	0	0	0	0	0	0	200	300	0	0	0	0	0	0	0	200	903	0	0	0	0	0	0	0	603	903	0
421	1	0	0	0	0	0	0	200	300	0	0	0	0	0	0	0	200	903	0	0	0	0	0	0	0	603	903	0
421	2	0	0	0	0	0	0	200	300	0	0	0	0	0	0	0	200	903	0	0	0	0	0	0	0	603	903	0
421	3	0	0	0	0	0	0	200	300	0	0	0	0	0	0	0	200	903	0	0	0	0	0	0	0	603	903	0
421	4	0	0	0	0	0	0	200	300	0	0	0	0	0	0	0	200	903	0	0	0	0	0	0	0	603	903	0
421	5	0	0	0	0	0	0	200	300	0	0	0	0	0	0	0	200	903	0	0	0	0	0	0	0	603	903	0
421	6	0	0	0	0	0	0	200	300	0	0	0	0	0	0	0	200	903	0	0	0	0	0	0	0	603	903	0
421	7	0	0	0	0	0	0	200	300	0	0	0	0	0	0	0	200	903	0	0	0	0	0	0	0	603	903	0
421	8	0	0	0	0	0	0	200	300	0	0	0	0	0	0	0	200	903	0	0	0	0	0	0	0	603	903	0
421	9	0	0	0	0	0	0	200	300	0	0	0	0	0	0	0	200	903	0	0	0	0	0	0	0	603	903	0
422	0	0	0	0	0	0	0	200	300	0	0	0	0	0	0	0	200	903	0	0	0	0	0	0	0	603	903	0
422	1	0	0	0	0	0	0	200	300	0	0	0	0	0	0	0	200	903	0	0	0	0	0	0	0	603	903	0
422	2	0	0	0	0	0	0	200	300	0	0	0	0	0	0	0	200	903	0	0	0	0	0	0	0	603	903	0
422	3	0	0	0	0	0	0	200	300	0	0	0	0	0	0	0	200	903	0	0	0	0	0	0	0	603	903	0
422	4	0	0	0	0	0	0	200	300	0	0	0	0	0	0	0	200	903	0	0	0	0	0	0	0	603	903	0
422	5	0	0	0	0	0	0	200	300	0	0	0	0	0	0	0	200	903	0	0	0	0	0	0	0	603	903	0
422	6	0	0	0	0	0	0	200	300	0	0	0	0	0	0	0	200	903	0	0	0	0	0	0	0	603	903	0
422	7	0	0	0	0	0	0	200	300	0	0	0	0	0	0	0	200	903	0	0	0	0	0	0	0	603	903	0
422	8	0	0	0	0	0	0	200	300	0	0	0	0	0	0	0	200	903	0	0	0	0	0	0	0	603	903	0
422	9	0	0	0	0	0	0	200	300	0	0	0	0	0	0	0	200	903	0	0	0	0	0	0	0	603	903	0
423	0	0	0	0	0	0	0	200	300	0	0	0	0	0	0	0	200	903	0	0	0	0	0	0	0	603	903	0
423	1	0	0	0	0	0	0	200	300	0	0	0	0	0	0	0	200	903	0	0	0	0	0	0	0	603	903	0
423	2	0	0	0	0	0	0	200	300	0	0	0	0	0	0	0	200	903	0	0	0	0	0	0	0	603	903	0
423	3	0	0	0	0	0	0	200	300	0	0	0	0	0	0	0	200	903	0	0	0	0	0	0	0	603	903	0
423	4	0	0	0	0	0	0	200	300	0	0	0	0	0	0	0	200	903	0	0	0	0	0	0	0	603	903	0
423	5	0	0	0	0	0	0	200	300	0	0	0	0	0	0	0	200	903	0	0	0	0	0	0	0	603	903	0
423	6	0	0	0	0	0	0	200	300	0	0	0	0	0	0	0	200	903	0	0	0	0	0	0	0	603	903	0
423	7	0	0	0	0	0	0	200	300	0	0	0	0	0	0	0	200	903	0	0	0	0	0	0	0	603	903	0
423	8	0	0	0	0	0	0	200	300	0	0	0	0	0	0	0	200	903	0	0	0	0	0	0	0	603	903	0
423	9	0	0	0	0	0	0	200	300	0	0	0	0	0	0	0	200	903	0	0	0	0	0	0	0	603	903	0
424	0	0	0	0	0	0	0	200	300	0	0	0	0	0	0	0	200	903	0	0	0	0	0	0	0	603	903	0
424	1	0	0	0	0	0	0	200	300	0	0	0	0	0	0	0	200	903	0	0	0	0	0	0	0	603	903	0
424	2	0	0	0	0	0	0	200	300	0	0	0	0	0	0	0	200	903	0	0	0	0	0	0	0	603	903	0
424	3	0	0	0	0	0	0	200	300	0	0	0	0	0	0	0	200	903	0	0	0	0	0	0	0	603	903	0
424	4	0	0	0	0	0	0	200	300	0	0	0	0	0	0	0	200	903	0	0	0	0	0	0	0	603	903	0
424	5	0	0	0	0	0	0	200	300	0	0	0	0	0	0	0	200	903	0	0	0	0	0	0	0	603	903	0
424	6	0	0	0	0	0	0	200	300	0	0	0	0	0	0	0	200	903	0	0	0	0	0	0	0	603	903	0
424	7	0	0	0	0	0	0	200	300	0	0	0	0	0	0	0	200	903	0	0	0	0	0	0	0	603	903	0
424	8	0	0	0	0	0	0	200	300	0	0	0	0	0	0	0	200	903	0	0	0	0	0	0	0	603	903	0
424	9	0	0	0	0	0	0	200	300	0	0	0	0	0	0	0	200	903	0	0	0	0	0	0	0	603	903	0
425	0	0	0	0	0	0	0	200	300	0	0	0	0	0	0	0	200	903	0	0	0	0	0	0	0	603	903	0
425	1	0	0	0	0	0	0	200	300	0	0	0	0	0	0	0	200	903	0	0	0	0	0	0	0	603	903	0
425	2	0	0	0	0	0	0	200	300	0	0	0	0	0	0	0	200	903	0	0	0	0	0	0	0	603	903	0
425	3	0	0	0	0	0	0	200	300	0	0	0	0	0	0	0	200	903	0	0	0	0	0	0	0	603	903	0
425	4	0	0	0	0	0	0	200	300	0	0	0	0	0	0	0	200	903	0	0	0	0	0	0	0	603	903	0
425	5	0	0	0	0	0	0	200	300	0	0	0	0	0	0	0	200	903	0	0	0	0	0	0	0	603	903	0
425	6	0	0	0	0	0	0	200	300	0	0	0	0	0	0	0	200	903	0	0	0	0	0	0	0	603	903	0
425	7	0	0	0	0	0	0	200	300	0	0	0	0	0	0	0	200	903	0	0	0	0	0	0	0	603	903	0
425	8	0	0	0	0	0	0	200	300	0	0	0	0	0	0	0	200	903	0	0	0	0	0	0	0	603	903	0
425	9	0	0	0	0	0	0	200	300	0	0	0	0	0	0	0	200	903	0	0	0	0	0	0	0	603	903	0
426	0	0	0	0	0	0	0	200	300	0	0	0	0	0	0	0	200	903	0	0	0	0	0	0	0	603	903	0
426	1	0	0	0	0	0	0	200	300	0	0	0	0	0	0	0	200	903	0	0	0	0	0	0	0	603	903	0
426	2	0	0	0	0	0	0	200	300	0	0	0	0	0	0	0	200	903	0	0	0	0	0	0	0	603	903	0
426	3	0	0	0	0	0	0	200	300	0	0	0	0	0	0	0	200	903	0	0	0	0	0	0	0	603	903	0
426	4	0	0	0	0	0	0	200	300	0	0	0	0	0	0	0	200	903	0	0	0	0	0	0	0	603	903	0
426	5	0	0	0	0	0	0	200	300	0	0	0	0	0	0	0	200	903	0	0	0	0	0	0	0	603	903	0
426	6	0	0	0	0	0	0	200	300	0	0	0	0	0	0	0	200	903	0	0	0	0	0	0	0	603	903	0
426	7	0	0	0	0	0	0	200	300	0	0	0	0	0	0	0	200	903	0	0	0	0	0	0	0	603	903	0
426	8	0	0	0	0	0	0	200	300	0	0	0	0	0	0	0	200	903	0	0	0	0	0	0	0	603	903	0
426	9	0	0	0	0	0	0	200	300	0	0	0	0	0	0	0	200	903	0	0	0	0	0	0	0	603	903	0
427	0	0	0	0	0	0	0	200	300	0	0	0	0	0	0	0	200	903	0	0	0	0	0	0	0	603	903	0
427	1	0	0	0	0	0	0	200	300	0	0	0	0	0	0	0	200	903	0	0	0	0	0	0	0	603	903	0
427	2	0	0	0	0	0	0	200	300	0	0	0	0	0	0	0	200	903	0	0	0	0	0	0	0	603	903	0
427	3	0	0	0	0	0	0	200	300	0	0	0	0	0	0	0	200	903	0	0	0	0	0	0	0	603	903	0
427	4	0	0	0	0	0	0	200	300	0	0	0	0	0	0	0	200	903	0	0	0	0	0	0	0	603	903	0
427	5	0	0	0	0	0	0	200	300	0	0	0	0	0	0	0	200	903	0	0	0	0	0	0	0	603	903	0
427	6	0	0	0	0	0	0	200	300	0	0	0	0	0	0	0	200	903	0	0	0	0	0	0	0	603	903	0
427	7	0	0	0	0	0	0	200	300	0	0	0	0	0	0	0	200	903	0	0	0	0	0	0	0	603	903	0
427	8	0	0	0	0	0	0	200	300	0	0	0	0	0	0	0	200	903	0	0	0	0	0	0	0	603	903	0
427	9	0	0	0	0	0	0	200	300	0	0	0	0	0	0	0	200	903	0	0	0	0	0	0	0	603	903	0
428	0	0	0	0	0	0	0	200	300	0	0	0	0	0	0	0	200	903	0	0	0	0	0	0	0	603	903	0
428	1	0	0	0	0	0	0	200	300	0	0	0	0	0	0	0	200	903	0	0	0	0	0	0	0	603	903	0
428	2	0	0	0	0	0	0	200	300	0	0	0	0	0	0	0	200	903	0	0	0	0	0	0	0	603	903	0
428	3	0	0	0	0	0	0	200	300	0	0	0	0	0	0	0	200	903	0	0	0	0	0	0	0	603	903	0
428	4	0	0	0	0	0	0	200	300	0	0	0	0	0	0	0	200	903	0	0	0	0	0	0	0	603	903	0
428	5	0	0	0	0	0	0	200	300	0	0	0	0	0	0	0	200	903	0	0	0	0	0	0	0	603	903	0
428	6	0	0	0	0	0	0	200	300	0	0	0	0	0	0	0	200	903	0	0	0	0	0	0	0	603	903	0
428	7	0	0	0	0	0	0	200	300	0	0	0	0	0	0	0	200	903	0	0	0	0	0	0	0	603	903	0
428	8	0	0	0	0	0	0	200	300	0	0	0	0	0	0	0	200	903	0	0	0	0	0	0	0	603	903	0
428	9	0	0	0	0	0	0	200	300	0	0	0	0	0	0	0	200	903	0	0	0	0	0	0	0	603	903	0
429	0	0	0	0	0	0	0	200	300	0	0	0	0	0	0	0	200	903	0	0	0	0	0	0	0	603	903	0
429	1	0	0	0	0	0	0	200	300	0	0	0	0	0	0	0	200	903	0	0	0	0	0	0	0	603	903	0
429	2	0	0	0	0	0	0	200	300	0	0	0	0	0	0	0	200	903	0	0	0	0	0	0	0	603	903	0
429	3	0	0	0	0	0	0	200	300	0	0	0	0	0	0	0	200	903	0	0	0	0	0	0	0	603	903	0
429	4	0	0	0	0	0	0	200	300	0	0	0	0	0	0	0	200	903	0	0	0	0	0	0	0	603	903	0
429	5	0	0	0	0	0	0	200	300	0	0	0	0	0	0	0	200	903	0	0	0	0	0	0	0	603	903	0
429	6	0	0	0	0	0	0	200	300	0	0	0	0	0	0	0	200	903	0	0	0	0	0	0	0	603	903	0
429	7	0	0	0	0	0	0	200	300	0	0	0	0	0	0	0	200	903	0	0	0	0	0	0	0	603	903	0
429	8	0	0	0	0	0	0	200	300	0	0	0	0	0	0	0	200	903	0	0	0	0	0	0	0	603	903	0
429	9	0	0	0	0	0	0	200	300	0	0	0	0	0	0	0	200	903	0	0	0	0	0	0	0	603	903	0
430	0	0	0	0	0	0	0	200	300	0	0	0	0	0	0	0	200	903	0	0	0	0	0	0	0	603	903	0
430	1	0	0	0	0	0	0	200	300	0	0	0	0	0	0	0	200	903	0	0	0	0	0	0	0	603	903	0
430	2	0	0	0	0	0	0	200	300	0	0	0	0	0	0	0	200	903	0	0	0	0	0	0	0	603	903	0
430	3	0	0	0	0	0	0	200	300	0	0	0	0	0	0	0	200	903	0	0	0	0	0	0	0	603	903	0
430	4	0	0	0	0	0	0	200	300	0	0	0	0	0	0	0	200	903	0	0	0	0	0	0	0	603	903	0
430	5	0	0	0	0	0	0	200	300	0	0	0	0	0	0	0	200	903	0	0	0	0	0	0	0	603	903	0
430	6	0	0	0	0	0	0	200	300	0	0	0	0	0	0	0	200	903	0	0	0	0	0	0	0	603	903	0
430	7	0	0	0	0	0	0	200	300	0	0	0	0	0	0	0	200	903	0	0	0	0	0	0	0	603	903	0
430	8	0	0	0	0	0	0	200	300	0	0	0	0	0	0	0	200	903	0	0	0	0	0	0	0	603	903	0
430	9	0	0	0	0	0	0	200	300	0	0	0	0	0	0	0	200	903	0	0	0	0	0	0	0	603	903	0
431	0	0	0	0	0	0	0	200	300	0	0	0	0	0	0	0	200	903	0	0	0	0	0	0	0	603	903	0
431	1	0	0	0	0	0	0	200	300	0	0	0	0	0	0	0	200	903	0	0	0	0	0	0	0	603	903	0
431	2	0	0	0	0	0	0	200	300	0	0	0	0	0	0	0	200	903	0	0	0	0	0	0	0	603	903	0
431	3	0	0	0	0	0	0	200	300	0	0	0	0	0	0	0	200	903	0	0	0	0	0	0	0	603	903	0
431	4	0	0	0	0	0	0	200	300	0	0	0	0	0	0	0	200	903	0	0	0	0	0	0	0	603	903	0
431	5	0	0	0	0	0	0	200	300	0	0	0	0	0	0	0	200	903	0	0	0	0	0	0	0	603	903	0
431	6	0	0	0	0	0	0	200	300	0	0	0	0	0	0	0	200	903	0	0	0	0	0	0	0	603	903	0
431	7	0	0	0	0	0	0	200	300	0	0	0	0	0	0	0	200	903	0	0	0	0	0	0	0	603	903	0
431	8	0	0	0	0	0	0	200	300	0	0	0	0	0	0	0	200	903	0	0	0	0	0	0	0	603	903	0
431	9	0	0	0	0	0	0	200	300	0	0	0	0	0	0	0	200	903	0	0	0	0	0	0	0	603	903	0
432	0	0	0	0	0	0	0	200	300	0	0	0	0	0	0	0	200	903	0	0	0	0	0	0	0	603	903	0
432	1	0	0	0	0	0	0	200	300	0	0	0	0	0	0	0	200	903	0	0	0	0	0	0	0	603	903	0
432	2	0	0	0	0	0	0	200	300	0	0	0	0	0	0	0	200	903	0	0	0	0	0	0	0	603	903	0
432	3	0	0	0	0	0	0	200	300	0	0	0	0	0	0	0	200	903	0	0	0	0	0	0	0	603	903	0
432	4	0	0	0	0	0	0	200	300	0	0	0	0	0	0	0	200	903	0	0	0	0	0	0	0	603	903	0
432	5	0	0	0	0	0	0	200	300	0	0	0	0	0	0	0	200	903	0	0	0	0	0	0	0	603	903	0
432	6	0	0	0	0	0	0	200	300	0	0	0	0	0	0	0	200	903	0	0	0	0	0	0	0	603	903	0
432	7	0	0	0	0	0	0	200	300	0	0	0	0	0	0	0	200	903	0	0	0	0	0	0	0	603	903	0
432	8	0	0	0	0	0	0	200	300	0	0	0	0	0	0	0	200	903	0	0	0	0	0	0	0	603	903	0
432	9	0	0	0	0	0	0	200	300	0	0	0	0	0	0	0	200	903	0	0	0	0	0	0	0	603	903	0
433	0	0	0	0	0	0	0	200	300	0	0	0	0	0	0	0	200	903	0	0	0	0	0	0	0	603	903	0
433	1	0	0	0	0	0	0	200	300	0	0	0	0	0	0	0	200	903	0	0	0	0	0	0	0	603	903	0
433	2	0	0	0	0	0	0	200	300	0	0	0	0	0	0	0	200	903	0	0	0	0	0	0	0	603	903	0
433	3	0	0	0	0	0	0	200	300	0	0	0	0	0	0	0	200	903	0	0	0	0	0	0	0	603	903	0
433	4	0	0	0	0	0	0	200	300	0	0	0	0	0	0	0	200	903	0	0	0	0	0	0	0	603	903	0
433	5	0	0	0	0	0	0	200	300	0	0	0	0	0	0	0	200	903	0	0	0	0	0	0	0	603	903	0
433	6	0	0	0	0	0	0	200	300	0	0	0	0	0	0	0	200	903	0	0	0	0	0	0	0	603	903	0
433	7	0	0	0	0	0	0	200	300	0	0	0	0	0	0	0	200	903	0	0	0	0	0	0	0	603	903	0
433	8	0	0	0	0	0	0	200	300	0	0	0	0	0	0	0	200	903	0	0	0	0	0	0	0	603	903	0
433	9	0	0	0	0	0	0	200	300	0	0	0	0	0	0	0	200	903	0	0	0	0	0	0	0	603	903	0
434	0	0	0	0	0	0	0	200	300	0	0	0	0	0	0	0	200	903	0	0	0	0	0	0	0	603	903	0
434	1	0	0	0	0	0	0	200	300	0	0	0	0	0	0	0	200	903	0	0	0	0	0	0	0	603	903	0
434	2	0	0	0	0	0	0	200	300	0	0	0	0	0	0	0	200	903	0	0	0	0	0	0	0	603	903	0
434	3	0	0	0	0	0	0	200	300	0	0	0	0	0	0	0	200	903	0	0	0	0	0	0	0	603	903	0
434	4	0	0	0	0	0	0	200	300	0	0	0	0	0	0	0	200	903	0	0	0	0	0	0	0	603	903	0
434	5	0	0	0	0	0	0	200	300	0	0	0	0	0	0	0	200	903	0	0	0	0	0	0	0	603	903	0
434	6	0	0	0	0	0	0	200	300	0	0	0	0	0	0	0	200	903	0	0	0	0	0	0	0	603	903	0
434	7	0	0	0	0	0	0	200	300	0	0	0	0	0	0	0	200	903	0	0	0	0	0	0	0	603	903	0
434	8	0	0	0	0	0	0	200	300	0	0	0	0	0	0	0	200	903	0	0	0	0	0	0	0	603	903	0
434	9	0	0	0	0	0	0	200	300	0	0	0	0	0	0	0	200	903	0	0	0	0	0	0	0	603	903	0
435	0	0	0	0	0	0	0	200	300	0	0	0	0	0	0	0	200	903	0	0	0	0	0	0	0	603	903	0
435	1	0	0	0	0	0	0	200	300	0	0	0	0	0	0	0	200	903	0	0	0	0	0	0	0	603	903	0
435	2	0	0	0	0	0	0	200	300	0	0	0	0	0	0	0	200	903	0	0	0	0	0	0	0	603	903	0
435	3	0	0	0	0	0	0	200	300	0	0	0	0	0	0	0	200	903	0	0	0	0	0	0	0	603	903	0
435	4	0	0	0	0	0	0	200	300	0	0	0	0	0	0	0	200	903	0	0	0	0	0	0	0	603	903	0
435	5	0	0	0	0	0	0	200	300	0	0	0	0	0	0	0	200	903	0	0	0	0	0	0	0	603	903	0
435	6	0	0	0	0	0	0	200	300	0	0	0	0	0	0	0	200	903	0	0	0	0	0	0	0	603	903	0
435	7	0	0	0	0	0	0	200	300	0	0	0	0	0	0	0	200	903	0	0	0	0	0	0	0	603	903	0
435	8	0	0	0	0	0	0	200	300	0	0	0	0	0	0	0	200	903	0	0	0	0	0	0	0	603	903	0
435	9	0	0	0	0	0	0	200	300	0	0	0	0	0	0	0	200	903	0	0	0	0	0	0	0	603	903	0
436	0	0	0	0	0	0	0	200	300	0	0	0	0	0	0	0	200	903	0	0	0	0	0	0	0	603	903	0
436	1	0	0	0	0	0	0	200	300	0	0	0	0	0	0	0	200	903	0	0	0	0	0	0	0	603	903	0
436	2	0	0	0	0	0	0	200	300	0	0	0	0	0	0	0	200	903	0	0	0	0	0	0	0	603	903	0
436	3	0	0	0	0	0	0	200	300	0	0	0	0	0	0	0	200	903	0	0	0	0	0	0	0	603	903	0
436	4	0	0	0	0	0	0	200	300	0	0	0	0	0	0	0	200	903	0	0	0	0	0	0	0	603	903	0
436	5	0	0	0	0	0	0	200	300	0	0	0	0	0	0	0	200	903	0	0	0	0	0	0	0	603	903	0
436	6	0	0	0	0	0	0	200	300	0	0	0	0	0	0	0	200	903	0	0	0	0	0	0	0	603	903	0
436	7	0	0	0	0	0	0	200	300	0	0	0	0	0	0	0	200	903	0	0	0	0	0	0	0	603	903	0
436	8	0	0	0	0	0	0	200	300	0	0	0	0	0	0	0	200	903	0	0	0	0	0	0	0	603	903	0
436	9	0	0	0	0	0	0	200	300	0	0	0	0	0	0	0	200	903	0	0	0	0	0	0	0	603	903	0
437	0	0	0	0	0	0	0	200	300	0	0	0	0	0	0	0	200	903	0	0	0	0	0	0	0	603	903	0
437	1	0	0	0	0	0	0	200	300	0	0	0	0	0	0	0	200	903	0	0	0	0	0	0	0	603	903	0
437	2	0	0	0	0	0	0	200	300	0	0	0	0	0	0	0	200	903	0	0	0	0	0	0	0	603	903	0
437	3	0	0	0	0	0	0	200	300	0	0	0	0	0	0	0	200	903	0	0	0	0	0	0	0	603	903	0
437	4	0	0	0	0	0	0	200	300	0	0	0	0	0	0	0	200	903	0	0	0	0	0	0	0	603	903	0
437	5	0	0	0	0	0	0	200	300	0	0	0	0	0	0	0	200	903	0	0	0	0	0	0	0	603	903	0
437	6	0	0	0	0	0	0	200	300	0	0	0	0	0	0	0	200	903	0	0	0	0	0	0	0	603	903	0
437	7	0	0	0	0	0	0	200	300	0	0	0	0	0	0	0	200	903	0	0	0	0	0	0	0	603	903	0
437	8	0	0	0	0	0	0	200	300	0	0	0	0	0	0	0	200	903	0	0	0	0	0	0	0	603	903	0
437	9	0	0	0	0	0	0	200	300	0	0	0	0	0	0	0	200	903	0	0	0	0	0	0	0	603	903	0
438	0	0	0	0	0	0	0	200	300	0	0	0	0	0	0	0	200	903	0	0	0	0	0	0	0	603	903	0
438	1	0	0	0	0	0	0	200	300	0	0	0	0	0	0	0	200	903	0	0	0	0	0	0	0	603	903	0
438	2	0	0	0	0	0	0	200	300	0	0	0	0	0	0	0	200	903	0	0	0	0	0	0	0	603	903	0
438	3	0	0	0	0	0	0	200	300	0	0	0	0	0	0	0	200	903	0	0	0	0	0	0	0	603	903	0
438	4	0	0	0	0	0	0	200	300	0	0	0	0	0	0	0	200	903	0	0	0	0	0	0	0	603	903	0
438	5	0	0	0	0	0	0	200	300	0	0	0	0	0	0	0	200	903	0	0	0	0	0	0	0	603	903	0
438	6	0	0	0	0	0	0	200	300	0	0	0	0	0	0	0	200	903	0	0	0	0	0	0	0	603	903	0
438	7	0	0	0	0	0	0	200	300	0	0	0	0	0	0	0	200	903	0	0	0	0	0	0	0	603	903	0
438	8	0	0	0	0	0	0	200	300	0	0	0	0	0	0	0	200	903	0	0	0	0	0	0	0	603	903	0
438	9	0	0	0	0	0	0	200	300	0	0	0	0	0	0	0	200	903	0	0	0	0	0	0	0	603	903	0
439	0	0	0	0	0	0	0	200	300	0	0	0	0	0	0	0	200	903	0	0	0	0	0	0	0	603	903	0
439	1	0	0	0	0	0	0	200	300	0	0	0	0	0	0	0	200	903	0	0	0	0	0	0	0	603	903	0
439	2	0	0	0	0	0	0	200	300	0	0	0	0	0	0	0	200	903	0	0	0	0	0	0	0	603	903	0
439	3	0	0	0	0	0	0	200	300	0	0	0	0	0	0	0	200	903	0	0	0	0	0	0	0	603	903	0
439	4	0	0	0	0	0	0	200	300	0	0	0	0	0	0	0	200	903	0	0	0	0	0	0	0	603	903	0
439	5	0	0	0	0	0	0	200	300	0	0	0	0	0	0	0	200	903	0	0	0	0	0	0	0	603	903	0
439	6	0	0	0	0	0	0	200	300	0	0	0	0	0	0	0	200	903	0	0	0	0	0	0	0	603	903	0
439	7	0	0	0	0	0	0	200	300	0	0	0	0	0	0	0	200	903	0	0	0	0	0	0	0	603	903	0
439	8	0	0	0	0	0	0	200	300	0	0	0	0	0	0	0	200	903	0	0	0	0	0	0	0	603	903	0
439	9	0	0	0	0	0	0	200	300	0	0	0	0	0	0	0	200	903	0	0	0	0	0	0	0	603	903	0
440	0	0	0	0	0	0	0	200	300	0	0	0	0	0	0	0	200	903	0	0	0	0	0	0	0	603	903	0
440	1	0	0	0	0	0	0	200	300	0	0	0	0	0	0	0	200	903	0	0	0	0	0	0	0	603	903	0
440	2	0	0	0	0	0	0	200	300	0	0	0	0	0	0	0	200	903	0	0	0	0	0	0	0	603	903	0
440	3	0	0	0	0	0	0	200	300	0	0	0	0	0	0	0	200	903	0	0	0	0	0	0	0	603	903	0
440	4	0	0	0	0	0	0	200	300	0	0	0	0	0	0	0	200	903	0	0	0	0	0	0	0	603	903	0
440	5	0	0	0	0	0	0	200	300	0	0	0	0	0	0	0	200	903	0	0	0	0	0	0	0	603	903	0
440	6	0	0	0	0	0	0	200	300	0	0	0	0	0	0	0	200	903	0	0	0	0	0	0	0	603	903	0
440	7	0	0	0	0	0	0	200	300	0	0	0	0	0	0	0	200	903	0	0	0	0	0	0	0	603	903	0
440	8	0	0	0	0	0	0	200	300	0	0	0	0	0	0	0	200	903	0	0	0	0	0	0	0	603	903	0
440	9	0	0	0	0	0	0	200	300	0	0	0	0	0	0	0	200	903	0	0	0	0	0	0	0	603	903	0
441	0	0	0	0	0	0	0	200	300	0	0	0	0	0	0	0	200	903	0	0	0	0	0	0	0	603	903	0
441	1	0	0	0	0	0	0	200	300	0	0	0	0	0	0	0	200	903	0	0	0	0	0	0	0	603	903	0
441	2	0	0	0	0	0	0	200	300	0	0	0	0	0	0	0	200	903	0	0	0	0	0	0	0	603	903	0
441	3	0	0	0	0	0	0	200	300	0	0	0	0	0	0	0	200	903	0	0	0	0	0	0	0	603	903	0
441	4	0	0	0	0	0	0	200	300	0	0	0	0	0	0	0	200	903	0	0	0	0	0	0	0	603	903	0
441	5	0	0	0	0	0	0	200	300	0	0	0	0	0	0	0	200	903	0	0	0	0	0	0	0	603	903	0
441	6	0	0	0	0	0	0	200	300	0	0	0	0	0	0	0	200	903	0	0	0	0	0	0	0	603	903	0
441	7	0	0	0	0	0	0	200	300	0	0	0	0	0	0	0	200	903	0	0	0	0	0	0	0	603	903	0
441	8	0	0	0	0	0	0	200	300	0	0	0	0	0	0	0	200	903	0	0	0	0	0	0	0	603	903	0
441	9	0	0	0	0	0	0	200	300	0	0	0	0	0	0	0	200	903	0	0	0	0	0	0	0	603	903	0
442	0	0	0	0	0	0	0	200	300	0	0	0	0	0	0	0	200	903	0	0	0	0	0	0	0	603	903	0
442	1	0	0	0	0	0	0	200	300	0	0	0	0	0	0	0	200	903	0	0	0	0	0	0	0	603	903	0
442	2	0	0	0	0	0	0	200	300	0	0	0	0	0	0	0	200	903	0	0	0	0	0	0	0	603	903	0
442	3	0	0	0	0	0	0	200	300	0	0	0	0	0	0	0	200	903	0	0	0	0	0	0	0	603	903	0
442	4	0	0	0	0	0	0	200	300	0	0	0	0	0	0	0	200	903	0	0	0	0	0	0	0	603	903	0
442	5	0	0	0	0	0	0	200	300	0	0	0	0	0	0	0	200	903	0	0	0	0	0	0	0	603	903	0
442	6	0	0	0	0	0	0	200	300	0	0	0	0	0	0	0	200	903	0	0	0	0	0	0	0	603	903	0
442	7	0	0	0	0	0	0	200	300	0	0	0	0	0	0	0	200	903	0	0	0	0	0	0	0	603	903	0
442	8	0	0	0	0	0	0	200	300	0	0	0	0	0	0	0	200	903	0	0	0	0	0	0	0	603	903	0
442	9	0	0	0	0	0	0	200	300	0	0	0	0	0	0	0	200	903	0	0	0	0	0	0	0	603	903	0
443	0	0	0	0	0	0	0	200	300	0	0	0	0	0	0	0	200	903	0	0	0	0	0	0	0	603	903	0
443	1	0	0	0	0	0	0	200	300	0	0	0	0	0	0	0	200	903	0	0	0	0	0	0	0	603	903	0
443	2	0	0	0	0	0	0	200	300	0	0	0	0	0	0	0	200	903	0	0	0	0	0	0	0	603	903	0
443	3	0	0	0	0	0	0	200	300	0	0	0	0	0	0	0	200	903	0	0	0	0	0	0	0	603	903	0
443	4	0	0	0	0	0	0	200	300	0	0	0	0	0	0	0	200	903	0	0	0	0	0	0	0	603	903	0
443	5	0	0	0	0	0	0	200	300	0	0	0	0	0	0	0	200	903	0	0	0	0	0	0	0	603	903	0
443	6	0	0	0	0	0	0	200	300	0	0	0	0	0	0	0	200	903	0	0	0	0	0	0	0	603	903	0
443	7	0	0	0	0	0	0	200	300	0	0	0	0	0	0	0	200	903	0	0	0	0	0	0	0	603	903	0
443	8	0	0	0	0	0	0	200	300	0	0	0	0	0	0	0	200	903	0	0	0	0	0	0	0	603	903	0
443	9	0	0	0	0	0	0	200	300	0	0	0	0	0	0	0	200	903	0	0	0	0	0	0	0	603	903	0
444	0	0	0	0	0	0	0	200	300	0	0	0	0	0	0	0	200	903	0	0	0	0	0	0	0	603	903	0
444	1	0	0	0	0	0	0	200	300	0	0	0	0	0	0	0	200	903	0	0	0	0	0	0	0	603	903	0
444	2	0	0	0	0	0	0	200	300	0	0	0	0	0	0	0	200	903	0	0	0	0	0	0	0	603	903	0
444	3	0	0	0	0	0	0	200	300	0	0	0	0	0	0	0	200	903	0	0	0	0	0	0	0	603	903	0
444	4	0	0	0	0	0	0	200	300	0	0	0	0	0	0	0	200	903	0	0	0	0	0	0	0	603	903	0
444	5	0	0	0	0	0	0	200	300	0	0	0	0	0	0	0	200	903	0	0	0	0	0	0	0	603	903	0
444	6	0	0	0	0	0	0	200	300	0	0	0	0	0	0	0	200	903	0	0	0	0	0	0	0	603	903	0
444	7	0	0	0	0	0	0	200	300	0	0	0	0	0	0	0	200	903	0	0	0	0	0	0	0	603	903	0
444	8	0	0	0	0	0	0	200	300	0	0	0	0	0	0	0	200	903	0	0	0	0	0	0	0	603	903	0
444	9	0	0	0	0	0	0	200	300	0	0	0	0	0	0	0	200	903	0	0	0	0	0	0	0	603	903	0
445	0	0	0	0	0	0	0	200	300	0	0	0	0	0	0	0	200	903	0	0	0	0	0	0	0	603	903	0
445	1	0	0	0	0	0	0	200	300	0	0	0	0	0	0	0	200	903	0	0	0	0	0	0	0	603	903	0
445	2	0	0	0	0	0	0	200	300	0	0	0	0	0	0	0	200	903	0	0	0	0	0	0	0	603	903	0
445	3	0	0	0	0	0	0	200	300	0	0	0	0	0	0	0	200	903	0	0	0	0	0	0	0	603	903	0
445	4	0	0	0	0	0	0	200	300	0	0	0	0	0	0	0	200	903	0	0	0	0	0	0	0	603	903	0
445	5	0	0	0	0	0	0	200	300	0	0	0	0	0	0	0	200	903	0	0	0	0	0	0	0	603	903	0
445	6	0	0	0	0	0	0	200	300	0	0	0	0	0	0	0	200	903	0	0	0	0	0	0	0	603	903	0
445	7	0	0	0	0	0	0	200	300	0	0	0	0	0	0	0	200	903	0	0	0	0	0	0	0	603	903	0
445	8	0	0	0	0	0	0	200	300	0	0	0	0	0	0	0	200	903	0	0	0	0	0	0	0	603	903	0
445	9	0	0	0	0	0	0	200	300	0	0	0	0	0	0	0	200	903	0	0	0	0	0	0	0	603	903	0
446	0	0	0	0	0	0	0	200	300	0	0	0	0	0	0	0	200	903	0	0	0	0	0	0	0	603	903	0
446	1	0	0	0	0	0	0	200	300	0	0	0	0	0	0	0	200	903	0	0	0	0	0	0	0	603	903	0
446	2	0	0	0	0	0	0	200	300	0	0	0	0	0	0	0	200	903	0	0	0	0	0	0	0	603	903	0
446	3	0	0	0	0	0	0	200	300	0	0	0	0	0	0	0	200	903	0	0	0	0	0	0	0	603	903	0
446	4	0	0	0	0	0	0	200	300	0	0	0	0	0	0	0	200	903	0	0	0	0	0	0	0	603	903	0
446	5	0	0	0	0	0	0	200	300	0	0	0	0	0	0	0	200	903	0	0	0	0	0	0	0	603	903	0
446	6	0	0	0	0	0	0	200	300	0	0	0	0	0	0	0	200	903	0	0	0	0	0	0	0	603	903	0
446	7	0	0	0	0	0	0	200	300	0	0	0	0	0	0	0	200	903	0	0	0	0	0	0	0	603	903	0
446	8	0	0	0	0	0	0	200	300	0	0	0	0	0	0	0	200	903	0	0	0	0	0	0	0	603	903	0
446	9	0	0	0	0	0	0	200	300	0	0	0	0	0	0	0	200	903	0	0	0	0	0	0	0	603	903	0
447	0	0	0	0	0	0	0	200	300	0	0	0	0	0	0	0	200	903	0	0	0	0	0	0	0	603	903	0
447	1	0	0	0	0	0	0	200	300	0	0	0	0	0	0	0	200	903	0	0	0	0	0	0	0	603	903	0
447	2	0	0	0	0	0	0	200	300	0	0	0	0	0	0	0	200	903	0	0	0	0	0	0	0	603	903	0
447	3	0	0	0	0	0	0	200	300	0	0	0	0	0	0	0	200	903	0	0	0	0	0	0	0	603	903	0
447	4	0	0	0	0	0	0	200	300	0	0	0	0	0	0	0	200	903	0	0	0	0	0	0	0	603	903	0
447	5	0	0	0	0	0	0	200	300	0	0	0	0	0	0	0	200	903	0	0	0	0	0	0	0	603	903	0
447	6	0	0	0	0	0	0	200	300	0	0	0	0	0	0	0	200	903	0	0	0	0	0	0	0	603	903	0
447	7	0	0	0	0	0	0	200	300	0	0	0	0	0	0	0	200	903	0	0	0	0	0	0	0	603	903	0
447	8	0	0	0	0	0	0	200	300	0	0	0	0	0	0	0	200	903	0	0	0	0	0	0	0	603	903	0
447	9	0	0	0	0	0	0	200	300	0	0	0	0	0	0	0	200	903	0	0	0	0	0	0	0	603	903	0
448	0	0	0	0	0	0	0	200	300	0	0	0	0	0	0	0	200	903	0	0	0	0	0	0	0	603	903	0
448	1	0	0	0	0	0	0	200	300	0	0	0	0	0	0	0	200	903	0	0	0	0	0	0	0	603	903	0
448	2	0	0	0	0	0	0	200	300	0	0	0	0	0	0	0	200	903	0	0	0	0	0	0	0	603	903	0
448	3	0	0	0	0	0	0	200	300	0	0	0	0	0	0	0	200	903	0	0	0	0	0	0	0	603	903	0
448	4	0	0	0	0	0	0	200	300	0	0	0	0	0	0	0	200	903	0	0	0	0	0	0	0	603	903	0
448	5	0	0	0	0	0	0	200	300	0	0	0	0	0	0	0	200	903	0	0	0	0	0	0	0	603	903	0
448	6	0	0	0	0	0	0	200	300	0	0	0	0	0	0	0	200	903	0	0	0	0	0	0	0	603	903	0
448	7	0	0	0	0	0	0	200	300	0	0	0	0	0	0	0	200	903	0	0	0	0	0	0	0	603	903	0
448	8	0	0	0	0	0	0	200	300	0	0	0	0	0	0	0	200	903	0	0	0	0	0	0	0	603	903	0
448	9	0	0	0	0	0	0	200	300	0	0	0	0	0	0	0	200	903	0	0	0	0	0	0	0	603	903	0
449	0	0	0	0	0	0	0	200	300	0	0	0	0	0	0	0	200	903	0	0	0	0	0	0	0	603	903	0
449	1	0	0	0	0	0	0	200	300	0	0	0	0	0	0	0	200	903	0	0	0	0	0	0	0	603	903	0
449	2	0	0	0	0	0	0	200	300	0	0	0	0	0	0	0	200	903	0	0	0	0	0	0	0	603	903	0
449	3	0	0	0	0	0	0	200	300	0	0	0	0	0	0	0	200	903	0	0	0	0	0	0	0	603	903	0
449	4	0	0	0	0	0	0	200	300	0	0	0	0	0	0	0	200	903	0	0	0	0	0	0	0	603	903	0
449	5	0	0	0	0	0	0	200	300	0	0	0	0	0	0	0	200	903	0	0	0	0	0	0	0	603	903	0
449	6	0	0	0	0	0	0	200	300	0	0	0	0	0	0	0	200	903	0	0	0	0	0	0	0	603	903	0
449	7	0	0	0	0	0	0	200	300	0	0	0	0	0	0	0	200	903	0	0	0	0	0	0	0	603	903	0
449	8	0	0	0	0	0	0	200	300	0	0	0	0	0	0	0	200	903	0	0	0	0	0	0	0	603	903	0
449	9	0	0	0	0	0	0	200	300	0	0	0	0	0	0	0	200	903	0	0	0	0	0	0	0	603	903	0
450	0	0	0	0	0	0	0	200	300	0	0	0	0	0	0	0	200	903	0	0	0	0	0	0	0	603	903	0
450	1	0	0	0	0	0	0	200	300	0	0	0	0	0	0	0	200	903	0	0	0	0	0	0	0	603	903	0
450	2	0	0	0	0	0	0	200	300	0	0	0	0	0	0	0	200	903	0	0	0	0	0	0	0	603	903	0
450	3	0	0	0	0	0	0	200	300	0	0	0	0	0	0	0	200	903	0	0	0	0	0	0	0	603	903	0
450	4	0	0	0	0	0	0	200	300	0	0	0	0	0	0	0	200	903	0	0	0	0	0	0	0	603	903	0
450	5	0	0	0	0	0	0	200	300	0	0	0	0	0	0	0	200	903	0	0	0	0	0	0	0	603	903	0
450	6	0	0	0	0	0	0	200	300	0	0	0	0	0	0	0	200	903	0	0	0	0	0	0	0	603	903	0
450	7	0	0	0	0	0	0	200	300	0	0	0	0	0	0	0	200	903	0	0	0	0	0	0	0	603	903	0
450	8	0	0	0	0	0	0	200	300	0	0	0	0	0	0	0	200	903	0	0	0	0	0	0	0	603	903	0
450	9	0	0	0	0	0	0	200	300	0	0	0	0	0	0	0	200	903	0	0	0	0	0	0	0	603	903	0
451	0	0	0	0	0	0	0	200	300	0	0	0	0	0	0	0	200	903	0	0	0	0	0	0	0	603	903	0
451	1	0	0	0	0	0	0	200	300	0	0	0	0	0	0	0	200	903	0	0	0	0	0	0	0	603	903	0
451	2	0	0	0	0	0	0	200	300	0	0	0	0	0	0	0	200	903	0	0	0	0	0	0	0	603	903	0
451	3	0	0	0	0	0	0	200	300	0	0	0	0	0	0	0	200	903	0	0	0	0	0	0	0	603	903	0
451	4	0	0	0	0	0	0	200	300	0	0	0	0	0	0	0	200	903	0	0	0	0	0	0	0	603	903	0
451	5	0	0	0	0	0	0	200	300	0	0	0	0	0	0	0	200	903	0	0	0	0	0	0	0	603	903	0
451	6	0	0	0	0	0	0	200	300	0	0	0	0	0	0	0	200	903	0	0	0	0	0	0	0	603	903	0
451	7	0	0	0	0	0	0	200	300	0	0	0	0	0	0	0	200	903	0	0	0	0	0	0	0	603	903	0
451	8	0	0	0	0	0	0	200	300	0	0	0	0	0	0	0	200	903	0	0	0	0	0	0	0	603	903	0
451	9	0	0	0	0	0	0	200	300	0	0	0	0	0	0	0	200	903	0	0	0	0	0	0	0	603	903	0
452	0	0	0	0	0	0	0	200	300	0	0	0	0	0	0	0	200	903	0	0	0	0	0	0	0	603	903	0
452	1	0	0	0	0	0	0	200	300	0	0	0	0	0	0	0	200	903	0	0	0	0	0	0	0	603	903	0
452	2	0	0	0	0	0	0	200	300	0	0	0	0	0	0	0	200	903	0	0	0	0	0	0	0	603	903	0
452	3	0	0	0	0	0	0	200	300	0	0	0	0	0	0	0	200	903	0	0	0	0	0	0	0	603	903	0
452	4	0	0	0	0	0	0	200	300	0	0	0	0	0	0	0	200	903	0	0	0	0	0	0	0	603	903	0
452	5	0	0	0	0	0	0	200	300	0	0	0	0	0	0	0	200	903	0	0	0	0	0	0	0	603	903	0
452	6	0	0	0	0	0	0	200	300	0	0	0	0	0	0	0	200	903	0	0	0	0	0	0	0	603	903	0
452	7	0	0	0	0	0	0	200	300	0	0	0	0	0	0	0	200	903	0	0	0	0	0	0	0	603	903	0
452	8	0	0	0	0	0	0	200	300	0	0	0	0	0	0	0	200	903	0	0	0	0	0	0	0	603	903	0
452	9	0	0	0	0	0	0	200	300	0	0	0	0	0	0	0	200	903	0	0	0	0	0	0	0	603	903	0
453	0	0	0	0	0	0	0	200	300	0	0	0	0	0	0	0	200	903	0	0	0	0	0	0	0	603	903	0
453	1	0	0	0	0	0	0	200	300	0	0	0	0	0	0	0	200	903	0	0	0	0	0	0	0	603	903	0
453	2	0	0	0	0	0	0	200	300	0	0	0	0	0	0	0	200	903	0	0	0	0	0	0	0	603	903	0
453	3	0	0	0	0	0	0	200	300	0	0	0	0	0	0	0	200	903	0	0	0	0	0	0	0	603	903	0
453	4	0	0	0	0	0	0	200	300	0	0	0	0	0	0	0	200	903	0	0	0	0	0	0	0	603	903	0
453	5	0	0	0	0	0	0	200	300	0	0	0	0	0	0	0	200	903	0	0	0	0	0	0	0	603	903	0
453	6	0	0	0	0	0	0	200	300	0	0	0	0	0	0	0	200	903	0	0	0	0	0	0	0	603	903	0
453	7	0	0	0	0	0	0	200	300	0	0	0	0	0	0	0	200	903	0	0	0	0	0	0	0	603	903	0
453	8	0	0	0	0	0	0	200	300	0	0	0	0	0	0	0	200	903	0	0	0	0	0	0	0	603	903	0
453	9	0	0	0	0	0	0	200	300	0	0	0	0	0	0	0	200	903	0	0	0	0	0	0	0	603	903	0
454	0	0	0	0	0	0	0	200	300	0	0	0	0	0	0	0	200	903	0	0	0	0	0	0	0	603	903	0
454	1	0	0	0	0	0	0	200	300	0	0	0	0	0	0	0	200	903	0	0	0	0	0	0	0	603	903	0
454	2	0	0	0	0	0	0	200	300	0	0	0	0	0	0	0	200	903	0	0	0	0	0	0	0	603	903	0
454	3	0	0	0	0	0	0	200	300	0	0	0	0	0	0	0	200	903	0	0	0	0	0	0	0	603	903	0
454	4	0	0	0	0	0	0	200	300	0	0	0	0	0	0	0	200	903	0	0	0	0	0	0	0	603	903	0
454	5	0	0	0	0	0	0	200	300	0	0	0	0	0	0	0	200	903	0	0	0	0	0	0	0	603	903	0
454	6	0	0	0	0	0	0	200	300	0	0	0	0	0	0	0	200	903	0	0	0	0	0	0	0	603	903	0
454	7	0	0	0	0	0	0	200	300	0	0	0	0	0	0	0	200	903	0	0	0	0	0	0	0	603	903	0
454	8	0	0	0	0	0	0	200	300	0	0	0	0	0	0	0	200	903	0	0	0	0	0	0	0	603	903	0
454	9	0	0	0	0	0	0	200	300	0	0	0	0	0	0	0	200	903	0	0	0	0	0	0	0	603	903	0
455	0	0	0	0	0	0	0	200	300	0	0	0	0	0	0	0	200	903	0	0	0	0	0	0	0	603	903	0
455	1	0	0	0	0	0	0	200	300	0	0	0	0	0	0	0	200	903	0	0	0	0	0	0	0	603	903	0
455	2	0	0	0	0	0	0	200	300	0	0	0	0	0	0	0	200	903	0	0	0	0	0	0	0	603	903	0
455	3	0	0	0	0	0	0	200	300	0	0	0	0	0	0	0	200	903	0	0	0	0	0	0	0	603	903	0
455	4	0	0	0	0	0	0	200	300	0	0	0	0	0	0	0	200	903	0	0	0	0	0	0	0	603	903	0
455	5	0	0	0	0	0	0	200	300	0	0	0	0	0	0	0	200	903	0	0	0	0	0	0	0	603	903	0
455	6	0	0	0	0	0	0	200	300	0	0	0	0	0	0	0	200	903	0	0	0	0	0	0	0	603	903	0
455	7	0	0	0	0	0	0	200	300	0	0	0	0	0	0	0	200	903	0	0	0	0	0	0	0	603	903	0
455	8	0	0	0	0	0	0	200	300	0	0	0	0	0	0	0	200	903	0	0	0	0	0	0	0	603	903	0
455	9	0	0	0	0	0	0	200	300	0	0	0	0	0	0	0	200	903	0	0	0	0	0	0	0	603	903	0
456	0	0	0	0	0	0	0	200	300	0	0	0	0	0	0	0	200	903	0	0	0	0	0	0	0	603	903	0
456	1	0	0	0	0	0	0	200	300	0	0	0	0	0	0	0	200	903	0	0	0	0	0	0	0	603	903	0
456	2	0	0	0	0	0	0	200	300	0	0	0	0	0	0	0	200	903	0	0	0	0	0	0	0	603	903	0
456	3	0	0	0	0	0	0	200	300	0	0	0	0	0	0	0	200	903	0	0	0	0	0	0	0	603	903	0
456	4	0	0	0	0	0	0	200	300	0	0	0	0	0	0	0	200	903	0	0	0	0	0	0	0	603	903	0
456	5	0	0	0	0	0	0	200	300	0	0	0	0	0	0	0	200	903	0	0	0	0	0	0	0	603	903	0
456	6	0	0	0	0	0	0	200	300	0	0	0	0	0	0	0	200	903	0	0	0	0	0	0	0	603	903	0
456	7	0	0	0	0	0	0	200	300	0	0	0	0	0	0	0	200	903	0	0	0	0	0	0	0	603	903	0
456	8	0	0	0	0	0	0	200	300	0	0	0	0	0	0	0	200	903	0	0	0	0	0	0	0	603	903	0
456	9	0	0	0	0	0	0	200	300	0	0	0	0	0	0	0	200	903	0	0	0	0	0	0	0	603	903	0
457	0	0	0	0	0	0	0	200	300	0	0	0	0	0	0	0	200	903	0	0	0	0	0	0	0	603	903	0
457	1	0	0	0	0	0	0	200	300	0	0	0	0	0	0	0	200	903	0	0	0	0	0	0	0	603	903	0
457	2	0	0	0	0	0	0	200	300	0	0	0	0	0	0	0	200	903	0	0	0	0	0	0	0	603	903	0
457	3	0	0	0	0	0	0	200	300	0	0	0	0	0	0	0	200	903	0	0	0	0	0	0	0	603	903	0
457	4	0	0	0	0	0	0	200	300	0	0	0	0	0	0	0	200	903	0	0	0	0	0	0	0	603	903	0
457	5	0	0	0	0	0	0	200	300	0	0	0	0	0	0	0	200	903	0	0	0	0	0	0	0	603	903	0
457	6	0	0	0	0	0	0	200	300	0	0	0	0	0	0	0	200	903	0	0	0	0	0	0	0	603	903	0
457	7	0	0	0	0	0	0	200	300	0	0	0	0	0	0	0	200	903	0	0	0	0	0	0	0	603	903	0
457	8	0	0	0	0	0	0	200	300	0	0	0	0	0	0	0	200	903	0	0	0	0	0	0	0	603	903	0
457	9	0	0	0	0	0	0	200	300	0	0	0	0	0	0	0	200	903	0	0	0	0	0	0	0	603	903	0
458	0	0	0	0	0	0	0	200	300	0	0	0	0	0	0	0	200	903	0	0	0	0	0	0	0	603	903	0
458	1	0	0	0	0	0	0	200	300	0	0	0	0	0	0	0	200	903	0	0	0	0	0	0	0	603	903	0
458	2	0	0	0	0	0	0	200	300	0	0	0	0	0	0	0	200	903	0	0	0	0	0	0	0	603	903	0
458	3	0	0	0	0	0	0	200	300	0	0	0	0	0	0	0	200	903	0	0	0	0	0	0	0	603	903	0
458	4	0	0	0	0	0	0	200	300	0	0	0	0	0	0	0	200	903	0	0	0	0	0	0	0	603	903	0
458	5	0	0	0	0	0	0	200	300	0	0	0	0	0	0	0	200	903	0	0	0	0	0	0	0	603	903	0
458	6	0	0	0	0	0	0	200	300	0	0	0	0	0	0	0	200	903	0	0	0	0	0	0	0	603	903	0
458	7	0	0	0	0	0	0	200	300	0	0	0	0	0	0	0	200	903	0	0	0	0	0	0	0	603	903	0
458	8	0	0	0	0	0	0	200	300	0	0	0	0	0	0	0	200	903	0	0	0	0	0	0	0	603	903	0
458	9	0	0	0	0	0	0	200	300	0	0	0	0	0	0	0	200	903	0	0	0	0	0	0	0	603	903	0
459	0	0	0	0	0	0	0	200	300	0	0	0	0	0	0	0	200	903	0	0	0	0	0	0	0	603	903	0
459	1	0	0	0	0	0	0	200	300	0	0	0	0	0	0	0	200	903	0	0	0	0	0	0	0	603	903	0
459	2	0	0	0	0	0	0	200	300	0	0	0	0	0	0	0	200	903	0	0	0	0	0	0	0	603	903	0
459	3	0	0	0	0	0	0	200	300	0	0	0	0	0	0	0	200	903	0	0	0	0	0	0	0	603	903	0
459	4	0	0	0	0	0	0	200	300	0	0	0	0	0	0	0	200	903	0	0	0	0	0	0	0	603	903	0
459	5	0	0	0	0	0	0	200	300	0	0	0	0	0	0	0	200	903	0	0	0	0	0	0	0	603	903	0
459	6	0	0	0	0	0	0	200	300	0	0	0	0	0	0	0	200	903	0	0	0	0	0	0	0	603	903	0
459	7	0	0	0	0	0	0	200	300	0	0	0	0	0	0	0	200	903	0	0	0	0	0	0	0	603	903	0
459	8	0	0	0	0	0	0	200	300	0	0	0	0	0	0	0	200	903	0	0	0	0	0	0	0	603	903	0
459	9	0	0	0	0	0	0	200	300	0	0	0	0	0	0	0	200	903	0	0	0	0	0	0	0	603	903	0
460	0	0	0	0	0	0	0	200	300	0	0	0	0	0	0	0	200	903	0	0	0	0	0	0	0	603	903	0
460	1	0	0	0	0	0	0	200	300	0	0	0	0	0	0	0	200	903	0	0	0	0	0	0	0	603	903	0
460	2	0	0	0	0	0	0	200	300	0	0	0	0	0	0	0	200	903	0	0	0	0	0	0	0	603	903	0
460	3	0	0	0	0	0	0	200	300	0	0	0	0	0	0	0	200	903	0	0	0	0	0	0	0	603	903	0
460	4	0	0	0	0	0	0	200	300	0	0	0	0	0	0	0	200	903	0	0	0	0	0	0	0	603	903	0
460	5	0	0	0	0	0	0	200	300	0	0	0	0	0	0	0	200	903	0	0	0	0	0	0	0	603	903	0
460	6	0	0	0	0	0	0	200	300	0	0	0	0	0	0	0	200	903	0	0	0	0	0	0	0	603	903	0
460	7	0	0	0	0	0	0	200	300	0	0	0	0	0	0	0	200	903	0	0	0	0	0	0	0	603	903	0
460	8	0	0	0	0	0	0	200	300	0	0	0	0	0	0	0	200	903	0	0	0	0	0	0	0	603	903	0
460	9	0	0	0	0	0	0	200	300	0	0	0	0	0	0	0	200	903	0	0	0	0	0	0	0	603	903	0
461	0	0	0	0	0	0	0	200	300	0	0	0	0	0	0	0	200	903	0	0	0	0	0	0	0	603	903	0
461	1	0	0	0	0	0	0	200	300	0	0	0	0	0	0	0	200	903	0	0	0	0	0	0	0	603	903	0
461	2	0	0	0	0	0	0	200	300	0	0	0	0	0	0	0	200	903	0	0	0	0	0	0	0	603	903	0
461	3	0	0	0	0	0	0	200	300	0	0	0	0	0	0	0	200	903	0	0	0	0	0	0	0	603	903	0
461	4	0	0	0	0	0	0	200	300	0	0	0	0	0	0	0	200	903	0	0	0	0	0	0	0	603	903	0
461	5	0	0	0	0	0	0	200	300	0	0	0	0	0	0	0	200	903	0	0	0	0	0	0	0	603	903	0
461	6	0	0	0	0	0	0	200	300	0	0	0	0	0	0	0	200	903	0	0	0	0	0	0	0	603	903	0
461	7	0	0	0	0	0	0	200	300	0	0	0	0	0	0	0	200	903	0	0	0	0	0	0	0	603	903	0
461	8	0	0	0	0	0	0	200	300	0	0	0	0	0	0	0	200	903	0	0	0	0	0	0	0	603	903	0
461	9	0	0	0	0	0	0	200	300	0	0	0	0	0	0	0	200	903	0	0	0	0	0	0	0	603	903	0
462	0	0	0	0	0	0	0	200	300	0	0	0	0	0	0	0	200	903	0	0	0	0	0	0	0	603	903	0
462	1	0	0	0	0	0	0	200	300	0	0	0	0	0	0	0	200	903	0	0	0	0	0	0	0	603	903	0
462	2	0	0	0	0	0	0	200	300	0	0	0	0	0	0	0	200	903	0	0	0	0	0	0	0	603	903	0
462	3	0	0	0	0	0	0	200	300	0	0	0	0	0	0	0	200	903	0	0	0	0	0	0	0	603	903	0
462	4	0	0	0	0	0	0	200	300	0	0	0	0	0	0	0	200	903	0	0	0	0	0	0	0	603	903	0
462	5	0	0	0	0	0	0	200	300	0	0	0	0	0	0	0	200	903	0	0	0	0	0	0	0	603	903	0
462	6	0	0	0	0	0	0	200	300	0	0	0	0	0	0	0	200	903	0	0	0	0	0	0	0	603	903	0
462	7	0	0	0	0	0	0	200	300	0	0	0	0	0	0	0	200	903	0	0	0	0	0	0	0	603	903	0
462	8	0	0	0	0	0	0	200	300	0	0	0	0	0	0	0	200	903	0	0	0	0	0	0	0	603	903	0
462	9	0	0	0	0	0	0	200	300	0	0	0	0	0	0	0	200	903	0	0	0	0	0	0	0	603	903	0
463	0	0	0	0	0	0	0	200	300	0	0	0	0	0	0	0	200	903	0	0	0	0	0	0	0	603	903	0
463	1	0	0	0	0	0	0	200	300	0	0	0	0	0	0	0	200	903	0	0	0	0	0	0	0	603	903	0
463	2	0	0	0	0	0	0	200	300	0	0	0	0	0	0	0	200	903	0	0	0	0	0	0	0	603	903	0
463	3	0	0	0	0	0	0	200	300	0	0	0	0	0	0	0	200	903	0	0	0	0	0	0	0	603	903	0
463	4	0	0	0	0	0	0	200	300	0	0	0	0	0	0	0	200	903	0	0	0	0	0	0	0	603	903	0
463	5	0	0	0	0	0	0	200	300	0	0	0	0	0	0	0	200	903	0	0	0	0	0	0	0	603	903	0
463	6	0	0	0	0	0	0	200	300	0	0	0	0	0	0	0	200	903	0	0	0	0	0	0	0	603	903	0
463	7	0	0	0	0	0	0	200	300	0	0	0	0	0	0	0	200	903	0	0	0	0	0	0	0	603	903	0
463	8	0	0	0	0	0	0	200	300	0	0	0	0	0	0	0	200	903	0	0	0	0	0	0	0	603	903	0
463	9	0	0	0	0	0	0	200	300	0	0	0	0	0	0	0	200	903	0	0	0	0	0	0	0	603	903	0
464	0	0	0	0	0	0	0	200	300	0	0	0	0	0	0	0	200	903	0	0	0	0	0	0	0	603	903	0
464	1	0	0	0	0	0	0	200	300	0	0	0	0	0	0	0	200	903	0	0	0	0	0	0	0	603	903	0
464	2	0	0	0	0	0	0	200	300	0	0	0	0	0	0	0	200	903	0	0	0	0	0	0	0	603	903	0
464	3	0	0	0	0	0	0	200	300	0	0	0	0	0	0	0	200	903	0	0	0	0	0	0	0	603	903	0
464	4	0	0	0	0	0	0	200	300	0	0	0	0	0	0	0	200	903	0	0	0	0	0	0	0	603	903	0
464	5	0	0	0	0	0	0	200	300	0	0	0	0	0	0	0	200	903	0	0	0	0	0	0	0	603	903	0
464	6	0	0	0	0	0	0	200	300	0	0	0	0	0	0	0	200	903	0	0	0	0	0	0	0	603	903	0
464	7	0	0	0	0	0	0	200	300	0	0	0	0	0	0	0	200	903	0	0	0	0	0	0	0	603	903	0
464	8	0	0	0	0	0	0	200	300	0	0	0	0	0	0	0	200	903	0	0	0	0	0	0	0	603	903	0
464	9	0	0	0	0	0	0	200	300	0	0	0	0	0	0	0	200	903	0	0	0	0	0	0	0	603	903	0
465	0	0	0	0	0	0	0	200	300	0	0	0	0	0	0	0	200	903	0	0	0	0	0	0	0	603	903	0
465	1	0	0	0	0	0	0	200	300	0	0	0	0	0	0	0	200	903	0	0	0	0	0	0	0	603	903	0
465	2	0	0	0	0	0	0	200	300	0	0	0	0	0	0	0	200	903	0	0	0	0	0	0	0	603	903	0
465	3	0	0	0	0	0	0	200	300	0	0	0	0	0	0	0	200	903	0	0	0	0	0	0	0	603	903	0
465	4	0	0	0	0	0	0	200	300	0	0	0	0	0	0	0	200	903	0	0	0	0	0	0	0	603	903	0
465	5	0	0	0	0	0	0	200	300	0	0	0	0	0	0	0	200	903	0	0	0	0	0	0	0	603	903	0
465	6	0	0	0	0	0	0	200	300	0	0	0	0	0	0	0	200	903	0	0	0	0	0	0	0	603	903	0
465	7	0	0	0	0	0	0	200	300	0	0	0	0	0	0	0	200	903	0	0	0	0	0	0	0	603	903	0
465	8	0	0	0	0	0	0	200	300	0	0	0	0	0	0	0	200	903	0	0	0	0	0	0	0	603	903	0
465	9	0	0	0	0	0	0	200	300	0	0	0	0	0	0	0	200	903	0	0	0	0	0	0	0	603	903	0
466	0	0	0	0	0	0	0	200	300	0	0	0	0	0	0	0	200	903	0	0	0	0	0	0	0	603	903	0
466	1	0	0	0	0	0	0	200	300	0	0	0	0	0	0	0	200	903	0	0	0	0	0	0	0	603	903	0
466	2	0	0	0	0	0	0	200	300	0	0	0	0	0	0	0	200	903	0	0	0	0	0	0	0	603	903	0
466	3	0	0	0	0	0	0	200	300	0	0	0	0	0	0	0	200	903	0	0	0	0	0	0	0	603	903	0
466	4	0	0	0	0	0	0	200	300	0	0	0	0	0	0	0	200	903	0	0	0	0	0	0	0	603	903	0
466	5	0	0	0	0	0	0	200	300	0	0	0	0	0	0	0	200	903	0	0	0	0	0	0	0	603	903	0
466	6	0	0	0	0	0	0	200	300	0	0	0	0	0	0	0	200	903	0	0	0	0	0	0	0	603	903	0
466	7	0	0	0	0	0	0	200	300	0	0	0	0	0	0	0	200	903	0	0	0	0	0	0	0	603	903	0
466	8	0	0	0	0	0	0	200	300	0	0	0	0	0	0	0	200	903	0	0	0	0	0	0	0	603	903	0
466	9	0	0	0	0	0	0	200	300	0	0	0	0	0	0	0	200	903	0	0	0	0	0	0	0	603	903	0
467	0	0	0	0	0	0	0	200	300	0	0	0	0	0	0	0	200	903	0	0	0	0	0	0	0	603	903	0
467	1	0	0	0	0	0	0	200	300	0	0	0	0	0	0	0	200	903	0	0	0	0	0	0	0	603	903	0
467	2	0	0	0	0	0	0	200	300	0	0	0	0	0	0	0	200	903	0	0	0	0	0	0	0	603	903	0
467	3	0	0	0	0	0	0	200	300	0	0	0	0	0	0	0	200	903	0	0	0	0	0	0	0	603	903	0
467	4	0	0	0	0	0	0	200	300	0	0	0	0	0	0	0	200	903	0	0	0	0	0	0	0	603	903	0
467	5	0	0	0	0	0	0	200	300	0	0	0	0	0	0	0	200	903	0	0	0	0	0	0	0	603	903	0
467	6	0	0	0	0	0	0	200	300	0	0	0	0	0	0	0	200	903	0	0	0	0	0	0	0	603	903	0
467	7	0	0	0	0	0	0	200	300	0	0	0	0	0	0	0	200	903	0	0	0	0	0	0	0	603	903	0
467	8	0	0	0	0	0	0	200	300	0	0	0	0	0	0	0	200	903	0	0	0	0	0	0	0	603	903	0
467	9	0	0	0	0	0	0	200	300	0	0	0	0	0	0	0	200	903	0	0	0	0	0	0	0	603	903	0
468	0	0	0	0	0	0	0	200	300	0	0	0	0	0	0	0	200	903	0	0	0	0	0	0	0	603	903	0
468	1	0	0	0	0	0	0	200	300	0	0	0	0	0	0	0	200	903	0	0	0	0	0	0	0	603	903	0
468	2	0	0	0	0	0	0	200	300	0	0	0	0	0	0	0	200	903	0	0	0	0	0	0	0	603	903	0
468	3	0	0	0	0	0	0	200	300	0	0	0	0	0	0	0	200	903	0	0	0	0	0	0	0	603	903	0
468	4	0	0	0	0	0	0	200	300	0	0	0	0	0	0	0	200	903	0	0	0	0	0	0	0	603	903	0
468	5	0	0	0	0	0	0	200	300	0	0	0	0	0	0	0	200	903	0	0	0	0	0	0	0	603	903	0
468	6	0	0	0	0	0	0	200	300	0	0	0	0	0	0	0	200	903	0	0	0	0	0	0	0	603	903	0
468	7	0	0	0	0	0	0	200	300	0	0	0	0	0	0	0	200	903	0	0	0	0	0	0	0	603	903	0
468	8	0	0	0	0	0	0	200	300	0	0	0	0	0	0	0	200	903	0	0	0	0	0	0	0	603	903	0
468	9	0	0	0	0	0	0	200	300	0	0	0	0	0	0	0	200	903	0	0	0	0	0	0	0	603	903	0
469	0	0	0	0	0	0	0	200	300	0	0	0	0	0	0	0	200	903	0	0	0	0	0	0	0	603	903	0
469	1	0	0	0	0	0	0	200	300	0	0	0	0	0	0	0	200	903	0	0	0	0	0	0	0	603	903	0
469	2	0	0	0	0	0	0	200	300	0	0	0	0	0	0	0	200	903	0	0	0	0	0	0	0	603	903	0
469	3	0	0	0	0	0	0	200	300	0	0	0	0	0	0	0	200	903	0	0	0	0	0	0	0	603	903	0
469	4	0	0	0	0	0	0	200	300	0	0	0	0	0	0	0	200	903	0	0	0	0	0	0	0	603	903	0
469	5	0	0	0	0	0	0	200	300	0	0	0	0	0	0	0	200	903	0	0	0	0	0	0	0	603	903	0
469	6	0	0	0	0	0	0	200	300	0	0	0	0	0	0	0	200	903	0	0	0	0	0	0	0	603	903	0
469	7	0	0	0	0	0	0	200	300	0	0	0	0	0	0	0	200	903	0	0	0	0	0	0	0	603	903	0
469	8	0	0	0	0	0	0	200	300	0	0	0	0	0	0	0	200	903	0	0	0	0	0	0	0	603	903	0
469	9	0	0	0	0	0	0	200	300	0	0	0	0	0	0	0	200	903	0	0	0	0	0	0	0	603	903	0
470	0	0	0	0	0	0	0	200	300	0	0	0	0	0	0	0	200	903	0	0	0	0	0	0	0	603	903	0
470	1	0	0	0	0	0	0	200	300	0	0	0	0	0	0	0	200	903	0	0	0	0	0	0	0	603	903	0
470	2	0	0	0	0	0	0	200	300	0	0	0	0	0	0	0	200	903	0	0	0	0	0	0	0	603	903	0
470	3	0	0	0	0	0	0	200	300	0	0	0	0	0	0	0	200	903	0	0	0	0	0	0	0	603	903	0
470	4	0	0	0	0	0	0	200	300	0	0	0	0	0	0	0	200	903	0	0	0	0	0	0	0	603	903	0
470	5	0	0	0	0	0	0	200	300	0	0	0	0	0	0	0	200	903	0	0	0	0	0	0	0	603	903	0
470	6	0	0	0	0	0	0	200	300	0	0	0	0	0	0	0	200	903	0	0	0	0	0	0	0	603	903	0
470	7	0	0	0	0	0	0	200	300	0	0	0	0	0	0	0	200	903	0	0	0	0	0	0	0	603	903	0
470	8	0	0	0	0	0	0	200	300	0	0	0	0	0	0	0	200	903	0	0	0	0	0	0	0	603	903	0
470	9	0	0	0	0	0	0	200	300	0	0	0	0	0	0	0	200	903	0	0	0	0	0	0	0	603	903	0
471	0	0	0	0	0	0	0	200	300	0	0	0	0	0	0	0	200	903	0	0	0	0	0	0	0	603	903	0
471	1	0	0	0	0	0	0	200	300	0	0	0	0	0	0	0	200	903	0	0	0	0	0	0	0	603	903	0
471	2	0	0	0	0	0	0	200	300	0	0	0	0	0	0	0	200	903	0	0	0	0	0	0	0	603	903	0
471	3	0	0	0	0	0	0	200	300	0	0	0	0	0	0	0	200	903	0	0	0	0	0	0	0	603	903	0
471	4	0	0	0	0	0	0	200	300	0	0	0	0	0	0	0	200	903	0	0	0	0	0	0	0	603	903	0
471	5	0	0	0	0	0	0	200	300	0	0	0	0	0	0	0	200	903	0	0	0	0	0	0	0	603	903	0
471	6	0	0	0	0	0	0	200	300	0	0	0	0	0	0	0	200	903	0	0	0	0	0	0	0	603	903	0
471	7	0	0	0	0	0	0	200	300	0	0	0	0	0	0	0	200	903	0	0	0	0	0	0	0	603	903	0
471	8	0	0	0	0	0	0	200	300	0	0	0	0	0	0	0	200	903	0	0	0	0	0	0	0	603	903	0
471	9	0	0	0	0	0	0	200	300	0	0	0	0	0	0	0	200	903	0	0	0	0	0	0	0	603	903	0
472	0	0	0	0	0	0	0	200	300	0	0	0	0	0	0	0	200	903	0	0	0	0	0	0	0	603	903	0
472	1	0	0	0	0	0	0	200	300	0	0	0	0	0	0	0	200	903	0	0	0	0	0	0	0	603	903	0
472	2	0	0	0	0	0	0	200	300	0	0	0	0	0	0	0	200	903	0	0	0	0	0	0	0	603	903	0
472	3	0	0	0	0	0	0	200	300	0	0	0	0	0	0	0	200	903	0	0	0	0	0	0	0	603	903	0
472	4	0	0	0	0	0	0	200	300	0	0	0	0	0	0	0	200	903	0	0	0	0	0	0	0	603	903	0
472	5	0	0	0	0	0	0	200	300	0	0	0	0	0	0	0	200	903	0	0	0	0	0	0	0	603	903	0
472	6	0	0	0	0	0	0	200	300	0	0	0	0	0	0	0	200	903	0	0	0	0	0	0	0	603	903	0
472	7	0	0	0	0	0	0	200	300	0	0	0	0	0	0	0	200	903	0	0	0	0	0	0	0	603	903	0
472	8	0	0	0	0	0	0	200	300	0	0	0	0	0	0	0	200	903	0	0	0	0	0	0	0	603	903	0
472	9	0	0	0	0	0	0	200	300	0	0	0	0	0	0	0	200	903	0	0	0	0	0	0	0	603	903	0
473	0	0	0	0	0	0	0	200	300	0	0	0	0	0	0	0	200	903	0	0	0	0	0	0	0	603	903	0
473	1	0	0	0	0	0	0	200	300	0	0	0	0	0	0	0	200	903	0	0	0	0	0	0	0	603	903	0
473	2	0	0	0	0	0	0	200	300	0	0	0	0	0	0	0	200	903	0	0	0	0	0	0	0	603	903	0
473	3	0	0	0	0	0	0	200	300	0	0	0	0	0	0	0	200	903	0	0	0	0	0	0	0	603	903	0
473	4	0	0	0	0	0	0	200	300	0	0	0	0	0	0	0	200	903	0	0	0	0	0	0	0	603	903	0
473	5	0	0	0	0	0	0	200	300	0	0	0	0	0	0	0	200	903	0	0	0	0	0	0	0	603	903	0
473	6	0	0	0	0	0	0	200	300	0	0	0	0	0	0	0	200	903	0	0	0	0	0	0	0	603	903	0
473	7	0	0	0	0	0	0	200	300	0	0	0	0	0	0	0	200	903	0	0	0	0	0	0	0	603	903	0
473	8	0	0	0	0	0	0	200	300	0	0	0	0	0	0	0	200	903	0	0	0	0	0	0	0	603	903	0
473	9	0	0	0	0	0	0	200	300	0	0	0	0	0	0	0	200	903	0	0	0	0	0	0	0	603	903	0
474	0	0	0	0	0	0	0	200	300	0	0	0	0	0	0	0	200	903	0	0	0	0	0	0	0	603	903	0
474	1	0	0	0	0	0	0	200	300	0	0	0	0	0	0	0	200	903	0	0	0	0	0	0	0	603	903	0
474	2	0	0	0	0	0	0	200	300	0	0	0	0	0	0	0	200	903	0	0	0	0	0	0	0	603	903	0
474	3	0	0	0	0	0	0	200	300	0	0	0	0	0	0	0	200	903	0	0	0	0	0	0	0	603	903	0
474	4	0	0	0	0	0	0	200	300	0	0	0	0	0	0	0	200	903	0	0	0	0	0	0	0	603	903	0
474	5	0	0	0	0	0	0	200	300	0	0	0	0	0	0	0	200	903	0	0	0	0	0	0	0	603	903	0
474	6	0	0	0	0	0	0	200	300	0	0	0	0	0	0	0	200	903	0	0	0	0	0	0	0	603	903	0
474	7	0	0	0	0	0	0	200	300	0	0	0	0	0	0	0	200	903	0	0	0	0	0	0	0	603	903	0
474	8	0	0	0	0	0	0	200	300	0	0	0	0	0	0	0	200	903	0	0	0	0	0	0	0	603	903	0
474	9	0	0	0	0	0	0	200	300	0	0	0	0	0	0	0	200	903	0	0	0	0	0	0	0	603	903	0
475	0	0	0	0	0	0	0	200	300	0	0	0	0	0	0	0	200	903	0	0	0	0	0	0	0	603	903	0
475	1	0	0	0	0	0	0	200	300	0	0	0	0	0	0	0	200	903	0	0	0	0	0	0	0	603	903	0
475	2	0	0	0	0	0	0	200	300	0	0	0	0	0	0	0	200	903	0	0	0	0	0	0	0	603	903	0
475	3	0	0	0	0	0	0	200	300	0	0	0	0	0	0	0	200	903	0	0	0	0	0	0	0	603	903	0
475	4	0	0	0	0	0	0	200	300	0	0	0	0	0	0	0	200	903	0	0	0	0	0	0	0	603	903	0
475	5	0	0	0	0	0	0	200	300	0	0	0	0	0	0	0	200	903	0	0	0	0	0	0	0	603	903	0
475	6	0	0	0	0	0	0	200	300	0	0	0	0	0	0	0	200	903	0	0	0	0	0	0	0	603	903	0
475	7	0	0	0	0	0	0	200	300	0	0	0	0	0	0	0	200	903	0	0	0	0	0	0	0	603	903	0
475	8	0	0	0	0	0	0	200	300	0	0	0	0	0	0	0	200	903	0	0	0	0	0	0	0	603	903	0
475	9	0	0	0	0	0	0	200	300	0	0	0	0	0	0	0	200	903	0	0	0	0	0	0	0	603	903	0
476	0	0	0	0	0	0	0	200	300	0	0	0	0	0	0	0	200	903	0	0	0	0	0	0	0	603	903	0
476	1	0	0	0	0	0	0	200	300	0	0	0	0	0	0	0	200	903	0	0	0	0	0	0	0	603	903	0
476	2	0	0	0	0	0	0	200	300	0	0	0	0	0	0	0	200	903	0	0	0	0	0	0	0	603	903	0
476	3	0	0	0	0	0	0	200	300	0	0	0	0	0	0	0	200	903	0	0	0	0	0	0	0	603	903	0
476	4	0	0	0	0	0	0	200	300	0	0	0	0	0	0	0	200	903	0	0	0	0	0	0	0	603	903	0
476	5	0	0	0	0	0	0	200	300	0	0	0	0	0	0	0	200	903	0	0	0	0	0	0	0	603	903	0
476	6	0	0	0	0	0	0	200	300	0	0	0	0	0	0	0	200	903	0	0	0	0	0	0	0	603	903	0
476	7	0	0	0	0	0	0	200	300	0	0	0	0	0	0	0	200	903	0	0	0	0	0	0	0	603	903	0
476	8	0	0	0	0	0	0	200	300	0	0	0	0	0	0	0	200	903	0	0	0	0	0	0	0	603	903	0
476	9	0	0	0	0	0	0	200	300	0	0	0	0	0	0	0	200	903	0	0	0	0	0	0	0	603	903	0
477	0	0	0	0	0	0	0	200	300	0	0	0	0	0	0	0	200	903	0	0	0	0	0	0	0	603	903	0
477	1	0	0	0	0	0	0	200	300	0	0	0	0	0	0	0	200	903	0	0	0	0	0	0	0	603	903	0
477	2	0	0	0	0	0	0	200	300	0	0	0	0	0	0	0	200	903	0	0	0	0	0	0	0	603	903	0
477	3	0	0	0	0	0	0	200	300	0	0	0	0	0	0	0	200	903	0	0	0	0	0	0	0	603	903	0
477	4	0	0	0	0	0	0	200	300	0	0	0	0	0	0	0	200	903	0	0	0	0	0	0	0	603	903	0
477	5	0	0	0	0	0	0	200	300	0	0	0	0	0	0	0	200	903	0	0	0	0	0	0	0	603	903	0
477	6	0	0	0	0	0	0	200	300	0	0	0	0	0	0	0	200	903	0	0	0	0	0	0	0	603	903	0
477	7	0	0	0	0	0	0	200	300	0	0	0	0	0	0	0	200	903	0	0	0	0	0	0	0	603	903	0
477	8	0	0	0	0	0	0	200	300	0	0	0	0	0	0	0	200	903	0	0	0	0	0	0	0	603	903	0
477	9	0	0	0	0	0	0	200	300	0	0	0	0	0	0	0	200	903	0	0	0	0	0	0	0	603	903	0
478	0	0	0	0	0	0	0	200	300	0	0	0	0	0	0	0	200	903	0	0	0	0	0	0	0	603	903	0
478	1	0	0	0	0	0	0	200	300	0	0	0	0	0	0	0	200	903	0	0	0	0	0	0	0	603	903	0
478	2	0	0	0	0	0	0	200	300	0	0	0	0	0	0	0	200	903	0	0	0	0	0	0	0	603	903	0
478	3	0	0	0	0	0	0	200	300	0	0	0	0	0	0	0	200	903	0	0	0	0	0	0	0	603	903	0
478	4	0	0	0	0	0	0	200	300	0	0	0	0	0	0	0	200	903	0	0	0	0	0	0	0	603	903	0
478	5	0	0	0	0	0	0	200	300	0	0	0	0	0	0	0	200	903	0	0	0	0	0	0	0	603	903	0
478	6	0	0	0	0	0	0	200	300	0	0	0	0	0	0	0	200	903	0	0	0	0	0	0	0	603	903	0
478	7	0	0	0	0	0	0	200	300	0	0	0	0	0	0	0	200	903	0	0	0	0	0	0	0	603	903	0
478	8	0	0	0	0	0	0	200	300	0	0	0	0	0	0	0	200	903	0	0	0	0	0	0	0	603	903	0
478	9	0	0	0	0	0	0	200	300	0	0	0	0	0	0	0	200	903	0	0	0	0	0	0	0	603	903	0
479	0	0	0	0	0	0	0	200	300	0	0	0	0	0	0	0	200	903	0	0	0	0	0	0	0	603	903	0
479	1	0	0	0	0	0	0	200	300	0	0	0	0	0	0	0	200	903	0	0	0	0	0	0	0	603	903	0
479	2	0	0	0	0	0	0	200	300	0	0	0	0	0	0	0	200	903	0	0	0	0	0	0	0	603	903	0
479	3	0	0	0	0	0	0	200	300	0	0	0	0	0	0	0	200	903	0	0	0	0	0	0	0	603	903	0
479	4	0	0	0	0	0	0	200	300	0	0	0	0	0	0	0	200	903	0	0	0	0	0	0	0	603	903	0
479	5	0	0	0	0	0	0	200	300	0	0	0	0	0	0	0	200	903	0	0	0	0	0	0	0	603	903	0
479	6	0	0	0	0	0	0	200	300	0	0	0	0	0	0	0	200	903	0	0	0	0	0	0	0	603	903	0
479	7	0	0	0	0	0	0	200	300	0	0	0	0	0	0	0	200	903	0	0	0	0	0	0	0	603	903	0
479	8	0	0	0	0	0	0	200	300	0	0	0	0	0	0	0	200	903	0	0	0	0	0	0	0	603	903	0
479	9	0	0	0	0	0	0	200	300	0	0	0	0	0	0	0	200	903	0	0	0	0	0	0	0	603	903	0
480	0	0	0	0	0	0	0	200	300	0	0	0	0	0	0	0	200	903	0	0	0	0	0	0	0	603	903	0
480	1	0	0	0	0	0	0	200	300	0	0	0	0	0	0	0	200	903	0	0	0	0	0	0	0	603	903	0
480	2	0	0	0	0	0	0	200	300	0	0	0	0	0	0	0	200	903	0	0	0	0	0	0	0	603	903	0
480	3	0	0	0	0	0	0	200	300	0	0	0	0	0	0	0	200	903	0	0	0	0	0	0	0	603	903	0
480	4	0	0	0	0	0	0	200	300	0	0	0	0	0	0	0	200	903	0	0	0	0	0	0	0	603	903	0
480	5	0	0	0	0	0	0	200	300	0	0	0	0	0	0	0	200	903	0	0	0	0	0	0	0	603	903	0
480	6	0	0	0	0	0	0	200	300	0	0	0	0	0	0	0	200	903	0	0	0	0	0	0	0	603	903	0
480	7	0	0	0	0	0	0	200	300	0	0	0	0	0	0	0	200	903	0	0	0	0	0	0	0	603	903	0
480	8	0	0	0	0	0	0	200	300	0	0	0	0	0	0	0	200	903	0	0	0	0	0	0	0	603	903	0
480	9	0	0	0	0	0	0	200	300	0	0	0	0	0	0	0	200	903	0	0	0	0	0	0	0	603	903	0
481	0	0	0	0	0	0	0	200	300	0	0	0	0	0	0	0	200	903	0	0	0	0	0	0	0	603	903	0
481	1	0	0	0	0	0	0	200	300	0	0	0	0	0	0	0	200	903	0	0	0	0	0	0	0	603	903	0
481	2	0	0	0	0	0	0	200	300	0	0	0	0	0	0	0	200	903	0	0	0	0	0	0	0	603	903	0
481	3	0	0	0	0	0	0	200	300	0	0	0	0	0	0	0	200	903	0	0	0	0	0	0	0	603	903	0
481	4	0	0	0	0	0	0	200	300	0	0	0	0	0	0	0	200	903	0	0	0	0	0	0	0	603	903	0
481	5	0	0	0	0	0	0	200	300	0	0	0	0	0	0	0	200	903	0	0	0	0	0	0	0	603	903	0
481	6	0	0	0	0	0	0	200	300	0	0	0	0	0	0	0	200	903	0	0	0	0	0	0	0	603	903	0
481	7	0	0	0	0	0	0	200	300	0	0	0	0	0	0	0	200	903	0	0	0	0	0	0	0	603	903	0
481	8	0	0	0	0	0	0	200	300	0	0	0	0	0	0	0	200	903	0	0	0	0	0	0	0	603	903	0
481	9	0	0	0	0	0	0	200	300	0	0	0	0	0	0	0	200	903	0	0	0	0	0	0	0	603	903	0
482	0	0	0	0	0	0	0	200	300	0	0	0	0	0	0	0	200	903	0	0	0	0	0	0	0	603	903	0
482	1	0	0	0	0	0	0	200	300	0	0	0	0	0	0	0	200	903	0	0	0	0	0	0	0	603	903	0
482	2	0	0	0	0	0	0	200	300	0	0	0	0	0	0	0	200	903	0	0	0	0	0	0	0	603	903	0
482	3	0	0	0	0	0	0	200	300	0	0	0	0	0	0	0	200	903	0	0	0	0	0	0	0	603	903	0
482	4	0	0	0	0	0	0	200	300	0	0	0	0	0	0	0	200	903	0	0	0	0	0	0	0	603	903	0
482	5	0	0	0	0	0	0	200	300	0	0	0	0	0	0	0	200	903	0	0	0	0	0	0	0	603	903	0
482	6	0	0	0	0	0	0	200	300	0	0	0	0	0	0	0	200	903	0	0	0	0	0	0	0	603	903	0
482	7	0	0	0	0	0	0	200	300	0	0	0	0	0	0	0	200	903	0	0	0	0	0	0	0	603	903	0
482	8	0	0	0	0	0	0	200	300	0	0	0	0	0	0	0	200	903	0	0	0	0	0	0	0	603	903	0
482	9	0	0	0	0	0	0	200	300	0	0	0	0	0	0	0	200	903	0	0	0	0	0	0	0	603	903	0
483	0	0	0	0	0	0	0	200	300	0	0	0	0	0	0	0	200	903	0	0	0	0	0	0	0	603	903	0
483	1	0	0	0	0	0	0	200	300	0	0	0	0	0	0	0	200	903	0	0	0	0	0	0	0	603	903	0
483	2	0	0	0	0	0	0	200	300	0	0	0	0	0	0	0	200	903	0	0	0	0	0	0	0	603	903	0
483	3	0	0	0	0	0	0	200	300	0	0	0	0	0	0	0	200	903	0	0	0	0	0	0	0	603	903	0
483	4	0	0	0	0	0	0	200	300	0	0	0	0	0	0	0	200	903	0	0	0	0	0	0	0	603	903	0
483	5	0	0	0	0	0	0	200	300	0	0	0	0	0	0	0	200	903	0	0	0	0	0	0	0	603	903	0
483	6	0	0	0	0	0	0	200	300	0	0	0	0	0	0	0	200	903	0	0	0	0	0	0	0	603	903	0
483	7	0	0	0	0	0	0	200	300	0	0	0	0	0	0	0	200	903	0	0	0	0	0	0	0	603	903	0
483	8	0	0	0	0	0	0	200	300	0	0	0	0	0	0	0	200	903	0	0	0	0	0	0	0	603	903	0
483	9	0	0	0	0	0	0	200	300	0	0	0	0	0	0	0	200	903	0	0	0	0	0	0	0	603	903	0
484	0	0	0	0	0	0	0	200	300	0	0	0	0	0	0	0	200	903	0	0	0	0	0	0	0	603	903	0
484	1	0	0	0	0	0	0	200	300	0	0	0	0	0	0	0	200	903	0	0	0	0	0	0	0	603	903	0
484	2	0	0	0	0	0	0	200	300	0	0	0	0	0	0	0	200	903	0	0	0	0	0	0	0	603	903	0
484	3	0	0	0	0	0	0	200	300	0	0	0	0	0	0	0	200	903	0	0	0	0	0	0	0	603	903	0
484	4	0	0	0	0	0	0	200	300	0	0	0	0	0	0	0	200	903	0	0	0	0	0	0	0	603	903	0
484	5	0	0	0	0	0	0	200	300	0	0	0	0	0	0	0	200	903	0	0	0	0	0	0	0	603	903	0
484	6	0	0	0	0	0	0	200	300	0	0	0	0	0	0	0	200	903	0	0	0	0	0	0	0	603	903	0
484	7	0	0	0	0	0	0	200	300	0	0	0	0	0	0	0	200	903	0	0	0	0	0	0	0	603	903	0
484	8	0	0	0	0	0	0	200	300	0	0	0	0	0	0	0	200	903	0	0	0	0	0	0	0	603	903	0
484	9	0	0	0	0	0	0	200	300	0	0	0	0	0	0	0	200	903	0	0	0	0	0	0	0	603	903	0
485	0	0	0	0	0	0	0	200	300	0	0	0	0	0	0	0	200	903	0	0	0	0	0	0	0	603	903	0
485	1	0	0	0	0	0	0	200	300	0	0	0	0	0	0	0	200	903	0	0	0	0	0	0	0	603	903	0
485	2	0	0	0	0	0	0	200	300	0	0	0	0	0	0	0	200	903	0	0	0	0	0	0	0	603	903	0
485	3	0	0	0	0	0	0	200	300	0	0	0	0	0	0	0	200	903	0	0	0	0	0	0	0	603	903	0
485	4	0	0	0	0	0	0	200	300	0	0	0	0	0	0	0	200	903	0	0	0	0	0	0	0	603	903	0
485	5	0	0	0	0	0	0	200	300	0	0	0	0	0	0	0	200	903	0	0	0	0	0	0	0	603	903	0
485	6	0	0	0	0	0	0	200	300	0	0	0	0	0	0	0	200	903	0	0	0	0	0	0	0	603	903	0
485	7	0	0	0	0	0	0	200	300	0	0	0	0	0	0	0	200	903	0	0	0	0	0	0	0	603	903	0
485	8	0	0	0	0	0	0	200	300	0	0	0	0	0	0	0	200	903	0	0	0	0	0	0	0	603	903	0
485	9	0	0	0	0	0	0	200	300	0	0	0	0	0	0	0	200	903	0	0	0	0	0	0	0	603	903	0
486	0	0	0	0	0	0	0	200	300	0	0	0	0	0	0	0	200	903	0	0	0	0	0	0	0	603	903	0
486	1	0	0	0	0	0	0	200	300	0	0	0	0	0	0	0	200	903	0	0	0	0	0	0	0	603	903	0
486	2	0	0	0	0	0	0	200	300	0	0	0	0	0	0	0	200	903	0	0	0	0	0	0	0	603	903	0
486	3	0	0	0	0	0	0	200	300	0	0	0	0	0	0	0	200	903	0	0	0	0	0	0	0	603	903	0
486	4	0	0	0	0	0	0	200	300	0	0	0	0	0	0	0	200	903	0	0	0	0	0	0	0	603	903	0
486	5	0	0	0	0	0	0	200	300	0	0	0	0	0	0	0	200	903	0	0	0	0	0	0	0	603	903	0
486	6	0	0	0	0	0	0	200	300	0	0	0	0	0	0	0	200	903	0	0	0	0	0	0	0	603	903	0
486	7	0	0	0	0	0	0	200	300	0	0	0	0	0	0	0	200	903	0	0	0	0	0	0	0	603	903	0
486	8	0	0	0	0	0	0	200	300	0	0	0	0	0	0	0	200	903	0	0	0	0	0	0	0	603	903	0
486	9	0	0	0	0	0	0	200	300	0	0	0	0	0	0	0	200	903	0	0	0	0	0	0	0	603	903	0
487	0	0	0	0	0	0	0	200	300	0	0	0	0	0	0	0	200	903	0	0	0	0	0	0	0	603	903	0
487	1	0	0	0	0	0	0	200	300	0	0	0	0	0	0	0	200	903	0	0	0	0	0	0	0	603	903	0
487	2	0	0	0	0	0	0	200	300	0	0	0	0	0	0	0	200	903	0	0	0	0	0	0	0	603	903	0
487	3	0	0	0	0	0	0	200	300	0	0	0	0	0	0	0	200	903	0	0	0	0	0	0	0	603	903	0
487	4	0	0	0	0	0	0	200	300	0	0	0	0	0	0	0	200	903	0	0	0	0	0	0	0	603	903	0
487	5	0	0	0	0	0	0	200	300	0	-2.05993	-11.7545	-17.8955	-4218.75	2526.43	-701.706	341.177	1138.74	0	0	0	0	0	0	0	603	903	0
487	6	0	0	0	0	0	0	200	300	0	0	0	0	0	0	0	200	903	0	0	0	0	0	0	0	603	903	0
487	7	0	0	0	0	0	0	200	300	0	0	0	0	0	0	0	200	903	0	0	0	0	0	0	0	603	903	0
487	8	0	0	0	0	0	0	200	300	0	0	0	0	0	0	0	200	903	0	0	0	0	0	0	0	603	903	0
487	9	0	0	0	0	0	0	200	300	0	0	0	0	0	0	0	200	903	0	0	0	0	0	0	0	603	903	0
488	0	0	0	0	0	0	0	200	300	0	-2.97546	-8.70269	-17.5903	-5134.27	2587.46	-793.259	347.096	1194.88	0	0	0	0	0	0	0	603	903	0
488	1	0	0	0	0	0	0	200	300	0	0	0	0	0	0	0	200	903	0	0	0	0	0	0	0	603	903	0
488	2	0	0	0	0	0	0	200	300	0	1.60218	-10.3812	-16.0645	-4584.96	2221.25	-610.154	338.271	1188.41	0	0	0	0	0	0	0	603	903	0
488	3	0	0	0	0	0	0	200	300	0	1.14441	-8.70269	-18.5059	-5408.93	3136.78	-1159.47	369.502	1195.28	0	0	0	0	0	0	0	603	903	0
488	4	0	0	0	0	0	0	200	300	0	-0.839229	-5.80352	-24.3042	-6416.02	3625.06	-793.259	349.154	1166.99	0	0	0	0	0	0	0	603	903	0
488	5	0	0	0	0	0	0	200	300	0	0.839237	-3.05694	-26.4404	-6416.02	3502.99	-152.39	332.486	1145.66	0	0	0	0	0	0	0	603	903	0
488	6	0	0	0	0	0	0	200	300	0	0.381474	1.06293	-31.6284	-8521.73	4967.83	76.4922	357.069	1172.43	0	0	0	0	0	0	0	603	903	0
488	7	0	0	0	0	0	0	200	300	0	4.50135	8.38715	-38.6475	-9437.25	5639.22	625.809	345.914	1147.19	0	0	0	0	0	0	0	603	903	0
488	8	0	0	0	0	0	0	200	300	0	2.05994	12.0493	-43.8354	-10078.1	5578.19	1495.56	327.253	1132.91	0	0	0	0	0	0	0	603	903	0
488	9	0	0	0	0	0	0	200	300	0	0.534062	11.4389	-48.1079	-11817.6	6615.79	1266.68	337.52	1148.65	0	0	0	0	0	0	0	603	903	0
489	0	0	0	0	0	0	0	200	300	0	1.14441	15.864	-55.4321	-12824.7	7409.24	1632.89	333.663	1134.36	0	0	0	0	0	0	0	603	903	0
489	1	0	0	0	0	0	0	200	300	0	2.67029	18.458	-60.9253	-13374	7958.56	1999.1	330.628	1122.52	0	0	0	0	0	0	0	603	903	0
489	2	0	0	0	0	0	0	200	300	0	0.991825	16.4743	-64.5874	-14838.9	8752.01	2090.65	335.507	1132.75	0	0	0	0	0	0	0	603	903	0
489	3	0	0	0	0	0	0	200	300	0	0.839237	17.0847	-71.3013	-15937.5	9179.26	1770.22	328.739	1126.52	0	0	0	0	0	0	0	603	903	0
489	4	0	0	0	0	0	0	200	300	0	1.297	22.2726	-78.9307	-17310.8	10400	2639.97	331.761	1122.32	0	0	0	0	0	0	0	603	903	0
489	5	0	0	0	0	0	0	200	300	0	1.44959	22.1201	-85.9497	-19508.1	10949.3	2594.19	327.392	1129.97	0	0	0	0	0	0	0	603	903	0
489	6	0	0	0	0	0	0	200	300	0	-0.534054	23.4934	-94.1895	-20332	11742.7	3372.39	324.671	1118.86	0	0	0	0	0	0	0	603	903	0
489	7	0	0	0	0	0	0	200	300	0	-0.534054	30.8176	-103.345	-22254.6	12902.4	4104.81	324.848	1118.34	0	0	0	0	0	0	0	603	903	0
489	8	0	0	0	0	0	0	200	300	0	-1.75476	34.9374	-110.974	-24635	14001	4425.25	326.165	1124.99	0	0	0	0	0	0	0	603	903	0
489	9	0	0	0	0	0	0	200	300	0	-2.97546	37.0737	-120.129	-26099.9	14611.4	5295	321.63	1120.26	0	0	0	0	0	0	0	603	903	0
490	0	0	0	0	0	0	0	200	300	0	-4.19616	39.8203	-129.285	-27473.2	15404.8	6027.42	319.155	1115.5	0	0	0	0	0	0	0	603	903	0
490	1	0	0	0	0	0	0	200	300	0	-5.56945	41.8039	-138.44	-29121.1	16381.4	5890.09	318.329	1113.35	0	0	0	0	0	0	0	603	903	0
490	2	0	0	0	0	0	0	200	300	0	-3.43322	43.0246	-145.459	-30585.9	17541.1	6576.74	320.591	1113.27	0	0	0	0	0	0	0	603	903	0
490	3	0	0	0	0	0	0	200	300	0	-4.65393	42.5668	-152.783	-31776.1	18334.5	6439.41	320.004	1110.98	0	0	0	0	0	0	0	603	903	0
490	4	0	0	0	0	0	0	200	300	0	-7.5531	42.872	-161.633	-34248	19616.3	6347.85	321.363	1114.89	0	0	0	0	0	0	0	603	903	0
490	5	0	0	0	0	0	0	200	300	0	-6.02722	42.5668	-169.568	-34888.9	20470.8	6439.41	320.723	1108.75	0	0	0	0	0	0	0	603	903	0
490	6	0	0	0	0	0	0	200	300	0	-5.11169	40.278	-176.892	-36079.1	20653.9	6393.63	316.76	1106.96	0	0	0	0	0	0	0	603	903	0
490	7	0	0	0	0	0	0	200	300	0	-6.79016	37.684	-183.911	-38001.7	21630.4	5981.64	317.614	1109.63	0	0	0	0	0	0	0	603	903	0
490	8	0	0	0	0	0	0	200	300	0	-6.63757	36.7685	-186.963	-39100.3	22301.8	5615.43	319.285	1112.13	0	0	0	0	0	0	0	603	903	0
490	9	0	0	0	0	0	0	200	300	0	-7.09533	33.1064	-193.677	-39008.8	22973.2	5569.66	318.616	1104.41	0	0	0	0	0	0	0	603	903	0
491	0	0	0	0	0	0	0	200	300	0	-5.56945	28.9865	-197.034	-39741.2	23095.3	4883.01	317.215	1104.7	0	0	0	0	0	0	0	603	903	0
491	1	0	0	0	0	0	0	200	300	0	-5.41687	28.071	-201.611	-41114.5	23766.7	4471.02	317.884	1106.93	0	0	0	0	0	0	0	603	903	0
491	2	0	0	0	0	0	0	200	300	0	-7.40051	23.0356	-203.748	-40839.8	24621.2	4379.47	320.842	1103.44	0	0	0	0	0	0	0	603	903	0
491	3	0	0	0	0	0	0	200	300	0	-6.94275	17.8476	-209.546	-41389.2	24071.8	3601.27	314.876	1100.52	0	0	0	0	0	0	0	603	903	0
491	4	0	0	0	0	0	0	200	300	0	-5.56945	14.4907	-211.377	-41846.9	24621.2	3463.94	316.48	1100.97	0	0	0	0	0	0	0	603	903	0
491	5	0	0	0	0	0	0	200	300	0	-7.09533	12.3544	-211.682	-42213.1	25597.7	3189.29	320.925	1102.42	0	0	0	0	0	0	0	603	903	0
491	6	0	0	0	0	0	0	200	300	0	-6.63757	7.62421	-217.48	-42945.6	25597.7	2548.42	317.701	1100.47	0	0	0	0	0	0	0	603	903	0
491	7	0	0	0	0	0	0	200	300	0	-7.85827	3.65693	-221.448	-43128.7	25536.7	2319.53	315.317	1097.76	0	0	0	0	0	0	0	603	903	0
491	8	0	0	0	0	0	0	200	300	0	-7.5531	0.45258	-222.668	-43586.4	25658.8	1815.99	315.233	1098.75	0	0	0	0	0	0	0	603	903	0
491	9	0	0	0	0	0	0	200	300	0	-7.5531	-3.20953	-226.025	-43311.8	26635.3	1266.68	317.842	1094.62	0	0	0	0	0	0	0	603	903	0
492	0	0	0	0	0	0	0	200	300	0	-6.33239	-7.02423	-227.856	-43769.5	26757.4	1129.35	317.431	1095.09	0	0	0	0	0	0	0	603	903	0
492	1	0	0	0	0	0	0	200	300	0	-7.85827	-9.31305	-231.213	-44868.2	27001.5	717.362	316.782	1097.06	0	0	0	0	0	0	0	603	903	0
492	2	0	0	0	0	0	0	200	300	0	-7.09533	-11.2967	-234.265	-45325.9	27672.9	122.269	318.126	1096.48	0	0	0	0	0	0	0	603	903	0
492	3	0	0	0	0	0	0	200	300	0	-6.02722	-14.6536	-240.063	-45600.6	27733.9	-60.8369	315.528	1092.95	0	0	0	0	0	0	0	603	903	0
492	4	0	0	0	0	0	0	200	300	0	-7.5531	-18.3157	-241.895	-46241.5	28283.3	-472.824	316.924	1094.16	0	0	0	0	0	0	0	603	903	0
492	5	0	0	0	0	0	0	200	300	0	-7.24792	-19.689	-249.219	-47065.4	28649.5	-472.824	314.957	1091.85	0	0	0	0	0	0	0	603	903	0
492	6	0	0	0	0	0	0	200	300	0	-8.16345	-22.4356	-253.796	-48164.1	29442.9	-1067.92	316.01	1092.77	0	0	0	0	0	0	0	603	903	0
492	7	0	0	0	0	0	0	200	300	0	-8.7738	-24.5718	-255.322	-48255.6	30236.4	-1159.47	318.424	1092	0	0	0	0	0	0	0	603	903	0
492	8	0	0	0	0	0	0	200	300	0	-6.02722	-26.0977	-266.614	-49171.1	30724.7	-1800.34	315.24	1087.43	0	0	0	0	0	0	0	603	903	0
492	9	0	0	0	0	0	0	200	300	0	-5.87463	-26.4029	-275.769	-51276.9	31884.3	-1937.67	315.62	1088.94	0	0	0	0	0	0	0	603	903	0
493	0	0	0	0	0	0	0	200	300	0	-6.94275	-30.065	-280.042	-50727.6	33227.1	-1937.67	318.651	1084.14	0	0	0	0	0	0	0	603	903	0
493	1	0	0	0	0	0	0	200	300	0	-6.33239	-29.7598	-289.807	-53291	33715.4	-2212.33	316.337	1086.88	0	0	0	0	0	0	0	603	903	0
493	2	0	0	0	0	0	0	200	300	0	-5.72204	-29.6072	-298.657	-53565.7	34569.9	-2258.1	315.751	1082.35	0	0	0	0	0	0	0	603	903	0
493	3	0	0	0	0	0	0	200	300	0	-4.04358	-31.4383	-306.897	-55122.1	36095.8	-2624.31	317.615	1082.61	0	0	0	0	0	0	0	603	903	0
493	4	0	0	0	0	0	0	200	300	0	-3.43322	-31.1331	-316.052	-56953.1	37072.3	-3127.85	317.298	1083.2	0	0	0	0	0	0	0	603	903	0
493	5	0	0	0	0	0	0	200	300	0	-3.12805	-31.5909	-324.597	-57319.4	37865.8	-3356.74	316.655	1079.59	0	0	0	0	0	0	0	603	903	0
493	6	0	0	0	0	0	0	200	300	0	-3.28064	-32.3538	-333.752	-59241.9	39025.5	-3310.96	316.929	1080.5	0	0	0	0	0	0	0	603	903	0
493	7	0	0	0	0	0	0	200	300	0	-1.75476	-34.49	-343.518	-60249	40063.1	-3677.17	316.626	1078.39	0	0	0	0	0	0	0	603	903	0
493	8	0	0	0	0	0	0	200	300	0	2.21253	-34.9478	-350.842	-61622.3	40978.6	-3860.28	316.801	1078.64	0	0	0	0	0	0	0	603	903	0
493	9	0	0	0	0	0	0	200	300	0	-1.44958	-34.7952	-357.861	-62995.6	41955.2	-4226.49	317.239	1079.03	0	0	0	0	0	0	0	603	903	0
494	0	0	0	0	0	0	0	200	300	0	-0.991817	-37.5418	-366.406	-63911.1	43420	-4318.04	318.502	1077.43	0	0	0	0	0	0	0	603	903	0
494	1	0	0	0	0	0	0	200	300	0	-0.991817	-38.3047	-375.867	-64552	44335.5	-4684.25	317.955	1074.74	0	0	0	0	0	0	0	603	903	0
494	2	0	0	0	0	0	0	200	300	0	0.228886	-39.9832	-384.106	-65467.5	44640.7	-4684.25	316.22	1073.44	0	0	0	0	0	0	0	603	903	0
494	3	0	0	0	0	0	0	200	300	0	0.686649	-41.8143	-391.125	-66840.8	45861.4	-4913.13	317.255	1073.89	0	0	0	0	0	0	0	603	903	0
494	4	0	0	0	0	0	0	200	300	0	0.381474	-43.1876	-396.619	-67298.6	46532.8	-5233.57	317.324	1072.68	0	0	0	0	0	0	0	603	903	0
494	5	0	0	0	0	0	0	200	300	0	0.839237	-44.7134	-404.553	-68946.5	48363.9	-5508.23	319.549	1073.43	0	0	0	0	0	0	0	603	903	0
494	6	0	0	0	0	0	0	200	300	0	3.28064	-46.0867	-410.046	-68946.5	48302.8	-5691.33	317.798	1071.14	0	0	0	0	0	0	0	603	903	0
494	7	0	0	0	0	0	0	200	300	0	4.19617	-48.223	-417.981	-69587.4	49279.4	-5920.21	317.899	1069.48	0	0	0	0	0	0	0	603	903	0
494	8	0	0	0	0	0	0	200	300	0	3.43323	-50.2066	-423.474	-70686	50317	-5920.21	318.819	1069.92	0	0	0	0	0	0	0	603	903	0
494	9	0	0	0	0	0	0	200	300	0	4.19617	-50.817	-427.747	-71510	50317	-6652.64	317.633	1070.18	0	0	0	0	0	0	0	603	903	0
495	0	0	0	0	0	0	0	200	300	0	5.56946	-52.8006	-434.46	-71784.7	51171.5	-6927.29	317.782	1068.23	0	0	0	0	0	0	0	603	903	0
495	1	0	0	0	0	0	0	200	300	0	6.63758	-54.4791	-437.817	-72150.9	52514.2	-6835.74	319.946	1067.8	0	0	0	0	0	0	0	603	903	0
495	2	0	0	0	0	0	0	200	300	0	8.01087	-54.6316	-438.733	-72791.8	52575.3	-7568.16	319.834	1068.91	0	0	0	0	0	0	0	603	903	0
495	3	0	0	0	0	0	0	200	300	0	8.01087	-56.3101	-448.499	-73432.6	52636.3	-7751.27	317.361	1066.73	0	0	0	0	0	0	0	603	903	0
495	4	0	0	0	0	0	0	200	300	0	10.2997	-57.836	-452.771	-73890.4	53734.9	-7934.37	318.68	1066.2	0	0	0	0	0	0	0	603	903	0
495	5	0	0	0	0	0	0	200	300	0	10.1471	-58.5989	-455.823	-74073.5	54467.4	-8025.93	319.492	1065.51	0	0	0	0	0	0	0	603	903	0
495	6	0	0	0	0	0	0	200	300	0	10.91	-59.5145	-458.569	-74256.6	54894.6	-8025.93	319.708	1064.93	0	0	0	0	0	0	0	603	903	0
495	7	0	0	0	0	0	0	200	300	0	11.3678	-59.0567	-471.387	-74256.6	56420.5	-8483.69	319.69	1060.53	0	0	0	0	0	0	0	603	903	0
495	8	0	0	0	0	0	0	200	300	0	13.6566	-57.6834	-486.646	-76362.3	59350.2	-8529.47	321.958	1059.92	0	0	0	0	0	0	0	603	903	0
495	9	0	0	0	0	0	0	200	300	0	22.9645	-59.667	-491.223	-76270.8	59716.4	-9719.66	321.567	1058.27	0	0	0	0	0	0	0	603	903	0
496	0	0	0	0	0	0	0	200	300	0	23.88	-67.2964	-498.242	-76545.4	60326.7	-10452.1	321.079	1056.63	0	0	0	0	0	0	0	603	903	0
496	1	0	0	0	0	0	0	200	300	0	23.88	-68.5171	-501.904	-76087.7	61791.6	-10635.2	323.114	1054.6	0	0	0	0	0	0	0	603	903	0
496	2	0	0	0	0	0	0	200	300	0	33.1879	-65.9231	-510.144	-77094.7	61547.4	-11596.5	320.647	1054.12	0	0	0	0	0	0	0	603	903	0
496	3	0	0	0	0	0	0	200	300	0	37.7655	-69.8904	-514.111	-78193.4	63195.4	-12466.2	322.922	1055.09	0	0	0	0	0	0	0	603	903	0
496	4	0	0	0	0	0	0	200	300	0	35.1715	-77.2147	-522.046	-79108.9	63744.7	-12786.7	322.106	1054.54	0	0	0	0	0	0	0	603	903	0
496	5	0	0	0	0	0	0	200	300	0	34.7137	-78.5879	-527.234	-78376.5	64721.3	-13290.2	322.756	1051.66	0	0	0	0	0	0	0	603	903	0
496	6	0	0	0	0	0	0	200	300	0	37.9181	-81.0294	-533.032	-79383.6	65636.8	-14297.3	323.139	1051.93	0	0	0	0	0	0	0	603	903	0
496	7	0	0	0	0	0	0	200	300	0	37.1552	-87.1329	-538.22	-80024.4	66125.1	-13976.9	322.859	1051.68	0	0	0	0	0	0	0	603	903	0
496	8	0	0	0	0	0	0	200	300	0	33.6456	-86.2173	-542.493	-79841.3	66491.3	-14297.3	322.566	1050.17	0	0	0	0	0	0	0	603	903	0
496	9	0	0	0	0	0	0	200	300	0	32.8827	-86.8277	-548.596	-80299.1	67406.8	-14800.8	322.871	1049.37	0	0	0	0	0	0	0	603	903	0
497	0	0	0	0	0	0	0	200	300	0	35.7819	-91.5579	-551.038	-81031.5	68322.4	-14800.8	323.989	1050.05	0	0	0	0	0	0	0	603	903	0
497	1	0	0	0	0	0	0	200	300	0	35.1715	-92.7786	-556.836	-80390.7	68017.1	-14892.4	322.149	1047.37	0	0	0	0	0	0	0	603	903	0
497	2	0	0	0	0	0	0	200	300	0	32.1198	-90.795	-559.277	-81763.9	68505.4	-15579	322.489	1049.2	0	0	0	0	0	0	0	603	903	0
497	3	0	0	0	0	0	0	200	300	0	31.0516	-91.7105	-563.55	-81031.5	69359.9	-15167	323.077	1046.79	0	0	0	0	0	0	0	603	903	0
497	4	0	0	0	0	0	0	200	300	0	34.8663	-91.8631	-565.991	-81855.5	69054.8	-15258.6	322.007	1047.62	0	0	0	0	0	0	0	603	903	0
497	5	0	0	0	0	0	0	200	300	0	32.5775	-91.4053	-570.264	-81672.4	69726.1	-15670.6	322.27	1046.22	0	0	0	0	0	0	0	603	903	0
497	6	0	0	0	0	0	0	200	300	0	30.5939	-90.9476	-573.621	-81947.1	70763.8	-15121.3	323.363	1045.86	0	0	0	0	0	0	0	603	903	0
497	7	0	0	0	0	0	0	200	300	0	33.6456	-92.0157	-575.146	-81947.1	70885.8	-15121.3	323.248	1045.48	0	0	0	0	0	0	0	603	903	0
497	8	0	0	0	0	0	0	200	300	0	33.3405	-91.2527	-579.114	-82404.8	71068.9	-15487.5	322.72	1045.29	0	0	0	0	0	0	0	603	903	0
497	9	0	0	0	0	0	0	200	300	0	32.5775	-87.8958	-581.555	-82496.3	71191	-15121.3	322.415	1044.85	0	0	0	0	0	0	0	603	903	0
498	0	0	0	0	0	0	0	200	300	0	32.5775	-88.201	-585.217	-81672.4	72045.5	-14846.6	323.109	1042.56	0	0	0	0	0	0	0	603	903	0
498	1	0	0	0	0	0	0	200	300	0	34.5612	-89.1165	-588.574	-81580.9	72533.8	-15533.3	323.236	1041.61	0	0	0	0	0	0	0	603	903	0
498	2	0	0	0	0	0	0	200	300	0	35.0189	-89.1165	-590.71	-82862.5	71801.3	-15029.7	321.551	1043.28	0	0	0	0	0	0	0	603	903	0
498	3	0	0	0	0	0	0	200	300	0	33.493	-88.8113	-593.152	-82404.8	73266.2	-15304.4	323.52	1041.93	0	0	0	0	0	0	0	603	903	0
498	4	0	0	0	0	0	0	200	300	0	37.0026	-91.1002	-595.288	-83045.7	73388.2	-15624.8	323.282	1042.51	0	0	0	0	0	0	0	603	903	0
498	5	0	0	0	0	0	0	200	300	0	36.6974	-90.3372	-597.729	-82679.5	73632.4	-15762.1	323.187	1041.32	0	0	0	0	0	0	0	603	903	0
498	6	0	0	0	0	0	0	200	300	0	37.1552	-89.7269	-602.917	-82771	74181.7	-15670.6	323.038	1040.28	0	0	0	0	0	0	0	603	903	0
498	7	0	0	0	0	0	0	200	300	0	38.3759	-91.4053	-603.833	-83778.1	74792.1	-16403	323.862	1041.74	0	0	0	0	0	0	0	603	903	0
498	8	0	0	0	0	0	0	200	300	0	39.444	-93.6941	-607.19	-82679.5	75280.4	-16403	323.982	1039.17	0	0	0	0	0	0	0	603	903	0
498	9	0	0	0	0	0	0	200	300	0	42.3431	-93.389	-610.547	-83686.6	75280.4	-16219.9	323.3	1040.07	0	0	0	0	0	0	0	603	903	0
499	0	0	0	0	0	0	0	200	300	0	40.6647	-93.389	-613.599	-83778.1	75646.6	-16815	323.284	1039.54	0	0	0	0	0	0	0	603	903	0
499	1	0	0	0	0	0	0	200	300	0	42.8009	-94.1519	-616.345	-83686.6	76317.9	-16540.3	323.823	1038.78	0	0	0	0	0	0	0	603	903	0
499	2	0	0	0	0	0	0	200	300	0	44.3268	-95.5252	-619.702	-84327.4	77233.5	-16631.9	324.63	1039.08	0	0	0	0	0	0	0	603	903	0
499	3	0	0	0	0	0	0	200	300	0	44.1742	-95.5252	-624.28	-84693.6	76684.1	-17135.4	322.836	1038.67	0	0	0	0	0	0	0	603	903	0
499	4	0	0	0	0	0	0	200	300	0	44.7845	-95.983	-627.637	-84419	77904.8	-16769.2	324.124	1037.5	0	0	0	0	0	0	0	603	903	0
499	5	0	0	0	0	0	0	200	300	0	45.3949	-97.6614	-629.773	-84785.2	78271.1	-16677.7	324.285	1037.63	0	0	0	0	0	0	0	603	903	0
499	6	0	0	0	0	0	0	200	300	0	46.6156	-95.6778	-634.656	-85059.8	78454.2	-17181.2	323.617	1037.03	0	0	0	0	0	0	0	603	903	0
499	7	0	0	0	0	0	0	200	300	0	47.6837	-95.8304	-637.708	-85243	79186.6	-17227	324.174	1036.67	0	0	0	0	0	0	0	603	903	0
499	8	0	0	0	0	0	0	200	300	0	46.9208	-96.1356	-637.097	-85700.7	79858	-17181.2	325.347	1037.52	0	0	0	0	0	0	0	603	903	0
499	9	0	0	0	0	0	0	200	300	0	48.2941	-97.6614	-645.947	-85792.2	80163.2	-17364.3	324.102	1035.82	0	0	0	0	0	0	0	603	903	0
500	0	0	0	0	0	0	0	200	300	0	50.5829	-96.8985	-646.863	-85700.7	80041.1	-17547.4	323.737	1035.49	0	0	0	0	0	0	0	603	903	0
500	1	0	0	0	0	0	0	200	300	0	48.5992	-97.9666	-649.609	-85975.4	80712.5	-17410.1	324.248	1035.35	0	0	0	0	0	0	0	603	903	0
500	2	0	0	0	0	0	0	200	300	0	49.2096	-98.2718	-654.492	-86799.3	81261.8	-17822.1	324.16	1035.62	0	0	0	0	0	0	0	603	903	0
500	3	0	0	0	0	0	0	200	300	0	47.9889	-96.8985	-660.596	-87165.5	81444.9	-17227	323.29	1034.95	0	0	0	0	0	0	0	603	903	0
500	4	0	0	0	0	0	0	200	300	0	47.9889	-98.2718	-665.173	-86890.9	82238.4	-17272.8	323.635	1033.63	0	0	0	0	0	0	0	603	903	0
500	5	0	0	0	0	0	0	200	300	0	48.1415	-99.1873	-667.615	-87531.7	82604.6	-17776.3	323.731	1034.11	0	0	0	0	0	0	0	603	903	0
500	6	0	0	0	0	0	0	200	300	0	47.9889	-98.577	-670.972	-87714.9	82970.8	-17410.1	323.658	1033.73	0	0	0	0	0	0	0	603	903	0
500	7	0	0	0	0	0	0	200	300	0	46.7682	-97.2037	-673.108	-88447.3	83092.9	-17410.1	323.447	1034.4	0	0	0	0	0	0	0	603	903	0
500	8	0	0	0	0	0	0	200	300	0	47.0734	-98.1192	-677.075	-87348.7	83581.2	-17639	323.444	1032.01	0	0	0	0	0	0	0	603	903	0
500	9	0	0	0	0	0	0	200	300	0	47.8363	-98.7295	-681.042	-87531.7	84496.6	-17364.3	324.07	1031.53	0	0	0	0	0	0	0	603	903	0
501	0	0	0	0	0	0	0	200	300	0	47.226	-97.9666	-684.094	-88264.2	84862.9	-16952.3	324.051	1032.02	0	0	0	0	0	0	0	603	903	0
501	1	0	0	0	0	0	0	200	300	0	46.463	-97.3563	-689.282	-89362.8	84679.8	-17410.1	322.852	1032.65	0	0	0	0	0	0	0	603	903	0
501	2	0	0	0	0	0	0	200	300	0	46.0053	-98.577	-691.418	-89729	85595.3	-17501.6	323.797	1032.78	0	0	0	0	0	0	0	603	903	0
501	3	0	0	0	0	0	0	200	300	0	47.8363	-97.0511	-695.386	-89637.5	85778.4	-17318.5	323.354	1031.9	0	0	0	0	0	0	0	603	903	0
501	4	0	0	0	0	0	0	200	300	0	47.6837	-96.7459	-700.879	-90003.7	85961.5	-17684.7	322.648	1031.42	0	0	0	0	0	0	0	603	903	0
501	5	0	0	0	0	0	0	200	300	0	46.7682	-96.8985	-702.71	-90919.2	86327.7	-17318.5	322.85	1032.38	0	0	0	0	0	0	0	603	903	0
501	6	0	0	0	0	0	0	200	300	0	45.2423	-98.1192	-708.203	-91193.8	86205.6	-17181.2	321.724	1031.77	0	0	0	0	0	0	0	603	903	0
501	7	0	0	0	0	0	0	200	300	0	45.5475	-96.7459	-709.424	-90369.9	87060.1	-16906.5	322.719	1030.39	0	0	0	0	0	0	0	603	903	0
501	8	0	0	0	0	0	0	200	300	0	46.3104	-96.2881	-713.391	-91193.8	87426.3	-17227	322.55	1030.83	0	0	0	0	0	0	0	603	903	0
501	9	0	0	0	0	0	0	200	300	0	47.8363	-97.9666	-716.748	-91102.3	88647	-16998.1	323.68	1030.11	0	0	0	0	0	0	0	603	903	0
502	0	0	0	0	0	0	0	200	300	0	47.0734	-95.5252	-721.936	-92109.4	88586	-17043.9	322.706	1030.59	0	0	0	0	0	0	0	603	903	0
502	1	0	0	0	0	0	0	200	300	0	46.6156	-96.7459	-724.988	-92109.4	88586	-16906.5	322.19	1030.05	0	0	0	0	0	0	0	603	903	0
502	2	0	0	0	0	0	0	200	300	0	45.7001	-95.22	-726.819	-92201	88952.2	-16860.8	322.386	1029.86	0	0	0	0	0	0	0	603	903	0
502	3	0	0	0	0	0	0	200	300	0	46.0053	-96.2881	-728.65	-92475.6	89440.5	-16952.3	322.748	1029.91	0	0	0	0	0	0	0	603	903	0
502	4	0	0	0	0	0	0	200	300	0	46.0053	-95.0674	-732.007	-92750.2	89867.7	-16815	322.769	1029.71	0	0	0	0	0	0	0	603	903	0
502	5	0	0	0	0	0	0	200	300	0	45.3949	-94.4571	-735.669	-92933.4	89745.7	-16494.6	321.992	1029.32	0	0	0	0	0	0	0	603	903	0
502	6	0	0	0	0	0	0	200	300	0	45.0897	-95.22	-739.636	-92658.7	90233.9	-16540.3	321.998	1028.28	0	0	0	0	0	0	0	603	903	0
502	7	0	0	0	0	0	0	200	300	0	45.8527	-95.22	-742.078	-93116.5	90783.3	-16586.1	322.337	1028.48	0	0	0	0	0	0	0	603	903	0
502	8	0	0	0	0	0	0	200	300	0	44.632	-94.4571	-742.383	-93116.5	90661.2	-16586.1	322.122	1028.43	0	0	0	0	0	0	0	603	903	0
502	9	0	0	0	0	0	0	200	300	0	44.0216	-95.22	-744.824	-93574.3	90966.4	-16586.1	322.131	1028.63	0	0	0	0	0	0	0	603	903	0
503	0	0	0	0	0	0	0	200	300	0	45.2423	-93.5416	-747.571	-93848.9	91393.7	-16357.2	322.254	1028.54	0	0	0	0	0	0	0	603	903	0
503	1	0	0	0	0	0	0	200	300	0	43.2587	-93.2364	-750.623	-93482.7	91393.7	-15533.3	321.757	1027.54	0	0	0	0	0	0	0	603	903	0
503	2	0	0	0	0	0	0	200	300	0	42.4957	-93.5416	-752.454	-93574.3	91393.7	-16128.3	321.461	1027.36	0	0	0	0	0	0	0	603	903	0
503	3	0	0	0	0	0	0	200	300	0	42.4957	-93.0838	-754.285	-94398.2	91515.7	-16082.6	321.328	1028.15	0	0	0	0	0	0	0	603	903	0
503	4	0	0	0	0	0	0	200	300	0	41.1224	-92.3209	-754.895	-93024.9	92187.1	-15945.2	322.119	1026.23	0	0	0	0	0	0	0	603	903	0
503	5	0	0	0	0	0	0	200	300	0	40.9699	-92.0157	-756.726	-94306.7	92248.1	-15716.4	321.904	1027.62	0	0	0	0	0	0	0	603	903	0
503	6	0	0	0	0	0	0	200	300	0	41.4276	-92.3209	-758.252	-93940.5	92065	-15624.8	321.417	1026.89	0	0	0	0	0	0	0	603	903	0
503	7	0	0	0	0	0	0	200	300	0	41.1224	-91.7105	-760.999	-93574.3	92370.2	-15395.9	321.38	1025.96	0	0	0	0	0	0	0	603	903	0
503	8	0	0	0	0	0	0	200	300	0	40.5121	-90.6424	-758.862	-94306.7	92065	-15395.9	321.32	1027.27	0	0	0	0	0	0	0	603	903	0
503	9	0	0	0	0	0	0	200	300	0	38.681	-91.2527	-763.135	-94123.5	92309.1	-15350.1	320.96	1026.34	0	0	0	0	0	0	0	603	903	0
504	0	0	0	0	0	0	0	200	300	0	39.5966	-91.2527	-762.219	-94032	92370.2	-15304.4	321.186	1026.37	0	0	0	0	0	0	0	603	903	0
504	1	0	0	0	0	0	0	200	300	0	39.444	-91.5579	-762.83	-93391.1	92797.4	-15258.6	321.649	1025.43	0	0	0	0	0	0	0	603	903	0
504	2	0	0	0	0	0	0	200	300	0	40.5121	-90.3372	-764.966	-93391.1	92980.6	-15075.5	321.549	1025.09	0	0	0	0	0	0	0	603	903	0
504	3	0	0	0	0	0	0	200	300	0	38.8336	-90.032	-765.271	-94123.5	92553.3	-15121.3	320.942	1025.99	0	0	0	0	0	0	0	603	903	0
504	4	0	0	0	0	0	0	200	300	0	37.9181	-90.4898	-763.44	-92475.6	92675.4	-15350.1	321.392	1024.13	0	0	0	0	0	0	0	603	903	0
504	5	0	0	0	0	0	0	200	300	0	40.3595	-90.9476	-766.492	-93757.3	93163.6	-15167	321.546	1025.32	0	0	0	0	0	0	0	603	903	0
504	6	0	0	0	0	0	0	200	300	0	37.7655	-89.5743	-765.576	-93024.9	92919.5	-15212.8	321.372	1024.51	0	0	0	0	0	0	0	603	903	0
504	7	0	0	0	0	0	0	200	300	0	39.1388	-89.2691	-766.797	-92750.2	92309.1	-14983.9	320.383	1023.96	0	0	0	0	0	0	0	603	903	0
504	8	0	0	0	0	0	0	200	300	0	38.5284	-88.8113	-767.712	-93208	93102.6	-15029.7	321.273	1024.41	0	0	0	0	0	0	0	603	903	0
504	9	0	0	0	0	0	0	200	300	0	37.3077	-87.7432	-767.407	-91743.2	93102.6	-14663.5	321.321	1022.55	0	0	0	0	0	0	0	603	903	0
505	0	0	0	0	0	0	0	200	300	0	39.5966	-88.5062	-768.018	-92658.7	92553.3	-14709.3	320.509	1023.65	0	0	0	0	0	0	0	603	903	0
505	1	0	0	0	0	0	0	200	300	0	37.3077	-86.2173	-765.881	-92017.8	92492.3	-14846.6	320.766	1023.15	0	0	0	0	0	0	0	603	903	0
505	2	0	0	0	0	0	0	200	300	0	37.7655	-87.5906	-765.576	-91651.6	92980.6	-14480.4	321.452	1022.72	0	0	0	0	0	0	0	603	903	0
505	3	0	0	0	0	0	0	200	300	0	38.5284	-85.9122	-765.271	-92201	92553.3	-14205.7	320.942	1023.48	0	0	0	0	0	0	0	603	903	0
505	4	0	0	0	0	0	0	200	300	0	37.0026	-84.3863	-761.609	-92109.4	92065	-14709.3	320.882	1023.94	0	0	0	0	0	0	0	603	903	0
505	5	0	0	0	0	0	0	200	300	0	39.444	-84.844	-765.881	-92017.8	92980.6	-14388.8	321.403	1023.15	0	0	0	0	0	0	0	603	903	0
505	6	0	0	0	0	0	0	200	300	0	37.4603	-84.9966	-765.271	-91010.8	92614.4	-14343.1	321.022	1021.93	0	0	0	0	0	0	0	603	903	0
505	7	0	0	0	0	0	0	200	300	0	38.5284	-84.5389	-763.44	-90003.7	92248.1	-14388.8	320.832	1020.89	0	0	0	0	0	0	0	603	903	0
505	8	0	0	0	0	0	0	200	300	0	38.5284	-83.4708	-762.83	-90736.1	92126.1	-14388.8	320.769	1021.95	0	0	0	0	0	0	0	603	903	0
505	9	0	0	0	0	0	0	200	300	0	38.5284	-82.2501	-762.524	-90736.1	92431.2	-14526.2	321.217	1021.99	0	0	0	0	0	0	0	603	903	0
506	0	0	0	0	0	0	0	200	300	0	38.0707	-81.7923	-762.219	-90461.4	92614.4	-14160	321.506	1021.68	0	0	0	0	0	0	0	603	903	0
506	1	0	0	0	0	0	0	200	300	0	38.3759	-81.7923	-757.642	-89820.6	91454.6	-14343.1	320.71	1021.55	0	0	0	0	0	0	0	603	903	0
506	2	0	0	0	0	0	0	200	300	0	38.681	-82.0975	-761.304	-89271.3	92431.2	-14343.1	321.412	1020.26	0	0	0	0	0	0	0	603	903	0
506	3	0	0	0	0	0	0	200	300	0	41.1224	-80.5716	-757.642	-89088.1	92065	-14068.4	321.515	1020.59	0	0	0	0	0	0	0	603	903	0
506	4	0	0	0	0	0	0	200	300	0	39.7491	-79.8086	-756.421	-89271.3	91637.8	-14068.4	321.147	1021.02	0	0	0	0	0	0	0	603	903	0
506	5	0	0	0	0	0	0	200	300	0	39.2914	-78.7405	-757.336	-88905.1	91942.9	-13976.9	321.403	1020.39	0	0	0	0	0	0	0	603	903	0
506	6	0	0	0	0	0	0	200	300	0	39.444	-77.3672	-754.895	-87898	91759.9	-14114.2	321.553	1019.44	0	0	0	0	0	0	0	603	903	0
506	7	0	0	0	0	0	0	200	300	0	40.6647	-78.4354	-754.59	-86707.8	91759.9	-13610.6	321.602	1017.91	0	0	0	0	0	0	0	603	903	0
506	8	0	0	0	0	0	0	200	300	0	41.275	-77.5198	-750.623	-87440.2	91149.5	-13839.5	321.432	1019.49	0	0	0	0	0	0	0	603	903	0
506	9	0	0	0	0	0	0	200	300	0	42.038	-75.3836	-750.012	-87257.1	91454.6	-13885.3	321.938	1019.34	0	0	0	0	0	0	0	603	903	0
507	0	0	0	0	0	0	0	200	300	0	40.6647	-74.4681	-747.571	-86707.8	91515.7	-14068.4	322.418	1018.99	0	0	0	0	0	0	0	603	903	0
507	1	0	0	0	0	0	0	200	300	0	41.275	-75.0784	-748.181	-86158.4	90539.2	-13793.8	321.012	1018.16	0	0	0	0	0	0	0	603	903	0
507	2	0	0	0	0	0	0	200	300	0	41.5802	-75.3836	-746.045	-84785.2	90600.2	-13885.3	321.441	1016.65	0	0	0	0	0	0	0	603	903	0
507	3	0	0	0	0	0	0	200	300	0	41.8854	-74.7732	-740.552	-85059.8	90539.2	-13473.3	322.259	1017.86	0	0	0	0	0	0	0	603	903	0
507	4	0	0	0	0	0	0	200	300	0	41.8854	-73.2474	-737.805	-85334.5	90417.1	-13885.3	322.549	1018.66	0	0	0	0	0	0	0	603	903	0
507	5	0	0	0	0	0	0	200	300	0	41.5802	-72.637	-738.11	-84785.2	89379.5	-13793.8	321.092	1017.87	0	0	0	0	0	0	0	603	903	0
507	6	0	0	0	0	0	0	200	300	0	41.8854	-71.5689	-736.89	-84052.8	89989.8	-13793.8	322.121	1017.06	0	0	0	0	0	0	0	603	903	0
507	7	0	0	0	0	0	0	200	300	0	42.9535	-72.637	-733.838	-82954.1	89867.7	-13702.2	322.463	1016.04	0	0	0	0	0	0	0	603	903	0
507	8	0	0	0	0	0	0	200	300	0	42.6483	-71.8741	-729.565	-82496.3	89013.2	-13519.1	322.009	1016.08	0	0	0	0	0	0	0	603	903	0
507	9	0	0	0	0	0	0	200	300	0	42.3431	-71.2637	-729.26	-82954.1	88341.9	-13656.4	321.139	1016.75	0	0	0	0	0	0	0	603	903	0
508	0	0	0	0	0	0	0	200	300	0	44.0216	-70.043	-726.208	-82313.3	88952.2	-13336	322.489	1016.35	0	0	0	0	0	0	0	603	903	0
508	1	0	0	0	0	0	0	200	300	0	43.4113	-68.8223	-723.462	-81580.9	88647	-13473.3	322.532	1015.76	0	0	0	0	0	0	0	603	903	0
508	2	0	0	0	0	0	0	200	300	0	42.9535	-69.5853	-718.884	-81123.1	87975.7	-13519.1	322.378	1015.85	0	0	0	0	0	0	0	603	903	0
508	3	0	0	0	0	0	0	200	300	0	43.5638	-68.9749	-718.274	-80482.2	87609.5	-13519.1	321.972	1015.05	0	0	0	0	0	0	0	603	903	0
508	4	0	0	0	0	0	0	200	300	0	43.4113	-68.8223	-715.222	-80299.1	87853.6	-13244.4	322.834	1015.27	0	0	0	0	0	0	0	603	903	0
508	5	0	0	0	0	0	0	200	300	0	42.6483	-67.2964	-712.476	-79749.8	87792.5	-13427.5	323.222	1014.93	0	0	0	0	0	0	0	603	903	0
508	6	0	0	0	0	0	0	200	300	0	44.3268	-65.4654	-707.898	-79383.6	86388.8	-13198.7	322.036	1015.14	0	0	0	0	0	0	0	603	903	0
508	7	0	0	0	0	0	0	200	300	0	44.632	-66.2283	-709.119	-78834.2	87182.2	-13564.9	322.944	1014.17	0	0	0	0	0	0	0	603	903	0
508	8	0	0	0	0	0	0	200	300	0	44.0216	-66.3809	-705.151	-78285	86999.1	-13015.6	323.377	1014.02	0	0	0	0	0	0	0	603	903	0
508	9	0	0	0	0	0	0	200	300	0	43.7164	-65.618	-701.489	-78193.4	86388.8	-12969.8	323.151	1014.47	0	0	0	0	0	0	0	603	903	0
509	0	0	0	0	0	0	0	200	300	0	42.9535	-65.0076	-697.827	-77003.2	85961.5	-12924	323.185	1013.35	0	0	0	0	0	0	0	603	903	0
509	1	0	0	0	0	0	0	200	300	0	44.3268	-63.4817	-698.743	-76820.1	85961.5	-12924	323.023	1012.94	0	0	0	0	0	0	0	603	903	0
509	2	0	0	0	0	0	0	200	300	0	44.1742	-62.8714	-695.996	-76820.1	85717.3	-12878.2	323.158	1013.37	0	0	0	0	0	0	0	603	903	0
509	3	0	0	0	0	0	0	200	300	0	44.1742	-63.1766	-694.775	-76270.8	85290.1	-12603.6	322.759	1012.78	0	0	0	0	0	0	0	603	903	0
509	4	0	0	0	0	0	0	200	300	0	45.5475	-61.8033	-689.282	-75813	85229.1	-12969.8	323.649	1012.99	0	0	0	0	0	0	0	603	903	0
509	5	0	0	0	0	0	0	200	300	0	44.0216	-61.4981	-687.146	-74989.1	84740.8	-12740.9	323.323	1012.13	0	0	0	0	0	0	0	603	903	0
509	6	0	0	0	0	0	0	200	300	0	44.632	-59.8196	-684.705	-74439.7	84374.6	-12328.9	323.228	1011.72	0	0	0	0	0	0	0	603	903	0
509	7	0	0	0	0	0	0	200	300	0	44.9371	-58.5989	-681.958	-74622.8	83886.3	-12740.9	323.008	1012.42	0	0	0	0	0	0	0	603	903	0
509	8	0	0	0	0	0	0	200	300	0	44.4794	-58.9041	-681.653	-74165	84252.5	-12420.5	323.6	1011.8	0	0	0	0	0	0	0	603	903	0
509	9	0	0	0	0	0	0	200	300	0	44.7845	-58.2938	-677.686	-72974.9	83947.4	-12512	323.874	1010.68	0	0	0	0	0	0	0	603	903	0
510	0	0	0	0	0	0	0	200	300	0	45.0897	-57.2256	-674.329	-72059.4	83031.8	-12191.6	323.133	1009.86	0	0	0	0	0	0	0	603	903	0
510	1	0	0	0	0	0	0	200	300	0	45.2423	-55.5472	-669.141	-72150.9	83459.1	-12100	324.726	1010.83	0	0	0	0	0	0	0	603	903	0
510	2	0	0	0	0	0	0	200	300	0	44.632	-55.8524	-670.972	-72517.1	82970.8	-12054.2	323.658	1011.08	0	0	0	0	0	0	0	603	903	0
510	3	0	0	0	0	0	0	200	300	0	46.1578	-54.9368	-669.446	-72150.9	82543.5	-11550.7	323.301	1010.78	0	0	0	0	0	0	0	603	903	0
510	4	0	0	0	0	0	0	200	300	0	44.7845	-54.1739	-665.784	-71235.4	82421.4	-11779.6	323.796	1009.99	0	0	0	0	0	0	0	603	903	0
510	5	0	0	0	0	0	0	200	300	0	45.5475	-53.2584	-664.258	-70869.1	82299.4	-11688	323.897	1009.69	0	0	0	0	0	0	0	603	903	0
510	6	0	0	0	0	0	0	200	300	0	45.5475	-52.4954	-660.901	-70960.7	82177.3	-11642.3	324.341	1010.37	0	0	0	0	0	0	0	603	903	0
510	7	0	0	0	0	0	0	200	300	0	44.4794	-50.9695	-657.849	-70502.9	81567	-11550.7	323.99	1010.17	0	0	0	0	0	0	0	603	903	0
510	8	0	0	0	0	0	0	200	300	0	44.4794	-50.9695	-657.239	-70319.8	81444.9	-11413.4	323.92	1009.99	0	0	0	0	0	0	0	603	903	0
510	9	0	0	0	0	0	0	200	300	0	45.3949	-50.054	-652.051	-69312.7	81383.9	-11321.8	324.812	1009.3	0	0	0	0	0	0	0	603	903	0
511	0	0	0	0	0	0	0	200	300	0	46.7682	-50.2066	-652.356	-69129.7	80407.3	-11184.5	323.257	1008.97	0	0	0	0	0	0	0	603	903	0
511	1	0	0	0	0	0	0	200	300	0	45.3949	-49.2911	-649.304	-68763.5	80956.6	-11047.2	324.682	1008.9	0	0	0	0	0	0	0	603	903	0
511	2	0	0	0	0	0	0	200	300	0	44.9371	-47.1548	-645.642	-68855	80529.4	-10818.3	324.728	1009.65	0	0	0	0	0	0	0	603	903	0
511	3	0	0	0	0	0	0	200	300	0	44.632	-45.9341	-642.896	-69129.7	80346.2	-10681	324.976	1010.53	0	0	0	0	0	0	0	603	903	0
511	4	0	0	0	0	0	0	200	300	0	45.0897	-45.9341	-642.896	-67664.8	79919	-10543.6	324.311	1008.25	0	0	0	0	0	0	0	603	903	0
511	5	0	0	0	0	0	0	200	300	0	45.2423	-45.9341	-640.149	-67298.6	79674.9	-9994.31	324.463	1008.13	0	0	0	0	0	0	0	603	903	0
511	6	0	0	0	0	0	0	200	300	0	43.5638	-44.866	-637.708	-67115.5	79858	-10360.5	325.227	1008.24	0	0	0	0	0	0	0	603	903	0
511	7	0	0	0	0	0	0	200	300	0	46.463	-43.3401	-632.214	-66932.4	79491.8	-9994.31	325.735	1008.87	0	0	0	0	0	0	0	603	903	0
511	8	0	0	0	0	0	0	200	300	0	44.7845	-42.8824	-633.13	-66200	79125.5	-9673.88	324.975	1007.56	0	0	0	0	0	0	0	603	903	0
511	9	0	0	0	0	0	0	200	300	0	44.0216	-41.9669	-632.825	-65833.8	79064.6	-10085.9	324.939	1007.03	0	0	0	0	0	0	0	603	903	0
512	0	0	0	0	0	0	0	200	300	0	44.632	-41.5091	-628.857	-65925.3	78820.4	-9811.21	325.339	1007.83	0	0	0	0	0	0	0	603	903	0
512	1	0	0	0	0	0	0	200	300	0	43.4113	-41.0513	-625.806	-65284.4	78332.1	-9673.88	325.17	1007.32	0	0	0	0	0	0	0	603	903	0
512	2	0	0	0	0	0	0	200	300	0	43.869	-41.0513	-624.28	-64643.6	77965.9	-9445	324.889	1006.55	0	0	0	0	0	0	0	603	903	0
512	3	0	0	0	0	0	0	200	300	0	43.7164	-39.678	-620.618	-63819.6	78026.9	-9490.77	325.725	1005.83	0	0	0	0	0	0	0	603	903	0
512	4	0	0	0	0	0	0	200	300	0	45.3949	-38.9151	-620.312	-64094.2	78026.9	-9307.67	325.786	1006.33	0	0	0	0	0	0	0	603	903	0
512	5	0	0	0	0	0	0	200	300	0	44.3268	-38.1522	-617.566	-64002.7	77294.5	-9261.89	325.16	1006.64	0	0	0	0	0	0	0	603	903	0
512	6	0	0	0	0	0	0	200	300	0	41.7328	-36.3211	-615.43	-63636.5	76867.3	-9216.12	324.9	1006.4	0	0	0	0	0	0	0	603	903	0
512	7	0	0	0	0	0	0	200	300	0	42.8009	-36.9315	-611.768	-62720.9	76867.3	-8437.92	325.648	1005.52	0	0	0	0	0	0	0	603	903	0
512	8	0	0	0	0	0	0	200	300	0	42.8009	-36.0159	-609.326	-61622.3	76562.1	-8849.9	325.65	1004.13	0	0	0	0	0	0	0	603	903	0
512	9	0	0	0	0	0	0	200	300	0	42.4957	-35.4056	-608.716	-62446.3	76440	-8666.8	325.576	1005.59	0	0	0	0	0	0	0	603	903	0
513	0	0	0	0	0	0	0	200	300	0	42.4957	-34.7952	-603.528	-62263.2	76501.1	-8529.47	326.757	1006.17	0	0	0	0	0	0	0	603	903	0
513	1	0	0	0	0	0	0	200	300	0	41.4276	-34.7952	-603.528	-61897	76379	-8437.92	326.554	1005.56	0	0	0	0	0	0	0	603	903	0
513	2	0	0	0	0	0	0	200	300	0	41.5802	-33.4219	-600.171	-60889.9	75646.6	-8392.14	326.042	1004.45	0	0	0	0	0	0	0	603	903	0
513	3	0	0	0	0	0	0	200	300	0	41.8854	-32.659	-596.814	-60706.8	75280.4	-8346.36	326.137	1004.72	0	0	0	0	0	0	0	603	903	0
513	4	0	0	0	0	0	0	200	300	0	42.1906	-32.0486	-596.814	-60706.8	75341.4	-8163.26	326.239	1004.72	0	0	0	0	0	0	0	603	903	0
513	5	0	0	0	0	0	0	200	300	0	41.275	-31.5909	-590.71	-60157.5	74853.1	-8209.04	326.717	1004.84	0	0	0	0	0	0	0	603	903	0
513	6	0	0	0	0	0	0	200	300	0	41.5802	-31.2857	-591.016	-59974.4	74670	-8071.71	326.342	1004.48	0	0	0	0	0	0	0	603	903	0
513	7	0	0	0	0	0	0	200	300	0	41.5802	-31.1331	-588.269	-59333.5	74975.2	-7934.37	327.45	1003.86	0	0	0	0	0	0	0	603	903	0
513	8	0	0	0	0	0	0	200	300	0	42.1906	-29.4546	-585.522	-58875.7	74670	-7797.05	327.527	1003.55	0	0	0	0	0	0	0	603	903	0
513	9	0	0	0	0	0	0	200	300	0	40.9699	-28.6917	-585.828	-59058.8	73815.5	-7385.06	326.002	1003.81	0	0	0	0	0	0	0	603	903	0
514	0	0	0	0	0	0	0	200	300	0	40.0543	-28.5391	-580.945	-58418	73815.5	-7201.95	327.061	1003.56	0	0	0	0	0	0	0	603	903	0
514	1	0	0	0	0	0	0	200	300	0	40.3595	-28.0814	-580.334	-57594	73693.5	-7522.39	326.984	1002.24	0	0	0	0	0	0	0	603	903	0
514	2	0	0	0	0	0	0	200	300	0	40.5121	-28.3865	-576.367	-56129.1	73266.2	-7339.28	327.117	1000.38	0	0	0	0	0	0	0	603	903	0
514	3	0	0	0	0	0	0	200	300	0	40.8173	-26.8607	-574.231	-56770	72900	-7339.28	326.952	1001.86	0	0	0	0	0	0	0	603	903	0
514	4	0	0	0	0	0	0	200	300	0	39.5966	-26.8607	-571.484	-56678.5	73266.2	-7339.28	328.203	1002.18	0	0	0	0	0	0	0	603	903	0
514	5	0	0	0	0	0	0	200	300	0	41.275	-25.9451	-571.179	-56495.4	73022	-7156.18	327.844	1001.91	0	0	0	0	0	0	0	603	903	0
514	6	0	0	0	0	0	0	200	300	0	39.444	-25.9451	-568.738	-56220.7	72289.6	-7201.95	327.105	1001.85	0	0	0	0	0	0	0	603	903	0
514	7	0	0	0	0	0	0	200	300	0	39.9017	-25.6399	-565.381	-55396.7	72228.6	-7064.62	327.752	1000.98	0	0	0	0	0	0	0	603	903	0
514	8	0	0	0	0	0	0	200	300	0	40.5121	-25.4874	-563.245	-55396.7	72228.6	-7064.62	328.237	1001.35	0	0	0	0	0	0	0	603	903	0
514	9	0	0	0	0	0	0	200	300	0	39.1388	-24.2667	-561.414	-55030.5	72045.5	-6515.31	328.329	1001.02	0	0	0	0	0	0	0	603	903	0
515	0	0	0	0	0	0	0	200	300	0	40.5121	-23.1985	-560.193	-55122.1	71313	-6606.86	327.301	1001.4	0	0	0	0	0	0	0	603	903	0
515	1	0	0	0	0	0	0	200	300	0	39.1388	-23.6563	-557.446	-54298.1	71618.3	-6652.64	328.476	1000.41	0	0	0	0	0	0	0	603	903	0
515	2	0	0	0	0	0	0	200	300	0	39.5966	-23.046	-555.615	-53565.7	71435.1	-6423.75	328.569	999.408	0	0	0	0	0	0	0	603	903	0
515	3	0	0	0	0	0	0	200	300	0	39.7491	-22.1304	-553.479	-53657.2	70946.8	-6332.2	328.183	999.945	0	0	0	0	0	0	0	603	903	0
515	4	0	0	0	0	0	0	200	300	0	38.3759	-22.1304	-550.732	-53840.3	70641.7	-6377.98	328.269	1000.76	0	0	0	0	0	0	0	603	903	0
515	5	0	0	0	0	0	0	200	300	0	38.3759	-21.3675	-550.427	-53291	71068.9	-6332.2	329.116	999.818	0	0	0	0	0	0	0	603	903	0
515	6	0	0	0	0	0	0	200	300	0	38.9862	-20.7571	-545.85	-52833.2	70763.8	-5965.99	329.64	999.791	0	0	0	0	0	0	0	603	903	0
515	7	0	0	0	0	0	0	200	300	0	38.8336	-21.2149	-545.544	-51002.2	70336.5	-6469.53	328.929	996.489	0	0	0	0	0	0	0	603	903	0
515	8	0	0	0	0	0	0	200	300	0	39.2914	-20.452	-544.324	-52009.3	70153.4	-6149.1	328.882	998.549	0	0	0	0	0	0	0	603	903	0
515	9	0	0	0	0	0	0	200	300	0	39.1388	-19.689	-541.272	-52100.8	70275.5	-6240.65	329.834	999.256	0	0	0	0	0	0	0	603	903	0
516	0	0	0	0	0	0	0	200	300	0	37.9181	-19.0787	-540.967	-51276.9	70214.4	-5782.89	329.794	997.788	0	0	0	0	0	0	0	603	903	0
516	1	0	0	0	0	0	0	200	300	0	38.5284	-18.0106	-534.863	-51185.3	69604.1	-6194.87	330.134	998.698	0	0	0	0	0	0	0	603	903	0
516	2	0	0	0	0	0	0	200	300	0	38.681	-18.1631	-537.915	-50544.4	69726.1	-6149.1	329.623	996.964	0	0	0	0	0	0	0	603	903	0
516	3	0	0	0	0	0	0	200	300	0	38.8336	-17.858	-534.863	-50361.3	69787.2	-5874.44	330.477	997.157	0	0	0	0	0	0	0	603	903	0
516	4	0	0	0	0	0	0	200	300	0	39.1388	-17.2476	-533.643	-50727.6	69237.9	-5828.66	329.746	998.059	0	0	0	0	0	0	0	603	903	0
516	5	0	0	0	0	0	0	200	300	0	37.7655	-17.095	-532.727	-50086.7	69176.9	-5645.56	329.854	997.019	0	0	0	0	0	0	0	603	903	0
516	6	0	0	0	0	0	0	200	300	0	38.2233	-15.7217	-531.506	-49537.4	69359.9	-5645.56	330.497	996.202	0	0	0	0	0	0	0	603	903	0
516	7	0	0	0	0	0	0	200	300	0	38.3759	-15.8743	-530.286	-48988	69298.9	-5370.9	330.682	995.38	0	0	0	0	0	0	0	603	903	0
516	8	0	0	0	0	0	0	200	300	0	38.681	-14.9588	-528.455	-48988	68749.6	-5462.45	330.096	995.701	0	0	0	0	0	0	0	603	903	0
516	9	0	0	0	0	0	0	200	300	0	38.8336	-14.8062	-526.013	-48988	68749.6	-5599.78	330.699	996.131	0	0	0	0	0	0	0	603	903	0
517	0	0	0	0	0	0	0	200	300	0	37.6129	-15.7217	-527.234	-48438.7	68993.7	-5554	330.86	994.873	0	0	0	0	0	0	0	603	903	0
517	1	0	0	0	0	0	0	200	300	0	39.1388	-13.8907	-525.098	-49079.6	68200.3	-5370.9	329.881	996.468	0	0	0	0	0	0	0	603	903	0
517	2	0	0	0	0	0	0	200	300	0	37.4603	-14.0433	-524.487	-48347.2	68078.2	-5142.02	329.8	995.18	0	0	0	0	0	0	0	603	903	0
517	3	0	0	0	0	0	0	200	300	0	38.2233	-13.5855	-522.961	-47706.3	68810.6	-5325.12	331.579	994.223	0	0	0	0	0	0	0	603	903	0
517	4	0	0	0	0	0	0	200	300	0	38.3759	-12.8226	-520.52	-46973.9	68261.3	-5325.12	331.141	993.244	0	0	0	0	0	0	0	603	903	0
517	5	0	0	0	0	0	0	200	300	0	37.3077	-13.4329	-520.52	-47706.3	68200.3	-5096.24	331.023	994.651	0	0	0	0	0	0	0	603	903	0
517	6	0	0	0	0	0	0	200	300	0	39.7491	-12.67	-519.604	-47431.7	68139.2	-4958.91	331.137	994.284	0	0	0	0	0	0	0	603	903	0
517	7	0	0	0	0	0	0	200	300	0	37.3077	-12.2122	-518.384	-47157	67895.1	-5004.69	330.975	993.969	0	0	0	0	0	0	0	603	903	0
517	8	0	0	0	0	0	0	200	300	0	37.9181	-11.907	-517.468	-46058.4	67895.1	-4730.03	331.206	992.007	0	0	0	0	0	0	0	603	903	0
517	9	0	0	0	0	0	0	200	300	0	38.2233	-11.1441	-515.027	-46424.6	67773	-4821.58	331.591	993.14	0	0	0	0	0	0	0	603	903	0
518	0	0	0	0	0	0	0	200	300	0	37.4603	-11.7545	-515.637	-46516.1	68139.2	-4684.25	332.146	993.211	0	0	0	0	0	0	0	603	903	0
518	1	0	0	0	0	0	0	200	300	0	38.681	-10.3812	-515.027	-46241.5	67773	-4592.7	331.591	992.785	0	0	0	0	0	0	0	603	903	0
518	2	0	0	0	0	0	0	200	300	0	36.5448	-9.77081	-514.111	-45966.8	67650.9	-4638.48	331.588	992.41	0	0	0	0	0	0	0	603	903	0
518	3	0	0	0	0	0	0	200	300	0	37.4603	-11.1441	-515.332	-45509	67773	-4638.48	331.513	991.31	0	0	0	0	0	0	0	603	903	0
518	4	0	0	0	0	0	0	200	300	0	37.1552	-9.77081	-512.585	-45966.8	67712	-4546.92	332.099	992.676	0	0	0	0	0	0	0	603	903	0
518	5	0	0	0	0	0	0	200	300	0	36.5448	-9.31305	-511.365	-44410.4	66857.5	-4501.15	330.743	989.847	0	0	0	0	0	0	0	603	903	0
518	6	0	0	0	0	0	0	200	300	0	36.087	-8.85528	-511.365	-45325.9	67406.8	-4455.37	331.817	991.637	0	0	0	0	0	0	0	603	903	0
518	7	0	0	0	0	0	0	200	300	0	36.85	-8.24493	-509.839	-44685.1	67834.1	-4409.59	333.05	990.646	0	0	0	0	0	0	0	603	903	0
518	8	0	0	0	0	0	0	200	300	0	36.6974	-9.31305	-511.365	-44685.1	67956.2	-4226.49	332.892	990.384	0	0	0	0	0	0	0	603	903	0
518	9	0	0	0	0	0	0	200	300	0	37.1552	-7.63458	-508.008	-44868.2	67223.7	-4089.16	332.328	991.322	0	0	0	0	0	0	0	603	903	0
519	0	0	0	0	0	0	0	200	300	0	35.6293	-7.63458	-509.534	-44318.9	67467.9	-4089.16	332.411	989.979	0	0	0	0	0	0	0	603	903	0
519	1	0	0	0	0	0	0	200	300	0	35.7819	-7.93975	-508.313	-44135.8	67650.9	-3860.28	333.089	989.828	0	0	0	0	0	0	0	603	903	0
519	2	0	0	0	0	0	0	200	300	0	36.3922	-7.17681	-508.618	-43678	67467.9	-3951.83	332.649	988.876	0	0	0	0	0	0	0	603	903	0
519	3	0	0	0	0	0	0	200	300	0	36.3922	-7.02423	-509.229	-43586.4	67406.8	-3860.28	332.37	988.593	0	0	0	0	0	0	0	603	903	0
519	4	0	0	0	0	0	0	200	300	0	36.3922	-7.48199	-507.092	-43952.7	67406.8	-3219.41	332.928	989.676	0	0	0	0	0	0	0	603	903	0
519	5	0	0	0	0	0	0	200	300	0	35.1715	-6.56646	-507.397	-43403.3	67834.1	-3906.05	333.69	988.541	0	0	0	0	0	0	0	603	903	0
519	6	0	0	0	0	0	0	200	300	0	35.7819	-5.34576	-506.787	-43403.3	67650.9	-3768.72	333.49	988.644	0	0	0	0	0	0	0	603	903	0
519	7	0	0	0	0	0	0	200	300	0	36.2396	-5.34576	-505.566	-42945.6	67345.8	-3768.72	333.209	987.945	0	0	0	0	0	0	0	603	903	0
519	8	0	0	0	0	0	0	200	300	0	36.6974	-5.34576	-507.397	-42670.9	67956.2	-3585.62	333.931	987.098	0	0	0	0	0	0	0	603	903	0
519	9	0	0	0	0	0	0	200	300	0	36.6974	-5.19317	-507.397	-43403.3	67589.9	-3448.29	333.209	988.541	0	0	0	0	0	0	0	603	903	0
520	0	0	0	0	0	0	0	200	300	0	35.4767	-5.34576	-507.092	-43037.1	67467.9	-3585.62	333.049	987.87	0	0	0	0	0	0	0	603	903	0
520	1	0	0	0	0	0	0	200	300	0	35.3241	-5.04058	-504.956	-42121.6	67284.7	-3219.41	333.249	986.416	0	0	0	0	0	0	0	603	903	0
520	2	0	0	0	0	0	0	200	300	0	36.6974	-3.81988	-506.787	-41572.3	67834.1	-3356.74	333.851	985.031	0	0	0	0	0	0	0	603	903	0
520	3	0	0	0	0	0	0	200	300	0	36.087	-3.66729	-506.787	-41663.8	67773	-3082.08	333.731	985.212	0	0	0	0	0	0	0	603	903	0
520	4	0	0	0	0	0	0	200	300	0	35.4767	-3.66729	-507.703	-42304.7	67345.8	-2990.52	332.648	986.326	0	0	0	0	0	0	0	603	903	0
520	5	0	0	0	0	0	0	200	300	0	34.8663	-4.27764	-506.787	-42121.6	67528.9	-3127.85	333.249	986.115	0	0	0	0	0	0	0	603	903	0
520	6	0	0	0	0	0	0	200	300	0	34.8663	-3.05694	-505.872	-41480.7	67345.8	-2715.87	333.128	984.999	0	0	0	0	0	0	0	603	903	0
520	7	0	0	0	0	0	0	200	300	0	37.0026	-2.59918	-506.482	-41663.8	67345.8	-2944.75	332.968	985.261	0	0	0	0	0	0	0	603	903	0
520	8	0	0	0	0	0	0	200	300	0	35.0189	-2.294	-506.482	-41755.4	67528.9	-2532.76	333.329	985.442	0	0	0	0	0	0	0	603	903	0
520	9	0	0	0	0	0	0	200	300	0	35.3241	-1.98883	-505.566	-41846.9	68078.2	-2670.09	334.657	985.772	0	0	0	0	0	0	0	603	903	0
521	0	0	0	0	0	0	0	200	300	0	35.4767	-2.294	-507.703	-41297.6	68017.1	-2761.64	333.97	984.342	0	0	0	0	0	0	0	603	903	0
521	1	0	0	0	0	0	0	200	300	0	36.2396	-2.44659	-506.787	-40748.3	67773	-2441.21	333.731	983.405	0	0	0	0	0	0	0	603	903	0
521	2	0	0	0	0	0	0	200	300	0	36.3922	-1.22589	-506.482	-41297.6	67834.1	-2578.54	333.932	984.538	0	0	0	0	0	0	0	603	903	0
521	3	0	0	0	0	0	0	200	300	0	34.8663	-1.37847	-505.261	-40107.4	67773	-2578.54	334.135	982.38	0	0	0	0	0	0	0	603	903	0
521	4	0	0	0	0	0	0	200	300	0	34.4086	-0.768123	-509.534	-40565.2	67834.1	-2258.1	333.13	982.612	0	0	0	0	0	0	0	603	903	0
521	5	0	0	0	0	0	0	200	300	0	36.5448	-0.768123	-508.618	-40473.6	67712	-2578.54	333.129	982.576	0	0	0	0	0	0	0	603	903	0
521	6	0	0	0	0	0	0	200	300	0	36.3922	-0.615535	-508.618	-40199	68383.4	-2166.55	334.449	982.036	0	0	0	0	0	0	0	603	903	0
521	7	0	0	0	0	0	0	200	300	0	36.087	-0.31036	-507.703	-40656.7	68444.4	-2166.55	334.812	983.08	0	0	0	0	0	0	0	603	903	0
521	8	0	0	0	0	0	0	200	300	0	34.256	0.147404	-508.923	-40199	67956.2	-1983.44	333.529	981.988	0	0	0	0	0	0	0	603	903	0
521	9	0	0	0	0	0	0	200	300	0	35.3241	0.45258	-511.365	-39741.2	68139.2	-1891.89	333.25	980.716	0	0	0	0	0	0	0	603	903	0
522	0	0	0	0	0	0	0	200	300	0	36.087	1.5207	-508.008	-39558.1	68627.5	-1937.67	335.091	980.869	0	0	0	0	0	0	0	603	903	0
522	1	0	0	0	0	0	0	200	300	0	38.2233	0.757756	-511.67	-39558.1	68810.6	-1708.79	334.482	980.312	0	0	0	0	0	0	0	603	903	0
522	2	0	0	0	0	0	0	200	300	0	35.9345	1.67328	-510.754	-40199	68261.3	-1800.34	333.648	981.705	0	0	0	0	0	0	0	603	903	0
522	3	0	0	0	0	0	0	200	300	0	35.3241	1.97846	-508.313	-39924.3	68688.6	-1708.79	335.131	981.543	0	0	0	0	0	0	0	603	903	0
522	4	0	0	0	0	0	0	200	300	0	35.6293	2.13105	-511.365	-38642.6	68444.4	-1663.01	333.847	978.568	0	0	0	0	0	0	0	603	903	0
522	5	0	0	0	0	0	0	200	300	0	36.2396	3.80951	-514.111	-39741.2	68566.5	-1525.68	333.369	980.301	0	0	0	0	0	0	0	603	903	0
522	6	0	0	0	0	0	0	200	300	0	37.9181	2.89399	-515.027	-39283.4	68871.6	-1342.58	333.724	979.275	0	0	0	0	0	0	0	603	903	0
522	7	0	0	0	0	0	0	200	300	0	36.3922	2.13105	-515.637	-39741.2	69298.9	-1296.8	334.395	980.072	0	0	0	0	0	0	0	603	903	0
522	8	0	0	0	0	0	0	200	300	0	36.087	3.9621	-515.332	-39741.2	69298.9	-1159.47	334.474	980.118	0	0	0	0	0	0	0	603	903	0
522	9	0	0	0	0	0	0	200	300	0	35.4767	4.57245	-516.248	-39558.1	69298.9	-1113.69	334.236	979.626	0	0	0	0	0	0	0	603	903	0
523	0	0	0	0	0	0	0	200	300	0	36.5448	5.48798	-518.994	-39191.9	69176.9	-1022.14	333.29	978.515	0	0	0	0	0	0	0	603	903	0
523	1	0	0	0	0	0	0	200	300	0	36.6974	4.57245	-519.91	-39191.9	69970.3	-1067.92	334.582	978.382	0	0	0	0	0	0	0	603	903	0
523	2	0	0	0	0	0	0	200	300	0	35.9345	5.03022	-519.604	-39191.9	70092.3	-793.259	334.896	978.426	0	0	0	0	0	0	0	603	903	0
523	3	0	0	0	0	0	0	200	300	0	35.3241	3.80951	-522.961	-39558.1	69543.1	-655.93	332.979	978.643	0	0	0	0	0	0	0	603	903	0
523	4	0	0	0	0	0	0	200	300	0	34.8663	5.33539	-521.13	-38642.6	69726.1	-335.495	333.798	977.151	0	0	0	0	0	0	0	603	903	0
523	5	0	0	0	0	0	0	200	300	0	35.7819	7.01386	-521.741	-38276.4	70153.4	-335.495	334.46	976.363	0	0	0	0	0	0	0	603	903	0
523	6	0	0	0	0	0	0	200	300	0	35.9345	5.79316	-523.572	-39100.3	70275.5	-518.601	334.223	977.68	0	0	0	0	0	0	0	603	903	0
523	7	0	0	0	0	0	0	200	300	0	35.1715	7.47162	-525.708	-38917.2	70397.6	-243.942	333.91	977.028	0	0	0	0	0	0	0	603	903	0
523	8	0	0	0	0	0	0	200	300	0	35.3241	7.01386	-525.708	-38825.7	70580.6	-152.39	334.258	976.854	0	0	0	0	0	0	0	603	903	0
523	9	0	0	0	0	0	0	200	300	0	35.1715	6.40351	-527.539	-38551	71191	-106.613	334.949	976.077	0	0	0	0	0	0	0	603	903	0
524	0	0	0	0	0	0	0	200	300	0	36.087	8.08197	-526.624	-38459.5	70519.6	122.269	333.909	976.03	0	0	0	0	0	0	0	603	903	0
524	1	0	0	0	0	0	0	200	300	0	35.6293	8.69233	-527.234	-38825.7	71191	-60.8369	335.027	976.64	0	0	0	0	0	0	0	603	903	0
524	2	0	0	0	0	0	0	200	300	0	34.8663	9.60785	-529.37	-37543.9	71557.2	122.269	335.174	973.922	0	0	0	0	0	0	0	603	903	0
524	3	0	0	0	0	0	0	200	300	0	35.3241	9.30268	-531.201	-38917.2	71252.1	396.927	334.134	976.263	0	0	0	0	0	0	0	603	903	0
524	4	0	0	0	0	0	0	200	300	0	35.9345	8.9975	-532.422	-37910.2	71557.2	122.269	334.399	974.203	0	0	0	0	0	0	0	603	903	0
524	5	0	0	0	0	0	0	200	300	0	35.7819	10.3708	-532.727	-38276.4	71923.4	488.48	335.01	974.85	0	0	0	0	0	0	0	603	903	0
524	6	0	0	0	0	0	0	200	300	0	36.087	10.0656	-535.168	-38825.7	72045.5	580.032	334.622	975.549	0	0	0	0	0	0	0	603	903	0
524	7	0	0	0	0	0	0	200	300	0	34.4086	10.9811	-536.694	-38459.5	71801.3	580.032	333.784	974.66	0	0	0	0	0	0	0	603	903	0
524	8	0	0	0	0	0	0	200	300	0	35.0189	11.5915	-537.61	-38093.3	72106.5	671.585	334.124	973.857	0	0	0	0	0	0	0	603	903	0
524	9	0	0	0	0	0	0	200	300	0	35.6293	11.4389	-535.779	-37543.9	71984.5	717.362	334.355	973.074	0	0	0	0	0	0	0	603	903	0
525	0	0	0	0	0	0	0	200	300	0	37.4603	11.8967	-539.746	-37818.6	72411.7	1175.12	334.159	973.067	0	0	0	0	0	0	0	603	903	0
525	1	0	0	0	0	0	0	200	300	0	35.4767	12.507	-540.967	-37910.2	72716.9	900.467	334.42	973.079	0	0	0	0	0	0	0	603	903	0
525	2	0	0	0	0	0	0	200	300	0	34.5612	12.8122	-540.051	-37818.6	73327.2	1083.57	335.778	973.028	0	0	0	0	0	0	0	603	903	0
525	3	0	0	0	0	0	0	200	300	0	34.8663	12.6596	-542.493	-36994.6	73571.4	1220.9	335.617	971.194	0	0	0	0	0	0	0	603	903	0
525	4	0	0	0	0	0	0	200	300	0	35.1715	13.5751	-545.85	-37635.5	73327.2	1083.57	334.336	971.948	0	0	0	0	0	0	0	603	903	0
525	5	0	0	0	0	0	0	200	300	0	35.7819	14.0329	-547.375	-37543.9	73632.4	1449.78	334.519	971.589	0	0	0	0	0	0	0	603	903	0
525	6	0	0	0	0	0	0	200	300	0	35.7819	12.6596	-549.207	-38093.3	73754.5	1220.9	334.293	972.361	0	0	0	0	0	0	0	603	903	0
525	7	0	0	0	0	0	0	200	300	0	34.8663	14.4907	-550.122	-37635.5	73754.5	1541.34	334.069	971.413	0	0	0	0	0	0	0	603	903	0
525	8	0	0	0	0	0	0	200	300	0	34.8663	15.2536	-550.122	-37177.7	74242.7	1449.78	334.957	970.581	0	0	0	0	0	0	0	603	903	0
525	9	0	0	0	0	0	0	200	300	0	35.3241	14.9484	-550.732	-36903.1	74731	1495.56	335.694	970.007	0	0	0	0	0	0	0	603	903	0
526	0	0	0	0	0	0	0	200	300	0	36.2396	15.864	-554.089	-36994.6	75219.3	1449.78	335.753	969.767	0	0	0	0	0	0	0	603	903	0
526	1	0	0	0	0	0	0	200	300	0	35.3241	15.864	-554.7	-37543.9	74731	1724.44	334.723	970.683	0	0	0	0	0	0	0	603	903	0
526	2	0	0	0	0	0	0	200	300	0	36.2396	16.0165	-556.226	-37086.2	74975.2	2044.88	334.793	969.675	0	0	0	0	0	0	0	603	903	0
526	3	0	0	0	0	0	0	200	300	0	34.5612	16.9321	-556.531	-36811.5	75646.6	1815.99	335.925	969.145	0	0	0	0	0	0	0	603	903	0
526	4	0	0	0	0	0	0	200	300	0	35.6293	17.695	-557.751	-36903.1	75829.6	2044.88	335.956	969.164	0	0	0	0	0	0	0	603	903	0
526	5	0	0	0	0	0	0	200	300	0	35.9345	17.5424	-561.414	-36445.3	75829.6	2182.21	335.069	967.917	0	0	0	0	0	0	0	603	903	0
526	6	0	0	0	0	0	0	200	300	0	37.1552	17.5424	-562.329	-36903.1	76256.9	2090.65	335.609	968.625	0	0	0	0	0	0	0	603	903	0
526	7	0	0	0	0	0	0	200	300	0	35.3241	16.3217	-564.16	-36903.1	76562.1	2273.76	335.71	968.412	0	0	0	0	0	0	0	603	903	0
526	8	0	0	0	0	0	0	200	300	0	35.3241	18.3054	-564.16	-36262.2	76501.1	2273.76	335.602	967.276	0	0	0	0	0	0	0	603	903	0
526	9	0	0	0	0	0	0	200	300	0	36.2396	19.3735	-565.991	-35712.9	76684.1	2273.76	335.486	966.098	0	0	0	0	0	0	0	603	903	0
527	0	0	0	0	0	0	0	200	300	0	36.2396	18.7631	-568.127	-35896	77294.5	2411.09	336.051	966.183	0	0	0	0	0	0	0	603	903	0
527	1	0	0	0	0	0	0	200	300	0	36.087	20.1364	-570.264	-36353.8	77233.5	2548.42	335.435	966.749	0	0	0	0	0	0	0	603	903	0
527	2	0	0	0	0	0	0	200	300	0	35.3241	19.5261	-571.484	-36353.8	77172.4	2685.75	335.039	966.613	0	0	0	0	0	0	0	603	903	0
527	3	0	0	0	0	0	0	200	300	0	35.9345	19.9838	-570.874	-35712.9	77721.8	2823.07	336.145	965.558	0	0	0	0	0	0	0	603	903	0
527	4	0	0	0	0	0	0	200	300	0	36.5448	21.3571	-572.705	-35987.5	77843.9	2960.4	335.923	965.838	0	0	0	0	0	0	0	603	903	0
527	5	0	0	0	0	0	0	200	300	0	37.6129	22.1201	-574.841	-35438.2	78393.1	3051.96	336.374	964.649	0	0	0	0	0	0	0	603	903	0
527	6	0	0	0	0	0	0	200	300	0	37.0026	22.1201	-576.367	-35896	77599.7	2868.85	334.636	965.28	0	0	0	0	0	0	0	603	903	0
527	7	0	0	0	0	0	0	200	300	0	35.9345	22.7304	-576.062	-35621.3	78759.3	3280.84	336.72	964.836	0	0	0	0	0	0	0	603	903	0
527	8	0	0	0	0	0	0	200	300	0	35.7819	22.1201	-579.419	-35438.2	79125.5	3051.96	336.56	964.162	0	0	0	0	0	0	0	603	903	0
527	9	0	0	0	0	0	0	200	300	0	39.444	22.1201	-580.029	-35255.1	78759.3	3189.29	335.785	963.782	0	0	0	0	0	0	0	603	903	0
528	0	0	0	0	0	0	0	200	300	0	36.85	22.4252	-580.945	-34522.7	79125.5	3189.29	336.201	962.425	0	0	0	0	0	0	0	603	903	0
528	1	0	0	0	0	0	0	200	300	0	37.9181	23.7985	-582.776	-35346.7	79552.8	3555.5	336.507	963.652	0	0	0	0	0	0	0	603	903	0
528	2	0	0	0	0	0	0	200	300	0	36.6974	24.1037	-584.302	-34522.7	79797	3235.06	336.568	962.084	0	0	0	0	0	0	0	603	903	0
528	3	0	0	0	0	0	0	200	300	0	36.3922	24.1037	-585.217	-34614.3	79735.9	3601.27	336.25	962.148	0	0	0	0	0	0	0	603	903	0
528	4	0	0	0	0	0	0	200	300	0	38.681	24.8666	-586.743	-34431.1	79919	3509.72	336.208	961.682	0	0	0	0	0	0	0	603	903	0
528	5	0	0	0	0	0	0	200	300	0	37.6129	25.477	-587.354	-34064.9	79735.9	3692.83	335.755	960.997	0	0	0	0	0	0	0	603	903	0
528	6	0	0	0	0	0	0	200	300	0	37.3077	26.3925	-588.879	-34614.3	80041.1	3875.93	335.921	961.78	0	0	0	0	0	0	0	603	903	0
528	7	0	0	0	0	0	0	200	300	0	36.85	25.3244	-589.795	-33698.7	80590.4	3738.6	336.641	960.136	0	0	0	0	0	0	0	603	903	0
528	8	0	0	0	0	0	0	200	300	0	36.5448	26.8503	-593.152	-34156.5	81322.8	4013.26	337.103	960.585	0	0	0	0	0	0	0	603	903	0
528	9	0	0	0	0	0	0	200	300	0	38.681	26.3925	-594.983	-33607.2	81322.8	4242.14	336.681	959.484	0	0	0	0	0	0	0	603	903	0
529	0	0	0	0	0	0	0	200	300	0	38.0707	25.6296	-594.373	-33607.2	80956.6	4242.14	336.205	959.542	0	0	0	0	0	0	0	603	903	0
529	1	0	0	0	0	0	0	200	300	0	38.0707	27.6132	-596.509	-33149.4	81444.9	4150.59	336.536	958.572	0	0	0	0	0	0	0	603	903	0
529	2	0	0	0	0	0	0	200	300	0	37.4603	28.6813	-597.119	-33515.6	81811.1	4150.59	337.01	959.129	0	0	0	0	0	0	0	603	903	0
529	3	0	0	0	0	0	0	200	300	0	40.2069	28.8339	-600.171	-33149.4	82055.2	4608.35	336.72	958.233	0	0	0	0	0	0	0	603	903	0
529	4	0	0	0	0	0	0	200	300	0	38.5284	28.9865	-600.781	-32691.6	81872.2	4471.02	336.276	957.415	0	0	0	0	0	0	0	603	903	0
529	5	0	0	0	0	0	0	200	300	0	39.1388	29.4443	-602.002	-32874.8	82116.3	4516.8	336.405	957.609	0	0	0	0	0	0	0	603	903	0
529	6	0	0	0	0	0	0	200	300	0	38.8336	29.4443	-602.612	-32691.6	82970.8	4562.58	337.685	957.25	0	0	0	0	0	0	0	603	903	0
529	7	0	0	0	0	0	0	200	300	0	38.0707	29.7495	-602.917	-32874.8	82848.7	4516.8	337.413	957.526	0	0	0	0	0	0	0	603	903	0
529	8	0	0	0	0	0	0	200	300	0	39.1388	30.665	-605.054	-32325.4	82177.3	4608.35	335.818	956.426	0	0	0	0	0	0	0	603	903	0
529	9	0	0	0	0	0	0	200	300	0	38.0707	30.9702	-606.58	-31501.5	83337	4837.23	337.388	954.933	0	0	0	0	0	0	0	603	903	0
530	0	0	0	0	0	0	0	200	300	0	39.5966	31.7331	-609.021	-31867.7	83398	4883.01	336.938	955.326	0	0	0	0	0	0	0	603	903	0
530	1	0	0	0	0	0	0	200	300	0	39.444	30.8176	-609.631	-31043.7	83398	4837.23	336.801	953.922	0	0	0	0	0	0	0	603	903	0
530	2	0	0	0	0	0	0	200	300	0	40.5121	31.5805	-609.937	-31776.1	83337	4928.79	336.632	955.097	0	0	0	0	0	0	0	603	903	0
530	3	0	0	0	0	0	0	200	300	0	38.681	31.2753	-611.462	-31684.6	84008.4	5111.89	337.389	954.818	0	0	0	0	0	0	0	603	903	0
530	4	0	0	0	0	0	0	200	300	0	38.681	33.1064	-612.073	-30494.4	84069.4	5249.22	337.352	952.822	0	0	0	0	0	0	0	603	903	0
530	5	0	0	0	0	0	0	200	300	0	40.0543	33.5642	-615.125	-30494.4	83825.3	5478.1	336.274	952.574	0	0	0	0	0	0	0	603	903	0
530	6	0	0	0	0	0	0	200	300	0	41.7328	33.7167	-613.599	-30128.2	84191.5	5432.33	337.209	952.101	0	0	0	0	0	0	0	603	903	0
530	7	0	0	0	0	0	0	200	300	0	40.3595	33.5642	-617.566	-30677.5	84557.7	5478.1	336.921	952.675	0	0	0	0	0	0	0	603	903	0
530	8	0	0	0	0	0	0	200	300	0	39.444	33.1064	-617.871	-29853.5	84923.9	5661.21	337.446	951.317	0	0	0	0	0	0	0	603	903	0
530	9	0	0	0	0	0	0	200	300	0	39.5966	33.8693	-616.956	-29762	84557.7	5661.21	337.056	951.24	0	0	0	0	0	0	0	603	903	0
531	0	0	0	0	0	0	0	200	300	0	40.2069	34.7849	-619.397	-29487.3	84740.8	5706.99	336.812	950.607	0	0	0	0	0	0	0	603	903	0
531	1	0	0	0	0	0	0	200	300	0	40.0543	34.9374	-622.449	-29121.1	85351.1	5752.76	337.122	949.785	0	0	0	0	0	0	0	603	903	0
531	2	0	0	0	0	0	0	200	300	0	41.275	34.0219	-620.312	-29395.8	85473.2	5890.09	337.791	950.389	0	0	0	0	0	0	0	603	903	0
531	3	0	0	0	0	0	0	200	300	0	40.5121	35.2426	-623.975	-28663.3	85351.1	5981.64	336.786	948.937	0	0	0	0	0	0	0	603	903	0
531	4	0	0	0	0	0	0	200	300	0	42.3431	35.09	-624.28	-28663.3	85351.1	5935.87	336.719	948.914	0	0	0	0	0	0	0	603	903	0
531	5	0	0	0	0	0	0	200	300	0	40.3595	36.4633	-622.144	-28388.7	85778.4	6027.42	337.876	948.63	0	0	0	0	0	0	0	603	903	0
531	6	0	0	0	0	0	0	200	300	0	40.9699	36.4633	-625.806	-27839.4	86083.6	6302.08	337.556	947.486	0	0	0	0	0	0	0	603	903	0
531	7	0	0	0	0	0	0	200	300	0	41.5802	37.0737	-628.247	-28388.7	85595.3	6393.63	336.245	948.187	0	0	0	0	0	0	0	603	903	0
531	8	0	0	0	0	0	0	200	300	0	40.2069	36.3107	-627.026	-27381.6	86571.8	5935.87	338.067	946.669	0	0	0	0	0	0	0	603	903	0
531	9	0	0	0	0	0	0	200	300	0	40.6647	36.6159	-630.994	-27747.8	86632.9	6530.96	337.296	946.975	0	0	0	0	0	0	0	603	903	0
532	0	0	0	0	0	0	0	200	300	0	40.6647	37.3788	-630.688	-27290	86571.8	6393.63	337.266	946.27	0	0	0	0	0	0	0	603	903	0
532	1	0	0	0	0	0	0	200	300	0	41.4276	38.1418	-631.299	-26649.2	86510.8	6576.74	337.036	945.213	0	0	0	0	0	0	0	603	903	0
532	2	0	0	0	0	0	0	200	300	0	41.1224	36.4633	-633.13	-27106.9	87121.2	6714.07	337.604	945.814	0	0	0	0	0	0	0	603	903	0
532	3	0	0	0	0	0	0	200	300	0	40.9699	39.0573	-635.266	-26557.6	87182.2	6759.84	337.237	944.806	0	0	0	0	0	0	0	603	903	0
532	4	0	0	0	0	0	0	200	300	0	43.2587	38.5996	-636.487	-26466.1	86938	6851.39	336.591	944.581	0	0	0	0	0	0	0	603	903	0
532	5	0	0	0	0	0	0	200	300	0	40.6647	36.6159	-635.876	-26008.3	87182.2	6805.62	337.106	943.902	0	0	0	0	0	0	0	603	903	0
532	6	0	0	0	0	0	0	200	300	0	41.8854	39.0573	-636.487	-25642.1	87487.4	7126.05	337.454	943.287	0	0	0	0	0	0	0	603	903	0
532	7	0	0	0	0	0	0	200	300	0	41.7328	39.9728	-637.708	-25733.7	87731.5	7034.5	337.573	943.353	0	0	0	0	0	0	0	603	903	0
532	8	0	0	0	0	0	0	200	300	0	40.9699	40.8884	-640.454	-25184.3	87060.1	7126.05	335.935	942.323	0	0	0	0	0	0	0	603	903	0
532	9	0	0	0	0	0	0	200	300	0	40.8173	39.3625	-638.623	-25275.9	88158.8	7080.28	338.045	942.579	0	0	0	0	0	0	0	603	903	0
533	0	0	0	0	0	0	0	200	300	0	41.8854	39.9728	-642.59	-24909.7	88341.9	7080.28	337.478	941.765	0	0	0	0	0	0	0	603	903	0
533	1	0	0	0	0	0	0	200	300	0	44.3268	39.8203	-642.285	-23811	87670.5	7217.61	336.498	940.072	0	0	0	0	0	0	0	603	903	0
533	2	0	0	0	0	0	0	200	300	0	41.8854	41.1935	-643.506	-23994.1	88280.8	7309.16	337.187	940.287	0	0	0	0	0	0	0	603	903	0
533	3	0	0	0	0	0	0	200	300	0	43.1061	39.9728	-643.201	-23902.6	88525	7446.49	337.632	940.162	0	0	0	0	0	0	0	603	903	0
533	4	0	0	0	0	0	0	200	300	0	41.1224	41.3461	-645.642	-23627.9	88708.1	7721.15	337.395	939.596	0	0	0	0	0	0	0	603	903	0
533	5	0	0	0	0	0	0	200	300	0	42.1906	41.041	-646.252	-22804	88647	7675.37	337.171	938.286	0	0	0	0	0	0	0	603	903	0
533	6	0	0	0	0	0	0	200	300	0	42.6483	40.1254	-646.863	-22895.5	88647	7629.6	337.042	938.395	0	0	0	0	0	0	0	603	903	0
533	7	0	0	0	0	0	0	200	300	0	41.275	41.3461	-647.473	-22620.9	89501.5	7675.37	338.232	937.937	0	0	0	0	0	0	0	603	903	0
533	8	0	0	0	0	0	0	200	300	0	41.8854	42.5668	-647.778	-21980	88952.2	8178.91	337.319	936.931	0	0	0	0	0	0	0	603	903	0
533	9	0	0	0	0	0	0	200	300	0	42.4957	40.278	-648.694	-21613.8	88341.9	7858.48	336.184	936.319	0	0	0	0	0	0	0	603	903	0
534	0	0	0	0	0	0	0	200	300	0	44.632	42.5668	-651.44	-21430.7	89684.7	7995.81	337.671	935.897	0	0	0	0	0	0	0	603	903	0
534	1	0	0	0	0	0	0	200	300	0	42.4957	41.9565	-651.44	-21888.4	89806.7	8224.69	337.859	936.6	0	0	0	0	0	0	0	603	903	0
534	2	0	0	0	0	0	0	200	300	0	42.038	42.2617	-652.661	-21064.5	89440.5	8087.36	337.04	935.275	0	0	0	0	0	0	0	603	903	0
534	3	0	0	0	0	0	0	200	300	0	42.8009	42.5668	-651.44	-19965.8	89562.6	8270.46	337.484	933.649	0	0	0	0	0	0	0	603	903	0
534	4	0	0	0	0	0	0	200	300	0	42.6483	43.1772	-649.609	-20148.9	89989.8	8178.91	338.529	934.017	0	0	0	0	0	0	0	603	903	0
534	5	0	0	0	0	0	0	200	300	0	44.632	43.635	-654.187	-19874.3	90233.9	8362.01	337.933	933.38	0	0	0	0	0	0	0	603	903	0
534	6	0	0	0	0	0	0	200	300	0	42.9535	43.9401	-654.492	-19965.8	90050.9	8178.91	337.589	933.506	0	0	0	0	0	0	0	603	903	0
534	7	0	0	0	0	0	0	200	300	0	42.038	43.3298	-653.882	-19508.1	90111.9	8224.69	337.811	932.834	0	0	0	0	0	0	0	603	903	0
534	8	0	0	0	0	0	0	200	300	0	42.6483	43.635	-657.239	-18134.8	90783.3	8453.57	338.128	930.592	0	0	0	0	0	0	0	603	903	0
534	9	0	0	0	0	0	0	200	300	0	43.2587	44.3979	-656.628	-18501	90661.2	8316.24	338.071	931.176	0	0	0	0	0	0	0	603	903	0
535	0	0	0	0	0	0	0	200	300	0	43.4113	45.1608	-657.849	-18592.5	90478.1	8590.9	337.536	931.263	0	0	0	0	0	0	0	603	903	0
535	1	0	0	0	0	0	0	200	300	0	42.9535	45.9238	-657.849	-18501	90783.3	8682.45	338	931.123	0	0	0	0	0	0	0	603	903	0
535	2	0	0	0	0	0	0	200	300	0	44.7845	45.3134	-659.68	-17951.7	91027.4	8545.12	337.987	930.213	0	0	0	0	0	0	0	603	903	0
535	3	0	0	0	0	0	0	200	300	0	43.869	46.5341	-661.206	-17402.3	91759.9	9002.88	338.776	929.319	0	0	0	0	0	0	0	603	903	0
535	4	0	0	0	0	0	0	200	300	0	44.0216	46.5341	-660.901	-17493.9	90539.2	8819.78	336.994	929.47	0	0	0	0	0	0	0	603	903	0
535	5	0	0	0	0	0	0	200	300	0	44.0216	46.5341	-663.342	-17310.8	91393.7	9048.66	337.778	929.096	0	0	0	0	0	0	0	603	903	0
535	6	0	0	0	0	0	0	200	300	0	44.0216	47.4496	-662.122	-17127.7	91820.9	8957.11	338.677	928.868	0	0	0	0	0	0	0	603	903	0
535	7	0	0	0	0	0	0	200	300	0	44.9371	48.5178	-662.732	-16669.9	91454.6	8865.55	337.996	928.153	0	0	0	0	0	0	0	603	903	0
535	8	0	0	0	0	0	0	200	300	0	43.4113	48.5178	-664.258	-16029.1	91759.9	9048.66	338.139	927.131	0	0	0	0	0	0	0	603	903	0
535	9	0	0	0	0	0	0	200	300	0	44.3268	48.8229	-667.004	-15937.5	92248.1	8957.11	338.302	926.894	0	0	0	0	0	0	0	603	903	0
536	0	0	0	0	0	0	0	200	300	0	44.0216	47.9074	-666.394	-16029.1	92370.2	8865.55	338.612	927.053	0	0	0	0	0	0	0	603	903	0
536	1	0	0	0	0	0	0	200	300	0	43.5638	48.9755	-668.53	-15296.6	92187.1	9048.66	337.895	925.881	0	0	0	0	0	0	0	603	903	0
536	2	0	0	0	0	0	0	200	300	0	45.2423	49.2807	-668.225	-15846	92309.1	9094.44	338.141	926.714	0	0	0	0	0	0	0	603	903	0
536	3	0	0	0	0	0	0	200	300	0	43.869	49.8911	-667.92	-14838.9	92980.6	9140.21	339.209	925.217	0	0	0	0	0	0	0	603	903	0
536	4	0	0	0	0	0	0	200	300	0	44.9371	50.8066	-669.751	-14655.8	92675.4	9231.77	338.373	924.882	0	0	0	0	0	0	0	603	903	0
536	5	0	0	0	0	0	0	200	300	0	44.7845	50.8066	-672.498	-13831.8	92370.2	9506.42	337.354	923.568	0	0	0	0	0	0	0	603	903	0
536	6	0	0	0	0	0	0	200	300	0	43.869	48.6704	-668.835	-14381.1	93285.7	9597.98	339.475	924.502	0	0	0	0	0	0	0	603	903	0
536	7	0	0	0	0	0	0	200	300	0	45.8527	50.8066	-675.244	-14564.2	93346.8	9689.53	338.242	924.569	0	0	0	0	0	0	0	603	903	0
536	8	0	0	0	0	0	0	200	300	0	42.4957	50.9592	-675.244	-13465.6	93346.8	9735.31	338.242	922.942	0	0	0	0	0	0	0	603	903	0
536	9	0	0	0	0	0	0	200	300	0	42.9535	51.1118	-676.465	-13557.1	93468.9	9918.41	338.173	923.041	0	0	0	0	0	0	0	603	903	0
537	0	0	0	0	0	0	0	200	300	0	42.8009	52.6376	-677.38	-13465.6	94079.2	10147.3	338.887	922.879	0	0	0	0	0	0	0	603	903	0
537	1	0	0	0	0	0	0	200	300	0	41.1224	54.1635	-680.737	-13374	94201.3	10101.5	338.381	922.646	0	0	0	0	0	0	0	603	903	0
537	2	0	0	0	0	0	0	200	300	0	41.1224	53.5532	-681.653	-14014.9	93896.1	10147.3	337.748	923.56	0	0	0	0	0	0	0	603	903	0
537	3	0	0	0	0	0	0	200	300	0	40.9699	53.5532	-682.568	-12916.3	94140.2	10513.5	337.921	921.923	0	0	0	0	0	0	0	603	903	0
537	4	0	0	0	0	0	0	200	300	0	42.4957	55.9946	-684.399	-12824.7	94384.3	10467.7	337.908	921.739	0	0	0	0	0	0	0	603	903	0
537	5	0	0	0	0	0	0	200	300	0	41.1224	56.9101	-686.23	-13007.8	94079.2	10605.1	337.096	921.955	0	0	0	0	0	0	0	603	903	0
537	6	0	0	0	0	0	0	200	300	0	39.5966	57.2153	-686.841	-12458.5	94750.5	10788.2	337.951	921.139	0	0	0	0	0	0	0	603	903	0
537	7	0	0	0	0	0	0	200	300	0	39.7491	58.1308	-688.672	-12550.1	94994.7	10788.2	337.939	921.224	0	0	0	0	0	0	0	603	903	0
537	8	0	0	0	0	0	0	200	300	0	40.0543	58.436	-689.893	-11909.2	95116.8	11017	337.872	920.262	0	0	0	0	0	0	0	603	903	0
537	9	0	0	0	0	0	0	200	300	0	40.8173	59.8093	-691.113	-11817.6	95055.8	11429	337.54	920.099	0	0	0	0	0	0	0	603	903	0
538	0	0	0	0	0	0	0	200	300	0	39.7491	59.6567	-692.029	-11909.2	95177.8	11474.8	337.534	920.209	0	0	0	0	0	0	0	603	903	0
538	1	0	0	0	0	0	0	200	300	0	42.1906	61.3351	-694.165	-11634.5	95849.2	11429	338.078	919.76	0	0	0	0	0	0	0	603	903	0
538	2	0	0	0	0	0	0	200	300	0	39.9017	61.3351	-695.386	-11543	95727.1	11383.3	337.66	919.599	0	0	0	0	0	0	0	603	903	0
538	3	0	0	0	0	0	0	200	300	0	40.3595	62.7084	-697.827	-11085.2	95788.2	11520.6	337.266	918.885	0	0	0	0	0	0	0	603	903	0
538	4	0	0	0	0	0	0	200	300	0	40.8173	61.6403	-694.165	-11268.3	95849.2	11245.9	338.078	919.233	0	0	0	0	0	0	0	603	903	0
538	5	0	0	0	0	0	0	200	300	0	41.1224	62.7084	-698.438	-11085.2	95238.8	11520.6	336.36	918.872	0	0	0	0	0	0	0	603	903	0
538	6	0	0	0	0	0	0	200	300	0	39.9017	63.4714	-698.743	-10719	95849.2	11795.2	337.174	918.34	0	0	0	0	0	0	0	603	903	0
538	7	0	0	0	0	0	0	200	300	0	39.7491	64.5395	-699.353	-10627.4	96032.3	11612.1	337.316	918.196	0	0	0	0	0	0	0	603	903	0
538	8	0	0	0	0	0	0	200	300	0	40.3595	66.0654	-700.269	-10169.7	96337.5	11932.6	337.572	917.523	0	0	0	0	0	0	0	603	903	0
538	9	0	0	0	0	0	0	200	300	0	40.8173	64.6921	-700.879	-9437.25	97192	11749.5	338.672	916.465	0	0	0	0	0	0	0	603	903	0
539	0	0	0	0	0	0	0	200	300	0	39.9017	67.4387	-703.015	-9528.81	96276.5	11795.2	336.948	916.554	0	0	0	0	0	0	0	603	903	0
539	1	0	0	0	0	0	0	200	300	0	40.5121	66.5231	-704.541	-9803.46	96459.5	12161.5	336.911	916.915	0	0	0	0	0	0	0	603	903	0
539	2	0	0	0	0	0	0	200	300	0	42.6483	67.1335	-704.846	-9254.15	97008.9	11657.9	337.631	916.129	0	0	0	0	0	0	0	603	903	0
539	3	0	0	0	0	0	0	200	300	0	42.4957	67.8964	-705.151	-9162.6	97131	12069.9	337.745	915.994	0	0	0	0	0	0	0	603	903	0
539	4	0	0	0	0	0	0	200	300	0	41.275	68.6594	-703.015	-9071.04	96947.8	12207.2	337.903	915.903	0	0	0	0	0	0	0	603	903	0
539	5	0	0	0	0	0	0	200	300	0	41.4276	69.8801	-705.762	-8796.38	97131	11932.6	337.626	915.464	0	0	0	0	0	0	0	603	903	0
539	6	0	0	0	0	0	0	200	300	0	40.6647	70.0327	-708.508	-8338.62	96703.7	12298.8	336.489	914.769	0	0	0	0	0	0	0	603	903	0
539	7	0	0	0	0	0	0	200	300	0	42.1906	68.812	-704.236	-7972.41	97008.9	12573.4	337.751	914.321	0	0	0	0	0	0	0	603	903	0
539	8	0	0	0	0	0	0	200	300	0	42.8009	71.2534	-709.119	-8063.96	97192	12253	337.06	914.372	0	0	0	0	0	0	0	603	903	0
539	9	0	0	0	0	0	0	200	300	0	41.7328	71.406	-709.729	-7972.41	97863.4	12207.2	337.888	914.233	0	0	0	0	0	0	0	603	903	0
540	0	0	0	0	0	0	0	200	300	0	42.3431	73.0844	-706.982	-7514.65	97619.2	12207.2	338.079	913.629	0	0	0	0	0	0	0	603	903	0
540	1	0	0	0	0	0	0	200	300	0	43.1061	73.5422	-710.034	-6690.67	97314	12436.1	337.055	912.423	0	0	0	0	0	0	0	603	903	0
540	2	0	0	0	0	0	0	200	300	0	43.869	73.8474	-710.645	-6782.23	97436.1	12344.6	337.109	912.544	0	0	0	0	0	0	0	603	903	0
540	3	0	0	0	0	0	0	200	300	0	43.5638	73.9999	-708.508	-6416.02	97619.2	12527.7	337.781	912.056	0	0	0	0	0	0	0	603	903	0
540	4	0	0	0	0	0	0	200	300	0	42.8009	74.6103	-711.56	-6507.57	98046.4	12390.3	337.791	912.146	0	0	0	0	0	0	0	603	903	0
540	5	0	0	0	0	0	0	200	300	0	44.1742	75.0681	-710.645	-5866.7	97558.2	12481.9	337.281	911.255	0	0	0	0	0	0	0	603	903	0
540	6	0	0	0	0	0	0	200	300	0	47.0734	76.5939	-708.813	-5958.25	97436.1	12527.7	337.464	911.406	0	0	0	0	0	0	0	603	903	0
540	7	0	0	0	0	0	0	200	300	0	45.2423	77.2043	-709.729	-5500.49	97802.3	12802.3	337.802	910.75	0	0	0	0	0	0	0	603	903	0
540	8	0	0	0	0	0	0	200	300	0	44.4794	77.9672	-711.865	-5592.04	98168.5	12893.9	337.903	910.856	0	0	0	0	0	0	0	603	903	0
540	9	0	0	0	0	0	0	200	300	0	44.7845	78.2724	-712.781	-4676.51	96947.8	13031.2	336.013	909.561	0	0	0	0	0	0	0	603	903	0
541	0	0	0	0	0	0	0	200	300	0	45.7001	77.5095	-710.95	-4035.64	97924.4	13031.2	337.737	908.676	0	0	0	0	0	0	0	603	903	0
541	1	0	0	0	0	0	0	200	300	0	46.0053	79.3405	-711.56	-4218.75	98046.4	13168.5	337.791	908.929	0	0	0	0	0	0	0	603	903	0
541	2	0	0	0	0	0	0	200	300	0	46.1578	81.019	-709.729	-4493.41	97497.2	12893.9	337.372	909.331	0	0	0	0	0	0	0	603	903	0
541	3	0	0	0	0	0	0	200	300	0	47.8363	80.1035	-707.288	-4584.96	97497.2	12985.4	337.847	909.483	0	0	0	0	0	0	0	603	903	0
541	4	0	0	0	0	0	0	200	300	0	45.8527	82.2397	-710.339	-3394.77	97985.5	12710.8	337.942	907.779	0	0	0	0	0	0	0	603	903	0
541	5	0	0	0	0	0	0	200	300	0	47.5311	82.2397	-709.424	-3486.33	97558.2	12893.9	337.517	907.914	0	0	0	0	0	0	0	603	903	0
541	6	0	0	0	0	0	0	200	300	0	47.3785	82.85	-706.982	-3577.88	97008.9	12893.9	337.215	908.061	0	0	0	0	0	0	0	603	903	0
541	7	0	0	0	0	0	0	200	300	0	47.226	83.4604	-706.677	-2296.14	97192	13260.1	337.534	906.249	0	0	0	0	0	0	0	603	903	0
541	8	0	0	0	0	0	0	200	300	0	47.0734	84.8337	-706.372	-3028.56	97069.9	13077	337.42	907.288	0	0	0	0	0	0	0	603	903	0
541	9	0	0	0	0	0	0	200	300	0	47.3785	85.9018	-706.677	-2479.25	96886.8	13214.3	337.102	906.508	0	0	0	0	0	0	0	603	903	0
542	0	0	0	0	0	0	0	200	300	0	48.5992	86.3596	-703.32	-2204.59	96825.7	13397.4	337.67	906.135	0	0	0	0	0	0	0	603	903	0
542	1	0	0	0	0	0	0	200	300	0	47.8363	86.3596	-704.541	-2296.14	96764.8	13168.5	337.344	906.259	0	0	0	0	0	0	0	603	903	0
542	2	0.427549	-6.30612	-9.19128	-2860.84	76.5382	-24.1699	208.327	611.256	0	47.6837	86.9699	-702.71	-1655.27	96886.8	13717.9	337.876	905.356	0	0	0	0	0	0	0	603	903	0
542	3	3.32672	-12.7148	-18.9569	-2952.39	-228.638	-253.052	187.939	455.742	0	49.2096	88.6484	-701.794	-1472.17	96215.4	13672.1	337.099	905.098	0	0	0	0	0	0	0	603	903	0
542	4	-1.09833	-12.4096	-20.788	-2311.52	76.5382	158.936	203.682	411.195	0	47.0734	88.4958	-700.879	-648.191	96154.4	13763.6	337.191	903.925	0	0	0	0	0	0	0	603	903	0
542	5	-4.15009	-6.91647	-14.0741	-2128.42	198.609	21.6065	214.112	451.229	0	47.5311	89.7165	-700.879	-922.85	96337.5	13717.9	337.452	904.317	0	0	0	0	0	0	0	603	903	0
542	6	0	0	0	0	0	0	200	300	0	47.226	90.632	-699.048	-556.639	95971.2	13992.5	337.289	903.796	0	0	0	0	0	0	0	603	903	0
542	7	1.95343	-5.54318	-12.243	-3227.05	381.714	21.6065	231.178	563.582	0	48.1415	89.7165	-696.301	-281.98	94872.6	14221.4	336.252	903.405	0	0	0	0	0	0	0	603	903	0
542	8	-1.55609	-3.55954	-25.3656	-3959.47	198.609	113.159	207.83	456.096	0	47.0734	91.5476	-693.86	-281.98	95666.1	13855.2	337.875	903.406	0	0	0	0	0	0	0	603	903	0
542	9	0.427549	1.62845	-30.8588	-5332.76	-228.638	-344.605	192.591	472.812	0	45.7001	93.226	-692.639	633.547	95116.8	14496.1	337.325	902.085	0	0	0	0	0	0	0	603	903	0
543	0	-0.0302147	7.88456	-29.0277	-5698.97	-716.919	-573.486	175.302	496.329	0	46.3104	91.5476	-690.198	999.758	94567.5	14358.7	337.015	901.552	0	0	0	0	0	0	0	603	903	0
543	1	-1.09833	10.6311	-31.1639	-5515.87	-45.5321	-390.381	198.539	476.995	0	45.8527	94.9045	-690.808	908.206	94384.3	14450.3	336.629	901.685	0	0	0	0	0	0	0	603	903	0
543	2	3.78448	8.80008	-38.7933	-6614.5	-167.602	-573.486	195.68	470.506	0	45.8527	94.7519	-689.893	725.1	94506.4	14862.3	336.987	901.949	0	0	0	0	0	0	0	603	903	0
543	3	3.93707	11.8518	-45.202	-8170.9	-594.849	-665.039	186.84	480.764	0	44.0216	95.6674	-685.925	999.758	94201.3	14953.8	337.335	901.543	0	0	0	0	0	0	0	603	903	0
543	4	0.885313	15.9717	-50.0848	-8628.66	-411.743	-573.486	191.779	472.281	0	44.3268	95.5148	-684.094	1732.18	93285.7	14999.6	336.364	900.468	0	0	0	0	0	0	0	603	903	0
543	5	-0.640566	11.2415	-52.2211	-10002	-716.919	-1031.25	186.271	491.531	0	44.3268	97.4985	-683.179	1823.73	92797.4	15274.3	335.832	900.331	0	0	0	0	0	0	0	603	903	0
543	6	2.41119	10.9363	-56.4935	-10276.6	-350.708	-1077.03	193.792	481.908	0	45.0897	98.7192	-678.906	1640.63	92492.3	15274.3	336.237	900.583	0	0	0	0	0	0	0	603	903	0
543	7	4.39483	10.6311	-62.9022	-10276.6	-716.919	-848.145	188.603	463.374	0	42.9535	99.1769	-677.991	1915.29	92309.1	15640.5	336.151	900.175	0	0	0	0	0	0	0	603	903	0
543	8	7.14142	10.0208	-68.7006	-12016.1	-533.813	-1351.69	192.23	474.906	0	41.7328	99.1769	-675.854	2189.95	91820.9	15732	335.859	899.76	0	0	0	0	0	0	0	603	903	0
543	9	9.58282	11.3941	-76.6351	-13755.6	-167.602	-2129.88	197.813	479.495	0	41.1224	99.9399	-674.023	2830.81	91515.7	15686.2	335.775	898.8	0	0	0	0	0	0	0	603	903	0
544	0	7.59918	15.3614	-82.7386	-14304.9	-655.884	-2129.88	192.073	472.893	0	41.275	100.245	-670.361	3013.92	91759.9	16006.7	336.881	898.504	0	0	0	0	0	0	0	603	903	0
544	1	9.73541	17.9554	-91.2836	-16136	-411.743	-2267.21	195.489	476.768	0	42.9535	101.924	-667.31	3471.68	90600.2	16144	335.769	897.798	0	0	0	0	0	0	0	603	903	0
544	2	15.6863	17.6502	-96.4716	-16685.3	-472.778	-2816.53	195.099	472.956	0	40.0543	100.245	-665.173	3380.13	90295	16601.8	335.747	897.918	0	0	0	0	0	0	0	603	903	0
544	3	16.6019	19.0235	-104.406	-17600.8	-411.743	-2999.64	196.056	468.58	0	38.5284	102.992	-663.037	3563.24	90356	16418.7	336.276	897.626	0	0	0	0	0	0	0	603	903	0
544	4	17.5174	21.1597	-114.782	-19065.7	-411.743	-3411.62	196.413	466.103	0	37.4603	102.686	-659.375	4204.11	89562.6	16510.2	335.83	896.624	0	0	0	0	0	0	0	603	903	0
544	5	18.2803	20.8545	-123.327	-21537.6	-961.06	-3548.95	192.207	474.638	0	37.4603	102.839	-656.934	4387.21	88952.2	16739.1	335.405	896.322	0	0	0	0	0	0	0	603	903	0
544	6	18.4329	21.9226	-130.041	-22270	-594.849	-3503.18	195.426	471.254	0	38.681	104.67	-653.271	4478.76	88280.8	16968	335.137	896.144	0	0	0	0	0	0	0	603	903	0
544	7	20.5692	21.6175	-135.839	-23643.3	-594.849	-3274.29	195.621	474.054	0	36.2396	105.433	-649.609	4478.76	88280.8	16830.6	335.898	896.106	0	0	0	0	0	0	0	603	903	0
544	8	23.7735	19.6338	-144.079	-24467.3	-1083.13	-4189.82	192.482	469.819	0	33.6456	103.602	-645.337	4661.87	87792.5	17380	336.041	895.776	0	0	0	0	0	0	0	603	903	0
544	9	24.3838	17.9554	-154.15	-25016.6	-716.919	-3732.06	195.349	462.288	0	33.493	106.806	-643.201	4844.98	86755	17380	334.88	895.467	0	0	0	0	0	0	0	603	903	0
545	0	22.095	17.6502	-162.084	-26573	-900.025	-3411.62	194.447	463.946	0	32.4249	106.654	-641.064	5760.5	86510.8	17563.1	334.949	894.014	0	0	0	0	0	0	0	603	903	0
545	1	23.6209	16.2769	-166.357	-28953.4	-1205.2	-3732.06	192.755	474.044	0	32.1198	107.569	-634.961	5668.95	85656.4	17746.2	334.9	894.072	0	0	0	0	0	0	0	603	903	0
545	2	27.1304	15.2088	-172.155	-28495.6	-1327.27	-4235.6	192.29	465.523	0	31.3568	107.417	-631.299	5668.95	85229.1	17746.2	335.006	894.02	0	0	0	0	0	0	0	603	903	0
545	3	25.452	13.2251	-182.226	-30876	-1083.13	-3594.73	194.056	469.438	0	29.3732	108.332	-627.332	6218.27	84740.8	17837.7	335.081	893.088	0	0	0	0	0	0	0	603	903	0
545	4	26.6727	11.3941	-191.381	-31059.1	-961.06	-3411.62	194.978	462.289	0	31.5094	108.943	-624.89	6126.71	84191.5	18341.3	334.73	893.196	0	0	0	0	0	0	0	603	903	0
545	5	26.6727	7.57938	-199.011	-32615.5	-1449.34	-4235.6	192.717	463.888	0	27.8473	108.18	-619.397	6859.14	83825.3	18249.7	335.334	891.926	0	0	0	0	0	0	0	603	903	0
545	6	25.9097	6.20609	-203.893	-33622.6	-1571.41	-3777.83	192.293	464.903	0	27.8473	108.943	-616.345	6676.03	82665.6	18524.4	334.122	892.168	0	0	0	0	0	0	0	603	903	0
545	7	27.7408	3.30692	-211.218	-34995.9	-1510.38	-3732.06	192.849	465.686	0	26.6266	109.4	-611.157	6676.03	82360.5	18707.5	334.762	892.076	0	0	0	0	0	0	0	603	903	0
545	8	28.9615	1.17069	-222.814	-35545.2	-1754.52	-3823.61	192.126	459.528	0	24.4904	111.537	-602.917	6950.69	82177.3	18615.9	336.299	891.472	0	0	0	0	0	0	0	603	903	0
545	9	28.3511	-0.507778	-228.307	-37010	-1632.45	-3777.83	192.85	462.106	0	23.7274	110.926	-600.781	6767.58	81078.7	18524.4	334.955	891.735	0	0	0	0	0	0	0	603	903	0
546	0	27.7408	-2.94918	-235.327	-37925.5	-1632.45	-3457.4	193.063	461.161	0	22.6593	110.926	-597.729	7683.11	80102.1	18982.1	334.011	890.146	0	0	0	0	0	0	0	603	903	0
546	1	27.7408	-6.91647	-241.125	-38932.6	-1998.66	-3548.95	191.711	461.462	0	23.2697	110.774	-592.847	7774.66	79308.7	19119.5	333.776	889.886	0	0	0	0	0	0	0	603	903	0
546	2	27.7408	-9.0527	-248.449	-39756.6	-2242.8	-3320.07	190.973	460.019	0	21.286	111.537	-587.048	7500	79125.5	19119.5	334.785	890.224	0	0	0	0	0	0	0	603	903	0
546	3	27.4356	-12.1045	-258.215	-41679.2	-2242.8	-3320.07	191.314	461.413	0	18.692	111.079	-583.081	7683.11	78515.2	19211	334.656	889.823	0	0	0	0	0	0	0	603	903	0
546	4	29.877	-13.6303	-263.098	-41679.2	-2120.73	-3182.74	191.939	458.417	0	18.9972	111.689	-575.757	7591.56	77294.5	18982.1	334.249	889.815	0	0	0	0	0	0	0	603	903	0
546	5	28.9615	-16.9873	-274.389	-43418.7	-2364.87	-3274.29	191.381	458.238	0	18.5394	112.147	-571.484	8323.98	76684.1	19027.9	334.184	888.434	0	0	0	0	0	0	0	603	903	0
546	6	28.046	-18.9709	-280.187	-43876.5	-2914.19	-3091.19	189.599	456.597	0	17.9291	111.231	-567.517	8415.53	75890.7	19211	333.724	888.171	0	0	0	0	0	0	0	603	903	0
546	7	28.046	-21.5649	-287.512	-44700.4	-2609.01	-2862.31	190.926	455.474	0	16.5558	112.147	-561.719	8598.63	75524.5	19119.5	334.453	887.692	0	0	0	0	0	0	0	603	903	0
546	8	27.4356	-26.2951	-297.582	-45890.6	-2975.22	-2816.53	190.002	454.212	0	14.5721	111.384	-556.836	8964.85	74242.7	19348.3	333.33	886.9	0	0	0	0	0	0	0	603	903	0
546	9	28.1985	-27.6684	-303.381	-47447	-3402.47	-2633.42	188.785	456.394	0	16.7084	109.858	-549.817	8690.19	73632.4	19348.3	333.922	887.194	0	0	0	0	0	0	0	603	903	0
547	0	27.7408	-30.8728	-314.367	-48271	-3341.43	-2496.09	189.371	453.55	0	13.504	111.537	-543.408	9147.96	73144.1	18890.6	334.603	886.166	0	0	0	0	0	0	0	603	903	0
547	1	27.4356	-31.6357	-320.471	-49369.6	-3463.5	-2450.32	189.192	454.054	0	14.1144	112.757	-535.168	9056.4	72167.5	19165.2	334.85	886.078	0	0	0	0	0	0	0	603	903	0
547	2	26.2149	-33.7719	-327.184	-49461.2	-3707.64	-2038.33	188.668	451.172	0	12.5885	112.757	-532.117	8781.74	70824.8	19165.2	333.1	886.497	0	0	0	0	0	0	0	603	903	0
547	3	25.2994	-36.0608	-335.424	-50742.9	-4195.92	-1901	187.491	451.28	0	10.7575	111.842	-526.624	9422.61	69970.3	19394.1	332.866	885.108	0	0	0	0	0	0	0	603	903	0
547	4	25.9097	-38.0444	-345.8	-51292.2	-4684.2	-1809.45	186.454	448.329	0	9.68933	112.452	-518.994	9331.06	69359.9	19165.2	333.643	885.021	0	0	0	0	0	0	0	603	903	0
547	5	24.3838	-39.4177	-354.345	-52207.8	-4134.89	-1443.24	188.331	447.336	0	11.673	112.147	-512.585	9514.17	69176.9	19073.7	334.957	884.439	0	0	0	0	0	0	0	603	903	0
547	6	23.6209	-41.0962	-362.585	-54496.6	-4867.31	-1397.46	186.576	450.3	0	9.23157	109.858	-506.482	9605.72	67406.8	19485.7	333.088	884.034	0	0	0	0	0	0	0	603	903	0
547	7	24.0787	-41.7065	-376.318	-55686.8	-5477.66	-1168.58	185.444	447.978	0	7.5531	111.994	-497.021	9331.06	66735.5	19211	334.271	884.226	0	0	0	0	0	0	0	603	903	0
547	8	19.9588	-44.4531	-386.083	-56785.4	-5782.84	-802.368	185.022	447.081	0	5.87464	111.842	-491.528	10063.5	65697.8	19302.6	333.66	882.526	0	0	0	0	0	0	0	603	903	0
547	9	17.2122	-43.9953	-400.732	-57609.4	-6210.09	-481.934	184.503	443.76	0	4.95911	111.689	-483.289	9880.38	64660.2	19394.1	333.792	882.556	0	0	0	0	0	0	0	603	903	0
548	0	16.907	-46.8945	-412.939	-58982.7	-6454.23	-298.828	184.37	442.836	0	4.80652	111.231	-478.406	9880.38	63378.5	19027.9	332.479	882.347	0	0	0	0	0	0	0	603	903	0
548	1	15.9915	-47.3523	-422.094	-60813.7	-7125.61	21.6065	183.118	444.076	0	5.1117	110.316	-470.776	10063.5	63012.3	19027.9	333.848	881.624	0	0	0	0	0	0	0	603	903	0
548	2	13.7027	-48.1152	-436.132	-62461.7	-7064.58	67.3829	183.802	443.217	0	3.58582	110.011	-463.147	9788.83	61791.6	18890.6	333.417	881.865	0	0	0	0	0	0	0	603	903	0
548	3	13.3975	-50.8618	-450.17	-63743.4	-7552.86	-161.499	183.222	441.598	0	1.90735	107.417	-455.518	10338.1	60509.8	18936.4	332.838	880.305	0	0	0	0	0	0	0	603	903	0
548	4	12.9398	-52.8454	-462.988	-65208.2	-8224.24	342.041	182.237	440.842	0	1.44959	108.485	-445.447	9788.83	59533.3	18570.1	333.648	881.025	0	0	0	0	0	0	0	603	903	0
548	5	11.1087	-53.3032	-471.533	-65757.6	-8468.38	570.923	182.041	439.455	0	1.75476	108.637	-439.038	10063.5	58556.7	18295.5	333.375	880.078	0	0	0	0	0	0	0	603	903	0
548	6	10.3458	-57.1179	-486.791	-66764.6	-8712.52	525.147	182.102	437.152	0	1.14441	105.433	-429.883	10063.5	57702.2	18158.2	334.228	879.59	0	0	0	0	0	0	0	603	903	0
548	7	10.0406	-61.2378	-495.947	-67863.3	-8834.59	250.488	182.186	436.836	0	0.534062	106.501	-422.559	10063.5	56115.3	17471.5	332.799	879.184	0	0	0	0	0	0	0	603	903	0
548	8	8.20953	-59.8645	-508.154	-69877.4	-9261.84	616.7	181.774	437.512	0	-1.75476	104.365	-413.708	9880.38	55077.7	17837.7	333.132	879.118	0	0	0	0	0	0	0	603	903	0
548	9	7.90436	-60.78	-518.224	-70976.1	-9383.91	616.7	181.892	436.96	0	-2.05993	104.06	-405.774	10246.6	54284.3	17563.1	333.78	877.748	0	0	0	0	0	0	0	603	903	0
549	0	7.59918	-63.6792	-525.854	-71159.2	-9505.98	570.923	181.923	435.321	0	-1.44958	102.992	-396.008	9788.83	53124.6	17242.6	334.15	878.281	0	0	0	0	0	0	0	603	903	0
549	1	5.00519	-66.1206	-538.976	-71617	-10177.4	891.358	181.117	432.876	0	-0.534054	101.771	-384.717	10338.1	51598.7	17105.3	334.121	876.128	0	0	0	0	0	0	0	603	903	0
549	2	4.8526	-67.4939	-544.775	-72715.6	-10299.4	845.581	181.094	433.478	0	-2.36511	100.855	-378.918	9788.83	50317	16830.6	332.791	877.166	0	0	0	0	0	0	0	603	903	0
549	3	3.93707	-68.7146	-552.404	-73905.8	-10482.5	982.911	181.024	433.789	0	-4.50134	100.092	-369.458	9788.83	49584.6	16830.6	334.209	876.505	0	0	0	0	0	0	0	603	903	0
549	4	1.80084	-69.4775	-560.949	-73905.8	-10848.8	799.805	180.66	431.751	0	-4.65393	97.3459	-361.218	10246.6	48485.9	16510.2	334.229	874.633	0	0	0	0	0	0	0	603	903	0
549	5	1.34308	-71.0034	-569.494	-75187.5	-11031.9	1166.02	180.629	432.025	0	-5.11169	95.9726	-352.673	9880.38	46166.6	16144	330.905	874.984	0	0	0	0	0	0	0	603	903	0
549	6	-0.793154	-71.4611	-575.292	-75004.4	-11459.1	1440.67	180.081	430.376	0	-4.65393	94.4467	-342.297	10063.5	46227.6	15732	335.051	873.6	0	0	0	0	0	0	0	603	903	0
549	7	-1.40351	-72.2241	-580.48	-75004.4	-11520.1	1303.35	180.154	429.211	0	-4.65393	93.0734	-333.752	9514.17	45068	15548.9	335.034	874.493	0	0	0	0	0	0	0	603	903	0
549	8	-4.45526	-74.5129	-586.279	-76103	-11703.3	1715.33	180.038	429.807	0	-6.63757	91.0898	-324.292	9605.72	43359	15045.4	333.704	873.379	0	0	0	0	0	0	0	603	903	0
549	9	-4.60785	-73.5974	-591.161	-76743.9	-12191.5	1715.33	179.377	429.819	0	-6.63757	88.6484	-315.442	9880.38	42321.4	14862.3	334.165	871.678	0	0	0	0	0	0	0	603	903	0
550	0	-6.59149	-71.9189	-598.791	-76927	-12008.4	1944.21	179.946	428.471	0	-5.72204	88.4958	-305.676	9239.51	41222.7	14541.8	334.857	872.774	0	0	0	0	0	0	0	603	903	0
550	1	-7.8122	-73.1396	-599.096	-77018.6	-12008.4	2310.42	179.956	428.558	0	-6.02722	85.1389	-294.69	9697.27	40246.2	14038.3	336.571	870.093	0	0	0	0	0	0	0	603	903	0
550	2	-9.18549	-73.1396	-606.42	-77018.6	-12618.8	1989.99	179.191	427.005	0	-5.72204	82.85	-289.502	8964.85	38720.3	13901	333.748	872.034	0	0	0	0	0	0	0	603	903	0
550	3	-11.1691	-73.75	-608.251	-77110.1	-12862.9	2722.41	178.853	426.774	0	-7.09533	81.019	-279.126	9422.61	37499.6	13031.2	334.346	869.242	0	0	0	0	0	0	0	603	903	0
550	4	-11.9321	-73.5974	-609.777	-78391.8	-12740.8	2768.19	179.106	428.558	0	-7.40051	79.3405	-271.497	10155	37072.3	12848.1	336.548	865.596	0	0	0	0	0	0	0	603	903	0
550	5	-12.3898	-73.4448	-612.829	-78025.6	-13107.1	2768.19	178.612	427.32	0	-6.17981	76.7465	-260.815	9239.51	35607.5	12390.3	336.524	867.575	0	0	0	0	0	0	0	603	903	0
550	6	-12.8476	-74.0551	-615.576	-77842.6	-13168.1	2813.97	178.608	426.455	0	-6.33239	72.9318	-251.355	8964.85	34081.6	12069.9	335.592	867.334	0	0	0	0	0	0	0	603	903	0
550	7	-14.5261	-74.3603	-617.407	-77110.1	-13473.3	3042.85	178.178	424.894	0	-6.48498	72.6267	-245.251	8507.08	33227.1	11612.1	335.482	868.313	0	0	0	0	0	0	0	603	903	0
550	8	-13.1528	-75.1233	-619.238	-77201.7	-13107.1	2997.07	178.834	424.672	0	-6.63757	69.5749	-234.57	8507.08	32494.7	10971.3	338.529	866.733	0	0	0	0	0	0	0	603	903	0
550	9	-16.3571	-76.0388	-616.796	-76652.3	-13046	3409.06	178.849	424.275	0	-7.09533	67.1335	-228.467	8049.32	31335	10833.9	337.154	867.768	0	0	0	0	0	0	0	603	903	0
551	0	-16.0519	-75.2758	-620.153	-77934.1	-13717.4	2951.3	177.881	425.669	0	-4.19616	65.1498	-216.565	8232.42	29809.1	10513.5	337.645	864.986	0	0	0	0	0	0	0	603	903	0
551	1	-15.5942	-75.581	-622.289	-77384.8	-13534.3	3729.49	178.251	424.355	0	-6.33239	64.2343	-208.936	8323.98	28527.4	10101.5	336.537	863.16	0	0	0	0	0	0	0	603	903	0
551	2	-18.3408	-76.1914	-622.289	-76652.3	-13595.3	3500.61	178.153	423.178	0	-4.9591	61.3351	-202.222	8140.87	27795	9781.08	337.448	862.743	0	0	0	0	0	0	0	603	903	0
551	3	-17.5778	-76.344	-623.815	-76377.7	-13717.4	3775.27	178.01	422.436	0	-5.26428	59.9619	-194.592	8140.87	27367.7	9506.42	340.641	861.164	0	0	0	0	0	0	0	603	903	0
551	4	-18.0356	-78.3276	-623.815	-76286.1	-14022.6	3729.49	177.521	422.29	0	-5.56945	56.9101	-186.353	7225.35	25170.5	9048.66	335.069	864.228	0	0	0	0	0	0	0	603	903	0
551	5	-17.4252	-78.0224	-624.426	-77110.1	-14144.7	3683.72	177.348	423.49	0	-3.7384	54.9265	-179.944	7591.56	24987.4	8774	338.862	860.812	0	0	0	0	0	0	0	603	903	0
551	6	-15.289	-77.4121	-633.581	-76835.5	-14144.7	3821.05	177.675	421.272	0	-0.534054	52.7902	-171.704	7316.9	24193.9	8316.24	340.905	860.387	0	0	0	0	0	0	0	603	903	0
551	7	-16.3571	-77.7172	-640.6	-76286.1	-14877.1	3866.82	176.776	419.085	0	-3.43322	51.7221	-164.685	7225.35	23278.4	8041.58	341.351	859.126	0	0	0	0	0	0	0	603	903	0
551	8	-22.4606	-80.6164	-644.872	-74729.7	-15060.2	4782.35	176.646	415.883	0	-2.5177	47.9074	-157.361	6767.58	22240.8	7675.37	341.336	859.993	0	0	0	0	0	0	0	603	903	0
551	9	-26.2753	-85.6518	-645.178	-75553.7	-15060.2	4873.9	176.657	417.105	0	-2.5177	46.6867	-151.868	6676.03	21874.6	7309.16	344.037	859.041	0	0	0	0	0	0	0	603	903	0
552	0	-26.2753	-85.1941	-642.126	-76743.9	-15304.3	4919.68	176.166	419.515	0	-0.686642	44.5505	-146.375	7133.79	20898	6988.72	342.771	854.263	0	0	0	0	0	0	0	603	903	0
552	1	-28.4116	-83.5156	-651.891	-76286.1	-15731.6	5011.23	175.868	417.023	0	-0.381466	41.6513	-141.797	6401.37	19921.4	6439.41	340.493	857.855	0	0	0	0	0	0	0	603	903	0
552	2	-31.6159	-86.8725	-657.69	-75279.1	-15853.6	5285.89	175.895	414.46	0	-1.90734	39.2099	-136.304	6676.03	19677.3	6347.85	344.364	854.021	0	0	0	0	0	0	0	603	903	0
552	3	-31.9211	-90.6872	-660.742	-75004.4	-15914.7	5148.56	175.914	413.515	0	-1.29699	38.5996	-130.505	6859.14	18273.5	5981.64	340.021	850.442	0	0	0	0	0	0	0	603	903	0
552	4	-31.1581	-90.8398	-659.216	-75279.1	-15975.7	5514.77	175.766	414.195	0	0.686649	35.3952	-125.317	6401.37	17785.2	5706.99	341.921	851.919	0	0	0	0	0	0	0	603	903	0
552	5	-32.684	-90.5346	-665.624	-76560.8	-16403	5377.44	175.357	415.021	0	2.36512	34.9374	-120.74	5943.61	17052.8	5523.88	341.236	853.773	0	0	0	0	0	0	0	603	903	0
552	6	-29.7849	-94.6545	-668.981	-76103	-16403	5285.89	175.481	413.76	0	2.5177	33.259	-115.857	5394.29	16930.7	5295	346.135	856.44	0	0	0	0	0	0	0	603	903	0
552	7	-31.1581	-95.8752	-672.643	-75645.3	-16219.8	5331.67	175.886	412.46	0	0.991825	30.2072	-110.974	5302.74	16259.3	4883.01	346.515	855.216	0	0	0	0	0	0	0	603	903	0
552	8	-29.9374	-93.5864	-672.643	-74546.7	-16403	5331.67	175.614	410.826	0	1.75476	30.0546	-105.481	5028.08	15160.7	4928.79	343.729	855.332	0	0	0	0	0	0	0	603	903	0
552	9	-32.0737	-96.0278	-677.831	-75828.4	-16891.2	5331.67	175.08	411.869	0	3.28064	28.071	-100.903	5028.08	14611.4	4471.02	344.806	853.169	0	0	0	0	0	0	0	603	903	0
553	0	-33.5996	-97.2485	-679.052	-76377.7	-16769.2	5377.44	175.305	412.477	0	6.48499	25.7822	-94.4946	5028.08	14245.2	4287.92	350.751	849.79	0	0	0	0	0	0	0	603	903	0
553	1	-33.447	-95.1123	-681.188	-76103	-16586.1	5652.1	175.651	411.721	0	4.95911	24.1037	-91.4429	4295.66	13634.8	4196.37	349.108	856.024	0	0	0	0	0	0	0	603	903	0
553	2	-33.1418	-94.9597	-683.325	-75736.8	-17257.4	5331.67	174.745	410.836	0	2.67029	22.7304	-87.7808	4204.11	12902.4	3647.05	346.984	855.107	0	0	0	0	0	0	0	603	903	0
553	3	-34.5151	-95.1123	-688.207	-75462.2	-17318.5	5423.22	174.835	409.65	0	4.65393	21.3571	-83.8135	4295.66	12108.9	3555.5	344.475	851.747	0	0	0	0	0	0	0	603	903	0
553	4	-37.5668	-95.57	-690.649	-75187.5	-17196.4	5835.21	175.101	408.865	0	6.3324	19.6787	-78.3203	3929.45	11803.8	3051.96	350.711	852.828	0	0	0	0	0	0	0	603	903	0
553	5	-36.3461	-94.6545	-692.175	-76377.7	-17379.5	5697.88	174.891	410.345	0	6.02723	18.458	-74.9634	4204.11	11376.5	3280.84	351.761	846.918	0	0	0	0	0	0	0	603	903	0
553	6	-37.7194	-92.6709	-693.09	-75004.4	-17928.8	5743.65	174.132	408.217	0	5.56946	18.1528	-70.0806	4021	10522	2868.85	350.142	845.623	0	0	0	0	0	0	0	603	903	0
553	7	-38.7875	-95.57	-697.668	-75919.9	-17989.9	6018.31	174.214	408.82	0	6.63758	15.2536	-68.8599	3746.34	9972.72	2639.97	344.826	848.595	0	0	0	0	0	0	0	603	903	0
553	8	-39.7031	-94.3493	-704.077	-75279.1	-17867.8	5835.21	174.622	406.919	0	5.87464	14.6433	-66.1133	3197.03	9789.61	2639.97	348.073	854.643	0	0	0	0	0	0	0	603	903	0
553	9	-40.6186	-93.739	-708.349	-75462.2	-18050.9	6018.31	174.517	406.533	0	5.26429	13.7277	-61.8408	3105.47	9362.37	2182.21	351.395	852.783	0	0	0	0	0	0	0	603	903	0
554	0	-42.9074	-93.739	-707.128	-75736.8	-18600.2	5926.76	173.696	407.105	0	5.87464	11.4389	-57.5684	2922.37	8446.84	2319.53	346.727	852.237	0	0	0	0	0	0	0	603	903	0
554	1	-43.6704	-95.7226	-712.621	-76377.7	-18966.4	6201.42	173.385	407.179	0	5.41687	11.8967	-53.6011	2647.71	8019.59	2182.21	349.616	853.603	0	0	0	0	0	0	0	603	903	0
554	2	-43.9755	-95.8752	-716.894	-76286.1	-18478.1	5880.98	174.225	406.412	0	6.94275	12.2018	-50.5493	2830.81	7897.52	2182.21	356.234	846.999	0	0	0	0	0	0	0	603	903	0
554	3	-44.4333	-94.6545	-721.472	-75736.8	-18783.3	6018.31	173.965	404.975	0	3.73841	11.8967	-46.582	2556.16	7653.38	2273.76	364.299	848.126	0	0	0	0	0	0	0	603	903	0
554	4	-44.1281	-97.0959	-723.608	-74821.3	-19088.5	6247.19	173.62	403.4	0	5.1117	11.1337	-45.0562	2464.6	6737.86	1907.55	349.544	848.299	0	0	0	0	0	0	0	603	903	0
554	5	-46.5695	-99.6899	-730.016	-75828.4	-19210.6	6201.42	173.685	403.872	0	5.87464	11.5915	-42.3096	2098.39	6493.72	1907.55	353.481	853.404	0	0	0	0	0	0	0	603	903	0
554	6	-47.1799	-98.3166	-733.984	-76560.8	-19332.6	6292.97	173.661	404.309	0	4.19617	10.8286	-38.9526	1549.07	6066.47	1678.67	355.74	863.232	0	0	0	0	0	0	0	603	903	0
554	7	-46.1118	-97.5537	-737.646	-76927	-19210.6	6064.09	173.957	404.287	0	3.891	9.60785	-35.5957	1549.07	5334.05	1632.89	349.851	859.481	0	0	0	0	0	0	0	603	903	0
554	8	-46.2643	-98.927	-741.918	-76377.7	-19943	5972.54	173.12	402.946	0	5.72205	9.30268	-33.4595	2006.84	5273.01	1815.99	357.594	843.022	0	0	0	0	0	0	0	603	903	0
554	9	-47.0273	-99.2321	-749.853	-75736.8	-19820.9	6201.42	173.567	401.002	0	6.48499	9.45527	-31.6284	1640.63	4784.73	1541.34	351.279	851.128	0	0	0	0	0	0	0	603	903	0
555	0	-47.7902	-99.9951	-754.125	-76743.9	-19882	6109.87	173.636	401.766	0	5.87464	6.40351	-30.4077	1365.97	4845.76	1404.01	359.36	858.078	0	0	0	0	0	0	0	603	903	0
555	1	-46.7221	-99.3847	-757.177	-77751	-19943	6064.09	173.661	402.685	0	4.65393	6.25092	-28.8818	999.758	4357.48	1175.12	350.873	868.385	0	0	0	0	0	0	0	603	903	0
555	2	-48.0954	-99.8425	-759.924	-77659.4	-20248.2	5835.21	173.355	402.194	0	6.94275	5.03022	-26.4404	725.1	3747.13	1129.35	341.72	875.576	0	0	0	0	0	0	0	603	903	0
555	3	-47.3325	-99.5373	-766.943	-76835.5	-20431.3	6018.31	173.36	400.184	0	4.65393	4.11469	-25.2197	1091.31	3808.17	1037.8	351	859.728	0	0	0	0	0	0	0	603	903	0
555	4	-45.5014	-98.4692	-773.046	-77659.4	-20248.2	6292.97	173.807	400.459	0	5.72205	3.9621	-21.2524	908.206	3441.96	717.362	361.956	860.266	0	0	0	0	0	0	0	603	903	0
555	5	-46.8747	-99.6899	-777.929	-77293.2	-20431.3	6247.19	173.736	399.358	0	5.26429	3.04657	-19.4214	908.206	3258.85	717.362	367.797	856.237	0	0	0	0	0	0	0	603	903	0
555	6	-45.5014	-100.3	-779.76	-78575	-20858.5	6064.09	173.25	400.768	0	4.34876	2.7414	-18.5059	633.547	3014.71	763.138	362.906	868.765	0	0	0	0	0	0	0	603	903	0
555	7	-46.4169	-98.6218	-784.643	-77934.1	-20675.4	6064.09	173.65	399.324	0	6.94275	2.58881	-17.5903	-7.32187	2648.5	763.138	350.566	903.416	0	0	0	0	0	0	0	603	903	0
555	8	-45.3488	-99.2321	-790.136	-78849.6	-20614.4	6155.64	173.91	399.792	0	0	0	0	0	0	0	200	903	0	0	0	0	0	0	0	603	903	0
555	9	-43.9755	-98.7744	-795.629	-78391.8	-20614.4	5835.21	174.09	398.528	0	0	0	0	0	0	0	200	903	0	0	0	0	0	0	0	603	903	0
556	0	-43.9755	-100.3	-800.817	-78025.6	-21041.6	6201.42	173.725	397.432	0	0	0	0	0	0	0	200	903	0	0	0	0	0	0	0	603	903	0
556	1	-42.7548	-98.7744	-802.343	-78758.1	-21163.7	5606.33	173.623	398.16	0	0	0	0	0	0	0	200	903	0	0	0	0	0	0	0	603	903	0
556	2	-43.5178	-97.5537	-806.31	-79124.3	-20797.5	5697.88	174.207	398.131	0	0	0	0	0	0	0	200	903	0	0	0	0	0	0	0	603	903	0
556	3	-41.3815	-98.6218	-810.583	-79398.9	-20980.6	5972.54	174.117	397.953	0	0	0	0	0	0	0	200	903	0	0	0	0	0	0	0	603	903	0
556	4	-41.3815	-97.8588	-814.55	-80131.3	-21529.9	5469	173.568	398.375	0	0	0	0	0	0	0	200	903	0	0	0	0	0	0	0	603	903	0
556	5	-41.0764	-98.7744	-817.907	-78758.1	-21590.9	5194.34	173.602	396.292	0	0	0	0	0	0	0	200	903	0	0	0	0	0	0	0	603	903	0
556	6	-39.3979	-99.2321	-820.654	-78666.5	-21652	5377.44	173.616	395.858	0	0	0	0	0	0	0	200	903	0	0	0	0	0	0	0	603	903	0
556	7	-40.7712	-98.6218	-821.264	-79215.8	-21774	5606.33	173.487	396.456	0	0	0	0	0	0	0	200	903	0	0	0	0	0	0	0	603	903	0
556	8	-39.3979	-97.5537	-825.231	-79124.3	-21713	5652.1	173.689	395.881	0	0	0	0	0	0	0	200	903	0	0	0	0	0	0	0	603	903	0
556	9	-38.7875	-97.7063	-830.419	-79398.9	-21468.9	5011.23	174.147	395.613	0	0	0	0	0	0	0	200	903	0	0	0	0	0	0	0	603	903	0
557	0	-38.7875	-97.5537	-833.776	-78483.4	-21407.8	5240.11	174.324	394.13	0	0	0	0	0	0	0	200	903	0	0	0	0	0	0	0	603	903	0
557	1	-37.7194	-98.3166	-832.861	-77842.6	-21590.9	5240.11	174.076	393.464	0	0	0	0	0	0	0	200	903	0	0	0	0	0	0	0	603	903	0
557	2	-38.1772	-98.164	-832.556	-78208.8	-22079.2	5377.44	173.48	393.938	0	0	0	0	0	0	0	200	903	0	0	0	0	0	0	0	603	903	0
557	3	-36.1935	-96.6381	-835.912	-78758.1	-21407.8	4965.45	174.39	394.218	0	0	0	0	0	0	0	200	903	0	0	0	0	0	0	0	603	903	0
557	4	-36.6513	-96.6381	-839.575	-78849.6	-21774	4919.68	174.065	393.916	0	0	0	0	0	0	0	200	903	0	0	0	0	0	0	0	603	903	0
557	5	-37.2617	-96.333	-842.016	-77842.6	-21774	4599.24	174.141	392.448	0	0	0	0	0	0	0	200	903	0	0	0	0	0	0	0	603	903	0
557	6	-35.1254	-96.333	-839.575	-78391.8	-21835.1	4873.9	173.993	393.371	0	0	0	0	0	0	0	200	903	0	0	0	0	0	0	0	603	903	0
557	7	-36.041	-96.333	-838.049	-77384.8	-21774	4873.9	174.018	392.339	0	0	0	0	0	0	0	200	903	0	0	0	0	0	0	0	603	903	0
557	8	-34.6677	-96.6381	-841.711	-77567.9	-21774	4736.57	174.131	392.155	0	0	0	0	0	0	0	200	903	0	0	0	0	0	0	0	603	903	0
557	9	-34.8203	-95.1123	-844.152	-77751	-22384.4	4690.8	173.483	392.105	0	0	0	0	0	0	0	200	903	0	0	0	0	0	0	0	603	903	0
558	0	-35.1254	-95.4174	-844.763	-77476.4	-21957.2	4645.02	174.008	391.714	0	0	0	0	0	0	0	200	903	0	0	0	0	0	0	0	603	903	0
558	1	-32.684	-95.1123	-844.457	-76377.7	-21468.9	4736.57	174.577	390.446	0	0	0	0	0	0	0	200	903	0	0	0	0	0	0	0	603	903	0
558	2	-34.5151	-95.1123	-845.068	-76377.7	-22079.2	4690.8	173.873	390.381	0	0	0	0	0	0	0	200	903	0	0	0	0	0	0	0	603	903	0
558	3	-32.2263	-94.8071	-845.983	-76469.2	-21957.2	4507.69	174.045	390.391	0	0	0	0	0	0	0	200	903	0	0	0	0	0	0	0	603	903	0
558	4	-33.2944	-94.3493	-848.12	-75553.7	-21896.1	4782.35	174.183	389.084	0	0	0	0	0	0	0	200	903	0	0	0	0	0	0	0	603	903	0
558	5	-33.5996	-95.8752	-848.425	-75919.9	-21713	4965.45	174.408	389.483	0	0	0	0	0	0	0	200	903	0	0	0	0	0	0	0	603	903	0
558	6	-31.7685	-94.3493	-848.73	-75370.6	-21652	4645.02	174.489	388.804	0	0	0	0	0	0	0	200	903	0	0	0	0	0	0	0	603	903	0
558	7	-32.5314	-94.8071	-845.373	-74272	-22018.2	3912.6	173.954	387.857	0	0	0	0	0	0	0	200	903	0	0	0	0	0	0	0	603	903	0
558	8	-31.4633	-95.1123	-847.814	-74546.7	-21835.1	4553.47	174.245	387.928	0	0	0	0	0	0	0	200	903	0	0	0	0	0	0	0	603	903	0
558	9	-31.3107	-94.8071	-850.256	-74729.7	-22506.5	4599.24	173.53	387.891	0	0	0	0	0	0	0	200	903	0	0	0	0	0	0	0	603	903	0
559	0	-31.4633	-93.5864	-850.256	-74088.9	-21957.2	4233.03	174.176	387.137	0	0	0	0	0	0	0	200	903	0	0	0	0	0	0	0	603	903	0
559	1	-30.09	-94.8071	-849.035	-74180.5	-21957.2	4416.14	174.139	387.37	0	0	0	0	0	0	0	200	903	0	0	0	0	0	0	0	603	903	0
559	2	-31.3107	-93.5864	-845.068	-73631.1	-21957.2	4416.14	174.017	387.13	0	0	0	0	0	0	0	200	903	0	0	0	0	0	0	0	603	903	0
559	3	-29.9374	-93.4338	-848.425	-72715.6	-22140.3	4233.03	173.904	385.707	0	0	0	0	0	0	0	200	903	0	0	0	0	0	0	0	603	903	0
559	4	-28.8693	-93.5864	-849.035	-72715.6	-22201.3	4416.14	173.851	385.645	0	0	0	0	0	0	0	200	903	0	0	0	0	0	0	0	603	903	0
559	5	-30.2426	-92.2131	-848.12	-72898.7	-22140.3	4004.15	173.895	385.953	0	0	0	0	0	0	0	200	903	0	0	0	0	0	0	0	603	903	0
559	6	-27.8012	-90.8398	-847.204	-71891.6	-21957.2	4233.03	174.083	384.858	0	0	0	0	0	0	0	200	903	0	0	0	0	0	0	0	603	903	0
559	7	-29.7849	-92.2131	-844.152	-72715.6	-22018.2	4141.48	173.917	386.14	0	0	0	0	0	0	0	200	903	0	0	0	0	0	0	0	603	903	0
559	8	-29.0219	-89.6191	-844.457	-71342.3	-22140.3	4095.7	173.782	384.483	0	0	0	0	0	0	0	200	903	0	0	0	0	0	0	0	603	903	0
559	9	-28.8693	-89.9243	-845.068	-70060.5	-21896.1	4004.15	174.09	382.905	0	0	0	0	0	0	0	200	903	0	0	0	0	0	0	0	603	903	0
560	0	-30.2426	-90.2295	-843.847	-70426.8	-22079.2	4004.15	173.835	383.459	0	0	0	0	0	0	0	200	903	0	0	0	0	0	0	0	603	903	0
560	1	-27.496	-88.8562	-841.1	-70609.9	-22506.5	4141.48	173.242	383.949	0	0	0	0	0	0	0	200	903	0	0	0	0	0	0	0	603	903	0
560	2	-29.9374	-87.788	-836.523	-69694.3	-22506.5	4004.15	173.095	383.314	0	0	0	0	0	0	0	200	903	0	0	0	0	0	0	0	603	903	0
560	3	-29.0219	-88.551	-837.744	-70152.1	-21774	3821.05	174.009	383.739	0	0	0	0	0	0	0	200	903	0	0	0	0	0	0	0	603	903	0
560	4	-28.7167	-87.3303	-837.744	-68504.1	-22079.2	4187.26	173.644	381.772	0	0	0	0	0	0	0	200	903	0	0	0	0	0	0	0	603	903	0
560	5	-29.9374	-87.4829	-835.607	-68229.5	-22506.5	4004.15	173.066	381.653	0	0	0	0	0	0	0	200	903	0	0	0	0	0	0	0	603	903	0
560	6	-28.259	-86.7199	-833.471	-67405.5	-21957.2	4004.15	173.656	380.873	0	0	0	0	0	0	0	200	903	0	0	0	0	0	0	0	603	903	0
560	7	-30.5478	-87.1777	-826.147	-67863.3	-21896.1	4004.15	173.496	382.144	0	0	0	0	0	0	0	200	903	0	0	0	0	0	0	0	603	903	0
560	8	-29.4797	-85.3466	-827.673	-67680.2	-22506.5	4049.93	172.808	381.772	0	0	0	0	0	0	0	200	903	0	0	0	0	0	0	0	603	903	0
560	9	-29.3271	-85.0415	-827.978	-66123.8	-22262.3	3821.05	173.112	379.862	0	0	0	0	0	0	0	200	903	0	0	0	0	0	0	0	603	903	0
561	0	-29.9374	-85.0415	-824.621	-65849.1	-22262.3	3912.6	173.003	379.854	0	0	0	0	0	0	0	200	903	0	0	0	0	0	0	0	603	903	0
561	1	-28.8693	-84.4311	-821.569	-65391.4	-21957.2	4049.93	173.274	379.593	0	0	0	0	0	0	0	200	903	0	0	0	0	0	0	0	603	903	0
561	2	-30.7004	-83.8208	-818.212	-65574.5	-22384.4	4004.15	172.642	380.144	0	0	0	0	0	0	0	200	903	0	0	0	0	0	0	0	603	903	0
561	3	-30.3952	-81.8371	-816.076	-64658.9	-22018.2	3912.6	173.019	379.232	0	0	0	0	0	0	0	200	903	0	0	0	0	0	0	0	603	903	0
561	4	-29.9374	-81.9897	-815.771	-64292.7	-21652	3821.05	173.458	378.812	0	0	0	0	0	0	0	200	903	0	0	0	0	0	0	0	603	903	0
561	5	-31.7685	-81.0742	-813.024	-63468.8	-22323.4	3821.05	172.543	378.065	0	0	0	0	0	0	0	200	903	0	0	0	0	0	0	0	603	903	0
[truncated: 2,074 more rows]
