# Supplementary material for: The Effects of an Extemporaneous Speech Dual-task on Older Adult Gait Control
Source: Research Square preprint supplement (doi:10.21203/rs.3.rs-7674245/v1), 2025-11-18
Supplement: Supplementary file 49 [file DT3Walk12.xlsx]

## Sheet: Sheet1
Trajectories
		03:LFHD			03:RFHD			03:LBHD			03:RBHD			03:C7			03:T10			03:CLAV			03:STRN			03:RBAK			03:LSHO			03:LUPA			03:LELB			03:LFRM			03:LWRA			03:LWRB			03:LFIN
Frame	Sub Frame	X	Y	Z	X	Y	Z	X	Y	Z	X	Y	Z	X	Y	Z	X	Y	Z	X	Y	Z	X	Y	Z	X	Y	Z	X	Y	Z	X	Y	Z	X	Y	Z	X	Y	Z	X	Y	Z	X	Y	Z	X	Y	Z
		mm	mm	mm	mm	mm	mm	mm	mm	mm	mm	mm	mm	mm	mm	mm	mm	mm	mm	mm	mm	mm	mm	mm	mm	mm	mm	mm	mm	mm	mm	mm	mm	mm	mm	mm	mm	mm	mm	mm	mm	mm	mm	mm	mm	mm	mm	mm	mm
681	0	118.012	-1800.27	1643.66	221.059	-1807.15	1643.48	87.4259	-1955.31	1660.84	223.046	-1974.67	1663.53	175.276	-2034.19	1515.13	182.949	-2138.8	1295.04	163.461	-1893.73	1417.66	162.31	-1871.33	1231.36	232.487	-2136.35	1370.5	-19.6402	-2026.85	1467.35	-85.7154	-2019.6	1264.14	-110.538	-2011.64	1145.2	-97.0748	-1879.74	1029.18	-41.1651	-1810.77	973.658	-100.424	-1838.49	934.432	-82.9395	-1745.61	887.423
682	0	119.081	-1788.37	1641.18	222.148	-1795.06	1641.03	88.8479	-1943.46	1658.22	224.457	-1962.63	1660.84	176.66	-2021.89	1512.26	183.538	-2126.38	1291.97	164.856	-1881.38	1414.9	163.163	-1858.95	1228.6	233.324	-2124.02	1367.31	-18.3104	-2014.04	1464.94	-84.3649	-2005.66	1261.71	-109.31	-1996.84	1142.91	-95.5535	-1862.9	1029.78	-39.5234	-1792.95	975.936	-98.6801	-1819.8	936.01	-81.1887	-1726.11	891.039
683	0	120.298	-1776.37	1638.86	223.38	-1782.9	1638.71	90.3682	-1931.5	1655.78	225.97	-1950.51	1658.29	178.077	-2009.52	1509.54	184.159	-2113.87	1289.07	166.286	-1868.96	1412.29	164.069	-1846.47	1226.01	234.184	-2111.63	1364.27	-16.9578	-2001.18	1462.68	-83.0033	-1991.82	1259.44	-108.065	-1982.3	1140.77	-94.0393	-1846.54	1030.2	-37.899	-1775.73	977.839	-96.9782	-1801.78	937.298	-79.4696	-1707.37	894.151
684	0	121.662	-1764.26	1636.72	224.756	-1770.66	1636.51	91.9864	-1919.44	1653.51	227.584	-1938.31	1655.86	179.528	-1997.08	1506.99	184.813	-2101.29	1286.33	167.753	-1856.46	1409.83	165.029	-1833.87	1223.58	235.066	-2099.19	1361.4	-15.5827	-1988.28	1460.56	-81.6306	-1978.1	1257.33	-106.805	-1968.01	1138.79	-92.5324	-1830.66	1030.45	-36.292	-1759.11	979.367	-95.3181	-1784.45	938.297	-77.7823	-1689.4	896.761
685	0	123.173	-1752.05	1634.74	226.274	-1758.35	1634.44	93.7009	-1907.26	1651.41	229.297	-1926.02	1653.57	181.012	-1984.59	1504.59	185.501	-2088.64	1283.76	169.254	-1843.9	1407.53	166.042	-1821.18	1221.3	235.971	-2086.68	1358.69	-14.1855	-1975.33	1458.59	-80.2473	-1964.5	1255.38	-105.528	-1953.98	1136.95	-91.0331	-1815.26	1030.51	-34.7029	-1743.08	980.52	-93.7003	-1767.81	939.007	-76.1274	-1672.2	898.868
686	0	124.826	-1739.74	1632.93	227.931	-1745.96	1632.51	95.5086	-1894.98	1649.48	231.106	-1913.66	1651.42	182.527	-1972.03	1502.36	186.223	-2075.91	1281.35	170.788	-1831.27	1405.39	167.106	-1808.37	1219.19	236.9	-2074.11	1356.14	-12.7674	-1962.34	1456.77	-78.8538	-1951.01	1253.59	-104.236	-1940.19	1135.26	-89.5425	-1800.34	1030.39	-33.1326	-1727.65	981.298	-92.126	-1751.85	939.428	-74.5064	-1655.77	900.47
687	0	126.616	-1727.32	1631.29	229.721	-1733.51	1630.7	97.4041	-1882.59	1647.74	233.006	-1901.22	1649.4	184.071	-1959.41	1500.28	186.979	-2063.11	1279.11	172.35	-1818.57	1403.41	168.219	-1795.47	1217.25	237.851	-2061.48	1353.76	-11.3302	-1949.31	1455.1	-77.4514	-1937.64	1251.97	-102.93	-1926.66	1133.72	-88.0621	-1785.91	1030.09	-31.5828	-1712.81	981.702	-90.5971	-1736.58	939.562	-72.9212	-1640.1	901.567
688	0	128.535	-1714.8	1629.81	231.636	-1720.97	1629.02	99.3791	-1870.1	1646.17	234.989	-1888.7	1647.52	185.64	-1946.73	1498.38	187.77	-2050.23	1277.05	173.936	-1805.81	1401.58	169.377	-1782.48	1215.47	238.827	-2048.8	1351.54	-9.87715	-1936.25	1453.58	-76.0418	-1924.39	1250.51	-101.61	-1913.38	1132.33	-86.5942	-1771.96	1029.61	-30.0561	-1698.58	981.734	-89.1162	-1722	939.409	-71.3751	-1625.21	902.158
689	0	130.57	-1702.19	1628.51	233.662	-1708.38	1627.49	101.422	-1857.51	1644.78	237.041	-1876.11	1645.8	187.23	-1934	1496.64	188.598	-2037.3	1275.16	175.537	-1793	1399.93	170.575	-1769.4	1213.87	239.826	-2036.07	1349.51	-8.41251	-1923.16	1452.21	-74.6272	-1911.26	1249.21	-100.277	-1900.36	1131.09	-85.142	-1758.49	1028.95	-28.5562	-1684.94	981.397	-87.6871	-1708.1	938.973	-69.8721	-1611.09	902.242
690	0	132.705	-1689.49	1627.39	235.785	-1695.72	1626.09	103.52	-1844.82	1643.57	239.147	-1863.46	1644.22	188.833	-1921.22	1495.08	189.463	-2024.3	1273.45	177.145	-1780.13	1398.44	171.805	-1756.24	1212.43	240.85	-2023.29	1347.65	-6.94215	-1910.05	1451	-73.2105	-1898.26	1248.08	-98.934	-1887.59	1130.01	-83.7096	-1745.51	1028.12	-27.0879	-1671.9	980.693	-86.3144	-1694.9	938.257	-68.418	-1597.75	901.818
691	0	134.919	-1676.7	1626.43	237.985	-1683	1624.83	105.652	-1832.05	1642.54	241.289	-1850.75	1642.8	190.442	-1908.4	1493.7	190.365	-2011.26	1271.93	178.747	-1767.23	1397.12	173.06	-1743.03	1211.18	241.898	-2010.48	1345.99	-5.47337	-1896.93	1449.94	-71.7953	-1885.4	1247.12	-97.582	-1875.07	1129.08	-82.302	-1733.01	1027.12	-25.6572	-1659.45	979.628	-85.0031	-1682.38	937.264	-67.0193	-1585.18	900.886
692	0	137.19	-1663.84	1625.63	240.237	-1670.23	1623.72	107.8	-1819.19	1641.71	243.444	-1837.99	1641.54	192.045	-1895.55	1492.51	191.304	-1998.17	1270.61	180.331	-1754.29	1395.98	174.332	-1729.78	1210.1	242.969	-1997.64	1344.52	-4.01484	-1883.82	1449.05	-70.3858	-1872.69	1246.33	-96.2232	-1862.81	1128.31	-80.9251	-1720.99	1025.96	-24.2714	-1647.6	978.208	-83.7592	-1670.55	936.003	-65.6842	-1573.4	899.45
693	0	139.489	-1650.92	1625	242.516	-1657.42	1622.76	109.938	-1806.27	1641.06	245.587	-1825.18	1640.45	193.631	-1882.68	1491.51	192.278	-1985.06	1269.49	181.882	-1741.35	1395.01	175.609	-1716.51	1209.2	244.061	-1984.78	1343.27	-2.57636	-1870.73	1448.31	-68.9866	-1860.12	1245.7	-94.8595	-1850.8	1127.68	-79.5852	-1709.45	1024.63	-22.9385	-1636.35	976.443	-82.5891	-1659.41	934.479	-64.422	-1562.41	897.514
694	0	141.786	-1637.95	1624.53	244.791	-1644.58	1621.94	112.041	-1793.29	1640.59	247.691	-1812.35	1639.54	195.188	-1869.8	1490.72	193.285	-1971.94	1268.59	183.387	-1728.4	1394.23	176.884	-1703.24	1208.48	245.174	-1971.92	1342.23	-1.16854	-1857.68	1447.74	-67.6025	-1847.71	1245.23	-93.4928	-1839.04	1127.21	-78.2895	-1698.4	1023.15	-21.6678	-1625.68	974.343	-81.4991	-1648.95	932.703	-63.243	-1552.19	895.089
695	0	144.049	-1624.95	1624.22	247.03	-1631.72	1621.28	114.081	-1780.27	1640.31	249.73	-1799.5	1638.82	196.701	-1856.94	1490.12	194.321	-1958.82	1267.9	184.831	-1715.48	1393.62	178.144	-1690.01	1207.94	246.302	-1959.06	1341.42	0.19766	-1844.68	1447.33	-66.2384	-1835.47	1244.92	-92.1252	-1827.53	1126.88	-77.045	-1687.82	1021.52	-20.4691	-1615.6	971.922	-80.496	-1639.17	930.687	-62.1587	-1542.77	892.186
696	0	146.243	-1611.92	1624.05	249.2	-1618.86	1620.77	116.031	-1767.22	1640.22	251.674	-1786.64	1638.3	198.157	-1844.09	1489.73	195.383	-1945.71	1267.42	186.2	-1702.59	1393.21	179.381	-1676.84	1207.59	247.444	-1946.23	1340.84	1.51141	-1831.76	1447.08	-64.8993	-1823.4	1244.77	-90.7582	-1816.28	1126.7	-75.8592	-1677.72	1019.76	-19.3526	-1606.11	969.196	-79.5863	-1630.07	928.446	-61.1807	-1534.12	888.824
697	0	148.335	-1598.89	1624.01	251.268	-1605.99	1620.41	117.861	-1754.17	1640.3	253.495	-1773.78	1637.98	199.544	-1831.28	1489.56	196.466	-1932.64	1267.17	187.482	-1689.75	1392.99	180.586	-1663.76	1207.42	248.594	-1933.42	1340.5	2.76253	-1818.93	1446.98	-63.5895	-1811.51	1244.77	-89.393	-1805.28	1126.65	-74.739	-1668.1	1017.86	-18.3284	-1597.19	966.185	-78.776	-1621.64	925.997	-60.3212	-1526.26	885.029
698	0	150.29	-1585.88	1624.11	253.2	-1593.15	1620.22	119.546	-1741.12	1640.57	255.169	-1760.94	1637.87	200.849	-1818.52	1489.59	197.563	-1919.62	1267.15	188.666	-1676.98	1392.95	181.748	-1650.78	1207.43	249.749	-1920.67	1340.4	3.94198	-1806.21	1447.04	-62.3129	-1799.82	1244.91	-88.0302	-1794.53	1126.73	-73.6909	-1658.95	1015.86	-17.4069	-1588.85	962.911	-78.0706	-1613.87	923.362	-59.5923	-1519.17	880.83
699	0	152.076	-1572.9	1624.33	254.965	-1580.34	1620.18	121.061	-1728.09	1641	256.672	-1748.14	1637.98	202.063	-1805.82	1489.84	198.672	-1906.66	1267.34	189.742	-1664.3	1393.12	182.86	-1637.93	1207.63	250.904	-1907.97	1340.54	5.04225	-1793.62	1447.25	-61.0723	-1788.31	1245.19	-86.6697	-1784.02	1126.93	-72.7208	-1650.26	1013.75	-16.5977	-1581.07	959.399	-77.475	-1606.75	920.563	-59.006	-1512.85	876.264
700	0	153.662	-1559.97	1624.68	256.535	-1567.57	1620.32	122.386	-1715.12	1641.61	257.984	-1735.37	1638.33	203.177	-1793.21	1490.29	199.788	-1893.77	1267.74	190.705	-1651.72	1393.47	183.913	-1625.22	1208.01	252.054	-1895.34	1340.92	6.05772	-1781.19	1447.59	-59.8697	-1777.01	1245.59	-85.3108	-1773.76	1127.25	-71.8337	-1642.04	1011.57	-15.9098	-1573.85	955.678	-76.9928	-1600.28	917.63	-58.5736	-1507.29	871.374
701	0	155.024	-1547.11	1625.14	257.883	-1554.86	1620.62	123.503	-1702.21	1642.38	259.09	-1722.67	1638.9	204.187	-1780.69	1490.95	200.909	-1880.96	1268.35	191.55	-1639.25	1394.03	184.9	-1612.65	1208.59	253.197	-1882.78	1341.53	6.98486	-1768.91	1448.07	-58.7057	-1765.9	1246.12	-83.9516	-1763.75	1127.67	-71.0333	-1634.27	1009.32	-15.3514	-1567.18	951.781	-76.627	-1594.43	914.593	-58.3062	-1502.48	866.21
702	0	156.139	-1534.33	1625.73	258.989	-1542.21	1621.12	124.401	-1689.38	1643.3	259.979	-1710.02	1639.71	205.089	-1768.26	1491.8	202.033	-1868.25	1269.16	192.275	-1626.89	1394.77	185.814	-1600.24	1209.35	254.328	-1870.3	1342.36	7.82231	-1756.81	1448.67	-57.5798	-1755.01	1246.75	-82.5895	-1753.97	1128.19	-70.3225	-1626.96	1007.03	-14.9294	-1561.05	947.741	-76.379	-1589.2	911.487	-58.2138	-1498.4	860.825
703	0	156.992	-1521.66	1626.43	259.838	-1529.64	1621.8	125.073	-1676.65	1644.36	260.648	-1697.45	1640.75	205.882	-1755.94	1492.84	203.161	-1855.64	1270.15	192.881	-1614.65	1395.71	186.651	-1587.97	1210.3	255.446	-1857.9	1343.39	8.5709	-1744.89	1449.39	-56.4904	-1744.32	1247.48	-81.2212	-1744.44	1128.8	-69.7029	-1620.09	1004.73	-14.6496	-1555.45	943.598	-76.2491	-1584.57	908.347	-58.3053	-1495.05	855.28
704	0	157.572	-1509.1	1627.27	260.421	-1517.15	1622.68	125.521	-1664.04	1645.57	261.097	-1684.96	1642.02	206.569	-1743.71	1494.04	204.293	-1843.13	1271.31	193.371	-1602.54	1396.84	187.406	-1575.84	1211.44	256.547	-1845.58	1344.62	9.2335	-1733.16	1450.21	-55.4346	-1733.84	1248.31	-79.8428	-1735.14	1129.5	-69.1748	-1613.65	1002.43	-14.5162	-1550.37	939.389	-76.236	-1580.53	905.213	-58.5881	-1492.41	849.637
705	0	157.878	-1496.67	1628.22	260.735	-1504.75	1623.75	125.749	-1651.57	1646.89	261.333	-1672.56	1643.5	207.155	-1731.6	1495.41	205.431	-1830.73	1272.63	193.75	-1590.53	1398.14	188.077	-1563.83	1212.75	257.631	-1833.34	1346.03	9.81486	-1721.61	1451.13	-54.4087	-1723.56	1249.22	-78.4502	-1726.08	1130.29	-68.7375	-1607.64	1000.15	-14.5319	-1545.79	935.156	-76.3371	-1577.05	902.124	-59.0673	-1490.46	843.961
706	0	157.912	-1484.38	1629.3	260.784	-1492.44	1625.03	125.769	-1639.23	1648.32	261.367	-1660.25	1645.18	207.645	-1719.58	1496.91	206.579	-1818.44	1274.08	194.025	-1578.64	1399.61	188.664	-1551.93	1214.23	258.696	-1821.18	1347.58	10.3213	-1710.25	1452.13	-53.4081	-1713.5	1250.2	-77.0394	-1717.26	1131.14	-68.389	-1602.04	997.938	-14.6972	-1541.69	930.938	-76.5479	-1574.12	899.12	-59.7454	-1489.18	838.316
707	0	157.686	-1472.23	1630.51	260.579	-1480.23	1626.5	125.596	-1627.06	1649.83	261.217	-1648.04	1647.03	208.049	-1707.64	1498.53	207.738	-1806.25	1275.64	194.204	-1566.84	1401.22	189.167	-1540.13	1215.85	259.742	-1809.07	1349.27	10.7605	-1699.06	1453.2	-52.4281	-1703.64	1251.24	-75.607	-1708.67	1132.06	-68.1264	-1596.84	995.799	-15.0108	-1538.07	926.774	-76.8623	-1571.7	896.237	-60.6216	-1488.54	832.767
708	0	157.216	-1460.22	1631.85	260.136	-1468.12	1628.14	125.252	-1615.04	1651.41	260.901	-1635.93	1649.02	208.375	-1695.79	1500.24	208.91	-1794.16	1277.3	194.296	-1555.12	1402.95	189.591	-1528.39	1217.6	260.768	-1797.03	1351.06	11.141	-1688.03	1454.32	-51.4635	-1693.99	1252.34	-74.1504	-1700.31	1133.05	-67.9459	-1592.02	993.757	-15.4693	-1534.89	922.703	-77.2723	-1569.77	893.511	-61.6909	-1488.51	827.372
709	0	156.526	-1448.36	1633.29	259.479	-1456.1	1629.96	124.759	-1603.17	1653.04	260.445	-1623.92	1651.12	208.634	-1684	1502.01	210.096	-1782.17	1279.02	194.311	-1543.48	1404.77	189.938	-1516.71	1219.45	261.773	-1785.04	1352.92	11.4715	-1677.14	1455.47	-50.5096	-1684.53	1253.48	-72.6683	-1692.18	1134.09	-67.8426	-1587.57	991.833	-16.0669	-1532.13	918.758	-77.7683	-1568.3	890.971	-62.9445	-1489.06	822.186
710	0	155.642	-1436.64	1634.84	258.634	-1444.17	1631.91	124.143	-1591.47	1654.68	259.872	-1612	1653.29	208.839	-1672.27	1503.83	211.295	-1770.28	1280.79	194.26	-1531.88	1406.65	190.215	-1505.07	1221.36	262.758	-1773.08	1354.82	11.7613	-1666.37	1456.64	-49.5624	-1675.26	1254.65	-71.161	-1684.27	1135.17	-67.8112	-1583.46	990.042	-16.7957	-1529.77	914.969	-78.3389	-1567.26	888.644	-64.3689	-1490.14	817.256
711	0	154.597	-1425.05	1636.47	257.631	-1432.33	1633.98	123.433	-1579.9	1656.31	259.211	-1600.17	1655.48	208.998	-1660.57	1505.65	212.506	-1758.48	1282.58	194.153	-1520.32	1408.57	190.427	-1493.46	1223.31	263.721	-1761.16	1356.74	12.0188	-1655.7	1457.81	-48.6187	-1666.17	1255.83	-69.6303	-1676.57	1136.29	-67.8455	-1579.66	988.396	-17.6453	-1527.77	911.361	-78.9714	-1566.6	886.547	-65.9465	-1491.72	812.62
712	0	153.422	-1413.57	1638.16	256.505	-1420.56	1636.12	122.656	-1568.48	1657.9	258.487	-1588.42	1657.65	209.124	-1648.9	1507.44	213.723	-1746.75	1284.36	193.999	-1508.78	1410.47	190.581	-1481.85	1225.24	264.658	-1749.25	1358.64	12.252	-1645.1	1458.95	-47.6766	-1657.26	1257.01	-68.0801	-1669.07	1137.44	-67.939	-1576.16	986.905	-18.6035	-1526.1	907.955	-79.6519	-1566.29	884.695	-67.6557	-1493.73	808.309
713	0	152.154	-1402.19	1639.88	255.287	-1408.86	1638.3	121.839	-1557.16	1659.42	257.726	-1576.74	1659.76	209.225	-1637.23	1509.18	214.942	-1735.11	1286.1	193.808	-1497.24	1412.33	190.684	-1470.25	1227.12	265.569	-1737.35	1360.48	12.4677	-1634.55	1460.04	-46.7354	-1648.5	1258.19	-66.5159	-1661.76	1138.61	-68.0847	-1572.93	985.574	-19.6562	-1524.71	904.766	-80.3658	-1566.27	883.094	-69.4715	-1496.12	804.344
714	0	150.826	-1390.89	1641.6	254.012	-1397.21	1640.47	121.006	-1545.94	1660.85	256.952	-1565.11	1661.76	209.31	-1625.56	1510.84	216.152	-1723.53	1287.78	193.586	-1485.7	1414.11	190.742	-1458.64	1228.91	266.449	-1725.45	1362.25	12.6714	-1624.03	1461.06	-45.796	-1639.88	1259.33	-64.9449	-1654.62	1139.78	-68.2752	-1569.92	984.404	-20.7874	-1523.58	901.805	-81.0978	-1566.51	881.745	-71.3661	-1498.84	800.736
715	0	149.471	-1379.65	1643.28	252.712	-1385.59	1642.58	120.182	-1534.8	1662.16	256.188	-1553.52	1663.61	209.384	-1613.86	1512.38	217.344	-1712.02	1289.37	193.343	-1474.12	1415.76	190.763	-1447.01	1230.58	267.292	-1713.54	1363.9	12.867	-1613.5	1462	-44.8606	-1631.38	1260.45	-63.3759	-1647.64	1140.95	-68.503	-1567.12	983.394	-21.9801	-1522.66	899.075	-81.8328	-1566.95	880.644	-73.31	-1501.81	797.488
716	0	148.12	-1368.43	1644.89	251.417	-1373.99	1644.6	119.385	-1523.69	1663.32	255.451	-1541.96	1665.29	209.451	-1602.13	1513.77	218.504	-1700.56	1290.84	193.081	-1462.51	1417.26	190.751	-1435.36	1232.08	268.094	-1701.61	1365.42	13.0563	-1602.94	1462.82	-43.9325	-1622.99	1261.51	-61.8188	-1640.78	1142.1	-68.7604	-1564.48	982.54	-23.2162	-1521.9	896.578	-82.556	-1567.55	879.782	-75.2728	-1504.98	794.599
717	0	146.801	-1357.22	1646.38	250.153	-1362.38	1646.48	118.631	-1512.6	1664.31	254.758	-1530.39	1666.74	209.514	-1590.35	1515	219.619	-1689.15	1292.18	192.806	-1450.86	1418.58	190.712	-1423.69	1233.38	268.846	-1689.66	1366.78	13.2395	-1592.33	1463.52	-43.0166	-1614.67	1262.51	-60.2846	-1634.03	1143.24	-69.0398	-1561.96	981.836	-24.4773	-1521.27	894.311	-83.2534	-1568.24	879.147	-77.2241	-1508.27	792.057
718	0	145.536	-1345.99	1647.73	248.942	-1350.76	1648.16	117.931	-1501.49	1665.12	254.118	-1518.82	1667.96	209.572	-1578.52	1516.04	220.671	-1677.77	1293.36	192.52	-1439.14	1419.68	190.648	-1412	1234.45	269.54	-1677.68	1367.95	13.4145	-1581.65	1464.07	-42.1187	-1606.41	1263.45	-58.7844	-1627.36	1144.34	-69.3338	-1559.53	981.272	-25.7448	-1520.72	892.268	-83.9119	-1568.99	878.724	-79.1344	-1511.63	789.85
719	0	144.346	-1334.71	1648.9	247.803	-1339.1	1649.62	117.294	-1490.34	1665.73	253.54	-1507.2	1668.92	209.622	-1566.62	1516.87	221.644	-1666.41	1294.37	192.225	-1427.37	1420.55	190.563	-1400.27	1235.27	270.168	-1665.66	1368.92	13.5776	-1570.88	1464.46	-41.2458	-1598.17	1264.3	-57.3294	-1620.74	1145.41	-69.6352	-1557.14	980.84	-27.0009	-1520.2	890.441	-84.52	-1569.74	878.498	-80.9761	-1514.98	787.96
720	0	143.243	-1323.35	1649.86	246.749	-1327.37	1650.82	116.723	-1479.11	1666.12	253.025	-1495.53	1669.6	209.661	-1554.65	1517.49	222.521	-1655.05	1295.18	191.918	-1415.52	1421.17	190.457	-1388.51	1235.82	270.72	-1653.6	1369.68	13.723	-1559.99	1464.69	-40.4055	-1589.93	1265.08	-55.9308	-1614.14	1146.45	-69.9375	-1554.77	980.529	-28.2286	-1519.68	888.821	-85.0679	-1570.43	878.452	-82.7243	-1518.27	786.37
721	0	142.236	-1311.9	1650.58	245.787	-1315.58	1651.73	116.216	-1467.79	1666.31	252.573	-1483.79	1670.01	209.68	-1542.6	1517.87	223.283	-1643.69	1295.78	191.599	-1403.59	1421.53	190.331	-1376.72	1236.1	271.186	-1641.48	1370.22	13.8434	-1548.97	1464.74	-39.6062	-1581.66	1265.77	-54.5988	-1607.54	1147.43	-70.2353	-1552.36	980.329	-29.4125	-1519.1	887.395	-85.5479	-1571.02	878.57	-84.3572	-1521.42	785.059
722	0	141.329	-1300.32	1651.04	244.921	-1303.69	1652.33	115.768	-1456.34	1666.27	252.179	-1471.96	1670.14	209.671	-1530.47	1518.02	223.916	-1632.3	1296.16	191.263	-1391.58	1421.63	190.183	-1364.89	1236.1	271.558	-1629.31	1370.52	13.9304	-1537.81	1464.62	-38.8569	-1573.34	1266.38	-53.3428	-1600.89	1148.38	-70.5237	-1549.88	980.228	-30.5393	-1518.44	886.152	-85.9545	-1571.45	878.837	-85.8568	-1524.4	784.007
723	0	140.519	-1288.61	1651.22	244.148	-1291.69	1652.62	115.371	-1444.74	1666.01	251.834	-1460.02	1669.98	209.626	-1518.25	1517.94	224.403	-1620.86	1296.33	190.906	-1379.48	1421.46	190.01	-1353.01	1235.81	271.826	-1617.07	1370.59	13.9741	-1526.5	1464.31	-38.1669	-1564.92	1266.89	-52.1712	-1594.18	1149.28	-70.7996	-1547.28	980.216	-31.5979	-1517.65	885.081	-86.2844	-1571.7	879.238	-87.2091	-1527.14	783.194
724	0	139.8	-1276.75	1651.13	243.461	-1279.58	1652.58	115.012	-1432.99	1665.54	251.525	-1447.97	1669.57	209.532	-1505.93	1517.62	224.733	-1609.36	1296.26	190.521	-1367.3	1421.02	189.81	-1341.08	1235.25	271.981	-1604.77	1370.42	13.9641	-1515.02	1463.82	-37.5457	-1556.39	1267.31	-51.0911	-1587.38	1150.13	-71.0606	-1544.54	980.281	-32.58	-1516.68	884.167	-86.5368	-1571.7	879.758	-88.4045	-1529.58	782.601
725	0	139.161	-1264.73	1650.75	242.85	-1267.35	1652.22	114.676	-1421.06	1664.87	251.238	-1435.8	1668.9	209.378	-1493.52	1517.08	224.897	-1597.79	1295.97	190.103	-1355.01	1420.34	189.579	-1329.09	1234.44	272.015	-1592.4	1370.03	13.8896	-1503.37	1463.16	-37.003	-1547.72	1267.64	-50.1085	-1580.45	1150.93	-71.3063	-1541.61	980.411	-33.4801	-1515.52	883.399	-86.7128	-1571.42	880.384	-89.4377	-1531.69	782.209
726	0	138.587	-1252.54	1650.1	242.299	-1254.99	1651.55	114.346	-1408.95	1664	250.955	-1423.49	1667.99	209.151	-1481.01	1516.32	224.887	-1586.12	1295.46	189.642	-1342.63	1419.41	189.312	-1317.04	1233.37	271.921	-1579.95	1369.42	13.7398	-1491.54	1462.33	-36.5482	-1538.89	1267.89	-49.228	-1573.36	1151.68	-71.5373	-1538.46	980.594	-34.2957	-1514.11	882.763	-86.8164	-1570.83	881.102	-90.3078	-1533.42	781.997
727	0	138.062	-1240.17	1649.18	241.792	-1242.49	1650.59	114.005	-1396.66	1662.94	250.659	-1411.04	1666.86	208.842	-1468.4	1515.35	224.7	-1574.34	1294.74	189.133	-1330.15	1418.26	189.004	-1304.91	1232.08	271.693	-1567.42	1368.61	13.5042	-1479.53	1461.32	-36.1902	-1529.87	1268.04	-48.4535	-1566.1	1152.37	-71.7559	-1535.06	980.818	-35.0271	-1512.42	882.244	-86.8531	-1569.87	881.897	-91.0179	-1534.73	781.946
728	0	137.563	-1227.64	1648.02	241.308	-1229.86	1649.37	113.631	-1384.17	1661.71	250.33	-1398.46	1665.54	208.436	-1455.69	1514.19	224.333	-1562.44	1293.82	188.566	-1317.57	1416.91	188.65	-1292.69	1230.59	271.326	-1554.8	1367.6	13.1727	-1467.33	1460.17	-35.9376	-1520.64	1268.11	-47.788	-1558.63	1153.01	-71.9657	-1531.36	981.069	-35.6771	-1510.43	881.828	-86.831	-1568.54	882.754	-91.5751	-1535.59	782.038
729	0	137.071	-1214.93	1646.64	240.828	-1217.1	1647.9	113.206	-1371.51	1660.33	249.947	-1385.75	1664.05	207.924	-1442.88	1512.87	223.789	-1550.41	1292.72	187.933	-1304.88	1415.37	188.245	-1280.38	1228.91	270.817	-1542.1	1366.42	12.7361	-1454.95	1458.86	-35.7979	-1511.18	1268.08	-47.2336	-1550.93	1153.58	-72.1717	-1527.35	981.332	-36.2514	-1508.09	881.499	-86.7598	-1566.78	883.659	-91.9896	-1535.97	782.25
730	0	136.564	-1202.06	1645.05	240.33	-1204.21	1646.22	112.709	-1358.66	1658.8	249.492	-1372.9	1662.4	207.297	-1429.97	1511.39	223.071	-1538.23	1291.45	187.228	-1292.09	1413.68	187.783	-1267.96	1227.09	270.162	-1529.31	1365.09	12.186	-1442.4	1457.42	-35.7778	-1501.48	1267.96	-46.7925	-1542.98	1154.08	-72.3801	-1522.98	981.593	-36.7578	-1505.39	881.241	-86.6512	-1564.58	884.594	-92.2747	-1535.84	782.562
731	0	136.018	-1189.03	1643.29	239.791	-1191.19	1644.37	112.124	-1345.63	1657.15	248.946	-1359.92	1660.63	206.545	-1416.95	1509.78	222.186	-1525.91	1290.03	186.445	-1279.19	1411.85	187.26	-1255.43	1225.14	269.363	-1516.43	1363.63	11.5154	-1429.66	1455.85	-35.8828	-1491.53	1267.75	-46.4662	-1534.75	1154.5	-72.5981	-1518.24	981.836	-37.2059	-1502.27	881.035	-86.5182	-1561.9	885.541	-92.4457	-1535.18	782.951
732	0	135.414	-1175.85	1641.39	239.191	-1178.05	1642.38	111.434	-1332.45	1655.39	248.293	-1346.82	1658.76	205.662	-1403.84	1508.07	221.142	-1513.44	1288.48	185.577	-1266.19	1409.91	186.672	-1242.78	1223.08	268.417	-1503.46	1362.06	10.7186	-1416.75	1454.17	-36.1175	-1481.31	1267.44	-46.2566	-1526.21	1154.83	-72.8336	-1513.08	982.045	-37.6067	-1498.73	880.862	-86.3757	-1558.72	886.481	-92.5199	-1533.96	783.394
733	0	134.732	-1162.53	1639.37	238.511	-1164.8	1640.28	110.624	-1319.11	1653.55	247.518	-1333.6	1656.81	204.643	-1390.63	1506.27	219.949	-1500.82	1286.84	184.622	-1253.08	1407.9	186.014	-1230.01	1220.96	267.329	-1490.4	1360.4	9.79155	-1403.68	1452.4	-36.4853	-1470.8	1267.03	-46.1655	-1517.35	1155.06	-73.0952	-1507.49	982.203	-37.9724	-1494.73	880.704	-86.2397	-1555.02	887.395	-92.5155	-1532.17	783.867
734	0	133.953	-1149.08	1637.27	237.733	-1151.44	1638.11	109.683	-1305.64	1651.64	246.61	-1320.27	1654.82	203.486	-1377.33	1504.42	218.62	-1488.05	1285.12	183.577	-1239.88	1405.82	185.284	-1217.12	1218.8	266.1	-1477.27	1358.7	8.73181	-1390.46	1450.54	-36.9884	-1460.01	1266.52	-46.195	-1508.15	1155.19	-73.3916	-1501.43	982.294	-38.3156	-1490.23	880.54	-86.1276	-1550.77	888.263	-92.4518	-1529.79	784.345
735	0	133.064	-1135.51	1635.12	236.844	-1137.98	1635.9	108.604	-1292.04	1649.69	245.56	-1306.84	1652.81	202.191	-1363.95	1502.53	217.166	-1475.13	1283.35	182.442	-1226.58	1403.72	184.479	-1204.1	1216.62	264.737	-1464.07	1356.96	7.53894	-1377.08	1448.62	-37.6282	-1448.92	1265.89	-46.3475	-1498.58	1155.19	-73.732	-1494.88	982.302	-38.6492	-1485.23	880.349	-86.0574	-1545.94	889.062	-92.3483	-1526.8	784.802
736	0	132.053	-1121.84	1632.94	235.832	-1124.43	1633.69	107.38	-1278.33	1647.71	244.364	-1293.31	1650.8	200.761	-1350.49	1500.63	215.602	-1462.08	1281.55	181.219	-1213.2	1401.62	183.599	-1190.96	1214.46	263.244	-1450.8	1355.22	6.21448	-1363.58	1446.66	-38.4048	-1437.53	1265.16	-46.6255	-1488.63	1155.06	-74.1252	-1487.82	982.213	-38.9861	-1479.68	880.114	-86.0479	-1540.51	889.772	-92.2248	-1523.18	785.213
737	0	130.912	-1108.08	1630.76	234.689	-1110.8	1631.49	106.013	-1264.52	1645.73	243.02	-1279.7	1648.82	199.2	-1336.97	1498.76	213.943	-1448.9	1279.77	179.912	-1199.75	1399.54	182.644	-1177.72	1212.34	261.631	-1437.47	1353.5	4.76218	-1349.95	1444.68	-39.3174	-1425.83	1264.32	-47.0318	-1478.28	1154.8	-74.5798	-1480.2	982.013	-39.3389	-1473.55	879.815	-86.1181	-1534.45	890.372	-92.1006	-1518.91	785.553
738	0	129.638	-1094.25	1628.59	233.412	-1097.1	1629.34	104.505	-1250.63	1643.78	241.532	-1266.01	1646.9	197.517	-1323.4	1496.93	212.202	-1435.61	1278.01	178.527	-1186.24	1397.52	181.617	-1164.37	1210.29	259.905	-1424.1	1351.82	3.18817	-1336.21	1442.69	-40.3642	-1413.82	1263.37	-47.5696	-1467.52	1154.39	-75.1041	-1472.02	981.692	-39.7197	-1466.83	879.436	-86.2867	-1527.73	890.844	-91.9946	-1513.96	785.798
739	0	128.233	-1080.35	1626.48	232.003	-1083.33	1627.27	102.862	-1236.68	1641.87	239.907	-1252.25	1645.06	195.723	-1309.79	1495.16	210.394	-1422.22	1276.31	177.072	-1172.68	1395.58	180.521	-1150.94	1208.34	258.08	-1410.71	1350.22	1.50112	-1322.38	1440.73	-41.5424	-1401.51	1262.31	-48.2417	-1456.33	1153.84	-75.7054	-1463.23	981.24	-40.1397	-1459.48	878.964	-86.5722	-1520.33	891.167	-91.9247	-1508.3	785.925
740	0	126.7	-1066.41	1624.43	230.465	-1069.52	1625.28	101.096	-1222.68	1640.02	238.156	-1238.45	1643.33	193.831	-1296.15	1493.49	208.534	-1408.75	1274.69	175.558	-1159.09	1393.74	179.361	-1137.43	1206.5	256.165	-1397.31	1348.71	-0.287738	-1308.49	1438.81	-42.8479	-1388.88	1261.16	-49.051	-1444.71	1153.14	-76.3902	-1453.83	980.653	-40.6094	-1451.46	878.385	-86.9919	-1512.21	891.325	-91.9077	-1501.9	785.912
741	0	125.05	-1052.45	1622.46	228.809	-1055.68	1623.41	99.221	-1208.66	1638.27	236.294	-1224.6	1641.72	191.857	-1282.51	1491.94	206.635	-1395.22	1273.17	173.996	-1145.49	1392.02	178.145	-1123.88	1204.81	254.175	-1383.91	1347.32	-2.16466	-1294.53	1436.97	-44.2757	-1375.95	1259.91	-50.0002	-1432.66	1152.29	-77.1639	-1443.78	979.927	-41.1378	-1442.76	877.693	-87.5615	-1503.34	891.304	-91.9589	-1494.72	785.74
742	0	123.298	-1038.48	1620.6	227.048	-1041.82	1621.68	97.2547	-1194.63	1636.62	234.338	-1210.74	1640.27	189.82	-1268.89	1490.52	204.71	-1381.66	1271.79	172.402	-1131.89	1390.45	176.88	-1110.29	1203.28	252.124	-1370.54	1346.06	-4.1136	-1280.54	1435.24	-45.8196	-1362.72	1258.59	-51.0914	-1420.16	1151.32	-78.0304	-1433.07	979.065	-41.733	-1433.34	876.883	-88.2948	-1493.69	891.093	-92.0925	-1486.74	785.392
743	0	121.46	-1024.52	1618.86	225.2	-1027.96	1620.08	95.2181	-1180.6	1635.11	232.31	-1196.87	1638.99	187.74	-1255.3	1489.25	202.771	-1368.07	1270.54	170.789	-1118.32	1389.05	175.578	-1096.69	1201.93	250.027	-1357.21	1344.95	-6.11651	-1266.54	1433.62	-47.4724	-1349.2	1257.22	-52.3258	-1407.23	1150.22	-78.9922	-1421.69	978.07	-42.4011	-1423.17	875.955	-89.2027	-1483.24	890.683	-92.321	-1477.89	784.855
744	0	119.559	-1010.59	1617.26	223.287	-1014.12	1618.65	93.1346	-1166.61	1633.76	230.233	-1183.01	1637.9	185.639	-1241.76	1488.16	200.829	-1354.5	1269.47	169.175	-1104.8	1387.83	174.249	-1083.12	1200.78	247.901	-1343.94	1344.01	-8.15379	-1252.55	1432.16	-49.2256	-1335.41	1255.8	-53.7042	-1393.87	1149.02	-80.0501	-1409.6	976.953	-43.1467	-1412.23	874.912	-90.2928	-1471.94	890.071	-92.6559	-1468.13	784.117
745	0	117.619	-996.721	1615.81	221.332	-1000.32	1617.39	91.0299	-1152.68	1632.57	228.133	-1169.19	1637	183.54	-1228.29	1487.26	198.895	-1340.95	1268.57	167.576	-1091.33	1386.81	172.904	-1069.58	1199.84	245.761	-1330.76	1343.24	-10.2048	-1238.58	1430.88	-51.0694	-1321.36	1254.37	-55.2257	-1380.1	1147.74	-81.2033	-1396.82	975.726	-43.9724	-1400.48	873.764	-91.5686	-1459.78	889.257	-93.1071	-1457.41	783.175
746	0	115.668	-982.925	1614.52	219.363	-986.59	1616.32	88.9311	-1138.81	1631.57	226.037	-1155.42	1636.33	181.466	-1214.92	1486.55	196.977	-1327.45	1267.87	166.009	-1077.96	1386.01	171.555	-1056.12	1199.11	243.625	-1317.67	1342.66	-12.2487	-1224.66	1429.81	-52.9929	-1307.06	1252.96	-56.8885	-1365.93	1146.4	-82.4489	-1383.33	974.409	-44.8786	-1387.92	872.525	-93.0294	-1446.74	888.247	-93.6833	-1445.69	782.031
747	0	113.733	-969.224	1613.42	217.409	-972.937	1615.44	86.8663	-1125.04	1630.77	223.974	-1141.73	1635.87	179.439	-1201.66	1486.06	195.085	-1314.02	1267.37	164.489	-1064.68	1385.42	170.213	-1042.76	1198.62	241.509	-1304.7	1342.28	-14.2647	-1210.82	1428.95	-54.9835	-1292.54	1251.58	-58.689	-1351.39	1145.02	-83.7826	-1369.13	973.021	-45.8636	-1374.51	871.214	-94.6696	-1432.8	887.052	-94.3915	-1432.91	780.692
748	0	111.845	-955.638	1612.51	215.498	-959.389	1614.76	84.8638	-1111.37	1630.18	221.971	-1128.13	1635.65	177.48	-1188.53	1485.78	193.225	-1300.68	1267.09	163.031	-1051.53	1385.06	168.89	-1029.51	1198.35	239.428	-1291.85	1342.11	-16.2333	-1197.07	1428.35	-57.0281	-1277.82	1250.28	-60.6222	-1336.49	1143.64	-85.198	-1354.23	971.591	-46.9234	-1360.26	869.856	-96.4785	-1417.94	885.689	-95.2368	-1419.03	779.175
749	0	110.033	-942.184	1611.8	213.66	-945.963	1614.28	82.9508	-1097.84	1629.83	220.055	-1114.65	1635.66	175.609	-1175.54	1485.73	191.403	-1287.45	1267.02	161.649	-1038.52	1384.93	167.597	-1016.41	1198.32	237.395	-1279.15	1342.14	-18.1364	-1183.43	1428	-59.1125	-1262.93	1249.08	-62.6817	-1321.27	1142.29	-86.6873	-1338.64	970.146	-48.0518	-1345.15	868.478	-98.4406	-1402.17	884.181	-96.2223	-1404.01	777.502
750	0	108.326	-928.877	1611.31	211.924	-932.679	1614.02	81.1533	-1084.44	1629.72	218.253	-1101.3	1635.9	173.843	-1162.71	1485.91	189.626	-1274.35	1267.17	160.353	-1025.66	1385.05	166.342	-1003.47	1198.52	235.424	-1266.6	1342.37	-19.9585	-1169.91	1427.94	-61.2226	-1247.91	1248.02	-64.8594	-1305.76	1141	-88.2412	-1322.38	968.719	-49.2407	-1329.18	867.115	-100.535	-1385.49	882.557	-97.3484	-1387.81	775.708
751	0	106.75	-915.731	1611.05	210.317	-919.552	1613.97	79.4944	-1071.21	1629.87	216.588	-1088.1	1636.39	172.194	-1150.04	1486.31	187.897	-1261.38	1267.55	159.152	-1012.95	1385.4	165.134	-990.706	1198.95	233.524	-1254.21	1342.82	-21.6864	-1156.54	1428.17	-63.3444	-1232.77	1247.12	-67.1461	-1289.99	1139.8	-89.8491	-1305.47	967.347	-50.4801	-1312.36	865.806	-102.738	-1367.93	880.851	-98.6126	-1370.4	773.835
752	0	105.328	-902.756	1611.03	208.861	-906.596	1614.13	77.9938	-1058.14	1630.27	215.079	-1075.06	1637.11	170.674	-1137.55	1486.95	186.218	-1248.56	1268.15	158.053	-1000.42	1386	163.98	-978.127	1199.62	231.702	-1241.98	1343.47	-23.3099	-1143.31	1428.69	-65.4643	-1217.56	1246.41	-69.5312	-1274	1138.73	-91.4996	-1287.94	966.064	-51.7588	-1294.7	864.591	-105.021	-1349.49	879.103	-100.009	-1351.78	771.932
753	0	104.079	-889.959	1611.25	207.576	-893.823	1614.5	76.6668	-1045.25	1630.95	213.743	-1062.2	1638.06	169.288	-1125.25	1487.8	184.593	-1235.9	1268.96	157.059	-988.065	1386.83	162.887	-965.738	1200.53	229.965	-1229.92	1344.31	-24.8222	-1130.25	1429.52	-67.57	-1202.29	1245.93	-72.0029	-1257.81	1137.81	-93.1807	-1269.82	964.91	-53.0642	-1276.23	863.517	-107.353	-1330.21	877.358	-101.528	-1331.93	770.058
754	0	103.018	-877.346	1611.72	206.476	-881.24	1615.09	75.524	-1032.54	1631.9	212.589	-1049.52	1639.24	168.04	-1113.12	1488.88	183.021	-1223.39	1269.98	156.171	-975.883	1387.9	161.859	-953.535	1201.66	228.314	-1218.02	1345.34	-26.2193	-1117.35	1430.64	-69.6502	-1187.01	1245.68	-74.5487	-1241.48	1137.08	-94.8801	-1251.16	963.92	-54.3835	-1256.98	862.628	-109.701	-1310.12	875.663	-103.156	-1310.88	768.277
755	0	102.154	-864.92	1612.45	205.571	-868.853	1615.89	74.5705	-1020.01	1633.12	211.623	-1037.03	1640.64	166.927	-1101.18	1490.16	181.504	-1211.04	1271.2	155.388	-963.875	1389.2	160.898	-941.514	1203.01	226.75	-1206.27	1346.56	-27.4999	-1104.62	1432.06	-71.6955	-1171.75	1245.7	-77.1553	-1225.02	1136.55	-96.5856	-1231.98	963.132	-55.7034	-1236.96	861.971	-112.034	-1289.29	874.067	-104.875	-1288.65	766.658
756	0	101.489	-852.68	1613.44	204.863	-856.667	1616.89	73.8056	-1007.67	1634.61	210.845	-1024.74	1642.24	165.946	-1089.41	1491.63	180.041	-1198.85	1272.59	154.705	-952.034	1390.72	160.007	-929.662	1204.58	225.272	-1194.68	1347.93	-28.6655	-1092.05	1433.76	-73.698	-1156.52	1245.98	-79.8087	-1208.47	1136.25	-98.2855	-1212.35	962.579	-57.0113	-1216.24	861.592	-114.319	-1267.74	872.62	-106.662	-1265.28	765.272
757	0	101.02	-840.624	1614.67	204.35	-844.681	1618.09	73.2234	-995.51	1636.35	210.248	-1012.66	1644.02	165.09	-1077.81	1493.28	178.633	-1186.82	1274.16	154.118	-940.352	1392.43	159.185	-917.965	1206.34	223.88	-1183.22	1349.46	-29.7196	-1079.64	1435.71	-75.6516	-1141.35	1246.54	-82.495	-1191.87	1136.18	-99.969	-1192.29	962.29	-58.2953	-1194.84	861.534	-116.527	-1245.55	871.369	-108.491	-1240.83	764.188
758	0	100.736	-828.751	1616.15	204.023	-832.894	1619.48	72.8124	-983.536	1638.34	209.821	-1000.76	1645.97	164.35	-1066.36	1495.08	177.28	-1174.93	1275.87	153.617	-928.818	1394.34	158.429	-906.406	1208.3	222.57	-1171.88	1351.11	-30.6672	-1067.38	1437.9	-77.5519	-1126.27	1247.38	-85.1995	-1175.23	1136.35	-101.626	-1171.87	962.292	-59.5446	-1172.82	861.835	-118.633	-1222.76	870.358	-110.332	-1215.38	763.472
759	0	100.622	-817.053	1617.87	203.866	-821.299	1621.06	72.5564	-971.741	1640.53	209.548	-989.069	1648.06	163.716	-1055.07	1497.03	175.985	-1163.18	1277.7	153.193	-917.416	1396.41	157.737	-894.968	1210.42	221.341	-1160.65	1352.88	-31.5145	-1055.27	1440.3	-79.3959	-1111.28	1248.47	-87.9081	-1158.6	1136.76	-103.248	-1151.13	962.602	-60.7498	-1150.23	862.527	-120.613	-1199.44	869.626	-112.154	-1189	763.185
760	0	100.657	-805.523	1619.8	203.859	-809.89	1622.8	72.4355	-960.118	1642.9	209.41	-977.565	1650.27	163.176	-1043.89	1499.08	174.75	-1151.56	1279.63	152.838	-906.131	1398.61	157.103	-883.632	1212.67	220.19	-1149.51	1354.74	-32.2683	-1043.28	1442.87	-81.1815	-1096.4	1249.81	-90.6064	-1141.98	1137.4	-104.827	-1130.11	963.235	-61.9028	-1127.13	863.637	-122.45	-1175.65	869.205	-113.924	-1161.8	763.376
761	0	100.817	-794.154	1621.92	203.98	-798.656	1624.7	72.4266	-948.661	1645.41	209.382	-966.244	1652.56	162.72	-1032.83	1501.21	173.577	-1140.05	1281.63	152.539	-894.946	1400.92	156.521	-872.377	1215.04	219.115	-1138.45	1356.66	-32.9357	-1031.42	1445.57	-82.9076	-1081.64	1251.37	-93.2802	-1125.4	1138.25	-106.357	-1108.86	964.198	-62.997	-1103.58	865.183	-124.129	-1151.44	869.122	-115.609	-1133.88	764.088
762	0	101.076	-782.932	1624.2	204.201	-787.584	1626.72	72.5045	-937.359	1648.03	209.441	-955.095	1654.9	162.334	-1021.86	1503.4	172.472	-1128.65	1283.68	152.285	-883.841	1403.31	155.983	-861.187	1217.48	218.116	-1127.45	1358.62	-33.5237	-1019.68	1448.37	-84.5733	-1067.02	1253.11	-95.9158	-1108.88	1139.29	-107.831	-1087.43	965.491	-64.0266	-1079.63	867.175	-125.642	-1126.88	869.394	-117.179	-1105.36	765.35
763	0	101.404	-771.847	1626.61	204.495	-776.657	1628.85	72.6435	-926.202	1650.7	209.56	-944.104	1657.26	162.01	-1010.96	1505.6	171.438	-1117.34	1285.75	152.066	-872.798	1405.73	155.483	-850.045	1219.96	217.193	-1116.48	1360.6	-34.0394	-1008.02	1451.21	-86.1778	-1052.52	1255	-98.4995	-1092.43	1140.49	-109.244	-1065.86	967.106	-64.9871	-1055.34	869.614	-126.982	-1102.02	870.03	-118.604	-1076.34	767.178
764	0	101.773	-760.883	1629.11	204.832	-765.859	1631.05	72.8184	-915.176	1653.39	209.715	-933.256	1659.59	161.735	-1000.11	1507.79	170.481	-1106.1	1287.79	151.872	-861.799	1408.15	155.013	-838.935	1222.44	216.344	-1105.55	1362.56	-34.4891	-996.459	1454.05	-87.7197	-1038.15	1256.99	-101.018	-1076.06	1141.82	-110.593	-1044.2	969.033	-65.8743	-1030.78	872.495	-128.148	-1076.92	871.034	-119.861	-1046.94	769.578
765	0	102.155	-750.024	1631.66	205.186	-755.17	1633.29	73.005	-904.266	1656.03	209.88	-922.532	1661.86	161.501	-989.294	1509.93	169.603	-1094.91	1289.8	151.692	-850.827	1410.53	154.565	-827.843	1224.87	215.57	-1094.62	1364.48	-34.879	-984.969	1456.84	-89.1974	-1023.91	1259.05	-103.459	-1059.79	1143.23	-111.872	-1022.47	971.251	-66.6842	-1006.01	875.802	-129.142	-1051.63	872.401	-120.93	-1017.28	772.542
766	0	102.526	-739.252	1634.22	205.53	-744.567	1635.55	73.1817	-893.455	1658.58	210.036	-911.913	1664.03	161.301	-978.491	1511.99	168.808	-1083.77	1291.72	151.519	-839.865	1412.84	154.132	-816.757	1227.22	214.872	-1083.69	1366.33	-35.2146	-973.542	1459.55	-90.608	-1009.8	1261.11	-105.809	-1043.6	1144.69	-113.077	-1000.71	973.738	-67.4132	-981.08	879.516	-129.967	-1026.2	874.119	-121.797	-987.446	776.055
767	0	102.865	-728.547	1636.74	205.844	-734.031	1637.77	73.3297	-882.724	1661	210.162	-901.375	1666.08	161.126	-967.685	1513.95	168.098	-1072.66	1293.54	151.345	-828.9	1415.02	153.708	-805.668	1229.45	214.25	-1072.75	1368.09	-35.5008	-962.168	1462.13	-91.9482	-995.807	1263.14	-108.057	-1027.52	1146.16	-114.203	-978.971	976.466	-68.0574	-956.063	883.607	-130.63	-1000.68	876.17	-122.452	-957.554	780.088
768	0	103.153	-717.89	1639.18	206.109	-723.536	1639.93	73.4337	-872.053	1663.25	210.244	-890.897	1667.96	160.973	-956.858	1515.76	167.474	-1061.55	1295.23	151.166	-817.919	1417.05	153.289	-794.567	1231.52	213.703	-1061.78	1369.72	-35.7416	-950.837	1464.55	-93.2133	-981.934	1265.08	-110.191	-1011.53	1147.58	-115.245	-957.27	979.403	-68.6127	-931.014	888.043	-131.137	-975.117	878.534	-122.892	-927.694	784.607
769	0	103.377	-707.259	1641.48	206.311	-713.061	1641.98	73.4824	-861.421	1665.28	210.27	-880.453	1669.65	160.837	-945.998	1517.41	166.934	-1050.45	1296.76	150.978	-806.909	1418.9	152.87	-783.449	1233.4	213.234	-1050.77	1371.22	-35.9404	-939.538	1466.76	-94.3983	-968.171	1266.9	-112.2	-995.629	1148.93	-116.198	-935.642	982.517	-69.0752	-905.991	892.785	-131.497	-949.566	881.184	-123.118	-897.951	789.574
770	0	103.53	-696.634	1643.62	206.441	-702.583	1643.88	73.4686	-850.805	1667.07	210.234	-870.02	1671.13	160.717	-935.09	1518.87	166.479	-1039.32	1298.1	150.779	-795.863	1420.53	152.449	-772.307	1235.06	212.842	-1039.72	1372.55	-36.0995	-928.262	1468.74	-95.4973	-954.51	1268.55	-114.076	-979.825	1150.17	-117.055	-914.114	985.77	-69.4409	-881.051	897.792	-131.716	-924.07	884.091	-123.136	-868.401	794.941
771	0	103.607	-685.995	1645.55	206.495	-692.081	1645.61	73.3891	-840.185	1668.6	210.132	-859.576	1672.37	160.61	-924.124	1520.12	166.104	-1028.16	1299.24	150.57	-784.772	1421.93	152.026	-761.138	1236.48	212.527	-1028.61	1373.7	-36.2203	-917	1470.47	-96.5041	-940.944	1270	-115.808	-964.106	1151.25	-117.81	-892.713	989.128	-69.7062	-856.25	903.02	-131.802	-898.676	887.223	-122.957	-839.115	800.663
772	0	103.608	-675.321	1647.23	206.473	-681.534	1647.12	73.2451	-829.541	1669.83	209.966	-849.096	1673.36	160.52	-913.092	1521.14	165.808	-1016.96	1300.17	150.352	-773.63	1423.06	151.6	-749.938	1237.63	212.289	-1017.44	1374.64	-36.3031	-905.744	1471.92	-97.4123	-927.462	1271.22	-117.389	-948.469	1152.16	-118.458	-871.465	992.553	-69.8683	-831.638	908.422	-131.762	-873.427	890.548	-122.595	-810.155	806.687
773	0	103.539	-664.596	1648.65	206.38	-670.925	1648.4	73.0414	-818.851	1670.77	209.741	-838.562	1674.09	160.447	-901.985	1521.92	165.587	-1005.7	1300.86	150.128	-762.432	1423.92	151.174	-738.704	1238.5	212.13	-1006.21	1375.37	-36.3475	-894.483	1473.09	-98.2158	-914.054	1272.18	-118.811	-932.908	1152.86	-118.993	-850.394	996.009	-69.9247	-807.266	913.951	-131.603	-848.369	894.03	-122.064	-781.578	812.964
774	0	103.409	-653.803	1649.78	206.225	-660.238	1649.41	72.7866	-808.099	1671.39	209.464	-827.954	1674.55	160.396	-890.797	1522.45	165.438	-994.369	1301.31	149.905	-751.172	1424.5	150.752	-727.432	1239.09	212.048	-994.904	1375.88	-36.3518	-883.211	1473.95	-98.9086	-900.711	1272.88	-120.067	-917.419	1153.35	-119.41	-829.524	999.461	-69.8741	-783.181	919.562	-131.328	-823.545	897.635	-121.382	-753.435	819.441
775	0	103.228	-642.928	1650.6	206.02	-649.458	1650.15	72.4923	-797.269	1671.71	209.149	-817.255	1674.74	160.371	-879.525	1522.73	165.36	-982.965	1301.5	149.689	-739.849	1424.78	150.339	-716.117	1239.38	212.045	-983.522	1376.15	-36.3136	-871.918	1474.52	-99.4852	-887.421	1273.28	-121.153	-902.001	1153.6	-119.705	-808.877	1002.88	-69.7162	-759.426	925.209	-130.943	-798.997	901.328	-120.569	-725.771	826.068
776	0	103.012	-631.961	1651.1	205.78	-638.576	1650.6	72.1726	-786.348	1671.72	208.809	-806.454	1674.66	160.378	-868.165	1522.75	165.35	-971.475	1301.45	149.486	-728.457	1424.78	149.941	-704.755	1239.39	212.12	-972.059	1376.18	-36.2298	-860.596	1474.8	-99.9408	-874.175	1273.4	-122.065	-886.651	1153.61	-119.875	-788.475	1006.23	-69.4516	-736.039	930.846	-130.452	-774.765	905.075	-119.642	-698.628	832.795
777	0	102.776	-620.892	1651.27	205.522	-627.581	1650.75	71.8439	-775.325	1671.43	208.462	-795.538	1674.31	160.425	-856.714	1522.51	165.407	-959.892	1301.13	149.307	-716.994	1424.5	149.565	-693.341	1239.11	212.274	-960.512	1375.97	-36.0965	-849.236	1474.78	-100.271	-860.962	1273.23	-122.799	-871.373	1153.37	-119.917	-768.339	1009.48	-69.0818	-713.058	936.433	-129.856	-750.889	908.84	-118.62	-672.045	839.571
778	0	102.538	-609.714	1651.13	205.264	-616.468	1650.6	71.5245	-764.193	1670.85	208.125	-784.499	1673.71	160.518	-845.172	1522.01	165.531	-948.209	1300.57	149.161	-705.458	1423.94	149.22	-681.867	1238.55	212.507	-948.877	1375.52	-35.9093	-837.828	1474.47	-100.473	-847.775	1272.78	-123.355	-856.167	1152.9	-119.829	-748.492	1012.6	-68.6091	-690.512	941.926	-129.16	-727.407	912.59	-117.52	-646.053	846.347
779	0	102.317	-598.424	1650.68	205.026	-605.233	1650.17	71.2334	-752.945	1670.01	207.818	-773.332	1672.87	160.665	-833.536	1521.27	165.722	-936.42	1299.76	149.058	-693.843	1423.11	148.915	-670.326	1237.73	212.817	-937.151	1374.82	-35.6636	-826.365	1473.9	-100.544	-834.605	1272.06	-123.731	-841.041	1152.18	-119.613	-728.951	1015.58	-68.0365	-668.431	947.289	-128.366	-704.352	916.292	-116.358	-620.685	853.074
780	0	102.132	-587.019	1649.94	204.827	-593.873	1649.46	70.9907	-741.58	1668.91	207.562	-762.031	1671.79	160.873	-821.806	1520.3	165.98	-924.523	1298.71	149.009	-682.146	1422.04	148.66	-658.709	1236.66	213.204	-925.331	1373.89	-35.3548	-814.836	1473.08	-100.483	-821.445	1271.08	-123.93	-826.001	1151.25	-119.27	-709.737	1018.39	-67.3669	-646.838	952.484	-127.477	-681.759	919.912	-115.147	-595.966	859.704
781	0	102.002	-575.498	1648.93	204.688	-582.386	1648.49	70.8166	-730.095	1667.58	207.377	-750.596	1670.5	161.152	-809.98	1519.1	166.306	-912.512	1297.44	149.025	-670.363	1420.74	148.465	-647.009	1235.36	213.668	-913.416	1372.74	-34.9779	-803.231	1472.03	-100.29	-808.292	1269.86	-123.954	-811.056	1150.1	-118.8	-690.867	1021.01	-66.6037	-625.753	957.475	-126.496	-659.657	923.419	-113.897	-571.919	866.19
782	0	101.944	-563.861	1647.66	204.625	-570.772	1647.27	70.7309	-718.492	1666.04	207.284	-739.025	1669.01	161.507	-798.059	1517.7	166.701	-900.386	1295.95	149.117	-658.488	1419.23	148.34	-635.215	1233.86	214.205	-901.402	1371.37	-34.5286	-791.541	1470.76	-99.9664	-795.141	1268.43	-123.81	-796.215	1148.76	-118.208	-672.357	1023.42	-65.7498	-605.193	962.228	-125.427	-638.074	926.781	-112.618	-548.565	872.484
783	0	101.975	-552.109	1646.18	204.656	-559.03	1645.84	70.7531	-706.771	1664.32	207.303	-727.317	1667.34	161.947	-786.04	1516.1	167.165	-888.144	1294.28	149.295	-646.518	1417.53	148.294	-623.318	1232.17	214.813	-889.289	1369.8	-34.0026	-779.756	1469.31	-99.5142	-781.99	1266.81	-123.501	-781.489	1147.24	-117.496	-654.222	1025.61	-64.808	-585.173	966.711	-124.274	-617.034	929.969	-111.315	-525.92	878.538
784	0	102.111	-540.244	1644.5	204.798	-547.161	1644.22	70.9012	-694.934	1662.44	207.452	-715.473	1665.51	162.477	-773.922	1514.34	167.696	-875.785	1292.44	149.568	-634.446	1415.68	148.337	-611.31	1230.32	215.49	-877.074	1368.05	-33.3961	-767.865	1467.69	-98.9369	-768.837	1265.02	-123.038	-766.889	1145.58	-116.67	-636.474	1027.56	-63.7805	-565.703	970.894	-123.04	-596.559	932.951	-109.99	-503.998	884.306
785	0	102.367	-528.265	1642.67	205.063	-535.164	1642.44	71.1916	-682.983	1660.43	207.747	-703.492	1663.54	163.102	-761.703	1512.42	168.293	-863.309	1290.44	149.946	-622.268	1413.68	148.477	-599.18	1228.33	216.232	-864.758	1366.13	-32.7061	-755.86	1465.94	-98.239	-755.682	1263.1	-122.428	-752.423	1143.78	-115.733	-619.124	1029.26	-62.6692	-546.792	974.745	-121.73	-576.669	935.701	-108.645	-482.809	889.742
786	0	102.753	-516.174	1640.71	205.464	-523.039	1640.52	71.6384	-670.92	1658.31	208.204	-691.375	1661.46	163.826	-749.381	1510.38	168.952	-850.718	1288.32	150.434	-609.978	1411.58	148.72	-586.921	1226.23	217.034	-852.338	1364.08	-31.9303	-743.731	1464.08	-97.4256	-742.525	1261.07	-121.681	-738.103	1141.89	-114.691	-602.183	1030.71	-61.4756	-528.446	978.237	-120.35	-557.38	938.191	-107.276	-462.36	894.801
787	0	103.281	-503.97	1638.67	206.012	-510.784	1638.51	72.2531	-658.745	1656.12	208.833	-679.123	1659.29	164.651	-736.954	1508.25	169.671	-838.013	1286.11	151.037	-597.572	1409.39	149.071	-574.527	1224.04	217.894	-839.814	1361.9	-31.0674	-731.473	1462.14	-96.5029	-729.368	1258.98	-120.809	-723.935	1139.93	-113.55	-585.656	1031.89	-60.2013	-510.671	981.343	-118.907	-538.707	940.396	-105.881	-442.659	899.437
788	0	103.958	-491.653	1636.57	206.713	-498.397	1636.44	73.0441	-646.458	1653.89	209.644	-666.735	1657.06	165.58	-724.42	1506.04	170.443	-825.197	1283.82	151.758	-585.046	1407.15	149.535	-561.991	1221.81	218.806	-827.188	1359.64	-30.1172	-719.078	1460.14	-95.4774	-716.214	1256.84	-119.821	-709.928	1137.92	-112.315	-569.549	1032.8	-58.8479	-493.468	984.038	-117.407	-520.66	942.293	-104.454	-423.708	903.608
789	0	104.789	-479.22	1634.46	207.572	-485.879	1634.32	74.0162	-634.059	1651.65	210.64	-654.211	1654.79	166.61	-711.778	1503.79	171.264	-812.273	1281.49	152.599	-572.399	1404.89	150.11	-549.31	1219.54	219.767	-814.46	1357.31	-29.0809	-706.543	1458.12	-94.3564	-703.063	1254.69	-118.728	-696.087	1135.9	-110.994	-553.867	1033.44	-57.4175	-476.841	986.299	-115.858	-503.25	943.861	-102.993	-405.511	907.272
790	0	105.776	-466.67	1632.35	208.593	-473.227	1632.2	75.1701	-621.545	1649.42	211.821	-641.552	1652.51	167.739	-699.027	1501.54	172.128	-799.246	1279.15	153.556	-559.628	1402.63	150.798	-536.482	1217.28	220.774	-801.633	1354.96	-27.9612	-693.867	1456.1	-93.1475	-689.921	1252.57	-117.542	-682.417	1133.9	-109.592	-538.613	1033.81	-55.913	-460.79	988.106	-114.268	-486.486	945.082	-101.491	-388.069	910.388
791	0	106.921	-454	1630.29	209.773	-460.441	1630.1	76.5029	-608.915	1647.24	213.185	-628.76	1650.25	168.965	-686.169	1499.3	173.03	-786.122	1276.83	154.625	-546.736	1400.4	151.592	-523.508	1215.05	221.825	-788.708	1352.6	-26.762	-681.053	1454.11	-91.8586	-676.79	1250.5	-116.272	-668.919	1131.93	-108.119	-523.787	1033.91	-54.3384	-445.315	989.44	-112.647	-470.374	945.939	-99.9453	-371.384	912.92
792	0	108.218	-441.209	1628.3	211.109	-447.523	1628.04	78.0069	-596.167	1645.13	214.721	-615.836	1648.03	170.28	-673.206	1497.1	173.966	-772.909	1274.56	155.798	-533.726	1398.23	152.487	-510.393	1212.88	222.916	-775.693	1350.27	-25.489	-668.104	1452.18	-90.4979	-663.676	1248.52	-114.927	-655.596	1130.04	-106.581	-509.39	1033.73	-52.699	-430.416	990.286	-111.006	-454.921	946.421	-98.3553	-355.458	914.83
793	0	109.662	-428.296	1626.4	212.594	-434.474	1626.06	79.6707	-583.299	1643.13	216.418	-602.784	1645.88	171.677	-660.142	1494.99	174.931	-759.616	1272.37	157.065	-520.604	1396.15	153.475	-497.143	1210.79	224.047	-762.591	1348	-24.1494	-655.03	1450.34	-89.074	-650.582	1246.65	-113.516	-642.447	1128.24	-104.988	-495.422	1033.28	-51.0017	-416.092	990.632	-109.354	-440.13	946.516	-96.7216	-340.292	916.088
794	0	111.244	-415.261	1624.62	214.217	-421.301	1624.16	81.4785	-570.31	1641.27	218.258	-589.609	1643.82	173.148	-646.985	1492.98	175.924	-746.253	1270.29	158.415	-507.379	1394.18	154.544	-483.771	1208.83	225.217	-749.411	1345.82	-22.7516	-641.842	1448.6	-87.5959	-637.516	1244.92	-112.046	-629.472	1126.57	-103.349	-481.884	1032.57	-49.2555	-402.342	990.471	-107.702	-426.006	946.218	-95.0476	-325.889	916.666
795	0	112.951	-402.107	1622.97	215.965	-408.01	1622.37	83.411	-557.203	1639.56	220.22	-576.319	1641.89	174.68	-633.744	1491.1	176.942	-732.833	1268.35	159.831	-494.062	1392.35	155.683	-470.291	1207	226.425	-736.164	1343.77	-21.3057	-628.558	1447	-86.0726	-624.483	1243.35	-110.524	-616.667	1125.03	-101.675	-468.775	1031.6	-47.471	-389.164	989.797	-106.063	-412.553	945.525	-93.3403	-312.253	916.54
796	0	114.767	-388.839	1621.46	217.819	-394.612	1620.7	85.4455	-543.982	1638.02	222.282	-562.923	1640.11	176.262	-620.43	1489.38	177.986	-719.369	1266.57	161.299	-480.669	1390.69	156.877	-456.721	1205.34	227.671	-722.859	1341.87	-19.8228	-615.194	1445.54	-84.5131	-611.491	1241.95	-108.954	-604.031	1123.65	-99.9748	-456.096	1030.37	-45.6609	-376.559	988.612	-104.446	-399.773	944.436	-91.6099	-299.389	915.694
797	0	116.674	-375.466	1620.11	219.761	-381.119	1619.16	87.5562	-530.651	1636.69	224.417	-549.434	1638.49	177.88	-607.057	1487.84	179.056	-705.878	1264.98	162.8	-467.215	1389.2	158.113	-443.084	1203.86	228.953	-709.512	1340.15	-18.3152	-601.773	1444.27	-82.9265	-598.549	1240.74	-107.342	-591.562	1122.44	-98.2605	-443.846	1028.91	-43.8398	-364.525	986.921	-102.864	-387.67	942.959	-89.8697	-287.304	914.121
798	0	118.652	-361.998	1618.92	221.768	-367.548	1617.76	89.7153	-517.223	1635.56	226.595	-535.866	1637.06	179.518	-593.641	1486.5	180.154	-692.374	1263.61	164.317	-453.722	1387.91	159.376	-429.405	1202.57	230.27	-696.136	1338.64	-16.7959	-588.318	1443.17	-81.3218	-585.667	1239.73	-105.69	-579.256	1121.42	-96.5433	-432.029	1027.2	-42.0243	-353.064	984.735	-101.327	-376.247	941.101	-88.1367	-276.007	911.819
799	0	120.676	-348.451	1617.91	223.816	-353.918	1616.51	91.8933	-503.709	1634.66	228.787	-522.238	1635.83	181.161	-580.201	1485.38	181.28	-678.876	1262.46	165.831	-440.21	1386.82	160.653	-415.712	1201.5	231.62	-682.748	1337.35	-15.2782	-574.853	1442.28	-79.7074	-572.855	1238.94	-104.003	-567.112	1120.59	-94.835	-420.645	1025.28	-40.2319	-342.175	982.07	-99.8435	-365.508	938.876	-86.4303	-265.506	908.799
800	0	122.721	-334.841	1617.06	225.877	-340.25	1615.42	94.0598	-490.126	1633.99	230.961	-508.57	1634.82	182.794	-566.754	1484.5	182.436	-665.402	1261.57	167.324	-426.702	1385.97	161.93	-402.033	1200.66	232.999	-669.365	1336.31	-13.7754	-561.406	1441.59	-78.0917	-560.127	1238.35	-102.282	-555.131	1119.95	-93.1472	-409.7	1023.15	-38.4817	-331.862	978.949	-98.4234	-355.457	936.304	-84.7725	-255.812	905.083
801	0	124.761	-321.19	1616.39	227.925	-326.567	1614.49	96.1844	-476.494	1633.55	233.089	-494.883	1634.04	184.399	-553.323	1483.85	183.621	-651.968	1260.92	168.78	-413.221	1385.34	163.194	-388.399	1200.04	234.404	-656.002	1335.53	-12.3006	-548.001	1441.11	-76.4824	-547.495	1237.98	-100.532	-543.312	1119.5	-91.492	-399.198	1020.82	-36.7927	-322.125	975.399	-97.0748	-346.098	933.408	-83.1868	-246.937	900.702
802	0	126.767	-307.522	1615.9	229.931	-312.893	1613.73	98.2378	-462.836	1633.36	235.139	-481.201	1633.5	185.962	-539.927	1483.46	184.836	-638.591	1260.55	170.183	-399.79	1384.94	164.434	-374.837	1199.66	235.83	-642.677	1335.02	-10.8659	-534.665	1440.84	-74.8868	-534.971	1237.82	-98.7534	-531.658	1119.25	-89.881	-389.142	1018.33	-35.1843	-312.969	971.457	-95.8049	-337.434	930.216	-81.6978	-238.889	895.702
803	0	128.711	-293.861	1615.59	231.868	-299.254	1613.16	100.192	-449.176	1633.4	237.086	-467.547	1633.2	187.47	-526.586	1483.33	186.079	-625.287	1260.44	171.52	-386.43	1384.79	165.641	-361.372	1199.52	237.27	-629.406	1334.78	-9.48236	-521.424	1440.79	-73.3115	-522.571	1237.86	-96.9503	-520.172	1119.18	-88.3254	-379.54	1015.68	-33.6751	-304.395	967.161	-94.6206	-329.468	926.764	-80.3299	-231.678	890.137
804	0	130.565	-280.236	1615.45	233.708	-285.674	1612.77	102.022	-435.541	1633.67	238.905	-453.946	1633.17	188.91	-513.32	1483.45	187.347	-612.068	1260.59	172.779	-373.162	1384.89	166.805	-348.026	1199.63	238.718	-616.202	1334.83	-8.15966	-508.299	1440.94	-71.7624	-510.306	1238.1	-95.1255	-508.86	1119.29	-86.836	-370.396	1012.92	-32.2827	-296.405	962.559	-93.5277	-322.201	923.092	-79.107	-225.311	884.077
805	0	132.301	-266.672	1615.51	235.425	-272.175	1612.59	103.706	-421.96	1634.17	240.574	-440.421	1633.39	190.272	-500.145	1483.82	188.636	-598.945	1261.01	173.951	-360.001	1385.22	167.922	-334.816	1199.97	240.168	-603.077	1335.15	-6.90568	-495.311	1441.3	-70.2446	-498.189	1238.52	-93.2818	-497.73	1119.57	-85.4227	-361.716	1010.05	-31.023	-289.002	957.702	-92.5315	-315.633	919.245	-78.0511	-219.794	877.599
806	0	133.894	-253.196	1615.75	236.996	-258.78	1612.63	105.226	-408.458	1634.89	242.079	-426.991	1633.87	191.548	-487.075	1484.45	189.943	-585.928	1261.69	175.029	-346.963	1385.8	168.984	-321.753	1200.56	241.613	-590.042	1335.74	-5.7265	-482.478	1441.85	-68.762	-486.235	1239.12	-91.4228	-486.789	1120.02	-84.0942	-353.503	1007.13	-29.9099	-282.185	952.645	-91.6365	-309.76	915.273	-77.1822	-215.126	870.789
807	0	135.322	-239.835	1616.19	238.4	-245.505	1612.89	106.569	-395.065	1635.81	243.406	-413.678	1634.6	192.733	-474.123	1485.31	191.264	-573.022	1262.6	176.01	-334.055	1386.62	169.988	-308.843	1201.39	243.046	-577.103	1336.59	-4.62618	-469.812	1442.58	-67.3176	-474.453	1239.88	-89.5518	-476.047	1120.62	-82.8583	-345.761	1004.17	-28.955	-275.952	947.448	-90.8462	-304.576	911.231	-76.5169	-211.306	863.742
808	0	136.566	-226.611	1616.83	239.621	-232.367	1613.39	107.728	-381.805	1636.94	244.55	-400.497	1635.59	193.824	-461.295	1486.41	192.594	-560.229	1263.75	176.891	-321.284	1387.66	170.933	-296.086	1202.44	244.461	-564.264	1337.68	-3.60679	-457.323	1443.48	-65.9133	-462.856	1240.8	-87.6726	-465.514	1121.37	-81.7214	-338.491	1001.23	-28.1674	-270.298	942.172	-90.1632	-300.071	907.177	-76.0686	-208.326	856.557
809	0	137.612	-213.543	1617.68	240.645	-219.377	1614.15	108.699	-368.7	1638.25	245.508	-387.461	1636.82	194.818	-448.596	1487.72	193.929	-547.552	1265.1	177.674	-308.651	1388.94	171.816	-283.478	1203.73	245.853	-551.526	1339.01	-2.66836	-445.015	1444.54	-64.5498	-451.453	1241.85	-85.7893	-455.201	1122.26	-80.6882	-331.691	998.327	-27.5534	-265.217	936.882	-89.5891	-296.23	903.171	-75.8464	-206.172	849.335
810	0	138.45	-200.649	1618.73	241.464	-206.542	1615.16	109.483	-355.77	1639.72	246.284	-374.58	1638.29	195.719	-436.026	1489.23	195.264	-534.988	1266.64	178.361	-296.153	1390.42	172.641	-271.012	1205.22	247.217	-538.889	1340.55	-1.80904	-432.887	1445.75	-63.2268	-440.252	1243.03	-83.9065	-445.119	1123.28	-79.7621	-325.356	995.513	-27.1164	-260.696	931.64	-89.1244	-293.035	899.273	-75.8549	-204.824	842.178
811	0	139.077	-187.939	1620	242.078	-193.866	1616.42	110.089	-343.028	1641.35	246.885	-361.86	1639.96	196.529	-423.582	1490.92	196.597	-522.534	1268.35	178.957	-283.785	1392.09	173.408	-258.675	1206.91	248.548	-526.349	1342.28	-1.02524	-420.935	1447.07	-61.9434	-429.259	1244.33	-82.0291	-435.277	1124.42	-78.945	-319.478	992.824	-26.8569	-256.72	926.508	-88.7687	-290.459	895.544	-76.0939	-204.255	835.184
812	0	139.496	-175.419	1621.48	242.487	-181.349	1617.95	110.526	-330.483	1643.1	247.322	-349.302	1641.83	197.254	-411.256	1492.76	197.922	-510.187	1270.2	179.469	-271.536	1393.94	174.123	-246.456	1208.77	249.843	-513.898	1344.16	-0.31186	-409.149	1448.5	-60.698	-418.481	1245.72	-80.1627	-425.684	1125.68	-78.2371	-314.045	990.295	-26.7726	-253.268	921.545	-88.5205	-288.472	892.038	-76.5581	-204.43	828.446
813	0	139.712	-163.09	1623.15	242.701	-168.987	1619.71	110.809	-318.141	1644.96	247.61	-336.904	1643.86	197.9	-399.04	1494.73	199.235	-497.94	1272.17	179.904	-259.395	1395.94	174.789	-234.34	1210.79	251.1	-501.531	1346.18	0.337469	-397.515	1450.02	-59.4888	-407.918	1247.21	-78.3135	-416.348	1127.05	-77.6375	-309.041	987.96	-26.8583	-250.315	916.804	-88.3771	-287.036	888.807	-77.2371	-205.305	822.048
814	0	139.739	-150.949	1624.99	242.731	-156.772	1621.7	110.957	-305.997	1646.89	247.766	-324.661	1646.02	198.476	-386.923	1496.79	200.531	-485.788	1274.22	180.272	-247.349	1398.06	175.413	-222.313	1212.93	252.317	-489.237	1348.3	0.93012	-386.018	1451.61	-58.3137	-397.571	1248.76	-76.4883	-407.272	1128.52	-77.1436	-304.443	985.849	-27.1061	-247.832	912.333	-88.3344	-286.108	885.896	-78.1157	-206.828	816.065
815	0	139.595	-138.986	1627	242.594	-144.693	1623.88	110.989	-294.045	1648.87	247.811	-312.562	1648.27	198.99	-374.89	1498.93	201.807	-473.725	1276.33	180.583	-235.382	1400.27	175.999	-210.362	1215.15	253.493	-477.008	1350.49	1.47415	-374.639	1453.23	-57.1707	-387.438	1250.38	-74.6945	-398.459	1130.08	-76.7519	-300.228	983.985	-27.5057	-245.783	908.172	-88.3873	-285.639	883.339	-79.1736	-208.937	810.554
816	0	139.302	-127.185	1629.12	242.312	-132.737	1626.22	110.927	-282.272	1650.87	247.764	-300.594	1650.58	199.452	-362.929	1501.09	203.054	-461.743	1278.46	180.845	-223.48	1402.53	176.553	-198.473	1217.42	254.626	-464.834	1352.71	1.97793	-363.358	1454.87	-56.0581	-377.514	1252.04	-72.9399	-389.905	1131.73	-76.4577	-296.365	982.386	-28.0442	-244.129	904.352	-88.5289	-285.572	881.162	-80.3868	-211.565	805.563
817	0	138.883	-115.53	1631.34	241.907	-120.886	1628.67	110.794	-270.658	1652.85	247.648	-288.742	1652.9	199.872	-351.023	1503.26	204.268	-449.838	1280.59	181.069	-211.628	1404.81	177.079	-186.636	1219.7	255.716	-452.705	1354.93	2.44977	-352.155	1456.5	-54.9748	-367.791	1253.72	-71.2325	-381.607	1133.45	-76.2551	-292.821	981.065	-28.7068	-242.825	900.895	-88.7515	-285.849	879.381	-81.7276	-214.635	801.121
818	0	138.366	-103.996	1633.61	241.406	-109.122	1631.19	110.612	-259.182	1654.79	247.483	-276.985	1655.19	200.258	-339.159	1505.39	205.443	-438.002	1282.68	181.263	-199.811	1407.06	177.58	-174.839	1221.94	256.762	-440.612	1357.11	2.89756	-341.008	1458.09	-53.92	-358.259	1255.42	-69.5804	-373.553	1135.22	-76.1374	-289.558	980.024	-29.4774	-241.823	897.815	-89.0458	-286.406	878.002	-83.166	-218.064	797.242
819	0	137.779	-92.5589	1635.88	240.837	-97.4254	1633.72	110.403	-247.817	1656.65	247.291	-265.304	1657.42	200.619	-327.322	1507.44	206.57	-426.23	1284.69	181.435	-188.017	1409.24	178.061	-163.075	1224.1	257.763	-428.547	1359.22	3.32836	-329.899	1459.62	-52.8933	-348.905	1257.11	-67.9911	-365.731	1137.04	-76.097	-286.535	979.261	-30.3382	-241.074	895.117	-89.4016	-287.176	877.021	-84.6708	-221.766	793.928
820	0	137.15	-81.191	1638.1	240.225	-85.7739	1636.21	110.187	-236.534	1658.4	247.09	-253.675	1659.52	200.963	-315.497	1509.39	207.643	-414.515	1286.61	181.593	-176.232	1411.31	178.521	-151.335	1226.14	258.717	-416.501	1361.22	3.74816	-318.806	1461.06	-51.8951	-339.714	1258.77	-66.4717	-358.124	1138.89	-76.1259	-283.712	978.769	-31.271	-240.525	892.796	-89.8077	-288.091	876.424	-86.2106	-225.651	791.165
821	0	136.506	-69.8636	1640.23	239.6	-74.1463	1638.61	109.98	-225.302	1660	246.898	-242.078	1661.48	201.295	-303.672	1511.19	208.655	-402.851	1288.41	181.742	-164.446	1413.24	178.961	-139.615	1228.02	259.621	-404.466	1363.09	4.16157	-307.713	1462.39	-50.926	-330.67	1260.4	-65.0283	-350.712	1140.74	-76.2151	-281.042	978.53	-32.2571	-240.121	890.839	-90.2524	-289.084	876.19	-87.7554	-229.631	788.928
822	0	135.873	-58.5476	1642.23	238.984	-62.521	1640.85	109.799	-214.091	1661.44	246.728	-230.487	1663.24	201.621	-291.834	1512.83	209.6	-391.231	1290.05	181.887	-152.65	1414.98	179.382	-127.908	1229.7	260.475	-392.438	1364.79	4.57167	-296.602	1463.57	-49.9868	-321.752	1261.96	-63.6655	-343.47	1142.59	-76.3555	-278.481	978.526	-33.278	-239.81	889.227	-90.7232	-290.088	876.291	-89.2771	-233.618	787.183
823	0	135.272	-47.2147	1644.04	238.402	-50.8775	1642.89	109.654	-202.87	1662.69	246.592	-218.883	1664.78	201.942	-279.973	1514.27	210.469	-379.649	1291.51	182.029	-140.834	1416.51	179.781	-116.209	1231.15	261.273	-380.408	1366.29	4.97981	-285.458	1464.6	-49.0788	-312.94	1263.46	-62.3868	-336.374	1144.42	-76.5378	-275.984	978.732	-34.3159	-239.537	887.935	-91.2077	-291.04	876.693	-90.7507	-237.526	785.888
824	0	134.724	-35.8376	1645.62	237.872	-39.1966	1644.69	109.554	-191.607	1663.72	246.497	-207.243	1666.08	202.259	-268.078	1515.5	211.257	-368.096	1292.77	182.171	-128.992	1417.8	180.156	-104.515	1232.34	262.013	-368.371	1367.58	5.3856	-274.268	1465.44	-48.2034	-304.212	1264.87	-61.1938	-329.394	1146.21	-76.7525	-273.507	979.12	-35.354	-239.251	886.933	-91.6932	-291.881	877.36	-92.1554	-241.275	784.997
825	0	134.243	-24.3913	1646.95	237.409	-27.4607	1646.2	109.503	-180.276	1664.53	246.448	-195.548	1667.11	202.571	-256.141	1516.48	211.958	-356.562	1293.82	182.311	-117.116	1418.82	180.505	-92.8205	1233.24	262.688	-356.323	1368.64	5.78683	-263.019	1466.09	-47.3623	-295.544	1266.19	-60.0865	-322.501	1147.94	-76.9906	-271.007	979.663	-36.377	-238.901	886.19	-92.1674	-292.555	878.254	-93.4742	-244.794	784.463
826	0	133.84	-12.8538	1647.98	237.025	-15.6543	1647.39	109.501	-168.851	1665.09	246.446	-183.783	1667.86	202.874	-244.154	1517.21	212.564	-345.039	1294.64	182.446	-105.2	1419.56	180.825	-81.1193	1233.85	263.295	-344.256	1369.45	6.17952	-251.698	1466.53	-46.5576	-286.912	1267.4	-59.0633	-315.664	1149.61	-77.2435	-268.44	980.33	-37.3718	-238.44	885.671	-92.6187	-293.012	879.334	-94.6946	-248.016	784.236
827	0	133.521	-1.20578	1648.71	236.725	-3.76452	1648.24	109.547	-157.312	1665.41	246.488	-171.931	1668.31	203.163	-232.108	1517.68	213.071	-333.514	1295.22	182.574	-93.2382	1420	181.111	-69.4048	1234.15	263.827	-332.165	1370	6.55807	-240.297	1466.76	-45.7914	-278.292	1268.5	-58.121	-308.851	1151.2	-77.5034	-265.769	981.093	-38.3272	-237.822	885.344	-93.0361	-293.209	880.564	-95.8085	-250.882	784.273
828	0	133.287	10.5681	1649.12	236.51	8.21941	1648.74	109.633	-145.639	1665.47	246.568	-159.982	1668.47	203.431	-219.998	1517.88	213.474	-321.975	1295.56	182.688	-81.2252	1420.15	181.36	-57.6694	1234.14	264.279	-320.045	1370.29	6.9154	-228.805	1466.76	-45.0665	-269.657	1269.47	-57.2554	-302.03	1152.71	-77.7635	-262.955	981.922	-39.2346	-237.003	885.176	-93.4101	-293.107	881.908	-96.8112	-253.344	784.529
829	0	133.135	22.4795	1649.2	236.376	20.3056	1648.88	109.751	-133.82	1665.28	246.677	-147.926	1668.33	203.668	-207.817	1517.81	213.768	-310.41	1295.66	182.783	-69.1549	1419.99	181.568	-45.9038	1233.82	264.644	-307.888	1370.32	7.24324	-217.214	1466.54	-44.3858	-260.984	1270.33	-56.4614	-295.168	1154.11	-78.018	-259.962	982.792	-40.0878	-235.944	885.136	-93.7324	-292.67	883.33	-97.7018	-255.361	784.964
830	0	133.056	34.5364	1648.96	236.316	32.4999	1648.67	109.889	-121.845	1664.85	246.806	-135.757	1667.92	203.866	-195.561	1517.48	213.949	-298.805	1295.51	182.849	-57.0216	1419.55	181.73	-34.098	1233.21	264.916	-295.687	1370.1	7.53235	-205.517	1466.09	-43.7524	-252.246	1271.05	-55.7336	-288.233	1155.4	-78.2623	-256.758	983.676	-40.8831	-234.609	885.194	-93.9964	-291.87	884.8	-98.4818	-256.899	785.541
831	0	133.037	46.7432	1648.4	236.317	44.8058	1648.11	110.032	-109.708	1664.18	246.939	-123.471	1667.23	204.014	-183.223	1516.9	214.016	-287.145	1295.12	182.88	-44.8192	1418.82	181.842	-22.2409	1232.32	265.091	-283.437	1369.62	7.77293	-193.707	1465.44	-43.1699	-243.42	1271.64	-55.0666	-281.191	1156.58	-78.4929	-253.311	984.551	-41.6187	-232.962	885.323	-94.1976	-290.682	886.289	-99.1548	-257.933	786.227
832	0	133.064	59.1008	1647.55	236.362	57.2248	1647.23	110.166	-97.4074	1663.29	247.064	-111.065	1666.28	204.102	-170.8	1516.07	213.967	-275.417	1294.51	182.865	-32.5419	1417.82	181.899	-10.321	1231.17	265.163	-271.128	1368.92	7.95485	-181.779	1464.58	-42.6418	-234.481	1272.11	-54.4558	-274.01	1157.65	-78.7078	-249.59	985.395	-42.295	-230.973	885.496	-94.3336	-289.083	887.771	-99.7263	-258.441	786.99
833	0	133.116	71.6073	1646.42	236.434	69.7568	1646.05	110.272	-84.9448	1662.19	247.162	-98.5413	1665.1	204.118	-158.288	1515.02	213.803	-263.606	1293.69	182.794	-20.1838	1416.59	181.897	1.67335	1229.77	265.128	-258.756	1367.99	8.06807	-169.73	1463.52	-42.1722	-225.406	1272.44	-53.897	-266.658	1158.58	-78.9059	-245.57	986.188	-42.9139	-228.612	885.692	-94.4043	-287.053	889.224	-100.203	-258.411	787.801
834	0	133.174	84.2581	1645.05	236.51	82.4001	1644.6	110.335	-72.3243	1660.89	247.218	-85.9006	1663.7	204.054	-145.683	1513.77	213.524	-251.701	1292.66	182.66	-7.73939	1415.12	181.831	13.7538	1228.17	264.984	-246.311	1366.86	8.1029	-157.557	1462.28	-41.7651	-216.171	1272.63	-53.3875	-259.103	1159.38	-79.0879	-241.221	986.912	-43.4788	-225.853	885.887	-94.4122	-284.574	890.625	-100.591	-257.83	788.635
835	0	133.215	97.047	1643.45	236.57	95.1517	1642.93	110.336	-59.5524	1659.43	247.215	-73.1469	1662.12	203.899	-132.982	1512.34	213.134	-239.687	1291.46	182.451	4.79643	1413.47	181.695	25.9314	1226.38	264.728	-233.789	1365.56	8.05036	-145.258	1460.87	-41.4249	-206.755	1272.69	-52.9259	-251.315	1160.04	-79.2552	-236.519	987.55	-43.9939	-222.67	886.062	-94.3619	-281.629	891.956	-100.9	-256.692	789.466
836	0	133.218	109.966	1641.67	236.592	108.008	1641.06	110.258	-46.6374	1657.81	247.137	-60.2846	1660.38	203.646	-120.185	1510.75	212.636	-227.555	1290.1	182.16	17.4279	1411.65	181.485	38.2165	1224.43	264.36	-221.185	1364.1	7.90244	-132.835	1459.32	-41.1563	-197.136	1272.62	-52.512	-243.263	1160.56	-79.4105	-231.437	988.088	-44.4643	-219.038	886.199	-94.2606	-278.202	893.199	-101.135	-254.99	790.27
837	0	133.162	123.008	1639.75	236.553	120.965	1639.03	110.086	-33.5882	1656.07	246.969	-47.3193	1658.52	203.287	-107.29	1509.03	212.035	-215.295	1288.6	181.778	30.1583	1409.7	181.197	50.6178	1222.37	263.881	-208.492	1362.52	7.65242	-120.287	1457.64	-40.9639	-187.295	1272.41	-52.1471	-234.92	1160.94	-79.5574	-225.952	988.511	-44.8953	-214.936	886.28	-94.1178	-274.276	894.338	-101.306	-252.719	791.025
838	0	133.026	136.161	1637.71	236.435	134.016	1636.9	109.806	-20.4149	1654.22	246.695	-34.257	1656.55	202.819	-94.2974	1507.2	211.338	-202.898	1287	181.301	42.9896	1407.64	180.826	63.1427	1220.21	263.292	-195.709	1360.84	7.29502	-107.619	1455.85	-40.8526	-177.213	1272.06	-51.8338	-226.258	1161.16	-79.7004	-220.039	988.81	-45.2924	-210.34	886.292	-93.9445	-269.833	895.358	-101.418	-249.872	791.709
839	0	132.795	149.419	1635.6	236.219	147.158	1634.69	109.405	-7.1276	1652.31	246.304	-21.1042	1654.52	202.236	-81.2095	1505.31	210.551	-190.36	1285.31	180.722	55.9223	1405.52	180.369	75.7966	1218	262.596	-182.834	1359.1	6.82662	-94.8347	1453.97	-40.827	-166.874	1271.59	-51.576	-217.254	1161.22	-79.8446	-213.672	988.972	-45.6612	-205.23	886.219	-93.7539	-264.855	896.245	-101.48	-246.441	792.301
840	0	132.453	162.771	1633.44	235.891	160.384	1632.45	108.874	6.26361	1650.34	245.786	-7.86764	1652.45	201.539	-68.0296	1503.37	209.683	-177.677	1283.56	180.04	68.9553	1403.37	179.825	88.5825	1215.77	261.797	-169.868	1357.31	6.24534	-81.9397	1452.03	-40.8917	-156.263	1270.98	-51.3786	-207.885	1161.13	-79.9959	-206.829	988.993	-46.0067	-199.582	886.05	-93.56	-259.323	896.986	-101.5	-242.416	792.781
841	0	131.99	176.208	1631.27	235.441	173.688	1630.21	108.206	19.7486	1648.36	245.133	5.44567	1650.39	200.728	-54.7626	1501.43	208.742	-164.848	1281.77	179.254	82.0854	1401.21	179.192	101.501	1213.55	260.9	-156.813	1355.51	5.55111	-68.9406	1450.05	-41.0511	-145.366	1270.24	-51.2471	-198.132	1160.88	-80.1607	-199.484	988.865	-46.334	-193.376	885.776	-93.3777	-253.217	897.571	-101.484	-237.784	793.133
842	0	131.399	189.722	1629.13	234.861	187.064	1628.02	107.398	33.3172	1646.38	244.342	18.8285	1648.35	199.807	-41.4155	1499.5	207.736	-151.876	1279.99	178.366	95.3075	1399.09	178.471	114.55	1211.38	259.912	-143.673	1353.73	4.74566	-55.8448	1448.06	-41.3089	-134.173	1269.38	-51.1879	-187.977	1160.47	-80.3458	-191.614	988.588	-46.6478	-186.59	885.389	-93.2219	-246.515	897.99	-101.441	-232.525	793.345
843	0	130.679	203.303	1627.04	234.15	200.505	1625.89	106.452	46.9594	1644.44	243.413	32.2734	1646.38	198.779	-27.997	1497.62	206.673	-138.766	1278.23	177.382	108.614	1397.03	177.664	127.724	1209.28	258.838	-130.457	1352	3.83256	-42.6605	1446.07	-41.6685	-122.676	1268.41	-51.2077	-177.409	1159.91	-80.5579	-183.195	988.161	-46.9526	-179.201	884.886	-93.1075	-239.194	898.235	-101.381	-226.62	793.404
844	0	129.831	216.941	1625.03	233.309	214.004	1623.87	105.371	60.6648	1642.56	242.349	45.7721	1644.49	197.652	-14.5182	1495.82	205.563	-125.527	1276.52	176.307	121.997	1395.06	176.776	141.017	1207.29	257.686	-117.172	1350.35	2.8171	-29.3962	1444.13	-42.1326	-110.869	1267.33	-51.3135	-166.416	1159.2	-80.8041	-174.205	987.588	-47.2531	-171.186	884.263	-93.0484	-231.23	898.303	-101.313	-220.04	793.303
845	0	128.863	230.627	1623.12	232.346	227.551	1621.98	104.165	74.4225	1640.78	241.157	59.3158	1642.73	196.436	-0.991994	1494.13	204.412	-112.171	1274.89	175.153	135.442	1393.22	175.812	154.415	1205.43	256.464	-103.833	1348.79	1.70627	-16.0611	1442.26	-42.7032	-98.7487	1266.16	-51.5124	-154.993	1158.36	-81.0908	-164.622	986.875	-47.5539	-162.523	883.522	-93.0579	-222.599	898.192	-101.245	-212.755	793.038
846	0	127.784	244.349	1621.33	231.271	241.137	1620.23	102.844	88.2209	1639.11	239.849	72.8946	1641.12	195.141	12.5668	1492.57	203.226	-98.7125	1273.36	173.93	148.938	1391.53	174.782	167.906	1203.73	255.179	-90.4524	1347.36	0.508642	-2.66467	1440.47	-43.3815	-86.3139	1264.92	-51.8112	-143.138	1157.4	-81.424	-154.427	986.03	-47.8596	-153.187	882.668	-93.1481	-213.275	897.899	-101.189	-204.732	792.605
847	0	126.609	258.095	1619.68	230.098	254.75	1618.66	101.425	102.047	1637.58	238.439	86.4972	1639.68	193.779	26.1414	1491.15	202.013	-85.1693	1271.95	172.654	162.469	1390.02	173.696	181.473	1202.22	253.839	-77.0473	1346.08	-0.765703	10.7833	1438.81	-44.1678	-73.5672	1263.62	-52.2166	-130.852	1156.33	-81.8092	-143.602	985.065	-48.1747	-143.157	881.708	-93.3294	-203.233	897.429	-101.151	-195.932	792.005
848	0	125.357	271.852	1618.19	228.847	268.376	1617.26	99.927	115.888	1636.21	236.946	100.111	1638.43	192.364	39.7137	1489.92	200.777	-71.5617	1270.68	171.341	176.016	1388.69	172.566	195.096	1200.91	252.454	-63.636	1344.95	-2.10531	24.2725	1437.3	-45.0616	-60.5134	1262.28	-52.7346	-118.139	1155.18	-82.2506	-132.133	983.992	-48.5034	-132.411	880.652	-93.6107	-192.448	896.786	-101.141	-186.317	791.24
849	0	124.048	285.604	1616.87	227.538	282.002	1616.06	98.3702	129.728	1635.03	235.389	113.722	1637.39	190.911	53.2646	1488.87	199.522	-57.9125	1269.58	170.008	189.561	1387.58	171.407	208.751	1199.83	251.031	-50.2383	1344.01	-3.49748	37.7924	1435.95	-46.0613	-47.16	1260.94	-53.371	-105.007	1153.95	-82.7516	-120.007	982.826	-48.8492	-120.926	879.513	-93.9991	-180.897	895.976	-101.165	-175.844	790.316
850	0	122.706	299.337	1615.73	226.195	295.609	1615.06	96.7787	143.55	1634.05	233.792	127.314	1636.58	189.436	66.7739	1488.03	198.25	-44.2456	1268.66	168.674	203.085	1386.7	170.234	222.415	1198.97	249.578	-36.875	1343.26	-4.92846	51.3317	1434.8	-47.1641	-33.5174	1259.61	-54.1304	-91.4691	1152.68	-83.3144	-107.216	981.587	-49.2149	-108.686	878.308	-94.4996	-168.557	895.008	-101.229	-164.472	789.239
851	0	121.356	313.031	1614.79	224.843	309.181	1614.27	95.1775	157.337	1633.28	232.18	140.871	1636	187.955	80.2216	1487.4	196.967	-30.5861	1267.93	167.36	216.567	1386.05	169.063	236.061	1198.37	248.104	-23.5672	1342.7	-6.38366	64.8787	1433.87	-48.3662	-19.5986	1258.31	-55.0169	-77.5383	1151.39	-83.9402	-93.754	980.292	-49.6021	-95.675	877.056	-95.1151	-155.41	893.894	-101.337	-152.159	788.021
852	0	120.023	326.67	1614.04	223.508	322.699	1613.69	93.5927	171.07	1632.74	230.577	154.375	1635.67	186.485	93.5875	1487	195.674	-16.9595	1267.41	166.084	229.987	1385.64	167.91	249.662	1198.01	246.618	-10.3364	1342.36	-7.84786	78.421	1433.17	-49.6625	-5.41906	1257.08	-56.0333	-63.232	1150.11	-84.6285	-79.6204	978.964	-50.0118	-81.8798	875.777	-95.8463	-141.441	892.645	-101.495	-138.865	786.673
853	0	118.732	340.233	1613.5	222.215	336.144	1613.33	92.0504	184.73	1632.43	229.012	167.809	1635.58	185.043	106.852	1486.83	194.374	-3.3905	1267.1	164.865	243.324	1385.48	166.791	263.189	1197.9	245.128	2.79694	1342.23	-9.30554	91.9455	1432.72	-51.0468	9.00306	1255.94	-57.1815	-48.5694	1148.85	-85.3779	-64.8171	977.623	-50.4438	-67.2928	874.494	-96.6917	-126.636	891.277	-101.704	-124.554	785.211
854	0	117.509	353.703	1613.16	220.989	349.496	1613.18	90.5765	198.298	1632.36	227.509	181.155	1635.74	183.645	119.998	1486.89	193.072	10.0974	1267.01	163.721	256.559	1385.58	165.723	276.616	1198.05	243.644	15.8132	1342.32	-10.7412	105.439	1432.52	-52.5113	23.6475	1254.91	-58.4617	-33.5717	1147.64	-86.1853	-49.3509	976.293	-50.897	-51.9106	873.231	-97.6476	-110.99	889.807	-101.968	-109.194	783.65
855	0	116.374	367.061	1613.04	219.853	362.739	1613.24	89.1954	211.754	1632.54	226.094	194.396	1636.14	182.306	133.006	1487.18	191.77	23.4829	1267.14	162.667	269.674	1385.91	164.72	289.917	1198.44	242.174	28.6946	1342.61	-12.1397	118.887	1432.6	-54.0472	38.4921	1254.01	-59.8728	-18.2615	1146.51	-87.0466	-33.2326	974.996	-51.3691	-35.7348	872.013	-98.7077	-94.5009	888.253	-102.286	-92.7585	782.013
856	0	115.351	380.289	1613.13	218.828	375.854	1613.51	87.9298	225.083	1632.96	224.79	207.517	1636.78	181.041	145.864	1487.7	190.474	36.7473	1267.49	161.719	282.653	1386.49	163.795	303.072	1199.07	240.725	41.4259	1343.12	-13.4867	132.277	1432.94	-55.6442	53.5128	1253.27	-61.4116	-2.66266	1145.47	-87.9563	-16.4774	973.758	-51.857	-18.7726	870.867	-99.8634	-77.1725	886.64	-102.661	-75.2301	780.324
857	0	114.456	393.372	1613.44	217.931	388.826	1613.98	86.7997	238.266	1633.62	223.617	220.502	1637.66	179.86	158.558	1488.44	189.188	49.8754	1268.06	160.886	295.482	1387.3	162.96	316.062	1199.94	239.306	53.9946	1343.83	-14.7691	145.596	1433.56	-57.2908	68.6844	1252.69	-63.0728	13.2004	1144.54	-88.9078	0.89511	972.602	-52.3565	-1.03654	869.821	-101.103	-59.0157	884.991	-103.092	-56.5992	778.614
858	0	113.706	406.296	1613.96	217.179	401.641	1614.65	85.8216	251.292	1634.52	222.594	233.34	1638.75	178.775	171.078	1489.4	187.917	62.8557	1268.83	160.179	308.15	1388.34	162.226	328.875	1201.03	237.922	66.3915	1344.73	-15.9752	158.83	1434.45	-58.9747	83.981	1252.31	-64.8491	29.3026	1143.75	-89.8936	18.8611	971.554	-52.8623	17.455	868.904	-102.414	-40.0476	883.335	-103.579	-36.8666	776.918
859	0	113.113	419.051	1614.7	216.583	414.287	1615.52	85.0085	264.148	1635.66	221.734	246.018	1640.06	177.791	183.418	1490.56	186.664	75.6801	1269.81	159.603	320.648	1389.6	161.601	341.502	1202.34	236.579	78.6113	1345.82	-17.0952	171.971	1435.6	-60.6827	99.3764	1252.12	-66.7308	45.6189	1143.11	-90.9056	37.3928	970.638	-53.3686	36.6783	868.146	-103.78	-20.2916	881.705	-104.118	-16.0439	775.279
860	0	112.684	431.628	1615.64	216.151	426.756	1616.56	84.369	276.825	1637.03	221.046	258.528	1641.57	176.914	195.575	1491.91	185.435	88.3446	1270.98	159.161	332.973	1391.06	161.091	353.942	1203.85	235.282	90.6524	1347.08	-18.1212	185.009	1437	-62.4009	114.845	1252.15	-68.7064	62.124	1142.62	-91.9352	56.4583	969.88	-53.8691	56.6047	867.578	-105.184	0.222362	880.136	-104.708	5.84628	773.744
861	0	112.425	444.022	1616.8	215.887	439.04	1617.79	83.9072	289.319	1638.61	220.534	270.862	1643.26	176.146	207.548	1493.44	184.232	100.848	1272.32	158.855	345.123	1392.71	160.701	366.197	1205.55	234.035	102.517	1348.49	-19.0475	197.937	1438.63	-64.1155	130.36	1252.38	-70.7621	78.7929	1142.31	-92.9735	76.0224	969.304	-54.3574	77.2006	867.231	-106.608	21.4583	878.666	-105.342	28.7694	772.365
862	0	112.337	456.231	1618.16	215.791	451.135	1619.19	83.6227	301.626	1640.4	220.199	283.017	1645.11	175.488	219.343	1495.12	183.059	113.193	1273.82	158.68	357.1	1394.54	160.431	378.273	1207.43	232.84	114.211	1350.05	-19.8705	210.753	1440.48	-65.8126	145.899	1252.83	-72.8828	95.6002	1142.18	-94.0118	96.0465	968.933	-54.8276	98.4284	867.136	-108.032	43.3749	877.333	-106.013	52.6797	771.196
863	0	112.416	468.256	1619.71	215.86	463.04	1620.74	83.5106	313.748	1642.37	220.036	294.987	1647.11	174.936	230.966	1496.95	181.921	125.384	1275.46	158.632	368.91	1396.52	160.28	390.18	1209.47	231.7	125.743	1351.73	-20.5885	223.454	1442.53	-67.479	161.437	1253.49	-75.0517	112.521	1142.23	-95.0417	116.489	968.788	-55.2738	120.247	867.325	-109.437	65.9257	876.178	-106.711	77.5205	770.294
864	0	112.656	480.1	1621.45	216.085	474.757	1622.44	83.5616	325.686	1644.51	220.036	306.775	1649.22	174.487	242.429	1498.89	180.82	137.427	1277.23	158.702	380.561	1398.63	160.244	401.93	1211.65	230.62	137.126	1353.51	-21.2018	236.04	1444.75	-69.1023	176.954	1254.35	-77.2513	129.529	1142.46	-96.0552	137.307	968.889	-55.6914	142.611	867.826	-110.803	89.0599	875.239	-107.425	103.225	769.716
865	0	113.046	491.77	1623.36	216.455	486.29	1624.27	83.763	337.448	1646.79	220.187	318.382	1651.44	174.136	253.744	1500.94	179.762	149.332	1279.1	158.882	392.064	1400.86	160.317	413.538	1213.94	229.6	148.374	1355.38	-21.7122	248.516	1447.11	-70.6712	192.427	1255.41	-79.4634	146.6	1142.88	-97.0452	158.455	969.25	-56.0763	165.474	868.665	-112.113	112.724	874.555	-108.139	129.717	769.514
866	0	113.574	503.276	1625.42	216.957	497.647	1626.22	84.0988	349.042	1649.18	220.473	329.814	1653.73	173.877	264.928	1503.06	178.751	161.107	1281.04	159.159	403.432	1403.16	160.49	425.016	1216.31	228.645	159.502	1357.32	-22.1229	260.884	1449.59	-72.1757	207.839	1256.65	-81.6699	163.708	1143.46	-98.0052	179.884	969.886	-56.4255	188.785	869.865	-113.349	136.859	874.158	-108.84	156.914	769.738
867	0	114.223	514.63	1627.61	217.575	508.838	1628.27	84.5509	360.479	1651.65	220.875	341.079	1656.06	173.701	275.998	1505.23	177.794	172.762	1283.04	159.521	414.679	1405.52	160.752	436.382	1218.75	227.759	170.528	1359.29	-22.4379	273.151	1452.14	-73.6074	223.172	1258.04	-83.8529	180.827	1144.21	-98.9296	201.549	970.804	-56.7367	212.493	871.444	-114.495	161.408	874.076	-109.508	184.727	770.428
868	0	114.977	525.846	1629.91	218.29	519.877	1630.38	85.0996	371.775	1654.17	221.376	352.189	1658.4	173.603	286.974	1507.42	176.897	184.311	1285.07	159.956	425.821	1407.91	161.092	447.649	1221.21	226.943	181.469	1361.29	-22.6623	285.323	1454.74	-74.9595	238.409	1259.57	-85.9954	197.933	1145.1	-99.8131	223.401	972.008	-57.0087	236.543	873.414	-115.537	186.309	874.331	-110.128	213.061	771.617
869	0	115.818	536.94	1632.28	219.085	530.78	1632.55	85.7247	382.944	1656.69	221.954	363.156	1660.72	173.576	297.873	1509.61	176.067	195.763	1287.11	160.45	436.875	1410.28	161.497	458.833	1223.67	226.203	192.344	1363.28	-22.801	297.405	1457.36	-76.2261	253.537	1261.2	-88.0812	215.001	1146.11	-100.651	245.392	973.495	-57.24	260.882	875.782	-116.462	211.502	874.938	-110.679	241.823	773.327
870	0	116.726	547.931	1634.69	219.942	541.564	1634.73	86.4063	394.004	1659.19	222.59	373.997	1662.99	173.612	308.715	1511.76	175.312	207.132	1289.12	160.99	447.857	1412.61	161.954	469.948	1226.09	225.54	203.17	1365.24	-22.8595	309.405	1459.95	-77.4031	268.544	1262.91	-90.0958	232.009	1147.22	-101.44	267.477	975.258	-57.4295	285.452	878.545	-117.261	236.925	875.903	-111.146	270.916	775.571
871	0	117.685	558.838	1637.09	220.843	552.25	1636.9	87.1257	404.973	1661.62	223.265	384.731	1665.17	173.706	319.518	1513.85	174.638	218.429	1291.08	161.565	458.785	1414.87	162.45	481.008	1228.43	224.96	213.964	1367.15	-22.8429	321.328	1462.49	-78.487	283.418	1264.66	-92.0259	248.937	1148.39	-102.174	289.609	977.284	-57.5753	310.197	881.696	-117.925	262.518	877.225	-111.512	300.245	778.349
872	0	118.677	569.679	1639.47	221.772	562.859	1639.02	87.8658	415.872	1663.96	223.962	395.377	1667.25	173.853	330.301	1515.85	174.054	229.665	1292.97	162.163	469.673	1417.01	162.974	492.025	1230.67	224.464	224.742	1368.98	-22.7561	333.179	1464.94	-79.4749	298.151	1266.41	-93.8596	265.768	1149.6	-102.85	311.747	979.556	-57.6745	335.059	885.22	-118.448	288.223	878.896	-111.76	329.719	781.651
873	0	119.687	580.476	1641.76	222.717	573.413	1641.06	88.612	426.72	1666.16	224.667	405.957	1669.19	174.049	341.08	1517.73	173.567	240.854	1294.75	162.776	480.537	1419.03	163.512	503.012	1232.77	224.057	235.518	1370.71	-22.6033	344.963	1467.26	-80.3645	312.737	1268.12	-95.5865	282.488	1150.82	-103.461	333.849	982.052	-57.7231	359.981	889.094	-118.826	313.981	880.899	-111.879	359.249	785.457
874	0	120.702	591.248	1643.94	223.664	583.934	1642.99	89.3522	437.537	1668.19	225.367	416.492	1670.97	174.29	351.868	1519.46	173.182	252.005	1296.4	163.394	491.391	1420.87	164.054	513.98	1234.7	223.74	246.306	1372.32	-22.3882	356.686	1469.43	-81.1535	327.174	1269.77	-97.1974	299.087	1152	-104.002	355.879	984.747	-57.7161	384.906	893.291	-119.054	339.74	883.213	-111.856	388.75	789.741
875	0	121.711	602.014	1645.96	224.606	594.445	1644.78	90.0775	448.343	1670.03	226.054	427.004	1672.55	174.574	362.681	1521.03	172.906	263.131	1297.91	164.011	502.248	1422.53	164.593	524.938	1236.43	223.518	257.118	1373.78	-22.1136	368.352	1471.41	-81.8392	341.46	1271.31	-98.684	315.557	1153.12	-104.465	377.799	987.611	-57.6473	409.779	897.78	-119.133	365.445	885.812	-111.683	418.143	794.467
876	0	122.705	612.791	1647.8	225.535	604.967	1646.39	90.7823	459.154	1671.65	226.722	437.515	1673.92	174.902	373.528	1522.41	172.743	274.242	1299.23	164.623	513.12	1423.97	165.12	535.897	1237.94	223.392	267.965	1375.07	-21.7813	379.966	1473.18	-82.419	355.597	1272.71	-100.039	331.896	1154.15	-104.844	399.579	990.615	-57.5095	434.546	902.525	-119.062	391.047	888.667	-111.352	447.354	799.595
877	0	123.68	623.596	1649.42	226.447	615.518	1647.79	91.4639	469.989	1673.02	227.369	448.045	1675.07	175.274	384.42	1523.58	172.698	285.35	1300.37	165.225	524.017	1425.17	165.63	546.864	1239.21	223.366	278.857	1376.17	-21.392	391.534	1474.73	-82.8897	369.59	1273.94	-101.256	348.1	1155.05	-105.13	421.188	993.727	-57.295	459.155	907.487	-118.843	416.5	891.745	-110.86	476.315	805.079
878	0	124.631	634.444	1650.8	227.342	626.117	1648.97	92.123	480.86	1674.14	227.994	458.612	1675.97	175.69	395.365	1524.53	172.773	296.465	1301.29	165.819	534.948	1426.13	166.12	557.847	1240.22	223.442	289.802	1377.07	-20.9456	403.062	1476.03	-83.2477	383.445	1274.98	-102.329	364.171	1155.81	-105.315	442.599	996.917	-56.9958	483.556	912.627	-118.477	441.757	895.015	-110.205	504.961	810.873
879	0	125.558	645.345	1651.9	228.217	636.778	1649.91	92.7631	491.781	1674.98	228.602	469.233	1676.62	176.155	406.371	1525.24	172.97	307.598	1301.99	166.404	545.923	1426.82	166.589	568.854	1240.96	223.623	300.809	1377.76	-20.4407	414.557	1477.07	-83.489	397.171	1275.8	-103.253	380.11	1156.4	-105.391	463.787	1000.15	-56.604	507.702	917.903	-117.968	466.777	898.442	-109.391	533.236	816.928
880	0	126.463	656.311	1652.73	229.078	647.515	1650.58	93.3907	502.761	1675.54	229.2	479.924	1677.01	176.673	417.443	1525.7	173.291	318.76	1302.45	166.984	556.948	1427.24	167.039	579.891	1241.42	223.911	311.883	1378.21	-19.8752	426.029	1477.84	-83.6098	410.778	1276.39	-104.021	395.919	1156.8	-105.349	484.73	1003.41	-56.1121	531.549	923.274	-117.319	491.519	901.994	-108.421	561.087	823.197
881	0	127.35	667.349	1653.26	229.926	658.338	1650.98	94.0147	513.809	1675.82	229.795	490.695	1677.13	177.249	428.587	1525.9	173.736	329.961	1302.67	167.563	568.03	1427.38	167.472	590.964	1241.6	224.308	323.031	1378.43	-19.2457	437.486	1478.33	-83.6059	424.277	1276.74	-104.63	411.6	1157	-105.183	505.405	1006.65	-55.5135	555.055	928.699	-116.534	515.944	905.639	-107.302	588.464	829.631
882	0	128.226	678.463	1653.5	230.77	669.255	1651.1	94.6463	524.928	1675.81	230.401	501.558	1676.98	177.889	439.806	1525.85	174.304	341.211	1302.63	168.15	579.175	1427.24	167.895	602.082	1241.49	224.816	334.257	1378.4	-18.5483	448.939	1478.56	-83.4734	437.681	1276.84	-105.076	427.153	1157	-104.887	525.792	1009.86	-54.8024	578.182	934.14	-115.616	540.016	909.348	-106.042	615.324	836.183
883	0	129.098	689.657	1653.44	231.616	680.273	1650.95	95.2988	536.123	1675.52	231.03	512.52	1676.57	178.601	451.104	1525.54	174.991	352.52	1302.34	168.752	590.389	1426.83	168.314	613.25	1241.11	225.436	345.567	1378.12	-17.7782	460.399	1478.52	-83.2089	451	1276.7	-105.355	442.577	1156.8	-104.454	545.871	1013	-53.9738	600.894	939.556	-114.569	563.699	913.089	-104.651	641.627	842.807
884	0	129.977	700.934	1653.1	232.475	691.394	1650.52	95.987	547.394	1674.95	231.698	523.586	1675.89	179.39	462.484	1524.98	175.797	363.895	1301.8	169.38	601.677	1426.15	168.739	624.476	1240.45	226.168	356.964	1377.6	-16.9306	471.878	1478.22	-82.8097	464.248	1276.32	-105.466	457.871	1156.4	-103.881	565.624	1016.06	-53.0241	623.159	944.913	-113.394	586.961	916.833	-103.139	667.334	849.459
885	0	130.875	712.291	1652.48	233.358	702.623	1649.82	96.7272	558.743	1674.13	232.422	534.759	1674.97	180.267	473.949	1524.17	176.715	375.347	1301.01	170.045	613.045	1425.21	169.178	635.767	1239.53	227.012	368.451	1376.83	-16	483.389	1477.67	-82.2739	477.434	1275.7	-105.407	473.031	1155.8	-103.164	585.031	1019.02	-51.9504	644.947	950.174	-112.095	609.768	920.553	-101.516	692.414	856.093
886	0	131.804	723.73	1651.59	234.277	713.959	1648.88	97.5365	570.166	1673.05	233.219	546.044	1673.81	181.237	485.499	1523.12	177.743	386.882	1299.99	170.759	624.496	1424.02	169.643	647.132	1238.36	227.967	380.03	1375.82	-14.9814	494.943	1476.89	-81.6005	490.569	1274.87	-105.181	488.05	1155.02	-102.303	604.076	1021.85	-50.7512	666.232	955.306	-110.673	632.091	924.218	-99.7904	716.837	862.667
887	0	132.78	735.247	1650.47	235.246	725.402	1647.7	98.4325	581.663	1671.75	234.107	557.439	1672.42	182.308	497.138	1521.85	178.873	398.507	1298.74	171.536	636.036	1422.6	170.146	658.578	1236.96	229.03	391.703	1374.57	-13.8699	506.551	1475.9	-80.79	503.659	1273.84	-104.788	502.921	1154.07	-101.297	622.742	1024.53	-49.426	686.991	960.277	-109.13	653.9	927.8	-97.9708	740.577	869.137
888	0	133.817	746.842	1649.13	236.281	736.953	1646.31	99.433	593.232	1670.24	235.104	568.946	1670.82	183.487	508.866	1520.37	180.099	410.227	1297.27	172.386	647.668	1420.98	170.697	670.113	1235.36	230.199	403.47	1373.11	-12.6615	518.224	1474.72	-79.8437	516.711	1272.62	-104.233	517.637	1152.97	-100.147	641.012	1027.06	-47.9751	707.202	965.055	-107.468	675.167	931.27	-96.0627	763.609	875.461
889	0	134.93	758.512	1647.6	237.395	748.611	1644.72	100.555	604.87	1668.54	236.227	580.562	1669.04	184.779	520.684	1518.69	181.415	422.048	1295.61	173.323	659.395	1419.16	171.309	681.744	1233.56	231.469	415.331	1371.44	-11.3527	529.973	1473.36	-78.7645	529.73	1271.24	-103.522	532.186	1151.73	-98.8567	658.872	1029.41	-46.4004	726.848	969.611	-105.69	695.866	934.597	-94.0704	785.916	881.593
890	0	136.136	770.255	1645.9	238.605	760.372	1642.97	101.814	616.575	1666.69	237.491	592.287	1667.09	186.188	532.592	1516.85	182.812	433.972	1293.78	174.358	671.22	1417.19	171.991	693.48	1231.61	232.837	427.286	1369.59	-9.94151	541.806	1471.85	-77.5564	542.717	1269.73	-102.66	546.56	1150.37	-97.4294	676.309	1031.57	-44.7047	745.913	973.914	-103.8	715.974	937.753	-91.9963	807.479	887.491
891	0	137.449	782.072	1644.08	239.924	772.236	1641.08	103.225	628.346	1664.7	238.911	604.117	1665	187.716	544.591	1514.85	184.282	446.001	1291.79	175.499	683.145	1415.08	172.755	705.326	1229.52	234.295	439.333	1367.57	-8.42712	553.731	1470.22	-76.2247	555.672	1268.1	-101.656	560.747	1148.92	-95.8711	693.31	1033.53	-42.8922	764.386	977.937	-101.804	735.467	940.707	-89.8418	828.286	893.109
892	0	138.885	793.96	1642.15	241.368	784.2	1639.08	104.8	640.182	1662.62	240.499	616.051	1662.78	189.364	556.679	1512.74	185.817	458.135	1289.67	176.754	695.171	1412.86	173.608	717.288	1227.32	235.837	451.469	1365.41	-6.81032	565.753	1468.49	-74.7755	568.593	1266.4	-100.517	574.739	1147.4	-94.1889	709.865	1035.27	-40.9688	782.257	981.651	-99.7093	754.326	943.432	-87.6075	848.324	898.403
893	0	140.454	805.92	1640.16	242.947	796.261	1636.99	106.547	652.084	1660.47	242.261	628.084	1660.48	191.129	568.855	1510.53	187.407	470.374	1287.45	178.128	707.298	1410.56	174.558	729.369	1225.04	237.457	463.691	1363.13	-5.09362	577.876	1466.68	-73.216	581.478	1264.63	-99.2532	588.524	1145.82	-92.3911	725.964	1036.79	-38.9416	799.519	985.028	-97.5246	772.534	945.897	-85.2943	867.586	903.327
894	0	142.169	817.952	1638.13	244.672	808.416	1634.84	108.472	664.051	1658.29	244.204	640.211	1658.11	193.009	581.117	1508.25	189.045	482.714	1285.15	179.624	719.524	1408.22	175.61	741.571	1222.72	239.147	475.995	1360.76	-3.28136	590.103	1464.83	-71.5541	594.322	1262.84	-97.873	602.096	1144.21	-90.4872	741.601	1038.06	-36.8191	816.168	988.041	-95.2611	790.076	948.076	-82.904	886.066	907.833
895	0	144.038	830.057	1636.09	246.551	820.66	1632.67	110.576	676.085	1656.1	246.327	652.428	1655.7	194.996	593.461	1505.93	190.723	495.149	1282.82	181.241	731.846	1405.85	176.768	753.895	1220.37	240.9	488.375	1358.33	-1.37975	602.432	1462.96	-69.7984	607.12	1261.03	-96.3851	615.449	1142.6	-88.4879	756.77	1039.09	-34.6116	832.202	990.664	-92.9314	806.941	949.942	-80.4399	903.759	911.874
896	0	146.064	842.234	1634.09	248.586	832.987	1630.49	112.855	688.187	1653.94	248.626	664.728	1653.28	197.082	605.883	1503.61	192.432	507.674	1280.47	182.975	744.261	1403.5	178.032	766.337	1218.04	242.709	500.826	1355.88	0.603108	614.861	1461.1	-67.9579	619.866	1259.25	-94.7978	628.578	1141	-86.4046	771.469	1039.87	-32.3305	847.622	992.87	-90.5494	823.118	951.471	-77.9081	920.663	915.403
897	0	148.251	854.483	1632.14	250.779	845.392	1628.34	115.301	700.357	1651.84	251.092	677.105	1650.88	199.256	618.377	1501.32	194.166	520.279	1278.14	184.82	756.761	1401.2	179.401	778.895	1215.76	244.566	513.341	1353.43	2.65734	627.385	1459.26	-66.042	632.555	1257.52	-93.1186	641.482	1139.43	-84.2496	785.696	1040.37	-29.989	862.431	994.636	-88.1303	838.6	952.639	-75.3174	936.775	918.372
898	0	150.593	866.802	1630.28	253.126	857.865	1626.25	117.903	712.596	1649.84	253.71	689.551	1648.52	201.506	630.936	1499.08	195.918	532.954	1275.86	186.766	769.34	1398.96	180.87	791.56	1213.55	246.465	525.91	1351.02	4.77138	639.995	1457.48	-64.0603	645.18	1255.85	-91.3543	654.16	1137.92	-82.0358	799.45	1040.61	-27.6013	876.633	995.938	-85.69	853.38	953.426	-72.6799	952.094	920.734
899	0	153.084	879.19	1628.53	255.617	870.399	1624.23	120.641	724.903	1647.95	256.463	702.055	1646.25	203.817	643.55	1496.92	197.683	545.686	1273.67	188.8	781.986	1396.83	182.434	804.322	1211.45	248.399	538.525	1348.69	6.9321	652.681	1455.79	-62.0226	657.737	1254.28	-89.5106	666.615	1136.48	-79.7764	812.733	1040.56	-25.1828	890.235	996.756	-83.2452	867.457	953.815	-70.0109	966.619	922.447
900	0	155.712	891.642	1626.92	258.24	882.981	1622.32	123.493	737.276	1646.2	259.325	714.607	1644.07	206.173	656.208	1494.89	199.458	558.461	1271.6	190.909	794.688	1394.83	184.084	817.167	1209.48	250.362	551.175	1346.46	9.12508	665.428	1454.2	-59.9388	670.22	1252.81	-87.5926	678.852	1135.13	-77.4847	825.548	1040.23	-22.7497	903.244	997.071	-80.8126	880.827	953.79	-67.3292	980.347	923.472
901	0	158.459	904.152	1625.45	260.978	895.6	1620.53	126.433	749.712	1644.62	262.27	727.195	1642.03	208.555	668.9	1493	201.24	571.263	1269.67	193.074	807.432	1392.98	185.81	830.08	1207.66	252.347	563.848	1344.36	11.3348	678.222	1452.73	-57.8186	682.623	1251.48	-85.6045	690.876	1133.9	-75.1741	837.897	1039.62	-20.3189	915.666	996.871	-78.4087	893.49	953.344	-64.6563	993.277	923.777
902	0	161.305	916.714	1624.16	263.809	908.241	1618.89	129.43	762.204	1643.22	265.265	739.807	1640.14	210.945	681.61	1491.28	203.027	584.076	1267.91	195.276	820.202	1391.31	187.599	843.04	1206.03	254.35	576.531	1342.44	13.545	691.044	1451.41	-55.6718	694.943	1250.28	-83.5504	702.696	1132.78	-72.858	849.785	1038.71	-17.9075	927.509	996.145	-76.0493	905.447	952.472	-62.0159	1005.4	923.336
903	0	164.225	929.317	1623.05	266.707	920.891	1617.4	132.452	774.745	1642.02	268.277	752.429	1638.43	213.322	694.324	1489.76	204.816	596.88	1266.35	197.497	832.982	1389.85	189.439	856.026	1204.61	256.364	589.211	1340.72	15.739	703.874	1450.25	-53.5081	707.173	1249.25	-81.4344	714.32	1131.79	-70.5492	861.216	1037.53	-15.5327	938.78	994.891	-73.7496	916.699	951.175	-59.4332	1016.72	922.136
904	0	167.189	941.951	1622.14	269.643	933.535	1616.1	135.462	787.326	1641.04	271.271	765.046	1636.93	215.668	707.027	1488.45	206.609	609.659	1265.01	199.714	845.752	1388.6	191.315	869.012	1203.4	258.383	601.873	1339.22	17.9003	716.694	1449.26	-51.3371	719.308	1248.38	-79.2609	725.757	1130.95	-68.2607	872.193	1036.07	-13.2113	949.483	993.109	-71.5233	927.25	949.459	-56.9341	1027.24	920.17
905	0	170.165	954.602	1621.42	272.585	946.155	1614.98	138.425	799.934	1640.29	274.209	777.644	1635.64	217.963	719.702	1487.38	208.402	622.391	1263.91	201.907	858.495	1387.58	193.214	881.972	1202.42	260.401	614.504	1337.97	20.0128	729.48	1448.46	-49.1683	731.342	1247.69	-77.0347	737.014	1130.26	-66.0046	882.72	1034.35	-10.9592	959.624	990.81	-69.3826	937.102	947.337	-54.5443	1036.93	917.446
906	0	173.119	967.255	1620.9	275.499	958.738	1614.07	141.304	812.557	1639.76	277.055	790.209	1634.59	220.189	732.333	1486.57	210.196	635.059	1263.07	204.057	871.19	1386.81	195.122	894.88	1201.68	262.411	627.088	1336.98	22.0613	742.212	1447.86	-47.011	743.27	1247.17	-74.7617	748.099	1129.71	-63.7929	892.801	1032.38	-8.7918	969.206	988.008	-67.3385	946.259	944.828	-52.2882	1045.8	913.982
907	0	176.012	979.895	1620.58	278.349	971.268	1613.37	144.064	825.178	1639.46	279.776	802.726	1633.79	222.329	744.904	1486.01	211.989	647.646	1262.49	206.143	883.82	1386.29	197.024	907.709	1201.19	264.407	639.614	1336.27	24.0324	754.867	1447.45	-44.8743	755.085	1246.84	-72.4486	759.018	1129.33	-61.6371	902.438	1030.17	-6.72319	978.228	984.728	-65.4006	954.726	941.959	-50.1882	1053.86	909.81
908	0	178.807	992.503	1620.46	281.098	983.731	1612.89	146.673	837.78	1639.39	282.34	815.182	1633.26	224.369	757.4	1485.72	213.778	660.134	1262.19	208.15	896.365	1386.03	198.906	920.436	1200.95	266.383	652.069	1335.85	25.9143	767.424	1447.25	-42.7668	766.78	1246.69	-70.1029	769.775	1129.1	-59.5477	911.633	1027.76	-4.76623	986.693	981.001	-63.5773	962.509	938.762	-48.2638	1061.08	904.977
909	0	181.466	1005.06	1620.54	283.711	996.117	1612.64	149.102	850.344	1639.56	284.718	827.566	1633	226.296	769.805	1485.71	215.562	672.51	1262.17	210.061	908.811	1386.03	200.757	933.04	1200.97	268.333	664.443	1335.73	27.6973	779.862	1447.25	-40.6968	778.347	1246.71	-67.7328	780.373	1129.02	-57.535	920.388	1025.16	-2.93237	994.598	976.864	-61.8761	969.615	935.277	-46.5316	1067.48	899.541
910	0	183.952	1017.55	1620.82	286.151	1008.41	1612.64	151.326	862.851	1639.95	286.889	839.867	1633.03	228.102	782.108	1485.97	217.339	684.763	1262.42	211.864	921.144	1386.29	202.564	945.505	1201.25	270.253	676.728	1335.9	29.3745	792.164	1447.45	-38.6716	789.777	1246.91	-65.3472	790.812	1129.09	-55.6081	928.702	1022.4	-1.23164	1001.94	972.365	-60.3034	976.052	931.55	-45.0046	1073.05	893.572
911	0	186.23	1029.96	1621.29	288.387	1020.62	1612.88	153.326	875.279	1640.55	288.836	852.079	1633.35	229.78	794.299	1486.5	219.106	696.885	1262.93	213.548	933.352	1386.81	204.314	957.821	1201.78	272.138	688.919	1336.36	30.9413	804.313	1447.84	-36.6977	801.063	1247.27	-62.9547	801.089	1129.32	-53.7754	936.578	1019.53	0.327478	1008.72	967.556	-58.8652	981.829	927.634	-43.6925	1077.79	887.154
912	0	188.269	1042.26	1621.95	290.39	1032.72	1613.38	155.088	887.607	1641.37	290.547	864.193	1633.96	231.329	806.37	1487.29	220.861	708.871	1263.71	215.107	945.43	1387.59	205.998	969.984	1202.57	273.984	701.014	1337.11	32.3956	816.295	1448.42	-34.7803	812.196	1247.8	-60.5643	811.199	1129.68	-52.0443	944.016	1016.58	1.73801	1014.94	962.497	-57.5666	986.957	923.587	-42.6018	1081.73	880.378
913	0	190.044	1054.45	1622.81	292.136	1044.72	1614.14	156.606	899.817	1642.39	292.018	876.206	1634.86	232.747	818.319	1488.33	222.603	720.72	1264.73	216.536	957.373	1388.63	207.608	981.995	1203.6	275.789	713.012	1338.12	33.7382	828.101	1449.18	-32.9235	823.165	1248.48	-58.1841	821.135	1130.18	-50.4209	951.017	1013.58	2.99456	1020.59	957.252	-56.412	991.45	919.47	-41.736	1084.85	873.342
914	0	191.535	1066.5	1623.86	293.608	1056.61	1615.16	157.877	911.889	1643.6	293.251	888.113	1636.03	234.039	830.144	1489.6	224.331	732.435	1265.98	217.833	969.184	1389.9	209.136	993.861	1204.88	277.552	724.918	1339.39	34.9717	839.726	1450.1	-31.1299	833.962	1249.3	-55.822	830.886	1130.82	-48.9101	957.582	1010.59	4.09329	1025.68	951.891	-55.4047	995.322	915.348	-41.096	1087.18	866.15
915	0	192.73	1078.4	1625.1	294.796	1068.4	1616.46	158.907	923.809	1644.98	294.254	899.913	1637.48	235.209	841.849	1491.09	226.042	744.02	1267.45	219	980.866	1391.41	210.578	1005.59	1206.38	279.27	736.735	1340.88	36.1011	851.17	1451.18	-29.4005	844.578	1250.26	-53.485	840.441	1131.59	-47.5158	963.715	1007.64	5.03195	1030.21	946.485	-54.5472	998.591	911.288	-40.6803	1088.74	858.909
916	0	193.627	1090.14	1626.54	295.697	1080.08	1618.01	159.708	935.561	1646.52	295.039	911.606	1639.17	236.264	853.44	1492.77	227.737	755.485	1269.09	220.039	992.429	1393.13	211.931	1017.2	1208.1	280.945	748.474	1342.58	37.1328	862.437	1452.39	-27.7352	855.003	1251.35	-51.1797	849.788	1132.48	-46.2403	969.42	1004.78	5.80986	1034.19	941.107	-53.8406	1001.28	907.355	-40.4852	1089.54	851.726
917	0	194.229	1101.73	1628.16	296.316	1091.66	1619.82	160.293	947.139	1648.19	295.623	923.191	1641.09	237.214	864.927	1494.63	229.414	766.837	1270.9	220.957	1003.89	1395.04	213.195	1028.71	1210.02	282.575	760.143	1344.46	38.0748	873.537	1453.73	-26.1329	865.23	1252.55	-48.9119	858.912	1133.49	-45.0849	974.705	1002.04	6.42774	1037.64	935.826	-53.2842	1003.41	903.611	-40.505	1089.62	844.703
918	0	194.551	1113.15	1629.95	296.668	1103.14	1621.87	160.683	958.537	1649.97	296.027	934.671	1643.19	238.068	876.321	1496.62	231.07	778.09	1272.85	221.761	1015.25	1397.12	214.372	1040.14	1212.11	284.164	771.753	1346.48	38.9357	884.482	1455.16	-24.5913	875.252	1253.85	-46.6871	867.802	1134.63	-44.0496	979.579	999.471	6.8877	1040.56	930.709	-52.8753	1005.01	900.113	-40.7317	1089.02	837.936
919	0	194.612	1124.41	1631.9	296.77	1114.52	1624.13	160.9	969.755	1651.84	296.276	946.048	1645.44	238.837	887.636	1498.71	232.701	789.255	1274.89	222.458	1026.53	1399.33	215.466	1051.5	1214.33	285.711	783.317	1348.62	39.725	895.288	1456.68	-23.1078	885.065	1255.24	-44.5107	876.444	1135.87	-43.1334	984.055	997.096	7.19314	1042.99	925.816	-52.6089	1006.12	896.91	-41.1548	1087.77	831.511
920	0	194.441	1135.51	1634	296.649	1125.82	1626.58	160.969	980.799	1653.77	296.392	957.328	1647.81	239.533	898.886	1500.88	234.304	800.345	1277.02	223.06	1037.76	1401.64	216.48	1062.81	1216.66	287.217	794.846	1350.82	40.4521	905.976	1458.25	-21.6796	894.667	1256.7	-42.3876	884.831	1137.21	-42.3341	988.149	994.946	7.3487	1044.94	921.2	-52.4776	1006.77	894.043	-41.7616	1085.94	825.5
921	0	194.068	1146.47	1636.21	296.336	1137.03	1629.18	160.917	991.68	1655.72	296.402	968.517	1650.23	240.165	910.089	1503.09	235.872	811.371	1279.18	223.576	1048.94	1404.01	217.42	1074.08	1219.05	288.685	806.352	1353.07	41.1262	916.566	1459.85	-20.3036	904.057	1258.22	-40.3228	892.956	1138.63	-41.6486	991.882	993.04	7.36023	1046.47	916.904	-52.4716	1007	891.54	-42.5368	1083.58	819.962
922	0	193.531	1157.3	1638.51	295.864	1148.16	1631.89	160.77	1002.41	1657.66	296.331	979.623	1652.67	240.744	921.258	1505.3	237.399	822.345	1281.35	224.016	1060.1	1406.4	218.292	1085.33	1221.47	290.113	817.845	1355.32	41.7561	927.079	1461.45	-18.9772	913.239	1259.77	-38.3212	900.816	1140.14	-41.0728	995.278	991.392	7.23468	1047.6	912.957	-52.5785	1006.87	889.421	-43.4623	1080.75	814.938
923	0	192.865	1168.02	1640.86	295.269	1159.23	1634.66	160.553	1013.02	1659.56	296.201	990.658	1655.08	241.28	932.411	1507.48	238.878	833.279	1283.5	224.39	1071.25	1408.77	219.1	1096.58	1223.86	291.502	829.335	1357.54	42.3496	937.536	1463.03	-17.698	922.219	1261.35	-36.3873	908.414	1141.71	-40.6019	998.364	990.007	6.98009	1048.38	909.381	-52.7839	1006.41	887.691	-44.5182	1077.53	810.452
924	0	192.11	1178.65	1643.22	294.584	1170.24	1637.44	160.291	1023.52	1661.38	296.036	1001.63	1657.41	241.779	943.562	1509.58	240.299	844.181	1285.6	224.707	1082.4	1411.08	219.848	1107.82	1226.18	292.849	840.83	1359.68	42.9135	947.96	1464.55	-16.4643	931.006	1262.93	-34.5256	915.758	1143.32	-40.2302	1001.17	988.886	6.60553	1048.86	906.185	-53.0718	1005.69	886.346	-45.6825	1073.99	806.514
925	0	191.3	1189.21	1645.55	293.845	1181.22	1640.18	160.004	1033.94	1663.09	295.853	1012.56	1659.61	242.249	954.724	1511.58	241.655	855.06	1287.6	224.976	1093.57	1413.29	220.541	1119.08	1228.4	294.153	852.337	1361.72	43.4531	958.368	1465.99	-15.2747	939.614	1264.49	-32.74	922.86	1144.97	-39.9511	1003.74	988.021	6.12103	1049.1	903.367	-53.4248	1004.76	885.372	-46.9321	1070.21	803.118
926	0	190.468	1199.74	1647.81	293.082	1192.16	1642.83	159.711	1044.32	1664.66	295.668	1023.47	1661.64	242.695	965.91	1513.44	242.937	865.924	1289.49	225.201	1104.76	1415.36	221.179	1130.35	1230.47	295.409	863.862	1363.63	43.9726	968.781	1467.33	-14.1283	948.057	1266.02	-31.0337	929.739	1146.63	-39.7575	1006.1	987.399	5.53747	1049.14	900.916	-53.8249	1003.68	884.749	-48.2432	1066.27	800.244
927	0	189.642	1210.25	1649.94	292.321	1203.1	1645.32	159.428	1054.68	1666.07	295.494	1034.36	1663.47	243.119	977.131	1515.13	244.136	876.78	1291.23	225.39	1116	1417.24	221.766	1141.64	1232.35	296.612	875.408	1365.37	44.4744	979.213	1468.53	-13.0249	956.354	1267.49	-29.4092	936.416	1148.29	-39.6416	1008.29	987.004	4.86649	1049.06	898.815	-54.2539	1002.49	884.446	-49.5919	1062.24	797.863
928	0	188.845	1220.78	1651.92	291.585	1214.05	1647.63	159.164	1065.05	1667.29	295.337	1045.26	1665.07	243.522	988.396	1516.63	245.244	887.638	1292.81	225.546	1127.27	1418.92	222.299	1152.96	1234.01	297.758	886.98	1366.93	44.9594	989.681	1469.58	-11.9645	964.526	1268.91	-27.868	942.917	1149.93	-39.5949	1010.37	986.815	4.1204	1048.9	897.041	-54.6943	1001.27	884.432	-50.9551	1058.2	795.939
929	0	188.095	1231.35	1653.7	290.89	1225.03	1649.7	158.926	1075.47	1668.3	295.204	1056.19	1666.41	243.905	999.714	1517.91	246.254	898.503	1294.2	225.67	1138.6	1420.37	222.779	1164.3	1235.42	298.839	898.581	1368.27	45.4269	1000.2	1470.46	-10.9475	972.598	1270.24	-26.4107	949.273	1151.54	-39.6087	1012.35	986.81	3.31209	1048.72	895.565	-55.1296	1000.06	884.674	-52.3111	1054.22	794.429
930	0	187.403	1241.99	1655.24	290.248	1236.05	1651.49	158.717	1085.95	1669.09	295.093	1067.17	1667.48	244.263	1011.09	1518.96	247.16	909.387	1295.38	225.762	1149.98	1421.56	223.204	1175.67	1236.56	299.849	910.214	1369.39	45.8747	1010.78	1471.15	-9.97484	980.593	1271.49	-25.0367	955.516	1153.11	-39.674	1014.3	986.965	2.45487	1048.58	894.36	-55.5451	998.922	885.136	-53.6396	1050.37	793.29
931	0	186.776	1252.72	1656.52	289.663	1247.14	1652.98	158.534	1096.54	1669.65	295.001	1078.21	1668.25	244.594	1022.53	1519.76	247.957	920.298	1296.33	225.821	1161.43	1422.48	223.572	1187.07	1237.43	300.781	921.881	1370.28	46.2988	1021.43	1471.65	-9.04762	988.538	1272.65	-23.7445	961.678	1154.63	-39.7816	1016.25	987.258	1.56219	1048.53	893.395	-55.9279	997.899	885.785	-54.9231	1046.7	792.481
932	0	186.213	1263.56	1657.51	289.137	1258.31	1654.14	158.373	1107.24	1669.96	294.92	1089.33	1668.74	244.892	1034.05	1520.31	248.64	931.248	1297.06	225.843	1172.93	1423.12	223.88	1198.5	1238	301.626	933.588	1370.91	46.694	1032.16	1471.93	-8.16735	996.461	1273.7	-22.5317	967.796	1156.09	-39.9228	1018.25	987.665	0.647286	1048.62	892.643	-56.2676	997.043	886.591	-56.1463	1043.28	791.959
933	0	185.709	1274.53	1658.19	288.665	1269.57	1654.96	158.224	1118.09	1670.03	294.842	1100.55	1668.94	245.148	1045.64	1520.6	249.209	942.25	1297.54	225.826	1184.51	1423.47	224.125	1209.97	1238.28	302.378	945.338	1371.3	47.0539	1042.98	1472.01	-7.33592	1004.39	1274.65	-21.3952	973.904	1157.48	-40.0892	1020.33	988.165	-0.277081	1048.9	892.077	-56.556	996.398	887.524	-57.2968	1040.16	791.687
934	0	185.255	1285.65	1658.56	288.236	1280.94	1655.43	158.075	1129.1	1669.86	294.753	1111.88	1668.85	245.355	1057.3	1520.63	249.661	953.318	1297.78	225.762	1196.16	1423.54	224.304	1221.49	1238.27	303.029	957.137	1371.44	47.3709	1053.9	1471.87	-6.55563	1012.35	1275.49	-20.3316	980.038	1158.8	-40.2732	1022.53	988.736	-1.19901	1049.41	891.672	-56.7874	996.005	888.561	-58.3653	1037.37	791.63
935	0	184.836	1296.92	1658.61	287.84	1292.43	1655.56	157.911	1140.27	1669.45	294.638	1123.33	1668.49	245.503	1069.06	1520.41	249.997	964.467	1297.78	225.645	1207.88	1423.32	224.415	1233.05	1237.97	303.574	968.992	1371.33	47.6366	1064.94	1471.53	-5.82916	1020.36	1276.23	-19.3374	986.231	1160.04	-40.4682	1024.9	989.358	-2.10775	1050.18	891.406	-56.9584	995.901	889.676	-59.3452	1034.96	791.757
936	0	184.437	1308.36	1658.35	287.458	1304.04	1655.35	157.718	1151.63	1668.81	294.483	1134.91	1667.87	245.582	1080.9	1519.95	250.217	975.712	1297.54	225.469	1219.68	1422.84	224.456	1244.67	1237.41	304.006	980.908	1370.98	47.842	1076.08	1470.98	-5.15969	1028.46	1276.86	-18.4094	992.518	1161.19	-40.6686	1027.47	990.013	-2.994	1051.26	891.258	-57.0678	996.121	890.851	-60.2328	1032.96	792.04
937	0	184.039	1319.97	1657.78	287.074	1315.79	1654.81	157.477	1163.17	1667.96	294.27	1146.62	1667.01	245.582	1092.83	1519.25	250.325	987.068	1297.07	225.226	1231.57	1422.11	224.424	1256.36	1236.6	304.32	992.893	1370.41	47.9776	1087.35	1470.23	-4.55083	1036.68	1277.38	-17.5451	998.932	1162.27	-40.8705	1030.27	990.682	-3.85017	1052.67	891.206	-57.1167	996.694	892.065	-61.0272	1031.41	792.451
938	0	183.62	1331.75	1656.93	286.668	1327.67	1653.97	157.17	1174.89	1666.89	293.983	1158.47	1665.93	245.491	1104.86	1518.33	250.322	998.55	1296.37	224.908	1243.56	1421.13	224.317	1268.12	1235.55	304.511	1004.96	1369.62	48.0337	1098.75	1469.29	-4.00671	1045.03	1277.79	-16.7431	1005.51	1163.25	-41.0712	1033.33	991.346	-4.67054	1054.43	891.232	-57.1078	997.646	893.3	-61.7299	1030.33	792.965
939	0	183.16	1343.7	1655.8	286.217	1339.69	1652.86	156.781	1186.8	1665.64	293.604	1170.47	1664.65	245.3	1117	1517.2	250.212	1010.17	1295.46	224.509	1255.64	1419.94	224.133	1279.97	1234.28	304.578	1017.1	1368.64	48.0008	1110.29	1468.16	-3.53196	1053.53	1278.08	-16.0032	1012.27	1164.13	-41.2697	1036.69	991.989	-5.45144	1056.57	891.314	-57.0459	999	894.538	-62.3443	1029.74	793.559
940	0	182.637	1355.81	1654.44	285.702	1351.85	1651.5	156.293	1198.89	1664.2	293.119	1182.61	1663.19	244.999	1129.24	1515.9	249.998	1021.94	1294.36	224.021	1267.83	1418.55	223.871	1291.92	1232.83	304.517	1029.35	1367.48	47.8694	1121.97	1466.87	-3.1318	1062.23	1278.27	-15.327	1019.26	1164.91	-41.4665	1040.37	992.593	-6.19112	1059.09	891.433	-56.9376	1000.78	895.761	-62.876	1029.65	794.21
941	0	182.032	1368.09	1652.86	285.102	1364.14	1649.93	155.69	1211.15	1662.6	292.514	1194.89	1661.57	244.578	1141.59	1514.42	249.683	1033.88	1293.08	223.439	1280.12	1416.98	223.53	1303.97	1231.21	304.326	1041.69	1366.17	47.6308	1133.79	1465.41	-2.81202	1071.13	1278.33	-14.7173	1026.51	1165.57	-41.6635	1044.41	993.14	-6.88964	1062.02	891.567	-56.7912	1003	896.95	-63.3316	1030.08	794.892
942	0	181.326	1380.53	1651.09	284.398	1376.57	1648.17	154.96	1223.59	1660.85	291.775	1207.31	1659.83	244.031	1154.05	1512.81	249.27	1045.98	1291.63	222.757	1292.53	1415.27	223.109	1316.14	1229.44	304.007	1054.13	1364.72	47.2769	1145.77	1463.81	-2.57899	1080.25	1278.26	-14.1791	1034.03	1166.11	-41.8641	1048.83	993.612	-7.54852	1065.37	891.694	-56.6165	1005.68	898.087	-63.7188	1031.04	795.583
943	0	180.503	1393.13	1649.16	283.575	1389.13	1646.27	154.09	1236.18	1658.98	290.893	1219.87	1657.97	243.351	1166.63	1511.08	248.761	1058.25	1290.05	221.972	1305.06	1413.43	222.606	1328.43	1227.56	303.559	1066.69	1363.16	46.8009	1157.9	1462.08	-2.43964	1089.63	1278.07	-13.7183	1041.88	1166.51	-42.0729	1053.66	993.994	-8.17051	1069.15	891.792	-56.425	1008.83	899.152	-64.0458	1032.55	796.256
944	0	179.549	1405.86	1647.11	282.617	1401.82	1644.25	153.073	1248.93	1656.99	289.86	1232.57	1656.04	242.534	1179.33	1509.25	248.159	1070.69	1288.36	221.079	1317.71	1411.49	222.022	1340.85	1225.58	302.984	1079.36	1361.51	46.1968	1170.18	1460.22	-2.40132	1099.29	1277.74	-13.3426	1050.06	1166.78	-42.2955	1058.92	994.267	-8.75924	1073.37	891.837	-56.2297	1012.48	900.127	-64.3211	1034.6	796.886
945	0	178.453	1418.74	1644.95	281.514	1414.63	1642.15	151.902	1261.82	1654.92	288.672	1245.39	1654.04	241.577	1192.15	1507.36	247.465	1083.29	1286.59	220.079	1330.49	1409.48	221.355	1353.4	1223.52	302.284	1092.15	1359.8	45.4607	1182.61	1458.26	-2.47161	1109.23	1277.27	-13.0604	1058.61	1166.88	-42.5386	1064.65	994.417	-9.31906	1078.05	891.809	-56.0448	1016.65	900.992	-64.5531	1037.22	797.448
946	0	177.211	1431.75	1642.73	280.26	1427.57	1640	150.577	1274.85	1652.77	287.327	1258.35	1652.01	240.481	1205.09	1505.41	246.679	1096.05	1284.75	218.972	1343.38	1407.42	220.606	1366.09	1221.42	301.463	1105.04	1358.06	44.59	1195.2	1456.22	-2.65812	1119.49	1276.65	-12.8806	1067.56	1166.82	-42.8093	1070.87	994.429	-9.85489	1083.21	891.687	-55.8856	1021.34	901.731	-64.7504	1040.4	797.919
947	0	175.818	1444.89	1640.47	278.851	1440.63	1637.82	149.098	1288.01	1650.59	285.828	1271.43	1649.97	239.247	1218.14	1503.46	245.804	1108.97	1282.88	217.76	1356.4	1405.34	219.773	1378.91	1219.29	300.525	1118.05	1356.31	43.5841	1207.94	1454.12	-2.96816	1130.07	1275.88	-12.8126	1076.92	1166.6	-43.1152	1077.6	994.292	-10.3721	1088.85	891.452	-55.7681	1026.59	902.326	-64.921	1044.17	798.275
948	0	174.278	1458.15	1638.19	277.288	1453.8	1635.65	147.47	1301.28	1648.38	284.179	1284.63	1647.94	237.881	1231.31	1501.51	244.84	1122.02	1281.02	216.447	1369.52	1403.26	218.858	1391.85	1217.17	299.474	1131.15	1354.58	42.4447	1220.82	1451.97	-3.40848	1140.99	1274.97	-12.8652	1086.71	1166.19	-43.464	1084.88	993.996	-10.8765	1095.01	891.087	-55.7088	1032.41	902.763	-65.073	1048.53	798.497
949	0	172.596	1471.52	1635.91	275.578	1467.09	1633.5	145.702	1314.67	1646.18	282.39	1297.94	1645.96	236.39	1244.57	1499.59	243.789	1135.18	1279.18	215.041	1382.75	1401.21	217.859	1404.91	1215.07	298.318	1144.35	1352.89	41.1754	1233.84	1449.81	-3.98493	1152.26	1273.9	-13.0469	1096.96	1165.61	-43.8634	1092.72	993.535	-11.3744	1101.7	890.58	-55.7245	1038.85	903.031	-65.214	1053.51	798.567
950	0	170.784	1484.99	1633.67	273.732	1480.48	1631.41	143.806	1328.17	1644.01	280.474	1311.36	1644.04	234.785	1257.92	1497.73	242.652	1148.46	1277.4	213.549	1396.08	1399.22	216.779	1418.08	1213.02	297.063	1157.63	1351.26	39.7822	1246.99	1447.67	-4.70217	1163.89	1272.71	-13.3653	1107.68	1164.86	-44.3206	1101.15	992.907	-11.8722	1108.96	889.924	-55.8315	1045.92	903.12	-65.3514	1059.14	798.471
951	0	168.857	1498.56	1631.48	271.763	1493.97	1629.39	141.799	1341.75	1641.91	278.445	1324.89	1642.22	233.077	1271.35	1495.96	241.433	1161.81	1275.7	211.982	1409.48	1397.3	215.617	1431.33	1211.04	295.716	1170.97	1349.73	38.2736	1260.25	1445.56	-5.56331	1175.89	1271.39	-13.8268	1118.86	1163.94	-44.8426	1110.2	992.113	-12.3765	1116.8	889.114	-56.0454	1053.66	903.024	-65.4925	1065.43	798.197
952	0	166.833	1512.22	1629.36	269.692	1507.54	1627.46	139.698	1355.42	1639.89	276.324	1338.49	1640.5	231.283	1284.83	1494.3	240.135	1175.24	1274.11	210.351	1422.94	1395.5	214.376	1444.67	1209.16	294.288	1184.36	1348.31	36.6602	1273.61	1443.52	-6.56972	1188.24	1269.95	-14.4365	1130.53	1162.87	-45.4353	1119.89	991.159	-12.8937	1125.27	888.153	-56.3807	1062.11	902.74	-65.6443	1072.43	797.74
953	0	164.736	1525.95	1627.33	267.542	1521.2	1625.63	137.527	1369.16	1637.98	274.132	1352.18	1638.93	229.417	1298.35	1492.77	238.762	1188.7	1272.65	208.671	1436.45	1393.82	213.058	1458.06	1207.41	292.787	1197.78	1347.02	34.9545	1287.05	1441.58	-7.72075	1200.96	1268.44	-15.1979	1142.66	1161.65	-46.1041	1130.23	990.054	-13.4305	1134.38	887.047	-56.8503	1071.29	902.268	-65.8144	1080.18	797.095
954	0	162.589	1539.74	1625.41	265.338	1534.91	1623.93	135.308	1382.95	1636.21	271.893	1365.92	1637.52	227.5	1311.89	1491.4	237.321	1202.19	1271.35	206.957	1449.98	1392.3	211.668	1471.48	1205.81	291.225	1211.21	1345.88	33.1714	1300.56	1439.78	-9.01365	1214.01	1266.85	-16.1133	1155.26	1160.32	-46.8532	1141.25	988.814	-13.9935	1144.18	885.808	-57.465	1081.25	901.612	-66.0101	1088.71	796.263
955	0	160.421	1553.56	1623.61	263.107	1548.67	1622.36	133.069	1396.77	1634.61	269.632	1379.69	1636.29	225.551	1325.43	1490.19	235.818	1215.67	1270.21	205.224	1463.51	1390.95	210.211	1484.92	1204.37	289.613	1224.62	1344.9	31.3269	1314.11	1438.14	-10.4435	1227.4	1265.24	-17.1831	1168.31	1158.9	-47.686	1152.94	987.458	-14.589	1154.7	884.453	-58.2333	1092.02	900.779	-66.2394	1098.09	795.248
956	0	158.258	1567.39	1621.95	260.88	1562.44	1620.93	130.836	1410.61	1633.2	267.377	1393.49	1635.25	223.59	1338.93	1489.17	234.261	1229.14	1269.27	203.489	1477.01	1389.8	208.694	1498.35	1203.13	287.962	1237.99	1344.09	29.4385	1327.69	1436.7	-12.003	1241.1	1263.62	-18.4066	1181.78	1157.41	-48.6044	1165.33	986.006	-15.2231	1165.96	883.003	-59.1604	1103.63	899.779	-66.5104	1108.35	794.057
957	0	156.129	1581.21	1620.45	258.685	1576.21	1619.68	128.637	1424.43	1632	265.155	1407.27	1634.42	221.637	1352.37	1488.35	232.66	1242.56	1268.52	201.769	1490.46	1388.87	207.125	1511.74	1202.09	286.286	1251.31	1343.46	27.5247	1341.26	1435.48	-13.6831	1255.07	1262.03	-19.7814	1195.66	1155.89	-49.6092	1178.4	984.484	-15.9013	1177.99	881.483	-60.2487	1116.1	898.623	-66.8317	1119.56	792.703
958	0	154.062	1594.98	1619.13	256.551	1589.94	1618.59	126.499	1438.21	1631.03	262.992	1421.01	1633.82	219.713	1365.72	1487.74	231.023	1255.92	1267.97	200.079	1503.84	1388.16	205.515	1525.07	1201.29	284.596	1264.54	1343.02	25.6038	1354.82	1434.5	-15.4726	1269.3	1260.5	-21.304	1209.91	1154.36	-50.6999	1192.17	982.921	-16.6287	1190.81	879.92	-61.4965	1129.46	897.328	-67.2122	1131.77	791.201
959	0	152.082	1608.68	1618	254.506	1603.61	1617.69	124.448	1451.92	1630.3	260.915	1434.69	1633.44	217.836	1378.97	1487.35	229.362	1269.19	1267.64	198.435	1517.12	1387.69	203.876	1538.32	1200.72	282.905	1277.67	1342.77	23.6944	1368.32	1433.78	-17.3585	1283.74	1259.08	-22.9697	1224.5	1152.86	-51.8745	1206.62	981.345	-17.4093	1204.45	878.345	-62.8984	1143.71	895.909	-67.6611	1145.02	789.571
960	0	150.213	1622.27	1617.09	252.574	1617.17	1616.98	122.507	1465.53	1629.83	258.948	1448.26	1633.29	216.024	1392.08	1487.18	227.687	1282.35	1267.52	196.851	1530.29	1387.47	202.22	1551.46	1200.4	281.223	1290.68	1342.72	21.814	1381.76	1433.35	-19.3266	1298.37	1257.78	-24.7724	1239.39	1151.43	-53.1298	1221.73	979.789	-18.2459	1218.92	876.79	-64.445	1158.87	894.389	-68.1874	1159.37	787.837
961	0	148.475	1635.72	1616.39	250.778	1630.61	1616.48	120.697	1479.02	1629.62	257.11	1461.71	1633.38	214.292	1405.04	1487.23	226.007	1295.4	1267.62	195.341	1543.31	1387.5	200.561	1564.48	1200.34	279.563	1303.54	1342.85	19.9791	1395.11	1433.21	-21.3619	1313.13	1256.65	-26.7052	1254.53	1150.09	-54.461	1237.49	978.285	-19.1401	1234.23	875.289	-66.1227	1174.93	892.789	-68.8003	1174.86	786.028
962	0	146.887	1649.01	1615.94	249.137	1643.89	1616.2	119.035	1492.34	1629.67	255.419	1474.99	1633.7	212.654	1417.82	1487.51	224.333	1308.32	1267.92	193.914	1556.18	1387.78	198.916	1577.35	1200.53	277.934	1316.25	1343.17	18.2045	1408.35	1433.37	-23.4485	1328	1255.71	-28.7601	1269.89	1148.88	-55.8623	1253.88	976.864	-20.0917	1250.37	873.877	-67.9144	1191.88	891.134	-69.5082	1191.52	784.179
963	0	145.46	1662.1	1615.74	247.664	1656.98	1616.14	117.535	1505.49	1630	253.888	1488.09	1634.24	211.118	1430.42	1488.01	222.673	1321.08	1268.44	192.581	1568.88	1388.32	197.301	1590.07	1200.99	276.343	1328.78	1343.68	16.5031	1421.46	1433.83	-25.5707	1342.93	1254.98	-30.9279	1285.44	1147.81	-57.3265	1270.85	975.558	-21.0989	1267.35	872.591	-69.7997	1209.7	889.453	-70.3185	1209.36	782.328
964	0	144.205	1674.99	1615.8	246.371	1669.87	1616.32	116.203	1518.44	1630.6	252.526	1500.99	1635.01	209.694	1442.82	1488.72	221.036	1333.69	1269.16	191.349	1581.4	1389.12	195.731	1602.61	1201.7	274.798	1341.14	1344.37	14.8855	1434.44	1434.59	-27.7127	1357.88	1254.49	-33.1987	1301.12	1146.92	-58.8457	1288.38	974.399	-22.1581	1285.15	871.467	-71.7552	1228.34	887.777	-71.2372	1228.4	780.522
965	0	143.127	1687.65	1616.13	245.262	1682.52	1616.72	115.044	1531.17	1631.46	251.336	1513.66	1636	208.384	1455.01	1489.65	219.43	1346.14	1270.07	190.222	1593.74	1390.15	194.224	1614.99	1202.68	273.304	1353.31	1345.22	13.36	1447.26	1435.63	-29.8597	1372.83	1254.25	-35.5614	1316.91	1146.22	-60.4109	1306.44	973.416	-23.2643	1303.75	870.543	-73.7562	1247.77	886.139	-72.2683	1248.62	778.81
966	0	142.225	1700.07	1616.73	244.338	1694.94	1617.37	114.058	1543.67	1632.57	250.319	1526.1	1637.19	207.191	1466.99	1490.77	217.861	1358.42	1271.16	189.205	1605.88	1391.43	192.793	1627.19	1203.9	271.866	1365.29	1346.24	11.9324	1459.93	1436.96	-31.9977	1387.75	1254.26	-38.0042	1332.77	1145.72	-62.0125	1324.96	972.637	-24.4112	1323.11	869.855	-75.7767	1267.94	884.575	-73.4125	1270.01	777.247
967	0	141.497	1712.25	1617.6	243.596	1707.11	1618.24	113.238	1555.95	1633.93	249.468	1538.29	1638.58	206.113	1478.77	1492.08	216.336	1370.54	1272.42	188.297	1617.84	1392.94	191.451	1639.22	1205.36	270.486	1377.09	1347.41	10.6062	1472.44	1438.54	-34.1141	1402.6	1254.53	-40.5144	1348.68	1145.43	-63.6407	1343.93	972.086	-25.5914	1343.2	869.44	-77.7909	1288.81	883.122	-74.6676	1292.52	775.891
968	0	140.936	1724.19	1618.73	243.028	1719.03	1619.35	112.575	1567.99	1635.52	248.775	1550.24	1640.15	205.146	1490.35	1493.56	214.859	1382.49	1273.83	187.498	1629.62	1394.65	190.209	1651.08	1207.05	269.167	1388.71	1348.73	9.38248	1484.79	1440.36	-36.1976	1417.37	1255.06	-43.0787	1364.6	1145.36	-65.2851	1363.28	971.787	-26.7966	1363.98	869.329	-79.774	1310.29	881.818	-76.0273	1316.11	774.803
969	0	140.529	1735.9	1620.11	242.621	1730.71	1620.67	112.056	1579.8	1637.32	248.227	1561.94	1641.89	204.285	1501.74	1495.19	213.435	1394.29	1275.39	186.802	1641.22	1396.57	189.074	1662.8	1208.96	267.908	1400.16	1350.17	8.26053	1496.99	1442.4	-38.2386	1432.04	1255.84	-45.6831	1380.53	1145.51	-66.9359	1382.99	971.757	-28.0182	1385.39	869.555	-81.7034	1332.35	880.7	-77.4807	1340.69	774.04
970	0	140.263	1747.39	1621.73	242.361	1742.15	1622.2	111.665	1591.4	1639.32	247.809	1573.42	1643.79	203.523	1512.95	1496.97	212.07	1405.93	1277.07	186.206	1652.66	1398.66	188.048	1674.37	1211.05	266.712	1411.45	1351.72	7.23779	1509.03	1444.63	-40.229	1446.6	1256.85	-48.3133	1396.44	1145.87	-68.5832	1402.99	972.012	-29.2469	1407.37	870.144	-83.5586	1354.91	879.804	-79.013	1366.2	773.66
971	0	140.121	1758.67	1623.55	242.229	1753.36	1623.91	111.386	1602.79	1641.47	247.502	1584.67	1645.81	202.851	1523.99	1498.86	210.767	1417.44	1278.85	185.701	1663.95	1400.9	187.131	1685.81	1213.31	265.578	1422.59	1353.37	6.31034	1520.92	1447.01	-42.1624	1461.05	1258.08	-50.9548	1412.32	1146.43	-70.2178	1423.26	972.561	-30.4733	1429.88	871.12	-85.3226	1377.91	879.164	-80.6047	1392.53	773.714
972	0	140.085	1769.77	1625.56	242.204	1764.37	1625.79	111.198	1614	1643.76	247.288	1595.72	1647.95	202.261	1534.9	1500.84	209.532	1428.83	1280.72	185.278	1675.11	1403.26	186.319	1697.14	1215.71	264.506	1433.61	1355.11	5.47325	1532.69	1449.52	-44.0338	1475.37	1259.49	-53.5932	1428.16	1147.16	-71.8311	1443.75	973.41	-31.688	1452.85	872.5	-86.9818	1401.29	878.809	-82.2324	1419.58	774.244
973	0	140.134	1780.7	1627.73	242.265	1775.19	1627.81	111.082	1625.04	1646.16	247.148	1606.59	1650.16	201.741	1545.69	1502.9	208.369	1440.1	1282.65	184.927	1686.16	1405.72	185.605	1708.38	1218.21	263.498	1444.52	1356.9	4.72088	1544.33	1452.11	-45.8394	1489.58	1261.07	-56.2141	1443.97	1148.06	-73.4153	1464.42	974.561	-32.8819	1476.21	874.298	-88.526	1425	878.764	-83.8697	1447.24	775.285
974	0	140.246	1791.48	1630.02	242.389	1785.84	1629.94	111.02	1635.93	1648.62	247.062	1617.3	1652.42	201.284	1556.38	1504.99	207.283	1451.28	1284.62	184.637	1697.12	1408.24	184.979	1719.53	1220.79	262.554	1455.33	1358.74	4.04722	1555.85	1454.76	-47.5765	1503.68	1262.77	-58.8035	1459.72	1149.1	-74.9631	1485.23	976.007	-34.0465	1499.91	876.519	-89.9489	1448.98	879.048	-85.4878	1475.39	776.859
975	0	140.402	1802.14	1632.39	242.552	1796.36	1632.14	110.991	1646.69	1651.12	247.012	1627.88	1654.7	200.879	1566.99	1507.1	206.279	1462.37	1286.6	184.396	1707.99	1410.79	184.43	1730.62	1223.39	261.675	1466.08	1360.59	3.4462	1567.29	1457.43	-49.243	1517.67	1264.56	-61.3479	1475.43	1150.25	-76.4681	1506.15	977.74	-35.1736	1523.88	879.162	-91.2472	1473.19	879.673	-87.0567	1503.93	778.976
976	0	140.579	1812.7	1634.81	242.734	1806.77	1634.38	110.979	1657.35	1653.61	246.982	1638.34	1656.97	200.52	1577.55	1509.2	205.362	1473.4	1288.58	184.193	1718.82	1413.32	183.945	1741.64	1225.99	260.863	1476.78	1362.45	2.91188	1578.63	1460.07	-50.8376	1531.55	1266.41	-63.8342	1491.08	1151.48	-77.9245	1527.15	979.745	-36.2559	1548.06	882.219	-92.4205	1497.57	880.646	-88.5466	1532.74	781.634
977	0	140.76	1823.19	1637.23	242.914	1817.1	1636.63	110.967	1667.93	1656.05	246.957	1648.73	1659.19	200.199	1588.08	1511.25	204.537	1484.37	1290.51	184.018	1729.6	1415.8	183.512	1752.63	1228.54	260.118	1487.45	1364.28	2.43873	1589.9	1462.66	-52.359	1545.34	1268.28	-66.2503	1506.68	1152.76	-79.3266	1548.19	982.002	-37.2865	1572.39	885.676	-93.4707	1522.08	881.966	-89.9292	1561.71	784.821
978	0	140.927	1833.64	1639.61	243.072	1827.37	1638.83	110.942	1678.45	1658.41	246.925	1659.06	1661.33	199.91	1598.59	1513.23	203.809	1495.3	1292.39	183.859	1740.37	1418.19	183.118	1763.58	1230.99	259.444	1498.1	1366.06	2.02177	1601.11	1465.15	-53.8057	1559.04	1270.13	-68.5844	1522.24	1154.05	-80.6692	1569.25	984.489	-38.2591	1596.81	889.51	-94.4011	1546.69	883.624	-91.1791	1590.74	788.514
979	0	141.064	1844.05	1641.92	243.194	1837.62	1640.97	110.892	1688.93	1660.65	246.874	1669.37	1663.36	199.648	1609.12	1515.12	203.181	1506.2	1294.18	183.708	1751.13	1420.46	182.751	1774.5	1233.32	258.841	1508.76	1367.77	1.65675	1612.26	1467.51	-55.1762	1572.65	1271.91	-70.8257	1537.74	1155.32	-81.9468	1590.3	987.179	-39.1678	1621.26	893.691	-95.216	1571.36	885.608	-92.2744	1619.75	792.679
980	0	141.159	1854.47	1644.1	243.267	1847.86	1642.99	110.807	1699.4	1662.73	246.796	1679.67	1665.25	199.411	1619.68	1516.87	202.658	1517.09	1295.85	183.558	1761.89	1422.57	182.402	1785.41	1235.48	258.311	1519.44	1369.38	1.34021	1623.37	1469.72	-56.4682	1586.19	1273.6	-72.964	1553.19	1156.53	-83.1539	1611.3	990.043	-40.0068	1645.69	898.186	-95.9198	1596.04	887.897	-93.1978	1648.64	797.28
981	0	141.202	1864.9	1646.13	243.28	1858.12	1644.86	110.682	1709.87	1664.63	246.685	1689.99	1666.97	199.196	1630.29	1518.47	202.241	1527.96	1297.39	183.404	1772.68	1424.48	182.063	1796.3	1237.44	257.856	1530.16	1370.87	1.06964	1634.44	1471.74	-57.679	1599.66	1275.16	-74.99	1568.59	1157.65	-84.2845	1632.24	993.048	-40.7704	1670.03	902.953	-96.5167	1620.71	890.467	-93.937	1677.35	802.271
982	0	141.189	1875.36	1647.97	243.229	1868.43	1646.56	110.512	1720.36	1666.31	246.537	1700.36	1668.5	199.003	1640.95	1519.9	201.933	1538.83	1298.78	183.241	1783.5	1426.18	181.728	1807.19	1239.16	257.477	1540.92	1372.23	0.843499	1645.49	1473.54	-58.8049	1613.06	1276.55	-76.8951	1583.94	1158.65	-85.3324	1653.09	996.162	-41.4533	1694.23	907.95	-97.0102	1645.32	893.289	-94.4849	1705.81	807.605
983	0	141.114	1885.88	1649.59	243.11	1878.8	1648.05	110.296	1730.9	1667.76	246.35	1710.79	1669.81	198.834	1651.68	1521.14	201.734	1549.71	1299.99	183.07	1794.35	1427.63	181.395	1818.08	1240.63	257.175	1551.73	1373.43	0.661235	1656.52	1475.1	-59.8419	1626.39	1277.75	-78.6712	1599.25	1159.5	-86.2906	1673.82	999.349	-42.0498	1718.24	913.13	-97.4029	1669.85	896.33	-94.8394	1733.97	813.233
984	0	140.98	1896.46	1650.95	242.926	1889.26	1649.3	110.037	1741.49	1668.94	246.126	1721.29	1670.9	198.69	1662.49	1522.17	201.644	1560.6	1301.01	182.89	1805.25	1428.81	181.063	1828.98	1241.83	256.95	1562.61	1374.45	0.523326	1667.54	1476.42	-60.785	1639.67	1278.73	-80.3109	1614.51	1160.18	-87.1524	1694.41	1002.58	-42.5544	1742	918.444	-97.6965	1694.24	899.554	-95.0034	1761.77	819.105
985	0	140.789	1907.13	1652.05	242.682	1899.8	1650.31	109.739	1752.15	1669.86	245.866	1731.88	1671.75	198.574	1673.38	1522.97	201.662	1571.51	1301.82	182.704	1816.21	1429.72	180.735	1839.89	1242.73	256.804	1573.56	1375.29	0.431235	1678.56	1477.46	-61.6286	1652.88	1279.48	-81.8071	1629.71	1160.67	-87.9106	1714.83	1005.81	-42.9617	1765.49	923.845	-97.8918	1718.47	902.925	-94.9844	1789.18	825.169
986	0	140.548	1917.88	1652.86	242.384	1910.45	1651.05	109.408	1762.89	1670.5	245.577	1742.57	1672.35	198.492	1684.36	1523.54	201.785	1582.45	1302.41	182.52	1827.21	1430.33	180.416	1850.82	1243.34	256.737	1584.59	1375.93	0.387367	1689.58	1478.22	-62.3668	1666.04	1279.97	-83.1533	1644.86	1160.95	-88.5584	1735.07	1009.01	-43.2665	1788.64	929.283	-97.9887	1742.48	906.404	-94.7932	1816.16	831.379
987	0	140.267	1928.73	1653.37	242.046	1921.22	1651.51	109.055	1773.73	1670.85	245.267	1753.37	1672.69	198.447	1695.43	1523.87	202.011	1593.42	1302.78	182.343	1838.28	1430.65	180.113	1861.77	1243.64	256.747	1595.7	1376.35	0.394989	1700.61	1478.71	-62.9934	1679.15	1280.21	-84.3436	1659.96	1161.01	-89.0893	1755.1	1012.16	-43.4641	1811.43	934.713	-97.9863	1766.24	909.952	-94.4437	1842.66	837.686
988	0	139.958	1939.69	1653.58	241.68	1932.11	1651.69	108.692	1784.67	1670.91	244.946	1764.29	1672.79	198.448	1706.6	1523.95	202.334	1604.42	1302.92	182.182	1849.41	1430.68	179.834	1872.75	1243.64	256.835	1606.89	1376.56	0.458101	1711.66	1478.91	-63.5022	1692.2	1280.18	-85.3724	1674.99	1160.84	-89.4976	1774.89	1015.22	-43.5505	1833.83	940.089	-97.8834	1789.7	913.53	-93.9518	1868.67	844.043
989	0	139.635	1950.76	1653.48	241.303	1943.12	1651.6	108.332	1795.71	1670.69	244.626	1775.33	1672.64	198.499	1717.87	1523.8	202.749	1615.47	1302.83	182.05	1860.61	1430.42	179.59	1883.77	1243.34	256.999	1618.17	1376.55	0.581274	1722.75	1478.83	-63.8871	1705.21	1279.89	-86.235	1689.95	1160.44	-89.7782	1794.43	1018.16	-43.5224	1855.8	945.369	-97.6781	1812.82	917.1	-93.3341	1894.14	850.403
990	0	139.313	1961.93	1653.08	240.933	1954.27	1651.23	107.992	1806.87	1670.21	244.323	1786.49	1672.25	198.608	1729.22	1523.41	203.251	1626.58	1302.5	181.957	1871.87	1429.87	179.392	1894.84	1242.76	257.239	1629.53	1376.31	0.769469	1733.87	1478.49	-64.1426	1718.17	1279.34	-86.9275	1704.84	1159.82	-89.9274	1813.68	1020.96	-43.3776	1877.33	950.514	-97.3688	1835.55	920.623	-92.6075	1919.04	856.721
991	0	139.011	1973.22	1652.4	240.59	1965.54	1650.6	107.69	1818.14	1669.46	244.053	1797.78	1671.63	198.783	1740.67	1522.78	203.832	1637.74	1301.96	181.917	1883.21	1429.07	179.253	1905.96	1241.91	257.553	1640.98	1375.86	1.02786	1745.05	1477.89	-64.2636	1731.09	1278.54	-87.4466	1719.63	1158.98	-89.9422	1832.63	1023.6	-43.1153	1898.38	955.487	-96.9537	1857.86	924.063	-91.788	1943.35	862.949
992	0	138.746	1984.62	1651.44	240.293	1976.95	1649.72	107.445	1829.53	1668.47	243.835	1809.19	1670.8	199.03	1752.22	1521.94	204.486	1648.96	1301.19	181.944	1894.62	1428.01	179.184	1917.15	1240.81	257.938	1652.51	1375.19	1.36167	1756.29	1477.05	-64.2462	1743.97	1277.51	-87.7904	1734.33	1157.94	-89.8213	1851.26	1026.06	-42.736	1918.96	960.253	-96.4315	1879.7	927.386	-90.8903	1967.04	869.04
993	0	138.539	1996.14	1650.23	240.065	1988.48	1648.62	107.276	1841.03	1667.26	243.686	1820.73	1669.76	199.356	1763.85	1520.89	205.205	1660.26	1300.21	182.051	1906.1	1426.72	179.198	1928.42	1239.47	258.393	1664.12	1374.32	1.77603	1767.6	1475.99	-64.0872	1756.82	1276.26	-87.9582	1748.93	1156.7	-89.5642	1869.54	1028.32	-42.2411	1939.03	964.78	-95.8013	1901.04	930.556	-89.9272	1990.08	874.949
994	0	138.407	2007.76	1648.8	239.925	2000.15	1647.31	107.204	1852.64	1665.85	243.629	1832.38	1668.55	199.769	1775.57	1519.65	205.981	1671.63	1299.04	182.252	1917.67	1425.22	179.307	1939.77	1237.93	258.916	1675.82	1373.25	2.27584	1778.99	1474.73	-63.785	1769.64	1274.82	-87.9502	1763.4	1155.29	-89.1719	1887.45	1030.35	-41.6335	1958.59	969.037	-95.063	1921.84	933.543	-88.909	2012.45	880.627
995	0	138.371	2019.49	1647.16	239.893	2011.94	1645.82	107.249	1864.37	1664.27	243.683	1844.16	1667.16	200.274	1787.38	1518.23	206.807	1683.1	1297.69	182.56	1929.33	1423.55	179.52	1951.22	1236.22	259.504	1687.6	1371.99	2.86567	1790.49	1473.29	-63.3389	1782.43	1273.21	-87.7684	1777.75	1153.74	-88.6464	1904.98	1032.16	-40.9164	1977.64	972.996	-94.217	1942.08	936.317	-87.8437	2034.12	886.029
996	0	138.449	2031.32	1645.36	239.987	2023.86	1644.17	107.43	1876.2	1662.54	243.869	1856.06	1665.64	200.879	1799.27	1516.66	207.676	1694.65	1296.18	182.986	1941.07	1421.71	179.847	1962.77	1234.35	260.156	1699.45	1370.56	3.54962	1802.09	1471.71	-62.7498	1795.2	1271.46	-87.4158	1791.96	1152.06	-87.9905	1922.12	1033.73	-40.0936	1996.15	976.632	-93.265	1961.71	938.851	-86.7366	2055.07	891.106
997	0	138.658	2043.25	1643.41	240.225	2035.9	1642.39	107.766	1888.13	1660.69	244.204	1868.07	1663.99	201.587	1811.25	1514.95	208.581	1706.3	1294.53	183.541	1952.91	1419.75	180.294	1974.43	1232.35	260.868	1711.39	1368.98	4.33119	1813.8	1470	-62.02	1807.95	1269.6	-86.8968	1806.02	1150.28	-87.2083	1938.84	1035.04	-39.1692	2014.13	979.921	-92.2097	1980.73	941.12	-85.5909	2075.3	895.814
998	0	139.015	2055.29	1641.36	240.622	2048.05	1640.5	108.272	1900.17	1658.75	244.706	1880.2	1662.24	202.405	1823.31	1513.14	209.518	1718.06	1292.76	184.233	1964.83	1417.68	180.868	1986.22	1230.26	261.64	1723.4	1367.27	5.2132	1825.65	1468.2	-61.153	1820.68	1267.66	-86.2173	1819.92	1148.42	-86.3043	1955.14	1036.1	-38.1472	2031.57	982.841	-91.0551	1999.11	943.102	-84.4073	2094.77	900.107
999	0	139.534	2067.41	1639.23	241.191	2060.33	1638.54	108.962	1912.3	1656.76	245.389	1892.43	1660.42	203.336	1835.45	1511.24	210.482	1729.94	1290.89	185.068	1976.86	1415.55	181.571	1998.13	1228.1	262.471	1735.5	1365.44	6.19764	1837.62	1466.33	-60.1538	1833.41	1265.66	-85.3839	1833.66	1146.53	-85.2842	1971.01	1036.91	-37.0317	2048.46	985.373	-89.8066	2016.84	944.779	-83.185	2113.48	903.944
1000	0	140.226	2079.64	1637.07	241.94	2072.71	1636.53	109.846	1924.52	1654.73	246.264	1904.77	1658.54	204.382	1847.68	1509.27	211.471	1741.92	1288.95	186.047	1988.98	1413.37	182.401	2010.17	1225.91	263.361	1747.66	1363.52	7.28554	1849.72	1464.43	-59.0284	1846.12	1263.65	-84.4046	1847.22	1144.62	-84.154	1986.44	1037.45	-35.8274	2064.81	987.499	-88.4707	2033.91	946.134	-81.922	2131.43	907.284
1001	0	141.102	2091.95	1634.9	242.877	2085.19	1634.49	110.932	1936.83	1652.71	247.338	1917.21	1656.62	205.545	1859.98	1507.27	212.485	1754.03	1286.96	187.171	2001.19	1411.17	183.357	2022.35	1223.71	264.309	1759.9	1361.53	8.47679	1861.97	1462.52	-57.7841	1858.82	1261.65	-83.288	1860.61	1142.73	-82.9208	2001.42	1037.73	-34.5389	2080.6	989.203	-87.0557	2050.3	947.155	-80.6161	2148.59	910.094
1002	0	142.165	2104.35	1632.74	244.005	2097.77	1632.45	112.223	1949.23	1650.71	248.614	1929.75	1654.7	206.825	1872.36	1505.26	213.524	1766.25	1284.94	188.436	2013.51	1408.99	184.432	2034.66	1221.54	265.318	1772.22	1359.5	9.77003	1874.34	1460.63	-56.4291	1871.5	1259.69	-82.0434	1873.82	1140.87	-81.592	2015.95	1037.75	-33.1717	2095.83	990.472	-85.5713	2066.02	947.832	-79.2648	2164.98	912.342
1003	0	143.419	2116.84	1630.64	245.322	2110.44	1630.43	113.716	1961.7	1648.77	250.091	1942.37	1652.78	208.22	1884.81	1503.26	214.592	1778.59	1282.93	189.835	2025.91	1406.84	185.618	2047.1	1219.41	266.389	1784.61	1357.45	11.1624	1886.84	1458.78	-54.9725	1884.17	1257.79	-80.6806	1886.84	1139.09	-80.1758	2030.03	1037.52	-31.732	2110.49	991.296	-84.0282	2081.06	948.161	-77.8668	2180.58	914.001
1004	0	144.861	2129.4	1628.62	246.825	2123.19	1628.45	115.406	1974.25	1646.91	251.764	1955.08	1650.91	209.728	1897.33	1501.3	215.692	1791.05	1280.95	191.359	2038.4	1404.76	186.902	2059.67	1217.35	267.524	1797.06	1355.4	12.6496	1899.45	1457	-53.4241	1896.82	1256	-79.21	1899.67	1137.4	-78.681	2043.65	1037.05	-30.2264	2124.59	991.665	-82.4383	2095.42	948.138	-76.4218	2195.39	915.051
1005	0	146.485	2142.05	1626.7	248.505	2136.02	1626.53	117.284	1986.87	1645.16	253.622	1967.87	1649.08	211.342	1909.91	1499.41	216.83	1803.62	1279.01	192.993	2050.97	1402.77	188.271	2072.36	1215.39	268.728	1809.58	1353.39	14.2254	1912.16	1455.32	-51.7942	1909.44	1254.32	-77.6417	1912.3	1135.82	-77.1167	2056.82	1036.33	-28.6629	2138.11	991.574	-80.8144	2109.11	947.764	-74.9313	2209.41	915.476
1006	0	148.28	2154.76	1624.9	250.351	2148.91	1624.7	119.334	1999.56	1643.53	255.651	1980.72	1647.33	213.055	1922.55	1497.59	218.012	1816.28	1277.16	194.723	2063.62	1400.88	189.709	2085.16	1213.56	270	1822.16	1351.43	15.882	1924.96	1453.74	-50.0935	1922.02	1252.77	-75.9861	1924.74	1134.38	-75.4924	2069.53	1035.38	-27.05	2151.05	991.019	-79.1698	2122.12	947.041	-73.399	2222.65	915.266
1007	0	150.231	2167.53	1623.24	252.346	2161.85	1622.96	121.538	2012.3	1642.05	257.832	1993.63	1645.67	214.858	1935.24	1495.89	219.243	1829.04	1275.4	196.529	2076.32	1399.12	191.2	2098.06	1211.86	271.344	1834.78	1349.55	17.6094	1937.81	1452.3	-48.3328	1934.55	1251.38	-74.2536	1936.99	1133.08	-73.8181	2081.78	1034.21	-25.3974	2163.4	990.002	-77.518	2134.45	945.975	-71.831	2235.1	914.419
1008	0	152.32	2180.35	1621.73	254.471	2174.83	1621.33	123.874	2025.09	1640.72	260.145	2006.58	1644.12	216.738	1947.96	1494.31	220.528	1841.88	1273.76	198.391	2089.07	1397.51	192.726	2111.03	1210.31	272.76	1847.45	1347.78	19.396	1950.7	1451	-46.5231	1947.01	1250.16	-72.4541	1949.04	1131.94	-72.104	2093.57	1032.82	-23.7151	2175.17	988.525	-75.8723	2146.11	944.575	-70.2362	2246.75	912.937
1009	0	154.526	2193.21	1620.39	256.704	2187.83	1619.82	126.315	2037.92	1639.57	262.563	2019.57	1642.69	218.682	1960.7	1492.87	221.87	1854.78	1272.27	200.287	2101.84	1396.05	194.27	2124.06	1208.94	274.245	1860.14	1346.13	21.2284	1963.61	1449.85	-44.6752	1959.39	1249.12	-70.5972	1960.89	1130.96	-70.3604	2104.91	1031.23	-22.0139	2186.34	986.597	-74.2452	2157.1	942.853	-68.6255	2257.62	910.829
1010	0	156.822	2206.11	1619.22	259.019	2200.85	1618.44	128.833	2050.78	1638.6	265.058	2032.58	1641.4	220.671	1973.44	1491.6	223.268	1867.71	1270.93	202.194	2114.64	1394.77	195.815	2137.12	1207.74	275.797	1872.84	1344.64	23.0915	1976.5	1448.88	-42.8002	1971.67	1248.25	-68.6921	1972.54	1130.16	-68.5977	2115.79	1029.45	-20.3045	2196.91	984.231	-72.6482	2167.4	940.821	-67.0125	2267.7	908.112
1011	0	159.183	2219.02	1618.23	261.389	2213.87	1617.2	131.397	2063.66	1637.82	267.599	2045.59	1640.26	222.689	1986.18	1490.5	224.722	1880.67	1269.77	204.09	2127.42	1393.66	197.346	2150.18	1206.73	277.409	1885.54	1343.32	24.9694	1989.35	1448.08	-40.9088	1983.84	1247.58	-66.7476	1983.99	1129.53	-66.8262	2126.21	1027.5	-18.5982	2206.88	981.444	-71.0915	2177.04	938.497	-65.4124	2276.97	904.808
1012	0	161.579	2231.93	1617.41	263.788	2226.87	1616.09	133.973	2076.55	1637.23	270.155	2058.6	1639.28	224.715	1998.89	1489.59	226.226	1893.61	1268.8	205.954	2140.17	1392.74	198.85	2163.22	1205.91	279.073	1898.22	1342.19	26.8452	2002.13	1447.46	-39.0119	1995.88	1247.09	-64.772	1995.23	1129.06	-65.0558	2136.18	1025.37	-16.9064	2216.26	978.258	-69.5834	2185.99	935.899	-63.8413	2285.45	900.944
1013	0	163.98	2244.83	1616.75	266.185	2239.84	1615.13	136.529	2089.43	1636.84	272.692	2071.58	1638.48	226.728	2011.56	1488.88	227.774	1906.52	1268.04	207.765	2152.88	1392.01	200.315	2176.21	1205.28	280.78	1910.86	1341.26	28.7021	2014.82	1447.03	-37.1198	2007.77	1246.78	-62.7727	2006.27	1128.76	-63.2964	2145.68	1023.11	-15.2405	2225.04	974.699	-68.1307	2194.26	933.048	-62.3159	2293.13	896.553
1014	0	166.357	2257.7	1616.26	268.552	2252.75	1614.3	139.031	2102.3	1636.64	275.178	2084.52	1637.86	228.71	2024.15	1488.38	229.356	1919.36	1267.48	209.507	2165.51	1391.48	201.733	2189.1	1204.85	282.518	1923.44	1340.55	30.5239	2027.4	1446.77	-35.2424	2019.49	1246.65	-60.7567	2017.1	1128.61	-61.5571	2154.73	1020.71	-13.612	2233.22	970.799	-66.7385	2201.86	929.97	-60.8522	2299.99	891.675
1015	0	168.678	2270.53	1615.91	270.859	2265.6	1613.61	141.446	2115.13	1636.64	277.58	2097.4	1637.44	230.64	2036.66	1488.08	230.963	1932.12	1267.14	211.164	2178.05	1391.16	203.096	2201.89	1204.62	284.274	1935.95	1340.05	32.2954	2039.83	1446.69	-33.3892	2031.05	1246.68	-58.73	2027.72	1128.62	-59.8466	2163.32	1018.2	-12.0321	2240.81	966.594	-65.4105	2208.77	926.692	-59.465	2306.05	886.354
1016	0	170.915	2283.3	1615.7	273.079	2278.37	1613.06	143.745	2127.91	1636.83	279.87	2110.21	1637.23	232.501	2049.06	1487.99	232.584	1944.77	1267.02	212.724	2190.48	1391.05	204.397	2214.54	1204.59	286.035	1948.37	1339.78	34.0029	2052.1	1446.78	-31.5685	2042.42	1246.87	-56.6981	2038.13	1128.76	-58.1732	2171.45	1015.59	-10.5119	2247.81	962.121	-64.1493	2215.01	923.245	-58.1672	2311.29	880.643
1017	0	173.038	2295.99	1615.63	275.185	2291.03	1612.66	145.9	2140.63	1637.21	282.02	2122.93	1637.23	234.278	2061.34	1488.12	234.209	1957.29	1267.1	214.179	2202.77	1391.16	205.633	2227.03	1204.76	287.79	1960.69	1339.73	35.6351	2064.19	1447.04	-29.7876	2053.59	1247.21	-54.6649	2048.33	1129.03	-56.5443	2179.12	1012.92	-9.06213	2254.23	957.426	-62.9567	2220.58	919.666	-56.9698	2315.73	874.601
1018	0	175.023	2308.58	1615.67	277.151	2303.59	1612.41	147.889	2153.27	1637.77	284.008	2135.55	1637.46	235.957	2073.47	1488.45	235.828	1969.66	1267.39	215.52	2214.92	1391.48	206.801	2239.35	1205.14	289.527	1972.9	1339.91	37.1829	2076.08	1447.46	-28.0524	2064.56	1247.69	-52.6336	2058.31	1129.42	-54.9665	2186.34	1010.2	-7.69276	2260.06	952.555	-61.8335	2225.49	915.994	-55.8814	2319.36	868.291
1019	0	176.844	2321.06	1615.84	278.956	2316.01	1612.31	149.693	2165.81	1638.52	285.817	2148.06	1637.92	237.53	2085.44	1488.99	237.433	1981.87	1267.87	216.746	2226.91	1392.02	207.898	2251.5	1205.73	291.234	1984.99	1340.29	38.6399	2087.75	1448.02	-26.3671	2075.32	1248.29	-50.6059	2068.08	1129.92	-53.4456	2193.11	1007.47	-6.41294	2265.33	947.56	-60.7806	2229.75	912.274	-54.9087	2322.2	861.784
1020	0	178.482	2333.41	1616.14	280.579	2328.3	1612.37	151.3	2178.23	1639.43	287.435	2160.43	1638.63	238.99	2097.25	1489.72	239.016	1993.91	1268.54	217.854	2238.73	1392.78	208.924	2263.47	1206.53	292.904	1996.95	1340.89	40.0024	2099.2	1448.72	-24.7341	2085.87	1249.02	-48.5826	2077.63	1130.52	-51.9864	2199.44	1004.75	-5.23066	2270.04	942.492	-59.798	2233.38	908.552	-54.0565	2324.25	855.157
1021	0	179.921	2345.61	1616.55	282.007	2340.45	1612.62	152.702	2190.52	1640.52	288.855	2172.66	1639.56	240.332	2108.89	1490.64	240.571	2005.78	1269.38	218.846	2250.38	1393.75	209.88	2275.27	1207.53	294.529	2008.79	1341.67	41.269	2110.42	1449.55	-23.1539	2096.2	1249.84	-46.5631	2086.95	1131.22	-50.5923	2205.33	1002.08	-4.15248	2274.21	937.407	-58.8854	2236.41	904.878	-53.3281	2325.54	848.487
1022	0	181.148	2357.64	1617.1	283.229	2352.44	1613.05	153.899	2202.65	1641.76	290.077	2184.75	1640.74	241.558	2120.35	1491.74	242.093	2017.47	1270.38	219.726	2261.86	1394.94	210.766	2286.91	1208.75	296.102	2020.5	1342.63	42.441	2121.41	1450.49	-21.6253	2106.32	1250.77	-44.5462	2096.05	1132.01	-49.2658	2210.79	999.477	-3.18338	2277.84	932.36	-58.0423	2238.85	901.305	-52.7253	2326.09	841.855
1023	0	182.158	2369.5	1617.78	284.239	2364.27	1613.67	154.893	2214.61	1643.14	291.104	2196.69	1642.13	242.669	2131.65	1492.99	243.578	2029.01	1271.51	220.498	2273.18	1396.34	211.587	2298.4	1210.15	297.619	2032.09	1343.76	43.5216	2132.17	1451.54	-20.1452	2116.21	1251.79	-42.5303	2104.93	1132.89	-48.0081	2215.85	996.984	-2.3266	2280.96	927.406	-57.2673	2240.73	897.882	-52.2485	2325.93	835.345
1024	0	182.949	2381.18	1618.61	285.037	2375.95	1614.5	155.695	2226.4	1644.66	291.946	2208.46	1643.74	243.669	2142.78	1494.39	245.021	2040.38	1272.76	221.169	2284.35	1397.92	212.344	2309.76	1211.75	299.078	2043.57	1345.02	44.5157	2142.72	1452.68	-18.7095	2125.87	1252.88	-40.5136	2113.57	1133.86	-46.8192	2220.5	994.629	-1.58359	2283.6	922.598	-56.5584	2242.1	894.662	-51.8968	2325.09	829.034
1025	0	183.525	2392.66	1619.59	285.626	2387.47	1615.53	156.316	2237.99	1646.3	292.615	2220.08	1645.53	244.565	2153.77	1495.91	246.419	2051.62	1274.12	221.744	2295.38	1399.67	213.043	2320.99	1213.51	300.476	2054.95	1346.42	45.4294	2153.08	1453.89	-17.3129	2135.32	1254.06	-38.4947	2121.99	1134.91	-45.6984	2224.78	992.441	-0.953926	2285.76	917.986	-55.9131	2242.98	891.689	-51.6675	2323.62	823
1026	0	183.896	2403.95	1620.71	286.017	2398.83	1616.75	156.773	2249.4	1648.03	293.127	2231.54	1647.48	245.363	2164.62	1497.54	247.769	2062.74	1275.56	222.233	2306.28	1401.57	213.688	2332.13	1215.43	301.812	2066.23	1347.91	46.27	2163.26	1455.17	-15.9499	2144.55	1255.29	-36.4731	2130.17	1136.04	-44.6438	2228.7	990.447	-0.435333	2287.48	913.615	-55.3275	2243.42	889.007	-51.5563	2321.56	817.311
1027	0	184.076	2415.04	1621.98	286.222	2410.04	1618.17	157.085	2260.6	1649.84	293.501	2242.85	1649.57	246.074	2175.36	1499.24	249.066	2073.74	1277.06	222.641	2317.07	1403.59	214.283	2343.19	1217.46	303.087	2077.43	1349.48	47.0453	2173.28	1456.49	-14.6148	2153.56	1256.58	-34.4492	2138.13	1137.24	-43.653	2232.27	988.668	-0.023628	2288.8	909.525	-54.7974	2243.47	886.651	-51.5563	2318.97	812.03
1028	0	184.082	2425.96	1623.38	286.259	2421.11	1619.76	157.272	2271.61	1651.7	293.754	2254.01	1651.75	246.706	2186	1501	250.309	2084.66	1278.6	222.978	2327.77	1405.7	214.834	2354.18	1219.58	304.3	2088.57	1351.11	47.7633	2183.17	1457.84	-13.3025	2162.36	1257.92	-32.425	2145.85	1138.52	-42.7231	2235.54	987.124	0.287243	2289.74	905.749	-54.317	2243.18	884.649	-51.6585	2315.91	807.206
1029	0	183.935	2436.7	1624.91	286.146	2432.05	1621.5	157.356	2282.44	1653.58	293.909	2265.03	1653.99	247.269	2196.56	1502.79	251.494	2095.51	1280.16	223.25	2338.4	1407.85	215.344	2365.11	1221.75	305.453	2099.64	1352.76	48.432	2192.96	1459.2	-12.0088	2170.97	1259.3	-30.4037	2153.36	1139.87	-41.8507	2238.53	985.825	0.505172	2290.35	902.312	-53.8802	2242.59	883.018	-51.851	2312.46	802.877
1030	0	183.658	2447.28	1626.54	285.906	2442.88	1623.36	157.357	2293.1	1655.46	293.983	2275.92	1656.25	247.773	2207.07	1504.58	252.618	2106.3	1281.71	223.464	2348.98	1410.01	215.818	2376.01	1223.94	306.546	2110.67	1354.42	49.0592	2202.68	1460.55	-10.7305	2179.39	1260.69	-28.3902	2160.66	1141.27	-41.0325	2241.27	984.779	0.639808	2290.68	899.232	-53.4797	2241.76	881.766	-52.1197	2308.68	799.067
1031	0	183.276	2457.73	1628.25	285.562	2453.6	1625.31	157.296	2303.6	1657.31	293.996	2286.7	1658.49	248.227	2217.55	1506.33	253.681	2117.05	1283.24	223.628	2359.51	1412.15	216.26	2386.88	1226.1	307.58	2121.66	1356.06	49.6517	2212.35	1461.86	-9.46584	2187.63	1262.11	-26.3905	2167.75	1142.73	-40.2648	2243.8	983.985	0.702436	2290.77	896.519	-53.108	2240.75	880.893	-52.4481	2304.65	795.787
1032	0	182.813	2468.06	1630.01	285.137	2464.23	1627.32	157.191	2313.96	1659.09	293.964	2297.38	1660.66	248.64	2228.02	1508.03	254.679	2127.78	1284.71	223.747	2370.03	1414.22	216.672	2397.73	1228.2	308.557	2132.63	1357.65	50.2156	2221.99	1463.12	-8.21423	2195.73	1263.52	-24.4119	2174.66	1144.23	-39.5441	2246.15	983.44	0.705736	2290.67	894.176	-52.757	2239.61	880.388	-52.8181	2300.46	793.036
1033	0	182.294	2478.3	1631.79	284.654	2474.8	1629.33	157.06	2324.22	1660.78	293.902	2307.98	1662.72	249.019	2238.48	1509.65	255.612	2138.49	1286.12	223.828	2380.54	1416.18	217.058	2408.56	1230.19	309.476	2143.59	1359.17	50.7561	2231.64	1464.32	-6.97659	2203.69	1264.93	-22.4626	2181.4	1145.75	-38.8666	2248.36	983.134	0.663252	2290.45	892.199	-52.4186	2238.41	880.234	-53.2107	2296.18	790.799
1034	0	181.74	2488.47	1633.54	284.137	2485.31	1631.31	156.917	2334.39	1662.34	293.821	2318.51	1664.64	249.371	2248.97	1511.16	256.476	2149.2	1287.43	223.874	2391.05	1418	217.418	2419.39	1232.05	310.337	2154.53	1360.59	51.2767	2241.31	1465.42	-5.75506	2211.53	1266.31	-20.5509	2188	1147.3	-38.2289	2250.46	983.052	0.58879	2290.15	890.578	-52.0851	2237.19	880.406	-53.6067	2291.9	789.054
1035	0	181.175	2498.61	1635.24	283.605	2495.8	1633.22	156.774	2344.51	1663.76	293.731	2329	1666.39	249.702	2259.5	1512.53	257.271	2159.92	1288.64	223.891	2401.59	1419.65	217.753	2430.22	1233.74	311.14	2165.48	1361.9	51.7797	2251.02	1466.41	-4.55292	2219.29	1267.67	-18.6855	2194.47	1148.86	-37.6274	2252.51	983.178	0.495901	2289.84	889.297	-51.7489	2236.01	880.874	-53.9874	2287.7	787.771
1036	0	180.615	2508.73	1636.84	283.077	2506.29	1635.02	156.641	2354.6	1665.02	293.638	2339.48	1667.93	250.014	2270.08	1513.75	257.993	2170.64	1289.71	223.882	2412.15	1421.09	218.063	2441.04	1235.22	311.884	2176.43	1363.07	52.2659	2260.79	1467.28	-3.37443	2226.98	1268.98	-16.8747	2200.84	1150.41	-37.0586	2254.54	983.491	0.397437	2289.57	888.336	-51.403	2234.93	881.606	-54.3355	2283.65	786.914
1037	0	180.078	2518.88	1638.31	282.568	2516.78	1636.66	156.525	2364.7	1666.08	293.546	2349.95	1669.25	250.31	2280.71	1514.8	258.641	2181.39	1290.65	223.851	2422.75	1422.32	218.346	2451.87	1236.48	312.564	2187.39	1364.09	52.7343	2270.64	1468.01	-2.22462	2234.63	1270.24	-15.1262	2207.14	1151.95	-36.5194	2256.59	983.97	0.305106	2289.4	887.672	-51.0415	2234.01	882.568	-54.6356	2279.84	786.443
1038	0	179.575	2529.08	1639.62	282.091	2527.32	1638.1	156.43	2374.83	1666.95	293.456	2360.44	1670.32	250.59	2291.41	1515.67	259.211	2192.15	1291.43	223.798	2433.39	1423.31	218.601	2462.7	1237.49	313.179	2198.36	1364.95	53.1827	2280.57	1468.59	-1.10913	2242.26	1271.44	-13.4467	2213.39	1153.47	-36.0069	2258.7	984.593	0.229007	2289.37	887.28	-50.6592	2233.28	883.722	-54.875	2276.31	786.318
1039	0	179.116	2539.34	1640.73	281.656	2537.9	1639.33	156.356	2385.02	1667.61	293.369	2370.98	1671.14	250.853	2302.19	1516.34	259.7	2202.94	1292.04	223.727	2444.09	1424.04	218.825	2473.53	1238.24	313.725	2209.36	1365.63	53.6074	2290.61	1469.02	-0.034096	2249.9	1272.58	-11.8422	2219.62	1154.96	-35.5185	2260.91	985.337	0.177151	2289.53	887.132	-50.2521	2232.79	885.036	-55.0441	2273.15	786.497
1040	0	178.707	2549.7	1641.62	281.268	2548.55	1640.31	156.303	2395.3	1668.05	293.283	2381.58	1671.7	251.094	2313.05	1516.8	260.105	2213.76	1292.49	223.635	2454.85	1424.52	219.014	2484.37	1238.73	314.196	2220.38	1366.12	54.0032	2300.76	1469.29	0.994083	2257.57	1273.65	-10.3176	2225.86	1156.41	-35.0525	2263.26	986.178	0.155	2289.93	887.201	-49.8173	2232.59	886.475	-55.1369	2270.4	786.94
1041	0	178.35	2560.16	1642.27	280.929	2559.29	1641.03	156.266	2405.69	1668.28	293.193	2392.26	1671.99	251.308	2324	1517.06	260.423	2224.61	1292.76	223.523	2465.68	1424.75	219.164	2495.22	1238.95	314.587	2231.42	1366.43	54.3639	2311.02	1469.4	1.96882	2265.3	1274.66	-8.87709	2232.14	1157.82	-34.6077	2265.78	987.097	0.165108	2290.62	887.457	-49.3531	2232.72	888.008	-55.1508	2268.11	787.609
1042	0	178.042	2570.76	1642.67	280.639	2570.12	1641.47	156.239	2416.2	1668.28	293.095	2403.03	1672.03	251.49	2335.04	1517.11	260.649	2235.5	1292.86	223.389	2476.58	1424.72	219.272	2506.08	1238.91	314.893	2242.5	1366.55	54.6823	2321.41	1469.34	2.88347	2273.11	1275.58	-7.52415	2238.48	1159.18	-34.184	2268.51	988.071	0.206913	2291.62	887.873	-48.8596	2233.21	889.607	-55.087	2266.32	788.466
1043	0	177.778	2581.5	1642.8	280.392	2581.07	1641.63	156.214	2426.86	1668.08	292.983	2413.91	1671.81	251.63	2346.17	1516.96	260.78	2246.44	1292.78	223.229	2487.55	1424.45	219.332	2516.96	1238.61	315.109	2253.62	1366.48	54.9505	2331.93	1469.13	3.73146	2281.02	1276.44	-6.26191	2244.9	1160.49	-33.7823	2271.47	989.081	0.276689	2292.97	888.418	-48.3383	2234.09	891.243	-54.95	2265.06	789.474
1044	0	177.55	2592.39	1642.68	280.18	2592.13	1641.5	156.18	2437.68	1667.68	292.85	2424.91	1671.36	251.721	2357.4	1516.61	260.814	2257.42	1292.53	223.039	2498.62	1423.95	219.343	2527.87	1238.06	315.228	2264.78	1366.22	55.1601	2342.58	1468.76	4.5063	2289.04	1277.22	-5.09354	2251.44	1161.73	-33.4047	2274.69	990.109	0.367701	2294.7	889.063	-47.7927	2235.38	892.893	-54.7473	2264.37	790.599
1045	0	177.348	2603.43	1642.3	279.993	2603.32	1641.09	156.126	2448.66	1667.08	292.688	2436.03	1670.69	251.752	2368.72	1516.07	260.746	2268.46	1292.11	222.815	2509.77	1423.23	219.299	2538.81	1237.28	315.245	2275.98	1365.79	55.3024	2353.37	1468.25	5.20162	2297.2	1277.92	-4.02248	2258.11	1162.92	-33.0542	2278.21	991.137	0.470601	2296.85	889.781	-47.2281	2237.11	894.533	-54.4889	2264.25	791.807
1046	0	177.157	2614.63	1641.67	279.817	2614.63	1640.42	156.038	2459.81	1666.3	292.489	2447.28	1669.81	251.712	2380.14	1515.34	260.576	2279.56	1291.53	222.551	2521.01	1422.31	219.197	2549.79	1236.28	315.156	2287.24	1365.2	55.369	2364.29	1467.59	5.8112	2305.52	1278.54	-3.05273	2264.94	1164.03	-32.7353	2282.05	992.146	0.574124	2299.42	890.541	-46.6523	2239.3	896.142	-54.1869	2264.73	793.063
1047	0	176.961	2625.99	1640.8	279.636	2626.07	1639.5	155.903	2471.14	1665.35	292.242	2458.66	1668.74	251.593	2391.65	1514.45	260.301	2290.73	1290.8	222.243	2532.36	1421.2	219.036	2560.83	1235.09	314.956	2298.54	1364.44	55.3513	2375.35	1466.8	6.32892	2314.01	1279.08	-2.18889	2271.96	1165.06	-32.4534	2286.23	993.12	0.665879	2302.45	891.317	-46.0751	2241.96	897.698	-53.8546	2265.8	794.336
1048	0	176.744	2637.5	1639.7	279.434	2637.65	1638.35	155.706	2482.63	1664.25	291.938	2470.18	1667.51	251.385	2403.25	1513.4	259.92	2301.97	1289.92	221.883	2543.8	1419.93	218.813	2571.93	1233.73	314.642	2309.91	1363.54	55.2417	2386.55	1465.88	6.74876	2322.68	1279.54	-1.43626	2279.18	1166.01	-32.215	2290.77	994.042	0.733134	2305.95	892.081	-45.5083	2245.11	899.182	-53.5066	2267.49	795.592
1049	0	176.489	2649.16	1638.41	279.193	2649.34	1636.99	155.432	2494.28	1663	291.564	2481.83	1666.13	251.077	2414.94	1512.22	259.434	2313.29	1288.92	221.467	2555.35	1418.52	218.527	2583.09	1232.21	314.212	2321.34	1362.51	55.0328	2397.87	1464.85	7.06483	2331.54	1279.9	-0.800748	2286.63	1166.86	-32.0275	2295.7	994.894	0.763407	2309.92	892.806	-44.9658	2248.75	900.574	-53.158	2269.78	796.803
1050	0	176.178	2660.95	1636.93	278.895	2661.15	1635.44	155.067	2506.09	1661.63	291.109	2493.59	1664.63	250.662	2426.72	1510.91	258.845	2324.69	1287.79	220.988	2567	1416.99	218.176	2594.35	1230.56	313.666	2332.84	1361.36	54.7183	2409.33	1463.7	7.27143	2340.62	1280.15	-0.288712	2294.32	1167.61	-31.8993	2301.02	995.661	0.744819	2314.39	893.469	-44.463	2252.9	901.854	-52.8248	2272.68	797.937
1051	0	175.794	2672.88	1635.29	278.523	2673.07	1633.73	154.598	2518.04	1660.14	290.563	2505.48	1663.02	250.133	2438.59	1509.49	258.155	2336.17	1286.56	220.44	2578.76	1415.35	217.761	2605.69	1228.81	313.004	2344.4	1360.11	54.293	2420.91	1462.45	7.3632	2349.91	1280.3	0.093229	2302.28	1168.25	-31.8389	2306.77	996.326	0.666273	2319.35	894.045	-44.0166	2257.57	903.004	-52.523	2276.18	798.967
1052	0	175.322	2684.92	1633.52	278.059	2685.1	1631.9	154.013	2530.13	1658.56	289.913	2517.48	1661.33	249.485	2450.53	1507.98	257.367	2347.75	1285.24	219.818	2590.62	1413.63	217.282	2617.14	1226.97	312.229	2356.04	1358.78	53.7529	2432.6	1461.1	7.3352	2359.43	1280.33	0.338453	2310.52	1168.76	-31.8553	2312.96	996.872	0.517536	2324.81	894.513	-43.6439	2262.76	904.005	-52.2689	2280.28	799.866
1053	0	174.747	2697.07	1631.64	277.49	2697.22	1629.96	153.301	2542.33	1656.89	289.149	2529.57	1659.58	248.713	2462.56	1506.39	256.487	2359.41	1283.84	219.118	2602.58	1411.85	216.738	2628.69	1225.07	311.343	2367.75	1357.38	53.0955	2444.41	1459.66	7.18316	2369.19	1280.24	0.440657	2319.06	1169.13	-31.9573	2319.59	997.285	0.289297	2330.78	894.85	-43.3624	2268.48	904.841	-52.0784	2284.99	800.609
1054	0	174.059	2709.32	1629.68	276.802	2709.42	1627.95	152.455	2554.64	1655.16	288.262	2541.76	1657.78	247.815	2474.65	1504.76	255.52	2371.17	1282.37	218.335	2614.63	1410.03	216.131	2640.35	1223.14	310.351	2379.53	1355.92	52.3196	2456.31	1458.14	6.9036	2379.19	1280.01	0.394212	2327.91	1169.35	-32.1535	2326.68	997.549	-0.026751	2337.26	895.04	-43.1892	2274.74	905.494	-51.9673	2290.29	801.172
1055	0	173.249	2721.64	1627.66	275.987	2721.69	1625.89	151.468	2567.05	1653.38	287.244	2554.02	1655.95	246.793	2486.8	1503.09	254.473	2383.01	1280.87	217.465	2626.78	1408.18	215.461	2652.13	1221.18	309.261	2391.38	1354.44	51.426	2468.31	1456.56	6.49405	2389.43	1279.65	0.194546	2337.08	1169.41	-32.4517	2334.24	997.651	-0.437786	2344.25	895.064	-43.14	2281.53	905.951	-51.9508	2296.2	801.536
1056	0	172.313	2734.04	1625.61	275.039	2734.03	1623.82	150.338	2579.54	1651.57	286.092	2566.35	1654.13	245.647	2499.01	1501.4	253.353	2394.94	1279.33	216.508	2639	1406.32	214.73	2664.02	1219.23	308.08	2403.3	1352.94	50.4167	2480.39	1454.91	5.95323	2399.91	1279.13	-0.161467	2346.58	1169.31	-32.859	2342.27	997.582	-0.949714	2351.76	894.911	-43.2292	2288.86	906.199	-52.0436	2302.7	801.683
1057	0	171.248	2746.5	1623.55	273.956	2746.41	1621.74	149.067	2592.09	1649.75	284.802	2578.74	1652.32	244.382	2511.27	1499.72	252.17	2406.94	1277.79	215.462	2651.28	1404.48	213.937	2676.03	1217.31	306.815	2415.29	1351.45	49.2958	2492.53	1453.22	5.28121	2410.64	1278.47	-0.6752	2356.42	1169.03	-33.3811	2350.8	997.334	-1.56709	2359.79	894.572	-43.4686	2296.75	906.229	-52.2592	2309.8	801.604
1058	0	170.056	2759	1621.5	272.739	2758.84	1619.7	147.656	2604.69	1647.93	283.376	2591.16	1650.54	243.005	2523.57	1498.06	250.931	2419.02	1276.26	214.328	2663.63	1402.67	213.086	2688.14	1215.43	305.477	2427.33	1349.98	48.0687	2504.74	1451.49	4.47949	2421.61	1277.67	-1.34611	2366.59	1168.57	-34.0225	2359.81	996.902	-2.29317	2368.34	894.043	-43.8676	2305.18	906.037	-52.61	2317.52	801.291
1059	0	168.743	2771.54	1619.5	271.393	2771.3	1617.72	146.115	2617.33	1646.14	281.818	2603.62	1648.82	241.526	2535.9	1496.44	249.643	2431.17	1274.75	213.108	2676.01	1400.9	212.179	2700.35	1213.62	304.075	2439.43	1348.55	46.7425	2516.99	1449.75	3.55103	2432.83	1276.72	-2.17174	2377.11	1167.93	-34.7861	2369.32	996.288	-3.12995	2377.42	893.325	-44.4327	2314.18	905.621	-53.1067	2325.84	800.746
1060	0	167.317	2784.09	1617.55	269.928	2783.77	1615.81	144.452	2630	1644.4	280.137	2616.11	1647.18	239.953	2548.25	1494.88	248.316	2443.37	1273.28	211.807	2688.43	1399.21	211.218	2712.65	1211.89	302.62	2451.56	1347.18	45.3256	2529.28	1448	2.50025	2444.27	1275.64	-3.14774	2387.96	1167.12	-35.6733	2379.32	995.494	-4.0784	2387.03	892.423	-45.1674	2323.73	904.985	-53.7582	2334.79	799.974
1061	0	165.79	2796.66	1615.69	268.355	2796.26	1614	142.681	2642.68	1642.71	278.343	2628.6	1645.62	238.3	2560.61	1493.4	246.957	2455.61	1271.88	210.433	2700.86	1397.6	210.209	2725.02	1210.28	301.12	2463.73	1345.89	43.8278	2541.58	1446.27	1.33288	2455.95	1274.43	-4.26809	2399.16	1166.14	-36.6838	2389.83	994.528	-5.13851	2397.18	891.347	-46.0726	2333.85	904.136	-54.5708	2344.38	798.985
1062	0	164.174	2809.23	1613.92	266.689	2808.75	1612.31	140.817	2655.36	1641.11	276.451	2641.09	1644.18	236.581	2572.96	1492.01	245.572	2467.89	1270.56	208.996	2713.29	1396.09	209.157	2737.46	1208.78	299.586	2475.92	1344.69	42.2598	2553.91	1444.57	0.055752	2467.85	1273.1	-5.52527	2410.69	1165.01	-37.8158	2400.83	993.401	-6.30942	2407.87	890.112	-47.1464	2344.54	903.085	-55.5484	2354.62	797.797
1063	0	162.486	2821.78	1612.26	264.948	2821.23	1610.75	138.876	2668.02	1639.6	274.477	2653.56	1642.87	234.81	2585.31	1490.74	244.167	2480.19	1269.33	207.507	2725.7	1394.7	208.067	2749.94	1207.43	298.027	2488.12	1343.6	40.6327	2566.23	1442.93	-1.32349	2479.97	1271.68	-6.91069	2422.55	1163.73	-39.0665	2412.34	992.126	-7.58937	2419.12	888.737	-48.3847	2355.8	901.849	-56.6924	2365.51	796.43
1064	0	160.744	2834.31	1610.72	263.151	2833.68	1609.34	136.877	2680.66	1638.21	272.441	2666.02	1641.71	233.002	2597.63	1489.6	242.749	2492.49	1268.22	205.979	2738.09	1393.44	206.947	2762.46	1206.23	296.452	2500.32	1342.62	38.9584	2578.55	1441.36	-2.79666	2492.3	1270.18	-8.41505	2434.72	1162.33	-40.4318	2424.34	990.719	-8.97578	2430.93	887.241	-49.7817	2367.65	900.446	-58.0021	2377.09	794.909
1065	0	158.964	2846.8	1609.33	261.316	2846.1	1608.09	134.839	2693.27	1636.95	270.361	2678.44	1640.7	231.173	2609.91	1488.6	241.323	2504.78	1267.23	204.425	2750.44	1392.34	205.804	2774.98	1205.19	294.869	2512.5	1341.78	37.2482	2590.86	1439.89	-4.35542	2504.83	1268.62	-10.0288	2447.22	1160.83	-41.9069	2436.84	989.199	-10.4653	2443.3	885.648	-51.33	2380.08	898.896	-59.4745	2389.35	793.26
1066	0	157.165	2859.24	1608.07	259.464	2858.49	1607.02	132.781	2705.82	1635.83	268.256	2690.82	1639.86	229.338	2622.16	1487.74	239.892	2517.06	1266.38	202.861	2762.74	1391.39	204.646	2787.5	1204.34	293.285	2524.66	1341.08	35.5133	2603.16	1438.53	-5.99159	2517.56	1267.01	-11.7424	2460.01	1159.23	-43.4869	2449.84	987.583	-12.0543	2456.25	883.982	-53.0219	2393.1	897.22	-61.1052	2402.32	791.512
1067	0	155.364	2871.62	1606.98	257.614	2870.82	1606.13	130.721	2718.31	1634.86	266.147	2703.15	1639.21	227.511	2634.34	1487.05	238.462	2529.3	1265.68	201.299	2774.97	1390.62	203.478	2800	1203.66	291.708	2536.79	1340.53	33.7641	2615.42	1437.3	-7.69749	2530.47	1265.38	-13.5472	2473.11	1157.58	-45.1665	2463.33	985.891	-13.7388	2469.79	882.268	-54.8491	2406.72	895.442	-62.8882	2416.02	789.695
1068	0	153.577	2883.94	1606.04	255.782	2883.09	1605.43	128.676	2730.74	1634.05	264.05	2715.42	1638.74	225.705	2646.47	1486.54	237.036	2541.5	1265.13	199.753	2787.14	1390.03	202.306	2812.45	1203.18	290.143	2548.87	1340.14	32.01	2627.66	1436.21	-9.46623	2543.57	1263.74	-15.435	2486.49	1155.87	-46.9408	2477.32	984.138	-15.5153	2483.92	880.528	-56.8038	2420.93	893.581	-64.817	2430.45	787.835
1069	0	151.817	2896.18	1605.27	253.984	2895.29	1604.93	126.659	2743.09	1633.4	261.982	2727.62	1638.46	223.931	2658.53	1486.19	235.618	2553.64	1264.76	198.232	2799.22	1389.62	201.135	2824.85	1202.89	288.597	2560.9	1339.91	30.2589	2639.87	1435.28	-11.2919	2556.85	1262.11	-17.399	2500.15	1154.13	-48.8053	2491.8	982.341	-17.3804	2498.64	878.783	-58.8789	2435.76	891.656	-66.8851	2445.63	785.957
1070	0	150.097	2908.33	1604.66	252.232	2907.42	1604.63	124.685	2755.35	1632.93	259.956	2739.74	1638.39	222.199	2670.52	1486.04	234.213	2565.72	1264.55	196.746	2811.22	1389.4	199.969	2837.18	1202.8	287.073	2572.87	1339.85	28.5176	2652.04	1434.53	-13.1696	2570.3	1260.51	-19.4336	2514.09	1152.37	-50.7562	2506.77	980.512	-19.3317	2513.96	877.051	-61.0683	2451.19	889.683	-69.0858	2461.56	784.081
1071	0	148.425	2920.4	1604.23	250.538	2919.47	1604.53	122.762	2767.53	1632.63	257.983	2751.79	1638.51	220.516	2682.43	1486.06	232.822	2577.74	1264.52	195.302	2823.13	1389.38	198.811	2849.43	1202.9	285.577	2584.77	1339.96	26.7913	2664.18	1433.95	-15.0956	2583.92	1258.93	-21.5342	2528.3	1150.61	-52.7901	2522.23	978.662	-21.3671	2529.89	875.345	-63.3667	2467.23	887.676	-71.4138	2478.27	782.225
1072	0	146.809	2932.37	1603.97	248.908	2931.43	1604.64	120.899	2779.61	1632.51	256.071	2763.76	1638.83	218.888	2694.26	1486.28	231.448	2589.69	1264.68	193.903	2834.94	1389.55	197.661	2861.59	1203.21	284.111	2596.6	1340.24	25.0837	2676.27	1433.56	-17.0673	2597.71	1257.39	-23.6978	2542.78	1148.86	-54.9048	2538.18	976.799	-23.485	2546.43	873.677	-65.7703	2483.89	885.644	-73.8645	2495.75	780.4
1073	0	145.253	2944.25	1603.88	247.348	2943.31	1604.95	119.1	2791.59	1632.56	254.225	2775.64	1639.35	217.318	2706.01	1486.69	230.093	2601.56	1265.01	192.553	2846.65	1389.92	196.522	2873.66	1203.71	282.676	2608.37	1340.69	23.3975	2688.33	1433.36	-19.0829	2611.66	1255.89	-25.9222	2557.51	1147.11	-57.0986	2554.62	974.929	-25.6844	2563.58	872.054	-68.2762	2501.16	883.593	-76.4347	2514	778.616
1074	0	143.76	2956.04	1603.96	245.861	2955.11	1605.46	117.367	2803.48	1632.8	252.448	2787.44	1640.08	215.809	2717.67	1487.28	228.758	2613.36	1265.53	191.254	2858.26	1390.49	195.393	2885.63	1204.41	281.275	2620.06	1341.32	21.734	2700.34	1433.35	-21.1413	2625.78	1254.44	-28.2063	2572.51	1145.37	-59.3705	2571.55	973.054	-27.9644	2581.35	870.48	-70.8826	2519.05	881.528	-79.1226	2533.04	776.879
1075	0	142.332	2967.72	1604.22	244.447	2966.81	1606.18	115.703	2815.27	1633.22	250.741	2799.14	1641.01	214.362	2729.25	1488.07	227.442	2625.08	1266.23	190.006	2869.78	1391.26	194.275	2897.49	1205.32	279.907	2631.67	1342.12	20.094	2712.32	1433.53	-23.2421	2640.06	1253.04	-30.5494	2587.76	1143.65	-61.72	2588.96	971.175	-30.3246	2599.72	868.957	-73.5887	2537.56	879.45	-81.9271	2552.86	775.19
1076	0	140.968	2979.31	1604.65	243.109	2978.43	1607.1	114.108	2826.96	1633.82	249.105	2810.77	1642.14	212.978	2740.75	1489.05	226.147	2636.72	1267.11	188.81	2881.19	1392.23	193.167	2909.26	1206.43	278.573	2643.21	1343.1	18.4777	2724.25	1433.91	-25.3851	2654.5	1251.69	-32.9513	2603.27	1141.94	-64.147	2606.86	969.295	-32.765	2618.71	867.487	-76.394	2556.69	877.361	-84.848	2573.46	773.551
[truncated: 69 more columns]

## Sheet: Sheet2
Devices
		025370 - Force			025370 - Moment			025370 - CoP			027571 - Force			027571 - Moment			027571 - CoP			037720 - Force			037720 - Moment			037720 - CoP
Frame	Sub Frame	Fx	Fy	Fz	Mx	My	Mz	Cx	Cy	Cz	Fx	Fy	Fz	Mx	My	Mz	Cx	Cy	Cz	Fx	Fy	Fz	Mx	My	Mz	Cx	Cy	Cz
		N	N	N	N.mm	N.mm	N.mm	mm	mm	mm	N	N	N	N.mm	N.mm	N.mm	mm	mm	mm	N	N	N	N.mm	N.mm	N.mm	mm	mm	mm
681	0	0	0	0	0	0	0	200	300	0	0	0	0	0	0	0	200	903	0	0	0	0	0	0	0	603	903	0
681	1	0	0	0	0	0	0	200	300	0	0	0	0	0	0	0	200	903	0	0	0	0	0	0	0	603	903	0
681	2	0	0	0	0	0	0	200	300	0	0	0	0	0	0	0	200	903	0	0	0	0	0	0	0	603	903	0
681	3	0	0	0	0	0	0	200	300	0	0	0	0	0	0	0	200	903	0	0	0	0	0	0	0	603	903	0
681	4	0	0	0	0	0	0	200	300	0	0	0	0	0	0	0	200	903	0	0	0	0	0	0	0	603	903	0
681	5	0	0	0	0	0	0	200	300	0	0	0	0	0	0	0	200	903	0	0	0	0	0	0	0	603	903	0
681	6	0	0	0	0	0	0	200	300	0	0	0	0	0	0	0	200	903	0	0	0	0	0	0	0	603	903	0
681	7	0	0	0	0	0	0	200	300	0	0	0	0	0	0	0	200	903	0	0	0	0	0	0	0	603	903	0
681	8	0	0	0	0	0	0	200	300	0	0	0	0	0	0	0	200	903	0	0	0	0	0	0	0	603	903	0
681	9	0	0	0	0	0	0	200	300	0	0	0	0	0	0	0	200	903	0	0	0	0	0	0	0	603	903	0
682	0	0	0	0	0	0	0	200	300	0	0	0	0	0	0	0	200	903	0	0	0	0	0	0	0	603	903	0
682	1	0	0	0	0	0	0	200	300	0	0	0	0	0	0	0	200	903	0	0	0	0	0	0	0	603	903	0
682	2	0	0	0	0	0	0	200	300	0	0	0	0	0	0	0	200	903	0	0	0	0	0	0	0	603	903	0
682	3	0	0	0	0	0	0	200	300	0	0	0	0	0	0	0	200	903	0	0	0	0	0	0	0	603	903	0
682	4	0	0	0	0	0	0	200	300	0	0	0	0	0	0	0	200	903	0	0	0	0	0	0	0	603	903	0
682	5	0	0	0	0	0	0	200	300	0	0	0	0	0	0	0	200	903	0	0	0	0	0	0	0	603	903	0
682	6	0	0	0	0	0	0	200	300	0	0	0	0	0	0	0	200	903	0	0	0	0	0	0	0	603	903	0
682	7	0	0	0	0	0	0	200	300	0	0	0	0	0	0	0	200	903	0	0	0	0	0	0	0	603	903	0
682	8	0	0	0	0	0	0	200	300	0	0	0	0	0	0	0	200	903	0	0	0	0	0	0	0	603	903	0
682	9	0	0	0	0	0	0	200	300	0	0	0	0	0	0	0	200	903	0	0	0	0	0	0	0	603	903	0
683	0	0	0	0	0	0	0	200	300	0	0	0	0	0	0	0	200	903	0	0	0	0	0	0	0	603	903	0
683	1	0	0	0	0	0	0	200	300	0	0	0	0	0	0	0	200	903	0	0	0	0	0	0	0	603	903	0
683	2	0	0	0	0	0	0	200	300	0	0	0	0	0	0	0	200	903	0	0	0	0	0	0	0	603	903	0
683	3	0	0	0	0	0	0	200	300	0	0	0	0	0	0	0	200	903	0	0	0	0	0	0	0	603	903	0
683	4	0	0	0	0	0	0	200	300	0	0	0	0	0	0	0	200	903	0	0	0	0	0	0	0	603	903	0
683	5	0	0	0	0	0	0	200	300	0	0	0	0	0	0	0	200	903	0	0	0	0	0	0	0	603	903	0
683	6	0	0	0	0	0	0	200	300	0	0	0	0	0	0	0	200	903	0	0	0	0	0	0	0	603	903	0
683	7	0	0	0	0	0	0	200	300	0	0	0	0	0	0	0	200	903	0	0	0	0	0	0	0	603	903	0
683	8	0	0	0	0	0	0	200	300	0	0	0	0	0	0	0	200	903	0	0	0	0	0	0	0	603	903	0
683	9	0	0	0	0	0	0	200	300	0	0	0	0	0	0	0	200	903	0	0	0	0	0	0	0	603	903	0
684	0	0	0	0	0	0	0	200	300	0	0	0	0	0	0	0	200	903	0	0	0	0	0	0	0	603	903	0
684	1	0	0	0	0	0	0	200	300	0	0	0	0	0	0	0	200	903	0	0	0	0	0	0	0	603	903	0
684	2	0	0	0	0	0	0	200	300	0	0	0	0	0	0	0	200	903	0	0	0	0	0	0	0	603	903	0
684	3	0	0	0	0	0	0	200	300	0	0	0	0	0	0	0	200	903	0	0	0	0	0	0	0	603	903	0
684	4	0	0	0	0	0	0	200	300	0	0	0	0	0	0	0	200	903	0	0	0	0	0	0	0	603	903	0
684	5	0	0	0	0	0	0	200	300	0	0	0	0	0	0	0	200	903	0	0	0	0	0	0	0	603	903	0
684	6	0	0	0	0	0	0	200	300	0	0	0	0	0	0	0	200	903	0	0	0	0	0	0	0	603	903	0
684	7	0	0	0	0	0	0	200	300	0	0	0	0	0	0	0	200	903	0	0	0	0	0	0	0	603	903	0
684	8	0	0	0	0	0	0	200	300	0	0	0	0	0	0	0	200	903	0	0	0	0	0	0	0	603	903	0
684	9	0	0	0	0	0	0	200	300	0	0	0	0	0	0	0	200	903	0	0	0	0	0	0	0	603	903	0
685	0	0	0	0	0	0	0	200	300	0	0	0	0	0	0	0	200	903	0	0	0	0	0	0	0	603	903	0
685	1	0	0	0	0	0	0	200	300	0	0	0	0	0	0	0	200	903	0	0	0	0	0	0	0	603	903	0
685	2	0	0	0	0	0	0	200	300	0	0	0	0	0	0	0	200	903	0	0	0	0	0	0	0	603	903	0
685	3	0	0	0	0	0	0	200	300	0	0	0	0	0	0	0	200	903	0	0	0	0	0	0	0	603	903	0
685	4	0	0	0	0	0	0	200	300	0	0	0	0	0	0	0	200	903	0	0	0	0	0	0	0	603	903	0
685	5	0	0	0	0	0	0	200	300	0	0	0	0	0	0	0	200	903	0	0	0	0	0	0	0	603	903	0
685	6	0	0	0	0	0	0	200	300	0	0	0	0	0	0	0	200	903	0	0	0	0	0	0	0	603	903	0
685	7	0	0	0	0	0	0	200	300	0	0	0	0	0	0	0	200	903	0	0	0	0	0	0	0	603	903	0
685	8	0	0	0	0	0	0	200	300	0	0	0	0	0	0	0	200	903	0	0	0	0	0	0	0	603	903	0
685	9	0	0	0	0	0	0	200	300	0	0	0	0	0	0	0	200	903	0	0	0	0	0	0	0	603	903	0
686	0	0	0	0	0	0	0	200	300	0	0	0	0	0	0	0	200	903	0	0	0	0	0	0	0	603	903	0
686	1	0	0	0	0	0	0	200	300	0	0	0	0	0	0	0	200	903	0	0	0	0	0	0	0	603	903	0
686	2	0	0	0	0	0	0	200	300	0	0	0	0	0	0	0	200	903	0	0	0	0	0	0	0	603	903	0
686	3	0	0	0	0	0	0	200	300	0	0	0	0	0	0	0	200	903	0	0	0	0	0	0	0	603	903	0
686	4	0	0	0	0	0	0	200	300	0	0	0	0	0	0	0	200	903	0	0	0	0	0	0	0	603	903	0
686	5	0	0	0	0	0	0	200	300	0	0	0	0	0	0	0	200	903	0	0	0	0	0	0	0	603	903	0
686	6	0	0	0	0	0	0	200	300	0	0	0	0	0	0	0	200	903	0	0	0	0	0	0	0	603	903	0
686	7	0	0	0	0	0	0	200	300	0	0	0	0	0	0	0	200	903	0	0	0	0	0	0	0	603	903	0
686	8	0	0	0	0	0	0	200	300	0	0	0	0	0	0	0	200	903	0	0	0	0	0	0	0	603	903	0
686	9	0	0	0	0	0	0	200	300	0	0	0	0	0	0	0	200	903	0	0	0	0	0	0	0	603	903	0
687	0	0	0	0	0	0	0	200	300	0	0	0	0	0	0	0	200	903	0	0	0	0	0	0	0	603	903	0
687	1	0	0	0	0	0	0	200	300	0	0	0	0	0	0	0	200	903	0	0	0	0	0	0	0	603	903	0
687	2	0	0	0	0	0	0	200	300	0	0	0	0	0	0	0	200	903	0	0	0	0	0	0	0	603	903	0
687	3	0	0	0	0	0	0	200	300	0	0	0	0	0	0	0	200	903	0	0	0	0	0	0	0	603	903	0
687	4	0	0	0	0	0	0	200	300	0	0	0	0	0	0	0	200	903	0	0	0	0	0	0	0	603	903	0
687	5	0	0	0	0	0	0	200	300	0	0	0	0	0	0	0	200	903	0	0	0	0	0	0	0	603	903	0
687	6	0	0	0	0	0	0	200	300	0	0	0	0	0	0	0	200	903	0	0	0	0	0	0	0	603	903	0
687	7	0	0	0	0	0	0	200	300	0	0	0	0	0	0	0	200	903	0	0	0	0	0	0	0	603	903	0
687	8	0	0	0	0	0	0	200	300	0	0	0	0	0	0	0	200	903	0	0	0	0	0	0	0	603	903	0
687	9	0	0	0	0	0	0	200	300	0	0	0	0	0	0	0	200	903	0	0	0	0	0	0	0	603	903	0
688	0	0	0	0	0	0	0	200	300	0	0	0	0	0	0	0	200	903	0	0	0	0	0	0	0	603	903	0
688	1	0	0	0	0	0	0	200	300	0	0	0	0	0	0	0	200	903	0	0	0	0	0	0	0	603	903	0
688	2	0	0	0	0	0	0	200	300	0	0	0	0	0	0	0	200	903	0	0	0	0	0	0	0	603	903	0
688	3	0	0	0	0	0	0	200	300	0	0	0	0	0	0	0	200	903	0	0	0	0	0	0	0	603	903	0
688	4	0	0	0	0	0	0	200	300	0	0	0	0	0	0	0	200	903	0	0	0	0	0	0	0	603	903	0
688	5	0	0	0	0	0	0	200	300	0	0	0	0	0	0	0	200	903	0	0	0	0	0	0	0	603	903	0
688	6	0	0	0	0	0	0	200	300	0	0	0	0	0	0	0	200	903	0	0	0	0	0	0	0	603	903	0
688	7	0	0	0	0	0	0	200	300	0	0	0	0	0	0	0	200	903	0	0	0	0	0	0	0	603	903	0
688	8	0	0	0	0	0	0	200	300	0	0	0	0	0	0	0	200	903	0	0	0	0	0	0	0	603	903	0
688	9	0	0	0	0	0	0	200	300	0	0	0	0	0	0	0	200	903	0	0	0	0	0	0	0	603	903	0
689	0	0	0	0	0	0	0	200	300	0	0	0	0	0	0	0	200	903	0	0	0	0	0	0	0	603	903	0
689	1	0	0	0	0	0	0	200	300	0	0	0	0	0	0	0	200	903	0	0	0	0	0	0	0	603	903	0
689	2	0	0	0	0	0	0	200	300	0	0	0	0	0	0	0	200	903	0	0	0	0	0	0	0	603	903	0
689	3	0	0	0	0	0	0	200	300	0	0	0	0	0	0	0	200	903	0	0	0	0	0	0	0	603	903	0
689	4	0	0	0	0	0	0	200	300	0	0	0	0	0	0	0	200	903	0	0	0	0	0	0	0	603	903	0
689	5	0	0	0	0	0	0	200	300	0	0	0	0	0	0	0	200	903	0	0	0	0	0	0	0	603	903	0
689	6	0	0	0	0	0	0	200	300	0	0	0	0	0	0	0	200	903	0	0	0	0	0	0	0	603	903	0
689	7	0	0	0	0	0	0	200	300	0	0	0	0	0	0	0	200	903	0	0	0	0	0	0	0	603	903	0
689	8	0	0	0	0	0	0	200	300	0	0	0	0	0	0	0	200	903	0	0	0	0	0	0	0	603	903	0
689	9	0	0	0	0	0	0	200	300	0	0	0	0	0	0	0	200	903	0	0	0	0	0	0	0	603	903	0
690	0	0	0	0	0	0	0	200	300	0	0	0	0	0	0	0	200	903	0	0	0	0	0	0	0	603	903	0
690	1	0	0	0	0	0	0	200	300	0	0	0	0	0	0	0	200	903	0	0	0	0	0	0	0	603	903	0
690	2	0	0	0	0	0	0	200	300	0	0	0	0	0	0	0	200	903	0	0	0	0	0	0	0	603	903	0
690	3	0	0	0	0	0	0	200	300	0	0	0	0	0	0	0	200	903	0	0	0	0	0	0	0	603	903	0
690	4	0	0	0	0	0	0	200	300	0	0	0	0	0	0	0	200	903	0	0	0	0	0	0	0	603	903	0
690	5	0	0	0	0	0	0	200	300	0	0	0	0	0	0	0	200	903	0	0	0	0	0	0	0	603	903	0
690	6	0	0	0	0	0	0	200	300	0	0	0	0	0	0	0	200	903	0	0	0	0	0	0	0	603	903	0
690	7	0	0	0	0	0	0	200	300	0	0	0	0	0	0	0	200	903	0	0	0	0	0	0	0	603	903	0
690	8	0	0	0	0	0	0	200	300	0	0	0	0	0	0	0	200	903	0	0	0	0	0	0	0	603	903	0
690	9	0	0	0	0	0	0	200	300	0	0	0	0	0	0	0	200	903	0	0	0	0	0	0	0	603	903	0
691	0	0	0	0	0	0	0	200	300	0	0	0	0	0	0	0	200	903	0	0	0	0	0	0	0	603	903	0
691	1	0	0	0	0	0	0	200	300	0	0	0	0	0	0	0	200	903	0	0	0	0	0	0	0	603	903	0
691	2	0	0	0	0	0	0	200	300	0	0	0	0	0	0	0	200	903	0	0	0	0	0	0	0	603	903	0
691	3	0	0	0	0	0	0	200	300	0	0	0	0	0	0	0	200	903	0	0	0	0	0	0	0	603	903	0
691	4	0	0	0	0	0	0	200	300	0	0	0	0	0	0	0	200	903	0	0	0	0	0	0	0	603	903	0
691	5	0	0	0	0	0	0	200	300	0	0	0	0	0	0	0	200	903	0	0	0	0	0	0	0	603	903	0
691	6	0	0	0	0	0	0	200	300	0	0	0	0	0	0	0	200	903	0	0	0	0	0	0	0	603	903	0
691	7	0	0	0	0	0	0	200	300	0	0	0	0	0	0	0	200	903	0	0	0	0	0	0	0	603	903	0
691	8	0	0	0	0	0	0	200	300	0	0	0	0	0	0	0	200	903	0	0	0	0	0	0	0	603	903	0
691	9	0	0	0	0	0	0	200	300	0	0	0	0	0	0	0	200	903	0	0	0	0	0	0	0	603	903	0
692	0	0	0	0	0	0	0	200	300	0	0	0	0	0	0	0	200	903	0	0	0	0	0	0	0	603	903	0
692	1	0	0	0	0	0	0	200	300	0	0	0	0	0	0	0	200	903	0	0	0	0	0	0	0	603	903	0
692	2	0	0	0	0	0	0	200	300	0	0	0	0	0	0	0	200	903	0	0	0	0	0	0	0	603	903	0
692	3	0	0	0	0	0	0	200	300	0	0	0	0	0	0	0	200	903	0	0	0	0	0	0	0	603	903	0
692	4	0	0	0	0	0	0	200	300	0	0	0	0	0	0	0	200	903	0	0	0	0	0	0	0	603	903	0
692	5	0	0	0	0	0	0	200	300	0	0	0	0	0	0	0	200	903	0	0	0	0	0	0	0	603	903	0
692	6	0	0	0	0	0	0	200	300	0	0	0	0	0	0	0	200	903	0	0	0	0	0	0	0	603	903	0
692	7	0	0	0	0	0	0	200	300	0	0	0	0	0	0	0	200	903	0	0	0	0	0	0	0	603	903	0
692	8	0	0	0	0	0	0	200	300	0	0	0	0	0	0	0	200	903	0	0	0	0	0	0	0	603	903	0
692	9	0	0	0	0	0	0	200	300	0	0	0	0	0	0	0	200	903	0	0	0	0	0	0	0	603	903	0
693	0	0	0	0	0	0	0	200	300	0	0	0	0	0	0	0	200	903	0	0	0	0	0	0	0	603	903	0
693	1	0	0	0	0	0	0	200	300	0	0	0	0	0	0	0	200	903	0	0	0	0	0	0	0	603	903	0
693	2	0	0	0	0	0	0	200	300	0	0	0	0	0	0	0	200	903	0	0	0	0	0	0	0	603	903	0
693	3	0	0	0	0	0	0	200	300	0	0	0	0	0	0	0	200	903	0	0	0	0	0	0	0	603	903	0
693	4	0	0	0	0	0	0	200	300	0	0	0	0	0	0	0	200	903	0	0	0	0	0	0	0	603	903	0
693	5	0	0	0	0	0	0	200	300	0	0	0	0	0	0	0	200	903	0	0	0	0	0	0	0	603	903	0
693	6	0	0	0	0	0	0	200	300	0	0	0	0	0	0	0	200	903	0	0	0	0	0	0	0	603	903	0
693	7	0	0	0	0	0	0	200	300	0	0	0	0	0	0	0	200	903	0	0	0	0	0	0	0	603	903	0
693	8	0	0	0	0	0	0	200	300	0	0	0	0	0	0	0	200	903	0	0	0	0	0	0	0	603	903	0
693	9	0	0	0	0	0	0	200	300	0	0	0	0	0	0	0	200	903	0	0	0	0	0	0	0	603	903	0
694	0	0	0	0	0	0	0	200	300	0	0	0	0	0	0	0	200	903	0	0	0	0	0	0	0	603	903	0
694	1	0	0	0	0	0	0	200	300	0	0	0	0	0	0	0	200	903	0	0	0	0	0	0	0	603	903	0
694	2	0	0	0	0	0	0	200	300	0	0	0	0	0	0	0	200	903	0	0	0	0	0	0	0	603	903	0
694	3	0	0	0	0	0	0	200	300	0	0	0	0	0	0	0	200	903	0	0	0	0	0	0	0	603	903	0
694	4	0	0	0	0	0	0	200	300	0	0	0	0	0	0	0	200	903	0	0	0	0	0	0	0	603	903	0
694	5	0	0	0	0	0	0	200	300	0	0	0	0	0	0	0	200	903	0	0	0	0	0	0	0	603	903	0
694	6	0	0	0	0	0	0	200	300	0	0	0	0	0	0	0	200	903	0	0	0	0	0	0	0	603	903	0
694	7	0	0	0	0	0	0	200	300	0	0	0	0	0	0	0	200	903	0	0	0	0	0	0	0	603	903	0
694	8	0	0	0	0	0	0	200	300	0	0	0	0	0	0	0	200	903	0	0	0	0	0	0	0	603	903	0
694	9	0	0	0	0	0	0	200	300	0	0	0	0	0	0	0	200	903	0	0	0	0	0	0	0	603	903	0
695	0	0	0	0	0	0	0	200	300	0	0	0	0	0	0	0	200	903	0	0	0	0	0	0	0	603	903	0
695	1	0	0	0	0	0	0	200	300	0	0	0	0	0	0	0	200	903	0	0	0	0	0	0	0	603	903	0
695	2	0	0	0	0	0	0	200	300	0	0	0	0	0	0	0	200	903	0	0	0	0	0	0	0	603	903	0
695	3	0	0	0	0	0	0	200	300	0	0	0	0	0	0	0	200	903	0	0	0	0	0	0	0	603	903	0
695	4	0	0	0	0	0	0	200	300	0	0	0	0	0	0	0	200	903	0	0	0	0	0	0	0	603	903	0
695	5	0	0	0	0	0	0	200	300	0	0	0	0	0	0	0	200	903	0	0	0	0	0	0	0	603	903	0
695	6	0	0	0	0	0	0	200	300	0	0	0	0	0	0	0	200	903	0	0	0	0	0	0	0	603	903	0
695	7	0	0	0	0	0	0	200	300	0	0	0	0	0	0	0	200	903	0	0	0	0	0	0	0	603	903	0
695	8	0	0	0	0	0	0	200	300	0	0	0	0	0	0	0	200	903	0	0	0	0	0	0	0	603	903	0
695	9	0	0	0	0	0	0	200	300	0	0	0	0	0	0	0	200	903	0	0	0	0	0	0	0	603	903	0
696	0	0	0	0	0	0	0	200	300	0	0	0	0	0	0	0	200	903	0	0	0	0	0	0	0	603	903	0
696	1	0	0	0	0	0	0	200	300	0	0	0	0	0	0	0	200	903	0	0	0	0	0	0	0	603	903	0
696	2	0	0	0	0	0	0	200	300	0	0	0	0	0	0	0	200	903	0	0	0	0	0	0	0	603	903	0
696	3	0	0	0	0	0	0	200	300	0	0	0	0	0	0	0	200	903	0	0	0	0	0	0	0	603	903	0
696	4	0	0	0	0	0	0	200	300	0	0	0	0	0	0	0	200	903	0	0	0	0	0	0	0	603	903	0
696	5	0	0	0	0	0	0	200	300	0	0	0	0	0	0	0	200	903	0	0	0	0	0	0	0	603	903	0
696	6	0	0	0	0	0	0	200	300	0	0	0	0	0	0	0	200	903	0	0	0	0	0	0	0	603	903	0
696	7	0	0	0	0	0	0	200	300	0	0	0	0	0	0	0	200	903	0	0	0	0	0	0	0	603	903	0
696	8	0	0	0	0	0	0	200	300	0	0	0	0	0	0	0	200	903	0	0	0	0	0	0	0	603	903	0
696	9	0	0	0	0	0	0	200	300	0	0	0	0	0	0	0	200	903	0	0	0	0	0	0	0	603	903	0
697	0	0	0	0	0	0	0	200	300	0	0	0	0	0	0	0	200	903	0	0	0	0	0	0	0	603	903	0
697	1	0	0	0	0	0	0	200	300	0	0	0	0	0	0	0	200	903	0	0	0	0	0	0	0	603	903	0
697	2	0	0	0	0	0	0	200	300	0	0	0	0	0	0	0	200	903	0	0	0	0	0	0	0	603	903	0
697	3	0	0	0	0	0	0	200	300	0	0	0	0	0	0	0	200	903	0	0	0	0	0	0	0	603	903	0
697	4	0	0	0	0	0	0	200	300	0	0	0	0	0	0	0	200	903	0	0	0	0	0	0	0	603	903	0
697	5	0	0	0	0	0	0	200	300	0	0	0	0	0	0	0	200	903	0	0	0	0	0	0	0	603	903	0
697	6	0	0	0	0	0	0	200	300	0	0	0	0	0	0	0	200	903	0	0	0	0	0	0	0	603	903	0
697	7	0	0	0	0	0	0	200	300	0	0	0	0	0	0	0	200	903	0	0	0	0	0	0	0	603	903	0
697	8	0	0	0	0	0	0	200	300	0	0	0	0	0	0	0	200	903	0	0	0	0	0	0	0	603	903	0
697	9	0	0	0	0	0	0	200	300	0	0	0	0	0	0	0	200	903	0	0	0	0	0	0	0	603	903	0
698	0	0	0	0	0	0	0	200	300	0	0	0	0	0	0	0	200	903	0	0	0	0	0	0	0	603	903	0
698	1	0	0	0	0	0	0	200	300	0	0	0	0	0	0	0	200	903	0	0	0	0	0	0	0	603	903	0
698	2	0	0	0	0	0	0	200	300	0	0	0	0	0	0	0	200	903	0	0	0	0	0	0	0	603	903	0
698	3	0	0	0	0	0	0	200	300	0	0	0	0	0	0	0	200	903	0	0	0	0	0	0	0	603	903	0
698	4	0	0	0	0	0	0	200	300	0	0	0	0	0	0	0	200	903	0	0	0	0	0	0	0	603	903	0
698	5	0	0	0	0	0	0	200	300	0	0	0	0	0	0	0	200	903	0	0	0	0	0	0	0	603	903	0
698	6	0	0	0	0	0	0	200	300	0	0	0	0	0	0	0	200	903	0	0	0	0	0	0	0	603	903	0
698	7	0	0	0	0	0	0	200	300	0	0	0	0	0	0	0	200	903	0	0	0	0	0	0	0	603	903	0
698	8	0	0	0	0	0	0	200	300	0	0	0	0	0	0	0	200	903	0	0	0	0	0	0	0	603	903	0
698	9	0	0	0	0	0	0	200	300	0	0	0	0	0	0	0	200	903	0	0	0	0	0	0	0	603	903	0
699	0	0	0	0	0	0	0	200	300	0	0	0	0	0	0	0	200	903	0	0	0	0	0	0	0	603	903	0
699	1	0	0	0	0	0	0	200	300	0	0	0	0	0	0	0	200	903	0	0	0	0	0	0	0	603	903	0
699	2	0	0	0	0	0	0	200	300	0	0	0	0	0	0	0	200	903	0	0	0	0	0	0	0	603	903	0
699	3	0	0	0	0	0	0	200	300	0	0	0	0	0	0	0	200	903	0	0	0	0	0	0	0	603	903	0
699	4	0	0	0	0	0	0	200	300	0	0	0	0	0	0	0	200	903	0	0	0	0	0	0	0	603	903	0
699	5	0	0	0	0	0	0	200	300	0	0	0	0	0	0	0	200	903	0	0	0	0	0	0	0	603	903	0
699	6	0	0	0	0	0	0	200	300	0	0	0	0	0	0	0	200	903	0	0	0	0	0	0	0	603	903	0
699	7	0	0	0	0	0	0	200	300	0	0	0	0	0	0	0	200	903	0	0	0	0	0	0	0	603	903	0
699	8	0	0	0	0	0	0	200	300	0	0	0	0	0	0	0	200	903	0	0	0	0	0	0	0	603	903	0
699	9	0	0	0	0	0	0	200	300	0	0	0	0	0	0	0	200	903	0	0	0	0	0	0	0	603	903	0
700	0	0	0	0	0	0	0	200	300	0	0	0	0	0	0	0	200	903	0	0	0	0	0	0	0	603	903	0
700	1	0	0	0	0	0	0	200	300	0	0	0	0	0	0	0	200	903	0	0	0	0	0	0	0	603	903	0
700	2	0	0	0	0	0	0	200	300	0	0	0	0	0	0	0	200	903	0	0	0	0	0	0	0	603	903	0
700	3	0	0	0	0	0	0	200	300	0	0	0	0	0	0	0	200	903	0	0	0	0	0	0	0	603	903	0
700	4	0	0	0	0	0	0	200	300	0	0	0	0	0	0	0	200	903	0	0	0	0	0	0	0	603	903	0
700	5	0	0	0	0	0	0	200	300	0	0	0	0	0	0	0	200	903	0	0	0	0	0	0	0	603	903	0
700	6	0	0	0	0	0	0	200	300	0	0	0	0	0	0	0	200	903	0	0	0	0	0	0	0	603	903	0
700	7	0	0	0	0	0	0	200	300	0	0	0	0	0	0	0	200	903	0	0	0	0	0	0	0	603	903	0
700	8	0	0	0	0	0	0	200	300	0	0	0	0	0	0	0	200	903	0	0	0	0	0	0	0	603	903	0
700	9	0	0	0	0	0	0	200	300	0	0	0	0	0	0	0	200	903	0	0	0	0	0	0	0	603	903	0
701	0	0	0	0	0	0	0	200	300	0	0	0	0	0	0	0	200	903	0	0	0	0	0	0	0	603	903	0
701	1	0	0	0	0	0	0	200	300	0	0	0	0	0	0	0	200	903	0	0	0	0	0	0	0	603	903	0
701	2	0	0	0	0	0	0	200	300	0	0	0	0	0	0	0	200	903	0	0	0	0	0	0	0	603	903	0
701	3	0	0	0	0	0	0	200	300	0	0	0	0	0	0	0	200	903	0	0	0	0	0	0	0	603	903	0
701	4	0	0	0	0	0	0	200	300	0	0	0	0	0	0	0	200	903	0	0	0	0	0	0	0	603	903	0
701	5	0	0	0	0	0	0	200	300	0	0	0	0	0	0	0	200	903	0	0	0	0	0	0	0	603	903	0
701	6	0	0	0	0	0	0	200	300	0	0	0	0	0	0	0	200	903	0	0	0	0	0	0	0	603	903	0
701	7	0	0	0	0	0	0	200	300	0	0	0	0	0	0	0	200	903	0	0	0	0	0	0	0	603	903	0
701	8	0	0	0	0	0	0	200	300	0	0	0	0	0	0	0	200	903	0	0	0	0	0	0	0	603	903	0
701	9	0	0	0	0	0	0	200	300	0	0	0	0	0	0	0	200	903	0	0	0	0	0	0	0	603	903	0
702	0	0	0	0	0	0	0	200	300	0	0	0	0	0	0	0	200	903	0	0	0	0	0	0	0	603	903	0
702	1	0	0	0	0	0	0	200	300	0	0	0	0	0	0	0	200	903	0	0	0	0	0	0	0	603	903	0
702	2	0	0	0	0	0	0	200	300	0	0	0	0	0	0	0	200	903	0	0	0	0	0	0	0	603	903	0
702	3	0	0	0	0	0	0	200	300	0	0	0	0	0	0	0	200	903	0	0	0	0	0	0	0	603	903	0
702	4	0	0	0	0	0	0	200	300	0	0	0	0	0	0	0	200	903	0	0	0	0	0	0	0	603	903	0
702	5	0	0	0	0	0	0	200	300	0	0	0	0	0	0	0	200	903	0	0	0	0	0	0	0	603	903	0
702	6	0	0	0	0	0	0	200	300	0	0	0	0	0	0	0	200	903	0	0	0	0	0	0	0	603	903	0
702	7	0	0	0	0	0	0	200	300	0	0	0	0	0	0	0	200	903	0	0	0	0	0	0	0	603	903	0
702	8	0	0	0	0	0	0	200	300	0	0	0	0	0	0	0	200	903	0	0	0	0	0	0	0	603	903	0
702	9	0	0	0	0	0	0	200	300	0	0	0	0	0	0	0	200	903	0	0	0	0	0	0	0	603	903	0
703	0	0	0	0	0	0	0	200	300	0	0	0	0	0	0	0	200	903	0	0	0	0	0	0	0	603	903	0
703	1	0	0	0	0	0	0	200	300	0	0	0	0	0	0	0	200	903	0	0	0	0	0	0	0	603	903	0
703	2	0	0	0	0	0	0	200	300	0	0	0	0	0	0	0	200	903	0	0	0	0	0	0	0	603	903	0
703	3	0	0	0	0	0	0	200	300	0	0	0	0	0	0	0	200	903	0	0	0	0	0	0	0	603	903	0
703	4	0	0	0	0	0	0	200	300	0	0	0	0	0	0	0	200	903	0	0	0	0	0	0	0	603	903	0
703	5	0	0	0	0	0	0	200	300	0	0	0	0	0	0	0	200	903	0	0	0	0	0	0	0	603	903	0
703	6	0	0	0	0	0	0	200	300	0	0	0	0	0	0	0	200	903	0	0	0	0	0	0	0	603	903	0
703	7	0	0	0	0	0	0	200	300	0	0	0	0	0	0	0	200	903	0	0	0	0	0	0	0	603	903	0
703	8	0	0	0	0	0	0	200	300	0	0	0	0	0	0	0	200	903	0	0	0	0	0	0	0	603	903	0
703	9	0	0	0	0	0	0	200	300	0	0	0	0	0	0	0	200	903	0	0	0	0	0	0	0	603	903	0
704	0	0	0	0	0	0	0	200	300	0	0	0	0	0	0	0	200	903	0	0	0	0	0	0	0	603	903	0
704	1	0	0	0	0	0	0	200	300	0	0	0	0	0	0	0	200	903	0	0	0	0	0	0	0	603	903	0
704	2	0	0	0	0	0	0	200	300	0	0	0	0	0	0	0	200	903	0	0	0	0	0	0	0	603	903	0
704	3	0	0	0	0	0	0	200	300	0	0	0	0	0	0	0	200	903	0	0	0	0	0	0	0	603	903	0
704	4	0	0	0	0	0	0	200	300	0	0	0	0	0	0	0	200	903	0	0	0	0	0	0	0	603	903	0
704	5	0	0	0	0	0	0	200	300	0	0	0	0	0	0	0	200	903	0	0	0	0	0	0	0	603	903	0
704	6	0	0	0	0	0	0	200	300	0	0	0	0	0	0	0	200	903	0	0	0	0	0	0	0	603	903	0
704	7	0	0	0	0	0	0	200	300	0	0	0	0	0	0	0	200	903	0	0	0	0	0	0	0	603	903	0
704	8	0	0	0	0	0	0	200	300	0	0	0	0	0	0	0	200	903	0	0	0	0	0	0	0	603	903	0
704	9	0	0	0	0	0	0	200	300	0	0	0	0	0	0	0	200	903	0	0	0	0	0	0	0	603	903	0
705	0	0	0	0	0	0	0	200	300	0	0	0	0	0	0	0	200	903	0	0	0	0	0	0	0	603	903	0
705	1	0	0	0	0	0	0	200	300	0	0	0	0	0	0	0	200	903	0	0	0	0	0	0	0	603	903	0
705	2	0	0	0	0	0	0	200	300	0	0	0	0	0	0	0	200	903	0	0	0	0	0	0	0	603	903	0
705	3	0	0	0	0	0	0	200	300	0	0	0	0	0	0	0	200	903	0	0	0	0	0	0	0	603	903	0
705	4	0	0	0	0	0	0	200	300	0	0	0	0	0	0	0	200	903	0	0	0	0	0	0	0	603	903	0
705	5	0	0	0	0	0	0	200	300	0	0	0	0	0	0	0	200	903	0	0	0	0	0	0	0	603	903	0
705	6	0	0	0	0	0	0	200	300	0	0	0	0	0	0	0	200	903	0	0	0	0	0	0	0	603	903	0
705	7	0	0	0	0	0	0	200	300	0	0	0	0	0	0	0	200	903	0	0	0	0	0	0	0	603	903	0
705	8	0	0	0	0	0	0	200	300	0	0	0	0	0	0	0	200	903	0	0	0	0	0	0	0	603	903	0
705	9	0	0	0	0	0	0	200	300	0	0	0	0	0	0	0	200	903	0	0	0	0	0	0	0	603	903	0
706	0	0	0	0	0	0	0	200	300	0	0	0	0	0	0	0	200	903	0	0	0	0	0	0	0	603	903	0
706	1	0	0	0	0	0	0	200	300	0	0	0	0	0	0	0	200	903	0	0	0	0	0	0	0	603	903	0
706	2	0	0	0	0	0	0	200	300	0	0	0	0	0	0	0	200	903	0	0	0	0	0	0	0	603	903	0
706	3	0	0	0	0	0	0	200	300	0	0	0	0	0	0	0	200	903	0	0	0	0	0	0	0	603	903	0
706	4	0	0	0	0	0	0	200	300	0	0	0	0	0	0	0	200	903	0	0	0	0	0	0	0	603	903	0
706	5	0	0	0	0	0	0	200	300	0	0	0	0	0	0	0	200	903	0	0	0	0	0	0	0	603	903	0
706	6	0	0	0	0	0	0	200	300	0	0	0	0	0	0	0	200	903	0	0	0	0	0	0	0	603	903	0
706	7	0	0	0	0	0	0	200	300	0	0	0	0	0	0	0	200	903	0	0	0	0	0	0	0	603	903	0
706	8	0	0	0	0	0	0	200	300	0	0	0	0	0	0	0	200	903	0	0	0	0	0	0	0	603	903	0
706	9	0	0	0	0	0	0	200	300	0	0	0	0	0	0	0	200	903	0	0	0	0	0	0	0	603	903	0
707	0	0	0	0	0	0	0	200	300	0	0	0	0	0	0	0	200	903	0	0	0	0	0	0	0	603	903	0
707	1	0	0	0	0	0	0	200	300	0	0	0	0	0	0	0	200	903	0	0	0	0	0	0	0	603	903	0
707	2	0	0	0	0	0	0	200	300	0	0	0	0	0	0	0	200	903	0	0	0	0	0	0	0	603	903	0
707	3	0	0	0	0	0	0	200	300	0	0	0	0	0	0	0	200	903	0	0	0	0	0	0	0	603	903	0
707	4	0	0	0	0	0	0	200	300	0	0	0	0	0	0	0	200	903	0	0	0	0	0	0	0	603	903	0
707	5	0	0	0	0	0	0	200	300	0	0	0	0	0	0	0	200	903	0	0	0	0	0	0	0	603	903	0
707	6	0	0	0	0	0	0	200	300	0	0	0	0	0	0	0	200	903	0	0	0	0	0	0	0	603	903	0
707	7	0	0	0	0	0	0	200	300	0	0	0	0	0	0	0	200	903	0	0	0	0	0	0	0	603	903	0
707	8	0	0	0	0	0	0	200	300	0	0	0	0	0	0	0	200	903	0	0	0	0	0	0	0	603	903	0
707	9	0	0	0	0	0	0	200	300	0	0	0	0	0	0	0	200	903	0	0	0	0	0	0	0	603	903	0
708	0	0	0	0	0	0	0	200	300	0	0	0	0	0	0	0	200	903	0	0	0	0	0	0	0	603	903	0
708	1	0	0	0	0	0	0	200	300	0	0	0	0	0	0	0	200	903	0	0	0	0	0	0	0	603	903	0
708	2	0	0	0	0	0	0	200	300	0	0	0	0	0	0	0	200	903	0	0	0	0	0	0	0	603	903	0
708	3	0	0	0	0	0	0	200	300	0	0	0	0	0	0	0	200	903	0	0	0	0	0	0	0	603	903	0
708	4	0	0	0	0	0	0	200	300	0	0	0	0	0	0	0	200	903	0	0	0	0	0	0	0	603	903	0
708	5	0	0	0	0	0	0	200	300	0	0	0	0	0	0	0	200	903	0	0	0	0	0	0	0	603	903	0
708	6	0	0	0	0	0	0	200	300	0	0	0	0	0	0	0	200	903	0	0	0	0	0	0	0	603	903	0
708	7	0	0	0	0	0	0	200	300	0	0	0	0	0	0	0	200	903	0	0	0	0	0	0	0	603	903	0
708	8	0	0	0	0	0	0	200	300	0	0	0	0	0	0	0	200	903	0	0	0	0	0	0	0	603	903	0
708	9	0	0	0	0	0	0	200	300	0	0	0	0	0	0	0	200	903	0	0	0	0	0	0	0	603	903	0
709	0	0	0	0	0	0	0	200	300	0	0	0	0	0	0	0	200	903	0	0	0	0	0	0	0	603	903	0
709	1	0	0	0	0	0	0	200	300	0	0	0	0	0	0	0	200	903	0	0	0	0	0	0	0	603	903	0
709	2	0	0	0	0	0	0	200	300	0	0	0	0	0	0	0	200	903	0	0	0	0	0	0	0	603	903	0
709	3	0	0	0	0	0	0	200	300	0	0	0	0	0	0	0	200	903	0	0	0	0	0	0	0	603	903	0
709	4	0	0	0	0	0	0	200	300	0	0	0	0	0	0	0	200	903	0	0	0	0	0	0	0	603	903	0
709	5	0	0	0	0	0	0	200	300	0	0	0	0	0	0	0	200	903	0	0	0	0	0	0	0	603	903	0
709	6	0	0	0	0	0	0	200	300	0	0	0	0	0	0	0	200	903	0	0	0	0	0	0	0	603	903	0
709	7	0	0	0	0	0	0	200	300	0	0	0	0	0	0	0	200	903	0	0	0	0	0	0	0	603	903	0
709	8	0	0	0	0	0	0	200	300	0	0	0	0	0	0	0	200	903	0	0	0	0	0	0	0	603	903	0
709	9	0	0	0	0	0	0	200	300	0	0	0	0	0	0	0	200	903	0	0	0	0	0	0	0	603	903	0
710	0	0	0	0	0	0	0	200	300	0	0	0	0	0	0	0	200	903	0	0	0	0	0	0	0	603	903	0
710	1	0	0	0	0	0	0	200	300	0	0	0	0	0	0	0	200	903	0	0	0	0	0	0	0	603	903	0
710	2	0	0	0	0	0	0	200	300	0	0	0	0	0	0	0	200	903	0	0	0	0	0	0	0	603	903	0
710	3	0	0	0	0	0	0	200	300	0	0	0	0	0	0	0	200	903	0	0	0	0	0	0	0	603	903	0
710	4	0	0	0	0	0	0	200	300	0	0	0	0	0	0	0	200	903	0	0	0	0	0	0	0	603	903	0
710	5	0	0	0	0	0	0	200	300	0	0	0	0	0	0	0	200	903	0	0	0	0	0	0	0	603	903	0
710	6	0	0	0	0	0	0	200	300	0	0	0	0	0	0	0	200	903	0	0	0	0	0	0	0	603	903	0
710	7	0	0	0	0	0	0	200	300	0	0	0	0	0	0	0	200	903	0	0	0	0	0	0	0	603	903	0
710	8	0	0	0	0	0	0	200	300	0	0	0	0	0	0	0	200	903	0	0	0	0	0	0	0	603	903	0
710	9	0	0	0	0	0	0	200	300	0	0	0	0	0	0	0	200	903	0	0	0	0	0	0	0	603	903	0
711	0	0	0	0	0	0	0	200	300	0	0	0	0	0	0	0	200	903	0	0	0	0	0	0	0	603	903	0
711	1	0	0	0	0	0	0	200	300	0	0	0	0	0	0	0	200	903	0	0	0	0	0	0	0	603	903	0
711	2	0	0	0	0	0	0	200	300	0	0	0	0	0	0	0	200	903	0	0	0	0	0	0	0	603	903	0
711	3	0	0	0	0	0	0	200	300	0	0	0	0	0	0	0	200	903	0	0	0	0	0	0	0	603	903	0
711	4	0	0	0	0	0	0	200	300	0	0	0	0	0	0	0	200	903	0	0	0	0	0	0	0	603	903	0
711	5	0	0	0	0	0	0	200	300	0	0	0	0	0	0	0	200	903	0	0	0	0	0	0	0	603	903	0
711	6	0	0	0	0	0	0	200	300	0	0	0	0	0	0	0	200	903	0	0	0	0	0	0	0	603	903	0
711	7	0	0	0	0	0	0	200	300	0	0	0	0	0	0	0	200	903	0	0	0	0	0	0	0	603	903	0
711	8	0	0	0	0	0	0	200	300	0	0	0	0	0	0	0	200	903	0	0	0	0	0	0	0	603	903	0
711	9	0	0	0	0	0	0	200	300	0	0	0	0	0	0	0	200	903	0	0	0	0	0	0	0	603	903	0
712	0	0	0	0	0	0	0	200	300	0	0	0	0	0	0	0	200	903	0	0	0	0	0	0	0	603	903	0
712	1	0	0	0	0	0	0	200	300	0	0	0	0	0	0	0	200	903	0	0	0	0	0	0	0	603	903	0
712	2	0	0	0	0	0	0	200	300	0	0	0	0	0	0	0	200	903	0	0	0	0	0	0	0	603	903	0
712	3	0	0	0	0	0	0	200	300	0	0	0	0	0	0	0	200	903	0	0	0	0	0	0	0	603	903	0
712	4	0	0	0	0	0	0	200	300	0	0	0	0	0	0	0	200	903	0	0	0	0	0	0	0	603	903	0
712	5	0	0	0	0	0	0	200	300	0	0	0	0	0	0	0	200	903	0	0	0	0	0	0	0	603	903	0
712	6	0	0	0	0	0	0	200	300	0	0	0	0	0	0	0	200	903	0	0	0	0	0	0	0	603	903	0
712	7	0	0	0	0	0	0	200	300	0	0	0	0	0	0	0	200	903	0	0	0	0	0	0	0	603	903	0
712	8	0	0	0	0	0	0	200	300	0	0	0	0	0	0	0	200	903	0	0	0	0	0	0	0	603	903	0
712	9	0	0	0	0	0	0	200	300	0	0	0	0	0	0	0	200	903	0	0	0	0	0	0	0	603	903	0
713	0	0	0	0	0	0	0	200	300	0	0	0	0	0	0	0	200	903	0	0	0	0	0	0	0	603	903	0
713	1	0	0	0	0	0	0	200	300	0	0	0	0	0	0	0	200	903	0	0	0	0	0	0	0	603	903	0
713	2	0	0	0	0	0	0	200	300	0	0	0	0	0	0	0	200	903	0	0	0	0	0	0	0	603	903	0
713	3	0	0	0	0	0	0	200	300	0	0	0	0	0	0	0	200	903	0	0	0	0	0	0	0	603	903	0
713	4	0	0	0	0	0	0	200	300	0	0	0	0	0	0	0	200	903	0	0	0	0	0	0	0	603	903	0
713	5	0	0	0	0	0	0	200	300	0	0	0	0	0	0	0	200	903	0	0	0	0	0	0	0	603	903	0
713	6	0	0	0	0	0	0	200	300	0	0	0	0	0	0	0	200	903	0	0	0	0	0	0	0	603	903	0
713	7	0	0	0	0	0	0	200	300	0	0	0	0	0	0	0	200	903	0	0	0	0	0	0	0	603	903	0
713	8	0	0	0	0	0	0	200	300	0	0	0	0	0	0	0	200	903	0	0	0	0	0	0	0	603	903	0
713	9	0	0	0	0	0	0	200	300	0	0	0	0	0	0	0	200	903	0	0	0	0	0	0	0	603	903	0
714	0	0	0	0	0	0	0	200	300	0	0	0	0	0	0	0	200	903	0	0	0	0	0	0	0	603	903	0
714	1	0	0	0	0	0	0	200	300	0	0	0	0	0	0	0	200	903	0	0	0	0	0	0	0	603	903	0
714	2	0	0	0	0	0	0	200	300	0	0	0	0	0	0	0	200	903	0	0	0	0	0	0	0	603	903	0
714	3	0	0	0	0	0	0	200	300	0	0	0	0	0	0	0	200	903	0	0	0	0	0	0	0	603	903	0
714	4	0	0	0	0	0	0	200	300	0	0	0	0	0	0	0	200	903	0	0	0	0	0	0	0	603	903	0
714	5	0	0	0	0	0	0	200	300	0	0	0	0	0	0	0	200	903	0	0	0	0	0	0	0	603	903	0
714	6	0	0	0	0	0	0	200	300	0	0	0	0	0	0	0	200	903	0	0	0	0	0	0	0	603	903	0
714	7	0	0	0	0	0	0	200	300	0	0	0	0	0	0	0	200	903	0	0	0	0	0	0	0	603	903	0
714	8	0	0	0	0	0	0	200	300	0	0	0	0	0	0	0	200	903	0	0	0	0	0	0	0	603	903	0
714	9	0	0	0	0	0	0	200	300	0	0	0	0	0	0	0	200	903	0	0	0	0	0	0	0	603	903	0
715	0	0	0	0	0	0	0	200	300	0	0	0	0	0	0	0	200	903	0	0	0	0	0	0	0	603	903	0
715	1	0	0	0	0	0	0	200	300	0	0	0	0	0	0	0	200	903	0	0	0	0	0	0	0	603	903	0
715	2	0	0	0	0	0	0	200	300	0	0	0	0	0	0	0	200	903	0	0	0	0	0	0	0	603	903	0
715	3	0	0	0	0	0	0	200	300	0	0	0	0	0	0	0	200	903	0	0	0	0	0	0	0	603	903	0
715	4	0	0	0	0	0	0	200	300	0	0	0	0	0	0	0	200	903	0	0	0	0	0	0	0	603	903	0
715	5	0	0	0	0	0	0	200	300	0	0	0	0	0	0	0	200	903	0	0	0	0	0	0	0	603	903	0
715	6	0	0	0	0	0	0	200	300	0	0	0	0	0	0	0	200	903	0	0	0	0	0	0	0	603	903	0
715	7	0	0	0	0	0	0	200	300	0	0	0	0	0	0	0	200	903	0	0	0	0	0	0	0	603	903	0
715	8	0	0	0	0	0	0	200	300	0	0	0	0	0	0	0	200	903	0	0	0	0	0	0	0	603	903	0
715	9	0	0	0	0	0	0	200	300	0	0	0	0	0	0	0	200	903	0	0	0	0	0	0	0	603	903	0
716	0	0	0	0	0	0	0	200	300	0	0	0	0	0	0	0	200	903	0	0	0	0	0	0	0	603	903	0
716	1	0	0	0	0	0	0	200	300	0	0	0	0	0	0	0	200	903	0	0	0	0	0	0	0	603	903	0
716	2	0	0	0	0	0	0	200	300	0	0	0	0	0	0	0	200	903	0	0	0	0	0	0	0	603	903	0
716	3	0	0	0	0	0	0	200	300	0	0	0	0	0	0	0	200	903	0	0	0	0	0	0	0	603	903	0
716	4	0	0	0	0	0	0	200	300	0	0	0	0	0	0	0	200	903	0	0	0	0	0	0	0	603	903	0
716	5	0	0	0	0	0	0	200	300	0	0	0	0	0	0	0	200	903	0	0	0	0	0	0	0	603	903	0
716	6	0	0	0	0	0	0	200	300	0	0	0	0	0	0	0	200	903	0	0	0	0	0	0	0	603	903	0
716	7	0	0	0	0	0	0	200	300	0	0	0	0	0	0	0	200	903	0	0	0	0	0	0	0	603	903	0
716	8	0	0	0	0	0	0	200	300	0	0	0	0	0	0	0	200	903	0	0	0	0	0	0	0	603	903	0
716	9	0	0	0	0	0	0	200	300	0	0	0	0	0	0	0	200	903	0	0	0	0	0	0	0	603	903	0
717	0	0	0	0	0	0	0	200	300	0	0	0	0	0	0	0	200	903	0	0	0	0	0	0	0	603	903	0
717	1	0	0	0	0	0	0	200	300	0	0	0	0	0	0	0	200	903	0	0	0	0	0	0	0	603	903	0
717	2	0	0	0	0	0	0	200	300	0	0	0	0	0	0	0	200	903	0	0	0	0	0	0	0	603	903	0
717	3	0	0	0	0	0	0	200	300	0	0	0	0	0	0	0	200	903	0	0	0	0	0	0	0	603	903	0
717	4	0	0	0	0	0	0	200	300	0	0	0	0	0	0	0	200	903	0	0	0	0	0	0	0	603	903	0
717	5	0	0	0	0	0	0	200	300	0	0	0	0	0	0	0	200	903	0	0	0	0	0	0	0	603	903	0
717	6	0	0	0	0	0	0	200	300	0	0	0	0	0	0	0	200	903	0	0	0	0	0	0	0	603	903	0
717	7	0	0	0	0	0	0	200	300	0	0	0	0	0	0	0	200	903	0	0	0	0	0	0	0	603	903	0
717	8	0	0	0	0	0	0	200	300	0	0	0	0	0	0	0	200	903	0	0	0	0	0	0	0	603	903	0
717	9	0	0	0	0	0	0	200	300	0	0	0	0	0	0	0	200	903	0	0	0	0	0	0	0	603	903	0
718	0	0	0	0	0	0	0	200	300	0	0	0	0	0	0	0	200	903	0	0	0	0	0	0	0	603	903	0
718	1	0	0	0	0	0	0	200	300	0	0	0	0	0	0	0	200	903	0	0	0	0	0	0	0	603	903	0
718	2	0	0	0	0	0	0	200	300	0	0	0	0	0	0	0	200	903	0	0	0	0	0	0	0	603	903	0
718	3	0	0	0	0	0	0	200	300	0	0	0	0	0	0	0	200	903	0	0	0	0	0	0	0	603	903	0
718	4	0	0	0	0	0	0	200	300	0	0	0	0	0	0	0	200	903	0	0	0	0	0	0	0	603	903	0
718	5	0	0	0	0	0	0	200	300	0	0	0	0	0	0	0	200	903	0	0	0	0	0	0	0	603	903	0
718	6	0	0	0	0	0	0	200	300	0	0	0	0	0	0	0	200	903	0	0	0	0	0	0	0	603	903	0
718	7	0	0	0	0	0	0	200	300	0	0	0	0	0	0	0	200	903	0	0	0	0	0	0	0	603	903	0
718	8	0	0	0	0	0	0	200	300	0	0	0	0	0	0	0	200	903	0	0	0	0	0	0	0	603	903	0
718	9	0	0	0	0	0	0	200	300	0	0	0	0	0	0	0	200	903	0	0	0	0	0	0	0	603	903	0
719	0	0	0	0	0	0	0	200	300	0	0	0	0	0	0	0	200	903	0	0	0	0	0	0	0	603	903	0
719	1	0	0	0	0	0	0	200	300	0	0	0	0	0	0	0	200	903	0	0	0	0	0	0	0	603	903	0
719	2	0	0	0	0	0	0	200	300	0	0	0	0	0	0	0	200	903	0	0	0	0	0	0	0	603	903	0
719	3	0	0	0	0	0	0	200	300	0	0	0	0	0	0	0	200	903	0	0	0	0	0	0	0	603	903	0
719	4	0	0	0	0	0	0	200	300	0	0	0	0	0	0	0	200	903	0	0	0	0	0	0	0	603	903	0
719	5	0	0	0	0	0	0	200	300	0	0	0	0	0	0	0	200	903	0	0	0	0	0	0	0	603	903	0
719	6	0	0	0	0	0	0	200	300	0	0	0	0	0	0	0	200	903	0	0	0	0	0	0	0	603	903	0
719	7	0	0	0	0	0	0	200	300	0	0	0	0	0	0	0	200	903	0	0	0	0	0	0	0	603	903	0
719	8	0	0	0	0	0	0	200	300	0	0	0	0	0	0	0	200	903	0	0	0	0	0	0	0	603	903	0
719	9	0	0	0	0	0	0	200	300	0	0	0	0	0	0	0	200	903	0	0	0	0	0	0	0	603	903	0
720	0	0	0	0	0	0	0	200	300	0	0	0	0	0	0	0	200	903	0	0	0	0	0	0	0	603	903	0
720	1	0	0	0	0	0	0	200	300	0	0	0	0	0	0	0	200	903	0	0	0	0	0	0	0	603	903	0
720	2	0	0	0	0	0	0	200	300	0	0	0	0	0	0	0	200	903	0	0	0	0	0	0	0	603	903	0
720	3	0	0	0	0	0	0	200	300	0	0	0	0	0	0	0	200	903	0	0	0	0	0	0	0	603	903	0
720	4	0	0	0	0	0	0	200	300	0	0	0	0	0	0	0	200	903	0	0	0	0	0	0	0	603	903	0
720	5	0	0	0	0	0	0	200	300	0	0	0	0	0	0	0	200	903	0	0	0	0	0	0	0	603	903	0
720	6	0	0	0	0	0	0	200	300	0	0	0	0	0	0	0	200	903	0	0	0	0	0	0	0	603	903	0
720	7	0	0	0	0	0	0	200	300	0	0	0	0	0	0	0	200	903	0	0	0	0	0	0	0	603	903	0
720	8	0	0	0	0	0	0	200	300	0	0	0	0	0	0	0	200	903	0	0	0	0	0	0	0	603	903	0
720	9	0	0	0	0	0	0	200	300	0	0	0	0	0	0	0	200	903	0	0	0	0	0	0	0	603	903	0
721	0	0	0	0	0	0	0	200	300	0	0	0	0	0	0	0	200	903	0	0	0	0	0	0	0	603	903	0
721	1	0	0	0	0	0	0	200	300	0	0	0	0	0	0	0	200	903	0	0	0	0	0	0	0	603	903	0
721	2	0	0	0	0	0	0	200	300	0	0	0	0	0	0	0	200	903	0	0	0	0	0	0	0	603	903	0
721	3	0	0	0	0	0	0	200	300	0	0	0	0	0	0	0	200	903	0	0	0	0	0	0	0	603	903	0
721	4	0	0	0	0	0	0	200	300	0	0	0	0	0	0	0	200	903	0	0	0	0	0	0	0	603	903	0
721	5	0	0	0	0	0	0	200	300	0	0	0	0	0	0	0	200	903	0	0	0	0	0	0	0	603	903	0
721	6	0	0	0	0	0	0	200	300	0	0	0	0	0	0	0	200	903	0	0	0	0	0	0	0	603	903	0
721	7	0	0	0	0	0	0	200	300	0	0	0	0	0	0	0	200	903	0	0	0	0	0	0	0	603	903	0
721	8	0	0	0	0	0	0	200	300	0	0	0	0	0	0	0	200	903	0	0	0	0	0	0	0	603	903	0
721	9	0	0	0	0	0	0	200	300	0	0	0	0	0	0	0	200	903	0	0	0	0	0	0	0	603	903	0
722	0	0	0	0	0	0	0	200	300	0	0	0	0	0	0	0	200	903	0	0	0	0	0	0	0	603	903	0
722	1	0	0	0	0	0	0	200	300	0	0	0	0	0	0	0	200	903	0	0	0	0	0	0	0	603	903	0
722	2	0	0	0	0	0	0	200	300	0	0	0	0	0	0	0	200	903	0	0	0	0	0	0	0	603	903	0
722	3	0	0	0	0	0	0	200	300	0	0	0	0	0	0	0	200	903	0	0	0	0	0	0	0	603	903	0
722	4	0	0	0	0	0	0	200	300	0	0	0	0	0	0	0	200	903	0	0	0	0	0	0	0	603	903	0
722	5	0	0	0	0	0	0	200	300	0	0	0	0	0	0	0	200	903	0	0	0	0	0	0	0	603	903	0
722	6	0	0	0	0	0	0	200	300	0	0	0	0	0	0	0	200	903	0	0	0	0	0	0	0	603	903	0
722	7	0	0	0	0	0	0	200	300	0	0	0	0	0	0	0	200	903	0	0	0	0	0	0	0	603	903	0
722	8	0	0	0	0	0	0	200	300	0	0	0	0	0	0	0	200	903	0	0	0	0	0	0	0	603	903	0
722	9	0	0	0	0	0	0	200	300	0	0	0	0	0	0	0	200	903	0	0	0	0	0	0	0	603	903	0
723	0	0	0	0	0	0	0	200	300	0	0	0	0	0	0	0	200	903	0	0	0	0	0	0	0	603	903	0
723	1	0	0	0	0	0	0	200	300	0	0	0	0	0	0	0	200	903	0	0	0	0	0	0	0	603	903	0
723	2	0	0	0	0	0	0	200	300	0	0	0	0	0	0	0	200	903	0	0	0	0	0	0	0	603	903	0
723	3	0	0	0	0	0	0	200	300	0	0	0	0	0	0	0	200	903	0	0	0	0	0	0	0	603	903	0
723	4	0	0	0	0	0	0	200	300	0	0	0	0	0	0	0	200	903	0	0	0	0	0	0	0	603	903	0
723	5	0	0	0	0	0	0	200	300	0	0	0	0	0	0	0	200	903	0	0	0	0	0	0	0	603	903	0
723	6	0	0	0	0	0	0	200	300	0	0	0	0	0	0	0	200	903	0	0	0	0	0	0	0	603	903	0
723	7	0	0	0	0	0	0	200	300	0	0	0	0	0	0	0	200	903	0	0	0	0	0	0	0	603	903	0
723	8	0	0	0	0	0	0	200	300	0	0	0	0	0	0	0	200	903	0	0	0	0	0	0	0	603	903	0
723	9	0	0	0	0	0	0	200	300	0	0	0	0	0	0	0	200	903	0	0	0	0	0	0	0	603	903	0
724	0	0	0	0	0	0	0	200	300	0	0	0	0	0	0	0	200	903	0	0	0	0	0	0	0	603	903	0
724	1	0	0	0	0	0	0	200	300	0	0	0	0	0	0	0	200	903	0	0	0	0	0	0	0	603	903	0
724	2	0	0	0	0	0	0	200	300	0	0	0	0	0	0	0	200	903	0	0	0	0	0	0	0	603	903	0
724	3	0	0	0	0	0	0	200	300	0	0	0	0	0	0	0	200	903	0	0	0	0	0	0	0	603	903	0
724	4	0	0	0	0	0	0	200	300	0	0	0	0	0	0	0	200	903	0	0	0	0	0	0	0	603	903	0
724	5	0	0	0	0	0	0	200	300	0	0	0	0	0	0	0	200	903	0	0	0	0	0	0	0	603	903	0
724	6	0	0	0	0	0	0	200	300	0	0	0	0	0	0	0	200	903	0	0	0	0	0	0	0	603	903	0
724	7	0	0	0	0	0	0	200	300	0	0	0	0	0	0	0	200	903	0	0	0	0	0	0	0	603	903	0
724	8	0	0	0	0	0	0	200	300	0	0	0	0	0	0	0	200	903	0	0	0	0	0	0	0	603	903	0
724	9	0	0	0	0	0	0	200	300	0	0	0	0	0	0	0	200	903	0	0	0	0	0	0	0	603	903	0
725	0	0	0	0	0	0	0	200	300	0	0	0	0	0	0	0	200	903	0	0	0	0	0	0	0	603	903	0
725	1	0	0	0	0	0	0	200	300	0	0	0	0	0	0	0	200	903	0	0	0	0	0	0	0	603	903	0
725	2	0	0	0	0	0	0	200	300	0	0	0	0	0	0	0	200	903	0	0	0	0	0	0	0	603	903	0
725	3	0	0	0	0	0	0	200	300	0	0	0	0	0	0	0	200	903	0	0	0	0	0	0	0	603	903	0
725	4	0	0	0	0	0	0	200	300	0	0	0	0	0	0	0	200	903	0	0	0	0	0	0	0	603	903	0
725	5	0	0	0	0	0	0	200	300	0	0	0	0	0	0	0	200	903	0	0	0	0	0	0	0	603	903	0
725	6	0	0	0	0	0	0	200	300	0	0	0	0	0	0	0	200	903	0	0	0	0	0	0	0	603	903	0
725	7	0	0	0	0	0	0	200	300	0	0	0	0	0	0	0	200	903	0	0	0	0	0	0	0	603	903	0
725	8	0	0	0	0	0	0	200	300	0	0	0	0	0	0	0	200	903	0	0	0	0	0	0	0	603	903	0
725	9	0	0	0	0	0	0	200	300	0	0	0	0	0	0	0	200	903	0	0	0	0	0	0	0	603	903	0
726	0	0	0	0	0	0	0	200	300	0	0	0	0	0	0	0	200	903	0	0	0	0	0	0	0	603	903	0
726	1	0	0	0	0	0	0	200	300	0	0	0	0	0	0	0	200	903	0	0	0	0	0	0	0	603	903	0
726	2	0	0	0	0	0	0	200	300	0	0	0	0	0	0	0	200	903	0	0	0	0	0	0	0	603	903	0
726	3	0	0	0	0	0	0	200	300	0	0	0	0	0	0	0	200	903	0	0	0	0	0	0	0	603	903	0
726	4	0	0	0	0	0	0	200	300	0	0	0	0	0	0	0	200	903	0	0	0	0	0	0	0	603	903	0
726	5	0	0	0	0	0	0	200	300	0	0	0	0	0	0	0	200	903	0	0	0	0	0	0	0	603	903	0
726	6	0	0	0	0	0	0	200	300	0	0	0	0	0	0	0	200	903	0	0	0	0	0	0	0	603	903	0
726	7	0	0	0	0	0	0	200	300	0	0	0	0	0	0	0	200	903	0	0	0	0	0	0	0	603	903	0
726	8	0	0	0	0	0	0	200	300	0	0	0	0	0	0	0	200	903	0	0	0	0	0	0	0	603	903	0
726	9	0	0	0	0	0	0	200	300	0	0	0	0	0	0	0	200	903	0	0	0	0	0	0	0	603	903	0
727	0	0	0	0	0	0	0	200	300	0	0	0	0	0	0	0	200	903	0	0	0	0	0	0	0	603	903	0
727	1	0	0	0	0	0	0	200	300	0	0	0	0	0	0	0	200	903	0	0	0	0	0	0	0	603	903	0
727	2	0	0	0	0	0	0	200	300	0	0	0	0	0	0	0	200	903	0	0	0	0	0	0	0	603	903	0
727	3	0	0	0	0	0	0	200	300	0	0	0	0	0	0	0	200	903	0	0	0	0	0	0	0	603	903	0
727	4	0	0	0	0	0	0	200	300	0	0	0	0	0	0	0	200	903	0	0	0	0	0	0	0	603	903	0
727	5	0	0	0	0	0	0	200	300	0	0	0	0	0	0	0	200	903	0	0	0	0	0	0	0	603	903	0
727	6	0	0	0	0	0	0	200	300	0	0	0	0	0	0	0	200	903	0	0	0	0	0	0	0	603	903	0
727	7	0	0	0	0	0	0	200	300	0	0	0	0	0	0	0	200	903	0	0	0	0	0	0	0	603	903	0
727	8	0	0	0	0	0	0	200	300	0	0	0	0	0	0	0	200	903	0	0	0	0	0	0	0	603	903	0
727	9	0	0	0	0	0	0	200	300	0	0	0	0	0	0	0	200	903	0	0	0	0	0	0	0	603	903	0
728	0	0	0	0	0	0	0	200	300	0	0	0	0	0	0	0	200	903	0	0	0	0	0	0	0	603	903	0
728	1	0	0	0	0	0	0	200	300	0	0	0	0	0	0	0	200	903	0	0	0	0	0	0	0	603	903	0
728	2	0	0	0	0	0	0	200	300	0	0	0	0	0	0	0	200	903	0	0	0	0	0	0	0	603	903	0
728	3	0	0	0	0	0	0	200	300	0	0	0	0	0	0	0	200	903	0	0	0	0	0	0	0	603	903	0
728	4	0	0	0	0	0	0	200	300	0	0	0	0	0	0	0	200	903	0	0	0	0	0	0	0	603	903	0
728	5	0	0	0	0	0	0	200	300	0	0	0	0	0	0	0	200	903	0	0	0	0	0	0	0	603	903	0
728	6	0	0	0	0	0	0	200	300	0	0	0	0	0	0	0	200	903	0	0	0	0	0	0	0	603	903	0
728	7	0	0	0	0	0	0	200	300	0	0	0	0	0	0	0	200	903	0	0	0	0	0	0	0	603	903	0
728	8	0	0	0	0	0	0	200	300	0	0	0	0	0	0	0	200	903	0	0	0	0	0	0	0	603	903	0
728	9	0	0	0	0	0	0	200	300	0	0	0	0	0	0	0	200	903	0	0	0	0	0	0	0	603	903	0
729	0	0	0	0	0	0	0	200	300	0	0	0	0	0	0	0	200	903	0	0	0	0	0	0	0	603	903	0
729	1	0	0	0	0	0	0	200	300	0	0	0	0	0	0	0	200	903	0	0	0	0	0	0	0	603	903	0
729	2	0	0	0	0	0	0	200	300	0	0	0	0	0	0	0	200	903	0	0	0	0	0	0	0	603	903	0
729	3	0	0	0	0	0	0	200	300	0	0	0	0	0	0	0	200	903	0	0	0	0	0	0	0	603	903	0
729	4	0	0	0	0	0	0	200	300	0	0	0	0	0	0	0	200	903	0	0	0	0	0	0	0	603	903	0
729	5	0	0	0	0	0	0	200	300	0	0	0	0	0	0	0	200	903	0	0	0	0	0	0	0	603	903	0
729	6	0	0	0	0	0	0	200	300	0	0	0	0	0	0	0	200	903	0	0	0	0	0	0	0	603	903	0
729	7	0	0	0	0	0	0	200	300	0	0	0	0	0	0	0	200	903	0	0	0	0	0	0	0	603	903	0
729	8	0	0	0	0	0	0	200	300	0	0	0	0	0	0	0	200	903	0	0	0	0	0	0	0	603	903	0
729	9	0	0	0	0	0	0	200	300	0	0	0	0	0	0	0	200	903	0	0	0	0	0	0	0	603	903	0
730	0	0	0	0	0	0	0	200	300	0	0	0	0	0	0	0	200	903	0	0	0	0	0	0	0	603	903	0
730	1	0	0	0	0	0	0	200	300	0	0	0	0	0	0	0	200	903	0	0	0	0	0	0	0	603	903	0
730	2	0	0	0	0	0	0	200	300	0	0	0	0	0	0	0	200	903	0	0	0	0	0	0	0	603	903	0
730	3	0	0	0	0	0	0	200	300	0	0	0	0	0	0	0	200	903	0	0	0	0	0	0	0	603	903	0
730	4	0	0	0	0	0	0	200	300	0	0	0	0	0	0	0	200	903	0	0	0	0	0	0	0	603	903	0
730	5	0	0	0	0	0	0	200	300	0	0	0	0	0	0	0	200	903	0	0	0	0	0	0	0	603	903	0
730	6	0	0	0	0	0	0	200	300	0	0	0	0	0	0	0	200	903	0	0	0	0	0	0	0	603	903	0
730	7	0	0	0	0	0	0	200	300	0	0	0	0	0	0	0	200	903	0	0	0	0	0	0	0	603	903	0
730	8	0	0	0	0	0	0	200	300	0	0	0	0	0	0	0	200	903	0	0	0	0	0	0	0	603	903	0
730	9	0	0	0	0	0	0	200	300	0	0	0	0	0	0	0	200	903	0	0	0	0	0	0	0	603	903	0
731	0	0	0	0	0	0	0	200	300	0	0	0	0	0	0	0	200	903	0	0	0	0	0	0	0	603	903	0
731	1	0	0	0	0	0	0	200	300	0	0	0	0	0	0	0	200	903	0	0	0	0	0	0	0	603	903	0
731	2	0	0	0	0	0	0	200	300	0	0	0	0	0	0	0	200	903	0	0	0	0	0	0	0	603	903	0
731	3	0	0	0	0	0	0	200	300	0	0	0	0	0	0	0	200	903	0	0	0	0	0	0	0	603	903	0
731	4	0	0	0	0	0	0	200	300	0	0	0	0	0	0	0	200	903	0	0	0	0	0	0	0	603	903	0
731	5	0	0	0	0	0	0	200	300	0	0	0	0	0	0	0	200	903	0	0	0	0	0	0	0	603	903	0
731	6	0	0	0	0	0	0	200	300	0	0	0	0	0	0	0	200	903	0	0	0	0	0	0	0	603	903	0
731	7	0	0	0	0	0	0	200	300	0	0	0	0	0	0	0	200	903	0	0	0	0	0	0	0	603	903	0
731	8	0	0	0	0	0	0	200	300	0	0	0	0	0	0	0	200	903	0	0	0	0	0	0	0	603	903	0
731	9	0	0	0	0	0	0	200	300	0	0	0	0	0	0	0	200	903	0	0	0	0	0	0	0	603	903	0
732	0	0	0	0	0	0	0	200	300	0	0	0	0	0	0	0	200	903	0	0	0	0	0	0	0	603	903	0
732	1	0	0	0	0	0	0	200	300	0	0	0	0	0	0	0	200	903	0	0	0	0	0	0	0	603	903	0
732	2	0	0	0	0	0	0	200	300	0	0	0	0	0	0	0	200	903	0	0	0	0	0	0	0	603	903	0
732	3	0	0	0	0	0	0	200	300	0	0	0	0	0	0	0	200	903	0	0	0	0	0	0	0	603	903	0
732	4	0	0	0	0	0	0	200	300	0	0	0	0	0	0	0	200	903	0	0	0	0	0	0	0	603	903	0
732	5	0	0	0	0	0	0	200	300	0	0	0	0	0	0	0	200	903	0	0	0	0	0	0	0	603	903	0
732	6	0	0	0	0	0	0	200	300	0	0	0	0	0	0	0	200	903	0	0	0	0	0	0	0	603	903	0
732	7	0	0	0	0	0	0	200	300	0	0	0	0	0	0	0	200	903	0	0	0	0	0	0	0	603	903	0
732	8	0	0	0	0	0	0	200	300	0	0	0	0	0	0	0	200	903	0	0	0	0	0	0	0	603	903	0
732	9	0	0	0	0	0	0	200	300	0	0	0	0	0	0	0	200	903	0	0	0	0	0	0	0	603	903	0
733	0	0	0	0	0	0	0	200	300	0	0	0	0	0	0	0	200	903	0	0	0	0	0	0	0	603	903	0
733	1	0	0	0	0	0	0	200	300	0	0	0	0	0	0	0	200	903	0	0	0	0	0	0	0	603	903	0
733	2	0	0	0	0	0	0	200	300	0	0	0	0	0	0	0	200	903	0	0	0	0	0	0	0	603	903	0
733	3	0	0	0	0	0	0	200	300	0	0	0	0	0	0	0	200	903	0	0	0	0	0	0	0	603	903	0
733	4	0	0	0	0	0	0	200	300	0	0	0	0	0	0	0	200	903	0	0	0	0	0	0	0	603	903	0
733	5	0	0	0	0	0	0	200	300	0	0	0	0	0	0	0	200	903	0	0	0	0	0	0	0	603	903	0
733	6	0	0	0	0	0	0	200	300	0	0	0	0	0	0	0	200	903	0	0	0	0	0	0	0	603	903	0
733	7	0	0	0	0	0	0	200	300	0	0	0	0	0	0	0	200	903	0	0	0	0	0	0	0	603	903	0
733	8	0	0	0	0	0	0	200	300	0	0	0	0	0	0	0	200	903	0	0	0	0	0	0	0	603	903	0
733	9	0	0	0	0	0	0	200	300	0	0	0	0	0	0	0	200	903	0	0	0	0	0	0	0	603	903	0
734	0	0	0	0	0	0	0	200	300	0	0	0	0	0	0	0	200	903	0	0	0	0	0	0	0	603	903	0
734	1	0	0	0	0	0	0	200	300	0	0	0	0	0	0	0	200	903	0	0	0	0	0	0	0	603	903	0
734	2	0	0	0	0	0	0	200	300	0	0	0	0	0	0	0	200	903	0	0	0	0	0	0	0	603	903	0
734	3	0	0	0	0	0	0	200	300	0	0	0	0	0	0	0	200	903	0	0	0	0	0	0	0	603	903	0
734	4	0	0	0	0	0	0	200	300	0	0	0	0	0	0	0	200	903	0	0	0	0	0	0	0	603	903	0
734	5	0	0	0	0	0	0	200	300	0	0	0	0	0	0	0	200	903	0	0	0	0	0	0	0	603	903	0
734	6	0	0	0	0	0	0	200	300	0	0	0	0	0	0	0	200	903	0	0	0	0	0	0	0	603	903	0
734	7	0	0	0	0	0	0	200	300	0	0	0	0	0	0	0	200	903	0	0	0	0	0	0	0	603	903	0
734	8	0	0	0	0	0	0	200	300	0	0	0	0	0	0	0	200	903	0	0	0	0	0	0	0	603	903	0
734	9	0	0	0	0	0	0	200	300	0	0	0	0	0	0	0	200	903	0	0	0	0	0	0	0	603	903	0
735	0	0	0	0	0	0	0	200	300	0	0	0	0	0	0	0	200	903	0	0	0	0	0	0	0	603	903	0
735	1	0	0	0	0	0	0	200	300	0	0	0	0	0	0	0	200	903	0	0	0	0	0	0	0	603	903	0
735	2	0	0	0	0	0	0	200	300	0	0	0	0	0	0	0	200	903	0	0	0	0	0	0	0	603	903	0
735	3	0	0	0	0	0	0	200	300	0	0	0	0	0	0	0	200	903	0	0	0	0	0	0	0	603	903	0
735	4	0	0	0	0	0	0	200	300	0	0	0	0	0	0	0	200	903	0	0	0	0	0	0	0	603	903	0
735	5	0	0	0	0	0	0	200	300	0	0	0	0	0	0	0	200	903	0	0	0	0	0	0	0	603	903	0
735	6	0	0	0	0	0	0	200	300	0	0	0	0	0	0	0	200	903	0	0	0	0	0	0	0	603	903	0
735	7	0	0	0	0	0	0	200	300	0	0	0	0	0	0	0	200	903	0	0	0	0	0	0	0	603	903	0
735	8	0	0	0	0	0	0	200	300	0	0	0	0	0	0	0	200	903	0	0	0	0	0	0	0	603	903	0
735	9	0	0	0	0	0	0	200	300	0	0	0	0	0	0	0	200	903	0	0	0	0	0	0	0	603	903	0
736	0	0	0	0	0	0	0	200	300	0	0	0	0	0	0	0	200	903	0	0	0	0	0	0	0	603	903	0
736	1	0	0	0	0	0	0	200	300	0	0	0	0	0	0	0	200	903	0	0	0	0	0	0	0	603	903	0
736	2	0	0	0	0	0	0	200	300	0	0	0	0	0	0	0	200	903	0	0	0	0	0	0	0	603	903	0
736	3	0	0	0	0	0	0	200	300	0	0	0	0	0	0	0	200	903	0	0	0	0	0	0	0	603	903	0
736	4	0	0	0	0	0	0	200	300	0	0	0	0	0	0	0	200	903	0	0	0	0	0	0	0	603	903	0
736	5	0	0	0	0	0	0	200	300	0	0	0	0	0	0	0	200	903	0	0	0	0	0	0	0	603	903	0
736	6	0	0	0	0	0	0	200	300	0	0	0	0	0	0	0	200	903	0	0	0	0	0	0	0	603	903	0
736	7	0	0	0	0	0	0	200	300	0	0	0	0	0	0	0	200	903	0	0	0	0	0	0	0	603	903	0
736	8	0	0	0	0	0	0	200	300	0	0	0	0	0	0	0	200	903	0	0	0	0	0	0	0	603	903	0
736	9	0	0	0	0	0	0	200	300	0	0	0	0	0	0	0	200	903	0	0	0	0	0	0	0	603	903	0
737	0	0	0	0	0	0	0	200	300	0	0	0	0	0	0	0	200	903	0	0	0	0	0	0	0	603	903	0
737	1	0	0	0	0	0	0	200	300	0	0	0	0	0	0	0	200	903	0	0	0	0	0	0	0	603	903	0
737	2	0	0	0	0	0	0	200	300	0	0	0	0	0	0	0	200	903	0	0	0	0	0	0	0	603	903	0
737	3	0	0	0	0	0	0	200	300	0	0	0	0	0	0	0	200	903	0	0	0	0	0	0	0	603	903	0
737	4	0	0	0	0	0	0	200	300	0	0	0	0	0	0	0	200	903	0	0	0	0	0	0	0	603	903	0
737	5	0	0	0	0	0	0	200	300	0	0	0	0	0	0	0	200	903	0	0	0	0	0	0	0	603	903	0
737	6	0	0	0	0	0	0	200	300	0	0	0	0	0	0	0	200	903	0	0	0	0	0	0	0	603	903	0
737	7	0	0	0	0	0	0	200	300	0	0	0	0	0	0	0	200	903	0	0	0	0	0	0	0	603	903	0
737	8	0	0	0	0	0	0	200	300	0	0	0	0	0	0	0	200	903	0	0	0	0	0	0	0	603	903	0
737	9	0	0	0	0	0	0	200	300	0	0	0	0	0	0	0	200	903	0	0	0	0	0	0	0	603	903	0
738	0	0	0	0	0	0	0	200	300	0	0	0	0	0	0	0	200	903	0	0	0	0	0	0	0	603	903	0
738	1	0	0	0	0	0	0	200	300	0	0	0	0	0	0	0	200	903	0	0	0	0	0	0	0	603	903	0
738	2	0	0	0	0	0	0	200	300	0	0	0	0	0	0	0	200	903	0	0	0	0	0	0	0	603	903	0
738	3	0	0	0	0	0	0	200	300	0	0	0	0	0	0	0	200	903	0	0	0	0	0	0	0	603	903	0
738	4	0	0	0	0	0	0	200	300	0	0	0	0	0	0	0	200	903	0	0	0	0	0	0	0	603	903	0
738	5	0	0	0	0	0	0	200	300	0	0	0	0	0	0	0	200	903	0	0	0	0	0	0	0	603	903	0
738	6	0	0	0	0	0	0	200	300	0	0	0	0	0	0	0	200	903	0	0	0	0	0	0	0	603	903	0
738	7	0	0	0	0	0	0	200	300	0	0	0	0	0	0	0	200	903	0	0	0	0	0	0	0	603	903	0
738	8	0	0	0	0	0	0	200	300	0	0	0	0	0	0	0	200	903	0	0	0	0	0	0	0	603	903	0
738	9	0	0	0	0	0	0	200	300	0	0	0	0	0	0	0	200	903	0	0	0	0	0	0	0	603	903	0
739	0	0	0	0	0	0	0	200	300	0	0	0	0	0	0	0	200	903	0	0	0	0	0	0	0	603	903	0
739	1	0	0	0	0	0	0	200	300	0	0	0	0	0	0	0	200	903	0	0	0	0	0	0	0	603	903	0
739	2	0	0	0	0	0	0	200	300	0	0	0	0	0	0	0	200	903	0	0	0	0	0	0	0	603	903	0
739	3	0	0	0	0	0	0	200	300	0	0	0	0	0	0	0	200	903	0	0	0	0	0	0	0	603	903	0
739	4	0	0	0	0	0	0	200	300	0	0	0	0	0	0	0	200	903	0	0	0	0	0	0	0	603	903	0
739	5	0	0	0	0	0	0	200	300	0	0	0	0	0	0	0	200	903	0	0	0	0	0	0	0	603	903	0
739	6	0	0	0	0	0	0	200	300	0	0	0	0	0	0	0	200	903	0	0	0	0	0	0	0	603	903	0
739	7	0	0	0	0	0	0	200	300	0	0	0	0	0	0	0	200	903	0	0	0	0	0	0	0	603	903	0
739	8	0	0	0	0	0	0	200	300	0	0	0	0	0	0	0	200	903	0	0	0	0	0	0	0	603	903	0
739	9	0	0	0	0	0	0	200	300	0	0	0	0	0	0	0	200	903	0	0	0	0	0	0	0	603	903	0
740	0	0	0	0	0	0	0	200	300	0	0	0	0	0	0	0	200	903	0	0	0	0	0	0	0	603	903	0
740	1	0	0	0	0	0	0	200	300	0	0	0	0	0	0	0	200	903	0	0	0	0	0	0	0	603	903	0
740	2	0	0	0	0	0	0	200	300	0	0	0	0	0	0	0	200	903	0	0	0	0	0	0	0	603	903	0
740	3	0	0	0	0	0	0	200	300	0	0	0	0	0	0	0	200	903	0	0	0	0	0	0	0	603	903	0
740	4	0	0	0	0	0	0	200	300	0	0	0	0	0	0	0	200	903	0	0	0	0	0	0	0	603	903	0
740	5	0	0	0	0	0	0	200	300	0	0	0	0	0	0	0	200	903	0	0	0	0	0	0	0	603	903	0
740	6	0	0	0	0	0	0	200	300	0	0	0	0	0	0	0	200	903	0	0	0	0	0	0	0	603	903	0
740	7	0	0	0	0	0	0	200	300	0	0	0	0	0	0	0	200	903	0	0	0	0	0	0	0	603	903	0
740	8	0	0	0	0	0	0	200	300	0	0	0	0	0	0	0	200	903	0	0	0	0	0	0	0	603	903	0
740	9	0	0	0	0	0	0	200	300	0	0	0	0	0	0	0	200	903	0	0	0	0	0	0	0	603	903	0
741	0	0	0	0	0	0	0	200	300	0	0	0	0	0	0	0	200	903	0	0	0	0	0	0	0	603	903	0
741	1	0	0	0	0	0	0	200	300	0	0	0	0	0	0	0	200	903	0	0	0	0	0	0	0	603	903	0
741	2	0	0	0	0	0	0	200	300	0	0	0	0	0	0	0	200	903	0	0	0	0	0	0	0	603	903	0
741	3	0	0	0	0	0	0	200	300	0	0	0	0	0	0	0	200	903	0	0	0	0	0	0	0	603	903	0
741	4	0	0	0	0	0	0	200	300	0	0	0	0	0	0	0	200	903	0	0	0	0	0	0	0	603	903	0
741	5	0	0	0	0	0	0	200	300	0	0	0	0	0	0	0	200	903	0	0	0	0	0	0	0	603	903	0
741	6	0	0	0	0	0	0	200	300	0	0	0	0	0	0	0	200	903	0	0	0	0	0	0	0	603	903	0
741	7	0	0	0	0	0	0	200	300	0	0	0	0	0	0	0	200	903	0	0	0	0	0	0	0	603	903	0
741	8	0	0	0	0	0	0	200	300	0	0	0	0	0	0	0	200	903	0	0	0	0	0	0	0	603	903	0
741	9	0	0	0	0	0	0	200	300	0	0	0	0	0	0	0	200	903	0	0	0	0	0	0	0	603	903	0
742	0	0	0	0	0	0	0	200	300	0	0	0	0	0	0	0	200	903	0	0	0	0	0	0	0	603	903	0
742	1	0	0	0	0	0	0	200	300	0	0	0	0	0	0	0	200	903	0	0	0	0	0	0	0	603	903	0
742	2	0	0	0	0	0	0	200	300	0	0	0	0	0	0	0	200	903	0	0	0	0	0	0	0	603	903	0
742	3	0	0	0	0	0	0	200	300	0	0	0	0	0	0	0	200	903	0	0	0	0	0	0	0	603	903	0
742	4	0	0	0	0	0	0	200	300	0	0	0	0	0	0	0	200	903	0	0	0	0	0	0	0	603	903	0
742	5	0	0	0	0	0	0	200	300	0	0	0	0	0	0	0	200	903	0	0	0	0	0	0	0	603	903	0
742	6	0	0	0	0	0	0	200	300	0	0	0	0	0	0	0	200	903	0	0	0	0	0	0	0	603	903	0
742	7	0	0	0	0	0	0	200	300	0	0	0	0	0	0	0	200	903	0	0	0	0	0	0	0	603	903	0
742	8	0	0	0	0	0	0	200	300	0	0	0	0	0	0	0	200	903	0	0	0	0	0	0	0	603	903	0
742	9	0	0	0	0	0	0	200	300	0	0	0	0	0	0	0	200	903	0	0	0	0	0	0	0	603	903	0
743	0	0	0	0	0	0	0	200	300	0	0	0	0	0	0	0	200	903	0	0	0	0	0	0	0	603	903	0
743	1	0	0	0	0	0	0	200	300	0	0	0	0	0	0	0	200	903	0	0	0	0	0	0	0	603	903	0
743	2	0	0	0	0	0	0	200	300	0	0	0	0	0	0	0	200	903	0	0	0	0	0	0	0	603	903	0
743	3	0	0	0	0	0	0	200	300	0	0	0	0	0	0	0	200	903	0	0	0	0	0	0	0	603	903	0
743	4	0	0	0	0	0	0	200	300	0	0	0	0	0	0	0	200	903	0	0	0	0	0	0	0	603	903	0
743	5	0	0	0	0	0	0	200	300	0	0	0	0	0	0	0	200	903	0	0	0	0	0	0	0	603	903	0
743	6	0	0	0	0	0	0	200	300	0	0	0	0	0	0	0	200	903	0	0	0	0	0	0	0	603	903	0
743	7	0	0	0	0	0	0	200	300	0	0	0	0	0	0	0	200	903	0	0	0	0	0	0	0	603	903	0
743	8	0	0	0	0	0	0	200	300	0	0	0	0	0	0	0	200	903	0	0	0	0	0	0	0	603	903	0
743	9	0	0	0	0	0	0	200	300	0	0	0	0	0	0	0	200	903	0	0	0	0	0	0	0	603	903	0
744	0	0	0	0	0	0	0	200	300	0	0	0	0	0	0	0	200	903	0	0	0	0	0	0	0	603	903	0
744	1	0	0	0	0	0	0	200	300	0	0	0	0	0	0	0	200	903	0	0	0	0	0	0	0	603	903	0
744	2	0	0	0	0	0	0	200	300	0	0	0	0	0	0	0	200	903	0	0	0	0	0	0	0	603	903	0
744	3	0	0	0	0	0	0	200	300	0	0	0	0	0	0	0	200	903	0	0	0	0	0	0	0	603	903	0
744	4	0	0	0	0	0	0	200	300	0	0	0	0	0	0	0	200	903	0	0	0	0	0	0	0	603	903	0
744	5	0	0	0	0	0	0	200	300	0	0	0	0	0	0	0	200	903	0	0	0	0	0	0	0	603	903	0
744	6	0	0	0	0	0	0	200	300	0	0	0	0	0	0	0	200	903	0	0	0	0	0	0	0	603	903	0
744	7	0	0	0	0	0	0	200	300	0	0	0	0	0	0	0	200	903	0	0	0	0	0	0	0	603	903	0
744	8	0	0	0	0	0	0	200	300	0	0	0	0	0	0	0	200	903	0	0	0	0	0	0	0	603	903	0
744	9	0	0	0	0	0	0	200	300	0	0	0	0	0	0	0	200	903	0	0	0	0	0	0	0	603	903	0
745	0	0	0	0	0	0	0	200	300	0	0	0	0	0	0	0	200	903	0	0	0	0	0	0	0	603	903	0
745	1	0	0	0	0	0	0	200	300	0	0	0	0	0	0	0	200	903	0	0	0	0	0	0	0	603	903	0
745	2	0	0	0	0	0	0	200	300	0	0	0	0	0	0	0	200	903	0	0	0	0	0	0	0	603	903	0
745	3	0	0	0	0	0	0	200	300	0	0	0	0	0	0	0	200	903	0	0	0	0	0	0	0	603	903	0
745	4	0	0	0	0	0	0	200	300	0	0	0	0	0	0	0	200	903	0	0	0	0	0	0	0	603	903	0
745	5	0	0	0	0	0	0	200	300	0	0	0	0	0	0	0	200	903	0	0	0	0	0	0	0	603	903	0
745	6	0	0	0	0	0	0	200	300	0	0	0	0	0	0	0	200	903	0	0	0	0	0	0	0	603	903	0
745	7	0	0	0	0	0	0	200	300	0	0	0	0	0	0	0	200	903	0	0	0	0	0	0	0	603	903	0
745	8	0	0	0	0	0	0	200	300	0	0	0	0	0	0	0	200	903	0	0	0	0	0	0	0	603	903	0
745	9	0	0	0	0	0	0	200	300	0	0	0	0	0	0	0	200	903	0	0	0	0	0	0	0	603	903	0
746	0	0	0	0	0	0	0	200	300	0	0	0	0	0	0	0	200	903	0	0	0	0	0	0	0	603	903	0
746	1	0	0	0	0	0	0	200	300	0	0	0	0	0	0	0	200	903	0	0	0	0	0	0	0	603	903	0
746	2	0	0	0	0	0	0	200	300	0	0	0	0	0	0	0	200	903	0	0	0	0	0	0	0	603	903	0
746	3	0	0	0	0	0	0	200	300	0	0	0	0	0	0	0	200	903	0	0	0	0	0	0	0	603	903	0
746	4	0	0	0	0	0	0	200	300	0	0	0	0	0	0	0	200	903	0	0	0	0	0	0	0	603	903	0
746	5	0	0	0	0	0	0	200	300	0	0	0	0	0	0	0	200	903	0	0	0	0	0	0	0	603	903	0
746	6	0	0	0	0	0	0	200	300	0	0	0	0	0	0	0	200	903	0	0	0	0	0	0	0	603	903	0
746	7	0	0	0	0	0	0	200	300	0	0	0	0	0	0	0	200	903	0	0	0	0	0	0	0	603	903	0
746	8	0	0	0	0	0	0	200	300	0	0	0	0	0	0	0	200	903	0	0	0	0	0	0	0	603	903	0
746	9	0	0	0	0	0	0	200	300	0	0	0	0	0	0	0	200	903	0	0	0	0	0	0	0	603	903	0
747	0	0	0	0	0	0	0	200	300	0	0	0	0	0	0	0	200	903	0	0	0	0	0	0	0	603	903	0
747	1	0	0	0	0	0	0	200	300	0	0	0	0	0	0	0	200	903	0	0	0	0	0	0	0	603	903	0
747	2	0	0	0	0	0	0	200	300	0	0	0	0	0	0	0	200	903	0	0	0	0	0	0	0	603	903	0
747	3	0	0	0	0	0	0	200	300	0	0	0	0	0	0	0	200	903	0	0	0	0	0	0	0	603	903	0
747	4	0	0	0	0	0	0	200	300	0	0	0	0	0	0	0	200	903	0	0	0	0	0	0	0	603	903	0
747	5	0	0	0	0	0	0	200	300	0	0	0	0	0	0	0	200	903	0	0	0	0	0	0	0	603	903	0
747	6	0	0	0	0	0	0	200	300	0	0	0	0	0	0	0	200	903	0	0	0	0	0	0	0	603	903	0
747	7	0	0	0	0	0	0	200	300	0	0	0	0	0	0	0	200	903	0	0	0	0	0	0	0	603	903	0
747	8	0	0	0	0	0	0	200	300	0	0	0	0	0	0	0	200	903	0	0	0	0	0	0	0	603	903	0
747	9	0	0	0	0	0	0	200	300	0	0	0	0	0	0	0	200	903	0	0	0	0	0	0	0	603	903	0
748	0	0	0	0	0	0	0	200	300	0	0	0	0	0	0	0	200	903	0	0	0	0	0	0	0	603	903	0
748	1	0	0	0	0	0	0	200	300	0	0	0	0	0	0	0	200	903	0	0	0	0	0	0	0	603	903	0
748	2	0	0	0	0	0	0	200	300	0	0	0	0	0	0	0	200	903	0	0	0	0	0	0	0	603	903	0
748	3	0	0	0	0	0	0	200	300	0	0	0	0	0	0	0	200	903	0	0	0	0	0	0	0	603	903	0
748	4	0	0	0	0	0	0	200	300	0	0	0	0	0	0	0	200	903	0	0	0	0	0	0	0	603	903	0
748	5	0	0	0	0	0	0	200	300	0	0	0	0	0	0	0	200	903	0	0	0	0	0	0	0	603	903	0
748	6	0	0	0	0	0	0	200	300	0	0	0	0	0	0	0	200	903	0	0	0	0	0	0	0	603	903	0
748	7	0	0	0	0	0	0	200	300	0	0	0	0	0	0	0	200	903	0	0	0	0	0	0	0	603	903	0
748	8	0	0	0	0	0	0	200	300	0	0	0	0	0	0	0	200	903	0	0	0	0	0	0	0	603	903	0
748	9	0	0	0	0	0	0	200	300	0	0	0	0	0	0	0	200	903	0	0	0	0	0	0	0	603	903	0
749	0	0	0	0	0	0	0	200	300	0	0	0	0	0	0	0	200	903	0	0	0	0	0	0	0	603	903	0
749	1	0	0	0	0	0	0	200	300	0	0	0	0	0	0	0	200	903	0	0	0	0	0	0	0	603	903	0
749	2	0	0	0	0	0	0	200	300	0	0	0	0	0	0	0	200	903	0	0	0	0	0	0	0	603	903	0
749	3	0	0	0	0	0	0	200	300	0	0	0	0	0	0	0	200	903	0	0	0	0	0	0	0	603	903	0
749	4	0	0	0	0	0	0	200	300	0	0	0	0	0	0	0	200	903	0	0	0	0	0	0	0	603	903	0
749	5	0	0	0	0	0	0	200	300	0	0	0	0	0	0	0	200	903	0	0	0	0	0	0	0	603	903	0
749	6	0	0	0	0	0	0	200	300	0	0	0	0	0	0	0	200	903	0	0	0	0	0	0	0	603	903	0
749	7	0	0	0	0	0	0	200	300	0	0	0	0	0	0	0	200	903	0	0	0	0	0	0	0	603	903	0
749	8	0	0	0	0	0	0	200	300	0	0	0	0	0	0	0	200	903	0	0	0	0	0	0	0	603	903	0
749	9	0	0	0	0	0	0	200	300	0	0	0	0	0	0	0	200	903	0	0	0	0	0	0	0	603	903	0
750	0	0	0	0	0	0	0	200	300	0	0	0	0	0	0	0	200	903	0	0	0	0	0	0	0	603	903	0
750	1	0	0	0	0	0	0	200	300	0	0	0	0	0	0	0	200	903	0	0	0	0	0	0	0	603	903	0
750	2	0	0	0	0	0	0	200	300	0	0	0	0	0	0	0	200	903	0	0	0	0	0	0	0	603	903	0
750	3	0	0	0	0	0	0	200	300	0	0	0	0	0	0	0	200	903	0	0	0	0	0	0	0	603	903	0
750	4	0	0	0	0	0	0	200	300	0	0	0	0	0	0	0	200	903	0	0	0	0	0	0	0	603	903	0
750	5	0	0	0	0	0	0	200	300	0	0	0	0	0	0	0	200	903	0	0	0	0	0	0	0	603	903	0
750	6	0	0	0	0	0	0	200	300	0	0	0	0	0	0	0	200	903	0	0	0	0	0	0	0	603	903	0
750	7	0	0	0	0	0	0	200	300	0	0	0	0	0	0	0	200	903	0	0	0	0	0	0	0	603	903	0
750	8	0	0	0	0	0	0	200	300	0	0	0	0	0	0	0	200	903	0	0	0	0	0	0	0	603	903	0
750	9	0	0	0	0	0	0	200	300	0	0	0	0	0	0	0	200	903	0	0	0	0	0	0	0	603	903	0
751	0	0	0	0	0	0	0	200	300	0	0	0	0	0	0	0	200	903	0	0	0	0	0	0	0	603	903	0
751	1	0	0	0	0	0	0	200	300	0	0	0	0	0	0	0	200	903	0	0	0	0	0	0	0	603	903	0
751	2	0	0	0	0	0	0	200	300	0	0	0	0	0	0	0	200	903	0	0	0	0	0	0	0	603	903	0
751	3	0	0	0	0	0	0	200	300	0	0	0	0	0	0	0	200	903	0	0	0	0	0	0	0	603	903	0
751	4	0	0	0	0	0	0	200	300	0	0	0	0	0	0	0	200	903	0	0	0	0	0	0	0	603	903	0
751	5	0	0	0	0	0	0	200	300	0	0	0	0	0	0	0	200	903	0	0	0	0	0	0	0	603	903	0
751	6	0	0	0	0	0	0	200	300	0	0	0	0	0	0	0	200	903	0	0	0	0	0	0	0	603	903	0
751	7	0	0	0	0	0	0	200	300	0	0	0	0	0	0	0	200	903	0	0	0	0	0	0	0	603	903	0
751	8	0	0	0	0	0	0	200	300	0	0	0	0	0	0	0	200	903	0	0	0	0	0	0	0	603	903	0
751	9	0	0	0	0	0	0	200	300	0	0	0	0	0	0	0	200	903	0	0	0	0	0	0	0	603	903	0
752	0	0	0	0	0	0	0	200	300	0	0	0	0	0	0	0	200	903	0	0	0	0	0	0	0	603	903	0
752	1	0	0	0	0	0	0	200	300	0	0	0	0	0	0	0	200	903	0	0	0	0	0	0	0	603	903	0
752	2	0	0	0	0	0	0	200	300	0	0	0	0	0	0	0	200	903	0	0	0	0	0	0	0	603	903	0
752	3	0	0	0	0	0	0	200	300	0	0	0	0	0	0	0	200	903	0	0	0	0	0	0	0	603	903	0
752	4	0	0	0	0	0	0	200	300	0	0	0	0	0	0	0	200	903	0	0	0	0	0	0	0	603	903	0
752	5	0	0	0	0	0	0	200	300	0	0	0	0	0	0	0	200	903	0	0	0	0	0	0	0	603	903	0
752	6	0	0	0	0	0	0	200	300	0	0	0	0	0	0	0	200	903	0	0	0	0	0	0	0	603	903	0
752	7	0	0	0	0	0	0	200	300	0	0	0	0	0	0	0	200	903	0	0	0	0	0	0	0	603	903	0
752	8	0	0	0	0	0	0	200	300	0	0	0	0	0	0	0	200	903	0	0	0	0	0	0	0	603	903	0
752	9	0	0	0	0	0	0	200	300	0	0	0	0	0	0	0	200	903	0	0	0	0	0	0	0	603	903	0
753	0	0	0	0	0	0	0	200	300	0	0	0	0	0	0	0	200	903	0	0	0	0	0	0	0	603	903	0
753	1	0	0	0	0	0	0	200	300	0	0	0	0	0	0	0	200	903	0	0	0	0	0	0	0	603	903	0
753	2	0	0	0	0	0	0	200	300	0	0	0	0	0	0	0	200	903	0	0	0	0	0	0	0	603	903	0
753	3	0	0	0	0	0	0	200	300	0	0	0	0	0	0	0	200	903	0	0	0	0	0	0	0	603	903	0
753	4	0	0	0	0	0	0	200	300	0	0	0	0	0	0	0	200	903	0	0	0	0	0	0	0	603	903	0
753	5	0	0	0	0	0	0	200	300	0	0	0	0	0	0	0	200	903	0	0	0	0	0	0	0	603	903	0
753	6	0	0	0	0	0	0	200	300	0	0	0	0	0	0	0	200	903	0	0	0	0	0	0	0	603	903	0
753	7	0	0	0	0	0	0	200	300	0	0	0	0	0	0	0	200	903	0	0	0	0	0	0	0	603	903	0
753	8	0	0	0	0	0	0	200	300	0	0	0	0	0	0	0	200	903	0	0	0	0	0	0	0	603	903	0
753	9	0	0	0	0	0	0	200	300	0	0	0	0	0	0	0	200	903	0	0	0	0	0	0	0	603	903	0
754	0	0	0	0	0	0	0	200	300	0	0	0	0	0	0	0	200	903	0	0	0	0	0	0	0	603	903	0
754	1	0	0	0	0	0	0	200	300	0	0	0	0	0	0	0	200	903	0	0	0	0	0	0	0	603	903	0
754	2	0	0	0	0	0	0	200	300	0	0	0	0	0	0	0	200	903	0	0	0	0	0	0	0	603	903	0
754	3	0	0	0	0	0	0	200	300	0	0	0	0	0	0	0	200	903	0	0	0	0	0	0	0	603	903	0
754	4	0	0	0	0	0	0	200	300	0	0	0	0	0	0	0	200	903	0	0	0	0	0	0	0	603	903	0
754	5	0	0	0	0	0	0	200	300	0	0	0	0	0	0	0	200	903	0	0	0	0	0	0	0	603	903	0
754	6	0	0	0	0	0	0	200	300	0	0	0	0	0	0	0	200	903	0	0	0	0	0	0	0	603	903	0
754	7	0	0	0	0	0	0	200	300	0	0	0	0	0	0	0	200	903	0	0	0	0	0	0	0	603	903	0
754	8	0	0	0	0	0	0	200	300	0	0	0	0	0	0	0	200	903	0	0	0	0	0	0	0	603	903	0
754	9	0	0	0	0	0	0	200	300	0	0	0	0	0	0	0	200	903	0	0	0	0	0	0	0	603	903	0
755	0	0	0	0	0	0	0	200	300	0	0	0	0	0	0	0	200	903	0	0	0	0	0	0	0	603	903	0
755	1	0	0	0	0	0	0	200	300	0	0	0	0	0	0	0	200	903	0	0	0	0	0	0	0	603	903	0
755	2	0	0	0	0	0	0	200	300	0	0	0	0	0	0	0	200	903	0	0	0	0	0	0	0	603	903	0
755	3	0	0	0	0	0	0	200	300	0	0	0	0	0	0	0	200	903	0	0	0	0	0	0	0	603	903	0
755	4	0	0	0	0	0	0	200	300	0	0	0	0	0	0	0	200	903	0	0	0	0	0	0	0	603	903	0
755	5	0	0	0	0	0	0	200	300	0	0	0	0	0	0	0	200	903	0	0	0	0	0	0	0	603	903	0
755	6	0	0	0	0	0	0	200	300	0	0	0	0	0	0	0	200	903	0	0	0	0	0	0	0	603	903	0
755	7	0	0	0	0	0	0	200	300	0	0	0	0	0	0	0	200	903	0	0	0	0	0	0	0	603	903	0
755	8	0	0	0	0	0	0	200	300	0	0	0	0	0	0	0	200	903	0	0	0	0	0	0	0	603	903	0
755	9	0	0	0	0	0	0	200	300	0	0	0	0	0	0	0	200	903	0	0	0	0	0	0	0	603	903	0
756	0	0	0	0	0	0	0	200	300	0	0	0	0	0	0	0	200	903	0	0	0	0	0	0	0	603	903	0
756	1	0	0	0	0	0	0	200	300	0	0	0	0	0	0	0	200	903	0	0	0	0	0	0	0	603	903	0
756	2	0	0	0	0	0	0	200	300	0	0	0	0	0	0	0	200	903	0	0	0	0	0	0	0	603	903	0
756	3	0	0	0	0	0	0	200	300	0	0	0	0	0	0	0	200	903	0	0	0	0	0	0	0	603	903	0
756	4	0	0	0	0	0	0	200	300	0	0	0	0	0	0	0	200	903	0	0	0	0	0	0	0	603	903	0
756	5	0	0	0	0	0	0	200	300	0	0	0	0	0	0	0	200	903	0	0	0	0	0	0	0	603	903	0
756	6	0	0	0	0	0	0	200	300	0	0	0	0	0	0	0	200	903	0	0	0	0	0	0	0	603	903	0
756	7	0	0	0	0	0	0	200	300	0	0	0	0	0	0	0	200	903	0	0	0	0	0	0	0	603	903	0
756	8	0	0	0	0	0	0	200	300	0	0	0	0	0	0	0	200	903	0	0	0	0	0	0	0	603	903	0
756	9	0	0	0	0	0	0	200	300	0	0	0	0	0	0	0	200	903	0	0	0	0	0	0	0	603	903	0
757	0	0	0	0	0	0	0	200	300	0	0	0	0	0	0	0	200	903	0	0	0	0	0	0	0	603	903	0
757	1	0	0	0	0	0	0	200	300	0	0	0	0	0	0	0	200	903	0	0	0	0	0	0	0	603	903	0
757	2	0	0	0	0	0	0	200	300	0	0	0	0	0	0	0	200	903	0	0	0	0	0	0	0	603	903	0
757	3	0	0	0	0	0	0	200	300	0	0	0	0	0	0	0	200	903	0	0	0	0	0	0	0	603	903	0
757	4	0	0	0	0	0	0	200	300	0	0	0	0	0	0	0	200	903	0	0	0	0	0	0	0	603	903	0
757	5	0	0	0	0	0	0	200	300	0	0	0	0	0	0	0	200	903	0	0	0	0	0	0	0	603	903	0
757	6	0	0	0	0	0	0	200	300	0	0	0	0	0	0	0	200	903	0	0	0	0	0	0	0	603	903	0
757	7	0	0	0	0	0	0	200	300	0	0	0	0	0	0	0	200	903	0	0	0	0	0	0	0	603	903	0
757	8	0	0	0	0	0	0	200	300	0	0	0	0	0	0	0	200	903	0	0	0	0	0	0	0	603	903	0
757	9	0	0	0	0	0	0	200	300	0	0	0	0	0	0	0	200	903	0	0	0	0	0	0	0	603	903	0
758	0	0	0	0	0	0	0	200	300	0	0	0	0	0	0	0	200	903	0	0	0	0	0	0	0	603	903	0
758	1	0	0	0	0	0	0	200	300	0	0	0	0	0	0	0	200	903	0	0	0	0	0	0	0	603	903	0
758	2	0	0	0	0	0	0	200	300	0	0	0	0	0	0	0	200	903	0	0	0	0	0	0	0	603	903	0
758	3	0	0	0	0	0	0	200	300	0	0	0	0	0	0	0	200	903	0	0	0	0	0	0	0	603	903	0
758	4	0	0	0	0	0	0	200	300	0	0	0	0	0	0	0	200	903	0	0	0	0	0	0	0	603	903	0
758	5	0	0	0	0	0	0	200	300	0	0	0	0	0	0	0	200	903	0	0	0	0	0	0	0	603	903	0
758	6	0	0	0	0	0	0	200	300	0	0	0	0	0	0	0	200	903	0	0	0	0	0	0	0	603	903	0
758	7	0	0	0	0	0	0	200	300	0	0	0	0	0	0	0	200	903	0	0	0	0	0	0	0	603	903	0
758	8	0	0	0	0	0	0	200	300	0	0	0	0	0	0	0	200	903	0	0	0	0	0	0	0	603	903	0
758	9	0	0	0	0	0	0	200	300	0	0	0	0	0	0	0	200	903	0	0	0	0	0	0	0	603	903	0
759	0	0	0	0	0	0	0	200	300	0	0	0	0	0	0	0	200	903	0	0	0	0	0	0	0	603	903	0
759	1	0	0	0	0	0	0	200	300	0	0	0	0	0	0	0	200	903	0	0	0	0	0	0	0	603	903	0
759	2	0	0	0	0	0	0	200	300	0	0	0	0	0	0	0	200	903	0	0	0	0	0	0	0	603	903	0
759	3	0	0	0	0	0	0	200	300	0	0	0	0	0	0	0	200	903	0	0	0	0	0	0	0	603	903	0
759	4	0	0	0	0	0	0	200	300	0	0	0	0	0	0	0	200	903	0	0	0	0	0	0	0	603	903	0
759	5	0	0	0	0	0	0	200	300	0	0	0	0	0	0	0	200	903	0	0	0	0	0	0	0	603	903	0
759	6	0	0	0	0	0	0	200	300	0	0	0	0	0	0	0	200	903	0	0	0	0	0	0	0	603	903	0
759	7	0	0	0	0	0	0	200	300	0	0	0	0	0	0	0	200	903	0	0	0	0	0	0	0	603	903	0
759	8	0	0	0	0	0	0	200	300	0	0	0	0	0	0	0	200	903	0	0	0	0	0	0	0	603	903	0
759	9	0	0	0	0	0	0	200	300	0	0	0	0	0	0	0	200	903	0	0	0	0	0	0	0	603	903	0
760	0	0	0	0	0	0	0	200	300	0	0	0	0	0	0	0	200	903	0	0	0	0	0	0	0	603	903	0
760	1	0	0	0	0	0	0	200	300	0	0	0	0	0	0	0	200	903	0	0	0	0	0	0	0	603	903	0
760	2	0	0	0	0	0	0	200	300	0	0	0	0	0	0	0	200	903	0	0	0	0	0	0	0	603	903	0
760	3	0	0	0	0	0	0	200	300	0	0	0	0	0	0	0	200	903	0	0	0	0	0	0	0	603	903	0
760	4	0	0	0	0	0	0	200	300	0	0	0	0	0	0	0	200	903	0	0	0	0	0	0	0	603	903	0
760	5	0	0	0	0	0	0	200	300	0	0	0	0	0	0	0	200	903	0	0	0	0	0	0	0	603	903	0
760	6	0	0	0	0	0	0	200	300	0	0	0	0	0	0	0	200	903	0	0	0	0	0	0	0	603	903	0
760	7	0	0	0	0	0	0	200	300	0	0	0	0	0	0	0	200	903	0	0	0	0	0	0	0	603	903	0
760	8	0	0	0	0	0	0	200	300	0	0	0	0	0	0	0	200	903	0	0	0	0	0	0	0	603	903	0
760	9	0	0	0	0	0	0	200	300	0	0	0	0	0	0	0	200	903	0	0	0	0	0	0	0	603	903	0
761	0	0	0	0	0	0	0	200	300	0	0	0	0	0	0	0	200	903	0	0	0	0	0	0	0	603	903	0
761	1	0	0	0	0	0	0	200	300	0	0	0	0	0	0	0	200	903	0	0	0	0	0	0	0	603	903	0
761	2	0	0	0	0	0	0	200	300	0	0	0	0	0	0	0	200	903	0	0	0	0	0	0	0	603	903	0
761	3	0	0	0	0	0	0	200	300	0	0	0	0	0	0	0	200	903	0	0	0	0	0	0	0	603	903	0
761	4	0	0	0	0	0	0	200	300	0	0	0	0	0	0	0	200	903	0	0	0	0	0	0	0	603	903	0
761	5	0	0	0	0	0	0	200	300	0	0	0	0	0	0	0	200	903	0	0	0	0	0	0	0	603	903	0
761	6	0	0	0	0	0	0	200	300	0	0	0	0	0	0	0	200	903	0	0	0	0	0	0	0	603	903	0
761	7	0	0	0	0	0	0	200	300	0	0	0	0	0	0	0	200	903	0	0	0	0	0	0	0	603	903	0
761	8	0	0	0	0	0	0	200	300	0	0	0	0	0	0	0	200	903	0	0	0	0	0	0	0	603	903	0
761	9	0	0	0	0	0	0	200	300	0	0	0	0	0	0	0	200	903	0	0	0	0	0	0	0	603	903	0
762	0	0	0	0	0	0	0	200	300	0	0	0	0	0	0	0	200	903	0	0	0	0	0	0	0	603	903	0
762	1	0	0	0	0	0	0	200	300	0	0	0	0	0	0	0	200	903	0	0	0	0	0	0	0	603	903	0
762	2	0	0	0	0	0	0	200	300	0	0	0	0	0	0	0	200	903	0	0	0	0	0	0	0	603	903	0
762	3	0	0	0	0	0	0	200	300	0	0	0	0	0	0	0	200	903	0	0	0	0	0	0	0	603	903	0
762	4	0	0	0	0	0	0	200	300	0	0	0	0	0	0	0	200	903	0	0	0	0	0	0	0	603	903	0
762	5	0	0	0	0	0	0	200	300	0	0	0	0	0	0	0	200	903	0	0	0	0	0	0	0	603	903	0
762	6	0	0	0	0	0	0	200	300	0	0	0	0	0	0	0	200	903	0	0	0	0	0	0	0	603	903	0
762	7	0	0	0	0	0	0	200	300	0	0	0	0	0	0	0	200	903	0	0	0	0	0	0	0	603	903	0
762	8	0	0	0	0	0	0	200	300	0	0	0	0	0	0	0	200	903	0	0	0	0	0	0	0	603	903	0
762	9	0	0	0	0	0	0	200	300	0	0	0	0	0	0	0	200	903	0	0	0	0	0	0	0	603	903	0
763	0	0	0	0	0	0	0	200	300	0	0	0	0	0	0	0	200	903	0	0	0	0	0	0	0	603	903	0
763	1	0	0	0	0	0	0	200	300	0	0	0	0	0	0	0	200	903	0	0	0	0	0	0	0	603	903	0
763	2	0	0	0	0	0	0	200	300	0	0	0	0	0	0	0	200	903	0	0	0	0	0	0	0	603	903	0
763	3	0	0	0	0	0	0	200	300	0	0	0	0	0	0	0	200	903	0	0	0	0	0	0	0	603	903	0
763	4	0	0	0	0	0	0	200	300	0	0	0	0	0	0	0	200	903	0	0	0	0	0	0	0	603	903	0
763	5	0	0	0	0	0	0	200	300	0	0	0	0	0	0	0	200	903	0	0	0	0	0	0	0	603	903	0
763	6	0	0	0	0	0	0	200	300	0	0	0	0	0	0	0	200	903	0	0	0	0	0	0	0	603	903	0
763	7	0	0	0	0	0	0	200	300	0	0	0	0	0	0	0	200	903	0	0	0	0	0	0	0	603	903	0
763	8	0	0	0	0	0	0	200	300	0	0	0	0	0	0	0	200	903	0	0	0	0	0	0	0	603	903	0
763	9	0	0	0	0	0	0	200	300	0	0	0	0	0	0	0	200	903	0	0	0	0	0	0	0	603	903	0
764	0	0	0	0	0	0	0	200	300	0	0	0	0	0	0	0	200	903	0	0	0	0	0	0	0	603	903	0
764	1	0	0	0	0	0	0	200	300	0	0	0	0	0	0	0	200	903	0	0	0	0	0	0	0	603	903	0
764	2	0	0	0	0	0	0	200	300	0	0	0	0	0	0	0	200	903	0	0	0	0	0	0	0	603	903	0
764	3	0	0	0	0	0	0	200	300	0	0	0	0	0	0	0	200	903	0	0	0	0	0	0	0	603	903	0
764	4	0	0	0	0	0	0	200	300	0	0	0	0	0	0	0	200	903	0	0	0	0	0	0	0	603	903	0
764	5	0	0	0	0	0	0	200	300	0	0	0	0	0	0	0	200	903	0	0	0	0	0	0	0	603	903	0
764	6	0	0	0	0	0	0	200	300	0	0	0	0	0	0	0	200	903	0	0	0	0	0	0	0	603	903	0
764	7	0	0	0	0	0	0	200	300	0	0	0	0	0	0	0	200	903	0	0	0	0	0	0	0	603	903	0
764	8	0	0	0	0	0	0	200	300	0	0	0	0	0	0	0	200	903	0	0	0	0	0	0	0	603	903	0
764	9	0	0	0	0	0	0	200	300	0	0	0	0	0	0	0	200	903	0	0	0	0	0	0	0	603	903	0
765	0	0	0	0	0	0	0	200	300	0	0	0	0	0	0	0	200	903	0	0	0	0	0	0	0	603	903	0
765	1	0	0	0	0	0	0	200	300	0	0	0	0	0	0	0	200	903	0	0	0	0	0	0	0	603	903	0
765	2	0	0	0	0	0	0	200	300	0	0	0	0	0	0	0	200	903	0	0	0	0	0	0	0	603	903	0
765	3	0	0	0	0	0	0	200	300	0	0	0	0	0	0	0	200	903	0	0	0	0	0	0	0	603	903	0
765	4	0	0	0	0	0	0	200	300	0	0	0	0	0	0	0	200	903	0	0	0	0	0	0	0	603	903	0
765	5	0	0	0	0	0	0	200	300	0	0	0	0	0	0	0	200	903	0	0	0	0	0	0	0	603	903	0
765	6	0	0	0	0	0	0	200	300	0	0	0	0	0	0	0	200	903	0	0	0	0	0	0	0	603	903	0
765	7	0	0	0	0	0	0	200	300	0	0	0	0	0	0	0	200	903	0	0	0	0	0	0	0	603	903	0
765	8	0	0	0	0	0	0	200	300	0	0	0	0	0	0	0	200	903	0	0	0	0	0	0	0	603	903	0
765	9	0	0	0	0	0	0	200	300	0	0	0	0	0	0	0	200	903	0	0	0	0	0	0	0	603	903	0
766	0	0	0	0	0	0	0	200	300	0	0	0	0	0	0	0	200	903	0	0	0	0	0	0	0	603	903	0
766	1	0	0	0	0	0	0	200	300	0	0	0	0	0	0	0	200	903	0	0	0	0	0	0	0	603	903	0
766	2	0	0	0	0	0	0	200	300	0	0	0	0	0	0	0	200	903	0	0	0	0	0	0	0	603	903	0
766	3	0	0	0	0	0	0	200	300	0	0	0	0	0	0	0	200	903	0	0	0	0	0	0	0	603	903	0
766	4	0	0	0	0	0	0	200	300	0	0	0	0	0	0	0	200	903	0	0	0	0	0	0	0	603	903	0
766	5	0	0	0	0	0	0	200	300	0	0	0	0	0	0	0	200	903	0	0	0	0	0	0	0	603	903	0
766	6	0	0	0	0	0	0	200	300	0	0	0	0	0	0	0	200	903	0	0	0	0	0	0	0	603	903	0
766	7	0	0	0	0	0	0	200	300	0	0	0	0	0	0	0	200	903	0	0	0	0	0	0	0	603	903	0
766	8	0	0	0	0	0	0	200	300	0	0	0	0	0	0	0	200	903	0	0	0	0	0	0	0	603	903	0
766	9	0	0	0	0	0	0	200	300	0	0	0	0	0	0	0	200	903	0	0	0	0	0	0	0	603	903	0
767	0	0	0	0	0	0	0	200	300	0	0	0	0	0	0	0	200	903	0	0	0	0	0	0	0	603	903	0
767	1	0	0	0	0	0	0	200	300	0	0	0	0	0	0	0	200	903	0	0	0	0	0	0	0	603	903	0
767	2	0	0	0	0	0	0	200	300	0	0	0	0	0	0	0	200	903	0	0	0	0	0	0	0	603	903	0
767	3	0	0	0	0	0	0	200	300	0	0	0	0	0	0	0	200	903	0	0	0	0	0	0	0	603	903	0
767	4	0	0	0	0	0	0	200	300	0	0	0	0	0	0	0	200	903	0	0	0	0	0	0	0	603	903	0
767	5	0	0	0	0	0	0	200	300	0	0	0	0	0	0	0	200	903	0	0	0	0	0	0	0	603	903	0
767	6	0	0	0	0	0	0	200	300	0	0	0	0	0	0	0	200	903	0	0	0	0	0	0	0	603	903	0
767	7	0	0	0	0	0	0	200	300	0	0	0	0	0	0	0	200	903	0	0	0	0	0	0	0	603	903	0
767	8	0	0	0	0	0	0	200	300	0	0	0	0	0	0	0	200	903	0	0	0	0	0	0	0	603	903	0
767	9	0	0	0	0	0	0	200	300	0	0	0	0	0	0	0	200	903	0	0	0	0	0	0	0	603	903	0
768	0	0	0	0	0	0	0	200	300	0	0	0	0	0	0	0	200	903	0	0	0	0	0	0	0	603	903	0
768	1	0	0	0	0	0	0	200	300	0	0	0	0	0	0	0	200	903	0	0	0	0	0	0	0	603	903	0
768	2	0	0	0	0	0	0	200	300	0	0	0	0	0	0	0	200	903	0	0	0	0	0	0	0	603	903	0
768	3	0	0	0	0	0	0	200	300	0	0	0	0	0	0	0	200	903	0	0	0	0	0	0	0	603	903	0
768	4	0	0	0	0	0	0	200	300	0	0	0	0	0	0	0	200	903	0	0	0	0	0	0	0	603	903	0
768	5	0	0	0	0	0	0	200	300	0	0	0	0	0	0	0	200	903	0	0	0	0	0	0	0	603	903	0
768	6	0	0	0	0	0	0	200	300	0	0	0	0	0	0	0	200	903	0	0	0	0	0	0	0	603	903	0
768	7	0	0	0	0	0	0	200	300	0	0	0	0	0	0	0	200	903	0	0	0	0	0	0	0	603	903	0
768	8	0	0	0	0	0	0	200	300	0	0	0	0	0	0	0	200	903	0	0	0	0	0	0	0	603	903	0
768	9	0	0	0	0	0	0	200	300	0	0	0	0	0	0	0	200	903	0	0	0	0	0	0	0	603	903	0
769	0	0	0	0	0	0	0	200	300	0	0	0	0	0	0	0	200	903	0	0	0	0	0	0	0	603	903	0
769	1	0	0	0	0	0	0	200	300	0	0	0	0	0	0	0	200	903	0	0	0	0	0	0	0	603	903	0
769	2	0	0	0	0	0	0	200	300	0	0	0	0	0	0	0	200	903	0	0	0	0	0	0	0	603	903	0
769	3	0	0	0	0	0	0	200	300	0	0	0	0	0	0	0	200	903	0	0	0	0	0	0	0	603	903	0
769	4	0	0	0	0	0	0	200	300	0	0	0	0	0	0	0	200	903	0	0	0	0	0	0	0	603	903	0
769	5	0	0	0	0	0	0	200	300	0	0	0	0	0	0	0	200	903	0	0	0	0	0	0	0	603	903	0
769	6	0	0	0	0	0	0	200	300	0	0	0	0	0	0	0	200	903	0	0	0	0	0	0	0	603	903	0
769	7	0	0	0	0	0	0	200	300	0	0	0	0	0	0	0	200	903	0	0	0	0	0	0	0	603	903	0
769	8	0	0	0	0	0	0	200	300	0	0	0	0	0	0	0	200	903	0	0	0	0	0	0	0	603	903	0
769	9	0	0	0	0	0	0	200	300	0	0	0	0	0	0	0	200	903	0	0	0	0	0	0	0	603	903	0
770	0	0	0	0	0	0	0	200	300	0	0	0	0	0	0	0	200	903	0	0	0	0	0	0	0	603	903	0
770	1	0	0	0	0	0	0	200	300	0	0	0	0	0	0	0	200	903	0	0	0	0	0	0	0	603	903	0
770	2	0	0	0	0	0	0	200	300	0	0	0	0	0	0	0	200	903	0	0	0	0	0	0	0	603	903	0
770	3	0	0	0	0	0	0	200	300	0	0	0	0	0	0	0	200	903	0	0	0	0	0	0	0	603	903	0
770	4	0	0	0	0	0	0	200	300	0	0	0	0	0	0	0	200	903	0	0	0	0	0	0	0	603	903	0
770	5	0	0	0	0	0	0	200	300	0	0	0	0	0	0	0	200	903	0	0	0	0	0	0	0	603	903	0
770	6	0	0	0	0	0	0	200	300	0	0	0	0	0	0	0	200	903	0	0	0	0	0	0	0	603	903	0
770	7	0	0	0	0	0	0	200	300	0	0	0	0	0	0	0	200	903	0	0	0	0	0	0	0	603	903	0
770	8	0	0	0	0	0	0	200	300	0	0	0	0	0	0	0	200	903	0	0	0	0	0	0	0	603	903	0
770	9	0	0	0	0	0	0	200	300	0	0	0	0	0	0	0	200	903	0	0	0	0	0	0	0	603	903	0
771	0	0	0	0	0	0	0	200	300	0	0	0	0	0	0	0	200	903	0	0	0	0	0	0	0	603	903	0
771	1	0	0	0	0	0	0	200	300	0	0	0	0	0	0	0	200	903	0	0	0	0	0	0	0	603	903	0
771	2	0	0	0	0	0	0	200	300	0	0	0	0	0	0	0	200	903	0	0	0	0	0	0	0	603	903	0
771	3	0	0	0	0	0	0	200	300	0	0	0	0	0	0	0	200	903	0	0	0	0	0	0	0	603	903	0
771	4	0	0	0	0	0	0	200	300	0	0	0	0	0	0	0	200	903	0	0	0	0	0	0	0	603	903	0
771	5	0	0	0	0	0	0	200	300	0	0	0	0	0	0	0	200	903	0	0	0	0	0	0	0	603	903	0
771	6	0	0	0	0	0	0	200	300	0	0	0	0	0	0	0	200	903	0	0	0	0	0	0	0	603	903	0
771	7	0	0	0	0	0	0	200	300	0	0	0	0	0	0	0	200	903	0	0	0	0	0	0	0	603	903	0
771	8	0	0	0	0	0	0	200	300	0	0	0	0	0	0	0	200	903	0	0	0	0	0	0	0	603	903	0
771	9	0	0	0	0	0	0	200	300	0	0	0	0	0	0	0	200	903	0	0	0	0	0	0	0	603	903	0
772	0	0	0	0	0	0	0	200	300	0	0	0	0	0	0	0	200	903	0	0	0	0	0	0	0	603	903	0
772	1	0	0	0	0	0	0	200	300	0	0	0	0	0	0	0	200	903	0	0	0	0	0	0	0	603	903	0
772	2	0	0	0	0	0	0	200	300	0	0	0	0	0	0	0	200	903	0	0	0	0	0	0	0	603	903	0
772	3	0	0	0	0	0	0	200	300	0	0	0	0	0	0	0	200	903	0	0	0	0	0	0	0	603	903	0
772	4	0	0	0	0	0	0	200	300	0	0	0	0	0	0	0	200	903	0	0	0	0	0	0	0	603	903	0
772	5	0	0	0	0	0	0	200	300	0	0	0	0	0	0	0	200	903	0	0	0	0	0	0	0	603	903	0
772	6	0	0	0	0	0	0	200	300	0	0	0	0	0	0	0	200	903	0	0	0	0	0	0	0	603	903	0
772	7	0	0	0	0	0	0	200	300	0	0	0	0	0	0	0	200	903	0	0	0	0	0	0	0	603	903	0
772	8	0	0	0	0	0	0	200	300	0	0	0	0	0	0	0	200	903	0	0	0	0	0	0	0	603	903	0
772	9	0	0	0	0	0	0	200	300	0	0	0	0	0	0	0	200	903	0	0	0	0	0	0	0	603	903	0
773	0	0	0	0	0	0	0	200	300	0	0	0	0	0	0	0	200	903	0	0	0	0	0	0	0	603	903	0
773	1	0	0	0	0	0	0	200	300	0	0	0	0	0	0	0	200	903	0	0	0	0	0	0	0	603	903	0
773	2	0	0	0	0	0	0	200	300	0	0	0	0	0	0	0	200	903	0	0	0	0	0	0	0	603	903	0
773	3	0	0	0	0	0	0	200	300	0	0	0	0	0	0	0	200	903	0	0	0	0	0	0	0	603	903	0
773	4	0	0	0	0	0	0	200	300	0	0	0	0	0	0	0	200	903	0	0	0	0	0	0	0	603	903	0
773	5	0	0	0	0	0	0	200	300	0	0	0	0	0	0	0	200	903	0	0	0	0	0	0	0	603	903	0
773	6	0	0	0	0	0	0	200	300	0	0	0	0	0	0	0	200	903	0	0	0	0	0	0	0	603	903	0
773	7	0	0	0	0	0	0	200	300	0	0	0	0	0	0	0	200	903	0	0	0	0	0	0	0	603	903	0
773	8	0	0	0	0	0	0	200	300	0	0	0	0	0	0	0	200	903	0	0	0	0	0	0	0	603	903	0
773	9	0	0	0	0	0	0	200	300	0	0	0	0	0	0	0	200	903	0	0	0	0	0	0	0	603	903	0
774	0	0	0	0	0	0	0	200	300	0	0	0	0	0	0	0	200	903	0	0	0	0	0	0	0	603	903	0
774	1	0	0	0	0	0	0	200	300	0	0	0	0	0	0	0	200	903	0	0	0	0	0	0	0	603	903	0
774	2	0	0	0	0	0	0	200	300	0	0	0	0	0	0	0	200	903	0	0	0	0	0	0	0	603	903	0
774	3	0	0	0	0	0	0	200	300	0	0	0	0	0	0	0	200	903	0	0	0	0	0	0	0	603	903	0
774	4	0	0	0	0	0	0	200	300	0	0	0	0	0	0	0	200	903	0	0	0	0	0	0	0	603	903	0
774	5	0	0	0	0	0	0	200	300	0	0	0	0	0	0	0	200	903	0	0	0	0	0	0	0	603	903	0
774	6	0	0	0	0	0	0	200	300	0	0	0	0	0	0	0	200	903	0	0	0	0	0	0	0	603	903	0
774	7	0	0	0	0	0	0	200	300	0	0	0	0	0	0	0	200	903	0	0	0	0	0	0	0	603	903	0
774	8	0	0	0	0	0	0	200	300	0	0	0	0	0	0	0	200	903	0	0	0	0	0	0	0	603	903	0
774	9	0	0	0	0	0	0	200	300	0	0	0	0	0	0	0	200	903	0	0	0	0	0	0	0	603	903	0
775	0	0	0	0	0	0	0	200	300	0	0	0	0	0	0	0	200	903	0	0	0	0	0	0	0	603	903	0
775	1	0	0	0	0	0	0	200	300	0	0	0	0	0	0	0	200	903	0	0	0	0	0	0	0	603	903	0
775	2	0	0	0	0	0	0	200	300	0	0	0	0	0	0	0	200	903	0	0	0	0	0	0	0	603	903	0
775	3	0	0	0	0	0	0	200	300	0	0	0	0	0	0	0	200	903	0	0	0	0	0	0	0	603	903	0
775	4	0	0	0	0	0	0	200	300	0	0	0	0	0	0	0	200	903	0	0	0	0	0	0	0	603	903	0
775	5	0	0	0	0	0	0	200	300	0	0	0	0	0	0	0	200	903	0	0	0	0	0	0	0	603	903	0
775	6	0	0	0	0	0	0	200	300	0	0	0	0	0	0	0	200	903	0	0	0	0	0	0	0	603	903	0
775	7	0	0	0	0	0	0	200	300	0	0	0	0	0	0	0	200	903	0	0	0	0	0	0	0	603	903	0
775	8	0	0	0	0	0	0	200	300	0	0	0	0	0	0	0	200	903	0	0	0	0	0	0	0	603	903	0
775	9	0	0	0	0	0	0	200	300	0	0	0	0	0	0	0	200	903	0	0	0	0	0	0	0	603	903	0
776	0	0	0	0	0	0	0	200	300	0	0	0	0	0	0	0	200	903	0	0	0	0	0	0	0	603	903	0
776	1	0	0	0	0	0	0	200	300	0	0	0	0	0	0	0	200	903	0	0	0	0	0	0	0	603	903	0
776	2	0	0	0	0	0	0	200	300	0	0	0	0	0	0	0	200	903	0	0	0	0	0	0	0	603	903	0
776	3	0	0	0	0	0	0	200	300	0	0	0	0	0	0	0	200	903	0	0	0	0	0	0	0	603	903	0
776	4	0	0	0	0	0	0	200	300	0	0	0	0	0	0	0	200	903	0	0	0	0	0	0	0	603	903	0
776	5	0	0	0	0	0	0	200	300	0	0	0	0	0	0	0	200	903	0	0	0	0	0	0	0	603	903	0
776	6	0	0	0	0	0	0	200	300	0	0	0	0	0	0	0	200	903	0	0	0	0	0	0	0	603	903	0
776	7	0	0	0	0	0	0	200	300	0	0	0	0	0	0	0	200	903	0	0	0	0	0	0	0	603	903	0
776	8	0	0	0	0	0	0	200	300	0	0	0	0	0	0	0	200	903	0	0	0	0	0	0	0	603	903	0
776	9	0	0	0	0	0	0	200	300	0	0	0	0	0	0	0	200	903	0	0	0	0	0	0	0	603	903	0
777	0	0	0	0	0	0	0	200	300	0	0	0	0	0	0	0	200	903	0	0	0	0	0	0	0	603	903	0
777	1	0	0	0	0	0	0	200	300	0	0	0	0	0	0	0	200	903	0	0	0	0	0	0	0	603	903	0
777	2	0	0	0	0	0	0	200	300	0	0	0	0	0	0	0	200	903	0	0	0	0	0	0	0	603	903	0
777	3	0	0	0	0	0	0	200	300	0	0	0	0	0	0	0	200	903	0	0	0	0	0	0	0	603	903	0
777	4	0	0	0	0	0	0	200	300	0	0	0	0	0	0	0	200	903	0	0	0	0	0	0	0	603	903	0
777	5	0	0	0	0	0	0	200	300	0	0	0	0	0	0	0	200	903	0	0	0	0	0	0	0	603	903	0
777	6	0	0	0	0	0	0	200	300	0	0	0	0	0	0	0	200	903	0	0	0	0	0	0	0	603	903	0
777	7	0	0	0	0	0	0	200	300	0	0	0	0	0	0	0	200	903	0	0	0	0	0	0	0	603	903	0
777	8	0	0	0	0	0	0	200	300	0	0	0	0	0	0	0	200	903	0	0	0	0	0	0	0	603	903	0
777	9	0	0	0	0	0	0	200	300	0	0	0	0	0	0	0	200	903	0	0	0	0	0	0	0	603	903	0
778	0	0	0	0	0	0	0	200	300	0	0	0	0	0	0	0	200	903	0	0	0	0	0	0	0	603	903	0
778	1	0	0	0	0	0	0	200	300	0	0	0	0	0	0	0	200	903	0	0	0	0	0	0	0	603	903	0
778	2	0	0	0	0	0	0	200	300	0	0	0	0	0	0	0	200	903	0	0	0	0	0	0	0	603	903	0
778	3	0	0	0	0	0	0	200	300	0	0	0	0	0	0	0	200	903	0	0	0	0	0	0	0	603	903	0
778	4	0	0	0	0	0	0	200	300	0	0	0	0	0	0	0	200	903	0	0	0	0	0	0	0	603	903	0
778	5	0	0	0	0	0	0	200	300	0	0	0	0	0	0	0	200	903	0	0	0	0	0	0	0	603	903	0
778	6	0	0	0	0	0	0	200	300	0	0	0	0	0	0	0	200	903	0	0	0	0	0	0	0	603	903	0
778	7	0	0	0	0	0	0	200	300	0	0	0	0	0	0	0	200	903	0	0	0	0	0	0	0	603	903	0
778	8	0	0	0	0	0	0	200	300	0	0	0	0	0	0	0	200	903	0	0	0	0	0	0	0	603	903	0
778	9	0	0	0	0	0	0	200	300	0	0	0	0	0	0	0	200	903	0	0	0	0	0	0	0	603	903	0
779	0	0	0	0	0	0	0	200	300	0	0	0	0	0	0	0	200	903	0	0	0	0	0	0	0	603	903	0
779	1	0	0	0	0	0	0	200	300	0	0	0	0	0	0	0	200	903	0	0	0	0	0	0	0	603	903	0
779	2	0	0	0	0	0	0	200	300	0	0	0	0	0	0	0	200	903	0	0	0	0	0	0	0	603	903	0
779	3	0	0	0	0	0	0	200	300	0	0	0	0	0	0	0	200	903	0	0	0	0	0	0	0	603	903	0
779	4	0	0	0	0	0	0	200	300	0	0	0	0	0	0	0	200	903	0	0	0	0	0	0	0	603	903	0
779	5	0	0	0	0	0	0	200	300	0	0	0	0	0	0	0	200	903	0	0	0	0	0	0	0	603	903	0
779	6	0	0	0	0	0	0	200	300	0	0	0	0	0	0	0	200	903	0	0	0	0	0	0	0	603	903	0
779	7	0	0	0	0	0	0	200	300	0	0	0	0	0	0	0	200	903	0	0	0	0	0	0	0	603	903	0
779	8	0	0	0	0	0	0	200	300	0	0	0	0	0	0	0	200	903	0	0	0	0	0	0	0	603	903	0
779	9	0	0	0	0	0	0	200	300	0	0	0	0	0	0	0	200	903	0	0	0	0	0	0	0	603	903	0
780	0	0	0	0	0	0	0	200	300	0	0	0	0	0	0	0	200	903	0	0	0	0	0	0	0	603	903	0
780	1	0	0	0	0	0	0	200	300	0	0	0	0	0	0	0	200	903	0	0	0	0	0	0	0	603	903	0
780	2	0	0	0	0	0	0	200	300	0	0	0	0	0	0	0	200	903	0	0	0	0	0	0	0	603	903	0
780	3	0	0	0	0	0	0	200	300	0	0	0	0	0	0	0	200	903	0	0	0	0	0	0	0	603	903	0
780	4	0	0	0	0	0	0	200	300	0	0	0	0	0	0	0	200	903	0	0	0	0	0	0	0	603	903	0
780	5	0	0	0	0	0	0	200	300	0	0	0	0	0	0	0	200	903	0	0	0	0	0	0	0	603	903	0
780	6	0	0	0	0	0	0	200	300	0	0	0	0	0	0	0	200	903	0	0	0	0	0	0	0	603	903	0
780	7	0	0	0	0	0	0	200	300	0	0	0	0	0	0	0	200	903	0	0	0	0	0	0	0	603	903	0
780	8	0	0	0	0	0	0	200	300	0	0	0	0	0	0	0	200	903	0	0	0	0	0	0	0	603	903	0
780	9	0	0	0	0	0	0	200	300	0	0	0	0	0	0	0	200	903	0	0	0	0	0	0	0	603	903	0
781	0	0	0	0	0	0	0	200	300	0	0	0	0	0	0	0	200	903	0	0	0	0	0	0	0	603	903	0
781	1	0	0	0	0	0	0	200	300	0	0	0	0	0	0	0	200	903	0	0	0	0	0	0	0	603	903	0
781	2	0	0	0	0	0	0	200	300	0	0	0	0	0	0	0	200	903	0	0	0	0	0	0	0	603	903	0
781	3	0	0	0	0	0	0	200	300	0	0	0	0	0	0	0	200	903	0	0	0	0	0	0	0	603	903	0
781	4	0	0	0	0	0	0	200	300	0	0	0	0	0	0	0	200	903	0	0	0	0	0	0	0	603	903	0
781	5	0	0	0	0	0	0	200	300	0	0	0	0	0	0	0	200	903	0	0	0	0	0	0	0	603	903	0
781	6	0	0	0	0	0	0	200	300	0	0	0	0	0	0	0	200	903	0	0	0	0	0	0	0	603	903	0
781	7	0	0	0	0	0	0	200	300	0	0	0	0	0	0	0	200	903	0	0	0	0	0	0	0	603	903	0
781	8	0	0	0	0	0	0	200	300	0	0	0	0	0	0	0	200	903	0	0	0	0	0	0	0	603	903	0
781	9	0	0	0	0	0	0	200	300	0	0	0	0	0	0	0	200	903	0	0	0	0	0	0	0	603	903	0
782	0	0	0	0	0	0	0	200	300	0	0	0	0	0	0	0	200	903	0	0	0	0	0	0	0	603	903	0
782	1	0	0	0	0	0	0	200	300	0	0	0	0	0	0	0	200	903	0	0	0	0	0	0	0	603	903	0
782	2	0	0	0	0	0	0	200	300	0	0	0	0	0	0	0	200	903	0	0	0	0	0	0	0	603	903	0
782	3	0	0	0	0	0	0	200	300	0	0	0	0	0	0	0	200	903	0	0	0	0	0	0	0	603	903	0
782	4	0	0	0	0	0	0	200	300	0	0	0	0	0	0	0	200	903	0	0	0	0	0	0	0	603	903	0
782	5	0	0	0	0	0	0	200	300	0	0	0	0	0	0	0	200	903	0	0	0	0	0	0	0	603	903	0
782	6	0	0	0	0	0	0	200	300	0	0	0	0	0	0	0	200	903	0	0	0	0	0	0	0	603	903	0
782	7	0	0	0	0	0	0	200	300	0	0	0	0	0	0	0	200	903	0	0	0	0	0	0	0	603	903	0
782	8	0	0	0	0	0	0	200	300	0	0	0	0	0	0	0	200	903	0	0	0	0	0	0	0	603	903	0
782	9	0	0	0	0	0	0	200	300	0	0	0	0	0	0	0	200	903	0	0	0	0	0	0	0	603	903	0
783	0	0	0	0	0	0	0	200	300	0	0	0	0	0	0	0	200	903	0	0	0	0	0	0	0	603	903	0
783	1	0	0	0	0	0	0	200	300	0	0	0	0	0	0	0	200	903	0	0	0	0	0	0	0	603	903	0
783	2	0	0	0	0	0	0	200	300	0	0	0	0	0	0	0	200	903	0	0	0	0	0	0	0	603	903	0
783	3	0	0	0	0	0	0	200	300	0	0	0	0	0	0	0	200	903	0	0	0	0	0	0	0	603	903	0
783	4	0	0	0	0	0	0	200	300	0	0	0	0	0	0	0	200	903	0	0	0	0	0	0	0	603	903	0
783	5	0	0	0	0	0	0	200	300	0	0	0	0	0	0	0	200	903	0	0	0	0	0	0	0	603	903	0
783	6	0	0	0	0	0	0	200	300	0	0	0	0	0	0	0	200	903	0	0	0	0	0	0	0	603	903	0
783	7	0	0	0	0	0	0	200	300	0	0	0	0	0	0	0	200	903	0	0	0	0	0	0	0	603	903	0
783	8	0	0	0	0	0	0	200	300	0	0	0	0	0	0	0	200	903	0	0	0	0	0	0	0	603	903	0
783	9	0	0	0	0	0	0	200	300	0	0	0	0	0	0	0	200	903	0	0	0	0	0	0	0	603	903	0
784	0	0	0	0	0	0	0	200	300	0	0	0	0	0	0	0	200	903	0	0	0	0	0	0	0	603	903	0
784	1	0	0	0	0	0	0	200	300	0	0	0	0	0	0	0	200	903	0	0	0	0	0	0	0	603	903	0
784	2	0	0	0	0	0	0	200	300	0	0	0	0	0	0	0	200	903	0	0	0	0	0	0	0	603	903	0
784	3	0	0	0	0	0	0	200	300	0	0	0	0	0	0	0	200	903	0	0	0	0	0	0	0	603	903	0
784	4	0	0	0	0	0	0	200	300	0	0	0	0	0	0	0	200	903	0	0	0	0	0	0	0	603	903	0
784	5	0	0	0	0	0	0	200	300	0	0	0	0	0	0	0	200	903	0	0	0	0	0	0	0	603	903	0
784	6	0	0	0	0	0	0	200	300	0	0	0	0	0	0	0	200	903	0	0	0	0	0	0	0	603	903	0
784	7	0	0	0	0	0	0	200	300	0	0	0	0	0	0	0	200	903	0	0	0	0	0	0	0	603	903	0
784	8	0	0	0	0	0	0	200	300	0	0	0	0	0	0	0	200	903	0	0	0	0	0	0	0	603	903	0
784	9	0	0	0	0	0	0	200	300	0	0	0	0	0	0	0	200	903	0	0	0	0	0	0	0	603	903	0
785	0	0	0	0	0	0	0	200	300	0	0	0	0	0	0	0	200	903	0	0	0	0	0	0	0	603	903	0
785	1	0	0	0	0	0	0	200	300	0	0	0	0	0	0	0	200	903	0	0	0	0	0	0	0	603	903	0
785	2	0	0	0	0	0	0	200	300	0	0	0	0	0	0	0	200	903	0	0	0	0	0	0	0	603	903	0
785	3	0	0	0	0	0	0	200	300	0	0	0	0	0	0	0	200	903	0	0	0	0	0	0	0	603	903	0
785	4	0	0	0	0	0	0	200	300	0	0	0	0	0	0	0	200	903	0	0	0	0	0	0	0	603	903	0
785	5	0	0	0	0	0	0	200	300	0	0	0	0	0	0	0	200	903	0	0	0	0	0	0	0	603	903	0
785	6	0	0	0	0	0	0	200	300	0	0	0	0	0	0	0	200	903	0	0	0	0	0	0	0	603	903	0
785	7	0	0	0	0	0	0	200	300	0	0	0	0	0	0	0	200	903	0	0	0	0	0	0	0	603	903	0
785	8	0	0	0	0	0	0	200	300	0	0	0	0	0	0	0	200	903	0	0	0	0	0	0	0	603	903	0
785	9	0	0	0	0	0	0	200	300	0	0	0	0	0	0	0	200	903	0	0	0	0	0	0	0	603	903	0
786	0	0	0	0	0	0	0	200	300	0	0	0	0	0	0	0	200	903	0	0	0	0	0	0	0	603	903	0
786	1	0	0	0	0	0	0	200	300	0	0	0	0	0	0	0	200	903	0	0	0	0	0	0	0	603	903	0
786	2	0	0	0	0	0	0	200	300	0	0	0	0	0	0	0	200	903	0	0	0	0	0	0	0	603	903	0
786	3	0	0	0	0	0	0	200	300	0	0	0	0	0	0	0	200	903	0	0	0	0	0	0	0	603	903	0
786	4	0	0	0	0	0	0	200	300	0	0	0	0	0	0	0	200	903	0	0	0	0	0	0	0	603	903	0
786	5	0	0	0	0	0	0	200	300	0	0	0	0	0	0	0	200	903	0	0	0	0	0	0	0	603	903	0
786	6	0	0	0	0	0	0	200	300	0	0	0	0	0	0	0	200	903	0	0	0	0	0	0	0	603	903	0
786	7	0	0	0	0	0	0	200	300	0	0	0	0	0	0	0	200	903	0	0	0	0	0	0	0	603	903	0
786	8	0	0	0	0	0	0	200	300	0	0	0	0	0	0	0	200	903	0	0	0	0	0	0	0	603	903	0
786	9	0	0	0	0	0	0	200	300	0	0	0	0	0	0	0	200	903	0	0	0	0	0	0	0	603	903	0
787	0	0	0	0	0	0	0	200	300	0	0	0	0	0	0	0	200	903	0	0	0	0	0	0	0	603	903	0
787	1	0	0	0	0	0	0	200	300	0	0	0	0	0	0	0	200	903	0	0	0	0	0	0	0	603	903	0
787	2	0	0	0	0	0	0	200	300	0	0	0	0	0	0	0	200	903	0	0	0	0	0	0	0	603	903	0
787	3	0	0	0	0	0	0	200	300	0	0	0	0	0	0	0	200	903	0	0	0	0	0	0	0	603	903	0
787	4	0	0	0	0	0	0	200	300	0	0	0	0	0	0	0	200	903	0	0	0	0	0	0	0	603	903	0
787	5	0	0	0	0	0	0	200	300	0	0	0	0	0	0	0	200	903	0	0	0	0	0	0	0	603	903	0
787	6	0	0	0	0	0	0	200	300	0	0	0	0	0	0	0	200	903	0	0	0	0	0	0	0	603	903	0
787	7	0	0	0	0	0	0	200	300	0	0	0	0	0	0	0	200	903	0	0	0	0	0	0	0	603	903	0
787	8	0	0	0	0	0	0	200	300	0	0	0	0	0	0	0	200	903	0	0	0	0	0	0	0	603	903	0
787	9	0	0	0	0	0	0	200	300	0	0	0	0	0	0	0	200	903	0	0	0	0	0	0	0	603	903	0
788	0	0	0	0	0	0	0	200	300	0	0	0	0	0	0	0	200	903	0	0	0	0	0	0	0	603	903	0
788	1	0	0	0	0	0	0	200	300	0	0	0	0	0	0	0	200	903	0	0	0	0	0	0	0	603	903	0
788	2	0	0	0	0	0	0	200	300	0	0	0	0	0	0	0	200	903	0	0	0	0	0	0	0	603	903	0
788	3	0	0	0	0	0	0	200	300	0	0	0	0	0	0	0	200	903	0	0	0	0	0	0	0	603	903	0
788	4	0	0	0	0	0	0	200	300	0	0	0	0	0	0	0	200	903	0	0	0	0	0	0	0	603	903	0
788	5	0	0	0	0	0	0	200	300	0	0	0	0	0	0	0	200	903	0	0	0	0	0	0	0	603	903	0
788	6	0	0	0	0	0	0	200	300	0	0	0	0	0	0	0	200	903	0	0	0	0	0	0	0	603	903	0
788	7	0	0	0	0	0	0	200	300	0	0	0	0	0	0	0	200	903	0	0	0	0	0	0	0	603	903	0
788	8	0	0	0	0	0	0	200	300	0	0	0	0	0	0	0	200	903	0	0	0	0	0	0	0	603	903	0
788	9	0	0	0	0	0	0	200	300	0	0	0	0	0	0	0	200	903	0	0	0	0	0	0	0	603	903	0
789	0	0	0	0	0	0	0	200	300	0	0	0	0	0	0	0	200	903	0	0	0	0	0	0	0	603	903	0
789	1	0	0	0	0	0	0	200	300	0	0	0	0	0	0	0	200	903	0	0	0	0	0	0	0	603	903	0
789	2	0	0	0	0	0	0	200	300	0	0	0	0	0	0	0	200	903	0	0	0	0	0	0	0	603	903	0
789	3	0	0	0	0	0	0	200	300	0	0	0	0	0	0	0	200	903	0	0	0	0	0	0	0	603	903	0
789	4	0	0	0	0	0	0	200	300	0	0	0	0	0	0	0	200	903	0	0	0	0	0	0	0	603	903	0
789	5	0	0	0	0	0	0	200	300	0	0	0	0	0	0	0	200	903	0	0	0	0	0	0	0	603	903	0
789	6	0	0	0	0	0	0	200	300	0	0	0	0	0	0	0	200	903	0	0	0	0	0	0	0	603	903	0
789	7	0	0	0	0	0	0	200	300	0	0	0	0	0	0	0	200	903	0	0	0	0	0	0	0	603	903	0
789	8	0	0	0	0	0	0	200	300	0	0	0	0	0	0	0	200	903	0	0	0	0	0	0	0	603	903	0
789	9	0	0	0	0	0	0	200	300	0	0	0	0	0	0	0	200	903	0	0	0	0	0	0	0	603	903	0
790	0	0	0	0	0	0	0	200	300	0	0	0	0	0	0	0	200	903	0	0	0	0	0	0	0	603	903	0
790	1	0	0	0	0	0	0	200	300	0	0	0	0	0	0	0	200	903	0	0	0	0	0	0	0	603	903	0
790	2	0	0	0	0	0	0	200	300	0	0	0	0	0	0	0	200	903	0	0	0	0	0	0	0	603	903	0
790	3	0	0	0	0	0	0	200	300	0	0	0	0	0	0	0	200	903	0	0	0	0	0	0	0	603	903	0
790	4	0	0	0	0	0	0	200	300	0	0	0	0	0	0	0	200	903	0	0	0	0	0	0	0	603	903	0
790	5	0	0	0	0	0	0	200	300	0	0	0	0	0	0	0	200	903	0	0	0	0	0	0	0	603	903	0
790	6	0	0	0	0	0	0	200	300	0	0	0	0	0	0	0	200	903	0	0	0	0	0	0	0	603	903	0
790	7	0	0	0	0	0	0	200	300	0	0	0	0	0	0	0	200	903	0	0	0	0	0	0	0	603	903	0
790	8	0	0	0	0	0	0	200	300	0	0	0	0	0	0	0	200	903	0	0	0	0	0	0	0	603	903	0
790	9	0	0	0	0	0	0	200	300	0	0	0	0	0	0	0	200	903	0	0	0	0	0	0	0	603	903	0
791	0	0	0	0	0	0	0	200	300	0	0	0	0	0	0	0	200	903	0	0	0	0	0	0	0	603	903	0
791	1	0	0	0	0	0	0	200	300	0	0	0	0	0	0	0	200	903	0	0	0	0	0	0	0	603	903	0
791	2	0	0	0	0	0	0	200	300	0	0	0	0	0	0	0	200	903	0	0	0	0	0	0	0	603	903	0
791	3	0	0	0	0	0	0	200	300	0	0	0	0	0	0	0	200	903	0	0	0	0	0	0	0	603	903	0
791	4	0	0	0	0	0	0	200	300	0	0	0	0	0	0	0	200	903	0	0	0	0	0	0	0	603	903	0
791	5	0	0	0	0	0	0	200	300	0	0	0	0	0	0	0	200	903	0	0	0	0	0	0	0	603	903	0
791	6	0	0	0	0	0	0	200	300	0	0	0	0	0	0	0	200	903	0	0	0	0	0	0	0	603	903	0
791	7	0	0	0	0	0	0	200	300	0	0	0	0	0	0	0	200	903	0	0	0	0	0	0	0	603	903	0
791	8	0	0	0	0	0	0	200	300	0	0	0	0	0	0	0	200	903	0	0	0	0	0	0	0	603	903	0
791	9	0	0	0	0	0	0	200	300	0	0	0	0	0	0	0	200	903	0	0	0	0	0	0	0	603	903	0
792	0	0	0	0	0	0	0	200	300	0	0	0	0	0	0	0	200	903	0	0	0	0	0	0	0	603	903	0
792	1	0	0	0	0	0	0	200	300	0	0	0	0	0	0	0	200	903	0	0	0	0	0	0	0	603	903	0
792	2	0	0	0	0	0	0	200	300	0	0	0	0	0	0	0	200	903	0	0	0	0	0	0	0	603	903	0
792	3	0	0	0	0	0	0	200	300	0	0	0	0	0	0	0	200	903	0	0	0	0	0	0	0	603	903	0
792	4	0	0	0	0	0	0	200	300	0	0	0	0	0	0	0	200	903	0	0	0	0	0	0	0	603	903	0
792	5	0	0	0	0	0	0	200	300	0	0	0	0	0	0	0	200	903	0	0	0	0	0	0	0	603	903	0
792	6	0	0	0	0	0	0	200	300	0	0	0	0	0	0	0	200	903	0	0	0	0	0	0	0	603	903	0
792	7	0	0	0	0	0	0	200	300	0	0	0	0	0	0	0	200	903	0	0	0	0	0	0	0	603	903	0
792	8	0	0	0	0	0	0	200	300	0	0	0	0	0	0	0	200	903	0	0	0	0	0	0	0	603	903	0
792	9	0	0	0	0	0	0	200	300	0	0	0	0	0	0	0	200	903	0	0	0	0	0	0	0	603	903	0
793	0	0	0	0	0	0	0	200	300	0	0	0	0	0	0	0	200	903	0	0	0	0	0	0	0	603	903	0
793	1	0	0	0	0	0	0	200	300	0	0	0	0	0	0	0	200	903	0	0	0	0	0	0	0	603	903	0
793	2	0	0	0	0	0	0	200	300	0	0	0	0	0	0	0	200	903	0	0	0	0	0	0	0	603	903	0
793	3	0	0	0	0	0	0	200	300	0	0	0	0	0	0	0	200	903	0	0	0	0	0	0	0	603	903	0
793	4	0	0	0	0	0	0	200	300	0	0	0	0	0	0	0	200	903	0	0	0	0	0	0	0	603	903	0
793	5	0	0	0	0	0	0	200	300	0	0	0	0	0	0	0	200	903	0	0	0	0	0	0	0	603	903	0
793	6	0	0	0	0	0	0	200	300	0	0	0	0	0	0	0	200	903	0	0	0	0	0	0	0	603	903	0
793	7	0	0	0	0	0	0	200	300	0	0	0	0	0	0	0	200	903	0	0	0	0	0	0	0	603	903	0
793	8	0	0	0	0	0	0	200	300	0	0	0	0	0	0	0	200	903	0	0	0	0	0	0	0	603	903	0
793	9	0	0	0	0	0	0	200	300	0	0	0	0	0	0	0	200	903	0	0	0	0	0	0	0	603	903	0
794	0	0	0	0	0	0	0	200	300	0	0	0	0	0	0	0	200	903	0	0	0	0	0	0	0	603	903	0
794	1	0	0	0	0	0	0	200	300	0	0	0	0	0	0	0	200	903	0	0	0	0	0	0	0	603	903	0
794	2	0	0	0	0	0	0	200	300	0	0	0	0	0	0	0	200	903	0	0	0	0	0	0	0	603	903	0
794	3	0	0	0	0	0	0	200	300	0	0	0	0	0	0	0	200	903	0	0	0	0	0	0	0	603	903	0
794	4	0	0	0	0	0	0	200	300	0	0	0	0	0	0	0	200	903	0	0	0	0	0	0	0	603	903	0
794	5	0	0	0	0	0	0	200	300	0	0	0	0	0	0	0	200	903	0	0	0	0	0	0	0	603	903	0
794	6	0	0	0	0	0	0	200	300	0	0	0	0	0	0	0	200	903	0	0	0	0	0	0	0	603	903	0
794	7	0	0	0	0	0	0	200	300	0	0	0	0	0	0	0	200	903	0	0	0	0	0	0	0	603	903	0
794	8	0	0	0	0	0	0	200	300	0	0	0	0	0	0	0	200	903	0	0	0	0	0	0	0	603	903	0
794	9	0	0	0	0	0	0	200	300	0	0	0	0	0	0	0	200	903	0	0	0	0	0	0	0	603	903	0
795	0	0	0	0	0	0	0	200	300	0	0	0	0	0	0	0	200	903	0	0	0	0	0	0	0	603	903	0
795	1	0	0	0	0	0	0	200	300	0	0	0	0	0	0	0	200	903	0	0	0	0	0	0	0	603	903	0
795	2	0	0	0	0	0	0	200	300	0	0	0	0	0	0	0	200	903	0	0	0	0	0	0	0	603	903	0
795	3	0	0	0	0	0	0	200	300	0	0	0	0	0	0	0	200	903	0	0	0	0	0	0	0	603	903	0
795	4	0	0	0	0	0	0	200	300	0	0	0	0	0	0	0	200	903	0	0	0	0	0	0	0	603	903	0
795	5	0	0	0	0	0	0	200	300	0	0	0	0	0	0	0	200	903	0	0	0	0	0	0	0	603	903	0
795	6	0	0	0	0	0	0	200	300	0	0	0	0	0	0	0	200	903	0	0	0	0	0	0	0	603	903	0
795	7	0	0	0	0	0	0	200	300	0	0	0	0	0	0	0	200	903	0	0	0	0	0	0	0	603	903	0
795	8	0	0	0	0	0	0	200	300	0	0	0	0	0	0	0	200	903	0	0	0	0	0	0	0	603	903	0
795	9	0	0	0	0	0	0	200	300	0	0	0	0	0	0	0	200	903	0	0	0	0	0	0	0	603	903	0
796	0	0	0	0	0	0	0	200	300	0	0	0	0	0	0	0	200	903	0	0	0	0	0	0	0	603	903	0
796	1	0	0	0	0	0	0	200	300	0	0	0	0	0	0	0	200	903	0	0	0	0	0	0	0	603	903	0
796	2	0	0	0	0	0	0	200	300	0	0	0	0	0	0	0	200	903	0	0	0	0	0	0	0	603	903	0
796	3	0	0	0	0	0	0	200	300	0	0	0	0	0	0	0	200	903	0	0	0	0	0	0	0	603	903	0
796	4	0	0	0	0	0	0	200	300	0	0	0	0	0	0	0	200	903	0	0	0	0	0	0	0	603	903	0
796	5	0	0	0	0	0	0	200	300	0	0	0	0	0	0	0	200	903	0	0	0	0	0	0	0	603	903	0
796	6	0	0	0	0	0	0	200	300	0	0	0	0	0	0	0	200	903	0	0	0	0	0	0	0	603	903	0
796	7	0	0	0	0	0	0	200	300	0	0	0	0	0	0	0	200	903	0	0	0	0	0	0	0	603	903	0
796	8	0	0	0	0	0	0	200	300	0	0	0	0	0	0	0	200	903	0	0	0	0	0	0	0	603	903	0
796	9	0	0	0	0	0	0	200	300	0	0	0	0	0	0	0	200	903	0	0	0	0	0	0	0	603	903	0
797	0	0	0	0	0	0	0	200	300	0	0	0	0	0	0	0	200	903	0	0	0	0	0	0	0	603	903	0
797	1	0	0	0	0	0	0	200	300	0	0	0	0	0	0	0	200	903	0	0	0	0	0	0	0	603	903	0
797	2	0	0	0	0	0	0	200	300	0	0	0	0	0	0	0	200	903	0	0	0	0	0	0	0	603	903	0
797	3	0	0	0	0	0	0	200	300	0	0	0	0	0	0	0	200	903	0	0	0	0	0	0	0	603	903	0
797	4	0	0	0	0	0	0	200	300	0	0	0	0	0	0	0	200	903	0	0	0	0	0	0	0	603	903	0
797	5	0	0	0	0	0	0	200	300	0	0	0	0	0	0	0	200	903	0	0	0	0	0	0	0	603	903	0
797	6	0	0	0	0	0	0	200	300	0	0	0	0	0	0	0	200	903	0	0	0	0	0	0	0	603	903	0
797	7	0	0	0	0	0	0	200	300	0	0	0	0	0	0	0	200	903	0	0	0	0	0	0	0	603	903	0
797	8	0	0	0	0	0	0	200	300	0	0	0	0	0	0	0	200	903	0	0	0	0	0	0	0	603	903	0
797	9	0	0	0	0	0	0	200	300	0	0	0	0	0	0	0	200	903	0	0	0	0	0	0	0	603	903	0
798	0	0	0	0	0	0	0	200	300	0	0	0	0	0	0	0	200	903	0	0	0	0	0	0	0	603	903	0
798	1	0	0	0	0	0	0	200	300	0	0	0	0	0	0	0	200	903	0	0	0	0	0	0	0	603	903	0
798	2	0	0	0	0	0	0	200	300	0	0	0	0	0	0	0	200	903	0	0	0	0	0	0	0	603	903	0
798	3	0	0	0	0	0	0	200	300	0	0	0	0	0	0	0	200	903	0	0	0	0	0	0	0	603	903	0
798	4	0	0	0	0	0	0	200	300	0	0	0	0	0	0	0	200	903	0	0	0	0	0	0	0	603	903	0
798	5	0	0	0	0	0	0	200	300	0	0	0	0	0	0	0	200	903	0	0	0	0	0	0	0	603	903	0
798	6	0	0	0	0	0	0	200	300	0	0	0	0	0	0	0	200	903	0	0	0	0	0	0	0	603	903	0
798	7	0	0	0	0	0	0	200	300	0	0	0	0	0	0	0	200	903	0	0	0	0	0	0	0	603	903	0
798	8	0	0	0	0	0	0	200	300	0	0	0	0	0	0	0	200	903	0	0	0	0	0	0	0	603	903	0
798	9	0	0	0	0	0	0	200	300	0	0	0	0	0	0	0	200	903	0	0	0	0	0	0	0	603	903	0
799	0	0	0	0	0	0	0	200	300	0	0	0	0	0	0	0	200	903	0	0	0	0	0	0	0	603	903	0
799	1	0	0	0	0	0	0	200	300	0	0	0	0	0	0	0	200	903	0	0	0	0	0	0	0	603	903	0
799	2	0	0	0	0	0	0	200	300	0	0	0	0	0	0	0	200	903	0	0	0	0	0	0	0	603	903	0
799	3	0	0	0	0	0	0	200	300	0	0	0	0	0	0	0	200	903	0	0	0	0	0	0	0	603	903	0
799	4	0	0	0	0	0	0	200	300	0	0	0	0	0	0	0	200	903	0	0	0	0	0	0	0	603	903	0
799	5	0	0	0	0	0	0	200	300	0	0	0	0	0	0	0	200	903	0	0	0	0	0	0	0	603	903	0
799	6	0	0	0	0	0	0	200	300	0	0	0	0	0	0	0	200	903	0	0	0	0	0	0	0	603	903	0
799	7	0	0	0	0	0	0	200	300	0	0	0	0	0	0	0	200	903	0	0	0	0	0	0	0	603	903	0
799	8	0	0	0	0	0	0	200	300	0	0	0	0	0	0	0	200	903	0	0	0	0	0	0	0	603	903	0
799	9	0	0	0	0	0	0	200	300	0	0	0	0	0	0	0	200	903	0	0	0	0	0	0	0	603	903	0
800	0	0	0	0	0	0	0	200	300	0	0	0	0	0	0	0	200	903	0	0	0	0	0	0	0	603	903	0
800	1	0	0	0	0	0	0	200	300	0	0	0	0	0	0	0	200	903	0	0	0	0	0	0	0	603	903	0
800	2	0	0	0	0	0	0	200	300	0	0	0	0	0	0	0	200	903	0	0	0	0	0	0	0	603	903	0
800	3	0	0	0	0	0	0	200	300	0	0	0	0	0	0	0	200	903	0	0	0	0	0	0	0	603	903	0
800	4	0	0	0	0	0	0	200	300	0	0	0	0	0	0	0	200	903	0	0	0	0	0	0	0	603	903	0
800	5	0	0	0	0	0	0	200	300	0	0	0	0	0	0	0	200	903	0	0	0	0	0	0	0	603	903	0
800	6	0	0	0	0	0	0	200	300	0	0	0	0	0	0	0	200	903	0	0	0	0	0	0	0	603	903	0
800	7	0	0	0	0	0	0	200	300	0	0	0	0	0	0	0	200	903	0	0	0	0	0	0	0	603	903	0
800	8	0	0	0	0	0	0	200	300	0	0	0	0	0	0	0	200	903	0	0	0	0	0	0	0	603	903	0
800	9	0	0	0	0	0	0	200	300	0	0	0	0	0	0	0	200	903	0	0	0	0	0	0	0	603	903	0
801	0	0	0	0	0	0	0	200	300	0	0	0	0	0	0	0	200	903	0	0	0	0	0	0	0	603	903	0
801	1	0	0	0	0	0	0	200	300	0	0	0	0	0	0	0	200	903	0	0	0	0	0	0	0	603	903	0
801	2	0	0	0	0	0	0	200	300	0	0	0	0	0	0	0	200	903	0	0	0	0	0	0	0	603	903	0
801	3	0	0	0	0	0	0	200	300	0	0	0	0	0	0	0	200	903	0	0	0	0	0	0	0	603	903	0
801	4	0	0	0	0	0	0	200	300	0	0	0	0	0	0	0	200	903	0	0	0	0	0	0	0	603	903	0
801	5	0	0	0	0	0	0	200	300	0	0	0	0	0	0	0	200	903	0	0	0	0	0	0	0	603	903	0
801	6	0	0	0	0	0	0	200	300	0	0	0	0	0	0	0	200	903	0	0	0	0	0	0	0	603	903	0
801	7	0	0	0	0	0	0	200	300	0	0	0	0	0	0	0	200	903	0	0	0	0	0	0	0	603	903	0
801	8	0	0	0	0	0	0	200	300	0	0	0	0	0	0	0	200	903	0	0	0	0	0	0	0	603	903	0
801	9	0	0	0	0	0	0	200	300	0	0	0	0	0	0	0	200	903	0	0	0	0	0	0	0	603	903	0
802	0	0	0	0	0	0	0	200	300	0	0	0	0	0	0	0	200	903	0	0	0	0	0	0	0	603	903	0
802	1	0	0	0	0	0	0	200	300	0	0	0	0	0	0	0	200	903	0	0	0	0	0	0	0	603	903	0
802	2	0	0	0	0	0	0	200	300	0	0	0	0	0	0	0	200	903	0	0	0	0	0	0	0	603	903	0
802	3	0	0	0	0	0	0	200	300	0	0	0	0	0	0	0	200	903	0	0	0	0	0	0	0	603	903	0
802	4	0	0	0	0	0	0	200	300	0	0	0	0	0	0	0	200	903	0	0	0	0	0	0	0	603	903	0
802	5	0	0	0	0	0	0	200	300	0	0	0	0	0	0	0	200	903	0	0	0	0	0	0	0	603	903	0
802	6	0	0	0	0	0	0	200	300	0	0	0	0	0	0	0	200	903	0	0	0	0	0	0	0	603	903	0
802	7	0	0	0	0	0	0	200	300	0	0	0	0	0	0	0	200	903	0	0	0	0	0	0	0	603	903	0
802	8	0	0	0	0	0	0	200	300	0	0	0	0	0	0	0	200	903	0	0	0	0	0	0	0	603	903	0
802	9	0	0	0	0	0	0	200	300	0	0	0	0	0	0	0	200	903	0	0	0	0	0	0	0	603	903	0
803	0	0	0	0	0	0	0	200	300	0	0	0	0	0	0	0	200	903	0	0	0	0	0	0	0	603	903	0
803	1	0	0	0	0	0	0	200	300	0	0	0	0	0	0	0	200	903	0	0	0	0	0	0	0	603	903	0
803	2	0	0	0	0	0	0	200	300	0	0	0	0	0	0	0	200	903	0	0	0	0	0	0	0	603	903	0
803	3	0	0	0	0	0	0	200	300	0	0	0	0	0	0	0	200	903	0	0	0	0	0	0	0	603	903	0
803	4	0	0	0	0	0	0	200	300	0	0	0	0	0	0	0	200	903	0	0	0	0	0	0	0	603	903	0
803	5	0	0	0	0	0	0	200	300	0	0	0	0	0	0	0	200	903	0	0	0	0	0	0	0	603	903	0
803	6	0	0	0	0	0	0	200	300	0	0	0	0	0	0	0	200	903	0	0	0	0	0	0	0	603	903	0
803	7	0	0	0	0	0	0	200	300	0	0	0	0	0	0	0	200	903	0	0	0	0	0	0	0	603	903	0
803	8	0	0	0	0	0	0	200	300	0	0	0	0	0	0	0	200	903	0	0	0	0	0	0	0	603	903	0
803	9	0	0	0	0	0	0	200	300	0	0	0	0	0	0	0	200	903	0	0	0	0	0	0	0	603	903	0
804	0	0	0	0	0	0	0	200	300	0	0	0	0	0	0	0	200	903	0	0	0	0	0	0	0	603	903	0
804	1	0	0	0	0	0	0	200	300	0	0	0	0	0	0	0	200	903	0	0	0	0	0	0	0	603	903	0
804	2	0	0	0	0	0	0	200	300	0	0	0	0	0	0	0	200	903	0	0	0	0	0	0	0	603	903	0
804	3	0	0	0	0	0	0	200	300	0	0	0	0	0	0	0	200	903	0	0	0	0	0	0	0	603	903	0
804	4	0	0	0	0	0	0	200	300	0	0	0	0	0	0	0	200	903	0	0	0	0	0	0	0	603	903	0
804	5	0	0	0	0	0	0	200	300	0	0	0	0	0	0	0	200	903	0	0	0	0	0	0	0	603	903	0
804	6	0	0	0	0	0	0	200	300	0	0	0	0	0	0	0	200	903	0	0	0	0	0	0	0	603	903	0
804	7	0	0	0	0	0	0	200	300	0	0	0	0	0	0	0	200	903	0	0	0	0	0	0	0	603	903	0
804	8	0	0	0	0	0	0	200	300	0	0	0	0	0	0	0	200	903	0	0	0	0	0	0	0	603	903	0
804	9	0	0	0	0	0	0	200	300	0	0	0	0	0	0	0	200	903	0	0	0	0	0	0	0	603	903	0
805	0	0	0	0	0	0	0	200	300	0	0	0	0	0	0	0	200	903	0	0	0	0	0	0	0	603	903	0
805	1	0	0	0	0	0	0	200	300	0	0	0	0	0	0	0	200	903	0	0	0	0	0	0	0	603	903	0
805	2	0	0	0	0	0	0	200	300	0	0	0	0	0	0	0	200	903	0	0	0	0	0	0	0	603	903	0
805	3	0	0	0	0	0	0	200	300	0	0	0	0	0	0	0	200	903	0	0	0	0	0	0	0	603	903	0
805	4	0	0	0	0	0	0	200	300	0	0	0	0	0	0	0	200	903	0	0	0	0	0	0	0	603	903	0
805	5	0	0	0	0	0	0	200	300	0	0	0	0	0	0	0	200	903	0	0	0	0	0	0	0	603	903	0
805	6	0	0	0	0	0	0	200	300	0	0	0	0	0	0	0	200	903	0	0	0	0	0	0	0	603	903	0
805	7	0	0	0	0	0	0	200	300	0	0	0	0	0	0	0	200	903	0	0	0	0	0	0	0	603	903	0
805	8	0	0	0	0	0	0	200	300	0	0	0	0	0	0	0	200	903	0	0	0	0	0	0	0	603	903	0
805	9	0	0	0	0	0	0	200	300	0	0	0	0	0	0	0	200	903	0	0	0	0	0	0	0	603	903	0
806	0	0	0	0	0	0	0	200	300	0	0	0	0	0	0	0	200	903	0	0	0	0	0	0	0	603	903	0
806	1	0	0	0	0	0	0	200	300	0	0	0	0	0	0	0	200	903	0	0	0	0	0	0	0	603	903	0
806	2	0	0	0	0	0	0	200	300	0	0	0	0	0	0	0	200	903	0	0	0	0	0	0	0	603	903	0
806	3	0	0	0	0	0	0	200	300	0	0	0	0	0	0	0	200	903	0	0	0	0	0	0	0	603	903	0
806	4	0	0	0	0	0	0	200	300	0	0	0	0	0	0	0	200	903	0	0	0	0	0	0	0	603	903	0
806	5	0	0	0	0	0	0	200	300	0	0	0	0	0	0	0	200	903	0	0	0	0	0	0	0	603	903	0
806	6	0	0	0	0	0	0	200	300	0	0	0	0	0	0	0	200	903	0	0	0	0	0	0	0	603	903	0
806	7	0	0	0	0	0	0	200	300	0	0	0	0	0	0	0	200	903	0	0	0	0	0	0	0	603	903	0
806	8	0	0	0	0	0	0	200	300	0	0	0	0	0	0	0	200	903	0	0	0	0	0	0	0	603	903	0
806	9	0	0	0	0	0	0	200	300	0	0	0	0	0	0	0	200	903	0	0	0	0	0	0	0	603	903	0
807	0	0	0	0	0	0	0	200	300	0	0	0	0	0	0	0	200	903	0	0	0	0	0	0	0	603	903	0
807	1	0	0	0	0	0	0	200	300	0	0	0	0	0	0	0	200	903	0	0	0	0	0	0	0	603	903	0
807	2	0	0	0	0	0	0	200	300	0	0	0	0	0	0	0	200	903	0	0	0	0	0	0	0	603	903	0
807	3	0	0	0	0	0	0	200	300	0	0	0	0	0	0	0	200	903	0	0	0	0	0	0	0	603	903	0
807	4	0	0	0	0	0	0	200	300	0	0	0	0	0	0	0	200	903	0	0	0	0	0	0	0	603	903	0
807	5	0	0	0	0	0	0	200	300	0	0	0	0	0	0	0	200	903	0	0	0	0	0	0	0	603	903	0
807	6	0	0	0	0	0	0	200	300	0	0	0	0	0	0	0	200	903	0	0	0	0	0	0	0	603	903	0
807	7	0	0	0	0	0	0	200	300	0	0	0	0	0	0	0	200	903	0	0	0	0	0	0	0	603	903	0
807	8	0	0	0	0	0	0	200	300	0	0	0	0	0	0	0	200	903	0	0	0	0	0	0	0	603	903	0
807	9	0	0	0	0	0	0	200	300	0	0	0	0	0	0	0	200	903	0	0	0	0	0	0	0	603	903	0
808	0	0	0	0	0	0	0	200	300	0	0	0	0	0	0	0	200	903	0	0	0	0	0	0	0	603	903	0
808	1	0	0	0	0	0	0	200	300	0	0	0	0	0	0	0	200	903	0	0	0	0	0	0	0	603	903	0
808	2	0	0	0	0	0	0	200	300	0	0	0	0	0	0	0	200	903	0	0	0	0	0	0	0	603	903	0
808	3	0	0	0	0	0	0	200	300	0	0	0	0	0	0	0	200	903	0	0	0	0	0	0	0	603	903	0
808	4	0	0	0	0	0	0	200	300	0	0	0	0	0	0	0	200	903	0	0	0	0	0	0	0	603	903	0
808	5	0	0	0	0	0	0	200	300	0	0	0	0	0	0	0	200	903	0	0	0	0	0	0	0	603	903	0
808	6	0	0	0	0	0	0	200	300	0	0	0	0	0	0	0	200	903	0	0	0	0	0	0	0	603	903	0
808	7	0	0	0	0	0	0	200	300	0	0	0	0	0	0	0	200	903	0	0	0	0	0	0	0	603	903	0
808	8	0	0	0	0	0	0	200	300	0	0	0	0	0	0	0	200	903	0	0	0	0	0	0	0	603	903	0
808	9	0	0	0	0	0	0	200	300	0	0	0	0	0	0	0	200	903	0	0	0	0	0	0	0	603	903	0
809	0	0	0	0	0	0	0	200	300	0	0	0	0	0	0	0	200	903	0	0	0	0	0	0	0	603	903	0
809	1	0	0	0	0	0	0	200	300	0	0	0	0	0	0	0	200	903	0	0	0	0	0	0	0	603	903	0
809	2	0	0	0	0	0	0	200	300	0	0	0	0	0	0	0	200	903	0	0	0	0	0	0	0	603	903	0
809	3	0	0	0	0	0	0	200	300	0	0	0	0	0	0	0	200	903	0	0	0	0	0	0	0	603	903	0
809	4	0	0	0	0	0	0	200	300	0	0	0	0	0	0	0	200	903	0	0	0	0	0	0	0	603	903	0
809	5	0	0	0	0	0	0	200	300	0	0	0	0	0	0	0	200	903	0	0	0	0	0	0	0	603	903	0
809	6	0	0	0	0	0	0	200	300	0	0	0	0	0	0	0	200	903	0	0	0	0	0	0	0	603	903	0
809	7	0	0	0	0	0	0	200	300	0	0	0	0	0	0	0	200	903	0	0	0	0	0	0	0	603	903	0
809	8	0	0	0	0	0	0	200	300	0	0	0	0	0	0	0	200	903	0	0	0	0	0	0	0	603	903	0
809	9	0	0	0	0	0	0	200	300	0	0	0	0	0	0	0	200	903	0	0	0	0	0	0	0	603	903	0
810	0	0	0	0	0	0	0	200	300	0	0	0	0	0	0	0	200	903	0	0	0	0	0	0	0	603	903	0
810	1	0	0	0	0	0	0	200	300	0	0	0	0	0	0	0	200	903	0	0	0	0	0	0	0	603	903	0
810	2	0	0	0	0	0	0	200	300	0	0	0	0	0	0	0	200	903	0	0	0	0	0	0	0	603	903	0
810	3	0	0	0	0	0	0	200	300	0	0	0	0	0	0	0	200	903	0	0	0	0	0	0	0	603	903	0
810	4	0	0	0	0	0	0	200	300	0	0	0	0	0	0	0	200	903	0	0	0	0	0	0	0	603	903	0
810	5	0	0	0	0	0	0	200	300	0	0	0	0	0	0	0	200	903	0	0	0	0	0	0	0	603	903	0
810	6	0	0	0	0	0	0	200	300	0	0	0	0	0	0	0	200	903	0	0	0	0	0	0	0	603	903	0
810	7	0	0	0	0	0	0	200	300	0	0	0	0	0	0	0	200	903	0	0	0	0	0	0	0	603	903	0
810	8	0	0	0	0	0	0	200	300	0	0	0	0	0	0	0	200	903	0	0	0	0	0	0	0	603	903	0
810	9	0	0	0	0	0	0	200	300	0	0	0	0	0	0	0	200	903	0	0	0	0	0	0	0	603	903	0
811	0	0	0	0	0	0	0	200	300	0	0	0	0	0	0	0	200	903	0	0	0	0	0	0	0	603	903	0
811	1	0	0	0	0	0	0	200	300	0	0	0	0	0	0	0	200	903	0	0	0	0	0	0	0	603	903	0
811	2	0	0	0	0	0	0	200	300	0	0	0	0	0	0	0	200	903	0	0	0	0	0	0	0	603	903	0
811	3	0	0	0	0	0	0	200	300	0	0	0	0	0	0	0	200	903	0	0	0	0	0	0	0	603	903	0
811	4	0	0	0	0	0	0	200	300	0	0	0	0	0	0	0	200	903	0	0	0	0	0	0	0	603	903	0
811	5	0	0	0	0	0	0	200	300	0	0	0	0	0	0	0	200	903	0	0	0	0	0	0	0	603	903	0
811	6	0	0	0	0	0	0	200	300	0	0	0	0	0	0	0	200	903	0	0	0	0	0	0	0	603	903	0
811	7	0	0	0	0	0	0	200	300	0	0	0	0	0	0	0	200	903	0	0	0	0	0	0	0	603	903	0
811	8	0	0	0	0	0	0	200	300	0	0	0	0	0	0	0	200	903	0	0	0	0	0	0	0	603	903	0
811	9	0	0	0	0	0	0	200	300	0	0	0	0	0	0	0	200	903	0	0	0	0	0	0	0	603	903	0
812	0	0	0	0	0	0	0	200	300	0	0	0	0	0	0	0	200	903	0	0	0	0	0	0	0	603	903	0
812	1	0	0	0	0	0	0	200	300	0	0	0	0	0	0	0	200	903	0	0	0	0	0	0	0	603	903	0
812	2	0	0	0	0	0	0	200	300	0	0	0	0	0	0	0	200	903	0	0	0	0	0	0	0	603	903	0
812	3	0	0	0	0	0	0	200	300	0	0	0	0	0	0	0	200	903	0	0	0	0	0	0	0	603	903	0
812	4	0	0	0	0	0	0	200	300	0	0	0	0	0	0	0	200	903	0	0	0	0	0	0	0	603	903	0
812	5	0	0	0	0	0	0	200	300	0	0	0	0	0	0	0	200	903	0	0	0	0	0	0	0	603	903	0
812	6	0	0	0	0	0	0	200	300	0	0	0	0	0	0	0	200	903	0	0	0	0	0	0	0	603	903	0
812	7	0	0	0	0	0	0	200	300	0	0	0	0	0	0	0	200	903	0	0	0	0	0	0	0	603	903	0
812	8	0	0	0	0	0	0	200	300	0	0	0	0	0	0	0	200	903	0	0	0	0	0	0	0	603	903	0
812	9	0	0	0	0	0	0	200	300	0	0	0	0	0	0	0	200	903	0	0	0	0	0	0	0	603	903	0
813	0	0	0	0	0	0	0	200	300	0	0	0	0	0	0	0	200	903	0	0	0	0	0	0	0	603	903	0
813	1	0	0	0	0	0	0	200	300	0	0	0	0	0	0	0	200	903	0	0	0	0	0	0	0	603	903	0
813	2	0	0	0	0	0	0	200	300	0	0	0	0	0	0	0	200	903	0	0	0	0	0	0	0	603	903	0
813	3	0	0	0	0	0	0	200	300	0	0	0	0	0	0	0	200	903	0	0	0	0	0	0	0	603	903	0
813	4	0	0	0	0	0	0	200	300	0	0	0	0	0	0	0	200	903	0	0	0	0	0	0	0	603	903	0
813	5	0	0	0	0	0	0	200	300	0	0	0	0	0	0	0	200	903	0	0	0	0	0	0	0	603	903	0
813	6	0	0	0	0	0	0	200	300	0	0	0	0	0	0	0	200	903	0	0	0	0	0	0	0	603	903	0
813	7	0	0	0	0	0	0	200	300	0	0	0	0	0	0	0	200	903	0	0	0	0	0	0	0	603	903	0
813	8	0	0	0	0	0	0	200	300	0	0	0	0	0	0	0	200	903	0	0	0	0	0	0	0	603	903	0
813	9	0	0	0	0	0	0	200	300	0	0	0	0	0	0	0	200	903	0	0	0	0	0	0	0	603	903	0
814	0	0	0	0	0	0	0	200	300	0	0	0	0	0	0	0	200	903	0	0	0	0	0	0	0	603	903	0
814	1	0	0	0	0	0	0	200	300	0	0	0	0	0	0	0	200	903	0	0	0	0	0	0	0	603	903	0
814	2	0	0	0	0	0	0	200	300	0	0	0	0	0	0	0	200	903	0	0	0	0	0	0	0	603	903	0
814	3	0	0	0	0	0	0	200	300	0	0	0	0	0	0	0	200	903	0	0	0	0	0	0	0	603	903	0
814	4	0	0	0	0	0	0	200	300	0	0	0	0	0	0	0	200	903	0	0	0	0	0	0	0	603	903	0
814	5	0	0	0	0	0	0	200	300	0	0	0	0	0	0	0	200	903	0	0	0	0	0	0	0	603	903	0
814	6	0	0	0	0	0	0	200	300	0	0	0	0	0	0	0	200	903	0	0	0	0	0	0	0	603	903	0
814	7	0	0	0	0	0	0	200	300	0	0	0	0	0	0	0	200	903	0	0	0	0	0	0	0	603	903	0
814	8	0	0	0	0	0	0	200	300	0	0	0	0	0	0	0	200	903	0	0	0	0	0	0	0	603	903	0
814	9	0	0	0	0	0	0	200	300	0	0	0	0	0	0	0	200	903	0	0	0	0	0	0	0	603	903	0
815	0	0	0	0	0	0	0	200	300	0	0	0	0	0	0	0	200	903	0	0	0	0	0	0	0	603	903	0
815	1	0	0	0	0	0	0	200	300	0	0	0	0	0	0	0	200	903	0	0	0	0	0	0	0	603	903	0
815	2	0	0	0	0	0	0	200	300	0	0	0	0	0	0	0	200	903	0	0	0	0	0	0	0	603	903	0
815	3	0	0	0	0	0	0	200	300	0	0	0	0	0	0	0	200	903	0	0	0	0	0	0	0	603	903	0
815	4	0	0	0	0	0	0	200	300	0	0	0	0	0	0	0	200	903	0	0	0	0	0	0	0	603	903	0
815	5	0	0	0	0	0	0	200	300	0	0	0	0	0	0	0	200	903	0	0	0	0	0	0	0	603	903	0
815	6	0	0	0	0	0	0	200	300	0	0	0	0	0	0	0	200	903	0	0	0	0	0	0	0	603	903	0
815	7	0	0	0	0	0	0	200	300	0	0	0	0	0	0	0	200	903	0	0	0	0	0	0	0	603	903	0
815	8	0	0	0	0	0	0	200	300	0	0	0	0	0	0	0	200	903	0	0	0	0	0	0	0	603	903	0
815	9	0	0	0	0	0	0	200	300	0	0	0	0	0	0	0	200	903	0	0	0	0	0	0	0	603	903	0
816	0	0	0	0	0	0	0	200	300	0	0	0	0	0	0	0	200	903	0	0	0	0	0	0	0	603	903	0
816	1	0	0	0	0	0	0	200	300	0	0	0	0	0	0	0	200	903	0	0	0	0	0	0	0	603	903	0
816	2	0	0	0	0	0	0	200	300	0	0	0	0	0	0	0	200	903	0	0	0	0	0	0	0	603	903	0
816	3	0	0	0	0	0	0	200	300	0	0	0	0	0	0	0	200	903	0	0	0	0	0	0	0	603	903	0
816	4	0	0	0	0	0	0	200	300	0	0	0	0	0	0	0	200	903	0	0	0	0	0	0	0	603	903	0
816	5	0	0	0	0	0	0	200	300	0	0	0	0	0	0	0	200	903	0	0	0	0	0	0	0	603	903	0
816	6	0	0	0	0	0	0	200	300	0	0	0	0	0	0	0	200	903	0	0	0	0	0	0	0	603	903	0
816	7	0	0	0	0	0	0	200	300	0	0	0	0	0	0	0	200	903	0	0	0	0	0	0	0	603	903	0
816	8	0	0	0	0	0	0	200	300	0	0	0	0	0	0	0	200	903	0	0	0	0	0	0	0	603	903	0
816	9	0	0	0	0	0	0	200	300	0	0	0	0	0	0	0	200	903	0	0	0	0	0	0	0	603	903	0
817	0	0	0	0	0	0	0	200	300	0	0	0	0	0	0	0	200	903	0	0	0	0	0	0	0	603	903	0
817	1	0	0	0	0	0	0	200	300	0	0	0	0	0	0	0	200	903	0	0	0	0	0	0	0	603	903	0
817	2	0	0	0	0	0	0	200	300	0	0	0	0	0	0	0	200	903	0	0	0	0	0	0	0	603	903	0
817	3	0	0	0	0	0	0	200	300	0	0	0	0	0	0	0	200	903	0	0	0	0	0	0	0	603	903	0
817	4	0	0	0	0	0	0	200	300	0	0	0	0	0	0	0	200	903	0	0	0	0	0	0	0	603	903	0
817	5	0	0	0	0	0	0	200	300	0	0	0	0	0	0	0	200	903	0	0	0	0	0	0	0	603	903	0
817	6	0	0	0	0	0	0	200	300	0	0	0	0	0	0	0	200	903	0	0	0	0	0	0	0	603	903	0
817	7	0	0	0	0	0	0	200	300	0	0	0	0	0	0	0	200	903	0	0	0	0	0	0	0	603	903	0
817	8	0	0	0	0	0	0	200	300	0	0	0	0	0	0	0	200	903	0	0	0	0	0	0	0	603	903	0
817	9	0	0	0	0	0	0	200	300	0	0	0	0	0	0	0	200	903	0	0	0	0	0	0	0	603	903	0
818	0	0	0	0	0	0	0	200	300	0	0	0	0	0	0	0	200	903	0	0	0	0	0	0	0	603	903	0
818	1	0	0	0	0	0	0	200	300	0	0	0	0	0	0	0	200	903	0	0	0	0	0	0	0	603	903	0
818	2	0	0	0	0	0	0	200	300	0	0	0	0	0	0	0	200	903	0	0	0	0	0	0	0	603	903	0
818	3	0	0	0	0	0	0	200	300	0	0	0	0	0	0	0	200	903	0	0	0	0	0	0	0	603	903	0
818	4	0	0	0	0	0	0	200	300	0	0	0	0	0	0	0	200	903	0	0	0	0	0	0	0	603	903	0
818	5	0	0	0	0	0	0	200	300	0	0	0	0	0	0	0	200	903	0	0	0	0	0	0	0	603	903	0
818	6	0	0	0	0	0	0	200	300	0	0	0	0	0	0	0	200	903	0	0	0	0	0	0	0	603	903	0
818	7	0	0	0	0	0	0	200	300	0	0	0	0	0	0	0	200	903	0	0	0	0	0	0	0	603	903	0
818	8	0	0	0	0	0	0	200	300	0	0	0	0	0	0	0	200	903	0	0	0	0	0	0	0	603	903	0
818	9	0	0	0	0	0	0	200	300	0	0	0	0	0	0	0	200	903	0	0	0	0	0	0	0	603	903	0
819	0	0	0	0	0	0	0	200	300	0	0	0	0	0	0	0	200	903	0	0	0	0	0	0	0	603	903	0
819	1	0	0	0	0	0	0	200	300	0	0	0	0	0	0	0	200	903	0	0	0	0	0	0	0	603	903	0
819	2	0	0	0	0	0	0	200	300	0	0	0	0	0	0	0	200	903	0	0	0	0	0	0	0	603	903	0
819	3	0	0	0	0	0	0	200	300	0	0	0	0	0	0	0	200	903	0	0	0	0	0	0	0	603	903	0
819	4	0	0	0	0	0	0	200	300	0	0	0	0	0	0	0	200	903	0	0	0	0	0	0	0	603	903	0
819	5	0	0	0	0	0	0	200	300	0	0	0	0	0	0	0	200	903	0	0	0	0	0	0	0	603	903	0
819	6	0	0	0	0	0	0	200	300	0	0	0	0	0	0	0	200	903	0	0	0	0	0	0	0	603	903	0
819	7	0	0	0	0	0	0	200	300	0	0	0	0	0	0	0	200	903	0	0	0	0	0	0	0	603	903	0
819	8	0	0	0	0	0	0	200	300	0	0	0	0	0	0	0	200	903	0	0	0	0	0	0	0	603	903	0
819	9	0	0	0	0	0	0	200	300	0	0	0	0	0	0	0	200	903	0	0	0	0	0	0	0	603	903	0
820	0	0	0	0	0	0	0	200	300	0	0	0	0	0	0	0	200	903	0	0	0	0	0	0	0	603	903	0
820	1	0	0	0	0	0	0	200	300	0	0	0	0	0	0	0	200	903	0	0	0	0	0	0	0	603	903	0
820	2	0	0	0	0	0	0	200	300	0	0	0	0	0	0	0	200	903	0	0	0	0	0	0	0	603	903	0
820	3	0	0	0	0	0	0	200	300	0	0	0	0	0	0	0	200	903	0	0	0	0	0	0	0	603	903	0
820	4	0	0	0	0	0	0	200	300	0	0	0	0	0	0	0	200	903	0	0	0	0	0	0	0	603	903	0
820	5	0	0	0	0	0	0	200	300	0	0	0	0	0	0	0	200	903	0	0	0	0	0	0	0	603	903	0
820	6	0	0	0	0	0	0	200	300	0	0	0	0	0	0	0	200	903	0	0	0	0	0	0	0	603	903	0
820	7	0	0	0	0	0	0	200	300	0	0	0	0	0	0	0	200	903	0	0	0	0	0	0	0	603	903	0
820	8	0	0	0	0	0	0	200	300	0	0	0	0	0	0	0	200	903	0	0	0	0	0	0	0	603	903	0
820	9	0	0	0	0	0	0	200	300	0	0	0	0	0	0	0	200	903	0	0	0	0	0	0	0	603	903	0
821	0	0	0	0	0	0	0	200	300	0	0	0	0	0	0	0	200	903	0	0	0	0	0	0	0	603	903	0
821	1	0	0	0	0	0	0	200	300	0	0	0	0	0	0	0	200	903	0	0	0	0	0	0	0	603	903	0
821	2	0	0	0	0	0	0	200	300	0	0	0	0	0	0	0	200	903	0	0	0	0	0	0	0	603	903	0
821	3	0	0	0	0	0	0	200	300	0	0	0	0	0	0	0	200	903	0	0	0	0	0	0	0	603	903	0
821	4	0	0	0	0	0	0	200	300	0	0	0	0	0	0	0	200	903	0	0	0	0	0	0	0	603	903	0
821	5	0	0	0	0	0	0	200	300	0	0	0	0	0	0	0	200	903	0	0	0	0	0	0	0	603	903	0
821	6	0	0	0	0	0	0	200	300	0	0	0	0	0	0	0	200	903	0	0	0	0	0	0	0	603	903	0
821	7	0	0	0	0	0	0	200	300	0	0	0	0	0	0	0	200	903	0	0	0	0	0	0	0	603	903	0
821	8	0	0	0	0	0	0	200	300	0	0	0	0	0	0	0	200	903	0	0	0	0	0	0	0	603	903	0
821	9	0	0	0	0	0	0	200	300	0	0	0	0	0	0	0	200	903	0	0	0	0	0	0	0	603	903	0
822	0	0	0	0	0	0	0	200	300	0	0	0	0	0	0	0	200	903	0	0	0	0	0	0	0	603	903	0
822	1	0	0	0	0	0	0	200	300	0	0	0	0	0	0	0	200	903	0	0	0	0	0	0	0	603	903	0
822	2	0	0	0	0	0	0	200	300	0	0	0	0	0	0	0	200	903	0	0	0	0	0	0	0	603	903	0
822	3	0	0	0	0	0	0	200	300	0	0	0	0	0	0	0	200	903	0	0	0	0	0	0	0	603	903	0
822	4	0	0	0	0	0	0	200	300	0	0	0	0	0	0	0	200	903	0	0	0	0	0	0	0	603	903	0
822	5	0	0	0	0	0	0	200	300	0	0	0	0	0	0	0	200	903	0	0	0	0	0	0	0	603	903	0
822	6	0	0	0	0	0	0	200	300	0	0	0	0	0	0	0	200	903	0	0	0	0	0	0	0	603	903	0
822	7	0	0	0	0	0	0	200	300	0	0	0	0	0	0	0	200	903	0	0	0	0	0	0	0	603	903	0
822	8	0	0	0	0	0	0	200	300	0	0	0	0	0	0	0	200	903	0	0	0	0	0	0	0	603	903	0
822	9	0	0	0	0	0	0	200	300	0	0	0	0	0	0	0	200	903	0	0	0	0	0	0	0	603	903	0
823	0	0	0	0	0	0	0	200	300	0	0	0	0	0	0	0	200	903	0	0	0	0	0	0	0	603	903	0
823	1	0	0	0	0	0	0	200	300	0	0	0	0	0	0	0	200	903	0	0	0	0	0	0	0	603	903	0
823	2	0	0	0	0	0	0	200	300	0	0	0	0	0	0	0	200	903	0	0	0	0	0	0	0	603	903	0
823	3	0	0	0	0	0	0	200	300	0	0	0	0	0	0	0	200	903	0	0	0	0	0	0	0	603	903	0
823	4	0	0	0	0	0	0	200	300	0	0	0	0	0	0	0	200	903	0	0	0	0	0	0	0	603	903	0
823	5	0	0	0	0	0	0	200	300	0	0	0	0	0	0	0	200	903	0	0	0	0	0	0	0	603	903	0
823	6	0	0	0	0	0	0	200	300	0	0	0	0	0	0	0	200	903	0	0	0	0	0	0	0	603	903	0
823	7	0	0	0	0	0	0	200	300	0	0	0	0	0	0	0	200	903	0	0	0	0	0	0	0	603	903	0
823	8	0	0	0	0	0	0	200	300	0	0	0	0	0	0	0	200	903	0	0	0	0	0	0	0	603	903	0
823	9	0	0	0	0	0	0	200	300	0	0	0	0	0	0	0	200	903	0	0	0	0	0	0	0	603	903	0
824	0	0	0	0	0	0	0	200	300	0	0	0	0	0	0	0	200	903	0	0	0	0	0	0	0	603	903	0
824	1	0	0	0	0	0	0	200	300	0	0	0	0	0	0	0	200	903	0	0	0	0	0	0	0	603	903	0
824	2	0	0	0	0	0	0	200	300	0	0	0	0	0	0	0	200	903	0	0	0	0	0	0	0	603	903	0
824	3	0	0	0	0	0	0	200	300	0	0	0	0	0	0	0	200	903	0	0	0	0	0	0	0	603	903	0
824	4	0	0	0	0	0	0	200	300	0	0	0	0	0	0	0	200	903	0	0	0	0	0	0	0	603	903	0
824	5	0	0	0	0	0	0	200	300	0	0	0	0	0	0	0	200	903	0	0	0	0	0	0	0	603	903	0
824	6	0	0	0	0	0	0	200	300	0	0	0	0	0	0	0	200	903	0	0	0	0	0	0	0	603	903	0
824	7	0	0	0	0	0	0	200	300	0	0	0	0	0	0	0	200	903	0	0	0	0	0	0	0	603	903	0
824	8	0	0	0	0	0	0	200	300	0	0	0	0	0	0	0	200	903	0	0	0	0	0	0	0	603	903	0
824	9	0	0	0	0	0	0	200	300	0	0	0	0	0	0	0	200	903	0	0	0	0	0	0	0	603	903	0
825	0	0	0	0	0	0	0	200	300	0	0	0	0	0	0	0	200	903	0	0	0	0	0	0	0	603	903	0
825	1	0	0	0	0	0	0	200	300	0	0	0	0	0	0	0	200	903	0	0	0	0	0	0	0	603	903	0
825	2	0	0	0	0	0	0	200	300	0	0	0	0	0	0	0	200	903	0	0	0	0	0	0	0	603	903	0
825	3	0	0	0	0	0	0	200	300	0	0	0	0	0	0	0	200	903	0	0	0	0	0	0	0	603	903	0
825	4	0	0	0	0	0	0	200	300	0	0	0	0	0	0	0	200	903	0	0	0	0	0	0	0	603	903	0
825	5	0	0	0	0	0	0	200	300	0	0	0	0	0	0	0	200	903	0	0	0	0	0	0	0	603	903	0
825	6	0	0	0	0	0	0	200	300	0	0	0	0	0	0	0	200	903	0	0	0	0	0	0	0	603	903	0
825	7	0	0	0	0	0	0	200	300	0	0	0	0	0	0	0	200	903	0	0	0	0	0	0	0	603	903	0
825	8	0	0	0	0	0	0	200	300	0	0	0	0	0	0	0	200	903	0	0	0	0	0	0	0	603	903	0
825	9	0	0	0	0	0	0	200	300	0	0	0	0	0	0	0	200	903	0	0	0	0	0	0	0	603	903	0
826	0	0	0	0	0	0	0	200	300	0	0	0	0	0	0	0	200	903	0	0	0	0	0	0	0	603	903	0
826	1	0	0	0	0	0	0	200	300	0	0	0	0	0	0	0	200	903	0	0	0	0	0	0	0	603	903	0
826	2	0	0	0	0	0	0	200	300	0	0	0	0	0	0	0	200	903	0	0	0	0	0	0	0	603	903	0
826	3	0	0	0	0	0	0	200	300	0	0	0	0	0	0	0	200	903	0	0	0	0	0	0	0	603	903	0
826	4	0	0	0	0	0	0	200	300	0	0	0	0	0	0	0	200	903	0	0	0	0	0	0	0	603	903	0
826	5	0	0	0	0	0	0	200	300	0	0	0	0	0	0	0	200	903	0	0	0	0	0	0	0	603	903	0
826	6	0	0	0	0	0	0	200	300	0	0	0	0	0	0	0	200	903	0	0	0	0	0	0	0	603	903	0
826	7	0	0	0	0	0	0	200	300	0	0	0	0	0	0	0	200	903	0	0	0	0	0	0	0	603	903	0
826	8	0	0	0	0	0	0	200	300	0	0	0	0	0	0	0	200	903	0	0	0	0	0	0	0	603	903	0
826	9	0	0	0	0	0	0	200	300	0	0	0	0	0	0	0	200	903	0	0	0	0	0	0	0	603	903	0
827	0	0	0	0	0	0	0	200	300	0	0	0	0	0	0	0	200	903	0	0	0	0	0	0	0	603	903	0
827	1	0	0	0	0	0	0	200	300	0	0	0	0	0	0	0	200	903	0	0	0	0	0	0	0	603	903	0
827	2	0	0	0	0	0	0	200	300	0	0	0	0	0	0	0	200	903	0	0	0	0	0	0	0	603	903	0
827	3	0	0	0	0	0	0	200	300	0	0	0	0	0	0	0	200	903	0	0	0	0	0	0	0	603	903	0
827	4	0	0	0	0	0	0	200	300	0	0	0	0	0	0	0	200	903	0	0	0	0	0	0	0	603	903	0
827	5	0	0	0	0	0	0	200	300	0	0	0	0	0	0	0	200	903	0	0	0	0	0	0	0	603	903	0
827	6	0	0	0	0	0	0	200	300	0	0	0	0	0	0	0	200	903	0	0	0	0	0	0	0	603	903	0
827	7	0	0	0	0	0	0	200	300	0	0	0	0	0	0	0	200	903	0	0	0	0	0	0	0	603	903	0
827	8	0	0	0	0	0	0	200	300	0	0	0	0	0	0	0	200	903	0	0	0	0	0	0	0	603	903	0
827	9	0	0	0	0	0	0	200	300	0	0	0	0	0	0	0	200	903	0	0	0	0	0	0	0	603	903	0
828	0	0	0	0	0	0	0	200	300	0	0	0	0	0	0	0	200	903	0	0	0	0	0	0	0	603	903	0
828	1	0	0	0	0	0	0	200	300	0	0	0	0	0	0	0	200	903	0	0	0	0	0	0	0	603	903	0
828	2	0	0	0	0	0	0	200	300	0	0	0	0	0	0	0	200	903	0	0	0	0	0	0	0	603	903	0
828	3	0	0	0	0	0	0	200	300	0	0	0	0	0	0	0	200	903	0	0	0	0	0	0	0	603	903	0
828	4	0	0	0	0	0	0	200	300	0	0	0	0	0	0	0	200	903	0	0	0	0	0	0	0	603	903	0
828	5	0	0	0	0	0	0	200	300	0	0	0	0	0	0	0	200	903	0	0	0	0	0	0	0	603	903	0
828	6	0	0	0	0	0	0	200	300	0	0	0	0	0	0	0	200	903	0	0	0	0	0	0	0	603	903	0
828	7	0	0	0	0	0	0	200	300	0	0	0	0	0	0	0	200	903	0	0	0	0	0	0	0	603	903	0
828	8	0	0	0	0	0	0	200	300	0	0	0	0	0	0	0	200	903	0	0	0	0	0	0	0	603	903	0
828	9	0	0	0	0	0	0	200	300	0	0	0	0	0	0	0	200	903	0	0	0	0	0	0	0	603	903	0
829	0	0	0	0	0	0	0	200	300	0	0	0	0	0	0	0	200	903	0	0	0	0	0	0	0	603	903	0
829	1	0	0	0	0	0	0	200	300	0	0	0	0	0	0	0	200	903	0	0	0	0	0	0	0	603	903	0
829	2	0	0	0	0	0	0	200	300	0	0	0	0	0	0	0	200	903	0	0	0	0	0	0	0	603	903	0
829	3	0	0	0	0	0	0	200	300	0	0	0	0	0	0	0	200	903	0	0	0	0	0	0	0	603	903	0
829	4	0	0	0	0	0	0	200	300	0	0	0	0	0	0	0	200	903	0	0	0	0	0	0	0	603	903	0
829	5	0	0	0	0	0	0	200	300	0	0	0	0	0	0	0	200	903	0	0	0	0	0	0	0	603	903	0
829	6	0	0	0	0	0	0	200	300	0	0	0	0	0	0	0	200	903	0	0	0	0	0	0	0	603	903	0
829	7	0	0	0	0	0	0	200	300	0	0	0	0	0	0	0	200	903	0	0	0	0	0	0	0	603	903	0
829	8	0	0	0	0	0	0	200	300	0	0	0	0	0	0	0	200	903	0	0	0	0	0	0	0	603	903	0
829	9	0	0	0	0	0	0	200	300	0	0	0	0	0	0	0	200	903	0	0	0	0	0	0	0	603	903	0
830	0	0	0	0	0	0	0	200	300	0	0	0	0	0	0	0	200	903	0	0	0	0	0	0	0	603	903	0
830	1	0	0	0	0	0	0	200	300	0	0	0	0	0	0	0	200	903	0	0	0	0	0	0	0	603	903	0
830	2	0	0	0	0	0	0	200	300	0	0	0	0	0	0	0	200	903	0	0	0	0	0	0	0	603	903	0
830	3	0	0	0	0	0	0	200	300	0	0	0	0	0	0	0	200	903	0	0	0	0	0	0	0	603	903	0
830	4	0	0	0	0	0	0	200	300	0	0	0	0	0	0	0	200	903	0	0	0	0	0	0	0	603	903	0
830	5	0	0	0	0	0	0	200	300	0	0	0	0	0	0	0	200	903	0	0	0	0	0	0	0	603	903	0
830	6	0	0	0	0	0	0	200	300	0	0	0	0	0	0	0	200	903	0	0	0	0	0	0	0	603	903	0
830	7	0	0	0	0	0	0	200	300	0	0	0	0	0	0	0	200	903	0	0	0	0	0	0	0	603	903	0
830	8	0	0	0	0	0	0	200	300	0	0	0	0	0	0	0	200	903	0	0	0	0	0	0	0	603	903	0
830	9	0	0	0	0	0	0	200	300	0	0	0	0	0	0	0	200	903	0	0	0	0	0	0	0	603	903	0
831	0	0	0	0	0	0	0	200	300	0	0	0	0	0	0	0	200	903	0	0	0	0	0	0	0	603	903	0
831	1	0	0	0	0	0	0	200	300	0	0	0	0	0	0	0	200	903	0	0	0	0	0	0	0	603	903	0
831	2	0	0	0	0	0	0	200	300	0	0	0	0	0	0	0	200	903	0	0	0	0	0	0	0	603	903	0
831	3	0	0	0	0	0	0	200	300	0	0	0	0	0	0	0	200	903	0	0	0	0	0	0	0	603	903	0
831	4	0	0	0	0	0	0	200	300	0	0	0	0	0	0	0	200	903	0	0	0	0	0	0	0	603	903	0
831	5	0	0	0	0	0	0	200	300	0	0	0	0	0	0	0	200	903	0	0	0	0	0	0	0	603	903	0
831	6	0	0	0	0	0	0	200	300	0	0	0	0	0	0	0	200	903	0	0	0	0	0	0	0	603	903	0
831	7	0	0	0	0	0	0	200	300	0	0	0	0	0	0	0	200	903	0	0	0	0	0	0	0	603	903	0
831	8	0	0	0	0	0	0	200	300	0	0	0	0	0	0	0	200	903	0	0	0	0	0	0	0	603	903	0
831	9	0	0	0	0	0	0	200	300	0	0	0	0	0	0	0	200	903	0	0	0	0	0	0	0	603	903	0
832	0	0	0	0	0	0	0	200	300	0	0	0	0	0	0	0	200	903	0	0	0	0	0	0	0	603	903	0
832	1	0	0	0	0	0	0	200	300	0	0	0	0	0	0	0	200	903	0	0	0	0	0	0	0	603	903	0
832	2	0	0	0	0	0	0	200	300	0	0	0	0	0	0	0	200	903	0	0	0	0	0	0	0	603	903	0
832	3	0	0	0	0	0	0	200	300	0	0	0	0	0	0	0	200	903	0	0	0	0	0	0	0	603	903	0
832	4	0	0	0	0	0	0	200	300	0	0	0	0	0	0	0	200	903	0	0	0	0	0	0	0	603	903	0
832	5	0	0	0	0	0	0	200	300	0	0	0	0	0	0	0	200	903	0	0	0	0	0	0	0	603	903	0
832	6	0	0	0	0	0	0	200	300	0	0	0	0	0	0	0	200	903	0	0	0	0	0	0	0	603	903	0
832	7	0	0	0	0	0	0	200	300	0	0	0	0	0	0	0	200	903	0	0	0	0	0	0	0	603	903	0
832	8	0	0	0	0	0	0	200	300	0	0	0	0	0	0	0	200	903	0	0	0	0	0	0	0	603	903	0
832	9	0	0	0	0	0	0	200	300	0	0	0	0	0	0	0	200	903	0	0	0	0	0	0	0	603	903	0
833	0	0	0	0	0	0	0	200	300	0	0	0	0	0	0	0	200	903	0	0	0	0	0	0	0	603	903	0
833	1	0	0	0	0	0	0	200	300	0	0	0	0	0	0	0	200	903	0	0	0	0	0	0	0	603	903	0
833	2	0	0	0	0	0	0	200	300	0	0	0	0	0	0	0	200	903	0	0	0	0	0	0	0	603	903	0
833	3	0	0	0	0	0	0	200	300	0	0	0	0	0	0	0	200	903	0	0	0	0	0	0	0	603	903	0
833	4	0	0	0	0	0	0	200	300	0	0	0	0	0	0	0	200	903	0	0	0	0	0	0	0	603	903	0
833	5	0	0	0	0	0	0	200	300	0	0	0	0	0	0	0	200	903	0	0	0	0	0	0	0	603	903	0
833	6	0	0	0	0	0	0	200	300	0	0	0	0	0	0	0	200	903	0	0	0	0	0	0	0	603	903	0
833	7	0	0	0	0	0	0	200	300	0	0	0	0	0	0	0	200	903	0	0	0	0	0	0	0	603	903	0
833	8	0	0	0	0	0	0	200	300	0	0	0	0	0	0	0	200	903	0	0	0	0	0	0	0	603	903	0
833	9	0	0	0	0	0	0	200	300	0	0	0	0	0	0	0	200	903	0	0	0	0	0	0	0	603	903	0
834	0	0	0	0	0	0	0	200	300	0	0	0	0	0	0	0	200	903	0	0	0	0	0	0	0	603	903	0
834	1	0	0	0	0	0	0	200	300	0	0	0	0	0	0	0	200	903	0	0	0	0	0	0	0	603	903	0
834	2	0	0	0	0	0	0	200	300	0	0	0	0	0	0	0	200	903	0	0	0	0	0	0	0	603	903	0
834	3	0	0	0	0	0	0	200	300	0	0	0	0	0	0	0	200	903	0	0	0	0	0	0	0	603	903	0
834	4	0	0	0	0	0	0	200	300	0	0	0	0	0	0	0	200	903	0	0	0	0	0	0	0	603	903	0
834	5	0	0	0	0	0	0	200	300	0	0	0	0	0	0	0	200	903	0	0	0	0	0	0	0	603	903	0
834	6	0	0	0	0	0	0	200	300	0	0	0	0	0	0	0	200	903	0	0	0	0	0	0	0	603	903	0
834	7	0	0	0	0	0	0	200	300	0	0	0	0	0	0	0	200	903	0	0	0	0	0	0	0	603	903	0
834	8	0	0	0	0	0	0	200	300	0	0	0	0	0	0	0	200	903	0	0	0	0	0	0	0	603	903	0
834	9	0	0	0	0	0	0	200	300	0	0	0	0	0	0	0	200	903	0	0	0	0	0	0	0	603	903	0
835	0	0	0	0	0	0	0	200	300	0	0	0	0	0	0	0	200	903	0	0	0	0	0	0	0	603	903	0
835	1	0	0	0	0	0	0	200	300	0	0	0	0	0	0	0	200	903	0	0	0	0	0	0	0	603	903	0
835	2	0	0	0	0	0	0	200	300	0	0	0	0	0	0	0	200	903	0	0	0	0	0	0	0	603	903	0
835	3	0	0	0	0	0	0	200	300	0	0	0	0	0	0	0	200	903	0	0	0	0	0	0	0	603	903	0
835	4	0	0	0	0	0	0	200	300	0	0	0	0	0	0	0	200	903	0	0	0	0	0	0	0	603	903	0
835	5	0	0	0	0	0	0	200	300	0	0	0	0	0	0	0	200	903	0	0	0	0	0	0	0	603	903	0
835	6	0	0	0	0	0	0	200	300	0	0	0	0	0	0	0	200	903	0	0	0	0	0	0	0	603	903	0
835	7	0	0	0	0	0	0	200	300	0	0	0	0	0	0	0	200	903	0	0	0	0	0	0	0	603	903	0
835	8	0	0	0	0	0	0	200	300	0	0	0	0	0	0	0	200	903	0	0	0	0	0	0	0	603	903	0
835	9	0	0	0	0	0	0	200	300	0	0	0	0	0	0	0	200	903	0	0	0	0	0	0	0	603	903	0
836	0	0	0	0	0	0	0	200	300	0	0	0	0	0	0	0	200	903	0	0	0	0	0	0	0	603	903	0
836	1	0	0	0	0	0	0	200	300	0	0	0	0	0	0	0	200	903	0	0	0	0	0	0	0	603	903	0
836	2	0	0	0	0	0	0	200	300	0	0	0	0	0	0	0	200	903	0	0	0	0	0	0	0	603	903	0
836	3	0	0	0	0	0	0	200	300	0	0	0	0	0	0	0	200	903	0	0	0	0	0	0	0	603	903	0
836	4	0	0	0	0	0	0	200	300	0	0	0	0	0	0	0	200	903	0	0	0	0	0	0	0	603	903	0
836	5	0	0	0	0	0	0	200	300	0	0	0	0	0	0	0	200	903	0	0	0	0	0	0	0	603	903	0
836	6	0	0	0	0	0	0	200	300	0	0	0	0	0	0	0	200	903	0	0	0	0	0	0	0	603	903	0
836	7	0	0	0	0	0	0	200	300	0	0	0	0	0	0	0	200	903	0	0	0	0	0	0	0	603	903	0
836	8	0	0	0	0	0	0	200	300	0	0	0	0	0	0	0	200	903	0	0	0	0	0	0	0	603	903	0
836	9	0	0	0	0	0	0	200	300	0	0	0	0	0	0	0	200	903	0	0	0	0	0	0	0	603	903	0
837	0	0	0	0	0	0	0	200	300	0	0	0	0	0	0	0	200	903	0	0	0	0	0	0	0	603	903	0
837	1	0	0	0	0	0	0	200	300	0	0	0	0	0	0	0	200	903	0	0	0	0	0	0	0	603	903	0
837	2	0	0	0	0	0	0	200	300	0	0	0	0	0	0	0	200	903	0	0	0	0	0	0	0	603	903	0
837	3	0	0	0	0	0	0	200	300	0	0	0	0	0	0	0	200	903	0	0	0	0	0	0	0	603	903	0
837	4	0	0	0	0	0	0	200	300	0	0	0	0	0	0	0	200	903	0	0	0	0	0	0	0	603	903	0
837	5	0	0	0	0	0	0	200	300	0	0	0	0	0	0	0	200	903	0	0	0	0	0	0	0	603	903	0
837	6	0	0	0	0	0	0	200	300	0	0	0	0	0	0	0	200	903	0	0	0	0	0	0	0	603	903	0
837	7	0	0	0	0	0	0	200	300	0	0	0	0	0	0	0	200	903	0	0	0	0	0	0	0	603	903	0
837	8	0	0	0	0	0	0	200	300	0	0	0	0	0	0	0	200	903	0	0	0	0	0	0	0	603	903	0
837	9	0	0	0	0	0	0	200	300	0	0	0	0	0	0	0	200	903	0	0	0	0	0	0	0	603	903	0
838	0	0	0	0	0	0	0	200	300	0	0	0	0	0	0	0	200	903	0	0	0	0	0	0	0	603	903	0
838	1	0	0	0	0	0	0	200	300	0	0	0	0	0	0	0	200	903	0	0	0	0	0	0	0	603	903	0
838	2	0	0	0	0	0	0	200	300	0	0	0	0	0	0	0	200	903	0	0	0	0	0	0	0	603	903	0
838	3	0	0	0	0	0	0	200	300	0	0	0	0	0	0	0	200	903	0	0	0	0	0	0	0	603	903	0
838	4	0	0	0	0	0	0	200	300	0	0	0	0	0	0	0	200	903	0	0	0	0	0	0	0	603	903	0
838	5	0	0	0	0	0	0	200	300	0	0	0	0	0	0	0	200	903	0	0	0	0	0	0	0	603	903	0
838	6	0	0	0	0	0	0	200	300	0	0	0	0	0	0	0	200	903	0	0	0	0	0	0	0	603	903	0
838	7	0	0	0	0	0	0	200	300	0	0	0	0	0	0	0	200	903	0	0	0	0	0	0	0	603	903	0
838	8	0	0	0	0	0	0	200	300	0	0	0	0	0	0	0	200	903	0	0	0	0	0	0	0	603	903	0
838	9	0	0	0	0	0	0	200	300	0	0	0	0	0	0	0	200	903	0	0	0	0	0	0	0	603	903	0
839	0	0	0	0	0	0	0	200	300	0	0	0	0	0	0	0	200	903	0	0	0	0	0	0	0	603	903	0
839	1	0	0	0	0	0	0	200	300	0	0	0	0	0	0	0	200	903	0	0	0	0	0	0	0	603	903	0
839	2	0	0	0	0	0	0	200	300	0	0	0	0	0	0	0	200	903	0	0	0	0	0	0	0	603	903	0
839	3	0	0	0	0	0	0	200	300	0	0	0	0	0	0	0	200	903	0	0	0	0	0	0	0	603	903	0
839	4	0	0	0	0	0	0	200	300	0	0	0	0	0	0	0	200	903	0	0	0	0	0	0	0	603	903	0
839	5	0	0	0	0	0	0	200	300	0	0	0	0	0	0	0	200	903	0	0	0	0	0	0	0	603	903	0
839	6	0	0	0	0	0	0	200	300	0	0	0	0	0	0	0	200	903	0	0	0	0	0	0	0	603	903	0
839	7	0	0	0	0	0	0	200	300	0	0	0	0	0	0	0	200	903	0	0	0	0	0	0	0	603	903	0
839	8	0	0	0	0	0	0	200	300	0	0	0	0	0	0	0	200	903	0	0	0	0	0	0	0	603	903	0
839	9	0	0	0	0	0	0	200	300	0	0	0	0	0	0	0	200	903	0	0	0	0	0	0	0	603	903	0
840	0	0	0	0	0	0	0	200	300	0	0	0	0	0	0	0	200	903	0	0	0	0	0	0	0	603	903	0
840	1	0	0	0	0	0	0	200	300	0	0	0	0	0	0	0	200	903	0	0	0	0	0	0	0	603	903	0
840	2	0	0	0	0	0	0	200	300	0	0	0	0	0	0	0	200	903	0	0	0	0	0	0	0	603	903	0
840	3	0	0	0	0	0	0	200	300	0	0	0	0	0	0	0	200	903	0	0	0	0	0	0	0	603	903	0
840	4	0	0	0	0	0	0	200	300	0	0	0	0	0	0	0	200	903	0	0	0	0	0	0	0	603	903	0
840	5	0	0	0	0	0	0	200	300	0	0	0	0	0	0	0	200	903	0	0	0	0	0	0	0	603	903	0
840	6	0	0	0	0	0	0	200	300	0	0	0	0	0	0	0	200	903	0	0	0	0	0	0	0	603	903	0
840	7	0	0	0	0	0	0	200	300	0	0	0	0	0	0	0	200	903	0	0	0	0	0	0	0	603	903	0
840	8	0	0	0	0	0	0	200	300	0	0	0	0	0	0	0	200	903	0	0	0	0	0	0	0	603	903	0
840	9	0	0	0	0	0	0	200	300	0	0	0	0	0	0	0	200	903	0	0	0	0	0	0	0	603	903	0
841	0	0	0	0	0	0	0	200	300	0	0	0	0	0	0	0	200	903	0	0	0	0	0	0	0	603	903	0
841	1	0	0	0	0	0	0	200	300	0	0	0	0	0	0	0	200	903	0	0	0	0	0	0	0	603	903	0
841	2	0	0	0	0	0	0	200	300	0	0	0	0	0	0	0	200	903	0	0	0	0	0	0	0	603	903	0
841	3	0	0	0	0	0	0	200	300	0	0	0	0	0	0	0	200	903	0	0	0	0	0	0	0	603	903	0
841	4	0	0	0	0	0	0	200	300	0	0	0	0	0	0	0	200	903	0	0	0	0	0	0	0	603	903	0
841	5	0	0	0	0	0	0	200	300	0	0	0	0	0	0	0	200	903	0	0	0	0	0	0	0	603	903	0
841	6	0	0	0	0	0	0	200	300	0	0	0	0	0	0	0	200	903	0	0	0	0	0	0	0	603	903	0
841	7	0	0	0	0	0	0	200	300	0	0	0	0	0	0	0	200	903	0	0	0	0	0	0	0	603	903	0
841	8	0	0	0	0	0	0	200	300	0	0	0	0	0	0	0	200	903	0	0	0	0	0	0	0	603	903	0
841	9	0	0	0	0	0	0	200	300	0	0	0	0	0	0	0	200	903	0	0	0	0	0	0	0	603	903	0
842	0	0	0	0	0	0	0	200	300	0	0	0	0	0	0	0	200	903	0	0	0	0	0	0	0	603	903	0
842	1	0	0	0	0	0	0	200	300	0	0	0	0	0	0	0	200	903	0	0	0	0	0	0	0	603	903	0
842	2	0	0	0	0	0	0	200	300	0	0	0	0	0	0	0	200	903	0	0	0	0	0	0	0	603	903	0
842	3	0	0	0	0	0	0	200	300	0	0	0	0	0	0	0	200	903	0	0	0	0	0	0	0	603	903	0
842	4	0	0	0	0	0	0	200	300	0	0	0	0	0	0	0	200	903	0	0	0	0	0	0	0	603	903	0
842	5	0	0	0	0	0	0	200	300	0	0	0	0	0	0	0	200	903	0	0	0	0	0	0	0	603	903	0
842	6	0	0	0	0	0	0	200	300	0	0	0	0	0	0	0	200	903	0	0	0	0	0	0	0	603	903	0
842	7	0	0	0	0	0	0	200	300	0	0	0	0	0	0	0	200	903	0	0	0	0	0	0	0	603	903	0
842	8	0	0	0	0	0	0	200	300	0	0	0	0	0	0	0	200	903	0	0	0	0	0	0	0	603	903	0
842	9	0	0	0	0	0	0	200	300	0	0	0	0	0	0	0	200	903	0	0	0	0	0	0	0	603	903	0
843	0	0	0	0	0	0	0	200	300	0	0	0	0	0	0	0	200	903	0	0	0	0	0	0	0	603	903	0
843	1	0	0	0	0	0	0	200	300	0	0	0	0	0	0	0	200	903	0	0	0	0	0	0	0	603	903	0
843	2	0	0	0	0	0	0	200	300	0	0	0	0	0	0	0	200	903	0	0	0	0	0	0	0	603	903	0
843	3	0	0	0	0	0	0	200	300	0	0	0	0	0	0	0	200	903	0	0	0	0	0	0	0	603	903	0
843	4	0	0	0	0	0	0	200	300	0	0	0	0	0	0	0	200	903	0	0	0	0	0	0	0	603	903	0
843	5	0	0	0	0	0	0	200	300	0	0	0	0	0	0	0	200	903	0	0	0	0	0	0	0	603	903	0
843	6	0	0	0	0	0	0	200	300	0	0	0	0	0	0	0	200	903	0	0	0	0	0	0	0	603	903	0
843	7	0	0	0	0	0	0	200	300	0	0	0	0	0	0	0	200	903	0	0	0	0	0	0	0	603	903	0
843	8	0	0	0	0	0	0	200	300	0	0	0	0	0	0	0	200	903	0	0	0	0	0	0	0	603	903	0
843	9	0	0	0	0	0	0	200	300	0	0	0	0	0	0	0	200	903	0	0	0	0	0	0	0	603	903	0
844	0	0	0	0	0	0	0	200	300	0	0	0	0	0	0	0	200	903	0	0	0	0	0	0	0	603	903	0
844	1	0	0	0	0	0	0	200	300	0	0	0	0	0	0	0	200	903	0	0	0	0	0	0	0	603	903	0
844	2	0	0	0	0	0	0	200	300	0	0	0	0	0	0	0	200	903	0	0	0	0	0	0	0	603	903	0
844	3	0	0	0	0	0	0	200	300	0	0	0	0	0	0	0	200	903	0	0	0	0	0	0	0	603	903	0
844	4	0	0	0	0	0	0	200	300	0	0	0	0	0	0	0	200	903	0	0	0	0	0	0	0	603	903	0
844	5	0	0	0	0	0	0	200	300	0	0	0	0	0	0	0	200	903	0	0	0	0	0	0	0	603	903	0
844	6	0	0	0	0	0	0	200	300	0	0	0	0	0	0	0	200	903	0	0	0	0	0	0	0	603	903	0
844	7	0	0	0	0	0	0	200	300	0	0	0	0	0	0	0	200	903	0	0	0	0	0	0	0	603	903	0
844	8	0	0	0	0	0	0	200	300	0	0	0	0	0	0	0	200	903	0	0	0	0	0	0	0	603	903	0
844	9	0	0	0	0	0	0	200	300	0	0	0	0	0	0	0	200	903	0	0	0	0	0	0	0	603	903	0
845	0	0	0	0	0	0	0	200	300	0	0	0	0	0	0	0	200	903	0	0	0	0	0	0	0	603	903	0
845	1	0	0	0	0	0	0	200	300	0	0	0	0	0	0	0	200	903	0	0	0	0	0	0	0	603	903	0
845	2	0	0	0	0	0	0	200	300	0	0	0	0	0	0	0	200	903	0	0	0	0	0	0	0	603	903	0
845	3	0	0	0	0	0	0	200	300	0	0	0	0	0	0	0	200	903	0	0	0	0	0	0	0	603	903	0
845	4	0	0	0	0	0	0	200	300	0	0	0	0	0	0	0	200	903	0	0	0	0	0	0	0	603	903	0
845	5	0	0	0	0	0	0	200	300	0	0	0	0	0	0	0	200	903	0	0	0	0	0	0	0	603	903	0
845	6	0	0	0	0	0	0	200	300	0	0	0	0	0	0	0	200	903	0	0	0	0	0	0	0	603	903	0
845	7	0	0	0	0	0	0	200	300	0	0	0	0	0	0	0	200	903	0	0	0	0	0	0	0	603	903	0
845	8	0	0	0	0	0	0	200	300	0	0	0	0	0	0	0	200	903	0	0	0	0	0	0	0	603	903	0
845	9	0	0	0	0	0	0	200	300	0	0	0	0	0	0	0	200	903	0	0	0	0	0	0	0	603	903	0
846	0	0	0	0	0	0	0	200	300	0	0	0	0	0	0	0	200	903	0	0	0	0	0	0	0	603	903	0
846	1	0	0	0	0	0	0	200	300	0	0	0	0	0	0	0	200	903	0	0	0	0	0	0	0	603	903	0
846	2	0	0	0	0	0	0	200	300	0	0	0	0	0	0	0	200	903	0	0	0	0	0	0	0	603	903	0
846	3	0	0	0	0	0	0	200	300	0	0	0	0	0	0	0	200	903	0	0	0	0	0	0	0	603	903	0
846	4	0	0	0	0	0	0	200	300	0	0	0	0	0	0	0	200	903	0	0	0	0	0	0	0	603	903	0
846	5	0	0	0	0	0	0	200	300	0	0	0	0	0	0	0	200	903	0	0	0	0	0	0	0	603	903	0
846	6	0	0	0	0	0	0	200	300	0	0	0	0	0	0	0	200	903	0	0	0	0	0	0	0	603	903	0
846	7	0	0	0	0	0	0	200	300	0	0	0	0	0	0	0	200	903	0	0	0	0	0	0	0	603	903	0
846	8	0	0	0	0	0	0	200	300	0	0	0	0	0	0	0	200	903	0	0	0	0	0	0	0	603	903	0
846	9	0	0	0	0	0	0	200	300	0	0	0	0	0	0	0	200	903	0	0	0	0	0	0	0	603	903	0
847	0	0	0	0	0	0	0	200	300	0	0	0	0	0	0	0	200	903	0	0	0	0	0	0	0	603	903	0
847	1	2.10602	7.2742	-11.3275	-22.7034	-716.919	-893.921	136.71	302.004	0	0	0	0	0	0	0	200	903	0	0	0	0	0	0	0	603	903	0
847	2	2.10602	12.3096	-18.9569	-1121.34	-900.025	-1305.91	152.523	359.152	0	0	0	0	0	0	0	200	903	0	0	0	0	0	0	0	603	903	0
847	3	-2.47162	6.66385	-13.1586	-755.126	-838.989	-573.486	136.24	357.387	0	0	0	0	0	0	0	200	903	0	0	0	0	0	0	0	603	903	0
847	4	0	0	0	0	0	0	200	300	0	0	0	0	0	0	0	200	903	0	0	0	0	0	0	0	603	903	0
847	5	2.71637	3.91727	-9.49646	-205.809	-167.602	-893.921	182.351	321.672	0	0	0	0	0	0	0	200	903	0	0	0	0	0	0	0	603	903	0
847	6	5.31036	10.4786	-15.6	435.06	-472.778	-893.921	169.694	272.111	0	0	0	0	0	0	0	200	903	0	0	0	0	0	0	0	603	903	0
847	7	2.2586	8.03714	-16.5155	-297.362	-961.06	-436.157	141.809	318.005	0	0	0	0	0	0	0	200	903	0	0	0	0	0	0	0	603	903	0
847	8	-2.7768	4.37503	-13.4637	-572.02	-1510.38	-1077.03	87.819	342.486	0	0	0	0	0	0	0	200	903	0	0	0	0	0	0	0	603	903	0
847	9	-0.182803	10.6311	-12.8534	-480.467	-838.989	-939.698	134.726	337.381	0	0	0	0	0	0	0	200	903	0	0	0	0	0	0	0	603	903	0
848	0	3.63189	13.0725	-15.9052	-480.467	-594.849	-710.816	162.6	330.208	0	0	0	0	0	0	0	200	903	0	0	0	0	0	0	0	603	903	0
848	1	3.47931	7.73197	-19.5673	-114.256	-1022.09	-1214.36	147.765	305.839	0	0	0	0	0	0	0	200	903	0	0	0	0	0	0	0	603	903	0
848	2	0.122373	7.88456	-18.6517	892.824	-1510.38	-1397.46	119.022	252.132	0	0	0	0	0	0	0	200	903	0	0	0	0	0	0	0	603	903	0
848	3	-2.01386	14.4458	-18.3466	-663.573	-1754.52	-1077.03	104.368	336.169	0	0	0	0	0	0	0	200	903	0	0	0	0	0	0	0	603	903	0
848	4	-0.945742	16.7347	-22.0087	-846.678	-2059.69	-1489.01	106.414	338.47	0	0	0	0	0	0	0	200	903	0	0	0	0	0	0	0	603	903	0
848	5	-1.86127	10.6311	-23.8397	-388.914	-1754.52	-1397.46	126.404	316.314	0	0	0	0	0	0	0	200	903	0	0	0	0	0	0	0	603	903	0
848	6	-1.86127	7.73197	-27.1967	-480.467	-1998.66	-390.381	126.511	317.666	0	0	0	0	0	0	0	200	903	0	0	0	0	0	0	0	603	903	0
848	7	-0.487978	7.42679	-31.4691	-846.678	-2425.9	-481.934	122.912	326.905	0	0	0	0	0	0	0	200	903	0	0	0	0	0	0	0	603	903	0
848	8	-2.62421	3.91727	-35.1312	-663.573	-2792.12	-207.275	120.523	318.888	0	0	0	0	0	0	0	200	903	0	0	0	0	0	0	0	603	903	0
848	9	-6.59149	-3.71212	-42.4554	-388.914	-3341.43	250.488	121.296	309.161	0	0	0	0	0	0	0	200	903	0	0	0	0	0	0	0	603	903	0
849	0	-3.9975	-6.91647	-45.8124	-388.914	-3768.68	1028.69	117.737	308.489	0	0	0	0	0	0	0	200	903	0	0	0	0	0	0	0	603	903	0
849	1	-1.40351	-8.44235	-52.5262	-297.362	-3951.78	845.581	124.766	305.661	0	0	0	0	0	0	0	200	903	0	0	0	0	0	0	0	603	903	0
849	2	-1.55609	-8.90011	-55.2728	-1212.89	-4379.03	845.581	120.774	321.944	0	0	0	0	0	0	0	200	903	0	0	0	0	0	0	0	603	903	0
849	3	-2.7768	-12.8674	-62.597	-663.573	-4928.34	1394.9	121.269	310.601	0	0	0	0	0	0	0	200	903	0	0	0	0	0	0	0	603	903	0
849	4	-4.30268	-12.7148	-70.2264	-1121.34	-5782.84	1394.9	117.654	315.967	0	0	0	0	0	0	0	200	903	0	0	0	0	0	0	0	603	903	0
849	5	-1.86127	-11.7993	-72.973	-1395.99	-6210.09	1303.35	114.899	319.13	0	0	0	0	0	0	0	200	903	0	0	0	0	0	0	0	603	903	0
849	6	-2.47162	-15.0036	-81.8231	-388.914	-6515.26	1852.66	120.374	304.753	0	0	0	0	0	0	0	200	903	0	0	0	0	0	0	0	603	903	0
849	7	-1.86127	-20.9546	-87.6215	-846.678	-7064.58	2218.87	119.374	309.663	0	0	0	0	0	0	0	200	903	0	0	0	0	0	0	0	603	903	0
849	8	-1.25092	-20.3442	-97.6923	-755.126	-7919.07	2127.32	118.939	307.73	0	0	0	0	0	0	0	200	903	0	0	0	0	0	0	0	603	903	0
849	9	-1.86127	-22.1753	-108.679	-1304.44	-8590.45	2447.75	120.955	312.003	0	0	0	0	0	0	0	200	903	0	0	0	0	0	0	0	603	903	0
850	0	-2.7768	-26.2951	-116.613	-1762.21	-9505.98	2813.97	118.483	315.112	0	0	0	0	0	0	0	200	903	0	0	0	0	0	0	0	603	903	0
850	1	-2.16645	-30.5676	-126.074	-1762.21	-10116.3	2951.3	119.758	313.978	0	0	0	0	0	0	0	200	903	0	0	0	0	0	0	0	603	903	0
850	2	1.95343	-30.8728	-136.45	-1762.21	-11153.9	3134.4	118.256	312.915	0	0	0	0	0	0	0	200	903	0	0	0	0	0	0	0	603	903	0
850	3	3.93707	-32.2461	-146.52	-2219.97	-11825.3	3271.73	119.292	315.151	0	0	0	0	0	0	0	200	903	0	0	0	0	0	0	0	603	903	0
850	4	3.32672	-34.5349	-157.507	-1579.1	-12252.6	3271.73	122.209	310.026	0	0	0	0	0	0	0	200	903	0	0	0	0	0	0	0	603	903	0
850	5	2.41119	-34.6875	-167.578	-2403.07	-13473.3	3271.73	119.6	314.34	0	0	0	0	0	0	0	200	903	0	0	0	0	0	0	0	603	903	0
850	6	4.70001	-31.0254	-179.479	-2586.18	-14205.7	2768.19	120.851	314.409	0	0	0	0	0	0	0	200	903	0	0	0	0	0	0	0	603	903	0
850	7	6.68365	-29.8047	-186.498	-2769.29	-14938.1	2585.08	119.902	314.849	0	0	0	0	0	0	0	200	903	0	0	0	0	0	0	0	603	903	0
850	8	7.59918	-29.3469	-195.959	-3593.26	-15304.3	2356.2	121.9	318.337	0	0	0	0	0	0	0	200	903	0	0	0	0	0	0	0	603	903	0
850	9	7.59918	-25.3796	-206.64	-3501.71	-15914.7	2401.98	122.984	316.946	0	0	0	0	0	0	0	200	903	0	0	0	0	0	0	0	603	903	0
851	0	7.59918	-21.8701	-216.1	-4600.34	-17196.4	2081.54	120.424	321.288	0	0	0	0	0	0	0	200	903	0	0	0	0	0	0	0	603	903	0
851	1	7.44659	-19.2761	-222.204	-4234.13	-17684.7	1303.35	120.412	319.055	0	0	0	0	0	0	0	200	903	0	0	0	0	0	0	0	603	903	0
851	2	7.44659	-18.6657	-228.918	-4051.02	-17867.8	1394.9	121.947	317.696	0	0	0	0	0	0	0	200	903	0	0	0	0	0	0	0	603	903	0
851	3	10.3458	-15.0036	-235.937	-4783.45	-17928.8	982.911	124.01	320.274	0	0	0	0	0	0	0	200	903	0	0	0	0	0	0	0	603	903	0
851	4	10.9561	-9.66305	-245.397	-5149.66	-19271.6	479.37	121.468	320.985	0	0	0	0	0	0	0	200	903	0	0	0	0	0	0	0	603	903	0
851	5	9.58282	-6.76388	-252.722	-5973.63	-19820.9	296.265	121.57	323.637	0	0	0	0	0	0	0	200	903	0	0	0	0	0	0	0	603	903	0
851	6	9.43023	-2.49142	-255.468	-6797.61	-20187.1	-24.1699	120.98	326.608	0	0	0	0	0	0	0	200	903	0	0	0	0	0	0	0	603	903	0
851	7	10.8035	1.32328	-263.098	-6614.5	-20187.1	-436.157	123.271	325.141	0	0	0	0	0	0	0	200	903	0	0	0	0	0	0	0	603	903	0
851	8	12.482	7.57938	-266.454	-6706.06	-20248.2	-985.474	124.009	325.168	0	0	0	0	0	0	0	200	903	0	0	0	0	0	0	0	603	903	0
851	9	12.6346	9.25785	-272.863	-6889.16	-20736.4	-1168.58	124.004	325.248	0	0	0	0	0	0	0	200	903	0	0	0	0	0	0	0	603	903	0
852	0	11.8716	12.7674	-277.136	-7255.37	-21346.8	-1489.01	122.973	326.18	0	0	0	0	0	0	0	200	903	0	0	0	0	0	0	0	603	903	0
852	1	10.9561	18.4131	-280.493	-7896.24	-21957.2	-1855.23	121.719	328.151	0	0	0	0	0	0	0	200	903	0	0	0	0	0	0	0	603	903	0
852	2	13.5501	21.9226	-284.765	-8537.11	-21835.1	-2312.99	123.322	329.98	0	0	0	0	0	0	0	200	903	0	0	0	0	0	0	0	603	903	0
852	3	14.4656	25.2796	-290.869	-8720.21	-22567.5	-2358.76	122.413	329.98	0	0	0	0	0	0	0	200	903	0	0	0	0	0	0	0	603	903	0
852	4	13.7027	26.958	-293.92	-9452.63	-22811.6	-2908.08	122.388	332.161	0	0	0	0	0	0	0	200	903	0	0	0	0	0	0	0	603	903	0
852	5	12.1768	31.6883	-303.686	-9086.42	-22933.7	-2953.86	124.482	329.921	0	0	0	0	0	0	0	200	903	0	0	0	0	0	0	0	603	903	0
852	6	12.7872	32.7564	-306.738	-8720.21	-23483	-3136.96	123.443	328.429	0	0	0	0	0	0	0	200	903	0	0	0	0	0	0	0	603	903	0
852	7	13.0923	34.8926	-313.146	-10093.5	-24337.5	-3640.5	122.281	332.233	0	0	0	0	0	0	0	200	903	0	0	0	0	0	0	0	603	903	0
852	8	13.0923	37.4866	-322.912	-11375.2	-25069.9	-3274.29	122.363	335.227	0	0	0	0	0	0	0	200	903	0	0	0	0	0	0	0	603	903	0
852	9	12.482	39.6228	-329.931	-11283.7	-25619.3	-3915.16	122.35	334.2	0	0	0	0	0	0	0	200	903	0	0	0	0	0	0	0	603	903	0
853	0	9.888	40.691	-341.833	-12748.5	-26473.8	-4235.6	122.554	337.295	0	0	0	0	0	0	0	200	903	0	0	0	0	0	0	0	603	903	0
853	1	9.12506	41.9117	-348.547	-12748.5	-27511.4	-4372.92	121.068	336.576	0	0	0	0	0	0	0	200	903	0	0	0	0	0	0	0	603	903	0
853	2	9.27765	42.522	-358.923	-13481	-28671	-4464.48	120.119	337.56	0	0	0	0	0	0	0	200	903	0	0	0	0	0	0	0	603	903	0
853	3	10.3458	43.4375	-369.909	-14488	-29159.3	-4510.25	121.172	339.167	0	0	0	0	0	0	0	200	903	0	0	0	0	0	0	0	603	903	0
853	4	7.90436	44.0479	-379.37	-15586.7	-30013.8	-4510.25	120.885	341.086	0	0	0	0	0	0	0	200	903	0	0	0	0	0	0	0	603	903	0
853	5	5.46295	45.7264	-389.135	-16685.3	-31173.5	-4189.82	119.89	342.878	0	0	0	0	0	0	0	200	903	0	0	0	0	0	0	0	603	903	0
853	6	4.70001	48.4729	-398.901	-17326.2	-32028	-4739.14	119.709	343.435	0	0	0	0	0	0	0	200	903	0	0	0	0	0	0	0	603	903	0
853	7	3.93707	49.3885	-408.666	-17783.9	-33248.7	-5013.79	118.641	343.517	0	0	0	0	0	0	0	200	903	0	0	0	0	0	0	0	603	903	0
853	8	5.46295	50.6092	-421.484	-18058.6	-33798	-4784.91	119.812	342.845	0	0	0	0	0	0	0	200	903	0	0	0	0	0	0	0	603	903	0
853	9	3.78448	51.3721	-429.724	-18882.6	-34408.3	-4784.91	119.929	343.941	0	0	0	0	0	0	0	200	903	0	0	0	0	0	0	0	603	903	0
854	0	1.49566	52.2876	-443.151	-20072.8	-35751.1	-5242.68	119.325	345.296	0	0	0	0	0	0	0	200	903	0	0	0	0	0	0	0	603	903	0
854	1	0.732725	55.9497	-452.001	-21262.9	-36666.6	-5288.45	118.879	347.042	0	0	0	0	0	0	0	200	903	0	0	0	0	0	0	0	603	903	0
854	2	0.732725	58.2386	-462.988	-21903.8	-37093.9	-5196.9	119.882	347.31	0	0	0	0	0	0	0	200	903	0	0	0	0	0	0	0	603	903	0
854	3	1.49566	60.9851	-474.279	-23277.1	-38375.6	-5380.01	119.086	349.079	0	0	0	0	0	0	0	200	903	0	0	0	0	0	0	0	603	903	0
854	4	-1.40351	63.7317	-484.96	-23277.1	-39230.1	-5563.11	119.107	347.998	0	0	0	0	0	0	0	200	903	0	0	0	0	0	0	0	603	903	0
854	5	-2.47162	65.5628	-491.369	-24192.6	-40267.7	-5334.23	118.05	349.235	0	0	0	0	0	0	0	200	903	0	0	0	0	0	0	0	603	903	0
854	6	-4.15009	66.4783	-500.219	-24833.5	-40511.8	-5517.34	119.012	349.645	0	0	0	0	0	0	0	200	903	0	0	0	0	0	0	0	603	903	0
854	7	-3.84491	69.5301	-509.374	-25749	-40939.1	-5563.11	119.629	350.55	0	0	0	0	0	0	0	200	903	0	0	0	0	0	0	0	603	903	0
854	8	-5.52338	70.5982	-518.53	-27030.8	-41915.6	-5608.89	119.164	352.13	0	0	0	0	0	0	0	200	903	0	0	0	0	0	0	0	603	903	0
854	9	-6.13373	73.4974	-524.328	-27488.5	-42953.2	-5929.32	118.079	352.426	0	0	0	0	0	0	0	200	903	0	0	0	0	0	0	0	603	903	0
855	0	-9.18549	74.5655	-531.347	-28404.1	-43868.8	-5608.89	117.439	353.457	0	0	0	0	0	0	0	200	903	0	0	0	0	0	0	0	603	903	0
855	1	-10.101	76.8543	-535.62	-28861.8	-44296	-5791.99	117.299	353.885	0	0	0	0	0	0	0	200	903	0	0	0	0	0	0	0	603	903	0
855	2	-10.5588	77.4646	-541.723	-29044.9	-44418.1	-5700.44	118.006	353.616	0	0	0	0	0	0	0	200	903	0	0	0	0	0	0	0	603	903	0
855	3	-12.0847	78.075	-548.437	-30052	-45577.8	-5837.77	116.895	354.796	0	0	0	0	0	0	0	200	903	0	0	0	0	0	0	0	603	903	0
855	4	-12.0847	78.8379	-547.521	-30601.3	-45944	-5746.22	116.087	355.891	0	0	0	0	0	0	0	200	903	0	0	0	0	0	0	0	603	903	0
855	5	-13.7631	78.8379	-558.508	-31516.9	-46066	-5471.56	117.519	356.431	0	0	0	0	0	0	0	200	903	0	0	0	0	0	0	0	603	903	0
855	6	-15.4416	80.0586	-561.254	-31883.1	-46737.4	-5517.34	116.727	356.807	0	0	0	0	0	0	0	200	903	0	0	0	0	0	0	0	603	903	0
855	7	-14.3735	78.2276	-574.987	-33897.2	-48751.6	-5105.35	115.213	358.953	0	0	0	0	0	0	0	200	903	0	0	0	0	0	0	0	603	903	0
855	8	-18.4933	76.3965	-590.551	-35453.6	-49911.3	-4281.37	115.484	360.035	0	0	0	0	0	0	0	200	903	0	0	0	0	0	0	0	603	903	0
855	9	-30.3952	81.2793	-600.012	-37284.7	-51193	-4098.27	114.68	362.14	0	0	0	0	0	0	0	200	903	0	0	0	0	0	0	0	603	903	0
856	0	-33.447	86.1621	-605.2	-38017.1	-51681.3	-4281.37	114.605	362.817	0	0	0	0	0	0	0	200	903	0	0	0	0	0	0	0	603	903	0
856	1	-31.0056	86.7725	-609.167	-39939.7	-52413.7	-4144.04	113.958	365.564	0	0	0	0	0	0	0	200	903	0	0	0	0	0	0	0	603	903	0
856	2	-36.4987	89.5191	-618.322	-40672.1	-53512.3	-3915.16	113.456	365.778	0	0	0	0	0	0	0	200	903	0	0	0	0	0	0	0	603	903	0
856	3	-40.3134	95.1648	-629.308	-41404.5	-53939.6	-4876.46	114.288	365.794	0	0	0	0	0	0	0	200	903	0	0	0	0	0	0	0	603	903	0
856	4	-39.0927	98.6744	-631.75	-43052.5	-54794.1	-4876.46	113.266	368.148	0	0	0	0	0	0	0	200	903	0	0	0	0	0	0	0	603	903	0
856	5	-40.0082	105.388	-633.276	-43235.6	-54916.1	-5334.23	113.282	368.273	0	0	0	0	0	0	0	200	903	0	0	0	0	0	0	0	603	903	0
856	6	-41.9919	107.219	-641.21	-43784.9	-55587.5	-5791.99	113.308	368.285	0	0	0	0	0	0	0	200	903	0	0	0	0	0	0	0	603	903	0
856	7	-34.6677	107.677	-647.924	-44883.5	-55648.6	-6661.75	114.113	369.273	0	0	0	0	0	0	0	200	903	0	0	0	0	0	0	0	603	903	0
856	8	-32.2263	111.644	-651.891	-45707.5	-56442	-6936.4	113.418	370.115	0	0	0	0	0	0	0	200	903	0	0	0	0	0	0	0	603	903	0
856	9	-34.8203	113.018	-654.638	-46714.6	-56381	-7256.84	113.875	371.359	0	0	0	0	0	0	0	200	903	0	0	0	0	0	0	0	603	903	0
857	0	-32.9892	113.17	-656.774	-47447	-56808.2	-7760.38	113.504	372.243	0	0	0	0	0	0	0	200	903	0	0	0	0	0	0	0	603	903	0
857	1	-32.3788	113.628	-661.657	-47721.7	-57296.5	-7211.06	113.405	372.125	0	0	0	0	0	0	0	200	903	0	0	0	0	0	0	0	603	903	0
857	2	-30.2426	114.543	-662.573	-47263.9	-57113.4	-7668.83	113.801	371.334	0	0	0	0	0	0	0	200	903	0	0	0	0	0	0	0	603	903	0
857	3	-28.7167	111.339	-667.761	-48545.7	-57296.5	-8080.81	114.196	372.699	0	0	0	0	0	0	0	200	903	0	0	0	0	0	0	0	603	903	0
857	4	-30.853	110.118	-670.507	-48454.1	-57235.5	-7165.29	114.639	372.265	0	0	0	0	0	0	0	200	903	0	0	0	0	0	0	0	603	903	0
857	5	-31.3107	110.576	-670.202	-49735.9	-57662.7	-7851.93	113.962	374.21	0	0	0	0	0	0	0	200	903	0	0	0	0	0	0	0	603	903	0
857	6	-30.2426	109.203	-673.254	-50010.5	-58639.3	-8538.57	112.902	374.282	0	0	0	0	0	0	0	200	903	0	0	0	0	0	0	0	603	903	0
857	7	-28.4116	107.524	-676.916	-50651.4	-58517.2	-7668.83	113.553	374.827	0	0	0	0	0	0	0	200	903	0	0	0	0	0	0	0	603	903	0
857	8	-30.3952	106.304	-681.799	-51658.4	-58517.2	-7760.38	114.172	375.768	0	0	0	0	0	0	0	200	903	0	0	0	0	0	0	0	603	903	0
857	9	-30.853	107.982	-683.325	-51109.1	-58883.4	-8447.02	113.828	374.795	0	0	0	0	0	0	0	200	903	0	0	0	0	0	0	0	603	903	0
858	0	-30.3952	108.44	-684.24	-51841.6	-59371.7	-8035.03	113.23	375.765	0	0	0	0	0	0	0	200	903	0	0	0	0	0	0	0	603	903	0
858	1	-32.3788	107.067	-686.071	-52390.9	-59737.9	-7806.15	112.928	376.364	0	0	0	0	0	0	0	200	903	0	0	0	0	0	0	0	603	903	0
858	2	-31.0056	106.914	-691.259	-52848.7	-59432.7	-8035.03	114.022	376.453	0	0	0	0	0	0	0	200	903	0	0	0	0	0	0	0	603	903	0
858	3	-31.0056	109.356	-693.395	-54588.1	-59798.9	-8080.81	113.759	378.726	0	0	0	0	0	0	0	200	903	0	0	0	0	0	0	0	603	903	0
858	4	-32.684	110.424	-696.447	-54954.3	-60592.4	-7668.83	112.998	378.907	0	0	0	0	0	0	0	200	903	0	0	0	0	0	0	0	603	903	0
858	5	-34.8203	111.95	-700.414	-55686.8	-60531.4	-8172.36	113.578	379.505	0	0	0	0	0	0	0	200	903	0	0	0	0	0	0	0	603	903	0
858	6	-35.1254	113.323	-698.889	-55778.3	-60714.5	-8080.81	113.127	379.81	0	0	0	0	0	0	0	200	903	0	0	0	0	0	0	0	603	903	0
858	7	-34.2099	114.696	-704.687	-55595.2	-60775.5	-7668.83	113.755	378.894	0	0	0	0	0	0	0	200	903	0	0	0	0	0	0	0	603	903	0
858	8	-34.8203	114.543	-707.433	-56419.2	-61385.9	-8218.14	113.227	379.752	0	0	0	0	0	0	0	200	903	0	0	0	0	0	0	0	603	903	0
858	9	-38.0246	115.001	-708.654	-56877	-61630	-7577.27	113.032	380.261	0	0	0	0	0	0	0	200	903	0	0	0	0	0	0	0	603	903	0
859	0	-38.9401	116.68	-711.706	-57060.1	-61935.2	-7577.27	112.976	380.174	0	0	0	0	0	0	0	200	903	0	0	0	0	0	0	0	603	903	0
859	1	-39.0927	116.222	-713.232	-58616.5	-62179.3	-7348.39	112.82	382.184	0	0	0	0	0	0	0	200	903	0	0	0	0	0	0	0	603	903	0
859	2	-38.1772	117.29	-715.368	-58524.9	-62057.3	-7806.15	113.251	381.811	0	0	0	0	0	0	0	200	903	0	0	0	0	0	0	0	603	903	0
859	3	-39.0927	117.29	-719.335	-59165.8	-62667.6	-6982.18	112.881	382.251	0	0	0	0	0	0	0	200	903	0	0	0	0	0	0	0	603	903	0
859	4	-40.9238	117.443	-721.777	-58891.1	-63155.9	-7623.05	112.499	381.592	0	0	0	0	0	0	0	200	903	0	0	0	0	0	0	0	603	903	0
859	5	-41.2289	117.595	-721.472	-59257.3	-62728.7	-7714.6	113.055	382.134	0	0	0	0	0	0	0	200	903	0	0	0	0	0	0	0	603	903	0
859	6	-43.06	116.375	-724.523	-60081.3	-63094.9	-7211.06	112.915	382.925	0	0	0	0	0	0	0	200	903	0	0	0	0	0	0	0	603	903	0
859	7	-41.8393	116.375	-728.185	-60447.5	-63705.2	-7302.61	112.515	383.011	0	0	0	0	0	0	0	200	903	0	0	0	0	0	0	0	603	903	0
859	8	-42.2971	116.222	-731.848	-61546.1	-64071.4	-7348.39	112.453	384.097	0	0	0	0	0	0	0	200	903	0	0	0	0	0	0	0	603	903	0
859	9	-44.2807	115.154	-733.373	-62003.9	-64010.4	-7531.5	112.718	384.546	0	0	0	0	0	0	0	200	903	0	0	0	0	0	0	0	603	903	0
860	0	-42.1445	116.527	-734.899	-62187	-64071.4	-7119.51	112.816	384.62	0	0	0	0	0	0	0	200	903	0	0	0	0	0	0	0	603	903	0
860	1	-43.9755	115.306	-735.815	-62553.2	-64315.6	-7211.06	112.593	385.012	0	0	0	0	0	0	0	200	903	0	0	0	0	0	0	0	603	903	0
860	2	-43.3652	115.917	-739.172	-62461.7	-65170	-7577.27	111.834	384.502	0	0	0	0	0	0	0	200	903	0	0	0	0	0	0	0	603	903	0
860	3	-42.2971	114.849	-744.665	-63011	-65048	-7165.29	112.648	384.617	0	0	0	0	0	0	0	200	903	0	0	0	0	0	0	0	603	903	0
860	4	-43.8229	114.849	-747.106	-63651.9	-65170	-7394.17	112.77	385.198	0	0	0	0	0	0	0	200	903	0	0	0	0	0	0	0	603	903	0
860	5	-42.1445	115.154	-745.886	-64475.8	-65597.3	-7394.17	112.055	386.442	0	0	0	0	0	0	0	200	903	0	0	0	0	0	0	0	603	903	0
860	6	-42.7548	114.391	-748.632	-65116.7	-65780.4	-7073.73	112.133	386.981	0	0	0	0	0	0	0	200	903	0	0	0	0	0	0	0	603	903	0
860	7	-41.6867	114.849	-752.294	-65391.4	-66329.7	-7256.84	111.83	386.923	0	0	0	0	0	0	0	200	903	0	0	0	0	0	0	0	603	903	0
860	8	-40.6186	114.391	-756.262	-65849.1	-65841.4	-7211.06	112.938	387.072	0	0	0	0	0	0	0	200	903	0	0	0	0	0	0	0	603	903	0
860	9	-41.2289	114.238	-758.703	-66398.4	-65963.5	-7485.72	113.058	387.516	0	0	0	0	0	0	0	200	903	0	0	0	0	0	0	0	603	903	0
861	0	-40.6186	113.933	-760.839	-66306.9	-66329.7	-7760.38	112.82	387.15	0	0	0	0	0	0	0	200	903	0	0	0	0	0	0	0	603	903	0
861	1	-39.7031	113.17	-762.67	-66306.9	-66451.8	-7577.27	112.87	386.94	0	0	0	0	0	0	0	200	903	0	0	0	0	0	0	0	603	903	0
861	2	-38.9401	112.407	-765.722	-67222.5	-66940.1	-7439.94	112.579	387.79	0	0	0	0	0	0	0	200	903	0	0	0	0	0	0	0	603	903	0
861	3	-38.1772	112.56	-769.689	-67588.7	-66940.1	-7577.27	113.03	387.813	0	0	0	0	0	0	0	200	903	0	0	0	0	0	0	0	603	903	0
861	4	-39.8557	111.95	-773.351	-68595.7	-66879.1	-7485.72	113.52	388.699	0	0	0	0	0	0	0	200	903	0	0	0	0	0	0	0	603	903	0
861	5	-38.9401	111.339	-772.741	-69236.6	-67428.3	-7531.5	112.741	389.599	0	0	0	0	0	0	0	200	903	0	0	0	0	0	0	0	603	903	0
861	6	-37.2617	111.644	-775.182	-67954.9	-67611.5	-7394.17	112.78	387.663	0	0	0	0	0	0	0	200	903	0	0	0	0	0	0	0	603	903	0
861	7	-35.4306	110.729	-779.455	-69694.3	-67306.3	-7439.94	113.65	389.414	0	0	0	0	0	0	0	200	903	0	0	0	0	0	0	0	603	903	0
861	8	-37.1091	110.271	-780.065	-69785.9	-67550.4	-7531.5	113.404	389.462	0	0	0	0	0	0	0	200	903	0	0	0	0	0	0	0	603	903	0
861	9	-37.1091	110.576	-783.727	-70152.1	-68099.8	-7165.29	113.108	389.511	0	0	0	0	0	0	0	200	903	0	0	0	0	0	0	0	603	903	0
862	0	-37.2617	109.356	-783.117	-70518.4	-68282.8	-7531.5	112.806	390.048	0	0	0	0	0	0	0	200	903	0	0	0	0	0	0	0	603	903	0
862	1	-35.7358	108.745	-784.643	-70884.6	-67916.6	-7531.5	113.443	390.34	0	0	0	0	0	0	0	200	903	0	0	0	0	0	0	0	603	903	0
862	2	-34.0573	108.898	-789.526	-71525.4	-67855.6	-7485.72	114.055	390.593	0	0	0	0	0	0	0	200	903	0	0	0	0	0	0	0	603	903	0
862	3	-35.278	108.745	-790.136	-72532.5	-68527	-7302.61	113.272	391.797	0	0	0	0	0	0	0	200	903	0	0	0	0	0	0	0	603	903	0
862	4	-35.5832	108.135	-790.441	-71983.2	-68832.2	-7439.94	112.919	391.067	0	0	0	0	0	0	0	200	903	0	0	0	0	0	0	0	603	903	0
862	5	-35.8884	107.372	-789.831	-73081.8	-68649	-7165.29	113.084	392.528	0	0	0	0	0	0	0	200	903	0	0	0	0	0	0	0	603	903	0
862	6	-33.9047	107.524	-791.052	-72715.6	-68282.8	-7394.17	113.681	391.923	0	0	0	0	0	0	0	200	903	0	0	0	0	0	0	0	603	903	0
862	7	-34.0573	107.219	-792.272	-72807.1	-68404.9	-7165.29	113.66	391.897	0	0	0	0	0	0	0	200	903	0	0	0	0	0	0	0	603	903	0
862	8	-33.5996	105.388	-795.324	-72715.6	-68710.1	-6936.4	113.607	391.429	0	0	0	0	0	0	0	200	903	0	0	0	0	0	0	0	603	903	0
862	9	-34.2099	105.541	-794.409	-73905.8	-69015.3	-7211.06	113.124	393.032	0	0	0	0	0	0	0	200	903	0	0	0	0	0	0	0	603	903	0
863	0	-31.9211	105.236	-794.103	-74363.5	-68404.9	-7394.17	113.859	393.645	0	0	0	0	0	0	0	200	903	0	0	0	0	0	0	0	603	903	0
863	1	-33.447	105.236	-791.052	-74272	-68649	-7394.17	113.218	393.89	0	0	0	0	0	0	0	200	903	0	0	0	0	0	0	0	603	903	0
863	2	-32.0737	104.93	-794.409	-75004.4	-69076.3	-7531.5	113.047	394.415	0	0	0	0	0	0	0	200	903	0	0	0	0	0	0	0	603	903	0
863	3	-32.2263	104.168	-797.155	-75462.2	-68832.2	-7394.17	113.653	394.664	0	0	0	0	0	0	0	200	903	0	0	0	0	0	0	0	603	903	0
863	4	-32.0737	103.557	-795.934	-74455.1	-68710.1	-7256.84	113.674	393.544	0	0	0	0	0	0	0	200	903	0	0	0	0	0	0	0	603	903	0
863	5	-29.7849	103.099	-794.103	-73448	-68710.1	-7211.06	113.475	392.492	0	0	0	0	0	0	0	200	903	0	0	0	0	0	0	0	603	903	0
863	6	-31.7685	102.489	-792.883	-74729.7	-68588.1	-7577.27	113.495	394.251	0	0	0	0	0	0	0	200	903	0	0	0	0	0	0	0	603	903	0
863	7	-30.3952	101.726	-793.493	-75645.3	-68893.2	-7577.27	113.177	395.332	0	0	0	0	0	0	0	200	903	0	0	0	0	0	0	0	603	903	0
863	8	-30.09	101.574	-794.714	-76103	-68893.2	-7256.84	113.311	395.762	0	0	0	0	0	0	0	200	903	0	0	0	0	0	0	0	603	903	0
863	9	-31.1581	101.116	-795.324	-76103	-68588.1	-7348.39	113.761	395.688	0	0	0	0	0	0	0	200	903	0	0	0	0	0	0	0	603	903	0
864	0	-29.3271	100.963	-792.578	-76743.9	-68343.9	-7577.27	113.77	396.828	0	0	0	0	0	0	0	200	903	0	0	0	0	0	0	0	603	903	0
864	1	-30.2426	100.353	-790.136	-76194.6	-68771.1	-7348.39	112.963	396.432	0	0	0	0	0	0	0	200	903	0	0	0	0	0	0	0	603	903	0
864	2	-29.0219	100.048	-793.188	-76286.1	-68588.1	-7348.39	113.529	396.177	0	0	0	0	0	0	0	200	903	0	0	0	0	0	0	0	603	903	0
864	3	-29.3271	99.2847	-794.103	-77110.1	-68466	-7256.84	113.782	397.103	0	0	0	0	0	0	0	200	903	0	0	0	0	0	0	0	603	903	0
864	4	-30.2426	98.5218	-793.798	-76652.3	-68404.9	-6753.3	113.826	396.564	0	0	0	0	0	0	0	200	903	0	0	0	0	0	0	0	603	903	0
864	5	-29.0219	98.064	-791.967	-76927	-68832.2	-7531.5	113.087	397.134	0	0	0	0	0	0	0	200	903	0	0	0	0	0	0	0	603	903	0
864	6	-30.2426	98.064	-790.746	-77751	-68771.1	-6707.52	113.03	398.326	0	0	0	0	0	0	0	200	903	0	0	0	0	0	0	0	603	903	0
864	7	-29.6323	97.3011	-789.526	-77659.4	-68343.9	-7394.17	113.437	398.362	0	0	0	0	0	0	0	200	903	0	0	0	0	0	0	0	603	903	0
864	8	-29.9374	96.8433	-790.746	-78300.3	-68221.8	-7165.29	113.725	399.021	0	0	0	0	0	0	0	200	903	0	0	0	0	0	0	0	603	903	0
864	9	-31.3107	96.2329	-789.526	-77567.9	-68649	-6982.18	113.05	398.246	0	0	0	0	0	0	0	200	903	0	0	0	0	0	0	0	603	903	0
865	0	-29.9374	95.9278	-786.474	-78025.6	-68466	-6890.63	112.946	399.209	0	0	0	0	0	0	0	200	903	0	0	0	0	0	0	0	603	903	0
865	1	-31.4633	94.5545	-785.864	-78025.6	-68282.8	-6890.63	113.111	399.286	0	0	0	0	0	0	0	200	903	0	0	0	0	0	0	0	603	903	0
865	2	-31.0056	93.3338	-784.948	-78025.6	-68038.7	-6936.4	113.321	399.402	0	0	0	0	0	0	0	200	903	0	0	0	0	0	0	0	603	903	0
865	3	-31.4633	93.639	-784.948	-79124.3	-68099.8	-6799.07	113.243	400.802	0	0	0	0	0	0	0	200	903	0	0	0	0	0	0	0	603	903	0
865	4	-31.9211	94.2493	-783.117	-77934.1	-67733.6	-6570.19	113.508	399.518	0	0	0	0	0	0	0	200	903	0	0	0	0	0	0	0	603	903	0
865	5	-32.3788	93.0286	-781.286	-79307.4	-68588.1	-6707.52	112.211	401.509	0	0	0	0	0	0	0	200	903	0	0	0	0	0	0	0	603	903	0
865	6	-32.9892	92.876	-778.539	-78941.2	-67794.6	-6707.52	112.921	401.397	0	0	0	0	0	0	0	200	903	0	0	0	0	0	0	0	603	903	0
865	7	-32.2263	90.4346	-776.403	-78941.2	-67916.6	-6387.09	112.524	401.676	0	0	0	0	0	0	0	200	903	0	0	0	0	0	0	0	603	903	0
865	8	-32.8366	91.1975	-775.488	-79124.3	-67184.2	-6615.97	113.365	402.032	0	0	0	0	0	0	0	200	903	0	0	0	0	0	0	0	603	903	0
865	9	-33.447	90.5872	-773.962	-78391.8	-67672.5	-6524.42	112.564	401.286	0	0	0	0	0	0	0	200	903	0	0	0	0	0	0	0	603	903	0
866	0	-33.2944	90.282	-770.91	-79856.7	-67428.3	-6478.64	112.534	403.588	0	0	0	0	0	0	0	200	903	0	0	0	0	0	0	0	603	903	0
866	1	-34.3625	90.4346	-766.332	-79948.2	-67306.3	-6249.76	112.171	404.326	0	0	0	0	0	0	0	200	903	0	0	0	0	0	0	0	603	903	0
866	2	-32.684	89.0613	-766.638	-79673.6	-67489.4	-6203.98	111.967	403.926	0	0	0	0	0	0	0	200	903	0	0	0	0	0	0	0	603	903	0
866	3	-32.3788	89.3665	-765.112	-79582	-67062.1	-6295.53	112.35	404.014	0	0	0	0	0	0	0	200	903	0	0	0	0	0	0	0	603	903	0
866	4	-33.9047	88.1458	-764.196	-79398.9	-66757	-6387.09	112.644	403.899	0	0	0	0	0	0	0	200	903	0	0	0	0	0	0	0	603	903	0
866	5	-34.6677	87.5354	-761.144	-79215.8	-66390.8	-6203.98	112.775	404.075	0	0	0	0	0	0	0	200	903	0	0	0	0	0	0	0	603	903	0
866	6	-35.278	86.1621	-755.651	-79490.5	-66879.1	-6203.98	111.495	405.195	0	0	0	0	0	0	0	200	903	0	0	0	0	0	0	0	603	903	0
866	7	-33.7521	87.688	-754.125	-79856.7	-66634.9	-6203.98	111.639	405.893	0	0	0	0	0	0	0	200	903	0	0	0	0	0	0	0	603	903	0
866	8	-32.9892	86.9251	-751.684	-78483.4	-66268.7	-6203.98	111.84	404.41	0	0	0	0	0	0	0	200	903	0	0	0	0	0	0	0	603	903	0
866	9	-34.8203	86.7725	-749.853	-80589.1	-66024.6	-5929.32	111.95	407.473	0	0	0	0	0	0	0	200	903	0	0	0	0	0	0	0	603	903	0
867	0	-35.4306	86.6199	-747.106	-79582	-66329.7	-5929.32	111.218	406.52	0	0	0	0	0	0	0	200	903	0	0	0	0	0	0	0	603	903	0
867	1	-35.4306	85.094	-742.529	-79215.8	-65963.5	-5746.22	111.164	406.684	0	0	0	0	0	0	0	200	903	0	0	0	0	0	0	0	603	903	0
867	2	-33.2944	84.6363	-739.477	-79307.4	-65536.3	-5975.1	111.375	407.248	0	0	0	0	0	0	0	200	903	0	0	0	0	0	0	0	603	903	0
867	3	-34.5151	82.3475	-737.646	-79215.8	-65170	-5700.44	111.651	407.39	0	0	0	0	0	0	0	200	903	0	0	0	0	0	0	0	603	903	0
867	4	-34.8203	83.4156	-736.12	-80222.9	-65658.4	-5883.55	110.805	408.981	0	0	0	0	0	0	0	200	903	0	0	0	0	0	0	0	603	903	0
867	5	-35.278	83.1104	-733.679	-78666.5	-64864.9	-5791.99	111.59	407.222	0	0	0	0	0	0	0	200	903	0	0	0	0	0	0	0	603	903	0
867	6	-35.7358	82.6526	-730.016	-79856.7	-64559.7	-5654.67	111.564	409.39	0	0	0	0	0	0	0	200	903	0	0	0	0	0	0	0	603	903	0
867	7	-35.278	81.8897	-726.049	-79307.4	-64498.7	-5654.67	111.165	409.231	0	0	0	0	0	0	0	200	903	0	0	0	0	0	0	0	603	903	0
867	8	-34.9728	81.1267	-724.218	-79398.9	-64437.6	-5517.34	111.025	409.634	0	0	0	0	0	0	0	200	903	0	0	0	0	0	0	0	603	903	0
867	9	-35.278	80.0586	-722.692	-79215.8	-64742.8	-5608.89	110.414	409.612	0	0	0	0	0	0	0	200	903	0	0	0	0	0	0	0	603	903	0
868	0	-36.3461	79.1431	-720.556	-79673.6	-64803.8	-5471.56	110.064	410.572	0	0	0	0	0	0	0	200	903	0	0	0	0	0	0	0	603	903	0
868	1	-34.8203	78.9905	-716.894	-79673.6	-63949.4	-5151.13	110.797	411.137	0	0	0	0	0	0	0	200	903	0	0	0	0	0	0	0	603	903	0
868	2	-36.8039	78.3802	-712.316	-79032.7	-63705.2	-5242.68	110.566	410.952	0	0	0	0	0	0	0	200	903	0	0	0	0	0	0	0	603	903	0
868	3	-35.1254	75.9388	-710.485	-79948.2	-63888.3	-5425.78	110.078	412.526	0	0	0	0	0	0	0	200	903	0	0	0	0	0	0	0	603	903	0
868	4	-35.4306	76.2439	-710.79	-78758.1	-64071.4	-5059.57	109.859	410.804	0	0	0	0	0	0	0	200	903	0	0	0	0	0	0	0	603	903	0
868	5	-36.3461	76.3965	-707.739	-78941.2	-63583.1	-5105.35	110.16	411.54	0	0	0	0	0	0	0	200	903	0	0	0	0	0	0	0	603	903	0
868	6	-34.6677	75.0232	-704.077	-78575	-63033.8	-4968.02	110.473	411.6	0	0	0	0	0	0	0	200	903	0	0	0	0	0	0	0	603	903	0
868	7	-36.3461	73.1922	-700.72	-79032.7	-63094.9	-4968.02	109.957	412.788	0	0	0	0	0	0	0	200	903	0	0	0	0	0	0	0	603	903	0
868	8	-35.8884	73.0396	-699.804	-79490.5	-63094.9	-4784.91	109.839	413.59	0	0	0	0	0	0	0	200	903	0	0	0	0	0	0	0	603	903	0
868	9	-34.8203	72.2766	-698.889	-79582	-62972.8	-4556.03	109.896	413.869	0	0	0	0	0	0	0	200	903	0	0	0	0	0	0	0	603	903	0
869	0	-36.8039	71.2085	-695.226	-79398.9	-62423.5	-4601.81	110.211	414.206	0	0	0	0	0	0	0	200	903	0	0	0	0	0	0	0	603	903	0
869	1	-36.6513	71.0559	-691.564	-78391.8	-62301.4	-4510.25	109.912	413.354	0	0	0	0	0	0	0	200	903	0	0	0	0	0	0	0	603	903	0
869	2	-35.7358	69.3775	-690.038	-77751	-62484.5	-4464.48	109.448	412.676	0	0	0	0	0	0	0	200	903	0	0	0	0	0	0	0	603	903	0
869	3	-35.1254	67.5464	-689.428	-78483.4	-62606.6	-4556.03	109.191	413.838	0	0	0	0	0	0	0	200	903	0	0	0	0	0	0	0	603	903	0
869	4	-35.8884	68.0042	-683.63	-79215.8	-61935.2	-4464.48	109.402	415.875	0	0	0	0	0	0	0	200	903	0	0	0	0	0	0	0	603	903	0
869	5	-37.2617	67.2412	-683.935	-77934.1	-61569	-4144.04	109.978	413.95	0	0	0	0	0	0	0	200	903	0	0	0	0	0	0	0	603	903	0
869	6	-36.9565	66.0205	-680.578	-79124.3	-61935.2	-4098.27	108.996	416.26	0	0	0	0	0	0	0	200	903	0	0	0	0	0	0	0	603	903	0
869	7	-36.4987	66.0205	-679.357	-78117.2	-61630	-4052.49	109.282	414.987	0	0	0	0	0	0	0	200	903	0	0	0	0	0	0	0	603	903	0
869	8	-36.4987	64.1895	-678.137	-77293.2	-61935.2	-3732.06	108.669	413.979	0	0	0	0	0	0	0	200	903	0	0	0	0	0	0	0	603	903	0
869	9	-35.5832	64.0369	-670.812	-78575	-61141.7	-3594.73	108.854	417.134	0	0	0	0	0	0	0	200	903	0	0	0	0	0	0	0	603	903	0
870	0	-38.0246	63.1214	-673.559	-78758.1	-60836.6	-3365.85	109.679	416.928	0	0	0	0	0	0	0	200	903	0	0	0	0	0	0	0	603	903	0
870	1	-38.1772	61.5955	-667.15	-79032.7	-61080.7	-3091.19	108.445	418.463	0	0	0	0	0	0	0	200	903	0	0	0	0	0	0	0	603	903	0
870	2	-37.2617	62.6636	-667.15	-78483.4	-60897.6	-3182.74	108.72	417.64	0	0	0	0	0	0	0	200	903	0	0	0	0	0	0	0	603	903	0
870	3	-37.2617	60.68	-665.014	-77384.8	-60653.4	-3136.96	108.794	416.366	0	0	0	0	0	0	0	200	903	0	0	0	0	0	0	0	603	903	0
870	4	-38.635	59.917	-661.962	-77934.1	-60165.2	-3274.29	109.111	417.732	0	0	0	0	0	0	0	200	903	0	0	0	0	0	0	0	603	903	0
870	5	-38.3298	59.3067	-661.657	-77659.4	-59982.1	-2999.64	109.346	417.371	0	0	0	0	0	0	0	200	903	0	0	0	0	0	0	0	603	903	0
870	6	-38.0246	57.1704	-656.164	-77384.8	-59982.1	-2999.64	108.587	417.935	0	0	0	0	0	0	0	200	903	0	0	0	0	0	0	0	603	903	0
870	7	-37.2617	58.2386	-654.943	-78483.4	-59860	-2908.08	108.603	419.832	0	0	0	0	0	0	0	200	903	0	0	0	0	0	0	0	603	903	0
870	8	-36.6513	57.0179	-652.502	-77018.6	-59921	-2770.75	108.167	418.036	0	0	0	0	0	0	0	200	903	0	0	0	0	0	0	0	603	903	0
870	9	-37.1091	55.0342	-647.314	-77934.1	-59371.7	-2816.53	108.28	420.396	0	0	0	0	0	0	0	200	903	0	0	0	0	0	0	0	603	903	0
871	0	-37.7194	56.1023	-649.755	-77018.6	-59798.9	-2450.32	107.967	418.535	0	0	0	0	0	0	0	200	903	0	0	0	0	0	0	0	603	903	0
871	1	-38.1772	55.3394	-646.398	-76835.5	-59432.7	-2496.09	108.056	418.867	0	0	0	0	0	0	0	200	903	0	0	0	0	0	0	0	603	903	0
871	2	-37.2617	53.8135	-642.126	-77018.6	-58761.4	-2633.42	108.489	419.943	0	0	0	0	0	0	0	200	903	0	0	0	0	0	0	0	603	903	0
871	3	-37.1091	53.2032	-641.516	-77110.1	-58700.3	-2541.87	108.497	420.2	0	0	0	0	0	0	0	200	903	0	0	0	0	0	0	0	603	903	0
871	4	-36.6513	52.135	-639.379	-77384.8	-59005.5	-2129.88	107.714	421.031	0	0	0	0	0	0	0	200	903	0	0	0	0	0	0	0	603	903	0
871	5	-37.2617	52.2876	-636.633	-77384.8	-58883.4	-2129.88	107.508	421.553	0	0	0	0	0	0	0	200	903	0	0	0	0	0	0	0	603	903	0
871	6	-38.0246	50.1514	-633.276	-77018.6	-58151	-2175.66	108.174	421.619	0	0	0	0	0	0	0	200	903	0	0	0	0	0	0	0	603	903	0
871	7	-37.4142	50.9143	-629.919	-76469.2	-58028.9	-2084.11	107.879	421.395	0	0	0	0	0	0	0	200	903	0	0	0	0	0	0	0	603	903	0
871	8	-37.2617	49.9988	-630.224	-76377.7	-58028.9	-1855.23	107.923	421.191	0	0	0	0	0	0	0	200	903	0	0	0	0	0	0	0	603	903	0
871	9	-37.7194	49.2359	-626.867	-76194.6	-57967.9	-1626.34	107.528	421.548	0	0	0	0	0	0	0	200	903	0	0	0	0	0	0	0	603	903	0
872	0	-36.6513	48.6255	-622.9	-76469.2	-57540.6	-1626.34	107.625	422.763	0	0	0	0	0	0	0	200	903	0	0	0	0	0	0	0	603	903	0
872	1	-37.872	47.8626	-616.796	-76469.2	-57296.5	-1626.34	107.106	423.978	0	0	0	0	0	0	0	200	903	0	0	0	0	0	0	0	603	903	0
872	2	-36.4987	47.8626	-617.712	-76286.1	-57540.6	-1580.57	106.849	423.498	0	0	0	0	0	0	0	200	903	0	0	0	0	0	0	0	603	903	0
872	3	-37.2617	45.116	-617.101	-76194.6	-57174.4	-1580.57	107.35	423.472	0	0	0	0	0	0	0	200	903	0	0	0	0	0	0	0	603	903	0
872	4	-37.2617	46.4893	-615.576	-75187.5	-56442	-1305.91	108.31	422.142	0	0	0	0	0	0	0	200	903	0	0	0	0	0	0	0	603	903	0
872	5	-34.3625	44.6582	-611.913	-74821.3	-57235.5	-1397.46	106.465	422.274	0	0	0	0	0	0	0	200	903	0	0	0	0	0	0	0	603	903	0
872	6	-37.4142	44.6582	-607.946	-74912.9	-56258.9	-1397.46	107.461	423.223	0	0	0	0	0	0	0	200	903	0	0	0	0	0	0	0	603	903	0
872	7	-36.1935	43.7427	-607.336	-75370.6	-56747.2	-1214.36	106.564	424.1	0	0	0	0	0	0	0	200	903	0	0	0	0	0	0	0	603	903	0
872	8	-36.3461	44.5056	-606.42	-75553.7	-56686.2	-1351.69	106.523	424.59	0	0	0	0	0	0	0	200	903	0	0	0	0	0	0	0	603	903	0
872	9	-36.9565	43.5901	-604.589	-75279.1	-55953.7	-1122.8	107.452	424.513	0	0	0	0	0	0	0	200	903	0	0	0	0	0	0	0	603	903	0
873	0	-36.9565	42.3694	-603.369	-73997.3	-55892.7	-939.698	107.366	422.64	0	0	0	0	0	0	0	200	903	0	0	0	0	0	0	0	603	903	0
873	1	-37.1091	41.9117	-598.791	-74729.7	-56258.9	-1214.36	106.046	424.801	0	0	0	0	0	0	0	200	903	0	0	0	0	0	0	0	603	903	0
873	2	-36.1935	40.9961	-596.349	-74455.1	-55953.7	-893.921	106.173	424.851	0	0	0	0	0	0	0	200	903	0	0	0	0	0	0	0	603	903	0
873	3	-35.5832	40.2332	-596.044	-74363.5	-55465.5	-893.921	106.944	424.762	0	0	0	0	0	0	0	200	903	0	0	0	0	0	0	0	603	903	0
873	4	-36.041	39.7754	-590.551	-74821.3	-55343.4	-710.816	106.285	426.697	0	0	0	0	0	0	0	200	903	0	0	0	0	0	0	0	603	903	0
873	5	-36.6513	39.928	-592.077	-74729.7	-55099.2	-802.368	106.939	426.216	0	0	0	0	0	0	0	200	903	0	0	0	0	0	0	0	603	903	0
873	6	-37.2617	39.0125	-588.72	-74638.2	-55648.6	-710.816	105.475	426.78	0	0	0	0	0	0	0	200	903	0	0	0	0	0	0	0	603	903	0
873	7	-35.5832	39.0125	-584.142	-74363.5	-55221.3	-436.157	105.466	427.304	0	0	0	0	0	0	0	200	903	0	0	0	0	0	0	0	603	903	0
873	8	-36.041	37.7918	-579.87	-74272	-54549.9	-436.157	105.927	428.084	0	0	0	0	0	0	0	200	903	0	0	0	0	0	0	0	603	903	0
873	9	-34.9728	36.4185	-582.617	-73722.7	-54549.9	-298.828	106.371	426.537	0	0	0	0	0	0	0	200	903	0	0	0	0	0	0	0	603	903	0
874	0	-36.1935	36.8763	-581.091	-74272	-54549.9	-481.934	106.125	427.815	0	0	0	0	0	0	0	200	903	0	0	0	0	0	0	0	603	903	0
874	1	-35.8884	36.1133	-576.513	-73997.3	-54427.9	-115.723	105.591	428.353	0	0	0	0	0	0	0	200	903	0	0	0	0	0	0	0	603	903	0
874	2	-36.3461	34.1297	-572.851	-73997.3	-54061.6	-115.723	105.627	429.174	0	0	0	0	0	0	0	200	903	0	0	0	0	0	0	0	603	903	0
874	3	-34.6677	35.9607	-574.072	-73539.5	-53939.6	67.3829	106.04	428.102	0	0	0	0	0	0	0	200	903	0	0	0	0	0	0	0	603	903	0
874	4	-34.9728	34.74	-572.241	-73081.8	-54061.6	-115.723	105.526	427.712	0	0	0	0	0	0	0	200	903	0	0	0	0	0	0	0	603	903	0
874	5	-35.8884	33.0616	-570.715	-73264.9	-54000.6	158.936	105.381	428.374	0	0	0	0	0	0	0	200	903	0	0	0	0	0	0	0	603	903	0
874	6	-34.5151	33.5193	-567.358	-73539.5	-53695.4	21.6065	105.359	429.618	0	0	0	0	0	0	0	200	903	0	0	0	0	0	0	0	603	903	0
874	7	-36.1935	33.8245	-564.916	-72715.6	-53329.2	67.3829	105.598	428.719	0	0	0	0	0	0	0	200	903	0	0	0	0	0	0	0	603	903	0
874	8	-34.3625	33.6719	-563.085	-73264.9	-53146.1	204.712	105.616	430.113	0	0	0	0	0	0	0	200	903	0	0	0	0	0	0	0	603	903	0
874	9	-36.041	33.2141	-563.085	-72532.5	-53146.1	387.818	105.616	428.813	0	0	0	0	0	0	0	200	903	0	0	0	0	0	0	0	603	903	0
875	0	-35.8884	32.6038	-556.677	-72807.1	-53329.2	250.488	104.201	430.789	0	0	0	0	0	0	0	200	903	0	0	0	0	0	0	0	603	903	0
875	1	-36.041	32.146	-559.118	-72532.5	-52779.9	158.936	105.601	429.727	0	0	0	0	0	0	0	200	903	0	0	0	0	0	0	0	603	903	0
875	2	-36.9565	29.3994	-555.761	-72624	-52230.6	387.818	106.02	430.675	0	0	0	0	0	0	0	200	903	0	0	0	0	0	0	0	603	903	0
875	3	-34.9728	30.315	-553.625	-72807.1	-52840.9	662.476	104.555	431.51	0	0	0	0	0	0	0	200	903	0	0	0	0	0	0	0	603	903	0
875	4	-35.8884	30.9253	-549.963	-72532.5	-52352.7	754.029	104.807	431.886	0	0	0	0	0	0	0	200	903	0	0	0	0	0	0	0	603	903	0
875	5	-35.8884	29.8572	-551.794	-72532.5	-52657.8	845.581	104.57	431.449	0	0	0	0	0	0	0	200	903	0	0	0	0	0	0	0	603	903	0
875	6	-37.2617	29.8572	-550.268	-71891.6	-52352.7	525.147	104.86	430.648	0	0	0	0	0	0	0	200	903	0	0	0	0	0	0	0	603	903	0
875	7	-37.1091	29.3994	-547.827	-71708.5	-51559.2	937.134	105.884	430.896	0	0	0	0	0	0	0	200	903	0	0	0	0	0	0	0	603	903	0
875	8	-36.3461	27.4158	-546.606	-71708.5	-52291.6	891.358	104.334	431.189	0	0	0	0	0	0	0	200	903	0	0	0	0	0	0	0	603	903	0
875	9	-35.8884	28.0262	-545.08	-71708.5	-51925.4	845.581	104.738	431.556	0	0	0	0	0	0	0	200	903	0	0	0	0	0	0	0	603	903	0
876	0	-35.7358	26.958	-544.47	-71891.6	-51559.2	982.911	105.304	432.04	0	0	0	0	0	0	0	200	903	0	0	0	0	0	0	0	603	903	0
876	1	-37.2617	27.2632	-543.554	-71342.3	-51498.2	982.911	105.257	431.252	0	0	0	0	0	0	0	200	903	0	0	0	0	0	0	0	603	903	0
876	2	-37.2617	25.8899	-540.502	-71891.6	-51681.3	1120.24	104.383	433.009	0	0	0	0	0	0	0	200	903	0	0	0	0	0	0	0	603	903	0
876	3	-36.8039	25.8899	-538.061	-71342.3	-51681.3	1120.24	103.949	432.591	0	0	0	0	0	0	0	200	903	0	0	0	0	0	0	0	603	903	0
876	4	-36.6513	25.2796	-535.314	-71250.8	-51070.9	1074.46	104.596	433.101	0	0	0	0	0	0	0	200	903	0	0	0	0	0	0	0	603	903	0
876	5	-35.8884	24.5166	-537.451	-71708.5	-50887.8	1852.66	105.316	433.423	0	0	0	0	0	0	0	200	903	0	0	0	0	0	0	0	603	903	0
876	6	-37.5668	23.4485	-535.62	-71800	-50887.8	1623.78	104.993	434.051	0	0	0	0	0	0	0	200	903	0	0	0	0	0	0	0	603	903	0
876	7	-36.6513	25.127	-533.483	-71525.4	-51376.1	1440.67	103.697	434.072	0	0	0	0	0	0	0	200	903	0	0	0	0	0	0	0	603	903	0
876	8	-36.9565	24.0589	-528.295	-70976.1	-50948.9	1715.33	103.56	434.349	0	0	0	0	0	0	0	200	903	0	0	0	0	0	0	0	603	903	0
876	9	-36.9565	21.6175	-529.516	-70701.4	-50765.7	1578	104.128	433.521	0	0	0	0	0	0	0	200	903	0	0	0	0	0	0	0	603	903	0
877	0	-36.041	21.9226	-531.652	-70701.4	-50582.6	1669.56	104.858	432.984	0	0	0	0	0	0	0	200	903	0	0	0	0	0	0	0	603	903	0
877	1	-37.5668	21.6175	-530.126	-71433.8	-50704.7	1761.11	104.354	434.749	0	0	0	0	0	0	0	200	903	0	0	0	0	0	0	0	603	903	0
877	2	-34.5151	22.0752	-528.6	-70518.4	-51009.9	1852.66	103.5	433.406	0	0	0	0	0	0	0	200	903	0	0	0	0	0	0	0	603	903	0
877	3	-36.041	20.8545	-526.769	-71342.3	-50399.5	1898.44	104.323	435.434	0	0	0	0	0	0	0	200	903	0	0	0	0	0	0	0	603	903	0
877	4	-36.1935	21.3123	-524.328	-70518.4	-50216.4	2035.77	104.227	434.493	0	0	0	0	0	0	0	200	903	0	0	0	0	0	0	0	603	903	0
877	5	-35.7358	20.3968	-525.854	-70701.4	-50033.3	1989.99	104.853	434.451	0	0	0	0	0	0	0	200	903	0	0	0	0	0	0	0	603	903	0
877	6	-34.5151	19.6338	-523.412	-71067.6	-50521.6	2127.32	103.477	435.777	0	0	0	0	0	0	0	200	903	0	0	0	0	0	0	0	603	903	0
877	7	-36.4987	18.4131	-522.192	-71342.3	-50216.4	2081.54	103.835	436.621	0	0	0	0	0	0	0	200	903	0	0	0	0	0	0	0	603	903	0
877	8	-36.6513	18.8709	-520.971	-70976.1	-49850.2	2127.32	104.313	436.238	0	0	0	0	0	0	0	200	903	0	0	0	0	0	0	0	603	903	0
877	9	-35.8884	18.4131	-519.75	-70518.4	-49667.1	2447.75	104.44	435.677	0	0	0	0	0	0	0	200	903	0	0	0	0	0	0	0	603	903	0
878	0	-35.4306	17.6502	-517.919	-69602.8	-49972.3	2218.87	103.513	434.389	0	0	0	0	0	0	0	200	903	0	0	0	0	0	0	0	603	903	0
878	1	-35.1254	17.0398	-519.75	-70426.8	-49667.1	2676.64	104.44	435.501	0	0	0	0	0	0	0	200	903	0	0	0	0	0	0	0	603	903	0
878	2	-35.5832	16.5821	-518.53	-71067.6	-49239.9	2447.75	105.039	437.056	0	0	0	0	0	0	0	200	903	0	0	0	0	0	0	0	603	903	0
878	3	-35.278	16.7347	-516.393	-71250.8	-49361.9	2585.08	104.41	437.978	0	0	0	0	0	0	0	200	903	0	0	0	0	0	0	0	603	903	0
878	4	-35.278	14.751	-513.036	-70884.6	-49667.1	2585.08	103.19	438.167	0	0	0	0	0	0	0	200	903	0	0	0	0	0	0	0	603	903	0
878	5	-34.9728	15.9717	-514.257	-70518.4	-49178.8	2585.08	104.369	437.127	0	0	0	0	0	0	0	200	903	0	0	0	0	0	0	0	603	903	0
878	6	-34.3625	15.514	-515.478	-69969	-49361.9	2630.86	104.24	435.736	0	0	0	0	0	0	0	200	903	0	0	0	0	0	0	0	603	903	0
878	7	-35.278	14.9036	-514.868	-70152.1	-48934.7	2813.97	104.957	436.253	0	0	0	0	0	0	0	200	903	0	0	0	0	0	0	0	603	903	0
878	8	-35.5832	14.9036	-510.29	-71433.8	-48812.6	2722.41	104.343	439.987	0	0	0	0	0	0	0	200	903	0	0	0	0	0	0	0	603	903	0
878	9	-34.8203	14.5984	-511.816	-70976.1	-49117.8	2859.74	104.032	438.675	0	0	0	0	0	0	0	200	903	0	0	0	0	0	0	0	603	903	0
879	0	-34.8203	14.1407	-511.205	-70335.2	-48934.7	2951.3	104.276	437.587	0	0	0	0	0	0	0	200	903	0	0	0	0	0	0	0	603	903	0
879	1	-33.5996	13.3777	-512.426	-70243.7	-48629.5	3225.95	105.099	437.081	0	0	0	0	0	0	0	200	903	0	0	0	0	0	0	0	603	903	0
879	2	-34.0573	12.7674	-510.595	-70335.2	-48629.5	3317.51	104.759	437.751	0	0	0	0	0	0	0	200	903	0	0	0	0	0	0	0	603	903	0
879	3	-33.1418	12.4622	-509.985	-71708.5	-48934.7	3042.85	104.047	440.609	0	0	0	0	0	0	0	200	903	0	0	0	0	0	0	0	603	903	0
879	4	-34.8203	13.0725	-508.459	-70976.1	-48568.5	3271.73	104.479	439.591	0	0	0	0	0	0	0	200	903	0	0	0	0	0	0	0	603	903	0
879	5	-33.2944	12.4622	-509.069	-70793	-48141.2	3225.95	105.433	439.064	0	0	0	0	0	0	0	200	903	0	0	0	0	0	0	0	603	903	0
879	6	-33.447	11.5467	-509.069	-70243.7	-48324.3	3225.95	105.073	437.985	0	0	0	0	0	0	0	200	903	0	0	0	0	0	0	0	603	903	0
879	7	-33.7521	10.9363	-509.069	-70335.2	-48385.4	3409.06	104.953	438.164	0	0	0	0	0	0	0	200	903	0	0	0	0	0	0	0	603	903	0
879	8	-33.7521	10.1734	-507.543	-70609.9	-48568.5	3546.39	104.307	439.121	0	0	0	0	0	0	0	200	903	0	0	0	0	0	0	0	603	903	0
879	9	-34.9728	10.9363	-506.933	-71067.6	-48690.6	3409.06	103.951	440.191	0	0	0	0	0	0	0	200	903	0	0	0	0	0	0	0	603	903	0
880	0	-33.1418	10.4786	-507.238	-70701.4	-48080.2	3500.61	105.212	439.385	0	0	0	0	0	0	0	200	903	0	0	0	0	0	0	0	603	903	0
880	1	-32.9892	9.8682	-508.154	-69969	-48324.3	3637.94	104.902	437.693	0	0	0	0	0	0	0	200	903	0	0	0	0	0	0	0	603	903	0
880	2	-32.9892	9.25785	-508.154	-70609.9	-48446.4	3592.16	104.662	438.954	0	0	0	0	0	0	0	200	903	0	0	0	0	0	0	0	603	903	0
880	3	-32.2263	6.66385	-506.628	-70060.5	-48507.4	3729.49	104.254	438.288	0	0	0	0	0	0	0	200	903	0	0	0	0	0	0	0	603	903	0
880	4	-33.5996	7.88456	-507.238	-71525.4	-48263.3	3637.94	104.851	441.009	0	0	0	0	0	0	0	200	903	0	0	0	0	0	0	0	603	903	0
880	5	-32.3788	8.6475	-507.543	-70243.7	-47714	3683.72	105.99	438.399	0	0	0	0	0	0	0	200	903	0	0	0	0	0	0	0	603	903	0
[truncated: 1,964 more rows]
