# Supplementary material for: The Effects of an Extemporaneous Speech Dual-task on Older Adult Gait Control
Source: Research Square preprint supplement (doi:10.21203/rs.3.rs-7674245/v1), 2025-11-18
Supplement: Supplementary file 51 [file DT4Walk1.xlsx]

## Sheet: Sheet1
Trajectories
		04:LFHD			04:RFHD			04:LBHD			04:RBHD			04:C7			04:T10			04:CLAV			04:STRN			04:RBAK			04:LSHO			04:LUPA			04:LELB			04:LFRM			04:LWRA			04:LWRB			04:LFIN
Frame	Sub Frame	X	Y	Z	X	Y	Z	X	Y	Z	X	Y	Z	X	Y	Z	X	Y	Z	X	Y	Z	X	Y	Z	X	Y	Z	X	Y	Z	X	Y	Z	X	Y	Z	X	Y	Z	X	Y	Z	X	Y	Z	X	Y	Z
		mm	mm	mm	mm	mm	mm	mm	mm	mm	mm	mm	mm	mm	mm	mm	mm	mm	mm	mm	mm	mm	mm	mm	mm	mm	mm	mm	mm	mm	mm	mm	mm	mm	mm	mm	mm	mm	mm	mm	mm	mm	mm	mm	mm	mm	mm	mm	mm
433	0	315.137	2645.79	1591.04	196.944	2649.33	1590.42	322.71	2811.82	1541.81	212.936	2810.07	1536.73	261.342	2801.98	1451.13	267.851	2884.12	1172.58	273.672	2679.22	1360.04	274.366	2615.37	1165.88	186.424	2892.47	1247.57	450.981	2731.1	1379.31	526.698	2788.46	1138.19	531.412	2803.03	1065.69	548.874	2747.62	899.161	501.983	2746.24	817.955	569.441	2774.28	815.023	541.479	2736.61	746.237
434	0	317.462	2636.95	1591.83	198.907	2639.92	1592.53	324.717	2802.81	1543.18	214.793	2801.73	1539.14	263.421	2793.41	1452.37	270.765	2874.72	1173.71	273.98	2670.55	1361.38	273.614	2606.45	1167.47	189.13	2884.52	1248.79	451.974	2720.27	1380.31	528.775	2778.04	1139.74	533.606	2792.12	1067.16	551.225	2736.96	900.524	504.485	2735.85	819.062	572.216	2763.74	816.428	544.378	2725.74	747.36
435	0	319.812	2627.95	1592.69	201.167	2631.19	1594.24	326.639	2794.13	1544.58	216.414	2792.83	1541.37	265.34	2784.86	1453.48	274.868	2866.57	1175.65	274.272	2661.84	1362.64	272.86	2597.45	1168.78	192.157	2876.86	1249.94	452.784	2709.42	1381.4	530.755	2767.02	1141.23	535.579	2781	1068.34	553.613	2726.04	901.741	507.014	2724.91	820.613	574.886	2752.92	818.012	546.897	2715.38	748.699
436	0	321.685	2619.3	1593.32	203.171	2622.38	1595.93	327.898	2785.77	1545.66	217.982	2784.13	1543.27	271.513	2778.39	1454.83	276.377	2856.4	1175.55	274.289	2653.41	1363.76	271.75	2588.81	1169.87	194.805	2869	1250.91	453.41	2698.65	1382.32	532.506	2755.58	1142.37	536.853	2769.64	1069.15	555.704	2714.9	902.703	509.614	2713.69	821.292	577.438	2741.71	818.928	549.479	2704.42	749.827
437	0	323.508	2610.92	1593.82	204.911	2613.75	1597.45	329.266	2777.36	1546.67	219.494	2775.65	1545.1	277.784	2769.12	1457.42	279.784	2847.75	1176.46	274.053	2644.89	1364.85	270.626	2580.19	1170.95	197.395	2860.88	1251.76	453.841	2687.95	1383.08	533.966	2743.72	1143.33	538.634	2757.92	1070.27	557.815	2703.2	903.808	511.672	2702.67	822.184	579.743	2730.14	819.975	552.174	2692.44	751.063
438	0	325.266	2602.06	1594.62	206.67	2605.04	1599.02	330.403	2768.72	1547.32	220.752	2767.06	1546.77	270.688	2759.98	1456.75	281.58	2838.6	1177.25	274.08	2636.51	1366.14	269.454	2571.58	1172.06	200.215	2853.25	1252.62	454.305	2677.33	1383.99	535.385	2731.41	1144.41	541.02	2745.69	1071.61	559.688	2691.28	905.018	514.065	2690.78	823.162	582.266	2718.04	821.466	554.386	2680.84	752.123
439	0	326.885	2593.56	1595.19	208.932	2596.83	1600.02	331.471	2760.29	1548.15	222.283	2758.83	1548.26	272.24	2751.76	1457.74	283.551	2830.25	1177.61	274.142	2628.25	1367.15	268.381	2563.08	1173.14	202.678	2845.52	1253.39	454.854	2666.83	1384.86	536.503	2718.88	1145.03	542.519	2733.52	1072.32	561.562	2679.03	906.122	516.248	2678.71	824.174	584.556	2705.66	822.428	556.715	2668.76	753.058
440	0	328.206	2585.2	1595.69	209.851	2588.03	1601.48	332.412	2752.06	1548.68	223.425	2750.56	1549.62	280.788	2744.37	1459.83	284.153	2818.88	1176.94	274.085	2619.91	1368.19	267.438	2554.68	1174.24	205.037	2837.5	1253.8	455.328	2656.45	1385.6	537.396	2705.98	1145.4	543.577	2721.28	1072.81	563.189	2666.31	907.066	518.43	2666.47	824.829	586.858	2692.74	823.401	559.113	2656.07	753.898
441	0	329.322	2576.72	1596.23	211.077	2579.78	1602.5	333.515	2743.79	1549.53	224.558	2742.26	1550.82	276.476	2735.57	1459.22	289.688	2812.55	1179.71	274.214	2611.7	1369.18	266.655	2546.24	1175.42	206.836	2829.76	1254.55	455.502	2646.39	1386.34	538.461	2692.71	1146.09	544.327	2708.65	1073.82	564.427	2653.26	908.088	520.406	2653.3	825.865	589.048	2679.41	824.66	561.183	2643.16	754.871
442	0	330.379	2568.27	1596.74	211.969	2571.27	1603.33	334.451	2735.4	1550.33	225.347	2733.84	1551.94	278.733	2727.65	1459.75	290.85	2803.77	1179.55	274.232	2603.41	1370.02	265.97	2537.91	1176.66	207.388	2822.06	1255.15	456.104	2636.12	1387.24	539.002	2679.4	1146.52	545.88	2695.83	1074.43	565.942	2639.83	909.166	522.271	2640.37	826.499	591.132	2665.73	825.7	563.493	2629.62	755.886
443	0	331.175	2559.9	1597.2	213.078	2563.41	1603.79	335.322	2727.08	1551.12	226.14	2725.67	1552.98	281.06	2719	1460.29	293.582	2794.99	1180.21	274.341	2595.22	1370.78	265.444	2529.65	1177.68	209.783	2813.93	1255.44	456.567	2626.14	1388.04	539.405	2666.35	1146.87	546.57	2683.16	1074.81	566.971	2626.25	909.996	523.977	2627.02	827.005	592.976	2651.9	826.477	565.59	2615.74	756.729
444	0	331.674	2551.88	1597.44	213.388	2554.69	1604.21	335.656	2718.76	1551.68	226.629	2717.45	1553.51	280.923	2711.09	1460.57	295.518	2786.53	1180.21	274.552	2586.93	1371.24	265.242	2521.31	1178.29	212.07	2805.94	1255.66	457.053	2616.4	1388.54	539.749	2653.27	1146.87	547.264	2670.23	1075.06	567.779	2612.67	910.613	525.595	2612.54	827.765	594.747	2637.6	827.252	567.572	2601.36	757.407
445	0	332.301	2543.37	1597.65	214.112	2546.64	1604.42	336.312	2710.54	1551.98	227.261	2709.31	1553.95	282.119	2702.93	1460.55	297.762	2777.73	1180.26	274.839	2578.69	1371.59	265.291	2512.98	1178.93	214.31	2797.8	1255.45	457.64	2606.69	1389.02	539.969	2640.38	1146.99	547.204	2657.44	1075.12	568.849	2598.68	911.343	527.217	2599.12	827.842	596.434	2622.98	827.951	569.554	2586.64	758.067
446	0	332.664	2535.36	1597.71	214.387	2538.39	1604.56	336.662	2702.39	1552.13	227.748	2701.01	1554.06	283.013	2694.72	1460.51	299.391	2769.31	1179.91	275.202	2570.38	1371.84	265.289	2504.68	1179.48	215.834	2789.64	1255.32	458.056	2597.39	1389.2	540.326	2627.85	1146.85	547.812	2644.64	1074.96	569.783	2584.48	912.003	528.639	2584.47	828.272	597.892	2608.24	828.547	571.317	2571.42	758.786
447	0	333.115	2526.76	1597.64	214.709	2530.08	1604.33	337.035	2694.3	1552.08	227.98	2692.79	1553.9	284.302	2686.41	1460.33	302.18	2760.8	1179.96	275.561	2561.97	1371.81	265.463	2496.23	1179.63	217.775	2781.56	1254.93	458.891	2587.65	1389.43	540.458	2615.56	1146.51	548.267	2631.64	1074.64	570.542	2570.28	912.299	529.834	2569.52	828.471	599.104	2593.21	828.763	572.932	2555.84	759.282
448	0	333.285	2518.64	1597.28	215.215	2522.18	1603.74	337.231	2685.99	1551.74	228.467	2684.77	1553.51	286.211	2677.56	1459.95	303.496	2752.38	1179.33	275.882	2553.54	1371.6	265.764	2487.71	1179.31	219.163	2773.24	1254.37	459.201	2578.42	1389.04	540.884	2603.35	1145.91	548.624	2619.01	1073.92	571.109	2555.9	912.373	530.789	2554.34	828.45	600.165	2577.97	828.78	574.263	2539.76	759.769
449	0	333.378	2510.6	1596.85	215.177	2513.71	1603.42	337.563	2677.81	1551.41	228.536	2676.41	1553.16	286.913	2669.2	1459.48	304.38	2744.13	1178.45	276.253	2545.18	1371.26	266.106	2479.24	1178.86	220.737	2765.16	1253.64	459.572	2569.29	1388.69	541.279	2591.35	1145.45	548.968	2606.27	1073.36	571.722	2541.36	912.584	531.506	2538.99	828.586	600.716	2562.57	828.892	575.307	2523.41	760.286
450	0	333.552	2502.16	1596.41	215.238	2505.52	1602.81	337.885	2669.49	1551.03	229.005	2668.39	1552.58	287.686	2660.74	1458.8	306.196	2735.72	1177.88	276.545	2536.73	1370.71	266.53	2470.62	1178.23	221.863	2756.63	1252.84	459.703	2560.31	1388.18	541.747	2579.66	1144.81	549.531	2593.57	1072.5	572.241	2526.68	912.703	531.834	2523.13	828.812	601.004	2547	828.665	576.118	2506.68	760.738
451	0	333.55	2494.07	1595.75	215.31	2497.07	1602.04	338.066	2661.15	1550.33	229.141	2660.07	1551.87	287.325	2652.73	1458.04	307.203	2727.35	1177.02	277.049	2528.24	1369.91	266.942	2462.09	1177.15	223.226	2748.32	1252.03	460.282	2551.17	1387.6	542.294	2568.07	1144.17	549.806	2581.08	1071.51	572.63	2511.94	912.578	532.113	2507.27	828.768	601.297	2531	828.338	576.631	2489.56	761.253
452	0	333.613	2485.42	1595	215.586	2489.18	1601	338.129	2652.84	1549.63	229.381	2651.68	1551.02	288.606	2643.78	1457.17	308.075	2719.19	1176.11	277.416	2519.66	1369.08	267.27	2453.48	1175.99	224.207	2739.69	1251.11	460.763	2541.98	1386.61	542.789	2556.8	1143.41	550.352	2568.61	1070.6	572.859	2497.17	912.551	532.167	2491.22	828.925	601.316	2514.89	827.971	576.748	2472.25	761.801
453	0	333.61	2477.23	1594.07	215.39	2480.57	1600.08	338.203	2644.49	1548.75	229.574	2643.51	1549.92	288.486	2635.51	1456.19	308.835	2710.93	1175	277.72	2511.08	1368.04	267.63	2444.8	1174.79	225.344	2731.43	1250.04	460.994	2533.09	1385.64	543.361	2545.59	1142.52	550.854	2556.31	1069.46	572.857	2482.27	912.577	532.177	2475.27	828.955	601.359	2498.64	827.737	576.46	2454.66	762.41
454	0	333.727	2468.53	1593.28	215.291	2472.25	1598.96	338.571	2635.99	1547.72	229.644	2634.93	1548.64	289.893	2626.4	1455.11	309.949	2702.69	1173.93	277.966	2502.43	1366.83	268.048	2436.08	1173.53	225.976	2722.87	1249.02	460.938	2524.43	1384.41	543.836	2534.62	1141.68	551.453	2544.08	1068.39	572.742	2467.37	912.565	531.564	2458.55	829.468	600.696	2482.36	827.326	575.96	2436.91	763.082
455	0	333.515	2460.24	1592.27	215.305	2463.94	1597.73	338.659	2627.31	1546.52	229.75	2626.56	1547.34	288.974	2617.98	1453.97	310.75	2694.79	1173.32	278.288	2493.54	1365.63	268.443	2427.38	1171.99	226.229	2714.36	1248.04	461.373	2515.38	1383.39	544.258	2523.78	1140.64	551.763	2531.95	1067.23	572.499	2452.36	912.532	531.101	2442.06	829.845	600.019	2465.93	826.817	575.164	2418.94	763.895
456	0	333.803	2451.33	1591.36	215.781	2456.56	1596.4	338.77	2618.77	1545.23	229.802	2618.03	1545.94	290.654	2608.74	1452.87	310.604	2686	1171.93	278.617	2484.75	1364.39	268.814	2418.71	1170.59	226.683	2705.83	1247.04	461.841	2506.33	1382.29	544.856	2513.11	1139.69	552.316	2519.99	1066.1	572.301	2437.48	912.68	530.349	2425.41	830.48	599.133	2449.45	826.5	574.144	2400.91	764.899
457	0	333.494	2443.05	1590.39	215.687	2447.93	1595.37	338.878	2610.09	1543.81	229.766	2609.16	1544.41	291.059	2599.8	1451.64	310.321	2677.33	1170.63	278.942	2475.87	1363.15	269.089	2410.07	1169.31	227.16	2696.86	1245.82	462.05	2497.48	1381.05	545.517	2502.78	1138.74	552.844	2508.21	1064.85	571.875	2422.77	912.877	529.49	2408.7	831.386	598.159	2433.11	826.31	572.949	2382.84	766.236
458	0	333.474	2434.16	1589.33	215.567	2439.47	1594.11	338.934	2601.2	1542.19	229.944	2600.62	1542.64	289.778	2591.19	1450.19	311.244	2668.59	1169.43	279.078	2466.76	1361.73	269.248	2401.45	1167.78	227.433	2687.99	1244.6	462.129	2488.65	1379.57	545.988	2492.55	1137.58	553.261	2496.58	1063.53	571.269	2408.11	913.036	528.446	2391.82	832.41	596.646	2416.81	825.875	571.498	2364.73	767.62
459	0	333.269	2425.71	1588.06	215.479	2430.8	1592.73	338.682	2592.36	1540.53	229.894	2591.93	1540.99	289.771	2582.08	1448.9	311.471	2659.84	1168.42	279.262	2457.76	1360.25	269.37	2392.66	1166.26	227.552	2679.21	1243.5	462.231	2479.75	1378.05	546.398	2482.48	1136.42	553.577	2485.03	1062.19	570.592	2393.44	913.201	527.258	2375.09	833.458	594.996	2400.64	825.533	569.846	2346.59	769.172
460	0	333.035	2416.96	1587.01	215.295	2422.06	1591.44	338.683	2583.62	1538.87	229.884	2583.08	1539.18	290.127	2572.68	1447.79	311.019	2651.09	1167.23	279.188	2448.58	1358.94	269.461	2383.85	1164.8	227.261	2670.17	1242.54	462.294	2470.84	1376.69	546.863	2472.47	1135.29	553.93	2473.72	1060.9	569.764	2379.03	913.507	525.728	2358.48	834.718	593.174	2384.54	825.401	568.04	2328.58	771.092
461	0	333	2407.9	1585.81	215.044	2413.46	1590.23	338.678	2574.51	1537.19	229.959	2574.22	1537.39	289.976	2563.5	1446.5	311.347	2642.58	1166.1	279.341	2439.34	1357.42	269.573	2374.9	1163.45	227.607	2660.9	1241.27	462.437	2461.89	1375.15	547.154	2462.86	1134.04	554.187	2462.64	1059.47	568.868	2364.89	913.812	524.156	2341.89	836.369	591.061	2368.72	825.095	566.023	2310.68	773.092
462	0	332.791	2399.2	1584.6	214.817	2404.58	1588.98	338.47	2565.51	1535.49	230.035	2565.39	1535.7	291.073	2553.81	1445.23	311.033	2633.56	1165.02	279.421	2429.97	1355.94	269.705	2365.7	1161.97	227.007	2651.62	1240.2	462.315	2452.96	1373.68	547.563	2453.05	1132.87	554.342	2451.58	1058	568.061	2350.72	914.203	522.44	2325.51	838.029	588.65	2352.92	824.984	563.89	2292.92	775.413
463	0	332.466	2389.98	1583.37	214.307	2395.25	1587.73	338.12	2556.26	1533.97	230.006	2556.48	1533.98	290.852	2544.45	1443.95	310.265	2624.48	1163.86	279.373	2420.56	1354.46	269.785	2356.46	1160.6	226.281	2642.3	1239.07	462.439	2443.84	1372.36	547.669	2443.55	1131.67	554.385	2440.54	1056.76	566.935	2336.85	914.663	520.814	2309.23	839.865	586.263	2337.23	825.054	561.594	2275.24	777.886
464	0	332.161	2380.92	1582.18	213.838	2386.37	1586.54	338.328	2547.1	1532.41	229.77	2547.39	1532.59	290.508	2534.86	1442.57	309.705	2615.57	1162.47	279.234	2411.09	1353.11	269.711	2347.22	1159.28	226.136	2632.71	1237.67	462.278	2434.94	1371.01	547.851	2433.95	1130.58	554.43	2429.73	1055.63	565.795	2323.11	915.208	518.823	2293.32	841.841	583.676	2321.87	825.396	559.135	2258.06	780.646
465	0	331.671	2371.98	1580.94	213.553	2377.52	1585.23	338.188	2537.92	1530.93	229.623	2538.3	1531.18	288.95	2525.69	1441.2	309.192	2606.49	1161.34	278.995	2401.56	1351.64	269.598	2337.69	1157.93	225.355	2623.19	1236.48	461.974	2425.87	1369.63	547.846	2424.48	1129.47	554.416	2418.98	1054.45	564.416	2309.61	915.827	516.593	2277.63	844.043	580.61	2306.61	825.826	556.728	2240.67	783.544
466	0	331.221	2362.72	1579.77	213.093	2368.39	1584.05	338.001	2528.41	1529.54	229.275	2529.02	1529.83	289.262	2515.71	1440.06	308.704	2596.99	1160.01	278.673	2391.92	1350.28	269.562	2328.05	1156.59	224.696	2613.44	1235.36	461.574	2416.84	1368.31	547.789	2414.86	1128.44	554.194	2408.25	1053.18	562.99	2296.26	916.487	514.498	2262.12	846.279	577.702	2291.37	826.155	553.946	2223.78	786.759
467	0	330.835	2353.08	1578.83	212.586	2359.28	1583.06	337.401	2519.02	1528.11	229.085	2519.79	1528.39	288.765	2505.98	1439.01	307.336	2587.49	1159.07	278.348	2382.27	1349.07	269.557	2318.39	1155.28	223.688	2603.64	1234.35	461.167	2407.59	1367.17	547.393	2405.49	1127.41	553.68	2397.87	1051.95	561.281	2283.12	917.168	512.06	2247.08	848.709	574.601	2276.55	826.686	551.063	2207.56	790.037
468	0	330.256	2343.83	1577.89	211.698	2349.93	1582.46	337.395	2509.48	1526.58	228.894	2510.61	1527	288.056	2496.19	1437.87	306.67	2577.82	1157.95	278.008	2372.35	1347.99	269.493	2308.53	1154.33	223.095	2593.9	1233.09	460.893	2398.28	1366.18	547.033	2396.02	1126.29	553.417	2387.67	1051.02	559.645	2270.28	917.948	509.569	2231.98	851.505	571.855	2261.7	827.409	548.158	2191.56	793.345
469	0	329.628	2334.38	1577.04	211.292	2341.01	1581.53	336.908	2500.04	1525.11	228.475	2501.22	1525.83	287.579	2486.28	1436.89	306.099	2568.03	1156.91	277.645	2362.4	1346.88	269.286	2298.62	1153.27	222.369	2583.9	1232.11	460.361	2388.85	1365.16	546.626	2386.65	1125.39	552.923	2377.31	1049.95	557.637	2257.57	918.797	506.607	2217.14	854.314	568.424	2247.38	828.373	545.119	2176.07	796.72
470	0	328.243	2325.27	1576.13	210.507	2331.68	1580.86	336.399	2490.22	1523.85	228.062	2491.77	1524.53	285.663	2476.59	1435.94	304.709	2558.27	1156.24	277.015	2352.3	1345.95	269.066	2288.63	1152.35	220.716	2573.97	1231.5	459.724	2379.16	1364.33	545.358	2377.42	1124.35	552.27	2367.34	1049	555.467	2245.01	919.76	503.941	2203.46	856.742	565.055	2233.31	829.098	542.007	2160.71	800.329
471	0	327.821	2315.59	1575.66	209.61	2322.37	1580.3	335.869	2480.58	1522.54	227.548	2482.21	1523.32	284.999	2466.29	1435.27	303.452	2548.03	1155.6	276.309	2342.21	1345.05	268.582	2278.39	1151.45	219.872	2563.65	1230.71	458.652	2369.68	1363.32	544.967	2367.74	1123.71	551.558	2357.14	1048.37	553.266	2232.67	920.746	500.963	2189.65	859.328	561.323	2219.46	830.632	538.551	2145.86	804.065
472	0	327.072	2305.78	1575.3	208.738	2312.91	1579.93	335.241	2470.64	1521.41	226.884	2472.57	1522.09	284.728	2455.86	1434.5	302.113	2537.91	1154.57	275.527	2331.95	1344.36	268.061	2268.24	1150.84	218.641	2553.44	1229.92	457.886	2359.75	1362.68	543.919	2358.31	1122.97	550.986	2347.21	1047.72	551.05	2220.63	921.836	497.974	2176.44	862.001	557.99	2205.79	831.695	535.424	2131.66	807.484
473	0	326.104	2296.17	1574.87	207.832	2303.49	1579.55	334.457	2460.83	1520.33	225.897	2462.64	1521.15	283.845	2445.76	1433.76	300.883	2527.12	1154.03	274.692	2321.62	1343.71	267.461	2257.96	1150.28	218.034	2543.09	1229.21	457.317	2349.54	1362.27	543.077	2348.59	1122.52	550.217	2337.17	1047.14	548.653	2208.78	922.889	494.885	2163.57	864.457	555.106	2192.21	833.277	532.296	2117.56	810.948
474	0	325.024	2286.48	1574.6	206.79	2293.96	1579.24	333.6	2450.77	1519.46	225.165	2452.98	1520.5	282.673	2435.35	1433.23	299.782	2516.82	1153.43	273.729	2311.22	1343.23	266.696	2247.49	1149.74	216.594	2532.51	1228.54	456.351	2339.5	1361.76	542.247	2338.74	1122.11	549.526	2327.03	1046.73	546.307	2197.07	924.005	491.901	2151.02	866.812	550.546	2179.65	833.942	528.986	2103.88	814.709
475	0	323.498	2277.12	1574.12	205.782	2284.36	1579.03	332.682	2440.95	1518.69	224.137	2443.05	1519.68	281.496	2425.24	1432.6	298.799	2506.34	1152.62	272.829	2300.82	1342.68	265.849	2236.82	1149.54	215.131	2521.52	1227.77	455.303	2329.29	1361.51	541.218	2328.88	1121.93	548.665	2317.16	1046.4	543.907	2185.51	925.077	488.782	2138.83	869.154	547.392	2166.92	835.265	525.346	2090.64	818.05
476	0	322.781	2267.15	1573.96	204.619	2274.64	1578.85	331.555	2430.96	1517.85	223.129	2433.27	1518.9	280.413	2414.78	1431.93	297.182	2494.92	1151.72	271.557	2290.18	1342.36	264.67	2225.77	1149.27	214.348	2510.69	1226.83	454.143	2319.27	1360.88	540.04	2319.03	1121.43	547.728	2307.24	1046.01	541.386	2174.26	925.951	485.616	2127.13	871.261	544.175	2154.51	836.312	521.542	2077.91	821.042
477	0	321.522	2257.66	1573.73	203.408	2264.92	1578.8	330.335	2421.15	1517	222.013	2423.48	1518.11	279.011	2404.4	1431.36	296.471	2484.06	1150.98	270.411	2279.48	1342	263.552	2214.47	1149.22	212.693	2499.43	1225.94	452.941	2309.05	1360.46	538.747	2309.11	1121.01	546.732	2297.6	1045.48	538.901	2163.29	926.707	482.496	2115.55	873.127	540.588	2142.46	837.388	518.222	2065.51	823.864
478	0	320.338	2247.87	1573.82	202.208	2255.08	1578.94	329.075	2411.1	1516.41	220.783	2413.49	1517.42	277.545	2393.85	1430.98	294.382	2472.96	1150.49	269.197	2268.79	1341.87	262.609	2203.16	1149.3	211.436	2488.32	1225.26	451.733	2298.9	1360.21	537.56	2299.1	1120.67	545.653	2287.86	1045.19	536.552	2152.49	927.562	479.539	2104.6	874.93	537.411	2130.62	838.363	514.925	2053.55	826.746
479	0	318.566	2238.2	1574.11	200.869	2245.18	1579.26	327.574	2401.1	1516.06	219.407	2403.42	1516.94	276.199	2383.3	1430.76	293.488	2461.51	1149.69	267.988	2257.93	1342.08	261.833	2191.48	1149.66	209.942	2476.82	1224.51	450.649	2288.52	1360.33	536.193	2289.16	1120.72	544.547	2278.41	1045.14	534.082	2142.03	928.445	476.742	2093.98	876.783	534.302	2119.1	839.489	511.605	2042.13	829.472
480	0	317.443	2228.19	1574.72	199.589	2235.32	1579.64	326.284	2390.96	1515.92	217.753	2393.05	1516.65	274.543	2372.56	1430.59	291.816	2449.96	1149.54	266.724	2246.91	1342.45	260.979	2179.75	1150.13	208.321	2465.34	1224.16	449.421	2278.08	1360.56	534.898	2279.12	1120.95	543.367	2269.01	1045.31	531.653	2131.77	929.377	473.704	2083.71	878.387	531.513	2108.48	840.751	508.451	2031.17	831.931
481	0	316.551	2218.04	1575.5	198.146	2225.39	1580.21	324.623	2380.76	1515.72	216.123	2382.8	1516.52	273.239	2361.79	1430.74	290.68	2438.43	1149.71	265.555	2235.96	1342.72	260.061	2167.89	1150.62	207.141	2454.07	1223.89	448.149	2267.54	1361.02	533.56	2269.18	1121.18	542.124	2259.62	1045.51	529.377	2122.01	930.244	470.964	2073.89	879.807	528.665	2098	841.709	505.442	2020.73	834.079
482	0	315.006	2208.27	1576.45	196.703	2215.41	1581.03	323.256	2370.67	1515.79	214.532	2372.56	1516.35	271.666	2350.92	1430.99	288.632	2426.91	1149.71	264.226	2224.85	1343.32	259.323	2156.06	1151.43	205.258	2442.5	1223.87	446.605	2257	1361.59	532.042	2259.35	1121.73	540.88	2250.41	1045.96	526.83	2112.32	931.074	468.15	2064.51	880.999	525.637	2087.94	842.579	502.413	2010.79	836.029
483	0	313.329	2198.34	1577.6	195.098	2205.27	1582.04	321.497	2360.36	1516.08	212.819	2362.03	1516.32	270.107	2340.11	1431.65	287.032	2415.85	1150.11	262.969	2213.83	1344.23	258.522	2144.46	1152.37	203.94	2431.2	1224.3	445.522	2246.24	1362.67	530.655	2249.45	1122.56	539.605	2241.41	1046.81	524.533	2103.31	931.939	465.555	2055.41	882.334	523.102	2078.84	843.685	499.638	2001.45	837.787
484	0	311.773	2188.43	1578.85	193.476	2195.17	1583.05	319.751	2350.11	1516.36	211.324	2351.74	1516.45	269.059	2329.22	1432.4	285.827	2403.96	1150.96	261.934	2202.91	1345.07	258.011	2133.03	1153.41	202.881	2419.66	1224.77	444.399	2235.63	1363.73	529.448	2239.65	1123.52	538.361	2232.22	1047.7	522.307	2094.2	932.605	462.913	2046.89	883.142	520.346	2069.68	844.152	496.887	1992.54	839.048
485	0	310.19	2178.47	1580.31	191.83	2185.15	1584.24	318.049	2339.69	1516.99	209.569	2341.27	1516.79	267.144	2318.37	1433.32	284.088	2392.83	1151.95	260.866	2191.85	1346.17	257.43	2121.72	1154.57	201.261	2408.59	1225.61	443.242	2225.01	1365.04	528.058	2229.81	1124.64	537.109	2223.15	1048.77	520.118	2085.51	933.331	460.482	2038.6	883.89	517.862	2061.13	844.824	494.266	1984.16	840.043
486	0	308.426	2168.46	1582.07	190.112	2175.16	1585.37	316.361	2329.47	1517.88	207.756	2330.75	1517.24	265.474	2307.64	1434.47	282.625	2381.66	1153.1	259.969	2181.08	1347.43	256.794	2110.71	1155.96	199.963	2397.35	1226.71	442.177	2214.51	1366.7	526.56	2220.11	1126.09	535.734	2214.04	1050.19	517.897	2077.08	934.205	458.172	2030.35	884.755	515.744	2052.94	845.638	491.696	1976.11	840.864
487	0	306.576	2158.58	1583.69	188.322	2165.01	1586.56	314.193	2318.85	1518.75	206.147	2320.41	1517.74	264.797	2296.6	1435.67	281.599	2371.05	1154.01	259.056	2170.34	1348.69	256.308	2099.81	1157.41	198.734	2386.14	1227.66	441.083	2204.23	1368.24	525.093	2210.37	1127.44	534.286	2205.15	1051.55	515.903	2068.8	934.9	455.965	2022.95	885.014	513.768	2045.07	846.211	489.341	1968.34	841.408
488	0	304.783	2148.61	1585.28	186.621	2154.81	1587.67	312.801	2308.84	1519.85	204.52	2309.98	1518.43	263.163	2285.97	1436.89	280.636	2360.5	1155.53	258.216	2159.59	1350.01	255.884	2089.05	1158.64	197.069	2375.22	1228.91	440.029	2194.05	1369.85	523.796	2200.55	1128.93	532.851	2196.52	1052.92	514.126	2060.77	935.474	453.964	2015.96	885.01	512.015	2037.36	846.729	486.912	1961.06	841.441
489	0	303.037	2138.56	1587.07	184.93	2144.79	1588.73	311.365	2298.43	1521.06	202.946	2299.59	1519.1	262.043	2275.36	1438.27	280.115	2349.85	1157.03	257.375	2149.06	1351.2	255.611	2078.6	1160.01	195.988	2364.2	1230.24	439.156	2184.19	1371.44	522.037	2191.24	1130.21	531.36	2187.98	1054.3	512.315	2052.83	935.952	451.874	2008.84	884.901	510.699	2029.78	847.21	484.63	1953.91	841.285
490	0	301.31	2128.45	1588.85	183.133	2134.71	1589.96	309.561	2288.17	1522.21	201.707	2289.41	1519.75	260.756	2264.75	1439.58	278.598	2339.81	1158.39	256.933	2138.6	1352.59	255.398	2068.38	1161.37	194.297	2353.28	1231.5	438.463	2174.45	1373.13	520.624	2181.85	1131.6	529.998	2179.59	1055.75	510.625	2045.3	936.369	450.071	2002.21	884.593	509.667	2022.66	847.697	482.435	1947.15	840.842
491	0	299.635	2118.41	1590.45	181.422	2124.62	1590.93	308.518	2277.91	1523.48	200.535	2279.11	1520.45	259.36	2254.4	1440.89	277.912	2329.98	1159.84	256.498	2128.27	1353.88	255.416	2058.27	1162.68	193.277	2342.6	1232.7	437.711	2165.02	1374.55	519.365	2172.52	1132.91	528.523	2171.26	1056.95	509.141	2037.96	936.679	448.412	1996.05	884.146	508.551	2015.4	847.965	480.501	1940.72	840.339
492	0	298.057	2108.21	1591.91	179.759	2114.51	1591.78	307.031	2267.68	1524.64	199.329	2268.84	1521.05	258.296	2244.04	1442.16	276.399	2320.27	1161.02	256.225	2118.08	1354.94	255.621	2048.4	1163.67	191.631	2331.91	1233.78	436.764	2155.96	1375.63	518.246	2163.32	1134.03	527.131	2163	1057.96	507.726	2030.53	936.847	446.949	1990.08	883.184	507.996	2008.81	848.089	478.596	1934.37	839.317
493	0	296.513	2097.79	1593.57	178.134	2104.48	1592.63	306.284	2257.33	1526.06	198.328	2258.67	1521.83	257.307	2233.91	1443.38	274.952	2310.19	1162.2	255.833	2107.99	1356.09	255.737	2038.52	1164.71	190.188	2321.33	1235.1	436.358	2146.8	1377.01	517.162	2154.47	1135.18	526.013	2154.86	1059.21	506.369	2023.4	936.912	445.447	1984.08	882.104	507.552	2002.04	848.298	476.673	1928.37	838.107
494	0	294.937	2087.76	1595.09	176.61	2094.39	1593.46	305.326	2247.06	1527.52	197.366	2248.52	1522.61	256.208	2223.74	1444.61	273.609	2300.68	1163.57	255.647	2097.96	1357.12	256.065	2028.78	1165.61	188.697	2311.23	1236.43	435.994	2137.77	1378.44	516.217	2145.74	1136.3	524.869	2146.77	1060.34	505.274	2016.41	937.099	444.283	1978.76	880.899	507.44	1995.37	848.648	474.686	1922.5	836.87
495	0	293.593	2077.23	1596.56	175.315	2084.26	1594.06	304.626	2236.72	1528.92	196.603	2238.38	1523.39	255.149	2213.7	1445.73	272.572	2291	1164.8	255.641	2088.01	1358.15	256.795	2019.19	1166.39	187.476	2300.9	1237.61	435.638	2129.03	1379.65	515.641	2137.07	1137.35	523.999	2138.78	1061.42	504.223	2009.48	936.975	443.369	1973.28	879.447	507.348	1989.1	848.487	473.05	1917.49	834.795
496	0	292.339	2066.87	1597.85	173.929	2073.97	1594.73	303.981	2226.4	1530.44	195.815	2228.12	1524.24	253.821	2203.97	1446.88	270.864	2281.7	1165.87	255.67	2078.26	1359.14	257.43	2009.76	1167.05	185.828	2290.84	1238.92	435.382	2120.44	1380.8	515.024	2128.73	1138.34	523.064	2130.73	1062.33	503.424	2002.79	936.771	442.697	1968.35	877.734	507.573	1982.81	848.352	471.899	1912.46	832.936
497	0	291.211	2056.48	1599.24	172.881	2063.89	1595.34	303.452	2216.18	1532.06	195.286	2218.06	1525.29	253.235	2193.85	1448.13	269.419	2272.25	1167.52	255.518	2068.51	1360.13	257.913	2000.05	1167.86	183.696	2280.9	1240.31	435.238	2111.86	1382.05	514.433	2120.77	1139.3	522.303	2122.89	1063.34	502.722	1996.13	936.587	442.262	1963.16	876.349	507.583	1976.85	848.008	470.859	1907.36	830.751
498	0	290.152	2046.27	1600.36	171.854	2053.8	1595.99	303.121	2205.91	1533.62	194.691	2207.93	1526.44	252.51	2184.21	1449.26	267.778	2263.06	1168.63	255.541	2058.9	1361.14	258.541	1990.65	1168.67	182.562	2270.95	1241.52	434.815	2103.45	1383.17	513.935	2113.12	1140.21	521.429	2115.13	1064.08	502.282	1989.79	936.077	441.997	1958.03	874.773	508.037	1971.1	847.66	470.024	1902.69	828.226
499	0	289.182	2035.92	1601.3	170.984	2043.79	1596.59	302.503	2195.81	1535.08	194.317	2198	1527.65	251.645	2174.52	1450.4	266.68	2253.6	1170.13	255.661	2049.48	1361.99	259.162	1981.47	1169.47	180.806	2261.36	1242.72	434.432	2095.24	1383.99	513.419	2105.71	1140.91	520.707	2107.7	1064.9	501.983	1983.73	935.415	441.778	1953	873.118	508.466	1966.14	846.906	469.627	1898.28	825.446
500	0	288.365	2025.79	1601.99	170.153	2033.47	1597.12	302.228	2185.73	1536.5	194.027	2188.1	1528.71	250.926	2165.05	1451.52	264.601	2244.4	1170.93	255.655	2040.1	1362.99	259.608	1972.28	1170.21	179.107	2251.98	1244.01	434.09	2086.98	1384.93	512.764	2098.65	1141.34	519.737	2100.29	1065.28	501.849	1977.66	934.61	441.973	1947.98	871.518	508.927	1961.03	845.974	469.546	1894.06	822.387
501	0	288.093	2015.16	1602.66	169.622	2023.3	1597.67	301.786	2175.89	1537.88	193.791	2178.34	1530.06	249.134	2156.01	1452.32	264.104	2235.34	1172.11	255.657	2030.76	1363.84	260.302	1963.12	1171.12	177.351	2242.52	1245.11	433.712	2078.88	1385.71	512.23	2091.59	1141.96	518.848	2093.08	1065.91	502.125	1972.06	933.894	442.322	1943.06	869.939	509.663	1956.4	845.048	469.814	1890.33	819.222
502	0	287.827	2004.79	1603.17	169.384	2013.05	1598.19	301.617	2165.82	1539.29	193.533	2168.46	1531.55	248.289	2146.69	1453.3	262.054	2226.58	1172.82	255.536	2021.55	1364.73	260.737	1953.99	1172.09	175.543	2233.09	1246.31	433.397	2070.78	1386.59	511.678	2084.62	1142.53	517.845	2085.59	1066.36	502.463	1966.36	933.15	443.104	1938.13	868.456	510.507	1951.9	844.051	470.3	1886.82	815.8
503	0	287.522	1994.56	1603.32	169.051	2002.67	1598.54	301.358	2155.94	1540.43	193.371	2158.7	1532.94	247.519	2137.39	1454.1	260.75	2217.37	1173.88	255.316	2012.29	1365.53	260.969	1944.99	1172.91	174.295	2223.55	1247	433.073	2062.58	1387.42	511.22	2077.83	1143.22	516.998	2078.45	1066.87	503.014	1960.82	932.222	443.929	1933.36	866.829	511.677	1947.7	843.083	471.235	1883.54	812.221
504	0	287.596	1984.2	1603.34	169.069	1992.39	1598.87	301.327	2146.03	1541.77	193.259	2148.88	1534.43	246.992	2128.23	1454.67	260.137	2208.05	1174.38	255.337	2003.3	1366	261.175	1936	1173.69	173.03	2214.08	1247.6	432.577	2054.5	1388.1	510.727	2070.99	1143.78	516.168	2071.42	1067.45	503.742	1955.54	931.283	445.027	1928.69	865.143	513.053	1943.74	842.113	472.516	1880.67	808.484
505	0	287.555	1974.13	1603.24	169.085	1982	1599.22	301.246	2136.27	1542.95	193.045	2138.94	1536	246.276	2119.11	1455.15	258.727	2198.72	1174.62	255.201	1994.25	1366.61	261.402	1927.09	1174.61	171.634	2204.68	1248.05	432.133	2046.31	1388.97	510.054	2064.26	1144.49	515.343	2064.44	1068.15	504.581	1950.3	930.386	446.307	1924.13	863.459	515.037	1939.74	841.4	473.905	1878.04	804.637
506	0	287.623	1963.92	1602.71	169.337	1971.77	1599.39	301.329	2126.39	1543.94	192.894	2129.12	1537.4	245.742	2110.13	1455.49	257.8	2188.96	1174.89	254.881	1985.16	1367.03	261.348	1918.07	1175.28	170.631	2195.1	1248.21	431.731	2038.12	1389.42	509.378	2057.56	1144.83	514.822	2057.95	1068.91	505.578	1945.19	929.335	447.841	1919.41	861.765	515.772	1936.23	839.95	475.734	1875.64	800.772
507	0	288.265	1953.47	1602.5	169.744	1961.43	1599.46	301.124	2116.6	1544.58	192.861	2119.41	1538.52	244.833	2101.09	1455.8	256.586	2179.67	1175.27	254.527	1976.3	1367.23	261.176	1909.05	1175.65	169.246	2185.68	1248.37	431.312	2029.79	1389.84	508.758	2050.63	1145.07	513.599	2050.81	1068.8	506.686	1940.13	928.162	449.462	1914.98	859.697	518.025	1932.63	838.903	477.767	1873.5	796.961
508	0	288.737	1943.5	1601.82	170.19	1951.13	1599.54	301.286	2106.85	1545	192.895	2109.43	1539.35	244.436	2092.05	1455.91	255.462	2169.52	1175.02	254.485	1967.77	1367.21	261.034	1900.12	1175.88	167.363	2176.56	1248.22	431	2021.62	1389.92	508.288	2043.81	1145.05	512.812	2043.95	1068.78	507.964	1935.26	926.807	451.236	1910.49	857.635	519.208	1929.67	837.094	480.009	1871.45	793.072
509	0	289.238	1933.34	1601.04	170.649	1940.92	1599.47	301.281	2097.06	1545.27	193.149	2099.8	1540.3	243.783	2083.04	1455.76	254.61	2159.42	1174.68	253.958	1958.48	1367.22	260.773	1891.26	1175.95	167.939	2167.27	1247.78	430.614	2013.28	1389.93	507.686	2036.98	1144.86	511.995	2037.07	1068.73	509.282	1930.47	925.198	453.242	1906.33	855.528	520.733	1926.57	835.59	482.582	1869.57	789.359
510	0	289.796	1923.33	1600.12	171.223	1930.64	1599.24	301.573	2087.34	1545.27	193.211	2089.97	1540.87	243.198	2074.01	1455.45	253.85	2149.39	1174.29	253.77	1949.39	1367	260.48	1882.13	1175.68	168.018	2157.81	1247.25	430.165	2004.81	1389.72	506.938	2029.68	1144.43	511.31	2030.54	1068.64	510.613	1925.67	923.516	455.212	1902.14	853.029	522.784	1923.68	833.936	485.064	1867.69	785.523
511	0	290.451	1913.08	1599.05	171.763	1920.43	1598.82	301.629	2077.8	1544.96	193.504	2080.25	1541.31	242.626	2064.85	1455.05	253.289	2140.35	1173.88	253.403	1940.13	1366.71	260.361	1873.06	1175.25	167.471	2148.5	1246.71	429.739	1996.14	1389.25	506.306	2022.25	1143.9	510.621	2023.58	1068.19	511.941	1920.64	921.846	457.356	1898.09	850.491	524.505	1920.6	832.254	487.722	1865.87	781.961
512	0	290.956	1903.05	1597.78	172.583	1910.2	1598.29	301.832	2068.09	1544.5	193.793	2070.25	1541.51	242.16	2055.68	1454.37	253.354	2131.77	1173.26	253.29	1931.06	1366.16	260.217	1863.89	1174.73	167.122	2139.17	1245.9	429.4	1987.39	1388.63	505.762	2014.92	1143.2	509.956	2016.54	1067.64	513.497	1916.42	919.882	459.566	1894.05	847.993	526.581	1917.58	830.494	490.669	1864.13	778.387
513	0	291.969	1892.91	1596.53	173.352	1900.13	1597.76	302.124	2058.23	1543.94	194.133	2060.43	1541.52	241.926	2046.41	1453.6	252.931	2122.77	1172.52	253.07	1921.97	1365.37	260.088	1854.58	1174.02	167.379	2130.45	1245.19	429.253	1978.48	1387.96	505.602	2007.57	1142.67	509.457	2009.4	1066.95	515.089	1911.94	917.892	461.772	1889.68	845.321	528.857	1914.69	828.704	493.721	1862.26	774.855
514	0	292.707	1882.75	1595.09	174.152	1889.88	1596.98	302.608	2048.24	1543.31	194.455	2050.57	1541.6	241.606	2036.96	1452.9	252.624	2113.63	1171.66	252.846	1912.41	1364.52	260.132	1845.16	1173.11	167.016	2120.98	1244.62	429.258	1969.25	1387.36	505.253	1999.39	1141.96	509.111	2002.13	1066.4	516.743	1907.2	915.981	464.147	1886.29	842.344	531.393	1911.67	826.921	496.839	1860.39	771.477
515	0	293.515	1872.62	1593.66	174.917	1879.66	1596.05	303.262	2038.35	1542.65	194.872	2040.49	1541.45	241.282	2027.33	1452.19	252.371	2104.25	1170.9	252.696	1902.77	1363.71	260.077	1835.68	1172.08	166.625	2111.43	1244	429.252	1959.72	1386.73	505.061	1991.18	1141.34	509.108	1994.72	1065.91	518.224	1902.6	913.901	466.295	1882.67	839.349	533.506	1908.9	825.125	499.957	1858.48	768.384
516	0	294.121	1862.42	1592.12	175.702	1869.58	1595.14	303.899	2028.34	1541.79	195.165	2030.37	1541.09	241.083	2017.59	1451.27	252.105	2094.74	1170.14	252.746	1893.61	1362.53	260.11	1826.38	1170.91	165.894	2101.71	1242.94	429.562	1950.12	1385.9	504.937	1983.4	1140.4	508.68	1987.15	1065.26	519.564	1897.98	911.855	468.611	1879.24	836.624	535.699	1905.84	823.271	502.83	1856.13	765.265
517	0	294.944	1852.3	1590.27	176.522	1859.26	1593.99	304.329	2018.3	1540.43	195.623	2020.36	1540.4	241.07	2007.8	1450.1	252.072	2085.06	1169.09	252.612	1883.79	1361.07	260.277	1816.67	1169.5	165.748	2092.2	1241.82	429.427	1940.67	1384.25	504.796	1975.08	1139.16	508.719	1979.13	1064.56	521.153	1893.29	909.631	470.791	1875.66	833.491	537.633	1902.77	821.109	506.185	1854.01	762.357
518	0	295.866	1841.99	1588.38	177.291	1849.05	1592.79	304.248	2007.97	1538.87	196.34	2010.3	1539.36	241.049	1997.84	1448.77	252.206	2075.3	1167.93	252.445	1873.41	1359.69	260.338	1806.93	1167.92	165.617	2082.54	1240.7	429.489	1930.8	1382.83	504.878	1967.03	1137.99	509.033	1972.13	1063.33	522.731	1888.48	907.456	473.21	1871.92	830.744	540.372	1899.71	819.392	509.219	1851.26	759.365
519	0	296.658	1831.73	1586.52	178.305	1838.66	1591.54	305.168	1997.99	1537.05	197.06	2000.17	1537.99	240.969	1987.75	1447.32	252.073	2065.73	1166.85	252.503	1863.47	1358.23	260.441	1797.28	1166.36	165.701	2072.83	1239.43	429.587	1920.81	1381.59	505.039	1958.6	1136.78	509.154	1964.5	1062.18	524.296	1883.62	905.399	475.542	1868.2	827.899	542.647	1896.37	817.765	512.214	1849.05	756.584
520	0	297.476	1821.52	1584.57	179.105	1828.45	1590.15	305.85	1987.72	1535.36	197.876	1990.03	1536.62	241.274	1977.5	1445.83	252.225	2055.96	1165.5	252.699	1853.22	1356.61	260.775	1787.56	1164.81	165.873	2063.29	1238.07	429.627	1910.36	1380.08	505.205	1950.14	1135.47	509.534	1956.9	1061.13	526.077	1878.51	903.564	477.846	1864.4	825.25	545.143	1892.89	816.216	515.352	1846.51	754.062
521	0	297.85	1811.08	1582.48	180.066	1818.11	1588.56	306.633	1977.37	1533.46	198.649	1979.71	1535.25	241.587	1967.3	1444.25	252.358	2046.11	1164.16	252.718	1843.01	1354.66	260.857	1777.82	1162.9	166.267	2053.45	1236.59	429.603	1900.25	1378.23	505.517	1941.45	1133.94	510.04	1949.13	1059.97	527.76	1873.4	901.331	480.278	1860.31	822.592	547.456	1889.05	814.363	518.169	1843.65	751.175
522	0	298.602	1800.63	1580.24	181.084	1807.69	1586.84	307.366	1967.09	1531.54	199.511	1969.51	1533.77	242.185	1956.86	1442.69	252.177	2036.16	1162.45	253.18	1832.73	1352.78	261.199	1767.56	1160.99	166.623	2043.53	1235.09	430.189	1889.81	1376.54	506.083	1932.53	1132.51	510.572	1941.34	1058.68	529.549	1867.97	899.154	482.62	1856.06	819.773	549.67	1885.26	812.46	521.237	1840.72	748.319
523	0	299.664	1790.2	1578.23	181.941	1797.21	1585.06	308.339	1956.66	1529.9	200.309	1959	1532.31	242.482	1946.41	1440.98	252.213	2026.16	1160.76	253.583	1822.34	1350.87	261.313	1757.46	1158.95	167.142	2033.44	1233.66	430.42	1879.05	1374.7	506.674	1923.54	1131.12	511.585	1933.2	1058.07	531.377	1862.48	897.224	484.994	1851.56	817.419	552.069	1881.1	810.882	524.137	1837.4	745.7
524	0	300.546	1779.53	1576.17	183.084	1786.81	1583.34	309.294	1946.1	1528.09	201.143	1948.58	1530.67	243.077	1935.91	1439.31	252.725	2016.05	1159.13	253.968	1811.75	1349.01	261.469	1746.92	1157.05	167.668	2023.28	1232.18	430.837	1868.17	1372.85	507.476	1914.73	1129.79	512.678	1925.05	1056.44	533.119	1856.53	895.06	487.447	1846.85	814.791	554.516	1876.41	809.412	526.963	1833.91	743.284
525	0	301.721	1768.89	1574.04	184.119	1776.22	1581.48	310.338	1935.46	1526.18	202.184	1937.99	1529.11	244.029	1925.39	1437.69	253.392	2005.91	1157.53	254.595	1801.34	1347.06	261.773	1736.56	1154.93	168.404	2012.83	1230.53	431.47	1857.32	1370.7	508.247	1905.21	1128.15	513.266	1916.7	1054.76	535.187	1850.58	892.945	489.714	1841.64	812.22	556.817	1871.94	807.48	529.912	1830.01	740.691
526	0	302.727	1757.87	1572.04	185.073	1765.55	1579.74	311.124	1924.73	1524.49	203.187	1927.27	1527.59	244.828	1914.77	1435.86	254.236	1995.34	1155.81	255.159	1790.69	1345.12	262.154	1725.93	1152.95	169.249	2002.43	1228.82	432.104	1846.63	1368.5	509.277	1896.03	1126.66	513.882	1908.42	1052.98	537.119	1844.31	890.718	492.118	1836.38	809.755	558.9	1866.98	805.633	532.702	1826.03	738.071
527	0	303.712	1747.17	1570.19	186.204	1754.89	1578.07	312.743	1914.09	1522.59	204.457	1916.75	1525.93	245.785	1904.05	1434.21	254.914	1985.03	1153.99	256.05	1779.96	1343.52	262.438	1715.16	1151.21	170.125	1991.82	1227.17	432.9	1835.71	1366.59	510.098	1886.31	1125.03	514.935	1899.52	1051.67	539.048	1837.89	888.667	494.369	1830.93	807.273	561.142	1860.97	804.081	535.201	1821.58	735.8
528	0	305.035	1736.19	1568.38	187.352	1744.16	1576.47	314.089	1903.27	1520.79	205.961	1906.17	1524.05	246.848	1893.34	1432.44	255.617	1974.31	1152.22	256.786	1769.11	1341.83	262.866	1704.17	1149.42	171.046	1981.23	1225.51	433.614	1824.78	1364.56	511.054	1876.77	1123.32	516.351	1890.59	1050.45	540.922	1831.14	886.736	496.71	1824.92	805.019	563.478	1855.56	802.53	537.823	1817.06	733.619
529	0	305.991	1725.37	1566.73	188.579	1733.35	1574.95	315.433	1892.34	1518.99	207.415	1895.41	1522.36	247.961	1882.45	1430.76	256.411	1963.5	1150.57	257.645	1758.09	1340.03	263.192	1692.97	1147.67	171.977	1970.37	1223.85	434.664	1813.8	1362.54	511.852	1866.66	1121.42	516.655	1881.35	1048.59	542.73	1824.01	884.614	498.943	1818.62	802.635	565.395	1849.62	800.811	540.333	1812.08	731.157
530	0	307.605	1714.44	1565.33	190.071	1722.63	1573.66	316.998	1881.37	1517.26	208.984	1884.47	1520.83	249.317	1871.43	1429.21	257.326	1952.75	1148.94	258.897	1747.02	1338.58	263.806	1681.96	1146.04	173.112	1959.37	1222.3	435.851	1802.69	1360.73	512.791	1856.64	1119.69	517.876	1871.87	1047.26	544.642	1816.7	882.76	501.157	1812.05	800.498	567.561	1843.25	799.464	542.923	1806.74	729.141
531	0	309.2	1703.42	1564.14	191.552	1711.79	1572.53	318.612	1870.33	1515.72	210.679	1873.58	1519.32	250.626	1860.3	1427.8	258.397	1941.67	1147.48	260.181	1735.8	1337.3	264.717	1671.06	1144.75	174.173	1948.14	1221.07	437.337	1791.7	1359.3	513.956	1846.45	1118.22	518.451	1862.31	1045.8	546.353	1808.96	881.263	503.4	1805.47	798.771	570	1836.93	798.502	545.43	1800.93	727.463
532	0	310.702	1692.39	1563.01	193.118	1700.9	1571.45	320.355	1859.19	1514.31	212.527	1862.66	1517.87	252.19	1849.11	1426.62	259.067	1930.24	1146.4	261.602	1724.59	1336.05	265.581	1659.89	1143.48	175.208	1936.77	1220.08	438.226	1780.7	1357.49	514.972	1835.81	1116.78	518.253	1852.42	1044.13	548.053	1800.79	879.731	505.387	1797.51	797.157	571.748	1829.76	797.206	547.62	1794.62	725.642
533	0	312.296	1681.3	1561.97	194.893	1689.91	1570.39	322.199	1848.02	1513.09	214.386	1851.73	1516.66	253.852	1837.77	1425.64	261.053	1918.13	1145.46	263.107	1713.17	1334.82	266.712	1648.53	1142.24	176.209	1925.19	1219.29	439.771	1769.54	1355.91	516.025	1825.1	1115.31	520.111	1842.48	1043.25	549.484	1792.35	878.144	507.308	1789.59	795.386	573.506	1822.1	796.01	549.764	1787.92	723.822
534	0	314.082	1670.16	1561.16	196.721	1679.06	1569.67	324.226	1836.76	1512.11	216.288	1840.47	1515.76	255.682	1826.34	1424.85	261.182	1906.22	1144.44	264.858	1701.66	1333.87	268.08	1637.04	1141.27	177.334	1913.52	1218.62	441.227	1758.4	1354.46	517.145	1814.44	1113.98	521.05	1832.18	1042.08	551.044	1783.48	876.731	509.384	1780.94	794.16	574.711	1814.32	794.752	551.807	1780.71	722.317
535	0	316.133	1659.06	1561	198.581	1668.12	1569.37	326.467	1825.44	1511.56	218.357	1829.24	1515.1	257.551	1814.81	1424.3	262.204	1894.13	1143.83	266.873	1690	1333.23	269.523	1625.29	1140.63	178.469	1901.86	1218.26	443.782	1747.13	1353.69	518.263	1803.7	1112.86	522.167	1821.74	1041.13	552.651	1774.24	875.723	511.138	1772.07	792.693	576.827	1805.66	794.147	553.888	1773.06	721.12
536	0	317.899	1647.77	1561.09	200.467	1657.03	1569.28	328.83	1813.93	1511.2	220.579	1818	1514.71	259.468	1803.15	1423.95	262.991	1881.75	1143.34	268.898	1678.25	1332.8	271.101	1613.28	1140.23	179.437	1889.85	1218.09	445.048	1735.87	1352.22	519.689	1792.9	1111.84	522.887	1811.24	1039.91	554.012	1764.74	874.471	513.072	1762.65	791.569	578.327	1796.52	793.209	555.707	1764.78	719.795
537	0	319.958	1636.52	1561.38	202.606	1646.03	1569.36	331.107	1802.14	1510.92	223.005	1806.81	1514.44	261.533	1791.38	1423.87	263.804	1869.43	1143.17	270.84	1666.41	1332.72	272.709	1601.12	1140.15	180.242	1877.75	1218.16	447.495	1724.51	1351.62	521.03	1782.03	1111.02	523.652	1800.45	1038.86	555.175	1754.78	873.361	513.933	1753.74	789.875	579.676	1787.16	792.498	557.501	1755.7	718.837
538	0	321.962	1625.06	1561.75	204.51	1634.82	1569.77	333.538	1790.69	1511.06	225.488	1795.55	1514.44	263.493	1779.51	1424.05	264.152	1857.68	1143.21	272.896	1654.56	1333.07	274.215	1588.71	1140.43	181.318	1865.77	1218.54	449.446	1713.08	1350.99	521.84	1771.29	1109.81	524.669	1789.3	1038.27	556.573	1744.6	872.65	515.305	1743.76	789.157	580.91	1777.34	792.038	558.595	1746.55	717.855
539	0	324.15	1613.59	1562.54	206.661	1623.69	1570.53	335.868	1779.19	1511.42	228.009	1784.29	1514.7	265.621	1767.76	1424.4	264.675	1845.3	1143.23	274.974	1642.67	1333.59	275.584	1576.16	1141.03	182.077	1853.39	1219.07	451.181	1701.6	1350.53	522.857	1760.35	1109.31	525.466	1777.98	1037.7	557.671	1734.16	872.01	516.435	1733.37	788.6	581.933	1767.21	791.557	560.194	1736.94	717.425
540	0	326.364	1602.09	1563.6	208.872	1612.38	1571.49	338.365	1767.61	1512.15	230.584	1773.17	1515.22	267.625	1755.9	1425.19	265.167	1833.64	1144	276.815	1630.7	1334.39	276.999	1563.75	1141.95	182.85	1841.32	1220.21	453.127	1690.08	1350.52	523.857	1748.98	1109.1	525.537	1766.52	1037.13	558.573	1723	871.724	517.218	1722.49	787.932	582.378	1756.49	791.104	561.163	1726.24	717.037
541	0	328.342	1590.56	1564.62	211.125	1600.9	1572.71	340.576	1755.92	1513.1	232.923	1761.68	1516.39	269.676	1744.06	1426.35	265.735	1822	1144.97	278.888	1618.98	1335.47	278.273	1551.49	1143.09	183.659	1829.26	1221.71	454.678	1678.49	1350.54	524.726	1737.4	1108.99	526.864	1754.87	1037.27	559.63	1711.58	871.797	518.179	1710.92	787.968	583.774	1745.25	791.497	562.064	1715.14	717.047
542	0	330.851	1579.01	1566	213.465	1589.33	1574.31	342.844	1744.4	1514.49	235.156	1750.12	1518.01	271.447	1732.23	1427.77	266.275	1810.24	1146.45	280.308	1607.14	1336.9	279.319	1539.31	1144.46	184.297	1817.16	1223.47	456.498	1667.04	1351.08	525.79	1725.76	1109.42	527.731	1742.97	1037.79	560.506	1699.82	872.083	519.142	1699.15	788.412	584.415	1733.6	791.807	562.843	1703.53	717.294
543	0	333.186	1567.48	1567.19	215.933	1577.75	1575.92	345.051	1732.85	1516.07	237.222	1738.56	1519.92	273.207	1720.57	1429.29	266.676	1798.05	1148.06	281.925	1595.64	1338.62	280.094	1527.3	1145.95	185.213	1805.48	1225.46	457.976	1655.6	1351.81	526.554	1713.81	1109.83	527.974	1730.86	1037.99	561.022	1687.76	872.539	519.747	1686.75	789.046	584.88	1721.57	792.273	563.381	1691.26	717.768
544	0	335.502	1555.84	1568.31	218.313	1565.94	1577.51	347.101	1721.38	1517.75	239.199	1726.98	1522.12	274.831	1709.12	1430.95	267.588	1786.61	1149.82	283.494	1584.29	1340.31	280.793	1515.67	1147.64	186.036	1793.95	1227.5	459.403	1644.14	1352.69	527.177	1701.64	1110.57	528.551	1718.6	1038.74	561.46	1675.22	873.345	520.003	1673.84	789.682	585.153	1708.78	792.96	563.73	1678.34	718.48
545	0	337.874	1544.28	1569.46	220.775	1554.08	1579.22	348.856	1709.93	1519.53	241.069	1715.41	1524.42	276.327	1697.89	1432.69	268.617	1775.08	1151.48	284.515	1572.81	1341.99	281.3	1504.05	1149.56	186.855	1782.54	1229.49	460.523	1632.8	1353.81	527.625	1689.28	1111.24	528.74	1706.08	1039.54	561.704	1662.21	874.284	520.18	1660.31	790.721	585.444	1695.51	793.917	563.871	1664.84	719.425
546	0	340.247	1532.74	1570.54	223.155	1542.13	1580.96	350.521	1698.6	1521.42	242.648	1703.85	1526.82	277.719	1686.86	1434.4	269.725	1763.81	1153.17	285.572	1561.78	1343.96	281.714	1492.7	1151.51	187.756	1771.38	1231.38	461.729	1621.35	1355.3	528.245	1676.85	1112.26	529.297	1693.51	1040.46	562.043	1648.98	875.507	520.341	1646.52	792.034	585.352	1681.93	794.79	563.942	1650.99	720.519
547	0	342.726	1521.01	1571.45	225.533	1530.04	1582.73	352.008	1687.31	1523.39	244.202	1692.25	1529.62	278.952	1675.92	1436.06	270.71	1752.51	1154.8	286.459	1550.9	1345.9	281.857	1481.34	1153.55	188.949	1760.99	1233.25	462.7	1609.86	1356.59	528.615	1664.21	1113.25	529.711	1680.84	1041.34	562.088	1635.27	876.636	520.32	1632.23	793.318	584.388	1667.75	795.162	563.594	1636.22	721.546
548	0	345.017	1509.43	1572.32	227.729	1517.76	1584.45	353.263	1676.19	1525.4	245.421	1680.49	1532.33	280.168	1665.25	1437.74	271.717	1741.32	1156.39	286.896	1539.83	1347.73	281.825	1470.23	1155.61	190.204	1750.43	1234.98	463.452	1598.3	1357.97	529.166	1651.43	1114.4	529.094	1667.99	1042.01	561.887	1621.03	877.829	519.891	1617.61	794.673	584.927	1652.96	796.591	563.322	1621.28	722.836
549	0	347.241	1498.25	1573.24	229.891	1505.55	1586.14	354.289	1665.09	1527.56	246.647	1668.85	1535.09	281.226	1654.59	1439.36	272.892	1730.25	1157.85	287.157	1529.2	1349.6	281.554	1459.2	1157.65	191.585	1740.13	1236.6	464.188	1586.74	1359.66	529.6	1638.82	1115.66	530.132	1654.85	1043.53	561.665	1606.7	879.225	519.677	1602.54	796.627	584.636	1637.96	797.733	562.789	1605.34	724.409
550	0	349.187	1486.8	1573.91	232.037	1493.5	1587.63	355.163	1654.05	1529.72	247.492	1657.25	1538.03	282.431	1644.17	1441.02	274.255	1719.38	1159.29	287.317	1518.53	1351.5	281.025	1448.64	1159.58	192.954	1730	1238.19	464.809	1575.11	1361.22	530.098	1626.01	1116.92	531.15	1641.51	1044.81	561.201	1591.82	880.535	519.007	1587.13	798.054	583.857	1622.59	798.576	561.817	1589.48	725.727
551	0	351.18	1475.44	1574.7	234.022	1481.25	1589.07	355.749	1643.07	1531.85	248.208	1645.57	1540.82	283.526	1633.78	1442.72	275.903	1708.8	1161.05	287.397	1508.08	1353.31	280.374	1438.06	1161.41	194.619	1720.13	1239.73	464.708	1563.63	1362.39	530.568	1613.23	1118.13	531.543	1628.13	1045.88	560.864	1576.96	881.88	517.956	1571.87	799.436	583.284	1606.63	799.632	560.372	1572.89	727.065
552	0	352.809	1464.14	1575.36	235.709	1469.04	1590.47	356.327	1632.17	1534.08	248.873	1633.91	1543.65	284.515	1623.45	1444.5	277.652	1698.58	1162.76	287.472	1497.75	1355.06	279.522	1427.72	1163.18	196.11	1710.02	1241.38	465.311	1551.87	1364.13	530.987	1600.28	1119.51	532.137	1614.67	1047.04	560.126	1561.39	883.325	516.685	1556.2	800.915	581.541	1590.32	800.19	559.07	1555.78	728.623
553	0	354.288	1452.92	1576.14	237.379	1456.97	1591.82	356.459	1621.19	1536.28	249.112	1622.36	1546.42	285.326	1612.99	1446.26	279.12	1688.23	1164.58	287.132	1487.34	1356.8	278.779	1417.6	1165.05	197.791	1700.34	1243.1	465.575	1540.13	1365.85	531.728	1587.21	1121.15	532.151	1600.87	1048.2	559.447	1545.75	885.003	515.615	1539.89	802.983	581.437	1573.53	801.868	557.54	1538.27	730.594
554	0	355.711	1441.75	1576.85	238.898	1445.03	1593.14	356.625	1610.29	1538.44	249.205	1610.66	1549.16	286.114	1602.64	1448.06	280.688	1677.77	1166.38	287.111	1477.02	1358.44	277.867	1407.42	1166.8	199.377	1690.71	1244.91	466.015	1528.58	1367.68	532.361	1574.01	1122.63	532.74	1587.14	1049.43	558.55	1530.03	886.577	514.362	1523.4	805.152	580.403	1556.6	803.05	555.832	1520.44	732.339
555	0	357.293	1430.55	1577.64	239.942	1433.01	1594.38	356.604	1599.49	1540.58	249.206	1599.05	1551.7	286.992	1592.32	1449.79	282.571	1668.05	1168.2	287.015	1466.84	1360.04	277.111	1397.41	1168.5	201.004	1680.9	1246.54	465.992	1516.86	1369.24	532.683	1560.79	1123.93	533.213	1573.16	1050.66	557.711	1513.97	888.256	512.834	1507.09	806.946	579.133	1539.33	804.131	554.06	1502.18	734.281
556	0	358.152	1419.42	1578.61	240.867	1421.2	1595.53	356.523	1588.65	1542.74	249.019	1587.67	1553.98	287.784	1582.1	1451.51	283.954	1657.84	1169.98	286.508	1456.51	1361.54	276.388	1387.49	1170.14	202.67	1671.26	1248.3	466.352	1505.26	1371.02	533.212	1547.38	1125.69	534.381	1559.18	1052.23	556.704	1497.65	890.033	511.042	1490.16	809.005	577.789	1521.56	805.396	551.898	1483.66	736.415
557	0	358.384	1408.51	1579.57	241.516	1409.49	1596.89	356.215	1577.88	1544.83	249.034	1576.33	1556.1	288.413	1571.69	1453.11	285.71	1648.2	1171.71	286.477	1446.39	1363.01	275.77	1377.63	1171.8	204.33	1661.46	1249.92	466.409	1493.82	1372.78	533.681	1533.83	1127.24	535.06	1545.14	1053.78	555.455	1481.05	891.929	509.259	1472.97	811.315	576.593	1503.7	807.047	549.601	1464.72	738.776
558	0	359.141	1397.63	1580.55	242.016	1398	1597.76	355.643	1567.06	1546.63	248.658	1565.04	1558.05	289.028	1561.28	1454.65	287.329	1638.52	1173.3	286.47	1436.45	1364.2	275.395	1367.81	1173.3	205.936	1651.72	1251.37	466.731	1482.51	1374.48	534.066	1520.25	1128.57	535.469	1530.8	1054.9	554.345	1464.47	893.893	507.697	1455.64	813.782	575.253	1485.57	808.6	547.428	1445.63	741.159
559	0	359.213	1386.6	1581.5	242.242	1386.53	1598.67	355.302	1556.4	1548.37	248.304	1554.02	1559.74	289.835	1550.94	1456.04	288.837	1628.52	1174.66	286.445	1426.3	1365.47	275.31	1358.23	1174.79	207.522	1641.97	1252.65	466.948	1471.18	1376.09	534.435	1506.72	1129.89	535.149	1516.82	1055.63	553.077	1447.66	895.805	505.918	1438.05	816.309	573.045	1467.39	809.672	545.032	1426.3	743.657
560	0	359.615	1375.96	1582.45	242.299	1375.37	1599.44	354.784	1545.72	1549.98	247.928	1542.99	1561.14	290.601	1540.69	1457.29	290.073	1618.27	1176.03	286.558	1416.12	1366.67	275.164	1348.43	1176.18	209.022	1632.22	1254.01	467.322	1459.8	1377.85	534.936	1492.8	1131.44	535.889	1502.5	1057.16	551.839	1430.66	897.995	504.145	1420.48	818.968	571.755	1448.8	811.572	542.585	1406.9	746.404
561	0	359.321	1365.14	1583.38	242.108	1364.24	1600.09	354.466	1535.11	1551.44	247.204	1531.74	1562.43	291.167	1530.26	1458.5	291.407	1608.27	1177.37	286.565	1405.88	1367.63	275.281	1338.77	1177.36	210.351	1622.57	1255.39	467.578	1448.62	1379.33	535.334	1479.11	1132.82	536.989	1488.26	1058.63	550.679	1413.73	900.304	502.07	1402.51	821.617	570.204	1430.18	813.516	540.072	1387.22	749.162
562	0	358.999	1354.48	1583.98	241.919	1353.27	1600.51	353.935	1524.53	1552.64	246.775	1521.08	1563.12	291.774	1519.88	1459.28	292.705	1598.24	1178.43	286.719	1395.74	1368.3	275.487	1329.05	1178.12	211.831	1612.88	1256.32	467.69	1437.52	1380.44	535.679	1465.52	1133.8	537.877	1473.97	1059.71	549.249	1396.63	902.194	500.525	1384.85	824.249	568.468	1411.37	814.925	537.425	1367.28	751.769
563	0	358.693	1343.84	1584.58	241.505	1342.47	1600.73	353.369	1513.97	1553.61	246.015	1509.98	1564.02	292.327	1509.43	1460.07	294.003	1588.07	1179.39	286.821	1385.45	1368.7	275.847	1319.36	1178.66	212.991	1603.02	1257.16	467.948	1426.39	1381.52	536.166	1451.77	1134.87	538.272	1459.91	1060.36	548.194	1379.71	904.179	498.334	1366.52	826.81	566.735	1392.39	816.563	534.738	1347.38	754.474
564	0	358.407	1333.32	1585.13	241.03	1331.75	1600.8	352.775	1503.44	1554.49	245.515	1499.53	1564.26	292.479	1499.02	1460.7	295.19	1578.02	1180.23	286.98	1375.34	1369	276.211	1309.83	1178.96	214.171	1593.44	1257.85	468.286	1415.43	1382.54	536.681	1438.09	1135.91	538.917	1445.61	1061.21	546.825	1362.52	906.269	496.519	1348.52	829.365	564.805	1373.4	818.271	532.126	1327.41	757.352
565	0	357.907	1322.86	1585.49	240.406	1321.09	1600.61	352.222	1492.95	1555.08	244.792	1488.83	1564.53	292.856	1488.69	1460.98	296.327	1567.36	1180.62	287.275	1365.13	1369.04	276.731	1300.28	1178.85	215.119	1583.52	1258.18	468.579	1404.55	1383.26	537.168	1424.77	1136.46	539.574	1431.41	1061.66	545.468	1345.45	907.978	494.589	1330.38	831.855	563.067	1354.55	819.696	529.466	1307.26	760.11
566	0	357.2	1312.29	1585.58	239.745	1310.53	1600.16	351.676	1482.5	1555.43	244.288	1478.33	1564.3	293.399	1478.3	1460.93	297.098	1557.56	1180.74	287.284	1354.91	1368.79	277.144	1290.72	1178.36	216.195	1573.75	1258.28	468.614	1393.7	1383.33	537.76	1411.35	1136.85	540.139	1417.33	1061.6	544.334	1328.29	909.529	492.595	1311.96	834.242	560.395	1335.72	820.539	526.844	1287.35	762.773
567	0	356.489	1301.88	1585.46	238.99	1300.02	1599.47	351.059	1472.12	1555.52	243.597	1467.93	1563.86	293.382	1467.88	1460.84	297.843	1548.06	1180.72	287.508	1344.78	1368.32	277.581	1281.07	1177.65	216.91	1563.98	1258.24	468.905	1382.97	1383.47	538.238	1398	1136.93	541.347	1402.51	1062.12	542.988	1311.12	911.02	490.552	1293.86	836.503	559.168	1316.73	822.144	524.163	1267.34	765.457
568	0	355.668	1291.35	1585.31	238.02	1289.65	1598.65	350.603	1461.79	1555.55	243.119	1457.49	1563.29	293.695	1457.53	1460.47	298.265	1538.47	1180.42	287.615	1334.68	1367.77	277.95	1271.48	1176.67	217.779	1554.17	1257.98	468.983	1372.39	1383.41	538.604	1384.75	1136.87	541.917	1388.35	1062.04	541.693	1294.12	912.43	488.672	1275.83	838.748	557.239	1297.71	823.42	521.352	1247.29	768.167
569	0	354.858	1280.79	1584.97	237.093	1279.24	1597.54	350.057	1451.41	1555.49	242.566	1447.33	1562.53	293.951	1447.32	1460	298.977	1529.06	1180.25	287.769	1324.58	1367.01	278.403	1261.87	1175.46	218.256	1544.67	1257.69	469.026	1361.74	1382.88	539.065	1371.66	1136.53	542.007	1374.85	1061.29	540.45	1277.29	913.698	486.685	1257.93	840.695	555.227	1278.85	824.548	518.647	1227.27	770.832
570	0	353.827	1270.3	1584.41	236.131	1268.89	1596.28	349.567	1440.89	1555.23	242.063	1436.97	1561.65	294.017	1436.87	1459.4	299.659	1520.01	1179.79	288.062	1314.5	1366.12	278.734	1252.02	1174.22	218.641	1534.65	1257.11	469.004	1351.27	1382.05	539.633	1358.82	1136.15	542.158	1360.87	1060.34	539.277	1260.43	914.825	484.843	1239.9	842.681	553.638	1260.03	825.682	516.161	1207.44	773.532
571	0	353.039	1259.79	1583.83	235.048	1258.48	1594.93	349.152	1430.39	1555.03	241.566	1426.71	1560.69	293.979	1426.58	1458.74	299.96	1510.47	1179.46	288.359	1304.41	1365.2	278.983	1242.36	1172.67	218.983	1525.15	1256.74	469.217	1340.96	1381.28	539.989	1345.96	1135.6	542.348	1346.99	1059.5	538.038	1243.57	915.996	482.812	1221.99	844.687	551.644	1241.51	826.61	513.669	1187.7	776.197
572	0	351.942	1249.25	1583.12	233.803	1248.3	1593.37	348.803	1419.78	1554.62	241.101	1416.48	1559.51	293.971	1416.28	1457.97	300.548	1501.57	1179	288.422	1294.48	1364.11	279.055	1232.59	1171.31	218.945	1515.29	1256.2	469.08	1330.71	1380.28	540.178	1333.14	1134.98	542.911	1333.16	1058.91	536.76	1227.31	916.96	481.035	1204.37	846.547	549.628	1223.21	827.578	511.231	1168.24	778.908
573	0	350.728	1238.5	1582.07	232.631	1237.99	1591.65	348.431	1409.32	1554.04	240.541	1406.27	1558.34	293.871	1406.09	1457	300.371	1492.03	1178.06	288.363	1284.3	1362.86	279.146	1222.85	1169.85	218.933	1505.37	1255.55	469.05	1320.73	1379.12	540.251	1320.54	1134.14	542.792	1319.36	1057.9	535.441	1210.9	917.856	479.22	1186.8	848.226	547.601	1205.26	828.421	508.881	1148.97	781.552
574	0	349.445	1227.82	1580.87	231.214	1227.87	1589.69	348.263	1398.79	1553.38	240.271	1396.13	1556.94	293.704	1395.81	1455.92	300.394	1482.85	1177.34	288.351	1274.29	1361.42	279.015	1213.11	1168.3	218.672	1495.73	1254.81	468.864	1310.73	1377.72	540.181	1307.94	1133.06	542.767	1305.67	1056.75	534.105	1194.71	918.651	477.545	1169.43	849.915	545.656	1187.44	829.168	506.642	1129.94	784.128
575	0	348.219	1217.18	1579.79	229.844	1217.69	1587.84	348.107	1388.23	1552.53	239.858	1386.03	1555.33	293.446	1385.62	1454.64	300.228	1473.33	1176.11	288.162	1264.25	1360.07	278.824	1203.37	1166.95	218.211	1485.78	1253.82	468.727	1300.82	1376.3	540.194	1295.52	1131.99	542.609	1292.17	1055.7	532.905	1178.8	919.446	475.799	1152.36	851.53	544.199	1169.65	830.313	504.519	1111.24	786.724
576	0	346.918	1206.5	1578.55	228.34	1207.61	1585.72	347.873	1377.55	1551.65	239.72	1375.98	1553.64	293.282	1375.58	1453.32	299.793	1463.81	1175.01	287.967	1254.19	1358.6	278.544	1193.67	1165.58	217.621	1475.69	1252.65	468.581	1291.23	1374.83	540.043	1283.4	1130.78	542.161	1278.76	1054.44	531.662	1163.24	920.119	474.414	1135.72	853.207	542.167	1152.59	830.923	502.615	1093	789.247
577	0	345.378	1195.69	1577.15	226.876	1197.42	1583.73	347.53	1366.77	1550.75	239.225	1365.87	1552.11	292.856	1365.41	1452.01	300.184	1456.08	1173.84	287.928	1244.22	1357.19	278.114	1183.84	1164.2	216.924	1465.69	1251.57	468.394	1281.52	1373.18	539.528	1271.28	1129.32	541.653	1265.58	1052.95	530.369	1147.71	920.85	472.688	1119.04	854.63	540.758	1135.48	831.844	500.783	1074.93	791.794
578	0	343.811	1184.8	1575.7	225.189	1187.31	1581.43	347.196	1355.97	1549.8	238.89	1355.78	1550.43	292.271	1355.32	1450.46	298.181	1444.54	1172.23	287.59	1234.11	1355.58	277.702	1174.02	1162.79	216.104	1455.45	1250.24	467.906	1271.9	1371.52	538.976	1259.41	1128	541.254	1252.46	1051.78	528.983	1132.5	921.44	471.074	1102.69	855.934	538.711	1118.87	832.424	499.074	1057.28	794.135
579	0	342.117	1174.03	1574.09	223.435	1177.19	1579.17	346.757	1345.18	1548.77	238.424	1345.77	1548.74	291.791	1345.28	1448.88	297.269	1434.76	1170.72	287.128	1224.09	1354.04	277.049	1163.99	1161.33	215.119	1445.28	1248.63	467.514	1262.34	1369.85	538.001	1247.68	1126.41	540.521	1239.41	1050.54	527.578	1117.61	921.885	469.456	1086.72	857.206	537.001	1102.62	833.135	497.313	1040.1	796.324
580	0	340.62	1163.15	1572.38	221.774	1167.02	1577.01	346.296	1334.4	1547.59	237.867	1335.46	1547.22	291.186	1335.25	1447.25	296.083	1424.62	1168.99	286.648	1213.97	1352.43	276.649	1153.89	1159.93	214.137	1434.84	1246.94	466.925	1252.7	1368	537.214	1236.23	1124.79	539.682	1226.52	1049.07	526.265	1103.02	922.261	467.938	1070.98	858.352	535.374	1086.7	833.787	495.762	1023.29	798.38
581	0	339.023	1152.33	1570.57	220.196	1156.91	1574.72	345.737	1323.66	1546.39	237.42	1325.25	1545.5	290.336	1325.01	1445.5	294.781	1414.2	1167.19	286.268	1203.83	1350.7	276.165	1143.61	1158.32	213.118	1424.42	1245.27	466.267	1243.07	1366.14	536.234	1224.78	1123.11	538.614	1214.09	1047.45	524.965	1088.72	922.466	466.589	1055.59	859.342	533.286	1071.26	833.863	494.349	1006.9	800.36
582	0	337.337	1141.48	1568.92	218.465	1146.59	1572.8	345.48	1312.7	1545.13	236.721	1315.08	1543.96	289.387	1314.82	1443.91	293.681	1403.42	1165.55	285.538	1193.55	1349.01	275.651	1133.34	1156.72	211.996	1413.82	1243.47	465.662	1233.32	1364.57	535.055	1213.78	1121.54	537.179	1201.91	1046.01	523.589	1074.71	922.757	465.112	1040.57	860.284	531.687	1056.3	834.423	492.982	991.023	802.289
583	0	335.274	1130.62	1567.24	216.738	1136.27	1570.85	344.407	1301.87	1543.58	235.776	1304.67	1542.31	288.418	1304.6	1442.2	292.568	1393.28	1163.83	284.832	1183.24	1347.36	275.117	1122.84	1155.1	210.861	1403.23	1241.57	464.809	1223.52	1362.96	533.855	1202.88	1119.92	536.047	1189.82	1044.76	522.255	1061.13	922.97	463.525	1026.04	861.193	530.127	1041.77	834.863	491.644	975.648	803.876
584	0	333.788	1119.7	1565.37	215.243	1125.9	1568.99	343.677	1291.13	1542.11	234.954	1294.21	1540.7	287.239	1294.33	1440.36	291.281	1383.24	1161.84	283.945	1172.84	1345.68	274.706	1112.24	1153.41	209.611	1392.52	1239.62	463.784	1213.58	1361.26	532.505	1192.33	1118.05	534.552	1178.04	1043.27	520.933	1047.95	922.918	462.018	1011.76	861.832	528.355	1027.56	834.907	490.342	960.776	805.278
585	0	332.16	1108.87	1563.63	213.529	1115.37	1567.24	342.568	1280.2	1540.54	234.345	1284.06	1539.16	285.903	1283.91	1438.73	290.128	1372.54	1160.08	282.813	1162.31	1343.99	274.273	1101.42	1151.73	208.35	1381.95	1237.71	462.578	1203.49	1359.66	530.95	1181.81	1116.28	533.035	1166.45	1041.92	519.461	1035.1	922.842	460.626	997.965	862.325	526.632	1013.96	834.953	489.133	946.389	806.573
586	0	330.523	1098.01	1562.05	211.934	1104.78	1565.74	341.227	1269.28	1538.95	233.029	1273.42	1537.77	284.402	1273.31	1437.12	289.15	1362.17	1158.59	281.595	1151.58	1342.5	273.698	1090.44	1150.24	207.061	1371.09	1235.94	461.512	1193.28	1358.48	529.565	1171.6	1114.86	531.51	1155.24	1040.71	518.016	1022.68	922.719	459.217	984.714	862.882	524.908	1000.92	835.098	488.019	932.697	807.763
587	0	328.824	1087.08	1560.52	210.349	1094.1	1564.34	339.976	1258.28	1537.51	231.517	1262.44	1536.32	282.751	1262.66	1435.65	287.709	1351.75	1156.84	280.328	1140.98	1341.07	273.129	1079.45	1148.8	205.69	1360.22	1234.08	460.148	1182.82	1357.3	528.118	1161.58	1113.51	530.058	1144.09	1039.54	516.662	1010.72	922.537	457.685	971.906	863.269	523.345	988.477	835.025	486.959	919.493	808.768
588	0	326.998	1076.25	1559.11	208.684	1083.28	1563.1	338.568	1247.42	1535.96	229.916	1251.67	1535	281.037	1251.93	1434.26	286.392	1340.72	1155.6	279.012	1130.13	1339.71	272.573	1068.43	1147.3	204.259	1349.3	1232.43	458.797	1172.28	1356.28	526.692	1151.63	1112.31	528.605	1133.27	1038.5	515.191	999.061	922.152	456.277	959.609	863.442	521.48	976.438	834.719	485.874	906.949	809.492
589	0	325.567	1065.3	1557.72	207.101	1072.32	1561.83	336.558	1236.46	1534.61	228.39	1240.82	1533.7	279.197	1241.12	1432.87	284.989	1329.53	1154.24	277.347	1119.2	1338.48	271.657	1057.24	1146.14	202.913	1338.22	1230.83	457.123	1161.47	1355.5	525.057	1141.79	1111.2	526.998	1122.73	1037.5	513.922	988.044	921.828	454.877	947.735	863.456	519.515	964.929	834.224	484.688	894.955	809.978
590	0	323.828	1054.34	1556.67	205.162	1061.26	1560.96	334.88	1225.53	1533.42	226.396	1229.72	1532.58	277.281	1230.25	1431.63	283.541	1318.69	1152.98	275.608	1108.19	1337.36	270.439	1045.85	1145.18	201.498	1327.02	1229.04	455.375	1150.6	1354.87	523.618	1132.1	1110.33	525.506	1112.37	1036.65	512.297	977.151	921.293	453.241	936.456	863.457	517.771	953.982	833.906	483.544	883.51	810.35
591	0	321.84	1043.4	1555.67	203.405	1050.09	1559.98	332.635	1214.57	1532.11	224.186	1218.51	1531.43	274.935	1219.13	1430.42	282.002	1306.99	1151.41	273.889	1096.97	1336.3	269.18	1034.3	1144.36	199.955	1315.48	1227.38	453.522	1139.57	1354.25	522.178	1122.38	1109.31	524.406	1102.17	1036.13	510.868	966.653	920.698	451.727	925.658	863.32	516.077	943.614	833.176	482.3	872.599	810.393
592	0	320.054	1032.39	1554.69	201.505	1038.87	1559.17	330.272	1203.52	1530.91	222.01	1207.5	1530.23	272.918	1208.1	1429.2	280.189	1295.09	1149.86	271.902	1085.58	1335.32	267.779	1022.64	1143.66	198.504	1303.8	1225.79	451.626	1128.35	1353.74	520.809	1112.49	1108.78	523.117	1092.26	1035.52	509.472	956.598	920.033	450.347	915.254	862.833	514.161	933.414	832.378	480.916	862.304	810.161
593	0	317.979	1021.39	1554.09	199.38	1027.56	1558.66	327.808	1192.43	1529.84	219.664	1196.04	1529.27	270.557	1196.84	1428.16	278.932	1282.83	1148.57	269.853	1074.08	1334.54	266.246	1010.7	1143.16	196.901	1291.85	1224.05	449.679	1117	1353.52	519.39	1102.59	1108.45	521.786	1082.5	1034.87	508.272	946.796	919.358	448.944	905.435	862.398	512.673	923.778	831.675	479.57	852.408	809.698
594	0	315.903	1010.37	1553.86	197.296	1016.17	1558.41	325.155	1181.33	1528.92	217.067	1184.77	1528.31	268.274	1185.53	1427.22	277.531	1270.84	1147.24	267.792	1062.38	1334.05	264.613	998.477	1142.99	195.373	1279.85	1222.45	447.567	1105.67	1353.32	518.166	1092.67	1108.32	520.696	1072.86	1034.54	507.082	937.453	918.646	447.795	895.94	861.9	511.216	914.54	830.814	478.125	843.108	809.006
595	0	313.731	999.232	1553.89	194.91	1004.86	1558.36	322.52	1170.2	1528.16	214.437	1173.24	1527.44	265.941	1174.18	1426.53	276.422	1259.19	1146.31	265.615	1050.58	1333.6	263.01	985.948	1142.9	193.79	1267.67	1221.1	445.414	1094.07	1353.24	516.808	1082.57	1108.28	519.555	1063.48	1034.27	506.035	928.302	917.728	446.4	886.936	861.101	509.672	905.709	829.758	476.725	834.278	807.945
596	0	311.194	987.992	1554.19	192.569	993.331	1558.43	319.889	1158.86	1527.76	211.592	1161.69	1526.92	263.54	1162.51	1426.11	274.387	1245.98	1145.55	263.458	1038.67	1333.4	261.354	973.044	1142.81	192.179	1255.29	1219.95	443.197	1082.32	1353.26	515.659	1072.48	1108.48	518.489	1054.18	1034.1	505.085	919.521	916.858	445.228	878.31	860.101	508.565	897.287	828.706	475.177	825.942	806.618
597	0	308.689	976.662	1554.8	189.919	981.862	1558.86	316.966	1147.38	1527.51	208.802	1149.93	1526.55	261.121	1150.72	1425.78	272.727	1233.37	1144.94	261.237	1026.63	1333.44	259.798	960.114	1142.99	190.625	1242.96	1219.19	441.102	1070.37	1353.81	514.384	1062.22	1109.07	517.498	1044.9	1034.39	504.109	911.102	915.954	444.211	870.07	859.219	507.368	889.474	827.773	473.908	818.219	805.229
598	0	305.977	965.359	1555.69	187.275	970.421	1559.51	314.161	1135.91	1527.53	205.86	1138.46	1526.3	258.869	1138.98	1425.85	271.164	1220.48	1144.81	259.092	1014.67	1333.79	258.19	947.037	1143.37	189.113	1230.55	1218.56	439.034	1058.26	1354.29	513.309	1051.87	1109.77	516.663	1035.8	1034.78	503.29	902.992	915.098	443.234	862.41	858.084	506.146	881.902	826.738	472.531	810.975	803.574
599	0	303.334	953.958	1556.8	184.555	958.939	1560.3	311.282	1124.4	1527.65	202.86	1126.66	1526.18	256.591	1127.02	1426.07	269.921	1207.95	1144.96	257.104	1002.61	1334.36	256.587	933.851	1144	187.79	1218.26	1218.34	436.902	1045.98	1355.02	512.259	1041.51	1110.71	515.592	1026.77	1035.25	502.553	895.196	914.268	442.277	855.17	856.965	505.862	875.079	825.88	471.415	804.285	801.711
600	0	300.321	942.506	1558.08	181.675	947.486	1561.16	308.017	1112.82	1528.24	199.925	1115	1526.41	254.384	1115.04	1426.6	268.313	1195.12	1145.35	255.136	990.572	1335.19	254.894	920.786	1144.86	186.399	1205.85	1218.46	434.785	1033.68	1355.99	510.934	1030.9	1111.96	514.429	1017.6	1035.94	501.528	887.465	913.594	441.434	848.352	855.539	505.153	868.454	824.806	470.422	798.07	799.73
601	0	297.166	931.052	1559.68	178.406	936.087	1562.2	305.211	1101.29	1528.91	197.008	1103.33	1526.62	252.432	1103.29	1427.36	266.839	1182.38	1146.21	253.149	978.673	1336.24	253.164	907.906	1146.02	184.943	1193.58	1218.7	432.794	1021.59	1357.28	509.629	1020.22	1113.51	513.367	1008.58	1037.25	500.515	880.059	912.919	440.805	841.925	854.303	504.527	862.318	824.032	469.528	792.402	797.726
602	0	294.24	919.679	1561.33	175.303	924.518	1563.38	302.031	1089.87	1529.99	193.831	1091.72	1527.1	250.306	1091.55	1428.37	265.215	1169.85	1146.73	251.11	966.74	1337.59	251.468	895.221	1147.29	183.471	1181.29	1219.38	430.667	1009.59	1358.6	508.268	1009.49	1115.09	512.333	999.532	1038.76	499.711	873.218	912.238	440.132	835.864	852.792	503.667	856.275	823.005	468.837	787.208	795.438
603	0	290.9	908.231	1563.09	172.15	913.171	1564.49	299.153	1078.24	1531.11	190.999	1080.13	1527.68	248.109	1079.65	1429.58	263.777	1157.77	1147.74	249.475	955.013	1339.07	249.949	882.8	1148.68	181.919	1168.98	1220.19	428.82	997.79	1360.15	506.679	998.872	1116.69	510.979	990.523	1040.23	499.039	866.324	911.773	439.659	830.134	851.307	504.049	850.992	822.38	468.404	782.445	793.164
604	0	287.985	896.856	1565.1	169.152	901.862	1565.51	296.294	1066.84	1532.58	188.049	1068.71	1528.54	246.061	1068.21	1430.83	262.475	1145.75	1149.17	247.805	943.405	1340.75	248.542	870.675	1150.35	180.271	1156.9	1221.17	426.946	986.258	1361.97	504.951	987.933	1118.59	509.495	981.599	1041.97	498.269	859.607	911.515	439.415	824.802	849.897	503.9	845.641	821.814	468.076	778.147	790.799
605	0	284.795	885.521	1567.16	165.991	890.699	1566.76	293.636	1055.41	1534.33	185.303	1057.28	1529.45	243.991	1056.76	1432.27	260.935	1134.07	1150.6	246.184	931.823	1342.56	247.311	858.902	1152.14	178.51	1144.73	1222.45	425.301	975.09	1364.01	503.456	977.144	1120.82	508.121	972.821	1044	497.619	853.149	911.506	439.306	819.577	848.592	504.25	840.721	821.611	467.979	774.247	788.565
606	0	281.769	874.221	1569.17	162.985	879.475	1567.87	290.779	1044.07	1536.01	182.645	1046.15	1530.37	242.072	1045.25	1433.59	259.14	1122.29	1151.77	244.802	920.428	1344.22	246.146	847.216	1153.97	176.632	1132.74	1223.63	423.705	964.263	1365.93	501.74	966.562	1122.84	506.57	963.985	1046	497.171	846.791	911.424	439.394	814.909	847.155	504.759	835.859	821.448	468.069	770.676	786.197
607	0	278.224	863.117	1571.13	159.798	868.489	1568.91	288.33	1032.77	1537.82	180.027	1034.89	1531.37	239.968	1034.02	1435.32	258.037	1111.03	1153.4	243.389	909.057	1345.84	245.363	835.77	1155.68	174.859	1120.75	1225.01	422.15	953.7	1367.84	499.926	955.967	1124.74	504.999	955.177	1048.01	496.715	840.605	911.348	439.394	810.15	845.702	505.462	831.171	821.322	468.435	767.31	783.851
608	0	275.457	851.898	1573.24	156.893	857.592	1569.88	285.759	1021.58	1539.7	177.664	1023.81	1532.43	237.911	1022.82	1436.86	256.483	1100.3	1155.19	242.168	897.872	1347.6	244.593	824.707	1157.39	172.713	1108.96	1226.37	420.688	943.24	1369.92	498.087	945.64	1126.77	503.429	946.54	1050.25	496.223	834.491	911.459	439.447	805.45	844.466	506.202	826.559	821.532	468.809	764.292	781.601
609	0	272.261	840.791	1575.32	154.009	846.731	1571.02	283.444	1010.38	1541.68	175.328	1012.88	1533.39	236.049	1011.82	1438.61	254.695	1089.5	1156.92	241.106	886.823	1349.32	244.181	813.82	1159.14	170.754	1097.32	1227.88	419.394	933.236	1372.13	496.505	935.526	1128.88	501.913	938.029	1052.52	495.926	828.518	911.766	439.967	801.51	843.48	507.291	822.075	821.969	469.556	761.449	779.692
610	0	269.606	829.763	1577.25	151.25	836.012	1572.04	281.005	999.357	1543.32	173.14	1001.97	1534.29	234.234	1000.78	1440.09	253.26	1079.03	1158.71	240.139	875.878	1350.91	243.986	803.14	1160.68	168.649	1085.87	1229.24	418.202	923.398	1374.11	494.907	925.738	1130.75	500.593	929.633	1054.57	495.838	822.613	912.001	440.478	797.503	842.291	508.518	817.424	822.353	470.494	758.888	777.596
611	0	266.906	818.774	1579.09	148.716	825.352	1572.9	278.841	988.312	1545.12	171.122	991.194	1535.18	232.386	989.982	1441.81	251.408	1068.33	1160.34	239.213	865.055	1352.46	244.027	792.73	1162.14	166.627	1074.6	1230.9	416.937	913.644	1376.08	493.349	916.322	1132.59	499.265	921.317	1056.57	495.841	816.806	912.291	441.081	793.192	841.417	509.783	812.986	822.921	471.453	756.129	775.895
612	0	264.255	807.917	1580.99	145.925	814.69	1573.95	276.733	977.346	1546.91	169.113	980.44	1536.27	230.525	979.167	1443.32	249.781	1057.84	1162.07	238.367	854.379	1354.05	244.112	782.396	1163.54	164.362	1063.58	1232.34	415.834	904.155	1378.22	492.235	907.694	1134.55	498.101	913.197	1058.79	496.015	811.152	912.875	441.85	789.369	840.725	511.174	808.634	823.794	472.724	753.918	774.345
613	0	261.784	797.132	1582.78	143.664	804.16	1574.74	274.8	966.463	1548.79	167.138	969.773	1537.22	228.782	968.49	1445.03	247.865	1047.51	1163.65	237.564	843.679	1355.58	244.438	772.124	1164.87	162.171	1052.76	1234.05	414.559	894.741	1380.14	491.235	899.322	1136.41	496.995	905.179	1060.83	496.222	805.497	913.48	442.939	786.056	839.894	512.55	804.309	824.749	474.008	751.63	772.943
614	0	259.332	786.351	1584.46	141.216	793.51	1575.87	272.75	955.665	1550.5	165.265	959.14	1538.26	226.836	957.808	1446.56	245.931	1037.02	1165.43	236.834	833.149	1356.94	244.81	762.036	1166.13	159.981	1042.11	1235.66	413.477	885.387	1382.06	490.322	891.355	1138.19	496.178	897.36	1062.94	496.729	800.061	914.167	444.062	782.672	839.367	513.883	800.114	825.705	475.46	749.313	771.919
615	0	257.31	775.689	1586.24	139.436	782.912	1576.85	270.722	945.033	1552.19	163.255	948.387	1539.49	225.099	947.177	1448.25	243.896	1026.81	1167.04	236.164	822.731	1358.37	245.215	751.782	1167.55	157.908	1031.55	1237.32	412.358	876.167	1384.07	489.627	883.738	1140.17	495.468	889.847	1064.96	497.253	794.498	915.158	445.367	778.941	839.321	515.463	795.701	826.976	477.212	746.853	771.217
616	0	255.515	765.222	1587.84	137.59	772.375	1577.84	268.802	934.657	1553.79	161.509	937.799	1540.6	223.247	936.588	1449.61	242.021	1016.68	1168.83	235.394	812.335	1359.86	245.469	741.729	1168.9	155.76	1020.96	1238.91	411.338	866.916	1386.11	489.189	876.705	1142.14	494.988	882.671	1067.02	497.732	788.982	916.309	446.529	774.84	839.667	517.13	791.499	828.438	479.084	744.712	770.844
617	0	253.992	754.945	1589.36	135.997	761.762	1578.95	267.051	924.293	1555.36	159.619	927.192	1541.82	221.489	926.132	1451.21	240.131	1006.64	1170.41	234.581	801.986	1361.19	245.78	731.726	1170.19	153.698	1010.53	1240.4	410.098	857.69	1387.98	488.772	870.096	1144.1	494.462	875.79	1069.01	498.632	783.661	917.483	448.242	770.87	840.125	518.88	787.22	829.966	481.168	741.963	770.886
618	0	252.268	744.636	1590.73	134.615	751.007	1580.28	265.159	914.071	1556.7	157.871	916.56	1542.93	219.845	915.545	1452.54	238.624	996.767	1172.1	233.678	791.715	1362.48	246.037	721.679	1171.54	151.588	1000.11	1241.85	408.474	848.547	1389.58	488.412	863.722	1146.13	494.217	869.091	1071.08	499.659	778.426	918.781	449.936	766.736	840.819	520.684	782.955	831.554	483.109	739.163	771.003
619	0	251.291	734.455	1592.03	133.402	740.442	1581.28	263.383	903.99	1557.84	155.936	905.993	1543.94	217.819	905.228	1453.79	236.691	986.423	1173.12	232.613	781.44	1363.66	245.987	711.743	1172.84	149.498	989.579	1243.26	407.44	839.232	1391.56	488.155	857.595	1148.3	493.846	862.672	1073.29	500.923	773.273	920.212	451.634	762.426	841.801	522.591	778.799	833.341	485.374	736.171	771.494
620	0	250.316	724.445	1593.23	132.376	729.939	1582.39	261.425	894.102	1558.73	154.236	895.467	1544.68	216.011	894.848	1454.91	235.51	976.884	1174.44	231.704	771.269	1364.73	245.867	701.862	1174.16	147.625	979.199	1244.15	406.232	829.984	1393.37	487.872	851.566	1150.43	493.511	856.356	1075.38	502.279	768.24	921.759	453.57	758.026	842.919	524.732	774.695	835.131	487.909	733.055	772.272
621	0	249.462	714.518	1594.08	131.472	719.122	1583.46	259.779	884.255	1559.28	152.494	884.961	1545.32	214.148	884.495	1455.7	234.048	966.761	1175.15	230.679	761.084	1365.6	245.544	691.905	1175.38	145.855	968.826	1244.82	405.212	820.709	1394.92	487.605	845.507	1152.41	493.314	850.241	1077.28	503.884	763.346	923.158	455.705	753.424	843.935	526.659	770.834	836.667	490.575	729.679	772.918
622	0	248.698	704.597	1594.84	130.677	708.433	1584.18	258.034	874.393	1559.79	150.871	874.47	1545.84	212.291	874.177	1456.33	232.822	956.521	1175.93	229.59	750.901	1366.4	245.171	681.953	1176.41	144.123	958.469	1245.57	403.569	811.5	1396.02	487.24	839.355	1154.37	493.008	843.985	1079.13	505.695	758.453	924.557	458.269	748.851	844.982	528.652	766.791	838.297	493.449	726.016	773.896
623	0	248.002	694.772	1595.65	129.875	698.027	1584.94	256.312	864.475	1560.31	149.168	863.975	1546.4	210.489	863.976	1456.98	231.455	946.358	1176.48	228.511	740.849	1367.05	244.77	672.159	1177.25	142.492	948.045	1246	402.215	802.201	1397.43	486.948	833.119	1156.24	493.232	838.074	1081.2	507.418	753.507	926.086	460.218	743.616	846.169	530.753	762.891	839.915	496.329	722.167	775.023
624	0	247.226	684.896	1596.18	129.233	687.723	1585.46	254.904	854.643	1560.7	147.516	853.51	1546.8	208.931	853.762	1457.45	230.233	936.164	1176.87	227.409	730.745	1367.52	244.09	662.781	1177.69	140.909	937.548	1246.29	400.885	792.865	1398.32	486.393	826.744	1157.76	493.087	831.84	1082.93	509.309	748.713	927.28	462.441	738.63	847.008	532.847	759.043	841.251	499.663	718.149	775.849
625	0	246.481	675.042	1596.49	128.547	677.2	1585.94	253.284	844.807	1560.81	146.328	843.17	1546.96	207.273	843.58	1457.71	228.991	926.079	1177.19	226.308	720.551	1367.77	243.464	652.773	1178.04	139.411	927.368	1246.39	399.583	783.381	1399.02	485.942	820.058	1159.07	493.144	825.718	1084.42	511.204	743.856	928.275	465.01	733.16	847.893	534.827	755.28	842.241	502.852	713.754	776.769
626	0	245.779	665.173	1596.76	127.872	666.611	1586.28	251.693	834.865	1560.75	144.64	832.827	1547.03	205.685	833.282	1457.84	227.434	915.524	1177.53	225.262	710.399	1367.78	242.861	642.673	1178.33	138.036	917.197	1246.56	398.306	773.914	1399.46	485.496	813.176	1160.23	492.817	819.446	1085.65	513.025	738.961	929.227	467.646	727.554	848.742	536.388	751.513	843.18	505.95	709.151	777.643
627	0	245.135	655.342	1596.91	127.07	656.144	1586.48	250.305	824.967	1560.55	142.965	822.348	1546.85	204.273	823.111	1457.77	226.066	904.268	1177.44	224.366	700.305	1367.75	242.159	632.735	1178.26	136.723	906.823	1246.49	397.224	764.238	1399.96	485.035	806.036	1161.37	492.769	812.984	1086.97	514.933	734.062	930.051	470.147	722.188	849.395	538.595	747.491	844.161	509.39	704.623	778.442
628	0	244.374	645.489	1596.8	126.353	645.896	1586.41	248.916	815.05	1560.17	141.492	811.938	1546.48	202.998	812.908	1457.54	224.6	893.424	1177.58	223.41	690.152	1367.43	241.642	622.881	1178.04	135.595	896.693	1246.19	396.432	754.427	1400.26	484.642	798.793	1162.19	492.598	806.444	1087.82	516.727	728.834	930.624	472.697	716.273	849.896	540.343	743.562	844.783	512.664	699.755	779.119
629	0	243.601	635.574	1596.43	125.579	635.606	1586.09	247.62	805.115	1559.53	140.265	801.673	1545.91	201.619	802.563	1457.1	223.299	882.426	1177.19	222.457	679.906	1366.94	241.022	613.001	1177.28	134.497	886.654	1245.66	395.305	744.633	1400.03	484.099	791.13	1162.62	492.361	799.565	1088.44	518.545	723.521	930.948	475.175	710.209	850.074	541.942	739.464	845.076	515.91	694.669	779.635
630	0	242.777	625.651	1595.91	124.961	625.469	1585.52	246.498	795.296	1558.81	139.045	791.376	1545.18	200.48	792.342	1456.5	222.385	871.706	1176.58	221.635	669.836	1366.26	240.491	602.791	1176.75	133.573	876.543	1245.11	394.11	734.818	1399.66	483.741	783.411	1163.09	492.378	792.577	1089.15	519.876	718.463	930.91	477.329	704.352	850.043	543.406	735.28	845.307	518.881	689.661	779.914
631	0	242.018	615.719	1595.31	124.081	615.162	1585.07	245.129	785.139	1557.92	137.984	781.114	1544.25	199.398	782.052	1455.71	222.04	861.776	1175.98	220.79	659.64	1365.58	239.967	592.892	1175.85	132.856	866.591	1244.29	393.352	724.778	1399.46	483.394	775.385	1163.4	492.348	785.424	1089.6	521.422	712.895	931.041	479.218	698.791	849.558	544.725	731.258	845.512	521.911	684.525	780.186
632	0	241.224	605.732	1594.5	123.4	604.922	1584.26	244.208	775.248	1556.79	136.884	770.871	1543.29	198.303	771.637	1454.84	221.471	851.784	1174.74	220.131	649.464	1364.6	239.658	582.858	1174.84	132.098	856.443	1243.24	392.459	714.736	1398.88	483.096	767.092	1163.38	492.175	777.844	1089.8	522.832	707.186	930.777	481.401	692.687	849.097	546.407	726.442	845.547	524.691	679.118	780.112
633	0	240.442	595.673	1593.64	122.549	594.726	1583.39	243.151	765.039	1555.54	135.981	760.663	1542	197.525	761.341	1453.96	221.147	842.005	1174.23	219.484	639.167	1363.53	239.441	572.679	1173.79	131.567	846.32	1242.19	391.752	704.578	1398.1	482.857	758.654	1163.38	492.026	770.175	1089.85	524.095	701.194	930.443	483.257	686.679	848.476	547.646	721.528	845.319	527.2	673.756	779.868
634	0	239.743	585.612	1592.73	121.831	584.672	1582.44	242.585	754.838	1554.4	135.246	750.405	1540.71	196.638	750.841	1452.85	220.603	831.574	1173.13	218.914	628.885	1362.38	239.321	563.137	1172.26	131.157	836.152	1241.23	391.089	694.386	1397.36	482.504	749.984	1163.16	492.043	762.269	1089.74	525.233	694.928	930.025	484.947	679.946	847.915	548.349	716.418	844.838	529.611	668.178	779.538
635	0	239.16	575.474	1591.67	121.117	574.464	1581.41	241.759	744.492	1553.09	134.451	740.136	1539.41	195.951	740.327	1451.62	220.25	821.468	1172.13	218.385	618.513	1361.09	239.093	552.814	1171.11	130.791	825.899	1240.2	390.469	684.105	1396.47	482.29	741.197	1162.74	491.631	754.018	1089.3	526.35	688.371	929.394	486.607	673.743	846.981	549.798	710.805	844.483	531.921	662.327	779.047
636	0	238.495	565.27	1590.4	120.68	564.471	1579.87	241.332	734.388	1551.61	133.771	729.853	1537.94	195.269	729.803	1450.31	219.989	811.099	1170.94	217.959	608.046	1359.64	238.991	542.41	1169.59	130.448	815.693	1238.89	389.954	673.64	1395.3	482.185	732.131	1162.11	491.929	745.694	1089.08	527.263	681.454	928.59	487.772	667.122	845.722	550.75	704.808	843.902	533.8	656.334	778.199
637	0	237.927	555.086	1588.98	120.063	553.98	1578.5	240.556	723.991	1549.92	133.195	719.605	1536.33	194.644	719.188	1448.85	219.872	800.672	1169.44	217.522	597.487	1357.97	239.143	532.718	1167.61	130.118	805.38	1237.29	389.678	662.963	1394.22	481.957	722.764	1161.29	491.527	736.97	1088.38	528.072	673.972	927.642	489.079	659.931	844.534	551.274	698.472	843.037	535.145	650.546	776.864
638	0	237.574	544.862	1587.49	119.763	543.931	1576.92	240.261	713.85	1548.12	132.894	709.362	1534.5	194.379	708.654	1447.12	219.776	789.959	1167.88	217.3	586.858	1356.41	239.04	522.043	1166.13	130.073	795.088	1235.68	389.403	652.375	1392.78	482.015	713.315	1160.39	491.403	728.017	1087.47	528.763	666.591	926.469	490.292	653.124	843.224	552.248	691.715	842.141	536.568	644.174	775.54
639	0	237.259	534.581	1585.87	119.482	533.716	1575.17	239.837	703.473	1546.23	132.74	699.033	1532.51	194.143	697.9	1445.27	219.851	779.642	1166.2	217.15	576.212	1354.69	239.065	511.287	1164.55	130.128	784.549	1233.91	389.277	641.556	1391.31	482.027	703.702	1159.24	491.501	718.973	1086.45	529.497	658.797	925.171	491.402	645.232	841.88	553.638	684.398	841.203	537.806	637.736	773.921
640	0	236.972	524.239	1584.19	119.202	523.381	1573.56	239.806	693.175	1544.33	132.647	688.688	1530.56	194.27	687.232	1443.39	219.875	768.693	1164.16	217.127	565.406	1352.98	238.956	500.094	1162.89	130.415	773.942	1231.84	389.421	630.56	1389.76	482.248	693.795	1157.9	491.71	709.569	1085.2	530.019	650.531	923.659	492.389	637.633	840.127	554.584	676.814	839.941	538.678	630.958	772.005
641	0	236.907	513.815	1582.44	119.08	513.003	1571.69	239.93	682.676	1542.39	132.765	678.346	1528.51	194.33	676.373	1441.36	219.947	758.016	1161.8	217.197	554.462	1351.1	238.776	489.015	1161.07	130.633	763.193	1229.64	389.331	619.572	1387.74	482.225	683.75	1156.24	491.775	699.844	1083.76	530.458	641.97	921.825	493.216	629.554	838.236	555.39	668.91	838.526	539.45	623.771	769.983
642	0	236.892	503.397	1580.77	119.196	502.788	1569.94	240.167	672.164	1540.55	133.025	667.937	1526.5	194.73	665.54	1439.4	220.283	746.962	1159.85	217.275	543.462	1349.32	238.589	477.691	1159.12	131.17	752.434	1227.65	389.242	608.449	1385.6	482.351	673.513	1154.55	491.793	689.844	1082.12	531.08	633.122	919.917	493.981	621.382	836.233	555.931	660.309	836.893	539.972	616.506	767.747
643	0	237.118	492.917	1578.98	119.367	492.373	1568.14	240.576	661.719	1538.54	133.439	657.482	1524.42	195.233	654.522	1437.33	220.891	735.714	1157.65	217.431	532.303	1347.45	238.519	466.218	1157.16	131.672	741.213	1225.54	389.82	597.058	1383.56	482.654	663	1152.62	491.899	679.571	1080.11	531.564	623.955	917.755	494.347	612.972	833.872	556.462	652.078	834.884	540.591	608.776	765.299
644	0	237.543	482.292	1577.42	119.755	481.937	1566.36	241.157	650.965	1536.5	134.064	646.904	1522.44	195.869	643.397	1435.38	221.099	724.461	1155.75	217.754	521.073	1345.53	238.373	454.534	1155.06	132.375	729.992	1223.59	390.451	585.417	1381.43	482.86	652.228	1150.49	491.791	668.953	1077.85	532.008	614.437	915.378	495.264	603.828	831.64	556.876	643.035	832.63	540.9	600.835	762.627
645	0	238.147	471.561	1576.02	120.31	471.654	1564.89	242.043	640.146	1534.55	134.828	636.146	1520.45	196.642	632.336	1433.54	221.862	713.139	1154.14	218.248	509.712	1343.65	238.242	442.705	1153.14	132.91	718.533	1221.84	390.836	573.94	1379.07	483.285	641.253	1148.34	492.173	658.153	1075.86	532.481	604.609	913.098	494.972	595.99	828.391	557.964	633.662	830.804	541.29	592.441	760.014
646	0	238.949	460.951	1574.55	120.99	461.265	1563.22	243.368	629.393	1532.46	135.807	625.502	1518.39	197.401	620.922	1431.53	222.451	701.348	1152.09	218.844	498.202	1341.82	238.071	430.767	1151.26	133.777	707.053	1219.96	391.576	562.263	1376.74	483.586	630.009	1146	492.483	647.087	1073.64	532.886	594.493	910.638	495.271	586.595	825.875	558.547	624.072	828.587	541.552	583.83	757.231
647	0	239.848	450.231	1573.04	121.87	450.7	1561.7	244.562	618.518	1530.27	137.155	614.72	1516.21	198.689	609.552	1429.6	222.711	689.588	1149.41	219.495	486.532	1339.92	237.891	418.604	1149.24	134.352	695.311	1217.89	392.486	550.477	1374.3	483.956	618.578	1143.37	493.061	635.793	1071.26	533.17	584.108	907.84	495.756	577.354	822.844	558.902	614.114	825.946	541.713	574.819	754.252
648	0	240.908	439.432	1571.64	122.946	440.084	1560.49	246.062	607.428	1528.06	138.749	604.022	1513.93	199.934	597.955	1427.73	223.426	677.531	1147.51	220.368	474.653	1338.16	237.932	406.528	1147.37	135.143	683.312	1215.91	393.482	538.615	1371.84	484.349	606.739	1140.71	492.869	624.076	1068.49	533.33	573.367	904.985	495.847	567.367	819.745	559.276	603.866	823.421	541.875	565.336	751.117
649	0	242.228	428.592	1570.38	124.138	429.603	1559.35	247.66	596.406	1525.87	140.593	593.202	1511.78	201.454	586.347	1425.84	223.95	665.294	1145.39	221.391	462.824	1336.54	237.935	394.222	1145.73	136.103	671.408	1214.18	395.057	526.56	1369.6	484.747	594.695	1138.01	493.254	612.281	1065.91	533.572	562.3	902.239	495.891	556.592	817.014	559.022	593.191	820.705	542.098	555.298	748.155
650	0	243.556	417.814	1569.37	125.533	419.15	1558.16	249.774	585.317	1523.91	142.541	582.401	1509.74	203.217	574.656	1424.08	224.652	652.776	1143.29	222.646	450.759	1335.07	238.109	381.947	1144.21	137.085	659.2	1212.67	396.327	514.558	1367.24	485.321	582.426	1135.24	493.855	599.714	1063.6	533.669	550.999	899.429	495.955	545.586	814.195	559.675	582.409	818.216	542.393	544.786	745.383
651	0	245.082	406.92	1568.34	127.107	408.553	1556.97	251.922	574.299	1521.98	144.802	571.646	1507.82	204.994	562.874	1422.61	225.749	640.091	1141.28	224.026	438.724	1333.74	238.436	369.481	1142.81	138.096	646.949	1211.2	397.963	502.466	1364.89	485.745	569.758	1132.27	494.161	587.182	1060.68	533.73	539.352	896.404	495.999	534.373	811.209	559.689	571.128	815.388	542.024	534.268	742.197
652	0	246.854	395.987	1567.31	128.749	398.058	1555.95	254.302	563.052	1520.39	147.054	560.8	1506.2	207.264	551.17	1421.25	226.619	626.97	1139.78	225.725	426.517	1332.46	238.885	356.759	1141.66	139.294	634.481	1209.96	399.731	490.237	1362.5	486.346	556.949	1129.25	493.95	574.496	1057.69	533.661	527.308	893.28	495.834	522.837	808.106	559.595	559.575	812.379	541.791	523.104	739.133
653	0	248.36	384.958	1567.04	130.337	387.624	1555.37	256.562	551.784	1519.45	149.596	549.916	1505	209.602	539.451	1420.21	227.462	613.825	1138.46	227.423	414.27	1331.51	239.467	343.881	1140.79	140.313	622.055	1209.08	401.814	477.927	1360.52	486.924	543.883	1126.44	493.294	561.777	1054.41	533.462	514.923	890.446	495.546	510.995	805.286	559.372	547.497	809.724	541.483	511.666	736.226
654	0	250.209	373.84	1567.26	132.15	377.108	1555.14	259.382	540.311	1519.04	152.179	539.004	1504.12	211.905	527.481	1419.59	228.433	600.435	1137.57	229.124	401.978	1330.93	239.924	330.742	1140.46	141.423	609.678	1208.4	403.724	465.519	1358.69	487.441	530.528	1123.79	493.632	548.482	1052.02	533.145	502.337	887.619	494.954	498.695	802.428	558.991	535.067	807.096	540.91	499.735	733.413
655	0	252.067	362.73	1567.76	133.942	366.537	1555.43	261.997	528.904	1518.69	154.939	528.031	1503.67	214.239	515.536	1419.23	228.721	587.186	1136.84	230.961	389.537	1330.78	240.598	317.616	1140.22	142.602	597.044	1208.1	405.513	452.99	1356.82	487.932	516.95	1121.26	493.755	534.936	1049.43	532.866	489.147	884.901	494.438	485.968	799.77	558.422	522.293	804.427	540.335	487.057	730.847
656	0	253.809	351.64	1568.82	135.732	355.904	1556.17	264.81	517.496	1518.75	157.685	516.987	1503.48	216.797	503.515	1419.35	229.232	574.02	1136.45	232.656	377.241	1331.12	240.959	304.167	1140.6	143.426	584.35	1208.53	407.232	440.429	1355.52	488.583	503.318	1119.2	493.165	520.914	1046.95	532.436	475.843	882.545	493.705	472.956	797.544	557.357	509.173	802.015	539.527	474.113	728.591
657	0	255.713	340.549	1570.27	137.701	345.323	1557.53	267.545	505.896	1519.02	160.32	505.831	1503.65	218.698	491.345	1419.86	229.923	561.156	1136.87	234.137	364.9	1331.92	241.291	291.165	1141.25	144.208	571.787	1209.28	408.88	427.858	1354.64	488.839	489.383	1117.7	493.531	506.869	1045.47	531.851	462.016	880.714	492.702	459.361	795.772	556.559	495.43	800.207	538.494	460.709	726.823
658	0	257.426	329.504	1571.68	139.613	334.694	1559.14	270.201	494.385	1519.22	163.116	494.706	1504.02	221.035	479.044	1420.62	229.827	548.745	1137.05	235.548	352.583	1332.99	241.363	278.096	1142.21	144.828	559.502	1210.64	410.232	415.357	1354.08	489.133	475.074	1116.5	492.16	492.136	1043.62	531.039	447.842	879.268	491.587	445.193	794.432	555.52	481.106	798.839	537.013	446.457	725.279
659	0	259.425	318.374	1573.32	141.607	324.067	1561.24	272.774	482.887	1519.45	165.71	483.555	1504.65	222.437	466.917	1421.9	230.242	536.622	1138.7	236.759	340.426	1334.24	241.297	265.609	1143.25	145.226	547.339	1212.26	411.387	402.883	1353.9	489.088	460.638	1115.63	491.652	477.513	1042.63	530.076	432.923	878.335	490.347	430.443	793.584	554.482	466.396	797.774	535.52	431.822	724.246
660	0	261.618	307.278	1574.9	143.748	313.366	1563.46	275.354	471.305	1519.87	168.176	472.376	1505.66	223.851	455.031	1423.26	230.066	524.682	1140.02	237.691	328.37	1335.67	241.279	253.619	1144.47	145.417	535.298	1214.16	412.194	390.712	1354.16	489.095	446.02	1115.22	491.292	462.855	1042.3	528.989	417.692	878.025	489.003	415.337	793.319	553.793	450.516	797.467	533.837	416.49	723.758
661	0	263.868	296.318	1576.5	145.891	302.836	1566.02	277.749	459.906	1520.32	170.442	461.372	1506.98	224.841	443.086	1424.81	230.475	513.133	1141.57	238.333	316.615	1337.3	241.002	242.308	1145.84	145.464	523.525	1216.47	412.955	378.581	1354.81	488.772	431.386	1115.11	491.263	448.324	1042.54	527.647	402	878.124	487.352	399.435	793.532	552.558	434.393	797.323	531.9	400.554	723.672
662	0	266.115	285.354	1577.88	148.079	292.247	1568.49	280.106	448.577	1520.91	172.715	450.515	1508.58	225.905	431.574	1426.51	230.79	501.68	1143.76	238.779	305.047	1339.01	240.521	230.987	1147.4	145.768	512.246	1218.76	413.651	366.522	1355.87	488.234	416.72	1115.14	490.739	433.691	1042.59	526.313	385.808	878.677	485.733	383.094	794.125	550.882	417.483	797.48	529.919	383.894	723.875
663	0	268.246	274.492	1579.09	150.125	281.639	1571	282.25	437.446	1521.77	174.61	439.7	1510.64	226.595	420.253	1428.22	230.473	490.199	1145.51	238.924	293.555	1340.65	239.758	219.868	1149.04	145.803	501.003	1220.87	414.01	354.577	1356.98	487.717	402.199	1115.43	489.542	418.924	1042.76	524.838	369.275	879.459	483.977	366.379	794.878	549.944	399.997	798.001	527.734	366.647	724.29
664	0	270.254	263.649	1580.48	151.942	271.266	1573.64	284.259	426.461	1522.88	176.386	429.052	1512.82	227.487	408.97	1429.93	230.718	479.186	1147.09	238.721	282.296	1342.32	239.055	208.878	1150.75	146.203	490.133	1222.73	413.932	342.796	1358.24	487.06	388.029	1115.92	489.919	404.563	1043.75	523.1	352.46	880.375	482.179	350.169	795.743	548.188	382.17	798.643	525.382	348.829	725.081
665	0	272.079	252.848	1581.84	153.797	260.798	1576.3	286.04	415.675	1523.98	178.026	418.47	1515.03	227.987	398.216	1431.49	230.972	467.99	1148.95	238.486	271.178	1344.03	238.145	197.854	1152.48	146.573	479.339	1224.54	414.166	330.951	1359.68	486.473	373.807	1116.69	489.505	389.91	1044.4	521.17	335.49	881.389	479.858	331.22	797.679	546.47	363.889	799.38	522.936	330.438	726.083
666	0	273.783	242.196	1583.06	155.577	250.393	1578.79	287.587	404.786	1524.91	179.621	408.02	1517.13	228.3	387.429	1432.89	231.704	456.983	1150.04	238.046	260.294	1345.67	237.182	187.028	1154.18	147.265	468.771	1225.98	414.023	319.059	1360.93	486.016	359.954	1117.37	489.114	375.198	1045.07	519.426	318.208	882.498	477.644	313.409	799.032	544.484	345.147	800.054	520.252	311.483	727.169
667	0	275.295	231.601	1584.44	157.055	240.12	1581.34	288.952	394.076	1525.92	180.91	397.594	1519.24	228.543	376.826	1434.39	232.258	446.261	1151.5	237.344	249.48	1347.3	235.871	176.186	1155.91	148.169	458.475	1227.12	413.878	307.294	1362.23	485.801	346.171	1118.49	488.927	360.492	1045.74	517.78	300.744	883.766	475.149	295.416	800.674	542.489	326.612	800.854	517.603	291.766	728.766
668	0	276.705	221.103	1585.82	158.415	229.905	1583.78	290.005	383.574	1526.86	182.015	387.274	1521.29	228.936	366.291	1435.87	233.115	435.53	1152.8	236.706	238.794	1349.05	234.539	165.375	1157.75	149.138	448.24	1228.58	413.574	295.444	1363.72	485.608	332.463	1119.71	488.954	345.874	1046.81	515.612	283.514	885.267	472.459	277.345	802.557	540.052	307.67	801.703	514.498	271.972	730.544
669	0	277.9	210.687	1587.05	159.552	219.601	1586.18	291.031	373.02	1527.83	182.982	377.03	1523.08	229.279	355.667	1437.38	233.948	424.988	1153.91	235.883	228.132	1350.74	233.131	154.63	1159.46	150.211	438.08	1229.66	413.331	283.532	1365.05	485.569	318.956	1120.86	488.818	331.148	1047.59	513.535	266.063	886.734	469.569	259.038	804.485	537.48	288.055	802.768	511.229	251.672	732.404
670	0	278.914	200.31	1588.5	160.545	209.296	1588.6	291.75	362.575	1528.8	183.56	366.695	1525.04	229.448	345.098	1438.9	235.338	414.346	1155.71	235.048	217.612	1352.3	231.652	143.99	1161.08	151.385	428.062	1231.17	412.851	271.654	1366.43	485.621	305.366	1122.22	488.822	316.379	1048.56	511.441	248.407	888.4	467.1	240.046	806.964	534.948	268.92	803.876	507.649	230.89	734.723
671	0	279.58	190.122	1589.96	161.22	199.012	1590.83	292.194	352.192	1529.99	184.021	356.343	1526.88	229.768	334.63	1440.63	237.089	404.063	1157.81	234.217	207.095	1353.87	230.244	133.518	1162.71	152.726	418.083	1232.71	412.537	259.7	1368.14	485.724	291.899	1123.78	489.123	301.692	1049.94	509.266	230.749	890.329	463.695	222.172	809.186	532.304	249.435	805.299	504.056	209.976	737.501
672	0	280.147	179.989	1591.49	161.83	188.889	1593.01	292.421	341.856	1531.27	184.244	346.007	1528.75	229.93	324.027	1442.24	238.143	393.916	1159.22	233.502	196.594	1355.69	229.069	123.226	1164.37	154.064	408.15	1234.31	412.279	247.812	1369.87	486.09	278.433	1125.46	489.285	287.042	1051.32	507.134	213.108	892.535	460.682	203.776	812.051	529.539	229.666	806.994	500.308	188.718	740.66
673	0	280.427	169.763	1592.96	162.205	178.711	1595.01	292.505	331.571	1532.56	184.348	335.748	1530.52	230.215	313.382	1444.11	239.408	383.643	1161.11	232.86	186.245	1357.34	228.078	113.04	1165.86	155.43	398.304	1236.17	412.009	235.884	1371.64	486.287	264.953	1127.2	489.506	272.304	1052.65	505.091	195.34	894.936	457.595	185.066	815.144	526.593	210.012	808.754	496.317	167.306	744.1
674	0	280.581	159.581	1594.41	162.382	168.611	1596.74	292.495	321.335	1533.91	184.108	325.449	1532.28	230.394	302.913	1445.8	240.674	373.282	1163.15	232.142	175.963	1358.91	227.115	102.992	1167.32	156.748	388.49	1238.12	411.759	224.106	1373.54	486.624	251.374	1129.05	489.883	257.651	1054.17	502.914	177.582	897.532	454.629	166.269	818.513	523.802	190.234	810.777	492.307	145.852	747.929
675	0	280.457	149.461	1595.83	162.245	158.358	1598.46	292.325	311.175	1535.32	183.885	315.129	1533.8	230.694	292.343	1447.4	241.98	362.996	1164.85	231.631	165.537	1360.36	226.338	93.0774	1168.88	157.97	378.623	1239.63	411.484	212.441	1375.38	486.88	237.907	1130.95	490.997	243.065	1056.28	500.664	159.92	900.394	451.561	147.35	822.336	520.331	170.776	813.023	488.267	124.448	752.08
676	0	280.179	139.265	1597.18	161.957	148.042	1599.82	291.963	300.958	1536.55	183.565	305	1535.08	230.985	281.615	1448.66	242.726	352.545	1166.16	231.141	155.158	1361.77	225.67	83.2046	1170.29	159.026	368.793	1241.19	411.276	200.79	1377.09	487.206	224.298	1132.72	491.578	228.621	1058.04	498.574	142.038	903.38	448.639	128.127	826.263	517.748	150.784	815.736	484.227	103.051	756.498
677	0	279.798	129.004	1598.41	161.546	137.799	1601.05	291.523	290.713	1537.56	183.214	294.71	1536.09	231.212	271.167	1449.92	243.838	342.115	1167.67	230.645	144.925	1362.91	225.206	73.2965	1171.42	160.125	358.917	1242.48	411.04	189.182	1378.48	487.518	210.591	1134.37	491.678	214.389	1059.13	496.431	124.465	906.284	445.451	109.623	829.862	514.752	130.966	818.195	480.211	81.6295	760.988
678	0	279.274	118.806	1599.53	161.193	127.662	1602.12	291.103	280.387	1538.47	182.758	284.383	1537.01	231.348	260.655	1450.88	244.311	331.637	1168.49	230.295	134.437	1364.06	224.929	63.5015	1172.41	160.97	349.04	1243.58	410.789	177.713	1379.87	487.961	197.134	1135.94	492.132	199.978	1060.55	494.43	106.718	909.5	442.611	90.4266	834.105	511.749	111.112	820.901	476.285	60.436	765.545
679	0	278.7	108.59	1600.61	160.612	117.418	1603	290.617	270.049	1539.24	182.55	274.121	1537.68	231.58	250.185	1451.76	245.386	321.469	1169.55	229.91	124.203	1365.02	224.698	53.6442	1173.38	161.965	338.999	1244.53	410.61	166.456	1381.2	488.481	183.42	1137.54	492.631	185.599	1061.87	492.557	89.1278	912.713	439.738	71.4193	838.378	508.883	91.5236	823.722	472.438	39.4539	770.323
680	0	278.097	98.2502	1601.35	159.86	107.107	1603.59	290.117	259.681	1539.89	182.06	263.773	1538.09	231.475	239.702	1452.56	245.912	311.028	1170.22	229.515	113.827	1365.67	224.514	43.7455	1173.99	162.76	329.103	1245.19	410.333	155.164	1382.25	488.729	169.646	1138.79	493.349	171.262	1062.96	490.649	71.5373	915.699	436.966	52.3563	842.544	505.867	71.8075	826.467	468.747	18.3955	775.039
681	0	277.34	87.7508	1601.96	159.228	96.8208	1603.92	289.783	249.195	1540.4	181.43	253.341	1538.4	231.605	229.022	1452.97	246.85	300.693	1170.88	229.127	103.41	1366.02	224.341	33.8565	1174.26	163.498	318.873	1245.78	410.028	143.879	1383.07	488.931	155.944	1139.7	493.76	156.902	1063.86	488.692	54.0476	918.621	434.203	33.1652	846.69	502.863	52.167	829.154	464.982	-2.38498	779.587
682	0	276.594	77.3309	1602.26	158.543	86.5533	1604	289.245	238.6	1540.6	180.995	242.927	1538.39	231.686	218.405	1453.21	247.251	290.357	1171.25	228.834	92.916	1366.22	224.249	23.77	1174.37	164.222	308.951	1246.28	409.859	132.636	1383.75	489.369	142.176	1140.59	494.39	142.602	1064.59	486.895	36.5306	921.512	431.372	14.2141	850.735	499.902	32.6746	831.889	461.226	-23.0116	784.067
683	0	275.937	66.8585	1602.38	157.849	76.1363	1603.93	288.726	228.095	1540.61	180.539	232.474	1538.22	231.651	207.802	1453.19	247.875	279.891	1171.31	228.504	82.4254	1366.13	224.262	13.6409	1174.13	164.97	298.913	1246.33	409.558	121.373	1384.06	489.727	128.638	1141.11	494.922	128.238	1065.18	485.278	19.2487	924.177	428.762	-4.6465	854.729	497.029	13.4146	834.522	457.714	-43.4761	788.573
684	0	275.199	56.3547	1602.2	157.067	65.5891	1603.67	288.197	217.527	1540.27	179.898	221.807	1537.77	231.617	197.049	1453.04	248.187	269.504	1171.09	228.229	71.8872	1365.82	224.298	3.48642	1173.6	165.604	288.771	1246.22	409.464	110.07	1384.07	490.018	114.995	1141.45	495.328	113.784	1065.3	483.477	2.01164	926.658	426.209	-23.2803	858.603	494.037	-5.74294	836.905	454.249	-63.5533	792.939
685	0	274.481	45.812	1601.84	156.478	55.0705	1603.12	287.555	206.814	1539.65	179.363	211.258	1537.15	231.552	186.285	1452.76	248.439	259.102	1170.77	228.032	61.3131	1365.28	224.172	-6.71424	1172.78	166.238	278.682	1245.98	409.239	98.775	1383.9	490.304	101.358	1141.53	495.502	99.3557	1065.1	481.649	-15.055	928.936	423.61	-41.7583	862.211	491.07	-24.7114	839.115	451.013	-83.4541	797.068
686	0	273.685	35.2057	1601.43	155.682	44.5602	1602.49	286.875	196.181	1539.13	178.778	200.5	1536.38	231.548	175.529	1452.34	248.621	249.14	1170.69	227.697	50.694	1364.64	223.976	-16.831	1171.66	166.716	268.604	1245.71	408.941	87.4905	1383.51	490.365	87.8484	1141.46	495.632	84.9142	1065.11	479.869	-31.9669	931.059	421.003	-59.8633	865.554	488.275	-43.4486	841.414	447.423	-103.258	801.167
687	0	272.908	24.6204	1600.83	154.839	33.7557	1601.62	286.196	185.516	1538.41	178.128	189.899	1535.25	231.415	164.565	1451.7	248.873	239.104	1170.28	227.336	40.1795	1363.65	223.796	-27.0402	1170.34	167.218	258.308	1245.17	408.599	76.3147	1382.78	490.523	74.2395	1141.32	495.842	70.39	1064.96	478.077	-48.7571	932.948	418.446	-77.7571	868.683	485.37	-61.9078	843.41	444.097	-122.831	805.19
688	0	272.045	13.8241	1599.88	154.018	22.94	1600.37	285.382	174.686	1537.45	177.536	179.177	1533.96	231.173	153.576	1450.92	249.205	229.045	1169.65	226.974	29.4824	1362.57	223.526	-37.2607	1168.69	167.627	248.04	1244.56	408.231	65.0803	1381.77	490.311	60.7035	1140.8	495.709	55.9152	1064.37	476.191	-65.5241	934.541	415.926	-95.4734	871.491	482.536	-80.1258	845.161	440.979	-141.796	808.792
689	0	271.255	3.05528	1598.94	153.275	12.1567	1599.15	284.756	163.917	1536.45	176.829	168.17	1532.83	231.06	142.634	1450.1	249.436	219.129	1169	226.794	18.8134	1361.31	223.268	-47.5405	1167.08	167.94	237.763	1243.82	407.915	53.8976	1380.76	490.3	47.1916	1140.17	495.441	41.4569	1063.65	474.344	-81.8799	935.944	413.497	-112.819	874.084	479.883	-98.1009	846.723	437.898	-160.546	812.281
690	0	270.517	-7.84126	1598	152.446	1.14319	1597.81	283.99	153.034	1535.43	175.963	157.333	1531.4	230.799	131.615	1449.18	249.725	209.025	1168.11	226.436	8.09148	1360.07	222.963	-57.8835	1165.44	168.021	227.639	1243.14	407.479	42.8068	1379.78	489.956	33.7896	1139.51	495.184	26.9035	1063.11	472.434	-98.1135	937.29	410.978	-129.987	876.524	477.141	-115.657	848.32	434.914	-178.813	815.489
691	0	269.55	-18.7312	1596.7	151.438	-9.88663	1596.18	283.261	142.041	1534.27	175.378	146.286	1529.95	230.341	120.599	1448.05	249.794	199.136	1167.37	225.983	-2.58639	1358.69	222.651	-68.2357	1163.71	167.933	217.001	1242.15	407.278	31.6642	1378.57	489.588	20.4363	1138.62	494.871	12.5822	1062.31	470.438	-114.181	938.266	408.559	-146.685	878.535	474.438	-132.959	849.497	432	-196.871	818.416
692	0	268.605	-29.7552	1595.2	150.687	-20.8701	1594.39	282.409	131.009	1532.91	174.446	135.271	1528.37	229.987	109.664	1446.72	249.888	189.235	1166.29	225.605	-13.3428	1356.97	222.223	-78.6814	1161.87	167.989	206.831	1241.22	406.675	20.605	1377.07	488.921	7.00647	1137.35	494.104	-1.84257	1061.07	468.397	-130.052	938.996	406.197	-163.153	880.074	471.855	-150.064	850.399	429.24	-214.459	820.891
693	0	267.66	-40.853	1593.57	149.685	-32.0749	1592.48	281.664	120.113	1531.35	173.631	124.177	1526.48	229.78	98.614	1445.39	249.893	179.189	1165.04	225.147	-24.1836	1355.37	221.783	-89.0836	1160.13	167.799	196.256	1240.07	406.174	9.59875	1375.55	488.097	-6.15389	1136.11	493.245	-16.0448	1060	466.436	-145.695	939.672	403.7	-179.537	881.536	469.36	-166.787	851.189	426.45	-231.645	823.147
694	0	266.694	-52.0255	1591.94	148.706	-43.3075	1590.53	280.763	109.029	1529.87	172.73	112.916	1524.8	229.257	87.7266	1443.87	249.722	168.985	1163.62	224.614	-34.9772	1353.65	221.286	-99.5936	1158.47	167.209	185.404	1238.69	405.711	-1.32501	1374.06	487.3	-19.161	1134.79	492.416	-30.1992	1059.05	464.394	-161.002	939.988	401.513	-195.137	882.664	466.962	-183.2	851.946	423.869	-248.533	825.098
695	0	265.812	-63.1066	1589.98	147.929	-54.4178	1588.32	279.886	97.9737	1528.08	171.767	101.871	1522.78	228.616	76.7187	1442.08	249.704	158.902	1162.29	224.03	-45.7222	1351.7	220.856	-110.024	1156.68	166.722	174.711	1237.09	405.177	-12.1712	1372.38	486.336	-32.2057	1133.25	491.208	-44.179	1057.56	462.378	-176.173	940.222	399.257	-210.548	883.18	464.645	-199.285	852.254	421.278	-264.889	826.601
696	0	264.885	-74.3802	1587.99	146.79	-65.7626	1586.16	278.853	86.7902	1526.19	171.073	90.6628	1520.9	228.145	65.8898	1440.37	249.522	148.812	1160.91	223.514	-56.621	1349.79	220.379	-120.499	1154.82	166.309	164.118	1235.37	404.676	-23.1141	1370.68	485.292	-45.0307	1131.63	489.841	-58.0639	1056.03	460.323	-191.07	940.129	397.04	-225.767	883.641	462.351	-215.114	852.354	418.878	-280.905	827.722
697	0	263.862	-85.6389	1585.86	145.809	-77.0501	1583.79	277.819	75.7179	1524.41	170.076	79.5515	1518.81	227.554	55.0005	1438.3	248.875	138.326	1158.68	222.856	-67.5539	1347.75	219.838	-131.099	1153	165.729	153.553	1233.5	404.163	-34.0558	1368.97	484.099	-57.6334	1129.83	488.511	-71.6732	1054.45	458.285	-205.609	939.841	394.802	-240.57	883.706	460.092	-230.381	852.317	416.589	-296.393	828.574
698	0	262.738	-96.8306	1583.7	144.757	-88.3044	1581.43	276.917	64.6783	1522.67	169.145	68.6462	1516.78	226.782	44.0498	1436.36	248.166	127.674	1156.73	222.068	-78.3736	1345.64	219.283	-141.908	1151.1	164.947	142.376	1231.29	403.478	-44.9694	1367.19	482.72	-70.0949	1127.92	487.081	-85.1597	1052.99	456.178	-219.854	939.158	392.573	-255.068	883.468	457.91	-245.308	851.963	414.184	-311.465	828.868
699	0	261.622	-108.203	1581.46	143.531	-99.7191	1579.17	275.854	53.4976	1520.93	168.215	57.4822	1514.77	226.06	33.0252	1434.35	247.821	117.236	1155.11	221.306	-89.4342	1343.57	218.698	-152.775	1149.09	164.445	131.614	1229.3	402.742	-56.0347	1365.19	481.332	-82.4337	1125.78	485.345	-98.5475	1051.19	454.183	-233.867	938.33	390.411	-269.277	882.734	455.741	-259.911	851.208	412.064	-326.179	828.853
700	0	260.509	-119.64	1579.34	142.515	-111.002	1576.87	274.807	42.2839	1519.28	167.181	46.1601	1513.21	225.263	22.0907	1432.52	246.996	106.795	1153.14	220.534	-100.524	1341.53	218.213	-163.861	1147.21	163.869	120.658	1227.44	402.001	-67.2104	1363.49	479.929	-94.6123	1123.78	483.562	-111.707	1049.38	452.148	-247.592	937.281	388.413	-283.072	881.858	453.749	-274.037	850.358	409.961	-340.354	828.386
701	0	259.265	-130.933	1577.56	141.299	-122.302	1574.87	273.7	31.0005	1517.77	166.145	35.082	1511.4	224.315	11.01	1430.79	245.917	95.7767	1151.31	219.668	-111.484	1339.6	217.614	-175.144	1145.42	162.927	109.36	1225.43	400.99	-78.2388	1361.65	478.437	-106.544	1121.85	481.641	-124.607	1047.65	450.09	-260.875	935.985	386.214	-296.351	880.728	451.718	-287.57	849.295	407.952	-353.94	827.736
702	0	258.051	-142.329	1575.81	139.993	-133.731	1573.06	272.586	19.6611	1516.21	164.704	23.6779	1509.95	223.306	-0.168872	1429.04	244.746	84.5054	1149.78	218.733	-122.708	1337.92	216.938	-186.393	1143.74	162.227	98.473	1223.74	400.348	-89.6391	1360.19	476.728	-118.235	1120.02	479.674	-137.259	1045.89	448.163	-273.751	934.612	384.239	-309.273	879.302	449.911	-300.566	847.958	406.161	-367.029	826.684
703	0	256.592	-153.827	1574.19	138.632	-144.969	1571.24	271.269	8.22857	1514.73	163.713	12.5661	1508.26	222.305	-11.3908	1427.6	243.408	73.0332	1147.87	217.784	-134.154	1336.21	216.183	-197.922	1142.1	161.391	87.352	1222.28	399.257	-101.137	1358.72	475.04	-130.003	1118.22	477.557	-149.787	1044.27	446.195	-286.34	933.07	382.333	-321.831	877.637	447.945	-313.129	846.373	404.391	-379.619	825.23
704	0	255.07	-165.221	1572.85	137.104	-156.46	1569.77	270.086	-3.27127	1513.52	162.48	1.07058	1506.77	221.213	-22.778	1426.24	242.093	61.6384	1146.67	216.519	-145.497	1334.8	215.212	-209.501	1140.64	160.223	75.9824	1220.8	397.979	-112.623	1357.35	473.51	-141.661	1116.49	475.478	-161.996	1042.84	444.197	-298.497	931.371	380.41	-333.819	875.728	446.084	-325.013	844.658	402.649	-391.641	823.606
705	0	253.492	-176.672	1571.49	135.549	-167.705	1568.46	268.793	-14.7139	1512.28	161.171	-10.267	1505.46	220.029	-34.1391	1424.99	240.878	49.8768	1145.7	215.235	-157.112	1333.55	214.102	-221.129	1139.45	159.204	64.6823	1219.58	396.813	-124.367	1356.42	471.442	-153.233	1115.12	473.382	-173.911	1041.64	442.294	-310.113	929.569	378.651	-345.359	873.771	444.41	-336.514	842.932	401.064	-403.03	821.663
706	0	251.935	-188.154	1570.43	134.035	-179.157	1567.26	267.241	-26.2776	1511.06	159.794	-21.6725	1504.26	218.722	-45.75	1423.89	239.747	37.9856	1144.64	213.908	-168.814	1332.47	212.815	-232.835	1138.36	158.043	52.8415	1218.37	395.486	-136.16	1355.37	469.583	-164.799	1113.77	471.307	-185.65	1040.33	440.514	-321.464	927.682	376.951	-356.391	871.665	442.719	-347.289	840.896	399.624	-413.983	819.499
707	0	250.417	-199.512	1569.54	132.402	-190.549	1566.25	265.795	-37.7851	1510.05	158.251	-33.0468	1502.94	217.32	-57.2684	1422.91	238.317	25.8118	1143.54	212.404	-180.484	1331.6	211.339	-244.664	1137.64	156.869	40.9825	1217.19	393.979	-148.089	1354.48	467.649	-176.342	1112.62	469.248	-197.251	1039.07	438.847	-332.331	925.825	375.405	-367.077	869.451	441.198	-357.71	838.758	398.309	-424.299	817.046
708	0	248.663	-211.006	1568.84	130.658	-201.98	1565.48	264.149	-49.229	1509.29	156.5	-44.5567	1502.23	215.77	-68.9832	1422.11	237.226	13.9246	1142.58	210.856	-192.398	1331.08	209.682	-256.808	1137.28	155.627	28.7744	1215.94	392.349	-160.021	1353.86	465.745	-187.939	1111.77	467.197	-208.416	1038.12	437.244	-342.791	924.025	373.852	-377.159	867.132	439.775	-367.582	836.706	396.979	-434.012	814.462
709	0	246.831	-222.448	1568.36	128.907	-213.394	1564.88	262.216	-60.6795	1508.66	154.905	-55.9372	1501.64	214.162	-80.5217	1421.21	235.931	1.36978	1141.47	208.967	-204.299	1330.62	207.861	-269.13	1137.18	154.077	16.1955	1214.8	390.717	-171.899	1353.49	463.777	-199.388	1111.06	465.295	-219.333	1037.38	435.717	-352.904	922.098	372.573	-386.734	864.683	438.459	-376.924	834.644	395.723	-443.233	811.739
710	0	244.938	-233.81	1567.97	126.999	-224.819	1564.46	260.424	-72.0967	1508.16	152.912	-67.4488	1501	212.335	-92.3537	1420.49	234.522	-11.5565	1140.69	207.289	-216.437	1330.32	206.149	-281.874	1137.19	152.61	3.50658	1213.58	388.824	-183.856	1353	461.759	-210.783	1110.31	463.388	-230.055	1036.57	434.333	-362.607	919.926	371.38	-396.042	862.085	437.318	-385.997	832.321	394.522	-451.933	808.7
711	0	242.955	-245.218	1568.03	125.011	-236.276	1564.5	258.272	-83.6782	1507.81	151.071	-79.0896	1500.62	210.509	-104.11	1420.11	233.178	-24.218	1139.7	205.43	-228.607	1330.29	204.427	-294.956	1137.54	151.103	-9.25468	1212.64	387.2	-195.895	1352.98	459.859	-222.244	1109.97	461.456	-240.495	1035.87	433.035	-371.962	917.918	370.122	-404.875	859.547	436.153	-394.524	830.099	393.394	-460.086	805.579
712	0	240.971	-256.569	1568.49	122.971	-247.751	1564.74	256.313	-95.2208	1507.77	148.999	-90.7455	1500.42	208.706	-116.031	1419.94	231.58	-36.8845	1139.12	203.614	-240.808	1330.59	202.802	-308.15	1138.22	149.595	-22.069	1211.91	385.477	-208.012	1353.28	458.06	-233.5	1110.03	459.829	-250.786	1035.73	431.962	-380.892	916.16	368.969	-413.368	857.144	435.271	-402.532	828.154	392.419	-467.764	802.607
713	0	238.784	-267.932	1569.08	120.809	-259.095	1565.24	254.108	-106.825	1507.72	146.737	-102.344	1500.17	206.85	-128.05	1419.95	229.829	-49.7184	1139.03	201.837	-253.14	1331.08	201.267	-321.596	1139.06	148.124	-34.9788	1211.3	383.733	-220.293	1353.77	456.346	-244.602	1110.18	458.174	-260.767	1035.56	431.003	-389.441	914.28	368.194	-420.876	854.642	434.542	-410.095	826.137	391.631	-474.844	799.459
714	0	236.464	-279.269	1569.92	118.515	-270.555	1565.79	252.01	-118.433	1507.8	144.69	-113.97	1500.14	205.105	-140.131	1420.17	227.943	-62.9559	1139.2	200.014	-265.518	1331.7	199.892	-335.131	1139.91	146.595	-47.8588	1210.96	382.024	-232.742	1354.56	454.748	-255.737	1110.6	456.718	-270.793	1035.64	429.892	-397.666	912.505	367.425	-428.252	852.216	433.954	-417.228	824.118	390.931	-481.427	796.395
715	0	234.106	-290.665	1571.1	116.235	-281.885	1566.62	249.805	-130.062	1508.3	142.519	-125.705	1500.25	203.291	-152.255	1420.7	226.532	-76.1101	1139.15	198.307	-277.956	1332.68	198.609	-348.658	1141.03	145.209	-60.6763	1210.99	380.232	-245.195	1355.61	453.187	-266.765	1111.32	455.361	-280.559	1036.19	429.037	-405.628	911.088	366.691	-435.163	849.926	433.47	-423.897	822.379	390.231	-487.469	793.413
716	0	231.699	-302.041	1572.57	113.712	-293.299	1567.66	247.5	-141.772	1509.19	140.222	-137.498	1500.71	201.443	-164.462	1421.6	225.025	-88.9685	1140.26	196.584	-290.302	1333.98	197.418	-361.926	1142.3	143.96	-73.3627	1211.42	378.606	-257.626	1357.12	451.821	-277.683	1112.47	454.218	-290.238	1037.22	428.152	-413.223	909.834	366.032	-441.49	847.785	433.177	-430.212	820.987	389.79	-492.949	790.525
717	0	229.222	-313.412	1574.23	111.25	-304.592	1568.79	245.268	-153.315	1510.27	138.027	-148.986	1501.39	199.609	-176.563	1422.7	223.939	-101.808	1140.91	194.971	-302.547	1335.45	196.313	-374.984	1143.7	142.796	-85.9517	1212.06	376.973	-269.974	1358.75	450.503	-288.522	1113.86	453.015	-299.788	1038.43	427.489	-420.665	909.001	365.686	-447.395	845.767	433.142	-436.172	819.818	389.366	-498.147	787.798
718	0	226.632	-324.719	1575.96	108.774	-316.002	1569.96	243.057	-164.921	1511.43	135.995	-160.725	1502.14	197.865	-188.696	1424.01	223.025	-114.797	1142.18	193.641	-314.745	1337.14	195.436	-387.692	1145.21	141.438	-98.6351	1213.13	375.457	-282.276	1360.65	449.215	-299.369	1115.45	451.853	-309.283	1039.75	426.879	-427.794	908.276	365.524	-452.981	844.038	433.561	-442.112	819.035	389.206	-502.548	785.13
719	0	224.136	-336.099	1578.04	106.224	-327.38	1571.22	240.863	-176.578	1512.94	133.768	-172.388	1503.12	196.126	-200.688	1425.48	221.534	-127.545	1143.8	192.388	-326.732	1338.99	194.768	-400.169	1146.98	140.261	-111.089	1214.32	373.887	-294.028	1362.59	448.017	-310.095	1117.49	450.947	-318.529	1041.51	426.418	-434.722	908.06	365.461	-458.116	842.582	433.999	-447.778	818.787	389.2	-506.571	782.779
720	0	221.554	-347.436	1580.09	103.793	-338.581	1572.47	238.86	-187.994	1514.61	131.897	-183.948	1503.93	194.538	-212.564	1427.12	220.816	-139.97	1145.46	191.199	-338.662	1340.89	194.093	-412.295	1148.81	139.06	-123.384	1215.72	372.625	-305.736	1364.88	446.844	-320.715	1119.62	450.036	-327.575	1043.69	426.19	-441.508	908.199	365.712	-462.945	841.503	434.923	-453.429	818.821	389.125	-510.581	780.762
721	0	218.991	-358.832	1582	101.293	-349.967	1573.53	236.919	-199.51	1516.49	129.867	-195.368	1504.77	192.878	-224.255	1428.64	219.416	-152.187	1146.95	190.204	-350.402	1342.59	193.716	-424.042	1150.55	137.636	-135.748	1217.13	371.348	-317.07	1367.1	445.843	-331.324	1121.82	449.518	-336.538	1045.92	426.068	-448.372	908.618	366.231	-467.704	840.526	435.858	-459.086	819.091	389.275	-514.431	778.945
722	0	216.572	-370.201	1584.1	98.9949	-361.241	1574.55	234.981	-210.924	1518.22	128.207	-206.782	1505.87	191.33	-235.942	1430.34	218.217	-163.69	1148.65	189.427	-362.074	1344.38	193.587	-435.656	1152.37	136.312	-147.827	1218.68	370.388	-328.03	1369.39	444.898	-341.755	1124.12	448.894	-345.348	1048.19	426.157	-455.124	909.192	366.956	-472.304	839.807	437.145	-464.969	819.884	389.671	-518.004	777.154
723	0	214.308	-381.436	1586.14	96.8372	-372.558	1575.67	233.317	-222.283	1520.18	126.613	-218.285	1506.84	190.026	-247.342	1431.99	217.412	-175.041	1150.36	188.858	-373.532	1346.21	193.486	-446.956	1154.24	134.875	-159.879	1220.15	369.536	-338.651	1371.59	444.267	-351.887	1126.38	448.698	-353.893	1050.57	426.43	-461.863	910.064	367.985	-476.758	839.352	438.619	-471.075	820.924	390.176	-521.361	775.532
724	0	212.214	-392.684	1588.1	94.7956	-383.74	1576.72	231.652	-233.76	1522.21	125.036	-229.564	1508.05	188.658	-258.68	1433.54	216.506	-185.609	1152.2	188.471	-384.934	1347.96	193.799	-458.112	1156.08	133.311	-171.909	1221.56	368.914	-348.845	1373.73	443.898	-361.853	1128.67	448.622	-362.167	1052.76	427.072	-468.542	911.008	369.456	-481.213	839.151	440.632	-477.445	822.117	391.135	-524.783	774.182
725	0	210.301	-403.955	1590.05	92.856	-394.994	1577.67	230.199	-244.918	1524.2	123.608	-240.899	1509.12	187.38	-269.823	1435.29	214.777	-196.762	1153.74	188.225	-396.066	1349.58	194.309	-469.08	1157.68	131.889	-183.455	1223.22	368.397	-358.854	1375.79	443.648	-371.481	1130.93	448.681	-370.46	1054.84	427.798	-475.316	912.064	370.988	-485.959	839.099	442.546	-483.518	823.428	392.207	-528.074	772.917
726	0	208.392	-415.196	1591.9	91.2701	-406.287	1578.57	228.862	-256.211	1526.24	122.503	-252.157	1510.51	186.274	-280.852	1436.97	213.412	-207.352	1155.61	188.171	-407.121	1351.21	194.937	-479.985	1159.35	130.261	-195.211	1224.81	368.057	-368.541	1377.74	443.605	-380.752	1133.04	448.888	-378.424	1056.98	428.862	-482.039	913.14	372.741	-491.071	839.286	444.575	-489.912	824.818	393.879	-531.441	771.755
727	0	206.837	-426.473	1593.78	89.6226	-417.452	1579.67	227.806	-267.356	1528.46	121.342	-263.402	1511.93	185.257	-291.722	1438.6	211.869	-218.092	1157.38	188.175	-417.939	1352.85	195.827	-490.81	1160.97	128.801	-206.321	1226.33	367.814	-377.884	1379.6	443.73	-389.471	1135.01	449.395	-386.15	1059.12	430.145	-488.788	914.306	374.756	-496.37	839.665	446.849	-496.012	826.101	396.026	-535.021	770.846
728	0	205.422	-437.749	1595.45	88.3898	-428.702	1580.62	226.768	-278.559	1530.34	120.436	-274.628	1513.15	184.306	-302.513	1440.07	209.824	-228.779	1158.69	188.412	-428.77	1354.27	196.77	-501.499	1162.48	126.936	-217.584	1227.76	367.661	-387.035	1381.27	444.074	-397.849	1136.79	449.929	-393.827	1060.91	431.882	-495.318	915.296	377.08	-502.341	840.211	449.351	-501.941	827.32	398.809	-538.867	770.086
729	0	204.213	-448.957	1597.18	87.3547	-439.961	1581.69	225.911	-289.785	1532.25	119.837	-285.781	1514.43	183.367	-313.183	1441.53	208.241	-239.719	1160.31	188.598	-439.442	1355.74	198.001	-512.127	1163.88	125.488	-228.596	1229.16	367.403	-395.9	1382.57	444.539	-405.698	1138.27	450.457	-401.162	1062.31	433.824	-501.632	916.068	379.679	-508.478	840.78	452.1	-507.813	828.444	402.066	-542.989	769.482
730	0	203.335	-460.247	1598.89	86.5079	-451.215	1582.82	225.213	-301.077	1534.2	119.237	-296.931	1516.02	182.564	-323.81	1443.07	206.23	-249.977	1161.56	188.956	-449.943	1357.34	199.146	-522.574	1165.4	123.497	-239.549	1230.82	367.472	-404.815	1384.24	445.151	-413.051	1139.86	451.108	-408.298	1063.98	436.077	-507.907	917.085	382.52	-513.912	841.131	455.063	-513.092	829.709	405.832	-547.135	769.274
731	0	202.687	-471.545	1600.47	85.8461	-462.428	1584.03	224.86	-312.061	1536.16	118.838	-308.241	1517.61	181.766	-334.396	1444.51	204.404	-260.468	1162.96	189.284	-460.334	1358.94	200.228	-532.977	1167.03	121.698	-250.559	1232.09	367.378	-413.463	1385.67	445.881	-419.852	1141.34	451.902	-415.12	1065.61	438.734	-513.956	918.184	385.54	-519.92	841.784	458.238	-518.378	830.882	409.902	-552.031	769.552
732	0	202.334	-483.064	1601.68	85.5708	-473.847	1585.18	224.506	-323.235	1538.05	118.564	-319.147	1519.5	181.075	-344.761	1445.91	202.507	-270.832	1164.29	189.581	-470.629	1360.32	201.293	-543.226	1168.43	119.866	-261.265	1233.56	367.204	-422.066	1386.98	446.606	-426.325	1142.63	452.452	-421.7	1067.04	441.568	-519.902	919.112	388.874	-526.175	842.32	461.505	-523.183	831.92	414.342	-557.08	769.801
733	0	202.195	-494.554	1602.59	85.3737	-485.352	1586.32	224.289	-334.419	1539.92	118.488	-330.258	1521.32	180.414	-355.199	1447.34	201.045	-280.989	1165.51	189.884	-480.893	1361.58	202.337	-553.371	1169.81	117.972	-272.042	1234.95	367.096	-430.756	1388.14	447.326	-432.48	1143.89	452.919	-428.093	1068.31	444.469	-525.573	919.915	392.431	-532.519	842.966	465.073	-528.276	832.841	419.03	-562.581	770.319
734	0	202.394	-506.036	1603.48	85.71	-496.634	1587.35	224.269	-345.553	1541.8	118.54	-341.179	1523.62	179.687	-365.577	1448.51	199.699	-290.872	1166.97	190.167	-490.922	1362.84	203.133	-563.329	1171.13	116.224	-282.701	1236.3	367.101	-439.359	1389.46	448.111	-438.207	1145.29	453.585	-434.174	1069.73	447.774	-531.087	920.932	396.149	-538.76	843.703	468.621	-532.463	833.835	423.9	-568.042	771.159
735	0	202.9	-517.562	1604.11	86.1635	-508.241	1588.27	224.492	-356.619	1543.65	118.641	-352.368	1525.56	179.047	-375.821	1449.86	198.249	-301.213	1167.81	190.441	-501.081	1364.03	204.018	-573.306	1172.61	114.505	-293.437	1237.64	366.996	-447.892	1390.66	448.805	-443.698	1146.65	454.283	-440.164	1071.13	451.401	-536.374	921.916	400.022	-545.112	844.43	472.414	-536.846	834.845	428.914	-573.631	772.01
736	0	203.532	-529.261	1604.34	86.8078	-519.958	1589.02	224.727	-367.841	1545.29	118.686	-363.417	1527.88	178.521	-386.02	1450.89	197.032	-311.349	1169.14	190.701	-511.088	1364.88	204.713	-583.134	1173.77	112.827	-304.153	1238.78	366.848	-456.425	1391.51	449.378	-449.128	1147.75	454.665	-446.179	1072.09	454.709	-541.727	922.559	404.072	-551.562	844.993	476.166	-541.049	835.561	434.13	-579.56	773.016
737	0	204.303	-541.001	1604.38	87.4794	-531.63	1589.65	225.135	-378.996	1546.68	119.149	-374.581	1529.76	178.002	-396.183	1451.7	195.832	-321.296	1169.52	190.89	-521.084	1365.59	205.318	-593.016	1174.74	111.465	-314.805	1239.66	366.823	-464.966	1392.23	449.853	-454.414	1148.63	455.123	-451.976	1072.95	458.185	-546.769	923.219	408.257	-558.01	845.566	479.82	-545.231	836.091	439.484	-585.832	773.979
738	0	205.237	-552.734	1604.26	88.3021	-543.372	1590.2	225.693	-390.19	1548.15	119.411	-385.71	1531.64	177.37	-406.266	1452.1	195.319	-331.341	1170.21	191.147	-531.011	1366.16	205.75	-602.767	1175.61	110.1	-325.306	1240.3	366.63	-473.406	1392.61	450.158	-459.612	1149.35	455.875	-457.646	1073.98	461.887	-551.884	923.926	412.377	-564.381	846.011	483.514	-549.211	836.68	444.807	-591.926	774.99
739	0	206.262	-564.539	1603.86	89.24	-555.103	1590.56	226.33	-401.469	1549.13	120.024	-396.802	1533.27	176.928	-416.297	1452.47	194.528	-341.524	1170.27	191.37	-541.01	1366.48	206.171	-612.497	1176.24	108.813	-335.992	1240.6	366.541	-482.008	1392.85	450.394	-464.936	1149.72	456.262	-463.315	1074.62	465.444	-556.934	924.321	416.617	-570.938	846.281	487.191	-553.297	837.147	450.195	-598.051	775.762
740	0	207.462	-576.446	1603.15	90.4079	-566.938	1590.63	227.183	-412.791	1549.79	120.721	-408.16	1534.62	176.638	-426.358	1452.59	193.736	-351.545	1170.49	191.738	-550.795	1366.47	206.61	-622.375	1176.52	107.612	-346.515	1240.78	366.622	-490.616	1392.62	450.537	-470.332	1149.77	456.54	-469.197	1074.85	468.804	-562.008	924.379	420.745	-578.015	846.471	490.611	-557.287	837.088	455.737	-604.211	776.37
741	0	208.789	-588.373	1602.34	91.6553	-578.786	1590.66	228.104	-424.157	1550.41	121.648	-419.33	1536.04	176.429	-436.45	1452.57	192.989	-361.822	1169.73	192.147	-560.601	1366.33	206.92	-632.069	1176.61	106.56	-356.909	1240.85	366.721	-499.269	1392.31	450.677	-475.842	1149.7	456.916	-474.962	1074.88	472.172	-567.095	924.404	424.812	-584.894	846.565	493.938	-561.357	837.019	461.202	-610.331	776.887
742	0	210.183	-600.288	1601.27	92.902	-590.629	1590.46	229.337	-435.485	1551.03	122.623	-430.525	1537.32	176.271	-446.558	1452.48	191.677	-371.617	1169.44	192.549	-570.4	1366.06	207.259	-641.836	1176.39	105.63	-367.281	1240.74	366.928	-508.004	1391.93	450.868	-481.461	1149.52	457.346	-480.847	1074.85	475.407	-572.212	924.279	428.904	-591.769	846.514	496.526	-565.194	836.676	466.623	-616.366	777.165
743	0	211.502	-612.288	1599.77	94.3004	-602.515	1589.95	230.429	-446.922	1551.33	123.634	-441.873	1538.36	176.246	-456.635	1452.2	190.867	-382.256	1169.26	192.923	-580.468	1365.57	207.588	-651.716	1175.97	104.742	-377.574	1240.58	367.089	-516.819	1391.22	450.876	-487.633	1149.14	457.749	-486.945	1074.61	478.399	-577.431	923.831	432.845	-598.581	845.945	499.367	-569.237	836.089	471.954	-622.41	777.298
744	0	213.071	-624.425	1598.17	95.7272	-614.446	1589.32	231.635	-458.522	1551.49	124.764	-453.327	1539.55	176.233	-466.79	1451.8	189.375	-392.419	1169.55	193.258	-590.34	1364.7	207.919	-661.594	1175.15	103.993	-387.798	1240.42	367.282	-525.82	1390.36	451.063	-493.947	1148.62	458.057	-493.274	1074.05	481.301	-582.776	923.104	436.6	-605.391	845.15	502.328	-573.95	835.478	477.087	-628.404	777.124
745	0	214.702	-636.54	1596.24	97.2858	-626.377	1588.5	232.949	-470.073	1551.53	125.964	-464.761	1540.48	176.232	-476.971	1451.21	188.327	-403.071	1168.73	193.734	-600.331	1363.76	208.257	-671.47	1174.24	103.293	-397.891	1240.02	367.068	-534.779	1389.25	450.901	-500.321	1147.93	458.624	-499.673	1073.45	483.979	-588.213	922.319	440.15	-612.118	844.211	504.316	-578.104	834.513	482.003	-634.162	776.719
746	0	216.41	-648.679	1594.11	98.9498	-638.493	1587.46	234.473	-481.612	1551.32	127.247	-476.256	1541.17	176.267	-487.239	1450.53	187.169	-414.085	1167.94	194.144	-610.363	1362.81	208.604	-681.328	1173.06	102.688	-407.892	1239.44	367.305	-544.004	1388.04	451.403	-507.294	1147.17	458.945	-506.357	1072.72	486.527	-593.643	921.324	443.583	-618.732	843.077	506.564	-582.625	833.438	486.735	-639.82	776.125
747	0	218.295	-660.867	1591.88	100.754	-650.562	1586.35	235.979	-493.349	1550.82	128.608	-487.766	1541.76	176.37	-497.541	1449.64	186.685	-424.014	1166.86	194.637	-620.286	1361.37	208.981	-691.117	1171.52	102.32	-417.959	1238.82	367.889	-553.483	1386.72	451.513	-514.618	1146.13	459.214	-513.348	1071.7	489.081	-599.547	920.169	446.94	-625.308	841.728	508.53	-587.386	832.09	491.069	-645.555	775.32
748	0	220.084	-673.058	1589.26	102.624	-662.737	1585.08	237.5	-505.246	1550.22	130.191	-499.304	1542.28	176.636	-507.866	1448.57	186.665	-434.094	1165.68	195.144	-630.352	1360.02	209.506	-701.026	1170.07	102.203	-427.922	1237.97	367.821	-562.932	1384.98	451.461	-522.197	1144.83	459.503	-520.494	1070.56	491.024	-604.898	918.608	450.042	-632.076	840.248	510.392	-592.163	830.524	495.229	-651.195	774.325
749	0	221.999	-685.332	1586.59	104.427	-674.754	1583.57	239.118	-517	1549.51	131.815	-510.955	1542.64	176.903	-518.243	1447.39	186.89	-443.671	1164.75	195.589	-640.527	1358.46	209.891	-710.874	1168.4	102.222	-437.954	1236.85	368.526	-572.555	1383.57	451.734	-530.031	1143.6	459.89	-527.775	1069.5	492.971	-610.927	917.081	452.568	-638.443	838.458	511.962	-597.183	829.058	498.956	-656.614	773.14
750	0	224.122	-697.642	1583.8	106.398	-687.051	1581.98	240.869	-528.778	1548.66	133.522	-522.63	1542.8	177.266	-528.64	1445.96	186.903	-453.743	1163.23	196.175	-650.609	1356.86	210.475	-720.822	1166.69	102.173	-448.13	1235.62	369.091	-582.236	1382.03	451.979	-538.174	1142.22	460.306	-535.379	1068.25	494.709	-616.962	915.484	455.058	-644.87	836.661	513.577	-602.262	827.515	502.143	-662.134	771.612
751	0	226.132	-709.966	1580.7	108.556	-699.391	1580.18	242.68	-540.638	1547.7	135.28	-534.483	1542.84	177.789	-539.082	1444.63	186.873	-463.994	1162.05	196.806	-660.916	1355.07	211.189	-730.918	1164.88	102.302	-458.357	1234.31	369.379	-592.042	1380.02	452.474	-546.808	1140.79	460.681	-543.218	1066.87	496.297	-623.276	913.609	457.315	-651.505	834.528	515.022	-607.574	825.66	505.127	-667.715	769.819
752	0	228.284	-722.339	1577.56	110.698	-711.598	1578.46	244.551	-552.527	1546.66	137.069	-546.347	1542.91	178.546	-549.479	1443.15	186.886	-473.916	1160.63	197.55	-671.194	1353.39	212.013	-741.114	1163.14	102.639	-468.448	1233.01	370.166	-602.096	1378.39	452.844	-555.69	1139.24	460.853	-551.427	1065.34	497.787	-629.796	911.732	459.423	-658.011	832.378	516.224	-613.168	823.794	507.734	-673.089	767.96
753	0	230.497	-734.537	1574.48	112.894	-723.956	1576.53	246.483	-564.455	1545.52	138.844	-558.278	1542.98	179.183	-559.891	1441.81	187.436	-484.045	1159.22	198.527	-681.604	1351.77	212.846	-751.445	1161.65	103.298	-478.88	1231.62	371.061	-612.241	1376.97	453.02	-564.596	1137.71	461.071	-559.726	1063.9	499.056	-636.382	909.892	461.015	-664.328	830.121	517.472	-618.988	822.173	509.962	-678.618	765.895
754	0	232.752	-746.8	1571.36	115.098	-736.309	1574.57	248.377	-576.378	1544.4	140.651	-570.199	1542.92	180.268	-570.518	1440.22	188.656	-494.243	1157.57	199.371	-692.14	1350.05	213.708	-761.916	1160.01	104.03	-489.161	1230.27	372.062	-622.595	1375.39	453.601	-573.869	1136.25	461.539	-568.313	1062.33	500.165	-643.345	907.793	462.562	-670.904	827.907	518.571	-624.936	820.224	511.776	-684.161	763.646
755	0	234.789	-758.722	1567.89	117.442	-748.678	1572.52	250.357	-588.348	1543.23	142.518	-582.098	1542.84	181.444	-581.213	1438.66	189.172	-504.869	1156.24	200.378	-702.752	1348.27	214.682	-772.614	1158.29	104.981	-499.534	1228.87	372.858	-633.122	1373.55	454.448	-583.478	1134.66	462.128	-576.87	1060.88	501.193	-650.607	905.632	463.723	-677.617	825.315	519.483	-631.18	818.104	513.168	-689.915	760.941
756	0	237.259	-771.029	1565.04	119.771	-761.102	1570.42	252.203	-600.123	1542.15	144.301	-594.11	1542.47	182.667	-591.969	1437.02	190.268	-515.438	1154.85	201.483	-713.56	1346.45	215.692	-783.441	1156.68	106.33	-510.054	1227.36	374.124	-643.841	1371.9	454.882	-592.981	1132.91	462.656	-585.813	1059.14	501.915	-658.063	903.362	464.824	-684.488	822.759	520.515	-637.569	816.23	514.152	-695.669	758.19
757	0	239.788	-783.093	1562.21	122.298	-773.402	1568.5	254.169	-612.011	1540.86	146.208	-606.142	1541.87	184.063	-602.873	1435.43	191.375	-526.163	1153.33	202.777	-724.5	1344.95	216.645	-794.281	1155.04	107.708	-520.806	1225.66	375.891	-654.861	1370.35	455.759	-603.005	1131.31	463.2	-595.112	1057.59	502.741	-665.625	901.187	465.882	-691.519	820.589	521.325	-644.168	814.267	515.022	-701.477	755.474
758	0	242.342	-795.042	1559.41	124.922	-785.716	1566.41	256.203	-623.709	1539.35	148.265	-618.215	1541.05	185.768	-613.891	1433.61	192.789	-537.016	1151.43	204.21	-735.617	1343.18	217.694	-805.336	1153.35	109.1	-531.346	1224.06	377.313	-666.142	1368.39	456.551	-613.221	1129.27	463.73	-604.588	1055.76	503.426	-673.588	898.731	466.549	-698.54	817.893	522.042	-651.177	811.976	515.424	-707.531	752.413
759	0	244.934	-806.977	1556.83	127.474	-797.91	1564.45	258.311	-635.449	1537.77	150.516	-630.229	1540.06	187.544	-625.079	1431.98	194.456	-548.316	1149.16	205.689	-746.836	1341.42	218.819	-816.559	1151.65	110.78	-541.993	1222.54	378.309	-677.441	1365.86	457.628	-623.759	1127.19	464.51	-614.323	1053.89	503.968	-681.822	896.112	466.529	-704.968	814.404	522.604	-658.487	809.605	515.514	-713.681	749.165
760	0	247.557	-818.792	1554.48	130.222	-810.103	1562.57	260.426	-647.12	1536.25	152.701	-642.189	1538.97	189.458	-636.329	1430.27	196.525	-559.508	1147.04	207.266	-758.176	1339.69	219.847	-827.976	1149.93	112.591	-552.894	1220.98	380.434	-689.106	1364.11	458.966	-634.511	1125.31	463.897	-625.096	1051.67	504.501	-690.043	893.587	466.878	-712.164	811.759	523.382	-665.898	807.615	515.412	-720.157	746.025
761	0	250.184	-830.421	1552.29	132.853	-822.162	1560.97	262.821	-658.707	1534.9	154.897	-654.074	1537.84	191.576	-647.68	1428.78	197.873	-571.236	1145.88	209.026	-769.661	1338.01	220.868	-839.574	1148.32	114.474	-563.899	1219.54	382.158	-700.827	1362.23	460.122	-645.312	1123.49	466.032	-634.471	1050.31	504.986	-698.287	891.076	467.022	-719.514	809.103	523.894	-673.599	805.294	515.034	-726.751	742.66
762	0	253.039	-842.074	1550.27	135.799	-834.174	1559.27	265.192	-670.4	1533.53	157.338	-665.904	1536.87	193.87	-659.122	1427.32	199.581	-582.854	1144.34	210.889	-781.272	1336.35	221.973	-851.346	1146.63	116.336	-575.16	1218.28	384.01	-712.726	1360.08	461.508	-656.512	1121.51	466.847	-645.052	1048.31	505.573	-707.224	888.438	467.14	-727.137	806.207	524.512	-681.854	802.846	514.426	-733.408	739.117
763	0	256	-853.717	1548.54	138.809	-846.162	1557.92	267.849	-681.97	1532.23	159.855	-677.816	1535.91	196.371	-670.611	1426	201.135	-594.37	1143.26	212.907	-792.912	1334.87	223.039	-863.234	1145.05	118.285	-586.751	1217.05	386.478	-724.854	1358.3	462.987	-667.868	1119.5	468.129	-655.608	1046.35	506.025	-716.332	885.705	467.072	-735.329	803.42	525.077	-690.182	800.52	513.691	-740.437	735.609
764	0	259.085	-865.339	1547.1	141.839	-857.93	1556.8	270.618	-693.64	1530.9	162.611	-689.57	1534.84	198.803	-682.312	1424.75	202.876	-606.127	1141.83	215.025	-804.671	1333.47	224.135	-875.205	1143.66	120.257	-598.462	1215.87	388.314	-736.84	1356.22	464.619	-679.403	1117.61	468.971	-666.65	1044.22	506.495	-725.764	883.07	467.01	-743.44	800.671	525.44	-699.052	798.013	512.784	-747.709	732.192
765	0	262.224	-876.946	1545.74	144.99	-869.6	1555.78	273.557	-705.204	1529.51	165.45	-701.262	1533.86	201.549	-693.974	1423.46	205.05	-618.363	1140.36	217.291	-816.54	1332.24	225.266	-887.223	1142.26	122.467	-610.621	1214.59	390.694	-748.929	1354.13	466.17	-691.127	1115.56	469.937	-677.899	1042.05	506.952	-735.504	880.355	466.872	-751.98	797.929	525.983	-708.252	795.534	511.826	-755.322	728.689
766	0	265.32	-888.65	1544.5	148.247	-881.477	1554.72	276.675	-716.905	1528.17	168.622	-712.9	1532.89	204.338	-705.766	1422.22	207.105	-630.853	1139.25	219.609	-828.512	1331.04	226.597	-899.537	1141.03	124.68	-622.754	1213.4	393.168	-761.065	1352.18	467.947	-703.112	1113.37	471.351	-688.939	1039.88	507.31	-745.671	877.552	466.716	-760.623	795.006	526.482	-717.782	793.137	510.847	-763.337	725.281
767	0	268.637	-900.417	1543.54	151.464	-892.951	1554.02	279.887	-728.448	1526.82	171.813	-724.479	1531.86	207.317	-717.398	1421.08	209.094	-643.54	1137.82	221.781	-840.522	1330.11	227.997	-911.892	1140	126.839	-634.773	1212.27	396.081	-773.242	1350.31	469.449	-715.111	1111.08	472.537	-700.573	1037.82	507.699	-756.119	874.875	466.604	-770.075	792.487	526.976	-727.815	790.786	509.738	-771.646	721.909
768	0	271.921	-911.933	1542.53	154.8	-904.347	1553.53	283.159	-739.907	1525.53	175.177	-735.851	1530.9	210.43	-729.069	1419.87	211.3	-656.24	1136.17	224.334	-852.461	1329.24	229.577	-924.452	1139.27	129.226	-647.107	1210.9	398.786	-785.301	1348.33	471.342	-727.441	1108.8	473.576	-712.391	1035.72	508.059	-766.938	872.344	466.395	-779.785	789.828	527.395	-738.149	788.474	508.817	-780.256	718.738
769	0	275.166	-923.238	1541.9	158.147	-915.747	1553.38	286.627	-751.576	1524.53	178.777	-747.266	1530.23	213.755	-740.636	1418.86	213.252	-668.944	1134.64	227.053	-864.589	1328.5	231.357	-937.355	1138.81	131.716	-659.552	1209.8	401.618	-797.47	1346.44	472.717	-739.771	1106.33	474.367	-724.485	1033.35	508.308	-778.091	869.694	466.234	-789.691	787.327	527.88	-748.797	786.081	507.841	-789.314	715.586
770	0	278.616	-935.046	1542.03	161.653	-927.228	1553.86	290.328	-763.315	1524.01	182.513	-758.784	1530.06	217.303	-752.319	1418.23	215.587	-682.241	1134.01	229.779	-876.607	1328.25	233.146	-950.32	1138.63	134.25	-671.951	1209.02	404.128	-809.699	1344.48	474.301	-752.484	1104.01	476.253	-736.614	1031.24	508.55	-789.52	867.224	466.111	-799.399	784.826	528.273	-759.973	783.75	506.923	-798.838	712.72
771	0	282.097	-946.547	1542.34	165.181	-938.531	1554.42	293.953	-774.992	1523.83	186.14	-770.315	1530.3	220.578	-764.043	1418.05	217.754	-694.8	1133.67	232.422	-888.561	1328.44	234.904	-963.535	1138.87	136.841	-684.279	1208.84	407.251	-822.028	1343.3	476.118	-765.229	1102.32	476.28	-749.728	1029.15	508.762	-801.261	864.973	465.67	-809.703	782.55	528.263	-771.25	781.654	506.204	-808.721	710.367
772	0	285.638	-957.935	1542.65	168.766	-949.863	1555.58	297.494	-786.516	1523.99	189.697	-781.709	1530.98	223.955	-775.72	1418.13	219.475	-707.893	1133.36	235.04	-900.642	1328.91	236.568	-976.731	1139.48	139.056	-696.552	1209.03	409.996	-834.354	1342.39	477.691	-778.072	1100.93	477.635	-762.473	1027.78	508.895	-813.337	863.077	465.413	-821.023	780.791	528.412	-782.889	780.036	505.458	-819.219	708.203
773	0	289.337	-969.78	1543.57	172.482	-961.325	1556.94	301.183	-797.997	1524.33	193.37	-793.323	1531.85	227.207	-787.551	1418.65	221.271	-720.219	1133.45	237.586	-912.691	1329.68	238.096	-989.88	1140.29	141.093	-708.652	1209.72	412.675	-846.777	1341.81	479.018	-791.125	1099.76	478.672	-775.729	1026.58	508.979	-825.714	861.35	465.021	-831.622	778.982	528.599	-795.029	778.641	504.779	-830.245	706.434
774	0	293.134	-981.303	1544.58	176.396	-972.947	1558.67	304.809	-809.82	1524.8	197.055	-804.973	1532.94	230.34	-799.37	1419.61	222.932	-732.424	1134.36	240.073	-924.644	1330.76	239.501	-1002.84	1141.45	143.335	-720.844	1211.05	415.449	-859.289	1341.52	480.175	-804.327	1098.9	479.368	-789.329	1025.59	509.013	-838.446	860.084	464.703	-843.272	777.8	528.614	-807.473	777.578	504.244	-841.856	705.151
775	0	296.991	-992.422	1545.64	180.377	-984.388	1560.59	308.555	-821.179	1525.37	200.735	-816.457	1534.43	233.367	-811.127	1420.83	224.611	-744.455	1135.26	242.358	-936.459	1332.23	240.523	-1015.27	1143	145.366	-732.744	1212.59	417.837	-871.589	1341.62	481.374	-817.805	1098.52	480.229	-802.889	1025.23	509.116	-851.434	859.555	464.466	-855.647	777.362	528.335	-820.421	776.89	503.755	-853.949	704.548
776	0	301.011	-1004	1546.92	184.459	-995.771	1562.86	312.043	-832.597	1526.12	204.298	-827.852	1536.04	236.111	-822.712	1422.23	226.2	-756.193	1137.23	244.435	-948.127	1333.85	241.472	-1027.46	1144.82	147.135	-744.46	1214.49	419.741	-883.77	1341.96	482.699	-831.665	1098.46	480.936	-816.631	1025.18	509.219	-864.918	859.562	464.128	-868.561	777.355	528.609	-833.785	777.047	503.388	-866.695	704.336
777	0	304.924	-1015.3	1547.95	188.618	-1007.28	1565.16	315.697	-844.01	1526.68	208.02	-839.388	1537.9	238.722	-834.201	1423.82	227.984	-767.765	1138.55	246.288	-959.728	1335.66	242.113	-1039.31	1146.64	148.876	-755.892	1216.55	421.654	-896.062	1342.55	483.681	-845.635	1098.47	481.259	-830.602	1025.3	509.196	-878.936	859.814	463.96	-882.027	777.584	528.75	-847.858	777.344	502.91	-880.193	704.253
778	0	308.879	-1026.49	1548.99	192.702	-1018.77	1567.75	318.932	-855.208	1527.52	211.172	-850.696	1539.79	241.138	-845.376	1425.65	229.347	-779.15	1140.72	247.77	-971.021	1337.52	242.52	-1050.81	1148.76	150.527	-767.044	1218.68	423.324	-908.196	1343.62	484.451	-859.635	1098.88	481.814	-844.537	1025.72	509.178	-893.403	860.51	463.775	-896.016	778.324	528.835	-862.507	778.055	502.666	-894.318	704.981
779	0	312.856	-1037.54	1550.03	196.939	-1030.24	1570.48	322.185	-866.137	1528.54	214.582	-861.862	1542.29	243.198	-856.378	1427.48	230.65	-789.859	1141.72	248.96	-982.086	1339.74	242.744	-1061.91	1151.09	152.267	-777.891	1220.8	425.06	-920.179	1345.2	484.942	-873.553	1099.7	482.334	-858.647	1026.57	508.966	-908.286	861.605	463.521	-910.779	779.537	528.749	-877.731	779.112	502.368	-909.032	706.006
780	0	316.832	-1048.33	1550.88	201.137	-1041.63	1573.13	324.927	-877.074	1529.56	217.592	-873.127	1545.01	245.114	-867.134	1429.46	232.319	-800.9	1143.98	249.976	-992.964	1341.95	242.844	-1072.89	1153.39	154.043	-788.476	1223	426.366	-932.156	1346.82	485.871	-887.797	1100.75	483.264	-872.76	1027.92	508.924	-923.586	863.009	463.357	-925.999	780.915	529.075	-893.525	780.501	502.106	-924.654	707.342
781	0	320.583	-1058.96	1551.51	205.435	-1053.04	1575.78	327.628	-887.641	1530.75	220.255	-884.318	1548.1	246.834	-877.722	1431.52	233.954	-811.458	1145.83	250.659	-1003.67	1344.24	242.701	-1083.62	1155.78	155.99	-798.968	1225.03	427.228	-944.119	1348.48	486.52	-902.009	1102.04	483.944	-887.202	1029.21	508.885	-939.357	864.633	463.058	-941.866	782.68	529.099	-910.038	781.846	501.794	-940.758	708.838
782	0	324.185	-1069.36	1552.22	209.38	-1064.39	1578.48	329.765	-898.074	1531.9	222.752	-895.395	1551.07	248.504	-888.064	1433.5	235.704	-822.461	1148.15	251.148	-1014.24	1346.64	242.437	-1094.25	1158.31	158.053	-809.199	1226.83	428.418	-955.96	1350.54	487.167	-916.051	1103.63	484.755	-901.568	1030.84	508.975	-955.445	866.554	462.537	-957.834	784.674	529.264	-926.929	783.601	501.396	-957.496	710.628
783	0	327.615	-1079.59	1553.05	213.046	-1075.59	1581.09	331.59	-908.231	1533.15	224.949	-906.283	1554.08	249.791	-898.342	1435.45	237.771	-833.037	1150.27	251.386	-1024.55	1348.9	241.951	-1104.73	1160.82	160.152	-819.247	1228.65	429.223	-967.656	1352.84	487.974	-929.914	1105.61	485.918	-915.814	1032.65	508.79	-971.626	868.802	462.327	-974.27	786.79	529.299	-944.378	785.422	500.995	-975.028	712.829
784	0	330.755	-1089.78	1553.83	216.505	-1086.73	1583.38	333.312	-918.308	1534.54	226.925	-917.429	1556.85	251.269	-908.406	1437.21	239.915	-843.398	1151.93	251.572	-1034.88	1351.06	241.453	-1115.19	1163.18	162.453	-829.081	1230.21	430.272	-979.55	1355	488.953	-943.82	1107.34	487.074	-930.296	1034.41	508.664	-988.384	870.9	462.072	-991.205	789.414	529.396	-961.885	787.367	500.419	-993.193	714.959
785	0	333.543	-1099.8	1554.7	219.688	-1097.66	1585.54	334.677	-928.343	1535.89	228.537	-928.137	1559.53	252.635	-918.544	1439.02	242.33	-854.185	1153.52	251.758	-1045.1	1353.09	240.921	-1125.7	1165.54	164.864	-838.963	1231.68	430.991	-991.311	1356.99	489.946	-957.708	1109.1	488.28	-944.8	1035.94	508.578	-1005.17	873.078	461.74	-1008.34	791.763	529.468	-980.354	789.179	499.885	-1012.02	717.251
786	0	335.965	-1109.67	1556.04	222.311	-1108.36	1587.87	335.907	-938.151	1537.4	229.761	-938.74	1561.73	253.917	-928.61	1440.82	245.097	-864.515	1155.12	251.887	-1055.15	1355.27	240.361	-1135.87	1167.83	167.358	-848.723	1233.2	431.779	-1002.97	1359.07	491.299	-971.396	1111.03	489.85	-959.19	1037.68	508.665	-1022.13	875.6	461.704	-1025.92	794.473	529.344	-998.565	791.139	499.192	-1030.96	719.941
787	0	338.04	-1119.54	1557.6	224.504	-1118.86	1589.9	336.925	-948.17	1538.86	230.986	-949.002	1563.71	255.272	-938.633	1442.5	247.564	-874.335	1156.44	252.075	-1065.2	1357.41	239.863	-1146.09	1170.15	169.946	-858.358	1234.58	432.463	-1014.54	1361.06	492.659	-985.114	1113.01	491.406	-973.776	1039.33	508.667	-1039.3	878.107	461.42	-1043.66	797.253	529.663	-1017.43	793.33	498.569	-1050.75	722.835
788	0	339.717	-1129.39	1559.14	226.306	-1129.06	1591.95	337.756	-957.896	1540.36	231.971	-959.444	1565.68	256.612	-948.805	1444.15	250.1	-883.92	1158.16	252.383	-1075.19	1359.34	239.451	-1156.2	1172.14	172.647	-867.964	1236.19	433.158	-1026.13	1362.9	494.185	-998.864	1114.85	493.034	-988.411	1040.93	508.668	-1056.66	880.582	461.062	-1061.76	800.152	529.572	-1036.28	795.257	497.796	-1070.92	725.735
789	0	340.921	-1139.07	1560.73	227.636	-1139.22	1593.76	338.532	-967.768	1541.94	232.763	-969.484	1567.37	258.122	-958.88	1445.8	252.734	-894.429	1159.69	252.82	-1085.23	1361.21	239.222	-1166.33	1174.02	175.348	-877.56	1237.64	433.933	-1037.66	1364.77	495.762	-1012.56	1116.71	494.973	-1003	1042.59	508.759	-1074.2	883.156	460.615	-1080.03	803.078	529.393	-1055.47	797.239	496.941	-1091.4	728.866
790	0	341.959	-1148.96	1562.67	228.534	-1149.14	1595.6	339.195	-977.431	1543.49	233.419	-979.475	1568.84	259.41	-969.04	1447.33	255.389	-904.644	1161.57	253.268	-1095.22	1363.04	239.079	-1176.29	1175.82	177.899	-887.196	1239.26	434.902	-1049.12	1366.78	497.507	-1026.21	1118.75	497.095	-1017.5	1044.5	508.896	-1091.71	885.872	460.059	-1098.23	806.251	529.366	-1074.79	799.641	496.082	-1112.17	732.342
791	0	342.555	-1158.59	1564.42	229.226	-1158.85	1597.04	339.735	-987.238	1544.99	233.927	-989.232	1570.13	260.998	-979.151	1448.76	257.85	-915.2	1163.27	253.936	-1105.3	1364.49	239.292	-1186.01	1177.23	180.366	-896.835	1240.74	435.811	-1060.62	1368.48	499.266	-1039.93	1120.62	498.934	-1032.09	1046.18	509.212	-1109.15	888.682	459.952	-1116.99	809.366	529.152	-1094.33	801.961	495.266	-1133.25	735.876
792	0	343.145	-1168.49	1566.18	229.498	-1168.52	1598.44	340.515	-997.029	1546.18	234.512	-998.99	1571.04	262.338	-989.428	1450.02	260.391	-925.504	1164.54	254.741	-1115.39	1365.72	239.711	-1195.42	1178.31	182.876	-906.477	1242.02	436.7	-1071.94	1369.98	501.066	-1053.6	1122.27	500.843	-1046.75	1047.61	509.465	-1126.75	891.347	459.562	-1136.06	812.829	528.947	-1113.93	804.079	494.433	-1154.47	739.485
793	0	343.372	-1178.17	1567.87	229.773	-1178.05	1599.75	340.811	-1006.92	1547.27	234.915	-1008.54	1571.84	263.881	-999.474	1451.13	262.476	-935.791	1165.65	255.518	-1125.39	1366.88	240.217	-1205.1	1179.45	185.276	-916.048	1243.14	437.665	-1083.25	1371.36	502.947	-1067.2	1123.9	502.808	-1061.27	1048.83	509.839	-1144.25	894.101	459.534	-1154.82	815.965	528.798	-1133.54	806.429	493.644	-1175.73	743.274
794	0	343.446	-1187.94	1569.47	229.668	-1187.41	1600.86	341.359	-1016.74	1548.36	235.24	-1018.19	1572.33	265.299	-1009.65	1451.9	264.224	-946.114	1166.41	256.357	-1135.42	1367.84	240.787	-1214.59	1180.16	187.383	-925.688	1244.08	438.62	-1094.33	1372.53	504.676	-1080.68	1125.26	504.778	-1075.71	1050.23	510.205	-1161.8	896.77	459.044	-1173.76	819.391	528.604	-1152.99	808.784	492.849	-1197.01	747.267
795	0	343.493	-1197.7	1570.72	229.621	-1196.86	1601.61	341.743	-1026.42	1549.08	235.622	-1027.62	1572.58	266.609	-1019.96	1452.52	265.936	-956.388	1166.79	257.245	-1145.59	1368.45	241.527	-1224.21	1180.6	189.465	-935.434	1244.57	439.68	-1105.52	1373.44	506.352	-1094.19	1126.29	506.717	-1090.1	1051.06	510.635	-1179.45	899.252	459.193	-1192.81	822.451	528.472	-1172.56	811.025	492.282	-1218.55	751.228
796	0	343.416	-1207.5	1571.75	229.38	-1206.35	1602.26	342.197	-1036.3	1549.56	236.001	-1037.38	1572.7	268.019	-1030.07	1452.95	267.393	-966.455	1167.02	258.155	-1155.67	1368.77	242.368	-1233.92	1180.7	191.438	-945.258	1245.05	440.477	-1116.54	1374.06	507.971	-1107.71	1127.15	508.525	-1104.65	1051.65	510.98	-1196.97	901.454	458.861	-1212.15	825.649	527.79	-1191.81	812.983	491.714	-1239.89	755.061
797	0	343.368	-1217.33	1572.79	229.263	-1215.7	1602.61	342.522	-1046.14	1549.91	236.243	-1046.71	1572.56	269.161	-1040.24	1453.21	268.943	-976.415	1167.01	259.066	-1165.73	1368.99	243.434	-1243.49	1180.62	193.323	-955.001	1245.24	441.675	-1127.47	1374.6	509.68	-1121.11	1127.97	510.305	-1119.03	1052.35	511.396	-1214.31	903.791	458.743	-1231.14	828.839	528.02	-1211.44	815.211	491.145	-1260.98	758.943
798	0	343.222	-1227.16	1573.56	228.97	-1225.15	1602.88	342.978	-1056.02	1549.99	236.444	-1056.53	1572.2	270.269	-1050.44	1453.27	270.337	-986.366	1167.08	260.049	-1175.88	1369.02	244.441	-1253.29	1180.45	194.873	-964.891	1245.2	442.47	-1138.24	1374.84	511.271	-1134.48	1128.61	512.031	-1133.56	1052.89	511.969	-1232.2	906.225	458.654	-1250.49	832.082	527.871	-1230.75	817.318	490.548	-1282.08	762.853
799	0	343.145	-1236.94	1574.02	228.786	-1234.67	1602.75	343.203	-1066.07	1549.87	236.746	-1065.98	1571.53	271.363	-1060.68	1453.15	271.712	-996.238	1166.93	260.967	-1185.99	1368.76	245.861	-1263.01	1179.84	196.258	-974.715	1245.02	443.351	-1148.9	1374.9	512.758	-1147.9	1129.11	513.633	-1148.18	1053.14	512.261	-1249.41	908.332	458.676	-1269.68	835.161	527.02	-1249.74	819.094	490.367	-1303.1	766.963
800	0	343.039	-1246.99	1574.27	228.489	-1244.29	1602.53	343.695	-1075.99	1549.55	236.966	-1075.8	1570.78	272.295	-1070.98	1452.85	273.21	-1006.13	1166.9	261.752	-1196.19	1368.2	246.773	-1272.7	1179.07	197.611	-984.544	1244.78	444.285	-1159.65	1374.72	514.15	-1161.32	1129.34	515.161	-1162.73	1053.3	512.707	-1266.71	910.276	458.798	-1288.63	837.958	526.661	-1268.89	820.931	490.001	-1323.92	770.645
801	0	342.847	-1256.95	1574.38	228.203	-1253.9	1602.14	343.976	-1086.12	1549.16	237.28	-1085.46	1569.75	273.027	-1081.29	1452.42	274.373	-1015.96	1166.35	262.49	-1206.43	1367.42	247.851	-1282.37	1178.08	198.734	-994.293	1244.33	444.894	-1170.14	1374.4	515.38	-1174.68	1129.45	516.626	-1177.08	1053.48	513.19	-1283.86	912.283	458.544	-1307.54	841.01	526.659	-1287.9	822.915	489.742	-1344.47	774.418
802	0	342.783	-1267.03	1574.37	227.92	-1263.71	1601.5	344.368	-1096.21	1548.53	237.5	-1095.52	1568.65	273.797	-1091.71	1451.86	275.653	-1026.06	1166.08	263.361	-1216.67	1366.55	248.919	-1292	1176.74	199.726	-1004.12	1243.8	445.702	-1180.61	1373.86	516.532	-1187.94	1129.39	517.829	-1191.42	1053.38	513.443	-1300.99	914.112	458.84	-1326.21	843.708	526.533	-1306.75	824.819	489.442	-1364.85	778.225
803	0	342.8	-1277.21	1574.1	227.863	-1273.61	1600.63	344.566	-1106.59	1547.62	237.826	-1105.4	1567.17	274.389	-1102.26	1451.12	276.779	-1035.93	1165.2	264.145	-1226.96	1365.42	249.926	-1301.69	1175.25	200.703	-1014.02	1243.17	446.497	-1191.18	1373.05	517.548	-1201.27	1129.02	518.826	-1205.84	1052.89	513.773	-1317.9	915.772	458.567	-1344.62	846.404	525.924	-1325.28	826.487	489.198	-1384.92	781.858
804	0	342.677	-1287.42	1573.68	227.704	-1283.51	1599.69	345.021	-1116.89	1546.61	237.984	-1115.46	1565.87	275.034	-1112.69	1450.3	277.829	-1045.83	1164.41	264.855	-1237.2	1364.27	250.934	-1311.47	1173.6	201.333	-1024.01	1242.51	447.009	-1201.46	1372.12	518.412	-1214.42	1128.61	519.764	-1220.14	1052.44	514.049	-1334.65	917.436	458.407	-1363.12	849.074	525.78	-1343.89	828.084	489.021	-1404.64	785.364
805	0	342.595	-1297.74	1573.17	227.421	-1293.51	1598.62	345.317	-1127.23	1545.65	238.317	-1125.61	1564.31	275.446	-1123.26	1449.47	278.732	-1055.68	1163.83	265.469	-1247.42	1363.1	252.033	-1320.94	1171.86	201.905	-1033.97	1241.8	447.64	-1211.72	1371.21	519.122	-1227.4	1128.14	520.48	-1234.27	1052.01	514.162	-1351.1	919.069	458.286	-1381.29	851.766	525.514	-1361.86	829.828	488.842	-1423.91	788.917
806	0	342.565	-1308.15	1572.38	227.336	-1303.83	1597.47	345.684	-1137.66	1544.66	238.649	-1136.02	1562.83	275.924	-1133.75	1448.48	279.33	-1065.26	1163.13	266.034	-1257.78	1361.83	252.887	-1330.64	1170.2	202.223	-1044.05	1241.18	448.165	-1222.04	1370.18	519.637	-1240.38	1127.57	521.094	-1248.33	1051.57	514.271	-1367.44	920.525	458.169	-1399.05	854.148	524.647	-1379.12	831.28	488.708	-1442.89	792.266
807	0	342.381	-1318.69	1571.35	227.202	-1314.03	1596	345.907	-1148.24	1543.55	239.045	-1146.32	1561.48	276.202	-1144.39	1447.67	279.663	-1074.9	1162.57	266.552	-1268.13	1360.3	253.63	-1340.54	1168.4	202.569	-1054.07	1240.45	448.582	-1232.28	1368.91	519.952	-1253.29	1126.81	521.607	-1262.37	1051.06	514.187	-1383.61	921.934	457.907	-1416.5	856.341	524.222	-1396.72	832.923	488.547	-1461.55	795.472
808	0	342.388	-1329.32	1570.32	226.975	-1324.38	1594.56	346.296	-1158.87	1542.48	238.976	-1156.75	1560.1	276.678	-1154.86	1446.6	280.083	-1083.71	1162.11	267.039	-1278.43	1358.95	254.289	-1350.27	1166.73	202.608	-1064.25	1239.76	449.065	-1242.44	1367.72	520.292	-1265.94	1126.09	521.994	-1276.23	1050.52	514.073	-1399.46	923.287	457.871	-1433.55	858.466	524.066	-1414	834.533	488.381	-1479.68	798.551
809	0	342.21	-1339.86	1569.17	226.742	-1334.74	1593.15	346.607	-1169.52	1541.35	239.615	-1167.12	1558.51	276.836	-1165.46	1445.5	280.089	-1093.31	1161.06	267.5	-1288.76	1357.55	254.868	-1360.12	1165.23	202.767	-1074.37	1238.9	449.462	-1252.49	1366.48	520.437	-1278.35	1125.33	522.334	-1289.91	1050.03	513.894	-1415	924.633	457.572	-1450.16	860.552	523.658	-1430.71	836.193	488.24	-1497.42	801.564
810	0	342.127	-1350.53	1567.77	226.714	-1345.2	1591.41	346.836	-1180.18	1539.94	239.566	-1177.63	1557.01	277.084	-1176.01	1444.21	280.308	-1103.18	1160.04	267.918	-1299.12	1356.03	255.305	-1369.89	1163.64	202.795	-1084.64	1238	449.726	-1262.64	1365.08	520.565	-1290.62	1124.38	522.424	-1303.45	1049.26	513.628	-1430.25	925.789	457.055	-1466.46	862.454	523.31	-1447.4	837.444	488.027	-1514.67	804.255
811	0	341.963	-1361.25	1566.22	226.532	-1355.76	1589.63	347.048	-1190.84	1538.46	239.985	-1188.15	1555.53	277.227	-1186.58	1442.96	280.567	-1113.04	1159.02	268.256	-1309.58	1354.51	255.694	-1379.84	1161.99	202.725	-1094.97	1236.85	449.999	-1272.82	1363.6	520.533	-1302.81	1123.37	522.472	-1316.81	1048.47	513.202	-1445.27	926.769	456.793	-1482.38	863.988	522.664	-1463.53	838.71	487.671	-1531.51	806.781
812	0	341.74	-1371.84	1564.73	226.214	-1366.37	1587.99	347.022	-1201.51	1537.21	239.754	-1198.77	1553.77	277.424	-1197.08	1441.54	280.718	-1123	1157.69	268.509	-1319.99	1352.88	255.977	-1389.84	1160.53	202.585	-1105.39	1235.56	450.121	-1282.82	1362.22	520.343	-1314.65	1122.2	522.376	-1329.8	1047.81	512.737	-1459.98	927.652	456.107	-1497.84	865.538	522.263	-1479.26	839.963	487.296	-1547.89	809.077
813	0	341.564	-1382.61	1563.15	226.025	-1376.92	1586.13	346.94	-1212.04	1535.54	239.711	-1209.24	1552.03	277.285	-1207.63	1439.96	280.639	-1132.84	1156.25	268.684	-1330.46	1351.16	256.249	-1399.92	1158.91	202.321	-1115.89	1234.07	450.386	-1292.94	1360.64	520.197	-1326.34	1120.86	522.172	-1342.54	1046.78	512.25	-1474.3	928.374	455.756	-1513.12	866.824	521.768	-1494.72	840.854	486.809	-1563.82	811.083
814	0	341.299	-1393.24	1561.46	225.712	-1387.61	1584.38	346.608	-1222.76	1533.74	239.552	-1220.03	1550.09	277.312	-1218.16	1438.32	280.455	-1142.81	1154.5	268.871	-1341.03	1349.4	256.499	-1410.18	1157.15	202.13	-1126.44	1232.48	450.362	-1303.12	1358.88	519.827	-1337.82	1119.28	521.758	-1355.2	1045.4	511.747	-1488.34	928.787	454.933	-1527.72	867.605	521.041	-1509.97	841.228	486.322	-1579.29	812.824
815	0	341.027	-1403.71	1559.87	225.462	-1398.14	1582.59	346.236	-1233.36	1531.91	238.829	-1230.62	1548.11	277.071	-1228.76	1436.7	280.521	-1152.77	1152.95	269.012	-1351.66	1347.64	256.733	-1420.42	1155.49	201.798	-1137.1	1230.98	450.507	-1313.35	1357.18	519.642	-1349.07	1117.75	521.344	-1367.53	1044.17	511.092	-1501.98	929.021	454.335	-1541.93	868.506	520.469	-1524.87	841.703	485.759	-1594.27	814.352
816	0	340.761	-1414.19	1558.43	224.924	-1408.76	1580.97	345.802	-1243.84	1530.23	238.644	-1241.25	1546.16	276.85	-1239.44	1435.01	280.352	-1162.96	1151.44	268.947	-1362.32	1345.87	256.918	-1430.9	1153.84	201.367	-1147.79	1229.33	450.563	-1323.67	1355.74	519.26	-1359.97	1116.24	521.004	-1379.49	1042.95	510.511	-1515.27	929.275	453.594	-1555.85	869.131	519.661	-1538.82	842.136	485.211	-1608.76	815.657
817	0	340.321	-1424.62	1556.99	224.476	-1419.4	1579.16	345.06	-1254.25	1528.57	237.749	-1252.03	1544.1	276.499	-1250.15	1433.39	279.85	-1173.26	1150.22	268.763	-1373.1	1344.09	257.158	-1441.01	1151.84	201.041	-1158.53	1227.69	449.843	-1333.75	1353.98	518.891	-1370.77	1114.57	520.663	-1391.27	1041.77	509.769	-1528.26	929.012	452.815	-1569.26	869.526	518.715	-1552.32	842.415	484.437	-1622.66	816.481
818	0	339.702	-1435	1555.73	223.91	-1430.1	1577.52	344.199	-1264.82	1526.96	236.656	-1262.55	1542.4	275.955	-1260.91	1431.91	279.772	-1183.83	1148.52	268.525	-1383.97	1342.44	257.308	-1451.9	1150.11	200.487	-1169.34	1226.16	449.78	-1344.49	1352.42	518.568	-1381.37	1112.89	520.048	-1402.85	1040.38	509.181	-1540.8	928.7	452.163	-1582.28	869.54	518.034	-1565.65	842.231	483.726	-1636.12	817.165
819	0	339.089	-1445.4	1554.68	223.229	-1440.61	1576.11	343.377	-1275.19	1525.44	235.663	-1273.23	1540.29	275.516	-1271.84	1430.33	279.255	-1194.49	1147.01	268.111	-1394.9	1340.75	257.547	-1462.58	1148.33	199.931	-1180.27	1224.5	449.629	-1355.29	1351.17	518.159	-1391.7	1111.25	519.5	-1414.06	1039.03	508.42	-1552.82	928.047	451.082	-1594.75	869.486	517.105	-1578.23	841.836	482.971	-1648.95	817.553
820	0	338.402	-1455.79	1553.77	222.436	-1451.18	1574.74	342.302	-1285.65	1523.99	234.854	-1284.04	1538.48	274.962	-1282.66	1428.87	278.844	-1205.39	1145.43	267.695	-1405.93	1339.28	257.654	-1473.48	1146.93	199.536	-1191.13	1222.77	449.229	-1366.05	1349.91	517.632	-1401.8	1109.66	518.959	-1424.96	1037.64	507.724	-1564.3	927.394	450.385	-1606.66	869.089	515.722	-1589.76	841.19	482.124	-1661.12	817.625
821	0	337.538	-1466.2	1553.03	221.343	-1461.76	1573.51	341.066	-1296.16	1522.49	233.405	-1294.62	1536.49	274.297	-1293.76	1427.49	278.315	-1216.57	1144.09	267.274	-1417.06	1338.03	257.659	-1484.7	1145.58	199.057	-1202.24	1221.22	448.888	-1377.25	1348.77	517.205	-1411.83	1108.08	518.277	-1435.72	1036.07	506.925	-1575.38	926.418	449.328	-1618.07	868.574	514.78	-1601.38	840.094	481.274	-1672.75	817.551
822	0	336.503	-1476.62	1552.42	220.375	-1472.25	1572.44	340	-1306.7	1521.12	232.289	-1305.08	1535.03	273.824	-1304.85	1426.22	277.865	-1227.9	1142.68	266.737	-1428.35	1336.87	257.427	-1496.28	1144.53	198.515	-1213.42	1219.86	448.375	-1388.51	1347.81	516.799	-1422	1106.82	517.729	-1446.21	1034.73	506.077	-1585.99	925.218	448.329	-1628.95	867.749	513.32	-1612.01	838.848	480.29	-1683.75	817.017
823	0	335.217	-1487.03	1551.94	219.008	-1482.86	1571.56	338.74	-1317.3	1520.1	231.244	-1315.9	1533.27	273.214	-1316	1425.08	277.414	-1239.49	1141.53	266.013	-1439.71	1335.88	257.098	-1507.47	1143.62	198.284	-1224.84	1218.47	447.69	-1399.81	1347.04	516.372	-1432.07	1105.82	517.421	-1456.42	1033.74	505.358	-1596.18	924.101	447.282	-1639.27	866.918	512.177	-1622.23	837.587	479.365	-1694.2	816.292
824	0	333.88	-1497.56	1551.53	217.602	-1493.32	1570.65	337.295	-1327.89	1518.99	229.859	-1326.65	1531.86	272.372	-1327.17	1423.97	276.892	-1251.13	1140.21	265.263	-1451.21	1335.1	256.663	-1519.16	1142.9	197.935	-1236.43	1217.13	447.02	-1411.37	1346.59	515.74	-1442.12	1104.94	516.984	-1466.37	1032.86	504.469	-1606.1	922.748	446.238	-1649.14	865.822	510.947	-1631.8	836.273	478.294	-1703.99	815.237
825	0	332.494	-1508.15	1551.23	216.136	-1503.84	1569.85	335.872	-1338.52	1518.03	228.187	-1337.28	1530.59	271.431	-1338.43	1423.16	276.509	-1262.92	1139.32	264.475	-1462.75	1334.37	256.099	-1531.14	1142.55	197.657	-1248.19	1215.89	446.228	-1422.97	1346.08	515.27	-1452.31	1104.3	516.642	-1476.18	1031.97	503.743	-1615.56	921.25	445.189	-1658.54	864.59	509.524	-1640.83	834.602	477.039	-1713.16	813.816
826	0	330.996	-1518.7	1551.15	214.566	-1514.27	1569.39	334.423	-1349.2	1517.26	226.44	-1347.94	1529.3	270.303	-1349.73	1422.37	276.128	-1274.98	1138.6	263.587	-1474.43	1334.01	255.41	-1543.48	1142.2	197.09	-1260.2	1214.85	445.391	-1434.64	1345.82	514.707	-1462.66	1104.05	516.28	-1485.79	1031.33	503.013	-1624.57	919.82	444.411	-1667.39	863.272	508.381	-1649.66	833.024	475.775	-1721.79	812.176
827	0	329.447	-1529.09	1551.21	212.925	-1524.96	1568.99	332.793	-1359.87	1516.62	224.742	-1358.58	1528.24	269.221	-1361.04	1421.62	275.576	-1287.09	1137.66	262.588	-1486.09	1333.71	254.739	-1555.87	1142.62	196.53	-1272.52	1213.64	444.464	-1446.17	1345.86	514.404	-1472.84	1104.08	515.984	-1495.04	1030.91	502.528	-1633.16	918.401	443.404	-1675.76	862.021	507.45	-1657.87	831.353	474.608	-1729.89	810.427
828	0	327.845	-1539.47	1551.35	211.191	-1535.48	1568.85	330.952	-1370.53	1516.04	223.191	-1369.44	1527.35	267.684	-1372.39	1420.82	274.943	-1299.45	1136.77	261.455	-1497.98	1333.56	254.085	-1568.51	1142.86	195.653	-1284.94	1212.3	443.207	-1457.59	1345.86	513.734	-1483.01	1104.12	515.735	-1504.21	1030.53	502.026	-1641.49	916.824	442.645	-1683.75	860.498	506.741	-1665.83	829.663	473.406	-1737.52	808.284
829	0	326.157	-1550.05	1551.8	209.478	-1546.15	1568.95	328.906	-1381.22	1515.45	221.116	-1380.29	1526.4	266.183	-1383.89	1420.35	274.03	-1311.86	1135.92	260.203	-1510.06	1333.47	253.321	-1581.37	1143.12	194.715	-1297.66	1211.02	442.05	-1469.24	1345.98	513.141	-1493.28	1104.24	515.215	-1513.26	1030.16	501.47	-1649.48	915.165	441.975	-1691.35	858.695	505.609	-1672.89	827.569	472.133	-1744.57	805.859
830	0	324.395	-1560.51	1552.67	207.77	-1556.8	1569.38	326.749	-1391.91	1515	219.077	-1391.3	1525.68	264.489	-1395.57	1419.89	272.985	-1324.23	1135.05	258.901	-1522.19	1333.49	252.777	-1594.51	1143.68	193.319	-1310.41	1209.91	440.775	-1480.67	1346.42	512.636	-1503.52	1104.59	514.766	-1521.97	1030.09	501.197	-1657.06	913.677	441.341	-1698.48	856.98	504.83	-1679.69	825.808	471.015	-1751.09	803.366
831	0	322.688	-1570.97	1553.77	205.963	-1567.58	1569.98	324.58	-1402.65	1514.85	216.698	-1402.34	1524.94	262.797	-1407.22	1419.85	271.524	-1336.48	1134.56	257.65	-1534.35	1333.89	252.347	-1607.5	1144.33	191.93	-1323.21	1209.16	439.51	-1492.14	1347.14	512.094	-1513.55	1105.29	514.285	-1530.5	1030.26	500.951	-1664.33	912.351	440.958	-1704.97	855.232	504.378	-1686.07	824.316	470.019	-1757.07	800.746
832	0	320.934	-1581.56	1555.03	204.068	-1578.46	1570.76	322.364	-1413.52	1514.8	214.441	-1413.46	1524.59	261.064	-1419.04	1420	269.741	-1348.77	1134.44	256.428	-1546.48	1334.47	251.99	-1620.76	1145.18	190.443	-1335.79	1208.87	438.22	-1503.89	1348.18	511.412	-1523.59	1106.14	513.766	-1539	1030.62	500.645	-1671.26	911.035	440.345	-1711.29	853.401	503.988	-1691.9	822.485	469.091	-1762.52	798.153
833	0	319.002	-1592.15	1556.56	202.1	-1589.34	1571.73	320.188	-1424.48	1515.05	212.052	-1424.63	1524.34	259.388	-1430.95	1420.51	268.34	-1360.78	1134.91	255.235	-1558.63	1335.28	251.784	-1633.48	1145.96	189.131	-1348.36	1208.99	436.988	-1515.73	1349.42	510.698	-1533.62	1107.3	513.356	-1547.32	1031.38	500.284	-1677.93	910.054	440.408	-1716.56	851.576	503.651	-1697.49	821.042	468.463	-1767.35	795.454
834	0	316.967	-1602.82	1558.3	199.868	-1600.11	1572.82	317.995	-1435.37	1515.65	209.903	-1435.8	1524.48	257.686	-1442.8	1421.33	266.677	-1372.71	1135.82	254.081	-1570.67	1336.31	251.525	-1646.13	1147.09	187.691	-1360.65	1209.42	435.871	-1527.46	1351.25	510.11	-1543.5	1109	512.853	-1555.43	1032.72	499.904	-1684.23	909.33	440.134	-1721.83	849.979	503.872	-1702.65	820.331	467.917	-1771.62	792.851
835	0	314.76	-1613.52	1560.08	197.586	-1610.76	1573.92	315.953	-1446.32	1516.42	207.839	-1446.92	1524.6	255.986	-1454.56	1422.45	265.395	-1384.73	1137.18	252.993	-1582.59	1337.4	251.317	-1658.4	1148.19	186.432	-1372.89	1210.28	434.692	-1539.28	1353.21	509.408	-1553.43	1110.78	512.451	-1563.49	1034.38	499.526	-1690.41	908.662	439.966	-1726.43	848.138	504.2	-1707.38	819.689	467.514	-1775.39	790.192
836	0	312.435	-1624.35	1561.84	195.322	-1621.47	1575.05	313.93	-1457.35	1517.14	205.558	-1458.01	1524.56	254.496	-1466.37	1423.76	264.443	-1396.61	1138.7	252.073	-1594.5	1338.56	251.204	-1670.54	1149.37	185.314	-1384.84	1211.47	433.483	-1550.8	1355.09	508.615	-1563.32	1112.48	511.928	-1571.72	1036.04	499.224	-1696.24	908.083	439.789	-1730.97	846.545	504.384	-1711.59	818.637	467.366	-1778.77	787.445
837	0	310.037	-1635.13	1563.69	192.976	-1632.24	1576.2	311.874	-1468.43	1518.02	203.455	-1468.9	1524.85	253.058	-1477.95	1425.12	263.694	-1408.54	1140.19	251.24	-1606.21	1339.89	249.123	-1685.27	1152.63	184.34	-1396.68	1212.67	432.326	-1562.19	1357.15	507.828	-1573.11	1114.43	511.529	-1579.91	1037.87	498.981	-1702.02	907.636	439.845	-1734.67	844.512	505.299	-1716.22	818.415	467.463	-1781.72	784.881
838	0	307.776	-1645.8	1565.68	190.59	-1642.65	1577.25	309.942	-1479.3	1519.2	201.691	-1479.6	1525.35	251.7	-1489.43	1426.52	263.392	-1420.18	1141.64	250.563	-1617.65	1341.41	251.214	-1693.7	1152.38	183.368	-1408.32	1213.94	431.575	-1573.41	1359.43	507.022	-1582.59	1116.53	511.153	-1587.9	1040	498.992	-1707.55	907.511	440.269	-1738.66	843.292	506.165	-1720.16	817.929	467.938	-1784.17	782.667
839	0	305.459	-1656.43	1567.58	188.081	-1653.01	1578.31	308.279	-1490.12	1520.51	200.176	-1490.14	1525.89	250.428	-1500.73	1427.86	262.943	-1431.6	1143.28	250.006	-1628.96	1342.96	251.241	-1704.79	1153.85	182.666	-1419.9	1215.34	430.691	-1584.27	1361.78	506.209	-1592.08	1118.59	510.785	-1595.77	1042.17	498.916	-1712.89	907.618	440.605	-1741.49	841.558	507.167	-1724	817.671	468.252	-1786.43	780.271
840	0	303.09	-1667.06	1569.48	185.723	-1663.49	1579.3	306.661	-1500.9	1521.94	198.41	-1500.76	1526.42	249.181	-1511.8	1429.3	262.782	-1442.72	1144.53	249.547	-1640.12	1344.37	251.526	-1715.64	1155.18	181.841	-1431.33	1216.63	429.945	-1594.76	1363.74	505.508	-1601.43	1120.59	510.355	-1603.54	1044.15	499.046	-1718.15	907.633	441.218	-1744.64	840.148	508.293	-1727.84	817.584	468.788	-1788.59	778.073
841	0	300.867	-1677.53	1571.33	183.44	-1673.69	1580.18	305.044	-1511.45	1523.41	196.888	-1511.28	1526.98	247.959	-1522.59	1430.73	262.338	-1453.55	1146.24	249.183	-1651.15	1345.88	251.863	-1725.98	1156.88	181.129	-1442.61	1217.79	429.315	-1605.05	1365.96	504.966	-1610.4	1122.6	509.944	-1610.84	1046.16	499.404	-1723.28	907.889	442.245	-1747.74	839.016	510.075	-1731.86	818.055	469.477	-1790.46	775.925
842	0	298.665	-1687.85	1573.33	181.215	-1683.59	1581.03	303.79	-1521.84	1525.09	195.414	-1521.36	1527.62	247.058	-1533.22	1432.17	261.951	-1464.3	1147.88	249.009	-1661.92	1347.4	252.288	-1736.36	1158.41	180.313	-1453.67	1219.17	428.914	-1614.95	1368.22	504.439	-1619.06	1124.71	509.891	-1618.33	1048.61	499.987	-1728.33	908.31	443.09	-1750.56	838.086	512.001	-1735.82	818.747	470.462	-1792.1	773.903
843	0	296.734	-1698.12	1575.2	179.219	-1693.58	1581.9	302.634	-1532.18	1526.81	194.478	-1531.36	1528.53	246.017	-1543.71	1433.73	261.185	-1474.8	1149.29	248.969	-1672.53	1348.89	252.955	-1746.74	1159.92	179.185	-1464.65	1220.6	428.546	-1624.61	1370.36	504.278	-1627.48	1126.69	509.648	-1625.53	1050.66	500.742	-1733.38	908.765	444.5	-1753.58	837.353	513.915	-1739.64	819.244	471.488	-1793.44	771.75
844	0	294.768	-1708.31	1577.19	177.256	-1703.38	1582.77	301.664	-1542.49	1528.4	193.363	-1541.39	1529.44	245.202	-1554.12	1435.35	260.221	-1485.3	1151.14	249.044	-1683.04	1350.34	253.801	-1757.08	1161.35	178.265	-1475.31	1222.01	428.274	-1634.08	1372.29	504.323	-1635.68	1128.76	509.573	-1632.7	1052.71	501.773	-1738.43	909.224	446.107	-1756.64	836.747	516.112	-1743.71	820.034	472.986	-1795.01	770.1
845	0	292.98	-1718.37	1579.05	175.474	-1712.86	1583.79	300.944	-1552.66	1530.08	192.545	-1551.06	1530.29	244.48	-1564.28	1436.8	259.372	-1495.65	1152.77	249.108	-1693.37	1351.86	254.658	-1767.2	1162.8	177.161	-1485.8	1223.61	428.183	-1643.22	1374.42	504.496	-1643.53	1130.72	509.704	-1639.58	1054.72	502.947	-1743.54	909.712	448.025	-1759.64	836.162	518.49	-1747.66	820.913	474.841	-1796.41	768.392
846	0	291.35	-1728.28	1581.07	173.87	-1722.37	1584.88	300.335	-1562.67	1531.8	192.005	-1560.83	1531.03	243.7	-1574.37	1438.35	258.091	-1505.85	1154.43	249.179	-1703.61	1353.46	255.48	-1777.28	1164.12	176.087	-1496.15	1225.13	427.887	-1652.21	1376.33	504.929	-1651.05	1132.65	510.061	-1646.43	1056.85	504.286	-1747.94	910.196	449.879	-1762.83	835.976	521.075	-1751.6	822.016	477.096	-1797.92	767.122
847	0	289.972	-1738.15	1582.98	172.537	-1731.69	1586.3	299.734	-1572.65	1533.27	191.734	-1570.43	1531.95	243.201	-1584.48	1439.97	257.044	-1515.87	1155.79	249.376	-1713.82	1355.09	256.487	-1787.1	1165.86	174.614	-1506.3	1226.73	427.823	-1661.3	1378.24	505.355	-1658.12	1134.32	510.337	-1653.23	1058.64	505.996	-1752.9	910.848	452.178	-1766.02	835.665	523.688	-1755.19	822.885	479.807	-1799.49	766.064
848	0	288.863	-1747.98	1584.93	171.412	-1741.02	1587.66	299.447	-1582.67	1534.6	191.399	-1579.68	1533.03	242.364	-1594.57	1441.43	255.869	-1525.62	1157.36	249.521	-1723.83	1356.73	257.349	-1796.9	1167.43	173.392	-1516.25	1228.48	427.261	-1670.1	1379.79	505.862	-1665.03	1136.11	510.474	-1659.72	1060.3	507.907	-1757.58	911.602	454.721	-1769.41	835.594	526.376	-1758.56	823.671	482.936	-1801.19	765.237
849	0	287.906	-1757.59	1586.79	170.47	-1750.05	1589.19	299.327	-1592.58	1536.08	191.334	-1589.24	1534.06	241.819	-1604.51	1443.13	254.643	-1535.16	1159.1	249.663	-1733.77	1358.4	258.114	-1806.63	1169.11	172.077	-1526.43	1230.23	427.126	-1678.95	1381.57	506.402	-1671.54	1138	510.786	-1665.98	1062.1	510.179	-1762	912.494	457.527	-1772.9	835.74	529.21	-1761.46	824.558	486.467	-1802.96	764.817
850	0	287.244	-1767.11	1588.52	169.708	-1759.22	1590.72	299.357	-1602.15	1537.31	191.347	-1598.46	1535.05	241.29	-1614.43	1444.77	253.606	-1544.49	1160.81	249.758	-1743.65	1360.02	258.769	-1816.1	1170.81	170.634	-1536.16	1232.09	427.041	-1687.91	1383.45	506.87	-1677.89	1139.84	511.146	-1672.19	1063.94	512.526	-1766.34	913.414	460.637	-1777.18	836.127	532.383	-1764.68	825.902	490.432	-1805.01	764.783
851	0	286.682	-1776.71	1590.16	169.219	-1768.15	1592.15	299.369	-1611.88	1538.52	191.464	-1607.79	1536.23	240.763	-1624.31	1446.25	252.449	-1553.79	1162.38	249.797	-1753.56	1361.55	259.27	-1825.73	1172.46	169.306	-1546.15	1233.91	426.749	-1696.83	1384.89	507.227	-1684.09	1141.71	511.381	-1678.17	1065.78	515.039	-1770.6	914.336	463.719	-1780.28	836.343	535.682	-1767.53	827.024	494.664	-1807.22	764.888
852	0	286.237	-1786.21	1591.53	168.852	-1777.35	1593.6	299.628	-1621.5	1539.61	191.643	-1617.13	1537.63	240.244	-1634.1	1447.82	251.811	-1563.27	1164.06	249.802	-1763.32	1363	259.528	-1835.16	1174.06	167.988	-1555.92	1235.62	426.547	-1705.7	1386.65	507.487	-1690.22	1143.53	511.828	-1684.29	1067.86	517.829	-1775.07	915.526	467.308	-1784.45	836.981	538.814	-1770.2	828.253	499.011	-1809.66	765.05
853	0	285.998	-1795.62	1592.83	168.57	-1786.33	1595.03	300.037	-1631.08	1540.86	192.061	-1626.23	1538.79	239.812	-1643.91	1449.29	250.501	-1572.93	1165.57	249.787	-1773.05	1364.33	259.631	-1844.52	1175.68	166.754	-1565.77	1237.39	426.378	-1714.49	1388.24	507.729	-1696.33	1145.39	512.225	-1690.2	1069.96	520.417	-1778.69	916.33	470.587	-1788.49	837.552	542.021	-1772.71	829.538	503.628	-1812.33	765.606
854	0	285.89	-1804.96	1593.94	168.624	-1795.44	1596.28	300.292	-1640.59	1541.8	192.294	-1635.49	1539.68	239.129	-1653.65	1450.55	250.343	-1582.53	1166.97	249.746	-1782.81	1365.58	259.716	-1854.01	1177.17	165.739	-1575.57	1238.83	426.121	-1723.4	1389.49	507.869	-1702.39	1147.04	512.53	-1696.09	1071.79	523.292	-1782.77	917.402	474.35	-1792.73	838.197	545.319	-1775.21	830.671	508.422	-1815.21	766.1
855	0	285.989	-1814.37	1594.99	168.67	-1804.47	1597.46	300.511	-1650.13	1542.48	192.698	-1644.61	1540.58	238.828	-1663.21	1451.7	249.605	-1592.29	1168.1	249.781	-1792.47	1366.84	259.661	-1863.21	1178.5	164.526	-1585.5	1240.11	425.932	-1732.33	1390.58	507.996	-1708.36	1148.35	512.723	-1701.9	1073.24	526.372	-1786.77	918.532	478.204	-1797.16	838.811	548.762	-1777.96	831.921	513.513	-1818.62	767.151
856	0	286.037	-1823.73	1595.85	168.754	-1813.69	1598.48	300.92	-1659.69	1543.09	192.867	-1654.11	1541.48	238.398	-1673.08	1452.68	249.312	-1602.36	1168.97	249.727	-1802.18	1367.85	259.523	-1872.69	1179.69	163.735	-1595.22	1241.31	425.758	-1741.12	1391.56	507.702	-1714.32	1149.63	512.745	-1707.53	1074.67	529.4	-1790.76	919.498	482.105	-1801.87	839.591	552.131	-1780.5	833.055	518.313	-1821.55	767.617
857	0	286.216	-1833.14	1596.5	168.834	-1822.93	1599.27	301.238	-1669.12	1543.59	193.216	-1663.35	1542.04	238.093	-1682.72	1453.46	249.121	-1612.66	1169.57	249.67	-1811.88	1368.56	259.306	-1881.9	1180.61	162.785	-1605.01	1242.22	425.603	-1749.98	1392.43	507.886	-1720.68	1150.98	512.847	-1713.4	1076.21	532.381	-1794.83	920.426	485.943	-1806.46	840.057	554.408	-1782.02	833.699	523.354	-1825.02	768.429
858	0	286.446	-1842.56	1596.94	169.018	-1832.22	1599.85	301.418	-1678.53	1543.85	193.596	-1672.59	1542.51	237.858	-1692.4	1454.07	248.276	-1623.36	1169.87	249.679	-1821.61	1369.15	259.126	-1891.31	1181.26	161.92	-1614.68	1242.95	425.498	-1758.91	1392.94	507.232	-1726.56	1151.66	512.886	-1719.23	1077.15	535.29	-1798.94	921.088	489.829	-1811.29	840.343	557.726	-1785.12	834.806	528.408	-1828.63	769.065
859	0	286.699	-1851.97	1597.25	169.298	-1841.72	1600.32	301.372	-1687.86	1543.82	193.865	-1682.03	1542.77	237.482	-1702.16	1454.52	247.702	-1633.48	1170.73	249.73	-1831.31	1369.51	258.869	-1900.79	1181.4	161.24	-1624.49	1243.51	425.425	-1767.96	1393.21	506.875	-1732.78	1151.94	513.152	-1725.44	1078.06	538.077	-1803.14	921.623	493.601	-1816.13	840.42	560.74	-1787.91	835.485	533.582	-1832.55	769.772
860	0	286.941	-1861.35	1597.5	169.603	-1851.22	1600.57	301.592	-1697.38	1543.95	193.767	-1691.59	1542.69	237.426	-1711.89	1454.83	246.297	-1643.1	1171.11	249.818	-1840.95	1369.74	258.701	-1909.88	1181.75	160.818	-1634.11	1243.94	425.441	-1777.06	1393.45	507.02	-1739.54	1152.56	513.107	-1731.48	1078.71	540.674	-1807.37	922.034	497.231	-1821.09	840.563	563.27	-1790.63	835.854	538.531	-1836.49	770.521
861	0	287.168	-1870.79	1597.5	169.863	-1860.72	1600.55	301.669	-1706.77	1543.88	193.946	-1701.19	1542.7	237.153	-1721.57	1455.03	246.297	-1652.37	1171.56	249.961	-1850.61	1369.81	258.585	-1919.23	1181.69	160.284	-1643.53	1244.42	425.355	-1786.2	1393.46	507.046	-1746.46	1153.05	513.199	-1737.71	1079.23	543.207	-1811.88	922.339	500.783	-1826.23	840.527	565.96	-1794.06	836.614	543.248	-1840.32	770.969
862	0	287.436	-1880.33	1597.26	169.997	-1870.36	1600.43	301.725	-1716.34	1543.65	194.064	-1710.91	1542.68	237.151	-1731.45	1455.04	246.298	-1661.29	1171.65	250.122	-1860.33	1369.51	258.525	-1928.51	1181.26	160.021	-1653.12	1244.68	425.47	-1795.44	1393.31	507.367	-1753.93	1153.48	513.643	-1744.34	1079.78	545.554	-1816.72	922.524	504.073	-1831.65	840.272	568.428	-1797.6	836.91	547.823	-1844.37	771.005
863	0	287.633	-1889.85	1596.98	170.201	-1880.13	1600.19	301.884	-1725.83	1543.48	193.9	-1720.56	1542.51	237.259	-1741.28	1455.06	246.015	-1670.34	1172	250.232	-1869.97	1369.12	258.519	-1937.87	1180.72	159.816	-1662.55	1244.91	425.528	-1804.72	1393.12	507.519	-1761.24	1153.69	514.025	-1751.24	1080.25	547.737	-1821.68	922.611	507.432	-1837.14	839.987	571.023	-1801.38	837.291	552.043	-1848.54	771.119
864	0	287.916	-1899.54	1596.52	170.42	-1889.85	1599.63	301.993	-1735.44	1543.06	193.839	-1730.25	1541.67	237.235	-1751.07	1454.81	246.055	-1679.66	1172.09	250.458	-1879.72	1368.61	258.646	-1947.03	1180	159.501	-1671.97	1244.9	425.592	-1813.95	1392.82	507.711	-1768.71	1153.91	514.344	-1758.27	1080.57	549.76	-1826.89	922.486	510.307	-1842.59	839.565	573.031	-1805.35	837.477	556.009	-1853.05	771.326
865	0	288.124	-1909.25	1595.84	170.706	-1899.57	1598.93	302.173	-1745.16	1542.36	194.076	-1739.92	1540.94	237.15	-1760.97	1454.23	245.665	-1689.04	1171.85	250.693	-1889.43	1367.68	258.886	-1956.3	1179.1	159.551	-1681.45	1244.56	425.753	-1823.37	1392.19	507.909	-1776.37	1153.62	514.85	-1765.7	1080.56	551.679	-1832.4	922.129	512.929	-1848.1	838.776	574.833	-1809.78	837.302	559.526	-1857.19	770.68
866	0	288.29	-1918.99	1595.03	171.006	-1909.3	1598.09	302.247	-1755.1	1541.34	194.295	-1749.87	1540.11	237.305	-1770.9	1453.68	245.968	-1698.22	1171.14	251.04	-1899.27	1366.84	259.208	-1965.52	1177.99	159.625	-1690.83	1244.06	425.845	-1833	1391.35	508.18	-1784.44	1153.1	515.118	-1773.29	1080.1	553.417	-1838.05	921.49	515.359	-1853.76	837.961	576.55	-1814.38	836.859	562.796	-1862.14	770.494
867	0	288.462	-1928.79	1594.07	170.988	-1919.08	1597.22	302.499	-1764.96	1540.21	194.783	-1759.74	1538.96	237.533	-1780.86	1452.75	246.654	-1707.68	1170.63	251.321	-1908.99	1365.66	259.65	-1974.85	1176.91	159.83	-1700.32	1243.5	426.1	-1842.55	1390.45	508.527	-1792.51	1152.58	515.521	-1780.93	1079.68	555.007	-1843.95	920.803	517.469	-1859.53	837.092	578.278	-1819.65	836.548	565.649	-1867.21	770.09
868	0	288.607	-1938.74	1593.01	171.12	-1928.9	1596.09	302.861	-1774.83	1539.11	195.074	-1769.6	1537.71	237.637	-1790.95	1451.8	246.468	-1716.99	1169.6	251.712	-1918.88	1364.55	260.112	-1984.07	1175.65	159.837	-1709.8	1242.65	426.48	-1852.2	1389.54	508.966	-1800.72	1151.97	516.012	-1788.62	1079.16	556.47	-1850.25	920.025	519.382	-1865.45	836.093	579.835	-1825.12	836.106	568.069	-1872.4	769.456
869	0	288.978	-1948.96	1591.76	171.358	-1938.81	1594.8	303.189	-1784.81	1537.94	195.175	-1779.3	1536.53	237.776	-1800.98	1450.57	246.788	-1726.43	1168.63	252.064	-1928.76	1363.09	260.731	-1993.5	1174.15	160.216	-1719.35	1241.65	426.745	-1861.94	1388.49	509.351	-1809.03	1151.06	516.626	-1796.64	1078.7	557.797	-1856.87	919.086	521.018	-1871.79	834.895	581.329	-1831.02	835.505	570.13	-1877.98	768.503
870	0	289.177	-1959.05	1590.28	171.613	-1948.72	1593.29	303.51	-1794.74	1536.57	195.746	-1789.28	1535.33	238.074	-1811.01	1449.51	247.242	-1735.96	1167.51	252.515	-1938.72	1361.55	261.334	-2002.95	1172.5	160.597	-1728.98	1240.63	427.05	-1871.69	1387.29	509.823	-1817.78	1150.18	517.175	-1804.88	1077.84	558.859	-1863.83	918.02	522.645	-1878.03	833.534	582.702	-1836.91	834.657	571.803	-1883.58	767.142
871	0	289.38	-1969.24	1588.89	171.802	-1958.65	1591.72	304.041	-1804.97	1535.33	196.388	-1799.15	1533.84	238.492	-1821.1	1448.28	247.717	-1745.55	1166.45	253.072	-1948.61	1359.92	261.951	-2012.31	1170.81	161.221	-1738.73	1239.45	427.637	-1881.68	1386.14	510.558	-1826.7	1149.53	517.719	-1813.27	1077.1	559.92	-1871.09	916.944	523.833	-1884.79	832.299	583.896	-1843.44	833.865	573.146	-1889.53	765.816
872	0	289.637	-1979.32	1587.38	172.02	-1968.62	1590.22	304.589	-1814.96	1533.93	196.815	-1809.3	1532.55	238.932	-1831.22	1446.81	248.212	-1755.21	1165.31	253.64	-1958.64	1358.34	262.686	-2021.89	1169.03	161.695	-1748.28	1238.13	428.232	-1891.7	1384.8	511.166	-1835.71	1148.49	518.054	-1821.67	1075.86	560.957	-1878.63	915.829	524.942	-1891.76	830.945	584.97	-1850.26	832.87	574.305	-1895.79	764.328
873	0	289.921	-1989.61	1585.68	172.337	-1978.66	1588.48	305.169	-1825.32	1532.55	197.369	-1819.31	1531.05	239.384	-1841.36	1445.32	249.091	-1765.05	1163.74	254.265	-1968.61	1356.61	263.431	-2031.69	1167.09	162.25	-1758.04	1236.73	428.889	-1901.87	1383.22	511.743	-1844.97	1147.22	518.767	-1830.28	1074.72	561.845	-1886.51	914.446	525.881	-1899.01	829.333	586.22	-1857.75	831.724	575.173	-1902.42	762.653
874	0	290.26	-1999.89	1583.97	172.692	-1988.68	1586.68	305.714	-1835.47	1530.79	198.146	-1829.39	1529.27	239.983	-1851.54	1443.67	249.874	-1774.89	1162.35	254.828	-1978.77	1354.85	264.119	-2041.69	1165.18	163.046	-1767.97	1235.16	429.458	-1912.09	1381.69	512.083	-1853.98	1145.46	519.421	-1839.07	1073.5	562.623	-1894.64	912.935	526.706	-1906.6	827.831	587.177	-1865.57	830.438	575.726	-1909.31	760.786
875	0	290.825	-2010.25	1582.27	173.147	-1998.83	1584.89	306.726	-1845.92	1529.06	198.963	-1839.55	1527.49	240.634	-1861.81	1441.94	250.712	-1784.68	1160.59	255.489	-1988.87	1353.03	264.797	-2051.77	1163.31	163.814	-1777.84	1233.44	430.178	-1922.25	1380.04	513.066	-1863.76	1144.32	520.184	-1848.18	1072.21	563.324	-1902.86	911.222	527.349	-1914.36	826.181	587.917	-1873.31	828.92	576.208	-1916.56	758.869
876	0	291.305	-2020.64	1580.47	173.83	-2008.96	1583.07	307.548	-1856.29	1527.36	199.815	-1849.73	1525.66	241.561	-1871.98	1440.03	251.355	-1794.73	1158.78	256.16	-1999.25	1351.22	265.497	-2062.16	1161.3	164.782	-1787.9	1231.68	430.85	-1932.58	1378.06	513.628	-1873.23	1142.42	520.806	-1857.34	1070.59	564.026	-1911.5	909.3	527.835	-1922.44	824.217	588.511	-1881.5	827.212	576.437	-1924.23	756.764
877	0	292.065	-2031.09	1578.6	174.625	-2019.14	1581.22	308.593	-1866.8	1525.43	200.91	-1859.97	1523.8	242.534	-1882.34	1438.28	252.179	-1804.93	1157.02	256.953	-2009.63	1349.39	266.219	-2072.64	1159.23	165.869	-1797.95	1229.95	431.751	-1943.31	1376.1	514.285	-1883.13	1140.46	521.328	-1866.69	1068.56	564.605	-1920.4	907.351	528.253	-1930.99	822.314	589.171	-1890.33	825.313	576.496	-1932.14	754.449
878	0	292.989	-2041.42	1576.92	175.517	-2029.25	1579.47	309.845	-1877.29	1523.56	202.215	-1870.22	1521.93	243.441	-1892.74	1436.67	253.214	-1815.06	1155.33	257.896	-2019.89	1347.52	266.864	-2083.19	1157.33	167.119	-1808.05	1228.21	432.541	-1953.68	1373.99	515.086	-1893.06	1138.64	521.912	-1876.39	1066.66	565.173	-1929.43	905.38	528.588	-1939.64	820.404	589.499	-1899.11	823.255	576.545	-1940.73	752.504
879	0	293.984	-2051.89	1575.44	176.534	-2039.45	1577.89	311.038	-1887.51	1522.05	203.448	-1880.52	1520.45	244.683	-1903.24	1434.96	254.332	-1825.46	1153.64	258.806	-2030.37	1345.83	267.536	-2093.7	1155.56	168.191	-1818.28	1226.64	433.669	-1964.44	1372.34	516.19	-1903.22	1137.21	522.974	-1886.31	1065.17	565.687	-1938.75	903.414	528.815	-1948.62	818.532	589.945	-1908.26	821.371	576.298	-1949.15	750.166
880	0	295.062	-2062.41	1573.96	177.637	-2049.78	1576.37	312.743	-1898.24	1520.79	205.041	-1890.82	1518.83	246.067	-1913.68	1433.52	255.393	-1836.03	1152.12	259.839	-2040.97	1344.14	268.156	-2104.48	1153.71	169.402	-1828.62	1225.22	435.02	-1975.35	1370.52	517.404	-1913.56	1135.47	523.844	-1896.37	1063.48	566.176	-1948.48	901.322	528.933	-1957.87	816.334	590.381	-1918.08	819.521	575.895	-1957.94	747.503
881	0	296.309	-2072.96	1572.53	178.961	-2059.99	1574.95	314.533	-1908.79	1519.3	206.56	-1901.04	1517.47	247.43	-1924.4	1432.14	256.708	-1846.69	1150.81	261.229	-2051.24	1342.35	268.792	-2115.35	1151.9	170.768	-1839.16	1223.9	436.227	-1986.17	1368.68	518.428	-1924.2	1133.76	524.12	-1906.58	1061.24	566.428	-1958.53	899.117	528.942	-1967.71	814.144	590.545	-1927.75	817.305	575.667	-1967.65	745.278
882	0	297.849	-2083.56	1571.39	180.488	-2070.38	1573.72	316.364	-1919.41	1517.9	208.51	-1911.51	1516.25	249.116	-1935.12	1430.9	257.929	-1857.51	1149.62	262.476	-2062.12	1341.04	269.498	-2126.13	1150.38	171.896	-1849.83	1222.74	437.683	-1996.96	1366.83	519.198	-1934.43	1131.75	525.174	-1916.97	1059.51	566.892	-1968.78	896.975	528.978	-1977.59	812.15	590.586	-1937.88	815.109	575.21	-1977.48	743.027
883	0	299.429	-2094.07	1570.48	182.226	-2080.57	1572.8	318.237	-1930.2	1516.8	210.599	-1922.02	1514.99	250.902	-1945.84	1429.78	259.087	-1868.49	1148.38	263.931	-2072.86	1339.85	270.312	-2136.95	1149.06	173.299	-1860.69	1221.73	439.309	-2007.77	1365.17	520.24	-1945.13	1129.92	525.814	-1927.44	1057.4	567.141	-1979.24	894.967	528.79	-1987.94	810.208	590.659	-1948.13	813.045	574.756	-1987.68	740.849
884	0	301.218	-2104.59	1569.58	184.032	-2091	1571.95	320.562	-1941.13	1515.67	212.578	-1932.48	1514.03	252.72	-1956.71	1428.76	260.119	-1879.57	1147.42	265.667	-2083.64	1338.69	271.309	-2147.94	1147.84	174.627	-1871.58	1220.86	440.855	-2018.69	1363.49	521.19	-1956.2	1127.9	526.954	-1938.83	1055.74	567.3	-1990.05	892.787	528.654	-1998.66	808.126	590.467	-1959.04	810.78	574.357	-1998.59	738.876
885	0	303.207	-2115.21	1568.86	186.001	-2101.32	1571.29	322.832	-1951.9	1514.57	214.996	-1942.98	1513.02	254.683	-1967.53	1427.82	261.483	-1891.02	1146.49	267.412	-2094.49	1337.75	272.402	-2159.01	1146.89	176.111	-1882.66	1220.04	442.801	-2029.67	1361.96	522.153	-1967.43	1126.06	527.405	-1949.94	1053.65	567.409	-2001.04	890.634	528.468	-2009.76	806.229	590.227	-1970.25	808.526	573.727	-2009.47	736.573
886	0	305.287	-2125.77	1568.32	188.029	-2111.78	1570.9	325.075	-1962.48	1513.74	217.068	-1953.46	1512.02	256.934	-1978.36	1426.95	262.586	-1902.53	1145.46	269.332	-2105.41	1336.99	273.668	-2170.28	1146.29	177.476	-1893.84	1219.28	444.655	-2040.37	1360.57	523.116	-1978.59	1124.18	528.003	-1961.11	1051.74	567.483	-2012.51	888.809	528.107	-2021.28	804.578	589.909	-1981.43	806.479	573.124	-2020.96	734.676
887	0	307.651	-2136.19	1567.92	190.335	-2122.11	1570.59	327.555	-1973.13	1513.08	219.702	-1963.98	1511.22	259.045	-1989.15	1426.24	264.026	-1914.27	1144.46	271.314	-2116.56	1336.7	275.059	-2181.82	1145.97	178.847	-1905.17	1218.64	446.765	-2051.25	1359.43	524.001	-1989.85	1122.32	528.502	-1972.5	1049.86	567.422	-2024.12	886.979	527.818	-2033.03	802.925	589.615	-1993.42	804.562	572.609	-2033.02	733.079
888	0	310.005	-2146.81	1568.21	192.74	-2132.5	1570.74	330.129	-1984.08	1512.68	222.197	-1974.73	1510.83	261.393	-2000.1	1425.96	265.14	-1926.02	1143.74	273.42	-2127.72	1336.46	276.532	-2193.6	1145.99	180.313	-1916.65	1218.38	448.81	-2062.28	1358.31	524.916	-2001.56	1120.53	529.052	-1984.18	1048.06	567.281	-2036.08	885.082	527.361	-2045.23	801.322	589.338	-2005.64	802.736	571.835	-2045.25	731.152
889	0	312.594	-2157.38	1568.67	195.353	-2142.95	1571.28	332.724	-1994.73	1512.47	224.765	-1985.32	1510.64	263.814	-2011.13	1425.95	266.084	-1937.62	1143.43	275.454	-2138.93	1336.68	277.873	-2205.4	1146.25	181.796	-1928.27	1218.31	451.021	-2073.54	1357.55	526.226	-2013.55	1119.49	529.905	-1996.4	1046.8	567.176	-2048.39	883.542	526.694	-2057.71	799.948	588.611	-2018.14	800.995	570.986	-2057.89	729.672
890	0	315.234	-2167.77	1569.26	198.001	-2153.42	1572.08	335.383	-2005.43	1512.55	227.415	-1996.14	1511.12	266.247	-2022.29	1426.26	266.804	-1949.36	1143.2	277.504	-2150.14	1337.18	279.184	-2217.39	1146.82	183.082	-1939.86	1218.57	453.105	-2084.69	1357.11	526.963	-2025.05	1118.26	530.377	-2008.45	1045.66	567.04	-2060.93	882.379	526.033	-2070.32	798.814	587.877	-2030.76	799.48	570.155	-2071.11	728.767
891	0	317.947	-2178.21	1570.19	200.799	-2163.87	1573.21	337.97	-2016.08	1512.87	230.01	-2006.76	1511.62	268.667	-2033.38	1426.67	268.143	-1961.27	1143.66	279.521	-2161.55	1337.97	280.387	-2229.51	1147.71	184.42	-1951.64	1219.21	455.341	-2096.04	1356.88	528.152	-2037.25	1117.75	531.22	-2020.8	1044.72	566.672	-2073.73	881.264	525.386	-2083.39	797.889	587.169	-2044.31	798.235	569.179	-2084.39	727.578
892	0	320.813	-2188.75	1571.43	203.645	-2174.37	1574.61	340.622	-2026.84	1513.25	232.683	-2017.63	1512.25	270.918	-2044.54	1427.48	268.853	-1972.95	1144.23	281.489	-2173	1338.89	281.487	-2241.65	1148.69	185.713	-1963.43	1220.18	457.212	-2107.56	1356.7	528.983	-2049.41	1117.09	531.678	-2033.69	1044.03	566.378	-2087.07	880.438	524.544	-2096.99	797.306	586.401	-2057.76	797.154	568.04	-2098.35	726.86
893	0	323.746	-2199.17	1572.92	206.504	-2184.9	1576.36	343.218	-2037.52	1513.9	235.599	-2028.79	1512.66	273.369	-2055.96	1428.48	270.031	-1984.77	1145.14	283.37	-2184.38	1340.12	282.377	-2253.85	1149.96	187.277	-1974.94	1221.45	459.169	-2119.07	1356.84	529.952	-2061.76	1116.69	532.103	-2046.54	1043.3	565.961	-2100.53	879.902	523.707	-2110.78	797.053	585.483	-2071.64	796.353	566.856	-2112.48	726.353
894	0	326.682	-2209.47	1574.52	209.563	-2195.39	1578.31	345.845	-2048.04	1514.55	238.275	-2039.45	1514.11	275.598	-2067.21	1429.65	270.699	-1996.28	1146.19	285.169	-2195.72	1341.72	283.139	-2265.85	1151.53	188.621	-1986.37	1223.08	461	-2130.64	1357.16	530.552	-2074.12	1116.28	532.242	-2059.79	1043.03	565.56	-2114.34	879.609	522.748	-2124.86	797.168	584.506	-2085.79	795.838	565.552	-2127.04	726.309
895	0	329.783	-2219.91	1576.15	212.579	-2205.94	1580.42	348.411	-2058.86	1515.28	240.66	-2050.31	1515.38	277.886	-2078.44	1431.04	271.997	-2007.91	1147.82	286.834	-2207.02	1343.3	283.77	-2277.61	1153.06	189.84	-1997.84	1224.93	462.793	-2142.44	1357.6	531.45	-2087.24	1116.35	532.981	-2072.83	1042.95	565.045	-2128.51	879.658	521.918	-2139.38	797.516	583.595	-2100.56	795.521	564.233	-2142.05	726.438
896	0	333.012	-2230.31	1577.58	215.79	-2216.54	1582.57	350.763	-2069.49	1516.03	242.62	-2060.9	1516.68	279.971	-2089.67	1432.62	273.107	-2019.7	1148.78	288.268	-2218.2	1344.91	284.159	-2289.22	1154.71	191.191	-2008.92	1226.87	464.242	-2154.13	1358.15	532.024	-2100.33	1116.36	533.373	-2086.15	1042.96	564.493	-2143.07	879.929	520.846	-2154.18	797.951	582.859	-2115.87	795.652	562.861	-2157.27	726.591
897	0	336.025	-2240.5	1578.95	218.878	-2227.25	1584.88	353.216	-2079.97	1516.88	245.388	-2071.73	1518.37	281.842	-2100.74	1434.35	274.525	-2031.12	1150.73	289.528	-2229.32	1346.57	284.433	-2300.55	1156.51	192.537	-2019.73	1228.91	465.791	-2165.79	1359.09	532.558	-2113.38	1116.68	533.569	-2099.76	1043.22	563.877	-2157.66	880.3	519.751	-2169.37	798.821	582.043	-2131.15	796.051	561.32	-2173.04	727.261
898	0	339.173	-2250.96	1580.37	221.983	-2237.83	1587.26	355.322	-2090.25	1517.72	247.668	-2082.43	1520.23	283.841	-2111.61	1435.92	275.79	-2042.28	1152.88	290.626	-2240.19	1348.29	284.501	-2311.62	1158.36	193.687	-2030.28	1231	467.124	-2177.37	1360.16	533.106	-2126.64	1117.25	534.115	-2113.08	1043.74	563.261	-2172.85	881.218	518.756	-2184.82	799.825	581.294	-2146.77	796.597	559.923	-2189.19	728.063
899	0	342.216	-2261.28	1581.41	225.288	-2248.48	1589.41	357.41	-2100.76	1518.45	249.687	-2093.03	1522.14	285.583	-2122.25	1437.52	276.937	-2053.07	1154.64	291.497	-2250.99	1349.98	284.403	-2322.47	1160.01	194.989	-2040.8	1232.99	468.37	-2189.11	1361.05	533.862	-2140.54	1117.97	534.602	-2127.29	1044.22	562.473	-2188.21	881.876	517.769	-2200.35	800.648	580.438	-2162.87	796.855	558.325	-2205.51	728.674
900	0	345.28	-2271.57	1582.3	228.316	-2259.16	1591.77	359.165	-2111.2	1519.18	251.106	-2103.7	1523.91	287.007	-2132.82	1439.11	278.056	-2063.87	1156.3	292.204	-2261.59	1351.58	284.171	-2333.09	1161.63	196.325	-2051	1234.83	469.374	-2200.72	1361.98	534.064	-2153.9	1118.15	534.855	-2141.21	1044.61	561.841	-2203.65	882.522	516.583	-2216.22	801.639	579.389	-2179.3	797.302	556.792	-2222.16	729.518
901	0	348.228	-2281.84	1583.3	231.351	-2269.9	1593.95	361.002	-2121.29	1520.16	252.901	-2114.35	1526.09	288.629	-2143.25	1440.65	279.336	-2074.5	1157.46	292.771	-2271.98	1353.21	283.878	-2343.47	1163.32	197.859	-2061.02	1236.44	470.232	-2212.14	1363.07	534.754	-2167.52	1118.72	535.321	-2155.15	1045.09	561.16	-2219.37	883.704	515.406	-2232.46	803.229	578.37	-2195.93	798.033	555.308	-2239.33	730.866
902	0	351.016	-2292.14	1584.02	234.217	-2280.59	1596.13	362.426	-2131.42	1520.98	254.649	-2124.76	1528.05	289.986	-2153.51	1441.92	280.807	-2085.35	1159	292.998	-2282.41	1354.74	283.407	-2353.72	1164.84	199.4	-2070.88	1237.77	470.933	-2223.52	1363.84	535.117	-2181.16	1119.34	535.643	-2169.22	1045.33	560.319	-2235.33	884.648	514.117	-2248.57	804.294	577.56	-2212.87	798.664	553.726	-2256.7	732.082
903	0	353.669	-2302.42	1584.53	236.99	-2291.4	1597.92	363.747	-2141.46	1521.77	256.049	-2135.22	1530.27	291.117	-2163.72	1443.16	282.541	-2095.23	1160.34	293.081	-2292.64	1356.08	282.832	-2363.86	1166.14	200.966	-2080.59	1239.14	471.467	-2235.04	1364.88	535.711	-2194.93	1119.99	536.1	-2183.46	1045.93	559.436	-2251.47	885.63	512.686	-2265.25	805.729	576.625	-2230.27	799.503	551.924	-2274.42	733.401
904	0	356.108	-2312.72	1584.98	239.597	-2302.28	1599.88	364.957	-2151.53	1522.87	257.398	-2145.8	1532.44	292.346	-2173.83	1444.44	284.347	-2105.36	1161.19	293.209	-2302.5	1357.32	282.182	-2373.94	1167.46	202.532	-2090.12	1240.33	471.952	-2246.38	1365.82	536.301	-2208.61	1120.7	536.779	-2197.76	1046.5	558.467	-2267.58	886.644	511.302	-2281.56	807.127	575.704	-2247.58	800.447	550.247	-2292.48	734.993
905	0	358.436	-2322.85	1585.44	241.968	-2313.01	1601.58	365.858	-2161.38	1524.02	258.445	-2156.24	1534.64	293.242	-2183.69	1445.58	286.018	-2115.29	1162.68	293.096	-2312.45	1358.65	281.563	-2383.76	1168.7	204.26	-2099.52	1241.53	472.532	-2257.69	1367.04	536.768	-2222	1121.31	537.187	-2211.73	1046.98	557.586	-2283.85	887.955	509.826	-2298.17	808.842	574.499	-2265.08	801.386	548.471	-2310.58	736.7
906	0	360.595	-2333.29	1585.99	244.178	-2323.92	1603.24	366.647	-2171.37	1525.16	259.348	-2166.67	1536.94	294.162	-2193.64	1446.96	287.467	-2125.09	1163.94	292.985	-2322.51	1359.98	280.985	-2393.44	1169.75	206.011	-2108.83	1242.69	472.829	-2269.05	1368.14	537.293	-2235.82	1122.26	537.844	-2226.38	1047.93	556.701	-2300.42	889.431	508.548	-2315.01	810.647	573.358	-2282.75	802.21	546.632	-2329.05	738.74
907	0	362.256	-2343.45	1586.37	246.178	-2334.82	1604.84	367.284	-2181.28	1526.37	260.019	-2177.09	1539.32	295.096	-2203.52	1448.29	289.168	-2134.4	1165.16	292.923	-2331.93	1361.16	280.448	-2403.19	1170.92	207.732	-2117.9	1243.9	473.148	-2280.3	1369.27	537.836	-2249.51	1123.19	538.382	-2240.68	1048.42	555.697	-2316.84	890.909	506.871	-2331.87	812.607	572.499	-2300.73	803.673	544.703	-2347.56	740.905
908	0	363.908	-2353.77	1586.96	247.826	-2345.69	1606.22	367.895	-2191.04	1527.99	260.608	-2187.56	1541.67	296.016	-2213.35	1449.62	291.039	-2144.15	1166.74	293	-2341.56	1362.27	279.939	-2412.69	1172	209.412	-2127.04	1245.17	473.38	-2291.21	1370.44	538.52	-2263.14	1124.45	539.055	-2255.1	1049.65	554.633	-2333.56	892.839	505.298	-2348.77	814.857	571.394	-2318.62	805.271	542.801	-2366.19	743.296
909	0	365.191	-2364.03	1587.58	249.175	-2356.49	1607.46	368.189	-2201.02	1529.76	261.172	-2197.72	1543.43	296.665	-2223.17	1451.04	292.385	-2153.23	1167.99	292.642	-2351.38	1363.73	279.541	-2422.11	1173.15	211.252	-2136.06	1246.57	473.787	-2302.29	1372.14	539.057	-2276.59	1125.86	539.741	-2269.44	1050.97	553.635	-2350.27	894.95	503.991	-2365.85	817.299	570.114	-2336.75	807.123	540.935	-2384.94	746.039
910	0	366.257	-2374.5	1588.22	250.315	-2367.43	1608.47	368.523	-2211.05	1531.53	261.457	-2208.33	1545.72	297.448	-2232.81	1452.43	293.913	-2162.56	1169.59	292.615	-2361.02	1364.95	279.333	-2431.52	1174.26	213.004	-2145.33	1247.93	474.144	-2313.28	1373.59	539.554	-2290.12	1127.07	540.385	-2283.78	1052.02	552.512	-2366.85	897.002	502.242	-2382.77	819.742	569.019	-2355.01	809.093	538.757	-2403.63	748.74
911	0	366.984	-2384.75	1588.74	251.135	-2378.25	1609.37	368.84	-2221.13	1533.24	261.79	-2218.52	1547.57	298.225	-2242.52	1453.72	295.598	-2171.9	1170.96	292.711	-2370.48	1365.96	279.277	-2440.69	1175.28	214.677	-2154.32	1249.16	474.301	-2323.93	1374.79	540.066	-2303.74	1128.38	540.948	-2298.15	1053.23	551.546	-2383.63	899.424	500.727	-2399.91	822.558	567.926	-2373.29	811.237	536.759	-2422.38	751.819
912	0	367.799	-2395.14	1589.32	251.727	-2389.07	1609.96	369.02	-2231.16	1535.1	261.95	-2229.07	1549.52	298.911	-2252.19	1454.81	297.213	-2181.38	1171.96	293.035	-2379.62	1366.88	279.325	-2449.8	1176.46	216.092	-2163.22	1250.29	474.651	-2334.49	1376.21	540.757	-2317.09	1129.84	541.505	-2312.14	1054.49	550.651	-2400.12	902.054	499.286	-2416.94	825.62	566.805	-2391.33	813.52	534.883	-2441.29	755.3
913	0	368.108	-2405.49	1589.91	252.076	-2399.79	1610.39	369.158	-2241.2	1536.79	262.082	-2239.32	1551.02	299.72	-2261.86	1455.76	298.504	-2190.78	1173.03	293.059	-2389.41	1368.03	279.552	-2458.71	1177.47	217.51	-2172.19	1251.28	475.156	-2344.96	1377.81	541.265	-2330.3	1131.34	542.109	-2326.15	1055.83	549.742	-2416.62	904.71	497.965	-2434.52	828.875	565.846	-2409.76	816.315	532.942	-2460.09	758.829
914	0	368.316	-2415.85	1590.29	252.256	-2410.53	1610.75	369.14	-2251.21	1538.41	262.032	-2249.67	1552.17	300.308	-2271.52	1456.74	300.407	-2200.14	1173.87	293.341	-2398.85	1368.78	279.886	-2467.75	1178.34	219.077	-2181.24	1252.33	475.505	-2355.41	1379.05	541.816	-2343.44	1132.53	542.963	-2340.25	1057.23	548.756	-2433.14	907.314	496.566	-2451.38	831.959	564.705	-2427.93	818.782	531.051	-2478.96	762.372
915	0	368.296	-2426.3	1590.65	252.156	-2421.23	1610.87	369.227	-2261.26	1540.05	261.959	-2260	1553.63	301.003	-2281.07	1457.71	301.4	-2209.63	1174.93	293.604	-2408.38	1369.37	280.225	-2476.55	1179.09	220.318	-2190.31	1253.1	476.004	-2365.64	1380.16	542.225	-2356.33	1133.74	543.706	-2354.07	1058.47	547.738	-2449.63	910.042	495.271	-2468.54	835.111	563.476	-2445.99	821.297	529.072	-2497.72	765.913
916	0	368.236	-2436.68	1591.03	252.002	-2431.73	1610.77	369.208	-2271.3	1541.42	261.83	-2270.33	1554.78	301.607	-2290.7	1458.34	302.751	-2218.39	1175.74	293.95	-2417.83	1369.87	280.62	-2485.44	1179.6	221.722	-2199.42	1253.84	476.414	-2375.76	1381.21	543.122	-2369.39	1135.11	544.594	-2367.62	1059.72	546.868	-2465.88	912.718	493.742	-2485.55	838.371	562.112	-2463.78	823.691	527.156	-2516.39	769.587
917	0	368.034	-2447.04	1591.21	251.835	-2442.12	1610.4	369.007	-2281.49	1542.51	261.595	-2280.52	1555.5	302.271	-2300.31	1458.81	303.453	-2227.5	1176.19	294.597	-2426.95	1369.93	281.109	-2494.32	1179.88	222.78	-2208.45	1254.36	476.852	-2385.9	1381.86	543.774	-2382.1	1135.99	545.064	-2381.06	1060.25	546.079	-2482.13	915.184	492.685	-2502.73	841.559	561.195	-2481.93	826.269	525.304	-2535	773.171
918	0	367.824	-2457.42	1591.24	251.503	-2452.64	1610.14	368.985	-2291.71	1543.44	261.709	-2290.51	1556.04	302.905	-2309.93	1459.14	304.244	-2236.41	1176.56	294.747	-2436.84	1370.13	281.664	-2503.34	1179.94	223.906	-2217.54	1254.72	477.377	-2396.05	1382.43	544.419	-2394.69	1136.64	545.836	-2394.51	1060.84	545.349	-2498.08	917.611	491.243	-2519.7	844.658	559.94	-2499.94	828.662	523.466	-2553.56	776.749
919	0	367.479	-2467.78	1591.27	250.952	-2463.07	1609.5	368.902	-2301.69	1544.24	261.455	-2300.72	1556.28	303.429	-2319.59	1459.24	305.545	-2245.88	1176.86	295.183	-2446.21	1370	282.218	-2512.16	1179.79	225.055	-2226.6	1255	477.677	-2405.93	1382.65	545.367	-2407.15	1137.34	546.514	-2407.69	1061.38	544.644	-2513.91	919.9	490.174	-2536.54	847.672	558.981	-2517.56	831.065	521.731	-2572	780.37
920	0	367.025	-2478.1	1591.15	250.541	-2473.26	1608.68	368.743	-2311.73	1544.84	261.218	-2310.85	1556.15	303.836	-2329.27	1459.21	306.098	-2254.93	1176.88	295.453	-2455.7	1369.77	282.686	-2521.31	1179.38	225.992	-2236	1255.03	477.984	-2415.63	1382.69	545.934	-2419.19	1137.74	547.379	-2420.97	1062.14	543.934	-2529.55	922.002	488.857	-2553.36	850.739	557.505	-2534.59	833.131	520.01	-2590.21	783.924
921	0	366.603	-2488.44	1590.69	250.014	-2483.59	1607.68	368.569	-2321.93	1545.14	261.104	-2320.97	1555.88	304.436	-2338.97	1459.01	306.821	-2263.55	1176.86	295.871	-2465.25	1369.14	283.203	-2530.34	1178.63	226.78	-2245.02	1254.9	478.522	-2425.65	1382.49	546.681	-2431.38	1137.85	547.849	-2433.87	1061.96	543.255	-2545.16	923.907	487.658	-2569.91	853.342	556.372	-2552.03	835.222	518.219	-2608.24	787.191
922	0	366.139	-2498.69	1590.14	249.515	-2493.91	1606.69	368.485	-2332.07	1545.24	260.908	-2331.12	1555.25	304.831	-2348.73	1458.61	307.187	-2272.4	1176.72	296.271	-2474.67	1368.42	283.678	-2539.52	1177.76	227.376	-2254.1	1254.73	478.799	-2435.39	1381.81	547.254	-2443.27	1137.68	548.485	-2446.84	1061.65	542.552	-2560.41	925.65	486.472	-2586.3	855.916	554.939	-2568.78	836.633	516.581	-2626.09	790.508
923	0	365.674	-2508.91	1589.57	248.974	-2504.13	1605.6	368.435	-2342.13	1545.23	260.72	-2341.07	1555.14	305.103	-2358.45	1458.11	307.952	-2281.03	1176.38	296.432	-2484.22	1367.65	284.099	-2548.42	1176.75	228.04	-2263.4	1254.34	478.787	-2444.94	1381.11	547.826	-2454.95	1137.41	549.069	-2459.64	1061.47	541.914	-2575.5	927.431	485.323	-2602.38	858.477	553.932	-2585.51	838.535	515.004	-2643.67	793.859
924	0	365.19	-2519.14	1588.87	248.584	-2514.2	1604.28	368.027	-2352.23	1544.95	260.592	-2351.07	1554.4	305.335	-2368.21	1457.57	308.51	-2289.49	1176.29	296.847	-2493.63	1366.69	284.453	-2557.56	1175.47	228.291	-2272.43	1254.09	479.195	-2454.68	1380.29	548.404	-2466.53	1137.12	549.419	-2472.16	1060.97	541.234	-2590.3	928.917	484.251	-2618.24	860.795	552.661	-2601.85	840.16	513.577	-2660.98	797.114
925	0	364.734	-2529.44	1587.92	248.033	-2524.51	1602.9	367.936	-2362.37	1544.61	260.318	-2361.09	1553.67	305.538	-2378.02	1456.92	308.96	-2297.83	1175.21	297.196	-2502.89	1365.28	284.744	-2566.67	1174.03	228.541	-2281.51	1253.79	479.497	-2464.49	1379.33	548.817	-2477.95	1136.4	549.842	-2484.71	1060.23	540.579	-2604.97	930.195	483.203	-2633.95	862.895	551.513	-2618.04	841.578	512.203	-2678.04	800.111
926	0	364.225	-2539.66	1586.85	247.559	-2534.6	1601.38	367.742	-2372.46	1544.11	259.942	-2371.52	1552.81	305.609	-2387.8	1456.14	309.605	-2305.38	1174.42	297.298	-2512.43	1364.07	284.93	-2575.74	1172.64	228.595	-2290.82	1253.29	479.426	-2474	1378.2	549.145	-2489.23	1135.73	550.228	-2497.19	1059.83	539.9	-2619.21	931.198	482.138	-2649.27	864.945	550.359	-2633.78	843.003	510.903	-2694.72	803.066
927	0	363.866	-2549.98	1585.68	246.897	-2544.99	1599.92	367.315	-2382.5	1543.53	259.886	-2381.22	1551.82	305.537	-2397.54	1455.1	309.565	-2313.92	1173.72	297.353	-2521.91	1362.83	284.993	-2584.71	1171.18	228.609	-2300	1252.75	479.368	-2483.38	1377.1	549.446	-2500.24	1134.86	550.313	-2509.2	1059.12	539.213	-2633.25	932.4	481.118	-2664.32	866.928	548.958	-2648.8	844.109	509.64	-2710.88	805.916
928	0	363.386	-2560.04	1584.09	246.621	-2555.09	1598.19	367.054	-2392.47	1542.67	259.342	-2391.44	1550.86	305.531	-2407.26	1454.12	309.162	-2322.45	1172.68	297.377	-2531.52	1361.44	285.01	-2593.86	1169.53	228.292	-2309.48	1251.87	479.372	-2492.97	1375.85	549.634	-2511.21	1133.88	550.458	-2521.4	1058.31	538.55	-2646.97	933.099	480.159	-2679.05	868.549	547.835	-2663.82	845.095	508.404	-2726.76	808.502
929	0	363.011	-2570.41	1582.7	246.225	-2565.47	1596.76	366.587	-2402.76	1541.73	258.9	-2401.67	1550.09	305.286	-2416.99	1453.11	309.052	-2330.71	1172.33	297.325	-2541.07	1360.03	285.01	-2602.99	1168.09	227.798	-2318.62	1251.11	479.421	-2502.49	1374.51	549.651	-2522.04	1132.85	550.473	-2533.37	1057.31	537.803	-2660.4	933.706	479.342	-2693.46	869.979	546.566	-2678.47	845.806	507.307	-2742.17	810.942
930	0	362.485	-2580.61	1581.28	245.85	-2575.43	1594.94	366.249	-2412.71	1540.78	258.51	-2411.7	1548.88	305.015	-2426.72	1451.84	308.691	-2340.51	1170.61	297.14	-2550.6	1358.53	284.888	-2612.13	1166.66	227.348	-2328.08	1250.06	478.936	-2511.76	1373.12	549.475	-2532.55	1131.79	550.315	-2545.06	1056.38	537.112	-2673.42	934.27	478.203	-2707.39	871.348	545.344	-2692.49	846.422	506.319	-2757.13	813.277
931	0	361.916	-2590.78	1579.84	245.16	-2585.86	1593.38	365.685	-2422.81	1539.67	258.105	-2421.59	1547.59	304.606	-2436.36	1450.62	308.04	-2348.43	1170.17	296.855	-2560.19	1357.09	284.778	-2621.36	1165.34	226.952	-2337.77	1248.8	478.994	-2521.19	1372.04	549.295	-2542.92	1130.65	549.912	-2556.26	1055.31	536.325	-2686.19	934.771	477.311	-2721.02	872.638	543.952	-2705.81	846.825	505.272	-2771.54	815.355
932	0	361.274	-2600.99	1578.1	244.647	-2596.04	1591.7	365.22	-2432.91	1538.52	257.737	-2431.72	1546.27	304.226	-2446.12	1449.29	308.598	-2361.51	1168.91	296.565	-2569.89	1355.67	284.623	-2630.6	1163.77	226.122	-2347.25	1247.75	478.376	-2530.39	1370.63	548.841	-2553.2	1129.51	549.518	-2567.59	1054.37	535.571	-2698.67	935.128	476.41	-2734.23	873.578	542.765	-2719.13	847.295	504.376	-2785.52	817.106
933	0	360.709	-2611.2	1576.31	244.073	-2606.27	1589.87	364.741	-2443.11	1537.44	257.175	-2441.82	1545.3	303.46	-2455.76	1448.04	307.256	-2367.35	1167.57	296.11	-2579.5	1354.1	284.379	-2640.02	1162.32	225.81	-2357.15	1246.42	477.863	-2539.77	1369.23	548.276	-2563.39	1128.27	548.955	-2578.7	1053.38	534.755	-2710.79	935.218	475.607	-2747.18	874.321	541.664	-2731.97	847.509	503.436	-2799.01	818.669
934	0	360.308	-2621.59	1574.77	243.484	-2616.41	1588.27	364.06	-2453.27	1536.34	256.31	-2452.08	1543.97	302.695	-2465.52	1446.61	306.108	-2377	1166.75	295.654	-2589.19	1352.66	284.152	-2649.46	1160.92	224.866	-2366.67	1245.13	477.519	-2549.19	1368.07	547.44	-2573.2	1127.1	548.158	-2589.36	1052.32	533.987	-2722.47	935.377	474.617	-2759.59	875.093	540.311	-2744.15	847.569	502.689	-2812	820.016
[truncated: 69 more columns]

## Sheet: Sheet2
Devices
		025370 - Force			025370 - Moment			025370 - CoP			027571 - Force			027571 - Moment			027571 - CoP			037720 - Force			037720 - Moment			037720 - CoP
Frame	Sub Frame	Fx	Fy	Fz	Mx	My	Mz	Cx	Cy	Cz	Fx	Fy	Fz	Mx	My	Mz	Cx	Cy	Cz	Fx	Fy	Fz	Mx	My	Mz	Cx	Cy	Cz
		N	N	N	N.mm	N.mm	N.mm	mm	mm	mm	N	N	N	N.mm	N.mm	N.mm	mm	mm	mm	N	N	N	N.mm	N.mm	N.mm	mm	mm	mm
433	0	0	0	0	0	0	0	200	300	0	0	0	0	0	0	0	200	903	0	0	0	0	0	0	0	603	903	0
433	1	0	0	0	0	0	0	200	300	0	0	0	0	0	0	0	200	903	0	0	0	0	0	0	0	603	903	0
433	2	0	0	0	0	0	0	200	300	0	0	0	0	0	0	0	200	903	0	0	0	0	0	0	0	603	903	0
433	3	0	0	0	0	0	0	200	300	0	0	0	0	0	0	0	200	903	0	0	0	0	0	0	0	603	903	0
433	4	0	0	0	0	0	0	200	300	0	0	0	0	0	0	0	200	903	0	0	0	0	0	0	0	603	903	0
433	5	0	0	0	0	0	0	200	300	0	0	0	0	0	0	0	200	903	0	0	0	0	0	0	0	603	903	0
433	6	0	0	0	0	0	0	200	300	0	0	0	0	0	0	0	200	903	0	0	0	0	0	0	0	603	903	0
433	7	0	0	0	0	0	0	200	300	0	0	0	0	0	0	0	200	903	0	0	0	0	0	0	0	603	903	0
433	8	0	0	0	0	0	0	200	300	0	0	0	0	0	0	0	200	903	0	0	0	0	0	0	0	603	903	0
433	9	0	0	0	0	0	0	200	300	0	0	0	0	0	0	0	200	903	0	0	0	0	0	0	0	603	903	0
434	0	0	0	0	0	0	0	200	300	0	0	0	0	0	0	0	200	903	0	0	0	0	0	0	0	603	903	0
434	1	0	0	0	0	0	0	200	300	0	0	0	0	0	0	0	200	903	0	0	0	0	0	0	0	603	903	0
434	2	0	0	0	0	0	0	200	300	0	0	0	0	0	0	0	200	903	0	0	0	0	0	0	0	603	903	0
434	3	0	0	0	0	0	0	200	300	0	0	0	0	0	0	0	200	903	0	0	0	0	0	0	0	603	903	0
434	4	0	0	0	0	0	0	200	300	0	0	0	0	0	0	0	200	903	0	0	0	0	0	0	0	603	903	0
434	5	0	0	0	0	0	0	200	300	0	0	0	0	0	0	0	200	903	0	0	0	0	0	0	0	603	903	0
434	6	0	0	0	0	0	0	200	300	0	0	0	0	0	0	0	200	903	0	0	0	0	0	0	0	603	903	0
434	7	0	0	0	0	0	0	200	300	0	0	0	0	0	0	0	200	903	0	0	0	0	0	0	0	603	903	0
434	8	0	0	0	0	0	0	200	300	0	0	0	0	0	0	0	200	903	0	0	0	0	0	0	0	603	903	0
434	9	0	0	0	0	0	0	200	300	0	0	0	0	0	0	0	200	903	0	0	0	0	0	0	0	603	903	0
435	0	0	0	0	0	0	0	200	300	0	0	0	0	0	0	0	200	903	0	0	0	0	0	0	0	603	903	0
435	1	0	0	0	0	0	0	200	300	0	0	0	0	0	0	0	200	903	0	0	0	0	0	0	0	603	903	0
435	2	0	0	0	0	0	0	200	300	0	0	0	0	0	0	0	200	903	0	0	0	0	0	0	0	603	903	0
435	3	0	0	0	0	0	0	200	300	0	0	0	0	0	0	0	200	903	0	0	0	0	0	0	0	603	903	0
435	4	0	0	0	0	0	0	200	300	0	0	0	0	0	0	0	200	903	0	0	0	0	0	0	0	603	903	0
435	5	0	0	0	0	0	0	200	300	0	0	0	0	0	0	0	200	903	0	0	0	0	0	0	0	603	903	0
435	6	0	0	0	0	0	0	200	300	0	0	0	0	0	0	0	200	903	0	0	0	0	0	0	0	603	903	0
435	7	0	0	0	0	0	0	200	300	0	0	0	0	0	0	0	200	903	0	0	0	0	0	0	0	603	903	0
435	8	0	0	0	0	0	0	200	300	0	0	0	0	0	0	0	200	903	0	0	0	0	0	0	0	603	903	0
435	9	0	0	0	0	0	0	200	300	0	0	0	0	0	0	0	200	903	0	0	0	0	0	0	0	603	903	0
436	0	0	0	0	0	0	0	200	300	0	0	0	0	0	0	0	200	903	0	0	0	0	0	0	0	603	903	0
436	1	0	0	0	0	0	0	200	300	0	0	0	0	0	0	0	200	903	0	0	0	0	0	0	0	603	903	0
436	2	0	0	0	0	0	0	200	300	0	0	0	0	0	0	0	200	903	0	0	0	0	0	0	0	603	903	0
436	3	0	0	0	0	0	0	200	300	0	0	0	0	0	0	0	200	903	0	0	0	0	0	0	0	603	903	0
436	4	0	0	0	0	0	0	200	300	0	0	0	0	0	0	0	200	903	0	0	0	0	0	0	0	603	903	0
436	5	0	0	0	0	0	0	200	300	0	0	0	0	0	0	0	200	903	0	0	0	0	0	0	0	603	903	0
436	6	0	0	0	0	0	0	200	300	0	0	0	0	0	0	0	200	903	0	0	0	0	0	0	0	603	903	0
436	7	0	0	0	0	0	0	200	300	0	0	0	0	0	0	0	200	903	0	0	0	0	0	0	0	603	903	0
436	8	0	0	0	0	0	0	200	300	0	0	0	0	0	0	0	200	903	0	0	0	0	0	0	0	603	903	0
436	9	0	0	0	0	0	0	200	300	0	0	0	0	0	0	0	200	903	0	0	0	0	0	0	0	603	903	0
437	0	0	0	0	0	0	0	200	300	0	0	0	0	0	0	0	200	903	0	0	0	0	0	0	0	603	903	0
437	1	0	0	0	0	0	0	200	300	0	0	0	0	0	0	0	200	903	0	0	0	0	0	0	0	603	903	0
437	2	0	0	0	0	0	0	200	300	0	0	0	0	0	0	0	200	903	0	0	0	0	0	0	0	603	903	0
437	3	0	0	0	0	0	0	200	300	0	0	0	0	0	0	0	200	903	0	0	0	0	0	0	0	603	903	0
437	4	0	0	0	0	0	0	200	300	0	0	0	0	0	0	0	200	903	0	0	0	0	0	0	0	603	903	0
437	5	0	0	0	0	0	0	200	300	0	0	0	0	0	0	0	200	903	0	0	0	0	0	0	0	603	903	0
437	6	0	0	0	0	0	0	200	300	0	0	0	0	0	0	0	200	903	0	0	0	0	0	0	0	603	903	0
437	7	0	0	0	0	0	0	200	300	0	0	0	0	0	0	0	200	903	0	0	0	0	0	0	0	603	903	0
437	8	0	0	0	0	0	0	200	300	0	0	0	0	0	0	0	200	903	0	0	0	0	0	0	0	603	903	0
437	9	0	0	0	0	0	0	200	300	0	0	0	0	0	0	0	200	903	0	0	0	0	0	0	0	603	903	0
438	0	0	0	0	0	0	0	200	300	0	0	0	0	0	0	0	200	903	0	0	0	0	0	0	0	603	903	0
438	1	0	0	0	0	0	0	200	300	0	0	0	0	0	0	0	200	903	0	0	0	0	0	0	0	603	903	0
438	2	0	0	0	0	0	0	200	300	0	0	0	0	0	0	0	200	903	0	0	0	0	0	0	0	603	903	0
438	3	0	0	0	0	0	0	200	300	0	0	0	0	0	0	0	200	903	0	0	0	0	0	0	0	603	903	0
438	4	0	0	0	0	0	0	200	300	0	0	0	0	0	0	0	200	903	0	0	0	0	0	0	0	603	903	0
438	5	0	0	0	0	0	0	200	300	0	0	0	0	0	0	0	200	903	0	0	0	0	0	0	0	603	903	0
438	6	0	0	0	0	0	0	200	300	0	0	0	0	0	0	0	200	903	0	0	0	0	0	0	0	603	903	0
438	7	0	0	0	0	0	0	200	300	0	0	0	0	0	0	0	200	903	0	0	0	0	0	0	0	603	903	0
438	8	0	0	0	0	0	0	200	300	0	0	0	0	0	0	0	200	903	0	0	0	0	0	0	0	603	903	0
438	9	0	0	0	0	0	0	200	300	0	0	0	0	0	0	0	200	903	0	0	0	0	0	0	0	603	903	0
439	0	0	0	0	0	0	0	200	300	0	0	0	0	0	0	0	200	903	0	0	0	0	0	0	0	603	903	0
439	1	0	0	0	0	0	0	200	300	0	0	0	0	0	0	0	200	903	0	0	0	0	0	0	0	603	903	0
439	2	0	0	0	0	0	0	200	300	0	0	0	0	0	0	0	200	903	0	0	0	0	0	0	0	603	903	0
439	3	0	0	0	0	0	0	200	300	0	0	0	0	0	0	0	200	903	0	0	0	0	0	0	0	603	903	0
439	4	0	0	0	0	0	0	200	300	0	0	0	0	0	0	0	200	903	0	0	0	0	0	0	0	603	903	0
439	5	0	0	0	0	0	0	200	300	0	0	0	0	0	0	0	200	903	0	0	0	0	0	0	0	603	903	0
439	6	0	0	0	0	0	0	200	300	0	0	0	0	0	0	0	200	903	0	0	0	0	0	0	0	603	903	0
439	7	0	0	0	0	0	0	200	300	0	0	0	0	0	0	0	200	903	0	0	0	0	0	0	0	603	903	0
439	8	0	0	0	0	0	0	200	300	0	0	0	0	0	0	0	200	903	0	0	0	0	0	0	0	603	903	0
439	9	0	0	0	0	0	0	200	300	0	0	0	0	0	0	0	200	903	0	0	0	0	0	0	0	603	903	0
440	0	0	0	0	0	0	0	200	300	0	0	0	0	0	0	0	200	903	0	0	0	0	0	0	0	603	903	0
440	1	0	0	0	0	0	0	200	300	0	0	0	0	0	0	0	200	903	0	0	0	0	0	0	0	603	903	0
440	2	0	0	0	0	0	0	200	300	0	0	0	0	0	0	0	200	903	0	0	0	0	0	0	0	603	903	0
440	3	0	0	0	0	0	0	200	300	0	0	0	0	0	0	0	200	903	0	0	0	0	0	0	0	603	903	0
440	4	0	0	0	0	0	0	200	300	0	0	0	0	0	0	0	200	903	0	0	0	0	0	0	0	603	903	0
440	5	0	0	0	0	0	0	200	300	0	0	0	0	0	0	0	200	903	0	0	0	0	0	0	0	603	903	0
440	6	0	0	0	0	0	0	200	300	0	0	0	0	0	0	0	200	903	0	0	0	0	0	0	0	603	903	0
440	7	0	0	0	0	0	0	200	300	0	0	0	0	0	0	0	200	903	0	0	0	0	0	0	0	603	903	0
440	8	0	0	0	0	0	0	200	300	0	0	0	0	0	0	0	200	903	0	0	0	0	0	0	0	603	903	0
440	9	0	0	0	0	0	0	200	300	0	0	0	0	0	0	0	200	903	0	0	0	0	0	0	0	603	903	0
441	0	0	0	0	0	0	0	200	300	0	0	0	0	0	0	0	200	903	0	0	0	0	0	0	0	603	903	0
441	1	0	0	0	0	0	0	200	300	0	0	0	0	0	0	0	200	903	0	0	0	0	0	0	0	603	903	0
441	2	0	0	0	0	0	0	200	300	0	0	0	0	0	0	0	200	903	0	0	0	0	0	0	0	603	903	0
441	3	0	0	0	0	0	0	200	300	0	0	0	0	0	0	0	200	903	0	0	0	0	0	0	0	603	903	0
441	4	0	0	0	0	0	0	200	300	0	0	0	0	0	0	0	200	903	0	0	0	0	0	0	0	603	903	0
441	5	0	0	0	0	0	0	200	300	0	0	0	0	0	0	0	200	903	0	0	0	0	0	0	0	603	903	0
441	6	0	0	0	0	0	0	200	300	0	0	0	0	0	0	0	200	903	0	0	0	0	0	0	0	603	903	0
441	7	0	0	0	0	0	0	200	300	0	0	0	0	0	0	0	200	903	0	0	0	0	0	0	0	603	903	0
441	8	0	0	0	0	0	0	200	300	0	0	0	0	0	0	0	200	903	0	0	0	0	0	0	0	603	903	0
441	9	0	0	0	0	0	0	200	300	0	0	0	0	0	0	0	200	903	0	0	0	0	0	0	0	603	903	0
442	0	0	0	0	0	0	0	200	300	0	0	0	0	0	0	0	200	903	0	0	0	0	0	0	0	603	903	0
442	1	0	0	0	0	0	0	200	300	0	0	0	0	0	0	0	200	903	0	0	0	0	0	0	0	603	903	0
442	2	0	0	0	0	0	0	200	300	0	0	0	0	0	0	0	200	903	0	0	0	0	0	0	0	603	903	0
442	3	0	0	0	0	0	0	200	300	0	0	0	0	0	0	0	200	903	0	0	0	0	0	0	0	603	903	0
442	4	0	0	0	0	0	0	200	300	0	0	0	0	0	0	0	200	903	0	0	0	0	0	0	0	603	903	0
442	5	0	0	0	0	0	0	200	300	0	0	0	0	0	0	0	200	903	0	0	0	0	0	0	0	603	903	0
442	6	0	0	0	0	0	0	200	300	0	0	0	0	0	0	0	200	903	0	0	0	0	0	0	0	603	903	0
442	7	0	0	0	0	0	0	200	300	0	0	0	0	0	0	0	200	903	0	0	0	0	0	0	0	603	903	0
442	8	0	0	0	0	0	0	200	300	0	0	0	0	0	0	0	200	903	0	0	0	0	0	0	0	603	903	0
442	9	0	0	0	0	0	0	200	300	0	0	0	0	0	0	0	200	903	0	0	0	0	0	0	0	603	903	0
443	0	0	0	0	0	0	0	200	300	0	0	0	0	0	0	0	200	903	0	0	0	0	0	0	0	603	903	0
443	1	0	0	0	0	0	0	200	300	0	0	0	0	0	0	0	200	903	0	0	0	0	0	0	0	603	903	0
443	2	0	0	0	0	0	0	200	300	0	0	0	0	0	0	0	200	903	0	0	0	0	0	0	0	603	903	0
443	3	0	0	0	0	0	0	200	300	0	0	0	0	0	0	0	200	903	0	0	0	0	0	0	0	603	903	0
443	4	0	0	0	0	0	0	200	300	0	0	0	0	0	0	0	200	903	0	0	0	0	0	0	0	603	903	0
443	5	0	0	0	0	0	0	200	300	0	0	0	0	0	0	0	200	903	0	0	0	0	0	0	0	603	903	0
443	6	0	0	0	0	0	0	200	300	0	0	0	0	0	0	0	200	903	0	0	0	0	0	0	0	603	903	0
443	7	0	0	0	0	0	0	200	300	0	0	0	0	0	0	0	200	903	0	0	0	0	0	0	0	603	903	0
443	8	0	0	0	0	0	0	200	300	0	0	0	0	0	0	0	200	903	0	0	0	0	0	0	0	603	903	0
443	9	0	0	0	0	0	0	200	300	0	0	0	0	0	0	0	200	903	0	0	0	0	0	0	0	603	903	0
444	0	0	0	0	0	0	0	200	300	0	0	0	0	0	0	0	200	903	0	0	0	0	0	0	0	603	903	0
444	1	0	0	0	0	0	0	200	300	0	0	0	0	0	0	0	200	903	0	0	0	0	0	0	0	603	903	0
444	2	0	0	0	0	0	0	200	300	0	0	0	0	0	0	0	200	903	0	0	0	0	0	0	0	603	903	0
444	3	0	0	0	0	0	0	200	300	0	0	0	0	0	0	0	200	903	0	0	0	0	0	0	0	603	903	0
444	4	0	0	0	0	0	0	200	300	0	0	0	0	0	0	0	200	903	0	0	0	0	0	0	0	603	903	0
444	5	0	0	0	0	0	0	200	300	0	0	0	0	0	0	0	200	903	0	0	0	0	0	0	0	603	903	0
444	6	0	0	0	0	0	0	200	300	0	0	0	0	0	0	0	200	903	0	0	0	0	0	0	0	603	903	0
444	7	0	0	0	0	0	0	200	300	0	0	0	0	0	0	0	200	903	0	0	0	0	0	0	0	603	903	0
444	8	0	0	0	0	0	0	200	300	0	0	0	0	0	0	0	200	903	0	0	0	0	0	0	0	603	903	0
444	9	0	0	0	0	0	0	200	300	0	0	0	0	0	0	0	200	903	0	0	0	0	0	0	0	603	903	0
445	0	0	0	0	0	0	0	200	300	0	0	0	0	0	0	0	200	903	0	0	0	0	0	0	0	603	903	0
445	1	0	0	0	0	0	0	200	300	0	0	0	0	0	0	0	200	903	0	0	0	0	0	0	0	603	903	0
445	2	0	0	0	0	0	0	200	300	0	0	0	0	0	0	0	200	903	0	0	0	0	0	0	0	603	903	0
445	3	0	0	0	0	0	0	200	300	0	0	0	0	0	0	0	200	903	0	0	0	0	0	0	0	603	903	0
445	4	0	0	0	0	0	0	200	300	0	0	0	0	0	0	0	200	903	0	0	0	0	0	0	0	603	903	0
445	5	0	0	0	0	0	0	200	300	0	0	0	0	0	0	0	200	903	0	0	0	0	0	0	0	603	903	0
445	6	0	0	0	0	0	0	200	300	0	0	0	0	0	0	0	200	903	0	0	0	0	0	0	0	603	903	0
445	7	0	0	0	0	0	0	200	300	0	0	0	0	0	0	0	200	903	0	0	0	0	0	0	0	603	903	0
445	8	0	0	0	0	0	0	200	300	0	0	0	0	0	0	0	200	903	0	0	0	0	0	0	0	603	903	0
445	9	0	0	0	0	0	0	200	300	0	0	0	0	0	0	0	200	903	0	0	0	0	0	0	0	603	903	0
446	0	0	0	0	0	0	0	200	300	0	0	0	0	0	0	0	200	903	0	0	0	0	0	0	0	603	903	0
446	1	0	0	0	0	0	0	200	300	0	0	0	0	0	0	0	200	903	0	0	0	0	0	0	0	603	903	0
446	2	0	0	0	0	0	0	200	300	0	0	0	0	0	0	0	200	903	0	0	0	0	0	0	0	603	903	0
446	3	0	0	0	0	0	0	200	300	0	0	0	0	0	0	0	200	903	0	0	0	0	0	0	0	603	903	0
446	4	0	0	0	0	0	0	200	300	0	0	0	0	0	0	0	200	903	0	0	0	0	0	0	0	603	903	0
446	5	0	0	0	0	0	0	200	300	0	0	0	0	0	0	0	200	903	0	0	0	0	0	0	0	603	903	0
446	6	0	0	0	0	0	0	200	300	0	0	0	0	0	0	0	200	903	0	0	0	0	0	0	0	603	903	0
446	7	0	0	0	0	0	0	200	300	0	0	0	0	0	0	0	200	903	0	0	0	0	0	0	0	603	903	0
446	8	0	0	0	0	0	0	200	300	0	0	0	0	0	0	0	200	903	0	0	0	0	0	0	0	603	903	0
446	9	0	0	0	0	0	0	200	300	0	0	0	0	0	0	0	200	903	0	0	0	0	0	0	0	603	903	0
447	0	0	0	0	0	0	0	200	300	0	0	0	0	0	0	0	200	903	0	0	0	0	0	0	0	603	903	0
447	1	0	0	0	0	0	0	200	300	0	0	0	0	0	0	0	200	903	0	0	0	0	0	0	0	603	903	0
447	2	0	0	0	0	0	0	200	300	0	0	0	0	0	0	0	200	903	0	0	0	0	0	0	0	603	903	0
447	3	0	0	0	0	0	0	200	300	0	0	0	0	0	0	0	200	903	0	0	0	0	0	0	0	603	903	0
447	4	0	0	0	0	0	0	200	300	0	0	0	0	0	0	0	200	903	0	0	0	0	0	0	0	603	903	0
447	5	0	0	0	0	0	0	200	300	0	0	0	0	0	0	0	200	903	0	0	0	0	0	0	0	603	903	0
447	6	0	0	0	0	0	0	200	300	0	0	0	0	0	0	0	200	903	0	0	0	0	0	0	0	603	903	0
447	7	0	0	0	0	0	0	200	300	0	0	0	0	0	0	0	200	903	0	0	0	0	0	0	0	603	903	0
447	8	0	0	0	0	0	0	200	300	0	0	0	0	0	0	0	200	903	0	0	0	0	0	0	0	603	903	0
447	9	0	0	0	0	0	0	200	300	0	0	0	0	0	0	0	200	903	0	0	0	0	0	0	0	603	903	0
448	0	0	0	0	0	0	0	200	300	0	0	0	0	0	0	0	200	903	0	0	0	0	0	0	0	603	903	0
448	1	0	0	0	0	0	0	200	300	0	0	0	0	0	0	0	200	903	0	0	0	0	0	0	0	603	903	0
448	2	0	0	0	0	0	0	200	300	0	0	0	0	0	0	0	200	903	0	0	0	0	0	0	0	603	903	0
448	3	0	0	0	0	0	0	200	300	0	0	0	0	0	0	0	200	903	0	0	0	0	0	0	0	603	903	0
448	4	0	0	0	0	0	0	200	300	0	0	0	0	0	0	0	200	903	0	0	0	0	0	0	0	603	903	0
448	5	0	0	0	0	0	0	200	300	0	0	0	0	0	0	0	200	903	0	0	0	0	0	0	0	603	903	0
448	6	0	0	0	0	0	0	200	300	0	0	0	0	0	0	0	200	903	0	0	0	0	0	0	0	603	903	0
448	7	0	0	0	0	0	0	200	300	0	0	0	0	0	0	0	200	903	0	0	0	0	0	0	0	603	903	0
448	8	0	0	0	0	0	0	200	300	0	0	0	0	0	0	0	200	903	0	0	0	0	0	0	0	603	903	0
448	9	0	0	0	0	0	0	200	300	0	0	0	0	0	0	0	200	903	0	0	0	0	0	0	0	603	903	0
449	0	0	0	0	0	0	0	200	300	0	0	0	0	0	0	0	200	903	0	0	0	0	0	0	0	603	903	0
449	1	0	0	0	0	0	0	200	300	0	0	0	0	0	0	0	200	903	0	0	0	0	0	0	0	603	903	0
449	2	0	0	0	0	0	0	200	300	0	0	0	0	0	0	0	200	903	0	0	0	0	0	0	0	603	903	0
449	3	0	0	0	0	0	0	200	300	0	0	0	0	0	0	0	200	903	0	0	0	0	0	0	0	603	903	0
449	4	0	0	0	0	0	0	200	300	0	0	0	0	0	0	0	200	903	0	0	0	0	0	0	0	603	903	0
449	5	0	0	0	0	0	0	200	300	0	0	0	0	0	0	0	200	903	0	0	0	0	0	0	0	603	903	0
449	6	0	0	0	0	0	0	200	300	0	0	0	0	0	0	0	200	903	0	0	0	0	0	0	0	603	903	0
449	7	0	0	0	0	0	0	200	300	0	0	0	0	0	0	0	200	903	0	0	0	0	0	0	0	603	903	0
449	8	0	0	0	0	0	0	200	300	0	0	0	0	0	0	0	200	903	0	0	0	0	0	0	0	603	903	0
449	9	0	0	0	0	0	0	200	300	0	0	0	0	0	0	0	200	903	0	0	0	0	0	0	0	603	903	0
450	0	0	0	0	0	0	0	200	300	0	0	0	0	0	0	0	200	903	0	0	0	0	0	0	0	603	903	0
450	1	0	0	0	0	0	0	200	300	0	0	0	0	0	0	0	200	903	0	0	0	0	0	0	0	603	903	0
450	2	0	0	0	0	0	0	200	300	0	0	0	0	0	0	0	200	903	0	0	0	0	0	0	0	603	903	0
450	3	0	0	0	0	0	0	200	300	0	0	0	0	0	0	0	200	903	0	0	0	0	0	0	0	603	903	0
450	4	0	0	0	0	0	0	200	300	0	0	0	0	0	0	0	200	903	0	0	0	0	0	0	0	603	903	0
450	5	0	0	0	0	0	0	200	300	0	0	0	0	0	0	0	200	903	0	0	0	0	0	0	0	603	903	0
450	6	0	0	0	0	0	0	200	300	0	0	0	0	0	0	0	200	903	0	0	0	0	0	0	0	603	903	0
450	7	0	0	0	0	0	0	200	300	0	0	0	0	0	0	0	200	903	0	0	0	0	0	0	0	603	903	0
450	8	0	0	0	0	0	0	200	300	0	0	0	0	0	0	0	200	903	0	0	0	0	0	0	0	603	903	0
450	9	0	0	0	0	0	0	200	300	0	0	0	0	0	0	0	200	903	0	0	0	0	0	0	0	603	903	0
451	0	0	0	0	0	0	0	200	300	0	0	0	0	0	0	0	200	903	0	0	0	0	0	0	0	603	903	0
451	1	0	0	0	0	0	0	200	300	0	0	0	0	0	0	0	200	903	0	0	0	0	0	0	0	603	903	0
451	2	0	0	0	0	0	0	200	300	0	0	0	0	0	0	0	200	903	0	0	0	0	0	0	0	603	903	0
451	3	0	0	0	0	0	0	200	300	0	0	0	0	0	0	0	200	903	0	0	0	0	0	0	0	603	903	0
451	4	0	0	0	0	0	0	200	300	0	0	0	0	0	0	0	200	903	0	0	0	0	0	0	0	603	903	0
451	5	0	0	0	0	0	0	200	300	0	0	0	0	0	0	0	200	903	0	0	0	0	0	0	0	603	903	0
451	6	0	0	0	0	0	0	200	300	0	0	0	0	0	0	0	200	903	0	0	0	0	0	0	0	603	903	0
451	7	0	0	0	0	0	0	200	300	0	0	0	0	0	0	0	200	903	0	0	0	0	0	0	0	603	903	0
451	8	0	0	0	0	0	0	200	300	0	0	0	0	0	0	0	200	903	0	0	0	0	0	0	0	603	903	0
451	9	0	0	0	0	0	0	200	300	0	0	0	0	0	0	0	200	903	0	0	0	0	0	0	0	603	903	0
452	0	0	0	0	0	0	0	200	300	0	0	0	0	0	0	0	200	903	0	0	0	0	0	0	0	603	903	0
452	1	0	0	0	0	0	0	200	300	0	0	0	0	0	0	0	200	903	0	0	0	0	0	0	0	603	903	0
452	2	0	0	0	0	0	0	200	300	0	0	0	0	0	0	0	200	903	0	0	0	0	0	0	0	603	903	0
452	3	0	0	0	0	0	0	200	300	0	0	0	0	0	0	0	200	903	0	0	0	0	0	0	0	603	903	0
452	4	0	0	0	0	0	0	200	300	0	0	0	0	0	0	0	200	903	0	0	0	0	0	0	0	603	903	0
452	5	0	0	0	0	0	0	200	300	0	0	0	0	0	0	0	200	903	0	0	0	0	0	0	0	603	903	0
452	6	0	0	0	0	0	0	200	300	0	0	0	0	0	0	0	200	903	0	0	0	0	0	0	0	603	903	0
452	7	0	0	0	0	0	0	200	300	0	0	0	0	0	0	0	200	903	0	0	0	0	0	0	0	603	903	0
452	8	0	0	0	0	0	0	200	300	0	0	0	0	0	0	0	200	903	0	0	0	0	0	0	0	603	903	0
452	9	0	0	0	0	0	0	200	300	0	0	0	0	0	0	0	200	903	0	0	0	0	0	0	0	603	903	0
453	0	0	0	0	0	0	0	200	300	0	0	0	0	0	0	0	200	903	0	0	0	0	0	0	0	603	903	0
453	1	0	0	0	0	0	0	200	300	0	0	0	0	0	0	0	200	903	0	0	0	0	0	0	0	603	903	0
453	2	0	0	0	0	0	0	200	300	0	0	0	0	0	0	0	200	903	0	0	0	0	0	0	0	603	903	0
453	3	0	0	0	0	0	0	200	300	0	0	0	0	0	0	0	200	903	0	0	0	0	0	0	0	603	903	0
453	4	0	0	0	0	0	0	200	300	0	0	0	0	0	0	0	200	903	0	0	0	0	0	0	0	603	903	0
453	5	0	0	0	0	0	0	200	300	0	0	0	0	0	0	0	200	903	0	0	0	0	0	0	0	603	903	0
453	6	0	0	0	0	0	0	200	300	0	0	0	0	0	0	0	200	903	0	0	0	0	0	0	0	603	903	0
453	7	0	0	0	0	0	0	200	300	0	0	0	0	0	0	0	200	903	0	0	0	0	0	0	0	603	903	0
453	8	0	0	0	0	0	0	200	300	0	0	0	0	0	0	0	200	903	0	0	0	0	0	0	0	603	903	0
453	9	0	0	0	0	0	0	200	300	0	0	0	0	0	0	0	200	903	0	0	0	0	0	0	0	603	903	0
454	0	0	0	0	0	0	0	200	300	0	0	0	0	0	0	0	200	903	0	0	0	0	0	0	0	603	903	0
454	1	0	0	0	0	0	0	200	300	0	0	0	0	0	0	0	200	903	0	0	0	0	0	0	0	603	903	0
454	2	0	0	0	0	0	0	200	300	0	0	0	0	0	0	0	200	903	0	0	0	0	0	0	0	603	903	0
454	3	0	0	0	0	0	0	200	300	0	0	0	0	0	0	0	200	903	0	0	0	0	0	0	0	603	903	0
454	4	0	0	0	0	0	0	200	300	0	0	0	0	0	0	0	200	903	0	0	0	0	0	0	0	603	903	0
454	5	0	0	0	0	0	0	200	300	0	0	0	0	0	0	0	200	903	0	0	0	0	0	0	0	603	903	0
454	6	0	0	0	0	0	0	200	300	0	0	0	0	0	0	0	200	903	0	0	0	0	0	0	0	603	903	0
454	7	0	0	0	0	0	0	200	300	0	0	0	0	0	0	0	200	903	0	0	0	0	0	0	0	603	903	0
454	8	0	0	0	0	0	0	200	300	0	0	0	0	0	0	0	200	903	0	0	0	0	0	0	0	603	903	0
454	9	0	0	0	0	0	0	200	300	0	0	0	0	0	0	0	200	903	0	0	0	0	0	0	0	603	903	0
455	0	0	0	0	0	0	0	200	300	0	0	0	0	0	0	0	200	903	0	0	0	0	0	0	0	603	903	0
455	1	0	0	0	0	0	0	200	300	0	0	0	0	0	0	0	200	903	0	0	0	0	0	0	0	603	903	0
455	2	0	0	0	0	0	0	200	300	0	0	0	0	0	0	0	200	903	0	0	0	0	0	0	0	603	903	0
455	3	0	0	0	0	0	0	200	300	0	0	0	0	0	0	0	200	903	0	0	0	0	0	0	0	603	903	0
455	4	0	0	0	0	0	0	200	300	0	0	0	0	0	0	0	200	903	0	0	0	0	0	0	0	603	903	0
455	5	0	0	0	0	0	0	200	300	0	0	0	0	0	0	0	200	903	0	0	0	0	0	0	0	603	903	0
455	6	0	0	0	0	0	0	200	300	0	0	0	0	0	0	0	200	903	0	0	0	0	0	0	0	603	903	0
455	7	0	0	0	0	0	0	200	300	0	0	0	0	0	0	0	200	903	0	0	0	0	0	0	0	603	903	0
455	8	0	0	0	0	0	0	200	300	0	0	0	0	0	0	0	200	903	0	0	0	0	0	0	0	603	903	0
455	9	0	0	0	0	0	0	200	300	0	0	0	0	0	0	0	200	903	0	0	0	0	0	0	0	603	903	0
456	0	0	0	0	0	0	0	200	300	0	0	0	0	0	0	0	200	903	0	0	0	0	0	0	0	603	903	0
456	1	0	0	0	0	0	0	200	300	0	0	0	0	0	0	0	200	903	0	0	0	0	0	0	0	603	903	0
456	2	0	0	0	0	0	0	200	300	0	0	0	0	0	0	0	200	903	0	0	0	0	0	0	0	603	903	0
456	3	0	0	0	0	0	0	200	300	0	0	0	0	0	0	0	200	903	0	0	0	0	0	0	0	603	903	0
456	4	0	0	0	0	0	0	200	300	0	0	0	0	0	0	0	200	903	0	0	0	0	0	0	0	603	903	0
456	5	0	0	0	0	0	0	200	300	0	0	0	0	0	0	0	200	903	0	0	0	0	0	0	0	603	903	0
456	6	0	0	0	0	0	0	200	300	0	0	0	0	0	0	0	200	903	0	0	0	0	0	0	0	603	903	0
456	7	0	0	0	0	0	0	200	300	0	0	0	0	0	0	0	200	903	0	0	0	0	0	0	0	603	903	0
456	8	0	0	0	0	0	0	200	300	0	0	0	0	0	0	0	200	903	0	0	0	0	0	0	0	603	903	0
456	9	0	0	0	0	0	0	200	300	0	0	0	0	0	0	0	200	903	0	0	0	0	0	0	0	603	903	0
457	0	0	0	0	0	0	0	200	300	0	0	0	0	0	0	0	200	903	0	0	0	0	0	0	0	603	903	0
457	1	0	0	0	0	0	0	200	300	0	0	0	0	0	0	0	200	903	0	0	0	0	0	0	0	603	903	0
457	2	0	0	0	0	0	0	200	300	0	0	0	0	0	0	0	200	903	0	0	0	0	0	0	0	603	903	0
457	3	0	0	0	0	0	0	200	300	0	0	0	0	0	0	0	200	903	0	0	0	0	0	0	0	603	903	0
457	4	0	0	0	0	0	0	200	300	0	0	0	0	0	0	0	200	903	0	0	0	0	0	0	0	603	903	0
457	5	0	0	0	0	0	0	200	300	0	0	0	0	0	0	0	200	903	0	0	0	0	0	0	0	603	903	0
457	6	0	0	0	0	0	0	200	300	0	0	0	0	0	0	0	200	903	0	0	0	0	0	0	0	603	903	0
457	7	0	0	0	0	0	0	200	300	0	0	0	0	0	0	0	200	903	0	0	0	0	0	0	0	603	903	0
457	8	0	0	0	0	0	0	200	300	0	0	0	0	0	0	0	200	903	0	0	0	0	0	0	0	603	903	0
457	9	0	0	0	0	0	0	200	300	0	0	0	0	0	0	0	200	903	0	0	0	0	0	0	0	603	903	0
458	0	0	0	0	0	0	0	200	300	0	0	0	0	0	0	0	200	903	0	0	0	0	0	0	0	603	903	0
458	1	0	0	0	0	0	0	200	300	0	0	0	0	0	0	0	200	903	0	0	0	0	0	0	0	603	903	0
458	2	0	0	0	0	0	0	200	300	0	0	0	0	0	0	0	200	903	0	0	0	0	0	0	0	603	903	0
458	3	0	0	0	0	0	0	200	300	0	0	0	0	0	0	0	200	903	0	0	0	0	0	0	0	603	903	0
458	4	0	0	0	0	0	0	200	300	0	0	0	0	0	0	0	200	903	0	0	0	0	0	0	0	603	903	0
458	5	0	0	0	0	0	0	200	300	0	0	0	0	0	0	0	200	903	0	0	0	0	0	0	0	603	903	0
458	6	0	0	0	0	0	0	200	300	0	0	0	0	0	0	0	200	903	0	0	0	0	0	0	0	603	903	0
458	7	0	0	0	0	0	0	200	300	0	0	0	0	0	0	0	200	903	0	0	0	0	0	0	0	603	903	0
458	8	0	0	0	0	0	0	200	300	0	0	0	0	0	0	0	200	903	0	0	0	0	0	0	0	603	903	0
458	9	0	0	0	0	0	0	200	300	0	0	0	0	0	0	0	200	903	0	0	0	0	0	0	0	603	903	0
459	0	0	0	0	0	0	0	200	300	0	0	0	0	0	0	0	200	903	0	0	0	0	0	0	0	603	903	0
459	1	0	0	0	0	0	0	200	300	0	0	0	0	0	0	0	200	903	0	0	0	0	0	0	0	603	903	0
459	2	0	0	0	0	0	0	200	300	0	0	0	0	0	0	0	200	903	0	0	0	0	0	0	0	603	903	0
459	3	0	0	0	0	0	0	200	300	0	0	0	0	0	0	0	200	903	0	0	0	0	0	0	0	603	903	0
459	4	0	0	0	0	0	0	200	300	0	0	0	0	0	0	0	200	903	0	0	0	0	0	0	0	603	903	0
459	5	0	0	0	0	0	0	200	300	0	0	0	0	0	0	0	200	903	0	0	0	0	0	0	0	603	903	0
459	6	0	0	0	0	0	0	200	300	0	0	0	0	0	0	0	200	903	0	0	0	0	0	0	0	603	903	0
459	7	0	0	0	0	0	0	200	300	0	0	0	0	0	0	0	200	903	0	0	0	0	0	0	0	603	903	0
459	8	0	0	0	0	0	0	200	300	0	0	0	0	0	0	0	200	903	0	0	0	0	0	0	0	603	903	0
459	9	0	0	0	0	0	0	200	300	0	0	0	0	0	0	0	200	903	0	0	0	0	0	0	0	603	903	0
460	0	0	0	0	0	0	0	200	300	0	0	0	0	0	0	0	200	903	0	0	0	0	0	0	0	603	903	0
460	1	0	0	0	0	0	0	200	300	0	0	0	0	0	0	0	200	903	0	0	0	0	0	0	0	603	903	0
460	2	0	0	0	0	0	0	200	300	0	0	0	0	0	0	0	200	903	0	0	0	0	0	0	0	603	903	0
460	3	0	0	0	0	0	0	200	300	0	0	0	0	0	0	0	200	903	0	0	0	0	0	0	0	603	903	0
460	4	0	0	0	0	0	0	200	300	0	0	0	0	0	0	0	200	903	0	0	0	0	0	0	0	603	903	0
460	5	0	0	0	0	0	0	200	300	0	0	0	0	0	0	0	200	903	0	0	0	0	0	0	0	603	903	0
460	6	0	0	0	0	0	0	200	300	0	0	0	0	0	0	0	200	903	0	0	0	0	0	0	0	603	903	0
460	7	0	0	0	0	0	0	200	300	0	0	0	0	0	0	0	200	903	0	0	0	0	0	0	0	603	903	0
460	8	0	0	0	0	0	0	200	300	0	0	0	0	0	0	0	200	903	0	0	0	0	0	0	0	603	903	0
460	9	0	0	0	0	0	0	200	300	0	0	0	0	0	0	0	200	903	0	0	0	0	0	0	0	603	903	0
461	0	0	0	0	0	0	0	200	300	0	0	0	0	0	0	0	200	903	0	0	0	0	0	0	0	603	903	0
461	1	0	0	0	0	0	0	200	300	0	0	0	0	0	0	0	200	903	0	0	0	0	0	0	0	603	903	0
461	2	0	0	0	0	0	0	200	300	0	0	0	0	0	0	0	200	903	0	0	0	0	0	0	0	603	903	0
461	3	0	0	0	0	0	0	200	300	0	0	0	0	0	0	0	200	903	0	0	0	0	0	0	0	603	903	0
461	4	0	0	0	0	0	0	200	300	0	0	0	0	0	0	0	200	903	0	0	0	0	0	0	0	603	903	0
461	5	0	0	0	0	0	0	200	300	0	0	0	0	0	0	0	200	903	0	0	0	0	0	0	0	603	903	0
461	6	0	0	0	0	0	0	200	300	0	0	0	0	0	0	0	200	903	0	0	0	0	0	0	0	603	903	0
461	7	0	0	0	0	0	0	200	300	0	0	0	0	0	0	0	200	903	0	0	0	0	0	0	0	603	903	0
461	8	0	0	0	0	0	0	200	300	0	0	0	0	0	0	0	200	903	0	0	0	0	0	0	0	603	903	0
461	9	0	0	0	0	0	0	200	300	0	0	0	0	0	0	0	200	903	0	0	0	0	0	0	0	603	903	0
462	0	0	0	0	0	0	0	200	300	0	0	0	0	0	0	0	200	903	0	0	0	0	0	0	0	603	903	0
462	1	0	0	0	0	0	0	200	300	0	0	0	0	0	0	0	200	903	0	0	0	0	0	0	0	603	903	0
462	2	0	0	0	0	0	0	200	300	0	0	0	0	0	0	0	200	903	0	0	0	0	0	0	0	603	903	0
462	3	0	0	0	0	0	0	200	300	0	0	0	0	0	0	0	200	903	0	0	0	0	0	0	0	603	903	0
462	4	0	0	0	0	0	0	200	300	0	0	0	0	0	0	0	200	903	0	0	0	0	0	0	0	603	903	0
462	5	0	0	0	0	0	0	200	300	0	0	0	0	0	0	0	200	903	0	0	0	0	0	0	0	603	903	0
462	6	0	0	0	0	0	0	200	300	0	0	0	0	0	0	0	200	903	0	0	0	0	0	0	0	603	903	0
462	7	0	0	0	0	0	0	200	300	0	0	0	0	0	0	0	200	903	0	0	0	0	0	0	0	603	903	0
462	8	0	0	0	0	0	0	200	300	0	0	0	0	0	0	0	200	903	0	0	0	0	0	0	0	603	903	0
462	9	0	0	0	0	0	0	200	300	0	0	0	0	0	0	0	200	903	0	0	0	0	0	0	0	603	903	0
463	0	0	0	0	0	0	0	200	300	0	0	0	0	0	0	0	200	903	0	0	0	0	0	0	0	603	903	0
463	1	0	0	0	0	0	0	200	300	0	0	0	0	0	0	0	200	903	0	0	0	0	0	0	0	603	903	0
463	2	0	0	0	0	0	0	200	300	0	0	0	0	0	0	0	200	903	0	0	0	0	0	0	0	603	903	0
463	3	0	0	0	0	0	0	200	300	0	0	0	0	0	0	0	200	903	0	0	0	0	0	0	0	603	903	0
463	4	0	0	0	0	0	0	200	300	0	0	0	0	0	0	0	200	903	0	0	0	0	0	0	0	603	903	0
463	5	0	0	0	0	0	0	200	300	0	0	0	0	0	0	0	200	903	0	0	0	0	0	0	0	603	903	0
463	6	0	0	0	0	0	0	200	300	0	0	0	0	0	0	0	200	903	0	0	0	0	0	0	0	603	903	0
463	7	0	0	0	0	0	0	200	300	0	0	0	0	0	0	0	200	903	0	0	0	0	0	0	0	603	903	0
463	8	0	0	0	0	0	0	200	300	0	0	0	0	0	0	0	200	903	0	0	0	0	0	0	0	603	903	0
463	9	0	0	0	0	0	0	200	300	0	0	0	0	0	0	0	200	903	0	0	0	0	0	0	0	603	903	0
464	0	0	0	0	0	0	0	200	300	0	0	0	0	0	0	0	200	903	0	0	0	0	0	0	0	603	903	0
464	1	0	0	0	0	0	0	200	300	0	0	0	0	0	0	0	200	903	0	0	0	0	0	0	0	603	903	0
464	2	0	0	0	0	0	0	200	300	0	0	0	0	0	0	0	200	903	0	0	0	0	0	0	0	603	903	0
464	3	0	0	0	0	0	0	200	300	0	0	0	0	0	0	0	200	903	0	0	0	0	0	0	0	603	903	0
464	4	0	0	0	0	0	0	200	300	0	0	0	0	0	0	0	200	903	0	0	0	0	0	0	0	603	903	0
464	5	0	0	0	0	0	0	200	300	0	0	0	0	0	0	0	200	903	0	0	0	0	0	0	0	603	903	0
464	6	0	0	0	0	0	0	200	300	0	0	0	0	0	0	0	200	903	0	0	0	0	0	0	0	603	903	0
464	7	0	0	0	0	0	0	200	300	0	0	0	0	0	0	0	200	903	0	0	0	0	0	0	0	603	903	0
464	8	0	0	0	0	0	0	200	300	0	0	0	0	0	0	0	200	903	0	0	0	0	0	0	0	603	903	0
464	9	0	0	0	0	0	0	200	300	0	0	0	0	0	0	0	200	903	0	0	0	0	0	0	0	603	903	0
465	0	0	0	0	0	0	0	200	300	0	0	0	0	0	0	0	200	903	0	0	0	0	0	0	0	603	903	0
465	1	0	0	0	0	0	0	200	300	0	0	0	0	0	0	0	200	903	0	0	0	0	0	0	0	603	903	0
465	2	0	0	0	0	0	0	200	300	0	0	0	0	0	0	0	200	903	0	0	0	0	0	0	0	603	903	0
465	3	0	0	0	0	0	0	200	300	0	0	0	0	0	0	0	200	903	0	0	0	0	0	0	0	603	903	0
465	4	0	0	0	0	0	0	200	300	0	0	0	0	0	0	0	200	903	0	0	0	0	0	0	0	603	903	0
465	5	0	0	0	0	0	0	200	300	0	0	0	0	0	0	0	200	903	0	0	0	0	0	0	0	603	903	0
465	6	0	0	0	0	0	0	200	300	0	0	0	0	0	0	0	200	903	0	0	0	0	0	0	0	603	903	0
465	7	0	0	0	0	0	0	200	300	0	0	0	0	0	0	0	200	903	0	0	0	0	0	0	0	603	903	0
465	8	0	0	0	0	0	0	200	300	0	0	0	0	0	0	0	200	903	0	0	0	0	0	0	0	603	903	0
465	9	0	0	0	0	0	0	200	300	0	0	0	0	0	0	0	200	903	0	0	0	0	0	0	0	603	903	0
466	0	0	0	0	0	0	0	200	300	0	0	0	0	0	0	0	200	903	0	0	0	0	0	0	0	603	903	0
466	1	0	0	0	0	0	0	200	300	0	0	0	0	0	0	0	200	903	0	0	0	0	0	0	0	603	903	0
466	2	0	0	0	0	0	0	200	300	0	0	0	0	0	0	0	200	903	0	0	0	0	0	0	0	603	903	0
466	3	0	0	0	0	0	0	200	300	0	0	0	0	0	0	0	200	903	0	0	0	0	0	0	0	603	903	0
466	4	0	0	0	0	0	0	200	300	0	0	0	0	0	0	0	200	903	0	0	0	0	0	0	0	603	903	0
466	5	0	0	0	0	0	0	200	300	0	0	0	0	0	0	0	200	903	0	0	0	0	0	0	0	603	903	0
466	6	0	0	0	0	0	0	200	300	0	0	0	0	0	0	0	200	903	0	0	0	0	0	0	0	603	903	0
466	7	0	0	0	0	0	0	200	300	0	0	0	0	0	0	0	200	903	0	0	0	0	0	0	0	603	903	0
466	8	0	0	0	0	0	0	200	300	0	0	0	0	0	0	0	200	903	0	0	0	0	0	0	0	603	903	0
466	9	0	0	0	0	0	0	200	300	0	0	0	0	0	0	0	200	903	0	0	0	0	0	0	0	603	903	0
467	0	0	0	0	0	0	0	200	300	0	0	0	0	0	0	0	200	903	0	0	0	0	0	0	0	603	903	0
467	1	0	0	0	0	0	0	200	300	0	0	0	0	0	0	0	200	903	0	0	0	0	0	0	0	603	903	0
467	2	0	0	0	0	0	0	200	300	0	0	0	0	0	0	0	200	903	0	0	0	0	0	0	0	603	903	0
467	3	0	0	0	0	0	0	200	300	0	0	0	0	0	0	0	200	903	0	0	0	0	0	0	0	603	903	0
467	4	0	0	0	0	0	0	200	300	0	0	0	0	0	0	0	200	903	0	0	0	0	0	0	0	603	903	0
467	5	0	0	0	0	0	0	200	300	0	0	0	0	0	0	0	200	903	0	0	0	0	0	0	0	603	903	0
467	6	0	0	0	0	0	0	200	300	0	0	0	0	0	0	0	200	903	0	0	0	0	0	0	0	603	903	0
467	7	0	0	0	0	0	0	200	300	0	0	0	0	0	0	0	200	903	0	0	0	0	0	0	0	603	903	0
467	8	0	0	0	0	0	0	200	300	0	0	0	0	0	0	0	200	903	0	0	0	0	0	0	0	603	903	0
467	9	0	0	0	0	0	0	200	300	0	0	0	0	0	0	0	200	903	0	0	0	0	0	0	0	603	903	0
468	0	0	0	0	0	0	0	200	300	0	0	0	0	0	0	0	200	903	0	0	0	0	0	0	0	603	903	0
468	1	0	0	0	0	0	0	200	300	0	0	0	0	0	0	0	200	903	0	0	0	0	0	0	0	603	903	0
468	2	0	0	0	0	0	0	200	300	0	0	0	0	0	0	0	200	903	0	0	0	0	0	0	0	603	903	0
468	3	0	0	0	0	0	0	200	300	0	0	0	0	0	0	0	200	903	0	0	0	0	0	0	0	603	903	0
468	4	0	0	0	0	0	0	200	300	0	0	0	0	0	0	0	200	903	0	0	0	0	0	0	0	603	903	0
468	5	0	0	0	0	0	0	200	300	0	0	0	0	0	0	0	200	903	0	0	0	0	0	0	0	603	903	0
468	6	0	0	0	0	0	0	200	300	0	0	0	0	0	0	0	200	903	0	0	0	0	0	0	0	603	903	0
468	7	0	0	0	0	0	0	200	300	0	0	0	0	0	0	0	200	903	0	0	0	0	0	0	0	603	903	0
468	8	0	0	0	0	0	0	200	300	0	0	0	0	0	0	0	200	903	0	0	0	0	0	0	0	603	903	0
468	9	0	0	0	0	0	0	200	300	0	0	0	0	0	0	0	200	903	0	0	0	0	0	0	0	603	903	0
469	0	0	0	0	0	0	0	200	300	0	0	0	0	0	0	0	200	903	0	0	0	0	0	0	0	603	903	0
469	1	0	0	0	0	0	0	200	300	0	0	0	0	0	0	0	200	903	0	0	0	0	0	0	0	603	903	0
469	2	0	0	0	0	0	0	200	300	0	0	0	0	0	0	0	200	903	0	0	0	0	0	0	0	603	903	0
469	3	0	0	0	0	0	0	200	300	0	0	0	0	0	0	0	200	903	0	0	0	0	0	0	0	603	903	0
469	4	0	0	0	0	0	0	200	300	0	0	0	0	0	0	0	200	903	0	0	0	0	0	0	0	603	903	0
469	5	0	0	0	0	0	0	200	300	0	0	0	0	0	0	0	200	903	0	0	0	0	0	0	0	603	903	0
469	6	0	0	0	0	0	0	200	300	0	0	0	0	0	0	0	200	903	0	0	0	0	0	0	0	603	903	0
469	7	0	0	0	0	0	0	200	300	0	0	0	0	0	0	0	200	903	0	0	0	0	0	0	0	603	903	0
469	8	0	0	0	0	0	0	200	300	0	0	0	0	0	0	0	200	903	0	0	0	0	0	0	0	603	903	0
469	9	0	0	0	0	0	0	200	300	0	0	0	0	0	0	0	200	903	0	0	0	0	0	0	0	603	903	0
470	0	0	0	0	0	0	0	200	300	0	0	0	0	0	0	0	200	903	0	0	0	0	0	0	0	603	903	0
470	1	0	0	0	0	0	0	200	300	0	0	0	0	0	0	0	200	903	0	0	0	0	0	0	0	603	903	0
470	2	0	0	0	0	0	0	200	300	0	0	0	0	0	0	0	200	903	0	0	0	0	0	0	0	603	903	0
470	3	0	0	0	0	0	0	200	300	0	0	0	0	0	0	0	200	903	0	0	0	0	0	0	0	603	903	0
470	4	0	0	0	0	0	0	200	300	0	0	0	0	0	0	0	200	903	0	0	0	0	0	0	0	603	903	0
470	5	0	0	0	0	0	0	200	300	0	0	0	0	0	0	0	200	903	0	0	0	0	0	0	0	603	903	0
470	6	0	0	0	0	0	0	200	300	0	0	0	0	0	0	0	200	903	0	0	0	0	0	0	0	603	903	0
470	7	0	0	0	0	0	0	200	300	0	0	0	0	0	0	0	200	903	0	0	0	0	0	0	0	603	903	0
470	8	0	0	0	0	0	0	200	300	0	0	0	0	0	0	0	200	903	0	0	0	0	0	0	0	603	903	0
470	9	0	0	0	0	0	0	200	300	0	0	0	0	0	0	0	200	903	0	0	0	0	0	0	0	603	903	0
471	0	0	0	0	0	0	0	200	300	0	0	0	0	0	0	0	200	903	0	0	0	0	0	0	0	603	903	0
471	1	0	0	0	0	0	0	200	300	0	0	0	0	0	0	0	200	903	0	0	0	0	0	0	0	603	903	0
471	2	0	0	0	0	0	0	200	300	0	0	0	0	0	0	0	200	903	0	0	0	0	0	0	0	603	903	0
471	3	0	0	0	0	0	0	200	300	0	0	0	0	0	0	0	200	903	0	0	0	0	0	0	0	603	903	0
471	4	0	0	0	0	0	0	200	300	0	0	0	0	0	0	0	200	903	0	0	0	0	0	0	0	603	903	0
471	5	0	0	0	0	0	0	200	300	0	0	0	0	0	0	0	200	903	0	0	0	0	0	0	0	603	903	0
471	6	0	0	0	0	0	0	200	300	0	0	0	0	0	0	0	200	903	0	0	0	0	0	0	0	603	903	0
471	7	0	0	0	0	0	0	200	300	0	0	0	0	0	0	0	200	903	0	0	0	0	0	0	0	603	903	0
471	8	0	0	0	0	0	0	200	300	0	0	0	0	0	0	0	200	903	0	0	0	0	0	0	0	603	903	0
471	9	0	0	0	0	0	0	200	300	0	0	0	0	0	0	0	200	903	0	0	0	0	0	0	0	603	903	0
472	0	0	0	0	0	0	0	200	300	0	0	0	0	0	0	0	200	903	0	0	0	0	0	0	0	603	903	0
472	1	0	0	0	0	0	0	200	300	0	0	0	0	0	0	0	200	903	0	0	0	0	0	0	0	603	903	0
472	2	0	0	0	0	0	0	200	300	0	0	0	0	0	0	0	200	903	0	0	0	0	0	0	0	603	903	0
472	3	0	0	0	0	0	0	200	300	0	0	0	0	0	0	0	200	903	0	0	0	0	0	0	0	603	903	0
472	4	0	0	0	0	0	0	200	300	0	0	0	0	0	0	0	200	903	0	0	0	0	0	0	0	603	903	0
472	5	0	0	0	0	0	0	200	300	0	0	0	0	0	0	0	200	903	0	0	0	0	0	0	0	603	903	0
472	6	0	0	0	0	0	0	200	300	0	0	0	0	0	0	0	200	903	0	0	0	0	0	0	0	603	903	0
472	7	0	0	0	0	0	0	200	300	0	0	0	0	0	0	0	200	903	0	0	0	0	0	0	0	603	903	0
472	8	0	0	0	0	0	0	200	300	0	0	0	0	0	0	0	200	903	0	0	0	0	0	0	0	603	903	0
472	9	0	0	0	0	0	0	200	300	0	0	0	0	0	0	0	200	903	0	0	0	0	0	0	0	603	903	0
473	0	0	0	0	0	0	0	200	300	0	0	0	0	0	0	0	200	903	0	0	0	0	0	0	0	603	903	0
473	1	0	0	0	0	0	0	200	300	0	0	0	0	0	0	0	200	903	0	0	0	0	0	0	0	603	903	0
473	2	0	0	0	0	0	0	200	300	0	0	0	0	0	0	0	200	903	0	0	0	0	0	0	0	603	903	0
473	3	0	0	0	0	0	0	200	300	0	0	0	0	0	0	0	200	903	0	0	0	0	0	0	0	603	903	0
473	4	0	0	0	0	0	0	200	300	0	0	0	0	0	0	0	200	903	0	0	0	0	0	0	0	603	903	0
473	5	0	0	0	0	0	0	200	300	0	0	0	0	0	0	0	200	903	0	0	0	0	0	0	0	603	903	0
473	6	0	0	0	0	0	0	200	300	0	0	0	0	0	0	0	200	903	0	0	0	0	0	0	0	603	903	0
473	7	0	0	0	0	0	0	200	300	0	0	0	0	0	0	0	200	903	0	0	0	0	0	0	0	603	903	0
473	8	0	0	0	0	0	0	200	300	0	0	0	0	0	0	0	200	903	0	0	0	0	0	0	0	603	903	0
473	9	0	0	0	0	0	0	200	300	0	0	0	0	0	0	0	200	903	0	0	0	0	0	0	0	603	903	0
474	0	0	0	0	0	0	0	200	300	0	0	0	0	0	0	0	200	903	0	0	0	0	0	0	0	603	903	0
474	1	0	0	0	0	0	0	200	300	0	0	0	0	0	0	0	200	903	0	0	0	0	0	0	0	603	903	0
474	2	0	0	0	0	0	0	200	300	0	0	0	0	0	0	0	200	903	0	0	0	0	0	0	0	603	903	0
474	3	0	0	0	0	0	0	200	300	0	0	0	0	0	0	0	200	903	0	0	0	0	0	0	0	603	903	0
474	4	0	0	0	0	0	0	200	300	0	0	0	0	0	0	0	200	903	0	0	0	0	0	0	0	603	903	0
474	5	0	0	0	0	0	0	200	300	0	0	0	0	0	0	0	200	903	0	0	0	0	0	0	0	603	903	0
474	6	0	0	0	0	0	0	200	300	0	0	0	0	0	0	0	200	903	0	0	0	0	0	0	0	603	903	0
474	7	0	0	0	0	0	0	200	300	0	0	0	0	0	0	0	200	903	0	0	0	0	0	0	0	603	903	0
474	8	0	0	0	0	0	0	200	300	0	0	0	0	0	0	0	200	903	0	0	0	0	0	0	0	603	903	0
474	9	0	0	0	0	0	0	200	300	0	0	0	0	0	0	0	200	903	0	0	0	0	0	0	0	603	903	0
475	0	0	0	0	0	0	0	200	300	0	0	0	0	0	0	0	200	903	0	0	0	0	0	0	0	603	903	0
475	1	0	0	0	0	0	0	200	300	0	0	0	0	0	0	0	200	903	0	0	0	0	0	0	0	603	903	0
475	2	0	0	0	0	0	0	200	300	0	0	0	0	0	0	0	200	903	0	0	0	0	0	0	0	603	903	0
475	3	0	0	0	0	0	0	200	300	0	0	0	0	0	0	0	200	903	0	0	0	0	0	0	0	603	903	0
475	4	0	0	0	0	0	0	200	300	0	0	0	0	0	0	0	200	903	0	0	0	0	0	0	0	603	903	0
475	5	0	0	0	0	0	0	200	300	0	0	0	0	0	0	0	200	903	0	0	0	0	0	0	0	603	903	0
475	6	0	0	0	0	0	0	200	300	0	0	0	0	0	0	0	200	903	0	0	0	0	0	0	0	603	903	0
475	7	0	0	0	0	0	0	200	300	0	0	0	0	0	0	0	200	903	0	0	0	0	0	0	0	603	903	0
475	8	0	0	0	0	0	0	200	300	0	0	0	0	0	0	0	200	903	0	0	0	0	0	0	0	603	903	0
475	9	0	0	0	0	0	0	200	300	0	0	0	0	0	0	0	200	903	0	0	0	0	0	0	0	603	903	0
476	0	0	0	0	0	0	0	200	300	0	0	0	0	0	0	0	200	903	0	0	0	0	0	0	0	603	903	0
476	1	0	0	0	0	0	0	200	300	0	0	0	0	0	0	0	200	903	0	0	0	0	0	0	0	603	903	0
476	2	0	0	0	0	0	0	200	300	0	0	0	0	0	0	0	200	903	0	0	0	0	0	0	0	603	903	0
476	3	0	0	0	0	0	0	200	300	0	0	0	0	0	0	0	200	903	0	0	0	0	0	0	0	603	903	0
476	4	0	0	0	0	0	0	200	300	0	0	0	0	0	0	0	200	903	0	0	0	0	0	0	0	603	903	0
476	5	0	0	0	0	0	0	200	300	0	0	0	0	0	0	0	200	903	0	0	0	0	0	0	0	603	903	0
476	6	0	0	0	0	0	0	200	300	0	0	0	0	0	0	0	200	903	0	0	0	0	0	0	0	603	903	0
476	7	0	0	0	0	0	0	200	300	0	0	0	0	0	0	0	200	903	0	0	0	0	0	0	0	603	903	0
476	8	0	0	0	0	0	0	200	300	0	0	0	0	0	0	0	200	903	0	0	0	0	0	0	0	603	903	0
476	9	0	0	0	0	0	0	200	300	0	0	0	0	0	0	0	200	903	0	0	0	0	0	0	0	603	903	0
477	0	0	0	0	0	0	0	200	300	0	0	0	0	0	0	0	200	903	0	0	0	0	0	0	0	603	903	0
477	1	0	0	0	0	0	0	200	300	0	0	0	0	0	0	0	200	903	0	0	0	0	0	0	0	603	903	0
477	2	0	0	0	0	0	0	200	300	0	0	0	0	0	0	0	200	903	0	0	0	0	0	0	0	603	903	0
477	3	0	0	0	0	0	0	200	300	0	0	0	0	0	0	0	200	903	0	0	0	0	0	0	0	603	903	0
477	4	0	0	0	0	0	0	200	300	0	0	0	0	0	0	0	200	903	0	0	0	0	0	0	0	603	903	0
477	5	0	0	0	0	0	0	200	300	0	0	0	0	0	0	0	200	903	0	0	0	0	0	0	0	603	903	0
477	6	0	0	0	0	0	0	200	300	0	0	0	0	0	0	0	200	903	0	0	0	0	0	0	0	603	903	0
477	7	0	0	0	0	0	0	200	300	0	0	0	0	0	0	0	200	903	0	0	0	0	0	0	0	603	903	0
477	8	0	0	0	0	0	0	200	300	0	0	0	0	0	0	0	200	903	0	0	0	0	0	0	0	603	903	0
477	9	0	0	0	0	0	0	200	300	0	0	0	0	0	0	0	200	903	0	0	0	0	0	0	0	603	903	0
478	0	0	0	0	0	0	0	200	300	0	0	0	0	0	0	0	200	903	0	0	0	0	0	0	0	603	903	0
478	1	0	0	0	0	0	0	200	300	0	0	0	0	0	0	0	200	903	0	0	0	0	0	0	0	603	903	0
478	2	0	0	0	0	0	0	200	300	0	0	0	0	0	0	0	200	903	0	0	0	0	0	0	0	603	903	0
478	3	0	0	0	0	0	0	200	300	0	0	0	0	0	0	0	200	903	0	0	0	0	0	0	0	603	903	0
478	4	0	0	0	0	0	0	200	300	0	0	0	0	0	0	0	200	903	0	0	0	0	0	0	0	603	903	0
478	5	0	0	0	0	0	0	200	300	0	0	0	0	0	0	0	200	903	0	0	0	0	0	0	0	603	903	0
478	6	0	0	0	0	0	0	200	300	0	0	0	0	0	0	0	200	903	0	0	0	0	0	0	0	603	903	0
478	7	0	0	0	0	0	0	200	300	0	0	0	0	0	0	0	200	903	0	0	0	0	0	0	0	603	903	0
478	8	0	0	0	0	0	0	200	300	0	0	0	0	0	0	0	200	903	0	0	0	0	0	0	0	603	903	0
478	9	0	0	0	0	0	0	200	300	0	0	0	0	0	0	0	200	903	0	0	0	0	0	0	0	603	903	0
479	0	0	0	0	0	0	0	200	300	0	0	0	0	0	0	0	200	903	0	0	0	0	0	0	0	603	903	0
479	1	0	0	0	0	0	0	200	300	0	0	0	0	0	0	0	200	903	0	0	0	0	0	0	0	603	903	0
479	2	0	0	0	0	0	0	200	300	0	0	0	0	0	0	0	200	903	0	0	0	0	0	0	0	603	903	0
479	3	0	0	0	0	0	0	200	300	0	0	0	0	0	0	0	200	903	0	0	0	0	0	0	0	603	903	0
479	4	0	0	0	0	0	0	200	300	0	0	0	0	0	0	0	200	903	0	0	0	0	0	0	0	603	903	0
479	5	0	0	0	0	0	0	200	300	0	0	0	0	0	0	0	200	903	0	0	0	0	0	0	0	603	903	0
479	6	0	0	0	0	0	0	200	300	0	0	0	0	0	0	0	200	903	0	0	0	0	0	0	0	603	903	0
479	7	0	0	0	0	0	0	200	300	0	0	0	0	0	0	0	200	903	0	0	0	0	0	0	0	603	903	0
479	8	0	0	0	0	0	0	200	300	0	0	0	0	0	0	0	200	903	0	0	0	0	0	0	0	603	903	0
479	9	0	0	0	0	0	0	200	300	0	0	0	0	0	0	0	200	903	0	0	0	0	0	0	0	603	903	0
480	0	0	0	0	0	0	0	200	300	0	0	0	0	0	0	0	200	903	0	0	0	0	0	0	0	603	903	0
480	1	0	0	0	0	0	0	200	300	0	0	0	0	0	0	0	200	903	0	0	0	0	0	0	0	603	903	0
480	2	0	0	0	0	0	0	200	300	0	0	0	0	0	0	0	200	903	0	0	0	0	0	0	0	603	903	0
480	3	0	0	0	0	0	0	200	300	0	0	0	0	0	0	0	200	903	0	0	0	0	0	0	0	603	903	0
480	4	0	0	0	0	0	0	200	300	0	0	0	0	0	0	0	200	903	0	0	0	0	0	0	0	603	903	0
480	5	0	0	0	0	0	0	200	300	0	0	0	0	0	0	0	200	903	0	0	0	0	0	0	0	603	903	0
480	6	0	0	0	0	0	0	200	300	0	0	0	0	0	0	0	200	903	0	0	0	0	0	0	0	603	903	0
480	7	0	0	0	0	0	0	200	300	0	0	0	0	0	0	0	200	903	0	0	0	0	0	0	0	603	903	0
480	8	0	0	0	0	0	0	200	300	0	0	0	0	0	0	0	200	903	0	0	0	0	0	0	0	603	903	0
480	9	0	0	0	0	0	0	200	300	0	0	0	0	0	0	0	200	903	0	0	0	0	0	0	0	603	903	0
481	0	0	0	0	0	0	0	200	300	0	0	0	0	0	0	0	200	903	0	0	0	0	0	0	0	603	903	0
481	1	0	0	0	0	0	0	200	300	0	0	0	0	0	0	0	200	903	0	0	0	0	0	0	0	603	903	0
481	2	0	0	0	0	0	0	200	300	0	0	0	0	0	0	0	200	903	0	0	0	0	0	0	0	603	903	0
481	3	0	0	0	0	0	0	200	300	0	0	0	0	0	0	0	200	903	0	0	0	0	0	0	0	603	903	0
481	4	0	0	0	0	0	0	200	300	0	0	0	0	0	0	0	200	903	0	0	0	0	0	0	0	603	903	0
481	5	0	0	0	0	0	0	200	300	0	0	0	0	0	0	0	200	903	0	0	0	0	0	0	0	603	903	0
481	6	0	0	0	0	0	0	200	300	0	0	0	0	0	0	0	200	903	0	0	0	0	0	0	0	603	903	0
481	7	0	0	0	0	0	0	200	300	0	0	0	0	0	0	0	200	903	0	0	0	0	0	0	0	603	903	0
481	8	0	0	0	0	0	0	200	300	0	0	0	0	0	0	0	200	903	0	0	0	0	0	0	0	603	903	0
481	9	0	0	0	0	0	0	200	300	0	0	0	0	0	0	0	200	903	0	0	0	0	0	0	0	603	903	0
482	0	0	0	0	0	0	0	200	300	0	0	0	0	0	0	0	200	903	0	0	0	0	0	0	0	603	903	0
482	1	0	0	0	0	0	0	200	300	0	0	0	0	0	0	0	200	903	0	0	0	0	0	0	0	603	903	0
482	2	0	0	0	0	0	0	200	300	0	0	0	0	0	0	0	200	903	0	0	0	0	0	0	0	603	903	0
482	3	0	0	0	0	0	0	200	300	0	0	0	0	0	0	0	200	903	0	0	0	0	0	0	0	603	903	0
482	4	0	0	0	0	0	0	200	300	0	0	0	0	0	0	0	200	903	0	0	0	0	0	0	0	603	903	0
482	5	0	0	0	0	0	0	200	300	0	0	0	0	0	0	0	200	903	0	0	0	0	0	0	0	603	903	0
482	6	0	0	0	0	0	0	200	300	0	0	0	0	0	0	0	200	903	0	0	0	0	0	0	0	603	903	0
482	7	0	0	0	0	0	0	200	300	0	0	0	0	0	0	0	200	903	0	0	0	0	0	0	0	603	903	0
482	8	0	0	0	0	0	0	200	300	0	0	0	0	0	0	0	200	903	0	0	0	0	0	0	0	603	903	0
482	9	0	0	0	0	0	0	200	300	0	0	0	0	0	0	0	200	903	0	0	0	0	0	0	0	603	903	0
483	0	0	0	0	0	0	0	200	300	0	0	0	0	0	0	0	200	903	0	0	0	0	0	0	0	603	903	0
483	1	0	0	0	0	0	0	200	300	0	0	0	0	0	0	0	200	903	0	0	0	0	0	0	0	603	903	0
483	2	0	0	0	0	0	0	200	300	0	0	0	0	0	0	0	200	903	0	0	0	0	0	0	0	603	903	0
483	3	0	0	0	0	0	0	200	300	0	0	0	0	0	0	0	200	903	0	0	0	0	0	0	0	603	903	0
483	4	0	0	0	0	0	0	200	300	0	0	0	0	0	0	0	200	903	0	0	0	0	0	0	0	603	903	0
483	5	0	0	0	0	0	0	200	300	0	0	0	0	0	0	0	200	903	0	0	0	0	0	0	0	603	903	0
483	6	0	0	0	0	0	0	200	300	0	0	0	0	0	0	0	200	903	0	0	0	0	0	0	0	603	903	0
483	7	0	0	0	0	0	0	200	300	0	0	0	0	0	0	0	200	903	0	0	0	0	0	0	0	603	903	0
483	8	0	0	0	0	0	0	200	300	0	0	0	0	0	0	0	200	903	0	0	0	0	0	0	0	603	903	0
483	9	0	0	0	0	0	0	200	300	0	0	0	0	0	0	0	200	903	0	0	0	0	0	0	0	603	903	0
484	0	0	0	0	0	0	0	200	300	0	0	0	0	0	0	0	200	903	0	0	0	0	0	0	0	603	903	0
484	1	0	0	0	0	0	0	200	300	0	0	0	0	0	0	0	200	903	0	0	0	0	0	0	0	603	903	0
484	2	0	0	0	0	0	0	200	300	0	0	0	0	0	0	0	200	903	0	0	0	0	0	0	0	603	903	0
484	3	0	0	0	0	0	0	200	300	0	0	0	0	0	0	0	200	903	0	0	0	0	0	0	0	603	903	0
484	4	0	0	0	0	0	0	200	300	0	0	0	0	0	0	0	200	903	0	0	0	0	0	0	0	603	903	0
484	5	0	0	0	0	0	0	200	300	0	0	0	0	0	0	0	200	903	0	0	0	0	0	0	0	603	903	0
484	6	0	0	0	0	0	0	200	300	0	0	0	0	0	0	0	200	903	0	0	0	0	0	0	0	603	903	0
484	7	0	0	0	0	0	0	200	300	0	0	0	0	0	0	0	200	903	0	0	0	0	0	0	0	603	903	0
484	8	0	0	0	0	0	0	200	300	0	0	0	0	0	0	0	200	903	0	0	0	0	0	0	0	603	903	0
484	9	0	0	0	0	0	0	200	300	0	0	0	0	0	0	0	200	903	0	0	0	0	0	0	0	603	903	0
485	0	0	0	0	0	0	0	200	300	0	0	0	0	0	0	0	200	903	0	0	0	0	0	0	0	603	903	0
485	1	0	0	0	0	0	0	200	300	0	0	0	0	0	0	0	200	903	0	0	0	0	0	0	0	603	903	0
485	2	0	0	0	0	0	0	200	300	0	0	0	0	0	0	0	200	903	0	0	0	0	0	0	0	603	903	0
485	3	0	0	0	0	0	0	200	300	0	0	0	0	0	0	0	200	903	0	0	0	0	0	0	0	603	903	0
485	4	0	0	0	0	0	0	200	300	0	0	0	0	0	0	0	200	903	0	0	0	0	0	0	0	603	903	0
485	5	0	0	0	0	0	0	200	300	0	0	0	0	0	0	0	200	903	0	0	0	0	0	0	0	603	903	0
485	6	0	0	0	0	0	0	200	300	0	0	0	0	0	0	0	200	903	0	0	0	0	0	0	0	603	903	0
485	7	0	0	0	0	0	0	200	300	0	0	0	0	0	0	0	200	903	0	0	0	0	0	0	0	603	903	0
485	8	0	0	0	0	0	0	200	300	0	0	0	0	0	0	0	200	903	0	0	0	0	0	0	0	603	903	0
485	9	0	0	0	0	0	0	200	300	0	0	0	0	0	0	0	200	903	0	0	0	0	0	0	0	603	903	0
486	0	0	0	0	0	0	0	200	300	0	0	0	0	0	0	0	200	903	0	0	0	0	0	0	0	603	903	0
486	1	0	0	0	0	0	0	200	300	0	0	0	0	0	0	0	200	903	0	0	0	0	0	0	0	603	903	0
486	2	0	0	0	0	0	0	200	300	0	0	0	0	0	0	0	200	903	0	0	0	0	0	0	0	603	903	0
486	3	0	0	0	0	0	0	200	300	0	0	0	0	0	0	0	200	903	0	0	0	0	0	0	0	603	903	0
486	4	0	0	0	0	0	0	200	300	0	0	0	0	0	0	0	200	903	0	0	0	0	0	0	0	603	903	0
486	5	0	0	0	0	0	0	200	300	0	0	0	0	0	0	0	200	903	0	0	0	0	0	0	0	603	903	0
486	6	0	0	0	0	0	0	200	300	0	0	0	0	0	0	0	200	903	0	0	0	0	0	0	0	603	903	0
486	7	0	0	0	0	0	0	200	300	0	0	0	0	0	0	0	200	903	0	0	0	0	0	0	0	603	903	0
486	8	0	0	0	0	0	0	200	300	0	0	0	0	0	0	0	200	903	0	0	0	0	0	0	0	603	903	0
486	9	0	0	0	0	0	0	200	300	0	0	0	0	0	0	0	200	903	0	0	0	0	0	0	0	603	903	0
487	0	0	0	0	0	0	0	200	300	0	0	0	0	0	0	0	200	903	0	0	0	0	0	0	0	603	903	0
487	1	0	0	0	0	0	0	200	300	0	0	0	0	0	0	0	200	903	0	0	0	0	0	0	0	603	903	0
487	2	0	0	0	0	0	0	200	300	0	0	0	0	0	0	0	200	903	0	0	0	0	0	0	0	603	903	0
487	3	0	0	0	0	0	0	200	300	0	0	0	0	0	0	0	200	903	0	0	0	0	0	0	0	603	903	0
487	4	0	0	0	0	0	0	200	300	0	0	0	0	0	0	0	200	903	0	0	0	0	0	0	0	603	903	0
487	5	0	0	0	0	0	0	200	300	0	0	0	0	0	0	0	200	903	0	0	0	0	0	0	0	603	903	0
487	6	0	0	0	0	0	0	200	300	0	0	0	0	0	0	0	200	903	0	0	0	0	0	0	0	603	903	0
487	7	0	0	0	0	0	0	200	300	0	0	0	0	0	0	0	200	903	0	0	0	0	0	0	0	603	903	0
487	8	0	0	0	0	0	0	200	300	0	0	0	0	0	0	0	200	903	0	0	0	0	0	0	0	603	903	0
487	9	0	0	0	0	0	0	200	300	0	0	0	0	0	0	0	200	903	0	0	0	0	0	0	0	603	903	0
488	0	0	0	0	0	0	0	200	300	0	0	0	0	0	0	0	200	903	0	0	0	0	0	0	0	603	903	0
488	1	0	0	0	0	0	0	200	300	0	0	0	0	0	0	0	200	903	0	0	0	0	0	0	0	603	903	0
488	2	0	0	0	0	0	0	200	300	0	0	0	0	0	0	0	200	903	0	0	0	0	0	0	0	603	903	0
488	3	0	0	0	0	0	0	200	300	0	0	0	0	0	0	0	200	903	0	0	0	0	0	0	0	603	903	0
488	4	0	0	0	0	0	0	200	300	0	0	0	0	0	0	0	200	903	0	0	0	0	0	0	0	603	903	0
488	5	0	0	0	0	0	0	200	300	0	0	0	0	0	0	0	200	903	0	0	0	0	0	0	0	603	903	0
488	6	0	0	0	0	0	0	200	300	0	0	0	0	0	0	0	200	903	0	0	0	0	0	0	0	603	903	0
488	7	0	0	0	0	0	0	200	300	0	0	0	0	0	0	0	200	903	0	0	0	0	0	0	0	603	903	0
488	8	0	0	0	0	0	0	200	300	0	0	0	0	0	0	0	200	903	0	0	0	0	0	0	0	603	903	0
488	9	0	0	0	0	0	0	200	300	0	0	0	0	0	0	0	200	903	0	0	0	0	0	0	0	603	903	0
489	0	0	0	0	0	0	0	200	300	0	0	0	0	0	0	0	200	903	0	0	0	0	0	0	0	603	903	0
489	1	0	0	0	0	0	0	200	300	0	0	0	0	0	0	0	200	903	0	0	0	0	0	0	0	603	903	0
489	2	0	0	0	0	0	0	200	300	0	0	0	0	0	0	0	200	903	0	0	0	0	0	0	0	603	903	0
489	3	0	0	0	0	0	0	200	300	0	0	0	0	0	0	0	200	903	0	0	0	0	0	0	0	603	903	0
489	4	0	0	0	0	0	0	200	300	0	0	0	0	0	0	0	200	903	0	0	0	0	0	0	0	603	903	0
489	5	0	0	0	0	0	0	200	300	0	0	0	0	0	0	0	200	903	0	0	0	0	0	0	0	603	903	0
489	6	0	0	0	0	0	0	200	300	0	0	0	0	0	0	0	200	903	0	0	0	0	0	0	0	603	903	0
489	7	0	0	0	0	0	0	200	300	0	0	0	0	0	0	0	200	903	0	0	0	0	0	0	0	603	903	0
489	8	0	0	0	0	0	0	200	300	0	0	0	0	0	0	0	200	903	0	0	0	0	0	0	0	603	903	0
489	9	0	0	0	0	0	0	200	300	0	0	0	0	0	0	0	200	903	0	0	0	0	0	0	0	603	903	0
490	0	0	0	0	0	0	0	200	300	0	0	0	0	0	0	0	200	903	0	0	0	0	0	0	0	603	903	0
490	1	0	0	0	0	0	0	200	300	0	0	0	0	0	0	0	200	903	0	0	0	0	0	0	0	603	903	0
490	2	0	0	0	0	0	0	200	300	0	0	0	0	0	0	0	200	903	0	0	0	0	0	0	0	603	903	0
490	3	0	0	0	0	0	0	200	300	0	0	0	0	0	0	0	200	903	0	0	0	0	0	0	0	603	903	0
490	4	0	0	0	0	0	0	200	300	0	0	0	0	0	0	0	200	903	0	0	0	0	0	0	0	603	903	0
490	5	0	0	0	0	0	0	200	300	0	0	0	0	0	0	0	200	903	0	0	0	0	0	0	0	603	903	0
490	6	0	0	0	0	0	0	200	300	0	0	0	0	0	0	0	200	903	0	0	0	0	0	0	0	603	903	0
490	7	0	0	0	0	0	0	200	300	0	0	0	0	0	0	0	200	903	0	0	0	0	0	0	0	603	903	0
490	8	0	0	0	0	0	0	200	300	0	0	0	0	0	0	0	200	903	0	0	0	0	0	0	0	603	903	0
490	9	0	0	0	0	0	0	200	300	0	0	0	0	0	0	0	200	903	0	0	0	0	0	0	0	603	903	0
491	0	0	0	0	0	0	0	200	300	0	0	0	0	0	0	0	200	903	0	0	0	0	0	0	0	603	903	0
491	1	0	0	0	0	0	0	200	300	0	0	0	0	0	0	0	200	903	0	0	0	0	0	0	0	603	903	0
491	2	0	0	0	0	0	0	200	300	0	0	0	0	0	0	0	200	903	0	0	0	0	0	0	0	603	903	0
491	3	0	0	0	0	0	0	200	300	0	0	0	0	0	0	0	200	903	0	0	0	0	0	0	0	603	903	0
491	4	0	0	0	0	0	0	200	300	0	0	0	0	0	0	0	200	903	0	0	0	0	0	0	0	603	903	0
491	5	0	0	0	0	0	0	200	300	0	0	0	0	0	0	0	200	903	0	0	0	0	0	0	0	603	903	0
491	6	0	0	0	0	0	0	200	300	0	0	0	0	0	0	0	200	903	0	0	0	0	0	0	0	603	903	0
491	7	0	0	0	0	0	0	200	300	0	0	0	0	0	0	0	200	903	0	0	0	0	0	0	0	603	903	0
491	8	0	0	0	0	0	0	200	300	0	0	0	0	0	0	0	200	903	0	0	0	0	0	0	0	603	903	0
491	9	0	0	0	0	0	0	200	300	0	0	0	0	0	0	0	200	903	0	0	0	0	0	0	0	603	903	0
492	0	0	0	0	0	0	0	200	300	0	0	0	0	0	0	0	200	903	0	0	0	0	0	0	0	603	903	0
492	1	0	0	0	0	0	0	200	300	0	0	0	0	0	0	0	200	903	0	0	0	0	0	0	0	603	903	0
492	2	0	0	0	0	0	0	200	300	0	0	0	0	0	0	0	200	903	0	0	0	0	0	0	0	603	903	0
492	3	0	0	0	0	0	0	200	300	0	0	0	0	0	0	0	200	903	0	0	0	0	0	0	0	603	903	0
492	4	0	0	0	0	0	0	200	300	0	0	0	0	0	0	0	200	903	0	0	0	0	0	0	0	603	903	0
492	5	0	0	0	0	0	0	200	300	0	0	0	0	0	0	0	200	903	0	0	0	0	0	0	0	603	903	0
492	6	0	0	0	0	0	0	200	300	0	0	0	0	0	0	0	200	903	0	0	0	0	0	0	0	603	903	0
492	7	0	0	0	0	0	0	200	300	0	0	0	0	0	0	0	200	903	0	0	0	0	0	0	0	603	903	0
492	8	0	0	0	0	0	0	200	300	0	0	0	0	0	0	0	200	903	0	0	0	0	0	0	0	603	903	0
492	9	0	0	0	0	0	0	200	300	0	0	0	0	0	0	0	200	903	0	0	0	0	0	0	0	603	903	0
493	0	0	0	0	0	0	0	200	300	0	0	0	0	0	0	0	200	903	0	0	0	0	0	0	0	603	903	0
493	1	0	0	0	0	0	0	200	300	0	0	0	0	0	0	0	200	903	0	0	0	0	0	0	0	603	903	0
493	2	0	0	0	0	0	0	200	300	0	0	0	0	0	0	0	200	903	0	0	0	0	0	0	0	603	903	0
493	3	0	0	0	0	0	0	200	300	0	0	0	0	0	0	0	200	903	0	0	0	0	0	0	0	603	903	0
493	4	0	0	0	0	0	0	200	300	0	0	0	0	0	0	0	200	903	0	0	0	0	0	0	0	603	903	0
493	5	0	0	0	0	0	0	200	300	0	0	0	0	0	0	0	200	903	0	0	0	0	0	0	0	603	903	0
493	6	0	0	0	0	0	0	200	300	0	0	0	0	0	0	0	200	903	0	0	0	0	0	0	0	603	903	0
493	7	0	0	0	0	0	0	200	300	0	0	0	0	0	0	0	200	903	0	0	0	0	0	0	0	603	903	0
493	8	0	0	0	0	0	0	200	300	0	0	0	0	0	0	0	200	903	0	0	0	0	0	0	0	603	903	0
493	9	0	0	0	0	0	0	200	300	0	0	0	0	0	0	0	200	903	0	0	0	0	0	0	0	603	903	0
494	0	0	0	0	0	0	0	200	300	0	0	0	0	0	0	0	200	903	0	0	0	0	0	0	0	603	903	0
494	1	0	0	0	0	0	0	200	300	0	0	0	0	0	0	0	200	903	0	0	0	0	0	0	0	603	903	0
494	2	0	0	0	0	0	0	200	300	0	0	0	0	0	0	0	200	903	0	0	0	0	0	0	0	603	903	0
494	3	0	0	0	0	0	0	200	300	0	0	0	0	0	0	0	200	903	0	0	0	0	0	0	0	603	903	0
494	4	0	0	0	0	0	0	200	300	0	0	0	0	0	0	0	200	903	0	0	0	0	0	0	0	603	903	0
494	5	0	0	0	0	0	0	200	300	0	0	0	0	0	0	0	200	903	0	0	0	0	0	0	0	603	903	0
494	6	0	0	0	0	0	0	200	300	0	0	0	0	0	0	0	200	903	0	0	0	0	0	0	0	603	903	0
494	7	0	0	0	0	0	0	200	300	0	0	0	0	0	0	0	200	903	0	0	0	0	0	0	0	603	903	0
494	8	0	0	0	0	0	0	200	300	0	0	0	0	0	0	0	200	903	0	0	0	0	0	0	0	603	903	0
494	9	0	0	0	0	0	0	200	300	0	0	0	0	0	0	0	200	903	0	0	0	0	0	0	0	603	903	0
495	0	0	0	0	0	0	0	200	300	0	0	0	0	0	0	0	200	903	0	0	0	0	0	0	0	603	903	0
495	1	0	0	0	0	0	0	200	300	0	0	0	0	0	0	0	200	903	0	0	0	0	0	0	0	603	903	0
495	2	0	0	0	0	0	0	200	300	0	0	0	0	0	0	0	200	903	0	0	0	0	0	0	0	603	903	0
495	3	0	0	0	0	0	0	200	300	0	0	0	0	0	0	0	200	903	0	0	0	0	0	0	0	603	903	0
495	4	0	0	0	0	0	0	200	300	0	0	0	0	0	0	0	200	903	0	0	0	0	0	0	0	603	903	0
495	5	0	0	0	0	0	0	200	300	0	0	0	0	0	0	0	200	903	0	0	0	0	0	0	0	603	903	0
495	6	0	0	0	0	0	0	200	300	0	0	0	0	0	0	0	200	903	0	0	0	0	0	0	0	603	903	0
495	7	0	0	0	0	0	0	200	300	0	0	0	0	0	0	0	200	903	0	0	0	0	0	0	0	603	903	0
495	8	0	0	0	0	0	0	200	300	0	0	0	0	0	0	0	200	903	0	0	0	0	0	0	0	603	903	0
495	9	0	0	0	0	0	0	200	300	0	0	0	0	0	0	0	200	903	0	0	0	0	0	0	0	603	903	0
496	0	0	0	0	0	0	0	200	300	0	0	0	0	0	0	0	200	903	0	0	0	0	0	0	0	603	903	0
496	1	0	0	0	0	0	0	200	300	0	0	0	0	0	0	0	200	903	0	0	0	0	0	0	0	603	903	0
496	2	0	0	0	0	0	0	200	300	0	0	0	0	0	0	0	200	903	0	0	0	0	0	0	0	603	903	0
496	3	0	0	0	0	0	0	200	300	0	0	0	0	0	0	0	200	903	0	0	0	0	0	0	0	603	903	0
496	4	0	0	0	0	0	0	200	300	0	0	0	0	0	0	0	200	903	0	0	0	0	0	0	0	603	903	0
496	5	0	0	0	0	0	0	200	300	0	0	0	0	0	0	0	200	903	0	0	0	0	0	0	0	603	903	0
496	6	0	0	0	0	0	0	200	300	0	0	0	0	0	0	0	200	903	0	0	0	0	0	0	0	603	903	0
496	7	0	0	0	0	0	0	200	300	0	0	0	0	0	0	0	200	903	0	0	0	0	0	0	0	603	903	0
496	8	0	0	0	0	0	0	200	300	0	0	0	0	0	0	0	200	903	0	0	0	0	0	0	0	603	903	0
496	9	0	0	0	0	0	0	200	300	0	0	0	0	0	0	0	200	903	0	0	0	0	0	0	0	603	903	0
497	0	0	0	0	0	0	0	200	300	0	0	0	0	0	0	0	200	903	0	0	0	0	0	0	0	603	903	0
497	1	0	0	0	0	0	0	200	300	0	0	0	0	0	0	0	200	903	0	0	0	0	0	0	0	603	903	0
497	2	0	0	0	0	0	0	200	300	0	0	0	0	0	0	0	200	903	0	0	0	0	0	0	0	603	903	0
497	3	0	0	0	0	0	0	200	300	0	0	0	0	0	0	0	200	903	0	0	0	0	0	0	0	603	903	0
497	4	0	0	0	0	0	0	200	300	0	0	0	0	0	0	0	200	903	0	0	0	0	0	0	0	603	903	0
497	5	0	0	0	0	0	0	200	300	0	0	0	0	0	0	0	200	903	0	0	0	0	0	0	0	603	903	0
497	6	0	0	0	0	0	0	200	300	0	0	0	0	0	0	0	200	903	0	0	0	0	0	0	0	603	903	0
497	7	0	0	0	0	0	0	200	300	0	0	0	0	0	0	0	200	903	0	0	0	0	0	0	0	603	903	0
497	8	0	0	0	0	0	0	200	300	0	0	0	0	0	0	0	200	903	0	0	0	0	0	0	0	603	903	0
497	9	0	0	0	0	0	0	200	300	0	0	0	0	0	0	0	200	903	0	0	0	0	0	0	0	603	903	0
498	0	0	0	0	0	0	0	200	300	0	0	0	0	0	0	0	200	903	0	0	0	0	0	0	0	603	903	0
498	1	0	0	0	0	0	0	200	300	0	0	0	0	0	0	0	200	903	0	0	0	0	0	0	0	603	903	0
498	2	0	0	0	0	0	0	200	300	0	0	0	0	0	0	0	200	903	0	0	0	0	0	0	0	603	903	0
498	3	0	0	0	0	0	0	200	300	0	0	0	0	0	0	0	200	903	0	0	0	0	0	0	0	603	903	0
498	4	0	0	0	0	0	0	200	300	0	0	0	0	0	0	0	200	903	0	0	0	0	0	0	0	603	903	0
498	5	0	0	0	0	0	0	200	300	0	0	0	0	0	0	0	200	903	0	0	0	0	0	0	0	603	903	0
498	6	0	0	0	0	0	0	200	300	0	0	0	0	0	0	0	200	903	0	0	0	0	0	0	0	603	903	0
498	7	0	0	0	0	0	0	200	300	0	0	0	0	0	0	0	200	903	0	0	0	0	0	0	0	603	903	0
498	8	0	0	0	0	0	0	200	300	0	0	0	0	0	0	0	200	903	0	0	0	0	0	0	0	603	903	0
498	9	0	0	0	0	0	0	200	300	0	0	0	0	0	0	0	200	903	0	0	0	0	0	0	0	603	903	0
499	0	0	0	0	0	0	0	200	300	0	0	0	0	0	0	0	200	903	0	0	0	0	0	0	0	603	903	0
499	1	0	0	0	0	0	0	200	300	0	0	0	0	0	0	0	200	903	0	0	0	0	0	0	0	603	903	0
499	2	0	0	0	0	0	0	200	300	0	0	0	0	0	0	0	200	903	0	0	0	0	0	0	0	603	903	0
499	3	0	0	0	0	0	0	200	300	0	0	0	0	0	0	0	200	903	0	0	0	0	0	0	0	603	903	0
499	4	0	0	0	0	0	0	200	300	0	0	0	0	0	0	0	200	903	0	0	0	0	0	0	0	603	903	0
499	5	0	0	0	0	0	0	200	300	0	0	0	0	0	0	0	200	903	0	0	0	0	0	0	0	603	903	0
499	6	0	0	0	0	0	0	200	300	0	0	0	0	0	0	0	200	903	0	0	0	0	0	0	0	603	903	0
499	7	0	0	0	0	0	0	200	300	0	0	0	0	0	0	0	200	903	0	0	0	0	0	0	0	603	903	0
499	8	0	0	0	0	0	0	200	300	0	0	0	0	0	0	0	200	903	0	0	0	0	0	0	0	603	903	0
499	9	0	0	0	0	0	0	200	300	0	0	0	0	0	0	0	200	903	0	0	0	0	0	0	0	603	903	0
500	0	0	0	0	0	0	0	200	300	0	0	0	0	0	0	0	200	903	0	0	0	0	0	0	0	603	903	0
500	1	0	0	0	0	0	0	200	300	0	0	0	0	0	0	0	200	903	0	0	0	0	0	0	0	603	903	0
500	2	0	0	0	0	0	0	200	300	0	0	0	0	0	0	0	200	903	0	0	0	0	0	0	0	603	903	0
500	3	0	0	0	0	0	0	200	300	0	0	0	0	0	0	0	200	903	0	0	0	0	0	0	0	603	903	0
500	4	0	0	0	0	0	0	200	300	0	0	0	0	0	0	0	200	903	0	0	0	0	0	0	0	603	903	0
500	5	0	0	0	0	0	0	200	300	0	0	0	0	0	0	0	200	903	0	0	0	0	0	0	0	603	903	0
500	6	0	0	0	0	0	0	200	300	0	0	0	0	0	0	0	200	903	0	0	0	0	0	0	0	603	903	0
500	7	0	0	0	0	0	0	200	300	0	0	0	0	0	0	0	200	903	0	0	0	0	0	0	0	603	903	0
500	8	0	0	0	0	0	0	200	300	0	0	0	0	0	0	0	200	903	0	0	0	0	0	0	0	603	903	0
500	9	0	0	0	0	0	0	200	300	0	0	0	0	0	0	0	200	903	0	0	0	0	0	0	0	603	903	0
501	0	0	0	0	0	0	0	200	300	0	0	0	0	0	0	0	200	903	0	0	0	0	0	0	0	603	903	0
501	1	0	0	0	0	0	0	200	300	0	0	0	0	0	0	0	200	903	0	0	0	0	0	0	0	603	903	0
501	2	0	0	0	0	0	0	200	300	0	0	0	0	0	0	0	200	903	0	0	0	0	0	0	0	603	903	0
501	3	0	0	0	0	0	0	200	300	0	0	0	0	0	0	0	200	903	0	0	0	0	0	0	0	603	903	0
501	4	0	0	0	0	0	0	200	300	0	0	0	0	0	0	0	200	903	0	0	0	0	0	0	0	603	903	0
501	5	0	0	0	0	0	0	200	300	0	0	0	0	0	0	0	200	903	0	0	0	0	0	0	0	603	903	0
501	6	0	0	0	0	0	0	200	300	0	0	0	0	0	0	0	200	903	0	0	0	0	0	0	0	603	903	0
501	7	0	0	0	0	0	0	200	300	0	0	0	0	0	0	0	200	903	0	0	0	0	0	0	0	603	903	0
501	8	0	0	0	0	0	0	200	300	0	0	0	0	0	0	0	200	903	0	0	0	0	0	0	0	603	903	0
501	9	0	0	0	0	0	0	200	300	0	0	0	0	0	0	0	200	903	0	0	0	0	0	0	0	603	903	0
502	0	0	0	0	0	0	0	200	300	0	0	0	0	0	0	0	200	903	0	0	0	0	0	0	0	603	903	0
502	1	0	0	0	0	0	0	200	300	0	0	0	0	0	0	0	200	903	0	0	0	0	0	0	0	603	903	0
502	2	0	0	0	0	0	0	200	300	0	0	0	0	0	0	0	200	903	0	0	0	0	0	0	0	603	903	0
502	3	0	0	0	0	0	0	200	300	0	0	0	0	0	0	0	200	903	0	0	0	0	0	0	0	603	903	0
502	4	0	0	0	0	0	0	200	300	0	0	0	0	0	0	0	200	903	0	0	0	0	0	0	0	603	903	0
502	5	0	0	0	0	0	0	200	300	0	0	0	0	0	0	0	200	903	0	0	0	0	0	0	0	603	903	0
502	6	0	0	0	0	0	0	200	300	0	0	0	0	0	0	0	200	903	0	0	0	0	0	0	0	603	903	0
502	7	0	0	0	0	0	0	200	300	0	0	0	0	0	0	0	200	903	0	0	0	0	0	0	0	603	903	0
502	8	0	0	0	0	0	0	200	300	0	0	0	0	0	0	0	200	903	0	0	0	0	0	0	0	603	903	0
502	9	0	0	0	0	0	0	200	300	0	0	0	0	0	0	0	200	903	0	0	0	0	0	0	0	603	903	0
503	0	0	0	0	0	0	0	200	300	0	0	0	0	0	0	0	200	903	0	0	0	0	0	0	0	603	903	0
503	1	0	0	0	0	0	0	200	300	0	0	0	0	0	0	0	200	903	0	0	0	0	0	0	0	603	903	0
503	2	0	0	0	0	0	0	200	300	0	0	0	0	0	0	0	200	903	0	0	0	0	0	0	0	603	903	0
503	3	0	0	0	0	0	0	200	300	0	0	0	0	0	0	0	200	903	0	0	0	0	0	0	0	603	903	0
503	4	0	0	0	0	0	0	200	300	0	0	0	0	0	0	0	200	903	0	0	0	0	0	0	0	603	903	0
503	5	0	0	0	0	0	0	200	300	0	0	0	0	0	0	0	200	903	0	0	0	0	0	0	0	603	903	0
503	6	0	0	0	0	0	0	200	300	0	0	0	0	0	0	0	200	903	0	0	0	0	0	0	0	603	903	0
503	7	0	0	0	0	0	0	200	300	0	0	0	0	0	0	0	200	903	0	0	0	0	0	0	0	603	903	0
503	8	0	0	0	0	0	0	200	300	0	0	0	0	0	0	0	200	903	0	0	0	0	0	0	0	603	903	0
503	9	0	0	0	0	0	0	200	300	0	0	0	0	0	0	0	200	903	0	0	0	0	0	0	0	603	903	0
504	0	0	0	0	0	0	0	200	300	0	0	0	0	0	0	0	200	903	0	0	0	0	0	0	0	603	903	0
504	1	0	0	0	0	0	0	200	300	0	0	0	0	0	0	0	200	903	0	0	0	0	0	0	0	603	903	0
504	2	0	0	0	0	0	0	200	300	0	0	0	0	0	0	0	200	903	0	0	0	0	0	0	0	603	903	0
504	3	0	0	0	0	0	0	200	300	0	0	0	0	0	0	0	200	903	0	0	0	0	0	0	0	603	903	0
504	4	0	0	0	0	0	0	200	300	0	0	0	0	0	0	0	200	903	0	0	0	0	0	0	0	603	903	0
504	5	0	0	0	0	0	0	200	300	0	0	0	0	0	0	0	200	903	0	0	0	0	0	0	0	603	903	0
504	6	0	0	0	0	0	0	200	300	0	0	0	0	0	0	0	200	903	0	0	0	0	0	0	0	603	903	0
504	7	0	0	0	0	0	0	200	300	0	0	0	0	0	0	0	200	903	0	0	0	0	0	0	0	603	903	0
504	8	0	0	0	0	0	0	200	300	0	0	0	0	0	0	0	200	903	0	0	0	0	0	0	0	603	903	0
504	9	0	0	0	0	0	0	200	300	0	0	0	0	0	0	0	200	903	0	0	0	0	0	0	0	603	903	0
505	0	0	0	0	0	0	0	200	300	0	0	0	0	0	0	0	200	903	0	0	0	0	0	0	0	603	903	0
505	1	0	0	0	0	0	0	200	300	0	0	0	0	0	0	0	200	903	0	0	0	0	0	0	0	603	903	0
505	2	0	0	0	0	0	0	200	300	0	0	0	0	0	0	0	200	903	0	0	0	0	0	0	0	603	903	0
505	3	0	0	0	0	0	0	200	300	0	0	0	0	0	0	0	200	903	0	0	0	0	0	0	0	603	903	0
505	4	0	0	0	0	0	0	200	300	0	0	0	0	0	0	0	200	903	0	0	0	0	0	0	0	603	903	0
505	5	0	0	0	0	0	0	200	300	0	0	0	0	0	0	0	200	903	0	0	0	0	0	0	0	603	903	0
505	6	0	0	0	0	0	0	200	300	0	0	0	0	0	0	0	200	903	0	0	0	0	0	0	0	603	903	0
505	7	0	0	0	0	0	0	200	300	0	0	0	0	0	0	0	200	903	0	0	0	0	0	0	0	603	903	0
505	8	0	0	0	0	0	0	200	300	0	0	0	0	0	0	0	200	903	0	0	0	0	0	0	0	603	903	0
505	9	0	0	0	0	0	0	200	300	0	0	0	0	0	0	0	200	903	0	0	0	0	0	0	0	603	903	0
506	0	0	0	0	0	0	0	200	300	0	0	0	0	0	0	0	200	903	0	0	0	0	0	0	0	603	903	0
506	1	0	0	0	0	0	0	200	300	0	0	0	0	0	0	0	200	903	0	0	0	0	0	0	0	603	903	0
506	2	0	0	0	0	0	0	200	300	0	0	0	0	0	0	0	200	903	0	0	0	0	0	0	0	603	903	0
506	3	0	0	0	0	0	0	200	300	0	0	0	0	0	0	0	200	903	0	0	0	0	0	0	0	603	903	0
506	4	0	0	0	0	0	0	200	300	0	0	0	0	0	0	0	200	903	0	0	0	0	0	0	0	603	903	0
506	5	0	0	0	0	0	0	200	300	0	0	0	0	0	0	0	200	903	0	0	0	0	0	0	0	603	903	0
506	6	0	0	0	0	0	0	200	300	0	0	0	0	0	0	0	200	903	0	0	0	0	0	0	0	603	903	0
506	7	0	0	0	0	0	0	200	300	0	0	0	0	0	0	0	200	903	0	0	0	0	0	0	0	603	903	0
506	8	0	0	0	0	0	0	200	300	0	0	0	0	0	0	0	200	903	0	0	0	0	0	0	0	603	903	0
506	9	0	0	0	0	0	0	200	300	0	0	0	0	0	0	0	200	903	0	0	0	0	0	0	0	603	903	0
507	0	0	0	0	0	0	0	200	300	0	0	0	0	0	0	0	200	903	0	0	0	0	0	0	0	603	903	0
507	1	0	0	0	0	0	0	200	300	0	0	0	0	0	0	0	200	903	0	0	0	0	0	0	0	603	903	0
507	2	0	0	0	0	0	0	200	300	0	0	0	0	0	0	0	200	903	0	0	0	0	0	0	0	603	903	0
507	3	0	0	0	0	0	0	200	300	0	0	0	0	0	0	0	200	903	0	0	0	0	0	0	0	603	903	0
507	4	0	0	0	0	0	0	200	300	0	0	0	0	0	0	0	200	903	0	0	0	0	0	0	0	603	903	0
507	5	0	0	0	0	0	0	200	300	0	0	0	0	0	0	0	200	903	0	0	0	0	0	0	0	603	903	0
507	6	0	0	0	0	0	0	200	300	0	0	0	0	0	0	0	200	903	0	0	0	0	0	0	0	603	903	0
507	7	0	0	0	0	0	0	200	300	0	0	0	0	0	0	0	200	903	0	0	0	0	0	0	0	603	903	0
507	8	0	0	0	0	0	0	200	300	0	0	0	0	0	0	0	200	903	0	0	0	0	0	0	0	603	903	0
507	9	0	0	0	0	0	0	200	300	0	0	0	0	0	0	0	200	903	0	0	0	0	0	0	0	603	903	0
508	0	0	0	0	0	0	0	200	300	0	0	0	0	0	0	0	200	903	0	0	0	0	0	0	0	603	903	0
508	1	0	0	0	0	0	0	200	300	0	0	0	0	0	0	0	200	903	0	0	0	0	0	0	0	603	903	0
508	2	0	0	0	0	0	0	200	300	0	0	0	0	0	0	0	200	903	0	0	0	0	0	0	0	603	903	0
508	3	0	0	0	0	0	0	200	300	0	0	0	0	0	0	0	200	903	0	0	0	0	0	0	0	603	903	0
508	4	0	0	0	0	0	0	200	300	0	0	0	0	0	0	0	200	903	0	0	0	0	0	0	0	603	903	0
508	5	0	0	0	0	0	0	200	300	0	0	0	0	0	0	0	200	903	0	0	0	0	0	0	0	603	903	0
508	6	0	0	0	0	0	0	200	300	0	0	0	0	0	0	0	200	903	0	0	0	0	0	0	0	603	903	0
508	7	0	0	0	0	0	0	200	300	0	0	0	0	0	0	0	200	903	0	0	0	0	0	0	0	603	903	0
508	8	0	0	0	0	0	0	200	300	0	0	0	0	0	0	0	200	903	0	0	0	0	0	0	0	603	903	0
508	9	0	0	0	0	0	0	200	300	0	0	0	0	0	0	0	200	903	0	0	0	0	0	0	0	603	903	0
509	0	0	0	0	0	0	0	200	300	0	0	0	0	0	0	0	200	903	0	0	0	0	0	0	0	603	903	0
509	1	0	0	0	0	0	0	200	300	0	0	0	0	0	0	0	200	903	0	0	0	0	0	0	0	603	903	0
509	2	0	0	0	0	0	0	200	300	0	0	0	0	0	0	0	200	903	0	0	0	0	0	0	0	603	903	0
509	3	0	0	0	0	0	0	200	300	0	0	0	0	0	0	0	200	903	0	0	0	0	0	0	0	603	903	0
509	4	0	0	0	0	0	0	200	300	0	0	0	0	0	0	0	200	903	0	0	0	0	0	0	0	603	903	0
509	5	0	0	0	0	0	0	200	300	0	0	0	0	0	0	0	200	903	0	0	0	0	0	0	0	603	903	0
509	6	0	0	0	0	0	0	200	300	0	0	0	0	0	0	0	200	903	0	0	0	0	0	0	0	603	903	0
509	7	0	0	0	0	0	0	200	300	0	0	0	0	0	0	0	200	903	0	0	0	0	0	0	0	603	903	0
509	8	0	0	0	0	0	0	200	300	0	0	0	0	0	0	0	200	903	0	0	0	0	0	0	0	603	903	0
509	9	0	0	0	0	0	0	200	300	0	0	0	0	0	0	0	200	903	0	0	0	0	0	0	0	603	903	0
510	0	0	0	0	0	0	0	200	300	0	0	0	0	0	0	0	200	903	0	0	0	0	0	0	0	603	903	0
510	1	0	0	0	0	0	0	200	300	0	0	0	0	0	0	0	200	903	0	0	0	0	0	0	0	603	903	0
510	2	0	0	0	0	0	0	200	300	0	0	0	0	0	0	0	200	903	0	0	0	0	0	0	0	603	903	0
510	3	0	0	0	0	0	0	200	300	0	0	0	0	0	0	0	200	903	0	0	0	0	0	0	0	603	903	0
510	4	0	0	0	0	0	0	200	300	0	0	0	0	0	0	0	200	903	0	0	0	0	0	0	0	603	903	0
510	5	0	0	0	0	0	0	200	300	0	0	0	0	0	0	0	200	903	0	0	0	0	0	0	0	603	903	0
510	6	0	0	0	0	0	0	200	300	0	0	0	0	0	0	0	200	903	0	0	0	0	0	0	0	603	903	0
510	7	0	0	0	0	0	0	200	300	0	0	0	0	0	0	0	200	903	0	0	0	0	0	0	0	603	903	0
510	8	0	0	0	0	0	0	200	300	0	0	0	0	0	0	0	200	903	0	0	0	0	0	0	0	603	903	0
510	9	0	0	0	0	0	0	200	300	0	0	0	0	0	0	0	200	903	0	0	0	0	0	0	0	603	903	0
511	0	0	0	0	0	0	0	200	300	0	0	0	0	0	0	0	200	903	0	0	0	0	0	0	0	603	903	0
511	1	0	0	0	0	0	0	200	300	0	0	0	0	0	0	0	200	903	0	0	0	0	0	0	0	603	903	0
511	2	0	0	0	0	0	0	200	300	0	0	0	0	0	0	0	200	903	0	0	0	0	0	0	0	603	903	0
511	3	0	0	0	0	0	0	200	300	0	0	0	0	0	0	0	200	903	0	0	0	0	0	0	0	603	903	0
511	4	0	0	0	0	0	0	200	300	0	0	0	0	0	0	0	200	903	0	0	0	0	0	0	0	603	903	0
511	5	0	0	0	0	0	0	200	300	0	0	0	0	0	0	0	200	903	0	0	0	0	0	0	0	603	903	0
511	6	0	0	0	0	0	0	200	300	0	0	0	0	0	0	0	200	903	0	0	0	0	0	0	0	603	903	0
511	7	0	0	0	0	0	0	200	300	0	0	0	0	0	0	0	200	903	0	0	0	0	0	0	0	603	903	0
511	8	0	0	0	0	0	0	200	300	0	0	0	0	0	0	0	200	903	0	0	0	0	0	0	0	603	903	0
511	9	0	0	0	0	0	0	200	300	0	0	0	0	0	0	0	200	903	0	0	0	0	0	0	0	603	903	0
512	0	0	0	0	0	0	0	200	300	0	0	0	0	0	0	0	200	903	0	0	0	0	0	0	0	603	903	0
512	1	0	0	0	0	0	0	200	300	0	0	0	0	0	0	0	200	903	0	0	0	0	0	0	0	603	903	0
512	2	0	0	0	0	0	0	200	300	0	0	0	0	0	0	0	200	903	0	0	0	0	0	0	0	603	903	0
512	3	0	0	0	0	0	0	200	300	0	0	0	0	0	0	0	200	903	0	0	0	0	0	0	0	603	903	0
512	4	0	0	0	0	0	0	200	300	0	0	0	0	0	0	0	200	903	0	0	0	0	0	0	0	603	903	0
512	5	0	0	0	0	0	0	200	300	0	0	0	0	0	0	0	200	903	0	0	0	0	0	0	0	603	903	0
512	6	0	0	0	0	0	0	200	300	0	0	0	0	0	0	0	200	903	0	0	0	0	0	0	0	603	903	0
512	7	0	0	0	0	0	0	200	300	0	0	0	0	0	0	0	200	903	0	0	0	0	0	0	0	603	903	0
512	8	0	0	0	0	0	0	200	300	0	0	0	0	0	0	0	200	903	0	0	0	0	0	0	0	603	903	0
512	9	0	0	0	0	0	0	200	300	0	0	0	0	0	0	0	200	903	0	0	0	0	0	0	0	603	903	0
513	0	0	0	0	0	0	0	200	300	0	0	0	0	0	0	0	200	903	0	0	0	0	0	0	0	603	903	0
513	1	0	0	0	0	0	0	200	300	0	0	0	0	0	0	0	200	903	0	0	0	0	0	0	0	603	903	0
513	2	0	0	0	0	0	0	200	300	0	0	0	0	0	0	0	200	903	0	0	0	0	0	0	0	603	903	0
513	3	0	0	0	0	0	0	200	300	0	0	0	0	0	0	0	200	903	0	0	0	0	0	0	0	603	903	0
513	4	0	0	0	0	0	0	200	300	0	0	0	0	0	0	0	200	903	0	0	0	0	0	0	0	603	903	0
513	5	0	0	0	0	0	0	200	300	0	0	0	0	0	0	0	200	903	0	0	0	0	0	0	0	603	903	0
513	6	0	0	0	0	0	0	200	300	0	0	0	0	0	0	0	200	903	0	0	0	0	0	0	0	603	903	0
513	7	0	0	0	0	0	0	200	300	0	0	0	0	0	0	0	200	903	0	0	0	0	0	0	0	603	903	0
513	8	0	0	0	0	0	0	200	300	0	0	0	0	0	0	0	200	903	0	0	0	0	0	0	0	603	903	0
513	9	0	0	0	0	0	0	200	300	0	0	0	0	0	0	0	200	903	0	0	0	0	0	0	0	603	903	0
514	0	0	0	0	0	0	0	200	300	0	0	0	0	0	0	0	200	903	0	0	0	0	0	0	0	603	903	0
514	1	0	0	0	0	0	0	200	300	0	0	0	0	0	0	0	200	903	0	0	0	0	0	0	0	603	903	0
514	2	0	0	0	0	0	0	200	300	0	0	0	0	0	0	0	200	903	0	0	0	0	0	0	0	603	903	0
514	3	0	0	0	0	0	0	200	300	0	0	0	0	0	0	0	200	903	0	0	0	0	0	0	0	603	903	0
514	4	0	0	0	0	0	0	200	300	0	0	0	0	0	0	0	200	903	0	0	0	0	0	0	0	603	903	0
514	5	0	0	0	0	0	0	200	300	0	0	0	0	0	0	0	200	903	0	0	0	0	0	0	0	603	903	0
514	6	0	0	0	0	0	0	200	300	0	0	0	0	0	0	0	200	903	0	0	0	0	0	0	0	603	903	0
514	7	0	0	0	0	0	0	200	300	0	0	0	0	0	0	0	200	903	0	0	0	0	0	0	0	603	903	0
514	8	0	0	0	0	0	0	200	300	0	0	0	0	0	0	0	200	903	0	0	0	0	0	0	0	603	903	0
514	9	0	0	0	0	0	0	200	300	0	0	0	0	0	0	0	200	903	0	0	0	0	0	0	0	603	903	0
515	0	0	0	0	0	0	0	200	300	0	0	0	0	0	0	0	200	903	0	0	0	0	0	0	0	603	903	0
515	1	0	0	0	0	0	0	200	300	0	0	0	0	0	0	0	200	903	0	0	0	0	0	0	0	603	903	0
515	2	0	0	0	0	0	0	200	300	0	0	0	0	0	0	0	200	903	0	0	0	0	0	0	0	603	903	0
515	3	0	0	0	0	0	0	200	300	0	0	0	0	0	0	0	200	903	0	0	0	0	0	0	0	603	903	0
515	4	0	0	0	0	0	0	200	300	0	0	0	0	0	0	0	200	903	0	0	0	0	0	0	0	603	903	0
515	5	0	0	0	0	0	0	200	300	0	0	0	0	0	0	0	200	903	0	0	0	0	0	0	0	603	903	0
515	6	0	0	0	0	0	0	200	300	0	0	0	0	0	0	0	200	903	0	0	0	0	0	0	0	603	903	0
515	7	0	0	0	0	0	0	200	300	0	0	0	0	0	0	0	200	903	0	0	0	0	0	0	0	603	903	0
515	8	0	0	0	0	0	0	200	300	0	0	0	0	0	0	0	200	903	0	0	0	0	0	0	0	603	903	0
515	9	0	0	0	0	0	0	200	300	0	0	0	0	0	0	0	200	903	0	0	0	0	0	0	0	603	903	0
516	0	0	0	0	0	0	0	200	300	0	0	0	0	0	0	0	200	903	0	0	0	0	0	0	0	603	903	0
516	1	0	0	0	0	0	0	200	300	0	0	0	0	0	0	0	200	903	0	0	0	0	0	0	0	603	903	0
516	2	0	0	0	0	0	0	200	300	0	0	0	0	0	0	0	200	903	0	0	0	0	0	0	0	603	903	0
516	3	0	0	0	0	0	0	200	300	0	0	0	0	0	0	0	200	903	0	0	0	0	0	0	0	603	903	0
516	4	0	0	0	0	0	0	200	300	0	0	0	0	0	0	0	200	903	0	0	0	0	0	0	0	603	903	0
516	5	0	0	0	0	0	0	200	300	0	0	0	0	0	0	0	200	903	0	0	0	0	0	0	0	603	903	0
516	6	0	0	0	0	0	0	200	300	0	0	0	0	0	0	0	200	903	0	0	0	0	0	0	0	603	903	0
516	7	0	0	0	0	0	0	200	300	0	0	0	0	0	0	0	200	903	0	0	0	0	0	0	0	603	903	0
516	8	0	0	0	0	0	0	200	300	0	0	0	0	0	0	0	200	903	0	0	0	0	0	0	0	603	903	0
516	9	0	0	0	0	0	0	200	300	0	0	0	0	0	0	0	200	903	0	0	0	0	0	0	0	603	903	0
517	0	0	0	0	0	0	0	200	300	0	0	0	0	0	0	0	200	903	0	0	0	0	0	0	0	603	903	0
517	1	0	0	0	0	0	0	200	300	0	0	0	0	0	0	0	200	903	0	0	0	0	0	0	0	603	903	0
517	2	0	0	0	0	0	0	200	300	0	0	0	0	0	0	0	200	903	0	0	0	0	0	0	0	603	903	0
517	3	0	0	0	0	0	0	200	300	0	0	0	0	0	0	0	200	903	0	0	0	0	0	0	0	603	903	0
517	4	0	0	0	0	0	0	200	300	0	0	0	0	0	0	0	200	903	0	0	0	0	0	0	0	603	903	0
517	5	0	0	0	0	0	0	200	300	0	0	0	0	0	0	0	200	903	0	0	0	0	0	0	0	603	903	0
517	6	0	0	0	0	0	0	200	300	0	0	0	0	0	0	0	200	903	0	0	0	0	0	0	0	603	903	0
517	7	0	0	0	0	0	0	200	300	0	0	0	0	0	0	0	200	903	0	0	0	0	0	0	0	603	903	0
517	8	0	0	0	0	0	0	200	300	0	0	0	0	0	0	0	200	903	0	0	0	0	0	0	0	603	903	0
517	9	0	0	0	0	0	0	200	300	0	0	0	0	0	0	0	200	903	0	0	0	0	0	0	0	603	903	0
518	0	0	0	0	0	0	0	200	300	0	0	0	0	0	0	0	200	903	0	0	0	0	0	0	0	603	903	0
518	1	0	0	0	0	0	0	200	300	0	0	0	0	0	0	0	200	903	0	0	0	0	0	0	0	603	903	0
518	2	0	0	0	0	0	0	200	300	0	0	0	0	0	0	0	200	903	0	0	0	0	0	0	0	603	903	0
518	3	0	0	0	0	0	0	200	300	0	0	0	0	0	0	0	200	903	0	0	0	0	0	0	0	603	903	0
518	4	0	0	0	0	0	0	200	300	0	0	0	0	0	0	0	200	903	0	0	0	0	0	0	0	603	903	0
518	5	0	0	0	0	0	0	200	300	0	0	0	0	0	0	0	200	903	0	0	0	0	0	0	0	603	903	0
518	6	0	0	0	0	0	0	200	300	0	0	0	0	0	0	0	200	903	0	0	0	0	0	0	0	603	903	0
518	7	0	0	0	0	0	0	200	300	0	0	0	0	0	0	0	200	903	0	0	0	0	0	0	0	603	903	0
518	8	0	0	0	0	0	0	200	300	0	0	0	0	0	0	0	200	903	0	0	0	0	0	0	0	603	903	0
518	9	0	0	0	0	0	0	200	300	0	0	0	0	0	0	0	200	903	0	0	0	0	0	0	0	603	903	0
519	0	0	0	0	0	0	0	200	300	0	0	0	0	0	0	0	200	903	0	0	0	0	0	0	0	603	903	0
519	1	0	0	0	0	0	0	200	300	0	0	0	0	0	0	0	200	903	0	0	0	0	0	0	0	603	903	0
519	2	0	0	0	0	0	0	200	300	0	0	0	0	0	0	0	200	903	0	0	0	0	0	0	0	603	903	0
519	3	0	0	0	0	0	0	200	300	0	0	0	0	0	0	0	200	903	0	0	0	0	0	0	0	603	903	0
519	4	0	0	0	0	0	0	200	300	0	0	0	0	0	0	0	200	903	0	0	0	0	0	0	0	603	903	0
519	5	0	0	0	0	0	0	200	300	0	0	0	0	0	0	0	200	903	0	0	0	0	0	0	0	603	903	0
519	6	0	0	0	0	0	0	200	300	0	0	0	0	0	0	0	200	903	0	0	0	0	0	0	0	603	903	0
519	7	0	0	0	0	0	0	200	300	0	0	0	0	0	0	0	200	903	0	0	0	0	0	0	0	603	903	0
519	8	0	0	0	0	0	0	200	300	0	0	0	0	0	0	0	200	903	0	0	0	0	0	0	0	603	903	0
519	9	0	0	0	0	0	0	200	300	0	0	0	0	0	0	0	200	903	0	0	0	0	0	0	0	603	903	0
520	0	0	0	0	0	0	0	200	300	0	0	0	0	0	0	0	200	903	0	0	0	0	0	0	0	603	903	0
520	1	0	0	0	0	0	0	200	300	0	0	0	0	0	0	0	200	903	0	0	0	0	0	0	0	603	903	0
520	2	0	0	0	0	0	0	200	300	0	0	0	0	0	0	0	200	903	0	0	0	0	0	0	0	603	903	0
520	3	0	0	0	0	0	0	200	300	0	0	0	0	0	0	0	200	903	0	0	0	0	0	0	0	603	903	0
520	4	0	0	0	0	0	0	200	300	0	0	0	0	0	0	0	200	903	0	0	0	0	0	0	0	603	903	0
520	5	0	0	0	0	0	0	200	300	0	0	0	0	0	0	0	200	903	0	0	0	0	0	0	0	603	903	0
520	6	0	0	0	0	0	0	200	300	0	0	0	0	0	0	0	200	903	0	0	0	0	0	0	0	603	903	0
520	7	0	0	0	0	0	0	200	300	0	0	0	0	0	0	0	200	903	0	0	0	0	0	0	0	603	903	0
520	8	0	0	0	0	0	0	200	300	0	0	0	0	0	0	0	200	903	0	0	0	0	0	0	0	603	903	0
520	9	0	0	0	0	0	0	200	300	0	0	0	0	0	0	0	200	903	0	0	0	0	0	0	0	603	903	0
521	0	0	0	0	0	0	0	200	300	0	0	0	0	0	0	0	200	903	0	0	0	0	0	0	0	603	903	0
521	1	0	0	0	0	0	0	200	300	0	0	0	0	0	0	0	200	903	0	0	0	0	0	0	0	603	903	0
521	2	0	0	0	0	0	0	200	300	0	0	0	0	0	0	0	200	903	0	0	0	0	0	0	0	603	903	0
521	3	0	0	0	0	0	0	200	300	0	0	0	0	0	0	0	200	903	0	0	0	0	0	0	0	603	903	0
521	4	0	0	0	0	0	0	200	300	0	0	0	0	0	0	0	200	903	0	0	0	0	0	0	0	603	903	0
521	5	0	0	0	0	0	0	200	300	0	0	0	0	0	0	0	200	903	0	0	0	0	0	0	0	603	903	0
521	6	0	0	0	0	0	0	200	300	0	0	0	0	0	0	0	200	903	0	0	0	0	0	0	0	603	903	0
521	7	0	0	0	0	0	0	200	300	0	0	0	0	0	0	0	200	903	0	0	0	0	0	0	0	603	903	0
521	8	0	0	0	0	0	0	200	300	0	0	0	0	0	0	0	200	903	0	0	0	0	0	0	0	603	903	0
521	9	0	0	0	0	0	0	200	300	0	0	0	0	0	0	0	200	903	0	0	0	0	0	0	0	603	903	0
522	0	0	0	0	0	0	0	200	300	0	0	0	0	0	0	0	200	903	0	0	0	0	0	0	0	603	903	0
522	1	0	0	0	0	0	0	200	300	0	0	0	0	0	0	0	200	903	0	0	0	0	0	0	0	603	903	0
522	2	0	0	0	0	0	0	200	300	0	0	0	0	0	0	0	200	903	0	0	0	0	0	0	0	603	903	0
522	3	0	0	0	0	0	0	200	300	0	0	0	0	0	0	0	200	903	0	0	0	0	0	0	0	603	903	0
522	4	0	0	0	0	0	0	200	300	0	0	0	0	0	0	0	200	903	0	0	0	0	0	0	0	603	903	0
522	5	0	0	0	0	0	0	200	300	0	0	0	0	0	0	0	200	903	0	0	0	0	0	0	0	603	903	0
522	6	0	0	0	0	0	0	200	300	0	0	0	0	0	0	0	200	903	0	0	0	0	0	0	0	603	903	0
522	7	0	0	0	0	0	0	200	300	0	0	0	0	0	0	0	200	903	0	0	0	0	0	0	0	603	903	0
522	8	0	0	0	0	0	0	200	300	0	0	0	0	0	0	0	200	903	0	0	0	0	0	0	0	603	903	0
522	9	0	0	0	0	0	0	200	300	0	0	0	0	0	0	0	200	903	0	0	0	0	0	0	0	603	903	0
523	0	0	0	0	0	0	0	200	300	0	0	0	0	0	0	0	200	903	0	0	0	0	0	0	0	603	903	0
523	1	0	0	0	0	0	0	200	300	0	0	0	0	0	0	0	200	903	0	0	0	0	0	0	0	603	903	0
523	2	0	0	0	0	0	0	200	300	0	0	0	0	0	0	0	200	903	0	0	0	0	0	0	0	603	903	0
523	3	0	0	0	0	0	0	200	300	0	0	0	0	0	0	0	200	903	0	0	0	0	0	0	0	603	903	0
523	4	0	0	0	0	0	0	200	300	0	0	0	0	0	0	0	200	903	0	0	0	0	0	0	0	603	903	0
523	5	0	0	0	0	0	0	200	300	0	0	0	0	0	0	0	200	903	0	0	0	0	0	0	0	603	903	0
523	6	0	0	0	0	0	0	200	300	0	0	0	0	0	0	0	200	903	0	0	0	0	0	0	0	603	903	0
523	7	0	0	0	0	0	0	200	300	0	0	0	0	0	0	0	200	903	0	0	0	0	0	0	0	603	903	0
523	8	0	0	0	0	0	0	200	300	0	0	0	0	0	0	0	200	903	0	0	0	0	0	0	0	603	903	0
523	9	0	0	0	0	0	0	200	300	0	0	0	0	0	0	0	200	903	0	0	0	0	0	0	0	603	903	0
524	0	0	0	0	0	0	0	200	300	0	0	0	0	0	0	0	200	903	0	0	0	0	0	0	0	603	903	0
524	1	0	0	0	0	0	0	200	300	0	0	0	0	0	0	0	200	903	0	0	0	0	0	0	0	603	903	0
524	2	0	0	0	0	0	0	200	300	0	0	0	0	0	0	0	200	903	0	0	0	0	0	0	0	603	903	0
524	3	0	0	0	0	0	0	200	300	0	0	0	0	0	0	0	200	903	0	0	0	0	0	0	0	603	903	0
524	4	0	0	0	0	0	0	200	300	0	0	0	0	0	0	0	200	903	0	0	0	0	0	0	0	603	903	0
524	5	0	0	0	0	0	0	200	300	0	0	0	0	0	0	0	200	903	0	0	0	0	0	0	0	603	903	0
524	6	0	0	0	0	0	0	200	300	0	0	0	0	0	0	0	200	903	0	0	0	0	0	0	0	603	903	0
524	7	0	0	0	0	0	0	200	300	0	0	0	0	0	0	0	200	903	0	0	0	0	0	0	0	603	903	0
524	8	0	0	0	0	0	0	200	300	0	0	0	0	0	0	0	200	903	0	0	0	0	0	0	0	603	903	0
524	9	0	0	0	0	0	0	200	300	0	0	0	0	0	0	0	200	903	0	0	0	0	0	0	0	603	903	0
525	0	0	0	0	0	0	0	200	300	0	0	0	0	0	0	0	200	903	0	0	0	0	0	0	0	603	903	0
525	1	0	0	0	0	0	0	200	300	0	0	0	0	0	0	0	200	903	0	0	0	0	0	0	0	603	903	0
525	2	0	0	0	0	0	0	200	300	0	0	0	0	0	0	0	200	903	0	0	0	0	0	0	0	603	903	0
525	3	0	0	0	0	0	0	200	300	0	0	0	0	0	0	0	200	903	0	0	0	0	0	0	0	603	903	0
525	4	0	0	0	0	0	0	200	300	0	0	0	0	0	0	0	200	903	0	0	0	0	0	0	0	603	903	0
525	5	0	0	0	0	0	0	200	300	0	0	0	0	0	0	0	200	903	0	0	0	0	0	0	0	603	903	0
525	6	0	0	0	0	0	0	200	300	0	0	0	0	0	0	0	200	903	0	0	0	0	0	0	0	603	903	0
525	7	0	0	0	0	0	0	200	300	0	0	0	0	0	0	0	200	903	0	0	0	0	0	0	0	603	903	0
525	8	0	0	0	0	0	0	200	300	0	0	0	0	0	0	0	200	903	0	0	0	0	0	0	0	603	903	0
525	9	0	0	0	0	0	0	200	300	0	0	0	0	0	0	0	200	903	0	0	0	0	0	0	0	603	903	0
526	0	0	0	0	0	0	0	200	300	0	0	0	0	0	0	0	200	903	0	0	0	0	0	0	0	603	903	0
526	1	0	0	0	0	0	0	200	300	0	0	0	0	0	0	0	200	903	0	0	0	0	0	0	0	603	903	0
526	2	0	0	0	0	0	0	200	300	0	0	0	0	0	0	0	200	903	0	0	0	0	0	0	0	603	903	0
526	3	0	0	0	0	0	0	200	300	0	0	0	0	0	0	0	200	903	0	0	0	0	0	0	0	603	903	0
526	4	0	0	0	0	0	0	200	300	0	0	0	0	0	0	0	200	903	0	0	0	0	0	0	0	603	903	0
526	5	0	0	0	0	0	0	200	300	0	0	0	0	0	0	0	200	903	0	0	0	0	0	0	0	603	903	0
526	6	0	0	0	0	0	0	200	300	0	0	0	0	0	0	0	200	903	0	0	0	0	0	0	0	603	903	0
526	7	0	0	0	0	0	0	200	300	0	0	0	0	0	0	0	200	903	0	0	0	0	0	0	0	603	903	0
526	8	0	0	0	0	0	0	200	300	0	0	0	0	0	0	0	200	903	0	0	0	0	0	0	0	603	903	0
526	9	0	0	0	0	0	0	200	300	0	0	0	0	0	0	0	200	903	0	0	0	0	0	0	0	603	903	0
527	0	0	0	0	0	0	0	200	300	0	0	0	0	0	0	0	200	903	0	0	0	0	0	0	0	603	903	0
527	1	0	0	0	0	0	0	200	300	0	0	0	0	0	0	0	200	903	0	0	0	0	0	0	0	603	903	0
527	2	0	0	0	0	0	0	200	300	0	0	0	0	0	0	0	200	903	0	0	0	0	0	0	0	603	903	0
527	3	0	0	0	0	0	0	200	300	0	0	0	0	0	0	0	200	903	0	0	0	0	0	0	0	603	903	0
527	4	0	0	0	0	0	0	200	300	0	0	0	0	0	0	0	200	903	0	0	0	0	0	0	0	603	903	0
527	5	0	0	0	0	0	0	200	300	0	0	0	0	0	0	0	200	903	0	0	0	0	0	0	0	603	903	0
527	6	0	0	0	0	0	0	200	300	0	0	0	0	0	0	0	200	903	0	0	0	0	0	0	0	603	903	0
527	7	0	0	0	0	0	0	200	300	0	0	0	0	0	0	0	200	903	0	0	0	0	0	0	0	603	903	0
527	8	0	0	0	0	0	0	200	300	0	0	0	0	0	0	0	200	903	0	0	0	0	0	0	0	603	903	0
527	9	0	0	0	0	0	0	200	300	0	0	0	0	0	0	0	200	903	0	0	0	0	0	0	0	603	903	0
528	0	0	0	0	0	0	0	200	300	0	0	0	0	0	0	0	200	903	0	0	0	0	0	0	0	603	903	0
528	1	0	0	0	0	0	0	200	300	0	0	0	0	0	0	0	200	903	0	0	0	0	0	0	0	603	903	0
528	2	0	0	0	0	0	0	200	300	0	0	0	0	0	0	0	200	903	0	0	0	0	0	0	0	603	903	0
528	3	0	0	0	0	0	0	200	300	0	0	0	0	0	0	0	200	903	0	0	0	0	0	0	0	603	903	0
528	4	0	0	0	0	0	0	200	300	0	0	0	0	0	0	0	200	903	0	0	0	0	0	0	0	603	903	0
528	5	0	0	0	0	0	0	200	300	0	0	0	0	0	0	0	200	903	0	0	0	0	0	0	0	603	903	0
528	6	0	0	0	0	0	0	200	300	0	0	0	0	0	0	0	200	903	0	0	0	0	0	0	0	603	903	0
528	7	0	0	0	0	0	0	200	300	0	0	0	0	0	0	0	200	903	0	0	0	0	0	0	0	603	903	0
528	8	0	0	0	0	0	0	200	300	0	0	0	0	0	0	0	200	903	0	0	0	0	0	0	0	603	903	0
528	9	0	0	0	0	0	0	200	300	0	0	0	0	0	0	0	200	903	0	0	0	0	0	0	0	603	903	0
529	0	0	0	0	0	0	0	200	300	0	0	0	0	0	0	0	200	903	0	0	0	0	0	0	0	603	903	0
529	1	0	0	0	0	0	0	200	300	0	0	0	0	0	0	0	200	903	0	0	0	0	0	0	0	603	903	0
529	2	0	0	0	0	0	0	200	300	0	0	0	0	0	0	0	200	903	0	0	0	0	0	0	0	603	903	0
529	3	0	0	0	0	0	0	200	300	0	0	0	0	0	0	0	200	903	0	0	0	0	0	0	0	603	903	0
529	4	0	0	0	0	0	0	200	300	0	0	0	0	0	0	0	200	903	0	0	0	0	0	0	0	603	903	0
529	5	0	0	0	0	0	0	200	300	0	0	0	0	0	0	0	200	903	0	0	0	0	0	0	0	603	903	0
529	6	0	0	0	0	0	0	200	300	0	0	0	0	0	0	0	200	903	0	0	0	0	0	0	0	603	903	0
529	7	0	0	0	0	0	0	200	300	0	0	0	0	0	0	0	200	903	0	0	0	0	0	0	0	603	903	0
529	8	0	0	0	0	0	0	200	300	0	0	0	0	0	0	0	200	903	0	0	0	0	0	0	0	603	903	0
529	9	0	0	0	0	0	0	200	300	0	0	0	0	0	0	0	200	903	0	0	0	0	0	0	0	603	903	0
530	0	0	0	0	0	0	0	200	300	0	0	0	0	0	0	0	200	903	0	0	0	0	0	0	0	603	903	0
530	1	0	0	0	0	0	0	200	300	0	0	0	0	0	0	0	200	903	0	0	0	0	0	0	0	603	903	0
530	2	0	0	0	0	0	0	200	300	0	0	0	0	0	0	0	200	903	0	0	0	0	0	0	0	603	903	0
530	3	0	0	0	0	0	0	200	300	0	0	0	0	0	0	0	200	903	0	0	0	0	0	0	0	603	903	0
530	4	0	0	0	0	0	0	200	300	0	0	0	0	0	0	0	200	903	0	0	0	0	0	0	0	603	903	0
530	5	0	0	0	0	0	0	200	300	0	0	0	0	0	0	0	200	903	0	0	0	0	0	0	0	603	903	0
530	6	0	0	0	0	0	0	200	300	0	0	0	0	0	0	0	200	903	0	0	0	0	0	0	0	603	903	0
530	7	0	0	0	0	0	0	200	300	0	0	0	0	0	0	0	200	903	0	0	0	0	0	0	0	603	903	0
530	8	0	0	0	0	0	0	200	300	0	0	0	0	0	0	0	200	903	0	0	0	0	0	0	0	603	903	0
530	9	0	0	0	0	0	0	200	300	0	0	0	0	0	0	0	200	903	0	0	0	0	0	0	0	603	903	0
531	0	0	0	0	0	0	0	200	300	0	0	0	0	0	0	0	200	903	0	0	0	0	0	0	0	603	903	0
531	1	0	0	0	0	0	0	200	300	0	0	0	0	0	0	0	200	903	0	0	0	0	0	0	0	603	903	0
531	2	0	0	0	0	0	0	200	300	0	0	0	0	0	0	0	200	903	0	0	0	0	0	0	0	603	903	0
531	3	0	0	0	0	0	0	200	300	0	0	0	0	0	0	0	200	903	0	0	0	0	0	0	0	603	903	0
531	4	0	0	0	0	0	0	200	300	0	0	0	0	0	0	0	200	903	0	0	0	0	0	0	0	603	903	0
531	5	0	0	0	0	0	0	200	300	0	0	0	0	0	0	0	200	903	0	0	0	0	0	0	0	603	903	0
531	6	0	0	0	0	0	0	200	300	0	0	0	0	0	0	0	200	903	0	0	0	0	0	0	0	603	903	0
531	7	0	0	0	0	0	0	200	300	0	0	0	0	0	0	0	200	903	0	0	0	0	0	0	0	603	903	0
531	8	0	0	0	0	0	0	200	300	0	0	0	0	0	0	0	200	903	0	0	0	0	0	0	0	603	903	0
531	9	0	0	0	0	0	0	200	300	0	0	0	0	0	0	0	200	903	0	0	0	0	0	0	0	603	903	0
532	0	0	0	0	0	0	0	200	300	0	0	0	0	0	0	0	200	903	0	0	0	0	0	0	0	603	903	0
532	1	0	0	0	0	0	0	200	300	0	0	0	0	0	0	0	200	903	0	0	0	0	0	0	0	603	903	0
532	2	0	0	0	0	0	0	200	300	0	0	0	0	0	0	0	200	903	0	0	0	0	0	0	0	603	903	0
532	3	0	0	0	0	0	0	200	300	0	0	0	0	0	0	0	200	903	0	0	0	0	0	0	0	603	903	0
532	4	0	0	0	0	0	0	200	300	0	0	0	0	0	0	0	200	903	0	0	0	0	0	0	0	603	903	0
532	5	0	0	0	0	0	0	200	300	0	0	0	0	0	0	0	200	903	0	0	0	0	0	0	0	603	903	0
532	6	0	0	0	0	0	0	200	300	0	0	0	0	0	0	0	200	903	0	0	0	0	0	0	0	603	903	0
532	7	0	0	0	0	0	0	200	300	0	0	0	0	0	0	0	200	903	0	0	0	0	0	0	0	603	903	0
532	8	0	0	0	0	0	0	200	300	0	0	0	0	0	0	0	200	903	0	0	0	0	0	0	0	603	903	0
532	9	0	0	0	0	0	0	200	300	0	0	0	0	0	0	0	200	903	0	0	0	0	0	0	0	603	903	0
533	0	0	0	0	0	0	0	200	300	0	0	0	0	0	0	0	200	903	0	0	0	0	0	0	0	603	903	0
533	1	0	0	0	0	0	0	200	300	0	0	0	0	0	0	0	200	903	0	0	0	0	0	0	0	603	903	0
533	2	0	0	0	0	0	0	200	300	0	0	0	0	0	0	0	200	903	0	0	0	0	0	0	0	603	903	0
533	3	0	0	0	0	0	0	200	300	0	0	0	0	0	0	0	200	903	0	0	0	0	0	0	0	603	903	0
533	4	0	0	0	0	0	0	200	300	0	0	0	0	0	0	0	200	903	0	0	0	0	0	0	0	603	903	0
533	5	0	0	0	0	0	0	200	300	0	0	0	0	0	0	0	200	903	0	0	0	0	0	0	0	603	903	0
533	6	0	0	0	0	0	0	200	300	0	0	0	0	0	0	0	200	903	0	0	0	0	0	0	0	603	903	0
533	7	0	0	0	0	0	0	200	300	0	0	0	0	0	0	0	200	903	0	0	0	0	0	0	0	603	903	0
533	8	0	0	0	0	0	0	200	300	0	0	0	0	0	0	0	200	903	0	0	0	0	0	0	0	603	903	0
533	9	0	0	0	0	0	0	200	300	0	0	0	0	0	0	0	200	903	0	0	0	0	0	0	0	603	903	0
534	0	0	0	0	0	0	0	200	300	0	0	0	0	0	0	0	200	903	0	0	0	0	0	0	0	603	903	0
534	1	0	0	0	0	0	0	200	300	0	0	0	0	0	0	0	200	903	0	0	0	0	0	0	0	603	903	0
534	2	0	0	0	0	0	0	200	300	0	0	0	0	0	0	0	200	903	0	0	0	0	0	0	0	603	903	0
534	3	0	0	0	0	0	0	200	300	0	0	0	0	0	0	0	200	903	0	0	0	0	0	0	0	603	903	0
534	4	0	0	0	0	0	0	200	300	0	0	0	0	0	0	0	200	903	0	0	0	0	0	0	0	603	903	0
534	5	0	0	0	0	0	0	200	300	0	0	0	0	0	0	0	200	903	0	0	0	0	0	0	0	603	903	0
534	6	0	0	0	0	0	0	200	300	0	0	0	0	0	0	0	200	903	0	0	0	0	0	0	0	603	903	0
534	7	0	0	0	0	0	0	200	300	0	0	0	0	0	0	0	200	903	0	0	0	0	0	0	0	603	903	0
534	8	0	0	0	0	0	0	200	300	0	0	0	0	0	0	0	200	903	0	0	0	0	0	0	0	603	903	0
534	9	0	0	0	0	0	0	200	300	0	0	0	0	0	0	0	200	903	0	0	0	0	0	0	0	603	903	0
535	0	0	0	0	0	0	0	200	300	0	0	0	0	0	0	0	200	903	0	0	0	0	0	0	0	603	903	0
535	1	0	0	0	0	0	0	200	300	0	0	0	0	0	0	0	200	903	0	0	0	0	0	0	0	603	903	0
535	2	0	0	0	0	0	0	200	300	0	0	0	0	0	0	0	200	903	0	0	0	0	0	0	0	603	903	0
535	3	0	0	0	0	0	0	200	300	0	0	0	0	0	0	0	200	903	0	0	0	0	0	0	0	603	903	0
535	4	0	0	0	0	0	0	200	300	0	0	0	0	0	0	0	200	903	0	0	0	0	0	0	0	603	903	0
535	5	0	0	0	0	0	0	200	300	0	0	0	0	0	0	0	200	903	0	0	0	0	0	0	0	603	903	0
535	6	0	0	0	0	0	0	200	300	0	0	0	0	0	0	0	200	903	0	0	0	0	0	0	0	603	903	0
535	7	0	0	0	0	0	0	200	300	0	0	0	0	0	0	0	200	903	0	0	0	0	0	0	0	603	903	0
535	8	0	0	0	0	0	0	200	300	0	0	0	0	0	0	0	200	903	0	0	0	0	0	0	0	603	903	0
535	9	0	0	0	0	0	0	200	300	0	0	0	0	0	0	0	200	903	0	0	0	0	0	0	0	603	903	0
536	0	0	0	0	0	0	0	200	300	0	0	0	0	0	0	0	200	903	0	0	0	0	0	0	0	603	903	0
536	1	0	0	0	0	0	0	200	300	0	0	0	0	0	0	0	200	903	0	0	0	0	0	0	0	603	903	0
536	2	0	0	0	0	0	0	200	300	0	0	0	0	0	0	0	200	903	0	0	0	0	0	0	0	603	903	0
536	3	0	0	0	0	0	0	200	300	0	0	0	0	0	0	0	200	903	0	0	0	0	0	0	0	603	903	0
536	4	0	0	0	0	0	0	200	300	0	0	0	0	0	0	0	200	903	0	0	0	0	0	0	0	603	903	0
536	5	0	0	0	0	0	0	200	300	0	0	0	0	0	0	0	200	903	0	0	0	0	0	0	0	603	903	0
536	6	0	0	0	0	0	0	200	300	0	0	0	0	0	0	0	200	903	0	0	0	0	0	0	0	603	903	0
536	7	0	0	0	0	0	0	200	300	0	0	0	0	0	0	0	200	903	0	0	0	0	0	0	0	603	903	0
536	8	0	0	0	0	0	0	200	300	0	0	0	0	0	0	0	200	903	0	0	0	0	0	0	0	603	903	0
536	9	0	0	0	0	0	0	200	300	0	0	0	0	0	0	0	200	903	0	0	0	0	0	0	0	603	903	0
537	0	0	0	0	0	0	0	200	300	0	0	0	0	0	0	0	200	903	0	0	0	0	0	0	0	603	903	0
537	1	0	0	0	0	0	0	200	300	0	0	0	0	0	0	0	200	903	0	0	0	0	0	0	0	603	903	0
537	2	0	0	0	0	0	0	200	300	0	0	0	0	0	0	0	200	903	0	0	0	0	0	0	0	603	903	0
537	3	0	0	0	0	0	0	200	300	0	0	0	0	0	0	0	200	903	0	0	0	0	0	0	0	603	903	0
537	4	0	0	0	0	0	0	200	300	0	0	0	0	0	0	0	200	903	0	0	0	0	0	0	0	603	903	0
537	5	0	0	0	0	0	0	200	300	0	0	0	0	0	0	0	200	903	0	0	0	0	0	0	0	603	903	0
537	6	0	0	0	0	0	0	200	300	0	0	0	0	0	0	0	200	903	0	0	0	0	0	0	0	603	903	0
537	7	0	0	0	0	0	0	200	300	0	0	0	0	0	0	0	200	903	0	0	0	0	0	0	0	603	903	0
537	8	0	0	0	0	0	0	200	300	0	0	0	0	0	0	0	200	903	0	0	0	0	0	0	0	603	903	0
537	9	0	0	0	0	0	0	200	300	0	0	0	0	0	0	0	200	903	0	0	0	0	0	0	0	603	903	0
538	0	0	0	0	0	0	0	200	300	0	0	0	0	0	0	0	200	903	0	0	0	0	0	0	0	603	903	0
538	1	0	0	0	0	0	0	200	300	0	0	0	0	0	0	0	200	903	0	0	0	0	0	0	0	603	903	0
538	2	0	0	0	0	0	0	200	300	0	0	0	0	0	0	0	200	903	0	0	0	0	0	0	0	603	903	0
538	3	0	0	0	0	0	0	200	300	0	0	0	0	0	0	0	200	903	0	0	0	0	0	0	0	603	903	0
538	4	0	0	0	0	0	0	200	300	0	0	0	0	0	0	0	200	903	0	0	0	0	0	0	0	603	903	0
538	5	0	0	0	0	0	0	200	300	0	0	0	0	0	0	0	200	903	0	0	0	0	0	0	0	603	903	0
538	6	0	0	0	0	0	0	200	300	0	0	0	0	0	0	0	200	903	0	0	0	0	0	0	0	603	903	0
538	7	0	0	0	0	0	0	200	300	0	0	0	0	0	0	0	200	903	0	0	0	0	0	0	0	603	903	0
538	8	0	0	0	0	0	0	200	300	0	0	0	0	0	0	0	200	903	0	0	0	0	0	0	0	603	903	0
538	9	0	0	0	0	0	0	200	300	0	0	0	0	0	0	0	200	903	0	0	0	0	0	0	0	603	903	0
539	0	0	0	0	0	0	0	200	300	0	0	0	0	0	0	0	200	903	0	0	0	0	0	0	0	603	903	0
539	1	0	0	0	0	0	0	200	300	0	0	0	0	0	0	0	200	903	0	0	0	0	0	0	0	603	903	0
539	2	0	0	0	0	0	0	200	300	0	0	0	0	0	0	0	200	903	0	0	0	0	0	0	0	603	903	0
539	3	0	0	0	0	0	0	200	300	0	0	0	0	0	0	0	200	903	0	0	0	0	0	0	0	603	903	0
539	4	0	0	0	0	0	0	200	300	0	0	0	0	0	0	0	200	903	0	0	0	0	0	0	0	603	903	0
539	5	0	0	0	0	0	0	200	300	0	0	0	0	0	0	0	200	903	0	0	0	0	0	0	0	603	903	0
539	6	0	0	0	0	0	0	200	300	0	0	0	0	0	0	0	200	903	0	0	0	0	0	0	0	603	903	0
539	7	0	0	0	0	0	0	200	300	0	0	0	0	0	0	0	200	903	0	0	0	0	0	0	0	603	903	0
539	8	0	0	0	0	0	0	200	300	0	0	0	0	0	0	0	200	903	0	0	0	0	0	0	0	603	903	0
539	9	0	0	0	0	0	0	200	300	0	0	0	0	0	0	0	200	903	0	0	0	0	0	0	0	603	903	0
540	0	0	0	0	0	0	0	200	300	0	0	0	0	0	0	0	200	903	0	0	0	0	0	0	0	603	903	0
540	1	0	0	0	0	0	0	200	300	0	0	0	0	0	0	0	200	903	0	0	0	0	0	0	0	603	903	0
540	2	0	0	0	0	0	0	200	300	0	0	0	0	0	0	0	200	903	0	0	0	0	0	0	0	603	903	0
540	3	0	0	0	0	0	0	200	300	0	0	0	0	0	0	0	200	903	0	0	0	0	0	0	0	603	903	0
540	4	0	0	0	0	0	0	200	300	0	0	0	0	0	0	0	200	903	0	0	0	0	0	0	0	603	903	0
540	5	0	0	0	0	0	0	200	300	0	0	0	0	0	0	0	200	903	0	0	0	0	0	0	0	603	903	0
540	6	0	0	0	0	0	0	200	300	0	0	0	0	0	0	0	200	903	0	0	0	0	0	0	0	603	903	0
540	7	0	0	0	0	0	0	200	300	0	0	0	0	0	0	0	200	903	0	0	0	0	0	0	0	603	903	0
540	8	0	0	0	0	0	0	200	300	0	0	0	0	0	0	0	200	903	0	0	0	0	0	0	0	603	903	0
540	9	0	0	0	0	0	0	200	300	0	0	0	0	0	0	0	200	903	0	0	0	0	0	0	0	603	903	0
541	0	0	0	0	0	0	0	200	300	0	0	0	0	0	0	0	200	903	0	0	0	0	0	0	0	603	903	0
541	1	0	0	0	0	0	0	200	300	0	0	0	0	0	0	0	200	903	0	0	0	0	0	0	0	603	903	0
541	2	0	0	0	0	0	0	200	300	0	0	0	0	0	0	0	200	903	0	0	0	0	0	0	0	603	903	0
541	3	0	0	0	0	0	0	200	300	0	0	0	0	0	0	0	200	903	0	0	0	0	0	0	0	603	903	0
541	4	0	0	0	0	0	0	200	300	0	0	0	0	0	0	0	200	903	0	0	0	0	0	0	0	603	903	0
541	5	0	0	0	0	0	0	200	300	0	0	0	0	0	0	0	200	903	0	0	0	0	0	0	0	603	903	0
541	6	0	0	0	0	0	0	200	300	0	0	0	0	0	0	0	200	903	0	0	0	0	0	0	0	603	903	0
541	7	0	0	0	0	0	0	200	300	0	0	0	0	0	0	0	200	903	0	0	0	0	0	0	0	603	903	0
541	8	0	0	0	0	0	0	200	300	0	0	0	0	0	0	0	200	903	0	0	0	0	0	0	0	603	903	0
541	9	0	0	0	0	0	0	200	300	0	0	0	0	0	0	0	200	903	0	0	0	0	0	0	0	603	903	0
542	0	0	0	0	0	0	0	200	300	0	0	0	0	0	0	0	200	903	0	0	0	0	0	0	0	603	903	0
542	1	0	0	0	0	0	0	200	300	0	0	0	0	0	0	0	200	903	0	0	0	0	0	0	0	603	903	0
542	2	0	0	0	0	0	0	200	300	0	0	0	0	0	0	0	200	903	0	0	0	0	0	0	0	603	903	0
542	3	0	0	0	0	0	0	200	300	0	0	0	0	0	0	0	200	903	0	0	0	0	0	0	0	603	903	0
542	4	0	0	0	0	0	0	200	300	0	0	0	0	0	0	0	200	903	0	0	0	0	0	0	0	603	903	0
542	5	0	0	0	0	0	0	200	300	0	0	0	0	0	0	0	200	903	0	0	0	0	0	0	0	603	903	0
542	6	0	0	0	0	0	0	200	300	0	0	0	0	0	0	0	200	903	0	0	0	0	0	0	0	603	903	0
542	7	0	0	0	0	0	0	200	300	0	0	0	0	0	0	0	200	903	0	0	0	0	0	0	0	603	903	0
542	8	0	0	0	0	0	0	200	300	0	0	0	0	0	0	0	200	903	0	0	0	0	0	0	0	603	903	0
542	9	0	0	0	0	0	0	200	300	0	0	0	0	0	0	0	200	903	0	0	0	0	0	0	0	603	903	0
543	0	0	0	0	0	0	0	200	300	0	0	0	0	0	0	0	200	903	0	0	0	0	0	0	0	603	903	0
543	1	0	0	0	0	0	0	200	300	0	0	0	0	0	0	0	200	903	0	0	0	0	0	0	0	603	903	0
543	2	0	0	0	0	0	0	200	300	0	0	0	0	0	0	0	200	903	0	0	0	0	0	0	0	603	903	0
543	3	0	0	0	0	0	0	200	300	0	0	0	0	0	0	0	200	903	0	0	0	0	0	0	0	603	903	0
543	4	0	0	0	0	0	0	200	300	0	0	0	0	0	0	0	200	903	0	0	0	0	0	0	0	603	903	0
543	5	0	0	0	0	0	0	200	300	0	0	0	0	0	0	0	200	903	0	0	0	0	0	0	0	603	903	0
543	6	0	0	0	0	0	0	200	300	0	0	0	0	0	0	0	200	903	0	0	0	0	0	0	0	603	903	0
543	7	0	0	0	0	0	0	200	300	0	0	0	0	0	0	0	200	903	0	0	0	0	0	0	0	603	903	0
543	8	0	0	0	0	0	0	200	300	0	0	0	0	0	0	0	200	903	0	0	0	0	0	0	0	603	903	0
543	9	0	0	0	0	0	0	200	300	0	0	0	0	0	0	0	200	903	0	0	0	0	0	0	0	603	903	0
544	0	0	0	0	0	0	0	200	300	0	0	0	0	0	0	0	200	903	0	0	0	0	0	0	0	603	903	0
544	1	0	0	0	0	0	0	200	300	0	0	0	0	0	0	0	200	903	0	0	0	0	0	0	0	603	903	0
544	2	0	0	0	0	0	0	200	300	0	0	0	0	0	0	0	200	903	0	0	0	0	0	0	0	603	903	0
544	3	0	0	0	0	0	0	200	300	0	0	0	0	0	0	0	200	903	0	0	0	0	0	0	0	603	903	0
544	4	0	0	0	0	0	0	200	300	0	0	0	0	0	0	0	200	903	0	0	0	0	0	0	0	603	903	0
544	5	0	0	0	0	0	0	200	300	0	0	0	0	0	0	0	200	903	0	0	0	0	0	0	0	603	903	0
544	6	0	0	0	0	0	0	200	300	0	0	0	0	0	0	0	200	903	0	0	0	0	0	0	0	603	903	0
544	7	0	0	0	0	0	0	200	300	0	0	0	0	0	0	0	200	903	0	0	0	0	0	0	0	603	903	0
544	8	0	0	0	0	0	0	200	300	0	0	0	0	0	0	0	200	903	0	0	0	0	0	0	0	603	903	0
544	9	0	0	0	0	0	0	200	300	0	0	0	0	0	0	0	200	903	0	0	0	0	0	0	0	603	903	0
545	0	0	0	0	0	0	0	200	300	0	0	0	0	0	0	0	200	903	0	0	0	0	0	0	0	603	903	0
545	1	0	0	0	0	0	0	200	300	0	0	0	0	0	0	0	200	903	0	0	0	0	0	0	0	603	903	0
545	2	0	0	0	0	0	0	200	300	0	0	0	0	0	0	0	200	903	0	0	0	0	0	0	0	603	903	0
545	3	0	0	0	0	0	0	200	300	0	0	0	0	0	0	0	200	903	0	0	0	0	0	0	0	603	903	0
545	4	0	0	0	0	0	0	200	300	0	0	0	0	0	0	0	200	903	0	0	0	0	0	0	0	603	903	0
545	5	0	0	0	0	0	0	200	300	0	0	0	0	0	0	0	200	903	0	0	0	0	0	0	0	603	903	0
545	6	0	0	0	0	0	0	200	300	0	0	0	0	0	0	0	200	903	0	0	0	0	0	0	0	603	903	0
545	7	0	0	0	0	0	0	200	300	0	0	0	0	0	0	0	200	903	0	0	0	0	0	0	0	603	903	0
545	8	0	0	0	0	0	0	200	300	0	0	0	0	0	0	0	200	903	0	0	0	0	0	0	0	603	903	0
545	9	0	0	0	0	0	0	200	300	0	0	0	0	0	0	0	200	903	0	0	0	0	0	0	0	603	903	0
546	0	0	0	0	0	0	0	200	300	0	0	0	0	0	0	0	200	903	0	0	0	0	0	0	0	603	903	0
546	1	0	0	0	0	0	0	200	300	0	0	0	0	0	0	0	200	903	0	0	0	0	0	0	0	603	903	0
546	2	0	0	0	0	0	0	200	300	0	0	0	0	0	0	0	200	903	0	0	0	0	0	0	0	603	903	0
546	3	0	0	0	0	0	0	200	300	0	0	0	0	0	0	0	200	903	0	0	0	0	0	0	0	603	903	0
546	4	0	0	0	0	0	0	200	300	0	0	0	0	0	0	0	200	903	0	0	0	0	0	0	0	603	903	0
546	5	0	0	0	0	0	0	200	300	0	0	0	0	0	0	0	200	903	0	0	0	0	0	0	0	603	903	0
546	6	0	0	0	0	0	0	200	300	0	0	0	0	0	0	0	200	903	0	0	0	0	0	0	0	603	903	0
546	7	0	0	0	0	0	0	200	300	0	0	0	0	0	0	0	200	903	0	0	0	0	0	0	0	603	903	0
546	8	0	0	0	0	0	0	200	300	0	0	0	0	0	0	0	200	903	0	0	0	0	0	0	0	603	903	0
546	9	0	0	0	0	0	0	200	300	0	0	0	0	0	0	0	200	903	0	0	0	0	0	0	0	603	903	0
547	0	0	0	0	0	0	0	200	300	0	0	0	0	0	0	0	200	903	0	0	0	0	0	0	0	603	903	0
547	1	0	0	0	0	0	0	200	300	0	0	0	0	0	0	0	200	903	0	0	0	0	0	0	0	603	903	0
547	2	0	0	0	0	0	0	200	300	0	0	0	0	0	0	0	200	903	0	0	0	0	0	0	0	603	903	0
547	3	0	0	0	0	0	0	200	300	0	0	0	0	0	0	0	200	903	0	0	0	0	0	0	0	603	903	0
547	4	0	0	0	0	0	0	200	300	0	0	0	0	0	0	0	200	903	0	0	0	0	0	0	0	603	903	0
547	5	0	0	0	0	0	0	200	300	0	0	0	0	0	0	0	200	903	0	0	0	0	0	0	0	603	903	0
547	6	0	0	0	0	0	0	200	300	0	0	0	0	0	0	0	200	903	0	0	0	0	0	0	0	603	903	0
547	7	0	0	0	0	0	0	200	300	0	0	0	0	0	0	0	200	903	0	0	0	0	0	0	0	603	903	0
547	8	0	0	0	0	0	0	200	300	0	0	0	0	0	0	0	200	903	0	0	0	0	0	0	0	603	903	0
547	9	0	0	0	0	0	0	200	300	0	0	0	0	0	0	0	200	903	0	0	0	0	0	0	0	603	903	0
548	0	0	0	0	0	0	0	200	300	0	0	0	0	0	0	0	200	903	0	0	0	0	0	0	0	603	903	0
548	1	0	0	0	0	0	0	200	300	0	0	0	0	0	0	0	200	903	0	0	0	0	0	0	0	603	903	0
548	2	0	0	0	0	0	0	200	300	0	0	0	0	0	0	0	200	903	0	0	0	0	0	0	0	603	903	0
548	3	0	0	0	0	0	0	200	300	0	0	0	0	0	0	0	200	903	0	0	0	0	0	0	0	603	903	0
548	4	0	0	0	0	0	0	200	300	0	0	0	0	0	0	0	200	903	0	0	0	0	0	0	0	603	903	0
548	5	0	0	0	0	0	0	200	300	0	0	0	0	0	0	0	200	903	0	0	0	0	0	0	0	603	903	0
548	6	0	0	0	0	0	0	200	300	0	0	0	0	0	0	0	200	903	0	0	0	0	0	0	0	603	903	0
548	7	0	0	0	0	0	0	200	300	0	0	0	0	0	0	0	200	903	0	0	0	0	0	0	0	603	903	0
548	8	0	0	0	0	0	0	200	300	0	0	0	0	0	0	0	200	903	0	0	0	0	0	0	0	603	903	0
548	9	0	0	0	0	0	0	200	300	0	0	0	0	0	0	0	200	903	0	0	0	0	0	0	0	603	903	0
549	0	0	0	0	0	0	0	200	300	0	0	0	0	0	0	0	200	903	0	0	0	0	0	0	0	603	903	0
549	1	0	0	0	0	0	0	200	300	0	0	0	0	0	0	0	200	903	0	0	0	0	0	0	0	603	903	0
549	2	0	0	0	0	0	0	200	300	0	0	0	0	0	0	0	200	903	0	0	0	0	0	0	0	603	903	0
549	3	0	0	0	0	0	0	200	300	0	0	0	0	0	0	0	200	903	0	0	0	0	0	0	0	603	903	0
549	4	0	0	0	0	0	0	200	300	0	0	0	0	0	0	0	200	903	0	0	0	0	0	0	0	603	903	0
549	5	0	0	0	0	0	0	200	300	0	0	0	0	0	0	0	200	903	0	0	0	0	0	0	0	603	903	0
549	6	0	0	0	0	0	0	200	300	0	0	0	0	0	0	0	200	903	0	0	0	0	0	0	0	603	903	0
549	7	0	0	0	0	0	0	200	300	0	0	0	0	0	0	0	200	903	0	0	0	0	0	0	0	603	903	0
549	8	0	0	0	0	0	0	200	300	0	0	0	0	0	0	0	200	903	0	0	0	0	0	0	0	603	903	0
549	9	0	0	0	0	0	0	200	300	0	0	0	0	0	0	0	200	903	0	0	0	0	0	0	0	603	903	0
550	0	0	0	0	0	0	0	200	300	0	0	0	0	0	0	0	200	903	0	0	0	0	0	0	0	603	903	0
550	1	0	0	0	0	0	0	200	300	0	0	0	0	0	0	0	200	903	0	0	0	0	0	0	0	603	903	0
550	2	0	0	0	0	0	0	200	300	0	0	0	0	0	0	0	200	903	0	0	0	0	0	0	0	603	903	0
550	3	0	0	0	0	0	0	200	300	0	0	0	0	0	0	0	200	903	0	0	0	0	0	0	0	603	903	0
550	4	0	0	0	0	0	0	200	300	0	0	0	0	0	0	0	200	903	0	0	0	0	0	0	0	603	903	0
550	5	0	0	0	0	0	0	200	300	0	0	0	0	0	0	0	200	903	0	0	0	0	0	0	0	603	903	0
550	6	0	0	0	0	0	0	200	300	0	0	0	0	0	0	0	200	903	0	0	0	0	0	0	0	603	903	0
550	7	0	0	0	0	0	0	200	300	0	0	0	0	0	0	0	200	903	0	0	0	0	0	0	0	603	903	0
550	8	0	0	0	0	0	0	200	300	0	0	0	0	0	0	0	200	903	0	0	0	0	0	0	0	603	903	0
550	9	0	0	0	0	0	0	200	300	0	0	0	0	0	0	0	200	903	0	0	0	0	0	0	0	603	903	0
551	0	0	0	0	0	0	0	200	300	0	0	0	0	0	0	0	200	903	0	0	0	0	0	0	0	603	903	0
551	1	0	0	0	0	0	0	200	300	0	0	0	0	0	0	0	200	903	0	0	0	0	0	0	0	603	903	0
551	2	0	0	0	0	0	0	200	300	0	0	0	0	0	0	0	200	903	0	0	0	0	0	0	0	603	903	0
551	3	0	0	0	0	0	0	200	300	0	0	0	0	0	0	0	200	903	0	0	0	0	0	0	0	603	903	0
551	4	0	0	0	0	0	0	200	300	0	0	0	0	0	0	0	200	903	0	0	0	0	0	0	0	603	903	0
551	5	0	0	0	0	0	0	200	300	0	0	0	0	0	0	0	200	903	0	0	0	0	0	0	0	603	903	0
551	6	0	0	0	0	0	0	200	300	0	0	0	0	0	0	0	200	903	0	0	0	0	0	0	0	603	903	0
551	7	0	0	0	0	0	0	200	300	0	0	0	0	0	0	0	200	903	0	0	0	0	0	0	0	603	903	0
551	8	0	0	0	0	0	0	200	300	0	0	0	0	0	0	0	200	903	0	0	0	0	0	0	0	603	903	0
551	9	0	0	0	0	0	0	200	300	0	0	0	0	0	0	0	200	903	0	0	0	0	0	0	0	603	903	0
552	0	0	0	0	0	0	0	200	300	0	0	0	0	0	0	0	200	903	0	0	0	0	0	0	0	603	903	0
552	1	0	0	0	0	0	0	200	300	0	0	0	0	0	0	0	200	903	0	0	0	0	0	0	0	603	903	0
552	2	0	0	0	0	0	0	200	300	0	0	0	0	0	0	0	200	903	0	0	0	0	0	0	0	603	903	0
552	3	0	0	0	0	0	0	200	300	0	0	0	0	0	0	0	200	903	0	0	0	0	0	0	0	603	903	0
552	4	0	0	0	0	0	0	200	300	0	0	0	0	0	0	0	200	903	0	0	0	0	0	0	0	603	903	0
552	5	0	0	0	0	0	0	200	300	0	0	0	0	0	0	0	200	903	0	0	0	0	0	0	0	603	903	0
552	6	0	0	0	0	0	0	200	300	0	0	0	0	0	0	0	200	903	0	0	0	0	0	0	0	603	903	0
552	7	0	0	0	0	0	0	200	300	0	0	0	0	0	0	0	200	903	0	0	0	0	0	0	0	603	903	0
552	8	0	0	0	0	0	0	200	300	0	0	0	0	0	0	0	200	903	0	0	0	0	0	0	0	603	903	0
552	9	0	0	0	0	0	0	200	300	0	0	0	0	0	0	0	200	903	0	0	0	0	0	0	0	603	903	0
553	0	0	0	0	0	0	0	200	300	0	0	0	0	0	0	0	200	903	0	0	0	0	0	0	0	603	903	0
553	1	0	0	0	0	0	0	200	300	0	0	0	0	0	0	0	200	903	0	0	0	0	0	0	0	603	903	0
553	2	0	0	0	0	0	0	200	300	0	0	0	0	0	0	0	200	903	0	0	0	0	0	0	0	603	903	0
553	3	0	0	0	0	0	0	200	300	0	0	0	0	0	0	0	200	903	0	0	0	0	0	0	0	603	903	0
553	4	0	0	0	0	0	0	200	300	0	0	0	0	0	0	0	200	903	0	0	0	0	0	0	0	603	903	0
553	5	0	0	0	0	0	0	200	300	0	0	0	0	0	0	0	200	903	0	0	0	0	0	0	0	603	903	0
553	6	0	0	0	0	0	0	200	300	0	0	0	0	0	0	0	200	903	0	0	0	0	0	0	0	603	903	0
553	7	0	0	0	0	0	0	200	300	0	0	0	0	0	0	0	200	903	0	0	0	0	0	0	0	603	903	0
553	8	0	0	0	0	0	0	200	300	0	0	0	0	0	0	0	200	903	0	0	0	0	0	0	0	603	903	0
553	9	0	0	0	0	0	0	200	300	0	0	0	0	0	0	0	200	903	0	0	0	0	0	0	0	603	903	0
554	0	0	0	0	0	0	0	200	300	0	0	0	0	0	0	0	200	903	0	0	0	0	0	0	0	603	903	0
554	1	0	0	0	0	0	0	200	300	0	0	0	0	0	0	0	200	903	0	0	0	0	0	0	0	603	903	0
554	2	0	0	0	0	0	0	200	300	0	0	0	0	0	0	0	200	903	0	0	0	0	0	0	0	603	903	0
554	3	0	0	0	0	0	0	200	300	0	0	0	0	0	0	0	200	903	0	0	0	0	0	0	0	603	903	0
554	4	0	0	0	0	0	0	200	300	0	0	0	0	0	0	0	200	903	0	0	0	0	0	0	0	603	903	0
554	5	0	0	0	0	0	0	200	300	0	0	0	0	0	0	0	200	903	0	0	0	0	0	0	0	603	903	0
554	6	0	0	0	0	0	0	200	300	0	0	0	0	0	0	0	200	903	0	0	0	0	0	0	0	603	903	0
554	7	0	0	0	0	0	0	200	300	0	0	0	0	0	0	0	200	903	0	0	0	0	0	0	0	603	903	0
554	8	0	0	0	0	0	0	200	300	0	0	0	0	0	0	0	200	903	0	0	0	0	0	0	0	603	903	0
554	9	0	0	0	0	0	0	200	300	0	0	0	0	0	0	0	200	903	0	0	0	0	0	0	0	603	903	0
555	0	0	0	0	0	0	0	200	300	0	0	0	0	0	0	0	200	903	0	0	0	0	0	0	0	603	903	0
555	1	0	0	0	0	0	0	200	300	0	0	0	0	0	0	0	200	903	0	0	0	0	0	0	0	603	903	0
555	2	0	0	0	0	0	0	200	300	0	0	0	0	0	0	0	200	903	0	0	0	0	0	0	0	603	903	0
555	3	0	0	0	0	0	0	200	300	0	0	0	0	0	0	0	200	903	0	0	0	0	0	0	0	603	903	0
555	4	0	0	0	0	0	0	200	300	0	0	0	0	0	0	0	200	903	0	0	0	0	0	0	0	603	903	0
555	5	0	0	0	0	0	0	200	300	0	0	0	0	0	0	0	200	903	0	0	0	0	0	0	0	603	903	0
555	6	0	0	0	0	0	0	200	300	0	0	0	0	0	0	0	200	903	0	0	0	0	0	0	0	603	903	0
555	7	0	0	0	0	0	0	200	300	0	0	0	0	0	0	0	200	903	0	0	0	0	0	0	0	603	903	0
555	8	0	0	0	0	0	0	200	300	0	0	0	0	0	0	0	200	903	0	0	0	0	0	0	0	603	903	0
555	9	0	0	0	0	0	0	200	300	0	0	0	0	0	0	0	200	903	0	0	0	0	0	0	0	603	903	0
556	0	0	0	0	0	0	0	200	300	0	0	0	0	0	0	0	200	903	0	0	0	0	0	0	0	603	903	0
556	1	0	0	0	0	0	0	200	300	0	0	0	0	0	0	0	200	903	0	0	0	0	0	0	0	603	903	0
556	2	0	0	0	0	0	0	200	300	0	0	0	0	0	0	0	200	903	0	0	0	0	0	0	0	603	903	0
556	3	0	0	0	0	0	0	200	300	0	0	0	0	0	0	0	200	903	0	0	0	0	0	0	0	603	903	0
556	4	0	0	0	0	0	0	200	300	0	0	0	0	0	0	0	200	903	0	0	0	0	0	0	0	603	903	0
556	5	0	0	0	0	0	0	200	300	0	0	0	0	0	0	0	200	903	0	0	0	0	0	0	0	603	903	0
556	6	0	0	0	0	0	0	200	300	0	0	0	0	0	0	0	200	903	0	0	0	0	0	0	0	603	903	0
556	7	0	0	0	0	0	0	200	300	0	0	0	0	0	0	0	200	903	0	0	0	0	0	0	0	603	903	0
556	8	0	0	0	0	0	0	200	300	0	0	0	0	0	0	0	200	903	0	0	0	0	0	0	0	603	903	0
556	9	0	0	0	0	0	0	200	300	0	0	0	0	0	0	0	200	903	0	0	0	0	0	0	0	603	903	0
557	0	0	0	0	0	0	0	200	300	0	0	0	0	0	0	0	200	903	0	0	0	0	0	0	0	603	903	0
557	1	0	0	0	0	0	0	200	300	0	0	0	0	0	0	0	200	903	0	0	0	0	0	0	0	603	903	0
557	2	0	0	0	0	0	0	200	300	0	0	0	0	0	0	0	200	903	0	0	0	0	0	0	0	603	903	0
557	3	0	0	0	0	0	0	200	300	0	0	0	0	0	0	0	200	903	0	0	0	0	0	0	0	603	903	0
557	4	0	0	0	0	0	0	200	300	0	0	0	0	0	0	0	200	903	0	0	0	0	0	0	0	603	903	0
557	5	0	0	0	0	0	0	200	300	0	0	0	0	0	0	0	200	903	0	0	0	0	0	0	0	603	903	0
557	6	0	0	0	0	0	0	200	300	0	0	0	0	0	0	0	200	903	0	0	0	0	0	0	0	603	903	0
557	7	0	0	0	0	0	0	200	300	0	0	0	0	0	0	0	200	903	0	0	0	0	0	0	0	603	903	0
557	8	0	0	0	0	0	0	200	300	0	0	0	0	0	0	0	200	903	0	0	0	0	0	0	0	603	903	0
557	9	0	0	0	0	0	0	200	300	0	0	0	0	0	0	0	200	903	0	0	0	0	0	0	0	603	903	0
558	0	0	0	0	0	0	0	200	300	0	0	0	0	0	0	0	200	903	0	0	0	0	0	0	0	603	903	0
558	1	0	0	0	0	0	0	200	300	0	0	0	0	0	0	0	200	903	0	0	0	0	0	0	0	603	903	0
558	2	0	0	0	0	0	0	200	300	0	0	0	0	0	0	0	200	903	0	0	0	0	0	0	0	603	903	0
558	3	0	0	0	0	0	0	200	300	0	0	0	0	0	0	0	200	903	0	0	0	0	0	0	0	603	903	0
558	4	0	0	0	0	0	0	200	300	0	0	0	0	0	0	0	200	903	0	0	0	0	0	0	0	603	903	0
558	5	0	0	0	0	0	0	200	300	0	0	0	0	0	0	0	200	903	0	0	0	0	0	0	0	603	903	0
558	6	0	0	0	0	0	0	200	300	0	0	0	0	0	0	0	200	903	0	0	0	0	0	0	0	603	903	0
558	7	0	0	0	0	0	0	200	300	0	0	0	0	0	0	0	200	903	0	0	0	0	0	0	0	603	903	0
558	8	0	0	0	0	0	0	200	300	0	0	0	0	0	0	0	200	903	0	0	0	0	0	0	0	603	903	0
558	9	0	0	0	0	0	0	200	300	0	0	0	0	0	0	0	200	903	0	0	0	0	0	0	0	603	903	0
559	0	0	0	0	0	0	0	200	300	0	0	0	0	0	0	0	200	903	0	0	0	0	0	0	0	603	903	0
559	1	0	0	0	0	0	0	200	300	0	0	0	0	0	0	0	200	903	0	0	0	0	0	0	0	603	903	0
559	2	0	0	0	0	0	0	200	300	0	0	0	0	0	0	0	200	903	0	0	0	0	0	0	0	603	903	0
559	3	0	0	0	0	0	0	200	300	0	0	0	0	0	0	0	200	903	0	0	0	0	0	0	0	603	903	0
559	4	0	0	0	0	0	0	200	300	0	0	0	0	0	0	0	200	903	0	0	0	0	0	0	0	603	903	0
559	5	0	0	0	0	0	0	200	300	0	0	0	0	0	0	0	200	903	0	0	0	0	0	0	0	603	903	0
559	6	0	0	0	0	0	0	200	300	0	0	0	0	0	0	0	200	903	0	0	0	0	0	0	0	603	903	0
559	7	0	0	0	0	0	0	200	300	0	0	0	0	0	0	0	200	903	0	0	0	0	0	0	0	603	903	0
559	8	0	0	0	0	0	0	200	300	0	0	0	0	0	0	0	200	903	0	0	0	0	0	0	0	603	903	0
559	9	0	0	0	0	0	0	200	300	0	0	0	0	0	0	0	200	903	0	0	0	0	0	0	0	603	903	0
560	0	0	0	0	0	0	0	200	300	0	0	0	0	0	0	0	200	903	0	0	0	0	0	0	0	603	903	0
560	1	0	0	0	0	0	0	200	300	0	0	0	0	0	0	0	200	903	0	0	0	0	0	0	0	603	903	0
560	2	0	0	0	0	0	0	200	300	0	0	0	0	0	0	0	200	903	0	0	0	0	0	0	0	603	903	0
560	3	0	0	0	0	0	0	200	300	0	0	0	0	0	0	0	200	903	0	0	0	0	0	0	0	603	903	0
560	4	0	0	0	0	0	0	200	300	0	0	0	0	0	0	0	200	903	0	0	0	0	0	0	0	603	903	0
560	5	0	0	0	0	0	0	200	300	0	0	0	0	0	0	0	200	903	0	0	0	0	0	0	0	603	903	0
560	6	0	0	0	0	0	0	200	300	0	0	0	0	0	0	0	200	903	0	0	0	0	0	0	0	603	903	0
560	7	0	0	0	0	0	0	200	300	0	0	0	0	0	0	0	200	903	0	0	0	0	0	0	0	603	903	0
560	8	0	0	0	0	0	0	200	300	0	0	0	0	0	0	0	200	903	0	0	0	0	0	0	0	603	903	0
560	9	0	0	0	0	0	0	200	300	0	0	0	0	0	0	0	200	903	0	0	0	0	0	0	0	603	903	0
561	0	0	0	0	0	0	0	200	300	0	0	0	0	0	0	0	200	903	0	0	0	0	0	0	0	603	903	0
561	1	0	0	0	0	0	0	200	300	0	0	0	0	0	0	0	200	903	0	0	0	0	0	0	0	603	903	0
561	2	0	0	0	0	0	0	200	300	0	0	0	0	0	0	0	200	903	0	0	0	0	0	0	0	603	903	0
561	3	0	0	0	0	0	0	200	300	0	0	0	0	0	0	0	200	903	0	0	0	0	0	0	0	603	903	0
561	4	0	0	0	0	0	0	200	300	0	0	0	0	0	0	0	200	903	0	0	0	0	0	0	0	603	903	0
561	5	0	0	0	0	0	0	200	300	0	0	0	0	0	0	0	200	903	0	0	0	0	0	0	0	603	903	0
561	6	0	0	0	0	0	0	200	300	0	0	0	0	0	0	0	200	903	0	0	0	0	0	0	0	603	903	0
561	7	0	0	0	0	0	0	200	300	0	0	0	0	0	0	0	200	903	0	0	0	0	0	0	0	603	903	0
561	8	0	0	0	0	0	0	200	300	0	0	0	0	0	0	0	200	903	0	0	0	0	0	0	0	603	903	0
561	9	0	0	0	0	0	0	200	300	0	0	0	0	0	0	0	200	903	0	0	0	0	0	0	0	603	903	0
562	0	0	0	0	0	0	0	200	300	0	0	0	0	0	0	0	200	903	0	0	0	0	0	0	0	603	903	0
562	1	0	0	0	0	0	0	200	300	0	0	0	0	0	0	0	200	903	0	0	0	0	0	0	0	603	903	0
562	2	0	0	0	0	0	0	200	300	0	0	0	0	0	0	0	200	903	0	0	0	0	0	0	0	603	903	0
562	3	0	0	0	0	0	0	200	300	0	0	0	0	0	0	0	200	903	0	0	0	0	0	0	0	603	903	0
562	4	0	0	0	0	0	0	200	300	0	0	0	0	0	0	0	200	903	0	0	0	0	0	0	0	603	903	0
562	5	0	0	0	0	0	0	200	300	0	0	0	0	0	0	0	200	903	0	0	0	0	0	0	0	603	903	0
562	6	0	0	0	0	0	0	200	300	0	0	0	0	0	0	0	200	903	0	0	0	0	0	0	0	603	903	0
562	7	0	0	0	0	0	0	200	300	0	0	0	0	0	0	0	200	903	0	0	0	0	0	0	0	603	903	0
562	8	0	0	0	0	0	0	200	300	0	0	0	0	0	0	0	200	903	0	0	0	0	0	0	0	603	903	0
562	9	0	0	0	0	0	0	200	300	0	0	0	0	0	0	0	200	903	0	0	0	0	0	0	0	603	903	0
563	0	0	0	0	0	0	0	200	300	0	0	0	0	0	0	0	200	903	0	0	0	0	0	0	0	603	903	0
563	1	0	0	0	0	0	0	200	300	0	0	0	0	0	0	0	200	903	0	0	0	0	0	0	0	603	903	0
563	2	0	0	0	0	0	0	200	300	0	0	0	0	0	0	0	200	903	0	0	0	0	0	0	0	603	903	0
563	3	0	0	0	0	0	0	200	300	0	0	0	0	0	0	0	200	903	0	0	0	0	0	0	0	603	903	0
563	4	0	0	0	0	0	0	200	300	0	0	0	0	0	0	0	200	903	0	0	0	0	0	0	0	603	903	0
563	5	0	0	0	0	0	0	200	300	0	0	0	0	0	0	0	200	903	0	0	0	0	0	0	0	603	903	0
563	6	0	0	0	0	0	0	200	300	0	0	0	0	0	0	0	200	903	0	0	0	0	0	0	0	603	903	0
563	7	0	0	0	0	0	0	200	300	0	0	0	0	0	0	0	200	903	0	0	0	0	0	0	0	603	903	0
563	8	0	0	0	0	0	0	200	300	0	0	0	0	0	0	0	200	903	0	0	0	0	0	0	0	603	903	0
563	9	0	0	0	0	0	0	200	300	0	0	0	0	0	0	0	200	903	0	0	0	0	0	0	0	603	903	0
564	0	0	0	0	0	0	0	200	300	0	0	0	0	0	0	0	200	903	0	0	0	0	0	0	0	603	903	0
564	1	0	0	0	0	0	0	200	300	0	0	0	0	0	0	0	200	903	0	0	0	0	0	0	0	603	903	0
564	2	0	0	0	0	0	0	200	300	0	0	0	0	0	0	0	200	903	0	0	0	0	0	0	0	603	903	0
564	3	0	0	0	0	0	0	200	300	0	0	0	0	0	0	0	200	903	0	0	0	0	0	0	0	603	903	0
564	4	0	0	0	0	0	0	200	300	0	0	0	0	0	0	0	200	903	0	0	0	0	0	0	0	603	903	0
564	5	0	0	0	0	0	0	200	300	0	0	0	0	0	0	0	200	903	0	0	0	0	0	0	0	603	903	0
564	6	0	0	0	0	0	0	200	300	0	0	0	0	0	0	0	200	903	0	0	0	0	0	0	0	603	903	0
564	7	0	0	0	0	0	0	200	300	0	0	0	0	0	0	0	200	903	0	0	0	0	0	0	0	603	903	0
564	8	0	0	0	0	0	0	200	300	0	0	0	0	0	0	0	200	903	0	0	0	0	0	0	0	603	903	0
564	9	0	0	0	0	0	0	200	300	0	0	0	0	0	0	0	200	903	0	0	0	0	0	0	0	603	903	0
565	0	0	0	0	0	0	0	200	300	0	0	0	0	0	0	0	200	903	0	0	0	0	0	0	0	603	903	0
565	1	0	0	0	0	0	0	200	300	0	0	0	0	0	0	0	200	903	0	0	0	0	0	0	0	603	903	0
565	2	0	0	0	0	0	0	200	300	0	0	0	0	0	0	0	200	903	0	0	0	0	0	0	0	603	903	0
565	3	0	0	0	0	0	0	200	300	0	0	0	0	0	0	0	200	903	0	0	0	0	0	0	0	603	903	0
565	4	0	0	0	0	0	0	200	300	0	0	0	0	0	0	0	200	903	0	0	0	0	0	0	0	603	903	0
565	5	0	0	0	0	0	0	200	300	0	0	0	0	0	0	0	200	903	0	0	0	0	0	0	0	603	903	0
565	6	0	0	0	0	0	0	200	300	0	0	0	0	0	0	0	200	903	0	0	0	0	0	0	0	603	903	0
565	7	0	0	0	0	0	0	200	300	0	0	0	0	0	0	0	200	903	0	0	0	0	0	0	0	603	903	0
565	8	0	0	0	0	0	0	200	300	0	0	0	0	0	0	0	200	903	0	0	0	0	0	0	0	603	903	0
565	9	0	0	0	0	0	0	200	300	0	0	0	0	0	0	0	200	903	0	0	0	0	0	0	0	603	903	0
566	0	0	0	0	0	0	0	200	300	0	0	0	0	0	0	0	200	903	0	0	0	0	0	0	0	603	903	0
566	1	0	0	0	0	0	0	200	300	0	0	0	0	0	0	0	200	903	0	0	0	0	0	0	0	603	903	0
566	2	0	0	0	0	0	0	200	300	0	0	0	0	0	0	0	200	903	0	0	0	0	0	0	0	603	903	0
566	3	0	0	0	0	0	0	200	300	0	0	0	0	0	0	0	200	903	0	0	0	0	0	0	0	603	903	0
566	4	0	0	0	0	0	0	200	300	0	0	0	0	0	0	0	200	903	0	0	0	0	0	0	0	603	903	0
566	5	0	0	0	0	0	0	200	300	0	0	0	0	0	0	0	200	903	0	0	0	0	0	0	0	603	903	0
566	6	0	0	0	0	0	0	200	300	0	0	0	0	0	0	0	200	903	0	0	0	0	0	0	0	603	903	0
566	7	0	0	0	0	0	0	200	300	0	0	0	0	0	0	0	200	903	0	0	0	0	0	0	0	603	903	0
566	8	0	0	0	0	0	0	200	300	0	0	0	0	0	0	0	200	903	0	0	0	0	0	0	0	603	903	0
566	9	0	0	0	0	0	0	200	300	0	0	0	0	0	0	0	200	903	0	0	0	0	0	0	0	603	903	0
567	0	0	0	0	0	0	0	200	300	0	0	0	0	0	0	0	200	903	0	0	0	0	0	0	0	603	903	0
567	1	0	0	0	0	0	0	200	300	0	0	0	0	0	0	0	200	903	0	0	0	0	0	0	0	603	903	0
567	2	0	0	0	0	0	0	200	300	0	0	0	0	0	0	0	200	903	0	0	0	0	0	0	0	603	903	0
567	3	0	0	0	0	0	0	200	300	0	0	0	0	0	0	0	200	903	0	0	0	0	0	0	0	603	903	0
567	4	0	0	0	0	0	0	200	300	0	0	0	0	0	0	0	200	903	0	0	0	0	0	0	0	603	903	0
567	5	0	0	0	0	0	0	200	300	0	0	0	0	0	0	0	200	903	0	0	0	0	0	0	0	603	903	0
567	6	0	0	0	0	0	0	200	300	0	0	0	0	0	0	0	200	903	0	0	0	0	0	0	0	603	903	0
567	7	0	0	0	0	0	0	200	300	0	0	0	0	0	0	0	200	903	0	0	0	0	0	0	0	603	903	0
567	8	0	0	0	0	0	0	200	300	0	0	0	0	0	0	0	200	903	0	0	0	0	0	0	0	603	903	0
567	9	0	0	0	0	0	0	200	300	0	0	0	0	0	0	0	200	903	0	0	0	0	0	0	0	603	903	0
568	0	0	0	0	0	0	0	200	300	0	0	0	0	0	0	0	200	903	0	0	0	0	0	0	0	603	903	0
568	1	0	0	0	0	0	0	200	300	0	0	0	0	0	0	0	200	903	0	0	0	0	0	0	0	603	903	0
568	2	0	0	0	0	0	0	200	300	0	0	0	0	0	0	0	200	903	0	0	0	0	0	0	0	603	903	0
568	3	0	0	0	0	0	0	200	300	0	0	0	0	0	0	0	200	903	0	0	0	0	0	0	0	603	903	0
568	4	0	0	0	0	0	0	200	300	0	0	0	0	0	0	0	200	903	0	0	0	0	0	0	0	603	903	0
568	5	0	0	0	0	0	0	200	300	0	0	0	0	0	0	0	200	903	0	0	0	0	0	0	0	603	903	0
568	6	0	0	0	0	0	0	200	300	0	0	0	0	0	0	0	200	903	0	0	0	0	0	0	0	603	903	0
568	7	0	0	0	0	0	0	200	300	0	0	0	0	0	0	0	200	903	0	0	0	0	0	0	0	603	903	0
568	8	0	0	0	0	0	0	200	300	0	0	0	0	0	0	0	200	903	0	0	0	0	0	0	0	603	903	0
568	9	0	0	0	0	0	0	200	300	0	0	0	0	0	0	0	200	903	0	0	0	0	0	0	0	603	903	0
569	0	0	0	0	0	0	0	200	300	0	0	0	0	0	0	0	200	903	0	0	0	0	0	0	0	603	903	0
569	1	0	0	0	0	0	0	200	300	0	0	0	0	0	0	0	200	903	0	0	0	0	0	0	0	603	903	0
569	2	0	0	0	0	0	0	200	300	0	0	0	0	0	0	0	200	903	0	0	0	0	0	0	0	603	903	0
569	3	0	0	0	0	0	0	200	300	0	0	0	0	0	0	0	200	903	0	0	0	0	0	0	0	603	903	0
569	4	0	0	0	0	0	0	200	300	0	0	0	0	0	0	0	200	903	0	0	0	0	0	0	0	603	903	0
569	5	0	0	0	0	0	0	200	300	0	0	0	0	0	0	0	200	903	0	0	0	0	0	0	0	603	903	0
569	6	0	0	0	0	0	0	200	300	0	0	0	0	0	0	0	200	903	0	0	0	0	0	0	0	603	903	0
569	7	0	0	0	0	0	0	200	300	0	0	0	0	0	0	0	200	903	0	0	0	0	0	0	0	603	903	0
569	8	0	0	0	0	0	0	200	300	0	0	0	0	0	0	0	200	903	0	0	0	0	0	0	0	603	903	0
569	9	0	0	0	0	0	0	200	300	0	0	0	0	0	0	0	200	903	0	0	0	0	0	0	0	603	903	0
570	0	0	0	0	0	0	0	200	300	0	0	0	0	0	0	0	200	903	0	0	0	0	0	0	0	603	903	0
570	1	0	0	0	0	0	0	200	300	0	0	0	0	0	0	0	200	903	0	0	0	0	0	0	0	603	903	0
570	2	0	0	0	0	0	0	200	300	0	0	0	0	0	0	0	200	903	0	0	0	0	0	0	0	603	903	0
570	3	0	0	0	0	0	0	200	300	0	0	0	0	0	0	0	200	903	0	0	0	0	0	0	0	603	903	0
570	4	0	0	0	0	0	0	200	300	0	0	0	0	0	0	0	200	903	0	0	0	0	0	0	0	603	903	0
570	5	0	0	0	0	0	0	200	300	0	0	0	0	0	0	0	200	903	0	0	0	0	0	0	0	603	903	0
570	6	0	0	0	0	0	0	200	300	0	0	0	0	0	0	0	200	903	0	0	0	0	0	0	0	603	903	0
570	7	0	0	0	0	0	0	200	300	0	0	0	0	0	0	0	200	903	0	0	0	0	0	0	0	603	903	0
570	8	0	0	0	0	0	0	200	300	0	0	0	0	0	0	0	200	903	0	0	0	0	0	0	0	603	903	0
570	9	0	0	0	0	0	0	200	300	0	0	0	0	0	0	0	200	903	0	0	0	0	0	0	0	603	903	0
571	0	0	0	0	0	0	0	200	300	0	0	0	0	0	0	0	200	903	0	0	0	0	0	0	0	603	903	0
571	1	0	0	0	0	0	0	200	300	0	0	0	0	0	0	0	200	903	0	0	0	0	0	0	0	603	903	0
571	2	0	0	0	0	0	0	200	300	0	0	0	0	0	0	0	200	903	0	0	0	0	0	0	0	603	903	0
571	3	0	0	0	0	0	0	200	300	0	0	0	0	0	0	0	200	903	0	0	0	0	0	0	0	603	903	0
571	4	0	0	0	0	0	0	200	300	0	0	0	0	0	0	0	200	903	0	0	0	0	0	0	0	603	903	0
571	5	0	0	0	0	0	0	200	300	0	0	0	0	0	0	0	200	903	0	0	0	0	0	0	0	603	903	0
571	6	0	0	0	0	0	0	200	300	0	0	0	0	0	0	0	200	903	0	0	0	0	0	0	0	603	903	0
571	7	0	0	0	0	0	0	200	300	0	0	0	0	0	0	0	200	903	0	0	0	0	0	0	0	603	903	0
571	8	0	0	0	0	0	0	200	300	0	0	0	0	0	0	0	200	903	0	0	0	0	0	0	0	603	903	0
571	9	0	0	0	0	0	0	200	300	0	0	0	0	0	0	0	200	903	0	0	0	0	0	0	0	603	903	0
572	0	0	0	0	0	0	0	200	300	0	0	0	0	0	0	0	200	903	0	0	0	0	0	0	0	603	903	0
572	1	0	0	0	0	0	0	200	300	0	0	0	0	0	0	0	200	903	0	0	0	0	0	0	0	603	903	0
572	2	0	0	0	0	0	0	200	300	0	0	0	0	0	0	0	200	903	0	0	0	0	0	0	0	603	903	0
572	3	0	0	0	0	0	0	200	300	0	0	0	0	0	0	0	200	903	0	0	0	0	0	0	0	603	903	0
572	4	0	0	0	0	0	0	200	300	0	0	0	0	0	0	0	200	903	0	0	0	0	0	0	0	603	903	0
572	5	0	0	0	0	0	0	200	300	0	0	0	0	0	0	0	200	903	0	0	0	0	0	0	0	603	903	0
572	6	0	0	0	0	0	0	200	300	0	0	0	0	0	0	0	200	903	0	0	0	0	0	0	0	603	903	0
572	7	0	0	0	0	0	0	200	300	0	0	0	0	0	0	0	200	903	0	0	0	0	0	0	0	603	903	0
572	8	0	0	0	0	0	0	200	300	0	0	0	0	0	0	0	200	903	0	0	0	0	0	0	0	603	903	0
572	9	0	0	0	0	0	0	200	300	0	0	0	0	0	0	0	200	903	0	0	0	0	0	0	0	603	903	0
573	0	0	0	0	0	0	0	200	300	0	0	0	0	0	0	0	200	903	0	0	0	0	0	0	0	603	903	0
573	1	0	0	0	0	0	0	200	300	0	0	0	0	0	0	0	200	903	0	0	0	0	0	0	0	603	903	0
573	2	0	0	0	0	0	0	200	300	0	0	0	0	0	0	0	200	903	0	0	0	0	0	0	0	603	903	0
573	3	0	0	0	0	0	0	200	300	0	0	0	0	0	0	0	200	903	0	0	0	0	0	0	0	603	903	0
573	4	0	0	0	0	0	0	200	300	0	0	0	0	0	0	0	200	903	0	0	0	0	0	0	0	603	903	0
573	5	0	0	0	0	0	0	200	300	0	0	0	0	0	0	0	200	903	0	0	0	0	0	0	0	603	903	0
573	6	0	0	0	0	0	0	200	300	0	0	0	0	0	0	0	200	903	0	0	0	0	0	0	0	603	903	0
573	7	0	0	0	0	0	0	200	300	0	0	0	0	0	0	0	200	903	0	0	0	0	0	0	0	603	903	0
573	8	0	0	0	0	0	0	200	300	0	0	0	0	0	0	0	200	903	0	0	0	0	0	0	0	603	903	0
573	9	0	0	0	0	0	0	200	300	0	0	0	0	0	0	0	200	903	0	0	0	0	0	0	0	603	903	0
574	0	0	0	0	0	0	0	200	300	0	0	0	0	0	0	0	200	903	0	0	0	0	0	0	0	603	903	0
574	1	0	0	0	0	0	0	200	300	0	0	0	0	0	0	0	200	903	0	0	0	0	0	0	0	603	903	0
574	2	0	0	0	0	0	0	200	300	0	0	0	0	0	0	0	200	903	0	0	0	0	0	0	0	603	903	0
574	3	0	0	0	0	0	0	200	300	0	0	0	0	0	0	0	200	903	0	0	0	0	0	0	0	603	903	0
574	4	0	0	0	0	0	0	200	300	0	0	0	0	0	0	0	200	903	0	0	0	0	0	0	0	603	903	0
574	5	0	0	0	0	0	0	200	300	0	0	0	0	0	0	0	200	903	0	0	0	0	0	0	0	603	903	0
574	6	0	0	0	0	0	0	200	300	0	0	0	0	0	0	0	200	903	0	0	0	0	0	0	0	603	903	0
574	7	0	0	0	0	0	0	200	300	0	0	0	0	0	0	0	200	903	0	0	0	0	0	0	0	603	903	0
574	8	0	0	0	0	0	0	200	300	0	0	0	0	0	0	0	200	903	0	0	0	0	0	0	0	603	903	0
574	9	0	0	0	0	0	0	200	300	0	0	0	0	0	0	0	200	903	0	0	0	0	0	0	0	603	903	0
575	0	0	0	0	0	0	0	200	300	0	0	0	0	0	0	0	200	903	0	0	0	0	0	0	0	603	903	0
575	1	0	0	0	0	0	0	200	300	0	0	0	0	0	0	0	200	903	0	0	0	0	0	0	0	603	903	0
575	2	0	0	0	0	0	0	200	300	0	0	0	0	0	0	0	200	903	0	0	0	0	0	0	0	603	903	0
575	3	0	0	0	0	0	0	200	300	0	0	0	0	0	0	0	200	903	0	0	0	0	0	0	0	603	903	0
575	4	0	0	0	0	0	0	200	300	0	0	0	0	0	0	0	200	903	0	0	0	0	0	0	0	603	903	0
575	5	0	0	0	0	0	0	200	300	0	0	0	0	0	0	0	200	903	0	0	0	0	0	0	0	603	903	0
575	6	0	0	0	0	0	0	200	300	0	0	0	0	0	0	0	200	903	0	0	0	0	0	0	0	603	903	0
575	7	0	0	0	0	0	0	200	300	0	0	0	0	0	0	0	200	903	0	0	0	0	0	0	0	603	903	0
575	8	0	0	0	0	0	0	200	300	0	0	0	0	0	0	0	200	903	0	0	0	0	0	0	0	603	903	0
575	9	0	0	0	0	0	0	200	300	0	0	0	0	0	0	0	200	903	0	0	0	0	0	0	0	603	903	0
576	0	0	0	0	0	0	0	200	300	0	0	0	0	0	0	0	200	903	0	0	0	0	0	0	0	603	903	0
576	1	0	0	0	0	0	0	200	300	0	0	0	0	0	0	0	200	903	0	0	0	0	0	0	0	603	903	0
576	2	0	0	0	0	0	0	200	300	0	0	0	0	0	0	0	200	903	0	0	0	0	0	0	0	603	903	0
576	3	0	0	0	0	0	0	200	300	0	0	0	0	0	0	0	200	903	0	0	0	0	0	0	0	603	903	0
576	4	0	0	0	0	0	0	200	300	0	0	0	0	0	0	0	200	903	0	0	0	0	0	0	0	603	903	0
576	5	0	0	0	0	0	0	200	300	0	0	0	0	0	0	0	200	903	0	0	0	0	0	0	0	603	903	0
576	6	0	0	0	0	0	0	200	300	0	0	0	0	0	0	0	200	903	0	0	0	0	0	0	0	603	903	0
576	7	0	0	0	0	0	0	200	300	0	0	0	0	0	0	0	200	903	0	0	0	0	0	0	0	603	903	0
576	8	0	0	0	0	0	0	200	300	0	0	0	0	0	0	0	200	903	0	0	0	0	0	0	0	603	903	0
576	9	0	0	0	0	0	0	200	300	0	0	0	0	0	0	0	200	903	0	0	0	0	0	0	0	603	903	0
577	0	0	0	0	0	0	0	200	300	0	0	0	0	0	0	0	200	903	0	0	0	0	0	0	0	603	903	0
577	1	0	0	0	0	0	0	200	300	0	0	0	0	0	0	0	200	903	0	0	0	0	0	0	0	603	903	0
577	2	0	0	0	0	0	0	200	300	0	0	0	0	0	0	0	200	903	0	0	0	0	0	0	0	603	903	0
577	3	0	0	0	0	0	0	200	300	0	0	0	0	0	0	0	200	903	0	0	0	0	0	0	0	603	903	0
577	4	0	0	0	0	0	0	200	300	0	0	0	0	0	0	0	200	903	0	0	0	0	0	0	0	603	903	0
577	5	0	0	0	0	0	0	200	300	0	0	0	0	0	0	0	200	903	0	0	0	0	0	0	0	603	903	0
577	6	0	0	0	0	0	0	200	300	0	0	0	0	0	0	0	200	903	0	0	0	0	0	0	0	603	903	0
577	7	0	0	0	0	0	0	200	300	0	0	0	0	0	0	0	200	903	0	0	0	0	0	0	0	603	903	0
577	8	0	0	0	0	0	0	200	300	0	0	0	0	0	0	0	200	903	0	0	0	0	0	0	0	603	903	0
577	9	0	0	0	0	0	0	200	300	0	0	0	0	0	0	0	200	903	0	0	0	0	0	0	0	603	903	0
578	0	0	0	0	0	0	0	200	300	0	0	0	0	0	0	0	200	903	0	0	0	0	0	0	0	603	903	0
578	1	0	0	0	0	0	0	200	300	0	0	0	0	0	0	0	200	903	0	0	0	0	0	0	0	603	903	0
578	2	0	0	0	0	0	0	200	300	0	0	0	0	0	0	0	200	903	0	0	0	0	0	0	0	603	903	0
578	3	0	0	0	0	0	0	200	300	0	0	0	0	0	0	0	200	903	0	0	0	0	0	0	0	603	903	0
578	4	0	0	0	0	0	0	200	300	0	0	0	0	0	0	0	200	903	0	0	0	0	0	0	0	603	903	0
578	5	0	0	0	0	0	0	200	300	0	0	0	0	0	0	0	200	903	0	0	0	0	0	0	0	603	903	0
578	6	0	0	0	0	0	0	200	300	0	0	0	0	0	0	0	200	903	0	0	0	0	0	0	0	603	903	0
578	7	0	0	0	0	0	0	200	300	0	0	0	0	0	0	0	200	903	0	0	0	0	0	0	0	603	903	0
578	8	0	0	0	0	0	0	200	300	0	0	0	0	0	0	0	200	903	0	0	0	0	0	0	0	603	903	0
578	9	0	0	0	0	0	0	200	300	0	0	0	0	0	0	0	200	903	0	0	0	0	0	0	0	603	903	0
579	0	0	0	0	0	0	0	200	300	0	0	0	0	0	0	0	200	903	0	0	0	0	0	0	0	603	903	0
579	1	0	0	0	0	0	0	200	300	0	0	0	0	0	0	0	200	903	0	0	0	0	0	0	0	603	903	0
579	2	0	0	0	0	0	0	200	300	0	0	0	0	0	0	0	200	903	0	0	0	0	0	0	0	603	903	0
579	3	0	0	0	0	0	0	200	300	0	0	0	0	0	0	0	200	903	0	0	0	0	0	0	0	603	903	0
579	4	0	0	0	0	0	0	200	300	0	0	0	0	0	0	0	200	903	0	0	0	0	0	0	0	603	903	0
579	5	0	0	0	0	0	0	200	300	0	0	0	0	0	0	0	200	903	0	0	0	0	0	0	0	603	903	0
579	6	0	0	0	0	0	0	200	300	0	0	0	0	0	0	0	200	903	0	0	0	0	0	0	0	603	903	0
579	7	0	0	0	0	0	0	200	300	0	0	0	0	0	0	0	200	903	0	0	0	0	0	0	0	603	903	0
579	8	0	0	0	0	0	0	200	300	0	0	0	0	0	0	0	200	903	0	0	0	0	0	0	0	603	903	0
579	9	0	0	0	0	0	0	200	300	0	0	0	0	0	0	0	200	903	0	0	0	0	0	0	0	603	903	0
580	0	0	0	0	0	0	0	200	300	0	0	0	0	0	0	0	200	903	0	0	0	0	0	0	0	603	903	0
580	1	0	0	0	0	0	0	200	300	0	0	0	0	0	0	0	200	903	0	0	0	0	0	0	0	603	903	0
580	2	0	0	0	0	0	0	200	300	0	0	0	0	0	0	0	200	903	0	0	0	0	0	0	0	603	903	0
580	3	0	0	0	0	0	0	200	300	0	0	0	0	0	0	0	200	903	0	0	0	0	0	0	0	603	903	0
580	4	0	0	0	0	0	0	200	300	0	0	0	0	0	0	0	200	903	0	0	0	0	0	0	0	603	903	0
580	5	0	0	0	0	0	0	200	300	0	0	0	0	0	0	0	200	903	0	0	0	0	0	0	0	603	903	0
580	6	0	0	0	0	0	0	200	300	0	0	0	0	0	0	0	200	903	0	0	0	0	0	0	0	603	903	0
580	7	0	0	0	0	0	0	200	300	0	0	0	0	0	0	0	200	903	0	0	0	0	0	0	0	603	903	0
580	8	0	0	0	0	0	0	200	300	0	0	0	0	0	0	0	200	903	0	0	0	0	0	0	0	603	903	0
580	9	0	0	0	0	0	0	200	300	0	0	0	0	0	0	0	200	903	0	0	0	0	0	0	0	603	903	0
581	0	0	0	0	0	0	0	200	300	0	0	0	0	0	0	0	200	903	0	0	0	0	0	0	0	603	903	0
581	1	0	0	0	0	0	0	200	300	0	0	0	0	0	0	0	200	903	0	0	0	0	0	0	0	603	903	0
581	2	0	0	0	0	0	0	200	300	0	0	0	0	0	0	0	200	903	0	0	0	0	0	0	0	603	903	0
581	3	0	0	0	0	0	0	200	300	0	0	0	0	0	0	0	200	903	0	0	0	0	0	0	0	603	903	0
581	4	0	0	0	0	0	0	200	300	0	0	0	0	0	0	0	200	903	0	0	0	0	0	0	0	603	903	0
581	5	0	0	0	0	0	0	200	300	0	0	0	0	0	0	0	200	903	0	0	0	0	0	0	0	603	903	0
581	6	0	0	0	0	0	0	200	300	0	0	0	0	0	0	0	200	903	0	0	0	0	0	0	0	603	903	0
581	7	0	0	0	0	0	0	200	300	0	0	0	0	0	0	0	200	903	0	0	0	0	0	0	0	603	903	0
581	8	0	0	0	0	0	0	200	300	0	0	0	0	0	0	0	200	903	0	0	0	0	0	0	0	603	903	0
581	9	0	0	0	0	0	0	200	300	0	0	0	0	0	0	0	200	903	0	0	0	0	0	0	0	603	903	0
582	0	0	0	0	0	0	0	200	300	0	0	0	0	0	0	0	200	903	0	0	0	0	0	0	0	603	903	0
582	1	0	0	0	0	0	0	200	300	0	0	0	0	0	0	0	200	903	0	0	0	0	0	0	0	603	903	0
582	2	0	0	0	0	0	0	200	300	0	0	0	0	0	0	0	200	903	0	0	0	0	0	0	0	603	903	0
582	3	0	0	0	0	0	0	200	300	0	0	0	0	0	0	0	200	903	0	0	0	0	0	0	0	603	903	0
582	4	0	0	0	0	0	0	200	300	0	0	0	0	0	0	0	200	903	0	0	0	0	0	0	0	603	903	0
582	5	0	0	0	0	0	0	200	300	0	0	0	0	0	0	0	200	903	0	0	0	0	0	0	0	603	903	0
582	6	0	0	0	0	0	0	200	300	0	0	0	0	0	0	0	200	903	0	0	0	0	0	0	0	603	903	0
582	7	0	0	0	0	0	0	200	300	0	0	0	0	0	0	0	200	903	0	0	0	0	0	0	0	603	903	0
582	8	0	0	0	0	0	0	200	300	0	0	0	0	0	0	0	200	903	0	0	0	0	0	0	0	603	903	0
582	9	0	0	0	0	0	0	200	300	0	0	0	0	0	0	0	200	903	0	0	0	0	0	0	0	603	903	0
583	0	0	0	0	0	0	0	200	300	0	0	0	0	0	0	0	200	903	0	0	0	0	0	0	0	603	903	0
583	1	0	0	0	0	0	0	200	300	0	0	0	0	0	0	0	200	903	0	0	0	0	0	0	0	603	903	0
583	2	0	0	0	0	0	0	200	300	0	0	0	0	0	0	0	200	903	0	0	0	0	0	0	0	603	903	0
583	3	0	0	0	0	0	0	200	300	0	0	0	0	0	0	0	200	903	0	0	0	0	0	0	0	603	903	0
583	4	0	0	0	0	0	0	200	300	0	0	0	0	0	0	0	200	903	0	0	0	0	0	0	0	603	903	0
583	5	0	0	0	0	0	0	200	300	0	0	0	0	0	0	0	200	903	0	0	0	0	0	0	0	603	903	0
583	6	0	0	0	0	0	0	200	300	0	0	0	0	0	0	0	200	903	0	0	0	0	0	0	0	603	903	0
583	7	0	0	0	0	0	0	200	300	0	0	0	0	0	0	0	200	903	0	0	0	0	0	0	0	603	903	0
583	8	0	0	0	0	0	0	200	300	0	0	0	0	0	0	0	200	903	0	0	0	0	0	0	0	603	903	0
583	9	0	0	0	0	0	0	200	300	0	0	0	0	0	0	0	200	903	0	0	0	0	0	0	0	603	903	0
584	0	0	0	0	0	0	0	200	300	0	0	0	0	0	0	0	200	903	0	0	0	0	0	0	0	603	903	0
584	1	0	0	0	0	0	0	200	300	0	0	0	0	0	0	0	200	903	0	0	0	0	0	0	0	603	903	0
584	2	0	0	0	0	0	0	200	300	0	0	0	0	0	0	0	200	903	0	0	0	0	0	0	0	603	903	0
584	3	0	0	0	0	0	0	200	300	0	0	0	0	0	0	0	200	903	0	0	0	0	0	0	0	603	903	0
584	4	0	0	0	0	0	0	200	300	0	0	0	0	0	0	0	200	903	0	0	0	0	0	0	0	603	903	0
584	5	0	0	0	0	0	0	200	300	0	0	0	0	0	0	0	200	903	0	0	0	0	0	0	0	603	903	0
584	6	0	0	0	0	0	0	200	300	0	0	0	0	0	0	0	200	903	0	0	0	0	0	0	0	603	903	0
584	7	0	0	0	0	0	0	200	300	0	0	0	0	0	0	0	200	903	0	0	0	0	0	0	0	603	903	0
584	8	0	0	0	0	0	0	200	300	0	0	0	0	0	0	0	200	903	0	0	0	0	0	0	0	603	903	0
584	9	0	0	0	0	0	0	200	300	0	0	0	0	0	0	0	200	903	0	0	0	0	0	0	0	603	903	0
585	0	0	0	0	0	0	0	200	300	0	0	0	0	0	0	0	200	903	0	0	0	0	0	0	0	603	903	0
585	1	0	0	0	0	0	0	200	300	0	0	0	0	0	0	0	200	903	0	0	0	0	0	0	0	603	903	0
585	2	0	0	0	0	0	0	200	300	0	0	0	0	0	0	0	200	903	0	0	0	0	0	0	0	603	903	0
585	3	0	0	0	0	0	0	200	300	0	0	0	0	0	0	0	200	903	0	0	0	0	0	0	0	603	903	0
585	4	0	0	0	0	0	0	200	300	0	0	0	0	0	0	0	200	903	0	0	0	0	0	0	0	603	903	0
585	5	0	0	0	0	0	0	200	300	0	0	0	0	0	0	0	200	903	0	0	0	0	0	0	0	603	903	0
585	6	0	0	0	0	0	0	200	300	0	0	0	0	0	0	0	200	903	0	0	0	0	0	0	0	603	903	0
585	7	0	0	0	0	0	0	200	300	0	0	0	0	0	0	0	200	903	0	0	0	0	0	0	0	603	903	0
585	8	0	0	0	0	0	0	200	300	0	0	0	0	0	0	0	200	903	0	0	0	0	0	0	0	603	903	0
585	9	0	0	0	0	0	0	200	300	0	0	0	0	0	0	0	200	903	0	0	0	0	0	0	0	603	903	0
586	0	0	0	0	0	0	0	200	300	0	0	0	0	0	0	0	200	903	0	0	0	0	0	0	0	603	903	0
586	1	0	0	0	0	0	0	200	300	0	0	0	0	0	0	0	200	903	0	0	0	0	0	0	0	603	903	0
586	2	0	0	0	0	0	0	200	300	0	0	0	0	0	0	0	200	903	0	0	0	0	0	0	0	603	903	0
586	3	0	0	0	0	0	0	200	300	0	0	0	0	0	0	0	200	903	0	0	0	0	0	0	0	603	903	0
586	4	0	0	0	0	0	0	200	300	0	0	0	0	0	0	0	200	903	0	0	0	0	0	0	0	603	903	0
586	5	0	0	0	0	0	0	200	300	0	0	0	0	0	0	0	200	903	0	0	0	0	0	0	0	603	903	0
586	6	0	0	0	0	0	0	200	300	0	0	0	0	0	0	0	200	903	0	0	0	0	0	0	0	603	903	0
586	7	0	0	0	0	0	0	200	300	0	0	0	0	0	0	0	200	903	0	0	0	0	0	0	0	603	903	0
586	8	0	0	0	0	0	0	200	300	0	0	0	0	0	0	0	200	903	0	0	0	0	0	0	0	603	903	0
586	9	0	0	0	0	0	0	200	300	0	0	0	0	0	0	0	200	903	0	0	0	0	0	0	0	603	903	0
587	0	0	0	0	0	0	0	200	300	0	0	0	0	0	0	0	200	903	0	0	0	0	0	0	0	603	903	0
587	1	0	0	0	0	0	0	200	300	0	0	0	0	0	0	0	200	903	0	0	0	0	0	0	0	603	903	0
587	2	0	0	0	0	0	0	200	300	0	0	0	0	0	0	0	200	903	0	0	0	0	0	0	0	603	903	0
587	3	0	0	0	0	0	0	200	300	0	0	0	0	0	0	0	200	903	0	0	0	0	0	0	0	603	903	0
587	4	0	0	0	0	0	0	200	300	0	0	0	0	0	0	0	200	903	0	0	0	0	0	0	0	603	903	0
587	5	0	0	0	0	0	0	200	300	0	0	0	0	0	0	0	200	903	0	0	0	0	0	0	0	603	903	0
587	6	0	0	0	0	0	0	200	300	0	0	0	0	0	0	0	200	903	0	0	0	0	0	0	0	603	903	0
587	7	0	0	0	0	0	0	200	300	0	0	0	0	0	0	0	200	903	0	0	0	0	0	0	0	603	903	0
587	8	0	0	0	0	0	0	200	300	0	0	0	0	0	0	0	200	903	0	0	0	0	0	0	0	603	903	0
587	9	0	0	0	0	0	0	200	300	0	0	0	0	0	0	0	200	903	0	0	0	0	0	0	0	603	903	0
588	0	0	0	0	0	0	0	200	300	0	0	0	0	0	0	0	200	903	0	0	0	0	0	0	0	603	903	0
588	1	0	0	0	0	0	0	200	300	0	0	0	0	0	0	0	200	903	0	0	0	0	0	0	0	603	903	0
588	2	0	0	0	0	0	0	200	300	0	0	0	0	0	0	0	200	903	0	0	0	0	0	0	0	603	903	0
588	3	0	0	0	0	0	0	200	300	0	0	0	0	0	0	0	200	903	0	0	0	0	0	0	0	603	903	0
588	4	0	0	0	0	0	0	200	300	0	0	0	0	0	0	0	200	903	0	0	0	0	0	0	0	603	903	0
588	5	0	0	0	0	0	0	200	300	0	0	0	0	0	0	0	200	903	0	0	0	0	0	0	0	603	903	0
588	6	0	0	0	0	0	0	200	300	0	0	0	0	0	0	0	200	903	0	0	0	0	0	0	0	603	903	0
588	7	0	0	0	0	0	0	200	300	0	0	0	0	0	0	0	200	903	0	0	0	0	0	0	0	603	903	0
588	8	0	0	0	0	0	0	200	300	0	0	0	0	0	0	0	200	903	0	0	0	0	0	0	0	603	903	0
588	9	0	0	0	0	0	0	200	300	0	0	0	0	0	0	0	200	903	0	0	0	0	0	0	0	603	903	0
589	0	0	0	0	0	0	0	200	300	0	0	0	0	0	0	0	200	903	0	0	0	0	0	0	0	603	903	0
589	1	0	0	0	0	0	0	200	300	0	0	0	0	0	0	0	200	903	0	0	0	0	0	0	0	603	903	0
589	2	0	0	0	0	0	0	200	300	0	0	0	0	0	0	0	200	903	0	0	0	0	0	0	0	603	903	0
589	3	0	0	0	0	0	0	200	300	0	0	0	0	0	0	0	200	903	0	0	0	0	0	0	0	603	903	0
589	4	0	0	0	0	0	0	200	300	0	0	0	0	0	0	0	200	903	0	0	0	0	0	0	0	603	903	0
589	5	0	0	0	0	0	0	200	300	0	0	0	0	0	0	0	200	903	0	0	0	0	0	0	0	603	903	0
589	6	0	0	0	0	0	0	200	300	0	0	0	0	0	0	0	200	903	0	0	0	0	0	0	0	603	903	0
589	7	0	0	0	0	0	0	200	300	0	0	0	0	0	0	0	200	903	0	0	0	0	0	0	0	603	903	0
589	8	0	0	0	0	0	0	200	300	0	0	0	0	0	0	0	200	903	0	0	0	0	0	0	0	603	903	0
589	9	0	0	0	0	0	0	200	300	0	0	0	0	0	0	0	200	903	0	0	0	0	0	0	0	603	903	0
590	0	0	0	0	0	0	0	200	300	0	0	0	0	0	0	0	200	903	0	0	0	0	0	0	0	603	903	0
590	1	0	0	0	0	0	0	200	300	0	0	0	0	0	0	0	200	903	0	0	0	0	0	0	0	603	903	0
590	2	0	0	0	0	0	0	200	300	0	0	0	0	0	0	0	200	903	0	0	0	0	0	0	0	603	903	0
590	3	0	0	0	0	0	0	200	300	0	0	0	0	0	0	0	200	903	0	0	0	0	0	0	0	603	903	0
590	4	0	0	0	0	0	0	200	300	0	0	0	0	0	0	0	200	903	0	0	0	0	0	0	0	603	903	0
590	5	0	0	0	0	0	0	200	300	0	0	0	0	0	0	0	200	903	0	0	0	0	0	0	0	603	903	0
590	6	0	0	0	0	0	0	200	300	0	0	0	0	0	0	0	200	903	0	0	0	0	0	0	0	603	903	0
590	7	0	0	0	0	0	0	200	300	0	0	0	0	0	0	0	200	903	0	0	0	0	0	0	0	603	903	0
590	8	0	0	0	0	0	0	200	300	0	0	0	0	0	0	0	200	903	0	0	0	0	0	0	0	603	903	0
590	9	0	0	0	0	0	0	200	300	0	0	0	0	0	0	0	200	903	0	0	0	0	0	0	0	603	903	0
591	0	0	0	0	0	0	0	200	300	0	0	0	0	0	0	0	200	903	0	0	0	0	0	0	0	603	903	0
591	1	0	0	0	0	0	0	200	300	0	0	0	0	0	0	0	200	903	0	0	0	0	0	0	0	603	903	0
591	2	0	0	0	0	0	0	200	300	0	0	0	0	0	0	0	200	903	0	0	0	0	0	0	0	603	903	0
591	3	0	0	0	0	0	0	200	300	0	0	0	0	0	0	0	200	903	0	0	0	0	0	0	0	603	903	0
591	4	0	0	0	0	0	0	200	300	0	0	0	0	0	0	0	200	903	0	0	0	0	0	0	0	603	903	0
591	5	0	0	0	0	0	0	200	300	0	0	0	0	0	0	0	200	903	0	0	0	0	0	0	0	603	903	0
591	6	0	0	0	0	0	0	200	300	0	0	0	0	0	0	0	200	903	0	0	0	0	0	0	0	603	903	0
591	7	0	0	0	0	0	0	200	300	0	0	0	0	0	0	0	200	903	0	0	0	0	0	0	0	603	903	0
591	8	0	0	0	0	0	0	200	300	0	6.9278	-9.9208	-22.5024	-1013.58	261.42	-157.838	211.617	948.043	0	0	0	0	0	0	0	603	903	0
591	9	0	0	0	0	0	0	200	300	0	12.5735	-14.3459	-23.7231	-647.37	322.455	208.373	213.592	930.289	0	0	0	0	0	0	0	603	903	0
592	0	0	0	0	0	0	0	200	300	0	0	0	0	0	0	0	200	903	0	0	0	0	0	0	0	603	903	0
592	1	0	0	0	0	0	0	200	300	0	0	0	0	0	0	0	200	903	0	0	0	0	0	0	0	603	903	0
592	2	0	0	0	0	0	0	200	300	0	7.69073	-10.5312	-17.9248	-830.475	505.561	25.2677	228.205	949.331	0	0	0	0	0	0	0	603	903	0
592	3	0	0	0	0	0	0	200	300	0	10.8951	-5.34317	-27.6904	-922.028	566.596	391.479	220.462	936.298	0	0	0	0	0	0	0	603	903	0
592	4	0	0	0	0	0	0	200	300	0	-1.61713	3.65952	-27.08	-1013.58	627.631	-157.838	223.177	940.429	0	0	0	0	0	0	0	603	903	0
592	5	0	0	0	0	0	0	200	300	0	1.28204	1.67587	-29.5214	-830.475	505.561	-112.061	217.125	931.131	0	0	0	0	0	0	0	603	903	0
592	6	0	0	0	0	0	0	200	300	0	11.5054	1.52329	-39.2871	-1379.79	444.526	574.584	211.315	938.121	0	0	0	0	0	0	0	603	903	0
592	7	0	0	0	0	0	0	200	300	0	8.45367	9.45786	-52.4096	-1837.56	1176.95	483.031	222.457	938.061	0	0	0	0	0	0	0	603	903	0
592	8	0	0	0	0	0	0	200	300	0	1.8924	10.6786	-53.6303	-1654.45	1054.88	-20.5087	219.669	933.849	0	0	0	0	0	0	0	603	903	0
592	9	0	0	0	0	0	0	200	300	0	7.69073	5.1854	-55.1562	-1013.58	1421.09	71.0441	225.765	921.377	0	0	0	0	0	0	0	603	903	0
593	0	0	0	0	0	0	0	200	300	0	14.252	8.54233	-62.7856	-2203.77	1299.02	254.149	220.69	938.1	0	0	0	0	0	0	0	603	903	0
593	1	0	0	0	0	0	0	200	300	0	10.8951	14.3407	-73.4668	-2203.77	1909.37	-66.2851	225.99	932.997	0	0	0	0	0	0	0	603	903	0
593	2	0	0	0	0	0	0	200	300	0	7.53815	9.76303	-76.8237	-1471.34	1237.98	391.479	216.115	922.152	0	0	0	0	0	0	0	603	903	0
593	3	0	0	0	0	0	0	200	300	0	12.8787	7.93198	-80.4858	-2020.66	1726.26	162.597	221.448	928.106	0	0	0	0	0	0	0	603	903	0
593	4	0	0	0	0	0	0	200	300	0	16.6934	17.8502	-86.5893	-2295.32	1604.19	25.2677	218.526	929.508	0	0	0	0	0	0	0	603	903	0
593	5	0	0	0	0	0	0	200	300	0	14.5572	17.6976	-93.9135	-2203.77	2336.62	437.255	224.881	926.466	0	0	0	0	0	0	0	603	903	0
593	6	0	0	0	0	0	0	200	300	0	13.0313	11.2889	-95.7446	-2203.77	1970.4	345.702	220.58	926.017	0	0	0	0	0	0	0	603	903	0
593	7	0	0	0	0	0	0	200	300	0	15.3201	15.1036	-100.933	-2569.98	2031.44	25.2677	220.127	928.462	0	0	0	0	0	0	0	603	903	0
593	8	0	0	0	0	0	0	200	300	0	19.5926	20.7494	-108.867	-2478.43	2580.76	391.479	223.706	925.766	0	0	0	0	0	0	0	603	903	0
593	9	0	0	0	0	0	0	200	300	0	18.9822	11.8993	-109.783	-1929.11	2641.79	299.926	224.064	920.572	0	0	0	0	0	0	0	603	903	0
594	0	0	0	0	0	0	0	200	300	0	16.846	7.6268	-118.022	-1746	2153.51	208.373	218.247	917.794	0	0	0	0	0	0	0	603	903	0
594	1	0	0	0	0	0	0	200	300	0	15.015	12.0519	-121.99	-1471.34	2824.9	528.808	223.157	915.061	0	0	0	0	0	0	0	603	903	0
594	2	0	0	0	0	0	0	200	300	0	17.1512	11.1363	-126.873	-2478.43	2946.97	528.808	223.228	922.535	0	0	0	0	0	0	0	603	903	0
594	3	0	0	0	0	0	0	200	300	0	19.1348	3.65952	-129.924	-1837.56	2519.72	299.926	219.394	917.143	0	0	0	0	0	0	0	603	903	0
594	4	0	0	0	0	0	0	200	300	0	15.1675	2.13364	-136.333	-1379.79	2763.86	666.137	220.273	913.121	0	0	0	0	0	0	0	603	903	0
594	5	0	0	0	0	0	0	200	300	0	13.4891	4.26987	-141.521	-2112.21	2702.83	437.255	219.098	917.925	0	0	0	0	0	0	0	603	903	0
594	6	0	0	0	0	0	0	200	300	0	18.8297	-0.0025921	-140.605	-1837.56	2641.79	483.031	218.789	916.069	0	0	0	0	0	0	0	603	903	0
594	7	0	0	0	0	0	0	200	300	0	18.2193	-5.49576	-147.319	-1746	2763.86	574.584	218.761	914.852	0	0	0	0	0	0	0	603	903	0
594	8	0	0	0	0	0	0	200	300	0	13.0313	-3.81729	-153.118	-1288.24	2824.9	483.031	218.449	911.413	0	0	0	0	0	0	0	603	903	0
594	9	0	0	0	0	0	0	200	300	0	16.5408	-5.80093	-158.916	-1471.34	2397.65	574.584	215.088	912.259	0	0	0	0	0	0	0	603	903	0
595	0	0	0	0	0	0	0	200	300	0	19.1348	-10.5312	-161.663	-1288.24	2946.97	895.019	218.229	910.969	0	0	0	0	0	0	0	603	903	0
595	1	0	0	0	0	0	0	200	300	0	15.4727	-10.6837	-164.104	-1196.69	2946.97	711.913	217.958	910.292	0	0	0	0	0	0	0	603	903	0
595	2	0	0	0	0	0	0	200	300	0	11.8106	-9.76822	-170.207	-647.37	2458.69	528.808	214.445	906.803	0	0	0	0	0	0	0	603	903	0
595	3	0	0	0	0	0	0	200	300	0	14.8624	-14.0407	-175.701	-1196.69	2458.69	666.137	213.994	909.811	0	0	0	0	0	0	0	603	903	0
595	4	0	0	0	0	0	0	200	300	0	16.9986	-16.1769	-177.837	-647.37	3008	757.69	216.914	906.64	0	0	0	0	0	0	0	603	903	0
595	5	0	0	0	0	0	0	200	300	0	14.8624	-12.6674	-178.447	-1013.58	2885.93	299.926	216.172	908.68	0	0	0	0	0	0	0	603	903	0
595	6	0	0	0	0	0	0	200	300	0	12.7261	-15.5666	-184.246	-464.264	3069.04	299.926	216.657	905.52	0	0	0	0	0	0	0	603	903	0
595	7	0	0	0	0	0	0	200	300	0	15.3201	-19.2287	-190.959	-372.712	2946.97	895.019	215.432	904.952	0	0	0	0	0	0	0	603	903	0
595	8	0	0	0	0	0	0	200	300	0	16.0831	-19.0761	-191.265	-464.264	2702.83	666.137	214.131	905.427	0	0	0	0	0	0	0	603	903	0
595	9	0	0	0	0	0	0	200	300	0	13.0313	-15.414	-194.011	-6.50045	3069.04	391.479	215.819	903.034	0	0	0	0	0	0	0	603	903	0
596	0	0	0	0	0	0	0	200	300	0	14.0994	-20.1442	-198.894	176.605	2519.72	620.36	212.669	902.112	0	0	0	0	0	0	0	603	903	0
596	1	0	0	0	0	0	0	200	300	0	16.6934	-21.6701	-205.913	-6.50045	2946.97	574.584	214.312	903.032	0	0	0	0	0	0	0	603	903	0
596	2	0	0	0	0	0	0	200	300	0	14.5572	-18.7709	-206.829	-98.0532	3374.21	757.69	216.314	903.474	0	0	0	0	0	0	0	603	903	0
596	3	0	0	0	0	0	0	200	300	0	12.8787	-20.602	-208.354	817.474	2885.93	711.913	213.851	899.077	0	0	0	0	0	0	0	603	903	0
596	4	0	0	0	0	0	0	200	300	0	14.4046	-23.3485	-213.237	817.474	3069.04	483.031	214.393	899.166	0	0	0	0	0	0	0	603	903	0
596	5	0	0	0	0	0	0	200	300	0	14.5572	-20.7545	-216.594	817.474	3496.28	483.031	216.142	899.226	0	0	0	0	0	0	0	603	903	0
596	6	0	0	0	0	0	0	200	300	0	13.3365	-22.1278	-219.951	725.922	3435.25	711.913	215.618	899.7	0	0	0	0	0	0	0	603	903	0
596	7	0	0	0	0	0	0	200	300	0	15.9305	-24.5692	-226.36	1275.24	3313.18	528.808	214.637	897.366	0	0	0	0	0	0	0	603	903	0
596	8	0	0	0	0	0	0	200	300	0	14.252	-25.027	-228.801	1824.55	3252.14	574.584	214.214	895.026	0	0	0	0	0	0	0	603	903	0
596	9	0	0	0	0	0	0	200	300	0	12.2684	-24.7218	-233.379	1916.11	3618.35	666.137	215.504	894.79	0	0	0	0	0	0	0	603	903	0
597	0	0	0	0	0	0	0	200	300	0	10.5899	-25.9425	-237.651	1916.11	3435.25	574.584	214.455	894.937	0	0	0	0	0	0	0	603	903	0
597	1	0	0	0	0	0	0	200	300	0	11.2003	-28.3839	-240.703	2099.21	3374.21	254.149	214.018	894.279	0	0	0	0	0	0	0	603	903	0
597	2	0	0	0	0	0	0	200	300	0	11.8106	-27.7736	-244.67	2556.98	2946.97	711.913	212.045	892.549	0	0	0	0	0	0	0	603	903	0
597	3	0	0	0	0	0	0	200	300	0	10.5899	-28.2314	-248.027	2648.53	3313.18	483.031	213.358	892.322	0	0	0	0	0	0	0	603	903	0
597	4	0	0	0	0	0	0	200	300	0	11.2003	-30.8253	-252.3	2648.53	3496.28	299.926	213.858	892.503	0	0	0	0	0	0	0	603	903	0
597	5	0	0	0	0	0	0	200	300	0	10.1321	-31.8935	-256.267	3930.27	3313.18	711.913	212.929	887.663	0	0	0	0	0	0	0	603	903	0
597	6	0	0	0	0	0	0	200	300	0	9.21661	-30.215	-261.15	3014.74	3313.18	391.479	212.687	891.456	0	0	0	0	0	0	0	603	903	0
597	7	0	0	0	0	0	0	200	300	0	8.45367	-33.7245	-264.812	3655.61	3496.28	666.137	213.203	889.195	0	0	0	0	0	0	0	603	903	0
597	8	0	0	0	0	0	0	200	300	0	8.45367	-35.403	-267.253	4204.93	3130.07	299.926	211.712	887.266	0	0	0	0	0	0	0	603	903	0
597	9	0	0	0	0	0	0	200	300	0	8.1485	-34.9452	-273.967	4479.58	3435.25	666.137	212.539	886.649	0	0	0	0	0	0	0	603	903	0
598	0	0	0	0	0	0	0	200	300	0	8.60626	-34.9452	-279.155	4113.37	3496.28	299.926	212.525	888.265	0	0	0	0	0	0	0	603	903	0
598	1	0	0	0	0	0	0	200	300	0	6.77521	-38.1496	-281.902	4113.37	3496.28	711.913	212.402	888.409	0	0	0	0	0	0	0	603	903	0
598	2	0	0	0	0	0	0	200	300	0	7.38556	-38.4547	-284.954	5761.32	3679.39	345.702	212.912	882.782	0	0	0	0	0	0	0	603	903	0
598	3	0	0	0	0	0	0	200	300	0	6.9278	-38.1496	-291.667	5486.66	3740.42	254.149	212.824	884.189	0	0	0	0	0	0	0	603	903	0
598	4	0	0	0	0	0	0	200	300	0	6.9278	-39.9806	-294.719	5578.22	3069.04	345.702	210.413	884.073	0	0	0	0	0	0	0	603	903	0
598	5	0	0	0	0	0	0	200	300	0	6.47003	-41.3539	-300.212	6310.64	3984.56	254.149	213.272	881.979	0	0	0	0	0	0	0	603	903	0
598	6	0	0	0	0	0	0	200	300	0	5.40192	-41.6591	-305.095	6951.51	3740.42	-20.5087	212.26	880.215	0	0	0	0	0	0	0	603	903	0
598	7	0	0	0	0	0	0	200	300	0	4.18121	-42.2694	-309.062	6859.96	3130.07	162.597	210.128	880.804	0	0	0	0	0	0	0	603	903	0
598	8	0	0	0	0	0	0	200	300	0	4.18121	-45.016	-313.945	7500.82	3923.53	391.479	212.497	879.108	0	0	0	0	0	0	0	603	903	0
598	9	0	0	0	0	0	0	200	300	0	5.09674	-46.3893	-319.133	8050.14	3923.53	116.82	212.294	877.775	0	0	0	0	0	0	0	603	903	0
599	0	0	0	0	0	0	0	200	300	0	2.19757	-46.0841	-322.795	8233.25	3618.35	-112.061	211.209	877.494	0	0	0	0	0	0	0	603	903	0
599	1	0	0	0	0	0	0	200	300	0	3.26569	-47.4574	-325.847	8416.36	3618.35	162.597	211.104	877.171	0	0	0	0	0	0	0	603	903	0
599	2	0	0	0	0	0	0	200	300	0	4.3338	-49.8988	-332.256	9240.33	4045.6	162.597	212.176	875.189	0	0	0	0	0	0	0	603	903	0
599	3	0	0	0	0	0	0	200	300	0	2.96051	-49.1359	-337.444	9240.33	3679.39	254.149	210.904	875.617	0	0	0	0	0	0	0	603	903	0
599	4	0	0	0	0	0	0	200	300	0	1.43463	-51.2721	-342.021	9698.09	4045.6	71.0441	211.829	874.645	0	0	0	0	0	0	0	603	903	0
599	5	0	0	0	0	0	0	200	300	0	1.58722	-53.1032	-346.599	10155.9	4045.6	254.149	211.672	873.699	0	0	0	0	0	0	0	603	903	0
599	6	0	0	0	0	0	0	200	300	0	2.19757	-53.8661	-351.482	11071.4	3618.35	345.702	210.295	871.501	0	0	0	0	0	0	0	603	903	0
599	7	0	0	0	0	0	0	200	300	0	0.519104	-53.8661	-355.144	11162.9	3923.53	162.597	211.048	871.568	0	0	0	0	0	0	0	603	903	0
599	8	0	0	0	0	0	0	200	300	0	0.0613403	-56.0023	-358.806	11986.9	3862.49	116.82	210.765	869.592	0	0	0	0	0	0	0	603	903	0
599	9	0	0	0	0	0	0	200	300	0	1.43463	-56.7653	-365.215	11986.9	3435.25	208.373	209.406	870.179	0	0	0	0	0	0	0	603	903	0
600	0	0	0	0	0	0	0	200	300	0	0.671692	-57.3756	-368.267	11803.8	4106.64	208.373	211.151	870.948	0	0	0	0	0	0	0	603	903	0
600	1	0	0	0	0	0	0	200	300	0	2.50275	-58.5963	-371.623	12902.4	3984.56	116.82	210.722	868.281	0	0	0	0	0	0	0	603	903	0
600	2	0	0	0	0	0	0	200	300	0	0.213928	-59.0541	-379.253	13360.2	3679.39	162.597	209.702	867.772	0	0	0	0	0	0	0	603	903	0
600	3	0	0	0	0	0	0	200	300	0	0.366516	-59.9696	-385.356	13909.5	3740.42	162.597	209.706	866.905	0	0	0	0	0	0	0	603	903	0
600	4	0	0	0	0	0	0	200	300	0	-0.854187	-60.2748	-392.375	14641.9	4045.6	299.926	210.311	865.684	0	0	0	0	0	0	0	603	903	0
600	5	0	0	0	0	0	0	200	300	0	-2.22748	-62.2585	-402.141	16289.9	3984.56	208.373	209.908	862.492	0	0	0	0	0	0	0	603	903	0
600	6	0	0	0	0	0	0	200	300	0	-3.29559	-64.8524	-410.076	17480.1	3679.39	162.597	208.972	860.374	0	0	0	0	0	0	0	603	903	0
600	7	0	0	0	0	0	0	200	300	0	-4.05853	-66.0732	-416.179	17571.6	4045.6	162.597	209.721	860.779	0	0	0	0	0	0	0	603	903	0
600	8	0	0	0	0	0	0	200	300	0	-5.737	-71.1086	-423.809	18578.7	3862.49	-295.167	209.114	859.163	0	0	0	0	0	0	0	603	903	0
600	9	0	0	0	0	0	0	200	300	0	-7.11029	-75.2284	-425.334	19219.6	4106.64	-249.391	209.655	857.813	0	0	0	0	0	0	0	603	903	0
601	0	0	0	0	0	0	0	200	300	0	-5.737	-76.2965	-430.522	19402.7	3984.56	-295.167	209.255	857.932	0	0	0	0	0	0	0	603	903	0
601	1	0	0	0	0	0	0	200	300	0	-5.43182	-79.3483	-433.574	19402.7	4045.6	-112.061	209.331	858.25	0	0	0	0	0	0	0	603	903	0
601	2	0	0	0	0	0	0	200	300	0	-4.05853	-85.2992	-436.321	19860.5	4167.67	-20.5087	209.552	857.482	0	0	0	0	0	0	0	603	903	0
601	3	0	0	0	0	0	0	200	300	0	-4.82147	-85.2992	-438.762	20409.8	3862.49	-157.838	208.803	856.483	0	0	0	0	0	0	0	603	903	0
601	4	0	0	0	0	0	0	200	300	0	-5.737	-82.7052	-443.035	20776	3923.53	-295.167	208.856	856.105	0	0	0	0	0	0	0	603	903	0
601	5	0	0	0	0	0	0	200	300	0	-6.04218	-84.5363	-448.528	20684.4	3984.56	-20.5087	208.884	856.884	0	0	0	0	0	0	0	603	903	0
601	6	0	0	0	0	0	0	200	300	0	-5.58441	-84.5363	-452.19	21874.6	4228.71	-340.943	209.352	854.625	0	0	0	0	0	0	0	603	903	0
601	7	0	0	0	0	0	0	200	300	0	-7.11029	-82.2475	-456.462	22515.5	3862.49	-340.943	208.462	853.674	0	0	0	0	0	0	0	603	903	0
601	8	0	0	0	0	0	0	200	300	0	-8.17841	-81.0268	-461.04	22881.7	3801.46	-249.391	208.245	853.369	0	0	0	0	0	0	0	603	903	0
601	9	0	0	0	0	0	0	200	300	0	-8.94135	-81.1794	-465.312	23064.8	4167.67	-569.825	208.957	853.432	0	0	0	0	0	0	0	603	903	0
602	0	0	0	0	0	0	0	200	300	0	-9.85687	-81.4845	-467.449	24071.9	3984.56	-386.72	208.524	851.504	0	0	0	0	0	0	0	603	903	0
602	1	0	0	0	0	0	0	200	300	0	-10.162	-80.8742	-472.331	24804.3	3679.39	-386.72	207.79	850.485	0	0	0	0	0	0	0	603	903	0
602	2	0	0	0	0	0	0	200	300	0	-10.7724	-82.4001	-474.163	24804.3	3862.49	-340.943	208.146	850.688	0	0	0	0	0	0	0	603	903	0
602	3	0	0	0	0	0	0	200	300	0	-10.3146	-83.163	-477.519	25170.5	3984.56	-386.72	208.344	850.289	0	0	0	0	0	0	0	603	903	0
602	4	0	0	0	0	0	0	200	300	0	-11.0776	-83.163	-481.792	25994.5	3984.56	-432.496	208.27	849.046	0	0	0	0	0	0	0	603	903	0
602	5	0	0	0	0	0	0	200	300	0	-11.6879	-85.6044	-485.149	26269.1	3923.53	-707.154	208.087	848.853	0	0	0	0	0	0	0	603	903	0
602	6	0	0	0	0	0	0	200	300	0	-9.5517	-87.4355	-488.201	26360.7	3679.39	-707.154	207.537	849.004	0	0	0	0	0	0	0	603	903	0
602	7	0	0	0	0	0	0	200	300	0	-12.2983	-87.7406	-492.778	27184.7	3923.53	-386.72	207.962	847.834	0	0	0	0	0	0	0	603	903	0
602	8	0	0	0	0	0	0	200	300	0	-12.4509	-88.351	-497.661	27734	4106.64	-569.825	208.252	847.271	0	0	0	0	0	0	0	603	903	0
602	9	0	0	0	0	0	0	200	300	0	-13.8242	-90.4872	-500.408	28191.8	3740.42	-707.154	207.475	846.662	0	0	0	0	0	0	0	603	903	0
603	0	0	0	0	0	0	0	200	300	0	-13.6716	-91.2502	-506.511	29107.3	3557.32	-386.72	207.023	845.534	0	0	0	0	0	0	0	603	903	0
603	1	0	0	0	0	0	0	200	300	0	-14.2819	-92.6234	-509.563	29748.1	4289.74	-524.049	208.418	844.62	0	0	0	0	0	0	0	603	903	0
603	2	0	0	0	0	0	0	200	300	0	-14.8923	-92.6234	-514.751	30022.8	3862.49	-844.484	207.504	844.675	0	0	0	0	0	0	0	603	903	0
603	3	0	0	0	0	0	0	200	300	0	-15.8078	-95.2174	-519.939	30572.1	3740.42	-798.707	207.194	844.201	0	0	0	0	0	0	0	603	903	0
603	4	0	0	0	0	0	0	200	300	0	-15.0449	-96.133	-526.042	31396.1	4106.64	-478.272	207.807	843.316	0	0	0	0	0	0	0	603	903	0
603	5	0	0	0	0	0	0	200	300	0	-14.4345	-96.8959	-529.399	31945.4	3923.53	-890.26	207.411	842.657	0	0	0	0	0	0	0	603	903	0
603	6	0	0	0	0	0	0	200	300	0	-17.1811	-97.3537	-533.061	32677.8	3740.42	-936.036	207.017	841.698	0	0	0	0	0	0	0	603	903	0
603	7	0	0	0	0	0	0	200	300	0	-17.3337	-98.1166	-539.165	33410.2	3923.53	-798.707	207.277	841.033	0	0	0	0	0	0	0	603	903	0
603	8	0	0	0	0	0	0	200	300	0	-17.0285	-97.964	-543.743	33959.6	3984.56	-798.707	207.328	840.545	0	0	0	0	0	0	0	603	903	0
603	9	0	0	0	0	0	0	200	300	0	-17.3337	-98.727	-546.184	33318.7	3923.53	-752.931	207.184	841.997	0	0	0	0	0	0	0	603	903	0
604	0	0	0	0	0	0	0	200	300	0	-18.707	-98.5744	-550.151	34600.4	3862.49	-844.484	207.021	840.107	0	0	0	0	0	0	0	603	903	0
604	1	0	0	0	0	0	0	200	300	0	-19.1647	-99.3373	-555.034	35058.2	3801.46	-1027.59	206.849	839.836	0	0	0	0	0	0	0	603	903	0
604	2	0	0	0	0	0	0	200	300	0	-19.4699	-98.1166	-558.696	35516	3862.49	-890.26	206.913	839.431	0	0	0	0	0	0	0	603	903	0
604	3	0	0	0	0	0	0	200	300	0	-18.4018	-99.1847	-563.579	35699.1	4228.71	-1256.47	207.503	839.657	0	0	0	0	0	0	0	603	903	0
604	4	0	0	0	0	0	0	200	300	0	-19.3173	-99.1847	-566.936	36614.6	3740.42	-1164.92	206.598	838.417	0	0	0	0	0	0	0	603	903	0
604	5	0	0	0	0	0	0	200	300	0	-18.8596	-98.2692	-569.072	36980.8	3740.42	-707.154	206.573	838.016	0	0	0	0	0	0	0	603	903	0
604	6	0	0	0	0	0	0	200	300	0	-19.4699	-98.8795	-573.955	37804.8	4289.74	-890.26	207.474	837.133	0	0	0	0	0	0	0	603	903	0
604	7	0	0	0	0	0	0	200	300	0	-21.301	-100.405	-577.922	37713.2	4045.6	-798.707	207	837.743	0	0	0	0	0	0	0	603	903	0
604	8	0	0	0	0	0	0	200	300	0	-21.301	-98.727	-581.279	38628.8	3984.56	-1119.14	206.855	836.545	0	0	0	0	0	0	0	603	903	0
604	9	0	0	0	0	0	0	200	300	0	-19.0121	-99.3373	-583.415	38903.4	3862.49	-981.813	206.62	836.318	0	0	0	0	0	0	0	603	903	0
605	0	0	0	0	0	0	0	200	300	0	-20.538	-100.558	-587.993	39086.5	3801.46	-1119.14	206.465	836.526	0	0	0	0	0	0	0	603	903	0
605	1	0	0	0	0	0	0	200	300	0	-19.3173	-100.1	-592.876	39452.7	4289.74	-1073.37	207.235	836.455	0	0	0	0	0	0	0	603	903	0
605	2	0	0	0	0	0	0	200	300	0	-19.9277	-100.558	-595.012	40459.8	4167.67	-1073.37	207.004	835.002	0	0	0	0	0	0	0	603	903	0
605	3	0	0	0	0	0	0	200	300	0	-19.4699	-101.474	-598.979	40551.4	3923.53	-1027.59	206.55	835.299	0	0	0	0	0	0	0	603	903	0
605	4	0	0	0	0	0	0	200	300	0	-20.0803	-101.779	-602.031	40185.1	4228.71	-844.484	207.024	836.251	0	0	0	0	0	0	0	603	903	0
605	5	0	0	0	0	0	0	200	300	0	-20.2328	-100.558	-605.083	41375.4	4167.67	-1073.37	206.888	834.62	0	0	0	0	0	0	0	603	903	0
605	6	0	0	0	0	0	0	200	300	0	-19.3173	-101.016	-609.05	42016.2	3862.49	-1210.69	206.342	834.014	0	0	0	0	0	0	0	603	903	0
605	7	0	0	0	0	0	0	200	300	0	-18.5544	-101.626	-611.492	42016.2	4228.71	-981.813	206.915	834.289	0	0	0	0	0	0	0	603	903	0
605	8	0	0	0	0	0	0	200	300	0	-17.3337	-102.847	-614.238	42016.2	4411.81	-1119.14	207.183	834.596	0	0	0	0	0	0	0	603	903	0
605	9	0	0	0	0	0	0	200	300	0	-18.8596	-100.405	-616.069	43389.5	4045.6	-1164.92	206.567	832.57	0	0	0	0	0	0	0	603	903	0
606	0	0	0	0	0	0	0	200	300	0	-17.7914	-100.405	-621.868	44030.4	4106.64	-1164.92	206.604	832.197	0	0	0	0	0	0	0	603	903	0
606	1	0	0	0	0	0	0	200	300	0	-18.5544	-101.321	-623.393	43114.8	4411.81	-1027.59	207.077	833.839	0	0	0	0	0	0	0	603	903	0
606	2	0	0	0	0	0	0	200	300	0	-19.0121	-100.405	-626.445	44030.4	4106.64	-1119.14	206.555	832.714	0	0	0	0	0	0	0	603	903	0
606	3	0	0	0	0	0	0	200	300	0	-18.707	-99.3373	-628.276	44579.7	4228.71	-1164.92	206.731	832.044	0	0	0	0	0	0	0	603	903	0
606	4	0	0	0	0	0	0	200	300	0	-18.4018	-99.1847	-632.244	44396.6	4106.64	-661.378	206.495	832.779	0	0	0	0	0	0	0	603	903	0
606	5	0	0	0	0	0	0	200	300	0	-19.0121	-99.7951	-634.38	44671.2	4167.67	-1027.59	206.57	832.583	0	0	0	0	0	0	0	603	903	0
606	6	0	0	0	0	0	0	200	300	0	-19.1647	-99.1847	-635.601	45403.7	4350.78	-1164.92	206.845	831.566	0	0	0	0	0	0	0	603	903	0
606	7	0	0	0	0	0	0	200	300	0	-18.707	-97.964	-635.601	45586.8	4350.78	-1348.02	206.845	831.278	0	0	0	0	0	0	0	603	903	0
606	8	0	0	0	0	0	0	200	300	0	-18.2492	-96.8959	-639.568	45769.9	3984.56	-1485.35	206.23	831.436	0	0	0	0	0	0	0	603	903	0
606	9	0	0	0	0	0	0	200	300	0	-18.707	-98.5744	-644.145	46227.6	4228.71	-936.036	206.565	831.234	0	0	0	0	0	0	0	603	903	0
607	0	0	0	0	0	0	0	200	300	0	-19.7751	-98.5744	-646.892	47143.2	4411.81	-1256.47	206.82	830.124	0	0	0	0	0	0	0	603	903	0
607	1	0	0	0	0	0	0	200	300	0	-16.8759	-97.8114	-647.502	47326.3	4900.09	-1210.69	207.568	829.91	0	0	0	0	0	0	0	603	903	0
607	2	0	0	0	0	0	0	200	300	0	-19.9277	-96.2856	-650.249	47600.9	4167.67	-1256.47	206.409	829.796	0	0	0	0	0	0	0	603	903	0
607	3	0	0	0	0	0	0	200	300	0	-20.2328	-96.4381	-654.216	47417.8	4289.74	-707.154	206.557	830.52	0	0	0	0	0	0	0	603	903	0
607	4	0	0	0	0	0	0	200	300	0	-19.0121	-96.7433	-654.216	47692.5	4106.64	-1348.02	206.277	830.1	0	0	0	0	0	0	0	603	903	0
607	5	0	0	0	0	0	0	200	300	0	-19.0121	-96.2856	-654.827	48058.7	3862.49	-1073.37	205.899	829.609	0	0	0	0	0	0	0	603	903	0
607	6	0	0	0	0	0	0	200	300	0	-19.9277	-95.37	-657.268	48241.8	4167.67	-1210.69	206.341	829.603	0	0	0	0	0	0	0	603	903	0
607	7	0	0	0	0	0	0	200	300	0	-19.9277	-93.8441	-658.794	48791.1	3923.53	-1256.47	205.956	828.939	0	0	0	0	0	0	0	603	903	0
607	8	0	0	0	0	0	0	200	300	0	-19.4699	-94.3019	-660.015	49340.4	3984.56	-1256.47	206.037	828.243	0	0	0	0	0	0	0	603	903	0
607	9	0	0	0	0	0	0	200	300	0	-19.1647	-95.0648	-663.066	49432	4167.67	-890.26	206.285	828.449	0	0	0	0	0	0	0	603	903	0
608	0	0	0	0	0	0	0	200	300	0	-20.8432	-93.9967	-662.761	49340.4	3435.25	-981.813	205.183	828.553	0	0	0	0	0	0	0	603	903	0
608	1	0	0	0	0	0	0	200	300	0	-19.9277	-93.0812	-664.287	50072.8	3984.56	-1164.92	205.998	827.622	0	0	0	0	0	0	0	603	903	0
608	2	0	0	0	0	0	0	200	300	0	-20.2328	-93.0812	-666.728	50530.6	4472.85	-1256.47	206.709	827.211	0	0	0	0	0	0	0	603	903	0
608	3	0	0	0	0	0	0	200	300	0	-19.6225	-92.9286	-667.949	50713.7	4106.64	-1164.92	206.148	827.076	0	0	0	0	0	0	0	603	903	0
608	4	0	0	0	0	0	0	200	300	0	-19.9277	-92.3183	-670.391	50164.4	3801.46	-1119.14	205.671	828.171	0	0	0	0	0	0	0	603	903	0
608	5	0	0	0	0	0	0	200	300	0	-19.3173	-92.9286	-669.78	51079.9	4228.71	-1027.59	206.314	826.736	0	0	0	0	0	0	0	603	903	0
608	6	0	0	0	0	0	0	200	300	0	-18.707	-91.4027	-670.696	51354.6	4045.6	-1256.47	206.032	826.431	0	0	0	0	0	0	0	603	903	0
608	7	0	0	0	0	0	0	200	300	0	-20.2328	-89.7243	-671.611	51263	3618.35	-1393.8	205.388	826.672	0	0	0	0	0	0	0	603	903	0
608	8	0	0	0	0	0	0	200	300	0	-18.707	-90.6398	-673.137	51629.3	3923.53	-1027.59	205.829	826.301	0	0	0	0	0	0	0	603	903	0
608	9	0	0	0	0	0	0	200	300	0	-20.538	-90.182	-671.916	52636.3	3557.32	-1164.92	205.294	824.662	0	0	0	0	0	0	0	603	903	0
609	0	0	0	0	0	0	0	200	300	0	-19.9277	-88.351	-674.358	52361.7	3740.42	-1256.47	205.547	825.353	0	0	0	0	0	0	0	603	903	0
609	1	0	0	0	0	0	0	200	300	0	-20.9958	-86.6725	-673.442	52178.6	3801.46	-890.26	205.645	825.52	0	0	0	0	0	0	0	603	903	0
609	2	0	0	0	0	0	0	200	300	0	-21.1484	-87.8932	-678.02	52727.9	3496.28	-844.484	205.157	825.233	0	0	0	0	0	0	0	603	903	0
609	3	0	0	0	0	0	0	200	300	0	-19.4699	-87.7406	-676.799	53002.5	3618.35	-981.813	205.346	824.687	0	0	0	0	0	0	0	603	903	0
609	4	0	0	0	0	0	0	200	300	0	-19.9277	-86.3673	-676.799	53002.5	3557.32	-844.484	205.256	824.687	0	0	0	0	0	0	0	603	903	0
609	5	0	0	0	0	0	0	200	300	0	-20.9958	-85.4518	-678.63	53551.8	3313.18	-981.813	204.882	824.088	0	0	0	0	0	0	0	603	903	0
609	6	0	0	0	0	0	0	200	300	0	-21.4536	-84.994	-679.546	53735	3496.28	-1073.37	205.145	823.925	0	0	0	0	0	0	0	603	903	0
609	7	0	0	0	0	0	0	200	300	0	-21.4536	-84.5363	-679.851	53918.1	3313.18	-1073.37	204.873	823.691	0	0	0	0	0	0	0	603	903	0
609	8	0	0	0	0	0	0	200	300	0	-20.9958	-84.2311	-681.987	54284.3	3252.14	-1119.14	204.769	823.403	0	0	0	0	0	0	0	603	903	0
609	9	0	0	0	0	0	0	200	300	0	-19.9277	-83.7733	-680.767	53918.1	3191.11	-1073.37	204.688	823.798	0	0	0	0	0	0	0	603	903	0
610	0	0	0	0	0	0	0	200	300	0	-19.9277	-82.0949	-680.156	54467.4	3496.28	-936.036	205.14	822.919	0	0	0	0	0	0	0	603	903	0
610	1	0	0	0	0	0	0	200	300	0	-19.0121	-81.6371	-682.292	54650.5	3435.25	-981.813	205.035	822.902	0	0	0	0	0	0	0	603	903	0
610	2	0	0	0	0	0	0	200	300	0	-22.8268	-80.8742	-684.123	55016.7	3191.11	-1164.92	204.665	822.581	0	0	0	0	0	0	0	603	903	0
610	3	0	0	0	0	0	0	200	300	0	-21.301	-81.3319	-685.039	54742.1	3252.14	-1027.59	204.747	823.089	0	0	0	0	0	0	0	603	903	0
610	4	0	0	0	0	0	0	200	300	0	-21.7587	-80.7216	-683.513	55657.6	3679.39	-1073.37	205.383	821.571	0	0	0	0	0	0	0	603	903	0
610	5	0	0	0	0	0	0	200	300	0	-22.2165	-78.2802	-683.513	55932.2	3252.14	-1348.02	204.758	821.17	0	0	0	0	0	0	0	603	903	0
610	6	0	0	0	0	0	0	200	300	0	-23.132	-78.2802	-684.734	54925.2	3008	-1210.69	204.393	822.786	0	0	0	0	0	0	0	603	903	0
610	7	0	0	0	0	0	0	200	300	0	-22.5217	-77.8224	-685.344	55749.1	3069.04	-890.26	204.478	821.655	0	0	0	0	0	0	0	603	903	0
610	8	0	0	0	0	0	0	200	300	0	-22.3691	-77.8224	-684.123	56023.8	2885.93	-1348.02	204.218	821.109	0	0	0	0	0	0	0	603	903	0
610	9	0	0	0	0	0	0	200	300	0	-22.5217	-77.0595	-683.208	56115.3	2946.97	-1164.92	204.313	820.865	0	0	0	0	0	0	0	603	903	0
611	0	0	0	0	0	0	0	200	300	0	-22.5217	-75.6862	-684.123	56023.8	3069.04	-1164.92	204.486	821.109	0	0	0	0	0	0	0	603	903	0
611	1	0	0	0	0	0	0	200	300	0	-21.301	-75.2284	-685.955	56390	2275.58	-936.036	203.317	820.793	0	0	0	0	0	0	0	603	903	0
611	2	0	0	0	0	0	0	200	300	0	-23.2846	-74.3129	-679.546	57214	2824.9	-1302.25	204.157	818.806	0	0	0	0	0	0	0	603	903	0
611	3	0	0	0	0	0	0	200	300	0	-24.6579	-74.7707	-683.818	56756.2	2397.65	-1164.92	203.506	820.001	0	0	0	0	0	0	0	603	903	0
611	4	0	0	0	0	0	0	200	300	0	-24.5053	-74.3129	-683.208	56573.1	2397.65	-1164.92	203.509	820.195	0	0	0	0	0	0	0	603	903	0
611	5	0	0	0	0	0	0	200	300	0	-23.7424	-72.3293	-681.987	56206.9	2519.72	-1210.69	203.695	820.584	0	0	0	0	0	0	0	603	903	0
611	6	0	0	0	0	0	0	200	300	0	-23.895	-71.7189	-682.292	56573.1	2336.62	-1393.8	203.425	820.084	0	0	0	0	0	0	0	603	903	0
611	7	0	0	0	0	0	0	200	300	0	-25.4208	-71.8715	-682.292	57122.4	2153.51	-1119.14	203.156	819.279	0	0	0	0	0	0	0	603	903	0
611	8	0	0	0	0	0	0	200	300	0	-25.5734	-71.1086	-681.682	57214	2275.58	-1164.92	203.338	819.07	0	0	0	0	0	0	0	603	903	0
611	9	0	0	0	0	0	0	200	300	0	-24.8105	-69.8878	-679.546	57580.2	2153.51	-1302.25	203.169	818.267	0	0	0	0	0	0	0	603	903	0
612	0	0	0	0	0	0	0	200	300	0	-25.1157	-69.2775	-678.325	57671.7	2458.69	-1393.8	203.625	817.979	0	0	0	0	0	0	0	603	903	0
612	1	0	0	0	0	0	0	200	300	0	-26.1838	-69.2775	-679.546	57946.4	2153.51	-1439.58	203.169	817.728	0	0	0	0	0	0	0	603	903	0
612	2	0	0	0	0	0	0	200	300	0	-26.1838	-69.2775	-677.715	57763.3	1909.37	-1393.8	202.817	817.768	0	0	0	0	0	0	0	603	903	0
612	3	0	0	0	0	0	0	200	300	0	-26.489	-68.9723	-676.799	58221.1	1909.37	-1302.25	202.821	816.976	0	0	0	0	0	0	0	603	903	0
612	4	0	0	0	0	0	0	200	300	0	-25.8786	-67.599	-675.273	58221.1	1970.4	-1348.02	202.918	816.781	0	0	0	0	0	0	0	603	903	0
612	5	0	0	0	0	0	0	200	300	0	-26.9467	-66.2257	-675.579	58129.5	1543.16	-1622.68	202.284	816.956	0	0	0	0	0	0	0	603	903	0
612	6	0	0	0	0	0	0	200	300	0	-26.1838	-66.9887	-671.611	58587.3	1604.19	-1256.47	202.389	815.766	0	0	0	0	0	0	0	603	903	0
612	7	0	0	0	0	0	0	200	300	0	-26.3364	-65.005	-671.916	58861.9	1970.4	-1485.35	202.933	815.397	0	0	0	0	0	0	0	603	903	0
612	8	0	0	0	0	0	0	200	300	0	-26.6415	-66.0732	-670.391	58404.2	1176.95	-1485.35	201.756	815.88	0	0	0	0	0	0	0	603	903	0
612	9	0	0	0	0	0	0	200	300	0	-24.9631	-64.3947	-670.696	58404.2	1360.05	-1485.35	202.028	815.92	0	0	0	0	0	0	0	603	903	0
613	0	0	0	0	0	0	0	200	300	0	-27.2519	-64.6999	-671.611	59136.6	1482.12	-1302.25	202.207	814.948	0	0	0	0	0	0	0	603	903	0
613	1	0	0	0	0	0	0	200	300	0	-24.8105	-64.3947	-668.56	59136.6	1665.23	-1485.35	202.491	814.546	0	0	0	0	0	0	0	603	903	0
613	2	0	0	0	0	0	0	200	300	0	-28.4726	-63.4792	-666.118	59136.6	1115.91	-1302.25	201.675	814.222	0	0	0	0	0	0	0	603	903	0
613	3	0	0	0	0	0	0	200	300	0	-28.4726	-62.2585	-662.456	59319.7	1360.05	-1393.8	202.053	813.455	0	0	0	0	0	0	0	603	903	0
613	4	0	0	0	0	0	0	200	300	0	-27.2519	-62.5636	-664.287	59319.7	1543.16	-1668.46	202.323	813.702	0	0	0	0	0	0	0	603	903	0
613	5	0	0	0	0	0	0	200	300	0	-27.5571	-62.1059	-663.372	58861.9	1176.95	-1485.35	201.774	814.269	0	0	0	0	0	0	0	603	903	0
613	6	0	0	0	0	0	0	200	300	0	-29.0829	-61.1903	-663.677	59594.3	932.807	-1439.58	201.406	813.206	0	0	0	0	0	0	0	603	903	0
613	7	0	0	0	0	0	0	200	300	0	-28.9304	-60.8852	-660.32	59777.4	688.666	-1164.92	201.043	812.472	0	0	0	0	0	0	0	603	903	0
613	8	0	0	0	0	0	0	200	300	0	-26.7941	-60.4274	-656.352	59869	566.596	-1210.69	200.863	811.785	0	0	0	0	0	0	0	603	903	0
613	9	0	0	0	0	0	0	200	300	0	-30.1511	-60.1222	-658.184	60052.1	1054.88	-1439.58	201.603	811.761	0	0	0	0	0	0	0	603	903	0
614	0	0	0	0	0	0	0	200	300	0	-30.3036	-59.2067	-657.268	60052.1	383.49	-1714.23	200.583	811.634	0	0	0	0	0	0	0	603	903	0
614	1	0	0	0	0	0	0	200	300	0	-28.9304	-59.2067	-655.437	59777.4	322.455	-1714.23	200.492	811.798	0	0	0	0	0	0	0	603	903	0
614	2	0	0	0	0	0	0	200	300	0	-29.2355	-58.5963	-652.996	60052.1	627.631	-1622.68	200.961	811.036	0	0	0	0	0	0	0	603	903	0
614	3	0	0	0	0	0	0	200	300	0	-27.5571	-58.9015	-652.08	60052.1	627.631	-1760.01	200.963	810.907	0	0	0	0	0	0	0	603	903	0
614	4	0	0	0	0	0	0	200	300	0	-29.3881	-56.9179	-650.859	61242.3	139.35	-1714.23	200.214	808.906	0	0	0	0	0	0	0	603	903	0
614	5	0	0	0	0	0	0	200	300	0	-28.9304	-56.9179	-649.333	60784.5	200.385	-1485.35	200.309	809.389	0	0	0	0	0	0	0	603	903	0
614	6	0	0	0	0	0	0	200	300	0	-31.2192	-56.6127	-648.418	60326.8	322.455	-1576.91	200.497	809.963	0	0	0	0	0	0	0	603	903	0
614	7	0	0	0	0	0	0	200	300	0	-30.4562	-54.9342	-644.451	60876.1	78.3146	-1805.79	200.122	808.538	0	0	0	0	0	0	0	603	903	0
614	8	0	0	0	0	0	0	200	300	0	-29.6933	-55.2394	-644.145	61150.7	200.385	-1668.46	200.311	808.067	0	0	0	0	0	0	0	603	903	0
614	9	0	0	0	0	0	0	200	300	0	-31.3718	-54.3239	-643.84	60418.3	78.3146	-1576.91	200.122	809.16	0	0	0	0	0	0	0	603	903	0
615	0	0	0	0	0	0	0	200	300	0	-30.7614	-54.3239	-641.399	60509.9	-532.037	-1760.01	199.171	808.66	0	0	0	0	0	0	0	603	903	0
615	1	0	0	0	0	0	0	200	300	0	-30.1511	-53.8661	-641.094	60876.1	-287.896	-1805.79	199.551	808.043	0	0	0	0	0	0	0	603	903	0
615	2	0	0	0	0	0	0	200	300	0	-29.9985	-54.4765	-638.652	60784.5	-348.932	-1668.46	199.454	807.824	0	0	0	0	0	0	0	603	903	0
615	3	0	0	0	0	0	0	200	300	0	-31.5244	-53.1032	-636.821	60876.1	-471.002	-1851.56	199.26	807.406	0	0	0	0	0	0	0	603	903	0
615	4	0	0	0	0	0	0	200	300	0	-31.2192	-52.1877	-634.99	61150.7	-348.932	-1805.79	199.451	806.698	0	0	0	0	0	0	0	603	903	0
615	5	0	0	0	0	0	0	200	300	0	-30.7614	-52.1877	-633.464	61974.7	-471.002	-1760.01	199.256	805.166	0	0	0	0	0	0	0	603	903	0
615	6	0	0	0	0	0	0	200	300	0	-31.3718	-51.5773	-629.192	61242.3	-959.283	-1805.79	198.475	805.665	0	0	0	0	0	0	0	603	903	0
615	7	0	0	0	0	0	0	200	300	0	-31.3718	-52.1877	-630.718	61150.7	-593.072	-1622.68	199.06	806.046	0	0	0	0	0	0	0	603	903	0
615	8	0	0	0	0	0	0	200	300	0	-30.914	-51.1195	-627.056	61608.5	-532.037	-1897.34	199.152	804.75	0	0	0	0	0	0	0	603	903	0
615	9	0	0	0	0	0	0	200	300	0	-31.5244	-50.0514	-626.445	61791.6	-1325.49	-1760.01	197.884	804.362	0	0	0	0	0	0	0	603	903	0
616	0	0	0	0	0	0	0	200	300	0	-31.3718	-49.7462	-626.14	61425.4	-959.283	-1851.56	198.468	804.898	0	0	0	0	0	0	0	603	903	0
616	1	0	0	0	0	0	0	200	300	0	-31.2192	-49.2885	-620.342	61974.7	-715.143	-1531.13	198.847	803.096	0	0	0	0	0	0	0	603	903	0
616	2	0	0	0	0	0	0	200	300	0	-30.4562	-49.5937	-621.868	61974.7	-1203.42	-1714.23	198.065	803.341	0	0	0	0	0	0	0	603	903	0
616	3	0	0	0	0	0	0	200	300	0	-32.2873	-48.373	-618.816	61974.7	-1020.32	-1714.23	198.351	802.85	0	0	0	0	0	0	0	603	903	0
616	4	0	0	0	0	0	0	200	300	0	-31.5244	-48.0678	-617.9	62157.8	-1142.39	-1851.56	198.151	802.405	0	0	0	0	0	0	0	603	903	0
616	5	0	0	0	0	0	0	200	300	0	-31.0666	-48.0678	-616.985	62432.5	-1264.46	-1439.58	197.951	801.81	0	0	0	0	0	0	0	603	903	0
616	6	0	0	0	0	0	0	200	300	0	-31.3718	-47.1523	-613.018	61974.7	-1081.35	-2034.67	198.236	801.902	0	0	0	0	0	0	0	603	903	0
616	7	0	0	0	0	0	0	200	300	0	-31.8295	-47.61	-613.018	61791.6	-1203.42	-1760.01	198.037	802.201	0	0	0	0	0	0	0	603	903	0
616	8	0	0	0	0	0	0	200	300	0	-31.8295	-46.8471	-612.102	62615.6	-1569.63	-1897.34	197.436	800.704	0	0	0	0	0	0	0	603	903	0
616	9	0	0	0	0	0	0	200	300	0	-30.914	-46.3893	-609.05	62524	-1447.56	-1988.89	197.623	800.342	0	0	0	0	0	0	0	603	903	0
617	0	0	0	0	0	0	0	200	300	0	-30.3036	-45.779	-608.745	62524	-1264.46	-2080.45	197.923	800.29	0	0	0	0	0	0	0	603	903	0
617	1	0	0	0	0	0	0	200	300	0	-29.5407	-46.0841	-606.609	62890.2	-1752.74	-1851.56	197.111	799.325	0	0	0	0	0	0	0	603	903	0
617	2	0	0	0	0	0	0	200	300	0	-30.1511	-44.5583	-606.609	62615.6	-1508.6	-1943.12	197.513	799.778	0	0	0	0	0	0	0	603	903	0
617	3	0	0	0	0	0	0	200	300	0	-30.6088	-45.016	-603.557	62798.7	-1386.53	-1988.89	197.703	798.952	0	0	0	0	0	0	0	603	903	0
617	4	0	0	0	0	0	0	200	300	0	-31.8295	-44.1005	-602.336	63439.5	-1874.81	-1897.34	196.887	797.678	0	0	0	0	0	0	0	603	903	0
617	5	0	0	0	0	0	0	200	300	0	-31.3718	-43.7953	-601.726	62432.5	-1935.85	-1897.34	196.783	799.244	0	0	0	0	0	0	0	603	903	0
617	6	0	0	0	0	0	0	200	300	0	-30.4562	-44.1005	-596.843	63073.3	-1874.81	-1897.34	196.859	797.322	0	0	0	0	0	0	0	603	903	0
617	7	0	0	0	0	0	0	200	300	0	-30.1511	-42.7272	-600.2	63256.4	-1813.78	-1943.12	196.978	797.608	0	0	0	0	0	0	0	603	903	0
617	8	0	0	0	0	0	0	200	300	0	-31.9821	-43.4901	-596.538	63256.4	-1874.81	-1851.56	196.857	796.961	0	0	0	0	0	0	0	603	903	0
617	9	0	0	0	0	0	0	200	300	0	-30.4562	-42.422	-596.538	62707.1	-2057.92	-1988.89	196.55	797.882	0	0	0	0	0	0	0	603	903	0
618	0	0	0	0	0	0	0	200	300	0	-29.8459	-42.2694	-594.402	62249.4	-1996.88	-1897.34	196.641	798.274	0	0	0	0	0	0	0	603	903	0
618	1	0	0	0	0	0	0	200	300	0	-30.1511	-41.9643	-592.571	62249.4	-1996.88	-1897.34	196.63	797.95	0	0	0	0	0	0	0	603	903	0
618	2	0	0	0	0	0	0	200	300	0	-30.7614	-41.6591	-590.129	63073.3	-2118.95	-1988.89	196.409	796.12	0	0	0	0	0	0	0	603	903	0
618	3	0	0	0	0	0	0	200	300	0	-29.8459	-39.828	-585.247	63531.1	-2424.13	-1622.68	195.858	794.446	0	0	0	0	0	0	0	603	903	0
618	4	0	0	0	0	0	0	200	300	0	-29.9985	-40.8961	-587.078	63805.8	-2057.92	-1943.12	196.495	794.316	0	0	0	0	0	0	0	603	903	0
618	5	0	0	0	0	0	0	200	300	0	-29.3881	-39.9806	-586.772	63622.6	-2057.92	-2034.67	196.493	794.572	0	0	0	0	0	0	0	603	903	0
618	6	0	0	0	0	0	0	200	300	0	-28.1674	-39.9806	-586.162	63622.6	-2118.95	-2080.45	196.385	794.459	0	0	0	0	0	0	0	603	903	0
618	7	0	0	0	0	0	0	200	300	0	-28.9304	-40.2858	-585.247	64355.1	-2241.02	-1988.89	196.171	793.038	0	0	0	0	0	0	0	603	903	0
618	8	0	0	0	0	0	0	200	300	0	-28.7778	-39.9806	-579.448	63531.1	-2057.92	-1851.56	196.448	793.359	0	0	0	0	0	0	0	603	903	0
618	9	0	0	0	0	0	0	200	300	0	-29.2355	-39.2177	-579.753	63622.6	-2302.06	-2034.67	196.029	793.259	0	0	0	0	0	0	0	603	903	0
619	0	0	0	0	0	0	0	200	300	0	-29.5407	-39.2177	-580.974	64538.2	-2485.16	-1988.89	195.722	791.914	0	0	0	0	0	0	0	603	903	0
619	1	0	0	0	0	0	0	200	300	0	-28.0148	-39.2177	-580.669	64172	-2179.99	-1851.56	196.246	792.486	0	0	0	0	0	0	0	603	903	0
619	2	0	0	0	0	0	0	200	300	0	-28.0148	-38.6073	-577.922	63622.6	-2424.13	-1805.79	195.805	792.911	0	0	0	0	0	0	0	603	903	0
619	3	0	0	0	0	0	0	200	300	0	-27.8622	-38.1496	-575.786	64629.7	-2729.3	-1760.01	195.26	790.754	0	0	0	0	0	0	0	603	903	0
619	4	0	0	0	0	0	0	200	300	0	-26.7941	-37.234	-577.312	64721.3	-2302.06	-1897.34	196.012	790.892	0	0	0	0	0	0	0	603	903	0
619	5	0	0	0	0	0	0	200	300	0	-26.489	-37.3866	-575.176	64446.6	-2851.37	-1897.34	195.043	790.953	0	0	0	0	0	0	0	603	903	0
619	6	0	0	0	0	0	0	200	300	0	-27.5571	-36.9289	-573.039	64080.4	-2607.23	-1988.89	195.45	791.175	0	0	0	0	0	0	0	603	903	0
619	7	0	0	0	0	0	0	200	300	0	-28.32	-37.3866	-573.345	65453.7	-2363.09	-1943.12	195.878	788.839	0	0	0	0	0	0	0	603	903	0
619	8	0	0	0	0	0	0	200	300	0	-25.726	-36.4711	-571.514	64721.3	-2790.34	-1805.79	195.118	789.755	0	0	0	0	0	0	0	603	903	0
619	9	0	0	0	0	0	0	200	300	0	-26.3364	-35.8607	-571.514	64721.3	-2546.2	-1714.23	195.545	789.755	0	0	0	0	0	0	0	603	903	0
620	0	0	0	0	0	0	0	200	300	0	-27.2519	-36.0133	-569.683	64904.4	-2485.16	-1622.68	195.638	789.069	0	0	0	0	0	0	0	603	903	0
620	1	0	0	0	0	0	0	200	300	0	-25.8786	-35.2504	-569.072	65636.8	-2851.37	-2034.67	194.989	787.66	0	0	0	0	0	0	0	603	903	0
620	2	0	0	0	0	0	0	200	300	0	-25.2682	-34.9452	-567.852	65911.5	-2912.41	-1622.68	194.871	786.928	0	0	0	0	0	0	0	603	903	0
620	3	0	0	0	0	0	0	200	300	0	-26.9467	-34.9452	-566.936	64538.2	-2424.13	-1805.79	195.724	789.163	0	0	0	0	0	0	0	603	903	0
620	4	0	0	0	0	0	0	200	300	0	-25.8786	-33.5719	-567.241	65819.9	-2607.23	-1851.56	195.404	786.965	0	0	0	0	0	0	0	603	903	0
620	5	0	0	0	0	0	0	200	300	0	-25.2682	-34.3349	-565.715	65728.4	-2790.34	-1988.89	195.068	786.814	0	0	0	0	0	0	0	603	903	0
620	6	0	0	0	0	0	0	200	300	0	-24.8105	-34.0297	-565.715	65179	-2485.16	-1805.79	195.607	787.785	0	0	0	0	0	0	0	603	903	0
620	7	0	0	0	0	0	0	200	300	0	-25.8786	-32.9616	-563.884	65636.8	-2973.44	-1668.46	194.727	786.599	0	0	0	0	0	0	0	603	903	0
620	8	0	0	0	0	0	0	200	300	0	-25.1157	-32.6564	-563.579	66094.6	-2790.34	-2034.67	195.049	785.724	0	0	0	0	0	0	0	603	903	0
620	9	0	0	0	0	0	0	200	300	0	-22.8268	-31.8935	-561.748	66460.8	-2973.44	-1851.56	194.707	784.689	0	0	0	0	0	0	0	603	903	0
621	0	0	0	0	0	0	0	200	300	0	-24.8105	-32.9616	-562.664	65728.4	-2973.44	-1943.12	194.715	786.184	0	0	0	0	0	0	0	603	903	0
621	1	0	0	0	0	0	0	200	300	0	-24.6579	-31.8935	-559.612	65453.7	-2790.34	-1805.79	195.014	786.037	0	0	0	0	0	0	0	603	903	0
621	2	0	0	0	0	0	0	200	300	0	-23.895	-31.5883	-559.001	66643.9	-2668.27	-1668.46	195.227	783.781	0	0	0	0	0	0	0	603	903	0
621	3	0	0	0	0	0	0	200	300	0	-23.132	-31.2831	-559.307	66094.6	-2973.44	-1668.46	194.684	784.828	0	0	0	0	0	0	0	603	903	0
621	4	0	0	0	0	0	0	200	300	0	-23.7424	-31.4357	-558.086	66094.6	-3034.48	-1760.01	194.563	784.569	0	0	0	0	0	0	0	603	903	0
621	5	0	0	0	0	0	0	200	300	0	-24.5053	-30.9779	-559.001	67010.1	-2668.27	-1531.13	195.227	783.125	0	0	0	0	0	0	0	603	903	0
621	6	0	0	0	0	0	0	200	300	0	-23.2846	-30.3676	-557.476	67284.8	-2912.41	-1760.01	194.776	782.305	0	0	0	0	0	0	0	603	903	0
621	7	0	0	0	0	0	0	200	300	0	-21.6061	-29.6046	-555.034	66643.9	-3034.48	-1714.23	194.533	782.928	0	0	0	0	0	0	0	603	903	0
621	8	0	0	0	0	0	0	200	300	0	-22.0639	-29.4521	-556.255	66918.5	-2729.3	-1668.46	195.093	782.698	0	0	0	0	0	0	0	603	903	0
621	9	0	0	0	0	0	0	200	300	0	-22.3691	-29.1469	-555.034	67742.5	-2973.44	-1760.01	194.643	780.949	0	0	0	0	0	0	0	603	903	0
622	0	0	0	0	0	0	0	200	300	0	-22.2165	-28.5365	-553.813	67651	-3339.66	-1897.34	193.97	780.845	0	0	0	0	0	0	0	603	903	0
622	1	0	0	0	0	0	0	200	300	0	-22.0639	-29.6046	-552.593	66827	-3095.51	-1576.91	194.398	782.067	0	0	0	0	0	0	0	603	903	0
622	2	0	0	0	0	0	0	200	300	0	-22.9794	-28.5365	-551.372	67010.1	-2912.41	-1393.8	194.718	781.467	0	0	0	0	0	0	0	603	903	0
622	3	0	0	0	0	0	0	200	300	0	-22.5217	-27.9262	-551.982	67467.9	-3217.58	-1805.79	194.171	780.772	0	0	0	0	0	0	0	603	903	0
622	4	0	0	0	0	0	0	200	300	0	-21.1484	-27.621	-552.288	67651	-2729.3	-1760.01	195.058	780.508	0	0	0	0	0	0	0	603	903	0
622	5	0	0	0	0	0	0	200	300	0	-21.7587	-27.4684	-551.982	67651	-3156.55	-1485.35	194.281	780.44	0	0	0	0	0	0	0	603	903	0
622	6	0	0	0	0	0	0	200	300	0	-21.9113	-26.8581	-549.236	67925.6	-3095.51	-1760.01	194.364	779.327	0	0	0	0	0	0	0	603	903	0
622	7	0	0	0	0	0	0	200	300	0	-18.707	-26.0951	-550.151	68108.7	-3156.55	-1485.35	194.262	779.2	0	0	0	0	0	0	0	603	903	0
622	8	0	0	0	0	0	0	200	300	0	-22.0639	-27.0106	-548.625	68383.4	-3217.58	-1714.23	194.135	778.355	0	0	0	0	0	0	0	603	903	0
622	9	0	0	0	0	0	0	200	300	0	-21.7587	-26.5529	-549.236	67467.9	-3278.62	-1668.46	194.031	780.16	0	0	0	0	0	0	0	603	903	0
623	0	0	0	0	0	0	0	200	300	0	-20.3854	-25.6374	-546.489	67193.2	-2973.44	-1576.91	194.559	780.046	0	0	0	0	0	0	0	603	903	0
623	1	0	0	0	0	0	0	200	300	0	-19.6225	-25.027	-547.71	68474.9	-3400.69	-1393.8	193.791	777.98	0	0	0	0	0	0	0	603	903	0
623	2	0	0	0	0	0	0	200	300	0	-20.6906	-23.9589	-547.1	68200.3	-3644.83	-1714.23	193.338	778.342	0	0	0	0	0	0	0	603	903	0
623	3	0	0	0	0	0	0	200	300	0	-19.9277	-24.5692	-546.489	68932.7	-3278.62	-1531.13	194.001	776.863	0	0	0	0	0	0	0	603	903	0
623	4	0	0	0	0	0	0	200	300	0	-19.1647	-23.9589	-545.268	69115.8	-3095.51	-1714.23	194.323	776.244	0	0	0	0	0	0	0	603	903	0
623	5	0	0	0	0	0	0	200	300	0	-19.4699	-23.5011	-543.743	69024.3	-3461.73	-1576.91	193.634	776.057	0	0	0	0	0	0	0	603	903	0
623	6	0	0	0	0	0	0	200	300	0	-17.7914	-23.9589	-545.879	68566.5	-3400.69	-1485.35	193.77	777.392	0	0	0	0	0	0	0	603	903	0
623	7	0	0	0	0	0	0	200	300	0	-18.8596	-22.8908	-544.658	69207.4	-3339.66	-1622.68	193.868	775.934	0	0	0	0	0	0	0	603	903	0
623	8	0	0	0	0	0	0	200	300	0	-19.4699	-23.0434	-544.048	69573.6	-3217.58	-1439.58	194.086	775.119	0	0	0	0	0	0	0	603	903	0
623	9	0	0	0	0	0	0	200	300	0	-19.7751	-21.9752	-542.827	69299	-3400.69	-1760.01	193.735	775.337	0	0	0	0	0	0	0	603	903	0
624	0	0	0	0	0	0	0	200	300	0	-18.8596	-21.9752	-542.827	69207.4	-3522.76	-1073.37	193.51	775.506	0	0	0	0	0	0	0	603	903	0
624	1	0	0	0	0	0	0	200	300	0	-18.5544	-21.2123	-540.081	69665.2	-3583.8	-1256.47	193.364	774.01	0	0	0	0	0	0	0	603	903	0
624	2	0	0	0	0	0	0	200	300	0	-18.0966	-21.0597	-541.912	69482	-3583.8	-1393.8	193.387	774.784	0	0	0	0	0	0	0	603	903	0
624	3	0	0	0	0	0	0	200	300	0	-19.0121	-20.602	-542.217	69848.2	-3339.66	-1576.91	193.841	774.18	0	0	0	0	0	0	0	603	903	0
624	4	0	0	0	0	0	0	200	300	0	-19.4699	-21.0597	-542.217	70031.4	-3522.76	-1164.92	193.503	773.843	0	0	0	0	0	0	0	603	903	0
624	5	0	0	0	0	0	0	200	300	0	-17.3337	-20.2968	-540.386	70306	-3278.62	-1393.8	193.933	772.897	0	0	0	0	0	0	0	603	903	0
624	6	0	0	0	0	0	0	200	300	0	-17.7914	-19.6864	-540.081	69939.8	-3461.73	-1302.25	193.59	773.501	0	0	0	0	0	0	0	603	903	0
624	7	0	0	0	0	0	0	200	300	0	-18.4018	-19.2287	-540.996	70489.1	-3339.66	-1439.58	193.827	772.705	0	0	0	0	0	0	0	603	903	0
624	8	0	0	0	0	0	0	200	300	0	-17.944	-19.0761	-540.691	70122.9	-3522.76	-1348.02	193.485	773.309	0	0	0	0	0	0	0	603	903	0
624	9	0	0	0	0	0	0	200	300	0	-17.6389	-18.7709	-538.249	70397.6	-3827.94	-1348.02	192.888	772.21	0	0	0	0	0	0	0	603	903	0
625	0	0	0	0	0	0	0	200	300	0	-17.944	-18.008	-536.724	70580.7	-3583.8	-1302.25	193.323	771.497	0	0	0	0	0	0	0	603	903	0
625	1	0	0	0	0	0	0	200	300	0	-15.35	-18.9235	-539.165	70306	-3400.69	-936.036	193.693	772.602	0	0	0	0	0	0	0	603	903	0
625	2	0	0	0	0	0	0	200	300	0	-17.0285	-17.5502	-540.081	71038.4	-3644.83	-1256.47	193.251	771.467	0	0	0	0	0	0	0	603	903	0
625	3	0	0	0	0	0	0	200	300	0	-16.7233	-16.9398	-539.165	71130	-3278.62	-1348.02	193.919	771.074	0	0	0	0	0	0	0	603	903	0
625	4	0	0	0	0	0	0	200	300	0	-18.4018	-16.4821	-537.639	71130	-3461.73	-1531.13	193.561	770.699	0	0	0	0	0	0	0	603	903	0
625	5	0	0	0	0	0	0	200	300	0	-17.3337	-16.1769	-538.86	70855.3	-3705.87	-1302.25	193.123	771.509	0	0	0	0	0	0	0	603	903	0
625	6	0	0	0	0	0	0	200	300	0	-16.7233	-15.7191	-537.029	72228.6	-3644.83	-1210.69	193.213	768.503	0	0	0	0	0	0	0	603	903	0
625	7	0	0	0	0	0	0	200	300	0	-16.4182	-16.0243	-537.639	71496.2	-3339.66	-1302.25	193.788	770.018	0	0	0	0	0	0	0	603	903	0
625	8	0	0	0	0	0	0	200	300	0	-16.8759	-15.414	-535.808	71038.4	-3705.87	-1485.35	193.084	770.418	0	0	0	0	0	0	0	603	903	0
625	9	0	0	0	0	0	0	200	300	0	-16.5707	-16.1769	-537.334	71770.8	-3950.01	-1119.14	192.649	769.432	0	0	0	0	0	0	0	603	903	0
626	0	0	0	0	0	0	0	200	300	0	-16.5707	-14.9562	-535.503	72137.1	-3339.66	-1027.59	193.764	768.291	0	0	0	0	0	0	0	603	903	0
626	1	0	0	0	0	0	0	200	300	0	-15.9604	-13.2777	-535.198	71862.4	-3827.94	-1256.47	192.848	768.727	0	0	0	0	0	0	0	603	903	0
626	2	0	0	0	0	0	0	200	300	0	-16.4182	-13.7355	-536.113	71953.9	-3400.69	-1119.14	193.657	768.786	0	0	0	0	0	0	0	603	903	0
626	3	0	0	0	0	0	0	200	300	0	-16.4182	-13.2777	-535.503	72411.7	-3400.69	-1210.69	193.65	767.778	0	0	0	0	0	0	0	603	903	0
626	4	0	0	0	0	0	0	200	300	0	-14.1293	-13.4303	-534.282	72686.4	-3766.9	-1210.69	192.95	766.955	0	0	0	0	0	0	0	603	903	0
626	5	0	0	0	0	0	0	200	300	0	-15.1974	-12.5148	-534.587	72411.7	-3888.97	-1119.14	192.725	767.547	0	0	0	0	0	0	0	603	903	0
626	6	0	0	0	0	0	0	200	300	0	-14.1293	-12.5148	-535.808	72594.9	-3522.76	-1256.47	193.425	767.513	0	0	0	0	0	0	0	603	903	0
626	7	0	0	0	0	0	0	200	300	0	-14.8923	-11.5993	-536.113	72961.1	-3583.8	-1210.69	193.315	766.907	0	0	0	0	0	0	0	603	903	0
626	8	0	0	0	0	0	0	200	300	0	-14.7397	-10.8363	-533.977	73144.1	-3583.8	-1027.59	193.288	766.02	0	0	0	0	0	0	0	603	903	0
626	9	0	0	0	0	0	0	200	300	0	-15.6552	-10.6837	-533.672	72686.4	-3461.73	-844.484	193.513	766.799	0	0	0	0	0	0	0	603	903	0
627	0	0	0	0	0	0	0	200	300	0	-16.113	-10.5312	-533.367	73235.7	-3705.87	-1073.37	193.052	765.692	0	0	0	0	0	0	0	603	903	0
627	1	0	0	0	0	0	0	200	300	0	-14.1293	-10.226	-534.893	73144.1	-3950.01	-981.813	192.615	766.255	0	0	0	0	0	0	0	603	903	0
627	2	0	0	0	0	0	0	200	300	0	-14.4345	-9.76822	-533.977	73235.7	-3156.55	-1210.69	194.089	765.849	0	0	0	0	0	0	0	603	903	0
627	3	0	0	0	0	0	0	200	300	0	-15.8078	-9.31045	-533.367	73327.3	-4194.15	-1302.25	192.136	765.52	0	0	0	0	0	0	0	603	903	0
627	4	0	0	0	0	0	0	200	300	0	-14.8923	-9.31045	-534.282	73510.3	-3583.8	-1210.69	193.292	765.413	0	0	0	0	0	0	0	603	903	0
627	5	0	0	0	0	0	0	200	300	0	-13.9767	-8.24234	-533.977	73693.5	-3278.62	-1073.37	193.86	764.991	0	0	0	0	0	0	0	603	903	0
627	6	0	0	0	0	0	0	200	300	0	-13.9767	-8.39493	-533.672	73876.6	-3766.9	-890.26	192.942	764.569	0	0	0	0	0	0	0	603	903	0
627	7	0	0	0	0	0	0	200	300	0	-12.9086	-7.78457	-534.893	73876.6	-4133.11	-1027.59	192.273	764.885	0	0	0	0	0	0	0	603	903	0
627	8	0	0	0	0	0	0	200	300	0	-13.6716	-7.93716	-533.672	74334.3	-3583.8	-707.154	193.285	763.712	0	0	0	0	0	0	0	603	903	0
627	9	0	0	0	0	0	0	200	300	0	-11.2302	-7.4794	-533.061	74425.9	-3644.83	-981.813	193.162	763.38	0	0	0	0	0	0	0	603	903	0
628	0	0	0	0	0	0	0	200	300	0	-13.9767	-7.02164	-534.587	74517.4	-3950.01	-1210.69	192.611	763.608	0	0	0	0	0	0	0	603	903	0
628	1	0	0	0	0	0	0	200	300	0	-12.756	-6.41128	-532.756	74242.8	-3705.87	-981.813	193.044	763.644	0	0	0	0	0	0	0	603	903	0
628	2	0	0	0	0	0	0	200	300	0	-13.3664	-7.17422	-535.503	75066.7	-3888.97	-707.154	192.738	762.82	0	0	0	0	0	0	0	603	903	0
628	3	0	0	0	0	0	0	200	300	0	-12.756	-6.2587	-532.451	74609	-3766.9	-981.813	192.925	762.876	0	0	0	0	0	0	0	603	903	0
628	4	0	0	0	0	0	0	200	300	0	-13.8242	-5.19058	-533.061	74151.2	-3461.73	-890.26	193.506	763.896	0	0	0	0	0	0	0	603	903	0
628	5	0	0	0	0	0	0	200	300	0	-13.6716	-5.19058	-533.977	75616.1	-3827.94	-981.813	192.831	761.391	0	0	0	0	0	0	0	603	903	0
628	6	0	0	0	0	0	0	200	300	0	-12.6035	-4.58023	-533.367	75066.7	-3705.87	-844.484	193.052	762.259	0	0	0	0	0	0	0	603	903	0
628	7	0	0	0	0	0	0	200	300	0	-12.756	-4.27505	-533.061	75158.3	-3583.8	-981.813	193.277	762.006	0	0	0	0	0	0	0	603	903	0
628	8	0	0	0	0	0	0	200	300	0	-13.0612	-4.8854	-533.061	75433	-3888.97	-936.036	192.704	761.491	0	0	0	0	0	0	0	603	903	0
628	9	0	0	0	0	0	0	200	300	0	-12.9086	-3.51211	-532.756	75890.8	-3888.97	-890.26	192.7	760.551	0	0	0	0	0	0	0	603	903	0
629	0	0	0	0	0	0	0	200	300	0	-12.6035	-3.20694	-534.893	75799.2	-3400.69	-981.813	193.642	761.291	0	0	0	0	0	0	0	603	903	0
629	1	0	0	0	0	0	0	200	300	0	-12.1457	-3.20694	-533.977	75890.8	-3522.76	-1027.59	193.403	760.876	0	0	0	0	0	0	0	603	903	0
629	2	0	0	0	0	0	0	200	300	0	-9.85687	-2.13882	-533.061	76073.8	-4072.08	-1027.59	192.361	760.289	0	0	0	0	0	0	0	603	903	0
629	3	0	0	0	0	0	0	200	300	0	-13.2138	-2.444	-532.451	76073.8	-3766.9	-1027.59	192.925	760.125	0	0	0	0	0	0	0	603	903	0
629	4	0	0	0	0	0	0	200	300	0	-9.5517	-1.83365	-532.756	76714.7	-3705.87	-1073.37	193.044	759.004	0	0	0	0	0	0	0	603	903	0
629	5	0	0	0	0	0	0	200	300	0	-12.9086	-1.68106	-533.977	76348.5	-3217.58	-1119.14	193.974	760.019	0	0	0	0	0	0	0	603	903	0
629	6	0	0	0	0	0	0	200	300	0	-12.1457	-0.612944	-534.587	76623.2	-3766.9	-1073.37	192.954	759.669	0	0	0	0	0	0	0	603	903	0
629	7	0	0	0	0	0	0	200	300	0	-11.3828	-1.2233	-533.672	76073.8	-3583.8	-752.931	193.285	760.452	0	0	0	0	0	0	0	603	903	0
629	8	0	0	0	0	0	0	200	300	0	-12.1457	-0.460356	-534.282	76531.6	-3583.8	-1210.69	193.292	759.758	0	0	0	0	0	0	0	603	903	0
629	9	0	0	0	0	0	0	200	300	0	-11.8405	-0.307768	-534.893	76623.2	-3400.69	-981.813	193.642	759.75	0	0	0	0	0	0	0	603	903	0
630	0	0	0	0	0	0	0	200	300	0	-12.2983	0.607759	-536.418	77264	-3827.94	-844.484	192.864	758.963	0	0	0	0	0	0	0	603	903	0
630	1	0	0	0	0	0	0	200	300	0	-11.0776	0.302584	-535.503	77538.7	-3705.87	-661.378	193.08	758.204	0	0	0	0	0	0	0	603	903	0
630	2	0	0	0	0	0	0	200	300	0	-10.925	0.912935	-533.977	77172.5	-3278.62	-1119.14	193.86	758.476	0	0	0	0	0	0	0	603	903	0
630	3	0	0	0	0	0	0	200	300	0	-9.24652	1.3707	-534.282	77447.1	-3522.76	-981.813	193.407	758.045	0	0	0	0	0	0	0	603	903	0
630	4	0	0	0	0	0	0	200	300	0	-11.0776	1.3707	-533.061	78088	-3705.87	-936.036	193.048	756.51	0	0	0	0	0	0	0	603	903	0
630	5	0	0	0	0	0	0	200	300	0	-10.6198	2.28623	-535.808	77721.8	-3156.55	-936.036	194.109	757.945	0	0	0	0	0	0	0	603	903	0
630	6	0	0	0	0	0	0	200	300	0	-11.6879	2.74399	-534.893	77264	-3644.83	-981.813	193.186	758.552	0	0	0	0	0	0	0	603	903	0
630	7	0	0	0	0	0	0	200	300	0	-11.8405	3.65952	-535.808	78362.7	-3950.01	-798.707	192.628	756.749	0	0	0	0	0	0	0	603	903	0
630	8	0	0	0	0	0	0	200	300	0	-10.6198	3.81211	-535.503	78362.7	-3461.73	-707.154	193.536	756.665	0	0	0	0	0	0	0	603	903	0
630	9	0	0	0	0	0	0	200	300	0	-10.3146	4.11728	-536.418	78088	-3888.97	-707.154	192.75	757.427	0	0	0	0	0	0	0	603	903	0
631	0	0	0	0	0	0	0	200	300	0	-11.5353	4.57504	-536.418	78454.2	-3644.83	-890.26	193.205	756.744	0	0	0	0	0	0	0	603	903	0
631	1	0	0	0	0	0	0	200	300	0	-10.4672	4.72763	-537.944	79186.6	-3644.83	-890.26	193.225	755.798	0	0	0	0	0	0	0	603	903	0
631	2	0	0	0	0	0	0	200	300	0	-9.24652	5.03281	-537.639	79186.6	-3705.87	-798.707	193.107	755.714	0	0	0	0	0	0	0	603	903	0
631	3	0	0	0	0	0	0	200	300	0	-11.3828	5.33798	-537.334	79095.1	-3156.55	-844.484	194.126	755.801	0	0	0	0	0	0	0	603	903	0
631	4	0	0	0	0	0	0	200	300	0	-11.3828	5.1854	-537.639	79461.3	-3400.69	-661.378	193.675	755.203	0	0	0	0	0	0	0	603	903	0
631	5	0	0	0	0	0	0	200	300	0	-9.85687	7.16904	-539.775	79369.7	-3827.94	-1027.59	192.908	755.958	0	0	0	0	0	0	0	603	903	0
631	6	0	0	0	0	0	0	200	300	0	-10.0095	6.25351	-539.165	79369.7	-3705.87	-707.154	193.127	755.791	0	0	0	0	0	0	0	603	903	0
631	7	0	0	0	0	0	0	200	300	0	-11.6879	7.47421	-538.249	79461.3	-3644.83	-752.931	193.228	755.371	0	0	0	0	0	0	0	603	903	0
631	8	0	0	0	0	0	0	200	300	0	-10.925	7.77939	-537.334	79827.5	-3766.9	-890.26	192.99	754.438	0	0	0	0	0	0	0	603	903	0
631	9	0	0	0	0	0	0	200	300	0	-10.0095	6.86386	-540.386	80193.7	-3644.83	-478.272	193.255	754.599	0	0	0	0	0	0	0	603	903	0
632	0	0	0	0	0	0	0	200	300	0	-9.70428	7.93198	-542.522	79827.5	-3461.73	-752.931	193.619	755.858	0	0	0	0	0	0	0	603	903	0
632	1	0	0	0	0	0	0	200	300	0	-10.3146	8.54233	-540.386	79919.1	-3461.73	-615.602	193.594	755.107	0	0	0	0	0	0	0	603	903	0
632	2	0	0	0	0	0	0	200	300	0	-10.162	9.15268	-540.691	80651.5	-3705.87	-981.813	193.146	753.836	0	0	0	0	0	0	0	603	903	0
632	3	0	0	0	0	0	0	200	300	0	-8.63617	9.45786	-540.996	81017.7	-3400.69	-890.26	193.714	753.244	0	0	0	0	0	0	0	603	903	0
632	4	0	0	0	0	0	0	200	300	0	-10.7724	10.2208	-542.827	80010.6	-3583.8	-798.707	193.398	755.604	0	0	0	0	0	0	0	603	903	0
632	5	0	0	0	0	0	0	200	300	0	-10.7724	9.76303	-540.386	80010.6	-3522.76	-844.484	193.481	754.938	0	0	0	0	0	0	0	603	903	0
[truncated: 3,024 more rows]
