# Supplementary material for: The Effects of an Extemporaneous Speech Dual-task on Older Adult Gait Control
Source: Research Square preprint supplement (doi:10.21203/rs.3.rs-7674245/v1), 2025-11-18
Supplement: Supplementary file 53 [file DT4Walk3.xlsx]

## Sheet: Sheet1
Trajectories
		04:LFHD			04:RFHD			04:LBHD			04:RBHD			04:C7			04:T10			04:CLAV			04:STRN			04:RBAK			04:LSHO			04:LUPA			04:LELB			04:LFRM			04:LWRA			04:LWRB			04:LFIN
Frame	Sub Frame	X	Y	Z	X	Y	Z	X	Y	Z	X	Y	Z	X	Y	Z	X	Y	Z	X	Y	Z	X	Y	Z	X	Y	Z	X	Y	Z	X	Y	Z	X	Y	Z	X	Y	Z	X	Y	Z	X	Y	Z	X	Y	Z
		mm	mm	mm	mm	mm	mm	mm	mm	mm	mm	mm	mm	mm	mm	mm	mm	mm	mm	mm	mm	mm	mm	mm	mm	mm	mm	mm	mm	mm	mm	mm	mm	mm	mm	mm	mm	mm	mm	mm	mm	mm	mm	mm	mm	mm	mm	mm	mm
375	0	275.442	2658.19	1584.09	157.994	2663.16	1577.43	285.64	2829.99	1559.62	178.448	2831.62	1548.5	235.533	2834.42	1450.42	244.922	2903.55	1165.38	238.112	2712.54	1364.21	233.994	2638.42	1168.24	162.45	2919.76	1239.52	414.376	2759.16	1377.58	494.346	2787.37	1133.98	498.827	2795.98	1059.89	544.479	2720.9	910.907	529.087	2670.66	842.372	535.808	2738.01	816.268	576.311	2685.87	779.757
376	0	275.625	2649.72	1584.59	158.224	2654.52	1577.91	286.365	2821.21	1559.98	179.229	2823.17	1548.87	236.49	2825.44	1451	246.804	2896.07	1166.38	238.712	2703.78	1364.91	234.406	2630.3	1168.88	163.626	2911.29	1240.24	415.134	2749.99	1378.02	495.504	2776.63	1134.78	500.24	2784.99	1060.62	545.249	2707.77	912.193	529.36	2657.19	844.228	536.653	2724.15	817.383	576.852	2671.2	781.384
377	0	275.962	2640.77	1585.26	158.401	2646.07	1578.59	286.981	2812.37	1560.42	178.663	2812.95	1549.42	237.419	2816.64	1451.67	248.344	2888.96	1167.46	239.219	2695.02	1365.31	234.887	2622.06	1169.45	164.548	2903.03	1241.17	415.789	2740.92	1378.69	496.594	2766.08	1135.36	501.305	2773.89	1061.15	546.018	2694.83	913.603	529.876	2643.48	846.337	537.404	2710.4	818.53	576.89	2656.67	782.866
378	0	276.142	2632.46	1585.96	158.552	2637.45	1579.08	287.621	2803.81	1561.05	179.091	2804.35	1549.93	238.258	2807.9	1452.43	249.458	2880.87	1168.61	239.897	2686.47	1365.79	235.425	2613.75	1169.86	165.432	2894.81	1242.07	416.511	2731.86	1379.27	497.625	2755.49	1136.26	502.961	2762.82	1062.01	546.448	2681.88	914.971	529.271	2630.14	848.034	538.113	2696.26	820.001	576.659	2641.99	784.66
379	0	276.584	2623.54	1586.62	158.963	2629.03	1579.49	288.253	2795.35	1561.72	179.584	2795.75	1550.37	239.068	2799.18	1453.03	250.166	2872.51	1169.42	240.355	2677.78	1366.06	235.983	2605.5	1170.15	166.053	2886.18	1242.86	417.168	2722.97	1379.9	498.716	2744.95	1137.03	504.251	2751.78	1062.72	546.82	2668.76	916.275	529.181	2616.4	849.951	538.673	2682.28	821.345	576.543	2626.87	786.603
380	0	277.126	2614.8	1586.9	159.429	2620.67	1579.67	288.232	2786.48	1561.85	179.874	2787.06	1550.53	239.629	2790.39	1453.34	248.801	2861.34	1169.04	240.931	2669.24	1366.18	236.638	2597.29	1170.34	166.777	2878.15	1243.44	417.833	2714.25	1380.12	499.824	2734.48	1137.42	505.28	2740.78	1062.98	546.843	2656.01	917.271	528.496	2603.01	851.394	539.051	2668.15	822.316	576.287	2611.73	788.311
381	0	277.35	2606.53	1586.97	159.667	2611.99	1579.71	288.902	2777.96	1561.81	180.166	2778.38	1550.52	240.175	2781.65	1453.49	249.102	2852.86	1169.4	241.433	2660.78	1366.29	237.342	2589.14	1170.22	167.2	2869.68	1243.8	418.389	2705.62	1380.28	500.664	2724.32	1137.73	506.204	2729.86	1063.12	546.906	2643.21	918.075	527.78	2589.59	852.901	539.03	2654.18	823.19	575.587	2596.9	789.693
382	0	277.826	2597.81	1586.87	160.085	2603.63	1579.65	289.29	2769.4	1561.79	180.807	2770.19	1550.45	240.638	2773.03	1453.43	249.575	2844.81	1169.4	241.946	2652.35	1366.09	237.944	2580.74	1170.29	167.827	2861.73	1243.9	418.889	2697.12	1380.15	501.442	2714.33	1137.68	507.014	2719.19	1062.92	546.897	2630.05	918.919	526.895	2576.11	854.437	538.741	2640.3	823.749	574.664	2582.31	791.063
383	0	278.106	2589.15	1586.48	160.354	2594.96	1579.38	289.622	2760.93	1561.51	181.254	2761.65	1550.22	241.092	2764.55	1453.17	249.926	2836.94	1169.52	242.433	2643.92	1365.79	238.49	2572.64	1170.03	168.15	2853.47	1243.89	419.346	2688.65	1379.81	502.23	2704.25	1137.57	507.767	2708.55	1062.64	546.538	2617.23	919.512	525.888	2562.71	855.963	538.659	2626.49	824.243	573.612	2567.5	792.259
384	0	278.409	2580.44	1586	160.637	2586.4	1578.89	290.023	2752.35	1561.12	181.554	2753.03	1549.92	241.525	2756.04	1452.84	250.048	2828.89	1169.11	242.823	2635.54	1365.27	238.983	2564.52	1169.38	168.481	2845.3	1243.76	419.723	2680.27	1379.37	502.581	2694.52	1137.23	508.313	2697.85	1062.2	546.002	2604.65	919.961	524.74	2549.39	857.209	538.164	2612.86	824.662	572.227	2553.08	793.432
385	0	278.553	2571.58	1585.39	160.938	2577.63	1578.29	290.274	2743.41	1560.83	181.93	2744.22	1549.45	241.673	2747.3	1452.51	250.154	2820.63	1169.01	243.194	2627.05	1364.72	239.469	2556.36	1168.67	168.678	2837.14	1243.54	420.102	2671.92	1378.9	502.926	2684.74	1136.84	508.707	2687.38	1061.65	545.395	2592.03	920.472	523.437	2536.19	858.595	537.362	2599.15	825.101	570.907	2538.61	794.529
386	0	278.745	2562.77	1584.71	160.96	2568.96	1577.64	290.62	2734.58	1560.52	182.391	2735.79	1549.17	241.876	2738.62	1452.01	250.153	2812.56	1168.73	243.568	2618.75	1363.99	239.746	2548.35	1168.13	168.587	2828.79	1243.33	420.553	2663.63	1378.29	503.269	2675.04	1136.49	509.099	2676.85	1061.17	544.711	2579.52	921.002	522.149	2523.14	859.83	536.398	2585.58	825.5	569.298	2524.52	795.539
387	0	278.911	2553.72	1583.84	161.211	2560.1	1576.79	290.924	2725.73	1560.05	182.508	2726.76	1548.7	242.07	2729.95	1451.5	250.412	2804.78	1168.54	243.853	2610.27	1363.04	240.113	2540.29	1167.21	168.725	2820.82	1243.17	420.9	2655.24	1377.64	503.616	2665.37	1135.93	509.354	2666.44	1060.55	543.896	2567.15	921.358	520.996	2510.1	861.06	535.186	2572.05	825.831	567.788	2510.38	796.468
388	0	278.914	2544.9	1582.99	161.42	2551.21	1575.67	291.125	2716.49	1559.62	182.585	2717.77	1548.37	242.174	2721.19	1451.08	250.027	2795.94	1168.21	244.142	2601.86	1362.02	240.427	2532.18	1166.18	168.606	2812.34	1242.91	421.206	2646.79	1377.07	503.789	2655.81	1135.33	509.128	2655.93	1060.01	543.037	2554.81	921.649	519.171	2497.16	861.972	533.93	2558.76	826.249	565.966	2496.54	797.355
389	0	278.959	2535.52	1582.04	161.312	2542.18	1574.73	291.34	2707.39	1559.1	182.624	2708.65	1547.77	241.982	2712.35	1450.52	249.955	2788.2	1167.92	244.229	2593.2	1360.9	240.682	2524.09	1165.21	168.452	2804.08	1242.73	421.417	2638.42	1376.45	503.7	2646.47	1134.85	509.39	2645.65	1059.48	541.858	2542.81	921.944	517.51	2485.05	862.731	532.515	2545.66	826.626	563.895	2482.78	798.225
390	0	279.008	2526.29	1580.79	161.263	2532.88	1573.66	291.405	2698.43	1558.19	182.752	2699.74	1547	241.902	2703.61	1449.63	249.485	2779.64	1167.1	244.343	2584.57	1359.57	240.823	2515.91	1164.21	168.145	2795.84	1242.19	421.442	2630.11	1375.5	503.584	2637.26	1133.94	509.248	2635.55	1058.44	540.59	2531.04	921.912	515.722	2472.64	863.602	530.912	2532.87	826.631	561.723	2469.5	798.703
391	0	279.057	2517.13	1579.36	161.374	2523.67	1572.45	291.323	2689.23	1557.1	182.7	2690.55	1545.97	241.665	2694.74	1448.63	249.33	2771.96	1166.26	244.4	2575.97	1358.19	240.765	2507.96	1162.96	167.645	2787.29	1241.37	421.415	2621.95	1374.37	503.071	2628.32	1132.64	508.854	2625.51	1057.26	539.181	2519.49	921.597	513.747	2460.48	864.133	528.626	2520.19	826.357	559.142	2456.67	798.891
392	0	279.05	2508.04	1577.83	161.361	2514.38	1571.11	290.996	2680.11	1555.78	182.669	2681.51	1544.81	241.367	2685.9	1447.54	248.669	2763.36	1165.29	244.238	2567.25	1356.74	240.886	2499.71	1161.7	167.217	2778.84	1240.43	421.447	2613.53	1373	502.637	2619.52	1131.38	508.338	2615.59	1056.03	537.821	2508.11	921.183	511.65	2448.5	864.663	526.925	2507.95	825.971	556.596	2443.84	798.934
393	0	278.999	2498.62	1576.39	161.265	2504.97	1569.75	290.745	2670.87	1554.59	182.468	2672.27	1543.68	240.996	2677.01	1446.43	248.294	2755.55	1164.45	244.14	2558.38	1355.15	240.937	2491.38	1160.52	166.613	2770.37	1239.72	421.4	2605.2	1371.86	502.268	2610.6	1130.36	507.833	2605.65	1054.93	536.112	2496.77	920.835	509.131	2436.9	864.971	524.785	2495.76	825.664	553.954	2431.22	799.167
394	0	278.767	2489.43	1574.91	161.032	2495.68	1568.36	290.549	2661.59	1553.3	182.094	2662.91	1542.42	240.514	2667.99	1445.37	247.745	2747.16	1163.67	243.916	2549.37	1353.46	240.793	2483.1	1159.36	165.994	2761.63	1238.8	421.313	2596.83	1370.75	501.775	2601.69	1129.24	507.325	2595.86	1053.68	534.34	2485.49	920.384	506.474	2425.54	865.017	523.21	2483.99	825.286	551.432	2418.66	799.426
395	0	278.5	2480.05	1573.32	160.808	2486.25	1566.84	289.98	2652.37	1551.89	181.482	2653.46	1541.18	240.132	2659.07	1444.21	246.963	2738.57	1162.65	243.691	2540.33	1351.65	240.599	2474.89	1157.87	165.015	2752.69	1237.85	421.119	2588.33	1369.44	501.071	2592.83	1127.9	506.524	2586.17	1052.46	532.303	2474.51	919.622	503.644	2414.42	864.714	521.297	2472.33	824.795	548.514	2406.43	799.385
396	0	278.12	2470.76	1571.8	160.4	2476.69	1565.41	289.351	2642.84	1550.43	181.021	2643.99	1539.76	239.363	2649.86	1443.07	246.37	2729.59	1161.75	243.36	2531.2	1349.72	240.65	2466.33	1156.4	164.057	2743.58	1236.93	420.822	2579.78	1368.31	500.381	2583.99	1126.65	505.685	2576.46	1051.4	530.214	2463.66	919.152	500.633	2403.51	864.375	519.253	2461.01	824.377	545.514	2394.4	799.402
397	0	277.618	2461.48	1570.41	160.409	2467.98	1563.89	288.845	2633.63	1548.93	180.157	2634.5	1538.21	238.605	2640.62	1441.86	245.705	2721.09	1160.85	242.874	2521.77	1347.98	240.377	2457.76	1155.11	163.001	2734.61	1236	420.488	2571.09	1367.12	499.55	2575.18	1125.44	504.797	2566.91	1050.18	528.123	2452.9	918.403	497.624	2393.01	864.111	517.287	2449.88	823.757	542.305	2382.81	799.167
398	0	277.156	2452.1	1568.93	159.951	2458.63	1562.4	288.035	2624.3	1547.23	179.429	2625.19	1536.58	237.755	2631.33	1440.56	244.862	2713.46	1159.79	242.352	2512.33	1346.13	240.125	2449.08	1153.64	162.002	2725.47	1234.86	419.996	2562.41	1365.82	498.672	2566.35	1124.09	503.371	2557.47	1048.71	525.865	2442.5	917.506	494.549	2382.78	863.425	515.102	2439.07	822.96	539.376	2371.54	798.906
399	0	276.221	2443.09	1567.58	159.167	2449.35	1561.06	287.298	2615.06	1545.51	178.709	2615.79	1534.86	236.801	2621.96	1439.39	244.134	2705.06	1158.65	241.63	2502.76	1344.11	240.012	2440.32	1151.92	160.834	2716.17	1233.76	419.338	2553.63	1364.6	497.695	2557.57	1122.8	502.595	2548.15	1047.44	523.577	2432.31	916.547	491.362	2372.83	862.61	513.02	2428.66	822.053	536.301	2360.43	798.497
400	0	275.396	2433.85	1566.25	158.282	2440.17	1559.73	286.254	2605.9	1543.73	177.566	2606.46	1533.02	235.626	2612.39	1438.07	243.086	2696.15	1157.42	240.827	2493.05	1342.43	239.749	2431.29	1150.62	159.602	2706.73	1232.53	418.593	2544.6	1363.37	496.507	2548.7	1121.5	501.406	2538.91	1046.2	521.124	2422.26	915.551	488.159	2363.07	861.934	510.636	2418.51	821.123	532.909	2350.05	797.555
401	0	274.339	2424.7	1565.07	157.216	2430.9	1558.61	285.115	2596.65	1541.86	176.566	2597.37	1531.21	234.258	2602.75	1436.61	242.182	2687.8	1156.3	239.987	2483.43	1340.74	239.497	2422.21	1149.02	158.173	2697.32	1231.27	417.613	2535.69	1362.1	495.373	2539.91	1120.09	500.065	2529.84	1044.84	518.751	2412.68	914.327	484.984	2353.75	860.776	508.373	2408.76	819.913	529.664	2339.84	796.727
402	0	273.271	2415.7	1563.96	156.077	2421.66	1557.35	283.806	2587.51	1539.99	175.365	2588.03	1529.18	232.972	2593.18	1435.33	241.365	2679.44	1155.33	238.948	2473.64	1338.97	239.137	2412.92	1147.3	156.746	2687.96	1229.98	416.554	2526.52	1360.89	493.994	2531.15	1118.74	498.781	2520.87	1043.39	516.236	2403.24	913.094	481.801	2344.56	859.718	505.895	2399.41	818.695	526.338	2330.13	795.542
403	0	271.76	2407.13	1562.78	154.444	2412.08	1556.37	282.238	2578.47	1538.12	174.046	2578.94	1527.46	231.441	2583.35	1434.07	240.269	2670.34	1154.43	237.869	2463.77	1337.57	238.844	2403.59	1145.91	155.484	2678.35	1228.78	415.375	2517.16	1359.92	492.646	2522.28	1117.59	497.263	2512.1	1042.11	513.788	2394.18	911.775	478.477	2335.84	858.394	503.504	2390.28	817.357	522.921	2320.72	794.29
404	0	270.247	2397.71	1561.86	152.887	2402.97	1555.49	280.614	2569.19	1536.64	172.508	2569.57	1525.9	229.855	2573.57	1432.91	239.086	2661.01	1153.47	236.676	2453.71	1336.23	238.372	2393.93	1144.58	154.021	2668.68	1227.61	414.225	2507.68	1359.1	491.259	2513.25	1116.74	495.898	2503.2	1041.26	511.324	2385.21	910.698	475.156	2327.34	857.227	501.43	2381.41	816.288	519.537	2311.49	793.177
405	0	268.675	2388.63	1561.12	151.215	2393.78	1554.59	279.073	2559.99	1535.28	170.639	2560.4	1524.41	228.35	2563.68	1431.89	237.803	2651.42	1152.67	235.439	2443.76	1334.91	237.769	2384.3	1143.29	152.577	2658.72	1226.62	413.003	2498	1358.58	489.949	2504.17	1116.01	494.607	2494.42	1040.48	508.87	2376.42	909.505	471.839	2319.26	855.589	499.409	2372.81	815.322	516.157	2302.52	791.916
406	0	266.957	2379.74	1560.46	149.406	2384.62	1553.63	277.224	2550.93	1534	168.711	2551.12	1523.11	226.496	2553.77	1430.96	236.461	2641.87	1151.95	234.057	2433.51	1333.76	237.224	2374.45	1142.2	150.943	2648.6	1225.68	411.498	2488.19	1358.23	488.418	2495	1115.58	493.176	2485.64	1039.91	506.535	2367.9	908.359	468.361	2311.44	854.16	497.606	2364.42	814.353	512.595	2293.81	790.594
407	0	264.896	2370.7	1559.82	147.534	2375.48	1552.82	275.075	2541.7	1532.86	166.485	2541.65	1521.75	224.521	2543.71	1430.05	235.093	2631.79	1151	232.589	2423.36	1332.78	236.526	2364.35	1141.23	149.425	2638.44	1224.57	410.016	2478.29	1357.77	486.934	2485.87	1115.08	491.778	2476.98	1039.53	503.909	2359.58	907.317	464.934	2303.87	852.547	495.74	2356.28	813.37	509.027	2285.44	789.091
408	0	262.862	2361.63	1559.17	145.51	2366.11	1552.15	272.825	2532.53	1531.59	164.416	2532.41	1520.36	222.657	2533.8	1429.1	233.761	2621.86	1150.06	231.181	2413.1	1331.76	235.387	2354	1140.56	147.968	2628.3	1223.47	408.235	2468.35	1357.62	485.369	2476.77	1114.79	490.001	2468.47	1039.07	501.508	2351.58	906.178	461.424	2296.79	850.829	494.115	2348.55	812.407	505.423	2277.38	787.363
409	0	260.693	2352.55	1558.6	143.393	2356.81	1551.49	270.484	2523.43	1530.2	162.179	2523.21	1518.96	220.582	2523.79	1428	232.252	2611.63	1148.92	229.459	2402.78	1331.05	234.723	2343.8	1139.94	146.386	2617.86	1222.05	406.607	2458.43	1357.26	483.896	2467.52	1114.38	488.772	2460.05	1038.64	499.358	2343.65	905.081	458.214	2289.81	849.181	492.743	2341.04	811.325	501.791	2269.59	785.507
410	0	258.528	2343.41	1558.18	141.035	2347.62	1551.1	267.944	2514.27	1528.74	160	2513.89	1517.44	218.623	2513.84	1427.09	230.97	2601.41	1147.77	227.808	2392.27	1330.43	233.888	2333.36	1139.37	144.971	2607.49	1220.73	404.79	2448.38	1357.13	482.342	2458.46	1114.22	487.328	2451.68	1038.07	497.136	2335.87	904.036	454.768	2283.23	847.404	491.617	2333.57	810.204	497.96	2262.07	783.423
411	0	256.093	2334.39	1558.24	138.654	2338.25	1550.93	265.472	2504.89	1527.65	157.566	2504.43	1516	216.416	2503.76	1426.38	229.578	2591.1	1147.12	225.993	2381.9	1330.09	232.866	2322.68	1139.25	143.335	2596.99	1219.7	402.965	2438.2	1357.27	480.868	2449.33	1114.27	485.914	2443.31	1038.18	494.889	2328.24	903.043	451.308	2276.89	845.791	490.596	2326.33	809.513	494.114	2254.86	781.38
412	0	253.511	2325.27	1558.67	136.055	2328.96	1551.04	262.95	2495.38	1526.67	155.089	2494.89	1514.83	214.191	2493.47	1425.88	228.276	2580.72	1146.47	224.119	2371.11	1329.88	231.565	2311.65	1139.27	141.681	2586.19	1218.77	401.06	2427.89	1357.66	479.339	2440.01	1114.64	484.503	2434.85	1038.36	492.851	2320.58	902.461	447.985	2270.91	843.966	489.99	2319.22	809.023	490.17	2247.94	779.518
413	0	250.752	2316.01	1559.36	133.506	2319.75	1551.22	260.404	2485.92	1525.91	152.391	2485.08	1513.75	212.076	2483.18	1425.67	226.728	2569.88	1146.43	222.252	2360.47	1329.75	230.461	2300.59	1139.21	140.337	2575.58	1218.25	399.254	2417.22	1358.26	477.999	2430.69	1115.38	483.236	2426.83	1039.04	490.665	2313.19	901.798	444.638	2265.47	842.214	489.396	2312.21	808.789	486.184	2241.24	777.593
414	0	248.123	2306.5	1560.38	130.895	2310.41	1551.62	258.007	2476.28	1525.47	149.995	2475.43	1512.84	209.919	2472.55	1425.89	225.44	2559.03	1146.55	220.566	2349.65	1329.93	229.472	2289.52	1139.58	138.723	2564.75	1218.29	397.429	2406.37	1359.27	476.646	2421.32	1116.34	482.079	2418.2	1040.12	488.618	2305.91	901.48	441.251	2260.26	840.509	489.267	2305.29	809.066	482.092	2235.05	775.872
415	0	245.354	2297.02	1561.76	127.987	2301.11	1552.39	255.363	2466.5	1525.34	147.325	2465.87	1512.28	207.745	2462.02	1426.38	223.827	2548.26	1146.98	218.621	2338.85	1330.59	227.989	2277.98	1140.47	137.347	2554.06	1218.62	395.43	2395.43	1360.72	475.548	2411.76	1117.88	481.195	2409.25	1041.51	486.693	2298.63	901.588	437.92	2255.4	839.209	488.735	2298.36	809.255	478.037	2229.22	774.467
416	0	242.275	2287.86	1563.38	125.124	2291.86	1553.35	252.891	2456.99	1525.26	144.817	2456.17	1511.71	205.752	2451.49	1426.94	222.738	2537.25	1147.92	216.734	2328.13	1331.33	226.689	2266.7	1141.36	135.888	2543.35	1218.97	393.766	2384.28	1362.12	474.417	2402.36	1119.49	480.307	2400.77	1043.2	484.721	2291.65	901.817	434.706	2251.07	837.934	488.178	2291.88	809.929	473.931	2223.93	772.98
417	0	239.135	2278.85	1564.91	122.052	2282.73	1554.27	250.331	2447.41	1525.25	142.282	2446.54	1511.22	203.86	2441.18	1427.68	221.466	2526.58	1148.46	214.959	2317.31	1332.36	225.362	2255.34	1142.38	134.832	2532.8	1219.49	391.793	2373.35	1363.53	473.206	2392.85	1121.13	479.209	2392.15	1044.64	482.694	2284.81	902.094	431.523	2246.67	837.047	488.098	2285.38	810.491	469.967	2218.99	771.543
418	0	236.088	2269.49	1566.58	119.046	2273.69	1555.4	247.668	2437.75	1525.52	139.993	2437.17	1510.89	201.89	2430.89	1428.52	220.109	2515.66	1149.46	213.102	2306.74	1333.56	224.031	2244.23	1143.82	133.459	2522.28	1220.14	389.974	2362.55	1365.02	472.068	2383.29	1122.94	478.245	2383.72	1046.52	480.695	2277.88	902.634	428.677	2243.22	835.999	487.491	2278.88	811.265	466.049	2214.49	770.019
419	0	232.987	2260.4	1568.57	115.98	2264.65	1556.68	245.01	2428.34	1526.06	137.75	2427.84	1510.63	199.934	2420.78	1429.5	219.088	2505.36	1150.3	211.407	2296.11	1335.13	222.566	2233.35	1145.47	132.103	2511.47	1220.9	388.174	2351.86	1366.88	470.717	2373.74	1125.01	477.276	2375.48	1048.69	478.661	2271.17	903.405	425.854	2239.74	835.333	487.206	2272.53	812.563	461.655	2210.41	768.863
420	0	230.047	2251.44	1570.68	113.055	2255.8	1558.18	242.631	2419.07	1526.7	135.495	2418.5	1510.59	197.88	2410.62	1430.67	217.786	2494.74	1151.47	209.681	2285.55	1336.82	221.279	2222.65	1147.29	130.715	2501.23	1221.86	386.269	2341.5	1368.74	469.546	2364.14	1127.13	476.185	2367.07	1050.79	476.965	2264.36	904.477	423.479	2236.79	834.95	486.972	2265.81	813.724	457.754	2206.67	767.791
421	0	227.091	2242.43	1572.82	110.286	2247.05	1559.61	240.257	2409.64	1527.51	133.17	2409.2	1510.86	196.043	2400.68	1432.04	216.787	2484.24	1152.87	208.168	2275.19	1338.41	220.054	2212.11	1149.24	129.241	2490.16	1222.82	384.576	2331.23	1370.81	468.319	2354.45	1129.4	475.047	2358.7	1053.09	475.17	2257.7	905.651	421.366	2233.42	834.752	486.958	2259.11	815.438	454.168	2203.25	766.843
422	0	224.245	2233.53	1575.25	107.555	2238.34	1561.21	238.053	2400.23	1528.61	130.953	2400.01	1511.23	194.08	2390.79	1433.58	215.938	2474.65	1154.18	206.512	2264.91	1340.42	218.823	2201.65	1151.18	127.75	2479.86	1224.25	382.964	2321.19	1373.22	467.053	2344.88	1131.92	474.05	2350.42	1055.71	473.574	2250.72	907.118	419.399	2229.94	834.847	486.813	2252.09	817.398	450.892	2200.05	766.174
423	0	221.647	2224.72	1577.82	104.804	2229.79	1562.96	235.498	2390.89	1529.72	128.88	2390.85	1511.91	192.205	2380.95	1435.13	214.434	2463.82	1155.91	204.933	2254.7	1342.43	217.645	2191.26	1153.24	126.17	2468.98	1225.59	381.385	2311.37	1375.7	465.897	2335.37	1134.56	472.939	2342.03	1058.4	472.002	2243.97	908.765	417.753	2226.06	835.382	487.159	2245.53	819.72	448.06	2197	765.6
424	0	219.04	2216.23	1580.15	102.438	2221.17	1564.8	233.942	2382.05	1530.73	126.82	2381.76	1512.45	190.191	2371.26	1436.61	213.144	2453.73	1157.68	203.594	2244.59	1344.35	216.74	2180.9	1155.33	124.381	2458.67	1227.06	379.912	2301.88	1378.04	464.73	2325.91	1137.07	471.967	2333.9	1061.21	470.712	2237.22	910.404	416.532	2222.1	835.94	486.991	2239.01	821.649	445.83	2194.14	765.118
425	0	216.787	2208.06	1582.3	100.216	2212.8	1566.28	232.055	2373.26	1531.59	124.925	2372.89	1512.84	188.353	2361.73	1438.13	211.669	2444.03	1159.23	202.359	2234.69	1346.07	216.131	2170.9	1157.39	122.567	2448.24	1228.3	378.398	2292.62	1380.24	463.527	2316.48	1139.45	470.685	2325.64	1063.54	469.687	2230.24	911.919	415.182	2217.66	836.563	486.987	2232.85	823.507	444.391	2191.33	764.814
426	0	214.697	2199.46	1584.54	98.1478	2204.61	1568.07	230.243	2364.57	1532.35	123.367	2364.12	1513.12	186.636	2351.99	1439.55	210.254	2434.73	1160.68	201.133	2224.93	1347.98	215.688	2160.97	1159.3	120.652	2437.89	1229.54	376.928	2283.62	1382.33	462.174	2307.38	1141.68	469.498	2317.54	1065.92	468.684	2223.8	913.409	414.871	2212.13	837.773	486.742	2226.83	825.291	443.326	2188.36	764.715
427	0	212.791	2191.28	1586.57	96.468	2196.46	1569.7	228.646	2355.93	1532.85	122.07	2355.51	1513.4	184.976	2342.47	1440.84	208.78	2425.1	1162	200.271	2215.21	1349.73	215.401	2151.34	1161.18	118.804	2428.07	1230.77	375.657	2274.81	1384.28	461.057	2298.46	1143.73	468.333	2309.56	1068	467.948	2217.64	914.79	414.89	2206.67	838.983	486.955	2221.08	826.907	443.031	2185.17	764.701
428	0	211.058	2183.2	1588.3	94.7207	2188.23	1571.22	226.792	2347.16	1533.23	120.754	2346.86	1513.61	183.331	2332.29	1441.97	207.182	2415.89	1163.15	199.426	2205.65	1351.26	215.261	2141.87	1162.68	117.323	2418.36	1231.88	374.664	2266.08	1386.09	459.713	2289.87	1145.28	467.19	2301.77	1069.85	467.539	2211.32	915.914	414.422	2202.31	839.191	487.306	2215.59	828.232	443.422	2181.82	764.702
429	0	209.606	2175.02	1590.07	93.0706	2179.87	1572.77	225.848	2338.73	1533.98	119.674	2338.3	1513.99	181.796	2322.96	1443.23	205.366	2406.78	1164.6	198.613	2196.41	1352.79	215.177	2132.74	1163.97	115.531	2408.83	1233.31	373.29	2257.77	1387.65	458.472	2281.47	1146.94	466.138	2294.1	1071.78	467.246	2205	917.016	414.602	2196.56	839.87	487.524	2210.13	829.711	444.184	2178.15	764.956
430	0	208.347	2166.81	1591.87	91.7668	2171.89	1574.11	224.733	2330.28	1534.86	118.644	2329.83	1514.5	180.382	2313.66	1444.69	203.824	2398.06	1166.37	197.992	2187.21	1354.23	215.169	2123.96	1165.19	113.674	2399.36	1234.83	372.409	2249.4	1389.48	457.083	2273.64	1148.54	465.276	2286.58	1073.86	467.325	2198.88	918.409	415.517	2190.33	841.036	488.211	2204.89	831.382	445.587	2174.21	765.499
431	0	207.215	2158.64	1593.53	90.7422	2163.59	1575.45	223.755	2321.79	1535.85	117.756	2321.32	1515.3	179.232	2304.84	1446.15	202.045	2389.46	1167.81	197.653	2178.13	1355.66	215.307	2115.46	1166.31	111.914	2389.98	1236.42	371.452	2241.42	1391.12	456.027	2266.07	1150.19	464.207	2279.1	1075.64	467.805	2192.7	919.736	416.072	2184.62	841.848	489.043	2199.58	832.928	447.233	2169.67	765.989
432	0	206.34	2150.5	1595	90.0148	2155.33	1576.62	222.599	2313.38	1536.86	116.543	2312.84	1516.31	177.894	2295.78	1447.57	200.338	2380.86	1169.36	197.238	2169.27	1356.86	215.408	2106.99	1167.28	110.112	2380.94	1237.94	370.71	2233.56	1392.59	455.16	2258.88	1151.72	463.484	2272.1	1077.42	468.492	2186.63	920.984	417.549	2178.11	842.886	490.237	2194.34	834.439	449.215	2164.73	766.606
433	0	205.518	2142.37	1596.43	89.2454	2147.09	1577.95	222.188	2305.2	1538.02	115.782	2304.37	1517.32	176.875	2287.08	1448.98	198.438	2372.32	1170.81	196.957	2160.76	1358.17	215.586	2098.65	1168.33	108.219	2371.88	1239.45	370.07	2225.9	1394.16	454.633	2252.07	1153.28	462.568	2265.22	1078.94	469.5	2180.62	922.269	419.088	2171.88	843.892	491.329	2189.08	835.981	451.154	2159.29	767.434
434	0	205.035	2134.23	1597.78	88.825	2138.86	1579.19	221.153	2296.83	1539.19	115.065	2296.06	1518.4	175.76	2278.5	1450.36	196.504	2363.88	1172.34	196.821	2152.36	1359.46	215.731	2090.45	1169.61	106.438	2362.99	1240.99	369.437	2218.59	1395.59	453.744	2245.96	1154.65	462.012	2258.66	1080.5	470.533	2174.76	923.614	420.533	2165.93	844.751	492.499	2184.18	837.319	453.419	2153.37	768.574
435	0	204.855	2125.99	1598.92	88.403	2130.42	1580.37	220.967	2288.82	1540.25	114.439	2287.67	1519.52	174.784	2270.17	1451.6	194.786	2355.81	1173.45	196.585	2144.22	1360.7	215.945	2082.38	1170.83	104.607	2354.19	1242.26	368.868	2211.46	1396.75	453.24	2239.95	1155.88	461.277	2252.48	1081.64	471.74	2168.98	924.65	421.943	2158.95	845.79	493.666	2178.72	838.525	455.882	2147.87	769.841
436	0	204.705	2118.02	1599.7	88.4417	2122.17	1581.54	220.344	2280.89	1541.08	113.94	2279.55	1520.67	173.85	2262.14	1452.49	193.106	2347.69	1174.37	196.51	2136.15	1361.8	216.106	2074.42	1171.97	102.888	2345.53	1243.31	368.119	2204.55	1397.74	452.767	2234.19	1156.98	460.312	2246.2	1082.49	473.009	2163.29	925.705	423.882	2152.44	846.669	494.982	2174.08	839.511	458.061	2140.99	770.882
437	0	204.739	2110.03	1600.49	88.2465	2113.73	1582.74	219.802	2273.04	1542.07	113.626	2271.46	1522.03	172.907	2254.17	1453.39	191.412	2339.92	1175.07	196.413	2128.5	1362.98	216.178	2066.52	1173.43	101.26	2337.07	1244.28	367.537	2197.95	1398.66	452.318	2228.81	1158.04	459.38	2240.24	1083.28	474.397	2157.7	926.752	425.794	2145.74	847.723	496.076	2169.05	840.585	460.537	2134.76	772.304
438	0	205.035	2102.05	1601.15	88.5245	2105.55	1583.89	219.307	2265.25	1542.99	113.247	2263.42	1523.23	172.028	2246.49	1454.23	189.739	2331.85	1175.99	196.189	2120.85	1364.21	216.215	2058.91	1174.91	99.7146	2328.68	1245.14	366.896	2191.46	1399.65	451.97	2223.34	1159.19	458.791	2234.25	1084.27	475.819	2152.09	927.939	427.614	2138.89	849.061	497.636	2163.63	841.749	463.26	2128.03	774.159
439	0	205.351	2094.35	1601.59	88.8144	2097.03	1584.88	219.108	2257.41	1544.05	113	2255.57	1524.69	171.086	2239.06	1455.12	188.086	2323.46	1176.51	196.103	2113.14	1365.31	216.286	2051.46	1176.36	98.2324	2320.15	1245.89	366.36	2184.96	1400.59	451.524	2217.92	1160.26	458.158	2228.33	1085.27	477.233	2146.26	929.04	429.701	2132.16	850.156	498.836	2158.4	842.847	465.634	2120.61	775.506
440	0	205.905	2086.13	1601.98	89.342	2088.98	1585.81	218.617	2249.66	1545.11	112.543	2247.41	1526.57	170.178	2231.72	1456	186.459	2315.23	1177.16	195.907	2105.6	1366.34	215.923	2043.78	1177.53	96.5171	2311.71	1246.71	365.821	2178.61	1401.39	451.053	2212.44	1161.25	457.309	2222.26	1086.16	478.647	2140.36	930.384	431.59	2125.3	851.208	500.158	2152.61	844.02	468.304	2113.22	777.325
441	0	206.602	2078.03	1602.3	89.6048	2080.64	1586.69	218.519	2241.89	1546.28	112.311	2239.66	1528.06	169.522	2223.8	1456.71	184.441	2306.74	1177.75	195.714	2097.98	1367.28	215.797	2036.27	1178.77	95.1543	2303.29	1247.44	365.381	2172.19	1402.35	450.65	2206.87	1162.34	457.492	2216.43	1087.51	480.121	2134.55	931.8	433.395	2118.07	852.48	501.535	2146.94	845.303	471.027	2105.75	779.167
442	0	207.35	2069.86	1602.52	90.3609	2072.53	1587.36	218.33	2234.13	1547.17	111.983	2231.67	1529.59	168.522	2216.56	1457.46	182.662	2298.44	1178.09	195.631	2090.39	1368.16	216.089	2029.35	1179.83	93.8202	2295.12	1248.02	364.672	2166.03	1403.18	450.24	2201.35	1163.25	457.225	2210.64	1088.46	481.348	2128.42	933.056	435.299	2111.07	853.749	502.732	2141	846.644	473.533	2098.07	780.987
443	0	208.018	2062.2	1602.45	90.9076	2064.04	1587.82	218.512	2226.54	1548.1	111.942	2223.83	1530.92	167.911	2209.07	1458.01	181.812	2291.23	1178.59	195.575	2082.89	1368.8	215.881	2021.4	1180.71	92.3027	2286.68	1248.45	364.388	2159.62	1403.63	449.712	2195.82	1163.88	457.019	2204.78	1089.34	482.426	2122.41	934.171	437.105	2103.78	854.722	503.957	2135.12	847.569	476.145	2089.96	782.735
444	0	208.844	2054.2	1602.26	91.7987	2056.16	1588.2	218.571	2218.83	1548.68	111.799	2215.93	1532.03	167.319	2201.55	1458.35	180.649	2283.63	1178.95	195.628	2075.44	1369.17	215.852	2013.62	1181.41	91.3374	2278.57	1248.71	364.052	2153.25	1404	449.339	2190.17	1164.34	456.77	2199.1	1089.8	483.547	2116.16	935.171	438.977	2096.5	855.71	505.041	2128.81	848.555	478.567	2081.97	784.294
445	0	209.632	2046.51	1602.05	92.5199	2048	1588.68	219.034	2211.37	1549.13	111.941	2208.15	1532.93	166.717	2193.95	1458.43	179.288	2275.8	1179.04	195.64	2067.95	1369.71	215.744	2005.89	1182.16	90.271	2270.58	1248.94	363.681	2146.96	1404.18	448.878	2184.8	1164.72	456.599	2193.35	1090.33	484.638	2110.31	936.196	440.684	2088.97	856.882	505.967	2122.87	849.423	481.213	2074.12	786.148
446	0	210.335	2038.71	1601.53	93.1751	2039.76	1588.99	218.732	2203.64	1548.94	112.045	2200.4	1533.46	166.339	2186.47	1458.38	178.468	2268.3	1178.6	195.705	2060.47	1369.96	216.218	1998.81	1182.28	89.1577	2262.42	1248.81	363.318	2140.52	1404.17	448.541	2179.31	1164.95	456.358	2187.8	1090.48	485.422	2103.99	936.778	442.164	2081.65	857.84	506.47	2116.43	849.814	483.678	2066.21	787.795
447	0	211.304	2030.74	1600.84	94.09	2031.82	1588.98	219.125	2196.2	1548.77	112.254	2192.52	1533.77	165.854	2178.8	1458.2	177.406	2260.57	1178.16	195.705	2052.73	1369.87	216.44	1991.31	1182.2	88.2988	2254.58	1248.62	362.613	2134.13	1403.87	448.173	2173.79	1164.77	456.307	2182.18	1090.39	486.218	2097.83	937.191	443.435	2073.96	858.522	506.997	2109.98	850.034	485.816	2058.24	789.075
448	0	212.289	2023.19	1600.27	94.8634	2023.73	1589.11	219.321	2188.7	1548.41	112.552	2184.89	1533.97	165.552	2171.12	1458.06	176.451	2252.99	1178.2	195.908	2045.18	1369.71	216.757	1983.98	1182.02	87.3371	2246.46	1248.52	362.714	2127.37	1403.64	447.965	2168.32	1164.7	456.424	2176.44	1090.42	486.794	2091.49	937.543	444.733	2066.77	859.172	507.365	2103.64	850.244	487.733	2050.37	790.384
449	0	213.322	2015.68	1599.77	95.8779	2015.78	1589.26	219.692	2181.4	1547.81	112.661	2176.89	1534.17	165.376	2163.48	1457.77	175.791	2245.35	1177.73	196.098	2037.6	1369.49	216.888	1976.12	1181.83	86.762	2238.62	1248.27	362.631	2120.59	1403.33	447.929	2162.8	1164.75	456.465	2170.62	1090.36	487.538	2085.11	937.874	445.671	2059.18	859.79	508.043	2096.95	850.63	489.774	2042.55	791.741
450	0	214.273	2007.94	1599.1	97.0581	2007.84	1589.02	220.207	2173.88	1547.3	112.862	2168.97	1534.13	165.204	2155.59	1457.43	175.139	2237.72	1177.48	196.41	2029.97	1369	217.276	1968.68	1181.27	85.9964	2230.48	1248.14	362.662	2113.62	1402.92	447.928	2157.13	1164.68	456.58	2164.7	1090.12	488.197	2078.7	938.049	446.719	2051.84	860.082	508.497	2090.41	850.745	491.867	2034.64	792.838
451	0	215.331	2000.28	1598.51	98.0581	1999.89	1588.87	220.539	2165.91	1546.97	113.107	2161.07	1534.02	164.903	2147.73	1457.26	174.4	2230.13	1177.5	196.524	2022.22	1368.4	217.588	1961.28	1180.52	85.4979	2222.68	1247.91	362.705	2106.46	1402.51	448.001	2151.32	1164.48	457.04	2158.92	1090.05	488.691	2072.06	938.132	447.392	2044.23	860.121	508.483	2083.44	850.568	493.049	2026.55	793.546
452	0	216.427	1992.63	1597.82	98.8568	1991.86	1588.63	220.48	2158.42	1545.98	113.242	2152.98	1533.8	164.97	2139.87	1456.77	173.768	2222.52	1177.15	196.803	2014.48	1367.66	217.978	1953.72	1179.71	84.9255	2214.57	1247.65	362.697	2099.15	1401.91	447.982	2145.51	1164.12	457.251	2152.9	1089.59	489.174	2065.44	937.989	448.101	2036.53	860.464	508.528	2076.53	850.266	493.662	2019.05	793.852
453	0	217.547	1985.01	1596.92	100.024	1984.1	1588.23	221.206	2150.96	1544.94	113.735	2145.3	1533.27	164.951	2131.87	1456.03	173.521	2214.45	1176.31	197.116	2006.69	1366.86	218.395	1946.23	1178.85	84.791	2206.89	1247	362.873	2091.78	1400.94	448.021	2139.62	1163.43	457.334	2146.93	1088.88	489.654	2058.99	937.44	448.591	2029.06	860.285	508.195	2069.64	849.517	494.946	2011.45	794.265
454	0	218.674	1977.46	1595.84	101.205	1976.11	1587.73	221.305	2143.23	1543.67	114.03	2137.25	1532.57	165.255	2123.9	1455.2	173.602	2206.65	1175.41	197.531	1998.89	1365.89	218.651	1938.46	1177.68	84.6718	2198.94	1246.27	363.113	2084.22	1399.82	448.153	2133.53	1162.48	457.407	2140.87	1087.88	489.933	2052.44	936.558	449.068	2021.61	859.783	508.204	2062.93	848.633	495.696	2003.99	794.209
455	0	219.825	1969.87	1594.74	102.418	1968.08	1587.18	221.847	2135.67	1542.45	114.689	2129.34	1531.68	165.592	2115.91	1454.21	173.375	2198.76	1174.5	198.066	1990.95	1364.9	218.891	1930.75	1176.5	84.6785	2191.01	1245.53	363.325	2076.59	1398.54	448.287	2127.25	1161.53	457.724	2134.59	1086.76	490.277	2045.77	935.588	449.45	2014.36	859.224	508.402	2056.11	847.589	495.968	1995.97	793.838
456	0	221.072	1962.33	1593.67	103.518	1960.15	1586.54	222.589	2128.12	1541.17	115.419	2121.53	1530.65	166.077	2107.86	1453.17	173.56	2190.47	1173.36	198.555	1983.1	1363.88	219.128	1922.98	1175.29	85.0387	2183.24	1244.6	363.825	2068.84	1397.24	448.415	2120.89	1160.46	457.695	2128.18	1085.51	490.588	2039.13	934.556	449.625	2007.06	858.563	508.295	2049.38	846.418	496.19	1988.62	793.261
457	0	222.178	1954.66	1592.31	104.567	1952.3	1585.72	223.192	2120.35	1539.65	116.119	2113.52	1529.64	166.705	2099.75	1451.92	173.623	2182.59	1172.18	198.954	1975.15	1362.59	219.357	1915.28	1174.05	85.2562	2175.16	1243.53	363.877	2061.03	1395.63	448.656	2114.22	1159.21	457.295	2121.4	1084.01	490.966	2032.73	933.366	449.702	1999.77	857.724	507.765	2042.6	844.774	496.257	1981.34	792.244
458	0	223.269	1946.83	1590.82	105.884	1944.41	1584.69	223.809	2112.58	1538.15	116.791	2105.49	1528.55	167.342	2091.59	1450.65	174.214	2174.95	1171.09	199.425	1967.01	1361.12	219.523	1907.26	1172.5	85.8677	2167.37	1242.41	364.442	2052.99	1393.93	448.847	2107.22	1157.7	457.87	2114.83	1082.56	490.998	2025.78	931.638	449.83	1992.54	856.454	507.852	2036.28	843.331	496.148	1974.11	790.857
459	0	224.464	1939.12	1589.69	107.044	1936.4	1583.63	224.514	2104.7	1536.89	117.559	2097.55	1527.33	168.077	2083.34	1449.52	174.648	2166.68	1170.1	200.101	1958.89	1359.73	219.78	1899.24	1170.88	86.4634	2159.3	1241.43	365.459	2044.6	1392.52	449.225	2099.98	1156.38	458.305	2107.95	1081.26	491.092	2018.74	930.103	449.77	1985.11	854.973	507.54	2028.79	841.527	495.817	1966.72	789.453
460	0	225.641	1931.13	1588.55	108.092	1928.29	1582.64	225.696	2096.74	1535.72	118.298	2089.54	1526.24	169.029	2075.13	1448.39	175.516	2158.74	1168.99	200.865	1950.84	1358.33	220.098	1891.17	1169.5	87.0786	2151.19	1240.46	366.359	2036.21	1391.08	449.96	2092.56	1155.1	458.87	2100.77	1079.99	491.283	2011.78	928.601	449.886	1977.95	853.55	507.394	2021.82	839.918	495.435	1959.62	787.772
461	0	226.992	1923.18	1587.33	109.311	1920.21	1581.45	226.658	2088.7	1534.29	119.243	2081.34	1525.1	170.008	2066.76	1447.11	176.337	2150.35	1167.79	201.496	1942.58	1356.71	220.424	1882.85	1167.86	88.0363	2143.23	1239.28	367.123	2027.62	1389.42	450.676	2084.83	1153.57	459.148	2093.38	1078.51	491.508	2004.87	926.758	449.939	1970.84	851.88	507.041	2014.91	837.879	495.065	1952.58	785.946
462	0	228.359	1915.13	1586.02	110.824	1912.28	1580.2	227.794	2080.69	1532.9	120.414	2073.18	1523.86	171.121	2058.4	1445.84	177.227	2141.72	1166.53	202.254	1934.14	1355.15	220.689	1874.45	1166.13	89.082	2135.12	1238.09	368.441	2018.83	1387.74	451.047	2076.47	1151.66	460.043	2085.98	1076.87	491.65	1997.6	924.699	449.756	1963.72	849.688	506.315	2007.83	835.512	494.516	1945.73	783.589
463	0	229.572	1907.15	1584.66	112.037	1904.22	1578.96	228.777	2072.53	1531.44	121.467	2065.05	1522.53	172.282	2050.03	1444.36	178.266	2133.25	1165	203.088	1925.7	1353.61	220.824	1865.77	1164.45	90.0803	2126.93	1236.82	369.384	2010.08	1385.89	451.564	2068.32	1149.83	460.363	2078.11	1074.96	491.517	1990.31	922.232	449.525	1957	847.344	506.101	2000.92	833.192	493.928	1939	781.11
464	0	230.891	1899.13	1583.15	113.314	1896.02	1577.75	230.212	2064.43	1529.7	122.847	2057.01	1520.95	173.643	2041.64	1442.74	179.351	2124.52	1163.28	203.967	1917.25	1352.02	221.306	1857.31	1162.71	91.423	2118.86	1235.27	370.257	2001.16	1383.86	452.306	2060.12	1147.74	460.727	2070.04	1072.67	491.631	1983.22	919.739	449.198	1949.44	845.211	505.679	1994.88	830.768	493.205	1932.38	778.26
465	0	232.435	1891.07	1581.51	114.817	1887.81	1576.48	231.403	2056.21	1527.79	124.423	2048.93	1519.3	175.221	2033.12	1441.04	180.701	2116.21	1161.52	204.842	1908.63	1350.39	221.647	1848.37	1161.07	92.9108	2110.76	1233.74	371.516	1992.07	1381.73	453.012	2051.57	1145.57	460.942	2061.85	1070.46	491.615	1975.96	916.998	449.037	1942.34	842.824	504.77	1987.36	827.58	492.301	1925.62	775.163
466	0	233.919	1882.9	1580.05	116.471	1879.82	1575.29	233.122	2048.04	1526.08	126.044	2040.78	1517.75	176.669	2024.53	1439.56	181.879	2107.33	1159.98	205.88	1899.88	1348.94	222.077	1839.49	1159.46	94.2058	2102.33	1232.39	372.8	1982.84	1379.76	453.778	2042.67	1143.56	461.973	2053.43	1068.51	491.634	1968.46	914.326	448.688	1935.27	840.116	504.868	1980.93	824.932	491.612	1919.03	772.114
467	0	235.623	1874.51	1578.78	118.072	1871.69	1574.24	234.615	2039.62	1524.31	127.641	2032.42	1516.21	178.255	2015.85	1438.11	183.263	2098.44	1158.45	206.857	1891.18	1347.46	222.648	1830.66	1157.87	95.685	2093.99	1231.07	374.052	1973.45	1377.95	454.548	2033.45	1141.57	461.989	2044.47	1066.31	491.581	1960.96	911.529	448.233	1928.11	837.331	504.356	1973.51	822.217	490.767	1912.5	768.967
468	0	237.358	1866.31	1577.74	119.624	1863.46	1573.37	236.636	2031.12	1522.71	129.522	2024.06	1514.83	179.961	2007.12	1436.79	184.674	2089.57	1157.11	207.91	1882.15	1346.01	223.17	1821.52	1156.51	97.3318	2085.53	1229.88	375.504	1963.96	1376.25	455.616	2024.11	1139.79	462.622	2035.55	1064.53	491.641	1953.23	909.045	448.075	1921.16	834.76	504.254	1966.33	819.75	489.994	1906.02	765.744
469	0	238.961	1857.63	1576.58	121.346	1855.15	1572.49	238.689	2022.37	1521.09	131.297	2015.58	1513.56	181.719	1998.09	1435.59	185.981	2080.56	1156.04	208.836	1872.83	1344.72	223.573	1812.39	1155.13	98.6996	2076.64	1228.91	376.969	1954.34	1374.54	456.564	2014.36	1137.88	463.319	2026.01	1062.62	491.64	1945.06	906.418	447.701	1914.08	831.764	504.094	1958.91	817.157	489.081	1899.38	762.506
470	0	240.874	1849.15	1575.73	123.137	1846.84	1571.77	240.587	2013.65	1519.76	133.376	2007.02	1512.35	183.513	1989.07	1434.7	187.606	2071.61	1155.03	210.051	1863.81	1343.59	223.977	1803.11	1153.76	100.472	2068.09	1228.15	378.542	1944.52	1373	457.476	2004.34	1136.03	463.703	2016.64	1060.98	491.712	1936.75	903.977	447.41	1906.85	828.906	503.918	1951.48	814.81	488.285	1892.59	759.355
471	0	242.703	1840.31	1574.89	125.043	1838.66	1571.13	242.979	2004.78	1518.45	135.379	1998.45	1511.29	185.401	1979.97	1433.77	189.029	2062.2	1154.18	211.397	1854.62	1342.56	224.548	1793.88	1152.58	102.01	2059.04	1227.51	380.328	1934.67	1371.55	458.508	1994.3	1134.21	464.46	2006.69	1059.2	491.733	1928.28	901.596	447.069	1899.5	826.24	504.448	1943.73	812.684	487.37	1886.07	756.174
472	0	244.663	1831.64	1574.25	127.054	1830.23	1570.69	245.386	1995.84	1517.16	137.807	1989.75	1510.22	187.567	1970.83	1432.85	190.712	2053.08	1153.29	212.837	1845.35	1341.63	225.165	1784.43	1151.51	103.986	2050.24	1226.73	381.87	1924.83	1369.99	459.719	1984	1132.38	465.108	1996.98	1057.47	491.91	1919.9	899.184	446.797	1892.92	822.994	504.352	1935.76	810.339	486.831	1879.36	752.96
473	0	246.949	1822.87	1573.55	129.072	1821.69	1570.21	247.909	1987	1515.9	140.056	1981.14	1509.31	189.775	1961.74	1431.95	192.383	2043.61	1152.27	214.326	1836.1	1340.75	225.974	1775.17	1150.58	105.711	2040.89	1226.05	384.016	1914.86	1368.55	460.669	1973.41	1130.38	465.821	1986.79	1055.59	492.054	1911.24	896.771	446.535	1885.42	820.179	504.815	1927.91	808.065	485.778	1872.82	749.463
474	0	248.981	1814.02	1572.84	131.14	1813.2	1569.89	250.24	1977.9	1514.72	142.656	1972.38	1508.33	192.056	1952.47	1431.15	194.113	2033.89	1151.28	215.934	1826.63	1340.15	226.633	1765.49	1149.79	107.845	2031.86	1225.34	385.675	1904.54	1367.04	461.525	1962.76	1128.39	466.476	1976.59	1053.79	491.906	1902.12	894.278	446.333	1878.1	817.45	505.06	1919.75	805.767	485.426	1865.93	746.643
475	0	251.237	1805.25	1572.39	133.382	1804.64	1569.64	252.767	1969	1513.8	145.222	1963.75	1507.61	194.457	1943.3	1430.27	195.926	2024.24	1150.27	217.512	1817.21	1339.7	227.53	1755.6	1149.34	109.616	2022.37	1224.75	387.424	1894.23	1365.72	462.498	1952.1	1126.62	466.953	1966.09	1052.1	492.096	1893.06	892.108	445.784	1870.73	814.682	505.899	1911.37	803.923	484.719	1859.03	743.564
476	0	253.483	1796.32	1571.7	135.804	1796.1	1569.42	255.227	1959.9	1512.82	147.957	1954.99	1506.94	197.039	1934.19	1429.5	197.622	2014.44	1149.22	219.261	1807.53	1339.31	228.433	1745.32	1148.92	111.956	2013.12	1223.88	389.62	1884.06	1364.43	463.574	1941.46	1124.6	467.764	1955.38	1050.32	492.157	1883.72	889.668	445.845	1863.05	812.334	506.527	1902.83	801.848	484.112	1852.07	740.51
477	0	256.016	1787.4	1571.41	138.255	1787.48	1569.48	257.874	1950.82	1512.08	150.664	1946.08	1506.56	199.693	1924.85	1428.87	199.437	2003.54	1148.28	220.951	1797.81	1339	229.406	1735.07	1148.72	114.005	2003.42	1223.26	391.807	1873.76	1363.24	464.608	1930.15	1122.82	468.499	1944.58	1048.7	492.608	1874.27	887.656	445.697	1855.15	809.707	507.196	1893.98	799.988	483.901	1844.87	737.824
478	0	258.623	1778.39	1571.73	140.707	1778.73	1570.04	260.94	1941.64	1511.78	153.353	1937.27	1506.48	202.206	1915.5	1428.6	201.483	1993.18	1147.66	222.778	1788.01	1339.08	230.267	1724.32	1148.93	116.428	1993.61	1222.91	393.99	1863.23	1362.39	466.035	1919	1121.56	469.438	1933.47	1047.46	492.877	1864.61	885.797	446.067	1846.92	807.866	507.742	1885	798.403	483.758	1837.48	735.335
479	0	261.155	1769.41	1572.24	143.308	1770.02	1570.75	263.861	1932.23	1511.64	156.112	1928.11	1506.5	204.81	1905.92	1428.54	203.494	1983.08	1147.34	224.634	1778.14	1339.38	231.052	1713.66	1149.24	118.716	1983.73	1222.82	396.405	1852.64	1361.78	467.541	1907.86	1120.56	470.267	1922.19	1046.34	493.395	1854.59	884.252	446.789	1838.04	806.211	508.954	1875.71	797.289	483.779	1829.92	733.184
480	0	263.876	1760.27	1572.6	146.014	1761.3	1571.54	266.362	1922.81	1511.17	158.685	1919.01	1506.84	207.294	1896.32	1428.58	205.387	1972.71	1147.12	226.216	1768.23	1339.69	231.868	1702.69	1149.66	120.759	1973.56	1222.9	398.509	1841.79	1361.07	468.923	1896.63	1119.45	471.605	1910.94	1045.36	493.98	1844.59	882.691	447.344	1829.29	804.342	509.901	1866.14	796.094	483.751	1822.04	730.834
481	0	266.61	1751.17	1573.22	148.677	1752.47	1572.63	269.546	1913.64	1510.98	161.472	1909.8	1507.05	209.87	1886.61	1428.84	207.174	1962.11	1147.06	227.928	1758.08	1340.23	232.531	1691.92	1150.17	122.831	1963.54	1223.12	400.469	1831	1360.64	470.351	1885.09	1118.59	472.468	1899.32	1044.45	494.629	1834.33	881.315	447.975	1819.92	802.551	510.936	1856.56	795.093	484.003	1813.81	728.997
482	0	269.312	1741.86	1574.19	151.455	1743.65	1574.13	272.186	1904.03	1510.74	164.439	1900.4	1507.17	212.264	1876.91	1429.14	208.856	1951.37	1147.18	229.674	1748.18	1340.87	233.002	1680.85	1150.95	125.136	1953.58	1223.49	402.465	1820.22	1360.29	471.742	1873.64	1118.04	473.263	1887.56	1043.75	495.317	1823.9	880.304	447.656	1812.01	800.737	511.999	1846.67	794.328	484.514	1805.35	727.624
483	0	272.128	1732.82	1575.13	154.225	1734.76	1575.82	274.806	1894.61	1510.44	167.188	1891.32	1507.32	214.607	1867.03	1429.67	210.868	1940.82	1147.45	231.179	1738.1	1341.83	233.708	1670.1	1151.9	127.07	1943.64	1224.21	404.299	1809.61	1360.25	473.127	1861.95	1117.49	474.063	1875.81	1043.22	496.272	1813.25	879.578	448.715	1802.68	799.926	513.289	1836.66	793.832	485.164	1796.52	726.542
484	0	274.885	1723.73	1576.21	157.184	1725.91	1577.53	277.647	1885.04	1510.42	169.963	1882	1507.86	217.014	1857.28	1430.41	212.795	1930.31	1148.1	232.791	1727.99	1342.85	234.411	1659.43	1152.88	129.054	1933.55	1225.07	406.168	1799.06	1360.22	474.405	1849.94	1117.08	475.113	1864.03	1042.89	497.279	1802.44	879.047	449.408	1792.6	799.391	514.632	1826.1	793.505	486.202	1787.42	725.83
485	0	277.633	1714.8	1577.35	159.909	1716.94	1579.47	280.012	1875.61	1510.36	172.631	1872.57	1508.64	219.136	1847.32	1431.35	214.724	1919.76	1148.96	234.27	1718.03	1344.11	234.996	1648.9	1154.09	130.961	1923.84	1226.23	407.869	1788.29	1360.53	475.608	1837.81	1117.04	476.099	1851.99	1042.93	498.292	1791.22	879.045	450.651	1782.36	799.295	516.072	1815.36	793.651	487.406	1777.86	725.576
486	0	280.395	1705.65	1578.58	162.654	1708.05	1581.54	282.687	1866.15	1510.68	175.023	1863.27	1509.67	221.38	1837.6	1432.48	216.432	1909.55	1150.01	235.733	1708.07	1345.5	235.546	1638.51	1155.62	132.671	1913.98	1227.61	409.64	1777.6	1361.35	476.696	1825.61	1117.29	477.128	1840.03	1043.3	499.426	1779.83	879.522	451.802	1771.7	799.487	517.645	1804.25	794.366	488.625	1768.06	725.489
487	0	283.005	1696.55	1579.95	165.309	1699.14	1583.61	284.912	1856.7	1511.09	177.312	1853.91	1510.77	223.223	1827.94	1433.74	217.629	1899.2	1151.22	236.925	1698.19	1346.83	236.109	1628.36	1157.15	134.076	1904.31	1229.16	411.162	1767.01	1362.12	477.802	1813.37	1117.76	477.862	1827.8	1043.93	500.579	1768.07	880.195	453.242	1760.54	800.004	519.255	1792.7	795.266	490.008	1757.59	725.807
488	0	285.458	1687.54	1581.15	167.994	1690.26	1585.63	287.391	1847.42	1511.69	179.542	1844.79	1512.07	225.133	1818.38	1435.11	219.128	1889.39	1152.66	238.184	1688.49	1348.37	236.534	1618.38	1158.58	135.704	1895.06	1230.73	412.217	1756.65	1362.92	478.823	1801.15	1118.23	479.298	1815.8	1044.82	501.801	1756.07	881.039	454.574	1749	800.485	520.933	1780.89	796.226	491.555	1746.47	726.312
489	0	288.165	1678.48	1582.4	170.563	1681.39	1587.65	289.276	1838.12	1512.5	181.509	1835.55	1513.64	226.818	1808.87	1436.55	220.64	1879.79	1154.12	239.117	1678.76	1349.78	236.912	1608.67	1160.11	137.049	1885.46	1232.23	413.88	1746.02	1364.17	479.912	1789.14	1119.17	480.444	1803.87	1045.88	503.115	1743.87	882.181	456.175	1737.04	801.569	522.696	1768.63	797.601	493.105	1735.01	727.038
490	0	290.508	1669.6	1583.39	172.94	1672.42	1589.6	291.19	1828.97	1513.13	183.3	1826.42	1515.29	228.444	1799.57	1437.69	221.902	1869.68	1155.35	240.022	1669.34	1351.26	237.18	1599.04	1161.65	138.725	1876.48	1233.56	415.258	1735.71	1365.36	481.136	1777.31	1120.14	481.576	1791.65	1046.91	504.504	1731.54	883.454	457.753	1724.74	802.781	524.513	1755.93	799	495.003	1723.3	727.941
491	0	292.76	1660.79	1584.07	175.243	1663.33	1591.34	292.704	1820.05	1513.77	184.855	1817.4	1516.72	229.934	1790.33	1438.71	223.497	1860.3	1156.25	240.62	1659.85	1352.63	237.417	1589.5	1163.18	140.196	1867.38	1234.66	416.119	1725.38	1366.34	482.116	1765.56	1120.85	482.95	1779.69	1047.65	505.894	1718.98	884.651	459.492	1711.87	804.049	526.19	1743	800.152	496.662	1710.85	728.929
492	0	294.935	1651.81	1584.69	177.39	1654.29	1592.97	293.883	1811.23	1514.4	186.317	1808.55	1518.1	231.332	1781.36	1439.6	224.898	1850.95	1157.05	241.221	1650.53	1353.9	237.405	1580.12	1164.43	141.812	1858.69	1235.59	416.885	1715.05	1367.15	483.143	1753.95	1121.66	484.068	1767.87	1048.46	507.177	1706.25	885.777	460.835	1699.19	805.035	527.886	1730.06	801.285	498.27	1697.85	730.009
493	0	296.904	1643.19	1585.28	179.436	1645.29	1594.55	294.97	1802.44	1515.02	187.606	1799.52	1519.57	232.475	1772.33	1440.56	226.532	1841.94	1157.83	241.55	1641.38	1355.11	237.333	1570.93	1165.5	143.551	1849.98	1236.42	417.47	1704.91	1368.12	484.396	1742.57	1122.49	485.474	1755.97	1049.27	508.519	1693.23	887.09	462.404	1686.05	806.445	529.506	1716.49	802.534	500	1684.35	731.352
494	0	298.727	1634.35	1585.83	181.344	1636.14	1596.06	295.853	1793.57	1515.67	188.413	1790.46	1520.98	233.848	1763.37	1441.48	227.666	1832.33	1158.25	241.808	1632.27	1356.09	237.258	1562	1166.57	145.178	1841.42	1237.29	418.36	1694.66	1369.15	485.756	1731.23	1123.52	486.735	1744.17	1050.05	510.015	1680.15	888.592	464.128	1672.57	808.137	531.229	1702.74	803.881	501.911	1670.35	732.933
495	0	300.178	1625.56	1586.39	183.047	1627.02	1597.4	296.439	1784.62	1516.31	189.044	1781.38	1522.36	234.774	1754.3	1442.51	229.933	1824	1159.61	242.044	1623.24	1357.13	237.071	1553.24	1167.44	146.767	1833.14	1238.15	419.05	1684.48	1370.19	487.233	1719.92	1124.7	488.442	1732.27	1051.08	511.426	1666.96	889.984	465.463	1659.21	809.302	532.969	1688.96	805.263	503.647	1655.96	734.561
496	0	301.644	1616.76	1587.04	184.394	1617.76	1598.67	296.905	1775.79	1517.31	189.578	1772.21	1523.98	235.789	1745.39	1443.63	231.689	1815.44	1161.02	242.134	1614.38	1358.09	236.817	1544.51	1168.18	148.535	1825.08	1239.26	419.444	1674.2	1371.29	488.46	1708.47	1125.89	489.994	1720.21	1052.26	512.715	1653.55	891.58	466.585	1645.39	810.779	534.656	1674.64	806.866	505.388	1640.95	736.314
497	0	302.689	1607.9	1587.82	185.575	1608.56	1599.9	297.217	1767.09	1518.32	189.772	1763.13	1525.47	236.492	1736.5	1444.87	233.347	1806.7	1162.19	242.044	1605.62	1358.99	236.464	1536.02	1168.8	150.235	1816.91	1240.4	420.079	1664.23	1372.59	489.877	1697.28	1127.36	491.558	1708.22	1053.51	514.015	1640.06	893.338	468.016	1631.61	812.468	536.024	1660.26	808.417	506.733	1625.59	738.23
498	0	303.464	1599.1	1588.41	186.472	1599.33	1600.94	297.337	1758.33	1519.34	189.936	1754.14	1526.87	237.304	1727.67	1445.95	235.202	1798.48	1163.36	241.962	1596.82	1359.69	236.069	1527.57	1169.23	151.997	1809.06	1241.35	420.261	1654.21	1373.61	490.968	1685.8	1128.48	493.306	1696.22	1054.62	515.148	1626.47	894.961	469.077	1617.57	814.109	537.317	1645.78	809.835	508.112	1610.07	740.24
499	0	304.227	1590.28	1589.15	187.197	1590.1	1601.88	297.429	1749.63	1520.43	190.037	1745.05	1528.22	237.987	1718.88	1446.97	236.787	1790.26	1164.56	242.049	1588.29	1360.47	236.022	1519.3	1169.82	153.556	1801.14	1242.43	420.532	1644.28	1374.6	492.241	1674.47	1129.72	494.798	1684.3	1055.83	516.275	1612.92	896.605	470.285	1603.47	815.966	538.674	1631.16	811.413	509.582	1594.26	742.657
500	0	304.432	1581.37	1589.96	187.489	1580.8	1602.77	297.471	1740.72	1521.74	190.203	1736.05	1529.41	238.518	1710.07	1448.12	238.41	1781.92	1165.86	241.958	1579.71	1361.33	235.937	1511.3	1170.47	155.215	1793.3	1243.52	420.871	1634.65	1375.84	493.313	1663.13	1131.15	496.491	1672.45	1057.13	517.455	1599.11	898.665	471.342	1589.24	818.093	539.834	1616.43	813.158	510.83	1578.13	745.323
501	0	304.721	1572.39	1590.88	187.67	1571.63	1603.56	297.475	1731.98	1523.13	190.153	1727.19	1530.77	239.176	1701.59	1449.33	240.071	1774.18	1167.01	241.867	1571.28	1362.25	235.823	1503.2	1171.21	156.683	1785.62	1244.63	421.007	1625.06	1377.21	494.549	1651.83	1132.74	498.162	1660.66	1058.6	518.44	1585.41	900.818	472.163	1574.88	820.282	540.929	1601.48	815.12	511.84	1561.71	748.255
502	0	304.576	1563.24	1591.69	187.616	1562.55	1604.14	297.446	1723.22	1524.65	190.06	1718.31	1532.11	239.794	1692.97	1450.3	241.559	1766.12	1168.18	241.962	1562.92	1363.15	235.917	1495.24	1171.88	158.197	1777.75	1245.59	421.255	1615.6	1378.31	495.737	1640.73	1134.18	499.799	1648.96	1060.01	519.271	1571.8	902.981	473.143	1560.39	822.811	541.926	1586.61	817.075	512.926	1545.37	751.254
503	0	304.202	1554.27	1592.53	187.096	1553.33	1604.58	297.309	1714.43	1526.16	190.11	1709.64	1533.27	240.283	1684.6	1451.32	242.915	1758.25	1169.33	241.978	1554.55	1364.07	236.052	1487.48	1172.63	159.585	1770.07	1246.69	421.407	1606.41	1379.59	496.697	1629.54	1135.65	501.388	1637.37	1061.46	520.034	1558.01	905.271	473.717	1545.61	825.403	542.709	1571.68	819.148	513.668	1528.68	754.466
504	0	303.666	1544.98	1593.3	186.583	1544.26	1604.96	297.21	1705.7	1527.89	190.076	1700.9	1534.64	240.811	1676.26	1452.36	244.072	1750.22	1170.35	242.075	1546.3	1364.85	236.303	1479.69	1173.53	160.751	1762.57	1247.73	421.654	1597.4	1381.09	497.756	1618.55	1137.39	502.629	1625.62	1062.97	520.794	1544.14	907.964	474.403	1531.15	828.088	543.337	1556.38	821.451	514.373	1512.1	758.066
505	0	303.146	1535.62	1593.94	185.872	1535.12	1605.25	297.271	1696.89	1529.79	190.001	1692.33	1536.05	241.239	1668.03	1453.34	245.555	1742.67	1171.56	242.229	1538.14	1365.63	236.658	1472.24	1174.37	161.941	1754.81	1248.73	421.909	1588.55	1382.39	498.801	1607.49	1139.08	504.195	1613.99	1064.66	521.452	1530.44	910.554	475.077	1516.3	831.095	544.3	1541.28	824.035	515.025	1495.5	761.521
506	0	302.419	1526.31	1594.5	185.106	1526.16	1605.21	297.343	1688.07	1531.65	189.955	1683.85	1537.53	241.612	1659.78	1454.32	246.533	1734.62	1172.69	242.351	1530.44	1366.03	236.965	1464.64	1175.01	162.919	1747.07	1249.66	422.267	1579.79	1383.69	500.333	1596.91	1140.89	505.934	1602.6	1066.26	522.107	1516.52	913.25	475.543	1501.55	833.918	544.841	1525.93	826.465	515.558	1478.69	765.101
507	0	301.72	1517.08	1595.03	184.252	1517.18	1605.15	297.485	1679.31	1533.48	189.777	1675.43	1538.86	241.961	1651.65	1455.23	247.47	1726.71	1173.57	242.493	1522.39	1366.64	237.449	1457.22	1175.69	163.797	1739.24	1250.48	422.669	1571.09	1384.94	501.196	1585.9	1142.39	507.332	1591.33	1067.71	522.74	1502.8	915.928	475.902	1486.89	836.82	545.468	1510.68	829.045	515.924	1462.43	768.668
508	0	301.09	1507.72	1595.5	183.319	1508.46	1605.05	297.725	1670.38	1535.16	189.92	1667.12	1539.97	242.287	1643.46	1455.82	248.197	1718.79	1174.38	242.632	1514.36	1367.12	237.879	1449.48	1176.19	164.657	1731.73	1251.12	422.838	1562.6	1385.99	502.177	1575.37	1143.82	508.78	1580.26	1069.16	523.195	1489.11	918.482	476.085	1471.75	839.959	545.954	1495.22	831.512	516.113	1445.88	772.272
509	0	300.151	1498.31	1595.6	182.45	1499.76	1604.78	297.87	1661.65	1536.27	190.058	1658.72	1540.86	242.5	1635.4	1456.27	248.957	1710.91	1174.77	242.657	1506.24	1367.37	238.418	1441.84	1176.58	165.416	1723.99	1251.45	422.916	1554.22	1386.66	503.102	1564.89	1144.92	509.922	1569.07	1070.11	523.707	1475.4	920.985	476.688	1457.04	842.821	546.166	1480.2	833.871	516.18	1429.47	775.74
510	0	299.263	1489.11	1595.6	181.632	1491.08	1604.42	298.195	1652.8	1537.41	190.334	1650.44	1541.45	242.638	1627.25	1456.49	249.466	1702.97	1174.98	242.825	1498.3	1367.46	239.024	1433.99	1176.79	166.074	1716.25	1251.69	422.929	1545.94	1387.19	504.003	1554.68	1145.79	511.146	1558.06	1070.94	524.085	1461.84	923.301	476.94	1442.25	845.667	546.269	1465.09	835.974	516.165	1413.01	779.198
511	0	298.544	1479.95	1595.61	180.747	1482.49	1604.14	298.348	1643.95	1538.11	190.653	1642.18	1541.97	242.726	1619.09	1456.71	250.024	1695.19	1175.39	242.834	1490.29	1367.46	239.521	1426.1	1176.85	166.603	1708.54	1251.83	423.226	1537.79	1387.65	504.899	1544.56	1146.76	512.397	1547.23	1071.75	524.444	1448.36	925.556	477.049	1427.47	848.566	546.293	1450.02	838.106	516.022	1396.84	782.677
512	0	297.361	1470.75	1595.31	180.042	1474.13	1603.67	298.831	1635.09	1538.74	190.814	1633.92	1542.32	242.754	1610.93	1456.66	250.416	1687.48	1175.38	242.826	1482.27	1367.25	239.979	1418.29	1176.66	166.876	1700.61	1251.77	423.252	1529.56	1387.83	505.977	1534.46	1147.41	513.336	1536.55	1072.16	524.787	1434.92	927.781	476.951	1412.77	851.29	546.41	1435.12	840.148	515.801	1380.87	785.97
513	0	296.871	1461.53	1594.93	179.162	1465.52	1603.11	299.163	1626.13	1539	191.224	1625.73	1542.41	242.708	1602.56	1456.49	250.989	1680.33	1175.15	242.869	1474.16	1366.82	240.534	1410.43	1176.24	167.222	1692.71	1251.63	423.272	1521.28	1387.79	506.617	1524.8	1147.77	514.31	1525.7	1072.49	524.985	1421.8	929.607	476.765	1398.15	853.97	546.299	1420.27	841.951	515.468	1364.97	789.076
514	0	295.896	1452.48	1594.4	178.449	1457.17	1602.44	299.499	1617.2	1539.15	191.684	1617.52	1542.35	242.56	1594.07	1456.33	251.365	1672.47	1175.17	243.178	1466.26	1366.31	240.836	1402.57	1175.45	167.427	1684.78	1251.55	423.185	1513.1	1387.53	507.45	1514.82	1148.05	515.219	1514.94	1072.69	525.125	1408.91	931.346	476.418	1383.86	856.265	545.956	1405.75	843.668	514.959	1349.24	792.057
515	0	295.242	1443.44	1593.93	177.625	1448.76	1601.72	299.788	1608.27	1539.21	191.819	1609.07	1542.34	242.571	1585.88	1456.09	251.386	1664.57	1175.33	242.766	1458.06	1365.61	241.042	1394.81	1174.66	167.614	1676.84	1251.31	423.198	1504.91	1387.29	508.023	1505.2	1148.27	516.063	1504.32	1072.86	525.136	1395.96	933.011	476.061	1369.66	858.602	545.33	1391.49	845.195	514.392	1333.73	795.066
516	0	294.363	1434.33	1593.16	176.894	1440.26	1600.88	300.125	1599.36	1539.06	191.986	1600.85	1542.09	242.278	1577.4	1455.72	251.534	1656.77	1175.16	242.671	1450	1364.84	241.164	1386.98	1173.56	167.706	1668.95	1250.98	423.003	1496.55	1386.81	508.552	1495.69	1148.22	516.795	1493.71	1072.93	525.029	1383.25	934.455	475.874	1355.63	860.806	544.974	1377.36	846.753	513.807	1318.7	797.877
517	0	293.74	1425.38	1592.31	176.298	1431.82	1599.96	300.449	1590.54	1538.67	192.236	1592.59	1541.66	241.926	1568.93	1455.16	251.529	1648.79	1174.69	242.786	1441.99	1363.97	241.34	1379.09	1172.41	167.677	1661.01	1250.5	422.755	1488.21	1386.12	508.982	1486.3	1148	517.125	1483.3	1072.48	524.881	1370.68	935.716	475.397	1341.91	862.765	544.248	1363.59	847.862	513.091	1303.7	800.442
518	0	293.044	1416.39	1591.39	175.616	1423.39	1599.04	300.54	1581.53	1538.16	192.604	1584.22	1541.06	241.89	1560.61	1454.54	251.54	1641.2	1174.14	242.498	1433.69	1362.98	241.302	1371.21	1171.16	167.515	1652.99	1249.92	422.623	1479.9	1385.35	509.377	1476.98	1147.53	517.519	1472.72	1071.96	524.682	1358.34	936.879	474.713	1328.38	864.617	543.517	1349.94	849	512.356	1289.09	803.014
519	0	292.429	1407.42	1590.49	174.931	1414.99	1598.1	300.804	1572.68	1537.54	192.694	1575.86	1540.35	241.459	1552.12	1453.78	251.327	1633.28	1173.52	242.253	1425.64	1362.08	241.158	1363.41	1170.08	167.324	1644.92	1249.23	422.297	1471.63	1384.49	509.535	1467.96	1147.16	517.856	1462.7	1071.61	524.237	1346.24	937.946	474.277	1315.24	866.392	542.662	1336.64	850.071	511.451	1274.82	805.495
520	0	291.708	1398.45	1589.36	174.264	1406.44	1596.94	300.762	1563.79	1536.78	192.73	1567.6	1539.52	241.144	1543.67	1452.87	251.221	1625.46	1172.74	242.088	1417.79	1360.92	240.872	1355.41	1168.72	167.222	1637	1248.44	421.791	1463.29	1383.33	509.352	1459.11	1146.29	517.936	1452.53	1070.89	523.788	1334.41	938.657	473.343	1302.14	868.086	541.687	1323.6	850.832	510.462	1260.83	807.676
521	0	291.086	1389.59	1588.09	173.68	1397.84	1595.69	300.463	1554.96	1535.86	192.696	1559.06	1538.57	240.772	1535.28	1451.81	250.816	1617.68	1171.87	241.749	1409.56	1359.63	240.693	1347.4	1167.38	166.935	1628.87	1247.51	421.463	1455.08	1382.08	509.064	1450.15	1145.26	517.838	1442.6	1069.99	523.105	1322.61	939.213	472.383	1289.15	869.471	540.49	1310.61	851.353	509.354	1247.09	809.534
522	0	290.319	1380.65	1586.76	173.121	1389.17	1594.48	300.449	1546.17	1535.06	192.226	1550.39	1537.75	240.257	1526.79	1450.86	250.661	1609.78	1171.19	241.419	1401.33	1358.42	240.352	1339.4	1166.15	166.59	1620.41	1246.61	420.975	1446.87	1380.99	508.808	1441.17	1144.37	517.723	1432.61	1069.25	522.361	1311.09	939.881	471.316	1276.62	870.808	539.122	1298.11	851.89	508.13	1233.78	811.361
523	0	289.742	1372.01	1585.51	172.453	1380.36	1593.35	300.137	1537.27	1534.22	191.723	1541.75	1536.95	239.727	1518.36	1449.83	250.286	1601.68	1170.28	240.942	1393.06	1357.38	240.033	1331.47	1164.93	166.03	1612.31	1245.69	420.47	1438.58	1379.95	508.625	1432.44	1143.63	517.504	1422.67	1068.65	521.533	1299.68	940.453	470.262	1264.51	872.032	537.982	1285.75	852.719	506.814	1220.85	813.005
524	0	289.19	1363.07	1584.21	171.972	1371.55	1592.01	299.551	1528.57	1533.25	191.025	1533.06	1536.14	239.192	1509.96	1448.85	249.618	1593.36	1169.3	240.103	1384.49	1356.13	239.639	1323.29	1163.67	165.484	1604.11	1244.77	420.053	1430.41	1378.87	508.307	1423.6	1142.67	517.204	1412.91	1067.86	520.526	1288.39	940.865	468.925	1252.54	872.989	536.486	1273.41	853.079	505.478	1208.18	814.398
525	0	288.538	1354.16	1582.71	171.26	1362.61	1590.72	298.896	1519.72	1532.05	190.401	1524.26	1535.12	238.354	1501.41	1447.74	249.446	1585.99	1168.47	239.503	1376.18	1354.76	239.208	1315.07	1162.37	164.728	1595.63	1243.62	419.278	1422.17	1377.58	507.681	1414.86	1141.5	516.724	1403.22	1066.83	519.486	1277.37	941.069	467.661	1240.68	873.739	534.822	1261.76	853.2	503.845	1195.76	815.527
526	0	287.863	1345.33	1581.24	170.689	1353.76	1589.42	297.957	1511.05	1530.91	189.512	1515.36	1534	237.612	1492.97	1446.39	248.503	1577.61	1167	238.799	1367.72	1353.52	238.599	1306.73	1161.03	164.035	1587.36	1242.29	418.661	1413.92	1376.31	506.971	1406.27	1140.25	516.186	1393.56	1065.79	518.254	1266.53	941.027	466.035	1229.28	874.339	533.184	1250.03	853.235	502.106	1183.78	816.359
527	0	287.395	1336.72	1579.99	170.056	1344.71	1588.21	297.181	1502.4	1529.77	188.617	1506.53	1532.85	236.728	1484.48	1445.03	247.666	1569.26	1165.53	237.941	1359.3	1352.21	238.04	1298.48	1159.85	163.138	1578.92	1240.88	417.909	1405.79	1375.01	506.262	1397.74	1138.98	515.349	1383.97	1064.6	517.035	1255.92	940.942	464.535	1218	874.816	531.555	1238.73	853.173	500.285	1172.06	817.048
528	0	286.695	1327.9	1578.51	169.43	1335.57	1586.86	295.728	1493.84	1528.39	187.413	1497.63	1531.71	235.698	1475.88	1443.74	246.773	1560.73	1164.12	237.226	1350.93	1350.82	237.476	1289.97	1158.32	162.298	1570.41	1239.49	417.092	1397.54	1373.55	505.453	1389.23	1137.63	514.466	1374.49	1063.39	515.678	1245.41	940.56	462.98	1207.22	874.973	529.852	1227.61	852.845	498.38	1160.72	817.455
529	0	286.048	1319.32	1577.02	168.758	1326.49	1585.53	294.524	1485.15	1526.92	186.069	1488.65	1530.39	234.732	1467.3	1442.32	246.266	1552.51	1162.8	236.31	1342.24	1349.47	236.938	1281.39	1156.93	161.424	1561.78	1237.93	416.081	1389.14	1372.17	504.356	1380.58	1136.24	513.304	1365.08	1062.04	514.224	1235.11	940.11	461.351	1196.57	874.932	528.201	1216.77	852.458	496.421	1149.68	817.698
530	0	285.273	1310.68	1575.77	168.078	1317.23	1584.33	292.971	1476.54	1525.75	184.579	1479.77	1528.89	233.468	1458.57	1440.93	245.29	1543.85	1161.27	235.374	1333.65	1348.12	236.289	1272.82	1155.72	160.451	1553.09	1236.46	414.942	1380.77	1371.01	503.36	1372.02	1135.16	512.276	1355.9	1061.05	512.744	1225.23	939.713	459.455	1186.32	874.863	526.261	1206.25	852.095	494.312	1139.14	817.788
531	0	284.587	1301.88	1574.42	167.25	1308.02	1583	291.285	1467.88	1524.42	182.988	1470.41	1527.92	232.372	1449.9	1439.63	244.647	1535.23	1160.12	234.333	1324.96	1346.8	235.677	1264.17	1154.35	159.559	1544.29	1234.99	413.952	1372.22	1369.87	502.159	1363.18	1134.03	511.043	1346.51	1059.95	511.112	1215.33	939.191	457.59	1176.43	874.57	524.443	1196.09	851.556	492.212	1128.87	817.577
532	0	283.66	1293.18	1572.95	166.349	1298.67	1581.58	289.677	1459.36	1523.26	181.17	1461.1	1526.85	230.944	1441.08	1438.5	243.708	1526.45	1159.11	233.326	1316.26	1345.44	235.07	1255.26	1152.91	158.492	1535.48	1233.65	412.774	1363.55	1368.8	500.919	1354.32	1132.89	509.773	1337.32	1058.97	509.134	1205.6	938.604	455.761	1166.71	874.072	522.65	1186.06	851.014	489.988	1118.82	817.18
533	0	282.893	1284.59	1571.77	165.435	1289.23	1580.36	287.724	1450.61	1522.3	179.221	1451.78	1525.8	229.589	1432.3	1437.35	242.699	1517.39	1158.13	232.106	1307.43	1344.14	234.333	1246.4	1151.67	157.376	1526.48	1232.33	411.541	1354.9	1368.02	499.634	1345.29	1132.08	508.502	1328.2	1058.22	507.378	1196.07	937.967	453.836	1157.31	873.511	521.019	1176.27	850.654	487.872	1109.34	816.581
534	0	282.065	1275.93	1570.66	164.322	1279.76	1579.18	285.721	1441.96	1521.35	177.05	1442.4	1524.85	228.067	1423.39	1436.22	241.907	1508.68	1157.04	230.954	1298.48	1343.06	233.665	1237.44	1150.56	156.423	1517.36	1230.93	410.366	1346.08	1367.37	498.302	1336.21	1131.41	506.977	1319.02	1057.42	505.694	1186.86	937.355	451.731	1148.17	872.891	519.158	1166.74	850.13	485.565	1100	815.963
535	0	281.068	1267.13	1569.59	163.313	1270.31	1577.93	283.644	1433.29	1520.25	174.973	1432.97	1523.82	226.587	1414.36	1435.07	241.555	1500.35	1156.14	229.761	1289.45	1342.06	233.033	1228.33	1149.56	155.273	1508.22	1229.59	409.166	1337.27	1366.59	496.926	1327.21	1130.49	505.592	1310.11	1056.5	503.874	1177.82	936.565	449.949	1139.34	872.052	517.213	1157.7	849.146	483.438	1091.14	815.064
536	0	279.852	1258.34	1568.56	162.111	1260.7	1576.88	281.31	1424.39	1519.28	172.93	1423.63	1522.49	225.142	1405.39	1433.91	240.408	1491.01	1154.7	228.397	1280.31	1340.94	232.109	1219.1	1148.51	154.275	1499.08	1228.18	407.761	1328.38	1365.82	495.295	1318.14	1129.59	504.063	1301.34	1055.47	502.103	1169.02	935.529	447.95	1130.75	871.021	515.551	1148.72	848.344	481.234	1082.42	813.98
537	0	278.471	1249.43	1567.76	160.673	1251.17	1575.89	278.969	1415.45	1518.45	170.648	1414.24	1521.41	223.387	1396.25	1432.84	239.195	1481.72	1153.46	227.023	1271.17	1340.04	231.181	1209.75	1147.69	152.998	1489.91	1226.84	406.246	1319.3	1365.18	493.685	1309.17	1128.83	502.554	1292.55	1054.75	500.274	1160.52	934.528	446.044	1122.5	869.998	513.78	1140.18	847.351	479.009	1074.1	812.888
538	0	276.979	1240.46	1566.93	159.342	1241.42	1575	276.758	1406.57	1517.55	168.474	1404.57	1520.52	221.823	1387.14	1431.83	238.179	1472.26	1152.36	225.582	1261.77	1339.36	230.229	1200.24	1147.22	151.768	1480.42	1225.53	404.665	1309.98	1364.61	492.088	1300.18	1128.17	501.015	1283.93	1054.09	498.483	1152.09	933.541	443.987	1114.47	868.8	511.745	1132.17	846.088	476.693	1066.1	811.544
539	0	275.564	1231.43	1566.16	157.974	1231.73	1574.11	274.372	1397.52	1516.72	166.125	1394.8	1519.68	220.305	1377.91	1430.97	237.274	1462.98	1151.45	224.157	1252.38	1338.61	229.049	1190.5	1146.57	150.625	1470.81	1224.45	403.165	1300.66	1364.14	490.51	1291.27	1127.59	499.422	1275.29	1053.33	496.546	1143.87	932.38	442.165	1106.86	867.403	509.905	1124.2	844.726	474.608	1058.41	810.03
540	0	273.81	1222.32	1565.54	156.468	1222	1573.38	271.951	1388.33	1516.07	163.748	1385.11	1519.08	218.692	1368.56	1430.18	235.927	1453.11	1150.74	222.559	1242.89	1337.97	227.823	1180.56	1146.14	149.311	1461.12	1223.45	401.495	1291.15	1363.8	489.018	1282.33	1127.13	497.973	1266.68	1052.78	494.943	1135.77	931.222	440.154	1099.25	865.95	508.13	1116.56	843.505	472.542	1050.98	808.478
541	0	272.51	1213.18	1565.11	154.926	1212.18	1572.84	269.058	1379.13	1515.74	161.288	1375.52	1518.52	216.877	1359.09	1429.56	234.502	1443.43	1150.05	221.008	1233.22	1337.66	226.495	1170.5	1146.07	147.969	1451.03	1222.4	400.038	1281.66	1363.8	487.531	1273.33	1127.11	496.494	1258.03	1052.57	493.203	1127.85	930.198	438.436	1092.04	864.676	506.583	1108.68	842.589	470.42	1043.88	806.882
542	0	270.875	1204.12	1564.67	153.344	1202.34	1572.33	267.047	1370.08	1515.56	158.842	1365.64	1518.25	214.851	1349.57	1429.07	233.208	1433.52	1149.23	219.258	1223.45	1337.47	225.13	1160.16	1146.07	146.527	1440.99	1221.43	398.267	1272.04	1363.67	485.958	1264.44	1126.96	495.086	1249.56	1052.34	491.347	1120.12	929.074	436.469	1085.09	863.066	505.221	1101.59	841.497	468.326	1037.02	805.111
543	0	269.314	1194.86	1564.43	151.812	1192.48	1571.99	264.531	1360.83	1515.28	156.353	1355.67	1518.13	213.053	1339.94	1428.71	231.688	1423.23	1148.75	217.444	1213.62	1337.18	223.577	1149.65	1146.06	144.812	1430.81	1220.69	396.44	1262.31	1363.52	484.496	1255.43	1126.8	493.52	1241.03	1052.01	489.88	1112.42	927.928	434.794	1078.18	861.454	503.666	1094.11	840.266	466.458	1030.4	803.098
544	0	267.6	1185.42	1564.53	150.136	1182.53	1571.92	261.929	1351.44	1515.34	153.959	1345.82	1518.03	211.299	1330.36	1428.38	229.839	1412.83	1148.46	215.688	1203.62	1337.24	222.096	1138.97	1146.15	143.133	1420.46	1220.12	394.662	1252.55	1363.67	482.824	1246.43	1126.83	491.964	1232.82	1051.98	488.255	1104.99	926.782	433.406	1071.46	859.792	502.402	1087.05	839.23	464.575	1024.05	801.177
545	0	265.853	1176.13	1564.81	148.365	1172.67	1572.16	259.423	1341.96	1515.41	151.562	1335.86	1518.08	209.22	1320.52	1428.27	228.29	1402.19	1147.88	213.845	1193.67	1337.56	220.514	1128.24	1146.62	141.426	1410.08	1219.54	392.735	1242.64	1363.98	481.129	1237.52	1126.97	490.334	1224.66	1051.94	486.793	1097.76	925.868	431.744	1065.19	858.408	501.185	1080.31	838.149	462.898	1018.03	799.434
546	0	264.037	1166.77	1565.19	146.632	1162.79	1572.56	256.946	1332.46	1515.53	149.174	1326.05	1518.15	207.304	1310.68	1428.24	226.415	1391.66	1147.8	212.015	1183.58	1338.03	219.018	1117.25	1147.19	139.844	1399.65	1219.11	390.848	1232.74	1364.34	479.372	1228.51	1127.2	488.606	1216.5	1051.99	485.408	1090.74	924.852	430.455	1059.06	856.88	500.175	1073.94	837.062	461.507	1012.41	797.506
547	0	262.003	1157.2	1565.77	144.785	1152.87	1573.07	254.444	1322.85	1515.8	146.826	1316.03	1518.42	205.143	1300.58	1428.57	224.966	1381.1	1147.6	210.219	1173.35	1338.64	217.486	1106.32	1147.84	138.172	1389.18	1219.07	389.161	1222.77	1364.95	477.672	1219.7	1127.52	486.73	1208.47	1052.05	484.029	1083.91	923.902	429.202	1053.19	855.36	499.117	1067.95	836.029	460.277	1006.96	795.711
548	0	260.076	1147.6	1566.73	142.737	1142.91	1573.91	252.067	1313.25	1516.45	144.541	1306.19	1518.8	203.507	1290.72	1429.11	223.45	1370.17	1148.13	208.455	1163.26	1339.49	216.099	1095.54	1148.87	136.658	1378.77	1219.38	387.165	1212.52	1365.86	475.863	1210.81	1128.28	484.996	1200.44	1052.81	482.631	1077.35	923.114	428.262	1047.38	854.196	497.957	1062.34	835.176	459.173	1001.98	794.042
549	0	257.921	1137.9	1567.93	140.539	1133.12	1574.89	249.863	1303.54	1517.38	142.287	1296.06	1519.49	201.518	1280.53	1429.98	221.897	1359.45	1148.87	206.641	1153.02	1340.62	214.621	1084.77	1150.13	135.095	1368.3	1220.02	385.385	1202.33	1367.22	474.039	1201.9	1129.43	483.226	1192.41	1053.85	481.12	1070.78	922.611	426.951	1042.2	852.904	496.845	1057.12	834.552	458.257	997.307	792.615
550	0	255.794	1128.08	1569.37	138.417	1123.17	1575.73	247.652	1293.65	1518.77	140.174	1286.1	1520.51	199.695	1270.47	1431.05	220.503	1349.31	1150.02	205.006	1142.81	1341.86	213.21	1074.01	1151.44	133.545	1357.96	1220.97	383.713	1192.05	1368.72	472.268	1192.9	1130.72	481.413	1184.55	1055.09	479.9	1065.01	922.131	426.077	1037.03	851.907	495.944	1052.32	834.068	457.617	992.937	791.056
551	0	253.556	1118.22	1570.89	136.267	1113.27	1576.84	245.82	1283.83	1520.18	138.021	1276.17	1521.65	197.9	1260.35	1432.43	219.087	1339.35	1151.54	203.449	1132.68	1343.2	211.865	1063.6	1152.99	132.042	1347.64	1222.29	382.134	1181.96	1370.48	470.343	1183.78	1132.21	479.749	1176.51	1056.66	478.457	1059.09	921.872	424.999	1032.2	850.937	495.253	1047.51	833.93	457.057	988.875	789.79
552	0	251.398	1108.24	1572.58	133.977	1103.44	1578.07	243.983	1273.87	1521.97	135.902	1266.35	1522.94	196.128	1250.33	1434.01	217.622	1329.27	1153.27	201.845	1122.55	1344.73	210.563	1053.33	1154.62	130.46	1337.38	1223.63	380.485	1171.84	1372.41	468.55	1174.79	1134.02	477.908	1168.78	1058.43	477.432	1053.28	921.972	424.157	1027.39	850.401	494.292	1043.18	833.838	456.543	984.996	788.699
553	0	249.129	1098.29	1574.21	131.615	1093.75	1579.15	242.275	1263.8	1523.58	134.174	1256.57	1524.39	194.45	1240.39	1435.44	216.465	1318.69	1154.96	200.423	1112.63	1346.29	209.239	1043.32	1156.32	128.886	1327.07	1225.15	379.036	1162.11	1374.35	466.794	1165.79	1135.8	476.29	1161.19	1060.19	476.465	1047.77	922.118	423.302	1022.7	850.007	493.474	1039.06	833.85	456.142	981.487	787.534
554	0	246.803	1088.25	1575.71	129.414	1084.12	1580.12	240.662	1253.87	1525.36	132.63	1247	1525.52	192.787	1230.55	1436.82	214.873	1308.94	1156.18	199.033	1102.79	1347.77	208.142	1033.52	1157.93	127.216	1316.93	1226.39	377.366	1152.47	1375.95	464.845	1156.9	1137.35	474.573	1153.96	1061.78	475.16	1042.36	922.166	422.539	1017.72	849.579	493.062	1034.63	834.076	455.733	978.008	786.52
555	0	244.609	1078.3	1577.04	127.201	1074.3	1581.14	239.085	1243.99	1526.91	131.168	1237.44	1526.72	191.09	1220.75	1438.17	213.457	1299.27	1157.4	197.782	1093	1349.21	206.925	1023.84	1159.48	125.567	1306.84	1227.65	375.841	1143.09	1377.46	462.982	1148.21	1138.79	472.92	1146.87	1063.3	474.35	1036.99	922.448	422.436	1013.26	849.3	492.269	1030.48	834.064	455.399	974.54	785.619
556	0	242.542	1068.35	1578.37	125.07	1064.72	1582.2	237.798	1234.22	1528.51	129.802	1228.11	1527.83	189.354	1211.06	1439.4	212.28	1290.02	1158.5	196.549	1083.34	1350.63	205.913	1014.38	1161.14	123.883	1296.91	1228.76	374.572	1134	1379.03	461.272	1139.76	1140.17	471.308	1139.89	1064.8	473.843	1031.66	922.78	421.678	1009.05	848.972	492.051	1026.27	834.368	455.072	971.253	784.743
557	0	240.535	1058.45	1579.68	123.005	1055.34	1583.11	236.383	1224.52	1529.81	128.669	1218.72	1528.99	188.037	1201.5	1440.52	211.019	1280.06	1159.56	195.485	1073.81	1351.98	205.135	1005	1162.64	122.29	1286.94	1229.88	373.349	1125.05	1380.45	459.95	1131.53	1141.54	469.852	1132.95	1066.11	473.285	1026.51	923.2	421.318	1004.64	848.928	491.781	1022.01	834.717	454.833	967.913	783.865
558	0	238.681	1048.53	1580.83	121.102	1045.88	1583.95	235.455	1214.58	1531.41	127.692	1209.34	1530.07	186.689	1192.05	1441.78	209.526	1271.57	1160.78	194.631	1064.32	1353.17	204.363	995.753	1163.85	120.622	1277.11	1230.84	372.298	1116.31	1381.75	458.78	1123.38	1142.9	468.683	1126.15	1067.41	472.842	1021.27	923.406	421.377	999.904	848.966	491.465	1017.83	834.928	454.766	964.7	782.991
559	0	236.925	1038.53	1582.07	119.27	1036.47	1584.83	234.776	1204.76	1532.86	126.659	1200.08	1531.32	185.237	1182.46	1443.02	208.073	1262.76	1162.42	193.721	1054.97	1354.25	203.84	986.652	1164.87	118.862	1267.4	1232.16	371.228	1107.69	1383.1	457.817	1115.65	1144.28	467.483	1119.32	1068.83	472.251	1015.99	923.759	420.761	995.532	848.739	491.455	1013.43	835.495	454.671	960.96	782.331
560	0	235.2	1028.64	1583.34	117.53	1027.14	1585.58	234.207	1195.06	1534.51	125.795	1190.75	1532.42	183.971	1173.02	1444.32	206.648	1254.44	1164.12	192.992	1045.68	1355.26	203.474	977.714	1165.87	117.436	1257.95	1233.61	370.386	1099.18	1384.47	456.943	1108.06	1145.6	466.818	1112.63	1070.39	471.883	1010.8	924.036	421.137	991.733	848.335	491.32	1008.96	836.016	454.635	957.903	781.544
561	0	233.685	1018.99	1584.39	115.851	1017.88	1586.16	233.296	1185.41	1535.84	125.135	1181.5	1533.45	182.786	1163.8	1445.51	205.42	1245.69	1165.5	192.534	1036.55	1356.1	203.359	968.857	1166.52	115.866	1248.49	1234.83	369.653	1090.96	1385.5	456.293	1100.65	1146.64	465.902	1106.06	1071.42	471.632	1005.51	924.149	421.071	987.264	848.135	491.177	1004.63	836.275	454.676	954.506	780.687
562	0	232.264	1009.21	1585.3	114.488	1008.62	1586.66	232.765	1175.63	1537.17	124.376	1172.34	1534.45	181.677	1154.38	1446.52	203.479	1236.4	1166.59	192.028	1027.48	1356.89	203.4	960.102	1167.11	114.243	1239.12	1236.05	369.022	1082.73	1386.46	455.71	1093.67	1147.59	465.274	1099.58	1072.42	471.492	1000.64	924.232	421.048	983.049	847.874	491.259	1000.26	836.515	454.704	951.043	779.984
563	0	231.063	999.636	1586.24	113.232	999.38	1587.17	232.426	1166.13	1538.41	123.837	1163.2	1535.42	180.77	1145.23	1447.66	201.808	1227.84	1167.72	191.868	1018.52	1357.76	203.688	951.636	1167.65	112.666	1229.96	1237.24	368.379	1074.73	1387.43	455.158	1087.02	1148.59	464.487	1093.3	1073.26	471.182	995.512	924.534	421.136	978.853	847.783	491.337	995.795	836.936	454.753	947.388	779.693
564	0	230.047	990.135	1587.09	112.054	990.227	1587.84	231.875	1156.66	1539.64	123.443	1154.2	1536.23	179.668	1136.03	1448.54	200.505	1219.31	1168.88	191.625	1009.53	1358.63	204.04	943.175	1168.31	111.236	1220.95	1238.44	367.979	1066.89	1388.4	454.639	1080.68	1149.36	463.86	1087.36	1074.11	471.085	990.634	924.819	420.864	974.276	847.956	491.541	991.648	837.217	455.15	943.762	779.472
565	0	229.145	980.666	1587.84	111.23	980.945	1588.41	231.283	1147.52	1540.81	122.866	1145.13	1537.2	178.961	1126.94	1449.62	198.654	1210.68	1170.03	191.606	1000.73	1359.38	204.487	934.752	1168.86	109.661	1212.01	1239.54	367.41	1058.98	1389.13	454.148	1074.6	1150.01	463.178	1081.5	1074.81	471.041	985.819	925.084	421.453	969.833	847.898	491.38	987.794	837.366	455.396	940.043	779.343
566	0	228.446	971.397	1588.68	110.498	971.644	1588.98	230.513	1138.29	1542.04	122.445	1135.88	1538.14	178.08	1117.81	1450.59	197.107	1201.82	1170.83	191.477	991.882	1360.11	205.016	926.406	1169.43	108.301	1202.94	1240.81	367.051	1051.22	1389.96	453.477	1068.91	1150.67	462.654	1075.84	1075.58	471.079	981.124	925.316	421.245	965.467	848.075	491.451	983.537	837.694	455.759	936.402	779.337
567	0	228.049	962.236	1589.44	110.165	962.201	1589.52	230.039	1129.37	1543.26	121.783	1126.73	1539.16	177.346	1108.88	1451.64	195.687	1193.78	1172.27	191.503	983.113	1360.94	205.557	918.085	1170.21	106.732	1193.97	1242	366.648	1043.48	1390.97	453.192	1063.5	1151.6	462.115	1070.32	1076.61	470.782	976.5	925.783	421.59	961.128	848.393	491.492	979.582	838.15	456.208	932.479	779.609
568	0	227.923	953.125	1590.3	110.031	952.827	1590.43	229.577	1120.19	1544.37	121.266	1117.37	1540.32	176.706	1099.8	1452.74	194.217	1185.5	1173.36	191.659	974.513	1361.8	206.198	909.899	1171.05	105.447	1185.1	1243.42	366.137	1035.92	1391.92	452.788	1058.14	1152.71	461.743	1065	1077.73	471.104	972.07	926.35	421.521	956.974	848.87	491.635	975.892	838.725	456.687	928.47	780.145
569	0	227.98	944.127	1591.02	110.291	943.341	1591.12	229.038	1111.31	1545.47	120.675	1108.05	1541.4	176.013	1090.93	1453.77	192.896	1176.94	1174.51	191.795	965.723	1362.59	206.802	901.592	1171.77	104.051	1176.15	1244.65	366.241	1028.1	1393.02	452.538	1053.13	1153.79	461.247	1059.62	1078.74	471.348	967.56	926.892	422.232	952.382	849.343	491.886	971.859	839.309	457.21	924.453	780.564
570	0	228.244	935.23	1591.66	110.55	933.88	1591.69	228.437	1102.64	1546.52	120.043	1098.6	1542.45	175.54	1081.95	1454.89	191.947	1168.64	1175.93	191.951	957.156	1363.26	207.232	893.465	1172.6	103.011	1167.4	1246.01	366.036	1020.42	1394.01	452.3	1048.04	1154.97	460.806	1054.38	1079.78	471.596	963.074	927.473	422.605	947.825	849.852	492.044	968.034	839.983	457.736	920.353	781.01
571	0	228.67	926.337	1592.31	111.039	924.456	1592.34	227.942	1093.73	1547.38	119.601	1089.16	1543.41	174.71	1073.19	1455.78	190.903	1160.46	1176.94	192.095	948.443	1363.93	207.587	885.335	1173.33	101.956	1158.38	1247.15	365.976	1012.78	1394.99	451.983	1042.99	1155.99	460.539	1049.29	1080.96	471.934	958.675	928.086	422.664	943.415	850.48	492.216	964.422	840.589	458.509	916.259	781.504
572	0	229.344	917.52	1592.76	111.725	914.764	1592.91	227.56	1085.12	1548.13	119.056	1079.77	1544.21	174.393	1064.39	1456.44	189.841	1151.74	1177.81	192.343	939.827	1364.46	208.014	877.266	1173.91	100.93	1149.49	1247.97	365.813	1005.07	1395.54	451.689	1037.94	1156.84	460.051	1044.25	1081.76	472.402	954.32	928.561	423.562	938.769	850.822	492.519	960.649	840.977	459.23	912.04	781.837
573	0	230.158	908.943	1593.1	112.691	905.248	1593.29	227.056	1076.62	1548.66	118.678	1070.35	1544.85	173.784	1055.54	1457.15	189.027	1143.44	1178.57	192.627	931.191	1364.78	208.371	869.161	1174.33	100	1140.47	1248.96	365.817	997.462	1395.98	451.485	1032.8	1157.5	459.633	1039.17	1082.28	472.795	949.7	928.868	424.12	933.881	851.211	492.69	956.722	841.138	460.185	907.912	782.015
574	0	231.06	900.349	1593.27	113.661	895.665	1593.71	226.118	1067.94	1549.08	118.162	1060.95	1545.51	173.429	1046.6	1457.56	188.021	1135.05	1178.92	192.942	922.582	1365.16	208.709	861.017	1174.74	99.1245	1131.59	1249.45	365.782	989.848	1396.28	451.362	1027.45	1157.98	459.145	1034.09	1082.8	473.468	945.352	929.065	424.486	928.703	851.692	493.015	952.817	841.293	460.983	903.616	782.285
575	0	232.249	891.799	1593.34	114.821	886.213	1594.13	225.948	1059.4	1549.2	117.867	1051.37	1545.84	173.387	1037.84	1457.78	186.972	1126.38	1179.22	193.338	913.986	1365.38	209.04	853.016	1174.89	98.2498	1122.64	1250.01	365.774	982.214	1396.35	451.119	1022.03	1158.26	458.635	1028.95	1082.95	474.167	940.896	929.133	425.241	923.607	851.926	493.405	948.974	841.296	461.975	899.37	782.311
576	0	233.359	883.302	1593.22	115.996	876.527	1594.27	225.548	1050.96	1549.42	117.455	1041.98	1546.24	173.144	1028.98	1458.07	185.909	1117.86	1179.66	193.656	905.373	1365.41	209.488	844.883	1174.75	97.578	1113.89	1250.45	365.911	974.611	1396.35	450.966	1016.26	1158.47	458.42	1023.71	1083.15	474.815	936.365	928.971	426.113	918.833	851.644	493.72	945.232	841.067	462.885	894.886	782.153
577	0	234.579	874.778	1593.01	117.305	866.898	1594.26	224.908	1042.47	1549.49	117.131	1032.29	1546.5	173.016	1020.02	1458.3	184.915	1108.22	1179.91	194.06	896.778	1365.29	209.743	836.519	1174.54	96.8075	1105.07	1250.98	365.986	966.78	1396.21	450.68	1010.37	1158.57	458.222	1018.28	1083.38	475.324	931.652	928.711	426.9	913.067	851.691	494.031	941.201	840.829	463.889	890.447	781.821
578	0	235.907	866.169	1592.88	118.707	857.279	1594.15	224.47	1033.86	1549.63	116.688	1022.64	1546.88	172.883	1011.13	1458.52	183.471	1099.02	1180.63	194.525	888.171	1365.12	210.221	828.31	1174.11	96.0982	1096.2	1251.42	366.291	959.029	1396.29	450.578	1004.31	1158.73	457.884	1012.65	1083.65	475.855	926.91	928.473	427.537	907.811	851.457	494.196	936.742	840.687	464.913	885.984	781.486
579	0	237.324	857.709	1592.53	120.192	847.677	1593.88	223.891	1025.19	1549.56	116.278	1013.12	1546.99	172.893	1002.26	1458.6	183.066	1090.7	1180.6	195.077	879.614	1364.8	210.93	820.633	1173.53	95.5869	1087.41	1251.66	366.471	951.105	1396.13	450.504	997.997	1158.76	457.687	1006.79	1083.69	476.389	922.152	928.094	428.009	902.986	850.866	494.52	932.614	840.313	465.994	881.507	781.049
580	0	238.549	849.144	1592.01	121.679	838.102	1593.44	223.426	1016.6	1549.39	116.058	1003.52	1546.93	172.945	993.343	1458.47	182.686	1082.81	1180.79	195.643	870.951	1364.32	211.539	812.303	1172.88	95.0795	1078.64	1251.9	366.624	943.276	1395.68	450.389	991.646	1158.49	457.515	1000.9	1083.47	476.883	917.31	927.458	428.99	898.242	849.959	494.638	928.427	839.698	467.022	876.954	780.382
581	0	239.913	840.392	1591.36	123.095	828.492	1593.03	223.428	1008	1549.15	116.346	993.959	1546.79	173.32	984.318	1458.2	182.059	1074.78	1181.06	196.224	862.353	1363.83	212.233	804.236	1172.19	94.6349	1069.93	1252	366.608	935.435	1395.12	450.144	985.053	1158.18	457.35	994.785	1083.11	477.294	912.295	926.765	429.659	892.749	849.394	494.406	924.213	838.806	467.958	872.315	779.726
582	0	241.23	831.748	1590.58	124.456	818.973	1592.52	223.334	999.249	1548.72	116.534	984.521	1546.47	173.24	975.489	1457.85	181.779	1066.11	1180.6	196.827	853.789	1363.22	212.888	796.127	1171.5	94.3717	1061.33	1251.81	367.145	927.246	1394.75	449.984	978.369	1157.72	457.331	988.739	1082.86	477.648	907.142	926.01	430.083	887.4	848.688	494.92	919.76	838.186	468.839	867.704	778.883
583	0	242.459	823.139	1589.62	125.86	809.437	1591.8	223.349	990.418	1548.08	116.706	974.998	1546.1	173.731	966.589	1457.24	181.731	1057.58	1180.04	197.401	845.145	1362.52	213.689	787.892	1170.7	94.1579	1052.77	1251.56	367.524	919.212	1393.97	449.899	971.523	1157.08	457.103	982.427	1082.29	477.962	901.91	925.042	430.487	882.158	847.693	495.072	915.238	837.251	469.51	863.019	777.837
584	0	243.634	814.422	1588.52	127.249	799.918	1590.99	223.39	981.564	1547.41	116.951	965.626	1545.59	174.228	957.711	1456.61	181.608	1049.36	1179.54	198.098	836.486	1361.69	214.563	779.748	1169.73	94.0582	1044.08	1251.17	368.06	911.054	1393.21	449.807	964.519	1156.29	456.872	975.897	1081.62	478.296	896.54	923.961	431.145	876.773	846.573	495.041	910.636	836.115	470.204	858.08	776.761
585	0	244.971	805.603	1587.57	128.657	790.435	1590.15	223.68	972.739	1546.75	117.469	956.104	1545.05	174.454	948.886	1455.94	181.525	1040.85	1179.14	198.908	827.76	1360.8	215.489	771.443	1168.77	94.1284	1035.4	1250.67	368.502	902.771	1392.35	449.962	957.432	1155.55	456.825	969.407	1080.96	478.591	890.867	922.918	431.67	871.369	845.534	495.17	905.673	834.998	470.78	853.138	775.611
586	0	246.379	796.715	1586.55	130.03	780.998	1589.24	224.191	963.848	1545.97	117.56	946.706	1544.5	174.825	939.967	1455.13	181.579	1032.21	1178.5	199.712	819.068	1359.91	216.307	763.124	1167.87	94.3009	1026.7	1250.11	368.794	894.519	1391.35	450.147	950.362	1154.83	456.904	962.806	1080.31	479.022	885.197	921.812	432.201	865.915	844.468	495.47	900.609	834.003	471.333	848.431	774.304
587	0	247.584	787.707	1585.26	131.348	771.653	1588.07	224.977	954.874	1545.17	118.942	937.489	1543.6	175.489	930.839	1454.38	181.795	1023.63	1177.89	200.569	810.312	1358.86	217.215	754.727	1166.92	94.6788	1017.94	1249.48	369.494	886.059	1390.4	450.458	943.155	1153.98	456.892	955.924	1079.43	479.34	879.284	920.63	432.831	860.516	843.053	495.752	895.297	832.79	471.817	843.408	772.915
588	0	248.835	778.625	1583.94	132.644	762.178	1586.83	225.743	945.828	1544.3	119.853	928.051	1542.83	176.208	921.693	1453.48	182.323	1014.9	1177.23	201.492	801.487	1357.65	218.208	746.144	1165.63	95.1956	1009.16	1248.77	370.595	877.49	1389.54	450.808	935.745	1152.97	457.182	948.915	1078.61	479.55	873.385	919.163	433.18	854.099	841.846	496.423	889.744	831.636	472.091	838.272	771.201
589	0	249.929	769.507	1582.52	133.871	752.824	1585.43	226.694	936.708	1543.36	120.388	918.788	1541.98	177.017	912.55	1452.41	182.88	1006.09	1176.45	202.381	792.591	1356.42	219.032	737.505	1164.33	95.7311	1000.44	1247.98	371.105	868.838	1388.35	451.218	928.307	1152.02	457.655	941.916	1077.84	480.065	867.257	917.811	433.318	849.024	839.922	496.543	884.276	830.375	472.272	832.835	769.556
590	0	251.179	760.175	1581.03	135.116	743.441	1584.04	227.789	927.507	1542.25	121.272	909.3	1540.79	177.705	903.482	1451.25	183.439	997.357	1175.42	203.332	783.661	1355.08	220.036	728.885	1163.13	96.418	991.646	1247.04	372.594	860.144	1387.34	451.87	920.775	1151.03	458.276	934.789	1076.86	480.609	860.952	916.368	433.709	843.064	838.351	497.005	878.478	828.99	472.846	827.692	767.792
591	0	252.48	750.812	1579.39	136.488	734.047	1582.45	228.975	918.171	1540.97	122.781	899.98	1539.67	178.808	894.322	1450.1	184.429	988.611	1174.28	204.434	774.67	1353.63	221.114	720.018	1161.64	97.3189	982.828	1245.97	373.515	851.23	1385.83	452.52	913.061	1149.74	458.438	927.243	1075.4	481.188	854.498	914.651	434.314	836.788	836.725	497.889	872.425	827.471	473.213	822.157	765.819
592	0	253.788	741.401	1577.59	137.739	724.671	1580.66	230.387	908.809	1539.72	123.985	890.802	1538.48	180.014	885.122	1448.81	185.315	979.816	1173.1	205.574	765.712	1352.08	222.055	711.055	1160.12	98.5374	973.898	1244.75	374.656	842.293	1384.31	453.293	905.189	1148.38	458.93	919.713	1074.04	481.825	847.878	912.952	434.925	830.506	834.891	498.024	866.234	825.701	473.667	816.468	763.866
593	0	255.169	731.829	1575.82	139.007	715.311	1578.96	232.044	899.381	1538.55	125.715	881.688	1537.33	181.311	875.961	1447.39	186.433	970.868	1171.79	206.664	756.572	1350.57	223.124	702.106	1158.64	99.0555	965.113	1243.52	375.39	833.191	1382.7	454.116	897.162	1147.06	460.016	912.159	1072.88	482.488	840.993	911.272	435.497	824.3	833.174	499.239	860.049	824.349	474.054	810.614	761.834
594	0	256.432	722.144	1573.93	140.219	706.015	1577.05	233.872	889.88	1537.22	127.516	872.583	1535.98	182.473	866.812	1445.77	187.631	961.844	1170.23	207.859	747.425	1348.94	224.197	693.047	1157	100.342	956.135	1242.05	376.714	823.996	1381.24	455.147	888.985	1145.62	460.724	904.168	1071.46	483.213	833.919	909.442	436.172	817.644	831.286	499.928	853.451	822.639	474.634	804.488	759.818
595	0	257.702	712.363	1571.76	141.601	696.656	1575.02	235.773	880.393	1535.73	129.421	863.428	1534.52	183.916	857.534	1444.14	188.993	952.731	1168.65	209.172	738.252	1347.12	225.268	683.83	1155.29	101.792	947.139	1240.54	377.983	814.731	1379.46	456.084	880.673	1143.9	461.539	896.18	1069.79	484.107	826.974	907.294	437.069	810.538	829.46	500.663	846.721	820.664	475.164	798.033	757.611
596	0	259.264	702.574	1569.77	142.925	687.317	1573.04	237.962	870.741	1534.25	131.479	854.358	1533.07	185.366	848.3	1442.58	190.548	943.586	1167.06	210.518	729.026	1345.35	226.537	674.613	1153.65	103.262	938.274	1239.09	379.503	805.532	1377.65	457.26	872.242	1142.32	462.588	888.097	1068.23	485.032	819.461	905.438	438.115	803.176	827.736	501.478	839.646	818.821	475.875	791.572	755.62
597	0	260.723	692.634	1567.68	144.278	678.009	1571.07	240.221	861.012	1532.65	133.871	845.203	1531.63	187.002	839.039	1440.96	192.007	934.424	1165.35	211.979	719.761	1343.64	227.772	665.308	1152.03	104.873	929.247	1237.43	381.371	796.12	1376.06	458.555	863.625	1140.73	463.586	879.748	1066.6	486.031	811.753	903.595	439.234	795.935	826.061	502.597	832.674	817.027	476.486	785.173	753.416
598	0	262.174	682.537	1565.63	145.683	668.771	1569.09	242.815	851.331	1531.21	136.13	836.191	1530.36	188.792	829.742	1439.23	193.644	925.055	1163.67	213.489	710.361	1341.92	229.071	655.834	1150.41	106.569	920.154	1235.9	382.702	786.743	1374.22	459.969	854.708	1139.09	464.865	871.289	1064.96	487.076	803.801	901.718	440.415	788.254	824.183	503.605	825.091	815.239	477.391	778.2	751.349
599	0	263.611	672.36	1563.65	147.061	659.495	1567.1	245.775	841.427	1530	139.098	827.088	1528.99	190.723	820.426	1437.61	195.504	915.519	1162.02	215.14	700.96	1340.19	230.459	646.318	1148.57	108.574	910.882	1234.28	384.872	777.021	1372.62	461.473	845.714	1137.43	466.247	862.605	1063.37	488.341	796.023	899.861	441.705	780.684	822.206	504.668	817.713	813.345	478.282	771.065	749.224
600	0	265.263	662.08	1561.89	148.433	650.347	1565.27	248.811	831.476	1528.89	141.853	818.15	1527.71	192.688	811.134	1436.22	197.523	905.926	1160.61	216.874	691.511	1338.61	231.754	636.768	1147.07	110.573	901.602	1232.78	386.808	767.352	1371.14	463.082	836.496	1135.88	467.726	853.828	1061.97	489.734	787.982	898.156	442.024	775.427	819.138	506.237	809.717	811.824	479.412	763.659	747.248
601	0	266.742	651.771	1560.2	149.832	641.216	1563.58	252.043	821.618	1527.71	144.736	809.167	1526.47	194.807	801.919	1434.89	199.633	896.354	1159.06	218.769	682.088	1337.1	233.247	627.168	1145.55	112.592	892.306	1231.33	388.575	757.664	1369.42	464.71	827.129	1134.33	469.386	844.915	1060.52	491.038	779.698	896.33	442.943	767.889	817.192	507.732	801.82	810.184	480.567	755.956	745.325
602	0	268.374	641.285	1558.49	151.161	632.136	1562.01	255.839	811.569	1526.44	148.298	800.321	1525.33	197.226	792.593	1433.4	201.657	886.727	1157.56	220.808	672.481	1335.69	234.826	617.479	1144.05	114.909	882.704	1229.83	391.044	747.795	1367.89	466.5	817.614	1132.54	470.983	835.735	1058.84	492.556	771.294	894.418	444.813	759.299	815.43	509.271	793.599	808.376	482.107	748.089	743.409
603	0	270.049	630.815	1557.02	152.576	623.091	1560.54	259.602	801.162	1525.31	152.036	791.45	1524.16	199.801	783.065	1432.03	203.967	876.989	1156.09	222.982	662.838	1334.49	236.388	607.668	1142.81	117.177	873.046	1228.55	393.371	738.041	1366.21	468.425	808.027	1130.85	472.686	826.386	1057.18	494.261	762.559	892.596	446.153	751.189	813.486	510.846	785.121	806.494	483.7	739.832	741.526
604	0	271.668	620.221	1555.9	154.049	614.262	1559.41	264.018	790.764	1524.43	156.274	782.537	1523.25	202.491	773.519	1430.89	206.352	866.867	1154.81	225.228	653.161	1333.47	238.282	597.799	1141.75	119.628	863.294	1227.39	395.728	728.223	1364.88	470.52	798.203	1129.46	474.697	816.894	1055.81	496.097	753.592	891.062	448.301	742.273	812.086	512.659	776.535	804.987	485.568	731.31	739.963
605	0	273.424	609.472	1554.84	155.619	605.432	1558.31	268.175	780.33	1523.57	160.088	773.624	1522.46	205.162	763.992	1429.93	208.603	856.751	1153.67	227.6	643.406	1332.58	240.302	587.645	1140.88	122.037	853.419	1226.29	398.034	718.396	1363.51	472.663	788.26	1127.98	476.624	807.009	1054.48	497.978	744.287	889.517	449.992	733.442	810.376	514.662	767.682	803.579	487.424	722.461	738.237
606	0	275.26	598.925	1553.77	157.302	596.52	1557.32	272.445	769.838	1522.71	164.232	764.769	1521.72	207.751	754.294	1429.05	211.289	846.225	1152.31	230.201	633.57	1331.74	242.456	577.211	1140.11	124.702	843.36	1225.11	401.025	708.504	1362.43	474.884	778.2	1126.49	478.782	797.018	1053.13	499.893	734.835	887.841	451.65	724.437	808.601	516.562	758.458	802.117	489.029	714.002	736.291
607	0	276.952	588.362	1553.02	159.006	587.64	1556.72	276.757	759.394	1521.99	168.423	755.679	1521.07	210.89	744.861	1428.21	213.731	835.714	1151.09	232.883	623.567	1331.21	244.798	566.617	1139.7	127.373	833.263	1224.06	403.817	698.575	1361.36	477.219	768.077	1125.15	480.928	786.876	1051.78	502.073	725.139	886.436	454.131	714.803	807.115	518.559	749.046	800.671	491.062	704.838	734.748
608	0	279.174	577.771	1552.91	161.039	578.797	1556.55	281.084	748.777	1521.57	172.694	746.671	1520.59	214.243	735.355	1427.48	216.138	825.028	1150.03	235.649	613.618	1330.97	247.142	555.932	1139.72	130.073	823.086	1223.2	406.419	688.638	1360.34	479.764	757.894	1123.98	482.966	776.39	1050.46	504.271	715.235	885.122	456.272	705.146	805.93	520.766	739.452	799.468	493.345	695.46	733.392
609	0	281.384	567.323	1553.03	163.183	569.845	1556.77	285.365	738.018	1521.3	176.96	737.477	1520.56	217.458	725.612	1427.06	218.609	814.296	1149.41	238.507	603.582	1330.99	249.631	544.976	1139.87	132.941	812.693	1222.74	409.801	678.476	1359.77	482.207	747.489	1122.97	485.114	765.672	1049.34	506.578	705.206	883.879	458.677	695.357	804.787	523.074	729.538	798.376	495.673	685.754	732.352
610	0	283.477	556.899	1553.23	165.52	560.81	1557.28	289.612	727.409	1521.28	181.209	728.116	1520.74	220.628	715.683	1426.99	221.362	803.448	1149	241.315	593.32	1331.32	252.033	533.829	1140.25	135.663	802.354	1222.66	412.449	668.211	1359.07	484.762	736.864	1122.14	487.519	754.744	1048.47	508.926	694.758	882.868	460.937	685.132	803.608	525.183	719.825	797.332	498.106	675.666	731.256
611	0	285.894	546.607	1553.76	168.205	551.843	1558.07	293.668	716.998	1521.51	185.406	718.774	1521.23	223.774	705.77	1427.38	223.957	792.476	1148.77	244.176	583.102	1331.98	254.285	522.554	1141.03	138.527	791.768	1222.53	415.421	657.848	1358.83	487.457	726.053	1121.7	489.691	743.462	1047.8	511.344	684.122	882.099	463.195	674.986	802.721	527.751	709.279	796.665	500.561	665.53	730.448
612	0	288.73	536.382	1554.96	171.034	542.61	1559.29	297.735	706.711	1522.13	189.455	709.219	1521.97	227.203	695.793	1427.78	226.684	781.514	1149.04	247.067	572.915	1332.87	256.536	511.321	1142.08	141.435	781.318	1223.25	418.807	647.325	1359.14	490.066	715.054	1121.49	491.499	731.731	1047.22	513.782	673.163	881.717	465.653	664.254	802.428	530.338	698.609	796.542	503.054	654.943	730.124
613	0	291.686	526.226	1556.34	174.168	533.114	1560.84	301.681	696.311	1523	193.212	699.522	1523.01	230.758	685.734	1428.82	229.214	770.646	1149.63	249.935	562.533	1334.05	258.808	500.115	1143.23	144.45	770.715	1224.06	421.909	636.675	1359.49	492.515	703.704	1121.4	493.87	719.999	1047.16	516.218	662.05	881.524	468.368	653.296	802.197	532.597	687.733	796.296	505.78	644.189	729.873
614	0	294.789	516.102	1557.89	177.402	523.376	1562.65	305.095	686.242	1524.1	197.022	689.627	1524.36	234.04	675.549	1430.12	232.173	759.831	1150.81	252.851	552.219	1335.51	261.015	488.947	1144.65	147.223	760.307	1225.43	424.818	626.067	1359.94	495.085	692	1121.55	496.234	708.026	1047.44	518.806	650.389	881.75	471.049	642.098	802.181	535.263	676.277	796.563	508.54	633.201	729.993
615	0	298.058	506.192	1559.8	180.601	513.675	1564.9	308.888	675.978	1525.45	200.473	679.776	1526.03	237.362	665.414	1431.7	234.605	749.533	1152.58	255.631	541.948	1337.22	263.138	478.258	1146.49	150.02	749.872	1227.15	427.929	615.352	1361.04	497.472	680.007	1122.2	498.71	696.024	1048.22	521.378	638.533	882.567	473.561	630.705	802.711	538.213	664.746	797.554	511.433	621.906	730.547
616	0	301.52	496.323	1561.65	184.059	503.923	1567.03	312.407	666.009	1526.96	203.892	669.92	1527.7	240.722	655.187	1433.4	237.225	739.166	1154.06	258.368	531.787	1339.09	264.982	467.413	1148.43	152.714	739.708	1229.11	430.858	604.811	1362.24	499.976	667.761	1122.93	501.069	683.715	1048.99	524.017	626.416	883.423	476.547	618.581	803.515	541.11	652.729	798.433	514.283	610.272	731.156
617	0	304.981	486.531	1563.47	187.636	493.988	1569.04	315.717	656.141	1528.4	207.176	660.006	1529.51	243.862	645.084	1435.29	239.88	728.844	1155.79	261.031	521.61	1340.89	266.863	456.944	1150.38	155.599	729.578	1231.18	433.365	594.281	1363.12	502.329	655.504	1123.47	503.203	671.304	1049.69	526.548	614.027	884.355	479.048	606.613	804.118	544.302	640.239	799.548	517.27	598.26	731.889
618	0	308.457	476.856	1565.25	191.046	484.015	1571.32	318.694	646.479	1529.94	210.205	649.997	1531.5	246.883	635.035	1437.1	242.453	718.507	1157.53	263.594	511.539	1342.84	268.522	446.757	1152.33	158.171	719.615	1233.47	436.384	583.718	1364.46	504.505	643.072	1124.16	505.542	658.853	1050.61	529.106	601.332	885.451	482.012	593.927	805.041	547.189	627.495	800.693	520.219	585.998	732.885
619	0	312.057	467.242	1567.02	194.749	474.026	1573.51	321.668	636.826	1531.61	213.146	640.155	1533.47	249.873	625.211	1438.94	244.856	708.221	1159.43	266.077	501.642	1344.8	270.003	436.615	1154.65	160.734	709.912	1235.52	438.749	573.349	1365.73	506.734	630.546	1125.09	507.95	646.378	1051.69	531.842	588.499	886.878	485.036	580.937	806.4	550.235	614.361	802.187	523.252	573.362	733.974
620	0	315.76	457.851	1568.56	198.523	464.116	1575.7	324.38	627.393	1533.14	215.748	630.273	1535.57	253.02	615.587	1440.49	247.4	698.208	1161.09	268.327	491.867	1346.76	271.422	426.426	1156.79	163.43	700.235	1237.48	441.269	562.942	1366.95	509.167	618.16	1126.01	510.216	633.703	1052.57	534.58	575.318	888.26	487.87	567.857	807.57	553.085	601.018	803.512	526.419	560.143	735.187
621	0	319.434	448.585	1569.9	202.078	453.992	1577.74	326.775	618.121	1534.53	218.137	620.292	1537.61	255.949	606.006	1442.27	249.885	688.251	1162.74	270.447	482.099	1348.42	272.925	417.046	1158.42	166.139	690.739	1239.08	444.009	552.467	1368.33	511.457	605.718	1126.88	512.693	621.176	1053.54	537.286	561.831	889.577	490.914	554.14	808.788	556.397	587.251	804.798	529.629	546.679	736.28
622	0	323	439.294	1571.25	205.644	443.796	1579.67	328.904	609.089	1536.08	220.296	610.349	1539.77	258.665	596.519	1443.68	252.302	678.48	1164.07	272.338	472.531	1350	274.235	407.373	1160.21	168.61	681.447	1240.77	446.275	542.076	1369.52	513.678	593.32	1127.74	514.736	608.322	1054.39	539.847	548.342	890.888	493.596	540.56	809.867	559.483	573.177	806.209	532.63	532.755	737.52
623	0	326.551	430.277	1572.41	209.256	433.903	1581.38	331.16	600.068	1537.52	222.245	600.424	1541.58	261.108	587.067	1445.1	254.484	668.654	1165.68	274.092	462.96	1351.48	275.187	397.48	1161.83	171.243	672.353	1242.14	448.487	531.742	1370.62	516.06	581.056	1128.53	517.552	595.815	1055.28	542.475	534.773	892.071	496.303	526.572	811.014	562.494	558.887	807.518	535.73	518.468	738.654
624	0	330.078	421.426	1573.36	212.889	423.652	1583.06	332.584	591.198	1538.71	224.006	590.563	1543.31	263.445	577.61	1446.45	257.111	659.221	1166.71	275.799	453.549	1352.73	276.213	387.974	1163.06	173.755	663.262	1243.63	450.504	521.349	1371.43	518.418	568.781	1129.14	519.837	583.112	1055.85	545.014	520.85	893.171	499.892	511.35	812.488	565.199	544.397	808.56	538.659	503.686	739.78
625	0	333.339	412.664	1574.2	216.286	413.502	1584.58	333.839	582.399	1539.77	225.594	580.563	1545.03	265.902	568.31	1447.4	259.699	649.752	1167.65	277.366	444.154	1353.92	277.147	378.967	1163.98	176.357	654.452	1244.79	452.093	511.095	1371.97	520.657	556.617	1129.7	522.225	570.304	1056.16	547.596	506.607	894.295	502.157	497.326	813.194	568.302	529.526	809.483	541.738	488.659	740.987
626	0	336.988	403.88	1575.09	219.778	403.36	1586.03	335.508	573.578	1540.93	226.914	570.656	1546.62	268.232	559.077	1448.68	262.271	640.555	1168.91	278.877	434.928	1355.09	277.905	369.184	1165.25	179.078	645.727	1245.81	454.263	500.75	1372.84	523.021	544.529	1130.41	524.779	557.562	1056.71	550.113	492.184	895.496	504.82	483.031	814.379	571.229	514.667	810.646	544.605	473.222	742.489
627	0	340.122	394.995	1576.02	222.956	393.367	1587.49	336.534	564.752	1541.92	228.083	560.725	1548.06	270.308	549.885	1449.68	264.821	631.65	1169.85	280.21	425.72	1356.15	278.734	360.159	1165.97	181.558	636.979	1247.16	455.801	490.447	1373.56	525.337	532.599	1131.07	527.261	544.679	1057.24	552.443	478.128	896.586	507.015	468.382	815.514	573.954	499.417	811.743	547.338	457.498	744.046
628	0	342.919	386.263	1576.73	226.086	383.322	1588.63	337.346	556.07	1542.9	229.128	550.837	1549.53	272.333	540.549	1450.72	267.241	622.663	1170.72	281.468	416.535	1357.05	279.405	351.071	1166.55	184.183	628.477	1248.09	457.42	480.161	1374.19	527.498	520.494	1131.66	529.705	531.808	1057.67	554.618	463.552	897.724	509.493	453.556	816.628	576.497	484.145	812.66	549.894	441.365	745.473
629	0	345.961	377.488	1577.46	228.934	373.09	1589.84	338.129	547.173	1543.86	230.102	540.873	1550.83	274.135	531.232	1451.76	269.938	613.933	1172.23	282.815	407.41	1357.92	280.231	342.312	1166.98	186.792	619.929	1249.22	459.046	469.963	1374.97	529.669	508.424	1132.48	532.302	518.934	1058.46	556.782	448.956	899.013	511.596	438.611	817.918	578.307	468.211	813.678	552.214	425.326	747.121
630	0	348.53	368.68	1578.23	231.636	363.268	1590.92	338.657	538.313	1544.8	231.078	530.944	1552.18	276.089	522.118	1453.08	272.449	605.186	1173.49	284.078	398.357	1358.87	281.007	333.424	1167.59	189.24	611.41	1250.38	460.478	459.761	1375.87	531.908	496.378	1133.41	534.845	505.954	1059.36	558.818	434.273	900.604	513.484	423.634	819.391	580.956	452.429	815.254	554.428	408.963	749.126
631	0	351.042	359.966	1578.85	234.323	353.526	1591.97	339.903	529.63	1545.74	232.444	521.272	1553.46	278.115	512.983	1453.82	274.88	596.431	1174.45	285.331	389.311	1359.73	281.898	324.608	1168.25	191.794	603.032	1251.34	461.807	449.787	1376.75	534.071	484.359	1134.45	537.331	493.085	1060.28	560.765	419.619	902.18	515.875	408.338	821.14	583.198	436.692	816.744	556.516	392.382	751.252
632	0	353.349	351.143	1579.48	236.819	343.742	1592.71	340.923	520.906	1546.64	233.434	511.612	1554.61	280.01	503.87	1454.94	277.405	587.83	1176.02	286.636	380.255	1360.46	282.93	315.959	1168.78	194.035	594.578	1252.6	463.543	439.734	1377.67	536.113	472.266	1135.5	539.971	480.203	1061.39	562.602	404.611	903.938	517.688	392.855	823	585.239	420.61	818.307	558.383	375.719	753.498
633	0	355.408	342.293	1580.03	238.867	334.009	1593.58	341.733	511.944	1547.57	234.452	501.965	1555.73	281.685	494.747	1455.94	279.609	579.066	1176.9	287.889	371.36	1361.27	283.903	307.41	1169.56	196.454	586.18	1253.47	465.027	429.819	1378.73	538.145	460.284	1136.59	542.335	467.525	1062.48	564.243	389.979	905.841	519.151	377.809	824.946	587.215	404.655	820.119	560.057	358.97	755.869
634	0	357.231	333.445	1580.5	240.851	324.593	1594.26	342.983	503.173	1548.35	235.626	492.603	1556.57	283.428	485.806	1456.8	281.841	570.522	1177.7	289.135	362.408	1362.04	285.11	299.037	1170.37	198.679	577.706	1254.48	466.64	420.074	1379.77	540.11	448.41	1137.67	544.607	454.992	1063.44	565.685	375.292	907.795	520.589	362.36	827.147	589.073	388.63	821.986	561.605	342.123	758.417
635	0	358.969	324.458	1580.89	242.656	315.335	1594.67	344.047	494.272	1549.01	236.786	483.334	1557.41	285.253	476.957	1457.3	284.087	562.042	1178.35	290.442	353.608	1362.68	286.384	290.63	1171.06	200.776	569.268	1255.1	467.87	410.669	1380.45	542.034	436.556	1138.51	546.916	442.547	1064.3	567.377	360.467	909.781	521.899	346.853	829.179	590.715	372.574	823.68	563.152	325.292	760.971
636	0	360.553	315.47	1581.19	244.325	306.155	1594.97	345.466	485.451	1549.74	238.167	474.174	1558.16	286.943	468.148	1457.8	285.927	553.234	1179	291.842	344.775	1363.23	287.721	282.323	1171.63	202.946	560.901	1255.87	469.519	401.118	1381.16	543.969	424.934	1139.36	549.069	430.193	1065.04	568.9	345.747	911.639	523.575	331.307	831.338	592.231	356.445	825.323	564.431	308.351	763.464
637	0	361.91	306.412	1581.47	245.548	296.92	1595.32	346.525	476.263	1550.33	239.583	465.204	1558.7	288.507	459.307	1458.31	287.855	544.787	1179.34	293.208	335.995	1363.73	289.048	274.063	1172.21	204.688	552.368	1256.22	471.014	391.821	1381.78	545.863	413.32	1140.18	551.367	418.045	1065.78	570.433	331.119	913.629	525.179	315.488	833.801	593.718	340.335	827.069	565.547	291.42	766.02
638	0	363.136	297.314	1581.69	246.772	287.998	1595.53	348.094	467.301	1550.95	240.827	456.419	1559.22	290.226	450.659	1458.73	289.824	536.248	1179.74	294.51	327.371	1364.12	290.357	265.801	1172.65	206.715	543.979	1256.62	472.585	382.637	1382.39	547.788	401.94	1140.95	553.517	405.936	1066.38	571.982	316.602	915.626	526.303	299.803	836.01	595.177	324.286	828.861	566.754	274.453	768.705
639	0	364.247	288.057	1581.78	247.859	279.211	1595.41	350.019	458.395	1551.4	242.634	447.573	1559.59	291.833	441.992	1458.88	291.56	527.578	1179.76	295.876	318.627	1364.24	291.624	257.392	1172.74	208.469	535.421	1256.78	473.845	373.601	1382.59	549.779	390.569	1141.49	555.663	393.894	1066.87	573.335	302.02	917.267	527.478	283.98	838.087	596.417	308.144	830.45	567.581	257.585	771.064
640	0	365.065	278.734	1581.72	248.724	270.453	1595.22	351.636	449.114	1551.79	244.322	439.005	1559.88	293.257	433.137	1458.96	293.075	519.322	1179.94	297.261	309.88	1364.18	293.045	248.974	1172.66	210.022	526.897	1256.91	475.401	364.462	1382.76	551.675	379.354	1141.85	557.753	381.882	1067.24	574.687	287.569	918.8	528.726	268.37	840.061	597.451	292.074	831.934	568.323	240.644	773.37
641	0	365.989	269.475	1581.72	249.45	262.004	1595.04	353.895	440.248	1552.12	246.166	430.546	1559.92	294.75	424.412	1458.96	294.727	510.803	1180.4	298.599	301.149	1364.17	294.385	240.401	1172.58	211.569	518.492	1256.97	476.876	355.514	1382.84	553.532	368.273	1142.19	559.818	370.133	1067.46	576.022	273.253	920.395	529.689	252.809	842.23	598.492	276.305	833.432	569.145	223.766	775.909
642	0	366.717	260.129	1581.49	250.032	253.628	1594.74	355.641	430.738	1552.05	247.892	422.171	1559.8	296.277	415.706	1458.76	296.151	502.461	1180.21	299.93	292.442	1363.93	295.858	231.837	1172.26	213.12	510.008	1256.9	478.279	346.613	1382.57	555.438	357.405	1142.2	561.72	358.38	1067.32	577.26	259.083	921.747	530.252	237.443	844.215	599.401	260.689	834.66	569.741	207.112	778.389
643	0	367.142	250.743	1581.05	250.571	245.276	1594.26	358.272	421.755	1551.73	249.99	413.775	1559.39	297.671	406.781	1458.45	297.625	494.343	1179.84	301.249	283.767	1363.47	297.262	223.203	1171.65	214.366	501.369	1256.78	479.624	337.764	1381.96	557.266	346.596	1141.93	563.442	346.654	1066.82	578.413	245.069	922.832	530.971	222.115	845.876	600.021	245.194	835.579	570.189	190.601	780.669
644	0	367.629	241.3	1580.61	250.879	236.822	1593.73	360.341	412.337	1551.35	251.938	405.363	1559	298.971	397.864	1458.13	298.697	485.984	1179.49	302.513	274.97	1362.97	298.594	214.63	1170.96	215.588	492.849	1256.6	480.908	328.918	1381.34	558.873	335.921	1141.76	565.155	335.104	1066.5	579.382	231.26	923.972	531.92	207.182	847.51	600.689	229.942	836.577	570.667	174.136	783.008
645	0	368.014	231.847	1580.19	251.216	228.579	1593.21	362.508	402.983	1550.89	254.016	397.048	1558.36	300.389	388.976	1457.61	300.022	477.69	1179.2	303.506	266.321	1362.31	299.851	206.05	1170.27	216.84	484.263	1256.22	482.192	320.086	1380.74	560.48	325.41	1141.45	566.848	323.681	1066.19	580.261	217.66	925.077	532.561	192.064	849.409	601.112	214.885	837.527	570.965	157.865	785.334
646	0	368.271	222.303	1579.59	251.562	220.378	1592.44	364.383	393.459	1550.32	255.961	388.612	1557.63	301.743	379.92	1456.98	301.507	469.423	1179.12	304.806	257.372	1361.54	301.069	197.508	1169.36	218.008	475.507	1255.81	483.168	311.338	1379.89	561.946	314.924	1141.03	568.417	312.273	1065.76	581.068	204.056	926.019	532.731	177.261	851.087	601.36	200.038	838.481	571.232	141.839	787.584
647	0	368.283	212.709	1578.92	251.823	212.009	1591.67	366.428	383.652	1549.55	257.636	380.304	1556.86	302.823	370.888	1456.45	302.341	460.781	1178.73	305.97	248.553	1360.65	302.168	188.959	1168.23	218.836	466.692	1255.51	484.248	302.498	1378.92	563.326	304.47	1140.4	569.791	300.931	1065.08	581.774	190.657	926.858	533.478	162.565	852.7	601.539	185.346	839.149	571.366	125.979	789.797
648	0	368.564	203.182	1578.19	252.004	203.49	1590.95	368.445	374.437	1548.67	259.459	371.62	1555.97	303.961	361.763	1455.78	303.207	452.323	1178.46	307.133	239.492	1359.85	303.3	180.423	1167.24	219.885	457.835	1255.02	485.601	293.545	1377.96	564.713	294.298	1139.84	571.083	289.762	1064.38	582.44	177.624	927.746	533.564	148.346	854.302	601.739	170.944	839.92	571.593	110.527	792.093
649	0	368.871	193.693	1577.47	252.316	194.993	1590.17	370.084	364.501	1547.72	261.431	363.051	1554.97	305.065	352.638	1455.03	304.256	443.869	1177.8	308.204	230.477	1358.96	304.19	171.836	1166.33	220.849	449.023	1254.55	486.755	284.663	1377.13	565.885	284.253	1139.21	572.583	278.734	1063.88	582.974	164.52	928.607	533.96	134.109	855.994	601.848	156.773	840.813	571.543	95.3749	794.273
650	0	369.192	184.216	1576.61	252.717	186.311	1589.25	371.694	354.908	1546.65	262.997	354.232	1553.96	306.207	343.529	1454.25	305.106	435.26	1177.1	309.197	221.389	1357.92	305.153	163.177	1165.21	221.705	440.071	1253.92	487.766	275.701	1376.06	567.041	274.285	1138.41	573.74	267.71	1063.1	583.357	151.802	929.222	533.853	120.177	857.393	601.791	142.733	841.324	571.395	80.4627	796.237
651	0	369.596	174.78	1575.64	253.105	177.437	1588.15	373.009	345.359	1545.48	264.34	345.07	1552.75	307.14	334.263	1453.34	305.681	426.413	1176.37	310.196	212.214	1356.75	305.975	154.419	1164	222.481	431.007	1253.17	488.703	266.706	1374.92	567.982	264.429	1137.48	574.901	256.786	1062.37	583.868	138.989	929.823	534.064	106.234	858.792	601.517	128.935	841.909	570.959	65.6813	797.904
652	0	370.034	165.397	1574.69	253.453	168.396	1587.16	373.904	335.815	1544.27	265.49	336.047	1551.42	307.863	324.963	1452.38	306.367	417.706	1175.65	311.042	203.115	1355.76	306.855	145.625	1162.96	223.082	421.797	1252.37	489.81	257.624	1374.01	568.896	254.736	1136.53	576.078	245.967	1061.62	583.998	126.53	930.296	533.642	93.0077	859.945	601.315	115.336	842.365	570.622	51.4506	799.664
653	0	370.629	156.028	1573.61	254.022	159.371	1586.05	375.054	326.393	1542.96	266.407	326.958	1549.94	308.695	315.666	1451.27	307.045	408.985	1174.76	311.84	193.852	1354.58	307.772	136.686	1161.8	223.706	412.462	1251.37	490.696	248.624	1372.73	569.834	245.148	1135.46	576.978	235.094	1060.65	584.225	114.083	930.639	533.566	79.7683	861.012	601.065	101.961	842.775	570.288	37.3929	801.242
654	0	371.256	146.619	1572.42	254.795	150.097	1584.79	375.658	316.976	1541.4	267.212	317.806	1548.55	309.532	306.321	1450.15	307.621	400.035	1173.56	312.776	184.531	1353.32	308.646	127.676	1160.54	224.203	403.085	1250.37	491.506	239.592	1371.39	570.759	235.708	1134.29	577.792	224.352	1059.47	584.377	101.993	930.802	533.274	66.949	861.915	600.88	88.6834	842.878	569.881	23.7168	802.493
655	0	371.903	137.295	1571.2	255.372	140.775	1583.48	376.344	307.648	1540.06	267.75	308.298	1547.14	310.203	296.907	1449.03	308.199	390.946	1172.43	313.602	175.168	1352.09	309.508	118.623	1159.36	224.698	393.615	1249.36	492.19	230.525	1370.12	571.487	226.323	1133.13	578.719	213.733	1058.47	584.435	89.8023	931.004	533.36	54.1183	862.603	600.534	75.7	843.104	569.226	10.2877	803.718
656	0	372.402	127.933	1569.85	255.943	131.258	1582.03	376.596	298.121	1538.71	268.087	298.77	1545.56	310.803	287.511	1447.72	308.344	381.644	1171.2	314.249	165.802	1350.79	310.248	109.393	1158.06	225.149	384.161	1248.23	492.815	221.415	1368.94	572.165	217.106	1131.95	579.48	203.16	1057.59	584.559	77.9865	931.155	532.926	41.7847	863.193	600.244	62.9525	843.282	568.59	-2.86692	804.712
657	0	372.973	118.616	1568.38	256.31	121.501	1580.6	377.033	288.934	1537.43	268.319	289.209	1544.15	311.382	278.055	1446.37	308.546	372.154	1169.88	315.027	156.317	1349.38	310.999	100.178	1156.66	225.556	374.594	1247.05	493.442	212.333	1367.64	572.743	207.782	1130.65	580.063	192.671	1056.47	584.634	66.2854	931.019	532.682	29.5702	863.523	599.925	50.4734	843.203	567.906	-15.5513	805.411
658	0	373.529	109.242	1566.9	256.86	111.7	1579	377.155	279.601	1535.98	268.431	279.504	1542.63	311.762	268.6	1445.05	308.407	362.791	1168.6	315.709	146.816	1347.92	311.846	90.7446	1155.17	225.841	365.052	1245.74	493.978	203.117	1366.26	573.23	198.39	1129.24	580.509	182.197	1055.2	584.554	54.7129	930.652	532.076	17.7055	863.699	599.534	38.1998	842.883	567.168	-28.1774	805.836
659	0	374.09	99.8488	1565.5	257.316	101.872	1577.4	376.869	270.16	1534.64	268.287	269.791	1541.19	312.129	259.067	1443.76	308.718	353.219	1167.55	316.264	137.217	1346.56	312.605	81.3089	1153.78	225.926	355.33	1244.28	494.53	193.926	1364.99	573.721	188.925	1128.05	580.979	171.86	1054.1	584.554	43.4123	930.404	531.835	6.16651	863.87	599.182	26.1499	842.66	566.57	-40.2694	806.224
660	0	374.586	90.5125	1564.2	257.682	92.0462	1575.85	376.681	261.024	1533.41	268.045	260.07	1539.76	312.347	249.593	1442.44	308.924	343.665	1166.24	316.847	127.628	1345.22	313.437	71.6607	1152.57	226.1	345.651	1242.87	494.628	184.878	1363.71	574.217	179.375	1126.97	581.526	161.598	1053.13	584.48	32.3438	930.192	531.734	-5.25662	863.972	599.031	14.5235	842.475	565.904	-52.0406	806.472
661	0	374.94	81.0907	1562.7	258.047	82.0272	1574.25	376.558	251.774	1532.09	267.415	250.095	1538.31	312.488	239.93	1440.91	309.067	334.114	1164.72	317.321	117.941	1343.79	314.206	61.9062	1151.14	226.35	335.824	1241.41	495.279	175.491	1362.56	574.573	169.612	1125.72	581.826	151.355	1051.94	584.298	21.4127	929.573	531.433	-16.3818	863.601	598.697	3.10575	841.994	565.362	-63.5893	806.479
662	0	375.178	71.6552	1561.23	258.357	71.9739	1572.52	375.973	242.283	1530.87	266.919	240.117	1536.86	312.627	230.186	1439.64	309.076	324.22	1163.24	317.677	108.163	1342.29	315.09	51.9319	1149.8	226.427	325.896	1239.94	495.525	166.118	1361.41	574.731	159.732	1124.54	582.062	141.175	1050.87	584.149	10.621	928.938	531.152	-27.1962	863.192	598.363	-7.97983	841.453	564.908	-74.7777	806.177
663	0	375.358	62.0878	1560.1	258.444	61.9097	1571.04	375.312	232.863	1529.72	266.212	230.036	1535.43	312.555	220.391	1438.42	308.838	314.172	1161.78	317.951	98.2731	1341.11	315.802	42.0161	1148.68	226.471	315.938	1238.49	495.764	156.609	1360.51	574.836	149.825	1123.67	582.135	131.107	1050.07	584.055	0.172952	928.503	530.887	-37.5764	862.718	598.093	-18.7463	841.025	564.371	-85.5348	805.948
664	0	375.474	52.5049	1558.98	258.371	51.7693	1569.66	374.404	223.312	1528.68	265.886	220.027	1534.05	312.512	210.494	1437	308.838	304.146	1160.51	318.132	88.3381	1339.87	316.395	32.025	1147.55	226.406	305.765	1236.85	495.778	147.022	1359.57	574.95	139.812	1122.74	582.289	121.183	1049.09	583.911	-10.0123	927.713	530.561	-47.8891	862.145	597.973	-29.1988	840.393	563.954	-95.9946	805.558
665	0	375.391	42.8258	1557.82	258.309	41.6253	1568.24	373.957	213.603	1527.37	265.256	209.952	1532.43	312.314	200.53	1435.74	308.817	293.765	1159.4	318.32	78.1992	1338.69	317.027	21.8531	1146.49	226.343	295.533	1235.34	495.819	137.327	1358.54	574.946	129.777	1121.73	582.275	111.308	1047.96	583.572	-20.008	926.792	530.436	-57.8764	861.403	597.774	-39.3566	839.419	563.634	-106.117	804.805
666	0	375.443	33.0965	1556.88	258.138	31.4426	1566.98	373.125	203.78	1526.23	264.446	199.825	1531.27	312.052	190.472	1434.41	308.534	283.337	1158.1	318.324	68.0369	1337.61	317.435	11.5691	1145.51	226.266	285.175	1234.03	495.74	127.352	1357.72	574.886	119.667	1120.98	582.239	101.526	1047.07	583.614	-29.8258	926.057	530.219	-67.5076	860.433	597.689	-49.2478	838.57	563.461	-115.877	804.071
667	0	375.14	23.2707	1556.1	257.794	21.2713	1565.91	372.29	193.944	1525.35	263.601	189.521	1530.1	311.68	180.255	1433.47	308.706	272.94	1156.77	318.152	57.6951	1336.68	317.751	1.04797	1144.71	226.222	274.641	1232.63	495.353	117.362	1357.02	575.126	109.71	1120.46	582.368	91.9477	1046.51	583.442	-39.33	925.134	529.969	-76.9126	859.584	597.684	-58.7275	837.865	563.28	-125.345	803.255
668	0	374.707	13.3224	1555.27	257.338	10.9799	1564.91	371.508	184.106	1524.54	262.742	179.318	1528.87	311.31	170.027	1432.39	308.905	262.327	1155.55	318.052	47.2687	1335.82	317.903	-9.50971	1144.02	226.481	264.143	1231.15	495.408	107.161	1356.52	575.071	99.7811	1119.92	582.46	82.3761	1045.96	583.342	-48.6643	924.249	529.909	-86.0298	858.501	597.641	-67.8966	836.953	563.177	-134.469	802.229
669	0	374.088	3.34114	1554.39	256.919	0.758872	1563.76	370.72	174.12	1523.58	262.07	169.051	1527.82	310.901	159.706	1431.26	308.686	251.292	1153.93	317.815	36.7321	1334.99	317.975	-20.421	1143.24	226.389	253.253	1229.68	495.138	96.743	1355.78	574.85	89.7618	1119.24	582.543	72.9118	1045.15	583.096	-57.7494	922.979	529.846	-94.8204	857.085	597.701	-76.7667	835.709	563.238	-143.267	801.032
670	0	373.499	-6.67829	1553.8	256.262	-9.50368	1562.85	369.793	163.95	1522.79	261.188	158.831	1526.8	310.299	149.37	1430.26	308.624	240.089	1153.23	317.448	26.0655	1334.28	317.986	-31.6322	1142.66	226.192	242.126	1228.29	494.702	86.3087	1355.32	574.673	79.8791	1118.82	582.506	63.6947	1044.61	583.07	-66.5916	921.981	529.799	-103.277	855.845	597.685	-85.471	834.707	563.105	-151.641	799.707
671	0	372.601	-16.7371	1553.3	255.464	-19.6662	1562.05	369.002	153.888	1522.14	260.276	148.58	1525.93	309.615	139.017	1429.39	308.584	228.869	1151.93	317.143	15.3922	1333.79	317.977	-43.0636	1142.52	226.143	230.947	1226.86	494.222	76.0203	1354.94	574.333	70.0522	1118.62	582.59	54.6564	1044.22	583.158	-75.1709	921.107	529.829	-111.307	854.587	597.946	-93.6393	833.837	563.174	-159.703	798.625
672	0	371.987	-26.8581	1552.77	254.601	-29.8892	1561.37	367.968	143.788	1521.58	259.32	138.382	1525.16	308.812	128.616	1428.37	308.765	217.403	1150.37	316.794	4.52008	1333.43	318.058	-54.8108	1142.34	225.693	219.433	1225.27	493.431	65.905	1354.43	574.118	60.3253	1118.42	582.717	45.7569	1043.9	583.235	-83.4942	920.026	530.057	-119.235	853.389	598.302	-101.625	832.848	563.437	-167.314	797.125
673	0	371.037	-36.9385	1552.47	253.516	-40.1896	1560.84	366.948	133.624	1521.25	258.401	128.152	1524.53	307.785	118.23	1427.53	308.521	205.646	1149.25	316.247	-6.4073	1333.18	318.101	-66.8741	1142.36	225.151	207.702	1223.63	492.834	55.6882	1354.23	573.864	50.5705	1118.3	582.584	37.1536	1043.57	583.09	-91.3832	919.041	530.19	-126.743	851.863	598.518	-109.353	831.763	563.685	-174.638	795.877
674	0	370.081	-47.1114	1552.73	252.631	-50.3853	1560.64	365.807	123.429	1521.18	257.267	117.81	1524.11	306.757	107.776	1426.89	308.358	193.94	1148.23	315.61	-17.2776	1333.17	318.259	-79.0937	1142.6	224.234	195.833	1222.21	492.078	45.4835	1354.28	573.54	41.1695	1118.3	582.547	28.772	1043.52	583.339	-99.0999	918.096	530.637	-133.775	850.618	598.917	-116.568	830.961	564.032	-181.655	794.58
675	0	368.924	-57.21	1553.11	251.572	-60.5547	1560.81	364.615	113.178	1521.2	255.91	107.376	1523.81	305.474	97.0658	1426.33	307.527	181.889	1146.99	315.08	-28.2919	1333.48	318.701	-91.3606	1143.12	223.68	183.952	1220.89	491.429	35.2774	1354.66	573.221	31.9974	1118.48	582.38	20.7941	1043.64	583.496	-106.305	917.189	530.91	-140.534	849.453	599.432	-123.256	830.24	564.51	-188.176	793.42
676	0	367.901	-67.3413	1553.78	250.437	-70.9533	1561.2	363.274	103.057	1521.18	254.69	97.0806	1523.54	304.34	86.3907	1426.03	306.651	169.75	1146.01	314.615	-39.3938	1333.87	319.303	-103.82	1143.77	222.857	171.809	1219.76	490.791	24.8779	1355.25	572.951	22.8716	1118.89	582.284	12.9188	1043.79	583.934	-113.205	916.51	531.427	-147.066	848.359	599.952	-129.6	829.401	565.365	-194.329	792.305
677	0	366.715	-77.4291	1554.79	249.104	-81.2978	1561.81	361.845	92.6253	1521.24	253.34	86.5039	1523.46	302.983	75.6252	1426.11	306.507	157.828	1145.78	314.076	-50.5614	1334.47	319.996	-116.368	1144.62	222.232	160.034	1219.04	490.039	14.3477	1356.18	572.562	14.118	1119.54	581.958	5.24483	1044.18	584.222	-119.717	915.865	531.938	-153.104	847.4	600.292	-135.276	828.517	566.09	-199.99	791.143
678	0	365.306	-87.636	1556.21	247.713	-91.4525	1562.66	360.463	82.2007	1521.59	251.903	76.0023	1523.44	301.848	64.7363	1426.36	305.73	145.545	1145.65	313.616	-61.6562	1335.28	320.691	-128.569	1145.7	221.435	148.139	1218.64	489.325	3.84277	1357.49	572.347	5.51379	1120.66	581.758	-2.30875	1045.12	584.612	-125.915	915.366	532.455	-158.82	846.573	600.713	-140.434	828.013	567.015	-205.111	790.221
679	0	363.855	-97.8398	1557.7	246.193	-101.555	1563.71	359.088	71.8253	1522	250.439	65.7443	1523.35	300.858	53.909	1426.89	305.95	133.872	1146.04	313.109	-72.7912	1336.19	321.296	-140.642	1146.89	221.099	136.587	1218.55	489.264	-7.05133	1359.29	572.09	-2.83917	1121.89	581.626	-9.75532	1046.28	584.945	-131.723	914.926	532.994	-164.175	845.765	601.19	-145.036	827.461	568.146	-209.712	789.366
680	0	362.226	-108.104	1559.4	244.475	-111.778	1564.88	357.823	61.3607	1522.54	249.342	55.1909	1523.26	299.798	42.8905	1427.72	305.097	121.939	1146.34	312.768	-83.9364	1337.14	321.959	-152.374	1147.94	220.66	125.089	1218.86	488.438	-17.803	1360.7	571.715	-11.182	1123.17	581.417	-17.0798	1047.63	585.273	-137.248	914.584	533.628	-169.212	845.074	601.47	-149.28	826.845	569.21	-214	788.334
681	0	360.48	-118.443	1561.4	242.793	-121.625	1566.12	356.631	50.7361	1523.31	248.049	44.7854	1523.52	298.925	31.9525	1428.63	305.527	110.544	1147.61	312.485	-94.8295	1338.29	322.519	-163.72	1149.1	220.706	114.02	1219.57	487.656	-28.5481	1362.52	571.4	-19.3802	1124.78	581.122	-24.3397	1049.14	585.664	-142.535	914.508	534.264	-173.961	844.619	601.934	-153.108	826.539	570.261	-217.801	787.393
682	0	358.703	-128.749	1563.47	241.018	-131.477	1567.28	355.525	40.2518	1524.33	246.843	34.777	1523.84	298.226	21.0201	1429.81	305.59	99.2584	1148.57	312.248	-105.586	1339.58	323.088	-174.886	1150.52	220.554	102.959	1220.68	487.344	-39.1702	1364.24	571.214	-27.5705	1126.64	581.082	-31.4071	1051.08	586.152	-147.546	914.703	534.988	-178.343	844.3	602.564	-156.75	826.501	571.36	-221.195	786.55
683	0	356.937	-139.044	1565.38	239.102	-141.3	1568.33	354.629	29.6986	1525.36	246.187	24.6281	1524.12	297.684	10.245	1431.01	305.848	88.3317	1150.19	312.183	-116.236	1340.81	323.616	-185.625	1151.9	220.652	92.0246	1221.54	486.95	-49.7443	1366.13	570.952	-35.5551	1128.41	580.935	-38.3514	1052.92	586.661	-152.505	914.858	535.785	-182.542	844.035	603.178	-160.17	826.472	572.463	-224.346	785.641
684	0	355.149	-149.3	1567.06	237.192	-151.066	1569.17	353.836	19.2849	1526.53	245.516	14.8181	1524.24	297.287	-0.359364	1432.21	305.965	77.7025	1151	312.202	-126.797	1341.94	324.123	-195.97	1153.19	220.7	81.2554	1222.59	486.997	-60.2015	1367.95	570.711	-43.524	1130.17	580.843	-45.1674	1054.72	587.214	-157.303	915.01	536.523	-186.6	843.735	603.767	-163.543	826.421	573.39	-227.23	784.593
685	0	353.01	-159.46	1568.84	235.336	-160.645	1569.93	353.281	8.99837	1527.94	244.917	4.97508	1524.74	296.908	-10.698	1433.39	306.31	67.4147	1152.57	312.26	-137.101	1343.13	324.574	-206.091	1154.47	220.936	70.6779	1223.58	486.918	-70.2392	1369.76	570.542	-51.2614	1131.96	580.812	-51.6983	1056.63	587.887	-161.796	915.331	537.344	-190.488	843.505	604.121	-166.685	826.645	574.22	-229.854	783.444
686	0	351.295	-169.687	1570.45	233.664	-170.164	1570.58	352.843	-1.11471	1529.33	244.365	-4.61566	1525.26	296.457	-20.8633	1434.51	306.632	57.3586	1153.73	312.367	-147.206	1344.35	325.102	-215.914	1155.74	220.999	60.2328	1224.43	486.621	-79.8497	1371.52	570.527	-58.9618	1133.79	581.001	-58.2177	1058.4	588.666	-166.386	915.632	538.237	-194.252	843.288	605.337	-170.185	827.019	575.06	-232.373	782.234
687	0	349.74	-179.805	1571.91	232.247	-179.626	1571.13	352.438	-11.3981	1530.72	244.332	-14.235	1525.87	296.254	-30.8392	1435.51	306.847	47.6326	1154.45	312.679	-157.087	1345.47	325.683	-225.571	1156.85	220.981	49.7516	1225.31	486.629	-89.2407	1372.84	570.73	-66.6362	1135.35	580.918	-64.6673	1059.92	589.512	-170.941	915.745	539.149	-198.195	843.044	606.322	-173.502	827.164	576.048	-234.764	780.966
688	0	348.428	-189.886	1573.35	230.91	-189.007	1571.62	352.349	-21.4837	1532.19	244.278	-23.6696	1526.49	296.11	-40.6449	1436.5	307.237	38.5004	1155.78	313.233	-167.007	1346.59	326.342	-235.055	1157.86	220.872	39.4554	1226.08	487.217	-98.6604	1374.4	571.055	-74.2278	1136.86	580.941	-71.1321	1061.17	590.552	-175.379	915.906	540.343	-201.607	842.686	607.407	-176.922	827.253	576.952	-236.924	779.603
689	0	347.17	-199.896	1574.84	229.602	-198.332	1572.23	352.203	-31.8622	1533.64	244.366	-33.0587	1527.18	296.043	-50.3649	1437.63	307.492	29.383	1156.56	313.698	-176.688	1347.8	327.022	-244.47	1158.98	220.662	29.3108	1227.05	486.979	-107.474	1375.56	571.681	-81.8045	1138.36	581.604	-77.0882	1062.75	591.468	-179.881	916.1	541.477	-205.252	842.5	608.594	-180.181	827.571	577.928	-239.186	778.26
690	0	346.085	-209.83	1576.07	228.409	-207.581	1572.77	352.505	-41.8532	1535.39	244.73	-42.3435	1528.12	295.995	-59.9612	1438.68	307.469	20.1239	1157.8	314.28	-186.177	1348.9	327.972	-253.831	1160.07	220.502	19.3902	1227.99	487.782	-116.309	1377.08	572.33	-89.2698	1139.83	581.548	-83.6195	1064.12	592.565	-184.263	916.24	542.628	-208.833	842.214	609.786	-183.356	827.808	578.933	-241.127	776.895
691	0	345.079	-219.872	1577.23	227.568	-216.823	1573.31	352.806	-51.8274	1536.92	245.114	-51.5406	1529.14	296.092	-69.3946	1439.84	307.364	11.024	1159.01	314.847	-195.646	1350.02	329.012	-263.275	1161.04	220.316	9.63354	1229.07	488.2	-125.026	1378.33	573.01	-96.9152	1140.91	581.689	-90.1125	1065.27	593.506	-188.757	916.23	543.942	-212.528	841.706	610.924	-186.576	827.844	580.135	-243.305	775.628
692	0	344.27	-229.871	1578.46	226.797	-226.035	1574.04	353.373	-61.7707	1538.66	245.603	-60.8939	1530.38	296.164	-78.8418	1441.05	307.367	1.67473	1160.1	315.559	-204.911	1351.19	330.39	-272.607	1162.1	220.124	-0.021974	1230.36	488.624	-133.595	1379.47	573.507	-104.364	1142.1	581.827	-96.7693	1066.56	594.579	-193.17	916.283	545.257	-216.127	841.303	612.156	-189.905	828.058	581.293	-245.454	774.4
693	0	343.646	-239.798	1579.87	226.218	-235.094	1574.89	354.028	-71.65	1540.29	246.524	-69.956	1531.69	296.332	-88.2775	1442.23	306.604	-8.10955	1161.41	316.161	-214.045	1352.43	331.78	-281.845	1163.34	219.898	-9.44577	1231.58	489.124	-142.101	1380.89	574.054	-111.689	1143.44	582.273	-103.131	1067.89	595.528	-197.533	916.493	546.492	-219.56	841.124	613.535	-192.997	828.446	582.625	-247.071	773.276
694	0	343.266	-249.664	1581.14	225.668	-244.146	1575.81	354.96	-81.6318	1541.99	247.502	-79.0166	1532.88	296.5	-97.5962	1443.53	306.344	-17.6123	1162.45	316.975	-223.187	1353.69	333.138	-290.882	1164.49	219.742	-18.8696	1232.92	489.714	-150.513	1382.15	574.481	-118.815	1144.76	582.293	-109.746	1069.12	596.562	-201.863	916.779	547.815	-222.95	840.964	615.092	-196.084	828.828	584.128	-248.945	772.316
695	0	342.817	-259.675	1582.23	225.4	-253.099	1576.65	356.012	-91.5232	1543.44	248.447	-88.1139	1534.2	296.788	-106.838	1444.85	305.616	-27.1677	1164.14	317.711	-232.32	1354.94	334.396	-299.753	1165.58	219.452	-28.3009	1234.31	489.87	-158.818	1383.04	574.578	-125.724	1145.9	582.468	-116.162	1070.41	597.473	-206.236	917.099	549.183	-226.386	840.758	615.96	-198.987	829.06	585.603	-250.844	771.589
696	0	342.409	-269.584	1583.36	225.173	-261.874	1577.58	357.372	-101.508	1545.14	249.916	-97.1298	1535.68	297.172	-116.104	1446.11	305.424	-36.4152	1165.26	318.529	-241.545	1356.22	335.449	-308.667	1166.84	219.221	-37.6159	1235.72	490.62	-167.34	1384.51	574.622	-132.51	1147.07	582.667	-122.558	1071.91	598.348	-210.593	917.539	550.495	-229.627	840.643	617.93	-202.07	829.87	587.185	-252.826	771.113
697	0	342.168	-279.444	1584.46	224.975	-270.637	1578.61	358.658	-111.539	1546.5	251.363	-106.025	1536.82	297.552	-125.349	1447.26	305.216	-45.4827	1166.42	319.267	-250.568	1357.47	336.554	-317.487	1168.07	219.156	-47.071	1236.83	491.195	-175.67	1385.69	574.597	-139.096	1148.25	582.607	-128.835	1073.31	599.306	-214.887	918.088	551.879	-232.993	840.637	619.379	-205.092	830.701	588.907	-254.714	770.636
698	0	342.124	-289.357	1585.53	224.989	-279.452	1579.61	360.207	-121.462	1547.85	253.065	-115.055	1538.27	297.936	-134.567	1448.37	305.322	-54.5908	1167.23	320.107	-259.627	1358.55	337.596	-326.272	1169.21	219.184	-56.3949	1238	491.232	-183.93	1386.48	574.507	-145.537	1149.25	582.9	-134.784	1074.63	600.197	-218.914	918.5	553.293	-236.381	840.716	620.749	-208.125	831.385	590.692	-256.832	770.4
699	0	342.187	-299.235	1586.49	225.251	-288.082	1580.56	361.991	-131.491	1549.03	254.791	-123.943	1539.52	298.459	-143.824	1449.54	305.92	-63.3151	1168.85	320.959	-268.831	1359.66	338.569	-335.155	1170.31	219.182	-65.7582	1239.26	492.383	-192.652	1387.77	574.571	-151.84	1150.34	582.586	-140.977	1075.86	601.311	-223.317	919.211	554.807	-239.87	840.725	622.177	-211.266	832.167	592.627	-259.278	770.024
700	0	342.398	-309.049	1587.31	225.705	-296.576	1581.56	363.752	-141.49	1550.09	256.744	-132.876	1540.78	299.071	-153.077	1450.65	305.841	-72.5432	1169.71	321.691	-277.949	1360.75	339.529	-343.988	1171.42	219.193	-75.1773	1240.52	492.644	-201.136	1388.59	574.541	-157.933	1151.46	582.521	-146.772	1076.98	602.417	-227.529	919.786	556.241	-243.396	840.87	623.561	-214.248	832.956	594.426	-261.414	770.117
701	0	342.761	-318.804	1588.05	225.981	-305.349	1582.63	365.624	-151.504	1551.06	258.48	-141.8	1541.78	299.593	-162.335	1451.54	306.062	-81.6422	1170.72	322.565	-287.014	1361.67	340.345	-352.745	1172.34	219.279	-84.5838	1241.51	493.431	-209.79	1389.48	574.655	-163.917	1152.41	582.452	-152.658	1078.13	603.632	-231.628	920.271	557.839	-247.164	841.039	625.009	-217.238	833.728	596.434	-263.703	770.042
702	0	343.227	-328.532	1588.65	226.729	-313.998	1583.54	367.529	-161.458	1551.59	260.446	-150.919	1542.73	300.269	-171.678	1452.37	306.46	-90.8991	1171.69	323.253	-296.257	1362.4	341.026	-361.544	1173.01	219.426	-93.8901	1242.53	494.072	-218.538	1390.17	574.749	-169.986	1153.21	582.087	-158.563	1078.95	604.818	-235.826	920.567	559.587	-251.229	841.181	625.833	-220.145	834.098	598.491	-266.397	769.936
703	0	343.897	-338.243	1589.2	227.368	-322.841	1584.47	369.186	-171.417	1551.87	262.368	-160.044	1543.48	300.999	-181.034	1453.12	306.727	-100.126	1172.15	324.056	-305.41	1362.91	341.663	-370.292	1173.38	219.6	-103.169	1243.5	494.724	-227.378	1390.71	575.098	-176.194	1154.13	581.934	-164.55	1079.77	606.099	-240.084	920.819	561.475	-255.96	841.619	627.469	-223.51	834.592	600.495	-269.266	769.802
704	0	344.657	-347.937	1589.56	228.275	-331.618	1585.27	371.148	-181.284	1552.01	264.298	-169.103	1543.85	301.656	-190.412	1453.64	306.824	-109.312	1172.6	324.839	-314.537	1363.29	342.147	-378.964	1173.61	220.031	-112.303	1244.2	495.434	-236.221	1391.14	575.308	-182.263	1154.72	581.82	-170.579	1080.47	607.402	-244.362	920.904	562.714	-258.816	840.678	628.871	-226.77	835.114	602.655	-272.288	769.767
705	0	345.689	-357.526	1589.81	229.373	-340.429	1585.92	373.045	-191.069	1551.8	266.143	-178.34	1544.04	302.361	-199.753	1453.99	307.149	-119.003	1173.29	325.538	-323.583	1363.51	342.648	-387.738	1173.59	220.326	-121.489	1244.68	496.547	-245.232	1391.47	575.777	-188.817	1155.18	581.617	-176.844	1080.93	608.817	-248.764	920.926	564.287	-263.258	840.488	629.706	-230.052	835.16	604.68	-275.081	769.41
706	0	346.69	-367.037	1589.82	230.579	-349.337	1586.45	374.938	-200.971	1551.39	268.187	-187.441	1544.08	303.167	-209.17	1454.19	306.945	-129.085	1173.6	326.405	-332.758	1363.46	343.271	-396.615	1173.34	220.602	-130.695	1245.21	496.784	-254.212	1391	576.022	-195.638	1155.38	581.563	-183.309	1081.07	610.083	-253.412	920.716	566.075	-267.798	839.924	631.319	-233.836	835.214	606.685	-278.324	768.847
707	0	347.783	-376.653	1589.7	231.602	-358.336	1586.87	376.703	-210.753	1550.93	269.975	-196.891	1544.07	303.97	-218.605	1454.31	307.092	-138.819	1173.61	327.192	-342.049	1363.36	343.81	-405.483	1172.93	221.012	-139.818	1245.58	497.616	-263.298	1390.91	576.405	-202.737	1155.61	581.665	-189.949	1081.34	611.474	-258.218	920.486	567.604	-272.432	839.388	632.509	-237.576	835.182	608.691	-281.7	768.198
708	0	348.993	-386.311	1589.52	232.913	-367.38	1587.1	378.522	-220.525	1550.46	271.818	-206.047	1543.88	304.792	-228.09	1454.33	307.472	-147.621	1173.92	328.039	-351.116	1362.97	344.417	-414.36	1172.43	221.516	-148.79	1245.71	498.852	-272.462	1390.89	576.537	-209.957	1155.69	582.407	-196.605	1081.66	612.698	-263.294	920.121	569.238	-277.137	838.844	633.404	-241.363	835.019	610.637	-285.251	767.589
709	0	350.171	-395.836	1589.07	234.051	-376.573	1587.25	380.255	-230.307	1549.66	273.521	-215.47	1543.58	305.713	-237.542	1454.12	308.24	-156.343	1173.9	328.862	-360.319	1362.41	345.102	-423.309	1171.73	221.988	-157.971	1245.75	499.645	-281.599	1390.38	576.596	-217.281	1155.31	582.907	-203.465	1081.7	614.114	-268.675	919.572	570.88	-281.767	837.804	634.899	-245.608	834.728	612.573	-289.093	766.802
710	0	351.546	-405.571	1588.44	235.538	-385.772	1587.12	381.989	-240.17	1548.57	275.357	-224.884	1543.16	306.697	-247.006	1453.75	308.822	-164.988	1173.81	329.724	-369.62	1361.65	345.873	-432.296	1170.85	222.63	-167.057	1245.72	500.173	-290.759	1389.42	576.927	-225.133	1154.63	582.564	-211.022	1081.04	615.323	-274.265	918.802	572.462	-287.446	836.987	635.65	-249.979	833.973	614.38	-293.284	765.86
711	0	352.916	-415.164	1587.86	236.864	-395.023	1586.92	383.736	-249.98	1547.6	277.081	-234.344	1542.59	307.612	-256.454	1453.3	309.369	-174.293	1173.23	330.646	-378.94	1360.99	346.638	-441.256	1169.99	223.314	-176.046	1245.45	501.447	-300.055	1388.85	577.424	-233.195	1154.03	583.163	-218.348	1080.65	616.267	-279.545	917.954	573.961	-292.911	836.15	636.622	-254.71	833.354	616.16	-297.424	764.885
712	0	354.259	-424.778	1586.96	238.343	-404.274	1586.53	385.619	-259.715	1546.61	278.933	-243.808	1541.92	308.626	-265.949	1452.68	310.913	-183.289	1173.08	331.592	-388.232	1360.11	347.403	-450.177	1169.06	224.03	-185.141	1245.08	501.976	-309.271	1387.68	578.034	-241.356	1153.34	584.09	-225.66	1080.35	617.387	-285.484	916.994	575.286	-298.231	835.064	637.884	-259.78	832.758	617.839	-302.03	763.899
713	0	355.648	-434.572	1585.72	239.777	-413.692	1585.76	387.287	-269.661	1545.36	280.654	-253.408	1541.03	309.831	-275.494	1451.8	311.215	-192.55	1172.5	332.565	-397.586	1358.94	348.256	-459.253	1167.8	224.855	-193.937	1244.51	503.515	-318.66	1386.84	578.733	-249.791	1152.36	584.942	-233.255	1079.7	618.526	-291.616	915.905	576.533	-303.943	833.621	638.755	-265.041	831.837	619.253	-307.126	762.557
714	0	357.052	-444.3	1584.42	241.248	-423.179	1584.84	389.138	-279.391	1543.97	282.482	-262.809	1540	311.004	-284.998	1450.82	312.596	-201.068	1171.68	333.589	-406.908	1357.76	349.145	-468.386	1166.47	225.886	-203.122	1243.73	504.248	-328.05	1385.45	579.526	-258.301	1151.34	585.17	-241.459	1078.61	619.474	-298.119	914.529	577.769	-310.004	832.152	639.806	-270.751	830.852	620.645	-312.452	761.175
715	0	358.603	-454.167	1583.12	242.83	-432.658	1583.9	390.766	-289.276	1542.52	284.215	-272.569	1538.86	312.192	-294.448	1449.79	313.333	-210.606	1170.57	334.693	-416.341	1356.48	350.059	-477.493	1165.21	227.061	-212.229	1242.8	505.482	-337.466	1384.16	580.794	-267.03	1150.35	586.195	-249.161	1077.73	620.481	-304.733	913.317	579.031	-316.275	830.84	641.246	-276.602	830.014	621.93	-318.084	759.906
716	0	360.195	-463.836	1581.59	244.46	-442.268	1582.72	392.647	-299.005	1541.05	286.095	-282.018	1537.73	313.7	-304.019	1448.5	314.197	-219.355	1169.41	335.873	-425.755	1355.2	351.042	-486.571	1163.87	228.179	-221.226	1241.74	506.579	-346.942	1382.71	581.477	-275.486	1149.04	587.071	-257.49	1076.59	621.682	-311.711	912.052	580.264	-322.793	829.514	642.222	-282.797	828.786	623.316	-323.93	758.556
717	0	361.866	-473.705	1579.75	246.172	-451.912	1581.24	394.313	-308.977	1539.45	287.805	-291.814	1536.56	315.1	-313.554	1447.11	315.7	-228.699	1168.15	337.139	-435.119	1353.71	352.075	-495.736	1162.22	229.602	-230.07	1240.65	507.848	-356.6	1381.04	582.418	-284.466	1147.55	587.829	-265.648	1075.25	622.757	-318.976	910.48	581.349	-329.578	827.765	643.188	-289.531	827.328	624.463	-330.236	756.819
718	0	363.424	-483.597	1577.91	247.833	-461.735	1579.68	396.149	-318.708	1537.81	289.644	-301.4	1535.12	316.563	-322.973	1445.69	317.574	-237.881	1166.53	338.473	-444.605	1351.99	353.179	-505.119	1160.66	230.981	-239.28	1239.33	509.45	-366.254	1379.5	583.788	-293.501	1146.11	588.846	-274.203	1073.81	623.864	-326.422	908.793	582.45	-336.542	825.971	644.316	-296.54	825.837	625.559	-336.793	755.04
719	0	365.232	-493.533	1576.02	249.557	-471.379	1577.92	397.927	-328.595	1536.26	291.482	-311.2	1533.76	318.253	-332.544	1444.18	318.631	-247.317	1165.36	339.844	-454.11	1350.42	354.203	-514.549	1159.01	232.601	-248.367	1237.94	511.027	-375.919	1377.88	584.707	-302.368	1144.59	589.589	-282.903	1072.41	624.956	-334.2	907.042	583.451	-343.835	824.127	645.362	-303.839	824.336	626.656	-343.685	753.229
720	0	366.939	-503.391	1573.86	251.338	-481.28	1576.2	400.05	-338.286	1534.69	293.448	-320.86	1532.37	319.984	-342.011	1442.54	320.202	-256.521	1164.08	341.241	-463.559	1348.53	355.346	-523.943	1157.2	234.135	-257.677	1236.49	512.914	-385.72	1376.22	586.269	-311.64	1142.87	590.019	-291.991	1070.32	626.097	-342.142	905.076	584.68	-351.651	822.139	646.405	-311.329	822.472	627.785	-350.971	751.182
721	0	368.874	-513.365	1571.76	253.342	-491.147	1574.25	401.864	-348.261	1532.98	295.232	-330.669	1530.95	321.858	-351.567	1440.87	321.861	-265.823	1162.19	342.897	-473.172	1346.73	356.623	-533.647	1155.34	235.969	-266.847	1234.96	513.946	-395.393	1373.85	587.422	-320.808	1140.78	591.823	-300.79	1068.76	627.262	-350.582	902.926	585.895	-359.93	820.078	647.662	-319.288	820.482	628.912	-358.587	748.993
722	0	370.88	-523.191	1569.62	255.316	-501.063	1572.46	403.811	-357.925	1531.24	297.136	-340.469	1529.57	323.711	-361.099	1439.17	324.119	-275.378	1160.46	344.488	-482.691	1344.92	357.933	-543.266	1153.59	237.677	-276.106	1233.4	515.785	-405.251	1371.89	588.705	-330.157	1138.78	593.135	-309.77	1066.8	628.643	-359.066	900.939	587.086	-368.152	818.04	648.684	-327.559	818.555	630.06	-366.582	746.945
723	0	373.059	-532.982	1567.78	257.422	-511.043	1570.7	405.637	-367.781	1529.57	299.042	-350.313	1527.85	325.731	-370.568	1437.38	325.679	-285.342	1158.66	346.253	-492.289	1343.25	359.219	-553.049	1151.91	239.696	-285.541	1231.58	517.996	-415.223	1370.1	590.288	-339.557	1136.84	594.368	-319.293	1064.89	630.034	-367.858	898.899	588.308	-376.823	815.93	649.826	-336.204	816.588	631.246	-374.912	744.934
724	0	375.257	-542.867	1565.58	259.743	-520.975	1568.87	407.67	-377.426	1527.89	300.947	-360.157	1526.41	327.821	-380.2	1435.6	327.86	-295.21	1156.82	347.917	-502.002	1341.41	360.538	-563	1150.15	242.07	-295.227	1229.65	519.638	-425.108	1367.86	591.894	-349.18	1134.67	595.338	-329.099	1062.35	631.26	-377.014	896.464	589.478	-385.97	813.652	650.947	-344.972	814.227	632.443	-383.791	742.705
725	0	377.655	-552.73	1563.78	262.07	-531.07	1567.07	409.573	-387.113	1526.15	302.941	-370.112	1524.95	330.038	-389.775	1433.89	329.857	-304.983	1154.74	349.84	-511.796	1339.77	361.89	-572.887	1148.41	243.92	-304.613	1228.11	522.054	-435.222	1366.1	593.524	-359.137	1132.58	597.302	-338.781	1060.47	632.617	-386.444	894.194	590.76	-395.274	811.405	651.976	-354.396	811.979	633.551	-393.006	740.41
726	0	380.057	-562.587	1561.92	264.49	-541.155	1565.37	411.614	-396.8	1524.68	304.97	-380.001	1523.49	332.371	-399.489	1432.28	331.878	-314.879	1153.06	351.792	-521.59	1338.12	363.352	-582.942	1146.89	246.151	-314.266	1226.57	523.793	-445.204	1364.12	595.419	-369.024	1130.7	599.197	-348.595	1058.58	633.956	-396.243	891.966	591.964	-405.159	809.391	653.367	-363.937	809.947	634.691	-402.79	738.305
727	0	382.703	-572.437	1560.4	267.01	-551.199	1563.84	413.896	-406.402	1523.24	307.224	-389.997	1522.03	334.729	-409.342	1430.75	334.031	-324.474	1151.95	353.984	-531.608	1336.68	364.893	-592.876	1145.36	248.477	-324.028	1225.07	526.14	-455.292	1362.28	597.297	-379.177	1128.69	600.709	-359.04	1056.55	635.415	-406.348	889.881	593.262	-415.142	807.307	654.548	-373.963	807.889	635.997	-412.816	736.279
728	0	385.284	-582.244	1558.9	269.618	-561.314	1562.31	416.046	-416.369	1521.87	309.399	-399.961	1520.79	337.351	-419.12	1429.41	336.072	-335.004	1150.29	356.241	-541.581	1335.21	366.545	-603.069	1144.05	250.895	-334.2	1223.68	528.728	-465.622	1360.61	599.144	-389.632	1126.63	602.59	-369.334	1054.45	636.829	-416.822	887.841	594.385	-425.559	805.162	655.7	-384.414	805.667	637.2	-423.335	734.208
729	0	387.974	-592.145	1557.5	272.311	-571.373	1560.95	418.514	-426.089	1520.74	311.8	-409.993	1519.56	339.873	-429.194	1428.23	338.551	-345.222	1148.87	358.564	-551.757	1333.97	368.262	-613.235	1142.82	253.112	-344.028	1222.69	530.797	-475.778	1358.83	601.031	-400.298	1124.74	604.294	-380.111	1052.5	638.148	-427.613	885.877	595.675	-436.423	803.426	656.929	-395.272	803.603	638.364	-434.327	732.363
730	0	390.767	-601.968	1556.37	275.014	-581.565	1559.87	421.027	-435.756	1519.72	314.037	-419.989	1518.45	342.456	-439.1	1427.14	341.334	-355.583	1147.67	361.056	-561.917	1332.96	370.052	-623.394	1141.84	255.489	-354.271	1221.75	533.368	-485.943	1357.51	603.212	-411.092	1123.16	605.764	-391.137	1050.71	639.629	-438.65	884.207	596.996	-447.49	801.844	658.191	-406.49	801.755	639.51	-445.71	730.82
731	0	393.803	-611.645	1555.3	277.974	-591.698	1558.8	423.429	-445.457	1518.73	316.458	-429.982	1517.56	345.251	-449.13	1426.11	343.087	-366.077	1146.7	363.585	-572.079	1332.02	372.148	-633.881	1140.99	258.038	-364.873	1220.69	536.016	-496.157	1356.31	605.299	-421.95	1121.51	607.566	-402.164	1048.97	641.076	-450.13	882.508	598.248	-459.056	800.335	659.628	-418.142	800.091	640.726	-457.531	729.251
732	0	396.989	-621.391	1554.27	281.103	-601.923	1557.87	425.801	-455.018	1517.59	318.786	-440.089	1516.67	348.081	-459.201	1425.1	345.451	-376.801	1145.85	366.245	-582.501	1331.22	374.357	-644.537	1140.27	260.376	-375.249	1219.7	539.052	-506.585	1355.23	607.556	-433.053	1119.89	610.198	-413.061	1047.63	642.62	-461.85	880.94	599.625	-470.973	798.792	661.085	-430.187	798.369	641.979	-469.885	727.734
733	0	400.346	-631.056	1553.56	284.3	-612.169	1557.37	428.297	-464.311	1516.71	321.035	-450.101	1515.9	350.858	-469.228	1424.32	347.739	-387.75	1144.85	369.042	-592.98	1330.67	376.718	-655.344	1139.93	262.801	-385.849	1218.75	541.394	-516.857	1353.99	609.669	-444.233	1118.39	612.355	-424.404	1046.11	644.272	-473.883	879.561	600.975	-483.236	797.617	662.564	-442.603	796.777	643.154	-482.509	726.45
734	0	403.826	-640.535	1553.49	287.71	-622.353	1557.37	430.713	-473.757	1516.14	323.511	-460.209	1515.26	353.835	-479.265	1423.66	349.963	-398.989	1143.75	371.824	-603.481	1330.49	379.143	-666.391	1139.93	265.265	-396.685	1217.99	544.581	-527.246	1353.43	612.033	-455.436	1117.12	614.706	-435.773	1044.73	645.905	-486.025	878.345	602.277	-495.665	796.567	664.078	-455.204	795.395	644.407	-495.393	725.432
735	0	407.506	-650.006	1553.67	291.215	-632.777	1557.64	433.093	-483.225	1515.69	325.716	-470.481	1514.88	356.662	-489.486	1423.32	352.157	-410.034	1143.02	374.633	-614.044	1330.59	381.633	-677.722	1140.08	267.669	-407.711	1217.48	547.374	-537.663	1352.75	614.525	-466.818	1116.02	616.822	-447.608	1043.53	647.598	-498.504	877.221	603.775	-508.41	795.549	665.588	-468.063	794.095	645.739	-508.704	724.414
736	0	411.269	-659.461	1553.94	294.848	-643.108	1558.14	435.484	-492.401	1515.42	327.864	-480.56	1514.79	359.44	-499.675	1423.2	354.253	-421.036	1142.81	377.393	-624.696	1330.91	384.095	-689.246	1140.48	270.132	-418.716	1217.29	549.752	-548.123	1352.11	617.046	-478.406	1115.21	619.004	-459.746	1042.59	649.243	-511.376	876.19	605.075	-521.569	794.811	666.925	-481.328	792.962	646.866	-522.498	723.63
737	0	415.116	-668.734	1554.7	298.577	-653.411	1559.02	437.797	-501.667	1515.37	330.134	-490.91	1514.82	362.296	-509.971	1423.42	356.402	-432.208	1143.07	380.218	-635.081	1331.34	386.444	-700.795	1141.24	272.385	-429.909	1217.46	552.528	-558.616	1352.06	619.637	-490.183	1114.73	621.272	-472.102	1041.85	650.941	-524.501	875.559	606.575	-534.972	794.447	668.368	-494.902	792.21	648.113	-536.431	723.163
738	0	419.081	-677.973	1556.07	302.379	-663.566	1560.39	440.196	-511.069	1515.49	332.456	-501.12	1514.95	365.03	-520.374	1423.87	358.418	-443.775	1142.86	383.066	-646.016	1332.38	388.811	-712.317	1142.31	274.634	-441.04	1217.93	555.578	-569.173	1352.34	622.069	-502.022	1114.42	623.807	-484.361	1041.42	652.626	-537.764	875.188	608.018	-548.671	794.244	670.055	-508.642	791.777	649.494	-550.738	722.962
739	0	422.951	-687.172	1557.42	306.254	-673.658	1561.95	442.709	-520.4	1515.46	334.716	-511.284	1515.41	367.872	-530.778	1424.57	360.756	-454.854	1143.22	385.949	-656.735	1333.39	391.171	-723.693	1143.46	276.904	-452.234	1218.79	558.146	-579.745	1352.52	624.402	-514.253	1114.08	625.264	-497.38	1040.68	654.363	-551.505	875.07	609.438	-562.865	794.336	671.615	-522.92	791.328	650.807	-565.506	723.049
740	0	426.876	-696.194	1558.95	309.998	-683.648	1563.79	445.189	-529.631	1515.64	337.244	-521.423	1515.91	370.464	-541.308	1425.54	362.95	-466.484	1143.9	388.655	-667.406	1334.64	393.459	-734.927	1144.83	278.939	-463.368	1219.87	560.435	-590.25	1352.87	626.745	-526.613	1114.06	626.897	-510.728	1040.16	655.946	-565.527	875.313	611.057	-577.273	794.736	673.092	-537.576	791.127	652.137	-580.499	723.305
741	0	430.738	-705.211	1560.68	313.681	-693.499	1565.83	447.556	-538.86	1515.93	339.707	-531.579	1516.39	373.208	-551.712	1426.61	364.621	-477.466	1145.49	391.224	-677.975	1336.13	395.485	-745.821	1146.32	280.935	-474.387	1221.03	562.955	-600.699	1353.69	629.048	-539.241	1114.32	629.264	-523.384	1040.28	657.685	-579.731	875.747	612.428	-591.642	795.195	674.997	-552.443	791.586	653.458	-595.696	723.929
742	0	434.566	-714.12	1562.18	317.417	-703.215	1567.92	449.986	-547.978	1516.19	341.857	-541.428	1516.94	375.689	-562.214	1427.78	366.751	-488.297	1146.16	393.676	-688.567	1337.53	397.442	-756.596	1147.85	282.955	-485.191	1222.39	565.737	-611.239	1354.76	631.025	-551.702	1114.55	631.59	-536.471	1040.59	659.231	-594.293	876.283	613.992	-606.722	796.112	676.55	-567.556	791.895	654.781	-611.301	724.553
743	0	438.39	-723.028	1563.95	321.14	-713.041	1570	452.167	-557.092	1516.45	344.133	-551.421	1517.67	378.226	-572.454	1429.1	369.161	-498.881	1147.1	396.224	-699.131	1339.02	399.481	-767.162	1149.36	284.885	-495.837	1223.87	567.782	-621.672	1355.51	633.154	-564.527	1114.9	633.841	-549.558	1041.1	660.943	-609.021	877.111	615.514	-621.972	797.061	678.279	-583.084	792.663	656.25	-627.229	725.52
744	0	442.187	-731.815	1565.62	324.864	-722.736	1572.22	454.175	-566.149	1516.75	345.891	-561.276	1518.52	380.564	-582.601	1430.43	370.635	-509.243	1149.2	398.522	-709.433	1340.62	401.47	-777.721	1151.08	286.75	-506.428	1225.36	570.13	-632.1	1356.76	634.989	-577.308	1115.46	635.607	-562.824	1041.64	662.52	-623.873	878.22	617.04	-637.211	798.237	679.936	-598.885	793.327	657.634	-643.383	726.715
745	0	445.843	-740.399	1567.14	328.49	-732.435	1574.37	455.912	-575.037	1517.23	347.802	-571.082	1519.6	382.778	-592.586	1431.72	372.76	-519.558	1150.14	400.356	-719.534	1342.35	403.238	-787.951	1152.79	288.64	-516.584	1226.84	572.161	-642.319	1357.94	636.953	-590.05	1116.14	637.886	-575.995	1042.25	664.263	-638.914	879.533	618.704	-653.003	799.839	681.62	-614.76	794.378	659.201	-659.796	728.202
746	0	449.49	-749.002	1568.46	331.91	-742.297	1576.37	457.572	-583.59	1517.8	349.248	-580.874	1520.83	384.994	-602.286	1432.96	374.753	-530.027	1151.06	402.308	-729.642	1343.95	404.986	-798.213	1154.52	290.682	-526.709	1228.07	574.341	-652.6	1359.22	639.191	-602.892	1116.89	639.769	-589.237	1042.8	665.85	-653.962	880.736	620.174	-667.752	800.87	683.351	-630.833	795.37	660.543	-676.51	729.598
747	0	452.764	-757.342	1569.67	335.261	-752.015	1578.42	458.945	-592.304	1518.56	350.692	-590.732	1522.03	386.911	-612.014	1434.2	376.414	-540.143	1153.09	404.081	-739.53	1345.53	406.544	-808.463	1156.17	292.69	-536.696	1229.41	575.986	-662.832	1360.34	640.926	-615.652	1117.62	641.839	-602.484	1043.6	667.414	-669.201	882.164	621.882	-683.244	802.245	684.704	-647.386	796.266	662.061	-693.481	731.344
748	0	455.922	-765.799	1571.13	338.36	-761.577	1580.23	460.216	-600.914	1519.38	351.829	-600.289	1523.3	388.92	-621.408	1435.47	378.78	-549.763	1153.94	405.753	-749.391	1347.03	407.953	-818.253	1157.8	294.699	-546.456	1230.52	578.088	-673.01	1362.04	642.824	-628.174	1118.67	644.111	-615.66	1044.56	669.053	-684.569	883.884	623.155	-699.692	804.303	686.476	-663.721	797.894	663.465	-710.662	733.25
749	0	458.81	-774.177	1572.47	341.197	-771.118	1582.16	461.416	-609.431	1520.1	353.008	-609.91	1524.44	390.693	-630.894	1436.55	380.805	-559.206	1154.59	407.292	-758.921	1348.54	409.347	-828.214	1159.43	296.779	-555.982	1231.63	579.629	-683.013	1363.24	644.489	-640.495	1119.56	646.187	-628.784	1045.5	670.577	-699.828	885.413	624.666	-715.859	806.192	687.917	-680.296	799.292	664.892	-728.012	735.364
750	0	461.59	-782.705	1573.77	344.102	-780.461	1583.73	462.523	-618.049	1520.65	354.156	-619.543	1525.33	392.479	-640.324	1437.63	382.826	-569.303	1155.52	408.855	-768.532	1349.98	410.558	-837.798	1160.77	299.186	-565.631	1232.5	581.266	-693.053	1364.41	646.68	-653.119	1120.42	648.384	-642.036	1046.27	672.219	-715.334	887.055	626.034	-732.152	808.076	689.372	-697.026	800.475	666.182	-745.587	737.346
751	0	464.04	-791.011	1575.08	346.495	-789.808	1585.48	463.559	-626.817	1521.22	354.853	-628.804	1526.21	394.282	-649.498	1438.72	385.226	-578.314	1156.98	410.243	-777.921	1351.28	411.7	-847.223	1162.1	301.114	-574.618	1233.66	582.836	-703.122	1365.66	648.623	-665.413	1121.34	650.146	-655.302	1046.75	673.767	-730.944	888.86	627.72	-748.398	810.074	690.842	-713.746	801.908	667.584	-763.43	739.855
752	0	466.183	-799.418	1576.51	348.652	-798.941	1587.16	464.614	-635.436	1521.91	356.032	-638.232	1526.99	395.868	-658.856	1439.93	387.567	-587.378	1158.28	411.588	-787.161	1352.61	412.871	-856.815	1163.53	303.094	-583.646	1234.88	584.519	-713.097	1367.16	651.054	-677.604	1122.58	652.305	-668.454	1047.74	675.203	-746.432	890.794	628.767	-764.738	812.416	692.229	-730.615	803.619	668.604	-781.038	742.321
753	0	468.102	-807.725	1577.88	350.531	-807.995	1588.87	465.555	-644.128	1522.54	357.05	-647.645	1527.87	397.479	-668.056	1441.2	389.396	-596.098	1159.02	412.802	-796.514	1353.99	413.841	-865.81	1164.66	305.068	-592.383	1236.25	586.122	-722.967	1368.65	652.409	-689.528	1123.66	654.646	-681.494	1048.95	676.506	-761.895	892.783	629.868	-781.12	814.792	693.678	-747.417	805.494	669.68	-798.894	745.144
754	0	469.945	-816.412	1579.4	352.375	-817.056	1590.33	466.404	-652.999	1523.17	357.906	-656.812	1528.68	399.064	-677.185	1442.46	391.406	-604.984	1160.96	414.033	-805.484	1354.96	414.737	-874.732	1165.62	307.075	-601.165	1237.56	587.129	-732.815	1369.85	654.686	-701.826	1124.85	656.683	-694.66	1049.9	677.877	-777.432	894.808	631.221	-798.36	817.633	694.929	-764.296	807.327	670.609	-816.903	747.971
755	0	471.559	-824.69	1580.71	354.096	-826.004	1592.02	467.322	-661.678	1523.98	358.88	-666.059	1529.63	400.406	-686.457	1443.89	393.845	-613.882	1162.32	415.216	-814.653	1356.19	415.778	-883.615	1166.67	309.067	-609.77	1239.14	588.445	-742.645	1371.25	656.359	-713.713	1126.14	658.797	-707.754	1051.07	679.115	-792.97	897.058	632.081	-814.035	820.017	696.281	-781.48	809.456	671.443	-834.807	751.099
756	0	473.095	-833.06	1582.26	355.685	-834.682	1593.61	468.105	-670.296	1524.93	359.659	-675.128	1530.57	401.973	-695.456	1445.22	395.765	-622.255	1163.48	416.44	-823.661	1357.56	416.865	-892.395	1167.86	311.019	-618.366	1240.55	590.14	-752.444	1372.98	658.397	-725.574	1127.55	661.075	-720.74	1052.48	680.319	-808.257	899.637	632.994	-830.148	823.003	697.375	-798.054	811.799	672.265	-852.622	754.62
757	0	474.581	-841.4	1583.73	357.105	-843.565	1595.05	468.9	-678.892	1525.78	360.379	-684.076	1531.54	403.383	-704.46	1446.71	397.658	-630.989	1165.47	417.713	-832.626	1358.9	417.996	-901.071	1169.08	313.08	-627.127	1242.06	591.115	-762.011	1374.43	660.654	-737.49	1129.23	663.098	-733.684	1053.88	681.572	-823.651	902.4	633.928	-846.287	826.26	698.54	-814.907	814.295	673.016	-870.376	758.319
758	0	475.804	-849.803	1584.98	358.39	-852.535	1596.34	469.541	-687.439	1526.71	361.191	-693.406	1532.75	404.64	-713.466	1448.04	399.655	-639.654	1166.84	418.883	-841.503	1360.06	419.134	-909.593	1170.12	314.803	-635.45	1243.51	592.331	-771.576	1375.85	662.436	-749.303	1130.65	665.043	-746.525	1055.24	682.497	-838.733	904.985	634.661	-862.367	829.349	699.588	-832.05	816.844	673.549	-888.144	761.957
759	0	477.01	-858.155	1586.37	359.599	-861.105	1597.59	470.198	-695.958	1527.8	361.769	-702.348	1533.56	406.209	-722.187	1449.31	401.43	-648.143	1168.12	420.013	-850.279	1361.27	420.29	-917.954	1171.42	316.61	-643.894	1244.94	594.057	-781.051	1377.82	664.082	-760.9	1132.34	667.201	-759.3	1057.03	683.655	-854.206	908.024	635.314	-878.222	832.805	700.251	-848.491	819.7	674.07	-905.658	765.991
760	0	478.149	-866.506	1587.77	360.621	-869.991	1598.76	470.886	-704.262	1528.88	362.498	-711.133	1534.28	407.541	-730.865	1450.46	403.345	-656.578	1169.41	421.187	-859.112	1362.52	421.457	-926.428	1172.77	318.369	-652.385	1246.06	595.405	-790.207	1379.53	666.194	-772.654	1134.19	669.309	-771.834	1058.88	684.513	-869.037	911.059	636.005	-894.028	836.338	701.295	-864.997	822.789	674.314	-923.078	770.013
761	0	479.203	-874.973	1588.91	361.687	-878.728	1599.66	471.627	-712.806	1529.68	363.426	-719.917	1534.78	408.766	-739.599	1451.44	404.913	-664.918	1170.52	422.471	-867.872	1363.64	422.613	-934.734	1173.93	319.989	-660.837	1247.17	596.65	-799.255	1380.9	668.001	-784.215	1135.7	671.188	-784.246	1060.16	685.441	-884.074	914.01	636.68	-909.691	839.756	702.129	-881.537	825.646	674.725	-940.325	774.108
762	0	480.194	-883.429	1589.92	362.837	-887.173	1600.29	472.453	-721.349	1530.35	364.218	-728.523	1535.39	410.246	-748.161	1452.46	406.459	-673.746	1171.35	423.746	-876.511	1364.63	423.839	-943.02	1175.07	321.512	-669.304	1248.21	597.893	-808.296	1382.09	669.619	-795.766	1137.11	673.108	-796.572	1061.5	686.297	-898.819	917.072	637.357	-925.401	843.248	702.82	-897.988	828.429	674.962	-957.403	778.059
763	0	481.095	-891.79	1590.97	363.601	-895.718	1601.11	473.384	-729.815	1531.28	365.081	-737.134	1536	411.583	-756.637	1453.42	407.957	-681.691	1172.31	424.95	-885.095	1365.63	425.15	-951.29	1176.21	322.963	-677.785	1249.23	599.292	-817.118	1383.42	671.376	-807.134	1138.55	674.948	-808.628	1062.99	687.13	-913.398	920.069	637.659	-941.609	847.299	704.088	-914.389	831.574	675.221	-974.295	782.243
764	0	481.931	-900.183	1591.98	364.354	-904.072	1601.76	474.432	-738.28	1531.97	365.984	-745.661	1536.35	412.803	-765.241	1454.18	409.385	-690.142	1173.55	426.145	-893.76	1366.35	426.335	-959.534	1177.1	324.211	-686.216	1250.12	600.677	-825.862	1384.57	673.299	-818.37	1139.92	676.871	-820.533	1064.27	688.004	-927.93	923.098	638.214	-956.83	850.823	704.478	-930.313	834.63	675.373	-991.074	786.146
765	0	482.695	-908.619	1592.59	365.092	-912.355	1602.16	475.352	-746.937	1532.21	367.079	-754.032	1536.2	413.924	-773.913	1454.62	410.333	-698.393	1174.2	427.336	-902.574	1366.79	427.614	-967.909	1177.64	325.44	-694.691	1250.78	601.856	-834.622	1385.19	674.579	-829.531	1140.75	678.573	-832.345	1065.23	688.783	-942.15	925.749	638.698	-972.199	854.002	705.09	-946.405	837.423	675.584	-1007.99	790.093
766	0	483.4	-916.996	1593.05	365.915	-920.494	1602.43	476.557	-755.478	1532.16	368.151	-762.512	1535.94	415.237	-782.476	1455	411.554	-706.762	1174.49	428.523	-911.24	1367.12	428.916	-976.29	1178.01	326.493	-703.166	1251.34	602.701	-843.282	1385.49	676.136	-840.484	1141.39	680.189	-844.083	1065.98	689.511	-956.327	928.151	639.021	-987.374	857.306	705.548	-962.114	839.902	675.665	-1024.29	793.689
767	0	484.259	-925.369	1593.85	366.541	-928.593	1602.85	477.76	-764.031	1531.95	369.392	-771.019	1535.51	416.374	-791.239	1455.24	412.541	-715.154	1174.77	429.693	-919.849	1367.48	430.294	-984.674	1178.36	327.446	-711.612	1251.84	603.977	-851.92	1385.99	677.679	-851.206	1142.17	681.851	-855.457	1066.65	690.318	-970.124	930.821	639.499	-1002.2	860.532	706.41	-977.825	842.732	675.919	-1040.32	797.61
768	0	484.959	-933.742	1594.25	367.163	-936.728	1603.07	478.849	-772.801	1531.5	370.475	-779.177	1534.6	417.461	-800.119	1455.29	413.499	-723.468	1174.78	430.9	-928.496	1367.57	431.579	-993.064	1178.29	328.468	-720.198	1252.09	605.431	-860.712	1386.26	679.209	-861.754	1142.53	683.373	-866.86	1067.01	691.063	-983.793	933.15	639.936	-1016.86	863.536	706.589	-992.976	845.133	675.94	-1056.31	801.113
769	0	485.546	-942.224	1594.33	367.827	-944.709	1603.01	480.095	-781.624	1530.79	371.636	-787.554	1533.86	418.538	-809.009	1455.2	414.103	-731.666	1175.05	432.039	-937.325	1367.34	432.709	-1001.41	1177.79	329.273	-728.777	1252.17	606.475	-869.508	1385.97	680.599	-872.185	1142.53	684.885	-878.129	1067.05	691.596	-997.301	934.994	640.277	-1031.49	866.278	706.74	-1008.05	847.135	676.165	-1072.13	804.577
770	0	486.212	-950.708	1594.31	368.448	-952.717	1602.87	481.226	-790.236	1530.03	372.817	-796.017	1532.85	419.726	-817.818	1455.01	414.397	-739.472	1174.55	433.024	-946.091	1366.94	433.76	-1009.75	1177.16	330.145	-737.626	1252.17	607.424	-878.185	1385.66	682.017	-882.424	1142.54	686.36	-889.211	1067.13	692.141	-1010.52	936.77	640.315	-1046.11	868.908	707.27	-1022.97	849.165	676.162	-1087.55	807.785
771	0	486.792	-959.11	1594.25	369.111	-960.837	1602.67	482.358	-798.987	1529.28	373.866	-804.662	1532.02	420.437	-826.643	1454.65	415.05	-747.983	1174.43	433.913	-954.8	1366.39	434.686	-1017.98	1176.39	330.603	-746.004	1252.31	608.14	-886.87	1385.17	683.343	-892.449	1142.51	687.683	-900.149	1067.15	692.598	-1023.55	938.562	640.516	-1060.16	871.492	707.091	-1037.07	851.129	676.205	-1102.75	810.886
772	0	487.528	-967.66	1594	369.706	-969.019	1602.33	483.374	-807.859	1528.25	374.854	-813.093	1530.91	421.26	-835.74	1454.37	415.608	-756.408	1174.55	434.914	-963.629	1365.67	435.609	-1026.24	1175.37	331.075	-754.695	1252.39	608.997	-895.548	1384.53	684.607	-902.379	1142.24	688.931	-911.147	1066.86	693.087	-1036.41	939.997	640.754	-1074.03	873.818	707.262	-1051.3	852.662	676.264	-1117.53	813.908
773	0	488.205	-976.258	1593.56	370.429	-977.367	1601.87	484.341	-816.755	1527.06	375.795	-821.718	1529.89	422.229	-844.576	1453.89	415.833	-764.615	1174.79	435.932	-972.556	1364.92	436.486	-1034.52	1174.24	331.517	-763.366	1252.33	610.009	-904.415	1383.7	685.844	-912.193	1141.76	690.104	-922.075	1066.36	693.534	-1049.1	941.248	641.001	-1087.58	875.86	707.241	-1065.14	853.913	676.203	-1132.13	816.634
774	0	488.867	-984.74	1593.1	370.914	-985.64	1601.53	485.34	-825.575	1525.84	376.673	-830.356	1528.76	422.787	-853.649	1453.34	416.272	-773.172	1174.63	436.695	-981.289	1364.05	437.226	-1042.86	1173.23	331.84	-772.126	1252.08	610.696	-913.086	1382.82	686.909	-921.719	1141.34	691.336	-932.706	1065.93	693.936	-1061.45	942.468	641.043	-1100.83	877.963	707.139	-1078.48	855.22	676.108	-1146.22	819.229
775	0	489.42	-993.323	1592.51	371.556	-994.055	1600.86	486.045	-834.527	1524.49	377.457	-839.197	1527.3	423.452	-862.587	1452.5	416.399	-781.591	1173.99	437.321	-990.066	1363.07	437.909	-1051.29	1172.11	332.079	-780.862	1251.61	611.42	-921.838	1382	687.836	-931.248	1140.72	692.411	-943.292	1065.54	694.39	-1073.63	943.49	641.078	-1113.81	879.777	706.872	-1091.54	856.477	675.935	-1159.99	821.479
776	0	490.003	-1002.03	1591.68	372.053	-1002.64	1600.08	486.684	-843.467	1522.87	378.094	-848.129	1525.9	424.051	-871.593	1451.53	416.692	-790.045	1173.3	438.041	-999.007	1362.01	438.549	-1059.83	1170.95	332.318	-789.617	1250.99	611.696	-930.428	1380.87	688.652	-940.724	1139.91	693.37	-953.876	1064.96	694.65	-1085.61	944.285	641.057	-1126.53	881.266	707.051	-1104.72	857.45	675.708	-1173.44	823.469
777	0	490.48	-1010.8	1590.74	372.637	-1011.42	1599.16	487.149	-852.48	1521.25	378.642	-857.094	1524.37	424.332	-880.582	1450.59	416.653	-798.164	1172.53	438.588	-1007.95	1360.79	439.087	-1068.41	1169.64	332.438	-798.438	1250.4	611.952	-939.073	1379.55	689.343	-950.076	1138.96	694.237	-964.322	1064.15	694.837	-1097.46	944.86	641.145	-1139.09	882.59	706.644	-1117.36	858.176	675.48	-1186.54	825.16
778	0	490.971	-1019.47	1589.72	373.041	-1020.05	1598.31	487.484	-861.52	1519.75	379.036	-866.036	1522.84	424.764	-889.426	1449.59	416.877	-806.693	1171.94	439.033	-1016.77	1359.72	439.568	-1076.97	1168.47	332.488	-807.326	1249.56	612.499	-947.707	1378.53	689.892	-959.286	1138.12	694.994	-974.529	1063.45	695.13	-1108.9	945.449	641.096	-1151.01	883.795	706.718	-1130	858.736	675.219	-1199.2	826.641
779	0	491.412	-1028.28	1588.62	373.547	-1028.93	1597.26	487.711	-870.433	1518.21	379.318	-875.082	1521.46	425.021	-898.741	1448.62	416.884	-815.022	1170.74	439.366	-1025.58	1358.44	440.034	-1085.49	1167.31	332.346	-816.273	1248.65	612.783	-956.343	1377.25	690.394	-968.445	1137.09	695.639	-984.744	1062.63	695.439	-1120.17	945.879	641.127	-1162.75	884.771	706.642	-1142.09	859.2	674.903	-1211.48	827.854
780	0	491.774	-1037.11	1587.41	373.875	-1038.03	1596.14	487.799	-879.43	1516.75	379.355	-884.393	1520.48	425.068	-907.799	1447.52	416.852	-823.682	1169.95	439.792	-1034.53	1357.23	440.56	-1094.13	1166	332.359	-825.25	1247.87	612.917	-964.902	1375.98	690.754	-977.489	1136.03	696.221	-994.849	1061.69	695.672	-1131.23	946.107	641.169	-1174.35	885.564	706.623	-1153.97	859.498	674.67	-1223.51	828.876
781	0	491.838	-1046.02	1586.23	373.999	-1047.04	1594.81	487.754	-888.448	1515.53	379.208	-893.531	1519.11	424.849	-916.649	1446.34	416.72	-832.241	1168.96	439.933	-1043.54	1355.9	440.975	-1102.84	1164.68	332.067	-834.306	1246.87	612.977	-973.402	1374.87	691.004	-986.493	1135.02	696.742	-1004.78	1060.98	695.798	-1142	946.155	641.066	-1185.5	886.024	706.269	-1165.22	859.745	674.273	-1235.12	829.67
782	0	491.856	-1054.98	1584.9	373.945	-1056.15	1593.49	487.612	-897.343	1514.33	378.951	-902.777	1517.66	424.67	-925.657	1445.15	416.382	-840.908	1168.1	440.055	-1052.43	1354.65	441.389	-1111.76	1163.43	331.829	-843.243	1245.86	613.127	-982.039	1373.85	691.196	-995.3	1134.05	697.097	-1014.45	1060.29	695.939	-1152.65	946.107	640.899	-1196.28	886.32	706.534	-1176.46	860.032	674.021	-1246.28	830.236
783	0	491.779	-1064.04	1583.46	373.863	-1065.54	1591.93	487.172	-906.302	1513.08	378.788	-911.887	1516.22	424.719	-934.811	1443.97	416.302	-849.692	1166.66	440.13	-1061.41	1353.21	441.775	-1120.59	1162.12	331.512	-852.345	1244.4	612.837	-990.523	1372.51	691.3	-1004.2	1132.93	697.425	-1024.08	1059.37	696.007	-1162.97	946.04	640.89	-1206.87	886.417	706.532	-1187.31	859.9	673.767	-1257.24	830.334
784	0	491.416	-1073.22	1582	373.565	-1074.85	1590.3	486.646	-915.281	1511.95	378.337	-920.948	1514.97	424.168	-943.762	1442.54	416.019	-858.375	1165.31	440.227	-1070.53	1351.9	442.095	-1129.37	1160.55	331.242	-861.499	1243.1	612.723	-999.346	1371.16	691.515	-1013.13	1131.78	697.624	-1033.78	1058.31	696.077	-1173.1	945.622	640.9	-1217.12	886.223	706.576	-1197.95	859.525	673.514	-1267.68	830.242
785	0	491.035	-1082.38	1580.69	373.051	-1084.44	1588.71	486.003	-924.283	1511	377.627	-930.112	1513.86	423.924	-952.669	1441.11	415.799	-867.408	1164.12	440.154	-1079.57	1350.64	442.374	-1138.41	1159.26	330.808	-870.709	1241.74	612.419	-1008.1	1369.92	691.305	-1021.87	1130.72	697.794	-1043.09	1057.39	696.043	-1183.06	945.276	640.894	-1226.99	885.794	706.697	-1208.29	859.275	673.411	-1277.9	830.19
786	0	490.465	-1091.64	1579.28	372.531	-1093.83	1587.02	485.418	-933.177	1510.13	377.032	-939.373	1512.64	423.255	-961.756	1439.81	415.591	-876.454	1162.56	439.961	-1088.59	1349.39	442.529	-1147.52	1157.9	330.552	-879.868	1240.28	612.037	-1016.82	1368.71	690.848	-1030.47	1129.52	698.059	-1052.35	1056.52	696.149	-1192.6	944.833	640.92	-1236.58	885.302	706.94	-1218.14	858.894	673.272	-1287.7	829.65
787	0	489.669	-1101.06	1577.81	371.588	-1103.42	1585.37	484.486	-942.311	1509.15	376.174	-948.739	1511.42	422.854	-970.662	1438.39	415.272	-885.454	1161.23	439.667	-1097.67	1348.04	442.516	-1156.62	1156.46	330.177	-889.056	1238.7	611.574	-1025.62	1367.39	690.957	-1039.42	1128.48	698.068	-1061.46	1055.5	696.182	-1201.98	943.947	641.002	-1245.92	884.406	707.186	-1227.7	858.182	673.312	-1297.13	828.945
788	0	488.691	-1110.52	1576.54	370.77	-1113.1	1583.71	483.453	-951.595	1508.39	375.141	-958.263	1510.41	422.04	-979.878	1437.16	415.038	-894.648	1159.94	439.324	-1106.94	1346.8	442.543	-1165.86	1154.99	329.8	-898.51	1237.12	611.056	-1034.7	1366.27	690.508	-1048.22	1127.36	697.944	-1070.5	1054.53	696.256	-1211.19	943.132	641.17	-1254.91	883.345	707.491	-1237.09	857.308	673.47	-1306.29	827.955
789	0	487.683	-1119.97	1575.54	369.685	-1122.64	1582.31	482.389	-960.946	1507.75	374.137	-967.647	1509.3	421.399	-989.129	1436.01	414.65	-903.824	1158.91	438.843	-1116.2	1345.64	442.53	-1175.29	1153.81	329.39	-907.859	1235.85	610.521	-1043.66	1365.44	690.536	-1057.11	1126.71	697.907	-1079.34	1053.77	696.307	-1220.11	942.185	641.346	-1263.63	882.171	707.842	-1245.87	856.517	673.798	-1314.96	826.95
790	0	486.487	-1129.43	1574.63	368.352	-1132.25	1581.03	481.375	-970.434	1507.05	372.869	-977.35	1508.4	420.56	-998.732	1435.04	414.291	-913.345	1157.61	438.277	-1125.5	1344.64	442.373	-1184.63	1152.59	328.884	-917.326	1234.3	609.9	-1052.87	1364.62	690.218	-1065.87	1125.91	697.726	-1088.1	1052.97	696.564	-1228.63	941.145	641.662	-1272.04	880.888	708.321	-1254.3	855.457	674.278	-1323.3	825.597
791	0	485.163	-1139.1	1573.72	367.171	-1141.79	1579.82	480.207	-980.183	1506.2	372.035	-986.833	1507.08	419.455	-1008.04	1433.79	413.926	-922.682	1156.28	437.56	-1134.99	1343.49	442.068	-1194.11	1151.45	328.404	-927.053	1232.81	608.909	-1062.19	1363.59	689.442	-1074.62	1124.91	697.499	-1096.84	1052.03	696.705	-1236.94	939.898	642.018	-1280.18	879.269	708.797	-1262.47	854.128	674.967	-1331.21	824.104
792	0	483.749	-1148.82	1572.91	365.68	-1151.45	1578.59	478.973	-989.813	1505.35	370.892	-996.341	1506.05	418.402	-1017.68	1432.73	413.431	-932.284	1155.32	436.736	-1144.71	1342.52	441.797	-1203.88	1150.36	327.766	-936.869	1231.47	608	-1071.7	1362.92	688.921	-1083.52	1124.34	697.147	-1105.38	1051.41	696.867	-1244.99	938.66	642.458	-1288.03	877.646	709.401	-1270.13	852.816	675.679	-1338.83	822.321
793	0	482.153	-1158.58	1572.29	363.985	-1160.98	1577.8	477.819	-999.442	1504.58	369.451	-1005.98	1504.99	417.182	-1027.43	1431.66	412.986	-942.2	1154.09	435.693	-1154.36	1341.54	441.303	-1213.57	1149.51	327.094	-946.714	1230.13	607.032	-1081.24	1362.38	688.821	-1092.41	1124.24	696.722	-1113.82	1051.05	697.048	-1252.72	937.364	642.993	-1295.48	875.793	709.725	-1277	851.525	676.507	-1346	820.539
794	0	480.455	-1168.42	1571.62	362.26	-1170.68	1576.84	476.617	-1009.31	1503.92	368.261	-1015.67	1504.03	415.832	-1037.4	1430.71	412.468	-952.18	1152.9	434.688	-1164.2	1340.65	440.773	-1223.54	1148.65	326.521	-956.974	1228.72	605.987	-1090.9	1361.81	688.059	-1101.25	1123.77	696.428	-1122.23	1050.55	697.375	-1260.32	935.919	643.626	-1302.76	873.718	710.596	-1284.16	849.974	677.485	-1352.85	818.311
795	0	478.711	-1178.37	1571.01	360.696	-1180.26	1575.94	475.202	-1019.34	1503.24	366.986	-1025.33	1503.21	414.497	-1047.19	1429.72	411.92	-962.482	1151.82	433.635	-1174.19	1339.72	440.176	-1233.78	1147.84	325.665	-967.226	1227.32	604.699	-1100.74	1361.07	687.347	-1110.25	1123.21	695.75	-1130.54	1049.78	697.61	-1267.72	934.239	644.365	-1309.75	871.49	711.404	-1290.84	848.169	678.576	-1359.35	815.883
796	0	476.814	-1188.28	1570.53	358.654	-1189.88	1575.24	473.97	-1029.2	1502.72	365.709	-1034.86	1502.51	413.114	-1057.23	1428.87	411.024	-973.114	1150.67	432.487	-1184.08	1339.14	439.492	-1244.11	1147.26	324.713	-977.724	1225.9	603.447	-1110.58	1360.54	686.541	-1119.22	1122.83	695.174	-1138.75	1049.23	698.013	-1274.91	932.697	645.285	-1316.61	869.183	712.415	-1297.29	846.319	679.688	-1365.46	813.341
797	0	474.804	-1198.15	1570.54	356.559	-1199.67	1575.03	472.305	-1039.16	1502.72	363.969	-1044.69	1502.12	411.811	-1067.29	1428.23	410.141	-983.726	1149.91	431.339	-1194.26	1338.67	438.866	-1254.79	1147.03	323.889	-988.156	1224.91	602.183	-1120.44	1360.3	685.715	-1128.08	1122.63	694.417	-1146.77	1048.84	698.423	-1281.64	930.947	646.137	-1322.86	866.802	713.344	-1303.1	844.533	681.051	-1371.1	810.698
798	0	472.649	-1208.19	1570.83	354.421	-1209.48	1574.83	470.83	-1049.24	1503.1	362.395	-1054.46	1502.06	410.334	-1077.53	1427.92	409.357	-994.403	1148.99	430.196	-1204.36	1338.46	438.336	-1265.87	1146.77	323.048	-998.792	1223.84	601.114	-1130.56	1360.21	684.819	-1136.89	1122.31	693.581	-1154.78	1048.41	699	-1288.27	929.182	647.108	-1329.08	864.25	714.27	-1308.6	842.519	682.409	-1376.54	807.8
799	0	470.353	-1218.37	1571.05	352.158	-1219.27	1574.46	469.245	-1059.25	1503.55	360.822	-1064.2	1502.24	408.933	-1087.8	1427.75	408.481	-1005.41	1148.62	428.999	-1214.7	1338.38	437.756	-1277.19	1146.7	322.243	-1009.38	1223.11	600.002	-1141.01	1360.28	683.756	-1145.71	1122.06	692.679	-1162.73	1048.12	699.38	-1294.66	927.187	648.065	-1334.41	861.273	715.186	-1313.81	840.375	683.879	-1381.45	804.836
800	0	468.062	-1228.47	1571.46	349.947	-1229.18	1574.32	467.549	-1069.22	1504.27	359.256	-1073.86	1502.32	407.68	-1097.84	1427.71	407.674	-1016.38	1148.35	427.698	-1224.96	1338.67	437.193	-1288.55	1147.07	321.458	-1020.01	1222.45	598.897	-1151.48	1360.69	682.711	-1154.45	1122.24	691.711	-1170.62	1048.21	699.747	-1300.6	925.266	648.996	-1339.72	858.602	716.168	-1318.53	838.476	685.467	-1385.86	802.015
801	0	465.873	-1238.62	1572.19	347.681	-1239.12	1574.41	465.867	-1079.28	1505.25	357.65	-1083.81	1502.58	406.593	-1108	1427.87	406.94	-1027.34	1148.04	426.532	-1235.35	1339.13	436.614	-1299.95	1147.68	320.844	-1030.53	1222.06	597.694	-1162.14	1361.34	681.742	-1163.05	1122.67	690.745	-1178.35	1048.43	700.219	-1306.13	923.547	649.899	-1344.47	855.913	717.317	-1322.84	836.791	687.06	-1389.66	799.018
802	0	463.592	-1248.81	1573.16	345.374	-1249.03	1574.74	464.14	-1089.47	1506.15	355.894	-1093.87	1503.13	405.424	-1118.14	1428.21	406.483	-1038.28	1148.04	425.315	-1245.72	1339.77	435.863	-1311.46	1148.47	320.373	-1041.05	1221.95	596.511	-1173.05	1362.09	680.216	-1171.59	1123	689.594	-1186.23	1048.71	700.508	-1311.6	921.641	650.806	-1348.97	853.234	717.909	-1326.4	834.651	688.717	-1393.03	796.066
803	0	461.278	-1259.06	1574.35	343.127	-1259.03	1575.28	462.489	-1099.79	1507.21	354.33	-1103.78	1503.85	404.163	-1128.37	1428.87	406.121	-1049.29	1148.57	424.087	-1256.16	1340.76	434.886	-1322.9	1149.61	320.034	-1051.53	1222.16	595.307	-1183.9	1363.17	679.284	-1180.47	1123.9	688.372	-1194.08	1049.47	700.802	-1316.62	920.183	651.492	-1353.11	850.728	718.651	-1329.7	832.866	690.349	-1395.86	793.282
804	0	459.004	-1269.23	1575.74	340.817	-1268.92	1576.14	461.073	-1109.83	1508.5	352.697	-1113.67	1504.5	403.021	-1138.59	1429.67	405.853	-1060.19	1149.38	422.736	-1266.42	1342.03	433.737	-1334.04	1151.07	319.538	-1061.75	1222.7	594.355	-1194.72	1364.77	677.94	-1189.06	1125.16	687.284	-1201.67	1050.66	700.859	-1321.28	918.758	652.231	-1356.63	848.301	719.281	-1332.28	831.434	691.811	-1398.08	790.563
805	0	456.824	-1279.35	1577.25	338.584	-1278.79	1577.06	459.632	-1120.07	1509.76	351.257	-1123.69	1505.34	401.913	-1148.57	1430.78	405.652	-1070.91	1150.15	421.421	-1276.89	1343.37	432.449	-1344.87	1152.62	319.181	-1072.07	1223.4	593.314	-1205.56	1366.4	677.122	-1198.1	1126.72	686.052	-1209.29	1052.05	700.965	-1325.78	917.724	652.905	-1359.83	846.201	719.726	-1334.58	830.184	693.174	-1399.86	787.891
806	0	454.653	-1289.48	1578.73	336.544	-1288.6	1578.14	458.143	-1130.35	1510.86	350.117	-1133.78	1506.03	400.932	-1158.75	1431.85	405.375	-1081.69	1151.06	420.14	-1287.16	1344.64	431.201	-1355.83	1154.26	318.81	-1082.31	1224.14	591.924	-1216.33	1367.9	675.77	-1207.23	1128.19	684.688	-1216.84	1053.38	700.918	-1330.17	916.777	653.58	-1362.82	843.994	720.257	-1336.91	829.06	694.481	-1401.44	785.297
807	0	452.625	-1299.52	1580.49	334.546	-1298.3	1579.37	456.812	-1140.67	1512.17	348.775	-1143.74	1507.11	399.635	-1168.67	1433.1	405.077	-1092.17	1152.03	418.944	-1297.47	1346.06	429.827	-1366.35	1155.94	318.273	-1092.54	1225.17	590.777	-1227.02	1369.53	674.482	-1216.37	1129.74	683.26	-1224.26	1054.79	700.975	-1334.37	916.025	654.121	-1366.06	842.59	720.716	-1338.98	828.205	695.531	-1402.52	782.689
808	0	450.708	-1309.35	1582.26	332.694	-1307.91	1580.71	455.601	-1150.75	1513.62	347.477	-1153.55	1508.11	398.467	-1178.85	1434.37	404.72	-1102.68	1153.43	417.67	-1307.51	1347.61	428.539	-1376.89	1157.85	317.659	-1102.68	1226.27	589.711	-1237.49	1371.41	673.327	-1225.42	1131.66	681.841	-1231.55	1056.55	701.056	-1338.4	915.676	654.804	-1368.67	841.029	720.927	-1340.65	827.689	696.527	-1403.17	780.367
809	0	448.867	-1319.27	1583.89	330.873	-1317.5	1581.92	454.372	-1160.73	1515.02	346.498	-1163.15	1509.18	397.473	-1188.65	1435.58	404.295	-1112.83	1154.73	416.407	-1317.55	1349.04	427.117	-1387.03	1159.46	317.145	-1112.82	1227.26	588.614	-1247.77	1373.02	672.041	-1234.6	1133.24	680.527	-1238.8	1058.19	701.055	-1342.44	915.359	655.511	-1371.08	839.596	721.584	-1342.77	827.487	697.357	-1403.88	777.846
810	0	447.016	-1329.03	1585.28	329.097	-1327.01	1583.11	453.329	-1170.54	1516.34	345.12	-1172.84	1510.22	396.514	-1198.37	1436.96	403.857	-1122.73	1155.85	415.193	-1327.53	1350.33	425.749	-1397.27	1160.95	316.39	-1122.83	1228.33	587.444	-1257.91	1374.6	670.824	-1243.75	1134.74	679.103	-1245.93	1059.69	701.019	-1346.48	915.044	655.971	-1374.19	838.62	721.972	-1344.72	827.202	698.042	-1404.42	775.611
811	0	445.435	-1338.81	1586.73	327.549	-1336.27	1584.26	452.301	-1180.4	1517.65	343.974	-1182.35	1511.22	395.324	-1208.2	1438.1	403.382	-1132.5	1157.09	414.005	-1337.29	1351.64	424.446	-1407.04	1162.34	315.529	-1132.68	1229.45	586.487	-1267.85	1376.08	669.682	-1252.72	1136.24	677.609	-1252.97	1061.18	700.994	-1350.47	914.791	656.711	-1375.95	836.977	722.465	-1346.87	827.244	698.651	-1404.82	773.24
812	0	443.912	-1348.4	1588.15	326.086	-1345.58	1585.41	451.426	-1190.16	1518.83	343.418	-1191.77	1512.14	394.428	-1217.81	1439.13	402.705	-1142.14	1158.22	413.01	-1346.97	1352.86	423.307	-1416.86	1163.79	314.784	-1142.41	1230.43	585.639	-1277.57	1377.54	668.644	-1261.56	1137.6	676.372	-1259.93	1062.7	700.895	-1354.49	914.591	657.066	-1378.33	835.971	723.025	-1349	827.309	699.217	-1405.09	771.256
813	0	442.534	-1358.03	1589.36	324.612	-1354.91	1586.49	450.582	-1199.79	1519.77	342.52	-1201.05	1513.11	393.585	-1227.32	1440.19	402.213	-1151.48	1159.13	412	-1356.52	1354.02	422.259	-1426.14	1164.87	313.953	-1151.99	1231.34	584.714	-1287.15	1378.62	667.651	-1270.38	1138.54	675.017	-1267.06	1063.82	700.869	-1358.66	914.416	657.522	-1380.91	835.056	723.322	-1351.44	827.325	699.634	-1405.45	769.06
814	0	441.232	-1367.52	1590.45	323.362	-1363.86	1587.38	449.69	-1209.42	1520.59	341.834	-1210.36	1513.85	392.593	-1236.92	1441.24	401.4	-1160.64	1160.19	411.119	-1365.87	1354.94	421.356	-1435.33	1165.79	313.121	-1161.49	1232.3	583.596	-1296.53	1379.39	666.813	-1279.04	1139.51	673.752	-1274.17	1064.87	700.728	-1363.03	914.24	657.743	-1383.44	833.985	723.859	-1353.98	827.349	699.998	-1405.83	767.313
815	0	439.976	-1376.9	1591.54	322.048	-1373.09	1588.23	449.095	-1218.96	1521.59	341.281	-1219.61	1514.64	391.834	-1246.19	1442.12	400.589	-1169.72	1161.26	410.275	-1375.17	1355.87	420.571	-1444.31	1166.59	312.268	-1170.73	1233.26	582.784	-1305.59	1380.45	665.953	-1287.33	1140.52	672.682	-1281.06	1065.93	700.417	-1366.85	914.099	657.864	-1385.9	833.069	724.122	-1356.45	827.644	700.245	-1406.27	765.499
816	0	438.802	-1386.32	1592.48	320.957	-1382.16	1589.01	448.455	-1228.26	1522.59	340.554	-1228.81	1515.39	390.767	-1255.5	1443.1	399.632	-1178.64	1162.13	409.542	-1384.3	1356.61	419.955	-1453.44	1167.31	311.249	-1179.86	1234.26	582.088	-1314.57	1381.42	665.13	-1295.4	1141.38	671.621	-1288.05	1067.02	700.067	-1371.41	913.923	657.929	-1388.62	832.321	724.357	-1359.35	827.958	700.455	-1407.06	764.064
817	0	437.69	-1395.7	1593.05	319.864	-1391.2	1589.63	447.761	-1237.69	1523.31	340.033	-1237.69	1516.11	390.085	-1264.7	1443.92	398.646	-1187.45	1162.85	408.872	-1393.35	1357.14	419.54	-1462.18	1167.64	310.472	-1188.82	1235.12	581.338	-1323.48	1381.95	664.15	-1303.31	1142.01	670.62	-1295.08	1067.71	699.484	-1375.87	913.516	657.927	-1391.87	831.482	724.687	-1362.38	828.123	700.694	-1408.17	762.698
818	0	436.742	-1405.01	1593.78	319.038	-1400.28	1590.2	447.237	-1246.9	1524.17	339.408	-1246.72	1516.99	389.302	-1273.85	1444.69	397.669	-1196.39	1163.85	408.401	-1402.26	1357.81	419.203	-1470.61	1167.98	309.48	-1197.76	1236.01	580.846	-1332.24	1382.67	663.28	-1310.89	1142.54	669.724	-1301.88	1068.39	698.994	-1380.47	913.335	657.803	-1395.09	830.882	724.499	-1365.68	828.379	700.598	-1409.17	761.427
819	0	435.924	-1414.22	1594.58	318.206	-1409.34	1590.86	446.691	-1256.06	1525.22	338.929	-1255.73	1517.87	388.697	-1282.78	1445.6	396.694	-1205.16	1164.72	407.874	-1411	1358.46	419.059	-1479.13	1168.51	308.575	-1206.47	1237.06	580.163	-1340.77	1383.41	662.27	-1318	1143.15	668.878	-1308.39	1069.27	698.346	-1385.16	913.326	657.413	-1396.96	830.297	724.734	-1369.24	828.935	700.41	-1410.55	760.661
820	0	435.116	-1423.39	1595.23	317.452	-1418.23	1591.42	446.347	-1265.15	1526.25	338.504	-1264.61	1518.74	387.946	-1291.59	1446.55	395.551	-1213.75	1165.85	407.389	-1419.59	1359.07	418.838	-1487.71	1169.02	307.655	-1215.08	1238.13	579.64	-1349.17	1384.21	661.343	-1324.84	1143.67	668.002	-1314.66	1070.03	697.753	-1389.41	913.546	656.961	-1400.02	830.075	724.753	-1372.73	829.489	700.242	-1412.34	760.156
821	0	434.402	-1432.63	1595.69	316.695	-1427.31	1591.98	445.846	-1274.21	1527.26	338.029	-1273.48	1519.87	387.266	-1300.23	1447.41	394.48	-1222.21	1166.77	406.966	-1428.14	1359.6	418.595	-1496.21	1169.45	306.805	-1223.49	1239.11	579.047	-1357.42	1384.89	660.458	-1331.52	1144.18	667.021	-1320.84	1070.61	696.988	-1394.01	913.629	656.407	-1403.3	829.796	724.482	-1376.46	829.924	699.785	-1414.53	759.736
822	0	433.887	-1441.77	1596.23	316.273	-1436.36	1592.51	445.495	-1283.15	1528.32	337.818	-1282.16	1520.97	386.462	-1308.9	1448.14	393.544	-1230.62	1167.52	406.472	-1436.55	1360.19	418.413	-1504.43	1170.03	305.685	-1231.93	1240.02	578.466	-1365.52	1385.61	659.585	-1337.78	1144.88	666.12	-1326.71	1071.48	696.211	-1398.57	913.853	655.747	-1406.64	829.768	723.811	-1380.2	830.572	699.161	-1417.02	759.494
823	0	433.383	-1450.8	1596.76	315.637	-1445.19	1593.13	445.085	-1291.93	1529.39	337.325	-1290.95	1521.96	385.896	-1317.41	1448.89	392.63	-1238.81	1168.36	406.107	-1444.87	1360.88	418.224	-1512.42	1170.69	304.787	-1240.2	1240.84	577.947	-1373.37	1386.44	658.909	-1343.65	1145.73	665.383	-1332.43	1072.47	695.402	-1403.11	914.178	654.936	-1410.16	830.043	723.448	-1384.36	831.371	698.737	-1420.48	759.816
824	0	433.055	-1459.81	1597.13	315.246	-1454.19	1593.67	444.659	-1300.69	1530.25	336.935	-1299.53	1522.91	385.101	-1325.74	1449.59	391.828	-1247.05	1169.16	405.739	-1453.19	1361.46	418.102	-1520.51	1171.28	303.838	-1248.52	1241.68	577.331	-1381.36	1387.05	658.34	-1349.42	1146.49	664.374	-1338.18	1073.1	694.657	-1407.76	914.477	654.206	-1413.9	830.239	722.925	-1388.38	831.912	697.894	-1423.64	759.934
825	0	432.765	-1468.71	1597.55	315.138	-1462.97	1594.22	444.369	-1309.39	1531.03	336.598	-1308.11	1524.17	384.457	-1334.01	1450.33	390.876	-1255.16	1169.81	405.395	-1461.37	1362.09	417.849	-1528.19	1171.86	302.958	-1256.71	1242.58	576.765	-1389.23	1387.76	657.442	-1354.83	1147.29	663.495	-1343.86	1073.89	693.944	-1412.38	914.943	653.238	-1418.19	830.678	721.845	-1392.37	832.299	697.132	-1427.27	760.215
826	0	432.492	-1477.58	1597.94	314.793	-1471.69	1594.77	444.056	-1318.02	1532.01	336.02	-1316.74	1525.41	383.782	-1342.21	1451.05	390.086	-1263.24	1170.59	404.921	-1469.5	1362.71	417.447	-1536.11	1172.63	302.093	-1264.87	1243.32	576.237	-1396.85	1388.57	656.761	-1360.24	1148.28	662.74	-1349.3	1074.83	693.211	-1417.09	915.457	652.309	-1422.51	831.217	721.099	-1396.78	833.023	696.281	-1431.5	760.868
827	0	432.188	-1486.23	1598.16	314.498	-1480.45	1595.29	443.739	-1326.45	1532.95	335.973	-1325.19	1526.43	383.08	-1350.35	1451.69	389.169	-1271.43	1171.32	404.424	-1477.51	1363.36	417.061	-1543.97	1173.41	301.227	-1273.08	1243.94	575.671	-1404.49	1389.37	655.646	-1365.34	1149.14	662.006	-1354.73	1075.77	692.443	-1421.84	915.953	651.468	-1427.06	831.812	719.848	-1400.89	833.612	695.366	-1436.13	761.404
828	0	431.982	-1494.89	1598.28	314.377	-1489.08	1595.73	443.471	-1334.91	1533.66	335.683	-1333.67	1527.26	382.461	-1358.38	1452.27	388.5	-1279.79	1171.93	403.981	-1485.57	1363.85	416.619	-1551.9	1174.07	300.59	-1281.12	1244.41	575.278	-1412.15	1389.94	655.082	-1370.92	1149.97	661.331	-1360.37	1076.54	691.736	-1426.8	916.406	650.629	-1431.98	832.312	718.911	-1405.54	833.999	694.361	-1440.55	761.737
829	0	431.819	-1503.5	1598.47	314.276	-1497.66	1596.09	443.188	-1343.34	1534.26	335.335	-1342.06	1528.11	381.853	-1366.39	1452.87	387.552	-1288.32	1172.17	403.62	-1493.54	1364.34	416.199	-1559.27	1174.42	299.789	-1289.21	1245.02	574.647	-1419.73	1390.41	654.508	-1376.67	1150.68	660.478	-1365.94	1077.21	691.032	-1431.86	916.902	649.688	-1437.24	832.918	717.627	-1410.16	834.24	693.371	-1445.84	762.426
830	0	431.694	-1511.99	1598.64	314.074	-1506.14	1596.51	442.934	-1351.69	1534.95	335.197	-1350.25	1528.91	381.275	-1374.45	1453.31	386.359	-1296.98	1172.72	403.242	-1501.51	1364.78	415.757	-1566.79	1174.93	299.094	-1297.27	1245.48	574.151	-1427.27	1390.92	653.978	-1382.36	1151.42	660.053	-1371.43	1077.98	690.375	-1437.08	917.47	648.729	-1442.79	833.66	716.686	-1415.2	834.685	692.25	-1451.17	763.079
831	0	431.561	-1520.5	1598.74	313.928	-1514.64	1596.7	442.849	-1359.96	1535.47	335.04	-1358.43	1529.63	380.602	-1382.53	1453.76	385.544	-1305.13	1172.98	402.833	-1509.42	1365.1	415.369	-1574.71	1175.42	298.533	-1305.2	1245.91	573.692	-1434.79	1391.31	653.456	-1388.31	1152.14	660.035	-1377.27	1078.89	689.583	-1442.36	917.82	647.748	-1448.62	834.32	715.223	-1420.1	834.888	691.112	-1456.75	763.538
832	0	431.401	-1528.99	1598.7	313.849	-1523.11	1596.89	442.606	-1368.26	1535.81	334.728	-1366.71	1530.26	380.254	-1390.5	1454	385.365	-1312.71	1173.35	402.51	-1517.34	1365.26	415.022	-1582.75	1175.72	297.989	-1313.15	1246.23	573.263	-1442.41	1391.54	652.829	-1394.3	1152.48	658.893	-1383.05	1079.08	688.729	-1448	918.101	646.735	-1454.71	834.774	713.837	-1425.53	834.875	689.841	-1462.75	763.905
833	0	431.215	-1537.42	1598.62	313.627	-1531.38	1597	442.32	-1376.51	1536.17	334.419	-1374.89	1530.79	379.861	-1398.5	1454.19	384.817	-1320.44	1173.65	402.175	-1525.25	1365.34	414.749	-1589.83	1175.55	297.386	-1321.13	1246.48	572.932	-1450.02	1391.87	652.327	-1400.59	1153.07	658.512	-1388.88	1079.6	687.857	-1453.74	918.285	645.573	-1461.05	835.178	712.273	-1431.1	834.95	688.325	-1468.9	764.225
834	0	431.142	-1545.77	1598.56	313.529	-1539.65	1596.97	442.234	-1384.59	1536.58	334.454	-1382.98	1531.23	379.254	-1406.62	1454.35	384.25	-1328.41	1173.86	401.821	-1533.12	1365.47	414.363	-1597.5	1175.61	296.867	-1329.12	1246.67	572.595	-1457.58	1392.12	651.856	-1406.79	1153.58	658.258	-1394.74	1080.18	686.945	-1459.59	918.535	644.325	-1467.54	835.721	710.792	-1436.85	834.977	686.864	-1475.48	764.672
835	0	431.122	-1554.14	1598.36	313.497	-1547.94	1596.85	442.223	-1392.77	1536.72	334.563	-1391.05	1531.46	378.81	-1414.68	1454.28	383.713	-1336.37	1173.92	401.611	-1541.08	1365.48	414.213	-1605.21	1175.5	296.459	-1336.99	1246.73	572.215	-1465.25	1391.98	651.451	-1413.15	1153.66	657.745	-1400.8	1080.26	686.091	-1465.73	918.552	643.111	-1474.45	836.108	709.125	-1443.06	834.707	685.38	-1482.32	764.891
836	0	431.124	-1562.47	1598.03	313.463	-1556.23	1596.76	442.235	-1400.97	1536.71	334.448	-1399.21	1531.77	378.629	-1422.76	1454.23	383.308	-1344.21	1173.82	401.434	-1549.01	1365.37	414.035	-1613.07	1175.27	295.995	-1344.96	1246.78	571.887	-1473	1391.73	651.099	-1419.76	1153.67	657.358	-1406.97	1080.2	685.165	-1472.06	918.512	641.805	-1481.41	836.339	707.523	-1449.51	834.227	683.626	-1489.18	764.898
837	0	431.086	-1570.75	1597.7	313.414	-1564.33	1596.69	442.299	-1409.11	1536.75	334.548	-1407.3	1531.98	378.311	-1430.79	1454.16	382.699	-1352.07	1173.7	401.161	-1556.91	1365.14	413.828	-1620.86	1175.09	295.542	-1352.92	1246.69	571.629	-1480.77	1391.58	650.822	-1426.28	1153.8	656.952	-1413.12	1080.22	684.156	-1478.43	918.384	640.401	-1488.46	836.585	705.777	-1455.97	833.889	681.961	-1496.59	765.175
838	0	431.096	-1579.07	1597.29	313.403	-1572.39	1596.47	442.451	-1417.35	1536.72	334.704	-1415.32	1531.97	378.032	-1438.95	1453.94	382.505	-1360.12	1173.54	400.963	-1564.88	1364.82	413.768	-1628.66	1174.74	295.209	-1360.87	1246.45	571.44	-1488.5	1391.43	650.515	-1432.8	1153.83	656.647	-1419.45	1080.23	683.094	-1485.02	918.186	638.95	-1495.55	836.709	704.231	-1462.66	833.586	680.057	-1504.03	765.169
839	0	431.11	-1587.47	1596.72	313.588	-1580.59	1596.03	442.759	-1425.58	1536.44	334.398	-1423.28	1531.93	377.629	-1447.21	1453.68	382.266	-1368.24	1173.42	400.798	-1573.04	1364.46	413.672	-1636.64	1174.17	295.011	-1368.76	1246.21	571.186	-1496.52	1390.98	650.209	-1439.64	1153.75	656.186	-1426.01	1079.95	682.047	-1491.94	917.758	637.673	-1503.54	836.913	702.453	-1469.81	832.985	678.118	-1511.76	764.89
840	0	431.256	-1595.85	1596.03	313.753	-1588.76	1595.66	443.037	-1433.93	1536.05	335.264	-1431.36	1531.87	377.433	-1455.4	1453.31	382.237	-1376.33	1172.93	400.654	-1581.08	1363.96	413.676	-1644.72	1173.56	294.848	-1376.83	1245.82	570.996	-1504.53	1390.41	649.867	-1446.64	1153.47	655.719	-1432.62	1079.5	680.866	-1498.96	917.234	636.505	-1511.42	836.943	700.56	-1477.03	832.069	676.188	-1519.59	764.634
841	0	431.447	-1604.25	1595.35	313.985	-1596.93	1595.31	443.475	-1442.2	1535.72	335.738	-1439.47	1531.77	377.322	-1463.58	1452.84	381.925	-1384.52	1172.61	400.486	-1589.14	1363.56	413.625	-1652.67	1172.93	294.68	-1384.88	1245.34	570.77	-1512.56	1389.88	649.518	-1453.6	1153.06	655.489	-1439.42	1079.06	679.692	-1506.1	916.686	634.054	-1518.05	836.224	698.808	-1484.34	831.353	674.157	-1527.51	764.204
842	0	431.711	-1612.65	1594.47	314.206	-1605.09	1594.81	443.924	-1450.38	1535.22	335.661	-1447.46	1531.5	377.29	-1471.83	1452.2	381.94	-1392.62	1171.91	400.379	-1597.2	1363.16	413.638	-1660.87	1172.16	294.64	-1392.91	1244.7	570.722	-1520.73	1389.21	649.304	-1460.75	1152.68	654.981	-1446.4	1078.52	678.64	-1513.56	916.119	631.887	-1525.78	835.512	696.987	-1492.16	830.357	672.186	-1535.84	764.017
843	0	432.071	-1621.22	1593.4	314.614	-1613.43	1594.17	444.479	-1458.83	1534.75	336.587	-1455.55	1531.5	377.196	-1480.18	1451.54	382.133	-1400.85	1171.22	400.221	-1605.23	1362.56	413.615	-1669.22	1171.25	294.738	-1400.96	1244.01	570.608	-1529.05	1388.39	649.006	-1468.14	1152.03	654.379	-1453.65	1077.86	677.507	-1521.22	915.357	630.677	-1534.13	835.189	695.265	-1500.06	829.391	670.29	-1544.34	763.453
844	0	432.537	-1629.77	1592.44	315.169	-1621.88	1593.58	444.979	-1467.26	1534.13	337.059	-1463.7	1531.05	377.162	-1488.52	1450.77	382.068	-1409.03	1170.42	400.003	-1613.36	1362.03	413.59	-1677.73	1170.3	294.787	-1409.11	1243.12	570.418	-1537.22	1387.39	648.739	-1475.69	1151.32	654.238	-1460.93	1077.08	676.276	-1528.96	914.425	629.587	-1542.36	835.154	693.564	-1508.03	828.416	668.264	-1552.81	762.748
845	0	433.185	-1638.29	1591.42	315.767	-1630.31	1592.96	445.423	-1475.74	1533.37	337.513	-1472.08	1530.63	377.15	-1496.77	1449.84	382.413	-1417.32	1169.47	399.745	-1621.46	1361.68	413.584	-1686.19	1169.3	295.004	-1417.12	1242.05	570.455	-1545.67	1386.62	648.442	-1483.29	1150.54	653.844	-1468.24	1076.3	675.179	-1536.99	913.608	627.687	-1550.79	834.387	691.889	-1516.31	827.431	666.252	-1561.56	762.116
846	0	434.156	-1646.94	1590.22	316.634	-1639.07	1592.2	445.982	-1484.1	1532.35	337.879	-1480.72	1530.23	377.193	-1504.99	1448.88	382.604	-1425.56	1168.03	399.612	-1629.38	1361.13	413.63	-1694.71	1168.11	295.382	-1425.27	1240.77	570.545	-1554.11	1385.5	648.101	-1491.1	1149.38	653.454	-1475.91	1075.02	674.047	-1545.17	912.503	626.388	-1559.32	833.623	690.096	-1524.8	825.899	664.251	-1570.18	760.991
847	0	435.207	-1655.6	1588.86	317.606	-1647.83	1591.45	446.36	-1492.69	1531.13	338.376	-1489.36	1529.62	377.435	-1513.25	1447.7	382.911	-1433.91	1167.04	399.589	-1637.08	1360.56	413.748	-1703.29	1166.94	295.795	-1433.44	1239.55	570.537	-1562.61	1384.26	647.815	-1499.16	1148.05	653.12	-1483.88	1073.72	672.959	-1553.68	911.307	625.153	-1568.23	832.804	688.744	-1533.54	824.522	662.47	-1579.42	760.115
848	0	436.318	-1664.24	1587.44	318.679	-1656.95	1590.5	446.833	-1501.22	1530.18	338.789	-1498.2	1528.83	377.67	-1521.51	1446.5	383.435	-1442.34	1165.76	399.378	-1645.23	1360.19	413.735	-1711.94	1165.8	296.256	-1441.58	1238.26	570.566	-1570.93	1382.99	647.659	-1507.18	1146.78	652.87	-1492.16	1072.47	671.913	-1562.29	910.094	623.895	-1577.57	832.294	687.181	-1542.6	823.202	660.625	-1588.54	759.084
849	0	437.388	-1672.98	1585.93	319.792	-1665.85	1589.43	447.36	-1509.68	1529.13	339.289	-1506.94	1528.29	377.979	-1529.66	1445.12	384.047	-1450.83	1164.32	399.054	-1653.34	1359.5	413.774	-1720.71	1164.59	296.712	-1449.75	1236.8	570.818	-1579.39	1381.82	647.639	-1515.39	1145.55	652.692	-1500.39	1071.18	670.85	-1571.13	908.686	622.455	-1586.54	831.022	685.904	-1551.6	821.729	658.858	-1597.8	757.807
850	0	438.669	-1681.94	1584.22	321.07	-1675.18	1588.26	447.934	-1518.25	1527.86	339.776	-1515.86	1527.42	378.516	-1537.94	1443.73	384.622	-1459.31	1162.85	398.95	-1661.53	1358.76	413.79	-1729.48	1163.24	297.357	-1458.07	1235.17	571.131	-1588.16	1380.45	647.784	-1523.87	1144.09	652.662	-1508.83	1069.6	669.938	-1580.26	907.056	620.944	-1595.4	829.336	684.52	-1561.07	819.965	657.083	-1607.39	756.226
851	0	439.926	-1690.96	1582.46	322.258	-1684.44	1586.86	448.567	-1527.1	1526.48	340.232	-1524.94	1526.44	379.077	-1546.07	1442.18	385.057	-1467.99	1161.11	398.846	-1669.74	1357.74	413.809	-1738.55	1162	298.142	-1466.34	1233.41	571.452	-1596.86	1378.82	647.826	-1532.54	1142.3	652.54	-1517.68	1067.72	669.112	-1589.58	905.311	619.76	-1604.78	827.948	683.234	-1570.46	818.017	655.399	-1617.04	754.599
852	0	441.29	-1699.92	1580.86	323.601	-1693.58	1585.61	449.465	-1535.95	1525.33	341.076	-1533.96	1525.48	379.801	-1554.43	1440.5	385.989	-1476.8	1159.46	399.023	-1678.03	1356.91	413.866	-1747.49	1160.91	298.896	-1474.68	1231.68	572.1	-1605.63	1377.21	648.164	-1541.37	1140.59	653.055	-1526.44	1065.91	668.356	-1598.94	903.613	618.741	-1614.11	826.513	682.329	-1580.37	816.274	653.948	-1626.78	753.03
853	0	442.629	-1708.87	1579.2	324.974	-1702.81	1584.28	450.453	-1544.77	1524.14	342.027	-1543.04	1524.59	380.75	-1562.74	1438.9	386.897	-1485.6	1157.44	399.354	-1686.45	1355.84	413.923	-1756.5	1159.68	299.905	-1483.09	1229.86	572.79	-1614.44	1375.38	648.614	-1550.32	1138.64	653.143	-1535.71	1063.82	667.681	-1608.51	901.647	617.723	-1623.75	824.903	681.45	-1590.2	814.152	652.558	-1636.76	751.269
854	0	444.076	-1717.95	1577.52	326.414	-1712.08	1582.98	451.342	-1553.83	1522.67	342.962	-1552.15	1523.61	381.849	-1571.21	1437.34	387.971	-1494.76	1155.77	399.894	-1694.89	1354.7	413.948	-1765.8	1158.35	301.1	-1491.56	1228.09	573.751	-1623.65	1373.55	648.86	-1559.52	1136.4	653.162	-1544.87	1061.4	667.112	-1618.35	899.51	616.756	-1633.54	822.883	680.453	-1600.42	811.753	651.215	-1646.76	749.059
855	0	445.666	-1727.08	1576.13	327.898	-1721.21	1581.72	452.534	-1562.74	1521.43	344.085	-1561.36	1522.49	383.282	-1579.75	1435.9	388.983	-1503.89	1153.91	400.5	-1703.5	1353.47	413.893	-1774.88	1156.99	302.496	-1500.22	1226.48	574.746	-1632.77	1371.7	649.372	-1568.83	1134.21	653.334	-1554.57	1059.19	666.703	-1628.28	897.328	615.924	-1643.49	820.906	679.95	-1610.59	809.696	650.131	-1657.23	747.208
856	0	447.223	-1735.99	1574.88	329.589	-1730.44	1580.74	453.844	-1571.45	1520.26	345.47	-1570.52	1521.41	384.798	-1588.49	1434.39	390.15	-1512.95	1152.39	401.454	-1712.31	1352.34	413.849	-1784.29	1155.75	303.886	-1508.95	1225.06	575.836	-1641.9	1369.85	649.925	-1578.31	1132.05	653.922	-1564.2	1057.11	666.371	-1638.36	895.163	615.19	-1653.51	818.928	679.456	-1620.99	807.664	649.153	-1667.61	745.274
857	0	449.024	-1744.97	1573.7	331.367	-1739.66	1579.77	455.249	-1580.54	1519.21	346.878	-1579.51	1520.49	386.392	-1597.28	1433.15	391.376	-1522.18	1150.76	402.548	-1721.22	1350.94	413.887	-1793.55	1154.33	305.26	-1517.91	1223.8	577.186	-1651.29	1367.86	650.57	-1588.13	1129.69	654.26	-1574.33	1054.73	666.121	-1648.69	892.846	614.579	-1663.55	816.586	678.892	-1631.2	805.154	648.369	-1677.96	742.869
858	0	451.062	-1754.01	1572.61	333.405	-1748.89	1578.91	456.584	-1589.51	1518	348.405	-1588.9	1519.56	388.243	-1606.31	1432.05	392.606	-1531.56	1149.65	403.82	-1730.41	1349.64	414.129	-1803.14	1152.88	306.725	-1527.01	1222.68	578.711	-1660.93	1365.88	651.128	-1598.31	1127.18	654.481	-1584.52	1052.16	666.042	-1659.19	890.475	614.158	-1674.05	814.256	678.703	-1642	802.835	647.732	-1688.62	740.559
859	0	453.107	-1762.85	1571.73	335.52	-1758.19	1578.17	458.216	-1598.48	1517.03	350.124	-1598.01	1518.7	390.213	-1615.42	1431.09	393.712	-1541	1148.51	405.307	-1739.46	1348.57	414.53	-1812.62	1151.8	308.098	-1536.25	1221.89	580.214	-1670.32	1364	651.532	-1608.3	1124.77	654.917	-1594.73	1049.82	666.08	-1669.65	888.304	614.057	-1684.67	812.333	678.166	-1652.5	800.338	647.424	-1699.33	738.604
860	0	455.265	-1771.76	1570.98	337.664	-1767.34	1577.42	459.906	-1607.47	1516.33	351.737	-1607.21	1518.07	392.149	-1624.6	1430.25	394.989	-1550.6	1147.59	406.865	-1748.73	1347.69	415.121	-1822.34	1150.89	309.53	-1545.52	1221.18	582.006	-1679.76	1362.48	652.364	-1618.79	1122.78	655.174	-1605.28	1047.72	666.243	-1680.17	886.288	614.054	-1695.35	810.473	678.472	-1663.22	798.34	647.475	-1710.35	736.888
861	0	457.8	-1781.03	1570.25	339.851	-1776.62	1576.74	461.66	-1616.3	1515.52	353.549	-1616.7	1517.28	394.371	-1633.74	1429.36	396.185	-1560.57	1146.68	408.461	-1758.06	1346.76	415.818	-1832.16	1150.06	311.092	-1554.98	1220.51	583.818	-1689.42	1360.85	653	-1629.42	1120.56	655.8	-1615.94	1045.6	666.457	-1691.06	884.158	614.044	-1706.24	808.446	678.356	-1674.06	796.257	647.482	-1721.16	734.742
862	0	460.092	-1790.2	1569.46	342.177	-1786.12	1576.31	463.812	-1625.62	1514.95	355.484	-1625.87	1516.93	396.52	-1642.78	1428.66	397.456	-1570.68	1145.84	410.05	-1767.55	1345.92	416.614	-1842.33	1149.48	312.472	-1564.42	1219.9	585.574	-1699.04	1359.16	653.981	-1640.12	1118.27	656.154	-1626.96	1043.61	666.672	-1702.13	882.132	614.258	-1717.33	806.375	678.675	-1685.09	794.37	647.649	-1732.58	732.921
863	0	462.465	-1799.44	1569.34	344.519	-1795.36	1576.25	466.151	-1634.75	1514.75	357.876	-1635.17	1516.79	399.018	-1651.95	1428.16	398.596	-1580.58	1144.82	411.807	-1776.97	1345.63	417.451	-1852.67	1149.44	314.015	-1573.93	1219.63	587.55	-1708.76	1357.86	655.043	-1651.09	1116.51	656.52	-1637.7	1041.4	667.028	-1713.04	880.361	614.731	-1728.58	804.834	678.804	-1696.23	792.614	648.056	-1743.75	731.288
864	0	464.802	-1808.8	1569.35	346.846	-1804.59	1576.56	468.662	-1644.2	1514.8	360.431	-1644.4	1517	401.193	-1661.16	1427.9	399.08	-1590.61	1144.39	413.569	-1786.46	1345.65	418.312	-1863.06	1149.72	315.4	-1583.63	1219.39	589.365	-1718.47	1356.73	655.746	-1662.02	1114.8	657.342	-1649.25	1039.96	667.515	-1724.1	878.677	615.255	-1739.98	803.432	679.179	-1707.23	790.875	648.525	-1754.78	729.721
865	0	467.133	-1818.25	1569.29	349.315	-1813.78	1577.03	471.11	-1653.64	1514.76	362.998	-1653.43	1517.48	403.301	-1670.45	1427.81	400.398	-1600.72	1144.19	415.337	-1796	1345.81	419.004	-1873.59	1150.23	316.902	-1593.5	1219.37	591.02	-1728.16	1355.68	656.472	-1673.19	1113.23	657.687	-1660.82	1038.39	668.047	-1735.51	877.259	615.888	-1751.36	802.018	679.551	-1718.55	789.393	649.074	-1766.16	728.346
866	0	469.569	-1827.73	1569.48	351.747	-1822.97	1577.75	473.752	-1663.19	1514.9	365.647	-1662.64	1518.24	405.419	-1679.66	1427.92	401.468	-1610.86	1143.8	416.971	-1805.65	1346.18	419.639	-1883.94	1151.04	318.33	-1603.09	1219.51	592.917	-1738.29	1355.38	657.54	-1684.44	1112.19	658.359	-1672.58	1037.37	668.594	-1746.86	876.09	616.614	-1762.98	801.005	679.809	-1730.03	788.199	649.742	-1777.54	727.313
867	0	471.832	-1837.16	1570.08	354.091	-1831.95	1578.75	476.219	-1672.52	1515.17	368.156	-1672.01	1519	407.36	-1688.99	1428.29	402.649	-1621.07	1144.15	418.511	-1815.29	1346.9	420.168	-1894.37	1152.13	319.797	-1612.97	1220.1	594.705	-1748.21	1355.2	658.309	-1695.76	1111.67	658.803	-1684.28	1036.64	669.283	-1758.49	875.405	617.469	-1774.73	800.356	680.728	-1741.34	787.643	650.498	-1789.17	726.827
868	0	474.346	-1846.63	1570.95	356.569	-1841.13	1580.03	479.058	-1682.11	1515.87	370.816	-1681.11	1519.92	409.459	-1698.53	1429.09	403.704	-1631.46	1144.46	419.925	-1825.07	1347.84	420.623	-1904.84	1153.43	321.214	-1622.9	1220.89	596.519	-1758.46	1355.42	659.319	-1707.36	1111.33	659.424	-1696.29	1036.27	669.883	-1770.14	874.957	617.932	-1785.87	799.61	681.256	-1753	787.207	651.406	-1800.73	726.4
869	0	476.662	-1855.95	1571.87	359.144	-1850.35	1581.44	481.567	-1691.63	1516.68	373.394	-1690.36	1521.27	411.312	-1708.06	1429.94	404.911	-1641.78	1145.45	421.301	-1834.93	1348.83	420.963	-1915.19	1154.75	322.415	-1632.75	1222.05	597.695	-1768.55	1355.49	659.752	-1719.04	1110.74	659.721	-1708.28	1035.75	670.686	-1782.11	874.833	618.599	-1797.4	799.188	682.364	-1764.59	786.999	652.396	-1812.41	726.17
870	0	479.368	-1865.09	1572.87	361.651	-1859.42	1583.09	483.905	-1700.8	1517.57	375.836	-1699.44	1522.65	413.122	-1717.57	1431.09	406.047	-1651.97	1146.63	422.503	-1844.6	1350.18	421.267	-1925.23	1156.43	323.553	-1642.45	1223.39	599.213	-1778.91	1356.05	660.963	-1731.3	1111.31	660.473	-1720.75	1036.3	671.46	-1794.04	875.224	619.516	-1809.25	799.366	683.2	-1776.53	787.284	653.334	-1823.83	726.176
871	0	481.807	-1874.12	1574.1	364.213	-1868.53	1584.86	486.069	-1709.97	1518.8	377.917	-1708.73	1524.32	414.887	-1727.11	1432.47	407.052	-1662.13	1148.13	423.537	-1854.39	1351.72	421.399	-1935.29	1158.26	324.67	-1652.2	1225.03	600.504	-1789.14	1356.97	661.589	-1743.21	1111.8	661.078	-1732.77	1036.87	672.395	-1806.29	875.947	620.565	-1821.29	799.953	684.383	-1788.35	788.142	654.502	-1835.7	726.723
872	0	484.303	-1883.24	1575.33	366.788	-1877.69	1586.61	488.171	-1718.97	1519.99	380.068	-1717.77	1526.13	416.405	-1736.58	1433.88	408.235	-1672.17	1149.36	424.429	-1864.21	1353.26	421.395	-1945.35	1160.02	325.897	-1661.74	1226.65	601.78	-1799.62	1358.15	662.036	-1755.01	1112.19	661.573	-1744.89	1037.44	673.201	-1818.6	876.825	621.688	-1833.63	800.724	685.581	-1801.09	789.115	655.789	-1847.86	727.418
873	0	486.684	-1892.17	1576.44	369.315	-1886.78	1588.33	490.031	-1727.98	1521.05	381.924	-1726.85	1527.59	417.997	-1746.1	1435.3	409.374	-1681.89	1150.55	425.33	-1873.85	1354.87	421.33	-1955.19	1161.85	327.161	-1671.16	1228.39	602.83	-1810.01	1359.09	662.77	-1767.11	1112.89	662.443	-1757.34	1038.4	674.185	-1831.16	877.945	622.872	-1846.06	801.615	686.691	-1813.04	789.923	657.088	-1860.03	728.148
874	0	489.031	-1900.96	1577.52	371.699	-1895.96	1590.14	491.594	-1736.69	1521.93	383.822	-1736.01	1529.24	419.33	-1755.47	1436.68	410.206	-1691.67	1152.1	426.012	-1883.46	1356.38	421.21	-1964.94	1163.67	328.27	-1680.54	1230.05	603.64	-1820.24	1360.19	663.333	-1779.02	1113.78	663.089	-1769.48	1039.37	675.193	-1843.62	879.113	624.114	-1858.64	802.739	687.905	-1825.81	791.32	658.393	-1872.3	729.188
875	0	491.268	-1909.82	1578.6	373.938	-1905.01	1591.85	493.205	-1745.63	1522.95	385.509	-1745.1	1530.82	420.518	-1764.87	1438.12	411.387	-1701.35	1153.77	426.605	-1892.99	1357.95	421.055	-1974.26	1165.46	329.211	-1689.64	1231.69	604.548	-1830.57	1361.45	664.087	-1791.02	1114.89	663.929	-1781.75	1040.54	676.197	-1856.2	880.631	625.404	-1871.25	804.016	689.556	-1838.7	792.836	659.789	-1884.84	730.371
876	0	493.275	-1918.64	1579.52	376.016	-1914	1593.49	494.61	-1754.59	1523.66	386.855	-1754.12	1532.22	421.69	-1774.18	1439.44	412.545	-1710.79	1154.98	427.085	-1902.44	1359.29	420.829	-1983.55	1167.06	330.226	-1698.74	1233.18	605.125	-1840.79	1362.36	665.375	-1803.36	1116.02	664.629	-1794.07	1041.48	677.368	-1869.06	882.034	626.669	-1884.21	805.329	690.642	-1851.57	794.125	661.279	-1897.67	731.616
877	0	495.072	-1927.44	1580.4	377.925	-1923.05	1595.14	496.255	-1763.64	1524.3	388.302	-1763.16	1533.6	422.63	-1783.4	1440.79	413.709	-1720.13	1156.14	427.361	-1911.87	1360.59	420.492	-1992.32	1168.47	331.343	-1707.59	1234.7	605.672	-1851.06	1363.74	666.413	-1815.62	1117.34	665.421	-1806.16	1042.34	678.388	-1881.85	883.514	627.94	-1897.23	806.744	691.877	-1864.7	795.341	662.758	-1910.87	733.219
878	0	496.624	-1936.15	1581.19	379.48	-1931.87	1596.66	497.208	-1772.38	1524.82	389.456	-1772.04	1534.61	423.418	-1792.53	1441.94	414.7	-1728.99	1157.52	427.547	-1921.19	1361.85	420.162	-2001.16	1169.74	332.323	-1716.34	1235.97	606.095	-1861.13	1365.02	667.104	-1827.27	1118.54	666.466	-1818.34	1043.77	679.569	-1894.74	885.07	629.036	-1910.15	808.204	693.338	-1877.87	797.172	664.072	-1923.84	734.487
879	0	498.057	-1945.09	1582.05	381.048	-1940.81	1598.13	498.29	-1781.4	1525.55	390.392	-1781.04	1535.61	424.18	-1801.76	1443.2	415.487	-1737.84	1158.84	427.65	-1930.5	1362.86	419.808	-2009.83	1170.77	333.321	-1724.87	1237.26	606.608	-1871.28	1366.31	668.093	-1839.14	1119.83	668.022	-1830.75	1045.19	680.565	-1907.88	886.7	630.166	-1923.22	809.663	694.898	-1891.68	799.043	665.487	-1937.55	736.372
880	0	499.302	-1953.88	1582.67	382.455	-1949.74	1599.49	499.077	-1790.32	1525.88	391.187	-1789.97	1536.92	424.744	-1810.93	1444.41	416.354	-1746.7	1160.21	427.754	-1939.66	1363.66	419.498	-2018.31	1171.5	334.308	-1733.22	1238.51	606.719	-1881.39	1367.3	668.76	-1850.99	1120.84	669.123	-1842.98	1046.1	681.471	-1921.06	888.25	631.272	-1936.4	811.122	696.249	-1905.06	800.456	666.686	-1951.19	737.813
881	0	500.28	-1962.61	1583.44	383.533	-1958.67	1600.81	499.574	-1799.18	1526.38	391.835	-1798.93	1538.06	425.012	-1819.94	1445.65	417.647	-1755.08	1161.16	427.773	-1948.75	1364.39	419.151	-2026.79	1172.13	335.425	-1741.74	1239.75	606.768	-1891.34	1368.44	669.748	-1862.87	1122.11	670.136	-1855.07	1047.32	682.382	-1934.03	889.924	632.217	-1949.53	812.809	697.852	-1919.01	801.989	667.822	-1964.96	739.66
882	0	501.158	-1971.24	1584.24	384.47	-1967.39	1602.03	500.104	-1807.84	1527.17	392.384	-1807.73	1539.18	425.636	-1828.94	1446.79	418.745	-1763.41	1162.68	427.844	-1957.63	1365.17	418.913	-2035.2	1172.84	336.467	-1749.81	1241.02	606.955	-1901.11	1369.69	670.396	-1874.3	1123.21	671.51	-1866.92	1048.74	683.339	-1947.13	891.919	633.255	-1962.56	814.702	699.28	-1933.25	804.215	668.97	-1979.04	741.899
883	0	501.786	-1979.97	1585	385.087	-1976.26	1603.2	500.402	-1816.6	1528.03	392.836	-1816.58	1540.16	426.001	-1837.83	1447.94	419.791	-1771.57	1164.05	427.819	-1966.49	1365.71	418.597	-2043.63	1173.44	337.551	-1757.94	1242.4	607.047	-1910.86	1370.85	671.387	-1885.97	1124.61	672.507	-1878.35	1049.73	684.206	-1960.12	893.729	634.297	-1975.86	816.616	700.766	-1947.04	806.218	670.053	-1993.31	744.119
884	0	502.155	-1988.7	1585.82	385.493	-1985.04	1604.17	500.375	-1825.19	1528.76	392.896	-1825.42	1541.3	426.378	-1846.63	1449.19	421.001	-1779.89	1165.35	427.814	-1975.25	1366.25	418.338	-2051.95	1173.98	338.652	-1765.96	1243.47	607.075	-1920.54	1371.95	671.98	-1897.22	1125.77	673.883	-1890.29	1051.33	685.087	-1973.19	895.783	635.138	-1989.17	818.603	701.767	-1960.98	807.873	671.031	-2007.76	746.489
885	0	502.319	-1997.46	1586.76	385.707	-1993.86	1605.15	500.511	-1834	1529.81	393.065	-1834.12	1542.24	427.13	-1855.43	1450.24	422.285	-1788.13	1166.34	427.807	-1983.84	1366.86	418.106	-2060.01	1174.6	339.795	-1773.79	1244.58	607.377	-1930.12	1373.24	673.393	-1908.8	1127.56	675.025	-1901.5	1052.51	685.992	-1986.13	897.816	636.072	-2002.44	820.801	702.922	-1974.84	810.096	671.974	-2022.2	748.919
886	0	502.33	-2006.06	1587.65	385.737	-2002.51	1605.99	500.529	-1842.5	1530.86	393.062	-1842.82	1543.27	427.581	-1864.01	1451.31	423.389	-1796.23	1167.52	427.903	-1992.29	1367.51	417.921	-2068.07	1175.35	341.036	-1781.74	1245.62	607.64	-1939.41	1374.38	674.305	-1919.69	1129	676.464	-1912.83	1054.1	686.85	-1998.87	899.982	636.895	-2015.67	823.083	704.15	-1988.83	812.352	672.874	-2036.39	751.538
887	0	502.155	-2014.75	1588.54	385.529	-2011.23	1606.69	500.483	-1851.05	1531.94	393.005	-1851.42	1544.3	428.156	-1872.5	1452.39	424.843	-1804.39	1168.96	428.001	-2000.68	1368.1	417.816	-2076.08	1176.08	342.169	-1789.61	1246.72	607.763	-1948.63	1375.35	675.355	-1930.45	1130.27	677.568	-1923.82	1055.07	687.72	-2011.71	902.141	637.781	-2028.96	825.404	705.176	-2002.75	814.373	673.84	-2051.02	754.374
888	0	501.828	-2023.38	1589.58	385.301	-2019.8	1607.42	500.49	-1859.7	1533.1	393.14	-1860.08	1545.22	428.662	-1880.86	1453.42	425.705	-1812.48	1169.66	428.116	-2009.01	1368.82	417.692	-2084.22	1176.79	343.361	-1797.36	1247.76	607.964	-1957.77	1376.62	676.497	-1940.99	1131.58	678.942	-1934.97	1056.43	688.568	-2024.42	904.482	638.617	-2042.81	828.059	706.112	-2016.72	816.621	674.731	-2065.58	757.409
889	0	501.41	-2031.92	1590.57	384.683	-2028.21	1608.06	500.305	-1868.21	1534.38	392.83	-1868.61	1546.01	428.985	-1889.18	1454.38	426.764	-1820.49	1170.97	428.201	-2017.24	1369.51	417.581	-2091.99	1177.67	344.469	-1805.22	1248.72	608.199	-1966.58	1377.9	677.374	-1951.19	1133.22	680.28	-1945.69	1057.89	689.413	-2037.32	906.915	639.324	-2055.56	830.514	706.846	-2030.03	818.705	675.567	-2080.25	760.584
890	0	500.866	-2040.53	1591.37	384.102	-2036.74	1608.56	500.098	-1876.61	1535.34	392.734	-1876.97	1546.6	429.529	-1897.37	1455.07	427.607	-1828.64	1171.79	428.276	-2025.44	1370	417.628	-2099.67	1178.58	345.506	-1813.18	1249.42	608.443	-1975.29	1378.89	678.419	-1961.21	1134.55	681.704	-1956.37	1059.3	690.166	-2049.65	909.084	640.073	-2068.66	832.949	707.835	-2043.73	821.139	676.296	-2094.49	763.323
891	0	500.357	-2049.07	1592.1	383.633	-2045.06	1608.95	499.758	-1885.11	1536.14	392.474	-1885.28	1547.35	429.909	-1905.58	1455.79	428.502	-1836.45	1172.35	428.423	-2033.68	1370.44	417.715	-2107.44	1179.25	346.402	-1820.98	1249.85	608.68	-1984.09	1379.69	679.686	-1971.23	1135.55	682.791	-1966.96	1060.28	690.924	-2062	911.207	640.78	-2081.91	835.347	708.537	-2057.34	822.963	676.882	-2108.81	766.179
892	0	499.842	-2057.48	1592.84	382.973	-2053.36	1609.37	499.625	-1893.54	1536.87	392.269	-1893.49	1547.95	430.336	-1913.62	1456.29	429.405	-1844.6	1172.94	428.516	-2041.8	1370.75	417.787	-2115.16	1179.9	347.186	-1828.88	1250.35	608.888	-1992.71	1380.55	680.525	-1980.94	1136.77	683.97	-1977.52	1061.28	691.814	-2074.34	913.483	641.449	-2095.02	837.893	709.272	-2070.92	825.237	677.456	-2123.12	769.151
893	0	499.199	-2065.76	1593.49	382.308	-2061.35	1609.59	499.531	-1901.67	1537.49	392.01	-1901.68	1548.18	430.541	-1921.79	1456.73	430.466	-1852.59	1173.43	428.608	-2049.89	1371.12	417.944	-2122.86	1180.46	347.995	-1836.73	1250.75	609.126	-2001.17	1381.46	681.504	-1990.47	1137.89	685.376	-1987.91	1062.56	692.498	-2086.45	915.599	642.12	-2108.02	840.409	709.94	-2084.07	827.091	678.124	-2137.28	772.098
894	0	498.59	-2074.06	1593.98	381.615	-2069.43	1609.74	499.444	-1910.06	1537.98	391.78	-1909.8	1548.33	430.788	-1929.9	1456.91	431.2	-1860.76	1173.53	428.617	-2058.11	1371.21	418.103	-2130.63	1180.75	348.784	-1844.55	1250.92	609.299	-2009.69	1382.03	682.471	-1999.96	1138.75	686.42	-1998.11	1063.38	693.276	-2098.51	917.498	642.727	-2120.96	842.721	710.626	-2097.39	829.267	678.661	-2151.25	774.843
895	0	497.792	-2082.29	1594.25	380.994	-2077.46	1609.75	499.214	-1918.32	1537.98	391.569	-1917.87	1548.13	430.957	-1938.09	1457.01	431.665	-1868.7	1173.77	428.608	-2066.39	1371.17	418.303	-2138.51	1180.82	349.535	-1852.48	1250.89	609.361	-2018.28	1382.31	683.51	-2009.53	1139.4	687.373	-2008.38	1063.87	693.961	-2110.32	919.16	643.275	-2133.89	844.812	710.906	-2110.23	830.538	679.099	-2165.2	777.486
896	0	497.066	-2090.52	1594.51	380.228	-2085.48	1609.73	499.15	-1926.62	1537.96	391.372	-1925.92	1547.82	431.116	-1946.41	1456.94	432.417	-1876.6	1173.81	428.558	-2074.73	1370.99	418.503	-2146.37	1180.76	350.123	-1860.26	1250.87	609.469	-2026.78	1382.57	684.415	-2018.79	1139.91	688.42	-2018.45	1064.5	694.58	-2122.27	920.853	643.731	-2146.55	846.841	711.426	-2123.07	832.401	679.462	-2178.79	779.867
897	0	496.46	-2098.72	1594.68	379.437	-2093.35	1609.51	498.904	-1935.04	1537.91	391.144	-1934	1547.14	430.926	-1954.63	1456.76	432.909	-1884.73	1173.53	428.473	-2082.98	1370.62	418.693	-2154.17	1180.48	350.594	-1868.16	1250.71	609.526	-2035.23	1382.79	685.252	-2028.02	1140.44	689.402	-2028.4	1065.01	695.179	-2133.95	922.314	644.189	-2159.19	848.871	711.882	-2135.69	833.861	679.823	-2192.32	782.336
898	0	495.751	-2106.95	1594.54	378.74	-2101.19	1609.15	498.637	-1943.45	1537.32	390.96	-1942	1546.6	430.968	-1963.12	1456.63	433.395	-1892.45	1173.52	428.43	-2091.37	1370.12	418.966	-2162.13	1179.94	351.231	-1876.32	1250.39	609.511	-2043.91	1382.64	685.846	-2037.24	1140.74	690.089	-2038.46	1065.1	695.679	-2145.46	923.683	644.68	-2171.72	850.648	712.03	-2148.23	834.985	680.3	-2205.89	784.737
899	0	494.945	-2115.19	1594.38	377.928	-2109.09	1608.78	498.377	-1951.89	1536.74	390.73	-1950.07	1545.81	430.947	-1971.63	1456.27	433.588	-1900.52	1173.31	428.351	-2099.71	1369.42	419.097	-2169.95	1179.18	351.501	-1884.29	1250.21	609.554	-2052.61	1382.41	686.425	-2046.32	1140.79	690.654	-2048.39	1064.99	696.202	-2156.74	924.711	645.029	-2184.02	852.211	712.481	-2160.76	836.181	680.523	-2218.92	786.73
900	0	494.027	-2123.35	1594.19	377.072	-2116.99	1608.18	498.19	-1960.16	1536.29	390.434	-1958.12	1544.99	430.679	-1980.14	1455.87	433.988	-1908.16	1173.18	428.166	-2107.99	1368.71	419.16	-2177.74	1178.32	351.759	-1892.25	1249.97	609.602	-2061.34	1382.36	686.976	-2055.26	1140.79	691.205	-2058.07	1065	696.666	-2167.89	925.734	645.263	-2196.08	853.735	712.48	-2172.61	837.072	680.838	-2231.73	788.638
901	0	493.21	-2131.58	1593.9	376.17	-2124.93	1607.53	497.776	-1968.54	1535.73	390.018	-1966.35	1543.96	430.622	-1988.73	1455.48	433.778	-1915.83	1172.85	427.978	-2116.53	1367.84	419.18	-2185.52	1177.29	351.916	-1900.15	1249.73	609.241	-2069.82	1381.93	686.995	-2064.13	1140.66	691.711	-2067.73	1064.93	696.998	-2179	926.658	645.495	-2207.98	855.001	712.44	-2184.2	837.938	681	-2244.34	790.427
902	0	492.339	-2139.94	1593.36	375.28	-2133.1	1606.73	497.171	-1976.87	1534.9	389.545	-1974.57	1542.87	430.299	-1997.47	1455	434.226	-1923.39	1172.68	427.72	-2124.87	1366.76	419.197	-2193.42	1175.92	351.925	-1908.41	1249.3	609.015	-2078.54	1381.24	687.376	-2073.32	1140.21	692.065	-2077.54	1064.47	697.183	-2189.97	927.078	645.646	-2219.82	855.929	712.702	-2196.24	838.628	681.165	-2256.8	791.691
903	0	491.47	-2148.28	1592.87	374.4	-2141.24	1605.88	496.607	-1985.15	1534.03	388.941	-1982.92	1541.79	430.015	-2006.05	1454.43	434.242	-1930.77	1172.34	427.414	-2133.42	1365.67	419.025	-2201.37	1174.67	351.78	-1916.25	1249.16	608.568	-2087.2	1380.45	687.245	-2082.15	1139.66	692.231	-2087.39	1063.95	697.247	-2200.71	927.306	645.692	-2231.29	856.672	712.503	-2207.67	838.816	681.254	-2268.77	792.614
904	0	490.531	-2156.51	1592.36	373.475	-2149.45	1605.08	495.897	-1993.68	1533.44	388.217	-1991.18	1540.89	429.607	-2014.85	1453.86	434.177	-1938.36	1171.7	426.985	-2141.83	1364.76	418.839	-2209.25	1173.47	351.568	-1924.69	1248.63	608.173	-2095.68	1379.76	687.294	-2091.22	1139.31	692.51	-2097.19	1063.7	697.284	-2211.3	927.577	645.675	-2242.63	857.374	712.323	-2218.76	839.081	681.286	-2280.59	793.727
905	0	489.604	-2164.84	1591.89	372.407	-2157.74	1604.22	495.237	-2002.19	1532.58	387.374	-1999.54	1539.74	429.192	-2023.5	1453.17	433.966	-1945.69	1171.38	426.604	-2150.18	1363.66	418.565	-2217.23	1172.27	351.232	-1932.87	1248.09	607.778	-2104.15	1378.94	687.252	-2100.19	1138.53	692.291	-2106.65	1062.84	697.17	-2221.79	927.615	645.583	-2253.55	857.596	711.86	-2229.43	838.829	681.307	-2292.23	794.618
906	0	488.681	-2173.17	1591.19	371.458	-2166.18	1603.2	494.362	-2010.75	1531.72	386.419	-2008.22	1538.62	428.836	-2032.12	1452.47	433.982	-1953.57	1171.24	426.163	-2158.73	1362.56	418.179	-2225.28	1170.93	350.689	-1940.75	1247.65	607.26	-2112.67	1377.87	686.902	-2109.31	1137.69	692.192	-2116.61	1062.23	696.93	-2232.1	927.284	645.395	-2264.47	857.626	711.701	-2240.4	838.708	681.203	-2303.4	794.902
907	0	487.663	-2181.62	1590.72	370.343	-2174.67	1602.39	493.271	-2019.18	1530.76	385.355	-2016.76	1537.34	428.169	-2040.78	1451.7	433.401	-1961.03	1170.32	425.747	-2167.13	1361.46	417.726	-2233.47	1169.84	350.283	-1949.34	1246.87	606.691	-2121.06	1377	686.408	-2118.28	1136.92	691.9	-2126.24	1061.51	696.711	-2242.33	927.137	645.057	-2275.08	857.636	711.427	-2251.03	838.603	680.921	-2314.41	795.23
908	0	486.462	-2189.92	1590.11	369.214	-2183.01	1601.49	492.032	-2027.59	1529.71	384.257	-2025.4	1535.92	427.483	-2049.32	1450.71	432.877	-1969.56	1169.49	425.087	-2175.77	1360.51	417.226	-2241.7	1168.83	349.717	-1957.74	1245.96	606.397	-2129.53	1376.13	686.018	-2127.48	1136.14	691.185	-2135.67	1060.67	696.216	-2252.15	926.386	644.644	-2285.27	857.205	711.022	-2261.24	838.189	680.704	-2325.03	795.394
909	0	485.408	-2198.35	1589.26	368.073	-2191.65	1600.43	490.92	-2036.17	1528.52	383.105	-2034.06	1534.5	426.785	-2057.88	1449.71	432.651	-1977.78	1168.56	424.55	-2184.28	1359.39	416.743	-2249.93	1167.69	349.017	-1966.31	1244.98	605.595	-2137.75	1374.93	685.33	-2136.65	1135.06	690.613	-2145.32	1059.7	695.706	-2262.14	925.956	644.183	-2295.38	856.712	710.461	-2271.26	837.463	680.269	-2335.37	795.03
910	0	484.221	-2206.76	1588.45	366.861	-2200.21	1599.33	489.654	-2044.86	1527.35	381.758	-2042.68	1533.18	425.87	-2066.55	1448.74	431.405	-1986.3	1167.67	423.914	-2192.84	1358.17	416.241	-2258.27	1166.55	348.286	-1974.9	1244.11	604.708	-2146.07	1373.67	684.117	-2145.49	1133.76	689.645	-2154.69	1058.46	694.956	-2271.8	925.129	643.404	-2305.14	856.001	709.904	-2281.19	836.622	679.786	-2345.28	794.474
911	0	482.938	-2215.16	1587.63	365.505	-2208.71	1598.15	488.462	-2053.35	1526.37	380.507	-2051.35	1531.84	424.916	-2075.22	1447.71	430.57	-1994.67	1166.66	423.109	-2201.65	1357.14	415.707	-2266.56	1165.56	347.325	-1983.42	1243.14	603.947	-2154.38	1372.81	683.35	-2154.69	1132.95	688.709	-2164.06	1057.75	694.237	-2281.2	924.49	642.702	-2314.6	855.217	709.25	-2290.64	835.994	679.198	-2354.93	793.918
912	0	481.59	-2223.58	1586.72	364.122	-2217.19	1596.95	487.019	-2061.74	1525.16	379.048	-2060.01	1530.28	423.906	-2083.91	1446.58	429.606	-2003.36	1165.58	422.255	-2210.18	1355.96	415.199	-2275.11	1164.46	346.311	-1992.18	1241.94	603.123	-2162.77	1372.02	682.235	-2163.82	1132.17	687.735	-2173.32	1057.12	693.356	-2290.54	923.695	641.989	-2323.89	854.428	708.546	-2299.77	835.254	678.56	-2364.18	793.198
913	0	480.078	-2232.15	1585.7	362.645	-2225.81	1595.59	485.678	-2070.48	1523.91	377.787	-2068.75	1528.86	422.728	-2092.64	1445.44	428.473	-2012.11	1164.31	421.292	-2218.96	1354.64	414.681	-2283.79	1163.28	345.319	-2000.81	1240.88	602.132	-2171.32	1371.02	681.212	-2173.31	1131.35	686.553	-2182.57	1056.2	692.434	-2299.69	922.752	641.156	-2332.96	853.244	707.902	-2309.12	834.542	677.762	-2373.17	791.905
914	0	478.538	-2240.76	1584.62	361.197	-2234.32	1594.31	484.255	-2079.18	1522.51	376.267	-2077.26	1527.17	421.483	-2101.45	1444.21	427.128	-2020.5	1163.09	420.246	-2227.84	1353.41	414.073	-2292.37	1162.13	344.033	-2009.41	1239.73	600.938	-2179.79	1369.97	679.856	-2182.46	1130.32	685.182	-2191.53	1054.97	691.432	-2308.63	921.812	640.226	-2341.71	852.024	706.9	-2317.83	833.285	677.021	-2382	790.894
915	0	476.963	-2249.2	1583.53	359.431	-2242.84	1593.09	482.789	-2087.83	1521.18	374.823	-2086.01	1525.71	419.972	-2110.23	1442.94	425.882	-2029.08	1161.89	419.158	-2236.49	1352.14	413.352	-2300.85	1160.79	343.058	-2018.64	1238.34	599.835	-2188.37	1369.05	678.6	-2191.54	1129.3	683.868	-2200.38	1054.06	690.216	-2317.29	920.688	639.246	-2350.19	850.835	705.992	-2326.28	832.148	676.132	-2390.27	789.583
916	0	475.318	-2257.87	1582.49	357.825	-2251.38	1591.81	481.351	-2096.66	1519.76	373.386	-2094.57	1524.02	418.539	-2119.1	1441.66	424.851	-2037.92	1160.43	417.951	-2245.37	1350.85	412.59	-2309.68	1159.44	341.94	-2027.59	1236.95	598.597	-2197.02	1367.98	676.891	-2200.22	1128.15	682.634	-2209.37	1053.27	689.04	-2325.85	919.547	638.36	-2358.47	849.367	705.196	-2334.84	831.227	675.169	-2398.47	788.156
917	0	473.467	-2266.59	1581.22	355.979	-2259.89	1590.47	479.668	-2105.51	1518.13	371.816	-2103.29	1522.45	417.018	-2128.05	1440.22	424.068	-2046.77	1159.6	416.566	-2254.54	1349.57	411.756	-2318.55	1158	340.882	-2036.66	1235.41	597.255	-2205.87	1366.95	675.755	-2209.41	1127.13	681.086	-2217.98	1051.92	687.826	-2334.3	918.279	637.004	-2366.52	847.712	703.75	-2342.76	829.443	674.02	-2406.43	786.439
918	0	471.301	-2275.26	1580.02	353.867	-2268.48	1589.16	478.074	-2114.36	1516.64	370.021	-2112.04	1520.93	415.509	-2137.04	1438.95	422.822	-2055.49	1158.36	415.232	-2263.36	1348.06	410.756	-2327.38	1156.53	339.516	-2045.67	1233.92	595.612	-2214.57	1365.84	674.079	-2217.95	1125.96	679.846	-2226.77	1051.11	686.441	-2342.51	916.893	635.962	-2374.35	846.015	702.953	-2350.86	828.365	672.795	-2414.09	784.729
919	0	469.376	-2284.09	1578.9	351.923	-2277.07	1587.73	476.291	-2123.23	1515.22	368.284	-2120.85	1518.93	413.691	-2146.11	1437.49	421.477	-2064.78	1156.72	413.715	-2272.63	1346.8	409.754	-2336.45	1155.07	338.086	-2054.78	1232.28	594.154	-2223.42	1364.98	671.928	-2225.75	1124.52	677.955	-2234.64	1049.66	685.115	-2350.51	915.424	634.532	-2381.89	844.338	702.088	-2358.75	827.372	671.642	-2421.39	782.828
920	0	467.196	-2292.91	1577.76	349.739	-2285.75	1586.46	474.324	-2132.16	1513.72	366.447	-2129.72	1517.41	411.76	-2155.37	1436.13	420.31	-2074.02	1155.36	412.228	-2281.56	1345.27	408.706	-2345.65	1153.55	336.541	-2063.4	1230.89	592.599	-2232.62	1363.98	671.121	-2234.97	1123.87	676.832	-2243.46	1048.95	683.811	-2358.39	913.916	633.237	-2389.26	842.53	700.696	-2366.1	825.535	670.175	-2428.6	780.979
921	0	465.021	-2301.79	1576.61	347.404	-2294.56	1585.09	472.425	-2141.41	1512.25	364.434	-2138.61	1515.8	409.948	-2164.62	1434.8	419.143	-2082.62	1153.87	410.542	-2290.91	1344	407.554	-2354.87	1152.05	335.315	-2073.09	1229.35	590.918	-2241.87	1362.87	669.188	-2243.11	1122.58	675.298	-2251.84	1047.73	682.39	-2366.04	912.309	631.858	-2396.41	840.657	699.288	-2373.64	823.752	668.714	-2435.53	778.903
922	0	462.728	-2310.62	1575.4	345.08	-2303.31	1583.76	470.361	-2150.49	1510.97	362.334	-2147.57	1514.24	408.029	-2173.89	1433.55	417.554	-2092.35	1152.88	408.772	-2300.22	1342.77	406.338	-2364.22	1150.8	334.017	-2083.18	1227.61	589.172	-2251.08	1362.05	667.533	-2251.14	1121.46	673.662	-2259.72	1046.56	681.057	-2373.56	910.797	630.433	-2403.31	838.783	698.008	-2380.6	822.181	667.188	-2442.07	776.713
923	0	460.358	-2319.65	1574.63	342.627	-2312.14	1582.6	468.185	-2159.51	1509.71	360.12	-2156.73	1512.67	406.031	-2183.22	1432.31	415.697	-2102.1	1151.95	406.977	-2309.64	1341.6	405.098	-2373.59	1149.59	332.439	-2092.21	1226.32	587.337	-2260.33	1361.24	666.271	-2259.52	1120.99	672.481	-2267.94	1046.04	679.56	-2380.78	909.154	628.972	-2410	836.903	696.838	-2387.47	820.817	665.763	-2448.48	774.633
924	0	457.744	-2328.76	1573.66	340.076	-2321.14	1581.24	465.959	-2168.8	1508.34	357.875	-2165.95	1510.97	403.865	-2192.74	1430.94	414.155	-2111.49	1150.6	405.091	-2319.26	1340.32	403.723	-2383.42	1148.45	330.698	-2101.81	1225	585.589	-2269.95	1360.53	664.745	-2267.76	1120.06	670.896	-2275.87	1044.98	678.172	-2388.01	907.436	627.493	-2416.6	834.943	695.456	-2394.19	819.148	664.13	-2454.81	772.548
925	0	455.095	-2337.9	1572.77	337.469	-2330.23	1580.1	463.517	-2178.21	1507.01	355.515	-2175.25	1509.36	401.941	-2202.36	1429.81	412.534	-2121.14	1149.19	403.337	-2328.61	1339.06	402.186	-2393.15	1147.26	329.084	-2111.71	1223.37	583.541	-2279.52	1359.55	662.97	-2275.86	1119.06	669.106	-2283.53	1043.75	676.686	-2395.02	905.79	626.058	-2422.97	832.997	694.186	-2400.74	817.453	662.543	-2460.7	770.117
926	0	452.524	-2347.06	1572.13	334.795	-2339.34	1579.08	461.087	-2187.6	1505.78	353.154	-2184.56	1507.83	399.879	-2211.89	1428.65	410.898	-2130.96	1148.01	401.199	-2338.45	1338.29	400.602	-2403.14	1146.45	327.32	-2121.72	1221.89	581.482	-2289.09	1358.84	661.543	-2284.11	1118.49	667.79	-2291.45	1043.18	675.271	-2401.73	904.228	624.584	-2429.07	831.104	692.521	-2406.59	815.457	661.033	-2466.41	768.037
927	0	449.909	-2356.33	1571.5	332.155	-2348.55	1578.12	458.68	-2197.01	1504.69	350.785	-2193.88	1506.56	397.471	-2221.53	1427.64	409.402	-2141.26	1146.57	399.154	-2348.41	1337.56	399.076	-2413.3	1145.89	325.566	-2131.57	1220.38	579.476	-2298.85	1358.18	659.86	-2292.39	1117.78	666.192	-2299.16	1042.39	673.877	-2408.39	902.674	623.203	-2435.08	829.358	691.187	-2412.66	813.918	659.553	-2472.12	766.187
928	0	447.156	-2365.73	1571.18	329.39	-2357.9	1577.48	456.144	-2206.65	1503.83	348.208	-2203.41	1505.4	395.296	-2231.4	1426.8	407.342	-2151.32	1145.44	397.159	-2358.1	1336.75	397.394	-2423.66	1145.21	323.85	-2141.8	1219.12	577.338	-2308.74	1357.66	658.097	-2300.74	1117.26	664.524	-2306.82	1041.64	672.481	-2414.96	901.203	622.004	-2440.98	827.579	689.677	-2418.46	812.288	658.174	-2477.39	764.07
929	0	444.341	-2375.2	1571.15	326.561	-2367.28	1577.06	453.514	-2216.16	1503.36	345.605	-2213.01	1504.66	392.919	-2241.22	1426.09	405.503	-2161.53	1145.22	395.114	-2367.8	1336.2	395.683	-2434.26	1144.96	322.15	-2152.32	1218.15	575.232	-2318.68	1357.54	656.396	-2309.01	1116.99	662.999	-2314.56	1041.58	670.99	-2421.25	899.908	620.333	-2446.51	825.892	688.486	-2424.25	811.297	656.523	-2482.26	762.052
930	0	441.406	-2384.6	1571.15	323.676	-2376.7	1576.72	450.918	-2225.81	1503.19	343.011	-2222.7	1503.96	390.638	-2251.08	1425.78	403.221	-2171.59	1144.25	392.925	-2377.89	1336.11	393.972	-2445	1144.97	320.272	-2162.63	1217.46	573.045	-2328.69	1357.78	654.453	-2317.35	1117.31	661.311	-2322.03	1041.8	669.521	-2427.4	898.881	619.112	-2452.13	824.675	687.157	-2429.57	810.434	655.176	-2487.24	760.581
931	0	438.55	-2394.23	1571.39	320.849	-2386.18	1576.56	448.358	-2235.57	1503.19	340.308	-2232.29	1503.5	388.294	-2260.95	1425.67	401.275	-2182.08	1144.09	390.578	-2388.27	1336.2	392.379	-2455.94	1145.04	318.515	-2172.85	1216.85	570.921	-2338.79	1357.94	652.745	-2326	1117.81	659.431	-2329.37	1041.91	668.054	-2433.64	897.859	617.522	-2457.43	823.568	685.612	-2434.48	809.497	653.763	-2491.81	759.053
932	0	435.707	-2403.87	1571.92	317.954	-2395.77	1576.69	445.571	-2245.41	1503.25	337.646	-2242.05	1503.55	385.935	-2270.93	1425.67	398.812	-2192.27	1144.25	388.487	-2398.25	1336.43	390.692	-2466.85	1145.46	316.726	-2183.32	1216.6	568.566	-2349	1358.28	650.834	-2334.62	1118.25	657.721	-2337.12	1042.57	666.548	-2439.18	897.353	616.097	-2462.55	822.576	684.377	-2439.7	809.031	652.448	-2496.14	757.79
933	0	432.726	-2413.42	1572.75	314.96	-2405.35	1577.21	442.877	-2255.17	1503.91	334.863	-2251.84	1503.86	383.498	-2280.73	1426.18	396.691	-2202.82	1144.24	386.199	-2408.55	1337.25	388.934	-2477.8	1146.34	314.965	-2193.71	1216.43	566.255	-2359.13	1359.12	648.624	-2342.84	1118.91	655.968	-2344.48	1043.49	664.908	-2444.7	896.967	614.74	-2467.71	822.13	682.816	-2444.26	808.708	651.137	-2500.15	756.736
934	0	429.748	-2423.06	1573.87	311.988	-2414.9	1577.84	440.188	-2264.93	1504.69	332.066	-2261.58	1504.21	381.111	-2290.59	1426.55	394.915	-2213.27	1144.62	384.046	-2418.37	1338.01	387.129	-2488.79	1147.3	312.794	-2203.86	1216.66	564.01	-2369.12	1360.34	646.787	-2351.53	1120.39	653.955	-2351.69	1044.69	663.376	-2450.38	897.115	613.207	-2472.08	821.614	681.488	-2448.79	808.872	649.996	-2504.25	756.35
935	0	426.658	-2432.73	1575.14	308.925	-2424.63	1578.73	437.258	-2274.58	1505.64	329.236	-2271.48	1504.92	378.568	-2300.49	1427.36	393.298	-2224.07	1145.29	381.672	-2428.66	1339.26	385.295	-2499.65	1148.54	310.48	-2213.93	1217.08	561.66	-2379.05	1361.6	644.661	-2360.11	1121.68	652.051	-2359.05	1046.08	661.765	-2455.9	897.307	611.845	-2476.88	821.45	679.938	-2453.06	808.953	648.609	-2507.98	755.67
[truncated: 69 more columns]

## Sheet: Sheet2
Devices
		025370 - Force			025370 - Moment			025370 - CoP			027571 - Force			027571 - Moment			027571 - CoP			037720 - Force			037720 - Moment			037720 - CoP
Frame	Sub Frame	Fx	Fy	Fz	Mx	My	Mz	Cx	Cy	Cz	Fx	Fy	Fz	Mx	My	Mz	Cx	Cy	Cz	Fx	Fy	Fz	Mx	My	Mz	Cx	Cy	Cz
		N	N	N	N.mm	N.mm	N.mm	mm	mm	mm	N	N	N	N.mm	N.mm	N.mm	mm	mm	mm	N	N	N	N.mm	N.mm	N.mm	mm	mm	mm
375	0	0	0	0	0	0	0	200	300	0	0	0	0	0	0	0	200	903	0	0	0	0	0	0	0	603	903	0
375	1	0	0	0	0	0	0	200	300	0	0	0	0	0	0	0	200	903	0	0	0	0	0	0	0	603	903	0
375	2	0	0	0	0	0	0	200	300	0	0	0	0	0	0	0	200	903	0	0	0	0	0	0	0	603	903	0
375	3	0	0	0	0	0	0	200	300	0	0	0	0	0	0	0	200	903	0	0	0	0	0	0	0	603	903	0
375	4	0	0	0	0	0	0	200	300	0	0	0	0	0	0	0	200	903	0	0	0	0	0	0	0	603	903	0
375	5	0	0	0	0	0	0	200	300	0	0	0	0	0	0	0	200	903	0	0	0	0	0	0	0	603	903	0
375	6	0	0	0	0	0	0	200	300	0	0	0	0	0	0	0	200	903	0	0	0	0	0	0	0	603	903	0
375	7	0	0	0	0	0	0	200	300	0	0	0	0	0	0	0	200	903	0	0	0	0	0	0	0	603	903	0
375	8	0	0	0	0	0	0	200	300	0	0	0	0	0	0	0	200	903	0	0	0	0	0	0	0	603	903	0
375	9	0	0	0	0	0	0	200	300	0	0	0	0	0	0	0	200	903	0	0	0	0	0	0	0	603	903	0
376	0	0	0	0	0	0	0	200	300	0	0	0	0	0	0	0	200	903	0	0	0	0	0	0	0	603	903	0
376	1	0	0	0	0	0	0	200	300	0	0	0	0	0	0	0	200	903	0	0	0	0	0	0	0	603	903	0
376	2	0	0	0	0	0	0	200	300	0	0	0	0	0	0	0	200	903	0	0	0	0	0	0	0	603	903	0
376	3	0	0	0	0	0	0	200	300	0	0	0	0	0	0	0	200	903	0	0	0	0	0	0	0	603	903	0
376	4	0	0	0	0	0	0	200	300	0	0	0	0	0	0	0	200	903	0	0	0	0	0	0	0	603	903	0
376	5	0	0	0	0	0	0	200	300	0	0	0	0	0	0	0	200	903	0	0	0	0	0	0	0	603	903	0
376	6	0	0	0	0	0	0	200	300	0	0	0	0	0	0	0	200	903	0	0	0	0	0	0	0	603	903	0
376	7	0	0	0	0	0	0	200	300	0	0	0	0	0	0	0	200	903	0	0	0	0	0	0	0	603	903	0
376	8	0	0	0	0	0	0	200	300	0	0	0	0	0	0	0	200	903	0	0	0	0	0	0	0	603	903	0
376	9	0	0	0	0	0	0	200	300	0	0	0	0	0	0	0	200	903	0	0	0	0	0	0	0	603	903	0
377	0	0	0	0	0	0	0	200	300	0	0	0	0	0	0	0	200	903	0	0	0	0	0	0	0	603	903	0
377	1	0	0	0	0	0	0	200	300	0	0	0	0	0	0	0	200	903	0	0	0	0	0	0	0	603	903	0
377	2	0	0	0	0	0	0	200	300	0	0	0	0	0	0	0	200	903	0	0	0	0	0	0	0	603	903	0
377	3	0	0	0	0	0	0	200	300	0	0	0	0	0	0	0	200	903	0	0	0	0	0	0	0	603	903	0
377	4	0	0	0	0	0	0	200	300	0	0	0	0	0	0	0	200	903	0	0	0	0	0	0	0	603	903	0
377	5	0	0	0	0	0	0	200	300	0	0	0	0	0	0	0	200	903	0	0	0	0	0	0	0	603	903	0
377	6	0	0	0	0	0	0	200	300	0	0	0	0	0	0	0	200	903	0	0	0	0	0	0	0	603	903	0
377	7	0	0	0	0	0	0	200	300	0	0	0	0	0	0	0	200	903	0	0	0	0	0	0	0	603	903	0
377	8	0	0	0	0	0	0	200	300	0	0	0	0	0	0	0	200	903	0	0	0	0	0	0	0	603	903	0
377	9	0	0	0	0	0	0	200	300	0	0	0	0	0	0	0	200	903	0	0	0	0	0	0	0	603	903	0
378	0	0	0	0	0	0	0	200	300	0	0	0	0	0	0	0	200	903	0	0	0	0	0	0	0	603	903	0
378	1	0	0	0	0	0	0	200	300	0	0	0	0	0	0	0	200	903	0	0	0	0	0	0	0	603	903	0
378	2	0	0	0	0	0	0	200	300	0	0	0	0	0	0	0	200	903	0	0	0	0	0	0	0	603	903	0
378	3	0	0	0	0	0	0	200	300	0	0	0	0	0	0	0	200	903	0	0	0	0	0	0	0	603	903	0
378	4	0	0	0	0	0	0	200	300	0	0	0	0	0	0	0	200	903	0	0	0	0	0	0	0	603	903	0
378	5	0	0	0	0	0	0	200	300	0	0	0	0	0	0	0	200	903	0	0	0	0	0	0	0	603	903	0
378	6	0	0	0	0	0	0	200	300	0	0	0	0	0	0	0	200	903	0	0	0	0	0	0	0	603	903	0
378	7	0	0	0	0	0	0	200	300	0	0	0	0	0	0	0	200	903	0	0	0	0	0	0	0	603	903	0
378	8	0	0	0	0	0	0	200	300	0	0	0	0	0	0	0	200	903	0	0	0	0	0	0	0	603	903	0
378	9	0	0	0	0	0	0	200	300	0	0	0	0	0	0	0	200	903	0	0	0	0	0	0	0	603	903	0
379	0	0	0	0	0	0	0	200	300	0	0	0	0	0	0	0	200	903	0	0	0	0	0	0	0	603	903	0
379	1	0	0	0	0	0	0	200	300	0	0	0	0	0	0	0	200	903	0	0	0	0	0	0	0	603	903	0
379	2	0	0	0	0	0	0	200	300	0	0	0	0	0	0	0	200	903	0	0	0	0	0	0	0	603	903	0
379	3	0	0	0	0	0	0	200	300	0	0	0	0	0	0	0	200	903	0	0	0	0	0	0	0	603	903	0
379	4	0	0	0	0	0	0	200	300	0	0	0	0	0	0	0	200	903	0	0	0	0	0	0	0	603	903	0
379	5	0	0	0	0	0	0	200	300	0	0	0	0	0	0	0	200	903	0	0	0	0	0	0	0	603	903	0
379	6	0	0	0	0	0	0	200	300	0	0	0	0	0	0	0	200	903	0	0	0	0	0	0	0	603	903	0
379	7	0	0	0	0	0	0	200	300	0	0	0	0	0	0	0	200	903	0	0	0	0	0	0	0	603	903	0
379	8	0	0	0	0	0	0	200	300	0	0	0	0	0	0	0	200	903	0	0	0	0	0	0	0	603	903	0
379	9	0	0	0	0	0	0	200	300	0	0	0	0	0	0	0	200	903	0	0	0	0	0	0	0	603	903	0
380	0	0	0	0	0	0	0	200	300	0	0	0	0	0	0	0	200	903	0	0	0	0	0	0	0	603	903	0
380	1	0	0	0	0	0	0	200	300	0	0	0	0	0	0	0	200	903	0	0	0	0	0	0	0	603	903	0
380	2	0	0	0	0	0	0	200	300	0	0	0	0	0	0	0	200	903	0	0	0	0	0	0	0	603	903	0
380	3	0	0	0	0	0	0	200	300	0	0	0	0	0	0	0	200	903	0	0	0	0	0	0	0	603	903	0
380	4	0	0	0	0	0	0	200	300	0	0	0	0	0	0	0	200	903	0	0	0	0	0	0	0	603	903	0
380	5	0	0	0	0	0	0	200	300	0	0	0	0	0	0	0	200	903	0	0	0	0	0	0	0	603	903	0
380	6	0	0	0	0	0	0	200	300	0	0	0	0	0	0	0	200	903	0	0	0	0	0	0	0	603	903	0
380	7	0	0	0	0	0	0	200	300	0	0	0	0	0	0	0	200	903	0	0	0	0	0	0	0	603	903	0
380	8	0	0	0	0	0	0	200	300	0	0	0	0	0	0	0	200	903	0	0	0	0	0	0	0	603	903	0
380	9	0	0	0	0	0	0	200	300	0	0	0	0	0	0	0	200	903	0	0	0	0	0	0	0	603	903	0
381	0	0	0	0	0	0	0	200	300	0	0	0	0	0	0	0	200	903	0	0	0	0	0	0	0	603	903	0
381	1	0	0	0	0	0	0	200	300	0	0	0	0	0	0	0	200	903	0	0	0	0	0	0	0	603	903	0
381	2	0	0	0	0	0	0	200	300	0	0	0	0	0	0	0	200	903	0	0	0	0	0	0	0	603	903	0
381	3	0	0	0	0	0	0	200	300	0	0	0	0	0	0	0	200	903	0	0	0	0	0	0	0	603	903	0
381	4	0	0	0	0	0	0	200	300	0	0	0	0	0	0	0	200	903	0	0	0	0	0	0	0	603	903	0
381	5	0	0	0	0	0	0	200	300	0	0	0	0	0	0	0	200	903	0	0	0	0	0	0	0	603	903	0
381	6	0	0	0	0	0	0	200	300	0	0	0	0	0	0	0	200	903	0	0	0	0	0	0	0	603	903	0
381	7	0	0	0	0	0	0	200	300	0	0	0	0	0	0	0	200	903	0	0	0	0	0	0	0	603	903	0
381	8	0	0	0	0	0	0	200	300	0	0	0	0	0	0	0	200	903	0	0	0	0	0	0	0	603	903	0
381	9	0	0	0	0	0	0	200	300	0	0	0	0	0	0	0	200	903	0	0	0	0	0	0	0	603	903	0
382	0	0	0	0	0	0	0	200	300	0	0	0	0	0	0	0	200	903	0	0	0	0	0	0	0	603	903	0
382	1	0	0	0	0	0	0	200	300	0	0	0	0	0	0	0	200	903	0	0	0	0	0	0	0	603	903	0
382	2	0	0	0	0	0	0	200	300	0	0	0	0	0	0	0	200	903	0	0	0	0	0	0	0	603	903	0
382	3	0	0	0	0	0	0	200	300	0	0	0	0	0	0	0	200	903	0	0	0	0	0	0	0	603	903	0
382	4	0	0	0	0	0	0	200	300	0	0	0	0	0	0	0	200	903	0	0	0	0	0	0	0	603	903	0
382	5	0	0	0	0	0	0	200	300	0	0	0	0	0	0	0	200	903	0	0	0	0	0	0	0	603	903	0
382	6	0	0	0	0	0	0	200	300	0	0	0	0	0	0	0	200	903	0	0	0	0	0	0	0	603	903	0
382	7	0	0	0	0	0	0	200	300	0	0	0	0	0	0	0	200	903	0	0	0	0	0	0	0	603	903	0
382	8	0	0	0	0	0	0	200	300	0	0	0	0	0	0	0	200	903	0	0	0	0	0	0	0	603	903	0
382	9	0	0	0	0	0	0	200	300	0	0	0	0	0	0	0	200	903	0	0	0	0	0	0	0	603	903	0
383	0	0	0	0	0	0	0	200	300	0	0	0	0	0	0	0	200	903	0	0	0	0	0	0	0	603	903	0
383	1	0	0	0	0	0	0	200	300	0	0	0	0	0	0	0	200	903	0	0	0	0	0	0	0	603	903	0
383	2	0	0	0	0	0	0	200	300	0	0	0	0	0	0	0	200	903	0	0	0	0	0	0	0	603	903	0
383	3	0	0	0	0	0	0	200	300	0	0	0	0	0	0	0	200	903	0	0	0	0	0	0	0	603	903	0
383	4	0	0	0	0	0	0	200	300	0	0	0	0	0	0	0	200	903	0	0	0	0	0	0	0	603	903	0
383	5	0	0	0	0	0	0	200	300	0	0	0	0	0	0	0	200	903	0	0	0	0	0	0	0	603	903	0
383	6	0	0	0	0	0	0	200	300	0	0	0	0	0	0	0	200	903	0	0	0	0	0	0	0	603	903	0
383	7	0	0	0	0	0	0	200	300	0	0	0	0	0	0	0	200	903	0	0	0	0	0	0	0	603	903	0
383	8	0	0	0	0	0	0	200	300	0	0	0	0	0	0	0	200	903	0	0	0	0	0	0	0	603	903	0
383	9	0	0	0	0	0	0	200	300	0	0	0	0	0	0	0	200	903	0	0	0	0	0	0	0	603	903	0
384	0	0	0	0	0	0	0	200	300	0	0	0	0	0	0	0	200	903	0	0	0	0	0	0	0	603	903	0
384	1	0	0	0	0	0	0	200	300	0	0	0	0	0	0	0	200	903	0	0	0	0	0	0	0	603	903	0
384	2	0	0	0	0	0	0	200	300	0	0	0	0	0	0	0	200	903	0	0	0	0	0	0	0	603	903	0
384	3	0	0	0	0	0	0	200	300	0	0	0	0	0	0	0	200	903	0	0	0	0	0	0	0	603	903	0
384	4	0	0	0	0	0	0	200	300	0	0	0	0	0	0	0	200	903	0	0	0	0	0	0	0	603	903	0
384	5	0	0	0	0	0	0	200	300	0	0	0	0	0	0	0	200	903	0	0	0	0	0	0	0	603	903	0
384	6	0	0	0	0	0	0	200	300	0	0	0	0	0	0	0	200	903	0	0	0	0	0	0	0	603	903	0
384	7	0	0	0	0	0	0	200	300	0	0	0	0	0	0	0	200	903	0	0	0	0	0	0	0	603	903	0
384	8	0	0	0	0	0	0	200	300	0	0	0	0	0	0	0	200	903	0	0	0	0	0	0	0	603	903	0
384	9	0	0	0	0	0	0	200	300	0	0	0	0	0	0	0	200	903	0	0	0	0	0	0	0	603	903	0
385	0	0	0	0	0	0	0	200	300	0	0	0	0	0	0	0	200	903	0	0	0	0	0	0	0	603	903	0
385	1	0	0	0	0	0	0	200	300	0	0	0	0	0	0	0	200	903	0	0	0	0	0	0	0	603	903	0
385	2	0	0	0	0	0	0	200	300	0	0	0	0	0	0	0	200	903	0	0	0	0	0	0	0	603	903	0
385	3	0	0	0	0	0	0	200	300	0	0	0	0	0	0	0	200	903	0	0	0	0	0	0	0	603	903	0
385	4	0	0	0	0	0	0	200	300	0	0	0	0	0	0	0	200	903	0	0	0	0	0	0	0	603	903	0
385	5	0	0	0	0	0	0	200	300	0	0	0	0	0	0	0	200	903	0	0	0	0	0	0	0	603	903	0
385	6	0	0	0	0	0	0	200	300	0	0	0	0	0	0	0	200	903	0	0	0	0	0	0	0	603	903	0
385	7	0	0	0	0	0	0	200	300	0	0	0	0	0	0	0	200	903	0	0	0	0	0	0	0	603	903	0
385	8	0	0	0	0	0	0	200	300	0	0	0	0	0	0	0	200	903	0	0	0	0	0	0	0	603	903	0
385	9	0	0	0	0	0	0	200	300	0	0	0	0	0	0	0	200	903	0	0	0	0	0	0	0	603	903	0
386	0	0	0	0	0	0	0	200	300	0	0	0	0	0	0	0	200	903	0	0	0	0	0	0	0	603	903	0
386	1	0	0	0	0	0	0	200	300	0	0	0	0	0	0	0	200	903	0	0	0	0	0	0	0	603	903	0
386	2	0	0	0	0	0	0	200	300	0	0	0	0	0	0	0	200	903	0	0	0	0	0	0	0	603	903	0
386	3	0	0	0	0	0	0	200	300	0	0	0	0	0	0	0	200	903	0	0	0	0	0	0	0	603	903	0
386	4	0	0	0	0	0	0	200	300	0	0	0	0	0	0	0	200	903	0	0	0	0	0	0	0	603	903	0
386	5	0	0	0	0	0	0	200	300	0	0	0	0	0	0	0	200	903	0	0	0	0	0	0	0	603	903	0
386	6	0	0	0	0	0	0	200	300	0	0	0	0	0	0	0	200	903	0	0	0	0	0	0	0	603	903	0
386	7	0	0	0	0	0	0	200	300	0	0	0	0	0	0	0	200	903	0	0	0	0	0	0	0	603	903	0
386	8	0	0	0	0	0	0	200	300	0	0	0	0	0	0	0	200	903	0	0	0	0	0	0	0	603	903	0
386	9	0	0	0	0	0	0	200	300	0	0	0	0	0	0	0	200	903	0	0	0	0	0	0	0	603	903	0
387	0	0	0	0	0	0	0	200	300	0	0	0	0	0	0	0	200	903	0	0	0	0	0	0	0	603	903	0
387	1	0	0	0	0	0	0	200	300	0	0	0	0	0	0	0	200	903	0	0	0	0	0	0	0	603	903	0
387	2	0	0	0	0	0	0	200	300	0	0	0	0	0	0	0	200	903	0	0	0	0	0	0	0	603	903	0
387	3	0	0	0	0	0	0	200	300	0	0	0	0	0	0	0	200	903	0	0	0	0	0	0	0	603	903	0
387	4	0	0	0	0	0	0	200	300	0	0	0	0	0	0	0	200	903	0	0	0	0	0	0	0	603	903	0
387	5	0	0	0	0	0	0	200	300	0	0	0	0	0	0	0	200	903	0	0	0	0	0	0	0	603	903	0
387	6	0	0	0	0	0	0	200	300	0	0	0	0	0	0	0	200	903	0	0	0	0	0	0	0	603	903	0
387	7	0	0	0	0	0	0	200	300	0	0	0	0	0	0	0	200	903	0	0	0	0	0	0	0	603	903	0
387	8	0	0	0	0	0	0	200	300	0	0	0	0	0	0	0	200	903	0	0	0	0	0	0	0	603	903	0
387	9	0	0	0	0	0	0	200	300	0	0	0	0	0	0	0	200	903	0	0	0	0	0	0	0	603	903	0
388	0	0	0	0	0	0	0	200	300	0	0	0	0	0	0	0	200	903	0	0	0	0	0	0	0	603	903	0
388	1	0	0	0	0	0	0	200	300	0	0	0	0	0	0	0	200	903	0	0	0	0	0	0	0	603	903	0
388	2	0	0	0	0	0	0	200	300	0	0	0	0	0	0	0	200	903	0	0	0	0	0	0	0	603	903	0
388	3	0	0	0	0	0	0	200	300	0	0	0	0	0	0	0	200	903	0	0	0	0	0	0	0	603	903	0
388	4	0	0	0	0	0	0	200	300	0	0	0	0	0	0	0	200	903	0	0	0	0	0	0	0	603	903	0
388	5	0	0	0	0	0	0	200	300	0	0	0	0	0	0	0	200	903	0	0	0	0	0	0	0	603	903	0
388	6	0	0	0	0	0	0	200	300	0	0	0	0	0	0	0	200	903	0	0	0	0	0	0	0	603	903	0
388	7	0	0	0	0	0	0	200	300	0	0	0	0	0	0	0	200	903	0	0	0	0	0	0	0	603	903	0
388	8	0	0	0	0	0	0	200	300	0	0	0	0	0	0	0	200	903	0	0	0	0	0	0	0	603	903	0
388	9	0	0	0	0	0	0	200	300	0	0	0	0	0	0	0	200	903	0	0	0	0	0	0	0	603	903	0
389	0	0	0	0	0	0	0	200	300	0	0	0	0	0	0	0	200	903	0	0	0	0	0	0	0	603	903	0
389	1	0	0	0	0	0	0	200	300	0	0	0	0	0	0	0	200	903	0	0	0	0	0	0	0	603	903	0
389	2	0	0	0	0	0	0	200	300	0	0	0	0	0	0	0	200	903	0	0	0	0	0	0	0	603	903	0
389	3	0	0	0	0	0	0	200	300	0	0	0	0	0	0	0	200	903	0	0	0	0	0	0	0	603	903	0
389	4	0	0	0	0	0	0	200	300	0	0	0	0	0	0	0	200	903	0	0	0	0	0	0	0	603	903	0
389	5	0	0	0	0	0	0	200	300	0	0	0	0	0	0	0	200	903	0	0	0	0	0	0	0	603	903	0
389	6	0	0	0	0	0	0	200	300	0	0	0	0	0	0	0	200	903	0	0	0	0	0	0	0	603	903	0
389	7	0	0	0	0	0	0	200	300	0	0	0	0	0	0	0	200	903	0	0	0	0	0	0	0	603	903	0
389	8	0	0	0	0	0	0	200	300	0	0	0	0	0	0	0	200	903	0	0	0	0	0	0	0	603	903	0
389	9	0	0	0	0	0	0	200	300	0	0	0	0	0	0	0	200	903	0	0	0	0	0	0	0	603	903	0
390	0	0	0	0	0	0	0	200	300	0	0	0	0	0	0	0	200	903	0	0	0	0	0	0	0	603	903	0
390	1	0	0	0	0	0	0	200	300	0	0	0	0	0	0	0	200	903	0	0	0	0	0	0	0	603	903	0
390	2	0	0	0	0	0	0	200	300	0	0	0	0	0	0	0	200	903	0	0	0	0	0	0	0	603	903	0
390	3	0	0	0	0	0	0	200	300	0	0	0	0	0	0	0	200	903	0	0	0	0	0	0	0	603	903	0
390	4	0	0	0	0	0	0	200	300	0	0	0	0	0	0	0	200	903	0	0	0	0	0	0	0	603	903	0
390	5	0	0	0	0	0	0	200	300	0	0	0	0	0	0	0	200	903	0	0	0	0	0	0	0	603	903	0
390	6	0	0	0	0	0	0	200	300	0	0	0	0	0	0	0	200	903	0	0	0	0	0	0	0	603	903	0
390	7	0	0	0	0	0	0	200	300	0	0	0	0	0	0	0	200	903	0	0	0	0	0	0	0	603	903	0
390	8	0	0	0	0	0	0	200	300	0	0	0	0	0	0	0	200	903	0	0	0	0	0	0	0	603	903	0
390	9	0	0	0	0	0	0	200	300	0	0	0	0	0	0	0	200	903	0	0	0	0	0	0	0	603	903	0
391	0	0	0	0	0	0	0	200	300	0	0	0	0	0	0	0	200	903	0	0	0	0	0	0	0	603	903	0
391	1	0	0	0	0	0	0	200	300	0	0	0	0	0	0	0	200	903	0	0	0	0	0	0	0	603	903	0
391	2	0	0	0	0	0	0	200	300	0	0	0	0	0	0	0	200	903	0	0	0	0	0	0	0	603	903	0
391	3	0	0	0	0	0	0	200	300	0	0	0	0	0	0	0	200	903	0	0	0	0	0	0	0	603	903	0
391	4	0	0	0	0	0	0	200	300	0	0	0	0	0	0	0	200	903	0	0	0	0	0	0	0	603	903	0
391	5	0	0	0	0	0	0	200	300	0	0	0	0	0	0	0	200	903	0	0	0	0	0	0	0	603	903	0
391	6	0	0	0	0	0	0	200	300	0	0	0	0	0	0	0	200	903	0	0	0	0	0	0	0	603	903	0
391	7	0	0	0	0	0	0	200	300	0	0	0	0	0	0	0	200	903	0	0	0	0	0	0	0	603	903	0
391	8	0	0	0	0	0	0	200	300	0	0	0	0	0	0	0	200	903	0	0	0	0	0	0	0	603	903	0
391	9	0	0	0	0	0	0	200	300	0	0	0	0	0	0	0	200	903	0	0	0	0	0	0	0	603	903	0
392	0	0	0	0	0	0	0	200	300	0	0	0	0	0	0	0	200	903	0	0	0	0	0	0	0	603	903	0
392	1	0	0	0	0	0	0	200	300	0	0	0	0	0	0	0	200	903	0	0	0	0	0	0	0	603	903	0
392	2	0	0	0	0	0	0	200	300	0	0	0	0	0	0	0	200	903	0	0	0	0	0	0	0	603	903	0
392	3	0	0	0	0	0	0	200	300	0	0	0	0	0	0	0	200	903	0	0	0	0	0	0	0	603	903	0
392	4	0	0	0	0	0	0	200	300	0	0	0	0	0	0	0	200	903	0	0	0	0	0	0	0	603	903	0
392	5	0	0	0	0	0	0	200	300	0	0	0	0	0	0	0	200	903	0	0	0	0	0	0	0	603	903	0
392	6	0	0	0	0	0	0	200	300	0	0	0	0	0	0	0	200	903	0	0	0	0	0	0	0	603	903	0
392	7	0	0	0	0	0	0	200	300	0	0	0	0	0	0	0	200	903	0	0	0	0	0	0	0	603	903	0
392	8	0	0	0	0	0	0	200	300	0	0	0	0	0	0	0	200	903	0	0	0	0	0	0	0	603	903	0
392	9	0	0	0	0	0	0	200	300	0	0	0	0	0	0	0	200	903	0	0	0	0	0	0	0	603	903	0
393	0	0	0	0	0	0	0	200	300	0	0	0	0	0	0	0	200	903	0	0	0	0	0	0	0	603	903	0
393	1	0	0	0	0	0	0	200	300	0	0	0	0	0	0	0	200	903	0	0	0	0	0	0	0	603	903	0
393	2	0	0	0	0	0	0	200	300	0	0	0	0	0	0	0	200	903	0	0	0	0	0	0	0	603	903	0
393	3	0	0	0	0	0	0	200	300	0	0	0	0	0	0	0	200	903	0	0	0	0	0	0	0	603	903	0
393	4	0	0	0	0	0	0	200	300	0	0	0	0	0	0	0	200	903	0	0	0	0	0	0	0	603	903	0
393	5	0	0	0	0	0	0	200	300	0	0	0	0	0	0	0	200	903	0	0	0	0	0	0	0	603	903	0
393	6	0	0	0	0	0	0	200	300	0	0	0	0	0	0	0	200	903	0	0	0	0	0	0	0	603	903	0
393	7	0	0	0	0	0	0	200	300	0	0	0	0	0	0	0	200	903	0	0	0	0	0	0	0	603	903	0
393	8	0	0	0	0	0	0	200	300	0	0	0	0	0	0	0	200	903	0	0	0	0	0	0	0	603	903	0
393	9	0	0	0	0	0	0	200	300	0	0	0	0	0	0	0	200	903	0	0	0	0	0	0	0	603	903	0
394	0	0	0	0	0	0	0	200	300	0	0	0	0	0	0	0	200	903	0	0	0	0	0	0	0	603	903	0
394	1	0	0	0	0	0	0	200	300	0	0	0	0	0	0	0	200	903	0	0	0	0	0	0	0	603	903	0
394	2	0	0	0	0	0	0	200	300	0	0	0	0	0	0	0	200	903	0	0	0	0	0	0	0	603	903	0
394	3	0	0	0	0	0	0	200	300	0	0	0	0	0	0	0	200	903	0	0	0	0	0	0	0	603	903	0
394	4	0	0	0	0	0	0	200	300	0	0	0	0	0	0	0	200	903	0	0	0	0	0	0	0	603	903	0
394	5	0	0	0	0	0	0	200	300	0	0	0	0	0	0	0	200	903	0	0	0	0	0	0	0	603	903	0
394	6	0	0	0	0	0	0	200	300	0	0	0	0	0	0	0	200	903	0	0	0	0	0	0	0	603	903	0
394	7	0	0	0	0	0	0	200	300	0	0	0	0	0	0	0	200	903	0	0	0	0	0	0	0	603	903	0
394	8	0	0	0	0	0	0	200	300	0	0	0	0	0	0	0	200	903	0	0	0	0	0	0	0	603	903	0
394	9	0	0	0	0	0	0	200	300	0	0	0	0	0	0	0	200	903	0	0	0	0	0	0	0	603	903	0
395	0	0	0	0	0	0	0	200	300	0	0	0	0	0	0	0	200	903	0	0	0	0	0	0	0	603	903	0
395	1	0	0	0	0	0	0	200	300	0	0	0	0	0	0	0	200	903	0	0	0	0	0	0	0	603	903	0
395	2	0	0	0	0	0	0	200	300	0	0	0	0	0	0	0	200	903	0	0	0	0	0	0	0	603	903	0
395	3	0	0	0	0	0	0	200	300	0	0	0	0	0	0	0	200	903	0	0	0	0	0	0	0	603	903	0
395	4	0	0	0	0	0	0	200	300	0	0	0	0	0	0	0	200	903	0	0	0	0	0	0	0	603	903	0
395	5	0	0	0	0	0	0	200	300	0	0	0	0	0	0	0	200	903	0	0	0	0	0	0	0	603	903	0
395	6	0	0	0	0	0	0	200	300	0	0	0	0	0	0	0	200	903	0	0	0	0	0	0	0	603	903	0
395	7	0	0	0	0	0	0	200	300	0	0	0	0	0	0	0	200	903	0	0	0	0	0	0	0	603	903	0
395	8	0	0	0	0	0	0	200	300	0	0	0	0	0	0	0	200	903	0	0	0	0	0	0	0	603	903	0
395	9	0	0	0	0	0	0	200	300	0	0	0	0	0	0	0	200	903	0	0	0	0	0	0	0	603	903	0
396	0	0	0	0	0	0	0	200	300	0	0	0	0	0	0	0	200	903	0	0	0	0	0	0	0	603	903	0
396	1	0	0	0	0	0	0	200	300	0	0	0	0	0	0	0	200	903	0	0	0	0	0	0	0	603	903	0
396	2	0	0	0	0	0	0	200	300	0	0	0	0	0	0	0	200	903	0	0	0	0	0	0	0	603	903	0
396	3	0	0	0	0	0	0	200	300	0	0	0	0	0	0	0	200	903	0	0	0	0	0	0	0	603	903	0
396	4	0	0	0	0	0	0	200	300	0	0	0	0	0	0	0	200	903	0	0	0	0	0	0	0	603	903	0
396	5	0	0	0	0	0	0	200	300	0	0	0	0	0	0	0	200	903	0	0	0	0	0	0	0	603	903	0
396	6	0	0	0	0	0	0	200	300	0	0	0	0	0	0	0	200	903	0	0	0	0	0	0	0	603	903	0
396	7	0	0	0	0	0	0	200	300	0	0	0	0	0	0	0	200	903	0	0	0	0	0	0	0	603	903	0
396	8	0	0	0	0	0	0	200	300	0	0	0	0	0	0	0	200	903	0	0	0	0	0	0	0	603	903	0
396	9	0	0	0	0	0	0	200	300	0	0	0	0	0	0	0	200	903	0	0	0	0	0	0	0	603	903	0
397	0	0	0	0	0	0	0	200	300	0	0	0	0	0	0	0	200	903	0	0	0	0	0	0	0	603	903	0
397	1	0	0	0	0	0	0	200	300	0	0	0	0	0	0	0	200	903	0	0	0	0	0	0	0	603	903	0
397	2	0	0	0	0	0	0	200	300	0	0	0	0	0	0	0	200	903	0	0	0	0	0	0	0	603	903	0
397	3	0	0	0	0	0	0	200	300	0	0	0	0	0	0	0	200	903	0	0	0	0	0	0	0	603	903	0
397	4	0	0	0	0	0	0	200	300	0	0	0	0	0	0	0	200	903	0	0	0	0	0	0	0	603	903	0
397	5	0	0	0	0	0	0	200	300	0	0	0	0	0	0	0	200	903	0	0	0	0	0	0	0	603	903	0
397	6	0	0	0	0	0	0	200	300	0	0	0	0	0	0	0	200	903	0	0	0	0	0	0	0	603	903	0
397	7	0	0	0	0	0	0	200	300	0	0	0	0	0	0	0	200	903	0	0	0	0	0	0	0	603	903	0
397	8	0	0	0	0	0	0	200	300	0	0	0	0	0	0	0	200	903	0	0	0	0	0	0	0	603	903	0
397	9	0	0	0	0	0	0	200	300	0	0	0	0	0	0	0	200	903	0	0	0	0	0	0	0	603	903	0
398	0	0	0	0	0	0	0	200	300	0	0	0	0	0	0	0	200	903	0	0	0	0	0	0	0	603	903	0
398	1	0	0	0	0	0	0	200	300	0	0	0	0	0	0	0	200	903	0	0	0	0	0	0	0	603	903	0
398	2	0	0	0	0	0	0	200	300	0	0	0	0	0	0	0	200	903	0	0	0	0	0	0	0	603	903	0
398	3	0	0	0	0	0	0	200	300	0	0	0	0	0	0	0	200	903	0	0	0	0	0	0	0	603	903	0
398	4	0	0	0	0	0	0	200	300	0	0	0	0	0	0	0	200	903	0	0	0	0	0	0	0	603	903	0
398	5	0	0	0	0	0	0	200	300	0	0	0	0	0	0	0	200	903	0	0	0	0	0	0	0	603	903	0
398	6	0	0	0	0	0	0	200	300	0	0	0	0	0	0	0	200	903	0	0	0	0	0	0	0	603	903	0
398	7	0	0	0	0	0	0	200	300	0	0	0	0	0	0	0	200	903	0	0	0	0	0	0	0	603	903	0
398	8	0	0	0	0	0	0	200	300	0	0	0	0	0	0	0	200	903	0	0	0	0	0	0	0	603	903	0
398	9	0	0	0	0	0	0	200	300	0	0	0	0	0	0	0	200	903	0	0	0	0	0	0	0	603	903	0
399	0	0	0	0	0	0	0	200	300	0	0	0	0	0	0	0	200	903	0	0	0	0	0	0	0	603	903	0
399	1	0	0	0	0	0	0	200	300	0	0	0	0	0	0	0	200	903	0	0	0	0	0	0	0	603	903	0
399	2	0	0	0	0	0	0	200	300	0	0	0	0	0	0	0	200	903	0	0	0	0	0	0	0	603	903	0
399	3	0	0	0	0	0	0	200	300	0	0	0	0	0	0	0	200	903	0	0	0	0	0	0	0	603	903	0
399	4	0	0	0	0	0	0	200	300	0	0	0	0	0	0	0	200	903	0	0	0	0	0	0	0	603	903	0
399	5	0	0	0	0	0	0	200	300	0	0	0	0	0	0	0	200	903	0	0	0	0	0	0	0	603	903	0
399	6	0	0	0	0	0	0	200	300	0	0	0	0	0	0	0	200	903	0	0	0	0	0	0	0	603	903	0
399	7	0	0	0	0	0	0	200	300	0	0	0	0	0	0	0	200	903	0	0	0	0	0	0	0	603	903	0
399	8	0	0	0	0	0	0	200	300	0	0	0	0	0	0	0	200	903	0	0	0	0	0	0	0	603	903	0
399	9	0	0	0	0	0	0	200	300	0	0	0	0	0	0	0	200	903	0	0	0	0	0	0	0	603	903	0
400	0	0	0	0	0	0	0	200	300	0	0	0	0	0	0	0	200	903	0	0	0	0	0	0	0	603	903	0
400	1	0	0	0	0	0	0	200	300	0	0	0	0	0	0	0	200	903	0	0	0	0	0	0	0	603	903	0
400	2	0	0	0	0	0	0	200	300	0	0	0	0	0	0	0	200	903	0	0	0	0	0	0	0	603	903	0
400	3	0	0	0	0	0	0	200	300	0	0	0	0	0	0	0	200	903	0	0	0	0	0	0	0	603	903	0
400	4	0	0	0	0	0	0	200	300	0	0	0	0	0	0	0	200	903	0	0	0	0	0	0	0	603	903	0
400	5	0	0	0	0	0	0	200	300	0	0	0	0	0	0	0	200	903	0	0	0	0	0	0	0	603	903	0
400	6	0	0	0	0	0	0	200	300	0	0	0	0	0	0	0	200	903	0	0	0	0	0	0	0	603	903	0
400	7	0	0	0	0	0	0	200	300	0	0	0	0	0	0	0	200	903	0	0	0	0	0	0	0	603	903	0
400	8	0	0	0	0	0	0	200	300	0	0	0	0	0	0	0	200	903	0	0	0	0	0	0	0	603	903	0
400	9	0	0	0	0	0	0	200	300	0	0	0	0	0	0	0	200	903	0	0	0	0	0	0	0	603	903	0
401	0	0	0	0	0	0	0	200	300	0	0	0	0	0	0	0	200	903	0	0	0	0	0	0	0	603	903	0
401	1	0	0	0	0	0	0	200	300	0	0	0	0	0	0	0	200	903	0	0	0	0	0	0	0	603	903	0
401	2	0	0	0	0	0	0	200	300	0	0	0	0	0	0	0	200	903	0	0	0	0	0	0	0	603	903	0
401	3	0	0	0	0	0	0	200	300	0	0	0	0	0	0	0	200	903	0	0	0	0	0	0	0	603	903	0
401	4	0	0	0	0	0	0	200	300	0	0	0	0	0	0	0	200	903	0	0	0	0	0	0	0	603	903	0
401	5	0	0	0	0	0	0	200	300	0	0	0	0	0	0	0	200	903	0	0	0	0	0	0	0	603	903	0
401	6	0	0	0	0	0	0	200	300	0	0	0	0	0	0	0	200	903	0	0	0	0	0	0	0	603	903	0
401	7	0	0	0	0	0	0	200	300	0	0	0	0	0	0	0	200	903	0	0	0	0	0	0	0	603	903	0
401	8	0	0	0	0	0	0	200	300	0	0	0	0	0	0	0	200	903	0	0	0	0	0	0	0	603	903	0
401	9	0	0	0	0	0	0	200	300	0	0	0	0	0	0	0	200	903	0	0	0	0	0	0	0	603	903	0
402	0	0	0	0	0	0	0	200	300	0	0	0	0	0	0	0	200	903	0	0	0	0	0	0	0	603	903	0
402	1	0	0	0	0	0	0	200	300	0	0	0	0	0	0	0	200	903	0	0	0	0	0	0	0	603	903	0
402	2	0	0	0	0	0	0	200	300	0	0	0	0	0	0	0	200	903	0	0	0	0	0	0	0	603	903	0
402	3	0	0	0	0	0	0	200	300	0	0	0	0	0	0	0	200	903	0	0	0	0	0	0	0	603	903	0
402	4	0	0	0	0	0	0	200	300	0	0	0	0	0	0	0	200	903	0	0	0	0	0	0	0	603	903	0
402	5	0	0	0	0	0	0	200	300	0	0	0	0	0	0	0	200	903	0	0	0	0	0	0	0	603	903	0
402	6	0	0	0	0	0	0	200	300	0	0	0	0	0	0	0	200	903	0	0	0	0	0	0	0	603	903	0
402	7	0	0	0	0	0	0	200	300	0	0	0	0	0	0	0	200	903	0	0	0	0	0	0	0	603	903	0
402	8	0	0	0	0	0	0	200	300	0	0	0	0	0	0	0	200	903	0	0	0	0	0	0	0	603	903	0
402	9	0	0	0	0	0	0	200	300	0	0	0	0	0	0	0	200	903	0	0	0	0	0	0	0	603	903	0
403	0	0	0	0	0	0	0	200	300	0	0	0	0	0	0	0	200	903	0	0	0	0	0	0	0	603	903	0
403	1	0	0	0	0	0	0	200	300	0	0	0	0	0	0	0	200	903	0	0	0	0	0	0	0	603	903	0
403	2	0	0	0	0	0	0	200	300	0	0	0	0	0	0	0	200	903	0	0	0	0	0	0	0	603	903	0
403	3	0	0	0	0	0	0	200	300	0	0	0	0	0	0	0	200	903	0	0	0	0	0	0	0	603	903	0
403	4	0	0	0	0	0	0	200	300	0	0	0	0	0	0	0	200	903	0	0	0	0	0	0	0	603	903	0
403	5	0	0	0	0	0	0	200	300	0	0	0	0	0	0	0	200	903	0	0	0	0	0	0	0	603	903	0
403	6	0	0	0	0	0	0	200	300	0	0	0	0	0	0	0	200	903	0	0	0	0	0	0	0	603	903	0
403	7	0	0	0	0	0	0	200	300	0	0	0	0	0	0	0	200	903	0	0	0	0	0	0	0	603	903	0
403	8	0	0	0	0	0	0	200	300	0	0	0	0	0	0	0	200	903	0	0	0	0	0	0	0	603	903	0
403	9	0	0	0	0	0	0	200	300	0	0	0	0	0	0	0	200	903	0	0	0	0	0	0	0	603	903	0
404	0	0	0	0	0	0	0	200	300	0	0	0	0	0	0	0	200	903	0	0	0	0	0	0	0	603	903	0
404	1	0	0	0	0	0	0	200	300	0	0	0	0	0	0	0	200	903	0	0	0	0	0	0	0	603	903	0
404	2	0	0	0	0	0	0	200	300	0	0	0	0	0	0	0	200	903	0	0	0	0	0	0	0	603	903	0
404	3	0	0	0	0	0	0	200	300	0	0	0	0	0	0	0	200	903	0	0	0	0	0	0	0	603	903	0
404	4	0	0	0	0	0	0	200	300	0	0	0	0	0	0	0	200	903	0	0	0	0	0	0	0	603	903	0
404	5	0	0	0	0	0	0	200	300	0	0	0	0	0	0	0	200	903	0	0	0	0	0	0	0	603	903	0
404	6	0	0	0	0	0	0	200	300	0	0	0	0	0	0	0	200	903	0	0	0	0	0	0	0	603	903	0
404	7	0	0	0	0	0	0	200	300	0	0	0	0	0	0	0	200	903	0	0	0	0	0	0	0	603	903	0
404	8	0	0	0	0	0	0	200	300	0	0	0	0	0	0	0	200	903	0	0	0	0	0	0	0	603	903	0
404	9	0	0	0	0	0	0	200	300	0	0	0	0	0	0	0	200	903	0	0	0	0	0	0	0	603	903	0
405	0	0	0	0	0	0	0	200	300	0	0	0	0	0	0	0	200	903	0	0	0	0	0	0	0	603	903	0
405	1	0	0	0	0	0	0	200	300	0	0	0	0	0	0	0	200	903	0	0	0	0	0	0	0	603	903	0
405	2	0	0	0	0	0	0	200	300	0	0	0	0	0	0	0	200	903	0	0	0	0	0	0	0	603	903	0
405	3	0	0	0	0	0	0	200	300	0	0	0	0	0	0	0	200	903	0	0	0	0	0	0	0	603	903	0
405	4	0	0	0	0	0	0	200	300	0	0	0	0	0	0	0	200	903	0	0	0	0	0	0	0	603	903	0
405	5	0	0	0	0	0	0	200	300	0	0	0	0	0	0	0	200	903	0	0	0	0	0	0	0	603	903	0
405	6	0	0	0	0	0	0	200	300	0	0	0	0	0	0	0	200	903	0	0	0	0	0	0	0	603	903	0
405	7	0	0	0	0	0	0	200	300	0	0	0	0	0	0	0	200	903	0	0	0	0	0	0	0	603	903	0
405	8	0	0	0	0	0	0	200	300	0	0	0	0	0	0	0	200	903	0	0	0	0	0	0	0	603	903	0
405	9	0	0	0	0	0	0	200	300	0	0	0	0	0	0	0	200	903	0	0	0	0	0	0	0	603	903	0
406	0	0	0	0	0	0	0	200	300	0	0	0	0	0	0	0	200	903	0	0	0	0	0	0	0	603	903	0
406	1	0	0	0	0	0	0	200	300	0	0	0	0	0	0	0	200	903	0	0	0	0	0	0	0	603	903	0
406	2	0	0	0	0	0	0	200	300	0	0	0	0	0	0	0	200	903	0	0	0	0	0	0	0	603	903	0
406	3	0	0	0	0	0	0	200	300	0	0	0	0	0	0	0	200	903	0	0	0	0	0	0	0	603	903	0
406	4	0	0	0	0	0	0	200	300	0	0	0	0	0	0	0	200	903	0	0	0	0	0	0	0	603	903	0
406	5	0	0	0	0	0	0	200	300	0	0	0	0	0	0	0	200	903	0	0	0	0	0	0	0	603	903	0
406	6	0	0	0	0	0	0	200	300	0	0	0	0	0	0	0	200	903	0	0	0	0	0	0	0	603	903	0
406	7	0	0	0	0	0	0	200	300	0	0	0	0	0	0	0	200	903	0	0	0	0	0	0	0	603	903	0
406	8	0	0	0	0	0	0	200	300	0	0	0	0	0	0	0	200	903	0	0	0	0	0	0	0	603	903	0
406	9	0	0	0	0	0	0	200	300	0	0	0	0	0	0	0	200	903	0	0	0	0	0	0	0	603	903	0
407	0	0	0	0	0	0	0	200	300	0	0	0	0	0	0	0	200	903	0	0	0	0	0	0	0	603	903	0
407	1	0	0	0	0	0	0	200	300	0	0	0	0	0	0	0	200	903	0	0	0	0	0	0	0	603	903	0
407	2	0	0	0	0	0	0	200	300	0	0	0	0	0	0	0	200	903	0	0	0	0	0	0	0	603	903	0
407	3	0	0	0	0	0	0	200	300	0	0	0	0	0	0	0	200	903	0	0	0	0	0	0	0	603	903	0
407	4	0	0	0	0	0	0	200	300	0	0	0	0	0	0	0	200	903	0	0	0	0	0	0	0	603	903	0
407	5	0	0	0	0	0	0	200	300	0	0	0	0	0	0	0	200	903	0	0	0	0	0	0	0	603	903	0
407	6	0	0	0	0	0	0	200	300	0	0	0	0	0	0	0	200	903	0	0	0	0	0	0	0	603	903	0
407	7	0	0	0	0	0	0	200	300	0	0	0	0	0	0	0	200	903	0	0	0	0	0	0	0	603	903	0
407	8	0	0	0	0	0	0	200	300	0	0	0	0	0	0	0	200	903	0	0	0	0	0	0	0	603	903	0
407	9	0	0	0	0	0	0	200	300	0	0	0	0	0	0	0	200	903	0	0	0	0	0	0	0	603	903	0
408	0	0	0	0	0	0	0	200	300	0	0	0	0	0	0	0	200	903	0	0	0	0	0	0	0	603	903	0
408	1	0	0	0	0	0	0	200	300	0	0	0	0	0	0	0	200	903	0	0	0	0	0	0	0	603	903	0
408	2	0	0	0	0	0	0	200	300	0	0	0	0	0	0	0	200	903	0	0	0	0	0	0	0	603	903	0
408	3	0	0	0	0	0	0	200	300	0	0	0	0	0	0	0	200	903	0	0	0	0	0	0	0	603	903	0
408	4	0	0	0	0	0	0	200	300	0	0	0	0	0	0	0	200	903	0	0	0	0	0	0	0	603	903	0
408	5	0	0	0	0	0	0	200	300	0	0	0	0	0	0	0	200	903	0	0	0	0	0	0	0	603	903	0
408	6	0	0	0	0	0	0	200	300	0	0	0	0	0	0	0	200	903	0	0	0	0	0	0	0	603	903	0
408	7	0	0	0	0	0	0	200	300	0	0	0	0	0	0	0	200	903	0	0	0	0	0	0	0	603	903	0
408	8	0	0	0	0	0	0	200	300	0	0	0	0	0	0	0	200	903	0	0	0	0	0	0	0	603	903	0
408	9	0	0	0	0	0	0	200	300	0	0	0	0	0	0	0	200	903	0	0	0	0	0	0	0	603	903	0
409	0	0	0	0	0	0	0	200	300	0	0	0	0	0	0	0	200	903	0	0	0	0	0	0	0	603	903	0
409	1	0	0	0	0	0	0	200	300	0	0	0	0	0	0	0	200	903	0	0	0	0	0	0	0	603	903	0
409	2	0	0	0	0	0	0	200	300	0	0	0	0	0	0	0	200	903	0	0	0	0	0	0	0	603	903	0
409	3	0	0	0	0	0	0	200	300	0	0	0	0	0	0	0	200	903	0	0	0	0	0	0	0	603	903	0
409	4	0	0	0	0	0	0	200	300	0	0	0	0	0	0	0	200	903	0	0	0	0	0	0	0	603	903	0
409	5	0	0	0	0	0	0	200	300	0	0	0	0	0	0	0	200	903	0	0	0	0	0	0	0	603	903	0
409	6	0	0	0	0	0	0	200	300	0	0	0	0	0	0	0	200	903	0	0	0	0	0	0	0	603	903	0
409	7	0	0	0	0	0	0	200	300	0	0	0	0	0	0	0	200	903	0	0	0	0	0	0	0	603	903	0
409	8	0	0	0	0	0	0	200	300	0	0	0	0	0	0	0	200	903	0	0	0	0	0	0	0	603	903	0
409	9	0	0	0	0	0	0	200	300	0	0	0	0	0	0	0	200	903	0	0	0	0	0	0	0	603	903	0
410	0	0	0	0	0	0	0	200	300	0	0	0	0	0	0	0	200	903	0	0	0	0	0	0	0	603	903	0
410	1	0	0	0	0	0	0	200	300	0	0	0	0	0	0	0	200	903	0	0	0	0	0	0	0	603	903	0
410	2	0	0	0	0	0	0	200	300	0	0	0	0	0	0	0	200	903	0	0	0	0	0	0	0	603	903	0
410	3	0	0	0	0	0	0	200	300	0	0	0	0	0	0	0	200	903	0	0	0	0	0	0	0	603	903	0
410	4	0	0	0	0	0	0	200	300	0	0	0	0	0	0	0	200	903	0	0	0	0	0	0	0	603	903	0
410	5	0	0	0	0	0	0	200	300	0	0	0	0	0	0	0	200	903	0	0	0	0	0	0	0	603	903	0
410	6	0	0	0	0	0	0	200	300	0	0	0	0	0	0	0	200	903	0	0	0	0	0	0	0	603	903	0
410	7	0	0	0	0	0	0	200	300	0	0	0	0	0	0	0	200	903	0	0	0	0	0	0	0	603	903	0
410	8	0	0	0	0	0	0	200	300	0	0	0	0	0	0	0	200	903	0	0	0	0	0	0	0	603	903	0
410	9	0	0	0	0	0	0	200	300	0	0	0	0	0	0	0	200	903	0	0	0	0	0	0	0	603	903	0
411	0	0	0	0	0	0	0	200	300	0	0	0	0	0	0	0	200	903	0	0	0	0	0	0	0	603	903	0
411	1	0	0	0	0	0	0	200	300	0	0	0	0	0	0	0	200	903	0	0	0	0	0	0	0	603	903	0
411	2	0	0	0	0	0	0	200	300	0	0	0	0	0	0	0	200	903	0	0	0	0	0	0	0	603	903	0
411	3	0	0	0	0	0	0	200	300	0	0	0	0	0	0	0	200	903	0	0	0	0	0	0	0	603	903	0
411	4	0	0	0	0	0	0	200	300	0	0	0	0	0	0	0	200	903	0	0	0	0	0	0	0	603	903	0
411	5	0	0	0	0	0	0	200	300	0	0	0	0	0	0	0	200	903	0	0	0	0	0	0	0	603	903	0
411	6	0	0	0	0	0	0	200	300	0	0	0	0	0	0	0	200	903	0	0	0	0	0	0	0	603	903	0
411	7	0	0	0	0	0	0	200	300	0	0	0	0	0	0	0	200	903	0	0	0	0	0	0	0	603	903	0
411	8	0	0	0	0	0	0	200	300	0	0	0	0	0	0	0	200	903	0	0	0	0	0	0	0	603	903	0
411	9	0	0	0	0	0	0	200	300	0	0	0	0	0	0	0	200	903	0	0	0	0	0	0	0	603	903	0
412	0	0	0	0	0	0	0	200	300	0	0	0	0	0	0	0	200	903	0	0	0	0	0	0	0	603	903	0
412	1	0	0	0	0	0	0	200	300	0	0	0	0	0	0	0	200	903	0	0	0	0	0	0	0	603	903	0
412	2	0	0	0	0	0	0	200	300	0	0	0	0	0	0	0	200	903	0	0	0	0	0	0	0	603	903	0
412	3	0	0	0	0	0	0	200	300	0	0	0	0	0	0	0	200	903	0	0	0	0	0	0	0	603	903	0
412	4	0	0	0	0	0	0	200	300	0	0	0	0	0	0	0	200	903	0	0	0	0	0	0	0	603	903	0
412	5	0	0	0	0	0	0	200	300	0	0	0	0	0	0	0	200	903	0	0	0	0	0	0	0	603	903	0
412	6	0	0	0	0	0	0	200	300	0	0	0	0	0	0	0	200	903	0	0	0	0	0	0	0	603	903	0
412	7	0	0	0	0	0	0	200	300	0	0	0	0	0	0	0	200	903	0	0	0	0	0	0	0	603	903	0
412	8	0	0	0	0	0	0	200	300	0	0	0	0	0	0	0	200	903	0	0	0	0	0	0	0	603	903	0
412	9	0	0	0	0	0	0	200	300	0	0	0	0	0	0	0	200	903	0	0	0	0	0	0	0	603	903	0
413	0	0	0	0	0	0	0	200	300	0	0	0	0	0	0	0	200	903	0	0	0	0	0	0	0	603	903	0
413	1	0	0	0	0	0	0	200	300	0	0	0	0	0	0	0	200	903	0	0	0	0	0	0	0	603	903	0
413	2	0	0	0	0	0	0	200	300	0	0	0	0	0	0	0	200	903	0	0	0	0	0	0	0	603	903	0
413	3	0	0	0	0	0	0	200	300	0	0	0	0	0	0	0	200	903	0	0	0	0	0	0	0	603	903	0
413	4	0	0	0	0	0	0	200	300	0	0	0	0	0	0	0	200	903	0	0	0	0	0	0	0	603	903	0
413	5	0	0	0	0	0	0	200	300	0	0	0	0	0	0	0	200	903	0	0	0	0	0	0	0	603	903	0
413	6	0	0	0	0	0	0	200	300	0	0	0	0	0	0	0	200	903	0	0	0	0	0	0	0	603	903	0
413	7	0	0	0	0	0	0	200	300	0	0	0	0	0	0	0	200	903	0	0	0	0	0	0	0	603	903	0
413	8	0	0	0	0	0	0	200	300	0	0	0	0	0	0	0	200	903	0	0	0	0	0	0	0	603	903	0
413	9	0	0	0	0	0	0	200	300	0	0	0	0	0	0	0	200	903	0	0	0	0	0	0	0	603	903	0
414	0	0	0	0	0	0	0	200	300	0	0	0	0	0	0	0	200	903	0	0	0	0	0	0	0	603	903	0
414	1	0	0	0	0	0	0	200	300	0	0	0	0	0	0	0	200	903	0	0	0	0	0	0	0	603	903	0
414	2	0	0	0	0	0	0	200	300	0	0	0	0	0	0	0	200	903	0	0	0	0	0	0	0	603	903	0
414	3	0	0	0	0	0	0	200	300	0	0	0	0	0	0	0	200	903	0	0	0	0	0	0	0	603	903	0
414	4	0	0	0	0	0	0	200	300	0	0	0	0	0	0	0	200	903	0	0	0	0	0	0	0	603	903	0
414	5	0	0	0	0	0	0	200	300	0	0	0	0	0	0	0	200	903	0	0	0	0	0	0	0	603	903	0
414	6	0	0	0	0	0	0	200	300	0	0	0	0	0	0	0	200	903	0	0	0	0	0	0	0	603	903	0
414	7	0	0	0	0	0	0	200	300	0	0	0	0	0	0	0	200	903	0	0	0	0	0	0	0	603	903	0
414	8	0	0	0	0	0	0	200	300	0	0	0	0	0	0	0	200	903	0	0	0	0	0	0	0	603	903	0
414	9	0	0	0	0	0	0	200	300	0	0	0	0	0	0	0	200	903	0	0	0	0	0	0	0	603	903	0
415	0	0	0	0	0	0	0	200	300	0	0	0	0	0	0	0	200	903	0	0	0	0	0	0	0	603	903	0
415	1	0	0	0	0	0	0	200	300	0	0	0	0	0	0	0	200	903	0	0	0	0	0	0	0	603	903	0
415	2	0	0	0	0	0	0	200	300	0	0	0	0	0	0	0	200	903	0	0	0	0	0	0	0	603	903	0
415	3	0	0	0	0	0	0	200	300	0	0	0	0	0	0	0	200	903	0	0	0	0	0	0	0	603	903	0
415	4	0	0	0	0	0	0	200	300	0	0	0	0	0	0	0	200	903	0	0	0	0	0	0	0	603	903	0
415	5	0	0	0	0	0	0	200	300	0	0	0	0	0	0	0	200	903	0	0	0	0	0	0	0	603	903	0
415	6	0	0	0	0	0	0	200	300	0	0	0	0	0	0	0	200	903	0	0	0	0	0	0	0	603	903	0
415	7	0	0	0	0	0	0	200	300	0	0	0	0	0	0	0	200	903	0	0	0	0	0	0	0	603	903	0
415	8	0	0	0	0	0	0	200	300	0	0	0	0	0	0	0	200	903	0	0	0	0	0	0	0	603	903	0
415	9	0	0	0	0	0	0	200	300	0	0	0	0	0	0	0	200	903	0	0	0	0	0	0	0	603	903	0
416	0	0	0	0	0	0	0	200	300	0	0	0	0	0	0	0	200	903	0	0	0	0	0	0	0	603	903	0
416	1	0	0	0	0	0	0	200	300	0	0	0	0	0	0	0	200	903	0	0	0	0	0	0	0	603	903	0
416	2	0	0	0	0	0	0	200	300	0	0	0	0	0	0	0	200	903	0	0	0	0	0	0	0	603	903	0
416	3	0	0	0	0	0	0	200	300	0	0	0	0	0	0	0	200	903	0	0	0	0	0	0	0	603	903	0
416	4	0	0	0	0	0	0	200	300	0	0	0	0	0	0	0	200	903	0	0	0	0	0	0	0	603	903	0
416	5	0	0	0	0	0	0	200	300	0	0	0	0	0	0	0	200	903	0	0	0	0	0	0	0	603	903	0
416	6	0	0	0	0	0	0	200	300	0	0	0	0	0	0	0	200	903	0	0	0	0	0	0	0	603	903	0
416	7	0	0	0	0	0	0	200	300	0	0	0	0	0	0	0	200	903	0	0	0	0	0	0	0	603	903	0
416	8	0	0	0	0	0	0	200	300	0	0	0	0	0	0	0	200	903	0	0	0	0	0	0	0	603	903	0
416	9	0	0	0	0	0	0	200	300	0	0	0	0	0	0	0	200	903	0	0	0	0	0	0	0	603	903	0
417	0	0	0	0	0	0	0	200	300	0	0	0	0	0	0	0	200	903	0	0	0	0	0	0	0	603	903	0
417	1	0	0	0	0	0	0	200	300	0	0	0	0	0	0	0	200	903	0	0	0	0	0	0	0	603	903	0
417	2	0	0	0	0	0	0	200	300	0	0	0	0	0	0	0	200	903	0	0	0	0	0	0	0	603	903	0
417	3	0	0	0	0	0	0	200	300	0	0	0	0	0	0	0	200	903	0	0	0	0	0	0	0	603	903	0
417	4	0	0	0	0	0	0	200	300	0	0	0	0	0	0	0	200	903	0	0	0	0	0	0	0	603	903	0
417	5	0	0	0	0	0	0	200	300	0	0	0	0	0	0	0	200	903	0	0	0	0	0	0	0	603	903	0
417	6	0	0	0	0	0	0	200	300	0	0	0	0	0	0	0	200	903	0	0	0	0	0	0	0	603	903	0
417	7	0	0	0	0	0	0	200	300	0	0	0	0	0	0	0	200	903	0	0	0	0	0	0	0	603	903	0
417	8	0	0	0	0	0	0	200	300	0	0	0	0	0	0	0	200	903	0	0	0	0	0	0	0	603	903	0
417	9	0	0	0	0	0	0	200	300	0	0	0	0	0	0	0	200	903	0	0	0	0	0	0	0	603	903	0
418	0	0	0	0	0	0	0	200	300	0	0	0	0	0	0	0	200	903	0	0	0	0	0	0	0	603	903	0
418	1	0	0	0	0	0	0	200	300	0	0	0	0	0	0	0	200	903	0	0	0	0	0	0	0	603	903	0
418	2	0	0	0	0	0	0	200	300	0	0	0	0	0	0	0	200	903	0	0	0	0	0	0	0	603	903	0
418	3	0	0	0	0	0	0	200	300	0	0	0	0	0	0	0	200	903	0	0	0	0	0	0	0	603	903	0
418	4	0	0	0	0	0	0	200	300	0	0	0	0	0	0	0	200	903	0	0	0	0	0	0	0	603	903	0
418	5	0	0	0	0	0	0	200	300	0	0	0	0	0	0	0	200	903	0	0	0	0	0	0	0	603	903	0
418	6	0	0	0	0	0	0	200	300	0	0	0	0	0	0	0	200	903	0	0	0	0	0	0	0	603	903	0
418	7	0	0	0	0	0	0	200	300	0	0	0	0	0	0	0	200	903	0	0	0	0	0	0	0	603	903	0
418	8	0	0	0	0	0	0	200	300	0	0	0	0	0	0	0	200	903	0	0	0	0	0	0	0	603	903	0
418	9	0	0	0	0	0	0	200	300	0	0	0	0	0	0	0	200	903	0	0	0	0	0	0	0	603	903	0
419	0	0	0	0	0	0	0	200	300	0	0	0	0	0	0	0	200	903	0	0	0	0	0	0	0	603	903	0
419	1	0	0	0	0	0	0	200	300	0	0	0	0	0	0	0	200	903	0	0	0	0	0	0	0	603	903	0
419	2	0	0	0	0	0	0	200	300	0	0	0	0	0	0	0	200	903	0	0	0	0	0	0	0	603	903	0
419	3	0	0	0	0	0	0	200	300	0	0	0	0	0	0	0	200	903	0	0	0	0	0	0	0	603	903	0
419	4	0	0	0	0	0	0	200	300	0	0	0	0	0	0	0	200	903	0	0	0	0	0	0	0	603	903	0
419	5	0	0	0	0	0	0	200	300	0	0	0	0	0	0	0	200	903	0	0	0	0	0	0	0	603	903	0
419	6	0	0	0	0	0	0	200	300	0	0	0	0	0	0	0	200	903	0	0	0	0	0	0	0	603	903	0
419	7	0	0	0	0	0	0	200	300	0	0	0	0	0	0	0	200	903	0	0	0	0	0	0	0	603	903	0
419	8	0	0	0	0	0	0	200	300	0	0	0	0	0	0	0	200	903	0	0	0	0	0	0	0	603	903	0
419	9	0	0	0	0	0	0	200	300	0	0	0	0	0	0	0	200	903	0	0	0	0	0	0	0	603	903	0
420	0	0	0	0	0	0	0	200	300	0	0	0	0	0	0	0	200	903	0	0	0	0	0	0	0	603	903	0
420	1	0	0	0	0	0	0	200	300	0	0	0	0	0	0	0	200	903	0	0	0	0	0	0	0	603	903	0
420	2	0	0	0	0	0	0	200	300	0	0	0	0	0	0	0	200	903	0	0	0	0	0	0	0	603	903	0
420	3	0	0	0	0	0	0	200	300	0	0	0	0	0	0	0	200	903	0	0	0	0	0	0	0	603	903	0
420	4	0	0	0	0	0	0	200	300	0	0	0	0	0	0	0	200	903	0	0	0	0	0	0	0	603	903	0
420	5	0	0	0	0	0	0	200	300	0	0	0	0	0	0	0	200	903	0	0	0	0	0	0	0	603	903	0
420	6	0	0	0	0	0	0	200	300	0	0	0	0	0	0	0	200	903	0	0	0	0	0	0	0	603	903	0
420	7	0	0	0	0	0	0	200	300	0	0	0	0	0	0	0	200	903	0	0	0	0	0	0	0	603	903	0
420	8	0	0	0	0	0	0	200	300	0	0	0	0	0	0	0	200	903	0	0	0	0	0	0	0	603	903	0
420	9	0	0	0	0	0	0	200	300	0	0	0	0	0	0	0	200	903	0	0	0	0	0	0	0	603	903	0
421	0	0	0	0	0	0	0	200	300	0	0	0	0	0	0	0	200	903	0	0	0	0	0	0	0	603	903	0
421	1	0	0	0	0	0	0	200	300	0	0	0	0	0	0	0	200	903	0	0	0	0	0	0	0	603	903	0
421	2	0	0	0	0	0	0	200	300	0	0	0	0	0	0	0	200	903	0	0	0	0	0	0	0	603	903	0
421	3	0	0	0	0	0	0	200	300	0	0	0	0	0	0	0	200	903	0	0	0	0	0	0	0	603	903	0
421	4	0	0	0	0	0	0	200	300	0	0	0	0	0	0	0	200	903	0	0	0	0	0	0	0	603	903	0
421	5	0	0	0	0	0	0	200	300	0	0	0	0	0	0	0	200	903	0	0	0	0	0	0	0	603	903	0
421	6	0	0	0	0	0	0	200	300	0	0	0	0	0	0	0	200	903	0	0	0	0	0	0	0	603	903	0
421	7	0	0	0	0	0	0	200	300	0	0	0	0	0	0	0	200	903	0	0	0	0	0	0	0	603	903	0
421	8	0	0	0	0	0	0	200	300	0	0	0	0	0	0	0	200	903	0	0	0	0	0	0	0	603	903	0
421	9	0	0	0	0	0	0	200	300	0	0	0	0	0	0	0	200	903	0	0	0	0	0	0	0	603	903	0
422	0	0	0	0	0	0	0	200	300	0	0	0	0	0	0	0	200	903	0	0	0	0	0	0	0	603	903	0
422	1	0	0	0	0	0	0	200	300	0	0	0	0	0	0	0	200	903	0	0	0	0	0	0	0	603	903	0
422	2	0	0	0	0	0	0	200	300	0	0	0	0	0	0	0	200	903	0	0	0	0	0	0	0	603	903	0
422	3	0	0	0	0	0	0	200	300	0	0	0	0	0	0	0	200	903	0	0	0	0	0	0	0	603	903	0
422	4	0	0	0	0	0	0	200	300	0	0	0	0	0	0	0	200	903	0	0	0	0	0	0	0	603	903	0
422	5	0	0	0	0	0	0	200	300	0	0	0	0	0	0	0	200	903	0	0	0	0	0	0	0	603	903	0
422	6	0	0	0	0	0	0	200	300	0	0	0	0	0	0	0	200	903	0	0	0	0	0	0	0	603	903	0
422	7	0	0	0	0	0	0	200	300	0	0	0	0	0	0	0	200	903	0	0	0	0	0	0	0	603	903	0
422	8	0	0	0	0	0	0	200	300	0	0	0	0	0	0	0	200	903	0	0	0	0	0	0	0	603	903	0
422	9	0	0	0	0	0	0	200	300	0	0	0	0	0	0	0	200	903	0	0	0	0	0	0	0	603	903	0
423	0	0	0	0	0	0	0	200	300	0	0	0	0	0	0	0	200	903	0	0	0	0	0	0	0	603	903	0
423	1	0	0	0	0	0	0	200	300	0	0	0	0	0	0	0	200	903	0	0	0	0	0	0	0	603	903	0
423	2	0	0	0	0	0	0	200	300	0	0	0	0	0	0	0	200	903	0	0	0	0	0	0	0	603	903	0
423	3	0	0	0	0	0	0	200	300	0	0	0	0	0	0	0	200	903	0	0	0	0	0	0	0	603	903	0
423	4	0	0	0	0	0	0	200	300	0	0	0	0	0	0	0	200	903	0	0	0	0	0	0	0	603	903	0
423	5	0	0	0	0	0	0	200	300	0	0	0	0	0	0	0	200	903	0	0	0	0	0	0	0	603	903	0
423	6	0	0	0	0	0	0	200	300	0	0	0	0	0	0	0	200	903	0	0	0	0	0	0	0	603	903	0
423	7	0	0	0	0	0	0	200	300	0	0	0	0	0	0	0	200	903	0	0	0	0	0	0	0	603	903	0
423	8	0	0	0	0	0	0	200	300	0	0	0	0	0	0	0	200	903	0	0	0	0	0	0	0	603	903	0
423	9	0	0	0	0	0	0	200	300	0	0	0	0	0	0	0	200	903	0	0	0	0	0	0	0	603	903	0
424	0	0	0	0	0	0	0	200	300	0	0	0	0	0	0	0	200	903	0	0	0	0	0	0	0	603	903	0
424	1	0	0	0	0	0	0	200	300	0	0	0	0	0	0	0	200	903	0	0	0	0	0	0	0	603	903	0
424	2	0	0	0	0	0	0	200	300	0	0	0	0	0	0	0	200	903	0	0	0	0	0	0	0	603	903	0
424	3	0	0	0	0	0	0	200	300	0	0	0	0	0	0	0	200	903	0	0	0	0	0	0	0	603	903	0
424	4	0	0	0	0	0	0	200	300	0	0	0	0	0	0	0	200	903	0	0	0	0	0	0	0	603	903	0
424	5	0	0	0	0	0	0	200	300	0	0	0	0	0	0	0	200	903	0	0	0	0	0	0	0	603	903	0
424	6	0	0	0	0	0	0	200	300	0	0	0	0	0	0	0	200	903	0	0	0	0	0	0	0	603	903	0
424	7	0	0	0	0	0	0	200	300	0	0	0	0	0	0	0	200	903	0	0	0	0	0	0	0	603	903	0
424	8	0	0	0	0	0	0	200	300	0	0	0	0	0	0	0	200	903	0	0	0	0	0	0	0	603	903	0
424	9	0	0	0	0	0	0	200	300	0	0	0	0	0	0	0	200	903	0	0	0	0	0	0	0	603	903	0
425	0	0	0	0	0	0	0	200	300	0	0	0	0	0	0	0	200	903	0	0	0	0	0	0	0	603	903	0
425	1	0	0	0	0	0	0	200	300	0	0	0	0	0	0	0	200	903	0	0	0	0	0	0	0	603	903	0
425	2	0	0	0	0	0	0	200	300	0	0	0	0	0	0	0	200	903	0	0	0	0	0	0	0	603	903	0
425	3	0	0	0	0	0	0	200	300	0	0	0	0	0	0	0	200	903	0	0	0	0	0	0	0	603	903	0
425	4	0	0	0	0	0	0	200	300	0	0	0	0	0	0	0	200	903	0	0	0	0	0	0	0	603	903	0
425	5	0	0	0	0	0	0	200	300	0	0	0	0	0	0	0	200	903	0	0	0	0	0	0	0	603	903	0
425	6	0	0	0	0	0	0	200	300	0	0	0	0	0	0	0	200	903	0	0	0	0	0	0	0	603	903	0
425	7	0	0	0	0	0	0	200	300	0	0	0	0	0	0	0	200	903	0	0	0	0	0	0	0	603	903	0
425	8	0	0	0	0	0	0	200	300	0	0	0	0	0	0	0	200	903	0	0	0	0	0	0	0	603	903	0
425	9	0	0	0	0	0	0	200	300	0	0	0	0	0	0	0	200	903	0	0	0	0	0	0	0	603	903	0
426	0	0	0	0	0	0	0	200	300	0	0	0	0	0	0	0	200	903	0	0	0	0	0	0	0	603	903	0
426	1	0	0	0	0	0	0	200	300	0	0	0	0	0	0	0	200	903	0	0	0	0	0	0	0	603	903	0
426	2	0	0	0	0	0	0	200	300	0	0	0	0	0	0	0	200	903	0	0	0	0	0	0	0	603	903	0
426	3	0	0	0	0	0	0	200	300	0	0	0	0	0	0	0	200	903	0	0	0	0	0	0	0	603	903	0
426	4	0	0	0	0	0	0	200	300	0	0	0	0	0	0	0	200	903	0	0	0	0	0	0	0	603	903	0
426	5	0	0	0	0	0	0	200	300	0	0	0	0	0	0	0	200	903	0	0	0	0	0	0	0	603	903	0
426	6	0	0	0	0	0	0	200	300	0	0	0	0	0	0	0	200	903	0	0	0	0	0	0	0	603	903	0
426	7	0	0	0	0	0	0	200	300	0	0	0	0	0	0	0	200	903	0	0	0	0	0	0	0	603	903	0
426	8	0	0	0	0	0	0	200	300	0	0	0	0	0	0	0	200	903	0	0	0	0	0	0	0	603	903	0
426	9	0	0	0	0	0	0	200	300	0	0	0	0	0	0	0	200	903	0	0	0	0	0	0	0	603	903	0
427	0	0	0	0	0	0	0	200	300	0	0	0	0	0	0	0	200	903	0	0	0	0	0	0	0	603	903	0
427	1	0	0	0	0	0	0	200	300	0	0	0	0	0	0	0	200	903	0	0	0	0	0	0	0	603	903	0
427	2	0	0	0	0	0	0	200	300	0	0	0	0	0	0	0	200	903	0	0	0	0	0	0	0	603	903	0
427	3	0	0	0	0	0	0	200	300	0	0	0	0	0	0	0	200	903	0	0	0	0	0	0	0	603	903	0
427	4	0	0	0	0	0	0	200	300	0	0	0	0	0	0	0	200	903	0	0	0	0	0	0	0	603	903	0
427	5	0	0	0	0	0	0	200	300	0	0	0	0	0	0	0	200	903	0	0	0	0	0	0	0	603	903	0
427	6	0	0	0	0	0	0	200	300	0	0	0	0	0	0	0	200	903	0	0	0	0	0	0	0	603	903	0
427	7	0	0	0	0	0	0	200	300	0	0	0	0	0	0	0	200	903	0	0	0	0	0	0	0	603	903	0
427	8	0	0	0	0	0	0	200	300	0	0	0	0	0	0	0	200	903	0	0	0	0	0	0	0	603	903	0
427	9	0	0	0	0	0	0	200	300	0	0	0	0	0	0	0	200	903	0	0	0	0	0	0	0	603	903	0
428	0	0	0	0	0	0	0	200	300	0	0	0	0	0	0	0	200	903	0	0	0	0	0	0	0	603	903	0
428	1	0	0	0	0	0	0	200	300	0	0	0	0	0	0	0	200	903	0	0	0	0	0	0	0	603	903	0
428	2	0	0	0	0	0	0	200	300	0	0	0	0	0	0	0	200	903	0	0	0	0	0	0	0	603	903	0
428	3	0	0	0	0	0	0	200	300	0	0	0	0	0	0	0	200	903	0	0	0	0	0	0	0	603	903	0
428	4	0	0	0	0	0	0	200	300	0	0	0	0	0	0	0	200	903	0	0	0	0	0	0	0	603	903	0
428	5	0	0	0	0	0	0	200	300	0	0	0	0	0	0	0	200	903	0	0	0	0	0	0	0	603	903	0
428	6	0	0	0	0	0	0	200	300	0	0	0	0	0	0	0	200	903	0	0	0	0	0	0	0	603	903	0
428	7	0	0	0	0	0	0	200	300	0	0	0	0	0	0	0	200	903	0	0	0	0	0	0	0	603	903	0
428	8	0	0	0	0	0	0	200	300	0	0	0	0	0	0	0	200	903	0	0	0	0	0	0	0	603	903	0
428	9	0	0	0	0	0	0	200	300	0	0	0	0	0	0	0	200	903	0	0	0	0	0	0	0	603	903	0
429	0	0	0	0	0	0	0	200	300	0	0	0	0	0	0	0	200	903	0	0	0	0	0	0	0	603	903	0
429	1	0	0	0	0	0	0	200	300	0	0	0	0	0	0	0	200	903	0	0	0	0	0	0	0	603	903	0
429	2	0	0	0	0	0	0	200	300	0	0	0	0	0	0	0	200	903	0	0	0	0	0	0	0	603	903	0
429	3	0	0	0	0	0	0	200	300	0	0	0	0	0	0	0	200	903	0	0	0	0	0	0	0	603	903	0
429	4	0	0	0	0	0	0	200	300	0	0	0	0	0	0	0	200	903	0	0	0	0	0	0	0	603	903	0
429	5	0	0	0	0	0	0	200	300	0	0	0	0	0	0	0	200	903	0	0	0	0	0	0	0	603	903	0
429	6	0	0	0	0	0	0	200	300	0	0	0	0	0	0	0	200	903	0	0	0	0	0	0	0	603	903	0
429	7	0	0	0	0	0	0	200	300	0	0	0	0	0	0	0	200	903	0	0	0	0	0	0	0	603	903	0
429	8	0	0	0	0	0	0	200	300	0	0	0	0	0	0	0	200	903	0	0	0	0	0	0	0	603	903	0
429	9	0	0	0	0	0	0	200	300	0	0	0	0	0	0	0	200	903	0	0	0	0	0	0	0	603	903	0
430	0	0	0	0	0	0	0	200	300	0	0	0	0	0	0	0	200	903	0	0	0	0	0	0	0	603	903	0
430	1	0	0	0	0	0	0	200	300	0	0	0	0	0	0	0	200	903	0	0	0	0	0	0	0	603	903	0
430	2	0	0	0	0	0	0	200	300	0	0	0	0	0	0	0	200	903	0	0	0	0	0	0	0	603	903	0
430	3	0	0	0	0	0	0	200	300	0	0	0	0	0	0	0	200	903	0	0	0	0	0	0	0	603	903	0
430	4	0	0	0	0	0	0	200	300	0	0	0	0	0	0	0	200	903	0	0	0	0	0	0	0	603	903	0
430	5	0	0	0	0	0	0	200	300	0	0	0	0	0	0	0	200	903	0	0	0	0	0	0	0	603	903	0
430	6	0	0	0	0	0	0	200	300	0	0	0	0	0	0	0	200	903	0	0	0	0	0	0	0	603	903	0
430	7	0	0	0	0	0	0	200	300	0	0	0	0	0	0	0	200	903	0	0	0	0	0	0	0	603	903	0
430	8	0	0	0	0	0	0	200	300	0	0	0	0	0	0	0	200	903	0	0	0	0	0	0	0	603	903	0
430	9	0	0	0	0	0	0	200	300	0	0	0	0	0	0	0	200	903	0	0	0	0	0	0	0	603	903	0
431	0	0	0	0	0	0	0	200	300	0	0	0	0	0	0	0	200	903	0	0	0	0	0	0	0	603	903	0
431	1	0	0	0	0	0	0	200	300	0	0	0	0	0	0	0	200	903	0	0	0	0	0	0	0	603	903	0
431	2	0	0	0	0	0	0	200	300	0	0	0	0	0	0	0	200	903	0	0	0	0	0	0	0	603	903	0
431	3	0	0	0	0	0	0	200	300	0	0	0	0	0	0	0	200	903	0	0	0	0	0	0	0	603	903	0
431	4	0	0	0	0	0	0	200	300	0	0	0	0	0	0	0	200	903	0	0	0	0	0	0	0	603	903	0
431	5	0	0	0	0	0	0	200	300	0	0	0	0	0	0	0	200	903	0	0	0	0	0	0	0	603	903	0
431	6	0	0	0	0	0	0	200	300	0	0	0	0	0	0	0	200	903	0	0	0	0	0	0	0	603	903	0
431	7	0	0	0	0	0	0	200	300	0	0	0	0	0	0	0	200	903	0	0	0	0	0	0	0	603	903	0
431	8	0	0	0	0	0	0	200	300	0	0	0	0	0	0	0	200	903	0	0	0	0	0	0	0	603	903	0
431	9	0	0	0	0	0	0	200	300	0	0	0	0	0	0	0	200	903	0	0	0	0	0	0	0	603	903	0
432	0	0	0	0	0	0	0	200	300	0	0	0	0	0	0	0	200	903	0	0	0	0	0	0	0	603	903	0
432	1	0	0	0	0	0	0	200	300	0	0	0	0	0	0	0	200	903	0	0	0	0	0	0	0	603	903	0
432	2	0	0	0	0	0	0	200	300	0	0	0	0	0	0	0	200	903	0	0	0	0	0	0	0	603	903	0
432	3	0	0	0	0	0	0	200	300	0	0	0	0	0	0	0	200	903	0	0	0	0	0	0	0	603	903	0
432	4	0	0	0	0	0	0	200	300	0	0	0	0	0	0	0	200	903	0	0	0	0	0	0	0	603	903	0
432	5	0	0	0	0	0	0	200	300	0	0	0	0	0	0	0	200	903	0	0	0	0	0	0	0	603	903	0
432	6	0	0	0	0	0	0	200	300	0	0	0	0	0	0	0	200	903	0	0	0	0	0	0	0	603	903	0
432	7	0	0	0	0	0	0	200	300	0	0	0	0	0	0	0	200	903	0	0	0	0	0	0	0	603	903	0
432	8	0	0	0	0	0	0	200	300	0	0	0	0	0	0	0	200	903	0	0	0	0	0	0	0	603	903	0
432	9	0	0	0	0	0	0	200	300	0	0	0	0	0	0	0	200	903	0	0	0	0	0	0	0	603	903	0
433	0	0	0	0	0	0	0	200	300	0	0	0	0	0	0	0	200	903	0	0	0	0	0	0	0	603	903	0
433	1	0	0	0	0	0	0	200	300	0	0	0	0	0	0	0	200	903	0	0	0	0	0	0	0	603	903	0
433	2	0	0	0	0	0	0	200	300	0	0	0	0	0	0	0	200	903	0	0	0	0	0	0	0	603	903	0
433	3	0	0	0	0	0	0	200	300	0	0	0	0	0	0	0	200	903	0	0	0	0	0	0	0	603	903	0
433	4	0	0	0	0	0	0	200	300	0	0	0	0	0	0	0	200	903	0	0	0	0	0	0	0	603	903	0
433	5	0	0	0	0	0	0	200	300	0	0	0	0	0	0	0	200	903	0	0	0	0	0	0	0	603	903	0
433	6	0	0	0	0	0	0	200	300	0	0	0	0	0	0	0	200	903	0	0	0	0	0	0	0	603	903	0
433	7	0	0	0	0	0	0	200	300	0	0	0	0	0	0	0	200	903	0	0	0	0	0	0	0	603	903	0
433	8	0	0	0	0	0	0	200	300	0	0	0	0	0	0	0	200	903	0	0	0	0	0	0	0	603	903	0
433	9	0	0	0	0	0	0	200	300	0	0	0	0	0	0	0	200	903	0	0	0	0	0	0	0	603	903	0
434	0	0	0	0	0	0	0	200	300	0	0	0	0	0	0	0	200	903	0	0	0	0	0	0	0	603	903	0
434	1	0	0	0	0	0	0	200	300	0	0	0	0	0	0	0	200	903	0	0	0	0	0	0	0	603	903	0
434	2	0	0	0	0	0	0	200	300	0	0	0	0	0	0	0	200	903	0	0	0	0	0	0	0	603	903	0
434	3	0	0	0	0	0	0	200	300	0	0	0	0	0	0	0	200	903	0	0	0	0	0	0	0	603	903	0
434	4	0	0	0	0	0	0	200	300	0	0	0	0	0	0	0	200	903	0	0	0	0	0	0	0	603	903	0
434	5	0	0	0	0	0	0	200	300	0	0	0	0	0	0	0	200	903	0	0	0	0	0	0	0	603	903	0
434	6	0	0	0	0	0	0	200	300	0	0	0	0	0	0	0	200	903	0	0	0	0	0	0	0	603	903	0
434	7	0	0	0	0	0	0	200	300	0	0	0	0	0	0	0	200	903	0	0	0	0	0	0	0	603	903	0
434	8	0	0	0	0	0	0	200	300	0	0	0	0	0	0	0	200	903	0	0	0	0	0	0	0	603	903	0
434	9	0	0	0	0	0	0	200	300	0	0	0	0	0	0	0	200	903	0	0	0	0	0	0	0	603	903	0
435	0	0	0	0	0	0	0	200	300	0	0	0	0	0	0	0	200	903	0	0	0	0	0	0	0	603	903	0
435	1	0	0	0	0	0	0	200	300	0	0	0	0	0	0	0	200	903	0	0	0	0	0	0	0	603	903	0
435	2	0	0	0	0	0	0	200	300	0	0	0	0	0	0	0	200	903	0	0	0	0	0	0	0	603	903	0
435	3	0	0	0	0	0	0	200	300	0	0	0	0	0	0	0	200	903	0	0	0	0	0	0	0	603	903	0
435	4	0	0	0	0	0	0	200	300	0	0	0	0	0	0	0	200	903	0	0	0	0	0	0	0	603	903	0
435	5	0	0	0	0	0	0	200	300	0	0	0	0	0	0	0	200	903	0	0	0	0	0	0	0	603	903	0
435	6	0	0	0	0	0	0	200	300	0	0	0	0	0	0	0	200	903	0	0	0	0	0	0	0	603	903	0
435	7	0	0	0	0	0	0	200	300	0	0	0	0	0	0	0	200	903	0	0	0	0	0	0	0	603	903	0
435	8	0	0	0	0	0	0	200	300	0	0	0	0	0	0	0	200	903	0	0	0	0	0	0	0	603	903	0
435	9	0	0	0	0	0	0	200	300	0	0	0	0	0	0	0	200	903	0	0	0	0	0	0	0	603	903	0
436	0	0	0	0	0	0	0	200	300	0	0	0	0	0	0	0	200	903	0	0	0	0	0	0	0	603	903	0
436	1	0	0	0	0	0	0	200	300	0	0	0	0	0	0	0	200	903	0	0	0	0	0	0	0	603	903	0
436	2	0	0	0	0	0	0	200	300	0	0	0	0	0	0	0	200	903	0	0	0	0	0	0	0	603	903	0
436	3	0	0	0	0	0	0	200	300	0	0	0	0	0	0	0	200	903	0	0	0	0	0	0	0	603	903	0
436	4	0	0	0	0	0	0	200	300	0	0	0	0	0	0	0	200	903	0	0	0	0	0	0	0	603	903	0
436	5	0	0	0	0	0	0	200	300	0	0	0	0	0	0	0	200	903	0	0	0	0	0	0	0	603	903	0
436	6	0	0	0	0	0	0	200	300	0	0	0	0	0	0	0	200	903	0	0	0	0	0	0	0	603	903	0
436	7	0	0	0	0	0	0	200	300	0	0	0	0	0	0	0	200	903	0	0	0	0	0	0	0	603	903	0
436	8	0	0	0	0	0	0	200	300	0	0	0	0	0	0	0	200	903	0	0	0	0	0	0	0	603	903	0
436	9	0	0	0	0	0	0	200	300	0	0	0	0	0	0	0	200	903	0	0	0	0	0	0	0	603	903	0
437	0	0	0	0	0	0	0	200	300	0	0	0	0	0	0	0	200	903	0	0	0	0	0	0	0	603	903	0
437	1	0	0	0	0	0	0	200	300	0	0	0	0	0	0	0	200	903	0	0	0	0	0	0	0	603	903	0
437	2	0	0	0	0	0	0	200	300	0	0	0	0	0	0	0	200	903	0	0	0	0	0	0	0	603	903	0
437	3	0	0	0	0	0	0	200	300	0	0	0	0	0	0	0	200	903	0	0	0	0	0	0	0	603	903	0
437	4	0	0	0	0	0	0	200	300	0	0	0	0	0	0	0	200	903	0	0	0	0	0	0	0	603	903	0
437	5	0	0	0	0	0	0	200	300	0	0	0	0	0	0	0	200	903	0	0	0	0	0	0	0	603	903	0
437	6	0	0	0	0	0	0	200	300	0	0	0	0	0	0	0	200	903	0	0	0	0	0	0	0	603	903	0
437	7	0	0	0	0	0	0	200	300	0	0	0	0	0	0	0	200	903	0	0	0	0	0	0	0	603	903	0
437	8	0	0	0	0	0	0	200	300	0	0	0	0	0	0	0	200	903	0	0	0	0	0	0	0	603	903	0
437	9	0	0	0	0	0	0	200	300	0	0	0	0	0	0	0	200	903	0	0	0	0	0	0	0	603	903	0
438	0	0	0	0	0	0	0	200	300	0	0	0	0	0	0	0	200	903	0	0	0	0	0	0	0	603	903	0
438	1	0	0	0	0	0	0	200	300	0	0	0	0	0	0	0	200	903	0	0	0	0	0	0	0	603	903	0
438	2	0	0	0	0	0	0	200	300	0	0	0	0	0	0	0	200	903	0	0	0	0	0	0	0	603	903	0
438	3	0	0	0	0	0	0	200	300	0	0	0	0	0	0	0	200	903	0	0	0	0	0	0	0	603	903	0
438	4	0	0	0	0	0	0	200	300	0	0	0	0	0	0	0	200	903	0	0	0	0	0	0	0	603	903	0
438	5	0	0	0	0	0	0	200	300	0	0	0	0	0	0	0	200	903	0	0	0	0	0	0	0	603	903	0
438	6	0	0	0	0	0	0	200	300	0	0	0	0	0	0	0	200	903	0	0	0	0	0	0	0	603	903	0
438	7	0	0	0	0	0	0	200	300	0	0	0	0	0	0	0	200	903	0	0	0	0	0	0	0	603	903	0
438	8	0	0	0	0	0	0	200	300	0	0	0	0	0	0	0	200	903	0	0	0	0	0	0	0	603	903	0
438	9	0	0	0	0	0	0	200	300	0	0	0	0	0	0	0	200	903	0	0	0	0	0	0	0	603	903	0
439	0	0	0	0	0	0	0	200	300	0	0	0	0	0	0	0	200	903	0	0	0	0	0	0	0	603	903	0
439	1	0	0	0	0	0	0	200	300	0	0	0	0	0	0	0	200	903	0	0	0	0	0	0	0	603	903	0
439	2	0	0	0	0	0	0	200	300	0	0	0	0	0	0	0	200	903	0	0	0	0	0	0	0	603	903	0
439	3	0	0	0	0	0	0	200	300	0	0	0	0	0	0	0	200	903	0	0	0	0	0	0	0	603	903	0
439	4	0	0	0	0	0	0	200	300	0	0	0	0	0	0	0	200	903	0	0	0	0	0	0	0	603	903	0
439	5	0	0	0	0	0	0	200	300	0	0	0	0	0	0	0	200	903	0	0	0	0	0	0	0	603	903	0
439	6	0	0	0	0	0	0	200	300	0	0	0	0	0	0	0	200	903	0	0	0	0	0	0	0	603	903	0
439	7	0	0	0	0	0	0	200	300	0	0	0	0	0	0	0	200	903	0	0	0	0	0	0	0	603	903	0
439	8	0	0	0	0	0	0	200	300	0	0	0	0	0	0	0	200	903	0	0	0	0	0	0	0	603	903	0
439	9	0	0	0	0	0	0	200	300	0	0	0	0	0	0	0	200	903	0	0	0	0	0	0	0	603	903	0
440	0	0	0	0	0	0	0	200	300	0	0	0	0	0	0	0	200	903	0	0	0	0	0	0	0	603	903	0
440	1	0	0	0	0	0	0	200	300	0	0	0	0	0	0	0	200	903	0	0	0	0	0	0	0	603	903	0
440	2	0	0	0	0	0	0	200	300	0	0	0	0	0	0	0	200	903	0	0	0	0	0	0	0	603	903	0
440	3	0	0	0	0	0	0	200	300	0	0	0	0	0	0	0	200	903	0	0	0	0	0	0	0	603	903	0
440	4	0	0	0	0	0	0	200	300	0	0	0	0	0	0	0	200	903	0	0	0	0	0	0	0	603	903	0
440	5	0	0	0	0	0	0	200	300	0	0	0	0	0	0	0	200	903	0	0	0	0	0	0	0	603	903	0
440	6	0	0	0	0	0	0	200	300	0	0	0	0	0	0	0	200	903	0	0	0	0	0	0	0	603	903	0
440	7	0	0	0	0	0	0	200	300	0	0	0	0	0	0	0	200	903	0	0	0	0	0	0	0	603	903	0
440	8	0	0	0	0	0	0	200	300	0	0	0	0	0	0	0	200	903	0	0	0	0	0	0	0	603	903	0
440	9	0	0	0	0	0	0	200	300	0	0	0	0	0	0	0	200	903	0	0	0	0	0	0	0	603	903	0
441	0	0	0	0	0	0	0	200	300	0	0	0	0	0	0	0	200	903	0	0	0	0	0	0	0	603	903	0
441	1	0	0	0	0	0	0	200	300	0	0	0	0	0	0	0	200	903	0	0	0	0	0	0	0	603	903	0
441	2	0	0	0	0	0	0	200	300	0	0	0	0	0	0	0	200	903	0	0	0	0	0	0	0	603	903	0
441	3	0	0	0	0	0	0	200	300	0	0	0	0	0	0	0	200	903	0	0	0	0	0	0	0	603	903	0
441	4	0	0	0	0	0	0	200	300	0	0	0	0	0	0	0	200	903	0	0	0	0	0	0	0	603	903	0
441	5	0	0	0	0	0	0	200	300	0	0	0	0	0	0	0	200	903	0	0	0	0	0	0	0	603	903	0
441	6	0	0	0	0	0	0	200	300	0	0	0	0	0	0	0	200	903	0	0	0	0	0	0	0	603	903	0
441	7	0	0	0	0	0	0	200	300	0	0	0	0	0	0	0	200	903	0	0	0	0	0	0	0	603	903	0
441	8	0	0	0	0	0	0	200	300	0	0	0	0	0	0	0	200	903	0	0	0	0	0	0	0	603	903	0
441	9	0	0	0	0	0	0	200	300	0	0	0	0	0	0	0	200	903	0	0	0	0	0	0	0	603	903	0
442	0	0	0	0	0	0	0	200	300	0	0	0	0	0	0	0	200	903	0	0	0	0	0	0	0	603	903	0
442	1	0	0	0	0	0	0	200	300	0	0	0	0	0	0	0	200	903	0	0	0	0	0	0	0	603	903	0
442	2	0	0	0	0	0	0	200	300	0	0	0	0	0	0	0	200	903	0	0	0	0	0	0	0	603	903	0
442	3	0	0	0	0	0	0	200	300	0	0	0	0	0	0	0	200	903	0	0	0	0	0	0	0	603	903	0
442	4	0	0	0	0	0	0	200	300	0	0	0	0	0	0	0	200	903	0	0	0	0	0	0	0	603	903	0
442	5	0	0	0	0	0	0	200	300	0	0	0	0	0	0	0	200	903	0	0	0	0	0	0	0	603	903	0
442	6	0	0	0	0	0	0	200	300	0	0	0	0	0	0	0	200	903	0	0	0	0	0	0	0	603	903	0
442	7	0	0	0	0	0	0	200	300	0	0	0	0	0	0	0	200	903	0	0	0	0	0	0	0	603	903	0
442	8	0	0	0	0	0	0	200	300	0	0	0	0	0	0	0	200	903	0	0	0	0	0	0	0	603	903	0
442	9	0	0	0	0	0	0	200	300	0	0	0	0	0	0	0	200	903	0	0	0	0	0	0	0	603	903	0
443	0	0	0	0	0	0	0	200	300	0	0	0	0	0	0	0	200	903	0	0	0	0	0	0	0	603	903	0
443	1	0	0	0	0	0	0	200	300	0	0	0	0	0	0	0	200	903	0	0	0	0	0	0	0	603	903	0
443	2	0	0	0	0	0	0	200	300	0	0	0	0	0	0	0	200	903	0	0	0	0	0	0	0	603	903	0
443	3	0	0	0	0	0	0	200	300	0	0	0	0	0	0	0	200	903	0	0	0	0	0	0	0	603	903	0
443	4	0	0	0	0	0	0	200	300	0	0	0	0	0	0	0	200	903	0	0	0	0	0	0	0	603	903	0
443	5	0	0	0	0	0	0	200	300	0	0	0	0	0	0	0	200	903	0	0	0	0	0	0	0	603	903	0
443	6	0	0	0	0	0	0	200	300	0	0	0	0	0	0	0	200	903	0	0	0	0	0	0	0	603	903	0
443	7	0	0	0	0	0	0	200	300	0	0	0	0	0	0	0	200	903	0	0	0	0	0	0	0	603	903	0
443	8	0	0	0	0	0	0	200	300	0	0	0	0	0	0	0	200	903	0	0	0	0	0	0	0	603	903	0
443	9	0	0	0	0	0	0	200	300	0	0	0	0	0	0	0	200	903	0	0	0	0	0	0	0	603	903	0
444	0	0	0	0	0	0	0	200	300	0	0	0	0	0	0	0	200	903	0	0	0	0	0	0	0	603	903	0
444	1	0	0	0	0	0	0	200	300	0	0	0	0	0	0	0	200	903	0	0	0	0	0	0	0	603	903	0
444	2	0	0	0	0	0	0	200	300	0	0	0	0	0	0	0	200	903	0	0	0	0	0	0	0	603	903	0
444	3	0	0	0	0	0	0	200	300	0	0	0	0	0	0	0	200	903	0	0	0	0	0	0	0	603	903	0
444	4	0	0	0	0	0	0	200	300	0	0	0	0	0	0	0	200	903	0	0	0	0	0	0	0	603	903	0
444	5	0	0	0	0	0	0	200	300	0	0	0	0	0	0	0	200	903	0	0	0	0	0	0	0	603	903	0
444	6	0	0	0	0	0	0	200	300	0	0	0	0	0	0	0	200	903	0	0	0	0	0	0	0	603	903	0
444	7	0	0	0	0	0	0	200	300	0	0	0	0	0	0	0	200	903	0	0	0	0	0	0	0	603	903	0
444	8	0	0	0	0	0	0	200	300	0	0	0	0	0	0	0	200	903	0	0	0	0	0	0	0	603	903	0
444	9	0	0	0	0	0	0	200	300	0	0	0	0	0	0	0	200	903	0	0	0	0	0	0	0	603	903	0
445	0	0	0	0	0	0	0	200	300	0	0	0	0	0	0	0	200	903	0	0	0	0	0	0	0	603	903	0
445	1	0	0	0	0	0	0	200	300	0	0	0	0	0	0	0	200	903	0	0	0	0	0	0	0	603	903	0
445	2	0	0	0	0	0	0	200	300	0	0	0	0	0	0	0	200	903	0	0	0	0	0	0	0	603	903	0
445	3	0	0	0	0	0	0	200	300	0	0	0	0	0	0	0	200	903	0	0	0	0	0	0	0	603	903	0
445	4	0	0	0	0	0	0	200	300	0	0	0	0	0	0	0	200	903	0	0	0	0	0	0	0	603	903	0
445	5	0	0	0	0	0	0	200	300	0	0	0	0	0	0	0	200	903	0	0	0	0	0	0	0	603	903	0
445	6	0	0	0	0	0	0	200	300	0	0	0	0	0	0	0	200	903	0	0	0	0	0	0	0	603	903	0
445	7	0	0	0	0	0	0	200	300	0	0	0	0	0	0	0	200	903	0	0	0	0	0	0	0	603	903	0
445	8	0	0	0	0	0	0	200	300	0	0	0	0	0	0	0	200	903	0	0	0	0	0	0	0	603	903	0
445	9	0	0	0	0	0	0	200	300	0	0	0	0	0	0	0	200	903	0	0	0	0	0	0	0	603	903	0
446	0	0	0	0	0	0	0	200	300	0	0	0	0	0	0	0	200	903	0	0	0	0	0	0	0	603	903	0
446	1	0	0	0	0	0	0	200	300	0	0	0	0	0	0	0	200	903	0	0	0	0	0	0	0	603	903	0
446	2	0	0	0	0	0	0	200	300	0	0	0	0	0	0	0	200	903	0	0	0	0	0	0	0	603	903	0
446	3	0	0	0	0	0	0	200	300	0	0	0	0	0	0	0	200	903	0	0	0	0	0	0	0	603	903	0
446	4	0	0	0	0	0	0	200	300	0	0	0	0	0	0	0	200	903	0	0	0	0	0	0	0	603	903	0
446	5	0	0	0	0	0	0	200	300	0	0	0	0	0	0	0	200	903	0	0	0	0	0	0	0	603	903	0
446	6	0	0	0	0	0	0	200	300	0	0	0	0	0	0	0	200	903	0	0	0	0	0	0	0	603	903	0
446	7	0	0	0	0	0	0	200	300	0	0	0	0	0	0	0	200	903	0	0	0	0	0	0	0	603	903	0
446	8	0	0	0	0	0	0	200	300	0	0	0	0	0	0	0	200	903	0	0	0	0	0	0	0	603	903	0
446	9	0	0	0	0	0	0	200	300	0	0	0	0	0	0	0	200	903	0	0	0	0	0	0	0	603	903	0
447	0	0	0	0	0	0	0	200	300	0	0	0	0	0	0	0	200	903	0	0	0	0	0	0	0	603	903	0
447	1	0	0	0	0	0	0	200	300	0	0	0	0	0	0	0	200	903	0	0	0	0	0	0	0	603	903	0
447	2	0	0	0	0	0	0	200	300	0	0	0	0	0	0	0	200	903	0	0	0	0	0	0	0	603	903	0
447	3	0	0	0	0	0	0	200	300	0	0	0	0	0	0	0	200	903	0	0	0	0	0	0	0	603	903	0
447	4	0	0	0	0	0	0	200	300	0	0	0	0	0	0	0	200	903	0	0	0	0	0	0	0	603	903	0
447	5	0	0	0	0	0	0	200	300	0	0	0	0	0	0	0	200	903	0	0	0	0	0	0	0	603	903	0
447	6	0	0	0	0	0	0	200	300	0	0	0	0	0	0	0	200	903	0	0	0	0	0	0	0	603	903	0
447	7	0	0	0	0	0	0	200	300	0	0	0	0	0	0	0	200	903	0	0	0	0	0	0	0	603	903	0
447	8	0	0	0	0	0	0	200	300	0	0	0	0	0	0	0	200	903	0	0	0	0	0	0	0	603	903	0
447	9	0	0	0	0	0	0	200	300	0	0	0	0	0	0	0	200	903	0	0	0	0	0	0	0	603	903	0
448	0	0	0	0	0	0	0	200	300	0	0	0	0	0	0	0	200	903	0	0	0	0	0	0	0	603	903	0
448	1	0	0	0	0	0	0	200	300	0	0	0	0	0	0	0	200	903	0	0	0	0	0	0	0	603	903	0
448	2	0	0	0	0	0	0	200	300	0	0	0	0	0	0	0	200	903	0	0	0	0	0	0	0	603	903	0
448	3	0	0	0	0	0	0	200	300	0	0	0	0	0	0	0	200	903	0	0	0	0	0	0	0	603	903	0
448	4	0	0	0	0	0	0	200	300	0	0	0	0	0	0	0	200	903	0	0	0	0	0	0	0	603	903	0
448	5	0	0	0	0	0	0	200	300	0	0	0	0	0	0	0	200	903	0	0	0	0	0	0	0	603	903	0
448	6	0	0	0	0	0	0	200	300	0	0	0	0	0	0	0	200	903	0	0	0	0	0	0	0	603	903	0
448	7	0	0	0	0	0	0	200	300	0	0	0	0	0	0	0	200	903	0	0	0	0	0	0	0	603	903	0
448	8	0	0	0	0	0	0	200	300	0	0	0	0	0	0	0	200	903	0	0	0	0	0	0	0	603	903	0
448	9	0	0	0	0	0	0	200	300	0	0	0	0	0	0	0	200	903	0	0	0	0	0	0	0	603	903	0
449	0	0	0	0	0	0	0	200	300	0	0	0	0	0	0	0	200	903	0	0	0	0	0	0	0	603	903	0
449	1	0	0	0	0	0	0	200	300	0	0	0	0	0	0	0	200	903	0	0	0	0	0	0	0	603	903	0
449	2	0	0	0	0	0	0	200	300	0	0	0	0	0	0	0	200	903	0	0	0	0	0	0	0	603	903	0
449	3	0	0	0	0	0	0	200	300	0	0	0	0	0	0	0	200	903	0	0	0	0	0	0	0	603	903	0
449	4	0	0	0	0	0	0	200	300	0	0	0	0	0	0	0	200	903	0	0	0	0	0	0	0	603	903	0
449	5	0	0	0	0	0	0	200	300	0	0	0	0	0	0	0	200	903	0	0	0	0	0	0	0	603	903	0
449	6	0	0	0	0	0	0	200	300	0	0	0	0	0	0	0	200	903	0	0	0	0	0	0	0	603	903	0
449	7	0	0	0	0	0	0	200	300	0	0	0	0	0	0	0	200	903	0	0	0	0	0	0	0	603	903	0
449	8	0	0	0	0	0	0	200	300	0	0	0	0	0	0	0	200	903	0	0	0	0	0	0	0	603	903	0
449	9	0	0	0	0	0	0	200	300	0	0	0	0	0	0	0	200	903	0	0	0	0	0	0	0	603	903	0
450	0	0	0	0	0	0	0	200	300	0	0	0	0	0	0	0	200	903	0	0	0	0	0	0	0	603	903	0
450	1	0	0	0	0	0	0	200	300	0	0	0	0	0	0	0	200	903	0	0	0	0	0	0	0	603	903	0
450	2	0	0	0	0	0	0	200	300	0	0	0	0	0	0	0	200	903	0	0	0	0	0	0	0	603	903	0
450	3	0	0	0	0	0	0	200	300	0	0	0	0	0	0	0	200	903	0	0	0	0	0	0	0	603	903	0
450	4	0	0	0	0	0	0	200	300	0	0	0	0	0	0	0	200	903	0	0	0	0	0	0	0	603	903	0
450	5	0	0	0	0	0	0	200	300	0	0	0	0	0	0	0	200	903	0	0	0	0	0	0	0	603	903	0
450	6	0	0	0	0	0	0	200	300	0	0	0	0	0	0	0	200	903	0	0	0	0	0	0	0	603	903	0
450	7	0	0	0	0	0	0	200	300	0	0	0	0	0	0	0	200	903	0	0	0	0	0	0	0	603	903	0
450	8	0	0	0	0	0	0	200	300	0	0	0	0	0	0	0	200	903	0	0	0	0	0	0	0	603	903	0
450	9	0	0	0	0	0	0	200	300	0	0	0	0	0	0	0	200	903	0	0	0	0	0	0	0	603	903	0
451	0	0	0	0	0	0	0	200	300	0	0	0	0	0	0	0	200	903	0	0	0	0	0	0	0	603	903	0
451	1	0	0	0	0	0	0	200	300	0	0	0	0	0	0	0	200	903	0	0	0	0	0	0	0	603	903	0
451	2	0	0	0	0	0	0	200	300	0	0	0	0	0	0	0	200	903	0	0	0	0	0	0	0	603	903	0
451	3	0	0	0	0	0	0	200	300	0	0	0	0	0	0	0	200	903	0	0	0	0	0	0	0	603	903	0
451	4	0	0	0	0	0	0	200	300	0	0	0	0	0	0	0	200	903	0	0	0	0	0	0	0	603	903	0
451	5	0	0	0	0	0	0	200	300	0	0	0	0	0	0	0	200	903	0	0	0	0	0	0	0	603	903	0
451	6	0	0	0	0	0	0	200	300	0	0	0	0	0	0	0	200	903	0	0	0	0	0	0	0	603	903	0
451	7	0	0	0	0	0	0	200	300	0	0	0	0	0	0	0	200	903	0	0	0	0	0	0	0	603	903	0
451	8	0	0	0	0	0	0	200	300	0	0	0	0	0	0	0	200	903	0	0	0	0	0	0	0	603	903	0
451	9	0	0	0	0	0	0	200	300	0	0	0	0	0	0	0	200	903	0	0	0	0	0	0	0	603	903	0
452	0	0	0	0	0	0	0	200	300	0	0	0	0	0	0	0	200	903	0	0	0	0	0	0	0	603	903	0
452	1	0	0	0	0	0	0	200	300	0	0	0	0	0	0	0	200	903	0	0	0	0	0	0	0	603	903	0
452	2	0	0	0	0	0	0	200	300	0	0	0	0	0	0	0	200	903	0	0	0	0	0	0	0	603	903	0
452	3	0	0	0	0	0	0	200	300	0	0	0	0	0	0	0	200	903	0	0	0	0	0	0	0	603	903	0
452	4	0	0	0	0	0	0	200	300	0	0	0	0	0	0	0	200	903	0	0	0	0	0	0	0	603	903	0
452	5	0	0	0	0	0	0	200	300	0	0	0	0	0	0	0	200	903	0	0	0	0	0	0	0	603	903	0
452	6	0	0	0	0	0	0	200	300	0	0	0	0	0	0	0	200	903	0	0	0	0	0	0	0	603	903	0
452	7	0	0	0	0	0	0	200	300	0	0	0	0	0	0	0	200	903	0	0	0	0	0	0	0	603	903	0
452	8	0	0	0	0	0	0	200	300	0	0	0	0	0	0	0	200	903	0	0	0	0	0	0	0	603	903	0
452	9	0	0	0	0	0	0	200	300	0	0	0	0	0	0	0	200	903	0	0	0	0	0	0	0	603	903	0
453	0	0	0	0	0	0	0	200	300	0	0	0	0	0	0	0	200	903	0	0	0	0	0	0	0	603	903	0
453	1	0	0	0	0	0	0	200	300	0	0	0	0	0	0	0	200	903	0	0	0	0	0	0	0	603	903	0
453	2	0	0	0	0	0	0	200	300	0	0	0	0	0	0	0	200	903	0	0	0	0	0	0	0	603	903	0
453	3	0	0	0	0	0	0	200	300	0	0	0	0	0	0	0	200	903	0	0	0	0	0	0	0	603	903	0
453	4	0	0	0	0	0	0	200	300	0	0	0	0	0	0	0	200	903	0	0	0	0	0	0	0	603	903	0
453	5	0	0	0	0	0	0	200	300	0	0	0	0	0	0	0	200	903	0	0	0	0	0	0	0	603	903	0
453	6	0	0	0	0	0	0	200	300	0	0	0	0	0	0	0	200	903	0	0	0	0	0	0	0	603	903	0
453	7	0	0	0	0	0	0	200	300	0	0	0	0	0	0	0	200	903	0	0	0	0	0	0	0	603	903	0
453	8	0	0	0	0	0	0	200	300	0	0	0	0	0	0	0	200	903	0	0	0	0	0	0	0	603	903	0
453	9	0	0	0	0	0	0	200	300	0	0	0	0	0	0	0	200	903	0	0	0	0	0	0	0	603	903	0
454	0	0	0	0	0	0	0	200	300	0	0	0	0	0	0	0	200	903	0	0	0	0	0	0	0	603	903	0
454	1	0	0	0	0	0	0	200	300	0	0	0	0	0	0	0	200	903	0	0	0	0	0	0	0	603	903	0
454	2	0	0	0	0	0	0	200	300	0	0	0	0	0	0	0	200	903	0	0	0	0	0	0	0	603	903	0
454	3	0	0	0	0	0	0	200	300	0	0	0	0	0	0	0	200	903	0	0	0	0	0	0	0	603	903	0
454	4	0	0	0	0	0	0	200	300	0	0	0	0	0	0	0	200	903	0	0	0	0	0	0	0	603	903	0
454	5	0	0	0	0	0	0	200	300	0	0	0	0	0	0	0	200	903	0	0	0	0	0	0	0	603	903	0
454	6	0	0	0	0	0	0	200	300	0	0	0	0	0	0	0	200	903	0	0	0	0	0	0	0	603	903	0
454	7	0	0	0	0	0	0	200	300	0	0	0	0	0	0	0	200	903	0	0	0	0	0	0	0	603	903	0
454	8	0	0	0	0	0	0	200	300	0	0	0	0	0	0	0	200	903	0	0	0	0	0	0	0	603	903	0
454	9	0	0	0	0	0	0	200	300	0	0	0	0	0	0	0	200	903	0	0	0	0	0	0	0	603	903	0
455	0	0	0	0	0	0	0	200	300	0	0	0	0	0	0	0	200	903	0	0	0	0	0	0	0	603	903	0
455	1	0	0	0	0	0	0	200	300	0	0	0	0	0	0	0	200	903	0	0	0	0	0	0	0	603	903	0
455	2	0	0	0	0	0	0	200	300	0	0	0	0	0	0	0	200	903	0	0	0	0	0	0	0	603	903	0
455	3	0	0	0	0	0	0	200	300	0	0	0	0	0	0	0	200	903	0	0	0	0	0	0	0	603	903	0
455	4	0	0	0	0	0	0	200	300	0	0	0	0	0	0	0	200	903	0	0	0	0	0	0	0	603	903	0
455	5	0	0	0	0	0	0	200	300	0	0	0	0	0	0	0	200	903	0	0	0	0	0	0	0	603	903	0
455	6	0	0	0	0	0	0	200	300	0	0	0	0	0	0	0	200	903	0	0	0	0	0	0	0	603	903	0
455	7	0	0	0	0	0	0	200	300	0	0	0	0	0	0	0	200	903	0	0	0	0	0	0	0	603	903	0
455	8	0	0	0	0	0	0	200	300	0	0	0	0	0	0	0	200	903	0	0	0	0	0	0	0	603	903	0
455	9	0	0	0	0	0	0	200	300	0	0	0	0	0	0	0	200	903	0	0	0	0	0	0	0	603	903	0
456	0	0	0	0	0	0	0	200	300	0	0	0	0	0	0	0	200	903	0	0	0	0	0	0	0	603	903	0
456	1	0	0	0	0	0	0	200	300	0	0	0	0	0	0	0	200	903	0	0	0	0	0	0	0	603	903	0
456	2	0	0	0	0	0	0	200	300	0	0	0	0	0	0	0	200	903	0	0	0	0	0	0	0	603	903	0
456	3	0	0	0	0	0	0	200	300	0	0	0	0	0	0	0	200	903	0	0	0	0	0	0	0	603	903	0
456	4	0	0	0	0	0	0	200	300	0	0	0	0	0	0	0	200	903	0	0	0	0	0	0	0	603	903	0
456	5	0	0	0	0	0	0	200	300	0	0	0	0	0	0	0	200	903	0	0	0	0	0	0	0	603	903	0
456	6	0	0	0	0	0	0	200	300	0	0	0	0	0	0	0	200	903	0	0	0	0	0	0	0	603	903	0
456	7	0	0	0	0	0	0	200	300	0	0	0	0	0	0	0	200	903	0	0	0	0	0	0	0	603	903	0
456	8	0	0	0	0	0	0	200	300	0	0	0	0	0	0	0	200	903	0	0	0	0	0	0	0	603	903	0
456	9	0	0	0	0	0	0	200	300	0	0	0	0	0	0	0	200	903	0	0	0	0	0	0	0	603	903	0
457	0	0	0	0	0	0	0	200	300	0	0	0	0	0	0	0	200	903	0	0	0	0	0	0	0	603	903	0
457	1	0	0	0	0	0	0	200	300	0	0	0	0	0	0	0	200	903	0	0	0	0	0	0	0	603	903	0
457	2	0	0	0	0	0	0	200	300	0	0	0	0	0	0	0	200	903	0	0	0	0	0	0	0	603	903	0
457	3	0	0	0	0	0	0	200	300	0	0	0	0	0	0	0	200	903	0	0	0	0	0	0	0	603	903	0
457	4	0	0	0	0	0	0	200	300	0	0	0	0	0	0	0	200	903	0	0	0	0	0	0	0	603	903	0
457	5	0	0	0	0	0	0	200	300	0	0	0	0	0	0	0	200	903	0	0	0	0	0	0	0	603	903	0
457	6	0	0	0	0	0	0	200	300	0	0	0	0	0	0	0	200	903	0	0	0	0	0	0	0	603	903	0
457	7	0	0	0	0	0	0	200	300	0	0	0	0	0	0	0	200	903	0	0	0	0	0	0	0	603	903	0
457	8	0	0	0	0	0	0	200	300	0	0	0	0	0	0	0	200	903	0	0	0	0	0	0	0	603	903	0
457	9	0	0	0	0	0	0	200	300	0	0	0	0	0	0	0	200	903	0	0	0	0	0	0	0	603	903	0
458	0	0	0	0	0	0	0	200	300	0	0	0	0	0	0	0	200	903	0	0	0	0	0	0	0	603	903	0
458	1	0	0	0	0	0	0	200	300	0	0	0	0	0	0	0	200	903	0	0	0	0	0	0	0	603	903	0
458	2	0	0	0	0	0	0	200	300	0	0	0	0	0	0	0	200	903	0	0	0	0	0	0	0	603	903	0
458	3	0	0	0	0	0	0	200	300	0	0	0	0	0	0	0	200	903	0	0	0	0	0	0	0	603	903	0
458	4	0	0	0	0	0	0	200	300	0	0	0	0	0	0	0	200	903	0	0	0	0	0	0	0	603	903	0
458	5	0	0	0	0	0	0	200	300	0	0	0	0	0	0	0	200	903	0	0	0	0	0	0	0	603	903	0
458	6	0	0	0	0	0	0	200	300	0	0	0	0	0	0	0	200	903	0	0	0	0	0	0	0	603	903	0
458	7	0	0	0	0	0	0	200	300	0	0	0	0	0	0	0	200	903	0	0	0	0	0	0	0	603	903	0
458	8	0	0	0	0	0	0	200	300	0	0	0	0	0	0	0	200	903	0	0	0	0	0	0	0	603	903	0
458	9	0	0	0	0	0	0	200	300	0	0	0	0	0	0	0	200	903	0	0	0	0	0	0	0	603	903	0
459	0	0	0	0	0	0	0	200	300	0	0	0	0	0	0	0	200	903	0	0	0	0	0	0	0	603	903	0
459	1	0	0	0	0	0	0	200	300	0	0	0	0	0	0	0	200	903	0	0	0	0	0	0	0	603	903	0
459	2	0	0	0	0	0	0	200	300	0	0	0	0	0	0	0	200	903	0	0	0	0	0	0	0	603	903	0
459	3	0	0	0	0	0	0	200	300	0	0	0	0	0	0	0	200	903	0	0	0	0	0	0	0	603	903	0
459	4	0	0	0	0	0	0	200	300	0	0	0	0	0	0	0	200	903	0	0	0	0	0	0	0	603	903	0
459	5	0	0	0	0	0	0	200	300	0	0	0	0	0	0	0	200	903	0	0	0	0	0	0	0	603	903	0
459	6	0	0	0	0	0	0	200	300	0	0	0	0	0	0	0	200	903	0	0	0	0	0	0	0	603	903	0
459	7	0	0	0	0	0	0	200	300	0	0	0	0	0	0	0	200	903	0	0	0	0	0	0	0	603	903	0
459	8	0	0	0	0	0	0	200	300	0	0	0	0	0	0	0	200	903	0	0	0	0	0	0	0	603	903	0
459	9	0	0	0	0	0	0	200	300	0	0	0	0	0	0	0	200	903	0	0	0	0	0	0	0	603	903	0
460	0	0	0	0	0	0	0	200	300	0	0	0	0	0	0	0	200	903	0	0	0	0	0	0	0	603	903	0
460	1	0	0	0	0	0	0	200	300	0	0	0	0	0	0	0	200	903	0	0	0	0	0	0	0	603	903	0
460	2	0	0	0	0	0	0	200	300	0	0	0	0	0	0	0	200	903	0	0	0	0	0	0	0	603	903	0
460	3	0	0	0	0	0	0	200	300	0	0	0	0	0	0	0	200	903	0	0	0	0	0	0	0	603	903	0
460	4	0	0	0	0	0	0	200	300	0	0	0	0	0	0	0	200	903	0	0	0	0	0	0	0	603	903	0
460	5	0	0	0	0	0	0	200	300	0	0	0	0	0	0	0	200	903	0	0	0	0	0	0	0	603	903	0
460	6	0	0	0	0	0	0	200	300	0	0	0	0	0	0	0	200	903	0	0	0	0	0	0	0	603	903	0
460	7	0	0	0	0	0	0	200	300	0	0	0	0	0	0	0	200	903	0	0	0	0	0	0	0	603	903	0
460	8	0	0	0	0	0	0	200	300	0	0	0	0	0	0	0	200	903	0	0	0	0	0	0	0	603	903	0
460	9	0	0	0	0	0	0	200	300	0	0	0	0	0	0	0	200	903	0	0	0	0	0	0	0	603	903	0
461	0	0	0	0	0	0	0	200	300	0	0	0	0	0	0	0	200	903	0	0	0	0	0	0	0	603	903	0
461	1	0	0	0	0	0	0	200	300	0	0	0	0	0	0	0	200	903	0	0	0	0	0	0	0	603	903	0
461	2	0	0	0	0	0	0	200	300	0	0	0	0	0	0	0	200	903	0	0	0	0	0	0	0	603	903	0
461	3	0	0	0	0	0	0	200	300	0	0	0	0	0	0	0	200	903	0	0	0	0	0	0	0	603	903	0
461	4	0	0	0	0	0	0	200	300	0	0	0	0	0	0	0	200	903	0	0	0	0	0	0	0	603	903	0
461	5	0	0	0	0	0	0	200	300	0	0	0	0	0	0	0	200	903	0	0	0	0	0	0	0	603	903	0
461	6	0	0	0	0	0	0	200	300	0	0	0	0	0	0	0	200	903	0	0	0	0	0	0	0	603	903	0
461	7	0	0	0	0	0	0	200	300	0	0	0	0	0	0	0	200	903	0	0	0	0	0	0	0	603	903	0
461	8	0	0	0	0	0	0	200	300	0	0	0	0	0	0	0	200	903	0	0	0	0	0	0	0	603	903	0
461	9	0	0	0	0	0	0	200	300	0	0	0	0	0	0	0	200	903	0	0	0	0	0	0	0	603	903	0
462	0	0	0	0	0	0	0	200	300	0	0	0	0	0	0	0	200	903	0	0	0	0	0	0	0	603	903	0
462	1	0	0	0	0	0	0	200	300	0	0	0	0	0	0	0	200	903	0	0	0	0	0	0	0	603	903	0
462	2	0	0	0	0	0	0	200	300	0	0	0	0	0	0	0	200	903	0	0	0	0	0	0	0	603	903	0
462	3	0	0	0	0	0	0	200	300	0	0	0	0	0	0	0	200	903	0	0	0	0	0	0	0	603	903	0
462	4	0	0	0	0	0	0	200	300	0	0	0	0	0	0	0	200	903	0	0	0	0	0	0	0	603	903	0
462	5	0	0	0	0	0	0	200	300	0	0	0	0	0	0	0	200	903	0	0	0	0	0	0	0	603	903	0
462	6	0	0	0	0	0	0	200	300	0	0	0	0	0	0	0	200	903	0	0	0	0	0	0	0	603	903	0
462	7	0	0	0	0	0	0	200	300	0	0	0	0	0	0	0	200	903	0	0	0	0	0	0	0	603	903	0
462	8	0	0	0	0	0	0	200	300	0	0	0	0	0	0	0	200	903	0	0	0	0	0	0	0	603	903	0
462	9	0	0	0	0	0	0	200	300	0	0	0	0	0	0	0	200	903	0	0	0	0	0	0	0	603	903	0
463	0	0	0	0	0	0	0	200	300	0	0	0	0	0	0	0	200	903	0	0	0	0	0	0	0	603	903	0
463	1	0	0	0	0	0	0	200	300	0	0	0	0	0	0	0	200	903	0	0	0	0	0	0	0	603	903	0
463	2	0	0	0	0	0	0	200	300	0	0	0	0	0	0	0	200	903	0	0	0	0	0	0	0	603	903	0
463	3	0	0	0	0	0	0	200	300	0	0	0	0	0	0	0	200	903	0	0	0	0	0	0	0	603	903	0
463	4	0	0	0	0	0	0	200	300	0	0	0	0	0	0	0	200	903	0	0	0	0	0	0	0	603	903	0
463	5	0	0	0	0	0	0	200	300	0	0	0	0	0	0	0	200	903	0	0	0	0	0	0	0	603	903	0
463	6	0	0	0	0	0	0	200	300	0	0	0	0	0	0	0	200	903	0	0	0	0	0	0	0	603	903	0
463	7	0	0	0	0	0	0	200	300	0	0	0	0	0	0	0	200	903	0	0	0	0	0	0	0	603	903	0
463	8	0	0	0	0	0	0	200	300	0	0	0	0	0	0	0	200	903	0	0	0	0	0	0	0	603	903	0
463	9	0	0	0	0	0	0	200	300	0	0	0	0	0	0	0	200	903	0	0	0	0	0	0	0	603	903	0
464	0	0	0	0	0	0	0	200	300	0	0	0	0	0	0	0	200	903	0	0	0	0	0	0	0	603	903	0
464	1	0	0	0	0	0	0	200	300	0	0	0	0	0	0	0	200	903	0	0	0	0	0	0	0	603	903	0
464	2	0	0	0	0	0	0	200	300	0	0	0	0	0	0	0	200	903	0	0	0	0	0	0	0	603	903	0
464	3	0	0	0	0	0	0	200	300	0	0	0	0	0	0	0	200	903	0	0	0	0	0	0	0	603	903	0
464	4	0	0	0	0	0	0	200	300	0	0	0	0	0	0	0	200	903	0	0	0	0	0	0	0	603	903	0
464	5	0	0	0	0	0	0	200	300	0	0	0	0	0	0	0	200	903	0	0	0	0	0	0	0	603	903	0
464	6	0	0	0	0	0	0	200	300	0	0	0	0	0	0	0	200	903	0	0	0	0	0	0	0	603	903	0
464	7	0	0	0	0	0	0	200	300	0	0	0	0	0	0	0	200	903	0	0	0	0	0	0	0	603	903	0
464	8	0	0	0	0	0	0	200	300	0	0	0	0	0	0	0	200	903	0	0	0	0	0	0	0	603	903	0
464	9	0	0	0	0	0	0	200	300	0	0	0	0	0	0	0	200	903	0	0	0	0	0	0	0	603	903	0
465	0	0	0	0	0	0	0	200	300	0	0	0	0	0	0	0	200	903	0	0	0	0	0	0	0	603	903	0
465	1	0	0	0	0	0	0	200	300	0	0	0	0	0	0	0	200	903	0	0	0	0	0	0	0	603	903	0
465	2	0	0	0	0	0	0	200	300	0	0	0	0	0	0	0	200	903	0	0	0	0	0	0	0	603	903	0
465	3	0	0	0	0	0	0	200	300	0	0	0	0	0	0	0	200	903	0	0	0	0	0	0	0	603	903	0
465	4	0	0	0	0	0	0	200	300	0	0	0	0	0	0	0	200	903	0	0	0	0	0	0	0	603	903	0
465	5	0	0	0	0	0	0	200	300	0	0	0	0	0	0	0	200	903	0	0	0	0	0	0	0	603	903	0
465	6	0	0	0	0	0	0	200	300	0	0	0	0	0	0	0	200	903	0	0	0	0	0	0	0	603	903	0
465	7	0	0	0	0	0	0	200	300	0	0	0	0	0	0	0	200	903	0	0	0	0	0	0	0	603	903	0
465	8	0	0	0	0	0	0	200	300	0	0	0	0	0	0	0	200	903	0	0	0	0	0	0	0	603	903	0
465	9	0	0	0	0	0	0	200	300	0	0	0	0	0	0	0	200	903	0	0	0	0	0	0	0	603	903	0
466	0	0	0	0	0	0	0	200	300	0	0	0	0	0	0	0	200	903	0	0	0	0	0	0	0	603	903	0
466	1	0	0	0	0	0	0	200	300	0	0	0	0	0	0	0	200	903	0	0	0	0	0	0	0	603	903	0
466	2	0	0	0	0	0	0	200	300	0	0	0	0	0	0	0	200	903	0	0	0	0	0	0	0	603	903	0
466	3	0	0	0	0	0	0	200	300	0	0	0	0	0	0	0	200	903	0	0	0	0	0	0	0	603	903	0
466	4	0	0	0	0	0	0	200	300	0	0	0	0	0	0	0	200	903	0	0	0	0	0	0	0	603	903	0
466	5	0	0	0	0	0	0	200	300	0	0	0	0	0	0	0	200	903	0	0	0	0	0	0	0	603	903	0
466	6	0	0	0	0	0	0	200	300	0	0	0	0	0	0	0	200	903	0	0	0	0	0	0	0	603	903	0
466	7	0	0	0	0	0	0	200	300	0	0	0	0	0	0	0	200	903	0	0	0	0	0	0	0	603	903	0
466	8	0	0	0	0	0	0	200	300	0	0	0	0	0	0	0	200	903	0	0	0	0	0	0	0	603	903	0
466	9	0	0	0	0	0	0	200	300	0	0	0	0	0	0	0	200	903	0	0	0	0	0	0	0	603	903	0
467	0	0	0	0	0	0	0	200	300	0	0	0	0	0	0	0	200	903	0	0	0	0	0	0	0	603	903	0
467	1	0	0	0	0	0	0	200	300	0	0	0	0	0	0	0	200	903	0	0	0	0	0	0	0	603	903	0
467	2	0	0	0	0	0	0	200	300	0	0	0	0	0	0	0	200	903	0	0	0	0	0	0	0	603	903	0
467	3	0	0	0	0	0	0	200	300	0	0	0	0	0	0	0	200	903	0	0	0	0	0	0	0	603	903	0
467	4	0	0	0	0	0	0	200	300	0	0	0	0	0	0	0	200	903	0	0	0	0	0	0	0	603	903	0
467	5	0	0	0	0	0	0	200	300	0	0	0	0	0	0	0	200	903	0	0	0	0	0	0	0	603	903	0
467	6	0	0	0	0	0	0	200	300	0	0	0	0	0	0	0	200	903	0	0	0	0	0	0	0	603	903	0
467	7	0	0	0	0	0	0	200	300	0	0	0	0	0	0	0	200	903	0	0	0	0	0	0	0	603	903	0
467	8	0	0	0	0	0	0	200	300	0	0	0	0	0	0	0	200	903	0	0	0	0	0	0	0	603	903	0
467	9	0	0	0	0	0	0	200	300	0	0	0	0	0	0	0	200	903	0	0	0	0	0	0	0	603	903	0
468	0	0	0	0	0	0	0	200	300	0	0	0	0	0	0	0	200	903	0	0	0	0	0	0	0	603	903	0
468	1	0	0	0	0	0	0	200	300	0	0	0	0	0	0	0	200	903	0	0	0	0	0	0	0	603	903	0
468	2	0	0	0	0	0	0	200	300	0	0	0	0	0	0	0	200	903	0	0	0	0	0	0	0	603	903	0
468	3	0	0	0	0	0	0	200	300	0	0	0	0	0	0	0	200	903	0	0	0	0	0	0	0	603	903	0
468	4	0	0	0	0	0	0	200	300	0	0	0	0	0	0	0	200	903	0	0	0	0	0	0	0	603	903	0
468	5	0	0	0	0	0	0	200	300	0	0	0	0	0	0	0	200	903	0	0	0	0	0	0	0	603	903	0
468	6	0	0	0	0	0	0	200	300	0	0	0	0	0	0	0	200	903	0	0	0	0	0	0	0	603	903	0
468	7	0	0	0	0	0	0	200	300	0	0	0	0	0	0	0	200	903	0	0	0	0	0	0	0	603	903	0
468	8	0	0	0	0	0	0	200	300	0	0	0	0	0	0	0	200	903	0	0	0	0	0	0	0	603	903	0
468	9	0	0	0	0	0	0	200	300	0	0	0	0	0	0	0	200	903	0	0	0	0	0	0	0	603	903	0
469	0	0	0	0	0	0	0	200	300	0	0	0	0	0	0	0	200	903	0	0	0	0	0	0	0	603	903	0
469	1	0	0	0	0	0	0	200	300	0	0	0	0	0	0	0	200	903	0	0	0	0	0	0	0	603	903	0
469	2	0	0	0	0	0	0	200	300	0	0	0	0	0	0	0	200	903	0	0	0	0	0	0	0	603	903	0
469	3	0	0	0	0	0	0	200	300	0	0	0	0	0	0	0	200	903	0	0	0	0	0	0	0	603	903	0
469	4	0	0	0	0	0	0	200	300	0	0	0	0	0	0	0	200	903	0	0	0	0	0	0	0	603	903	0
469	5	0	0	0	0	0	0	200	300	0	0	0	0	0	0	0	200	903	0	0	0	0	0	0	0	603	903	0
469	6	0	0	0	0	0	0	200	300	0	0	0	0	0	0	0	200	903	0	0	0	0	0	0	0	603	903	0
469	7	0	0	0	0	0	0	200	300	0	0	0	0	0	0	0	200	903	0	0	0	0	0	0	0	603	903	0
469	8	0	0	0	0	0	0	200	300	0	0	0	0	0	0	0	200	903	0	0	0	0	0	0	0	603	903	0
469	9	0	0	0	0	0	0	200	300	0	0	0	0	0	0	0	200	903	0	0	0	0	0	0	0	603	903	0
470	0	0	0	0	0	0	0	200	300	0	0	0	0	0	0	0	200	903	0	0	0	0	0	0	0	603	903	0
470	1	0	0	0	0	0	0	200	300	0	0	0	0	0	0	0	200	903	0	0	0	0	0	0	0	603	903	0
470	2	0	0	0	0	0	0	200	300	0	0	0	0	0	0	0	200	903	0	0	0	0	0	0	0	603	903	0
470	3	0	0	0	0	0	0	200	300	0	0	0	0	0	0	0	200	903	0	0	0	0	0	0	0	603	903	0
470	4	0	0	0	0	0	0	200	300	0	0	0	0	0	0	0	200	903	0	0	0	0	0	0	0	603	903	0
470	5	0	0	0	0	0	0	200	300	0	0	0	0	0	0	0	200	903	0	0	0	0	0	0	0	603	903	0
470	6	0	0	0	0	0	0	200	300	0	0	0	0	0	0	0	200	903	0	0	0	0	0	0	0	603	903	0
470	7	0	0	0	0	0	0	200	300	0	0	0	0	0	0	0	200	903	0	0	0	0	0	0	0	603	903	0
470	8	0	0	0	0	0	0	200	300	0	0	0	0	0	0	0	200	903	0	0	0	0	0	0	0	603	903	0
470	9	0	0	0	0	0	0	200	300	0	0	0	0	0	0	0	200	903	0	0	0	0	0	0	0	603	903	0
471	0	0	0	0	0	0	0	200	300	0	0	0	0	0	0	0	200	903	0	0	0	0	0	0	0	603	903	0
471	1	0	0	0	0	0	0	200	300	0	0	0	0	0	0	0	200	903	0	0	0	0	0	0	0	603	903	0
471	2	0	0	0	0	0	0	200	300	0	0	0	0	0	0	0	200	903	0	0	0	0	0	0	0	603	903	0
471	3	0	0	0	0	0	0	200	300	0	0	0	0	0	0	0	200	903	0	0	0	0	0	0	0	603	903	0
471	4	0	0	0	0	0	0	200	300	0	0	0	0	0	0	0	200	903	0	0	0	0	0	0	0	603	903	0
471	5	0	0	0	0	0	0	200	300	0	0	0	0	0	0	0	200	903	0	0	0	0	0	0	0	603	903	0
471	6	0	0	0	0	0	0	200	300	0	0	0	0	0	0	0	200	903	0	0	0	0	0	0	0	603	903	0
471	7	0	0	0	0	0	0	200	300	0	0	0	0	0	0	0	200	903	0	0	0	0	0	0	0	603	903	0
471	8	0	0	0	0	0	0	200	300	0	0	0	0	0	0	0	200	903	0	0	0	0	0	0	0	603	903	0
471	9	0	0	0	0	0	0	200	300	0	0	0	0	0	0	0	200	903	0	0	0	0	0	0	0	603	903	0
472	0	0	0	0	0	0	0	200	300	0	0	0	0	0	0	0	200	903	0	0	0	0	0	0	0	603	903	0
472	1	0	0	0	0	0	0	200	300	0	0	0	0	0	0	0	200	903	0	0	0	0	0	0	0	603	903	0
472	2	0	0	0	0	0	0	200	300	0	0	0	0	0	0	0	200	903	0	0	0	0	0	0	0	603	903	0
472	3	0	0	0	0	0	0	200	300	0	0	0	0	0	0	0	200	903	0	0	0	0	0	0	0	603	903	0
472	4	0	0	0	0	0	0	200	300	0	0	0	0	0	0	0	200	903	0	0	0	0	0	0	0	603	903	0
472	5	0	0	0	0	0	0	200	300	0	0	0	0	0	0	0	200	903	0	0	0	0	0	0	0	603	903	0
472	6	0	0	0	0	0	0	200	300	0	0	0	0	0	0	0	200	903	0	0	0	0	0	0	0	603	903	0
472	7	0	0	0	0	0	0	200	300	0	0	0	0	0	0	0	200	903	0	0	0	0	0	0	0	603	903	0
472	8	0	0	0	0	0	0	200	300	0	0	0	0	0	0	0	200	903	0	0	0	0	0	0	0	603	903	0
472	9	0	0	0	0	0	0	200	300	0	0	0	0	0	0	0	200	903	0	0	0	0	0	0	0	603	903	0
473	0	0	0	0	0	0	0	200	300	0	0	0	0	0	0	0	200	903	0	0	0	0	0	0	0	603	903	0
473	1	0	0	0	0	0	0	200	300	0	0	0	0	0	0	0	200	903	0	0	0	0	0	0	0	603	903	0
473	2	0	0	0	0	0	0	200	300	0	0	0	0	0	0	0	200	903	0	0	0	0	0	0	0	603	903	0
473	3	0	0	0	0	0	0	200	300	0	0	0	0	0	0	0	200	903	0	0	0	0	0	0	0	603	903	0
473	4	0	0	0	0	0	0	200	300	0	0	0	0	0	0	0	200	903	0	0	0	0	0	0	0	603	903	0
473	5	0	0	0	0	0	0	200	300	0	0	0	0	0	0	0	200	903	0	0	0	0	0	0	0	603	903	0
473	6	0	0	0	0	0	0	200	300	0	0	0	0	0	0	0	200	903	0	0	0	0	0	0	0	603	903	0
473	7	0	0	0	0	0	0	200	300	0	0	0	0	0	0	0	200	903	0	0	0	0	0	0	0	603	903	0
473	8	0	0	0	0	0	0	200	300	0	0	0	0	0	0	0	200	903	0	0	0	0	0	0	0	603	903	0
473	9	0	0	0	0	0	0	200	300	0	0	0	0	0	0	0	200	903	0	0	0	0	0	0	0	603	903	0
474	0	0	0	0	0	0	0	200	300	0	0	0	0	0	0	0	200	903	0	0	0	0	0	0	0	603	903	0
474	1	0	0	0	0	0	0	200	300	0	0	0	0	0	0	0	200	903	0	0	0	0	0	0	0	603	903	0
474	2	0	0	0	0	0	0	200	300	0	0	0	0	0	0	0	200	903	0	0	0	0	0	0	0	603	903	0
474	3	0	0	0	0	0	0	200	300	0	0	0	0	0	0	0	200	903	0	0	0	0	0	0	0	603	903	0
474	4	0	0	0	0	0	0	200	300	0	0	0	0	0	0	0	200	903	0	0	0	0	0	0	0	603	903	0
474	5	0	0	0	0	0	0	200	300	0	0	0	0	0	0	0	200	903	0	0	0	0	0	0	0	603	903	0
474	6	0	0	0	0	0	0	200	300	0	0	0	0	0	0	0	200	903	0	0	0	0	0	0	0	603	903	0
474	7	0	0	0	0	0	0	200	300	0	0	0	0	0	0	0	200	903	0	0	0	0	0	0	0	603	903	0
474	8	0	0	0	0	0	0	200	300	0	0	0	0	0	0	0	200	903	0	0	0	0	0	0	0	603	903	0
474	9	0	0	0	0	0	0	200	300	0	0	0	0	0	0	0	200	903	0	0	0	0	0	0	0	603	903	0
475	0	0	0	0	0	0	0	200	300	0	0	0	0	0	0	0	200	903	0	0	0	0	0	0	0	603	903	0
475	1	0	0	0	0	0	0	200	300	0	0	0	0	0	0	0	200	903	0	0	0	0	0	0	0	603	903	0
475	2	0	0	0	0	0	0	200	300	0	0	0	0	0	0	0	200	903	0	0	0	0	0	0	0	603	903	0
475	3	0	0	0	0	0	0	200	300	0	0	0	0	0	0	0	200	903	0	0	0	0	0	0	0	603	903	0
475	4	0	0	0	0	0	0	200	300	0	0	0	0	0	0	0	200	903	0	0	0	0	0	0	0	603	903	0
475	5	0	0	0	0	0	0	200	300	0	0	0	0	0	0	0	200	903	0	0	0	0	0	0	0	603	903	0
475	6	0	0	0	0	0	0	200	300	0	0	0	0	0	0	0	200	903	0	0	0	0	0	0	0	603	903	0
475	7	0	0	0	0	0	0	200	300	0	0	0	0	0	0	0	200	903	0	0	0	0	0	0	0	603	903	0
475	8	0	0	0	0	0	0	200	300	0	0	0	0	0	0	0	200	903	0	0	0	0	0	0	0	603	903	0
475	9	0	0	0	0	0	0	200	300	0	0	0	0	0	0	0	200	903	0	0	0	0	0	0	0	603	903	0
476	0	0	0	0	0	0	0	200	300	0	0	0	0	0	0	0	200	903	0	0	0	0	0	0	0	603	903	0
476	1	0	0	0	0	0	0	200	300	0	0	0	0	0	0	0	200	903	0	0	0	0	0	0	0	603	903	0
476	2	0	0	0	0	0	0	200	300	0	0	0	0	0	0	0	200	903	0	0	0	0	0	0	0	603	903	0
476	3	0	0	0	0	0	0	200	300	0	0	0	0	0	0	0	200	903	0	0	0	0	0	0	0	603	903	0
476	4	0	0	0	0	0	0	200	300	0	0	0	0	0	0	0	200	903	0	0	0	0	0	0	0	603	903	0
476	5	0	0	0	0	0	0	200	300	0	0	0	0	0	0	0	200	903	0	0	0	0	0	0	0	603	903	0
476	6	0	0	0	0	0	0	200	300	0	0	0	0	0	0	0	200	903	0	0	0	0	0	0	0	603	903	0
476	7	0	0	0	0	0	0	200	300	0	0	0	0	0	0	0	200	903	0	0	0	0	0	0	0	603	903	0
476	8	0	0	0	0	0	0	200	300	0	0	0	0	0	0	0	200	903	0	0	0	0	0	0	0	603	903	0
476	9	0	0	0	0	0	0	200	300	0	0	0	0	0	0	0	200	903	0	0	0	0	0	0	0	603	903	0
477	0	0	0	0	0	0	0	200	300	0	0	0	0	0	0	0	200	903	0	0	0	0	0	0	0	603	903	0
477	1	0	0	0	0	0	0	200	300	0	0	0	0	0	0	0	200	903	0	0	0	0	0	0	0	603	903	0
477	2	0	0	0	0	0	0	200	300	0	0	0	0	0	0	0	200	903	0	0	0	0	0	0	0	603	903	0
477	3	0	0	0	0	0	0	200	300	0	0	0	0	0	0	0	200	903	0	0	0	0	0	0	0	603	903	0
477	4	0	0	0	0	0	0	200	300	0	0	0	0	0	0	0	200	903	0	0	0	0	0	0	0	603	903	0
477	5	0	0	0	0	0	0	200	300	0	0	0	0	0	0	0	200	903	0	0	0	0	0	0	0	603	903	0
477	6	0	0	0	0	0	0	200	300	0	0	0	0	0	0	0	200	903	0	0	0	0	0	0	0	603	903	0
477	7	0	0	0	0	0	0	200	300	0	0	0	0	0	0	0	200	903	0	0	0	0	0	0	0	603	903	0
477	8	0	0	0	0	0	0	200	300	0	0	0	0	0	0	0	200	903	0	0	0	0	0	0	0	603	903	0
477	9	0	0	0	0	0	0	200	300	0	0	0	0	0	0	0	200	903	0	0	0	0	0	0	0	603	903	0
478	0	0	0	0	0	0	0	200	300	0	0	0	0	0	0	0	200	903	0	0	0	0	0	0	0	603	903	0
478	1	0	0	0	0	0	0	200	300	0	0	0	0	0	0	0	200	903	0	0	0	0	0	0	0	603	903	0
478	2	0	0	0	0	0	0	200	300	0	0	0	0	0	0	0	200	903	0	0	0	0	0	0	0	603	903	0
478	3	0	0	0	0	0	0	200	300	0	0	0	0	0	0	0	200	903	0	0	0	0	0	0	0	603	903	0
478	4	0	0	0	0	0	0	200	300	0	0	0	0	0	0	0	200	903	0	0	0	0	0	0	0	603	903	0
478	5	0	0	0	0	0	0	200	300	0	0	0	0	0	0	0	200	903	0	0	0	0	0	0	0	603	903	0
478	6	0	0	0	0	0	0	200	300	0	0	0	0	0	0	0	200	903	0	0	0	0	0	0	0	603	903	0
478	7	0	0	0	0	0	0	200	300	0	0	0	0	0	0	0	200	903	0	0	0	0	0	0	0	603	903	0
478	8	0	0	0	0	0	0	200	300	0	0	0	0	0	0	0	200	903	0	0	0	0	0	0	0	603	903	0
478	9	0	0	0	0	0	0	200	300	0	0	0	0	0	0	0	200	903	0	0	0	0	0	0	0	603	903	0
479	0	0	0	0	0	0	0	200	300	0	0	0	0	0	0	0	200	903	0	0	0	0	0	0	0	603	903	0
479	1	0	0	0	0	0	0	200	300	0	0	0	0	0	0	0	200	903	0	0	0	0	0	0	0	603	903	0
479	2	0	0	0	0	0	0	200	300	0	0	0	0	0	0	0	200	903	0	0	0	0	0	0	0	603	903	0
479	3	0	0	0	0	0	0	200	300	0	0	0	0	0	0	0	200	903	0	0	0	0	0	0	0	603	903	0
479	4	0	0	0	0	0	0	200	300	0	0	0	0	0	0	0	200	903	0	0	0	0	0	0	0	603	903	0
479	5	0	0	0	0	0	0	200	300	0	0	0	0	0	0	0	200	903	0	0	0	0	0	0	0	603	903	0
479	6	0	0	0	0	0	0	200	300	0	0	0	0	0	0	0	200	903	0	0	0	0	0	0	0	603	903	0
479	7	0	0	0	0	0	0	200	300	0	0	0	0	0	0	0	200	903	0	0	0	0	0	0	0	603	903	0
479	8	0	0	0	0	0	0	200	300	0	0	0	0	0	0	0	200	903	0	0	0	0	0	0	0	603	903	0
479	9	0	0	0	0	0	0	200	300	0	0	0	0	0	0	0	200	903	0	0	0	0	0	0	0	603	903	0
480	0	0	0	0	0	0	0	200	300	0	0	0	0	0	0	0	200	903	0	0	0	0	0	0	0	603	903	0
480	1	0	0	0	0	0	0	200	300	0	0	0	0	0	0	0	200	903	0	0	0	0	0	0	0	603	903	0
480	2	0	0	0	0	0	0	200	300	0	0	0	0	0	0	0	200	903	0	0	0	0	0	0	0	603	903	0
480	3	0	0	0	0	0	0	200	300	0	0	0	0	0	0	0	200	903	0	0	0	0	0	0	0	603	903	0
480	4	0	0	0	0	0	0	200	300	0	0	0	0	0	0	0	200	903	0	0	0	0	0	0	0	603	903	0
480	5	0	0	0	0	0	0	200	300	0	0	0	0	0	0	0	200	903	0	0	0	0	0	0	0	603	903	0
480	6	0	0	0	0	0	0	200	300	0	0	0	0	0	0	0	200	903	0	0	0	0	0	0	0	603	903	0
480	7	0	0	0	0	0	0	200	300	0	0	0	0	0	0	0	200	903	0	0	0	0	0	0	0	603	903	0
480	8	0	0	0	0	0	0	200	300	0	0	0	0	0	0	0	200	903	0	0	0	0	0	0	0	603	903	0
480	9	0	0	0	0	0	0	200	300	0	0	0	0	0	0	0	200	903	0	0	0	0	0	0	0	603	903	0
481	0	0	0	0	0	0	0	200	300	0	0	0	0	0	0	0	200	903	0	0	0	0	0	0	0	603	903	0
481	1	0	0	0	0	0	0	200	300	0	0	0	0	0	0	0	200	903	0	0	0	0	0	0	0	603	903	0
481	2	0	0	0	0	0	0	200	300	0	0	0	0	0	0	0	200	903	0	0	0	0	0	0	0	603	903	0
481	3	0	0	0	0	0	0	200	300	0	0	0	0	0	0	0	200	903	0	0	0	0	0	0	0	603	903	0
481	4	0	0	0	0	0	0	200	300	0	0	0	0	0	0	0	200	903	0	0	0	0	0	0	0	603	903	0
481	5	0	0	0	0	0	0	200	300	0	0	0	0	0	0	0	200	903	0	0	0	0	0	0	0	603	903	0
481	6	0	0	0	0	0	0	200	300	0	0	0	0	0	0	0	200	903	0	0	0	0	0	0	0	603	903	0
481	7	0	0	0	0	0	0	200	300	0	0	0	0	0	0	0	200	903	0	0	0	0	0	0	0	603	903	0
481	8	0	0	0	0	0	0	200	300	0	0	0	0	0	0	0	200	903	0	0	0	0	0	0	0	603	903	0
481	9	0	0	0	0	0	0	200	300	0	0	0	0	0	0	0	200	903	0	0	0	0	0	0	0	603	903	0
482	0	0	0	0	0	0	0	200	300	0	0	0	0	0	0	0	200	903	0	0	0	0	0	0	0	603	903	0
482	1	0	0	0	0	0	0	200	300	0	0	0	0	0	0	0	200	903	0	0	0	0	0	0	0	603	903	0
482	2	0	0	0	0	0	0	200	300	0	0	0	0	0	0	0	200	903	0	0	0	0	0	0	0	603	903	0
482	3	0	0	0	0	0	0	200	300	0	0	0	0	0	0	0	200	903	0	0	0	0	0	0	0	603	903	0
482	4	0	0	0	0	0	0	200	300	0	0	0	0	0	0	0	200	903	0	0	0	0	0	0	0	603	903	0
482	5	0	0	0	0	0	0	200	300	0	0	0	0	0	0	0	200	903	0	0	0	0	0	0	0	603	903	0
482	6	0	0	0	0	0	0	200	300	0	0	0	0	0	0	0	200	903	0	0	0	0	0	0	0	603	903	0
482	7	0	0	0	0	0	0	200	300	0	0	0	0	0	0	0	200	903	0	0	0	0	0	0	0	603	903	0
482	8	0	0	0	0	0	0	200	300	0	0	0	0	0	0	0	200	903	0	0	0	0	0	0	0	603	903	0
482	9	0	0	0	0	0	0	200	300	0	0	0	0	0	0	0	200	903	0	0	0	0	0	0	0	603	903	0
483	0	0	0	0	0	0	0	200	300	0	0	0	0	0	0	0	200	903	0	0	0	0	0	0	0	603	903	0
483	1	0	0	0	0	0	0	200	300	0	0	0	0	0	0	0	200	903	0	0	0	0	0	0	0	603	903	0
483	2	0	0	0	0	0	0	200	300	0	0	0	0	0	0	0	200	903	0	0	0	0	0	0	0	603	903	0
483	3	0	0	0	0	0	0	200	300	0	0	0	0	0	0	0	200	903	0	0	0	0	0	0	0	603	903	0
483	4	0	0	0	0	0	0	200	300	0	0	0	0	0	0	0	200	903	0	0	0	0	0	0	0	603	903	0
483	5	0	0	0	0	0	0	200	300	0	0	0	0	0	0	0	200	903	0	0	0	0	0	0	0	603	903	0
483	6	0	0	0	0	0	0	200	300	0	0	0	0	0	0	0	200	903	0	0	0	0	0	0	0	603	903	0
483	7	0	0	0	0	0	0	200	300	0	0	0	0	0	0	0	200	903	0	0	0	0	0	0	0	603	903	0
483	8	0	0	0	0	0	0	200	300	0	0	0	0	0	0	0	200	903	0	0	0	0	0	0	0	603	903	0
483	9	0	0	0	0	0	0	200	300	0	0	0	0	0	0	0	200	903	0	0	0	0	0	0	0	603	903	0
484	0	0	0	0	0	0	0	200	300	0	0	0	0	0	0	0	200	903	0	0	0	0	0	0	0	603	903	0
484	1	0	0	0	0	0	0	200	300	0	0	0	0	0	0	0	200	903	0	0	0	0	0	0	0	603	903	0
484	2	0	0	0	0	0	0	200	300	0	0	0	0	0	0	0	200	903	0	0	0	0	0	0	0	603	903	0
484	3	0	0	0	0	0	0	200	300	0	0	0	0	0	0	0	200	903	0	0	0	0	0	0	0	603	903	0
484	4	0	0	0	0	0	0	200	300	0	0	0	0	0	0	0	200	903	0	0	0	0	0	0	0	603	903	0
484	5	0	0	0	0	0	0	200	300	0	0	0	0	0	0	0	200	903	0	0	0	0	0	0	0	603	903	0
484	6	0	0	0	0	0	0	200	300	0	0	0	0	0	0	0	200	903	0	0	0	0	0	0	0	603	903	0
484	7	0	0	0	0	0	0	200	300	0	0	0	0	0	0	0	200	903	0	0	0	0	0	0	0	603	903	0
484	8	0	0	0	0	0	0	200	300	0	0	0	0	0	0	0	200	903	0	0	0	0	0	0	0	603	903	0
484	9	0	0	0	0	0	0	200	300	0	0	0	0	0	0	0	200	903	0	0	0	0	0	0	0	603	903	0
485	0	0	0	0	0	0	0	200	300	0	0	0	0	0	0	0	200	903	0	0	0	0	0	0	0	603	903	0
485	1	0	0	0	0	0	0	200	300	0	0	0	0	0	0	0	200	903	0	0	0	0	0	0	0	603	903	0
485	2	0	0	0	0	0	0	200	300	0	0	0	0	0	0	0	200	903	0	0	0	0	0	0	0	603	903	0
485	3	0	0	0	0	0	0	200	300	0	0	0	0	0	0	0	200	903	0	0	0	0	0	0	0	603	903	0
485	4	0	0	0	0	0	0	200	300	0	0	0	0	0	0	0	200	903	0	0	0	0	0	0	0	603	903	0
485	5	0	0	0	0	0	0	200	300	0	0	0	0	0	0	0	200	903	0	0	0	0	0	0	0	603	903	0
485	6	0	0	0	0	0	0	200	300	0	0	0	0	0	0	0	200	903	0	0	0	0	0	0	0	603	903	0
485	7	0	0	0	0	0	0	200	300	0	0	0	0	0	0	0	200	903	0	0	0	0	0	0	0	603	903	0
485	8	0	0	0	0	0	0	200	300	0	0	0	0	0	0	0	200	903	0	0	0	0	0	0	0	603	903	0
485	9	0	0	0	0	0	0	200	300	0	0	0	0	0	0	0	200	903	0	0	0	0	0	0	0	603	903	0
486	0	0	0	0	0	0	0	200	300	0	0	0	0	0	0	0	200	903	0	0	0	0	0	0	0	603	903	0
486	1	0	0	0	0	0	0	200	300	0	0	0	0	0	0	0	200	903	0	0	0	0	0	0	0	603	903	0
486	2	0	0	0	0	0	0	200	300	0	0	0	0	0	0	0	200	903	0	0	0	0	0	0	0	603	903	0
486	3	0	0	0	0	0	0	200	300	0	0	0	0	0	0	0	200	903	0	0	0	0	0	0	0	603	903	0
486	4	0	0	0	0	0	0	200	300	0	0	0	0	0	0	0	200	903	0	0	0	0	0	0	0	603	903	0
486	5	0	0	0	0	0	0	200	300	0	0	0	0	0	0	0	200	903	0	0	0	0	0	0	0	603	903	0
486	6	0	0	0	0	0	0	200	300	0	0	0	0	0	0	0	200	903	0	0	0	0	0	0	0	603	903	0
486	7	0	0	0	0	0	0	200	300	0	0	0	0	0	0	0	200	903	0	0	0	0	0	0	0	603	903	0
486	8	0	0	0	0	0	0	200	300	0	0	0	0	0	0	0	200	903	0	0	0	0	0	0	0	603	903	0
486	9	0	0	0	0	0	0	200	300	0	0	0	0	0	0	0	200	903	0	0	0	0	0	0	0	603	903	0
487	0	0	0	0	0	0	0	200	300	0	0	0	0	0	0	0	200	903	0	0	0	0	0	0	0	603	903	0
487	1	0	0	0	0	0	0	200	300	0	0	0	0	0	0	0	200	903	0	0	0	0	0	0	0	603	903	0
487	2	0	0	0	0	0	0	200	300	0	0	0	0	0	0	0	200	903	0	0	0	0	0	0	0	603	903	0
487	3	0	0	0	0	0	0	200	300	0	0	0	0	0	0	0	200	903	0	0	0	0	0	0	0	603	903	0
487	4	0	0	0	0	0	0	200	300	0	0	0	0	0	0	0	200	903	0	0	0	0	0	0	0	603	903	0
487	5	0	0	0	0	0	0	200	300	0	0	0	0	0	0	0	200	903	0	0	0	0	0	0	0	603	903	0
487	6	0	0	0	0	0	0	200	300	0	0	0	0	0	0	0	200	903	0	0	0	0	0	0	0	603	903	0
487	7	0	0	0	0	0	0	200	300	0	0	0	0	0	0	0	200	903	0	0	0	0	0	0	0	603	903	0
487	8	0	0	0	0	0	0	200	300	0	0	0	0	0	0	0	200	903	0	0	0	0	0	0	0	603	903	0
487	9	0	0	0	0	0	0	200	300	0	0	0	0	0	0	0	200	903	0	0	0	0	0	0	0	603	903	0
488	0	0	0	0	0	0	0	200	300	0	0	0	0	0	0	0	200	903	0	0	0	0	0	0	0	603	903	0
488	1	0	0	0	0	0	0	200	300	0	0	0	0	0	0	0	200	903	0	0	0	0	0	0	0	603	903	0
488	2	0	0	0	0	0	0	200	300	0	0	0	0	0	0	0	200	903	0	0	0	0	0	0	0	603	903	0
488	3	0	0	0	0	0	0	200	300	0	0	0	0	0	0	0	200	903	0	0	0	0	0	0	0	603	903	0
488	4	0	0	0	0	0	0	200	300	0	0	0	0	0	0	0	200	903	0	0	0	0	0	0	0	603	903	0
488	5	0	0	0	0	0	0	200	300	0	0	0	0	0	0	0	200	903	0	0	0	0	0	0	0	603	903	0
488	6	0	0	0	0	0	0	200	300	0	0	0	0	0	0	0	200	903	0	0	0	0	0	0	0	603	903	0
488	7	0	0	0	0	0	0	200	300	0	0	0	0	0	0	0	200	903	0	0	0	0	0	0	0	603	903	0
488	8	0	0	0	0	0	0	200	300	0	0	0	0	0	0	0	200	903	0	0	0	0	0	0	0	603	903	0
488	9	0	0	0	0	0	0	200	300	0	0	0	0	0	0	0	200	903	0	0	0	0	0	0	0	603	903	0
489	0	0	0	0	0	0	0	200	300	0	0	0	0	0	0	0	200	903	0	0	0	0	0	0	0	603	903	0
489	1	0	0	0	0	0	0	200	300	0	0	0	0	0	0	0	200	903	0	0	0	0	0	0	0	603	903	0
489	2	0	0	0	0	0	0	200	300	0	0	0	0	0	0	0	200	903	0	0	0	0	0	0	0	603	903	0
489	3	0	0	0	0	0	0	200	300	0	0	0	0	0	0	0	200	903	0	0	0	0	0	0	0	603	903	0
489	4	0	0	0	0	0	0	200	300	0	0	0	0	0	0	0	200	903	0	0	0	0	0	0	0	603	903	0
489	5	0	0	0	0	0	0	200	300	0	0	0	0	0	0	0	200	903	0	0	0	0	0	0	0	603	903	0
489	6	0	0	0	0	0	0	200	300	0	0	0	0	0	0	0	200	903	0	0	0	0	0	0	0	603	903	0
489	7	0	0	0	0	0	0	200	300	0	0	0	0	0	0	0	200	903	0	0	0	0	0	0	0	603	903	0
489	8	0	0	0	0	0	0	200	300	0	0	0	0	0	0	0	200	903	0	0	0	0	0	0	0	603	903	0
489	9	0	0	0	0	0	0	200	300	0	0	0	0	0	0	0	200	903	0	0	0	0	0	0	0	603	903	0
490	0	0	0	0	0	0	0	200	300	0	0	0	0	0	0	0	200	903	0	0	0	0	0	0	0	603	903	0
490	1	0	0	0	0	0	0	200	300	0	0	0	0	0	0	0	200	903	0	0	0	0	0	0	0	603	903	0
490	2	0	0	0	0	0	0	200	300	0	0	0	0	0	0	0	200	903	0	0	0	0	0	0	0	603	903	0
490	3	0	0	0	0	0	0	200	300	0	0	0	0	0	0	0	200	903	0	0	0	0	0	0	0	603	903	0
490	4	0	0	0	0	0	0	200	300	0	0	0	0	0	0	0	200	903	0	0	0	0	0	0	0	603	903	0
490	5	0	0	0	0	0	0	200	300	0	0	0	0	0	0	0	200	903	0	0	0	0	0	0	0	603	903	0
490	6	0	0	0	0	0	0	200	300	0	0	0	0	0	0	0	200	903	0	0	0	0	0	0	0	603	903	0
490	7	0	0	0	0	0	0	200	300	0	0	0	0	0	0	0	200	903	0	0	0	0	0	0	0	603	903	0
490	8	0	0	0	0	0	0	200	300	0	0	0	0	0	0	0	200	903	0	0	0	0	0	0	0	603	903	0
490	9	0	0	0	0	0	0	200	300	0	0	0	0	0	0	0	200	903	0	0	0	0	0	0	0	603	903	0
491	0	0	0	0	0	0	0	200	300	0	0	0	0	0	0	0	200	903	0	0	0	0	0	0	0	603	903	0
491	1	0	0	0	0	0	0	200	300	0	0	0	0	0	0	0	200	903	0	0	0	0	0	0	0	603	903	0
491	2	0	0	0	0	0	0	200	300	0	0	0	0	0	0	0	200	903	0	0	0	0	0	0	0	603	903	0
491	3	0	0	0	0	0	0	200	300	0	0	0	0	0	0	0	200	903	0	0	0	0	0	0	0	603	903	0
491	4	0	0	0	0	0	0	200	300	0	0	0	0	0	0	0	200	903	0	0	0	0	0	0	0	603	903	0
491	5	0	0	0	0	0	0	200	300	0	0	0	0	0	0	0	200	903	0	0	0	0	0	0	0	603	903	0
491	6	0	0	0	0	0	0	200	300	0	0	0	0	0	0	0	200	903	0	0	0	0	0	0	0	603	903	0
491	7	0	0	0	0	0	0	200	300	0	0	0	0	0	0	0	200	903	0	0	0	0	0	0	0	603	903	0
491	8	0	0	0	0	0	0	200	300	0	0	0	0	0	0	0	200	903	0	0	0	0	0	0	0	603	903	0
491	9	0	0	0	0	0	0	200	300	0	0	0	0	0	0	0	200	903	0	0	0	0	0	0	0	603	903	0
492	0	0	0	0	0	0	0	200	300	0	0	0	0	0	0	0	200	903	0	0	0	0	0	0	0	603	903	0
492	1	0	0	0	0	0	0	200	300	0	0	0	0	0	0	0	200	903	0	0	0	0	0	0	0	603	903	0
492	2	0	0	0	0	0	0	200	300	0	0	0	0	0	0	0	200	903	0	0	0	0	0	0	0	603	903	0
492	3	0	0	0	0	0	0	200	300	0	0	0	0	0	0	0	200	903	0	0	0	0	0	0	0	603	903	0
492	4	0	0	0	0	0	0	200	300	0	0	0	0	0	0	0	200	903	0	0	0	0	0	0	0	603	903	0
492	5	0	0	0	0	0	0	200	300	0	0	0	0	0	0	0	200	903	0	0	0	0	0	0	0	603	903	0
492	6	0	0	0	0	0	0	200	300	0	0	0	0	0	0	0	200	903	0	0	0	0	0	0	0	603	903	0
492	7	0	0	0	0	0	0	200	300	0	0	0	0	0	0	0	200	903	0	0	0	0	0	0	0	603	903	0
492	8	0	0	0	0	0	0	200	300	0	0	0	0	0	0	0	200	903	0	0	0	0	0	0	0	603	903	0
492	9	0	0	0	0	0	0	200	300	0	0	0	0	0	0	0	200	903	0	0	0	0	0	0	0	603	903	0
493	0	0	0	0	0	0	0	200	300	0	0	0	0	0	0	0	200	903	0	0	0	0	0	0	0	603	903	0
493	1	0	0	0	0	0	0	200	300	0	0	0	0	0	0	0	200	903	0	0	0	0	0	0	0	603	903	0
493	2	0	0	0	0	0	0	200	300	0	0	0	0	0	0	0	200	903	0	0	0	0	0	0	0	603	903	0
493	3	0	0	0	0	0	0	200	300	0	0	0	0	0	0	0	200	903	0	0	0	0	0	0	0	603	903	0
493	4	0	0	0	0	0	0	200	300	0	0	0	0	0	0	0	200	903	0	0	0	0	0	0	0	603	903	0
493	5	0	0	0	0	0	0	200	300	0	0	0	0	0	0	0	200	903	0	0	0	0	0	0	0	603	903	0
493	6	0	0	0	0	0	0	200	300	0	0	0	0	0	0	0	200	903	0	0	0	0	0	0	0	603	903	0
493	7	0	0	0	0	0	0	200	300	0	0	0	0	0	0	0	200	903	0	0	0	0	0	0	0	603	903	0
493	8	0	0	0	0	0	0	200	300	0	0	0	0	0	0	0	200	903	0	0	0	0	0	0	0	603	903	0
493	9	0	0	0	0	0	0	200	300	0	0	0	0	0	0	0	200	903	0	0	0	0	0	0	0	603	903	0
494	0	0	0	0	0	0	0	200	300	0	0	0	0	0	0	0	200	903	0	0	0	0	0	0	0	603	903	0
494	1	0	0	0	0	0	0	200	300	0	0	0	0	0	0	0	200	903	0	0	0	0	0	0	0	603	903	0
494	2	0	0	0	0	0	0	200	300	0	0	0	0	0	0	0	200	903	0	0	0	0	0	0	0	603	903	0
494	3	0	0	0	0	0	0	200	300	0	0	0	0	0	0	0	200	903	0	0	0	0	0	0	0	603	903	0
494	4	0	0	0	0	0	0	200	300	0	0	0	0	0	0	0	200	903	0	0	0	0	0	0	0	603	903	0
494	5	0	0	0	0	0	0	200	300	0	0	0	0	0	0	0	200	903	0	0	0	0	0	0	0	603	903	0
494	6	0	0	0	0	0	0	200	300	0	0	0	0	0	0	0	200	903	0	0	0	0	0	0	0	603	903	0
494	7	0	0	0	0	0	0	200	300	0	0	0	0	0	0	0	200	903	0	0	0	0	0	0	0	603	903	0
494	8	0	0	0	0	0	0	200	300	0	0	0	0	0	0	0	200	903	0	0	0	0	0	0	0	603	903	0
494	9	0	0	0	0	0	0	200	300	0	0	0	0	0	0	0	200	903	0	0	0	0	0	0	0	603	903	0
495	0	0	0	0	0	0	0	200	300	0	0	0	0	0	0	0	200	903	0	0	0	0	0	0	0	603	903	0
495	1	0	0	0	0	0	0	200	300	0	0	0	0	0	0	0	200	903	0	0	0	0	0	0	0	603	903	0
495	2	0	0	0	0	0	0	200	300	0	0	0	0	0	0	0	200	903	0	0	0	0	0	0	0	603	903	0
495	3	0	0	0	0	0	0	200	300	0	0	0	0	0	0	0	200	903	0	0	0	0	0	0	0	603	903	0
495	4	0	0	0	0	0	0	200	300	0	0	0	0	0	0	0	200	903	0	0	0	0	0	0	0	603	903	0
495	5	0	0	0	0	0	0	200	300	0	0	0	0	0	0	0	200	903	0	0	0	0	0	0	0	603	903	0
495	6	0	0	0	0	0	0	200	300	0	0	0	0	0	0	0	200	903	0	0	0	0	0	0	0	603	903	0
495	7	0	0	0	0	0	0	200	300	0	0	0	0	0	0	0	200	903	0	0	0	0	0	0	0	603	903	0
495	8	0	0	0	0	0	0	200	300	0	0	0	0	0	0	0	200	903	0	0	0	0	0	0	0	603	903	0
495	9	0	0	0	0	0	0	200	300	0	0	0	0	0	0	0	200	903	0	0	0	0	0	0	0	603	903	0
496	0	0	0	0	0	0	0	200	300	0	0	0	0	0	0	0	200	903	0	0	0	0	0	0	0	603	903	0
496	1	0	0	0	0	0	0	200	300	0	0	0	0	0	0	0	200	903	0	0	0	0	0	0	0	603	903	0
496	2	0	0	0	0	0	0	200	300	0	0	0	0	0	0	0	200	903	0	0	0	0	0	0	0	603	903	0
496	3	0	0	0	0	0	0	200	300	0	0	0	0	0	0	0	200	903	0	0	0	0	0	0	0	603	903	0
496	4	0	0	0	0	0	0	200	300	0	0	0	0	0	0	0	200	903	0	0	0	0	0	0	0	603	903	0
496	5	0	0	0	0	0	0	200	300	0	0	0	0	0	0	0	200	903	0	0	0	0	0	0	0	603	903	0
496	6	0	0	0	0	0	0	200	300	0	0	0	0	0	0	0	200	903	0	0	0	0	0	0	0	603	903	0
496	7	0	0	0	0	0	0	200	300	0	0	0	0	0	0	0	200	903	0	0	0	0	0	0	0	603	903	0
496	8	0	0	0	0	0	0	200	300	0	0	0	0	0	0	0	200	903	0	0	0	0	0	0	0	603	903	0
496	9	0	0	0	0	0	0	200	300	0	0	0	0	0	0	0	200	903	0	0	0	0	0	0	0	603	903	0
497	0	0	0	0	0	0	0	200	300	0	0	0	0	0	0	0	200	903	0	0	0	0	0	0	0	603	903	0
497	1	0	0	0	0	0	0	200	300	0	0	0	0	0	0	0	200	903	0	0	0	0	0	0	0	603	903	0
497	2	0	0	0	0	0	0	200	300	0	0	0	0	0	0	0	200	903	0	0	0	0	0	0	0	603	903	0
497	3	0	0	0	0	0	0	200	300	0	0	0	0	0	0	0	200	903	0	0	0	0	0	0	0	603	903	0
497	4	0	0	0	0	0	0	200	300	0	0	0	0	0	0	0	200	903	0	0	0	0	0	0	0	603	903	0
497	5	0	0	0	0	0	0	200	300	0	0	0	0	0	0	0	200	903	0	0	0	0	0	0	0	603	903	0
497	6	0	0	0	0	0	0	200	300	0	0	0	0	0	0	0	200	903	0	0	0	0	0	0	0	603	903	0
497	7	0	0	0	0	0	0	200	300	0	0	0	0	0	0	0	200	903	0	0	0	0	0	0	0	603	903	0
497	8	0	0	0	0	0	0	200	300	0	0	0	0	0	0	0	200	903	0	0	0	0	0	0	0	603	903	0
497	9	0	0	0	0	0	0	200	300	0	0	0	0	0	0	0	200	903	0	0	0	0	0	0	0	603	903	0
498	0	0	0	0	0	0	0	200	300	0	0	0	0	0	0	0	200	903	0	0	0	0	0	0	0	603	903	0
498	1	0	0	0	0	0	0	200	300	0	0	0	0	0	0	0	200	903	0	0	0	0	0	0	0	603	903	0
498	2	0	0	0	0	0	0	200	300	0	0	0	0	0	0	0	200	903	0	0	0	0	0	0	0	603	903	0
498	3	0	0	0	0	0	0	200	300	0	0	0	0	0	0	0	200	903	0	0	0	0	0	0	0	603	903	0
498	4	0	0	0	0	0	0	200	300	0	0	0	0	0	0	0	200	903	0	0	0	0	0	0	0	603	903	0
498	5	0	0	0	0	0	0	200	300	0	0	0	0	0	0	0	200	903	0	0	0	0	0	0	0	603	903	0
498	6	0	0	0	0	0	0	200	300	0	0	0	0	0	0	0	200	903	0	0	0	0	0	0	0	603	903	0
498	7	0	0	0	0	0	0	200	300	0	0	0	0	0	0	0	200	903	0	0	0	0	0	0	0	603	903	0
498	8	0	0	0	0	0	0	200	300	0	0	0	0	0	0	0	200	903	0	0	0	0	0	0	0	603	903	0
498	9	0	0	0	0	0	0	200	300	0	0	0	0	0	0	0	200	903	0	0	0	0	0	0	0	603	903	0
499	0	0	0	0	0	0	0	200	300	0	0	0	0	0	0	0	200	903	0	0	0	0	0	0	0	603	903	0
499	1	0	0	0	0	0	0	200	300	0	0	0	0	0	0	0	200	903	0	0	0	0	0	0	0	603	903	0
499	2	0	0	0	0	0	0	200	300	0	0	0	0	0	0	0	200	903	0	0	0	0	0	0	0	603	903	0
499	3	0	0	0	0	0	0	200	300	0	0	0	0	0	0	0	200	903	0	0	0	0	0	0	0	603	903	0
499	4	0	0	0	0	0	0	200	300	0	0	0	0	0	0	0	200	903	0	0	0	0	0	0	0	603	903	0
499	5	0	0	0	0	0	0	200	300	0	0	0	0	0	0	0	200	903	0	0	0	0	0	0	0	603	903	0
499	6	0	0	0	0	0	0	200	300	0	0	0	0	0	0	0	200	903	0	0	0	0	0	0	0	603	903	0
499	7	0	0	0	0	0	0	200	300	0	0	0	0	0	0	0	200	903	0	0	0	0	0	0	0	603	903	0
499	8	0	0	0	0	0	0	200	300	0	0	0	0	0	0	0	200	903	0	0	0	0	0	0	0	603	903	0
499	9	0	0	0	0	0	0	200	300	0	0	0	0	0	0	0	200	903	0	0	0	0	0	0	0	603	903	0
500	0	0	0	0	0	0	0	200	300	0	0	0	0	0	0	0	200	903	0	0	0	0	0	0	0	603	903	0
500	1	0	0	0	0	0	0	200	300	0	0	0	0	0	0	0	200	903	0	0	0	0	0	0	0	603	903	0
500	2	0	0	0	0	0	0	200	300	0	0	0	0	0	0	0	200	903	0	0	0	0	0	0	0	603	903	0
500	3	0	0	0	0	0	0	200	300	0	0	0	0	0	0	0	200	903	0	0	0	0	0	0	0	603	903	0
500	4	0	0	0	0	0	0	200	300	0	0	0	0	0	0	0	200	903	0	0	0	0	0	0	0	603	903	0
500	5	0	0	0	0	0	0	200	300	0	0	0	0	0	0	0	200	903	0	0	0	0	0	0	0	603	903	0
500	6	0	0	0	0	0	0	200	300	0	0	0	0	0	0	0	200	903	0	0	0	0	0	0	0	603	903	0
500	7	0	0	0	0	0	0	200	300	0	0	0	0	0	0	0	200	903	0	0	0	0	0	0	0	603	903	0
500	8	0	0	0	0	0	0	200	300	0	0	0	0	0	0	0	200	903	0	0	0	0	0	0	0	603	903	0
500	9	0	0	0	0	0	0	200	300	0	0	0	0	0	0	0	200	903	0	0	0	0	0	0	0	603	903	0
501	0	0	0	0	0	0	0	200	300	0	0	0	0	0	0	0	200	903	0	0	0	0	0	0	0	603	903	0
501	1	0	0	0	0	0	0	200	300	0	0	0	0	0	0	0	200	903	0	0	0	0	0	0	0	603	903	0
501	2	0	0	0	0	0	0	200	300	0	0	0	0	0	0	0	200	903	0	0	0	0	0	0	0	603	903	0
501	3	0	0	0	0	0	0	200	300	0	0	0	0	0	0	0	200	903	0	0	0	0	0	0	0	603	903	0
501	4	0	0	0	0	0	0	200	300	0	0	0	0	0	0	0	200	903	0	0	0	0	0	0	0	603	903	0
501	5	0	0	0	0	0	0	200	300	0	0	0	0	0	0	0	200	903	0	0	0	0	0	0	0	603	903	0
501	6	0	0	0	0	0	0	200	300	0	0	0	0	0	0	0	200	903	0	0	0	0	0	0	0	603	903	0
501	7	0	0	0	0	0	0	200	300	0	0	0	0	0	0	0	200	903	0	0	0	0	0	0	0	603	903	0
501	8	0	0	0	0	0	0	200	300	0	0	0	0	0	0	0	200	903	0	0	0	0	0	0	0	603	903	0
501	9	0	0	0	0	0	0	200	300	0	0	0	0	0	0	0	200	903	0	0	0	0	0	0	0	603	903	0
502	0	0	0	0	0	0	0	200	300	0	0	0	0	0	0	0	200	903	0	0	0	0	0	0	0	603	903	0
502	1	0	0	0	0	0	0	200	300	0	0	0	0	0	0	0	200	903	0	0	0	0	0	0	0	603	903	0
502	2	0	0	0	0	0	0	200	300	0	0	0	0	0	0	0	200	903	0	0	0	0	0	0	0	603	903	0
502	3	0	0	0	0	0	0	200	300	0	0	0	0	0	0	0	200	903	0	0	0	0	0	0	0	603	903	0
502	4	0	0	0	0	0	0	200	300	0	0	0	0	0	0	0	200	903	0	0	0	0	0	0	0	603	903	0
502	5	0	0	0	0	0	0	200	300	0	0	0	0	0	0	0	200	903	0	0	0	0	0	0	0	603	903	0
502	6	0	0	0	0	0	0	200	300	0	0	0	0	0	0	0	200	903	0	0	0	0	0	0	0	603	903	0
502	7	0	0	0	0	0	0	200	300	0	0	0	0	0	0	0	200	903	0	0	0	0	0	0	0	603	903	0
502	8	0	0	0	0	0	0	200	300	0	0	0	0	0	0	0	200	903	0	0	0	0	0	0	0	603	903	0
502	9	0	0	0	0	0	0	200	300	0	0	0	0	0	0	0	200	903	0	0	0	0	0	0	0	603	903	0
503	0	0	0	0	0	0	0	200	300	0	0	0	0	0	0	0	200	903	0	0	0	0	0	0	0	603	903	0
503	1	0	0	0	0	0	0	200	300	0	0	0	0	0	0	0	200	903	0	0	0	0	0	0	0	603	903	0
503	2	0	0	0	0	0	0	200	300	0	0	0	0	0	0	0	200	903	0	0	0	0	0	0	0	603	903	0
503	3	0	0	0	0	0	0	200	300	0	0	0	0	0	0	0	200	903	0	0	0	0	0	0	0	603	903	0
503	4	0	0	0	0	0	0	200	300	0	0	0	0	0	0	0	200	903	0	0	0	0	0	0	0	603	903	0
503	5	0	0	0	0	0	0	200	300	0	0	0	0	0	0	0	200	903	0	0	0	0	0	0	0	603	903	0
503	6	0	0	0	0	0	0	200	300	0	0	0	0	0	0	0	200	903	0	0	0	0	0	0	0	603	903	0
503	7	0	0	0	0	0	0	200	300	0	0	0	0	0	0	0	200	903	0	0	0	0	0	0	0	603	903	0
503	8	0	0	0	0	0	0	200	300	0	0	0	0	0	0	0	200	903	0	0	0	0	0	0	0	603	903	0
503	9	0	0	0	0	0	0	200	300	0	0	0	0	0	0	0	200	903	0	0	0	0	0	0	0	603	903	0
504	0	0	0	0	0	0	0	200	300	0	0	0	0	0	0	0	200	903	0	0	0	0	0	0	0	603	903	0
504	1	0	0	0	0	0	0	200	300	0	0	0	0	0	0	0	200	903	0	0	0	0	0	0	0	603	903	0
504	2	0	0	0	0	0	0	200	300	0	0	0	0	0	0	0	200	903	0	0	0	0	0	0	0	603	903	0
504	3	0	0	0	0	0	0	200	300	0	0	0	0	0	0	0	200	903	0	0	0	0	0	0	0	603	903	0
504	4	0	0	0	0	0	0	200	300	0	0	0	0	0	0	0	200	903	0	0	0	0	0	0	0	603	903	0
504	5	0	0	0	0	0	0	200	300	0	0	0	0	0	0	0	200	903	0	0	0	0	0	0	0	603	903	0
504	6	0	0	0	0	0	0	200	300	0	0	0	0	0	0	0	200	903	0	0	0	0	0	0	0	603	903	0
504	7	0	0	0	0	0	0	200	300	0	0	0	0	0	0	0	200	903	0	0	0	0	0	0	0	603	903	0
504	8	0	0	0	0	0	0	200	300	0	0	0	0	0	0	0	200	903	0	0	0	0	0	0	0	603	903	0
504	9	0	0	0	0	0	0	200	300	0	0	0	0	0	0	0	200	903	0	0	0	0	0	0	0	603	903	0
505	0	0	0	0	0	0	0	200	300	0	0	0	0	0	0	0	200	903	0	0	0	0	0	0	0	603	903	0
505	1	0	0	0	0	0	0	200	300	0	0	0	0	0	0	0	200	903	0	0	0	0	0	0	0	603	903	0
505	2	0	0	0	0	0	0	200	300	0	0	0	0	0	0	0	200	903	0	0	0	0	0	0	0	603	903	0
505	3	0	0	0	0	0	0	200	300	0	0	0	0	0	0	0	200	903	0	0	0	0	0	0	0	603	903	0
505	4	0	0	0	0	0	0	200	300	0	0	0	0	0	0	0	200	903	0	0	0	0	0	0	0	603	903	0
505	5	0	0	0	0	0	0	200	300	0	0	0	0	0	0	0	200	903	0	0	0	0	0	0	0	603	903	0
505	6	0	0	0	0	0	0	200	300	0	0	0	0	0	0	0	200	903	0	0	0	0	0	0	0	603	903	0
505	7	0	0	0	0	0	0	200	300	0	0	0	0	0	0	0	200	903	0	0	0	0	0	0	0	603	903	0
505	8	0	0	0	0	0	0	200	300	0	0	0	0	0	0	0	200	903	0	0	0	0	0	0	0	603	903	0
505	9	0	0	0	0	0	0	200	300	0	0	0	0	0	0	0	200	903	0	0	0	0	0	0	0	603	903	0
506	0	0	0	0	0	0	0	200	300	0	0	0	0	0	0	0	200	903	0	0	0	0	0	0	0	603	903	0
506	1	0	0	0	0	0	0	200	300	0	0	0	0	0	0	0	200	903	0	0	0	0	0	0	0	603	903	0
506	2	0	0	0	0	0	0	200	300	0	0	0	0	0	0	0	200	903	0	0	0	0	0	0	0	603	903	0
506	3	0	0	0	0	0	0	200	300	0	0	0	0	0	0	0	200	903	0	0	0	0	0	0	0	603	903	0
506	4	0	0	0	0	0	0	200	300	0	0	0	0	0	0	0	200	903	0	0	0	0	0	0	0	603	903	0
506	5	0	0	0	0	0	0	200	300	0	0	0	0	0	0	0	200	903	0	0	0	0	0	0	0	603	903	0
506	6	0	0	0	0	0	0	200	300	0	0	0	0	0	0	0	200	903	0	0	0	0	0	0	0	603	903	0
506	7	0	0	0	0	0	0	200	300	0	0	0	0	0	0	0	200	903	0	0	0	0	0	0	0	603	903	0
506	8	0	0	0	0	0	0	200	300	0	0	0	0	0	0	0	200	903	0	0	0	0	0	0	0	603	903	0
506	9	0	0	0	0	0	0	200	300	0	0	0	0	0	0	0	200	903	0	0	0	0	0	0	0	603	903	0
507	0	0	0	0	0	0	0	200	300	0	0	0	0	0	0	0	200	903	0	0	0	0	0	0	0	603	903	0
507	1	0	0	0	0	0	0	200	300	0	0	0	0	0	0	0	200	903	0	0	0	0	0	0	0	603	903	0
507	2	0	0	0	0	0	0	200	300	0	0	0	0	0	0	0	200	903	0	0	0	0	0	0	0	603	903	0
507	3	0	0	0	0	0	0	200	300	0	0	0	0	0	0	0	200	903	0	0	0	0	0	0	0	603	903	0
507	4	0	0	0	0	0	0	200	300	0	0	0	0	0	0	0	200	903	0	0	0	0	0	0	0	603	903	0
507	5	0	0	0	0	0	0	200	300	0	0	0	0	0	0	0	200	903	0	0	0	0	0	0	0	603	903	0
507	6	0	0	0	0	0	0	200	300	0	0	0	0	0	0	0	200	903	0	0	0	0	0	0	0	603	903	0
507	7	0	0	0	0	0	0	200	300	0	0	0	0	0	0	0	200	903	0	0	0	0	0	0	0	603	903	0
507	8	0	0	0	0	0	0	200	300	0	0	0	0	0	0	0	200	903	0	0	0	0	0	0	0	603	903	0
507	9	0	0	0	0	0	0	200	300	0	0	0	0	0	0	0	200	903	0	0	0	0	0	0	0	603	903	0
508	0	0	0	0	0	0	0	200	300	0	0	0	0	0	0	0	200	903	0	0	0	0	0	0	0	603	903	0
508	1	0	0	0	0	0	0	200	300	0	0	0	0	0	0	0	200	903	0	0	0	0	0	0	0	603	903	0
508	2	0	0	0	0	0	0	200	300	0	0	0	0	0	0	0	200	903	0	0	0	0	0	0	0	603	903	0
508	3	0	0	0	0	0	0	200	300	0	0	0	0	0	0	0	200	903	0	0	0	0	0	0	0	603	903	0
508	4	0	0	0	0	0	0	200	300	0	0	0	0	0	0	0	200	903	0	0	0	0	0	0	0	603	903	0
508	5	0	0	0	0	0	0	200	300	0	0	0	0	0	0	0	200	903	0	0	0	0	0	0	0	603	903	0
508	6	0	0	0	0	0	0	200	300	0	0	0	0	0	0	0	200	903	0	0	0	0	0	0	0	603	903	0
508	7	0	0	0	0	0	0	200	300	0	0	0	0	0	0	0	200	903	0	0	0	0	0	0	0	603	903	0
508	8	0	0	0	0	0	0	200	300	0	0	0	0	0	0	0	200	903	0	0	0	0	0	0	0	603	903	0
508	9	0	0	0	0	0	0	200	300	0	0	0	0	0	0	0	200	903	0	0	0	0	0	0	0	603	903	0
509	0	0	0	0	0	0	0	200	300	0	0	0	0	0	0	0	200	903	0	0	0	0	0	0	0	603	903	0
509	1	0	0	0	0	0	0	200	300	0	0	0	0	0	0	0	200	903	0	0	0	0	0	0	0	603	903	0
509	2	0	0	0	0	0	0	200	300	0	0	0	0	0	0	0	200	903	0	0	0	0	0	0	0	603	903	0
509	3	0	0	0	0	0	0	200	300	0	0	0	0	0	0	0	200	903	0	0	0	0	0	0	0	603	903	0
509	4	0	0	0	0	0	0	200	300	0	0	0	0	0	0	0	200	903	0	0	0	0	0	0	0	603	903	0
509	5	0	0	0	0	0	0	200	300	0	0	0	0	0	0	0	200	903	0	0	0	0	0	0	0	603	903	0
509	6	0	0	0	0	0	0	200	300	0	0	0	0	0	0	0	200	903	0	0	0	0	0	0	0	603	903	0
509	7	0	0	0	0	0	0	200	300	0	0	0	0	0	0	0	200	903	0	0	0	0	0	0	0	603	903	0
509	8	0	0	0	0	0	0	200	300	0	0	0	0	0	0	0	200	903	0	0	0	0	0	0	0	603	903	0
509	9	0	0	0	0	0	0	200	300	0	0	0	0	0	0	0	200	903	0	0	0	0	0	0	0	603	903	0
510	0	0	0	0	0	0	0	200	300	0	0	0	0	0	0	0	200	903	0	0	0	0	0	0	0	603	903	0
510	1	0	0	0	0	0	0	200	300	0	0	0	0	0	0	0	200	903	0	0	0	0	0	0	0	603	903	0
510	2	0	0	0	0	0	0	200	300	0	0	0	0	0	0	0	200	903	0	0	0	0	0	0	0	603	903	0
510	3	0	0	0	0	0	0	200	300	0	0	0	0	0	0	0	200	903	0	0	0	0	0	0	0	603	903	0
510	4	0	0	0	0	0	0	200	300	0	0	0	0	0	0	0	200	903	0	0	0	0	0	0	0	603	903	0
510	5	0	0	0	0	0	0	200	300	0	0	0	0	0	0	0	200	903	0	0	0	0	0	0	0	603	903	0
510	6	0	0	0	0	0	0	200	300	0	0	0	0	0	0	0	200	903	0	0	0	0	0	0	0	603	903	0
510	7	0	0	0	0	0	0	200	300	0	0	0	0	0	0	0	200	903	0	0	0	0	0	0	0	603	903	0
510	8	0	0	0	0	0	0	200	300	0	0	0	0	0	0	0	200	903	0	0	0	0	0	0	0	603	903	0
510	9	0	0	0	0	0	0	200	300	0	0	0	0	0	0	0	200	903	0	0	0	0	0	0	0	603	903	0
511	0	0	0	0	0	0	0	200	300	0	0	0	0	0	0	0	200	903	0	0	0	0	0	0	0	603	903	0
511	1	0	0	0	0	0	0	200	300	0	0	0	0	0	0	0	200	903	0	0	0	0	0	0	0	603	903	0
511	2	0	0	0	0	0	0	200	300	0	0	0	0	0	0	0	200	903	0	0	0	0	0	0	0	603	903	0
511	3	0	0	0	0	0	0	200	300	0	0	0	0	0	0	0	200	903	0	0	0	0	0	0	0	603	903	0
511	4	0	0	0	0	0	0	200	300	0	0	0	0	0	0	0	200	903	0	0	0	0	0	0	0	603	903	0
511	5	0	0	0	0	0	0	200	300	0	0	0	0	0	0	0	200	903	0	0	0	0	0	0	0	603	903	0
511	6	0	0	0	0	0	0	200	300	0	0	0	0	0	0	0	200	903	0	0	0	0	0	0	0	603	903	0
511	7	0	0	0	0	0	0	200	300	0	0	0	0	0	0	0	200	903	0	0	0	0	0	0	0	603	903	0
511	8	0	0	0	0	0	0	200	300	0	0	0	0	0	0	0	200	903	0	0	0	0	0	0	0	603	903	0
511	9	0	0	0	0	0	0	200	300	0	0	0	0	0	0	0	200	903	0	0	0	0	0	0	0	603	903	0
512	0	0	0	0	0	0	0	200	300	0	0	0	0	0	0	0	200	903	0	0	0	0	0	0	0	603	903	0
512	1	0	0	0	0	0	0	200	300	0	0	0	0	0	0	0	200	903	0	0	0	0	0	0	0	603	903	0
512	2	0	0	0	0	0	0	200	300	0	0	0	0	0	0	0	200	903	0	0	0	0	0	0	0	603	903	0
512	3	0	0	0	0	0	0	200	300	0	0	0	0	0	0	0	200	903	0	0	0	0	0	0	0	603	903	0
512	4	0	0	0	0	0	0	200	300	0	0	0	0	0	0	0	200	903	0	0	0	0	0	0	0	603	903	0
512	5	0	0	0	0	0	0	200	300	0	0	0	0	0	0	0	200	903	0	0	0	0	0	0	0	603	903	0
512	6	0	0	0	0	0	0	200	300	0	0	0	0	0	0	0	200	903	0	0	0	0	0	0	0	603	903	0
512	7	0	0	0	0	0	0	200	300	0	0	0	0	0	0	0	200	903	0	0	0	0	0	0	0	603	903	0
512	8	0	0	0	0	0	0	200	300	0	0	0	0	0	0	0	200	903	0	0	0	0	0	0	0	603	903	0
512	9	0	0	0	0	0	0	200	300	0	0	0	0	0	0	0	200	903	0	0	0	0	0	0	0	603	903	0
513	0	0	0	0	0	0	0	200	300	0	0	0	0	0	0	0	200	903	0	0	0	0	0	0	0	603	903	0
513	1	0	0	0	0	0	0	200	300	0	0	0	0	0	0	0	200	903	0	0	0	0	0	0	0	603	903	0
513	2	0	0	0	0	0	0	200	300	0	0	0	0	0	0	0	200	903	0	0	0	0	0	0	0	603	903	0
513	3	0	0	0	0	0	0	200	300	0	0	0	0	0	0	0	200	903	0	0	0	0	0	0	0	603	903	0
513	4	0	0	0	0	0	0	200	300	0	0	0	0	0	0	0	200	903	0	0	0	0	0	0	0	603	903	0
513	5	0	0	0	0	0	0	200	300	0	0	0	0	0	0	0	200	903	0	0	0	0	0	0	0	603	903	0
513	6	0	0	0	0	0	0	200	300	0	0	0	0	0	0	0	200	903	0	0	0	0	0	0	0	603	903	0
513	7	0	0	0	0	0	0	200	300	0	0	0	0	0	0	0	200	903	0	0	0	0	0	0	0	603	903	0
513	8	0	0	0	0	0	0	200	300	0	0	0	0	0	0	0	200	903	0	0	0	0	0	0	0	603	903	0
513	9	0	0	0	0	0	0	200	300	0	0	0	0	0	0	0	200	903	0	0	0	0	0	0	0	603	903	0
514	0	0	0	0	0	0	0	200	300	0	0	0	0	0	0	0	200	903	0	0	0	0	0	0	0	603	903	0
514	1	0	0	0	0	0	0	200	300	0	0	0	0	0	0	0	200	903	0	0	0	0	0	0	0	603	903	0
514	2	0	0	0	0	0	0	200	300	0	0	0	0	0	0	0	200	903	0	0	0	0	0	0	0	603	903	0
514	3	0	0	0	0	0	0	200	300	0	0	0	0	0	0	0	200	903	0	0	0	0	0	0	0	603	903	0
514	4	0	0	0	0	0	0	200	300	0	0	0	0	0	0	0	200	903	0	0	0	0	0	0	0	603	903	0
514	5	0	0	0	0	0	0	200	300	0	0	0	0	0	0	0	200	903	0	0	0	0	0	0	0	603	903	0
514	6	0	0	0	0	0	0	200	300	0	0	0	0	0	0	0	200	903	0	0	0	0	0	0	0	603	903	0
514	7	0	0	0	0	0	0	200	300	0	0	0	0	0	0	0	200	903	0	0	0	0	0	0	0	603	903	0
514	8	0	0	0	0	0	0	200	300	0	0	0	0	0	0	0	200	903	0	0	0	0	0	0	0	603	903	0
514	9	0	0	0	0	0	0	200	300	0	0	0	0	0	0	0	200	903	0	0	0	0	0	0	0	603	903	0
515	0	0	0	0	0	0	0	200	300	0	0	0	0	0	0	0	200	903	0	0	0	0	0	0	0	603	903	0
515	1	0	0	0	0	0	0	200	300	0	0	0	0	0	0	0	200	903	0	0	0	0	0	0	0	603	903	0
515	2	0	0	0	0	0	0	200	300	0	0	0	0	0	0	0	200	903	0	0	0	0	0	0	0	603	903	0
515	3	0	0	0	0	0	0	200	300	0	0	0	0	0	0	0	200	903	0	0	0	0	0	0	0	603	903	0
515	4	0	0	0	0	0	0	200	300	0	0	0	0	0	0	0	200	903	0	0	0	0	0	0	0	603	903	0
515	5	0	0	0	0	0	0	200	300	0	0	0	0	0	0	0	200	903	0	0	0	0	0	0	0	603	903	0
515	6	0	0	0	0	0	0	200	300	0	0	0	0	0	0	0	200	903	0	0	0	0	0	0	0	603	903	0
515	7	0	0	0	0	0	0	200	300	0	0	0	0	0	0	0	200	903	0	0	0	0	0	0	0	603	903	0
515	8	0	0	0	0	0	0	200	300	0	0	0	0	0	0	0	200	903	0	0	0	0	0	0	0	603	903	0
515	9	0	0	0	0	0	0	200	300	0	0	0	0	0	0	0	200	903	0	0	0	0	0	0	0	603	903	0
516	0	0	0	0	0	0	0	200	300	0	0	0	0	0	0	0	200	903	0	0	0	0	0	0	0	603	903	0
516	1	0	0	0	0	0	0	200	300	0	0	0	0	0	0	0	200	903	0	0	0	0	0	0	0	603	903	0
516	2	0	0	0	0	0	0	200	300	0	0	0	0	0	0	0	200	903	0	0	0	0	0	0	0	603	903	0
516	3	0	0	0	0	0	0	200	300	0	0	0	0	0	0	0	200	903	0	0	0	0	0	0	0	603	903	0
516	4	0	0	0	0	0	0	200	300	0	0	0	0	0	0	0	200	903	0	0	0	0	0	0	0	603	903	0
516	5	0	0	0	0	0	0	200	300	0	0	0	0	0	0	0	200	903	0	0	0	0	0	0	0	603	903	0
516	6	0	0	0	0	0	0	200	300	0	0	0	0	0	0	0	200	903	0	0	0	0	0	0	0	603	903	0
516	7	0	0	0	0	0	0	200	300	0	0	0	0	0	0	0	200	903	0	0	0	0	0	0	0	603	903	0
516	8	0	0	0	0	0	0	200	300	0	0	0	0	0	0	0	200	903	0	0	0	0	0	0	0	603	903	0
516	9	0	0	0	0	0	0	200	300	0	0	0	0	0	0	0	200	903	0	0	0	0	0	0	0	603	903	0
517	0	0	0	0	0	0	0	200	300	0	0	0	0	0	0	0	200	903	0	0	0	0	0	0	0	603	903	0
517	1	0	0	0	0	0	0	200	300	0	0	0	0	0	0	0	200	903	0	0	0	0	0	0	0	603	903	0
517	2	0	0	0	0	0	0	200	300	0	0	0	0	0	0	0	200	903	0	0	0	0	0	0	0	603	903	0
517	3	0	0	0	0	0	0	200	300	0	0	0	0	0	0	0	200	903	0	0	0	0	0	0	0	603	903	0
517	4	0	0	0	0	0	0	200	300	0	0	0	0	0	0	0	200	903	0	0	0	0	0	0	0	603	903	0
517	5	0	0	0	0	0	0	200	300	0	0	0	0	0	0	0	200	903	0	0	0	0	0	0	0	603	903	0
517	6	0	0	0	0	0	0	200	300	0	0	0	0	0	0	0	200	903	0	0	0	0	0	0	0	603	903	0
517	7	0	0	0	0	0	0	200	300	0	0	0	0	0	0	0	200	903	0	0	0	0	0	0	0	603	903	0
517	8	0	0	0	0	0	0	200	300	0	0	0	0	0	0	0	200	903	0	0	0	0	0	0	0	603	903	0
517	9	0	0	0	0	0	0	200	300	0	0	0	0	0	0	0	200	903	0	0	0	0	0	0	0	603	903	0
518	0	0	0	0	0	0	0	200	300	0	0	0	0	0	0	0	200	903	0	0	0	0	0	0	0	603	903	0
518	1	0	0	0	0	0	0	200	300	0	0	0	0	0	0	0	200	903	0	0	0	0	0	0	0	603	903	0
518	2	0	0	0	0	0	0	200	300	0	0	0	0	0	0	0	200	903	0	0	0	0	0	0	0	603	903	0
518	3	0	0	0	0	0	0	200	300	0	0	0	0	0	0	0	200	903	0	0	0	0	0	0	0	603	903	0
518	4	0	0	0	0	0	0	200	300	0	0	0	0	0	0	0	200	903	0	0	0	0	0	0	0	603	903	0
518	5	0	0	0	0	0	0	200	300	0	0	0	0	0	0	0	200	903	0	0	0	0	0	0	0	603	903	0
518	6	0	0	0	0	0	0	200	300	0	0	0	0	0	0	0	200	903	0	0	0	0	0	0	0	603	903	0
518	7	0	0	0	0	0	0	200	300	0	0	0	0	0	0	0	200	903	0	0	0	0	0	0	0	603	903	0
518	8	0	0	0	0	0	0	200	300	0	0	0	0	0	0	0	200	903	0	0	0	0	0	0	0	603	903	0
518	9	0	0	0	0	0	0	200	300	0	0	0	0	0	0	0	200	903	0	0	0	0	0	0	0	603	903	0
519	0	0	0	0	0	0	0	200	300	0	0	0	0	0	0	0	200	903	0	0	0	0	0	0	0	603	903	0
519	1	0	0	0	0	0	0	200	300	0	0	0	0	0	0	0	200	903	0	0	0	0	0	0	0	603	903	0
519	2	0	0	0	0	0	0	200	300	0	0	0	0	0	0	0	200	903	0	0	0	0	0	0	0	603	903	0
519	3	0	0	0	0	0	0	200	300	0	0	0	0	0	0	0	200	903	0	0	0	0	0	0	0	603	903	0
519	4	0	0	0	0	0	0	200	300	0	0	0	0	0	0	0	200	903	0	0	0	0	0	0	0	603	903	0
519	5	0	0	0	0	0	0	200	300	0	0	0	0	0	0	0	200	903	0	0	0	0	0	0	0	603	903	0
519	6	0	0	0	0	0	0	200	300	0	0	0	0	0	0	0	200	903	0	0	0	0	0	0	0	603	903	0
519	7	0	0	0	0	0	0	200	300	0	0	0	0	0	0	0	200	903	0	0	0	0	0	0	0	603	903	0
519	8	0	0	0	0	0	0	200	300	0	0	0	0	0	0	0	200	903	0	0	0	0	0	0	0	603	903	0
519	9	0	0	0	0	0	0	200	300	0	0	0	0	0	0	0	200	903	0	0	0	0	0	0	0	603	903	0
520	0	0	0	0	0	0	0	200	300	0	0	0	0	0	0	0	200	903	0	0	0	0	0	0	0	603	903	0
520	1	0	0	0	0	0	0	200	300	0	0	0	0	0	0	0	200	903	0	0	0	0	0	0	0	603	903	0
520	2	0	0	0	0	0	0	200	300	0	0	0	0	0	0	0	200	903	0	0	0	0	0	0	0	603	903	0
520	3	0	0	0	0	0	0	200	300	0	0	0	0	0	0	0	200	903	0	0	0	0	0	0	0	603	903	0
520	4	0	0	0	0	0	0	200	300	0	0	0	0	0	0	0	200	903	0	0	0	0	0	0	0	603	903	0
520	5	0	0	0	0	0	0	200	300	0	0	0	0	0	0	0	200	903	0	0	0	0	0	0	0	603	903	0
520	6	0	0	0	0	0	0	200	300	0	0	0	0	0	0	0	200	903	0	0	0	0	0	0	0	603	903	0
520	7	0	0	0	0	0	0	200	300	0	0	0	0	0	0	0	200	903	0	0	0	0	0	0	0	603	903	0
520	8	0	0	0	0	0	0	200	300	0	0	0	0	0	0	0	200	903	0	0	0	0	0	0	0	603	903	0
520	9	0	0	0	0	0	0	200	300	0	0	0	0	0	0	0	200	903	0	0	0	0	0	0	0	603	903	0
521	0	0	0	0	0	0	0	200	300	0	0	0	0	0	0	0	200	903	0	0	0	0	0	0	0	603	903	0
521	1	0	0	0	0	0	0	200	300	0	0	0	0	0	0	0	200	903	0	0	0	0	0	0	0	603	903	0
521	2	0	0	0	0	0	0	200	300	0	0	0	0	0	0	0	200	903	0	0	0	0	0	0	0	603	903	0
521	3	0	0	0	0	0	0	200	300	0	0	0	0	0	0	0	200	903	0	0	0	0	0	0	0	603	903	0
521	4	0	0	0	0	0	0	200	300	0	0	0	0	0	0	0	200	903	0	0	0	0	0	0	0	603	903	0
521	5	0	0	0	0	0	0	200	300	0	0	0	0	0	0	0	200	903	0	0	0	0	0	0	0	603	903	0
521	6	0	0	0	0	0	0	200	300	0	0	0	0	0	0	0	200	903	0	0	0	0	0	0	0	603	903	0
521	7	0	0	0	0	0	0	200	300	0	0	0	0	0	0	0	200	903	0	0	0	0	0	0	0	603	903	0
521	8	0	0	0	0	0	0	200	300	0	0	0	0	0	0	0	200	903	0	0	0	0	0	0	0	603	903	0
521	9	0	0	0	0	0	0	200	300	0	0	0	0	0	0	0	200	903	0	0	0	0	0	0	0	603	903	0
522	0	0	0	0	0	0	0	200	300	0	0	0	0	0	0	0	200	903	0	0	0	0	0	0	0	603	903	0
522	1	0	0	0	0	0	0	200	300	0	0	0	0	0	0	0	200	903	0	0	0	0	0	0	0	603	903	0
522	2	0	0	0	0	0	0	200	300	0	0	0	0	0	0	0	200	903	0	0	0	0	0	0	0	603	903	0
522	3	0	0	0	0	0	0	200	300	0	0	0	0	0	0	0	200	903	0	0	0	0	0	0	0	603	903	0
522	4	0	0	0	0	0	0	200	300	0	0	0	0	0	0	0	200	903	0	0	0	0	0	0	0	603	903	0
522	5	0	0	0	0	0	0	200	300	0	0	0	0	0	0	0	200	903	0	0	0	0	0	0	0	603	903	0
522	6	0	0	0	0	0	0	200	300	0	0	0	0	0	0	0	200	903	0	0	0	0	0	0	0	603	903	0
522	7	0	0	0	0	0	0	200	300	0	0	0	0	0	0	0	200	903	0	0	0	0	0	0	0	603	903	0
522	8	0	0	0	0	0	0	200	300	0	0	0	0	0	0	0	200	903	0	0	0	0	0	0	0	603	903	0
522	9	0	0	0	0	0	0	200	300	0	0	0	0	0	0	0	200	903	0	0	0	0	0	0	0	603	903	0
523	0	0	0	0	0	0	0	200	300	0	0	0	0	0	0	0	200	903	0	0	0	0	0	0	0	603	903	0
523	1	0	0	0	0	0	0	200	300	0	0	0	0	0	0	0	200	903	0	0	0	0	0	0	0	603	903	0
523	2	0	0	0	0	0	0	200	300	0	0	0	0	0	0	0	200	903	0	0	0	0	0	0	0	603	903	0
523	3	0	0	0	0	0	0	200	300	0	0	0	0	0	0	0	200	903	0	0	0	0	0	0	0	603	903	0
523	4	0	0	0	0	0	0	200	300	0	0	0	0	0	0	0	200	903	0	0	0	0	0	0	0	603	903	0
523	5	0	0	0	0	0	0	200	300	0	0	0	0	0	0	0	200	903	0	0	0	0	0	0	0	603	903	0
523	6	0	0	0	0	0	0	200	300	0	0	0	0	0	0	0	200	903	0	0	0	0	0	0	0	603	903	0
523	7	0	0	0	0	0	0	200	300	0	0	0	0	0	0	0	200	903	0	0	0	0	0	0	0	603	903	0
523	8	0	0	0	0	0	0	200	300	0	0	0	0	0	0	0	200	903	0	0	0	0	0	0	0	603	903	0
523	9	0	0	0	0	0	0	200	300	0	0	0	0	0	0	0	200	903	0	0	0	0	0	0	0	603	903	0
524	0	0	0	0	0	0	0	200	300	0	0	0	0	0	0	0	200	903	0	0	0	0	0	0	0	603	903	0
524	1	0	0	0	0	0	0	200	300	0	0	0	0	0	0	0	200	903	0	0	0	0	0	0	0	603	903	0
524	2	0	0	0	0	0	0	200	300	0	0	0	0	0	0	0	200	903	0	0	0	0	0	0	0	603	903	0
524	3	0	0	0	0	0	0	200	300	0	0	0	0	0	0	0	200	903	0	0	0	0	0	0	0	603	903	0
524	4	0	0	0	0	0	0	200	300	0	0	0	0	0	0	0	200	903	0	0	0	0	0	0	0	603	903	0
524	5	0	0	0	0	0	0	200	300	0	0	0	0	0	0	0	200	903	0	0	0	0	0	0	0	603	903	0
524	6	0	0	0	0	0	0	200	300	0	0	0	0	0	0	0	200	903	0	0	0	0	0	0	0	603	903	0
524	7	0	0	0	0	0	0	200	300	0	0	0	0	0	0	0	200	903	0	0	0	0	0	0	0	603	903	0
524	8	0	0	0	0	0	0	200	300	0	0	0	0	0	0	0	200	903	0	0	0	0	0	0	0	603	903	0
524	9	0	0	0	0	0	0	200	300	0	0	0	0	0	0	0	200	903	0	0	0	0	0	0	0	603	903	0
525	0	0	0	0	0	0	0	200	300	0	0	0	0	0	0	0	200	903	0	0	0	0	0	0	0	603	903	0
525	1	0	0	0	0	0	0	200	300	0	0	0	0	0	0	0	200	903	0	0	0	0	0	0	0	603	903	0
525	2	0	0	0	0	0	0	200	300	0	0	0	0	0	0	0	200	903	0	0	0	0	0	0	0	603	903	0
525	3	0	0	0	0	0	0	200	300	0	0	0	0	0	0	0	200	903	0	0	0	0	0	0	0	603	903	0
525	4	0	0	0	0	0	0	200	300	0	0	0	0	0	0	0	200	903	0	0	0	0	0	0	0	603	903	0
525	5	0	0	0	0	0	0	200	300	0	0	0	0	0	0	0	200	903	0	0	0	0	0	0	0	603	903	0
525	6	0	0	0	0	0	0	200	300	0	0	0	0	0	0	0	200	903	0	0	0	0	0	0	0	603	903	0
525	7	0	0	0	0	0	0	200	300	0	0	0	0	0	0	0	200	903	0	0	0	0	0	0	0	603	903	0
525	8	0	0	0	0	0	0	200	300	0	0	0	0	0	0	0	200	903	0	0	0	0	0	0	0	603	903	0
525	9	0	0	0	0	0	0	200	300	0	0	0	0	0	0	0	200	903	0	0	0	0	0	0	0	603	903	0
526	0	0	0	0	0	0	0	200	300	0	0	0	0	0	0	0	200	903	0	0	0	0	0	0	0	603	903	0
526	1	0	0	0	0	0	0	200	300	0	0	0	0	0	0	0	200	903	0	0	0	0	0	0	0	603	903	0
526	2	0	0	0	0	0	0	200	300	0	0	0	0	0	0	0	200	903	0	0	0	0	0	0	0	603	903	0
526	3	0	0	0	0	0	0	200	300	0	0	0	0	0	0	0	200	903	0	0	0	0	0	0	0	603	903	0
526	4	0	0	0	0	0	0	200	300	0	0	0	0	0	0	0	200	903	0	0	0	0	0	0	0	603	903	0
526	5	0	0	0	0	0	0	200	300	0	0	0	0	0	0	0	200	903	0	0	0	0	0	0	0	603	903	0
526	6	0	0	0	0	0	0	200	300	0	0	0	0	0	0	0	200	903	0	0	0	0	0	0	0	603	903	0
526	7	0	0	0	0	0	0	200	300	0	0	0	0	0	0	0	200	903	0	0	0	0	0	0	0	603	903	0
526	8	0	0	0	0	0	0	200	300	0	0	0	0	0	0	0	200	903	0	0	0	0	0	0	0	603	903	0
526	9	0	0	0	0	0	0	200	300	0	0	0	0	0	0	0	200	903	0	0	0	0	0	0	0	603	903	0
527	0	0	0	0	0	0	0	200	300	0	0	0	0	0	0	0	200	903	0	0	0	0	0	0	0	603	903	0
527	1	0	0	0	0	0	0	200	300	0	0	0	0	0	0	0	200	903	0	0	0	0	0	0	0	603	903	0
527	2	0	0	0	0	0	0	200	300	0	0	0	0	0	0	0	200	903	0	0	0	0	0	0	0	603	903	0
527	3	0	0	0	0	0	0	200	300	0	0	0	0	0	0	0	200	903	0	0	0	0	0	0	0	603	903	0
527	4	0	0	0	0	0	0	200	300	0	0	0	0	0	0	0	200	903	0	0	0	0	0	0	0	603	903	0
527	5	0	0	0	0	0	0	200	300	0	0	0	0	0	0	0	200	903	0	0	0	0	0	0	0	603	903	0
527	6	0	0	0	0	0	0	200	300	0	0	0	0	0	0	0	200	903	0	0	0	0	0	0	0	603	903	0
527	7	0	0	0	0	0	0	200	300	0	0	0	0	0	0	0	200	903	0	0	0	0	0	0	0	603	903	0
527	8	0	0	0	0	0	0	200	300	0	0	0	0	0	0	0	200	903	0	0	0	0	0	0	0	603	903	0
527	9	0	0	0	0	0	0	200	300	0	0	0	0	0	0	0	200	903	0	0	0	0	0	0	0	603	903	0
528	0	0	0	0	0	0	0	200	300	0	0	0	0	0	0	0	200	903	0	0	0	0	0	0	0	603	903	0
528	1	0	0	0	0	0	0	200	300	0	0	0	0	0	0	0	200	903	0	0	0	0	0	0	0	603	903	0
528	2	0	0	0	0	0	0	200	300	0	0	0	0	0	0	0	200	903	0	0	0	0	0	0	0	603	903	0
528	3	0	0	0	0	0	0	200	300	0	0	0	0	0	0	0	200	903	0	0	0	0	0	0	0	603	903	0
528	4	0	0	0	0	0	0	200	300	0	0	0	0	0	0	0	200	903	0	0	0	0	0	0	0	603	903	0
528	5	0	0	0	0	0	0	200	300	0	0	0	0	0	0	0	200	903	0	0	0	0	0	0	0	603	903	0
528	6	0	0	0	0	0	0	200	300	0	0	0	0	0	0	0	200	903	0	0	0	0	0	0	0	603	903	0
528	7	0	0	0	0	0	0	200	300	0	0	0	0	0	0	0	200	903	0	0	0	0	0	0	0	603	903	0
528	8	0	0	0	0	0	0	200	300	0	0	0	0	0	0	0	200	903	0	0	0	0	0	0	0	603	903	0
528	9	0	0	0	0	0	0	200	300	0	0	0	0	0	0	0	200	903	0	0	0	0	0	0	0	603	903	0
529	0	0	0	0	0	0	0	200	300	0	0	0	0	0	0	0	200	903	0	0	0	0	0	0	0	603	903	0
529	1	0	0	0	0	0	0	200	300	0	0	0	0	0	0	0	200	903	0	0	0	0	0	0	0	603	903	0
529	2	0	0	0	0	0	0	200	300	0	0	0	0	0	0	0	200	903	0	0	0	0	0	0	0	603	903	0
529	3	0	0	0	0	0	0	200	300	0	0	0	0	0	0	0	200	903	0	0	0	0	0	0	0	603	903	0
529	4	0	0	0	0	0	0	200	300	0	0	0	0	0	0	0	200	903	0	0	0	0	0	0	0	603	903	0
529	5	0	0	0	0	0	0	200	300	0	0	0	0	0	0	0	200	903	0	0	0	0	0	0	0	603	903	0
529	6	0	0	0	0	0	0	200	300	0	0	0	0	0	0	0	200	903	0	0	0	0	0	0	0	603	903	0
529	7	0	0	0	0	0	0	200	300	0	0	0	0	0	0	0	200	903	0	0	0	0	0	0	0	603	903	0
529	8	0	0	0	0	0	0	200	300	0	0	0	0	0	0	0	200	903	0	0	0	0	0	0	0	603	903	0
529	9	0	0	0	0	0	0	200	300	0	0	0	0	0	0	0	200	903	0	0	0	0	0	0	0	603	903	0
530	0	0	0	0	0	0	0	200	300	0	0	0	0	0	0	0	200	903	0	0	0	0	0	0	0	603	903	0
530	1	0	0	0	0	0	0	200	300	0	0	0	0	0	0	0	200	903	0	0	0	0	0	0	0	603	903	0
530	2	0	0	0	0	0	0	200	300	0	0	0	0	0	0	0	200	903	0	0	0	0	0	0	0	603	903	0
530	3	0	0	0	0	0	0	200	300	0	0	0	0	0	0	0	200	903	0	0	0	0	0	0	0	603	903	0
530	4	0	0	0	0	0	0	200	300	0	0	0	0	0	0	0	200	903	0	0	0	0	0	0	0	603	903	0
530	5	0	0	0	0	0	0	200	300	0	0	0	0	0	0	0	200	903	0	0	0	0	0	0	0	603	903	0
530	6	0	0	0	0	0	0	200	300	0	0	0	0	0	0	0	200	903	0	0	0	0	0	0	0	603	903	0
530	7	0	0	0	0	0	0	200	300	0	0	0	0	0	0	0	200	903	0	0	0	0	0	0	0	603	903	0
530	8	0	0	0	0	0	0	200	300	0	0	0	0	0	0	0	200	903	0	0	0	0	0	0	0	603	903	0
530	9	0	0	0	0	0	0	200	300	0	0	0	0	0	0	0	200	903	0	0	0	0	0	0	0	603	903	0
531	0	0	0	0	0	0	0	200	300	0	0	0	0	0	0	0	200	903	0	0	0	0	0	0	0	603	903	0
531	1	0	0	0	0	0	0	200	300	0	0	0	0	0	0	0	200	903	0	0	0	0	0	0	0	603	903	0
531	2	0	0	0	0	0	0	200	300	0	0	0	0	0	0	0	200	903	0	0	0	0	0	0	0	603	903	0
531	3	0	0	0	0	0	0	200	300	0	0	0	0	0	0	0	200	903	0	0	0	0	0	0	0	603	903	0
531	4	0	0	0	0	0	0	200	300	0	0	0	0	0	0	0	200	903	0	0	0	0	0	0	0	603	903	0
531	5	0	0	0	0	0	0	200	300	0	0	0	0	0	0	0	200	903	0	0	0	0	0	0	0	603	903	0
531	6	0	0	0	0	0	0	200	300	0	0	0	0	0	0	0	200	903	0	0	0	0	0	0	0	603	903	0
531	7	0	0	0	0	0	0	200	300	0	0	0	0	0	0	0	200	903	0	0	0	0	0	0	0	603	903	0
531	8	0	0	0	0	0	0	200	300	0	0	0	0	0	0	0	200	903	0	0	0	0	0	0	0	603	903	0
531	9	0	0	0	0	0	0	200	300	0	0	0	0	0	0	0	200	903	0	0	0	0	0	0	0	603	903	0
532	0	0	0	0	0	0	0	200	300	0	0	0	0	0	0	0	200	903	0	0	0	0	0	0	0	603	903	0
532	1	0	0	0	0	0	0	200	300	0	0	0	0	0	0	0	200	903	0	0	0	0	0	0	0	603	903	0
532	2	0	0	0	0	0	0	200	300	0	0	0	0	0	0	0	200	903	0	0	0	0	0	0	0	603	903	0
532	3	0	0	0	0	0	0	200	300	0	0	0	0	0	0	0	200	903	0	0	0	0	0	0	0	603	903	0
532	4	0	0	0	0	0	0	200	300	0	0	0	0	0	0	0	200	903	0	0	0	0	0	0	0	603	903	0
532	5	0	0	0	0	0	0	200	300	0	0	0	0	0	0	0	200	903	0	0	0	0	0	0	0	603	903	0
532	6	0	0	0	0	0	0	200	300	0	0	0	0	0	0	0	200	903	0	0	0	0	0	0	0	603	903	0
532	7	0	0	0	0	0	0	200	300	0	0	0	0	0	0	0	200	903	0	0	0	0	0	0	0	603	903	0
532	8	0	0	0	0	0	0	200	300	0	0	0	0	0	0	0	200	903	0	0	0	0	0	0	0	603	903	0
532	9	0	0	0	0	0	0	200	300	0	0	0	0	0	0	0	200	903	0	0	0	0	0	0	0	603	903	0
533	0	0	0	0	0	0	0	200	300	0	0	0	0	0	0	0	200	903	0	0	0	0	0	0	0	603	903	0
533	1	0	0	0	0	0	0	200	300	0	0	0	0	0	0	0	200	903	0	0	0	0	0	0	0	603	903	0
533	2	0	0	0	0	0	0	200	300	0	0	0	0	0	0	0	200	903	0	0	0	0	0	0	0	603	903	0
533	3	0	0	0	0	0	0	200	300	0	0	0	0	0	0	0	200	903	0	0	0	0	0	0	0	603	903	0
533	4	0	0	0	0	0	0	200	300	0	0	0	0	0	0	0	200	903	0	0	0	0	0	0	0	603	903	0
533	5	0	0	0	0	0	0	200	300	0	0	0	0	0	0	0	200	903	0	0	0	0	0	0	0	603	903	0
533	6	0	0	0	0	0	0	200	300	0	0	0	0	0	0	0	200	903	0	0	0	0	0	0	0	603	903	0
533	7	0	0	0	0	0	0	200	300	0	0	0	0	0	0	0	200	903	0	0	0	0	0	0	0	603	903	0
533	8	0	0	0	0	0	0	200	300	0	0	0	0	0	0	0	200	903	0	0	0	0	0	0	0	603	903	0
533	9	0	0	0	0	0	0	200	300	0	0	0	0	0	0	0	200	903	0	0	0	0	0	0	0	603	903	0
534	0	0	0	0	0	0	0	200	300	0	0	0	0	0	0	0	200	903	0	0	0	0	0	0	0	603	903	0
534	1	0	0	0	0	0	0	200	300	0	0	0	0	0	0	0	200	903	0	0	0	0	0	0	0	603	903	0
534	2	0	0	0	0	0	0	200	300	0	0	0	0	0	0	0	200	903	0	0	0	0	0	0	0	603	903	0
534	3	0	0	0	0	0	0	200	300	0	0	0	0	0	0	0	200	903	0	0	0	0	0	0	0	603	903	0
534	4	0	0	0	0	0	0	200	300	0	0	0	0	0	0	0	200	903	0	0	0	0	0	0	0	603	903	0
534	5	0	0	0	0	0	0	200	300	0	0	0	0	0	0	0	200	903	0	0	0	0	0	0	0	603	903	0
534	6	0	0	0	0	0	0	200	300	0	0	0	0	0	0	0	200	903	0	0	0	0	0	0	0	603	903	0
534	7	0	0	0	0	0	0	200	300	0	0	0	0	0	0	0	200	903	0	0	0	0	0	0	0	603	903	0
534	8	0	0	0	0	0	0	200	300	0	0	0	0	0	0	0	200	903	0	0	0	0	0	0	0	603	903	0
534	9	0	0	0	0	0	0	200	300	0	0	0	0	0	0	0	200	903	0	0	0	0	0	0	0	603	903	0
535	0	0	0	0	0	0	0	200	300	0	0	0	0	0	0	0	200	903	0	0	0	0	0	0	0	603	903	0
535	1	0	0	0	0	0	0	200	300	0	0	0	0	0	0	0	200	903	0	0	0	0	0	0	0	603	903	0
535	2	0	0	0	0	0	0	200	300	0	0	0	0	0	0	0	200	903	0	0	0	0	0	0	0	603	903	0
535	3	0	0	0	0	0	0	200	300	0	0	0	0	0	0	0	200	903	0	0	0	0	0	0	0	603	903	0
535	4	0	0	0	0	0	0	200	300	0	0	0	0	0	0	0	200	903	0	0	0	0	0	0	0	603	903	0
535	5	0	0	0	0	0	0	200	300	0	0	0	0	0	0	0	200	903	0	0	0	0	0	0	0	603	903	0
535	6	0	0	0	0	0	0	200	300	0	0	0	0	0	0	0	200	903	0	0	0	0	0	0	0	603	903	0
535	7	0	0	0	0	0	0	200	300	0	0	0	0	0	0	0	200	903	0	0	0	0	0	0	0	603	903	0
535	8	0	0	0	0	0	0	200	300	0	0	0	0	0	0	0	200	903	0	0	0	0	0	0	0	603	903	0
535	9	0	0	0	0	0	0	200	300	0	0	0	0	0	0	0	200	903	0	0	0	0	0	0	0	603	903	0
536	0	0	0	0	0	0	0	200	300	0	0	0	0	0	0	0	200	903	0	0	0	0	0	0	0	603	903	0
536	1	0	0	0	0	0	0	200	300	0	0	0	0	0	0	0	200	903	0	0	0	0	0	0	0	603	903	0
536	2	0	0	0	0	0	0	200	300	0	0	0	0	0	0	0	200	903	0	0	0	0	0	0	0	603	903	0
536	3	0	0	0	0	0	0	200	300	0	0	0	0	0	0	0	200	903	0	0	0	0	0	0	0	603	903	0
536	4	0	0	0	0	0	0	200	300	0	0	0	0	0	0	0	200	903	0	0	0	0	0	0	0	603	903	0
536	5	0	0	0	0	0	0	200	300	0	0	0	0	0	0	0	200	903	0	0	0	0	0	0	0	603	903	0
536	6	0	0	0	0	0	0	200	300	0	0	0	0	0	0	0	200	903	0	0	0	0	0	0	0	603	903	0
536	7	0	0	0	0	0	0	200	300	0	0	0	0	0	0	0	200	903	0	0	0	0	0	0	0	603	903	0
536	8	0	0	0	0	0	0	200	300	0	0	0	0	0	0	0	200	903	0	0	0	0	0	0	0	603	903	0
536	9	0	0	0	0	0	0	200	300	0	0	0	0	0	0	0	200	903	0	0	0	0	0	0	0	603	903	0
537	0	0	0	0	0	0	0	200	300	0	0	0	0	0	0	0	200	903	0	0	0	0	0	0	0	603	903	0
537	1	0	0	0	0	0	0	200	300	0	0	0	0	0	0	0	200	903	0	0	0	0	0	0	0	603	903	0
537	2	0	0	0	0	0	0	200	300	0	0	0	0	0	0	0	200	903	0	0	0	0	0	0	0	603	903	0
537	3	0	0	0	0	0	0	200	300	0	0	0	0	0	0	0	200	903	0	0	0	0	0	0	0	603	903	0
537	4	0	0	0	0	0	0	200	300	0	0	0	0	0	0	0	200	903	0	0	0	0	0	0	0	603	903	0
537	5	0	0	0	0	0	0	200	300	0	0	0	0	0	0	0	200	903	0	0	0	0	0	0	0	603	903	0
537	6	0	0	0	0	0	0	200	300	0	0	0	0	0	0	0	200	903	0	0	0	0	0	0	0	603	903	0
537	7	0	0	0	0	0	0	200	300	0	0	0	0	0	0	0	200	903	0	0	0	0	0	0	0	603	903	0
537	8	0	0	0	0	0	0	200	300	0	0	0	0	0	0	0	200	903	0	0	0	0	0	0	0	603	903	0
537	9	0	0	0	0	0	0	200	300	0	0	0	0	0	0	0	200	903	0	0	0	0	0	0	0	603	903	0
538	0	0	0	0	0	0	0	200	300	0	0	0	0	0	0	0	200	903	0	0	0	0	0	0	0	603	903	0
538	1	0	0	0	0	0	0	200	300	0	0	0	0	0	0	0	200	903	0	0	0	0	0	0	0	603	903	0
538	2	0	0	0	0	0	0	200	300	0	0	0	0	0	0	0	200	903	0	0	0	0	0	0	0	603	903	0
538	3	0	0	0	0	0	0	200	300	0	0	0	0	0	0	0	200	903	0	0	0	0	0	0	0	603	903	0
538	4	0	0	0	0	0	0	200	300	0	0	0	0	0	0	0	200	903	0	0	0	0	0	0	0	603	903	0
538	5	0	0	0	0	0	0	200	300	0	0	0	0	0	0	0	200	903	0	0	0	0	0	0	0	603	903	0
538	6	0	0	0	0	0	0	200	300	0	0	0	0	0	0	0	200	903	0	0	0	0	0	0	0	603	903	0
538	7	0	0	0	0	0	0	200	300	0	0	0	0	0	0	0	200	903	0	0	0	0	0	0	0	603	903	0
538	8	0	0	0	0	0	0	200	300	0	0	0	0	0	0	0	200	903	0	0	0	0	0	0	0	603	903	0
538	9	0	0	0	0	0	0	200	300	0	0	0	0	0	0	0	200	903	0	0	0	0	0	0	0	603	903	0
539	0	0	0	0	0	0	0	200	300	0	0	0	0	0	0	0	200	903	0	0	0	0	0	0	0	603	903	0
539	1	0	0	0	0	0	0	200	300	0	0	0	0	0	0	0	200	903	0	0	0	0	0	0	0	603	903	0
539	2	0	0	0	0	0	0	200	300	0	0	0	0	0	0	0	200	903	0	0	0	0	0	0	0	603	903	0
539	3	0	0	0	0	0	0	200	300	0	0	0	0	0	0	0	200	903	0	0	0	0	0	0	0	603	903	0
539	4	0	0	0	0	0	0	200	300	0	0	0	0	0	0	0	200	903	0	0	0	0	0	0	0	603	903	0
539	5	0	0	0	0	0	0	200	300	0	0	0	0	0	0	0	200	903	0	0	0	0	0	0	0	603	903	0
539	6	0	0	0	0	0	0	200	300	0	0	0	0	0	0	0	200	903	0	0	0	0	0	0	0	603	903	0
539	7	0	0	0	0	0	0	200	300	0	0	0	0	0	0	0	200	903	0	0	0	0	0	0	0	603	903	0
539	8	0	0	0	0	0	0	200	300	0	0	0	0	0	0	0	200	903	0	0	0	0	0	0	0	603	903	0
539	9	0	0	0	0	0	0	200	300	0	0	0	0	0	0	0	200	903	0	0	0	0	0	0	0	603	903	0
540	0	0	0	0	0	0	0	200	300	0	0	0	0	0	0	0	200	903	0	0	0	0	0	0	0	603	903	0
540	1	0	0	0	0	0	0	200	300	0	0	0	0	0	0	0	200	903	0	0	0	0	0	0	0	603	903	0
540	2	0	0	0	0	0	0	200	300	0	0	0	0	0	0	0	200	903	0	0	0	0	0	0	0	603	903	0
540	3	0	0	0	0	0	0	200	300	0	0	0	0	0	0	0	200	903	0	0	0	0	0	0	0	603	903	0
540	4	0	0	0	0	0	0	200	300	0	0	0	0	0	0	0	200	903	0	0	0	0	0	0	0	603	903	0
540	5	0	0	0	0	0	0	200	300	0	0	0	0	0	0	0	200	903	0	0	0	0	0	0	0	603	903	0
540	6	0	0	0	0	0	0	200	300	0	7.08038	1.98105	-21.892	-4217.93	-654.107	-1073.37	170.121	1095.67	0	0	0	0	0	0	0	603	903	0
540	7	0	0	0	0	0	0	200	300	0	7.08038	6.86386	-22.1972	-3668.61	-959.283	-1210.69	156.784	1068.27	0	0	0	0	0	0	0	603	903	0
540	8	0	0	0	0	0	0	200	300	0	5.5545	7.6268	-23.1127	-4584.14	-1203.42	-1027.59	147.932	1101.34	0	0	0	0	0	0	0	603	903	0
540	9	0	0	0	0	0	0	200	300	0	6.47003	9.91562	-26.7749	-5316.56	-1081.35	-1393.8	159.613	1101.57	0	0	0	0	0	0	0	603	903	0
541	0	0	0	0	0	0	0	200	300	0	6.47003	13.7303	-30.437	-5774.32	-1264.46	-1393.8	158.456	1092.71	0	0	0	0	0	0	0	603	903	0
541	1	0	0	0	0	0	0	200	300	0	5.85968	16.0191	-34.7094	-6232.09	-1203.42	-1439.58	165.329	1082.55	0	0	0	0	0	0	0	603	903	0
541	2	0	0	0	0	0	0	200	300	0	6.62262	15.5614	-39.5922	-7330.72	-1691.7	-1668.46	157.272	1088.16	0	0	0	0	0	0	0	603	903	0
541	3	0	0	0	0	0	0	200	300	0	8.60626	16.4769	-42.9492	-8154.69	-1752.74	-1531.13	159.19	1092.87	0	0	0	0	0	0	0	603	903	0
541	4	0	0	0	0	0	0	200	300	0	9.3692	17.545	-49.9682	-8887.12	-1752.74	-1988.89	164.923	1080.86	0	0	0	0	0	0	0	603	903	0
541	5	0	0	0	0	0	0	200	300	0	9.97955	16.1717	-51.4941	-9253.33	-1996.88	-2126.22	161.221	1082.7	0	0	0	0	0	0	0	603	903	0
541	6	0	0	0	0	0	0	200	300	0	7.84332	15.4088	-55.1562	-10077.3	-2485.16	-1576.91	154.943	1085.7	0	0	0	0	0	0	0	603	903	0
541	7	0	0	0	0	0	0	200	300	0	10.2847	14.0355	-61.5649	-11359	-2546.2	-2034.67	158.642	1087.51	0	0	0	0	0	0	0	603	903	0
541	8	0	0	0	0	0	0	200	300	0	11.658	13.5777	-66.4477	-10992.8	-2424.13	-2217.78	163.518	1068.44	0	0	0	0	0	0	0	603	903	0
541	9	0	0	0	0	0	0	200	300	0	10.2847	12.5096	-69.4995	-12457.7	-2607.23	-1988.89	162.486	1082.25	0	0	0	0	0	0	0	603	903	0
542	0	0	0	0	0	0	0	200	300	0	9.3692	11.5941	-72.8564	-13190.1	-2851.37	-2217.78	160.863	1084.04	0	0	0	0	0	0	0	603	903	0
542	1	0	0	0	0	0	0	200	300	0	12.5735	12.0519	-76.5185	-13190.1	-3400.69	-2217.78	155.557	1075.38	0	0	0	0	0	0	0	603	903	0
542	2	0	0	0	0	0	0	200	300	0	13.6417	10.0682	-80.791	-13922.5	-3339.66	-1805.79	158.663	1075.33	0	0	0	0	0	0	0	603	903	0
542	3	0	0	0	0	0	0	200	300	0	10.5899	8.69492	-82.622	-14105.6	-3156.55	-2126.22	161.795	1073.72	0	0	0	0	0	0	0	603	903	0
542	4	0	0	0	0	0	0	200	300	0	12.7261	8.69492	-86.5893	-14746.5	-3400.69	-2263.55	160.726	1073.3	0	0	0	0	0	0	0	603	903	0
542	5	0	0	0	0	0	0	200	300	0	12.7261	7.16904	-86.8945	-14929.6	-3644.83	-2080.45	158.055	1074.81	0	0	0	0	0	0	0	603	903	0
542	6	0	0	0	0	0	0	200	300	0	12.5735	4.11728	-92.6928	-15662	-3400.69	-1760.01	163.312	1071.97	0	0	0	0	0	0	0	603	903	0
542	7	0	0	0	0	0	0	200	300	0	11.0477	1.98105	-94.8291	-16119.8	-3766.9	-1668.46	160.277	1072.99	0	0	0	0	0	0	0	603	903	0
542	8	0	0	0	0	0	0	200	300	0	11.2003	1.82846	-96.9653	-16119.8	-4255.18	-1851.56	156.116	1069.24	0	0	0	0	0	0	0	603	903	0
542	9	0	0	0	0	0	0	200	300	0	12.7261	-0.0025921	-101.238	-15845.1	-4011.04	-1164.92	160.38	1059.51	0	0	0	0	0	0	0	603	903	0
543	0	0	0	0	0	0	0	200	300	0	13.0313	-1.52847	-104.595	-17218.4	-3950.01	-1485.35	162.235	1067.62	0	0	0	0	0	0	0	603	903	0
543	1	0	0	0	0	0	0	200	300	0	10.8951	-2.90176	-105.205	-17310	-4499.32	-1485.35	157.233	1067.54	0	0	0	0	0	0	0	603	903	0
543	2	0	0	0	0	0	0	200	300	0	10.5899	-3.96988	-107.341	-18225.5	-4133.11	-1439.58	161.496	1072.79	0	0	0	0	0	0	0	603	903	0
543	3	0	0	0	0	0	0	200	300	0	13.0313	-5.03799	-111.309	-18042.4	-4438.29	-890.26	160.126	1065.09	0	0	0	0	0	0	0	603	903	0
543	4	0	0	0	0	0	0	200	300	0	13.0313	-5.64834	-114.665	-18774.8	-4926.57	-1302.25	157.035	1066.74	0	0	0	0	0	0	0	603	903	0
543	5	0	0	0	0	0	0	200	300	0	10.5899	-6.71646	-116.497	-19324.1	-5231.74	-1256.47	155.091	1068.88	0	0	0	0	0	0	0	603	903	0
543	6	0	0	0	0	0	0	200	300	0	10.4373	-7.4794	-119.548	-19598.8	-5048.64	-1073.37	157.769	1066.94	0	0	0	0	0	0	0	603	903	0
543	7	0	0	0	0	0	0	200	300	0	11.5054	-7.93716	-122.6	-19781.9	-5475.88	-707.154	155.335	1064.35	0	0	0	0	0	0	0	603	903	0
543	8	0	0	0	0	0	0	200	300	0	10.2847	-8.85269	-130.84	-21063.6	-6269.34	-569.825	152.084	1063.99	0	0	0	0	0	0	0	603	903	0
543	9	0	0	0	0	0	0	200	300	0	9.06403	-8.39493	-136.638	-22162.3	-6269.34	-295.167	154.117	1065.2	0	0	0	0	0	0	0	603	903	0
544	0	0	0	0	0	0	0	200	300	0	6.01227	-10.0734	-140.911	-22253.8	-6696.59	-112.061	152.476	1060.93	0	0	0	0	0	0	0	603	903	0
544	1	0	0	0	0	0	0	200	300	0	5.70709	-10.8363	-145.183	-23718.7	-6940.73	116.82	152.193	1066.37	0	0	0	0	0	0	0	603	903	0
544	2	0	0	0	0	0	0	200	300	0	4.94415	-9.76822	-151.592	-24176.4	-7245.9	71.0441	152.201	1062.48	0	0	0	0	0	0	0	603	903	0
544	3	0	0	0	0	0	0	200	300	0	4.3338	-11.5993	-154.644	-24451.1	-8100.4	849.242	147.619	1061.11	0	0	0	0	0	0	0	603	903	0
544	4	0	0	0	0	0	0	200	300	0	3.1131	-13.7355	-162.578	-25091.9	-7917.29	666.137	151.302	1057.34	0	0	0	0	0	0	0	603	903	0
544	5	0	0	0	0	0	0	200	300	0	2.96051	-13.1252	-168.376	-26373.7	-7978.33	986.571	152.616	1059.64	0	0	0	0	0	0	0	603	903	0
544	6	0	0	0	0	0	0	200	300	0	4.79156	-13.4303	-172.344	-27014.6	-8832.82	803.466	148.749	1059.75	0	0	0	0	0	0	0	603	903	0
544	7	0	0	0	0	0	0	200	300	0	2.35016	-15.1088	-178.752	-27197.7	-9138	1123.9	148.879	1055.15	0	0	0	0	0	0	0	603	903	0
544	8	0	0	0	0	0	0	200	300	0	2.19757	-16.9398	-181.499	-27655.4	-9626.28	1307.01	146.962	1055.37	0	0	0	0	0	0	0	603	903	0
544	9	0	0	0	0	0	0	200	300	0	1.12946	-17.7028	-187.908	-28113.2	-9687.31	986.571	148.446	1052.61	0	0	0	0	0	0	0	603	903	0
545	0	0	0	0	0	0	0	200	300	0	0.213928	-18.1606	-193.401	-29303.4	-10175.6	1169.68	147.386	1054.52	0	0	0	0	0	0	0	603	903	0
545	1	0	0	0	0	0	0	200	300	0	1.12946	-20.7545	-196.758	-28937.2	-9992.49	1352.78	149.214	1050.07	0	0	0	0	0	0	0	603	903	0
545	2	0	0	0	0	0	0	200	300	0	0.519104	-21.5175	-198.589	-30310.5	-10541.8	1490.11	146.916	1055.63	0	0	0	0	0	0	0	603	903	0
545	3	0	0	0	0	0	0	200	300	0	-0.701599	-22.7382	-205.913	-30859.8	-10785.9	1535.89	147.619	1052.87	0	0	0	0	0	0	0	603	903	0
545	4	0	0	0	0	0	0	200	300	0	-0.854187	-23.9589	-211.406	-30676.7	-10724.9	1718.99	149.269	1048.11	0	0	0	0	0	0	0	603	903	0
545	5	0	0	0	0	0	0	200	300	0	-0.854187	-25.4848	-216.289	-31317.5	-11579.4	1764.77	146.463	1047.79	0	0	0	0	0	0	0	603	903	0
545	6	0	0	0	0	0	0	200	300	0	-0.549011	-25.9425	-219.036	-32233.1	-11701.5	1627.44	146.577	1050.16	0	0	0	0	0	0	0	603	903	0
545	7	0	0	0	0	0	0	200	300	0	-1.31195	-27.0106	-223.003	-32141.5	-11701.5	1993.65	147.528	1047.13	0	0	0	0	0	0	0	603	903	0
545	8	0	0	0	0	0	0	200	300	0	-2.07489	-28.0788	-226.665	-33606.4	-12128.7	1947.88	146.491	1051.26	0	0	0	0	0	0	0	603	903	0
545	9	0	0	0	0	0	0	200	300	0	-2.22748	-29.1469	-232.769	-32416.2	-12617	1947.88	145.796	1042.26	0	0	0	0	0	0	0	603	903	0
546	0	0	0	0	0	0	0	200	300	0	-1.61713	-30.3676	-236.736	-34430.3	-12556	1947.88	146.962	1048.44	0	0	0	0	0	0	0	603	903	0
546	1	0	0	0	0	0	0	200	300	0	-2.38007	-31.5883	-240.398	-35071.2	-12922.2	2314.09	146.247	1048.89	0	0	0	0	0	0	0	603	903	0
546	2	0	0	0	0	0	0	200	300	0	-3.29559	-31.7409	-244.06	-34613.4	-13166.3	2542.97	146.053	1044.82	0	0	0	0	0	0	0	603	903	0
546	3	0	0	0	0	0	0	200	300	0	-3.29559	-32.9616	-249.858	-35529	-13288.4	2359.86	146.816	1045.2	0	0	0	0	0	0	0	603	903	0
546	4	0	0	0	0	0	0	200	300	0	-2.99042	-33.7245	-253.52	-36627.6	-14081.8	2130.98	144.455	1047.48	0	0	0	0	0	0	0	603	903	0
546	5	0	0	0	0	0	0	200	300	0	-3.14301	-35.403	-259.929	-36993.8	-14142.9	2680.3	145.589	1045.32	0	0	0	0	0	0	0	603	903	0
546	6	0	0	0	0	0	0	200	300	0	-4.82147	-35.2504	-262.981	-36902.3	-13837.7	2771.85	147.381	1043.32	0	0	0	0	0	0	0	603	903	0
546	7	0	0	0	0	0	0	200	300	0	-4.05853	-35.5556	-267.253	-36993.8	-14448.1	2497.19	145.939	1041.42	0	0	0	0	0	0	0	603	903	0
546	8	0	0	0	0	0	0	200	300	0	-3.90594	-36.3185	-272.136	-38092.4	-14936.3	2497.19	145.114	1042.98	0	0	0	0	0	0	0	603	903	0
546	9	0	0	0	0	0	0	200	300	0	-5.27924	-37.3866	-278.85	-38916.4	-14753.2	2954.96	147.093	1042.56	0	0	0	0	0	0	0	603	903	0
547	0	0	0	0	0	0	0	200	300	0	-4.66888	-37.997	-282.512	-39008	-15424.6	3275.39	145.402	1041.08	0	0	0	0	0	0	0	603	903	0
547	1	0	0	0	0	0	0	200	300	0	-3.60077	-38.6073	-284.038	-39099.5	-15729.8	2954.96	144.621	1040.66	0	0	0	0	0	0	0	603	903	0
547	2	0	0	0	0	0	0	200	300	0	-6.34735	-38.9125	-289.531	-40198.2	-15790.8	3138.06	145.461	1041.84	0	0	0	0	0	0	0	603	903	0
547	3	0	0	0	0	0	0	200	300	0	-6.04218	-39.9806	-295.024	-40198.2	-16340.1	3046.51	144.614	1039.25	0	0	0	0	0	0	0	603	903	0
547	4	0	0	0	0	0	0	200	300	0	-5.737	-40.7436	-299.297	-39648.8	-16401.2	3275.39	145.201	1035.47	0	0	0	0	0	0	0	603	903	0
547	5	0	0	0	0	0	0	200	300	0	-5.88959	-41.9643	-302.043	-41479.9	-16279.1	3275.39	146.103	1040.33	0	0	0	0	0	0	0	603	903	0
547	6	0	0	0	0	0	0	200	300	0	-7.26288	-43.185	-304.79	-41296.8	-17011.5	3321.17	144.186	1038.49	0	0	0	0	0	0	0	603	903	0
547	7	0	0	0	0	0	0	200	300	0	-6.65253	-43.185	-310.893	-41296.8	-17438.8	3595.83	143.908	1035.83	0	0	0	0	0	0	0	603	903	0
547	8	0	0	0	0	0	0	200	300	0	-4.82147	-43.7953	-315.471	-42212.3	-17255.7	3687.38	145.302	1036.81	0	0	0	0	0	0	0	603	903	0
547	9	0	0	0	0	0	0	200	300	0	-7.41547	-45.3212	-319.133	-42853.2	-17560.8	3641.6	144.973	1037.28	0	0	0	0	0	0	0	603	903	0
548	0	0	0	0	0	0	0	200	300	0	-7.87323	-45.1686	-321.269	-42761.6	-17438.8	4190.92	145.719	1036.1	0	0	0	0	0	0	0	603	903	0
548	1	0	0	0	0	0	0	200	300	0	-6.04218	-45.6264	-322.795	-42853.2	-17499.8	3870.48	145.787	1035.76	0	0	0	0	0	0	0	603	903	0
548	2	0	0	0	0	0	0	200	300	0	-5.88959	-46.6945	-327.983	-43768.7	-18354.3	3962.04	144.039	1036.45	0	0	0	0	0	0	0	603	903	0
548	3	0	0	0	0	0	0	200	300	0	-7.11029	-47.9152	-333.782	-43402.5	-18415.3	4145.14	144.828	1033.03	0	0	0	0	0	0	0	603	903	0
548	4	0	0	0	0	0	0	200	300	0	-8.48358	-49.5937	-336.528	-43585.6	-18293.3	4236.69	145.641	1032.52	0	0	0	0	0	0	0	603	903	0
548	5	0	0	0	0	0	0	200	300	0	-7.11029	-49.5937	-340.19	-43402.5	-19086.7	4053.59	143.894	1030.58	0	0	0	0	0	0	0	603	903	0
548	6	0	0	0	0	0	0	200	300	0	-6.19476	-49.4411	-343.852	-44409.6	-19452.9	4374.02	143.427	1032.15	0	0	0	0	0	0	0	603	903	0
548	7	0	0	0	0	0	0	200	300	0	-8.17841	-51.2721	-347.515	-44134.9	-19086.7	4740.23	145.076	1030	0	0	0	0	0	0	0	603	903	0
548	8	0	0	0	0	0	0	200	300	0	-8.94135	-52.3402	-349.04	-45416.7	-19758.1	4328.25	143.393	1033.12	0	0	0	0	0	0	0	603	903	0
548	9	0	0	0	0	0	0	200	300	0	-7.56805	-52.4928	-353.923	-44318	-19941.2	4557.13	143.657	1028.22	0	0	0	0	0	0	0	603	903	0
549	0	0	0	0	0	0	0	200	300	0	-7.56805	-52.6454	-355.754	-45691.3	-19514	4602.9	145.148	1031.44	0	0	0	0	0	0	0	603	903	0
549	1	0	0	0	0	0	0	200	300	0	-9.09393	-53.4084	-359.722	-45599.8	-20429.5	4969.12	143.207	1029.76	0	0	0	0	0	0	0	603	903	0
549	2	0	0	0	0	0	0	200	300	0	-9.24652	-54.6291	-362.773	-45508.2	-20551.6	5014.89	143.349	1028.45	0	0	0	0	0	0	0	603	903	0
549	3	0	0	0	0	0	0	200	300	0	-9.09393	-55.0868	-365.52	-45782.9	-20124.3	4831.79	144.943	1028.25	0	0	0	0	0	0	0	603	903	0
549	4	0	0	0	0	0	0	200	300	0	-8.78876	-56.0023	-371.929	-46332.2	-20978.8	4923.34	143.595	1027.57	0	0	0	0	0	0	0	603	903	0
549	5	0	0	0	0	0	0	200	300	0	-8.48358	-56.1549	-372.234	-46515.3	-21039.8	5243.77	143.477	1027.96	0	0	0	0	0	0	0	603	903	0
549	6	0	0	0	0	0	0	200	300	0	-10.4672	-56.0023	-374.98	-46698.4	-20978.8	5381.1	144.054	1027.54	0	0	0	0	0	0	0	603	903	0
549	7	0	0	0	0	0	0	200	300	0	-10.925	-57.0705	-377.422	-46515.3	-21650.2	5472.66	142.637	1026.24	0	0	0	0	0	0	0	603	903	0
549	8	0	0	0	0	0	0	200	300	0	-12.2983	-58.2912	-381.999	-46606.9	-21711.2	5518.43	143.164	1025.01	0	0	0	0	0	0	0	603	903	0
549	9	0	0	0	0	0	0	200	300	0	-13.0612	-58.9015	-385.356	-47156.2	-21955.4	5701.54	143.026	1025.37	0	0	0	0	0	0	0	603	903	0
550	0	0	0	0	0	0	0	200	300	0	-12.756	-59.817	-386.577	-47064.6	-22382.6	5609.99	142.1	1024.75	0	0	0	0	0	0	0	603	903	0
550	1	0	0	0	0	0	0	200	300	0	-13.519	-59.0541	-388.103	-48071.7	-22199.5	6067.75	142.8	1026.86	0	0	0	0	0	0	0	603	903	0
550	2	0	0	0	0	0	0	200	300	0	-13.8242	-60.1222	-391.765	-47339.3	-22138.5	6021.97	143.49	1023.84	0	0	0	0	0	0	0	603	903	0
550	3	0	0	0	0	0	0	200	300	0	-14.1293	-61.9533	-392.07	-47705.5	-22993	6113.53	141.355	1024.68	0	0	0	0	0	0	0	603	903	0
550	4	0	0	0	0	0	0	200	300	0	-14.8923	-61.8007	-396.648	-47980.1	-23115	6342.41	141.724	1023.96	0	0	0	0	0	0	0	603	903	0
550	5	0	0	0	0	0	0	200	300	0	-16.8759	-62.8688	-398.784	-47430.8	-22565.7	6388.18	143.414	1021.94	0	0	0	0	0	0	0	603	903	0
550	6	0	0	0	0	0	0	200	300	0	-18.0966	-62.2585	-402.446	-47888.6	-23481.3	6388.18	141.654	1021.99	0	0	0	0	0	0	0	603	903	0
550	7	0	0	0	0	0	0	200	300	0	-18.0966	-61.1903	-403.667	-47980.1	-24091.6	6250.86	140.318	1021.86	0	0	0	0	0	0	0	603	903	0
550	8	0	0	0	0	0	0	200	300	0	-19.0121	-63.6317	-412.212	-48621	-24213.7	7212.16	141.259	1020.95	0	0	0	0	0	0	0	603	903	0
550	9	0	0	0	0	0	0	200	300	0	-22.6743	-65.6154	-417.4	-48712.6	-24579.9	6845.95	141.112	1019.7	0	0	0	0	0	0	0	603	903	0
551	0	0	0	0	0	0	0	200	300	0	-23.2846	-66.8361	-421.367	-48163.3	-25129.2	6891.72	140.363	1017.3	0	0	0	0	0	0	0	603	903	0
551	1	0	0	0	0	0	0	200	300	0	-24.3527	-69.7353	-424.419	-48254.8	-25312.3	7303.71	140.36	1016.7	0	0	0	0	0	0	0	603	903	0
551	2	0	0	0	0	0	0	200	300	0	-26.0312	-70.956	-428.081	-49078.8	-25739.6	7807.25	139.872	1017.65	0	0	0	0	0	0	0	603	903	0
551	3	0	0	0	0	0	0	200	300	0	-25.726	-73.2448	-432.353	-49353.4	-25800.6	7944.58	140.325	1017.15	0	0	0	0	0	0	0	603	903	0
551	4	0	0	0	0	0	0	200	300	0	-26.7941	-76.2965	-435.1	-48895.7	-25922.7	8219.24	140.421	1015.38	0	0	0	0	0	0	0	603	903	0
551	5	0	0	0	0	0	0	200	300	0	-26.7941	-78.8905	-438.152	-49078.8	-26472	8265.01	139.583	1015.01	0	0	0	0	0	0	0	603	903	0
551	6	0	0	0	0	0	0	200	300	0	-27.0993	-79.5009	-437.236	-48621	-26533	8265.01	139.317	1014.2	0	0	0	0	0	0	0	603	903	0
551	7	0	0	0	0	0	0	200	300	0	-26.7941	-79.8061	-442.119	-49353.4	-25922.7	8585.45	141.367	1014.63	0	0	0	0	0	0	0	603	903	0
551	8	0	0	0	0	0	0	200	300	0	-25.1157	-79.9586	-444.255	-49628.1	-26533	8539.67	140.275	1014.71	0	0	0	0	0	0	0	603	903	0
551	9	0	0	0	0	0	0	200	300	0	-25.1157	-80.8742	-446.392	-49261.9	-26899.2	8356.57	139.741	1013.36	0	0	0	0	0	0	0	603	903	0
552	0	0	0	0	0	0	0	200	300	0	-26.1838	-80.2638	-449.138	-49719.6	-26716.1	8448.12	140.517	1013.7	0	0	0	0	0	0	0	603	903	0
552	1	0	0	0	0	0	0	200	300	0	-24.9631	-80.1112	-450.054	-49536.5	-27326.5	8402.34	139.282	1013.07	0	0	0	0	0	0	0	603	903	0
552	2	0	0	0	0	0	0	200	300	0	-25.4208	-78.4328	-451.885	-49719.6	-27265.4	8265.01	139.663	1013.03	0	0	0	0	0	0	0	603	903	0
552	3	0	0	0	0	0	0	200	300	0	-26.489	-77.6698	-455.547	-49811.2	-26838.2	8356.57	141.086	1012.34	0	0	0	0	0	0	0	603	903	0
552	4	0	0	0	0	0	0	200	300	0	-27.2519	-77.5172	-457.073	-49811.2	-27814.8	8493.9	139.146	1011.98	0	0	0	0	0	0	0	603	903	0
552	5	0	0	0	0	0	0	200	300	0	-25.5734	-78.4328	-460.43	-49719.6	-27936.8	8539.67	139.324	1010.99	0	0	0	0	0	0	0	603	903	0
552	6	0	0	0	0	0	0	200	300	0	-26.489	-78.2802	-460.735	-49628.1	-27509.6	8768.55	140.292	1010.72	0	0	0	0	0	0	0	603	903	0
552	7	0	0	0	0	0	0	200	300	0	-28.9304	-77.2121	-464.702	-50269	-28058.9	8768.55	139.62	1011.17	0	0	0	0	0	0	0	603	903	0
552	8	0	0	0	0	0	0	200	300	0	-28.32	-77.6698	-466.533	-49719.6	-28486.1	8356.57	138.941	1009.57	0	0	0	0	0	0	0	603	903	0
552	9	0	0	0	0	0	0	200	300	0	-26.6415	-80.4164	-466.533	-49811.2	-28242	8905.88	139.464	1009.77	0	0	0	0	0	0	0	603	903	0
553	0	0	0	0	0	0	0	200	300	0	-26.9467	-81.4845	-470.5	-50635.2	-28181	9043.21	140.104	1010.62	0	0	0	0	0	0	0	603	903	0
553	1	0	0	0	0	0	0	200	300	0	-29.3881	-81.1794	-471.111	-50360.5	-28608.2	8402.34	139.275	1009.9	0	0	0	0	0	0	0	603	903	0
553	2	0	0	0	0	0	0	200	300	0	-28.32	-80.8742	-473.857	-50085.9	-28364.1	8860.11	140.142	1008.7	0	0	0	0	0	0	0	603	903	0
553	3	0	0	0	0	0	0	200	300	0	-28.9304	-81.0268	-476.909	-50726.7	-28791.3	8951.66	139.629	1009.37	0	0	0	0	0	0	0	603	903	0
553	4	0	0	0	0	0	0	200	300	0	-29.9985	-82.7052	-476.909	-50818.3	-29340.6	9180.54	138.478	1009.56	0	0	0	0	0	0	0	603	903	0
553	5	0	0	0	0	0	0	200	300	0	-31.3718	-82.5526	-481.792	-50543.6	-28852.3	9134.76	140.115	1007.91	0	0	0	0	0	0	0	603	903	0
553	6	0	0	0	0	0	0	200	300	0	-29.9985	-83.4682	-483.623	-50543.6	-29340.6	9043.21	139.332	1007.51	0	0	0	0	0	0	0	603	903	0
553	7	0	0	0	0	0	0	200	300	0	-31.9821	-82.8578	-486.98	-51092.9	-29706.8	9134.76	138.998	1007.92	0	0	0	0	0	0	0	603	903	0
553	8	0	0	0	0	0	0	200	300	0	-33.0502	-83.4682	-490.032	-51001.4	-29401.7	9043.21	140	1007.08	0	0	0	0	0	0	0	603	903	0
553	9	0	0	0	0	0	0	200	300	0	-31.9821	-84.8415	-493.389	-50360.5	-29951	9409.42	139.295	1005.07	0	0	0	0	0	0	0	603	903	0
554	0	0	0	0	0	0	0	200	300	0	-32.2873	-84.3837	-493.083	-51459.2	-30317.2	9455.2	138.515	1007.36	0	0	0	0	0	0	0	603	903	0
554	1	0	0	0	0	0	0	200	300	0	-33.3554	-85.6044	-498.577	-51184.5	-30012	9546.75	139.805	1005.66	0	0	0	0	0	0	0	603	903	0
554	2	0	0	0	0	0	0	200	300	0	-33.8132	-85.2992	-501.628	-51276	-30561.3	9546.75	139.076	1005.22	0	0	0	0	0	0	0	603	903	0
554	3	0	0	0	0	0	0	200	300	0	-32.4399	-85.6044	-504.375	-51642.3	-30805.5	9455.2	138.923	1005.39	0	0	0	0	0	0	0	603	903	0
554	4	0	0	0	0	0	0	200	300	0	-34.1183	-86.5199	-507.732	-51550.7	-30195.1	9500.98	140.529	1004.53	0	0	0	0	0	0	0	603	903	0
554	5	0	0	0	0	0	0	200	300	0	-34.4235	-85.757	-512.004	-51459.2	-31171.7	9638.3	139.118	1003.51	0	0	0	0	0	0	0	603	903	0
554	6	0	0	0	0	0	0	200	300	0	-32.8976	-86.6725	-510.784	-52008.5	-31660	9500.98	138.017	1004.82	0	0	0	0	0	0	0	603	903	0
554	7	0	0	0	0	0	0	200	300	0	-32.8976	-86.5199	-513.835	-52924	-30744.4	9546.75	140.167	1006	0	0	0	0	0	0	0	603	903	0
554	8	0	0	0	0	0	0	200	300	0	-34.5761	-86.2148	-518.108	-53015.5	-31660	9775.63	138.893	1005.33	0	0	0	0	0	0	0	603	903	0
554	9	0	0	0	0	0	0	200	300	0	-32.8976	-87.2829	-520.854	-52832.4	-31721	9455.2	139.098	1004.43	0	0	0	0	0	0	0	603	903	0
555	0	0	0	0	0	0	0	200	300	0	-31.5244	-85.1466	-524.211	-53015.5	-31904.1	9363.65	139.139	1004.13	0	0	0	0	0	0	0	603	903	0
555	1	0	0	0	0	0	0	200	300	0	-33.508	-86.6725	-526.042	-53473.3	-32270.3	10050.3	138.655	1004.65	0	0	0	0	0	0	0	603	903	0
555	2	0	0	0	0	0	0	200	300	0	-35.1865	-86.8251	-528.484	-53931.1	-32209.3	9821.41	139.053	1005.05	0	0	0	0	0	0	0	603	903	0
555	3	0	0	0	0	0	0	200	300	0	-33.6606	-85.9096	-532.756	-53290.2	-32026.2	9638.3	139.886	1003.03	0	0	0	0	0	0	0	603	903	0
555	4	0	0	0	0	0	0	200	300	0	-33.6606	-86.5199	-535.198	-54114.2	-32636.5	9821.41	139.02	1004.11	0	0	0	0	0	0	0	603	903	0
555	5	0	0	0	0	0	0	200	300	0	-35.3391	-87.1303	-537.639	-54205.7	-32819.6	9775.63	138.956	1003.82	0	0	0	0	0	0	0	603	903	0
555	6	0	0	0	0	0	0	200	300	0	-35.0339	-88.8087	-540.996	-54297.3	-32392.4	9867.19	140.125	1003.37	0	0	0	0	0	0	0	603	903	0
555	7	0	0	0	0	0	0	200	300	0	-34.4235	-86.6725	-541.912	-54388.8	-33063.8	9775.63	138.987	1003.36	0	0	0	0	0	0	0	603	903	0
555	8	0	0	0	0	0	0	200	300	0	-35.3391	-85.757	-546.489	-55212.8	-33185.8	9821.41	139.274	1004.03	0	0	0	0	0	0	0	603	903	0
555	9	0	0	0	0	0	0	200	300	0	-33.6606	-87.2829	-549.236	-55121.3	-33002.7	9729.86	139.912	1003.36	0	0	0	0	0	0	0	603	903	0
556	0	0	0	0	0	0	0	200	300	0	-35.3391	-86.5199	-550.762	-55121.3	-33368.9	9912.96	139.413	1003.08	0	0	0	0	0	0	0	603	903	0
556	1	0	0	0	0	0	0	200	300	0	-34.8813	-85.9096	-552.898	-55762.1	-33613.1	9775.63	139.206	1003.85	0	0	0	0	0	0	0	603	903	0
556	2	0	0	0	0	0	0	200	300	0	-36.102	-84.2311	-555.034	-55395.9	-33613.1	9867.19	139.44	1002.81	0	0	0	0	0	0	0	603	903	0
556	3	0	0	0	0	0	0	200	300	0	-35.6442	-85.2992	-559.917	-55304.4	-33979.3	9867.19	139.314	1001.77	0	0	0	0	0	0	0	603	903	0
556	4	0	0	0	0	0	0	200	300	0	-34.5761	-85.9096	-561.748	-55945.2	-34101.4	10004.5	139.294	1002.59	0	0	0	0	0	0	0	603	903	0
556	5	0	0	0	0	0	0	200	300	0	-34.5761	-85.6044	-563.884	-56769.2	-33857.2	9821.41	139.957	1003.68	0	0	0	0	0	0	0	603	903	0
556	6	0	0	0	0	0	0	200	300	0	-36.4072	-84.2311	-565.715	-56586.1	-34040.3	9592.53	139.828	1003.03	0	0	0	0	0	0	0	603	903	0
556	7	0	0	0	0	0	0	200	300	0	-35.4916	-84.0785	-568.157	-56311.4	-34772.8	9638.3	138.797	1002.11	0	0	0	0	0	0	0	603	903	0
556	8	0	0	0	0	0	0	200	300	0	-34.8813	-84.2311	-570.598	-57043.9	-34345.5	9775.63	139.808	1002.97	0	0	0	0	0	0	0	603	903	0
556	9	0	0	0	0	0	0	200	300	0	-35.0339	-82.5526	-572.124	-57501.6	-34589.7	9272.09	139.542	1003.51	0	0	0	0	0	0	0	603	903	0
557	0	0	0	0	0	0	0	200	300	0	-35.6442	-84.6889	-574.26	-57501.6	-34589.7	9592.53	139.767	1003.13	0	0	0	0	0	0	0	603	903	0
557	1	0	0	0	0	0	0	200	300	0	-34.5761	-82.7052	-576.702	-57410.1	-34467.6	9775.63	140.233	1002.55	0	0	0	0	0	0	0	603	903	0
557	2	0	0	0	0	0	0	200	300	0	-33.0502	-83.163	-580.059	-57684.7	-35322.1	9912.96	139.106	1002.45	0	0	0	0	0	0	0	603	903	0
557	3	0	0	0	0	0	0	200	300	0	-35.3391	-84.2311	-581.89	-57867.8	-34955.9	9958.74	139.927	1002.45	0	0	0	0	0	0	0	603	903	0
557	4	0	0	0	0	0	0	200	300	0	-35.4916	-83.3156	-583.721	-57867.8	-34894.8	9638.3	140.22	1002.14	0	0	0	0	0	0	0	603	903	0
557	5	0	0	0	0	0	0	200	300	0	-34.5761	-82.7052	-584.331	-57959.4	-35444.1	9592.53	139.342	1002.19	0	0	0	0	0	0	0	603	903	0
557	6	0	0	0	0	0	0	200	300	0	-34.5761	-82.4001	-588.298	-58691.8	-35627.2	9500.98	139.44	1002.77	0	0	0	0	0	0	0	603	903	0
557	7	0	0	0	0	0	0	200	300	0	-36.102	-82.2475	-591.045	-57867.8	-35261	9546.75	140.341	1000.91	0	0	0	0	0	0	0	603	903	0
557	8	0	0	0	0	0	0	200	300	0	-36.2546	-82.0949	-591.655	-58508.7	-35444.1	9455.2	140.093	1001.89	0	0	0	0	0	0	0	603	903	0
557	9	0	0	0	0	0	0	200	300	0	-34.5761	-81.9423	-594.097	-57593.2	-35322.1	9409.42	140.545	999.943	0	0	0	0	0	0	0	603	903	0
558	0	0	0	0	0	0	0	200	300	0	-35.0339	-81.6371	-597.148	-58874.9	-35688.3	9455.2	140.235	1001.59	0	0	0	0	0	0	0	603	903	0
558	1	0	0	0	0	0	0	200	300	0	-36.2546	-79.8061	-597.454	-58966.5	-35871.4	9546.75	139.96	1001.7	0	0	0	0	0	0	0	603	903	0
558	2	0	0	0	0	0	0	200	300	0	-35.9494	-80.4164	-599.895	-59515.8	-35566.2	9729.86	140.713	1002.21	0	0	0	0	0	0	0	603	903	0
558	3	0	0	0	0	0	0	200	300	0	-35.0339	-80.7216	-602.642	-58966.5	-35932.4	9455.2	140.375	1000.85	0	0	0	0	0	0	0	603	903	0
558	4	0	0	0	0	0	0	200	300	0	-34.5761	-80.8742	-603.862	-59973.6	-35993.5	9546.75	140.395	1002.32	0	0	0	0	0	0	0	603	903	0
558	5	0	0	0	0	0	0	200	300	0	-34.4235	-79.5009	-603.862	-60339.8	-36054.5	9317.87	140.294	1002.92	0	0	0	0	0	0	0	603	903	0
558	6	0	0	0	0	0	0	200	300	0	-35.1865	-78.7379	-606.609	-59973.6	-36054.5	9180.54	140.564	1001.87	0	0	0	0	0	0	0	603	903	0
558	7	0	0	0	0	0	0	200	300	0	-35.9494	-78.2802	-609.355	-59698.9	-36359.7	9226.32	140.331	1000.97	0	0	0	0	0	0	0	603	903	0
558	8	0	0	0	0	0	0	200	300	0	-35.1865	-78.8905	-611.797	-59790.4	-36481.7	9272.09	140.37	1000.73	0	0	0	0	0	0	0	603	903	0
558	9	0	0	0	0	0	0	200	300	0	-35.4916	-78.4328	-611.492	-60431.3	-36359.7	9363.65	140.539	1001.83	0	0	0	0	0	0	0	603	903	0
559	0	0	0	0	0	0	0	200	300	0	-35.4916	-77.5172	-614.238	-60248.2	-36664.8	9455.2	140.308	1001.09	0	0	0	0	0	0	0	603	903	0
559	1	0	0	0	0	0	0	200	300	0	-35.1865	-77.3647	-616.68	-60706	-36298.6	9180.54	141.139	1001.44	0	0	0	0	0	0	0	603	903	0
559	2	0	0	0	0	0	0	200	300	0	-34.1183	-75.9914	-614.238	-60980.6	-36786.9	8951.66	140.11	1002.28	0	0	0	0	0	0	0	603	903	0
559	3	0	0	0	0	0	0	200	300	0	-34.4235	-77.3647	-620.037	-60980.6	-37275.2	10004.5	139.882	1001.35	0	0	0	0	0	0	0	603	903	0
559	4	0	0	0	0	0	0	200	300	0	-35.3391	-76.9069	-620.342	-60248.2	-36359.7	9180.54	141.388	1000.12	0	0	0	0	0	0	0	603	903	0
559	5	0	0	0	0	0	0	200	300	0	-36.2546	-74.7707	-621.257	-60980.6	-36420.7	9226.32	141.376	1001.16	0	0	0	0	0	0	0	603	903	0
559	6	0	0	0	0	0	0	200	300	0	-36.102	-75.0758	-624.919	-61072.2	-37458.3	9043.21	140.059	1000.73	0	0	0	0	0	0	0	603	903	0
559	7	0	0	0	0	0	0	200	300	0	-34.8813	-75.381	-626.445	-61346.8	-37092.1	9043.21	140.79	1000.93	0	0	0	0	0	0	0	603	903	0
559	8	0	0	0	0	0	0	200	300	0	-34.7287	-75.381	-625.53	-61896.2	-37519.3	9409.42	140.02	1001.95	0	0	0	0	0	0	0	603	903	0
559	9	0	0	0	0	0	0	200	300	0	-34.1183	-73.7025	-627.056	-61896.2	-37641.4	8951.66	139.971	1001.71	0	0	0	0	0	0	0	603	903	0
560	0	0	0	0	0	0	0	200	300	0	-34.4235	-72.787	-628.581	-61621.5	-37275.2	8997.44	140.7	1001.03	0	0	0	0	0	0	0	603	903	0
560	1	0	0	0	0	0	0	200	300	0	-35.3391	-73.3974	-630.413	-61530	-37824.5	9134.76	140	1000.6	0	0	0	0	0	0	0	603	903	0
560	2	0	0	0	0	0	0	200	300	0	-36.102	-73.2448	-632.549	-62170.8	-38190.7	9088.99	139.624	1001.29	0	0	0	0	0	0	0	603	903	0
560	3	0	0	0	0	0	0	200	300	0	-35.7968	-73.0922	-632.549	-61987.7	-37519.3	8951.66	140.685	1001	0	0	0	0	0	0	0	603	903	0
560	4	0	0	0	0	0	0	200	300	0	-35.3391	-71.8715	-633.159	-61255.3	-37946.6	8905.88	140.068	999.746	0	0	0	0	0	0	0	603	903	0
560	5	0	0	0	0	0	0	200	300	0	-34.8813	-72.0241	-635.906	-62262.4	-38434.9	8997.44	139.559	1000.91	0	0	0	0	0	0	0	603	903	0
560	6	0	0	0	0	0	0	200	300	0	-34.8813	-72.0241	-636.516	-62537	-37763.5	8951.66	140.672	1001.25	0	0	0	0	0	0	0	603	903	0
560	7	0	0	0	0	0	0	200	300	0	-35.0339	-71.4137	-635.906	-61804.6	-38312.8	8905.88	139.751	1000.19	0	0	0	0	0	0	0	603	903	0
560	8	0	0	0	0	0	0	200	300	0	-35.9494	-70.6508	-638.347	-61804.6	-37641.4	8905.88	141.033	999.82	0	0	0	0	0	0	0	603	903	0
560	9	0	0	0	0	0	0	200	300	0	-36.4072	-70.3456	-639.568	-61896.2	-38068.7	8951.66	140.478	999.778	0	0	0	0	0	0	0	603	903	0
561	0	0	0	0	0	0	0	200	300	0	-35.9494	-69.8878	-639.873	-62720.1	-38556.9	9180.54	139.743	1001.02	0	0	0	0	0	0	0	603	903	0
561	1	0	0	0	0	0	0	200	300	0	-34.5761	-70.193	-640.789	-61804.6	-37946.6	9043.21	140.781	999.451	0	0	0	0	0	0	0	603	903	0
561	2	0	0	0	0	0	0	200	300	0	-35.6442	-69.5827	-640.483	-62720.1	-38068.7	8860.11	140.563	1000.93	0	0	0	0	0	0	0	603	903	0
561	3	0	0	0	0	0	0	200	300	0	-37.1701	-68.362	-641.094	-62537	-38251.8	8677	140.334	1000.55	0	0	0	0	0	0	0	603	903	0
561	4	0	0	0	0	0	0	200	300	0	-35.6442	-67.4464	-642.925	-62170.8	-38434.9	8814.33	140.219	999.7	0	0	0	0	0	0	0	603	903	0
561	5	0	0	0	0	0	0	200	300	0	-35.0339	-68.5146	-642.925	-62170.8	-38251.8	9088.99	140.504	999.7	0	0	0	0	0	0	0	603	903	0
561	6	0	0	0	0	0	0	200	300	0	-37.1701	-67.7516	-643.535	-62903.2	-38495.9	9088.99	140.181	1000.75	0	0	0	0	0	0	0	603	903	0
561	7	0	0	0	0	0	0	200	300	0	-34.8813	-66.9887	-642.009	-62353.9	-38434.9	8860.11	140.133	1000.12	0	0	0	0	0	0	0	603	903	0
561	8	0	0	0	0	0	0	200	300	0	-36.5598	-65.768	-643.535	-61987.7	-38740	8951.66	139.801	999.324	0	0	0	0	0	0	0	603	903	0
561	9	0	0	0	0	0	0	200	300	0	-36.5598	-65.768	-646.587	-62537	-38923.1	8997.44	139.802	999.719	0	0	0	0	0	0	0	603	903	0
562	0	0	0	0	0	0	0	200	300	0	-37.6279	-66.6835	-645.977	-62720.1	-38434.9	8814.33	140.501	1000.09	0	0	0	0	0	0	0	603	903	0
562	1	0	0	0	0	0	0	200	300	0	-37.4753	-65.6154	-645.977	-61987.7	-39045.2	8539.67	139.556	998.96	0	0	0	0	0	0	0	603	903	0
562	2	0	0	0	0	0	0	200	300	0	-36.7123	-64.8524	-646.282	-62170.8	-39228.3	8722.78	139.302	999.198	0	0	0	0	0	0	0	603	903	0
562	3	0	0	0	0	0	0	200	300	0	-36.8649	-64.6999	-648.723	-62903.2	-38679	8722.78	140.377	999.965	0	0	0	0	0	0	0	603	903	0
562	4	0	0	0	0	0	0	200	300	0	-36.4072	-64.5473	-649.028	-62903.2	-39106.3	8905.88	139.746	999.919	0	0	0	0	0	0	0	603	903	0
562	5	0	0	0	0	0	0	200	300	0	-37.3227	-63.174	-646.282	-62262.4	-38679	8768.55	140.151	999.339	0	0	0	0	0	0	0	603	903	0
562	6	0	0	0	0	0	0	200	300	0	-36.7123	-63.7843	-647.808	-61896.2	-38801.1	8814.33	140.104	998.547	0	0	0	0	0	0	0	603	903	0
562	7	0	0	0	0	0	0	200	300	0	-38.2382	-63.6317	-648.113	-62353.9	-39655.6	8722.78	138.814	999.208	0	0	0	0	0	0	0	603	903	0
562	8	0	0	0	0	0	0	200	300	0	-37.933	-62.7162	-649.639	-62445.5	-38984.2	9088.99	139.991	999.123	0	0	0	0	0	0	0	603	903	0
562	9	0	0	0	0	0	0	200	300	0	-37.3227	-63.0214	-649.639	-62537	-38923.1	8905.88	140.085	999.264	0	0	0	0	0	0	0	603	903	0
563	0	0	0	0	0	0	0	200	300	0	-38.0856	-62.2585	-648.723	-62262.4	-39045.2	8631.22	139.812	998.977	0	0	0	0	0	0	0	603	903	0
563	1	0	0	0	0	0	0	200	300	0	-38.0856	-61.3429	-649.333	-62537	-39289.4	8493.9	139.493	999.31	0	0	0	0	0	0	0	603	903	0
563	2	0	0	0	0	0	0	200	300	0	-38.5434	-61.0378	-650.249	-62353.9	-38801.1	8585.45	140.329	998.892	0	0	0	0	0	0	0	603	903	0
563	3	0	0	0	0	0	0	200	300	0	-37.6279	-61.1903	-647.502	-61804.6	-39350.4	8814.33	139.227	998.451	0	0	0	0	0	0	0	603	903	0
563	4	0	0	0	0	0	0	200	300	0	-39.3063	-60.4274	-649.639	-62170.8	-38984.2	8585.45	139.991	998.701	0	0	0	0	0	0	0	603	903	0
563	5	0	0	0	0	0	0	200	300	0	-36.8649	-60.1222	-649.639	-62353.9	-39899.7	8173.46	138.582	998.983	0	0	0	0	0	0	0	603	903	0
563	6	0	0	0	0	0	0	200	300	0	-36.8649	-59.3593	-648.723	-61804.6	-39777.6	8677	138.683	998.271	0	0	0	0	0	0	0	603	903	0
563	7	0	0	0	0	0	0	200	300	0	-35.9494	-59.0541	-649.639	-61896.2	-38801.1	8677	140.273	998.278	0	0	0	0	0	0	0	603	903	0
563	8	0	0	0	0	0	0	200	300	0	-39.0012	-58.2912	-649.639	-61896.2	-39594.5	8402.34	139.051	998.278	0	0	0	0	0	0	0	603	903	0
563	9	0	0	0	0	0	0	200	300	0	-38.696	-57.8334	-647.808	-62079.3	-39716.6	8448.12	138.691	998.83	0	0	0	0	0	0	0	603	903	0
564	0	0	0	0	0	0	0	200	300	0	-37.933	-57.3756	-649.028	-61438.4	-39045.2	8631.22	139.841	997.662	0	0	0	0	0	0	0	603	903	0
564	1	0	0	0	0	0	0	200	300	0	-37.933	-56.3075	-649.028	-61987.7	-39594.5	8402.34	138.994	998.508	0	0	0	0	0	0	0	603	903	0
564	2	0	0	0	0	0	0	200	300	0	-39.3063	-56.4601	-647.197	-61987.7	-39350.4	8448.12	139.199	998.779	0	0	0	0	0	0	0	603	903	0
564	3	0	0	0	0	0	0	200	300	0	-39.6115	-56.6127	-648.418	-61255.3	-39106.3	8631.22	139.69	997.469	0	0	0	0	0	0	0	603	903	0
564	4	0	0	0	0	0	0	200	300	0	-37.0175	-56.1549	-648.113	-61346.8	-39594.5	8356.57	138.908	997.655	0	0	0	0	0	0	0	603	903	0
564	5	0	0	0	0	0	0	200	300	0	-39.0012	-55.0868	-647.197	-61621.5	-39350.4	8402.34	139.199	998.213	0	0	0	0	0	0	0	603	903	0
564	6	0	0	0	0	0	0	200	300	0	-39.6115	-54.6291	-646.587	-62079.3	-39228.3	8219.24	139.33	999.011	0	0	0	0	0	0	0	603	903	0
564	7	0	0	0	0	0	0	200	300	0	-38.696	-54.3239	-647.197	-60522.9	-39777.6	8173.46	138.539	996.515	0	0	0	0	0	0	0	603	903	0
564	8	0	0	0	0	0	0	200	300	0	-39.0012	-54.4765	-646.587	-61438.4	-39716.6	7898.8	138.575	998.02	0	0	0	0	0	0	0	603	903	0
564	9	0	0	0	0	0	0	200	300	0	-37.4753	-55.0868	-645.977	-61255.3	-39167.3	8173.46	139.367	997.826	0	0	0	0	0	0	0	603	903	0
565	0	0	0	0	0	0	0	200	300	0	-38.8486	-53.2558	-645.366	-60797.5	-39472.5	8310.79	138.837	997.206	0	0	0	0	0	0	0	603	903	0
565	1	0	0	0	0	0	0	200	300	0	-39.3063	-52.6454	-644.756	-60431.3	-39106.3	8127.68	139.347	996.728	0	0	0	0	0	0	0	603	903	0
565	2	0	0	0	0	0	0	200	300	0	-40.2219	-52.4928	-644.451	-60797.5	-39167.3	8219.24	139.224	997.34	0	0	0	0	0	0	0	603	903	0
565	3	0	0	0	0	0	0	200	300	0	-39.4589	-51.5773	-641.399	-60889.1	-39655.6	8127.68	138.173	997.932	0	0	0	0	0	0	0	603	903	0
565	4	0	0	0	0	0	0	200	300	0	-39.3063	-50.6618	-642.62	-60522.9	-39350.4	8402.34	138.766	997.182	0	0	0	0	0	0	0	603	903	0
565	5	0	0	0	0	0	0	200	300	0	-39.6115	-50.5092	-642.009	-60706	-38679	7990.36	139.753	997.556	0	0	0	0	0	0	0	603	903	0
565	6	0	0	0	0	0	0	200	300	0	-40.3745	-50.204	-642.314	-60431.3	-39411.4	7898.8	138.642	997.084	0	0	0	0	0	0	0	603	903	0
565	7	0	0	0	0	0	0	200	300	0	-39.6115	-49.4411	-640.483	-59882	-39838.7	7990.36	137.799	996.495	0	0	0	0	0	0	0	603	903	0
565	8	0	0	0	0	0	0	200	300	0	-39.3063	-50.3566	-638.957	-59882	-38923.1	8036.13	139.083	996.718	0	0	0	0	0	0	0	603	903	0
565	9	0	0	0	0	0	0	200	300	0	-39.6115	-48.373	-638.957	-60156.7	-39411.4	7761.48	138.319	997.148	0	0	0	0	0	0	0	603	903	0
566	0	0	0	0	0	0	0	200	300	0	-40.527	-47.4574	-638.957	-59973.6	-39350.4	7898.8	138.415	996.862	0	0	0	0	0	0	0	603	903	0
566	1	0	0	0	0	0	0	200	300	0	-39.7641	-47.4574	-638.957	-59607.3	-38740	7990.36	139.37	996.288	0	0	0	0	0	0	0	603	903	0
566	2	0	0	0	0	0	0	200	300	0	-37.4753	-47.7626	-637.126	-59698.9	-39228.3	8219.24	138.429	996.7	0	0	0	0	0	0	0	603	903	0
566	3	0	0	0	0	0	0	200	300	0	-39.7641	-45.9315	-631.328	-59698.9	-39228.3	7807.25	137.864	997.561	0	0	0	0	0	0	0	603	903	0
566	4	0	0	0	0	0	0	200	300	0	-40.3745	-45.4738	-631.328	-58966.5	-38495.9	7807.25	139.024	996.401	0	0	0	0	0	0	0	603	903	0
566	5	0	0	0	0	0	0	200	300	0	-39.1537	-45.1686	-634.075	-58966.5	-39289.4	7853.03	138.037	995.996	0	0	0	0	0	0	0	603	903	0
566	6	0	0	0	0	0	0	200	300	0	-39.6115	-46.0841	-634.075	-59058	-38923.1	7624.15	138.614	996.141	0	0	0	0	0	0	0	603	903	0
566	7	0	0	0	0	0	0	200	300	0	-40.0693	-46.0841	-631.328	-59424.2	-38618	7715.7	138.831	997.126	0	0	0	0	0	0	0	603	903	0
566	8	0	0	0	0	0	0	200	300	0	-39.4589	-44.5583	-629.497	-58508.7	-38923.1	7532.59	138.168	995.945	0	0	0	0	0	0	0	603	903	0
566	9	0	0	0	0	0	0	200	300	0	-39.7641	-44.2531	-630.107	-58325.6	-38923.1	7624.15	138.228	995.565	0	0	0	0	0	0	0	603	903	0
567	0	0	0	0	0	0	0	200	300	0	-40.0693	-43.9479	-629.497	-58417.2	-38495.9	7441.04	138.847	995.8	0	0	0	0	0	0	0	603	903	0
567	1	0	0	0	0	0	0	200	300	0	-40.2219	-44.1005	-627.361	-58508.7	-38801.1	7441.04	138.152	996.262	0	0	0	0	0	0	0	603	903	0
567	2	0	0	0	0	0	0	200	300	0	-39.9167	-42.5746	-626.445	-58142.5	-38434.9	7212.16	138.646	995.813	0	0	0	0	0	0	0	603	903	0
567	3	0	0	0	0	0	0	200	300	0	-39.9167	-42.7272	-625.835	-57867.8	-38373.8	7303.71	138.684	995.465	0	0	0	0	0	0	0	603	903	0
567	4	0	0	0	0	0	0	200	300	0	-39.9167	-43.3376	-622.478	-58417.2	-38923.1	7441.04	137.471	996.846	0	0	0	0	0	0	0	603	903	0
567	5	0	0	0	0	0	0	200	300	0	-40.2219	-42.1169	-624.004	-57593.2	-38312.8	7349.49	138.602	995.296	0	0	0	0	0	0	0	603	903	0
567	6	0	0	0	0	0	0	200	300	0	-39.3063	-41.2013	-620.952	-57227	-37885.6	7441.04	138.988	995.16	0	0	0	0	0	0	0	603	903	0
567	7	0	0	0	0	0	0	200	300	0	-40.2219	-40.1332	-621.562	-57501.6	-38312.8	7120.61	138.361	995.511	0	0	0	0	0	0	0	603	903	0
567	8	0	0	0	0	0	0	200	300	0	-40.0693	-39.3703	-621.562	-57318.5	-38556.9	6983.28	137.968	995.217	0	0	0	0	0	0	0	603	903	0
567	9	0	0	0	0	0	0	200	300	0	-37.933	-39.828	-620.342	-57227	-37824.5	7074.83	139.026	995.251	0	0	0	0	0	0	0	603	903	0
568	0	0	0	0	0	0	0	200	300	0	-39.0012	-39.6754	-619.426	-57043.9	-37458.3	6891.72	139.527	995.091	0	0	0	0	0	0	0	603	903	0
568	1	0	0	0	0	0	0	200	300	0	-39.4589	-38.3022	-616.069	-56128.3	-37946.6	6800.17	138.405	994.107	0	0	0	0	0	0	0	603	903	0
568	2	0	0	0	0	0	0	200	300	0	-39.3063	-37.5392	-616.68	-56036.8	-37519.3	6708.62	139.159	993.869	0	0	0	0	0	0	0	603	903	0
568	3	0	0	0	0	0	0	200	300	0	-38.2382	-37.0815	-617.595	-56586.1	-37275.2	6800.17	139.645	994.623	0	0	0	0	0	0	0	603	903	0
568	4	0	0	0	0	0	0	200	300	0	-38.3908	-37.6918	-616.069	-56952.3	-37702.4	6708.62	138.802	995.445	0	0	0	0	0	0	0	603	903	0
568	5	0	0	0	0	0	0	200	300	0	-39.0012	-36.7763	-612.407	-56677.7	-37275.2	6571.29	139.133	995.549	0	0	0	0	0	0	0	603	903	0
568	6	0	0	0	0	0	0	200	300	0	-38.8486	-35.403	-611.186	-55945.2	-37336.2	6479.74	138.912	994.536	0	0	0	0	0	0	0	603	903	0
568	7	0	0	0	0	0	0	200	300	0	-37.4753	-35.5556	-611.186	-55945.2	-37214.2	6662.84	139.112	994.536	0	0	0	0	0	0	0	603	903	0
568	8	0	0	0	0	0	0	200	300	0	-37.7805	-34.7926	-611.186	-56311.4	-37031.1	6525.51	139.411	995.135	0	0	0	0	0	0	0	603	903	0
568	9	0	0	0	0	0	0	200	300	0	-37.6279	-34.64	-609.966	-56494.5	-36786.9	6433.96	139.69	995.619	0	0	0	0	0	0	0	603	903	0
569	0	0	0	0	0	0	0	200	300	0	-37.0175	-34.1823	-608.44	-55121.3	-37397.3	6479.74	138.536	993.594	0	0	0	0	0	0	0	603	903	0
569	1	0	0	0	0	0	0	200	300	0	-37.0175	-33.4193	-608.44	-55212.8	-36909	6296.63	139.338	993.745	0	0	0	0	0	0	0	603	903	0
569	2	0	0	0	0	0	0	200	300	0	-38.2382	-33.1142	-608.745	-54388.8	-36786.9	6479.74	139.569	992.346	0	0	0	0	0	0	0	603	903	0
569	3	0	0	0	0	0	0	200	300	0	-37.7805	-32.6564	-607.524	-55212.8	-37214.2	6342.41	138.745	993.882	0	0	0	0	0	0	0	603	903	0
569	4	0	0	0	0	0	0	200	300	0	-37.4753	-32.5038	-605.388	-54571.9	-36481.7	6296.63	139.738	993.144	0	0	0	0	0	0	0	603	903	0
569	5	0	0	0	0	0	0	200	300	0	-37.1701	-32.5038	-603.862	-54846.6	-36725.9	6205.08	139.182	993.826	0	0	0	0	0	0	0	603	903	0
569	6	0	0	0	0	0	0	200	300	0	-36.2546	-31.2831	-603.862	-55395.9	-36848	6113.53	138.98	994.736	0	0	0	0	0	0	0	603	903	0
569	7	0	0	0	0	0	0	200	300	0	-37.1701	-30.6728	-604.167	-54297.3	-36359.7	5976.2	139.819	992.871	0	0	0	0	0	0	0	603	903	0
569	8	0	0	0	0	0	0	200	300	0	-37.0175	-30.6728	-602.642	-54480.4	-36298.6	5838.87	139.767	993.403	0	0	0	0	0	0	0	603	903	0
569	9	0	0	0	0	0	0	200	300	0	-37.3227	-29.6046	-601.116	-54388.8	-36420.7	5609.99	139.411	993.48	0	0	0	0	0	0	0	603	903	0
570	0	0	0	0	0	0	0	200	300	0	-37.1701	-28.6891	-599.59	-53931.1	-36481.7	5655.76	139.156	992.947	0	0	0	0	0	0	0	603	903	0
570	1	0	0	0	0	0	0	200	300	0	-35.9494	-29.1469	-599.895	-53748	-36176.6	5793.09	139.695	992.596	0	0	0	0	0	0	0	603	903	0
570	2	0	0	0	0	0	0	200	300	0	-37.0175	-27.621	-595.012	-53931.1	-36298.6	5609.99	138.995	993.639	0	0	0	0	0	0	0	603	903	0
570	3	0	0	0	0	0	0	200	300	0	-37.6279	-28.2314	-598.979	-53748	-35871.4	5609.99	140.112	992.733	0	0	0	0	0	0	0	603	903	0
570	4	0	0	0	0	0	0	200	300	0	-37.0175	-27.3158	-596.538	-53473.3	-36115.5	5335.33	139.458	992.639	0	0	0	0	0	0	0	603	903	0
570	5	0	0	0	0	0	0	200	300	0	-36.5598	-26.5529	-596.233	-53290.2	-36115.5	5747.32	139.427	992.378	0	0	0	0	0	0	0	603	903	0
570	6	0	0	0	0	0	0	200	300	0	-36.5598	-26.4003	-595.317	-53564.9	-35566.2	5289.55	140.257	992.977	0	0	0	0	0	0	0	603	903	0
570	7	0	0	0	0	0	0	200	300	0	-34.4235	-25.4848	-595.012	-53107.1	-36054.5	5335.33	139.405	992.254	0	0	0	0	0	0	0	603	903	0
570	8	0	0	0	0	0	0	200	300	0	-35.4916	-25.3322	-594.097	-52557.8	-35871.4	5289.55	139.62	991.467	0	0	0	0	0	0	0	603	903	0
570	9	0	0	0	0	0	0	200	300	0	-35.4916	-24.7218	-590.129	-52374.7	-35444.1	5472.66	139.938	991.751	0	0	0	0	0	0	0	603	903	0
571	0	0	0	0	0	0	0	200	300	0	-36.102	-24.8744	-590.74	-52100	-35627.2	5243.77	139.69	991.195	0	0	0	0	0	0	0	603	903	0
571	1	0	0	0	0	0	0	200	300	0	-36.2546	-23.8063	-588.909	-52100	-35627.2	5152.22	139.503	991.469	0	0	0	0	0	0	0	603	903	0
571	2	0	0	0	0	0	0	200	300	0	-35.0339	-24.8744	-591.35	-51642.3	-35383.1	5198	140.166	990.329	0	0	0	0	0	0	0	603	903	0
571	3	0	0	0	0	0	0	200	300	0	-34.8813	-23.196	-589.519	-52466.2	-35505.2	4969.12	139.773	991.998	0	0	0	0	0	0	0	603	903	0
571	4	0	0	0	0	0	0	200	300	0	-34.5761	-22.2804	-588.298	-52466.2	-35383.1	4740.23	139.855	992.183	0	0	0	0	0	0	0	603	903	0
571	5	0	0	0	0	0	0	200	300	0	-34.5761	-22.2804	-589.519	-51733.8	-34833.8	4923.34	140.911	990.756	0	0	0	0	0	0	0	603	903	0
571	6	0	0	0	0	0	0	200	300	0	-35.3391	-21.6701	-588.909	-51459.2	-35139	4740.23	140.332	990.381	0	0	0	0	0	0	0	603	903	0
571	7	0	0	0	0	0	0	200	300	0	-35.4916	-21.6701	-586.162	-51642.3	-35505.2	4969.12	139.428	991.102	0	0	0	0	0	0	0	603	903	0
571	8	0	0	0	0	0	0	200	300	0	-35.1865	-21.0597	-586.162	-51550.7	-34955.9	4969.12	140.365	990.946	0	0	0	0	0	0	0	603	903	0
571	9	0	0	0	0	0	0	200	300	0	-34.5761	-20.602	-583.415	-51276	-34772.8	4831.79	140.398	990.889	0	0	0	0	0	0	0	603	903	0
572	0	0	0	0	0	0	0	200	300	0	-34.7287	-19.9916	-583.721	-51001.4	-35016.9	4786.01	140.011	990.373	0	0	0	0	0	0	0	603	903	0
572	1	0	0	0	0	0	0	200	300	0	-35.3391	-20.4494	-584.331	-51001.4	-34711.7	4419.8	140.596	990.282	0	0	0	0	0	0	0	603	903	0
572	2	0	0	0	0	0	0	200	300	0	-34.7287	-19.6864	-582.195	-50452.1	-34650.7	4694.46	140.483	989.658	0	0	0	0	0	0	0	603	903	0
572	3	0	0	0	0	0	0	200	300	0	-34.5761	-19.6864	-581.279	-50177.4	-34772.8	4465.58	140.179	989.322	0	0	0	0	0	0	0	603	903	0
572	4	0	0	0	0	0	0	200	300	0	-34.8813	-19.2287	-581.89	-50360.5	-34589.7	4511.35	140.556	989.547	0	0	0	0	0	0	0	603	903	0
572	5	0	0	0	0	0	0	200	300	0	-33.3554	-18.7709	-581.584	-50177.4	-34955.9	4511.35	139.895	989.277	0	0	0	0	0	0	0	603	903	0
572	6	0	0	0	0	0	0	200	300	0	-33.6606	-18.008	-580.059	-49536.5	-34833.8	4465.58	139.948	988.399	0	0	0	0	0	0	0	603	903	0
572	7	0	0	0	0	0	0	200	300	0	-34.2709	-18.6183	-579.143	-49353.4	-34284.5	4694.46	140.801	988.218	0	0	0	0	0	0	0	603	903	0
572	8	0	0	0	0	0	0	200	300	0	-34.7287	-17.0924	-577.312	-48712.6	-34589.7	4236.69	140.085	987.378	0	0	0	0	0	0	0	603	903	0
572	9	0	0	0	0	0	0	200	300	0	-34.8813	-16.7873	-577.312	-49078.8	-34650.7	4465.58	139.979	988.013	0	0	0	0	0	0	0	603	903	0
573	0	0	0	0	0	0	0	200	300	0	-33.9658	-17.245	-577.617	-47797	-34223.4	4236.69	140.751	985.749	0	0	0	0	0	0	0	603	903	0
573	1	0	0	0	0	0	0	200	300	0	-33.9658	-16.4821	-575.481	-49078.8	-34650.7	4190.92	139.788	988.283	0	0	0	0	0	0	0	603	903	0
573	2	0	0	0	0	0	0	200	300	0	-35.3391	-16.0243	-574.871	-49445	-34284.5	4099.36	140.361	989.011	0	0	0	0	0	0	0	603	903	0
573	3	0	0	0	0	0	0	200	300	0	-35.1865	-14.3459	-574.26	-48071.7	-34528.6	3962.04	139.873	986.711	0	0	0	0	0	0	0	603	903	0
573	4	0	0	0	0	0	0	200	300	0	-33.8132	-15.1088	-574.565	-47705.5	-34467.6	4099.36	140.011	986.029	0	0	0	0	0	0	0	603	903	0
573	5	0	0	0	0	0	0	200	300	0	-35.0339	-16.3295	-573.65	-48529.5	-34345.5	4236.69	140.128	987.598	0	0	0	0	0	0	0	603	903	0
573	6	0	0	0	0	0	0	200	300	0	-33.6606	-15.1088	-571.819	-48163.3	-33796.2	4053.59	140.897	987.228	0	0	0	0	0	0	0	603	903	0
573	7	0	0	0	0	0	0	200	300	0	-34.4235	-14.8036	-572.429	-47247.7	-33979.3	4007.81	140.64	985.539	0	0	0	0	0	0	0	603	903	0
573	8	0	0	0	0	0	0	200	300	0	-34.4235	-14.1933	-572.734	-46881.5	-34284.5	3916.26	140.139	984.856	0	0	0	0	0	0	0	603	903	0
573	9	0	0	0	0	0	0	200	300	0	-34.7287	-14.4984	-571.819	-47613.9	-33857.2	3916.26	140.79	986.268	0	0	0	0	0	0	0	603	903	0
574	0	0	0	0	0	0	0	200	300	0	-34.5761	-15.2614	-572.429	-46698.4	-34101.4	4190.92	140.427	984.579	0	0	0	0	0	0	0	603	903	0
574	1	0	0	0	0	0	0	200	300	0	-34.5761	-14.9562	-571.208	-46332.2	-33857.2	4007.81	140.727	984.113	0	0	0	0	0	0	0	603	903	0
574	2	0	0	0	0	0	0	200	300	0	-33.6606	-13.7355	-570.598	-46790	-33307.9	3550.05	141.626	985.002	0	0	0	0	0	0	0	603	903	0
574	3	0	0	0	0	0	0	200	300	0	-33.0502	-12.82	-570.598	-46149.1	-34162.4	3778.93	140.129	983.879	0	0	0	0	0	0	0	603	903	0
574	4	0	0	0	0	0	0	200	300	0	-33.6606	-13.8881	-569.377	-45782.9	-33979.3	4145.14	140.322	983.409	0	0	0	0	0	0	0	603	903	0
574	5	0	0	0	0	0	0	200	300	0	-34.5761	-12.6674	-568.157	-45142	-33307.9	3778.93	141.375	982.453	0	0	0	0	0	0	0	603	903	0
[truncated: 3,614 more rows]
